# Supplementary material for: Novel Driver Strength Index highlights important cancer genes in TCGA PanCanAtlas patients
Source: PeerJ journal article supplement (doi:10.7717/peerj.13860), 2022-08-11

SNA-based oncogenic events

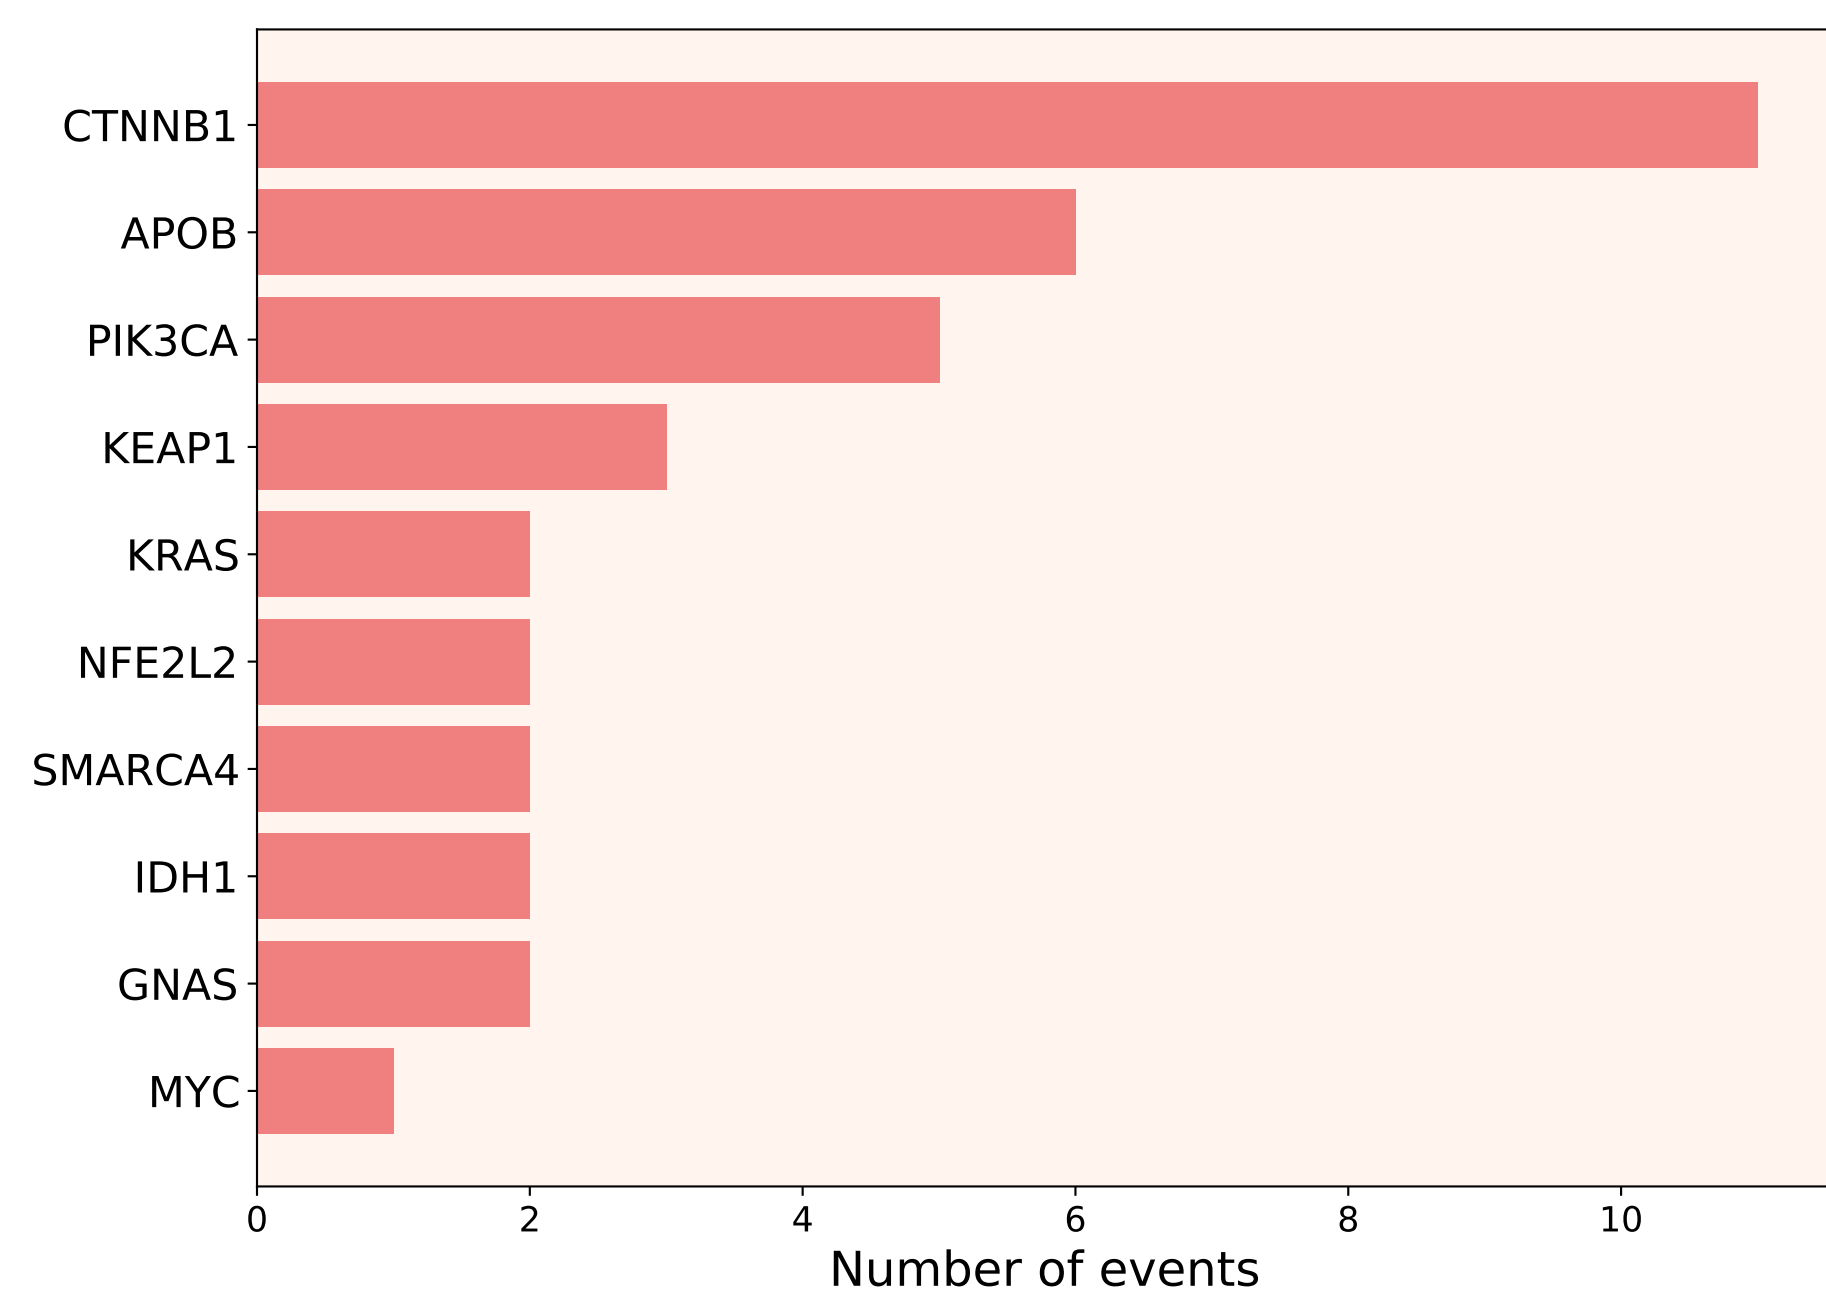

CNA-based oncogenic events

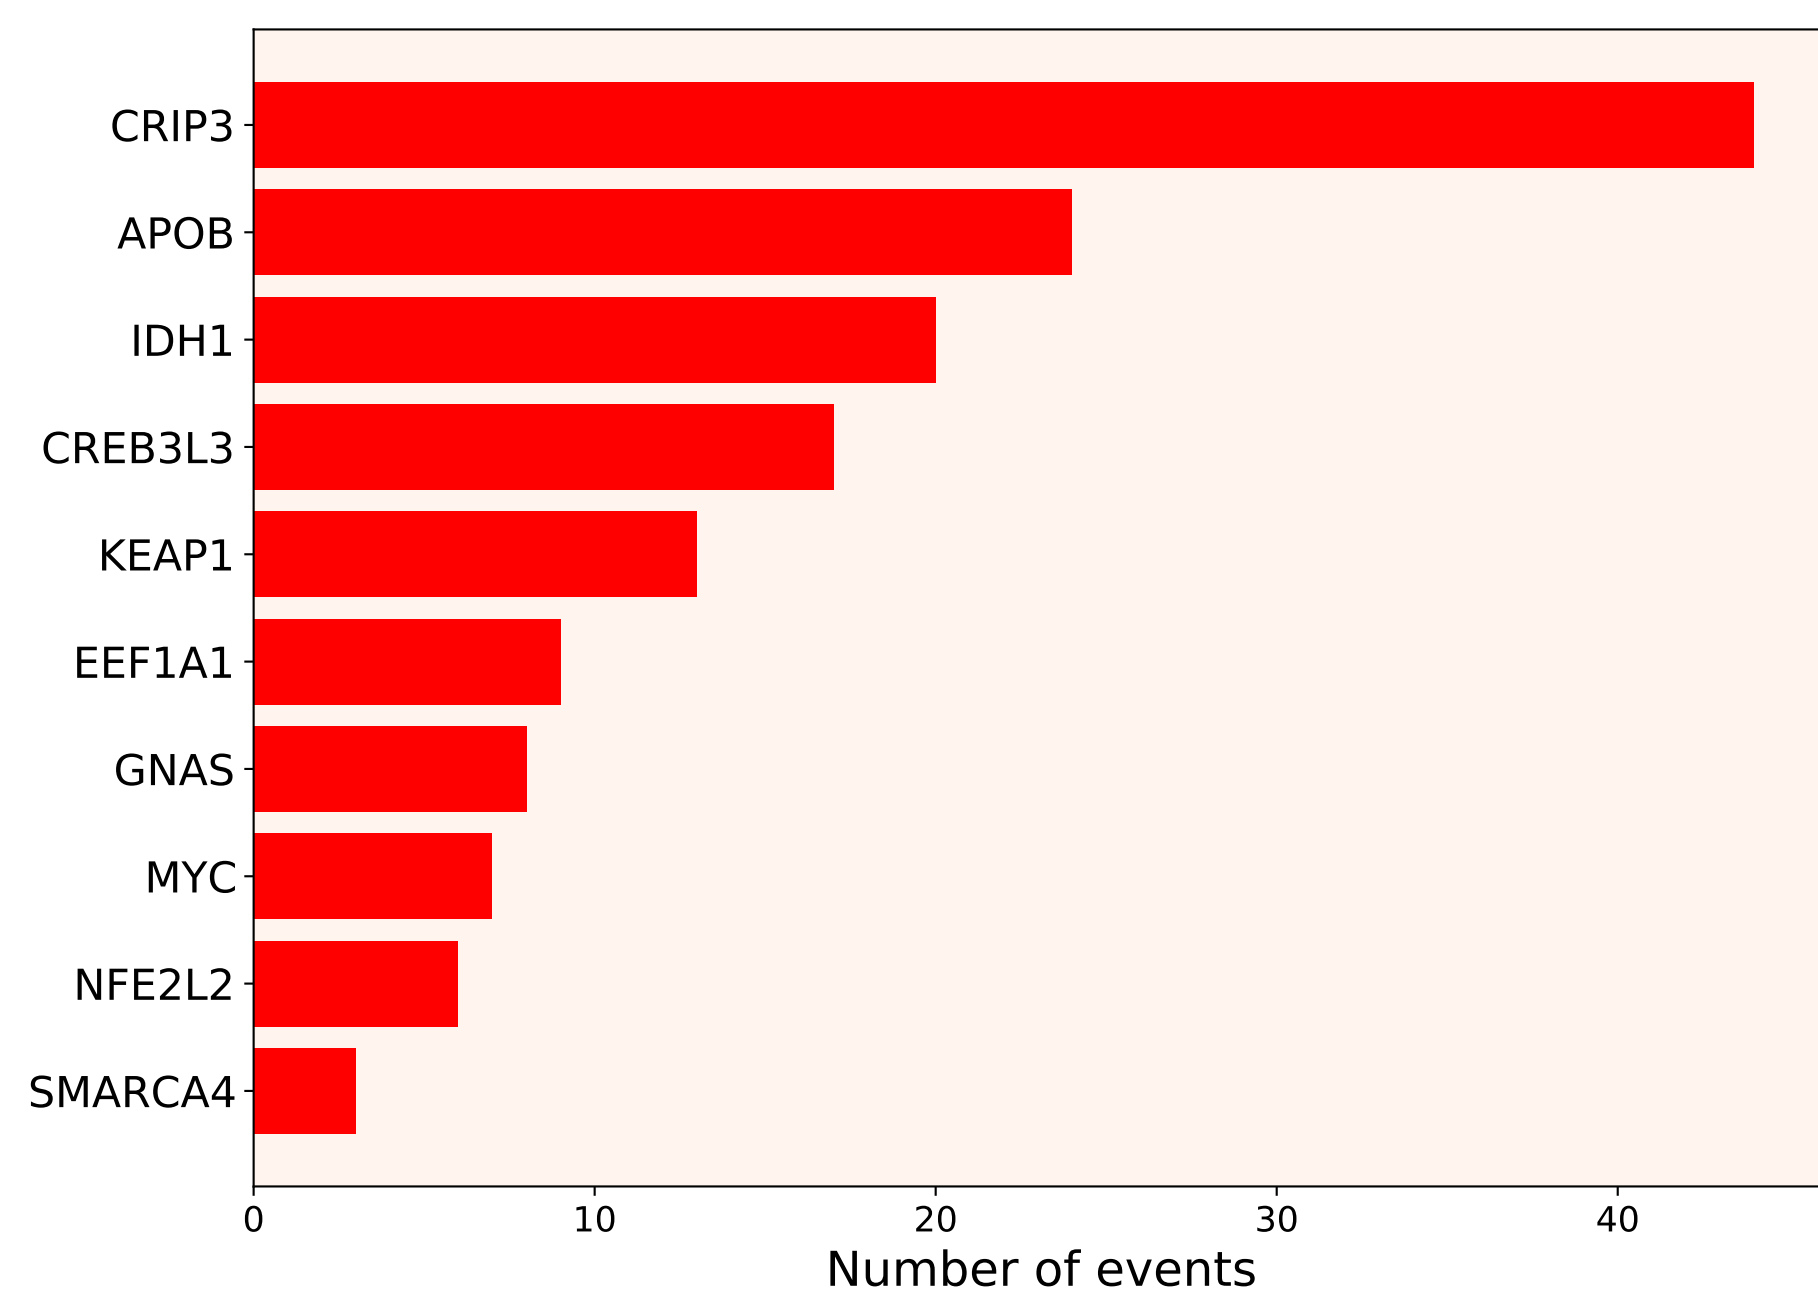

Mixed oncogenic events

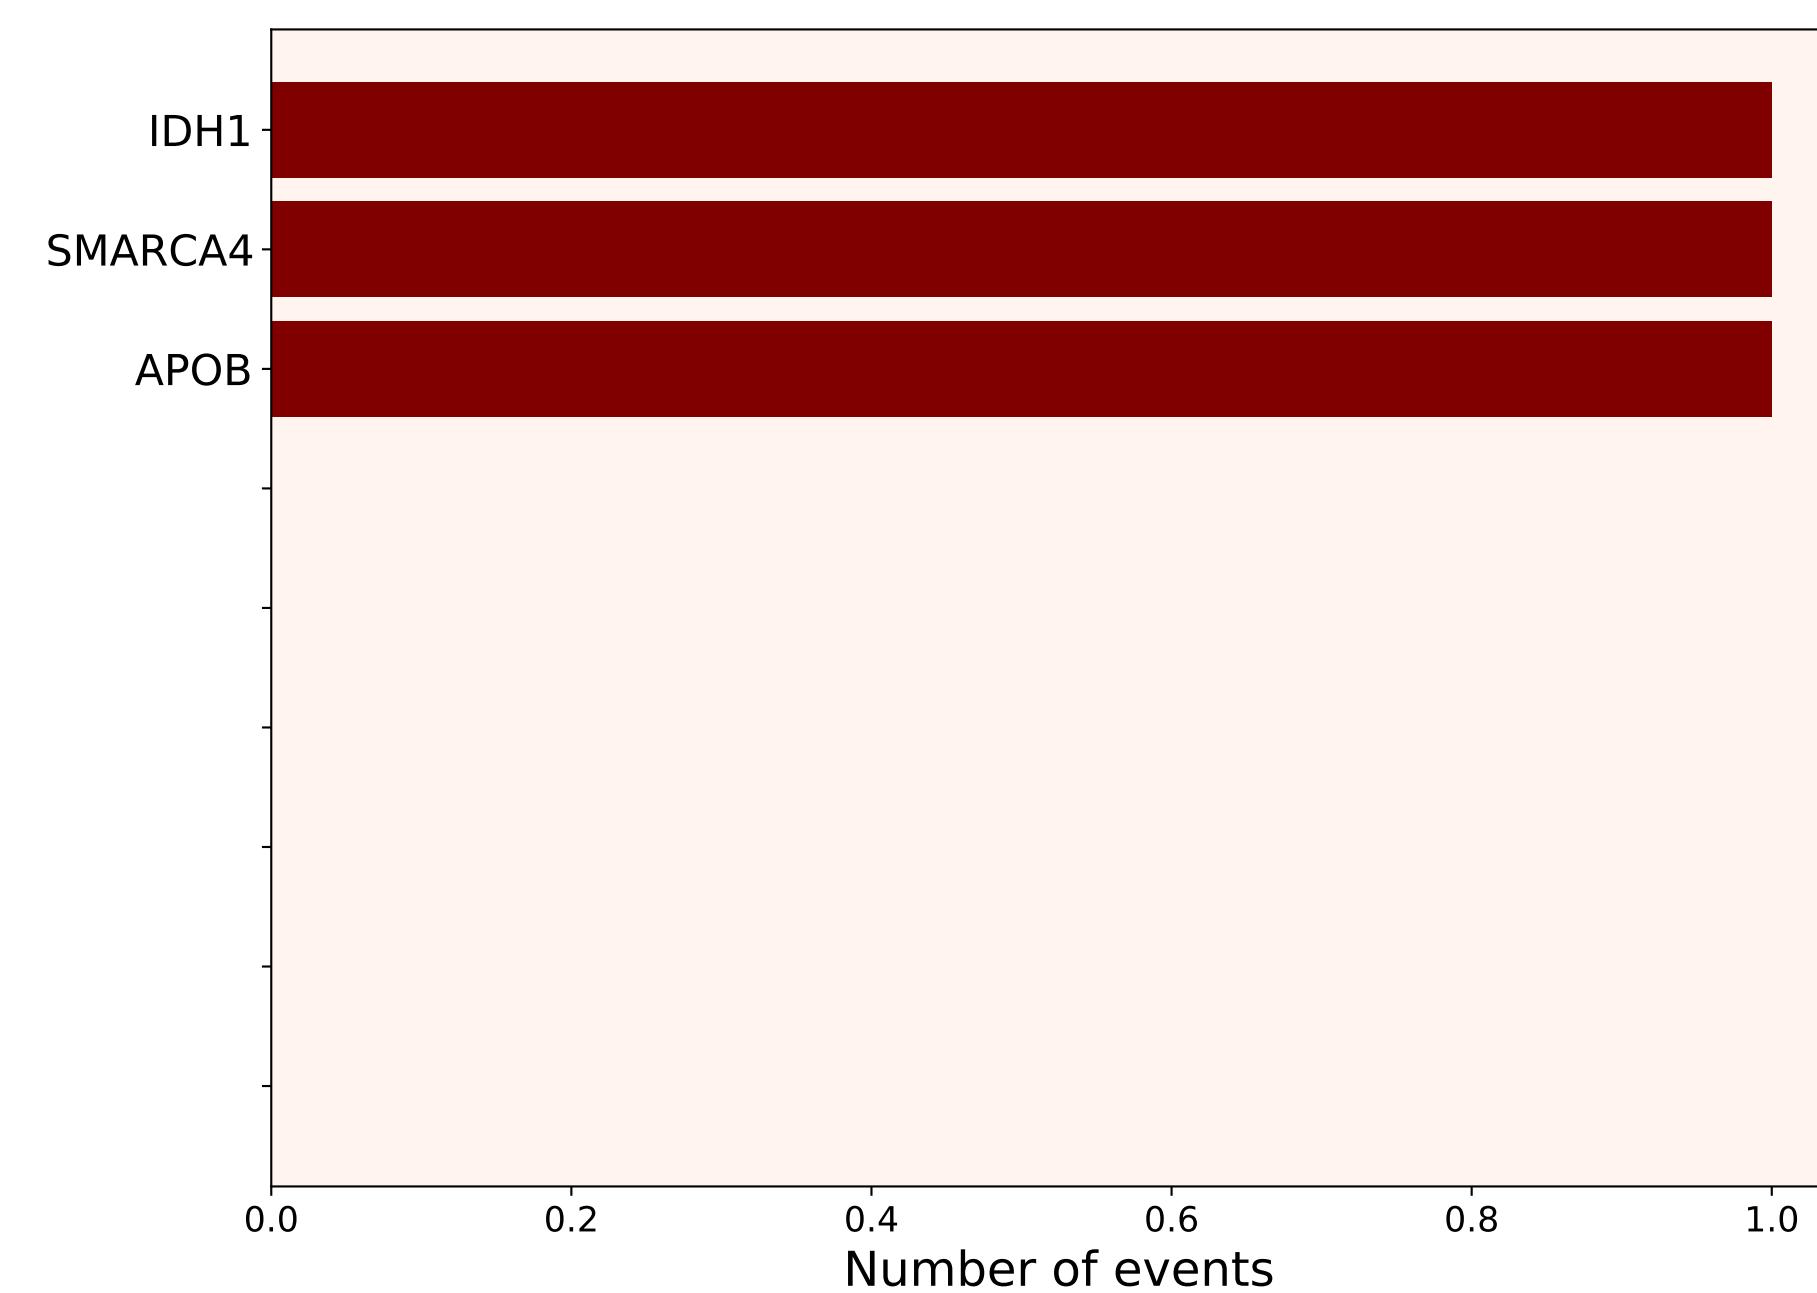

SNA-based tumor suppressor events

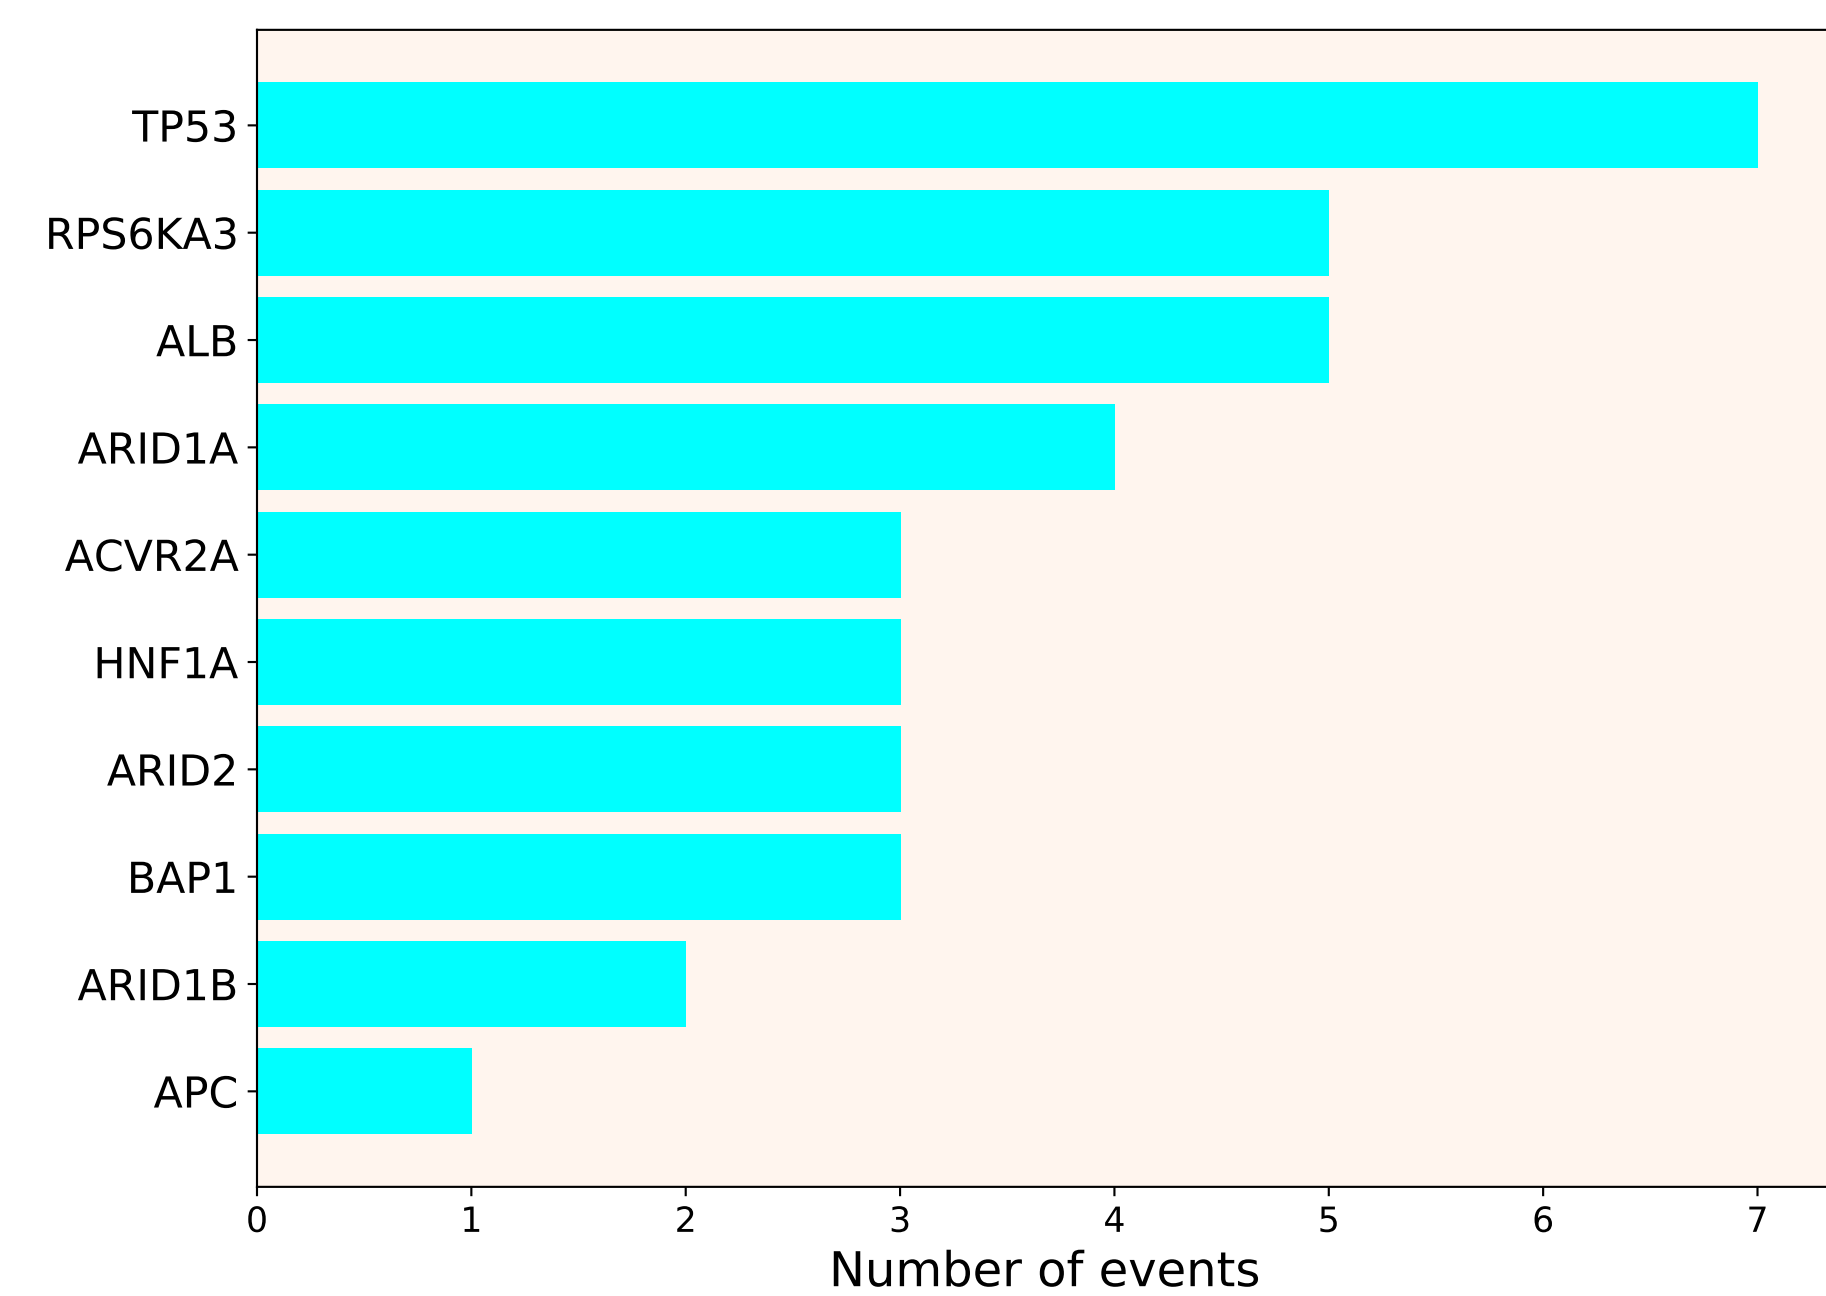

CNA-based tumor suppressor events

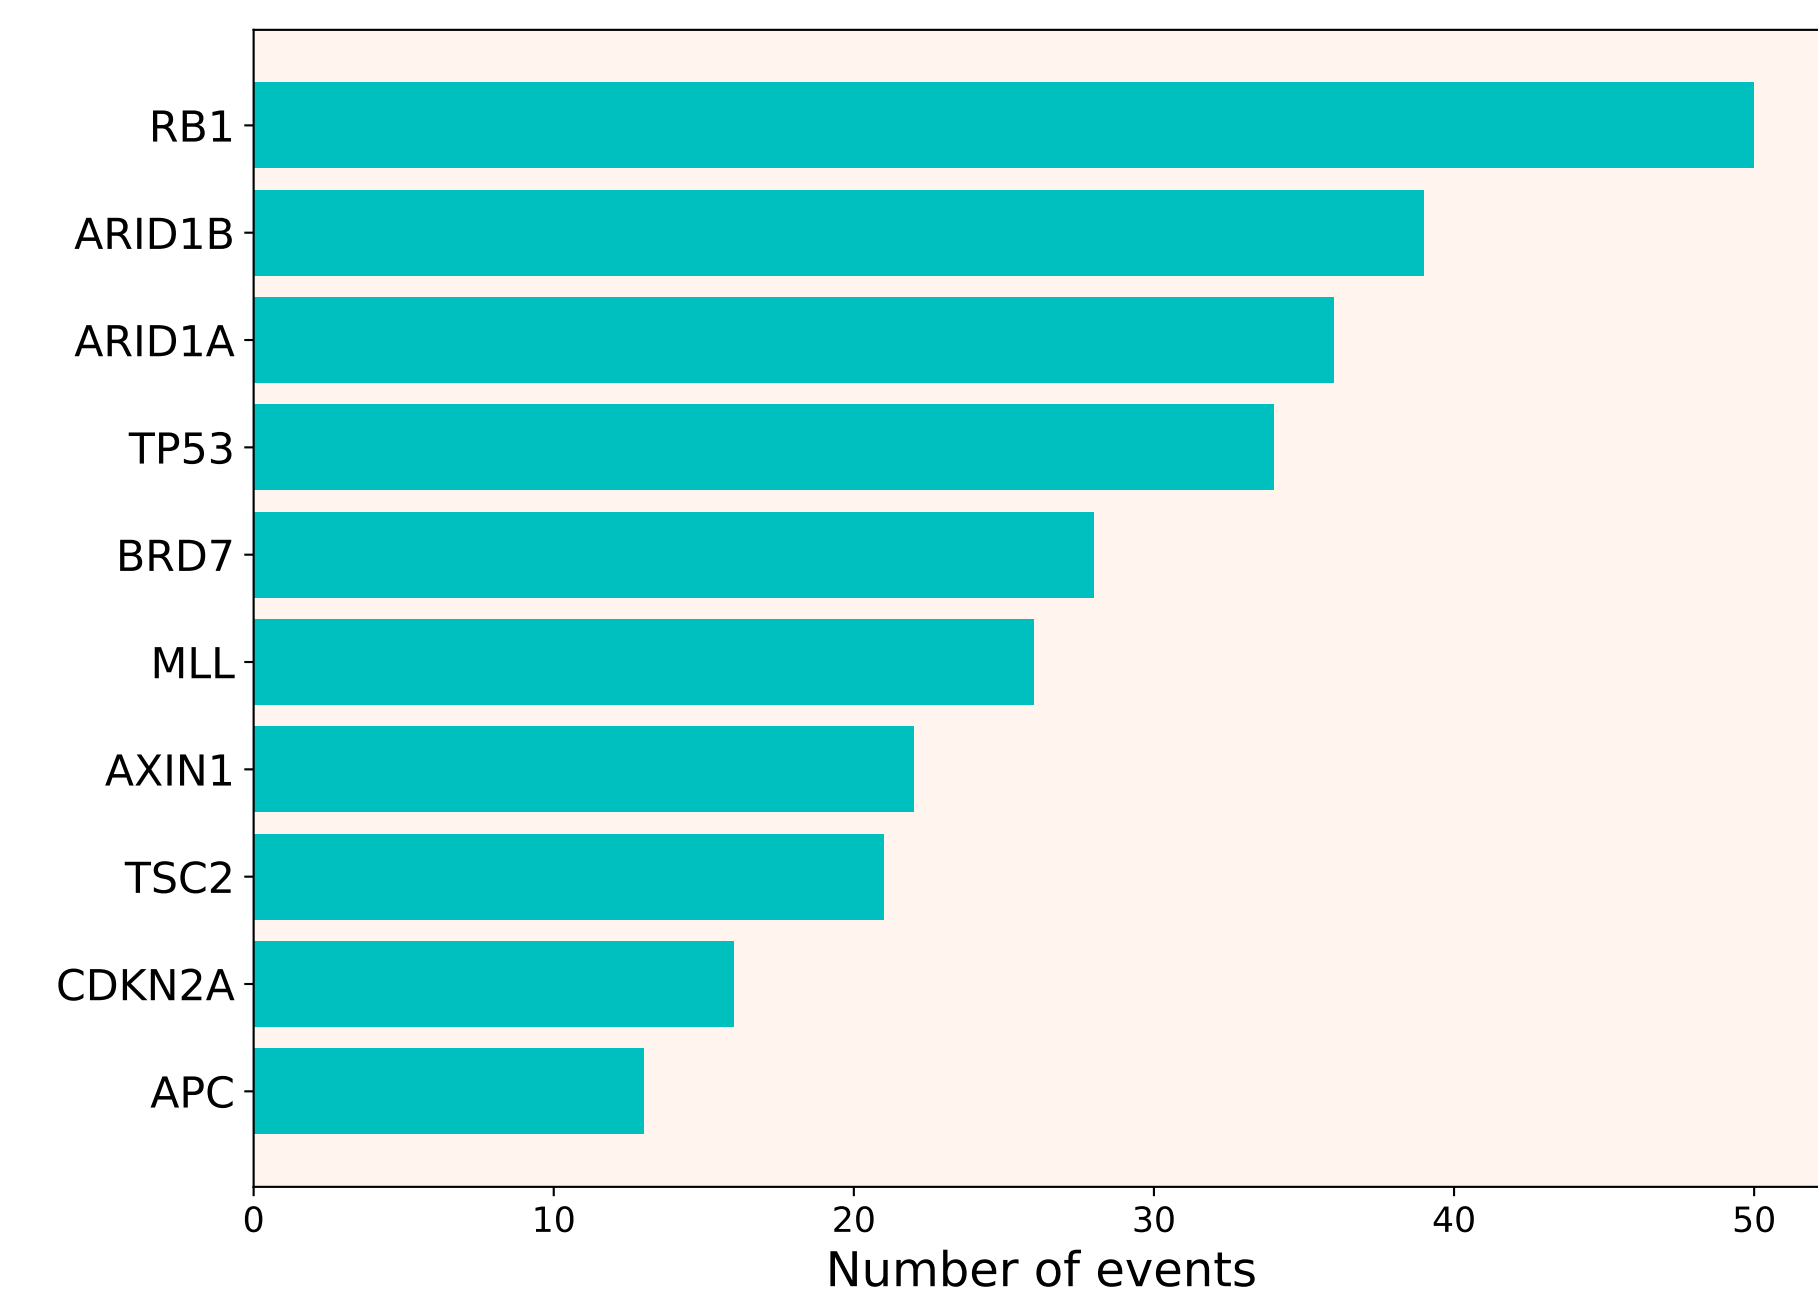

Mixed tumor suppressor events

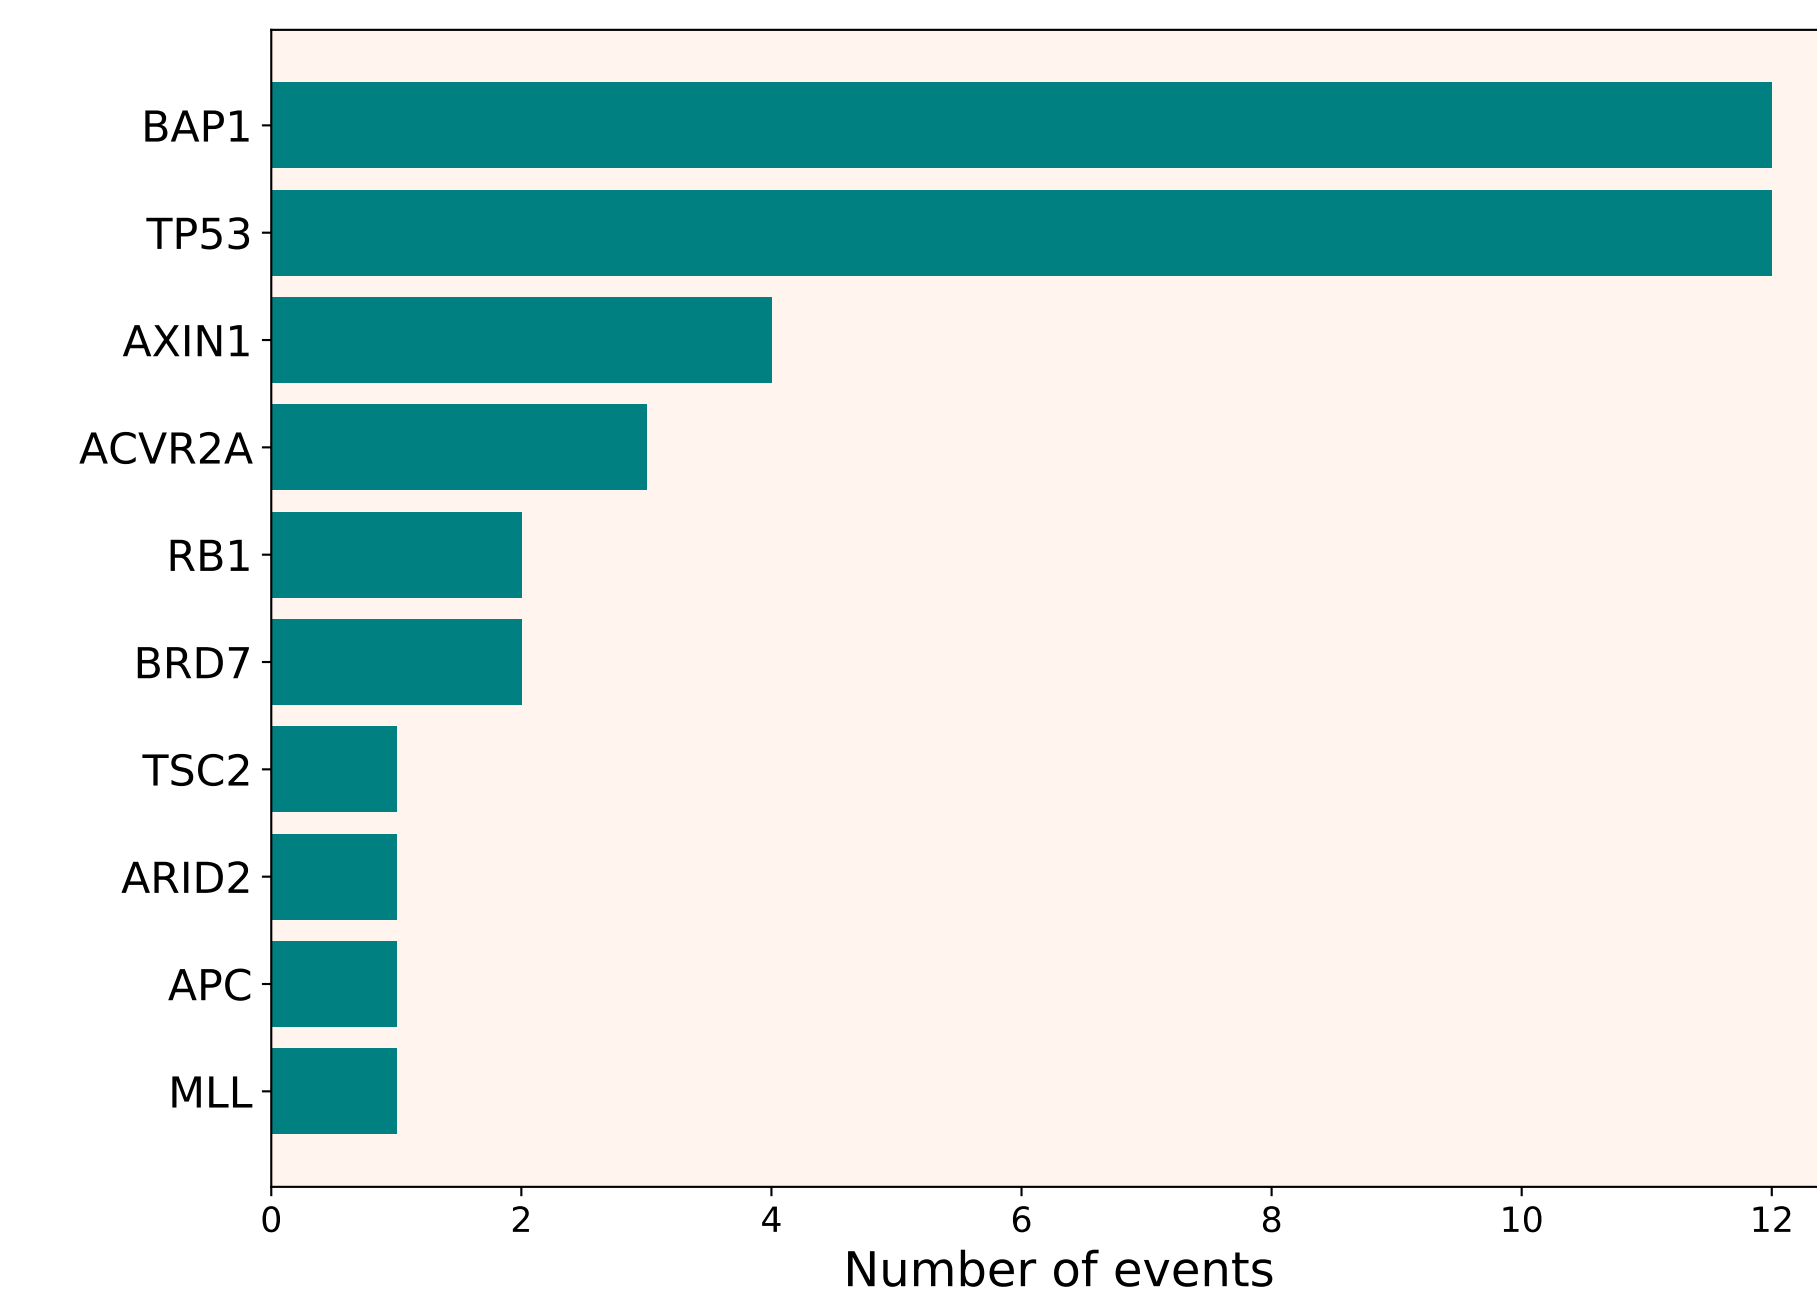

Driver chromosome losses

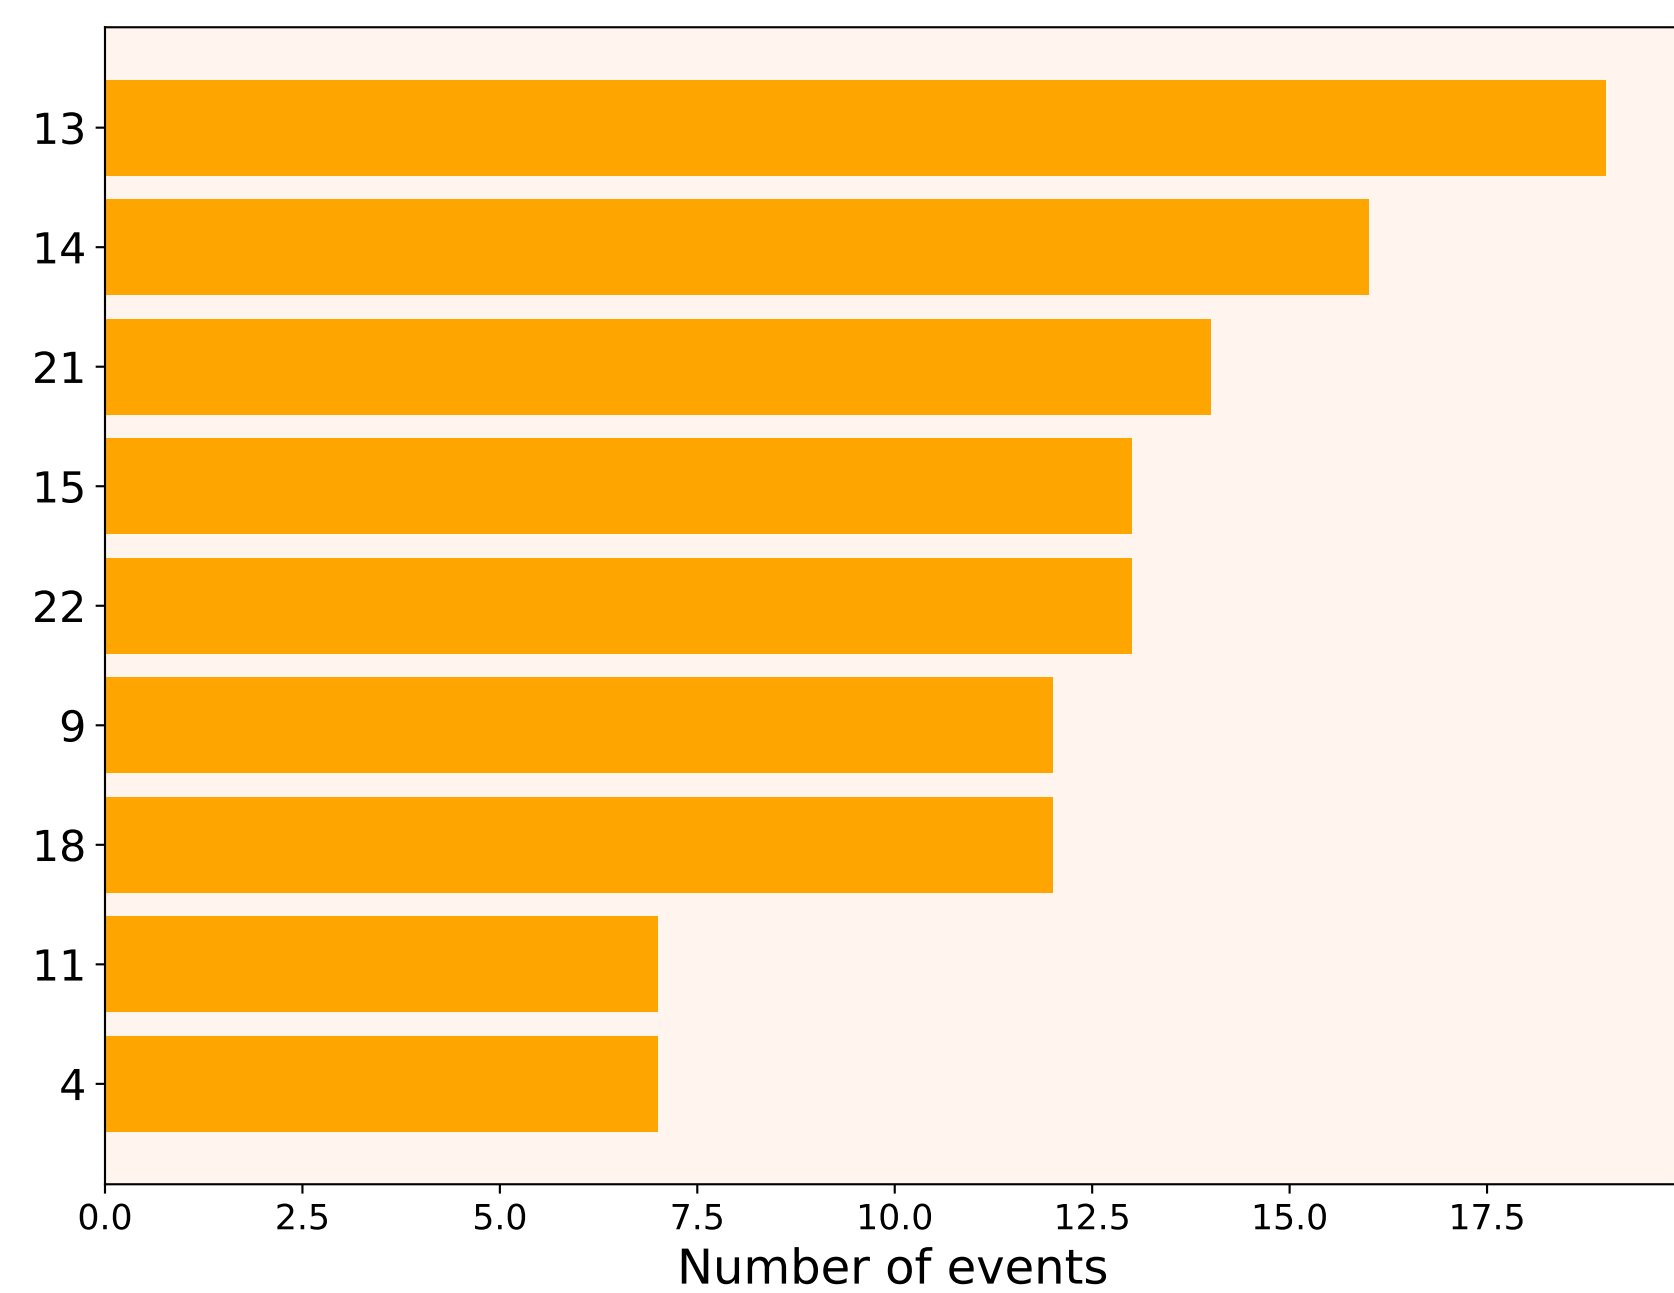

Driver chromosome gains

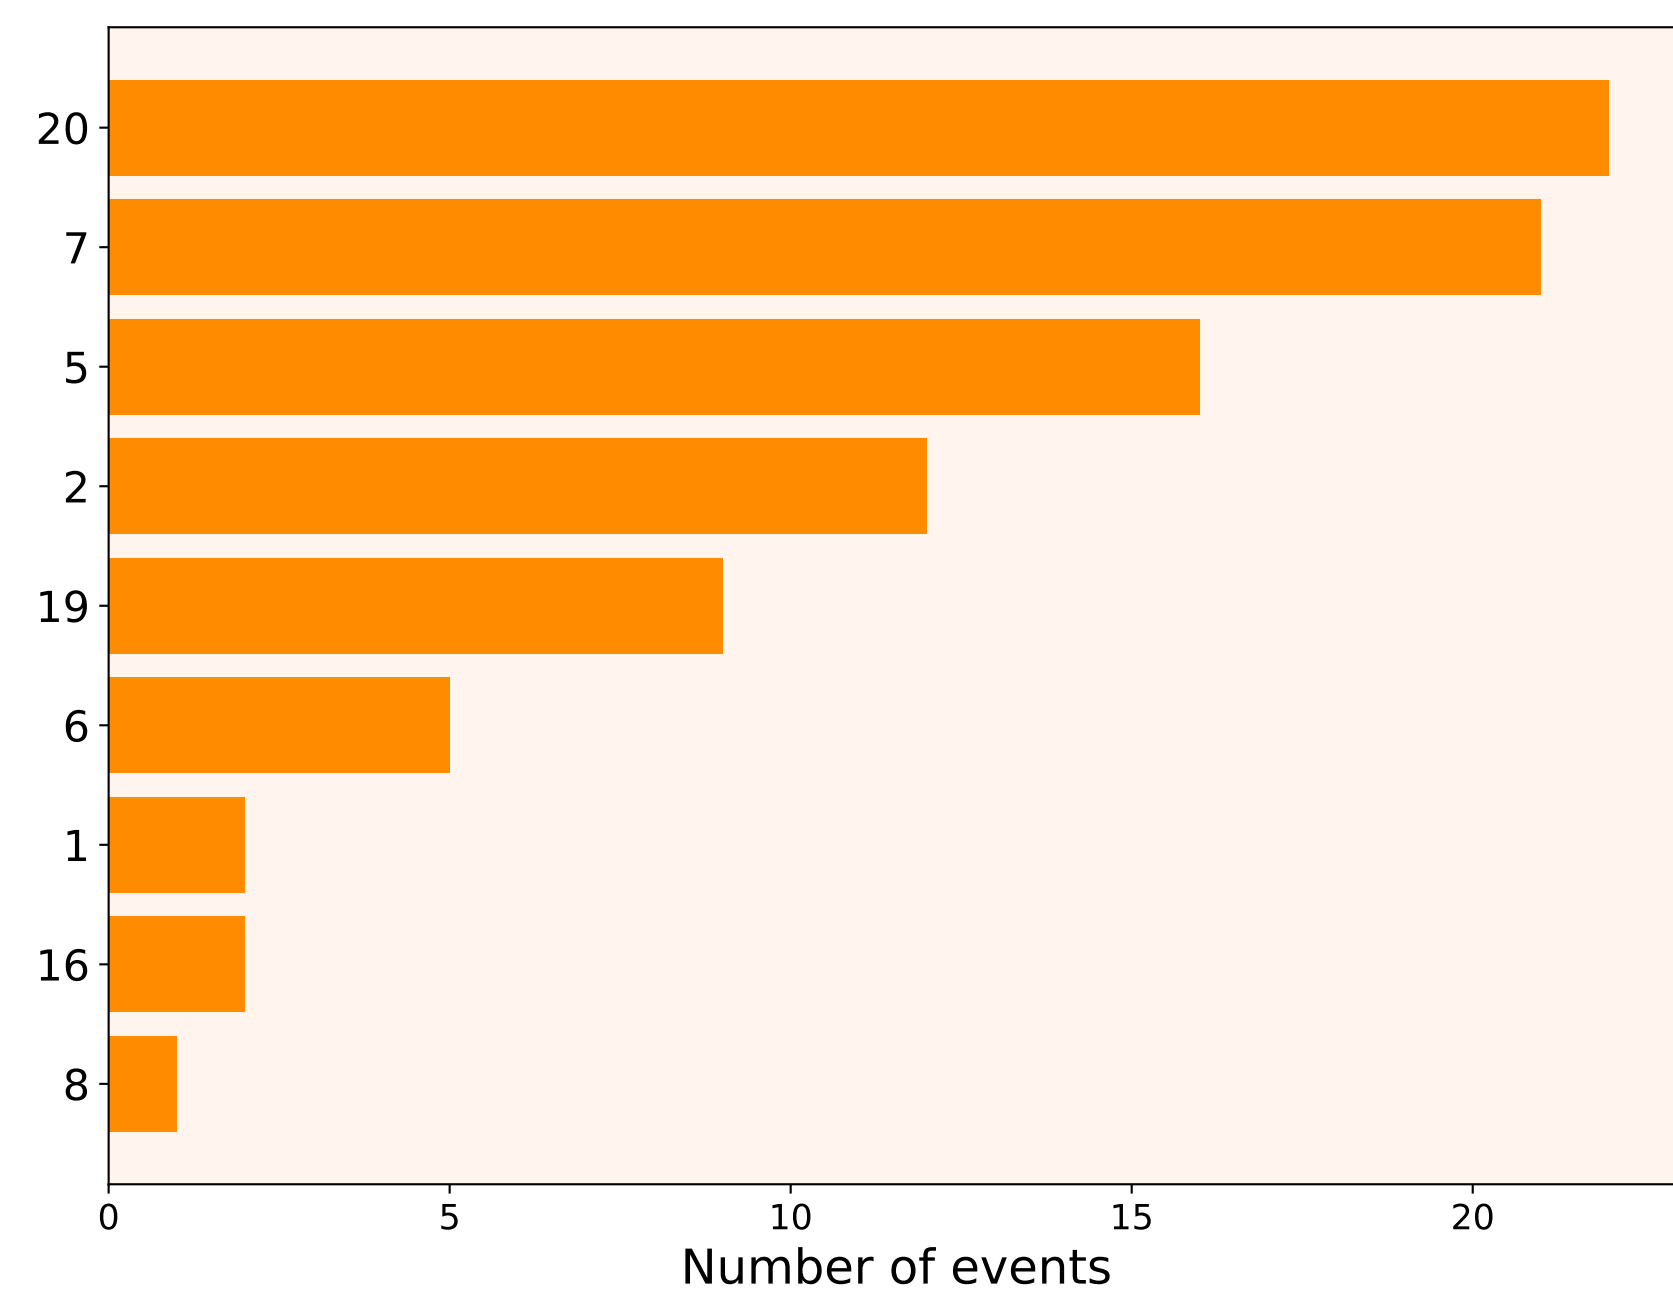

Driver arm losses

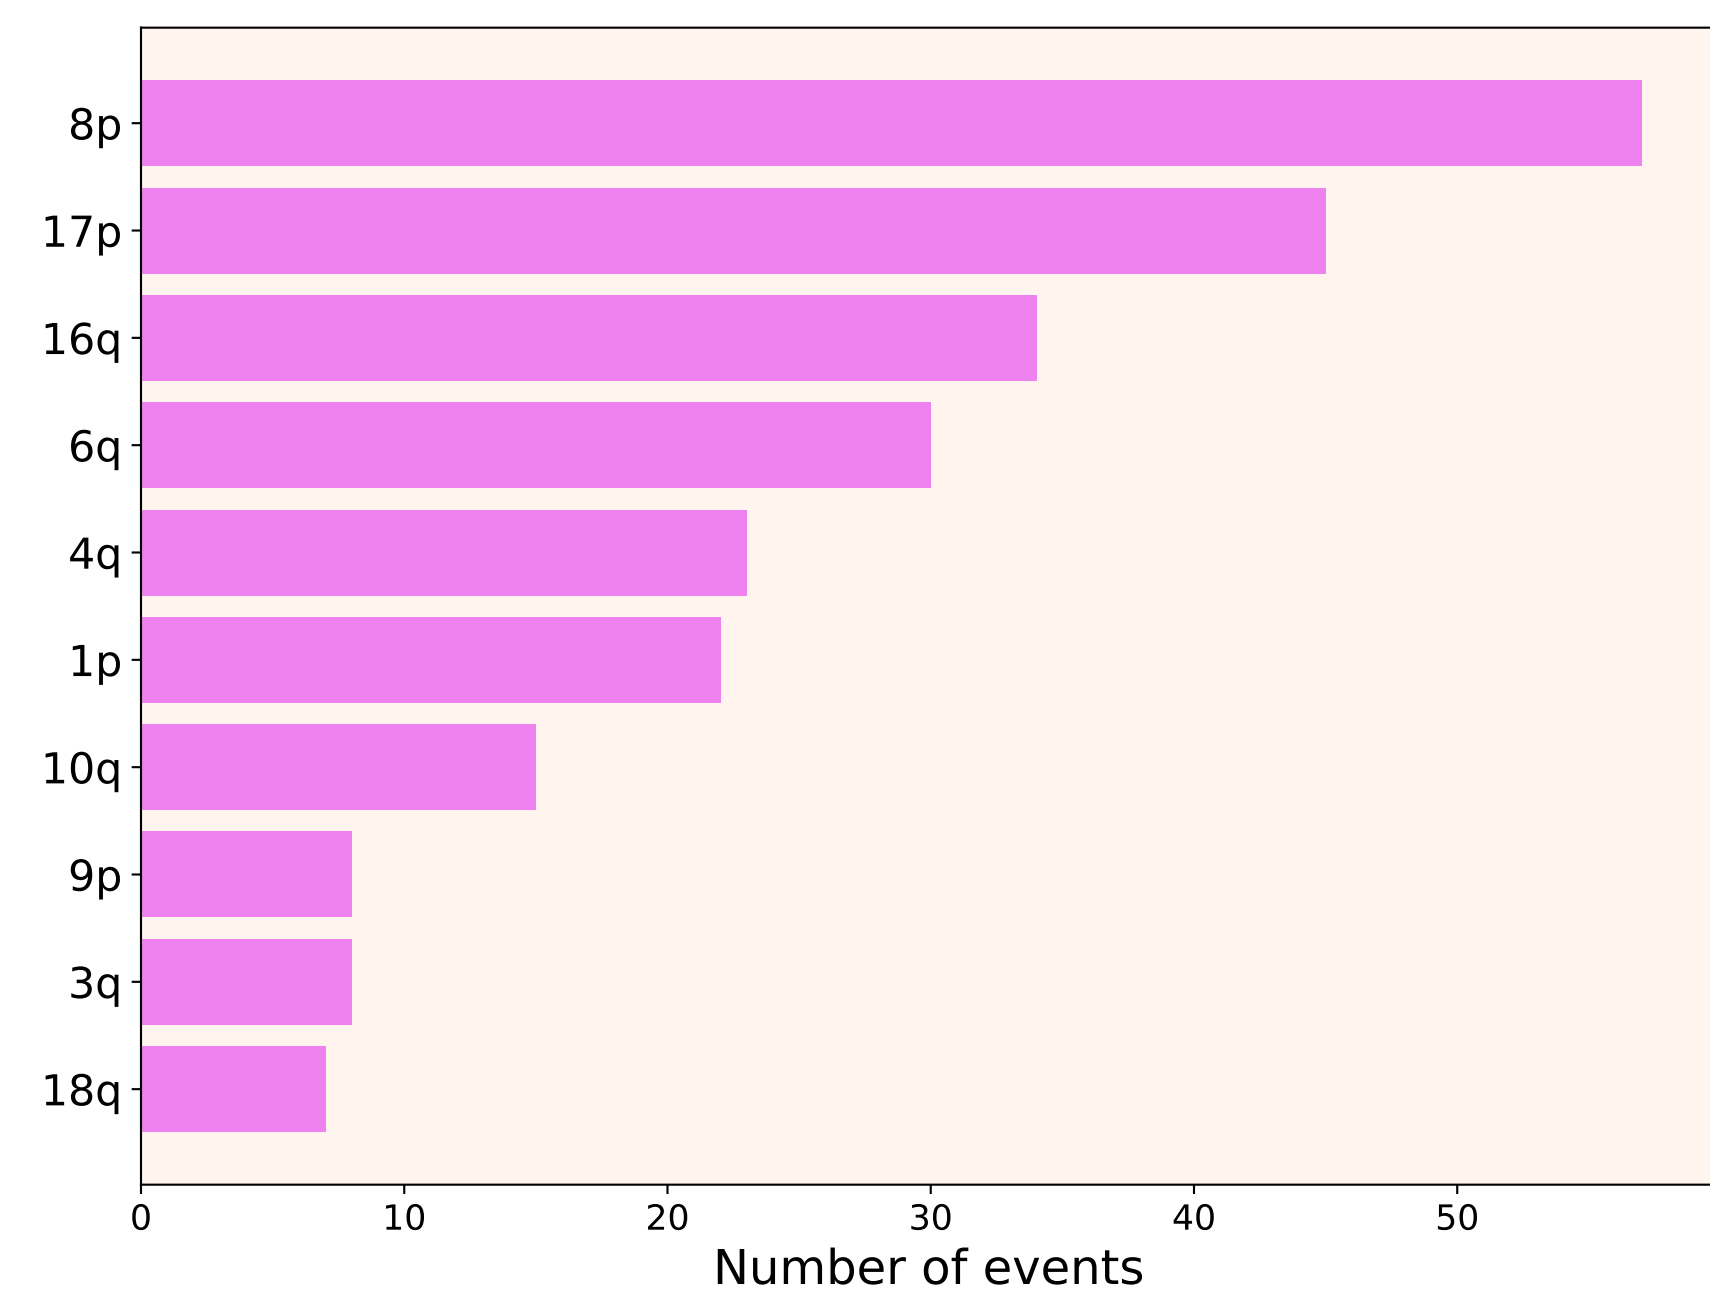

Driver arm gains

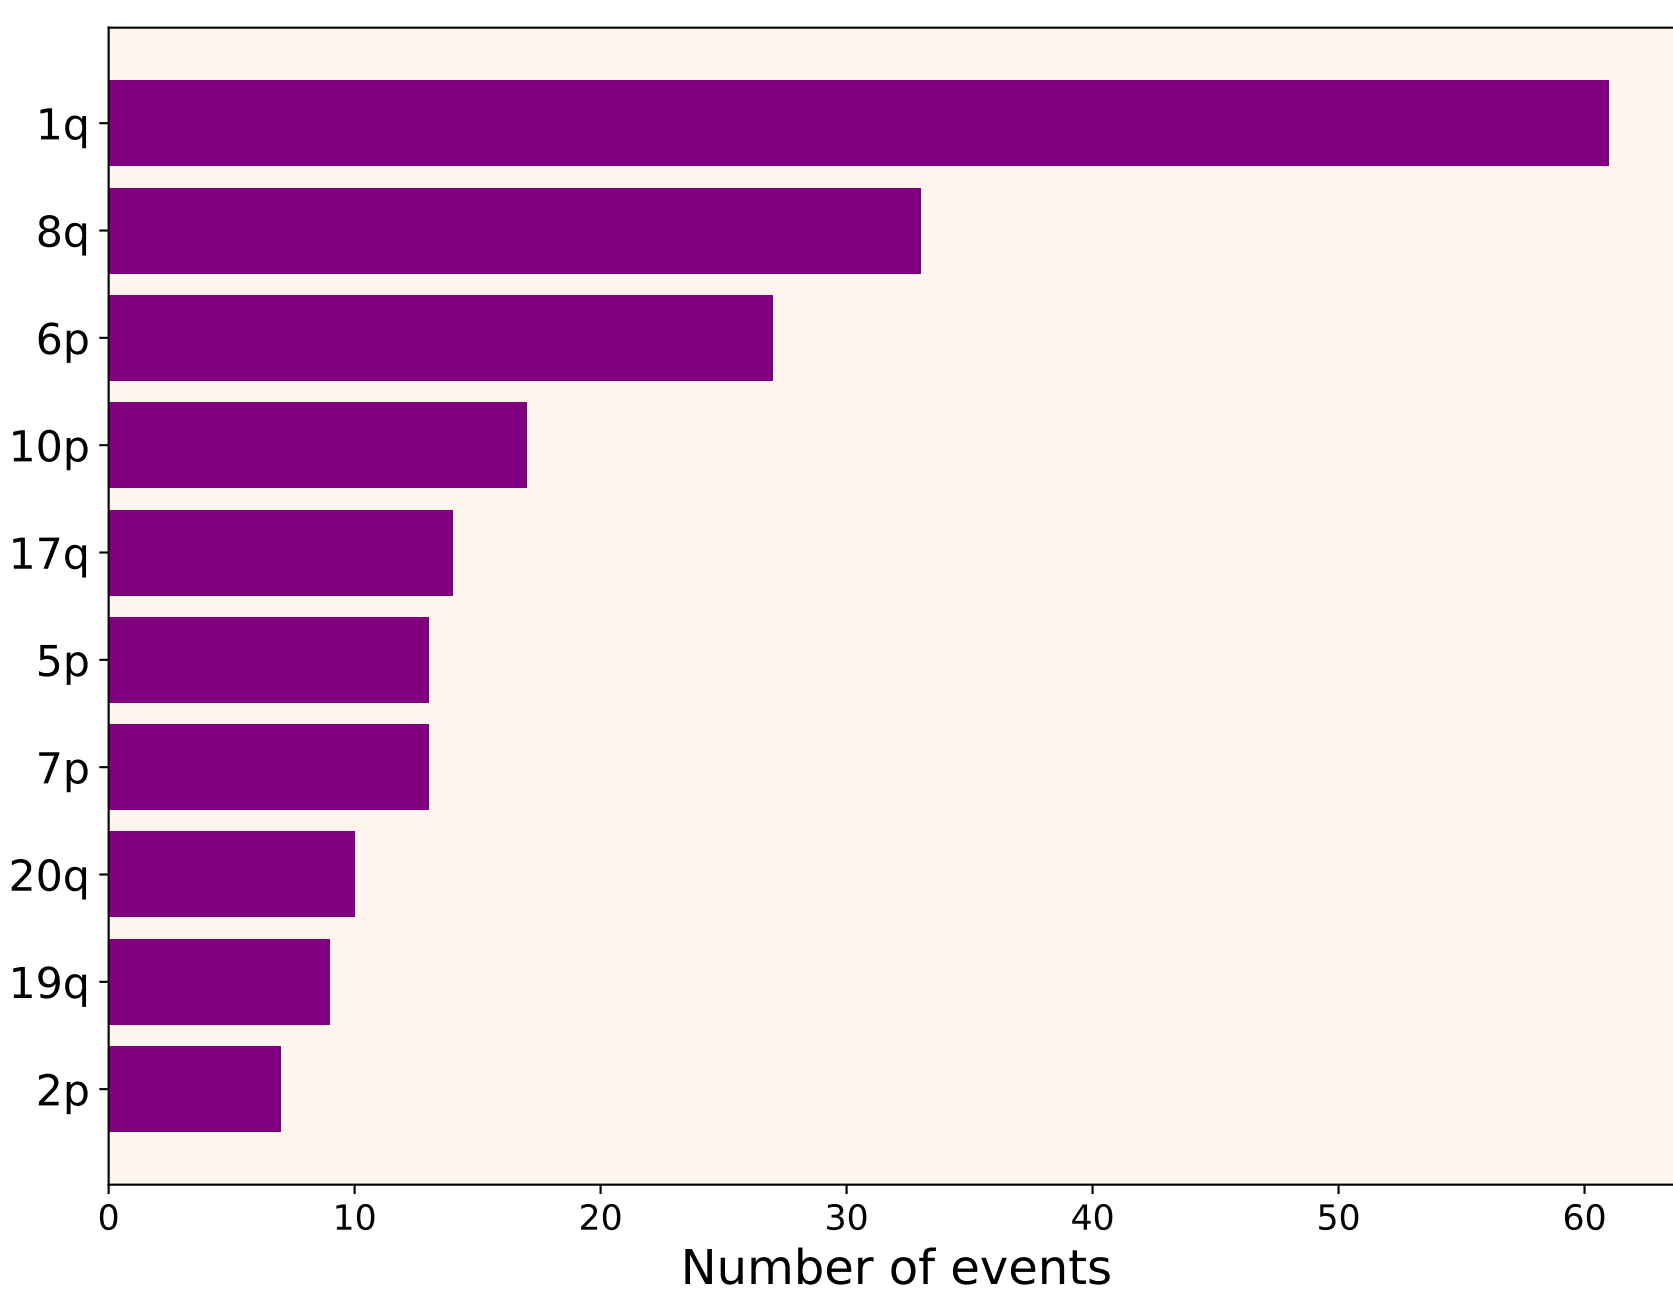

Driver events of all classes

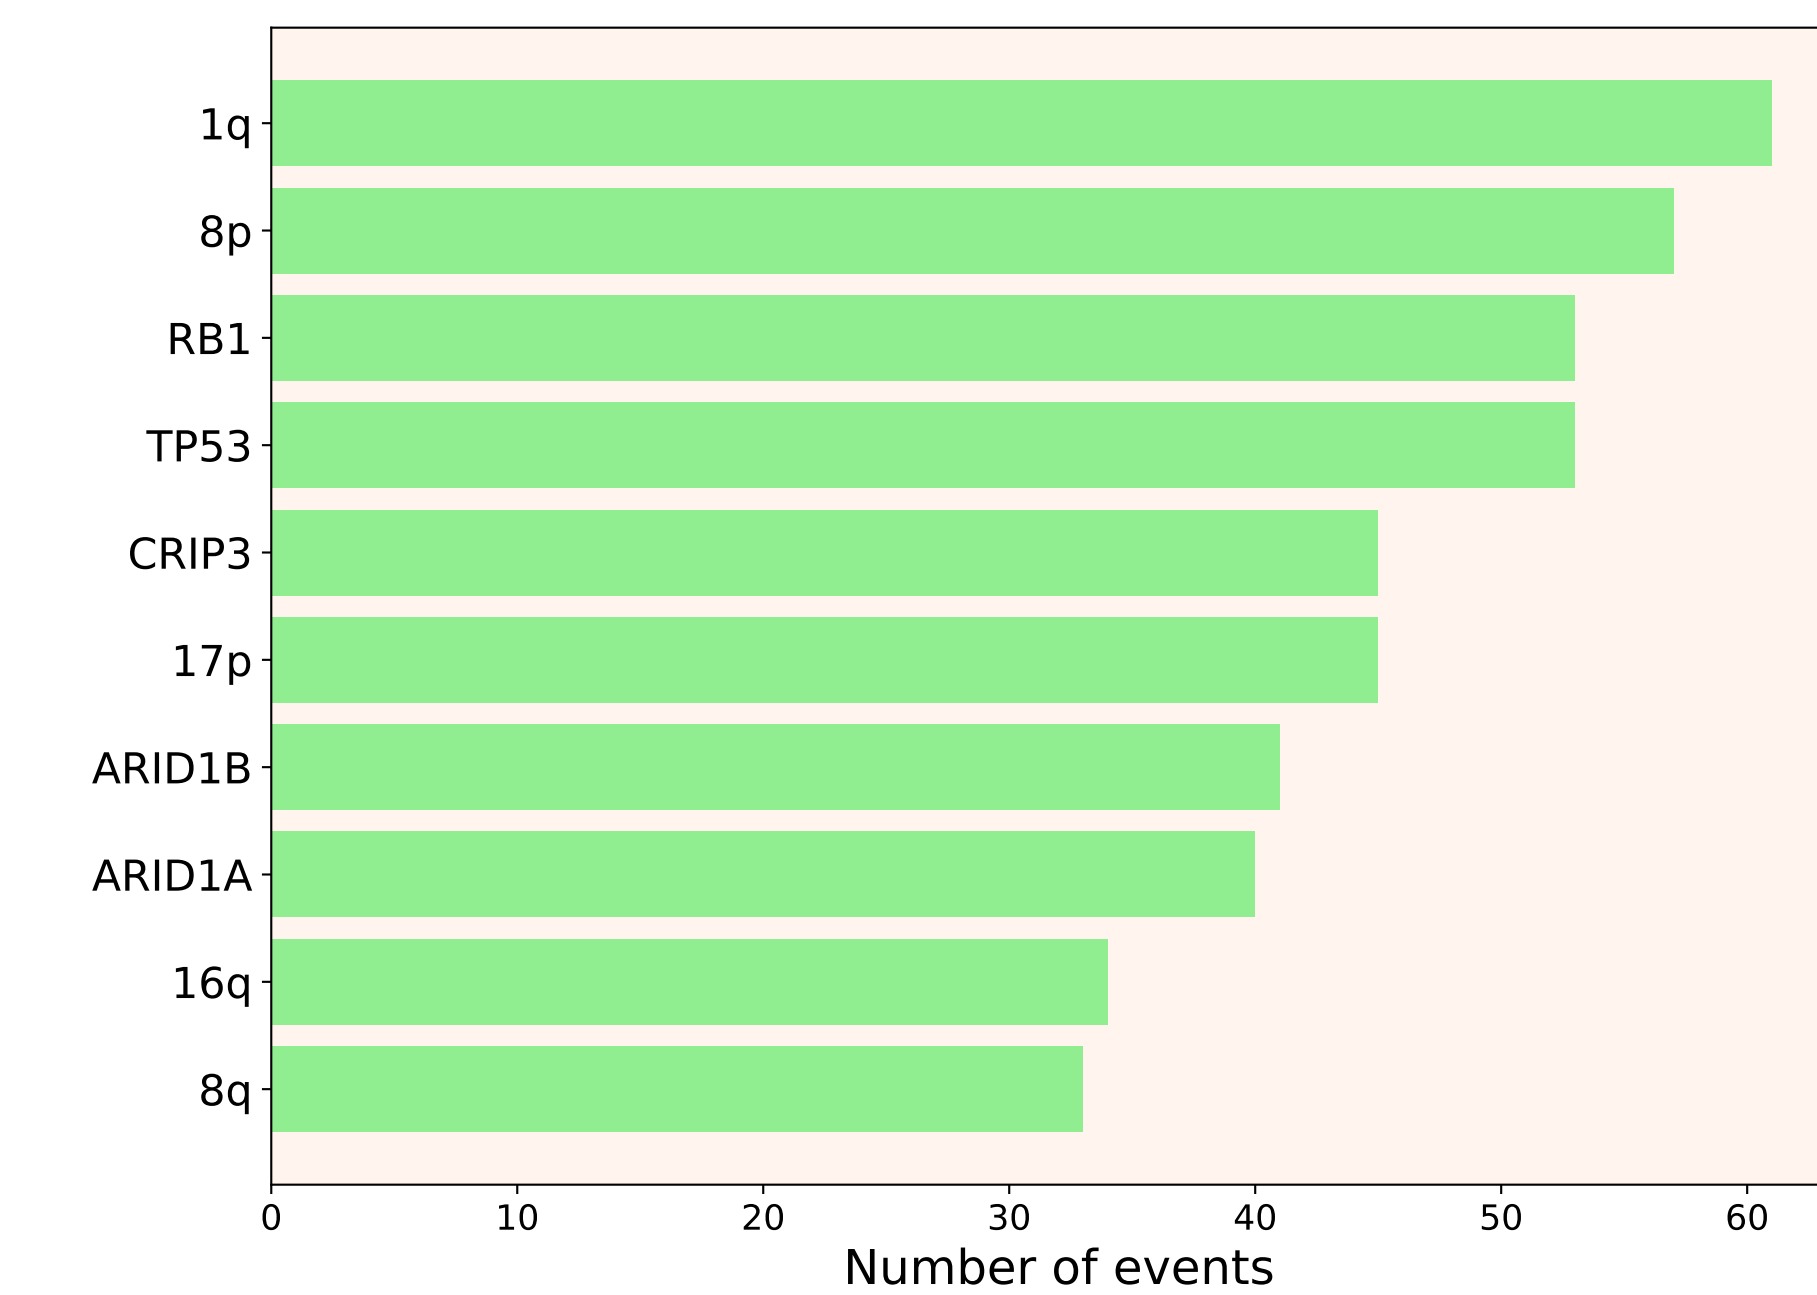

Supplement: Supplemental_Data_S1.zip [file Supplemental_Data_S1.zip]
