# Supplementary material for: Novel Driver Strength Index highlights important cancer genes in TCGA PanCanAtlas patients
Source: PeerJ journal article supplement (doi:10.7717/peerj.13860), 2022-08-11
Supplement: Supplemental_Data_S2.zip [file Supplemental_Data_S2.zip]

## GECNAV pipeline

- 1) Go to <https://gdc.cancer.gov/about-data/publications/PanCan-CellOfOrigin>
- 2) Download the file Analyte level annotations - [merged\\_sample\\_quality\\_annotations.tsv](#)
- 3) Using information in the column **aliquot\_barcode**, delete all samples named TCGA-XX-XXXX-YYX-XXX-XXXX-XX, where YY – any number, except 01, 03 and 09 (see [https://docs.gdc.cancer.gov/Encyclopedia/pages/TCGA\\_Barcode/](https://docs.gdc.cancer.gov/Encyclopedia/pages/TCGA_Barcode/) and table <https://gdc.cancer.gov/resources-tcga-users/tcga-code-tables/sample-type-codes>), and also, using information in the column **Do\_not\_use**, delete all samples with False value, and save the resulting file as **merged\_sample\_quality\_annotations\_do\_not\_use.tsv**.
- 4) Download the file gzipped ISAR-corrected GISTIC2.0 all\_thresholded.by\_genes file - [ISAR\\_GISTIC.all\\_thresholded.by\\_genes.txt](#), extract to **ISAR\_GISTIC.all\_thresholded.by\_genes.txt** and rename to **ISAR\_GISTIC.all\_thresholded.by\_genes.tsv**
- 5) Delete from the file **ISAR\_GISTIC.all\_thresholded.by\_genes.tsv** all samples named TCGA-XX-XXXX-YYX-XXX-XXXX-XX, where YY – any number, except 01, 03 и 09; and all samples present in the file **merged\_sample\_quality\_annotations\_do\_not\_use.tsv**, and save the resulting file as **ISAR\_GISTIC.all\_thresholded.by\_genes\_primary\_whitelisted.tsv**
- 6) Download the file RNA batch corrected matrix - [EBPlusPlusAdjustPANCAN\\_IlluminaHiSeq\\_RNASeqV2.geneExp.tsv](#)
- 7) Delete from the file **EBPlusPlusAdjustPANCAN\_IlluminaHiSeq\_RNASeqV2-v2.geneExp.tsv** all samples named TCGA-XX-XXXX-YYX-XXX-XXXX-XX, where YY – any number, except 01, 03 и 09; and all samples present in the file **merged\_sample\_quality\_annotations\_do\_not\_use.tsv**, and save the resulting file as **EBPlusPlusAdjustPANCAN\_IlluminaHiSeq\_RNASeqV2-v2.geneExp\_primary\_whitelisted.tsv**
- 8) Download the file miRNA batch corrected matrix - [pancanMiRs\\_EBadjOnProtocolPlatformWithoutRepsWithUnCorrectMiRs\\_08\\_04\\_16.csv](#) and convert to **pancanMiRs\_EBadjOnProtocolPlatformWithoutRepsWithUnCorrectMiRs\_08\_04\_16.tsv**
- 9) Delete from the file **pancanMiRs\_EBadjOnProtocolPlatformWithoutRepsWithUnCorrectMiRs\_08\_04\_16.tsv** all samples named TCGA-XX-XXXX-YYX-XXX-XXXX-XX, where YY – any number, except 01, 03 и 09; and all samples present in the file **merged\_sample\_quality\_annotations\_do\_not\_use.tsv**, and save the resulting file as **pancanMiRs\_EBadjOnProtocolPlatformWithoutRepsWithUnCorrectMiRs\_08\_04\_16\_primary\_whitelisted.tsv**
- 10) Using the file **EBPlusPlusAdjustPANCAN\_IlluminaHiSeq\_RNASeqV2-v2.geneExp\_primary\_whitelisted.tsv**, determine the median expression level for each gene across patients. If the expression for a given gene in a given patient is below 0.05x median value, replace it with “-2”, if between 0.05x and 0.75x median value, replace it with “-1”, if between 1.25x and 1.75x median value, replace with “1”, if above 1.75x median value, replace with “2”, otherwise replace with “0”. Save the file as **EBPlusPlusAdjustPANCAN\_IlluminaHiSeq\_RNASeqV2-v2.geneExp\_primary\_whitelisted\_median.tsv**
- 11) Using the file **pancanMiRs\_EBadjOnProtocolPlatformWithoutRepsWithUnCorrectMiRs\_08\_04\_16\_primary\_whitelisted.tsv**, determine the median expression level for each miRNA across patients. If the expression for a given miRNA in a given patient is below 0.05x median value, replace it with “-2”, if between 0.05x and 0.75x median value, replace it with “-1”, if between 1.25x and 1.75x median value, replace with “1”, if above 1.75x median value, replace with “2”, otherwise replace with “0”. Save the file as

pancanMiRs\_EBadjOnProtocolPlatformWithoutRepsWithUnCorrectMiRs\_08\_04\_16\_primary\_whitelisted\_median.tsv

- 12) Process the file **ISAR\_GISTIC.all\_thresholded.by\_genes\_primary\_whitelisted.tsv** according to the following table:

|                                                                                                                                                              |    | Gene CNA status in a given patient                           |    |   |   |   |
|--------------------------------------------------------------------------------------------------------------------------------------------------------------|----|--------------------------------------------------------------|----|---|---|---|
|                                                                                                                                                              |    | ISAR_GISTIC.all_thresholded.by_genes_primary_whitelisted.tsv |    |   |   |   |
|                                                                                                                                                              |    | -2                                                           | -1 | 0 | 1 | 2 |
| <b>Gene expression status in the same patient</b><br>EBPlusPlusAdjustPANCAN_IlluminaHiSeq_RNASeqV2-v2.geneExp_primary_whitelisted_median.tsv                 | 2  | 0                                                            | 0  | 0 | 2 | 2 |
|                                                                                                                                                              | 1  | 0                                                            | 0  | 0 | 1 | 1 |
|                                                                                                                                                              | 0  | 0                                                            | 0  | 0 | 0 | 0 |
|                                                                                                                                                              | -1 | -1                                                           | -1 | 0 | 0 | 0 |
|                                                                                                                                                              | -2 | -2                                                           | -2 | 0 | 0 | 0 |
| <b>If gene not found look in the miRNA file:</b>                                                                                                             |    |                                                              |    |   |   |   |
| <b>miRNA expression status in the same patient</b><br>pancanMiRs_EBadjOnProtocolPlatformWithoutRepsWithUnCorrectMiRs_08_04_16_primary_whitelisted_median.tsv | 2  | 0                                                            | 0  | 0 | 2 | 2 |
|                                                                                                                                                              | 1  | 0                                                            | 0  | 0 | 1 | 1 |
|                                                                                                                                                              | 0  | 0                                                            | 0  | 0 | 0 | 0 |
|                                                                                                                                                              | -1 | -1                                                           | -1 | 0 | 0 | 0 |
|                                                                                                                                                              | -2 | -2                                                           | -2 | 0 | 0 | 0 |
| <b>If still not found then:</b>                                                                                                                              |    | -2                                                           | -1 | 0 | 1 | 2 |

Save the results as

**ISAR\_GISTIC.all\_thresholded.by\_genes\_primary\_whitelisted\_RNAfiltered.tsv**
