# Supplementary material for: Novel Driver Strength Index highlights important cancer genes in TCGA PanCanAtlas patients
Source: PeerJ journal article supplement (doi:10.7717/peerj.13860), 2022-08-11
Supplement: Supplemental_Data_S3.zip [file Supplemental_Data_S3.zip]

## ANDRIF description

ANDRIF (ANeuploidy DRIVER Finder) is a Python 3.7 software package that predicts cancer driver aneuploidies (i.e. chromosomal arm or full chromosome gains or losses) from the TCGA PanCanAtlas aneuploidy data (<https://gdc.cancer.gov/about-data/publications/PanCan-CellOfOrigin>). Low quality samples and metastatic samples are filtered out. Driver prediction is based on calculating the average alteration status for each arm or chromosome in each cancer type. Bootstrapping is used to obtain the realistic distribution of the average alteration statuses under the null hypothesis. Benjamini–Hochberg procedure is performed to keep the false discovery rate under 5%. The pipeline can be executed fully automatically in less than 30 minutes on a modern PC (Linux, Windows or MacOS).

This package has been developed by

Aleksey V. Belikov, Dr.rer.nat.

<https://github.com/belikov-av>

Laboratory of Innovative Medicine, School of Biological and Medical Physics, Moscow Institute of Physics and Technology

Roles: concept, pipeline, supervision

and

Alexey D. Vyatkin

<https://github.com/VyatkinAlexey>

Skoltech

Roles: programming

A detailed description of pipeline steps can be found in the file ANDRIF pipeline.pdf

Instructions for executing the code can be found in the file Instructions.txt
