# Supplementary material for: Novel Driver Strength Index highlights important cancer genes in TCGA PanCanAtlas patients
Source: PeerJ journal article supplement (doi:10.7717/peerj.13860), 2022-08-11
Supplement: Supplemental_Data_S5.zip [file Supplemental_Data_S5.zip]

## PALDRIC GENE pipeline

To obtain the necessary files, run SNADRIF, GECNAV and ANDRIF pipelines before executing PALDRIC GENE pipeline.

- 1) Go to <https://gdc.cancer.gov/node/905/>
- 2) Download Clinical with Follow-up - [clinical\\_PANCAN\\_patient\\_with\\_followup.tsv](#)
- 3) Remove from **clinical\_PANCAN\_patient\_with\_followup.tsv** all patients with **icd\_o\_3\_histology** different from XXXX/3 (primary malignant neoplasm) and all patients not present (at the level TCGA-XX-XXXX) simultaneously in **mc3.v0.2.8.PUBLIC\_primary\_whitelisted\_Entrez.tsv**, **ISAR\_GISTIC.all\_thresholded.by\_genes\_primary\_whitelisted.tsv** and **Primary\_whitelisted\_arms.tsv** and save the resulting file as **clinical\_PANCAN\_patient\_with\_followup\_primary\_whitelisted.tsv**
- 4) A) Manually convert the outputs of third-party driver *mutation* prediction algorithms to tsv files with columns **HUGO symbol**, **Ensembl Transcript ID**, **mutation**, **cohort**, removing all results with q-value >0.05  
B) Manually convert the outputs of third-party driver *gene* prediction algorithms to tsv files with columns **HUGO symbol**, **cohort**, removing all results with q-value >0.05
- 5) Find Entrez Gene IDs using HUGO symbols and external database [ftp://ftp.ncbi.nih.gov/gene/DATA/GENE\\_INFO/Mammalia/Homo\\_sapiens.gene\\_info.gz](ftp://ftp.ncbi.nih.gov/gene/DATA/GENE_INFO/Mammalia/Homo_sapiens.gene_info.gz) and update the file
- 6) A) For lists of driver *mutations*, remove all entries from **mc3.v0.2.8.PUBLIC\_primary\_whitelisted\_Entrez.tsv** except those that satisfy the following conditions simultaneously: **Transcript\_ID** matches **Ensembl Transcript ID** in the driver list; nucleotide/amino acid substitution matches the one in the driver list; cancer type (identified by matching **Tumor\_Sample\_Barcode** with **bcr\_patient\_barcode** and **acronym** in **clinical\_PANCAN\_patient\_with\_followup.tsv**) matches **cohort** in the driver list or the driver list is for pancancer analysis; **Variant\_Classification** column contains one of the following values: De\_novo\_Start\_InFrame, Frame\_Shift\_Del, Frame\_Shift\_Ins, In\_Frame\_Del, In\_Frame\_Ins, Missense\_Mutation, Nonsense\_Mutation, Nonstop\_Mutation, Translation\_Start\_Site.  
Save the results as **AlgorithmName\_output\_SNA.tsv** with columns **TCGA Barcode**, **HUGO Symbol**, **Entrez Gene ID**  
B) For lists of driver *genes*, remove all entries from **mc3.v0.2.8.PUBLIC\_primary\_whitelisted\_Entrez.tsv** except those that satisfy the following conditions simultaneously: **Entrez\_Gene\_ID** matches **Entrez Gene ID** in the driver list; cancer type (identified by matching **Tumor\_Sample\_Barcode** with **bcr\_patient\_barcode** and **acronym** in **clinical\_PANCAN\_patient\_with\_followup.tsv**) matches **cohort** in the driver list or the driver list is for pancancer analysis; **Variant\_Classification** column contains one of the following values: De\_novo\_Start\_InFrame, Frame\_Shift\_Del, Frame\_Shift\_Ins, In\_Frame\_Del, In\_Frame\_Ins, Missense\_Mutation, Nonsense\_Mutation, Nonstop\_Mutation, Translation\_Start\_Site.  
Save the results as **AlgorithmName\_output\_SNA.tsv** with columns **TCGA Barcode**, **HUGO Symbol**, **Entrez Gene ID**

- 7) Remove all entries from **ISAR\_GISTIC.all\_thresholded.by\_genes\_primary\_whitelisted.tsv** except those that satisfy the following conditions simultaneously: **Locus ID** matches **Entrez Gene ID** in the driver list; cancer type (identified by matching Tumor Sample Barcode with **bcr\_patient\_barcode** and **acronym** in **clinical\_PANCAN\_patient\_with\_followup.tsv**) matches **cohort** in the driver list or the driver list is for pancancer analysis; CNA values are 2,1, -1 or -2. Convert these data from the matrix to a list format (with columns **TCGA Barcode**, **HUGO Symbol**, **Entrez Gene ID**) and save as **AlgorithmName\_output\_CNA.tsv**.
- 8) Combine **AlgorithmName\_output\_SNA.tsv** and **AlgorithmName\_output\_CNA.tsv**, remove duplicate **TCGA Barcode-Entrez Gene ID** pairs, and save as **AlgorithmName\_output.tsv**
- 9) Choose desired **AlgorithmName\_output.tsv** files and fill the columns **TCGA Barcode**, **HUGO Symbol** and **Entrez Gene ID** of **AnalysisName\_genes\_level0.tsv**, removing duplicate **TCGA Barcode-Entrez Gene ID** pairs and patients not present in **clinical\_PANCAN\_patient\_with\_followup\_primary\_whitelisted.tsv**. If overlap was chosen by the user, remove all **TCGA Barcode-Entrez Gene ID** pairs present in fewer chosen **AlgorithmName\_output.tsv** files than the user-chosen overlap number.
- 10) Use data from **SNA\_classification\_patients.tsv** to fill the columns **Number of hyperactivating SNAs** and **Number of inactivating SNAs** in **AnalysisName\_genes\_level0.tsv**; if a given **TCGA Barcode-Entrez Gene ID** pair is absent in **SNA\_classification\_patients.tsv**, write zeros. Use data from **SNA\_classification\_genes\_NSEI\_HISR.tsv** to fill the **HISR** column; if a given **Entrez Gene ID** is absent in **SNA\_classification\_genes\_NSEI\_HISR.tsv**, leave the cell empty. Use data from **ISAR\_GISTIC.all\_thresholded.by\_genes\_primary\_whitelisted\_RNAfiltered.tsv** to fill the **CNA status** column; if a given **TCGA Barcode-Entrez Gene ID** pair is absent in **ISAR\_GISTIC.all\_thresholded.by\_genes\_primary\_whitelisted\_RNAfiltered.tsv** write zero. Save the results as **AnalysisName\_genes\_level1.tsv**
- 11) Use data from **AnalysisName\_genes\_level1.tsv** to classify driver alterations according to the following table:

| Driver type                | Number of hyperactivating SNAs + inactivating SNAs | Number of inactivating SNAs | HISR | CNA status | Count as ... driver event(s) |
|----------------------------|----------------------------------------------------|-----------------------------|------|------------|------------------------------|
| SNA-based oncogene         | ≥1                                                 | 0                           | >5   | 0          | 1                            |
| CNA-based oncogene         | 0                                                  | 0                           | >5   | 1 or 2     | 1                            |
| Mixed oncogene             | ≥1                                                 | 0                           | >5   | 1 or 2     | 1                            |
| SNA-based tumor suppressor | ≥1                                                 | ≥0                          | ≤5   | 0          | 1                            |
| CNA-based tumor suppressor | 0                                                  | 0                           | ≤5   | -1 or -2   | 1                            |
| Mixed tumor suppressor     | ≥1                                                 | ≥0                          | ≤5   | -1 or -2   | 1                            |
| Passenger                  | 0                                                  | 0                           |      | 0          | 0                            |
| Low-probability driver     | All the rest                                       |                             |      |            | 0                            |

and fill the columns **CNA status**, **Driver type** and **Count as ... driver event(s)** of **AnalysisName\_genes\_level1.tsv**, saving it as **AnalysisName\_genes\_level2.tsv**

- 12) Use data from **AnalysisName\_genes\_level2.tsv**, **Chromosome\_drivers\_FDR5.tsv** и **Arm\_drivers\_FDR5.tsv**, to count for each patient the number of driver events of various classes (**Number of SNA-based oncogenic events**, **Number of CNA-based oncogenic events**, **Number of Mixed oncogenic events**, **Number of SNA-based tumor suppressor events**, **Number of CNA-based tumor suppressor events**, **Number of Mixed tumor suppressor events**, **Number of Driver chromosome losses**, **Number of**

**Driver chromosome gains, Number of Driver arm losses, Number of Driver arm gains, Total number of driver events**), counting each tumor suppressor as 2 events (see table above). Add patients without any identified drivers (i.e. whose TCGA barcodes are absent in **AnalysisName\_genes\_level2.tsv**, **Chromosome\_drivers\_FDR5.tsv** and **Arm\_drivers\_FDR5.tsv**, but present in **clinical\_PANCAN\_patient\_with\_followup\_primary\_whitelisted.tsv**) writing zero values for them, saving the results as **AnalysisName\_patients.tsv**.

Write individual gene or chromosome names for each patient and driver class into **AnalysisName\_patients\_genes.tsv**.

Use data from **clinical\_PANCAN\_patient\_with\_followup\_primary\_whitelisted.tsv** to fill the columns **Cancer type (acronym)**, **Gender (gender)**, **Age (age\_at\_initial\_pathologic\_diagnosis)**, and **Tumor stage (pathologic\_stage**, if data absent then **clinical\_stage**, if data absent then **pathologic\_T**, if data absent then **clinical\_T**, convert to Arabic number) in both files.

- 13) Use data from **AnalysisName\_patients.tsv** to count the number of patients with each integer total number of driver events (0,1,...,99, 100) for each cancer type, also for males and females separately, and save as **AnalysisName\_distribution\_events.tsv**, **AnalysisName\_distribution\_events\_males.tsv** and **AnalysisName\_distribution\_events\_females.tsv**. For each file, plot a multicolor cumulative histogram "Cancer type distribution by total number of driver events per patient".
- 14) Use data from **AnalysisName\_patients.tsv** to count the average number of various types of driver events in each cancer type (ACC,..., UVM, PANCAN), also for males and females separately, and save as **AnalysisName\_distribution\_cohorts.tsv**, **AnalysisName\_distribution\_cohorts\_males.tsv** and **AnalysisName\_distribution\_cohorts\_females.tsv**. For each file, plot a multicolor cumulative histogram "Driver event distribution by cancer type"

Use data from **AnalysisName\_patients\_genes.tsv** to count the number of various types of driver events in individual genes or chromosomes in each cancer type (ACC,..., UVM, PANCAN), also for males and females separately, and save as

**AnalysisName\_distribution\_cohorts\_genes.tsv**, **AnalysisName\_distribution\_cohorts\_males\_genes.tsv** and **AnalysisName\_distribution\_cohorts\_females\_genes.tsv**. For each cancer type and gender, plot a histogram of top 10 driver events in each class and overall.

- 15) Use data from **AnalysisName\_patients.tsv** to count the average number of various types of driver events in patients with each total number of driver events (1,2,...,99, 100), also for males and females separately, and save as **AnalysisName\_distribution\_events\_detailed.tsv**, **AnalysisName\_distribution\_events\_detailed\_males.tsv** and **AnalysisName\_distribution\_events\_detailed\_females.tsv**. For each file, plot a multicolor cumulative histogram "Driver event distribution by total number of driver events per patient".

Use data from **AnalysisName\_patients\_genes.tsv** to count the number of various types of driver events in individual genes or chromosomes in patients with each total number of driver events (1,2,..., 99, 100), also for males and females separately, and save as

**AnalysisName\_distribution\_events\_detailed\_genes.tsv**,  
**AnalysisName\_distribution\_events\_detailed\_males\_genes.tsv** and  
**AnalysisName\_distribution\_events\_detailed\_females\_genes.tsv**. For each total number of driver events and gender, plot a histogram of top 10 driver events in each class and overall.

Calculate Driver Strength Index (DSI)

$$DSI_A = \sum_{i=1}^{100} \frac{p_{A_i}}{i p_i}$$

Where  $p_{A_i}$  = number of patients with a driver event in the gene/chromosome A amongst patients with  $i$  driver events in total;  $p_i$  = number of patients with  $i$  driver events in total.

Take  $p_{A_i}$  data from **AnalysisName\_distribution\_events\_detailed\_genes.tsv**,  
**AnalysisName\_distribution\_events\_detailed\_males\_genes.tsv** and  
**AnalysisName\_distribution\_events\_detailed\_females\_genes.tsv**.

Take  $p_i$  data from the PANCAN row of **AnalysisName\_distribution\_events.tsv**,  
**AnalysisName\_distribution\_events\_males.tsv** and  
**AnalysisName\_distribution\_events\_females.tsv**.

Save results as **AnalysisName\_distribution\_events\_detailed\_genes\_DSI.tsv**,  
**AnalysisName\_distribution\_events\_detailed\_males\_genes\_DSI.tsv** and  
**AnalysisName\_distribution\_events\_detailed\_females\_genes\_DSI.tsv**.

Use these data to combine lists of drivers from various classes, removing drivers with lower DSI in case of duplicates and removing all drivers with  $DSI < 0.05$ , fetch Entrez Gene IDs from

[ftp://ftp.ncbi.nih.gov/gene/DATA/GENE\\_INFO/Mammalia/Homo\\_sapiens.gene\\_info.gz](ftp://ftp.ncbi.nih.gov/gene/DATA/GENE_INFO/Mammalia/Homo_sapiens.gene_info.gz)  
and save the results as

**AnalysisName\_distribution\_events\_detailed\_genes\_DSI\_top.tsv**,  
**AnalysisName\_distribution\_events\_detailed\_males\_genes\_DSI\_top.tsv** and  
**AnalysisName\_distribution\_events\_detailed\_females\_genes\_DSI\_top.tsv**.

Calculate Normalized Driver Strength Index (NDSI)

$$NDSI_A = \frac{\sum_{i=1}^{100} \frac{p_{A_i}}{i p_i}}{\sum_{i=1}^{100} \frac{p_{A_i}}{p_i}}$$

Where  $p_{A_i}$  = number of patients with a driver event in the gene/chromosome A amongst patients with  $i$  driver events in total;  $p_i$  = number of patients with  $i$  driver events in total.

Take  $p_{A_i}$  data from **AnalysisName\_distribution\_events\_detailed\_genes.tsv**,  
**AnalysisName\_distribution\_events\_detailed\_males\_genes.tsv** and  
**AnalysisName\_distribution\_events\_detailed\_females\_genes.tsv**.

Remove genes/chromosomes if present in less than 10 patients in each driver event type, as counted in the PANCAN row of **AnalysisName\_distribution\_cohorts\_genes.tsv**,  
**AnalysisName\_distribution\_cohorts\_males\_genes.tsv** and  
**AnalysisName\_distribution\_cohorts\_females\_genes.tsv**.

Take  $p_i$  data from the PANCAN row of **AnalysisName\_distribution\_events.tsv**, **AnalysisName\_distribution\_events\_males.tsv** and **AnalysisName\_distribution\_events\_females.tsv**.

Save results as **AnalysisName\_distribution\_events\_detailed\_genes\_NDSI.tsv**, **AnalysisName\_distribution\_events\_detailed\_males\_genes\_NDSI.tsv** and **AnalysisName\_distribution\_events\_detailed\_females\_genes\_NDSI.tsv**.

Use these data to combine lists of drivers from various classes, removing drivers with lower NDSI in case of duplicates and removing all drivers with  $NDSI < 0.05$ , fetch Entrez Gene IDs from

[ftp://ftp.ncbi.nih.gov/gene/DATA/GENE\\_INFO/Mammalia/Homo\\_sapiens.gene\\_info.gz](ftp://ftp.ncbi.nih.gov/gene/DATA/GENE_INFO/Mammalia/Homo_sapiens.gene_info.gz) and save the results as

**AnalysisName\_distribution\_events\_detailed\_genes\_NDSI\_top.tsv**, **AnalysisName\_distribution\_events\_detailed\_males\_genes\_NDSI\_top.tsv** and **AnalysisName\_distribution\_events\_detailed\_females\_genes\_NDSI\_top.tsv**.

- 16) Use data from **AnalysisName\_patients.tsv** to count the average number of various types of driver events for males and females separately, and save as **AnalysisName\_distribution\_gender.tsv**. Plot a multicolor cumulative histogram “Driver event distribution by gender”.

Use data from **AnalysisName\_patients\_genes.tsv** to count the number of various types of driver events in individual genes or chromosomes for males and females separately, and save as **AnalysisName\_distribution\_gender\_genes.tsv**. For each gender, plot a histogram of top 10 driver events in each class and overall.

- 17) Use data from **AnalysisName\_patients.tsv** to count the average number of various types of driver events for each tumor stage (1,2,3,4), also for males and females separately, and save as **AnalysisName\_distribution\_stage.tsv**, **AnalysisName\_distribution\_stage\_males.tsv** and **AnalysisName\_distribution\_stage\_females.tsv**. For each file, plot a multicolor cumulative histogram “Driver event distribution by cancer stage”.

Use data from **AnalysisName\_patients\_genes.tsv** to count the number of various types of driver events in individual genes or chromosomes for each tumor stage (1,2,3,4), also for males and females separately, and save as

**AnalysisName\_distribution\_stage\_genes.tsv**, **AnalysisName\_distribution\_stage\_males\_genes.tsv** and **AnalysisName\_distribution\_stage\_females\_genes.tsv**. For each stage and gender, plot a histogram of top 10 driver events in each class and overall.

- 18) Use data from **AnalysisName\_patients.tsv** to count the average number of various types of driver events for each age group (<25, 25-29,...,>85), also for males and females separately, and save as **AnalysisName\_distribution\_age.tsv**, **AnalysisName\_distribution\_age\_males.tsv** and **AnalysisName\_distribution\_age\_females.tsv**. For each file, plot a multicolor cumulative histogram “Driver event distribution by age”.

Use data from **AnalysisName\_patients\_genes.tsv** to count the number of various types of driver events in individual genes or chromosomes for each age group (<25, 25-29,...,>85), also for males and females separately, and save as

**AnalysisName\_distribution\_age\_genes.tsv**, **AnalysisName\_distribution\_age\_males\_genes.tsv** and

**AnalysisName\_distribution\_age\_females\_genes.tsv.** For each age group and gender, plot a histogram of top 10 driver events in each class and overall.
