# Supplementary figures and images for: Novel Driver Strength Index highlights important cancer genes in TCGA PanCanAtlas patients (part 1 of 4)
Source: PeerJ journal article supplement (doi:10.7717/peerj.13860), 2022-08-11

# LGG\_FEMALE

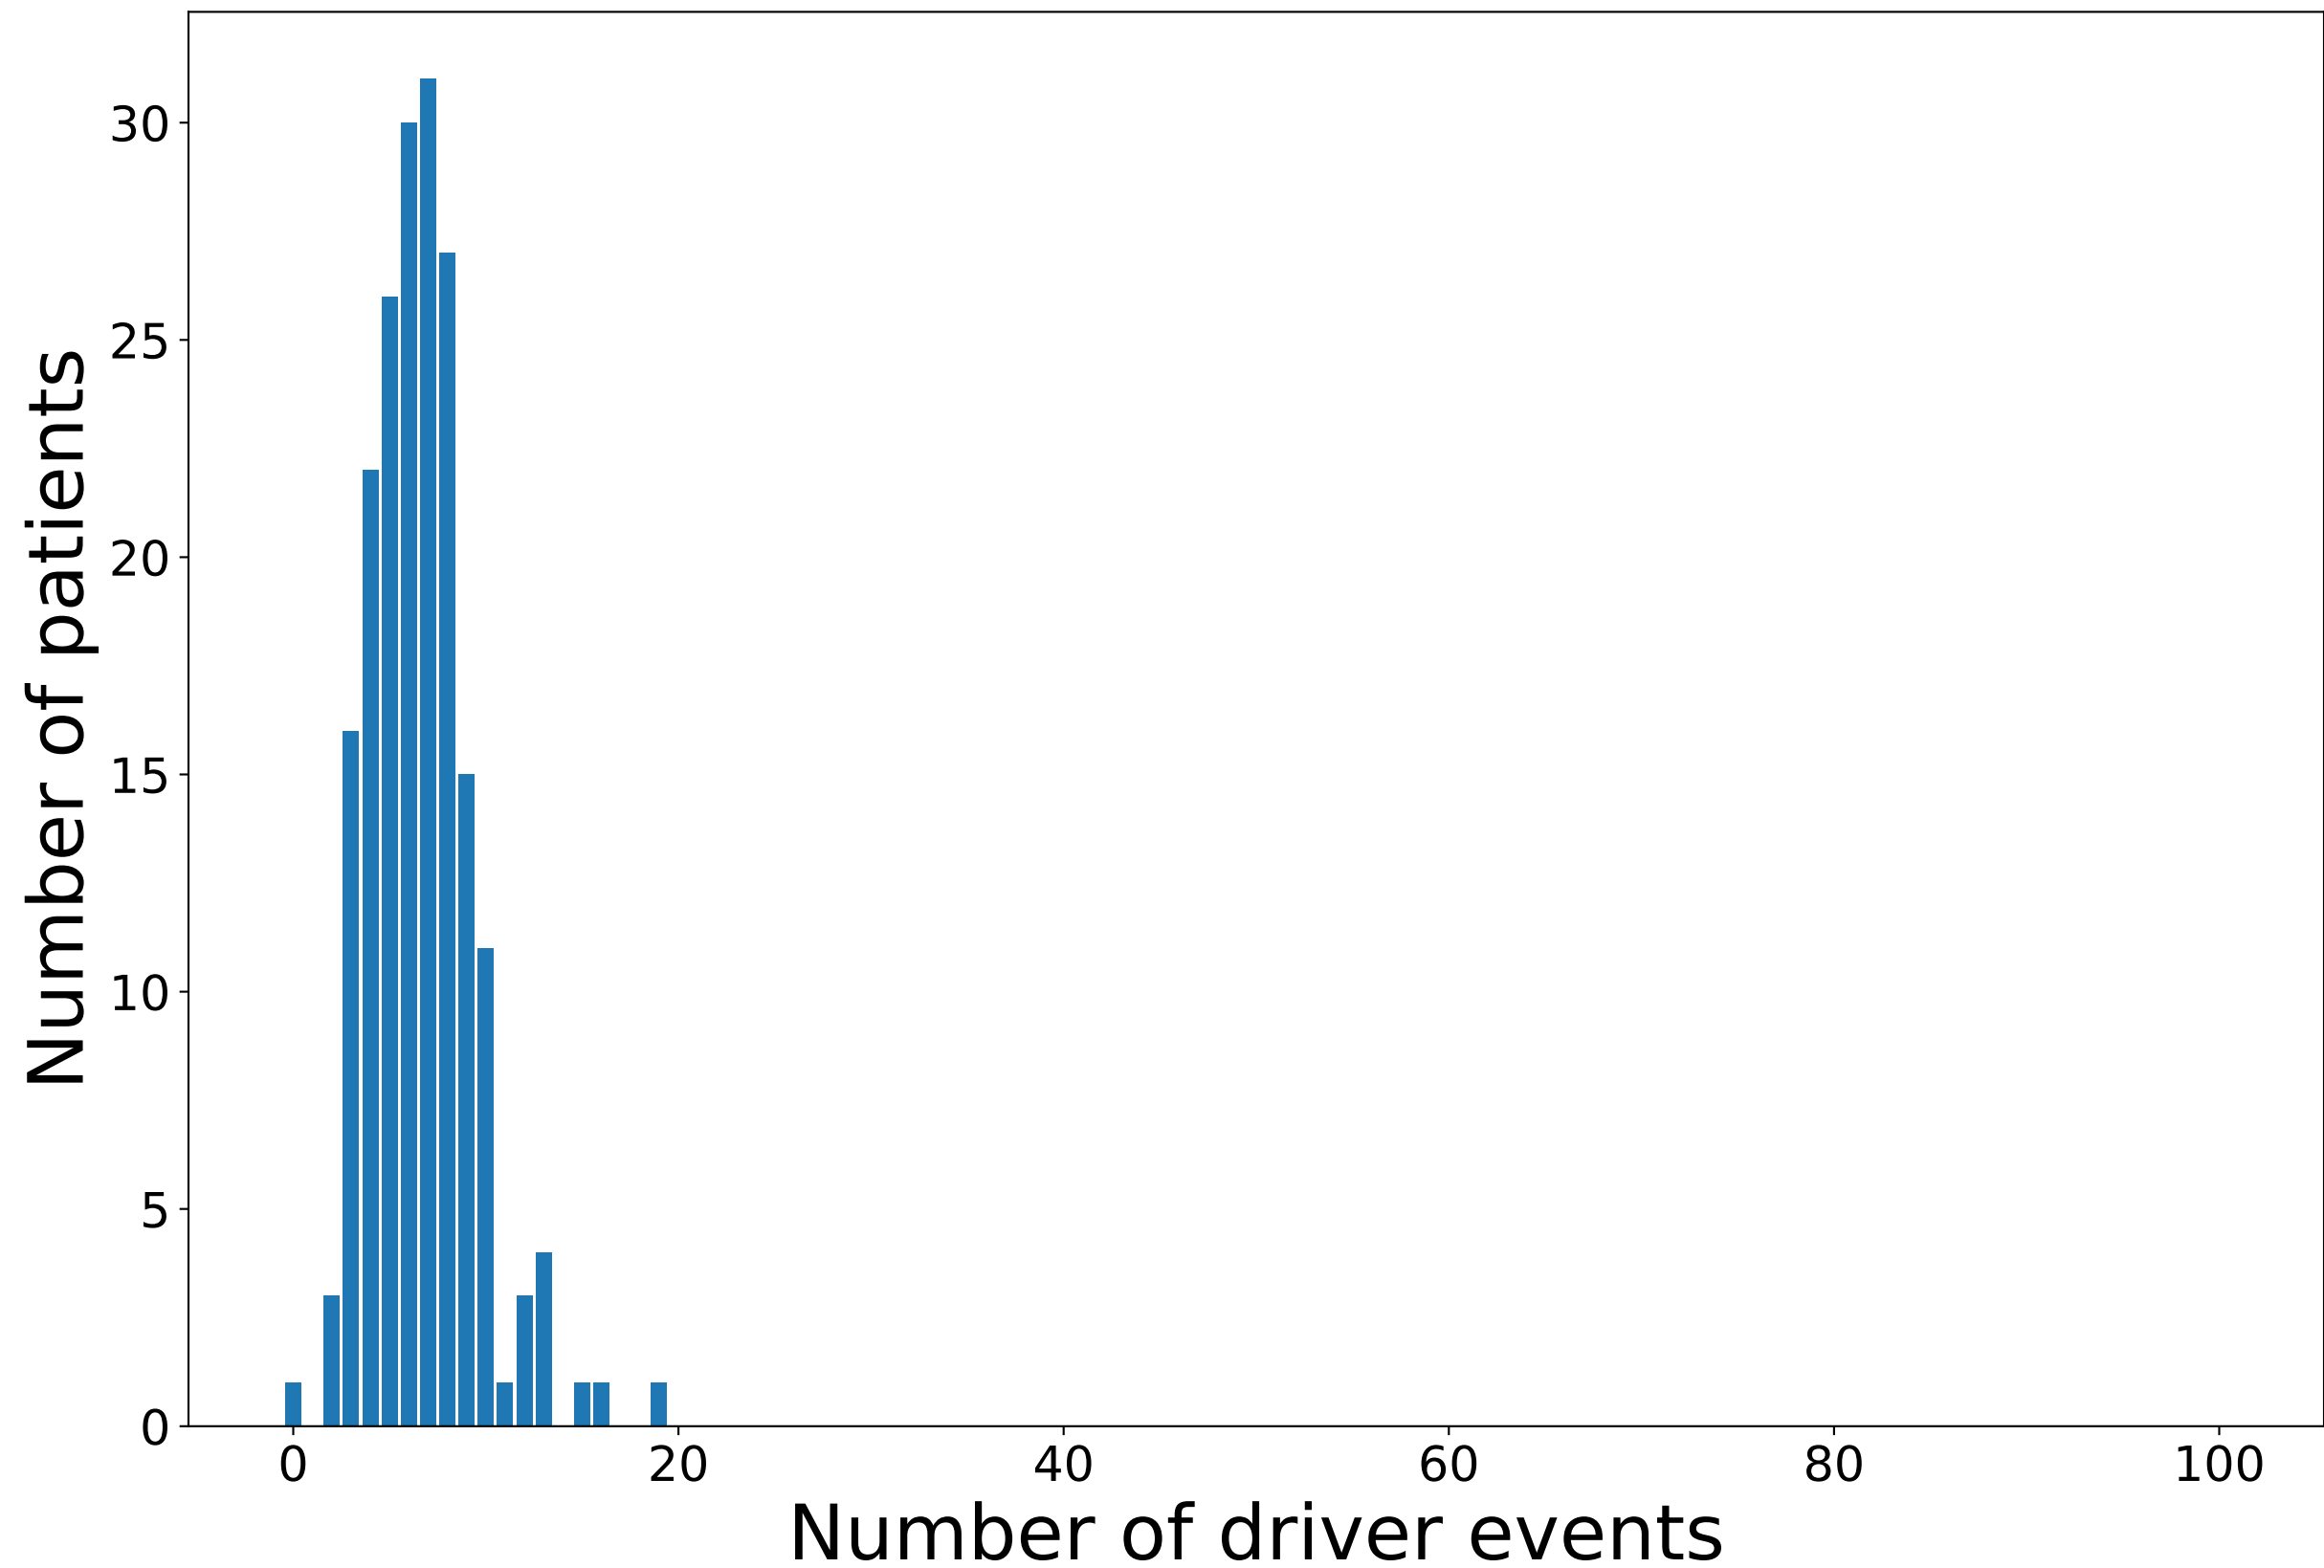

Supplement: Supplemental_Data_S1.zip [file Supplemental_Data_S1.zip]

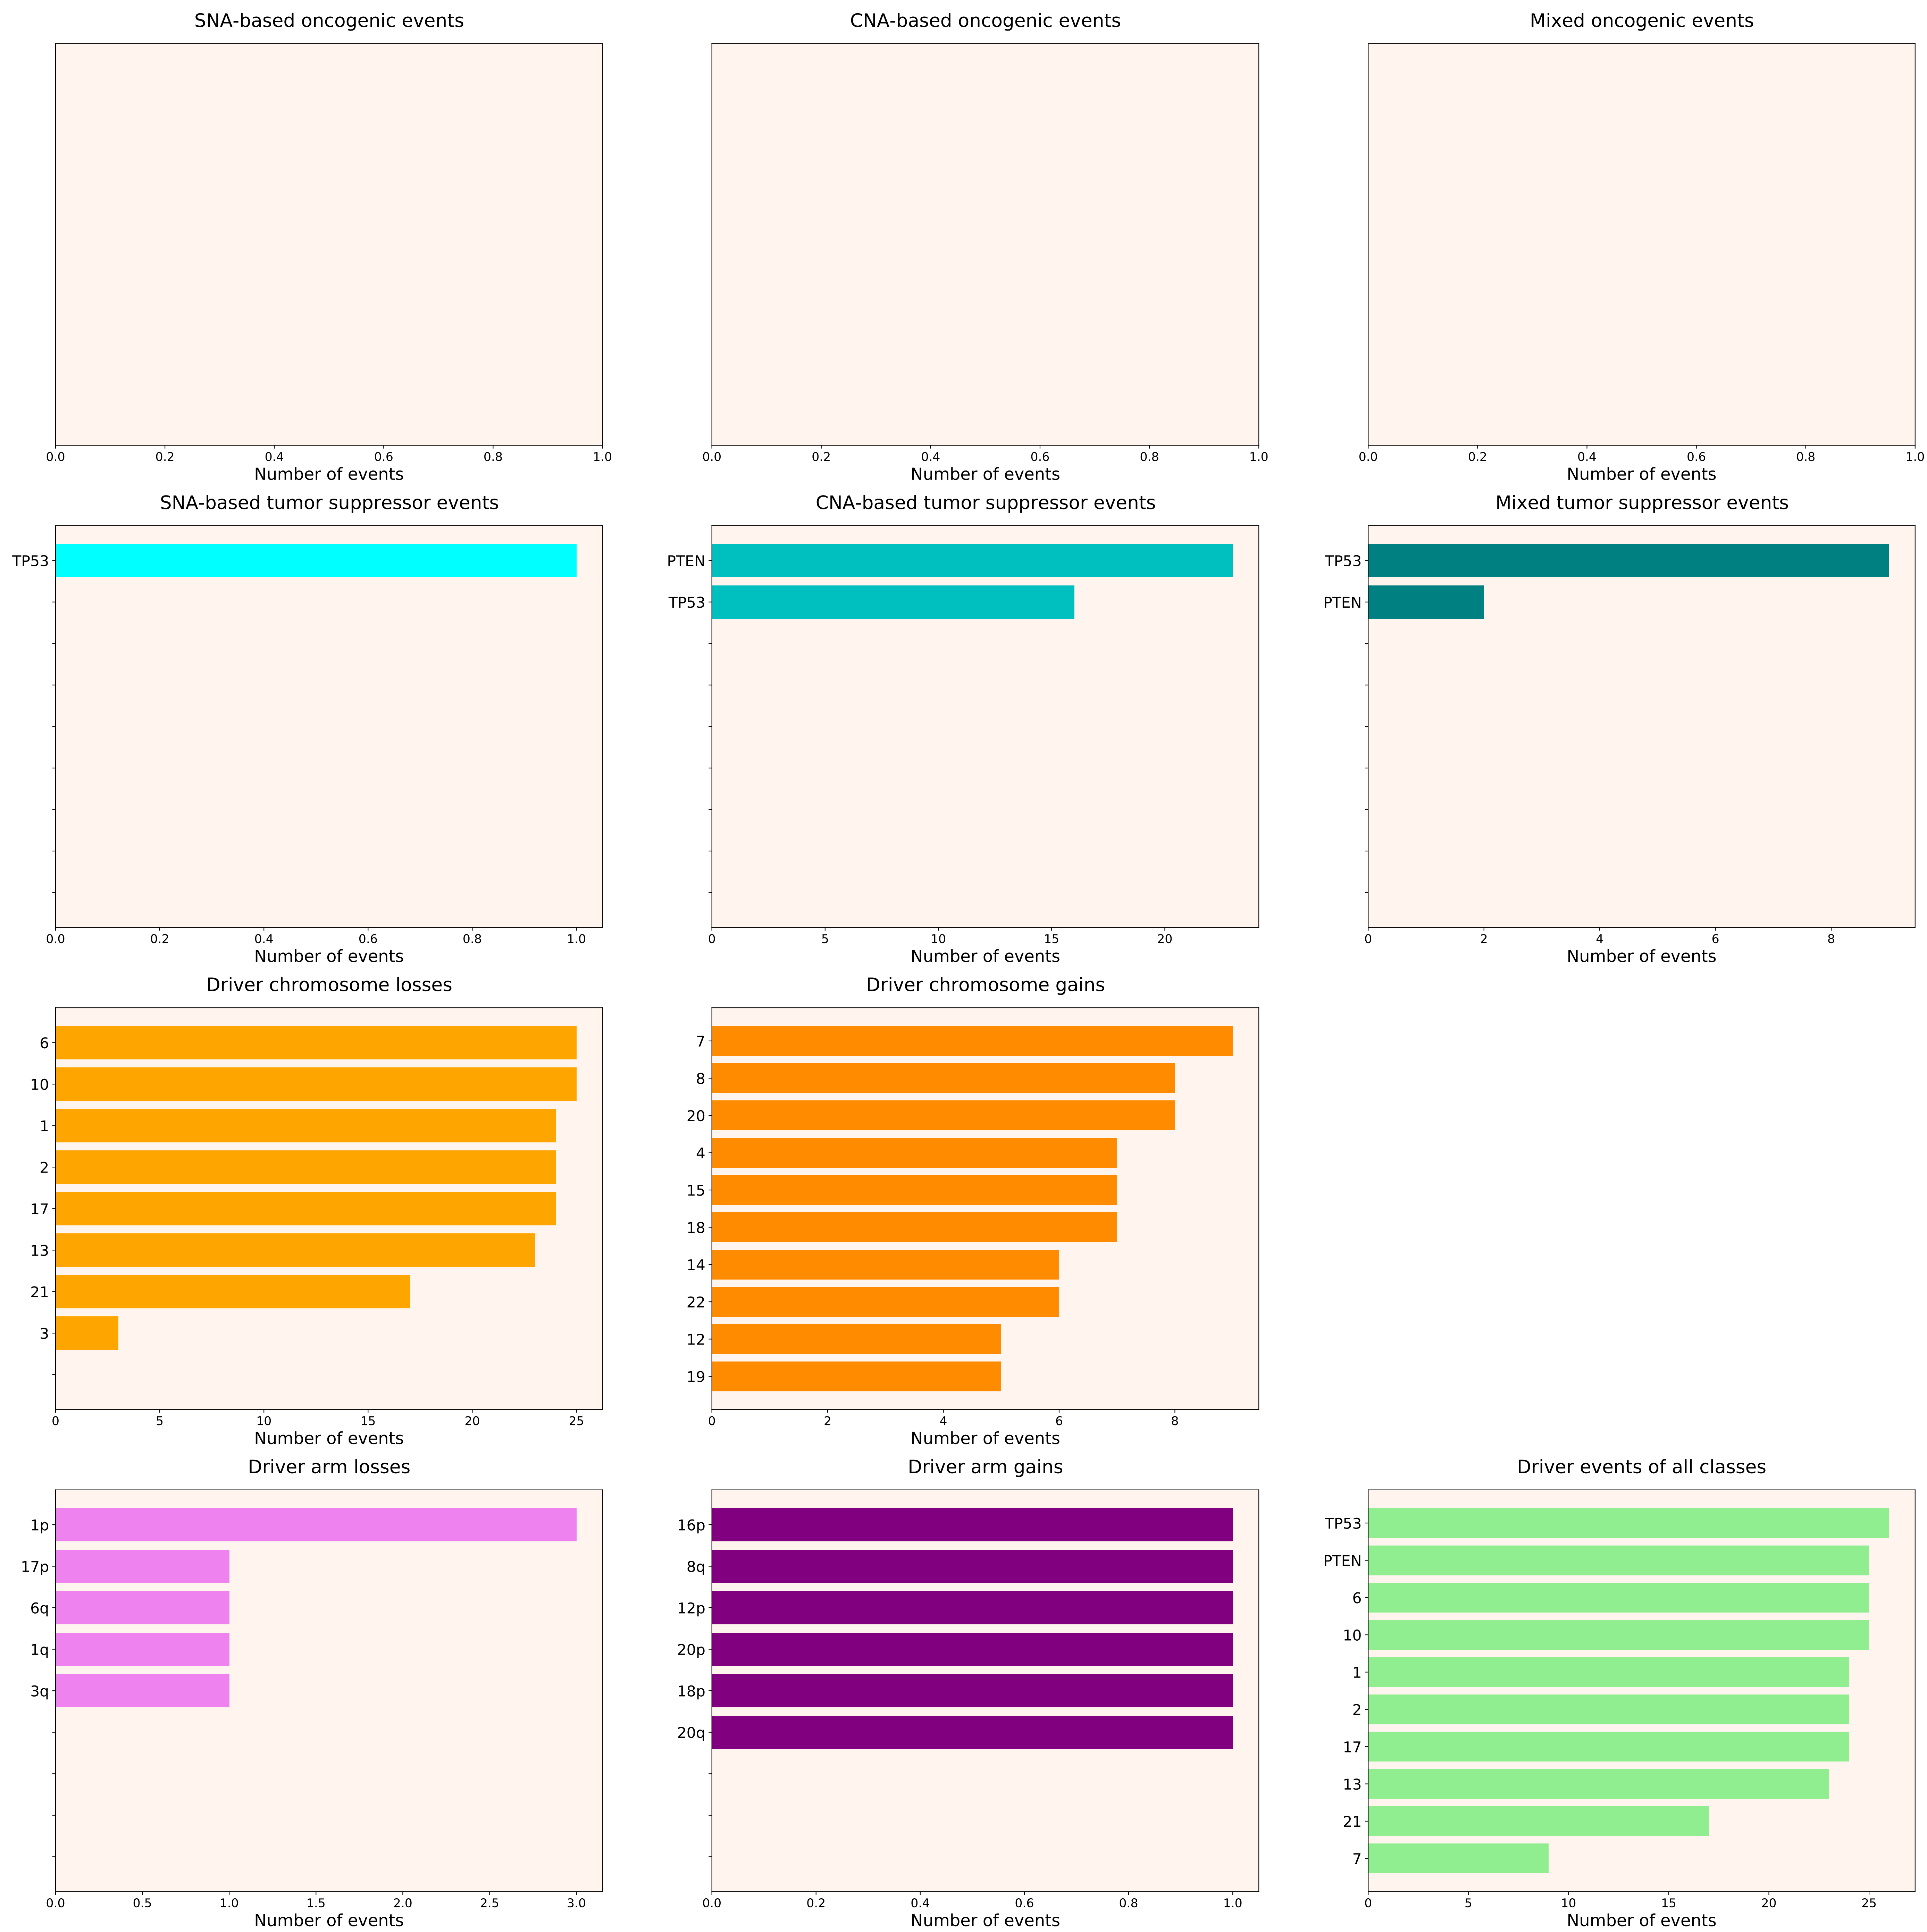

Supplement: Supplemental_Data_S1.zip [file Supplemental_Data_S1.zip]

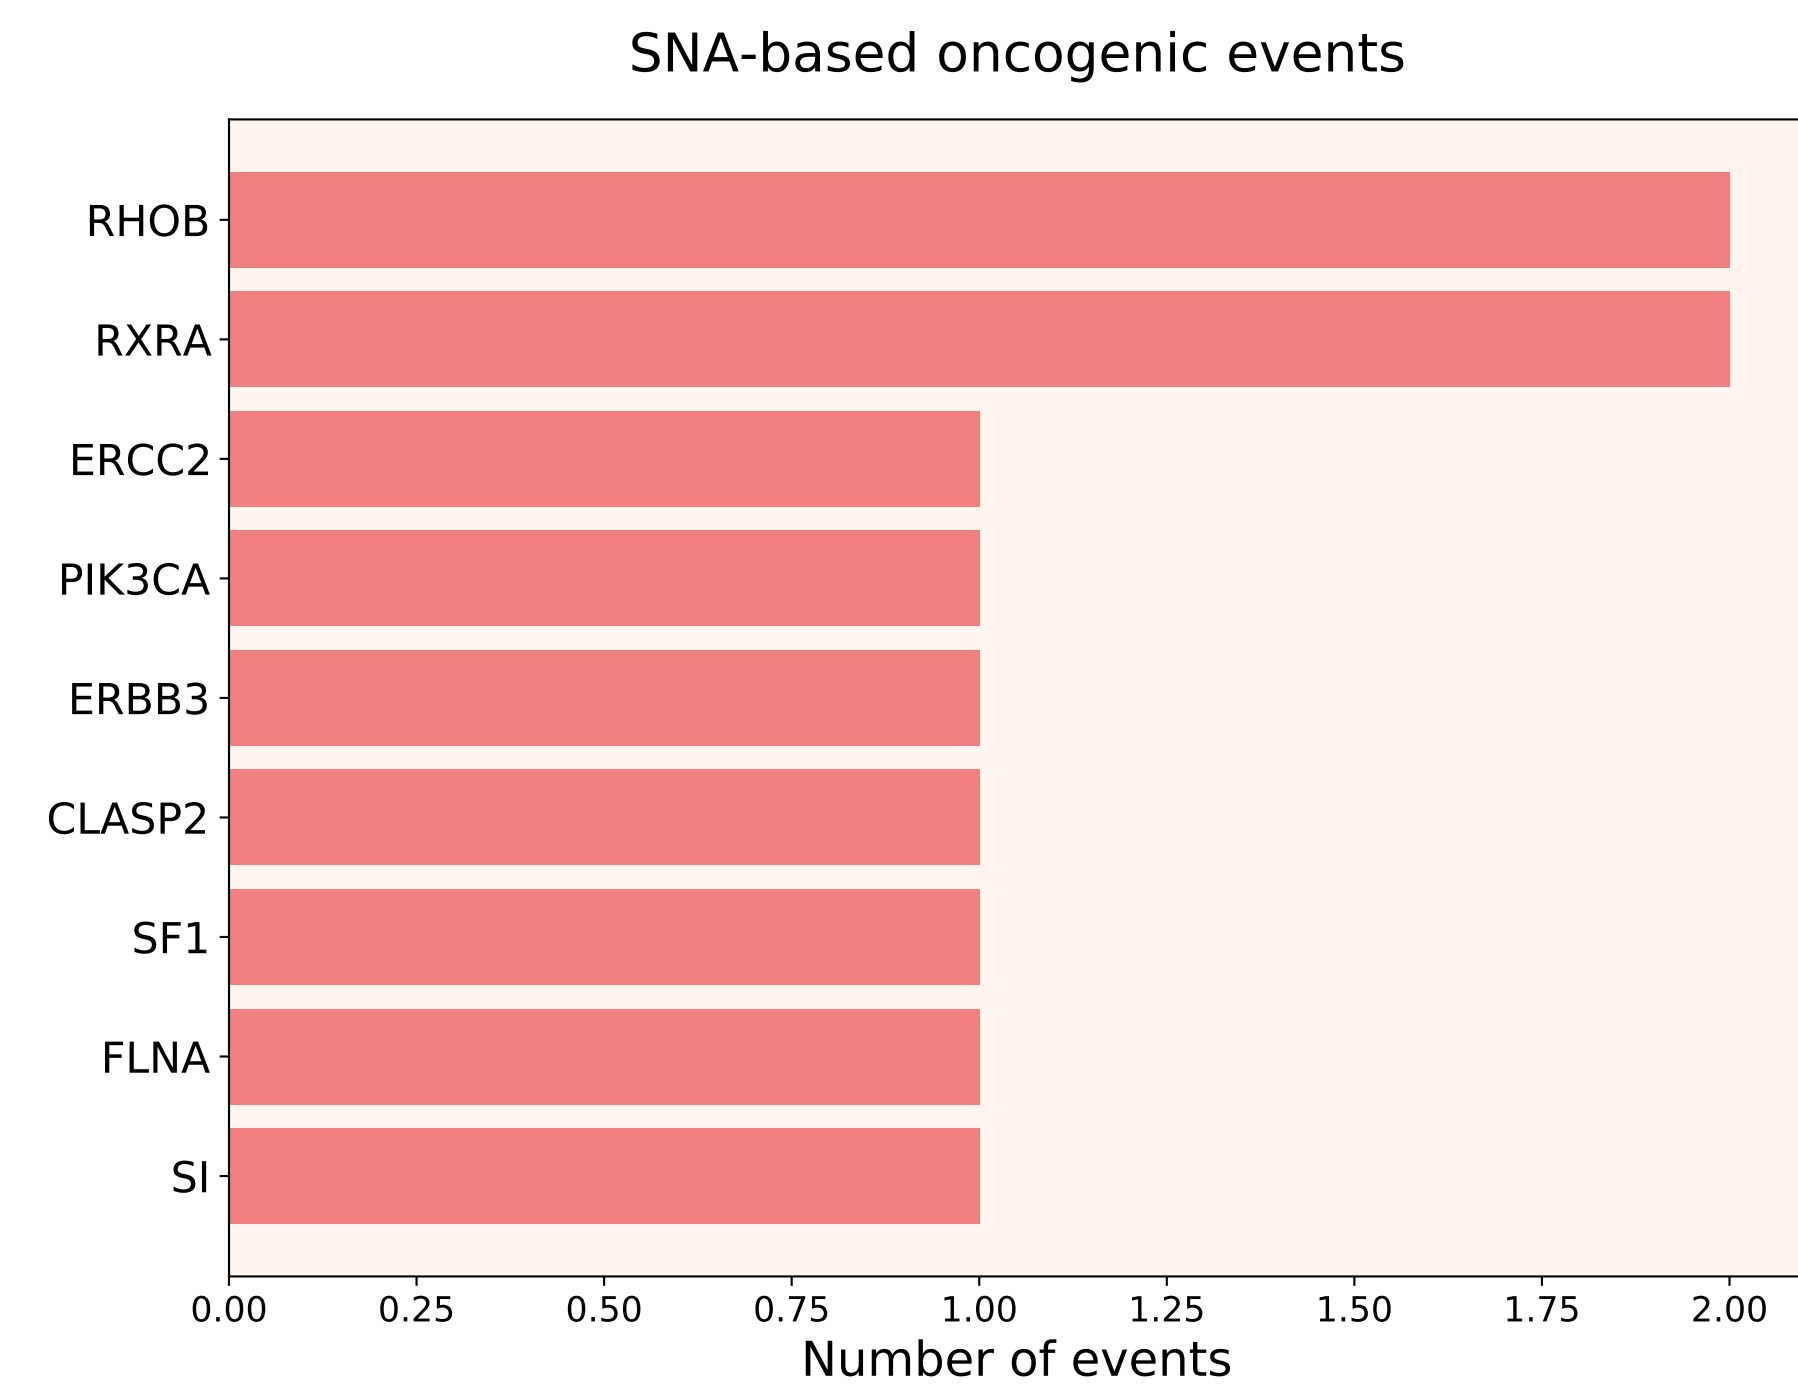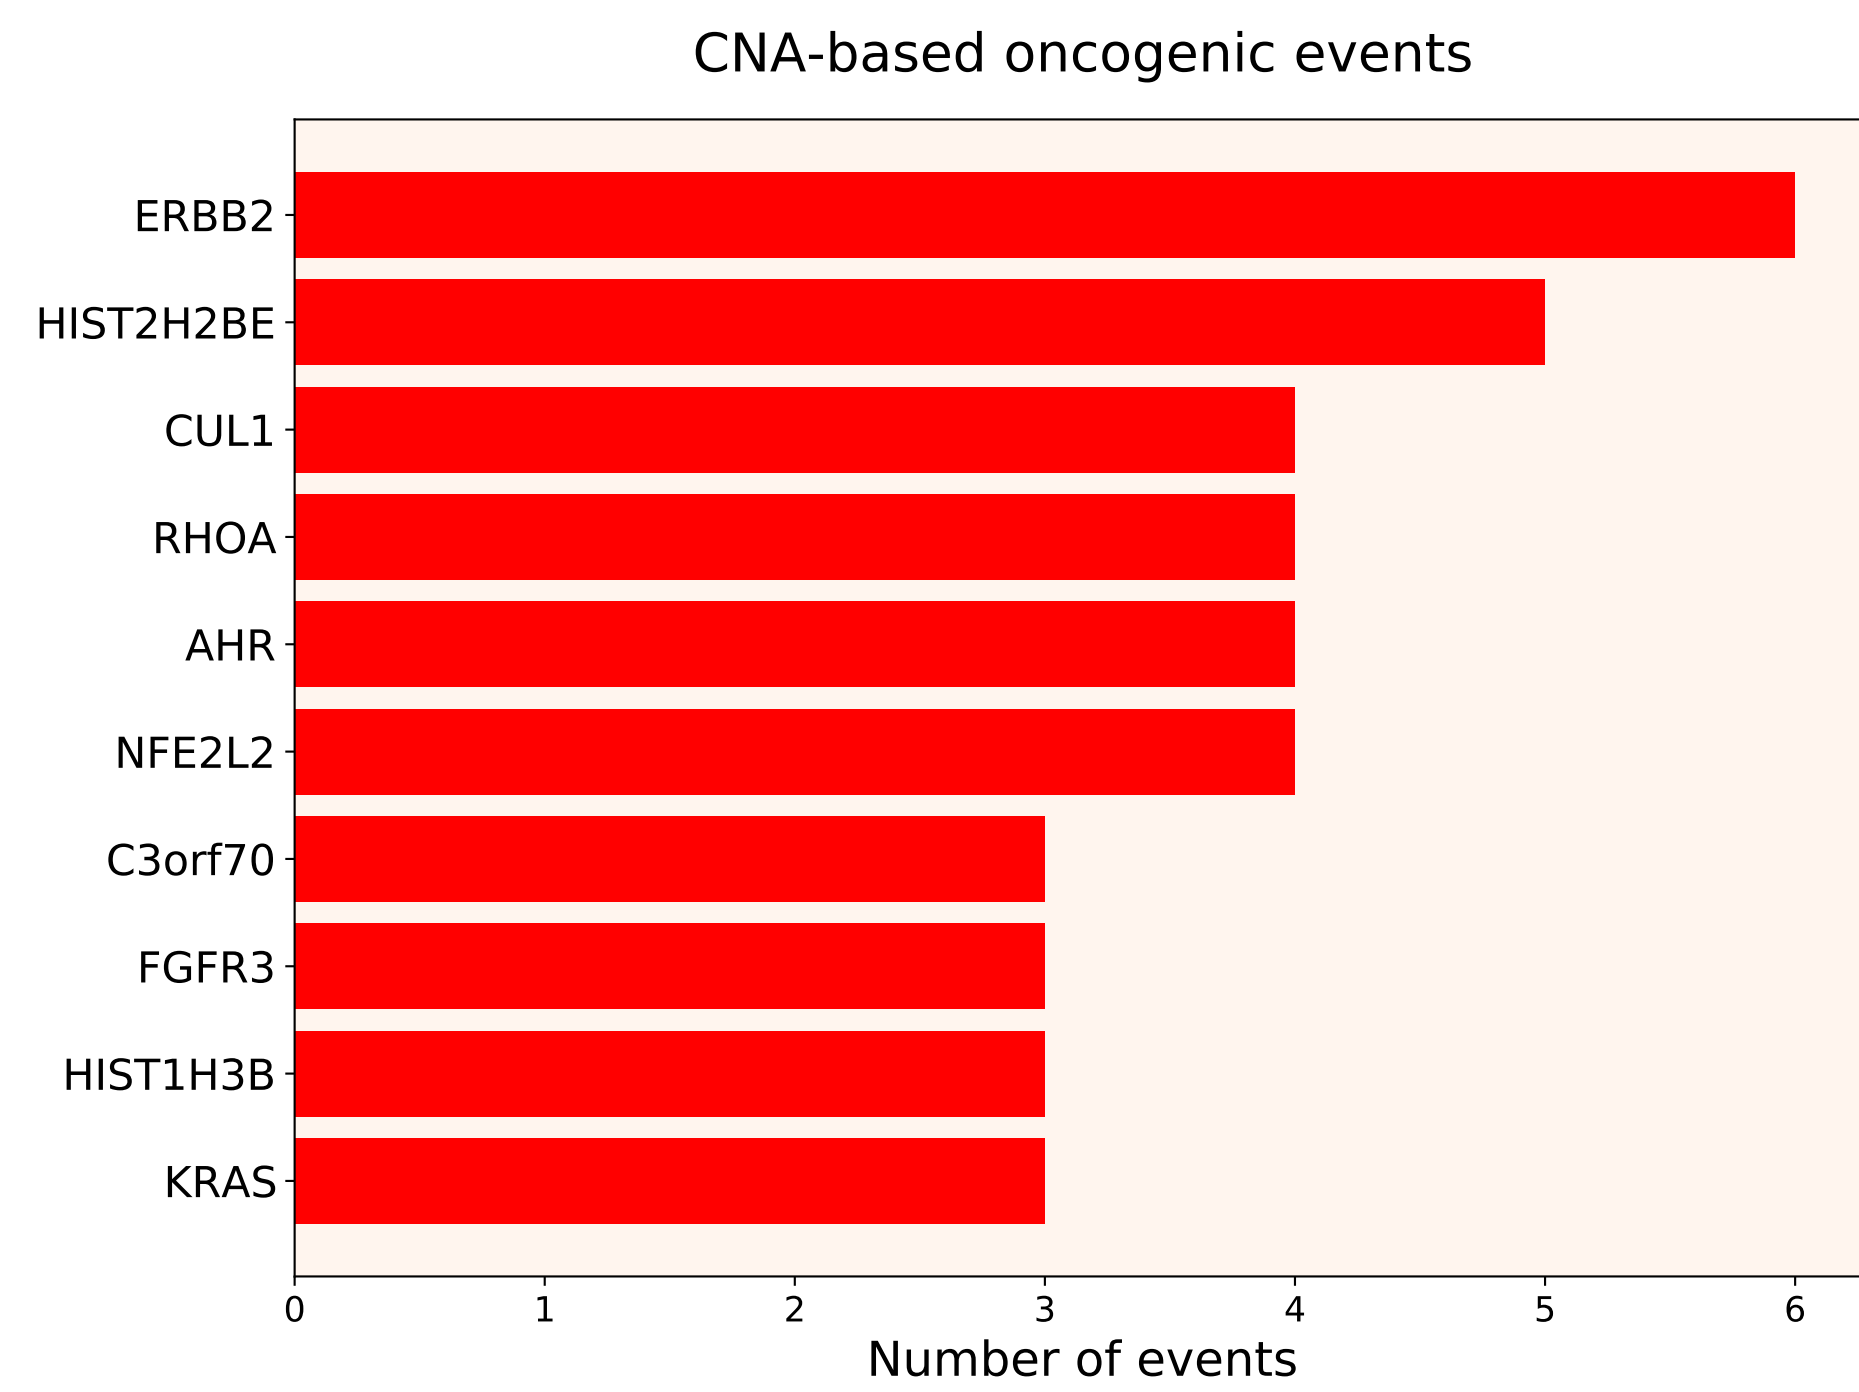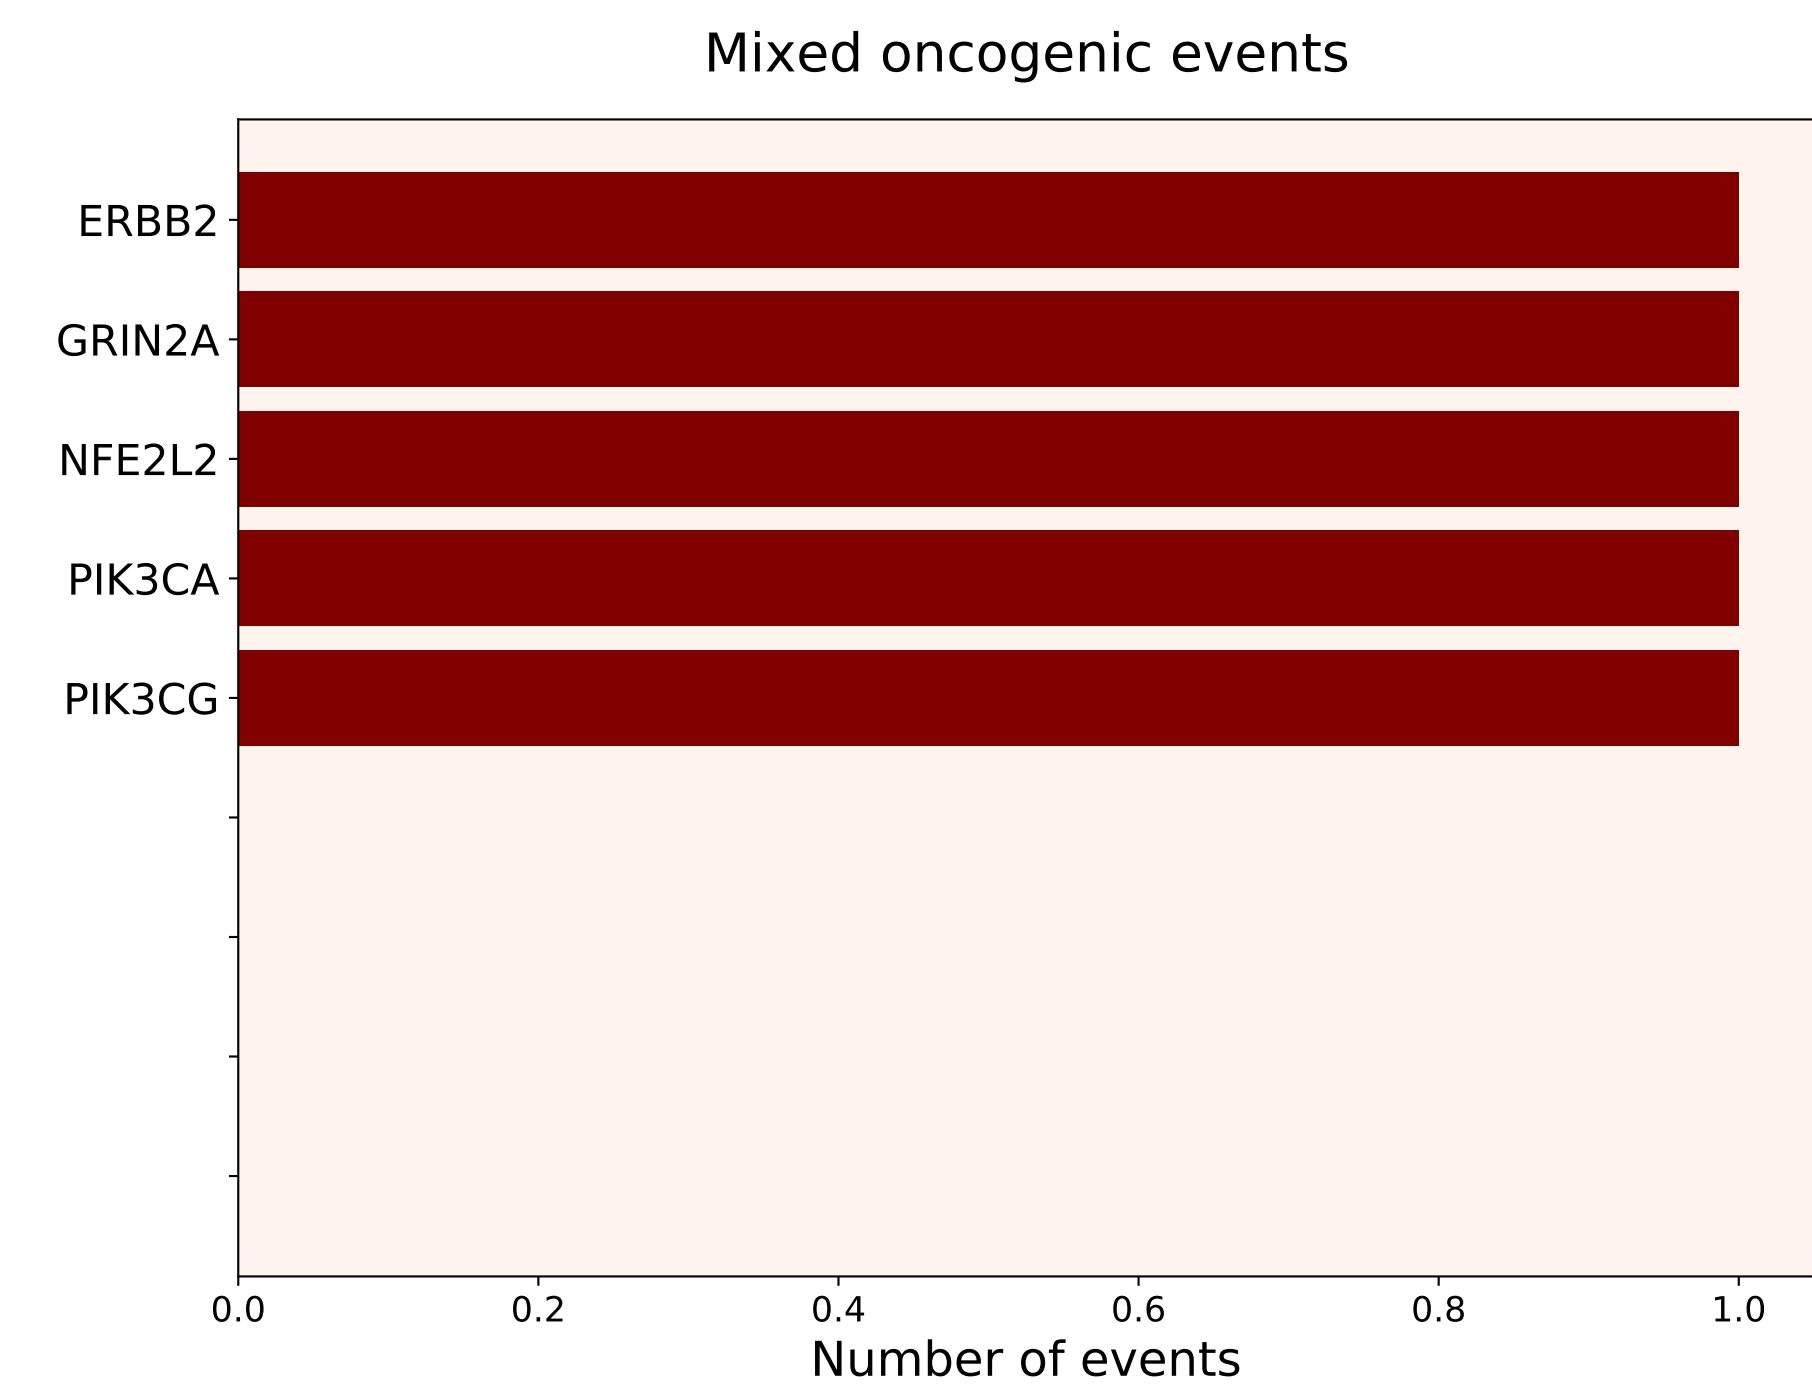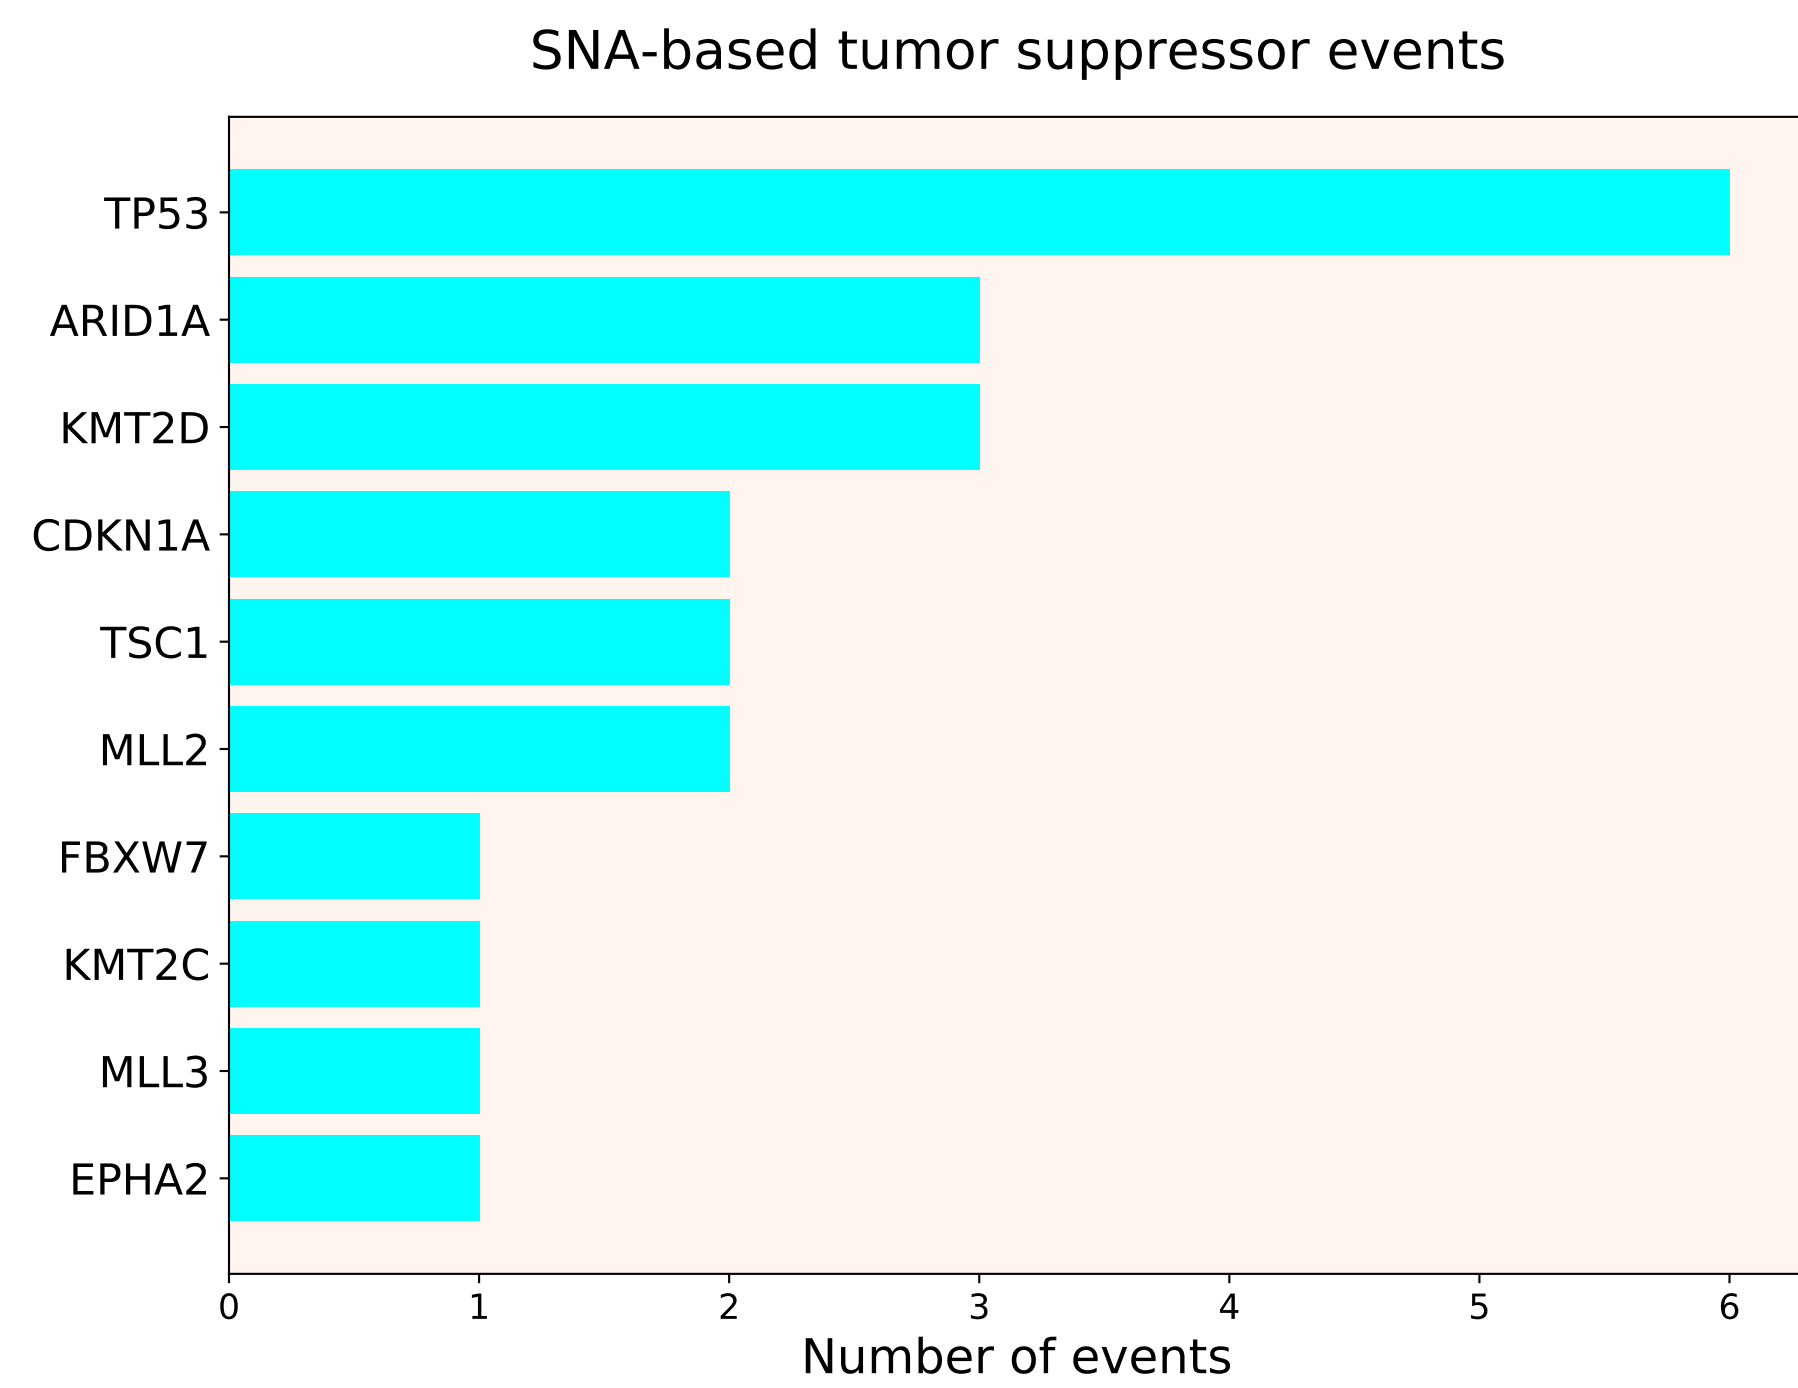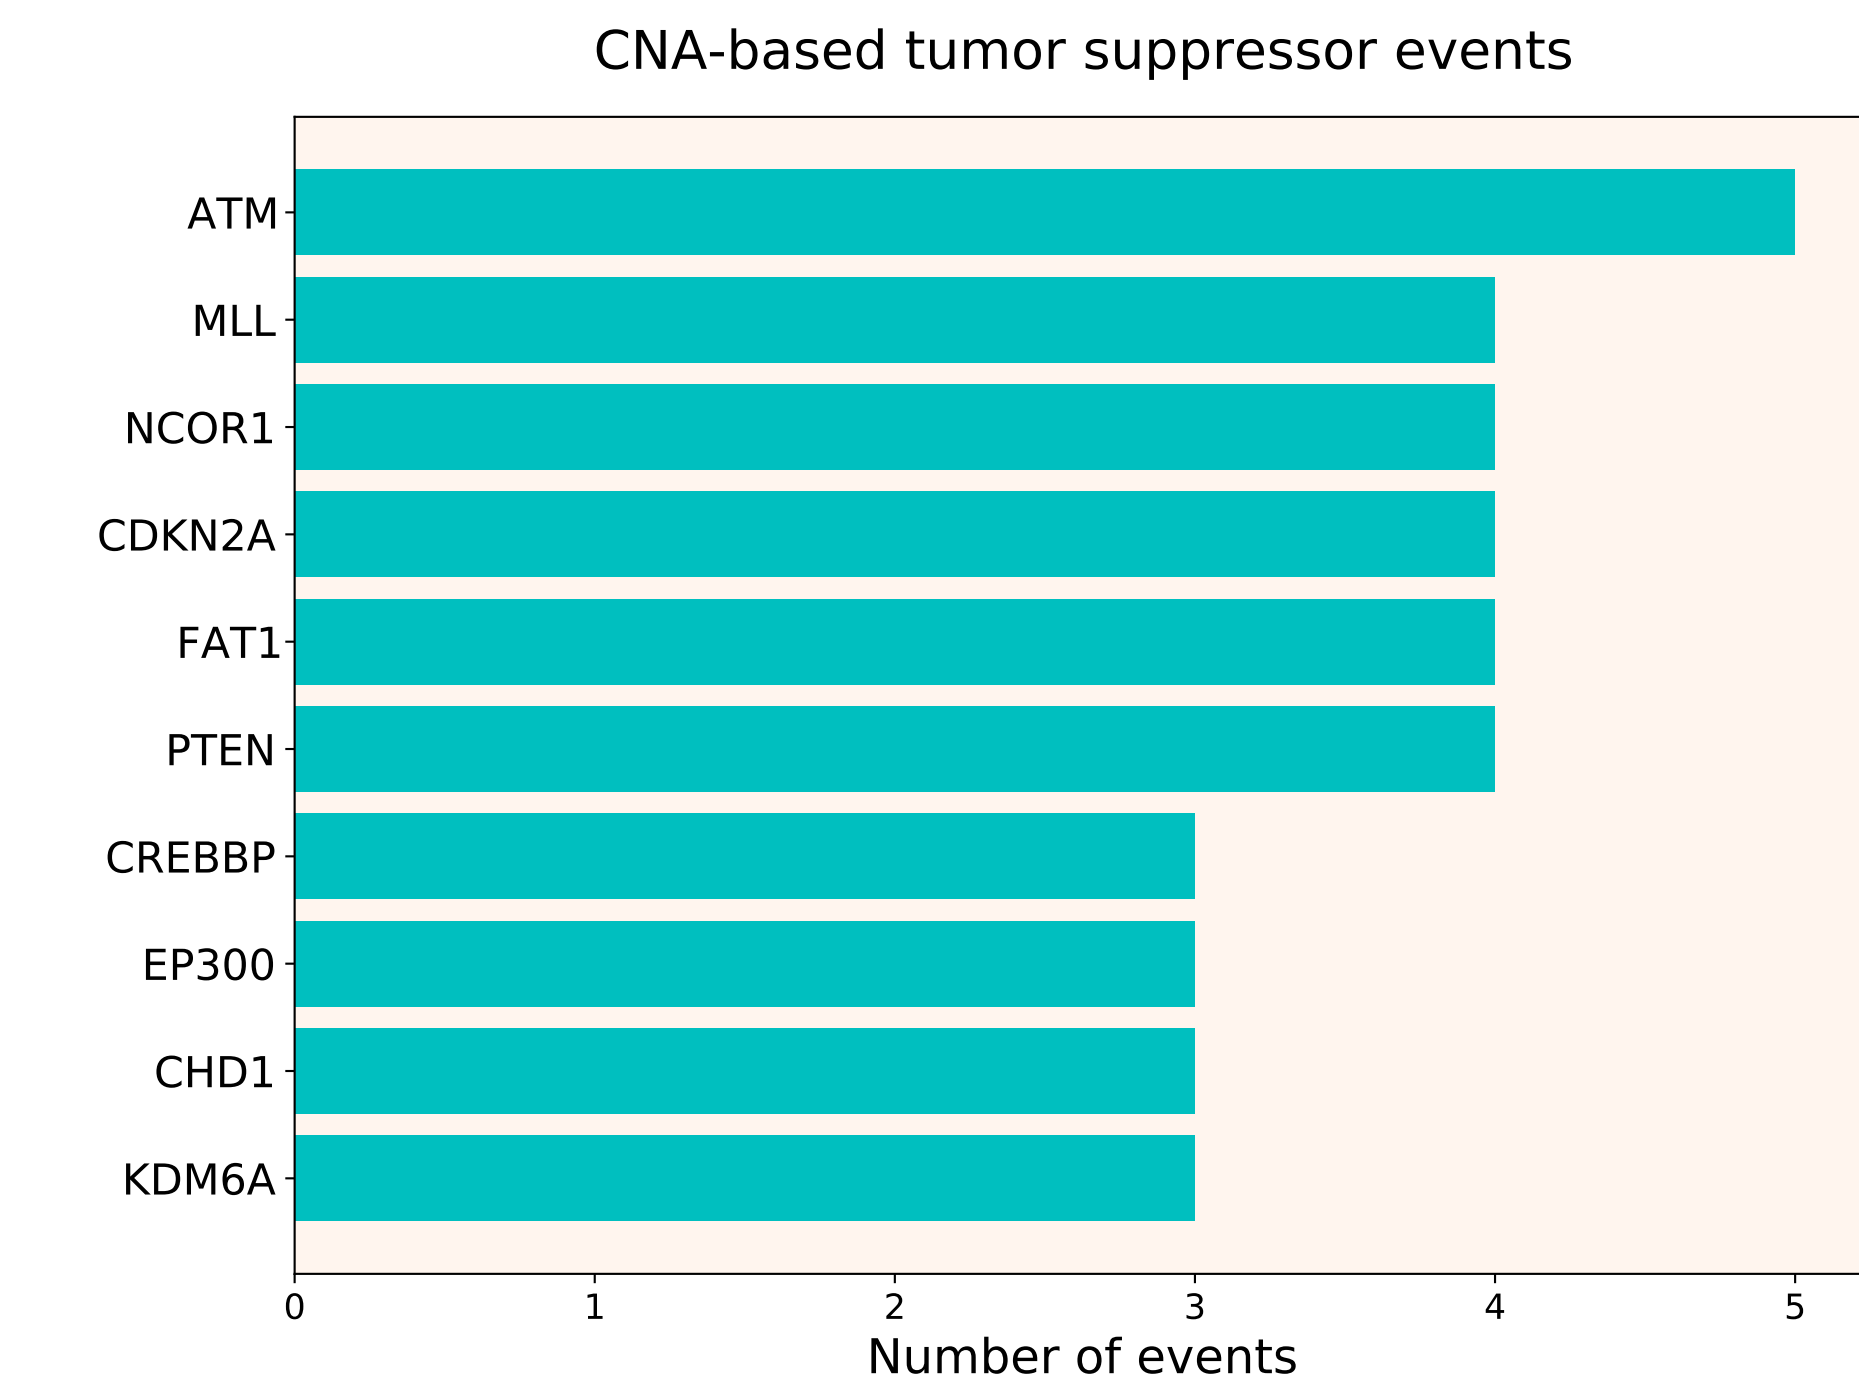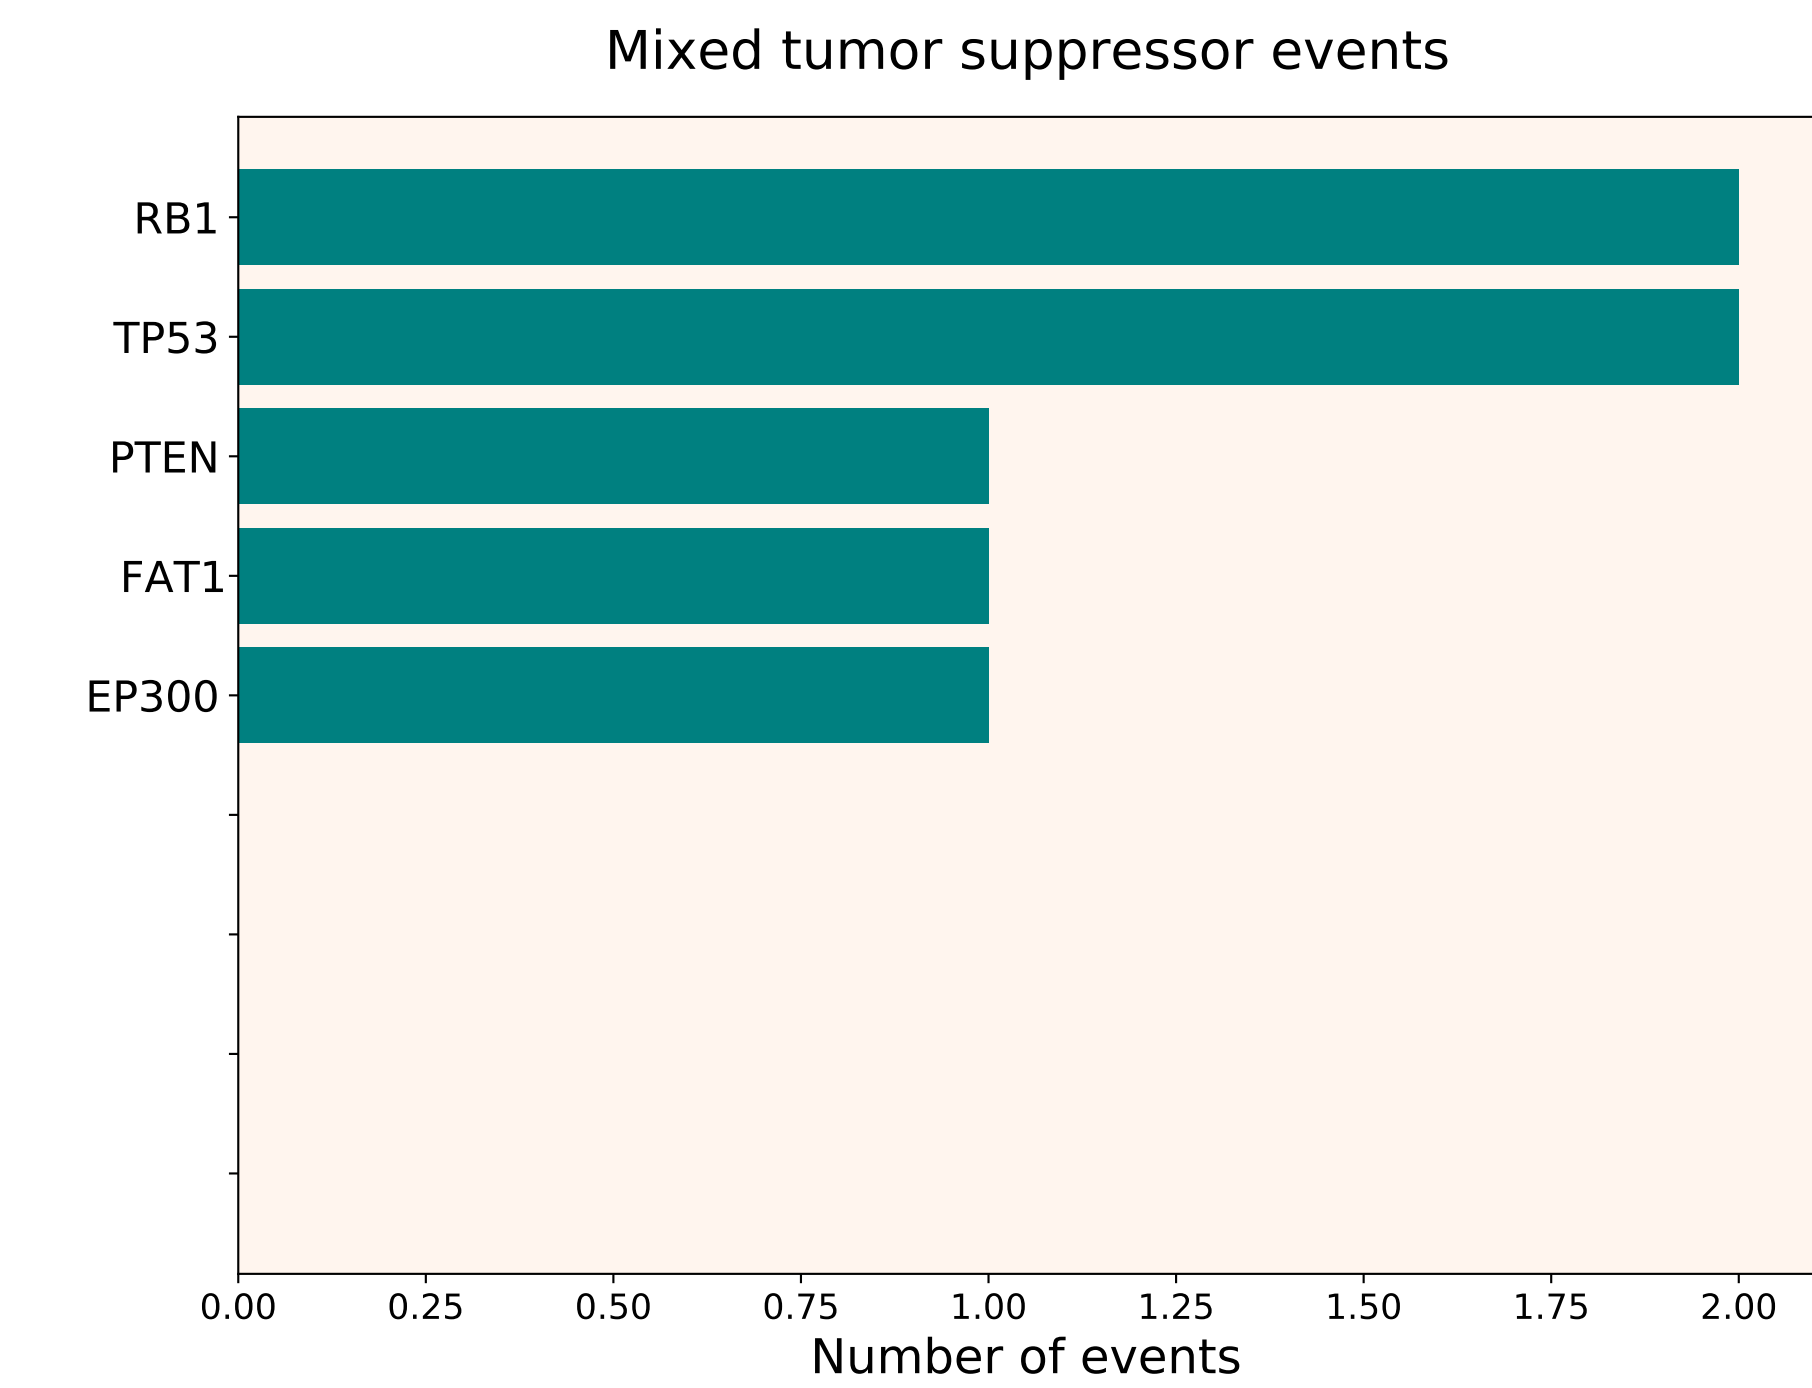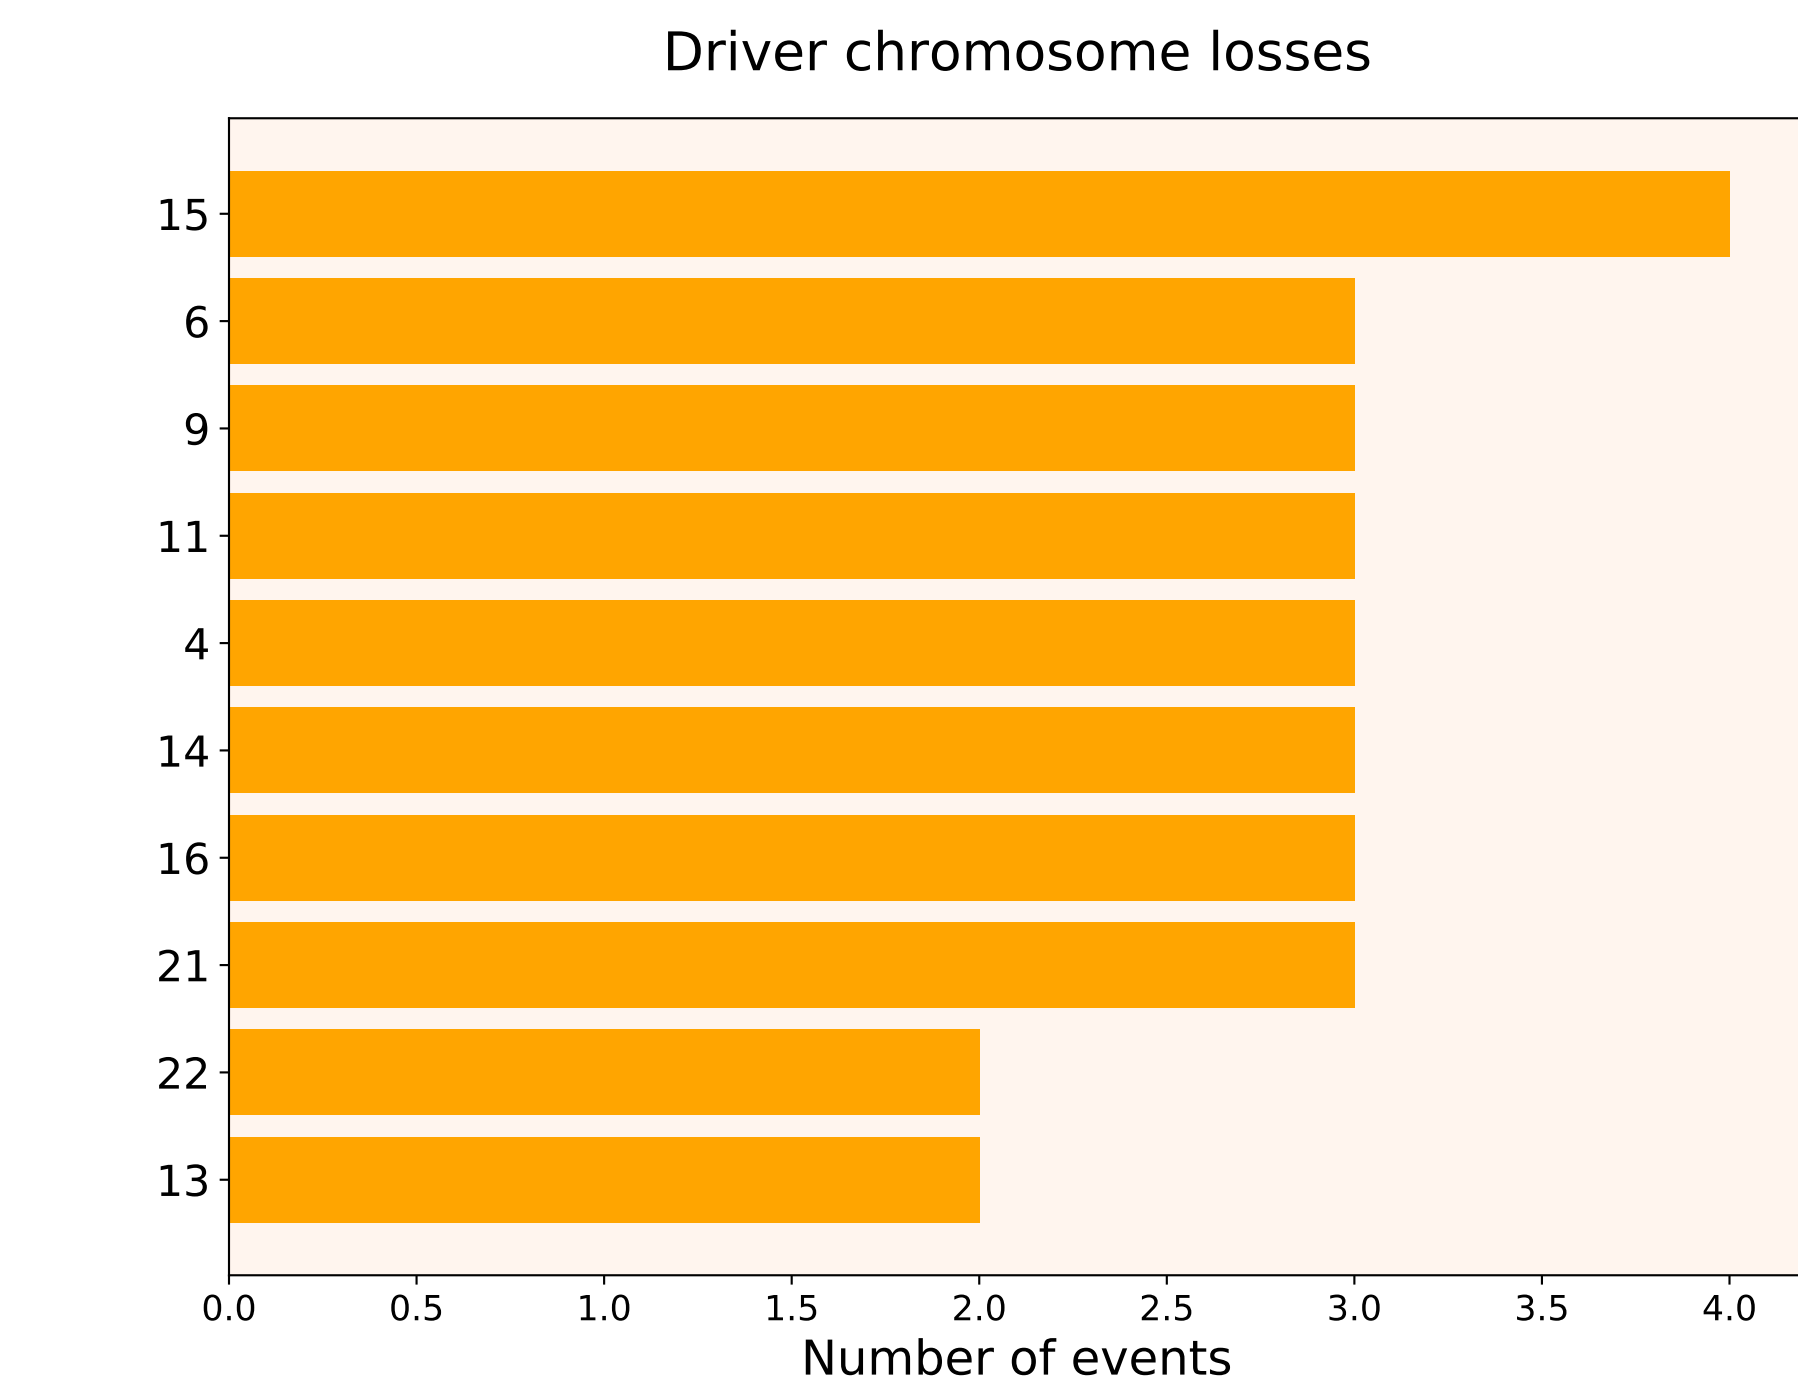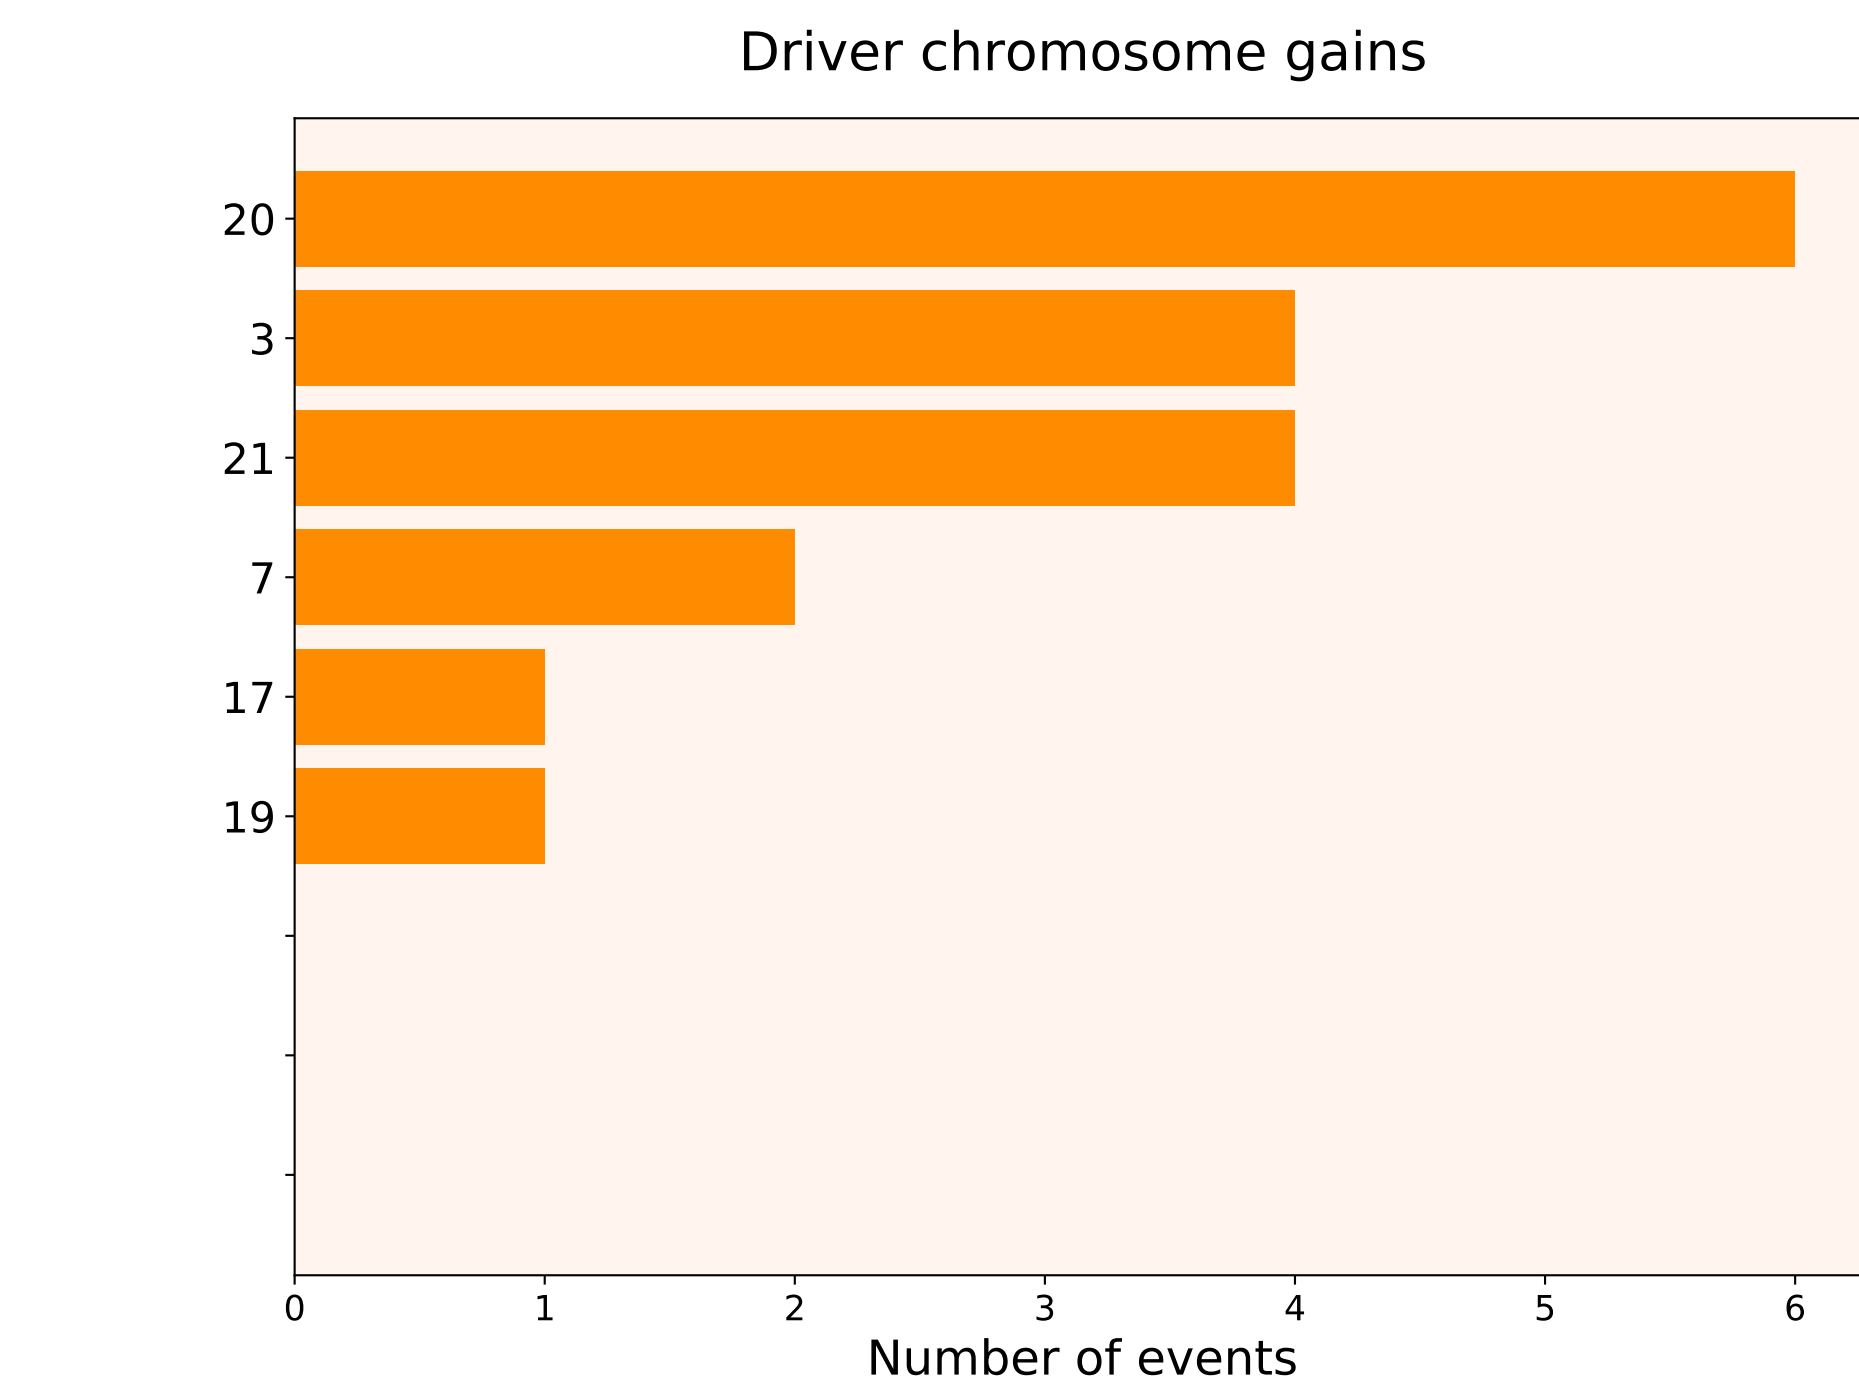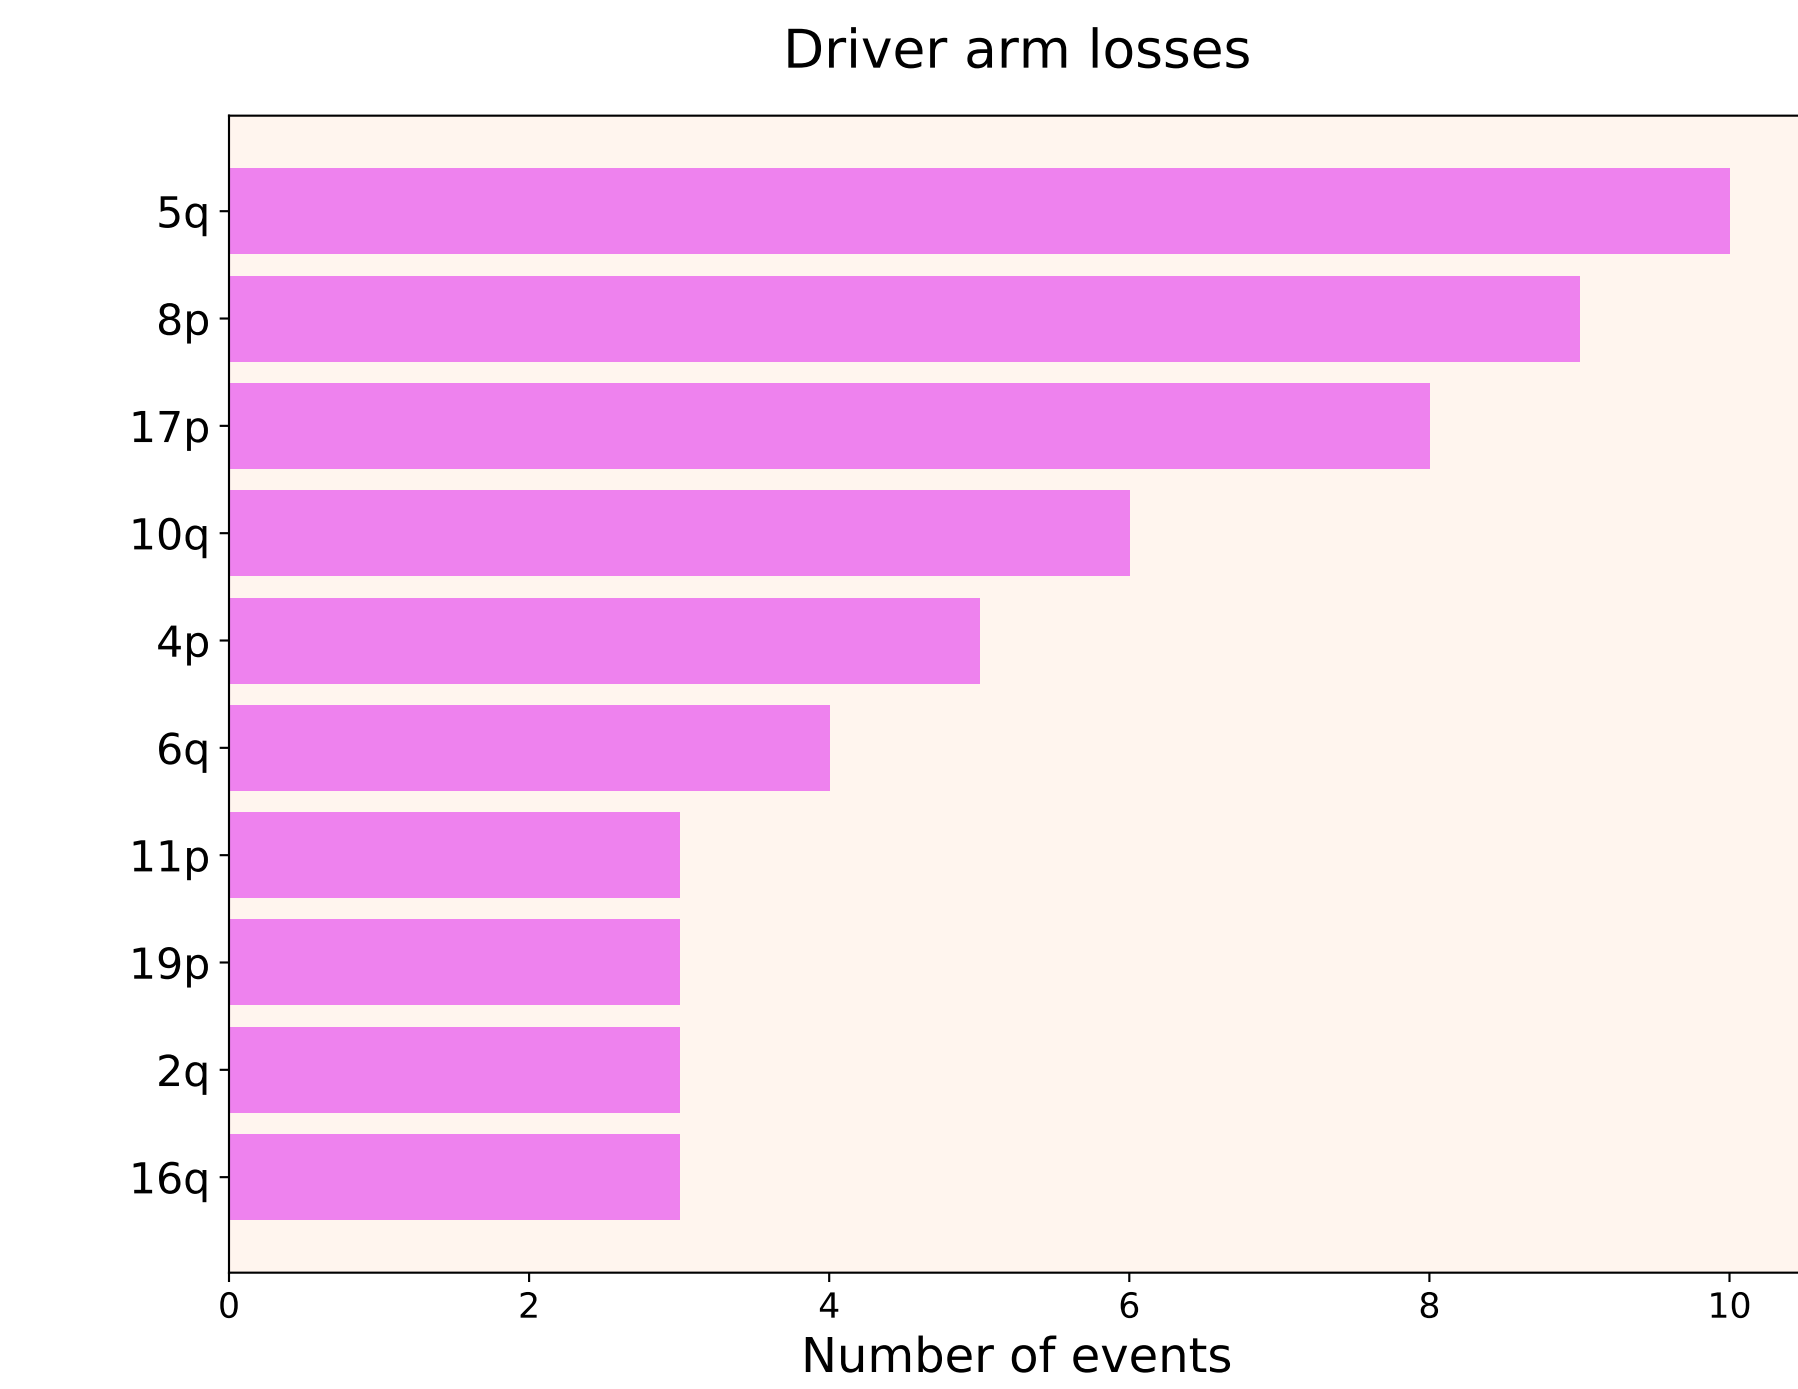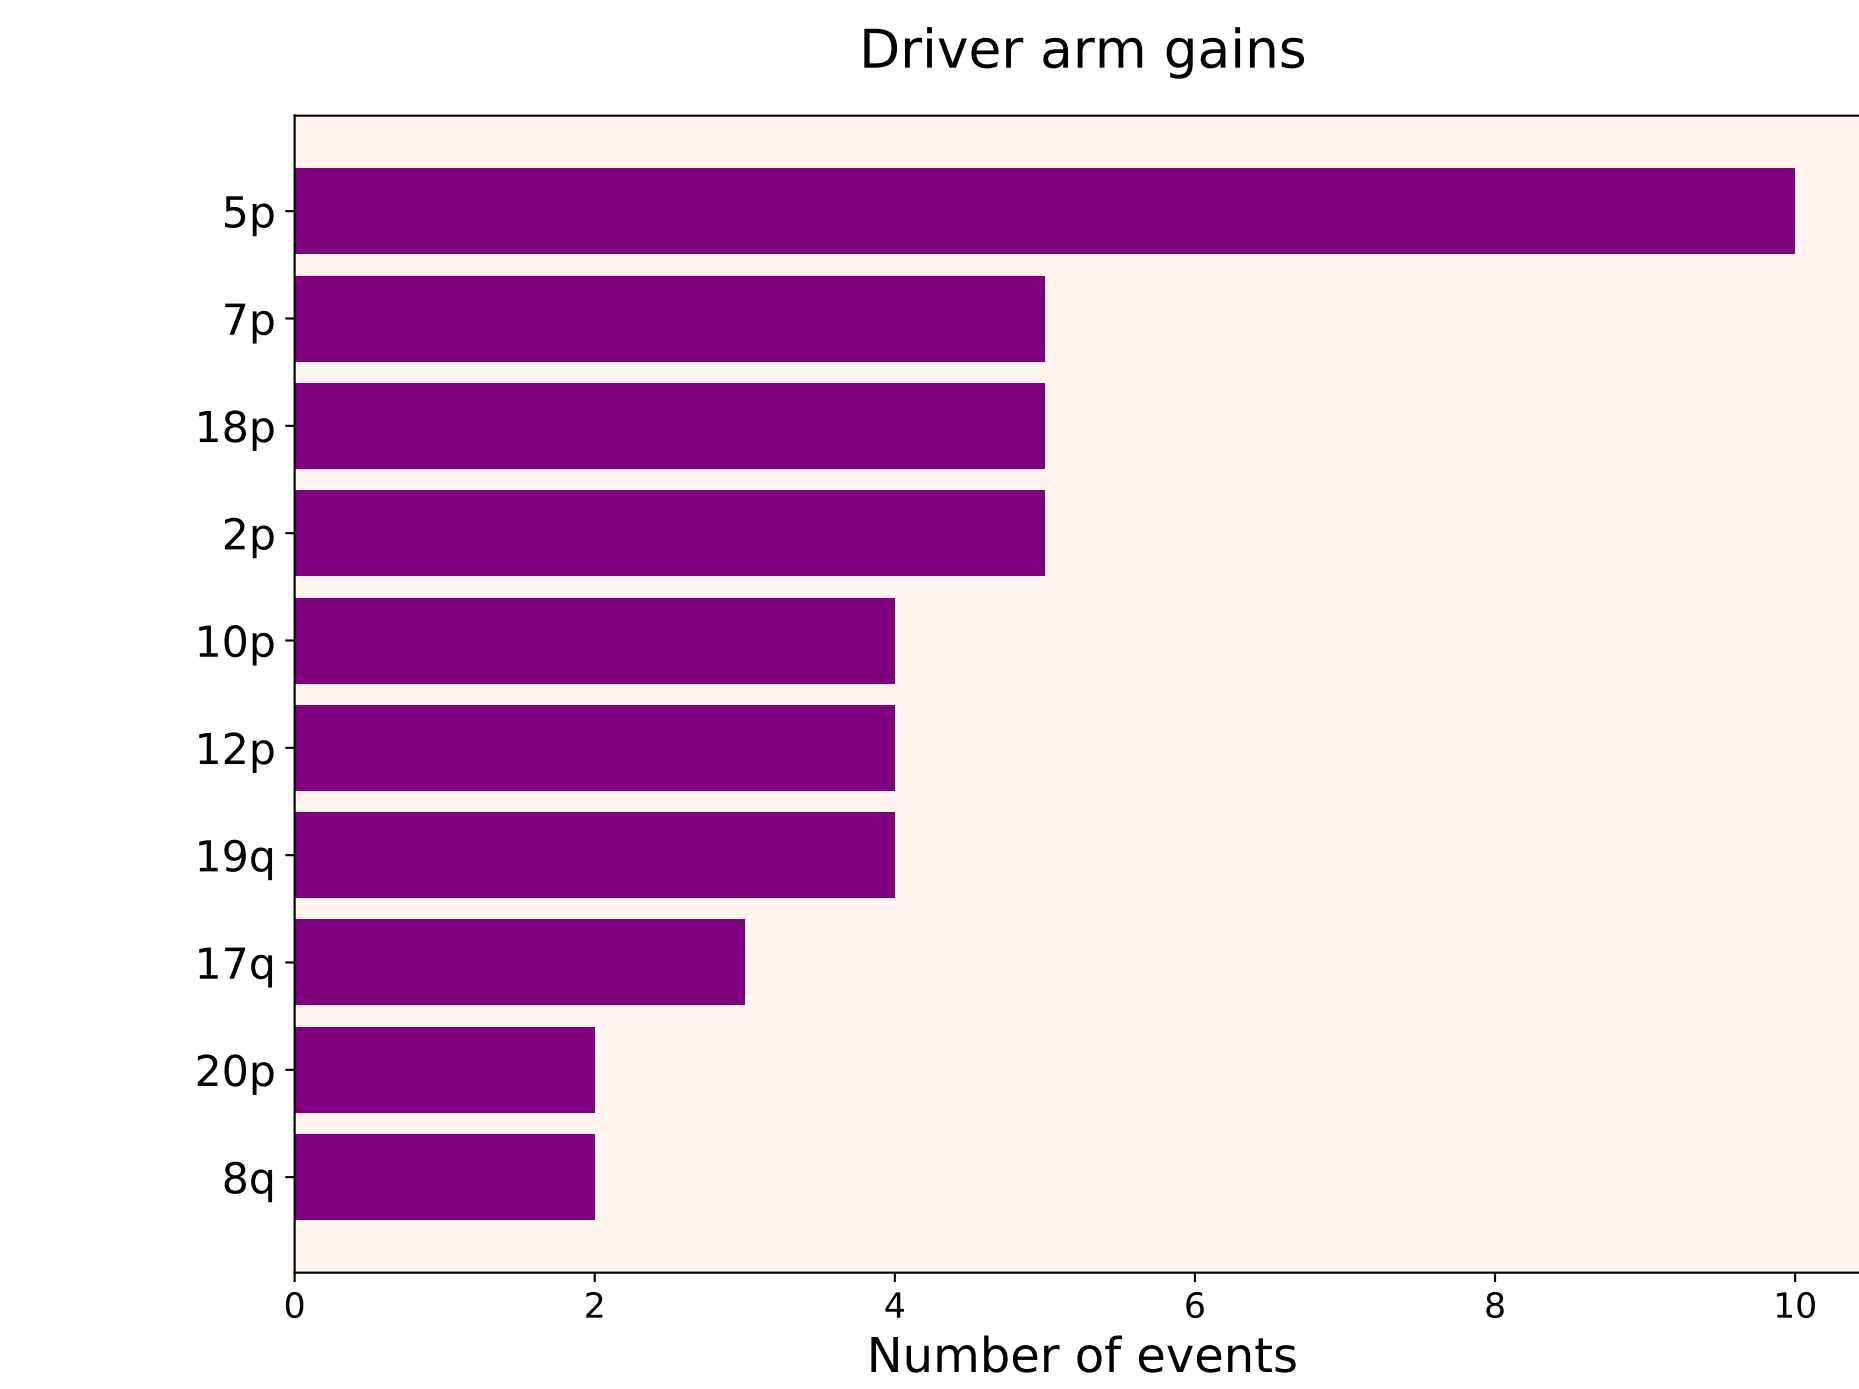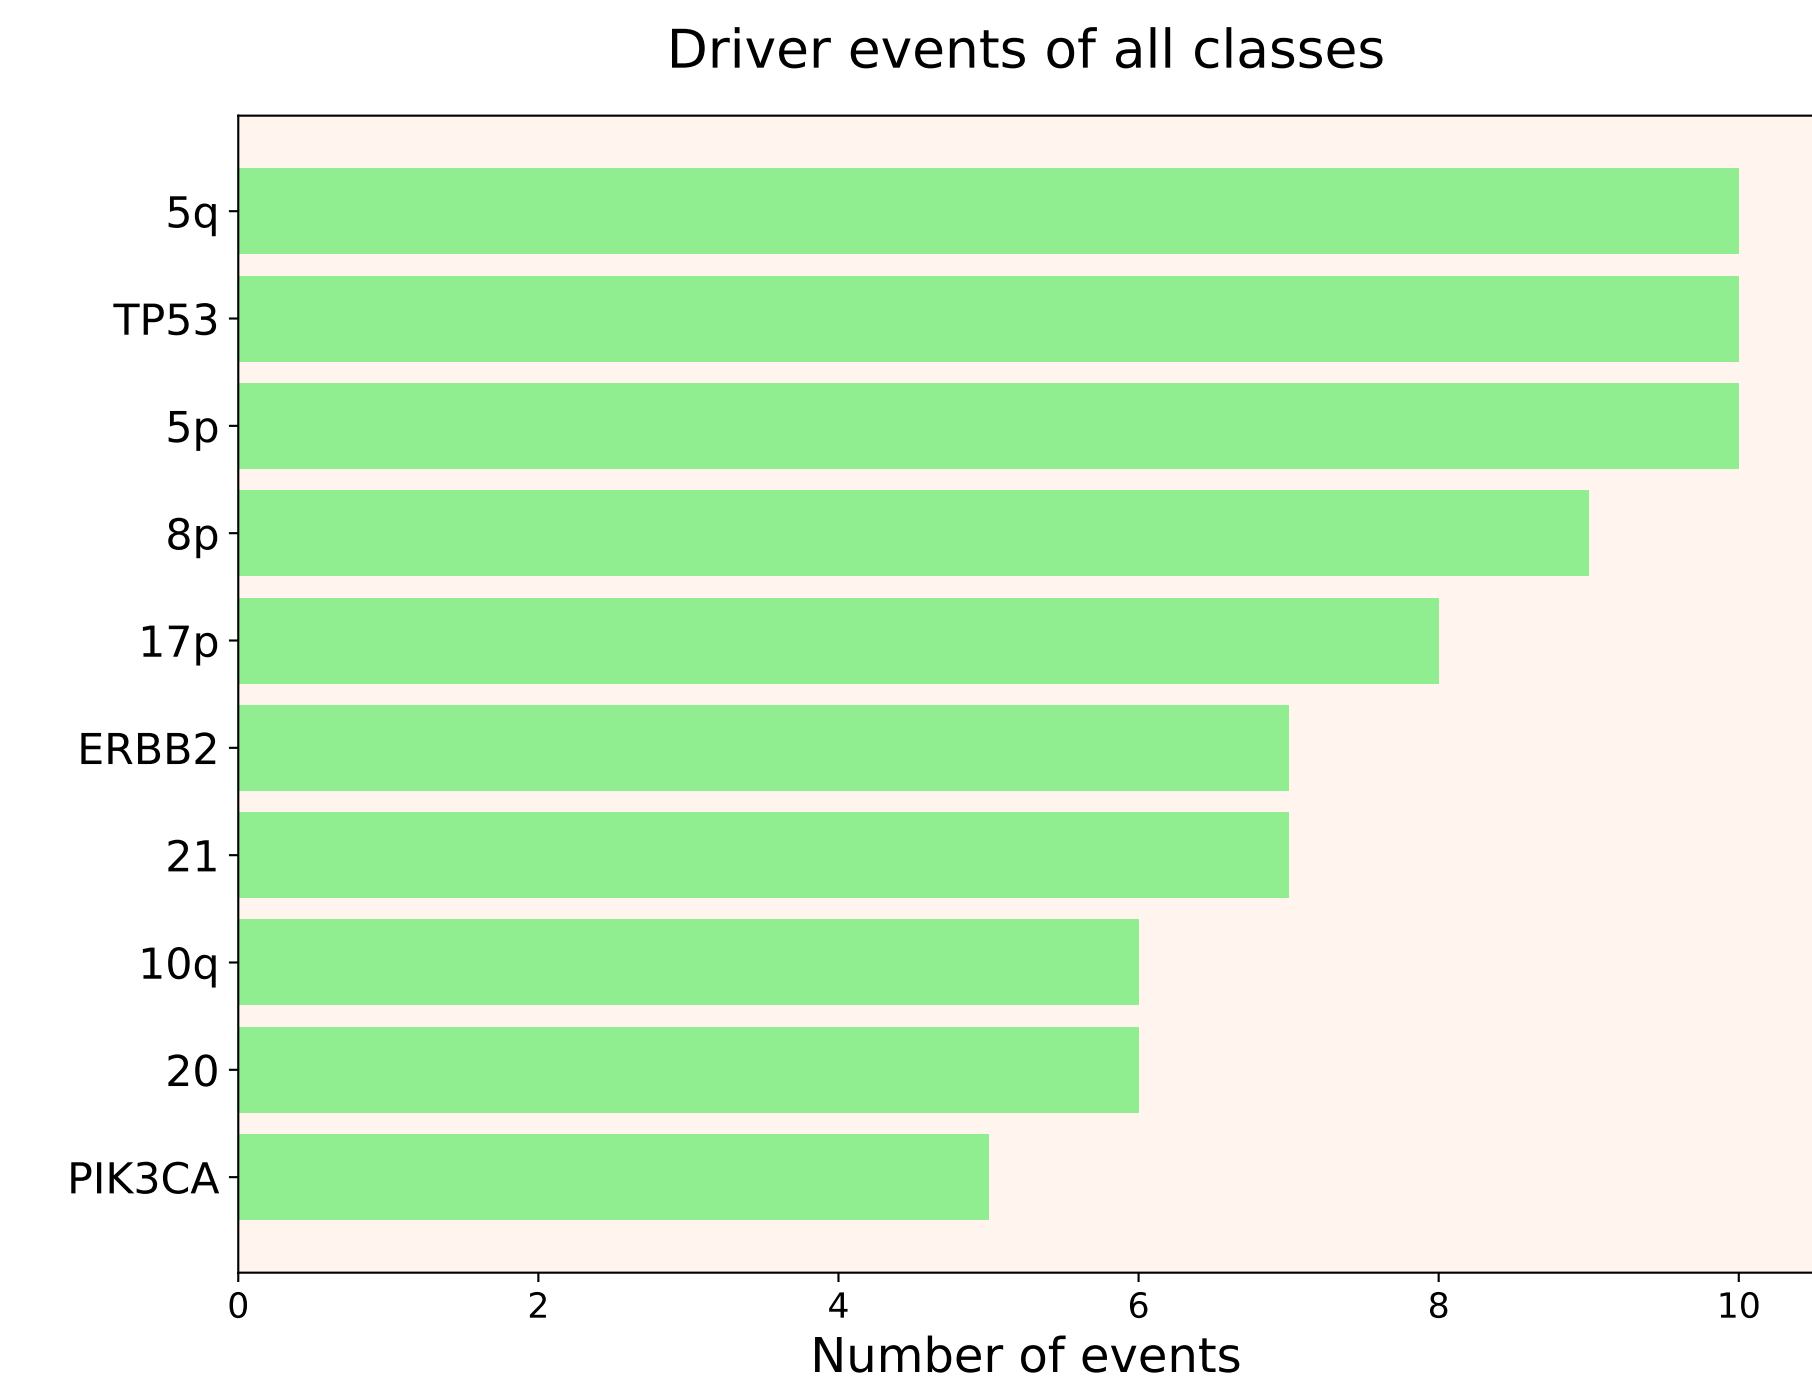

Supplement: Supplemental_Data_S1.zip [file Supplemental_Data_S1.zip]

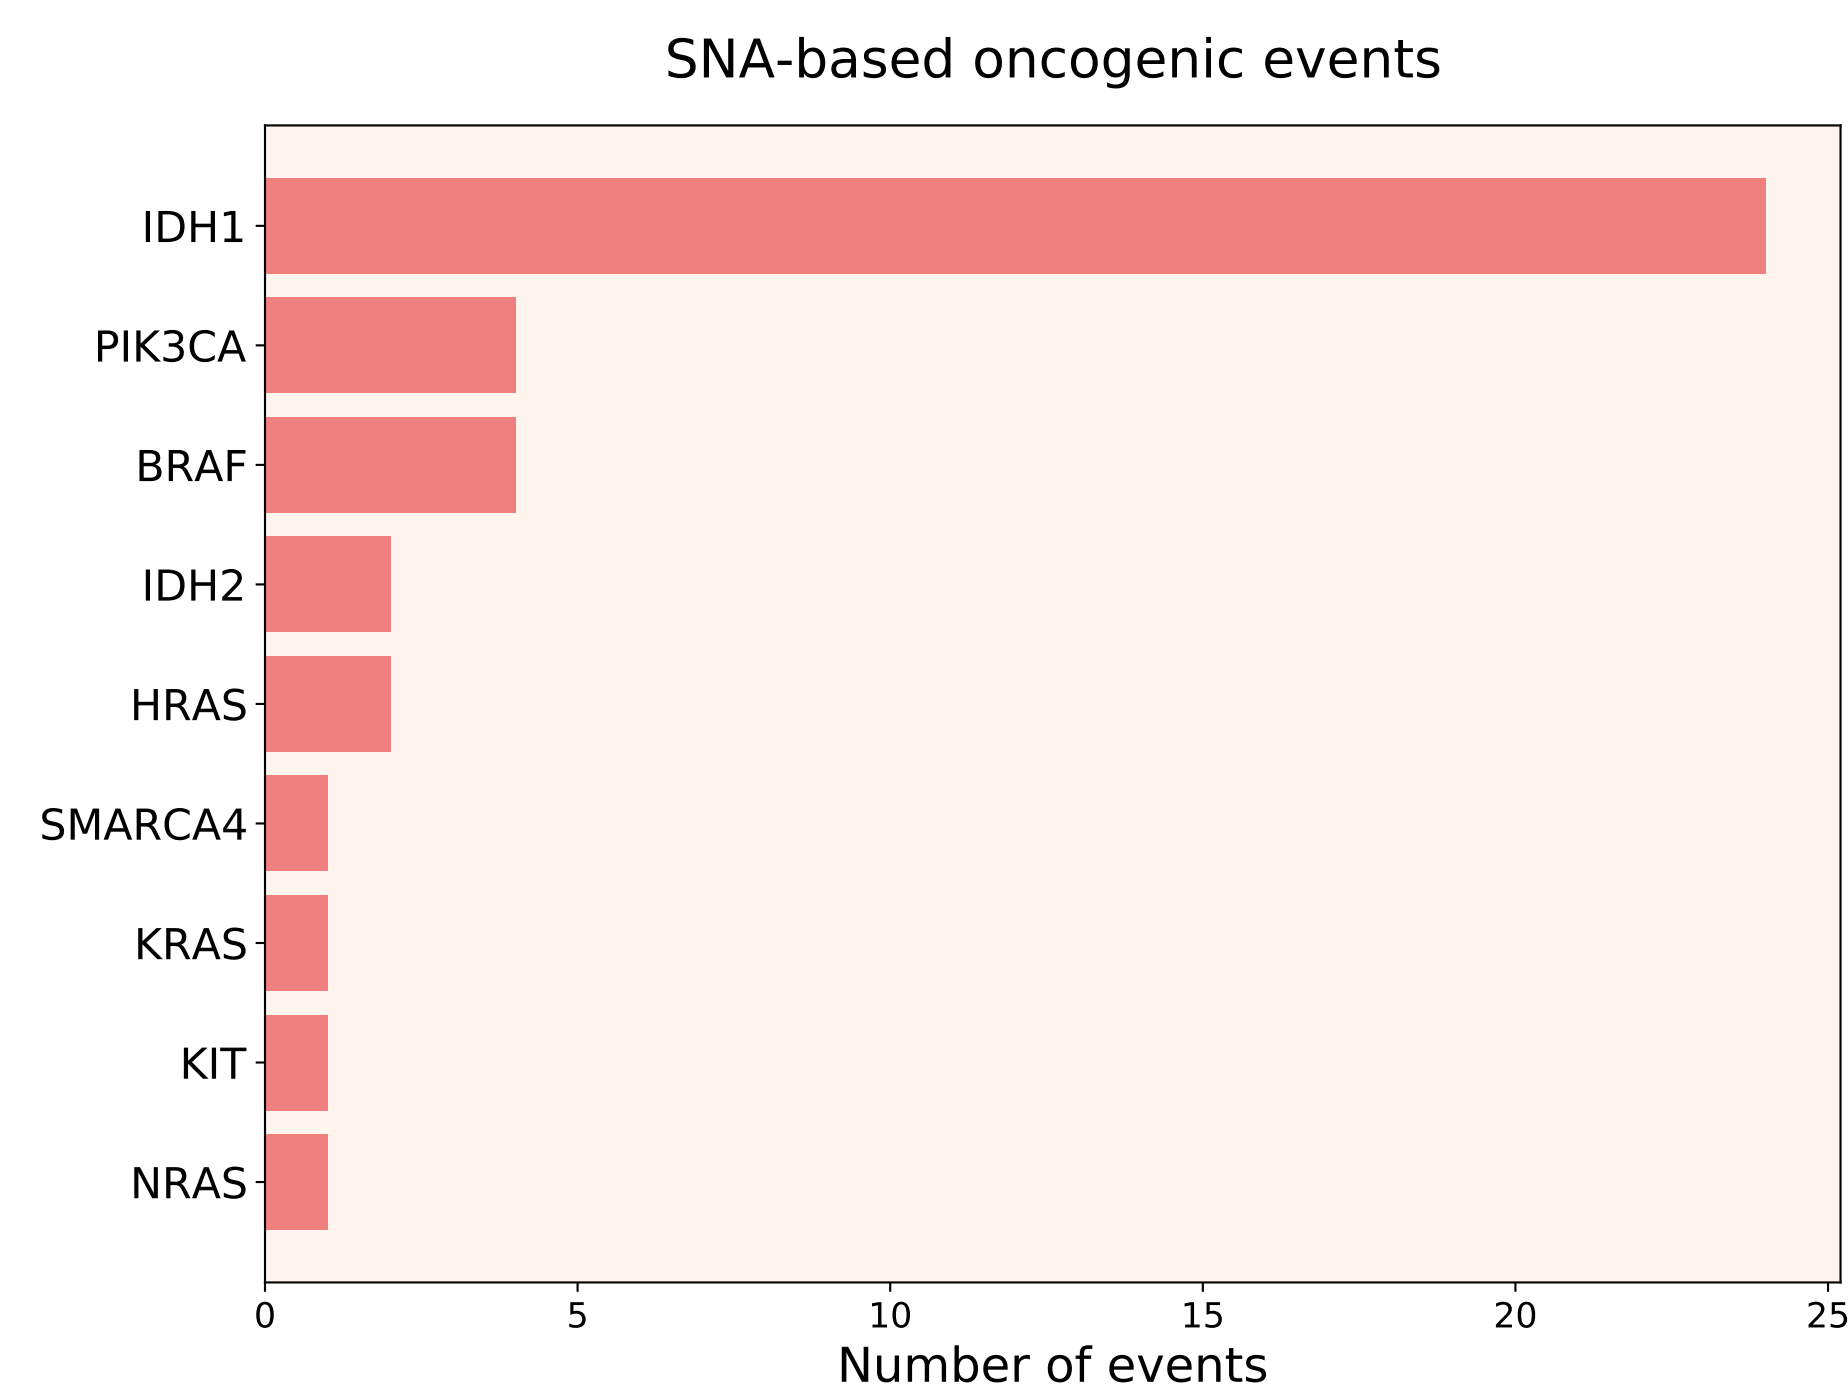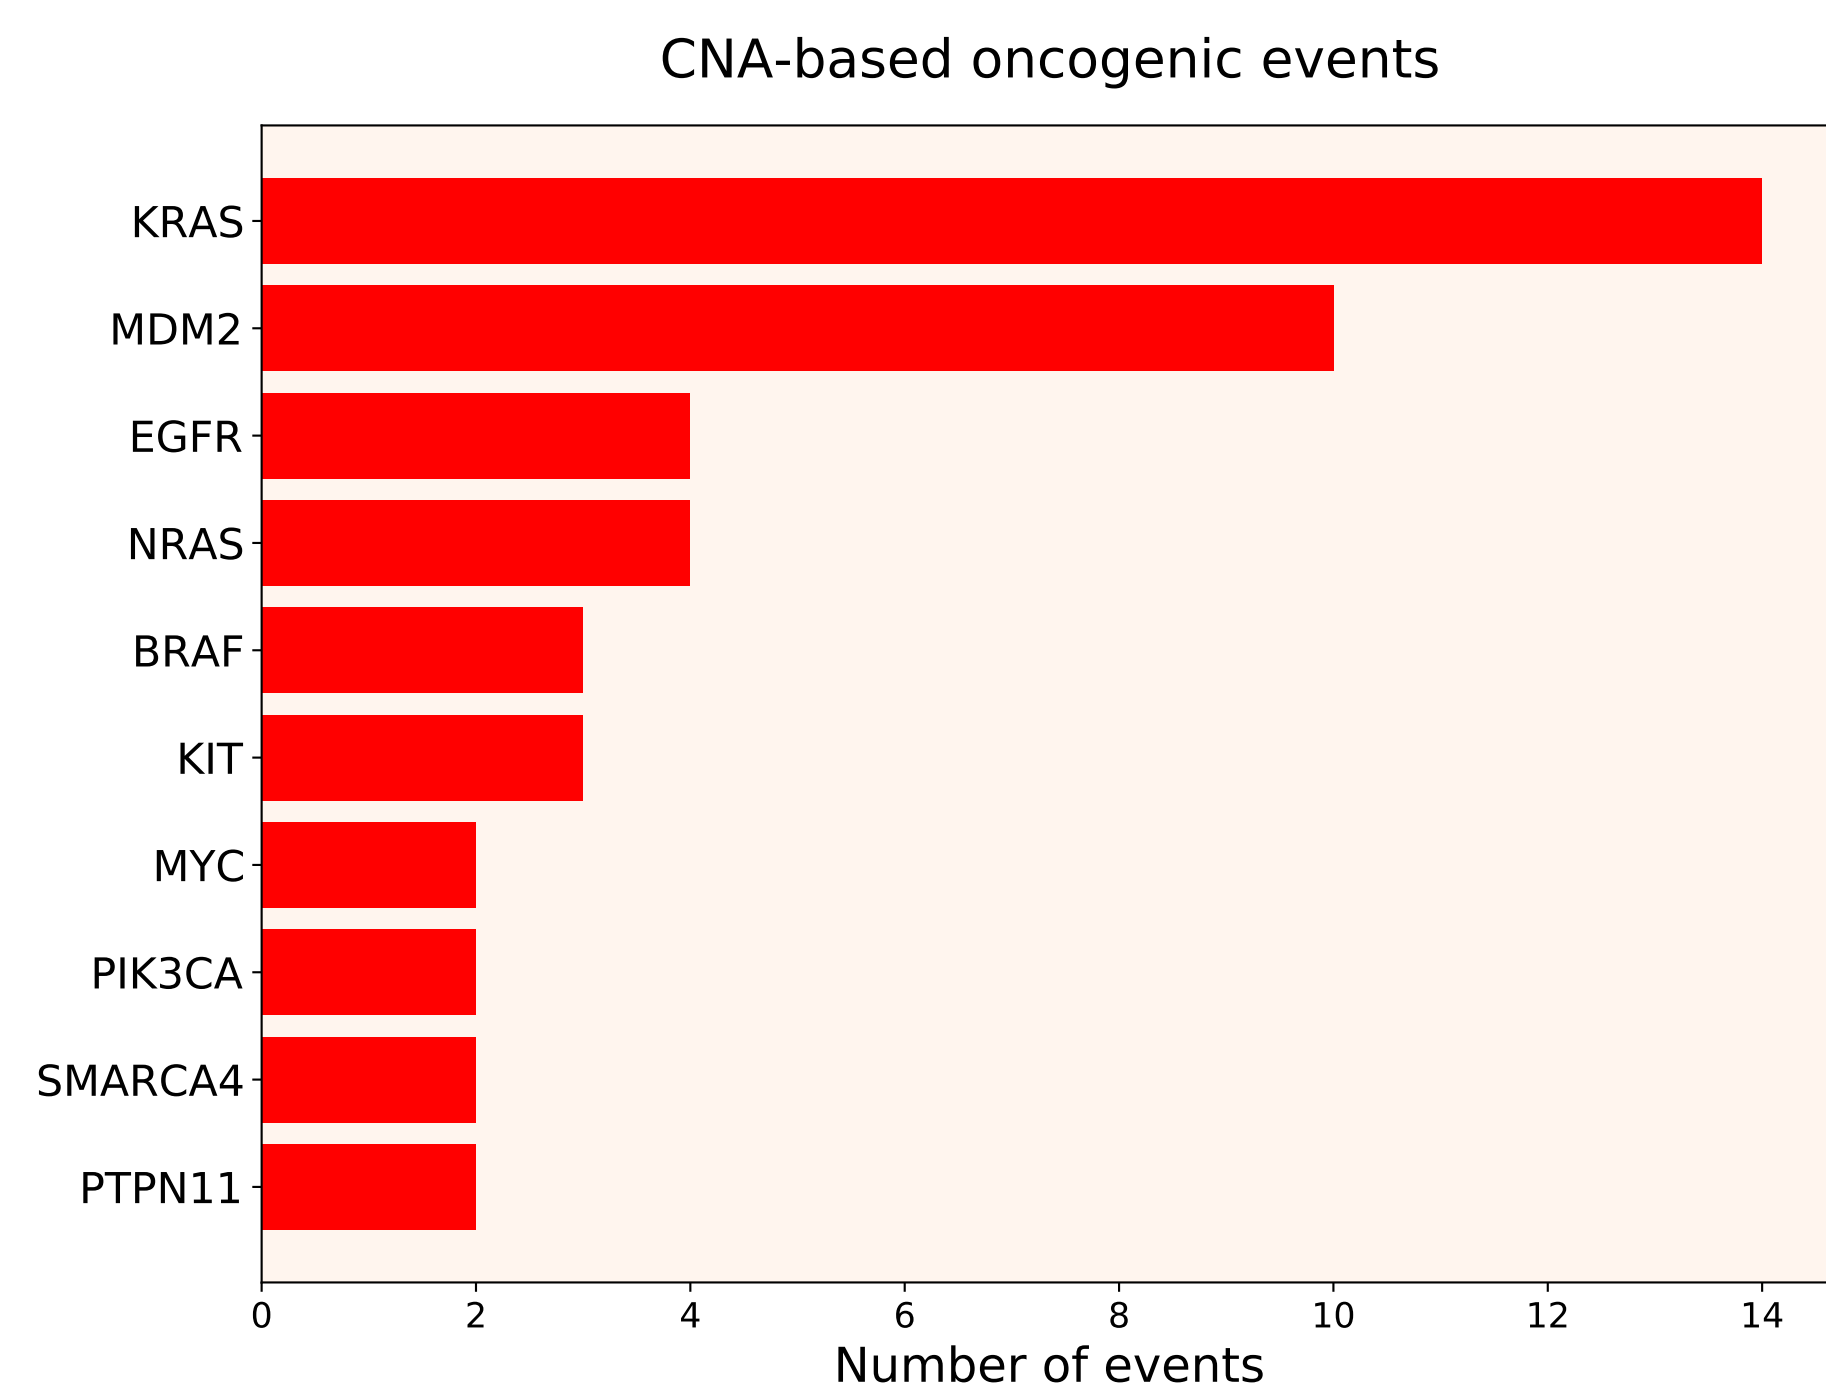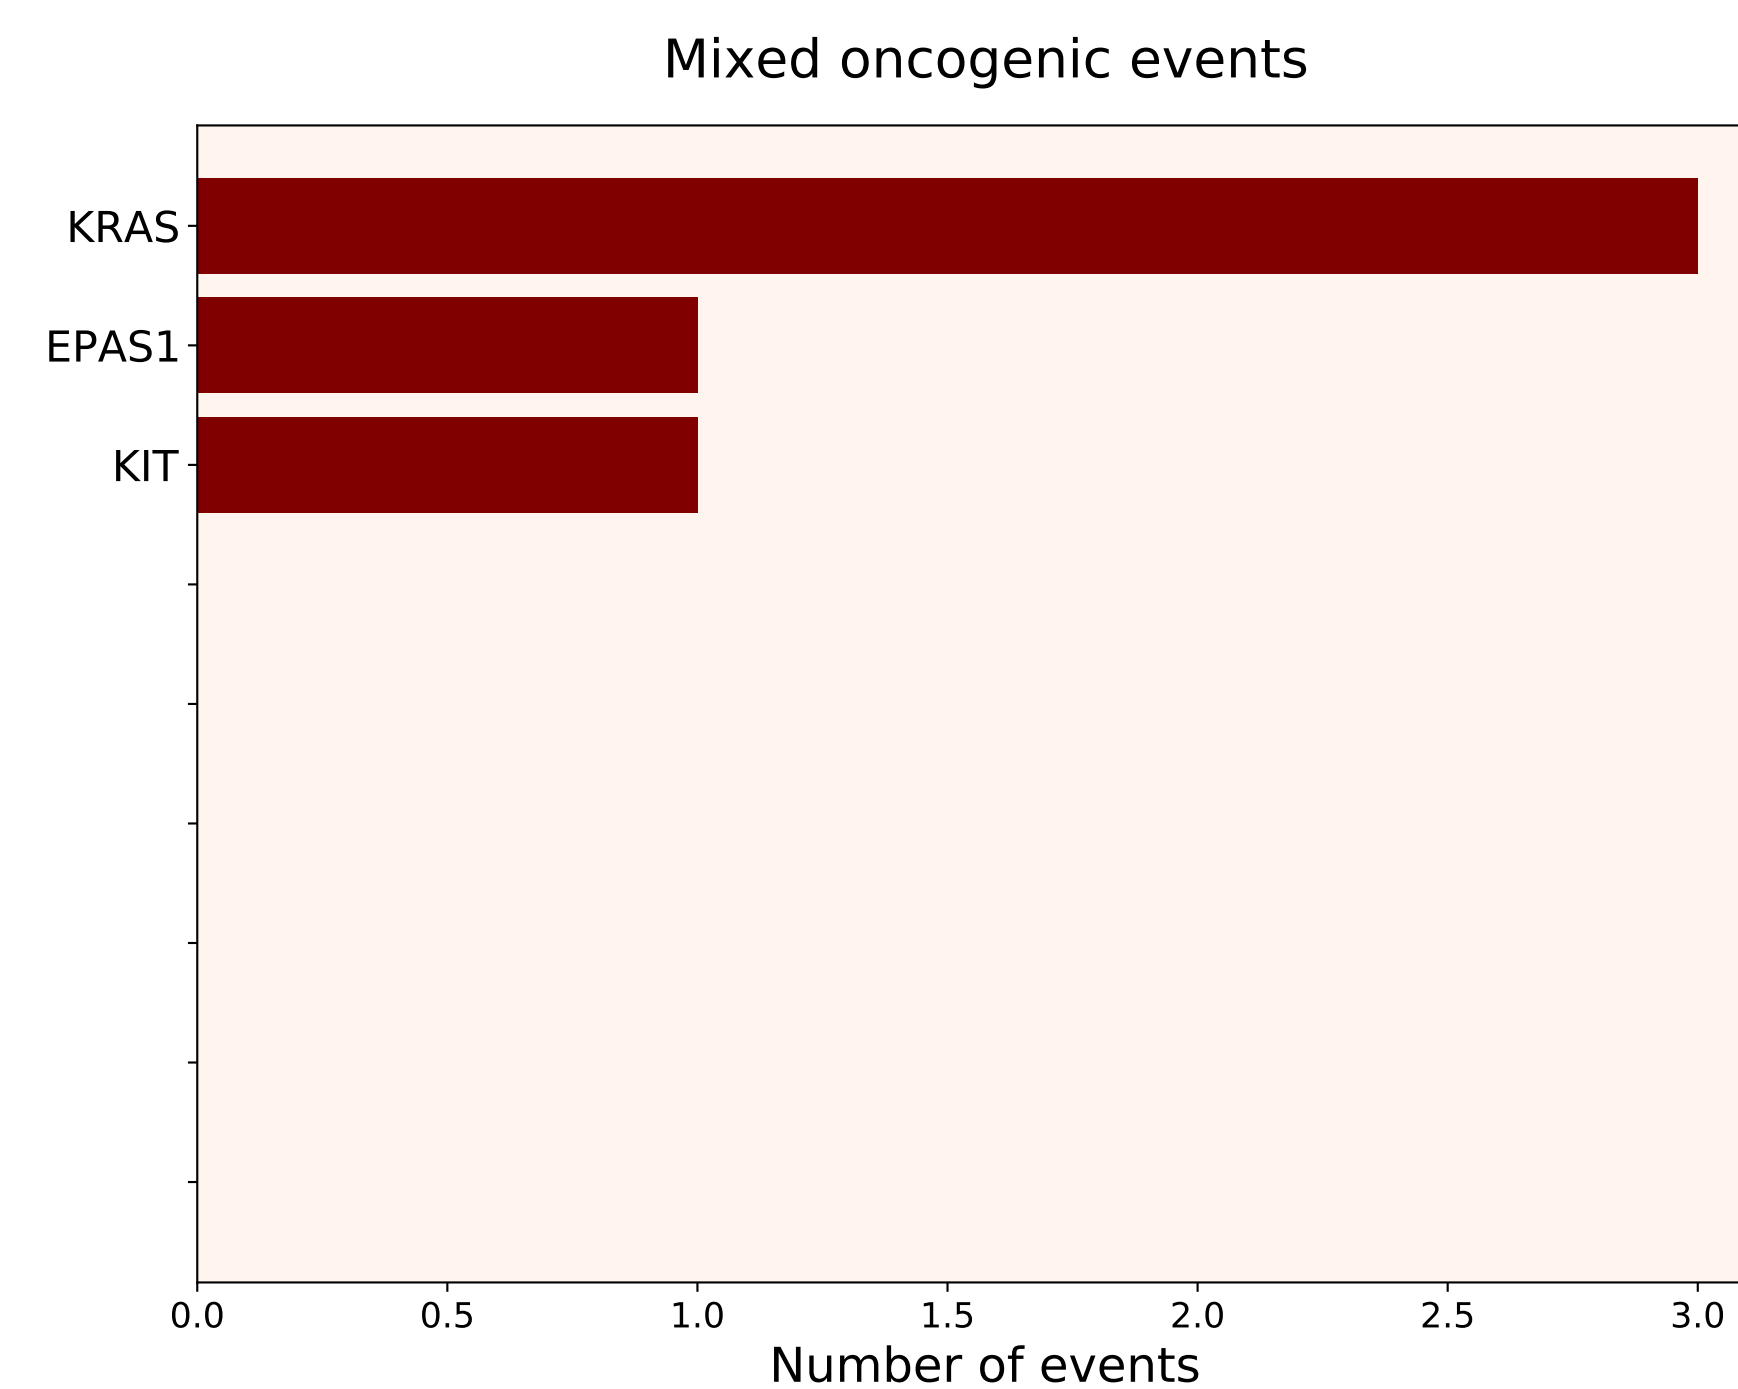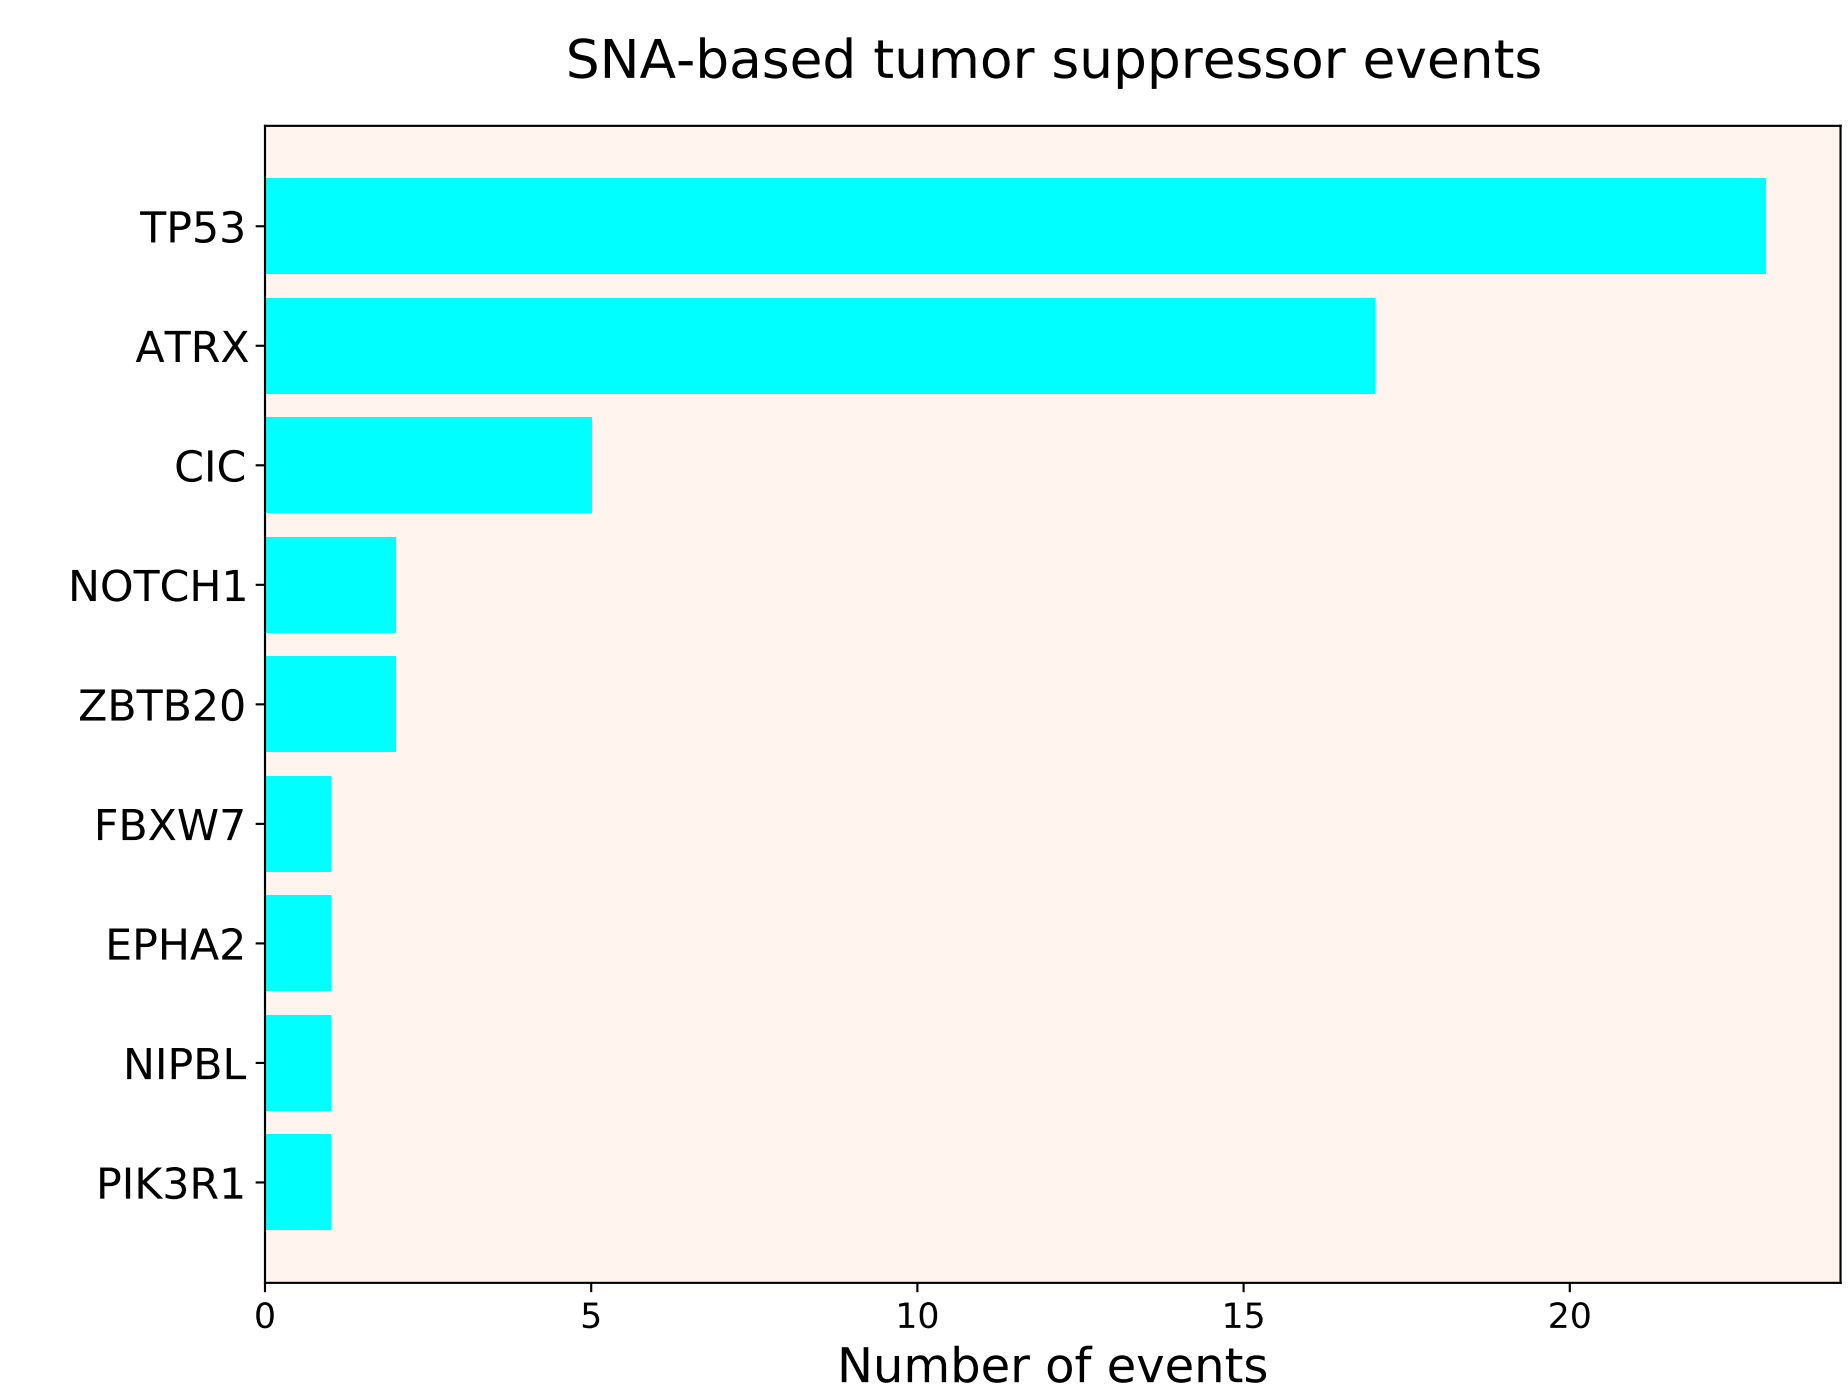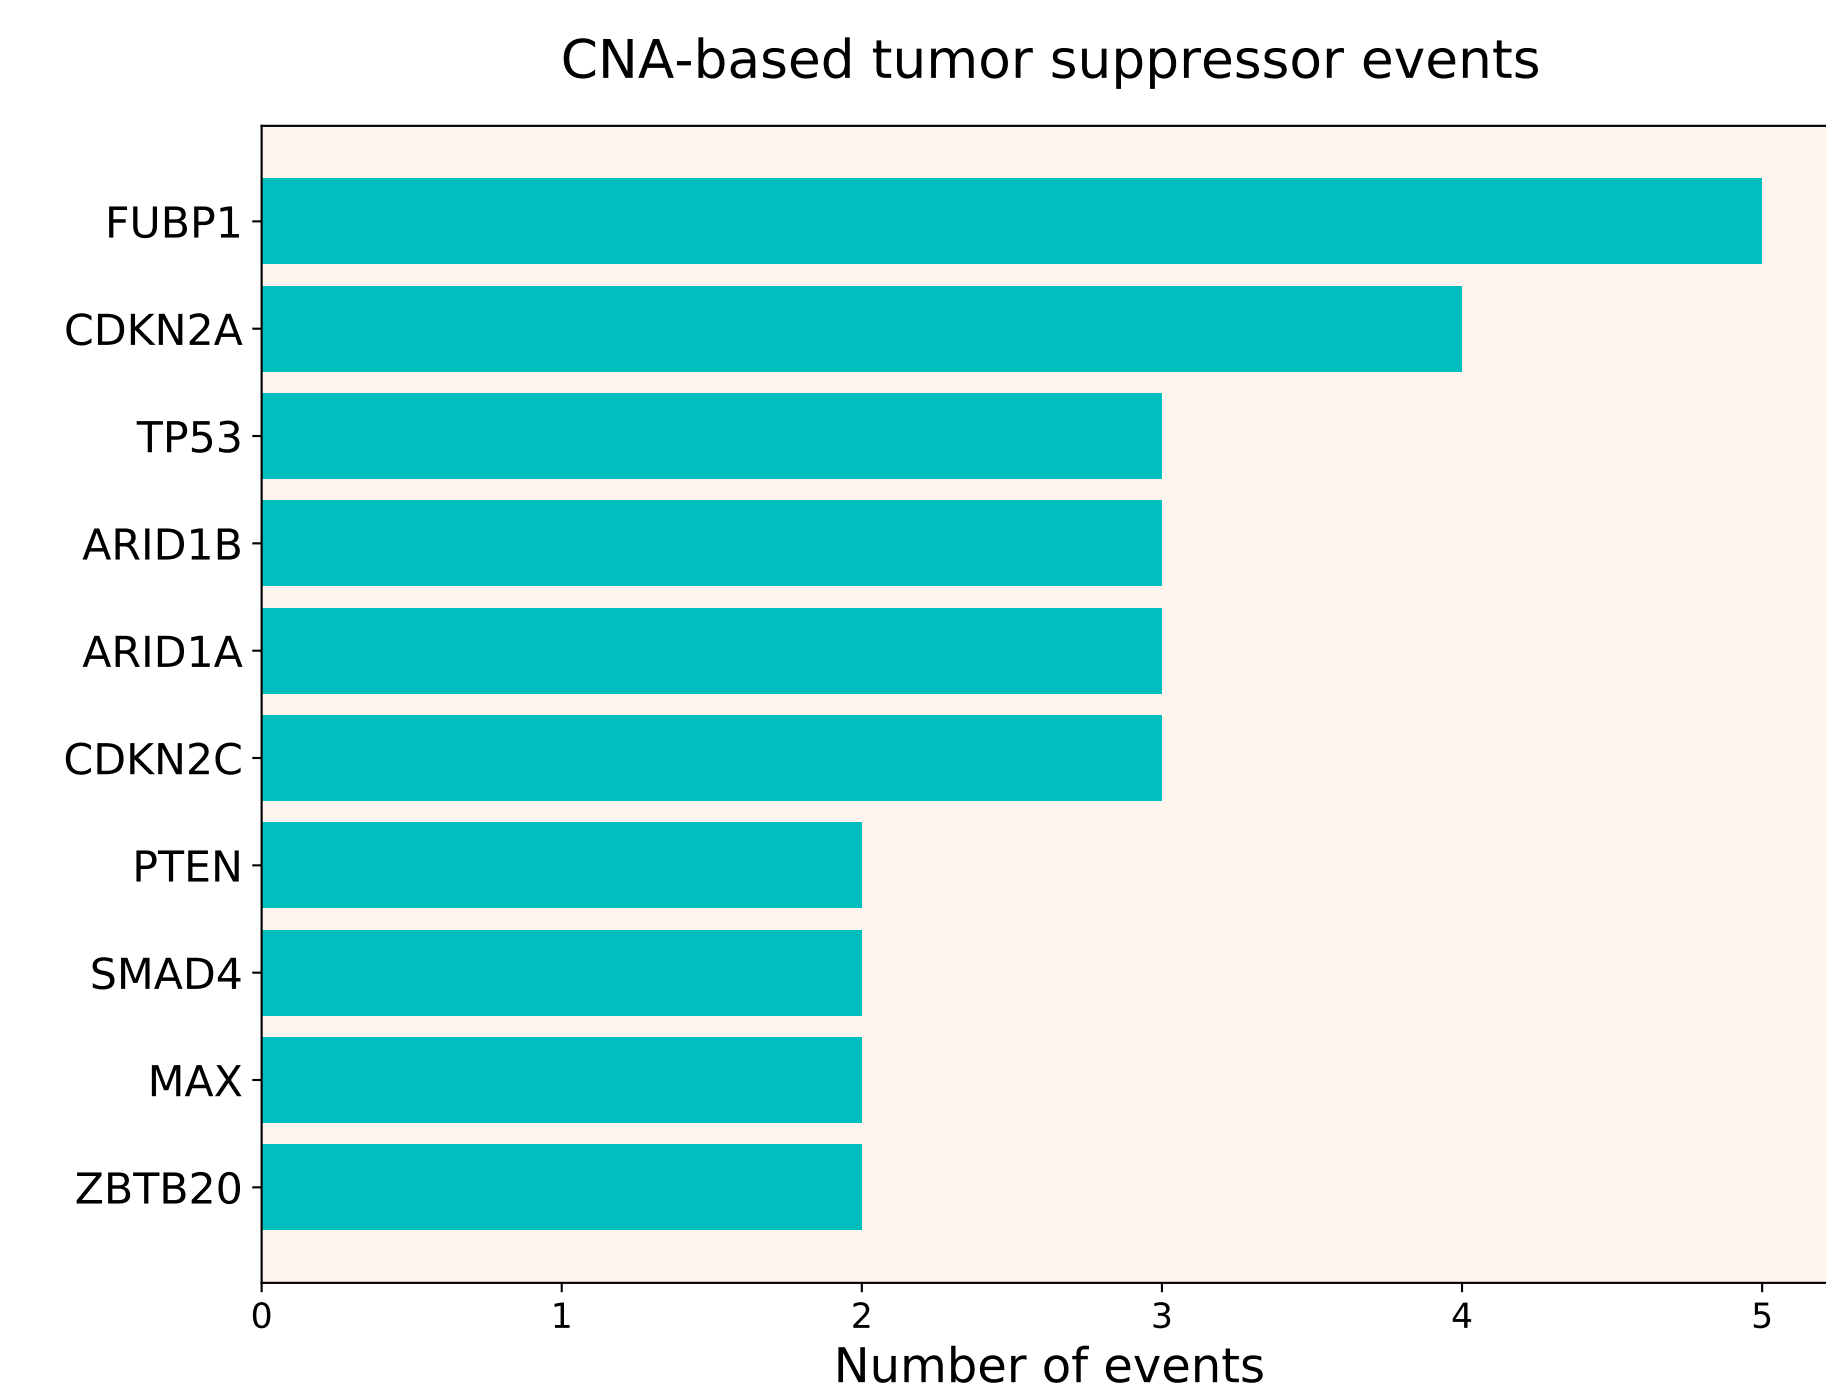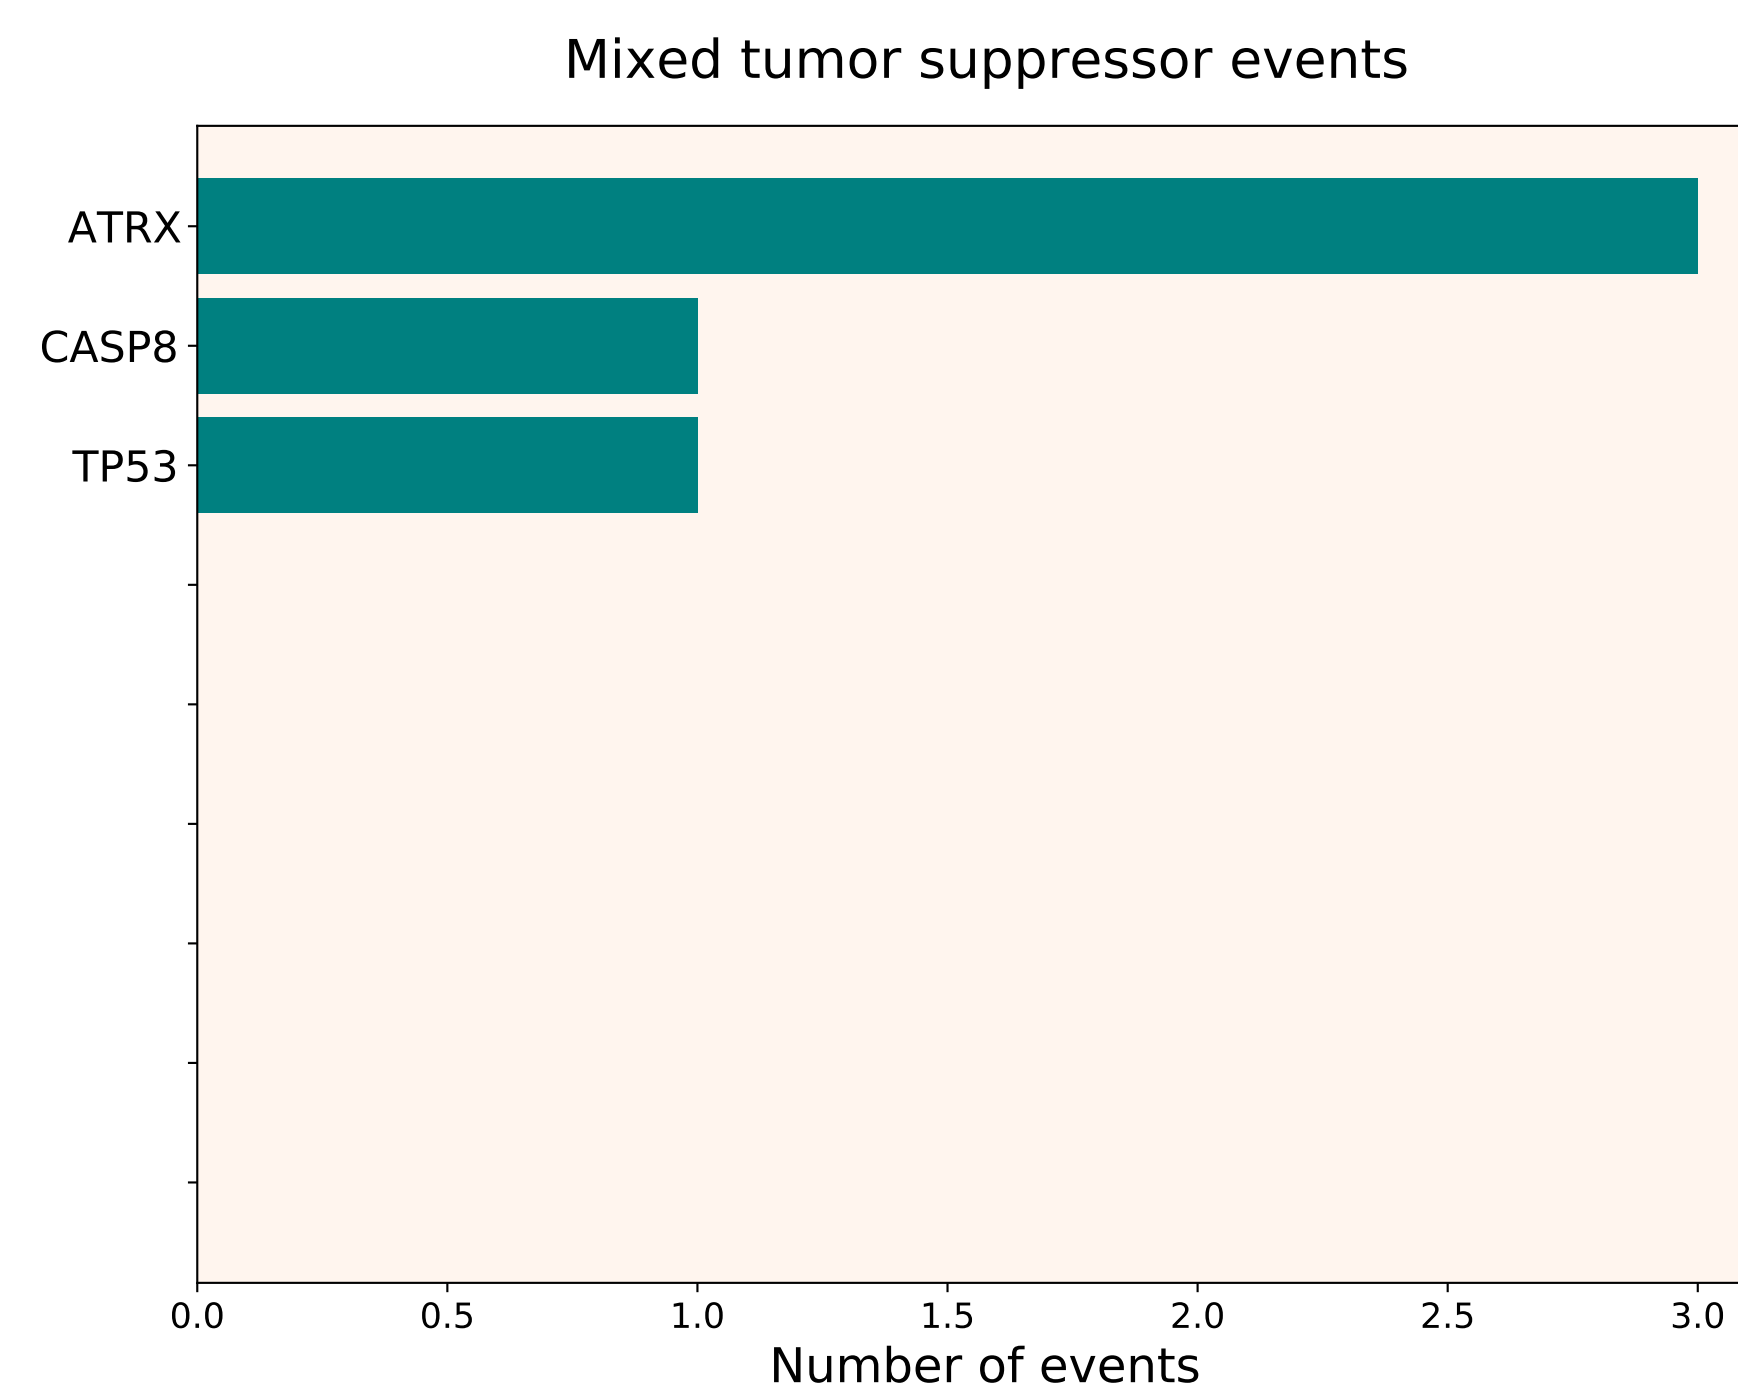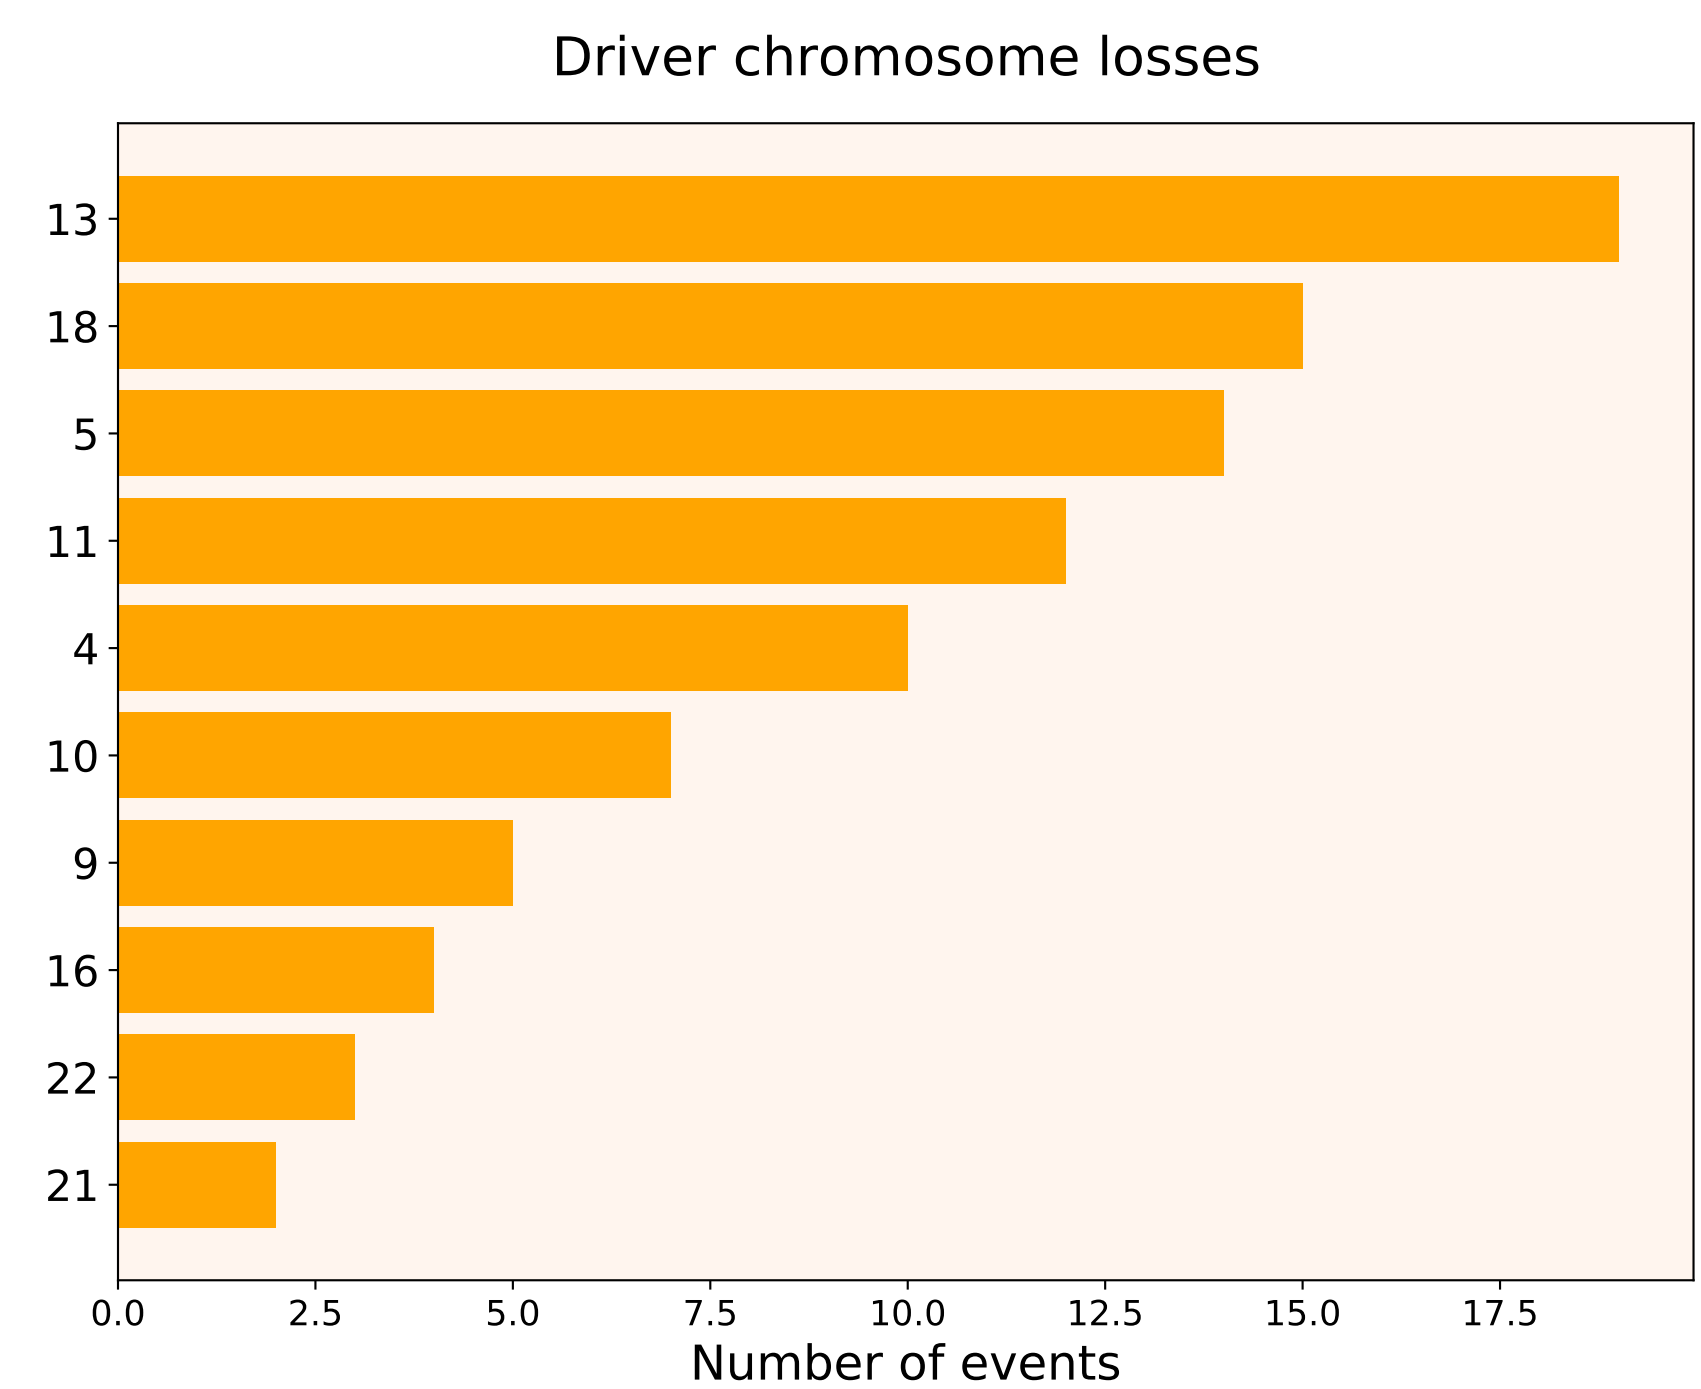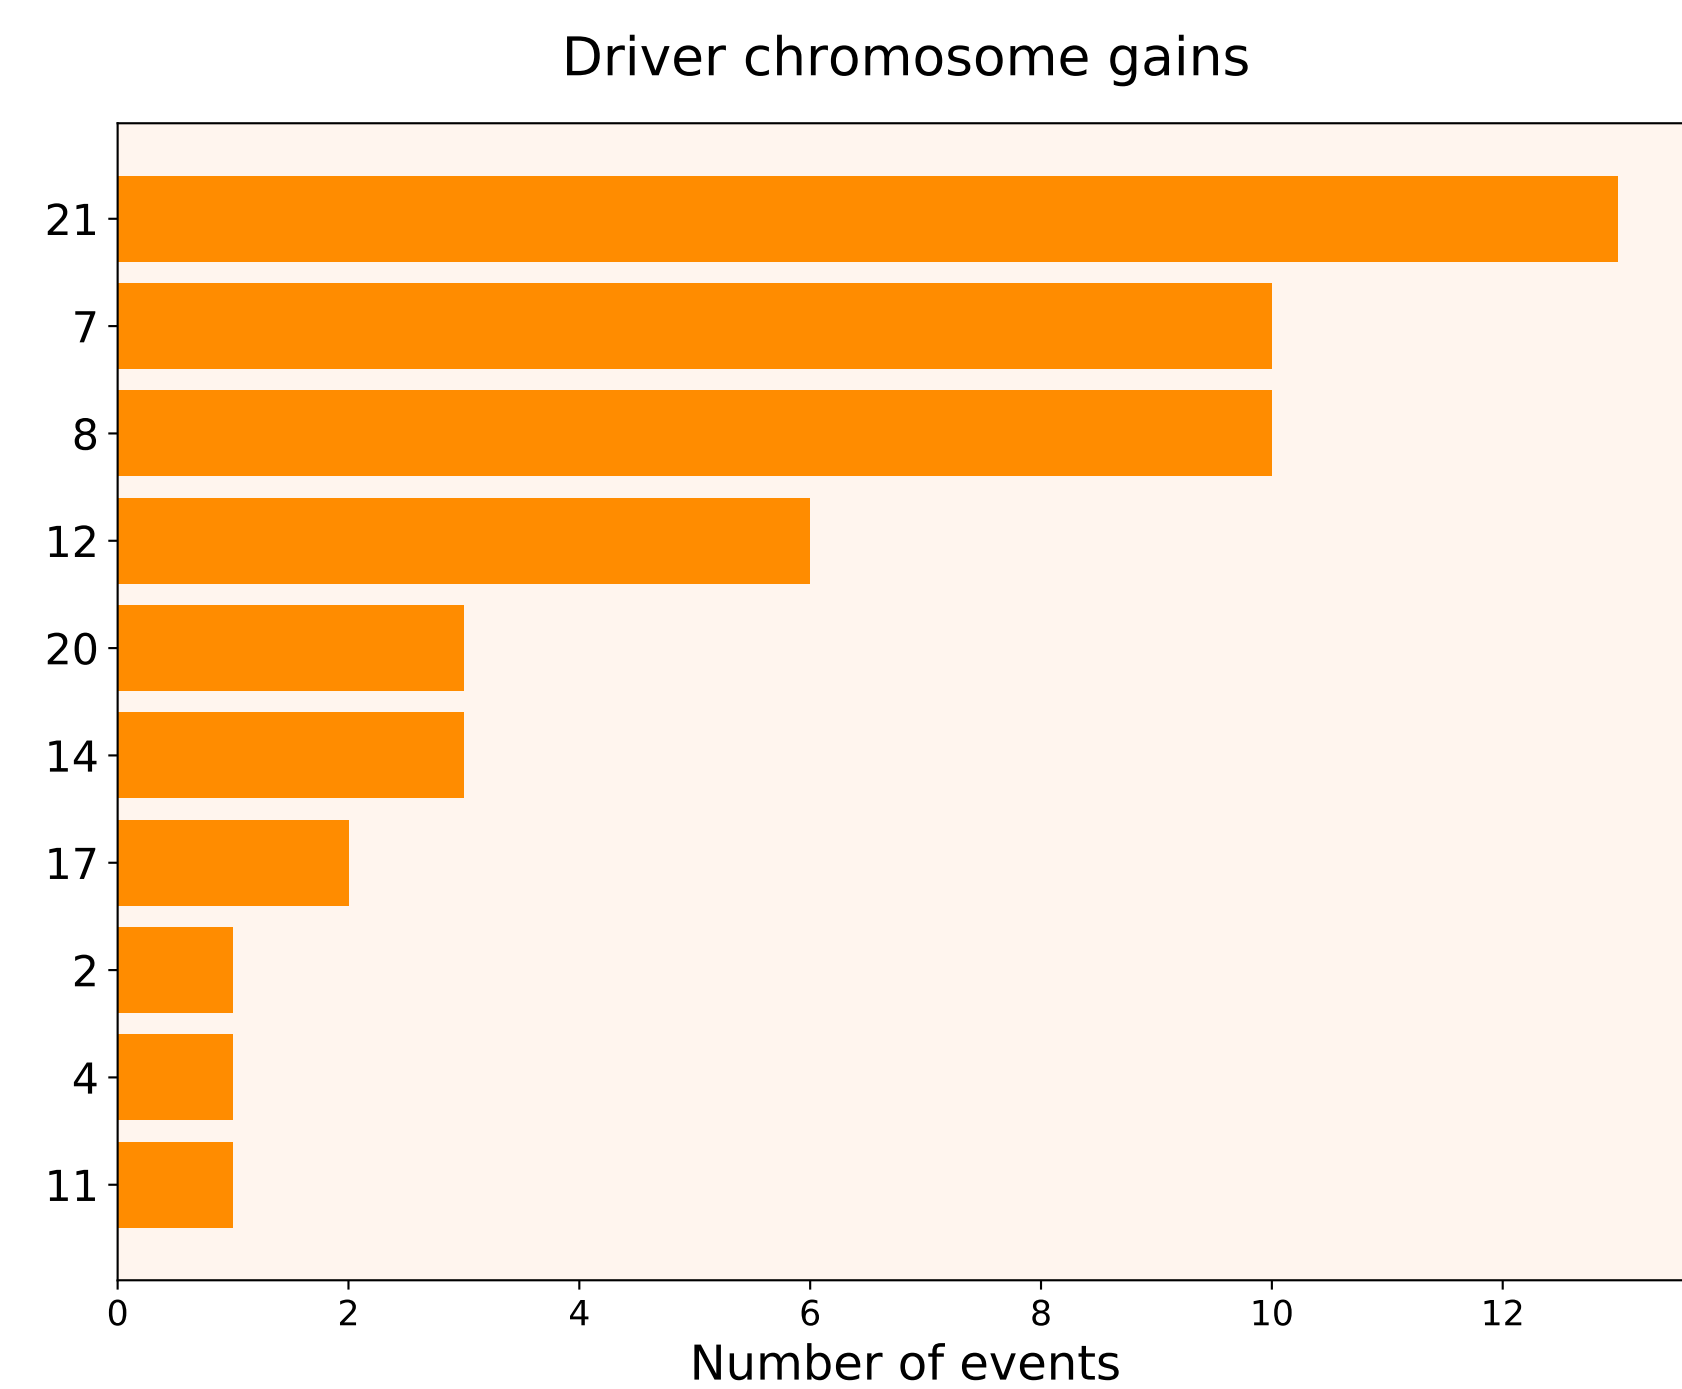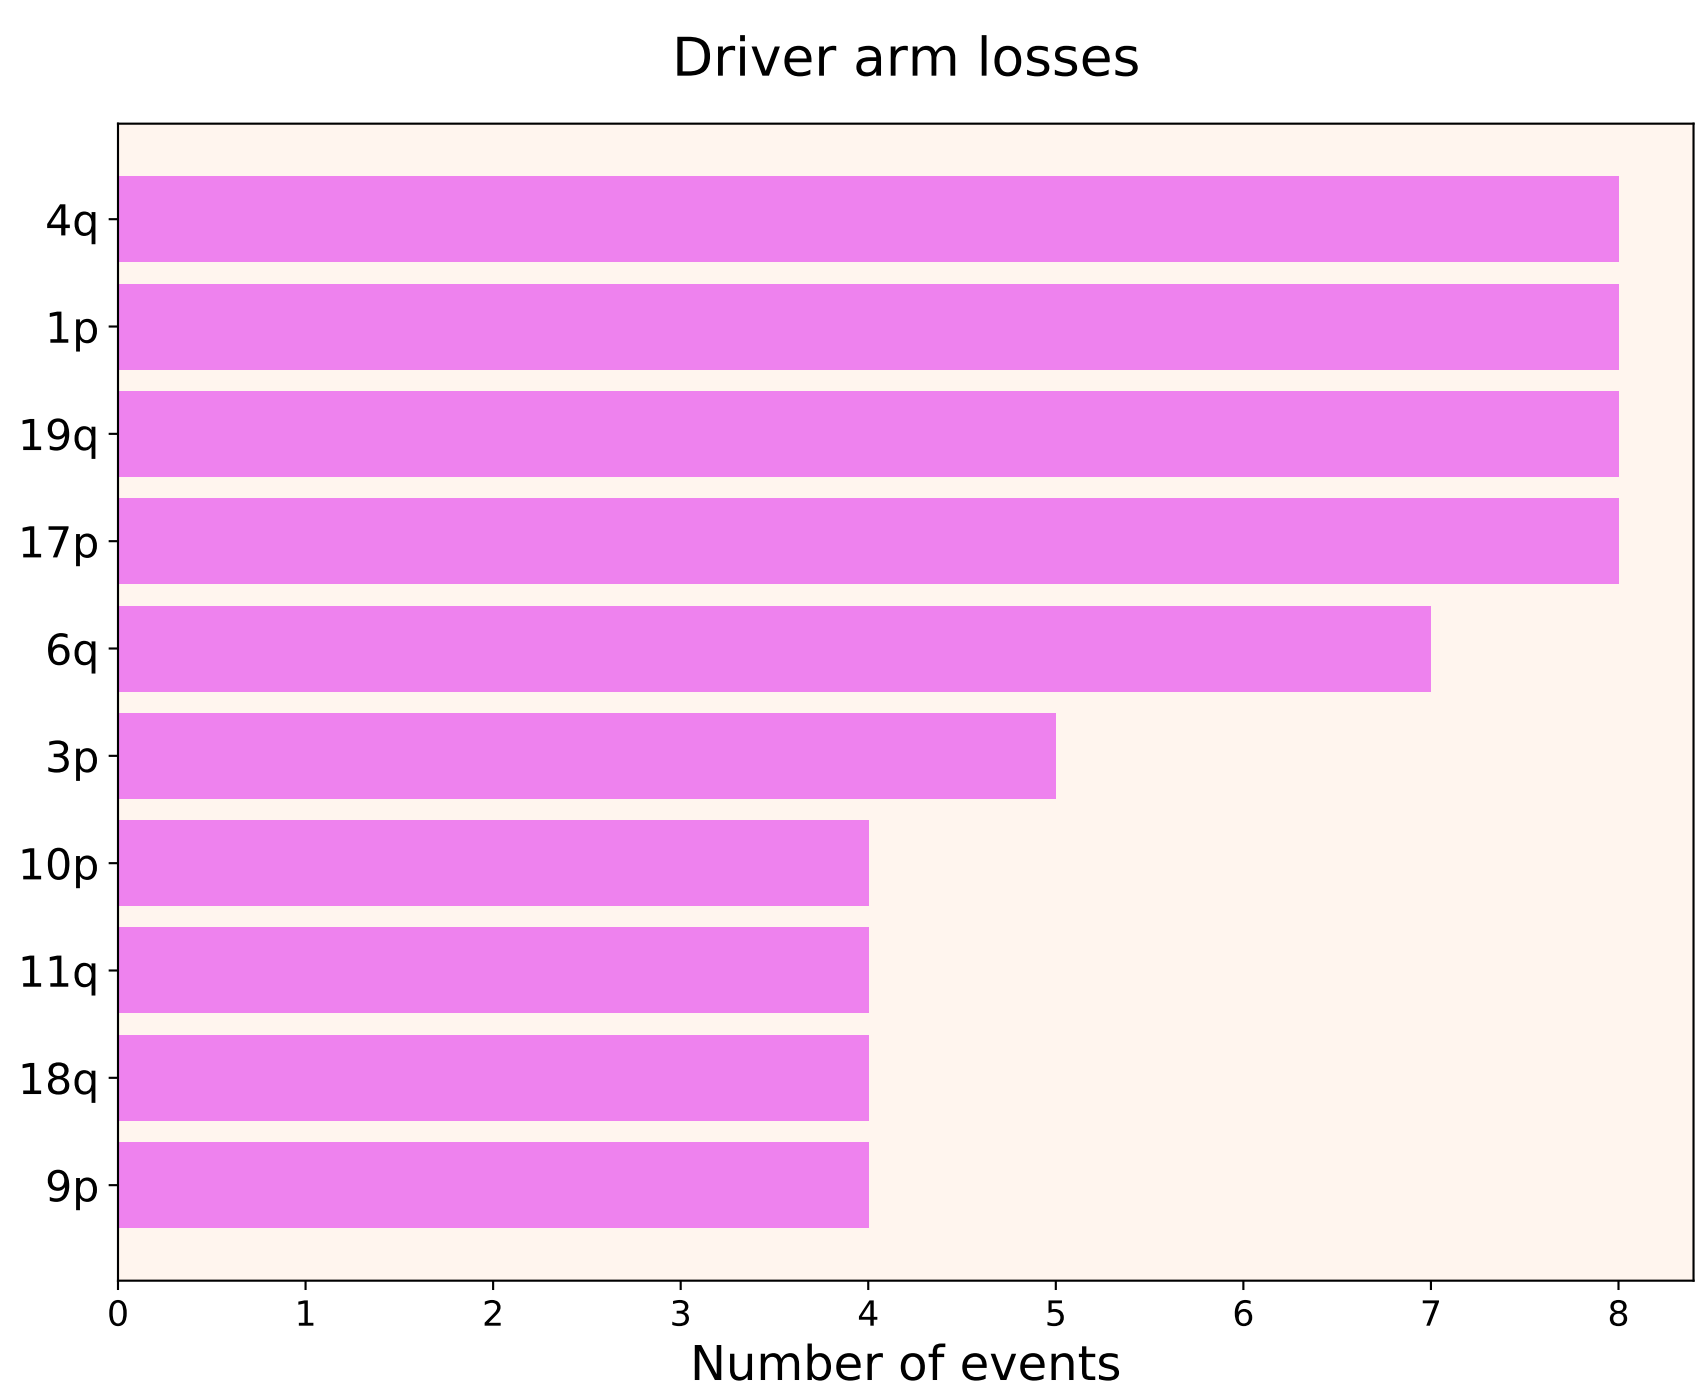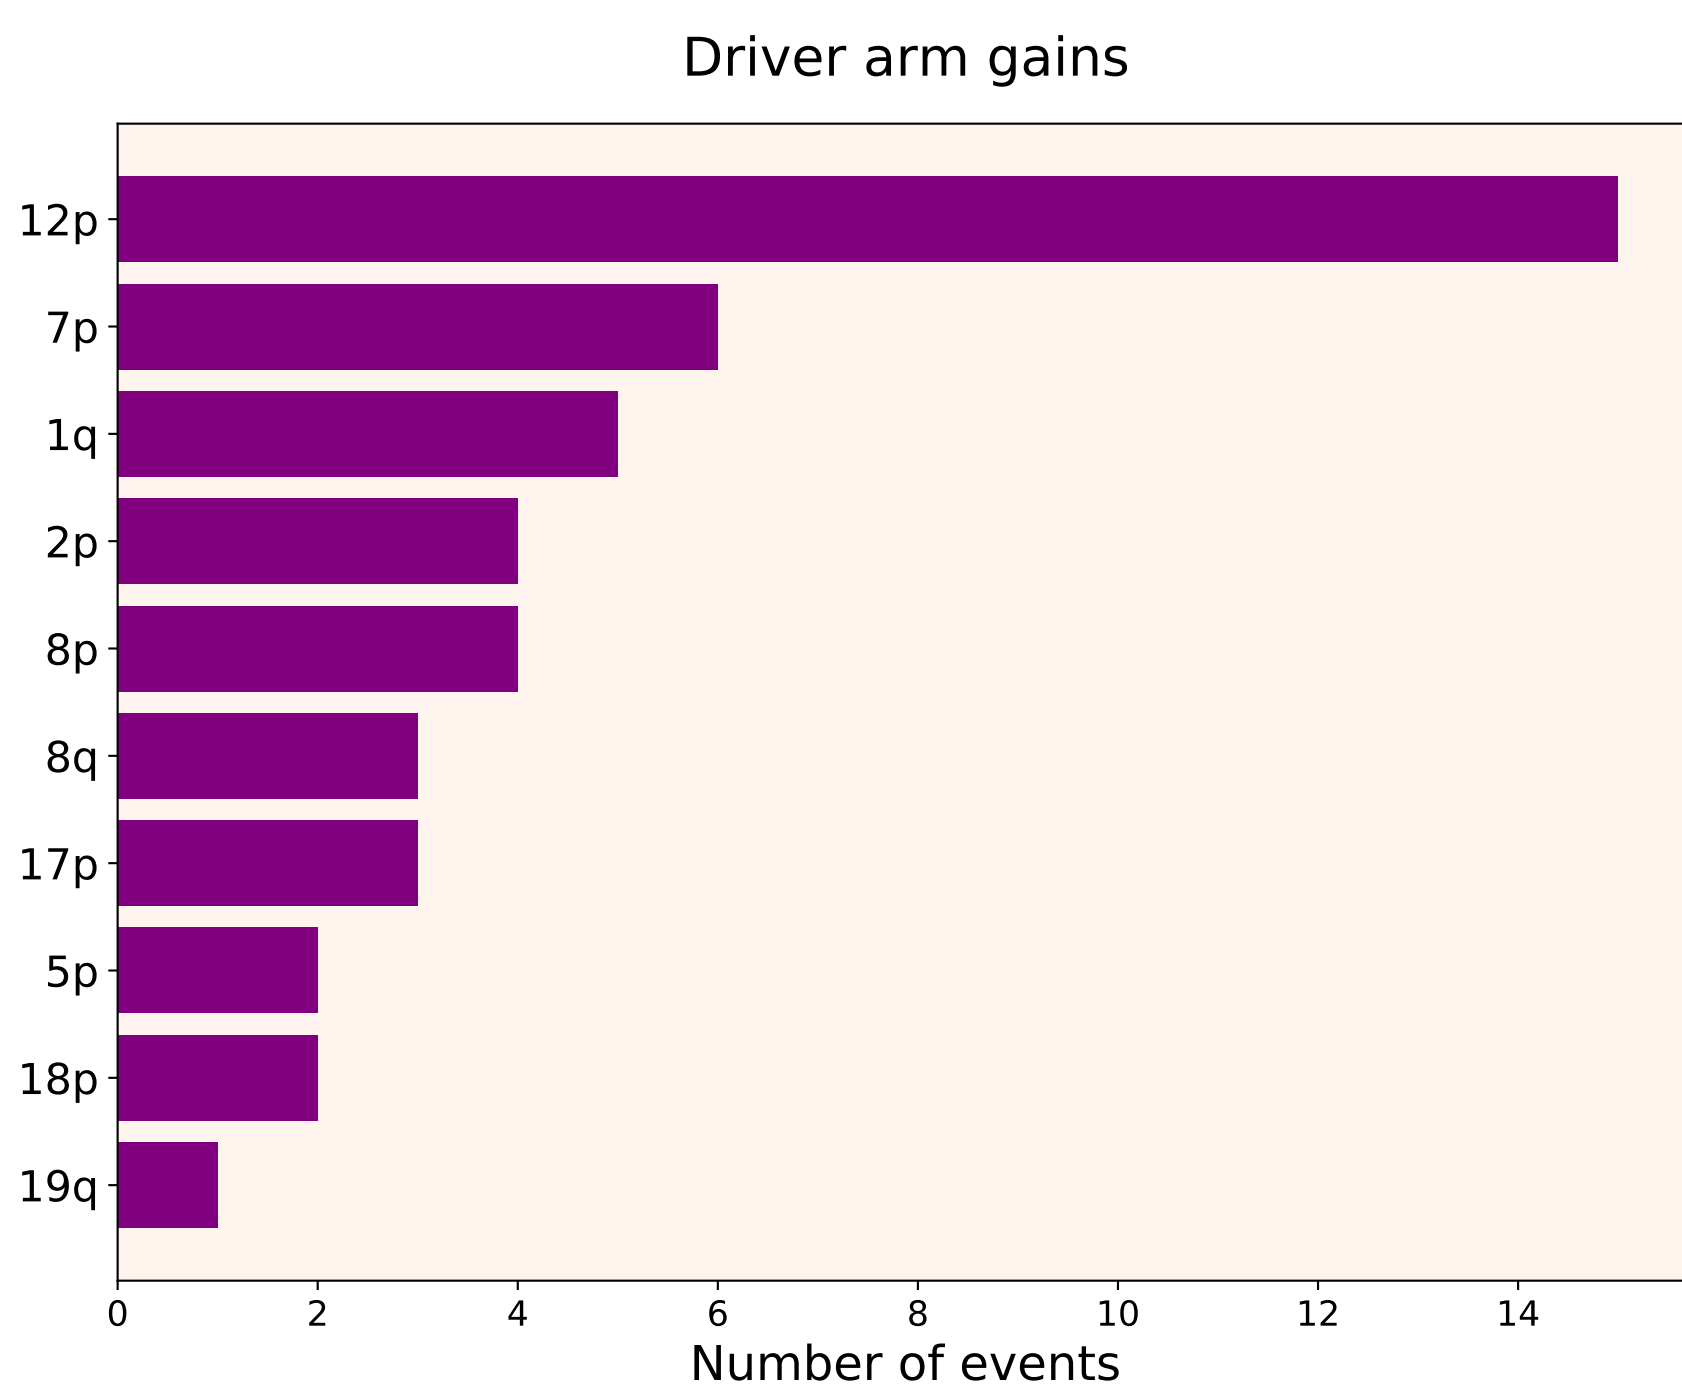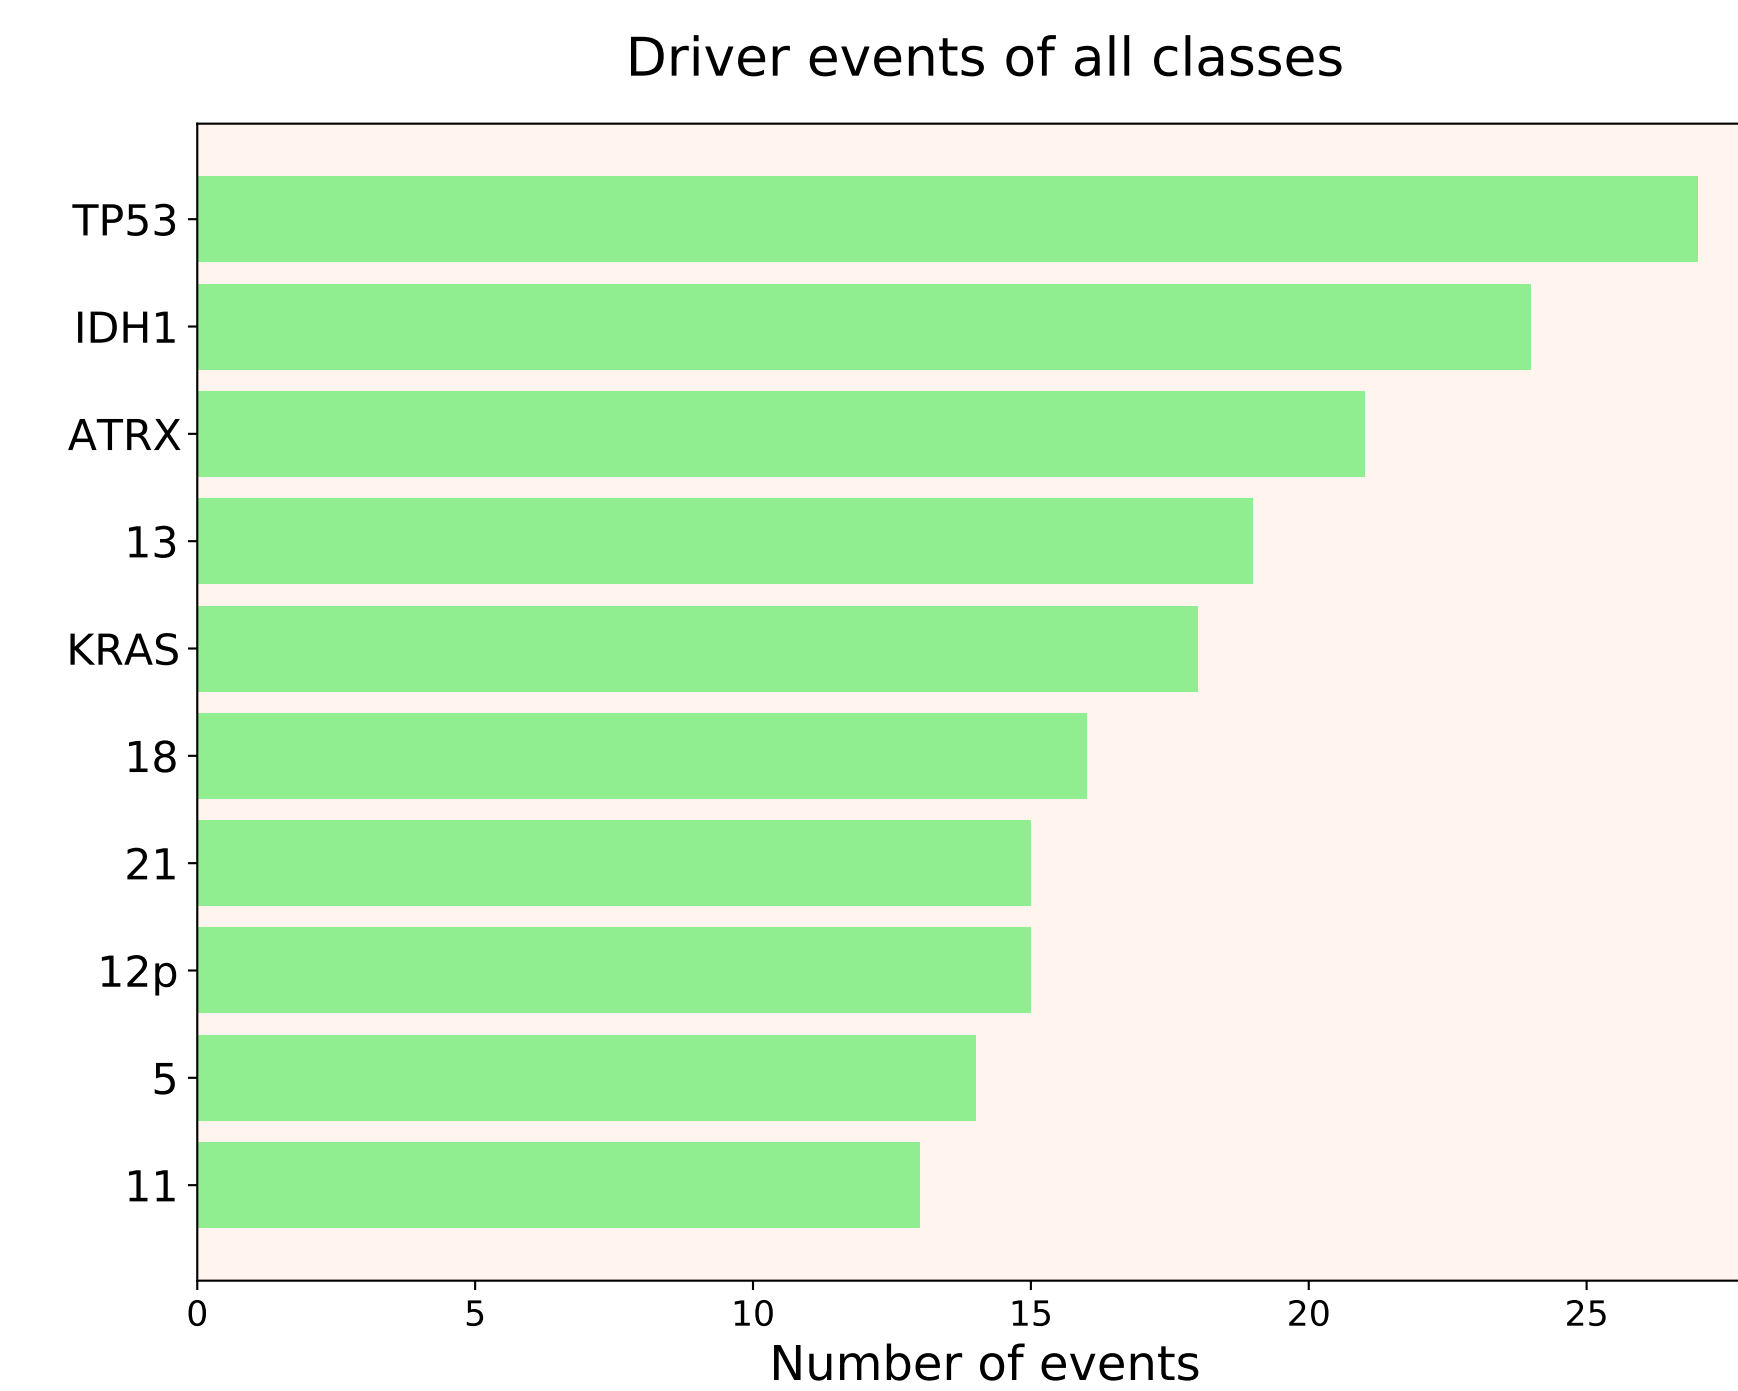

Supplement: Supplemental_Data_S1.zip [file Supplemental_Data_S1.zip]

# PCPG\_MALE

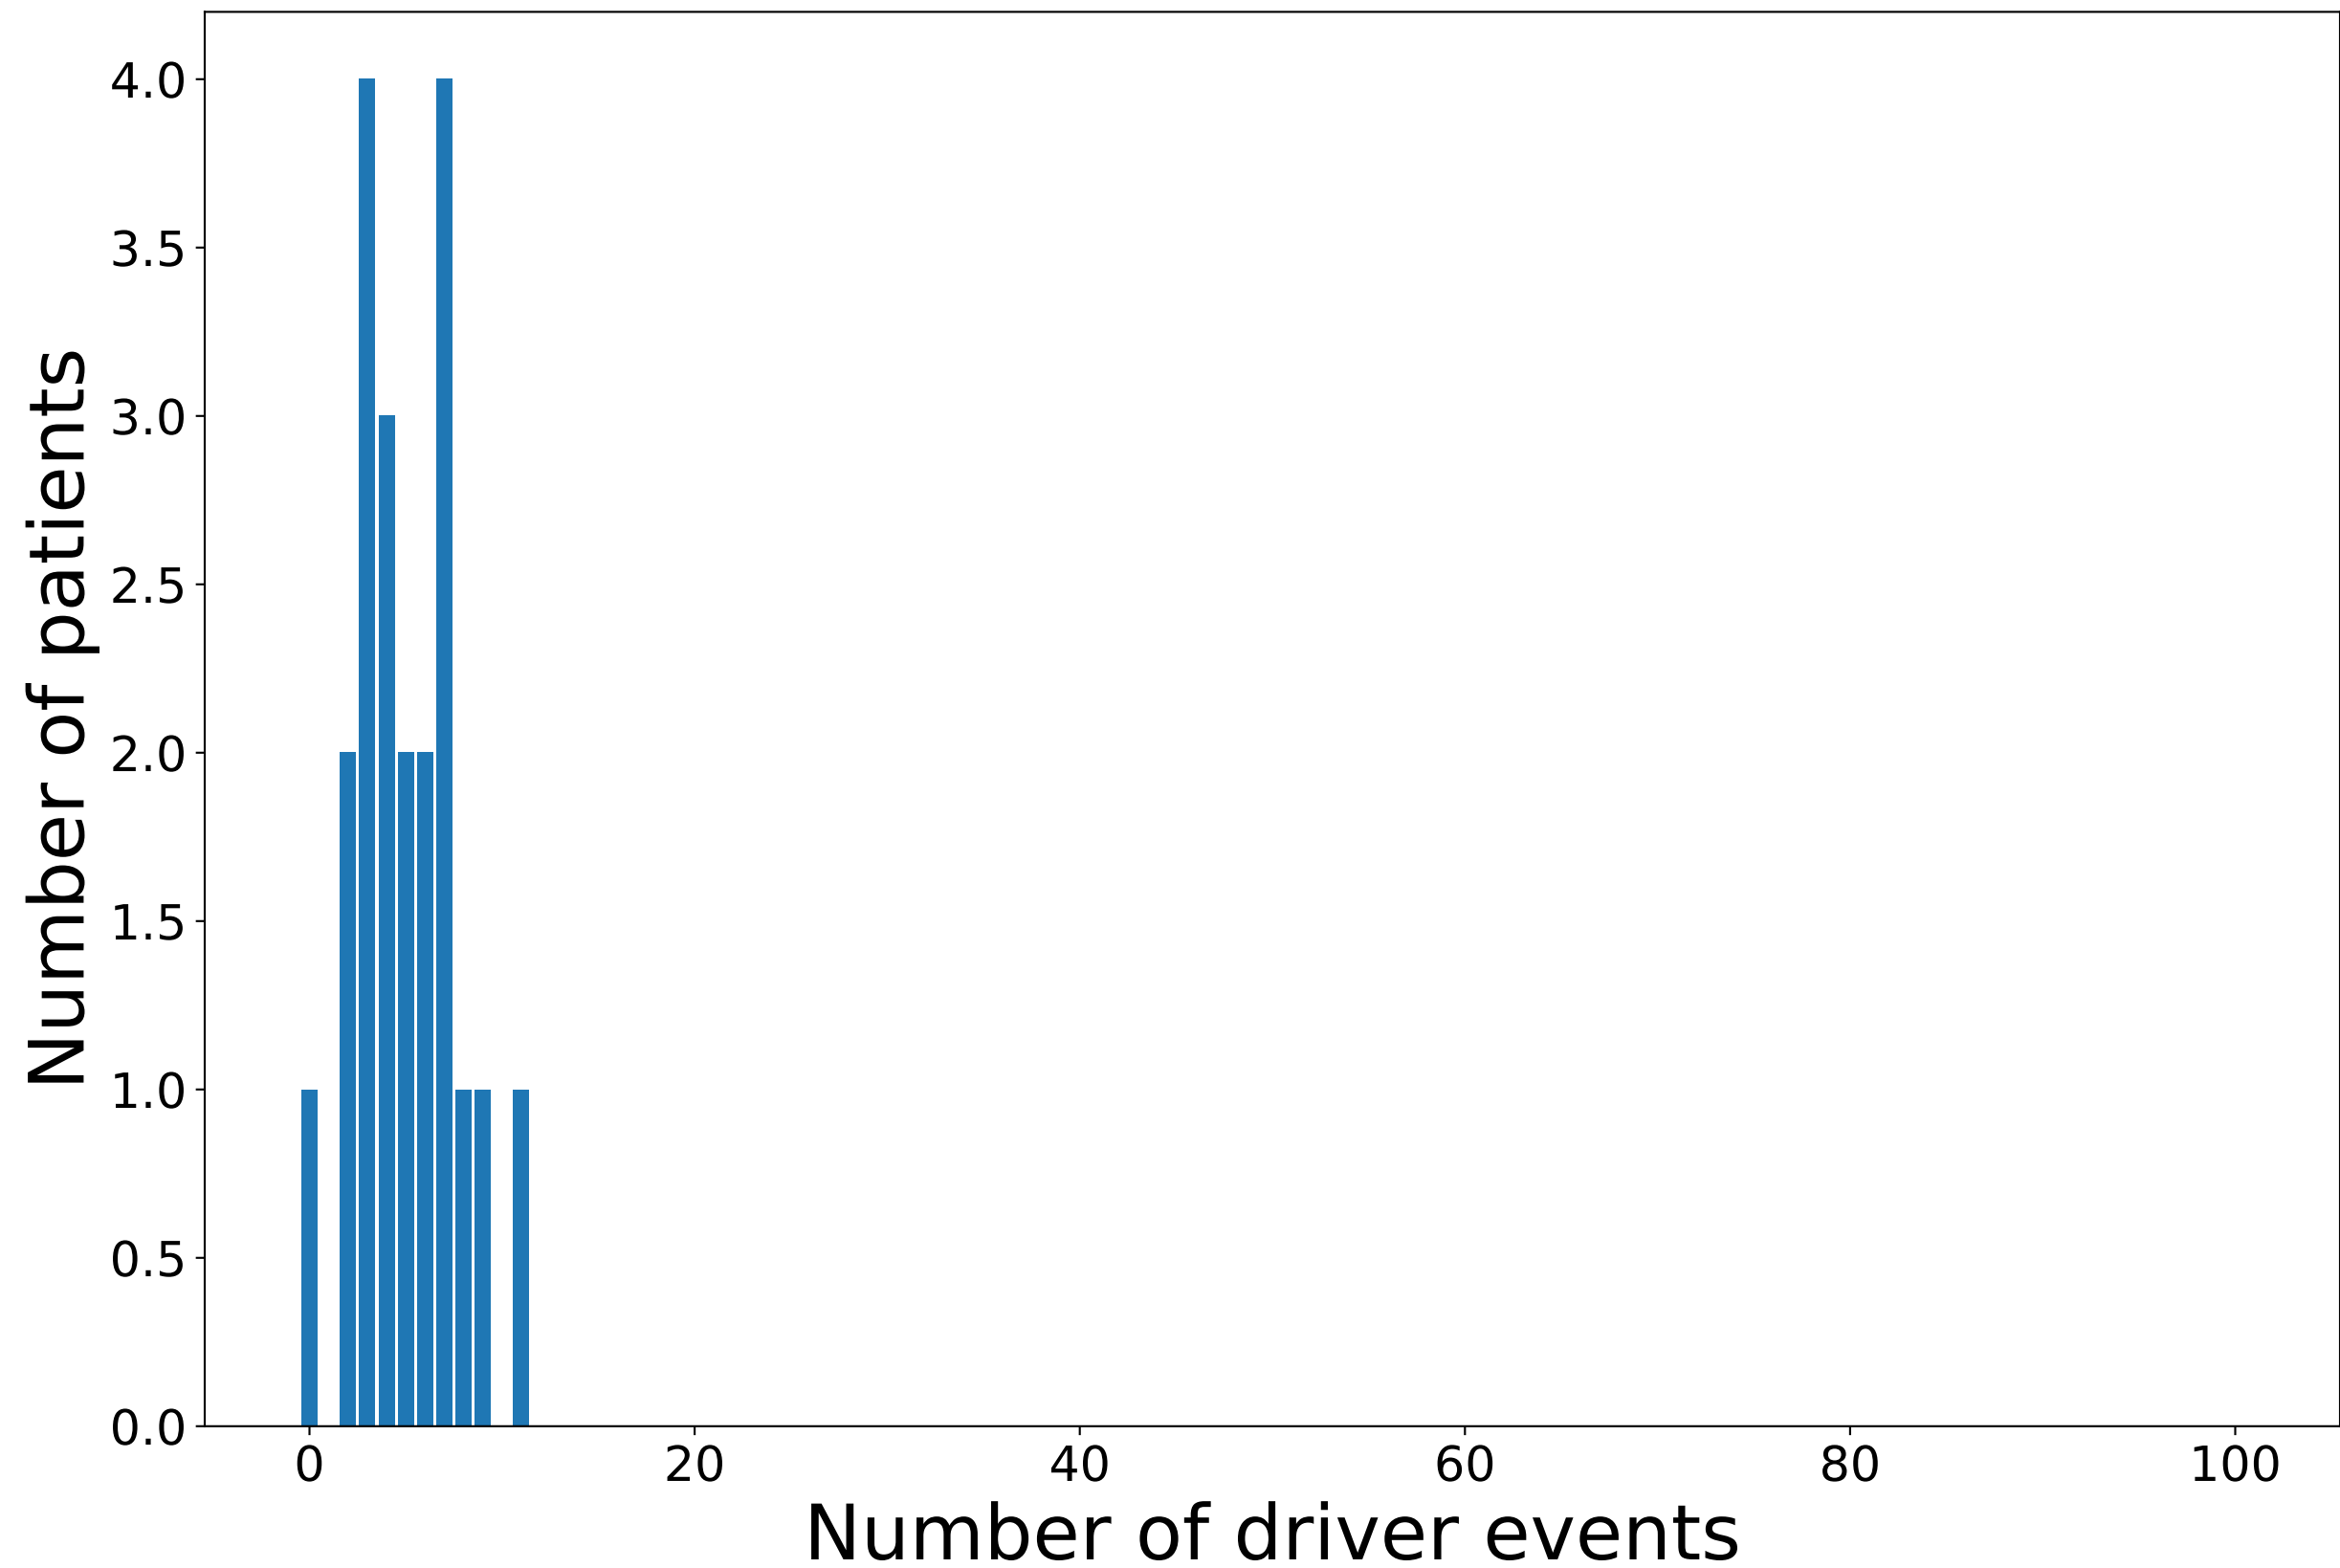

Supplement: Supplemental_Data_S1.zip [file Supplemental_Data_S1.zip]

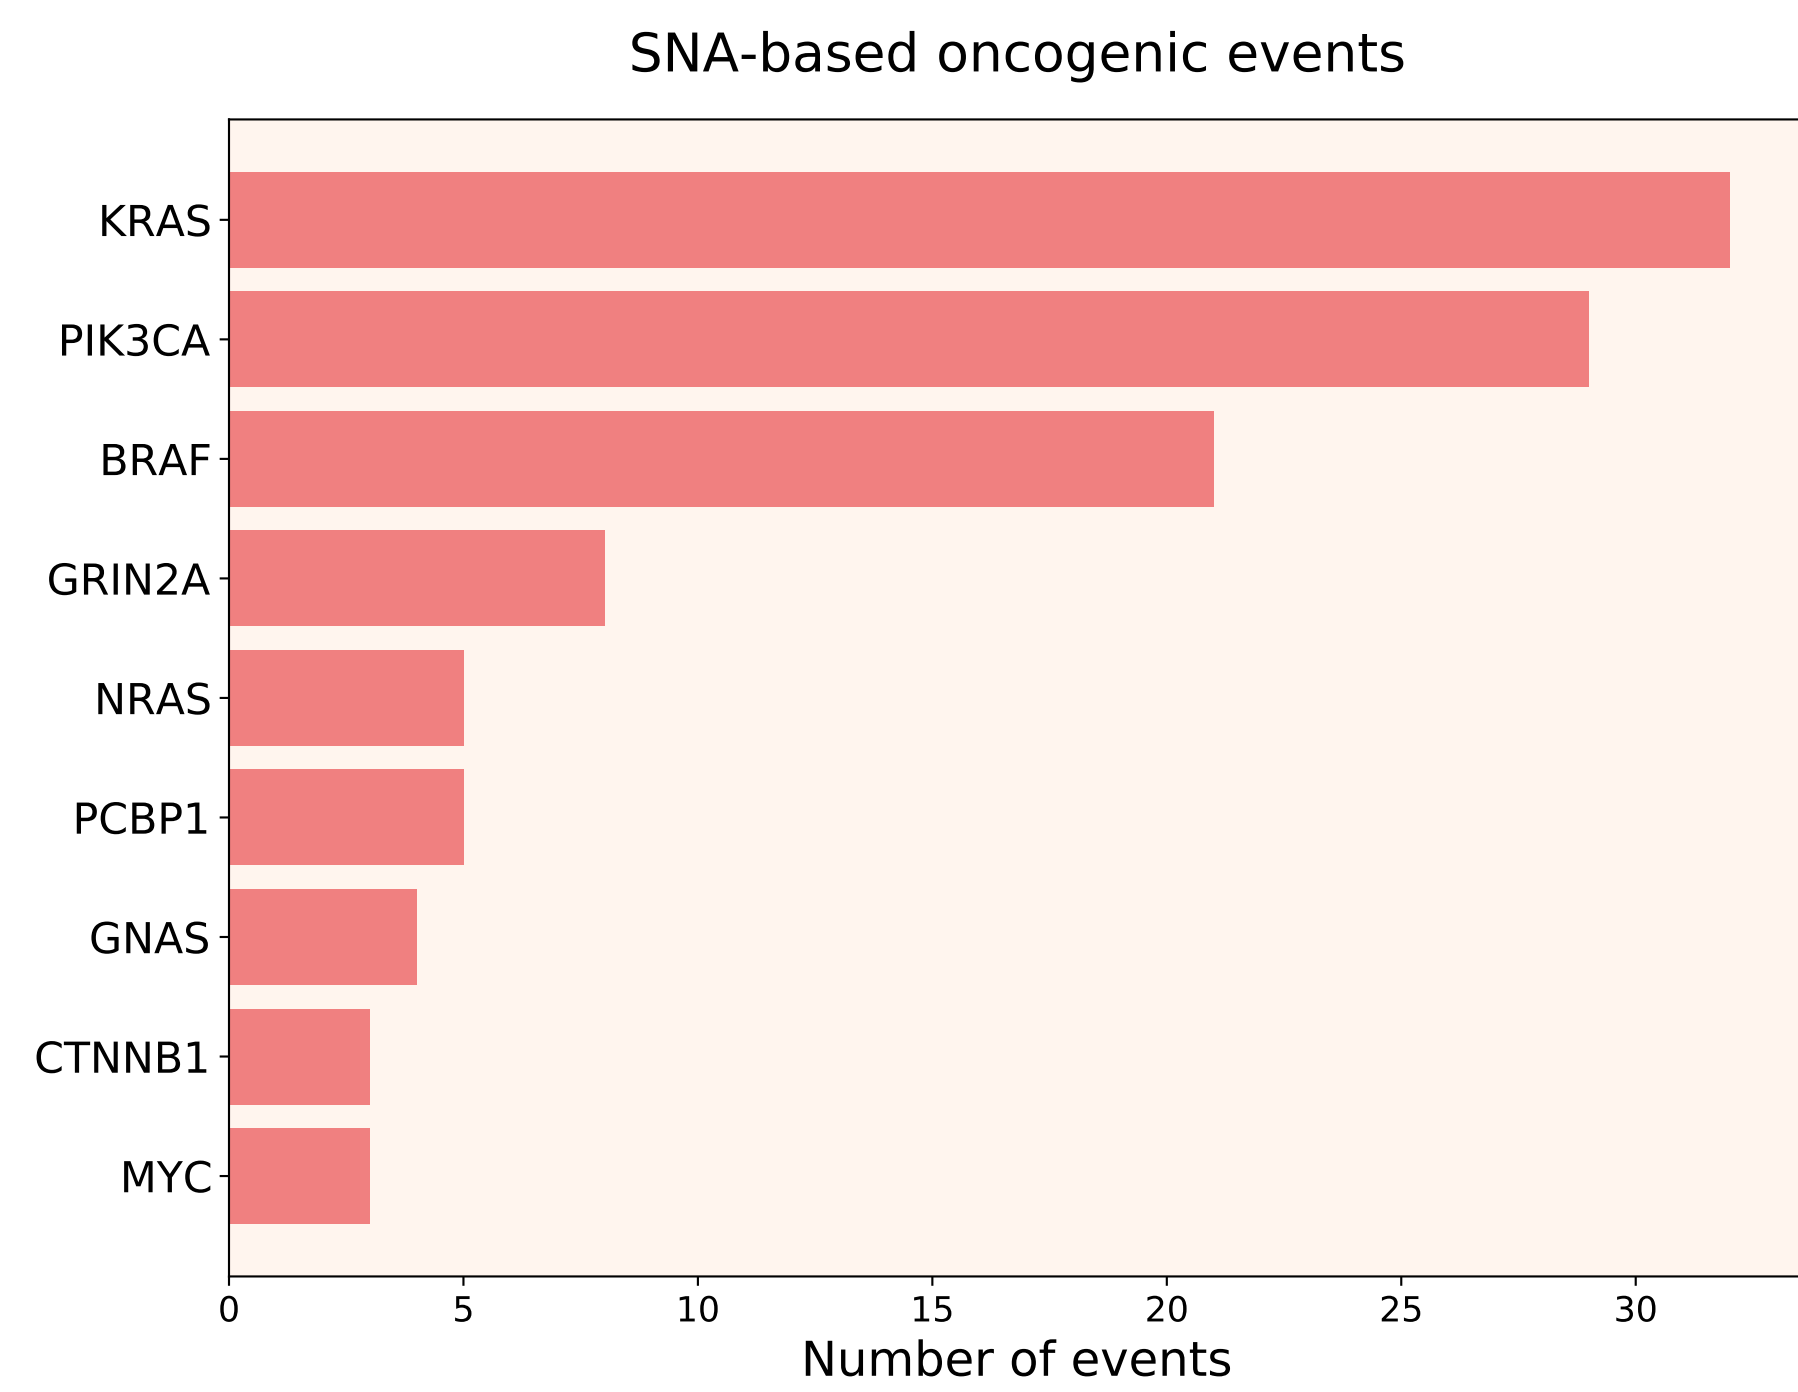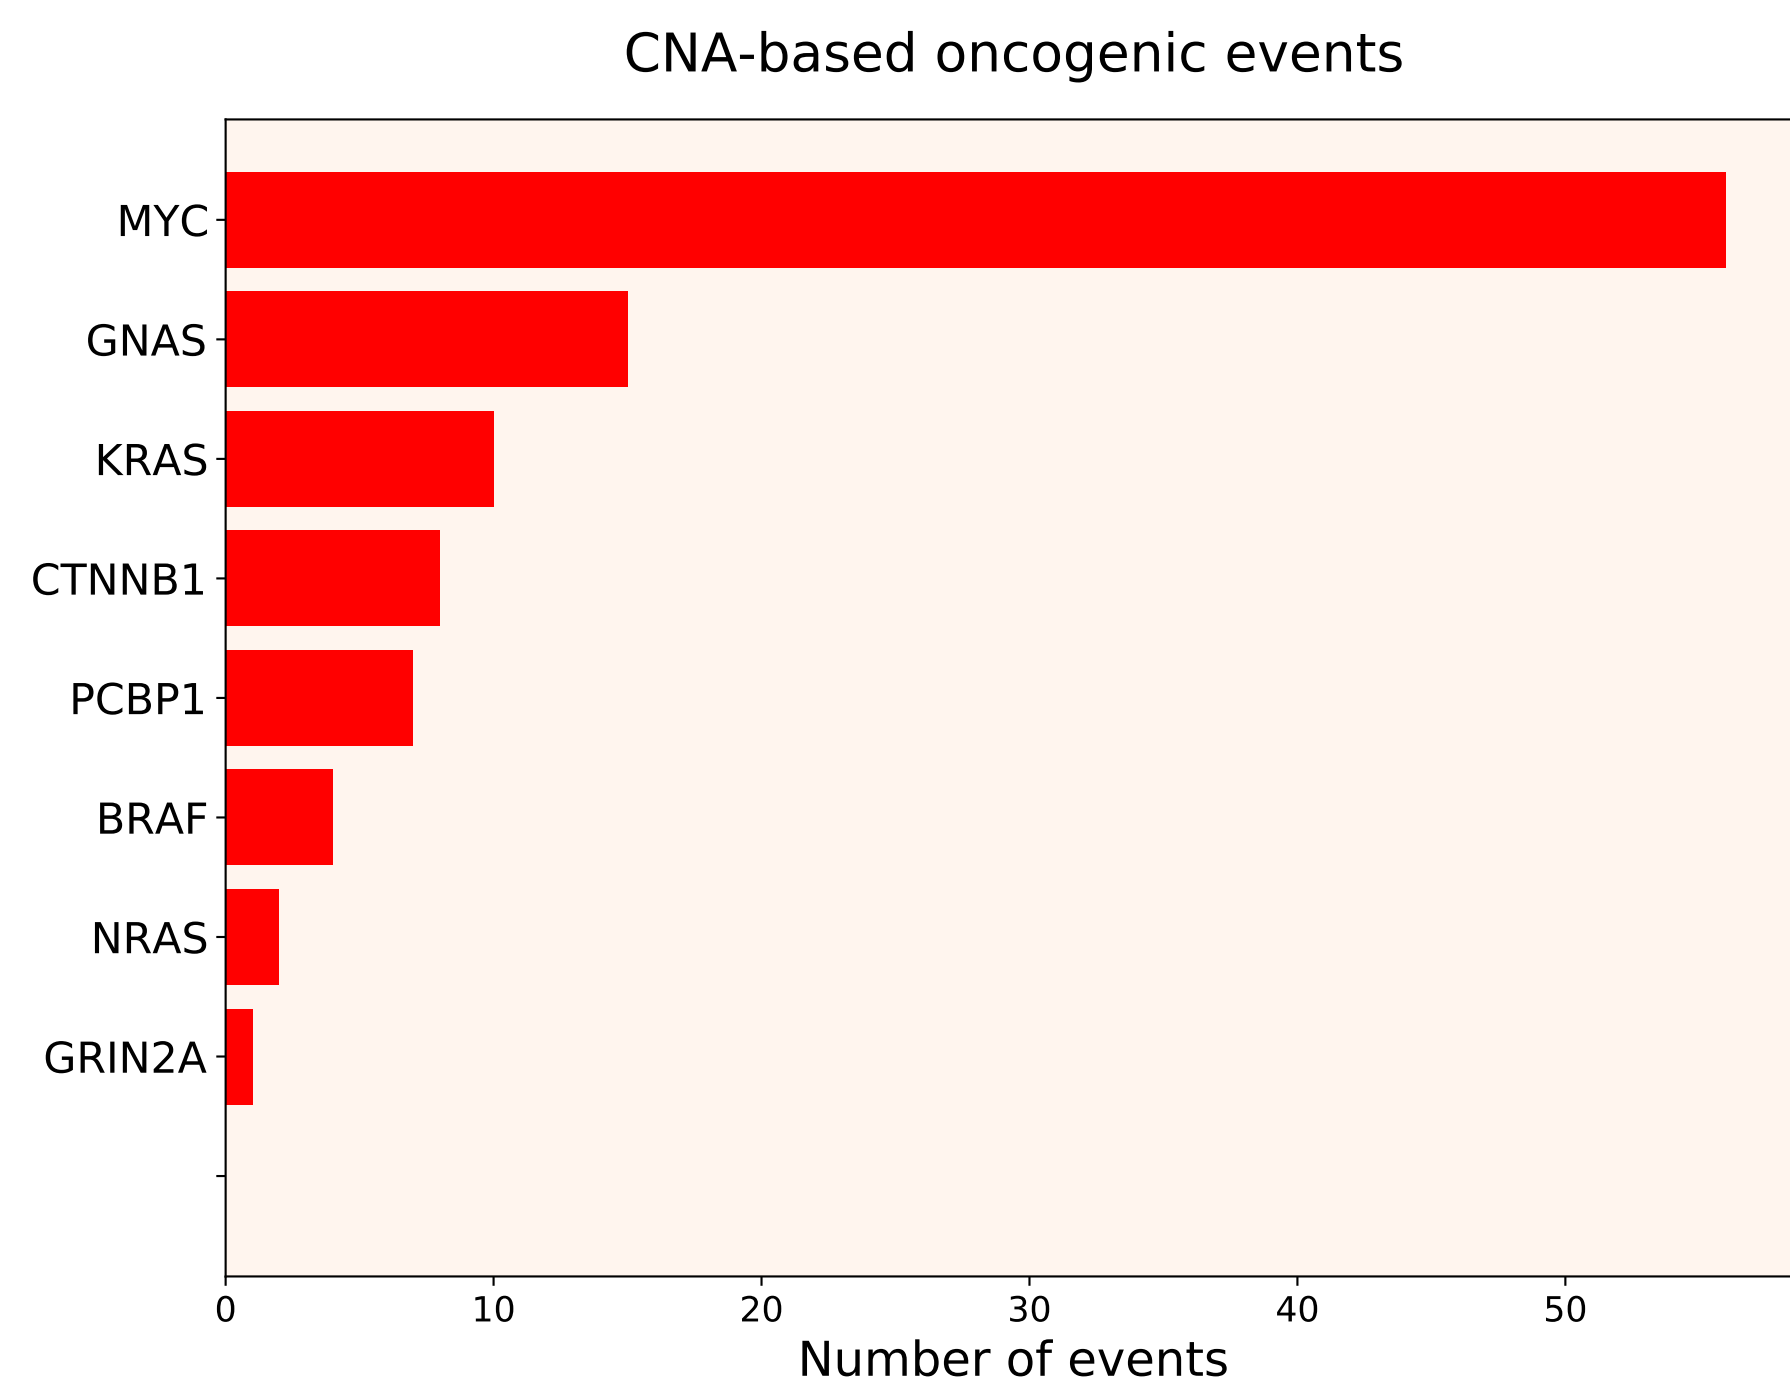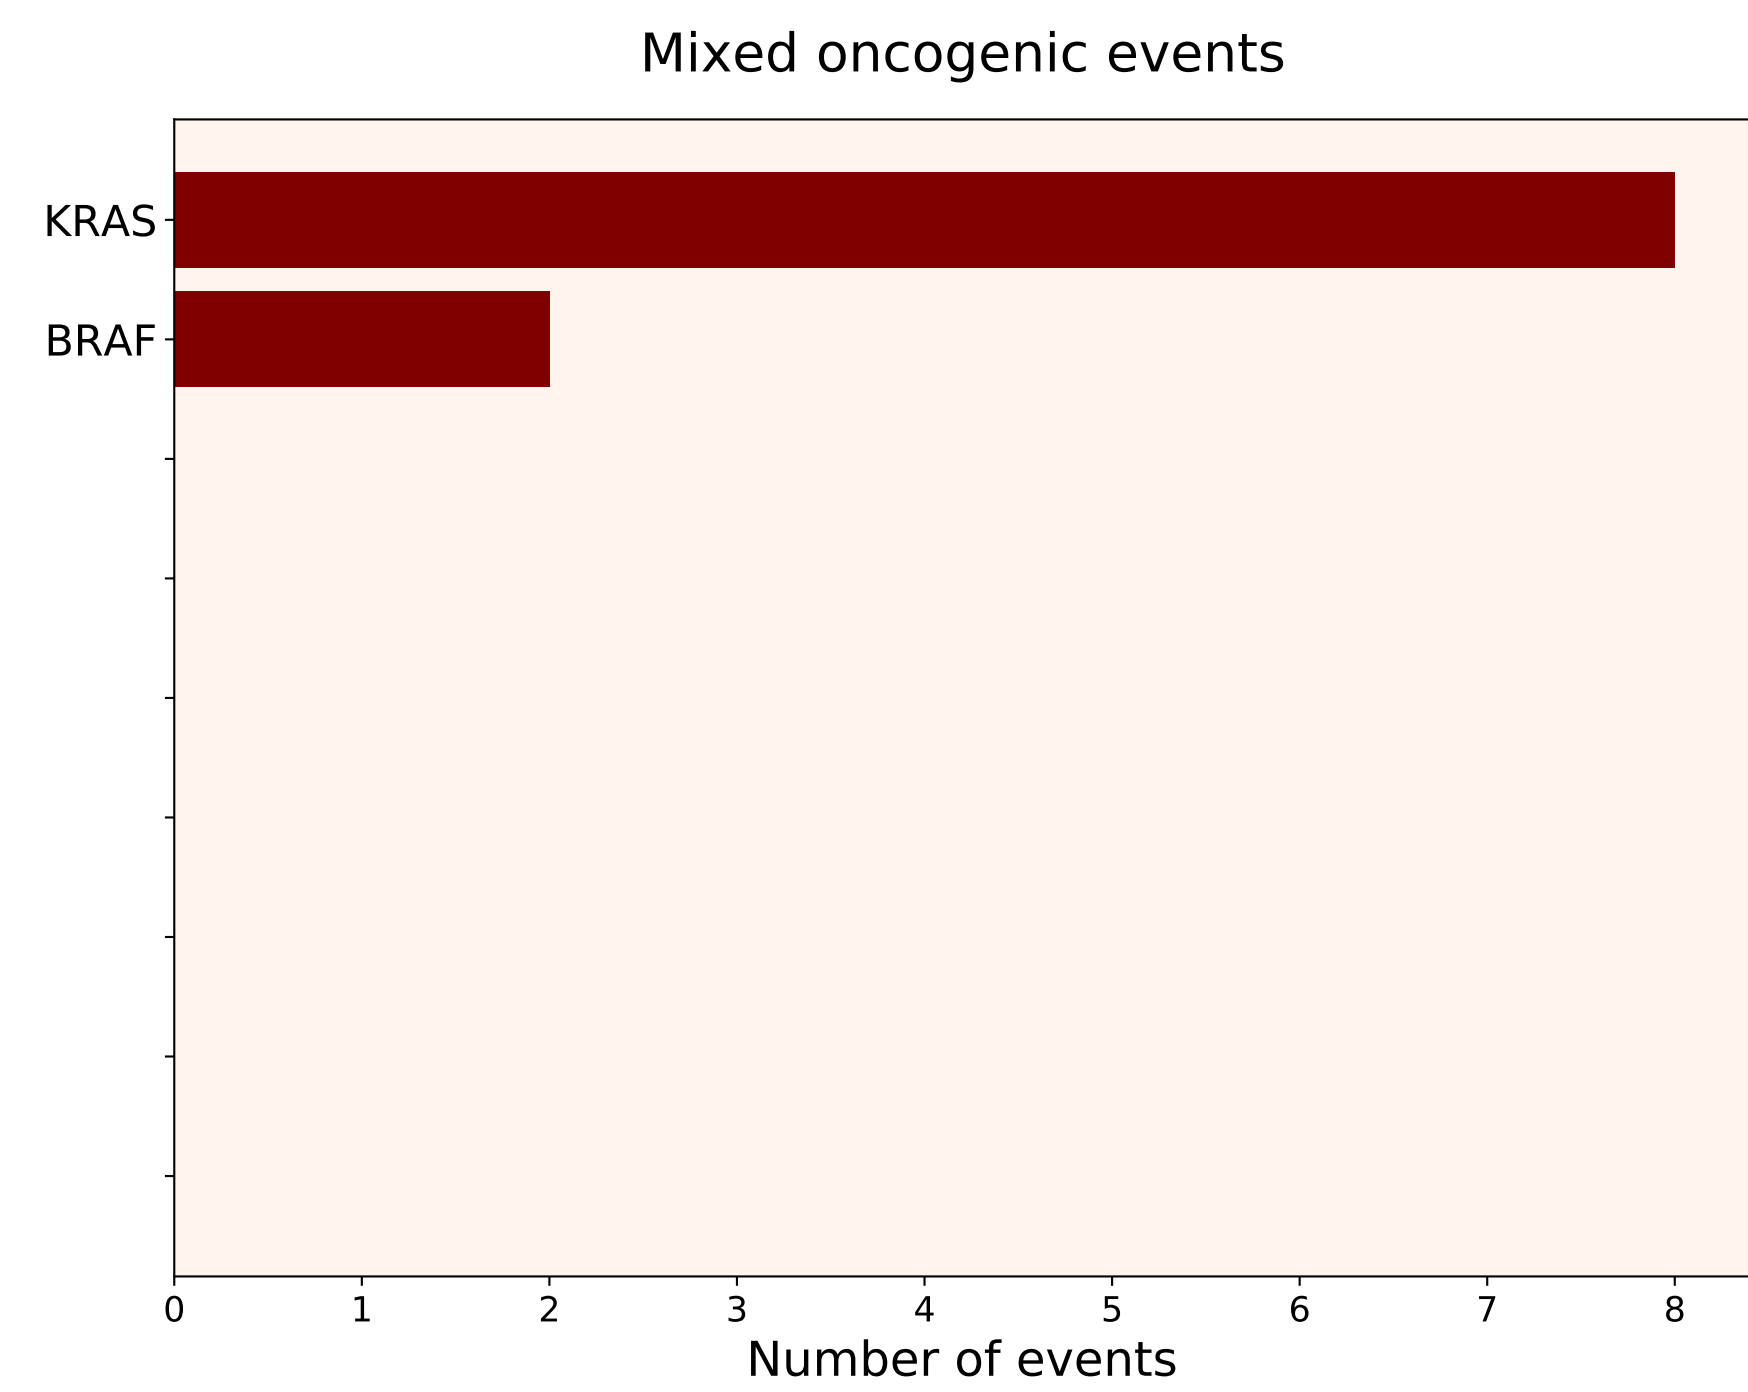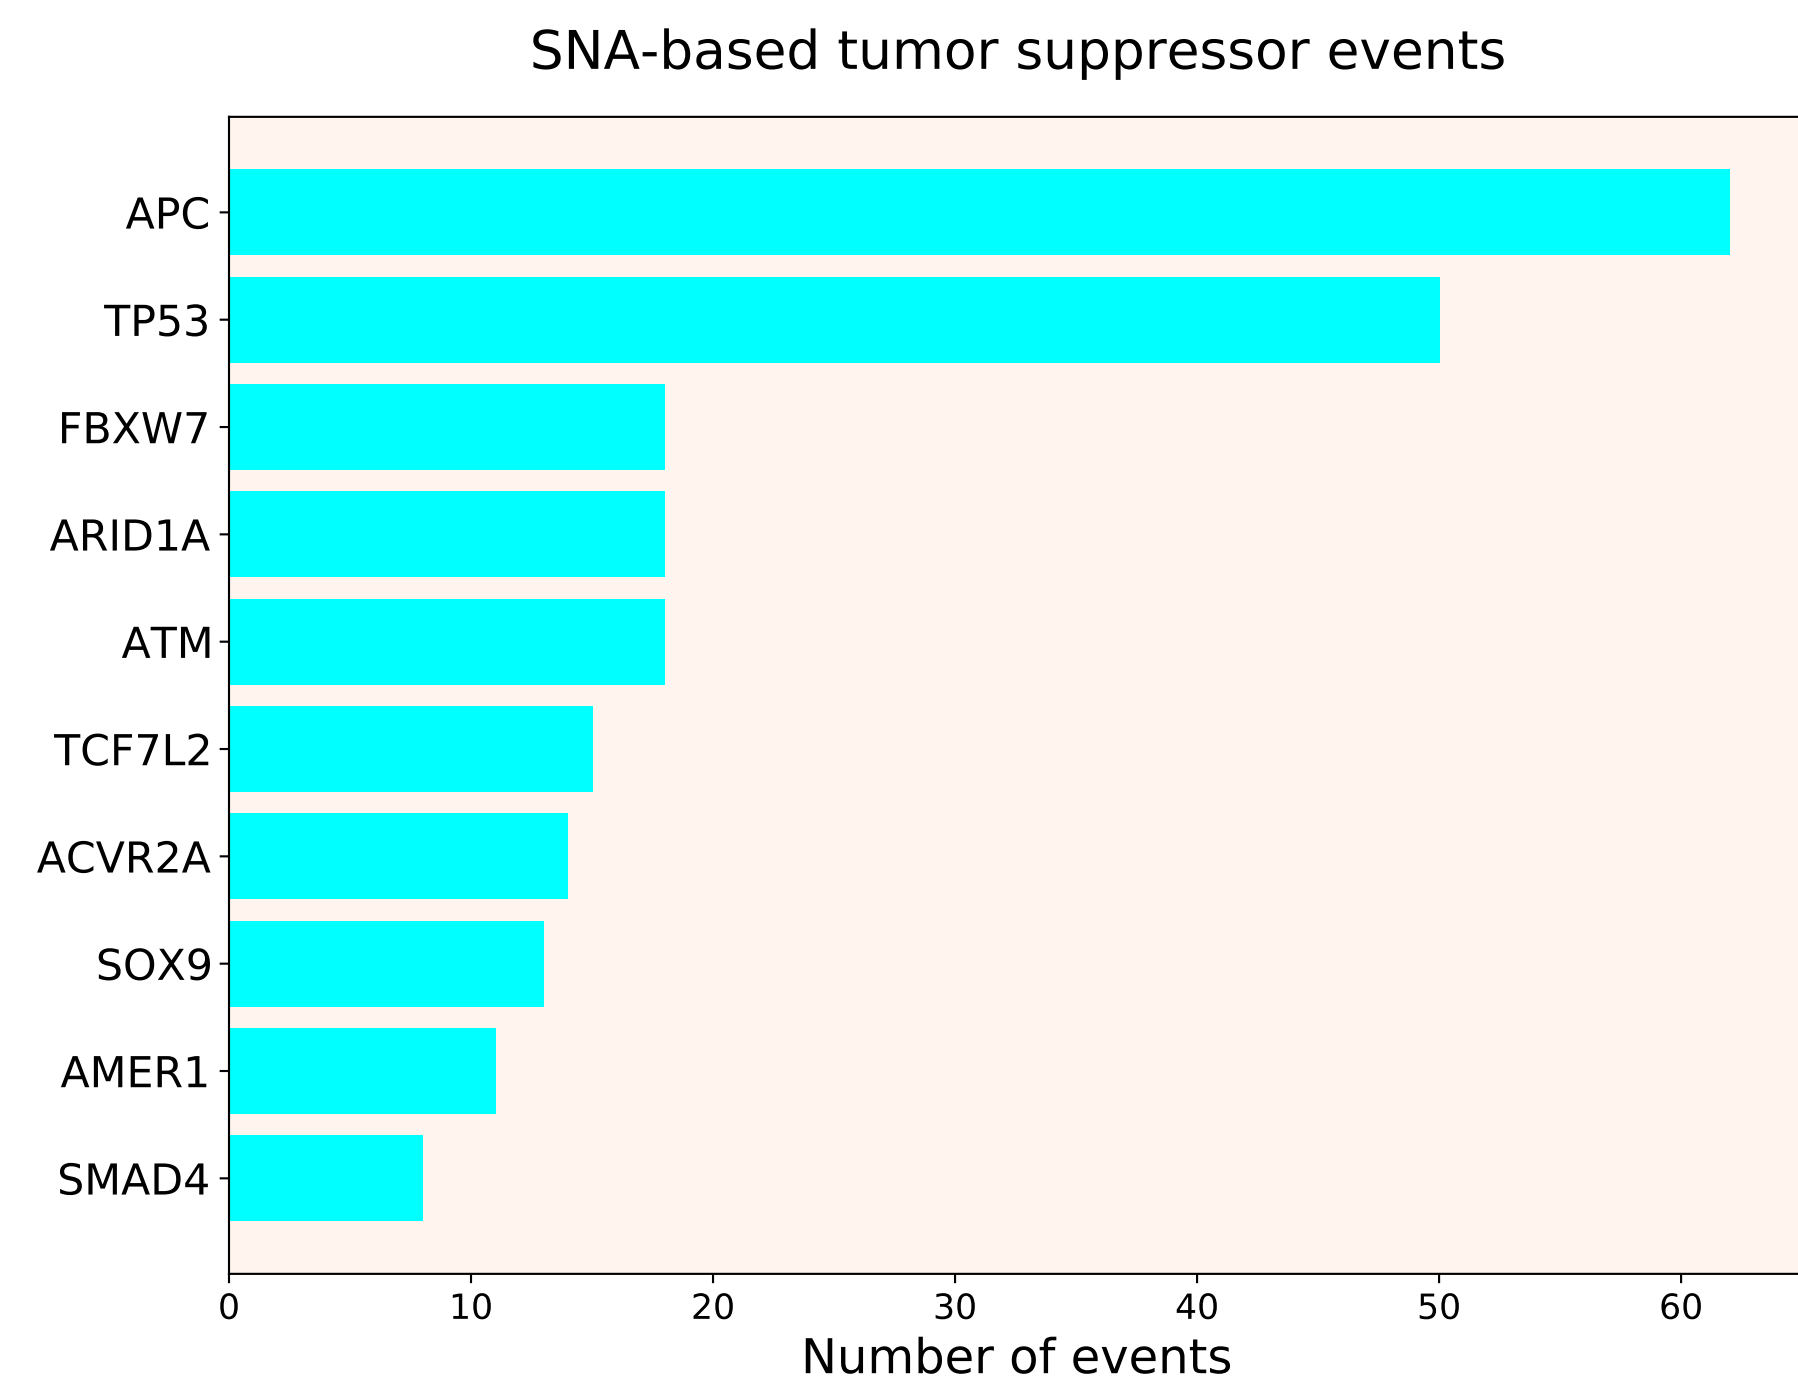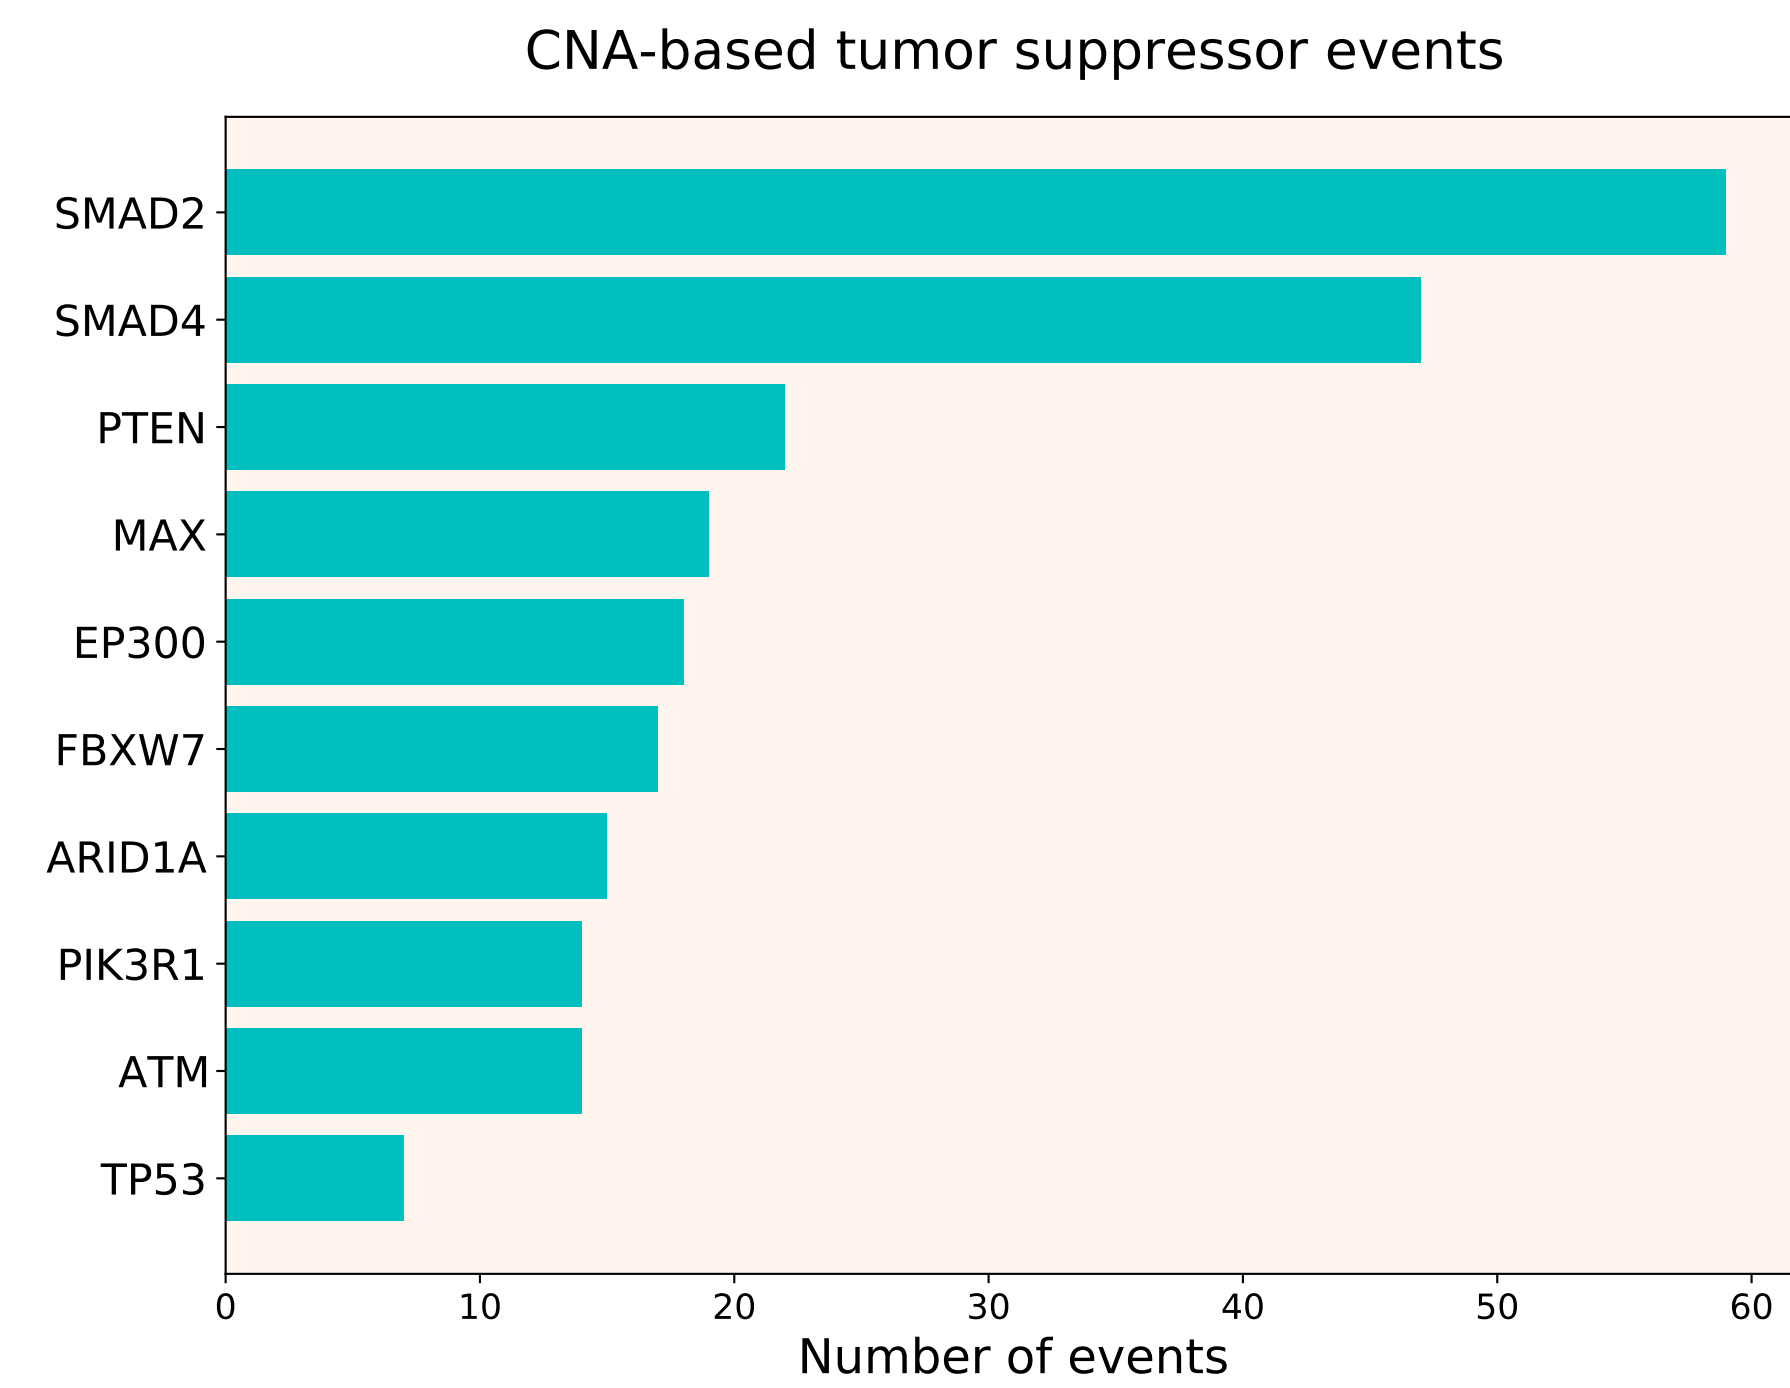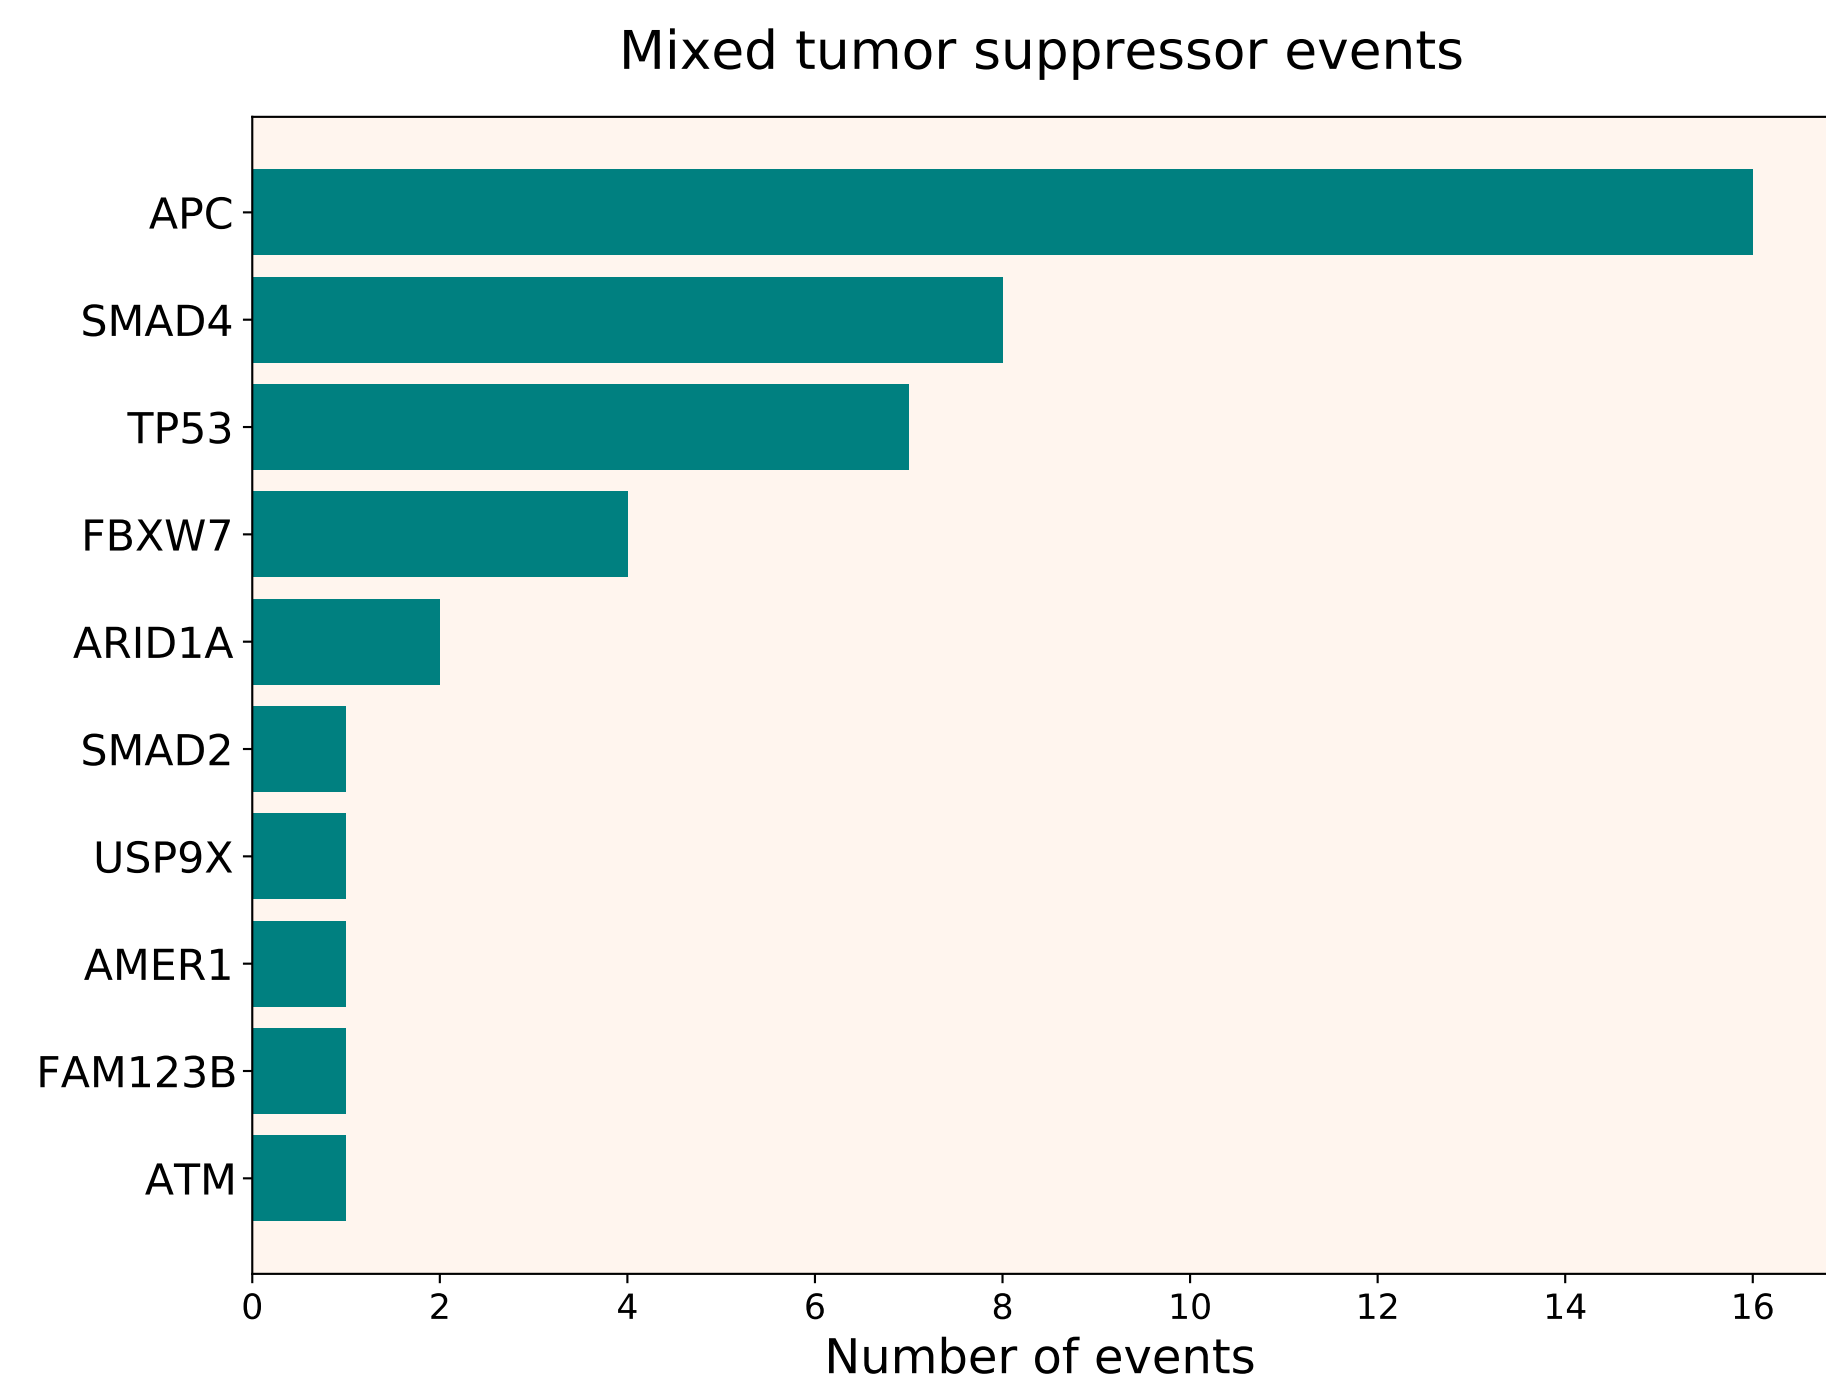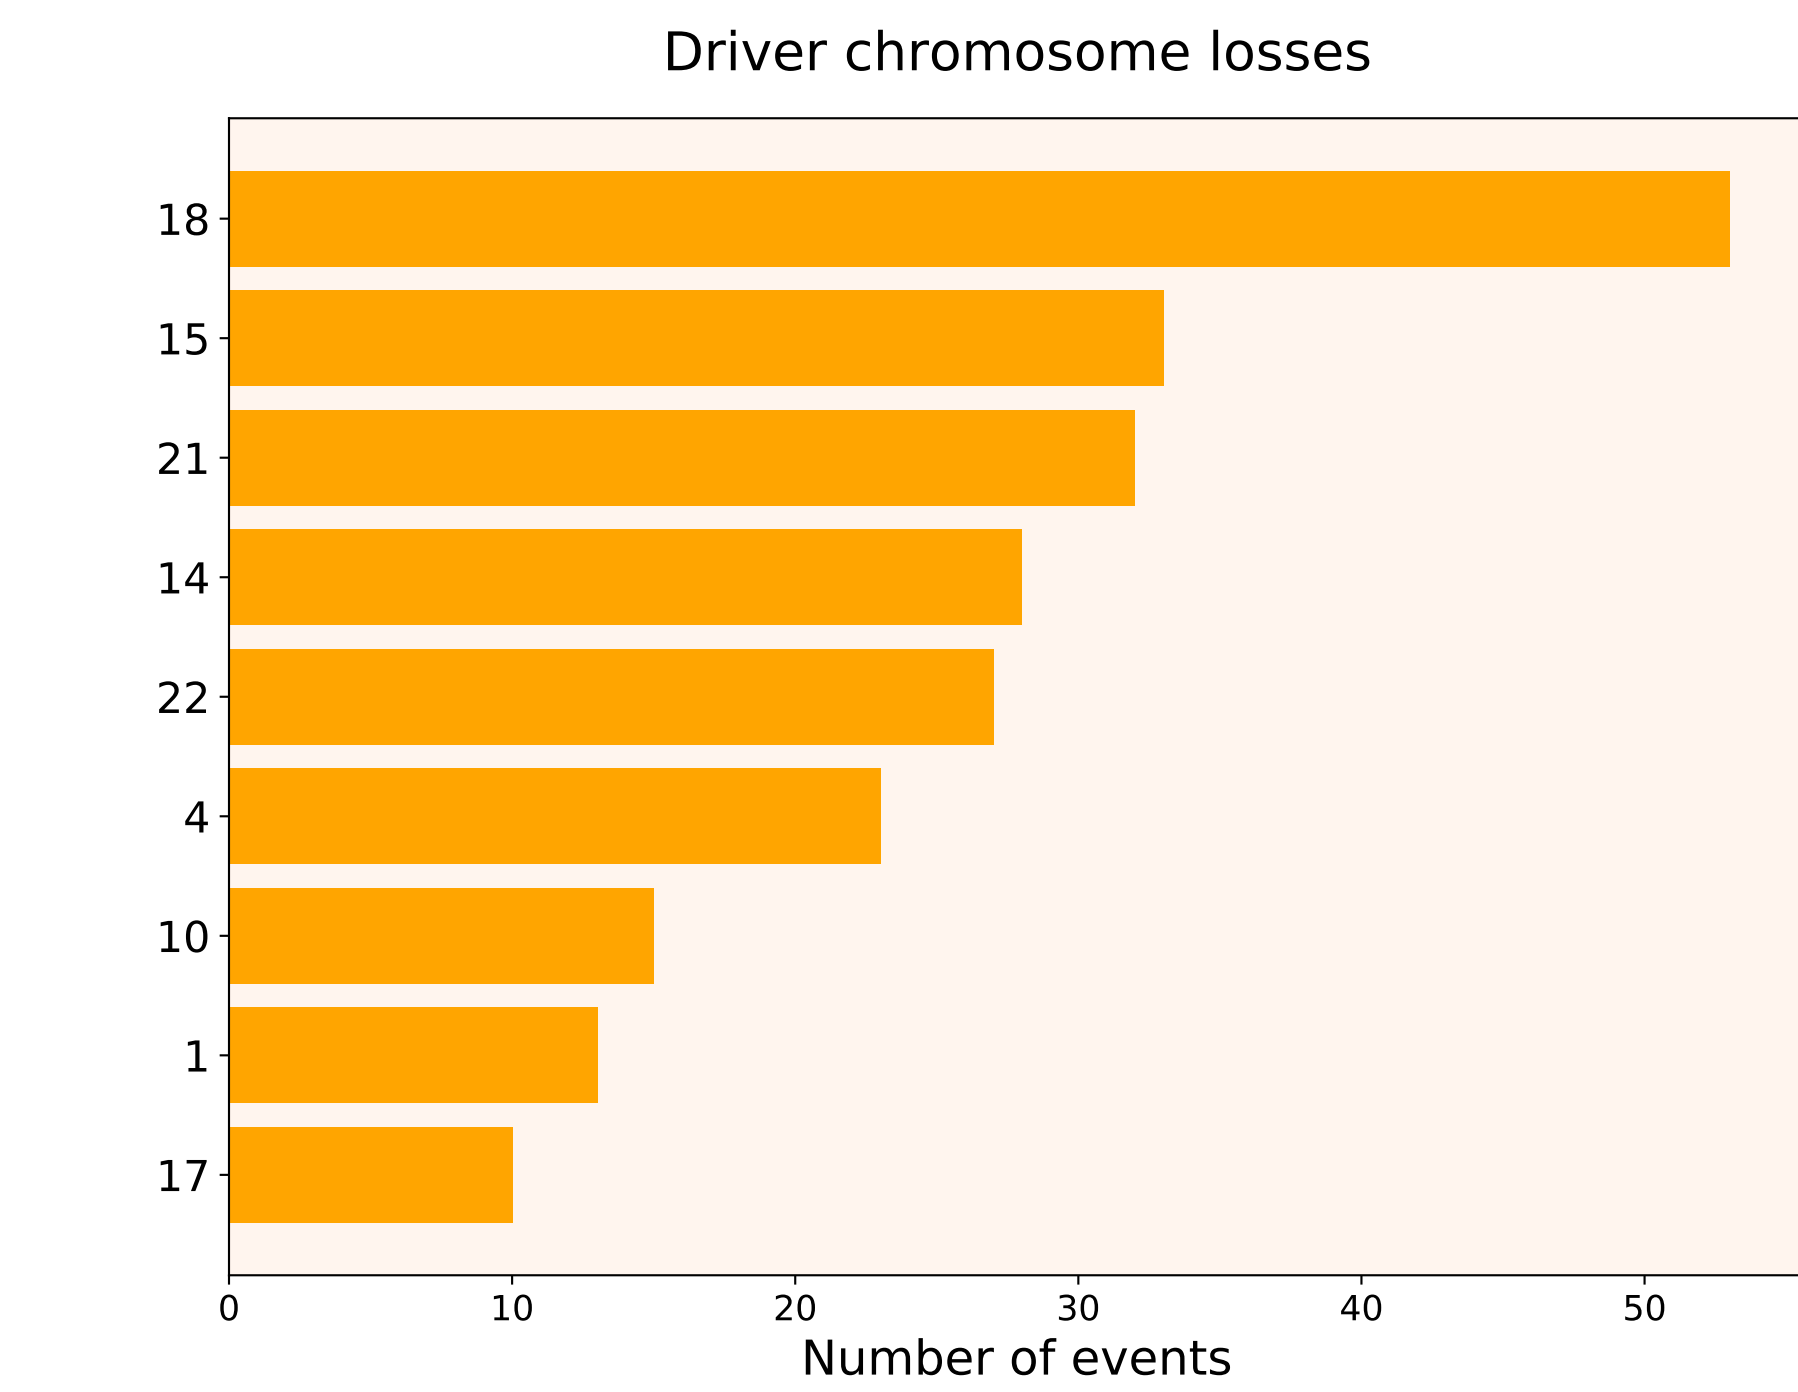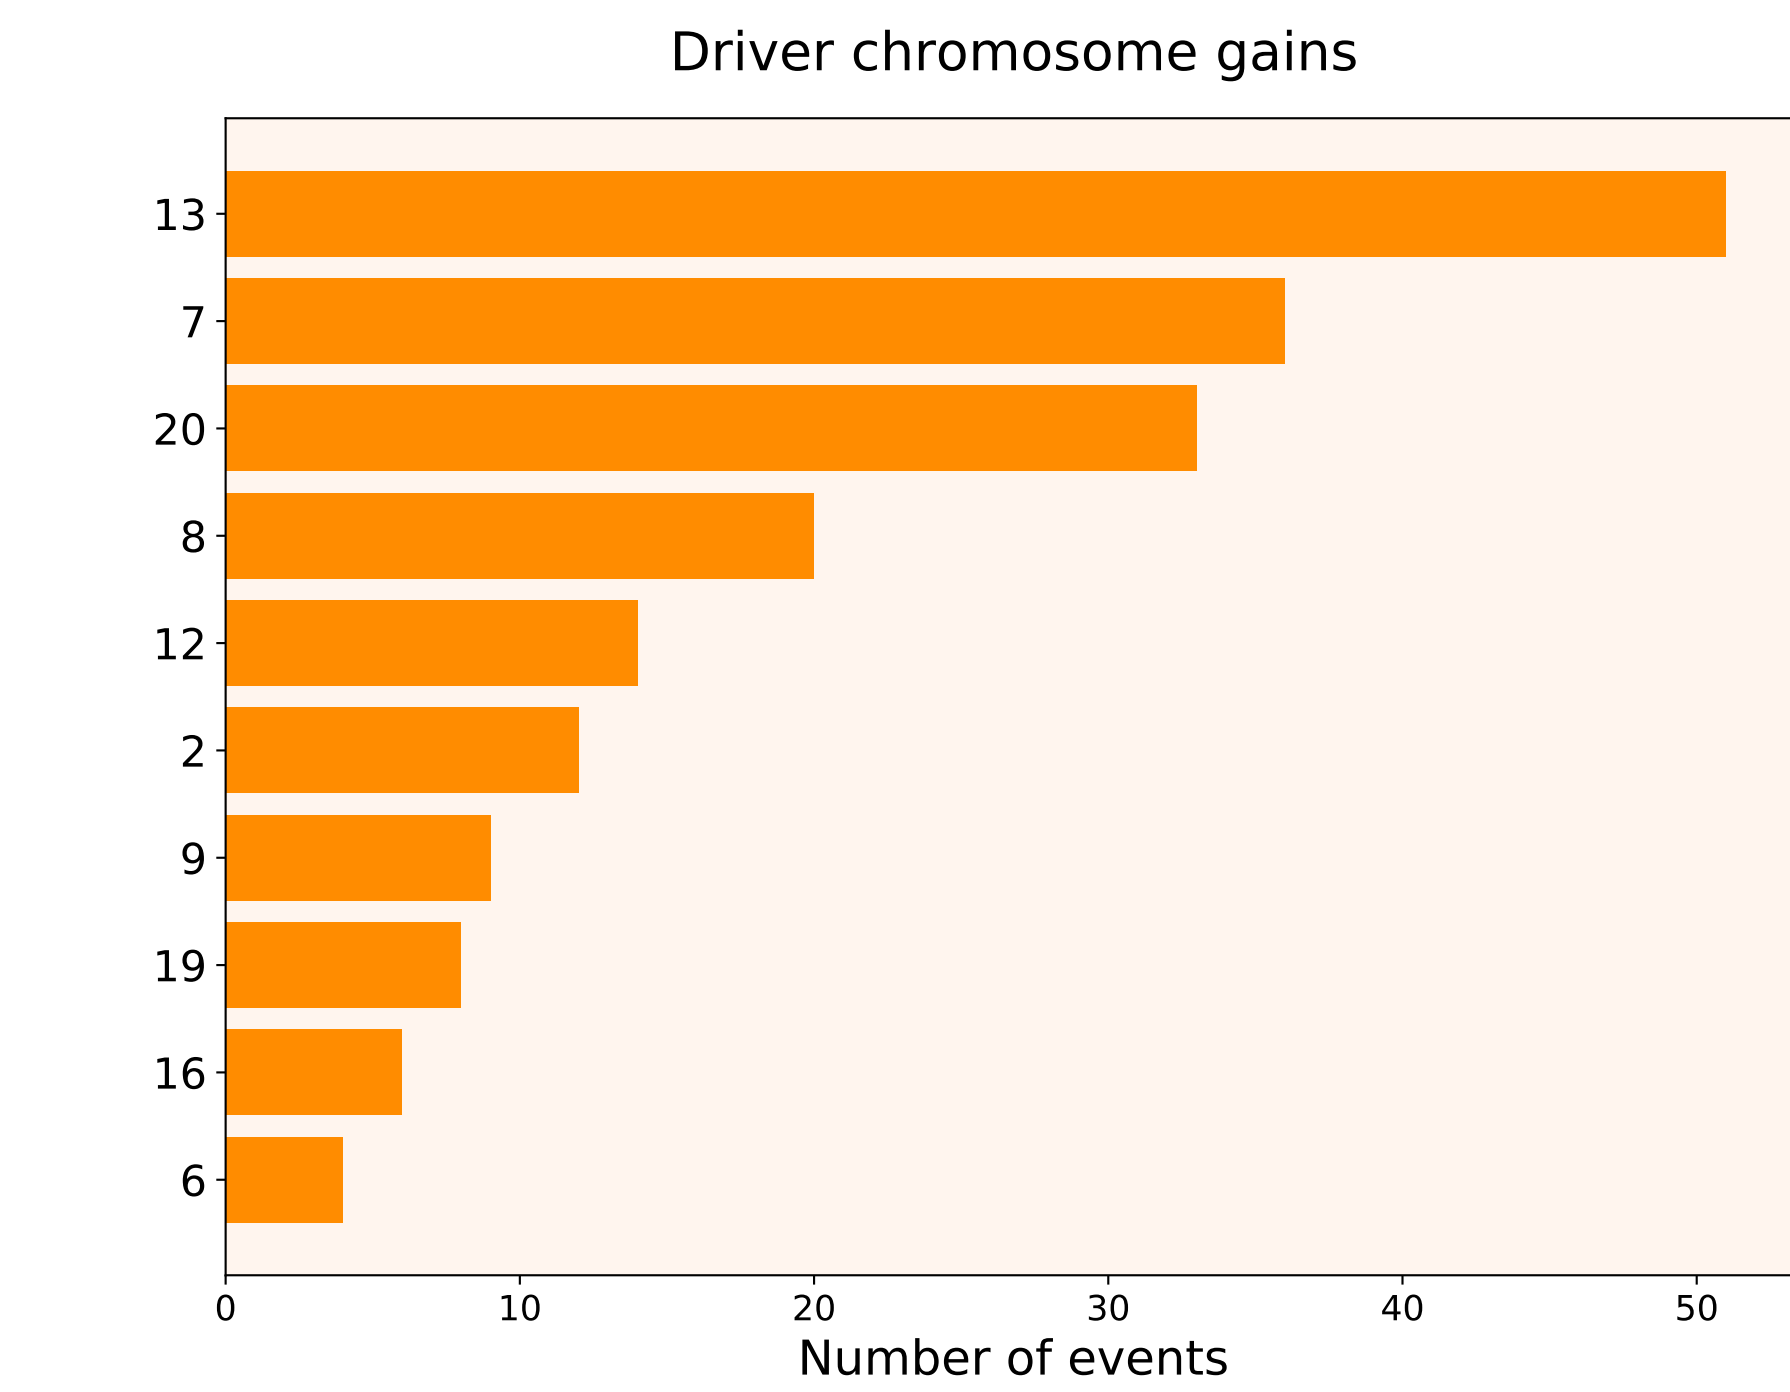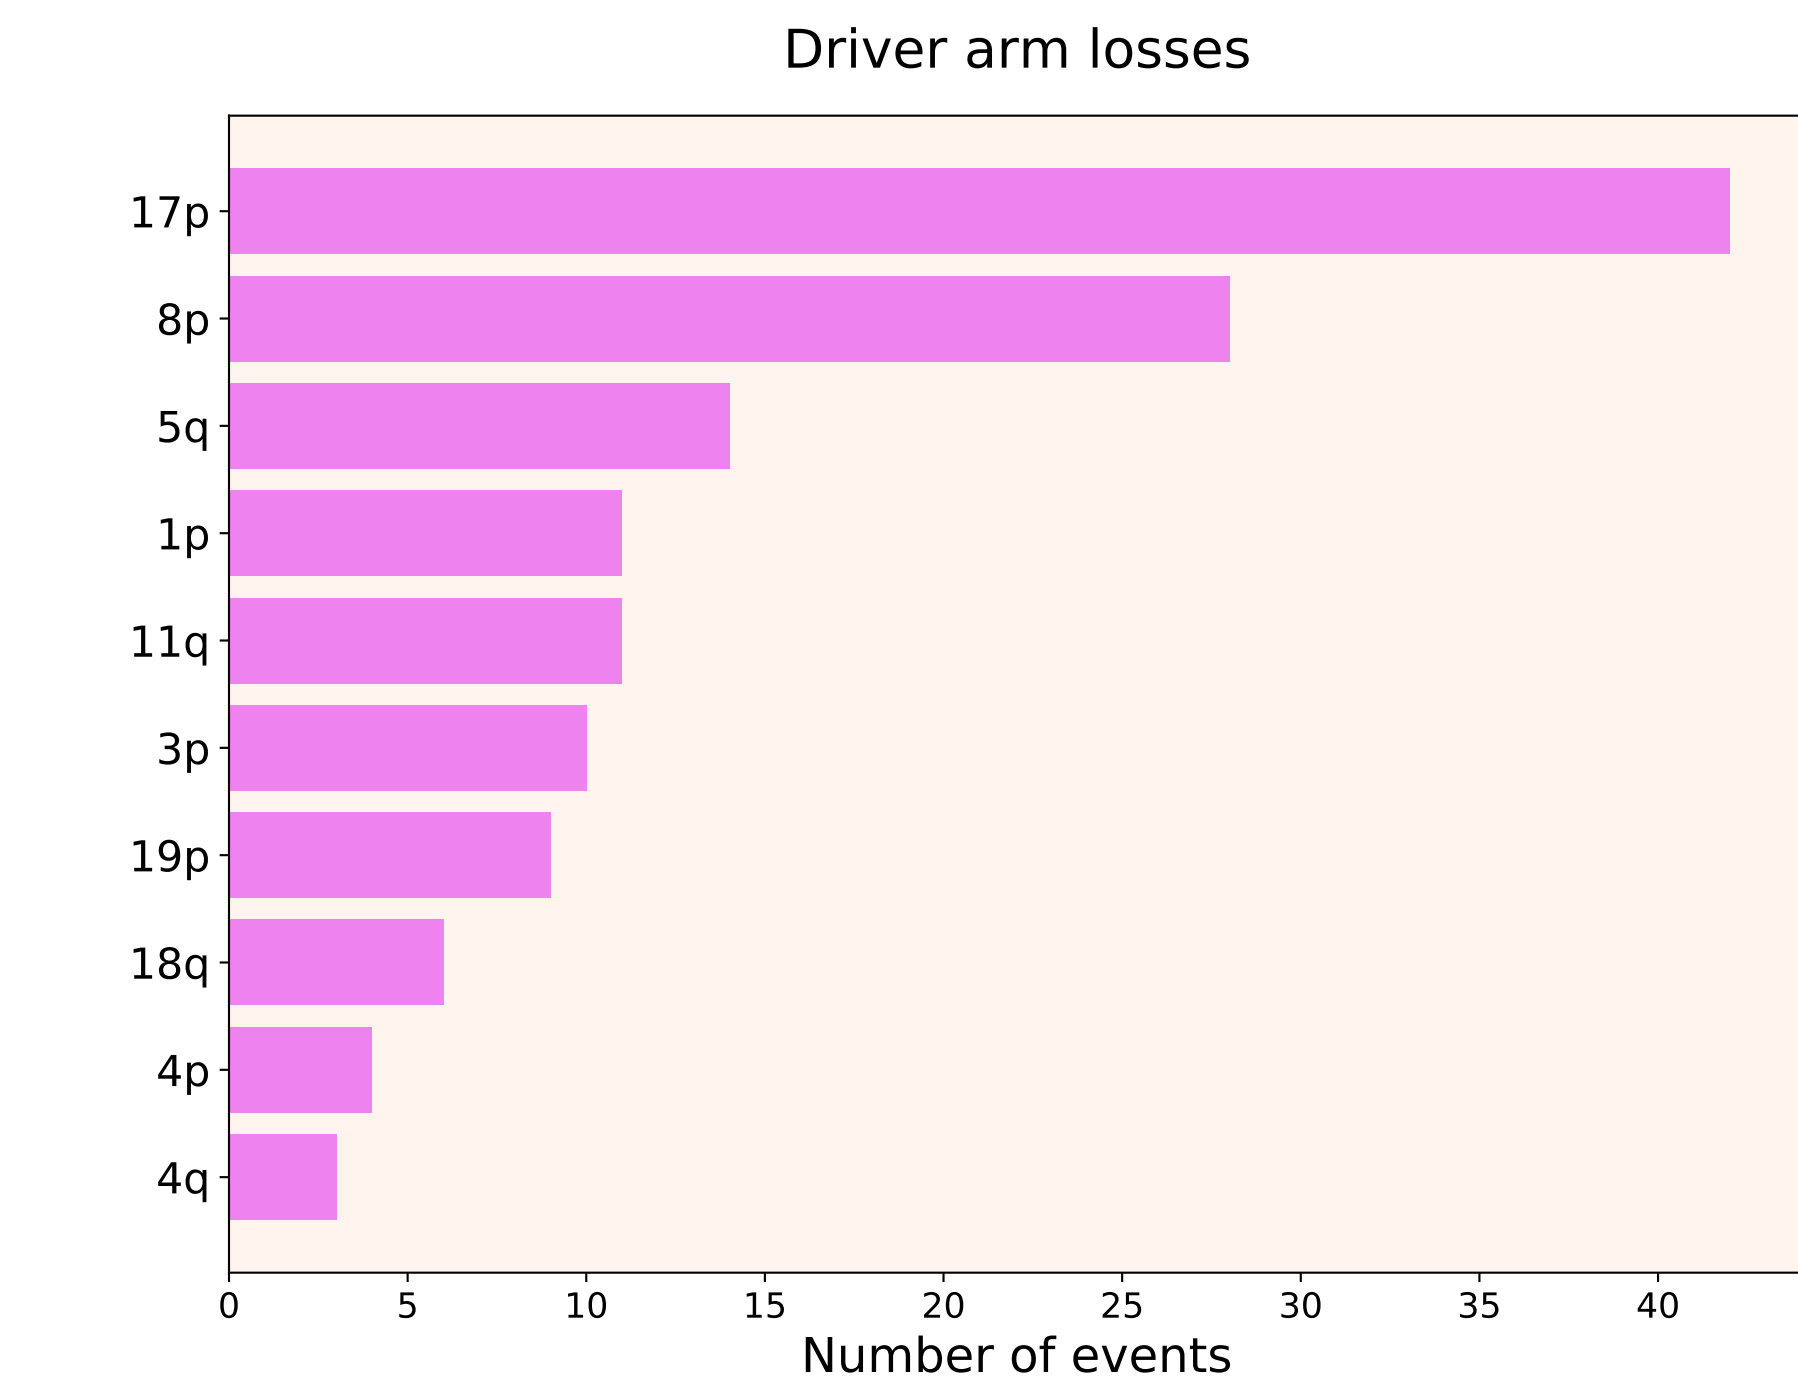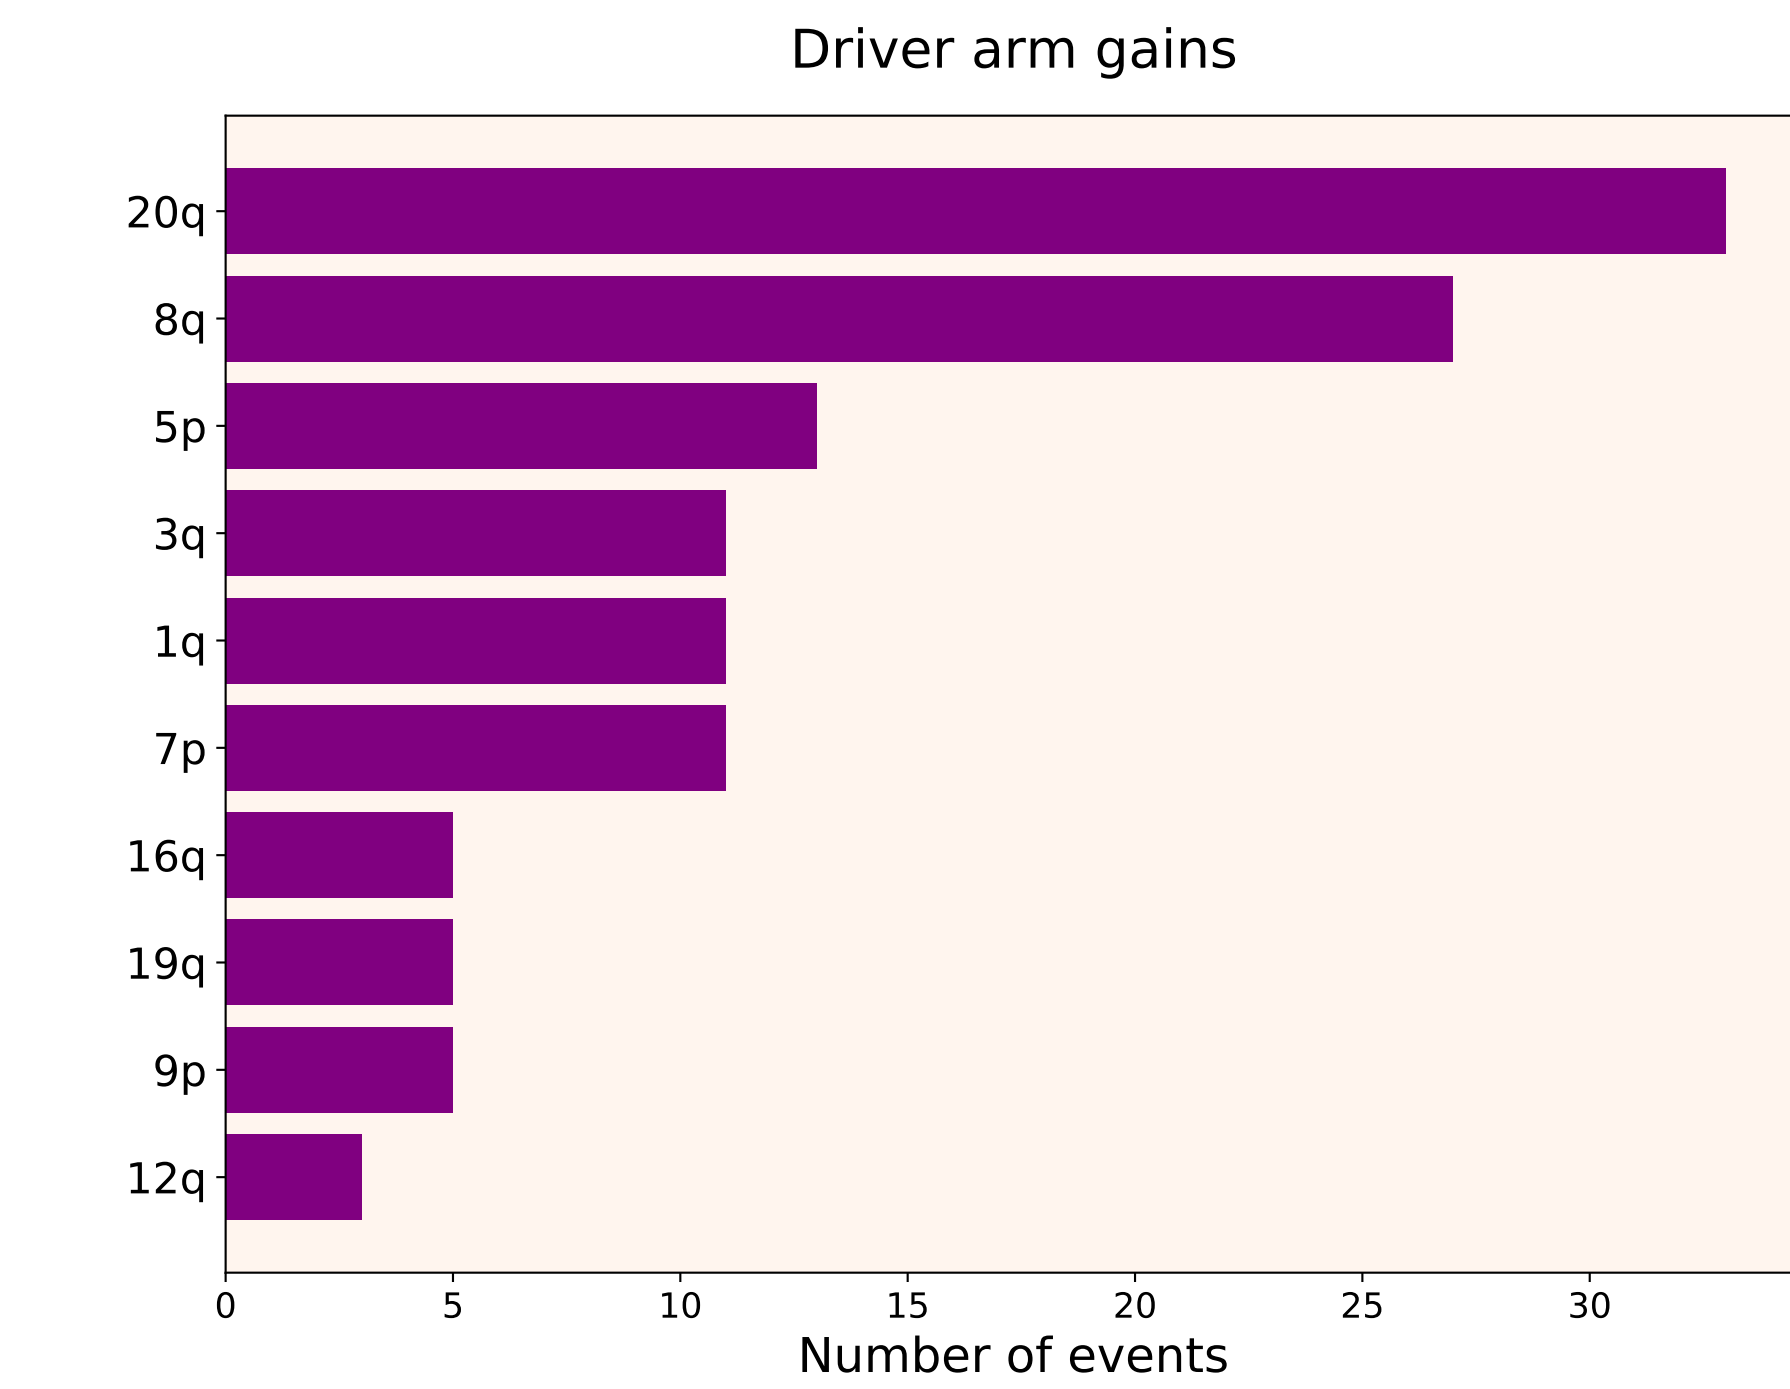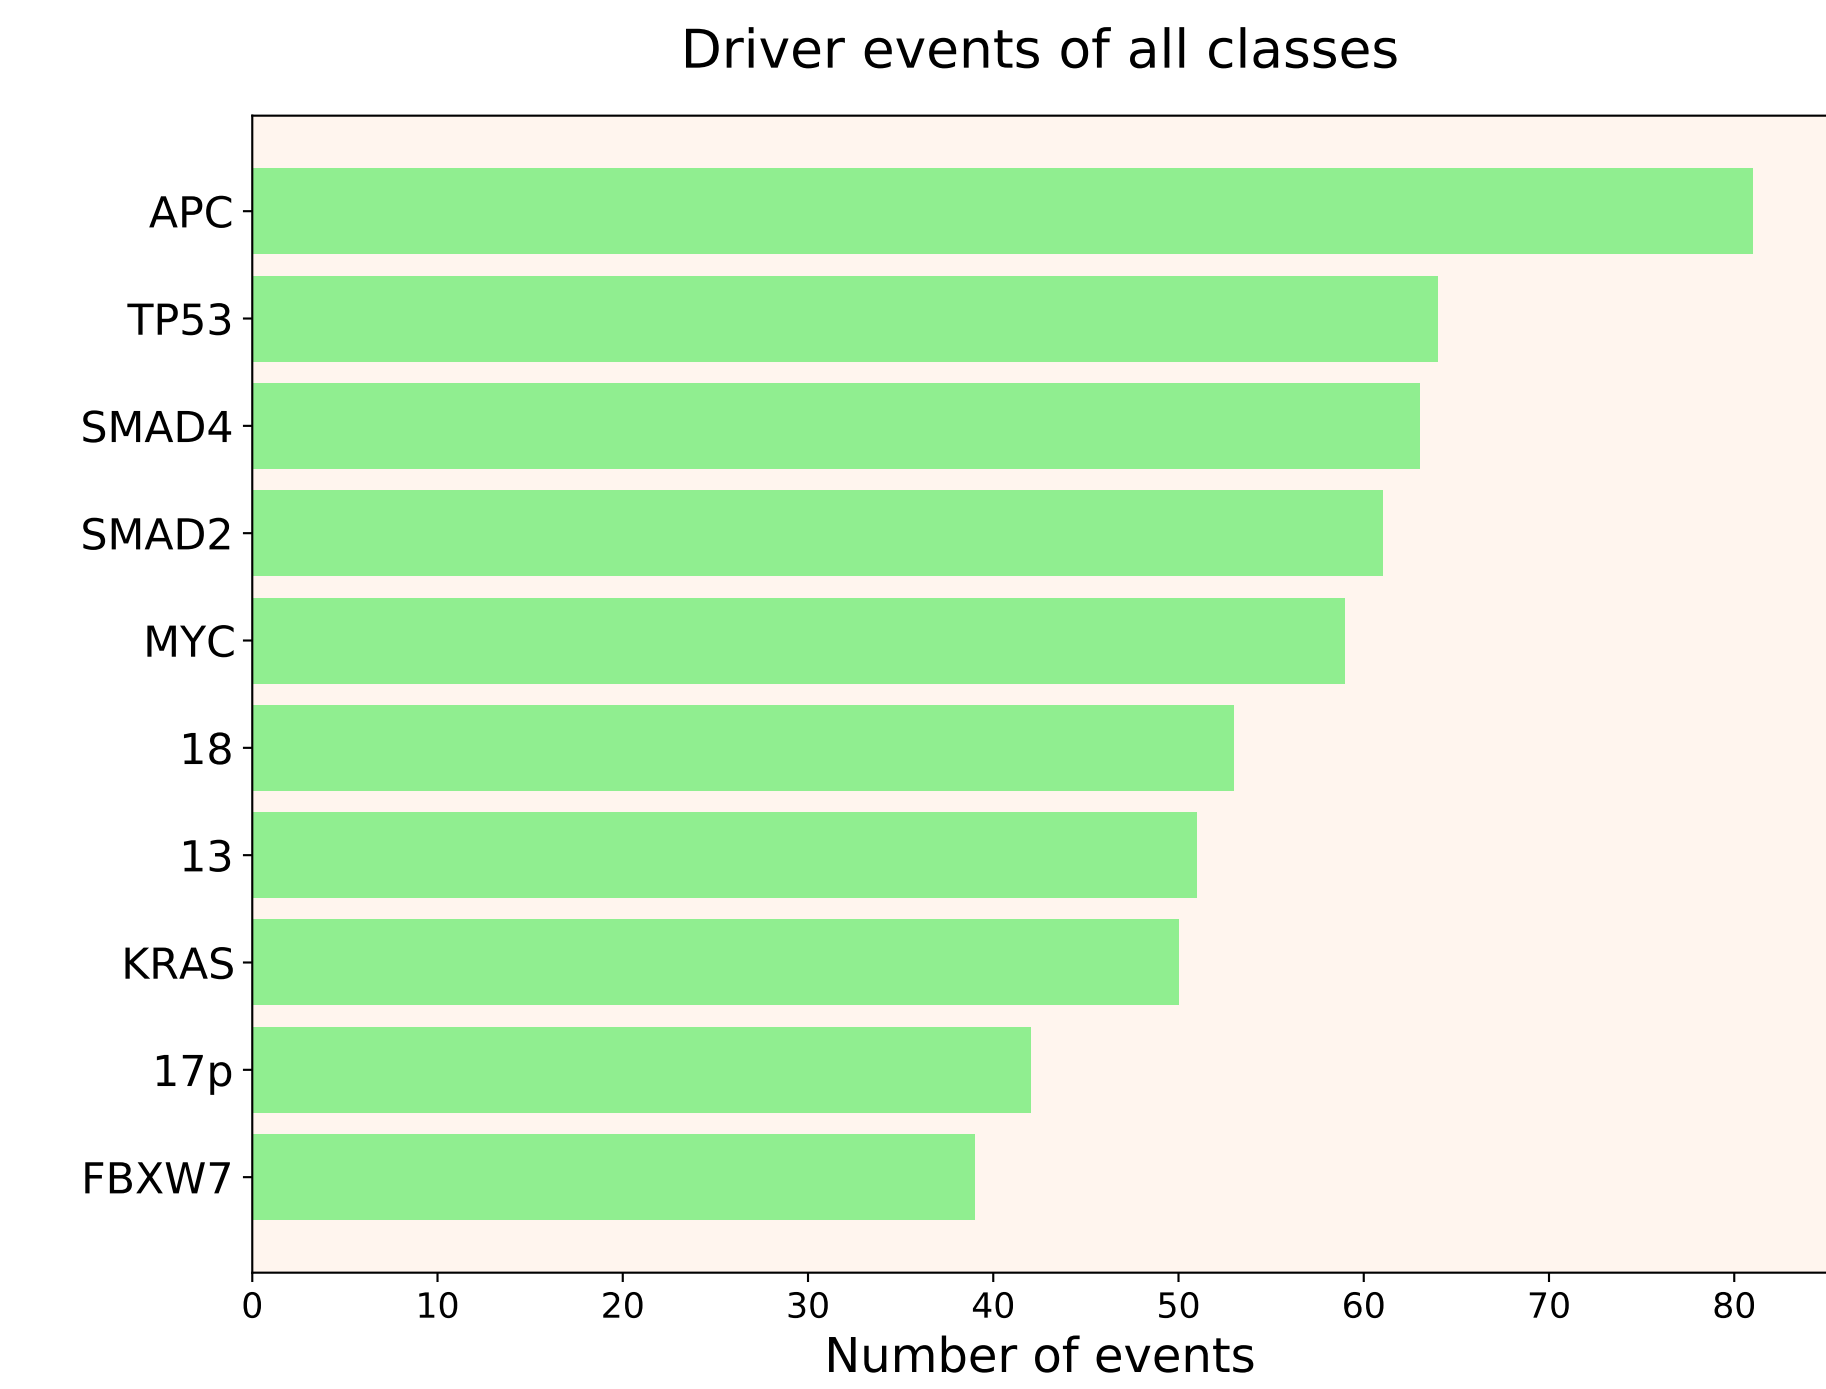

Supplement: Supplemental_Data_S1.zip [file Supplemental_Data_S1.zip]

# UCEC

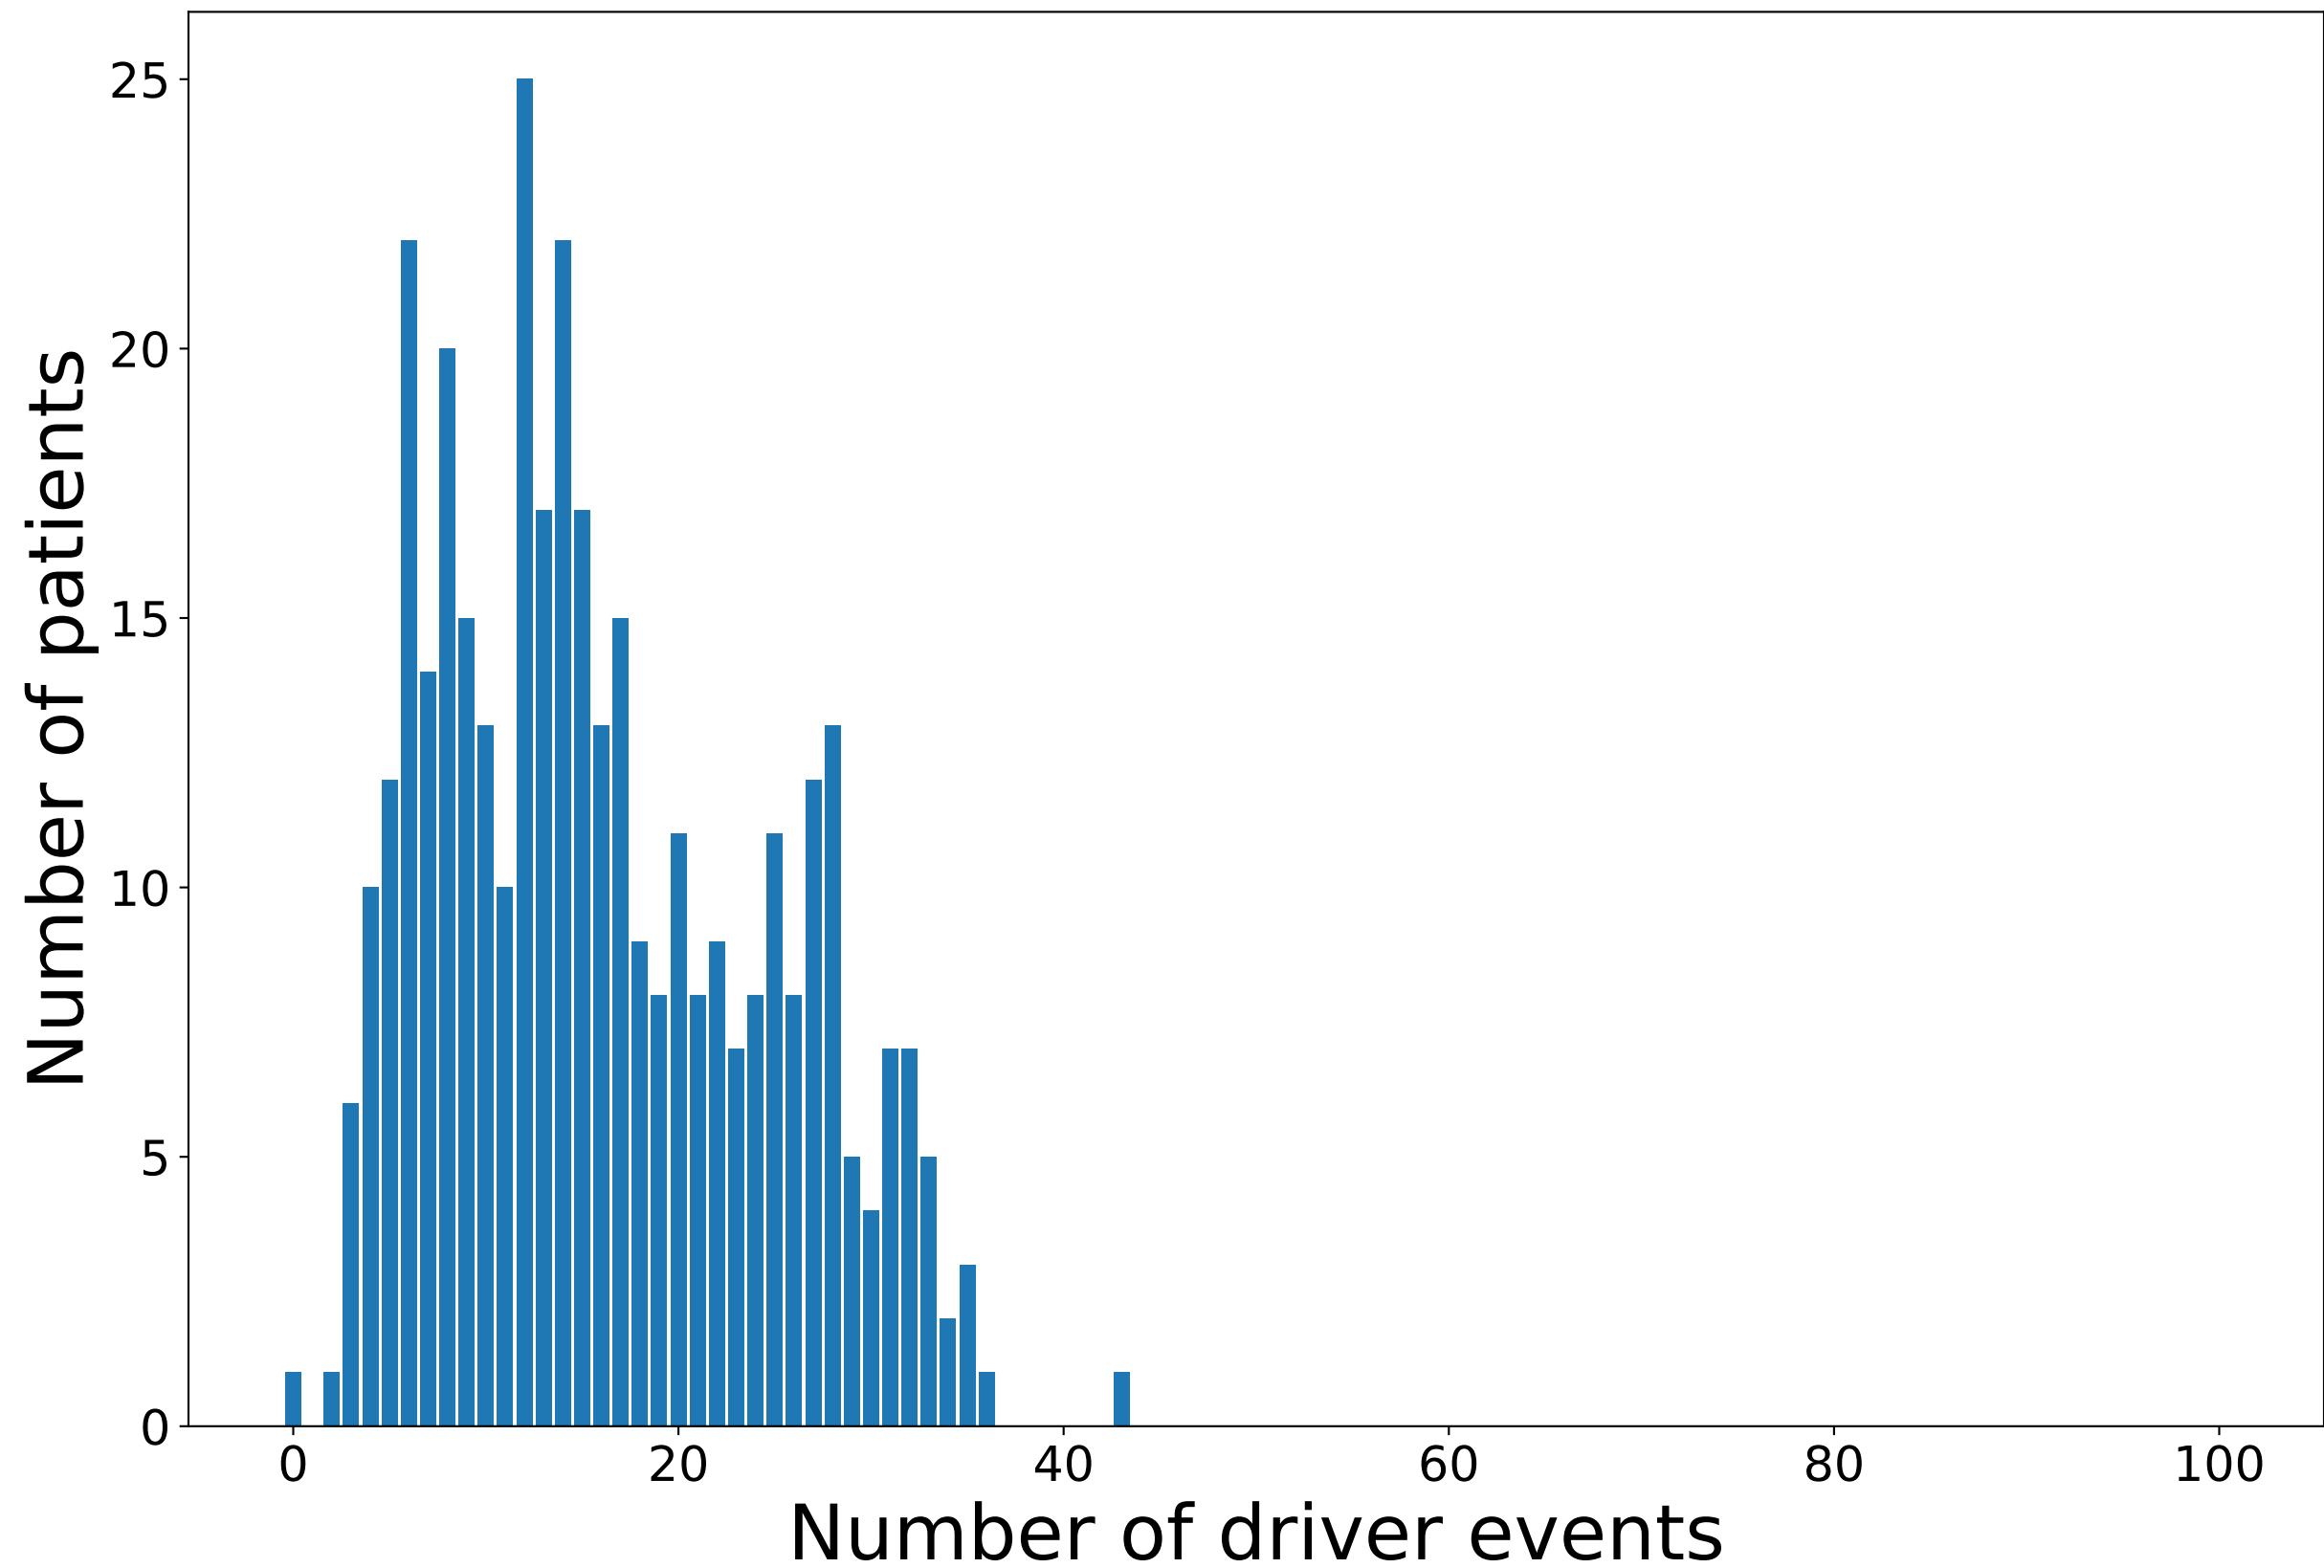

Supplement: Supplemental_Data_S1.zip [file Supplemental_Data_S1.zip]

# KICH\_FEMALE

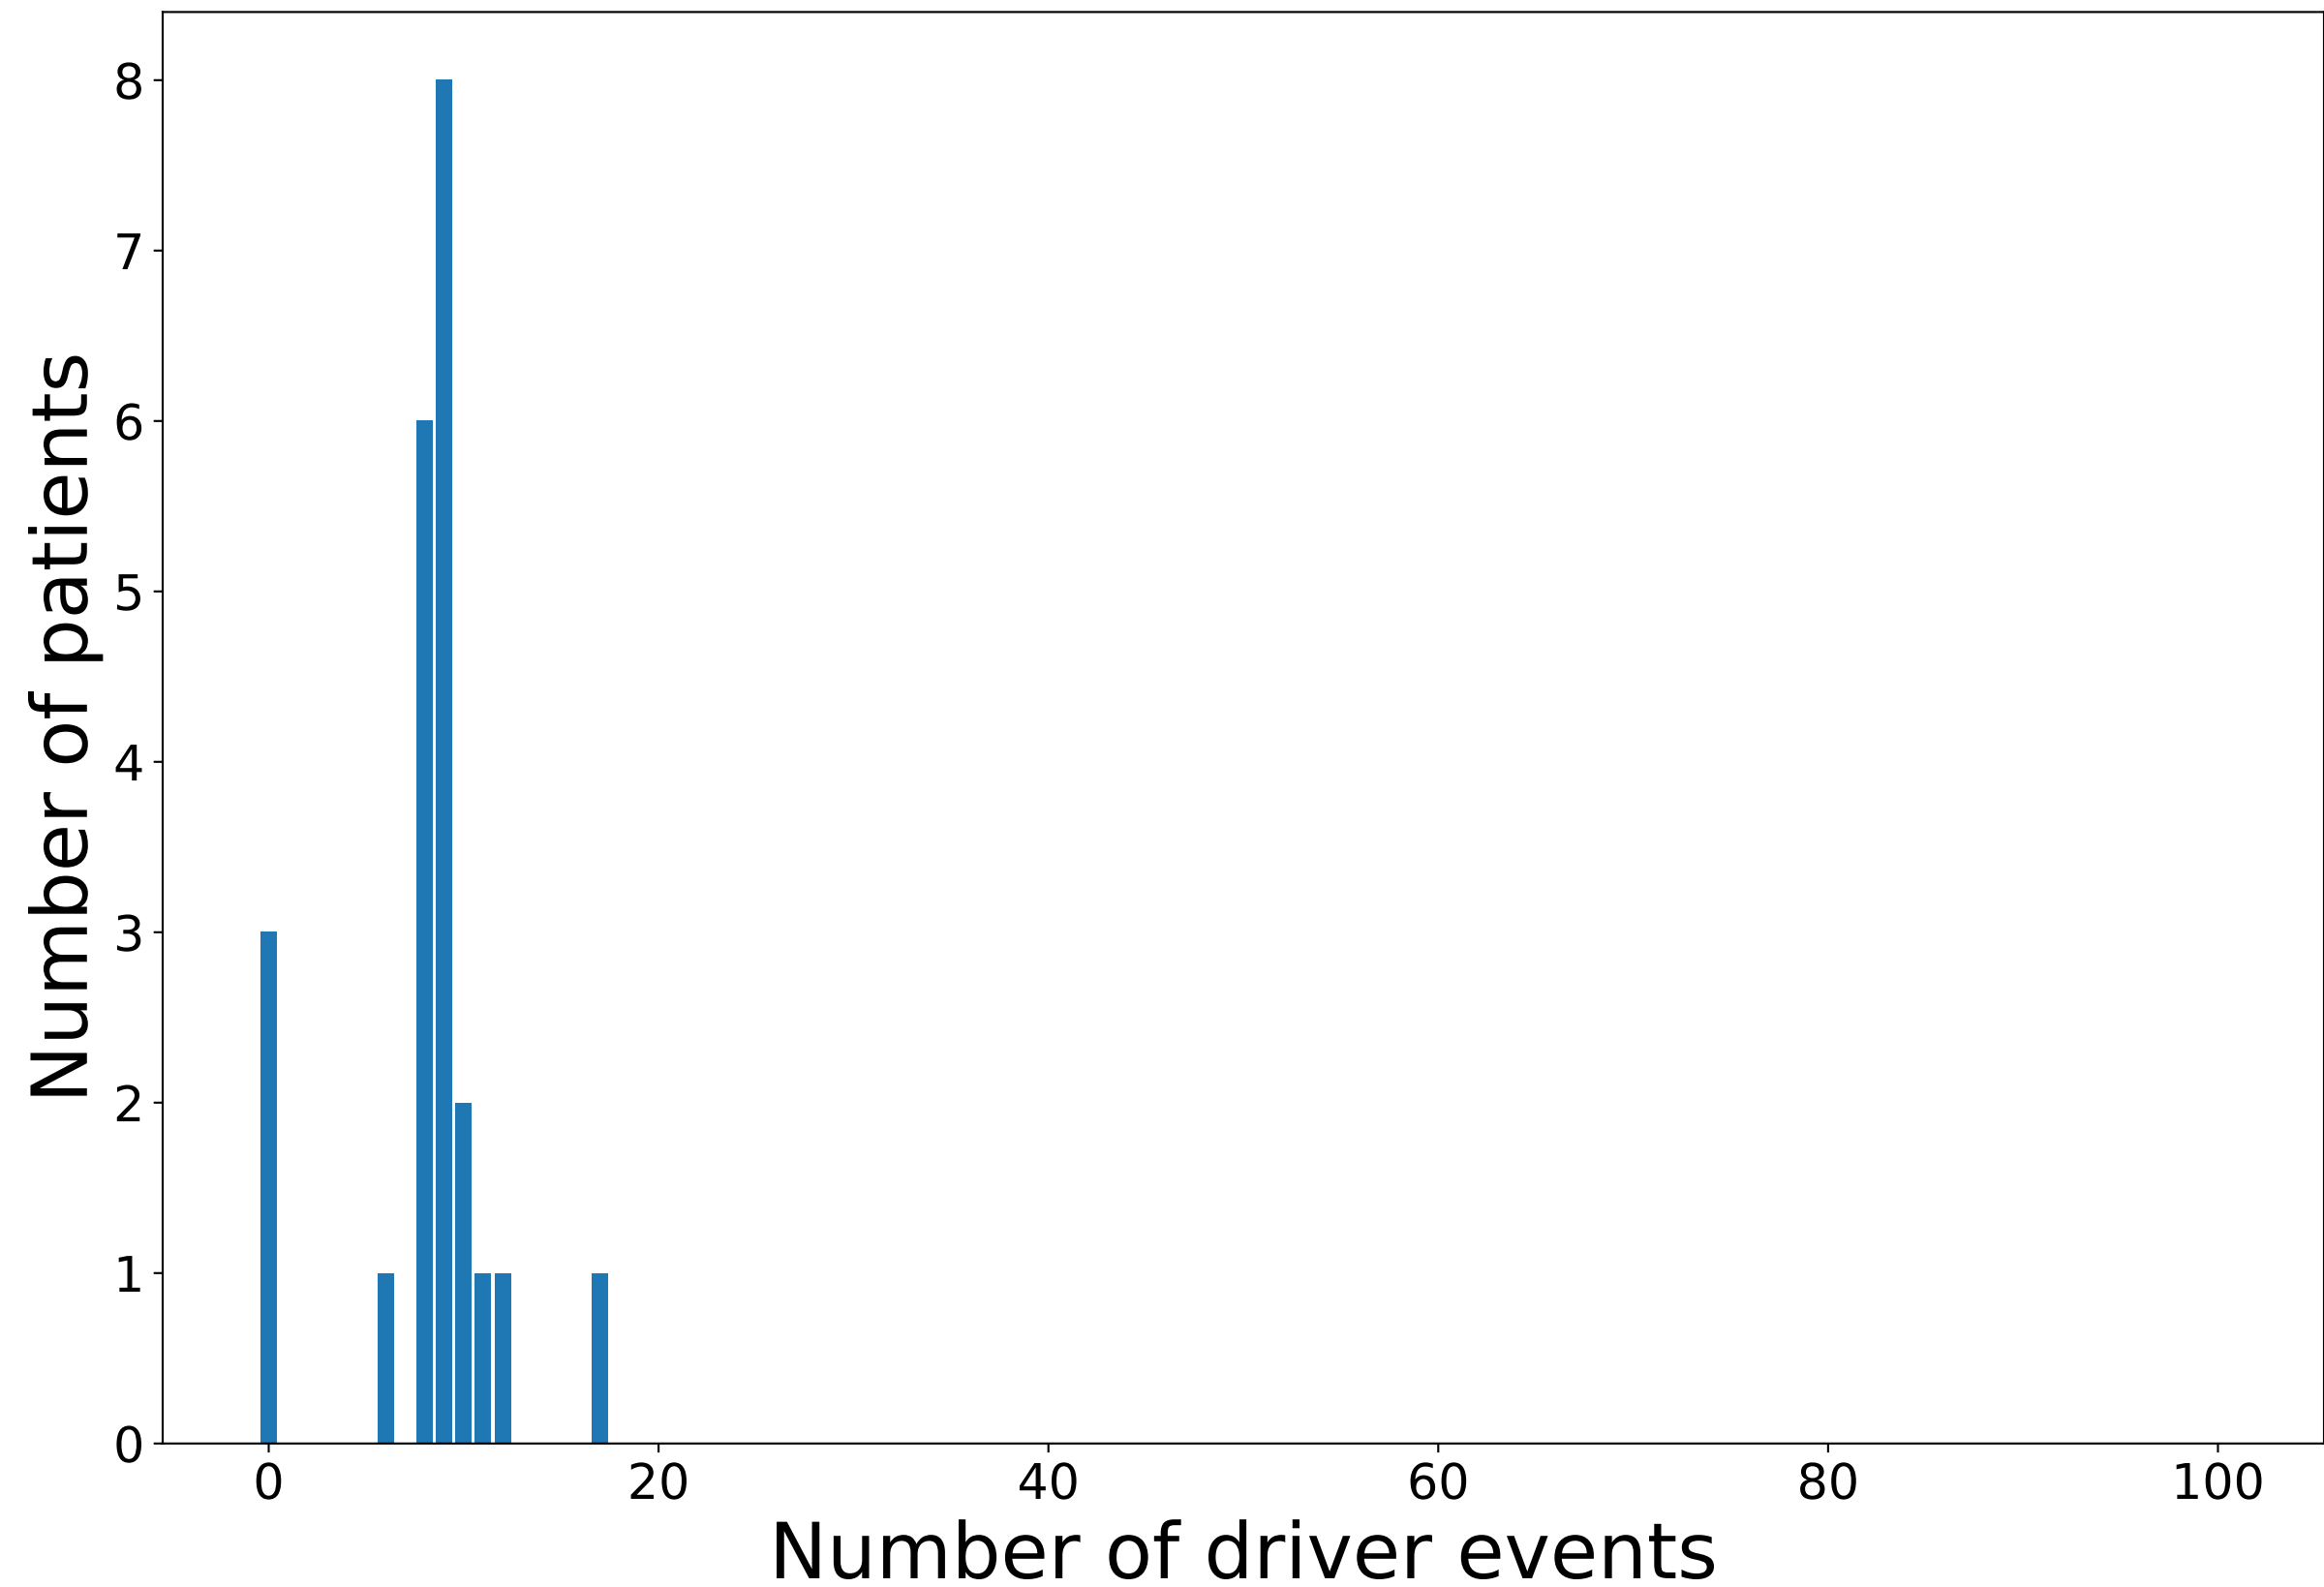

Supplement: Supplemental_Data_S1.zip [file Supplemental_Data_S1.zip]

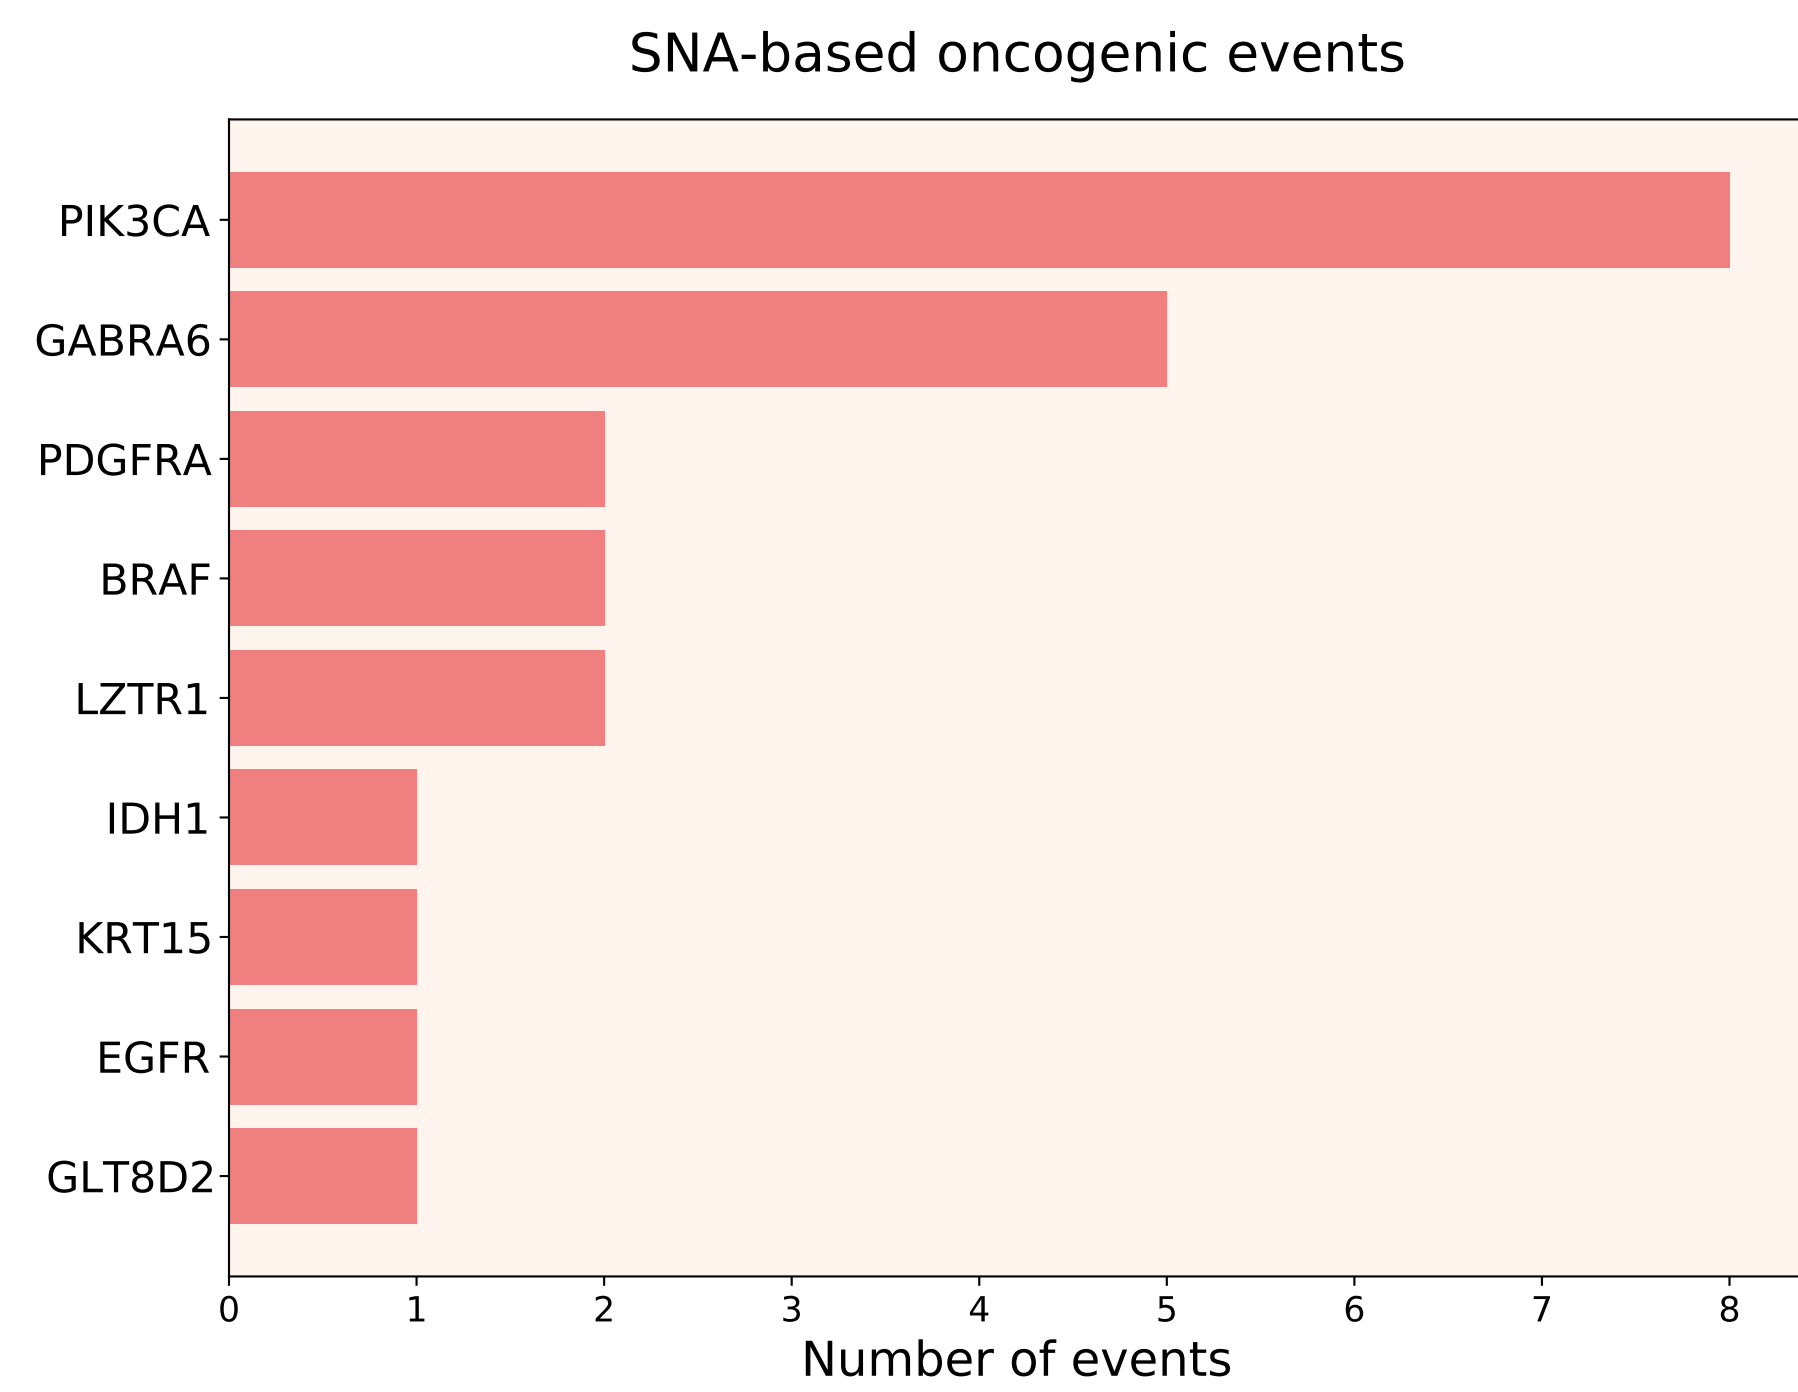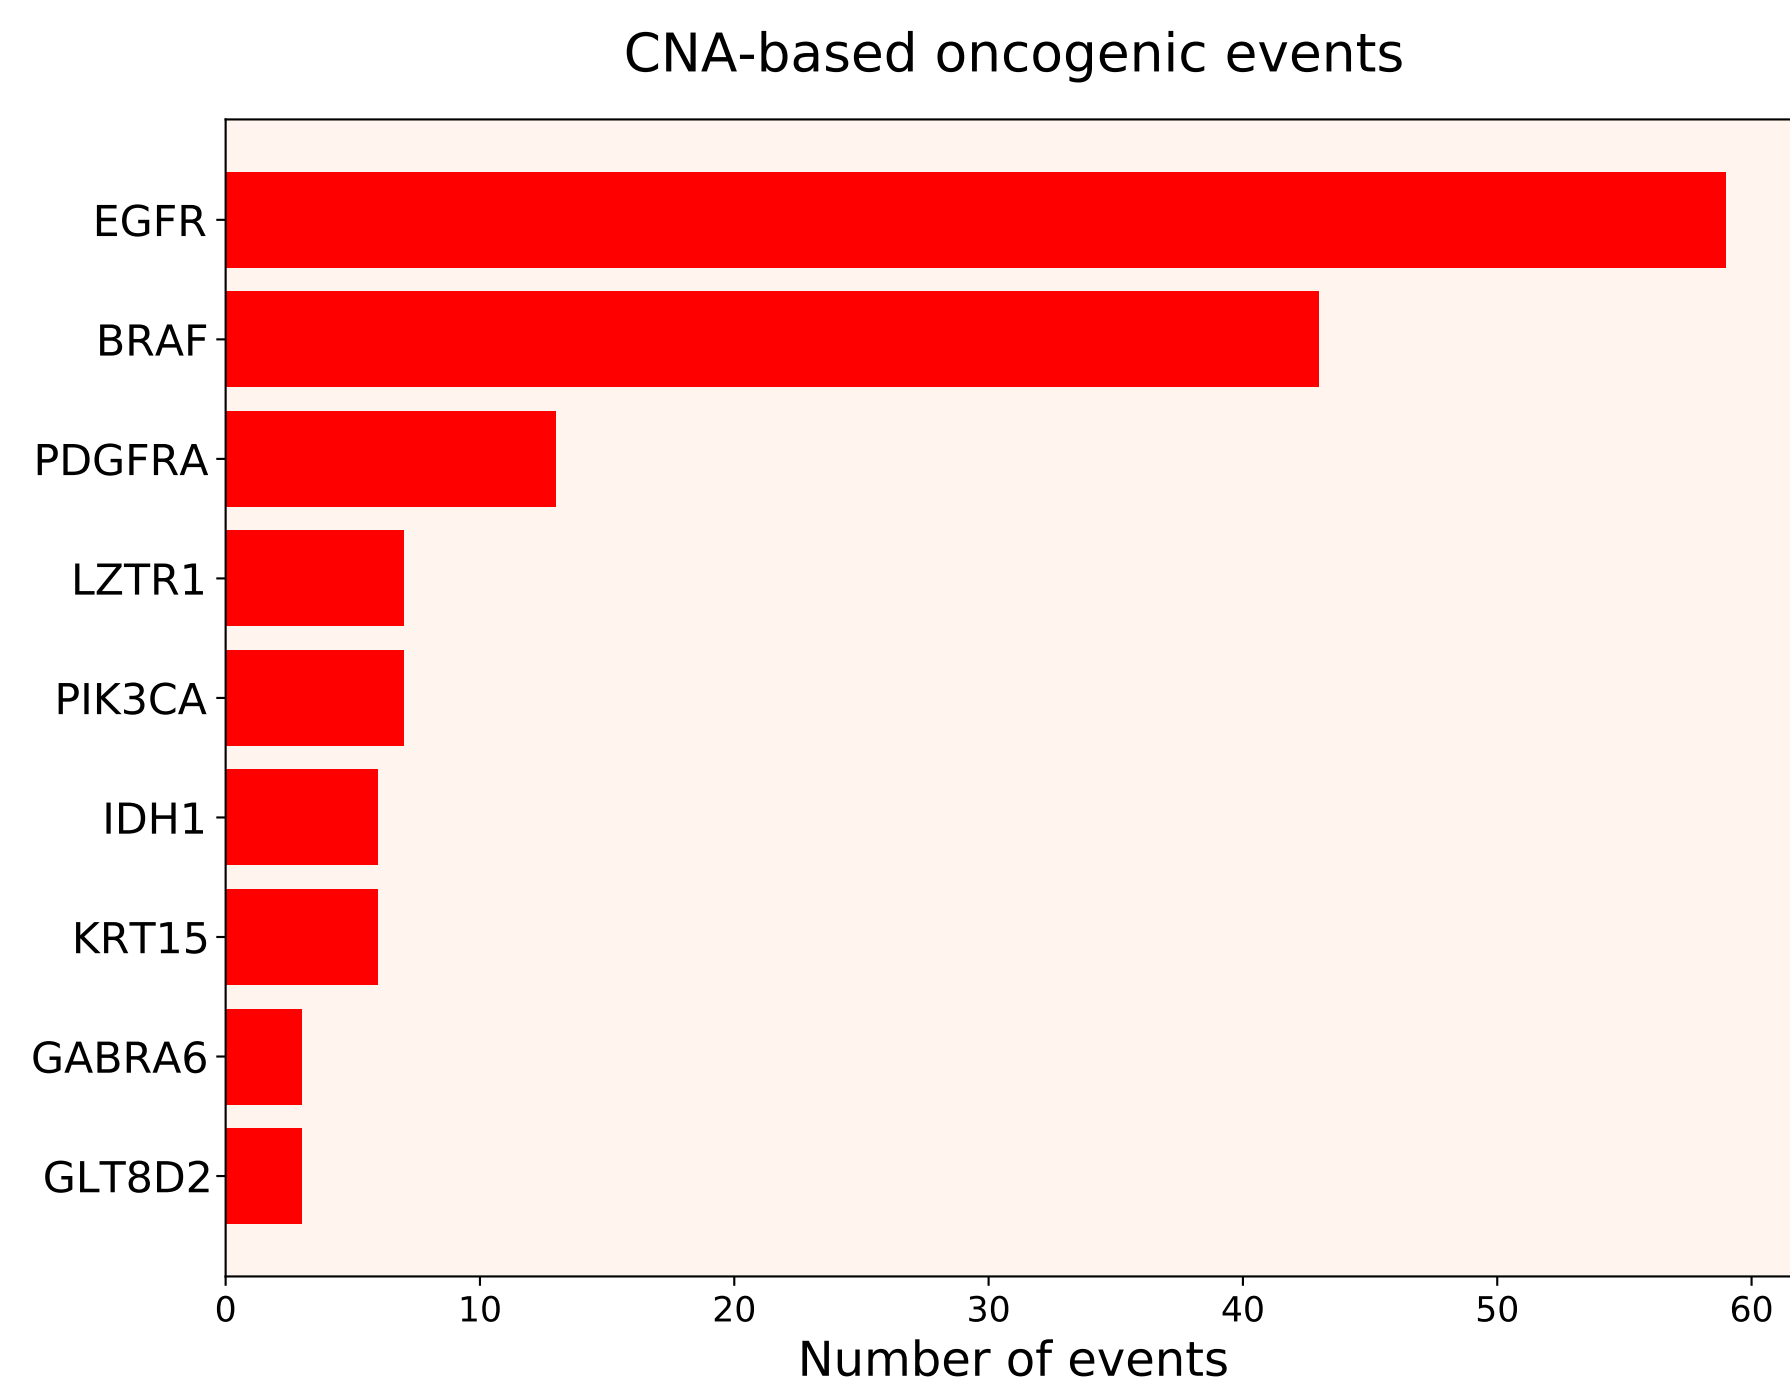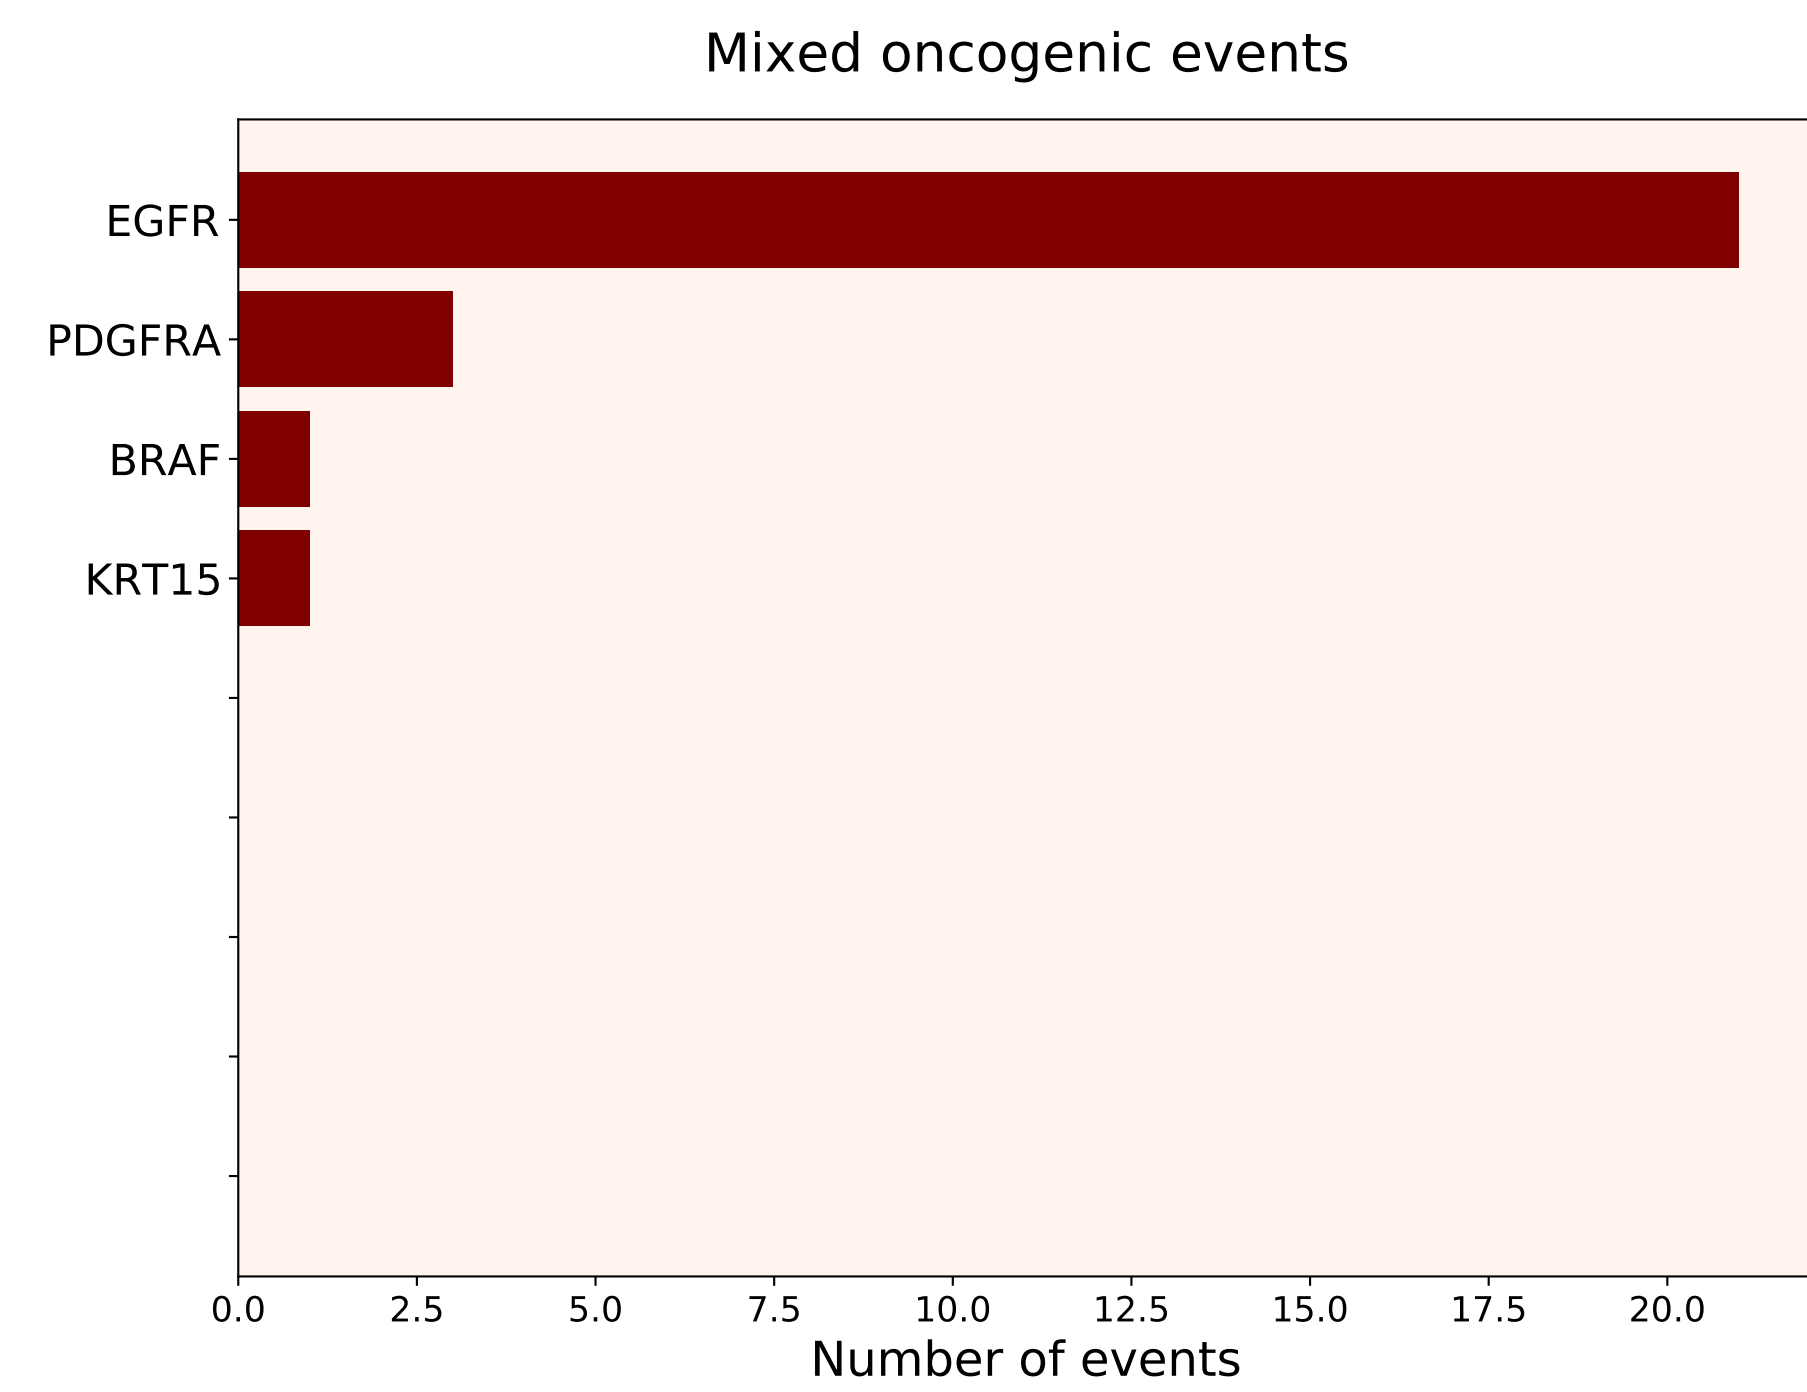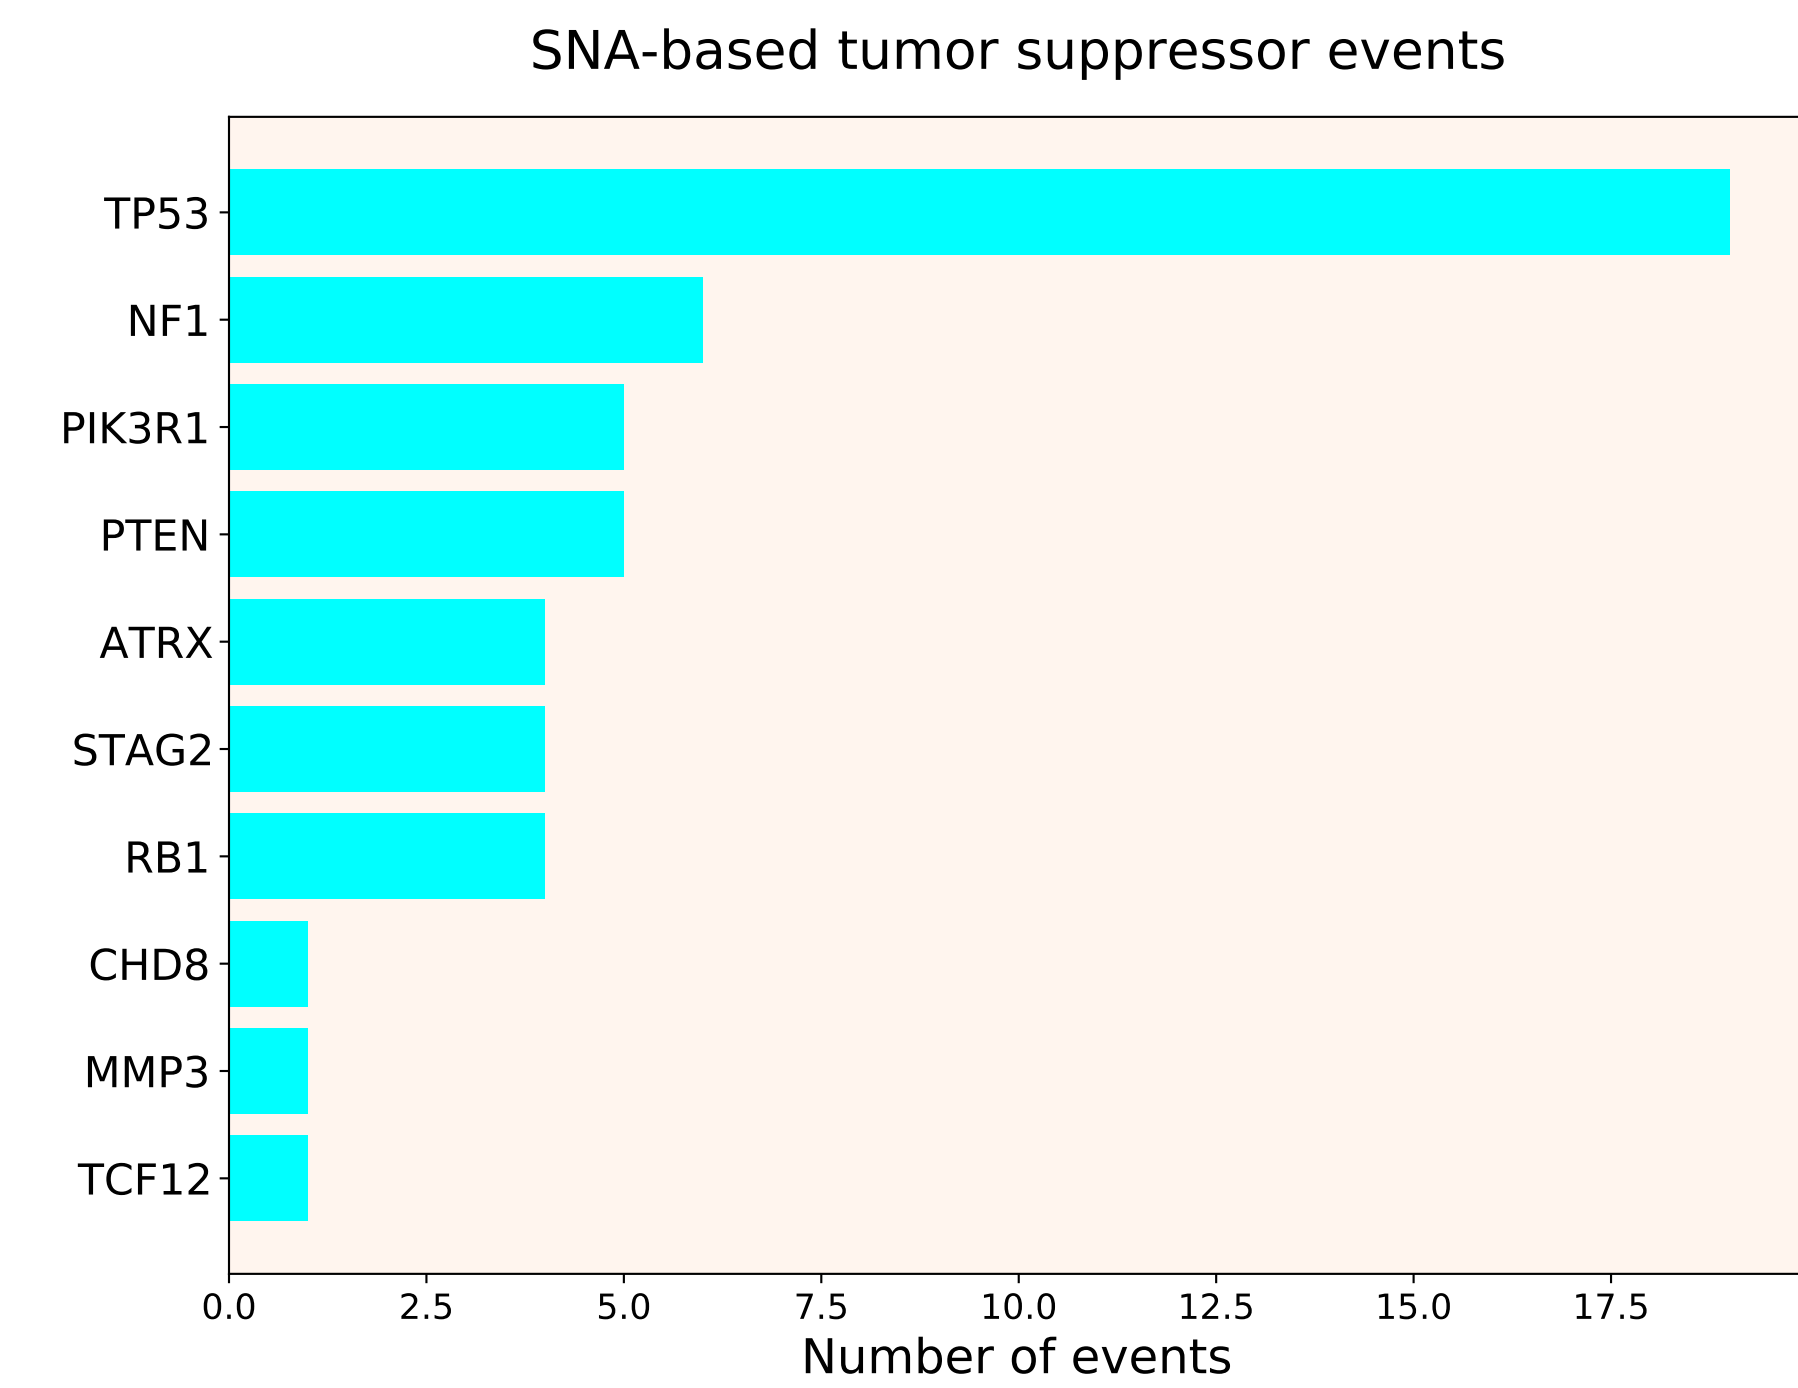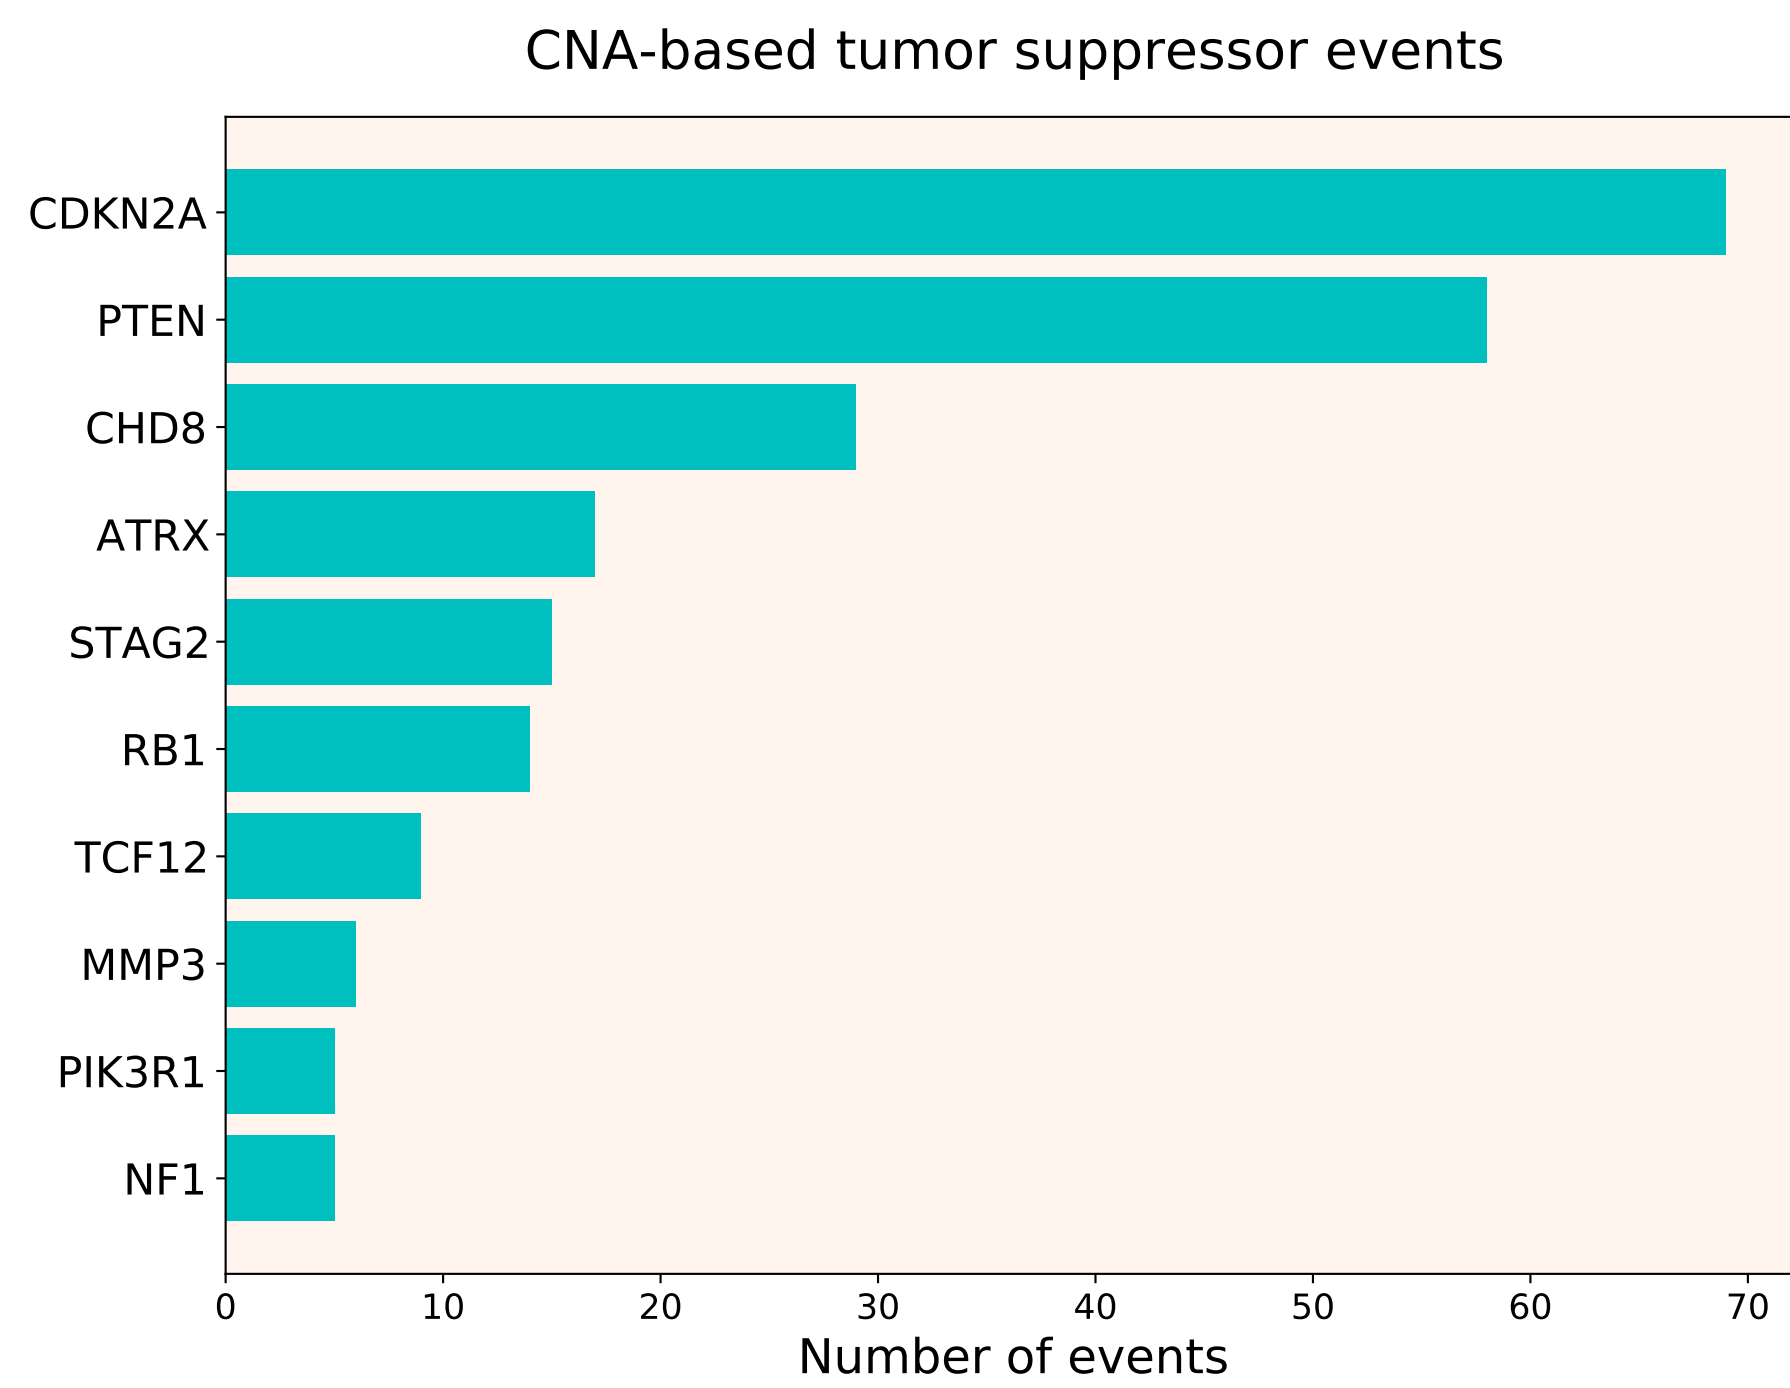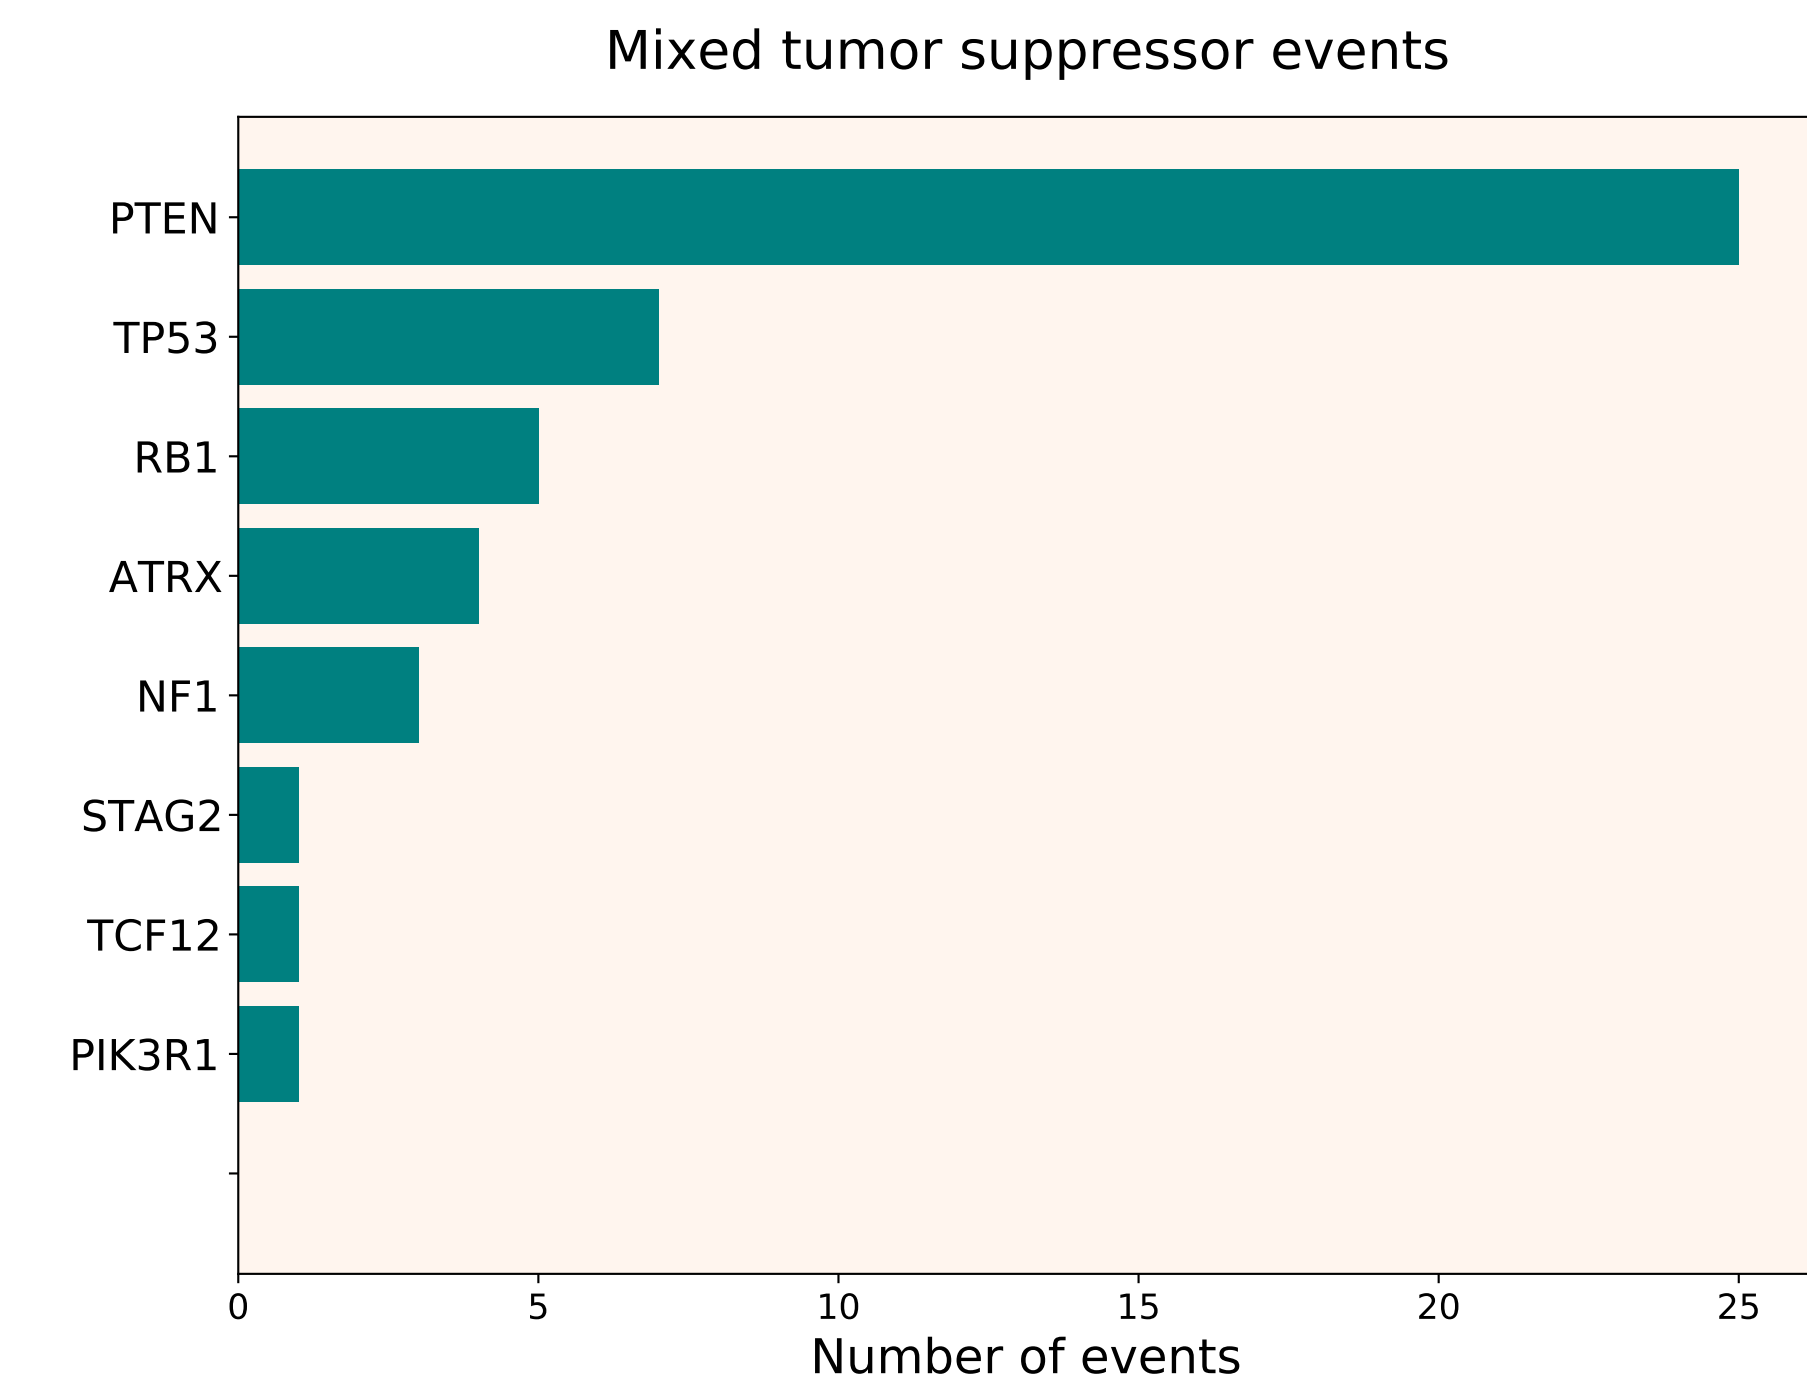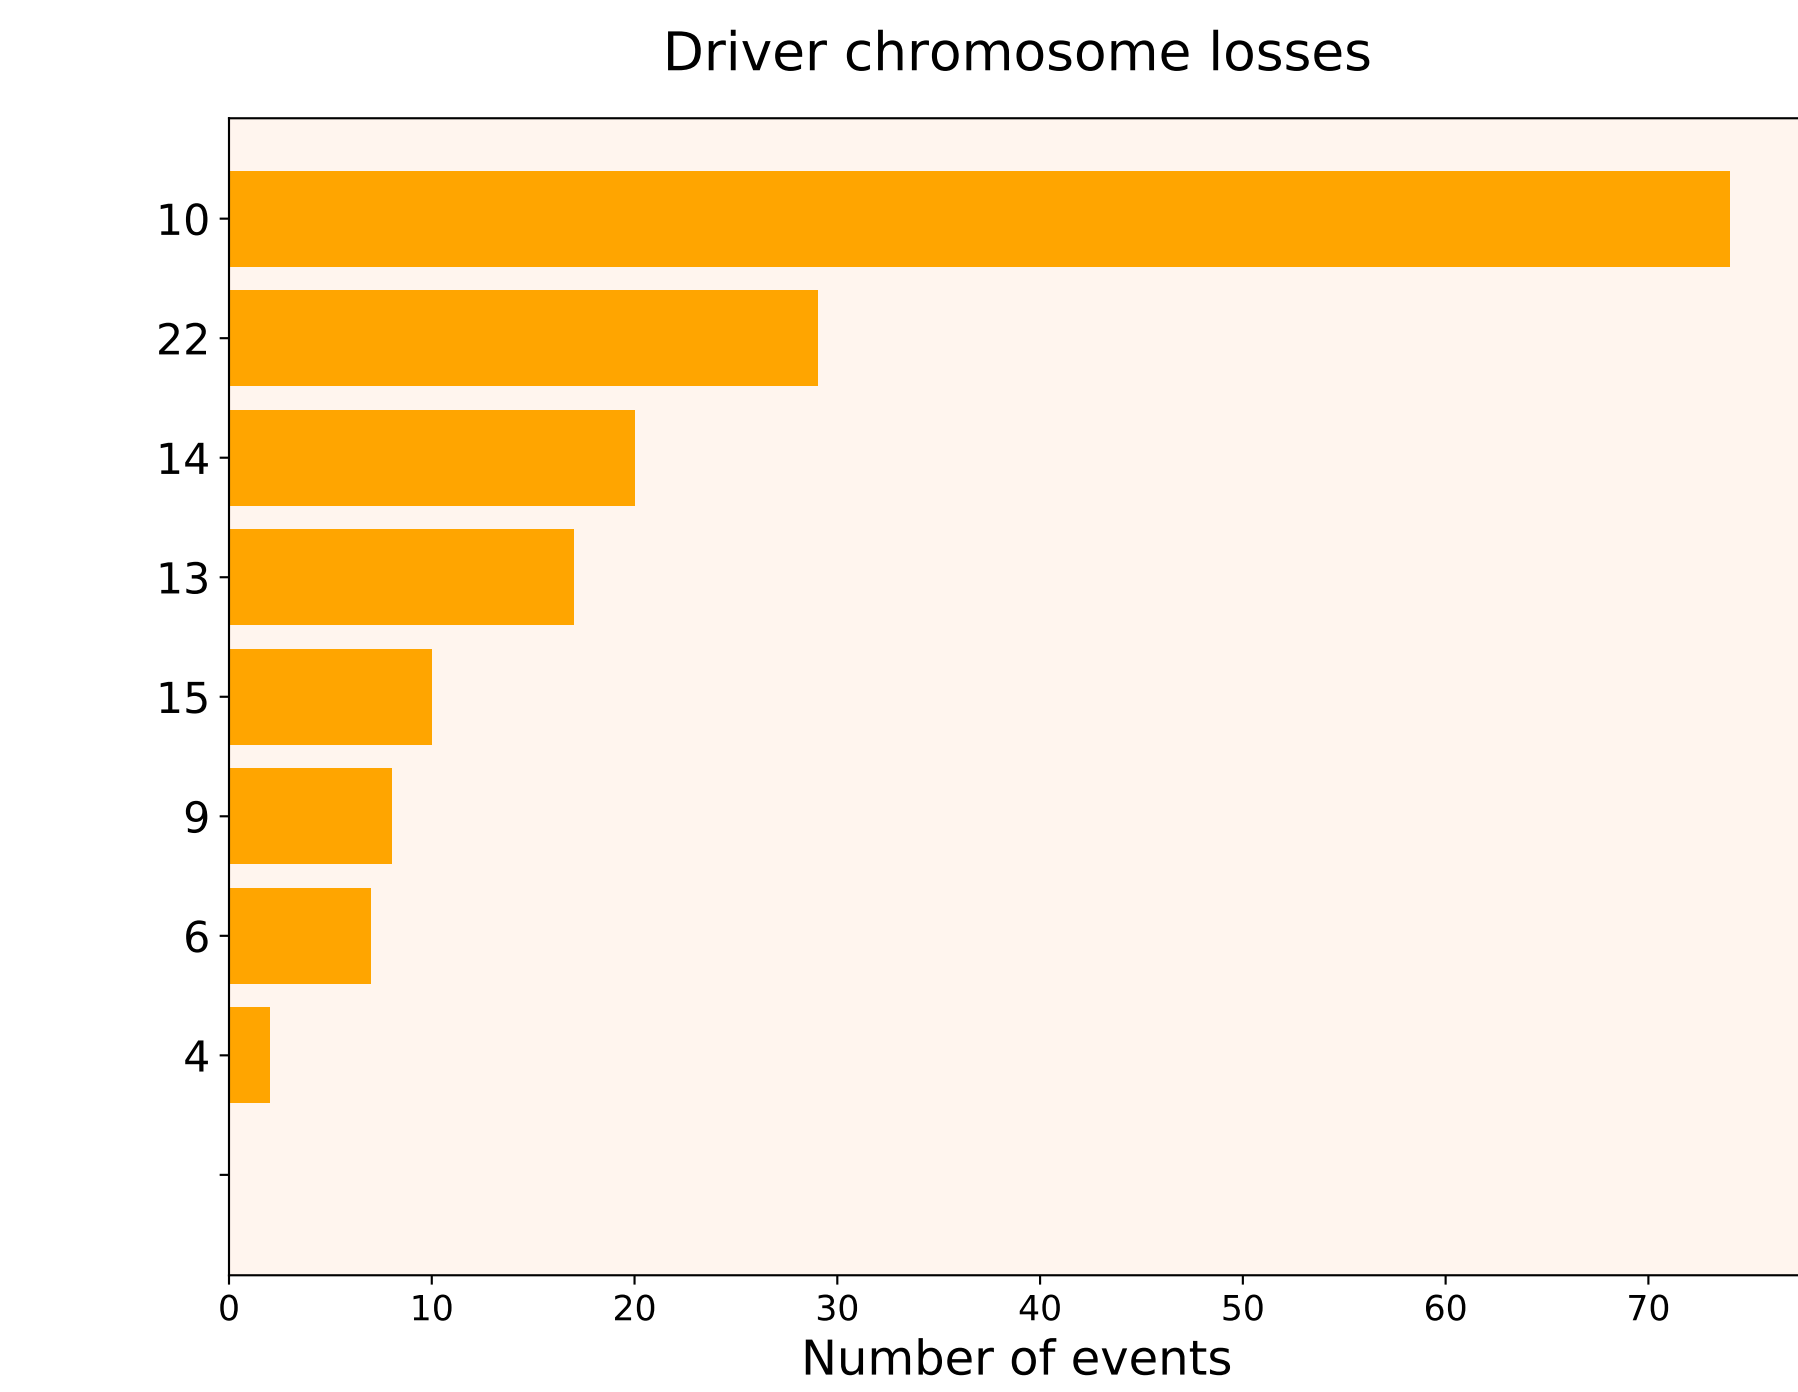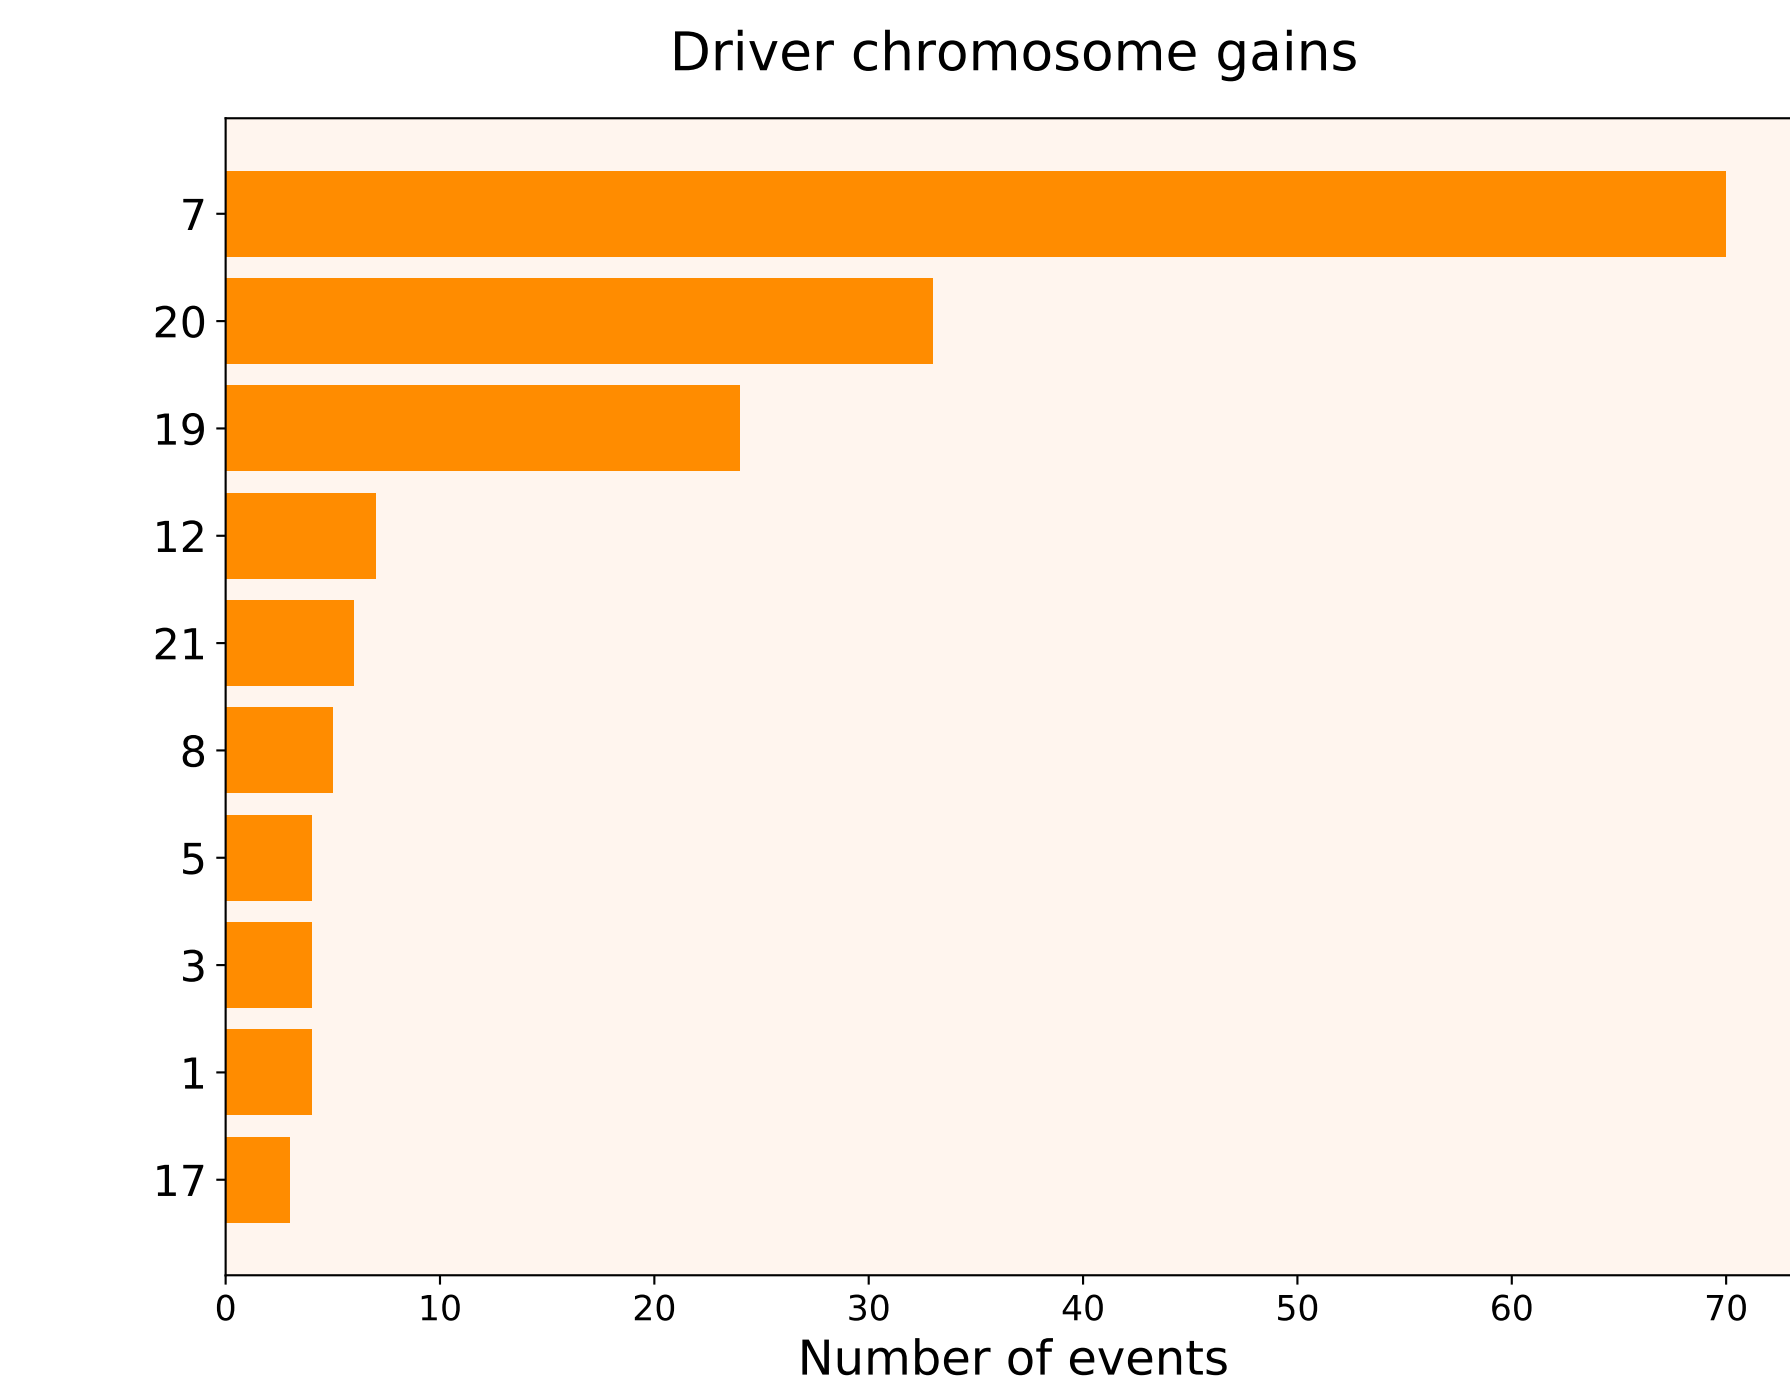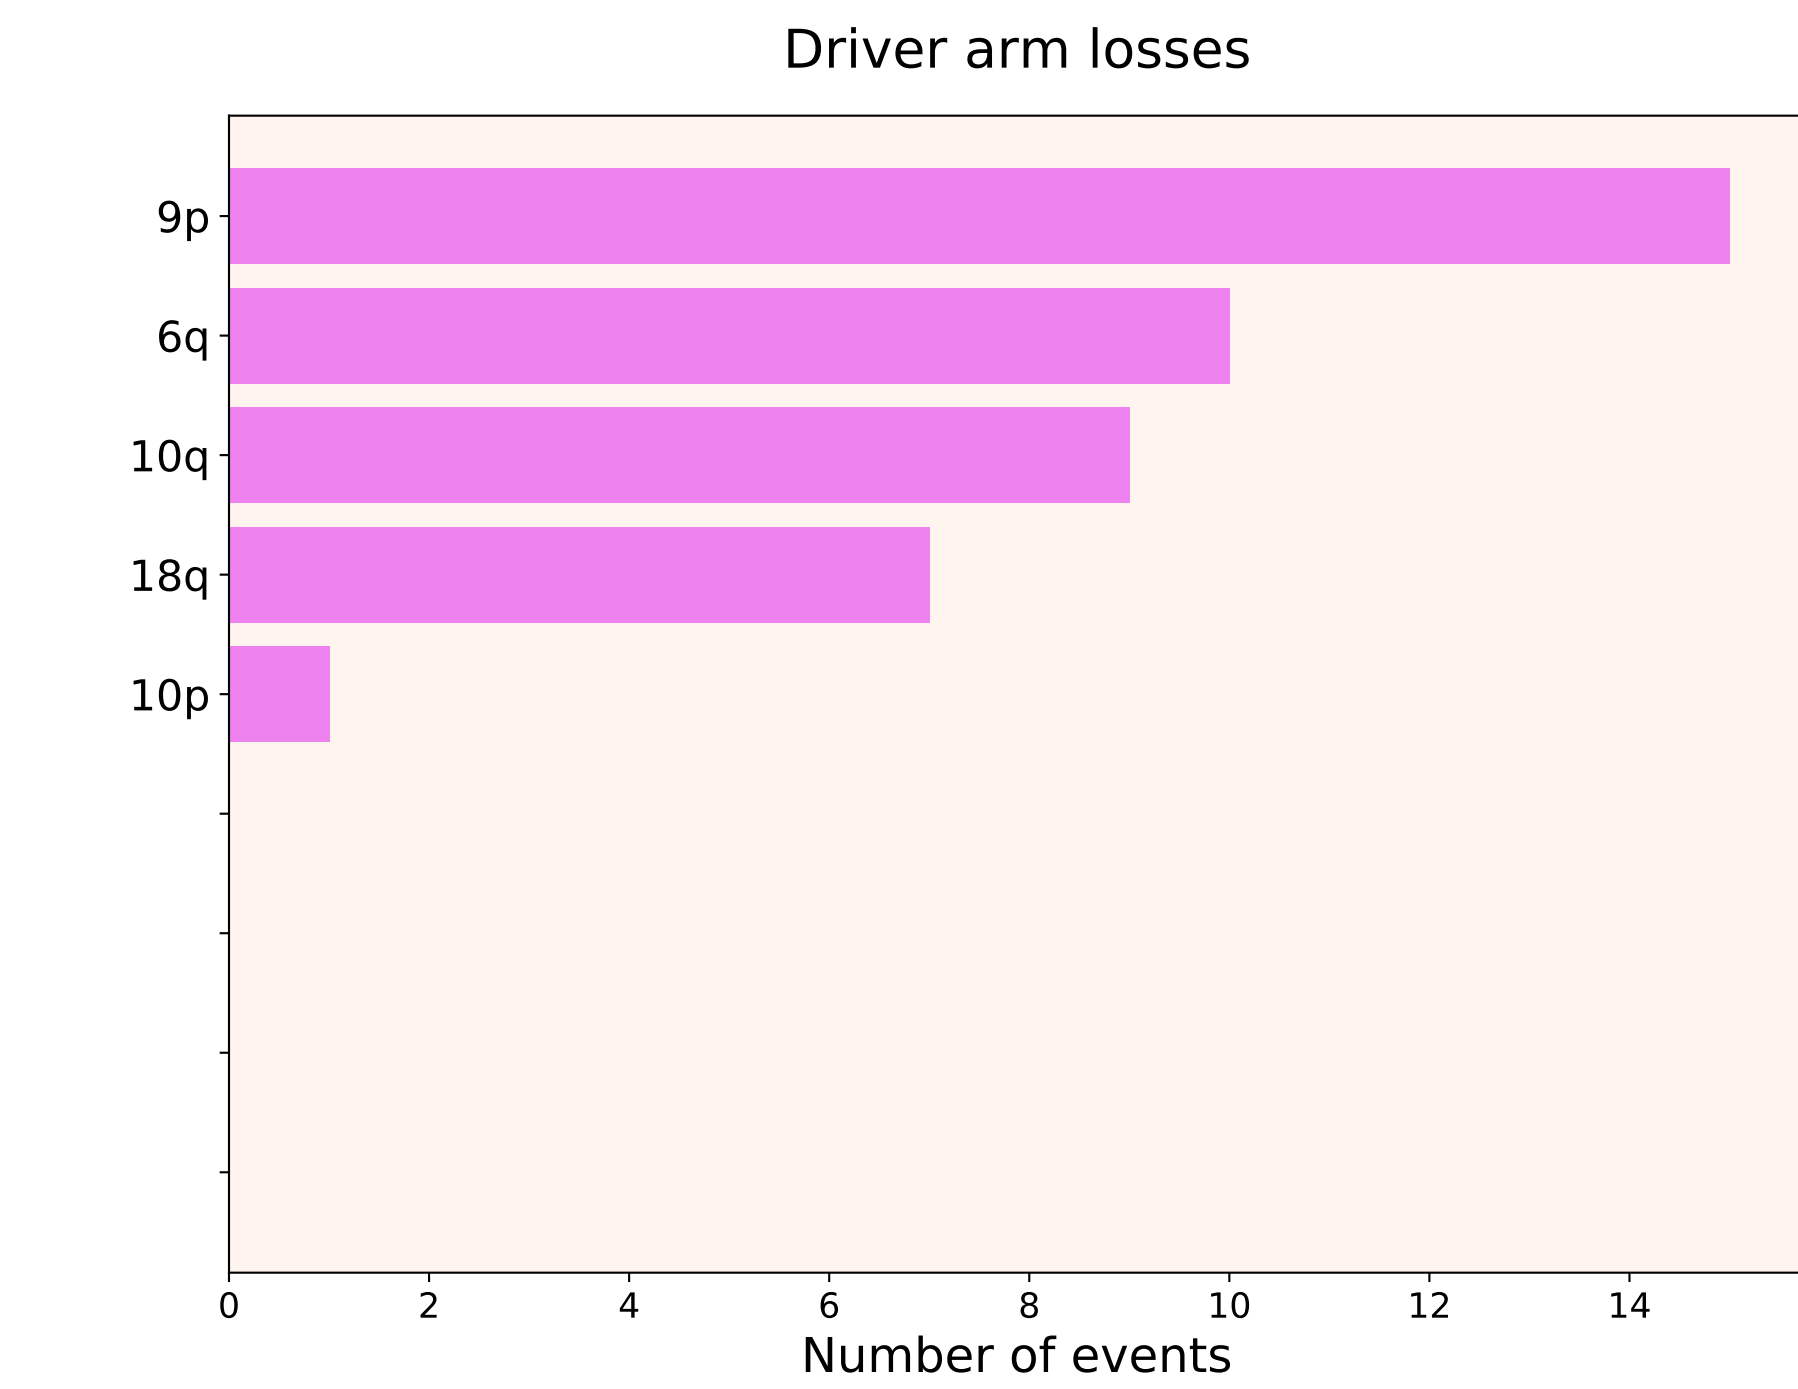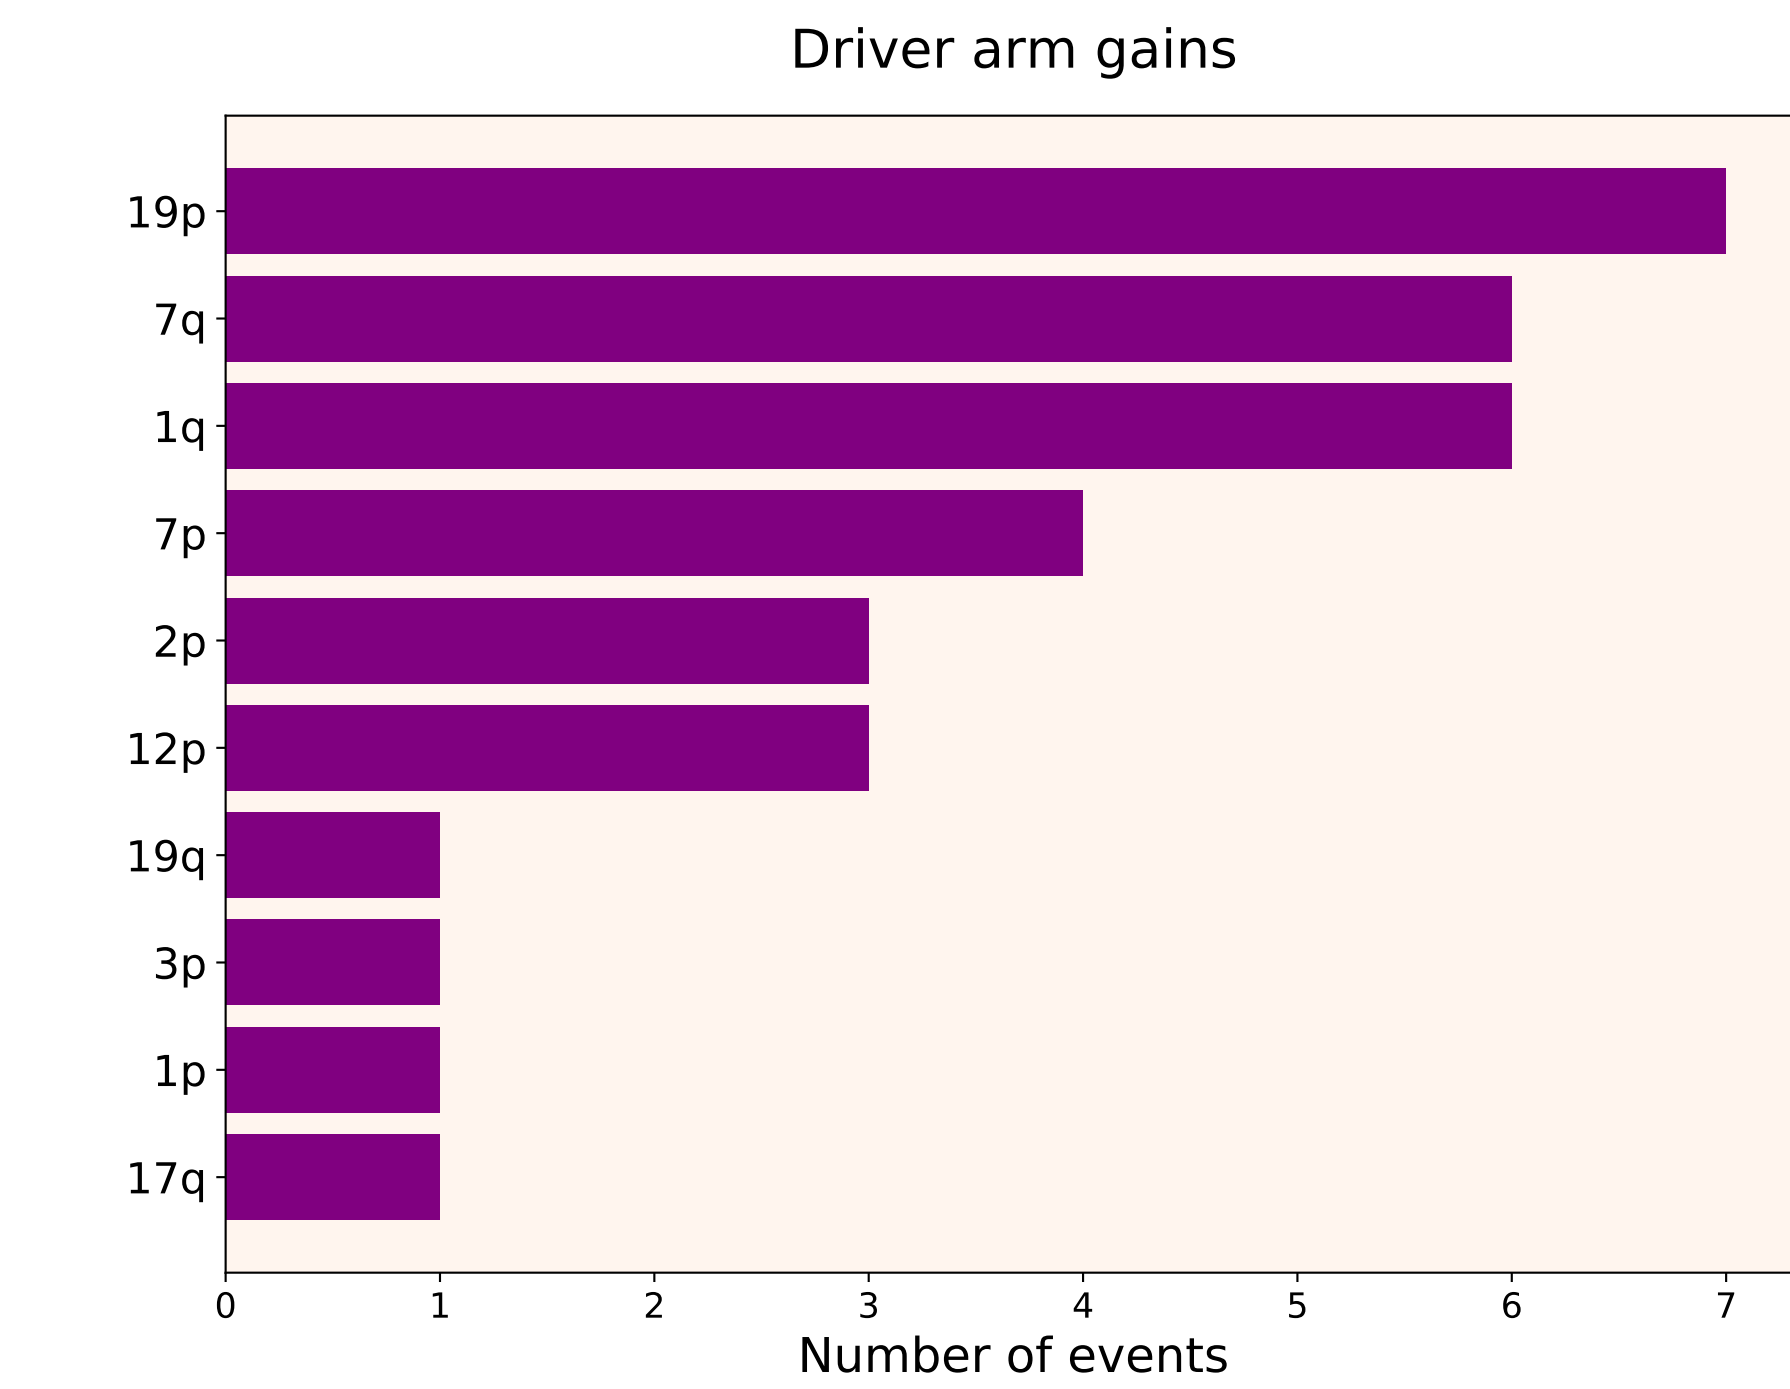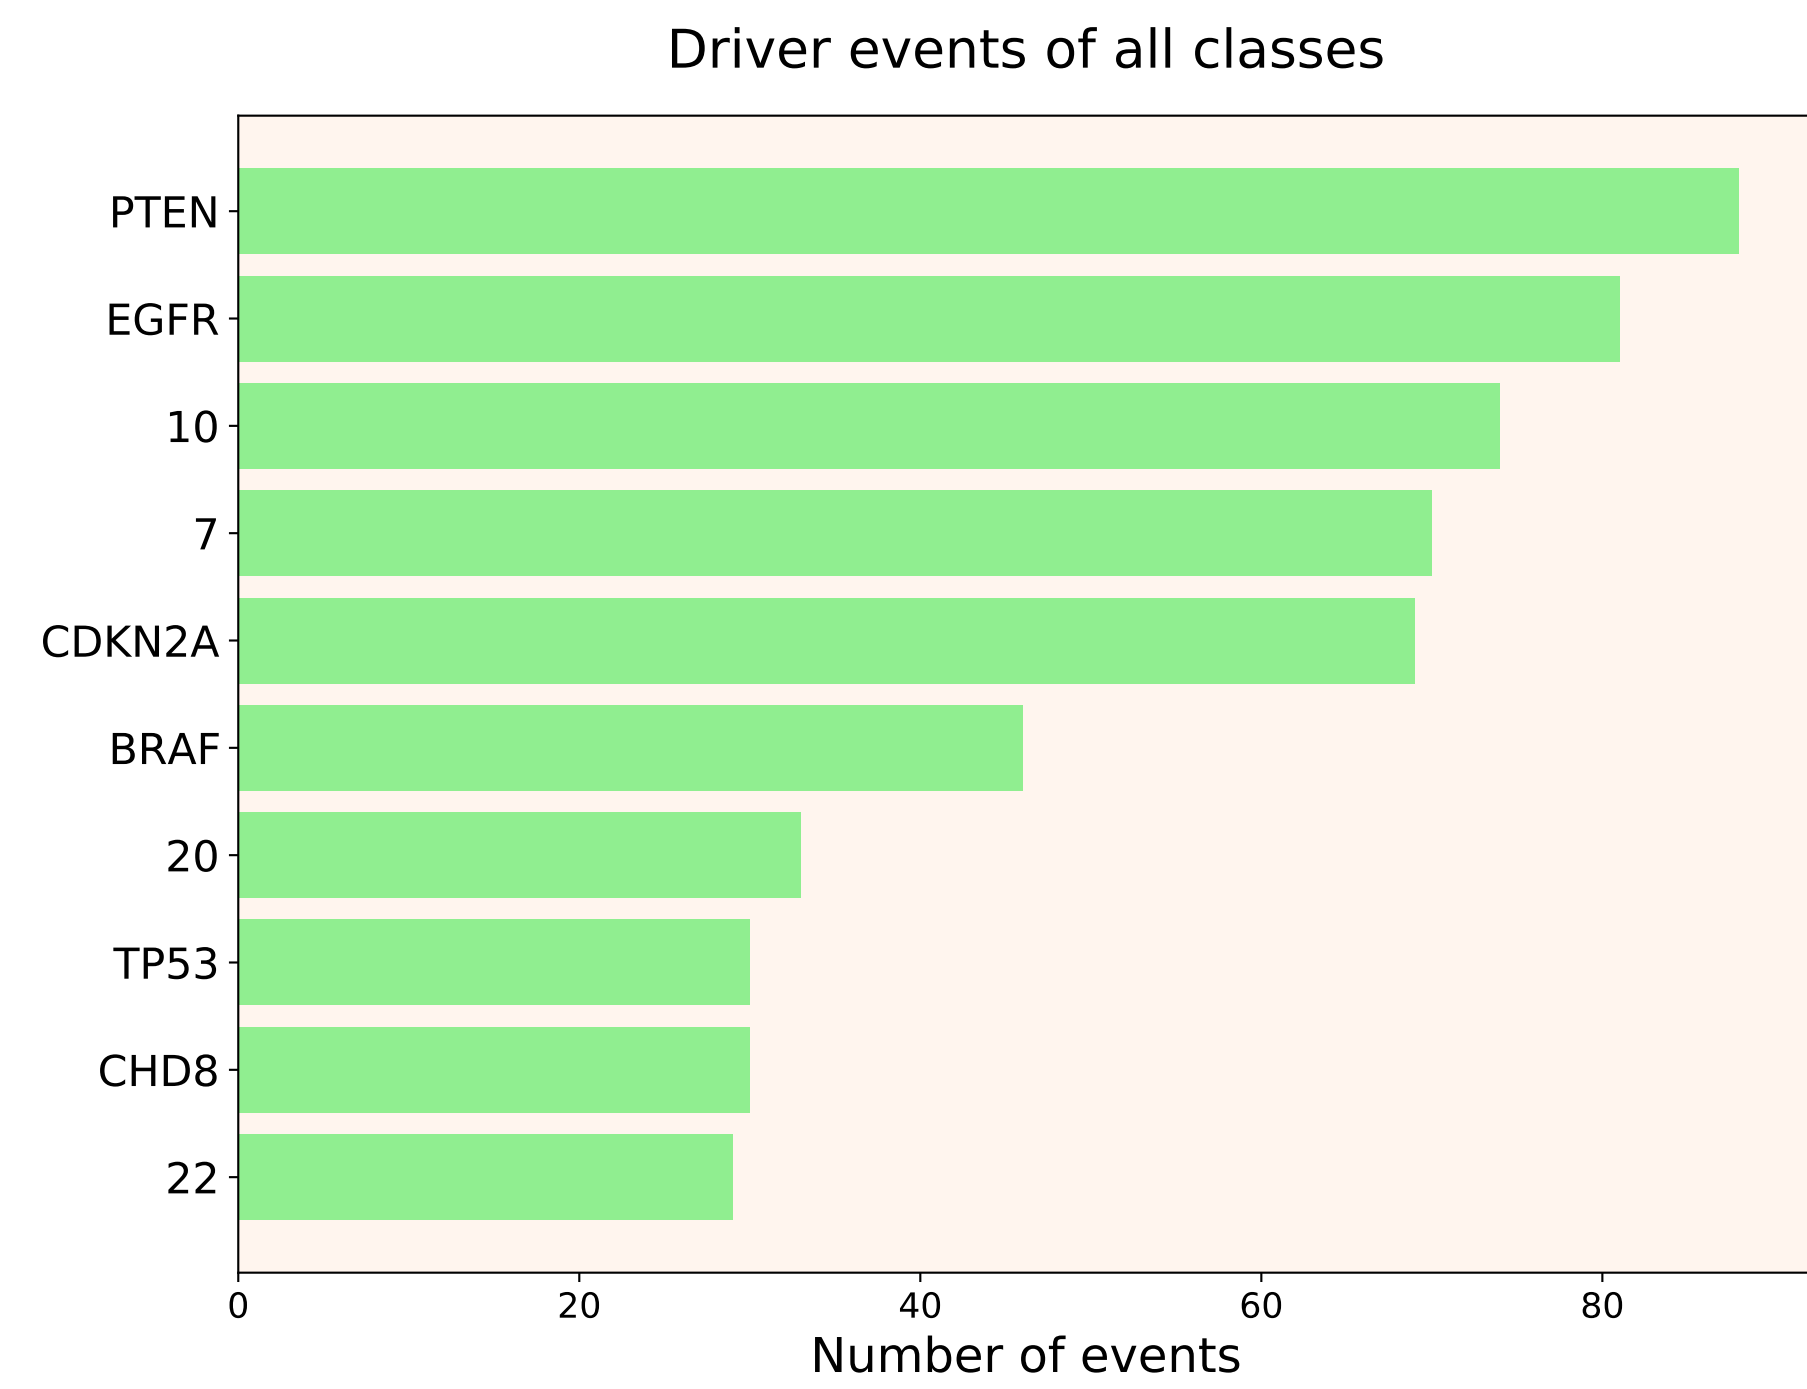

Supplement: Supplemental_Data_S1.zip [file Supplemental_Data_S1.zip]

# PCPG\_FEMALE

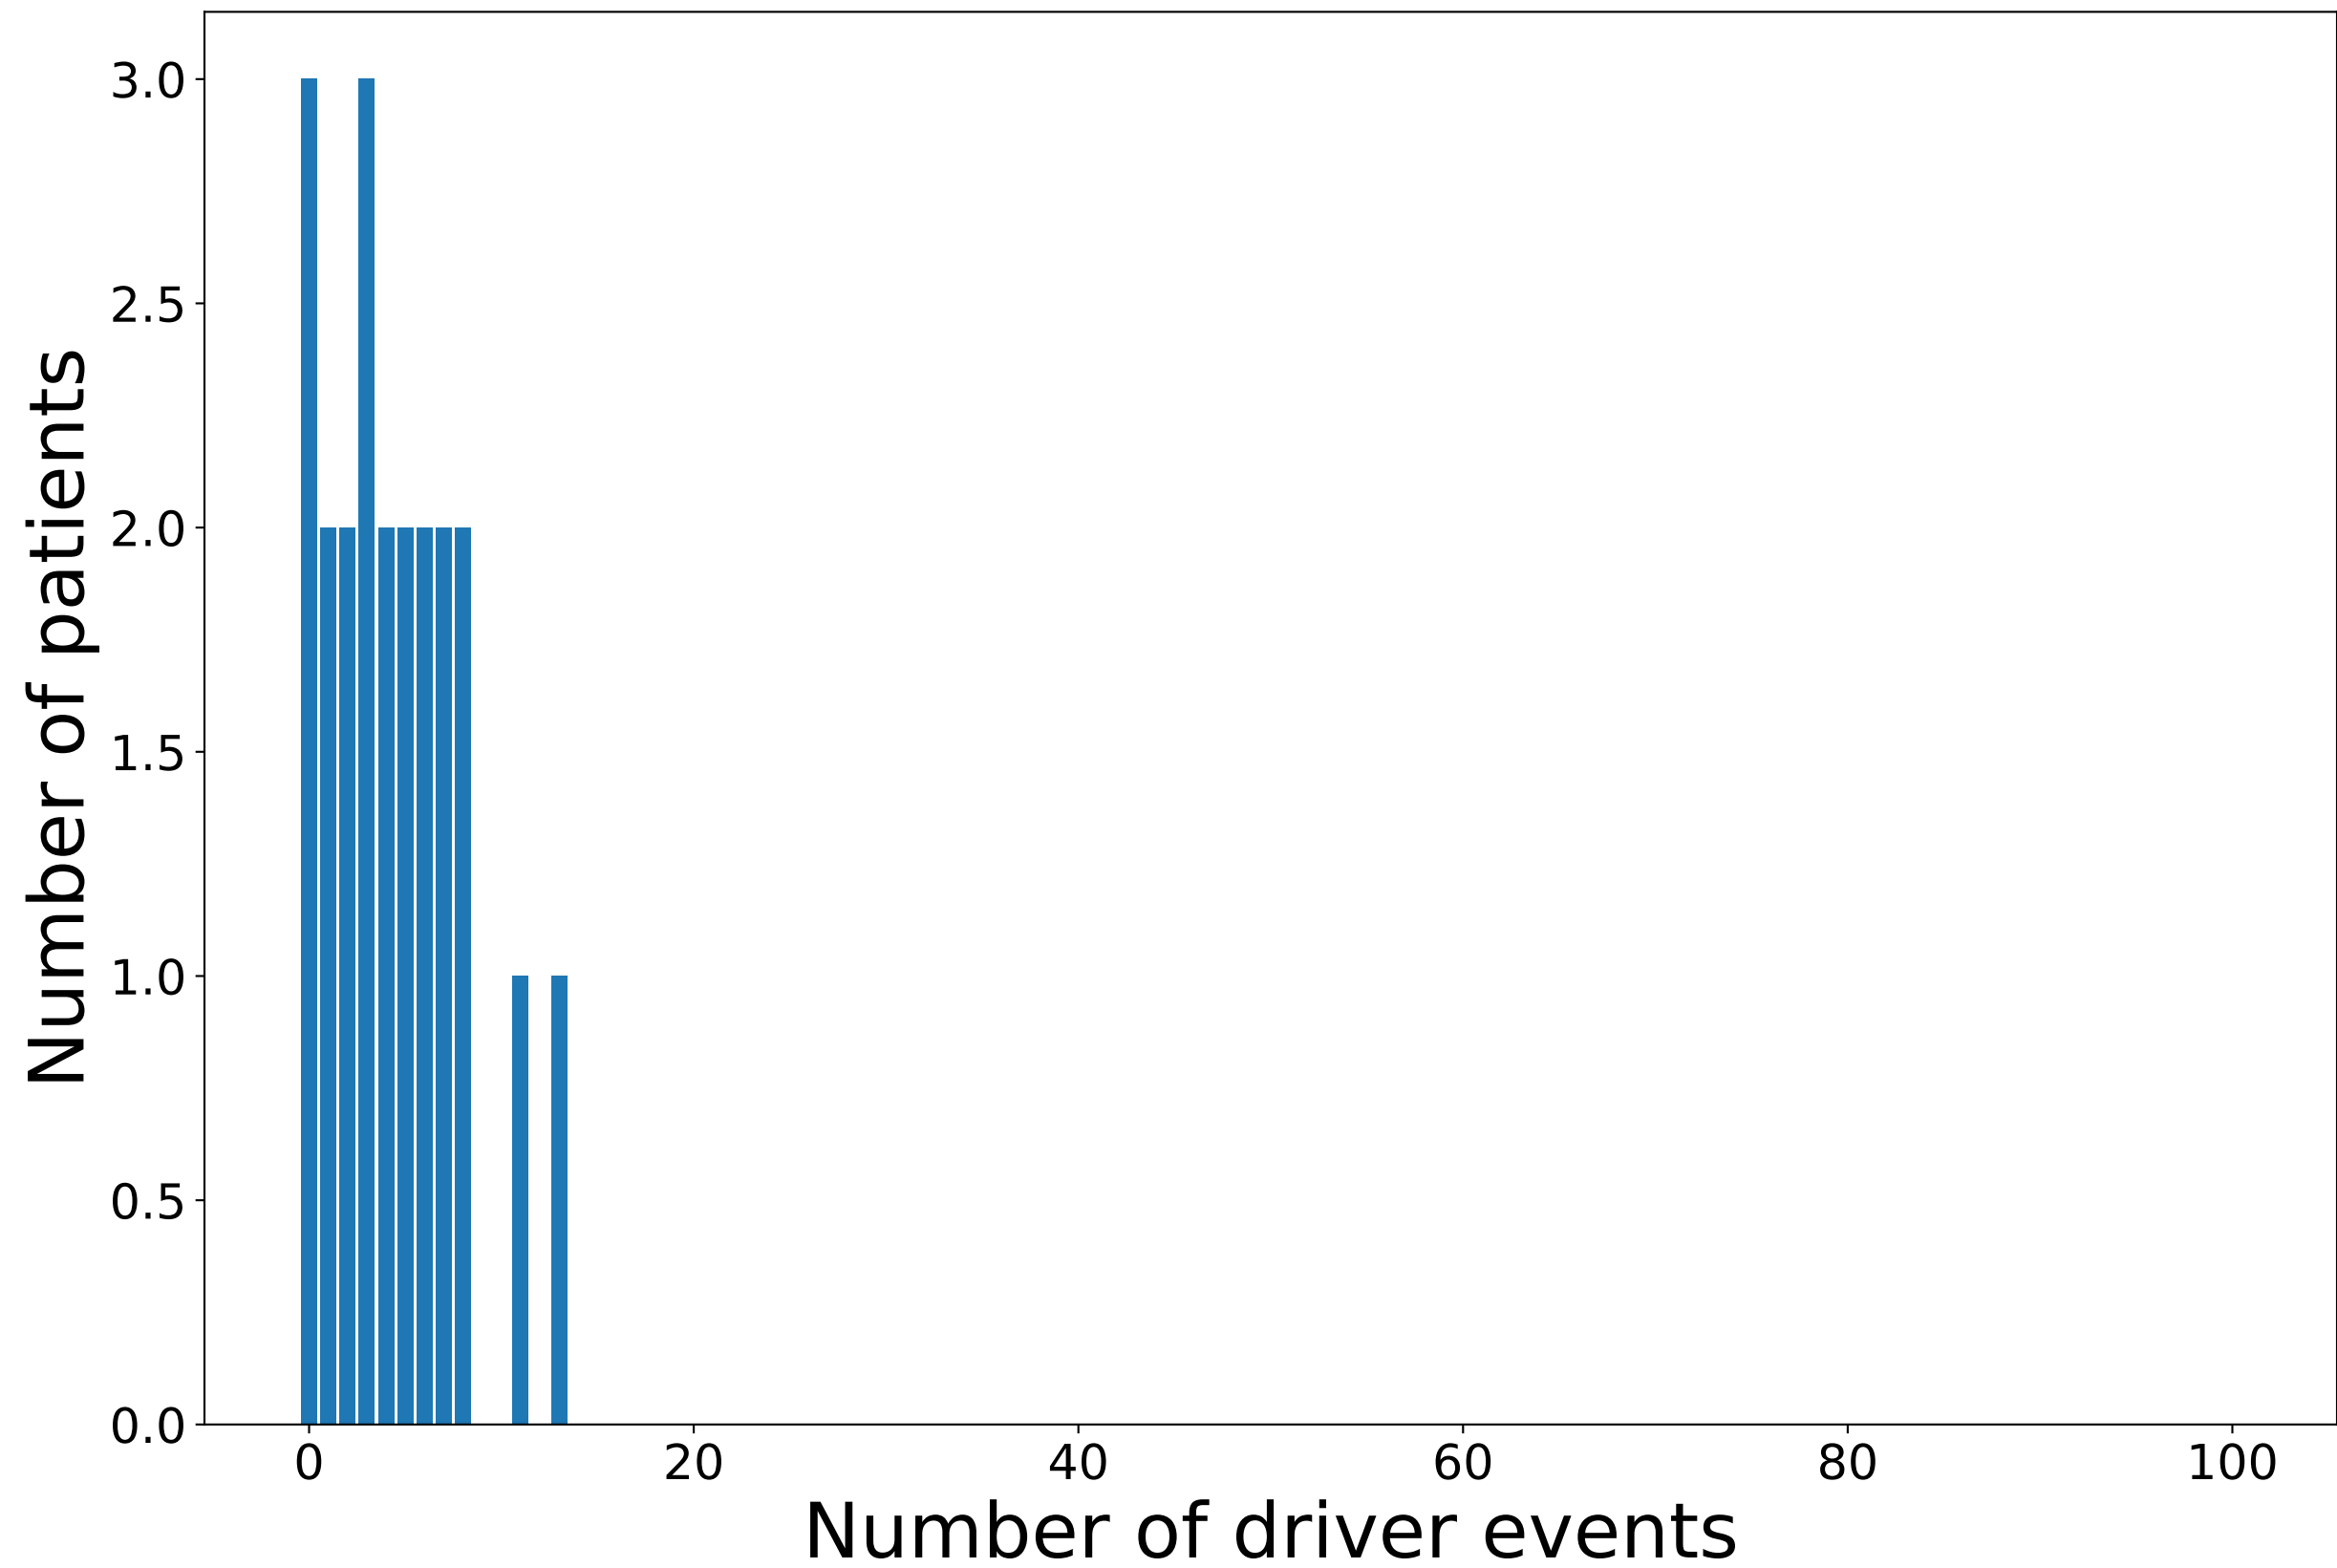

Supplement: Supplemental_Data_S1.zip [file Supplemental_Data_S1.zip]

# SKCM\_FEMALE

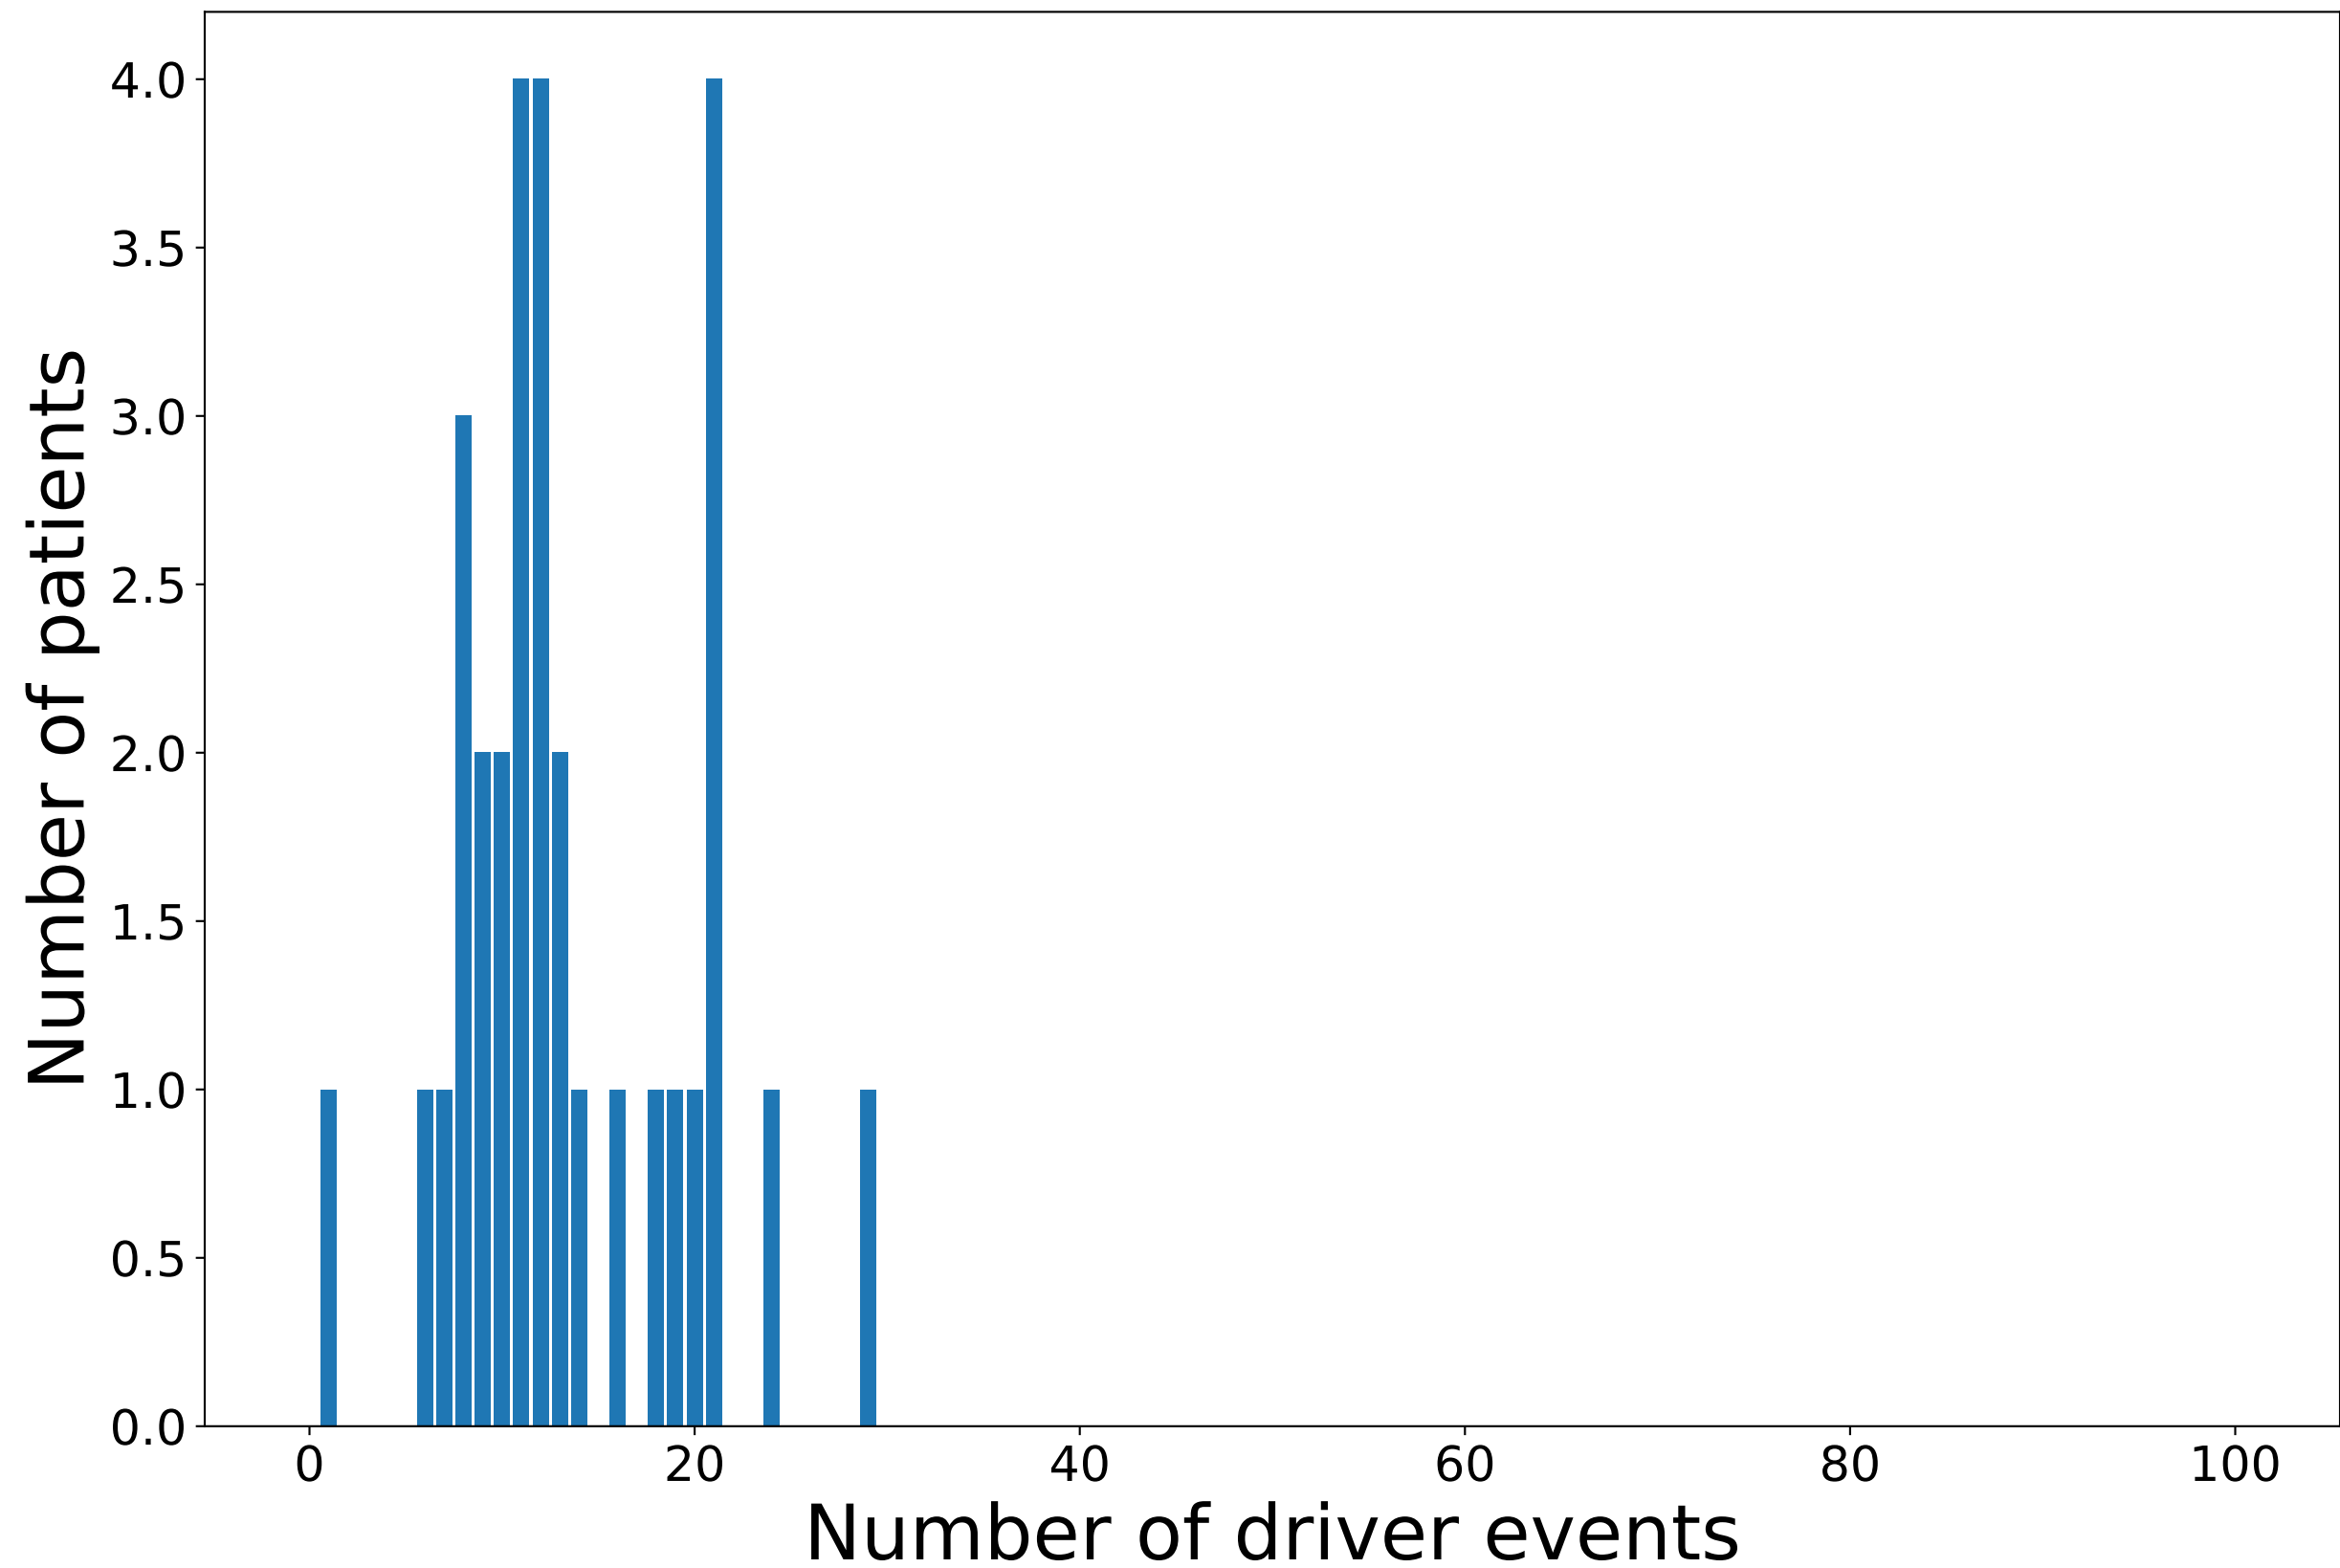

Supplement: Supplemental_Data_S1.zip [file Supplemental_Data_S1.zip]

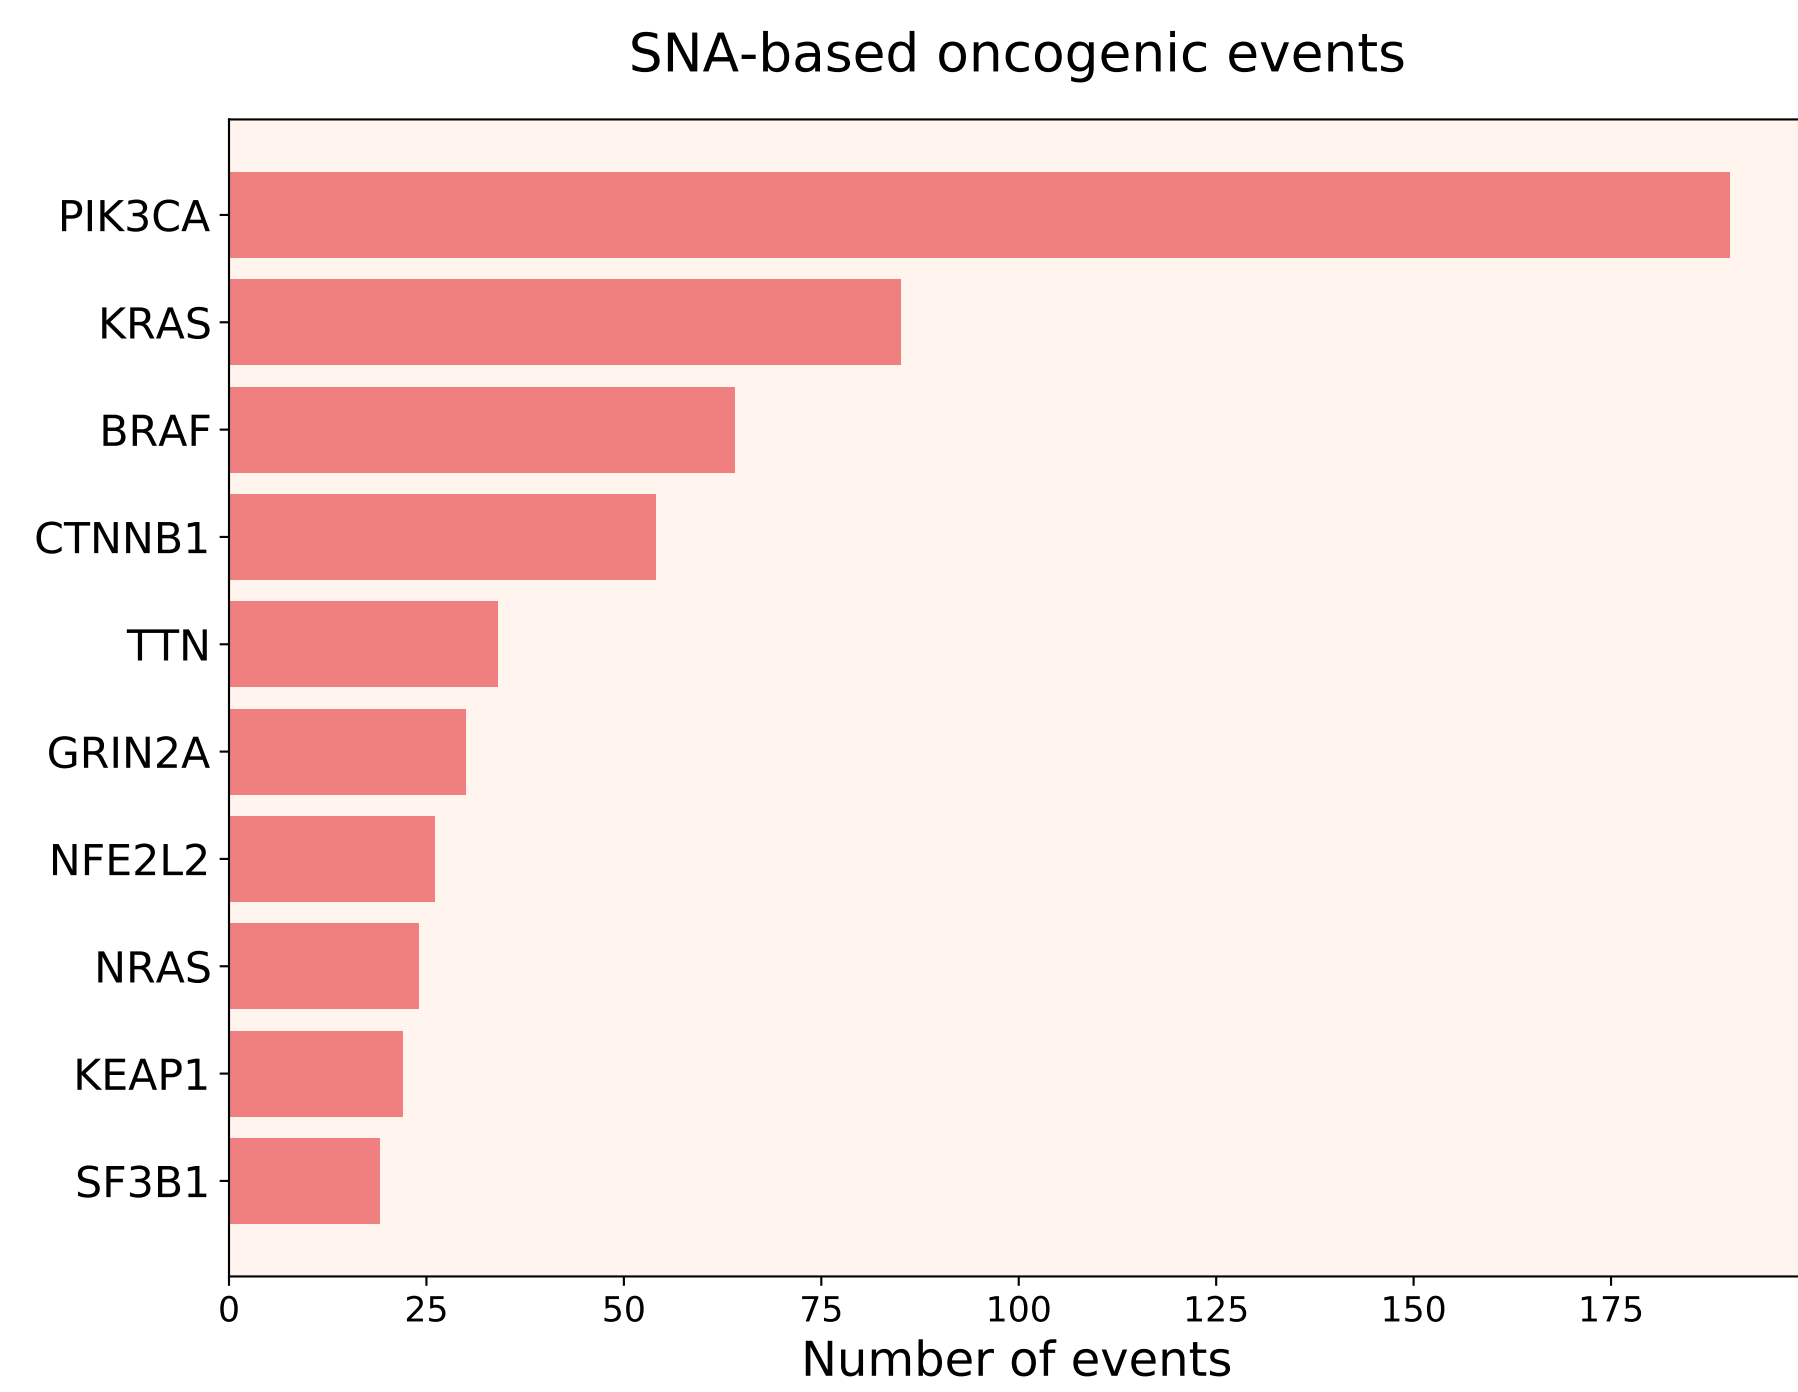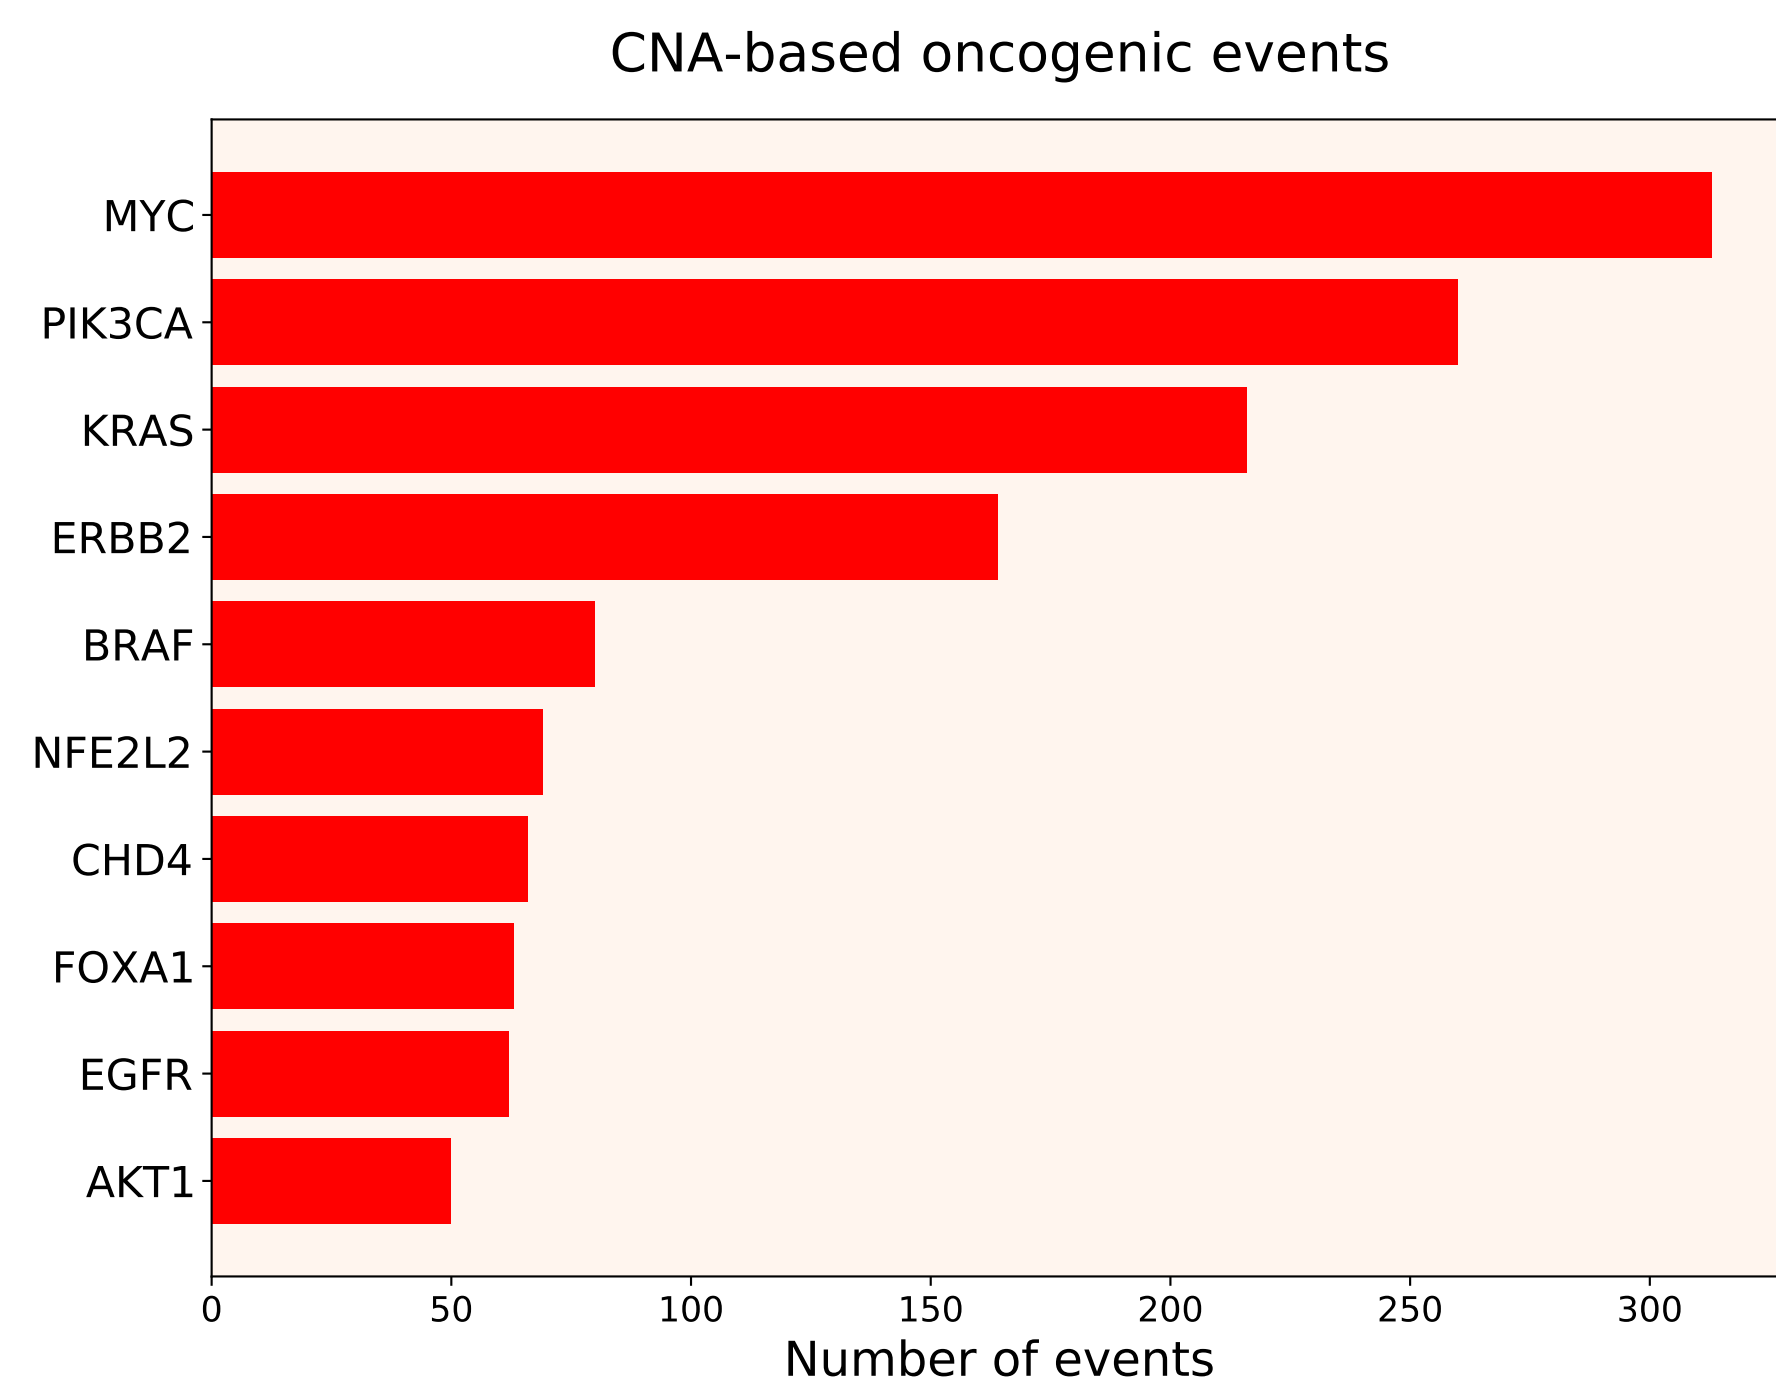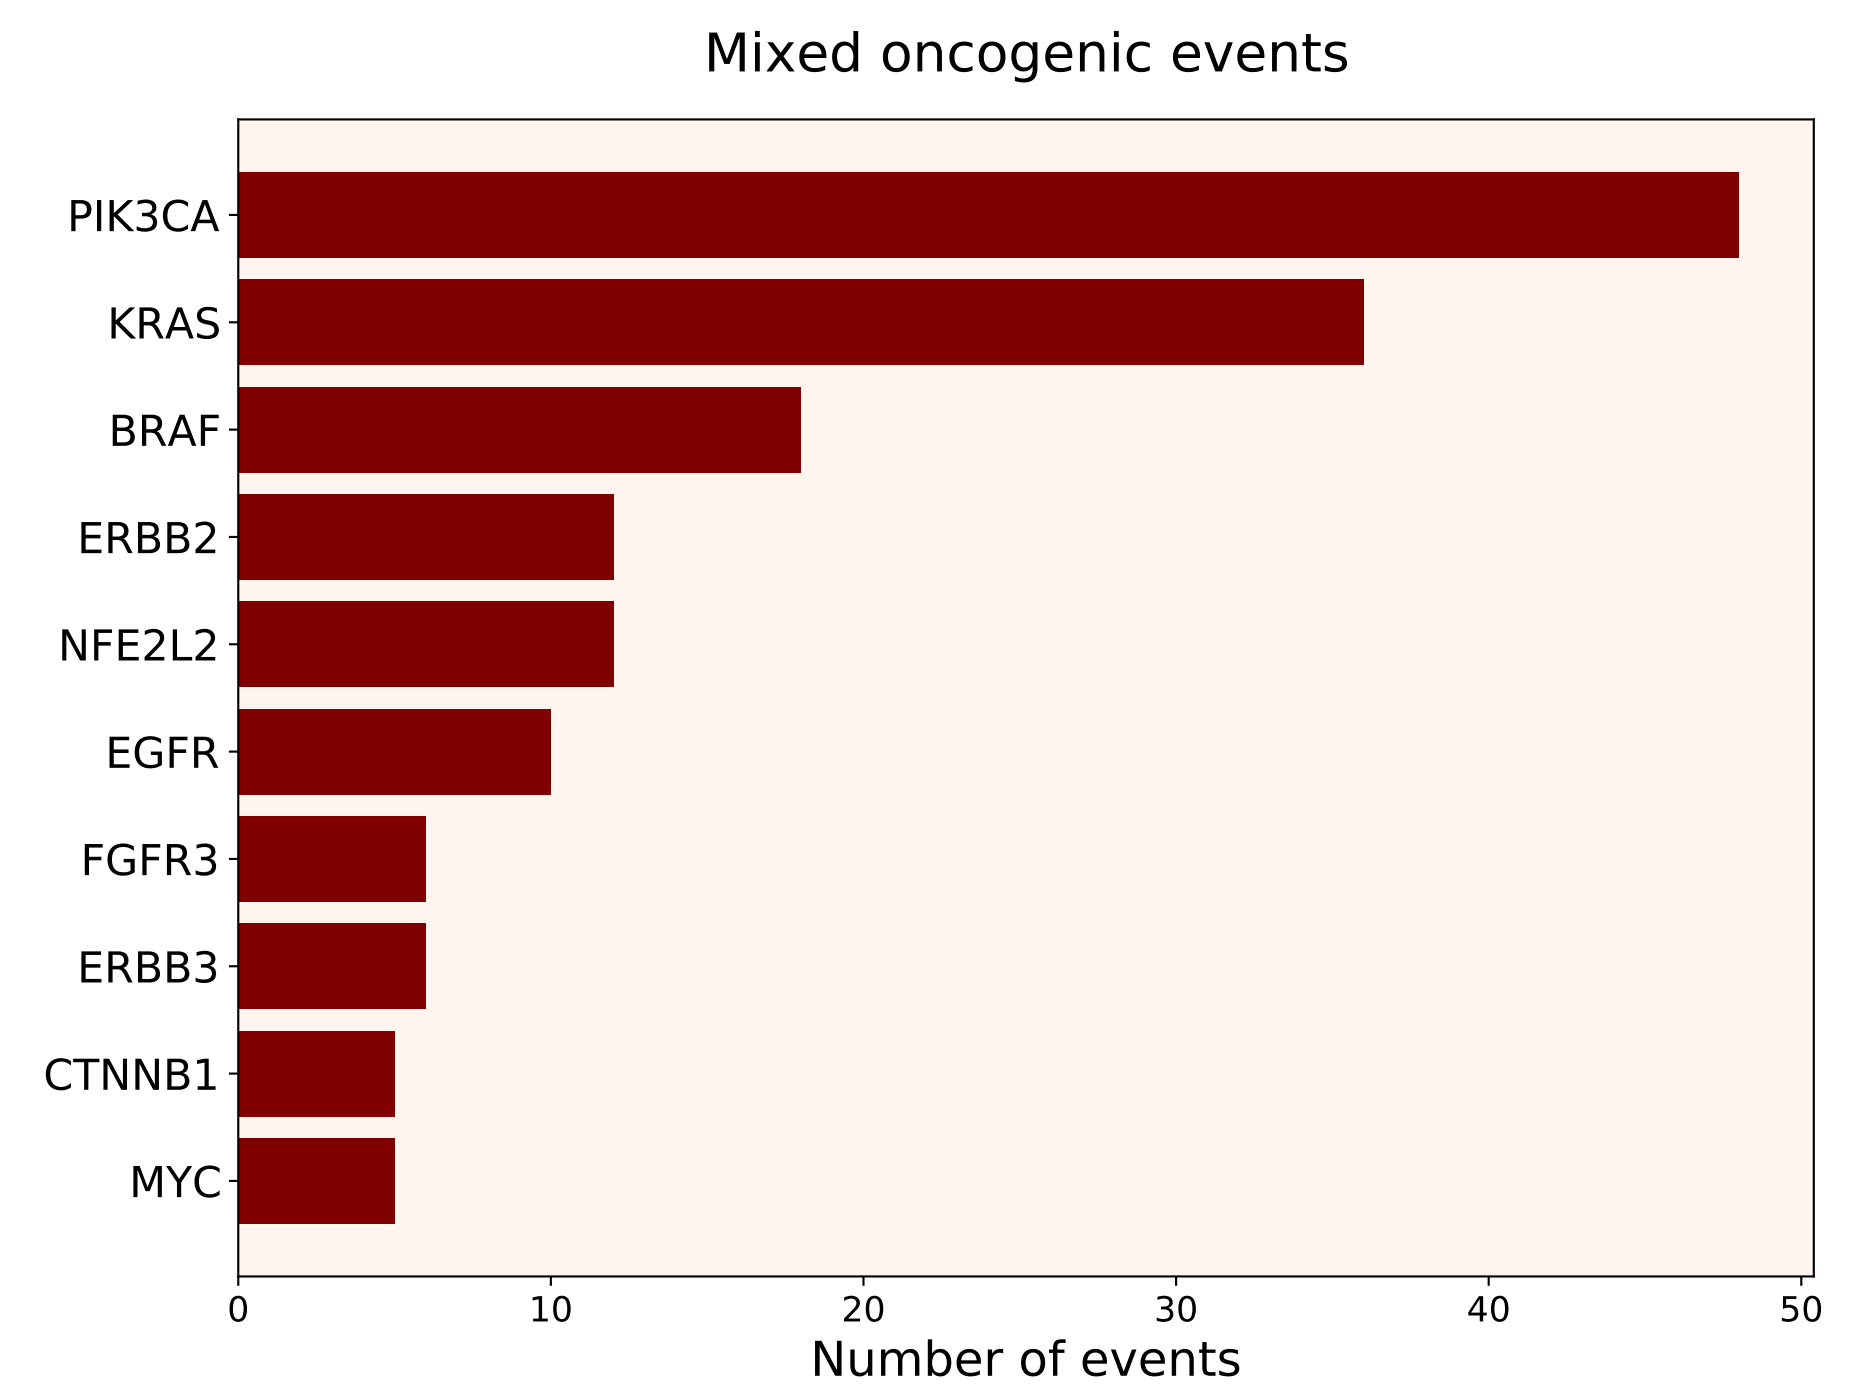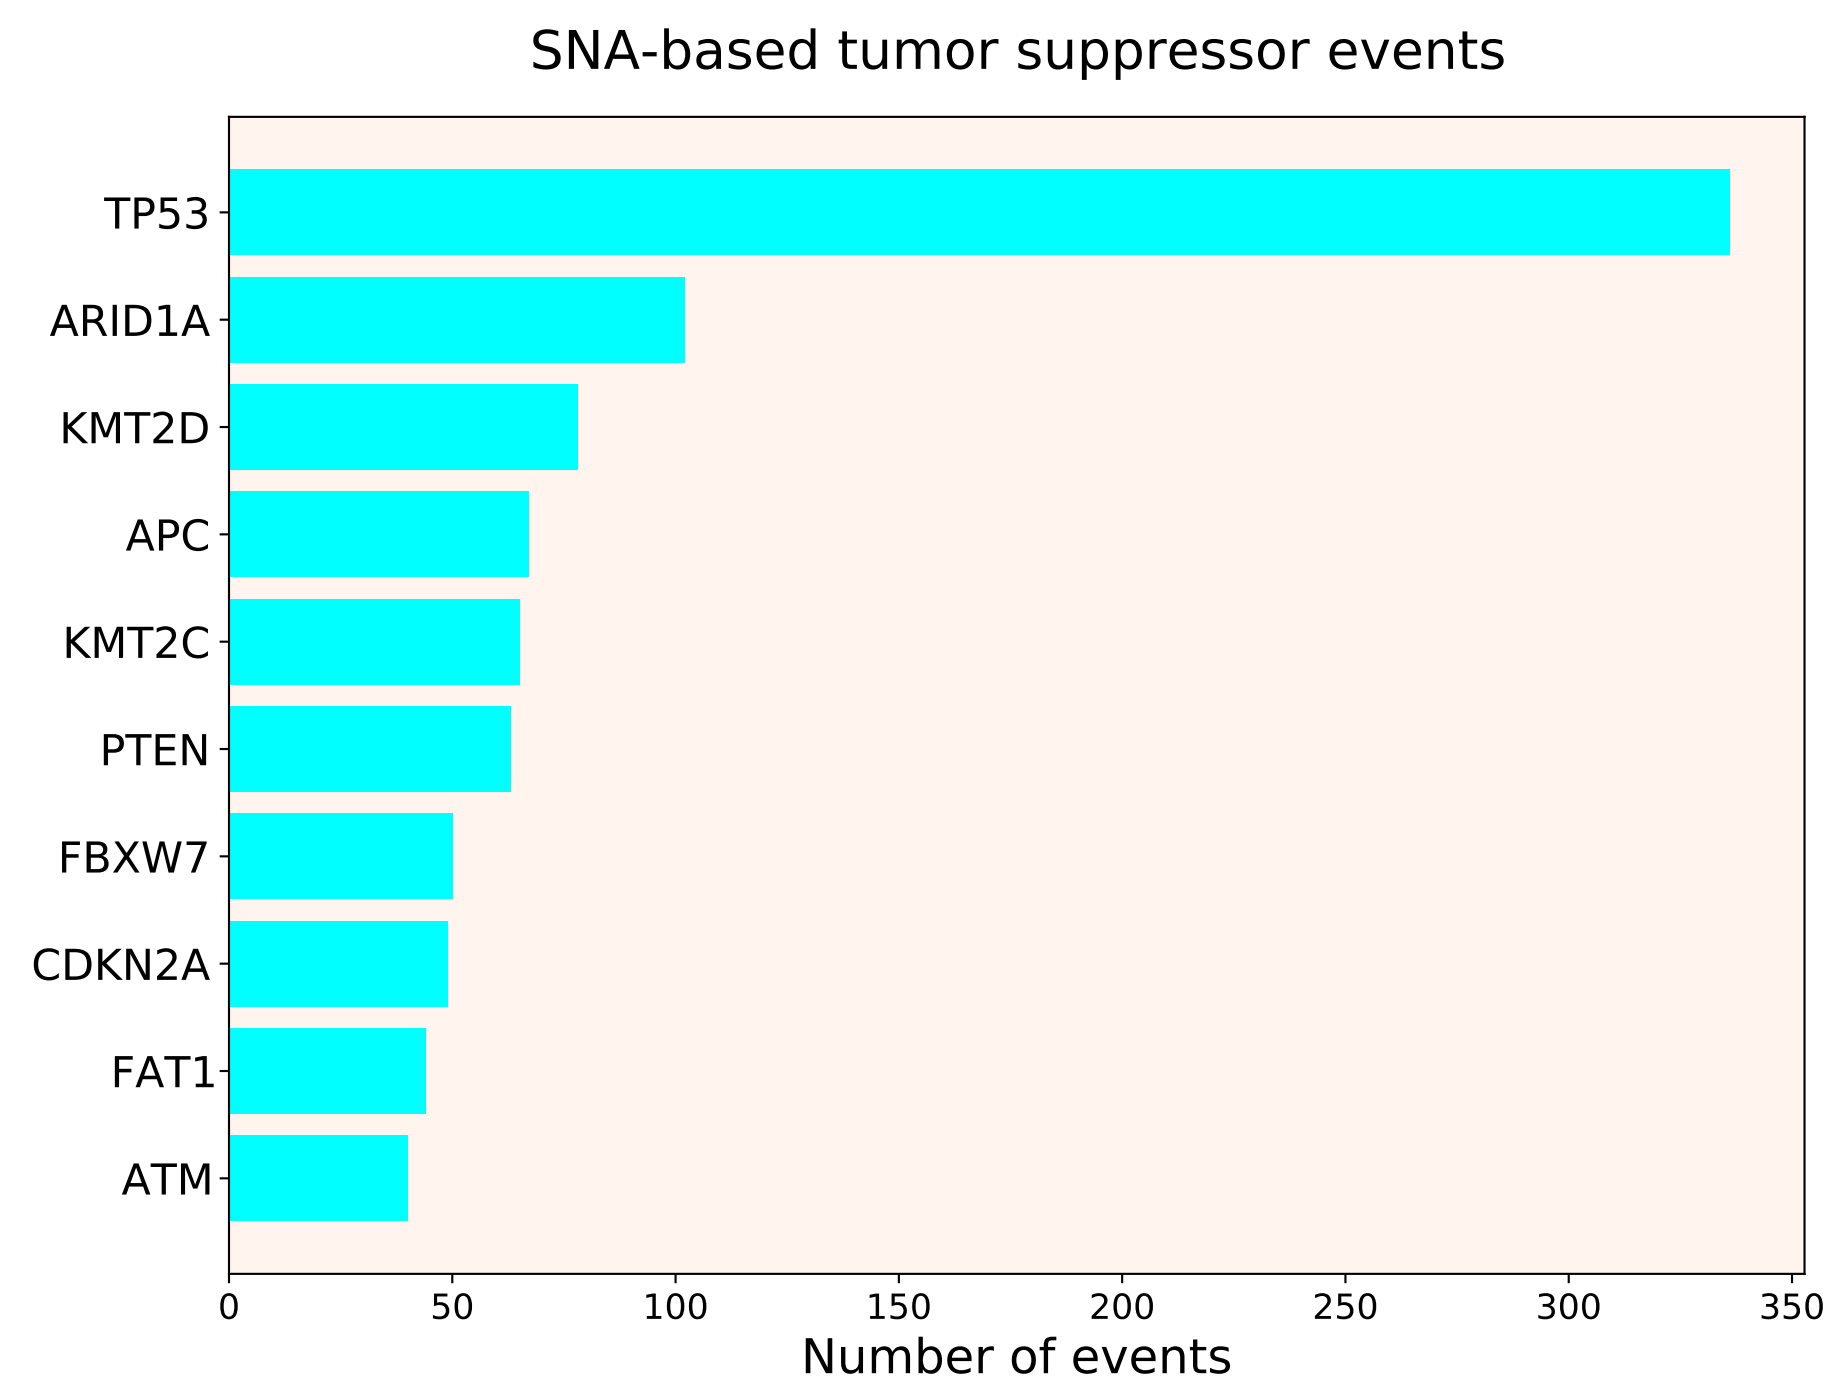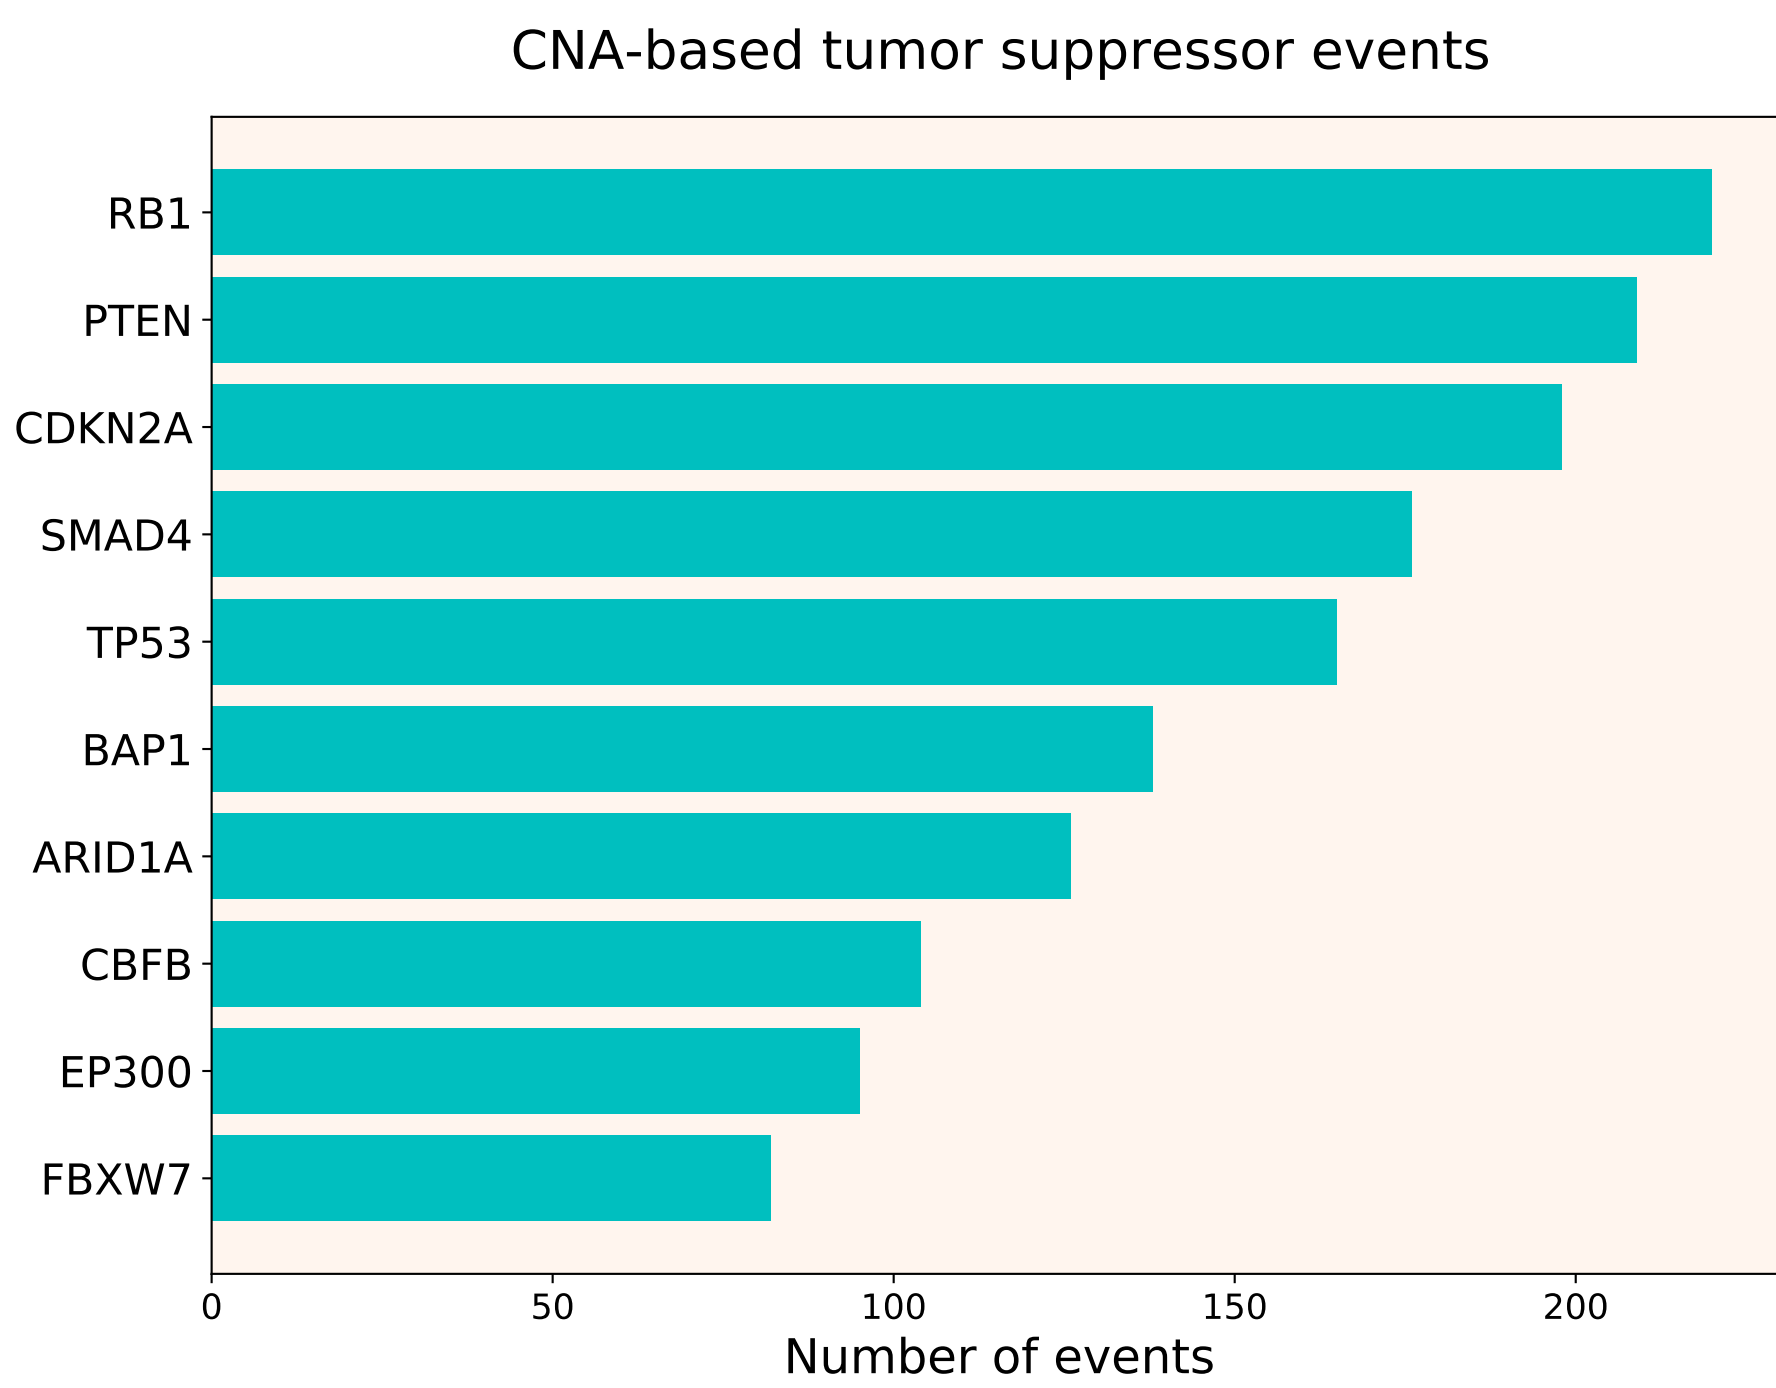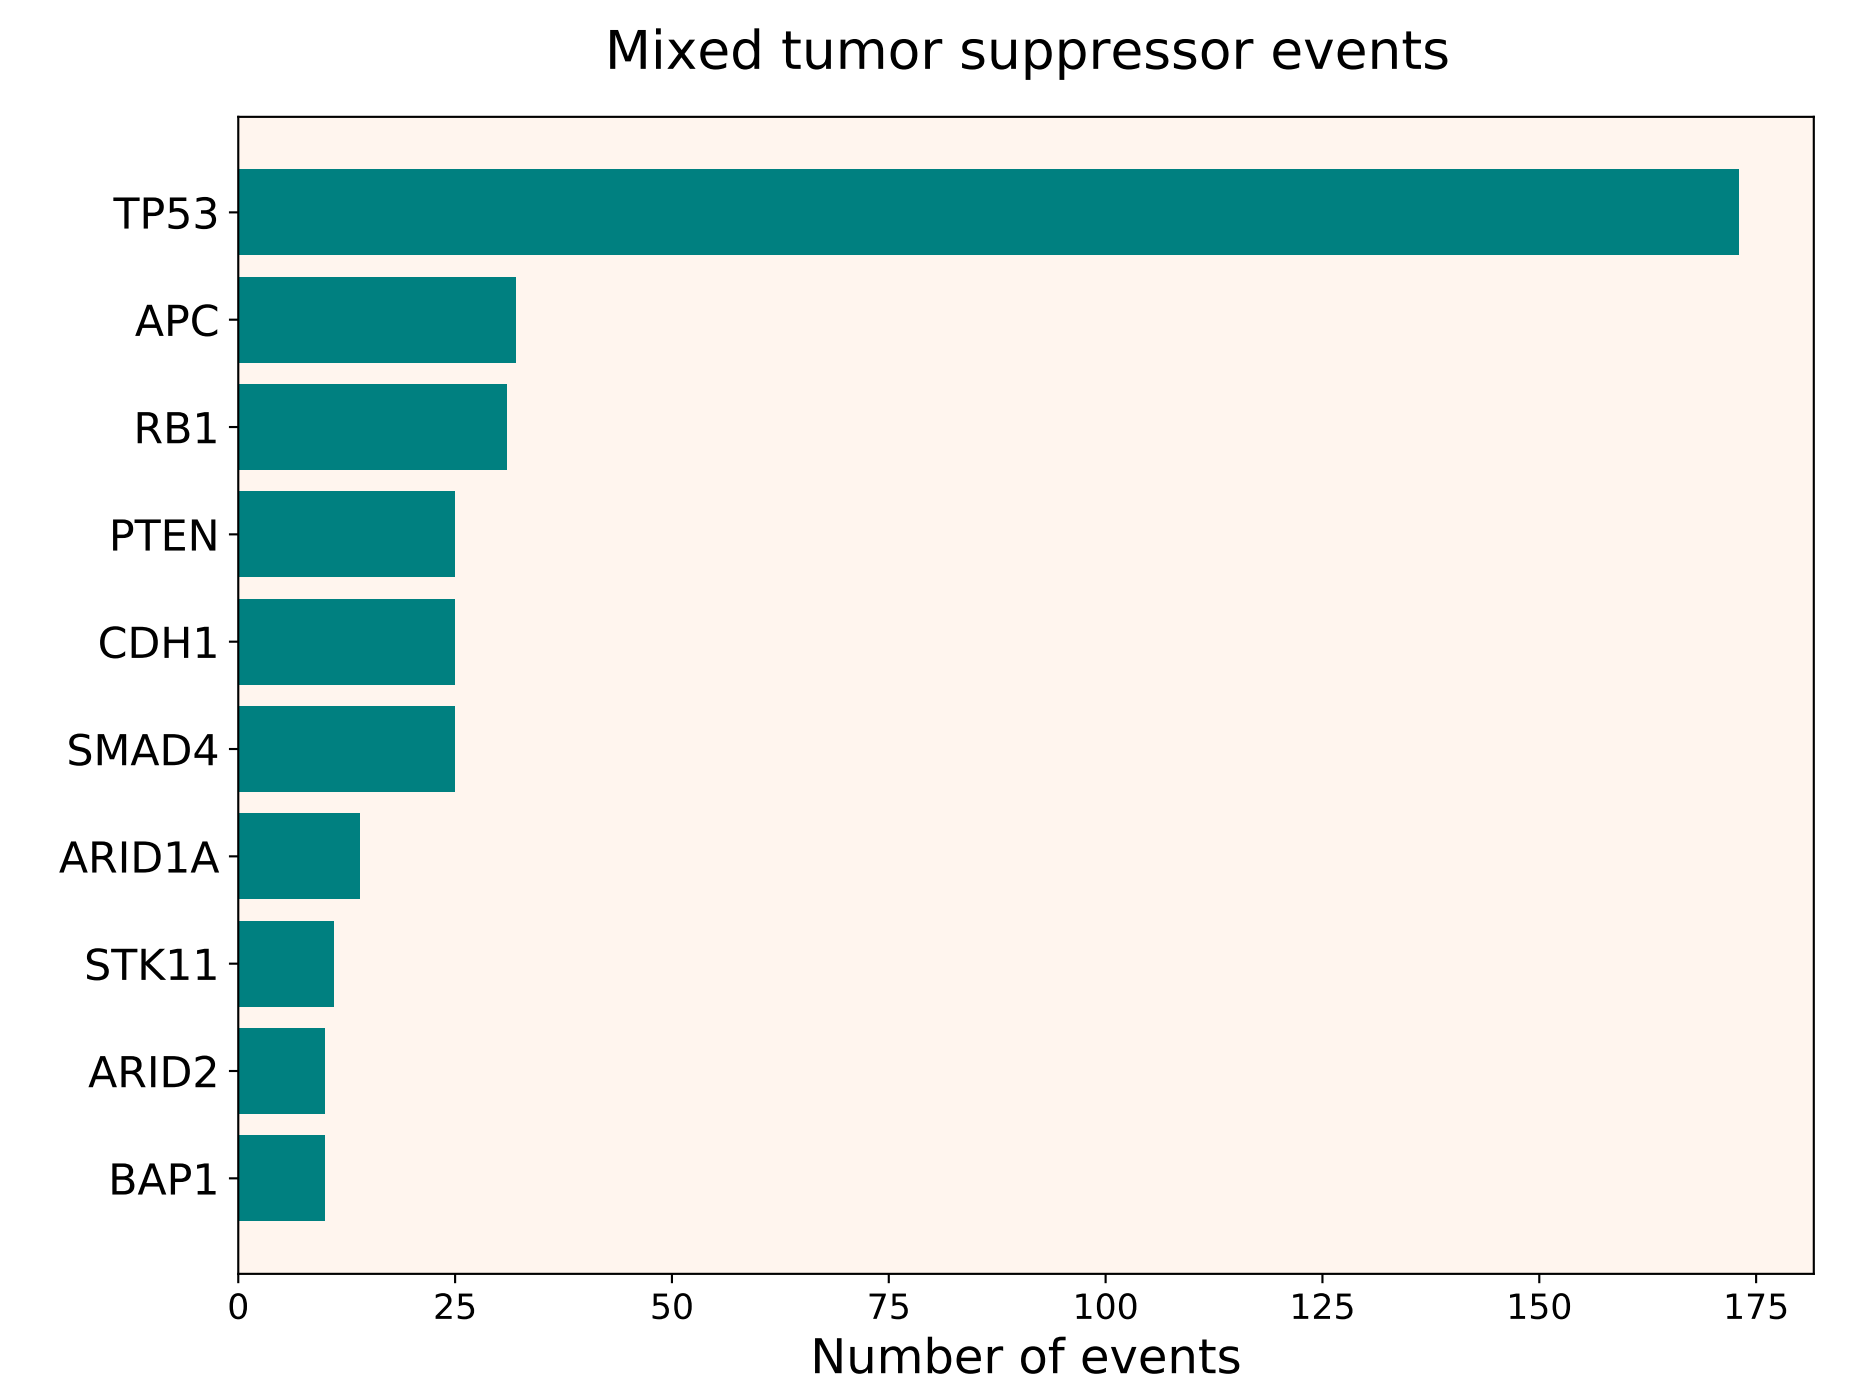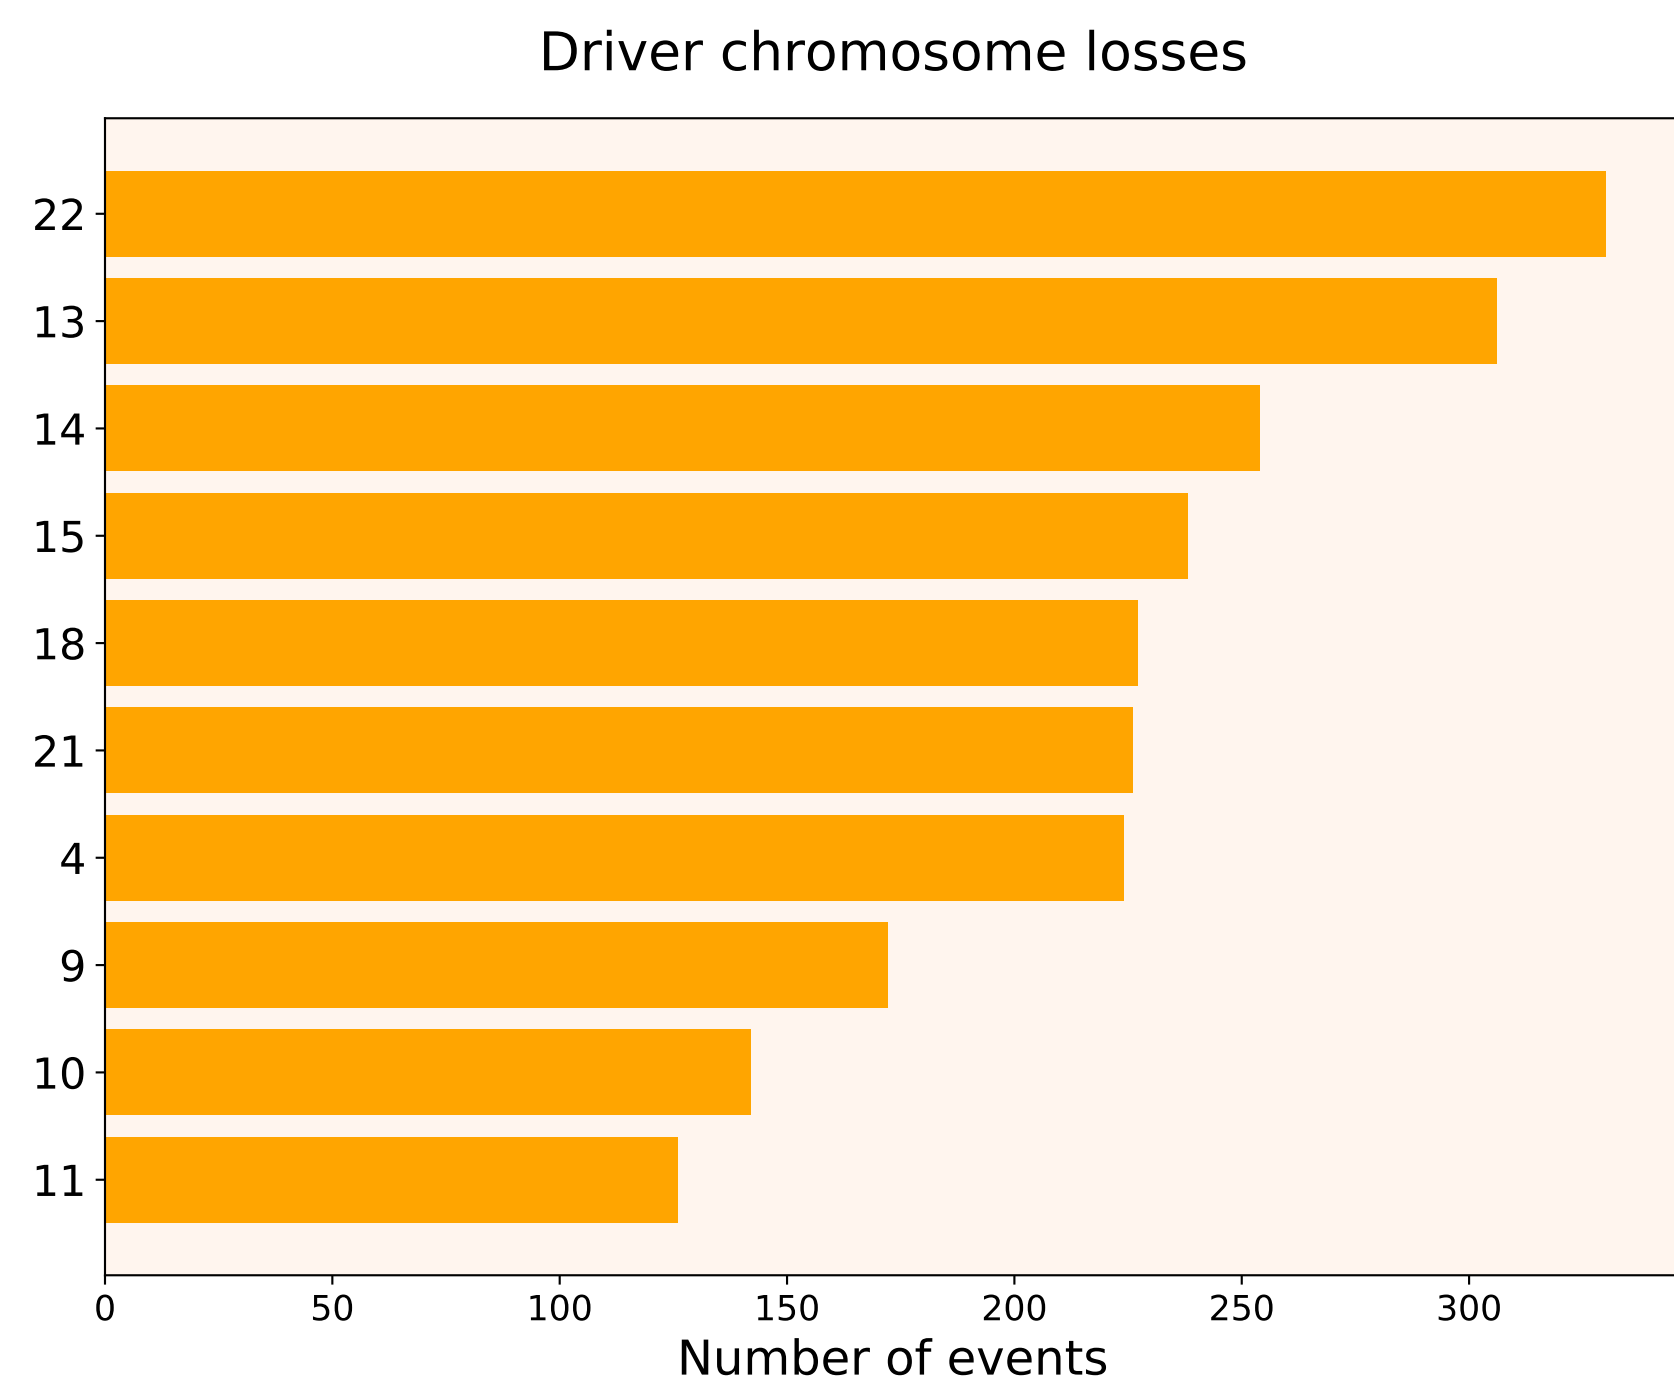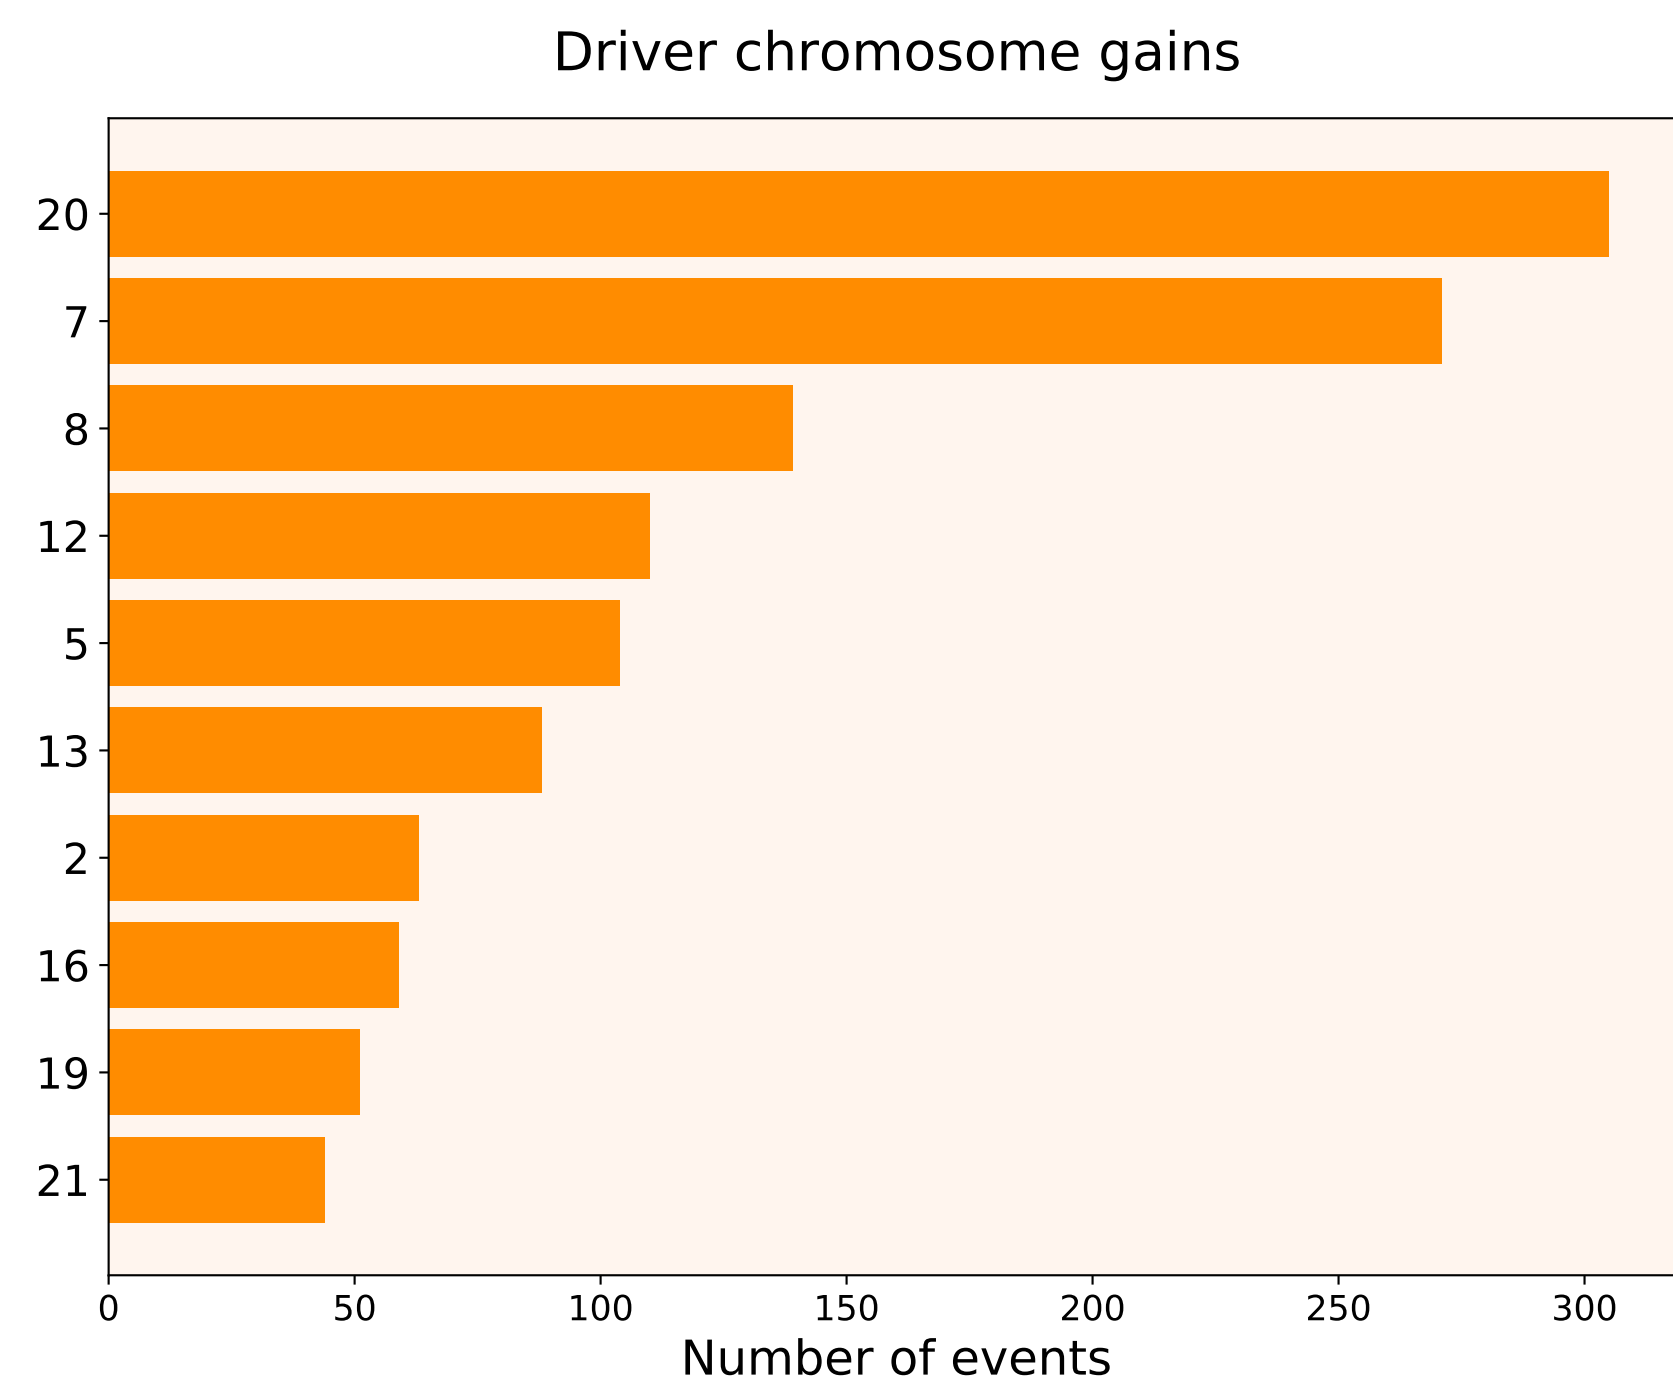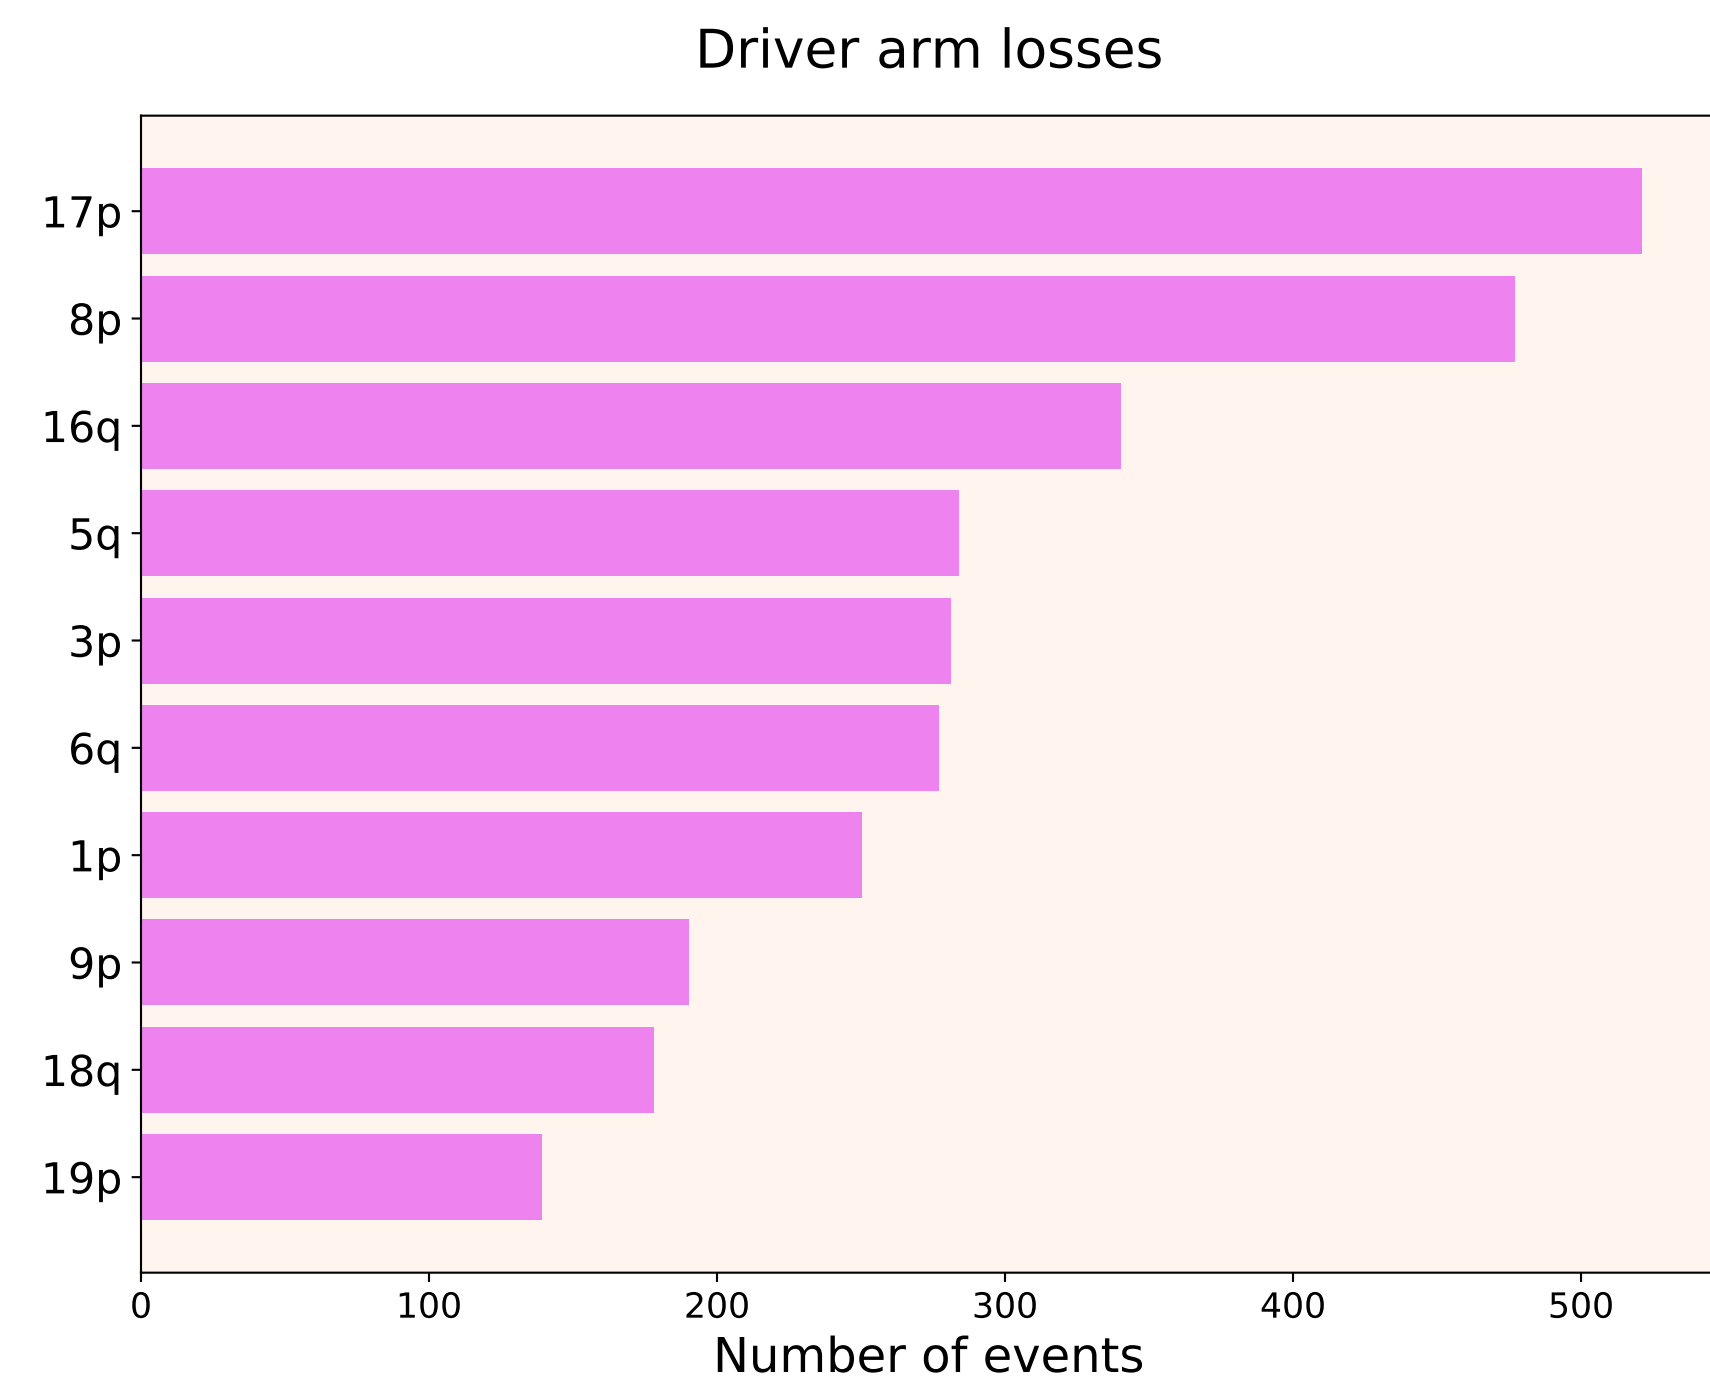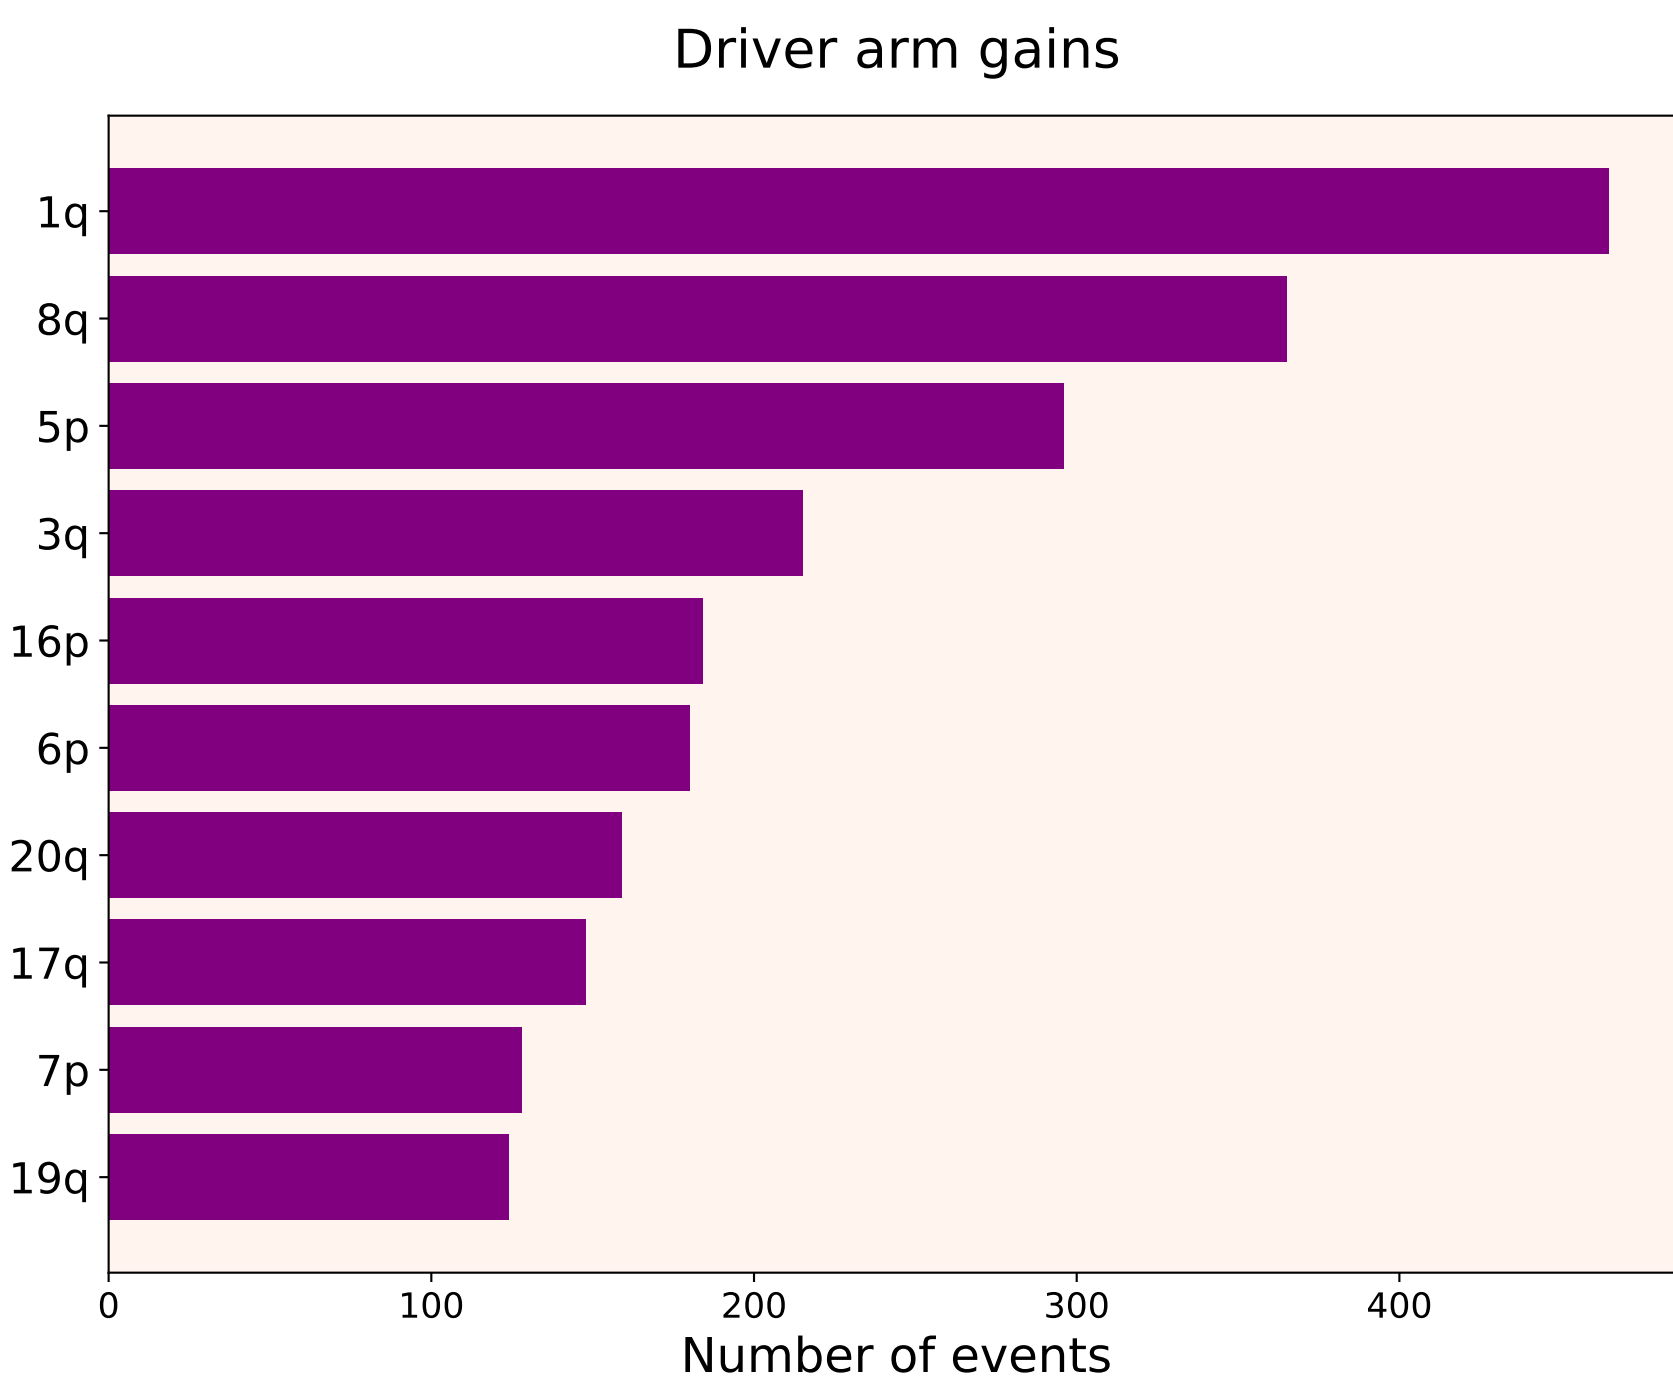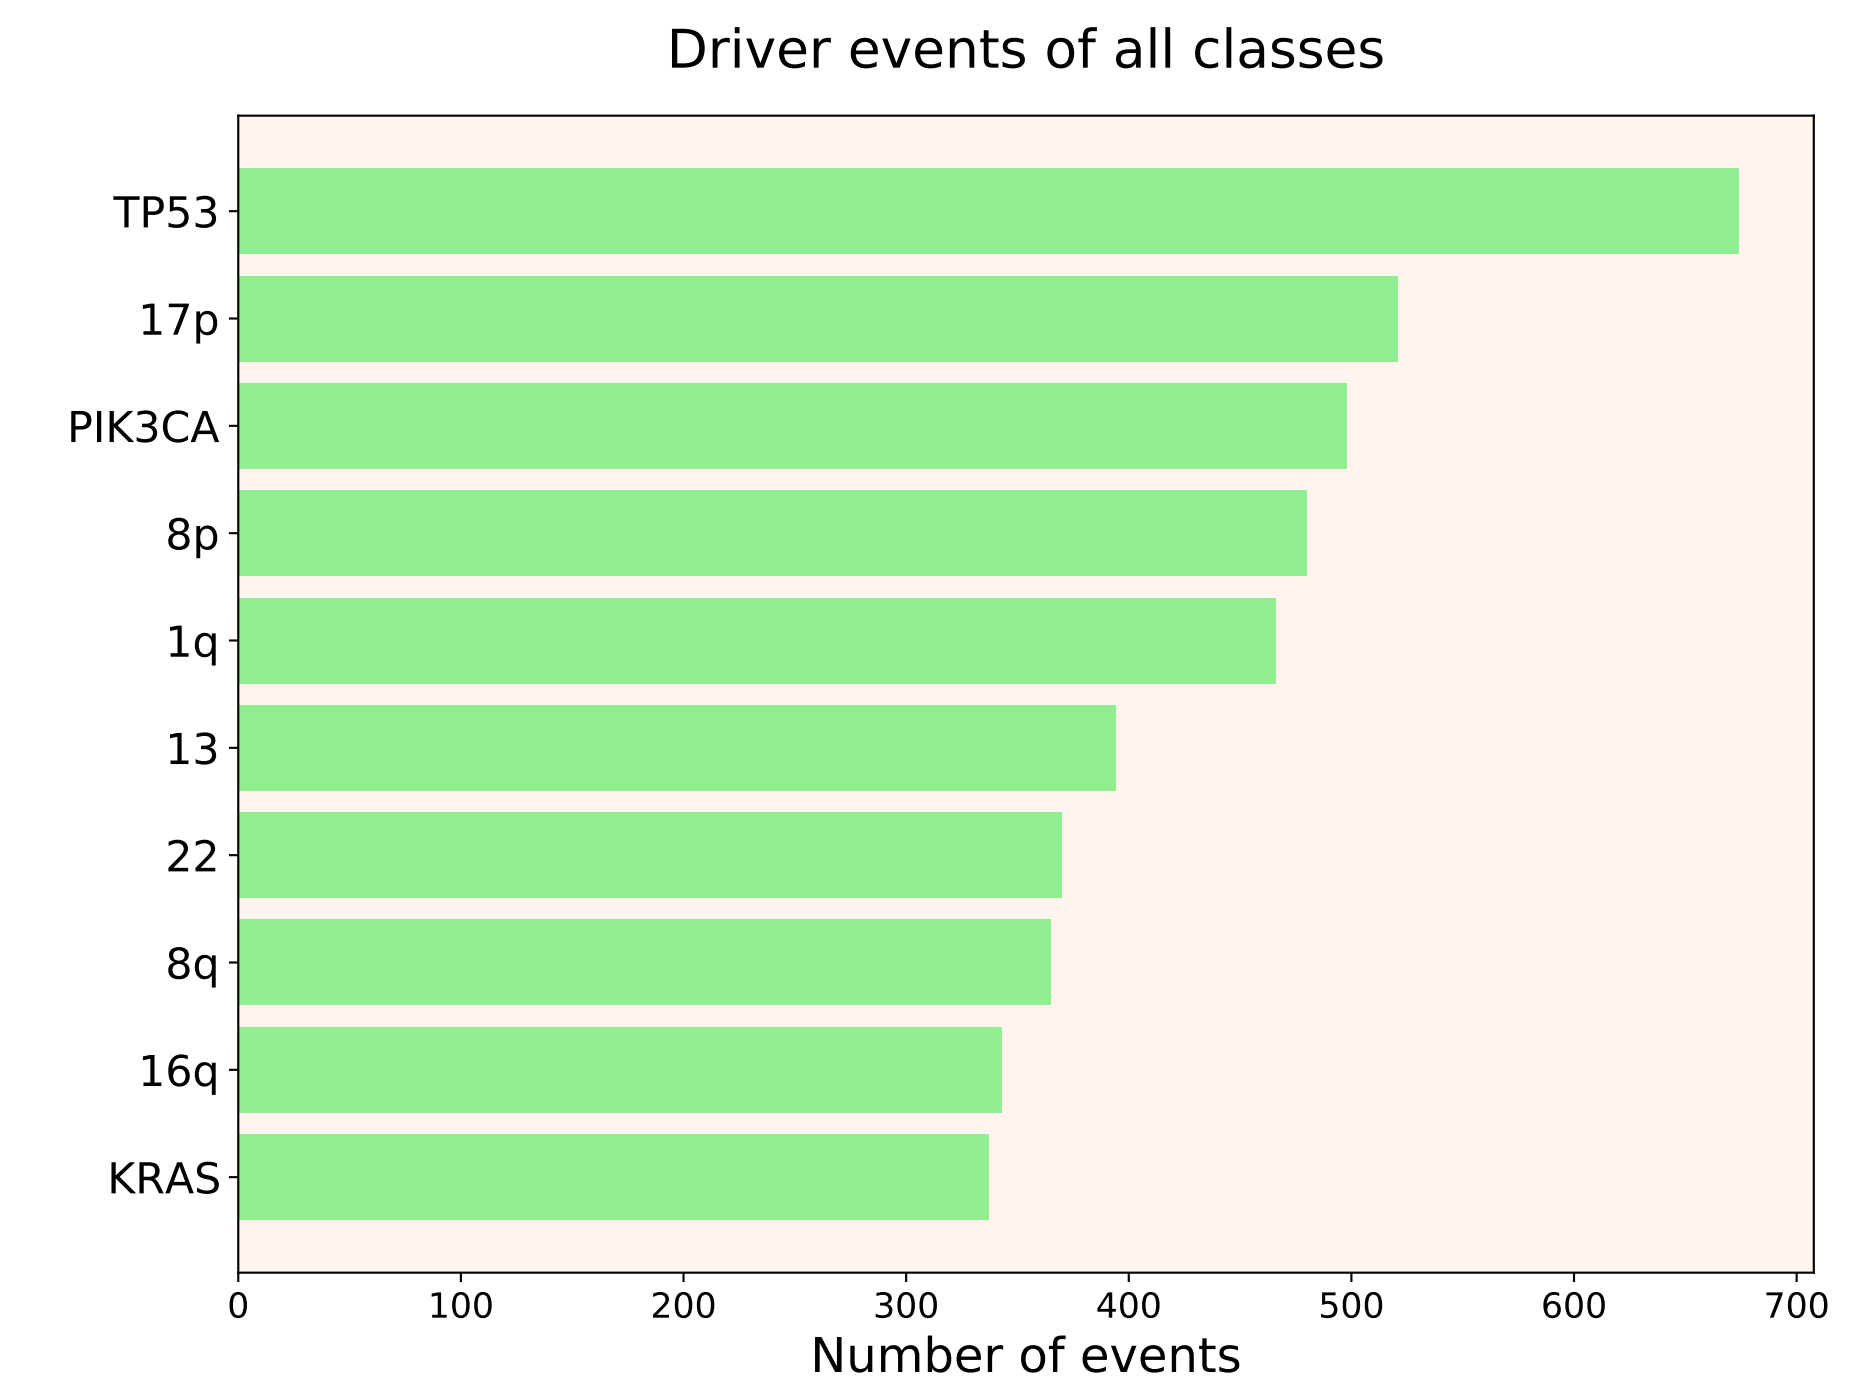

Supplement: Supplemental_Data_S1.zip [file Supplemental_Data_S1.zip]

# UVM\_MALE

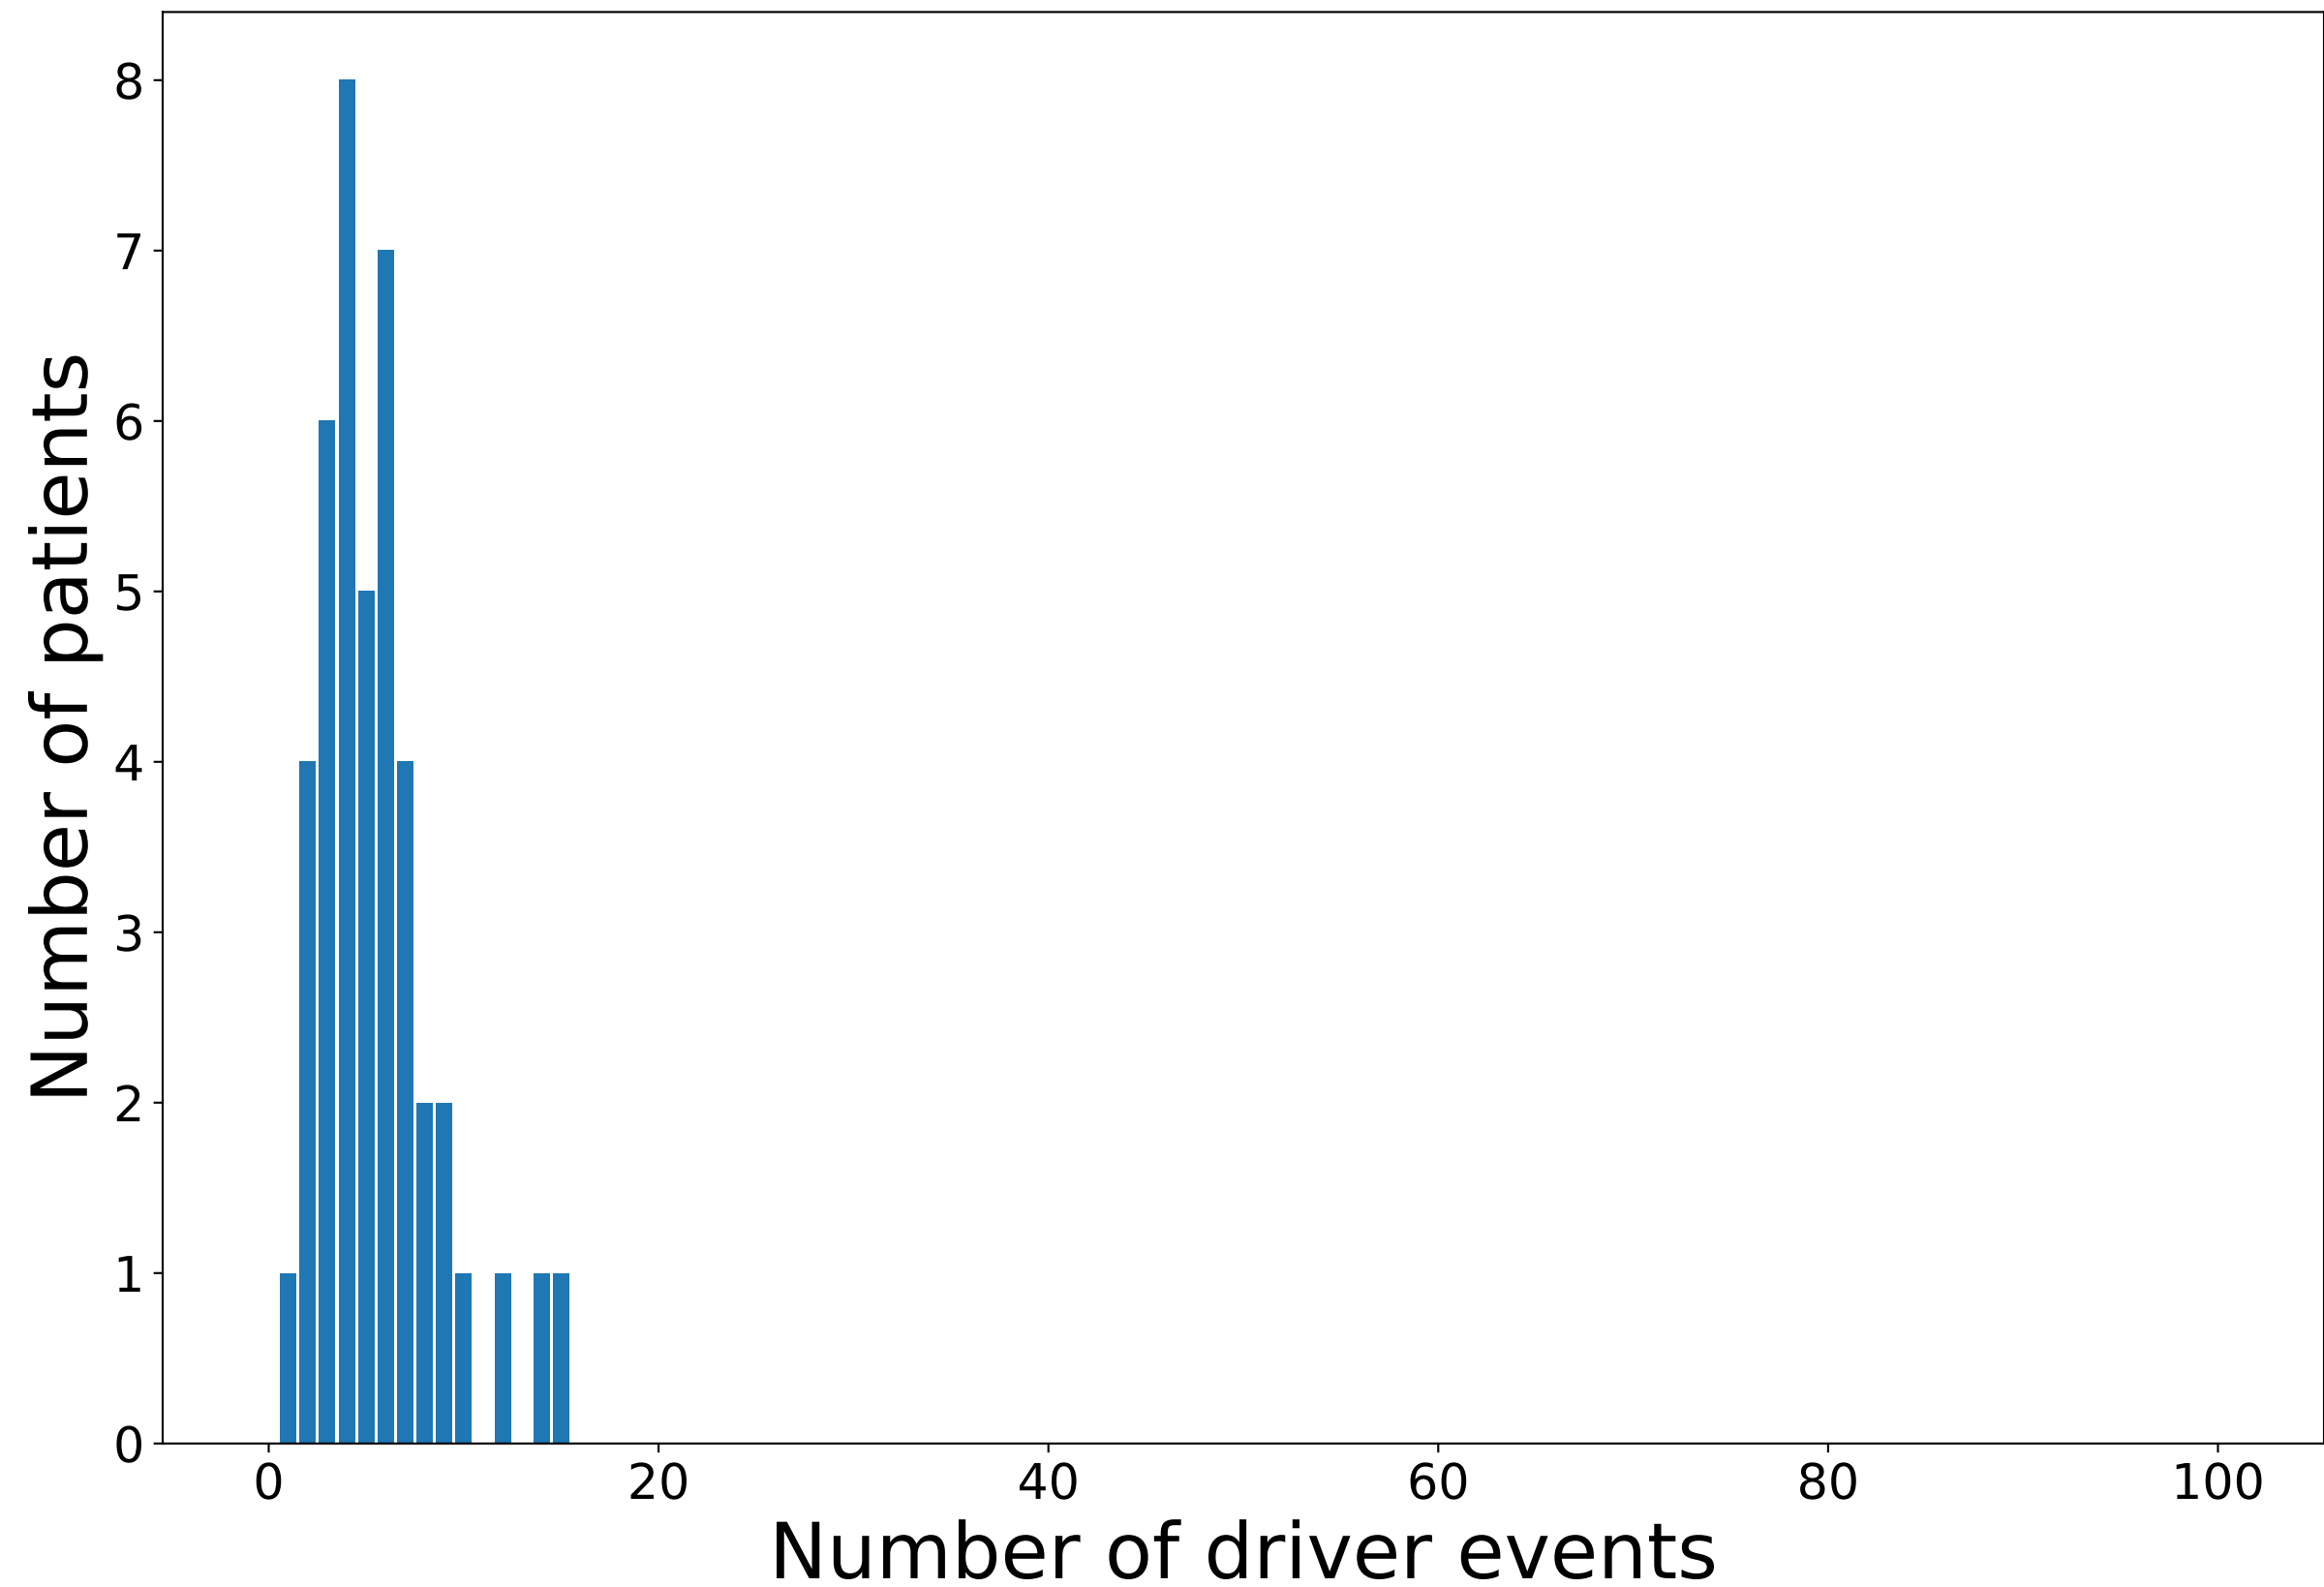

Supplement: Supplemental_Data_S1.zip [file Supplemental_Data_S1.zip]

# GBM\_FEMALE

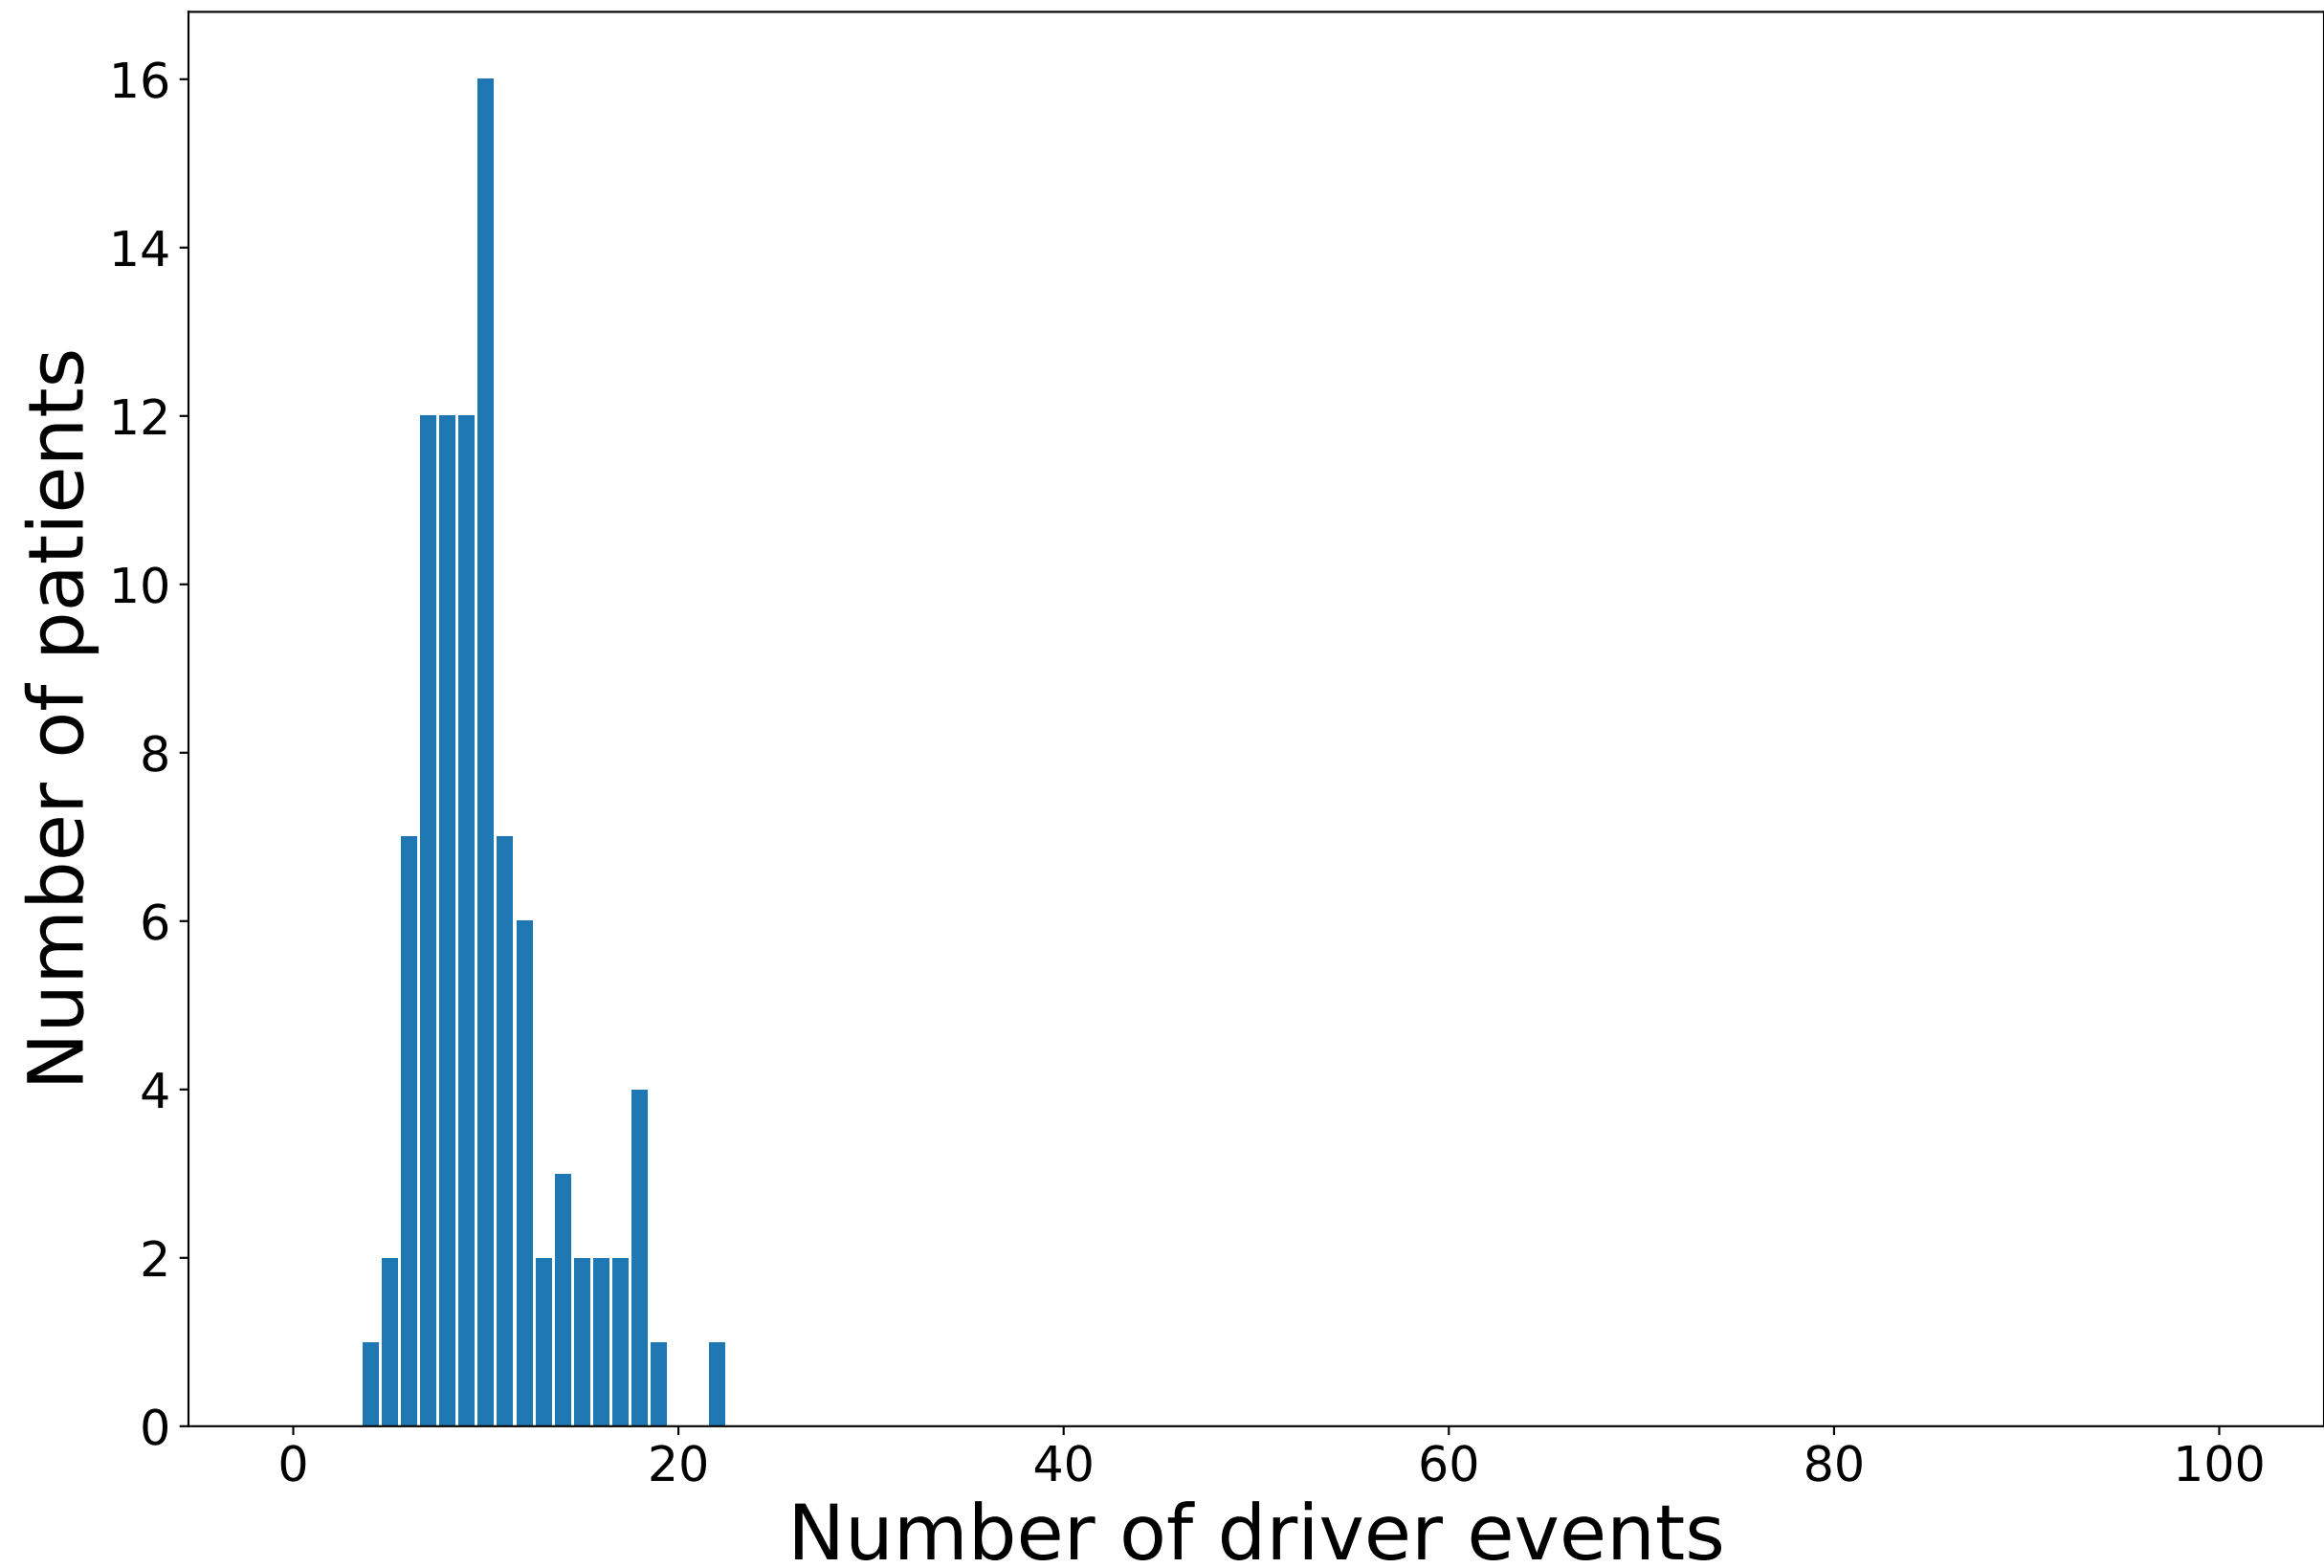

Supplement: Supplemental_Data_S1.zip [file Supplemental_Data_S1.zip]

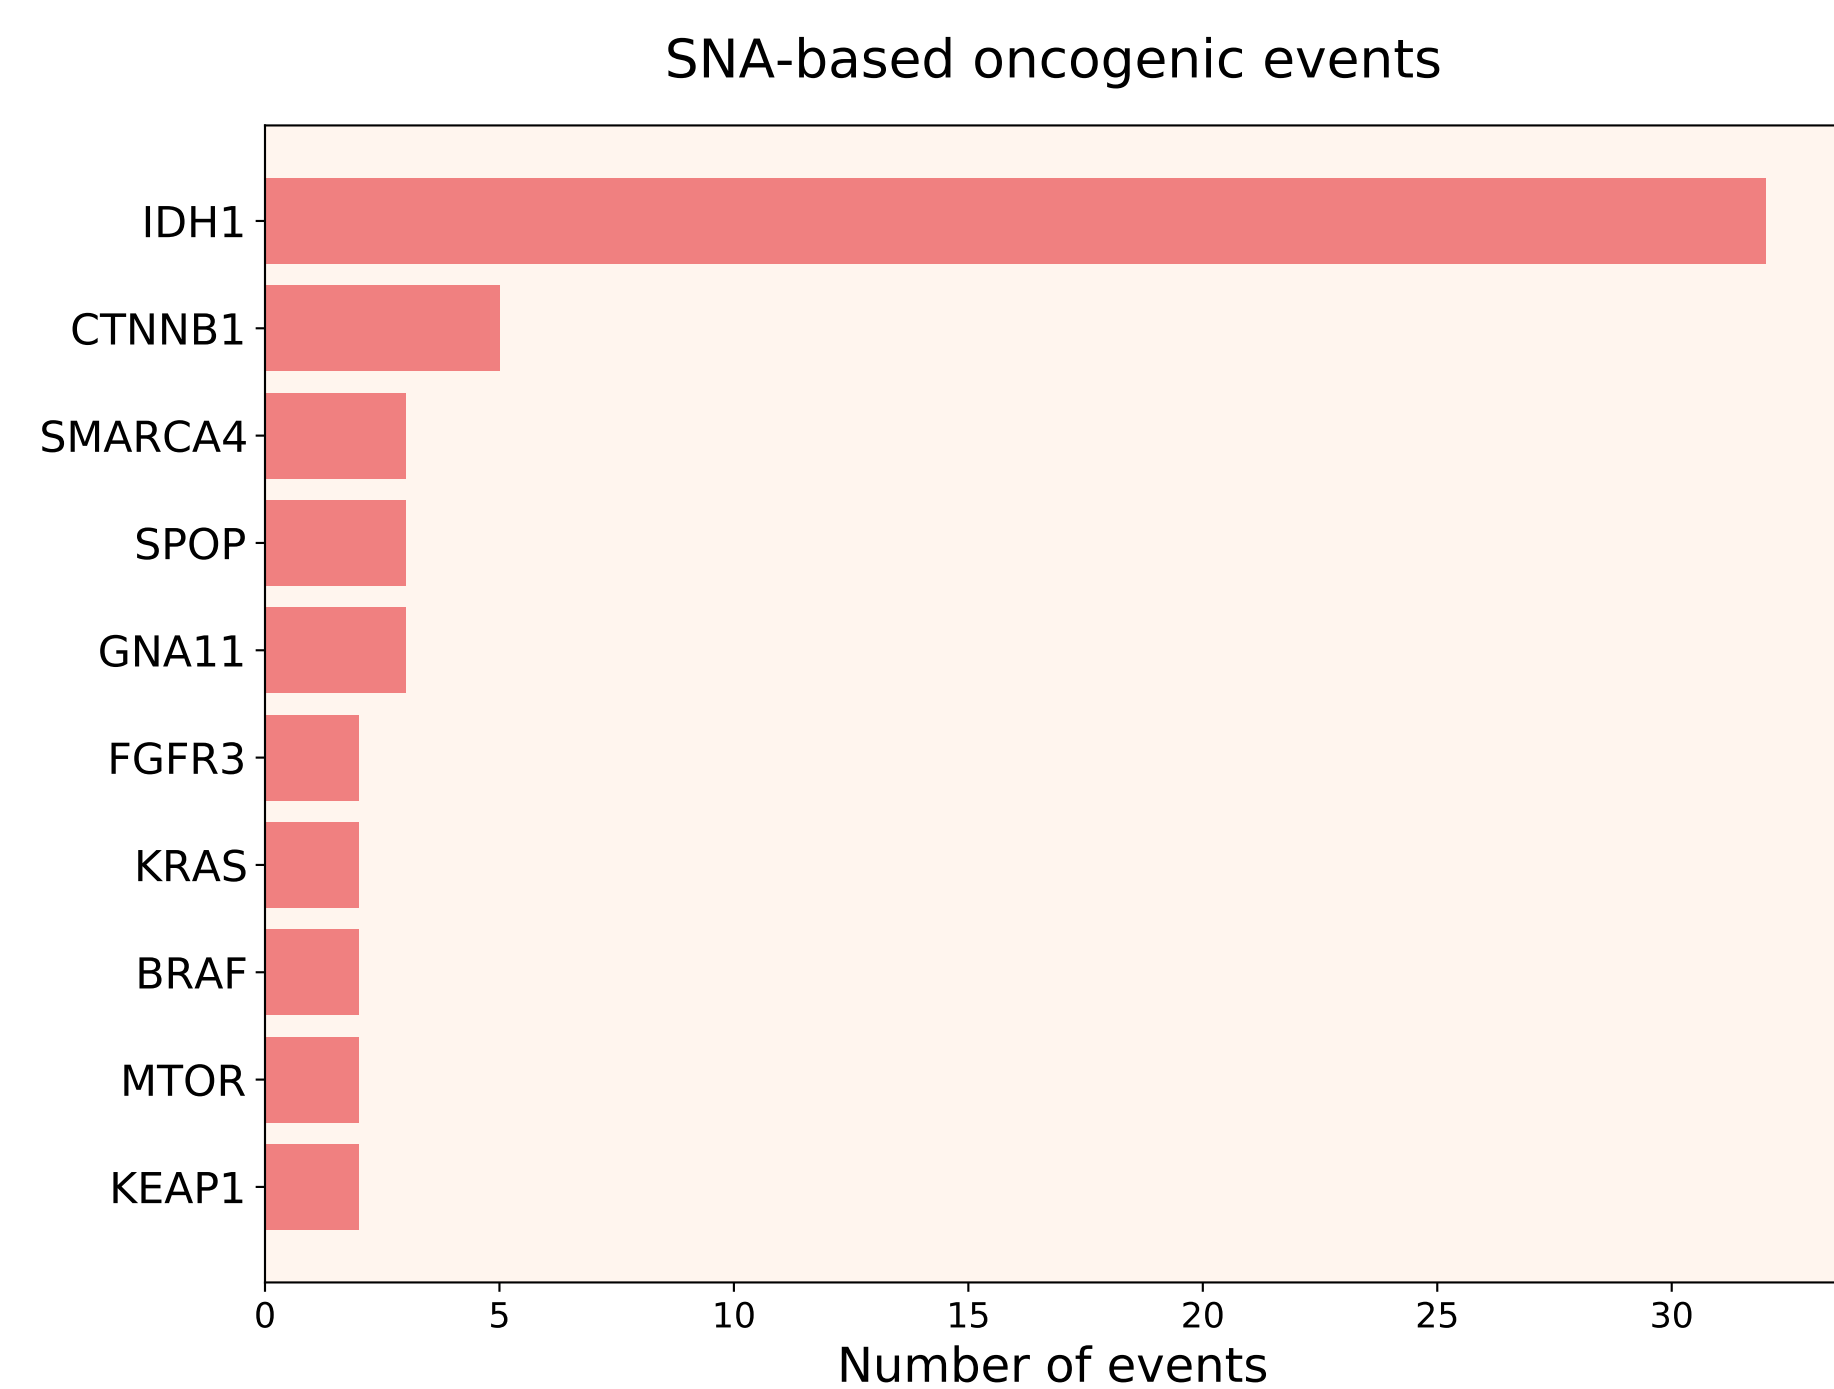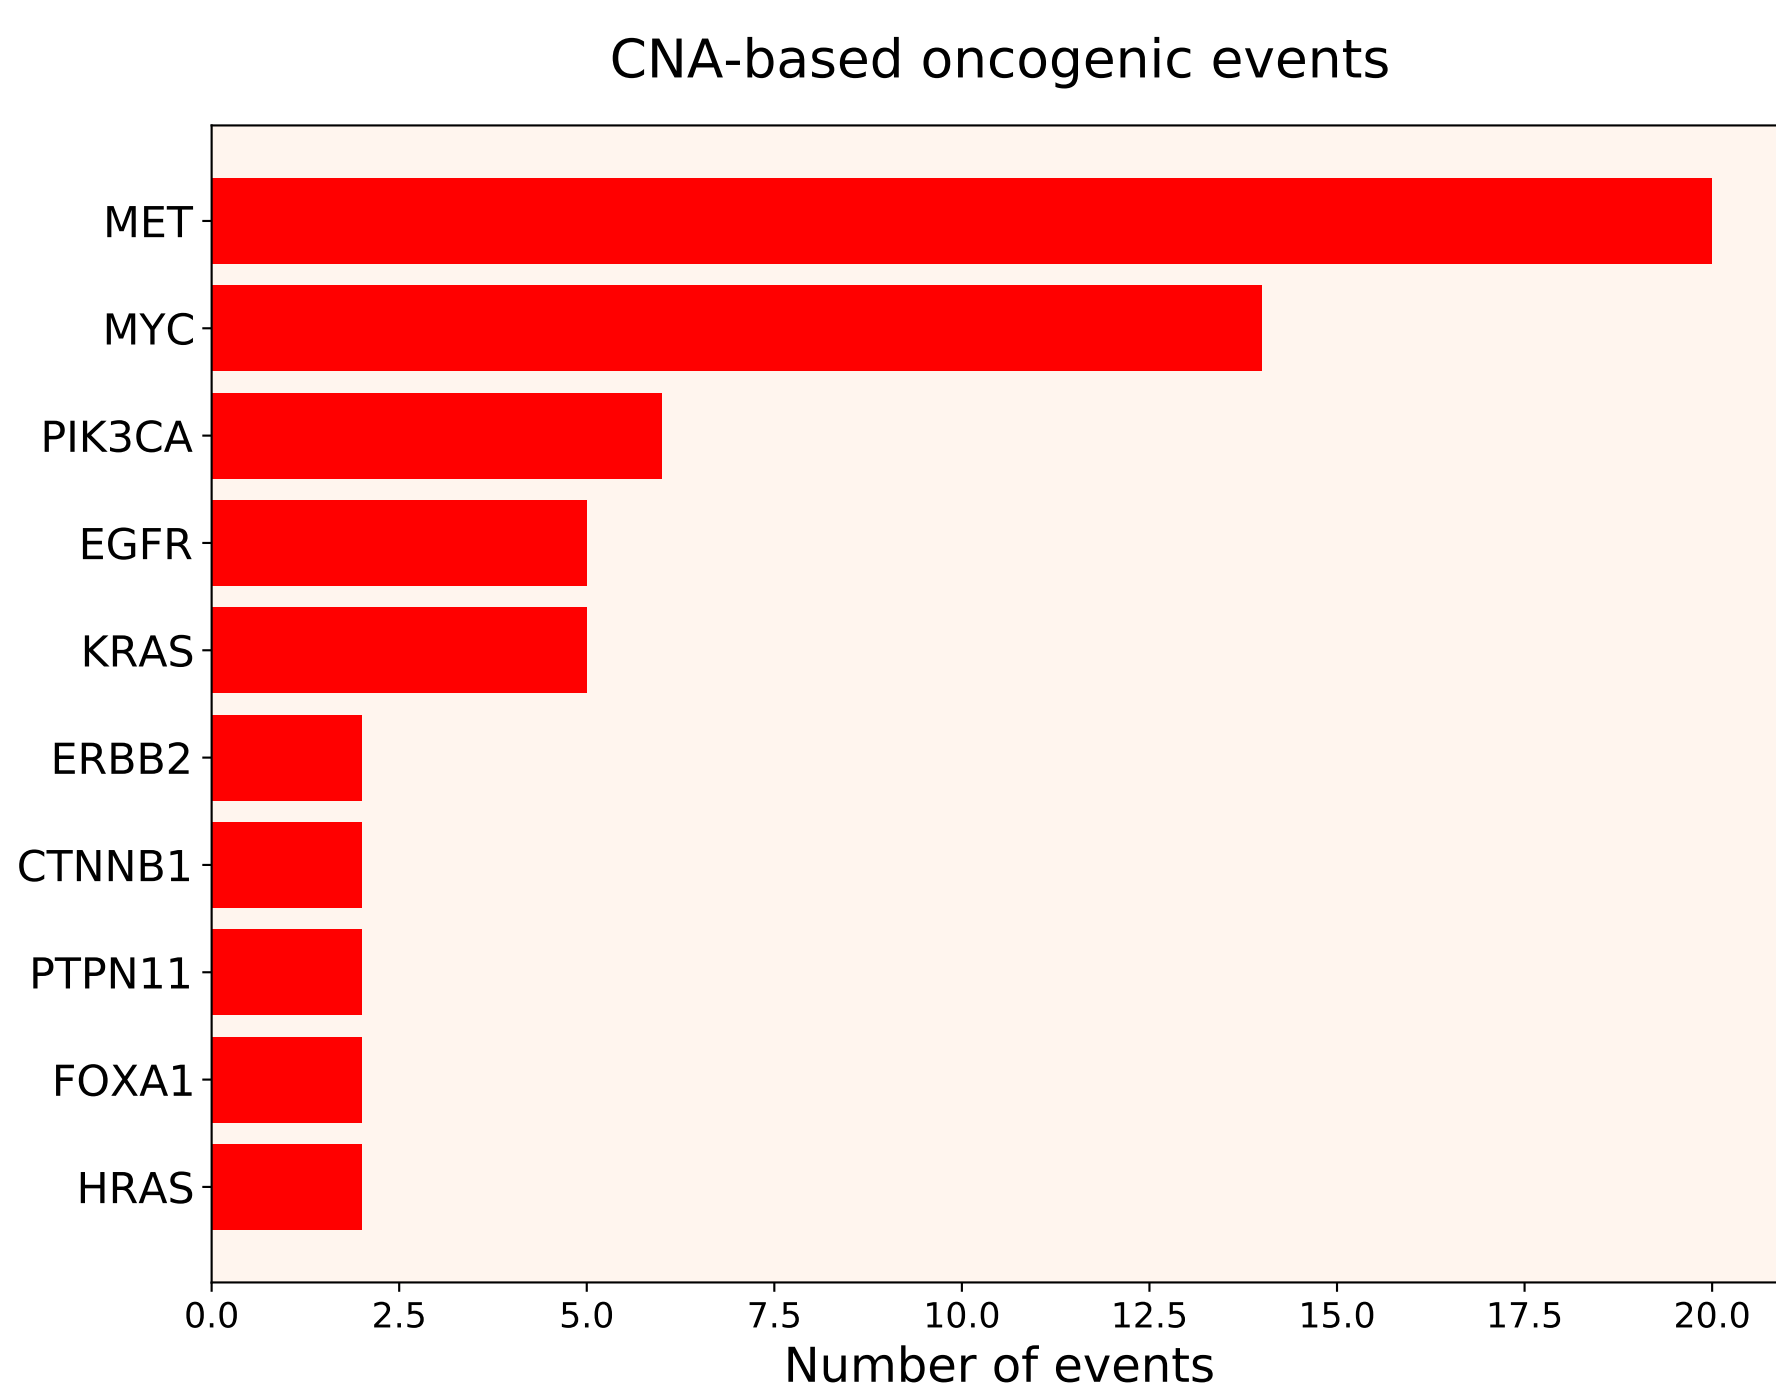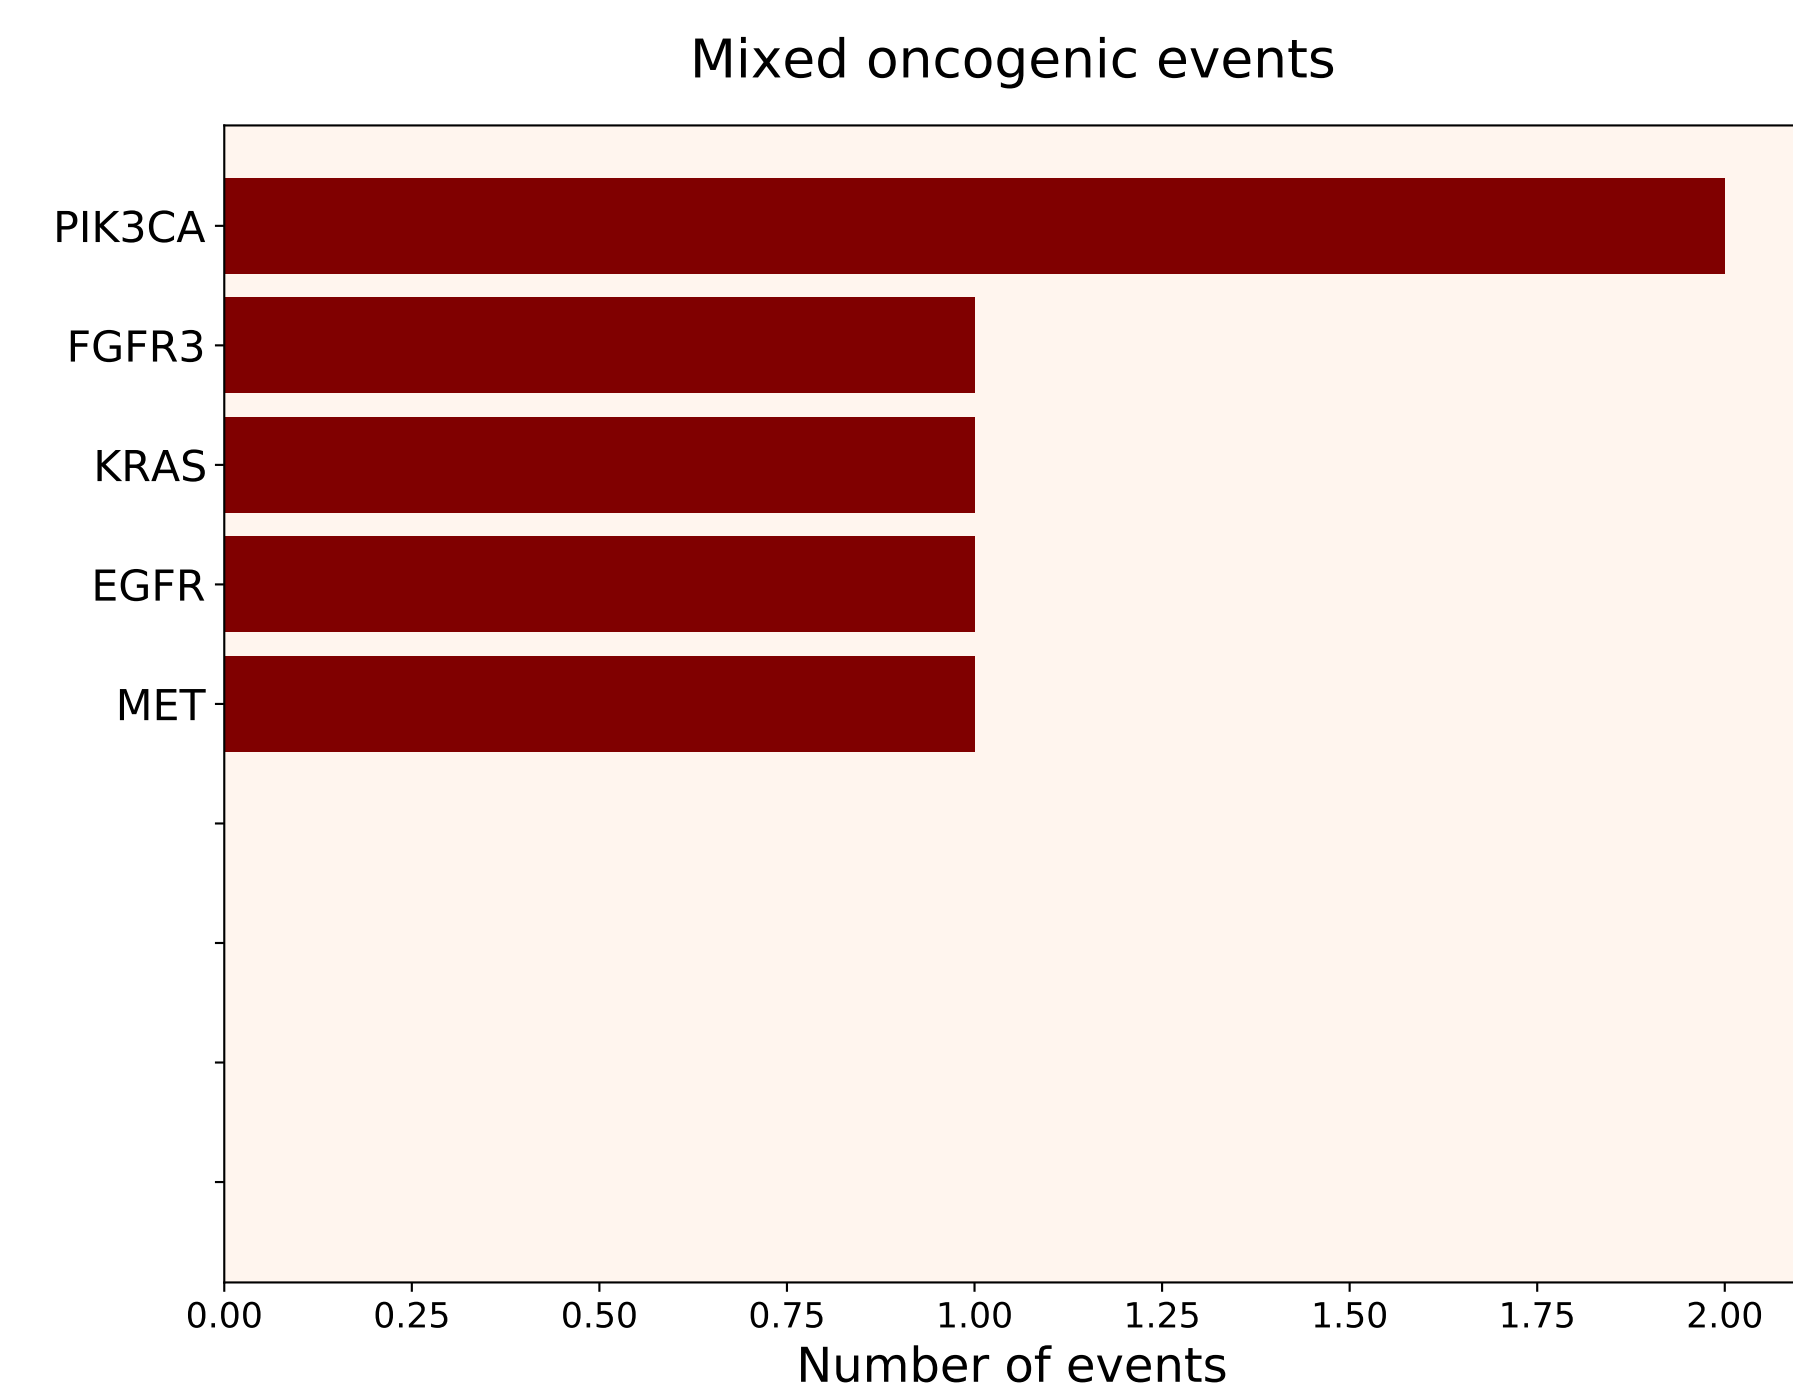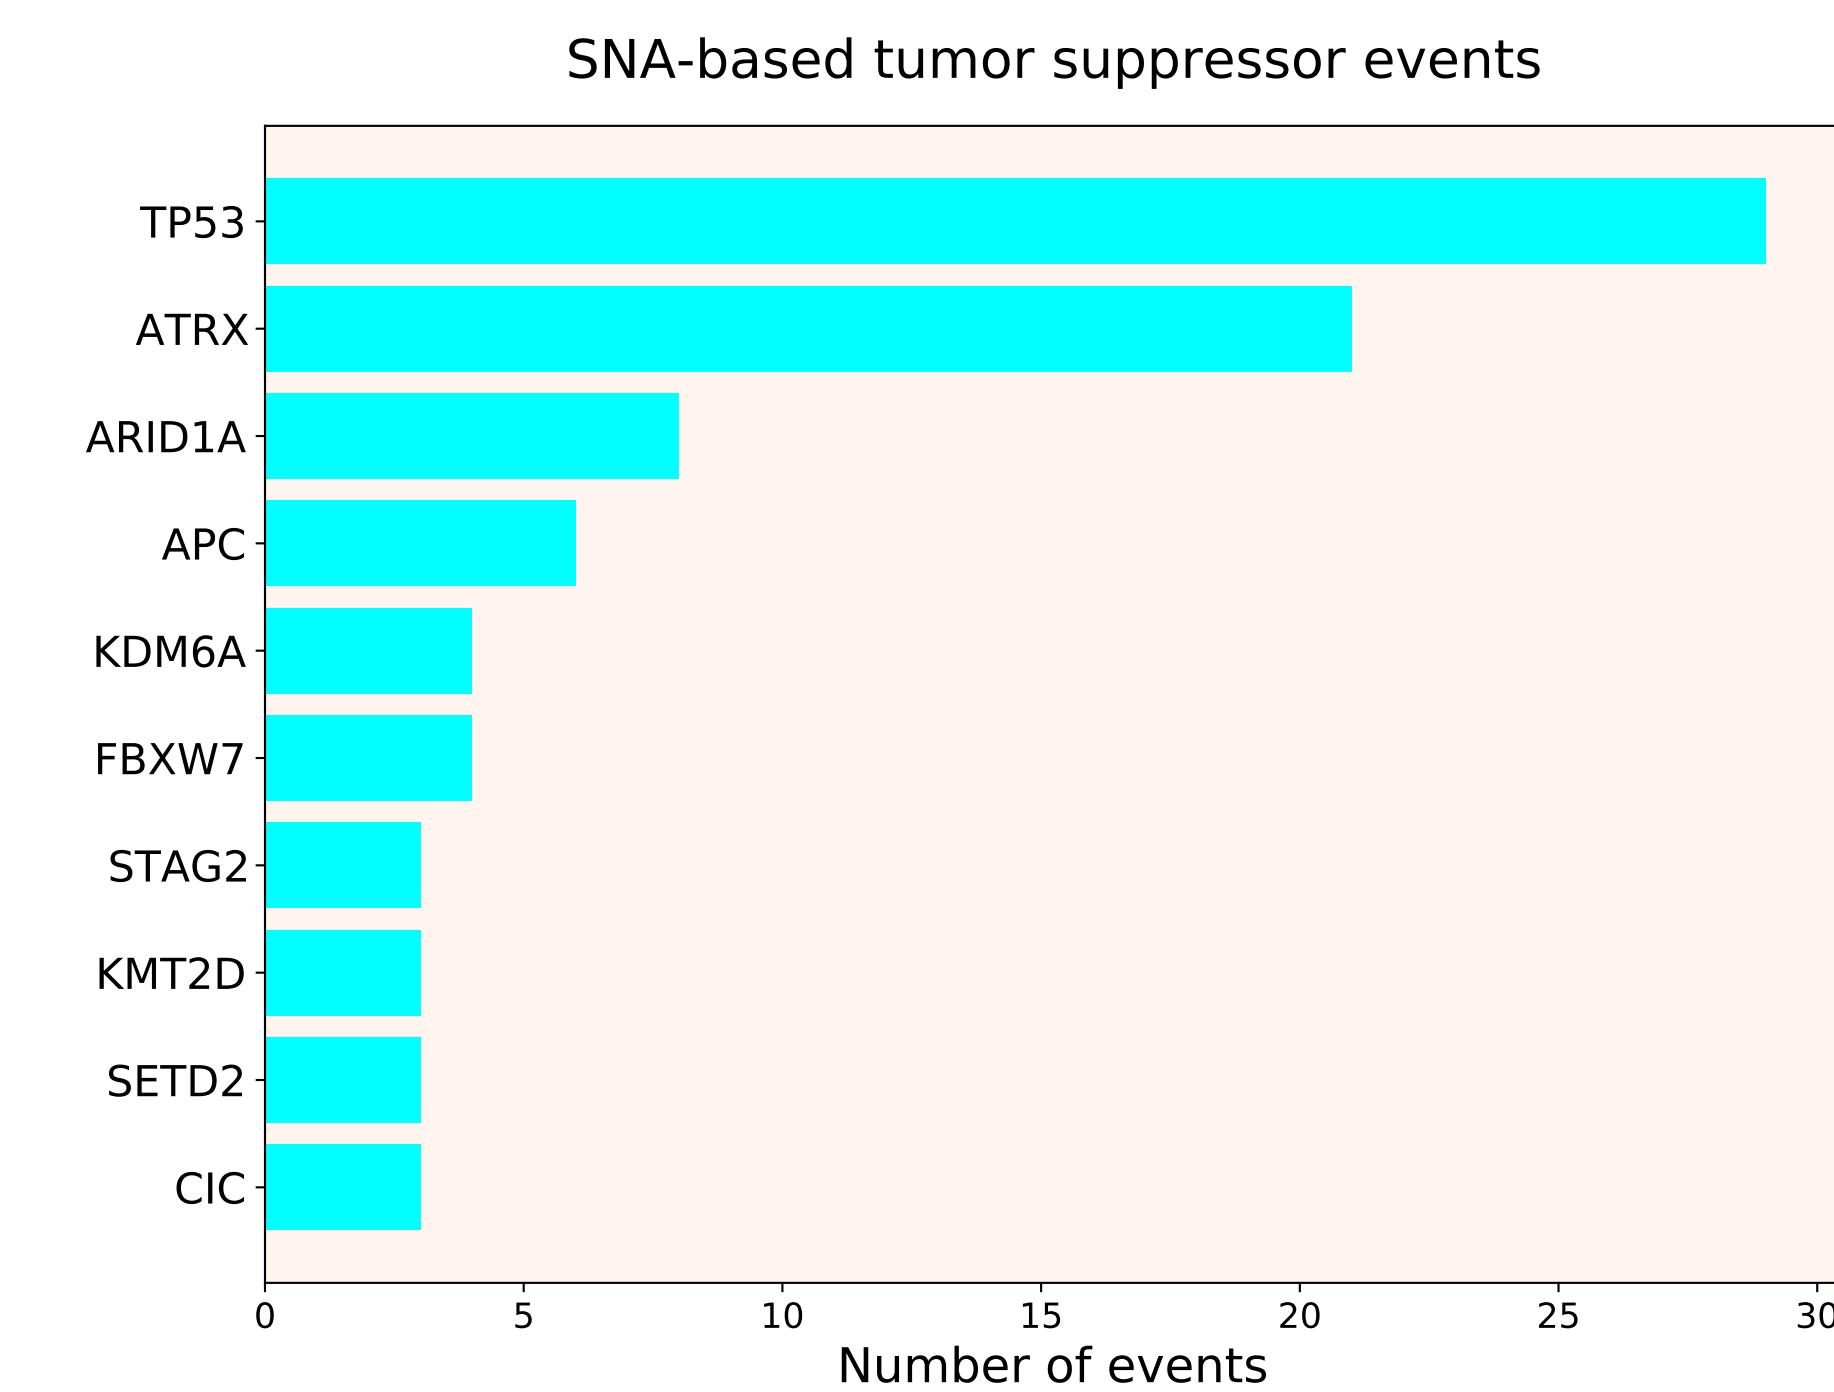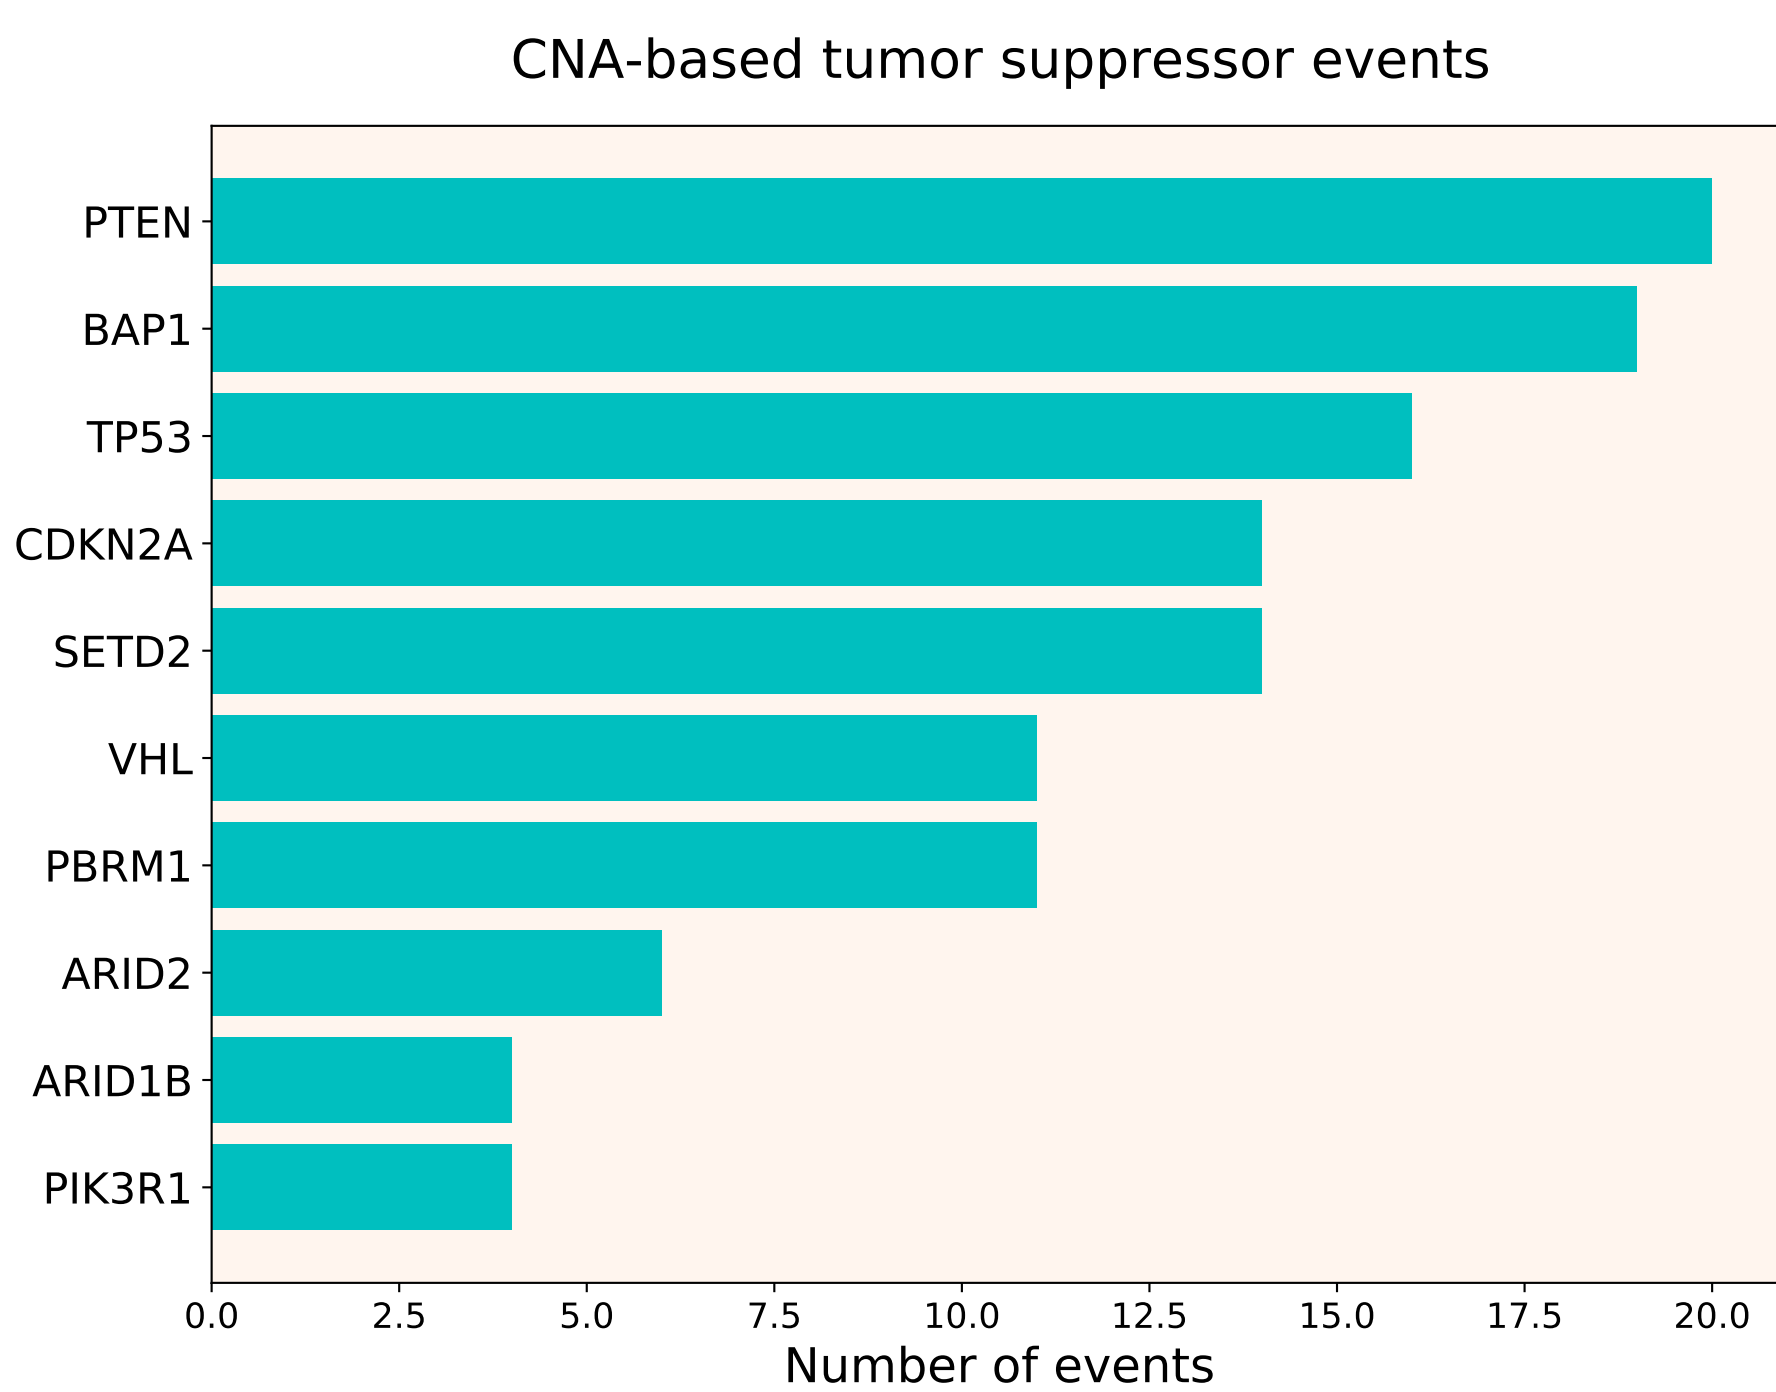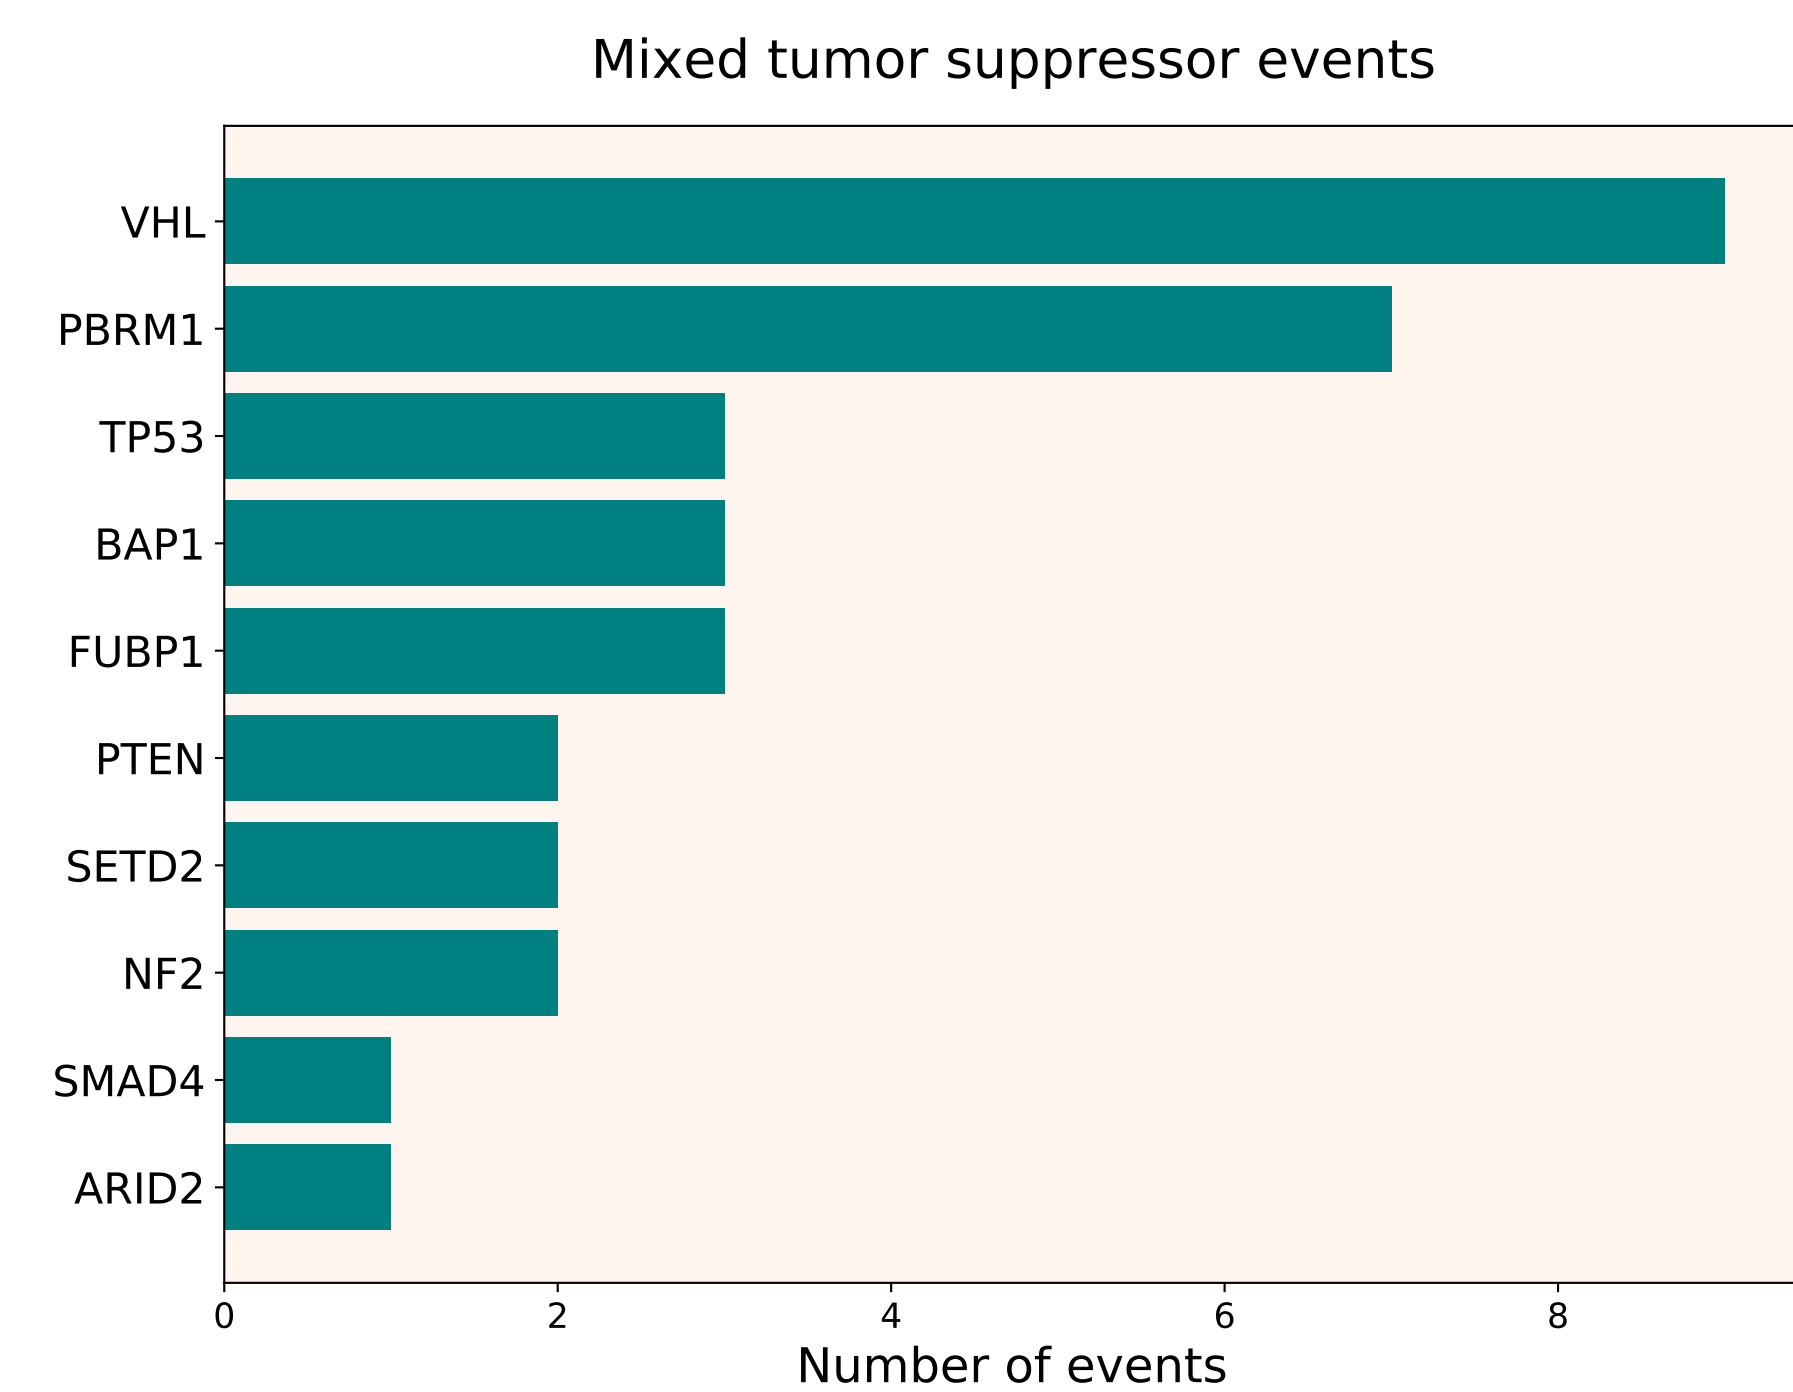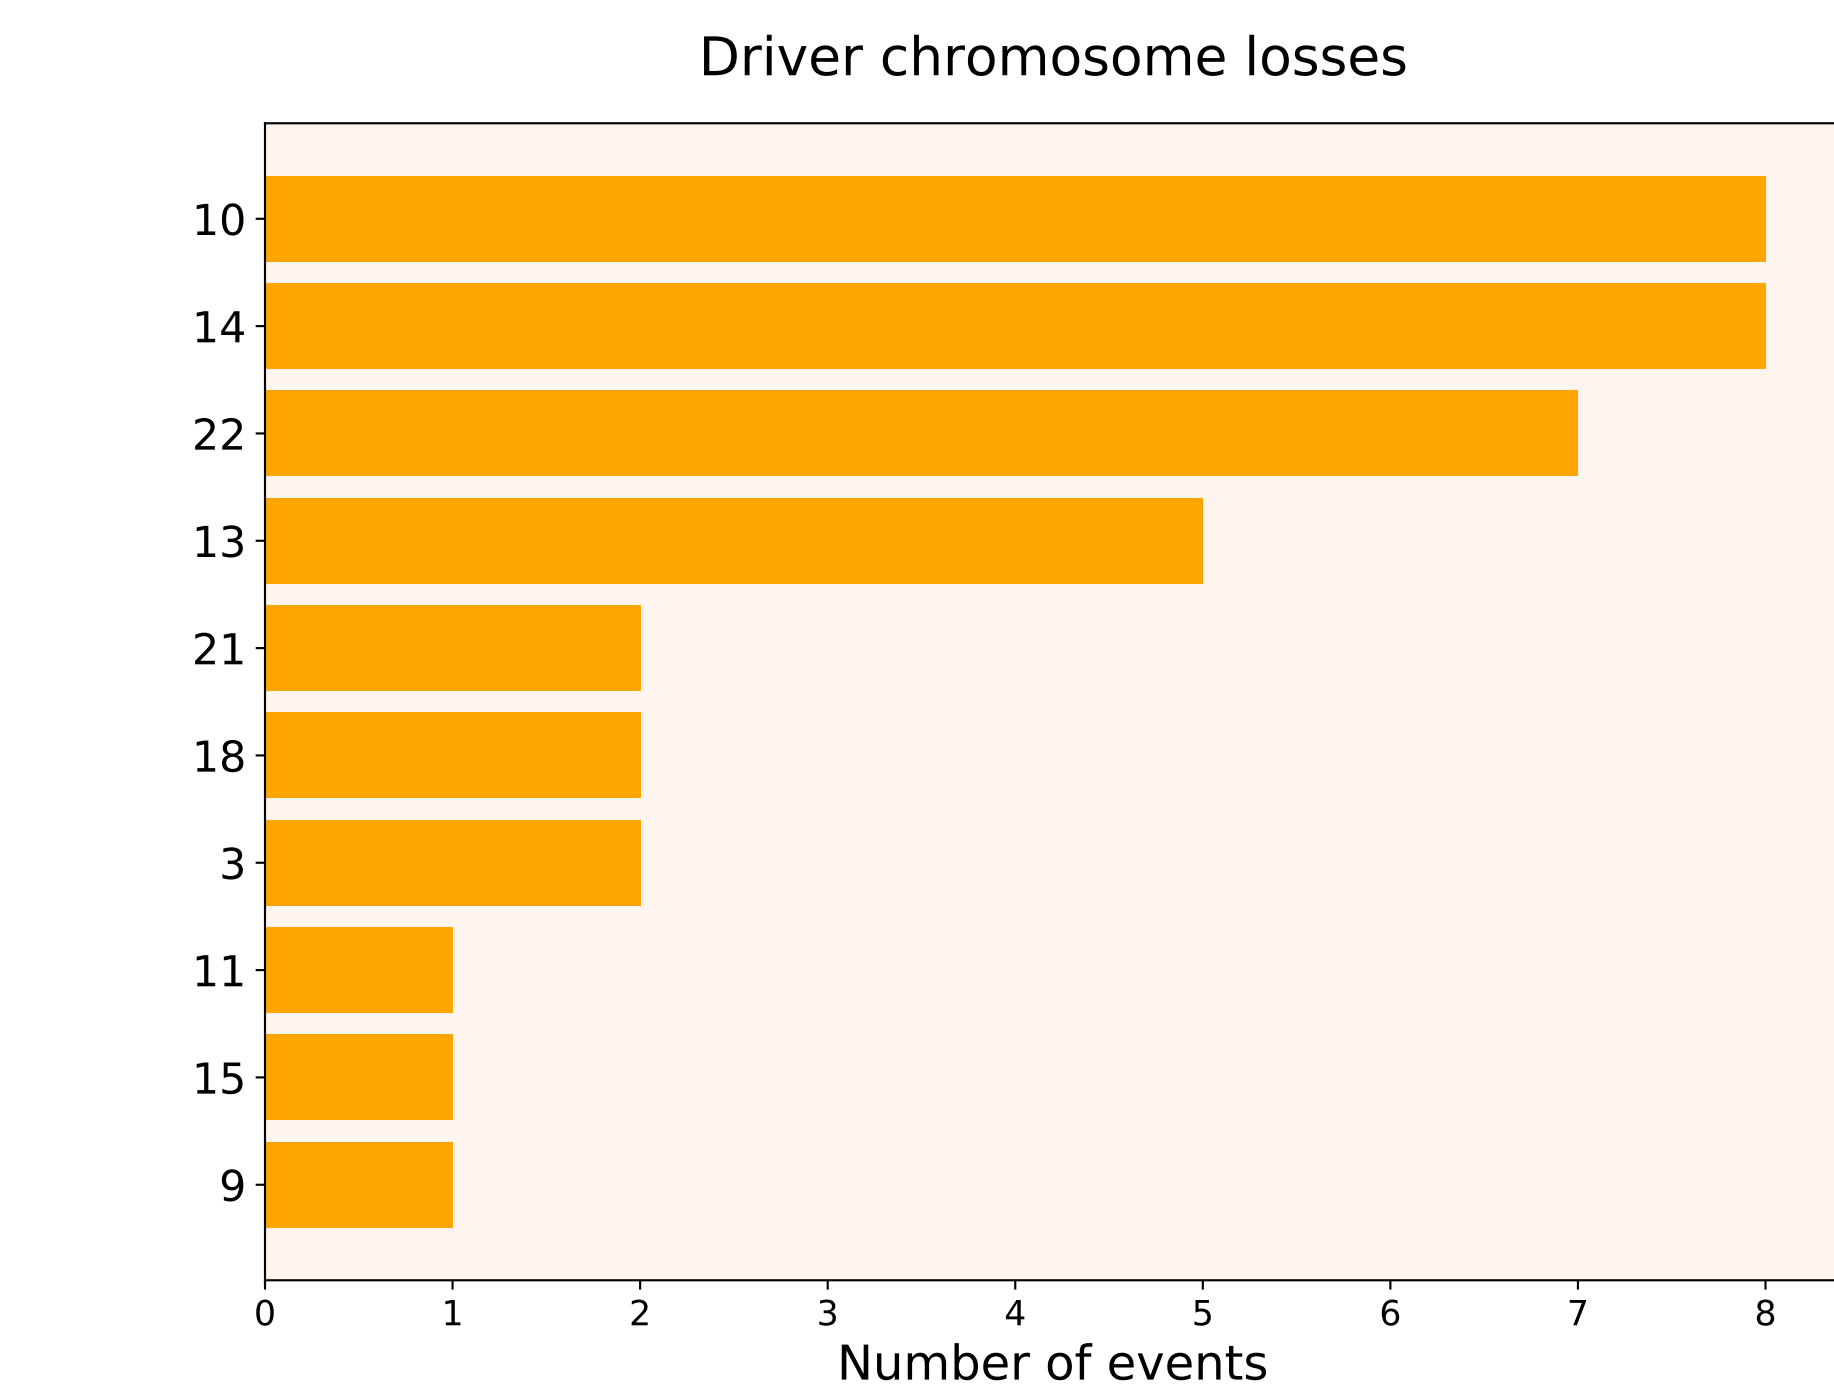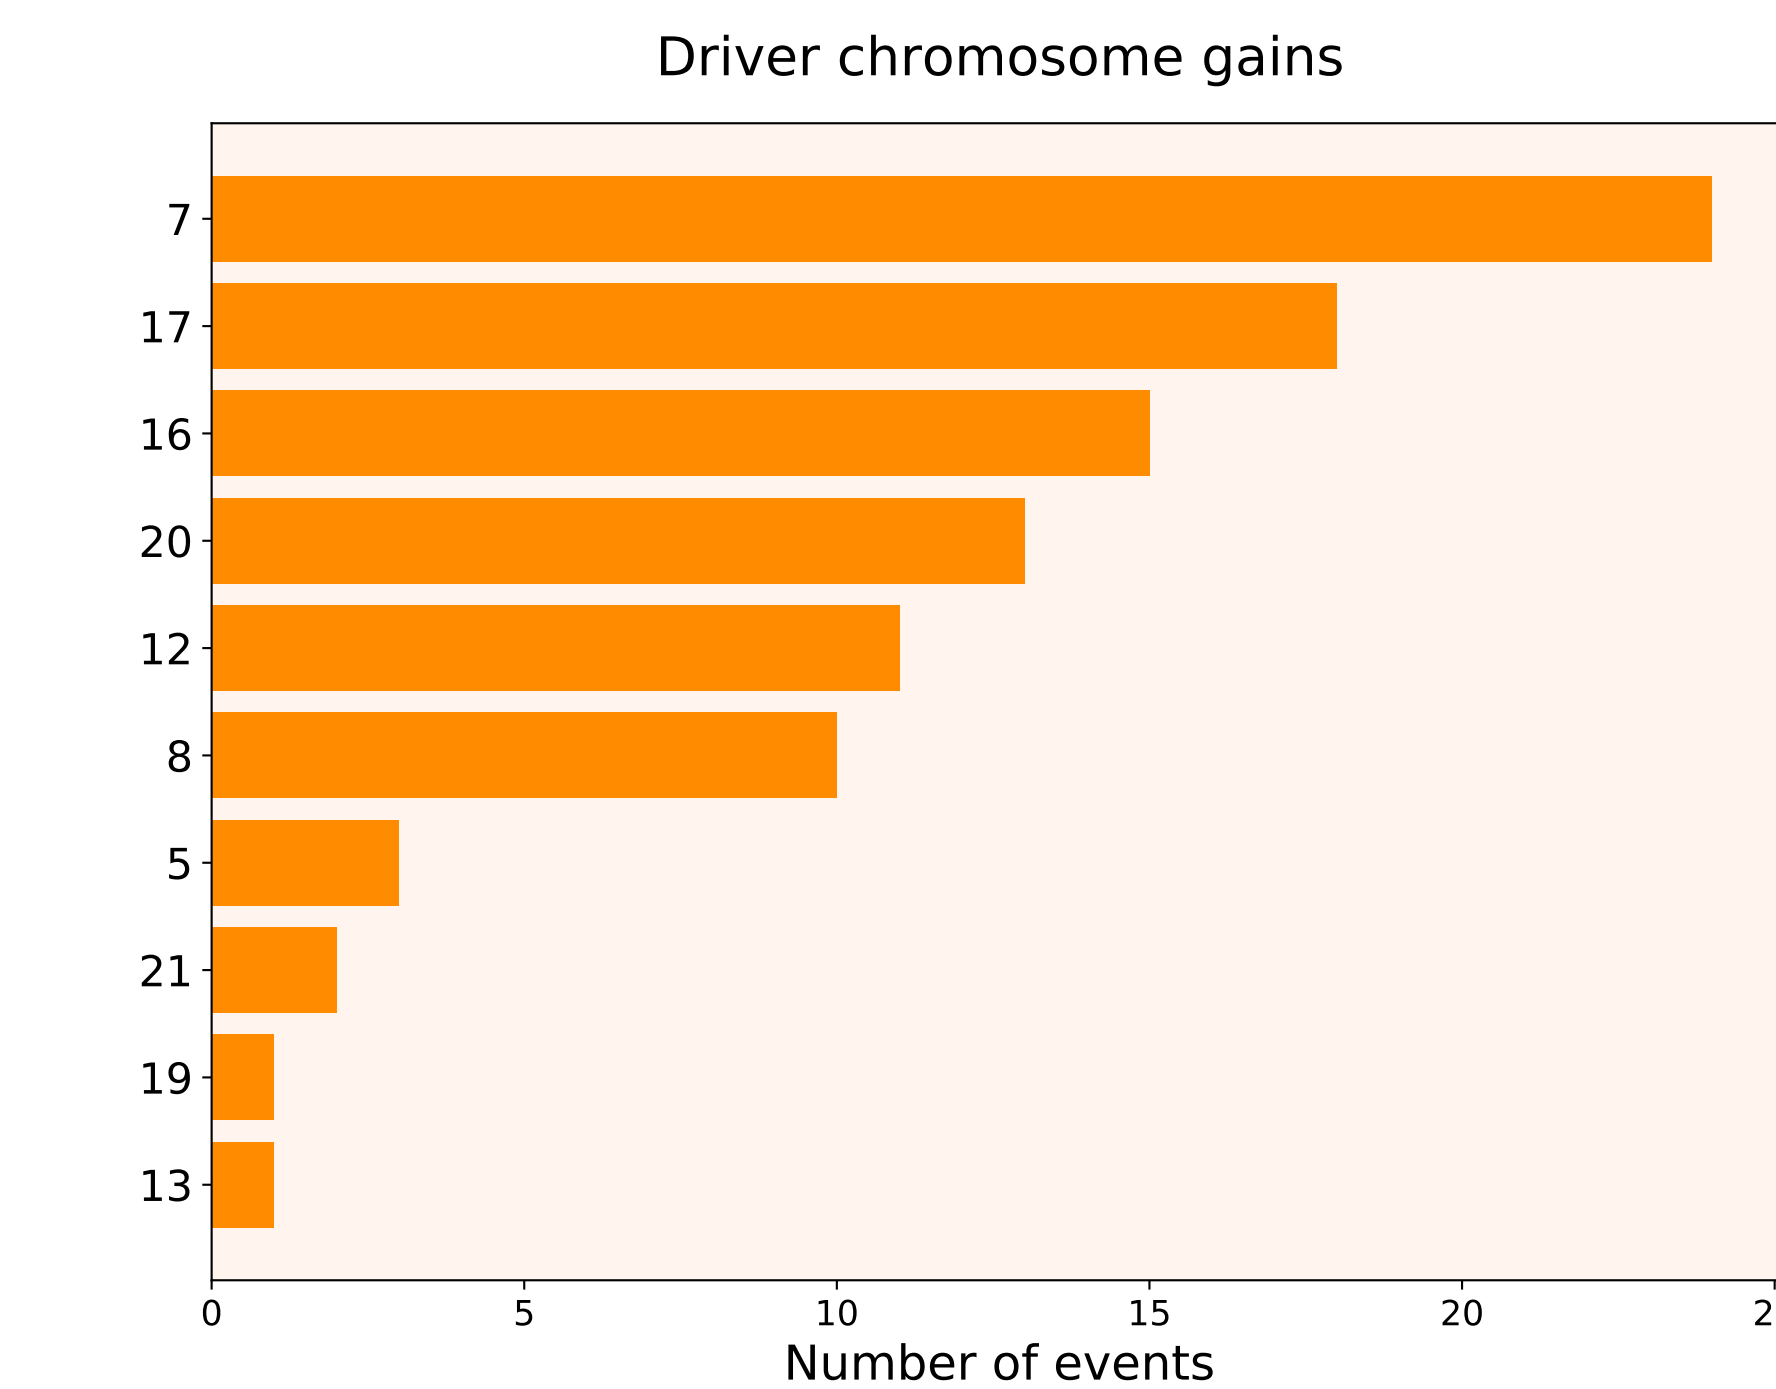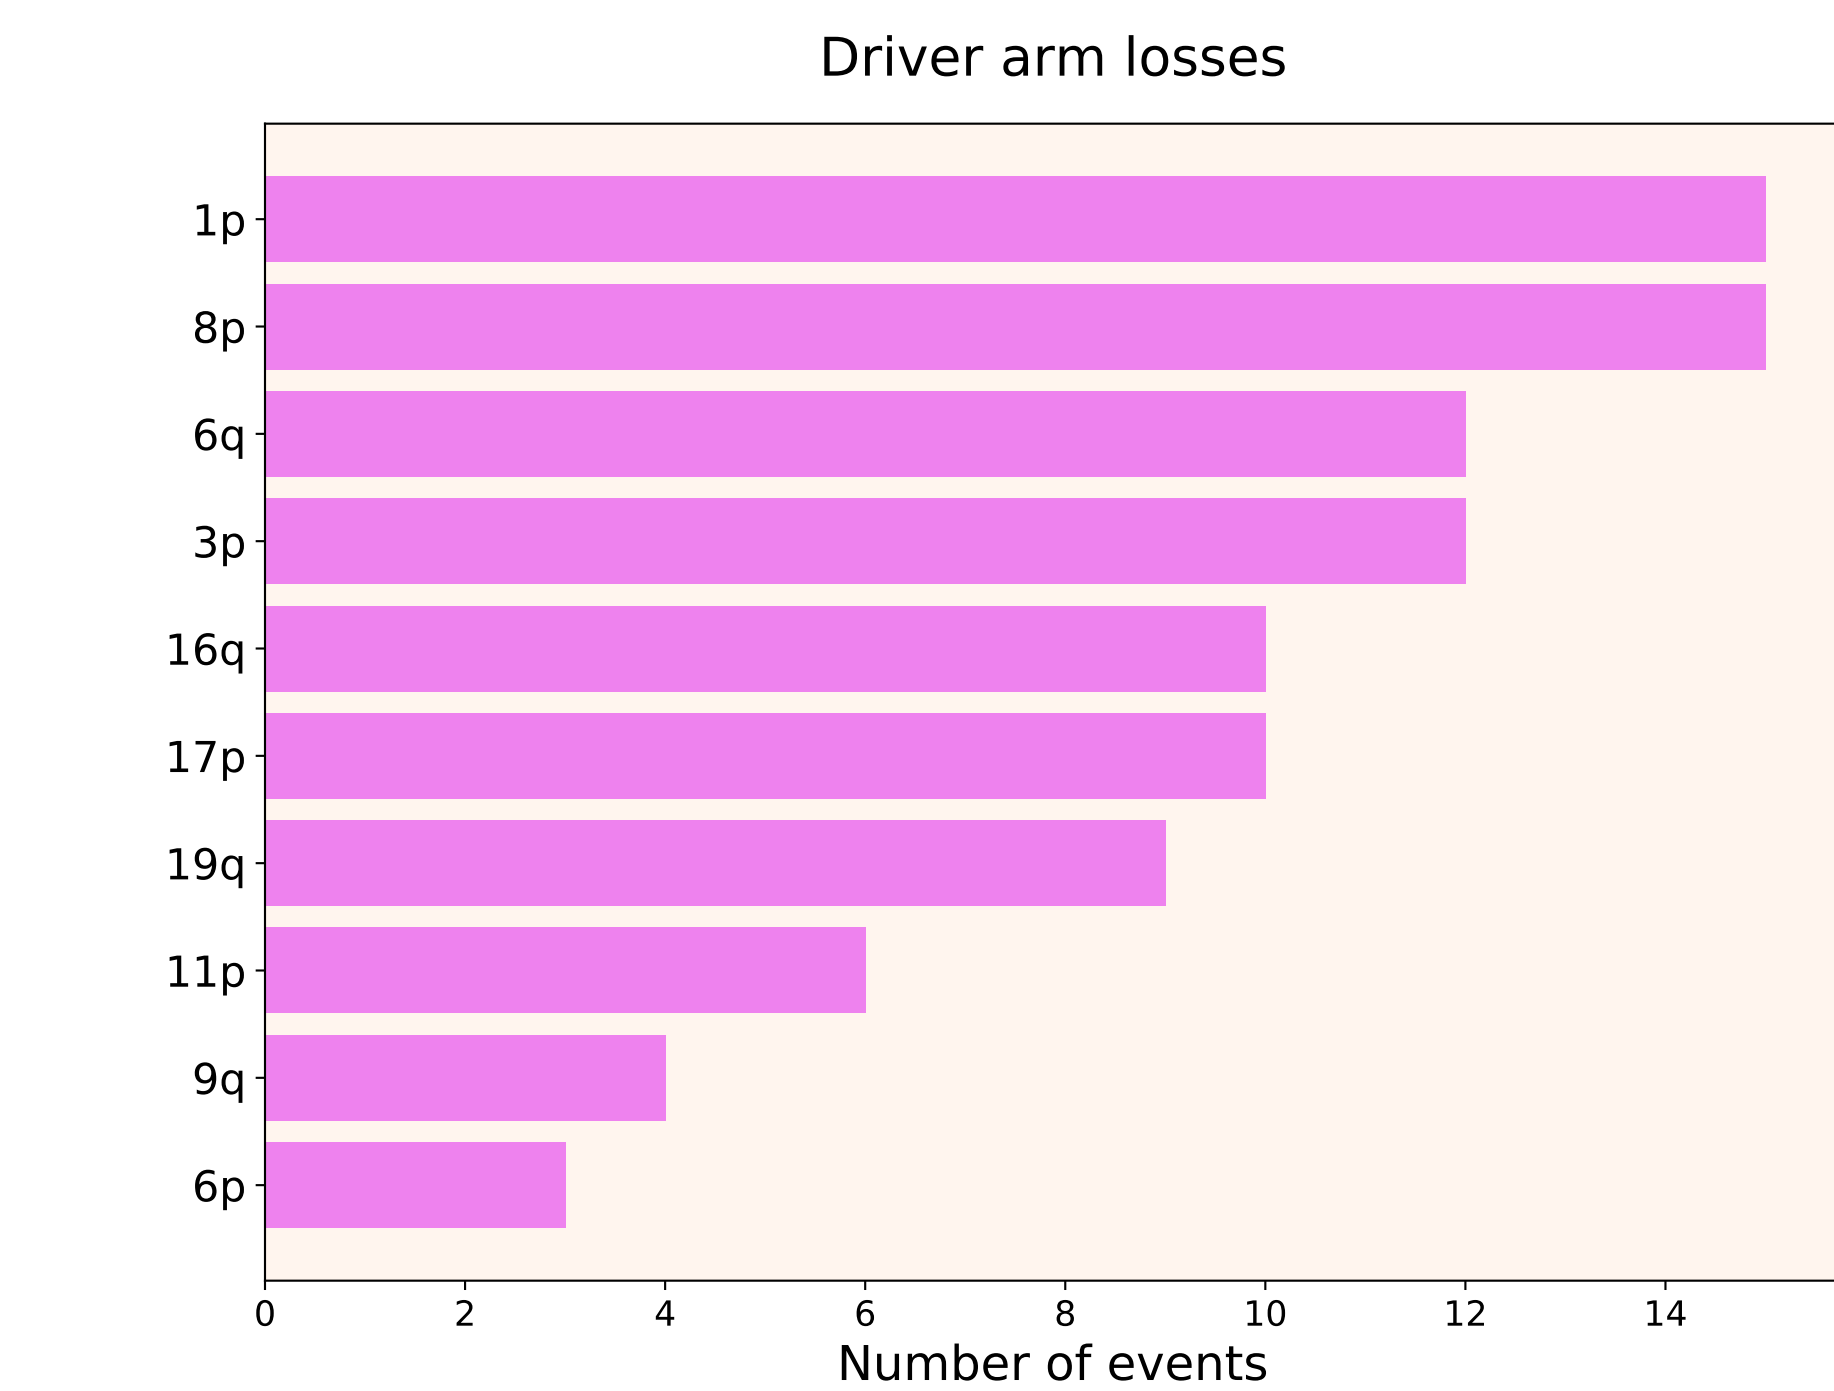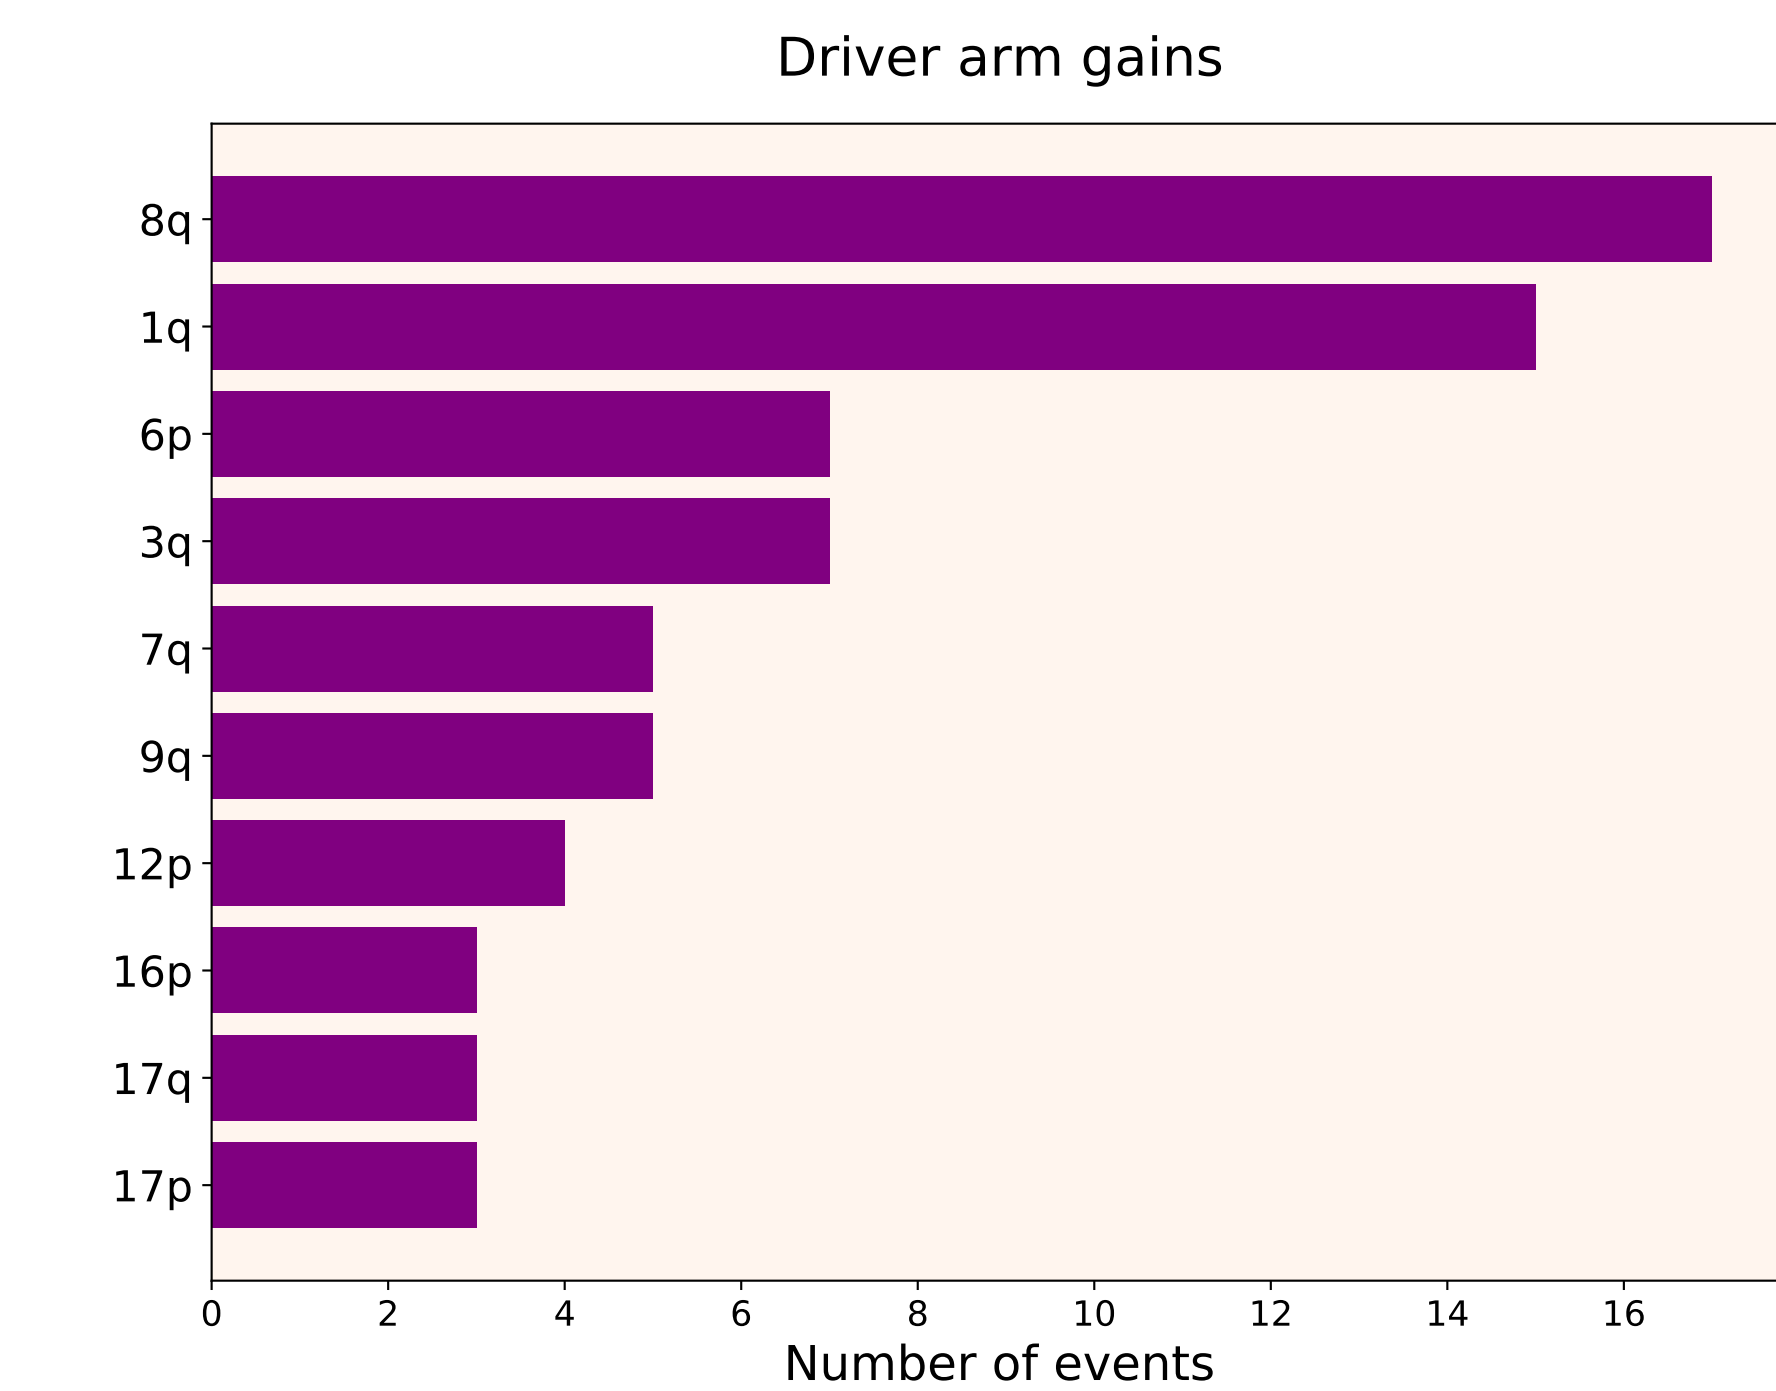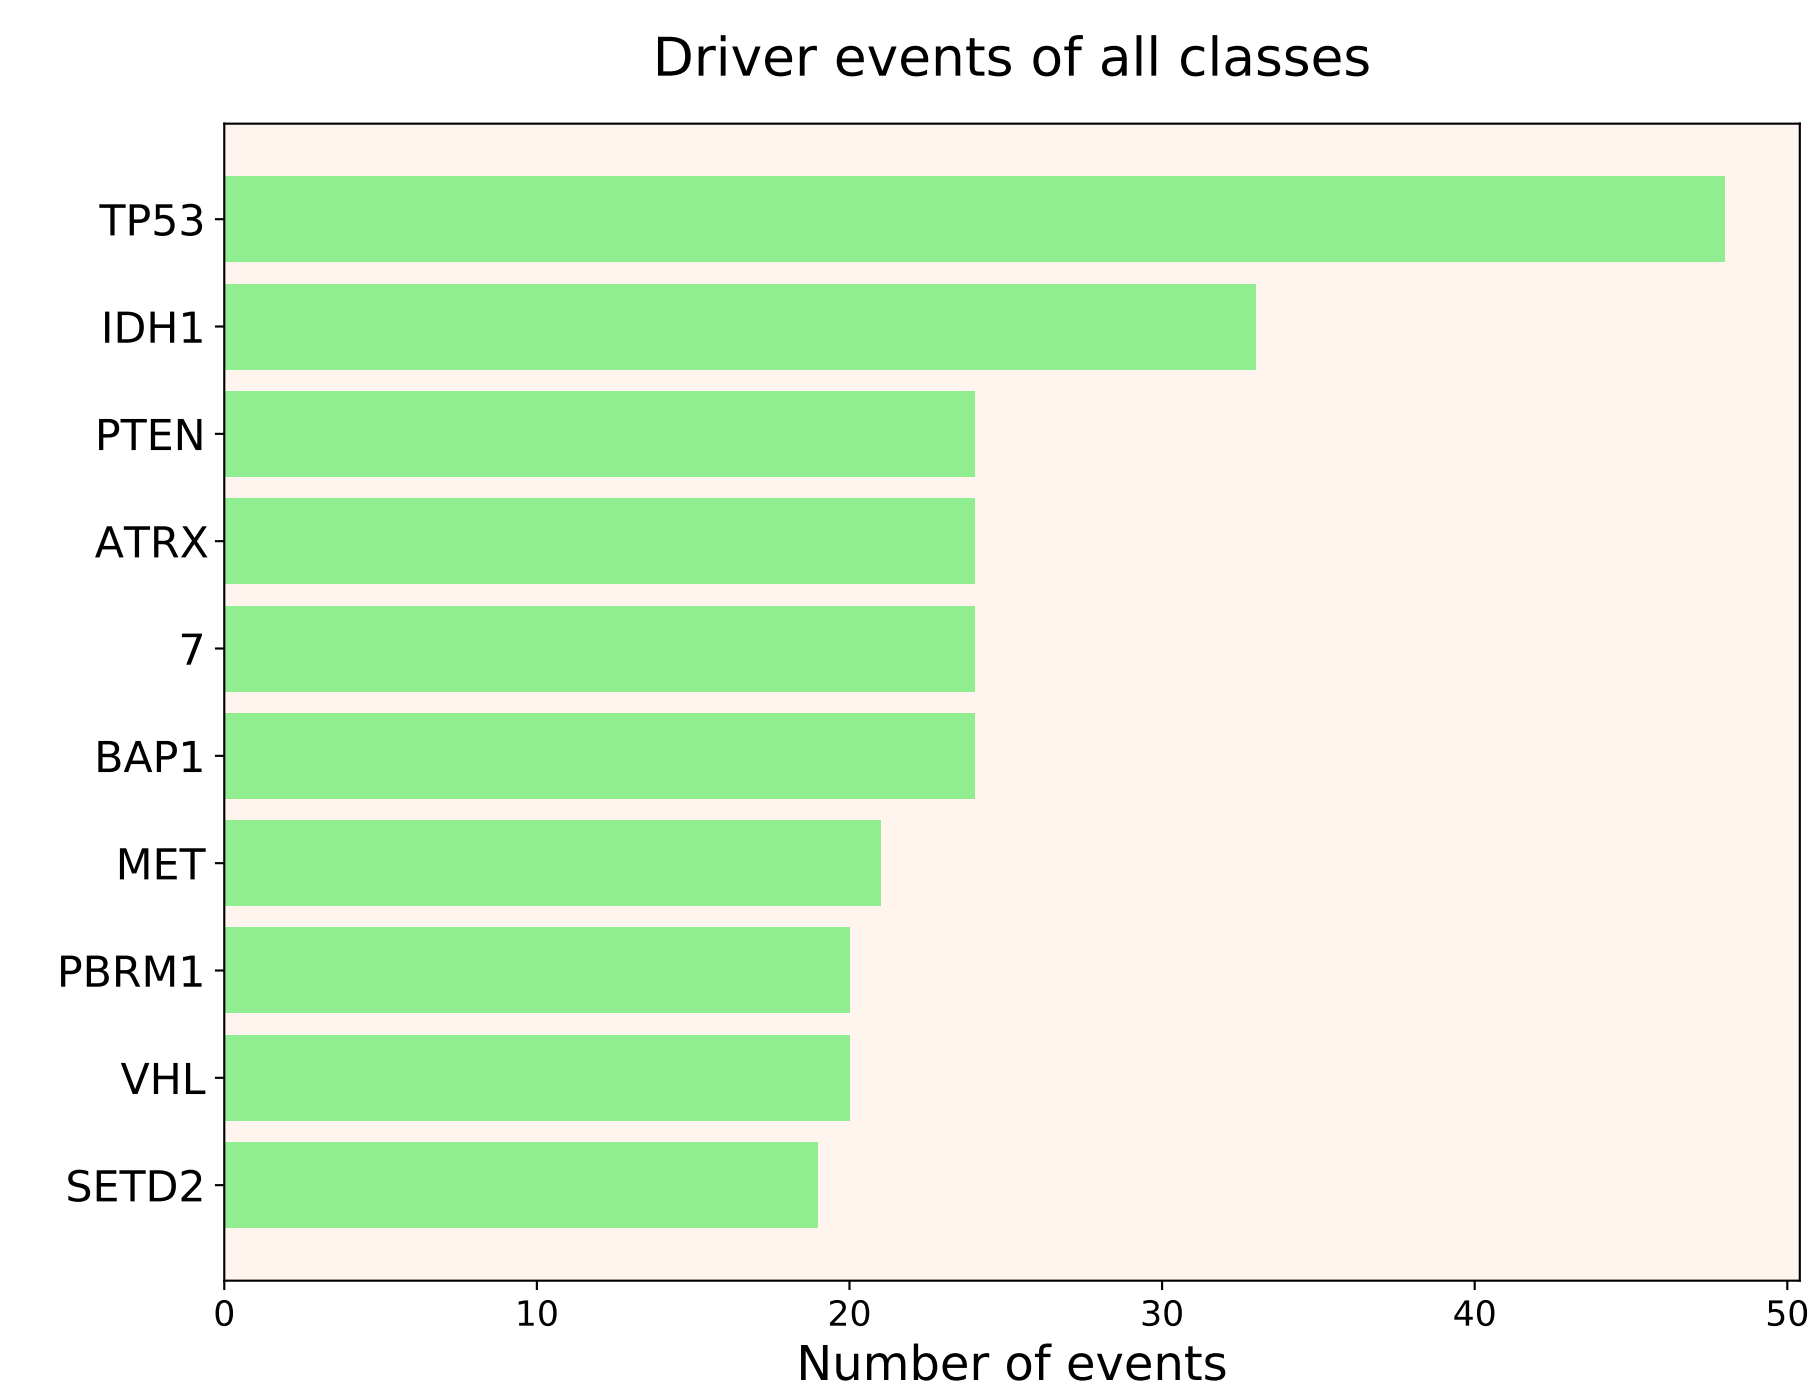

Supplement: Supplemental_Data_S1.zip [file Supplemental_Data_S1.zip]

# READ

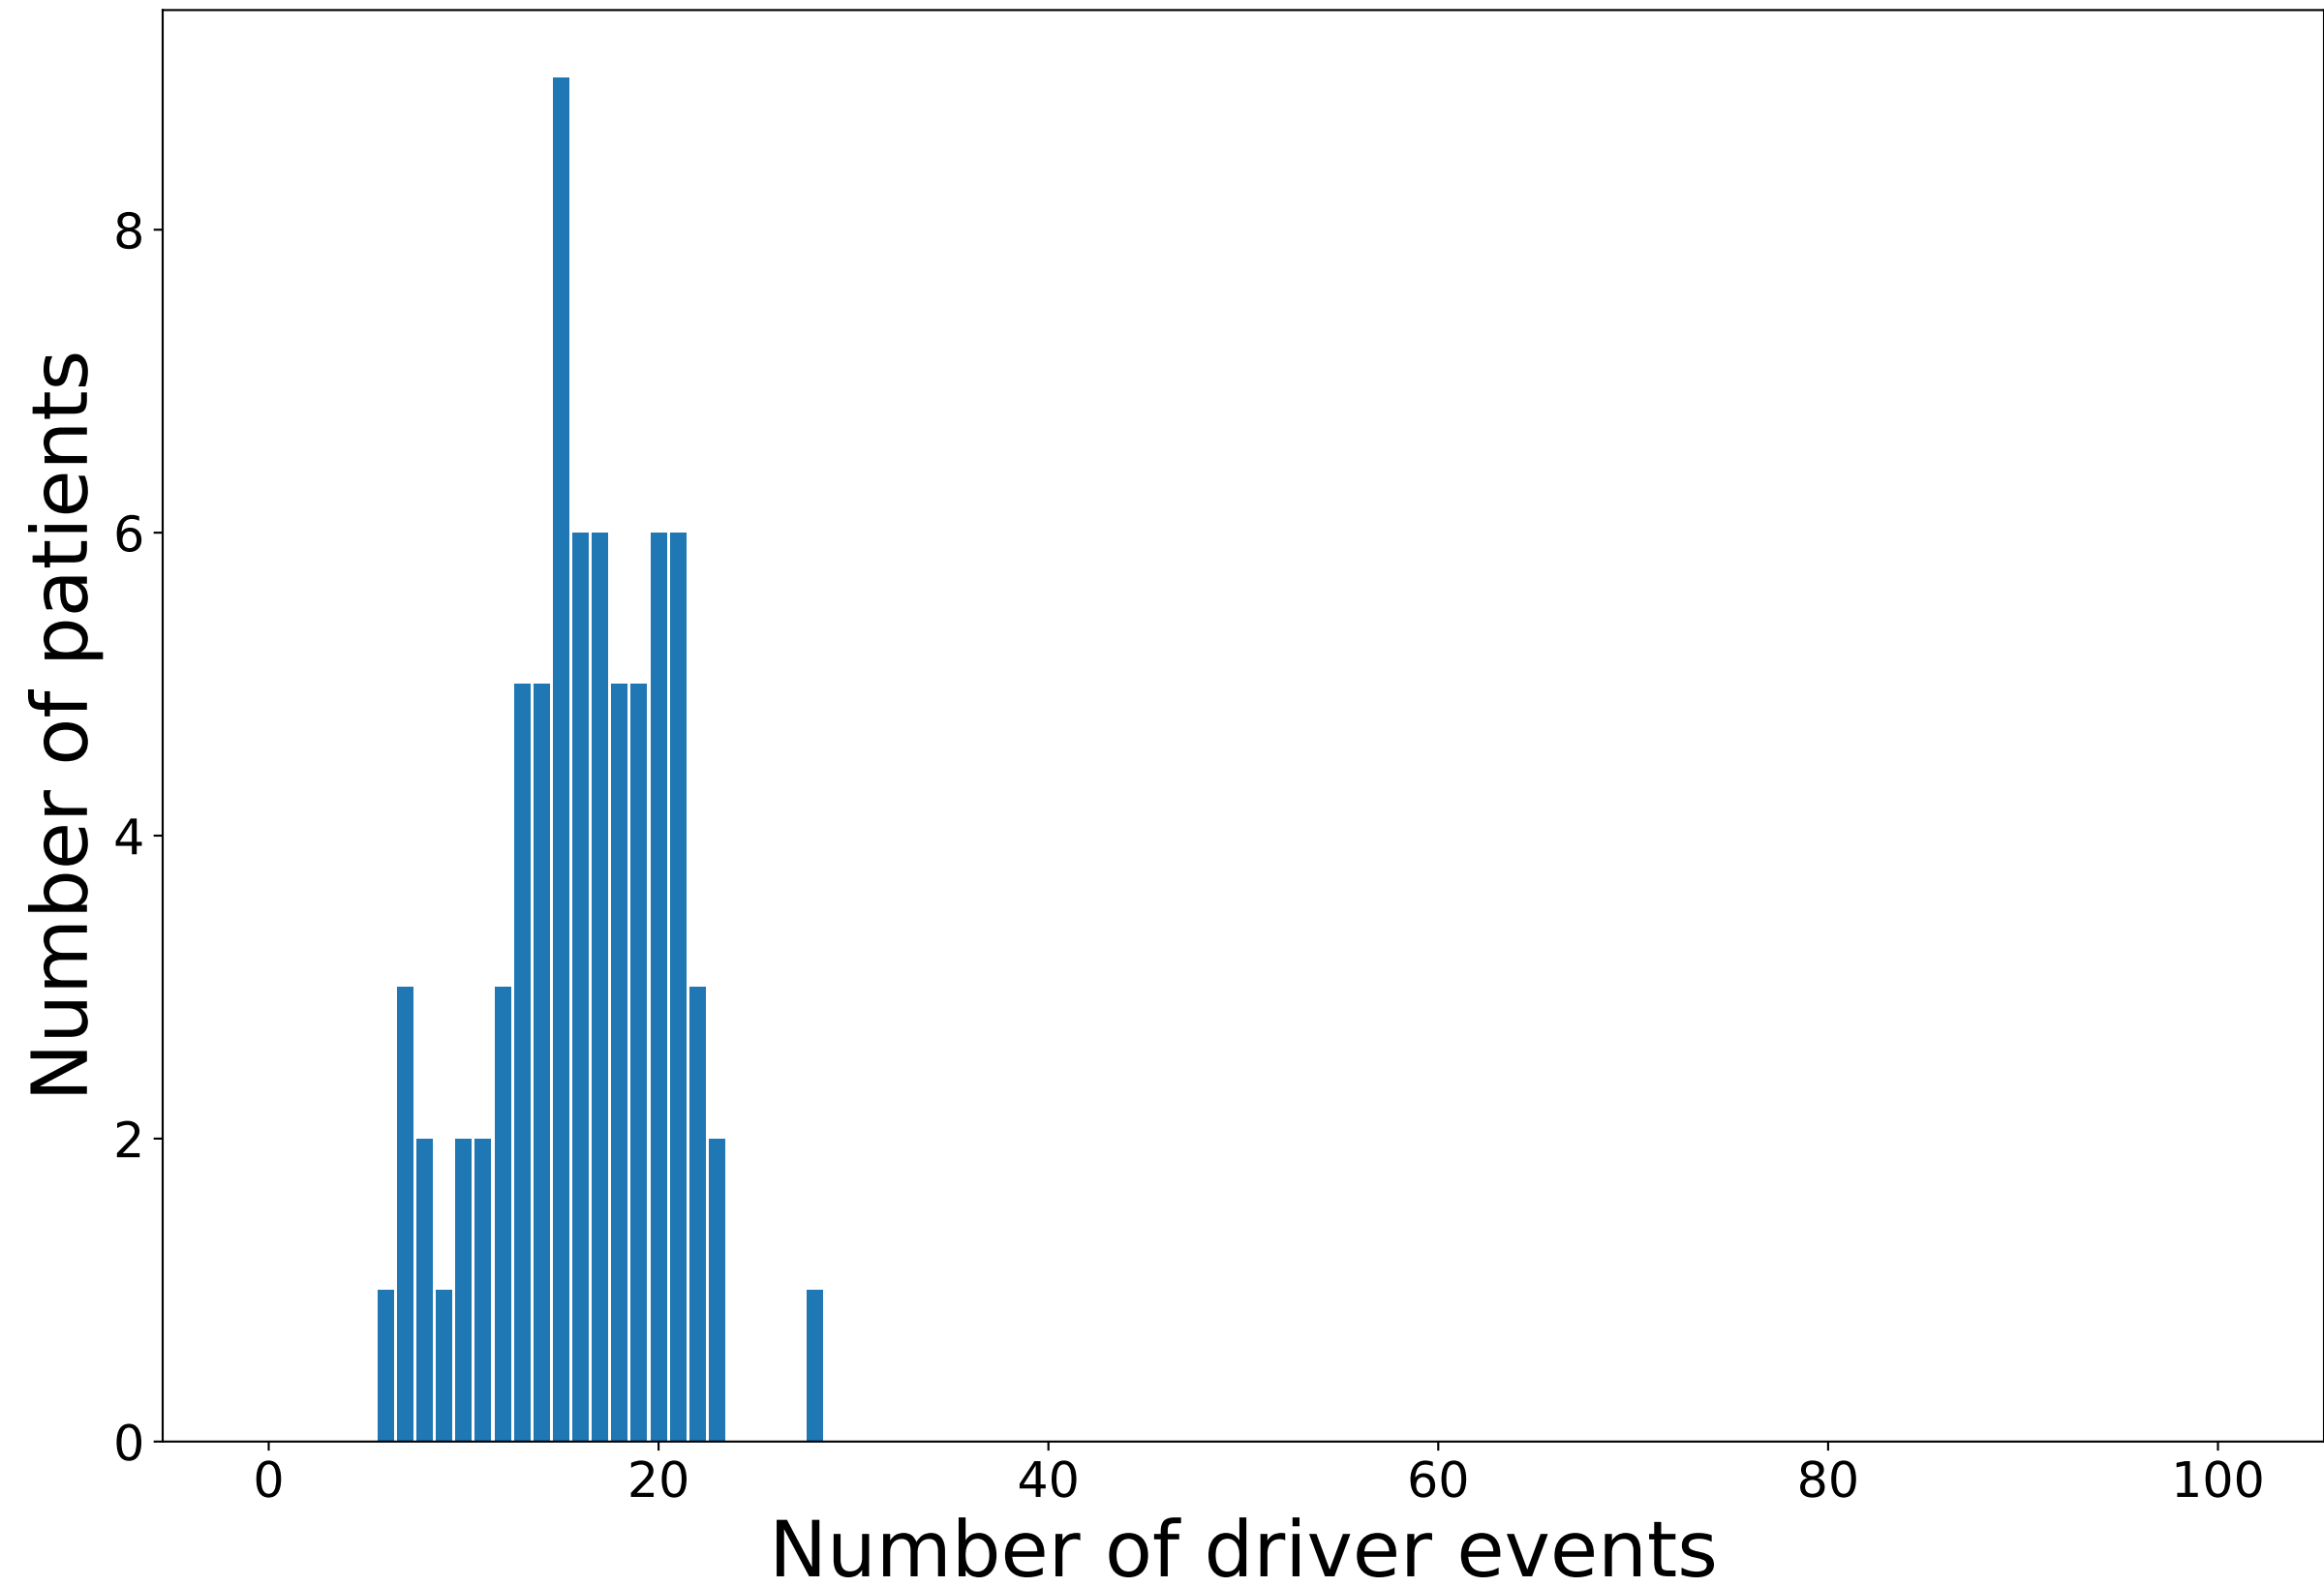

Supplement: Supplemental_Data_S1.zip [file Supplemental_Data_S1.zip]

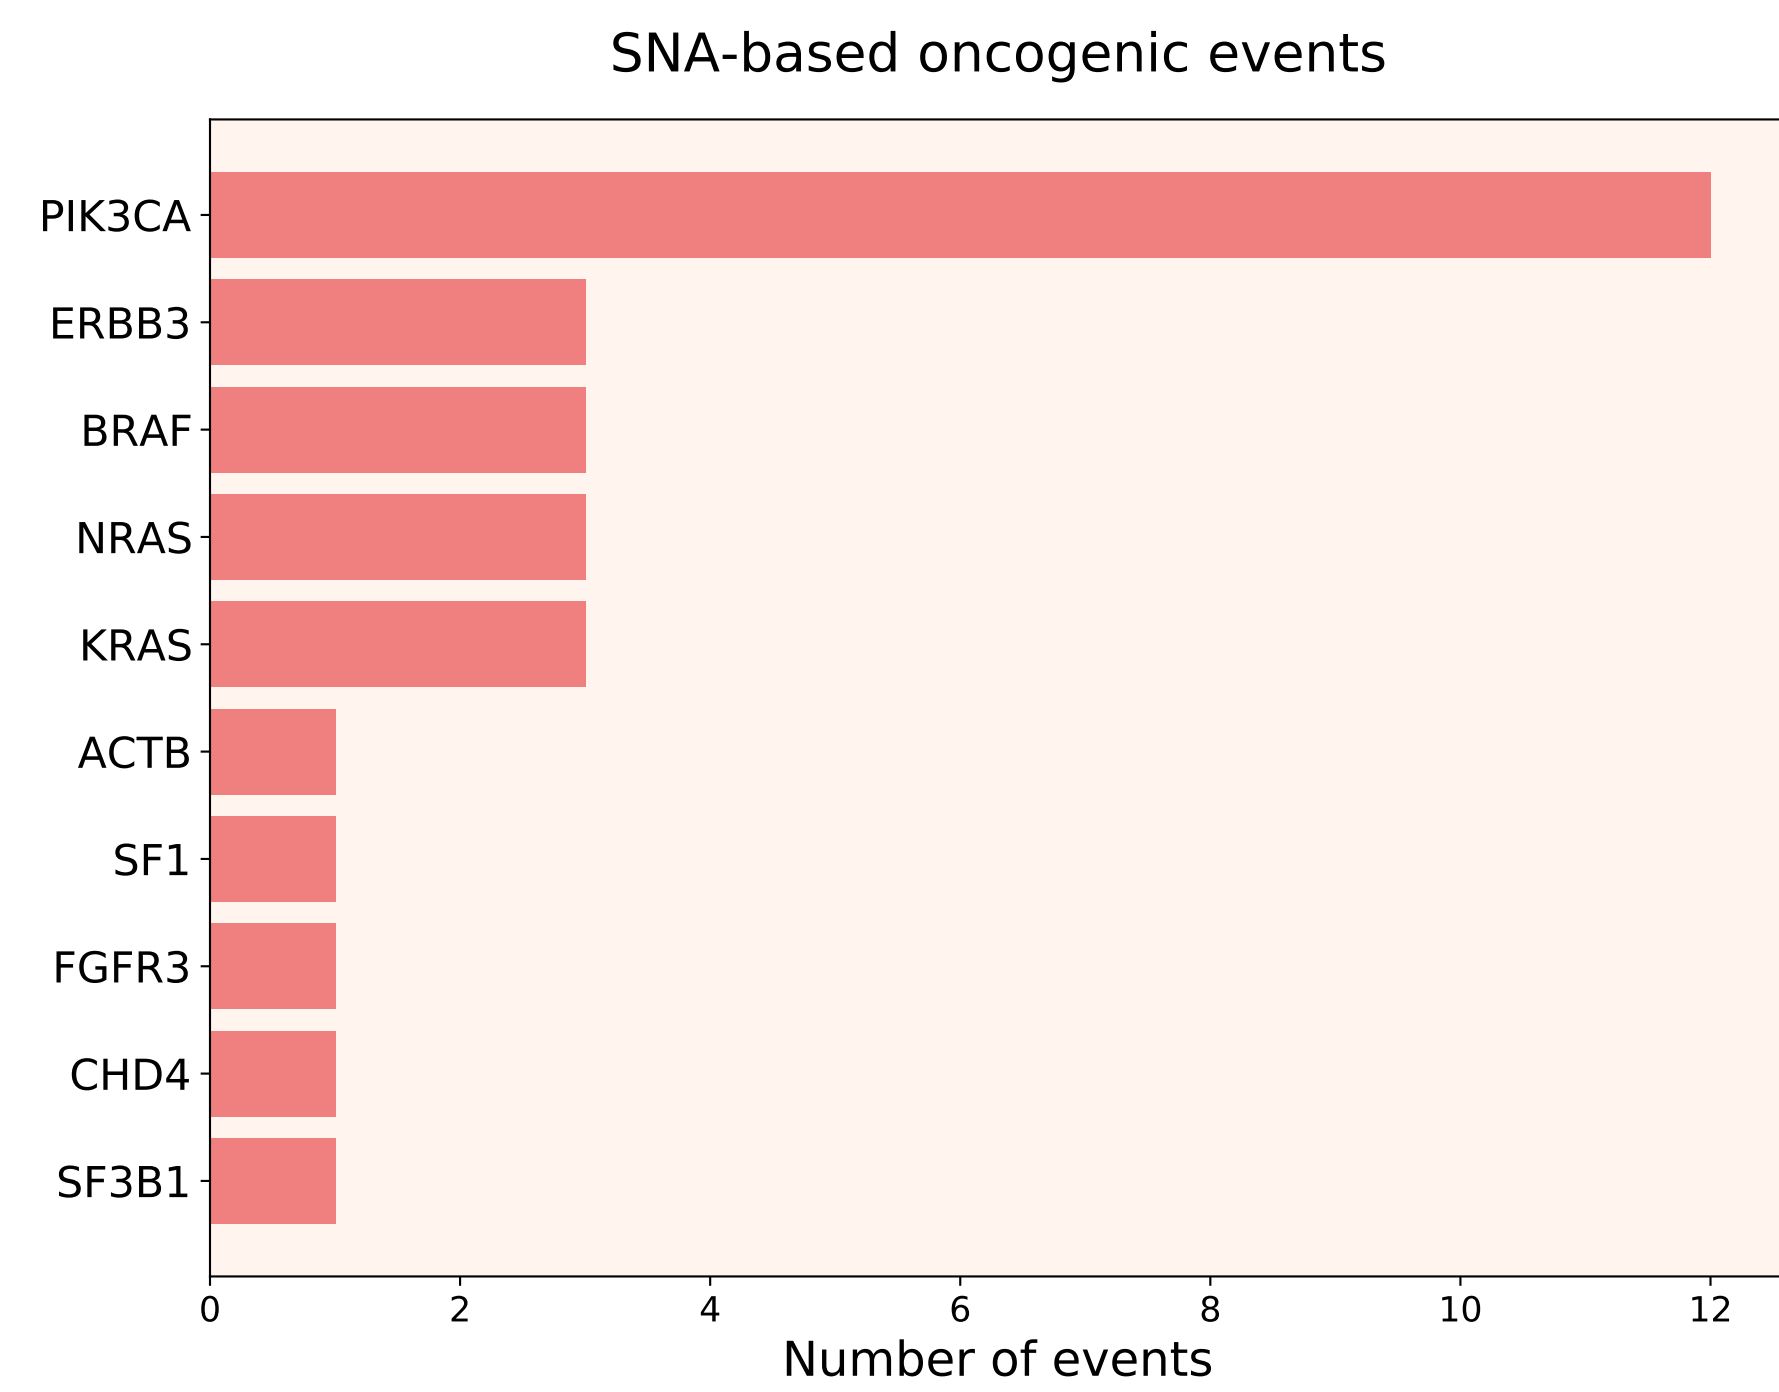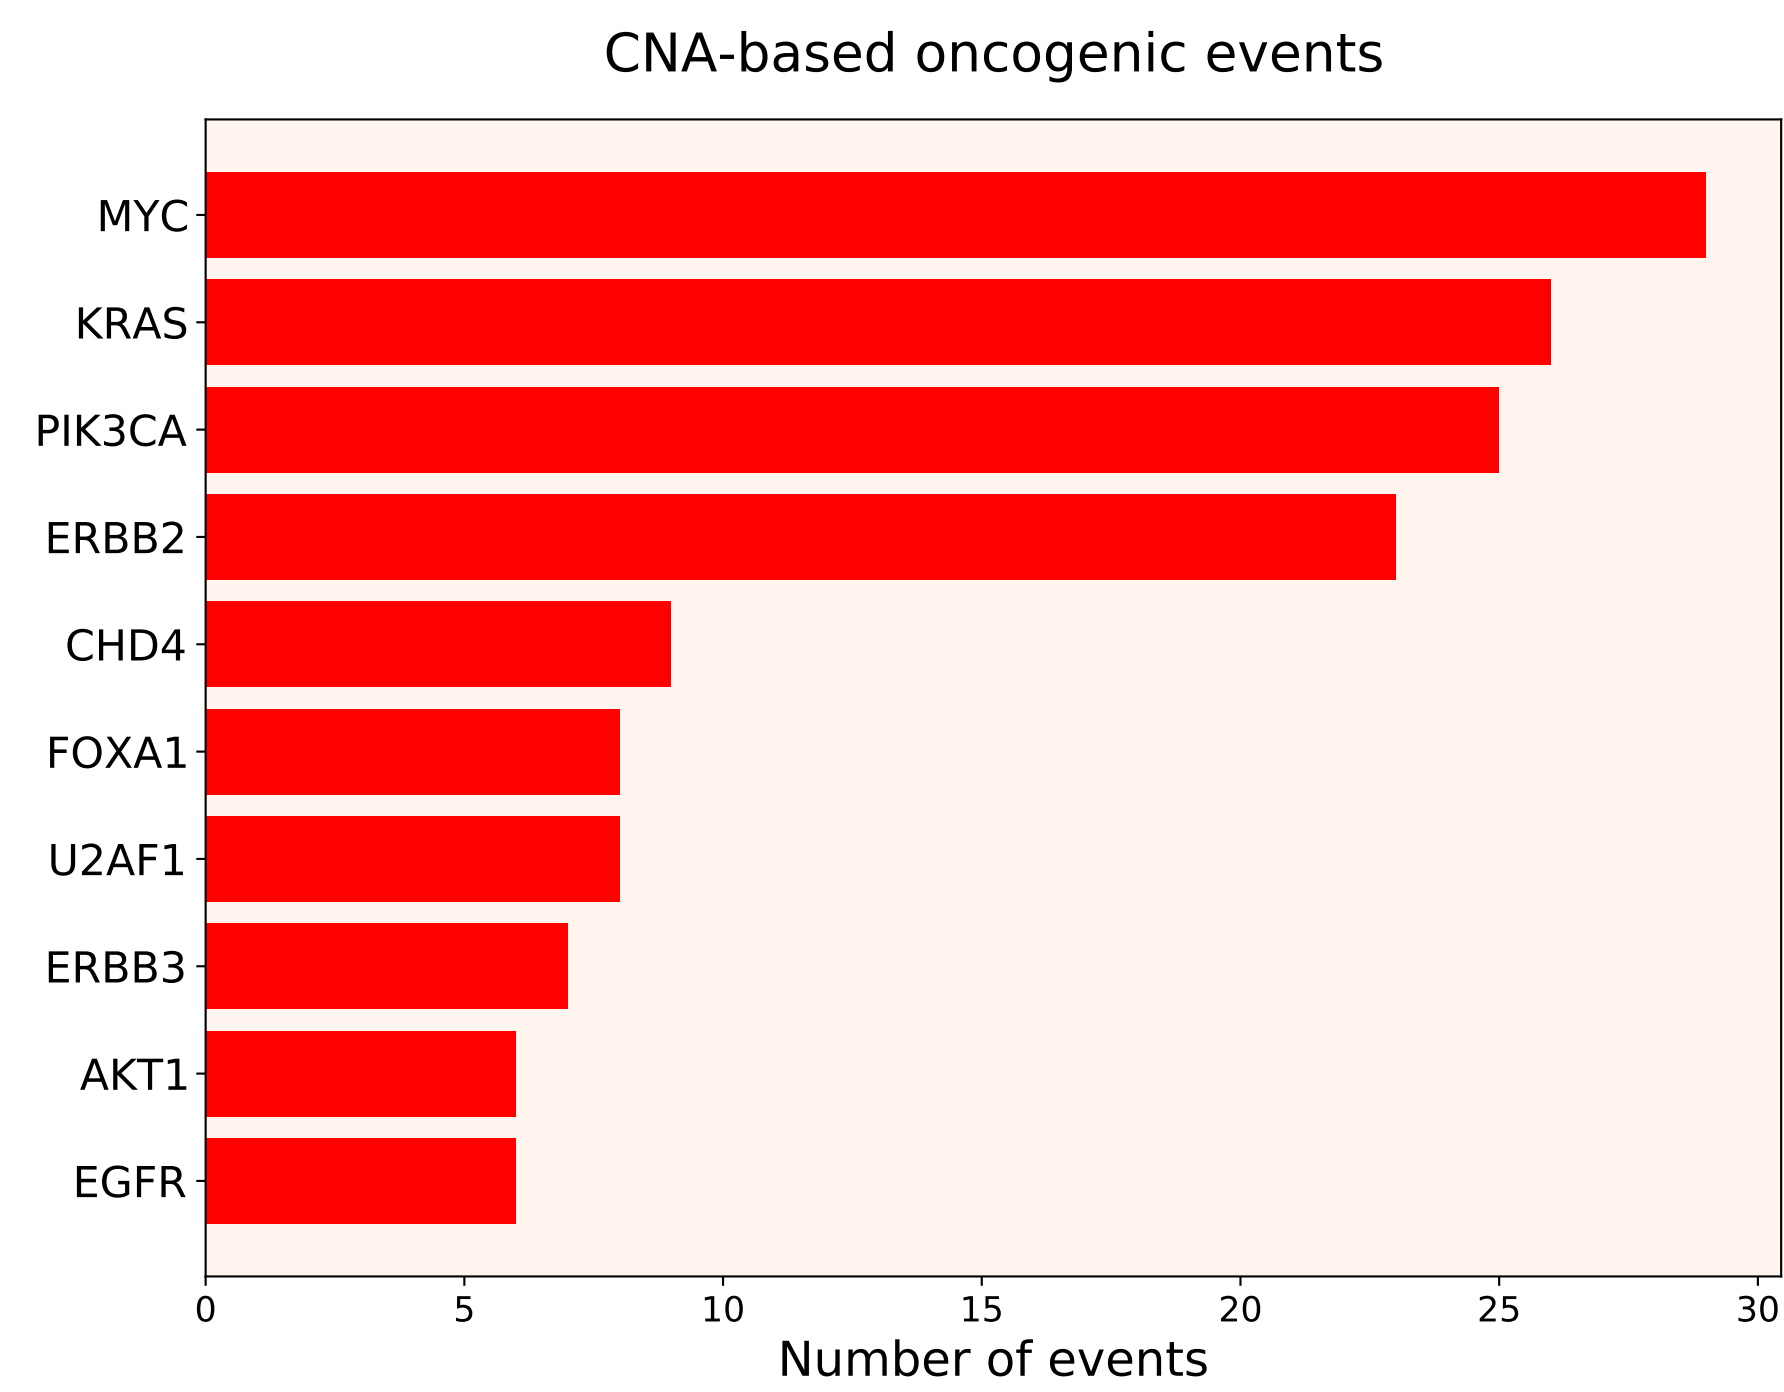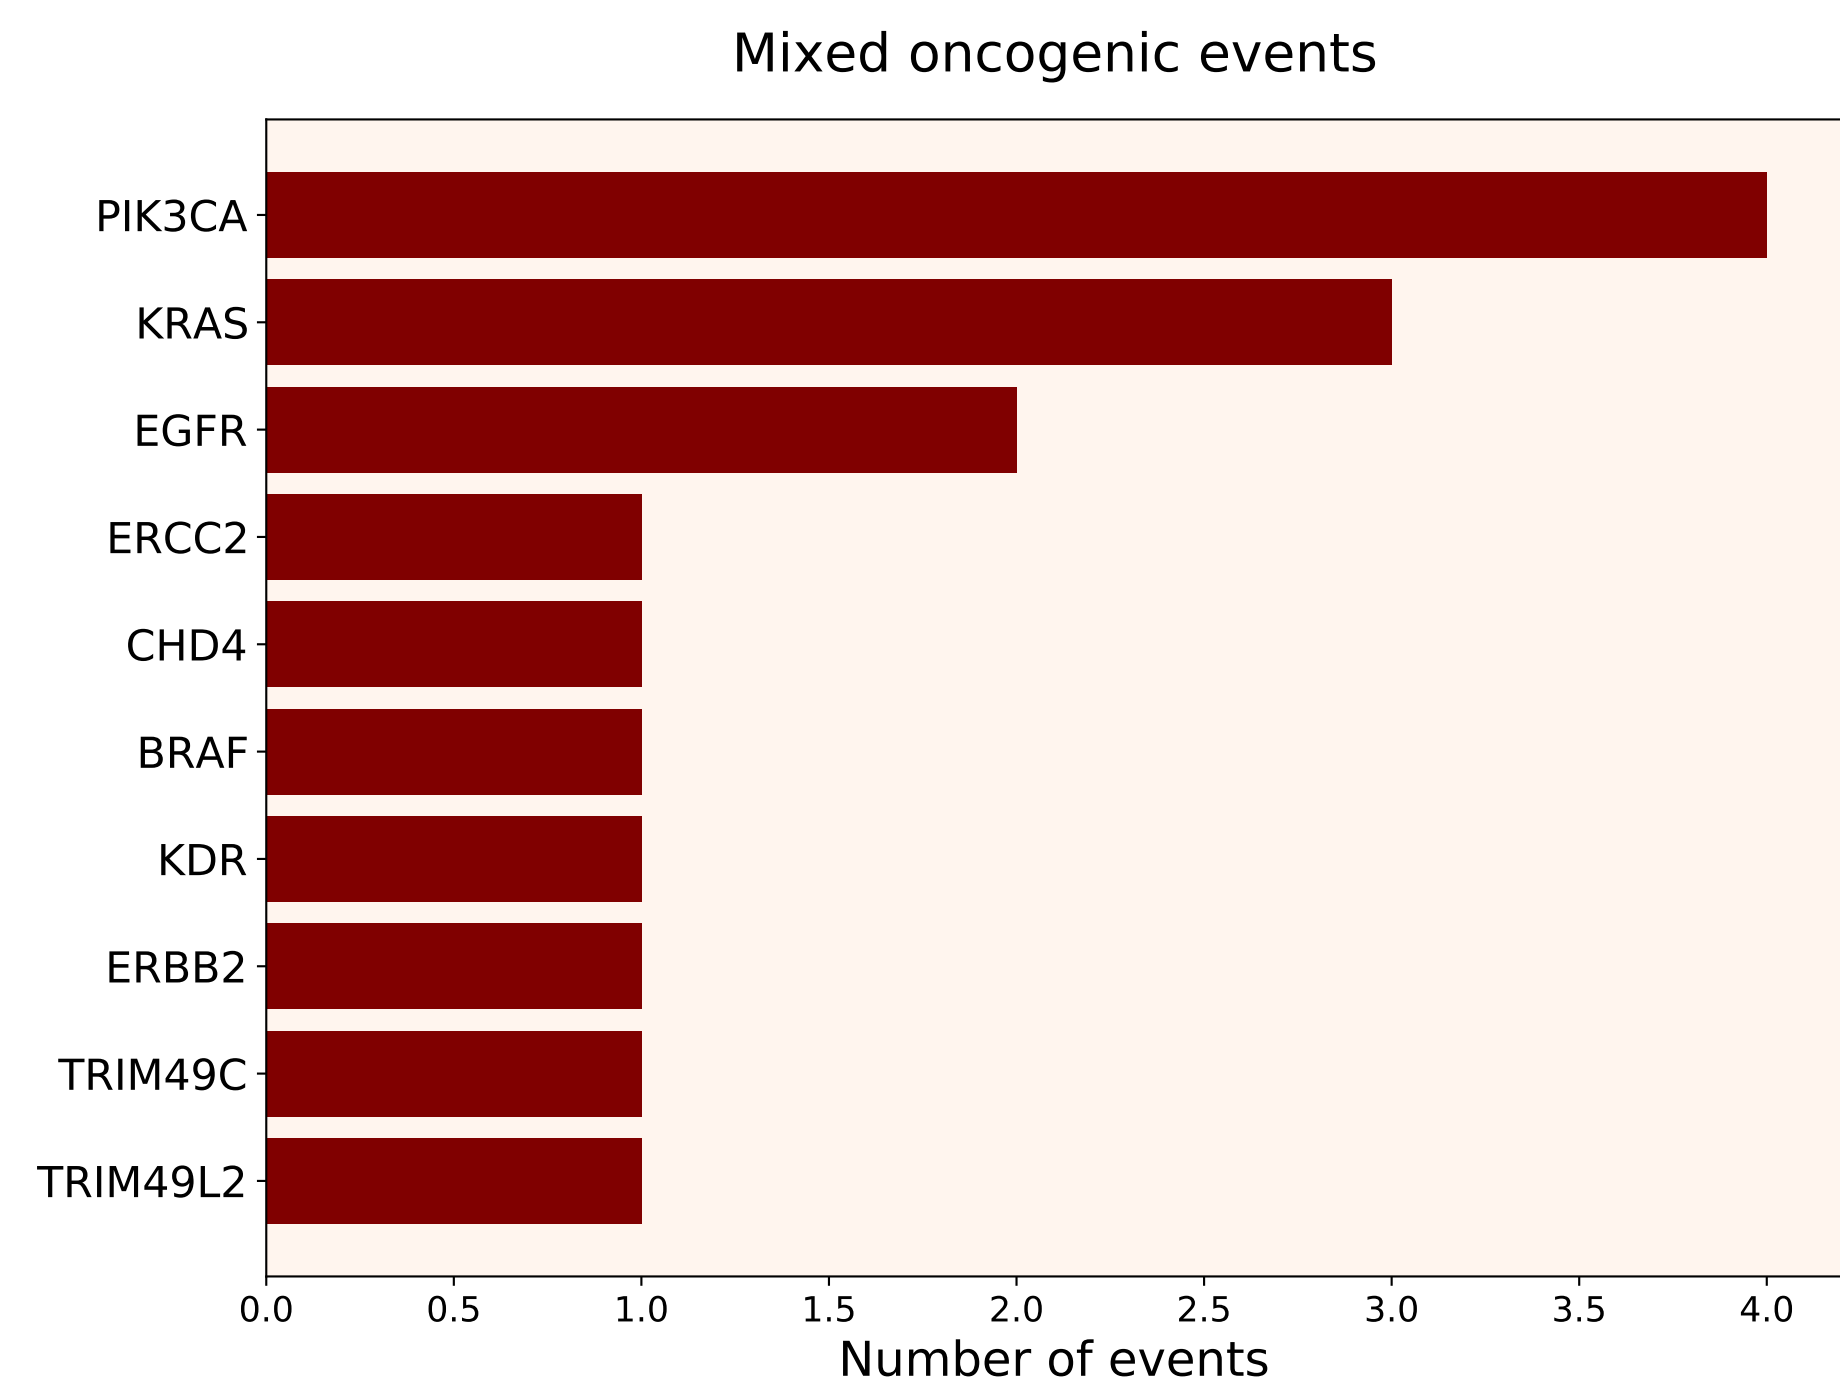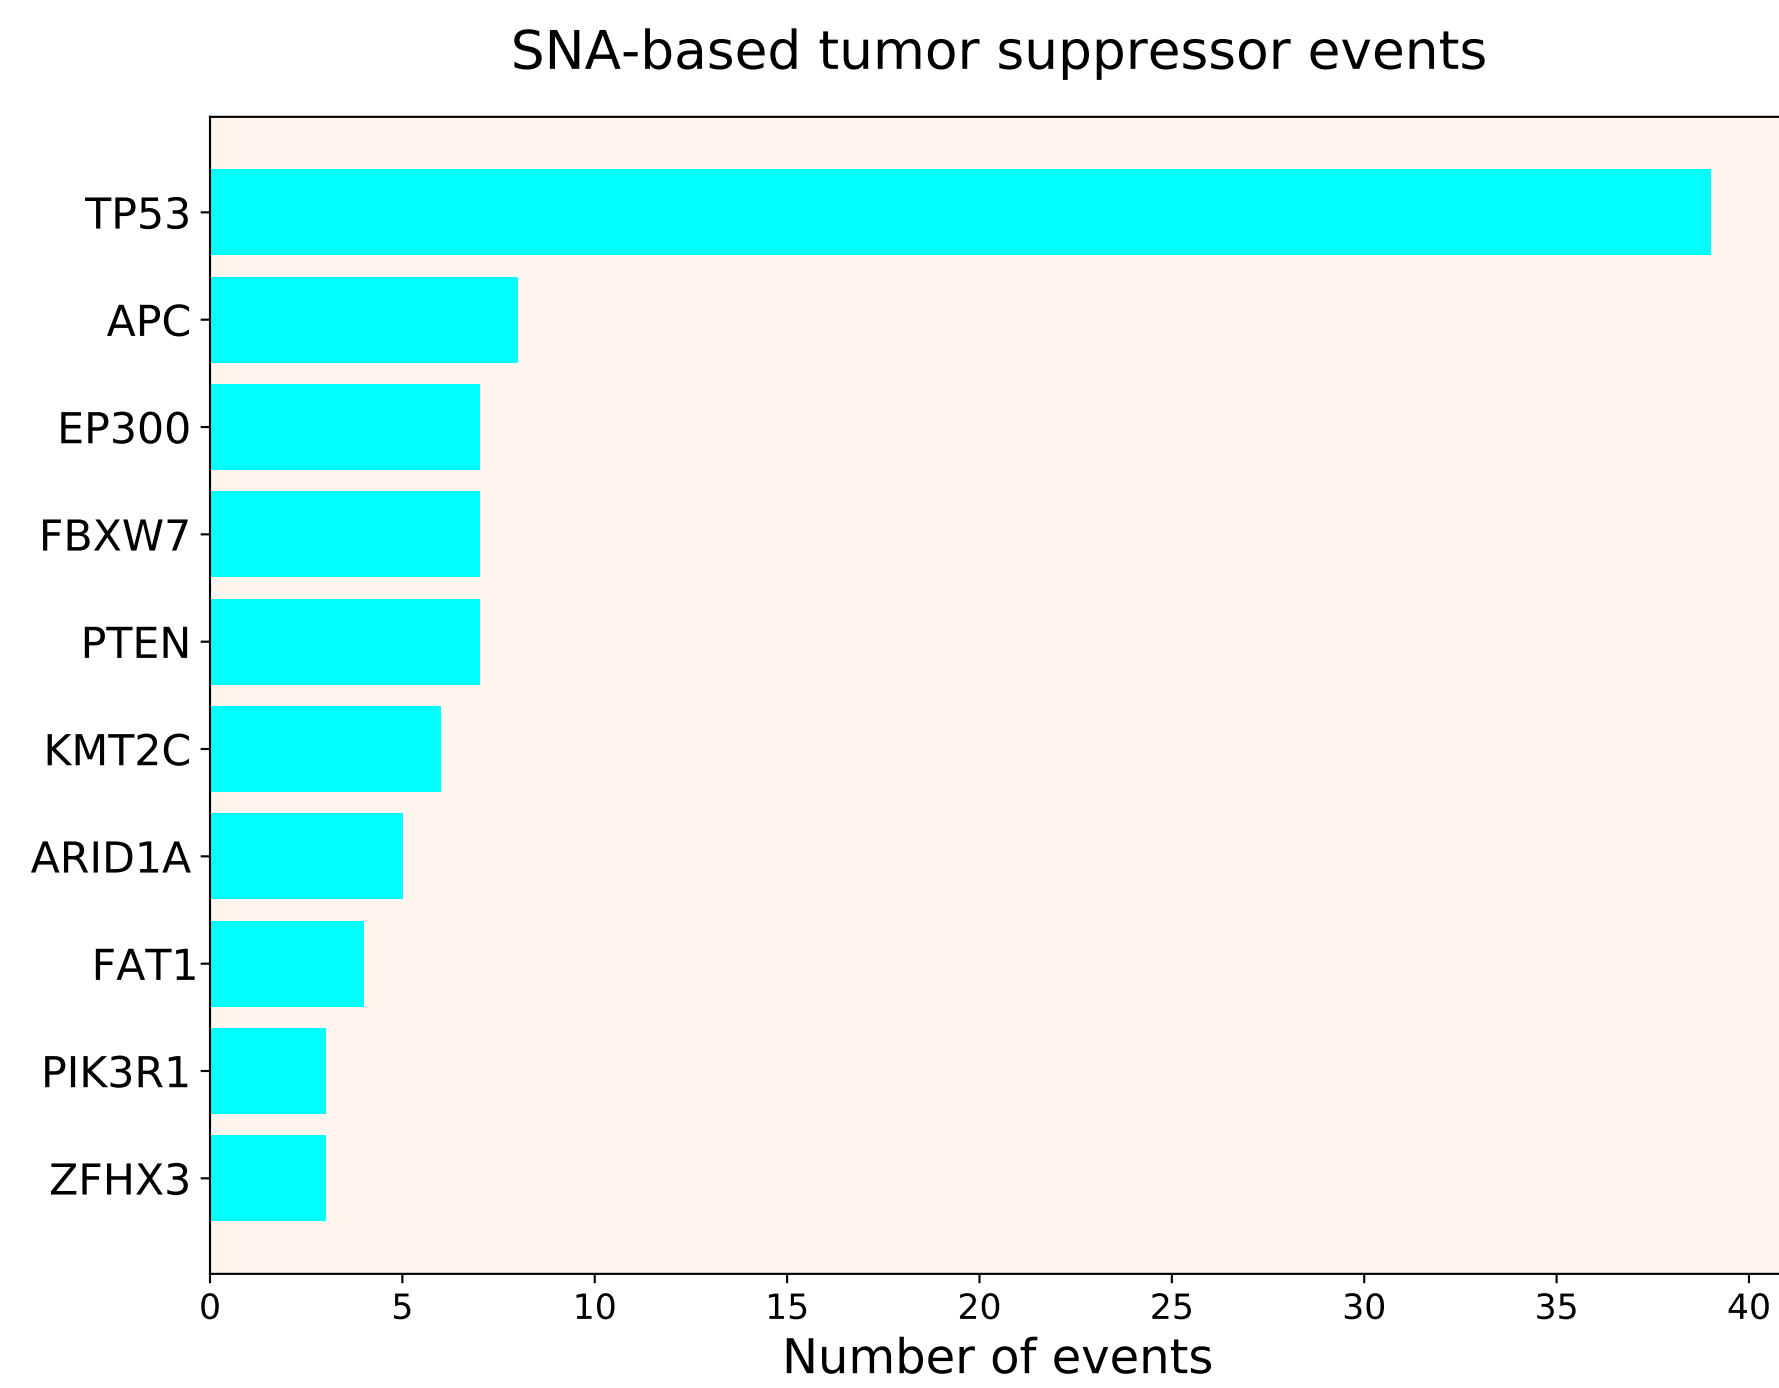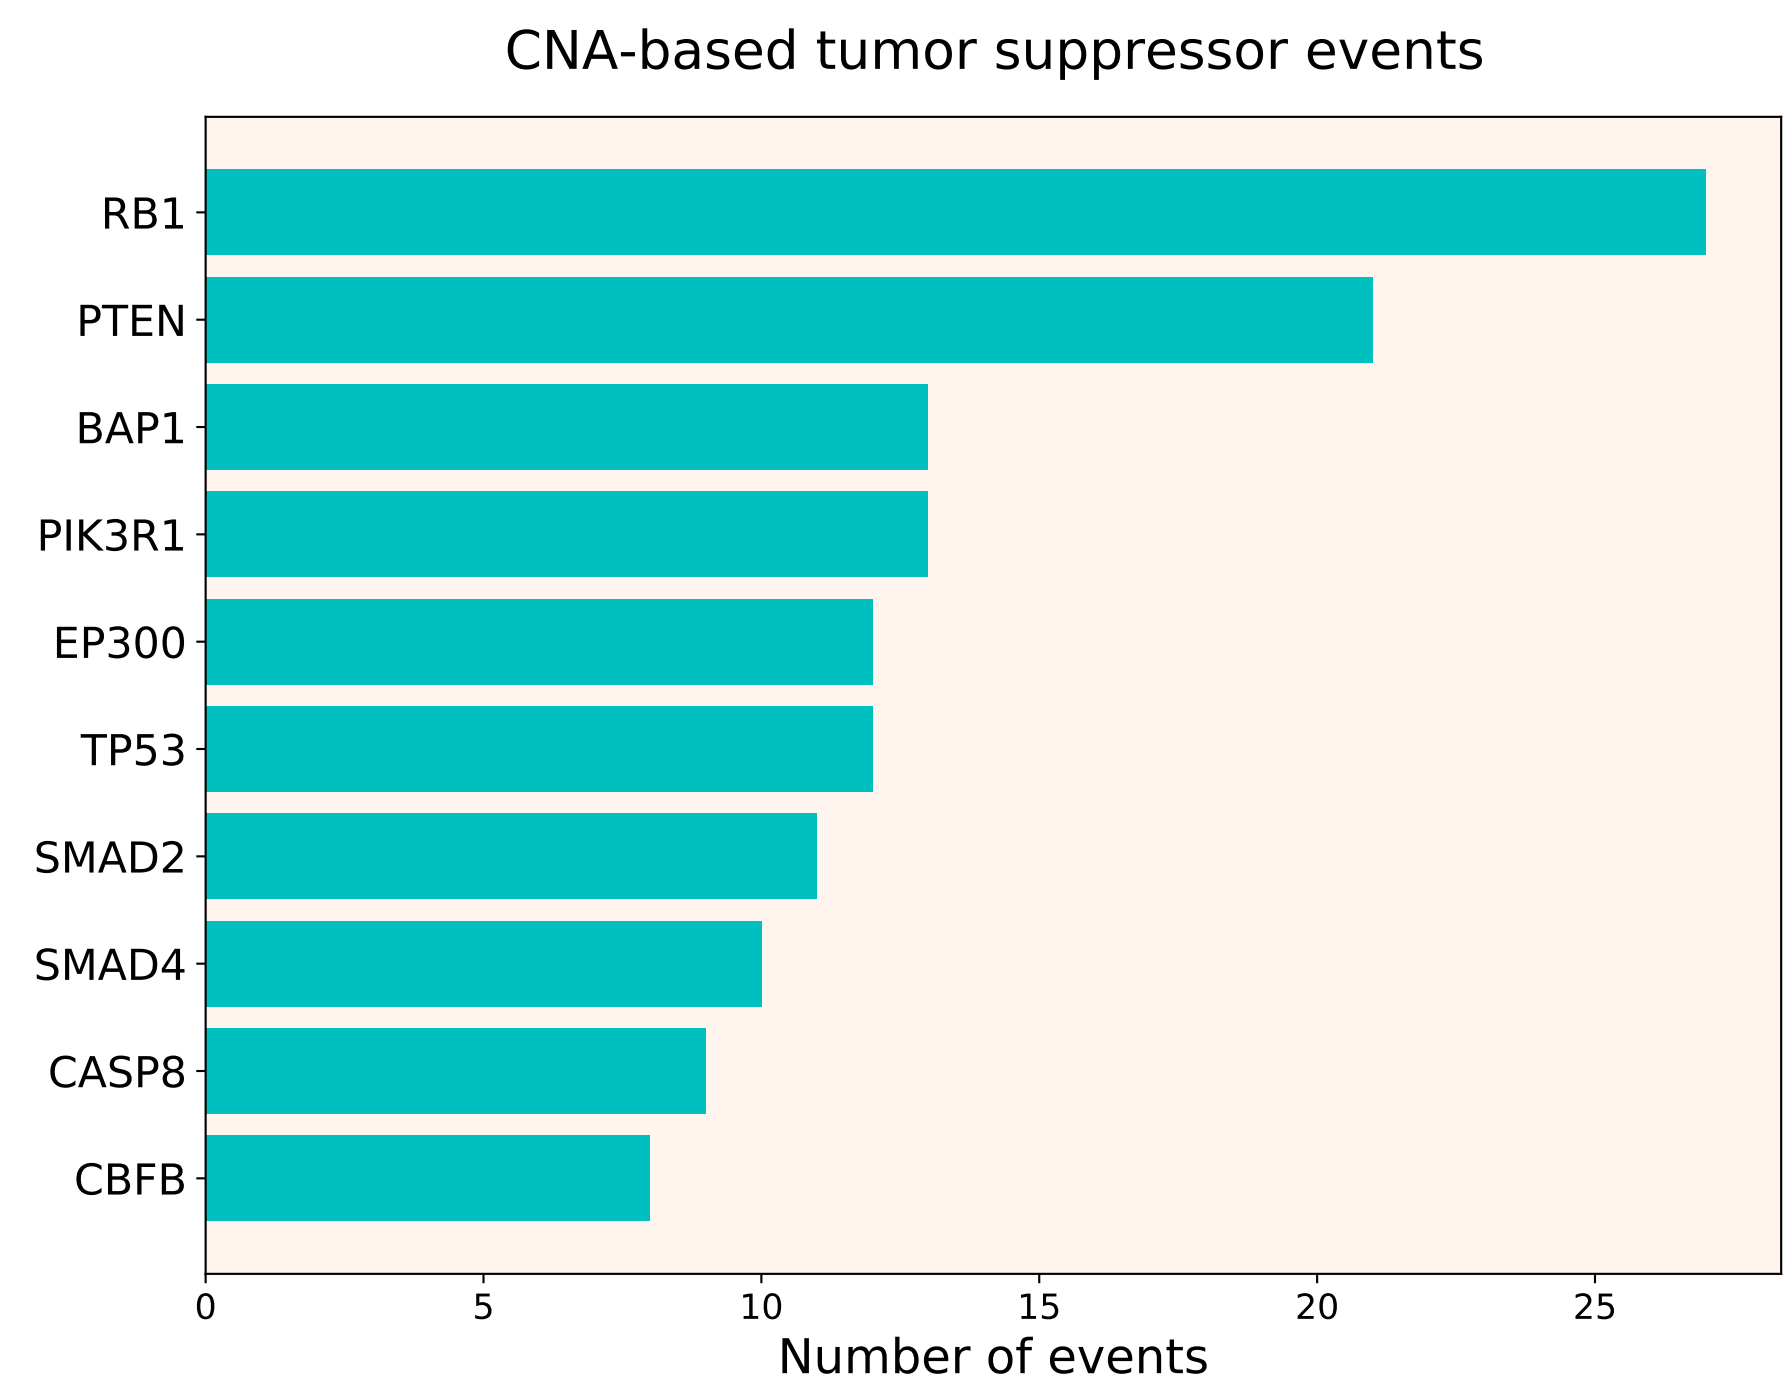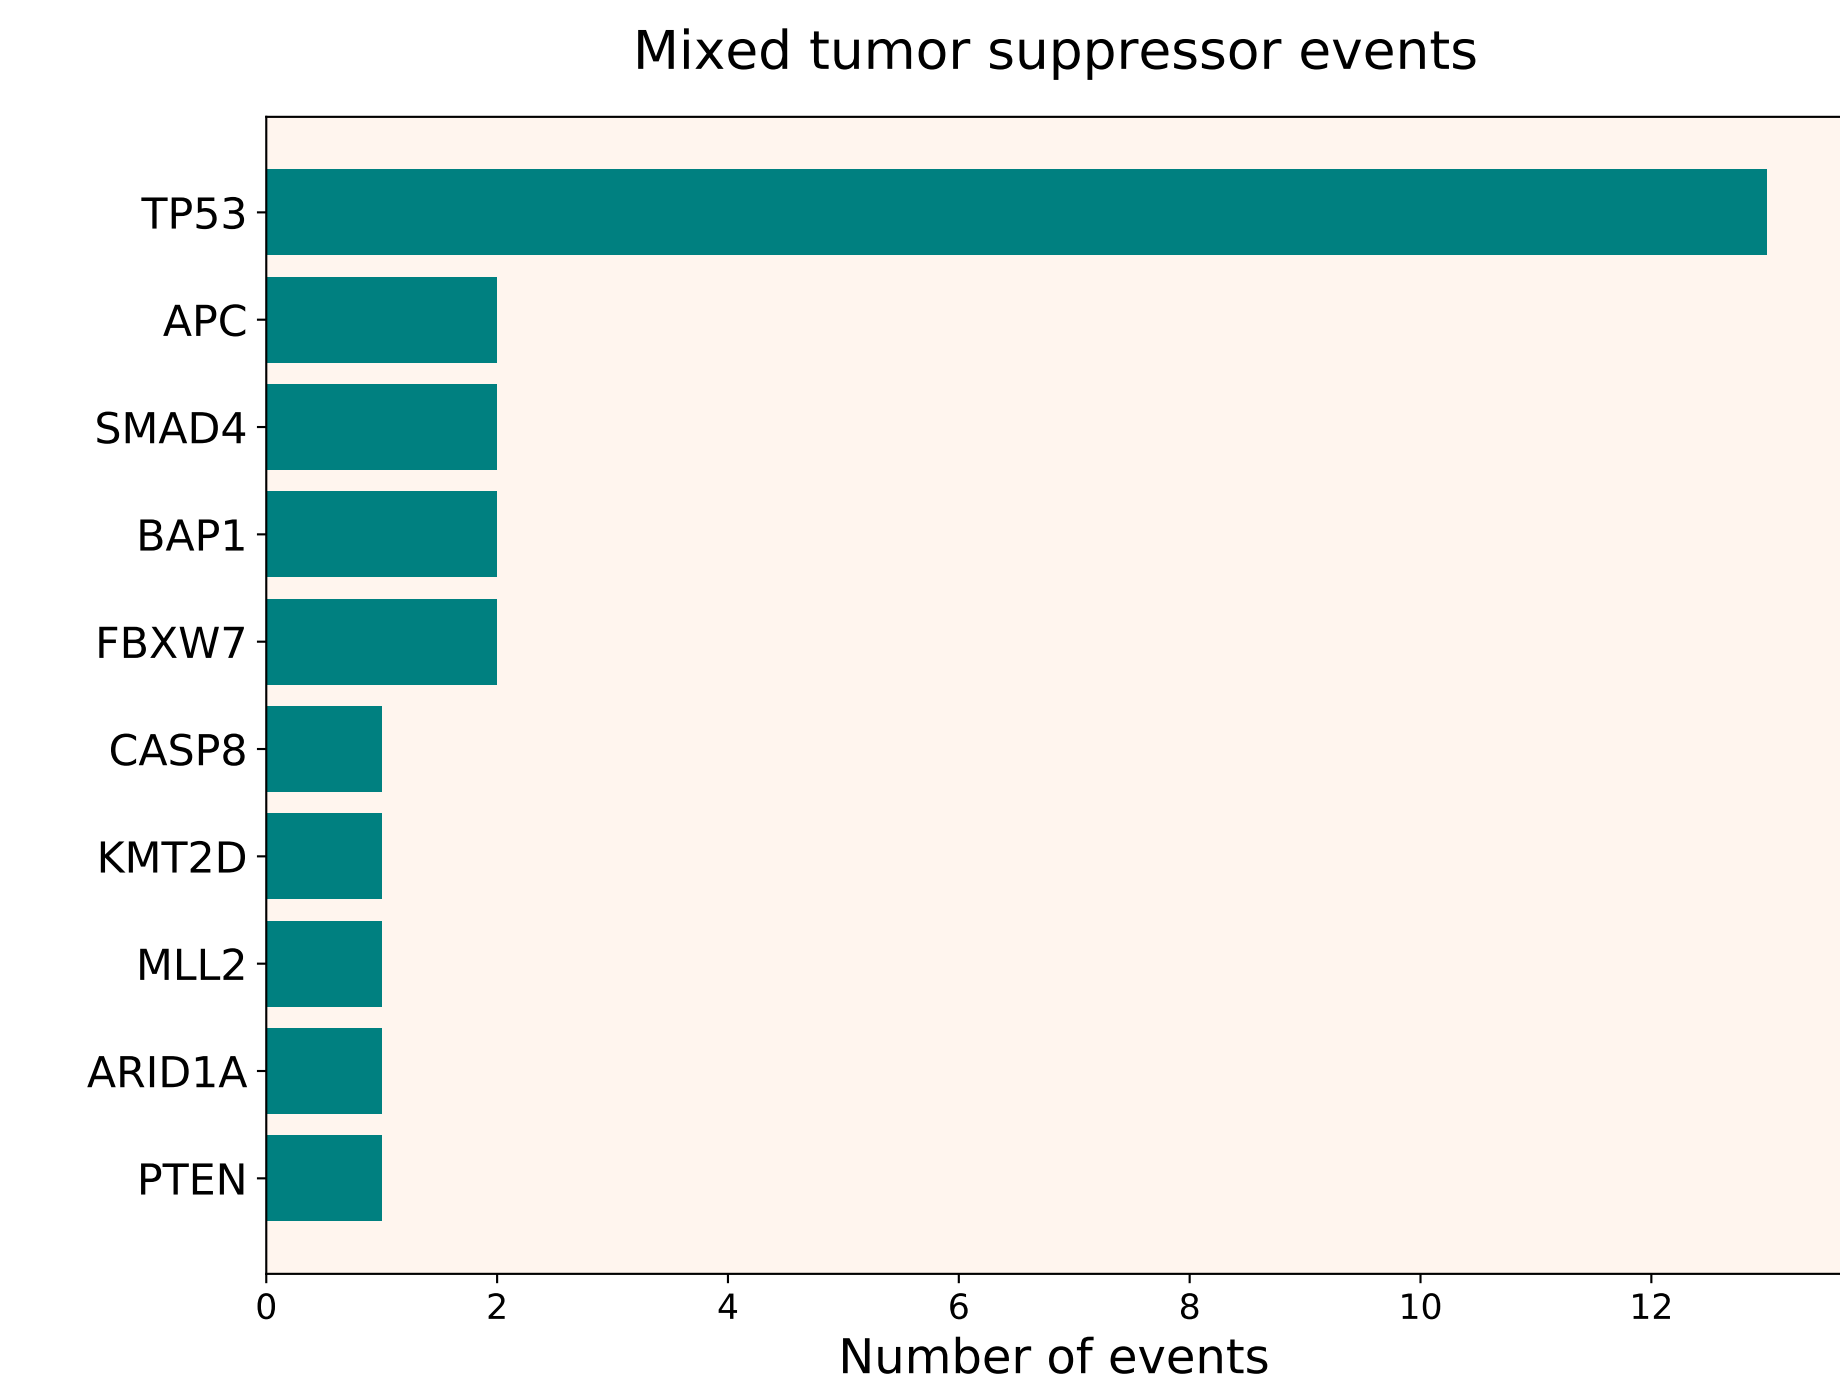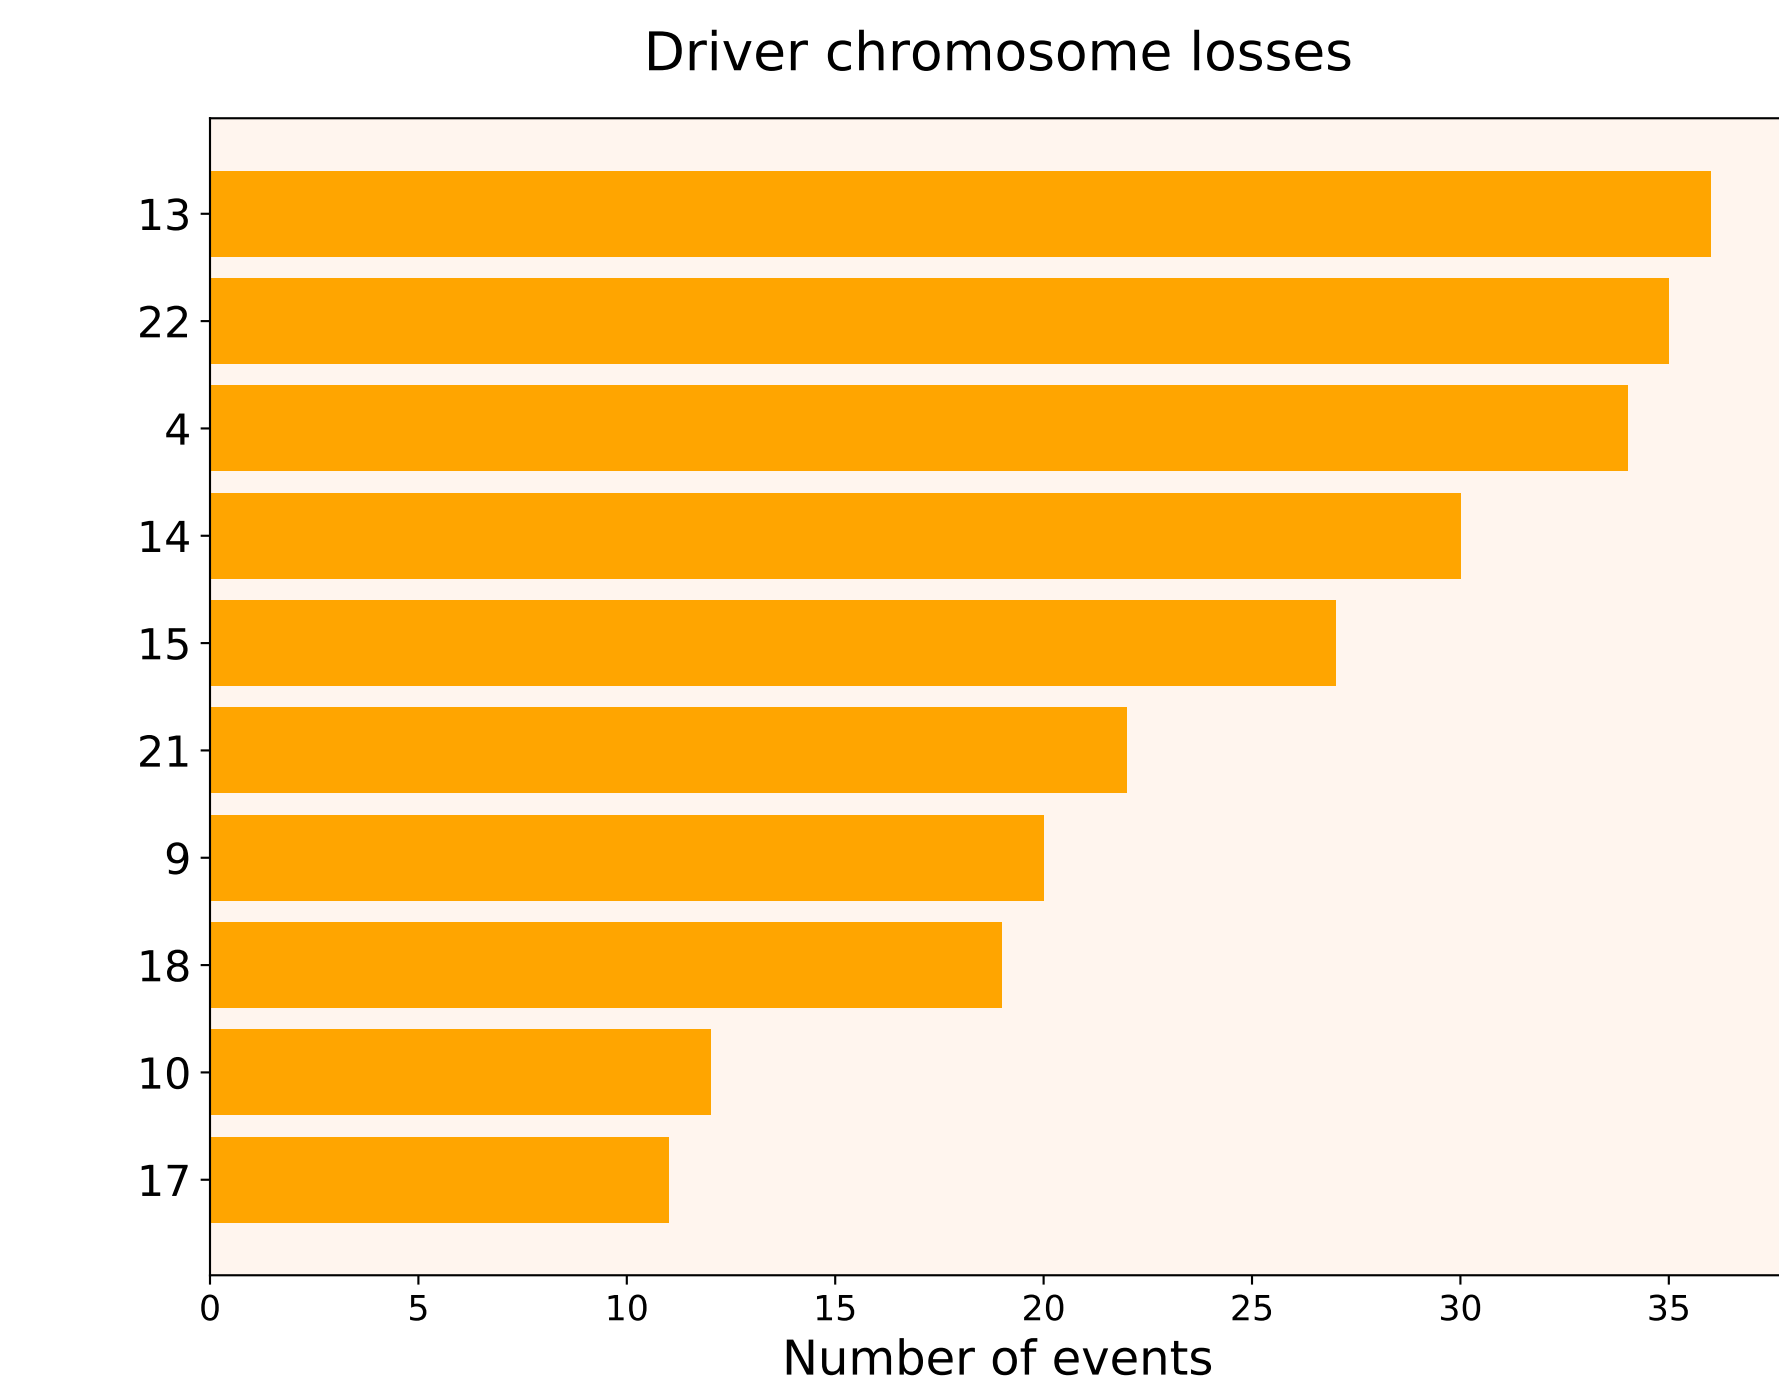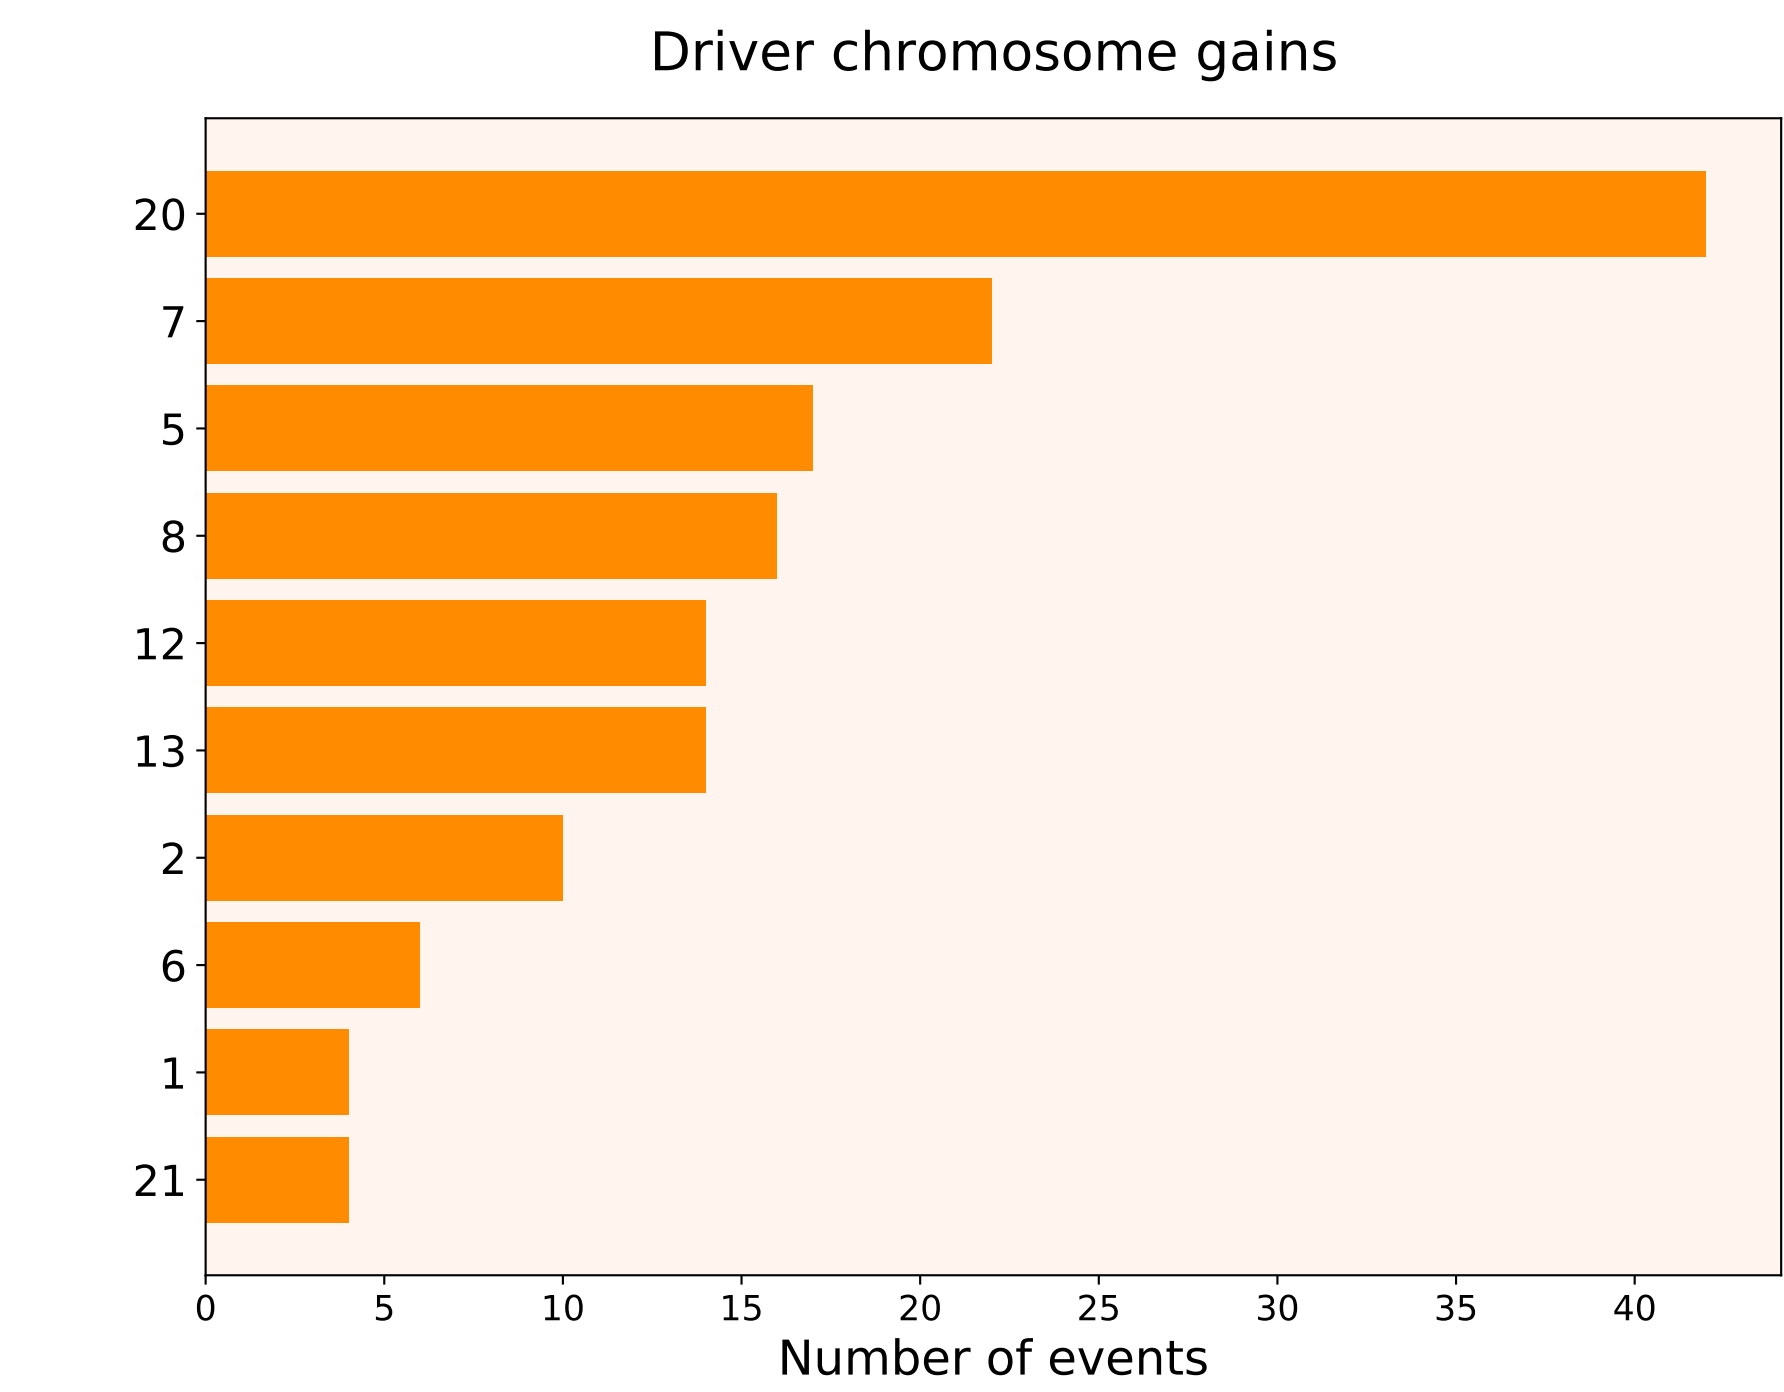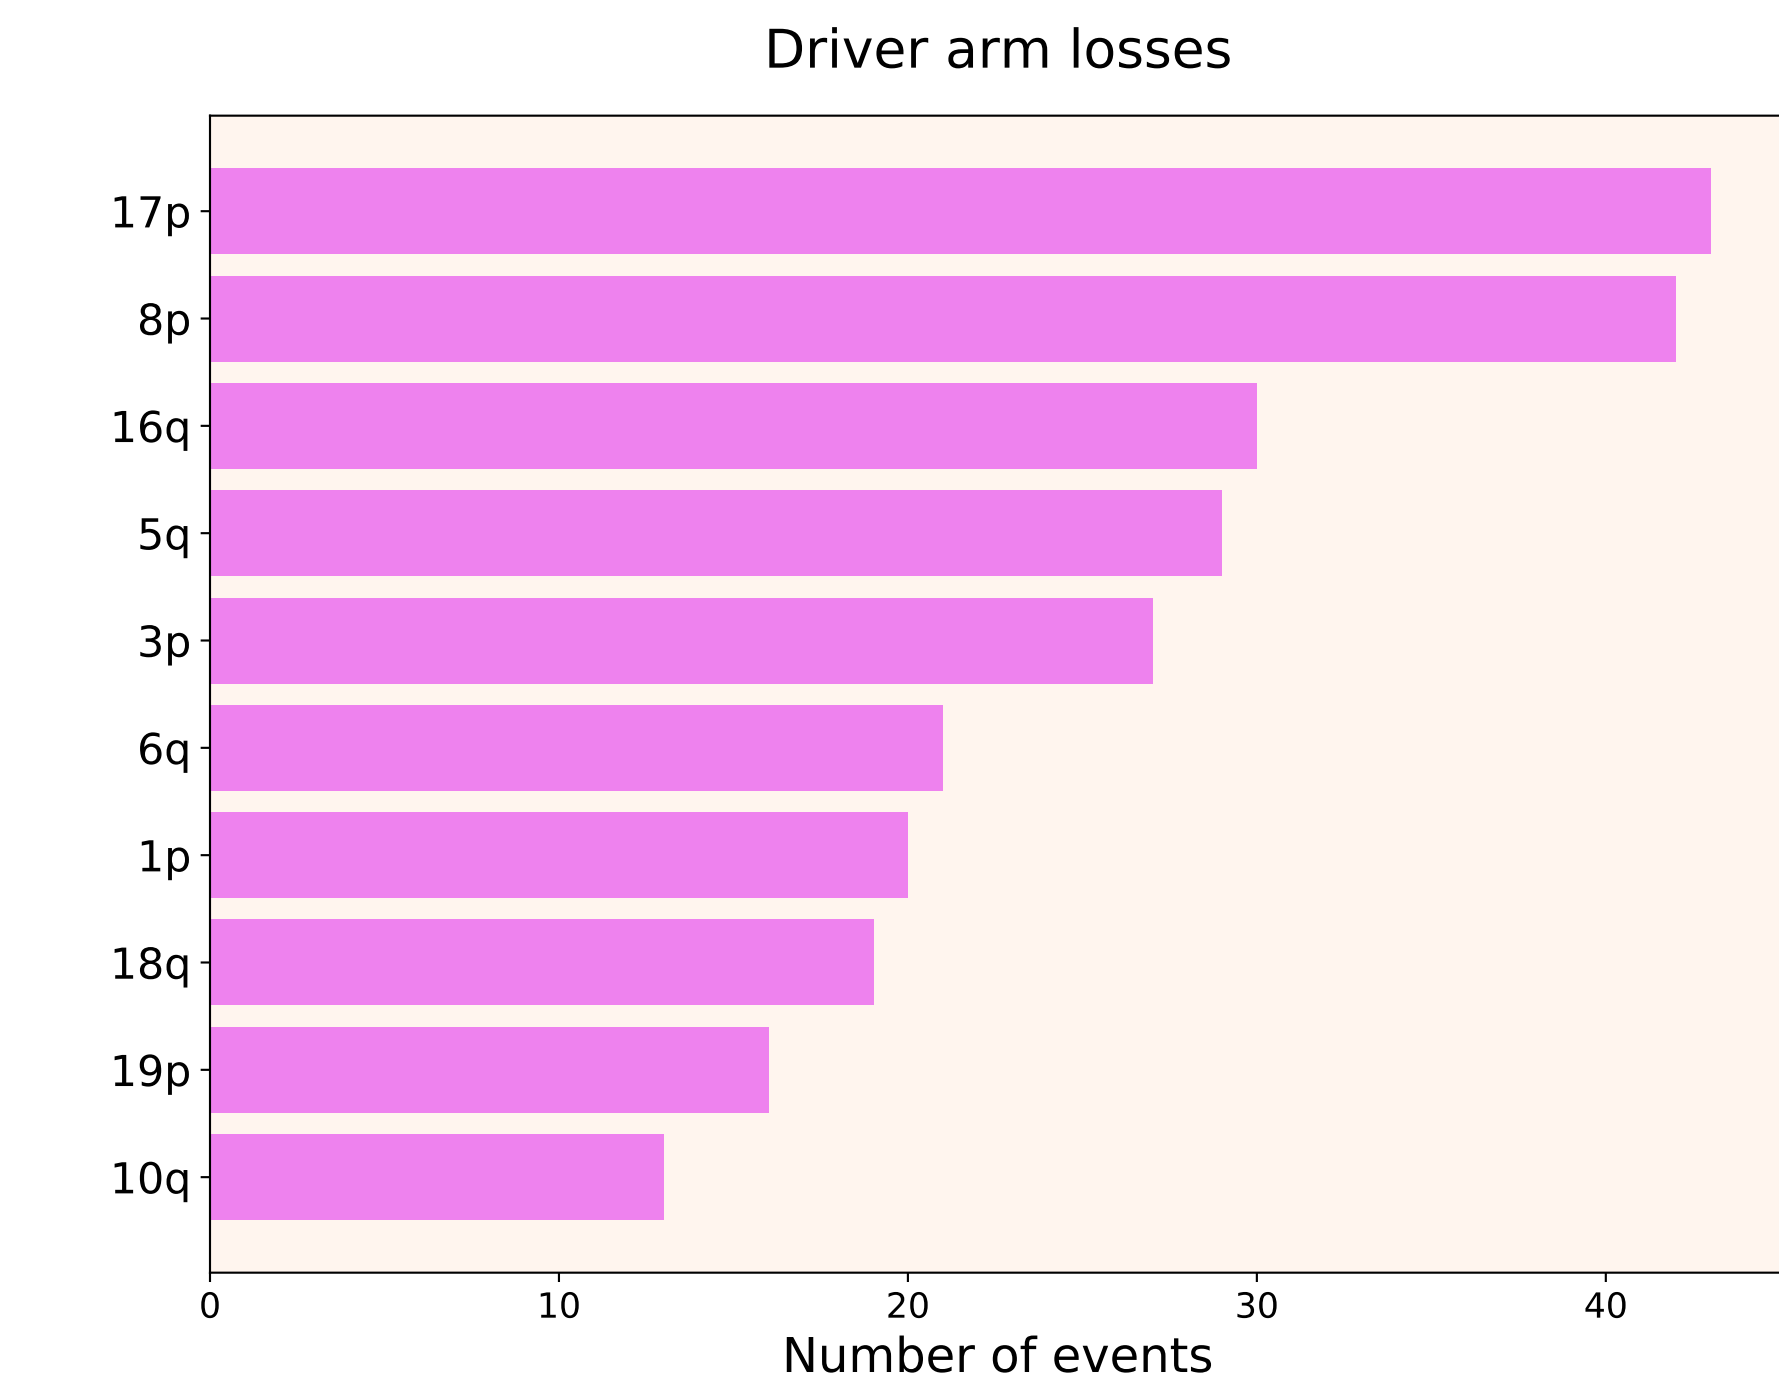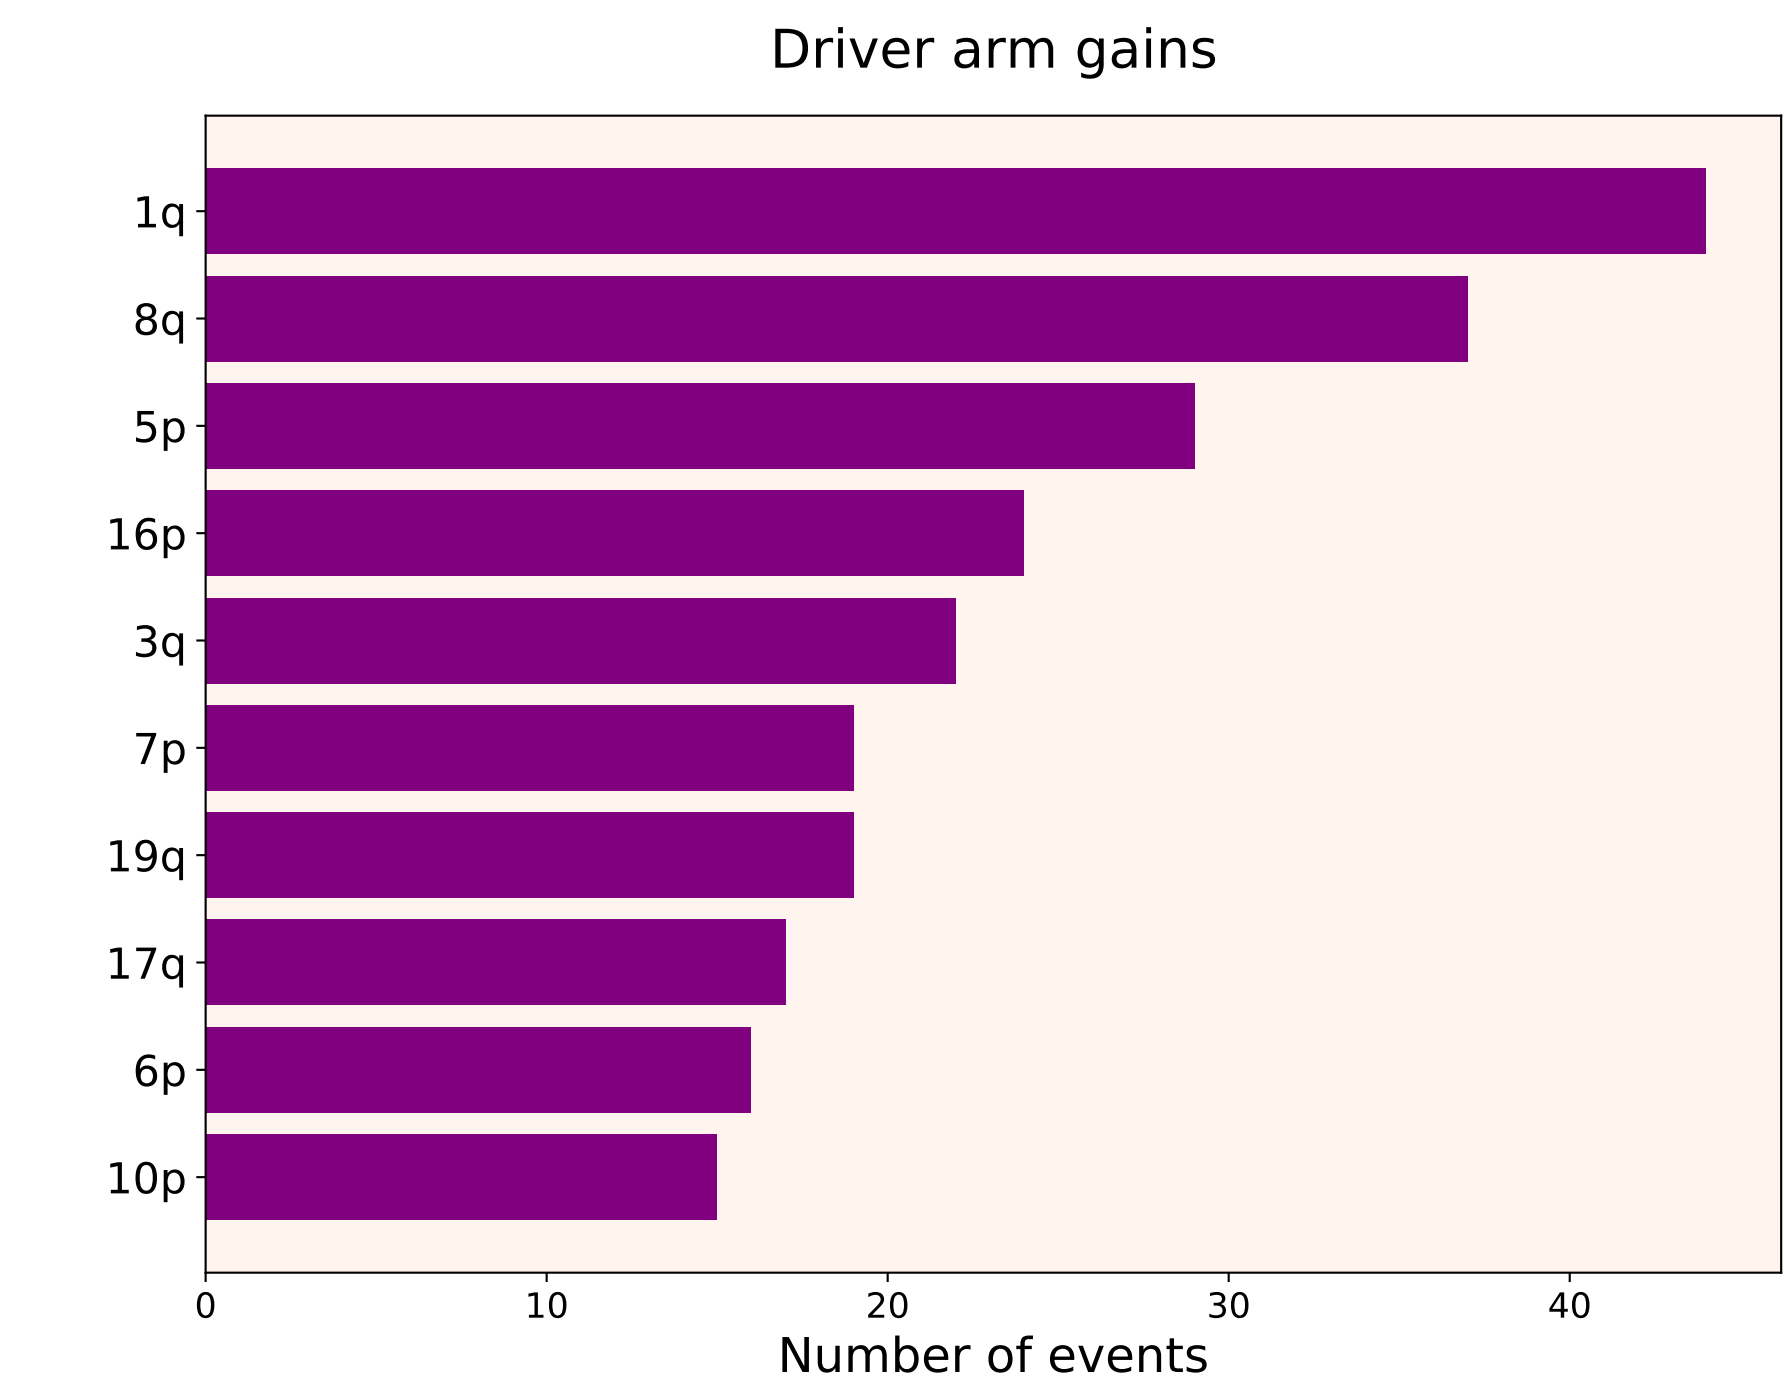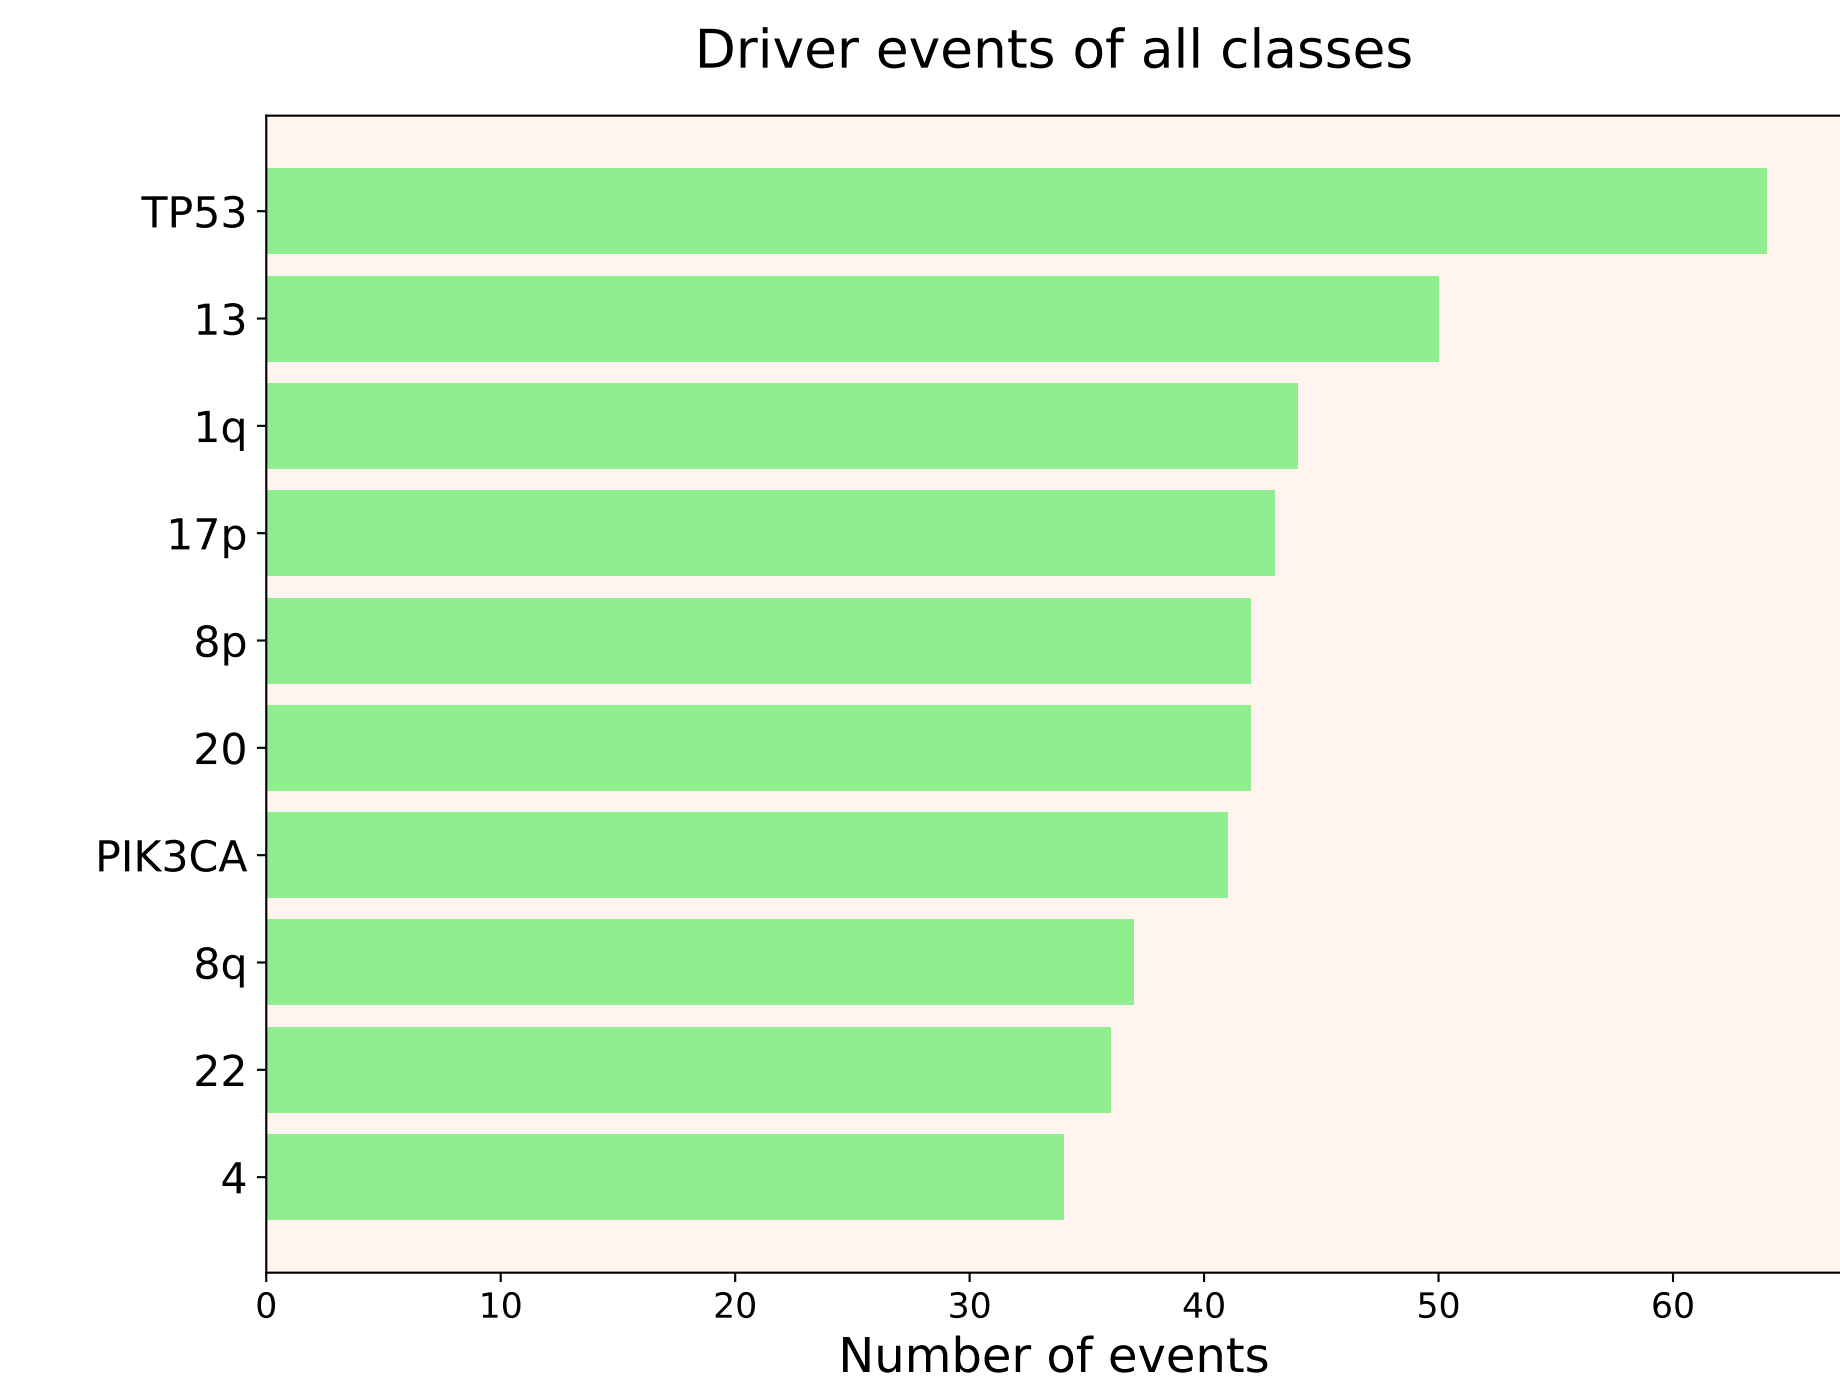

Supplement: Supplemental_Data_S1.zip [file Supplemental_Data_S1.zip]

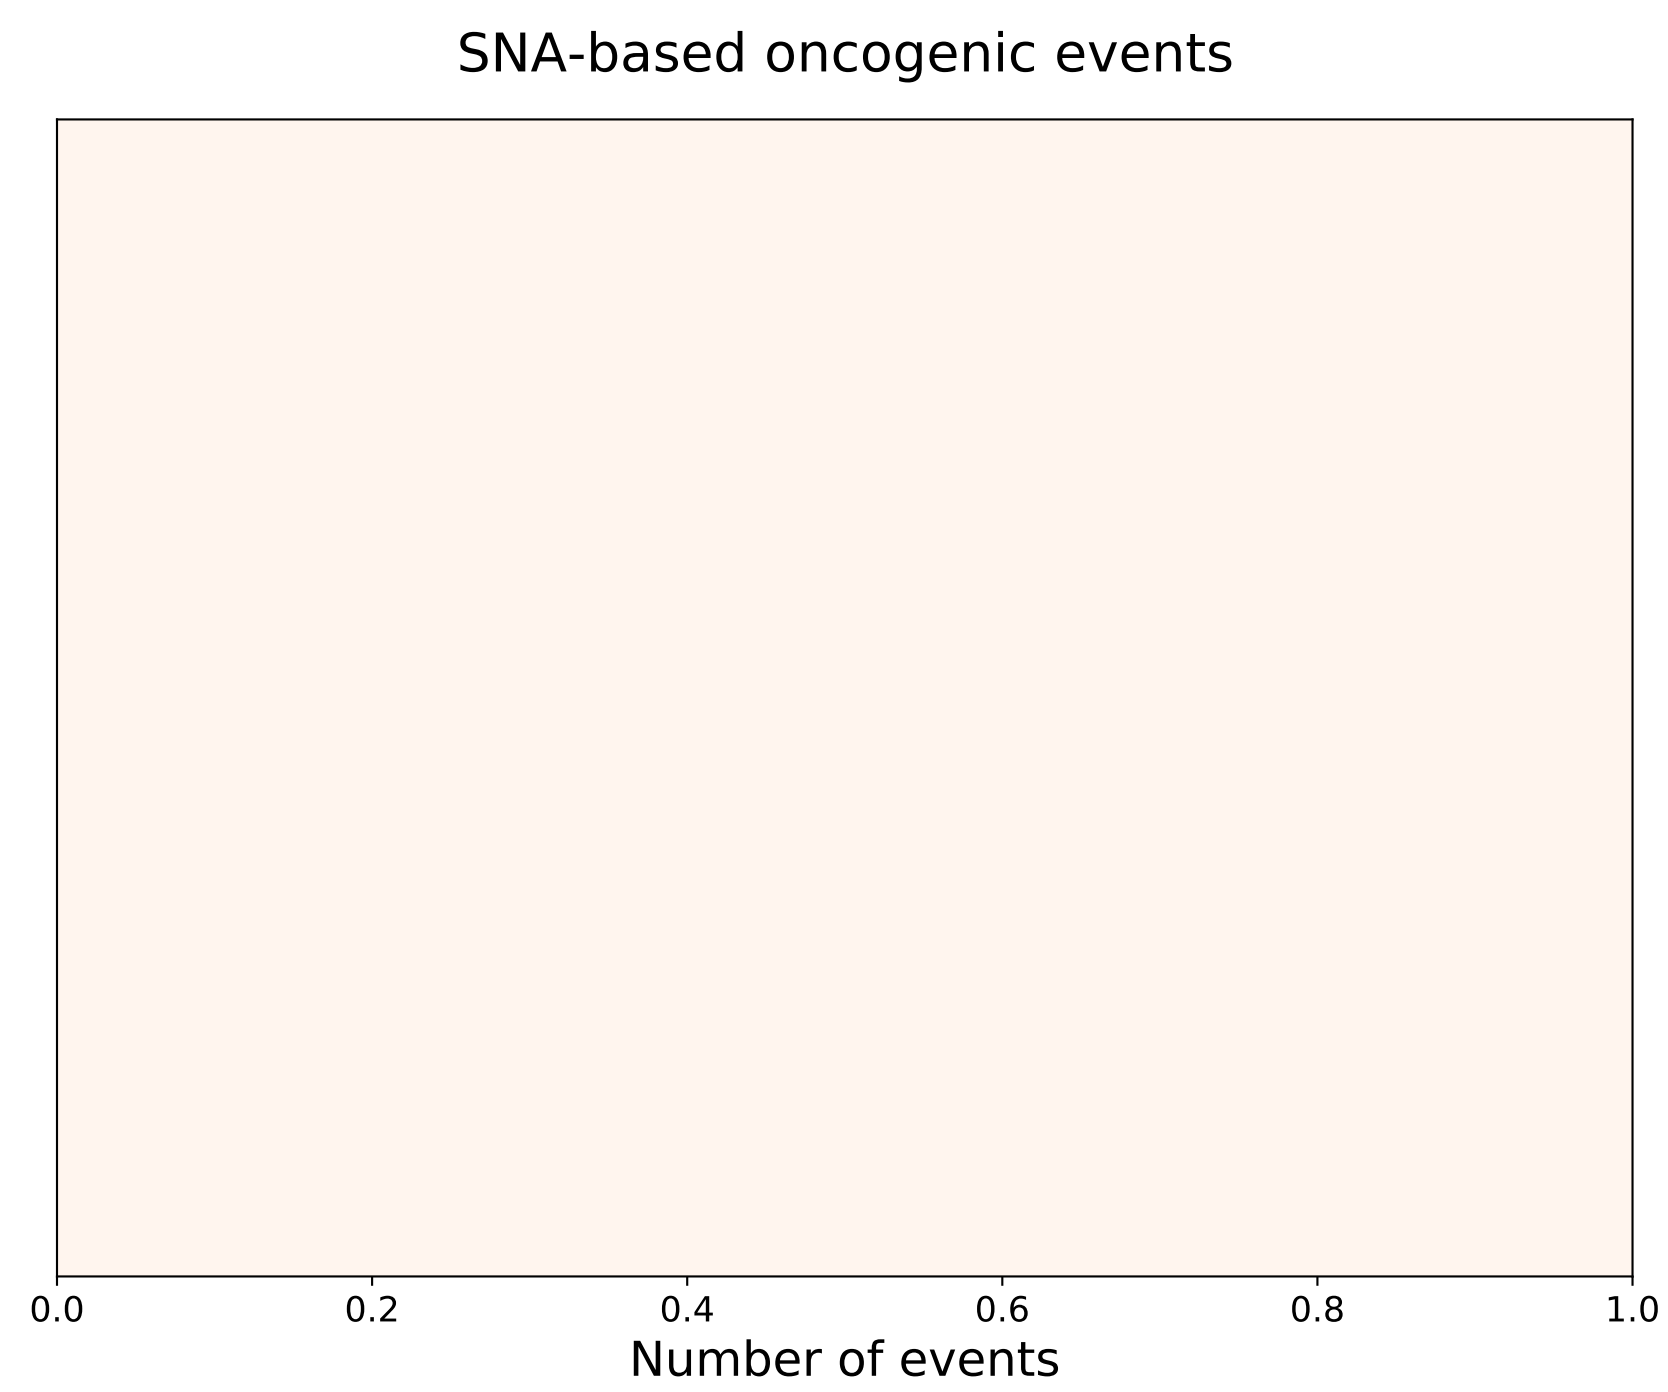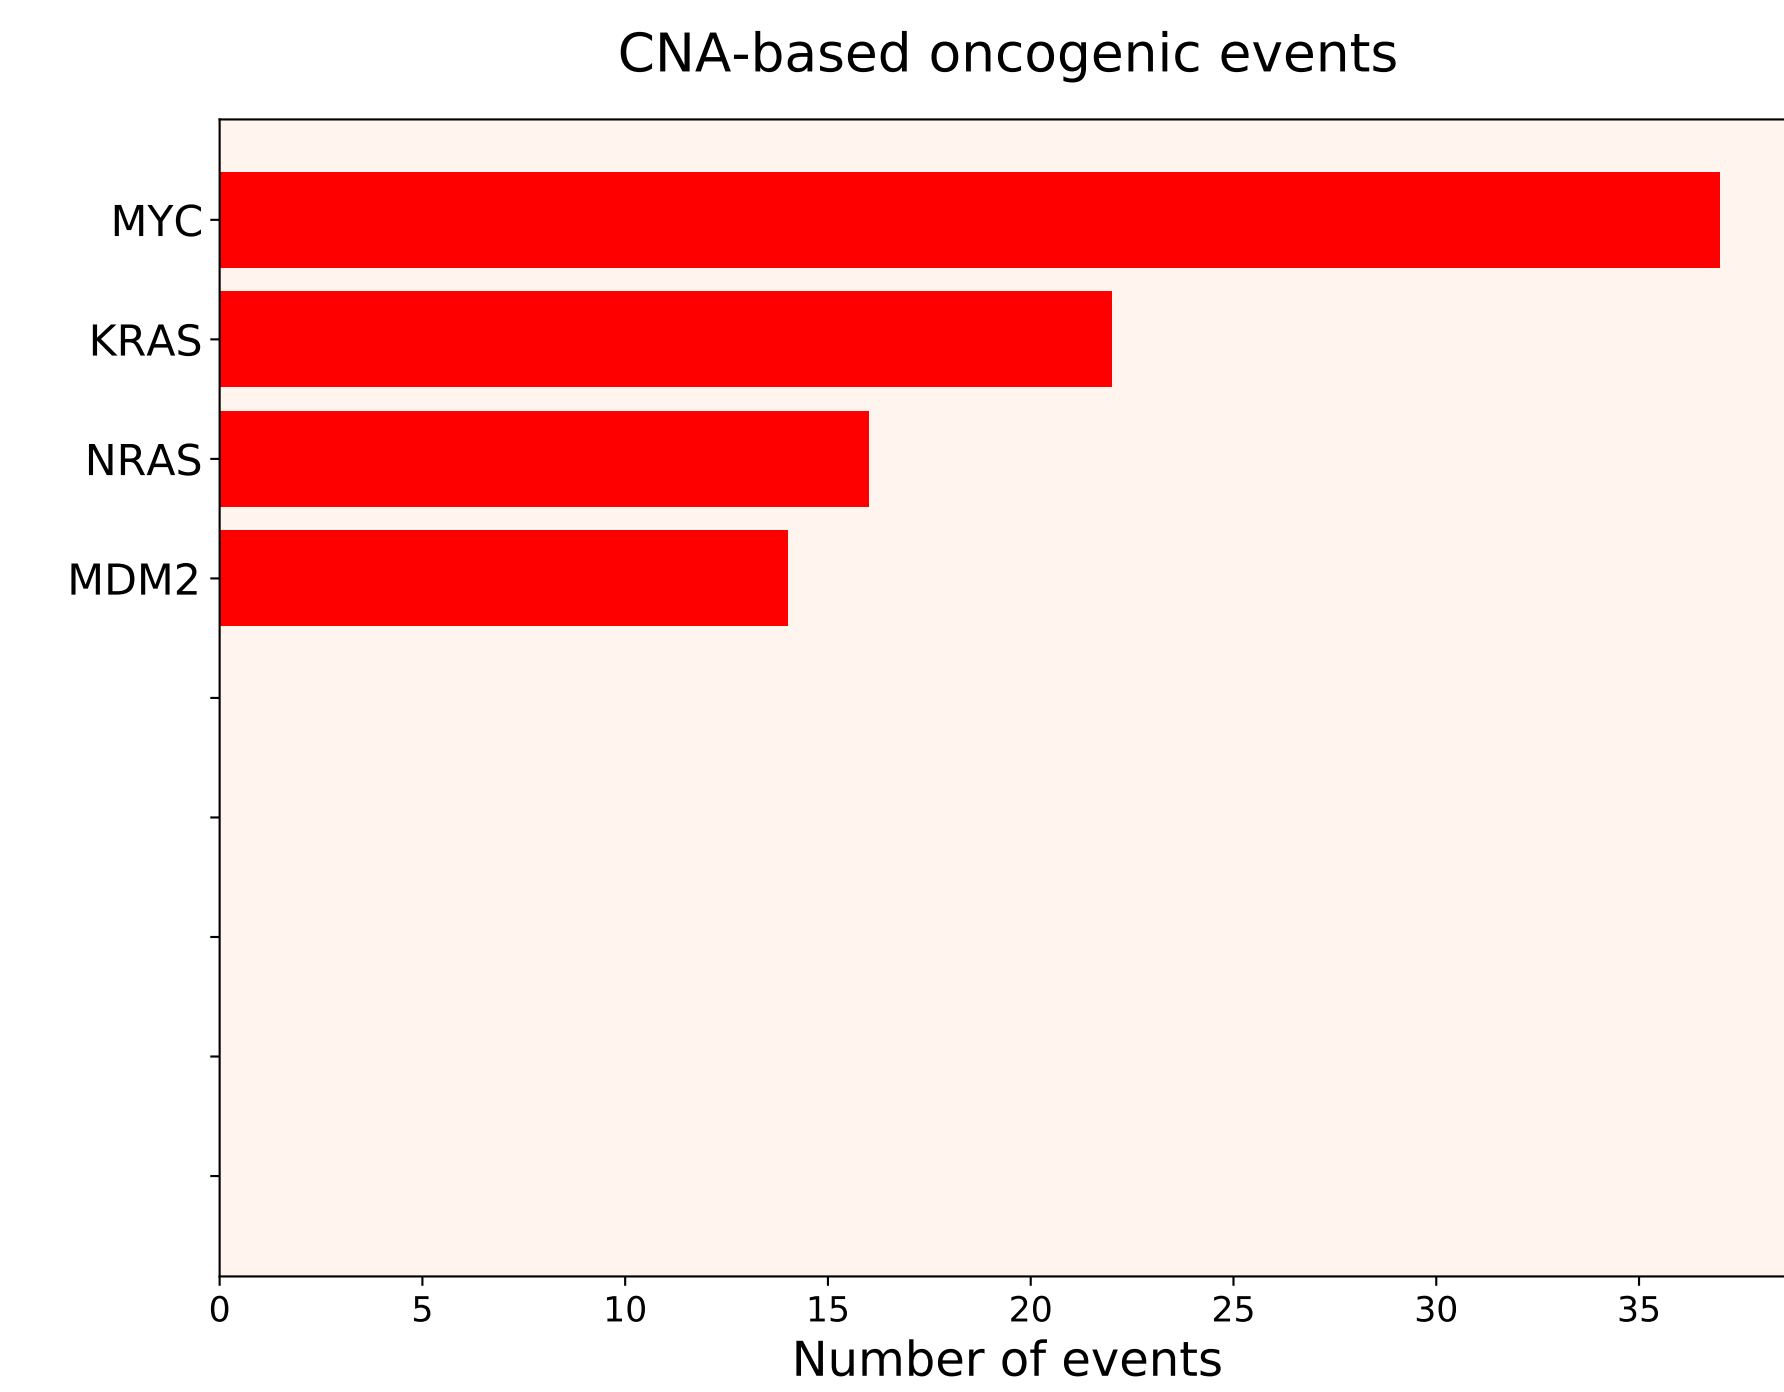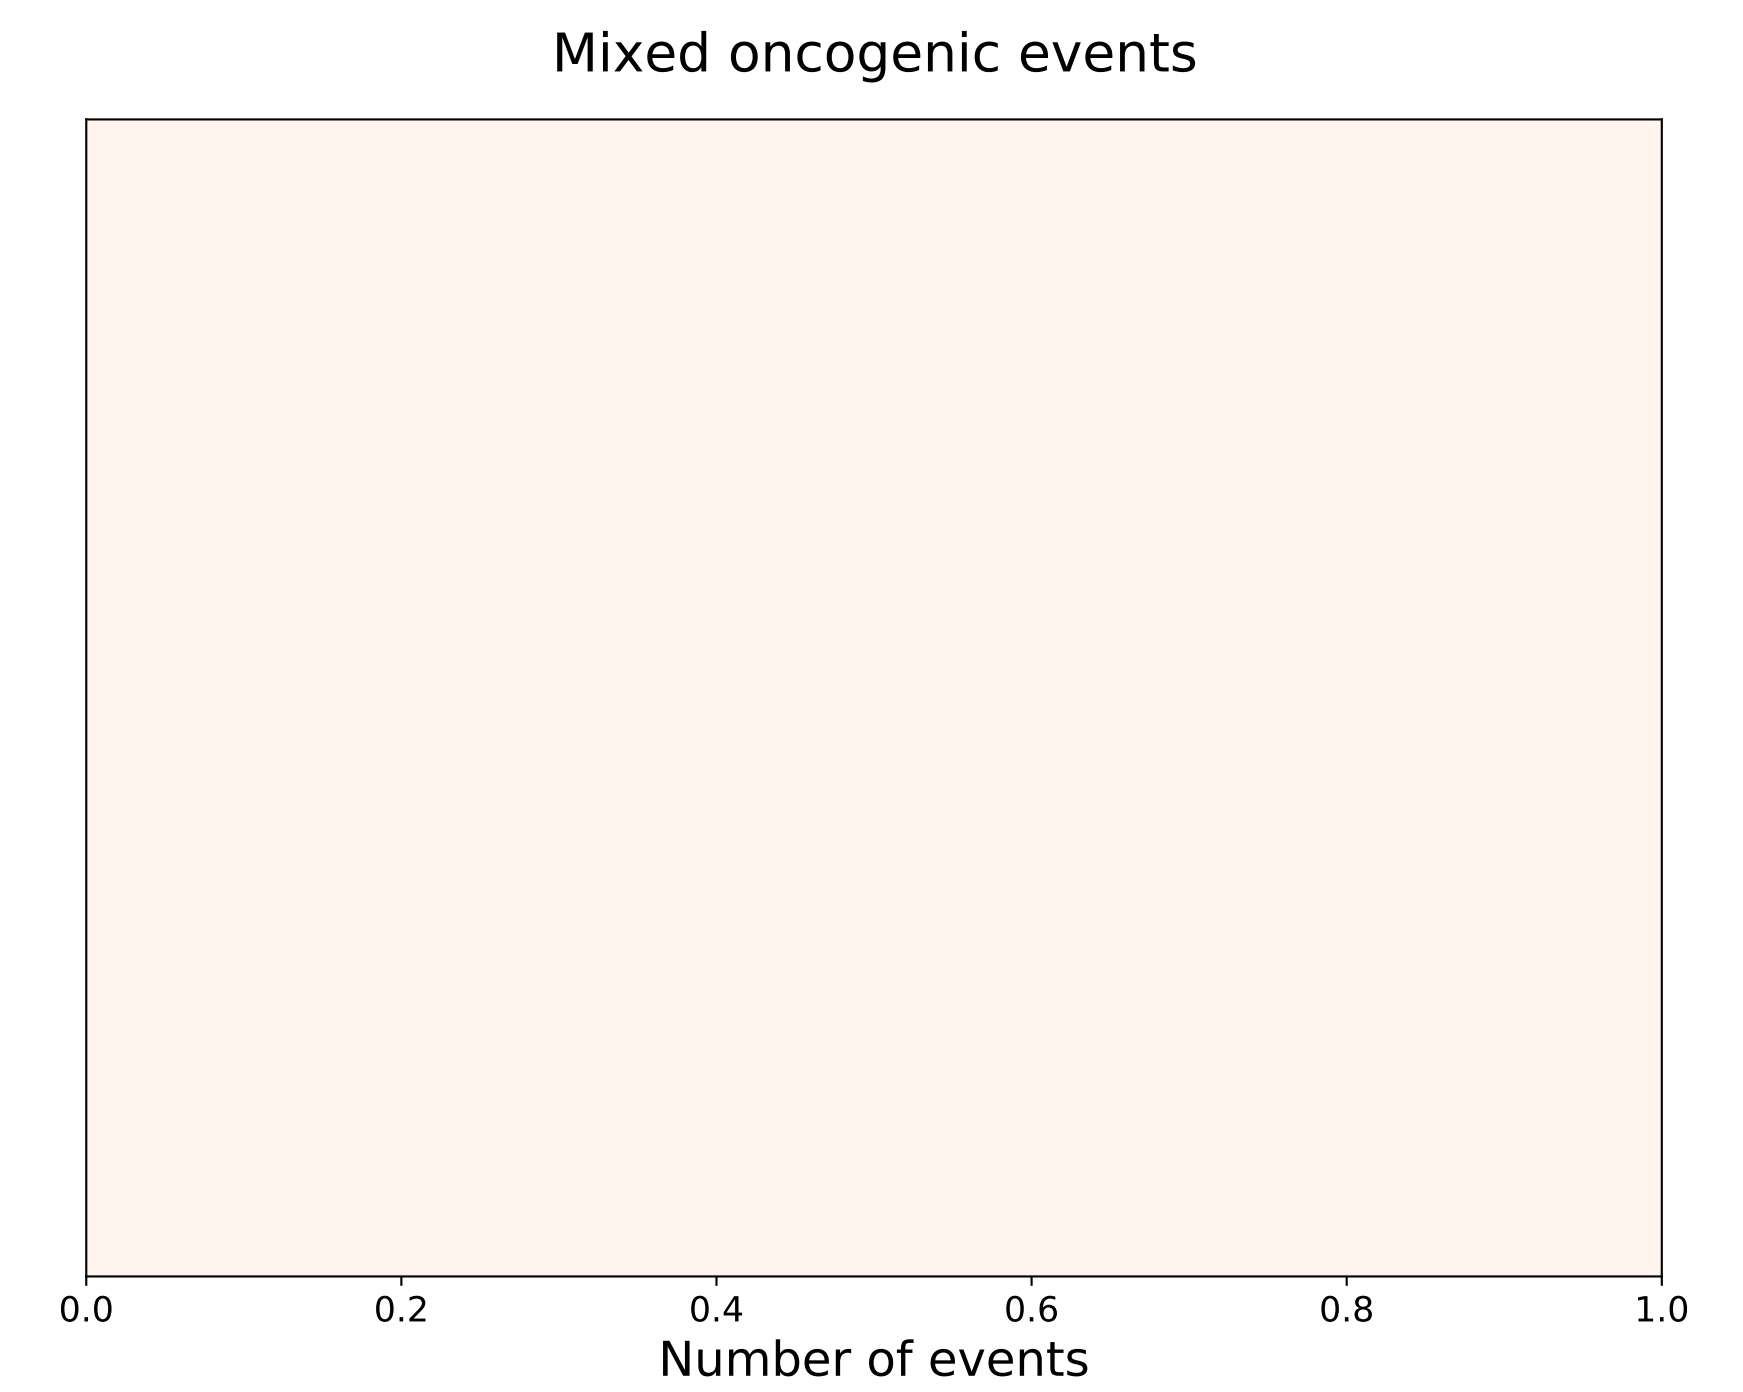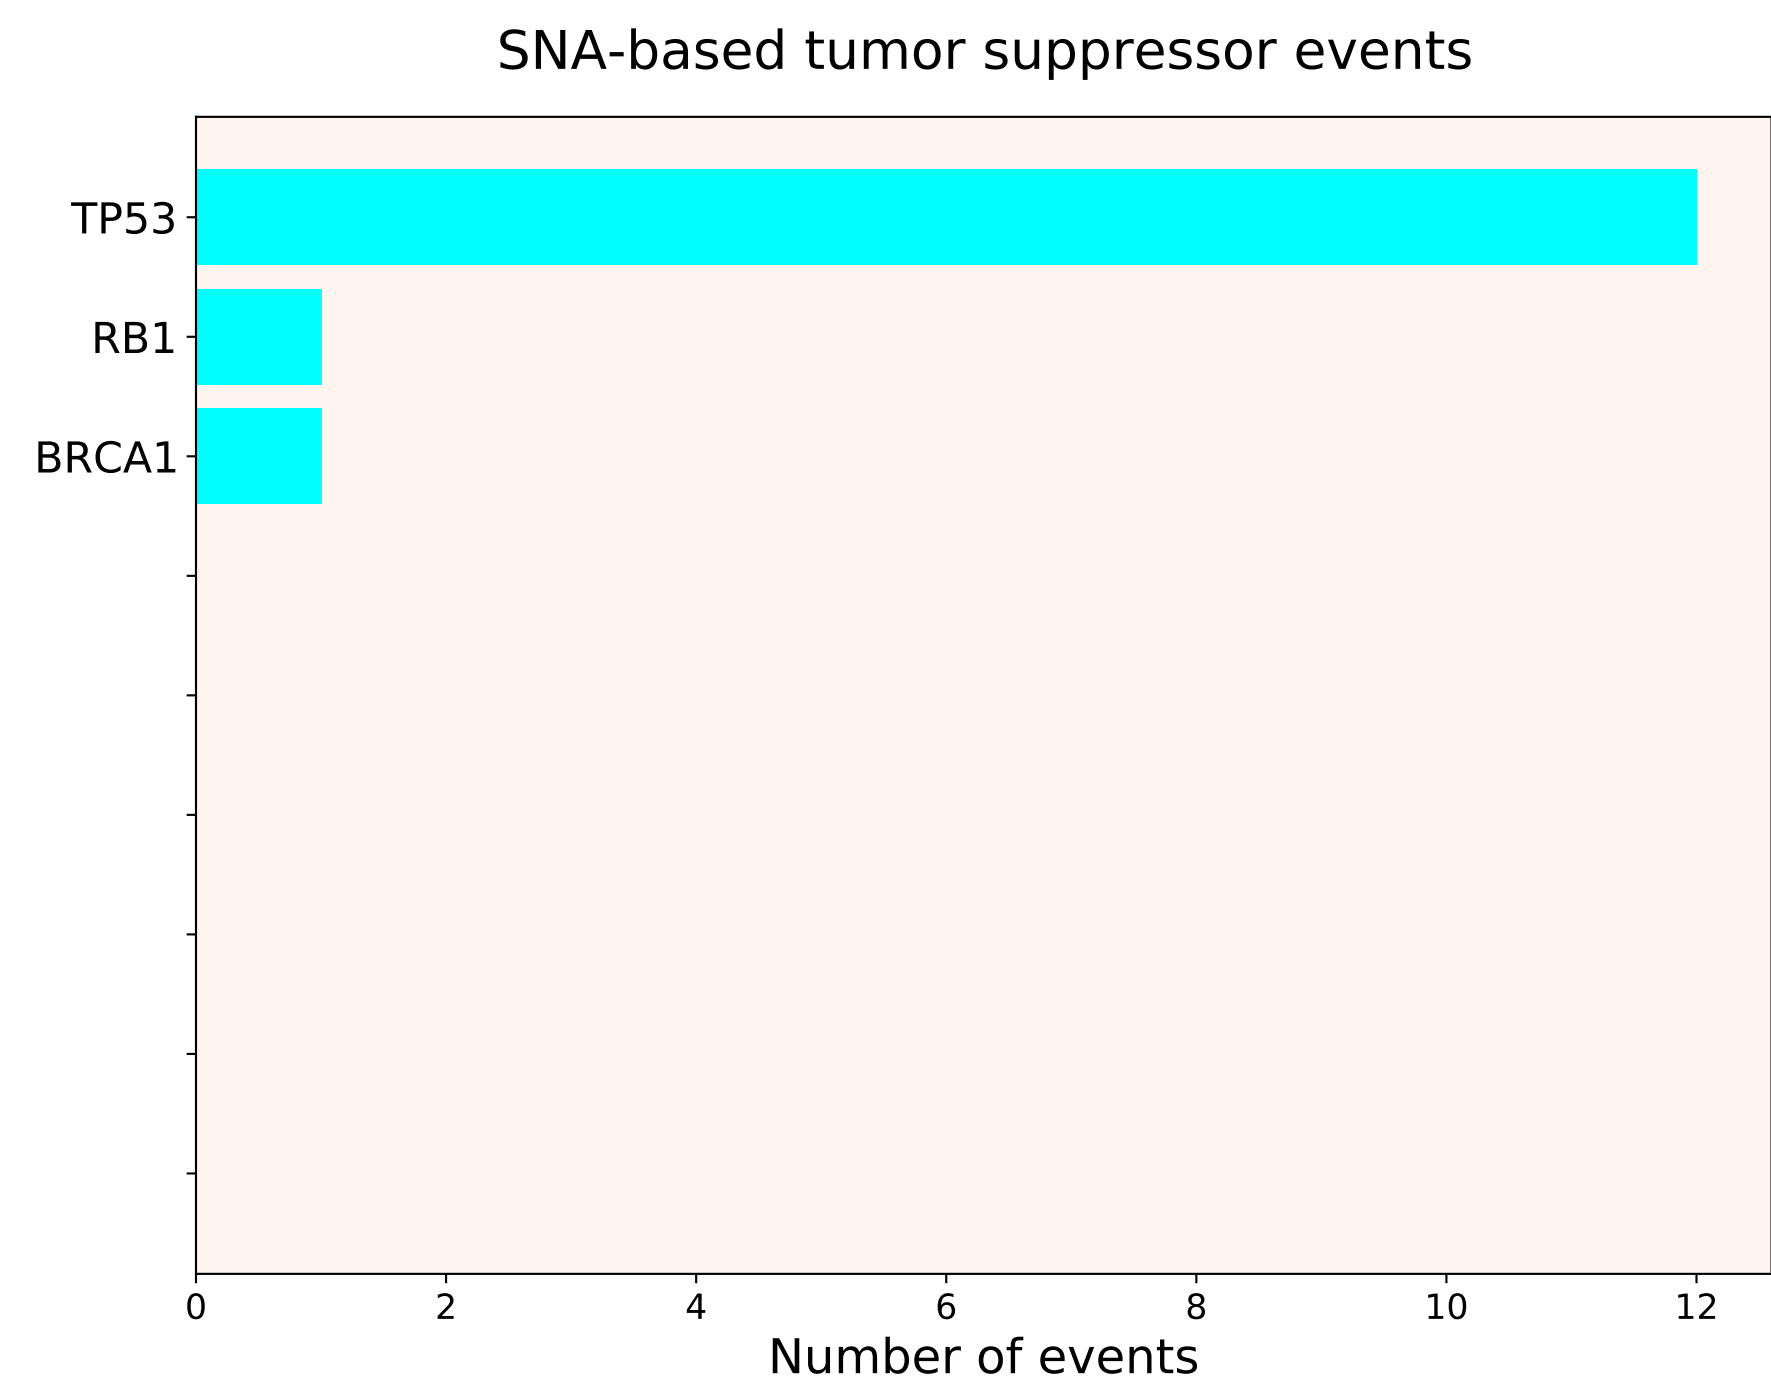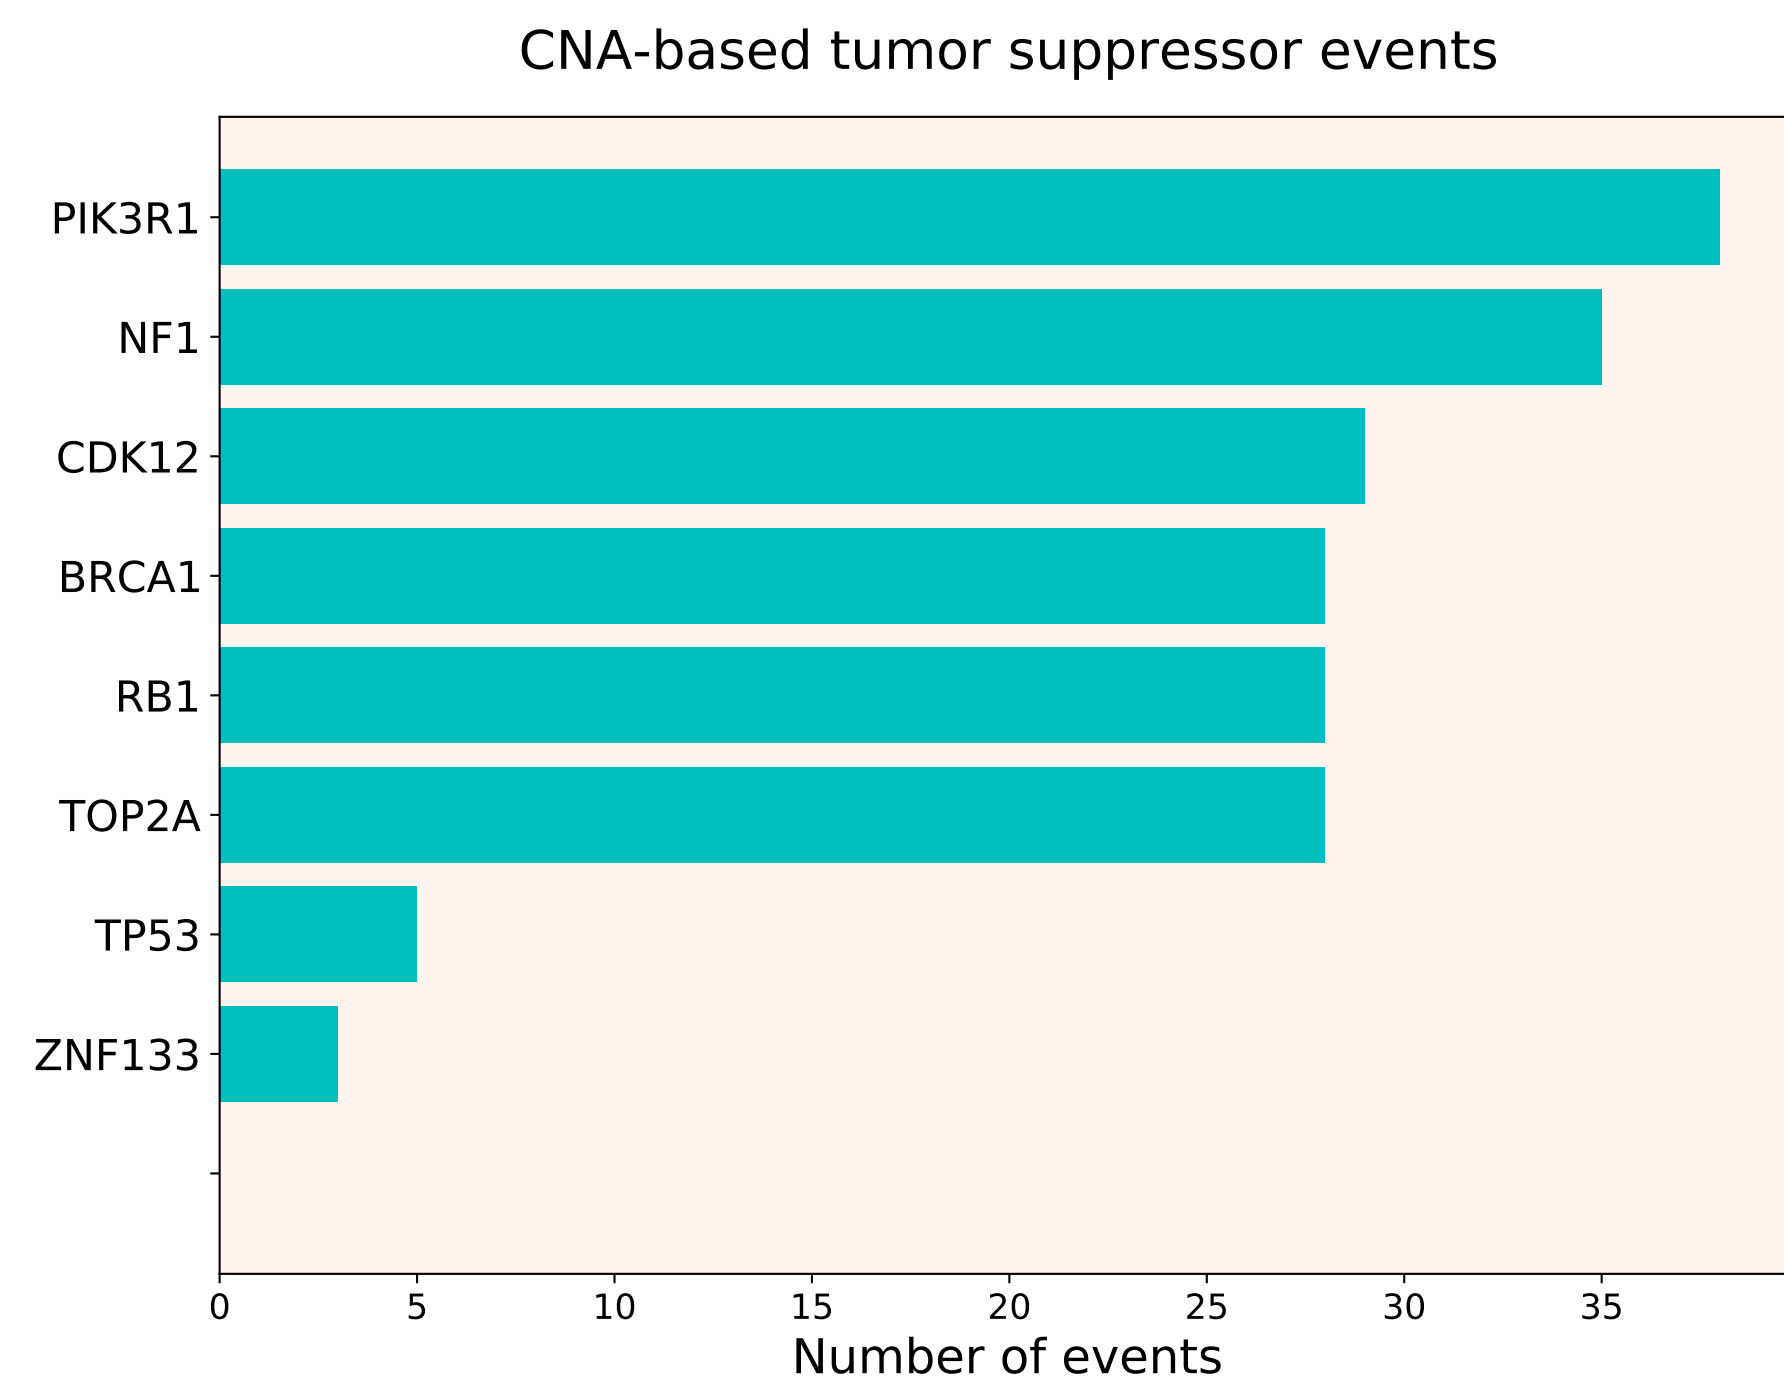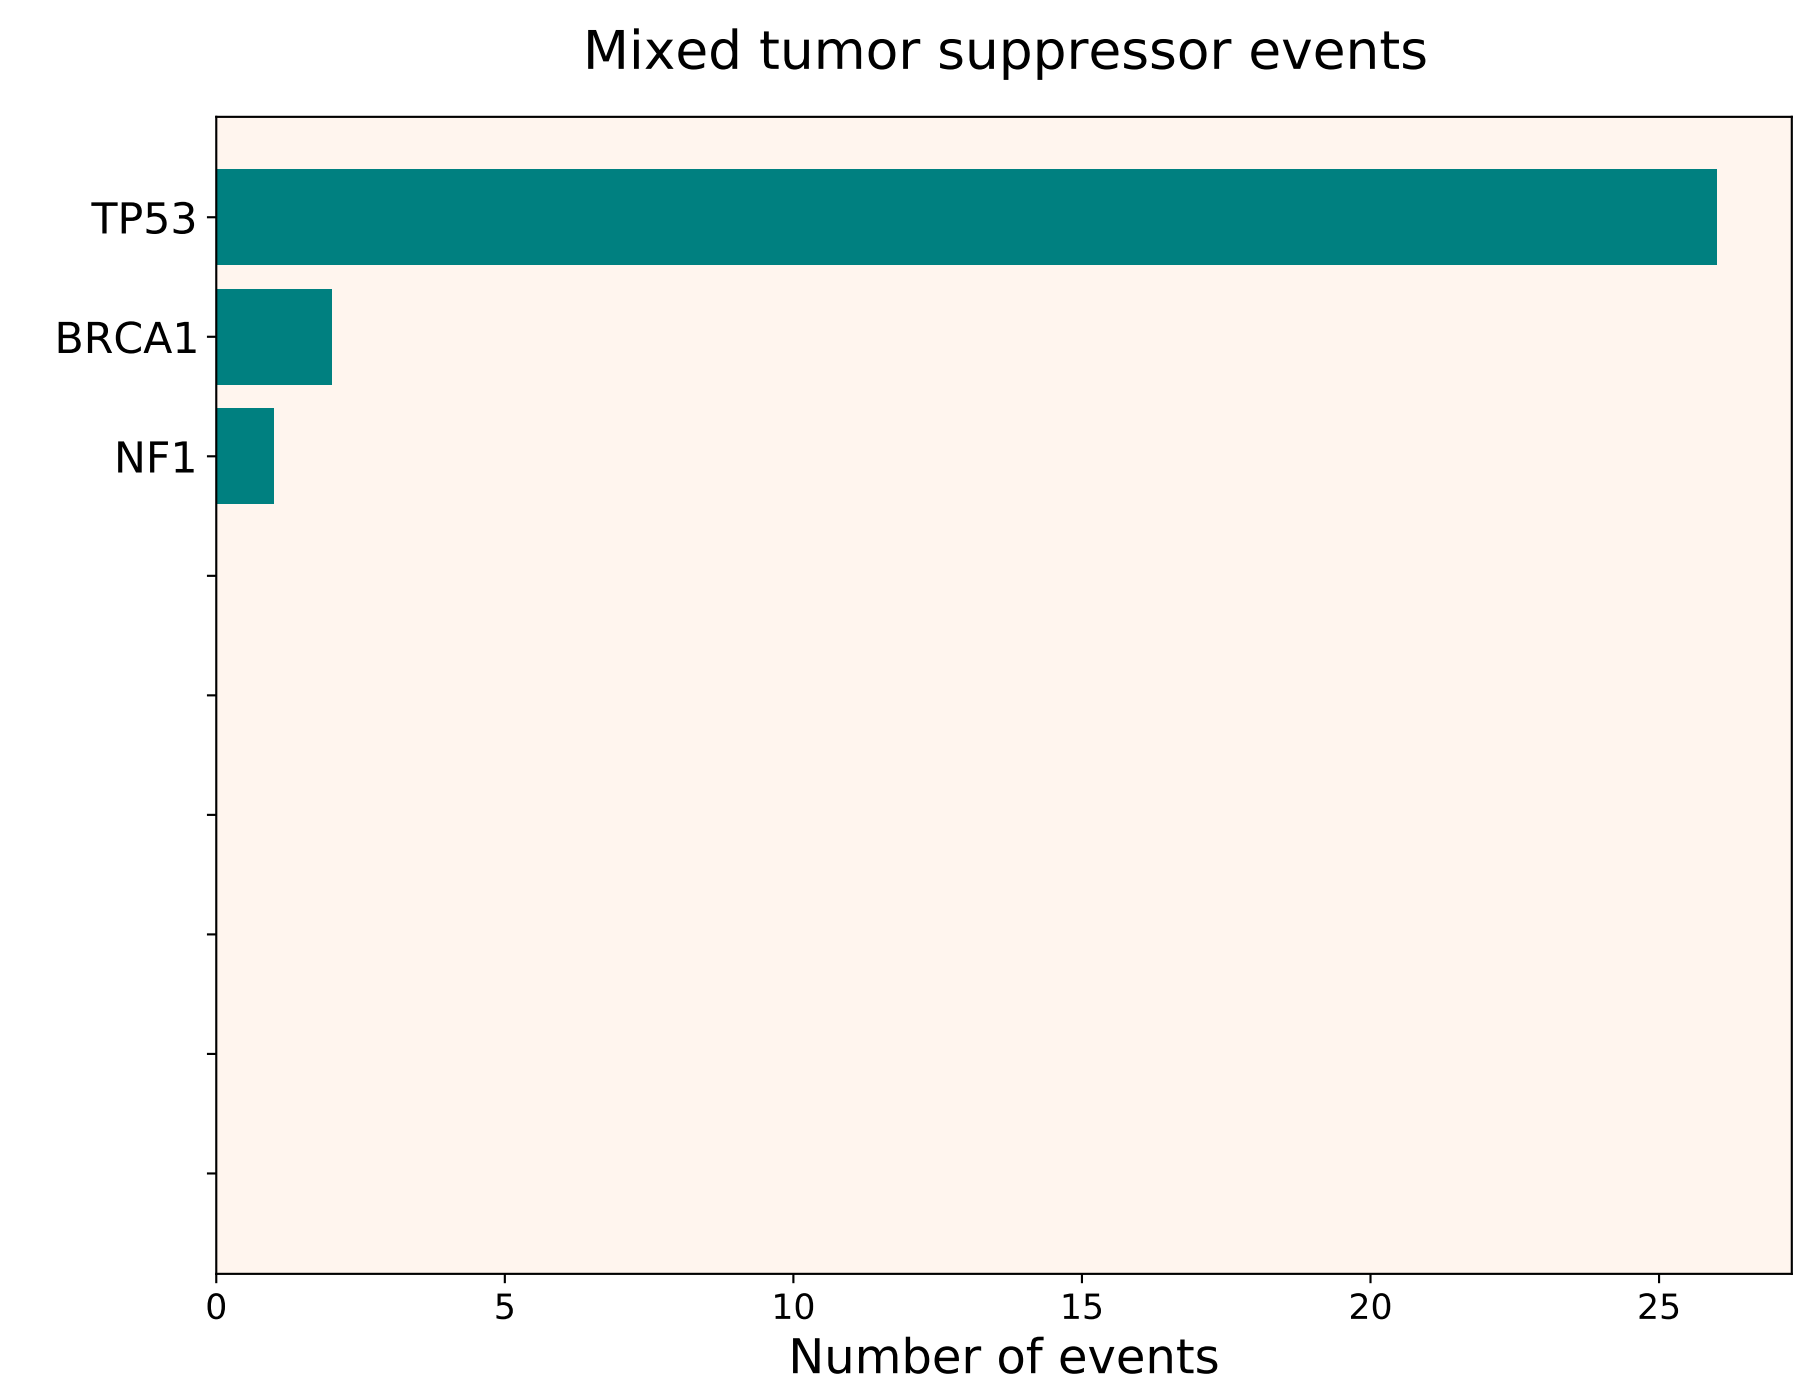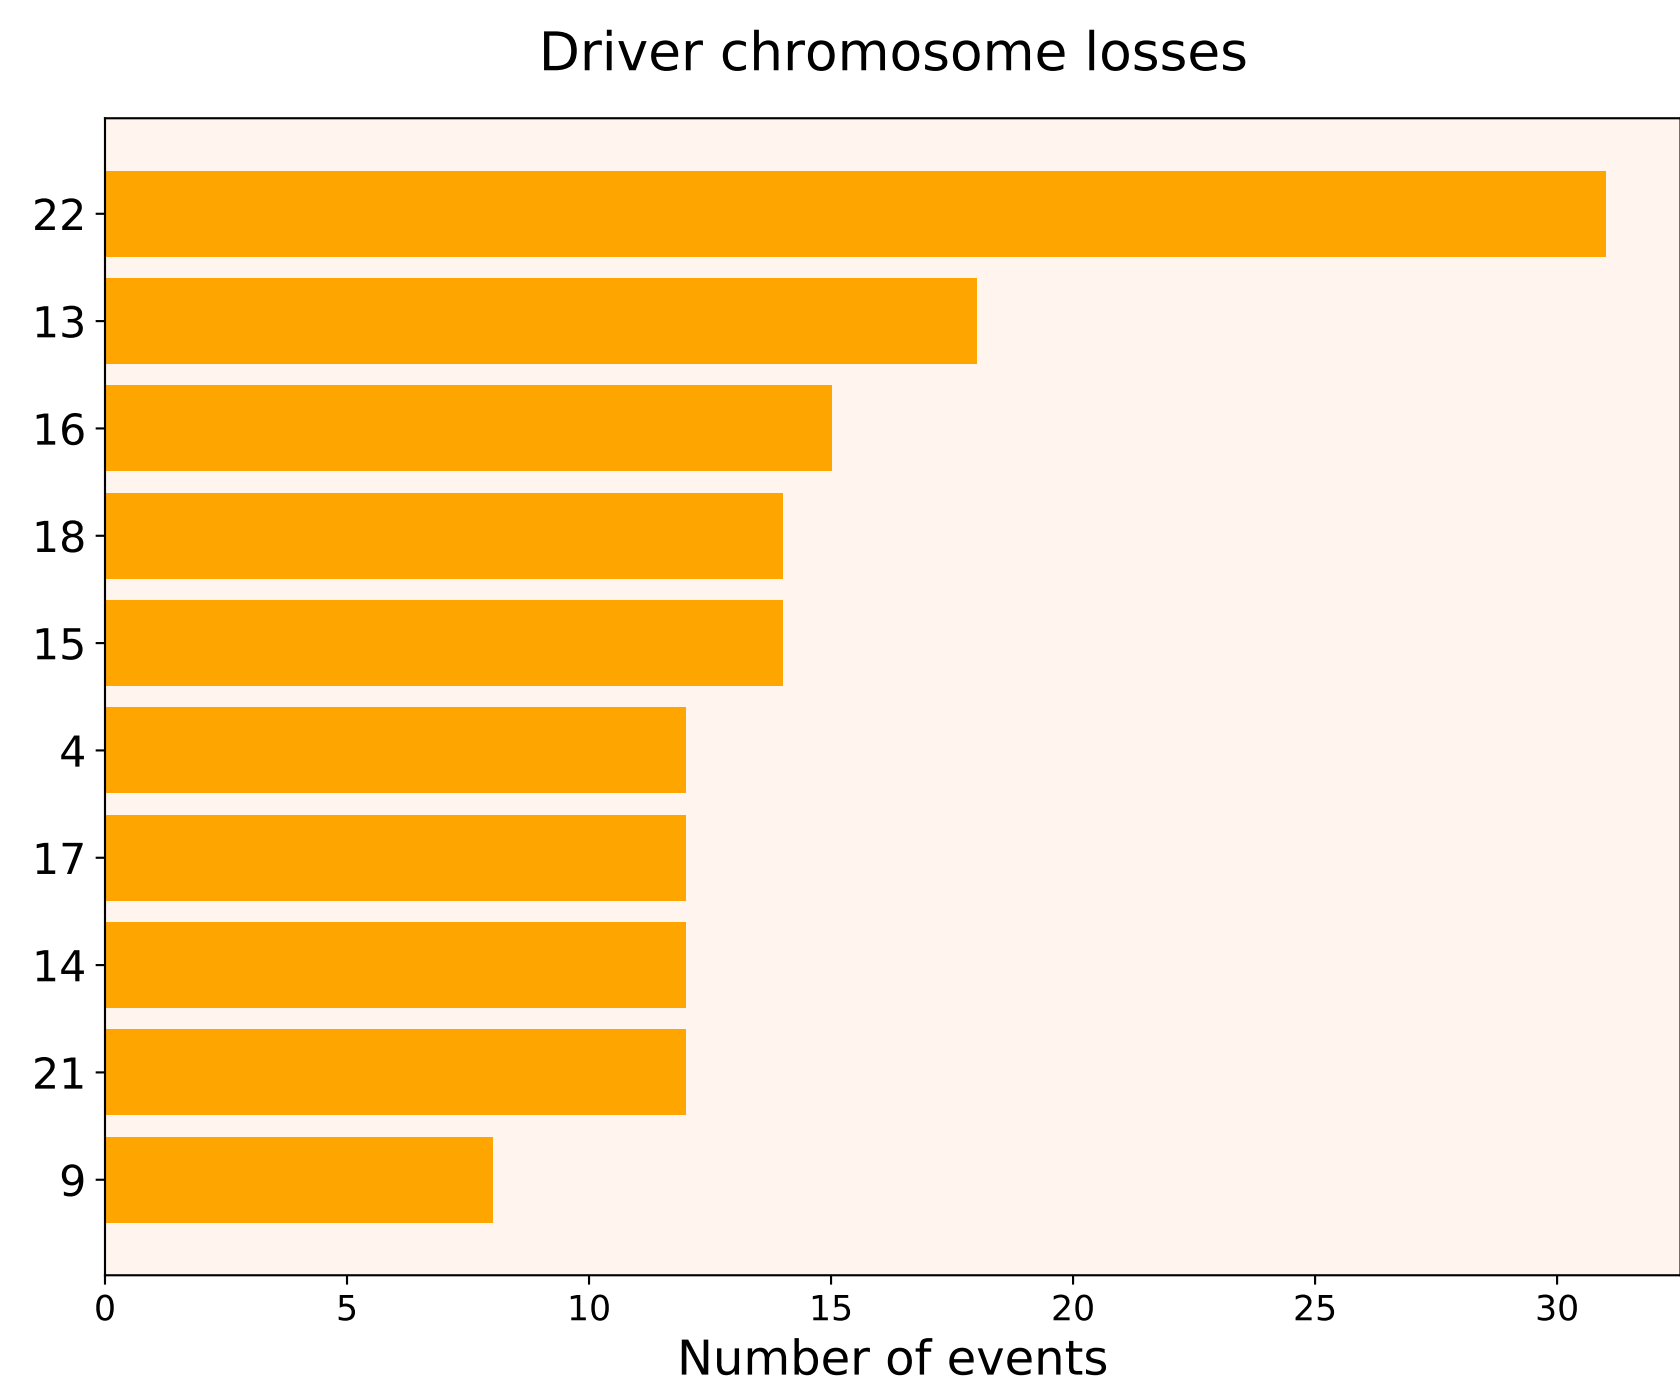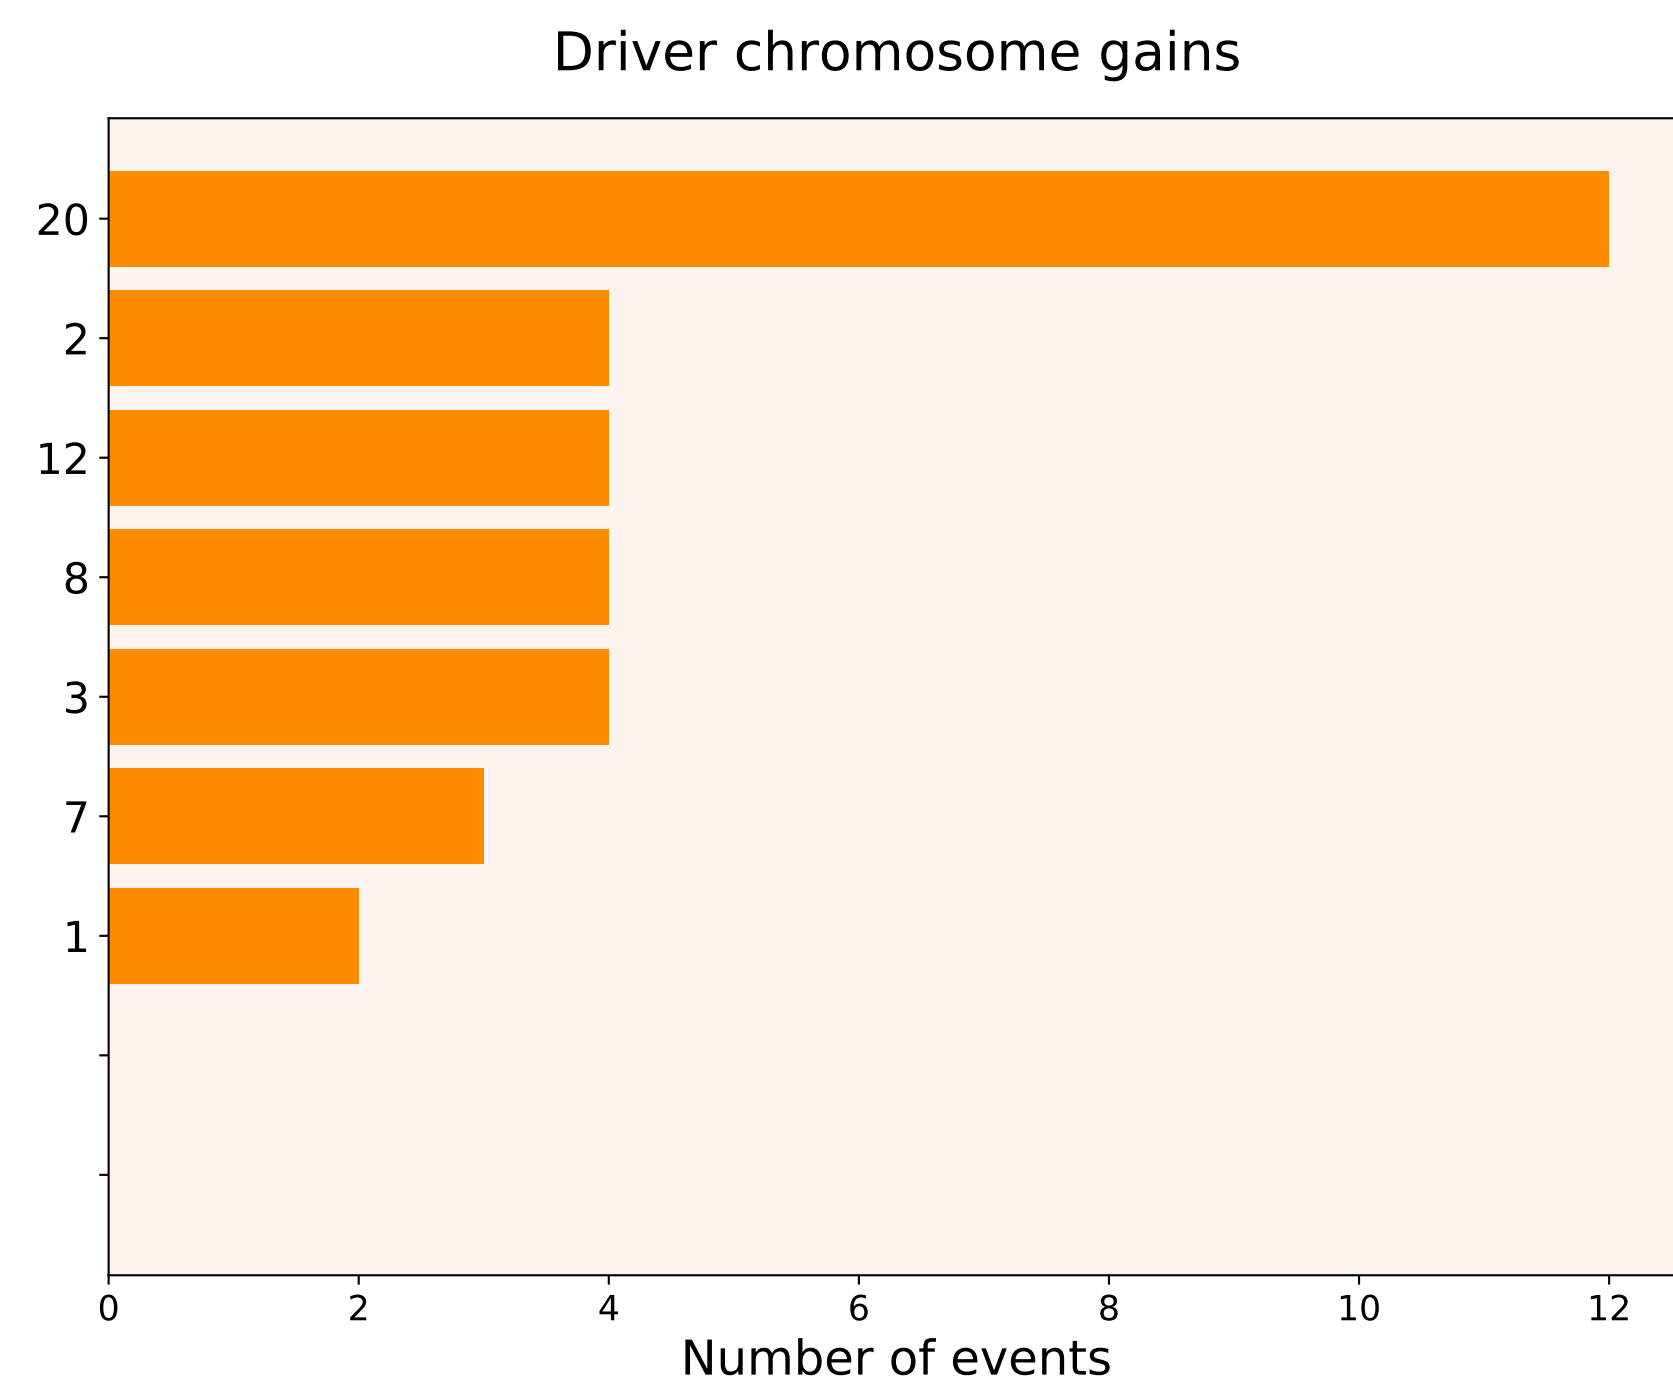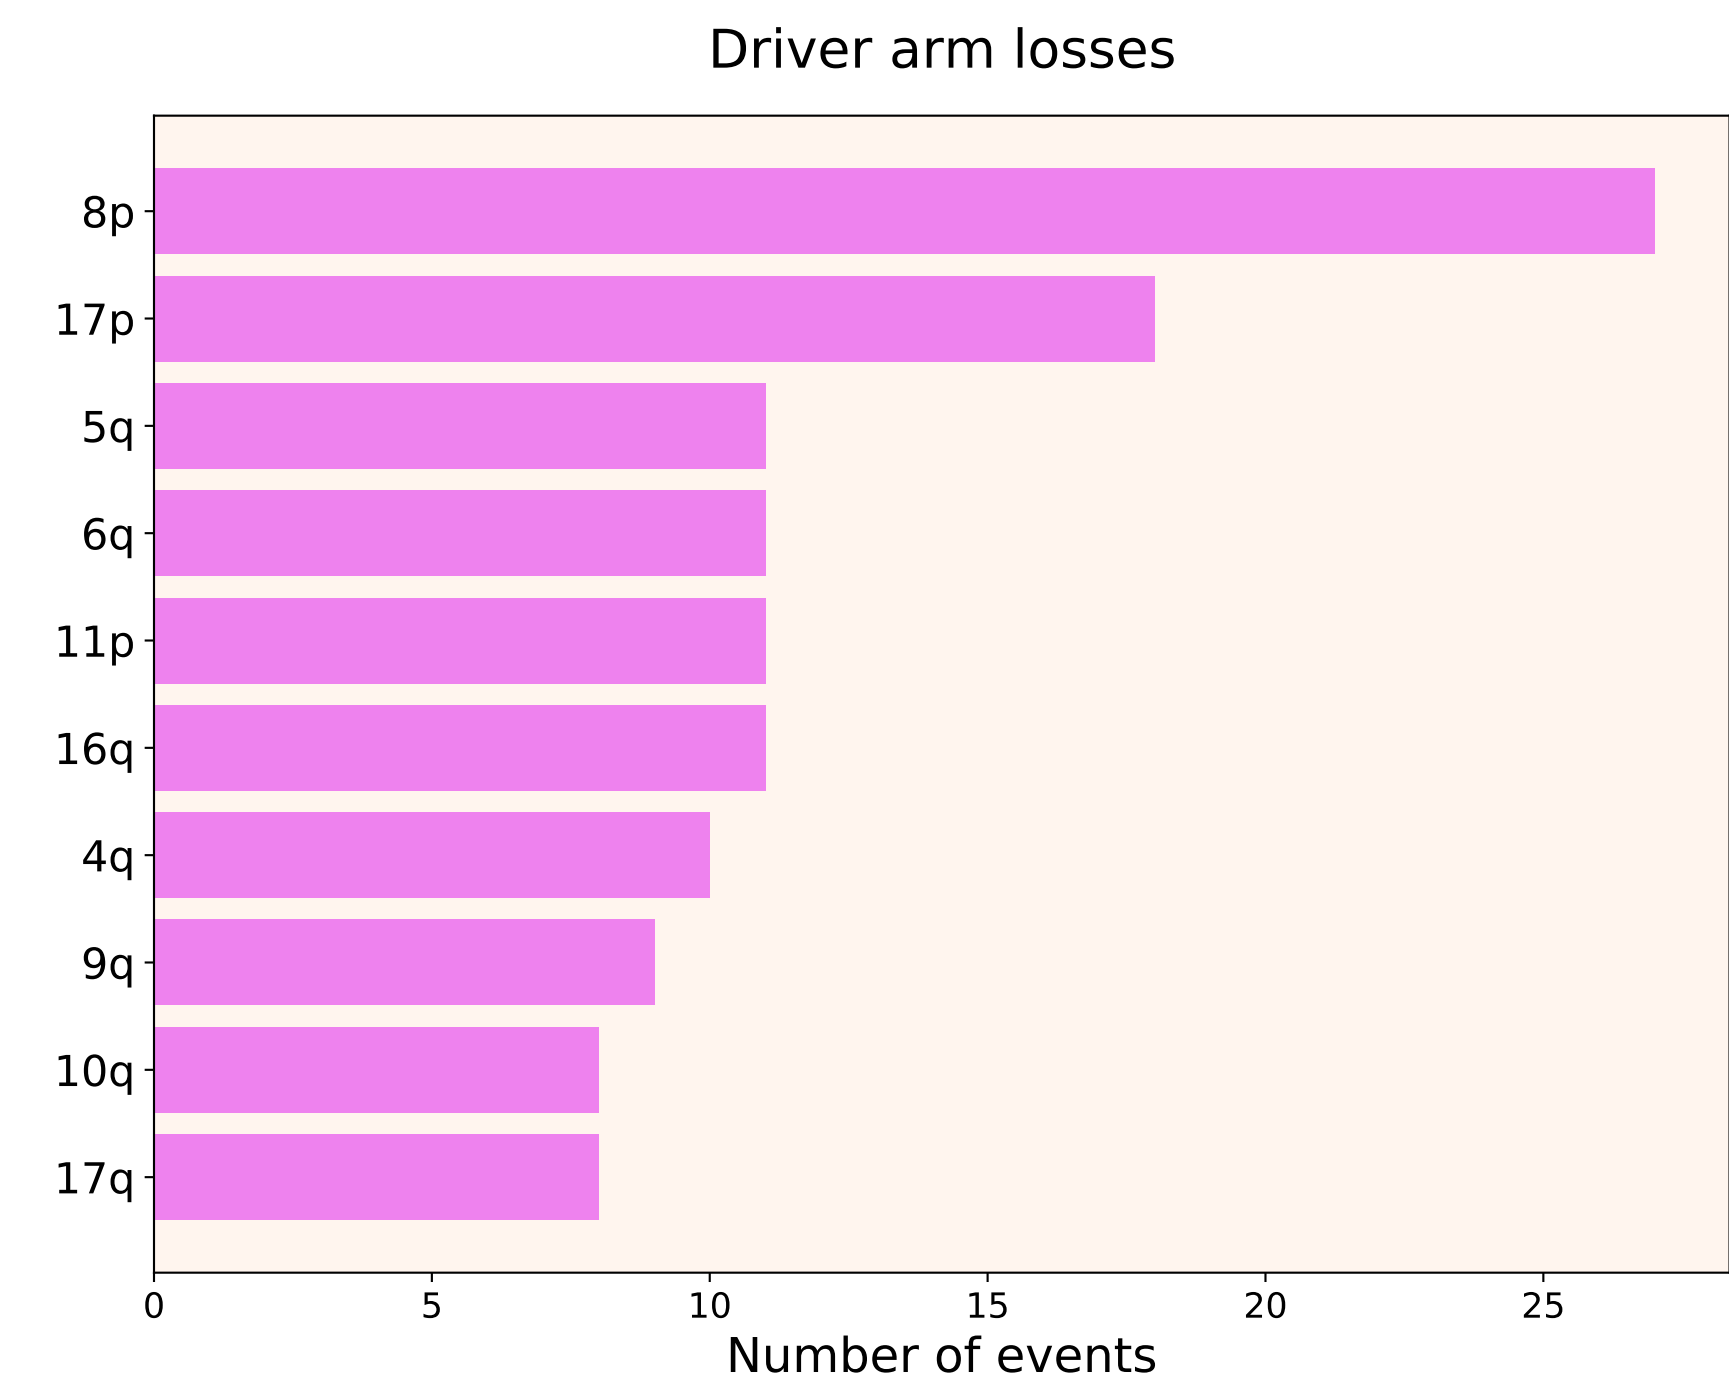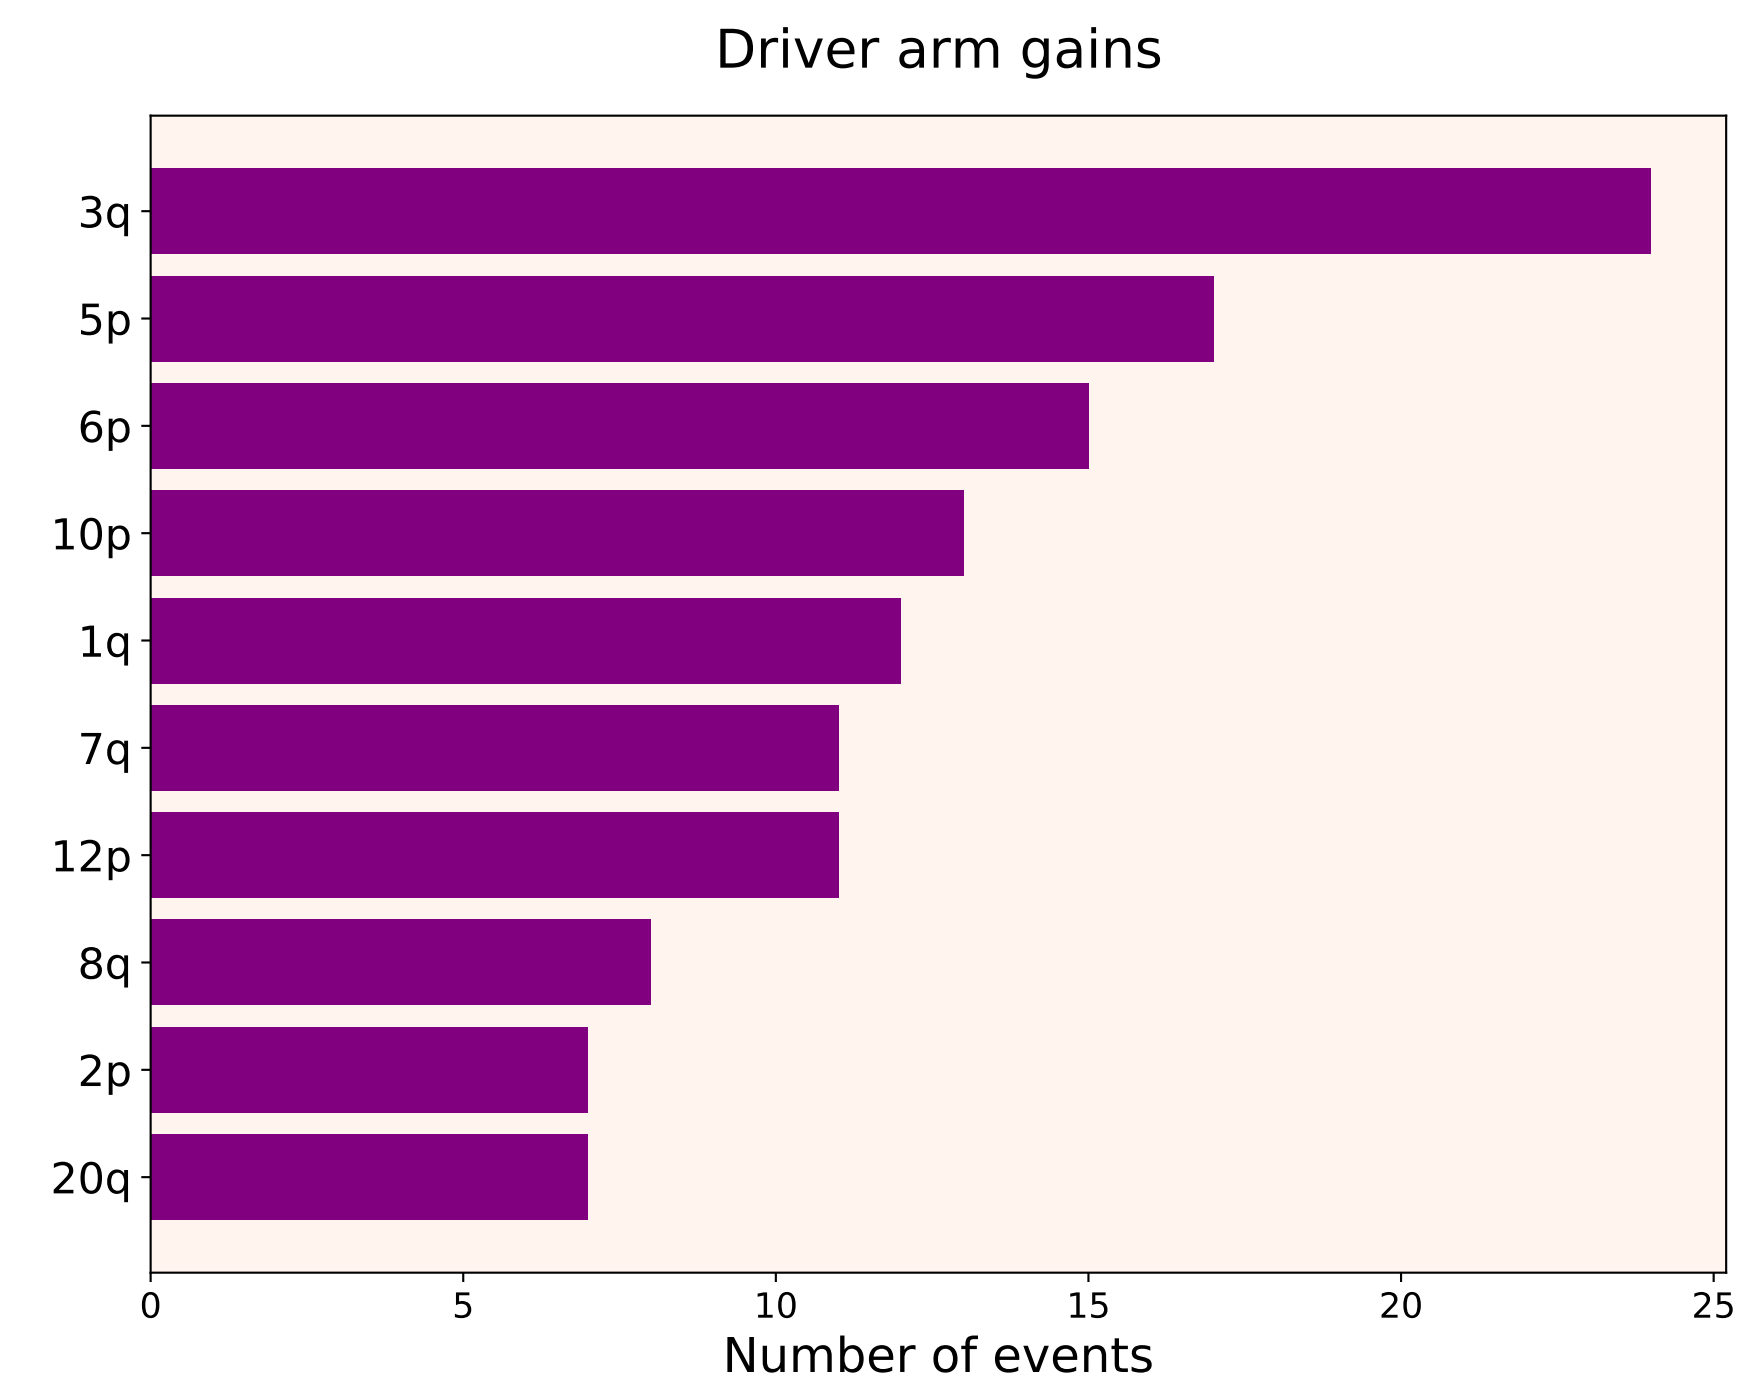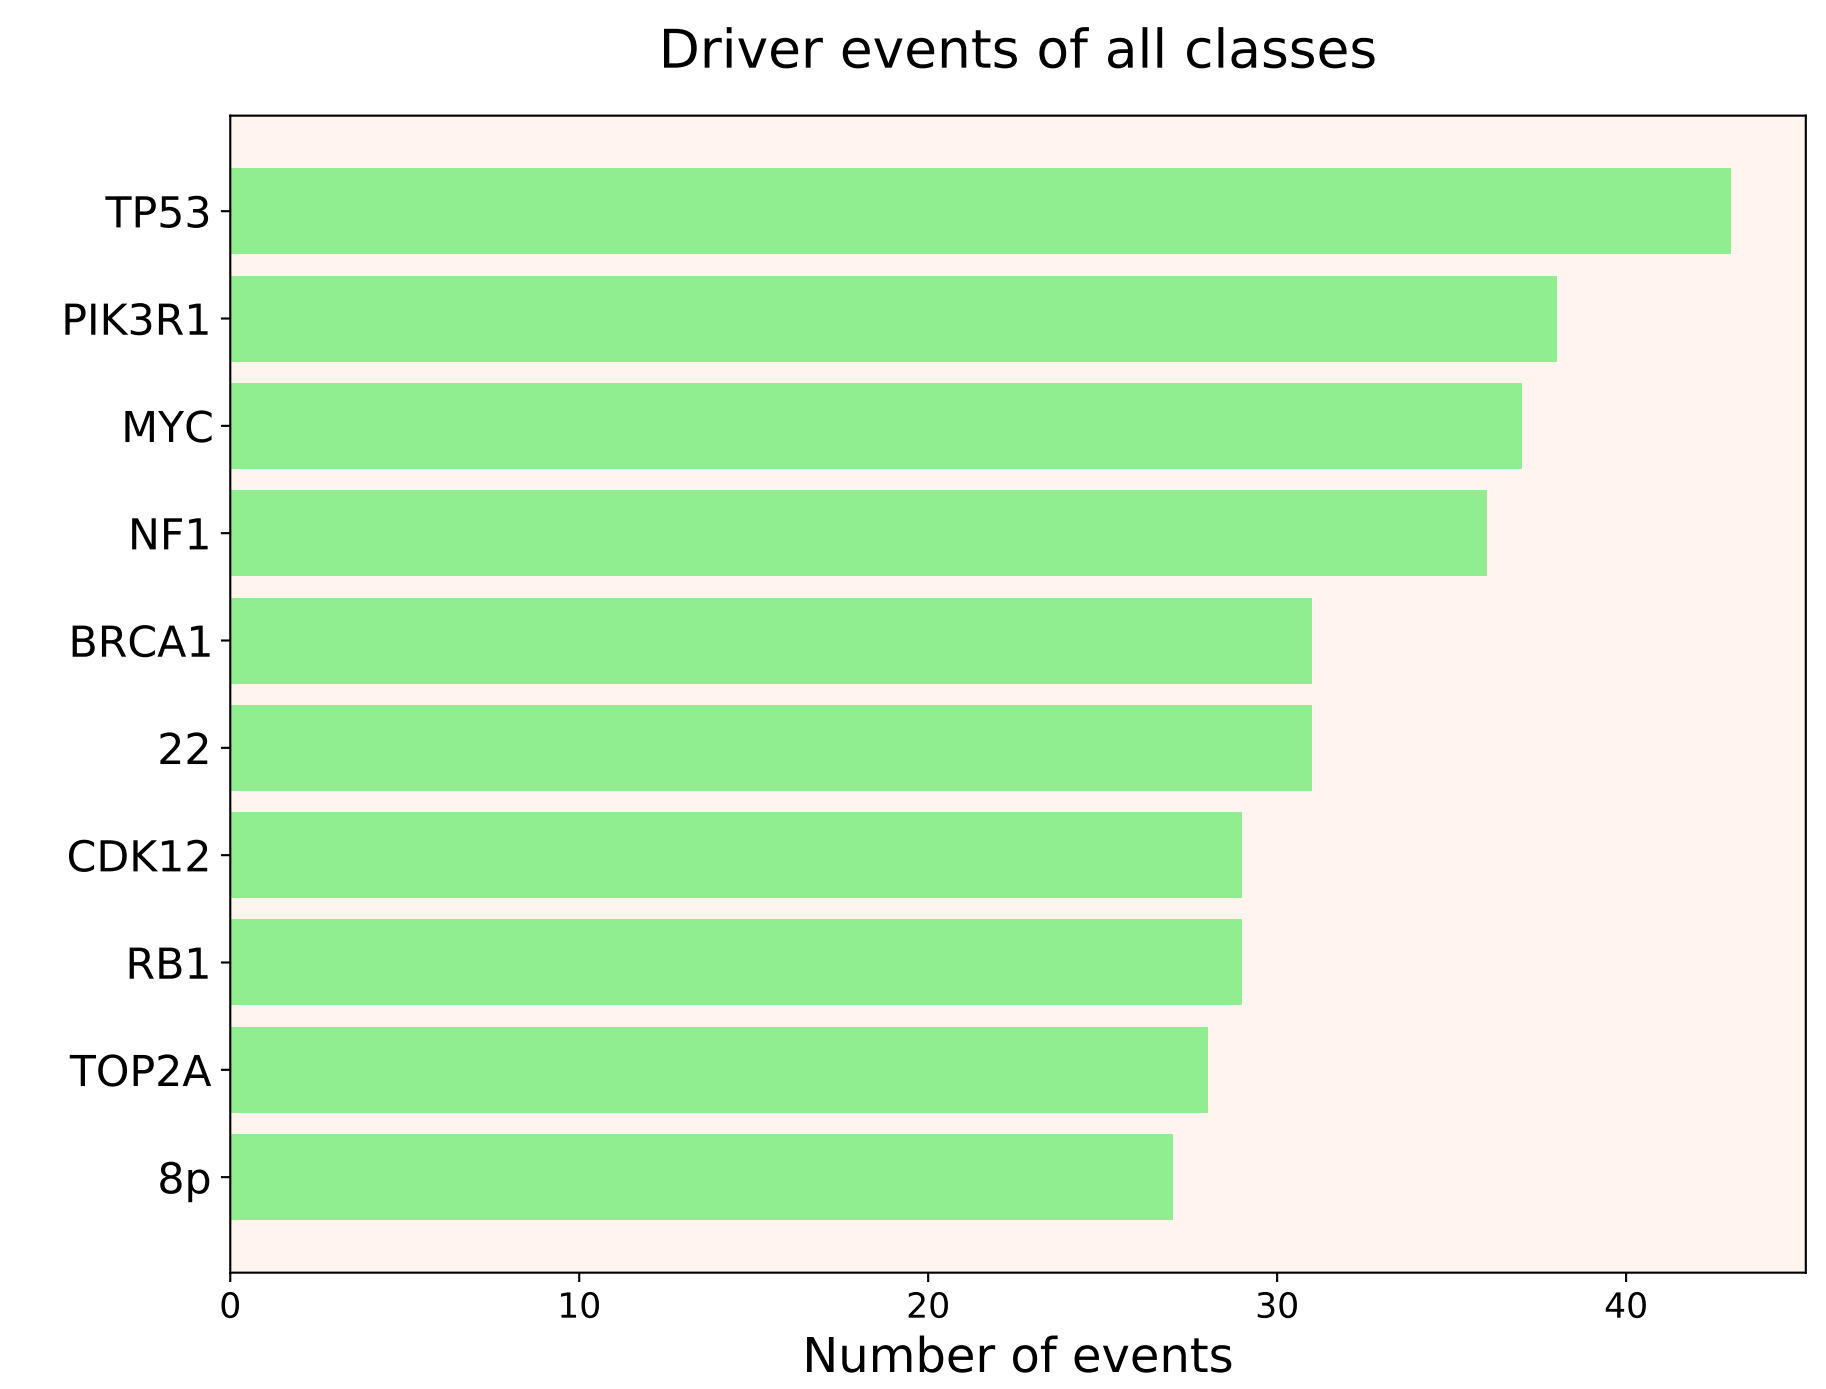

Supplement: Supplemental_Data_S1.zip [file Supplemental_Data_S1.zip]

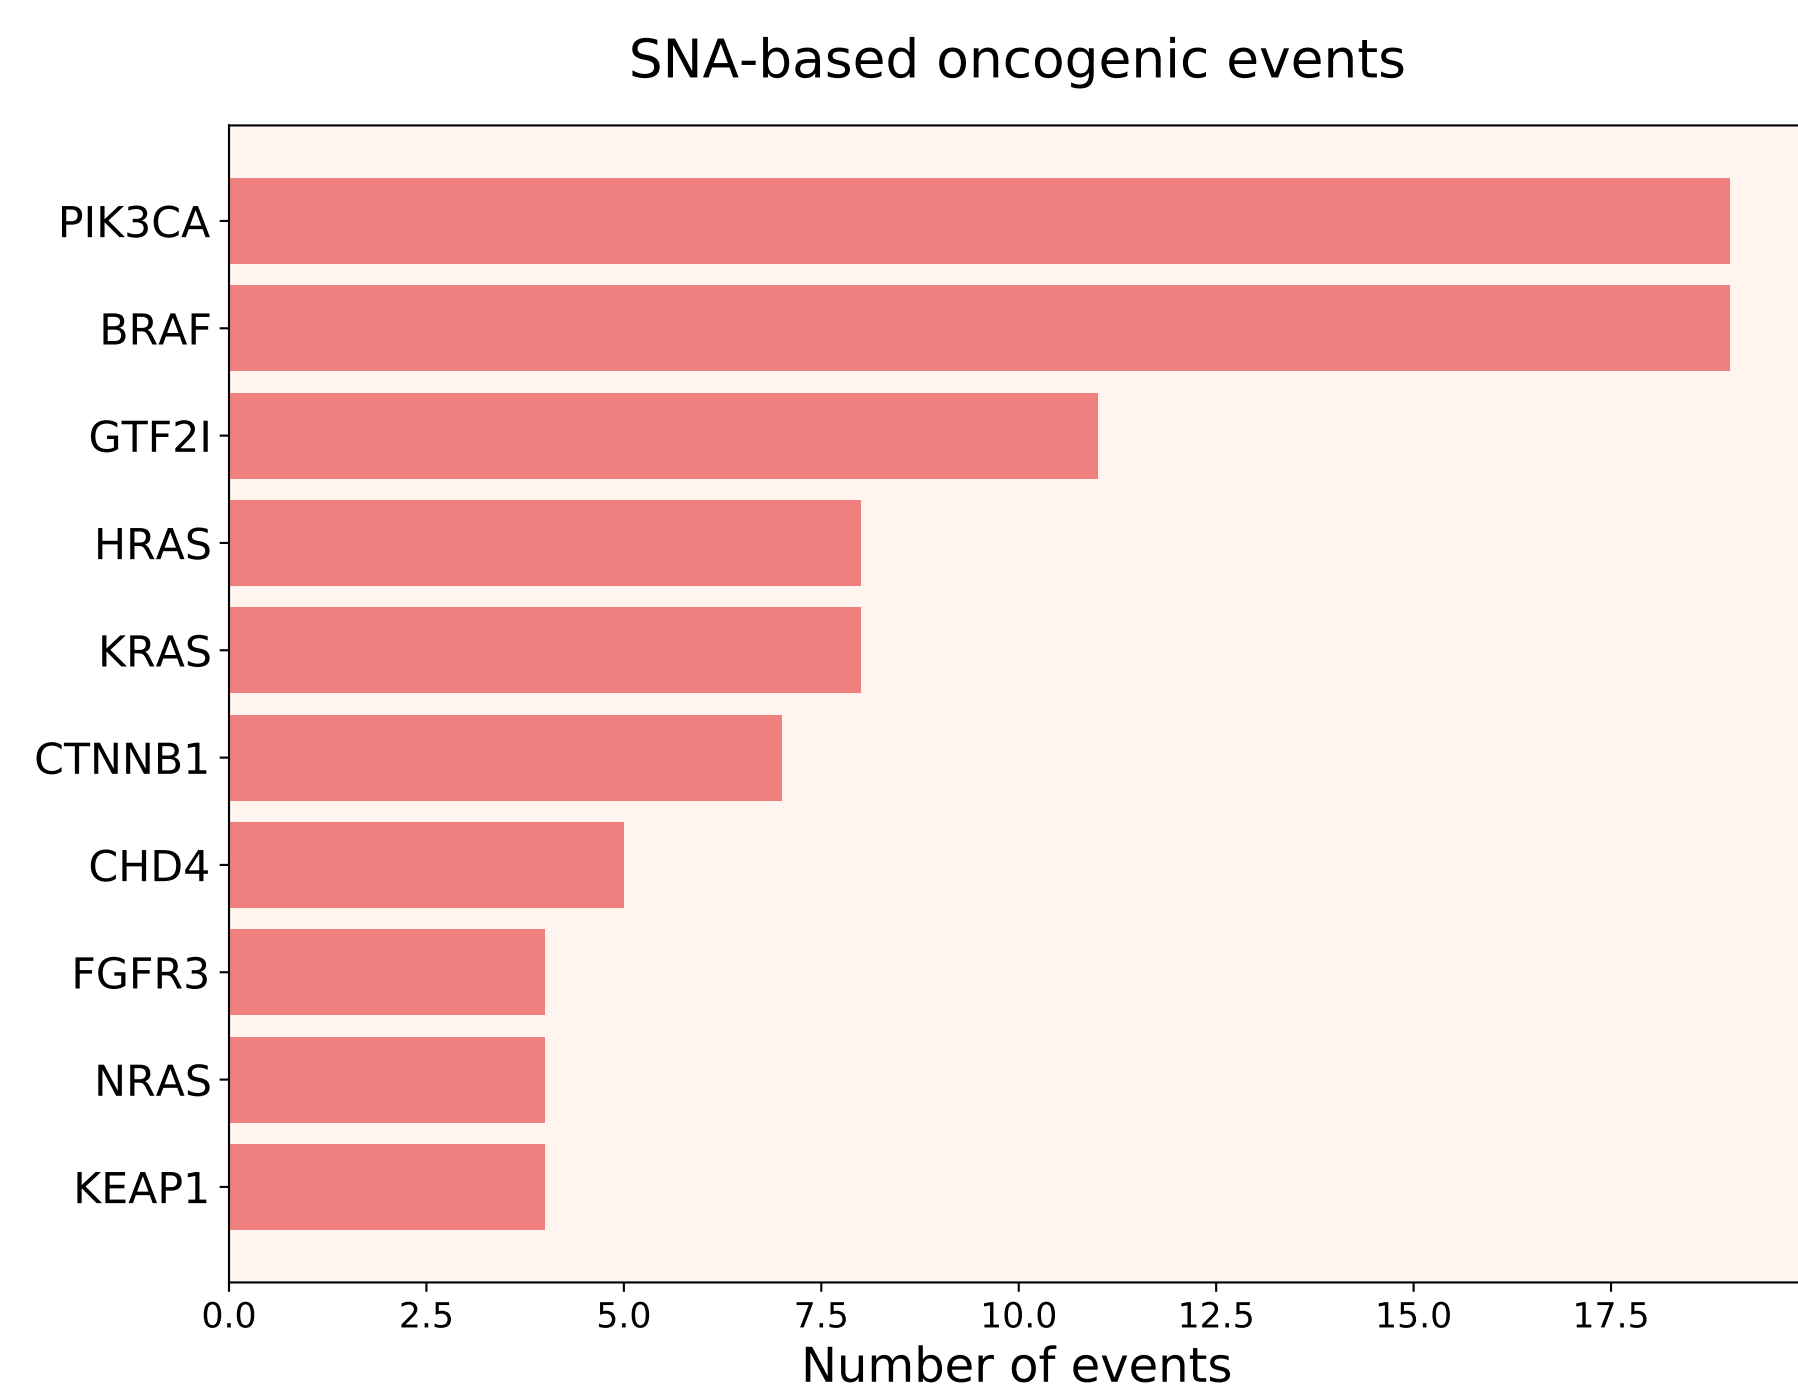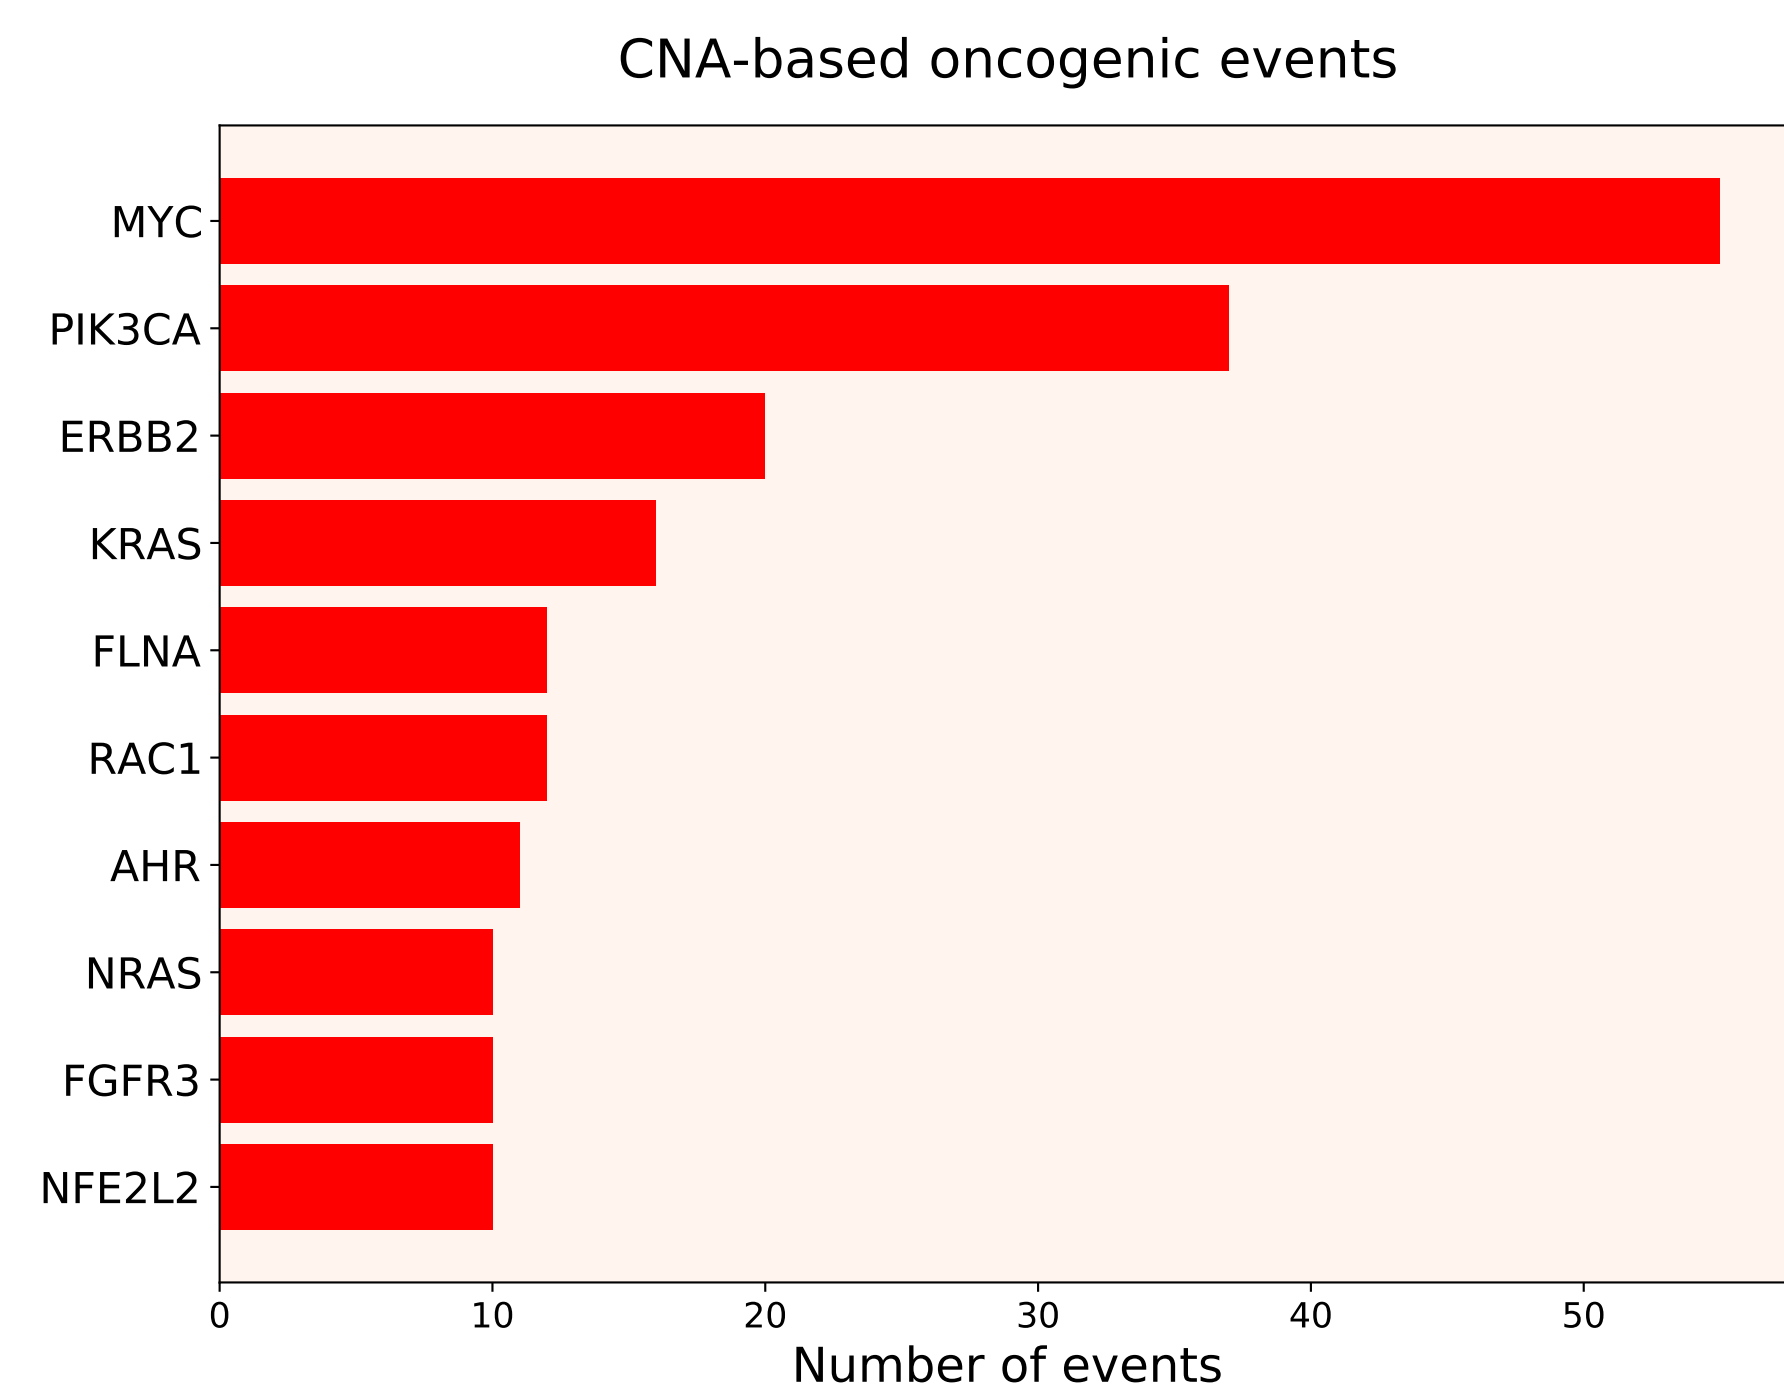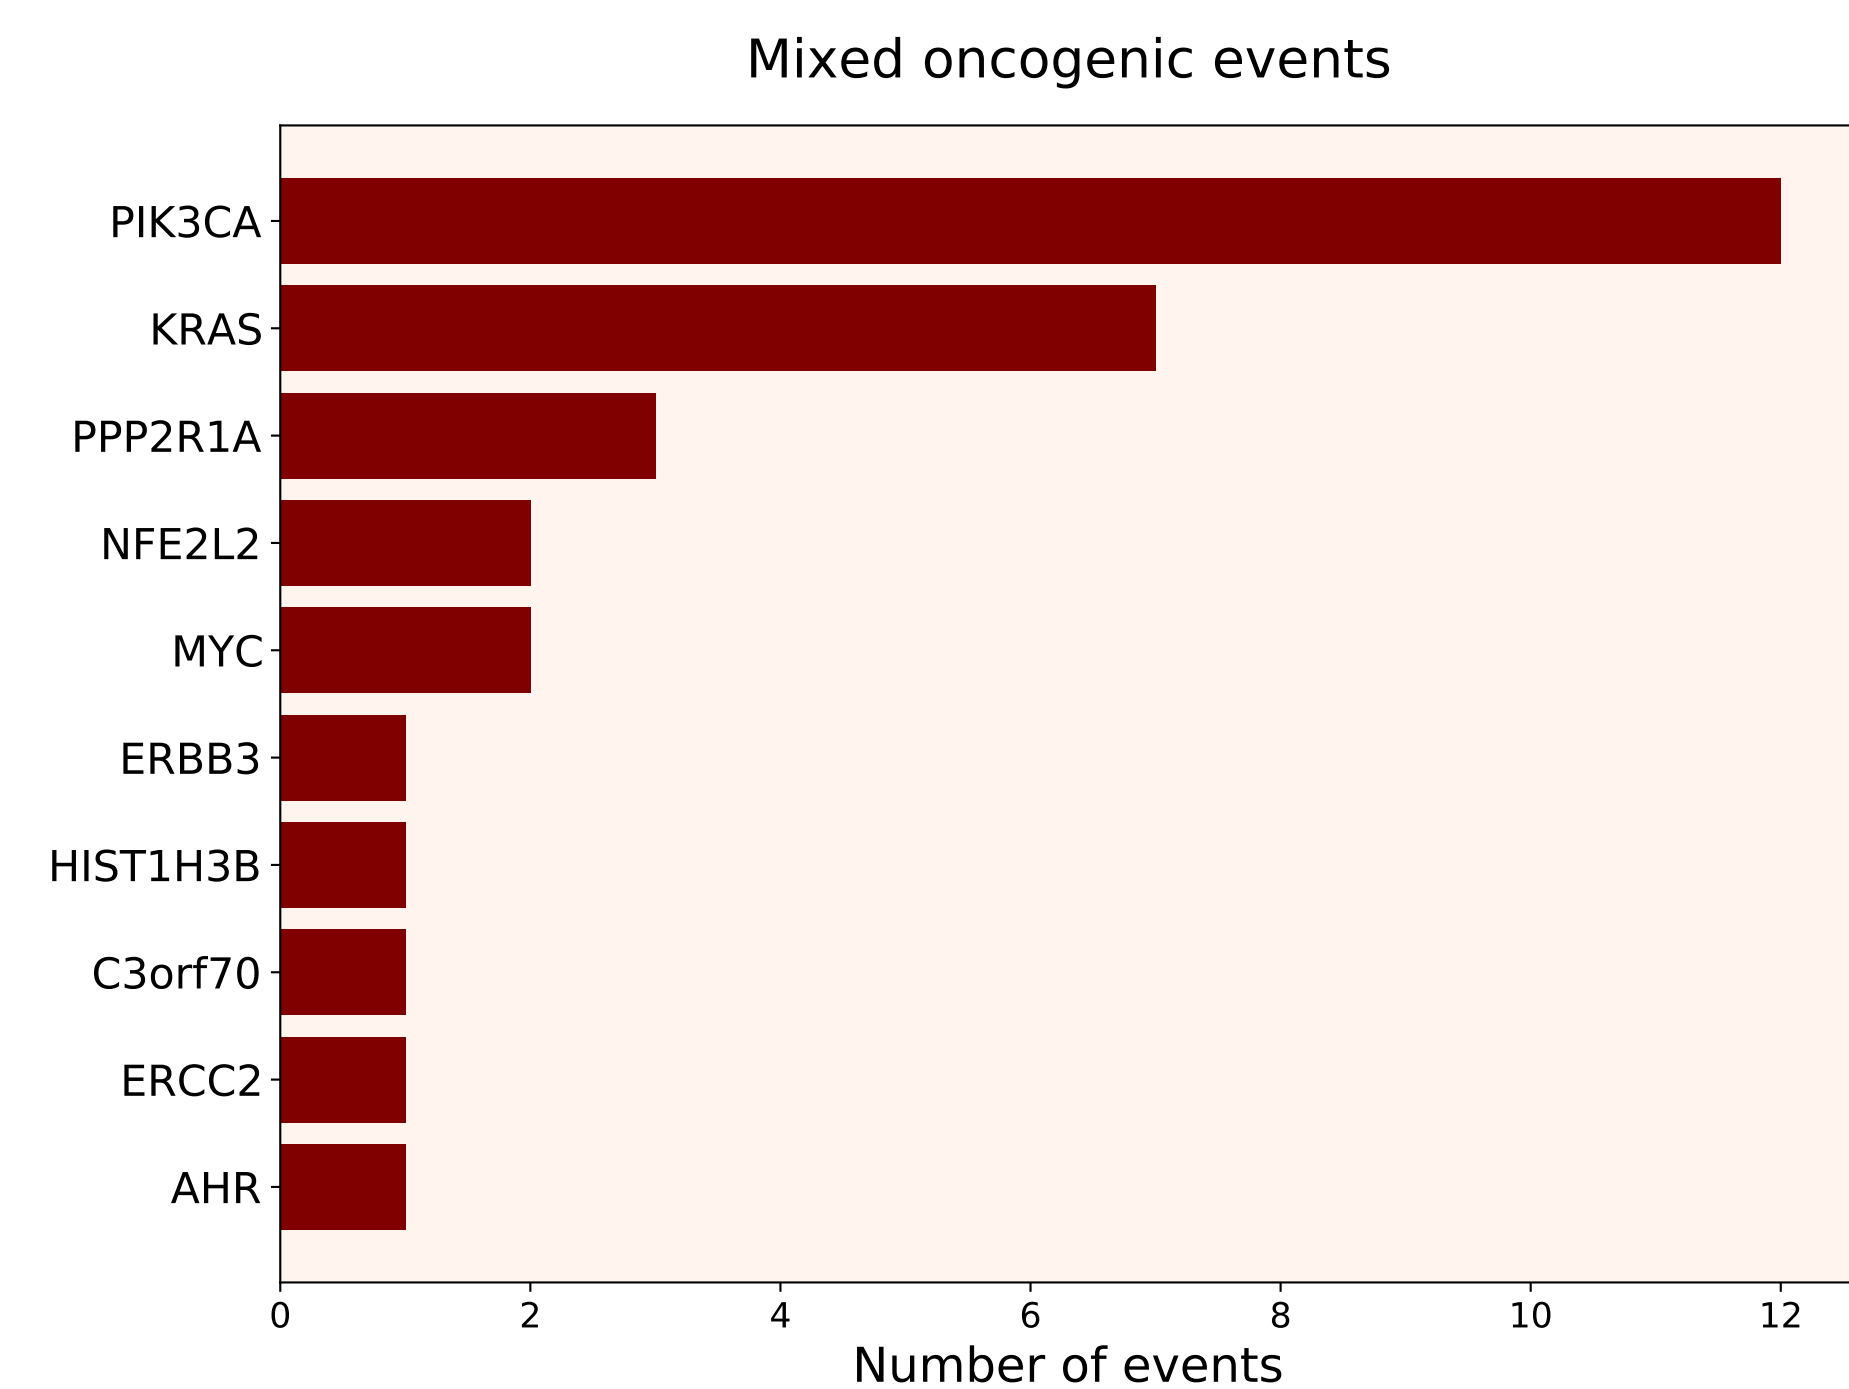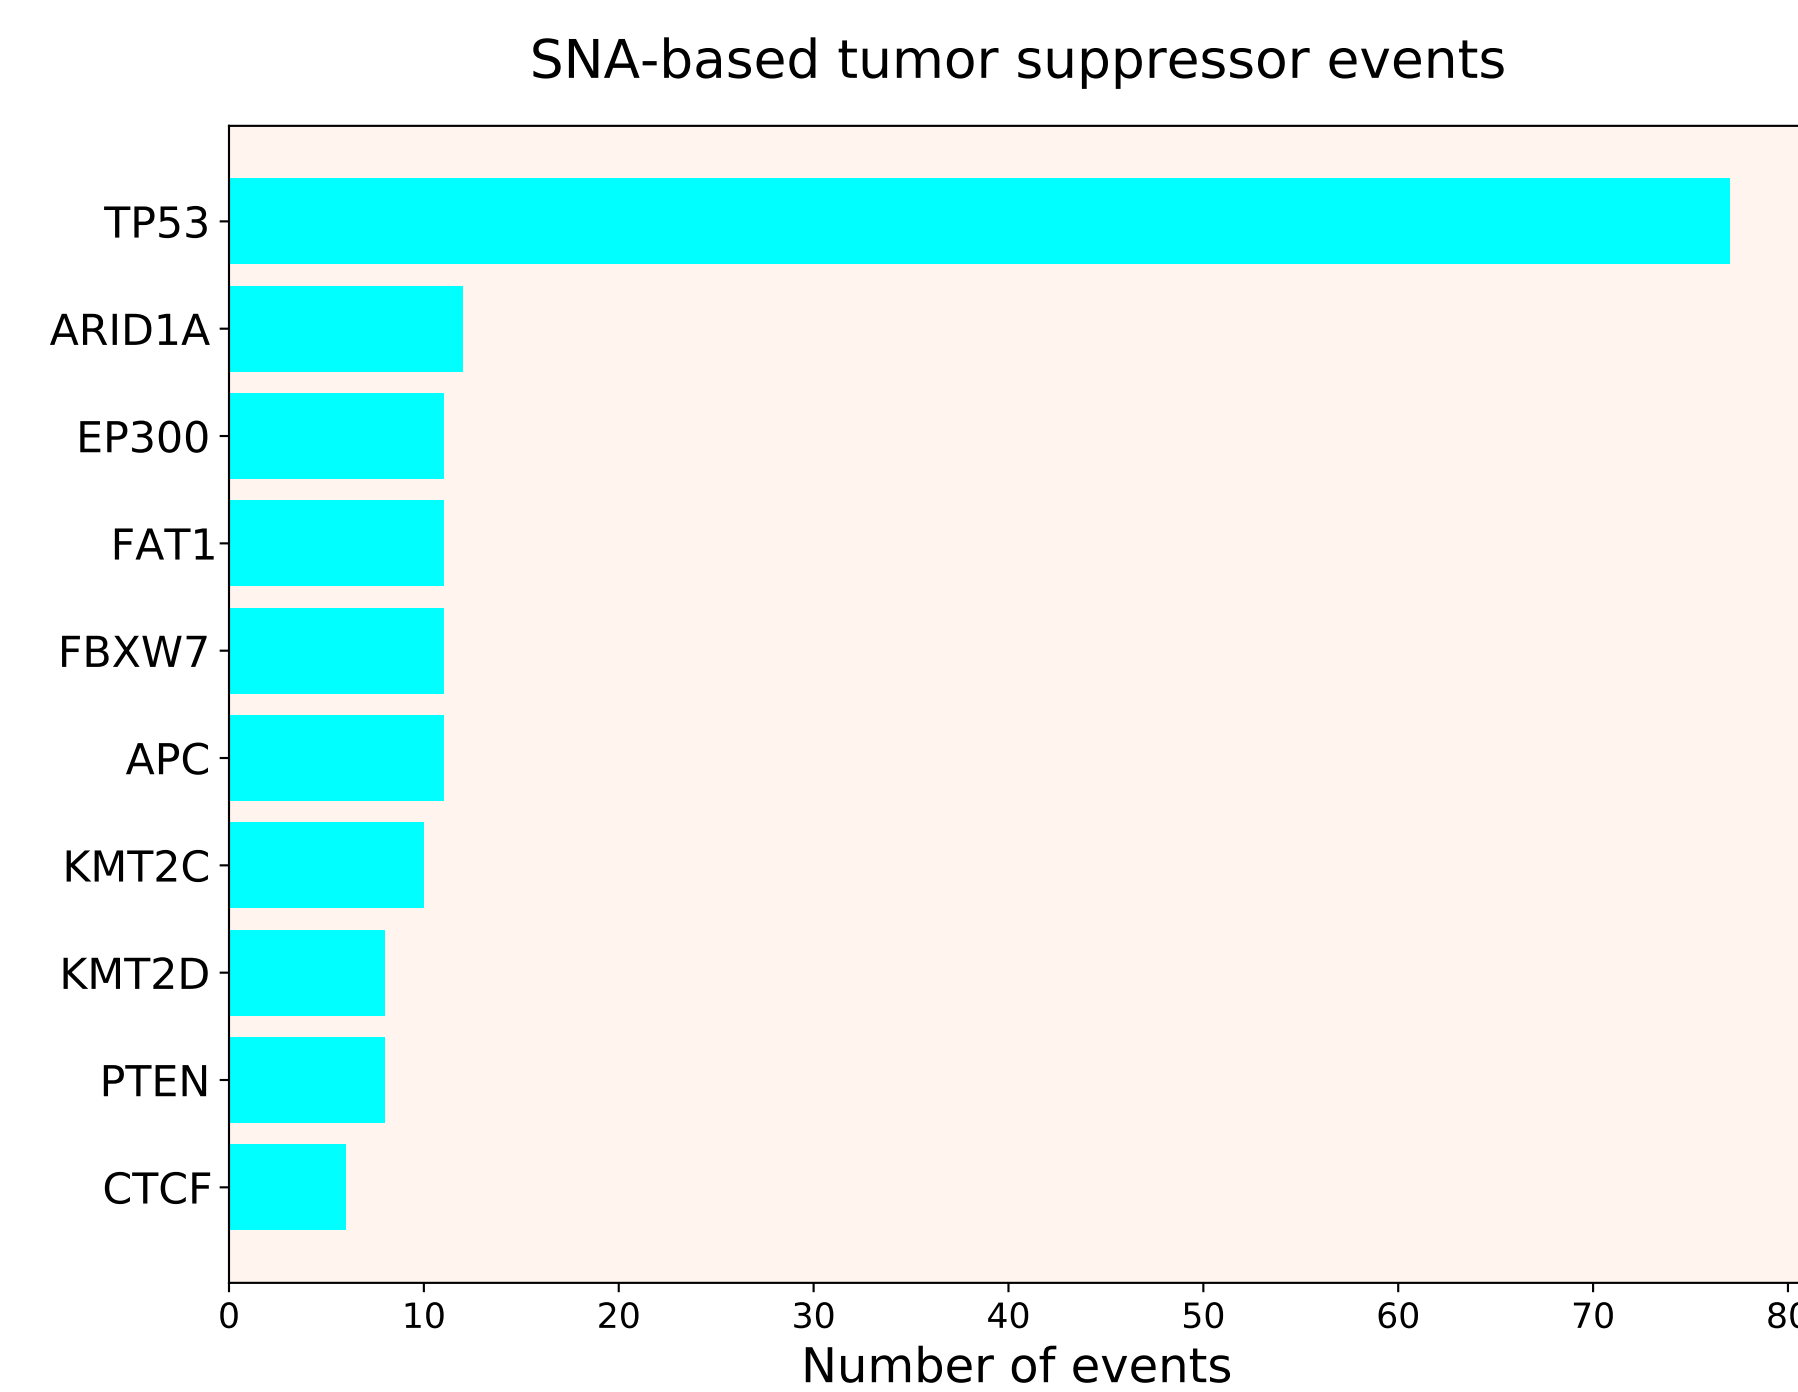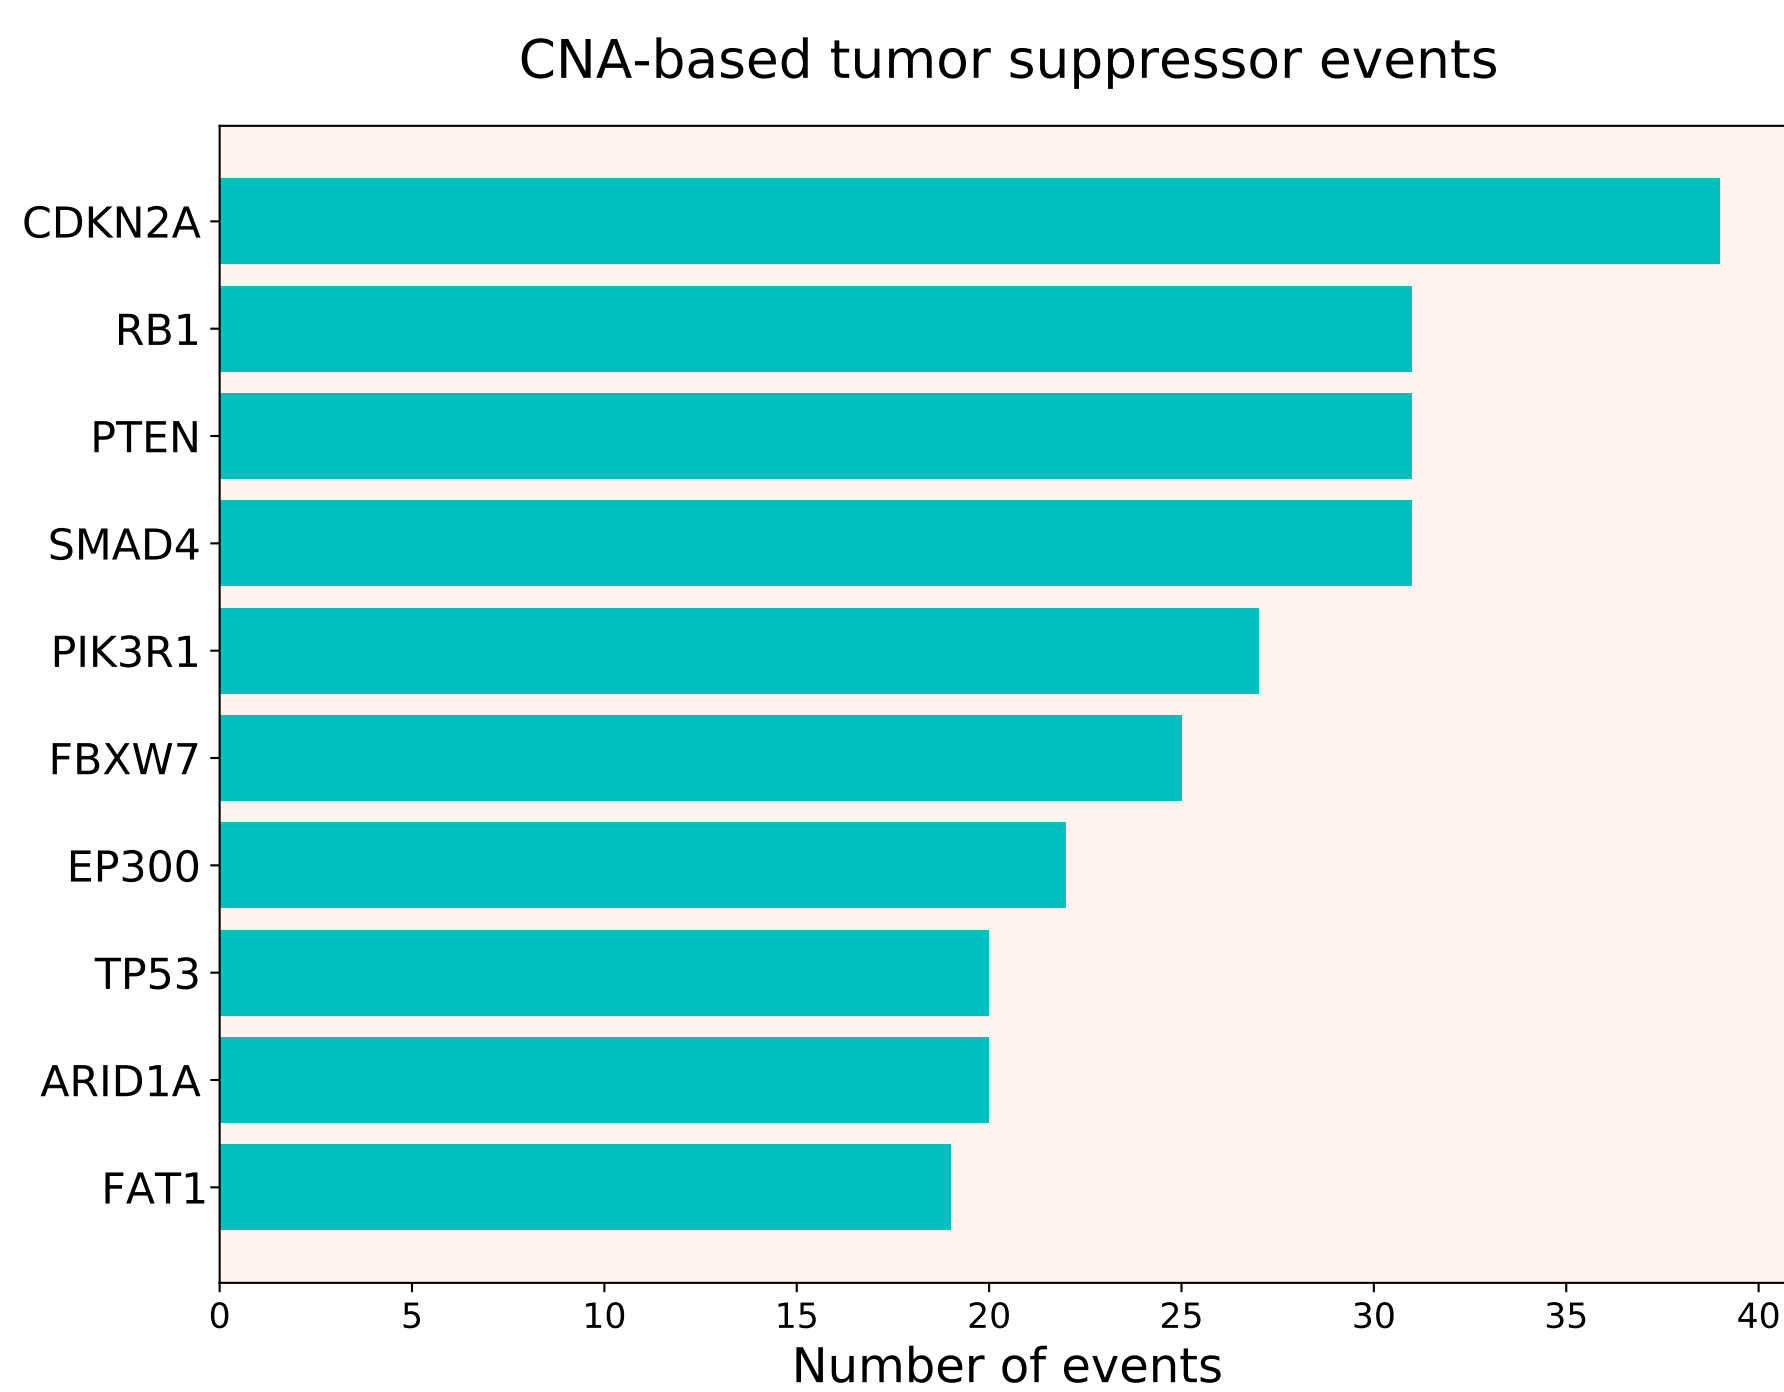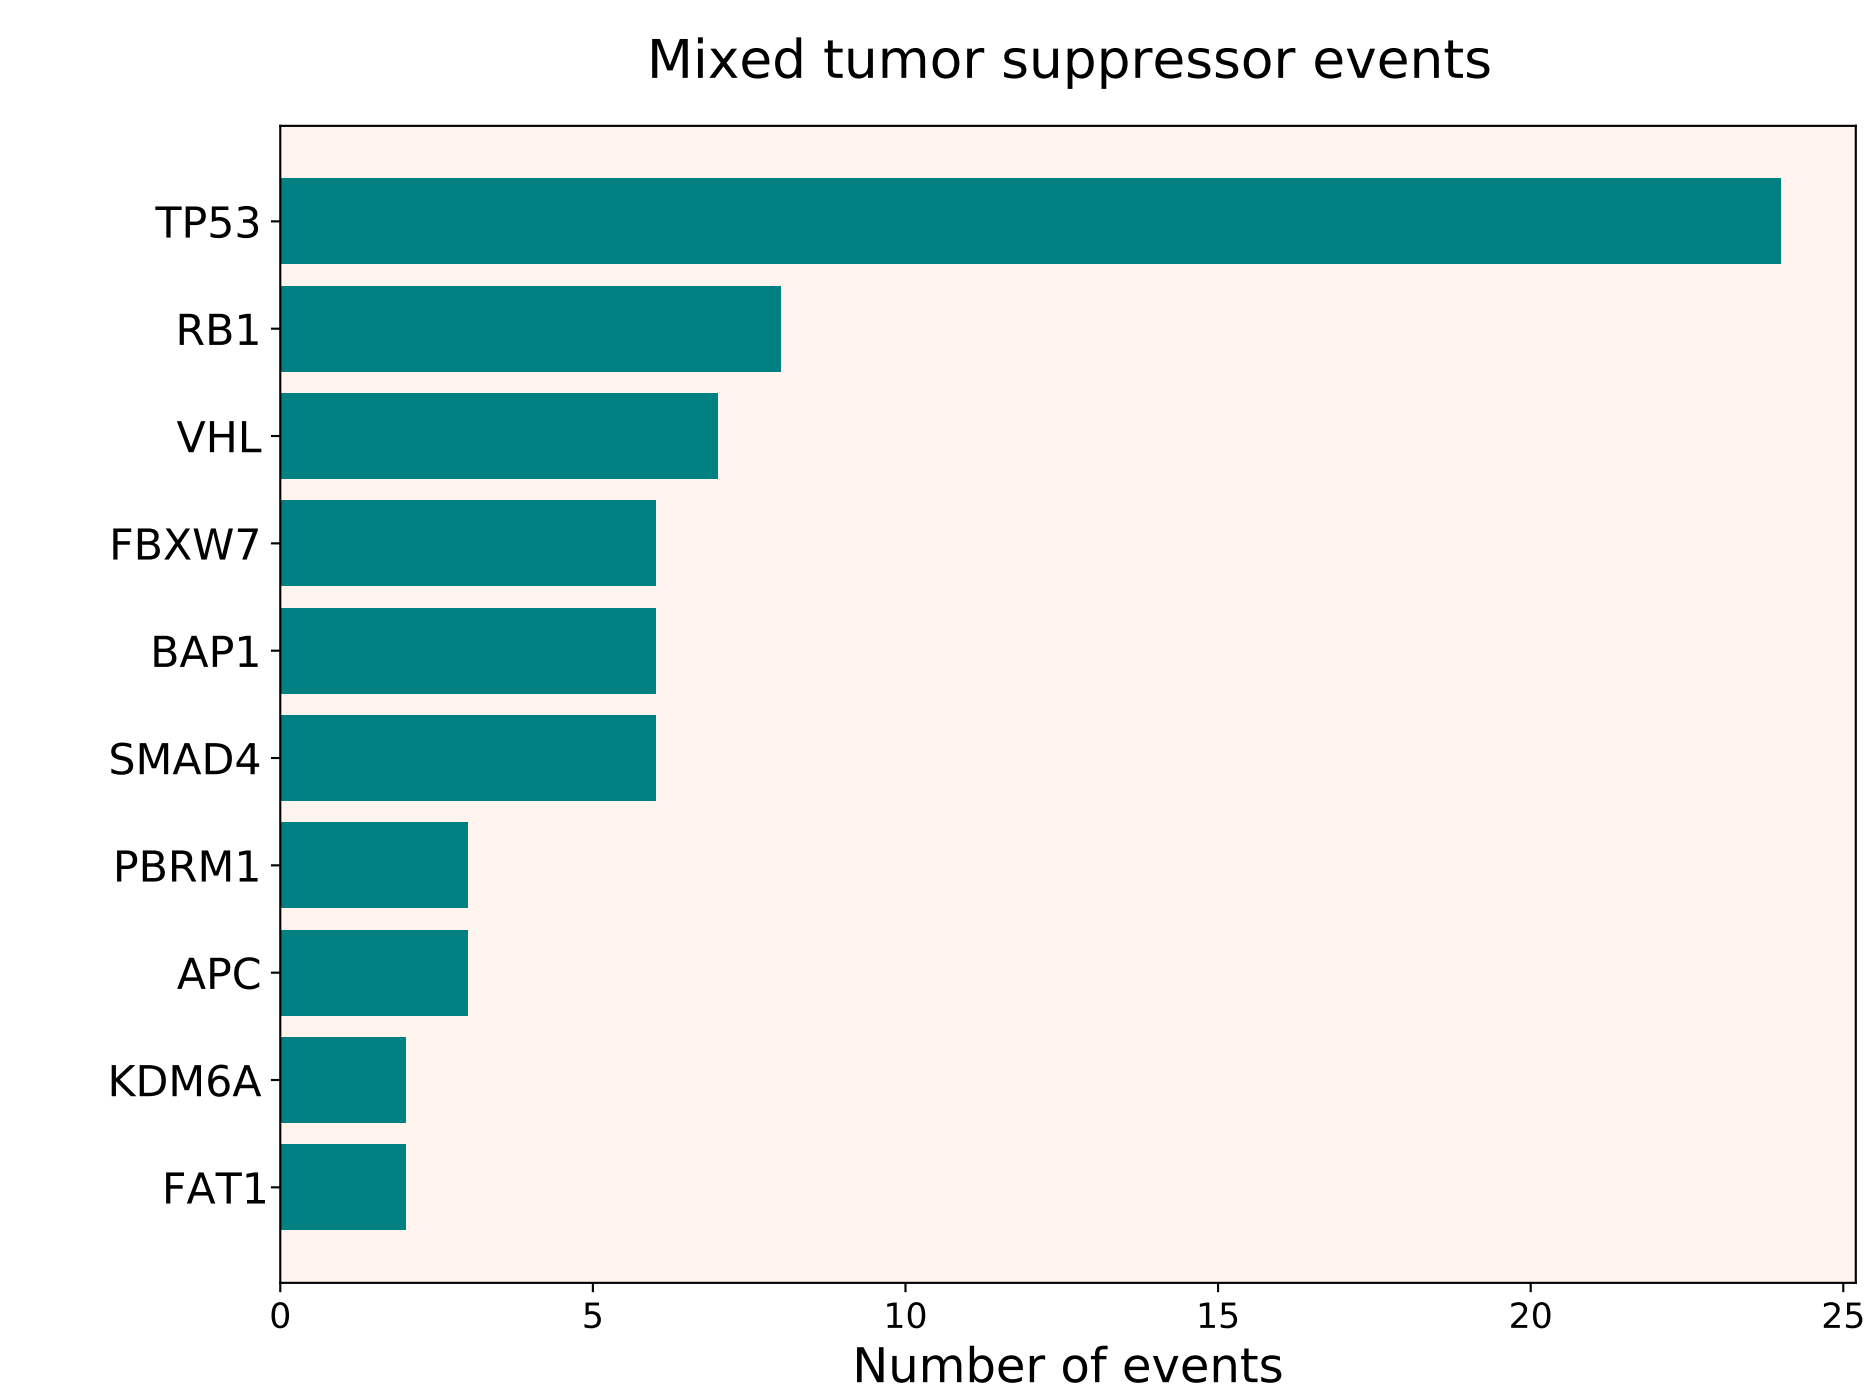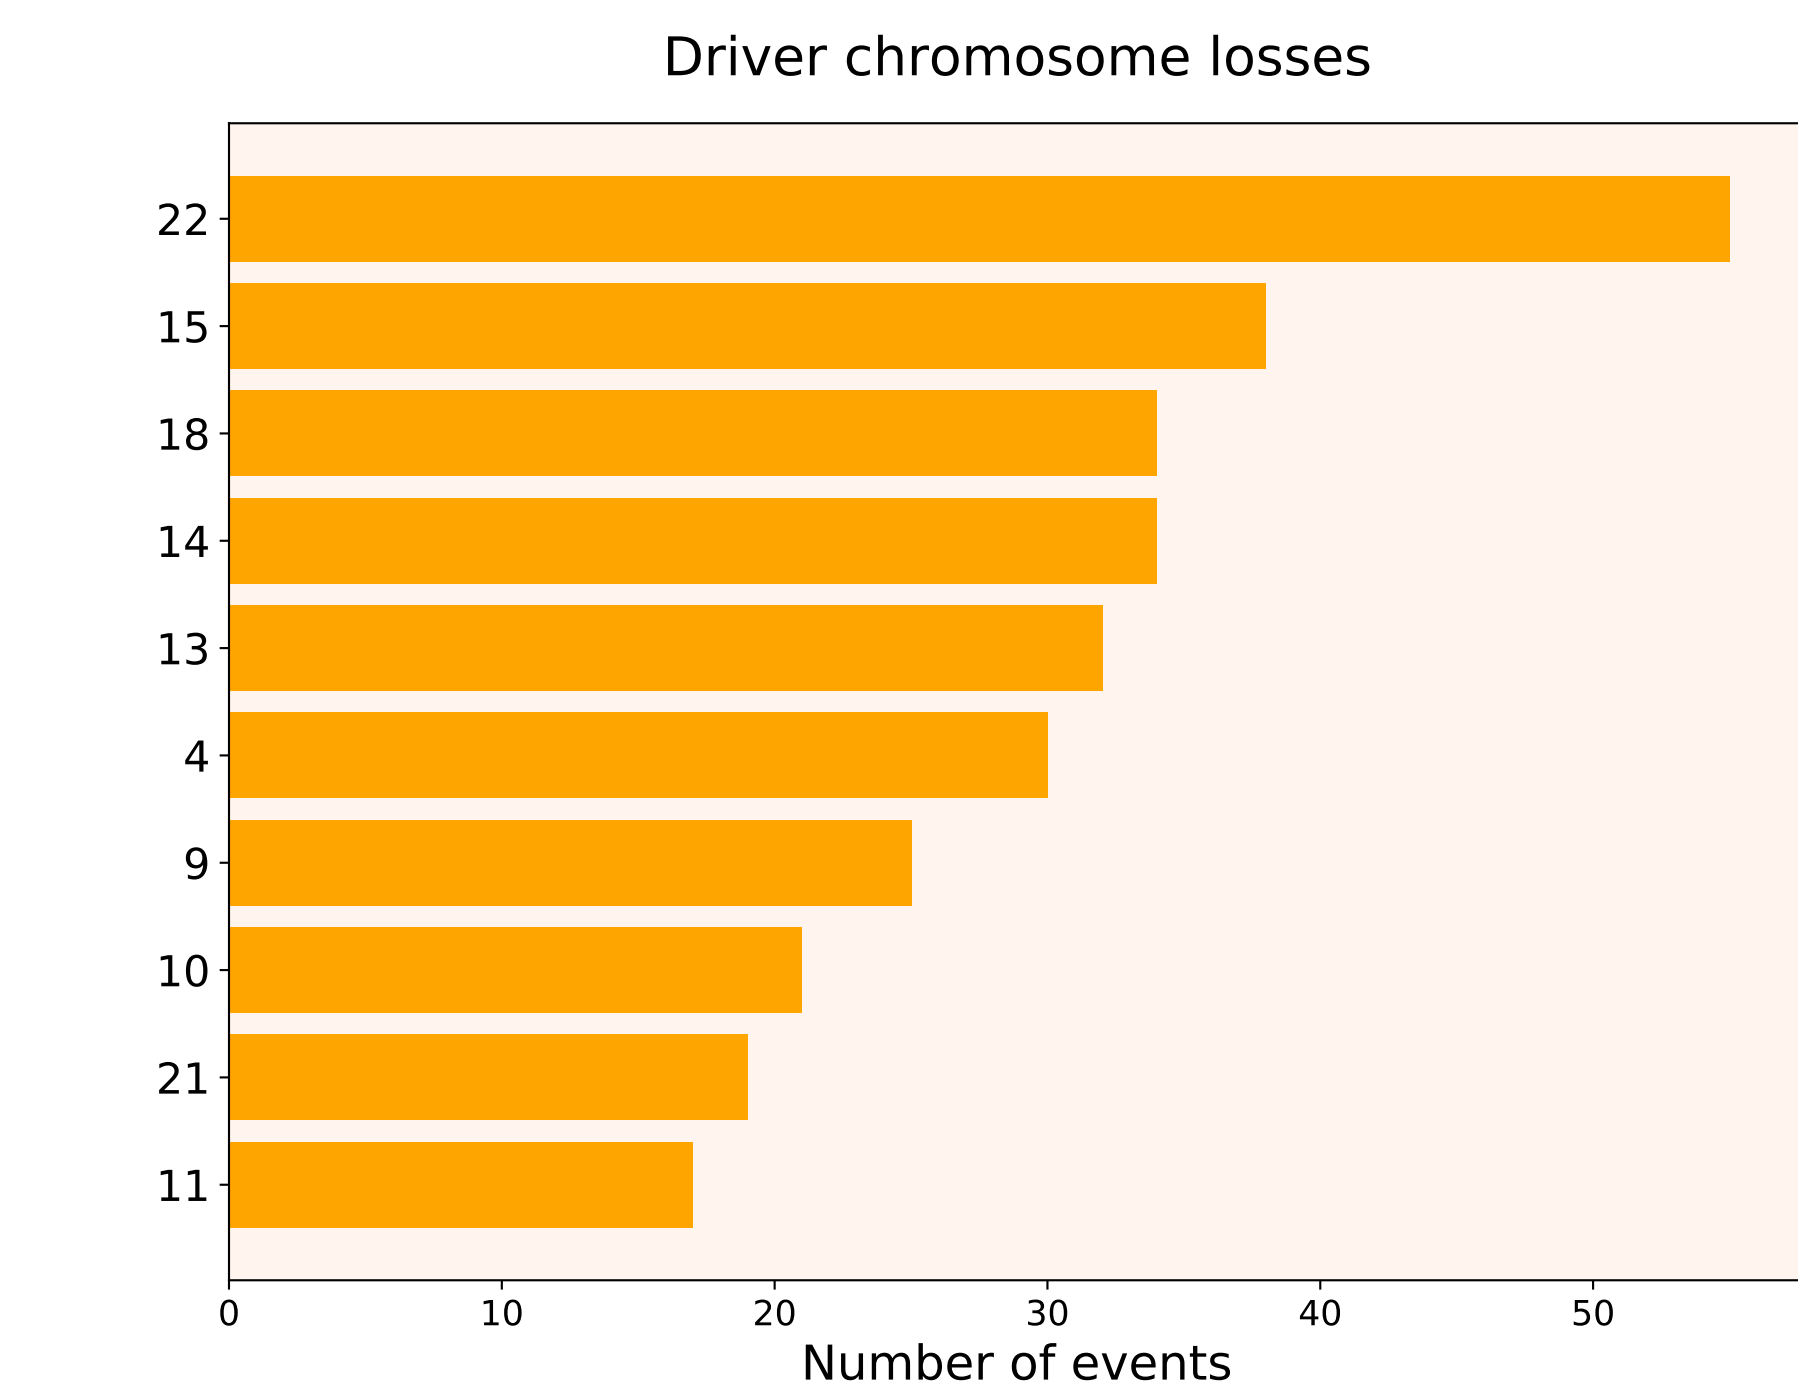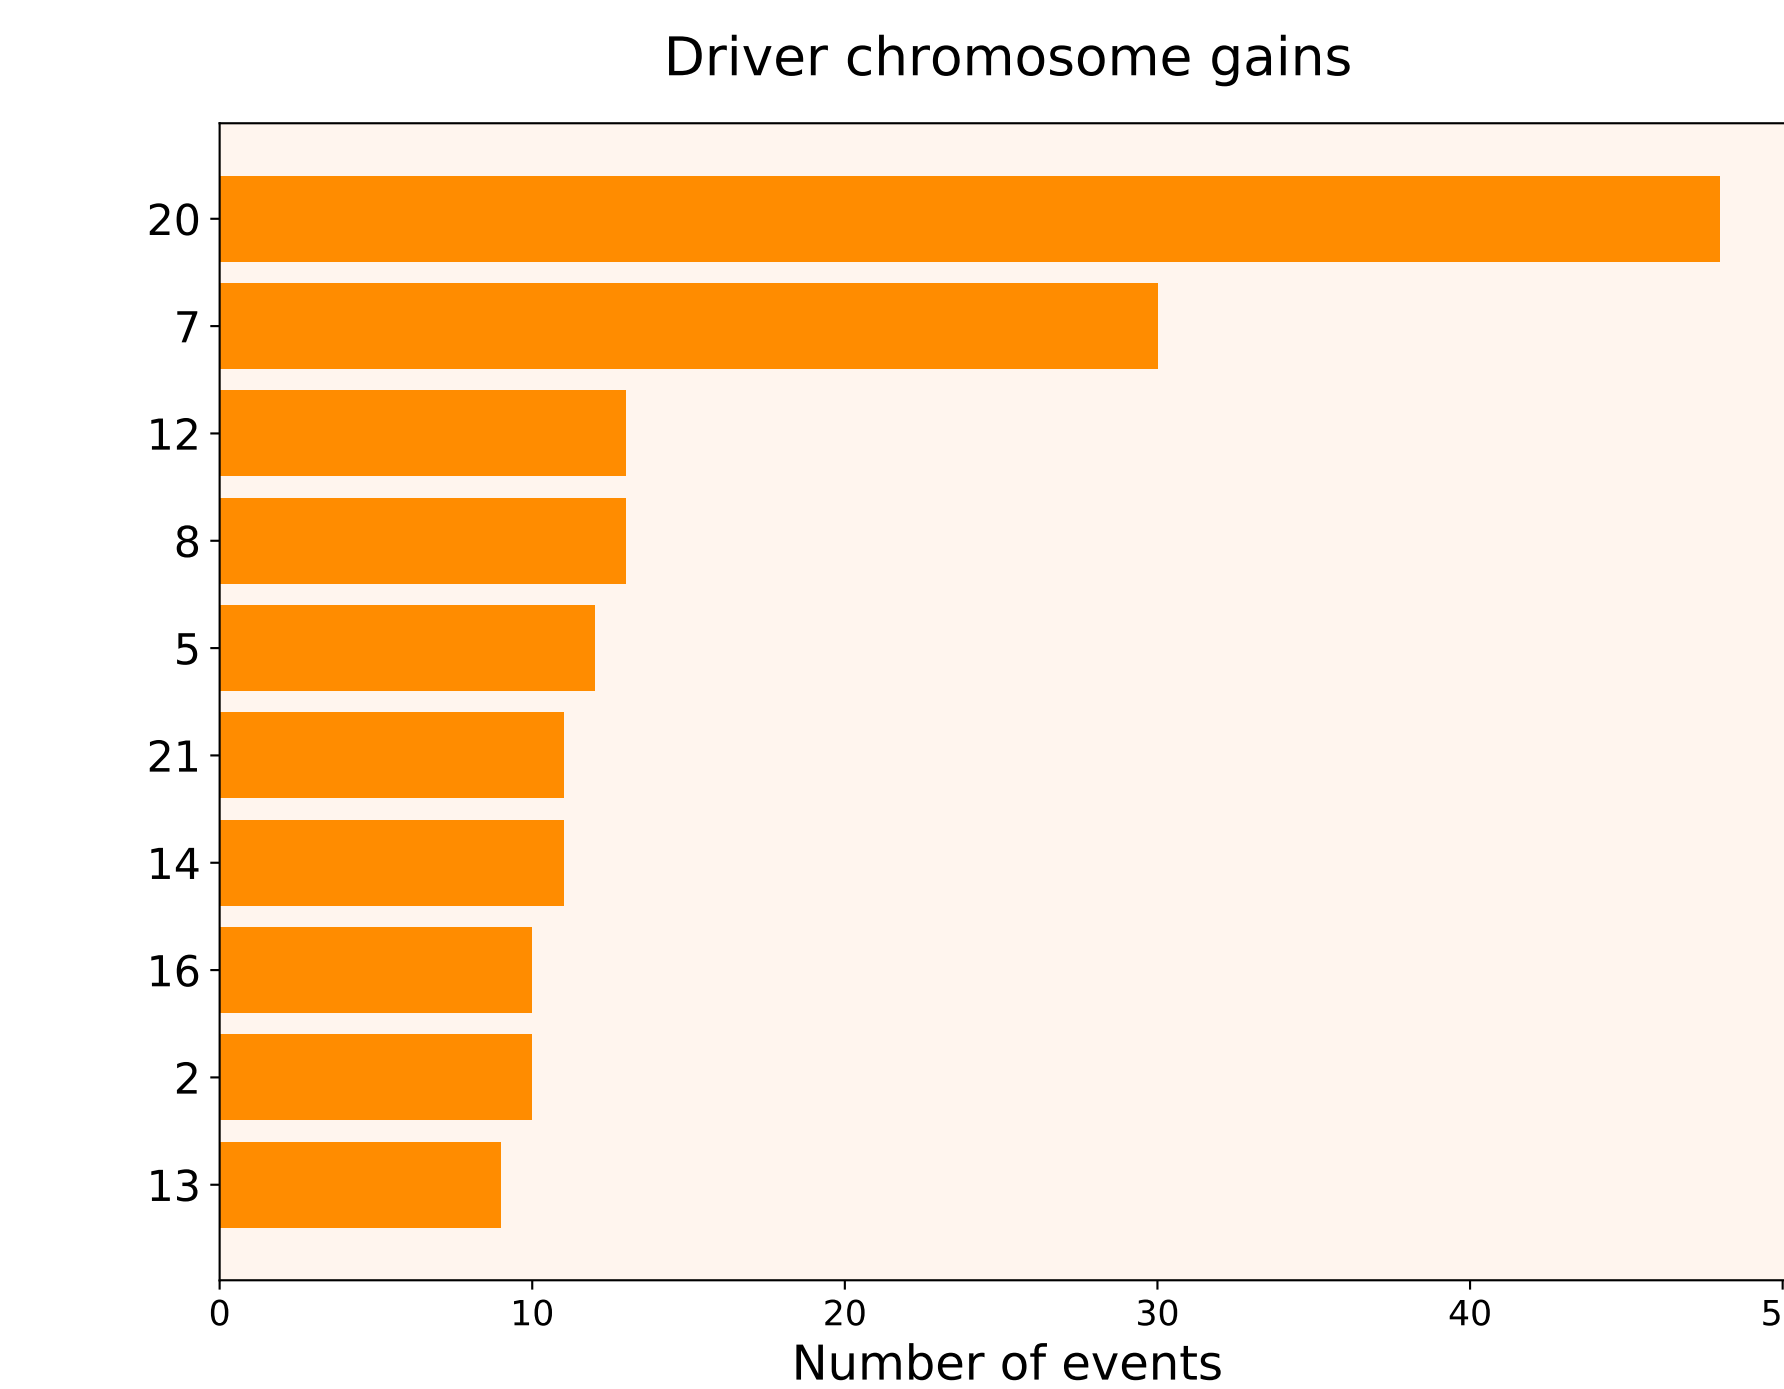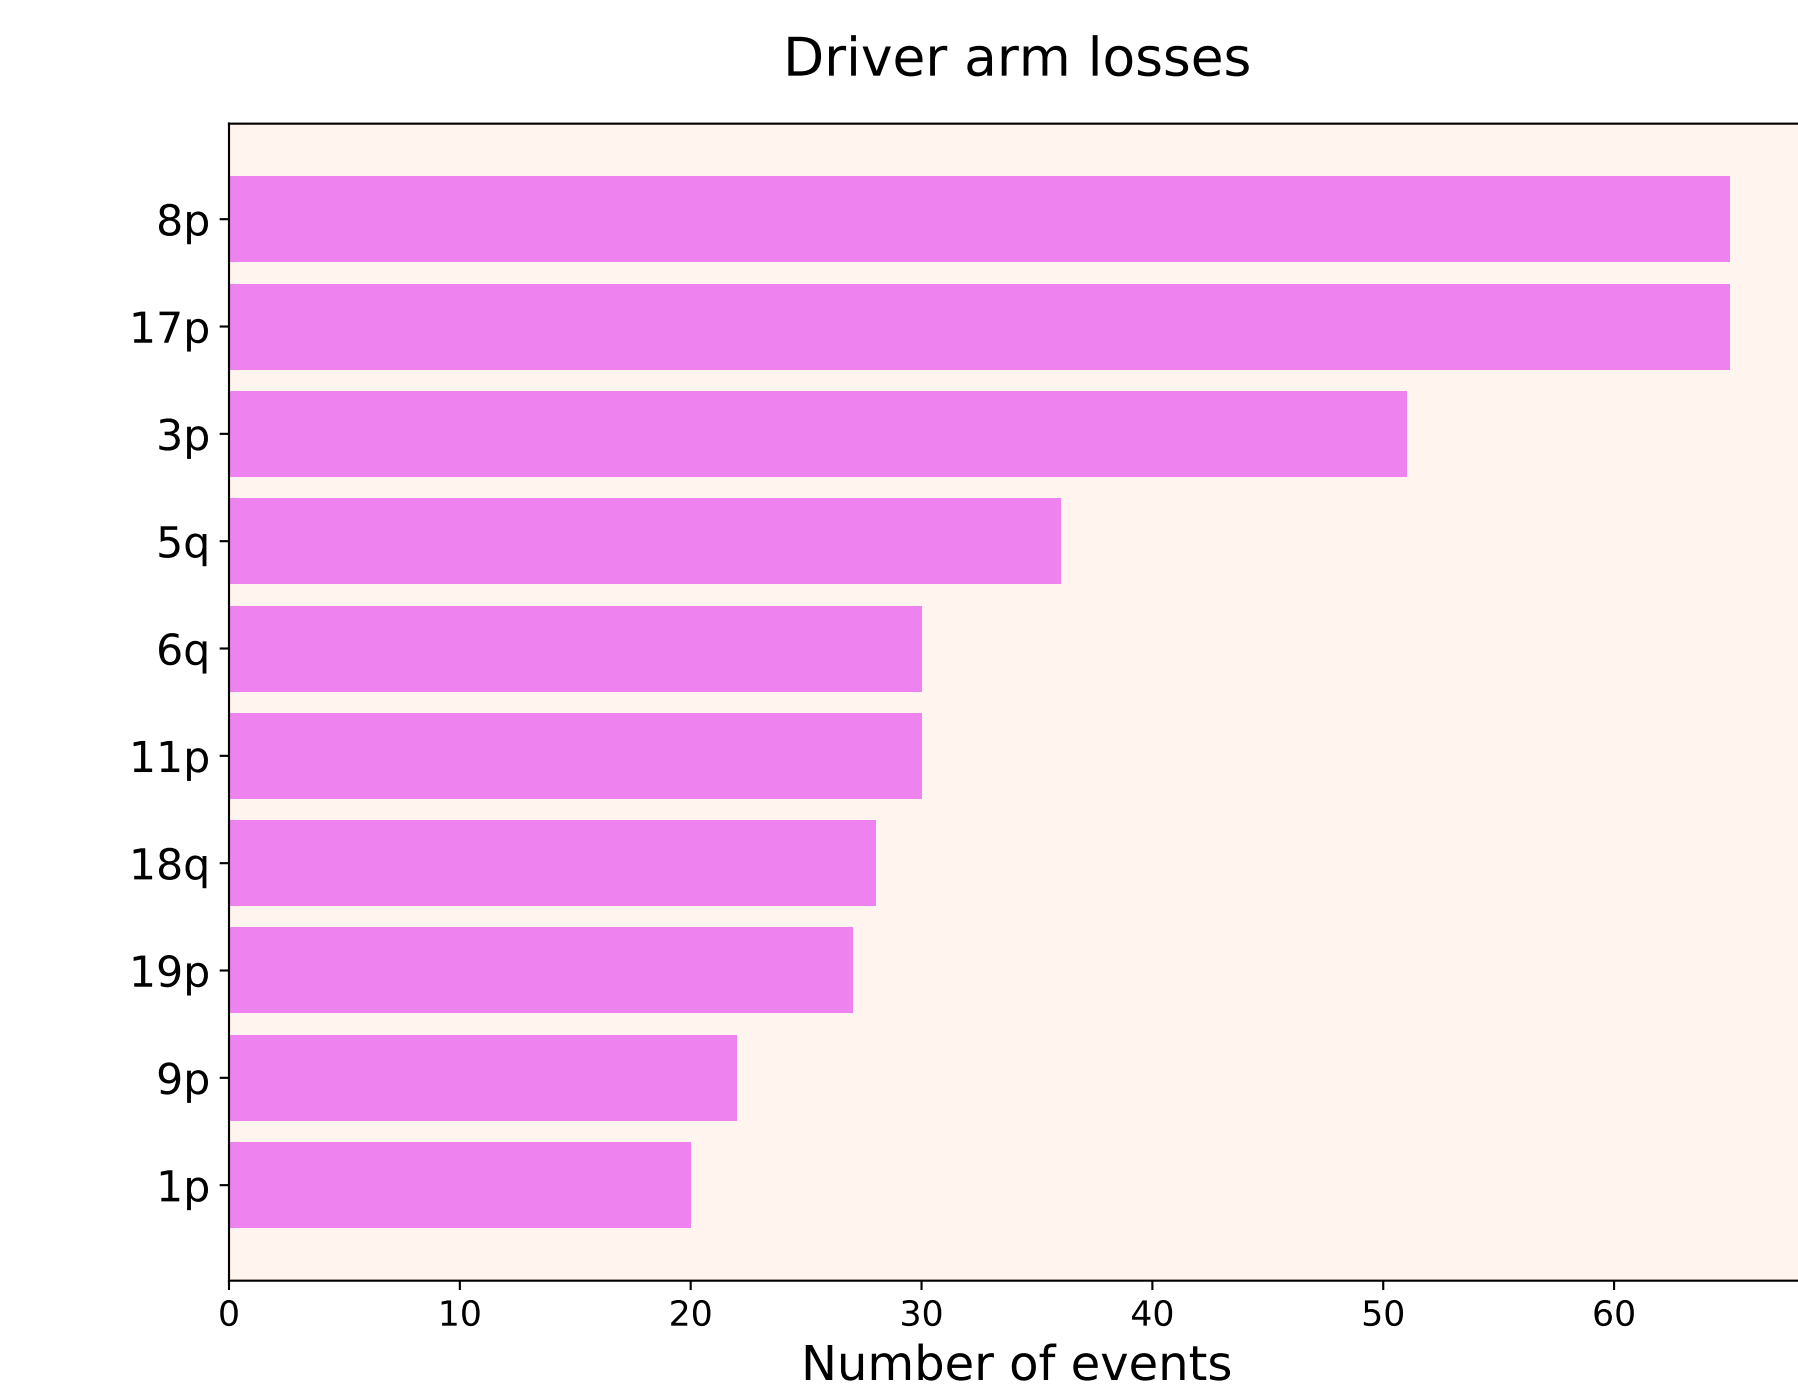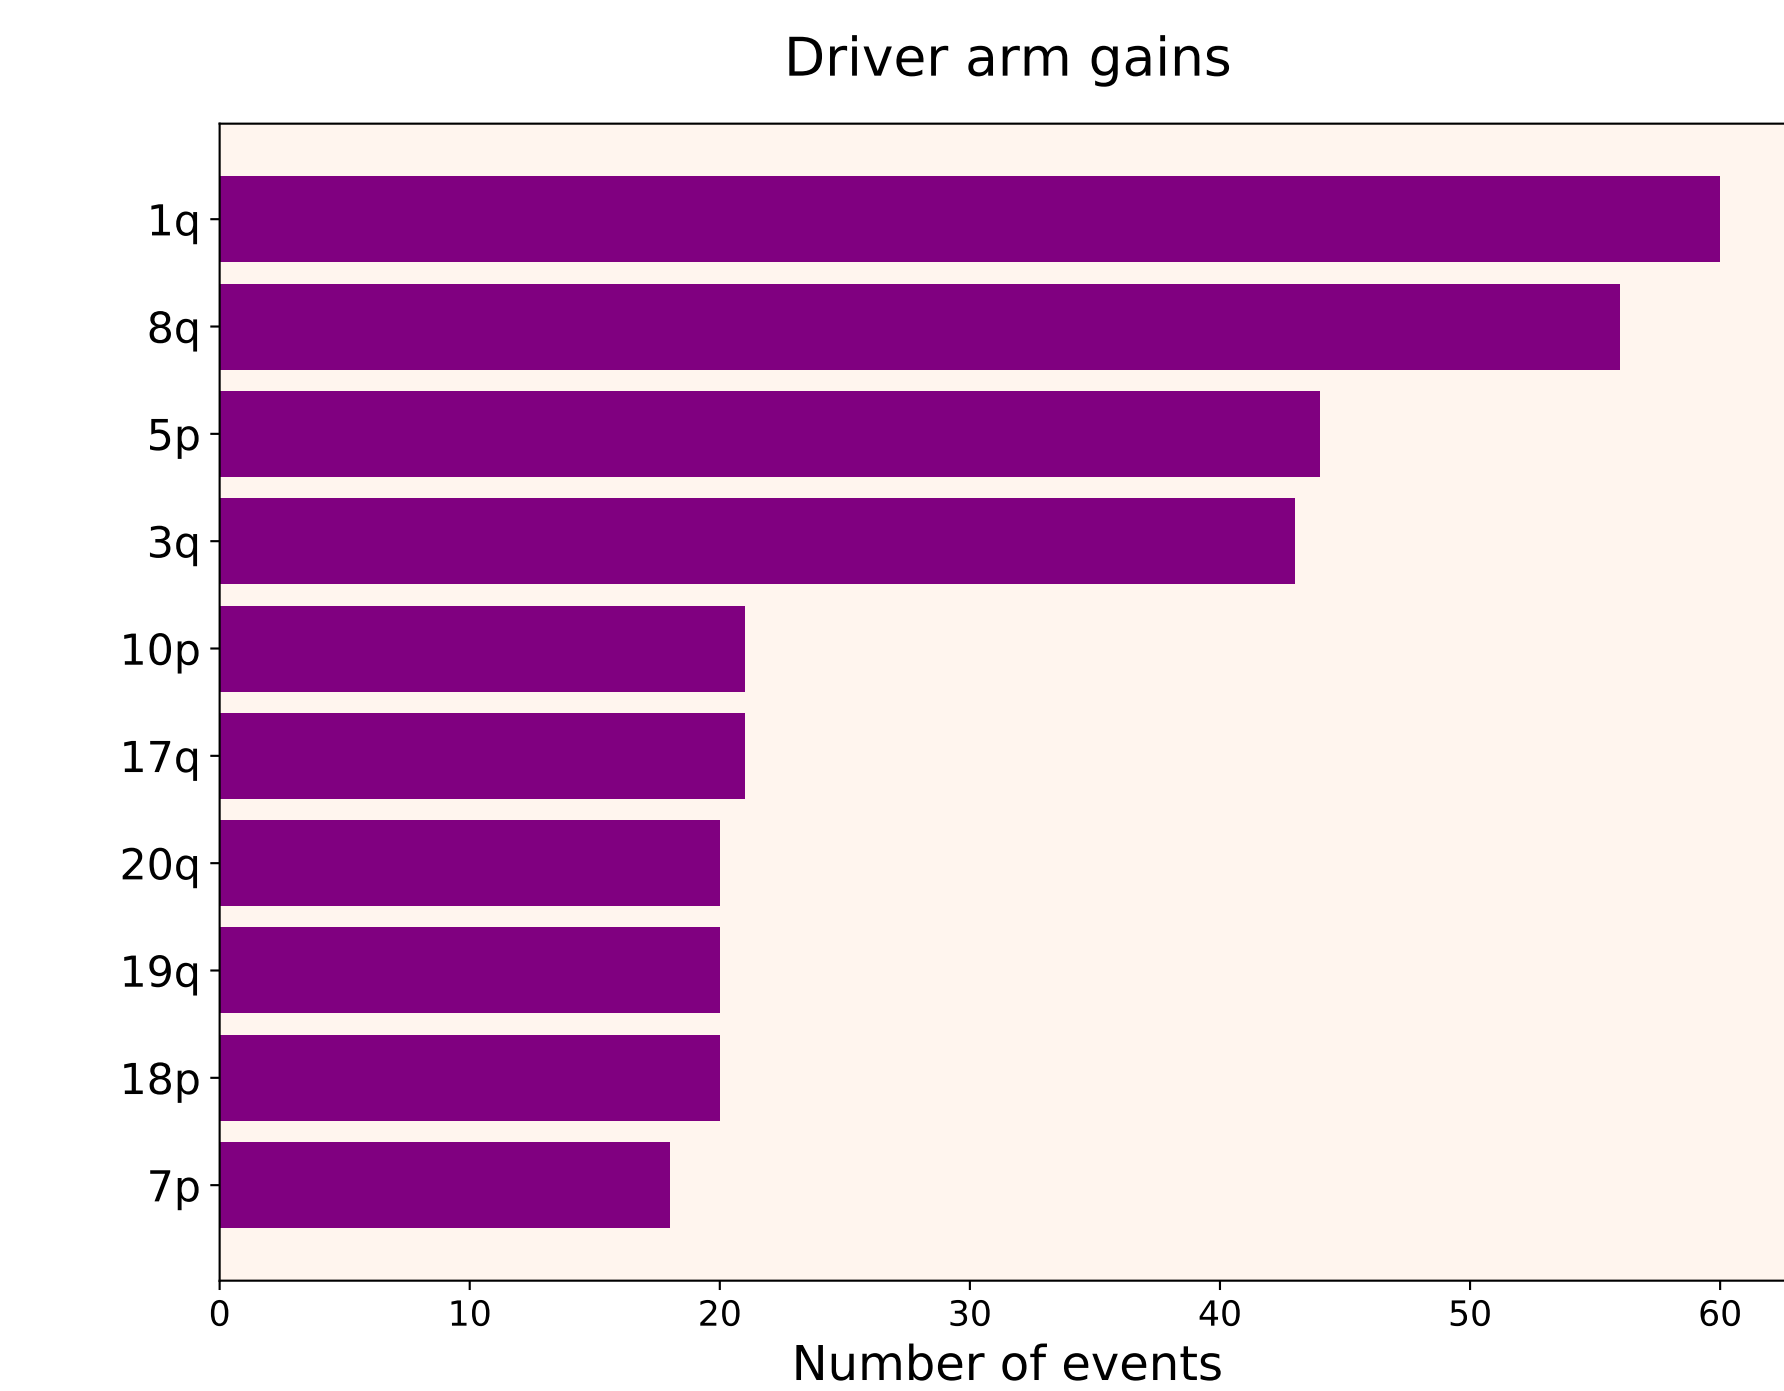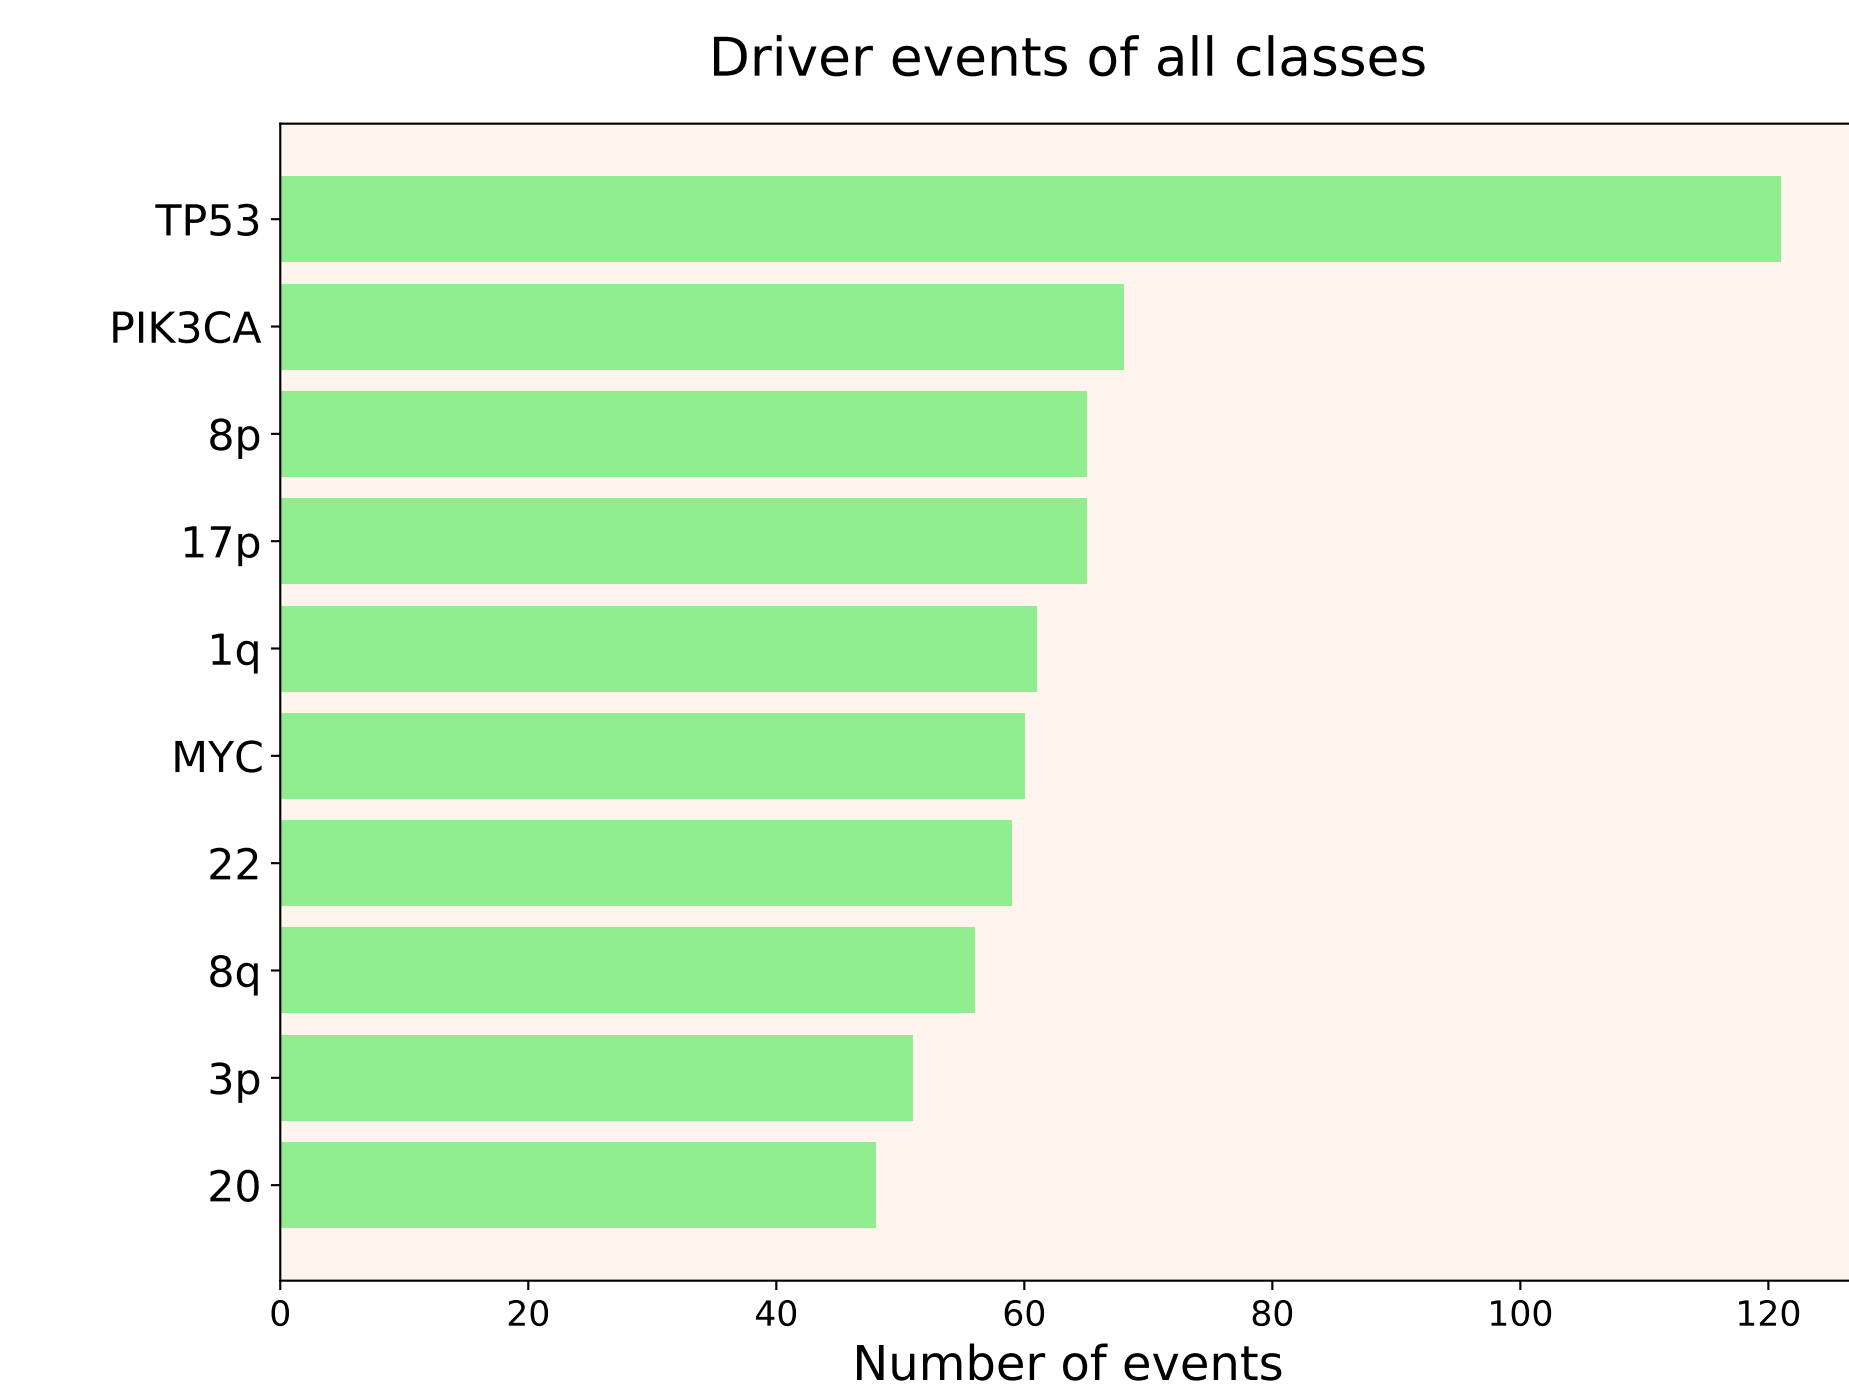

Supplement: Supplemental_Data_S1.zip [file Supplemental_Data_S1.zip]

# KICH

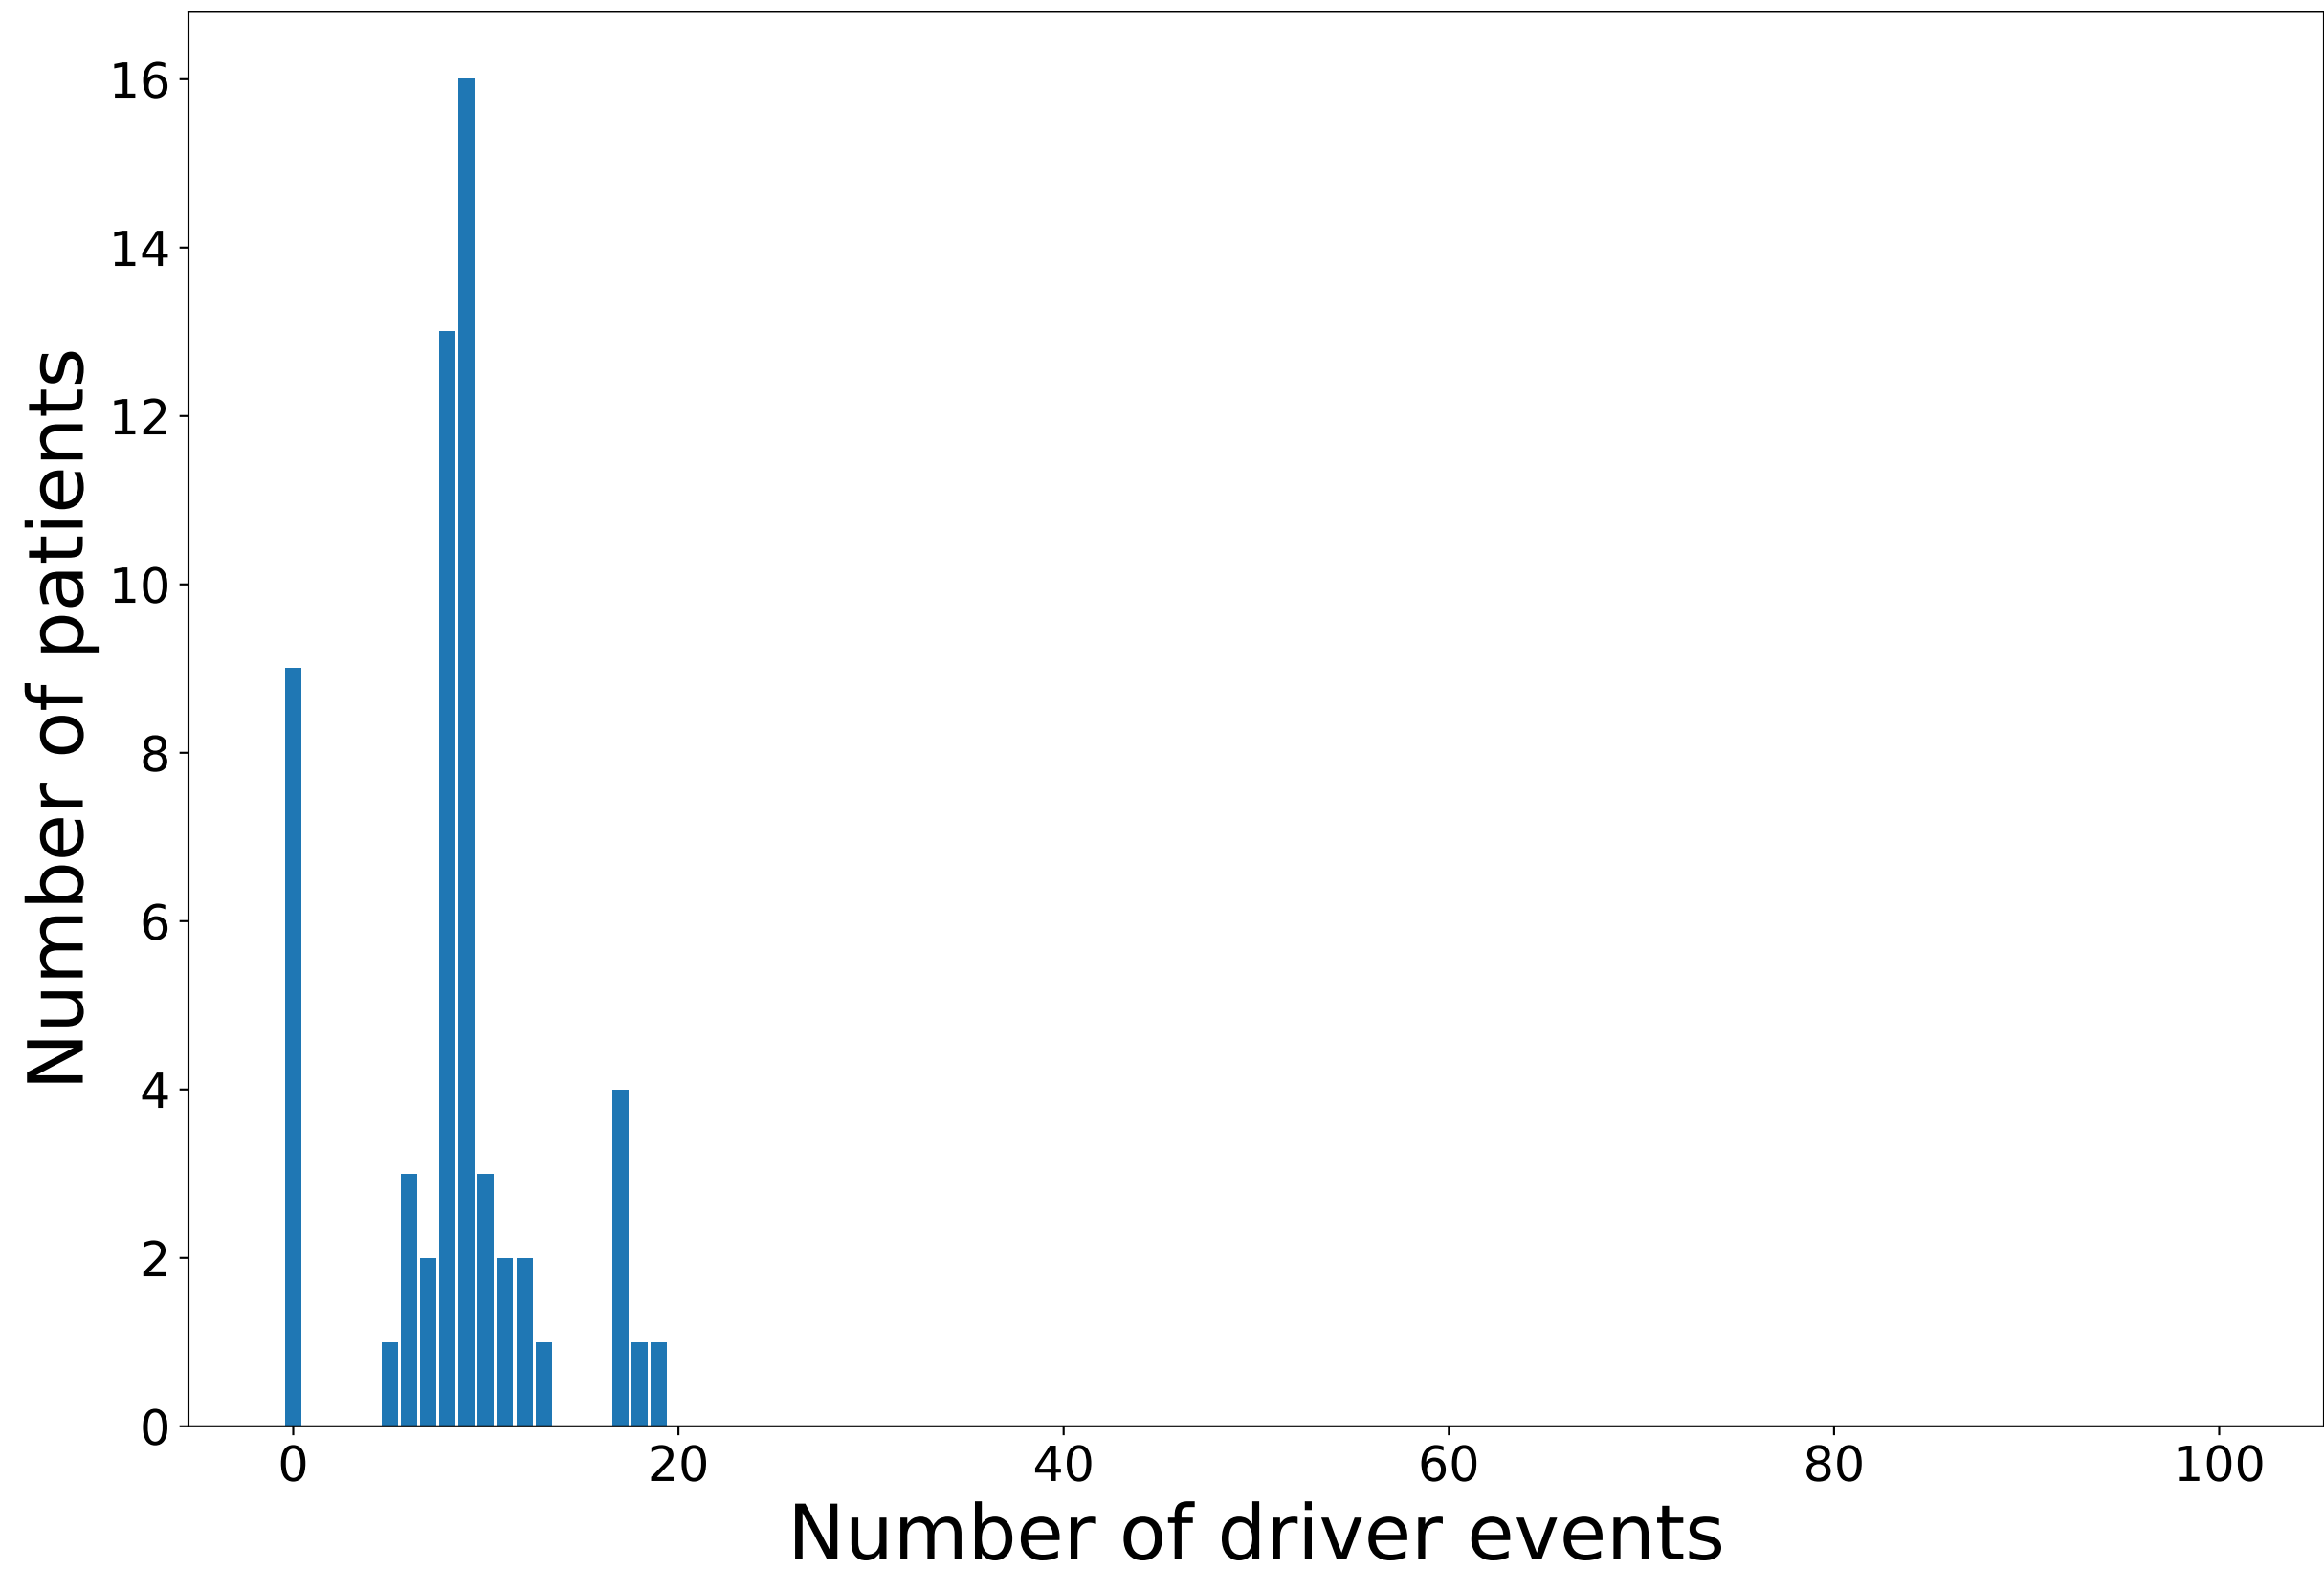

Supplement: Supplemental_Data_S1.zip [file Supplemental_Data_S1.zip]

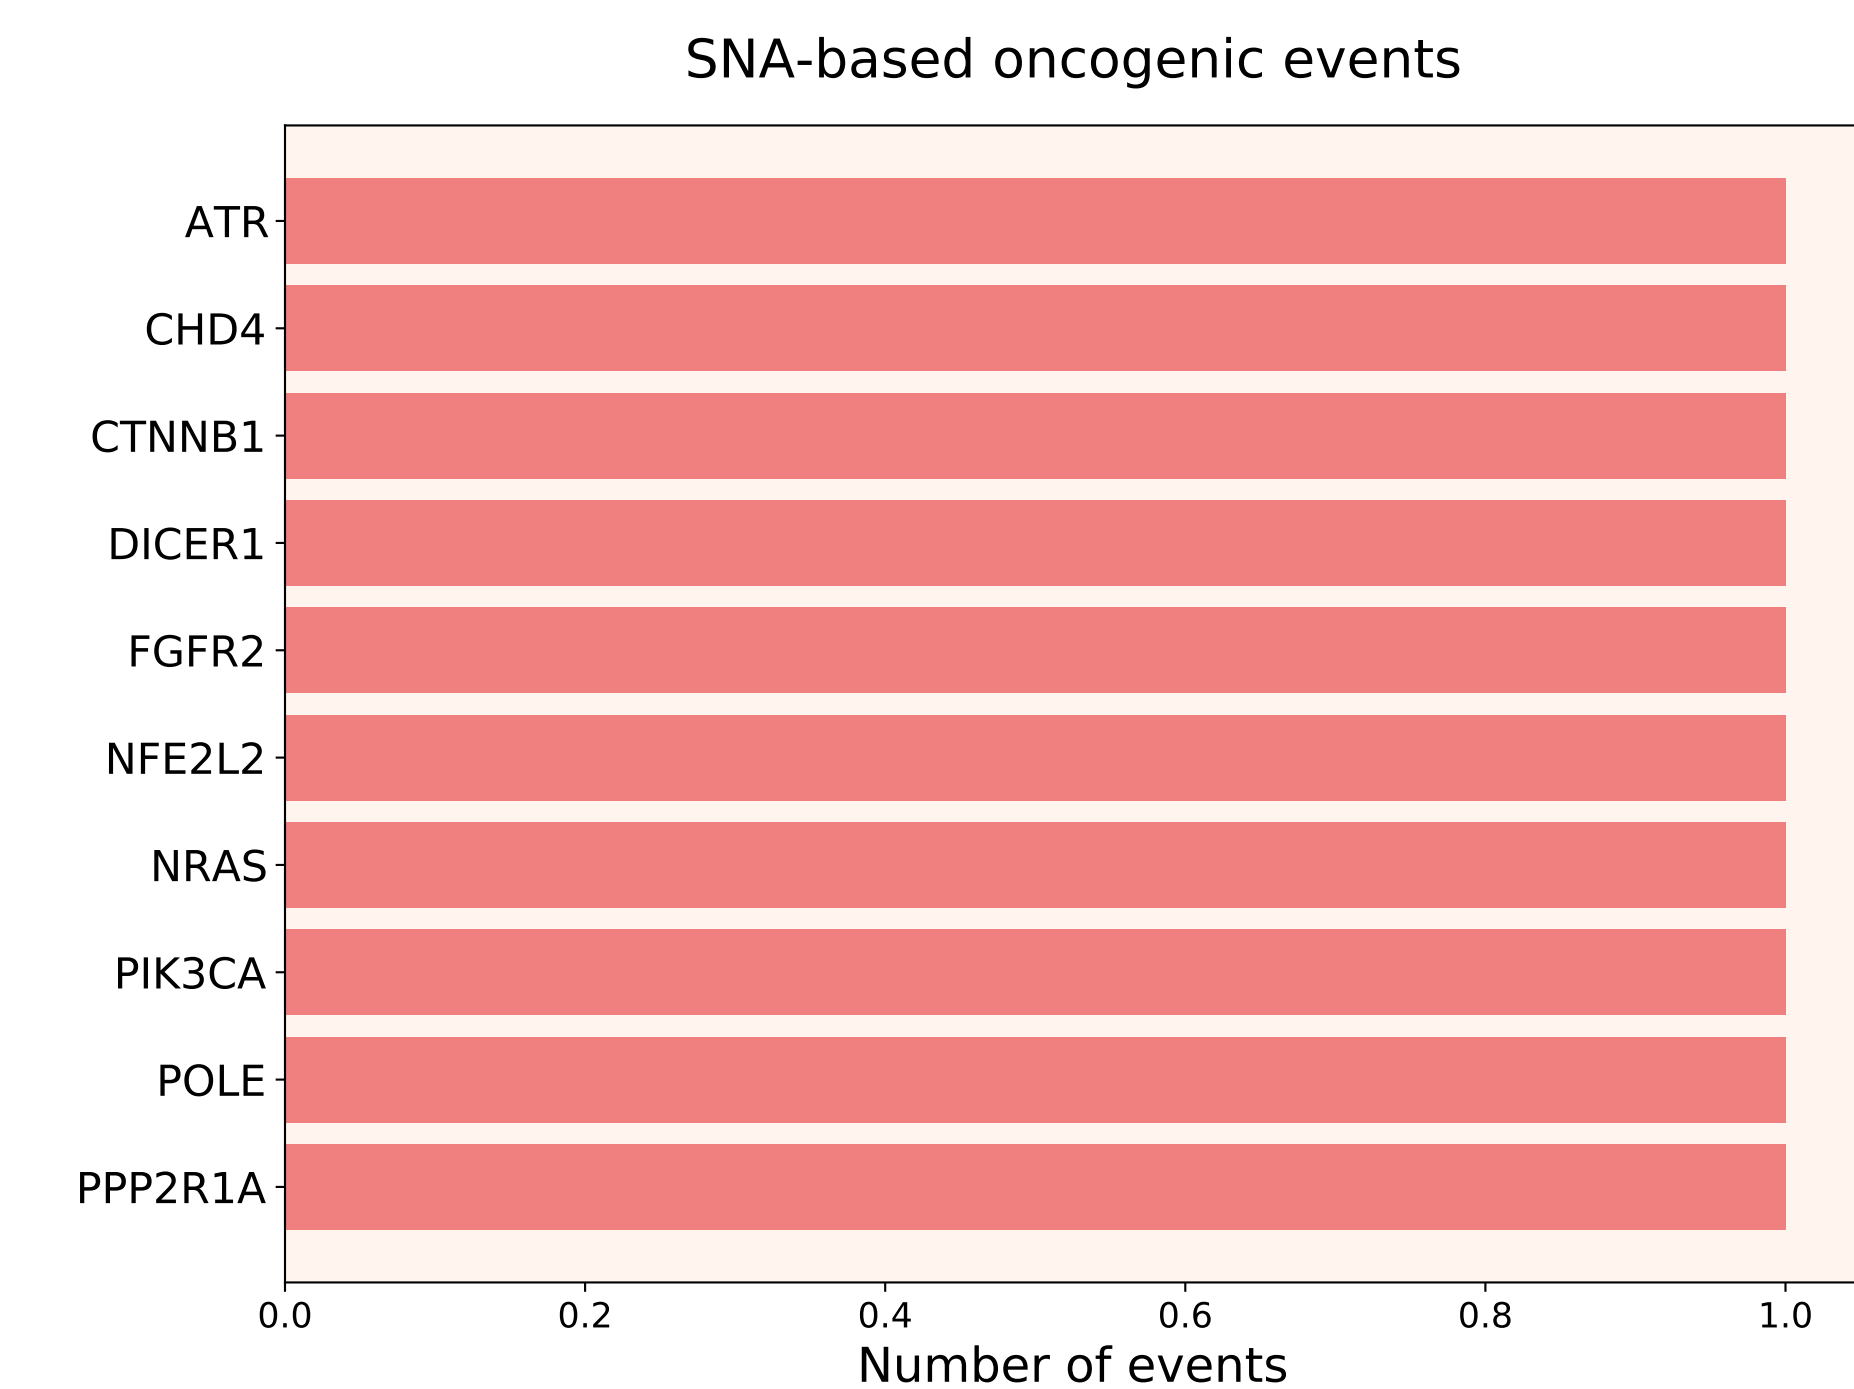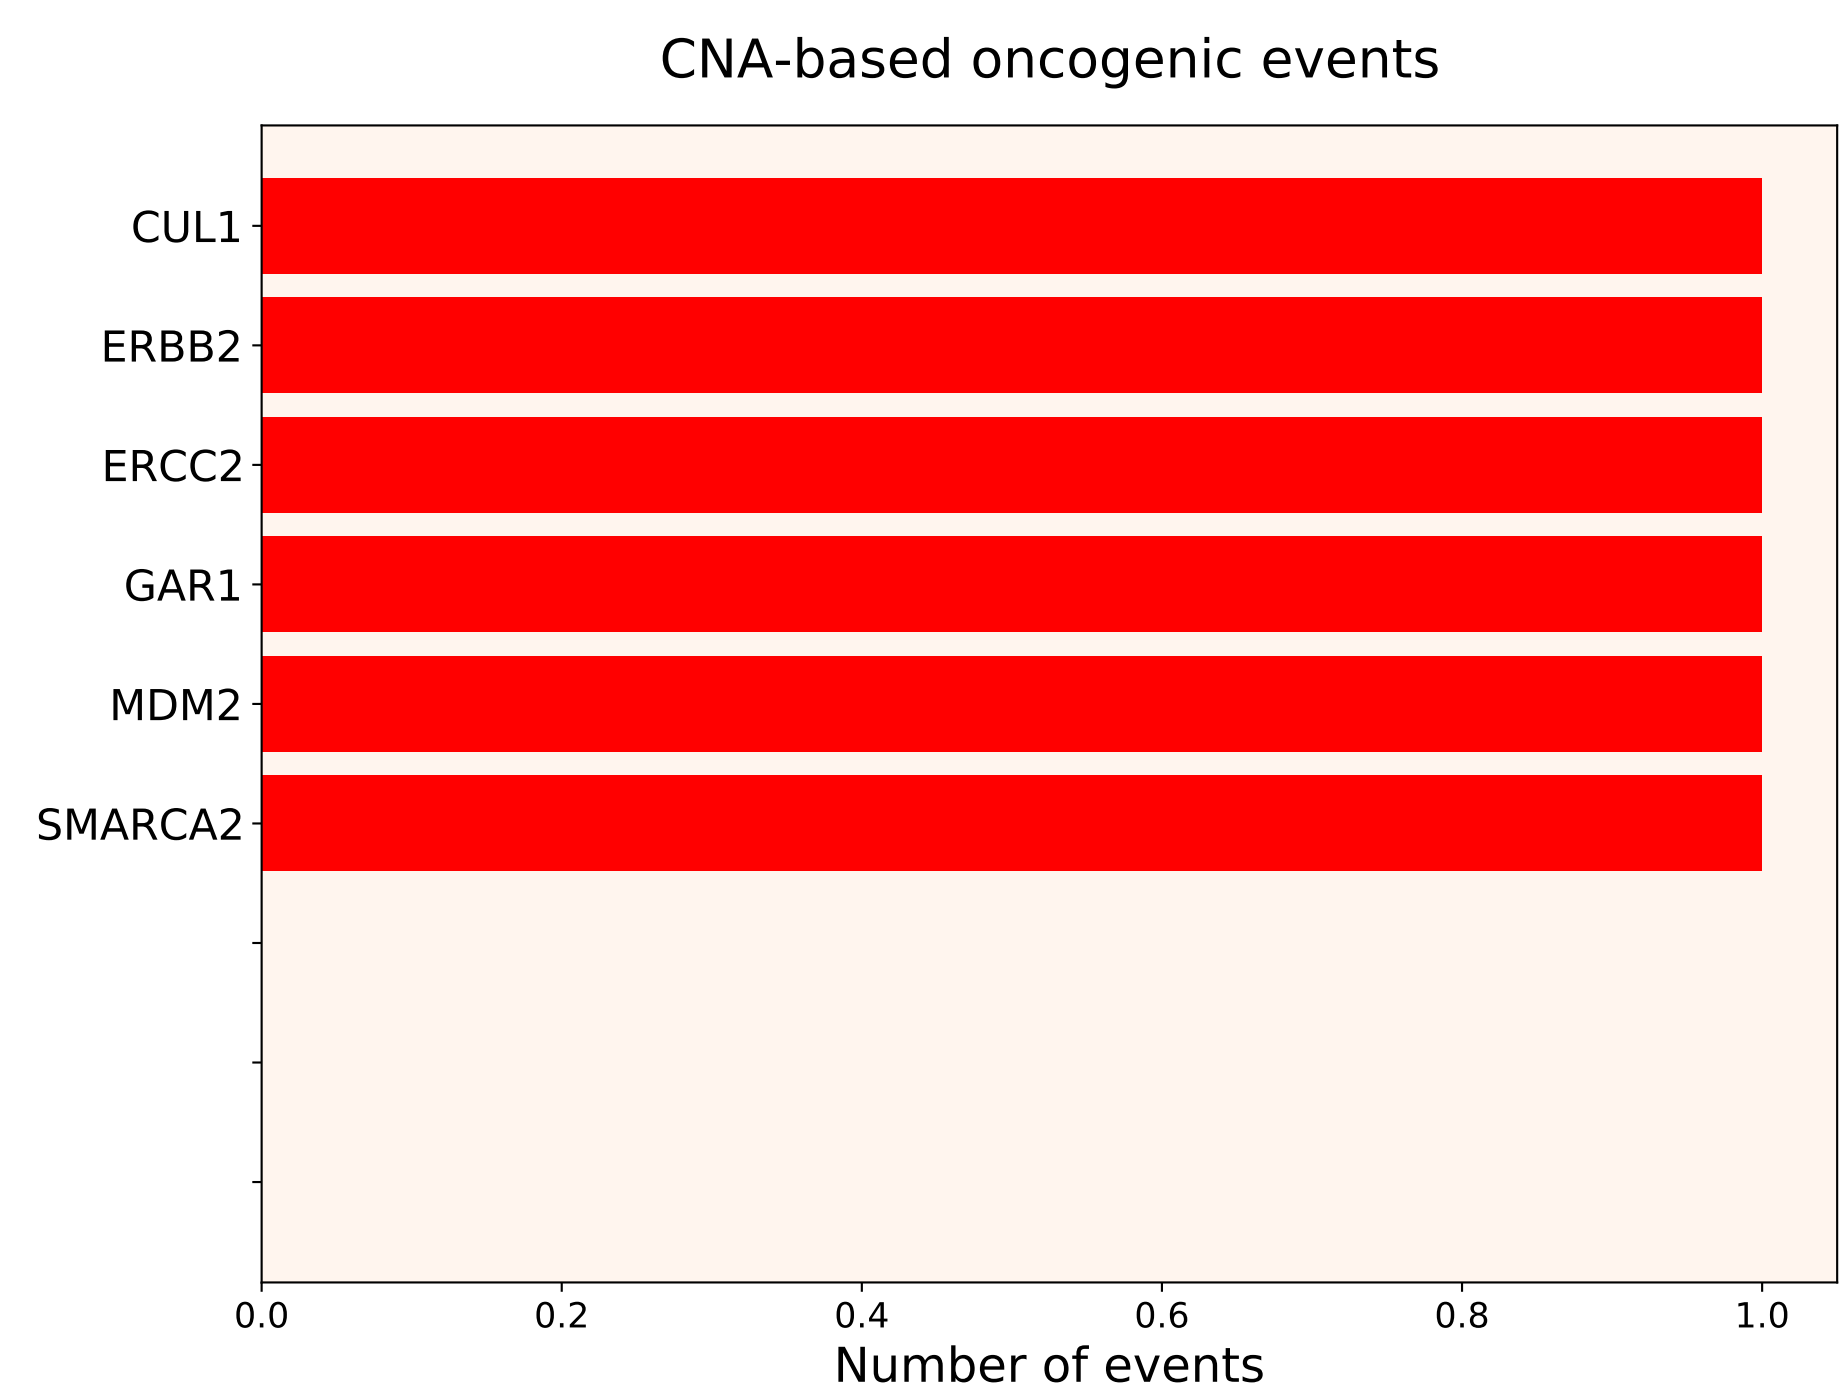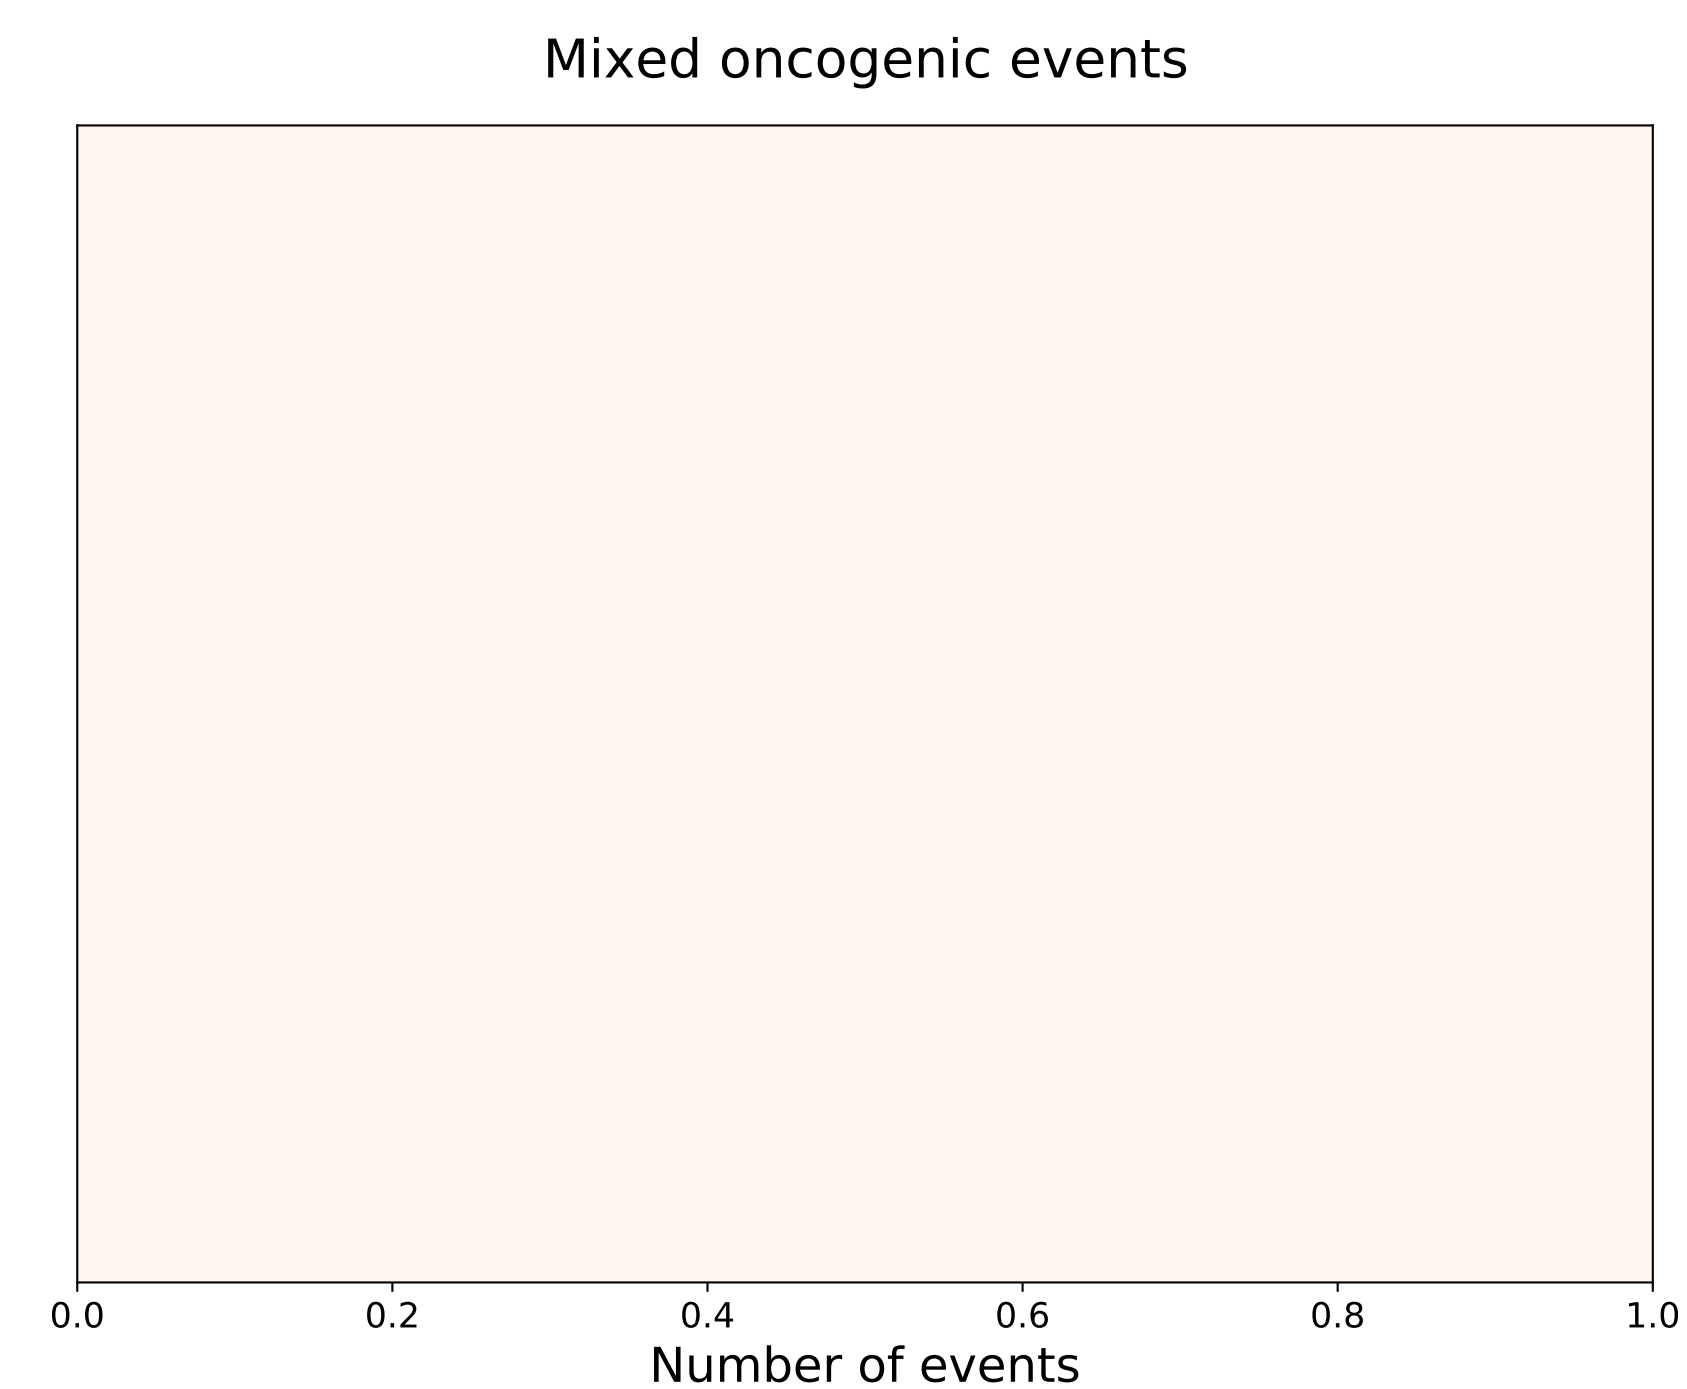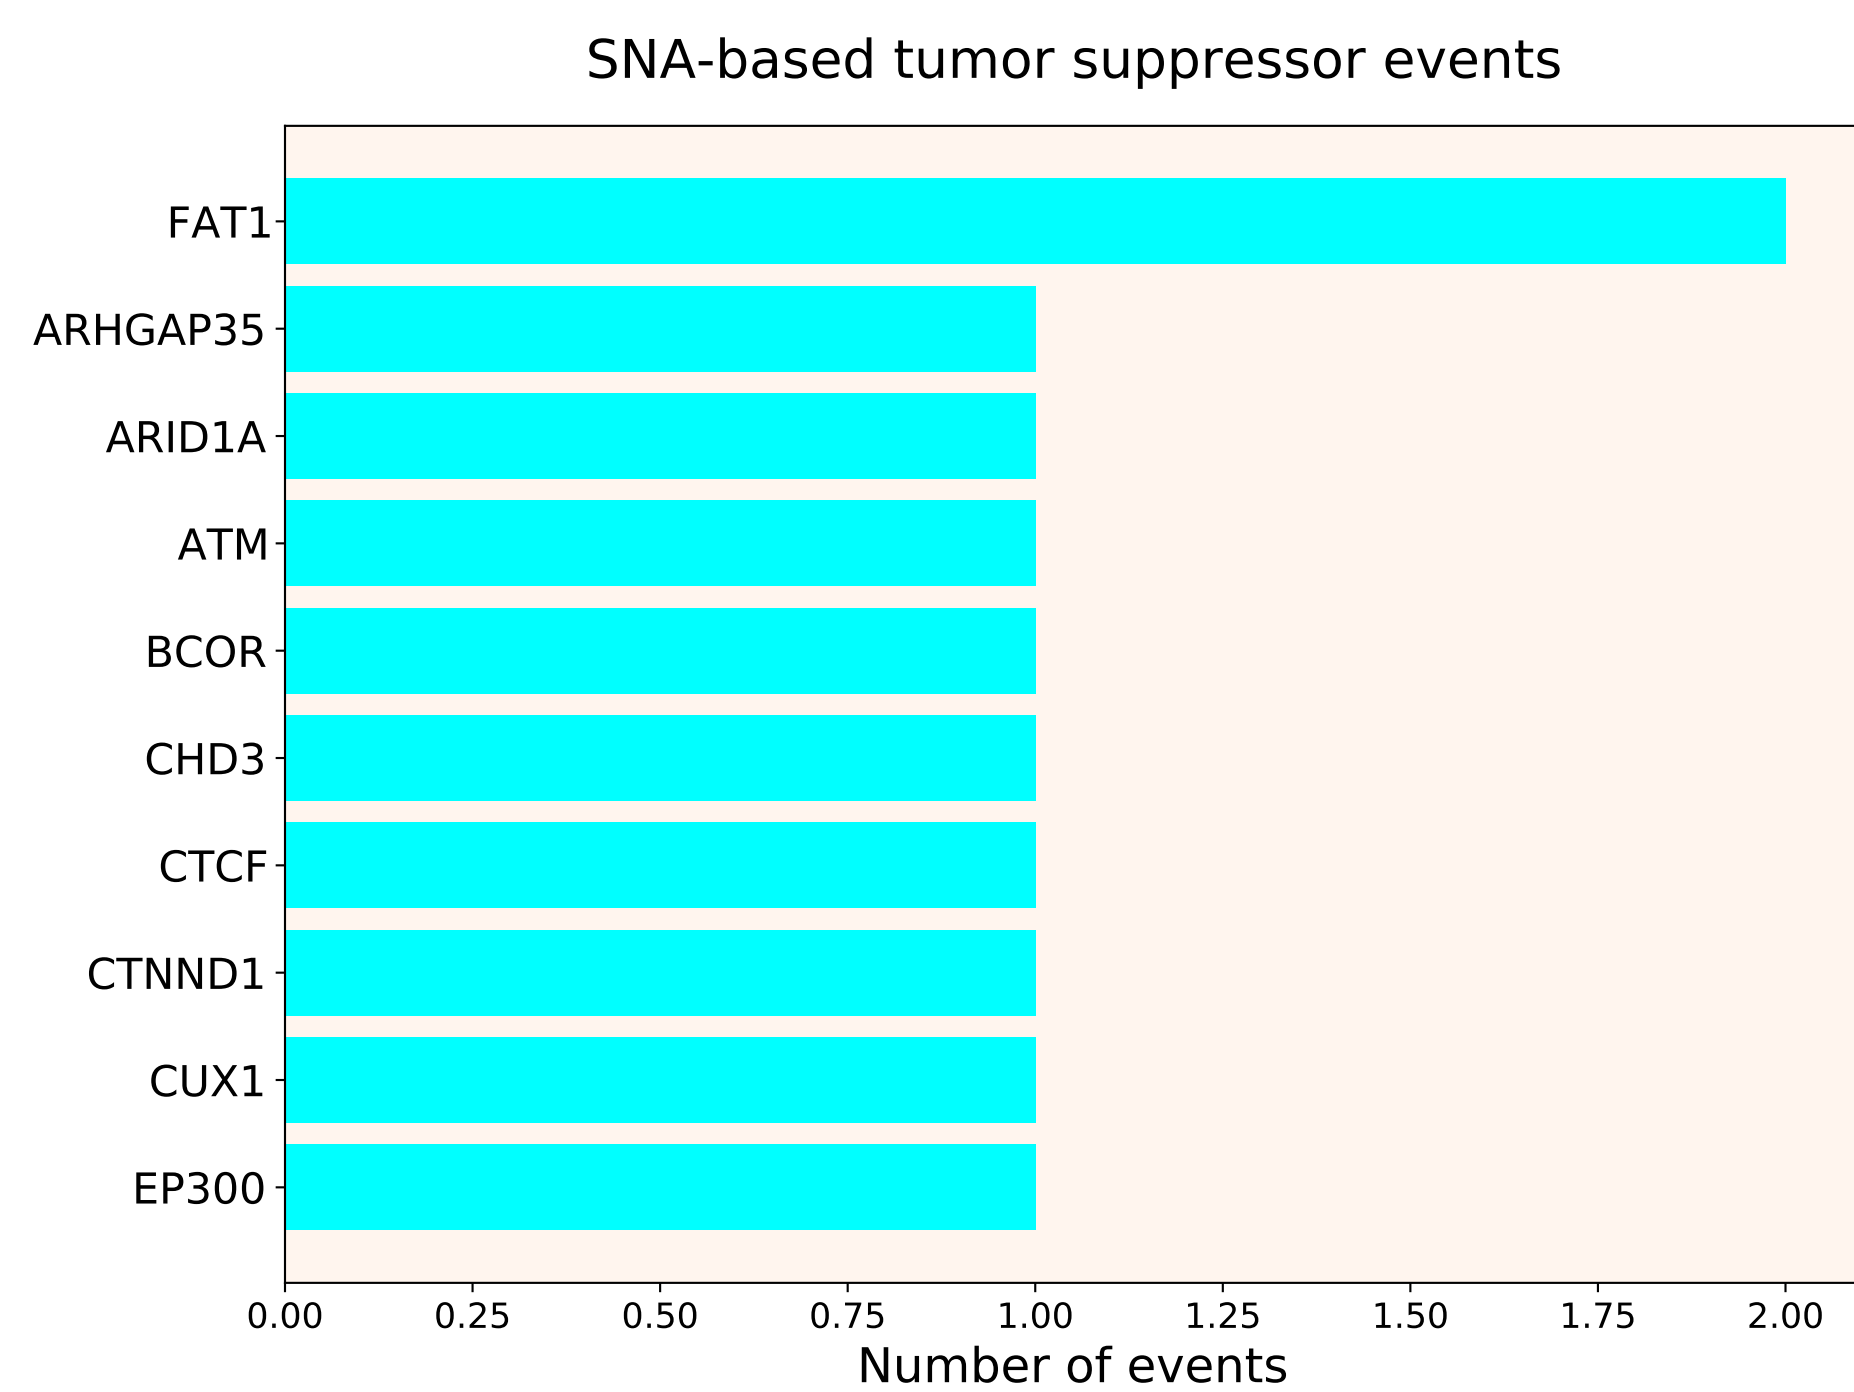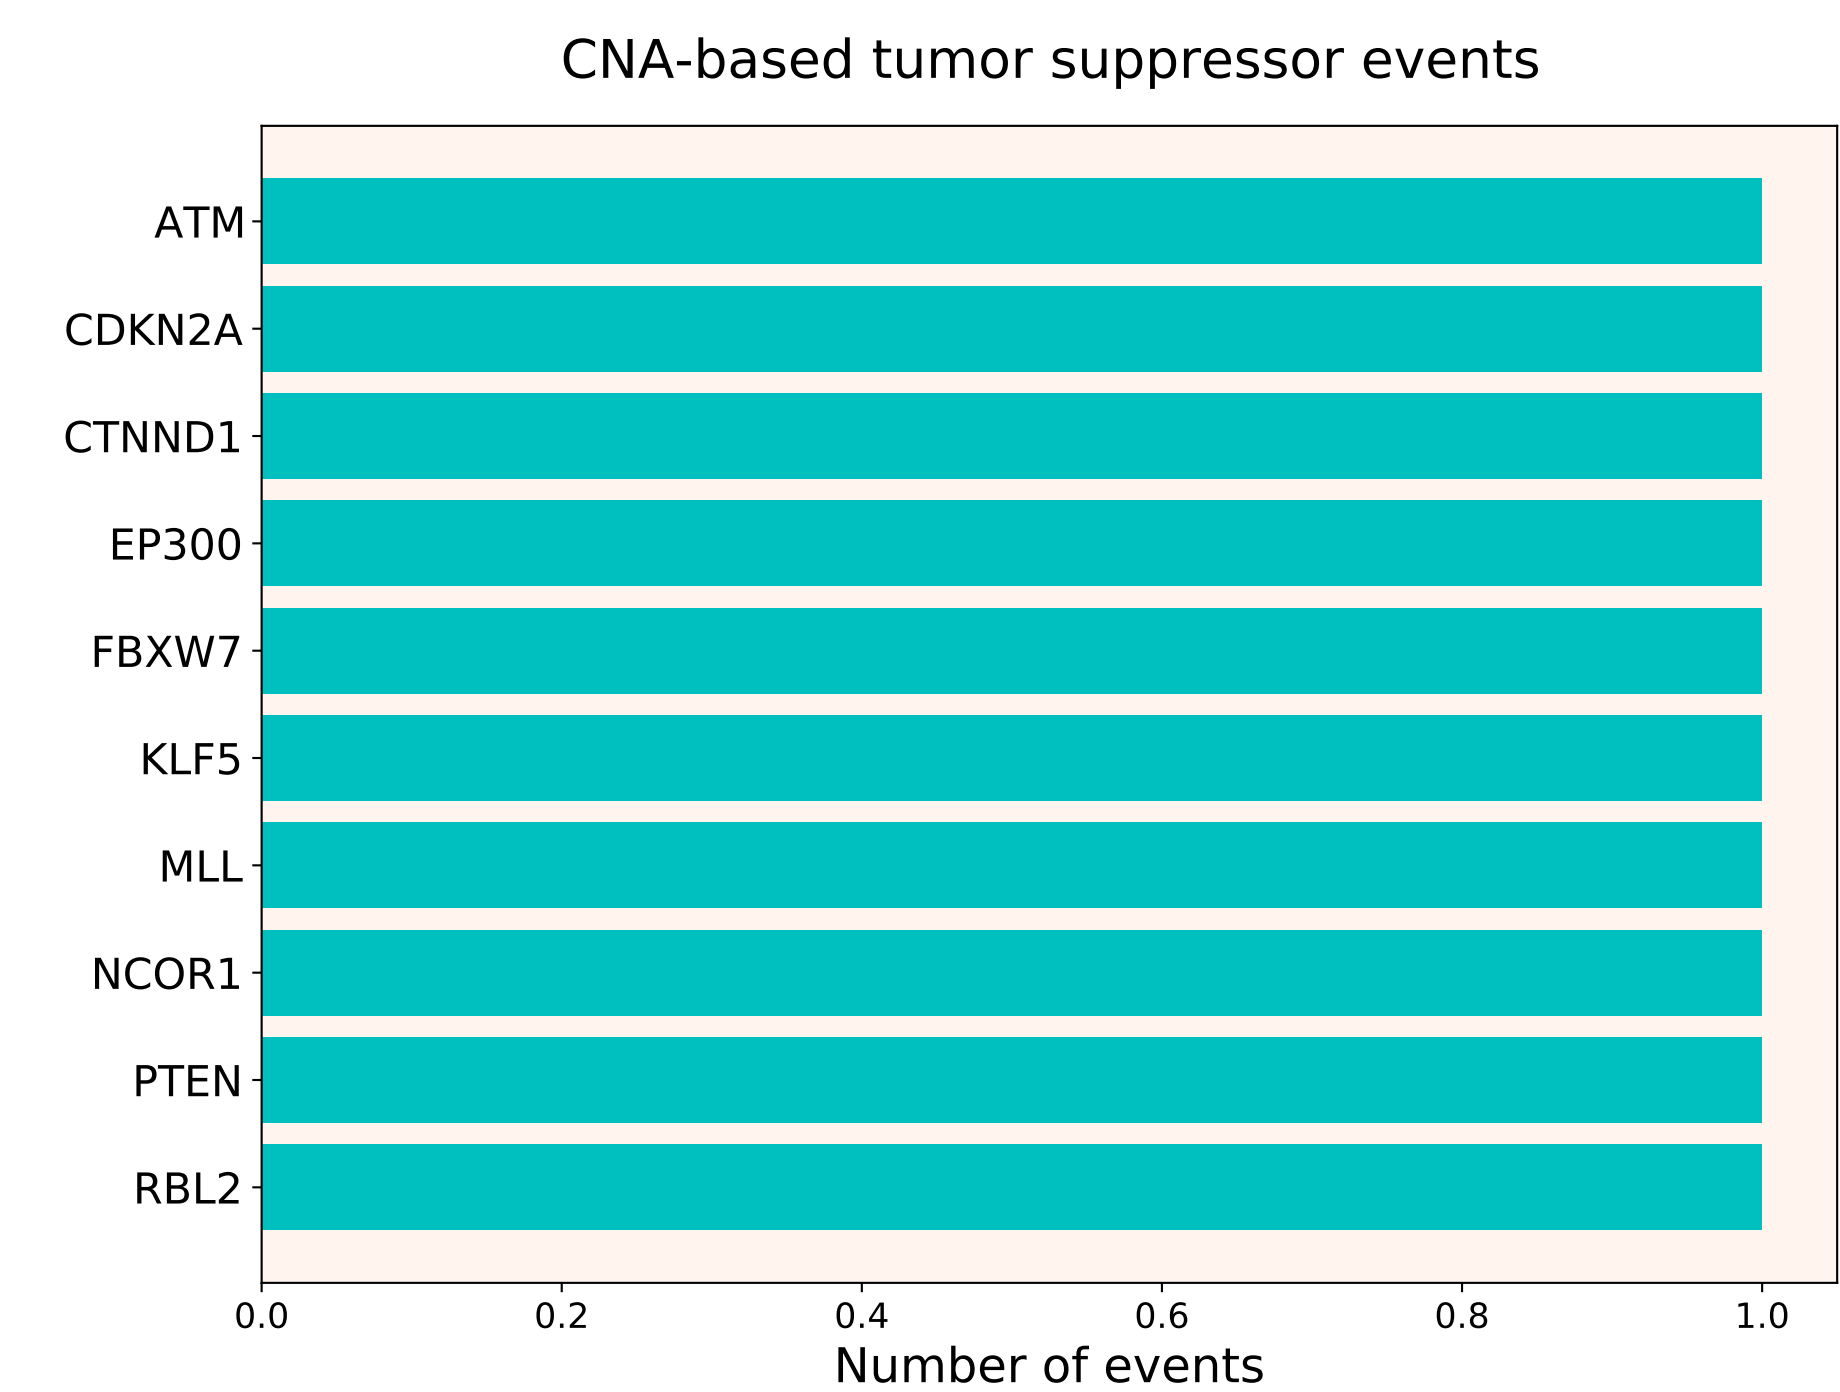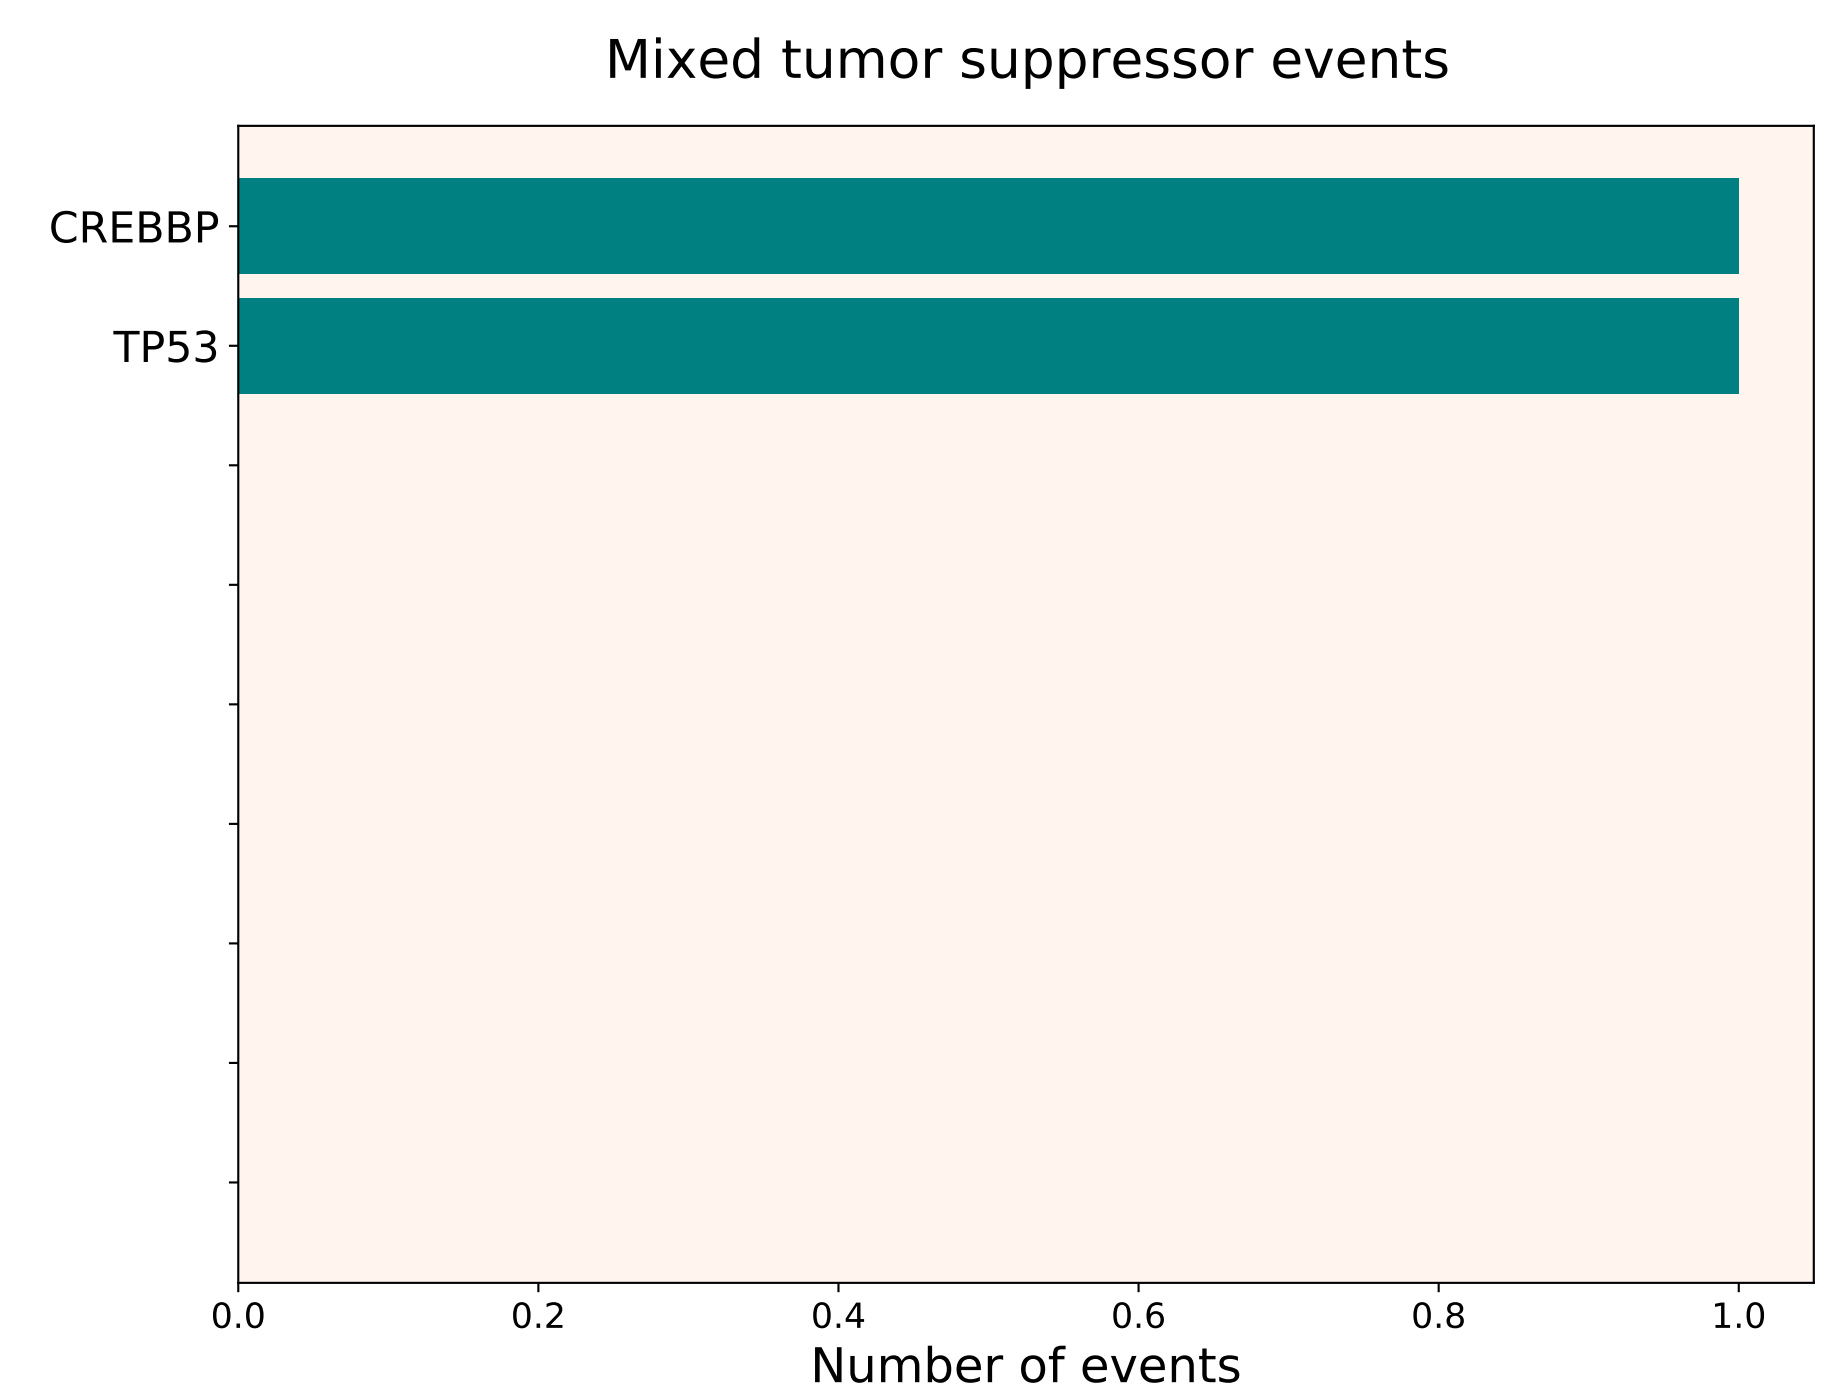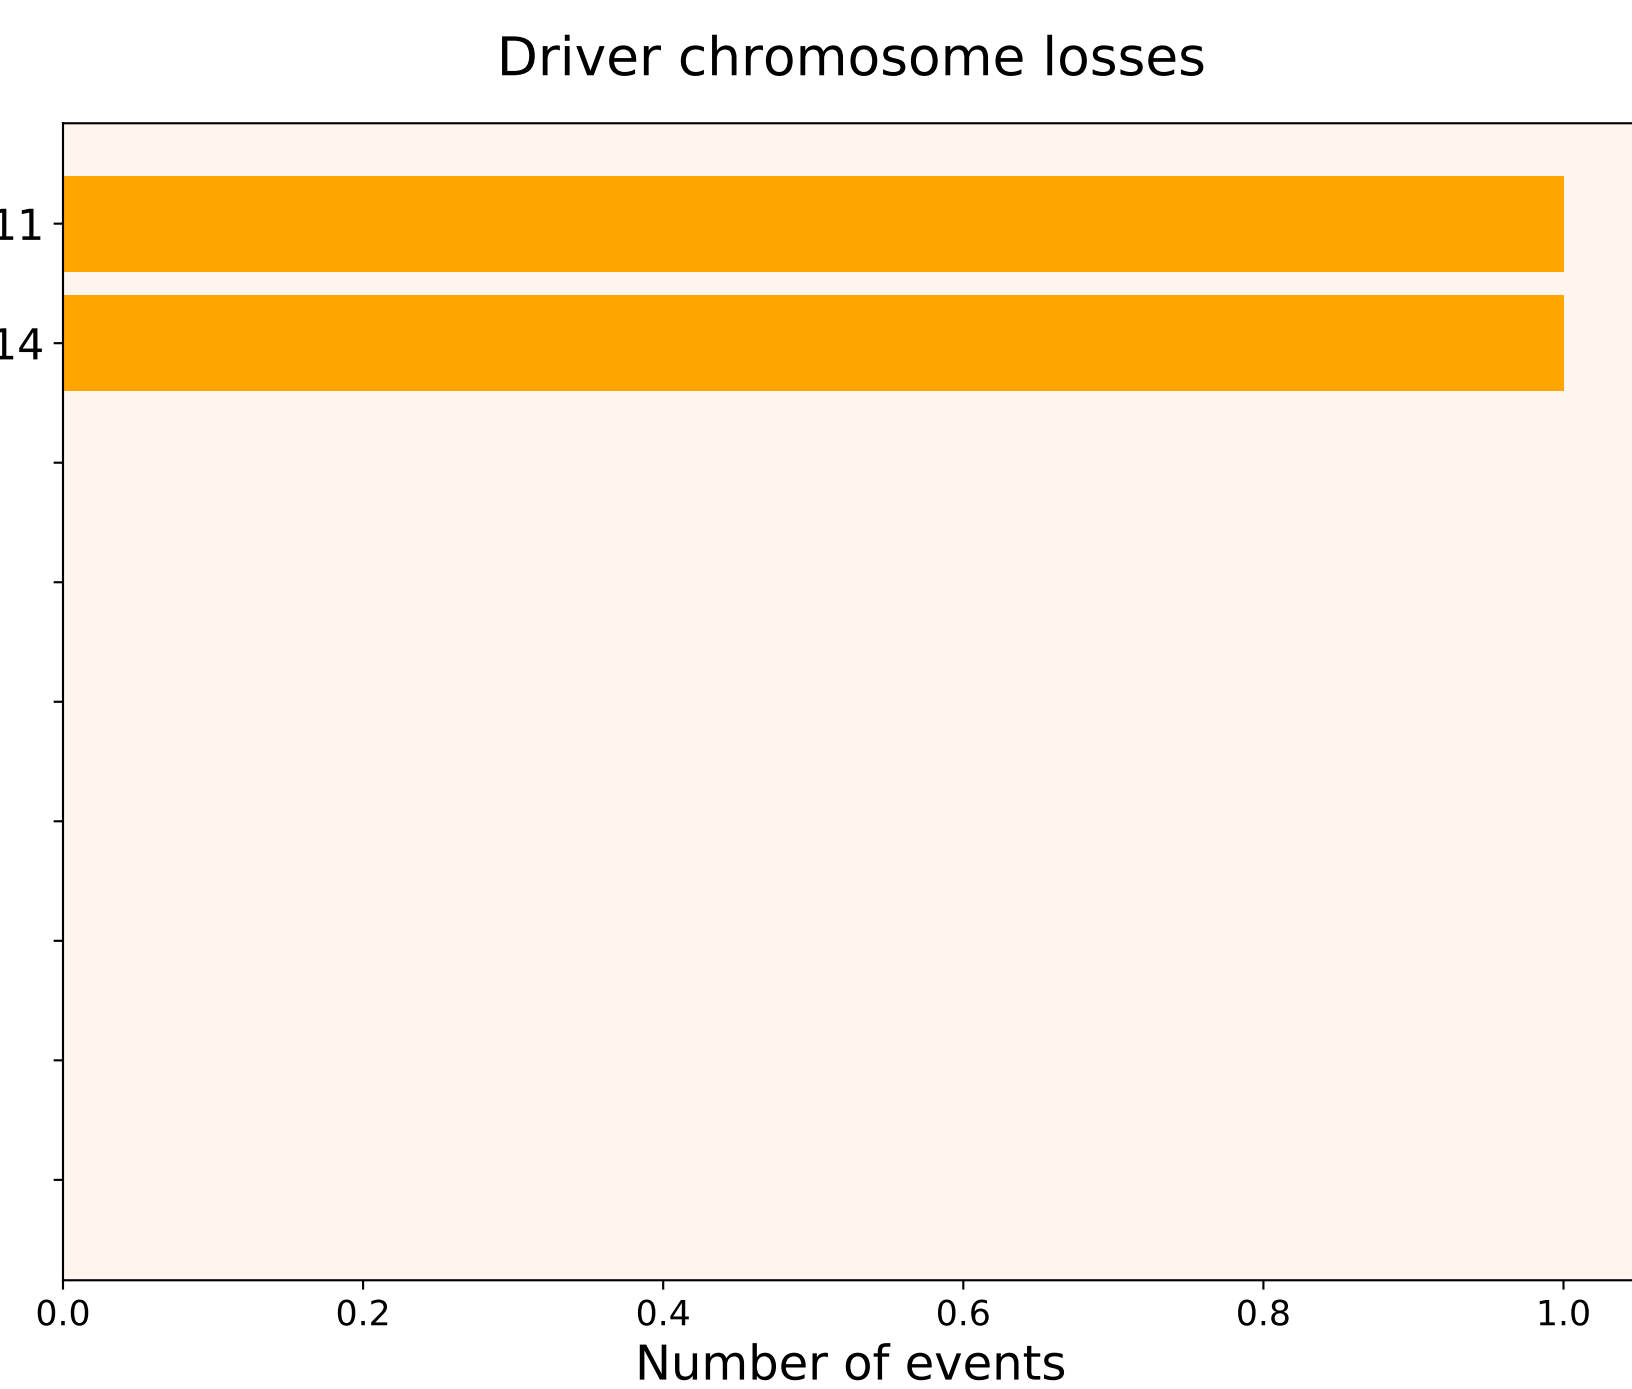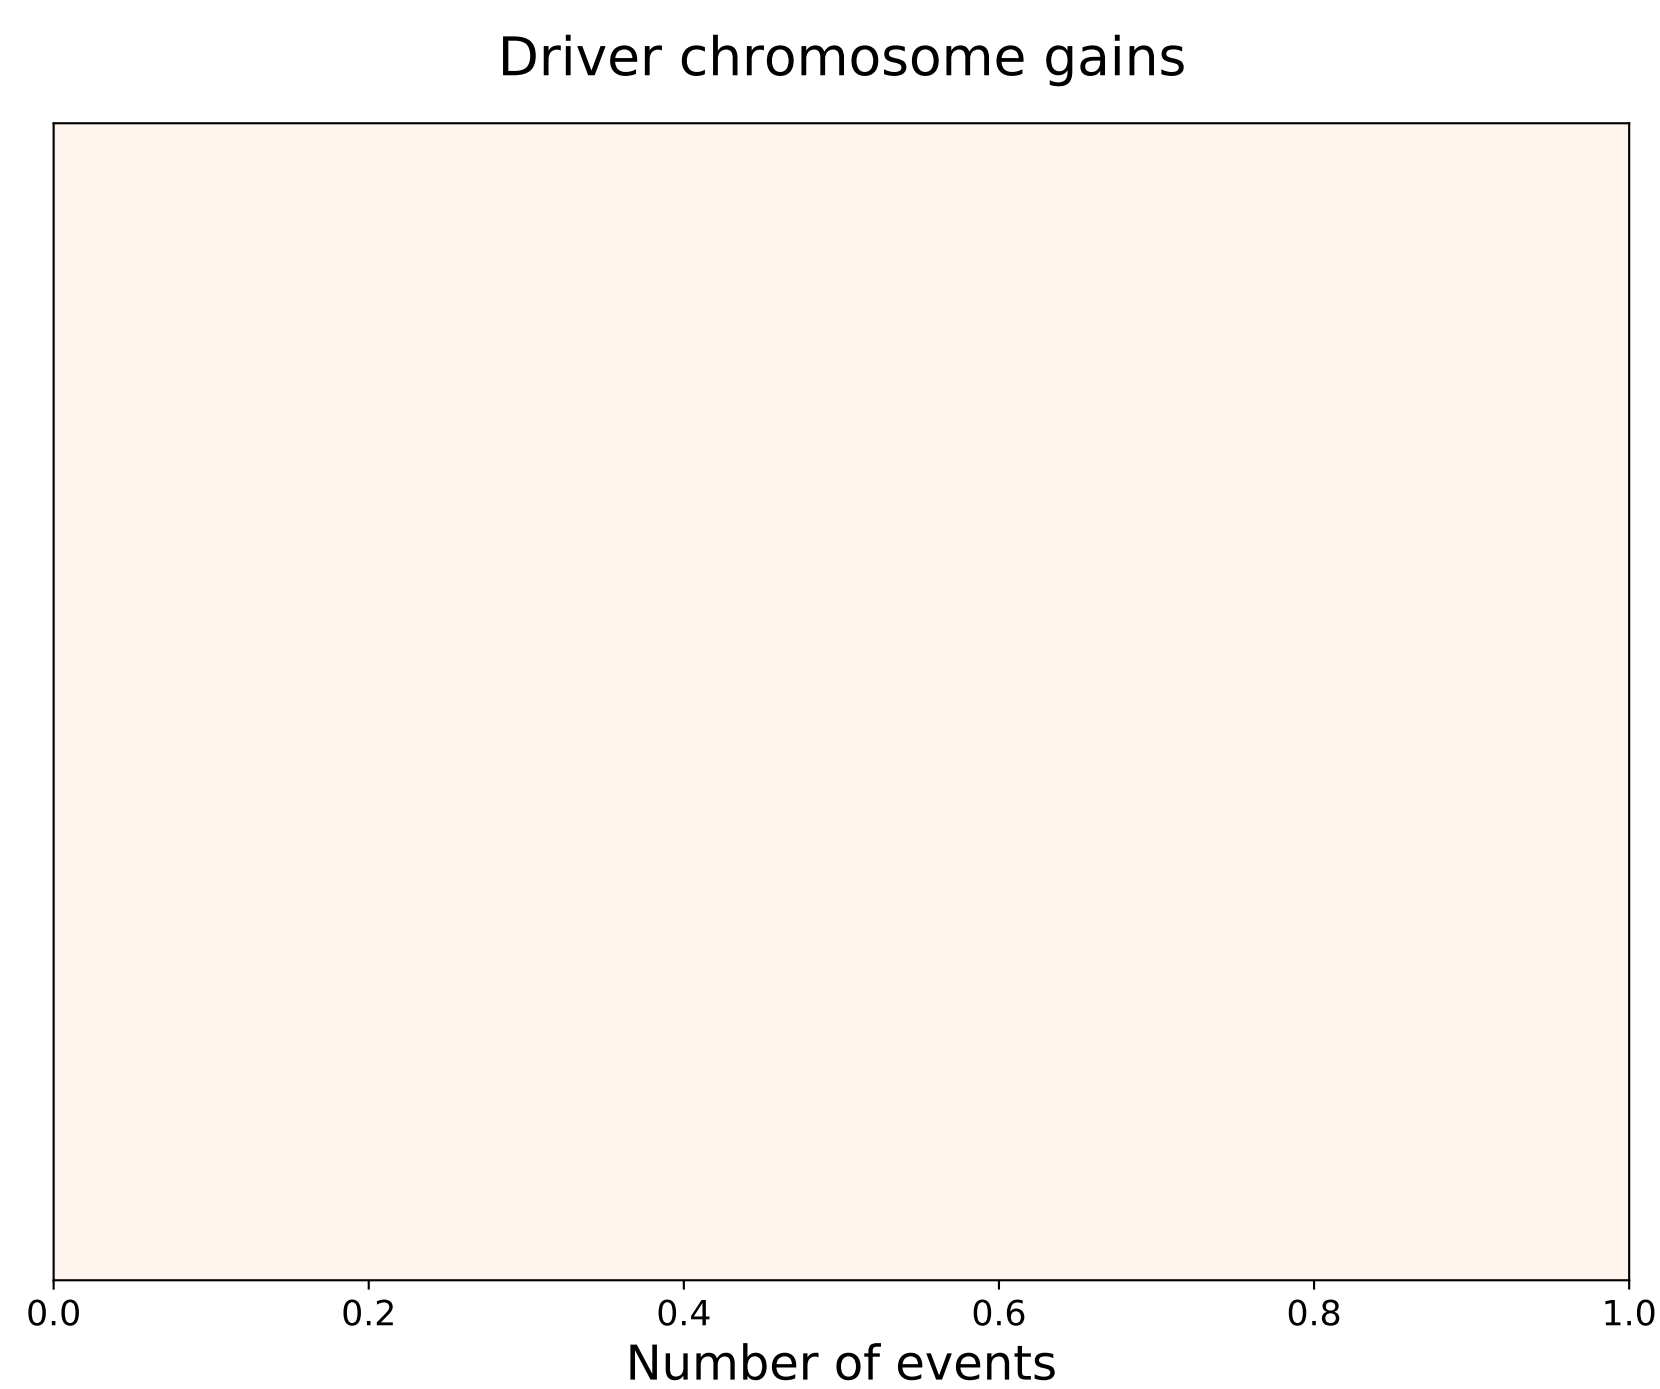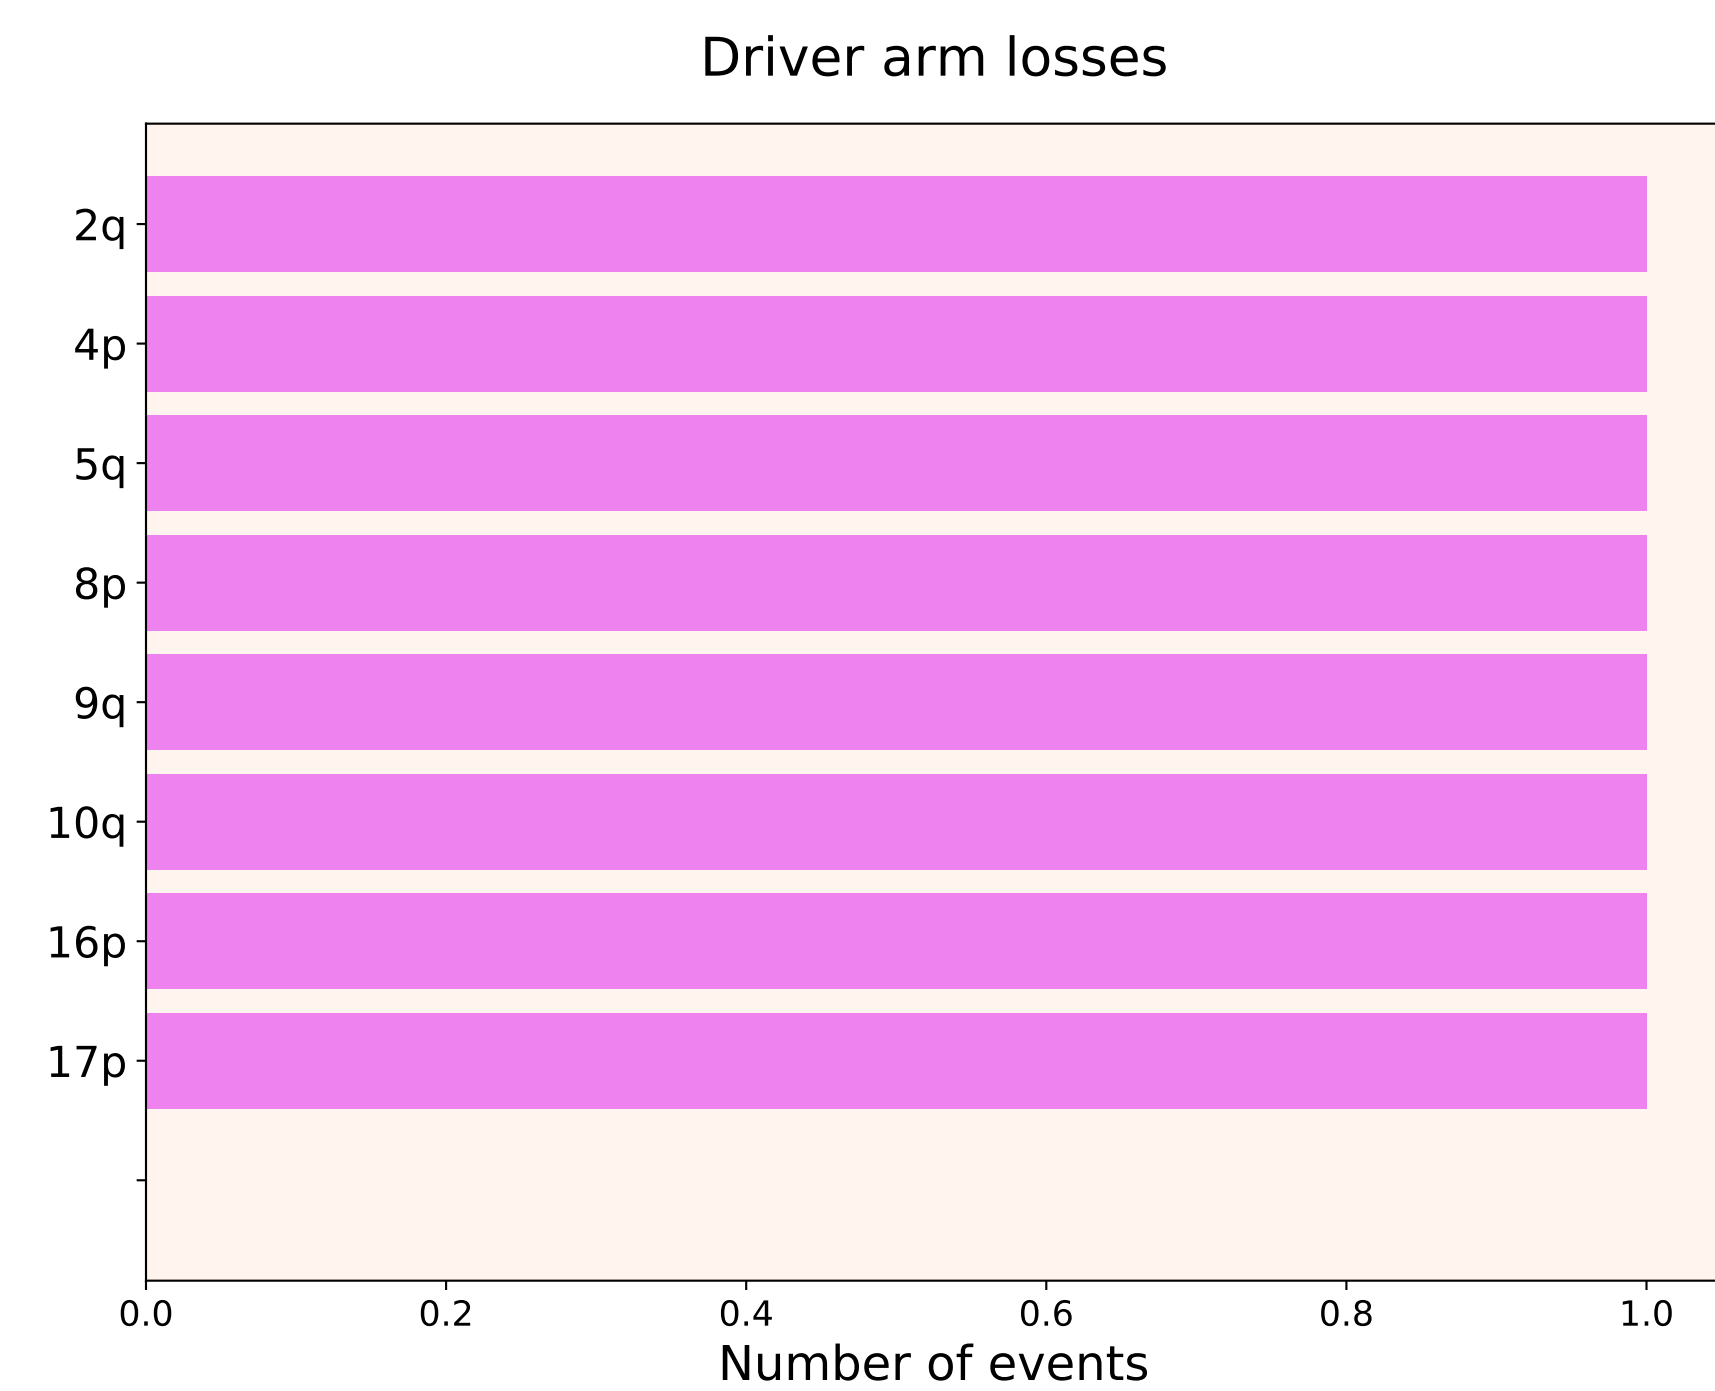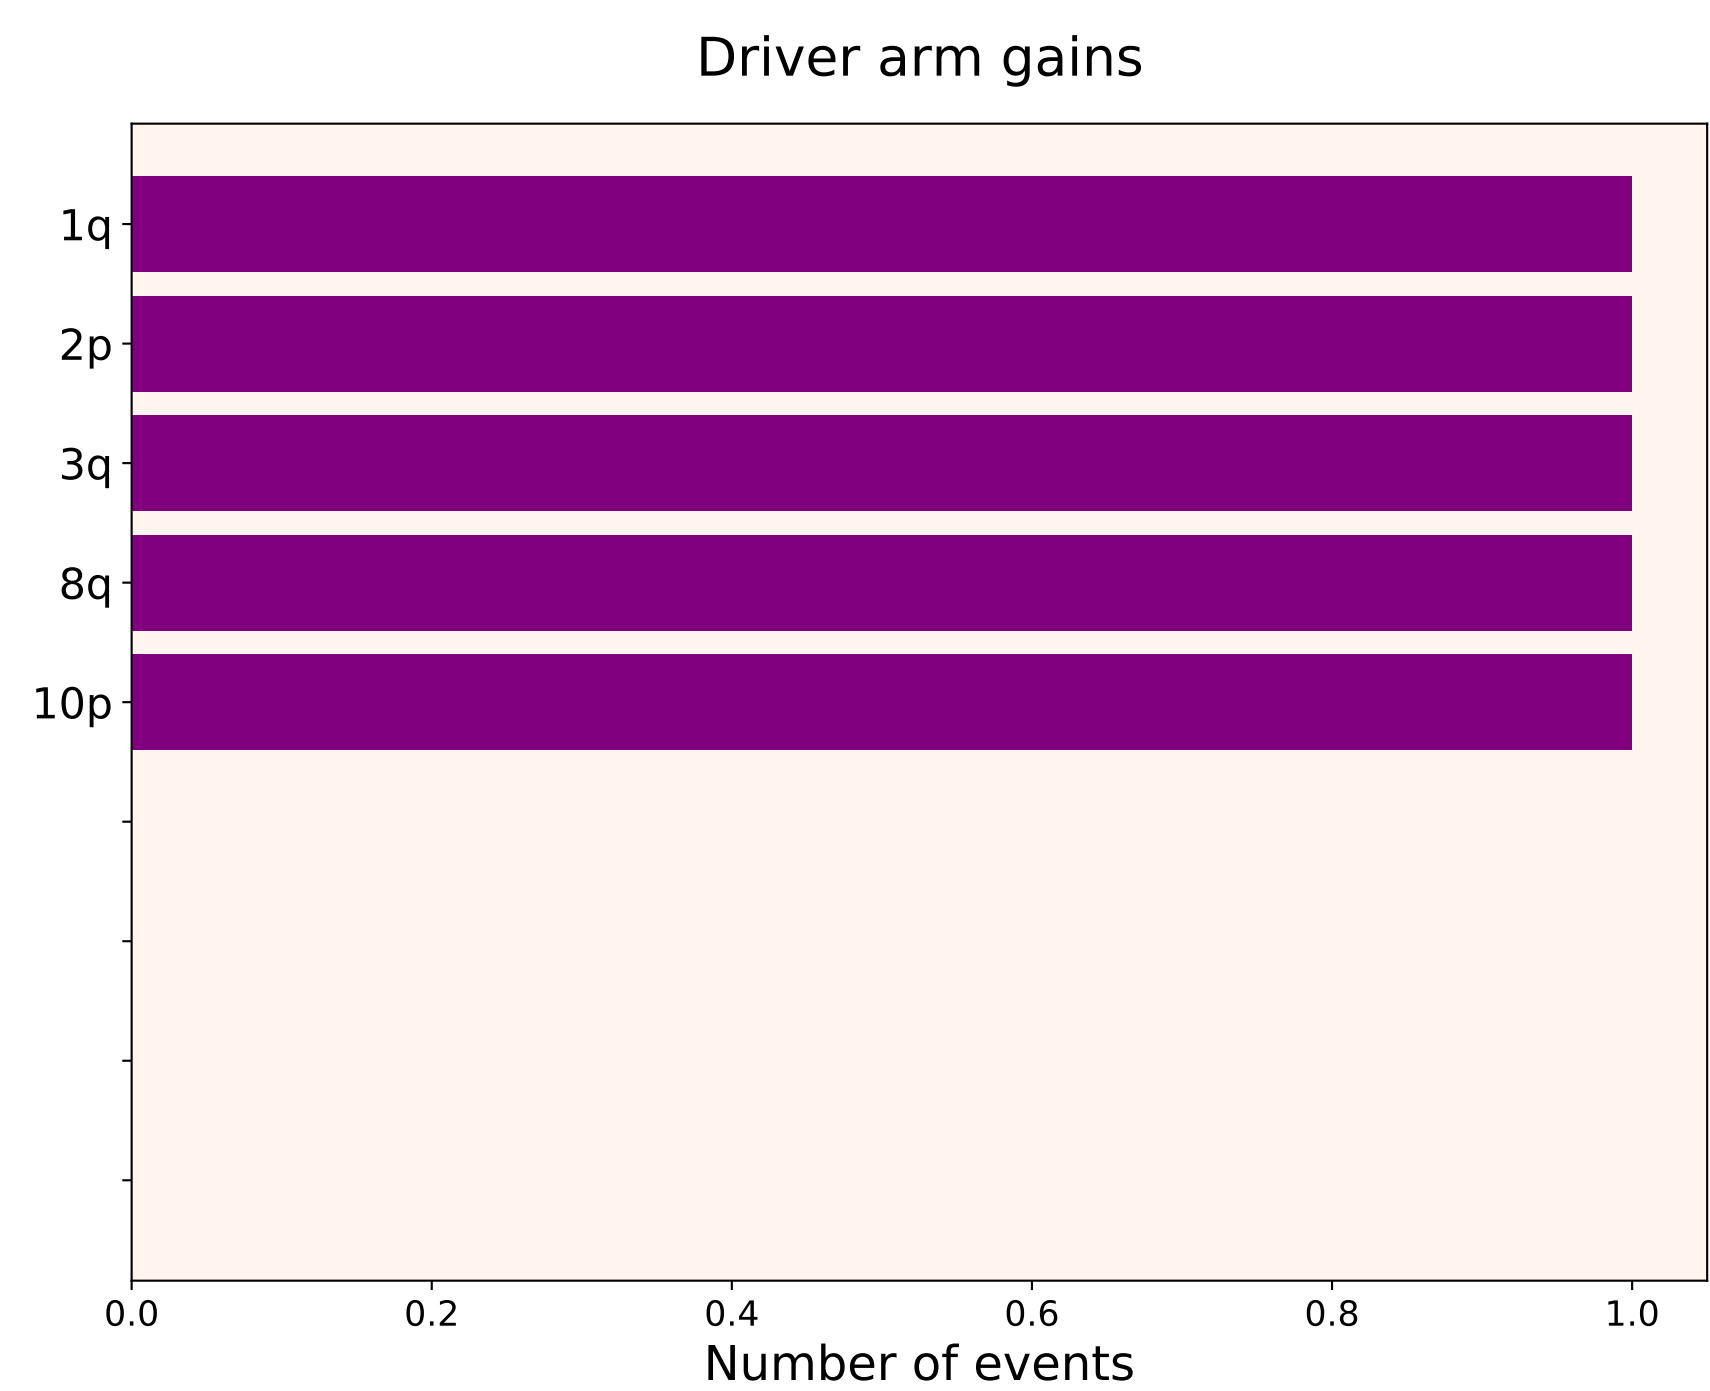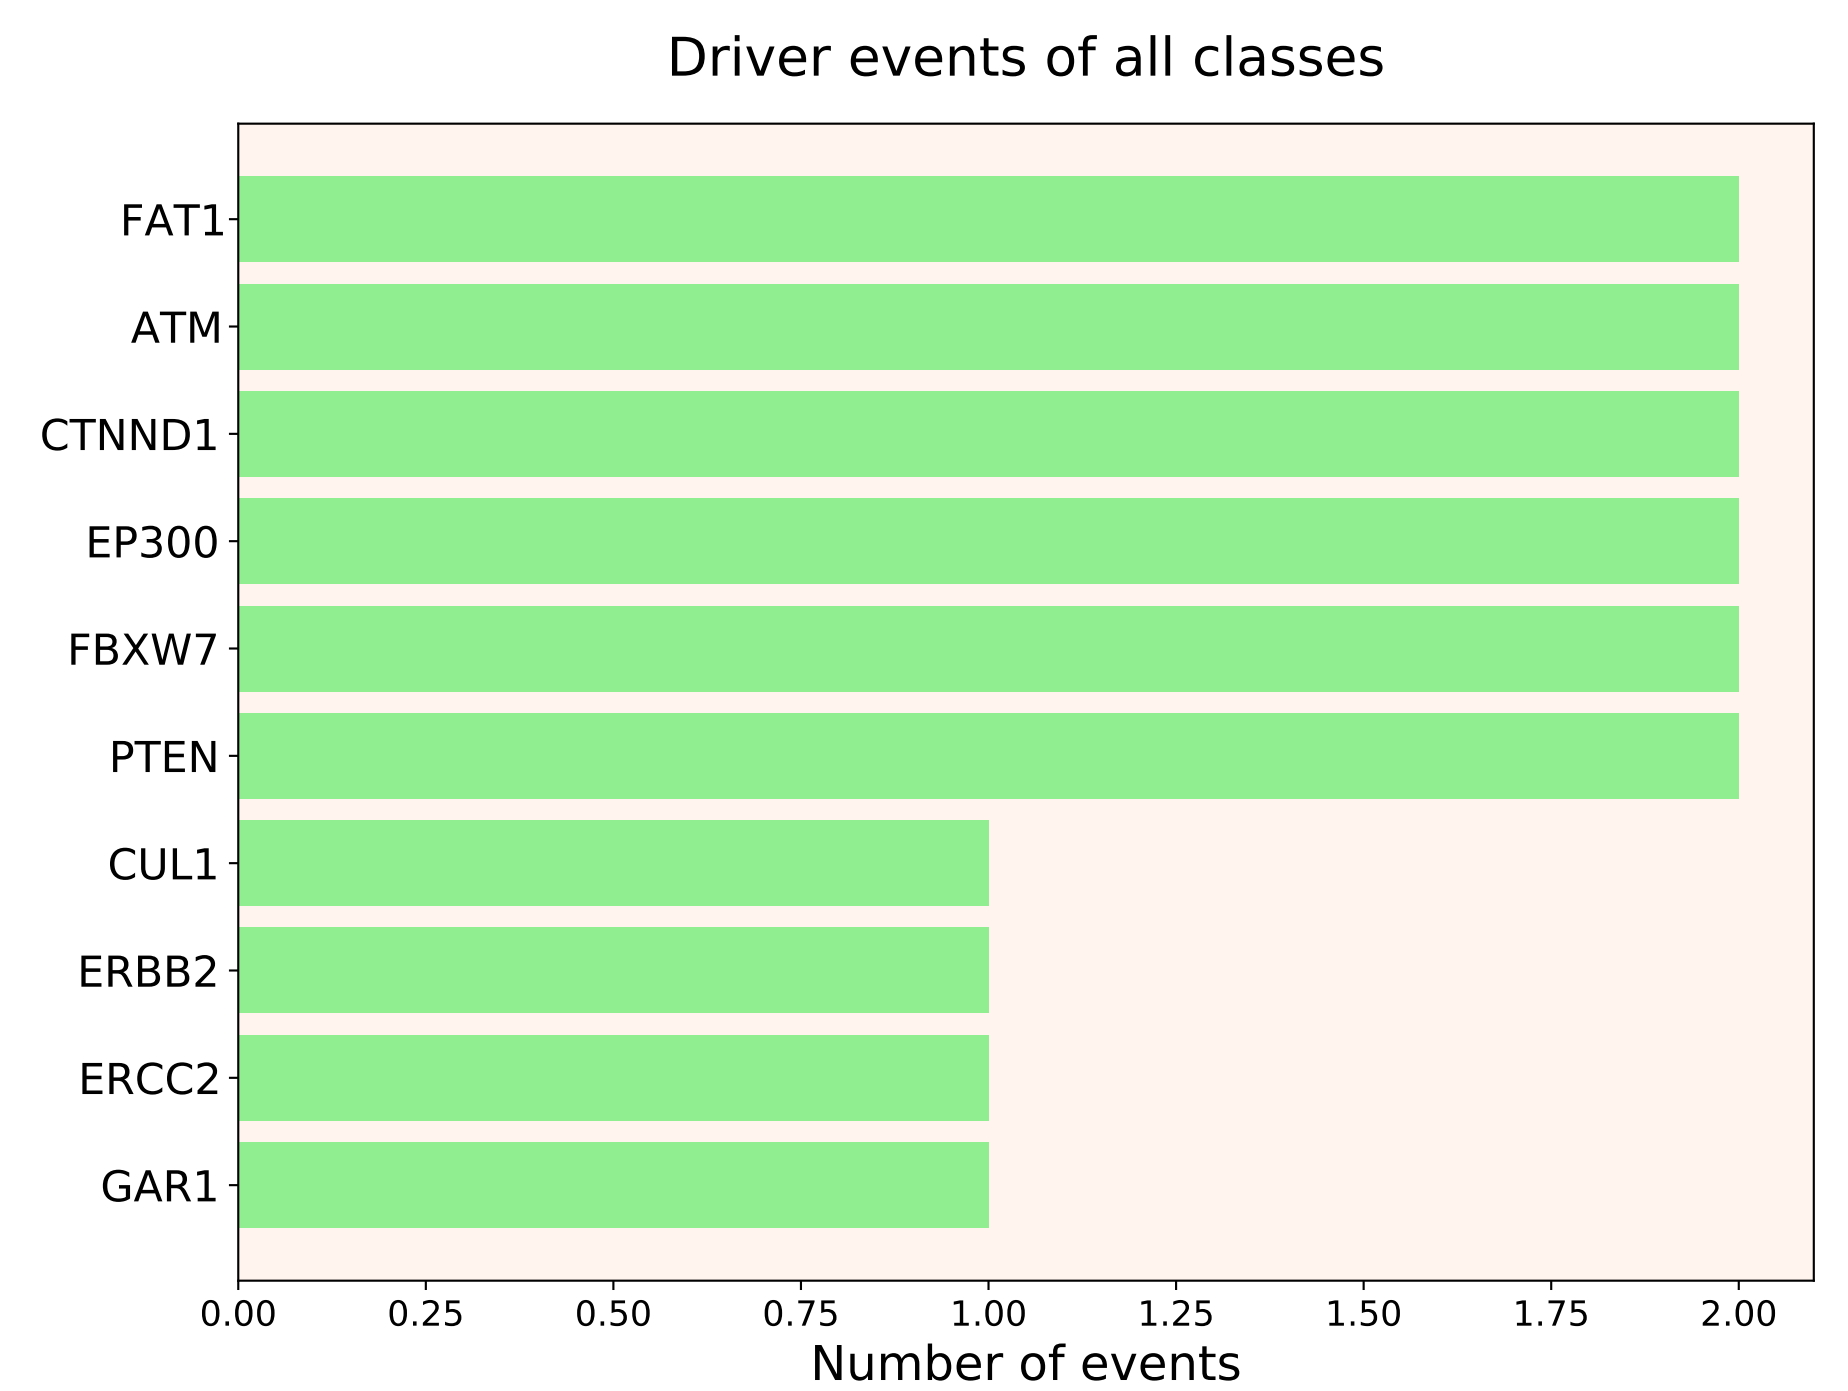

Supplement: Supplemental_Data_S1.zip [file Supplemental_Data_S1.zip]

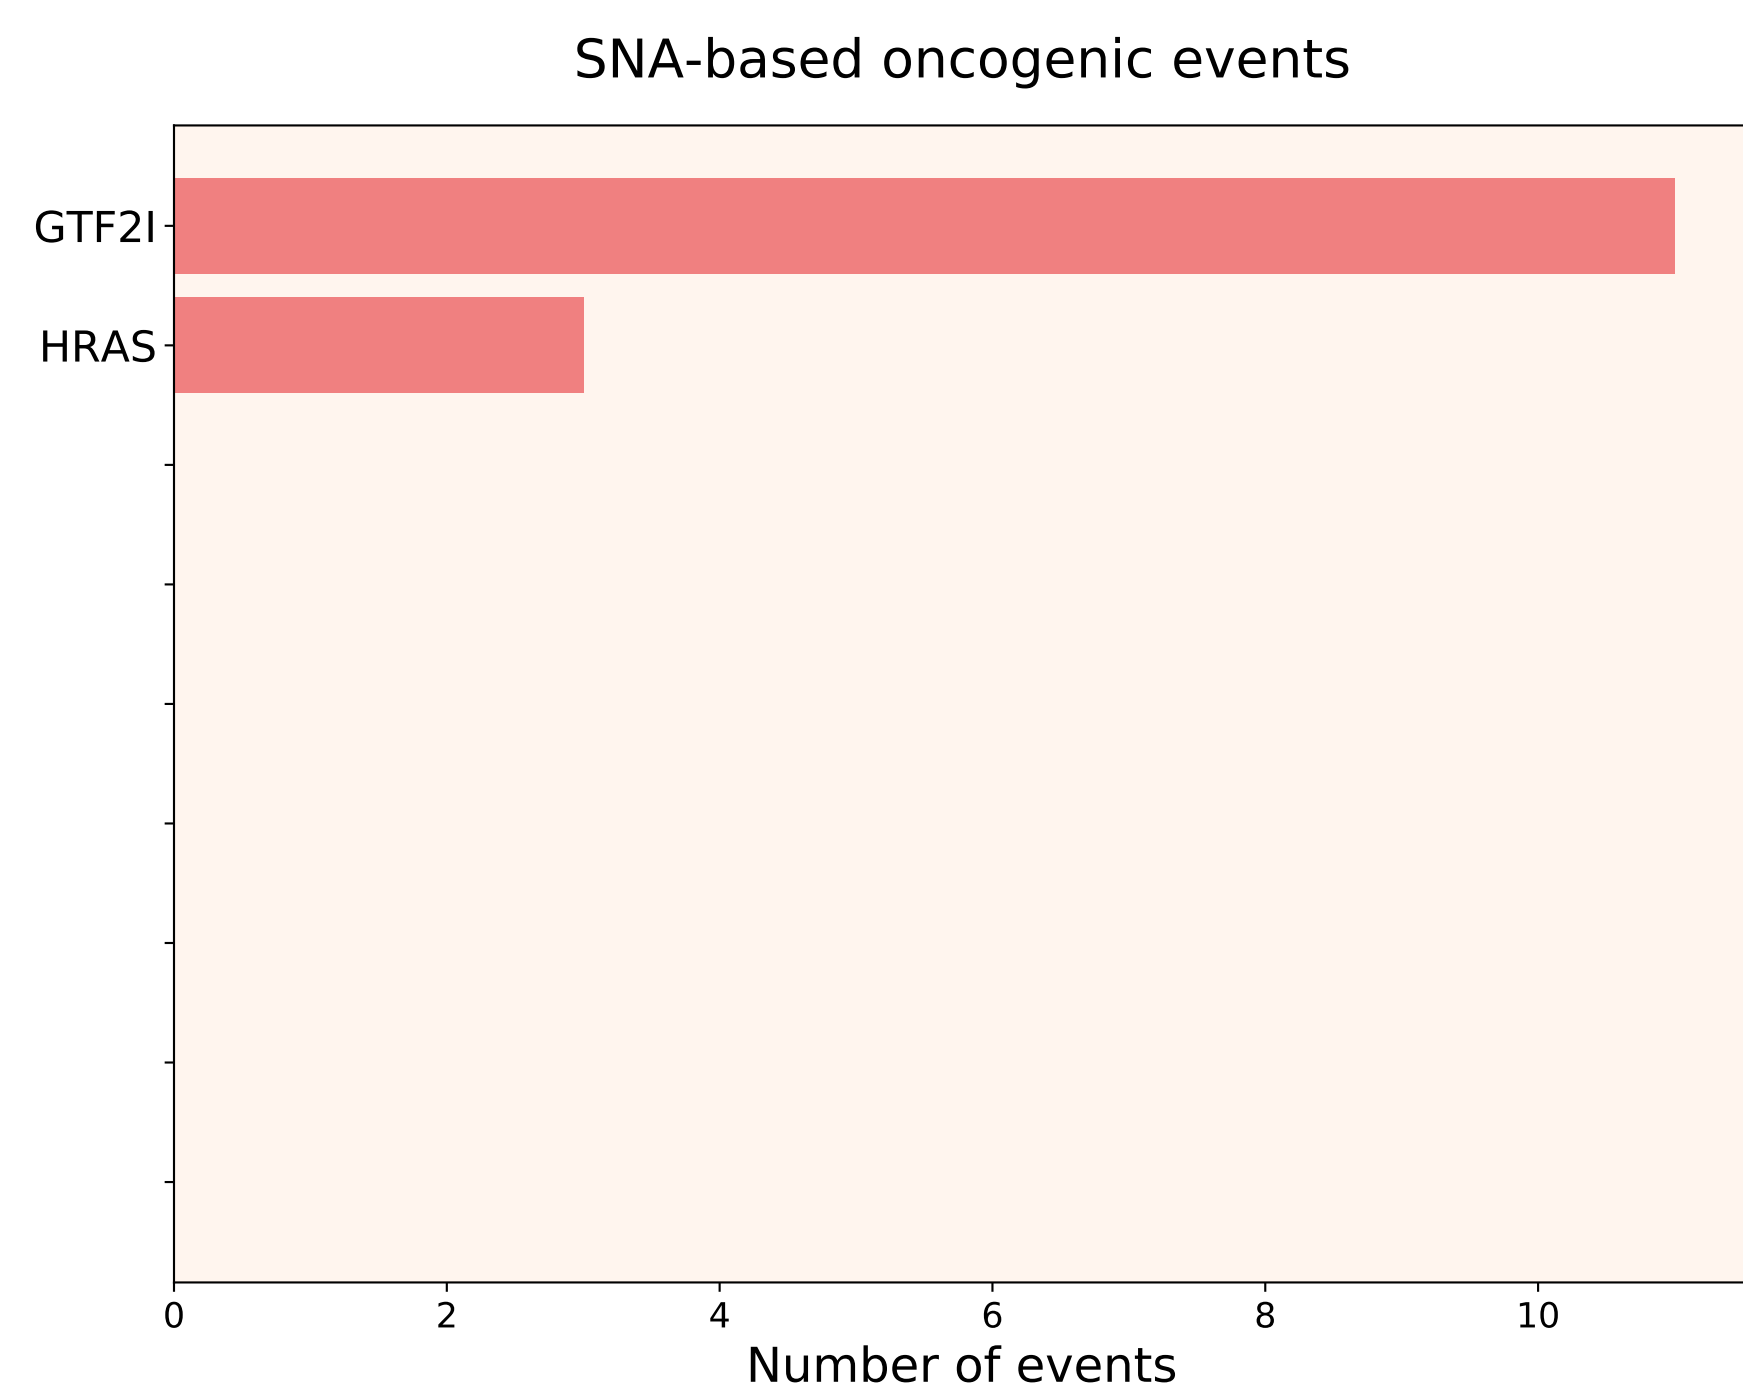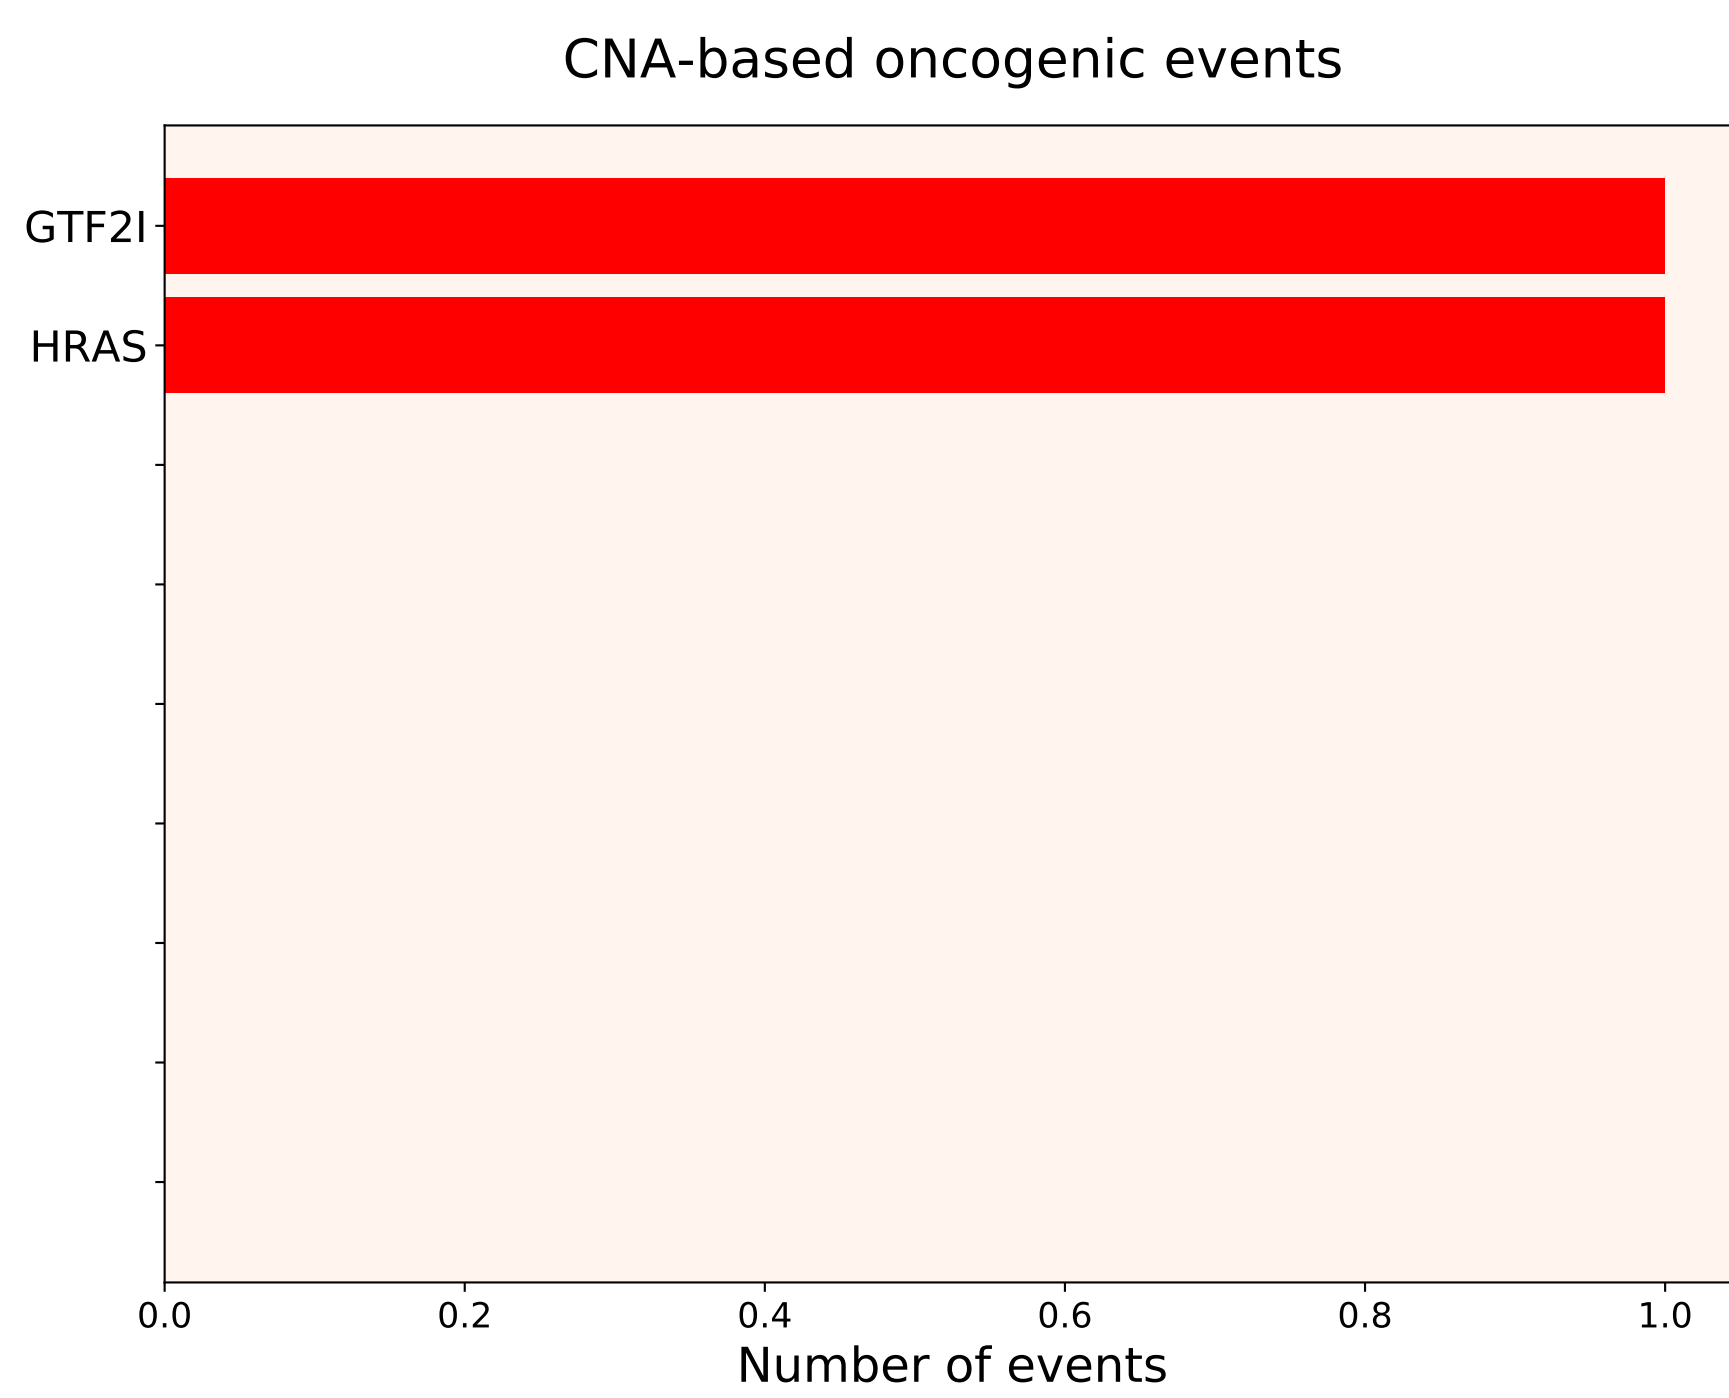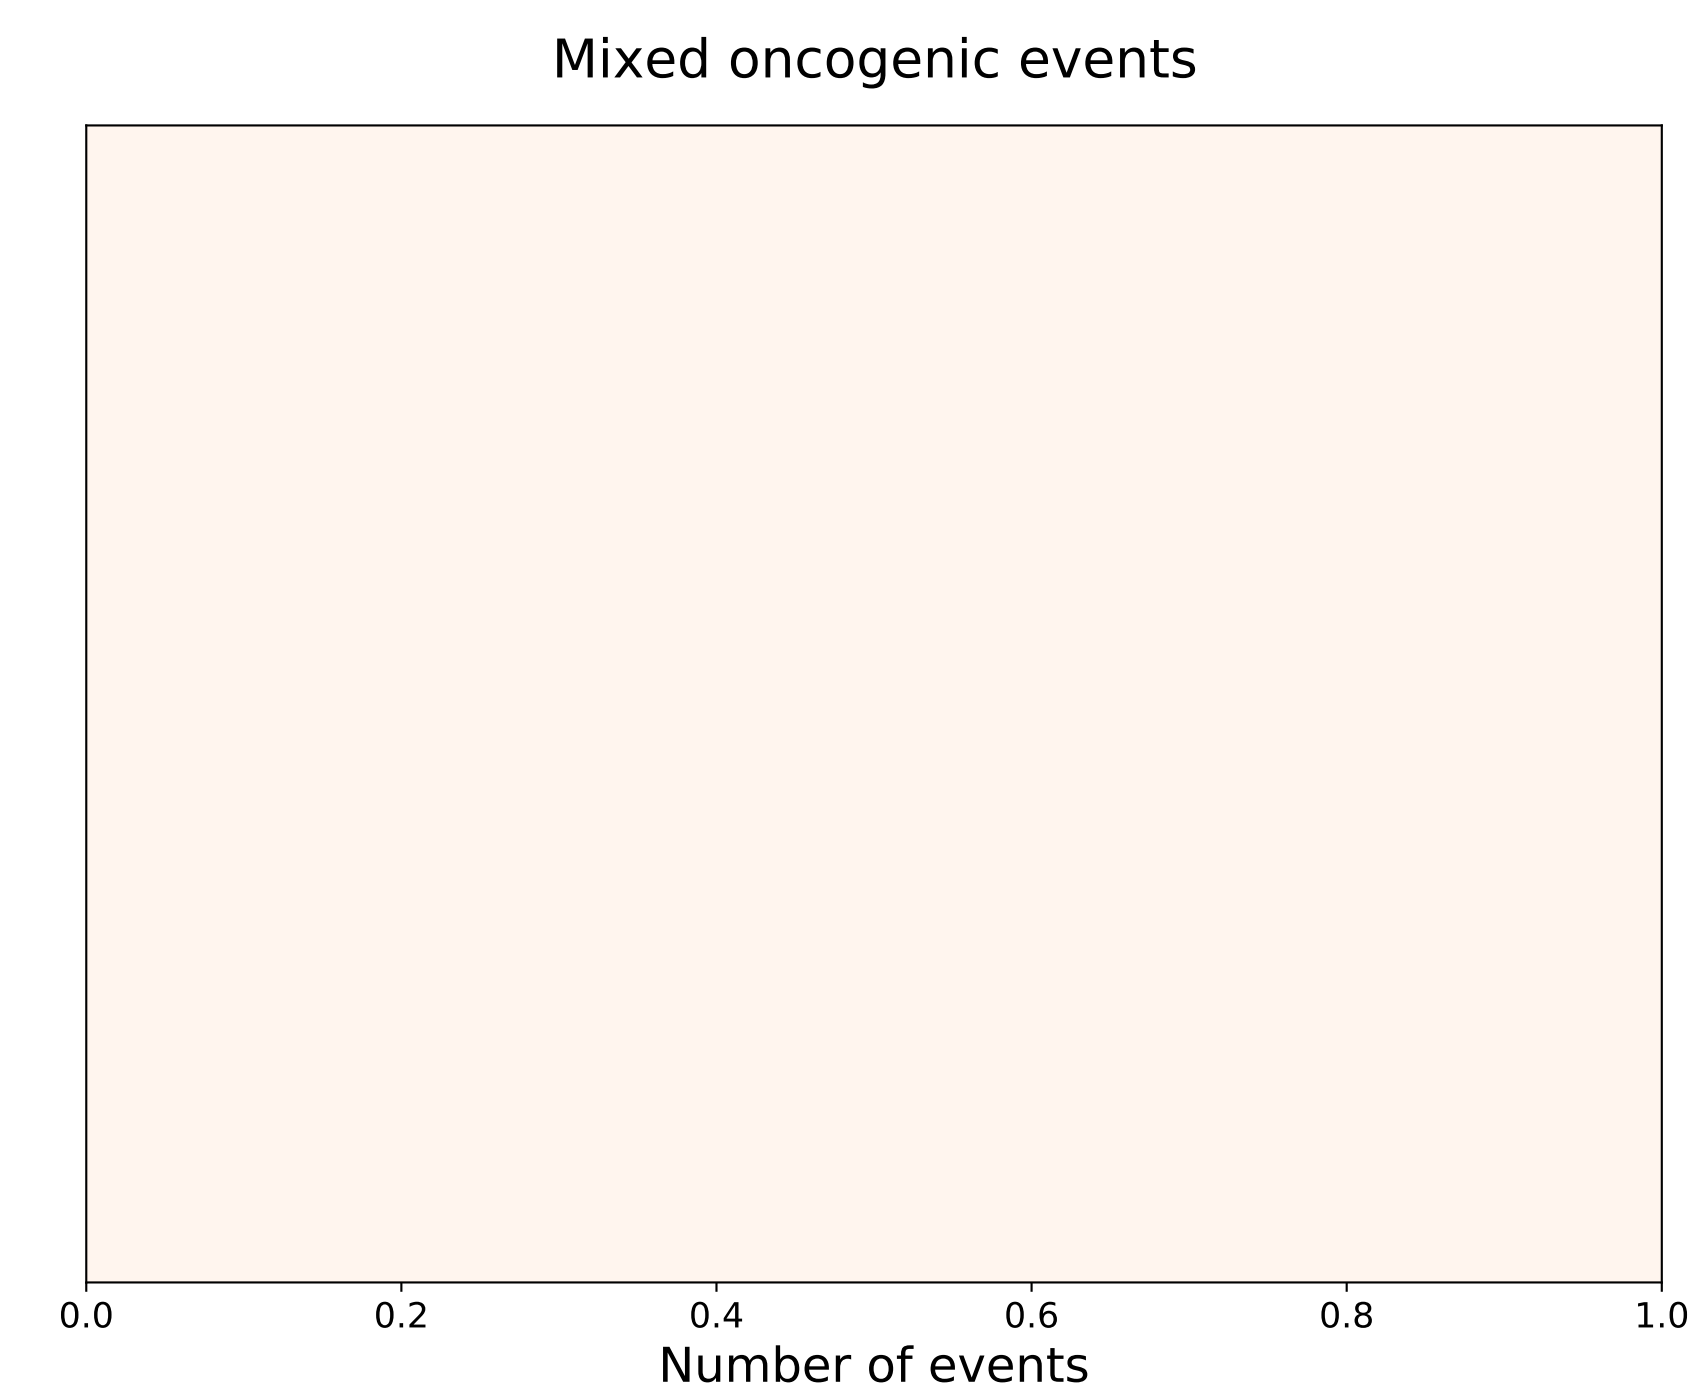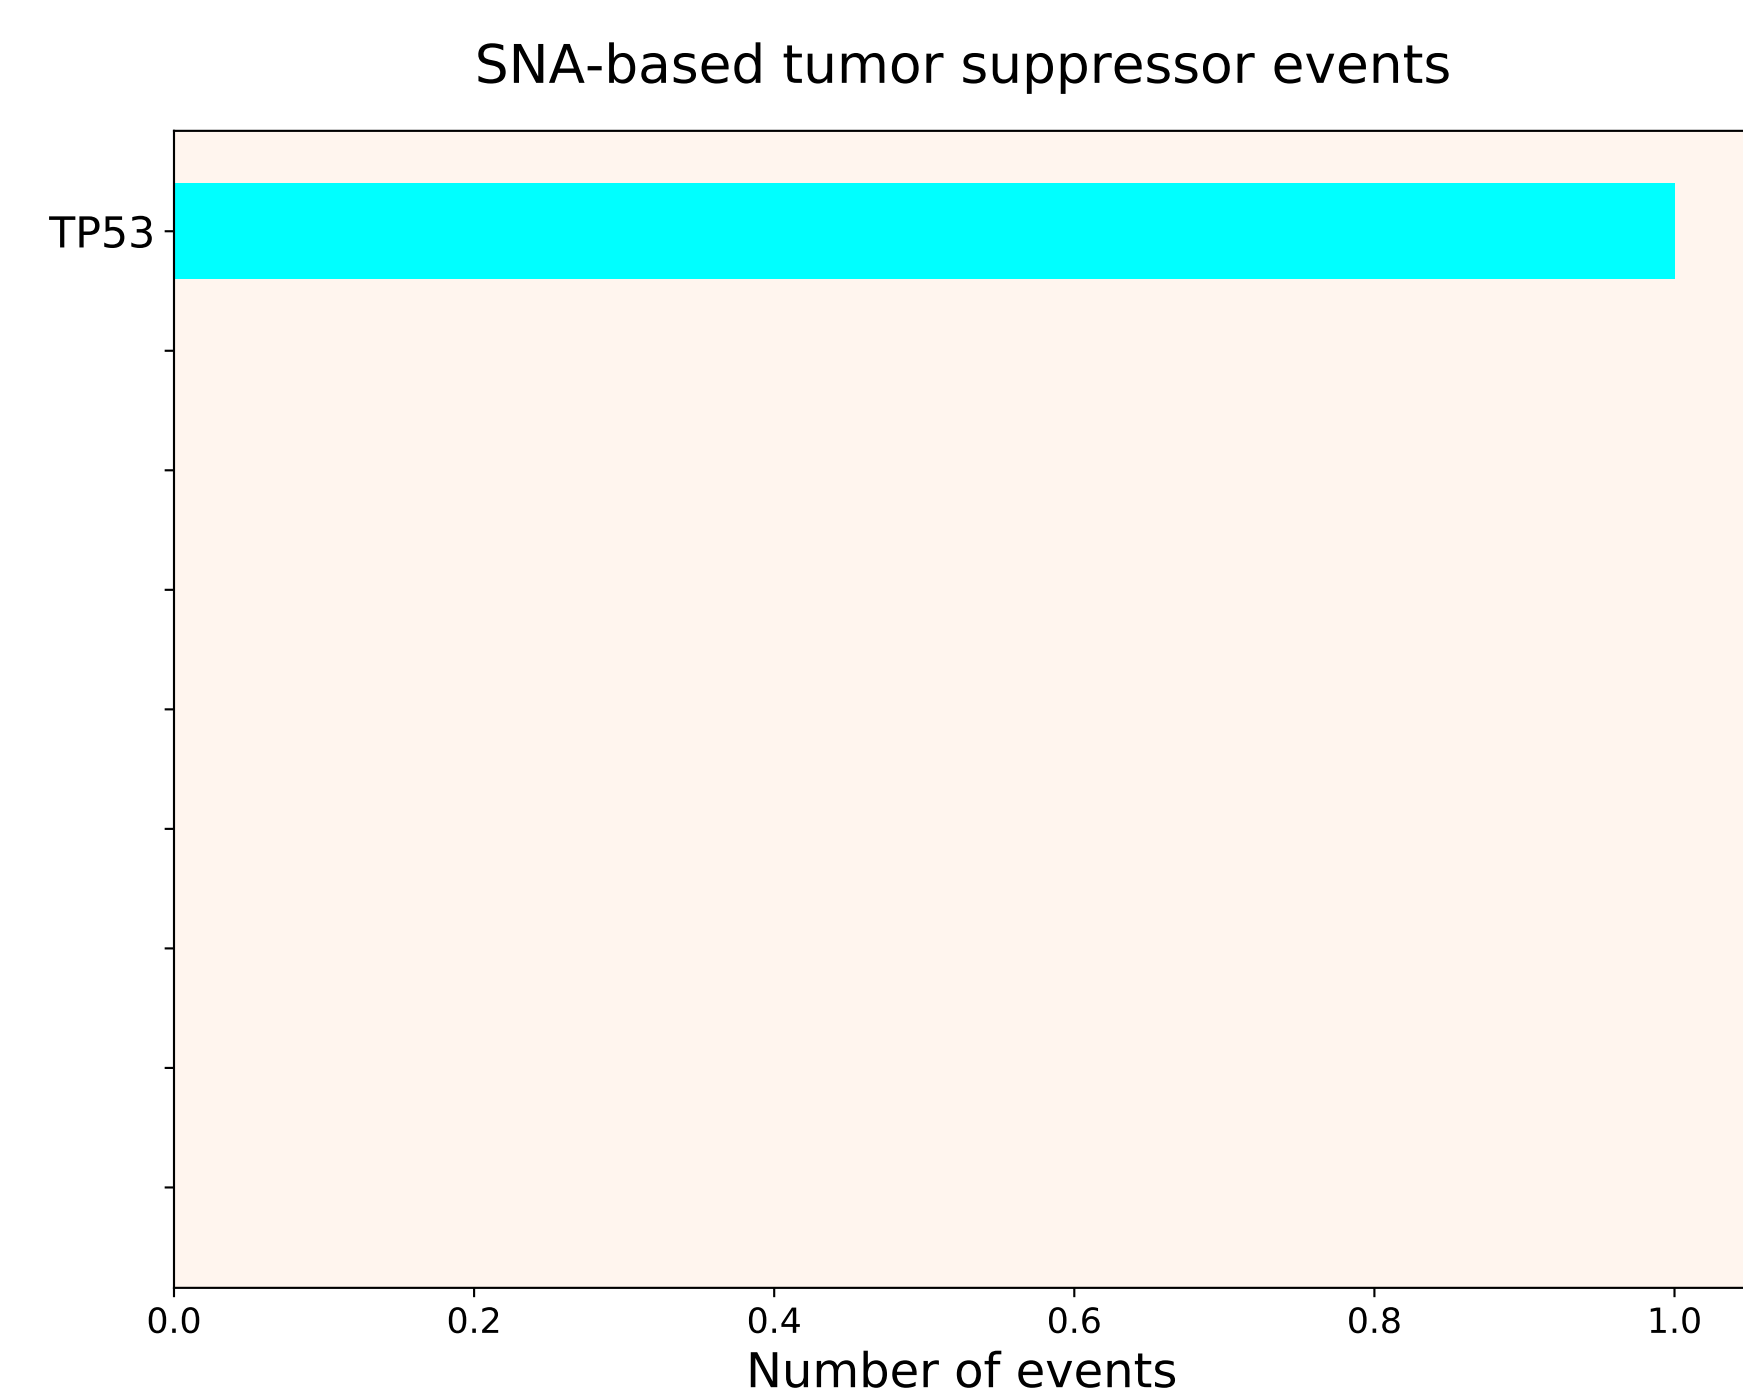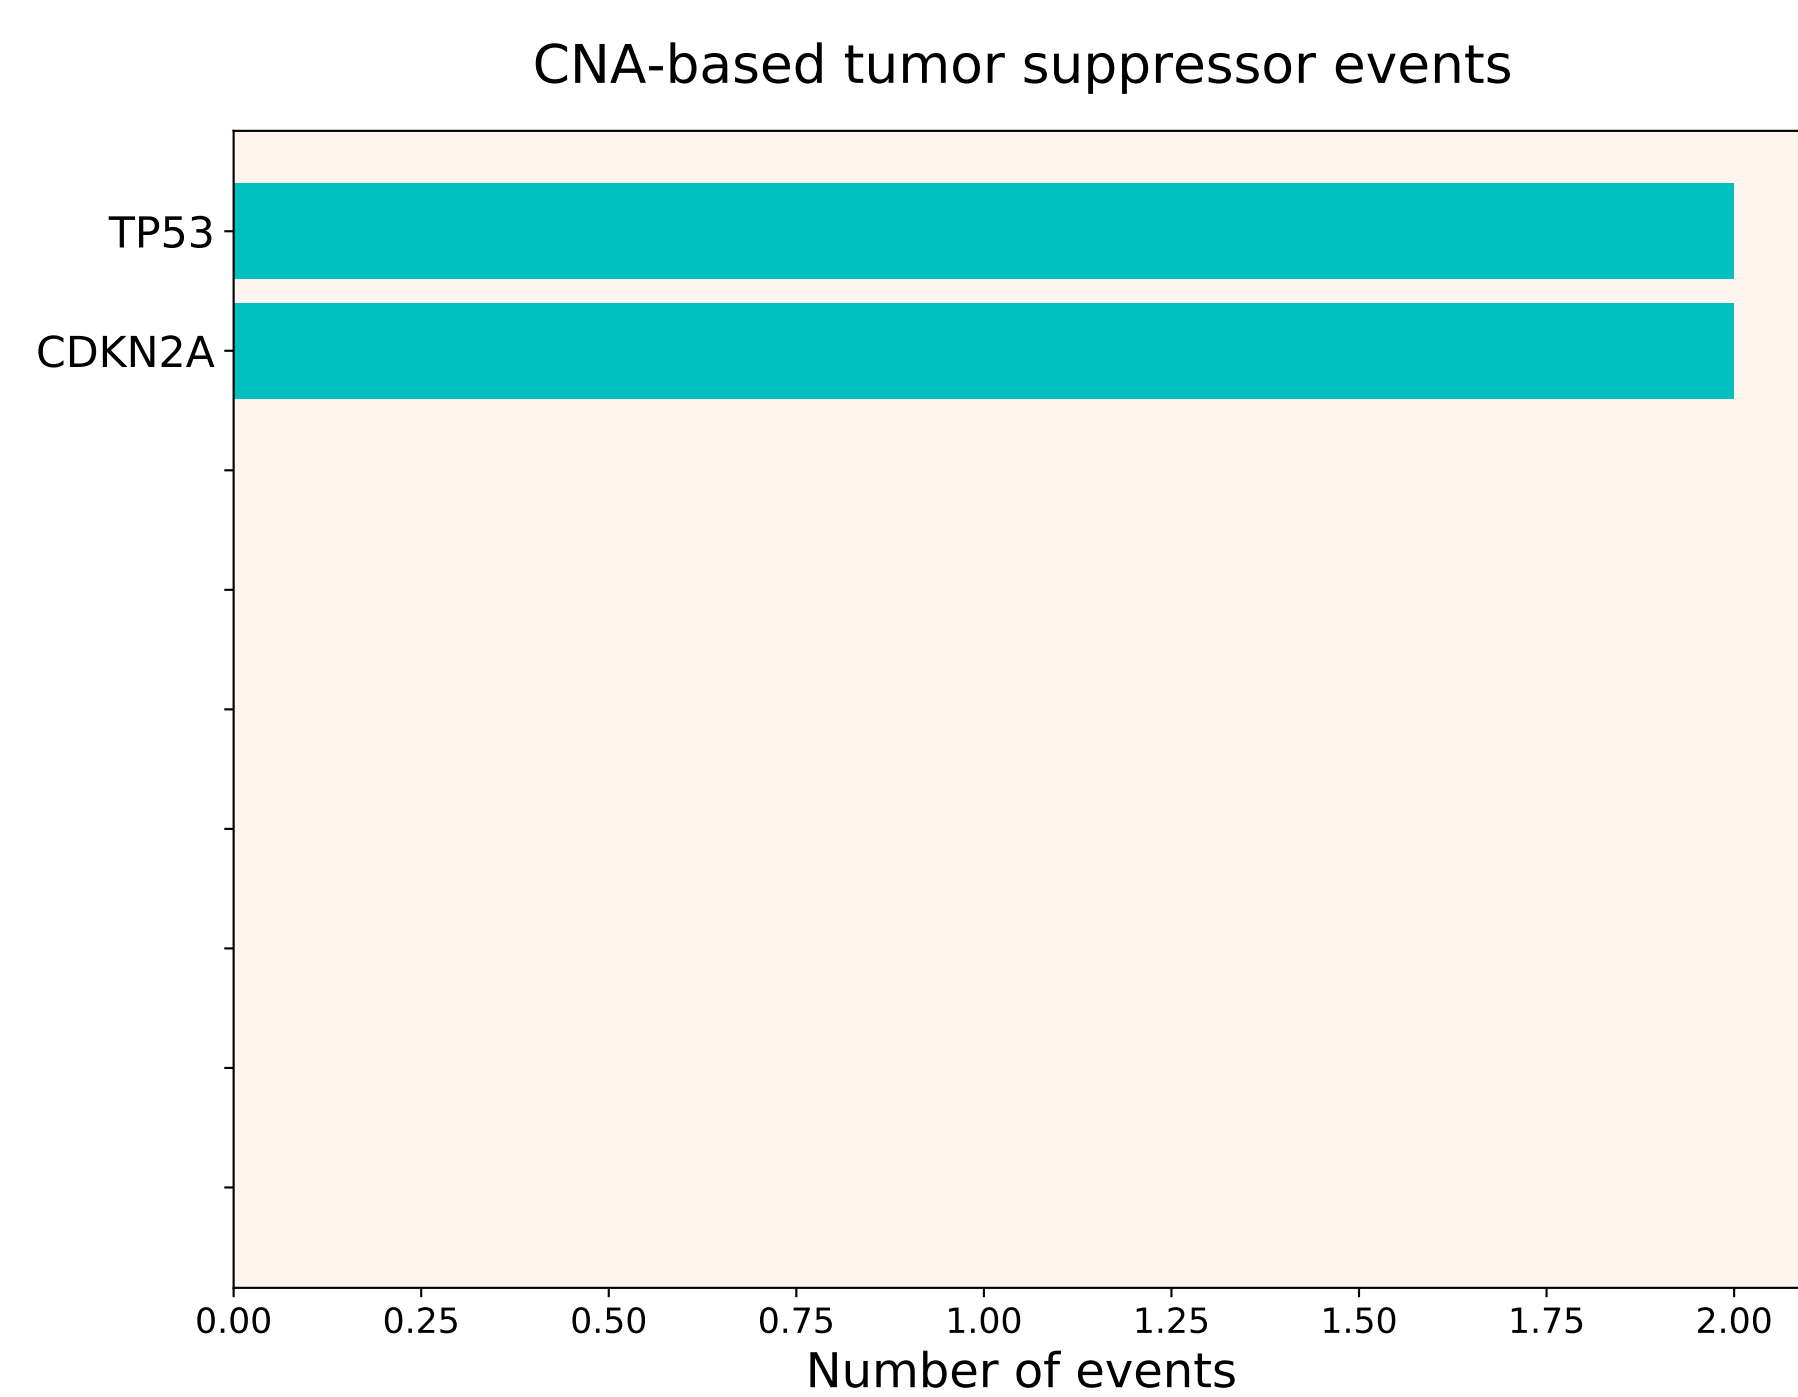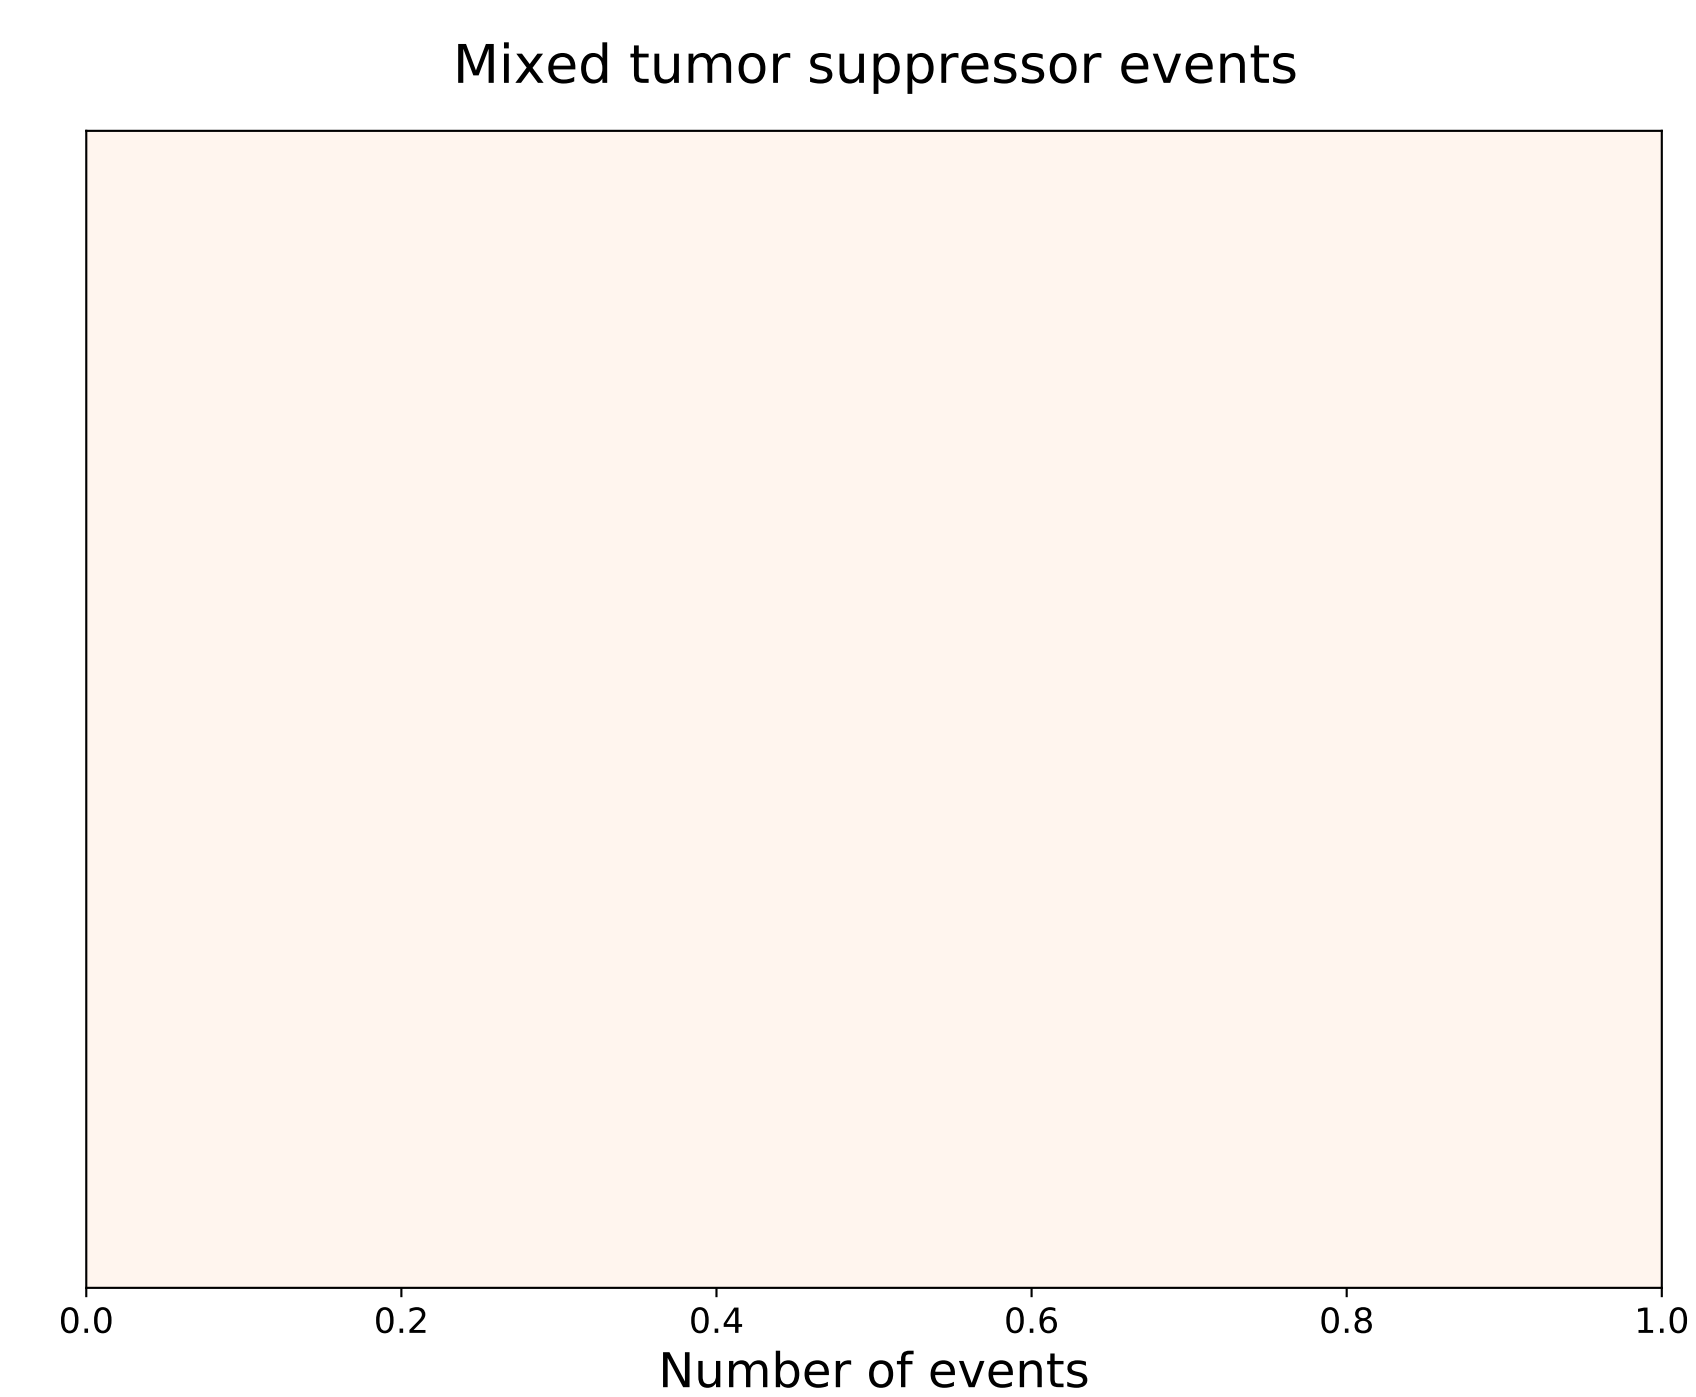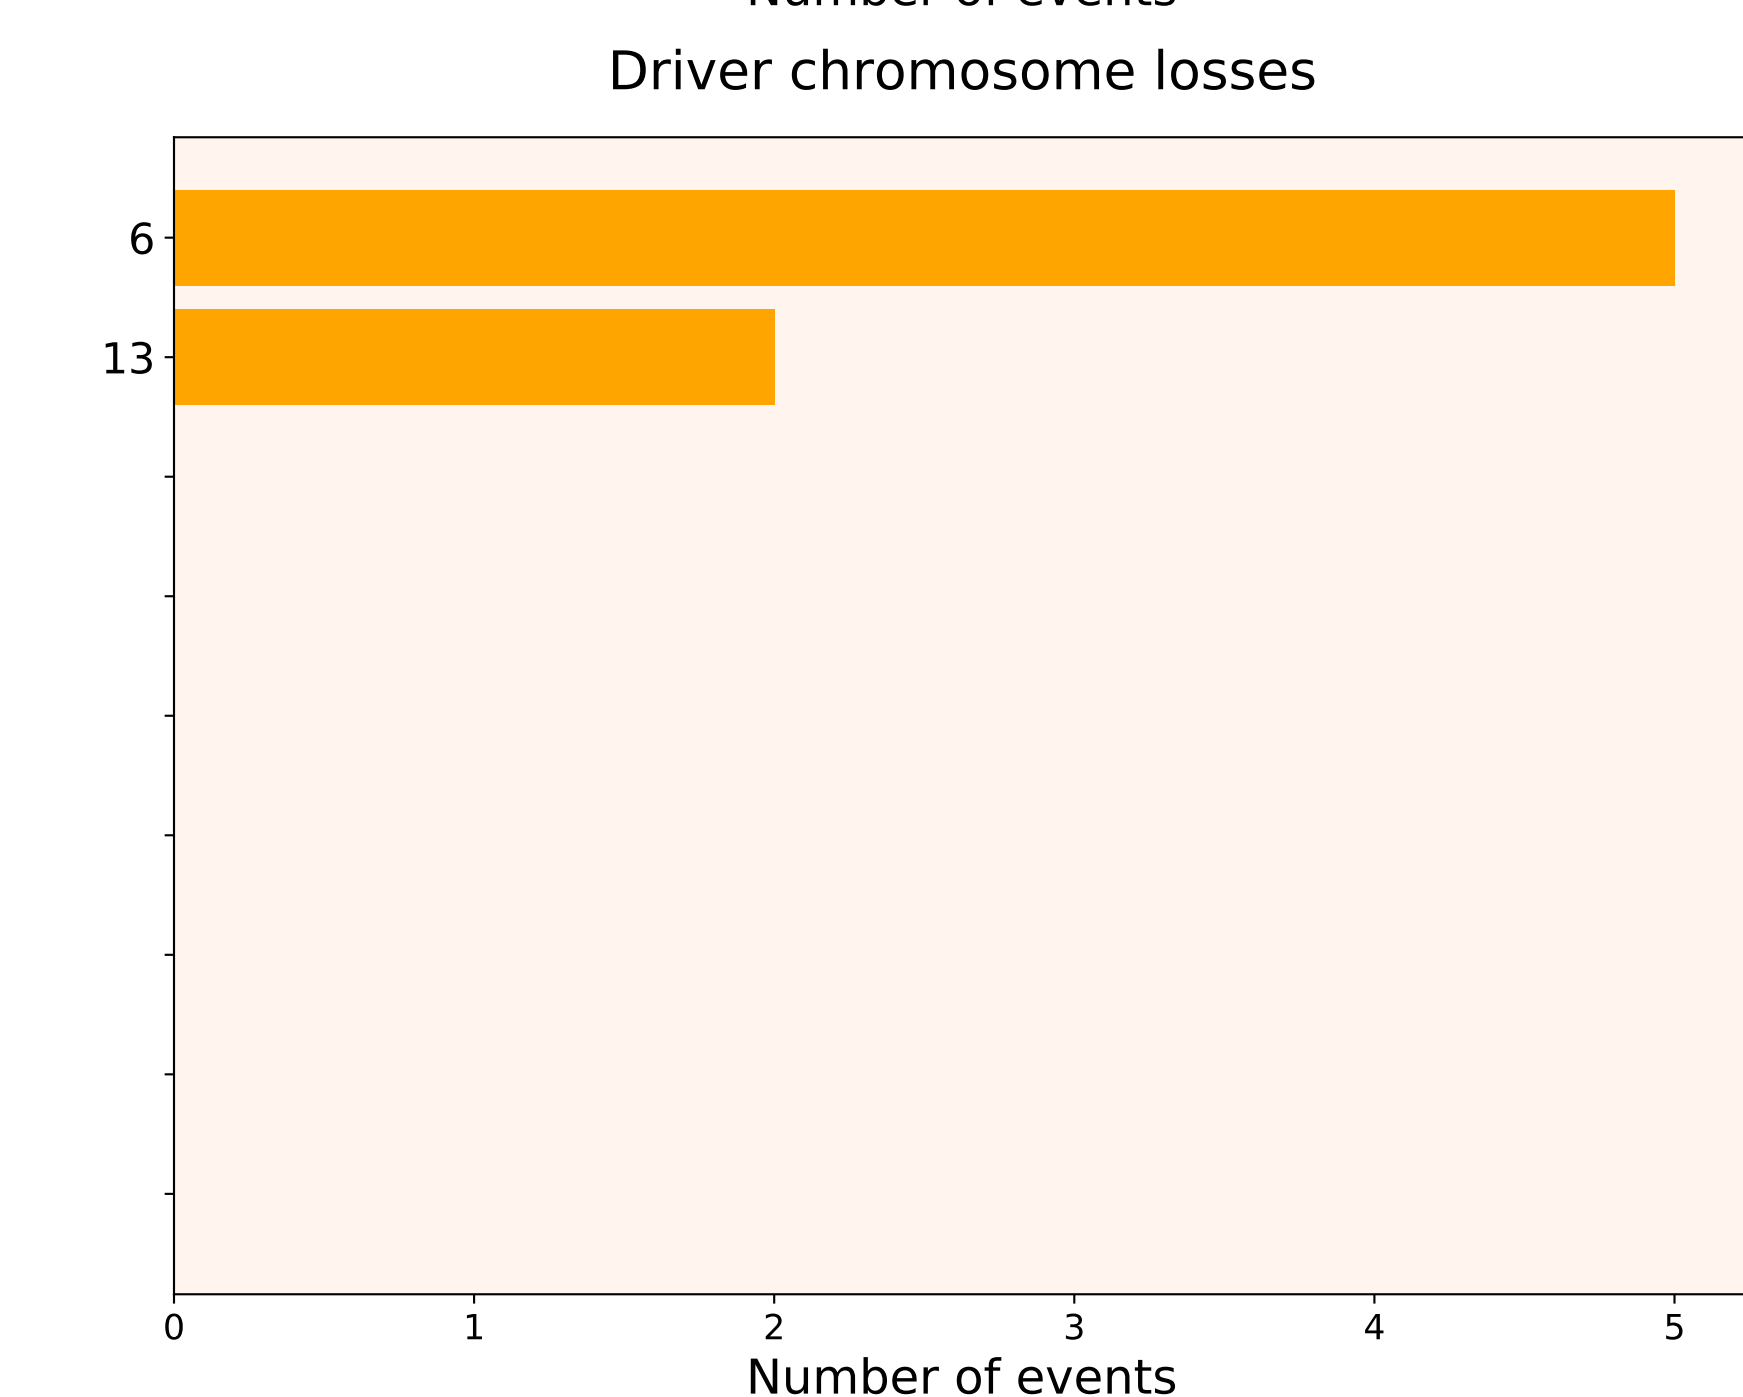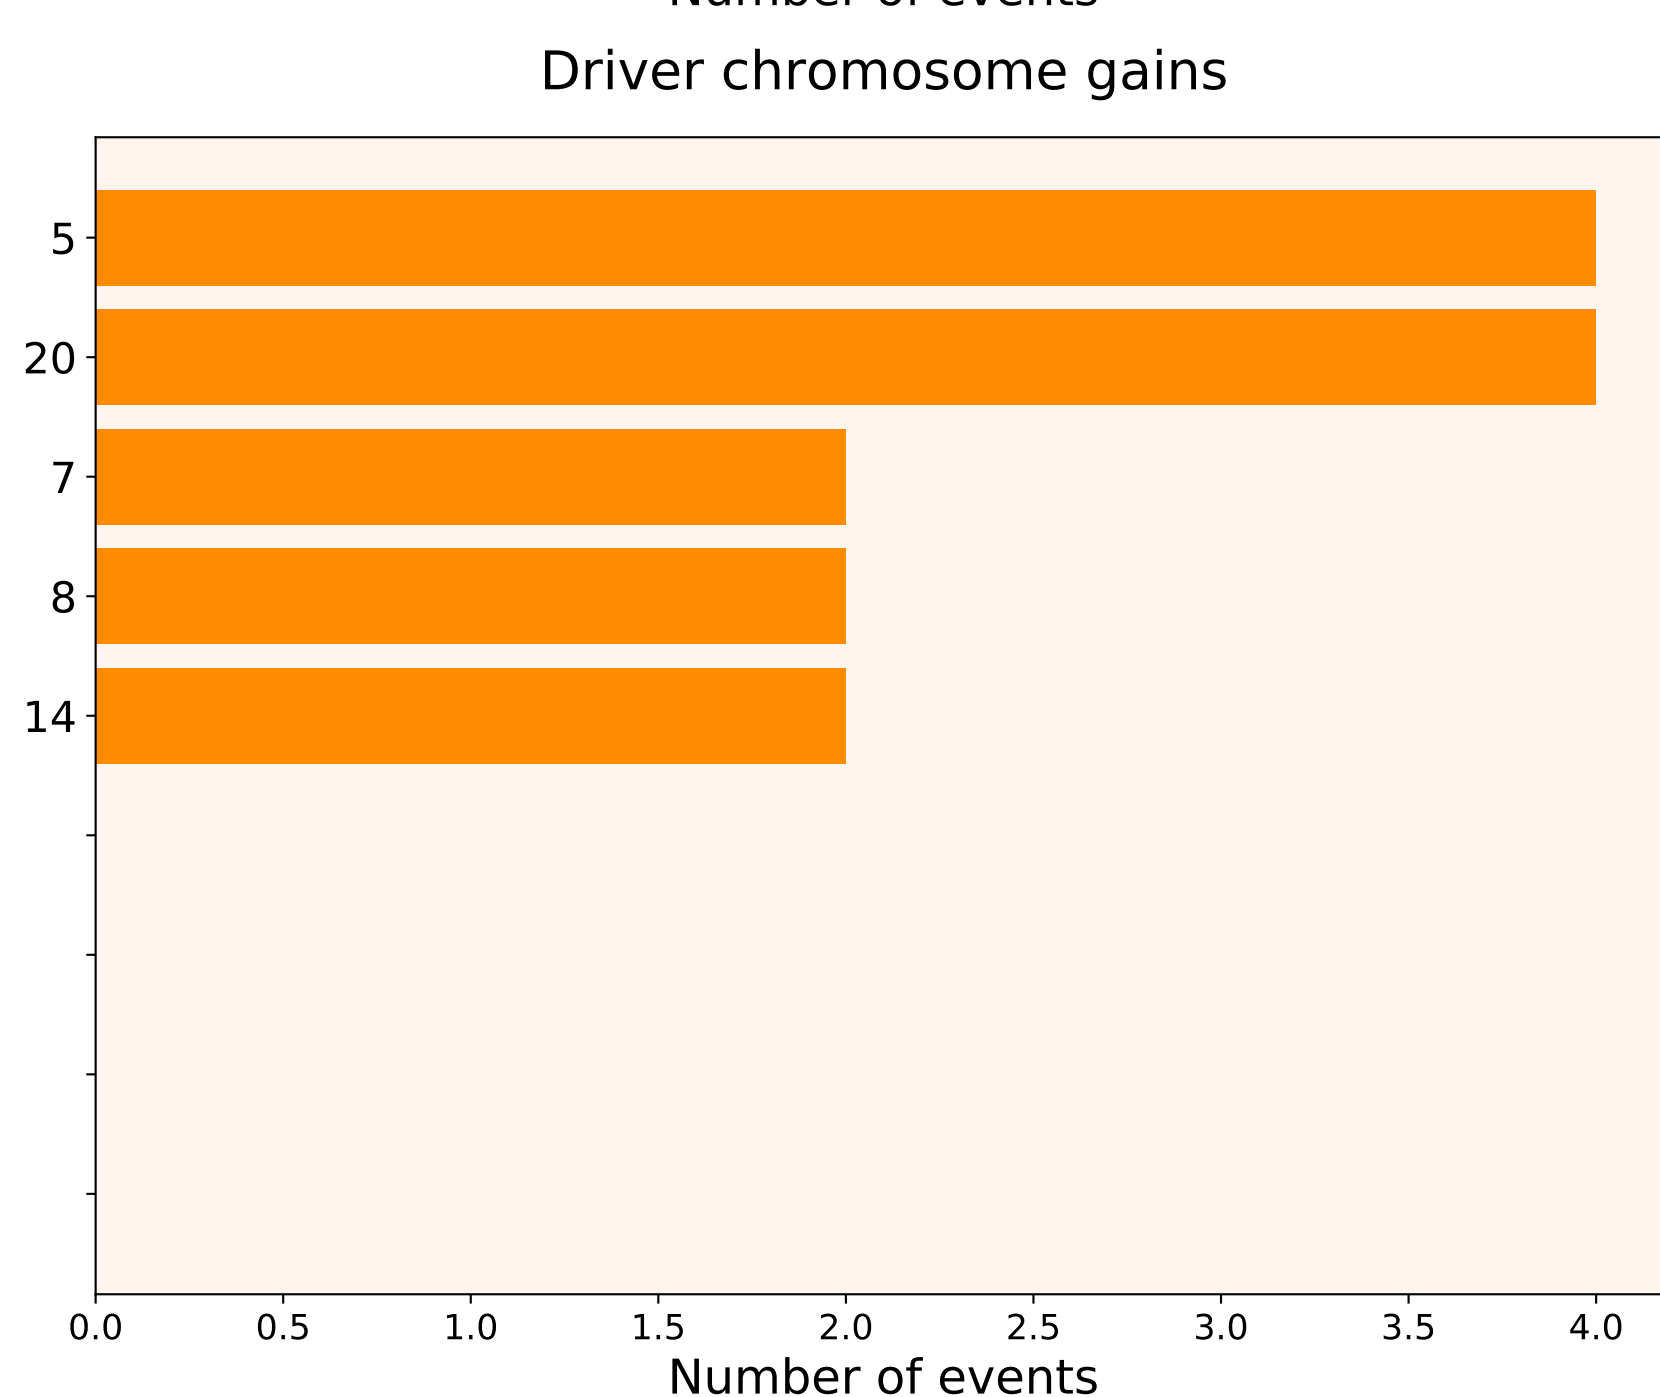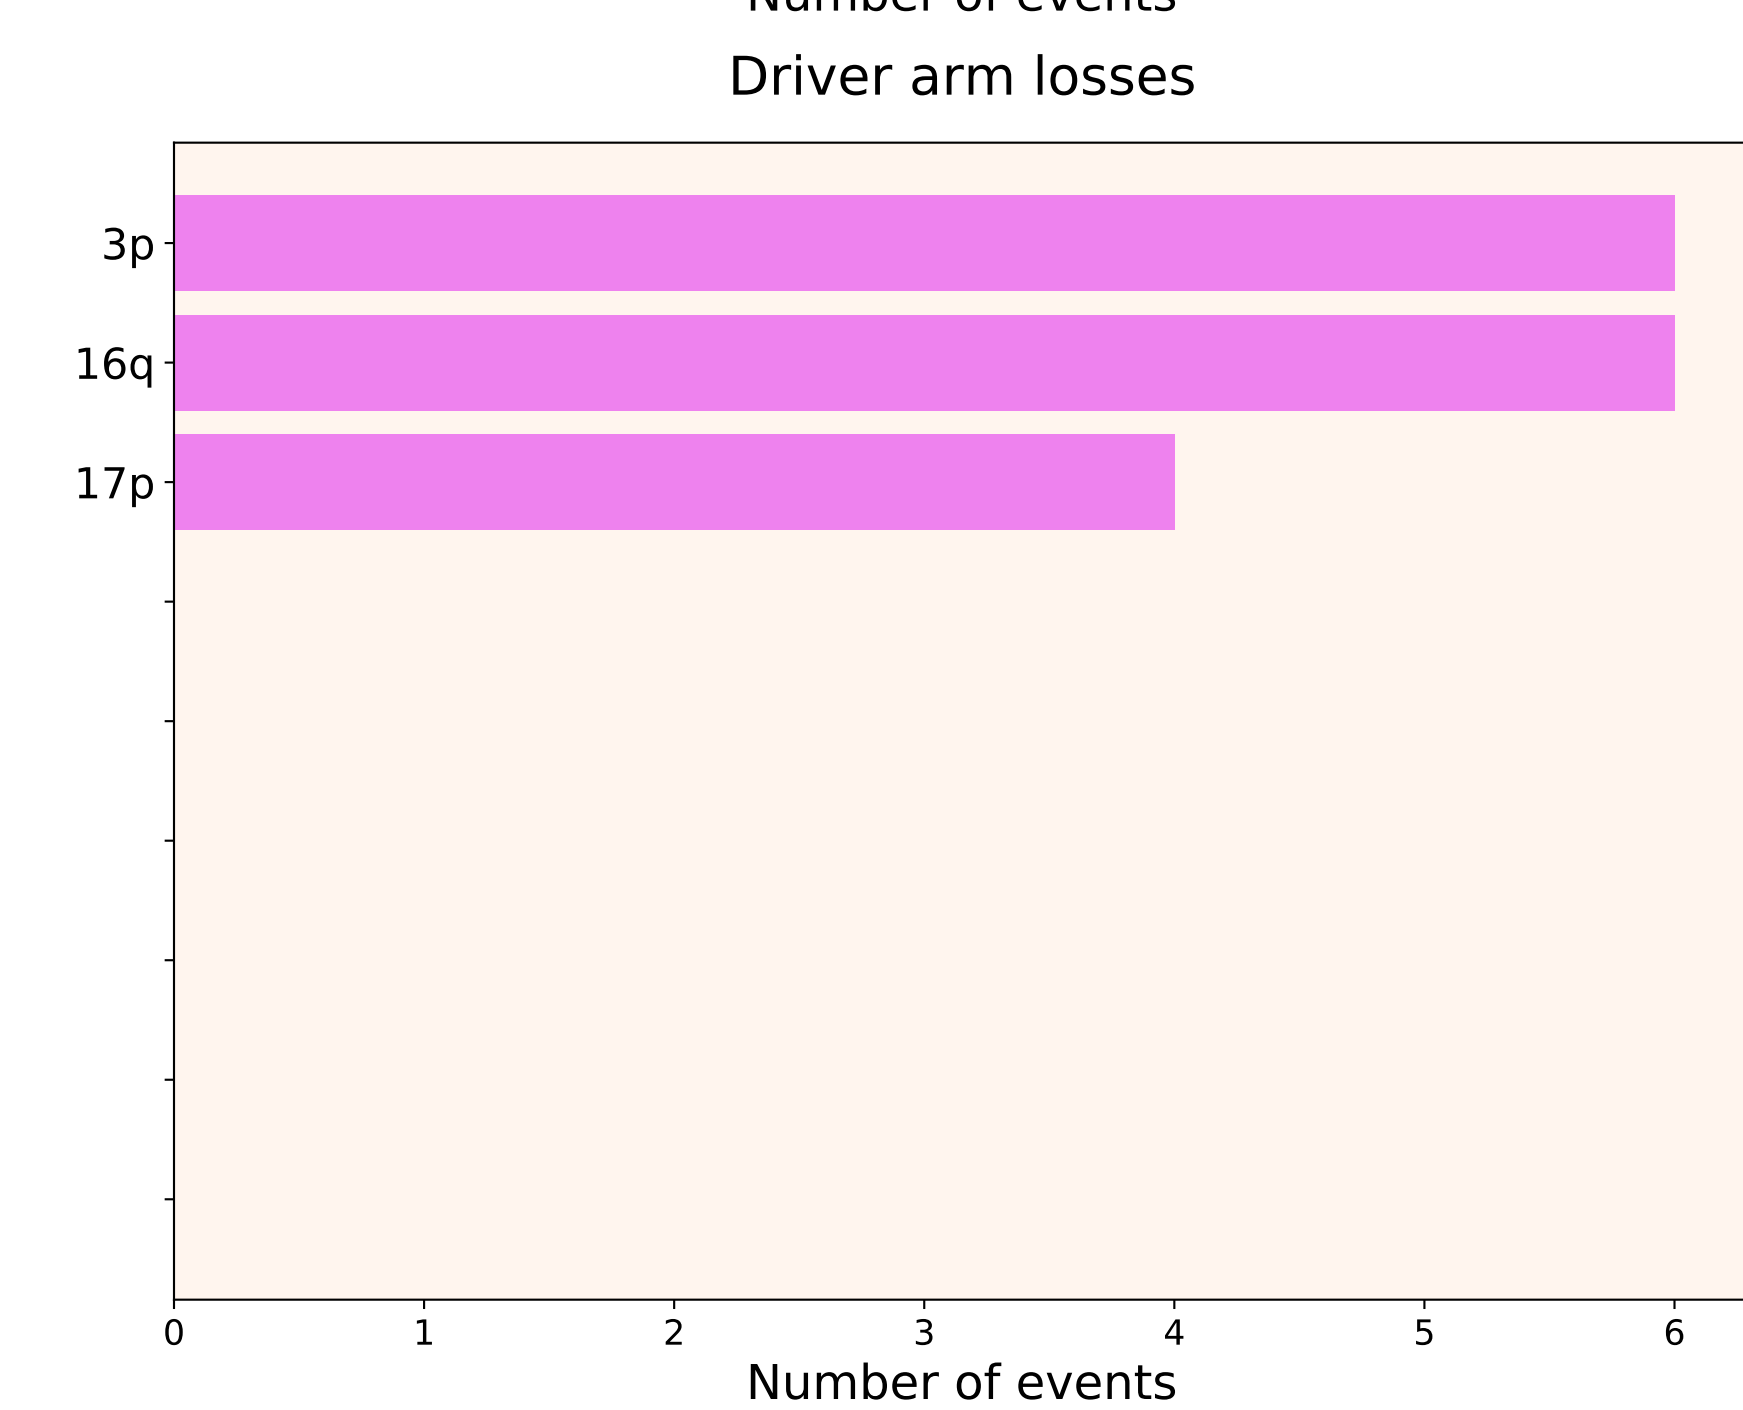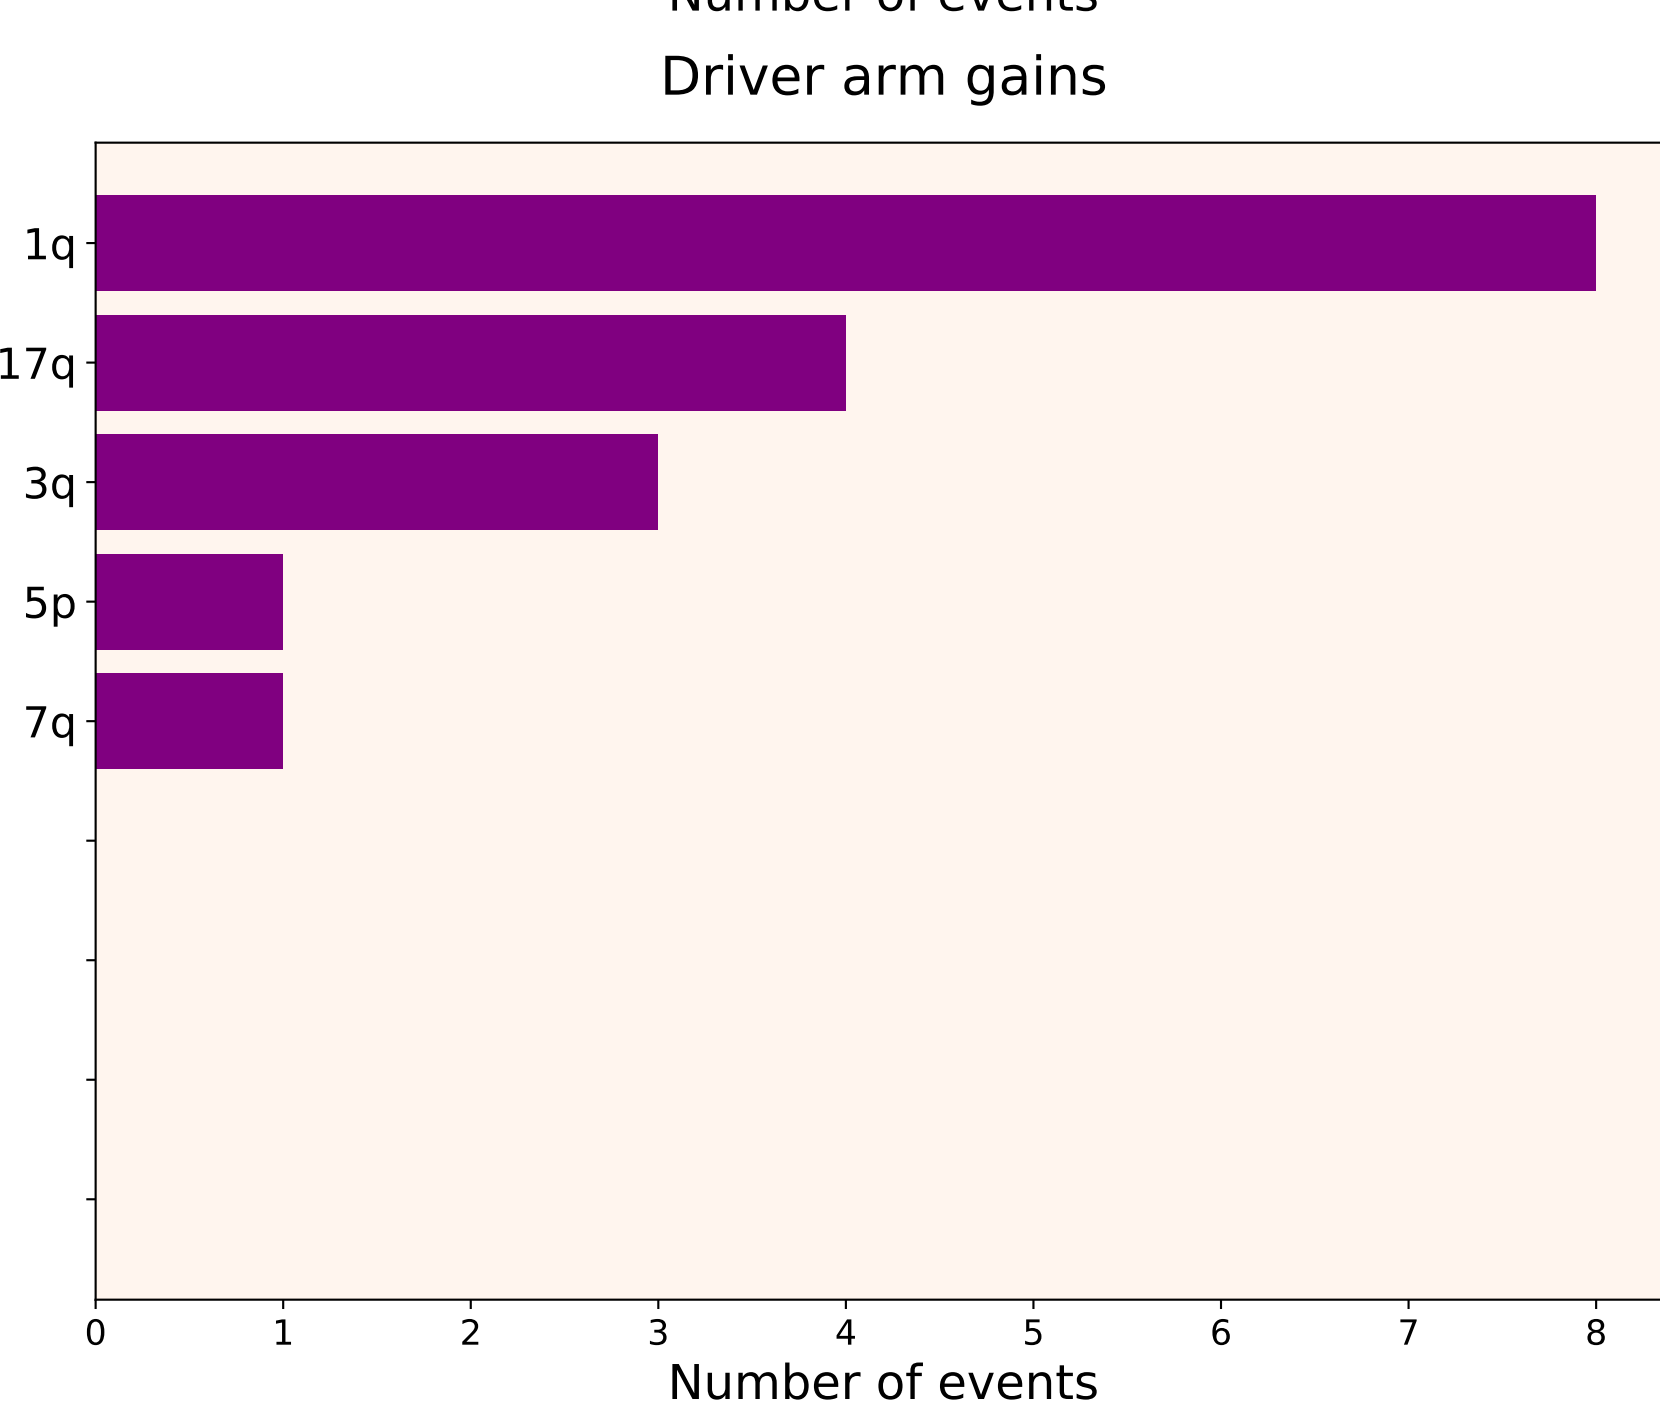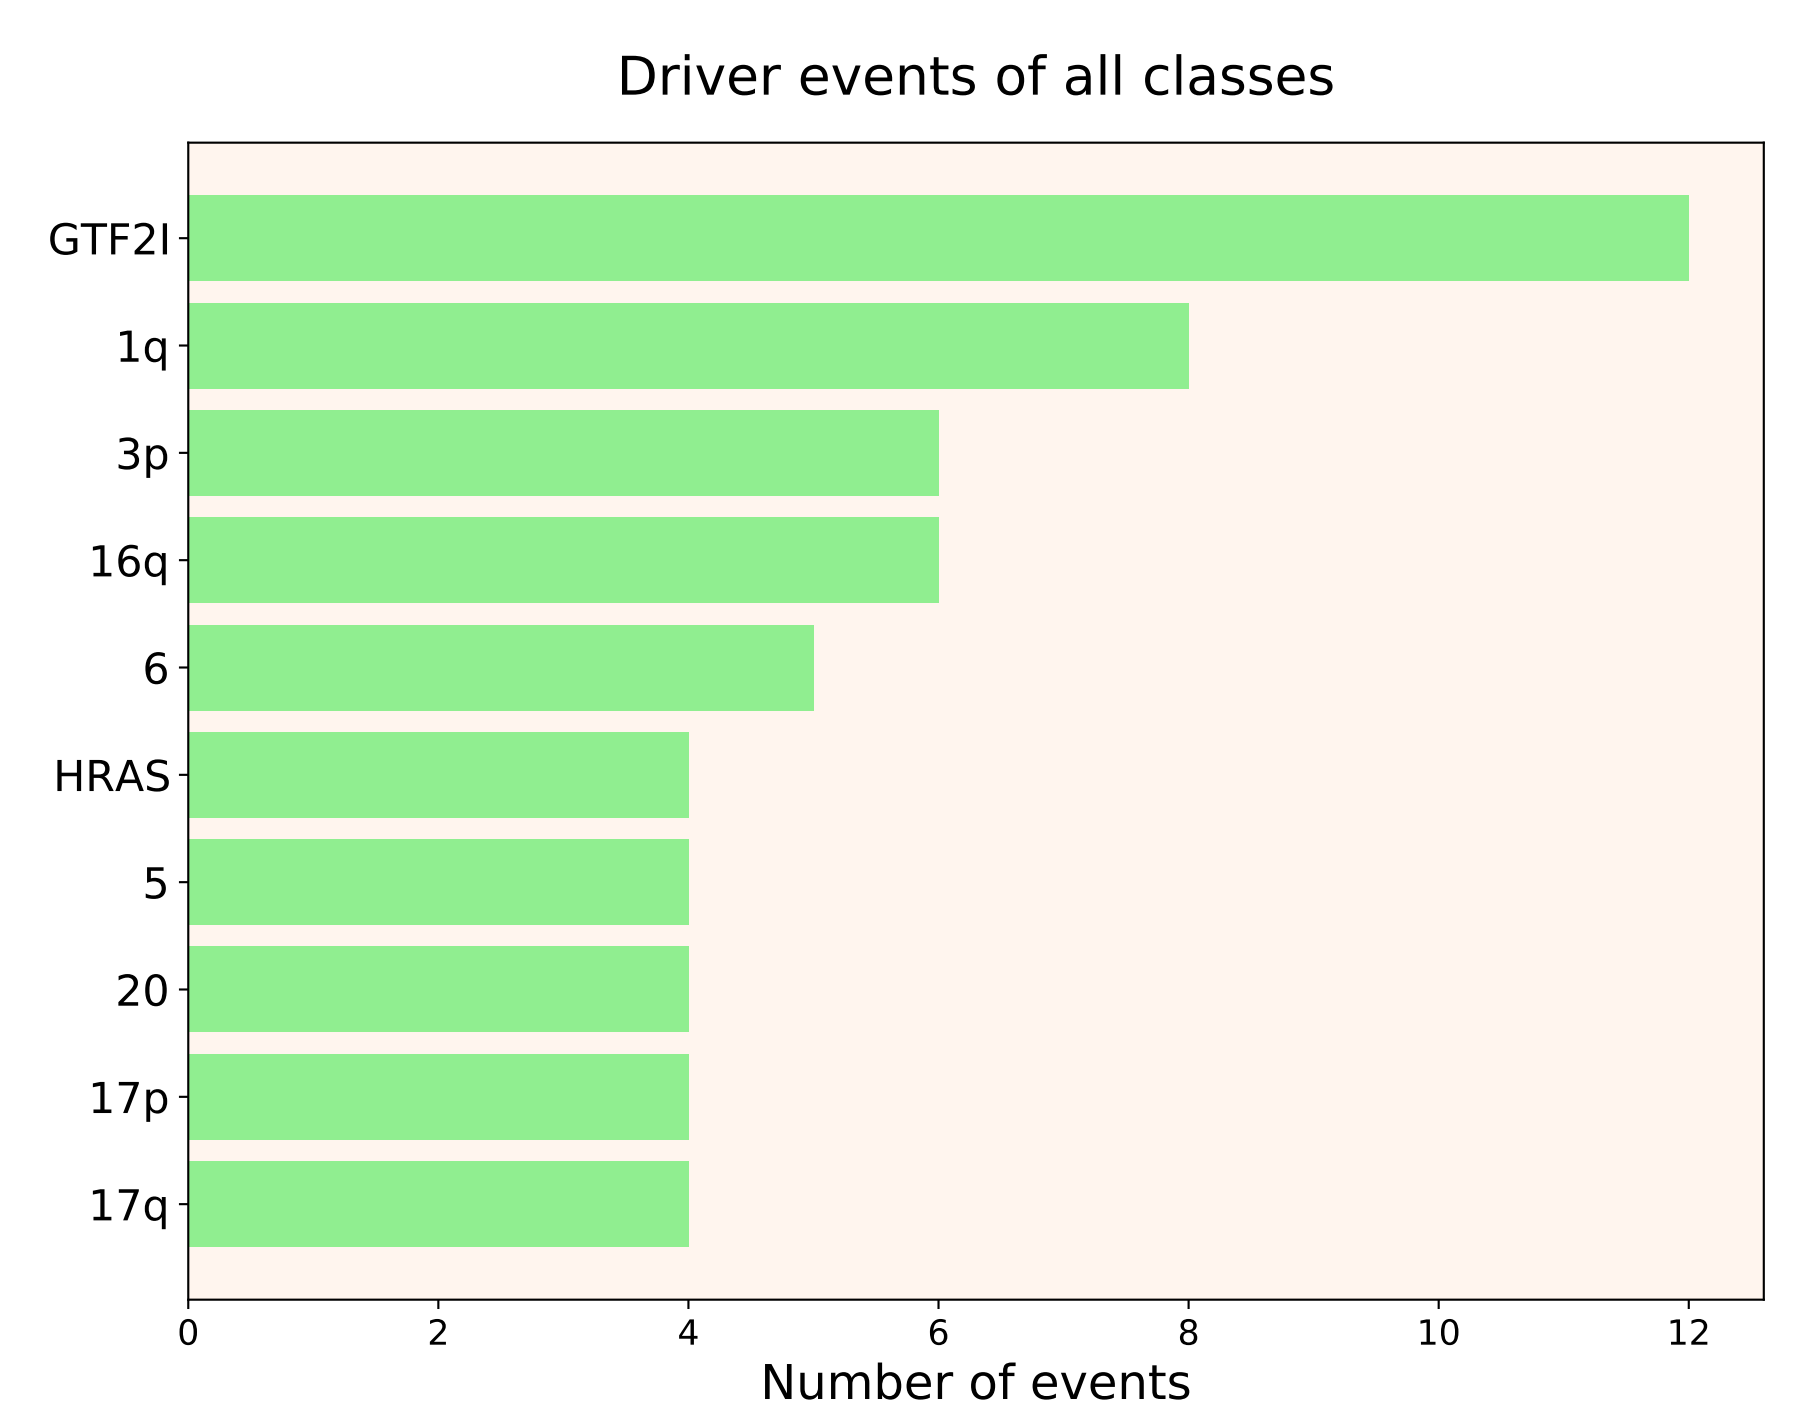

Supplement: Supplemental_Data_S1.zip [file Supplemental_Data_S1.zip]

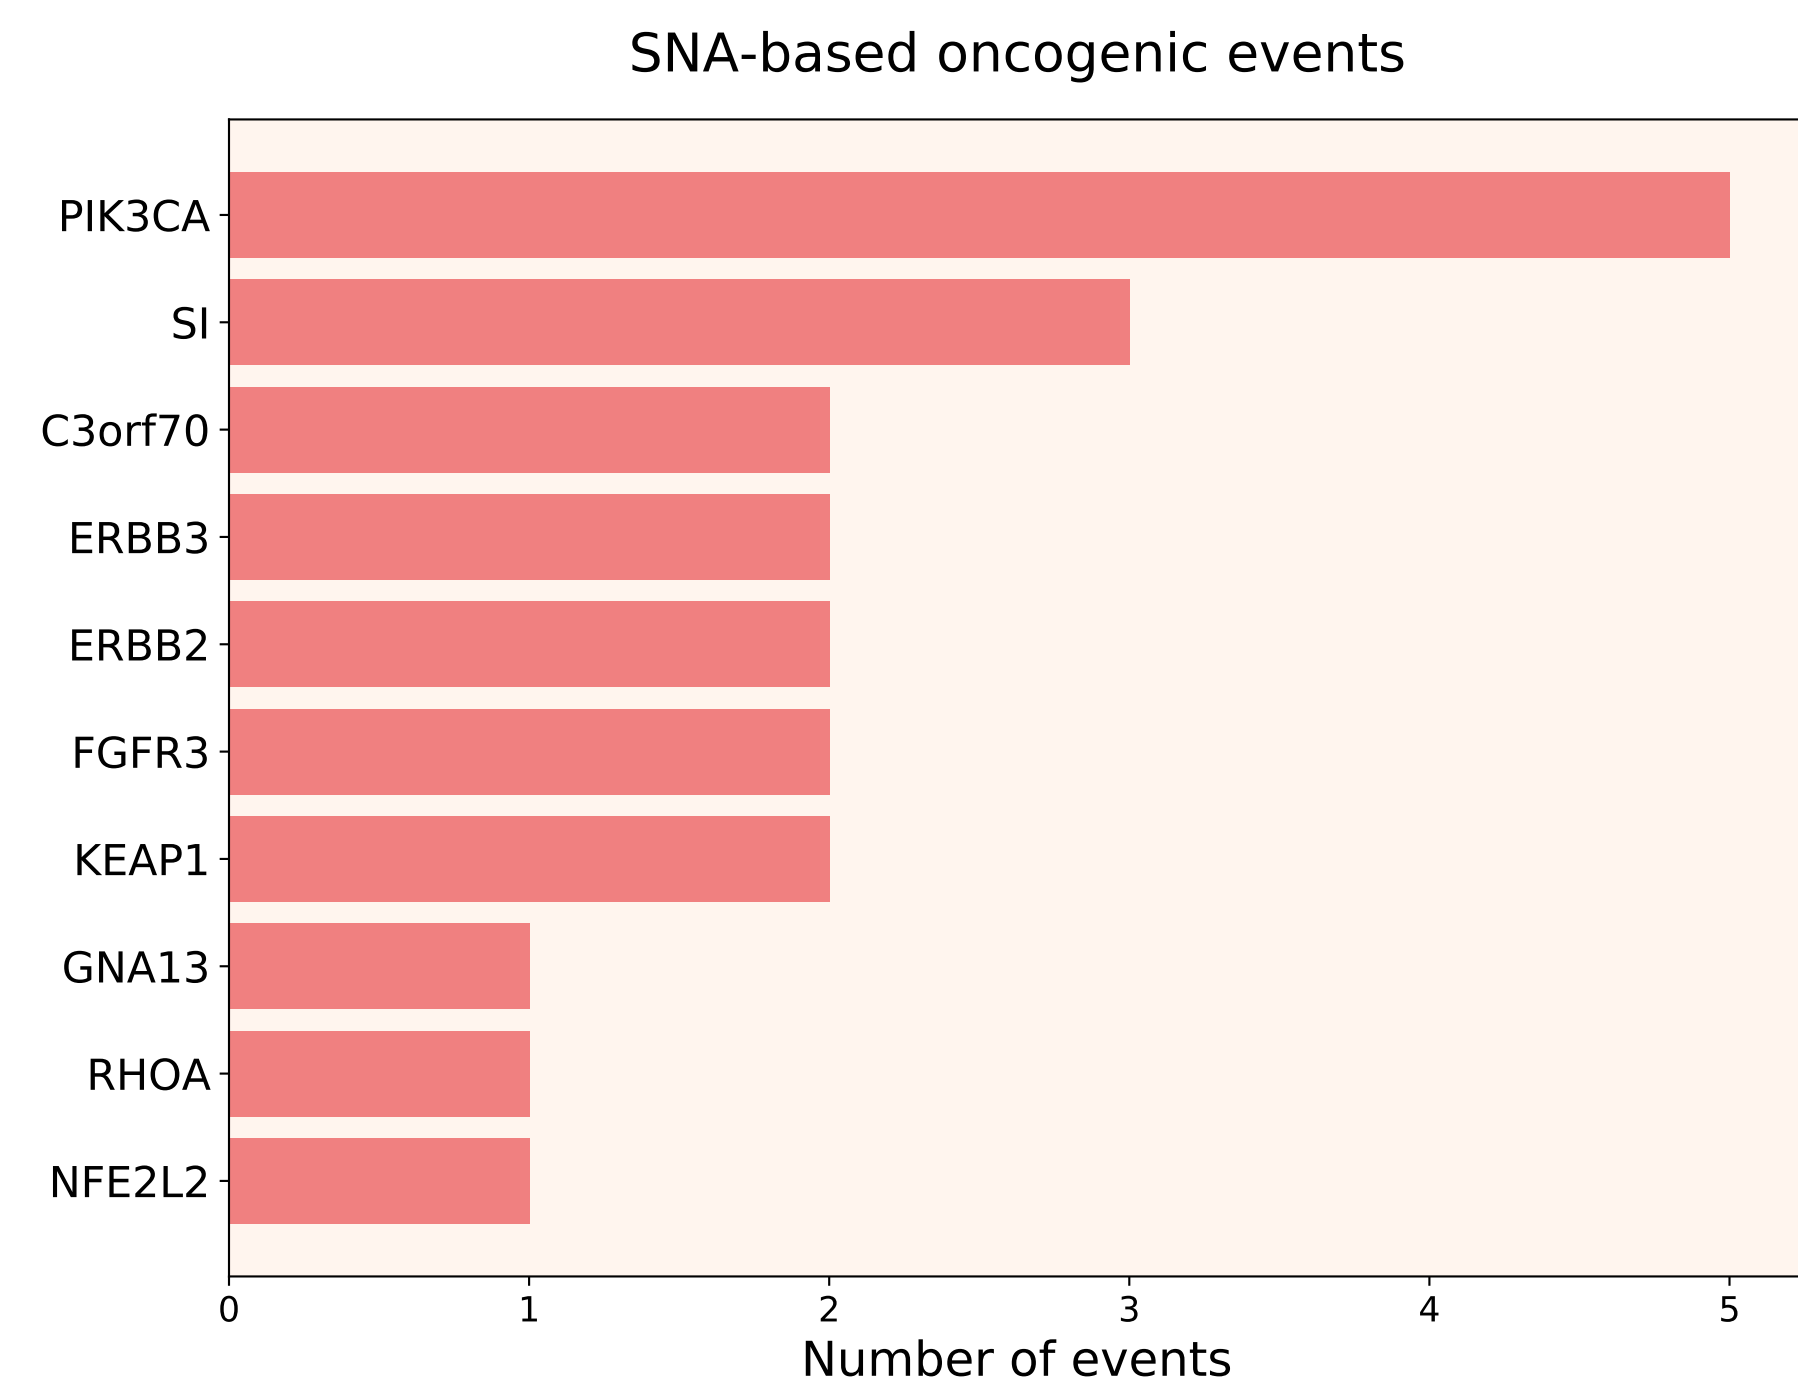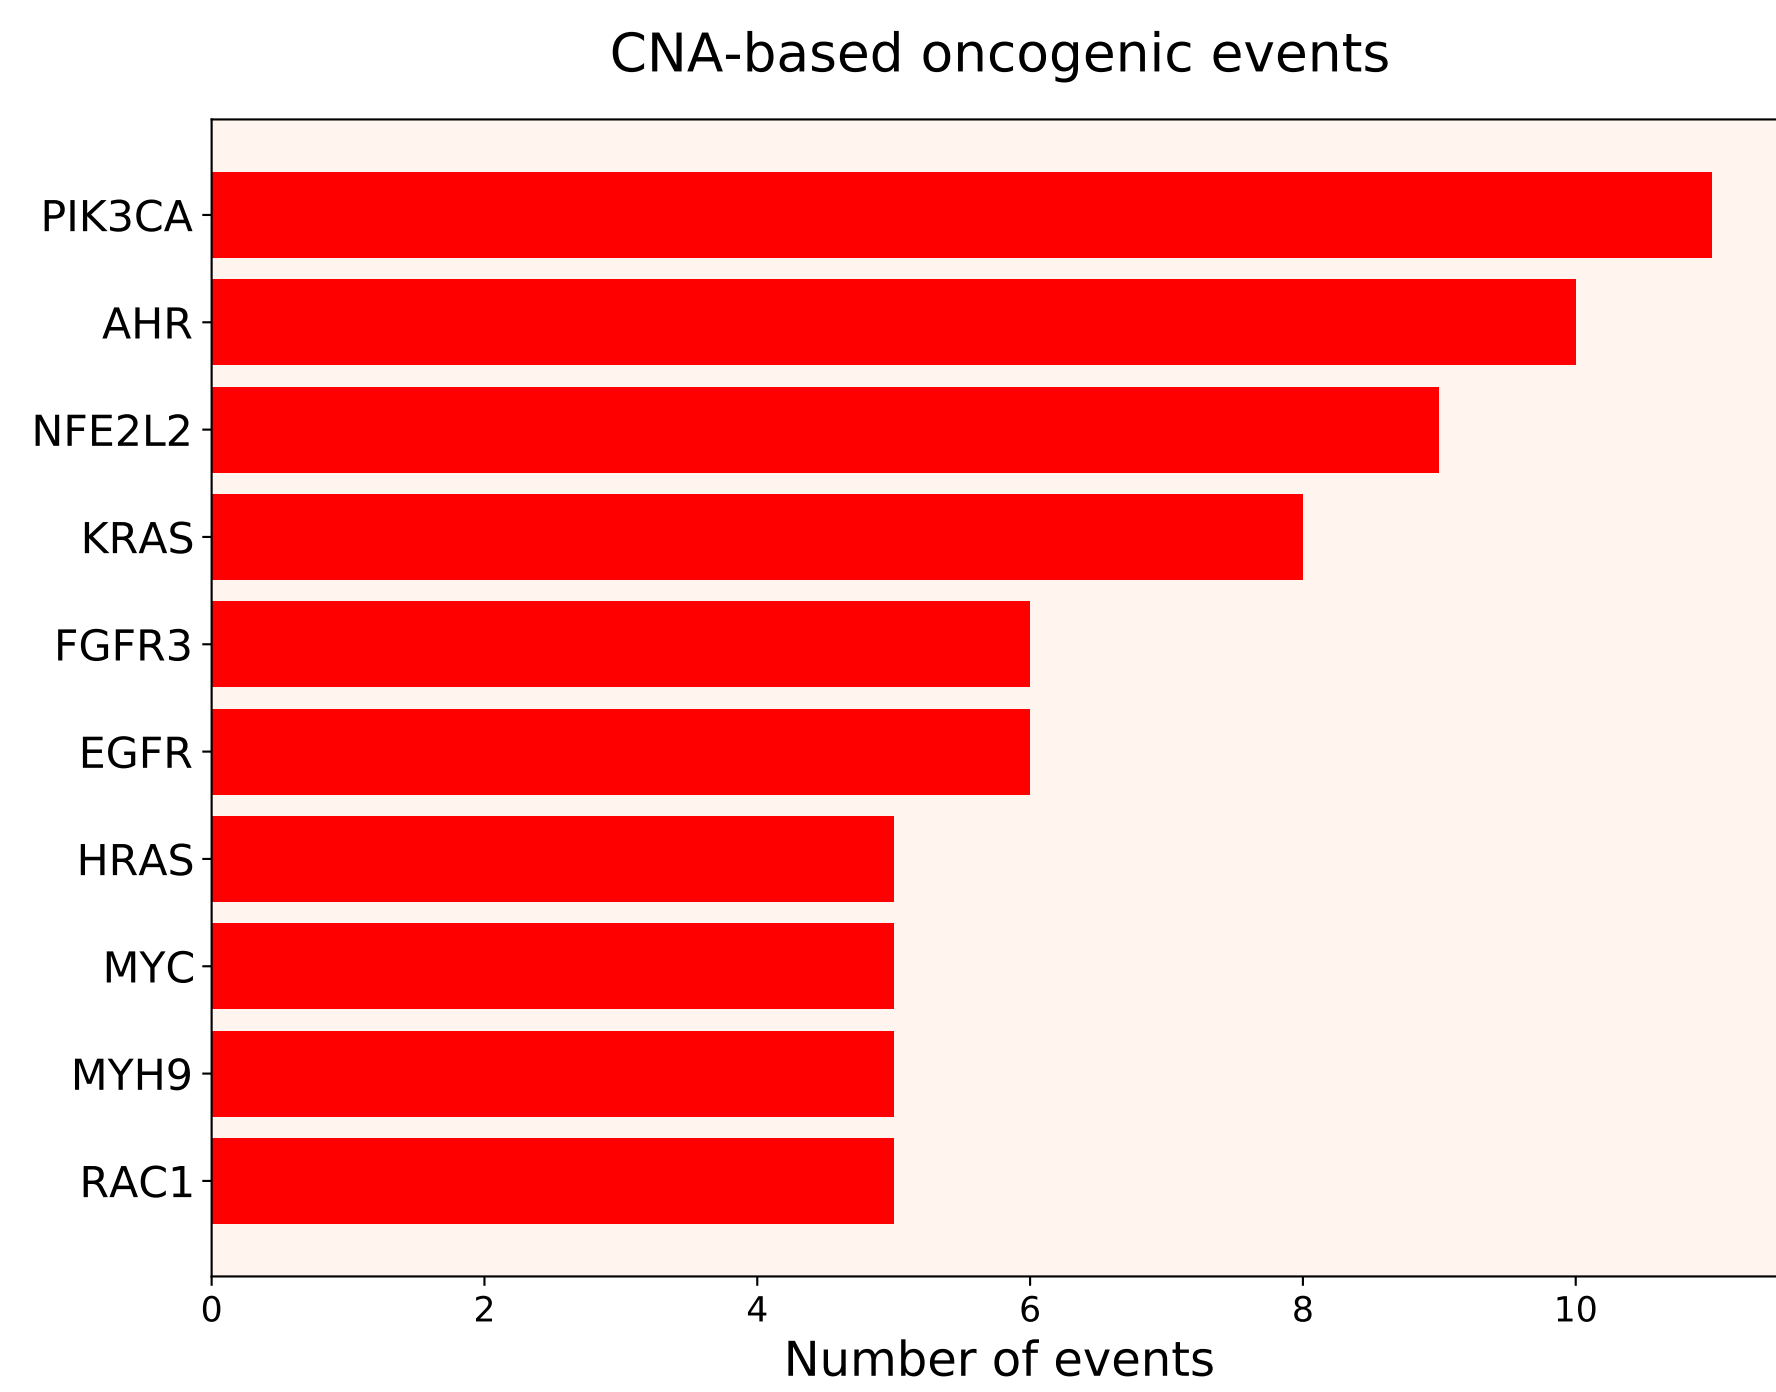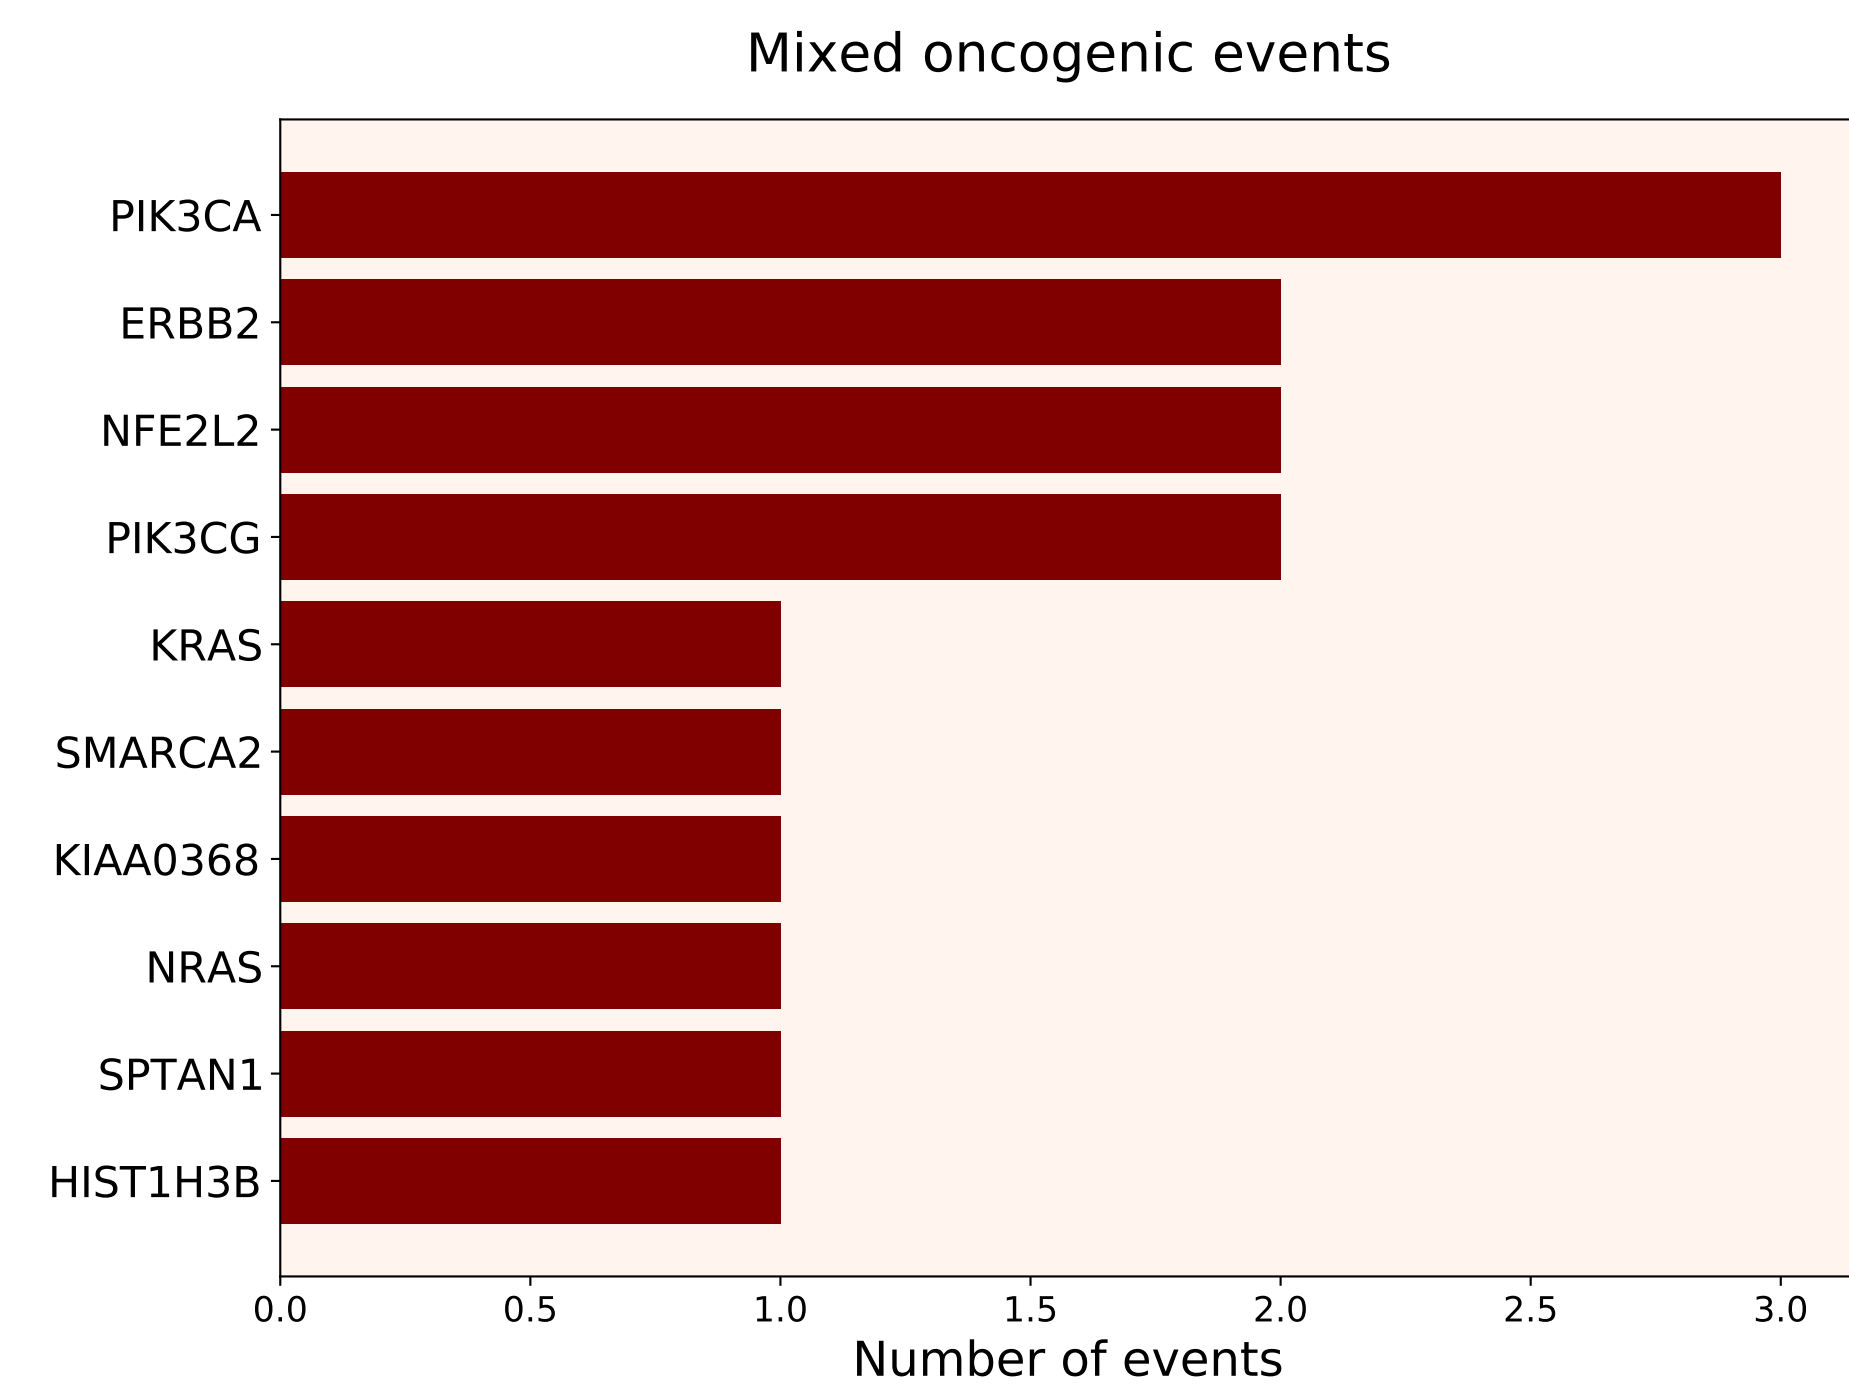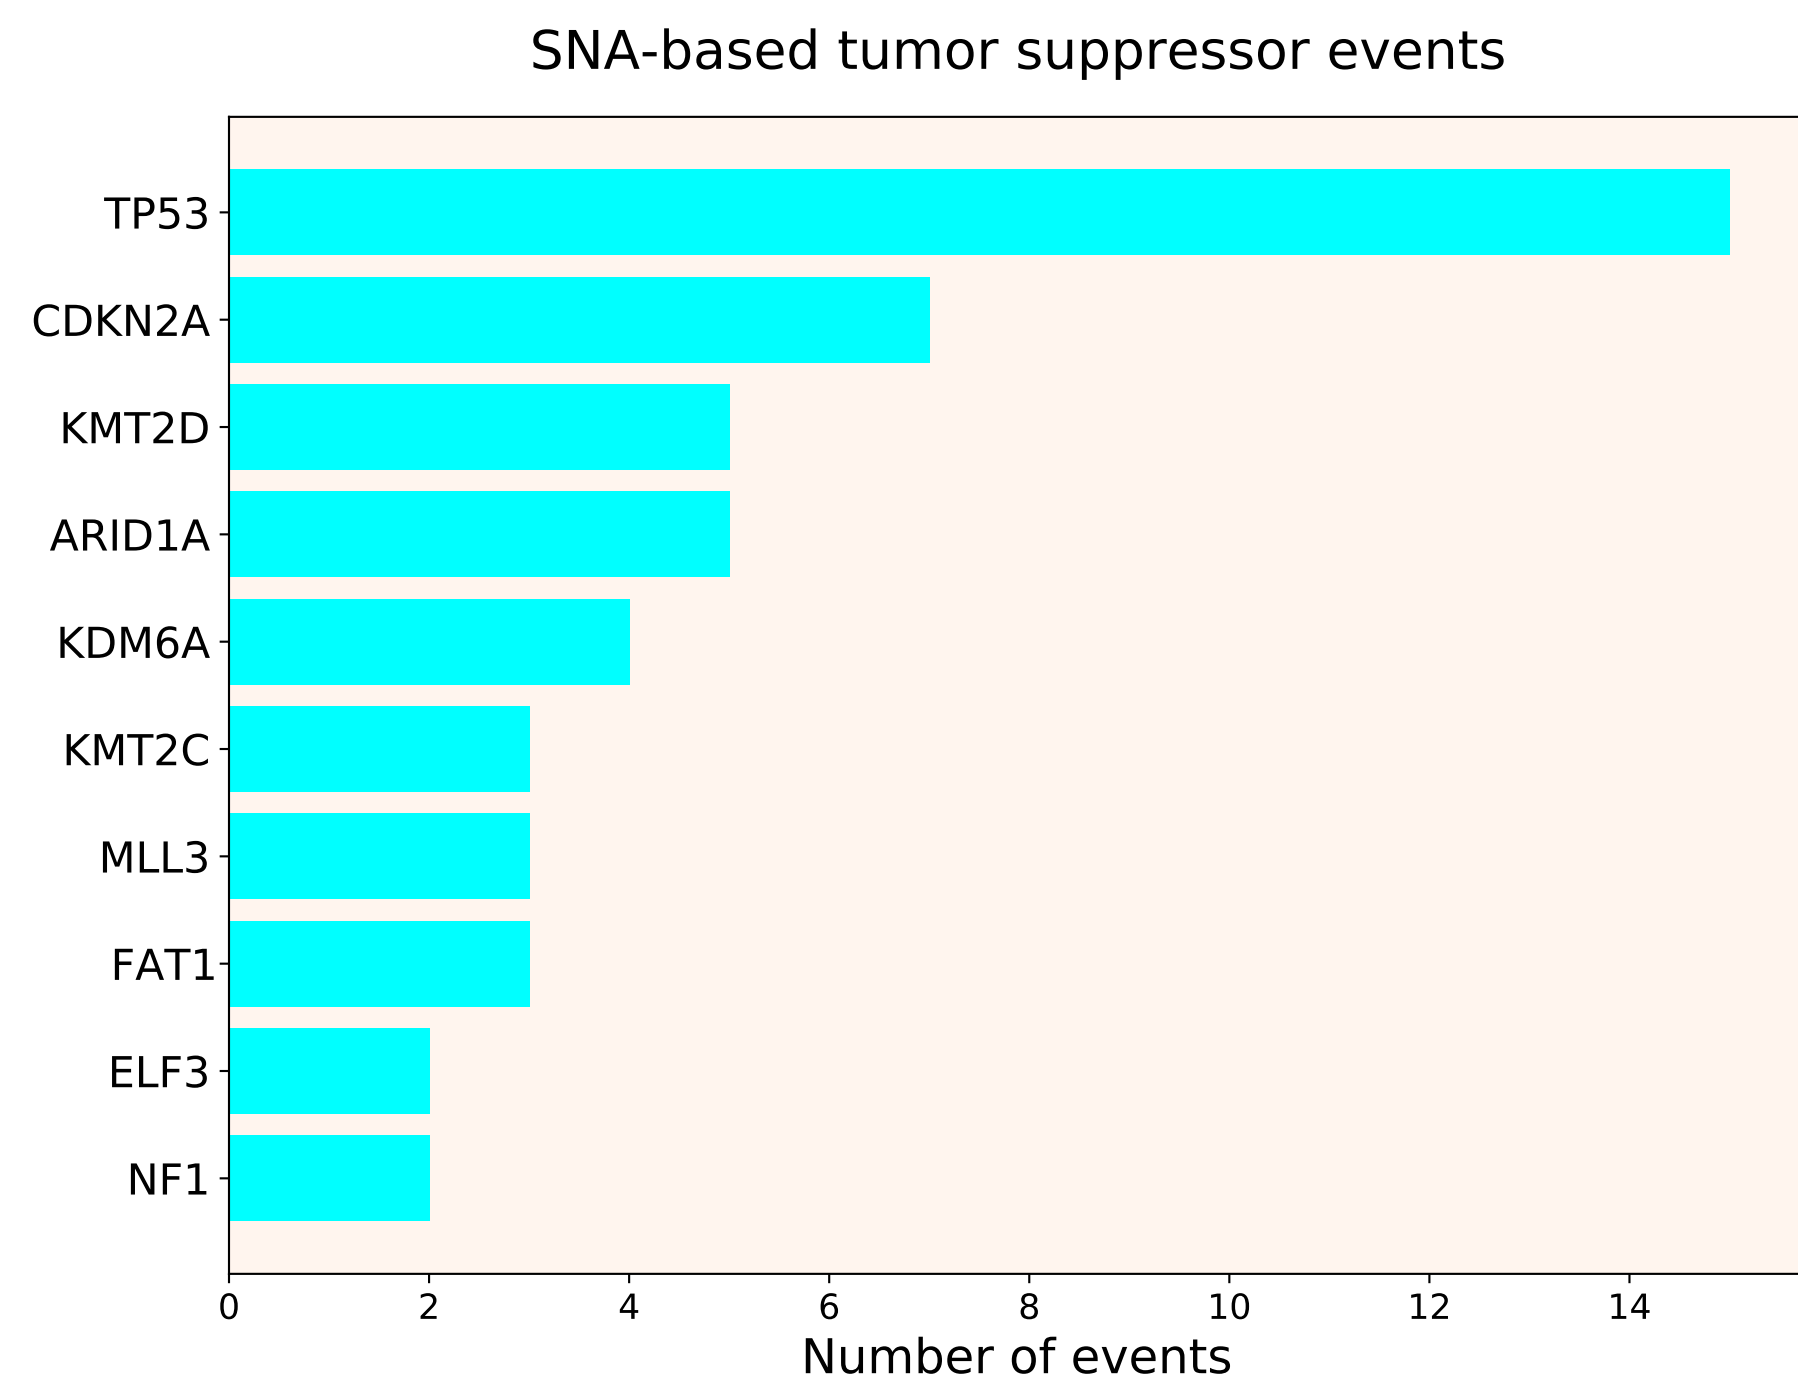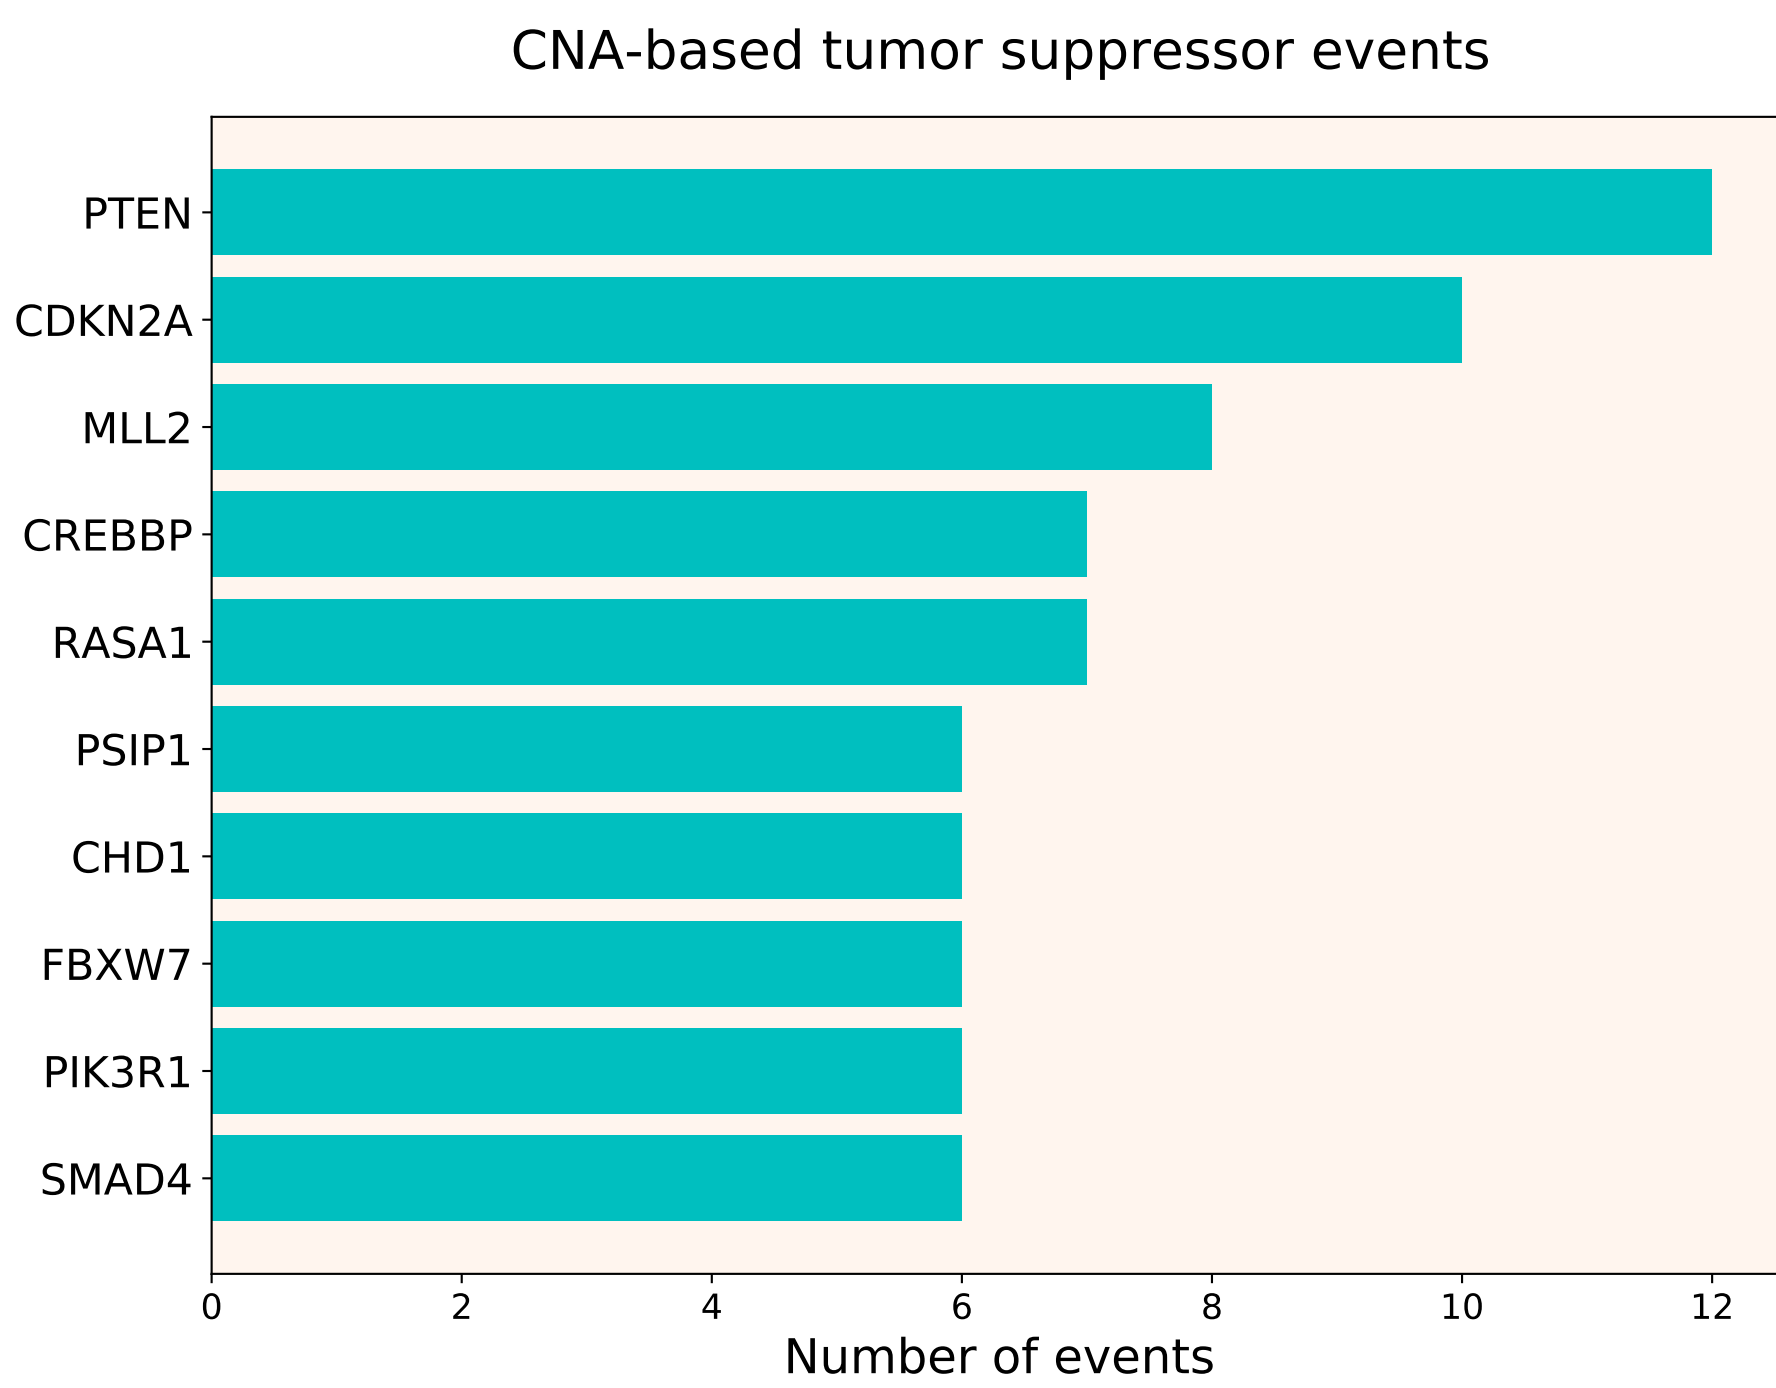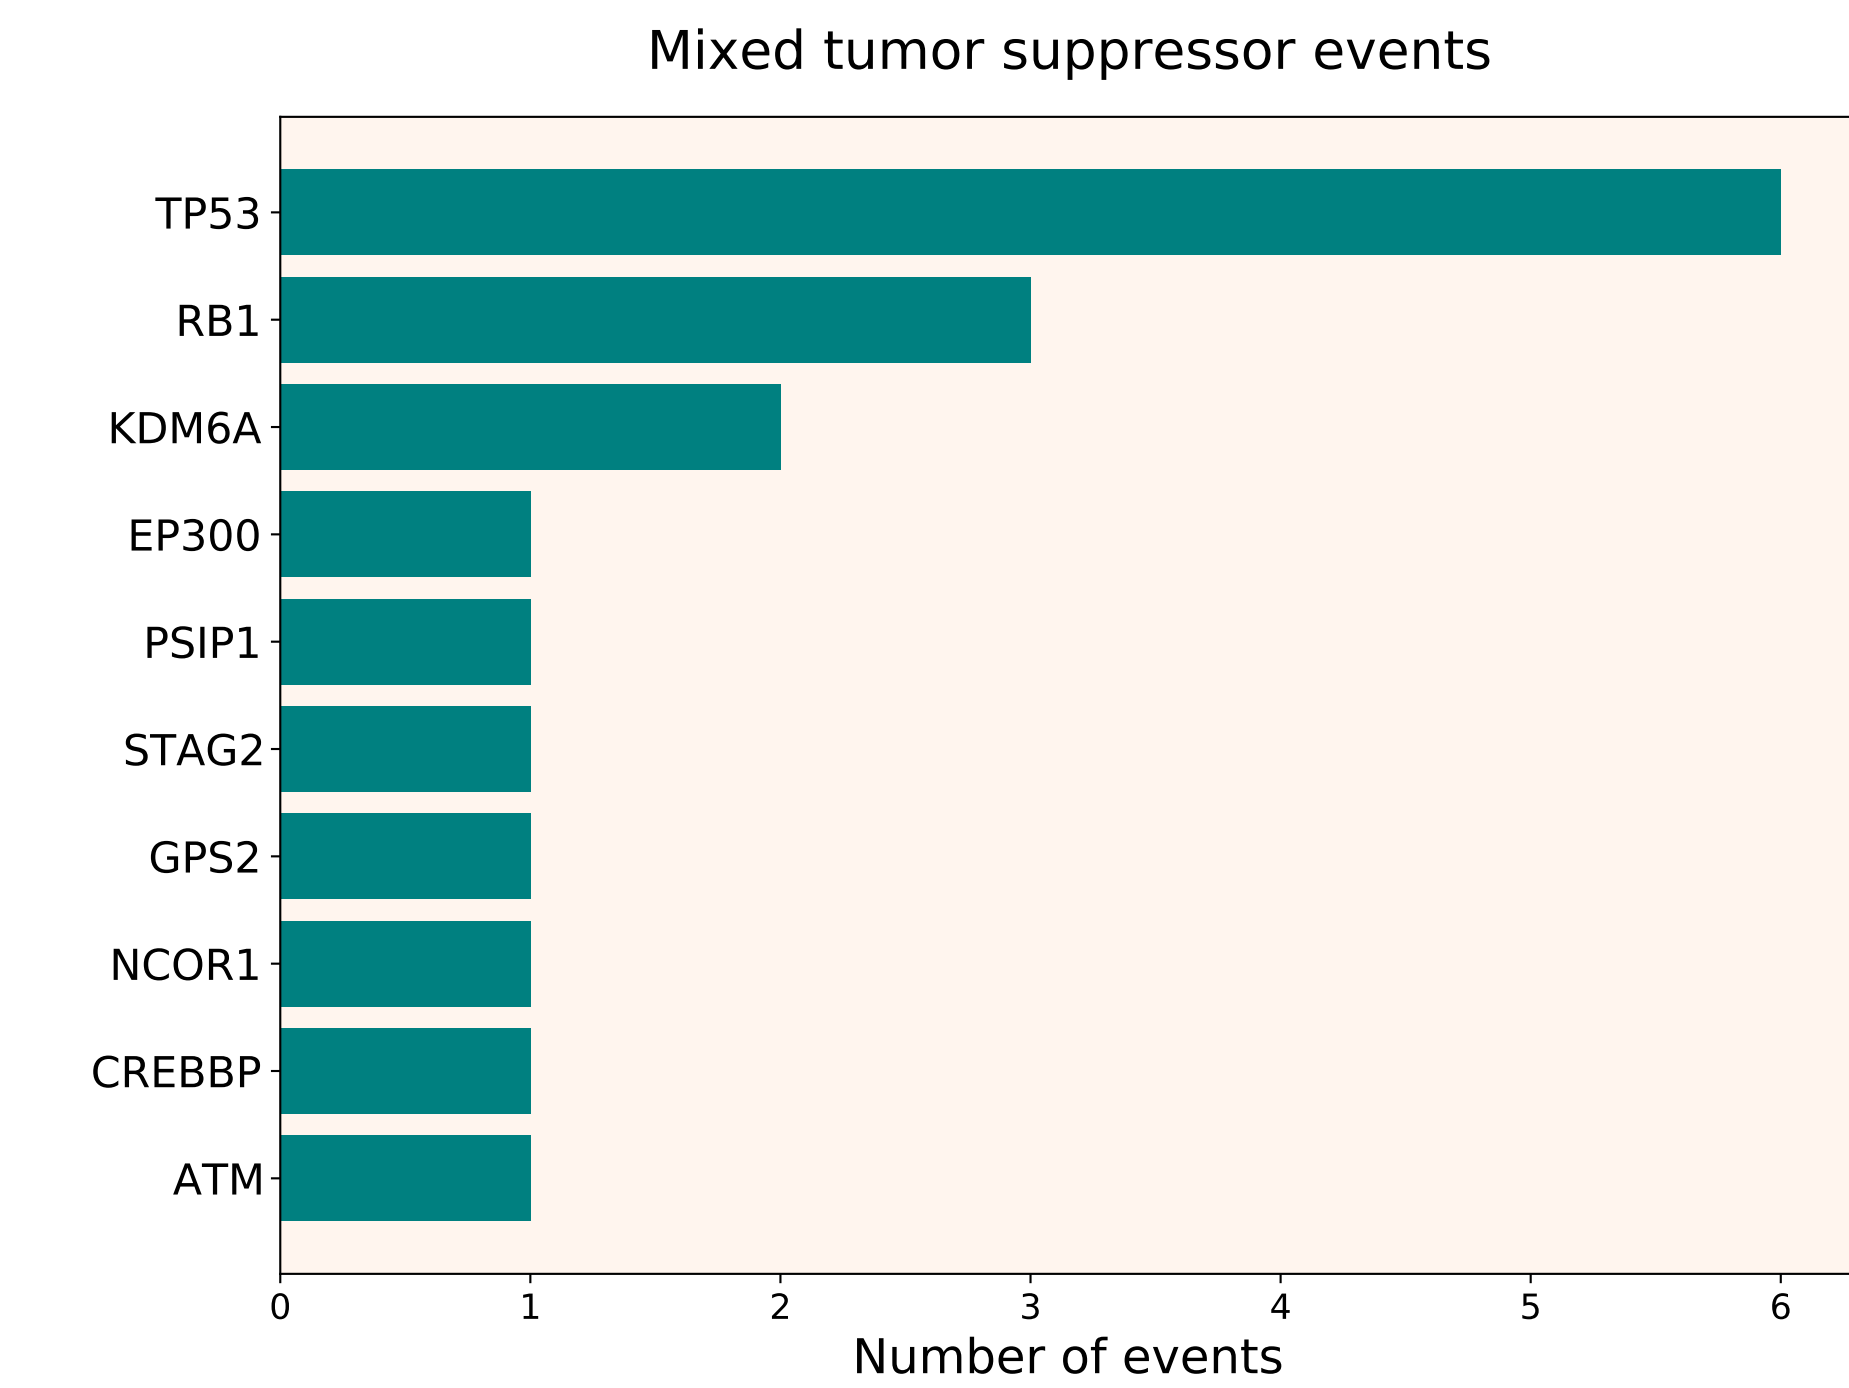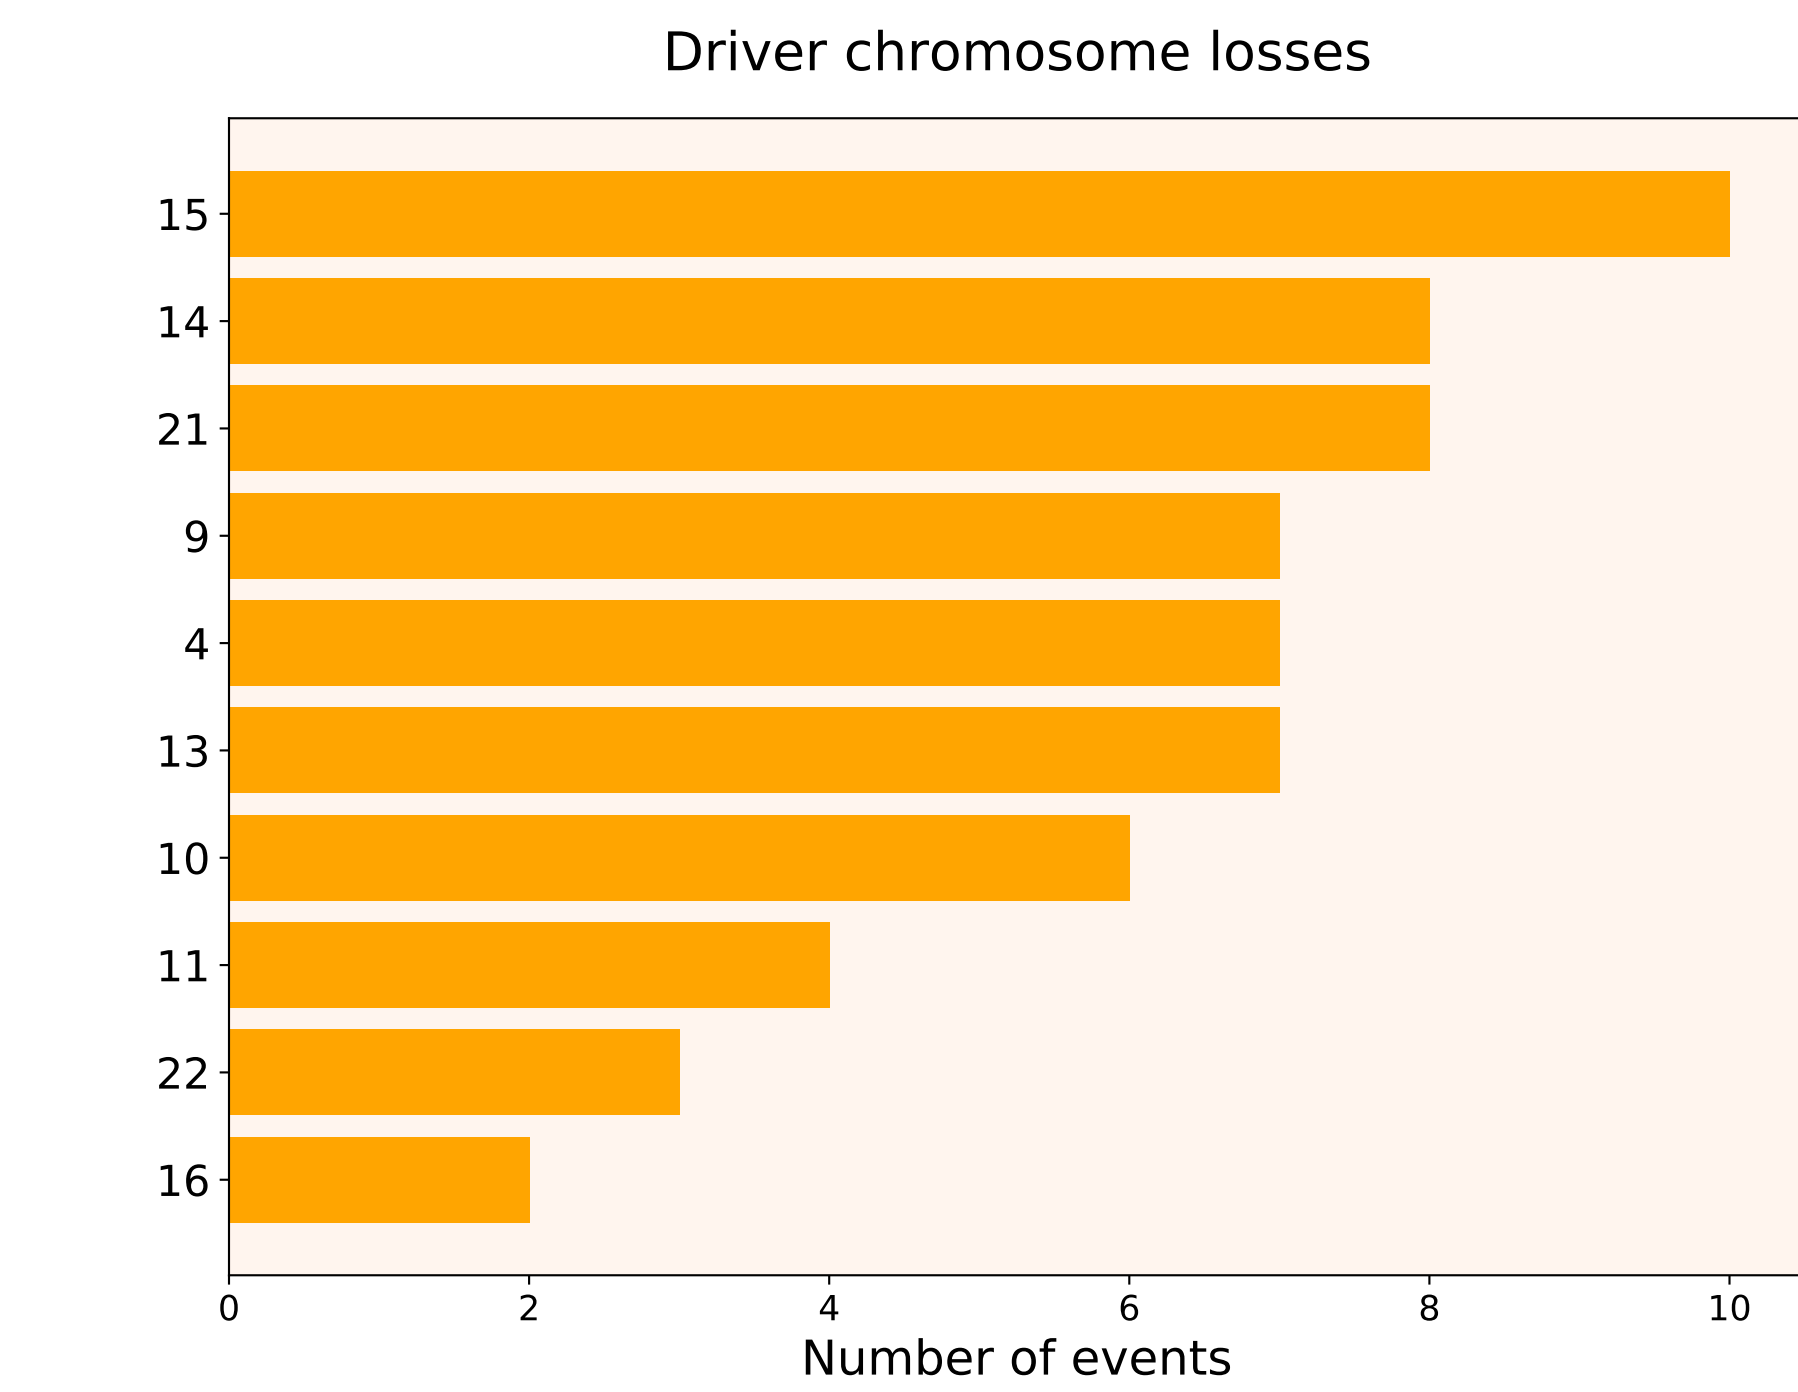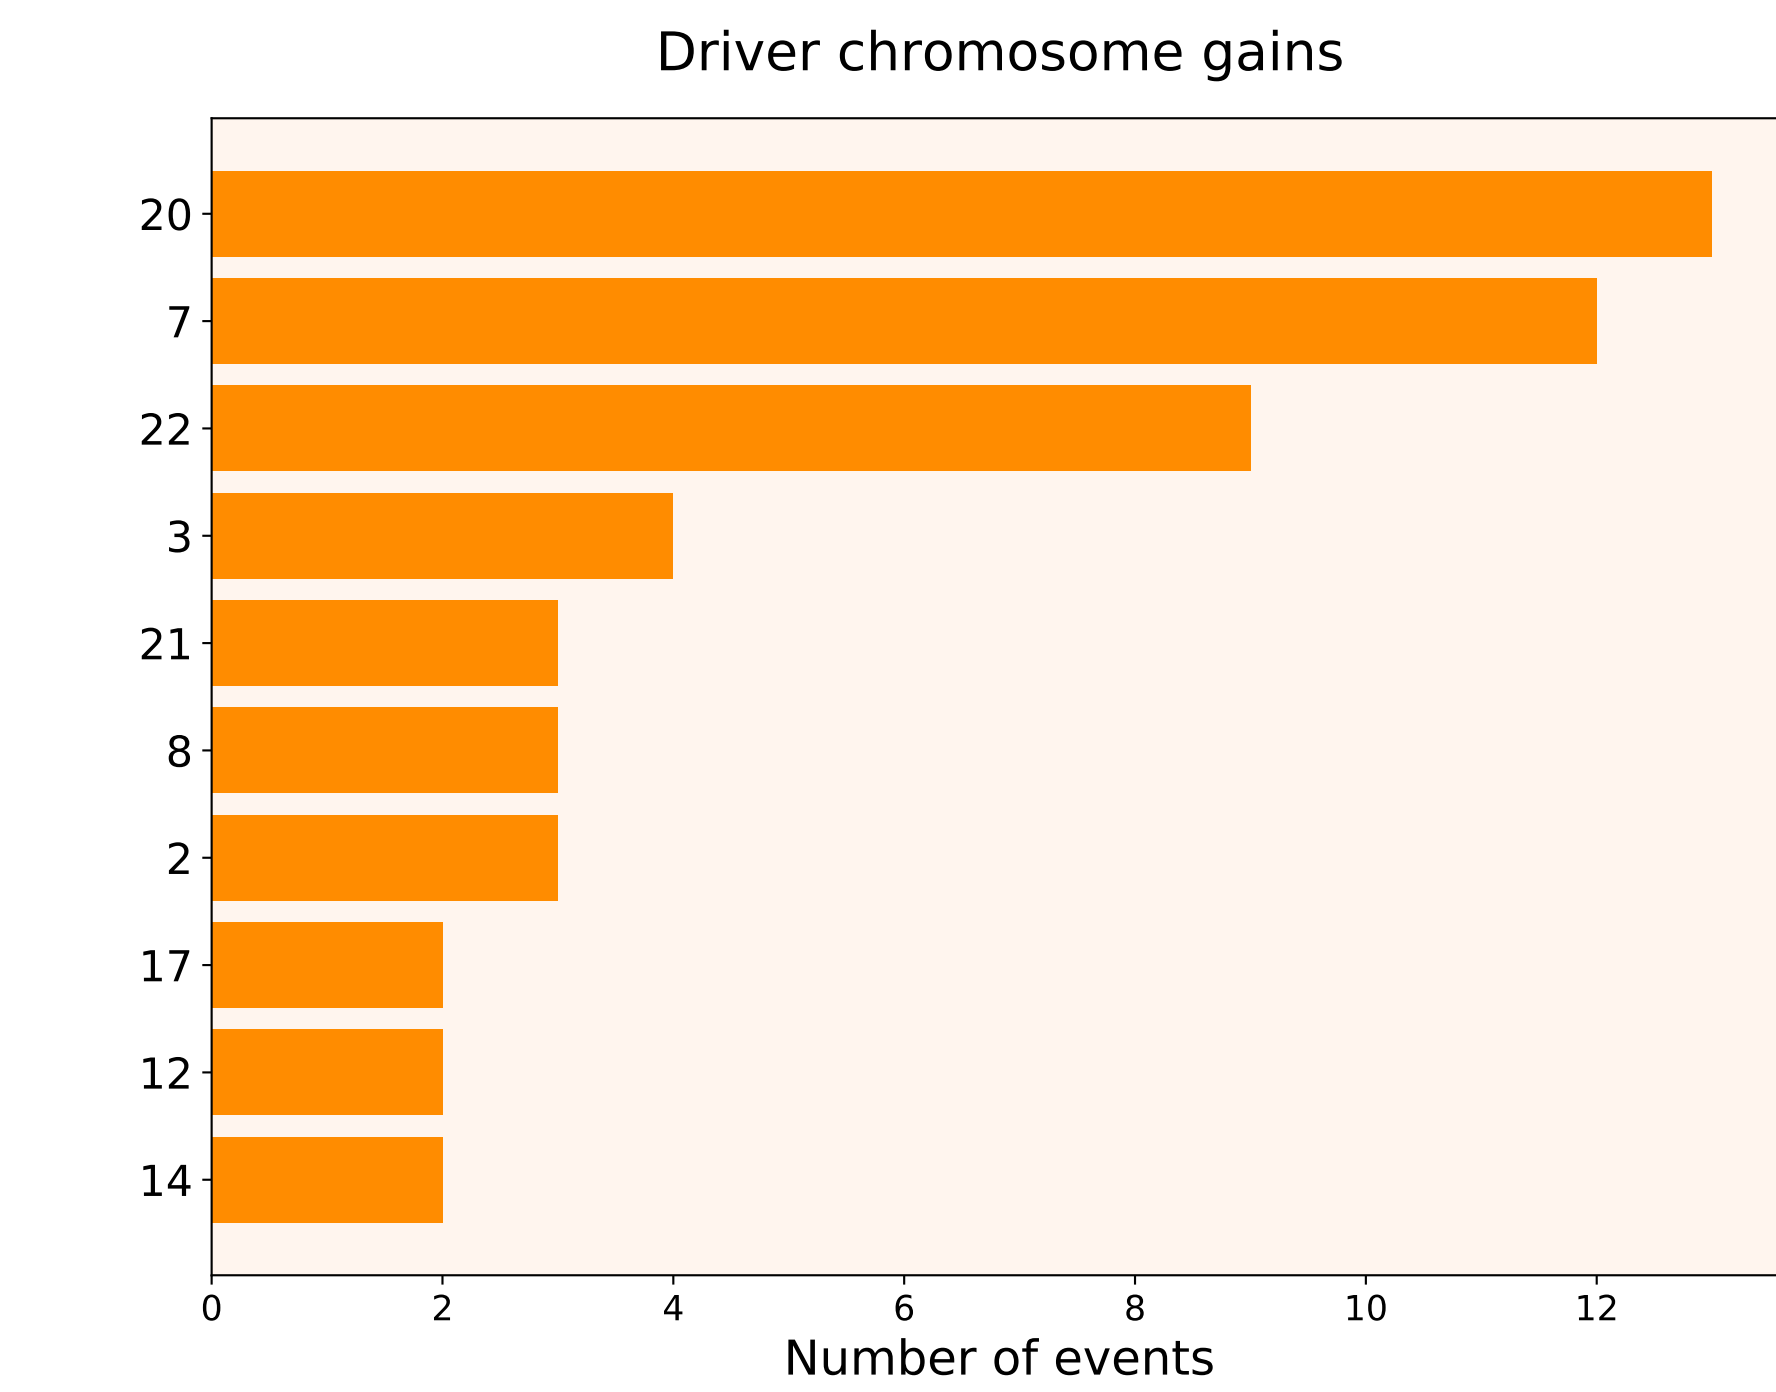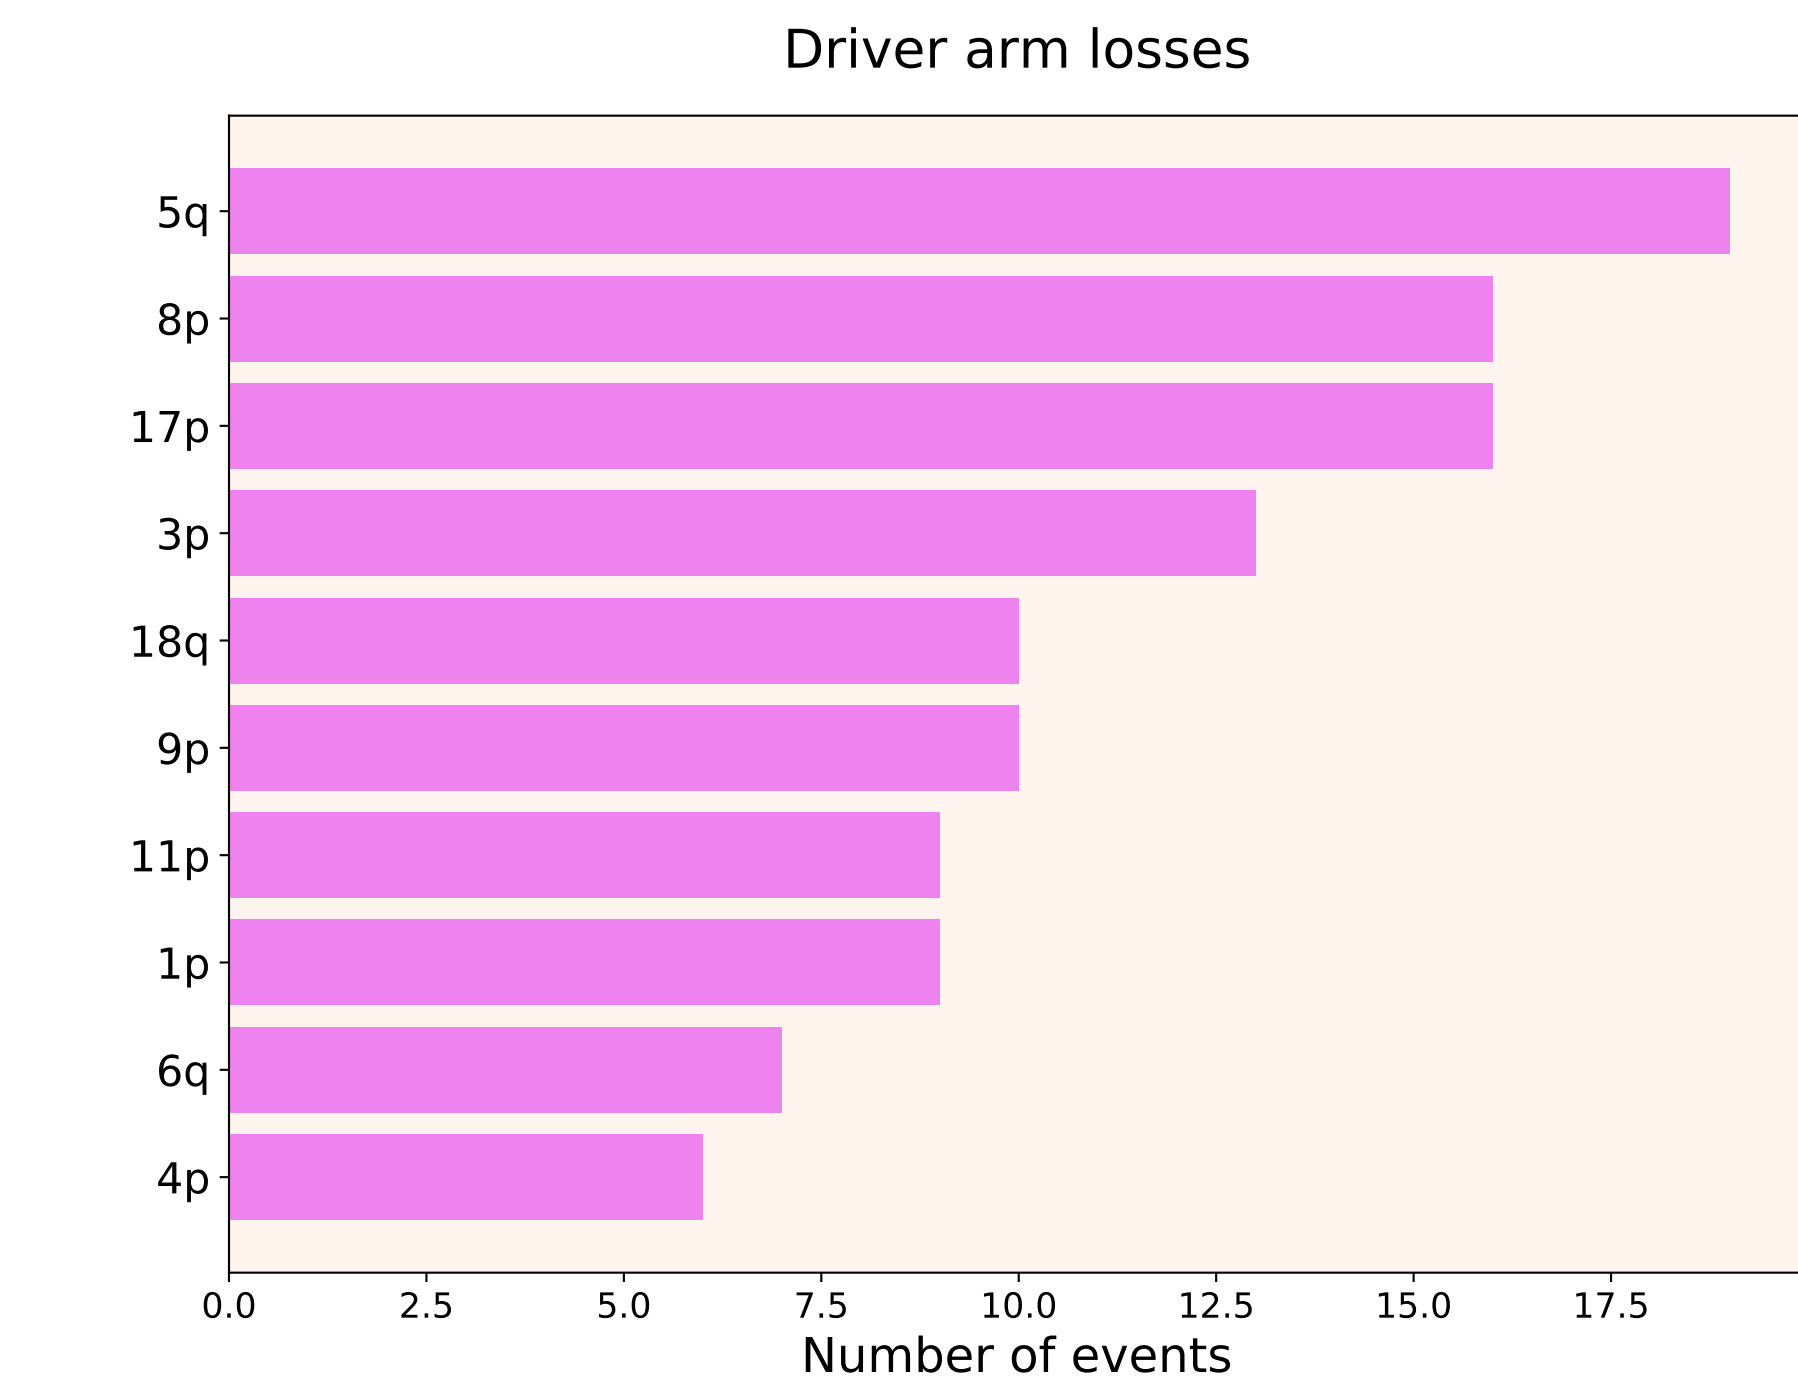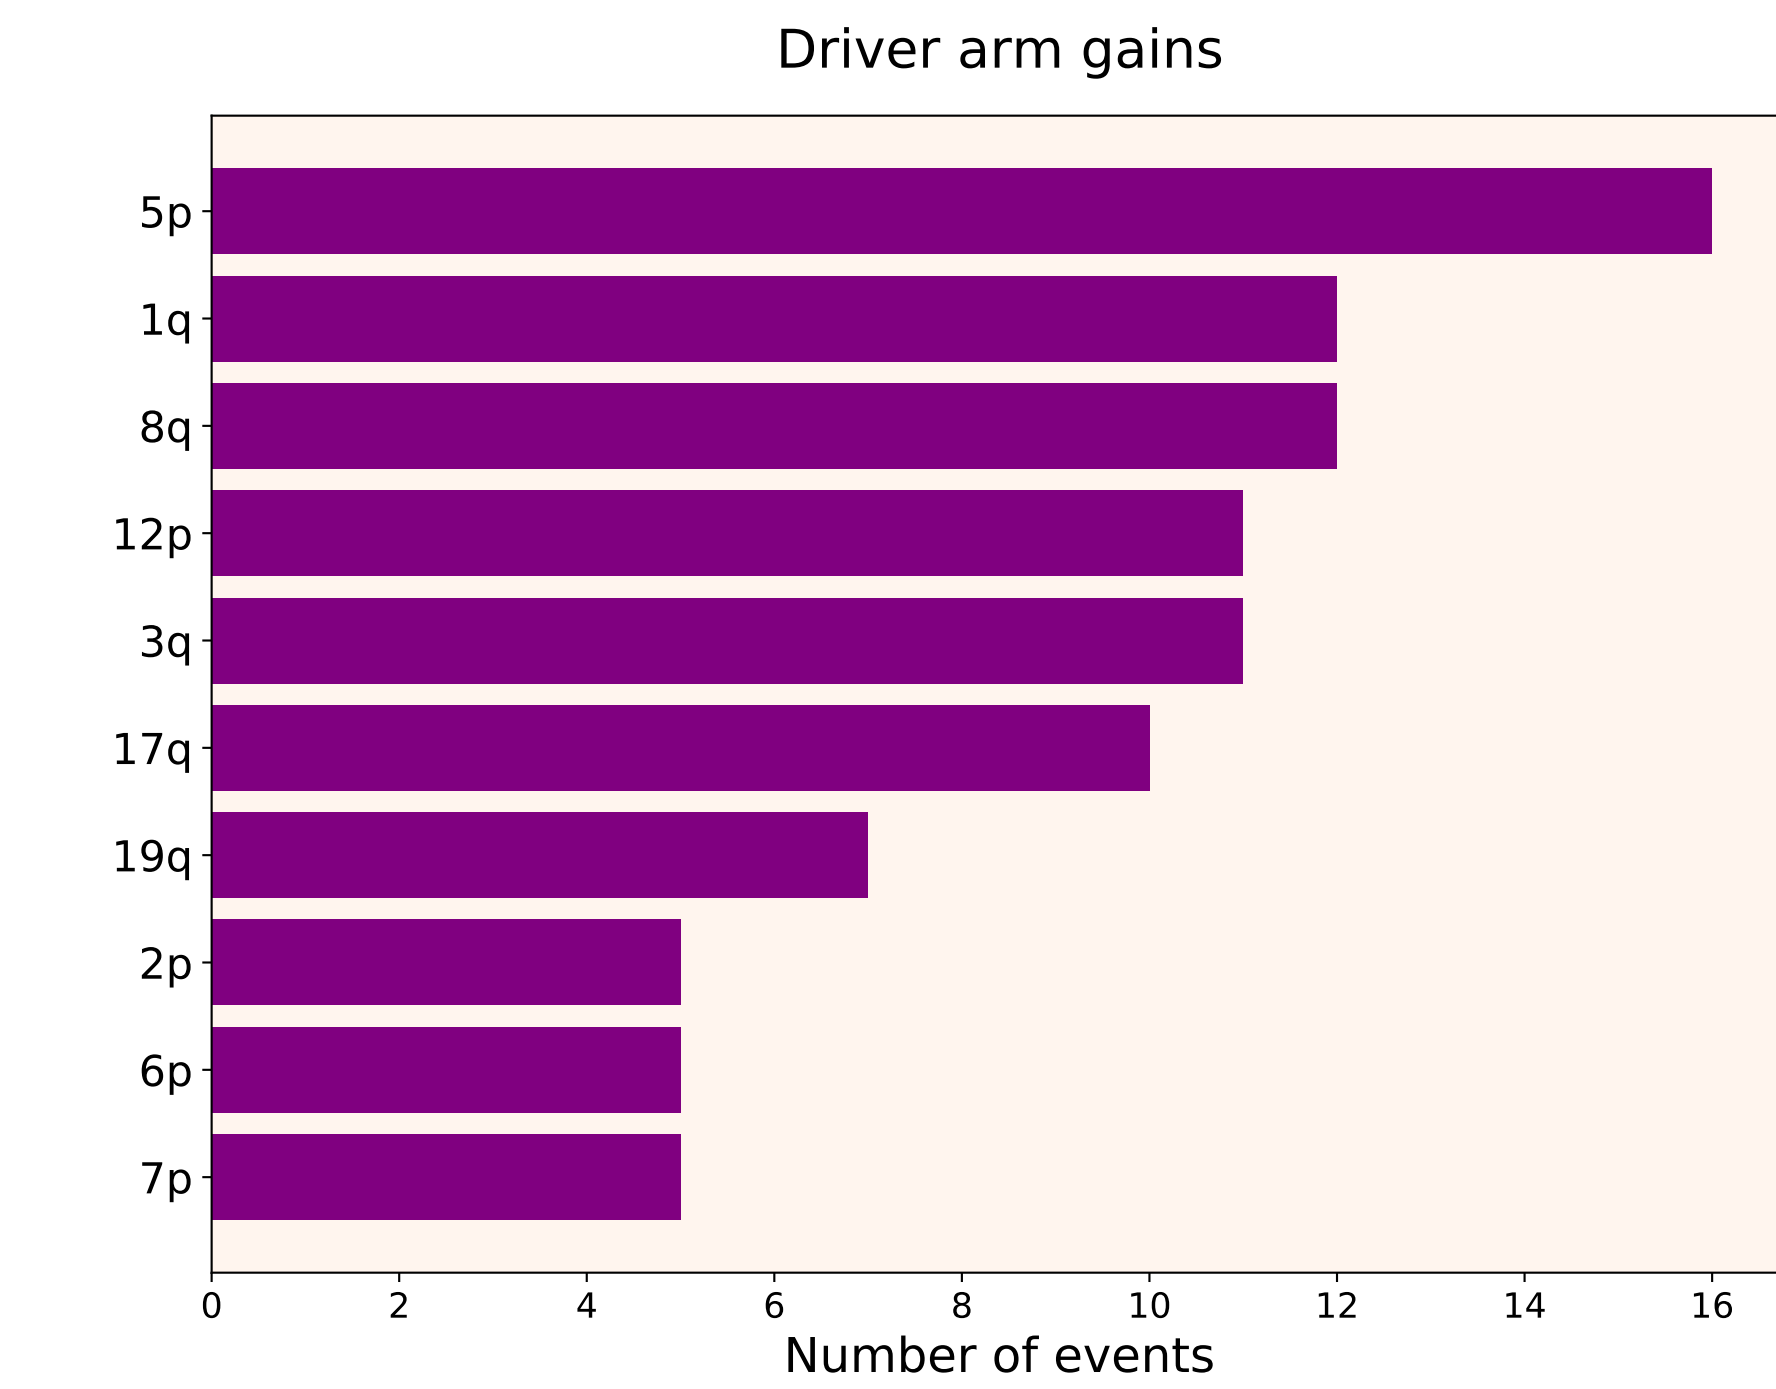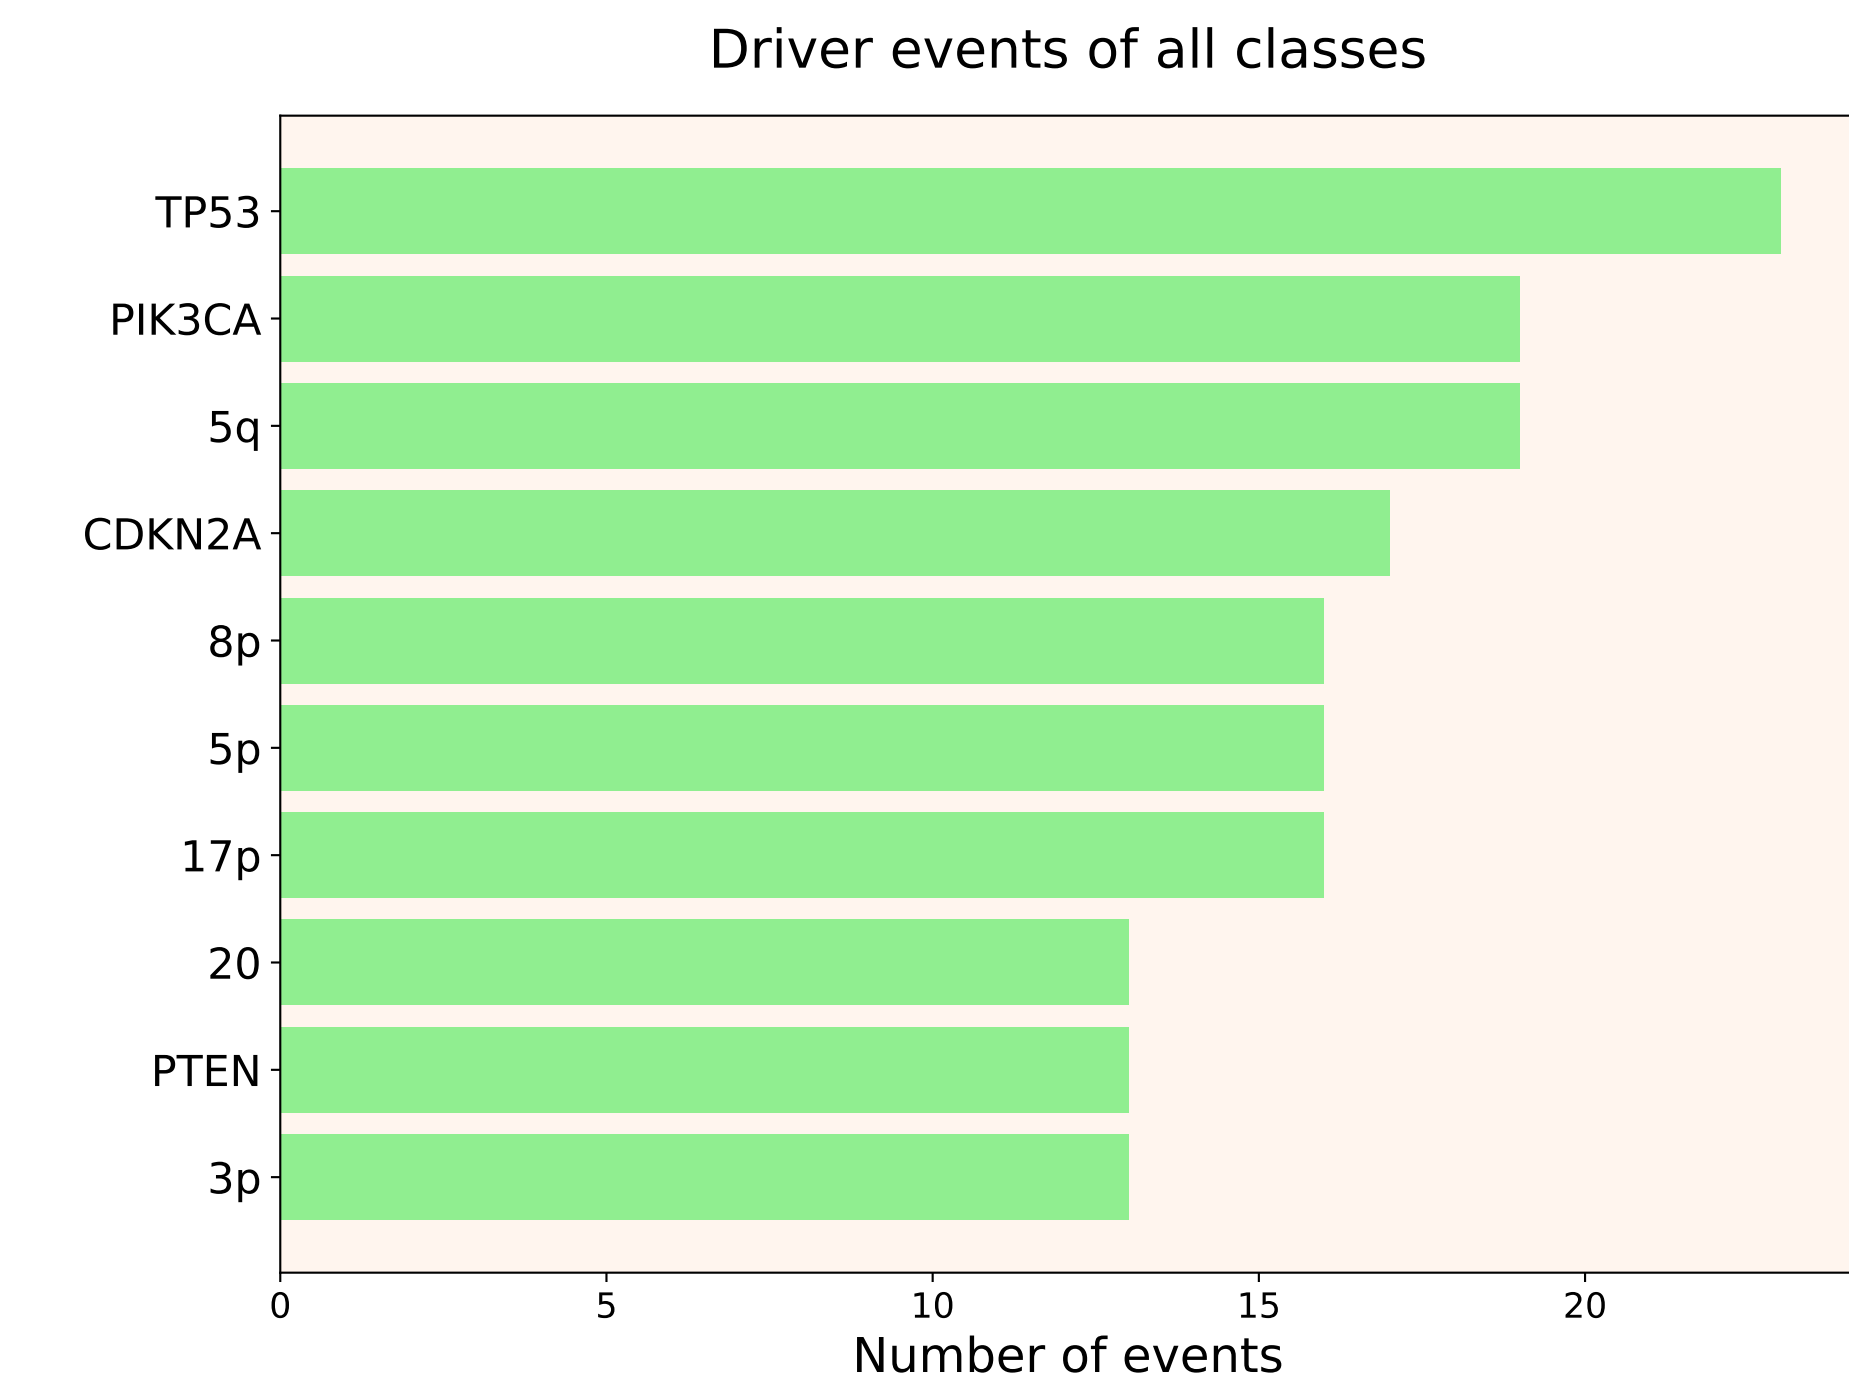

Supplement: Supplemental_Data_S1.zip [file Supplemental_Data_S1.zip]

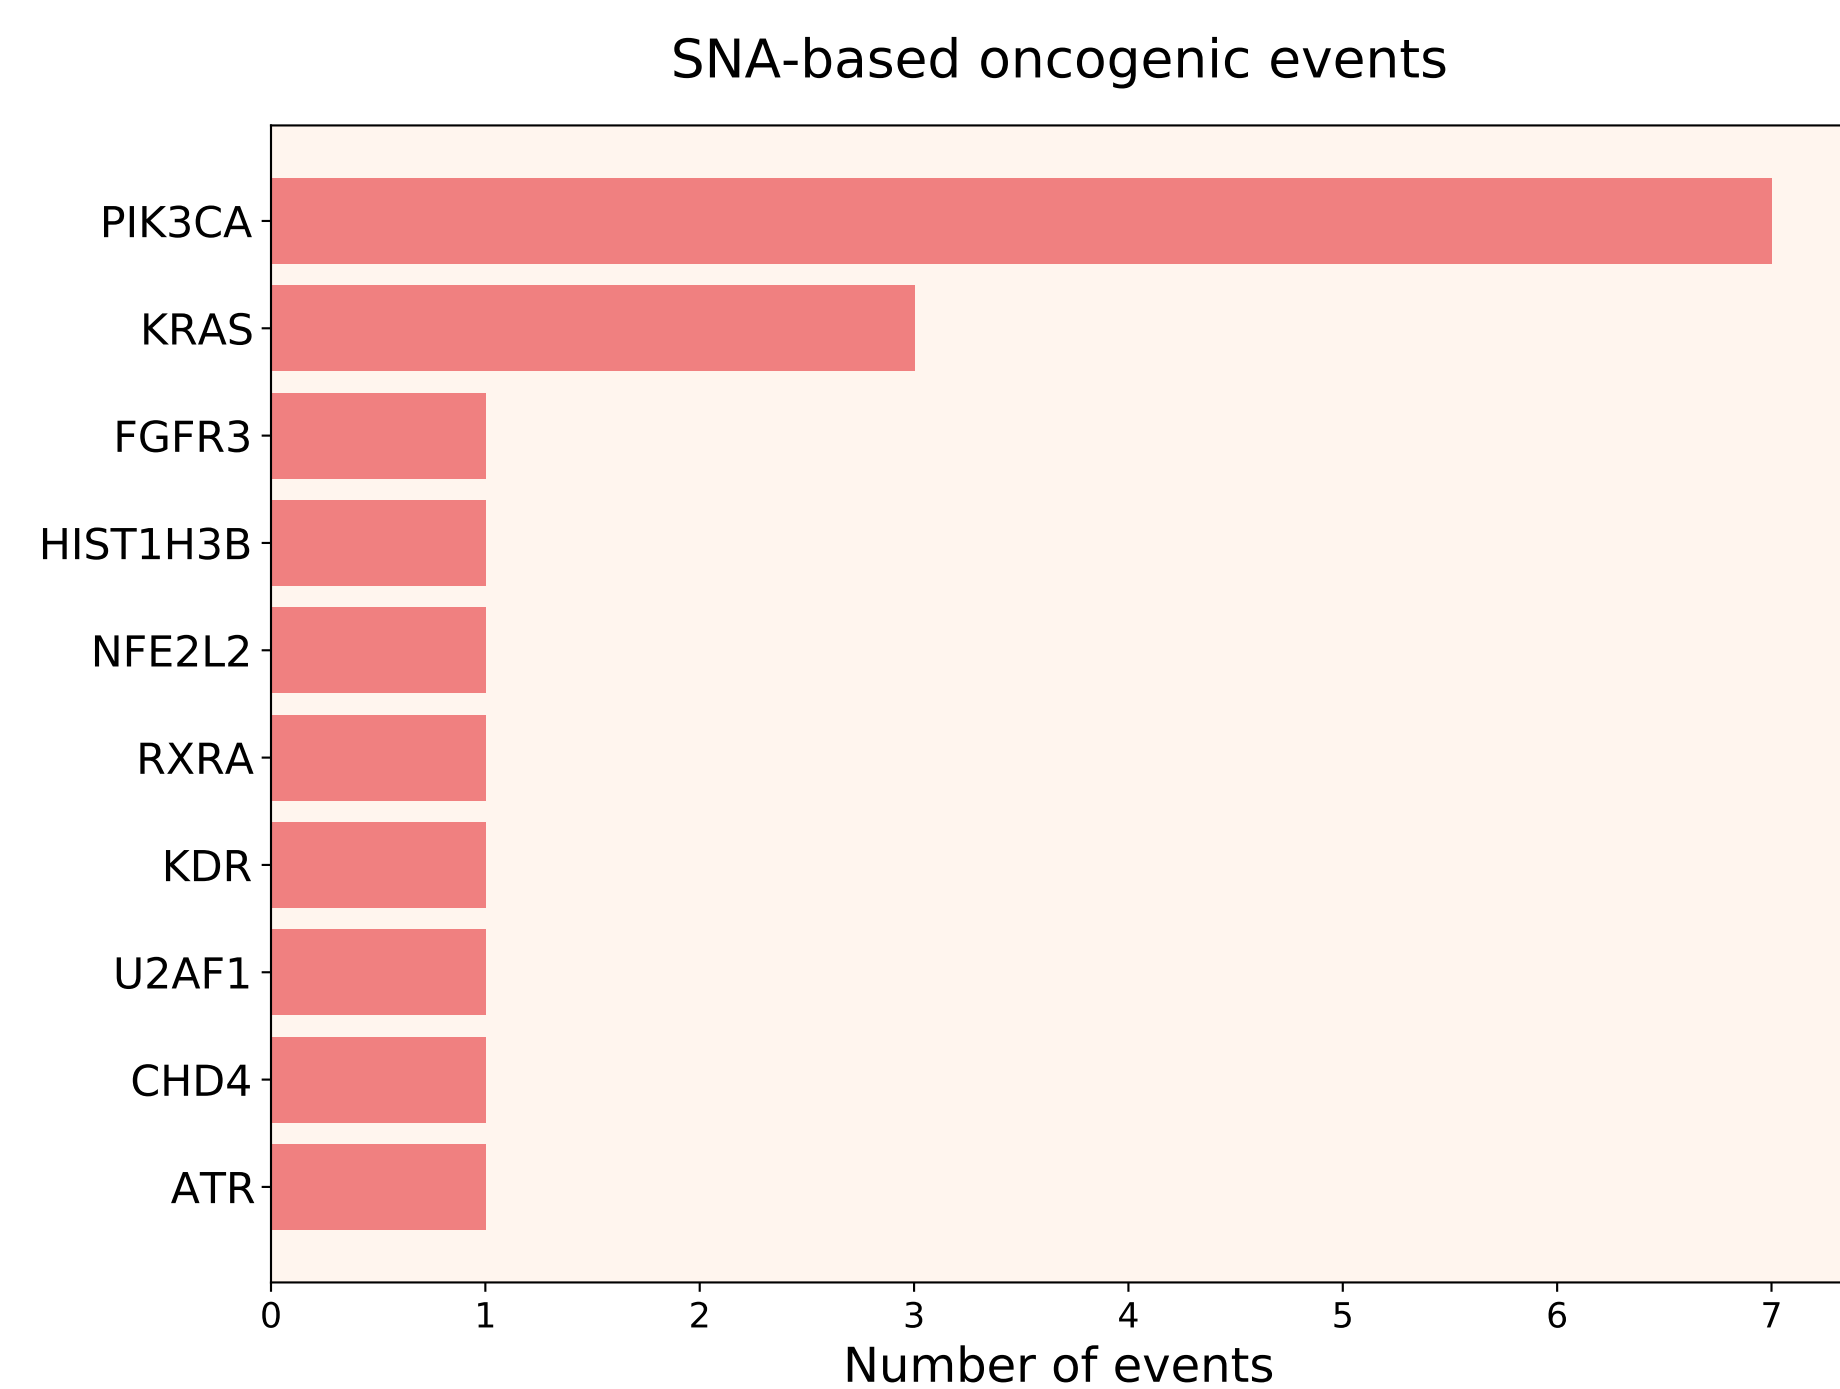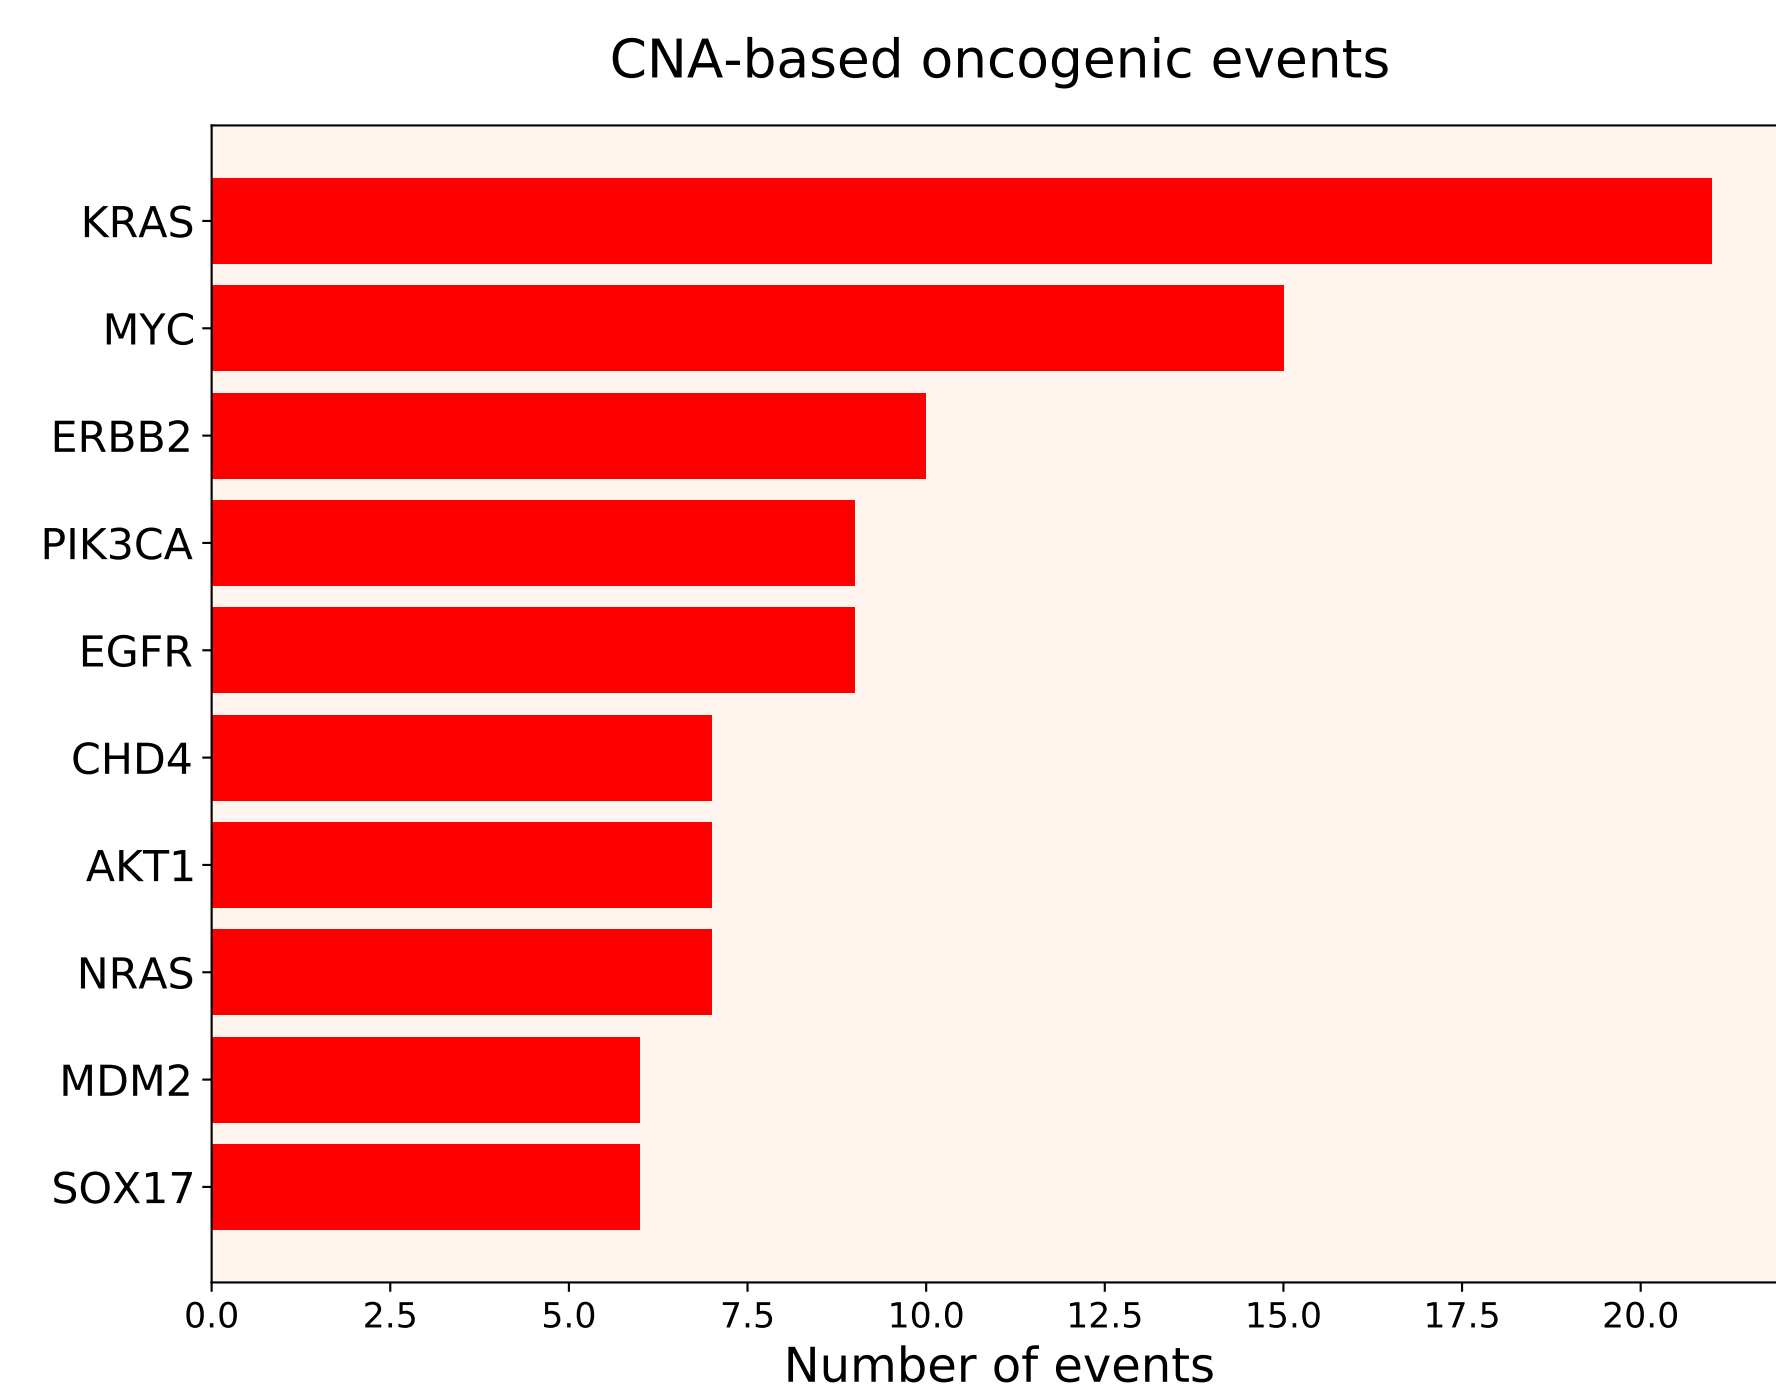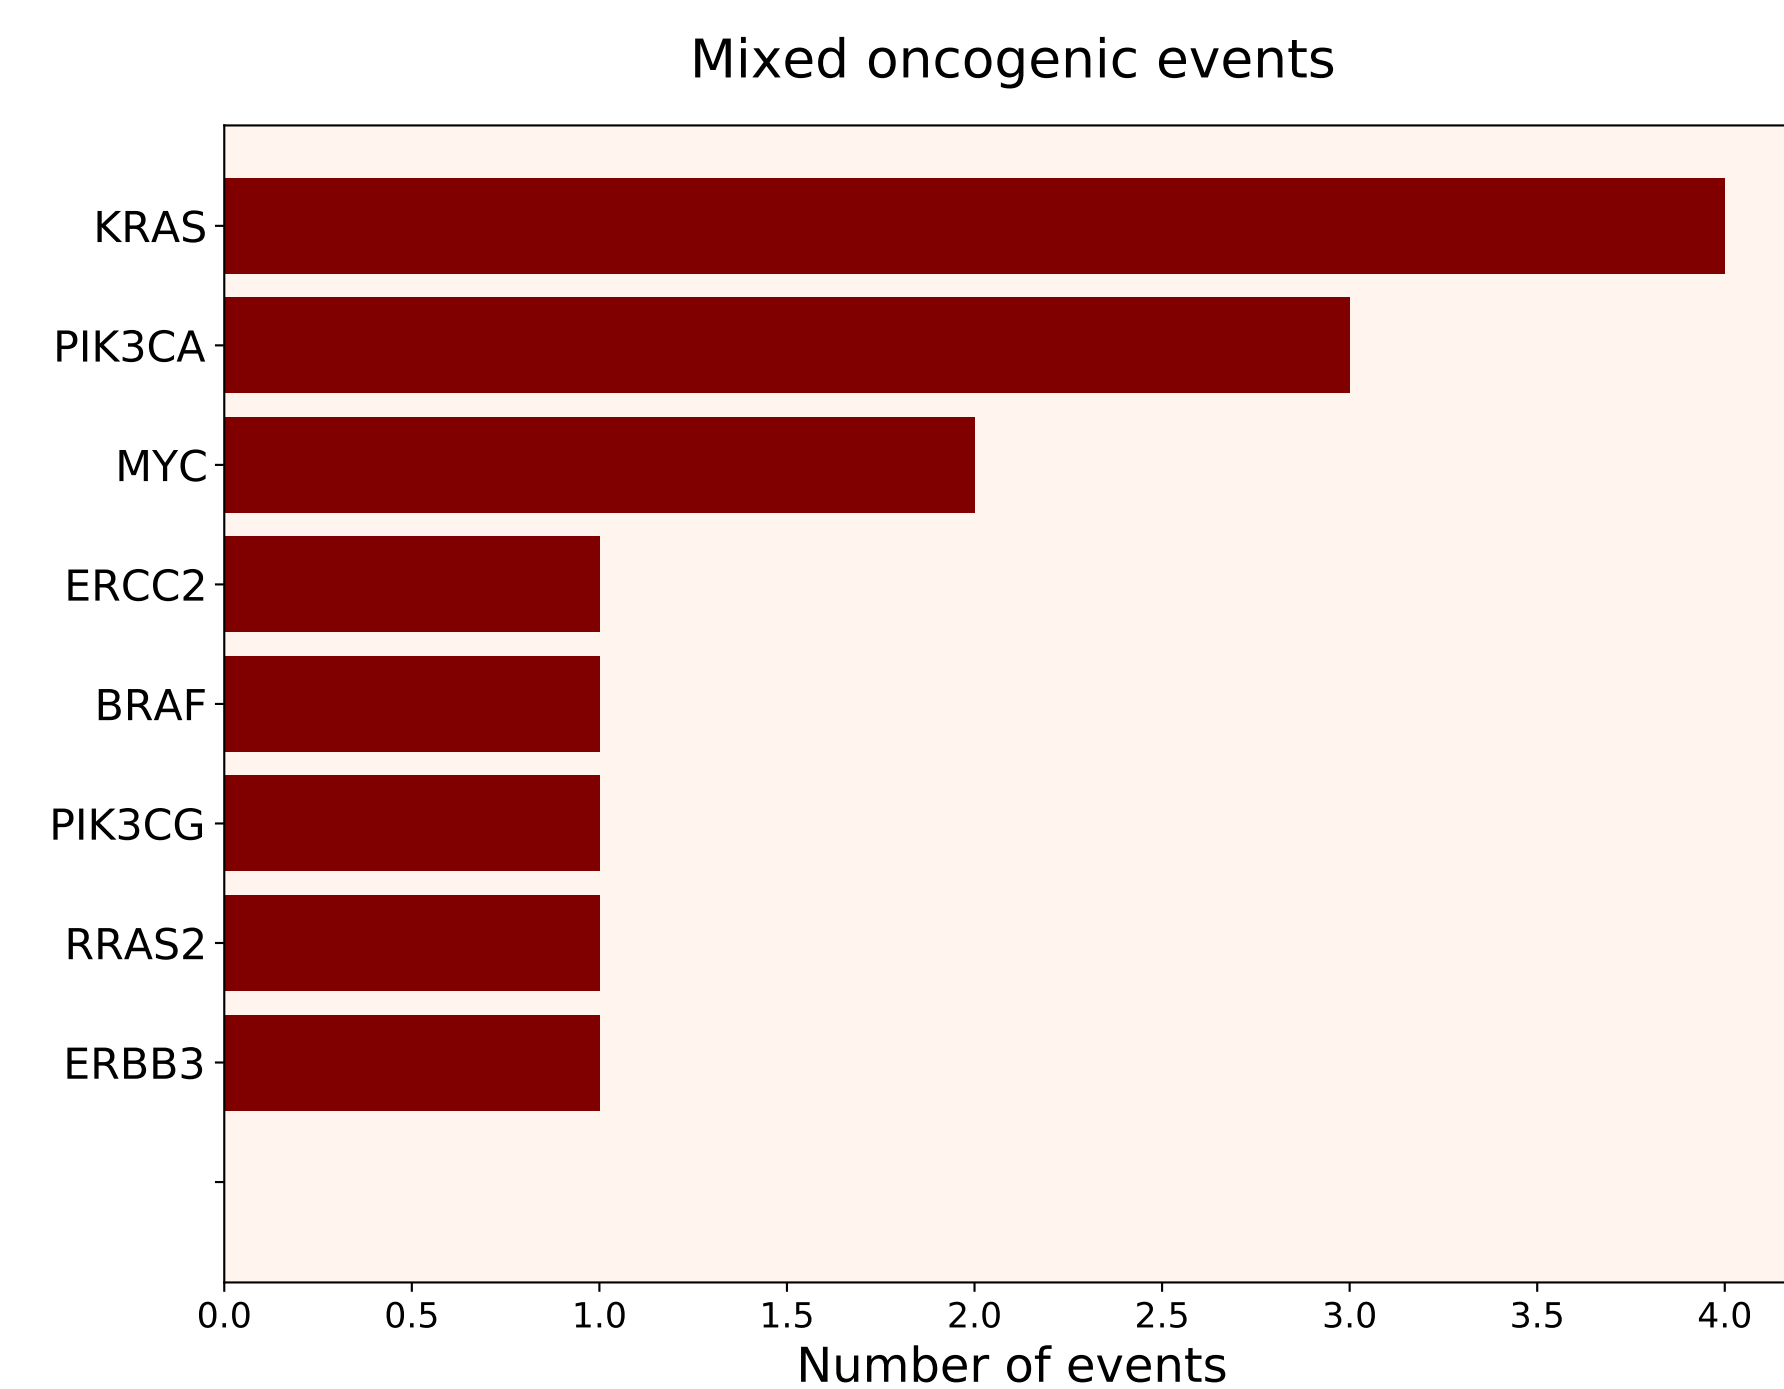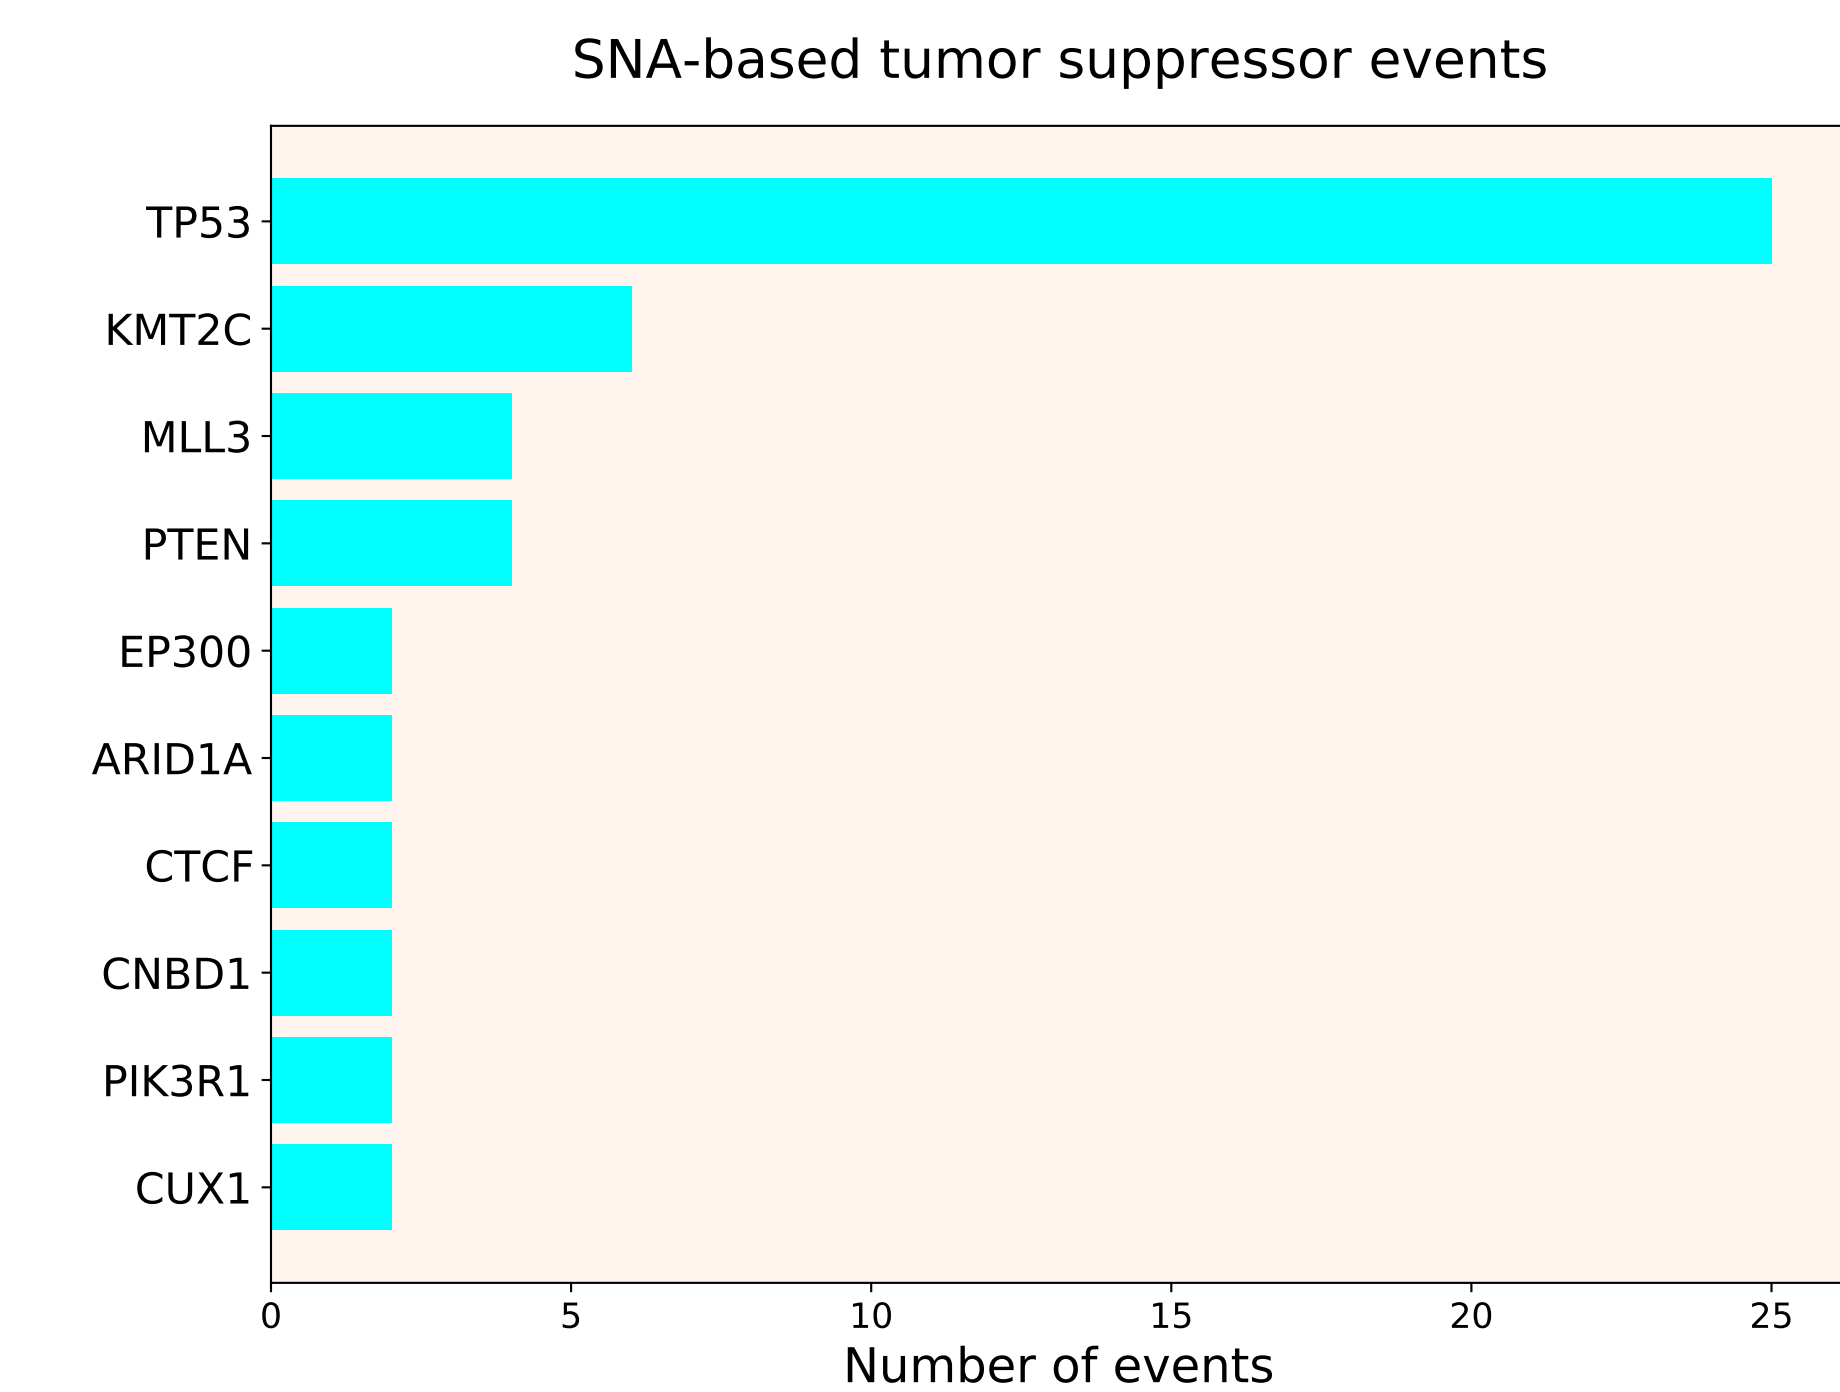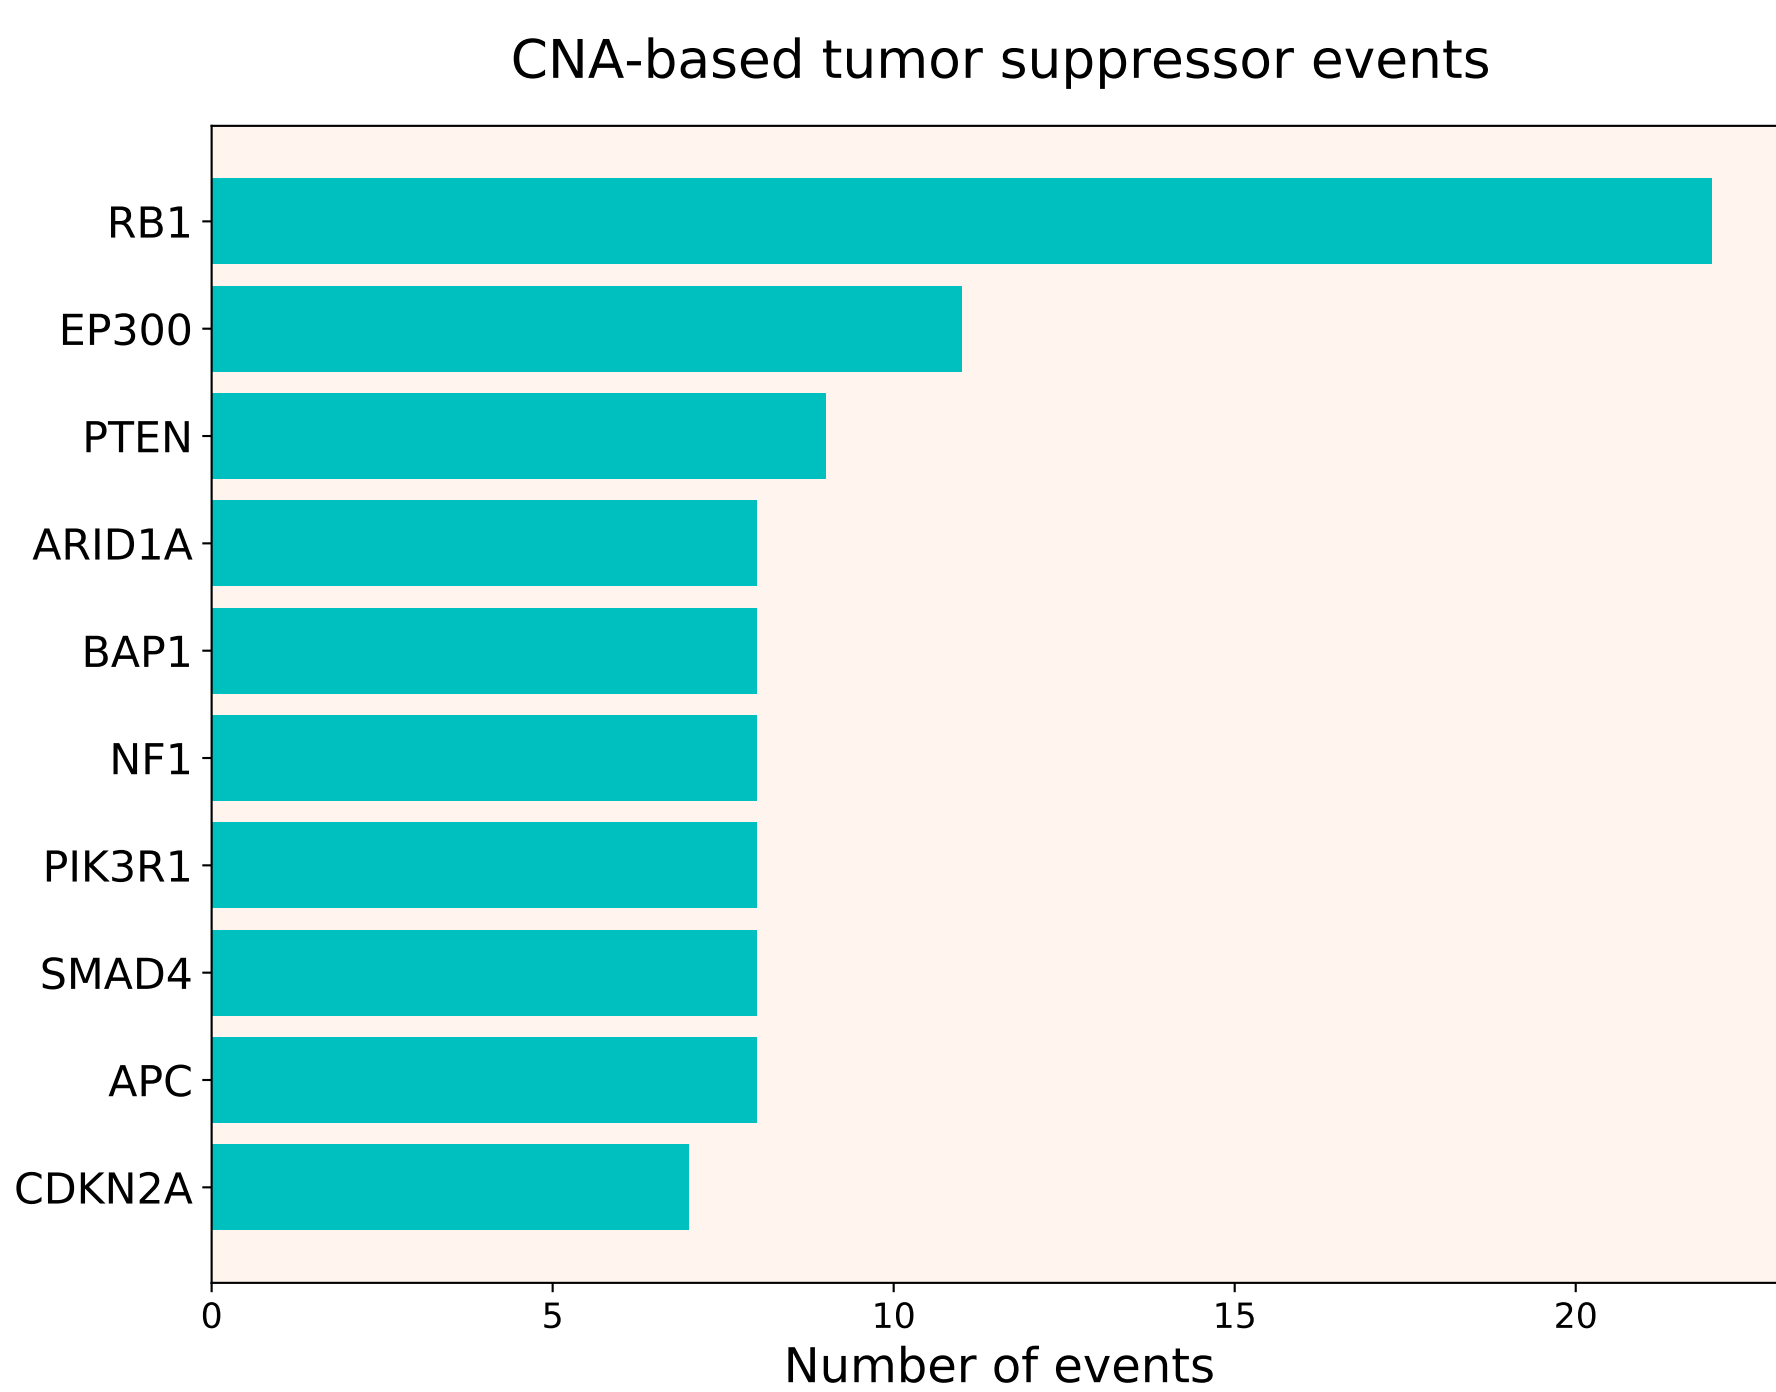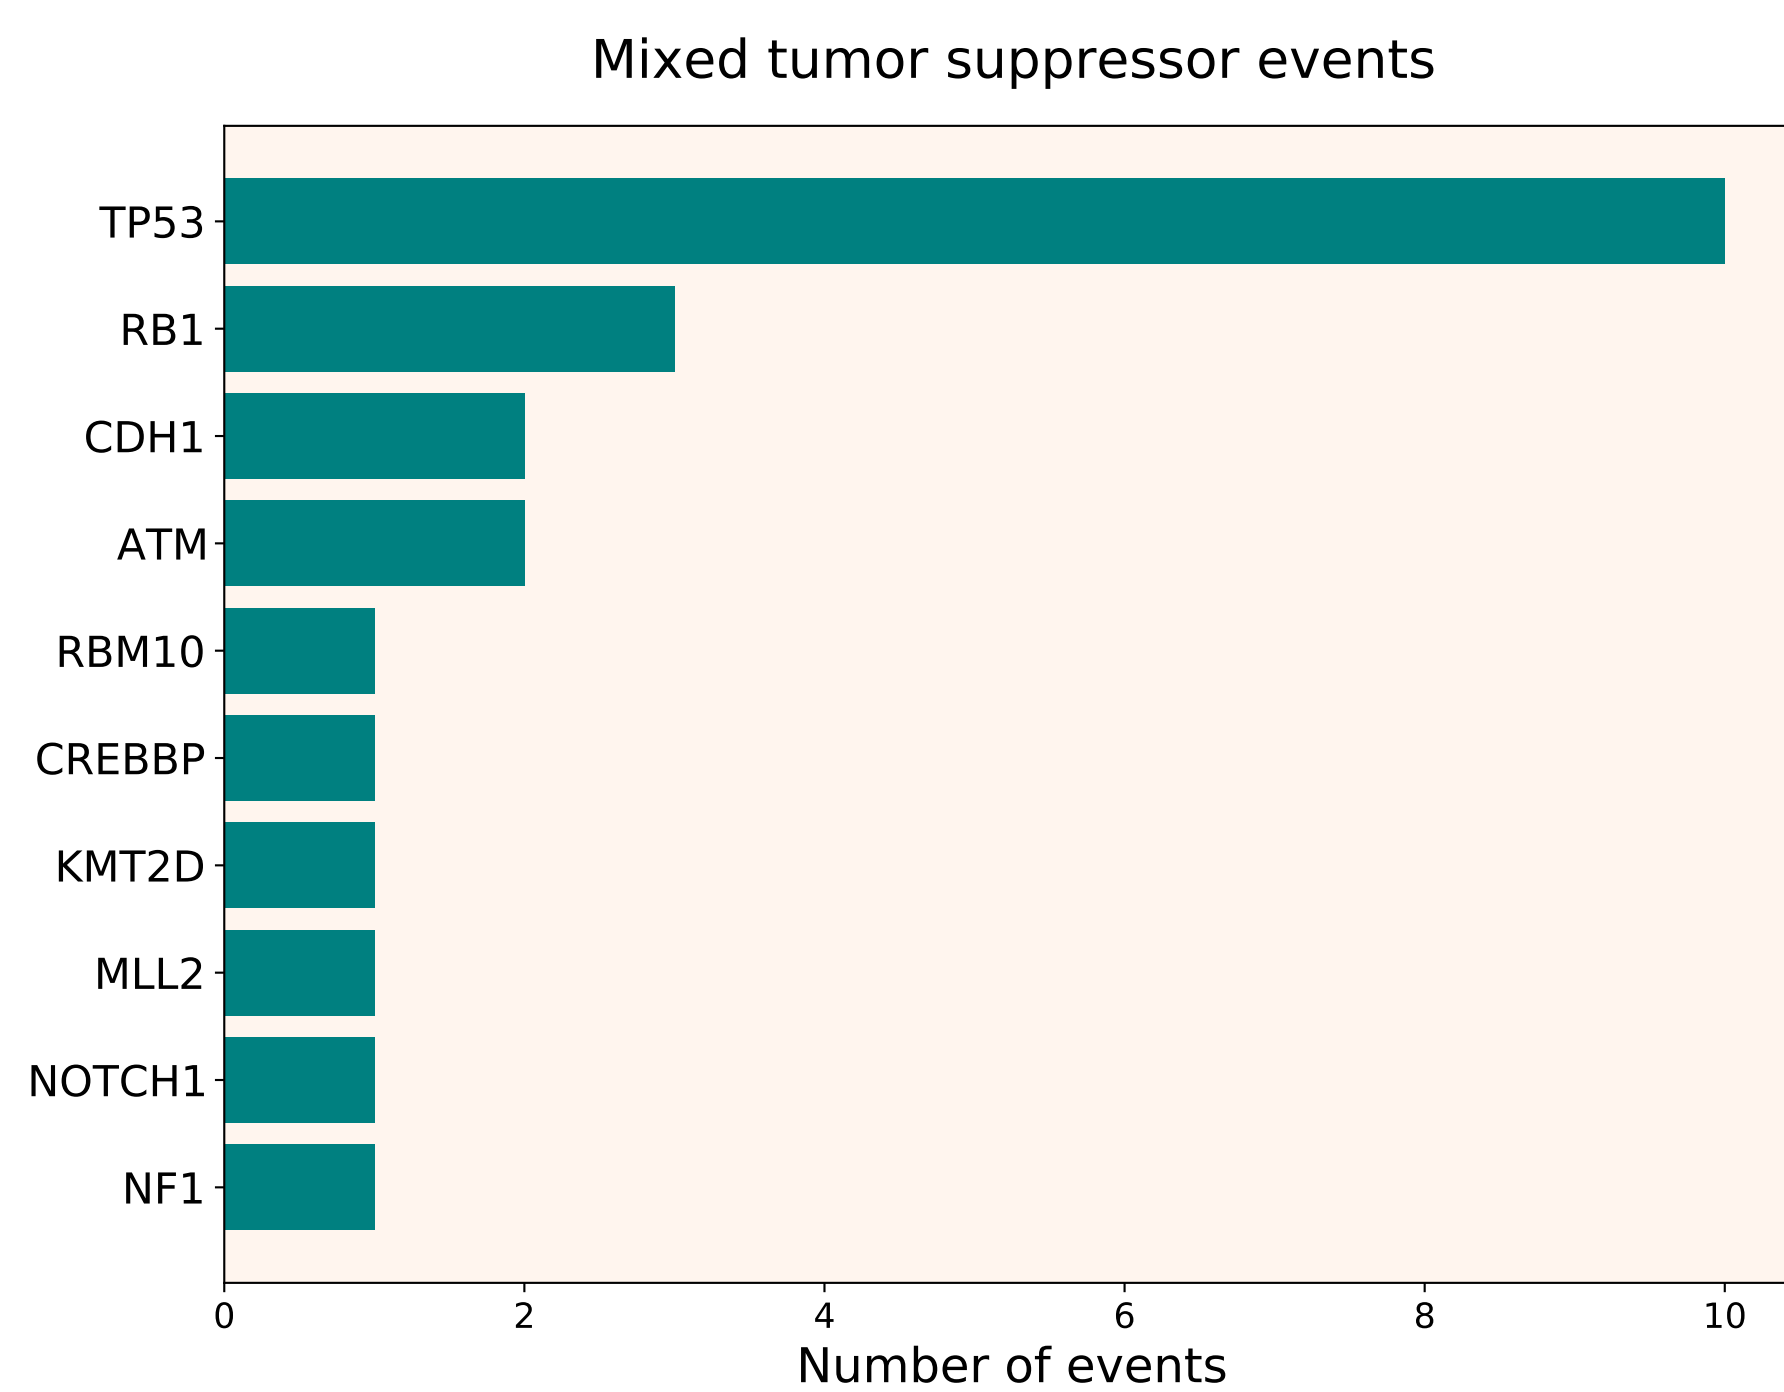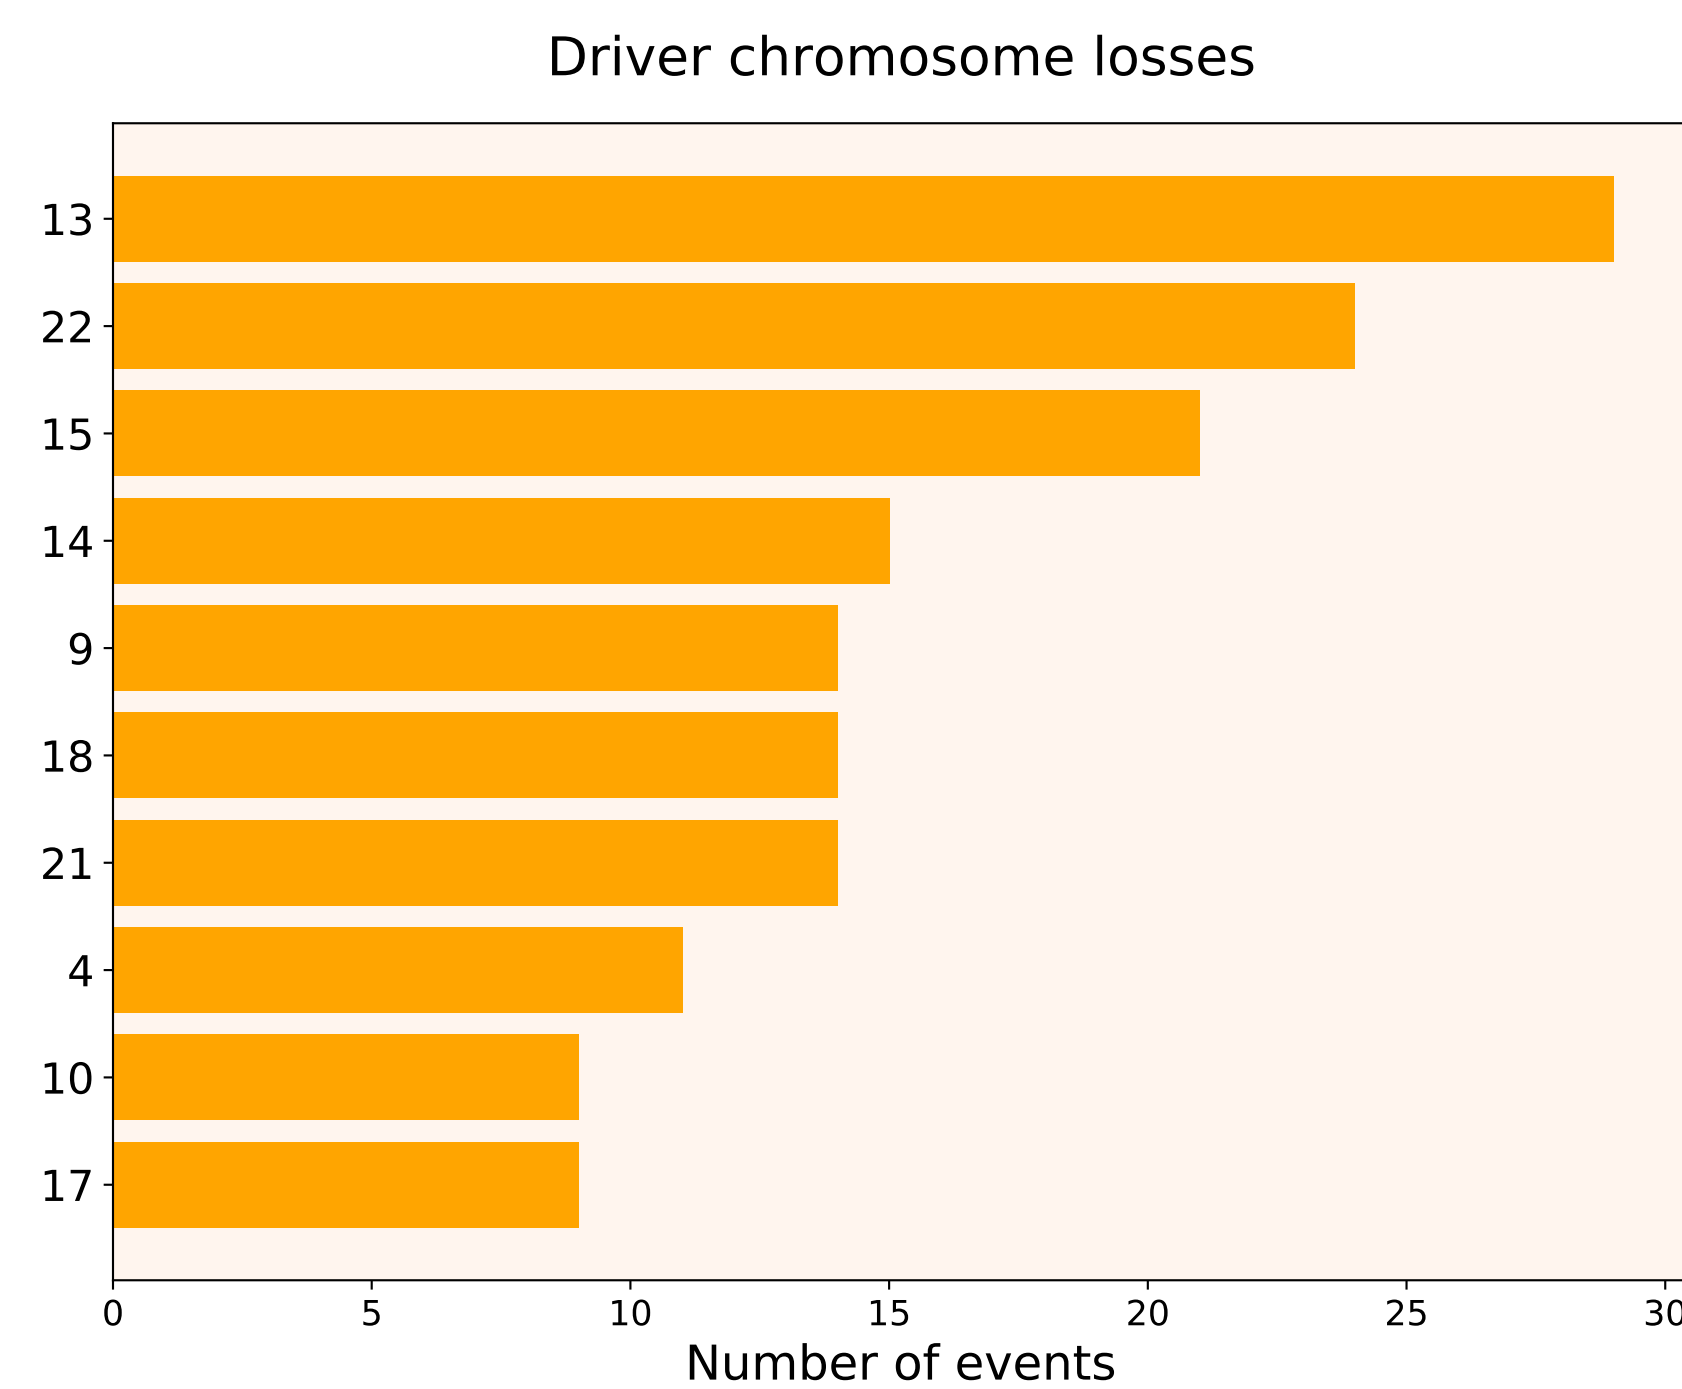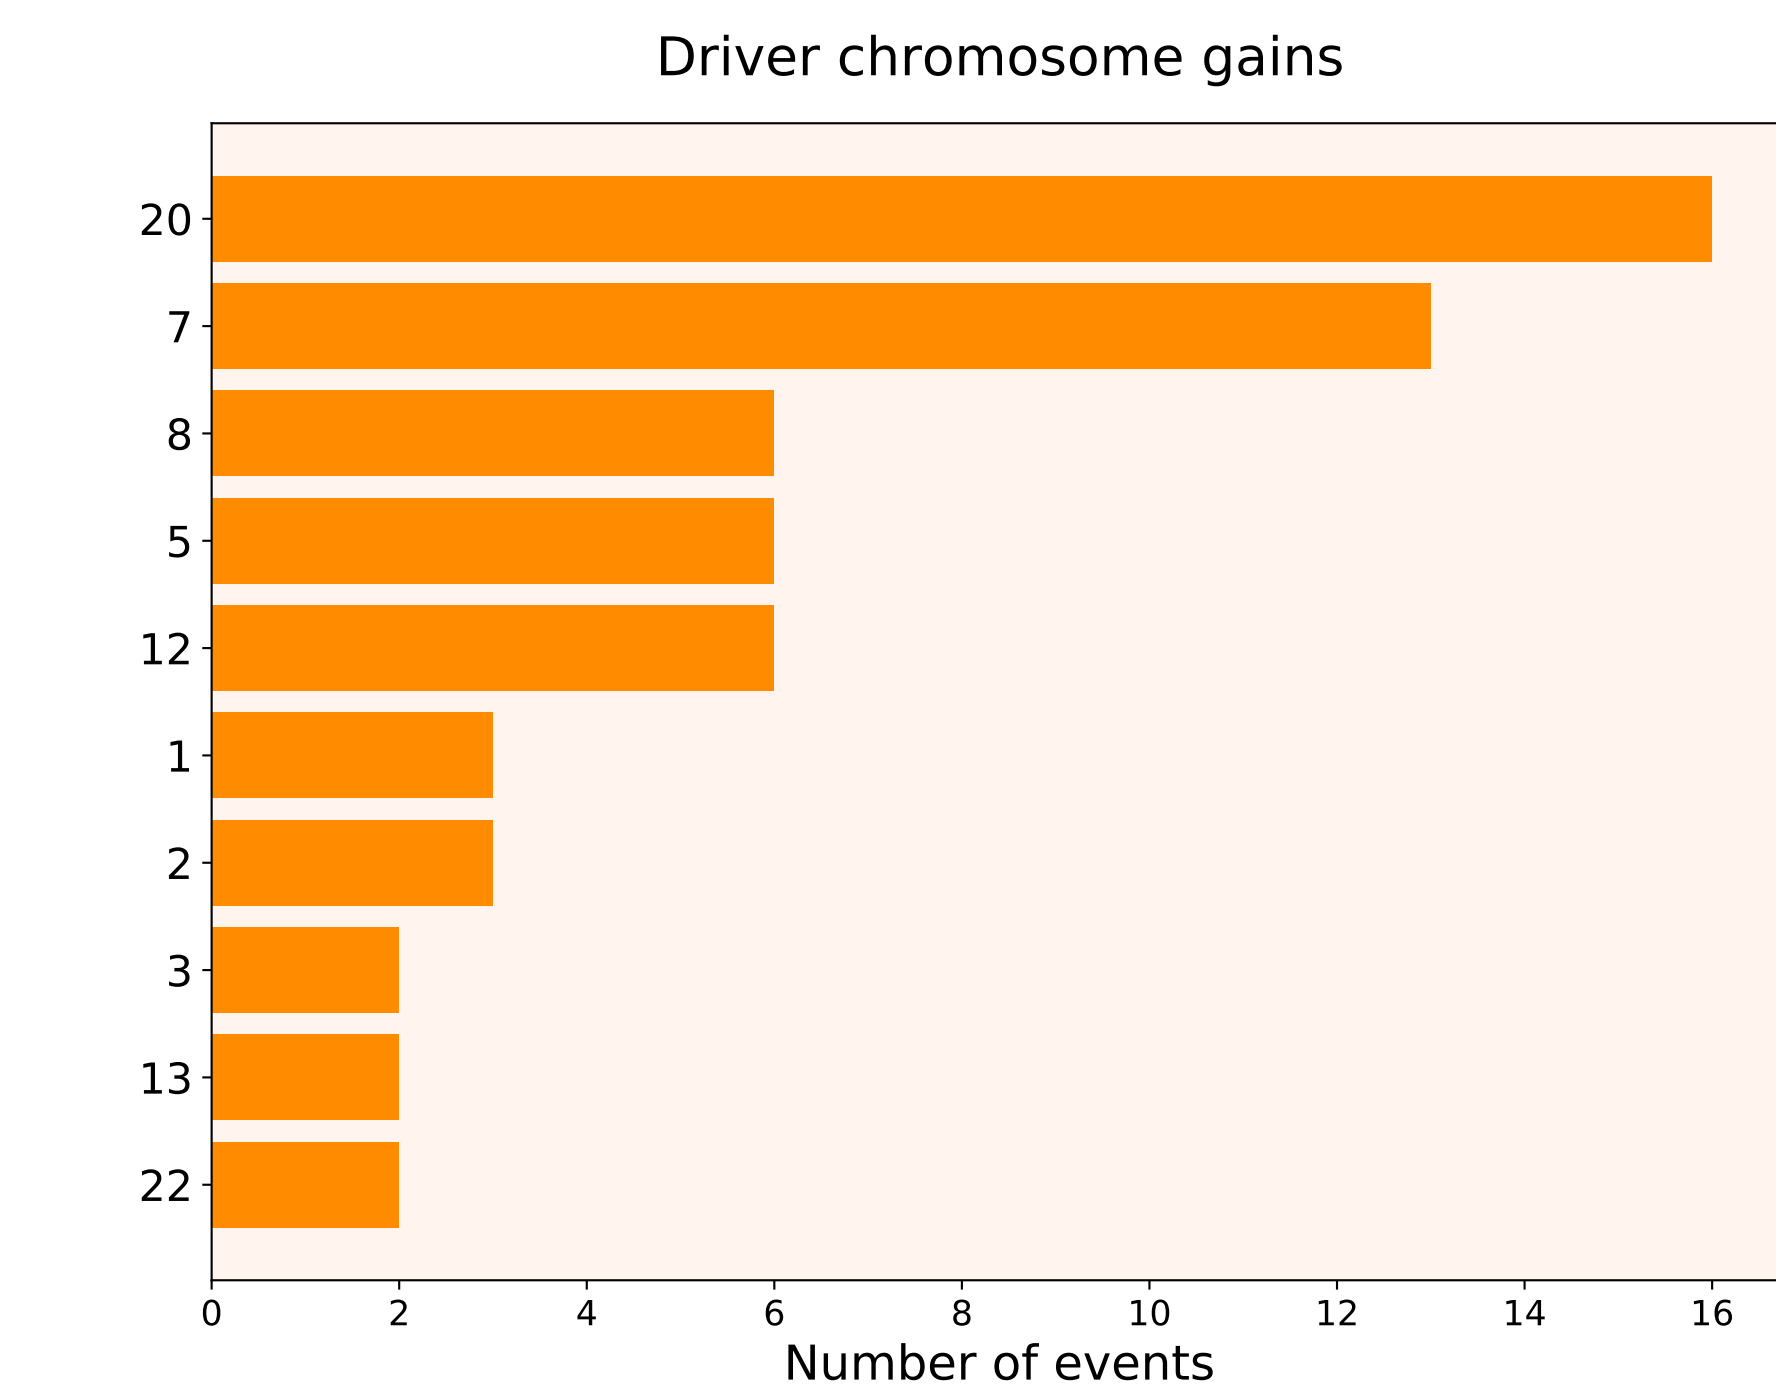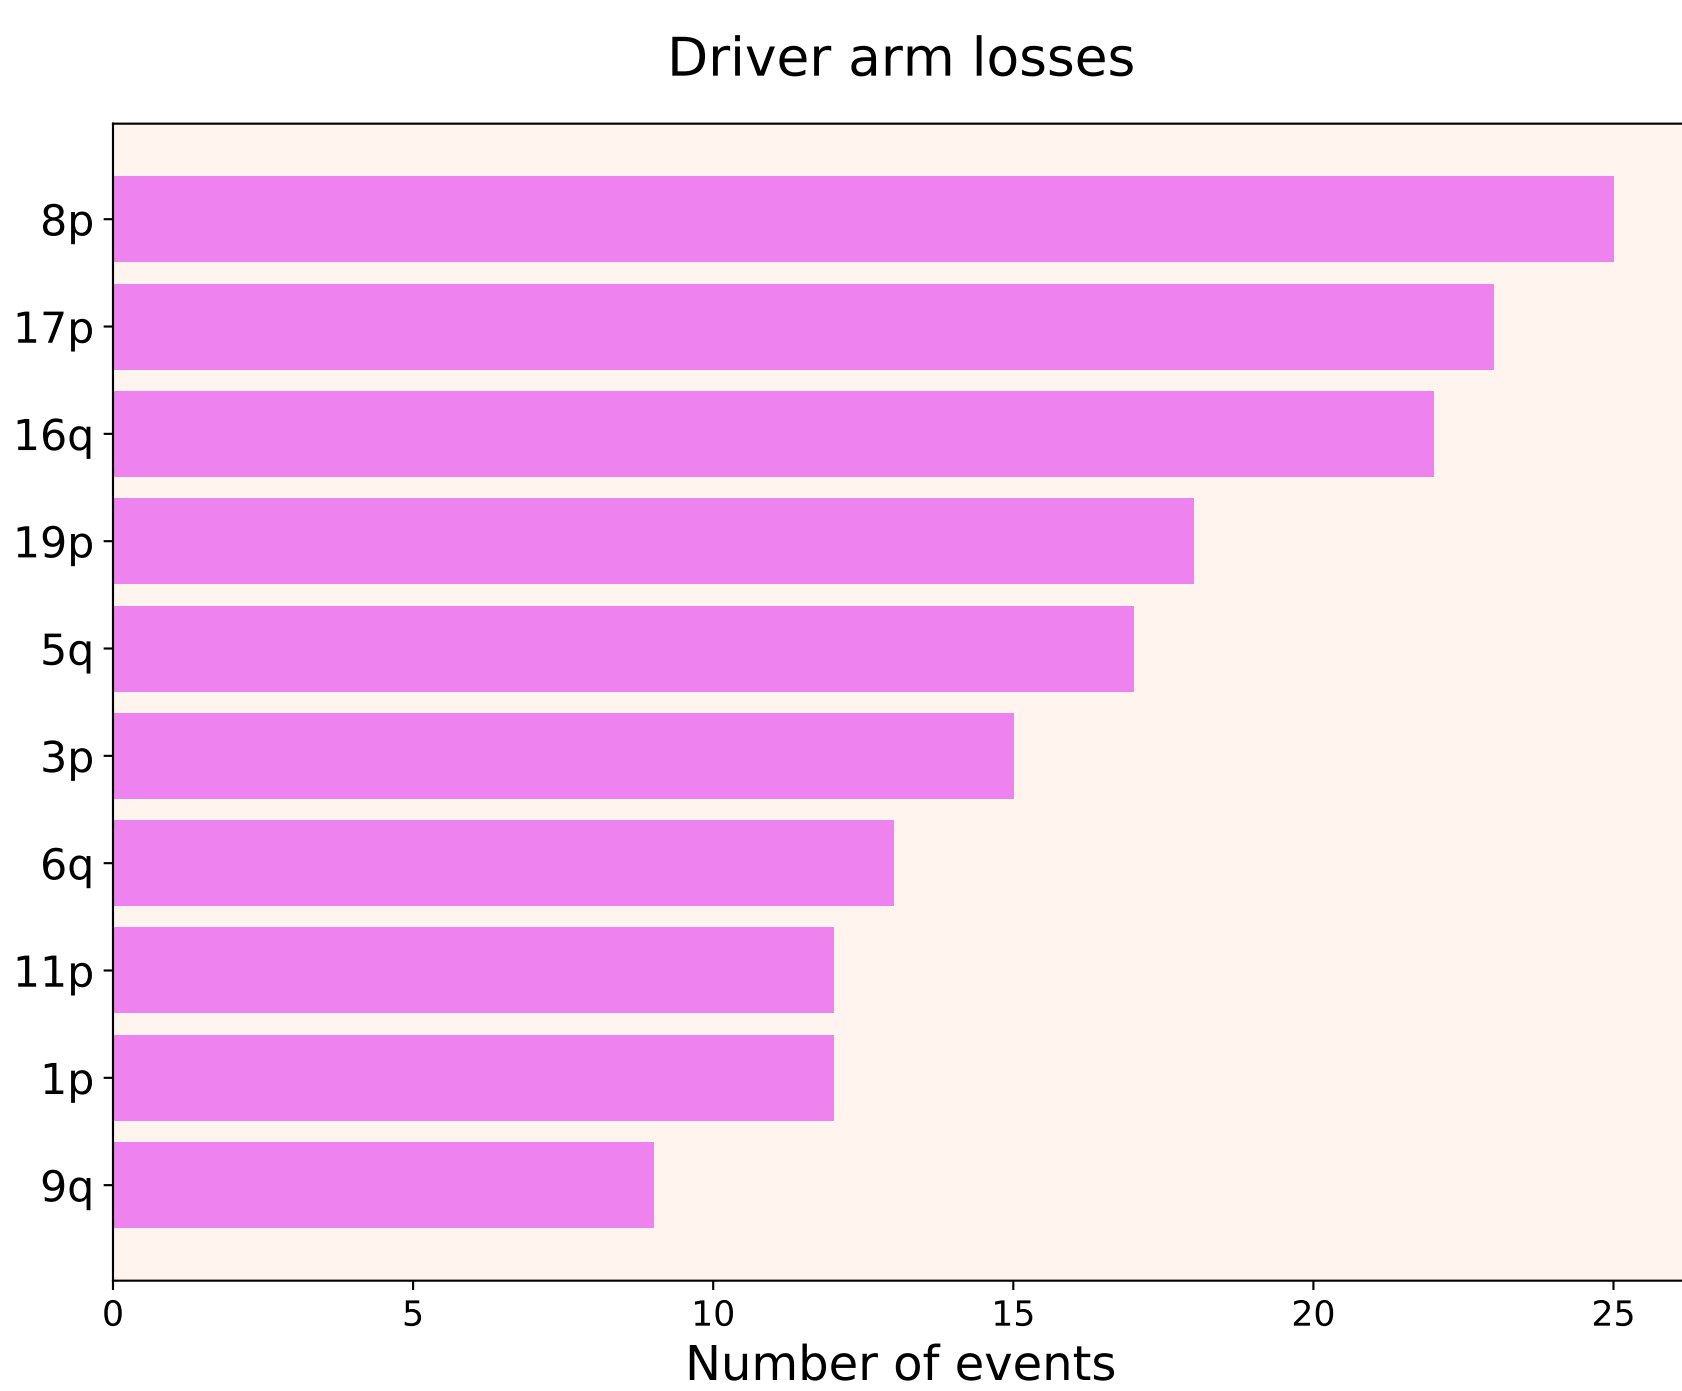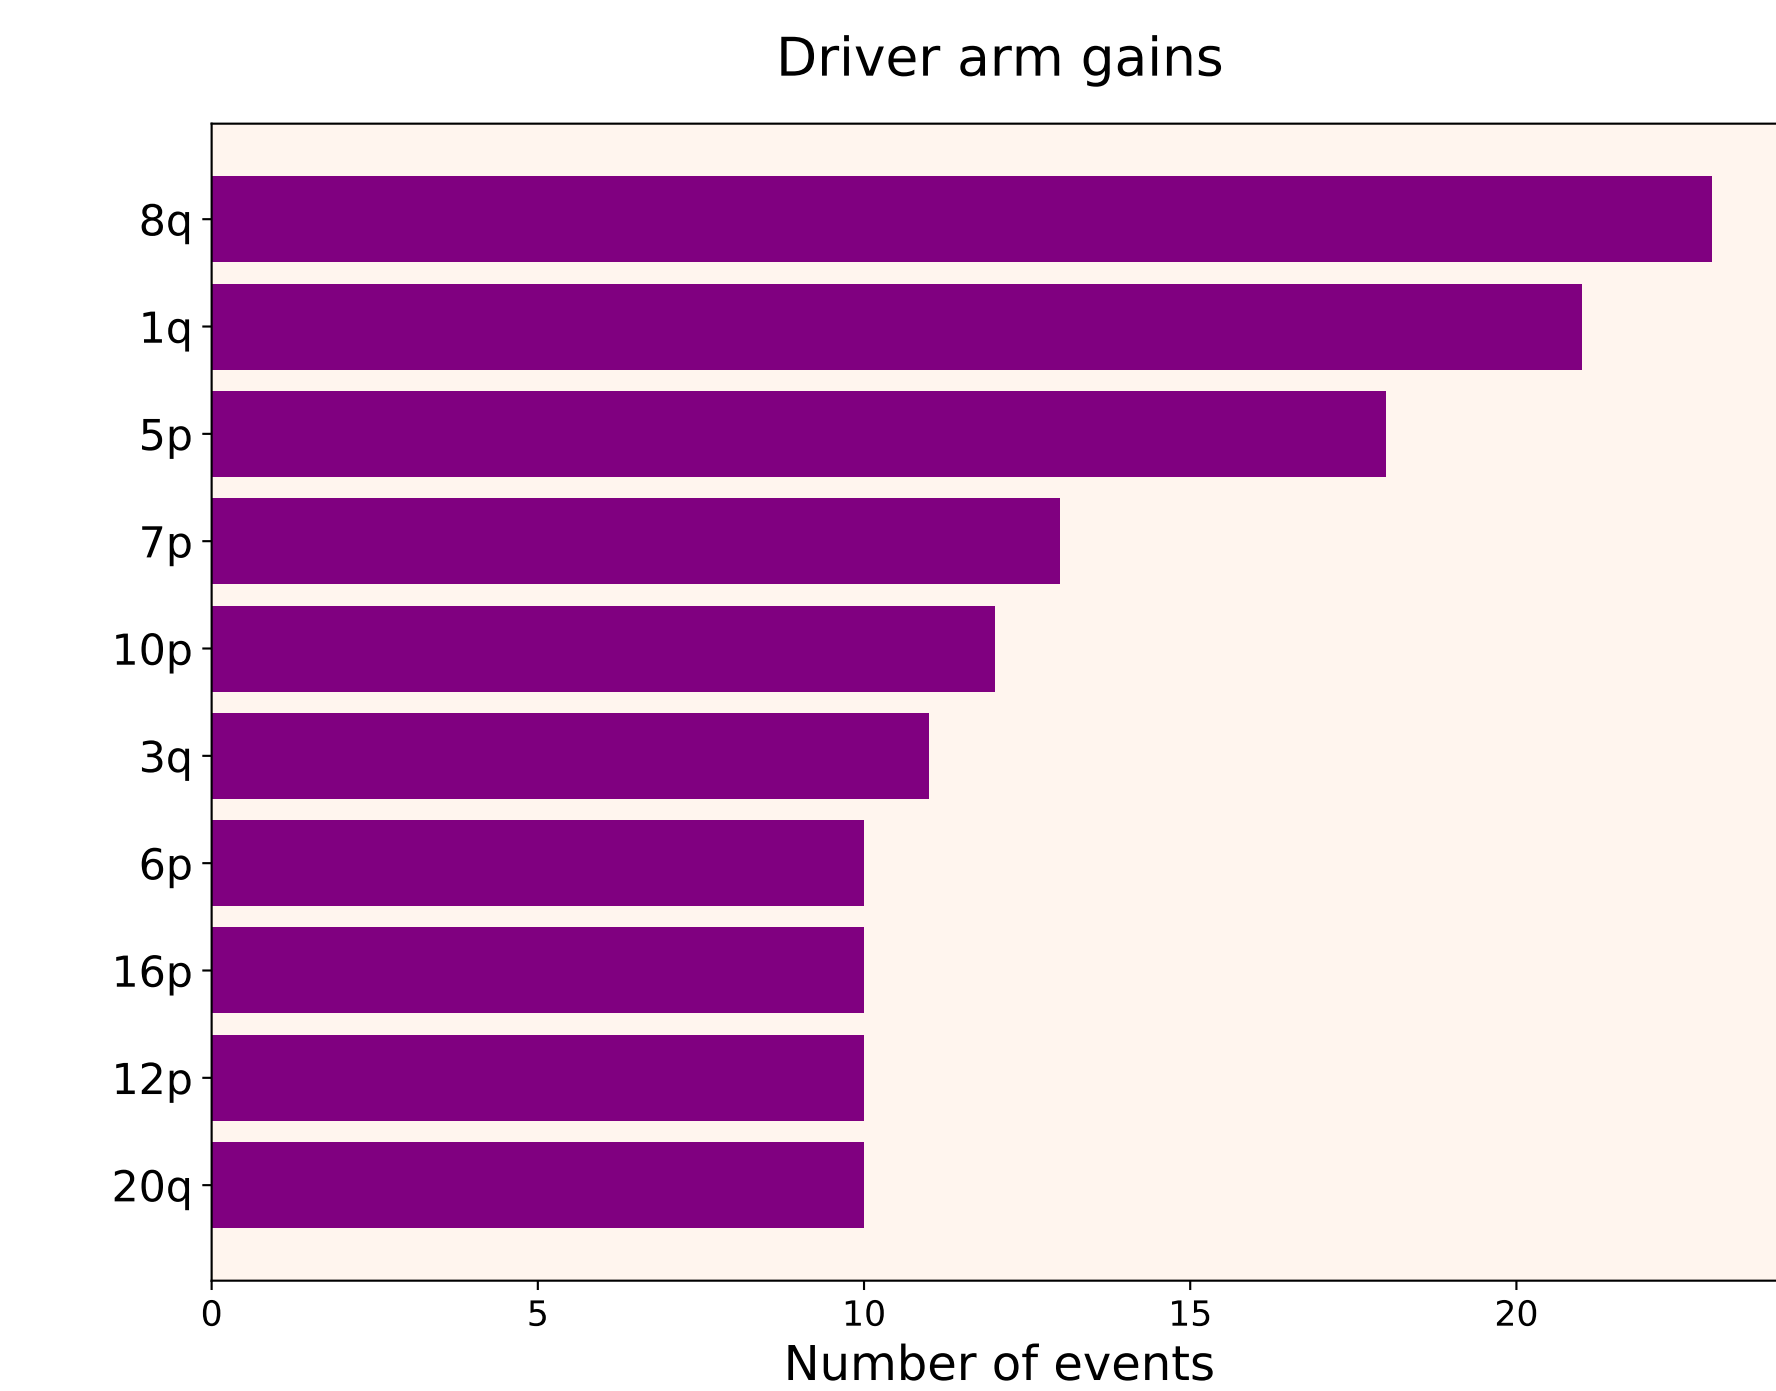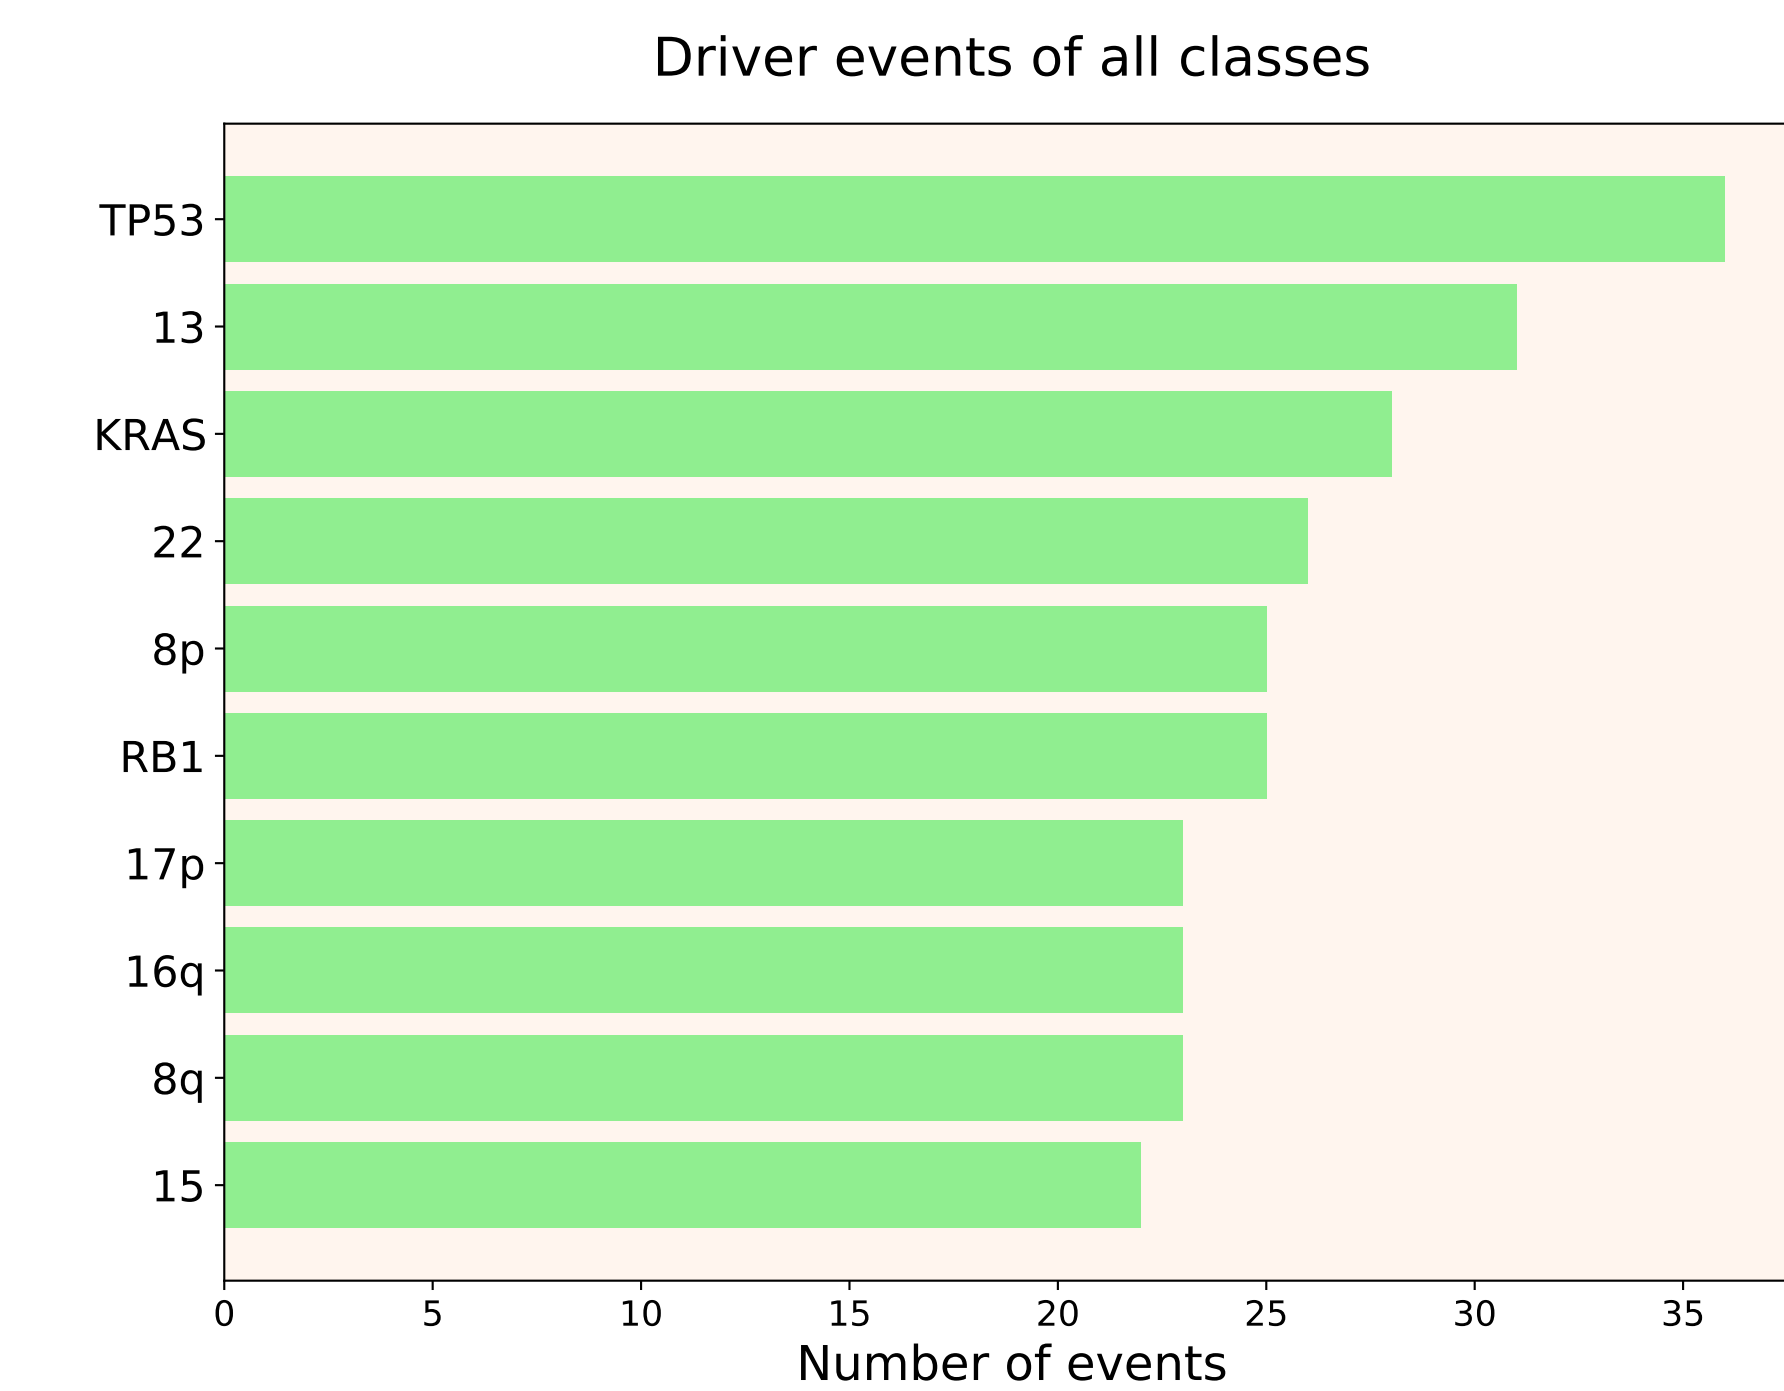

Supplement: Supplemental_Data_S1.zip [file Supplemental_Data_S1.zip]

# DLBC\_MALE

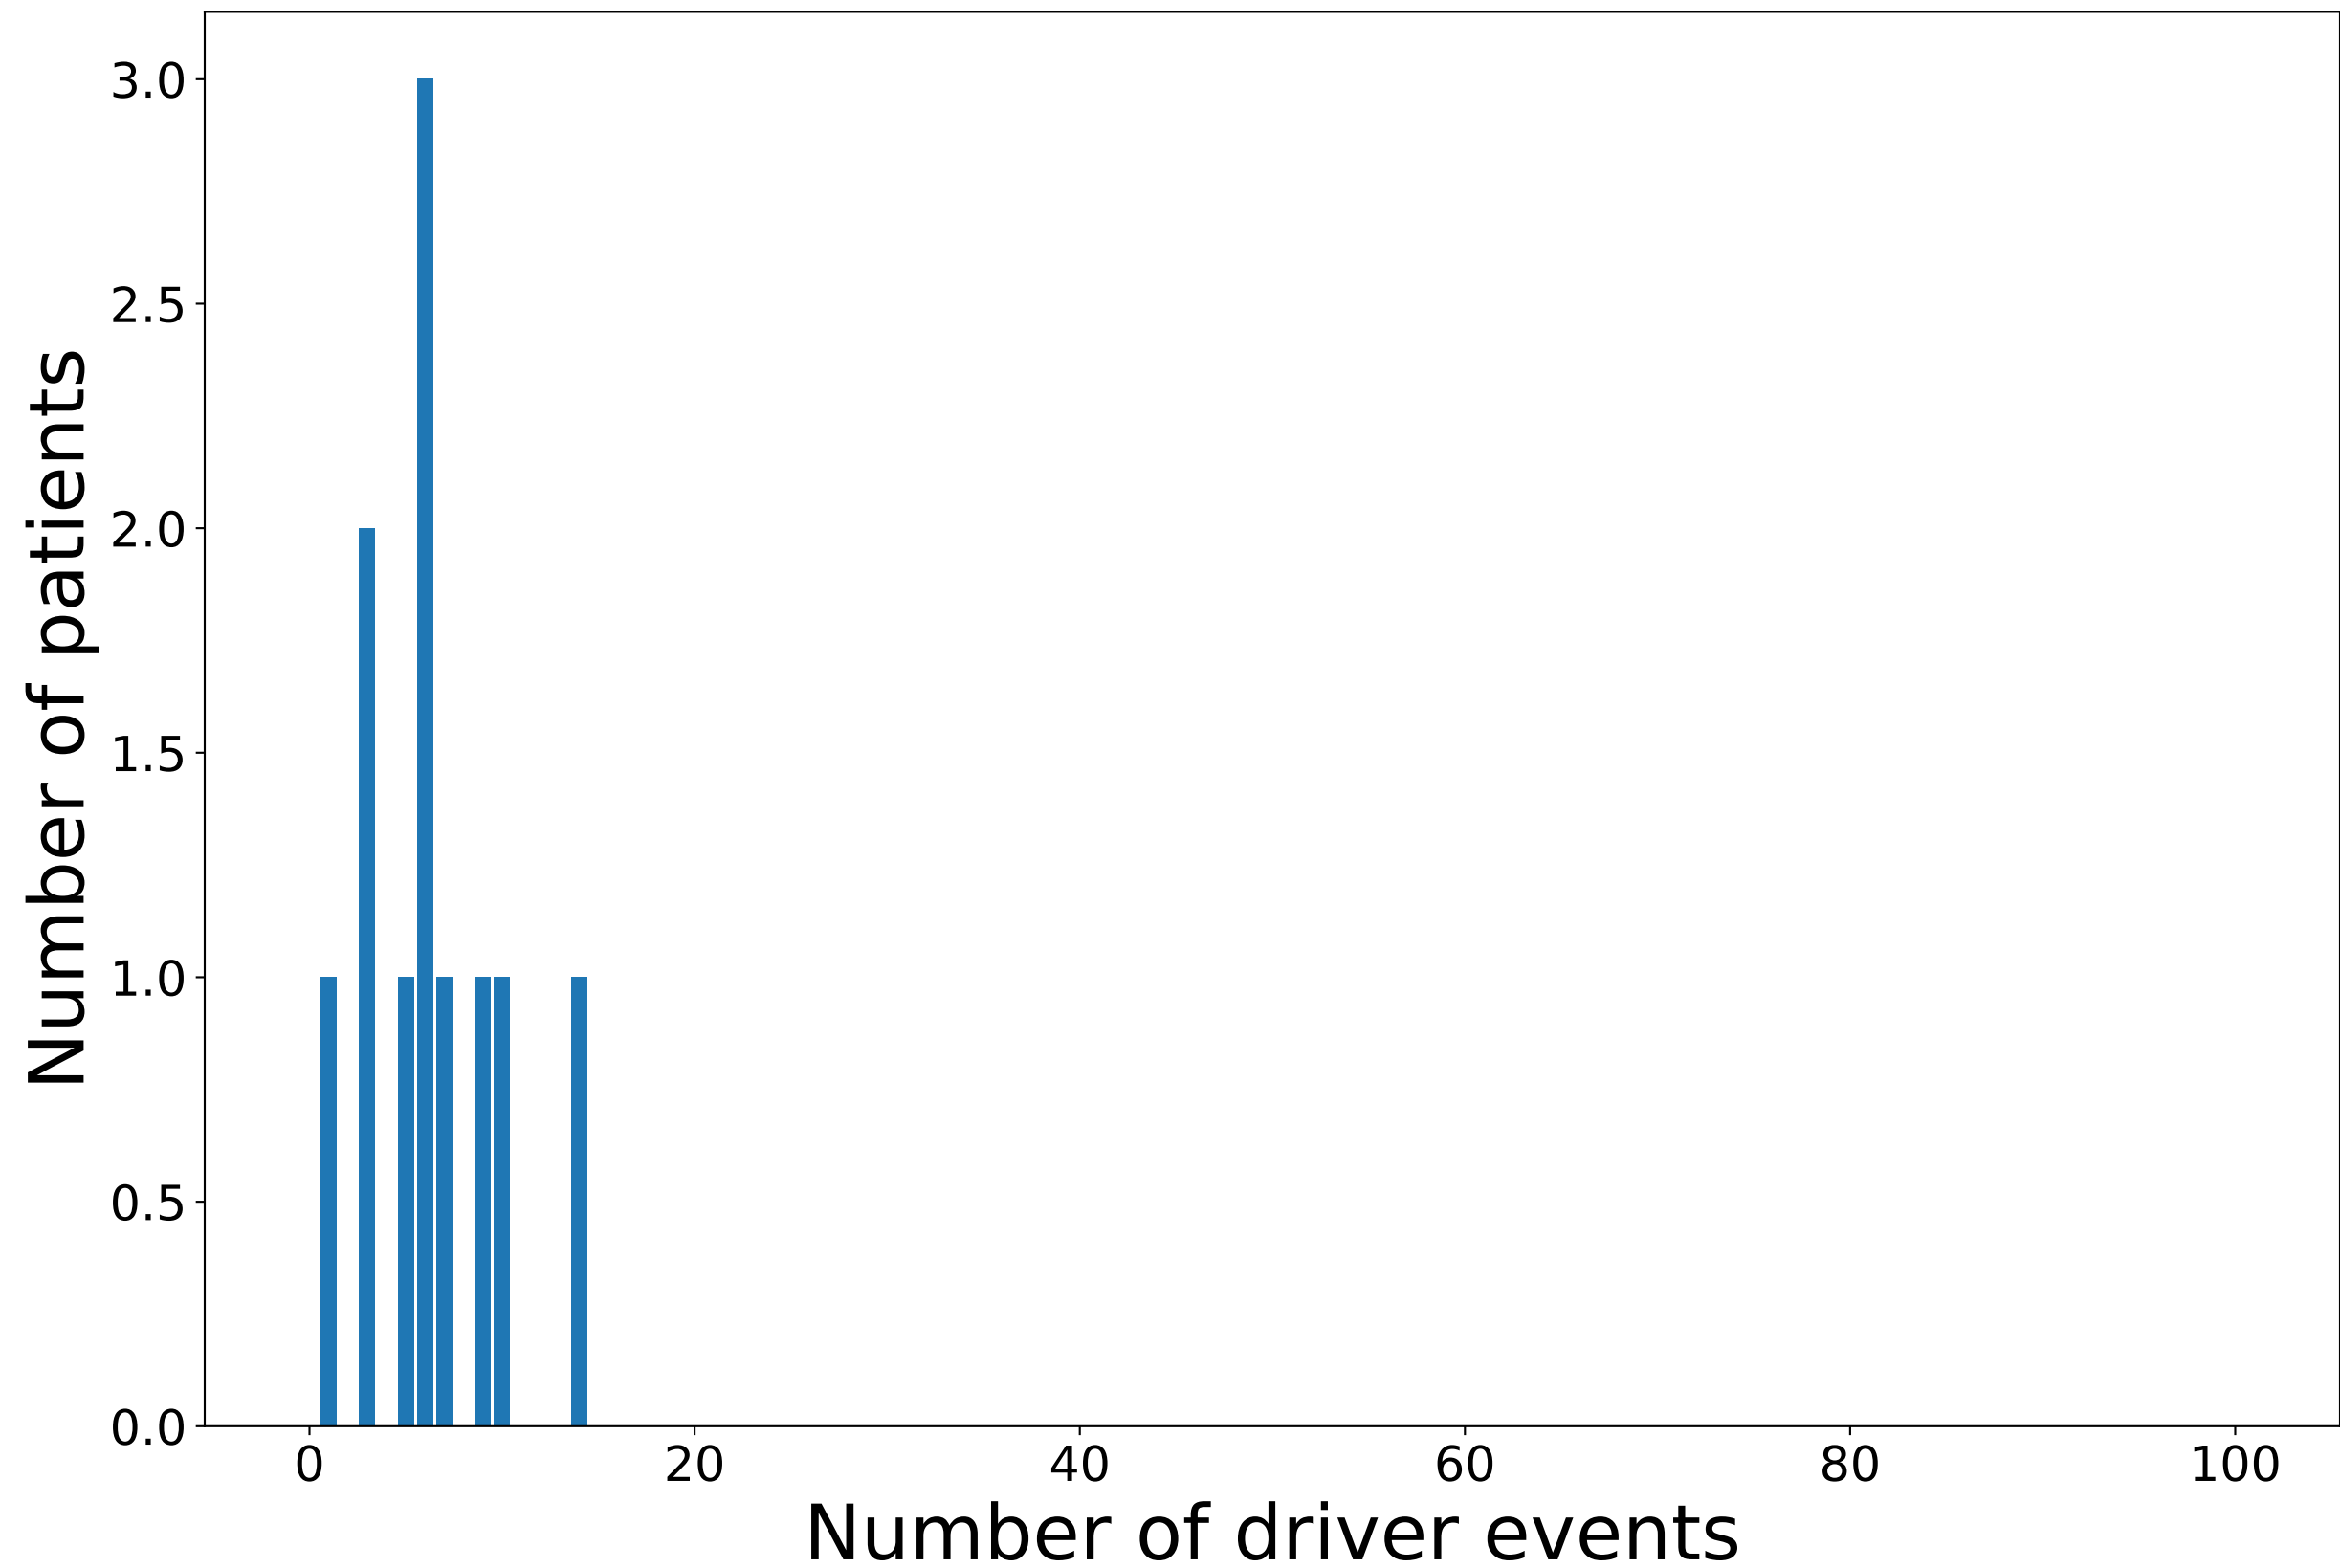

Supplement: Supplemental_Data_S1.zip [file Supplemental_Data_S1.zip]

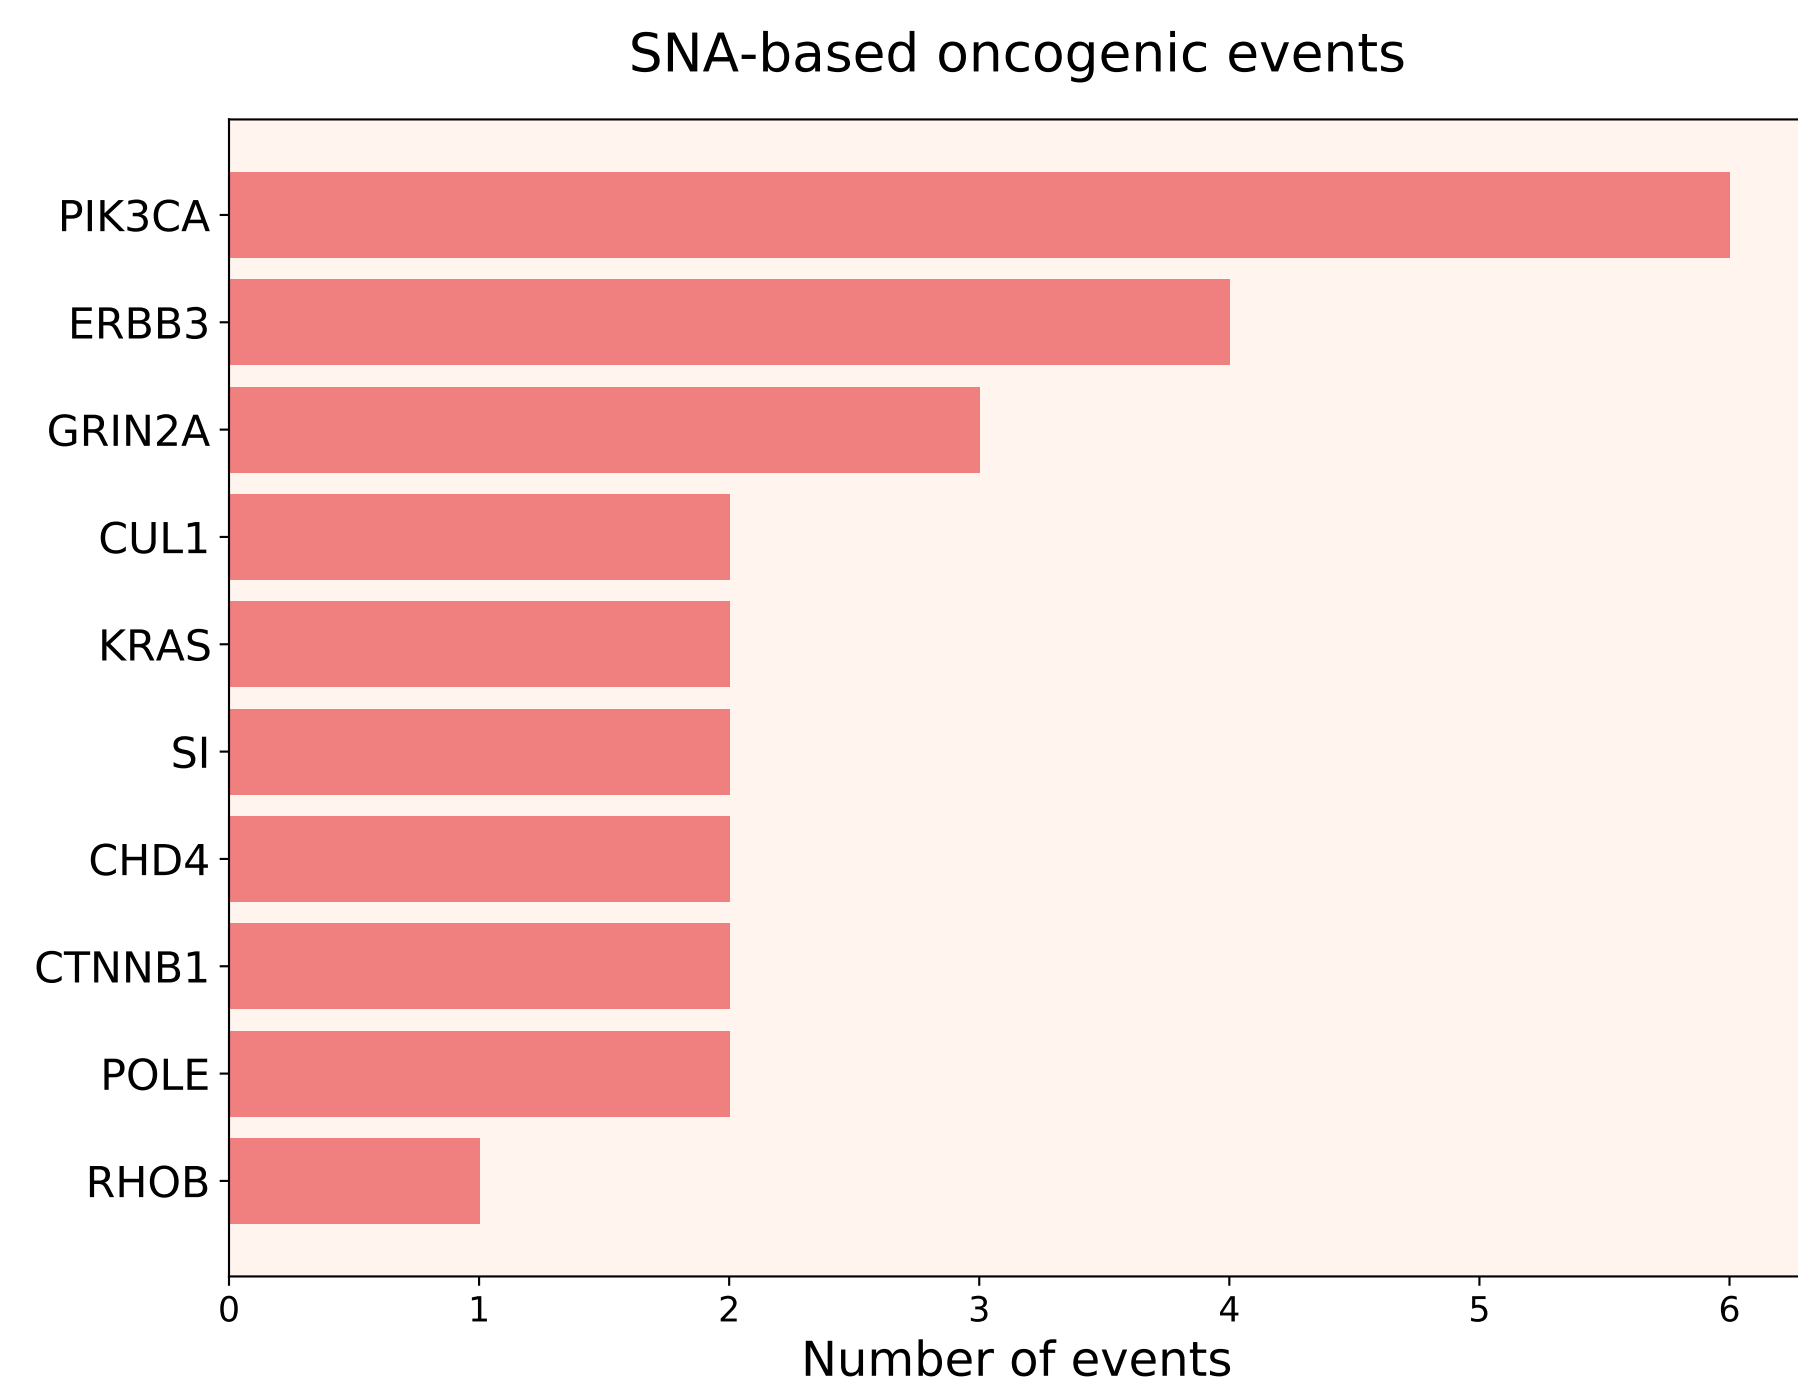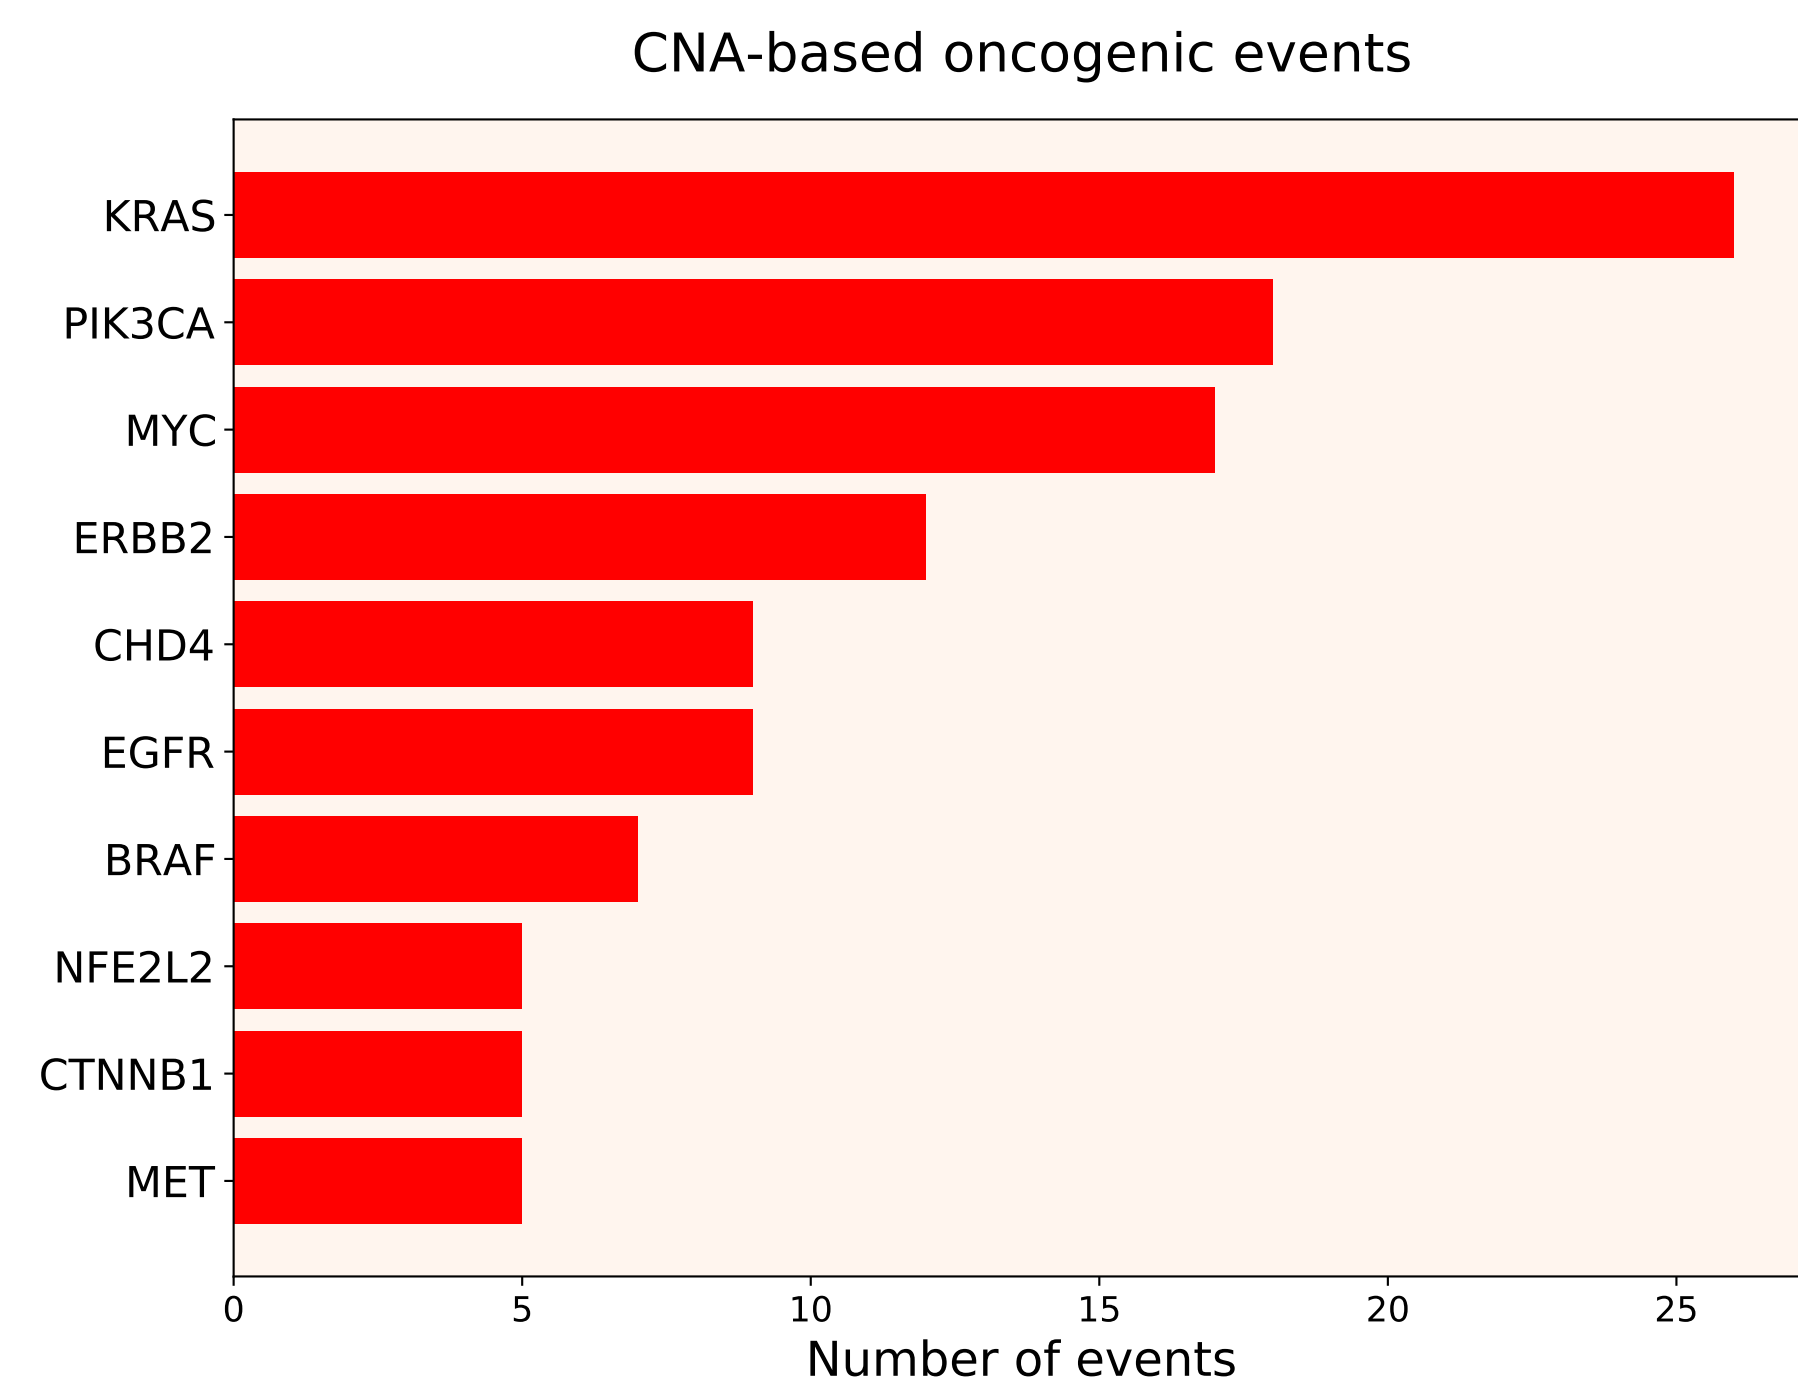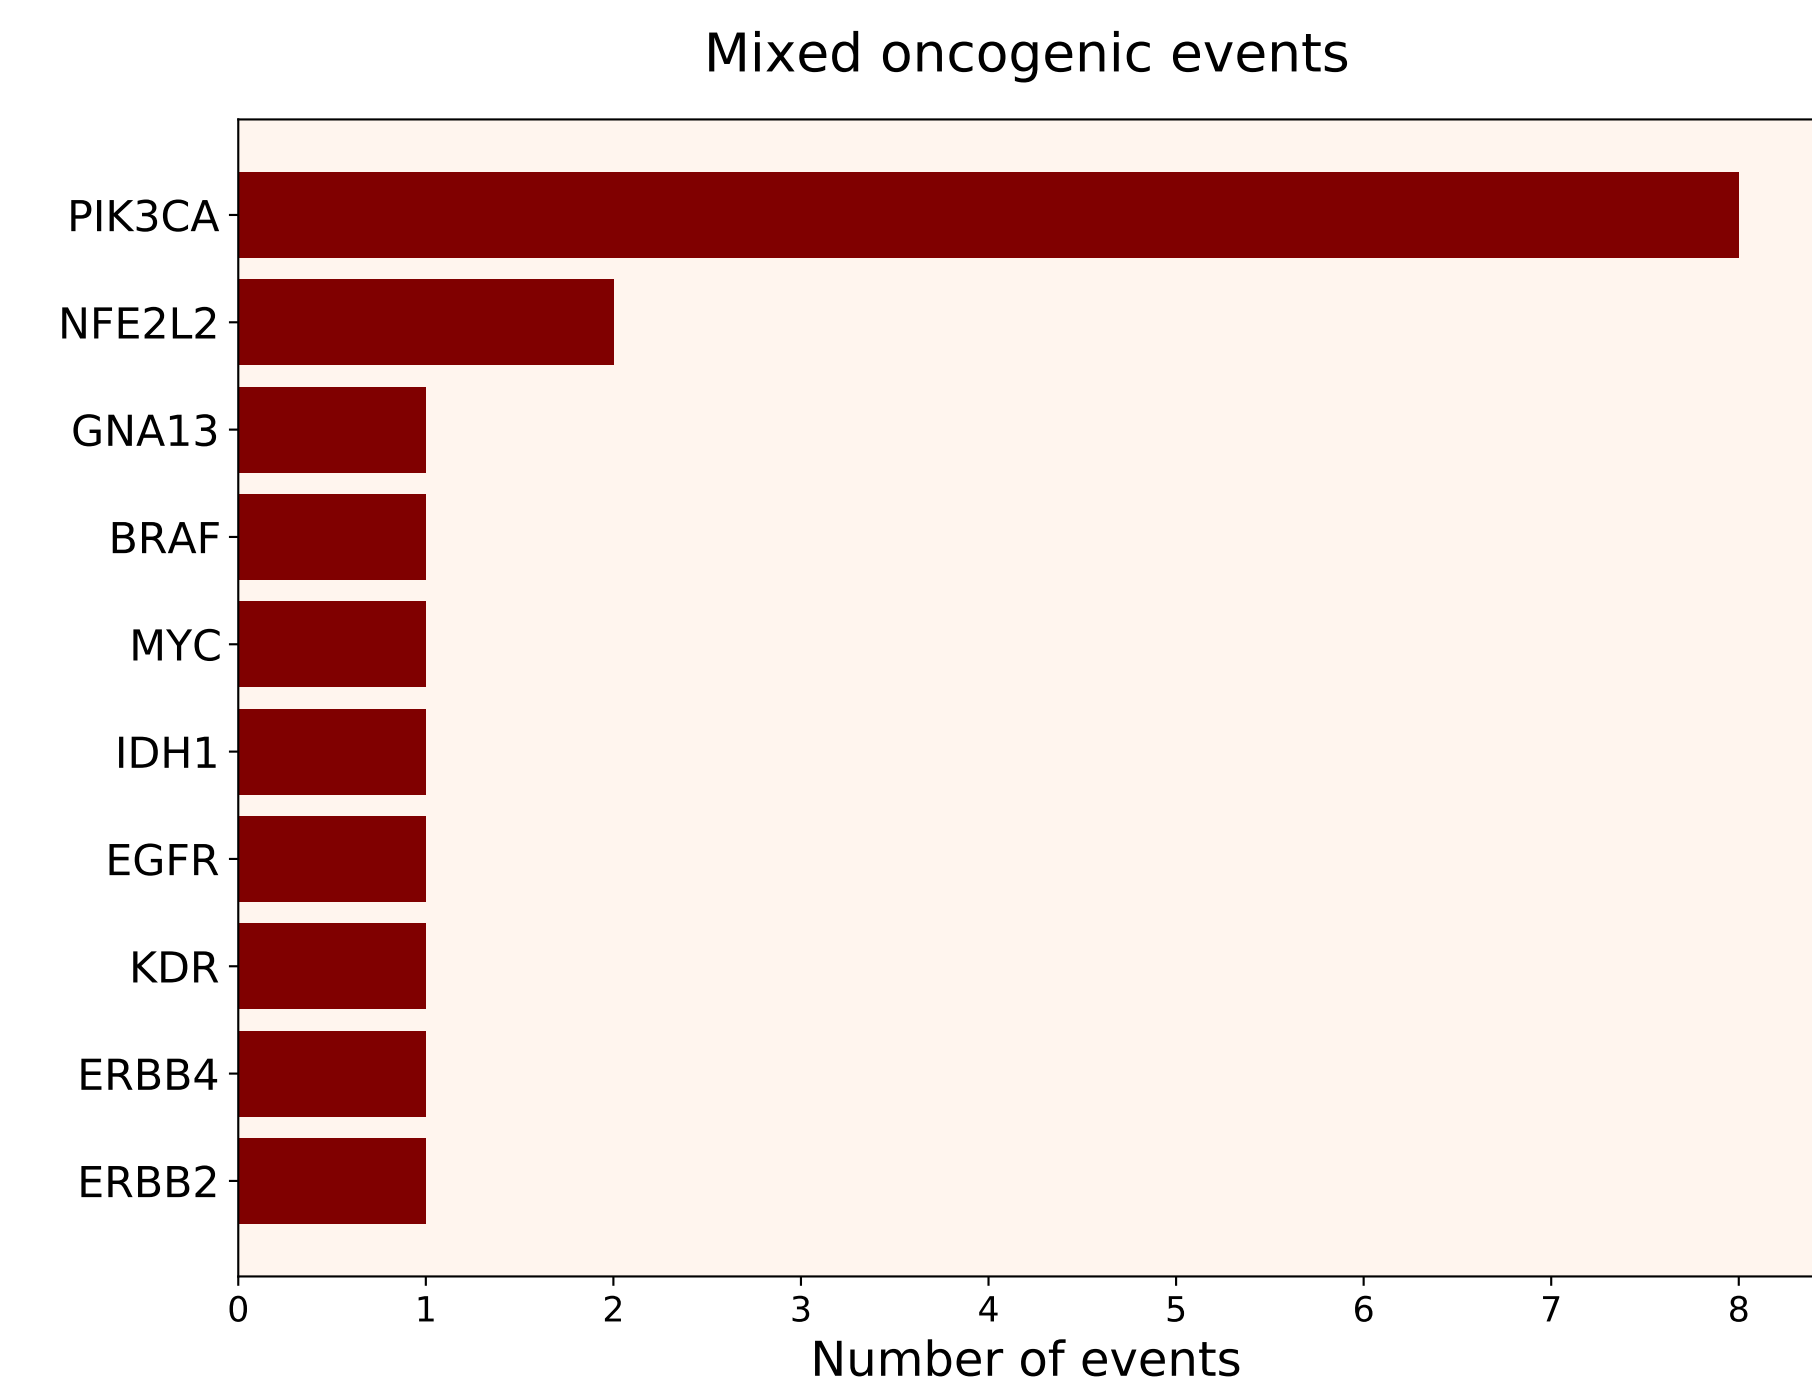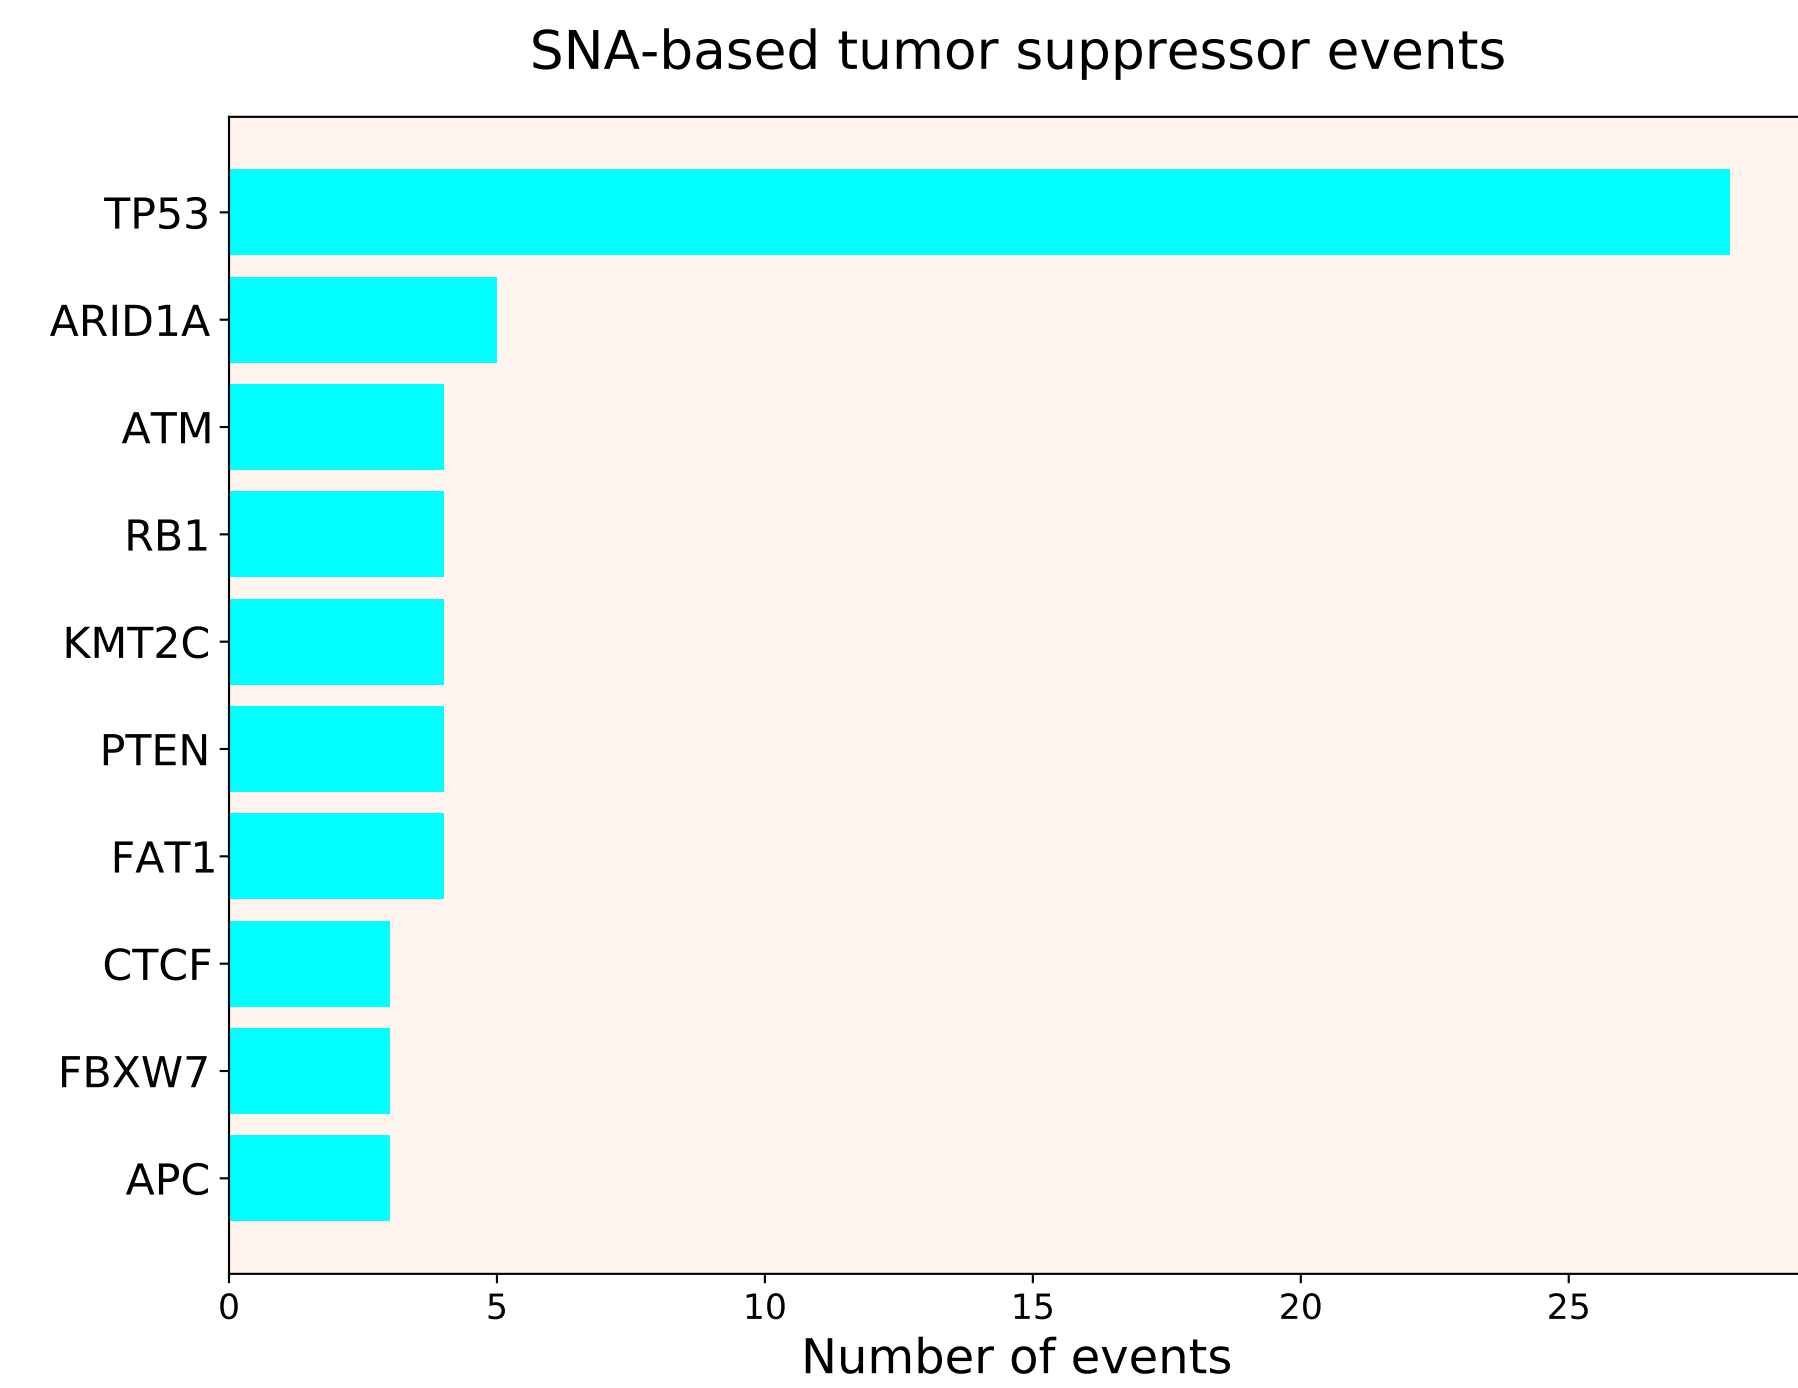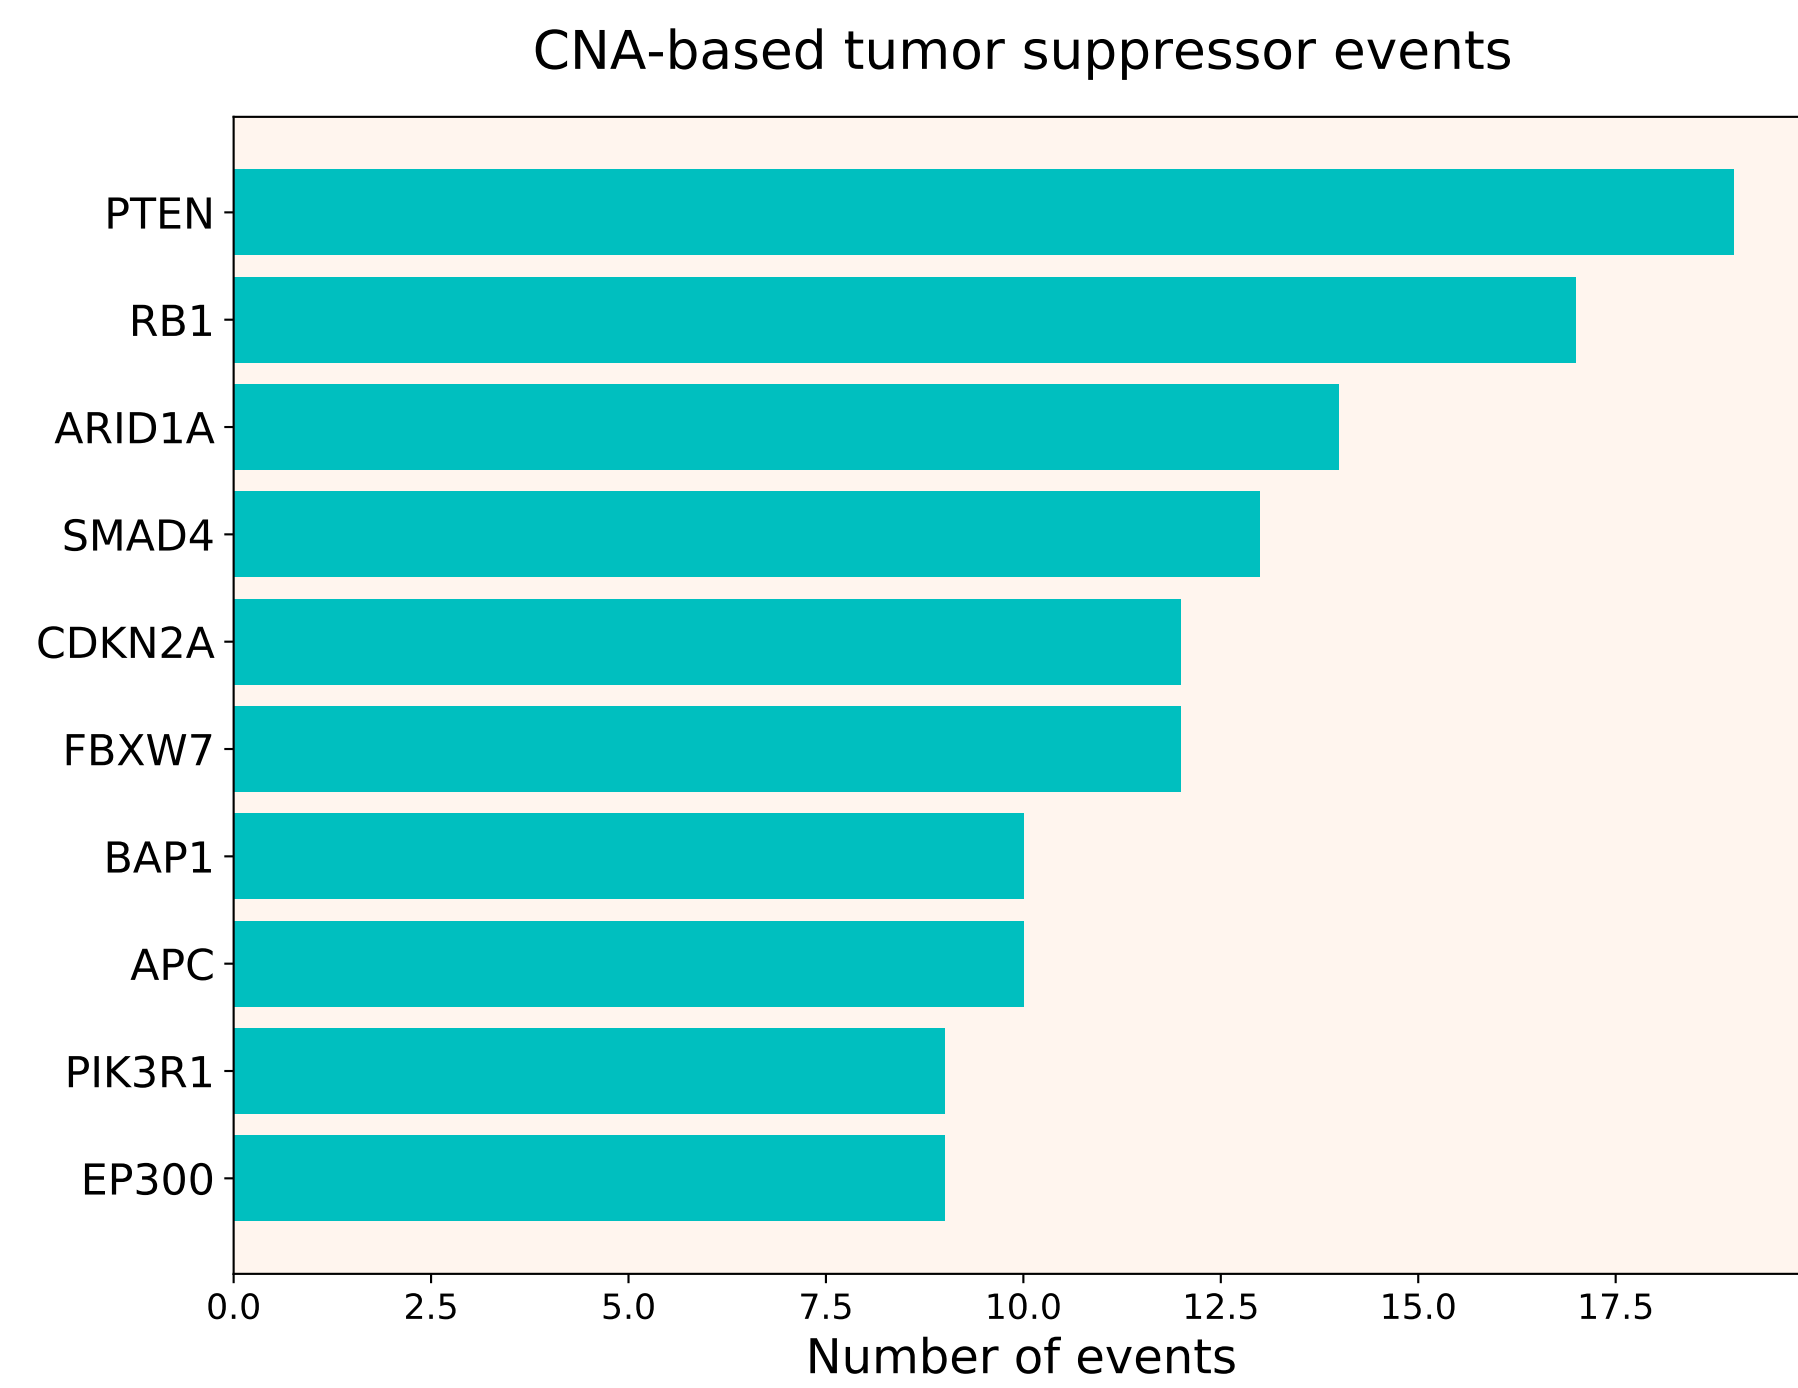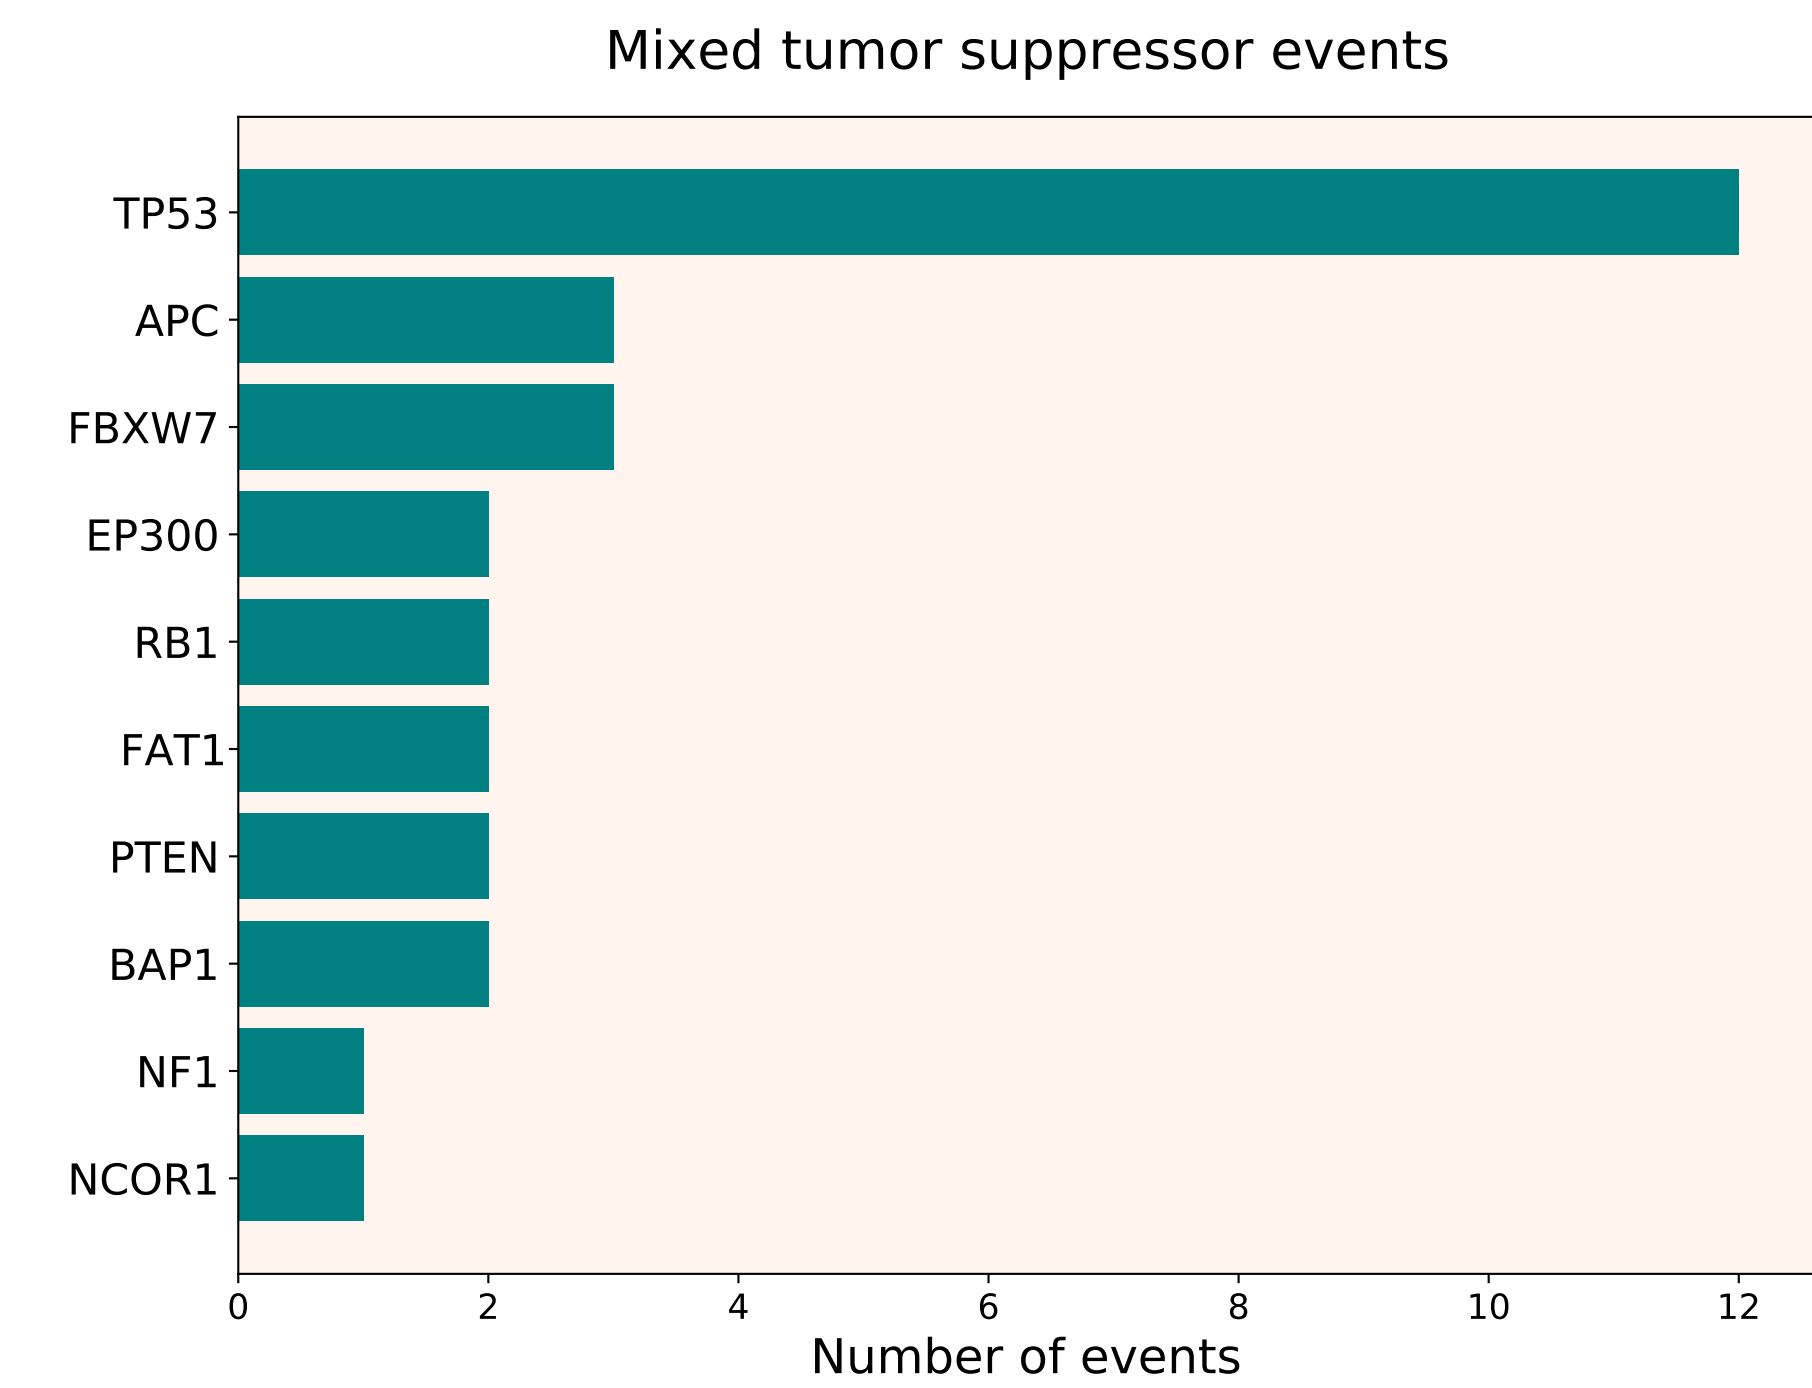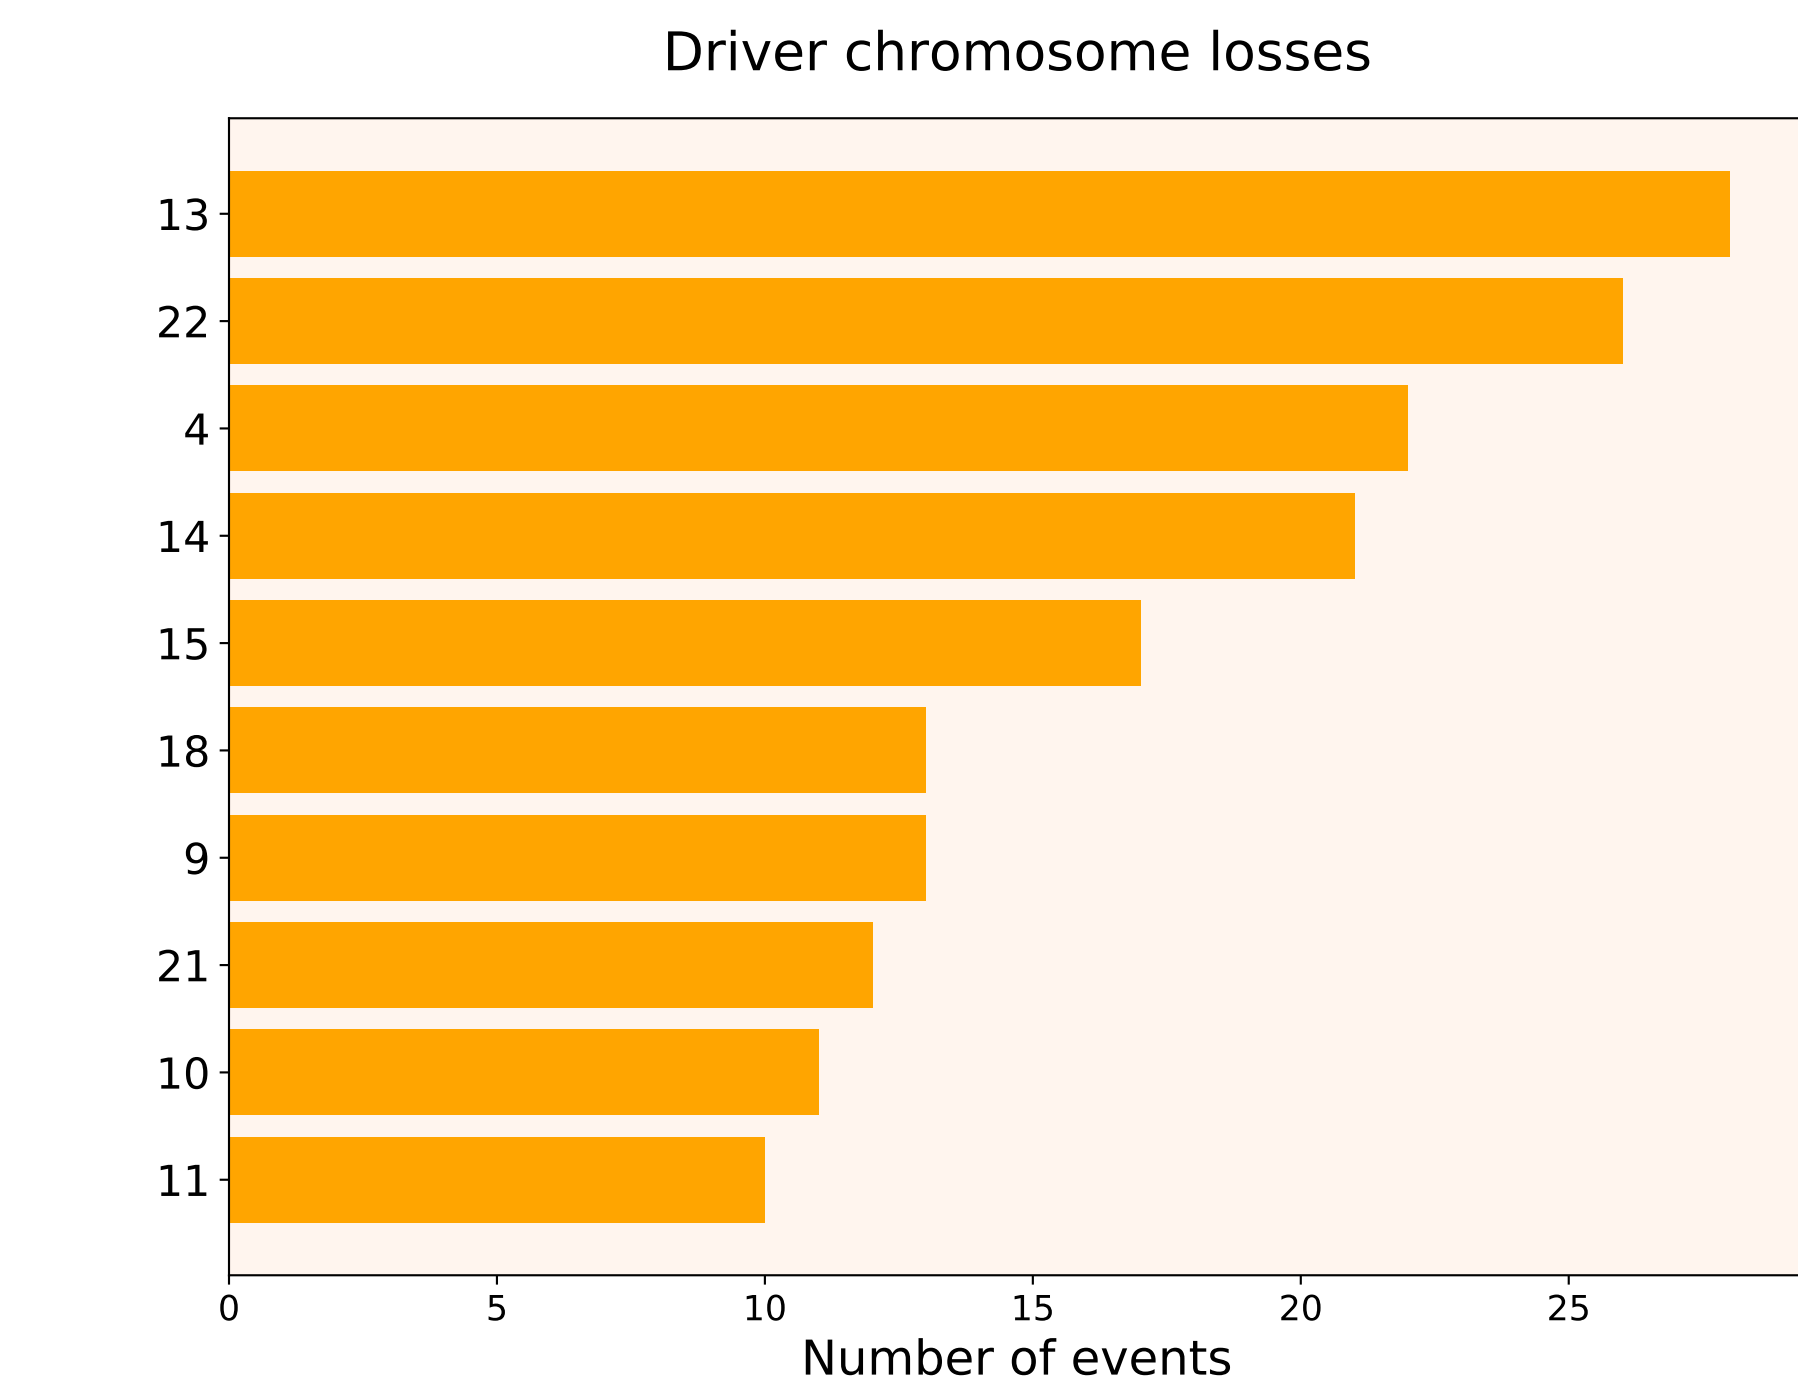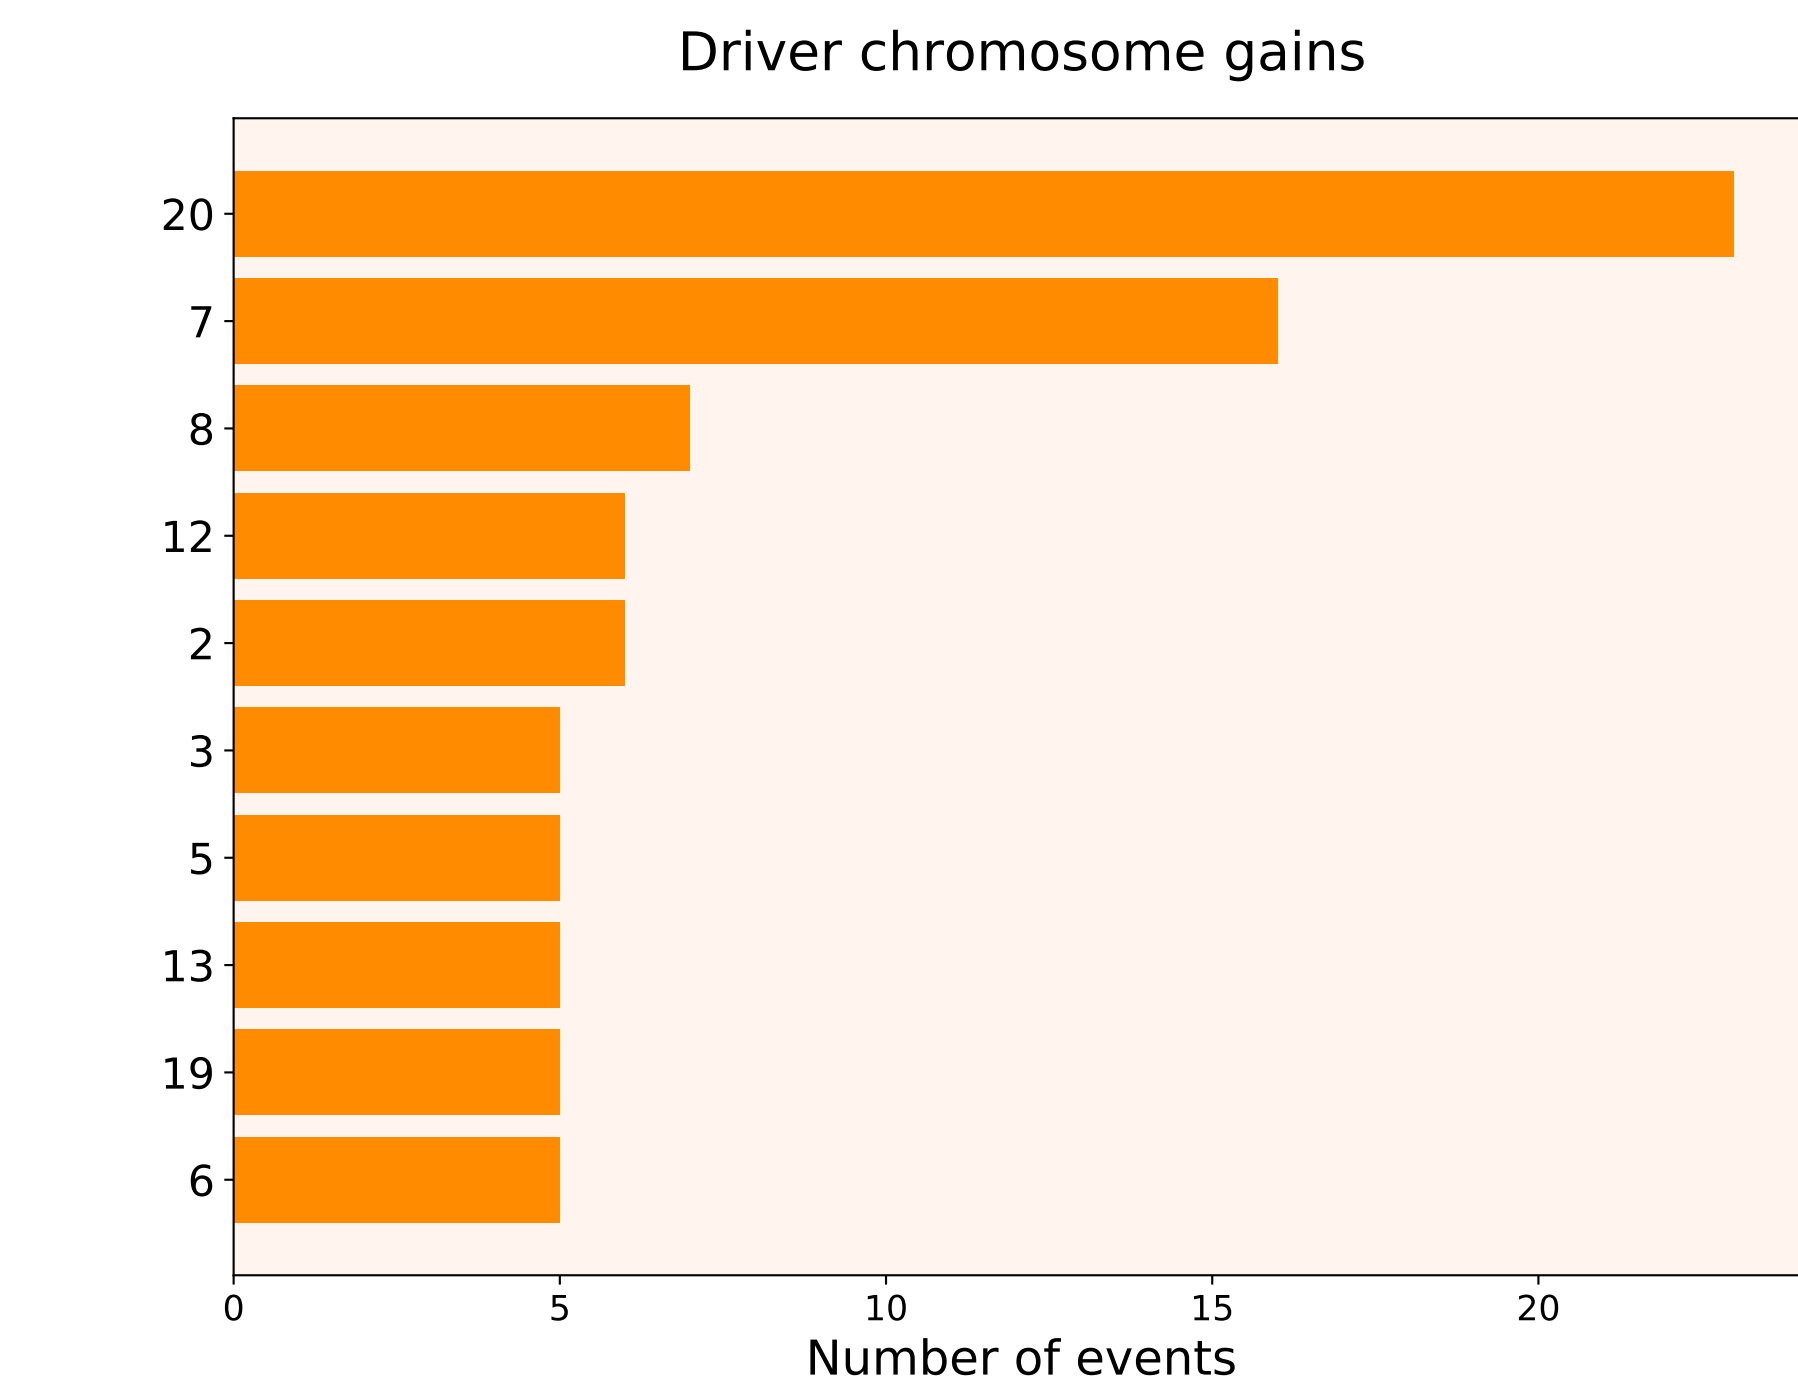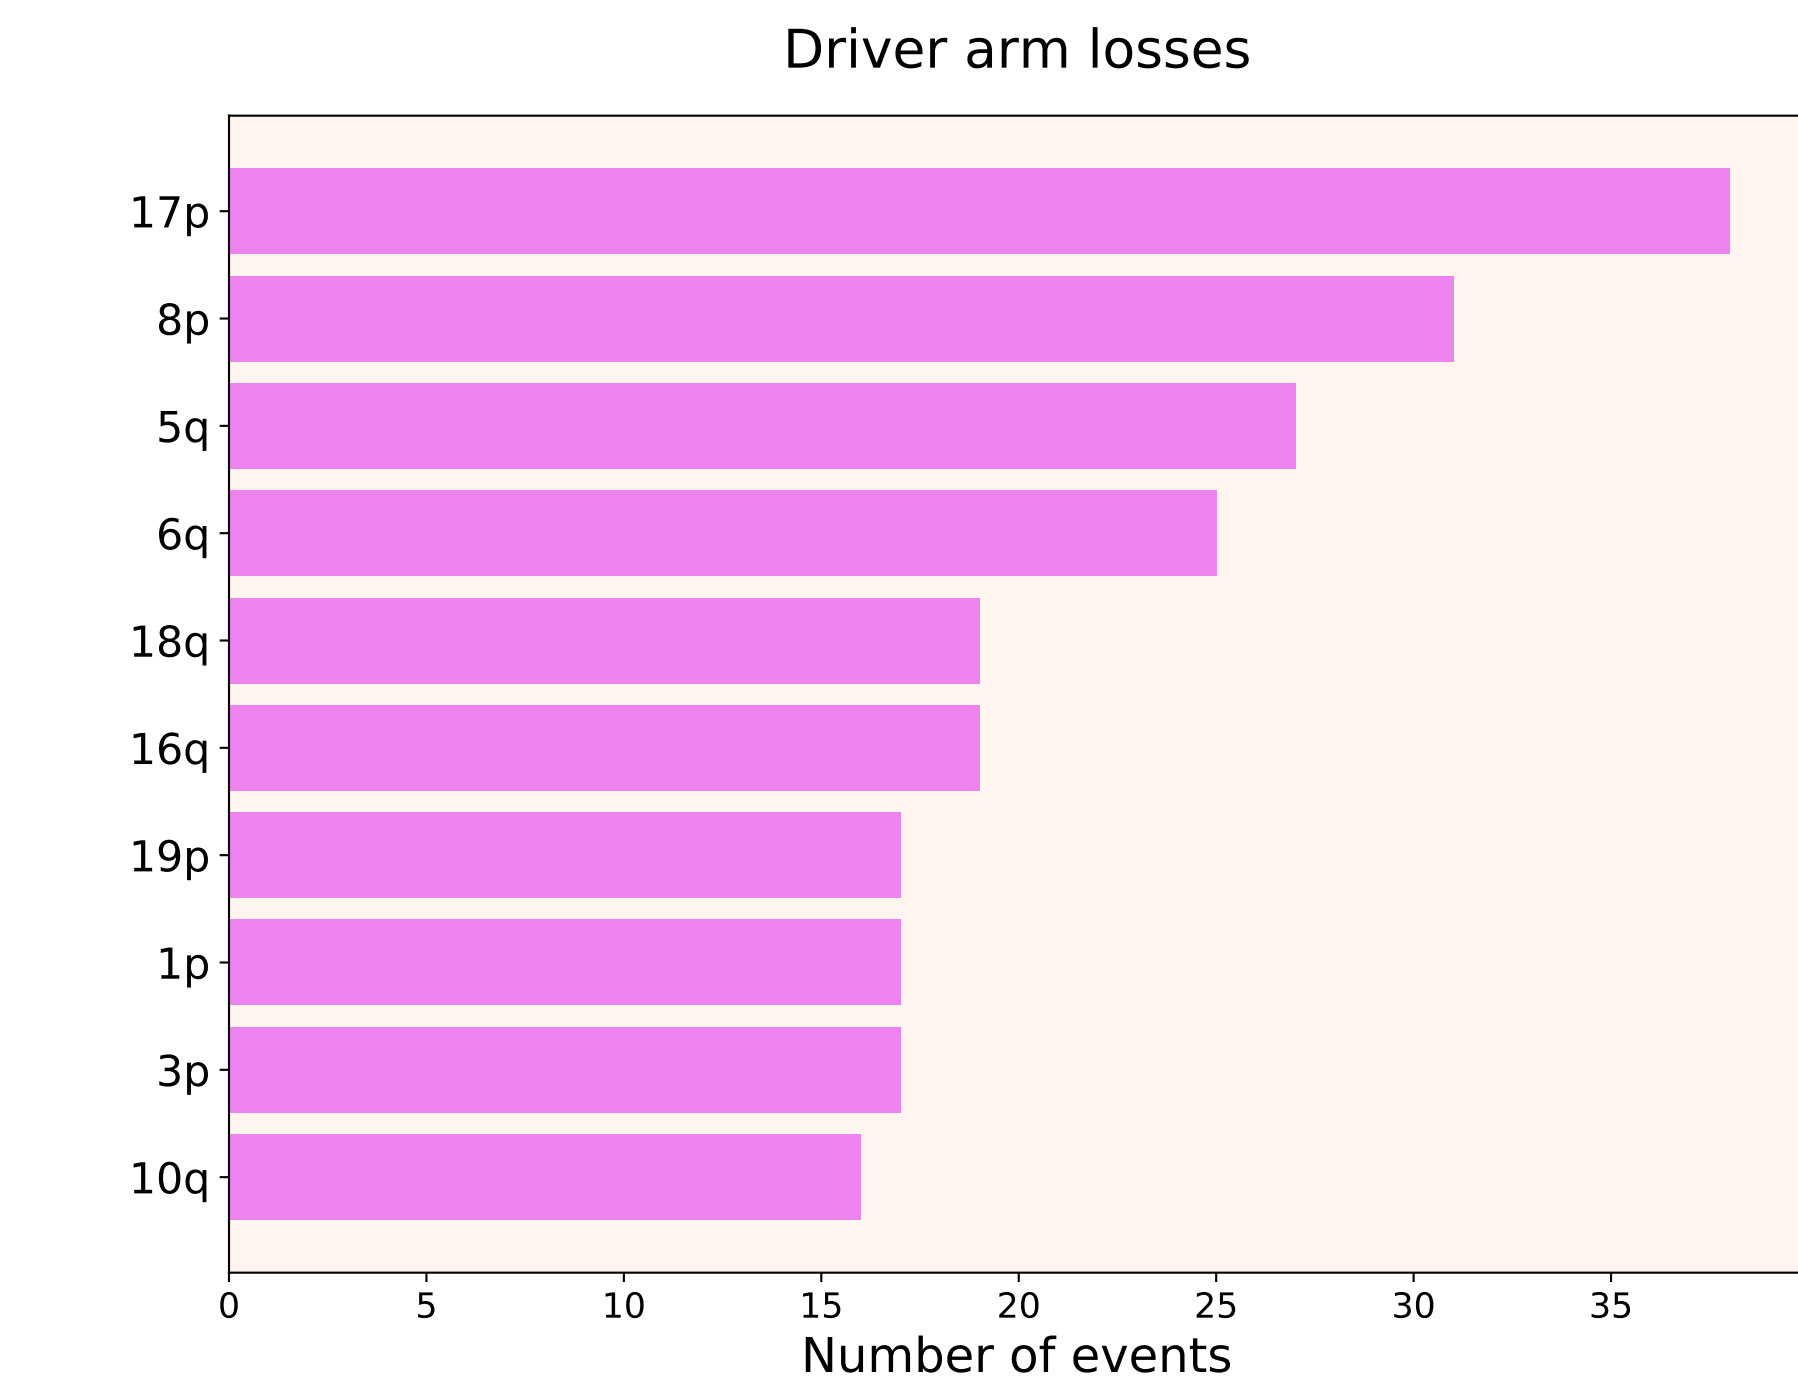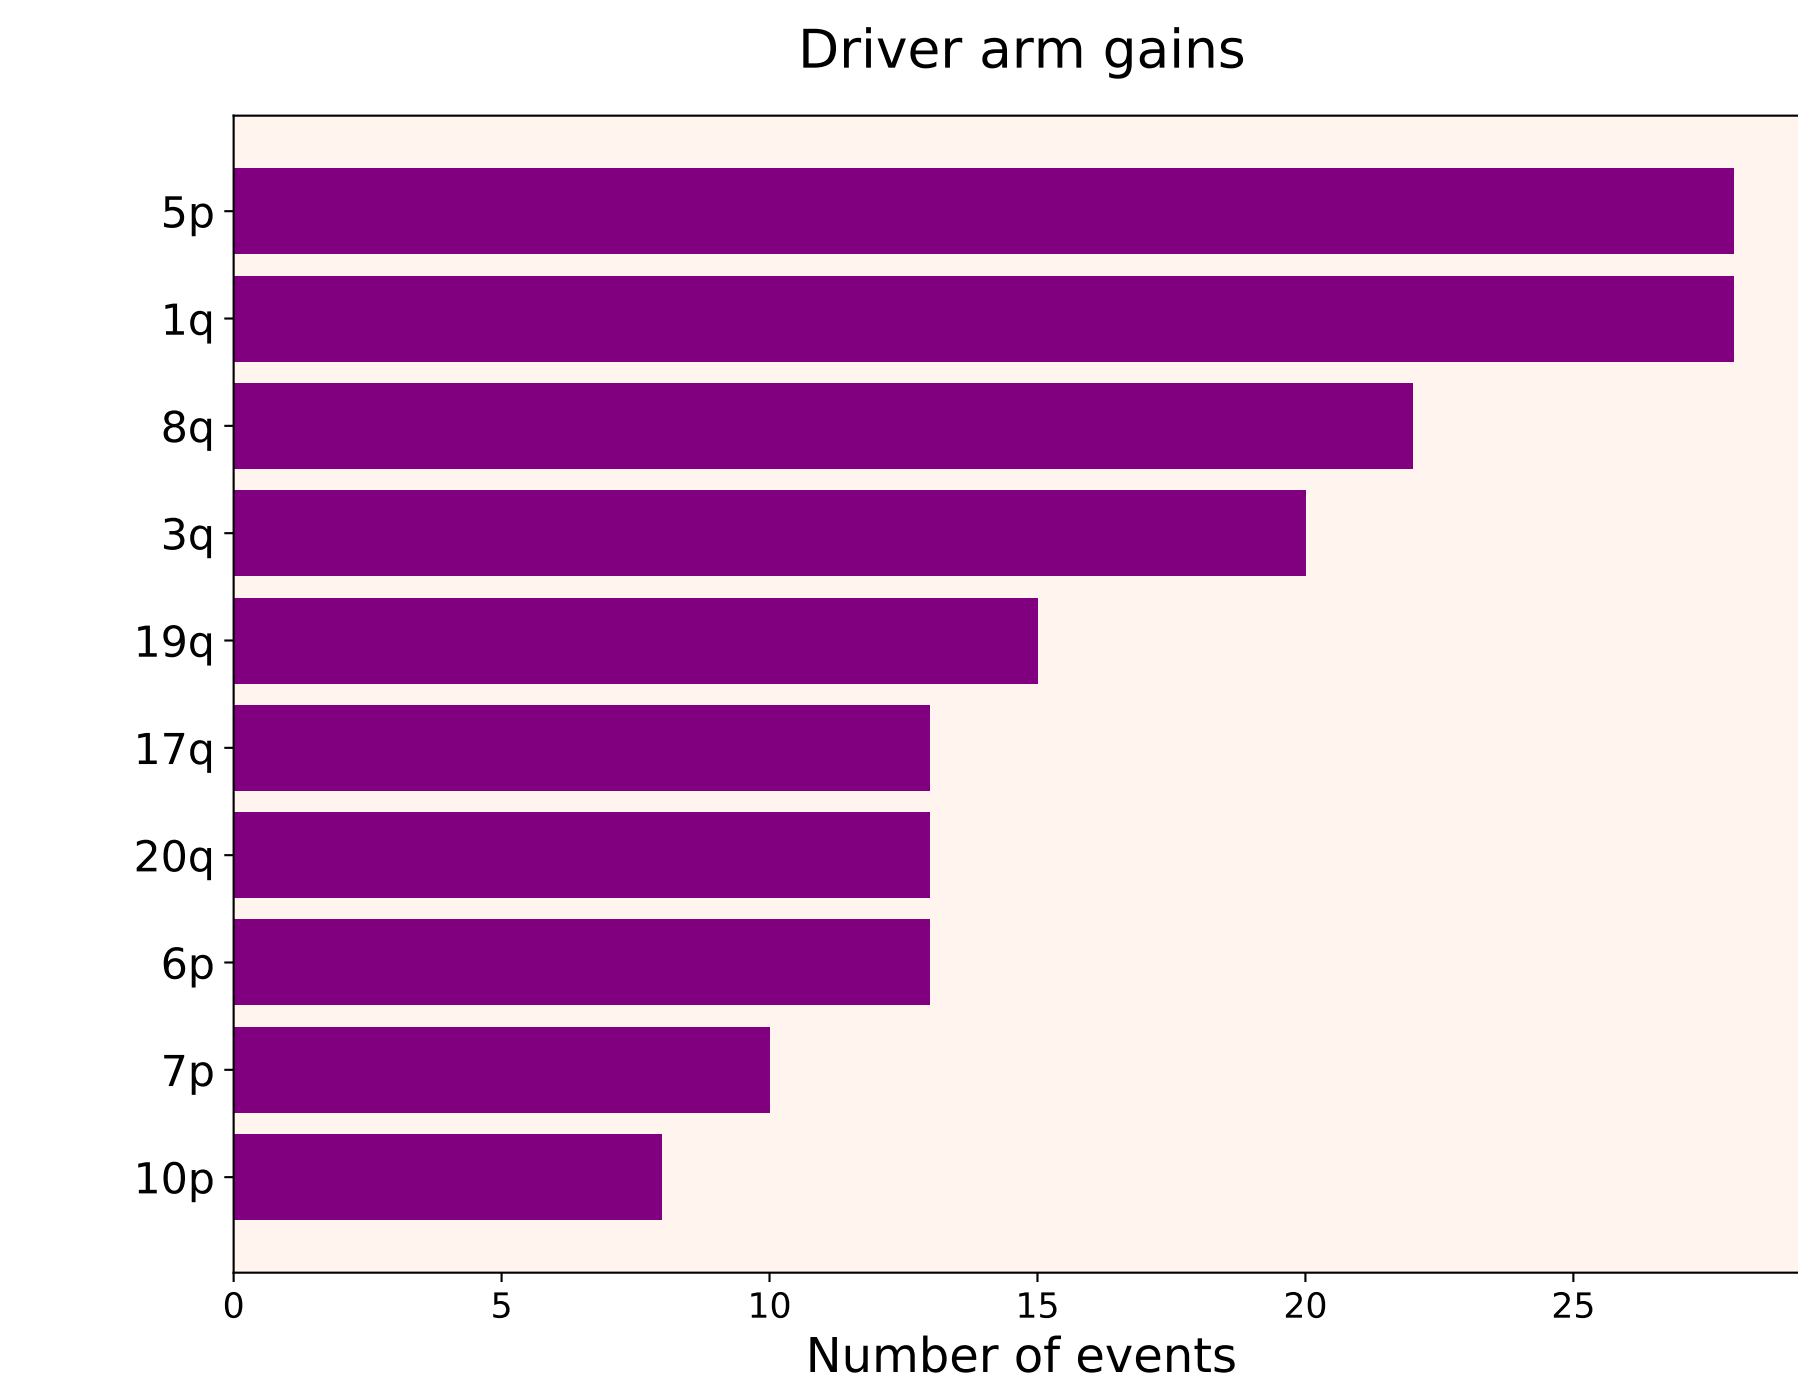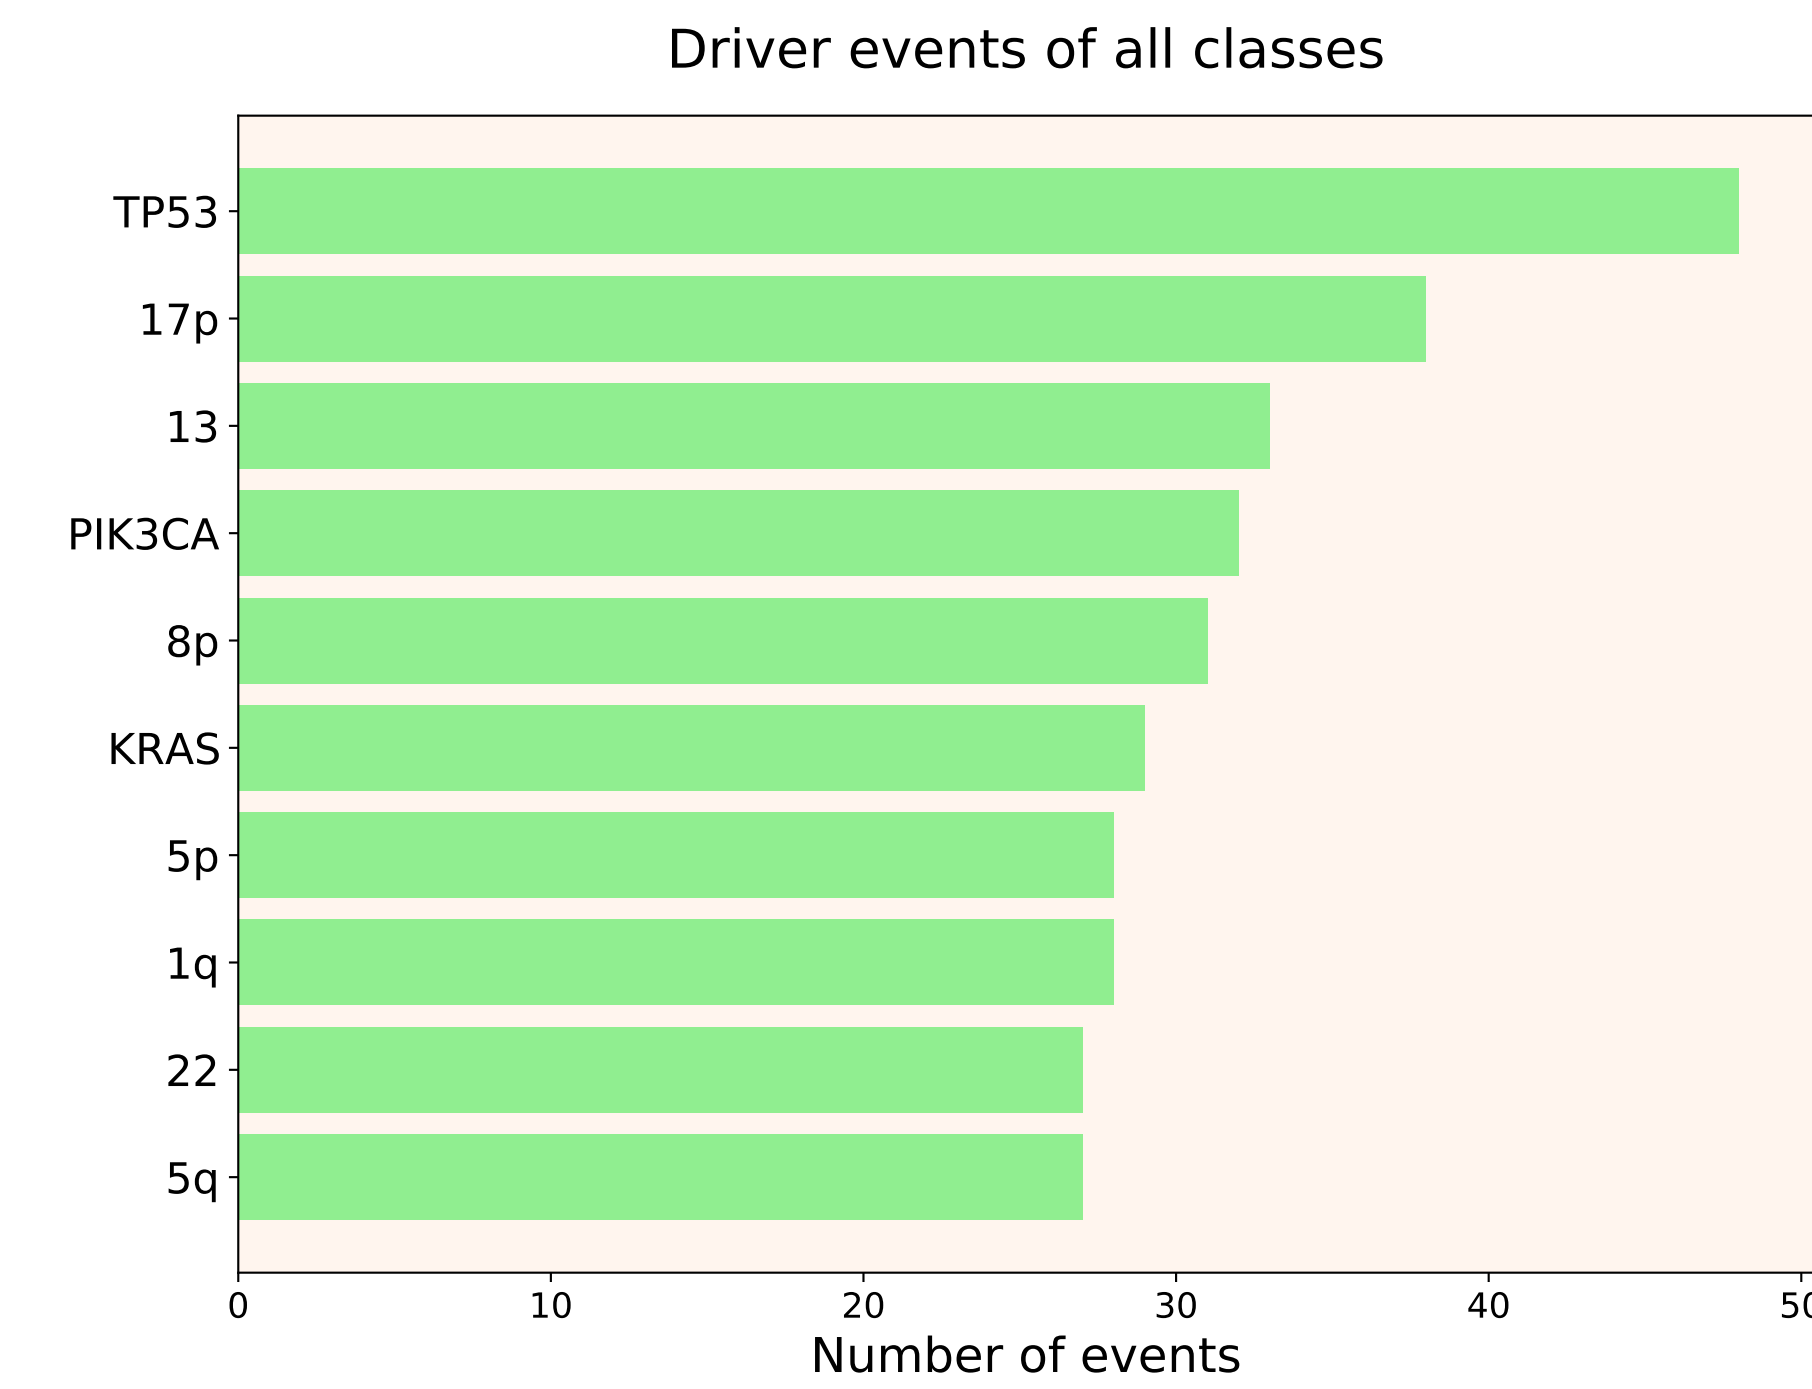

Supplement: Supplemental_Data_S1.zip [file Supplemental_Data_S1.zip]

# UVM

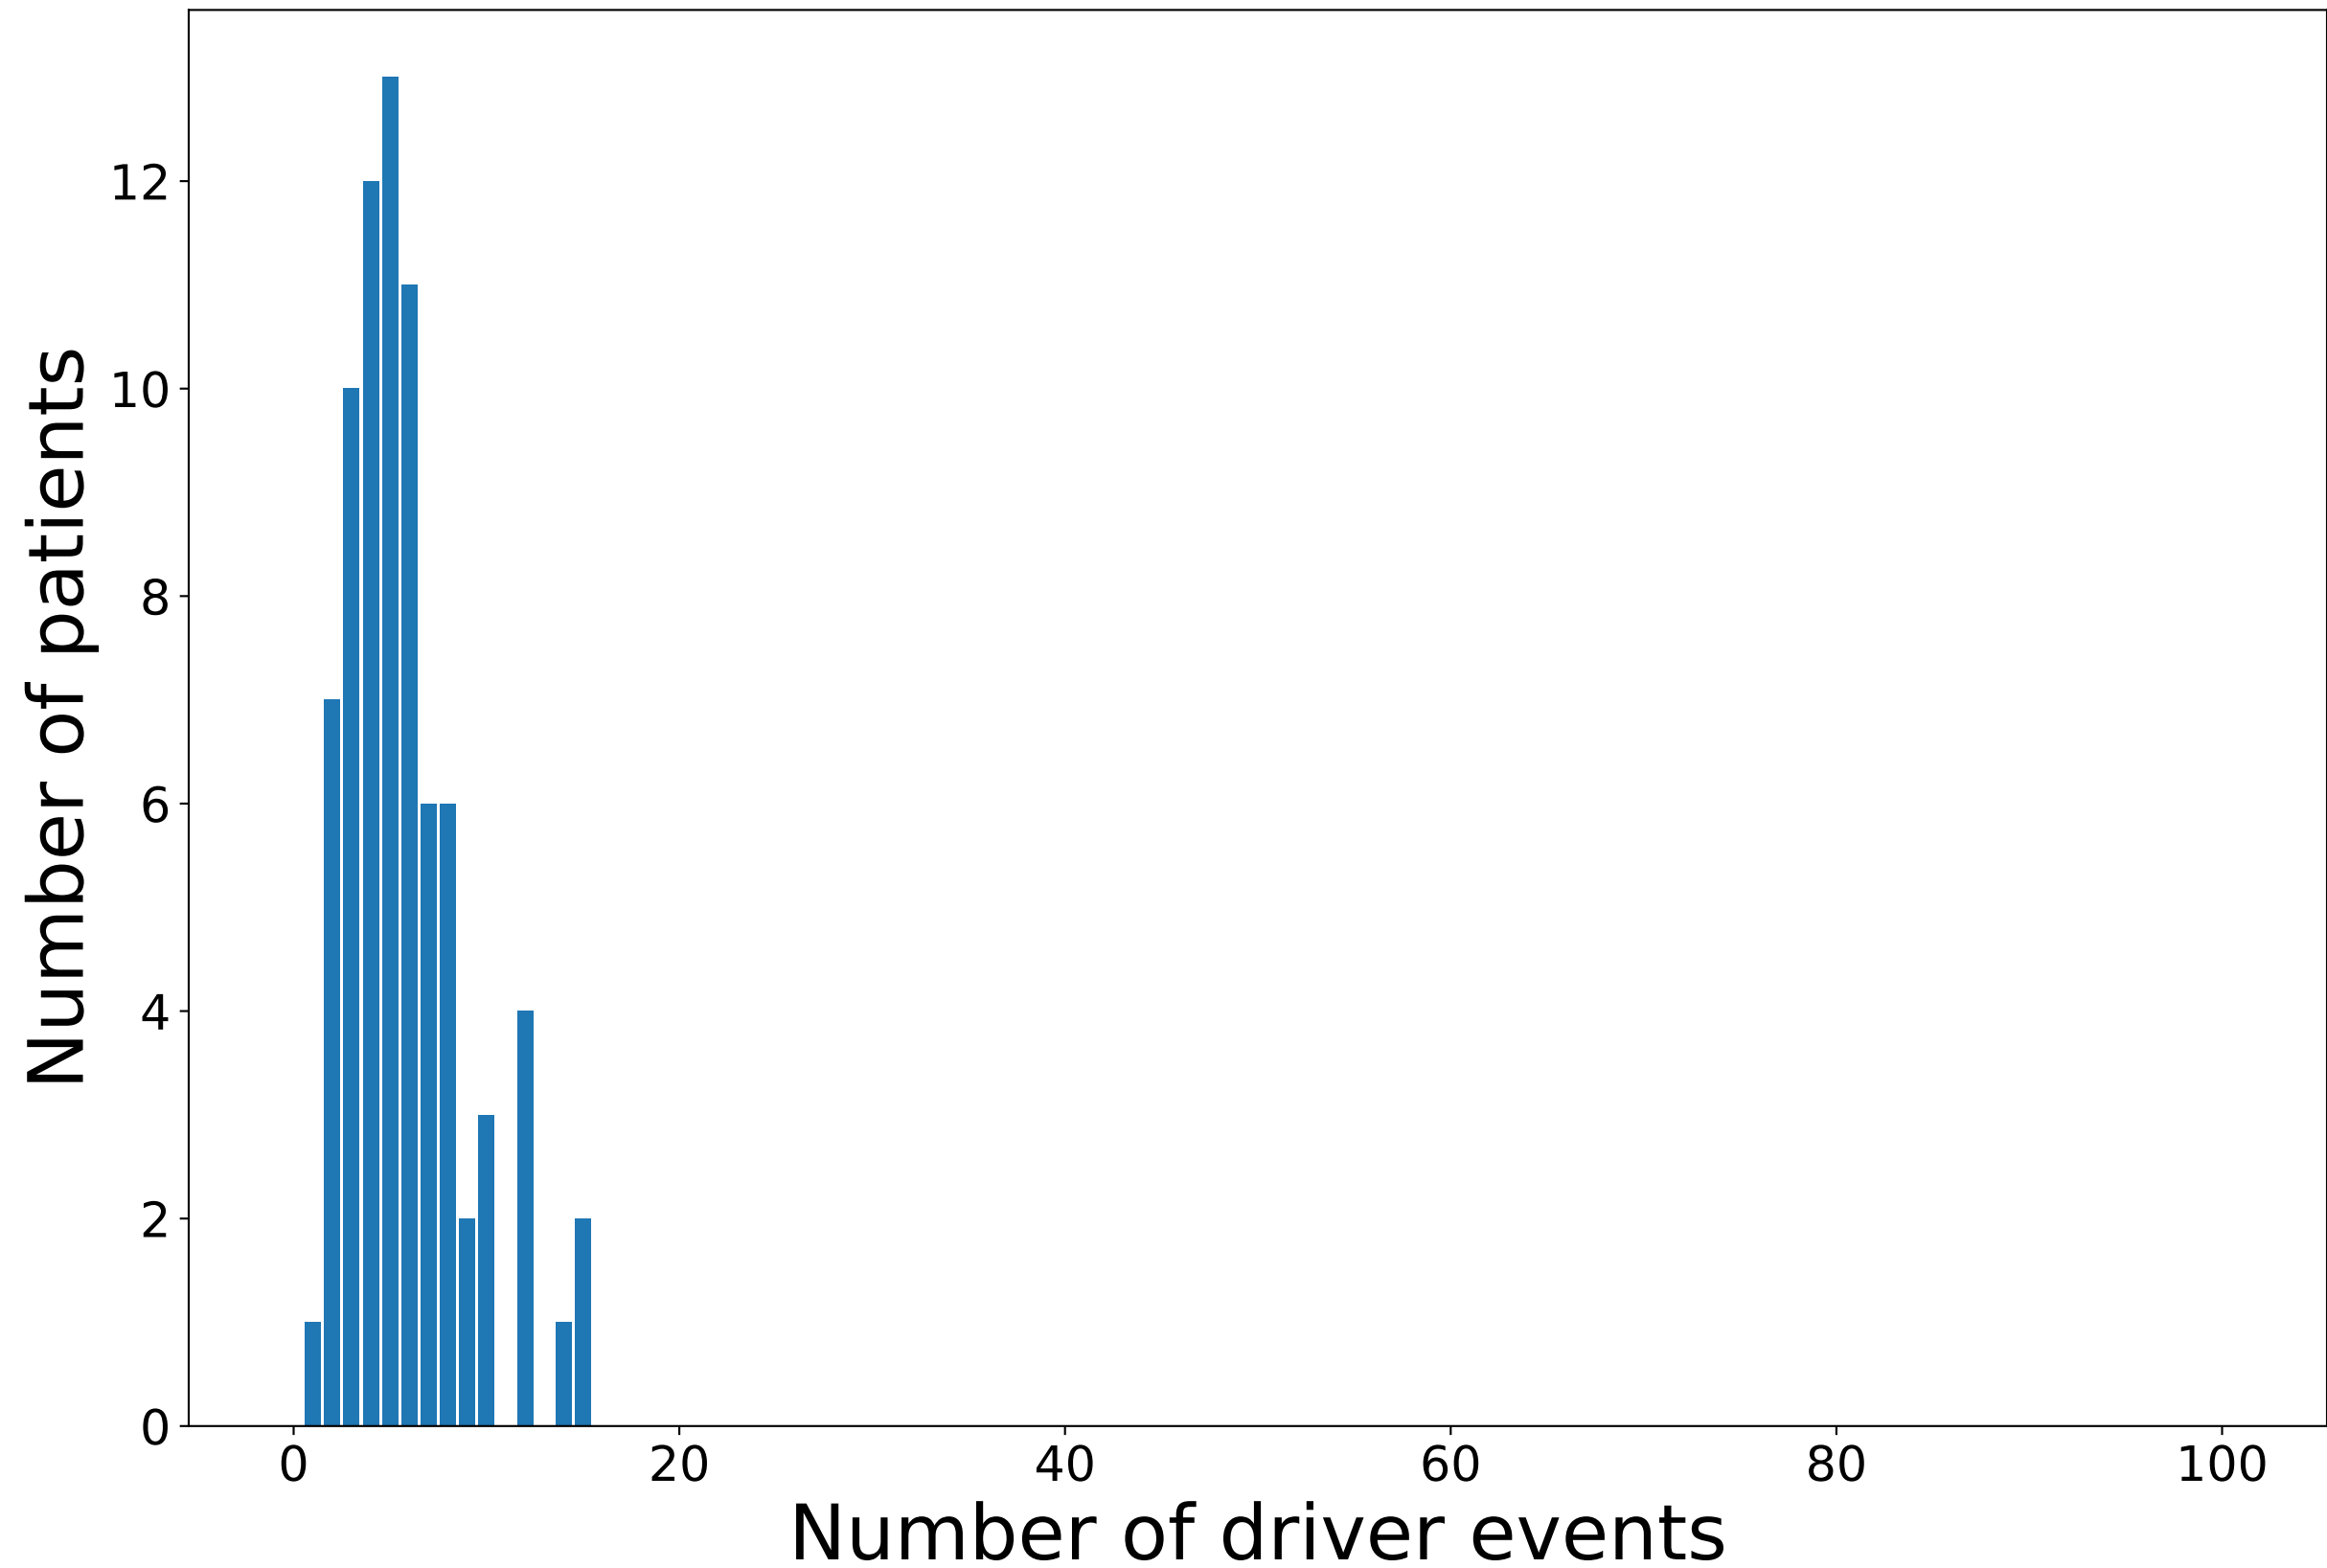

Supplement: Supplemental_Data_S1.zip [file Supplemental_Data_S1.zip]

OV

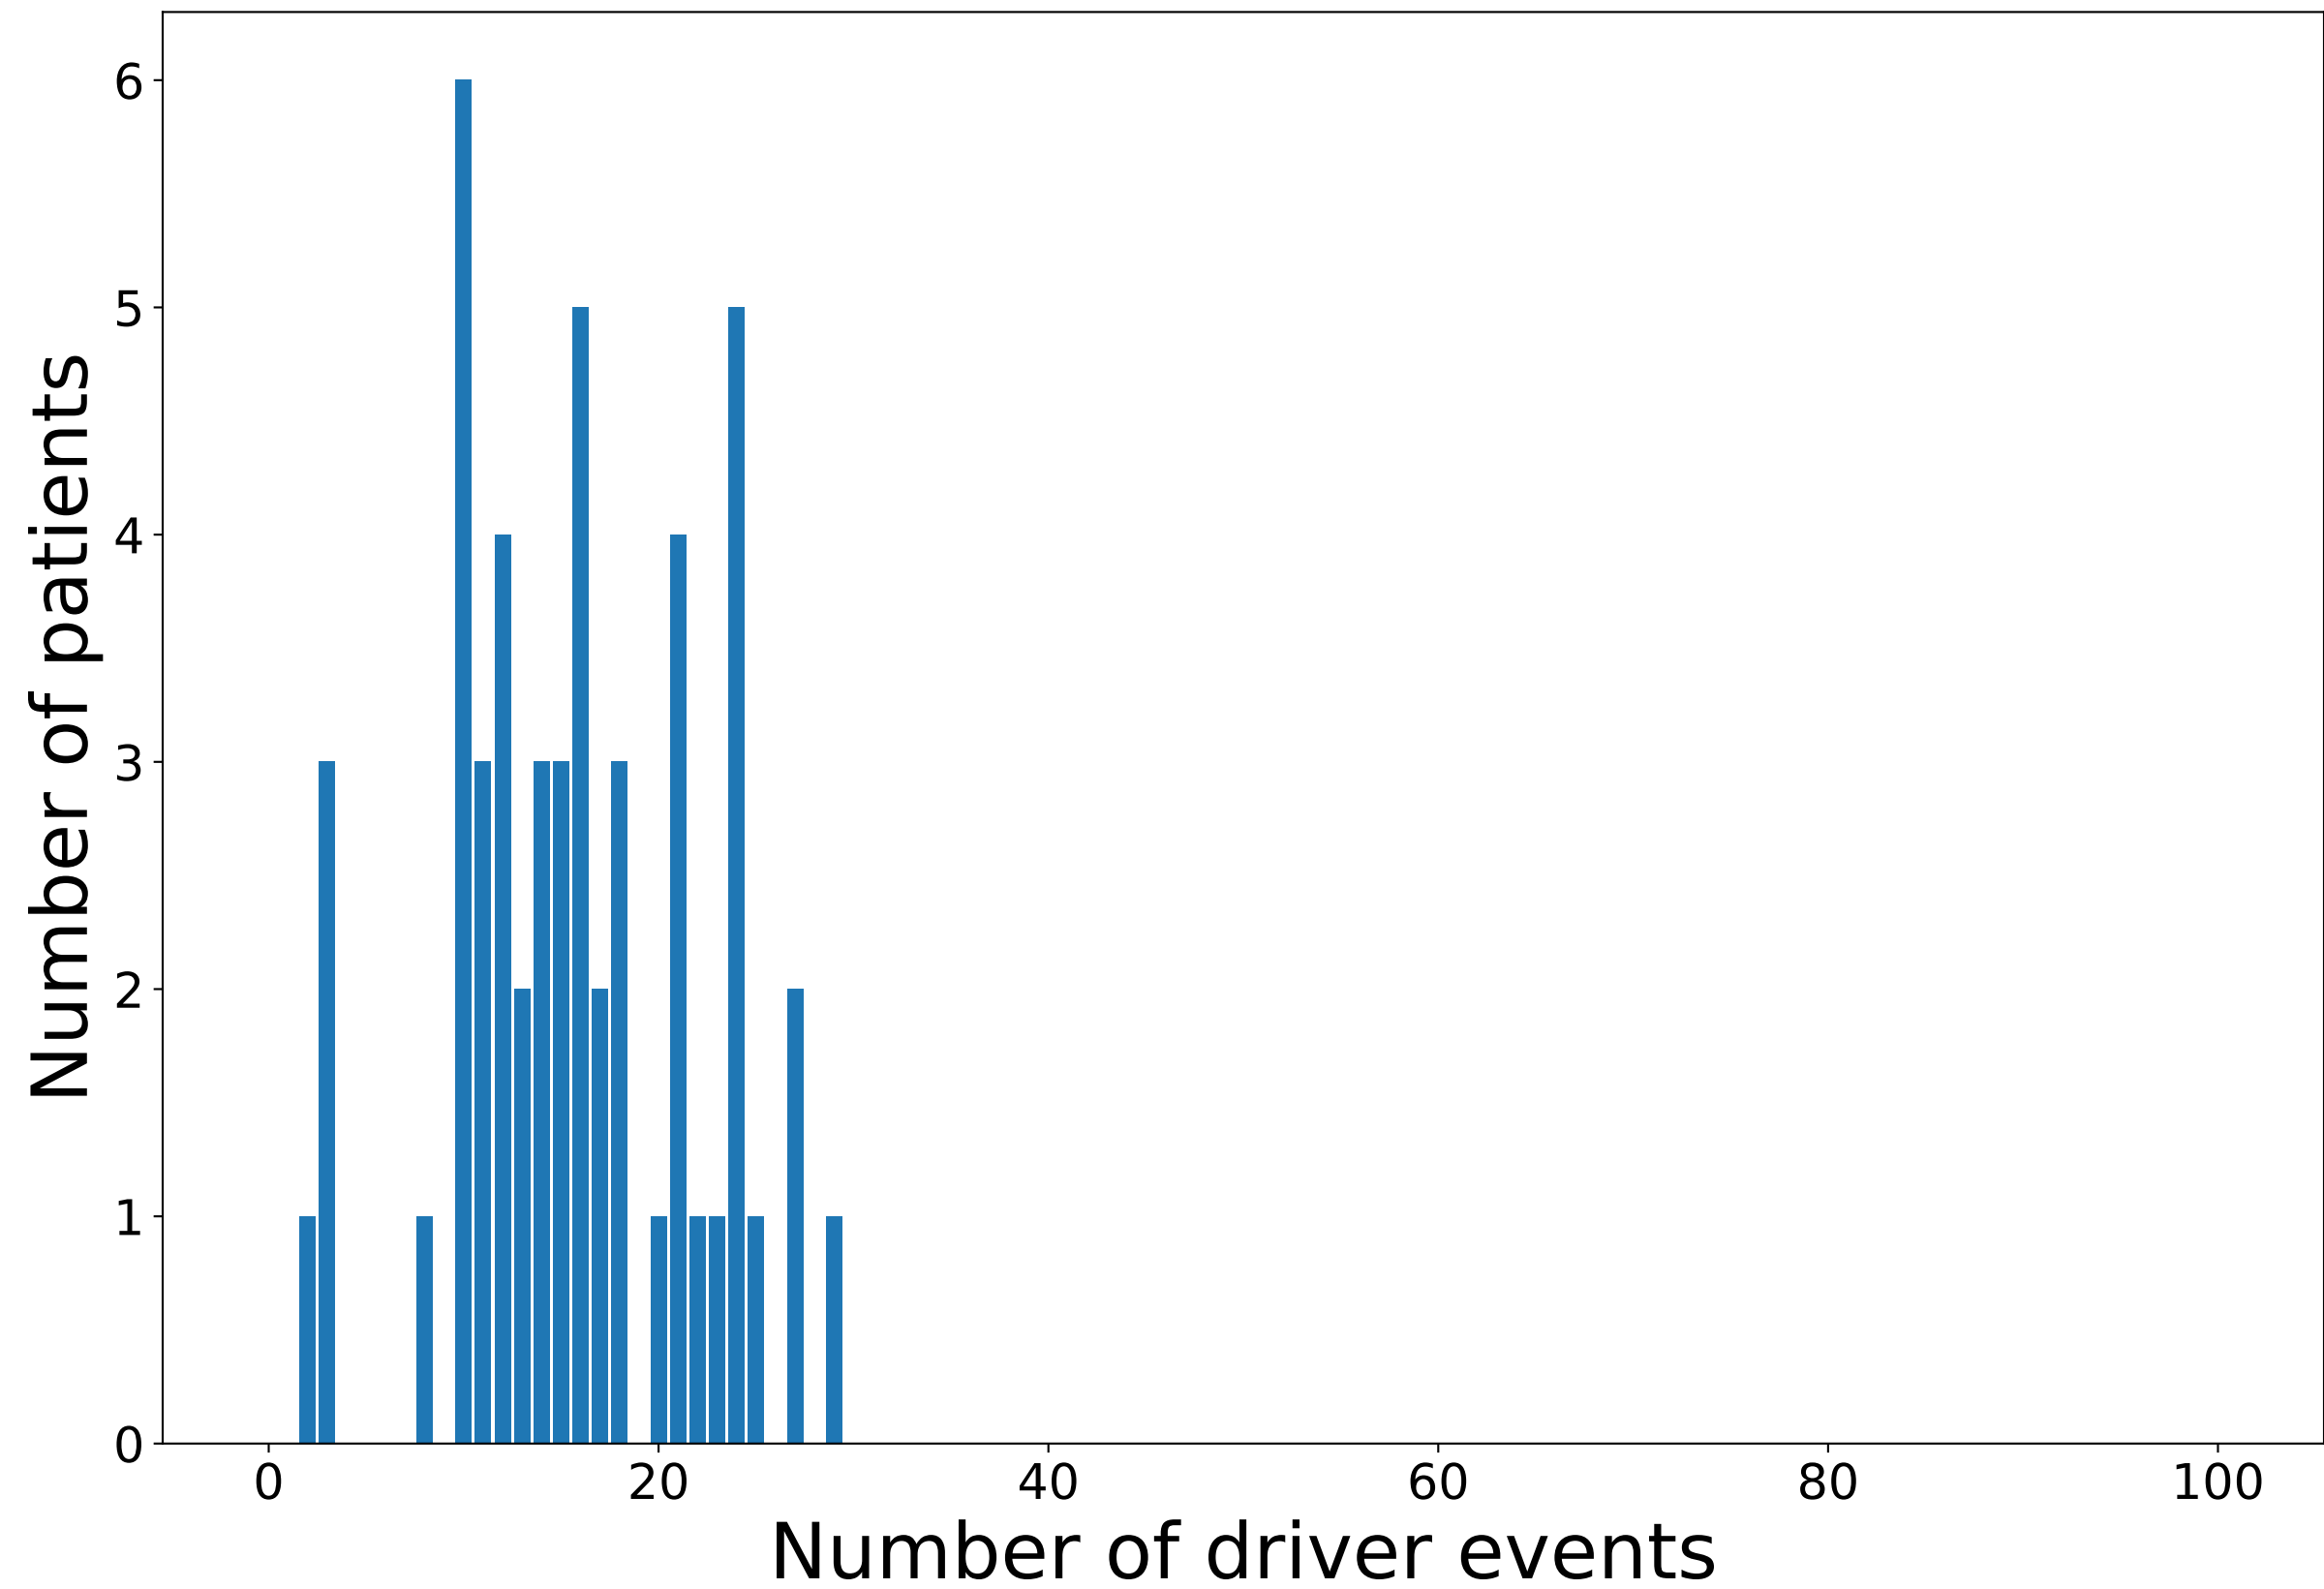

Supplement: Supplemental_Data_S1.zip [file Supplemental_Data_S1.zip]

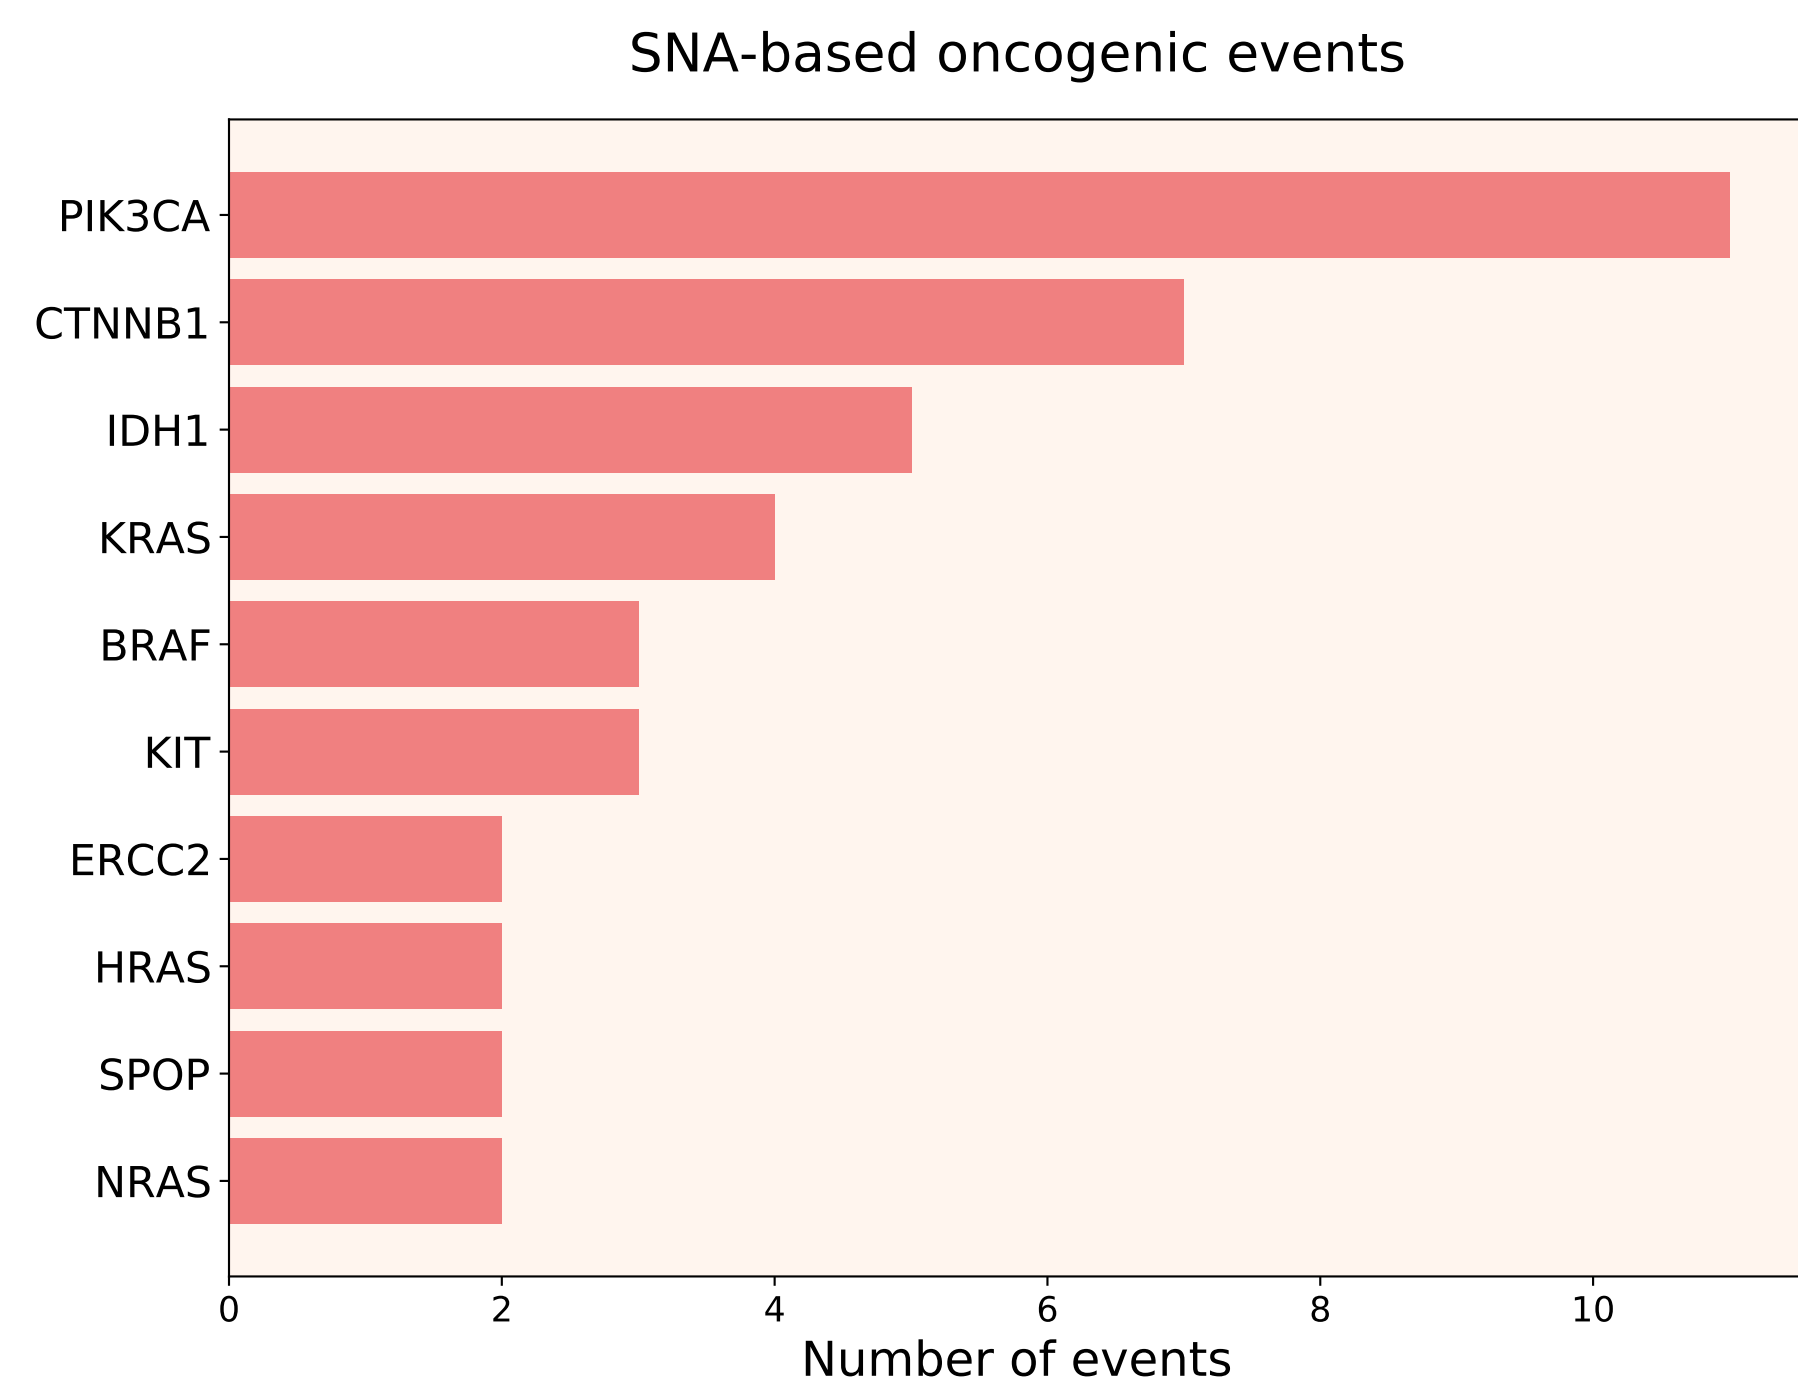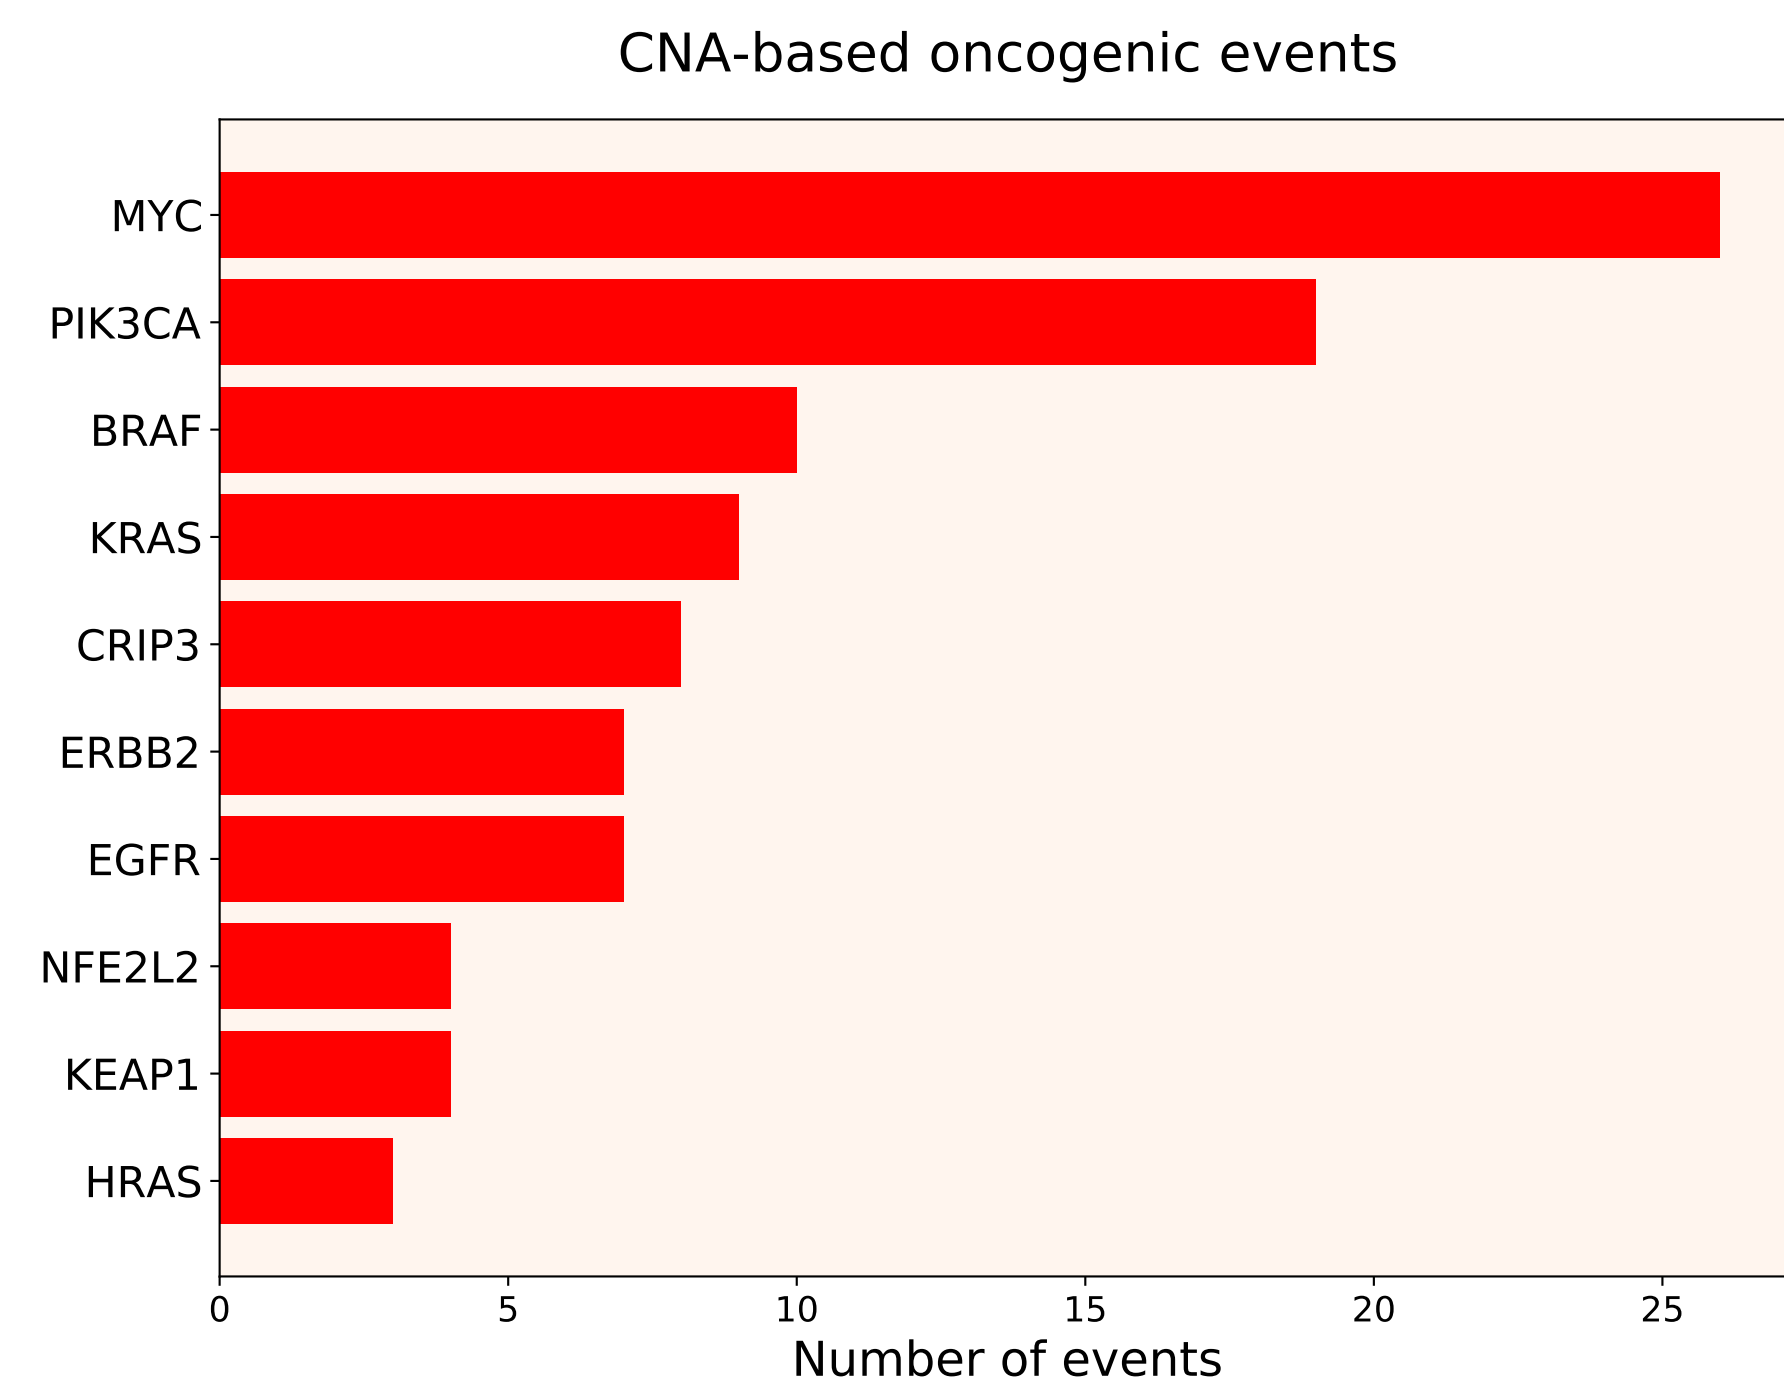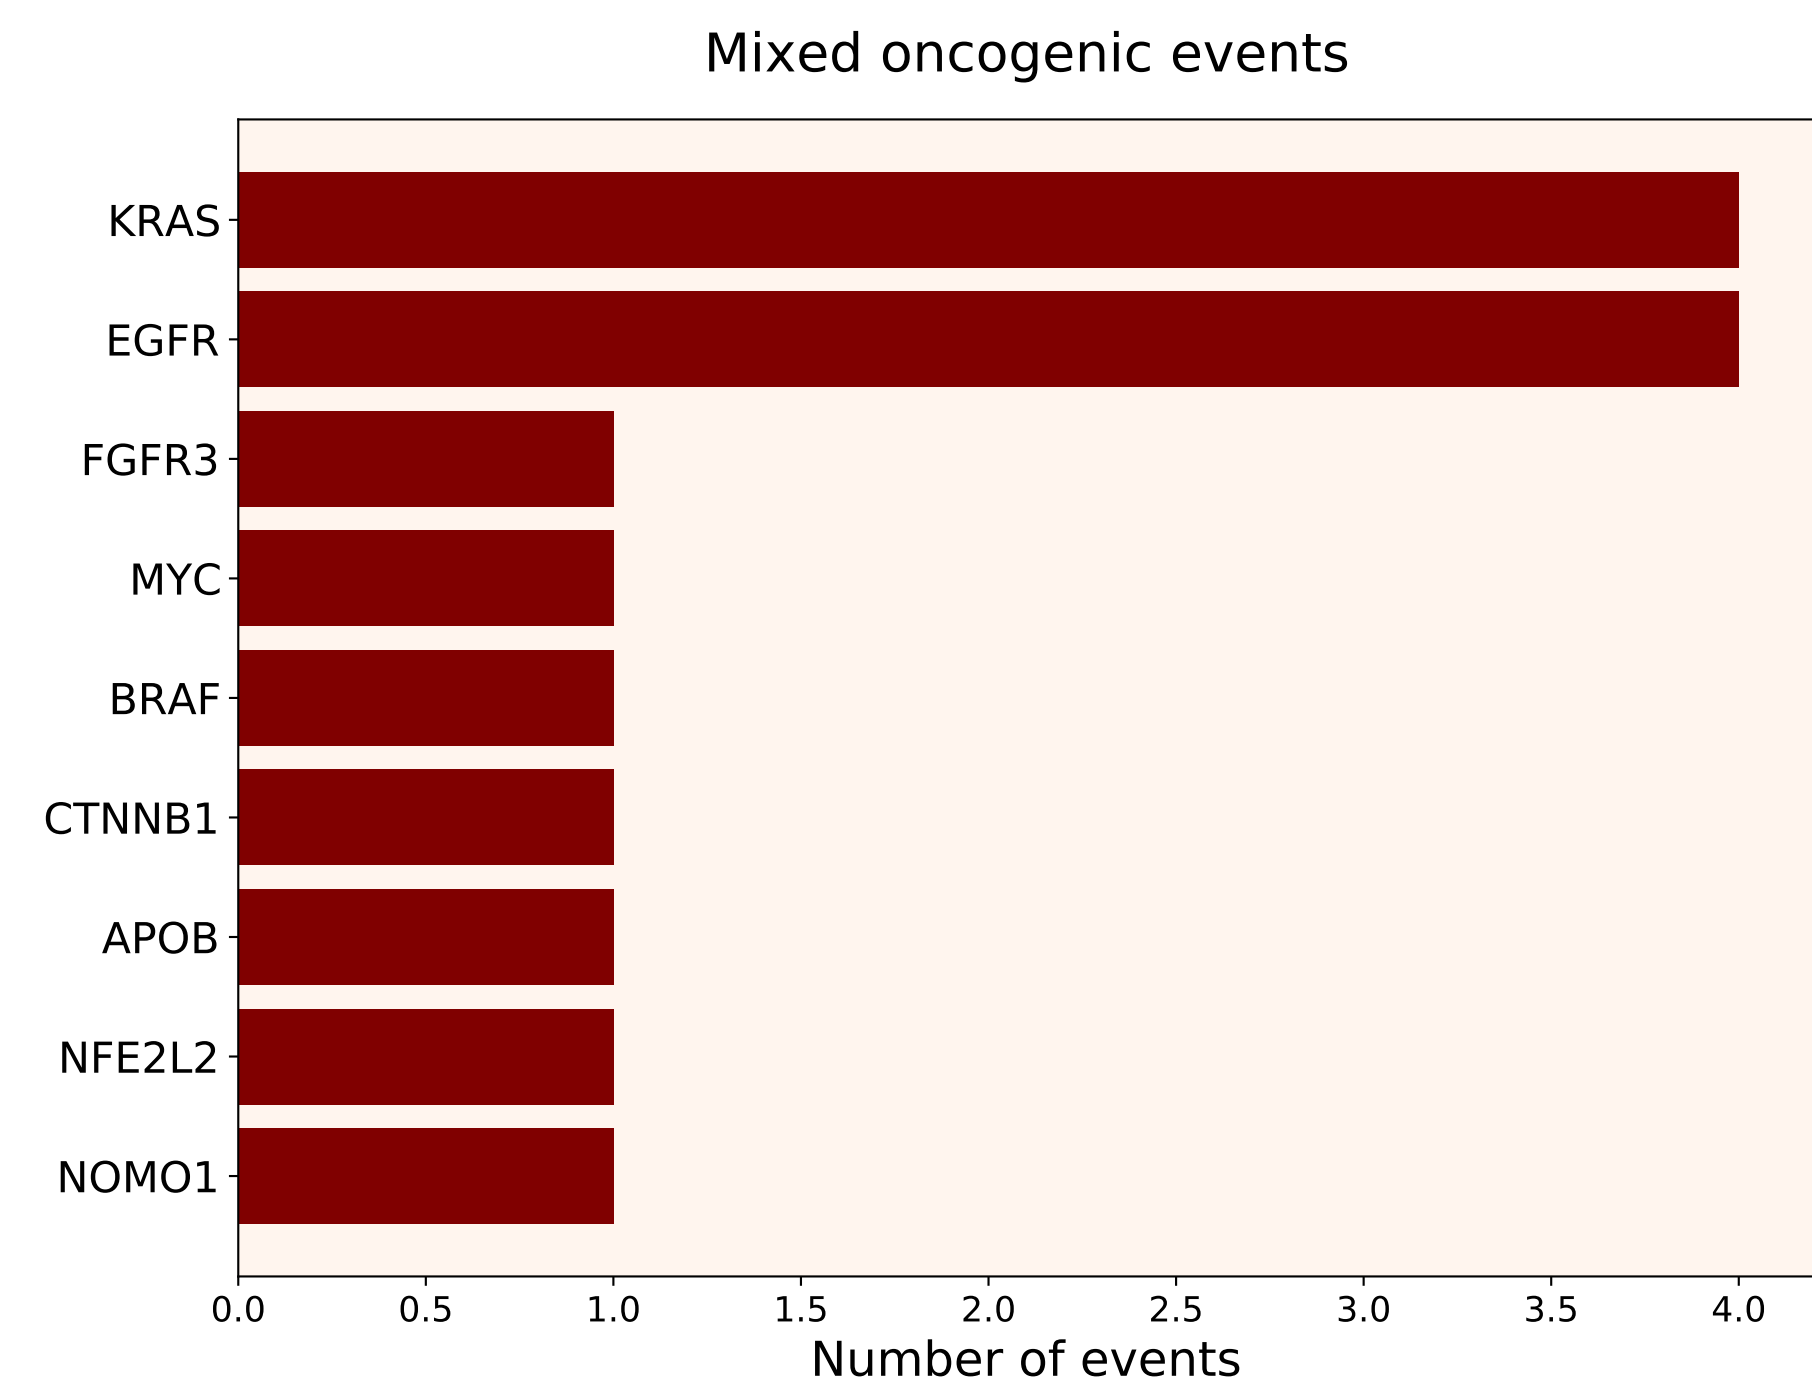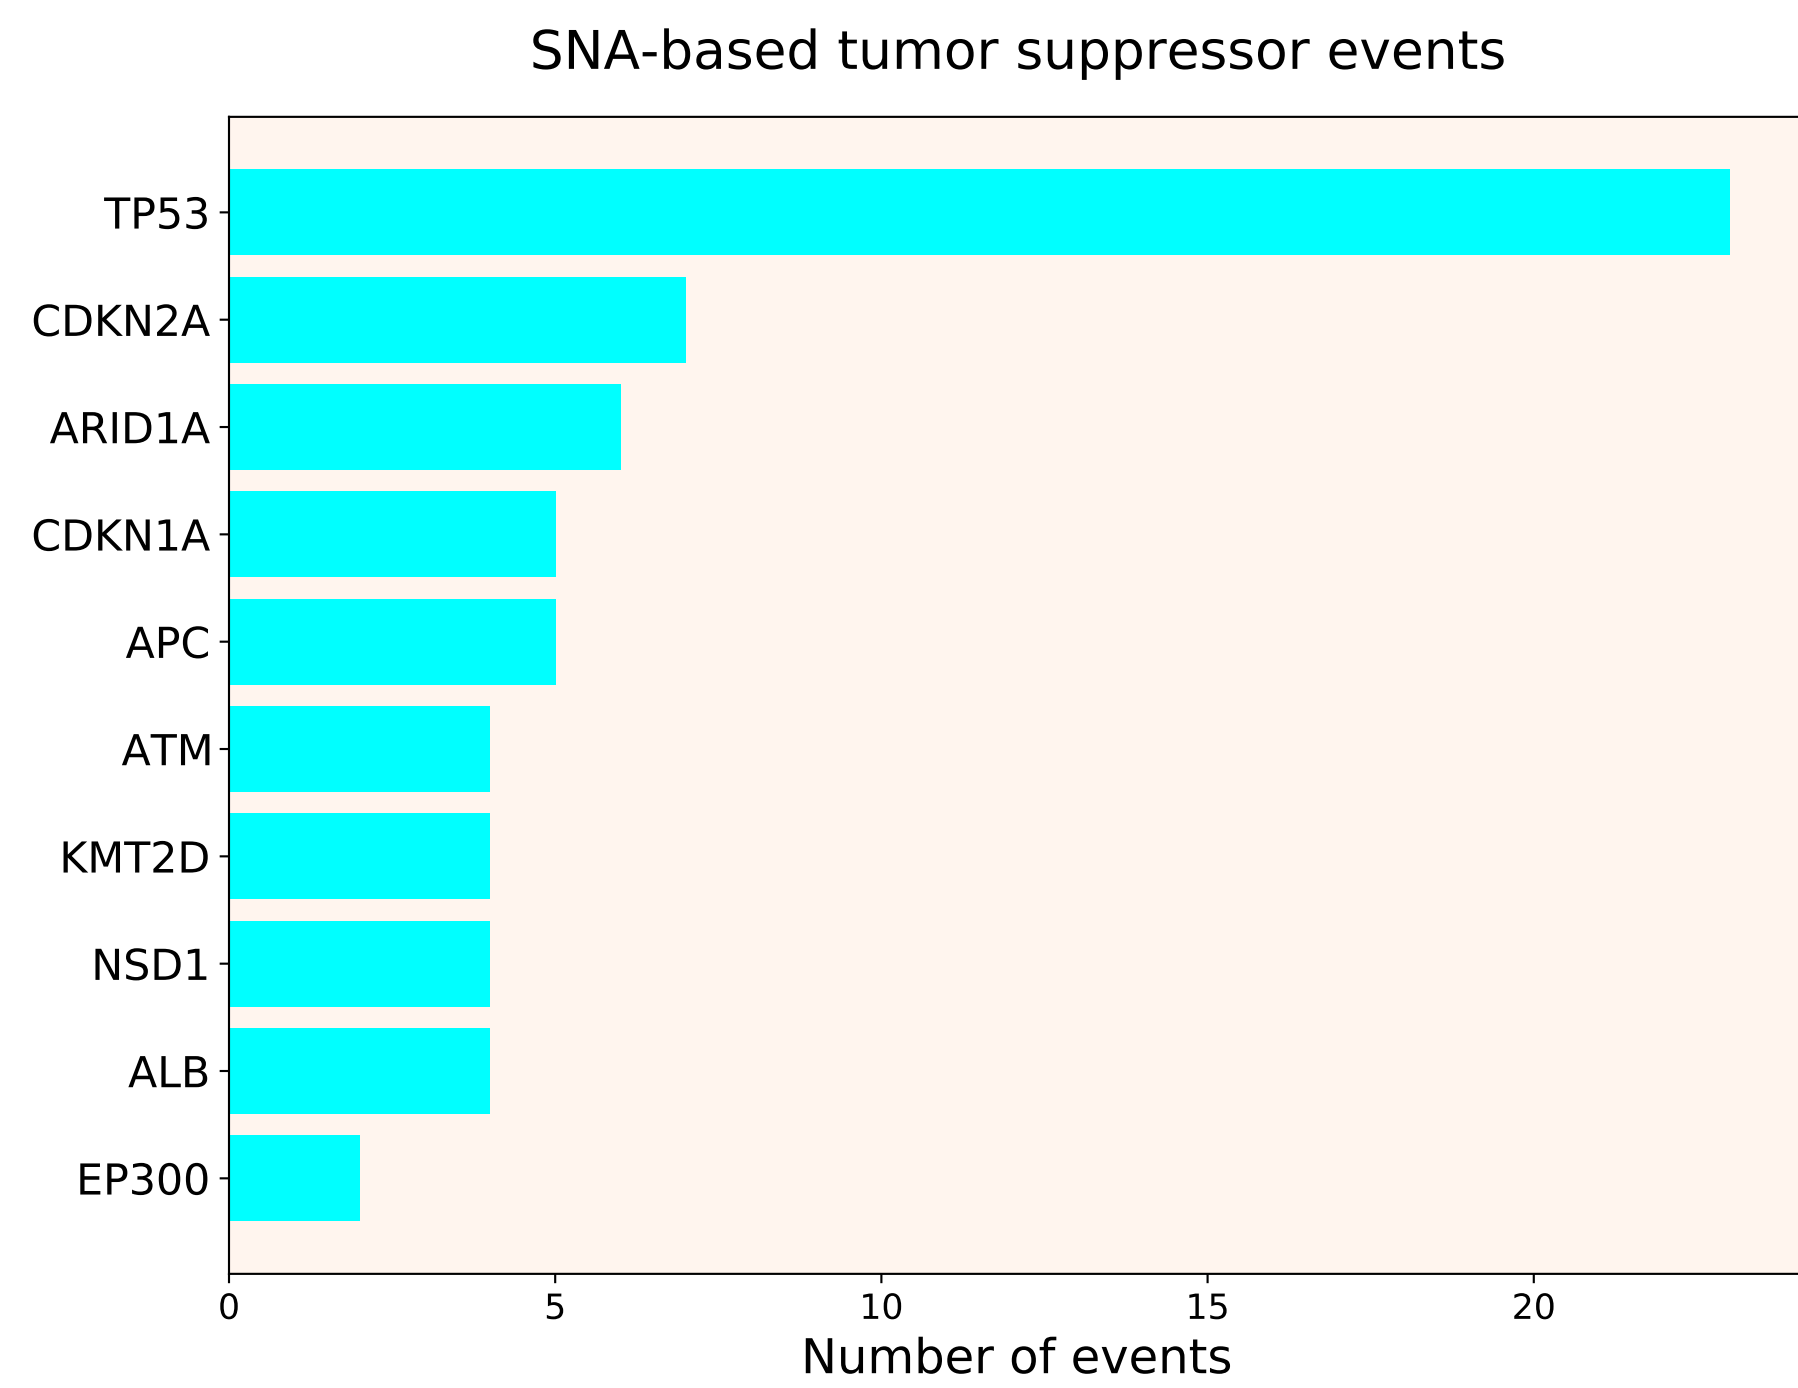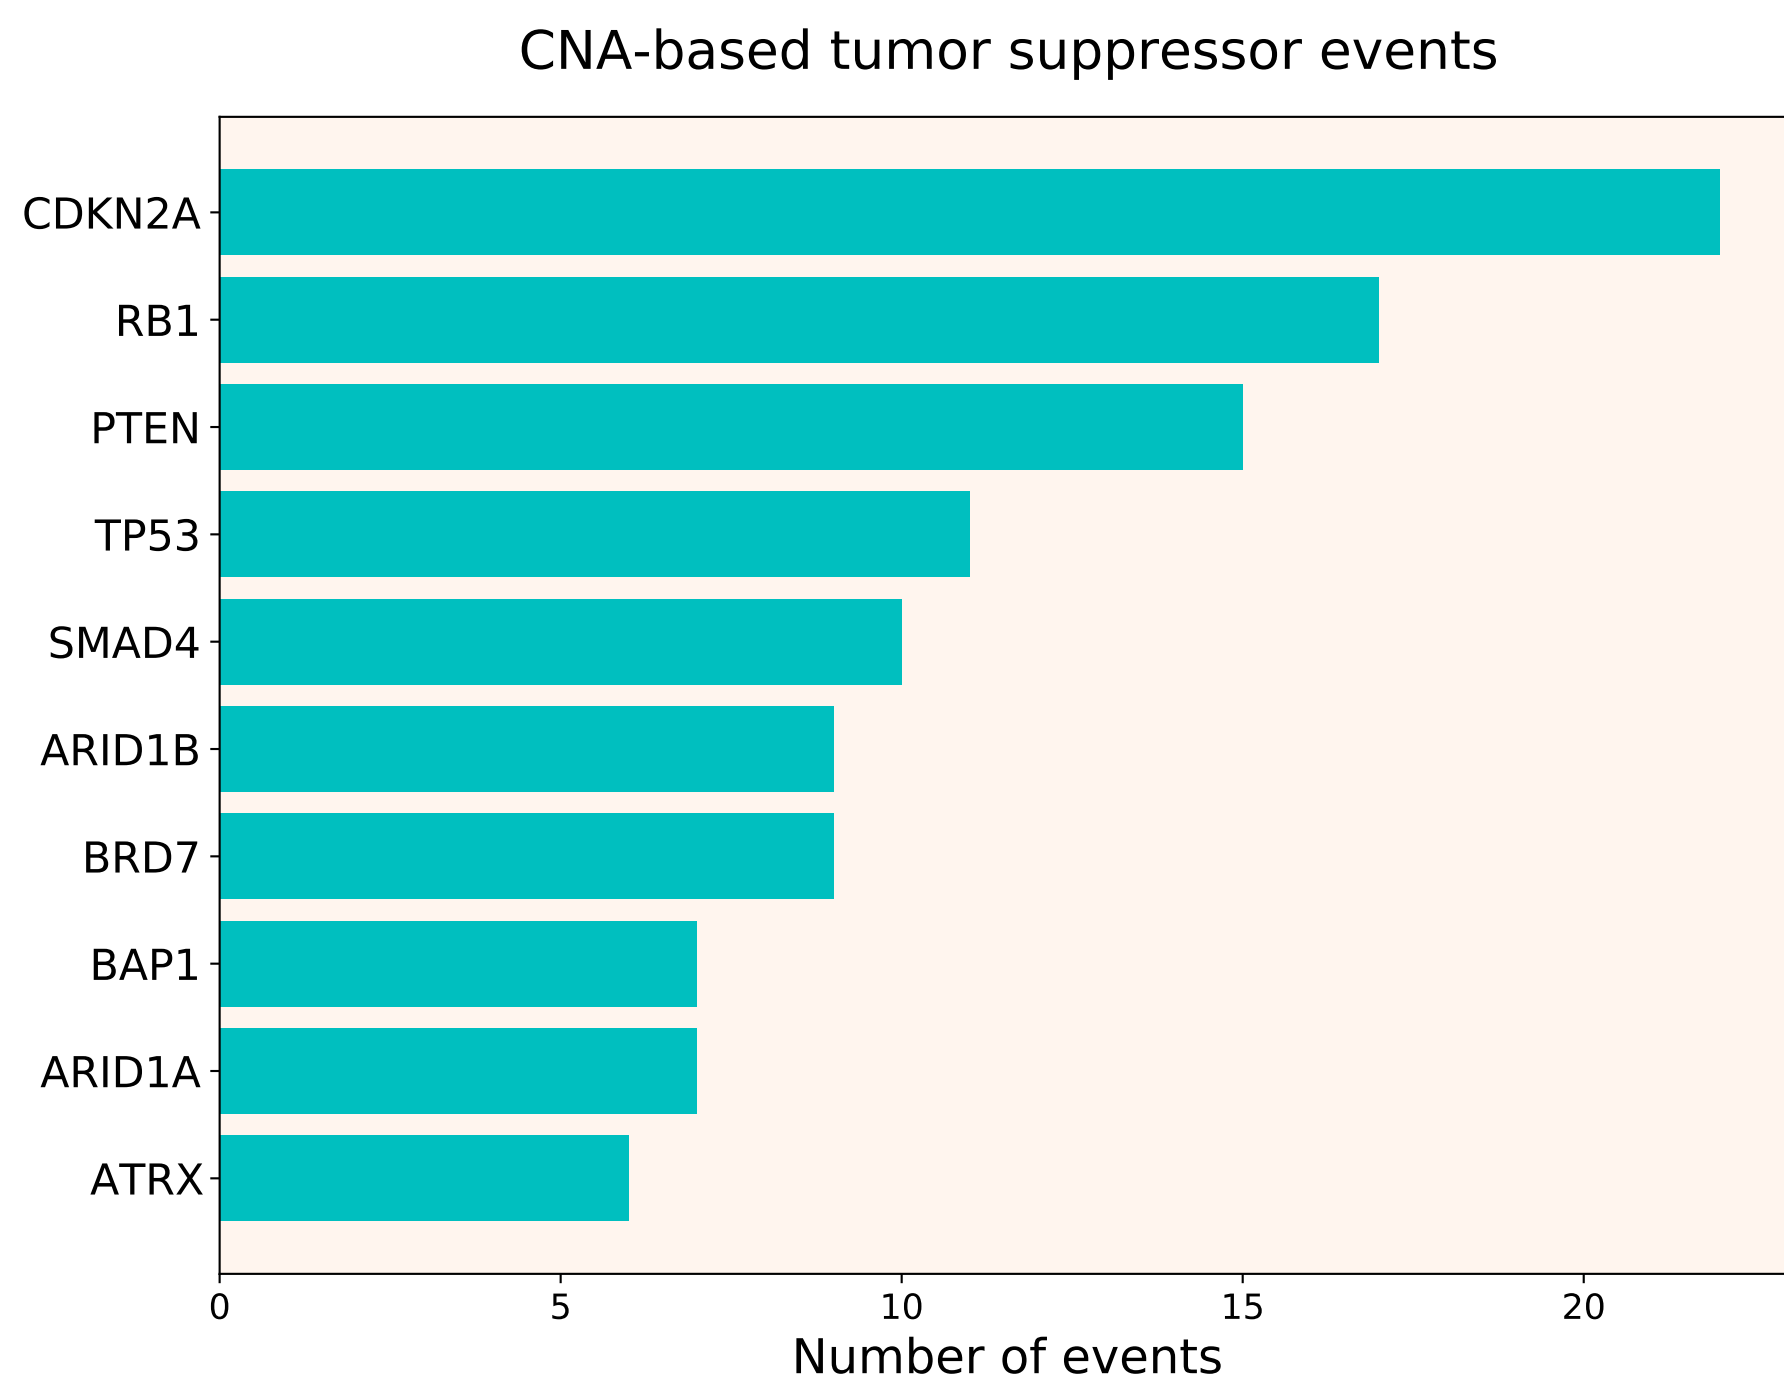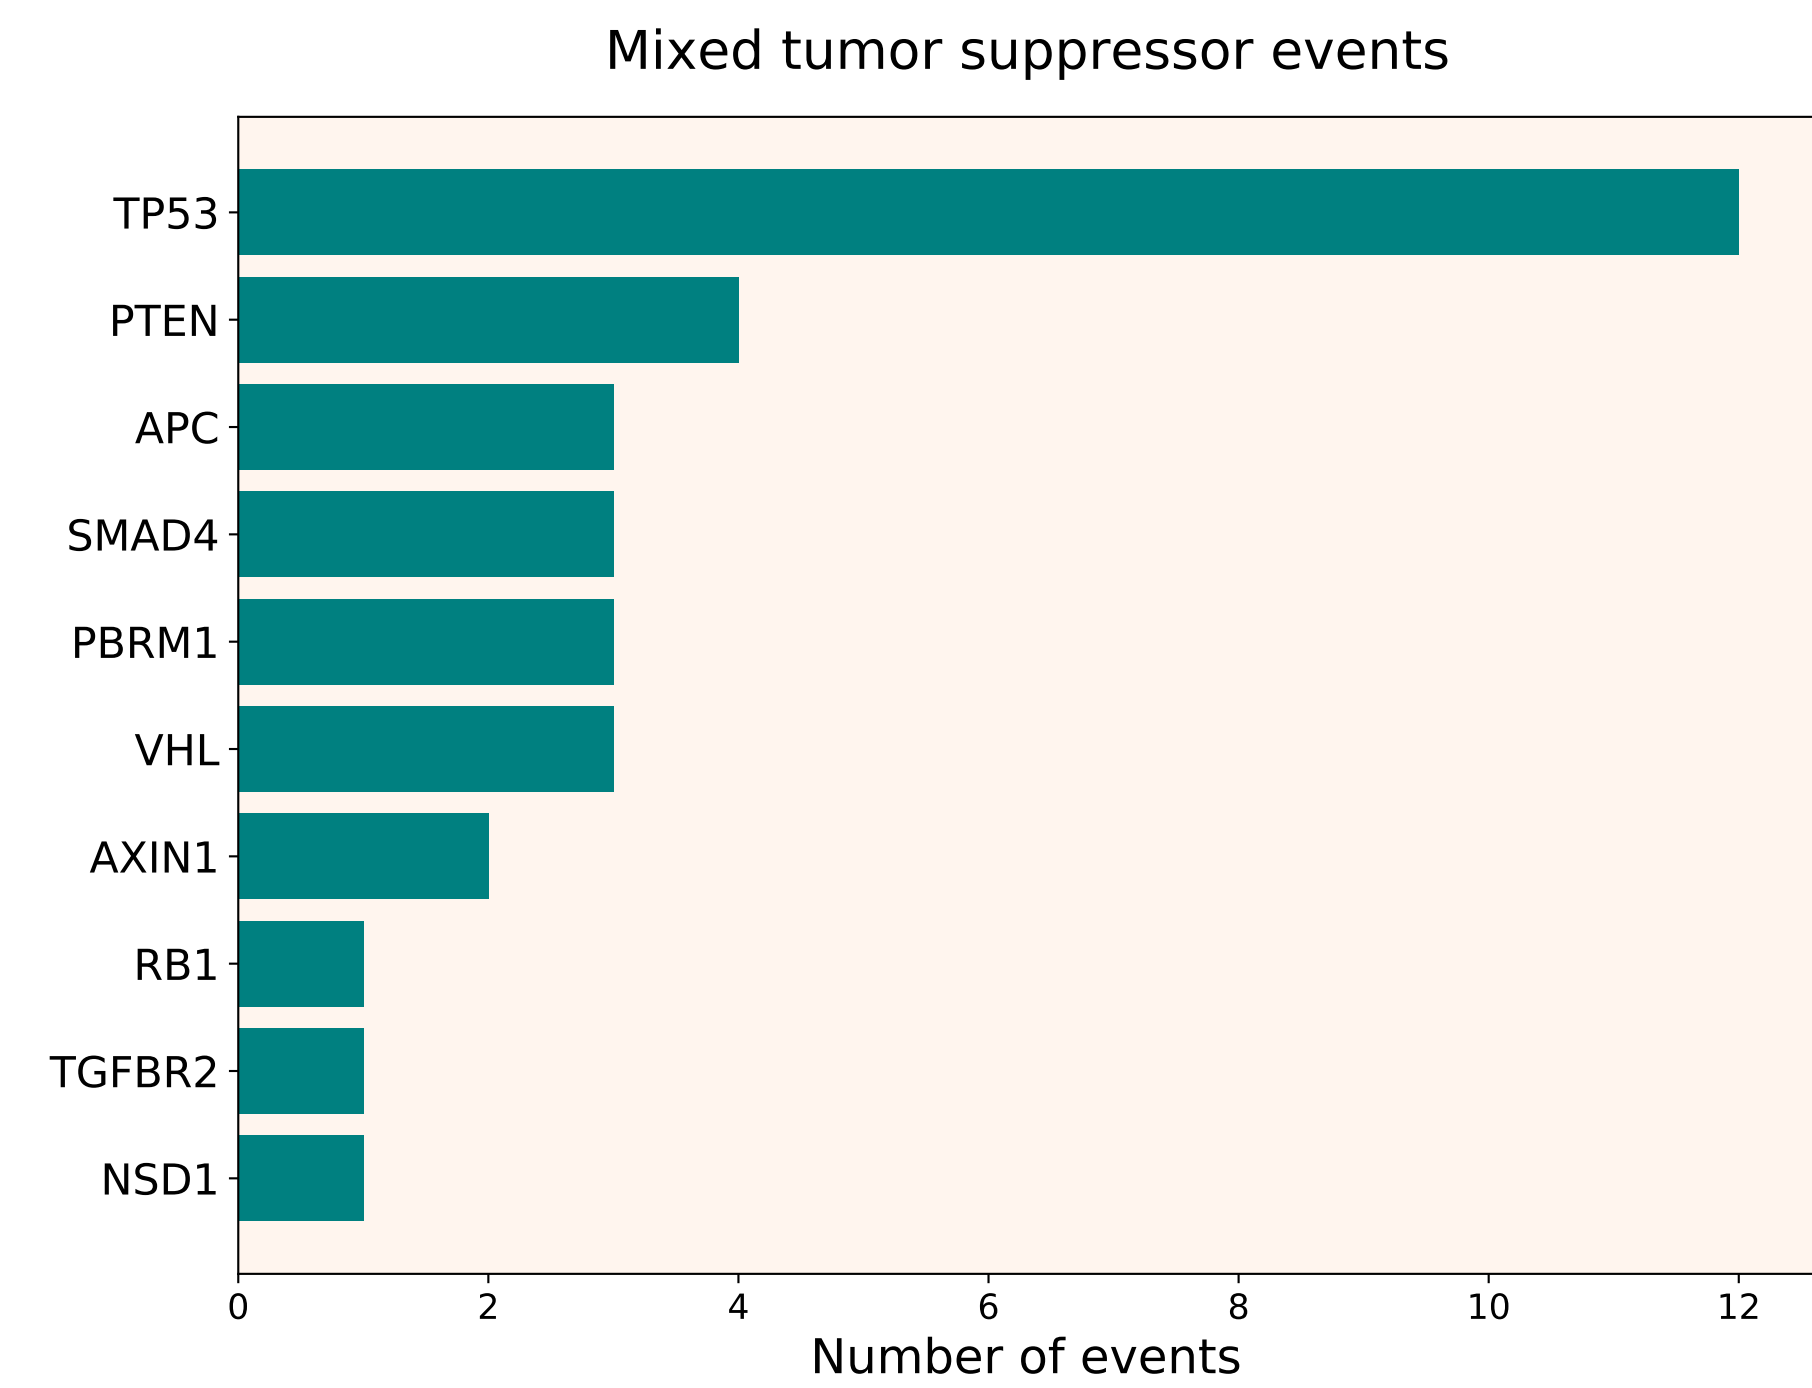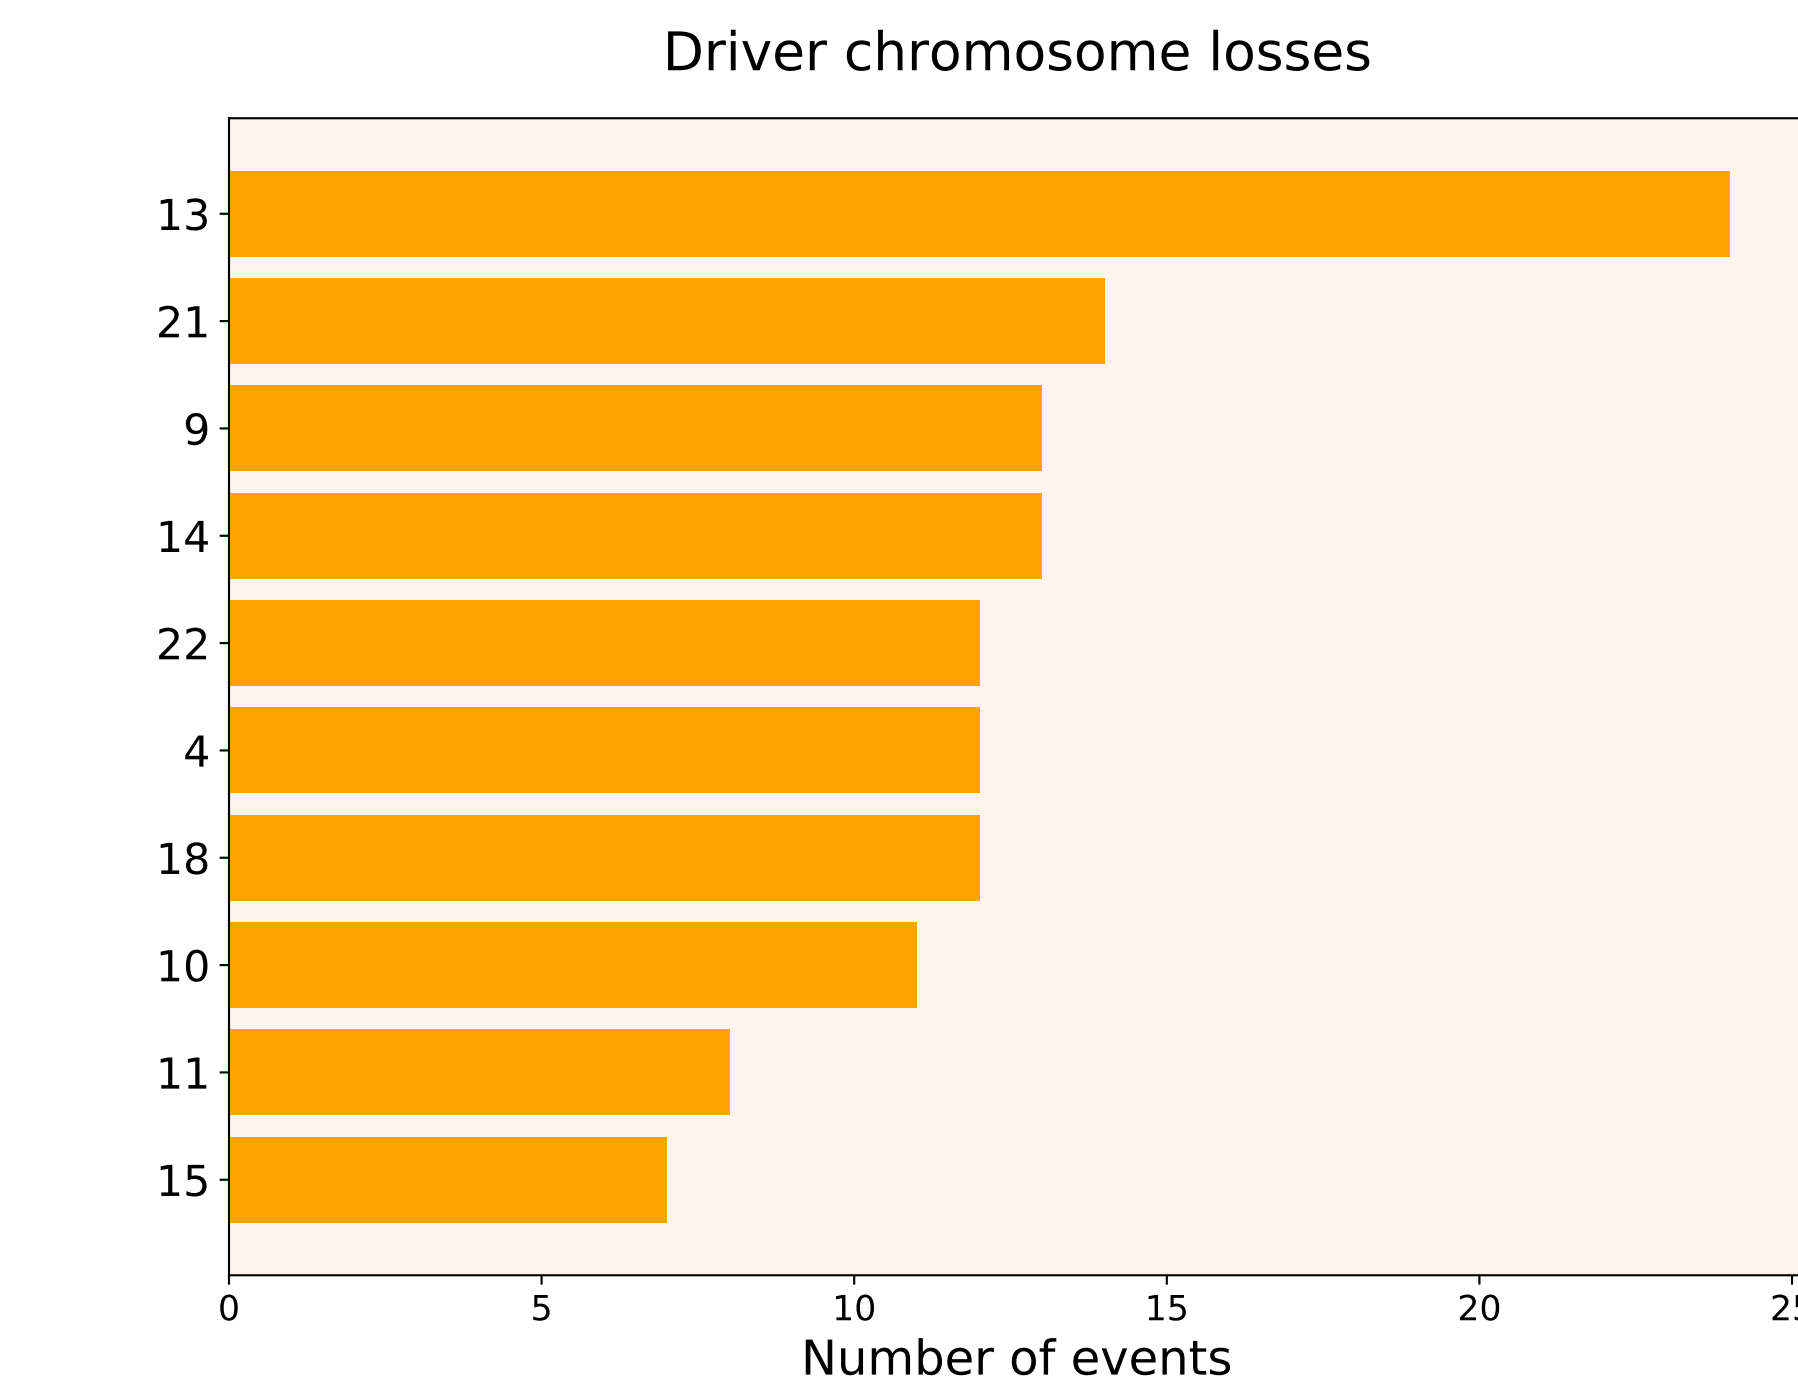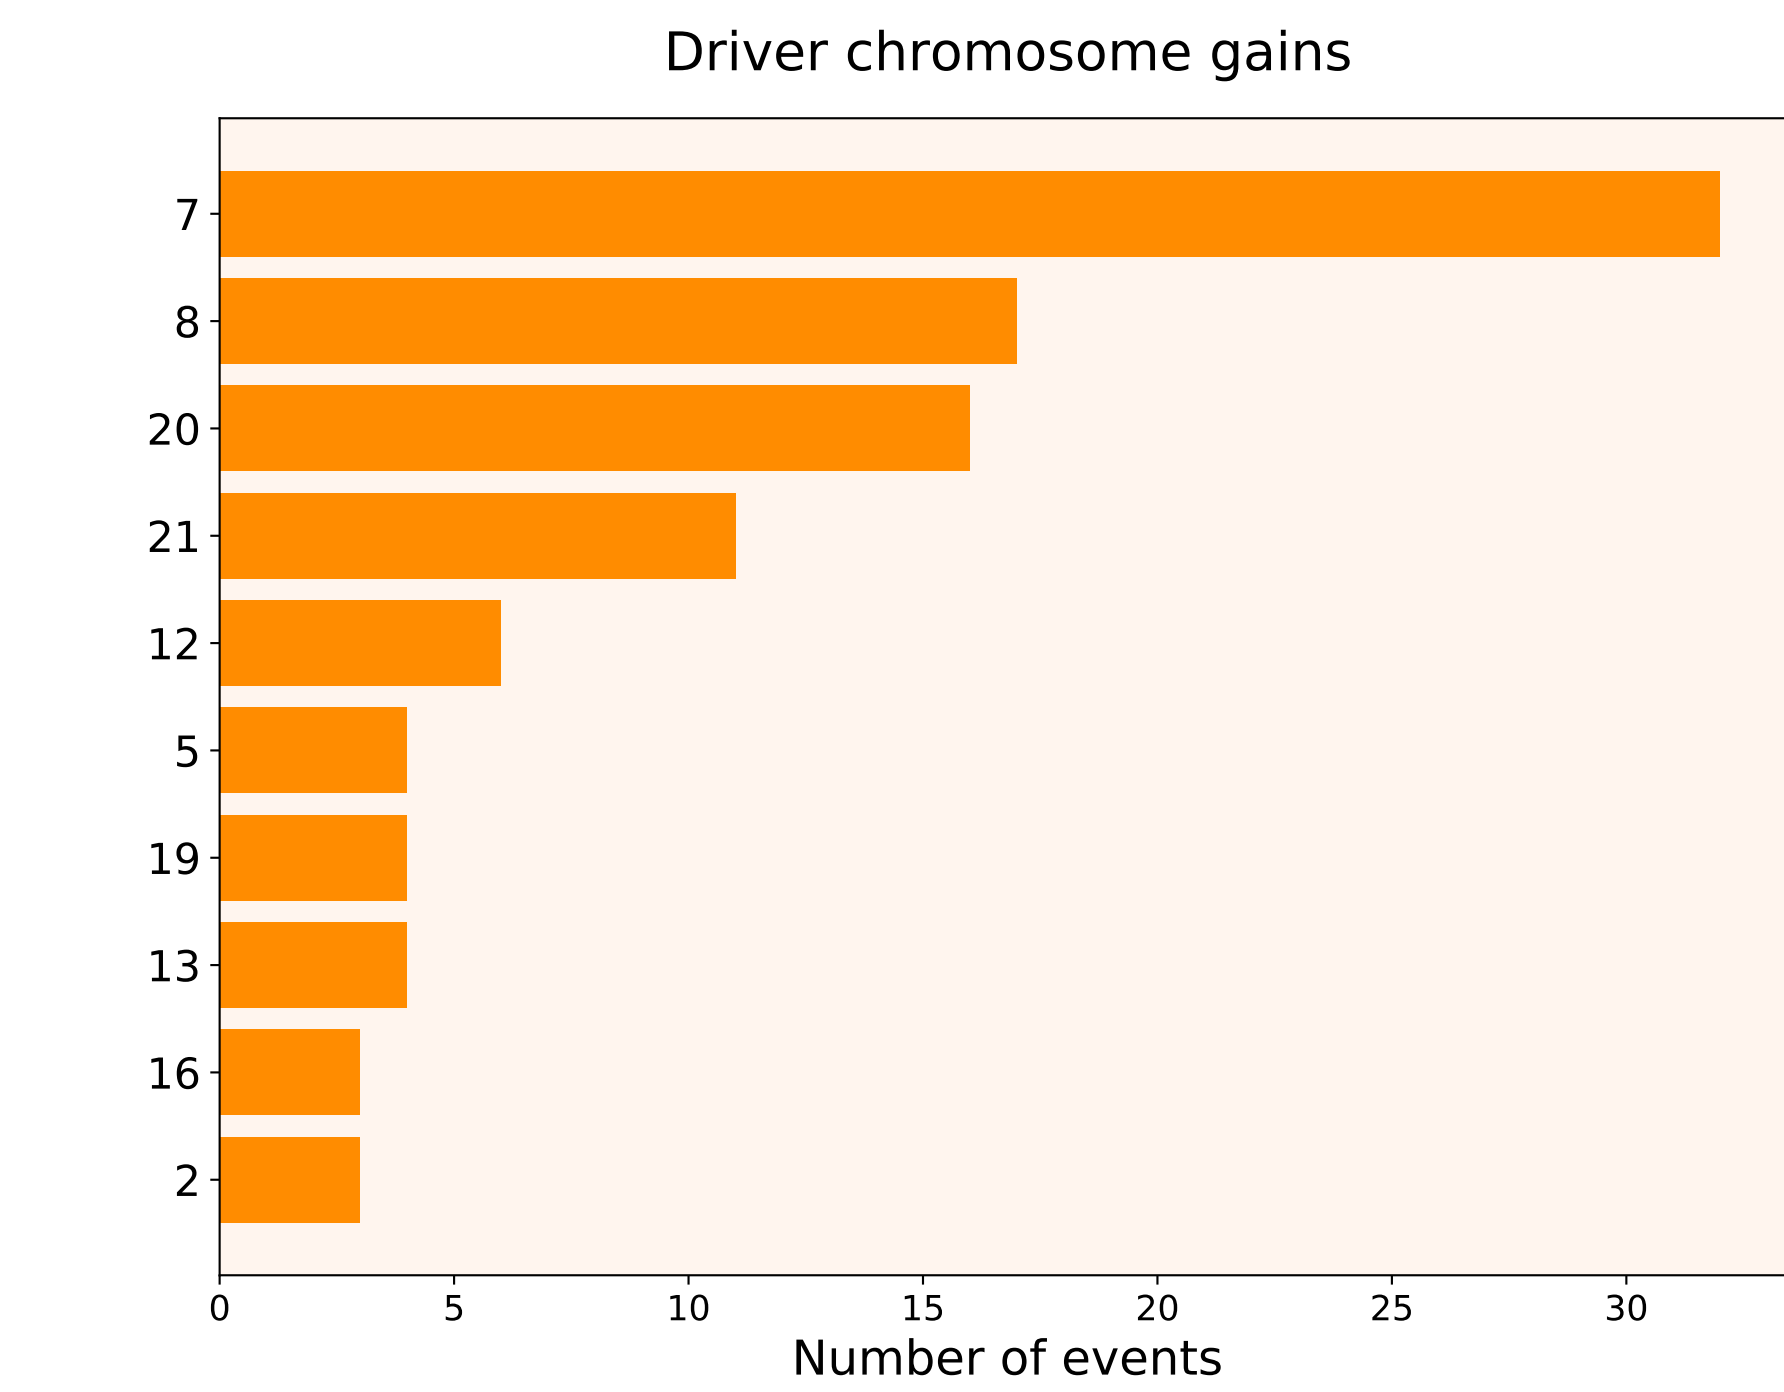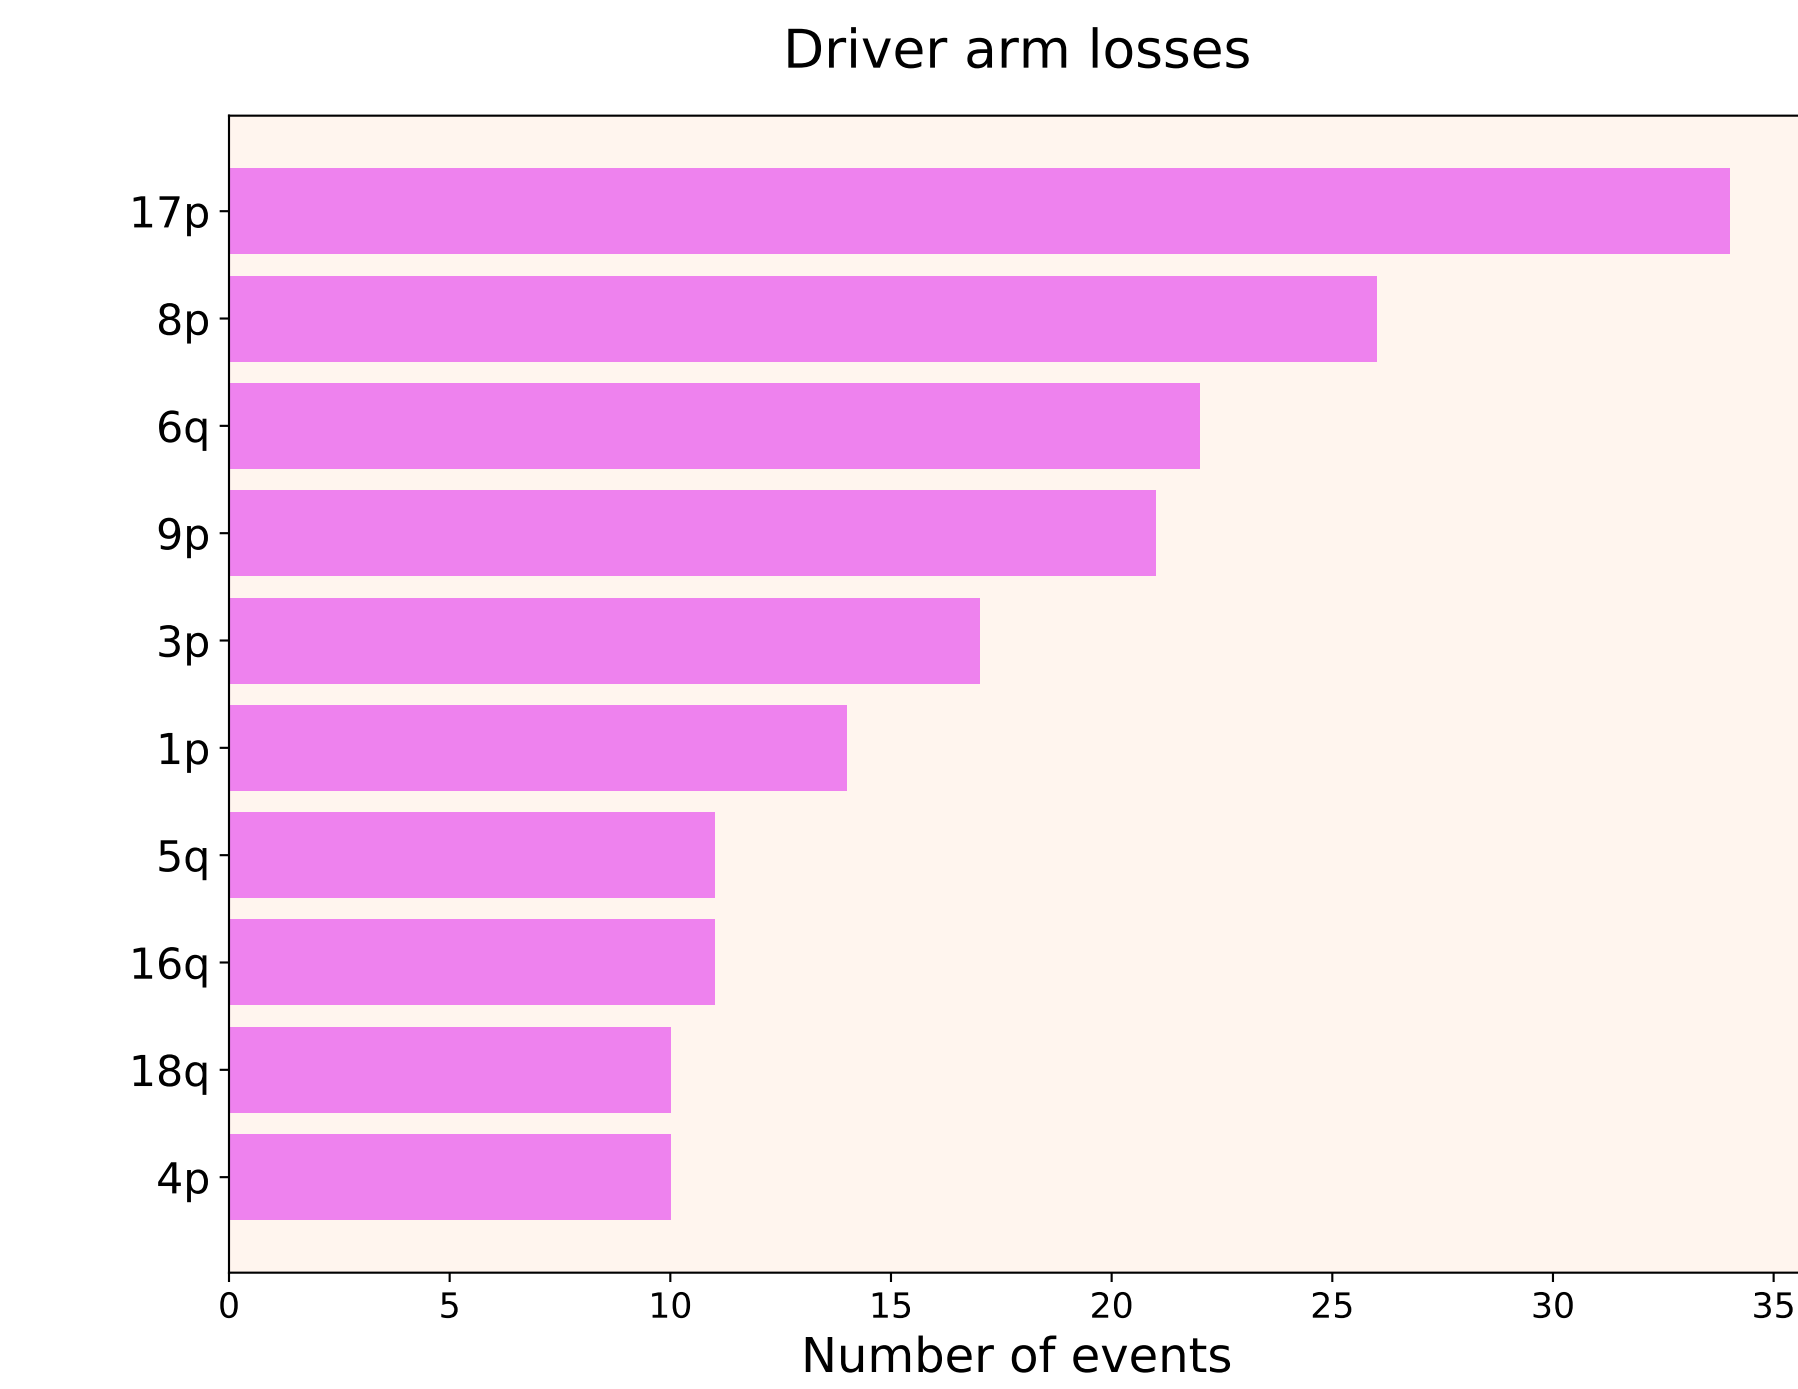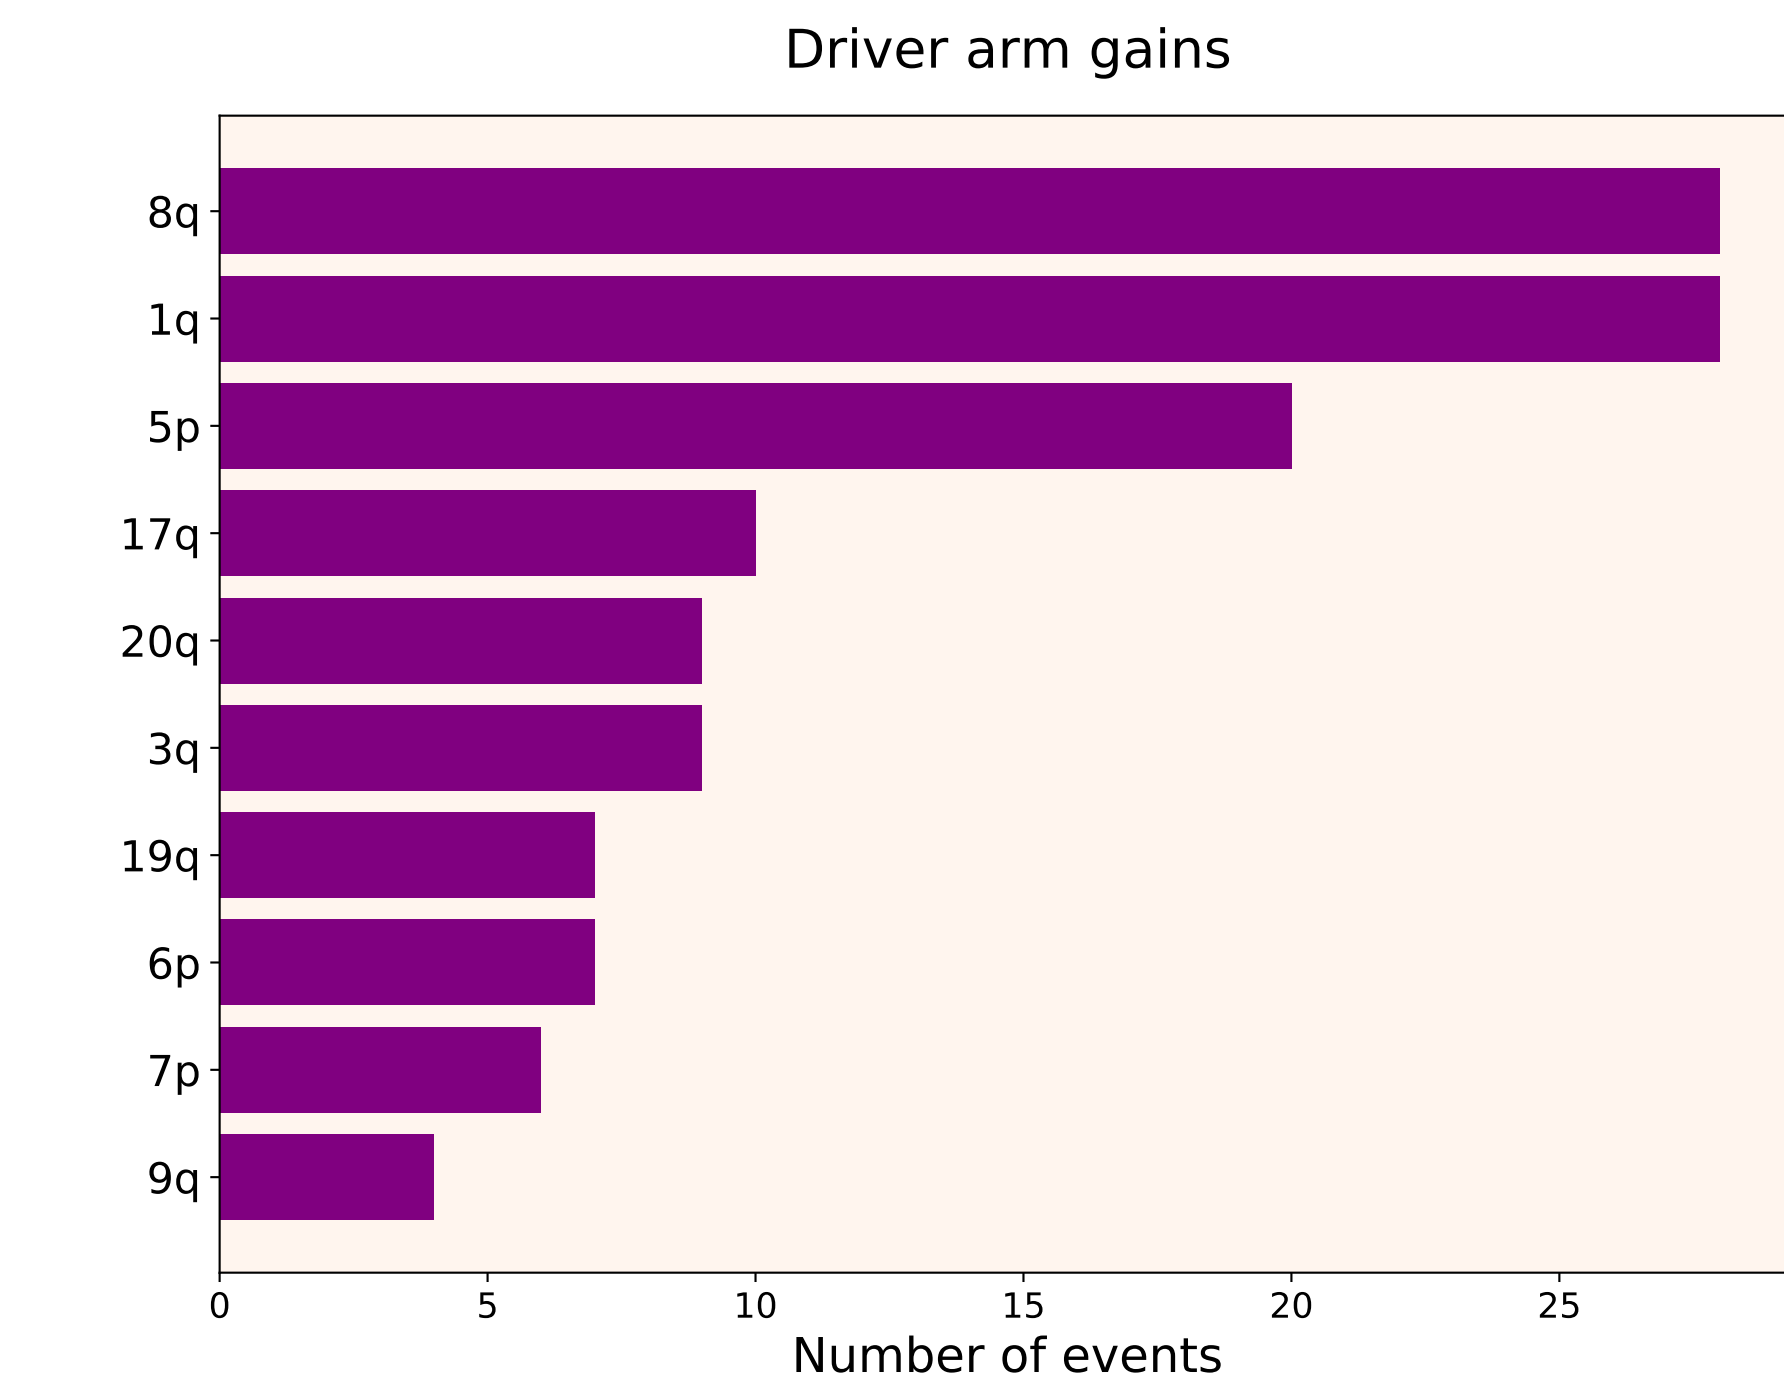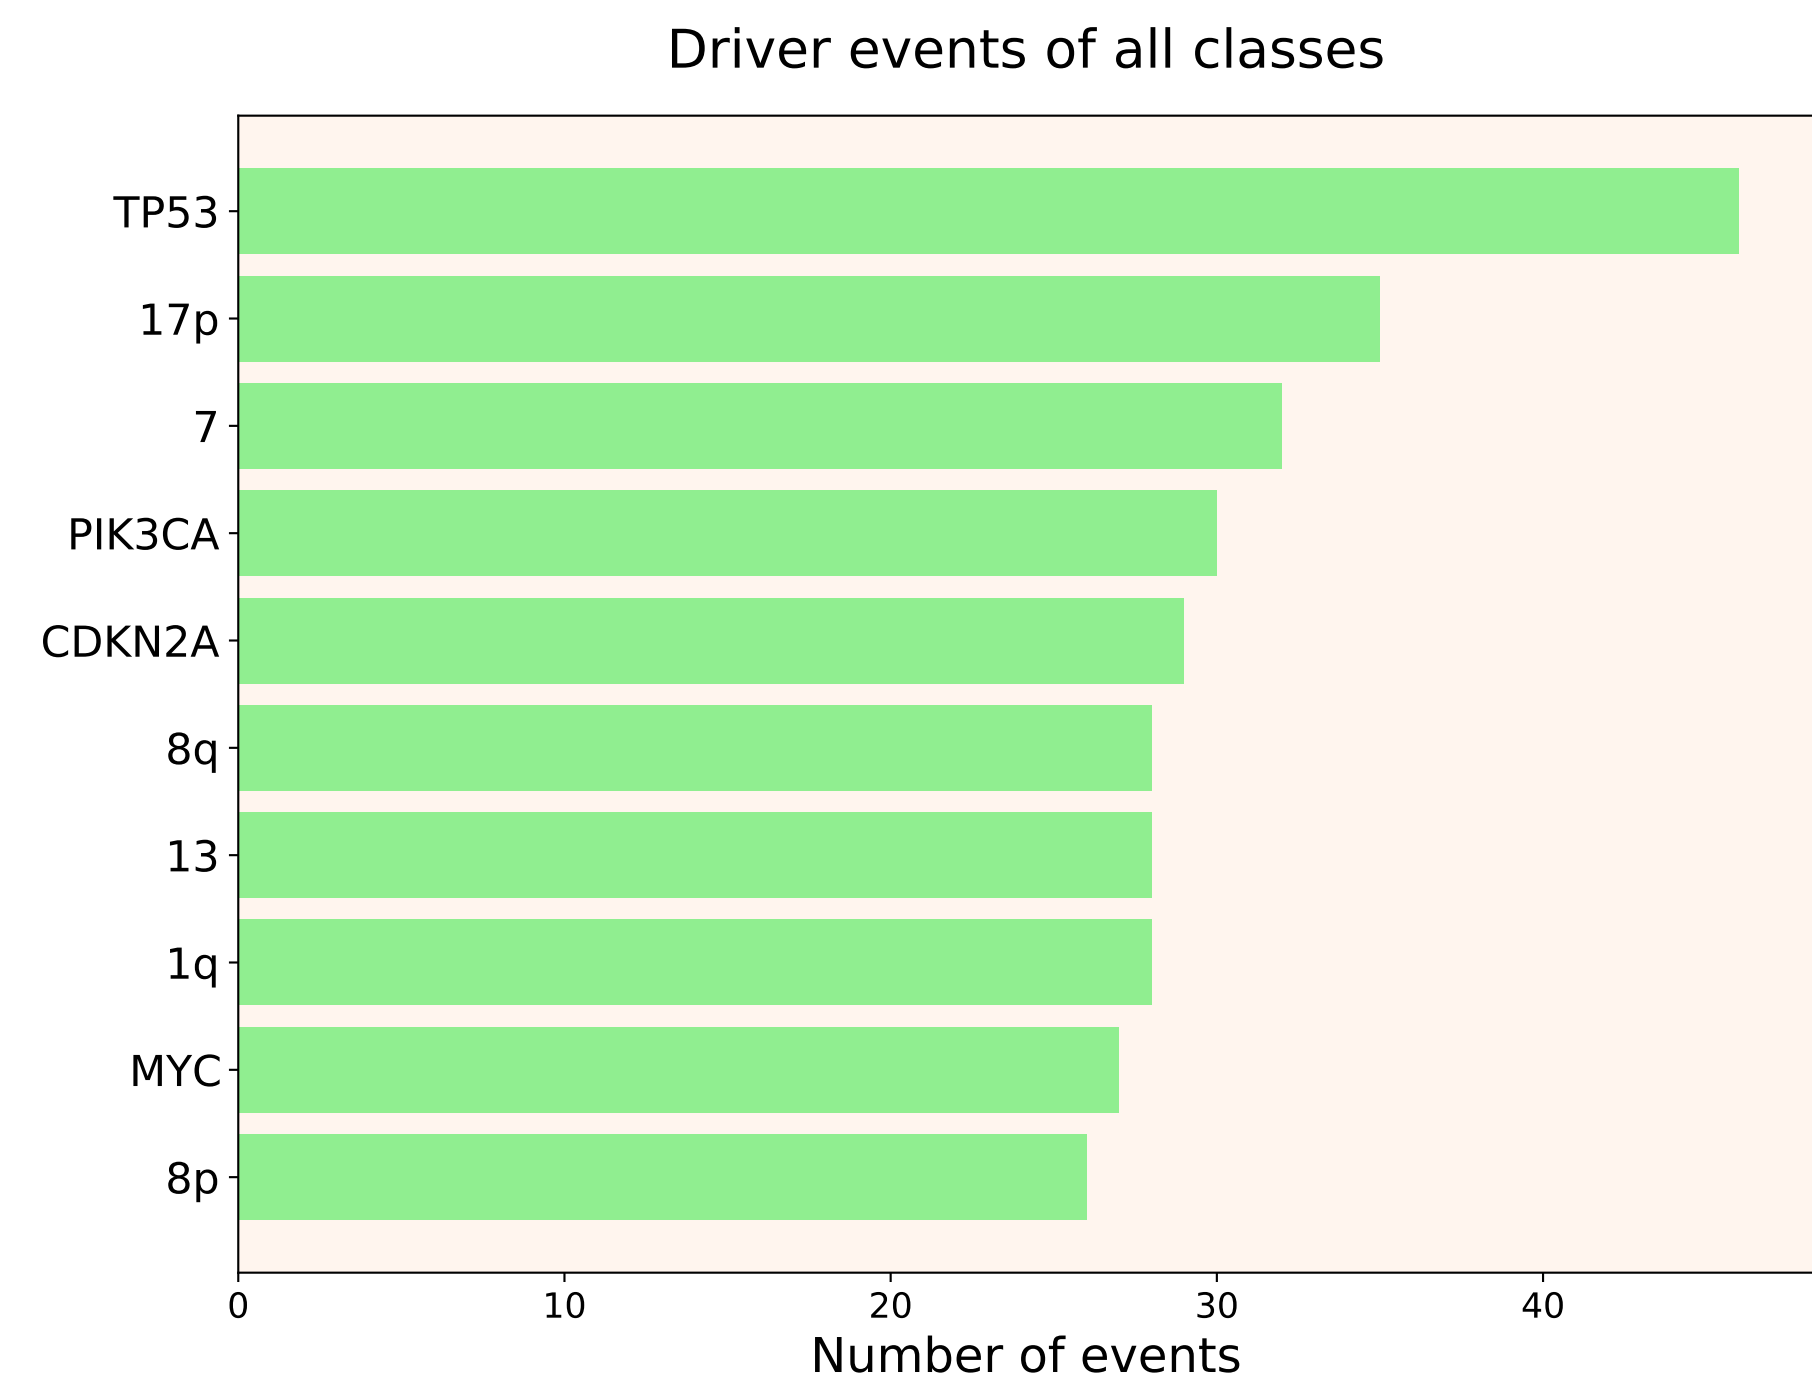

Supplement: Supplemental_Data_S1.zip [file Supplemental_Data_S1.zip]

# KIRP\_FEMALE

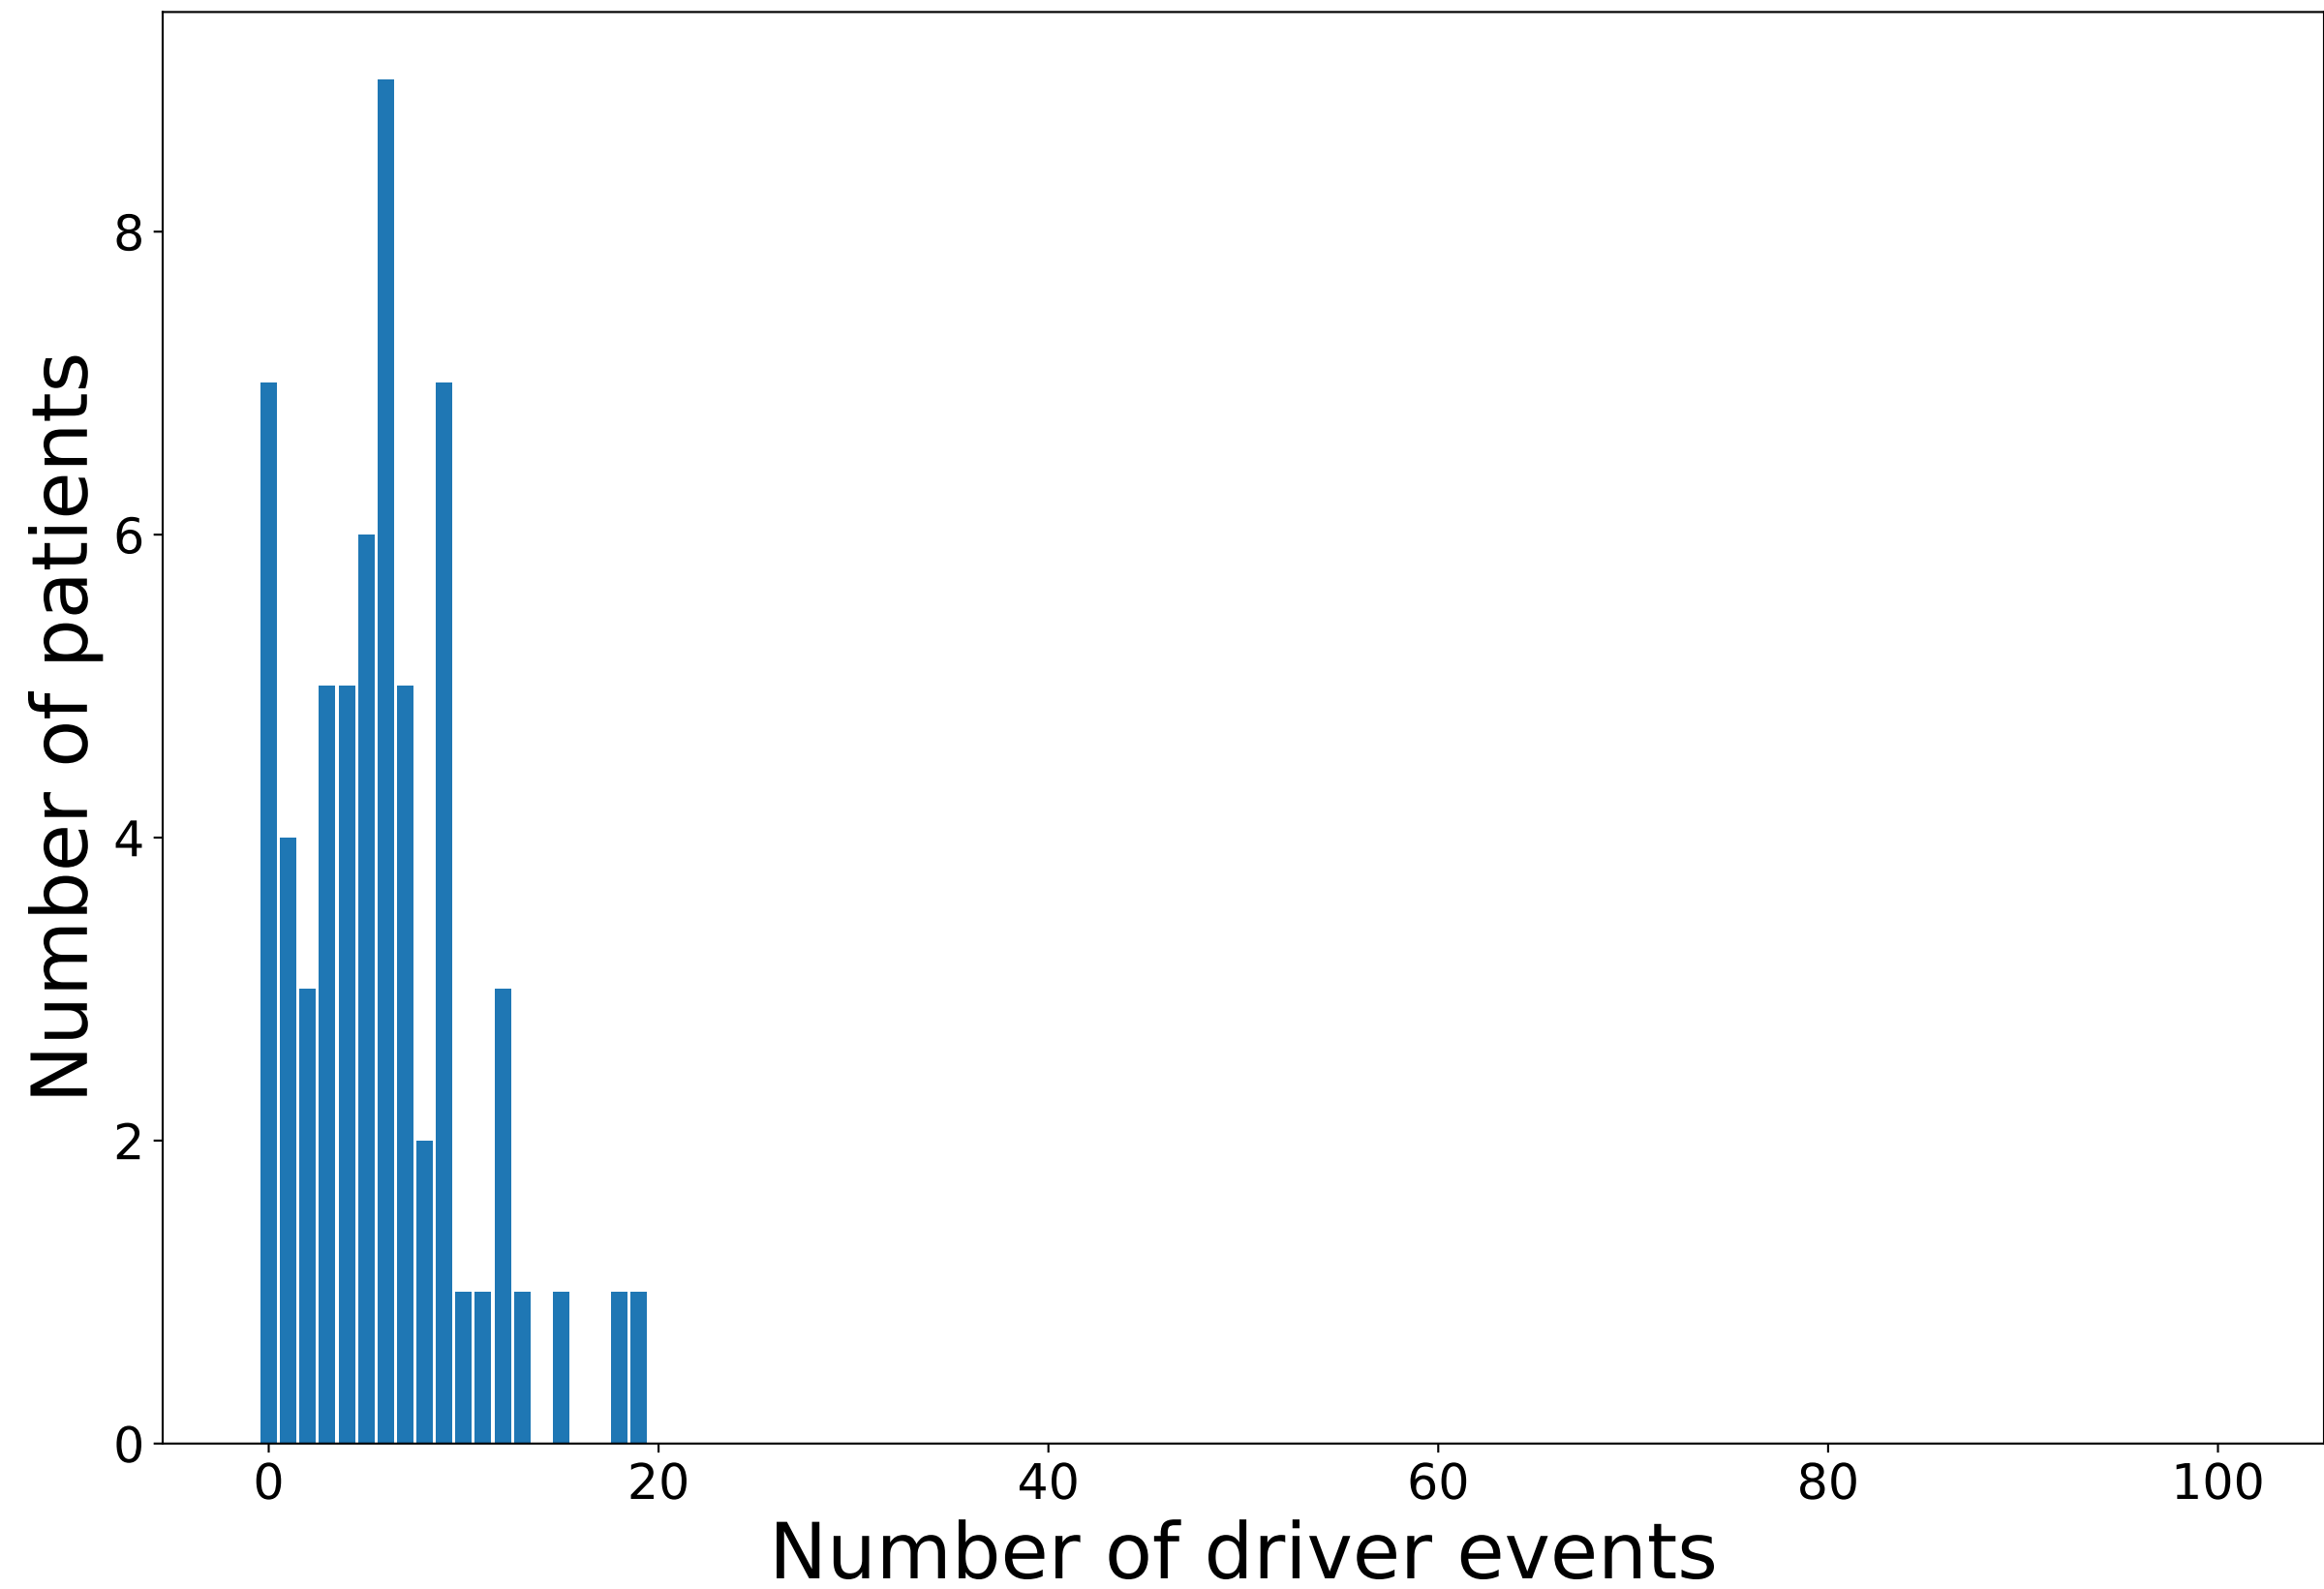

Supplement: Supplemental_Data_S1.zip [file Supplemental_Data_S1.zip]

# MESO\_MALE

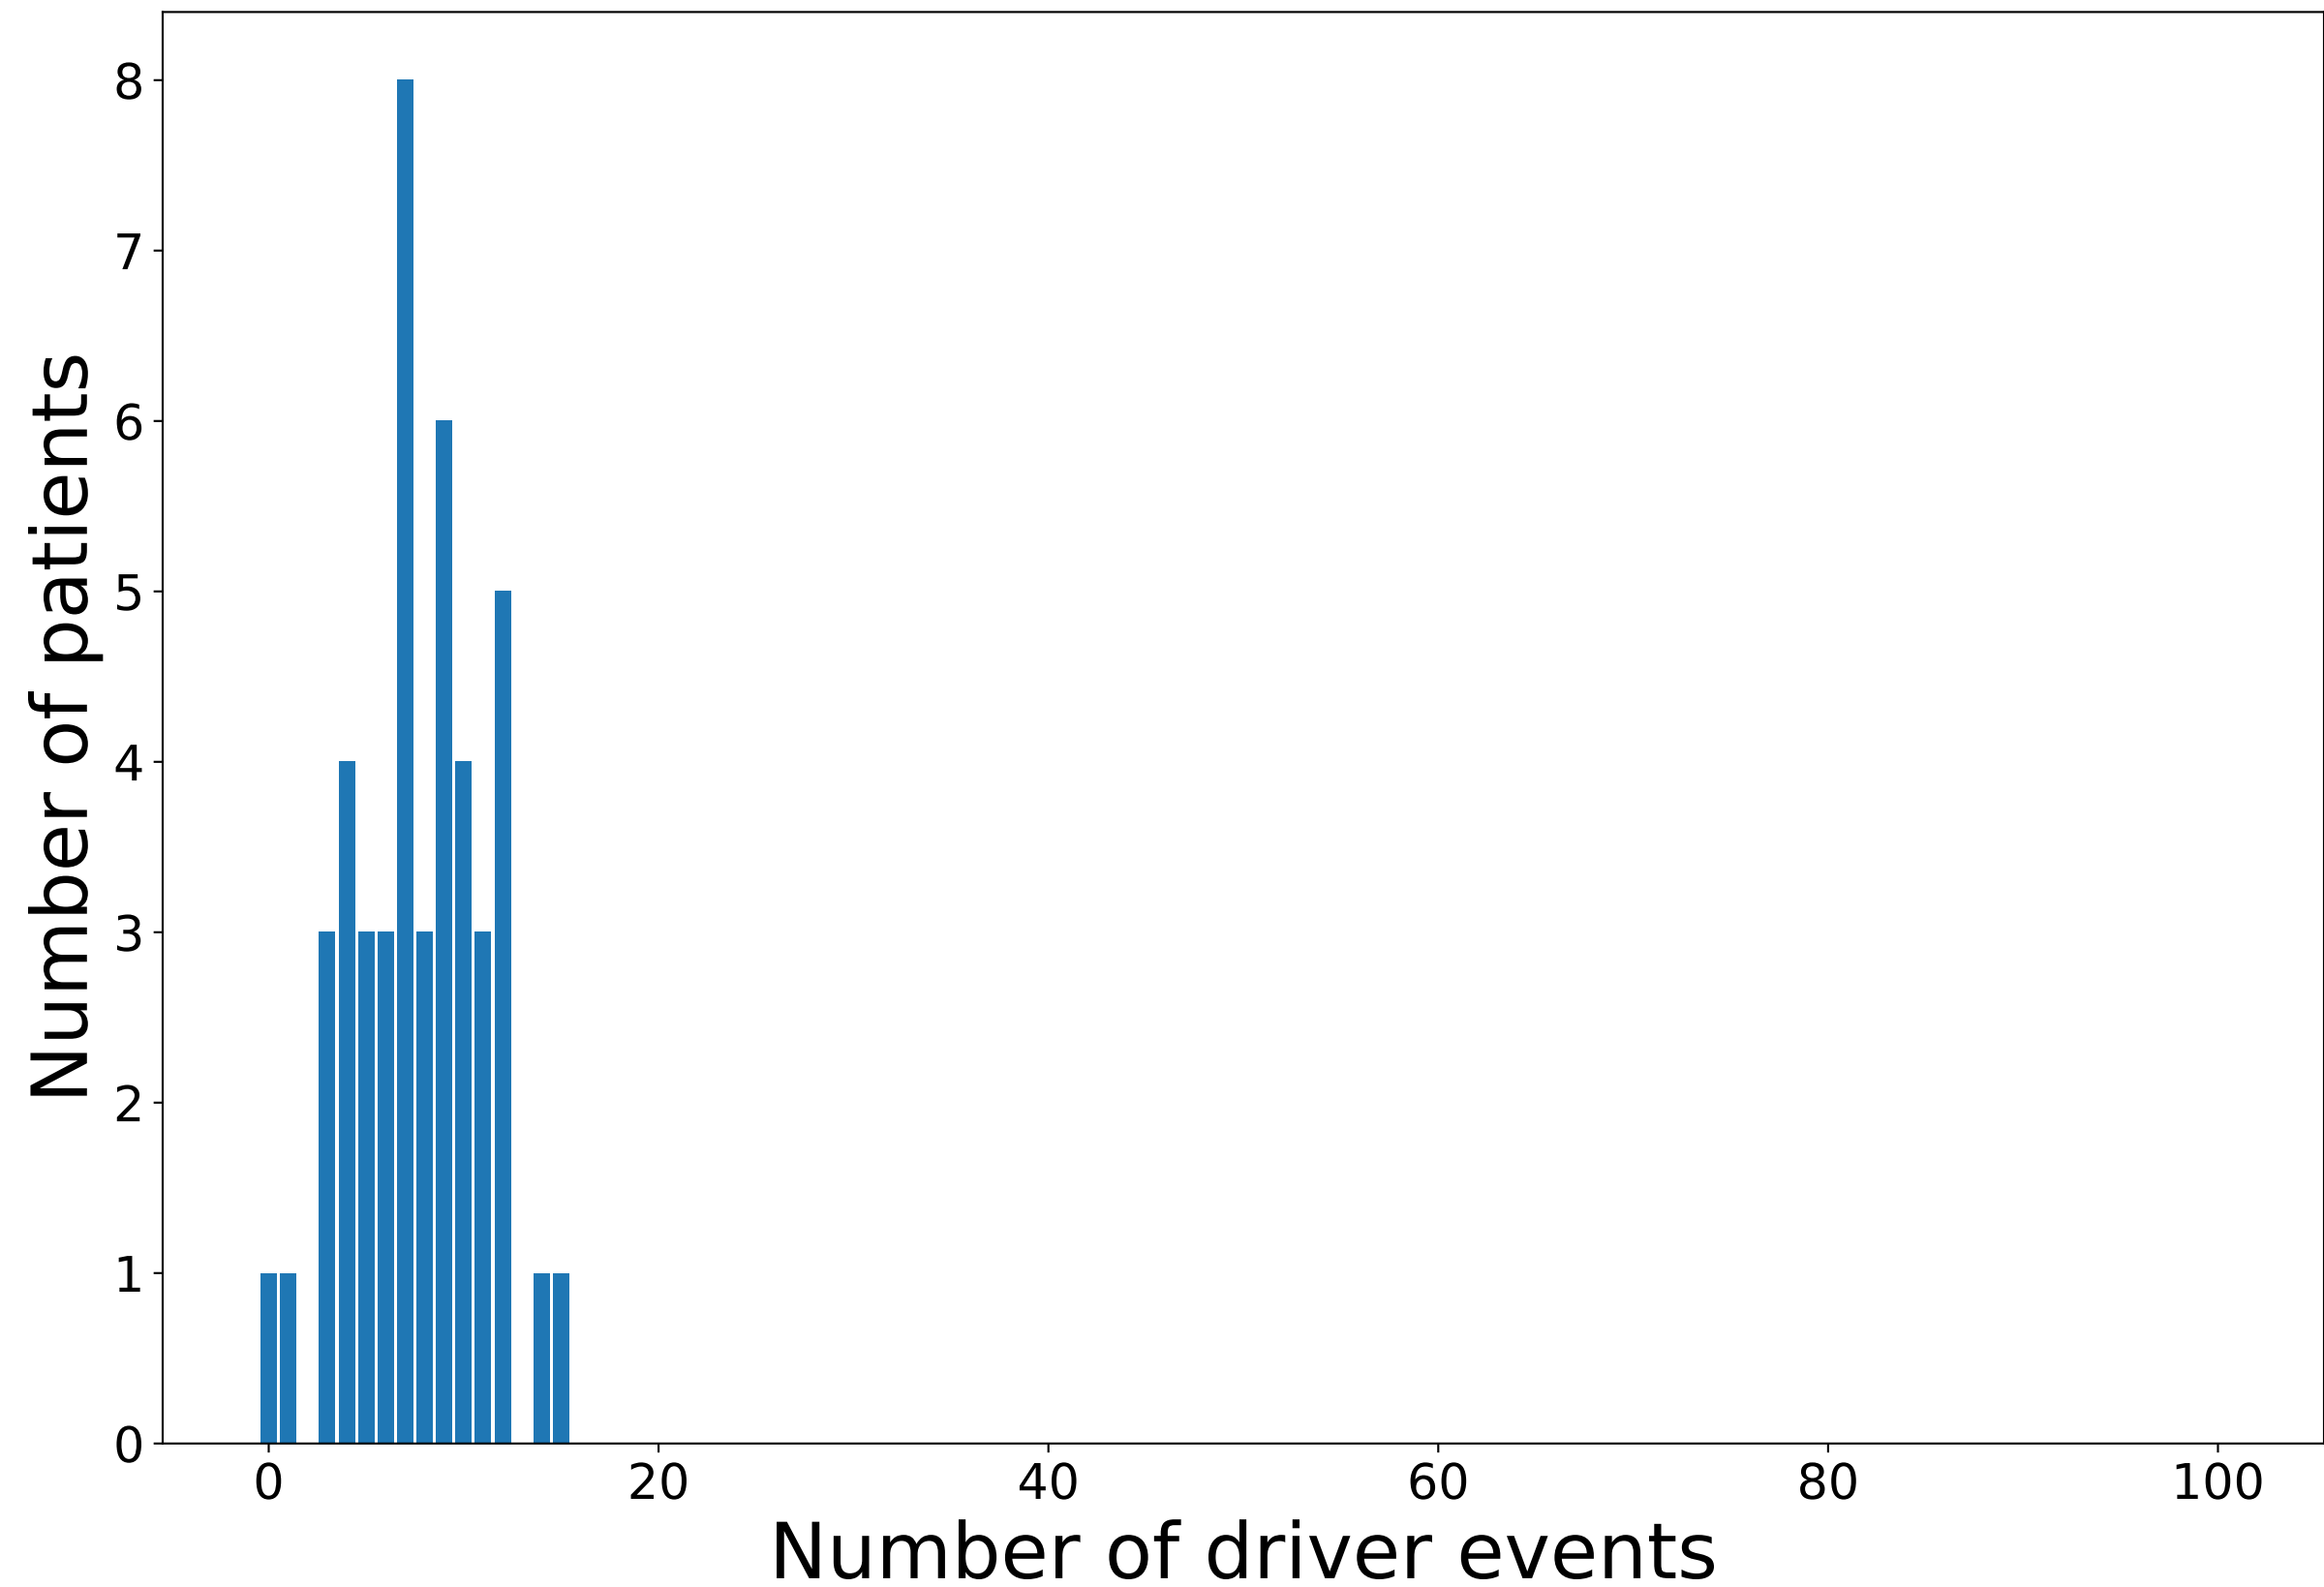

Supplement: Supplemental_Data_S1.zip [file Supplemental_Data_S1.zip]

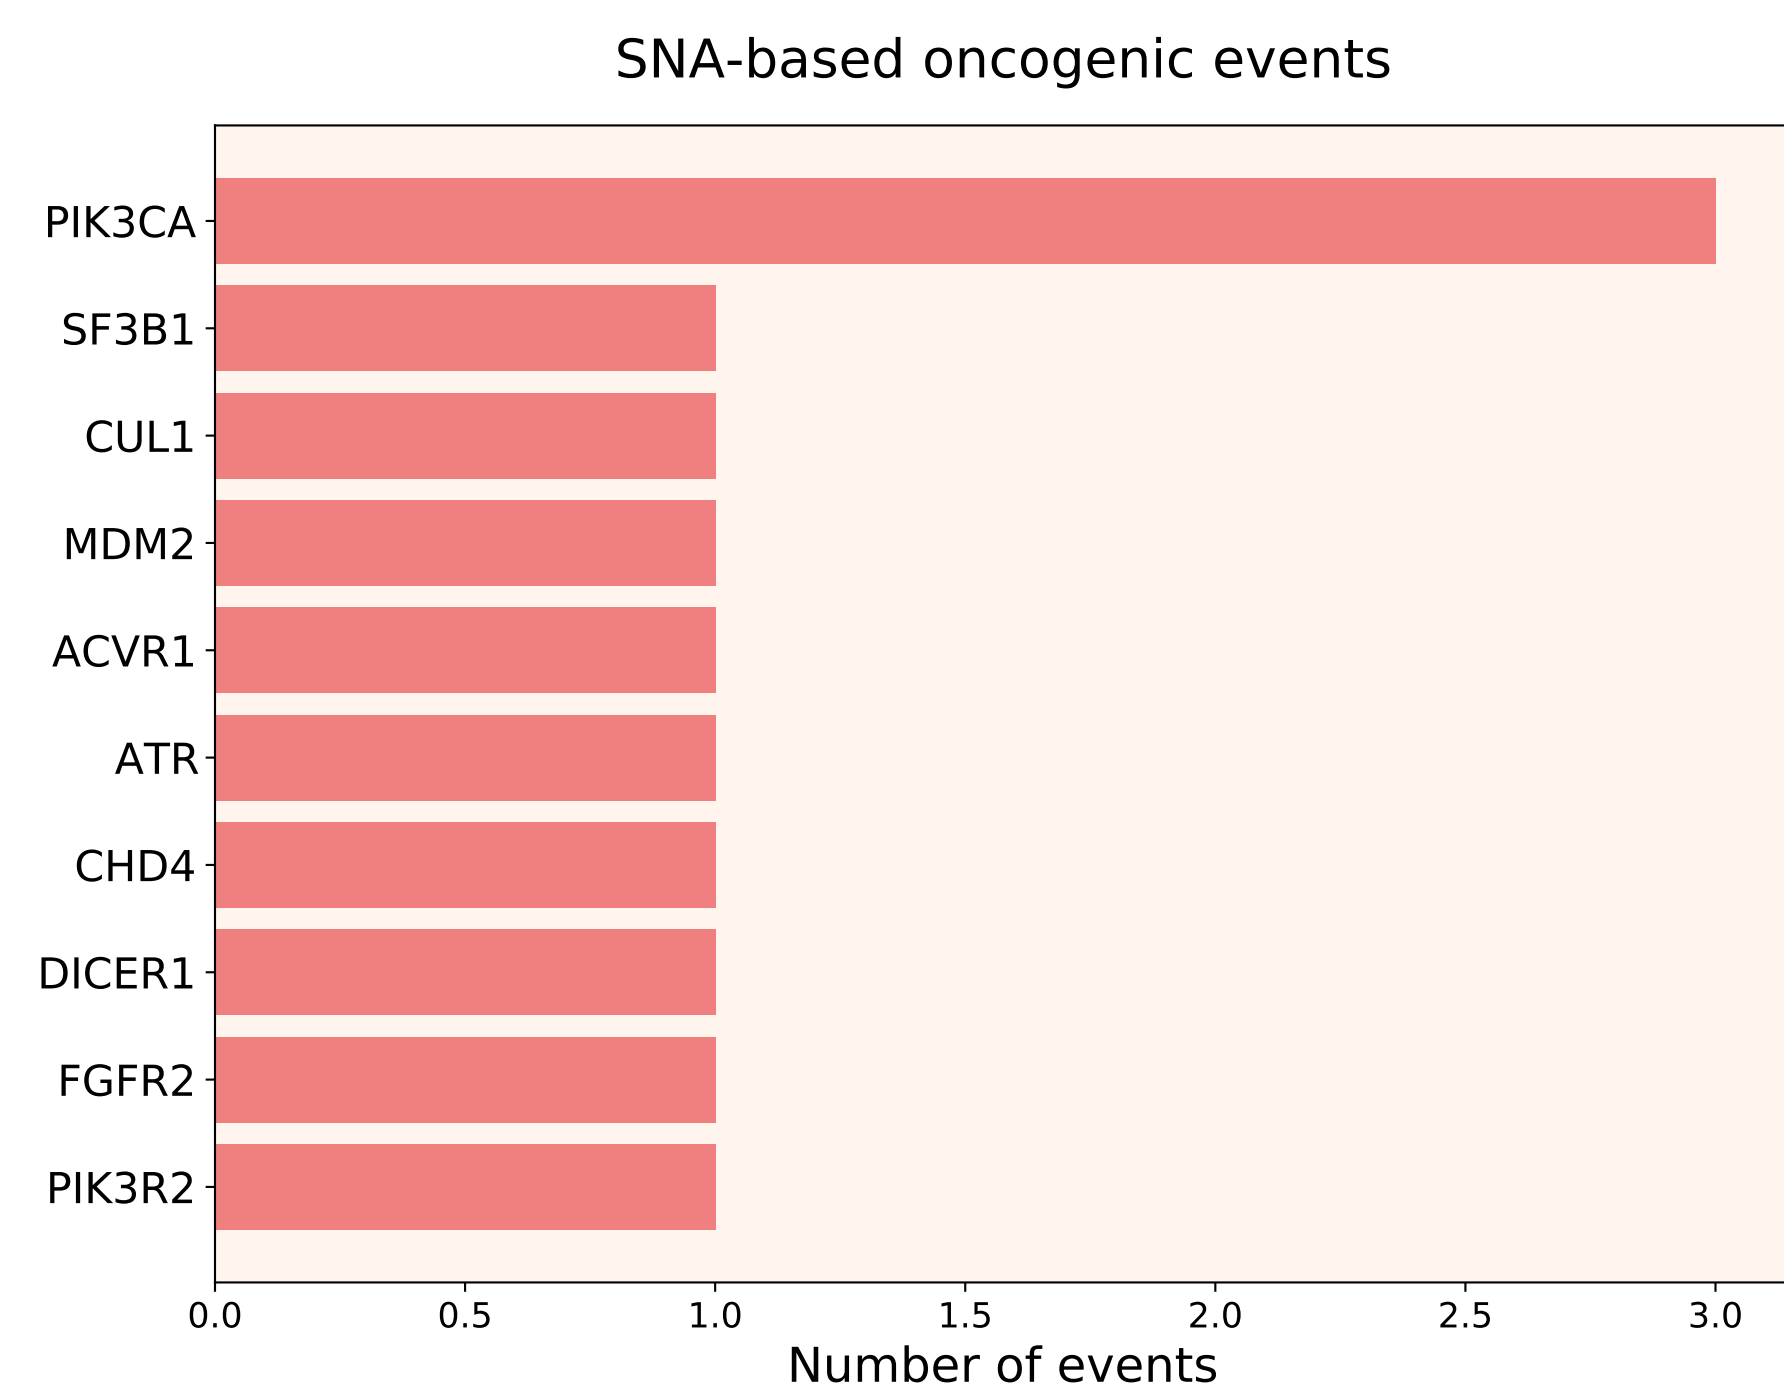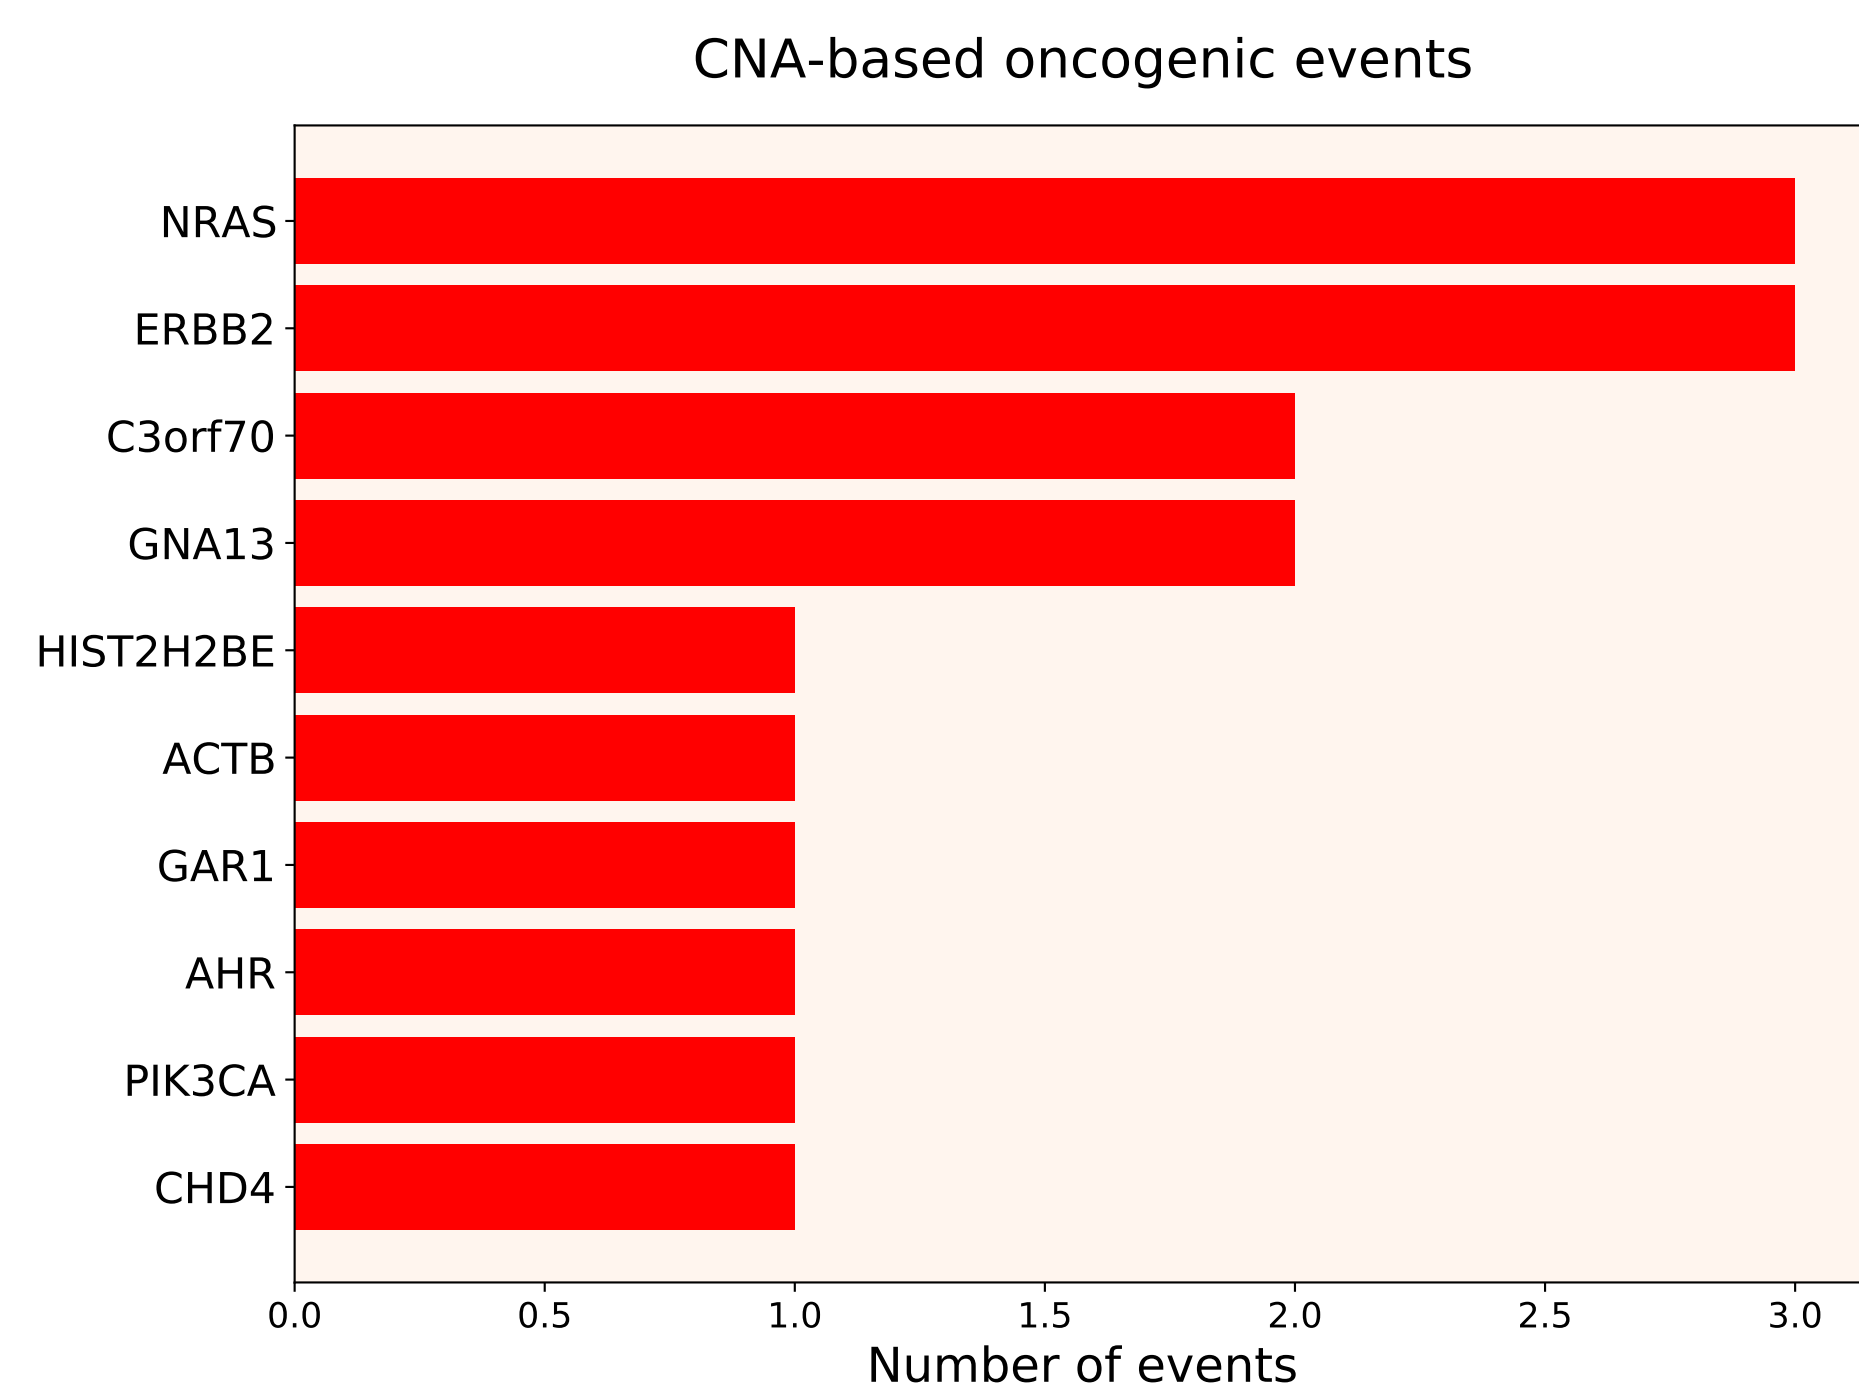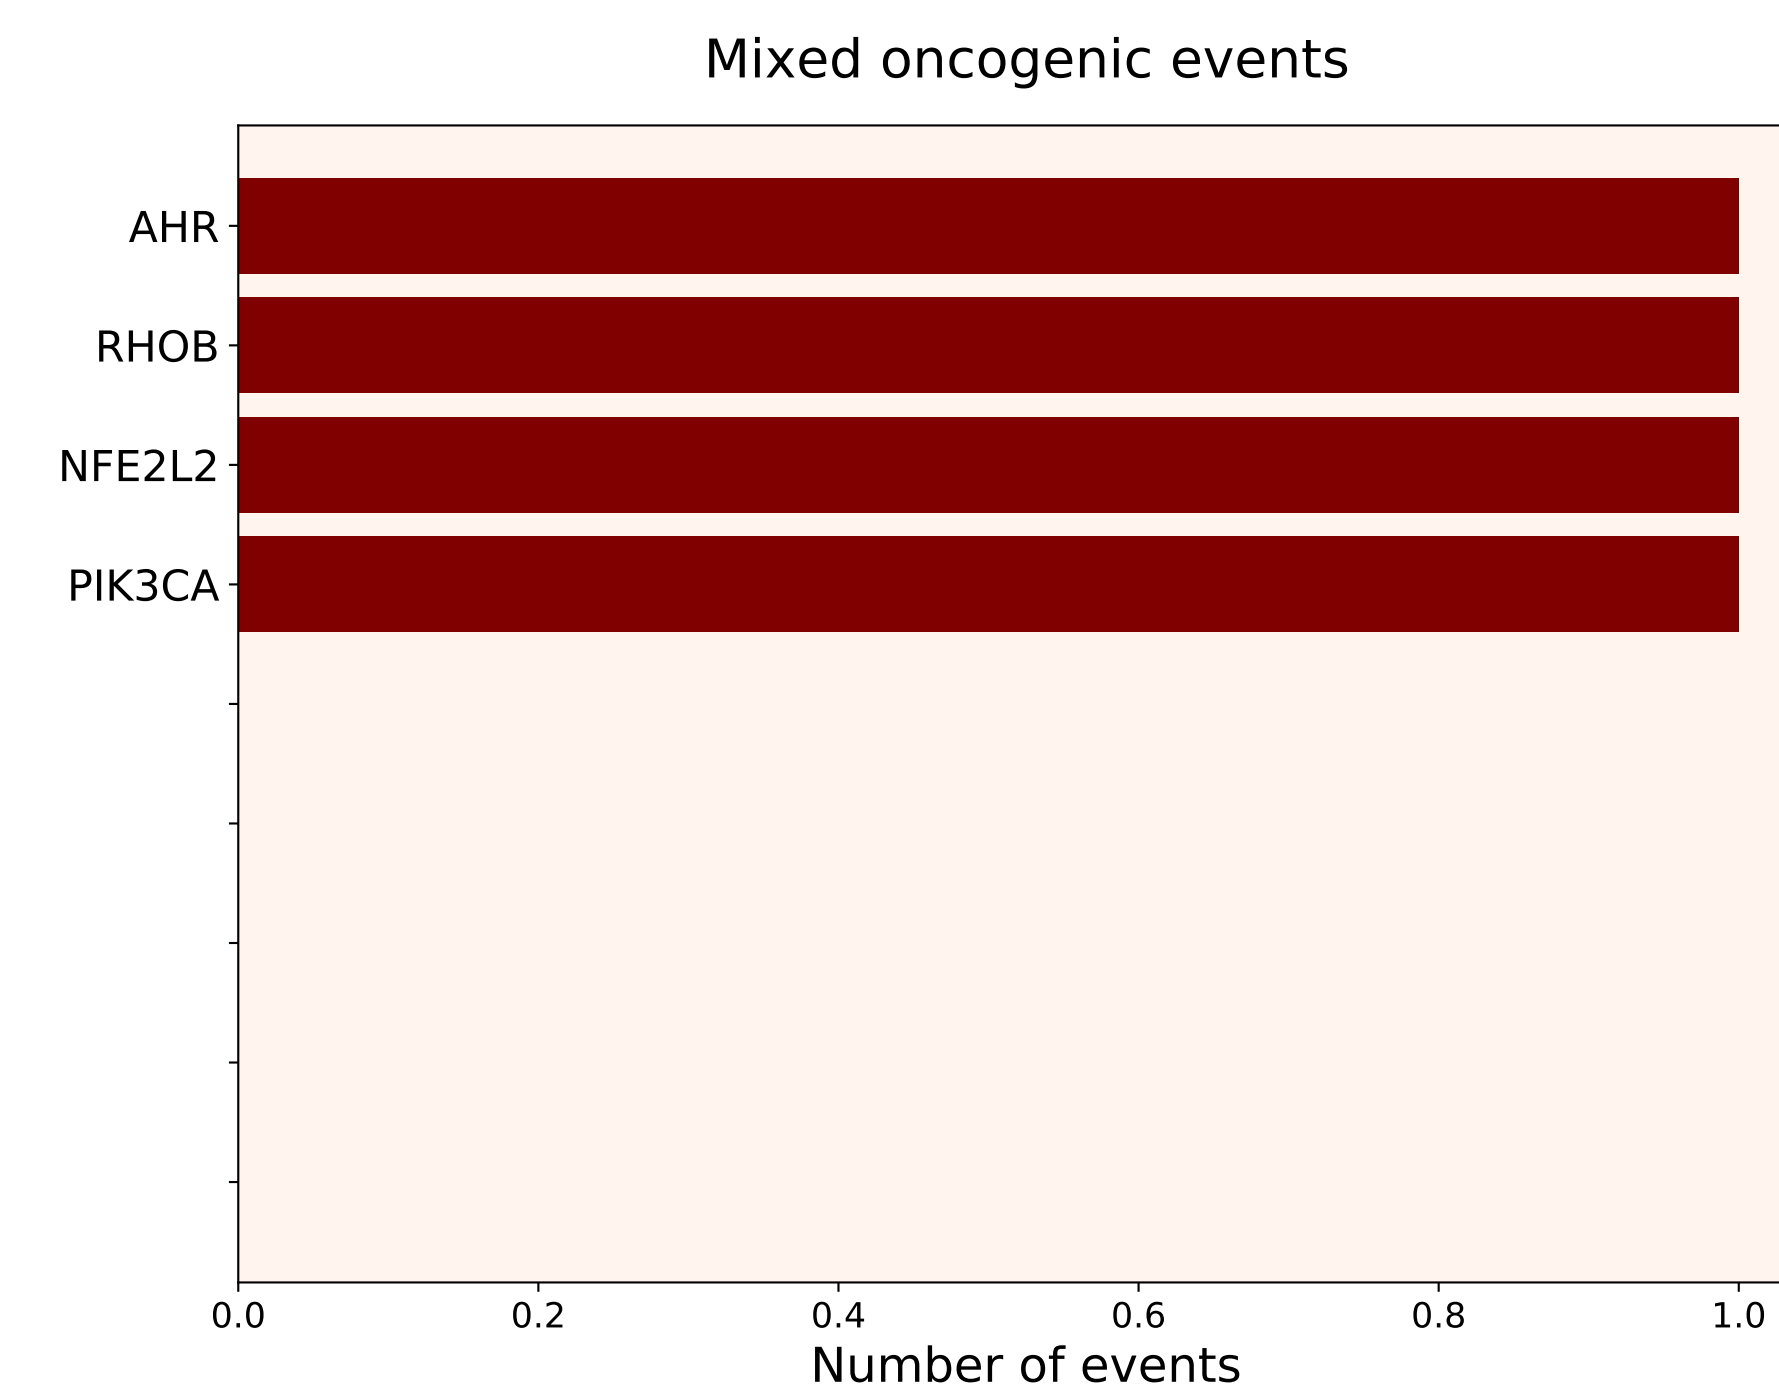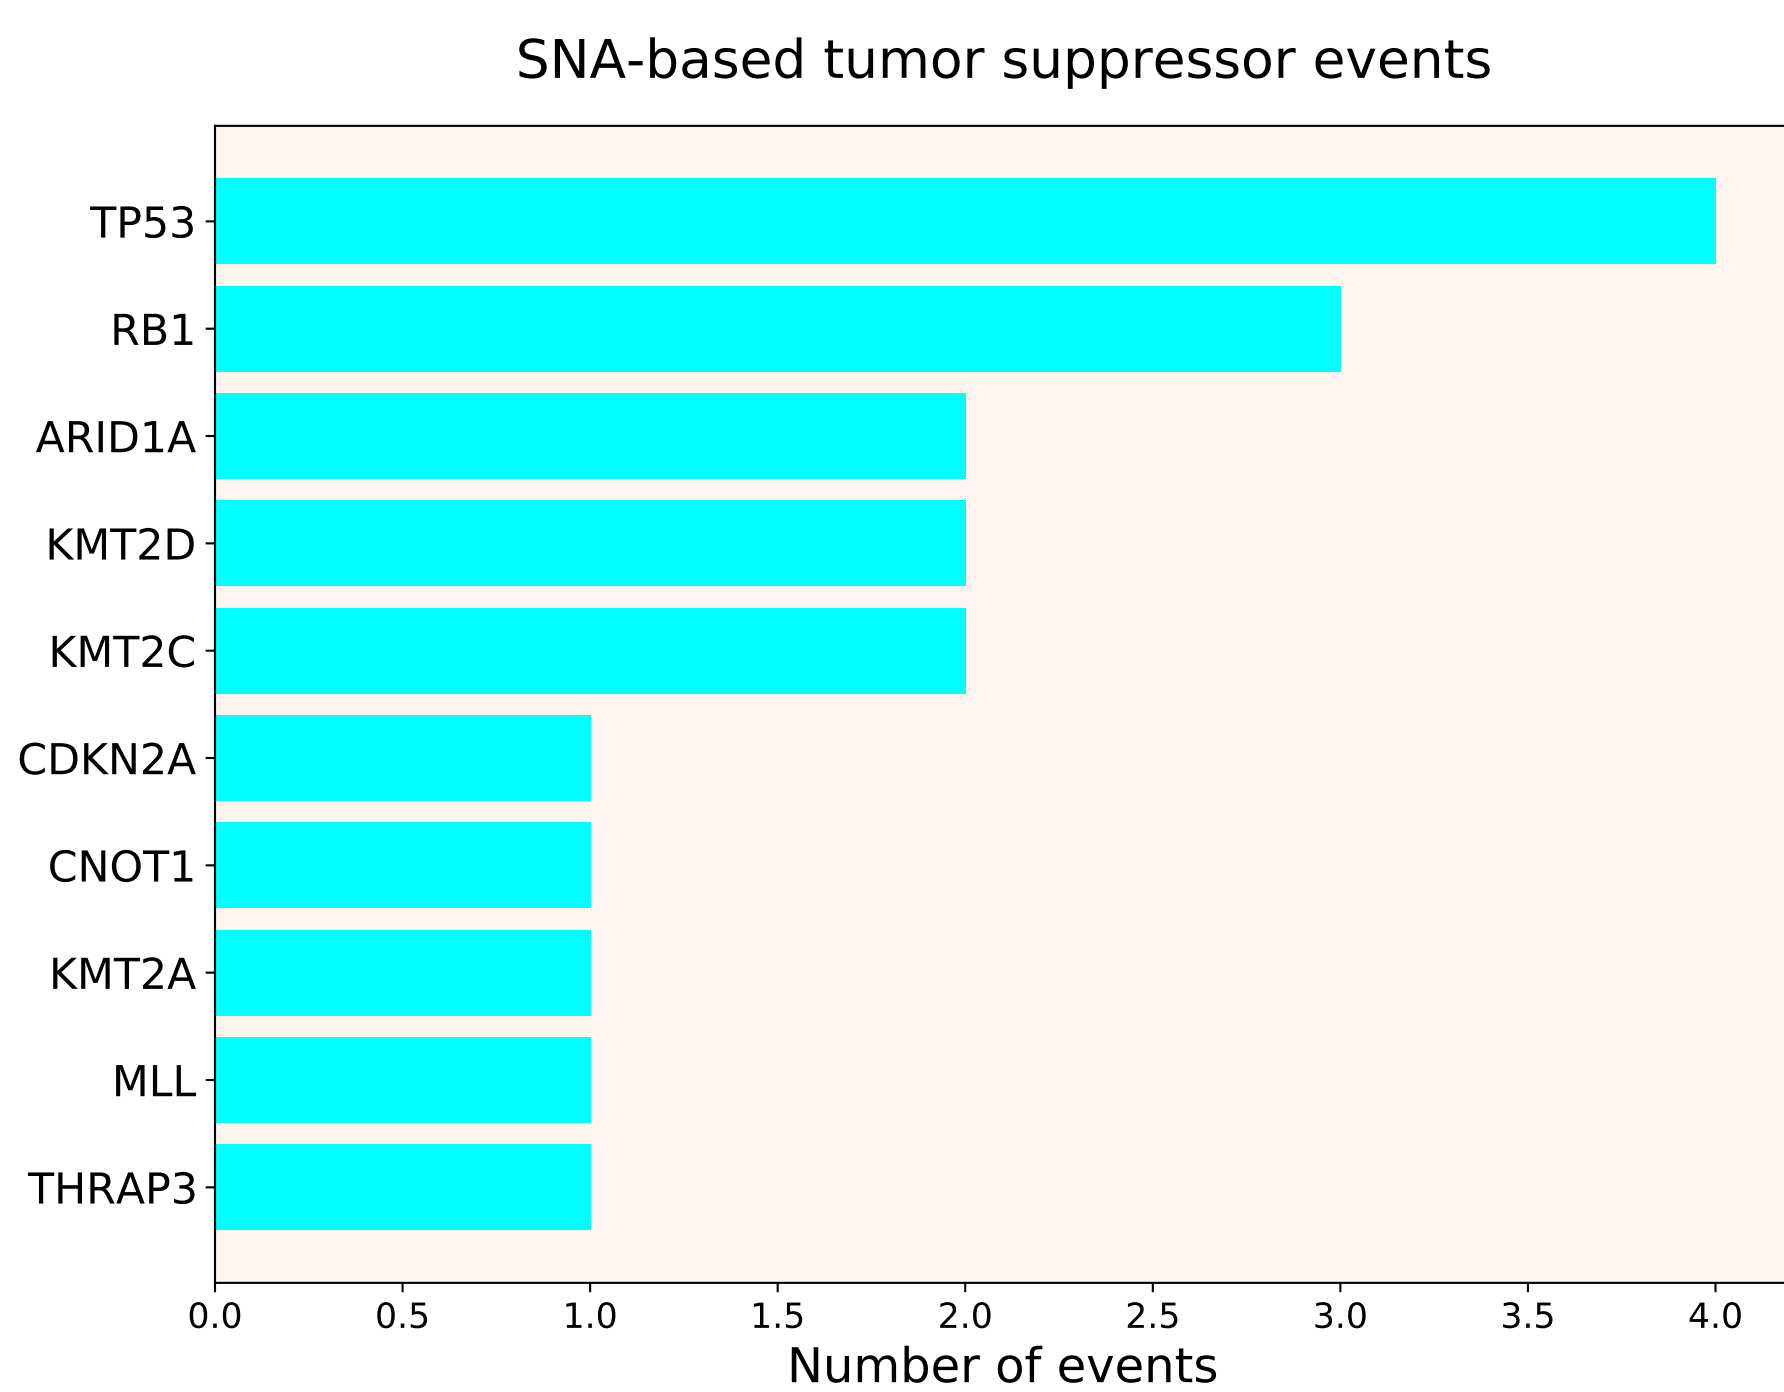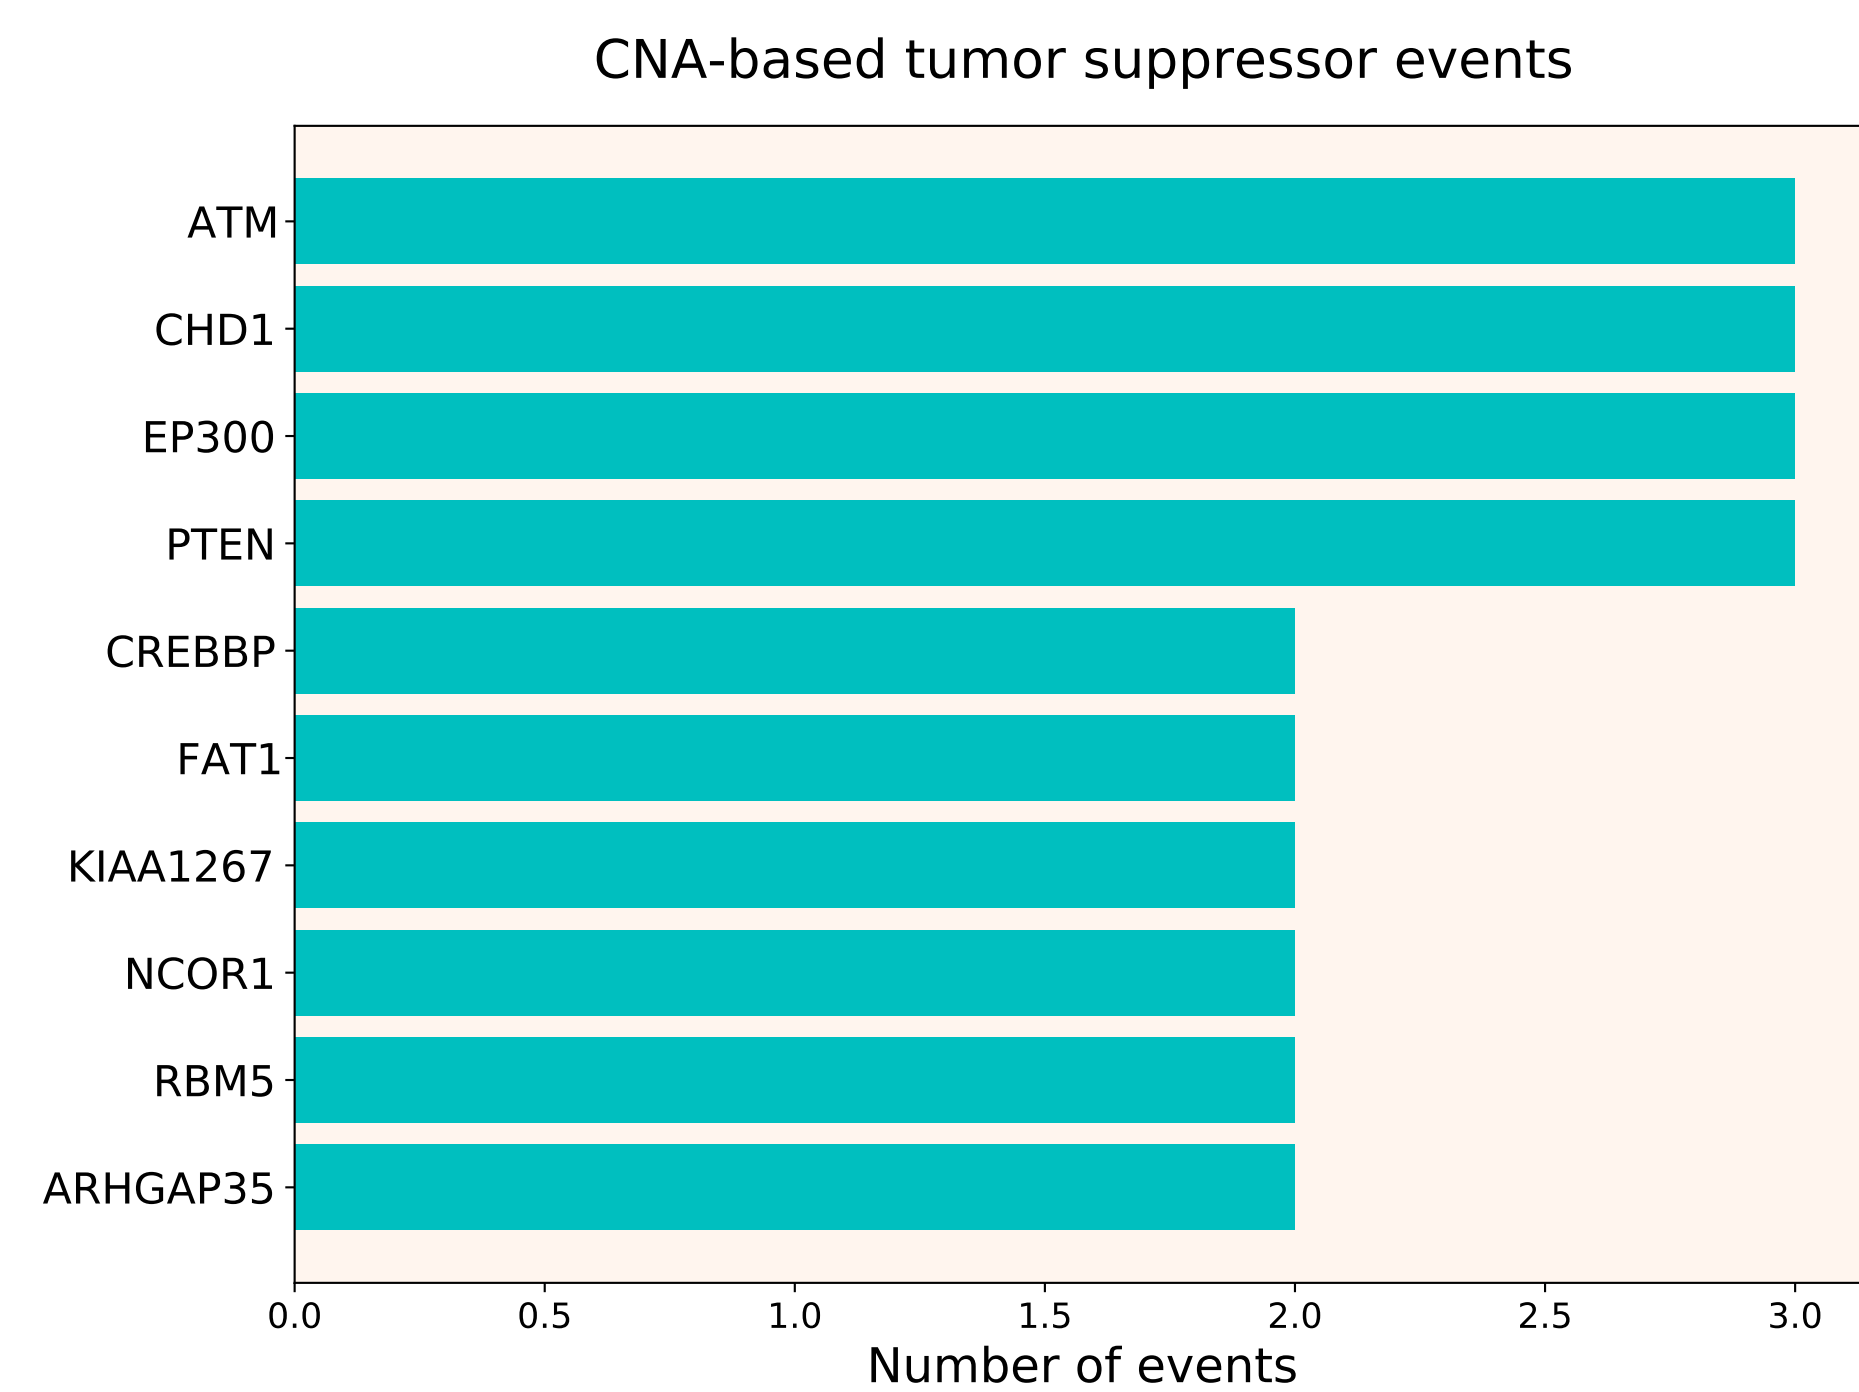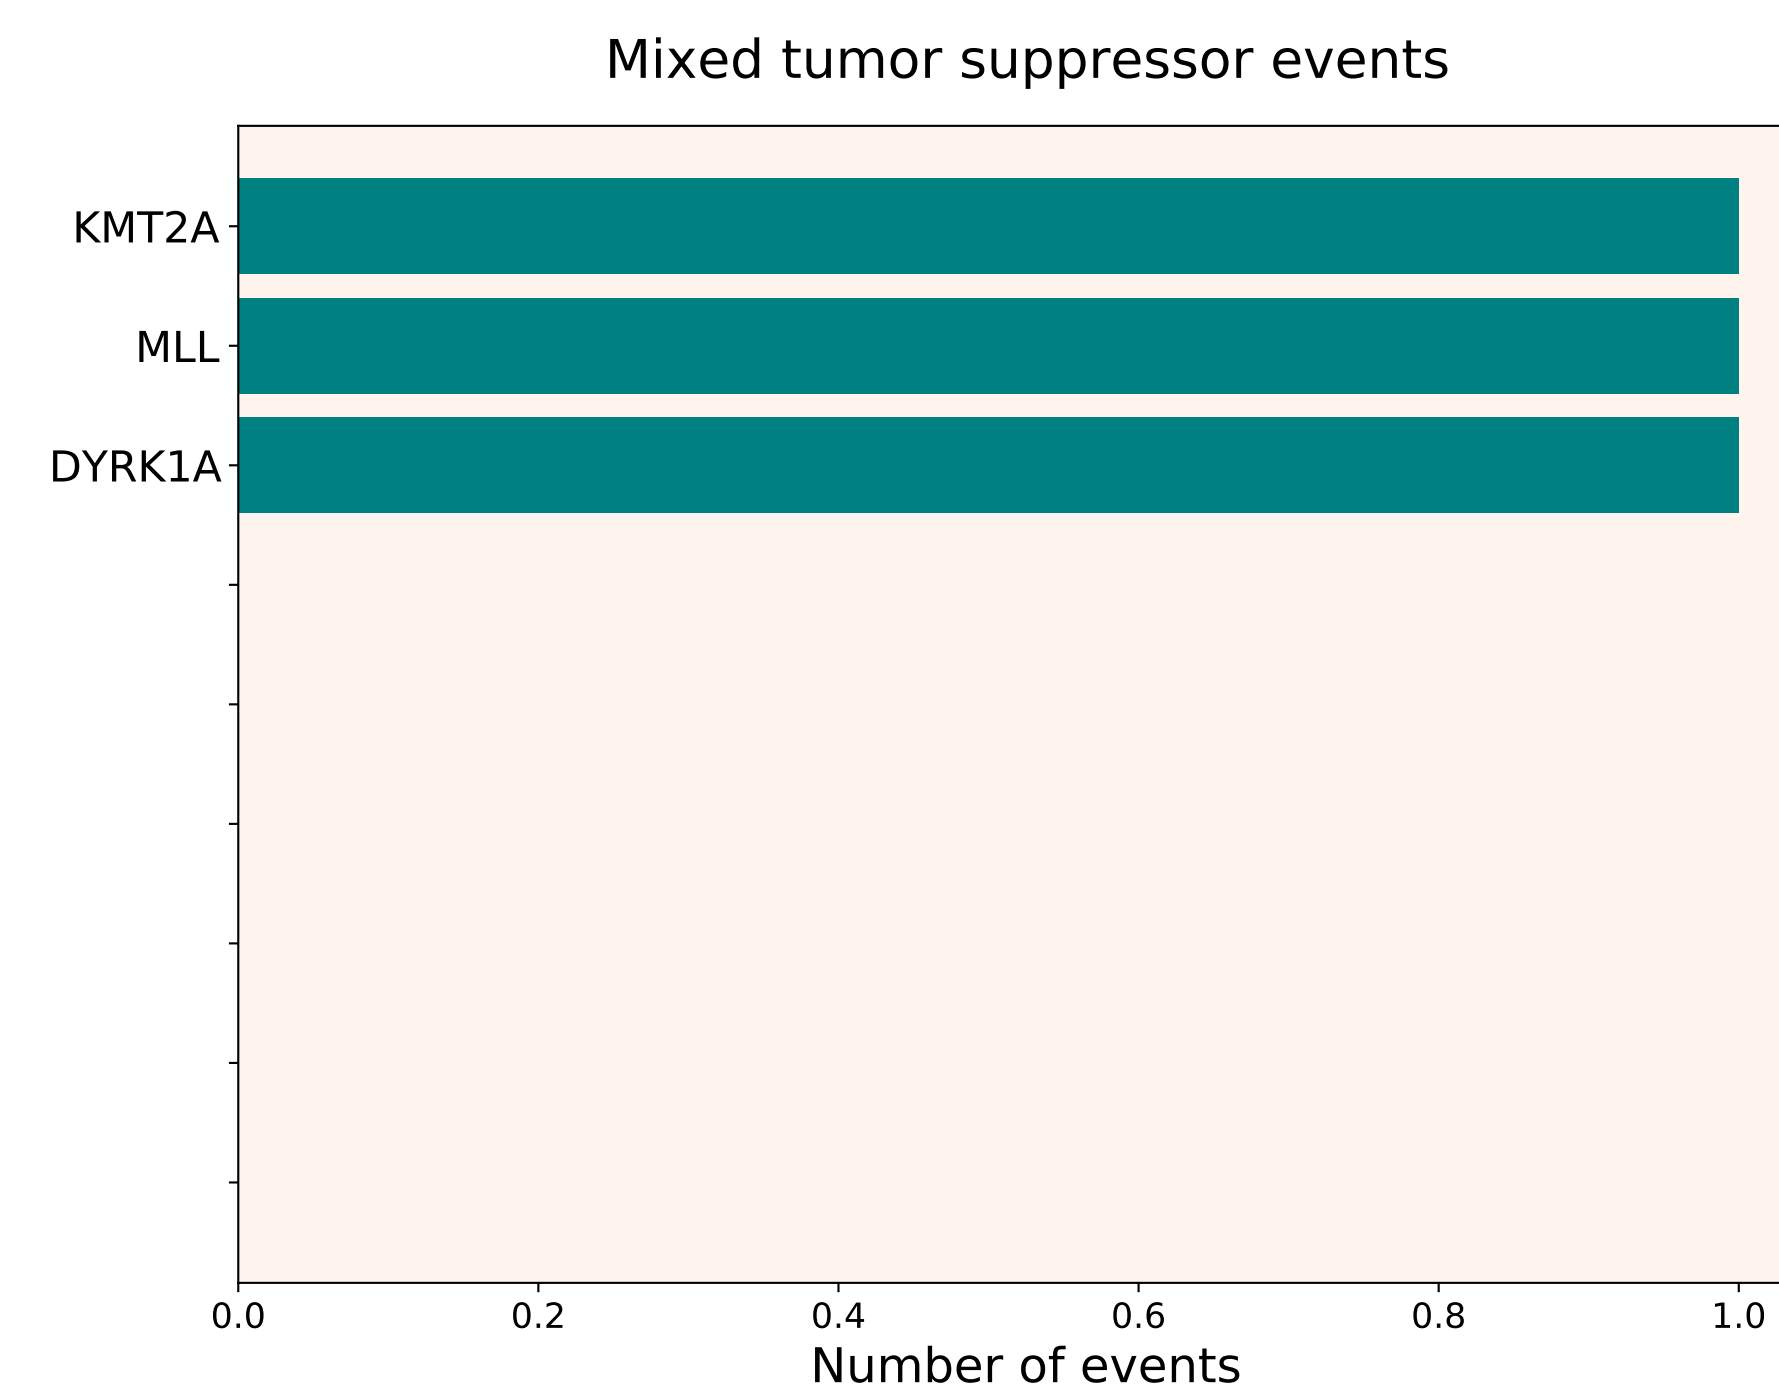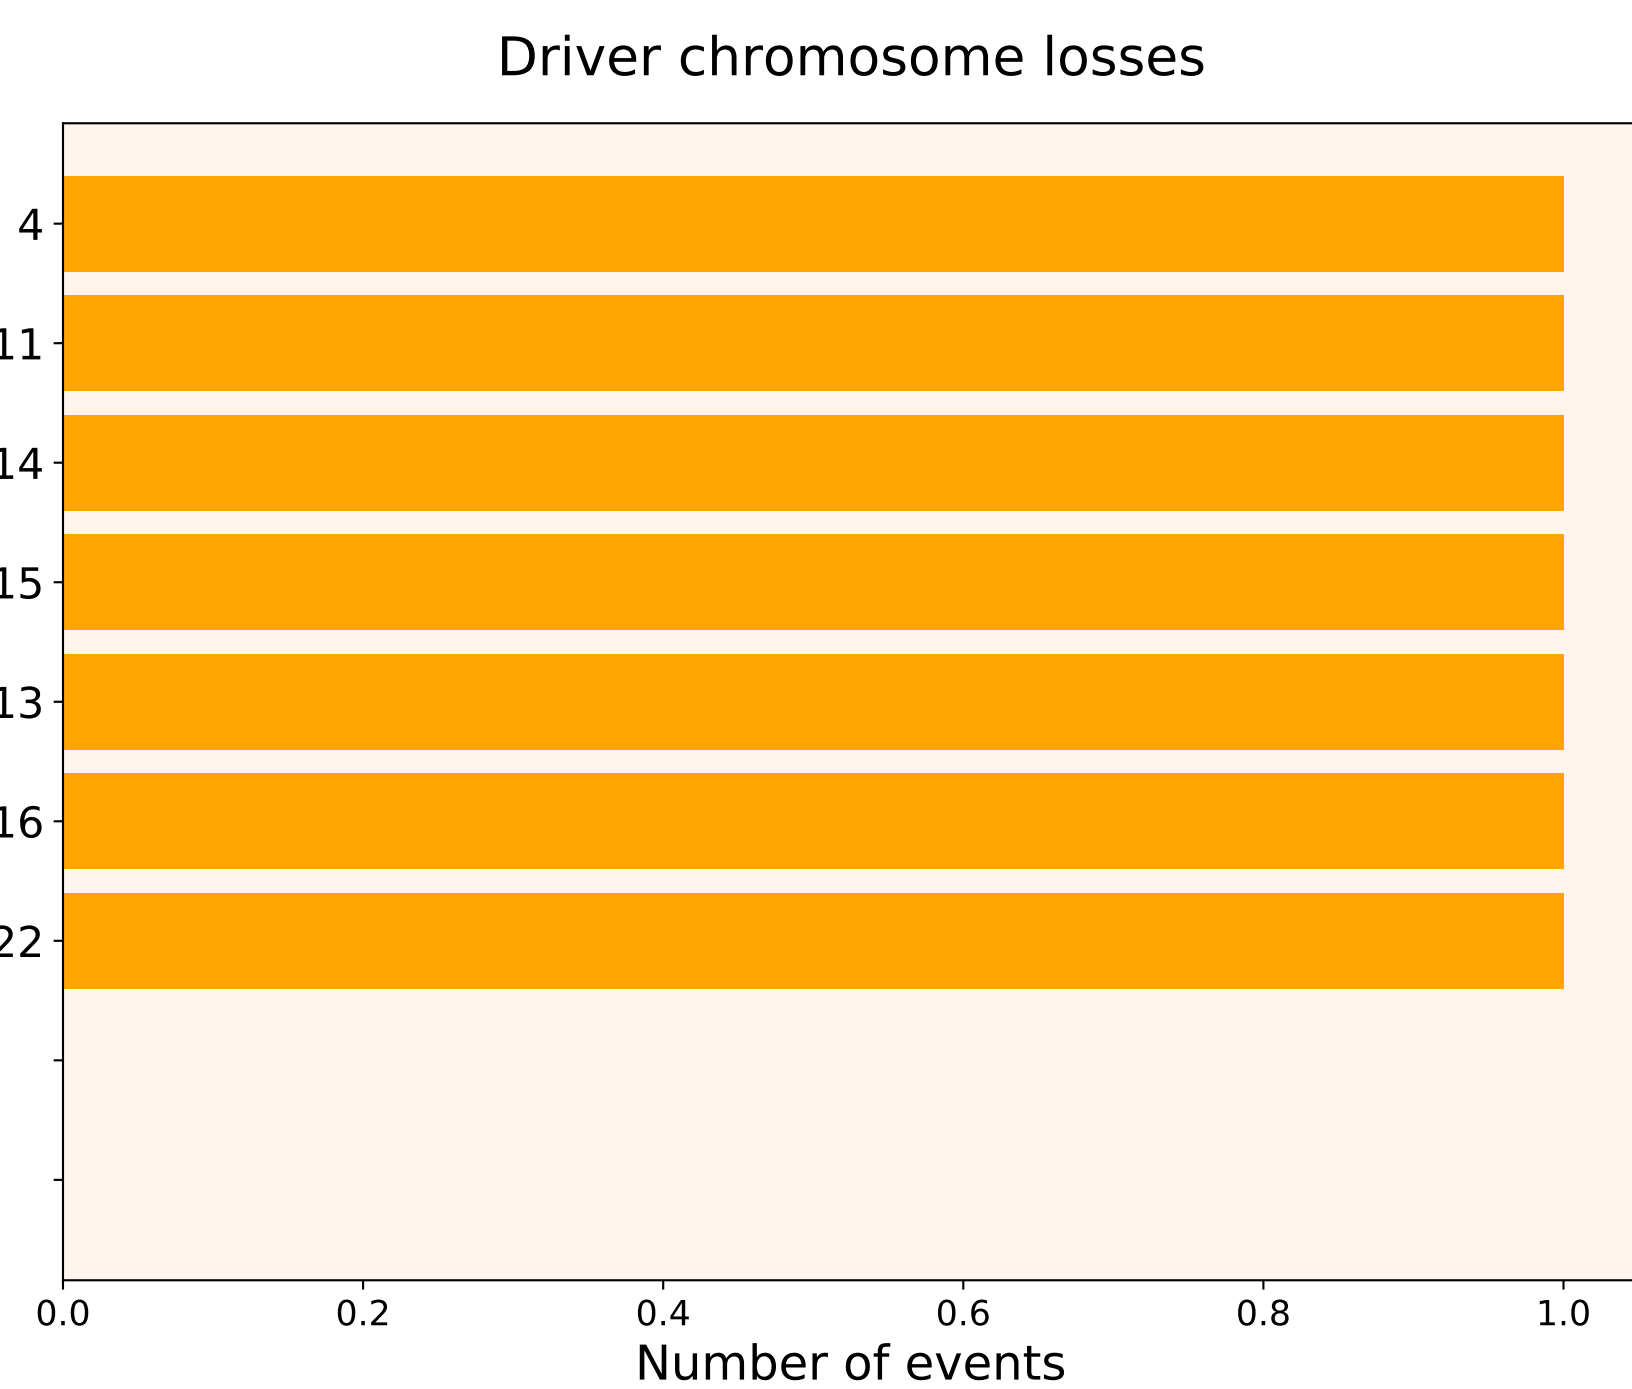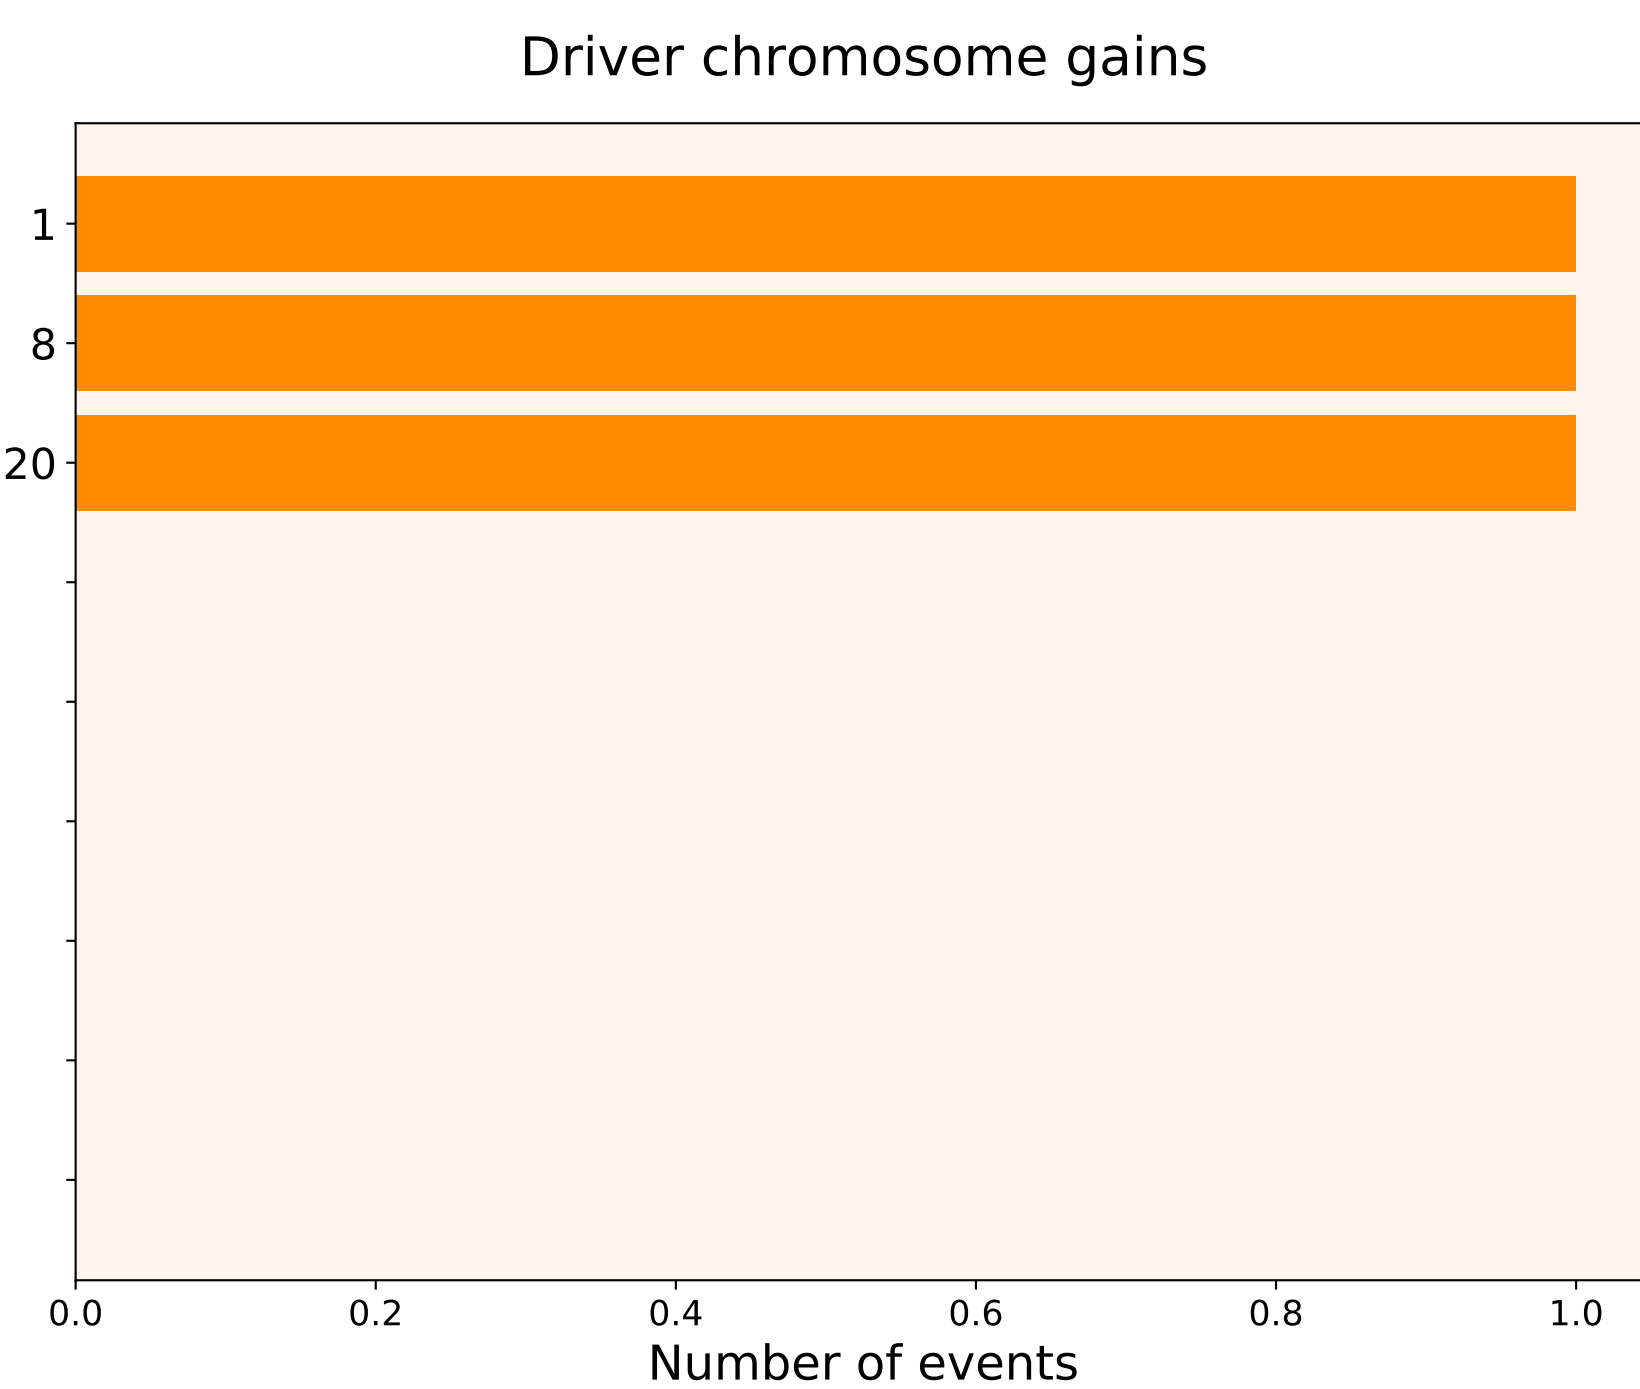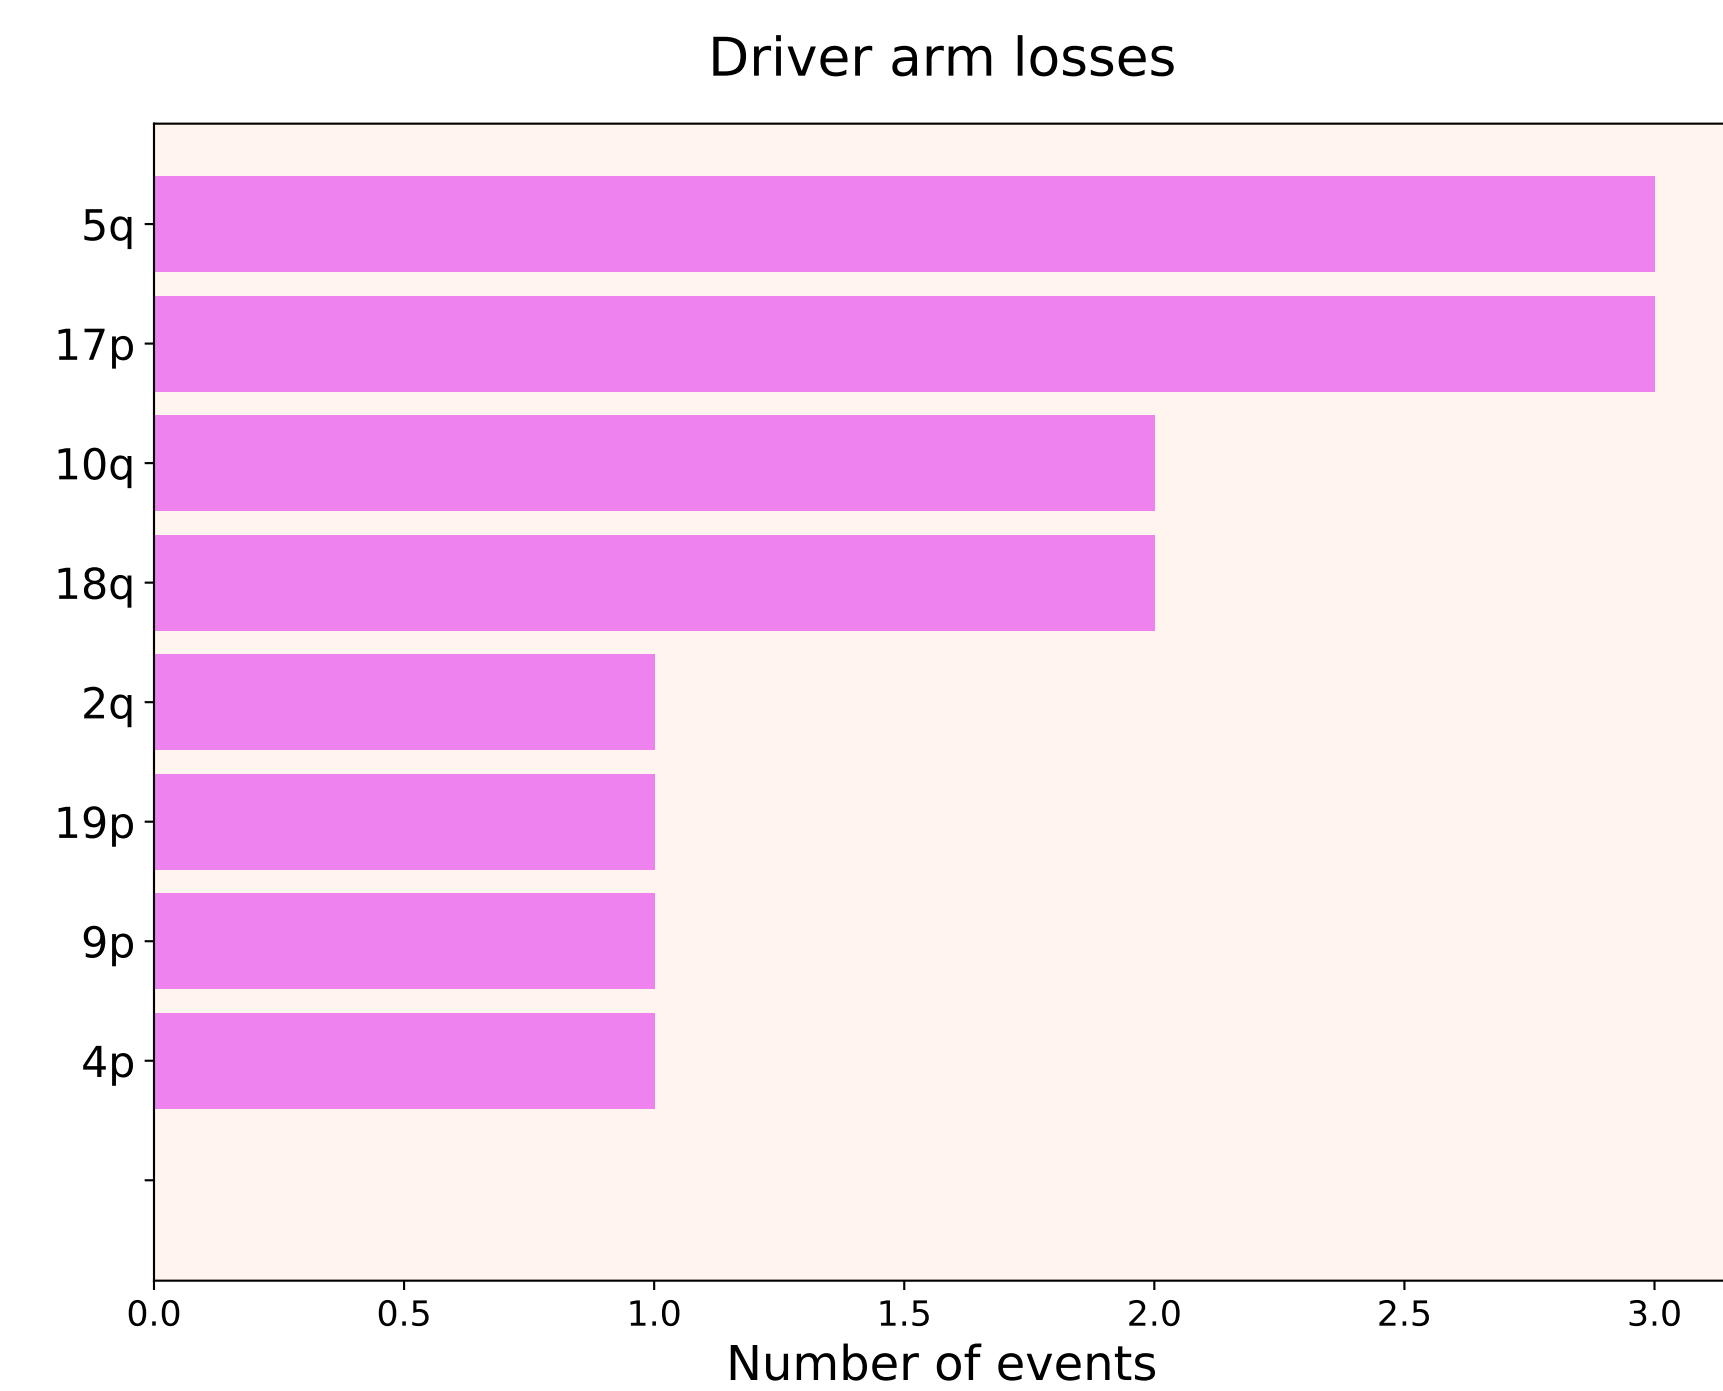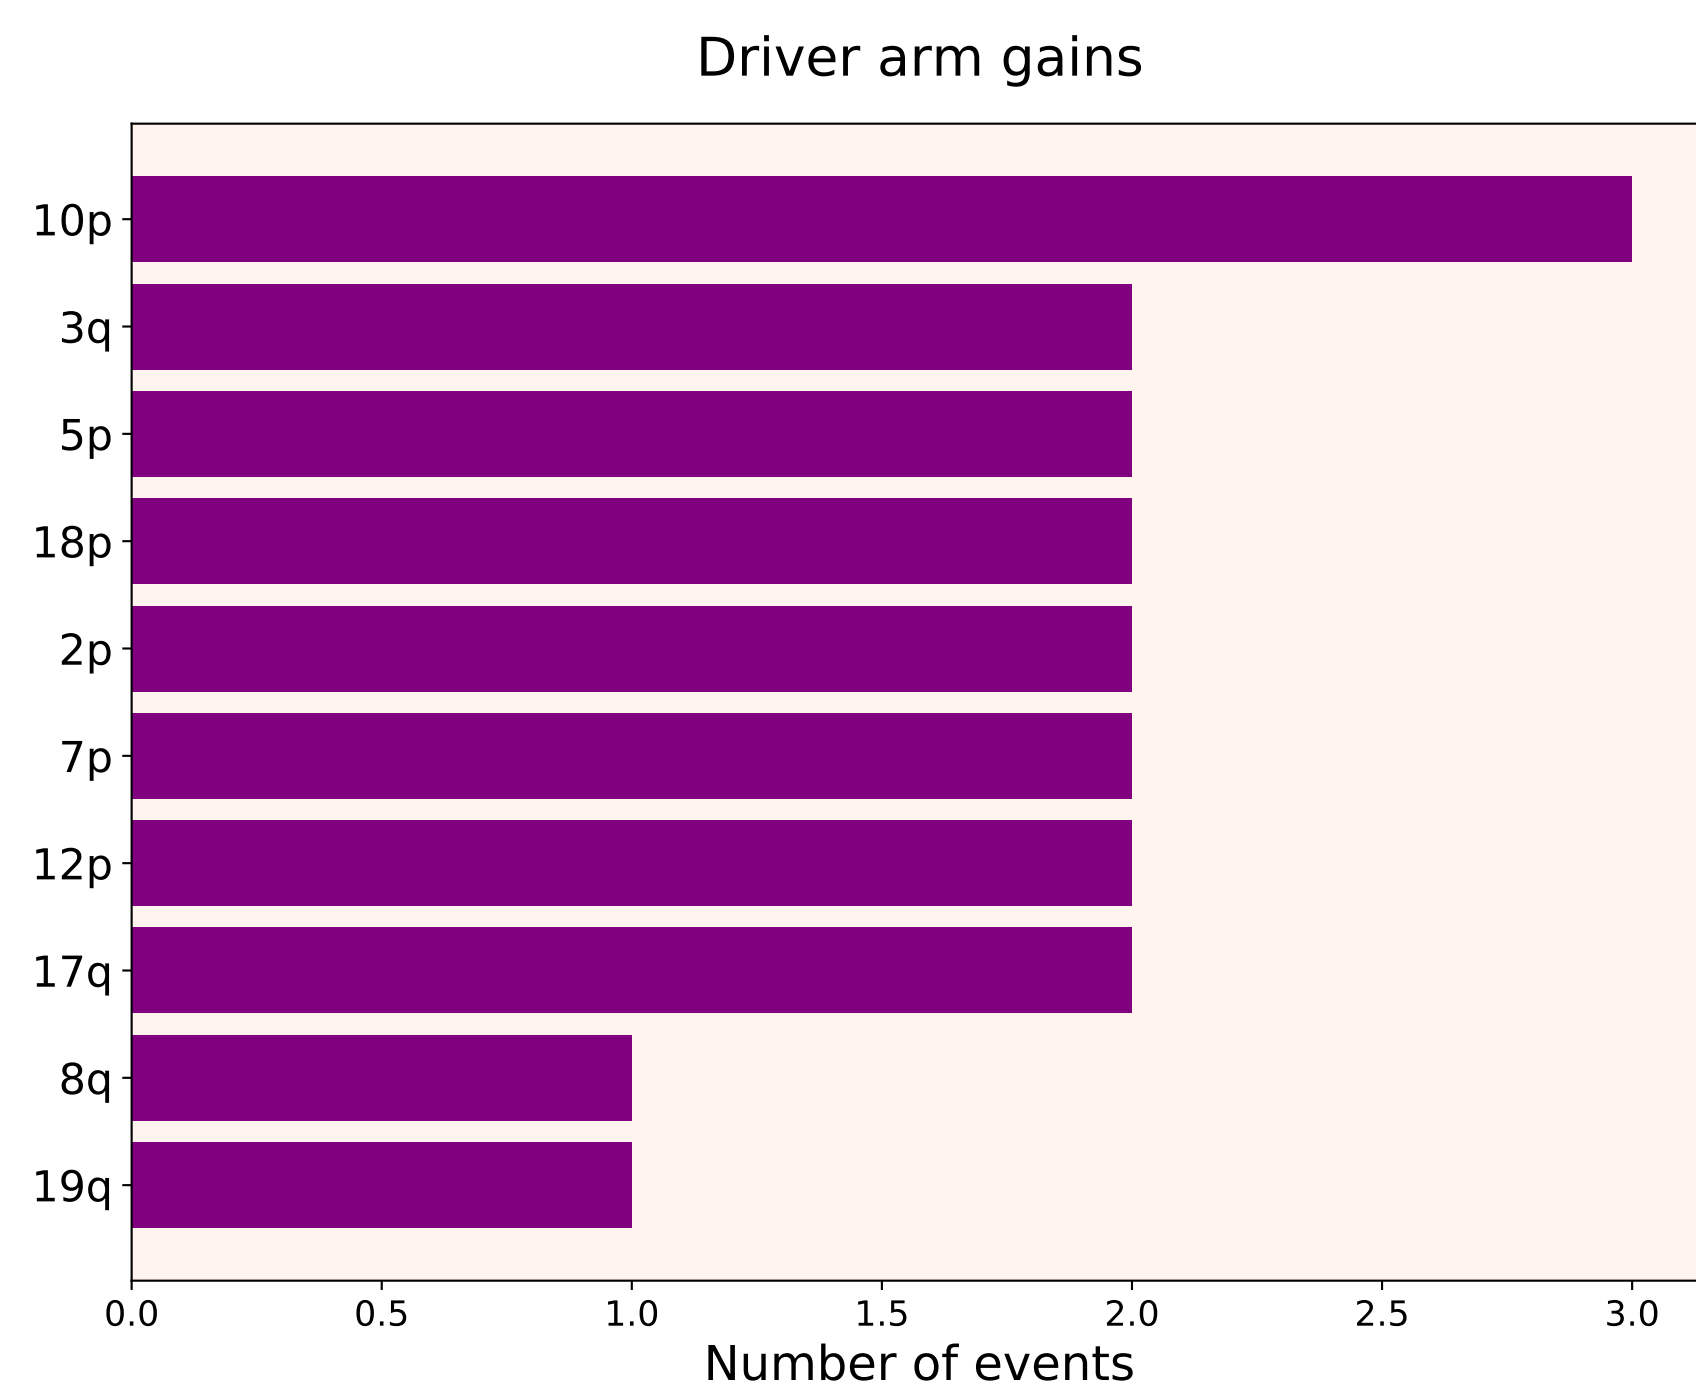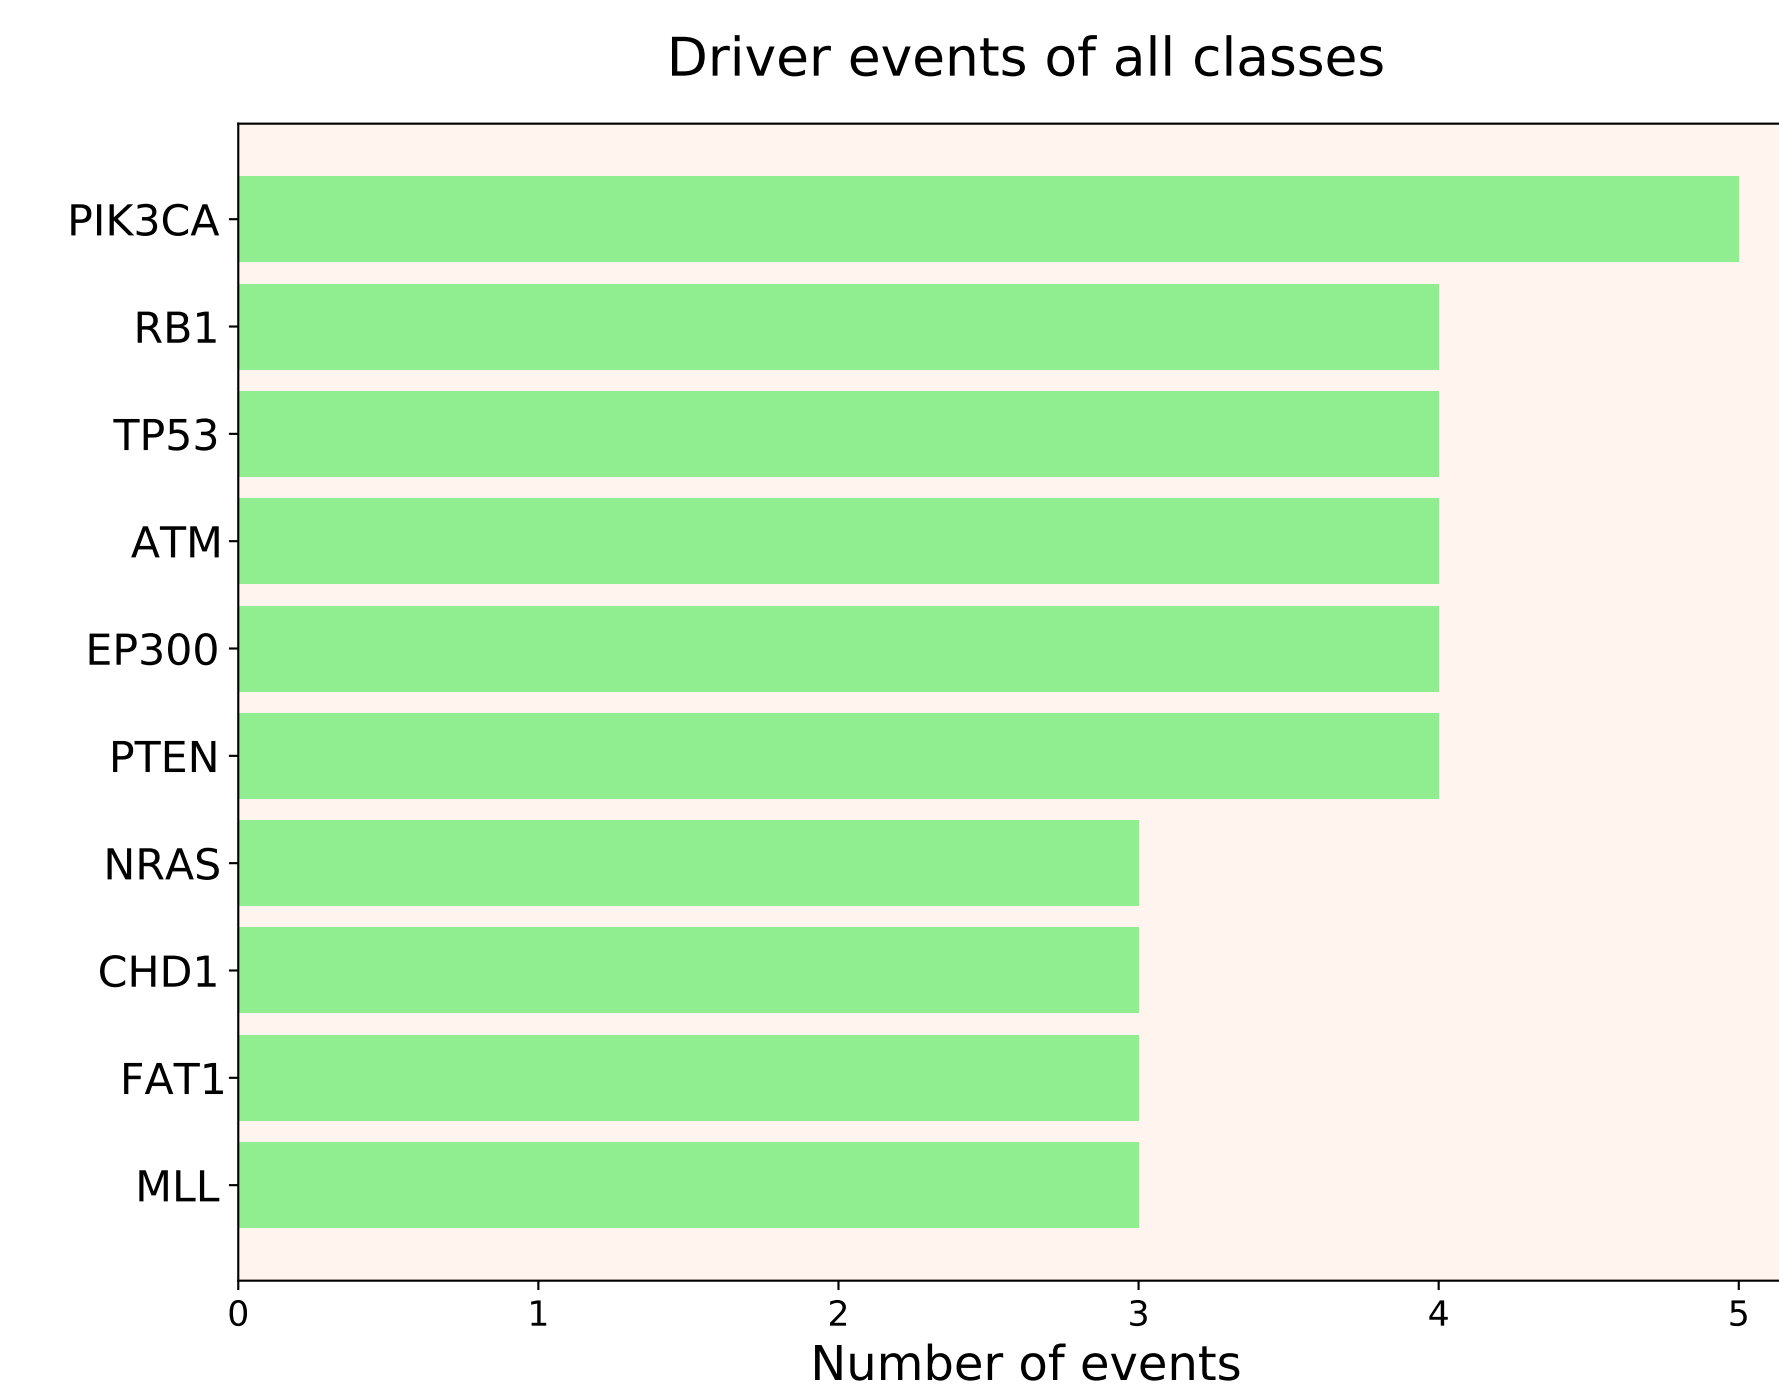

Supplement: Supplemental_Data_S1.zip [file Supplemental_Data_S1.zip]

# CESC

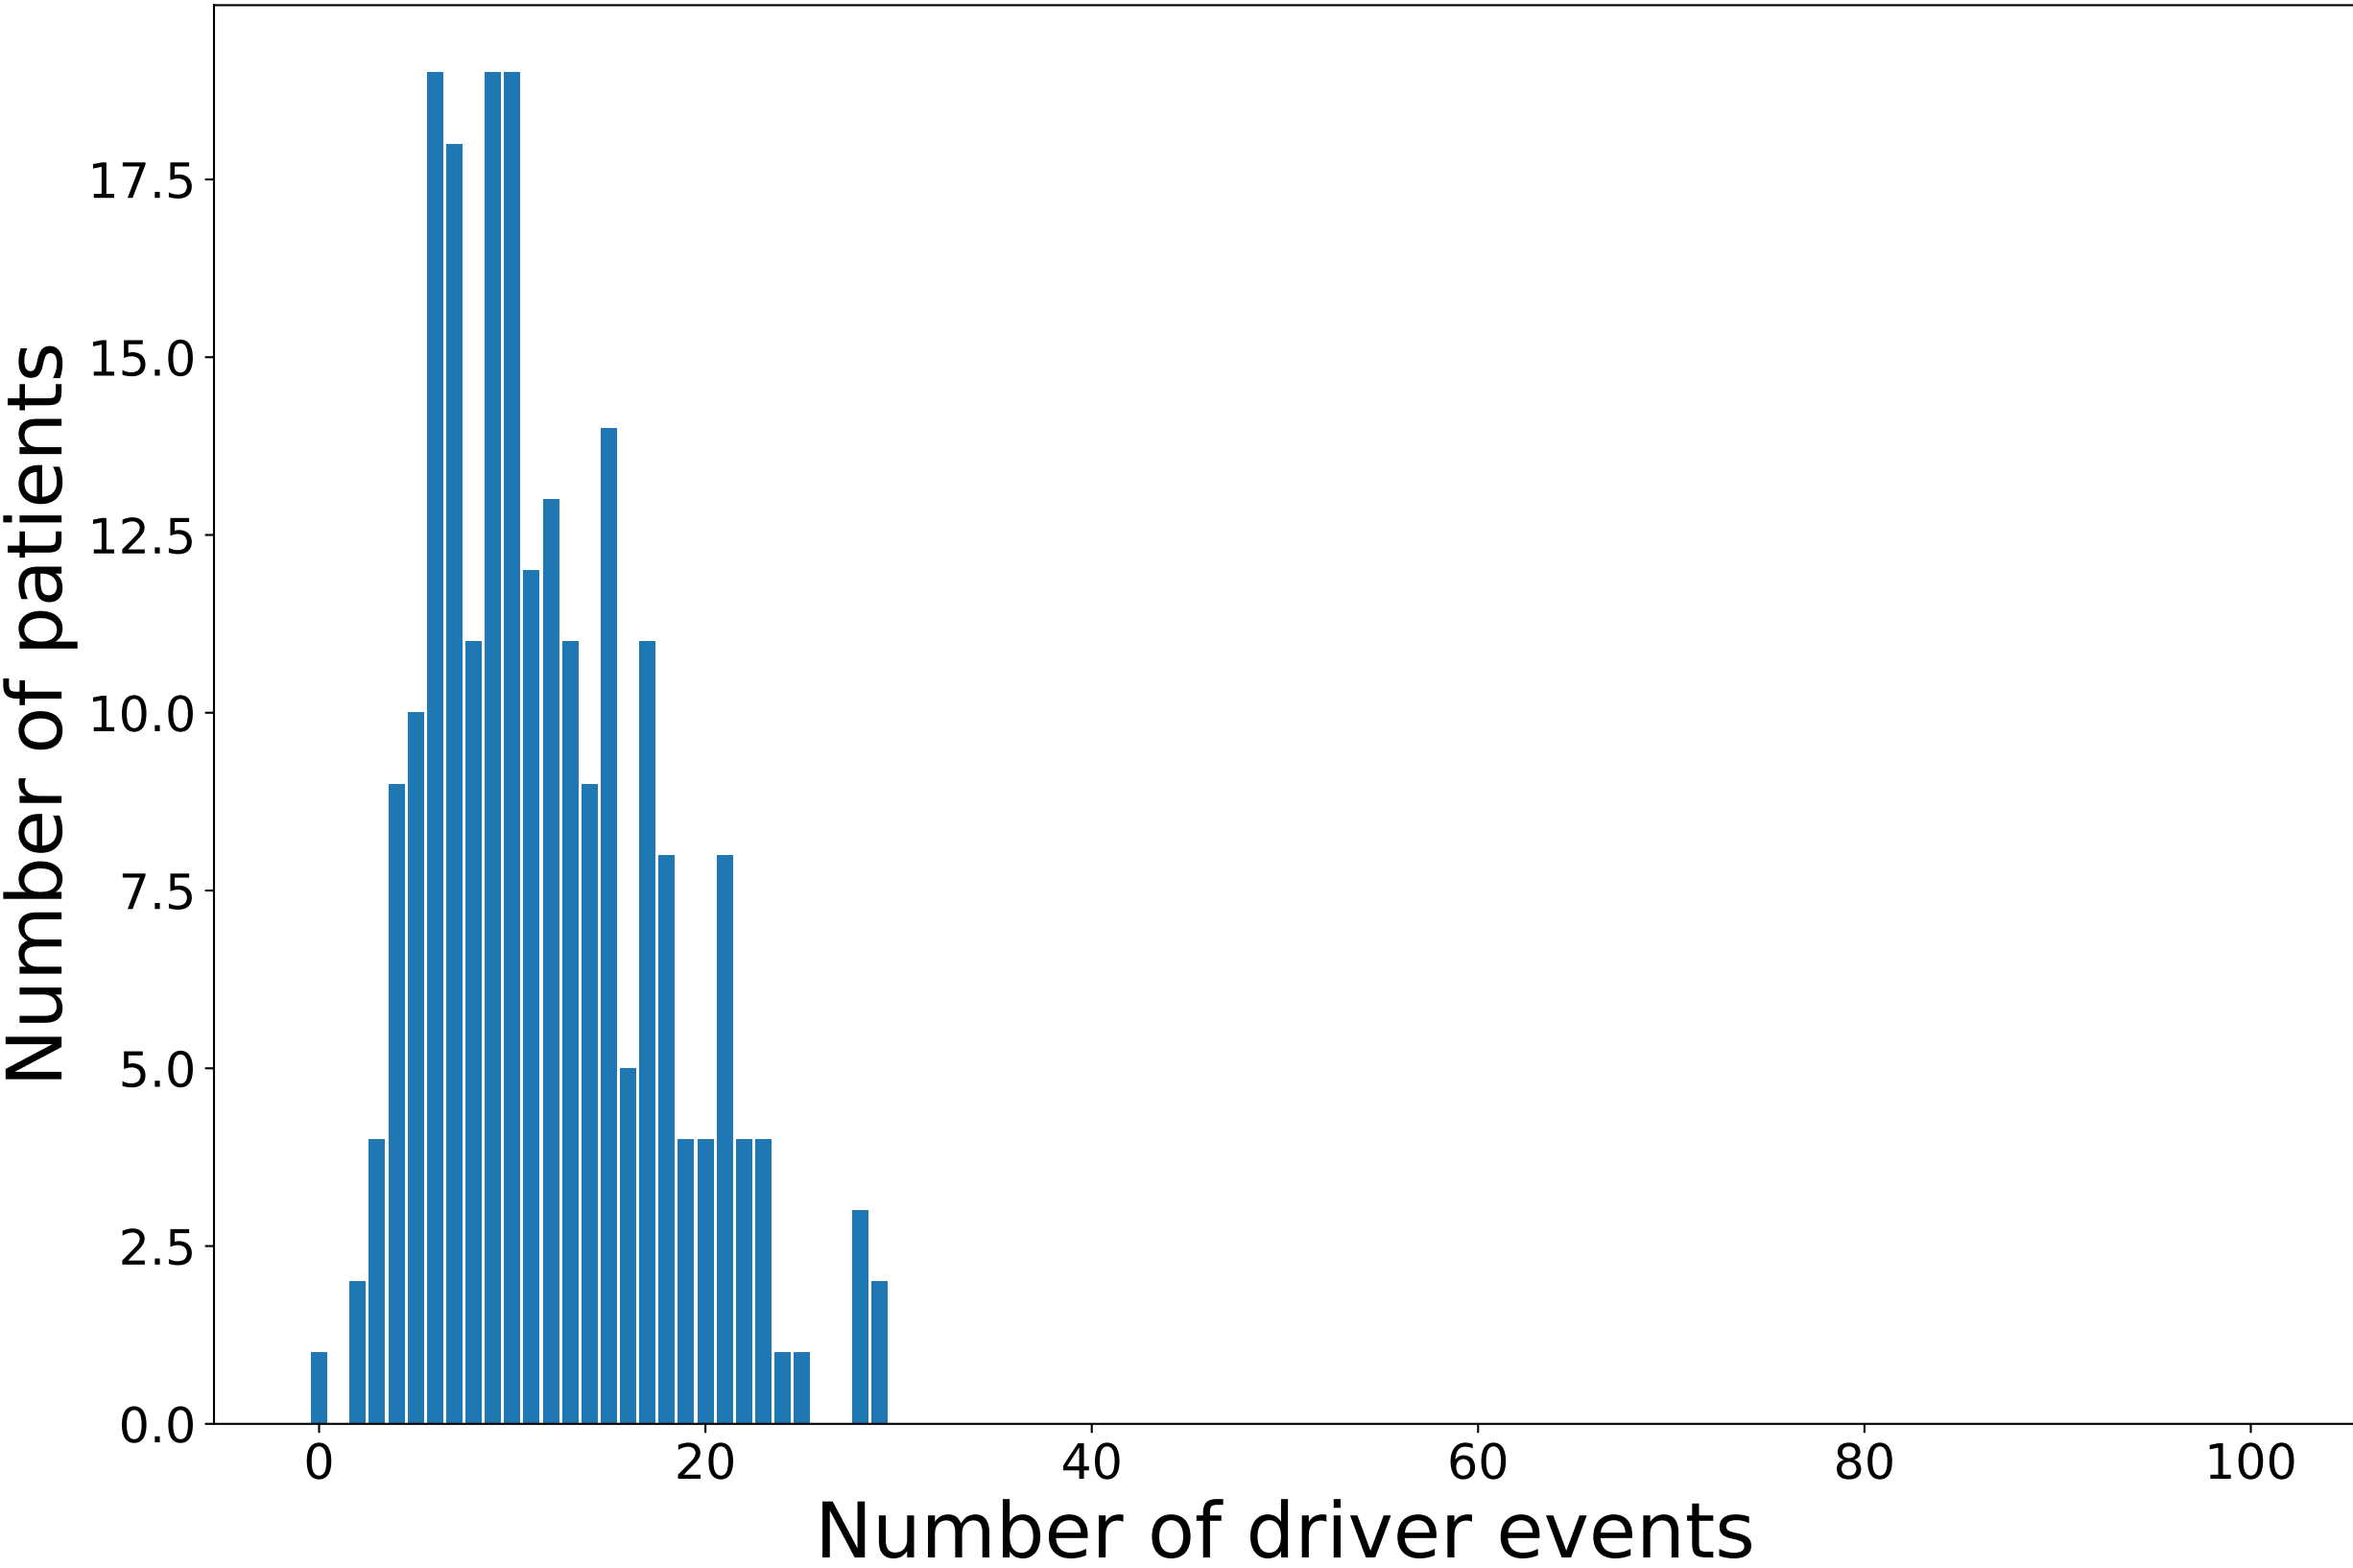

Supplement: Supplemental_Data_S1.zip [file Supplemental_Data_S1.zip]

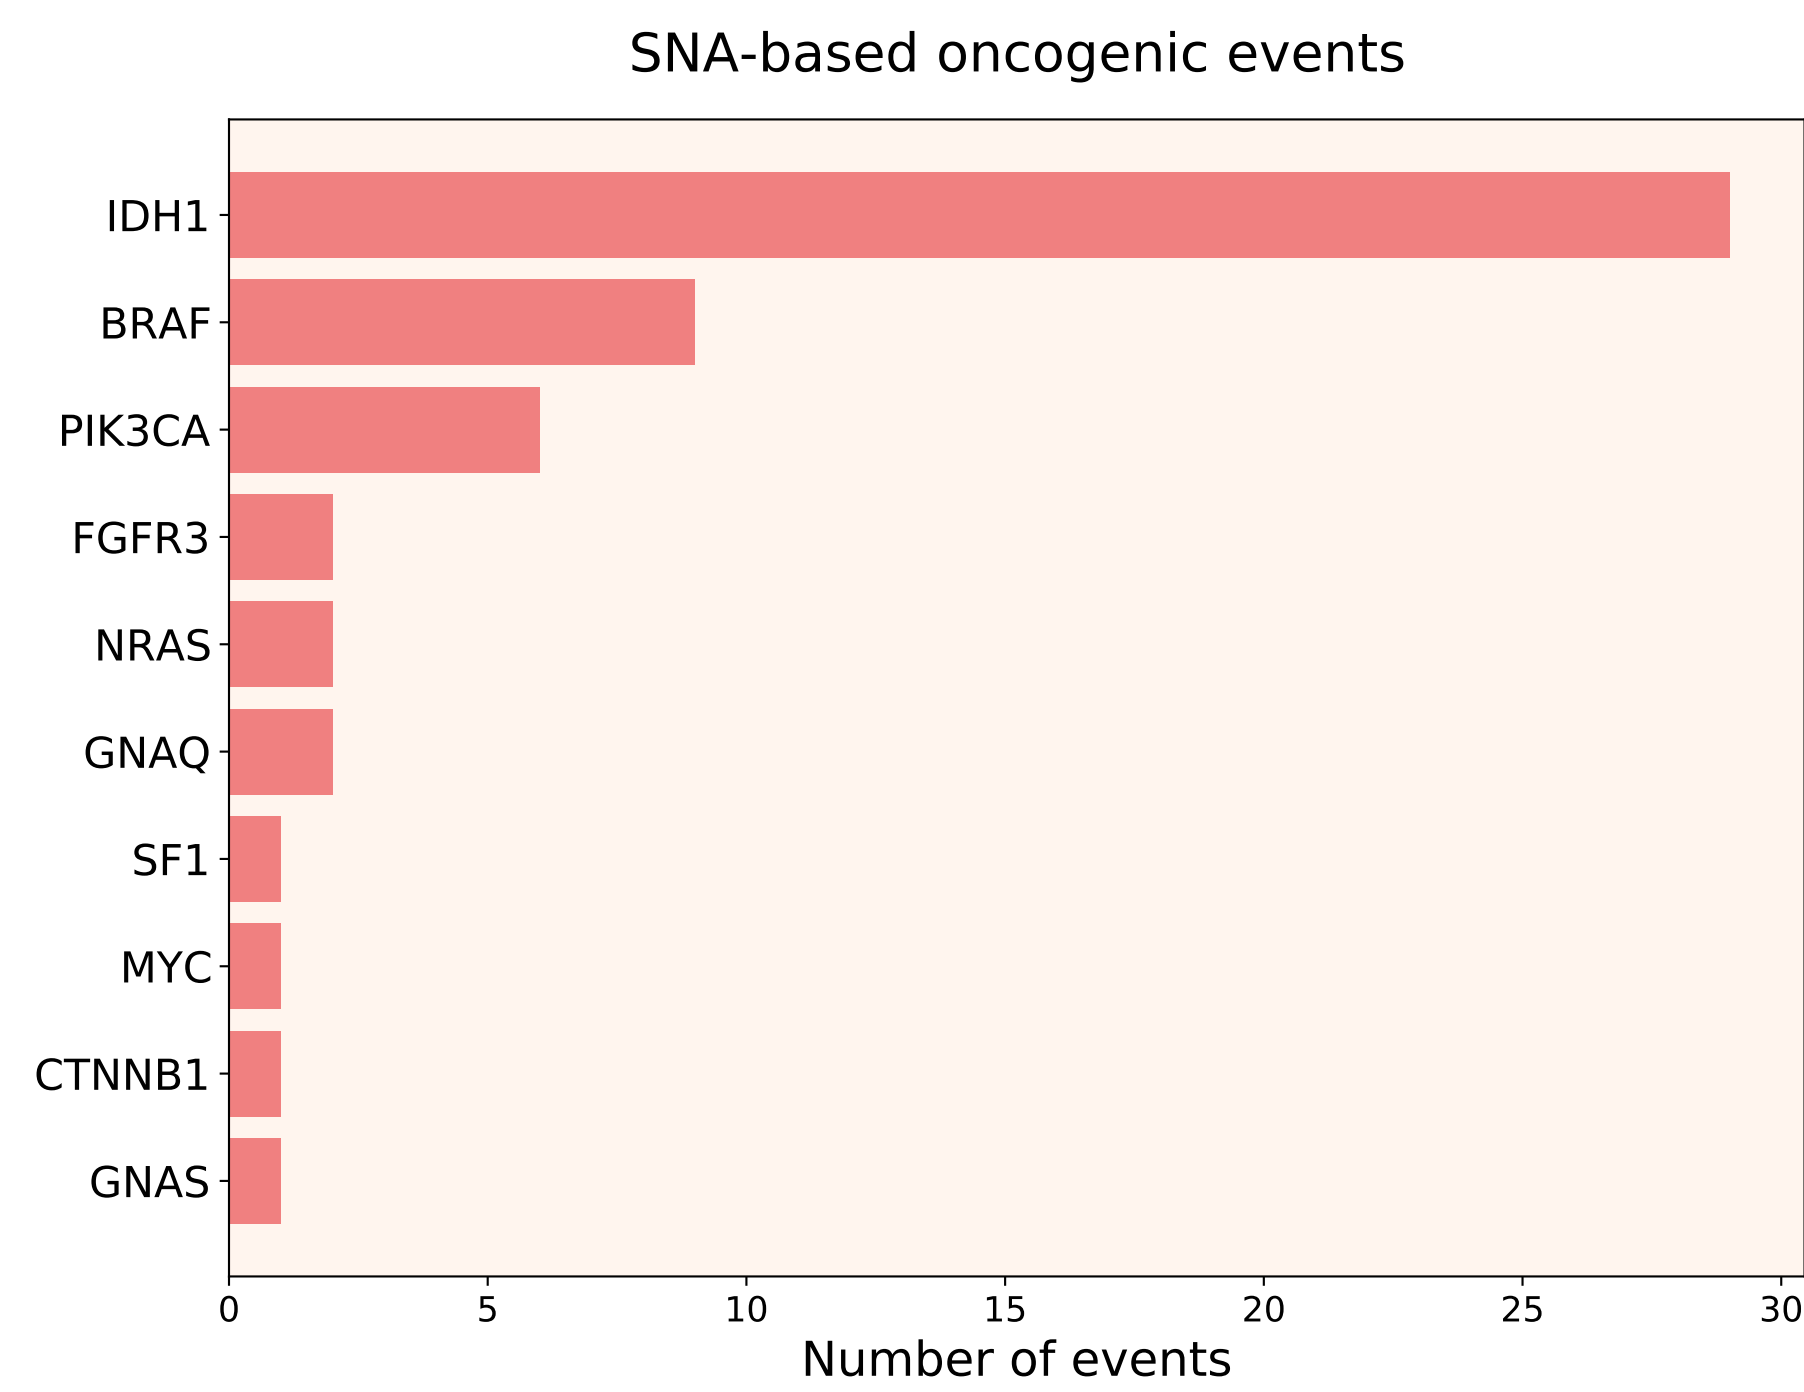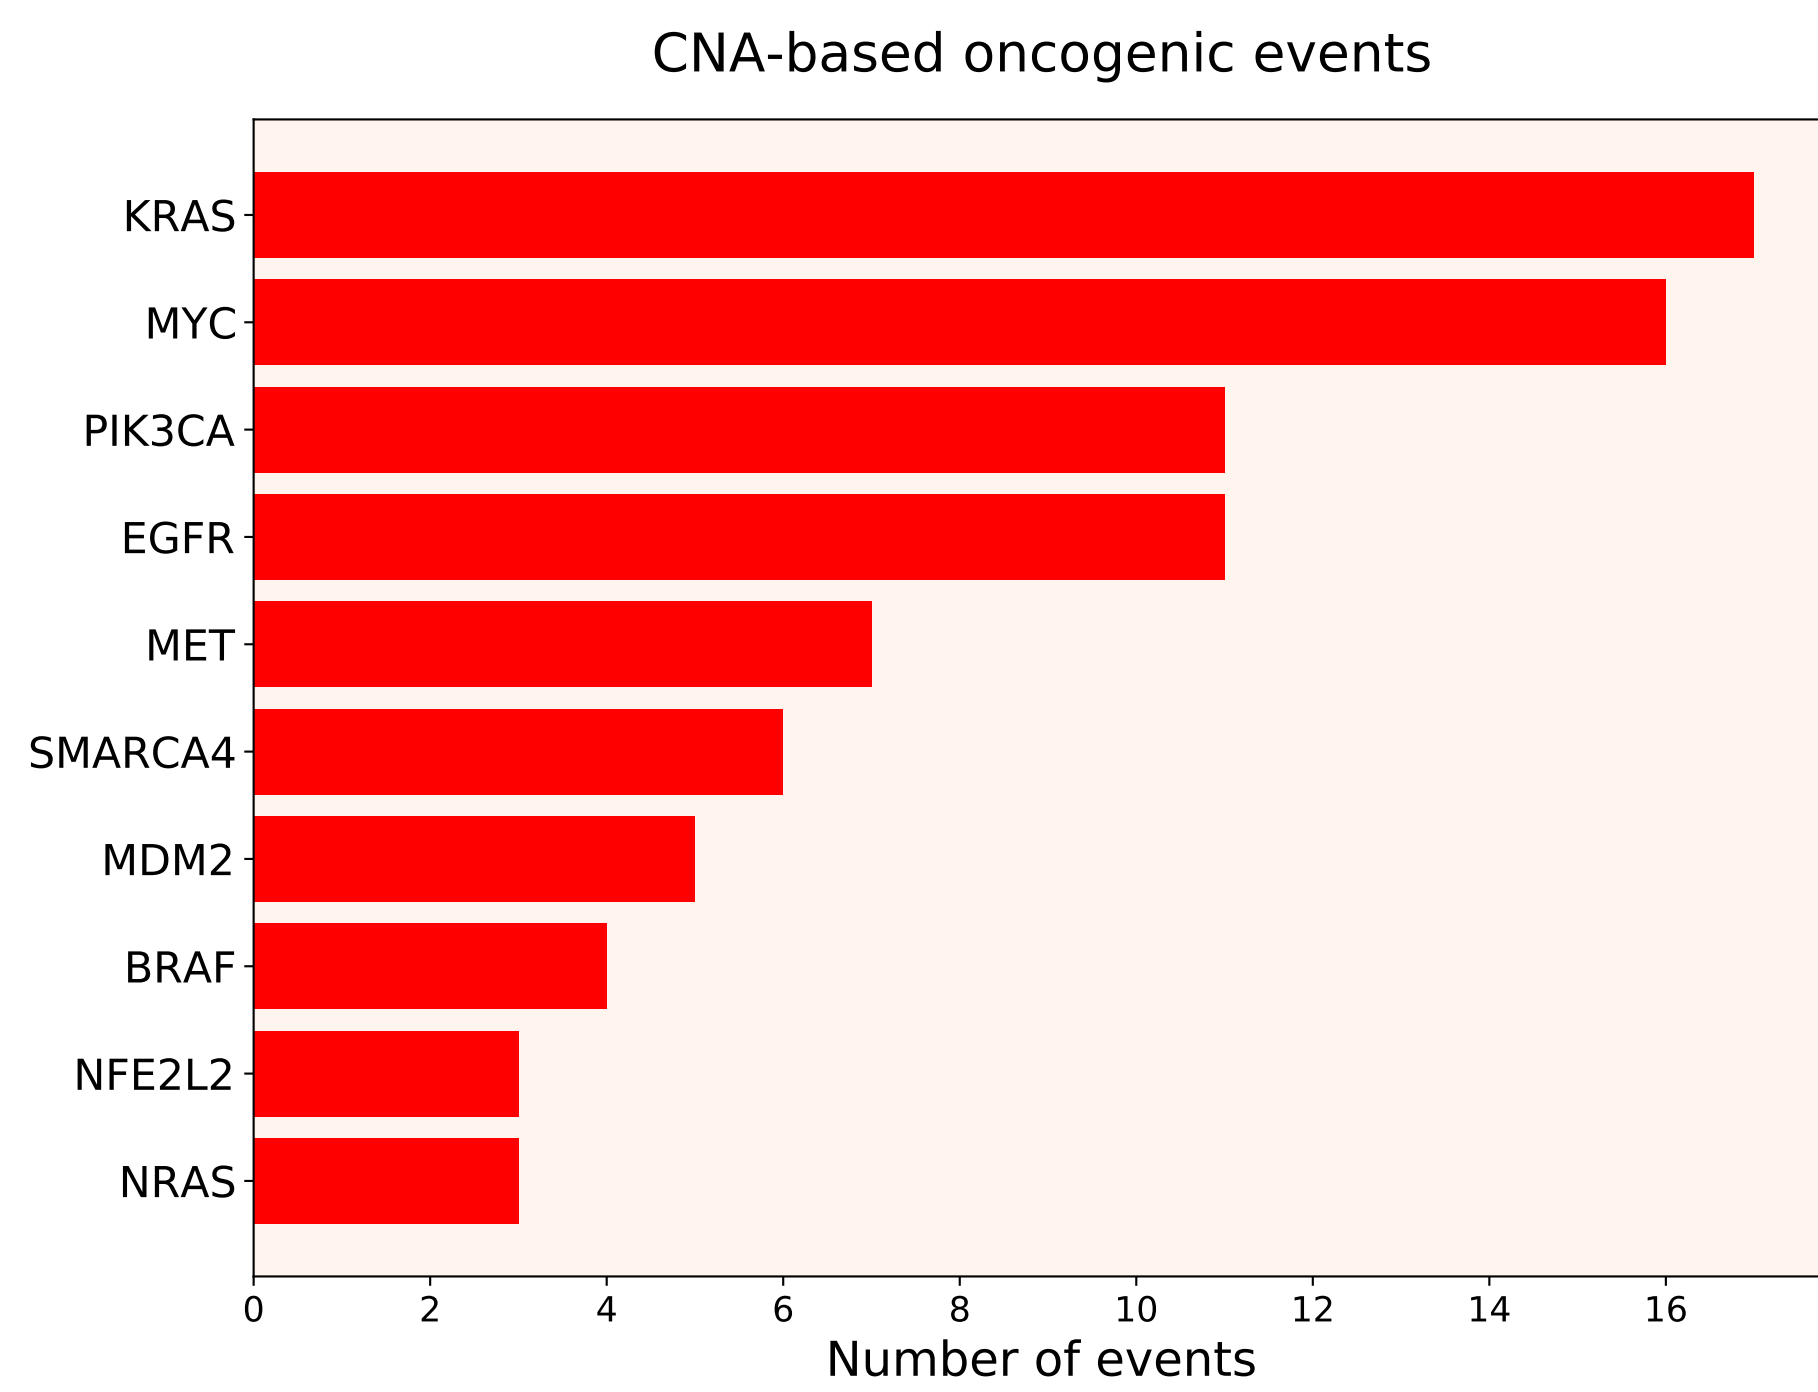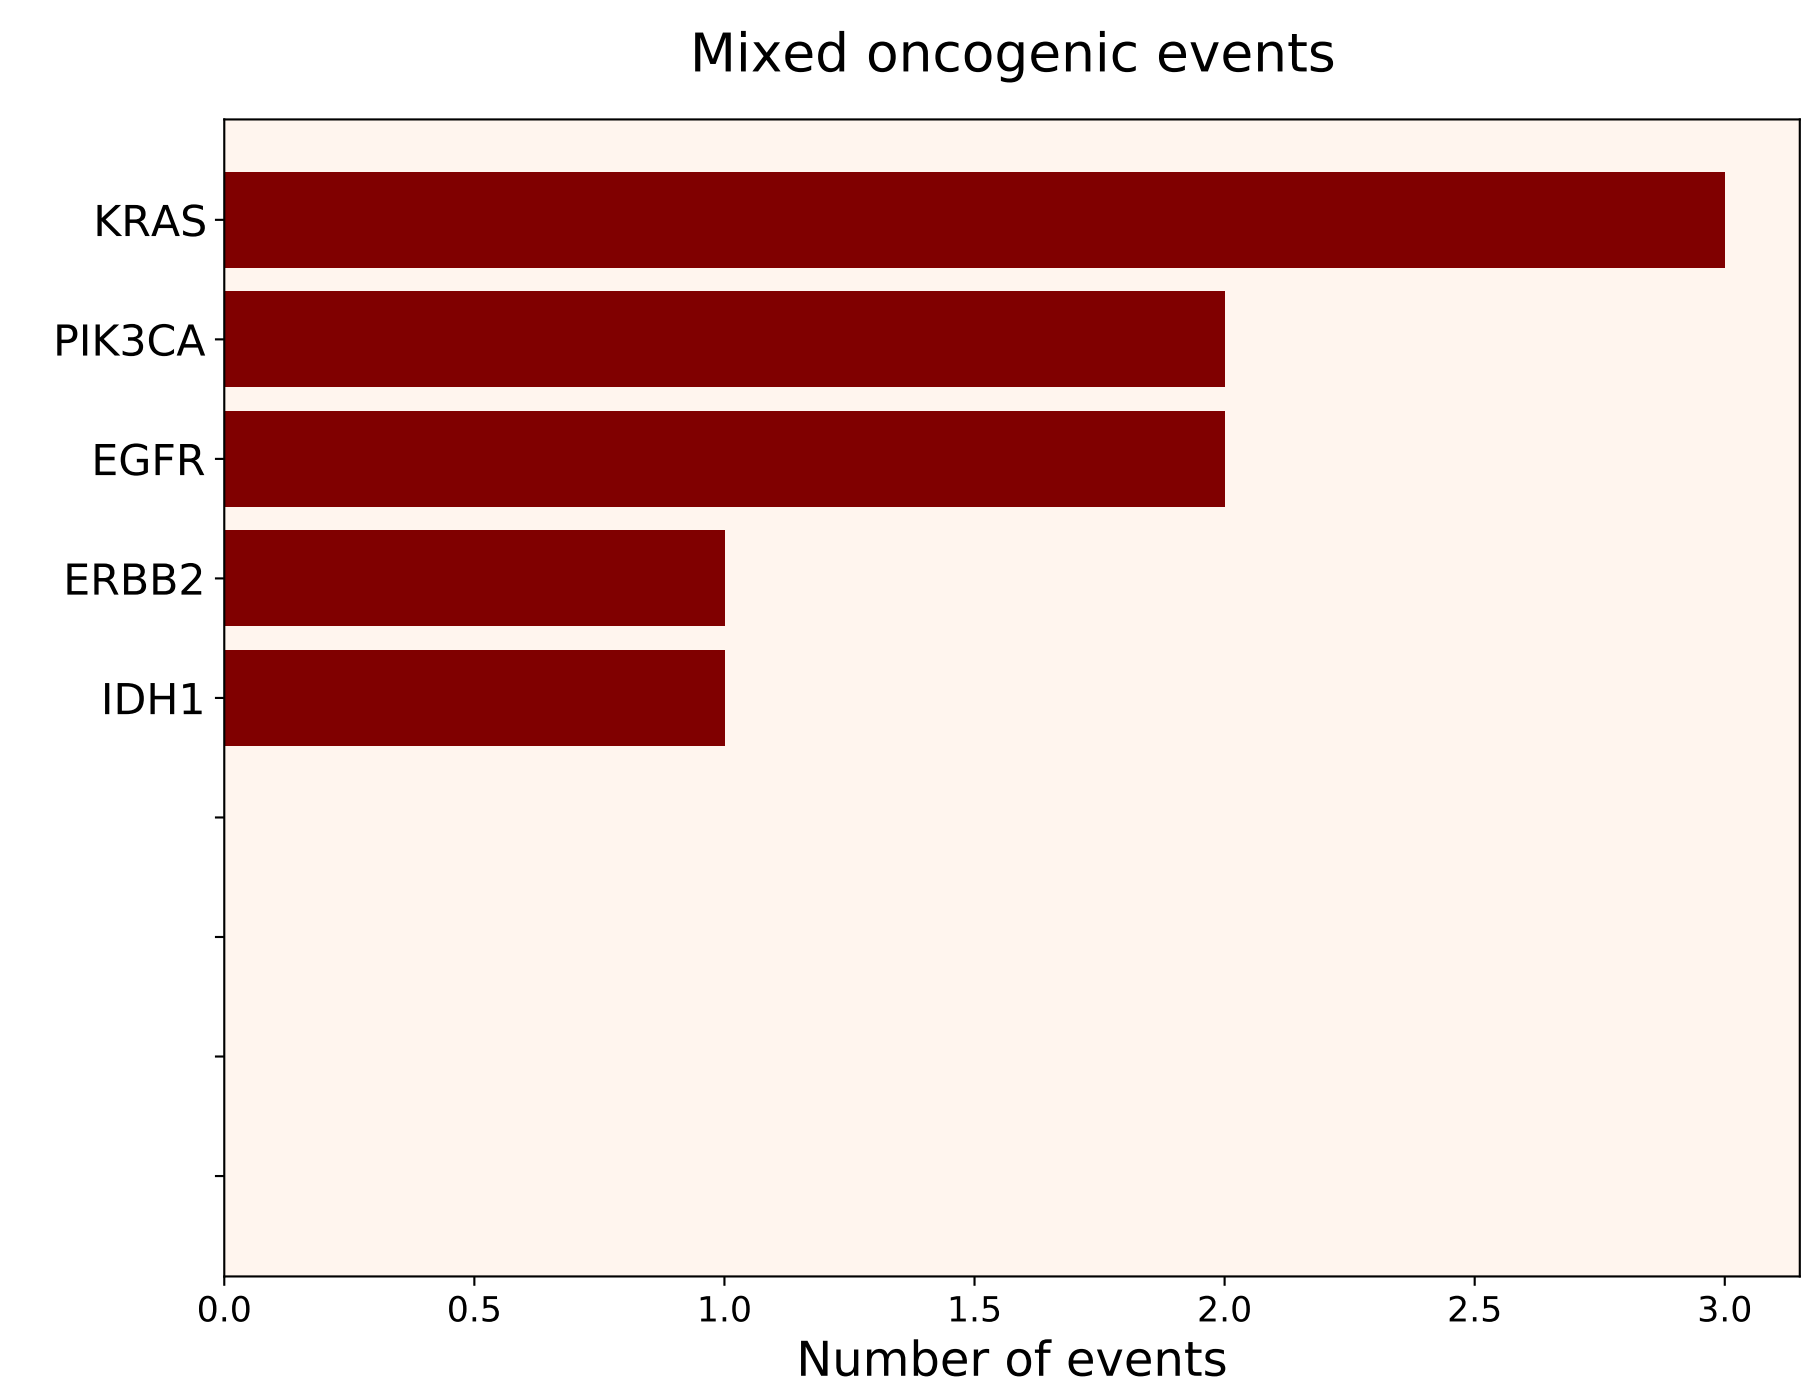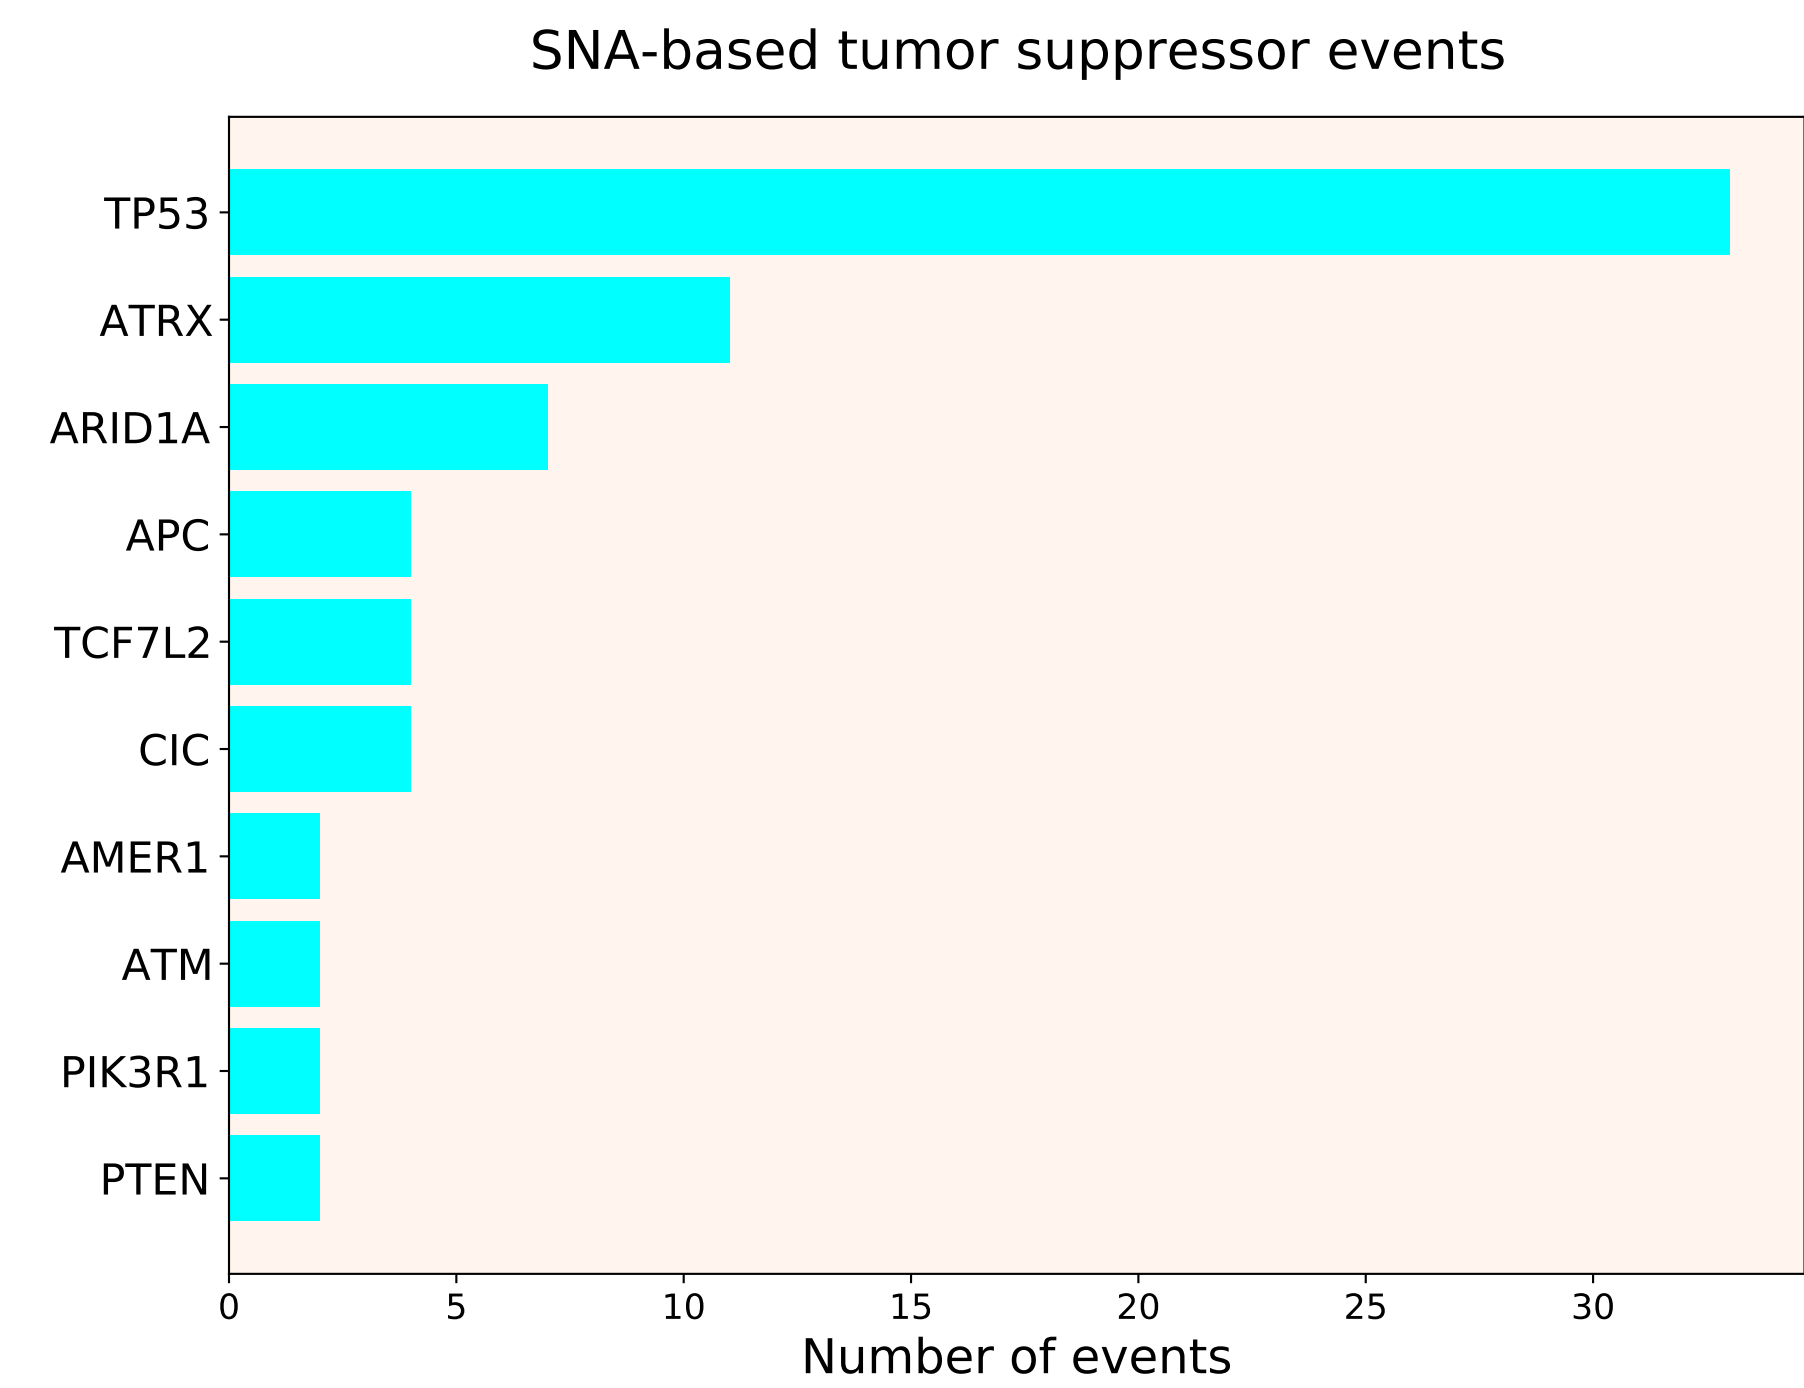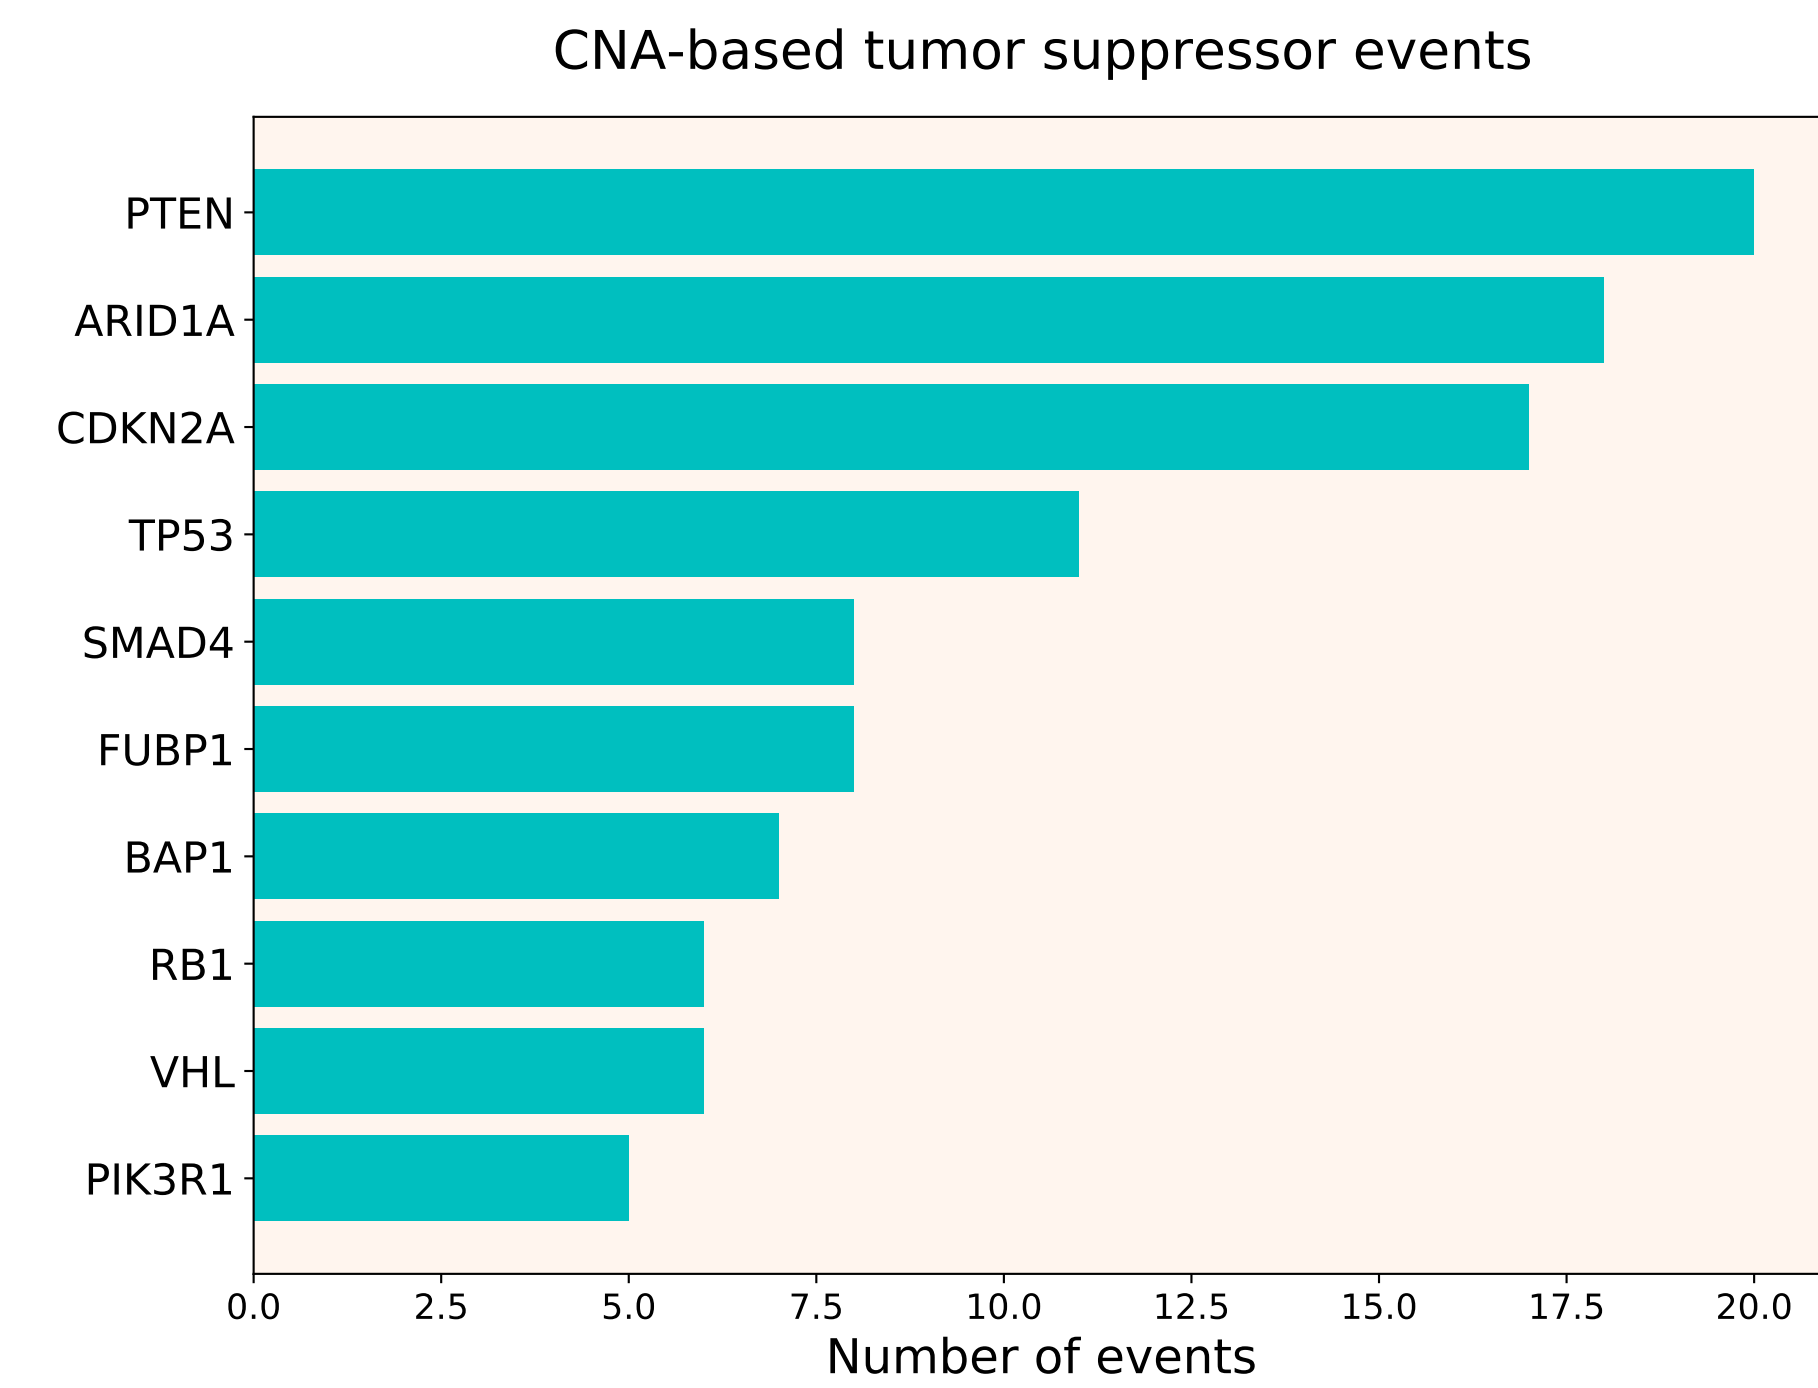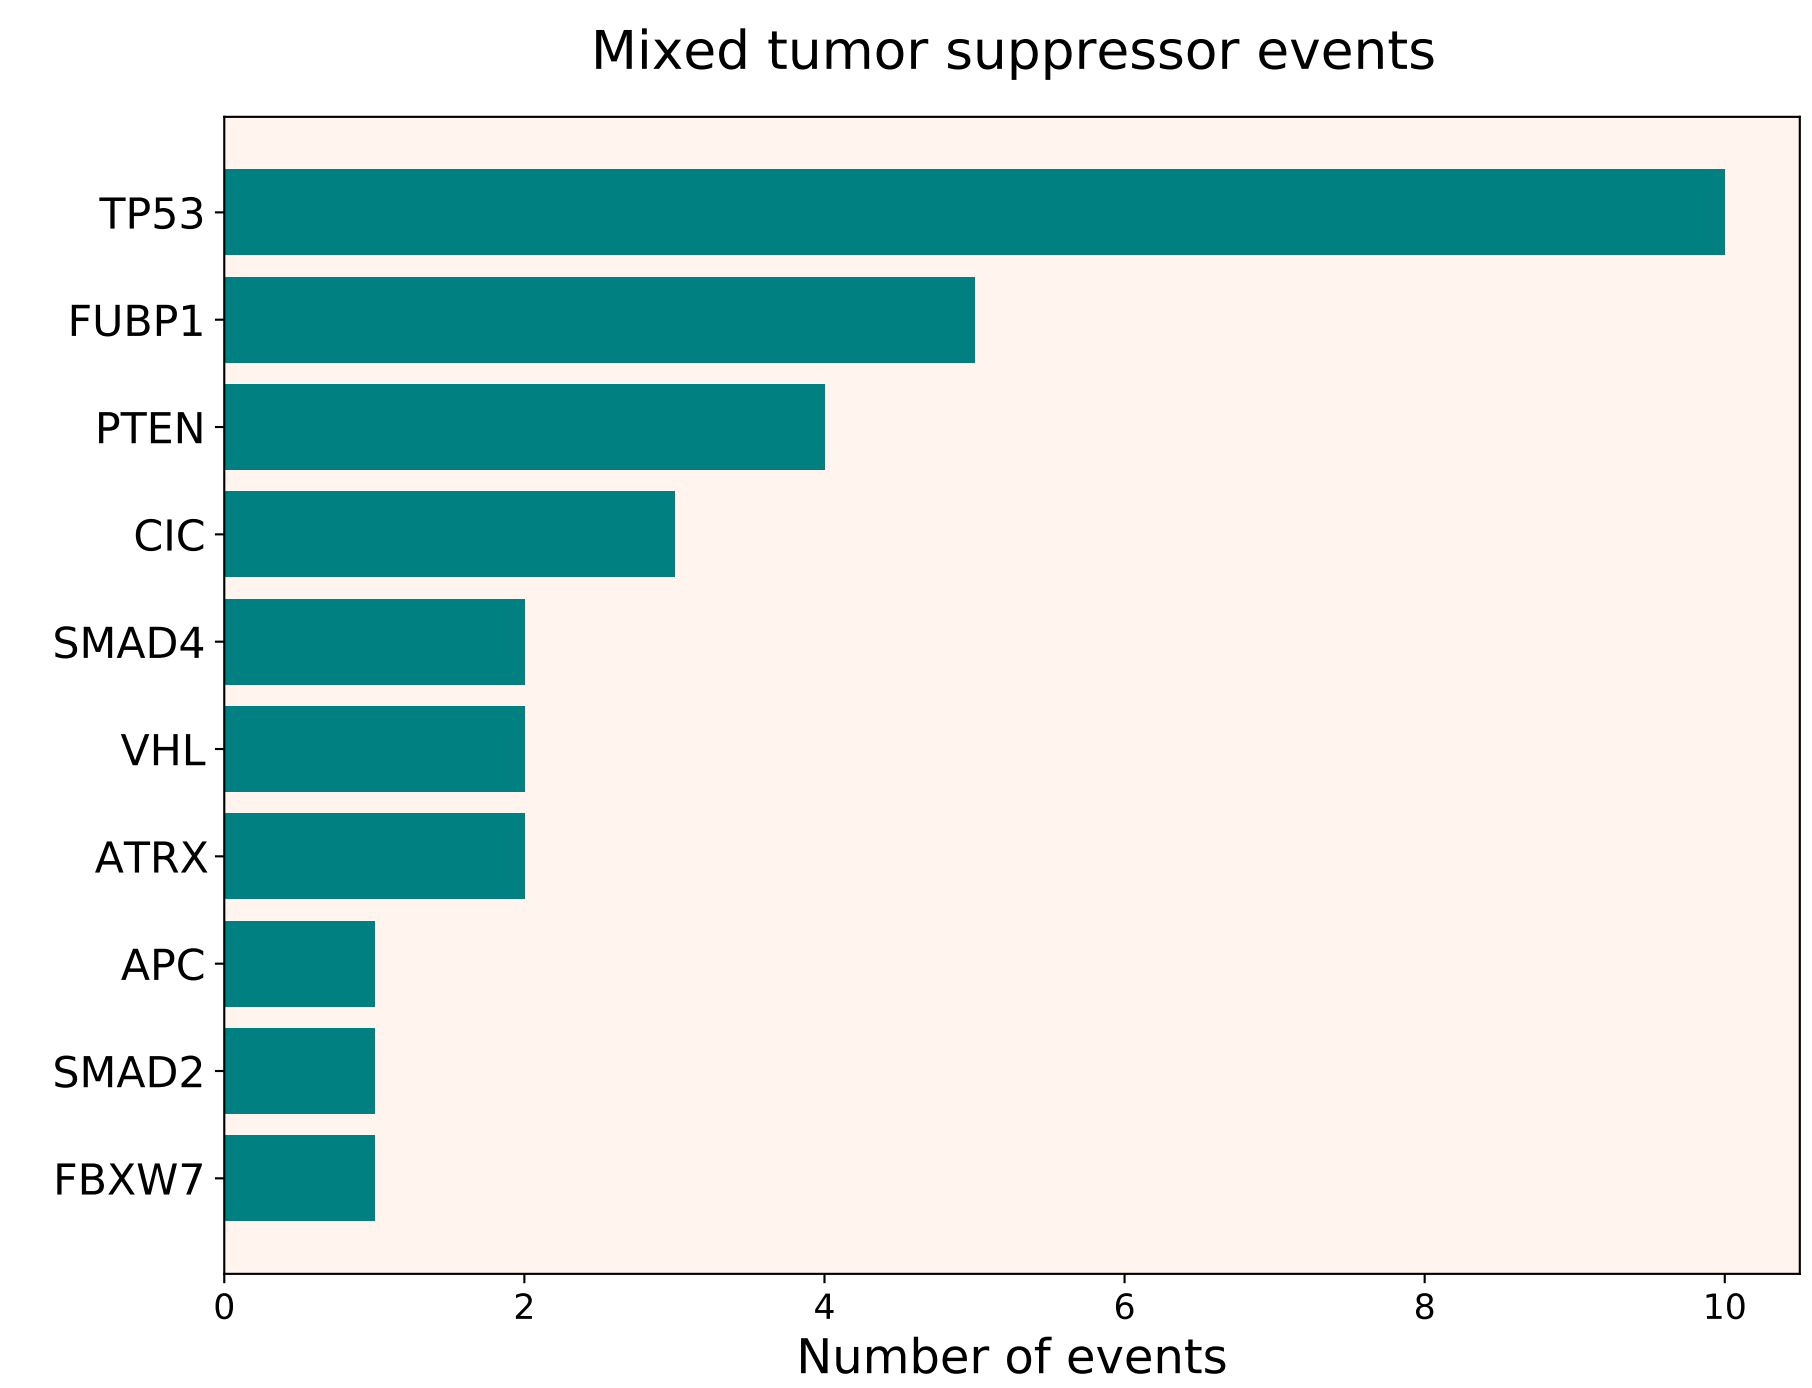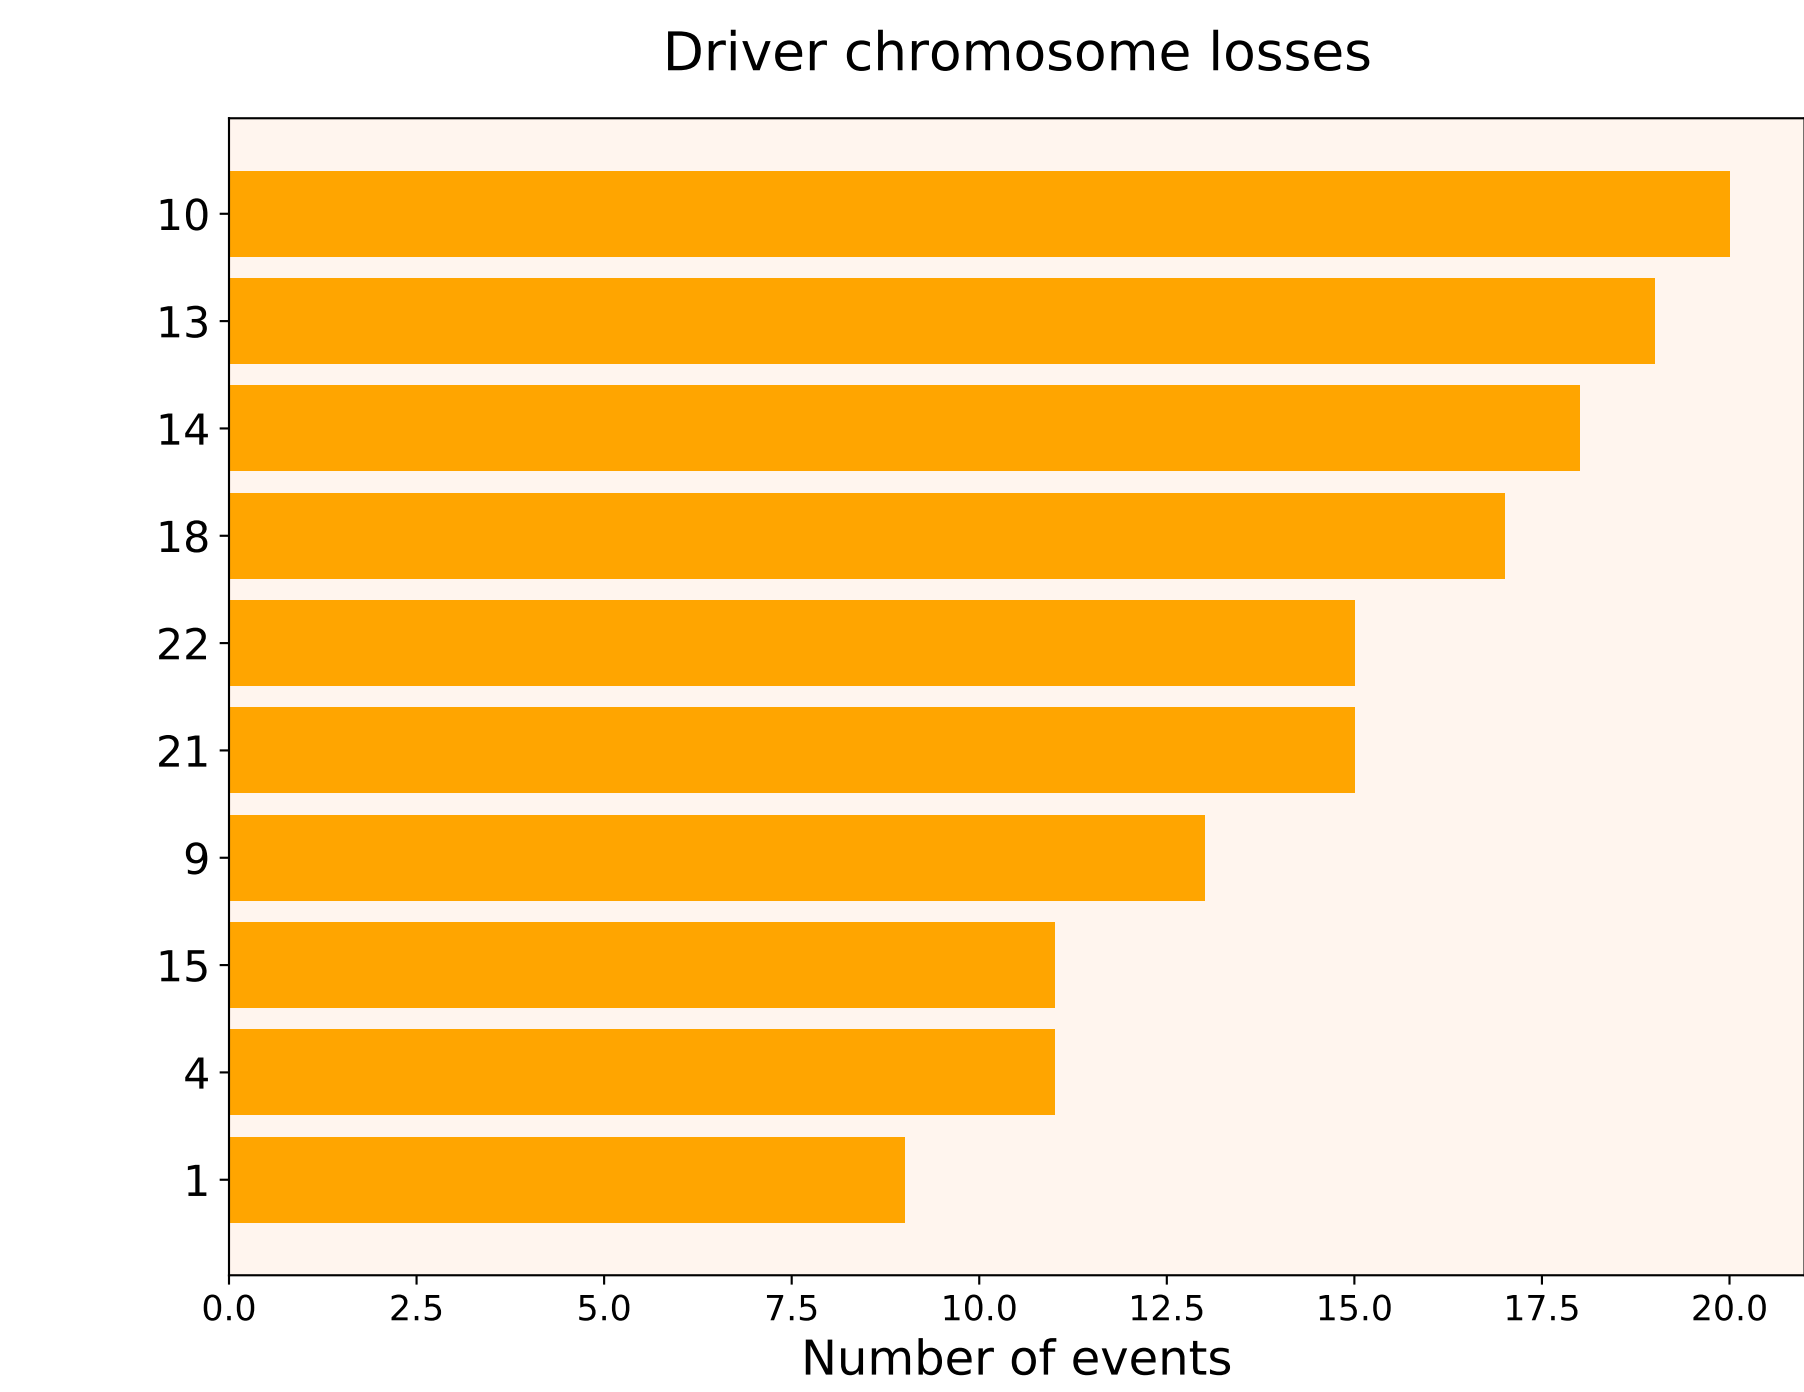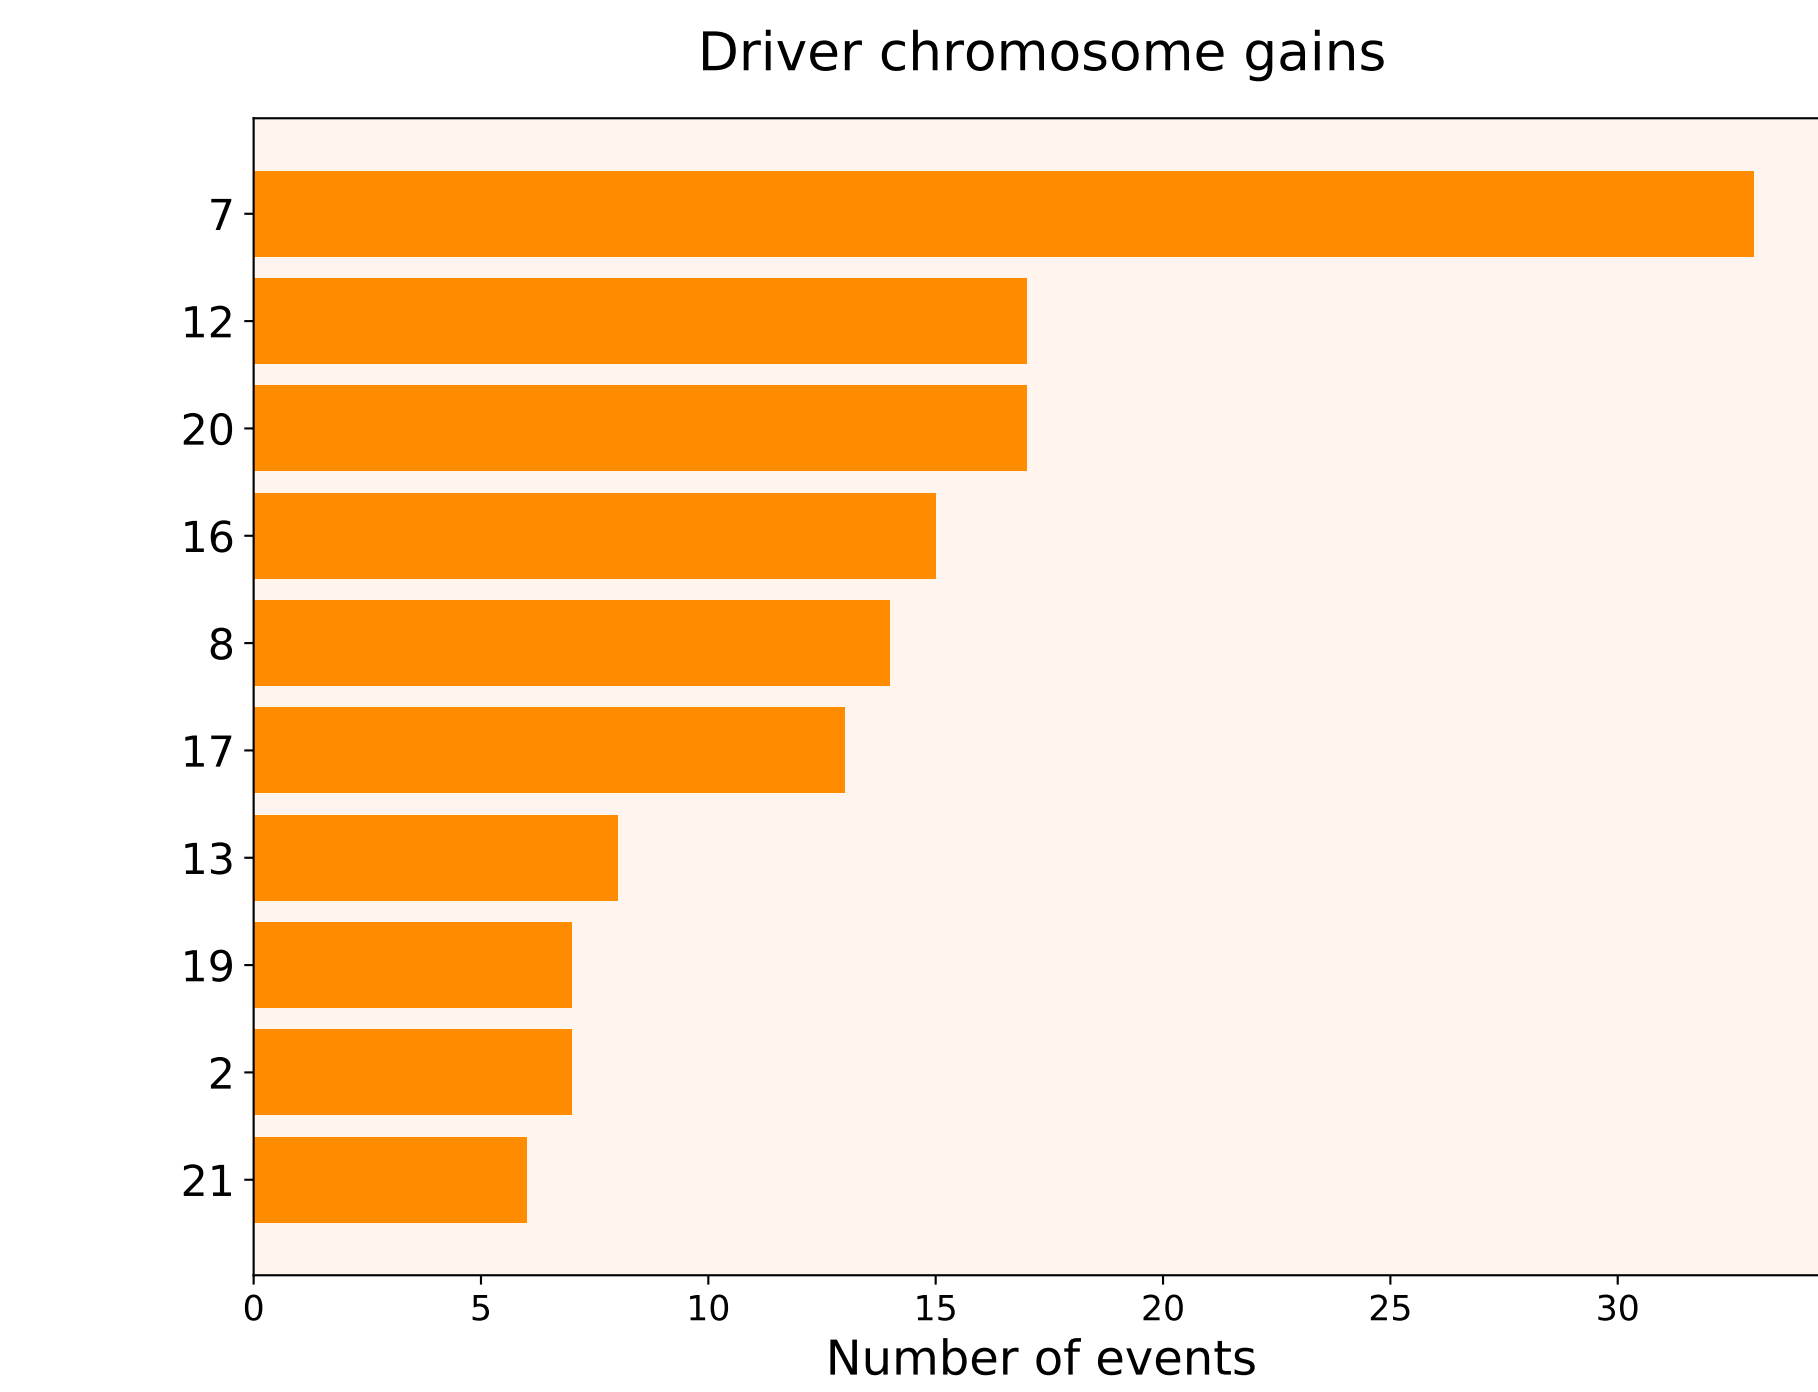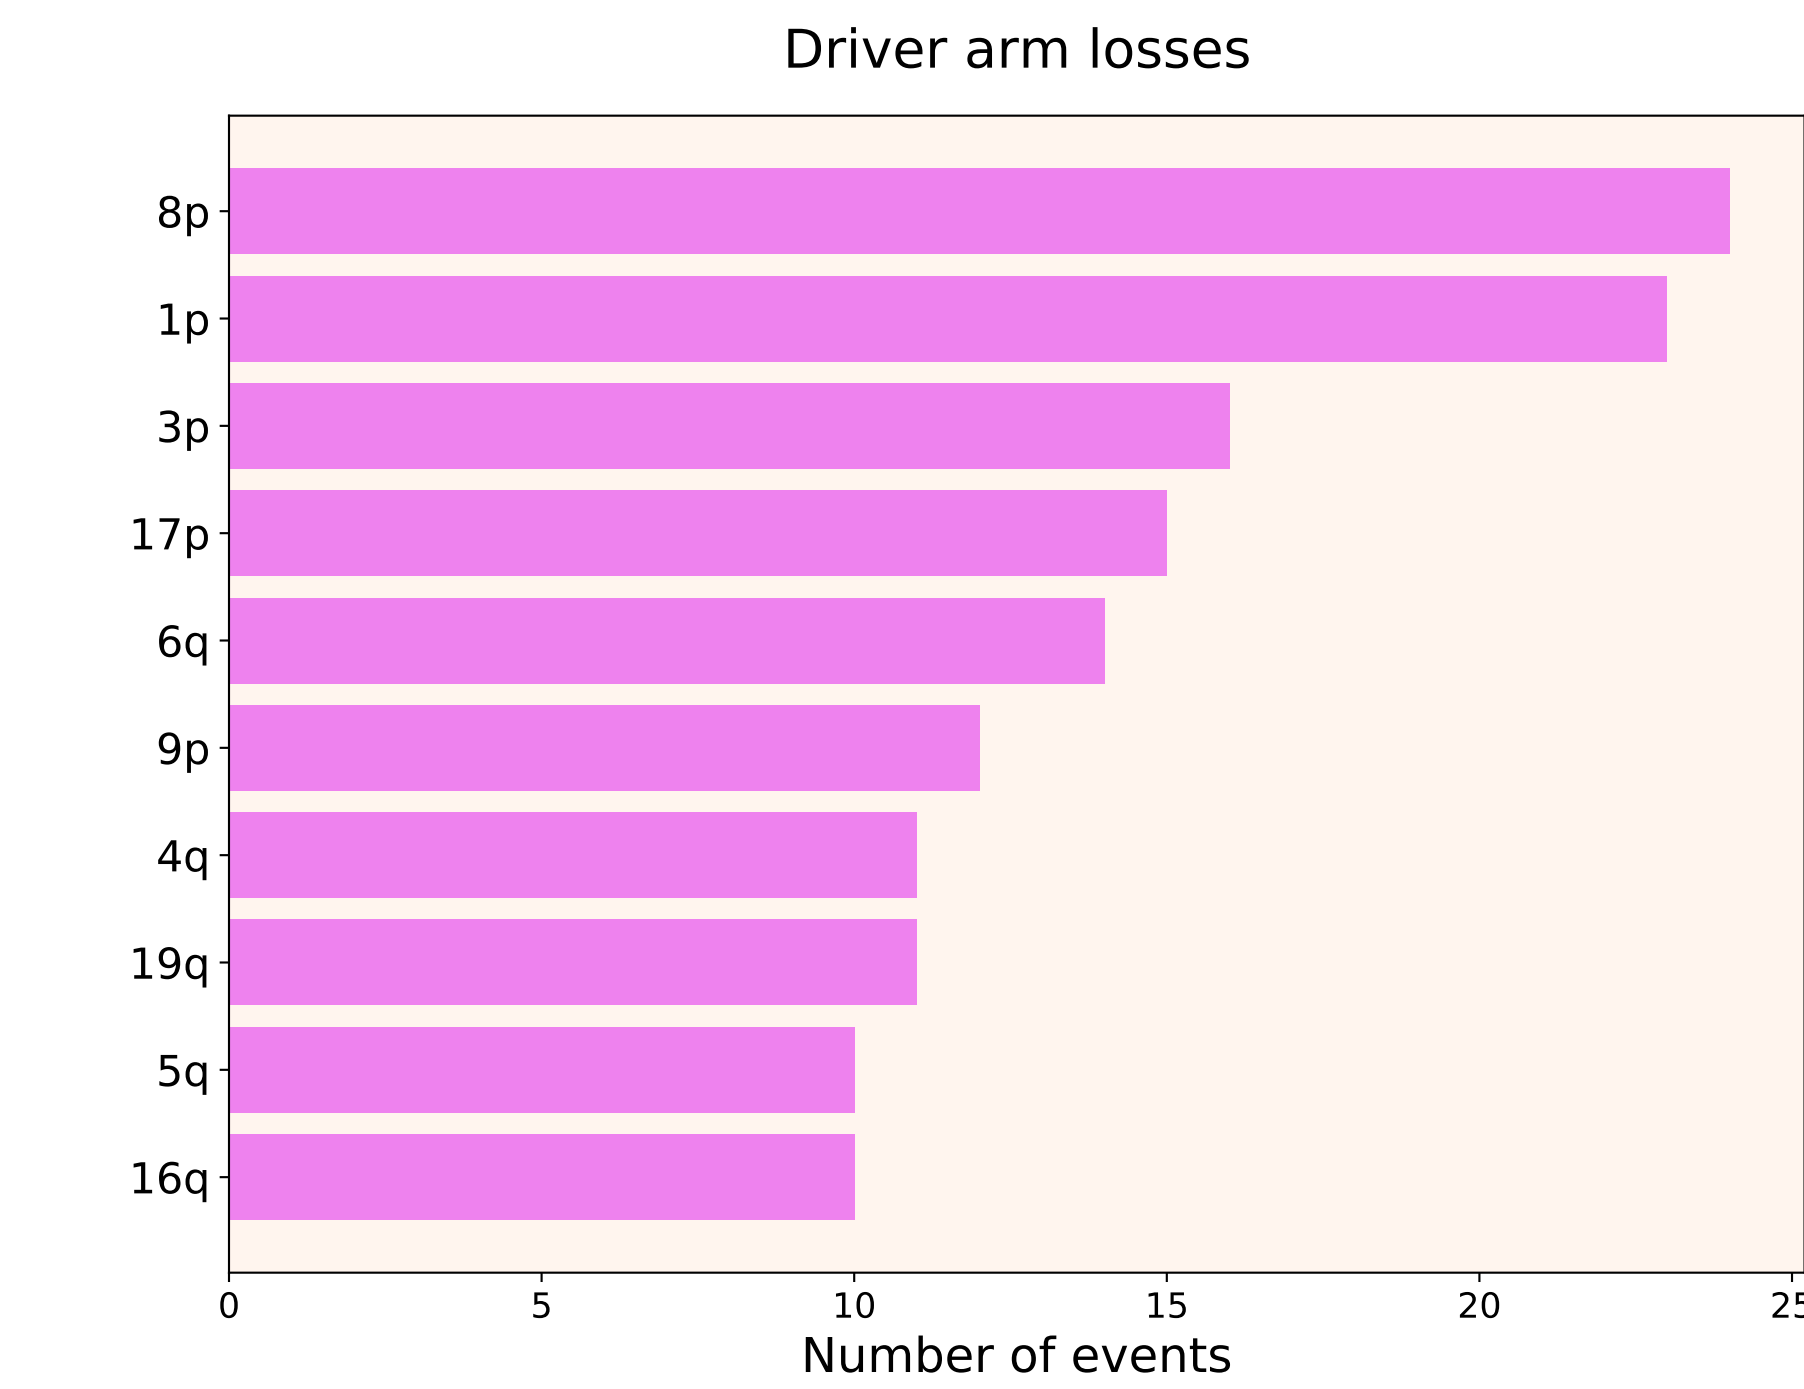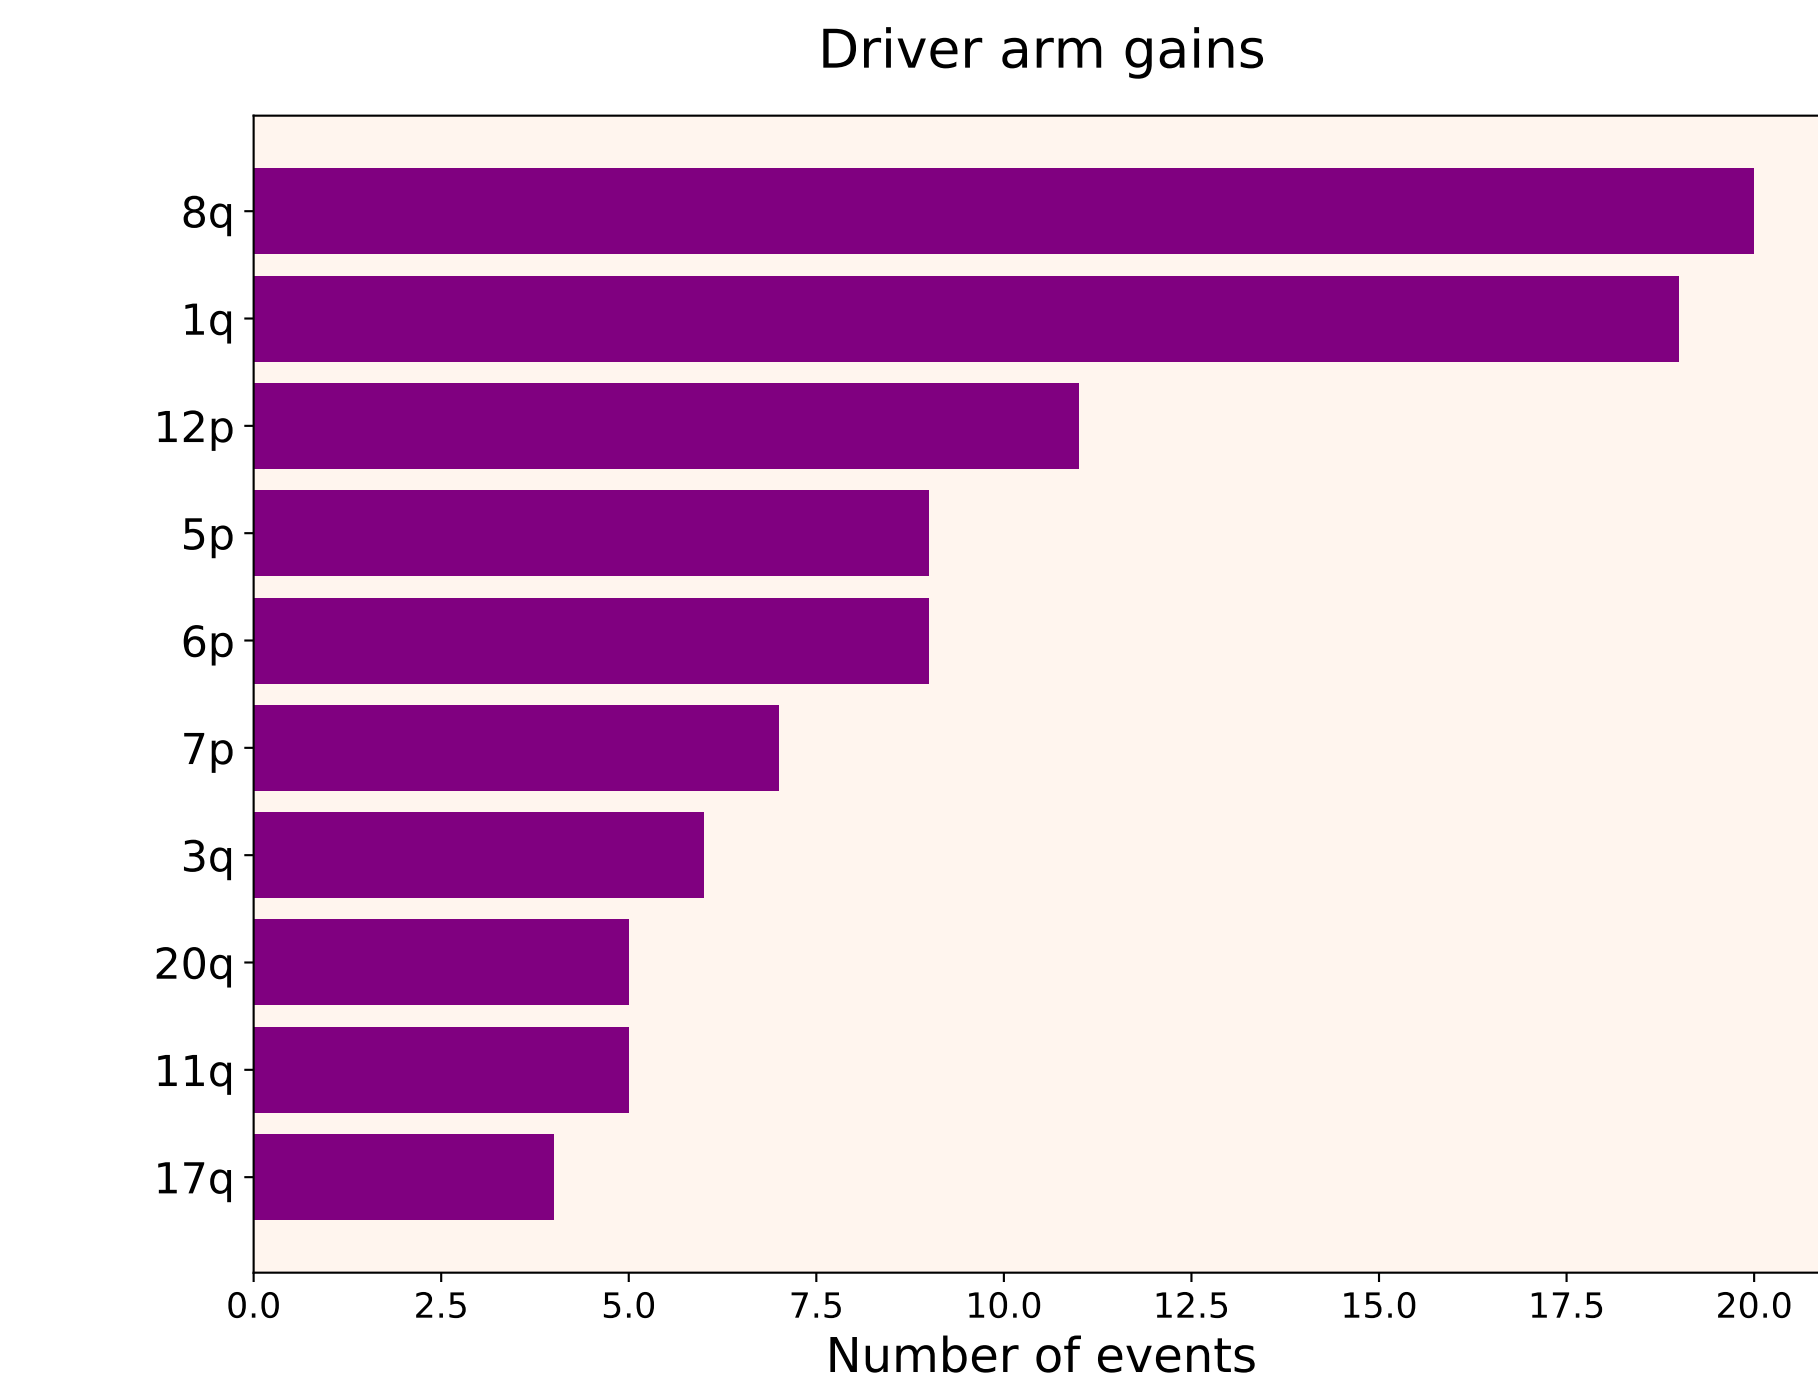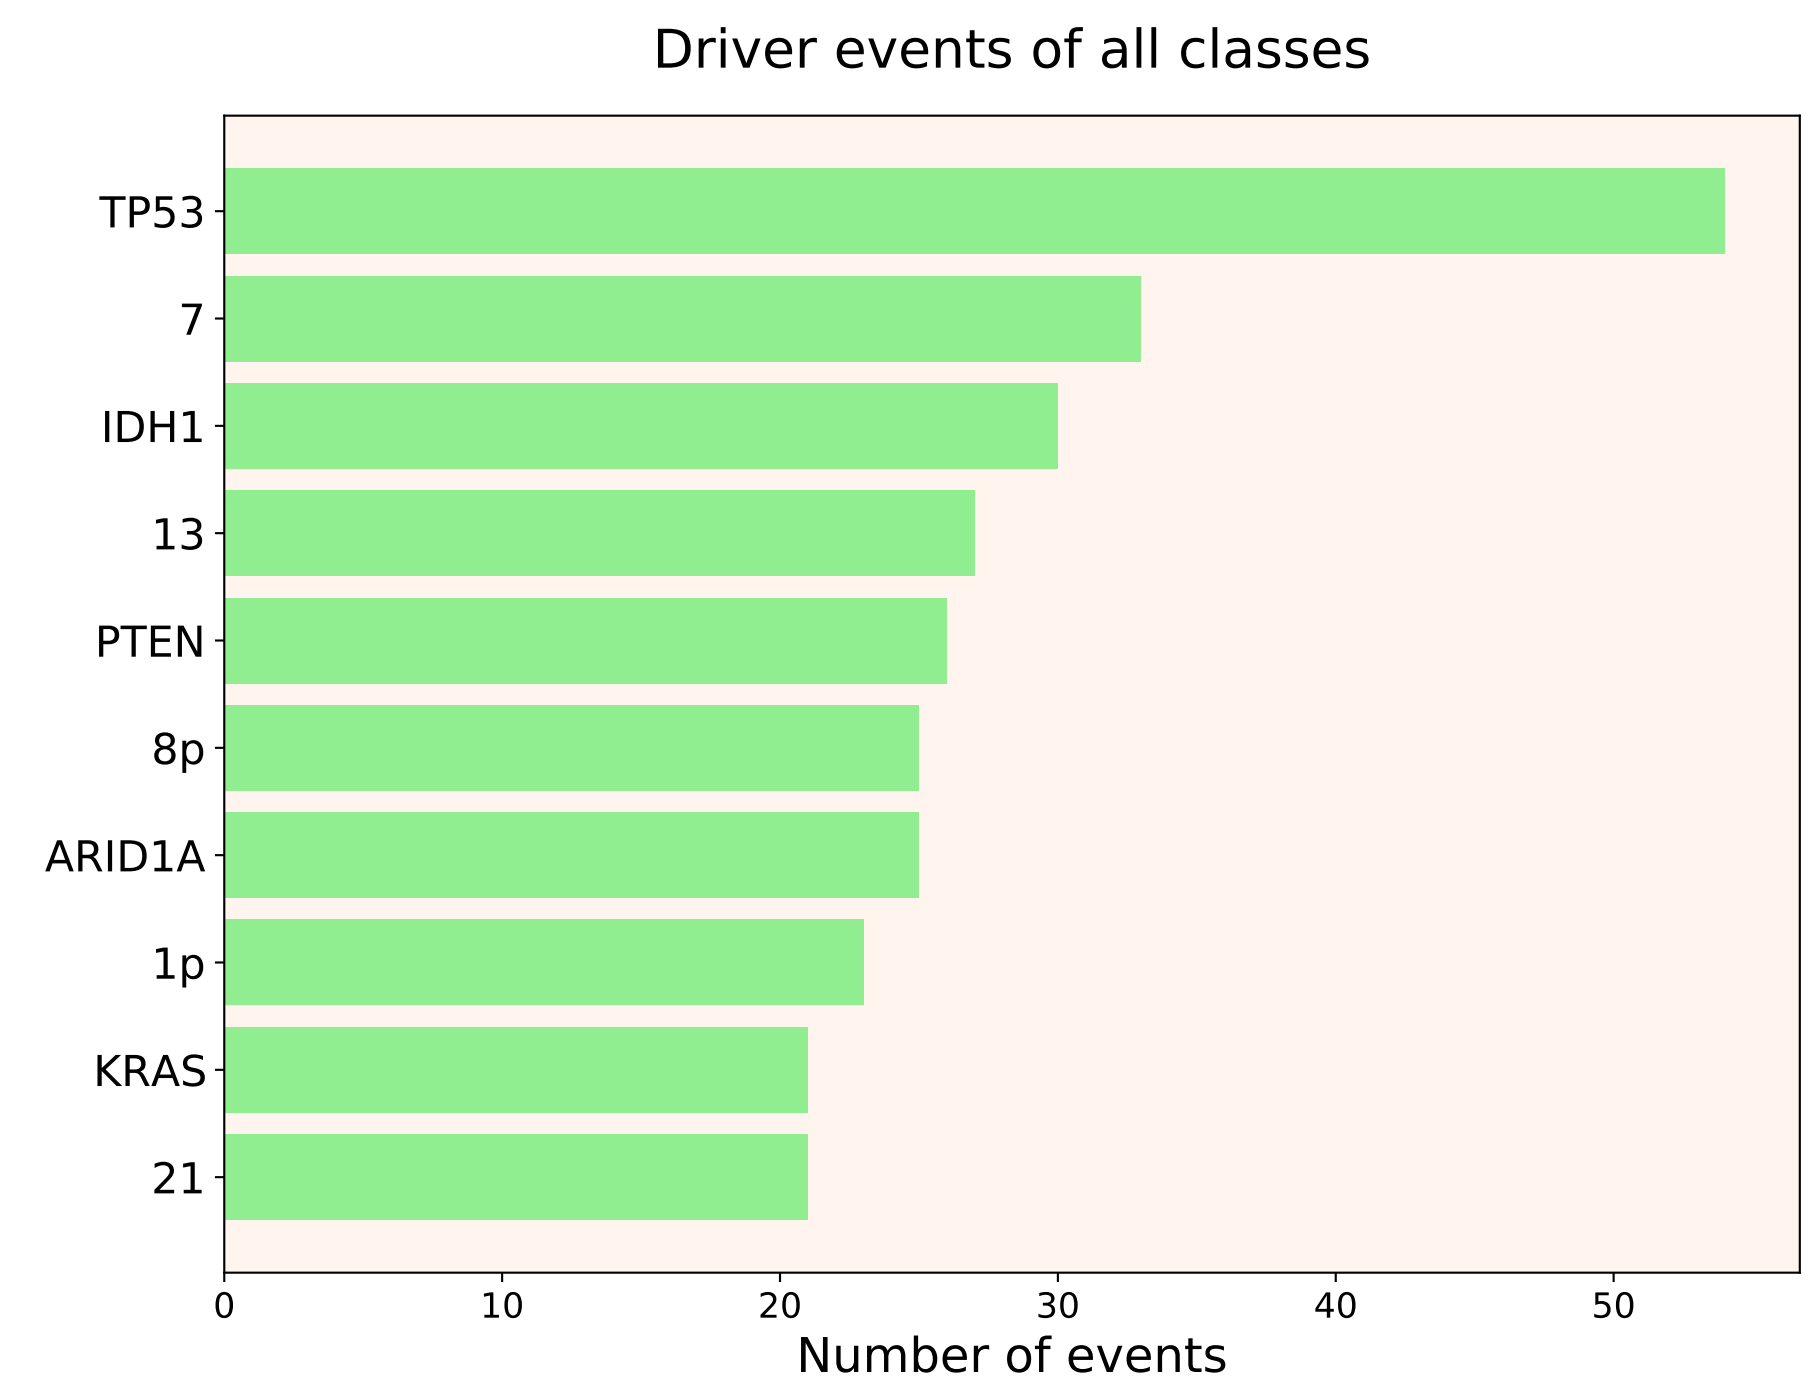

Supplement: Supplemental_Data_S1.zip [file Supplemental_Data_S1.zip]

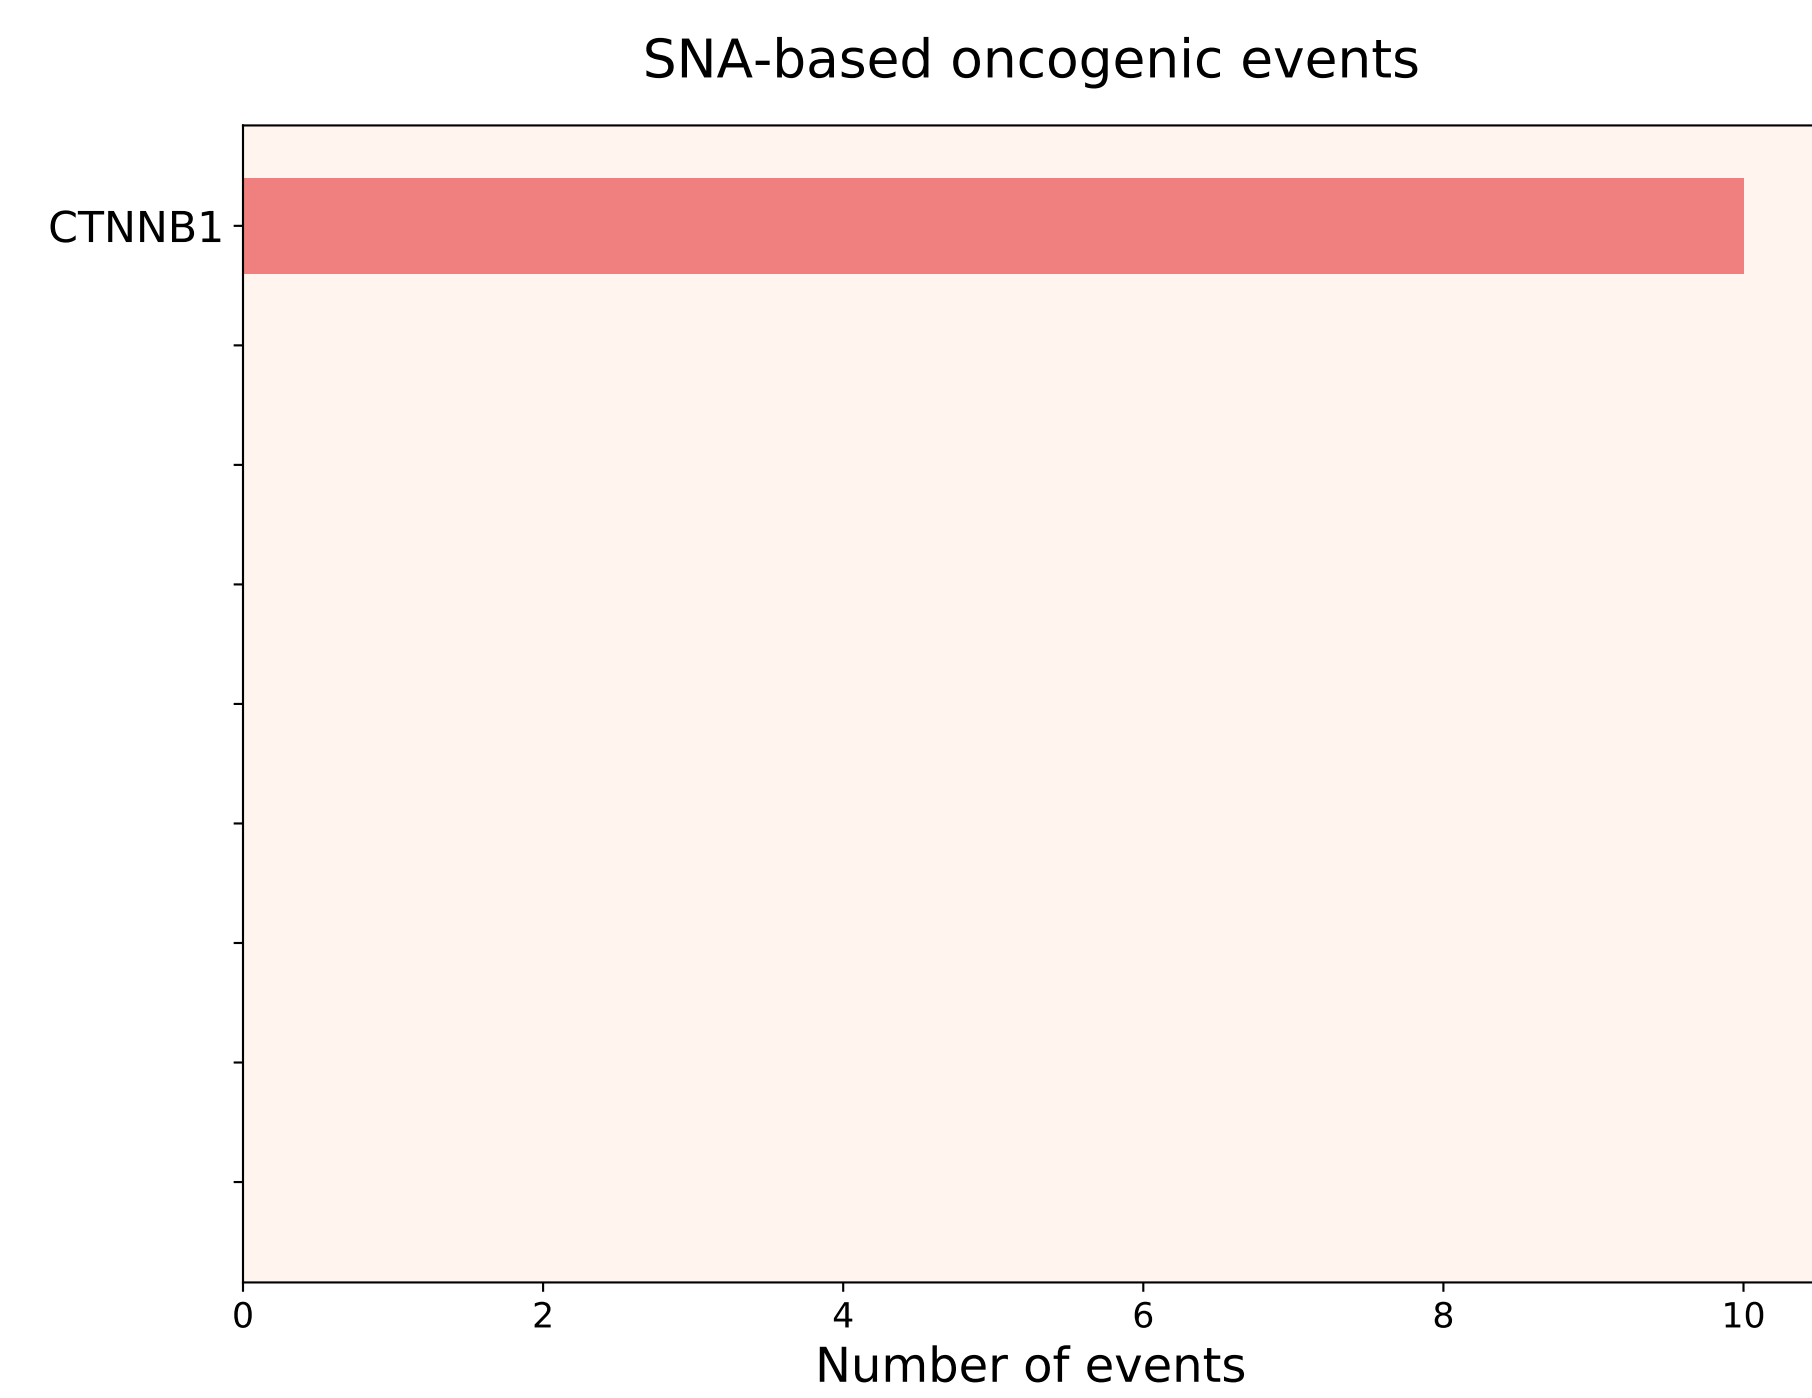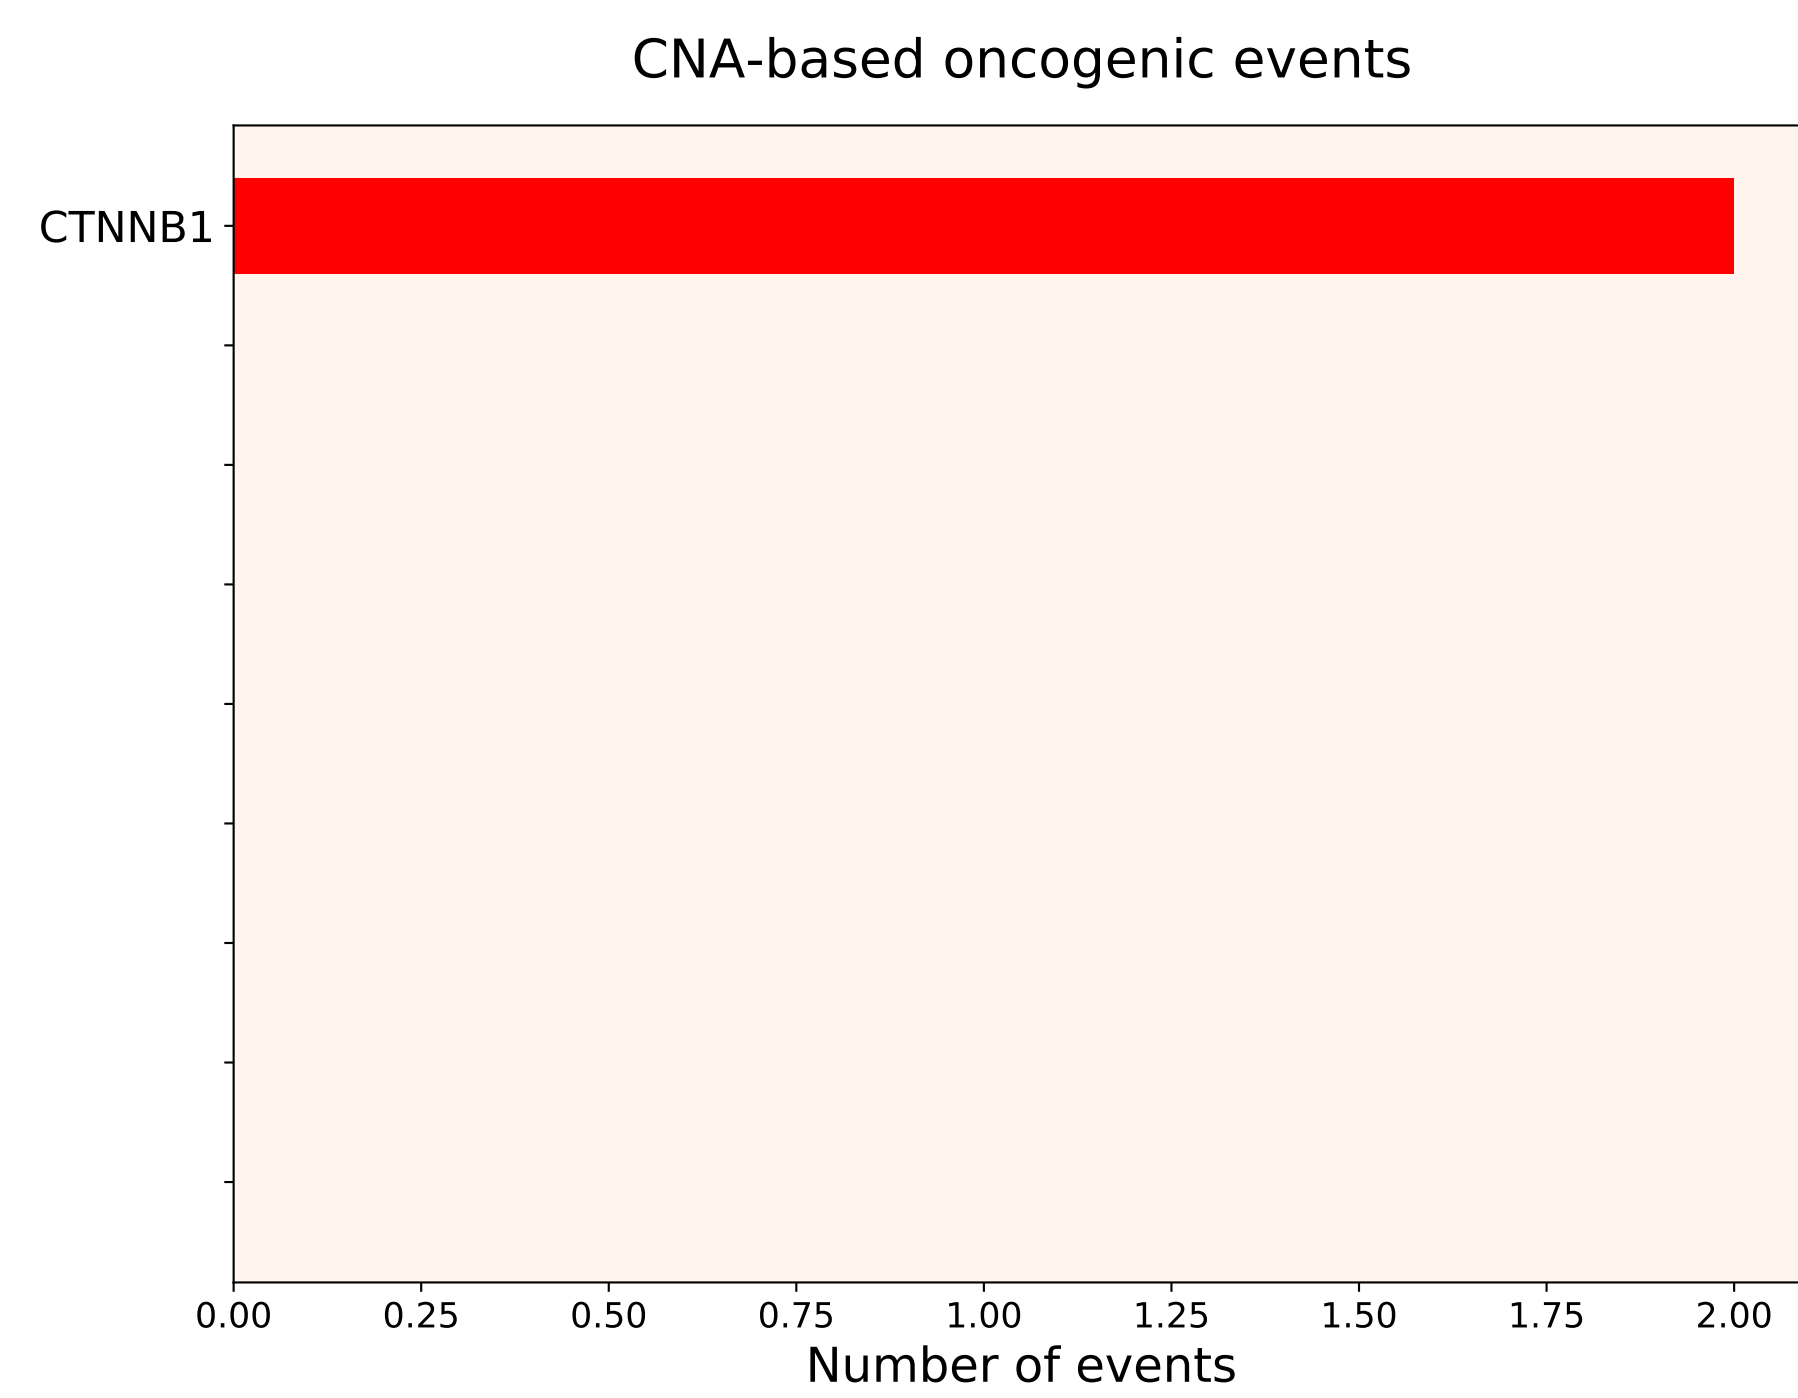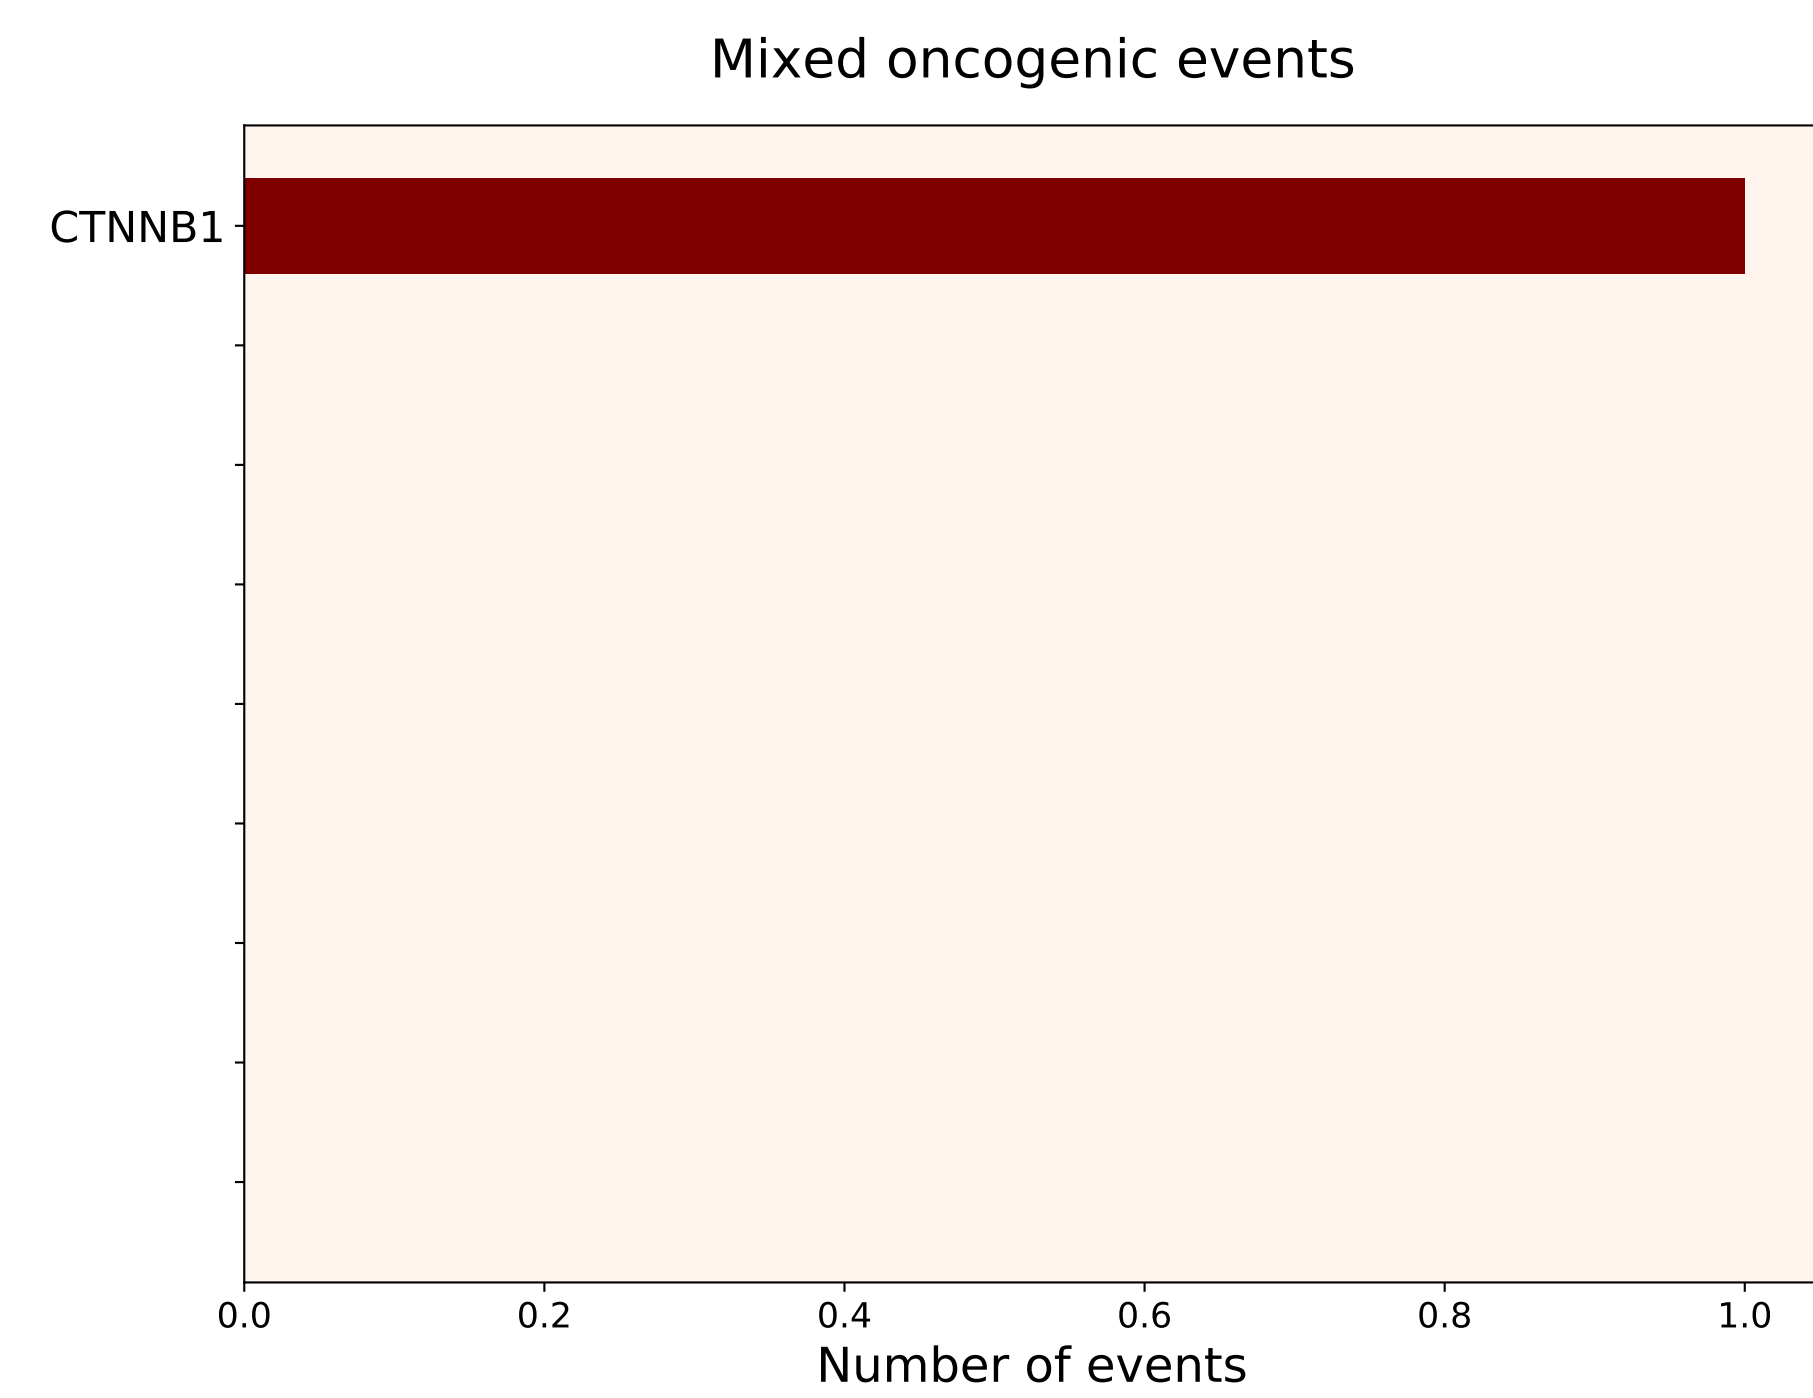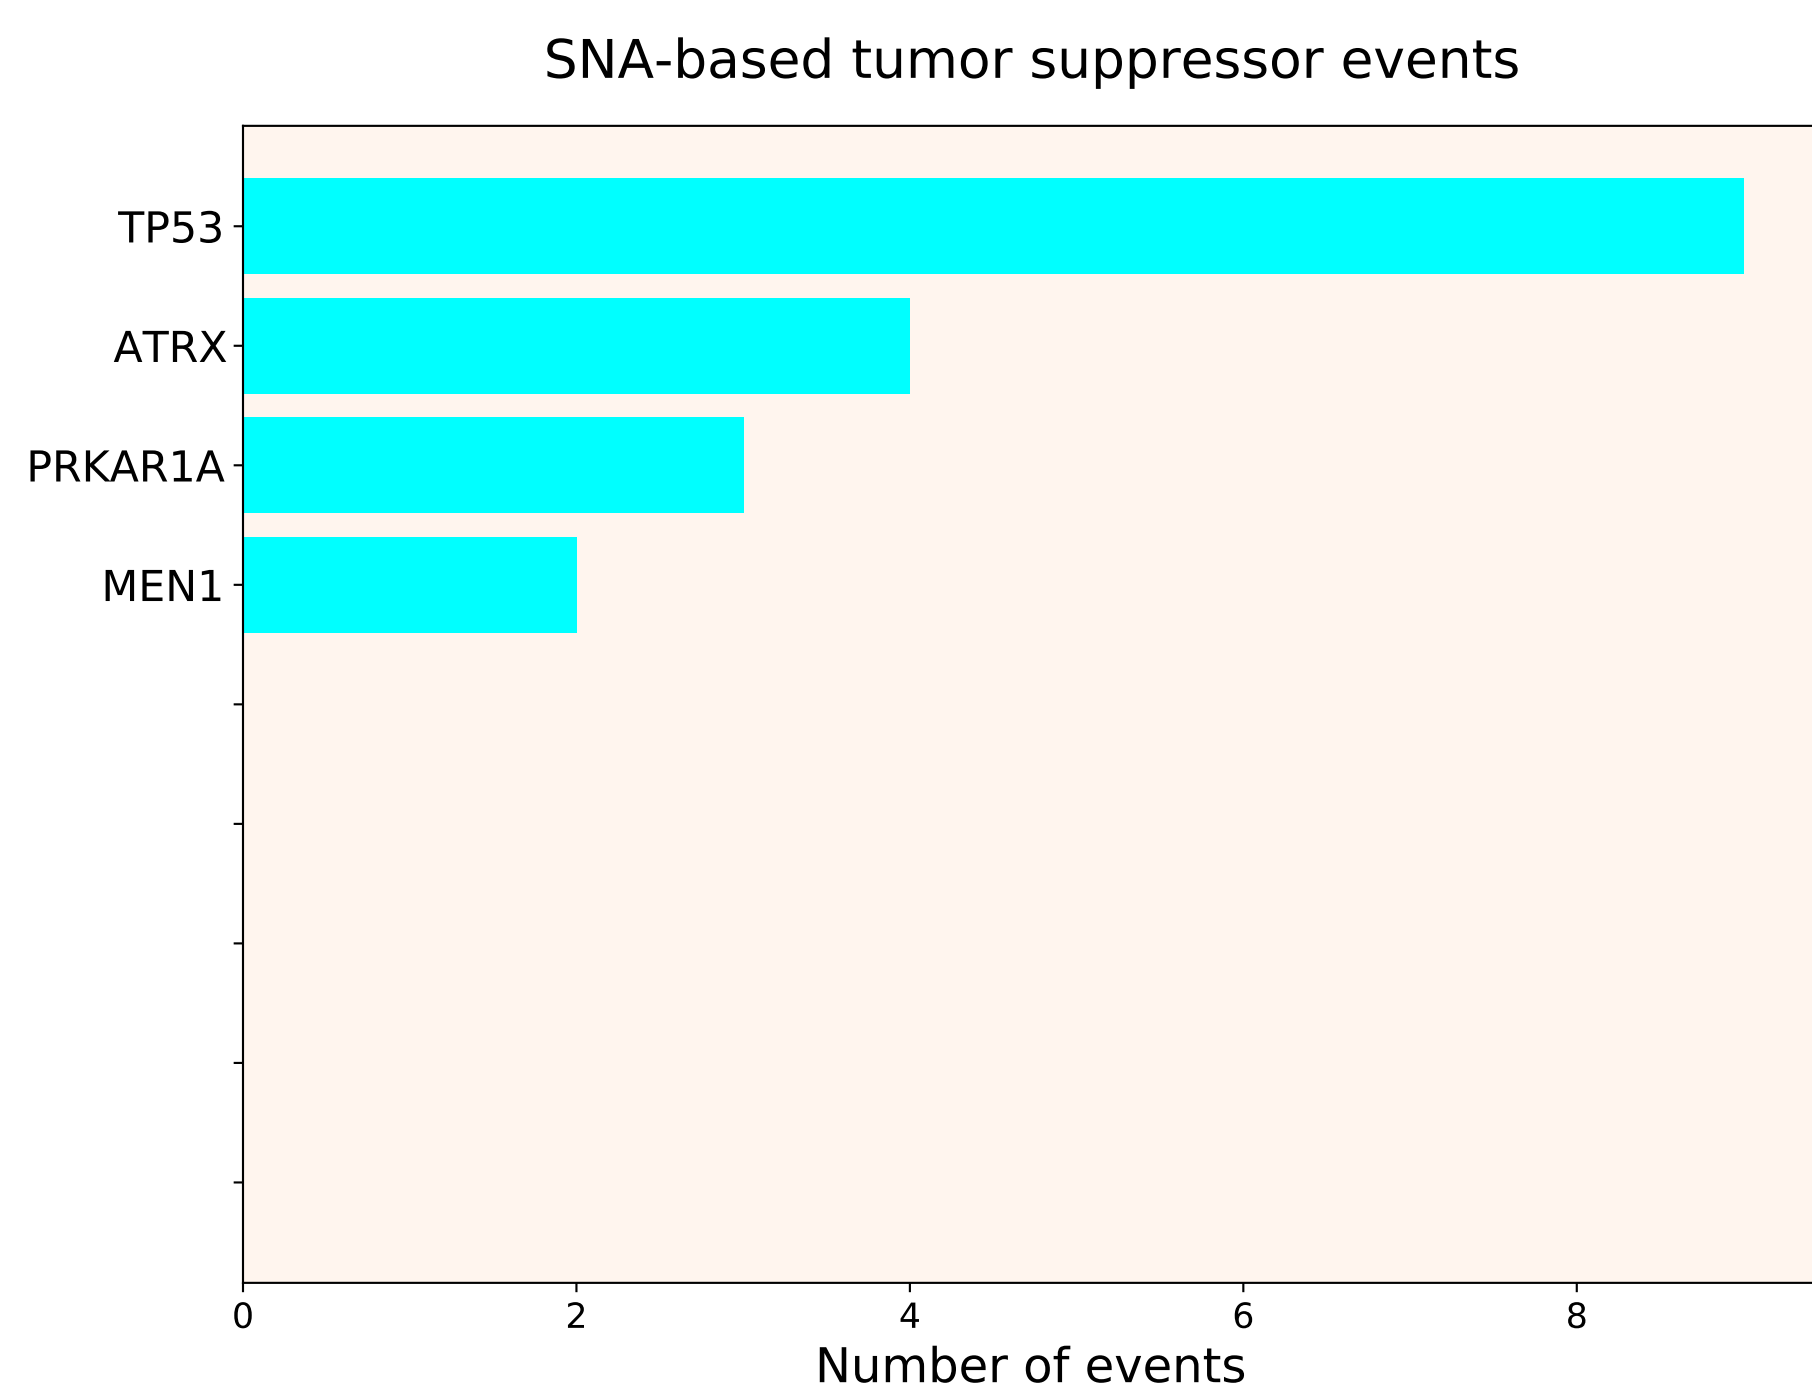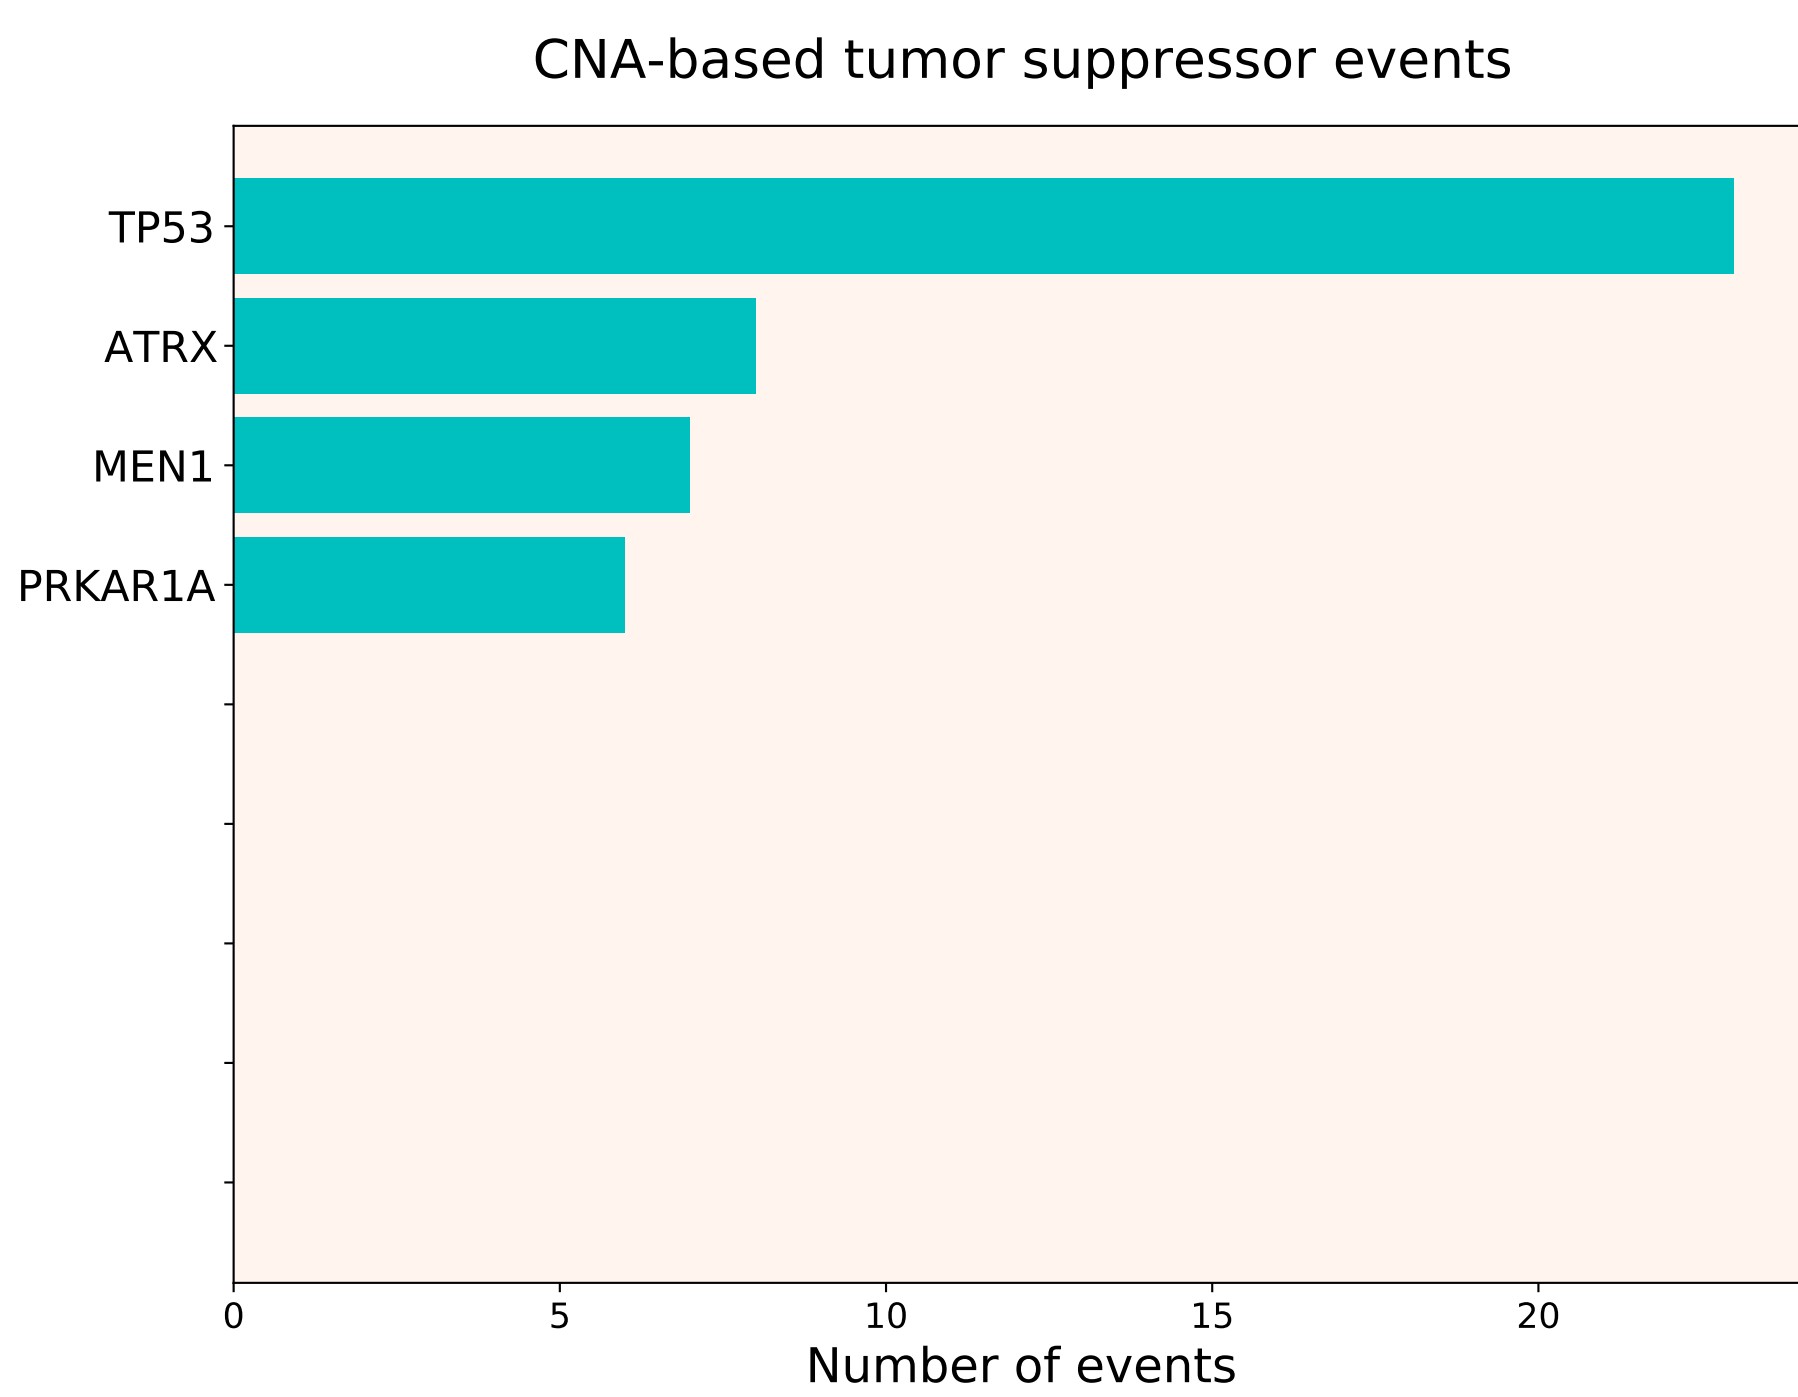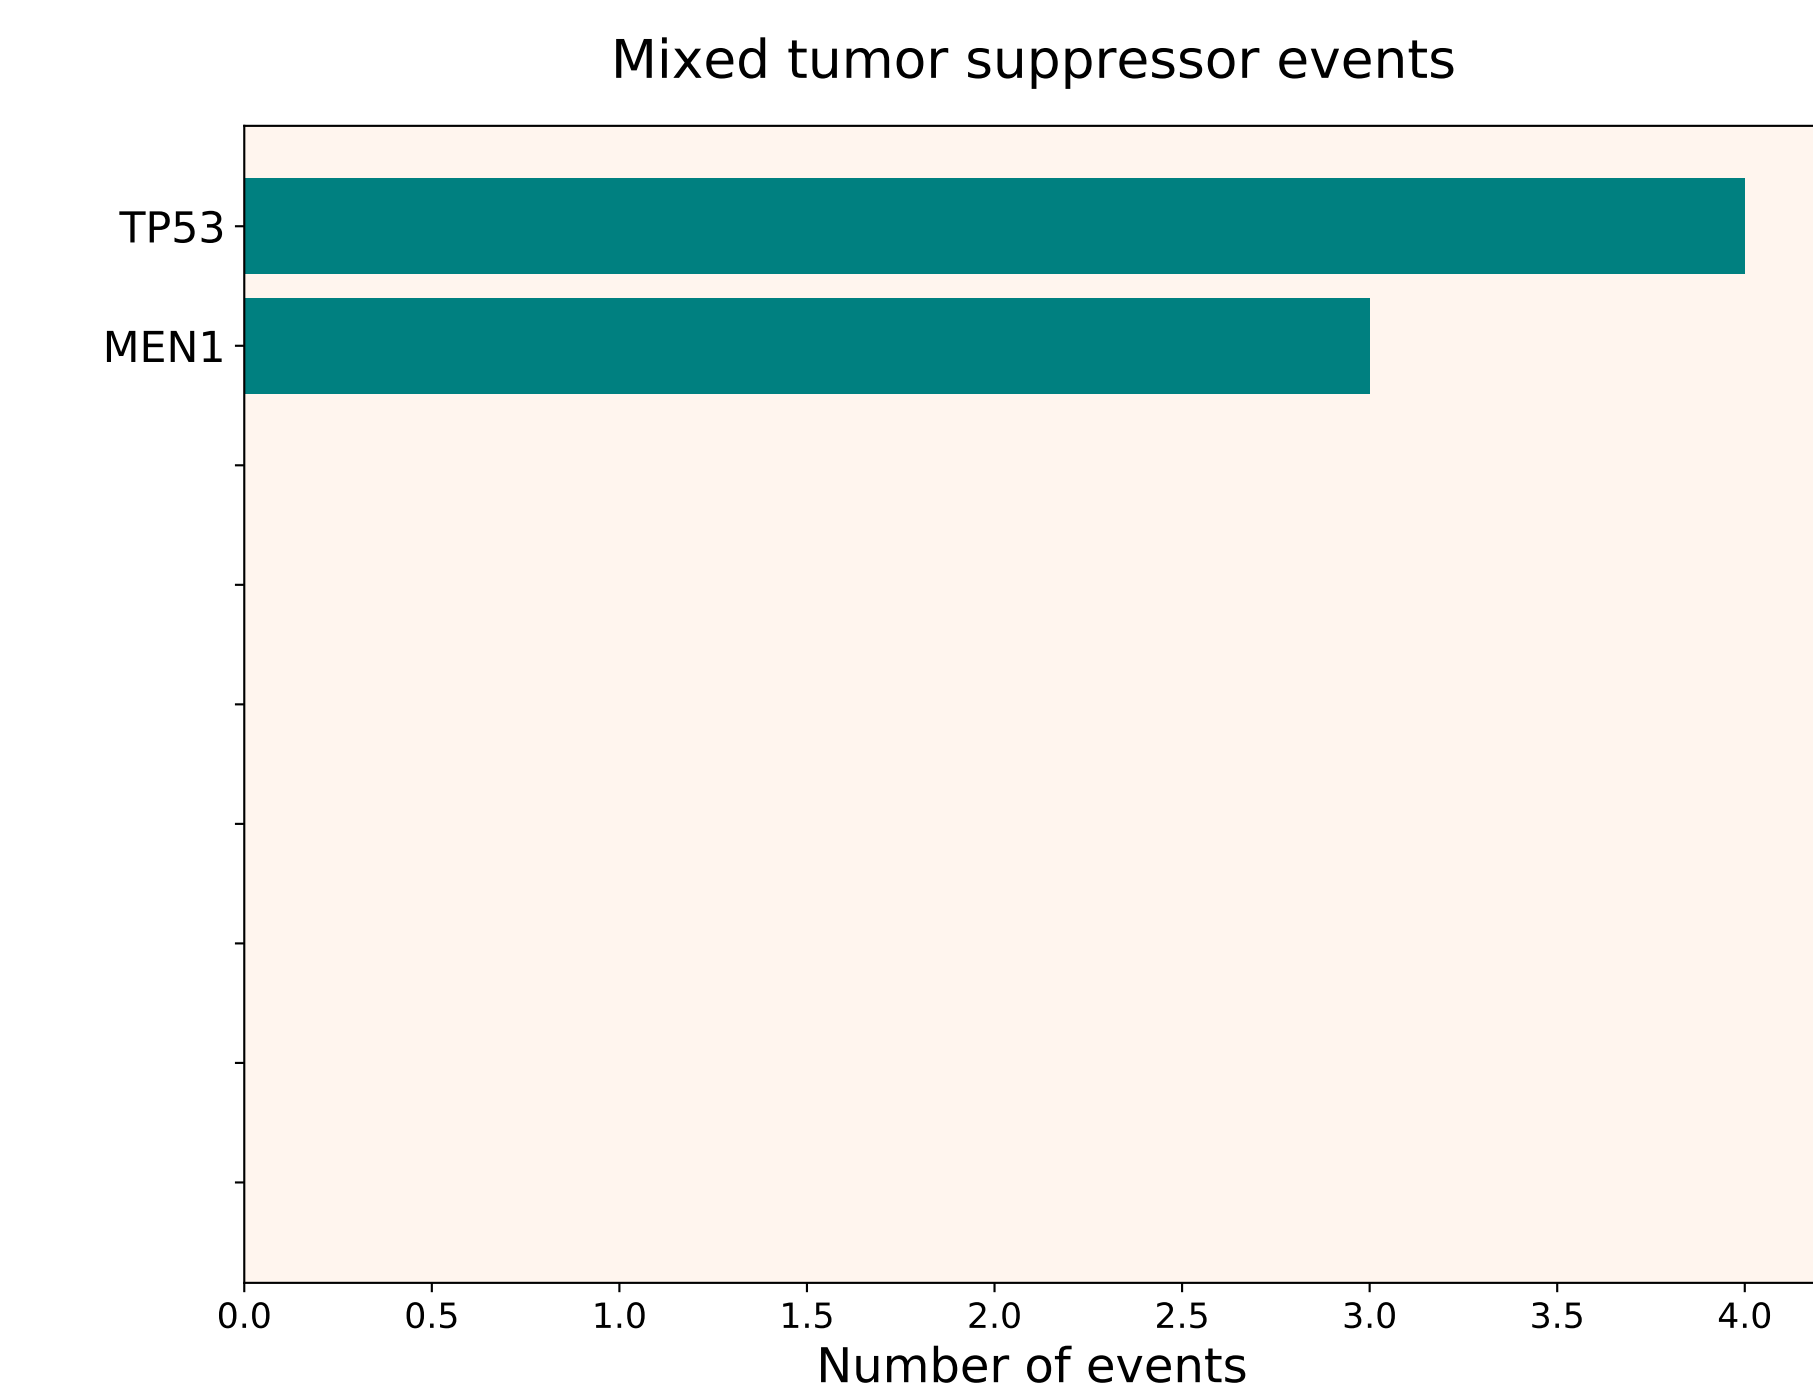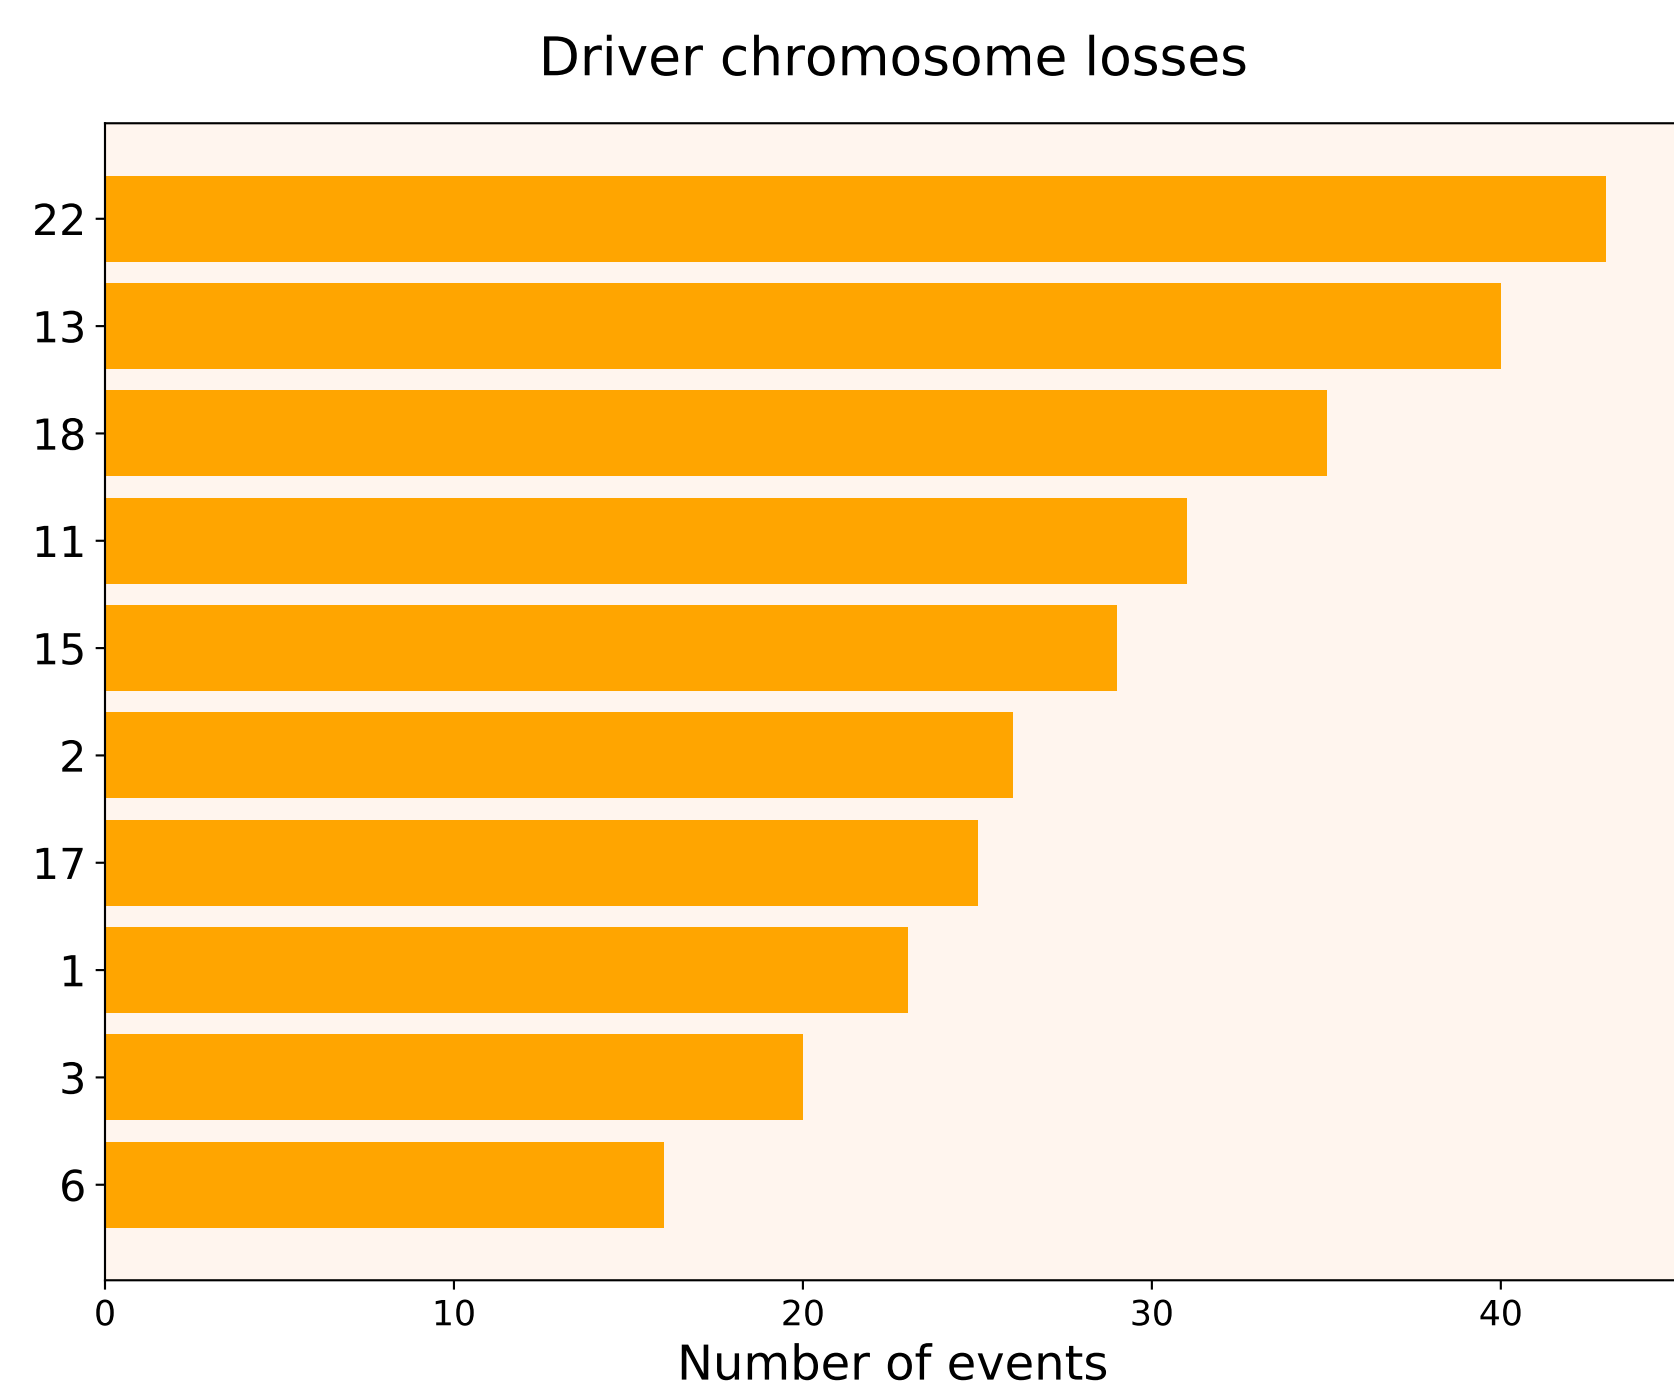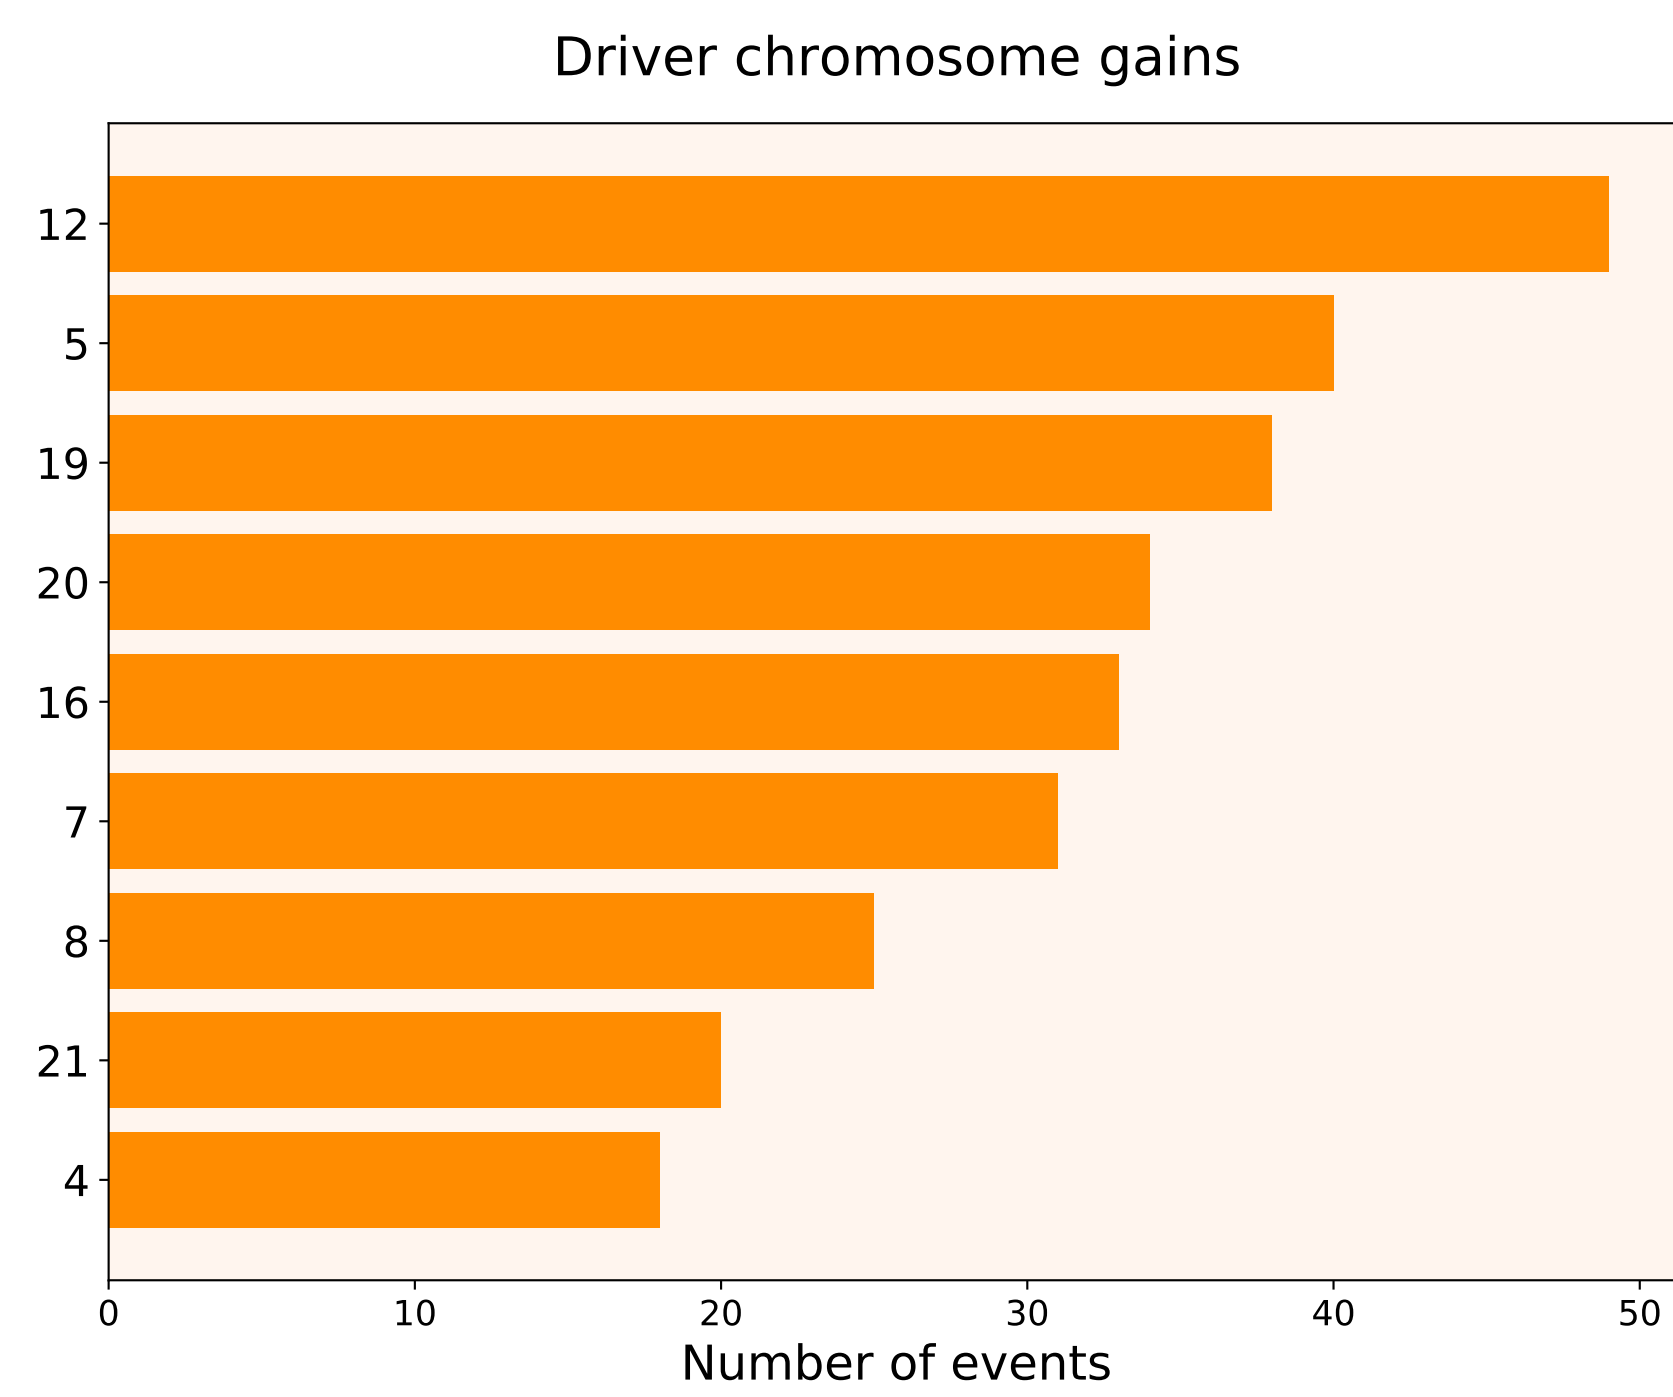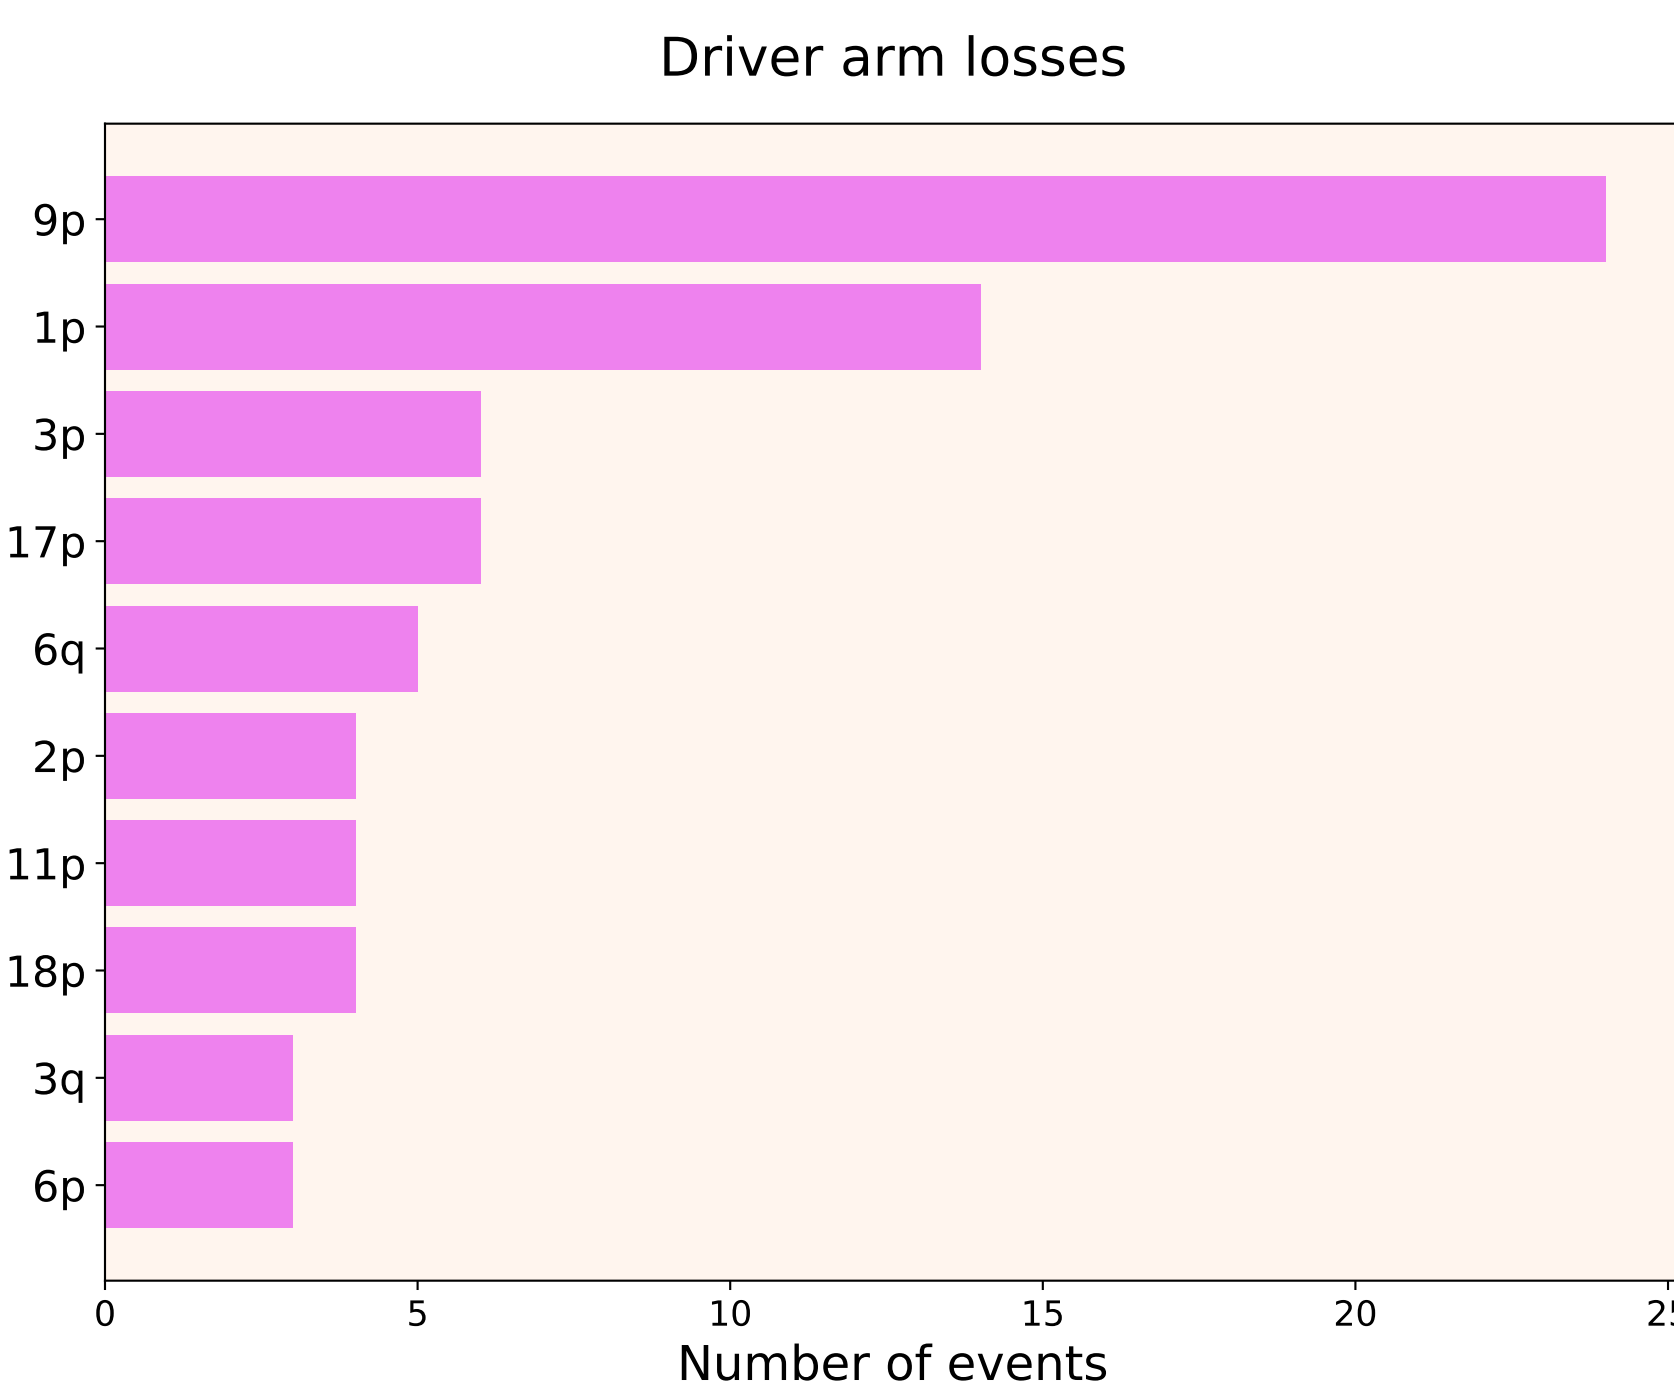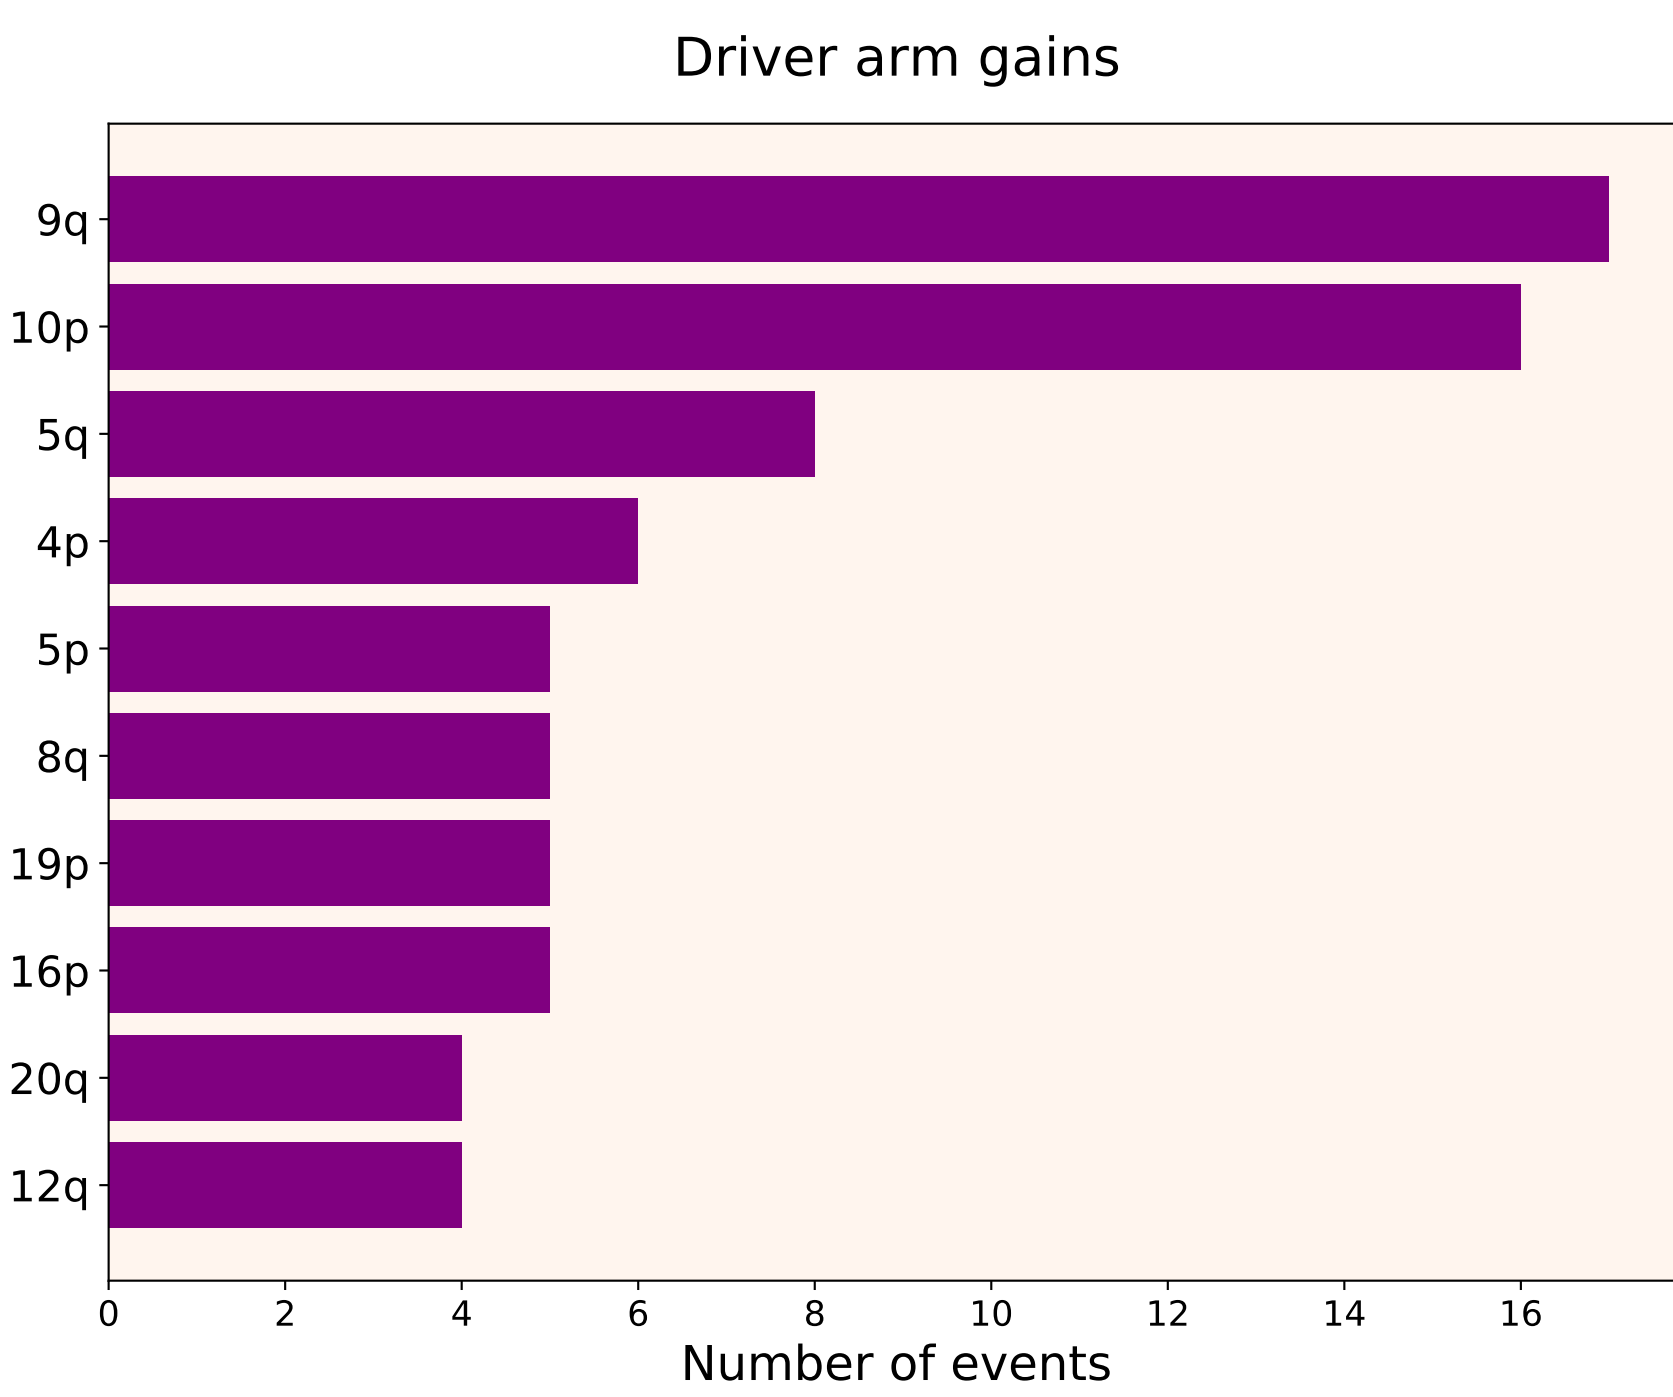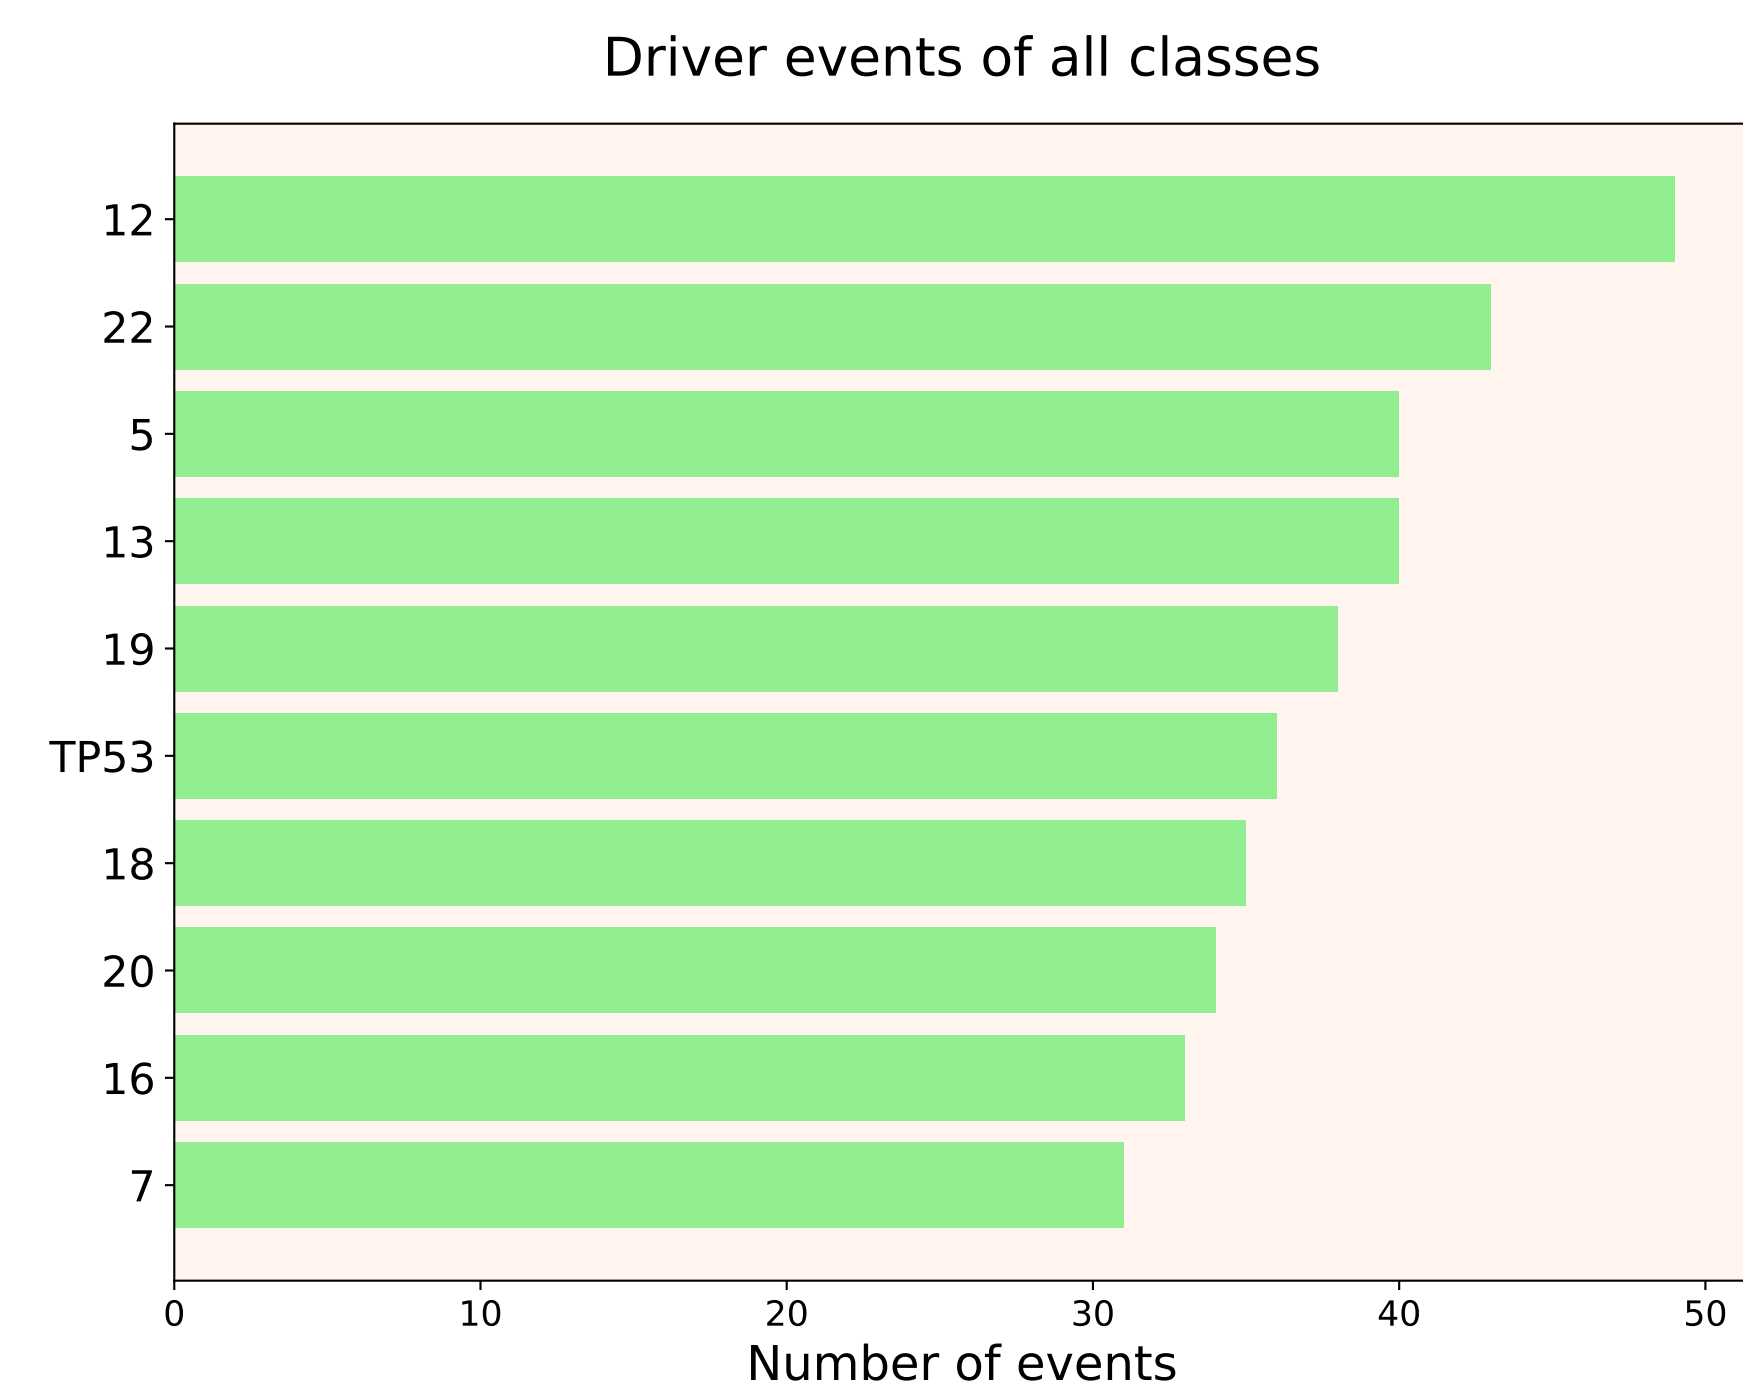

Supplement: Supplemental_Data_S1.zip [file Supplemental_Data_S1.zip]

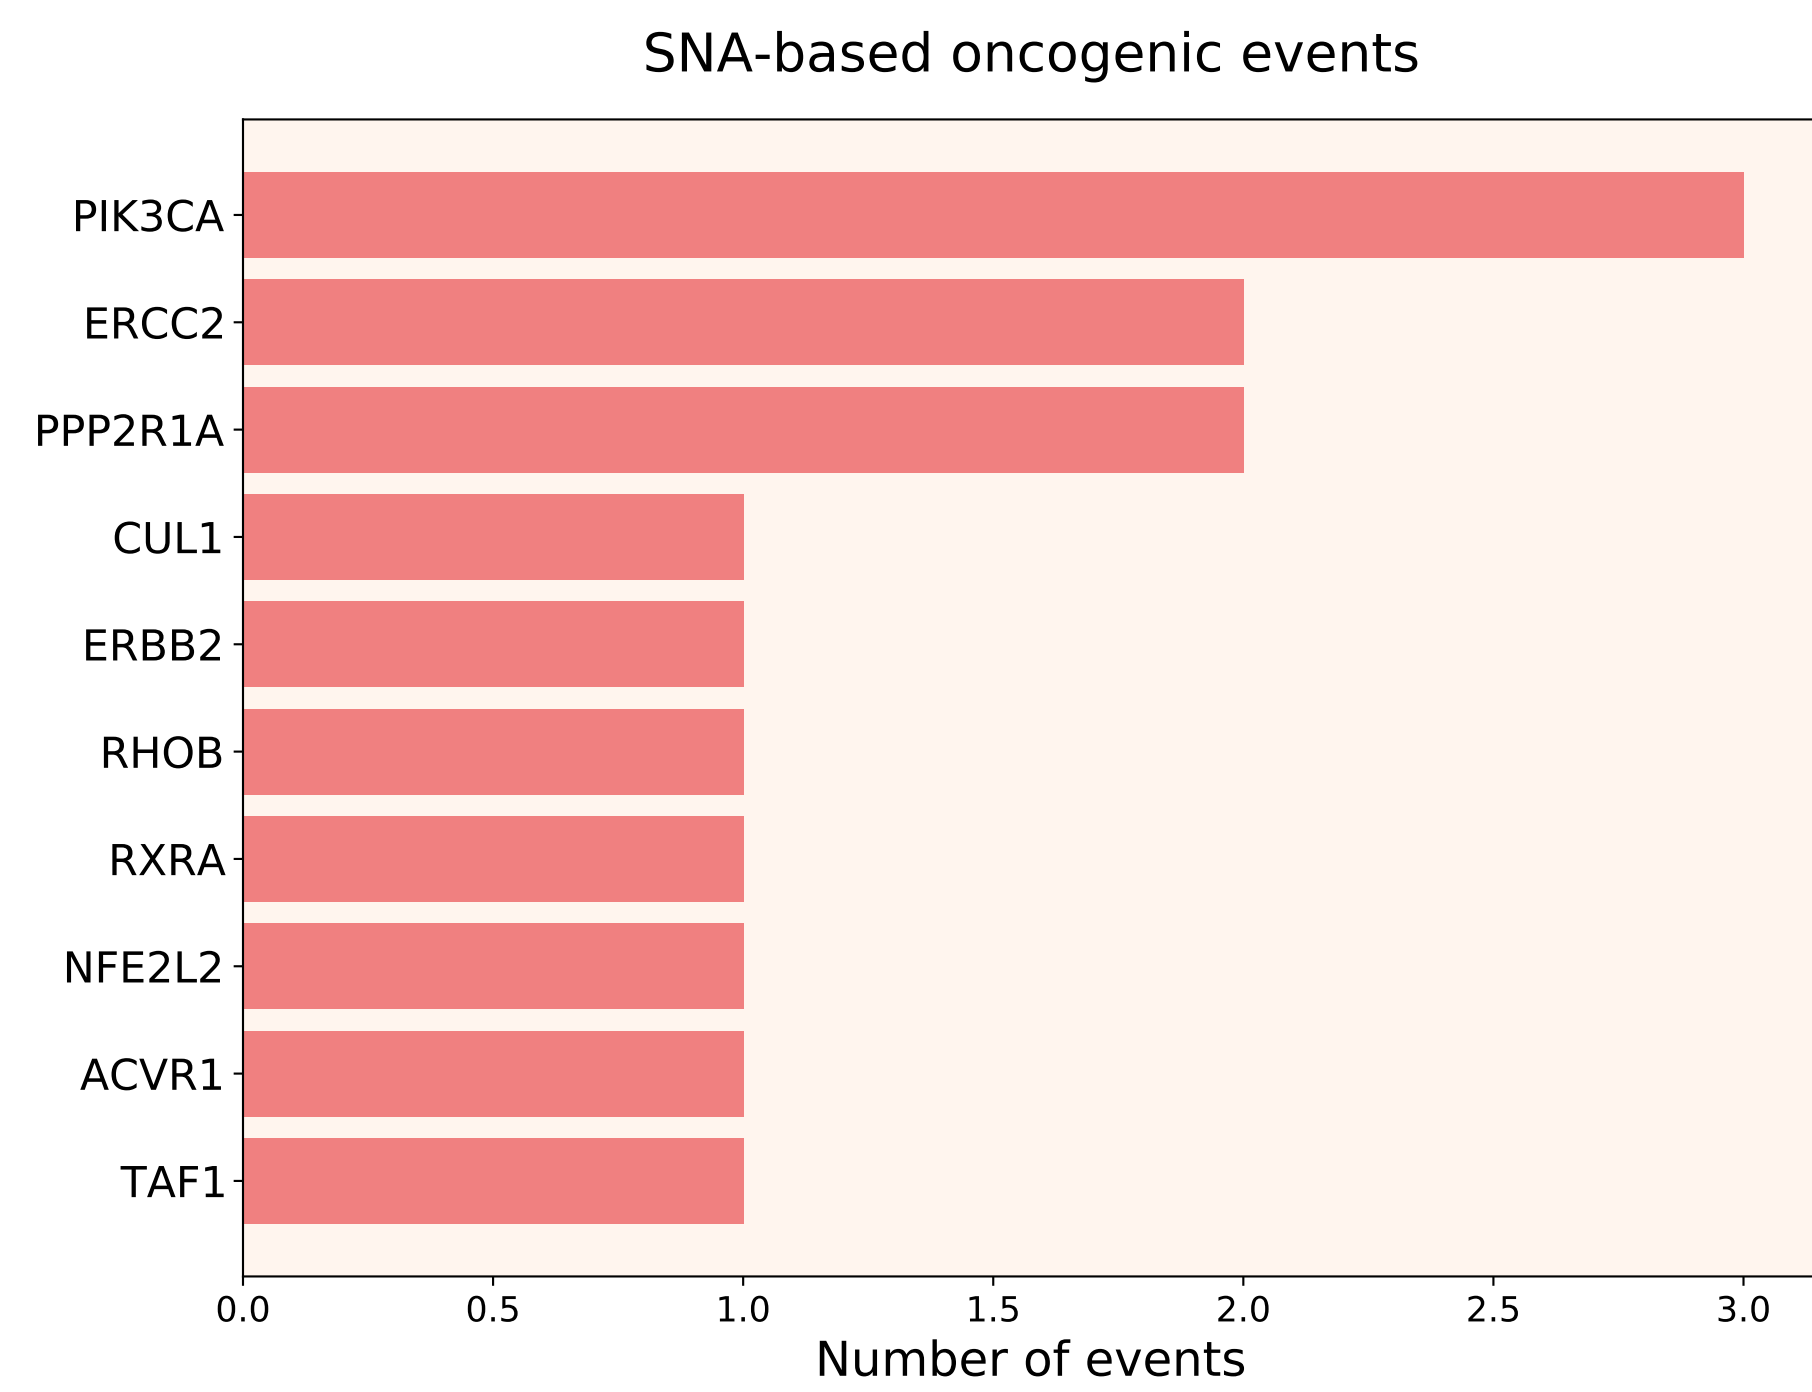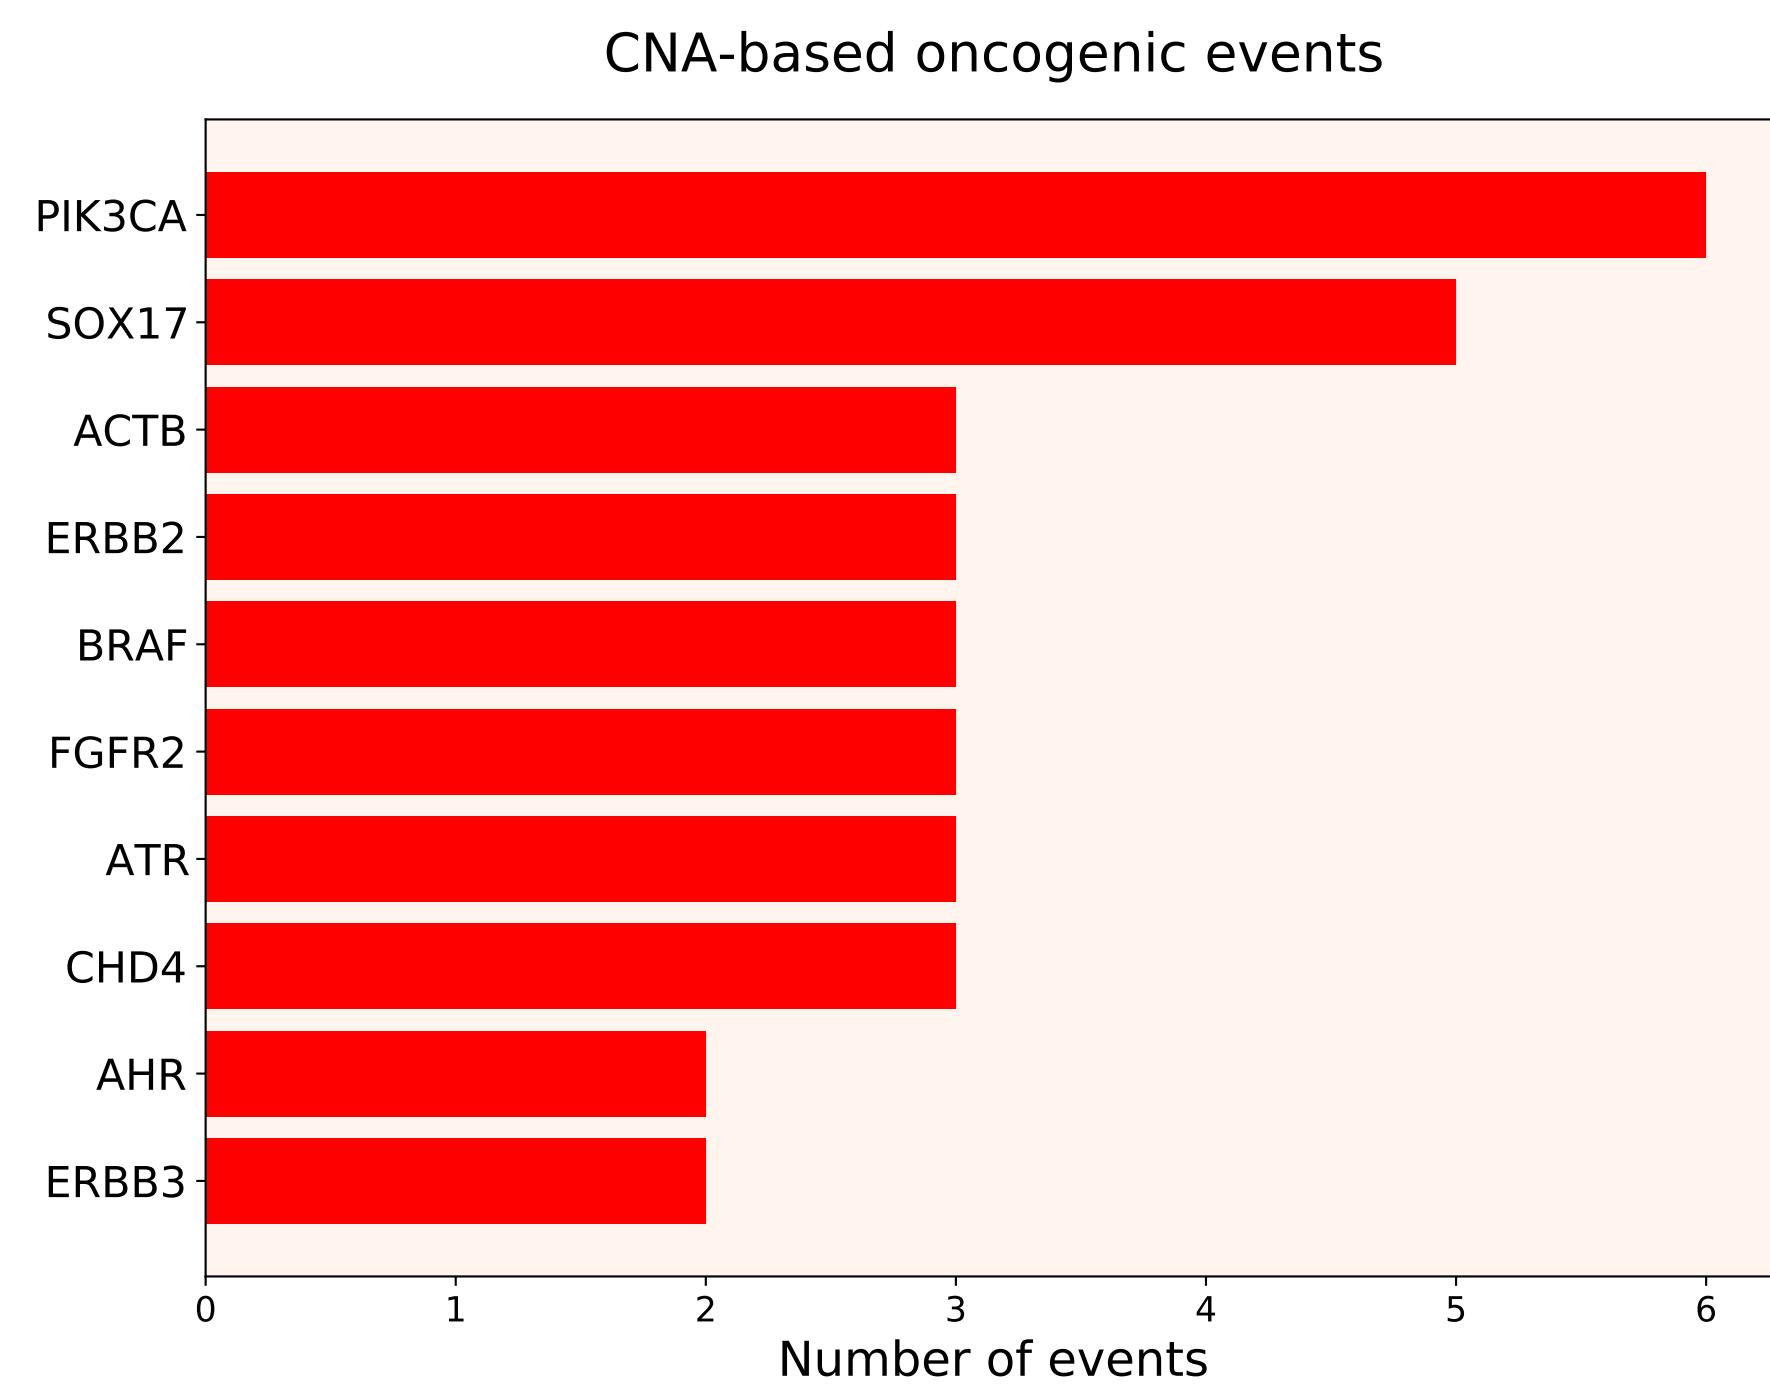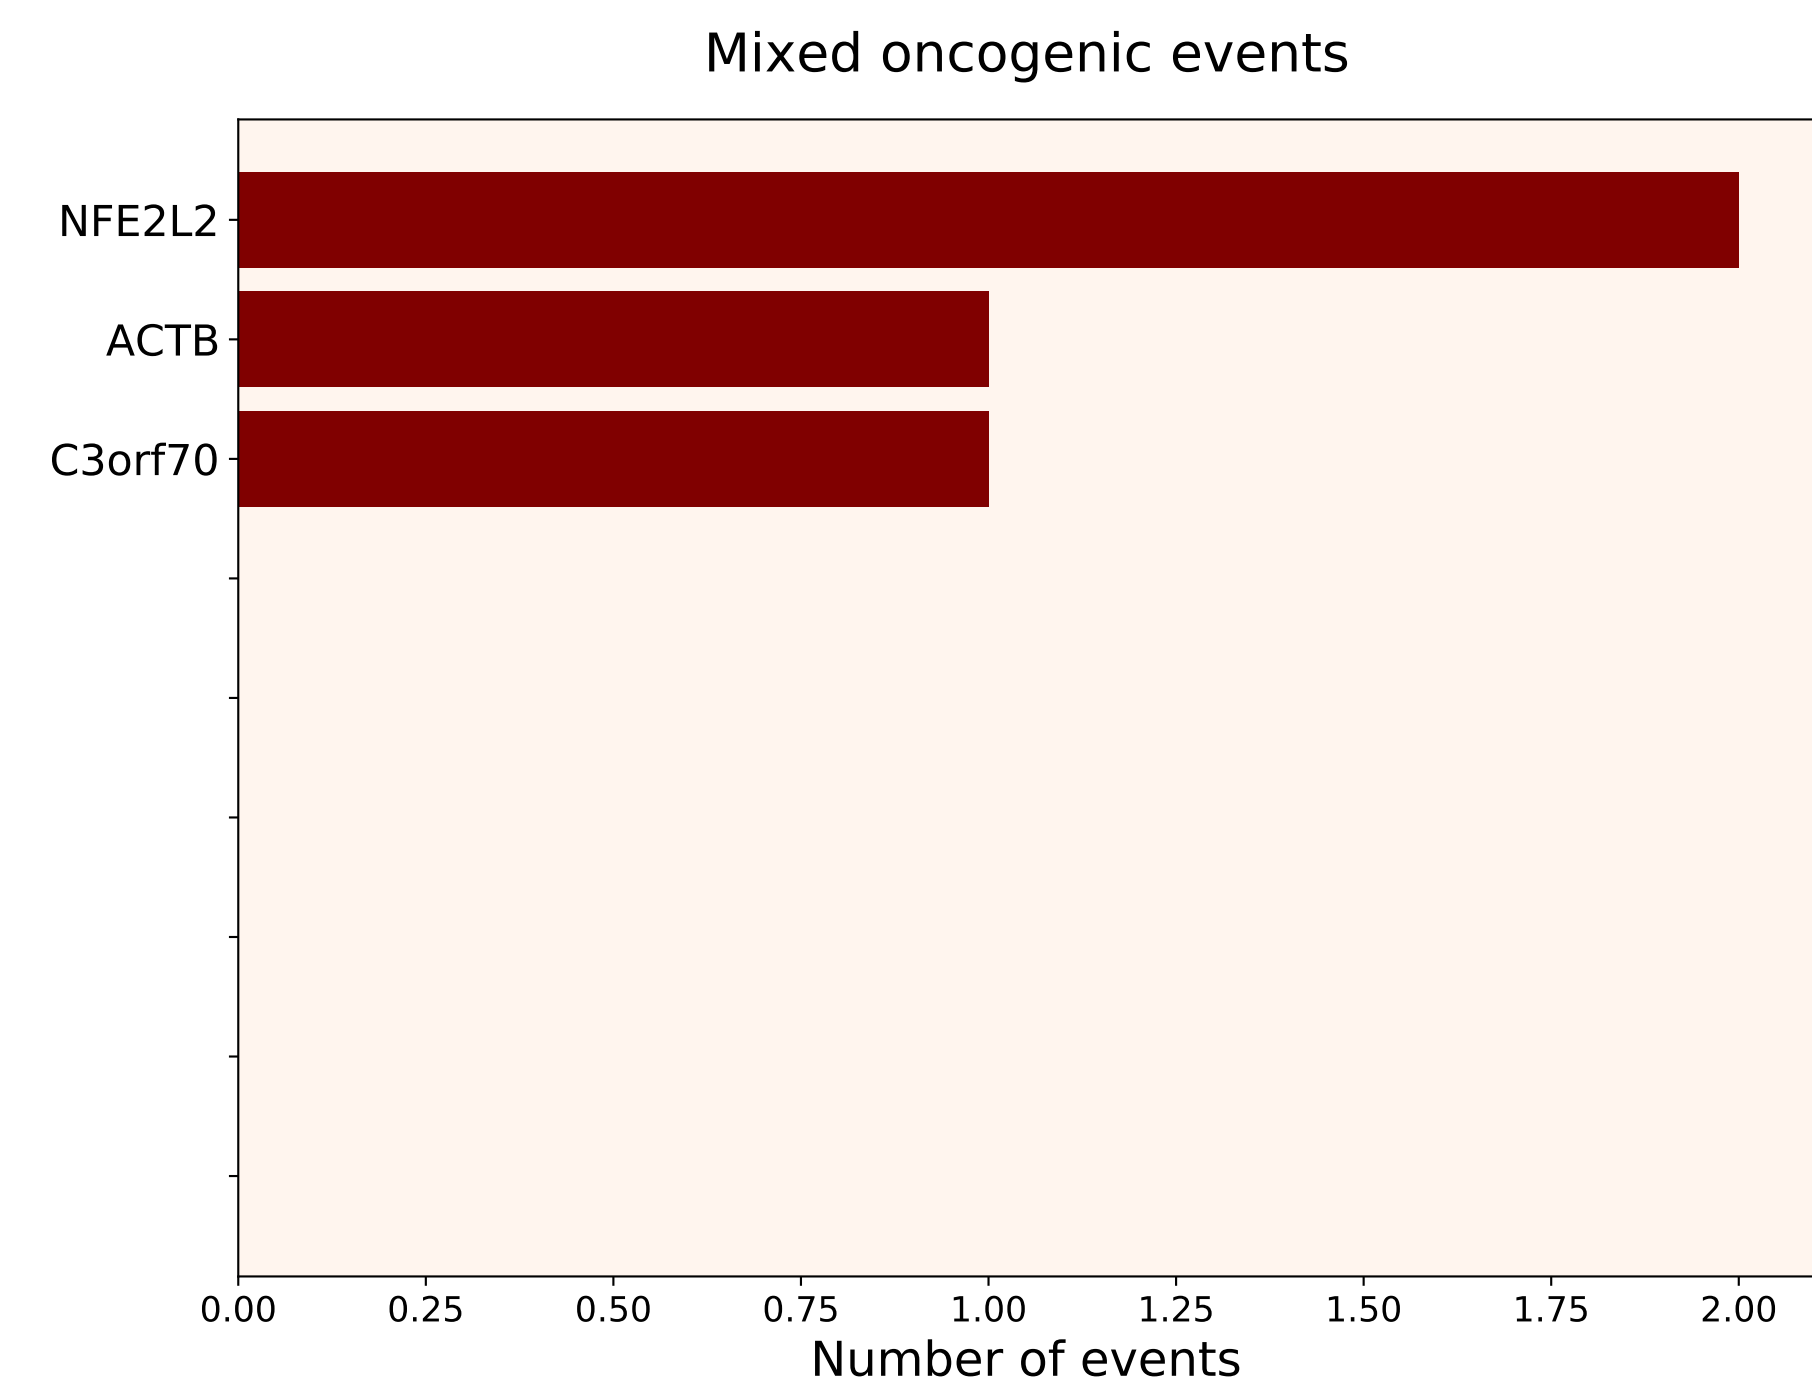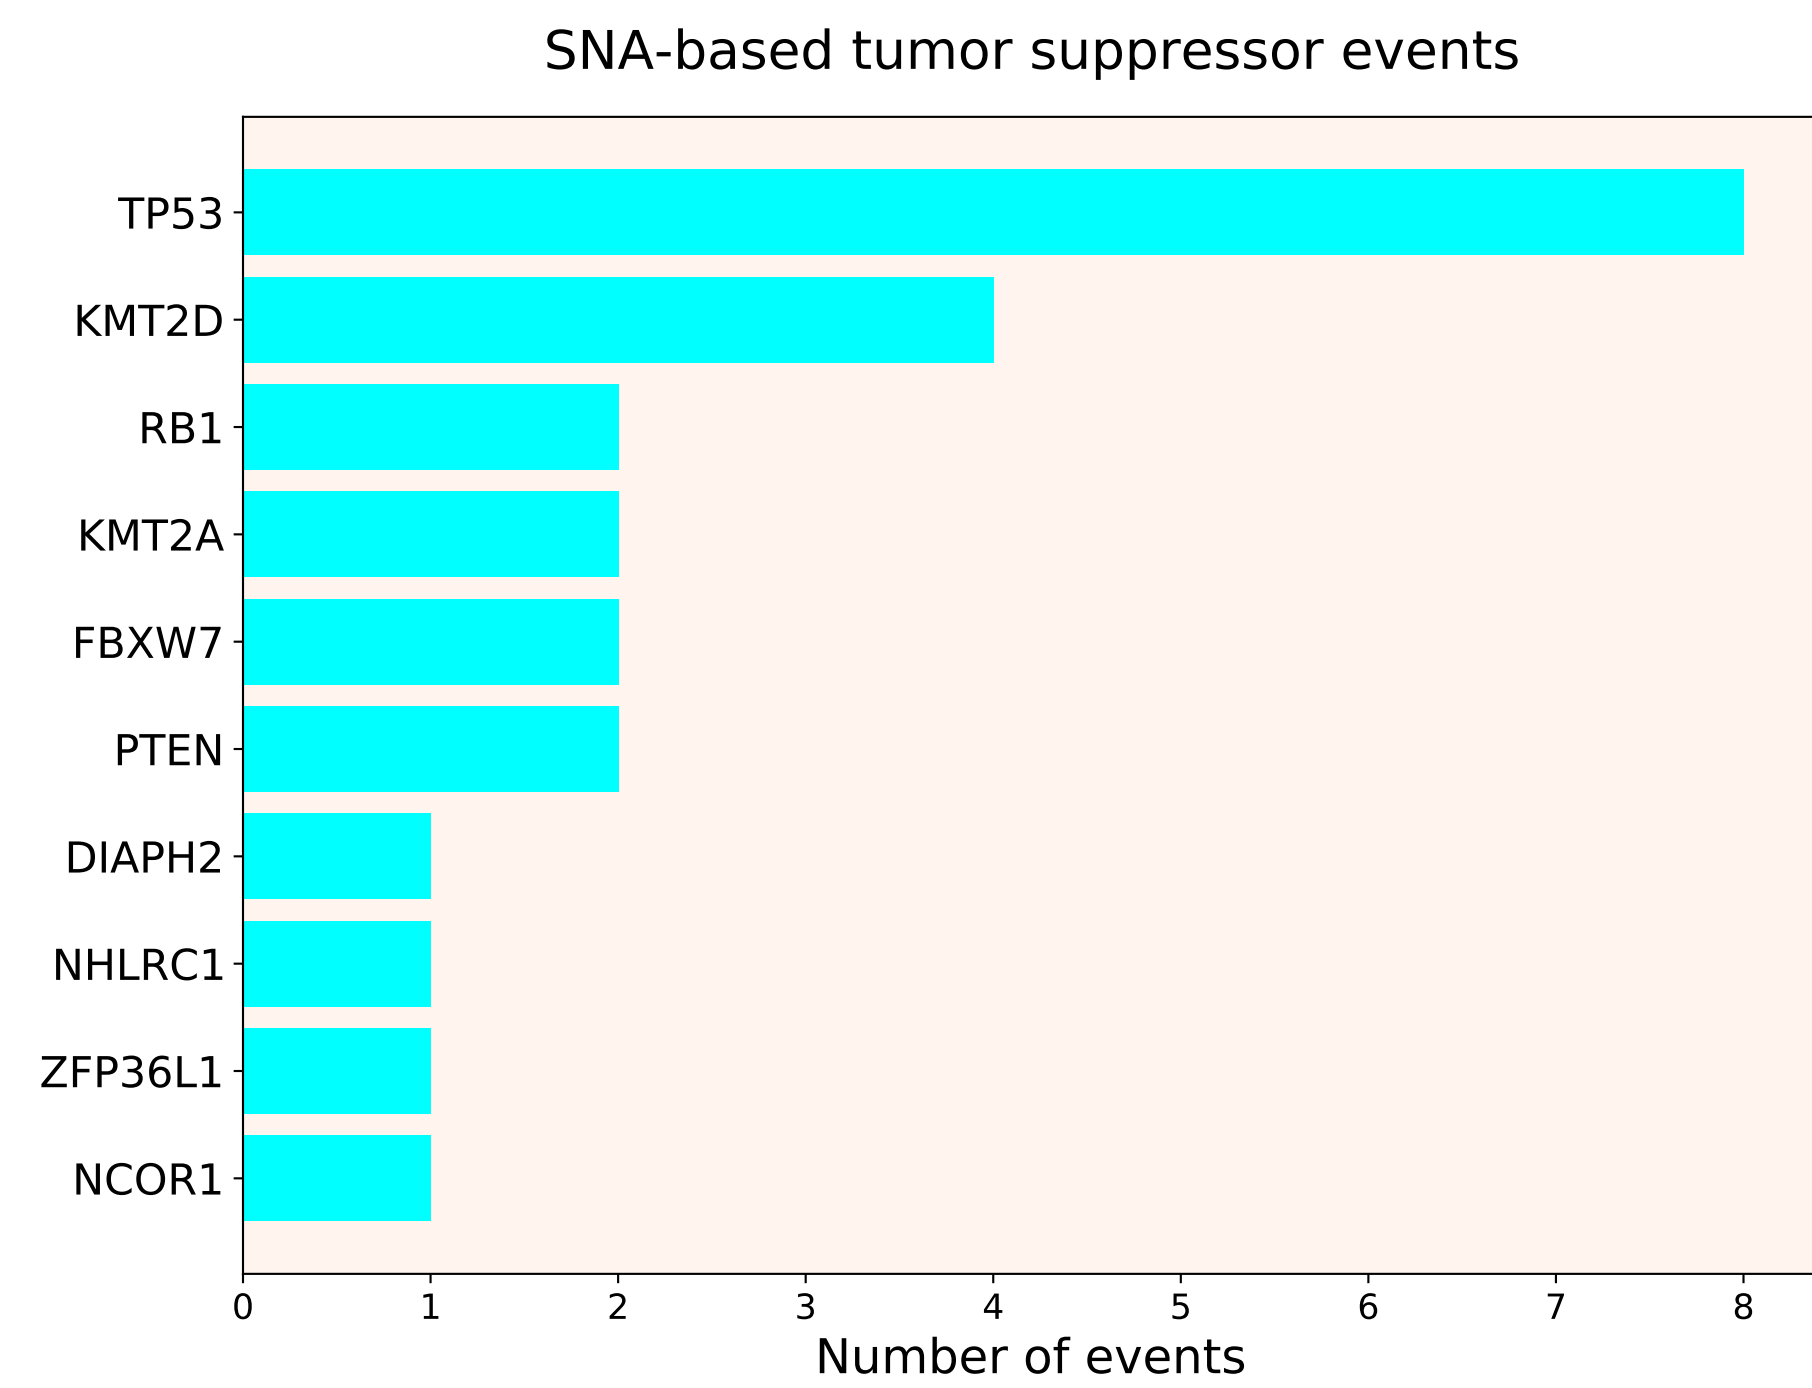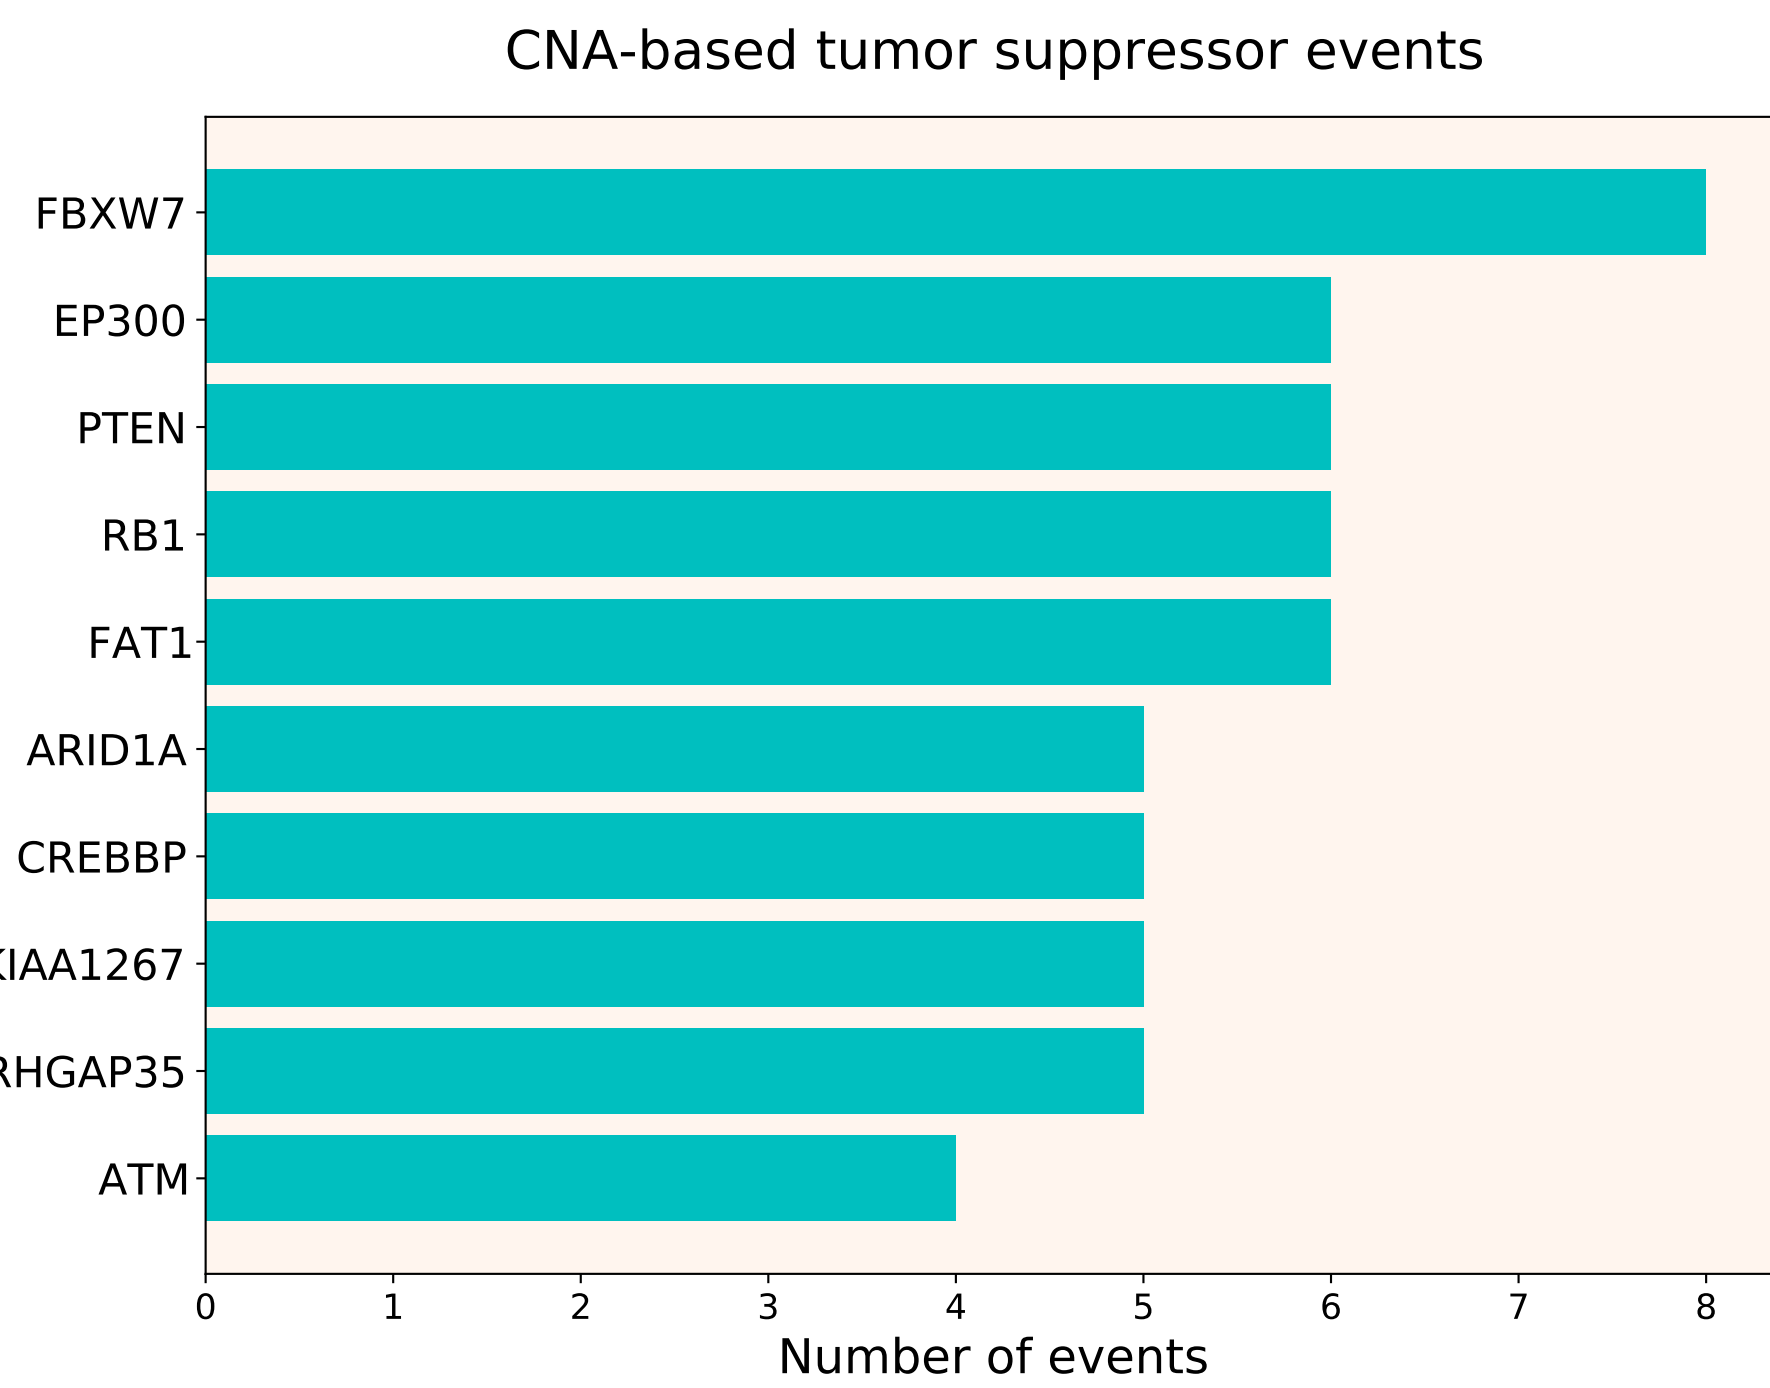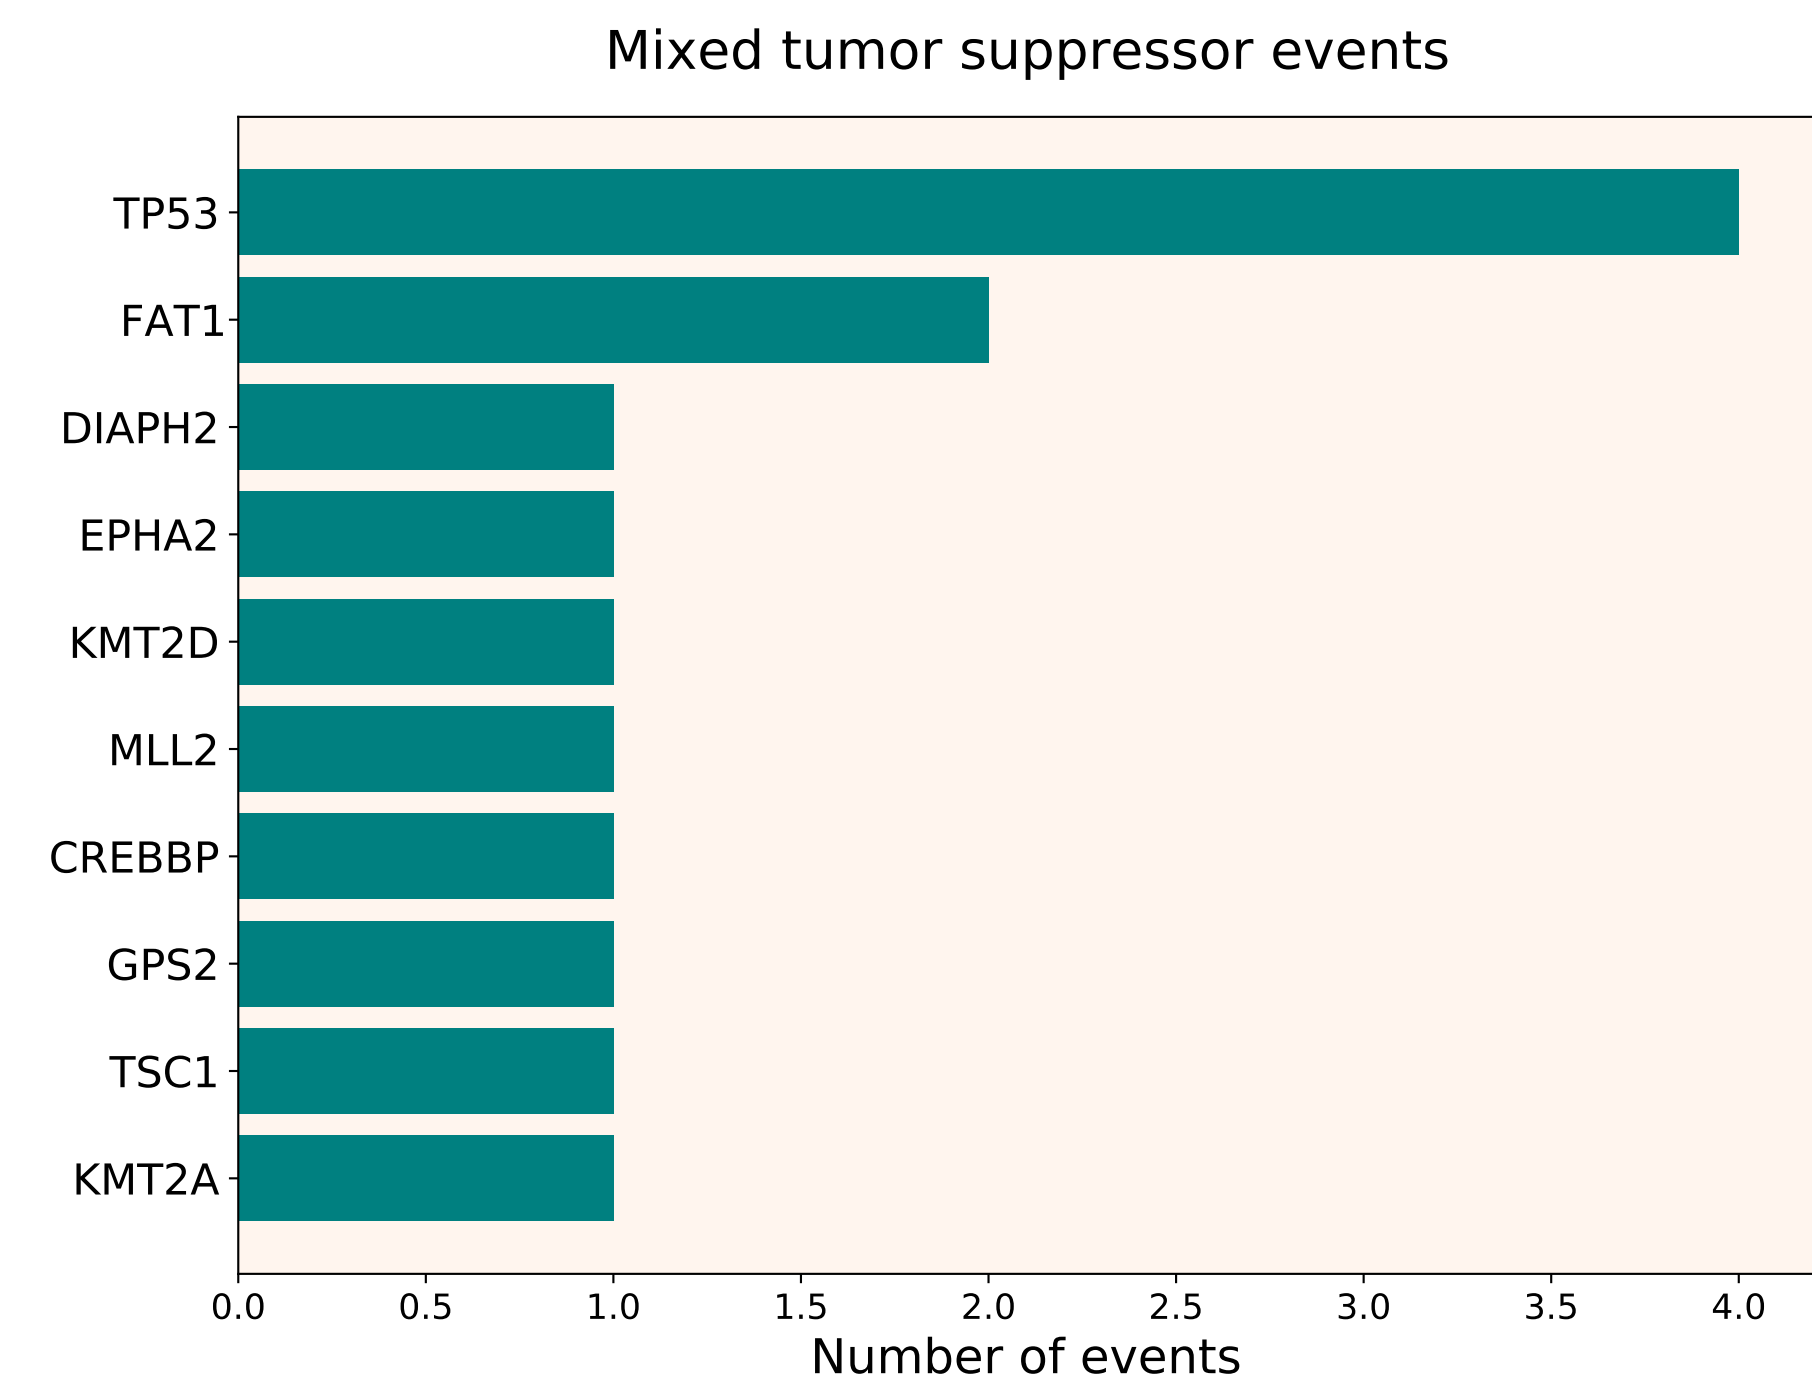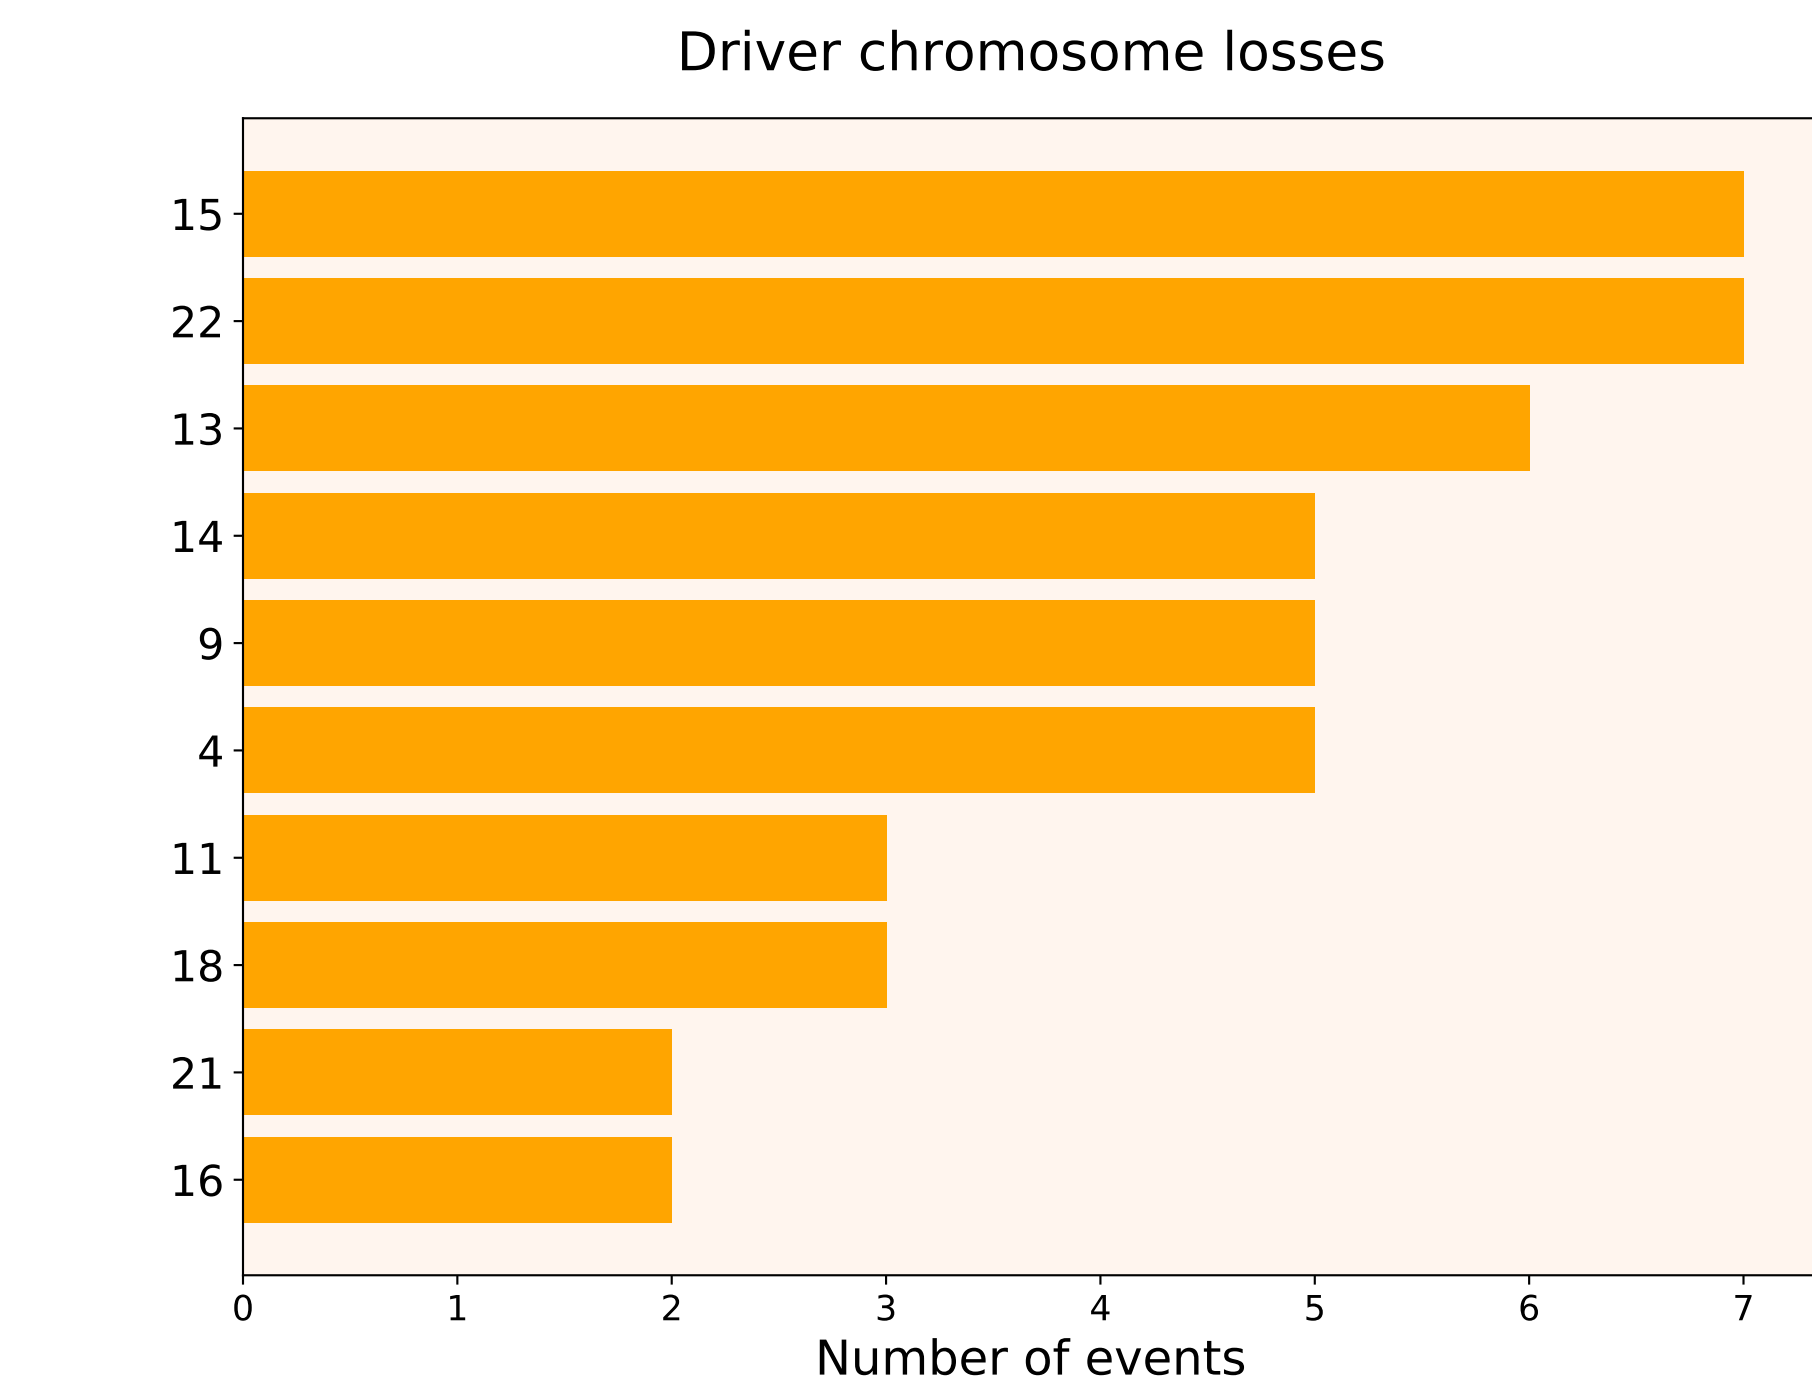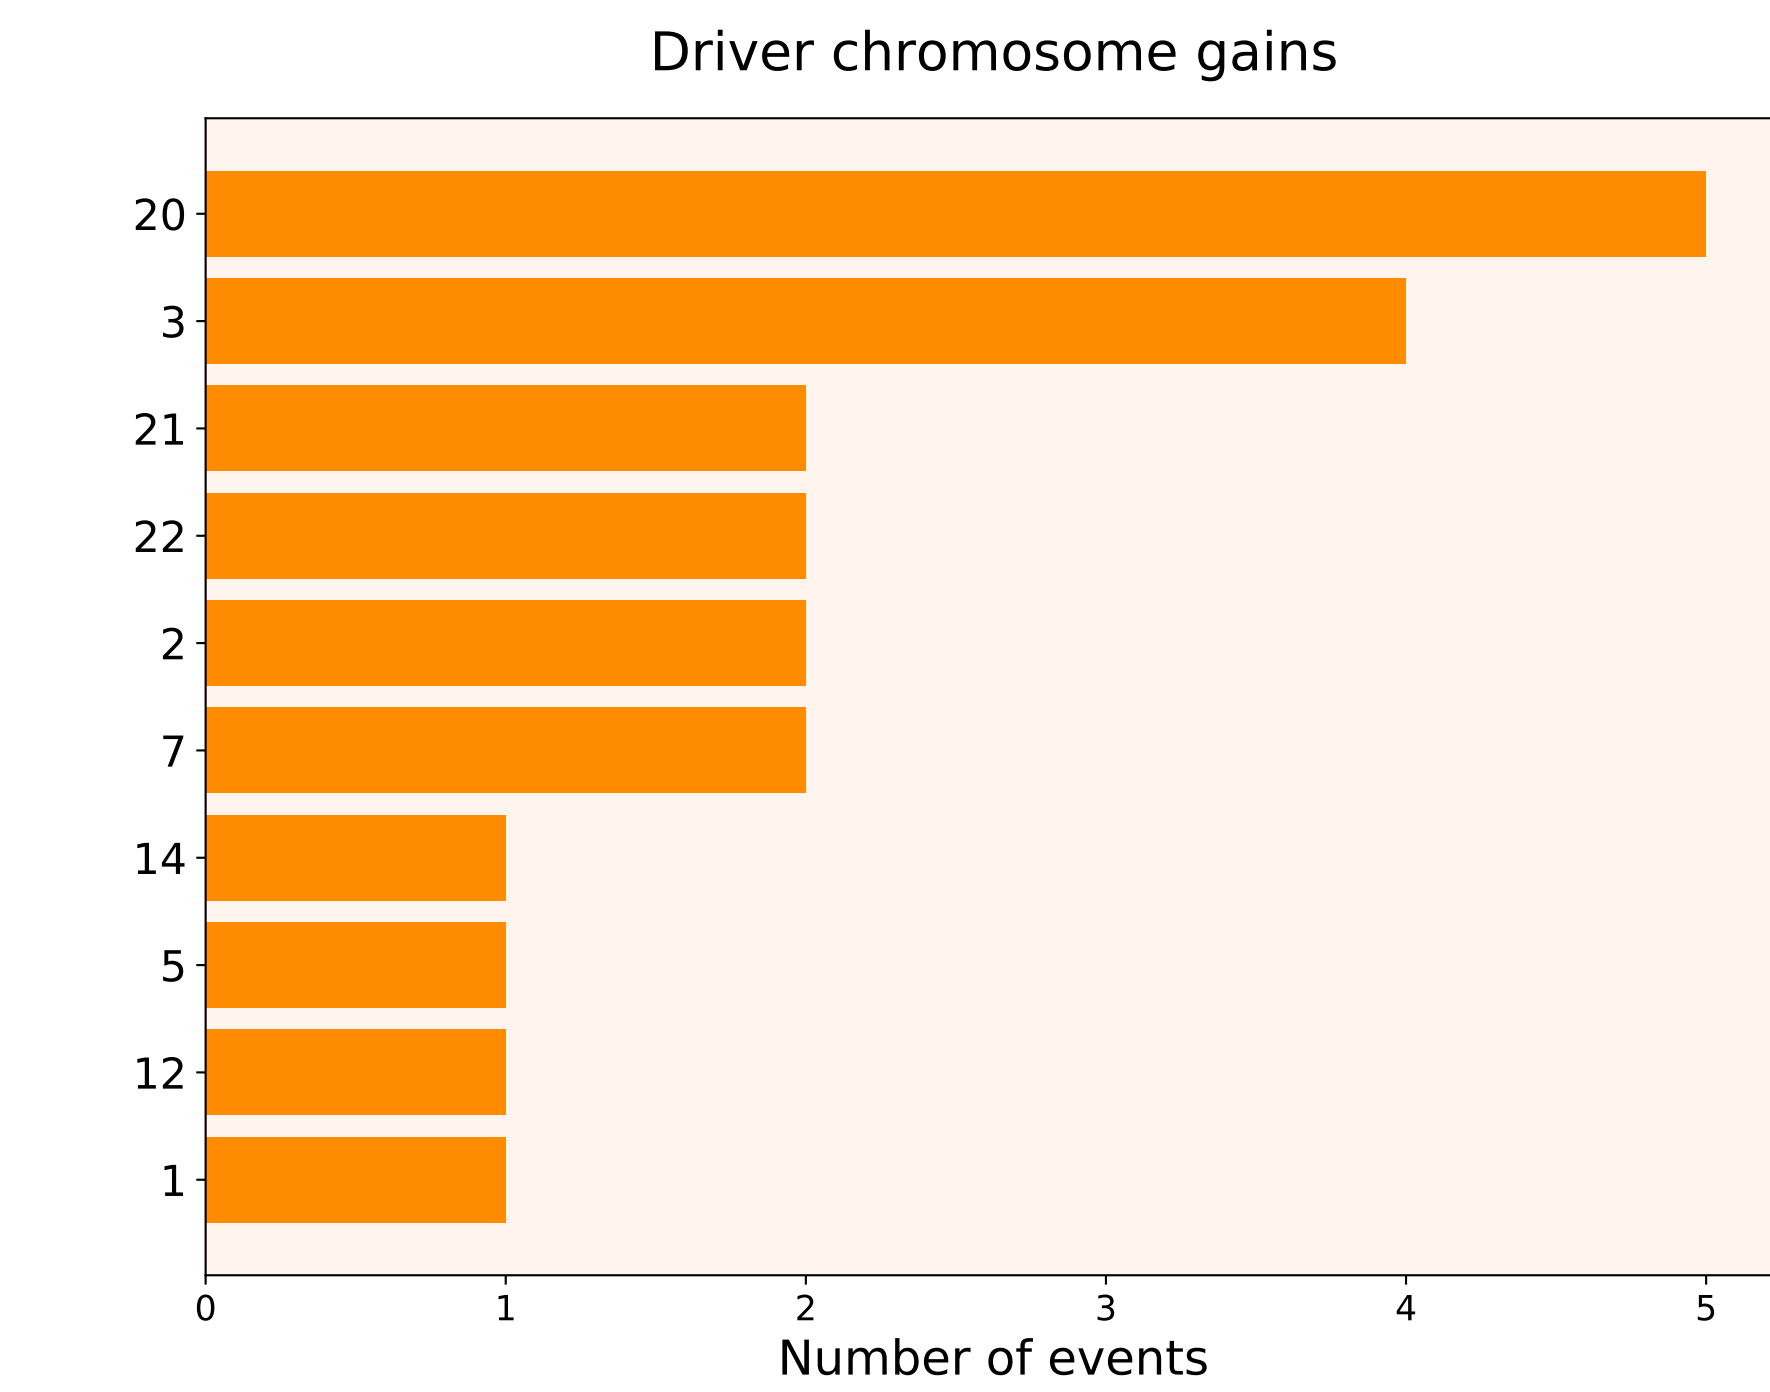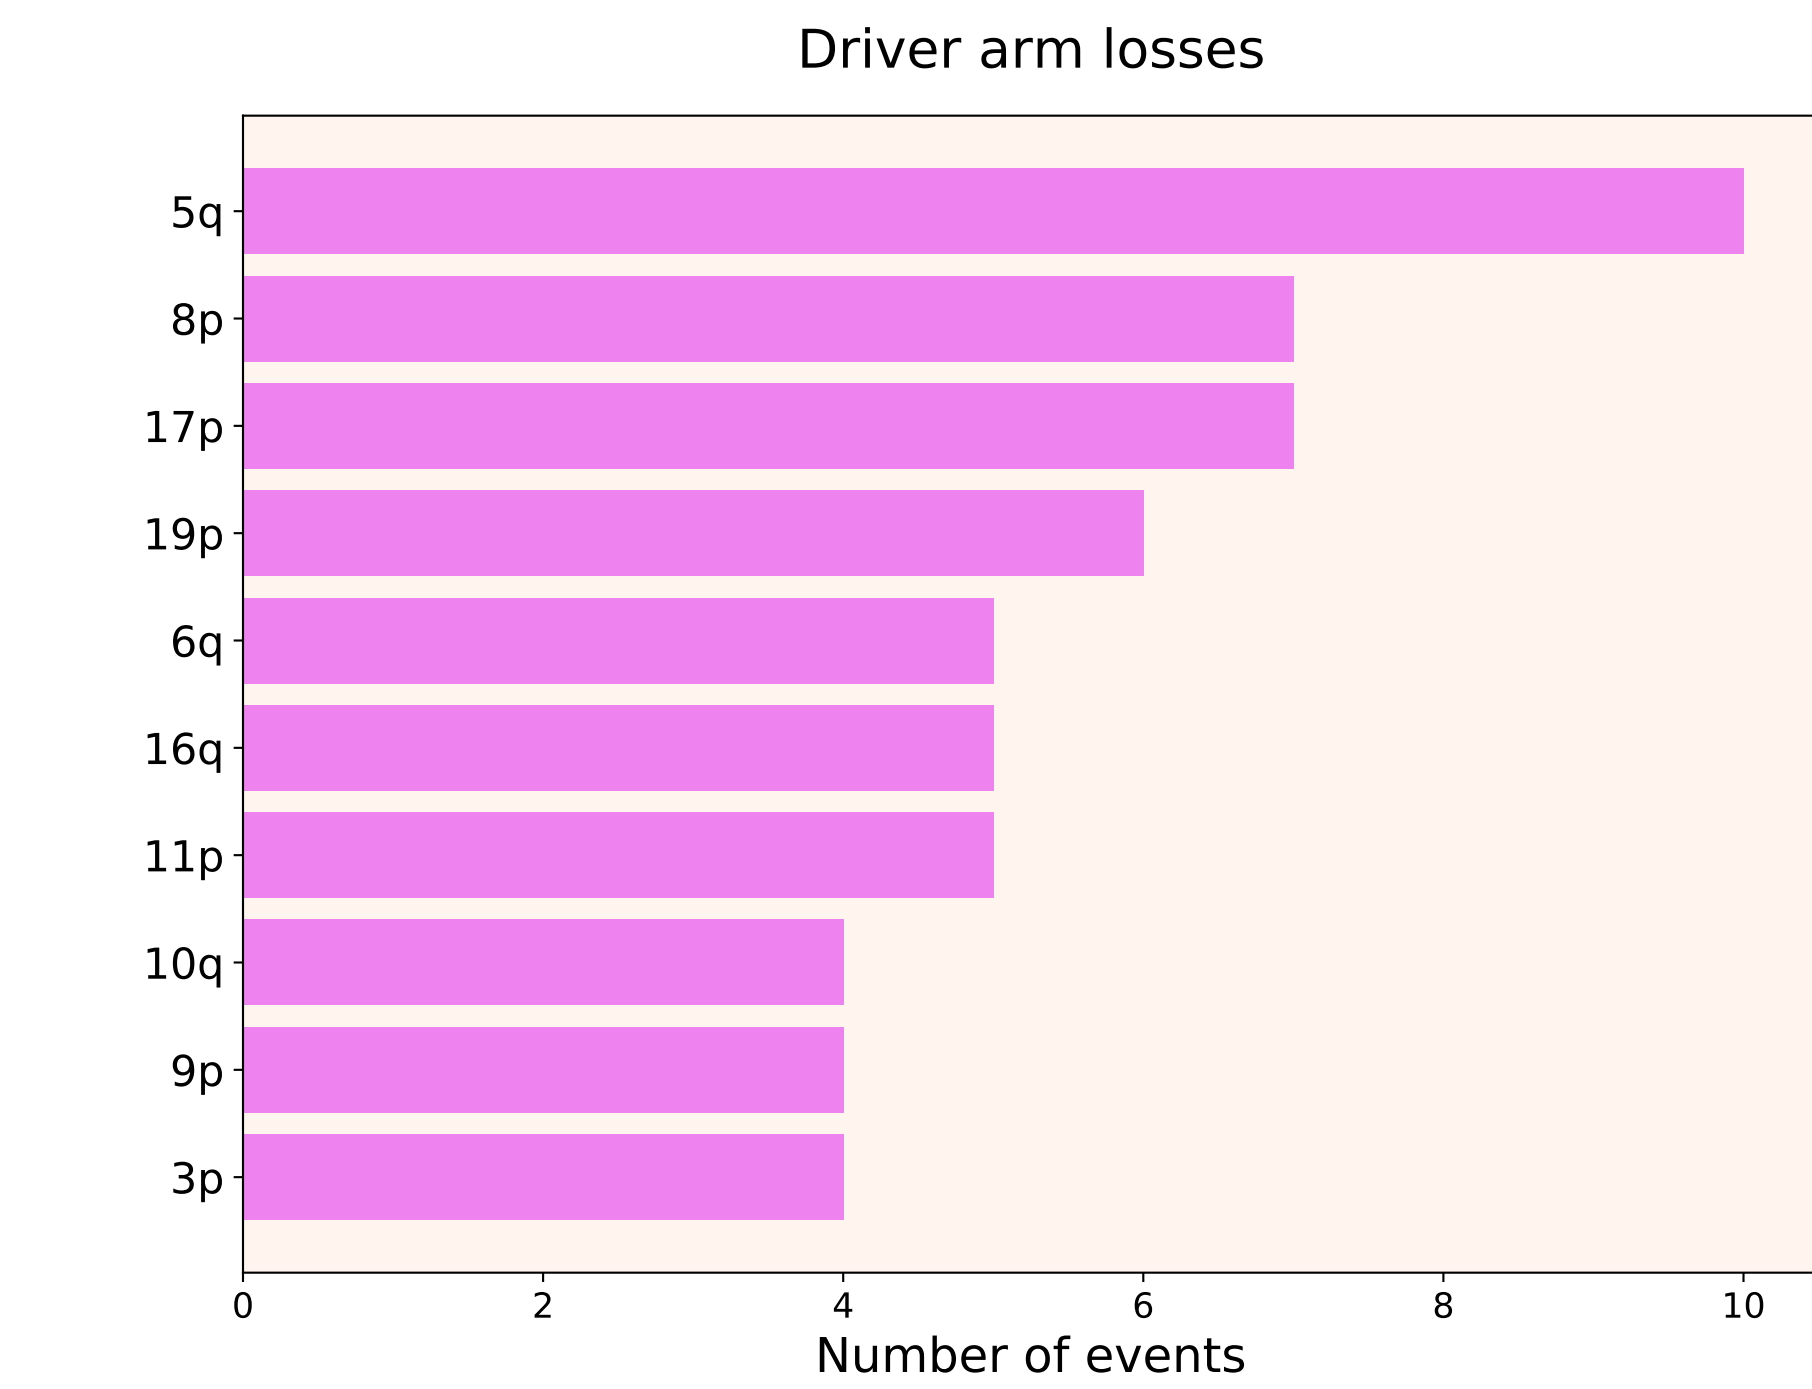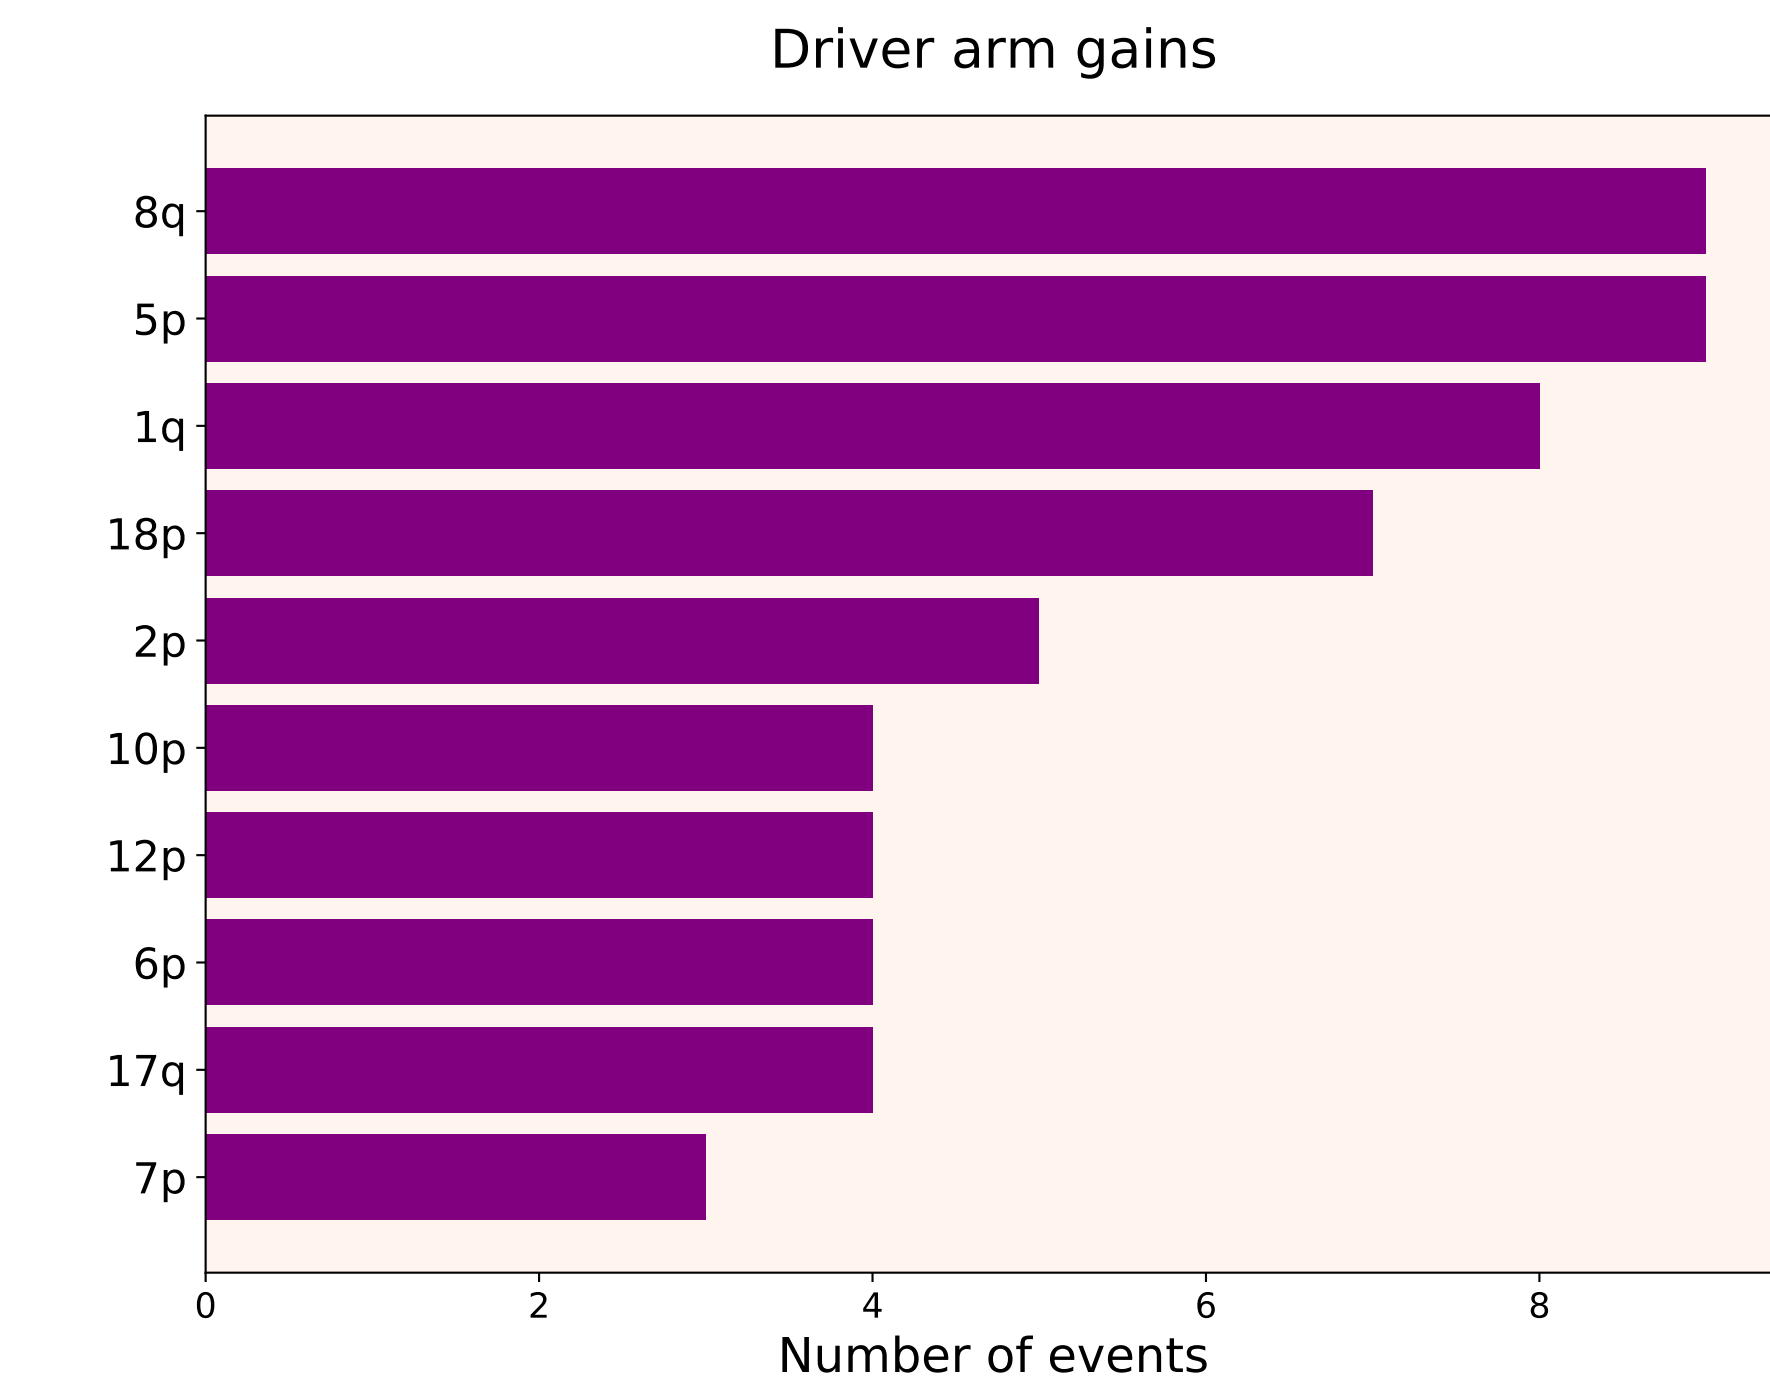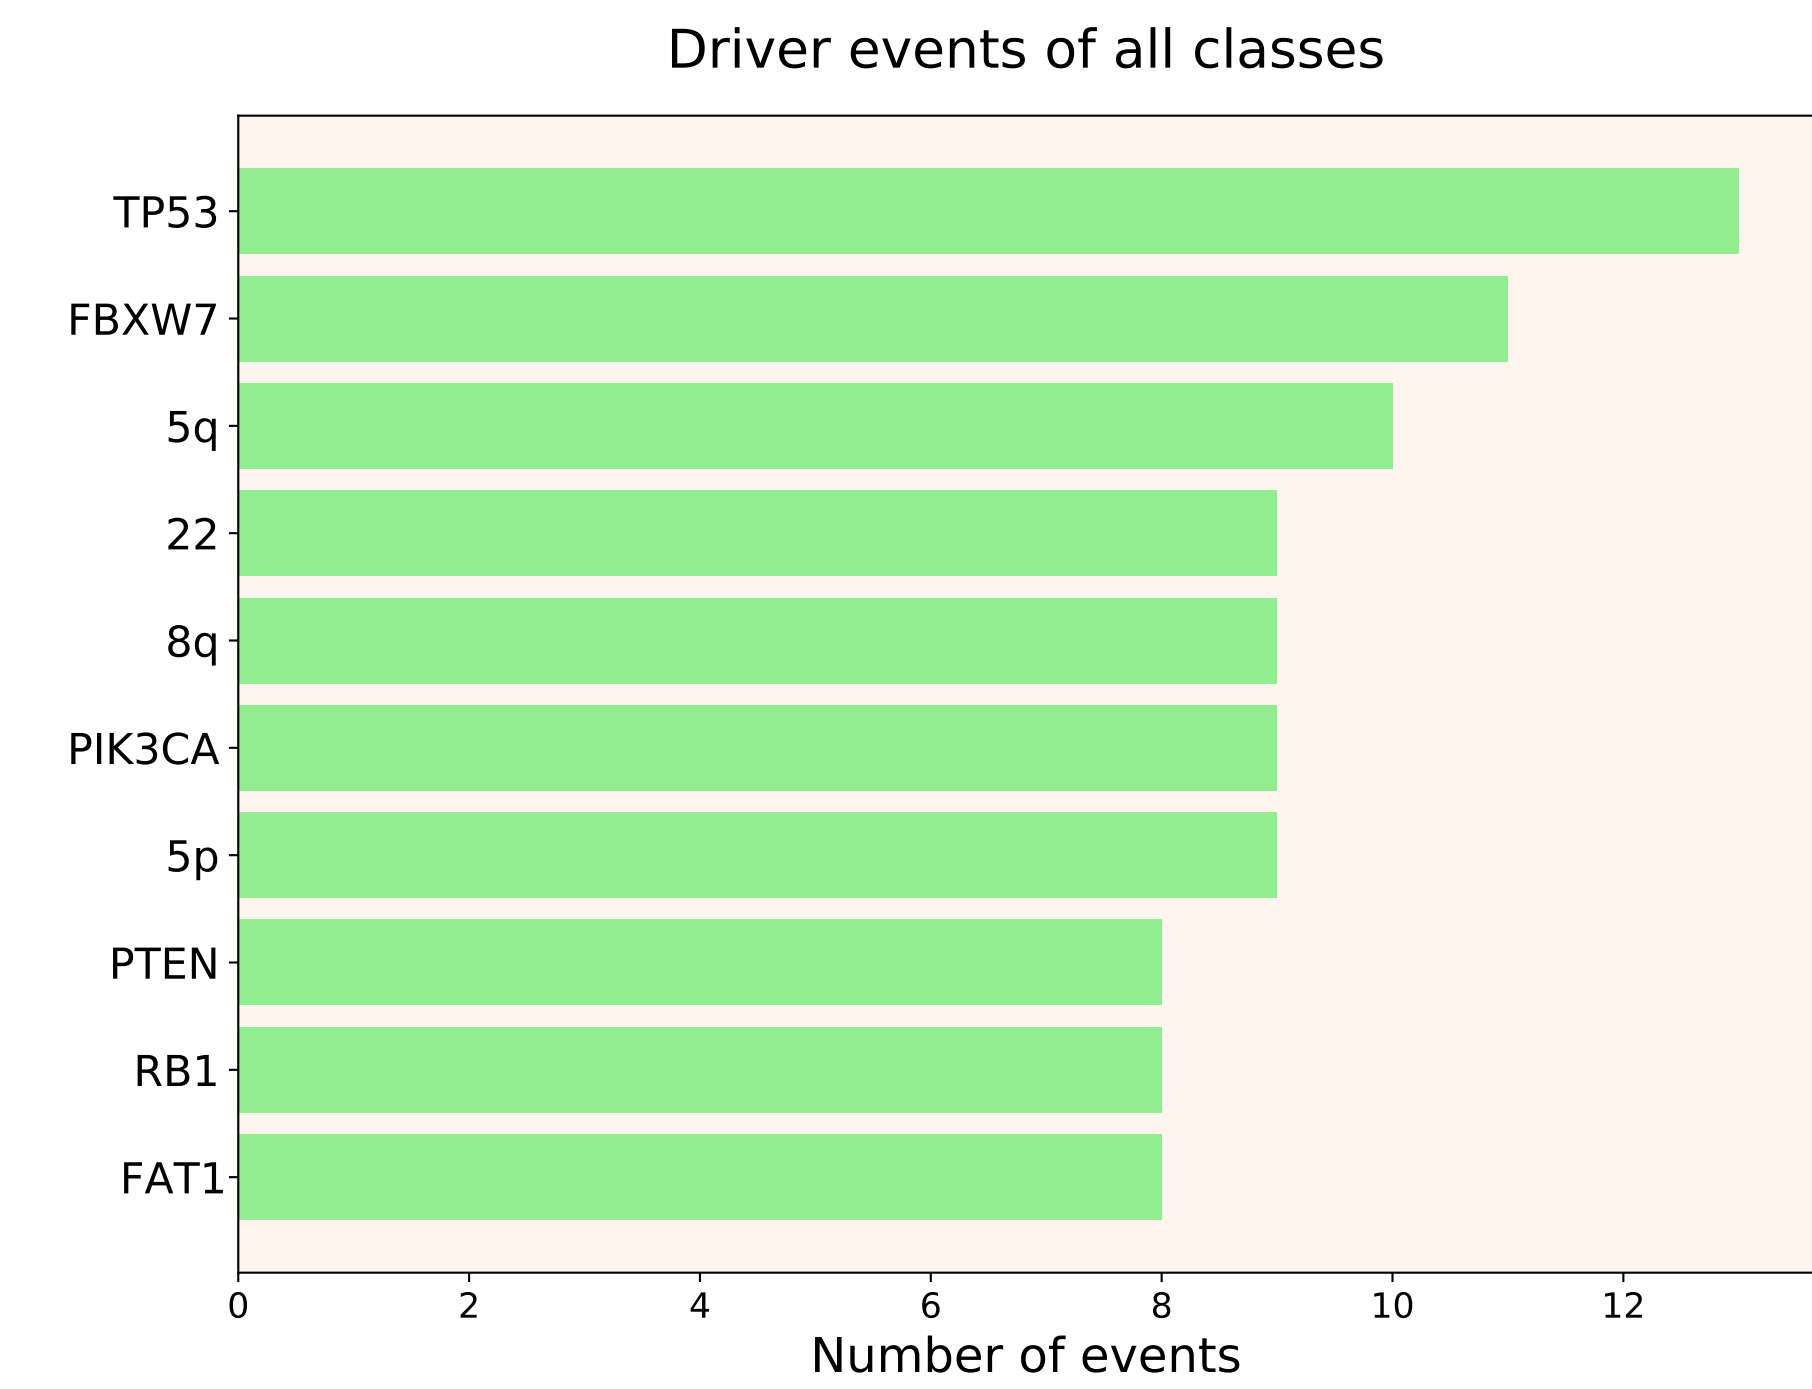

Supplement: Supplemental_Data_S1.zip [file Supplemental_Data_S1.zip]

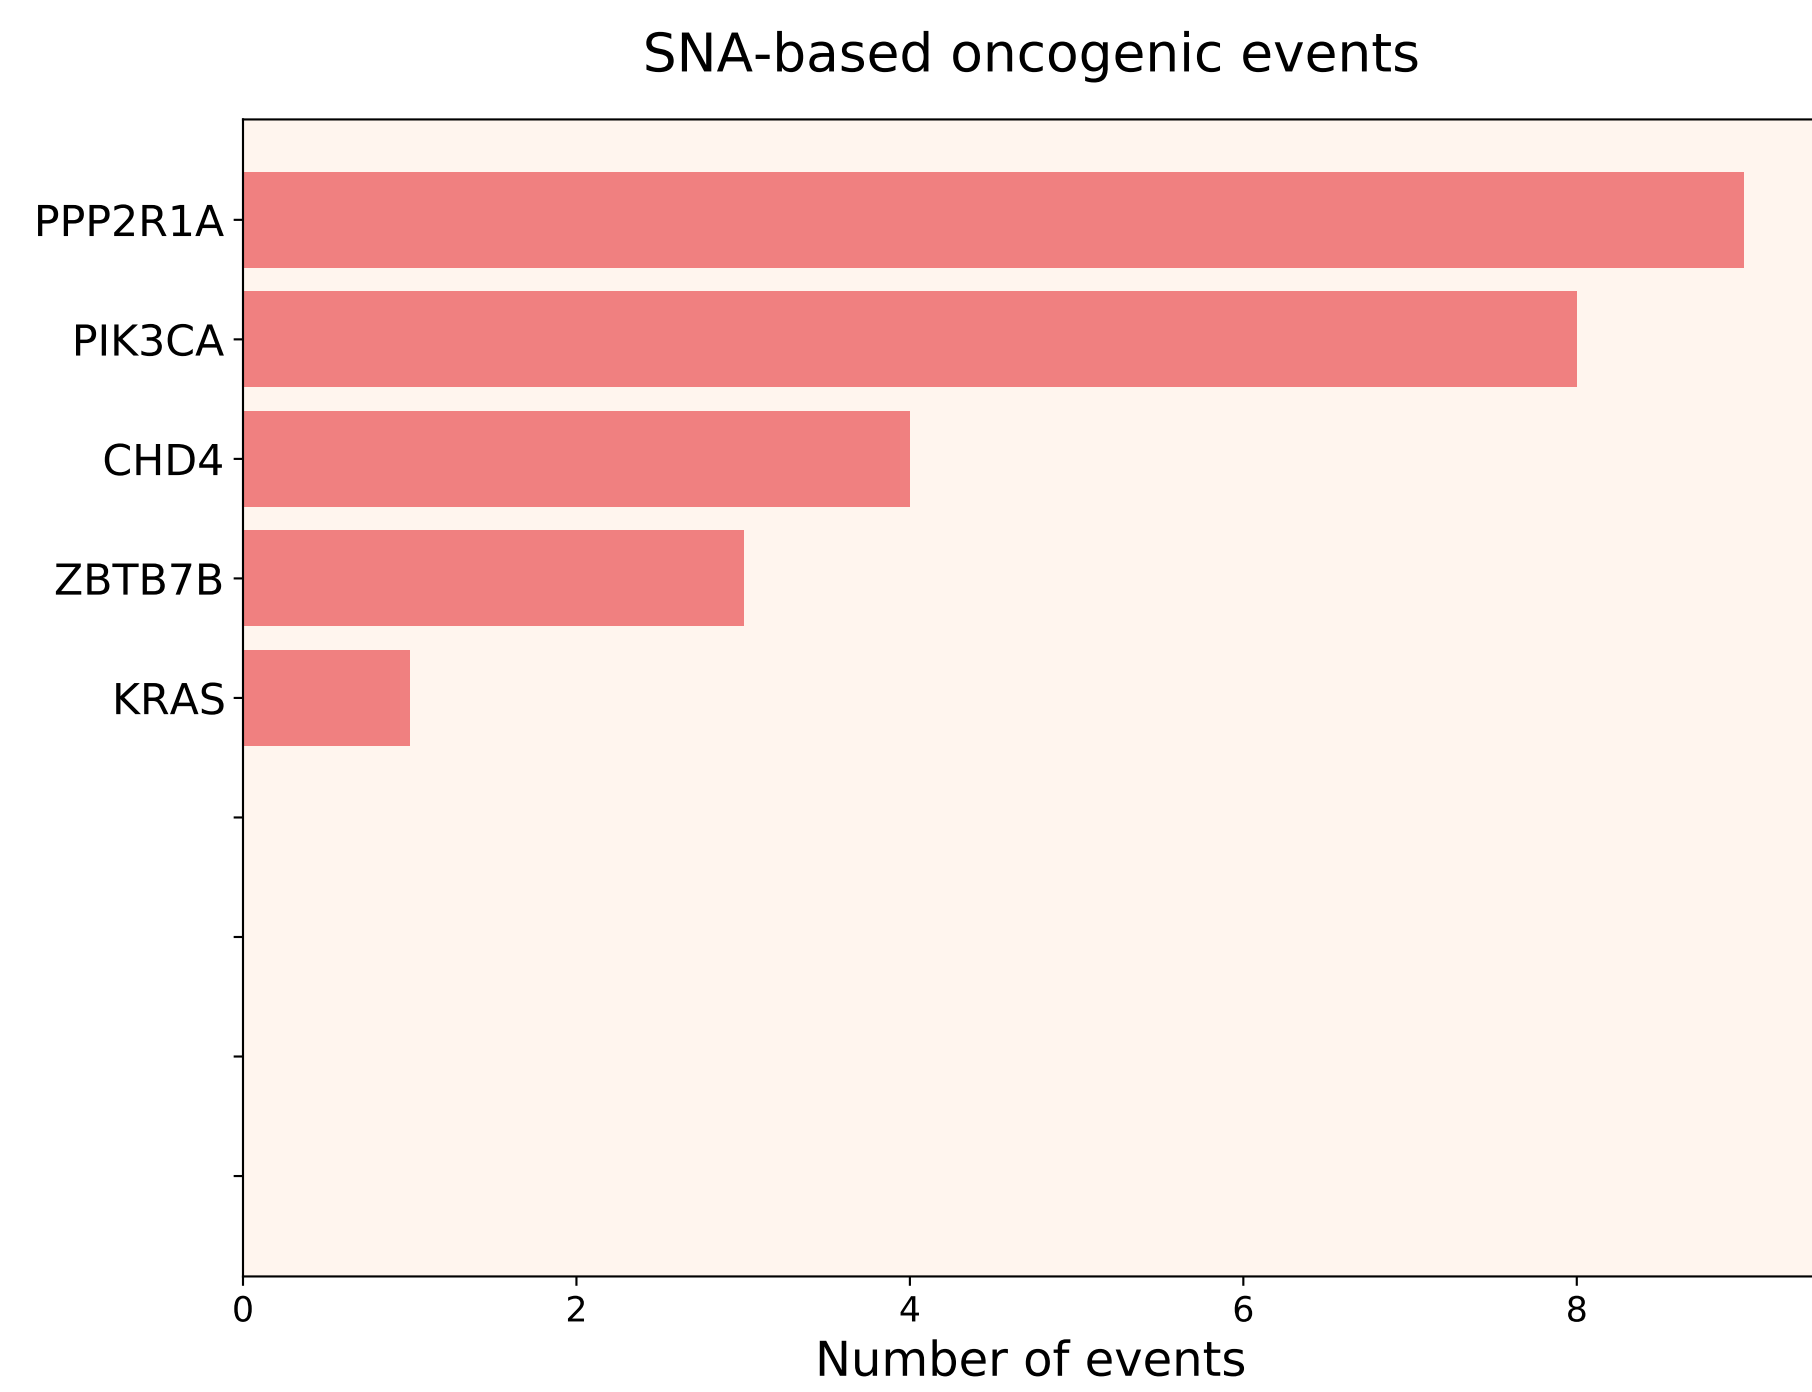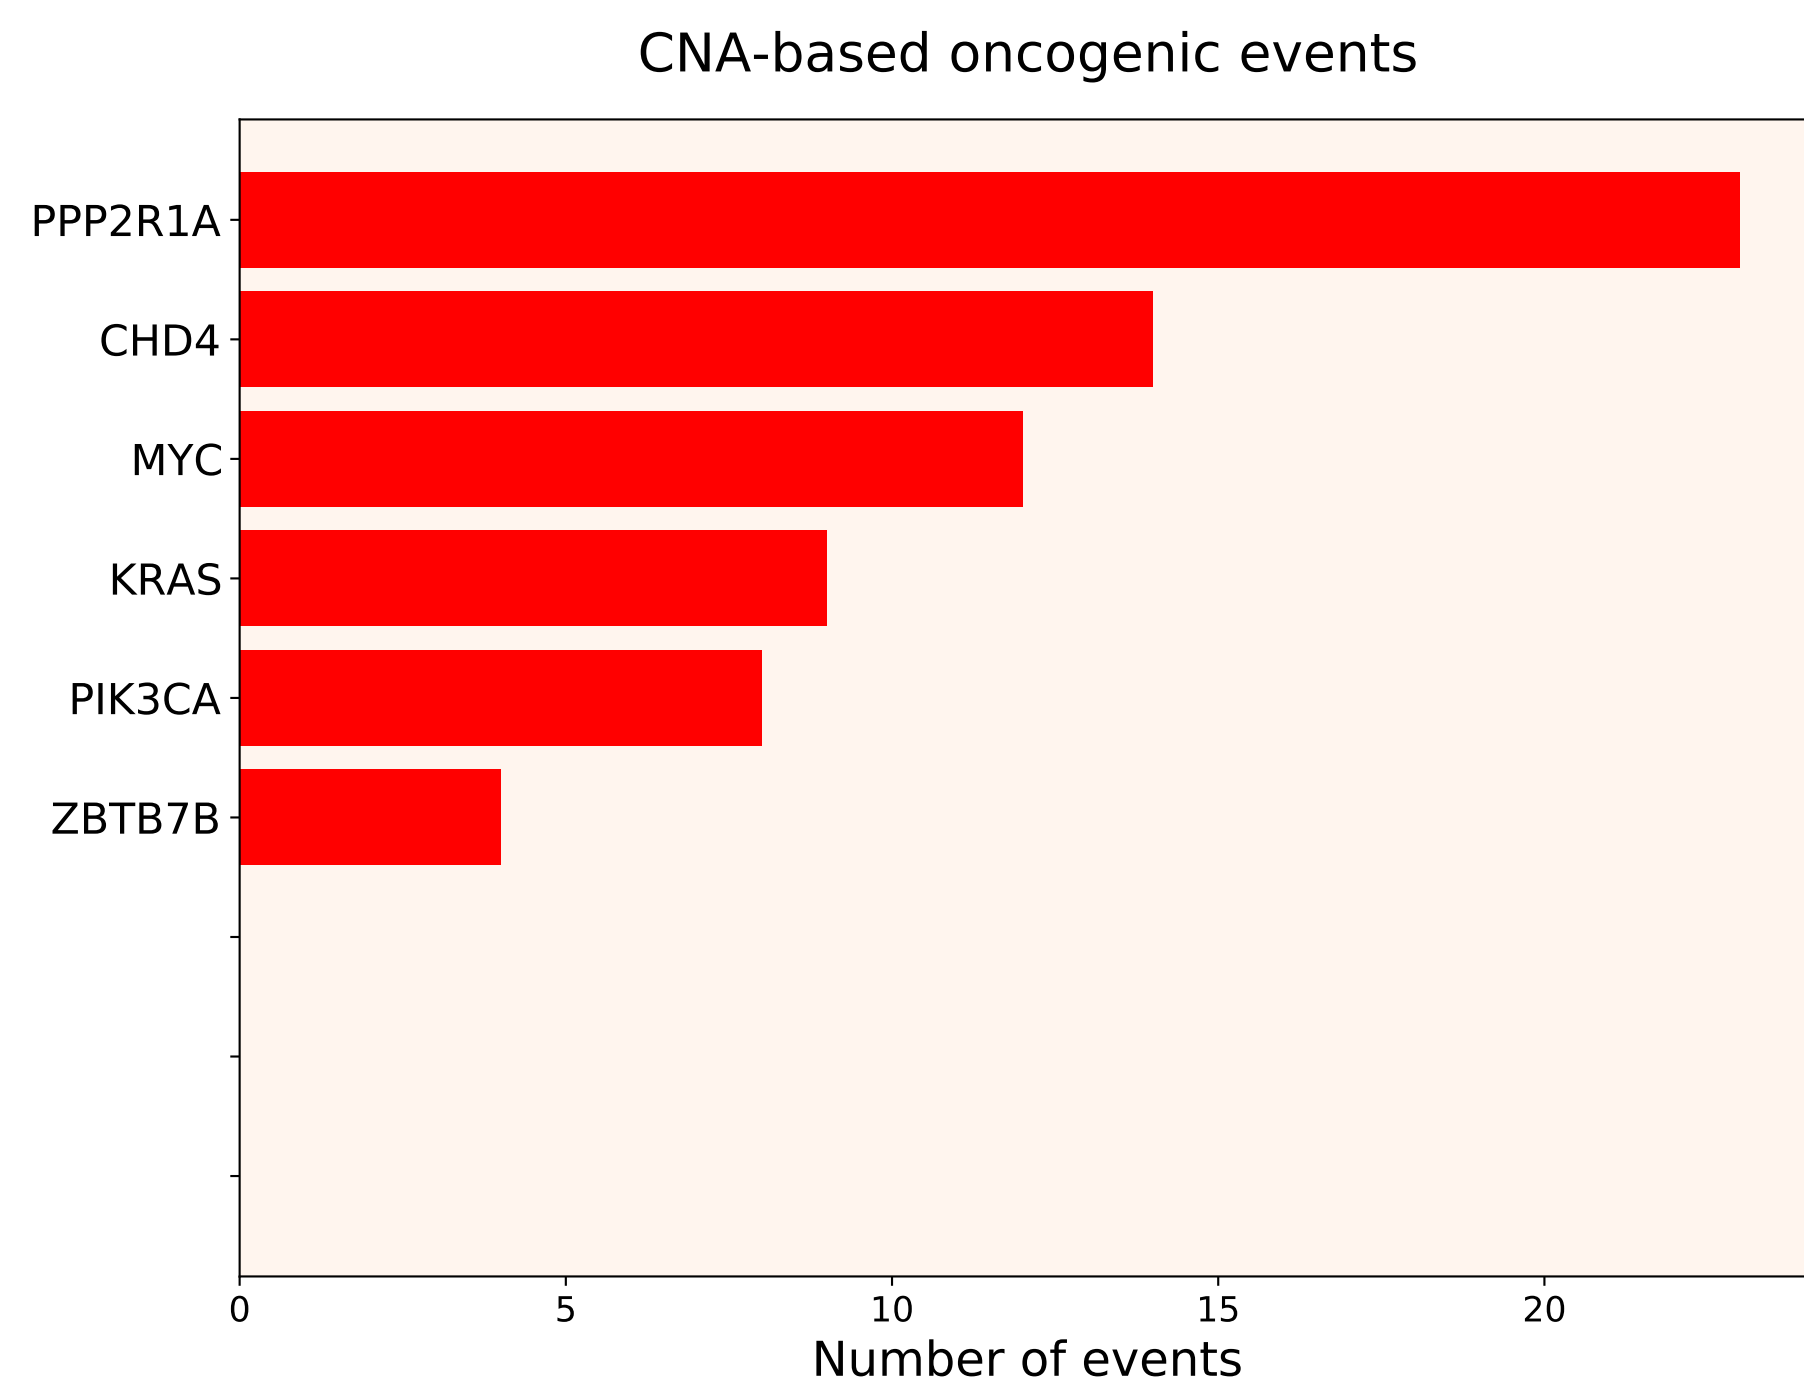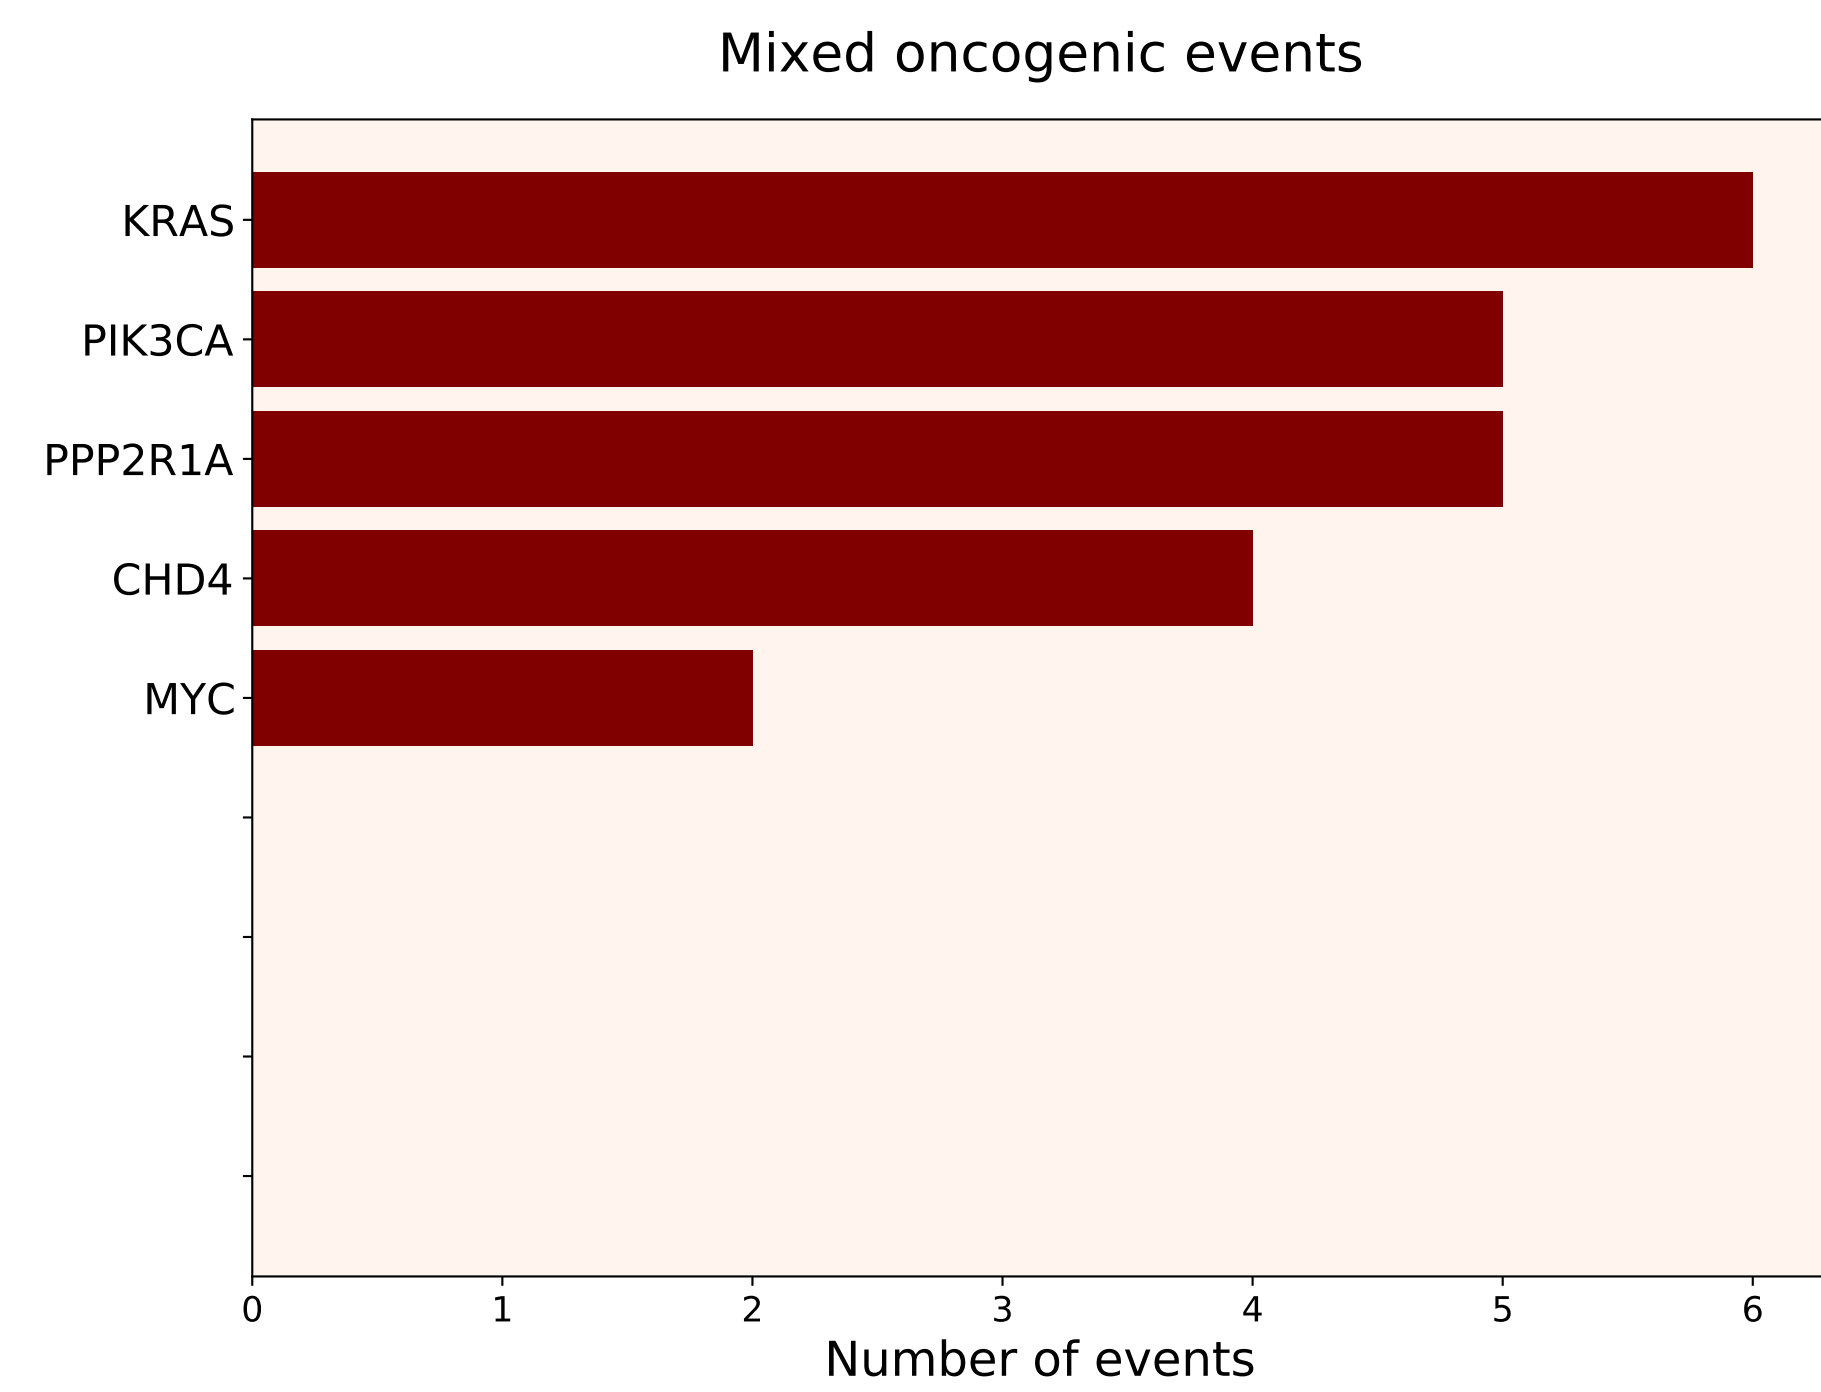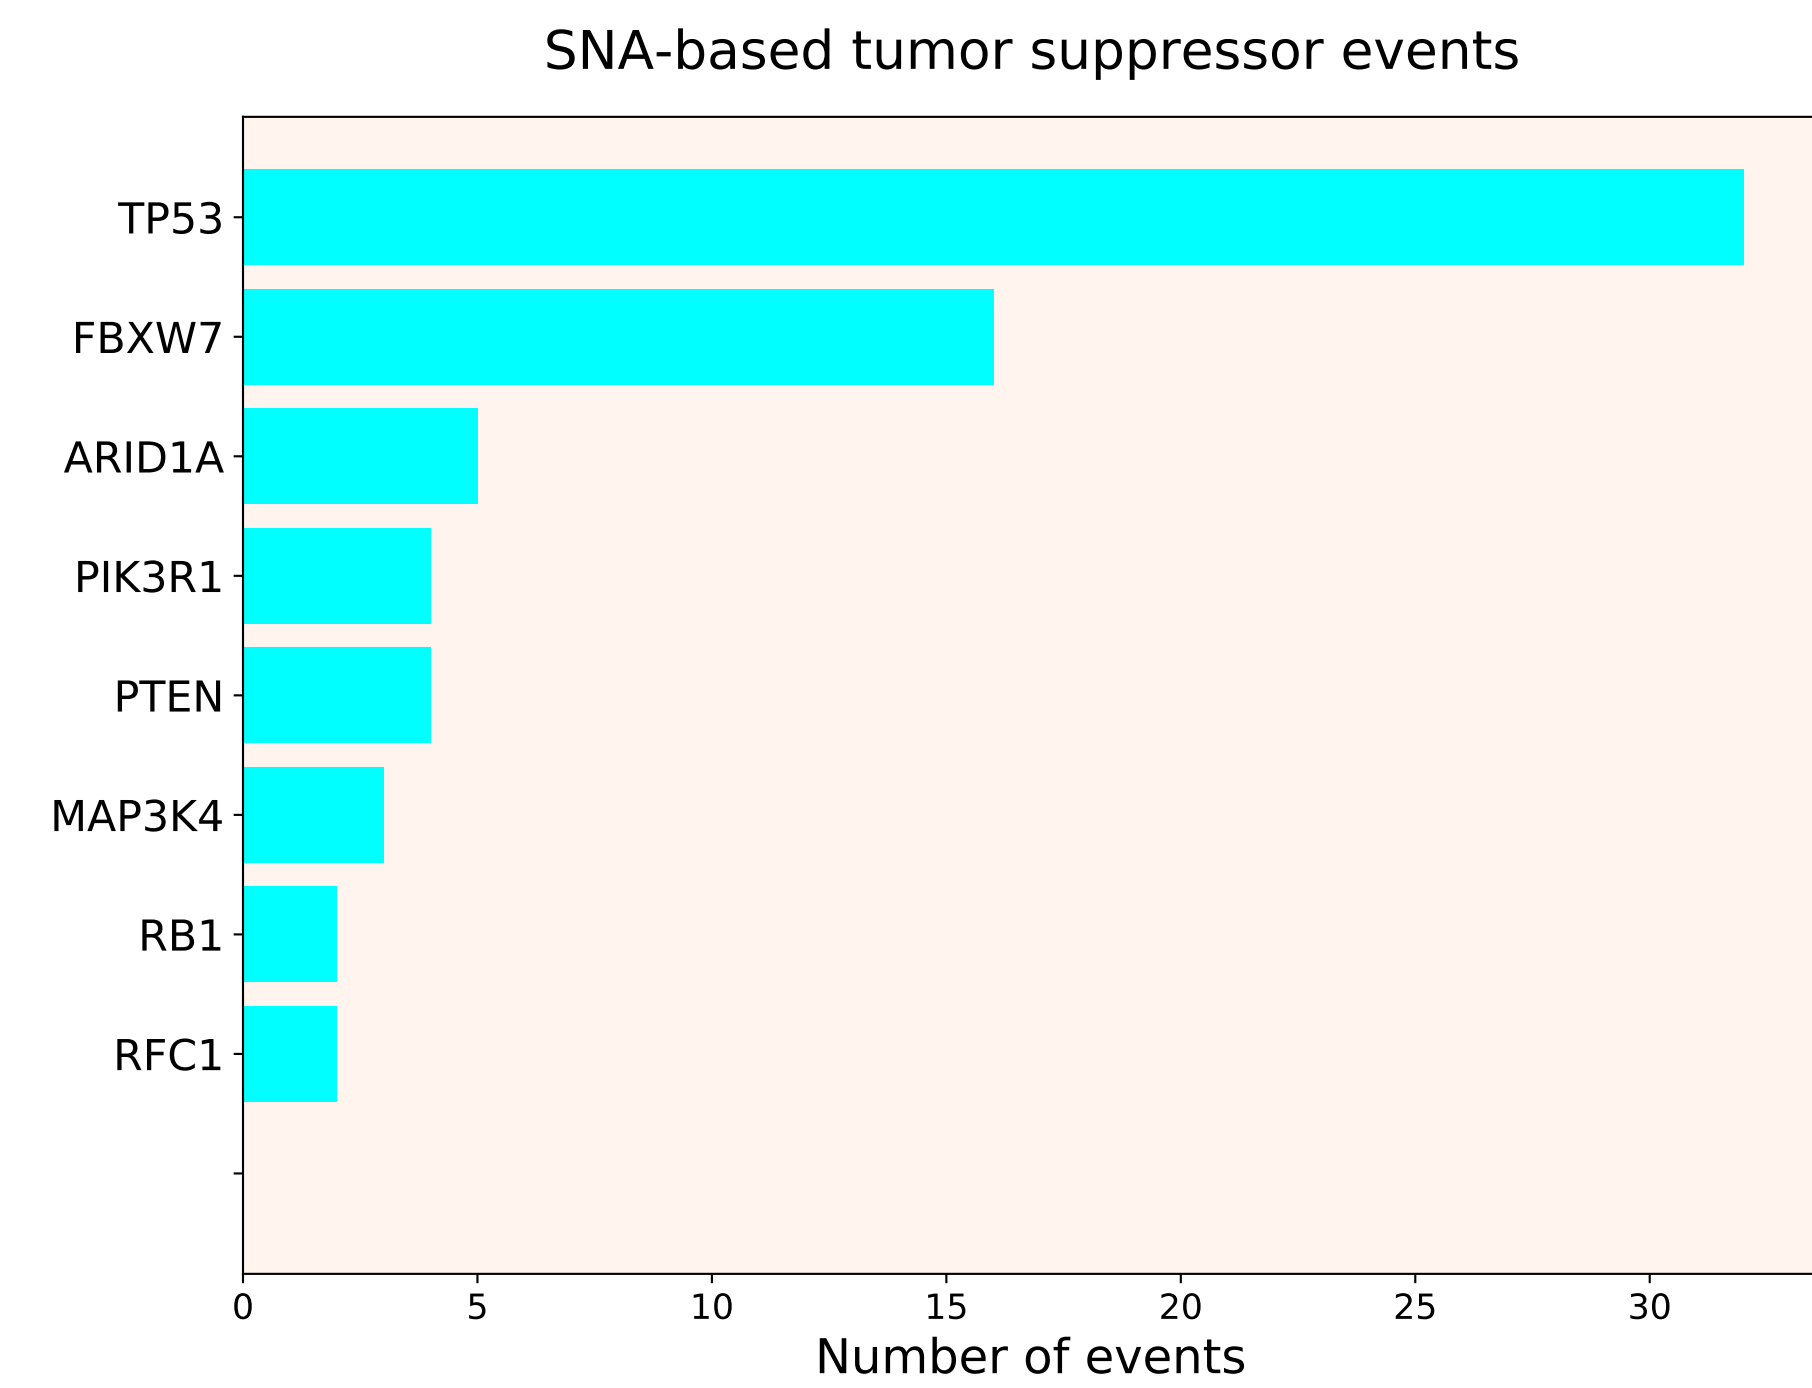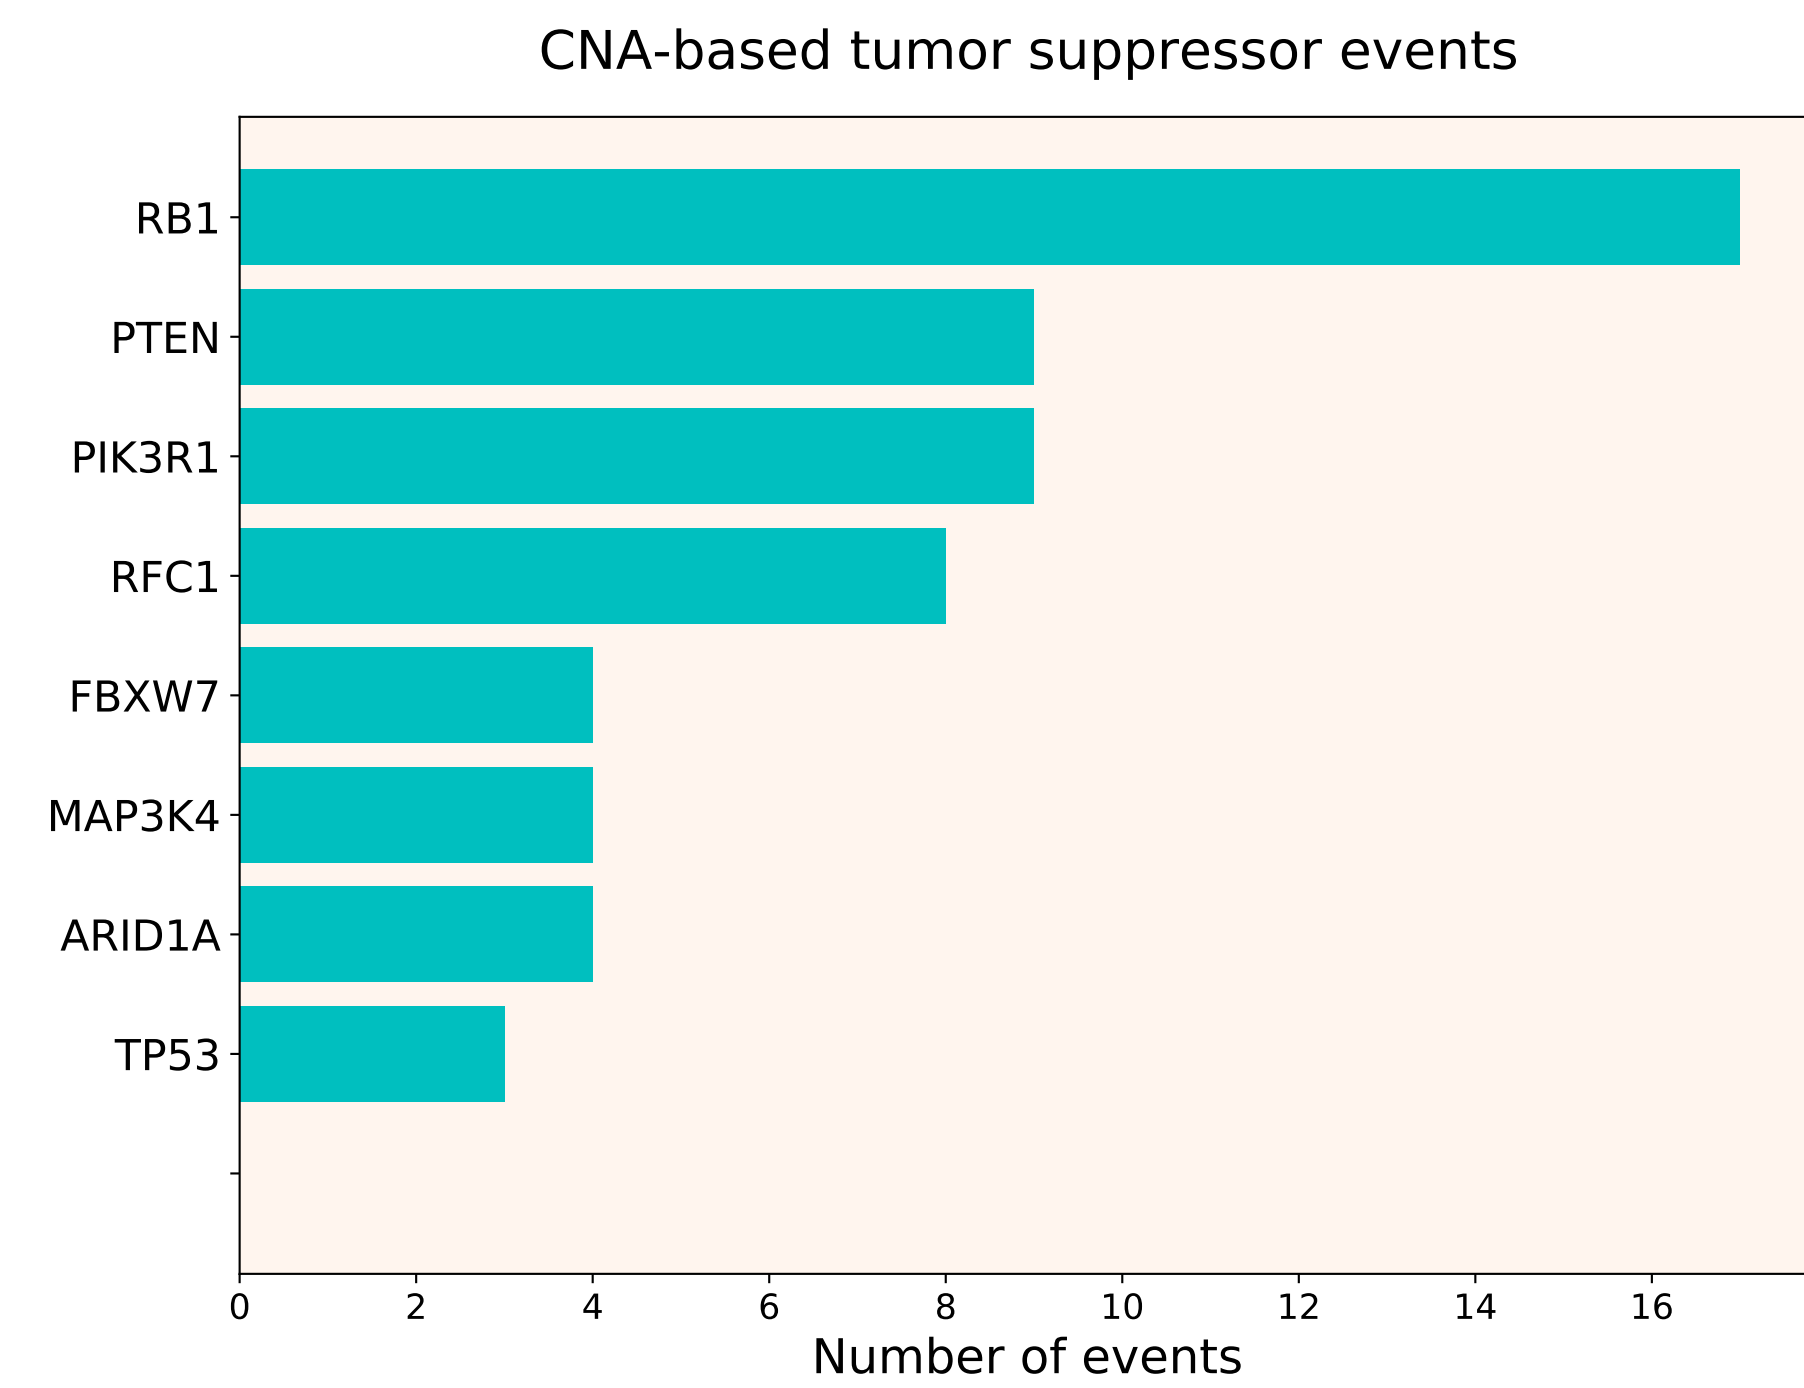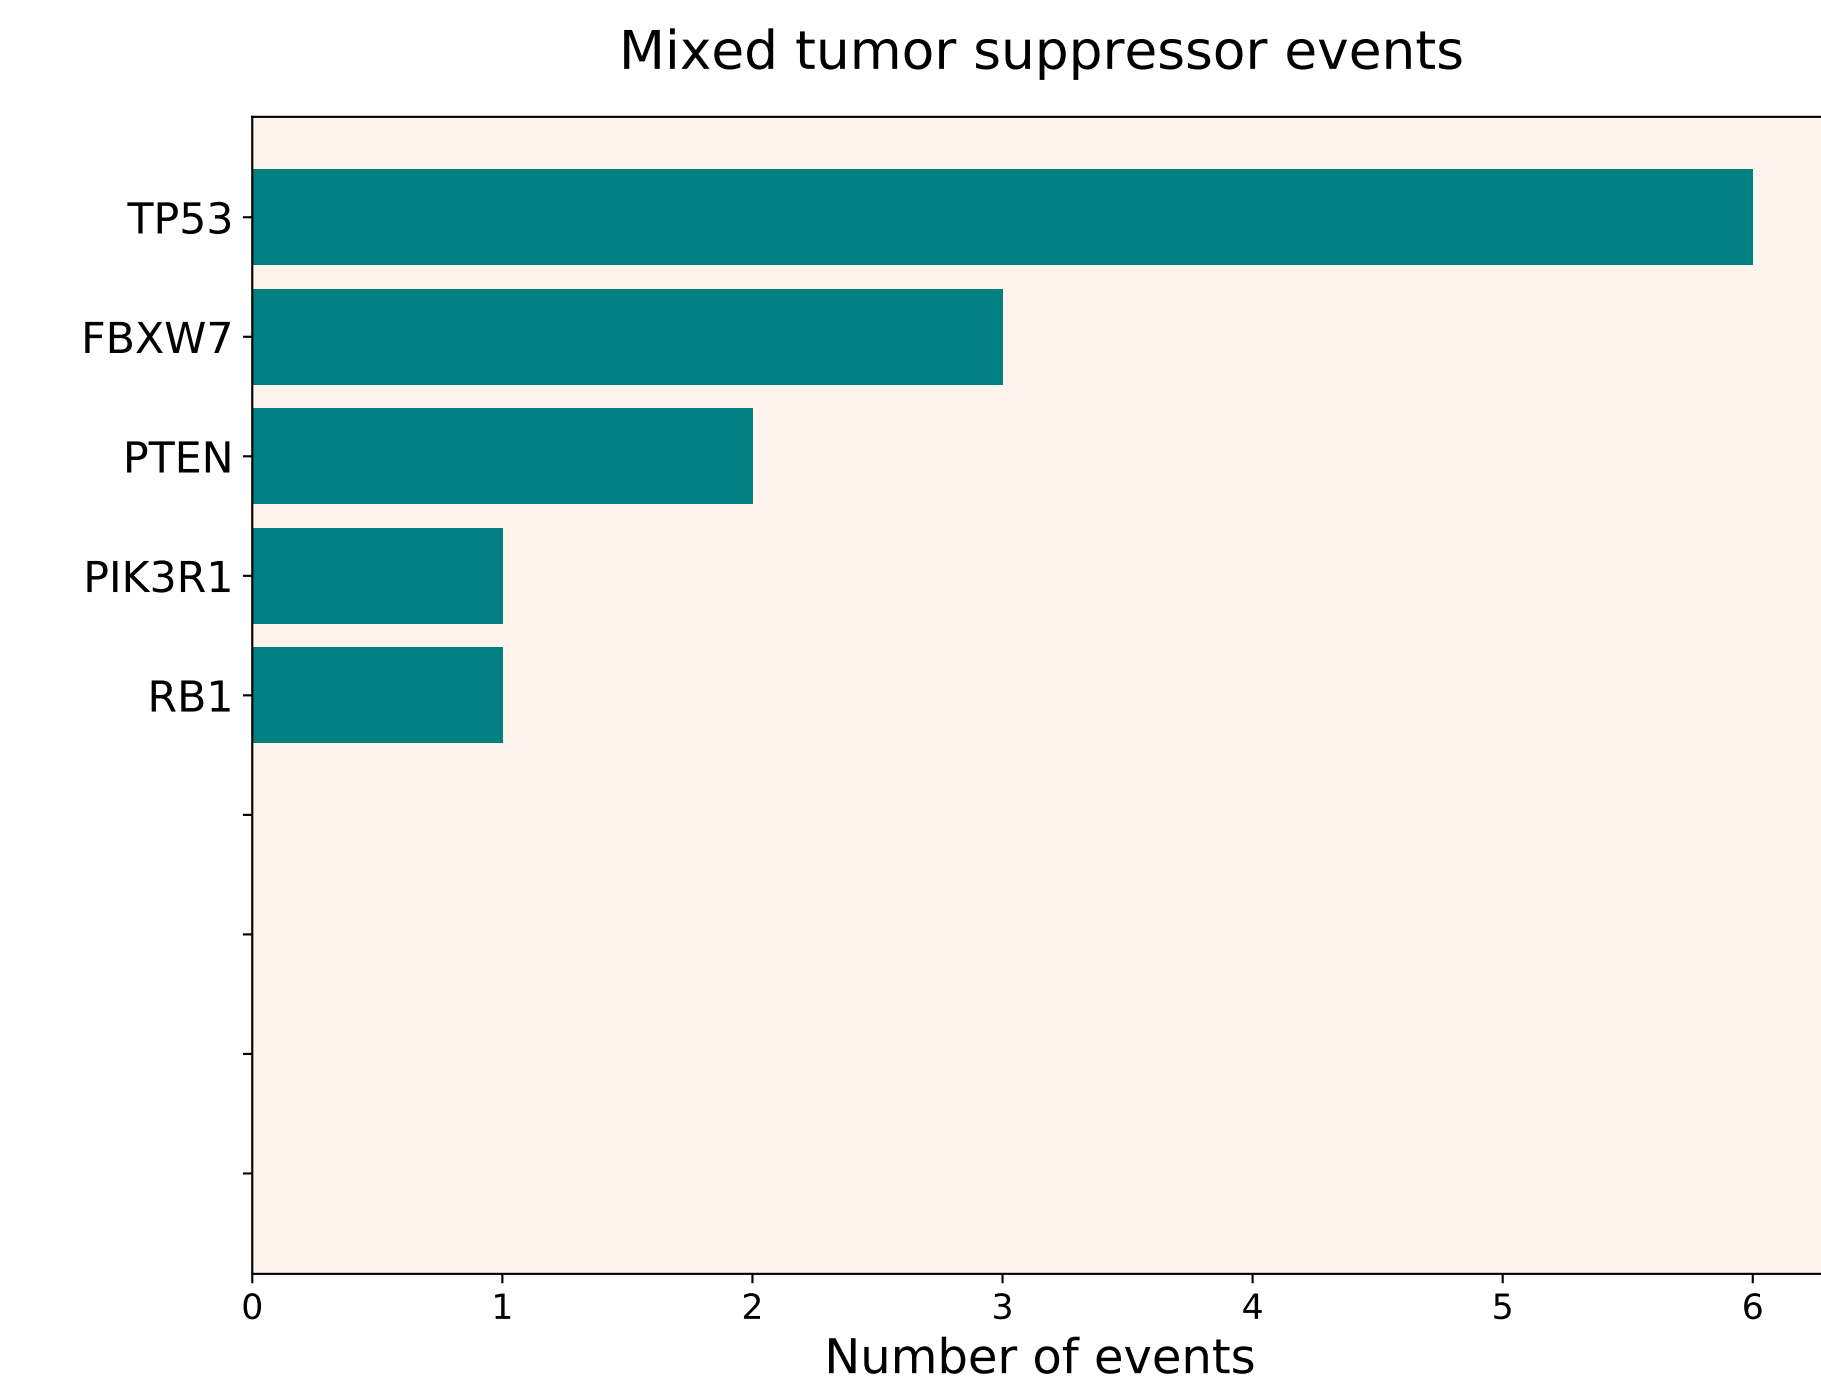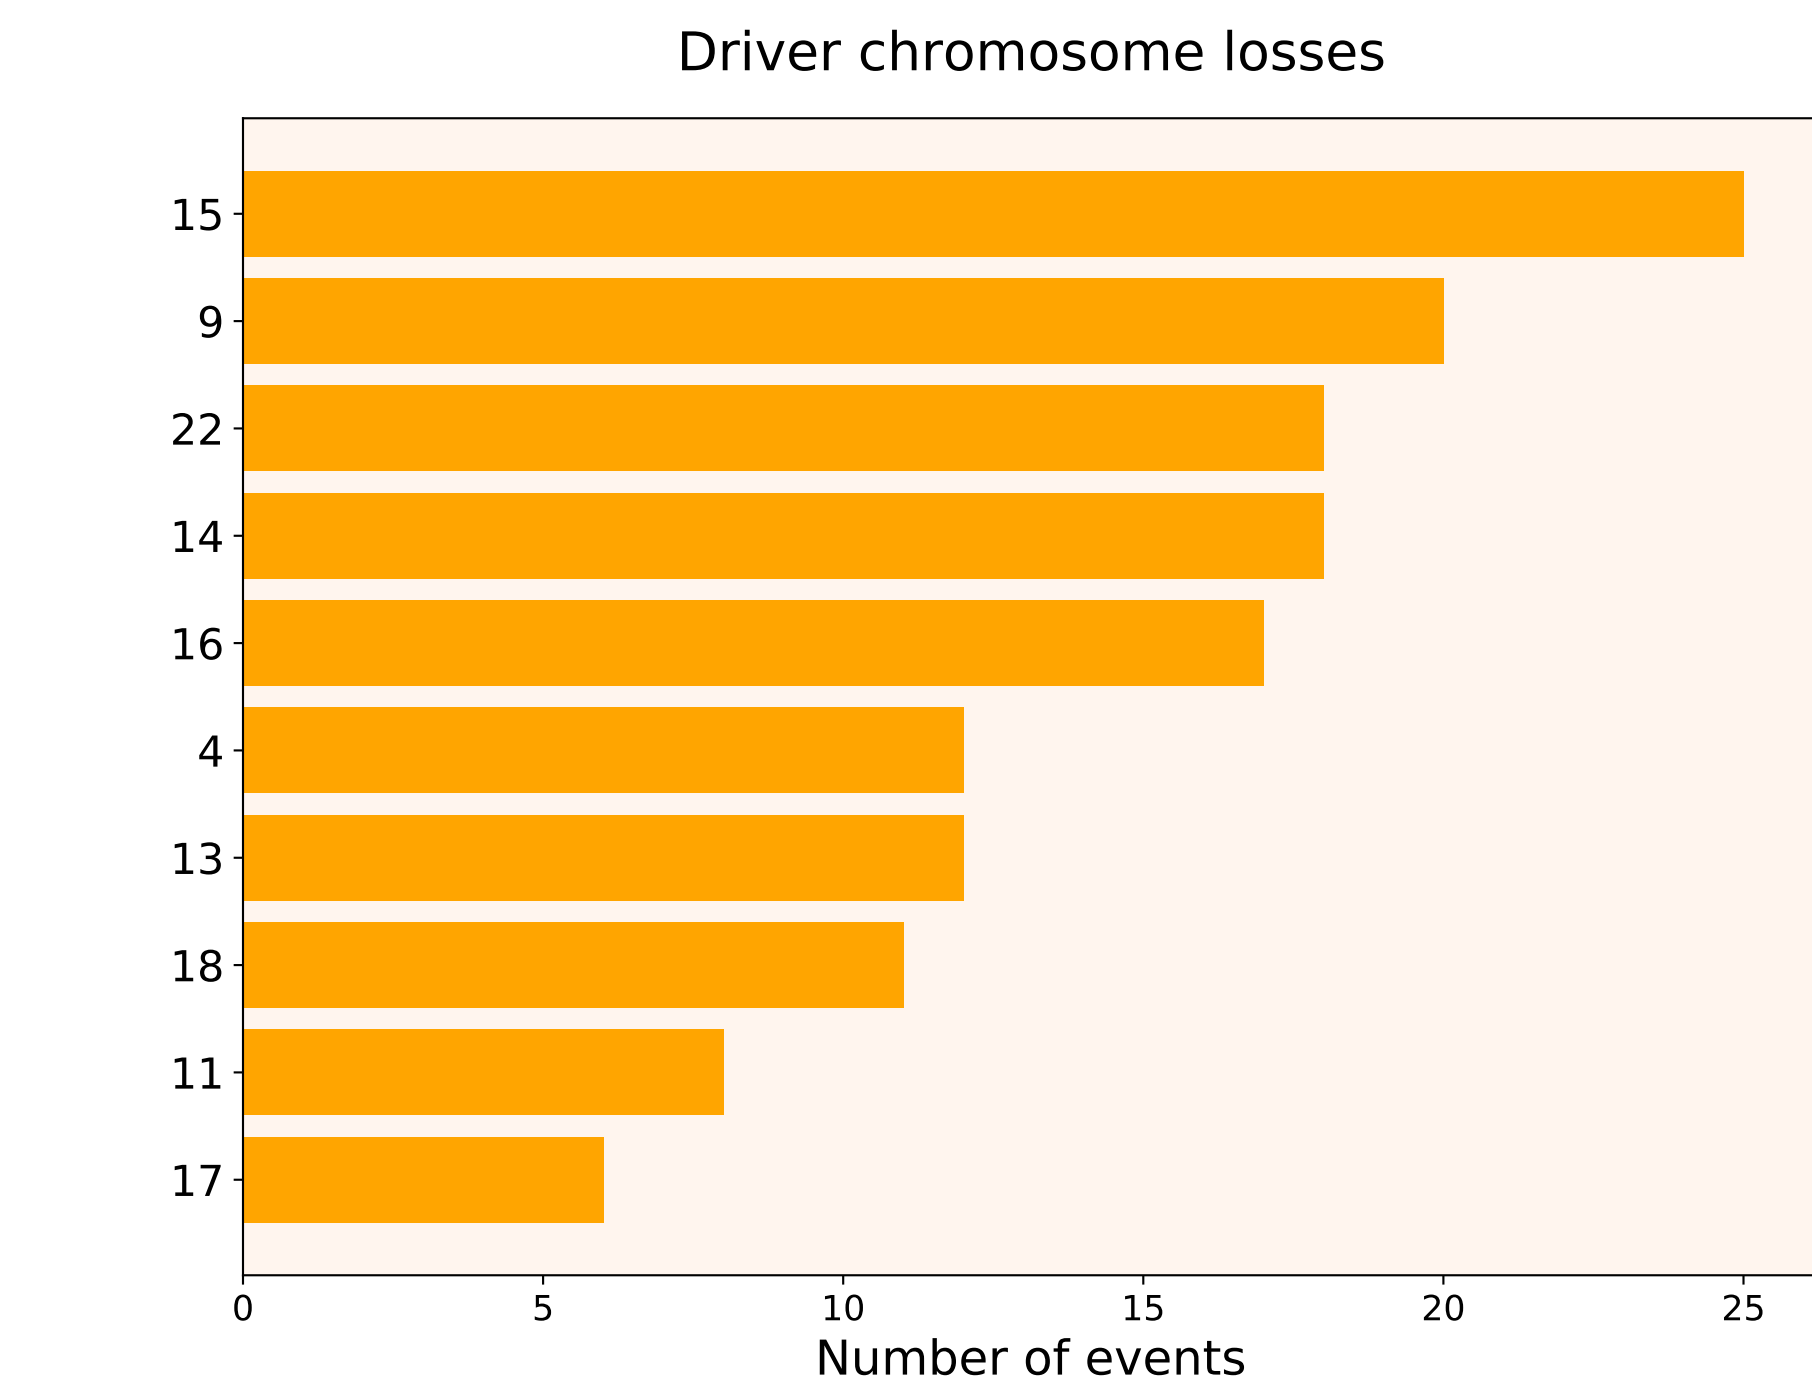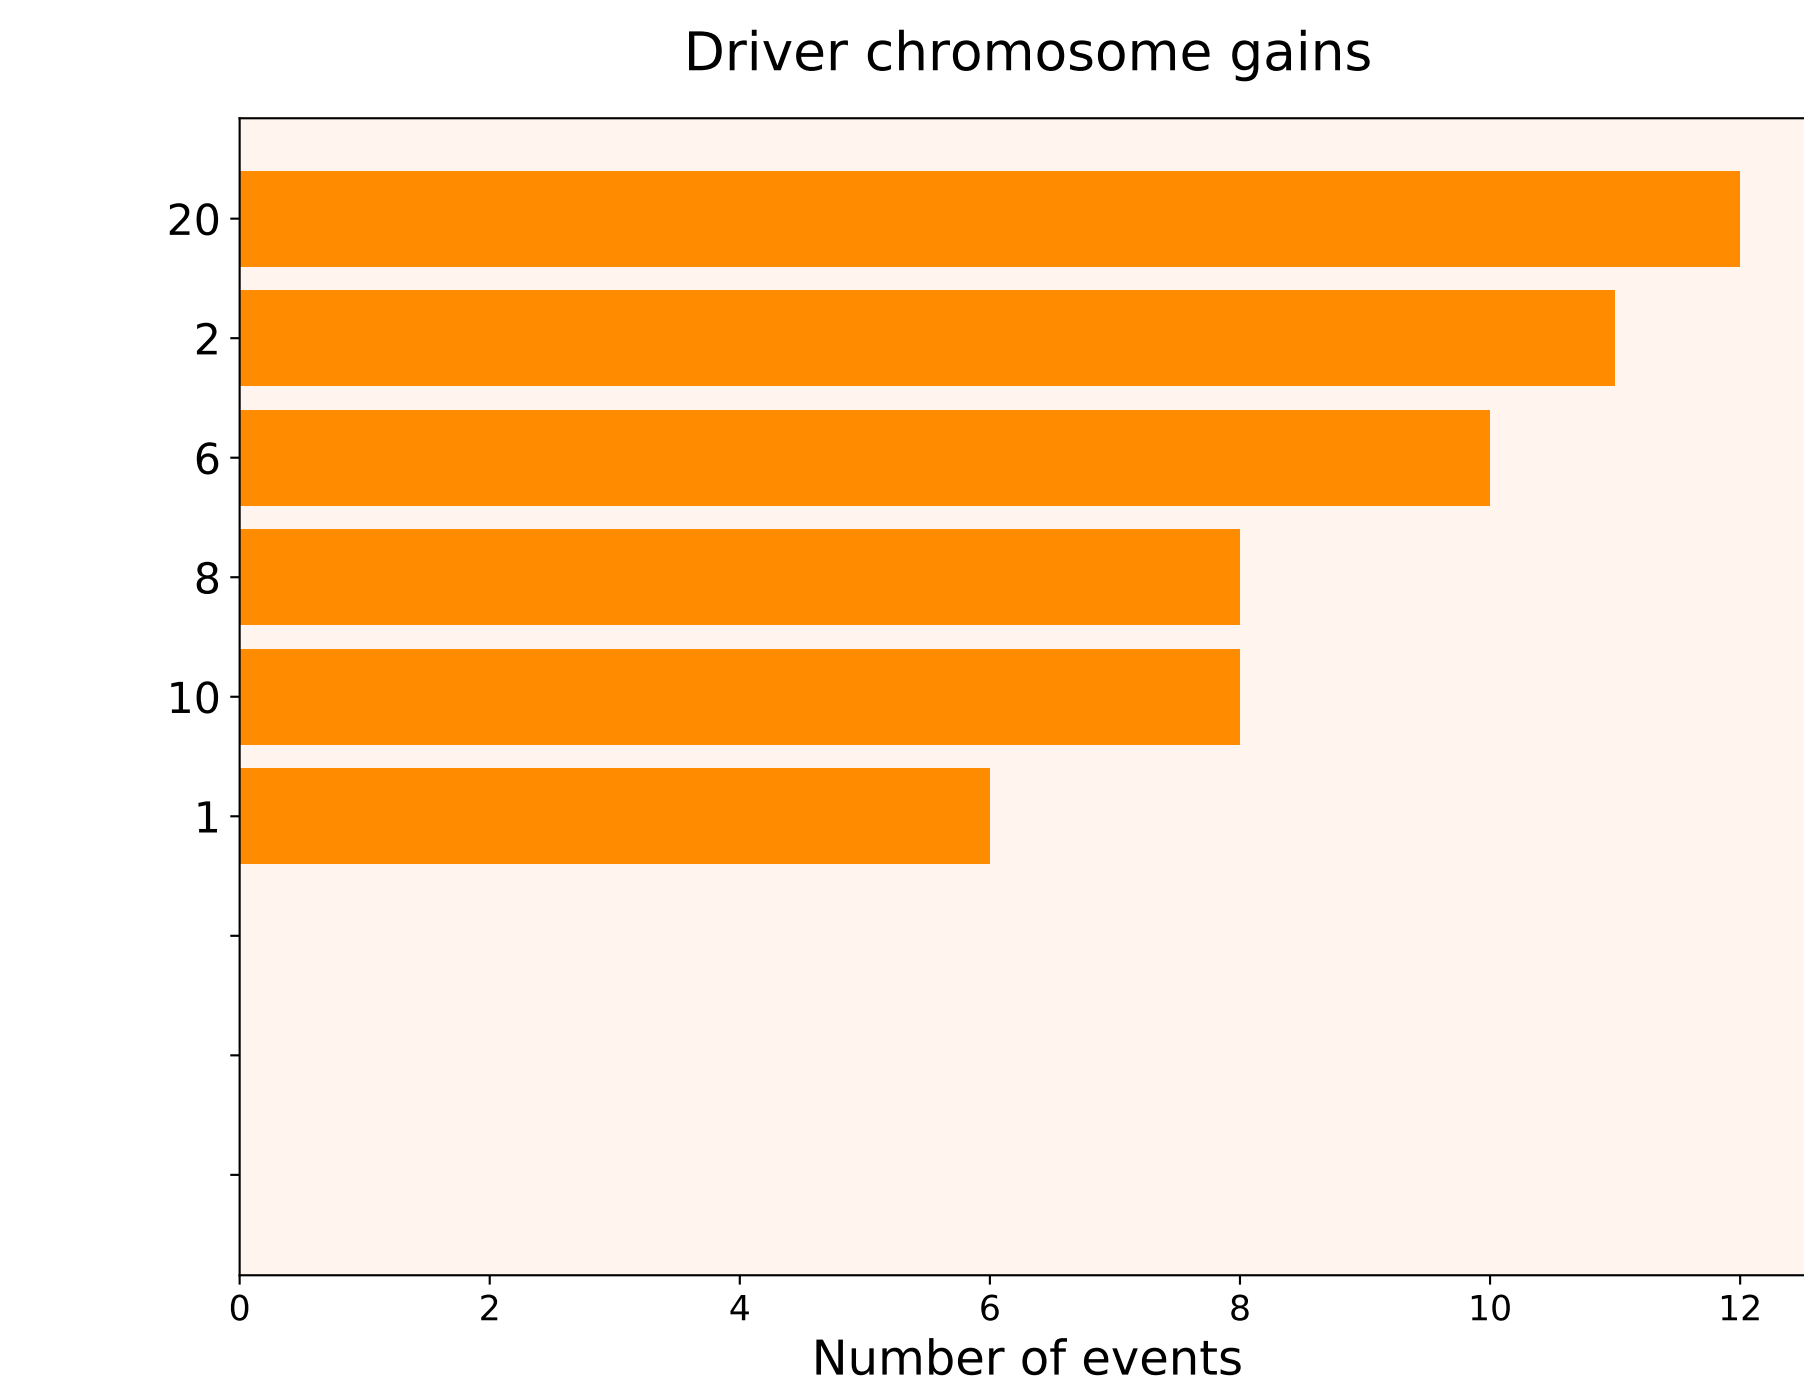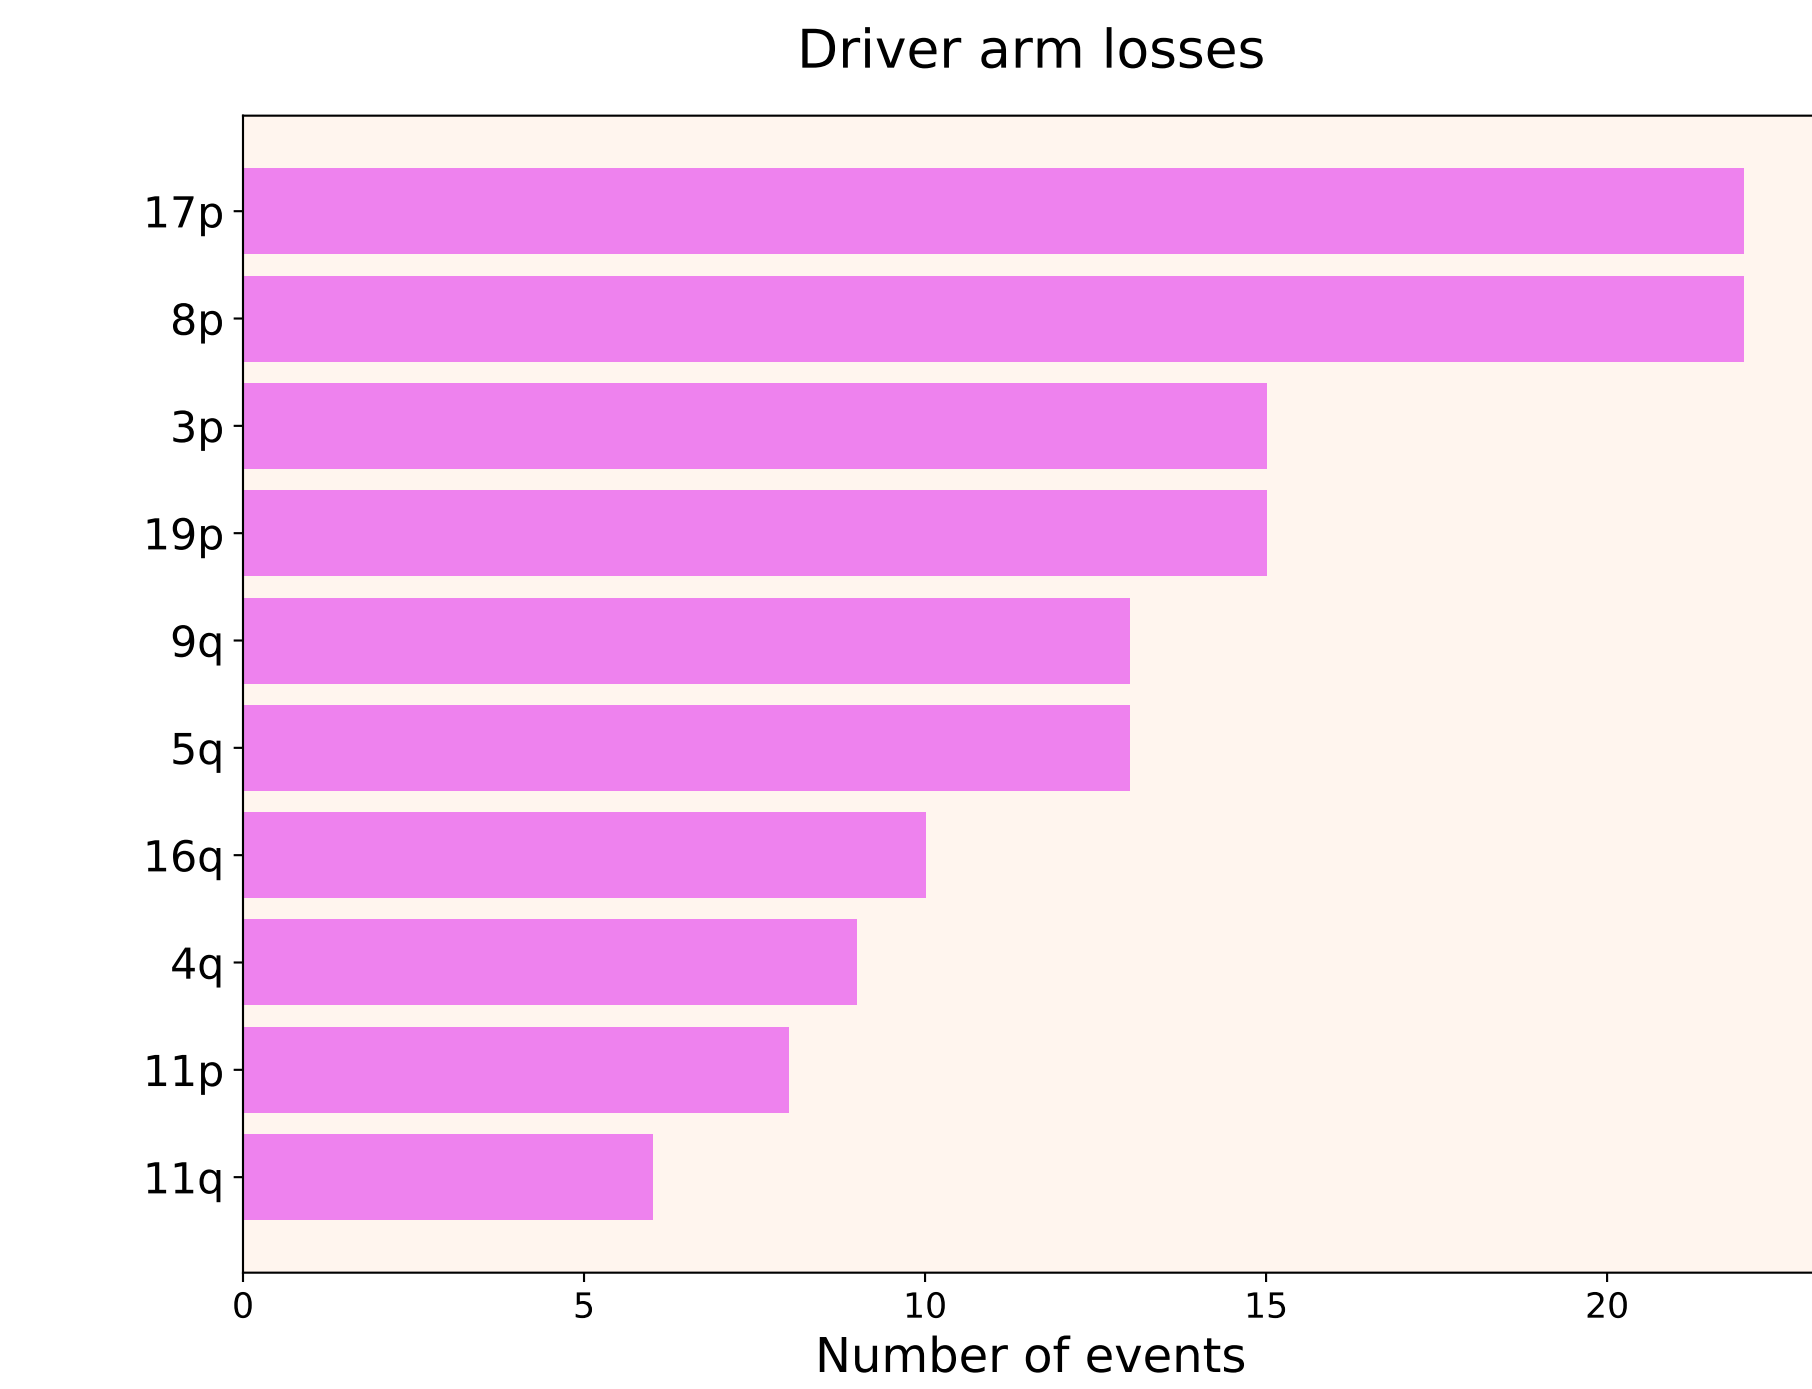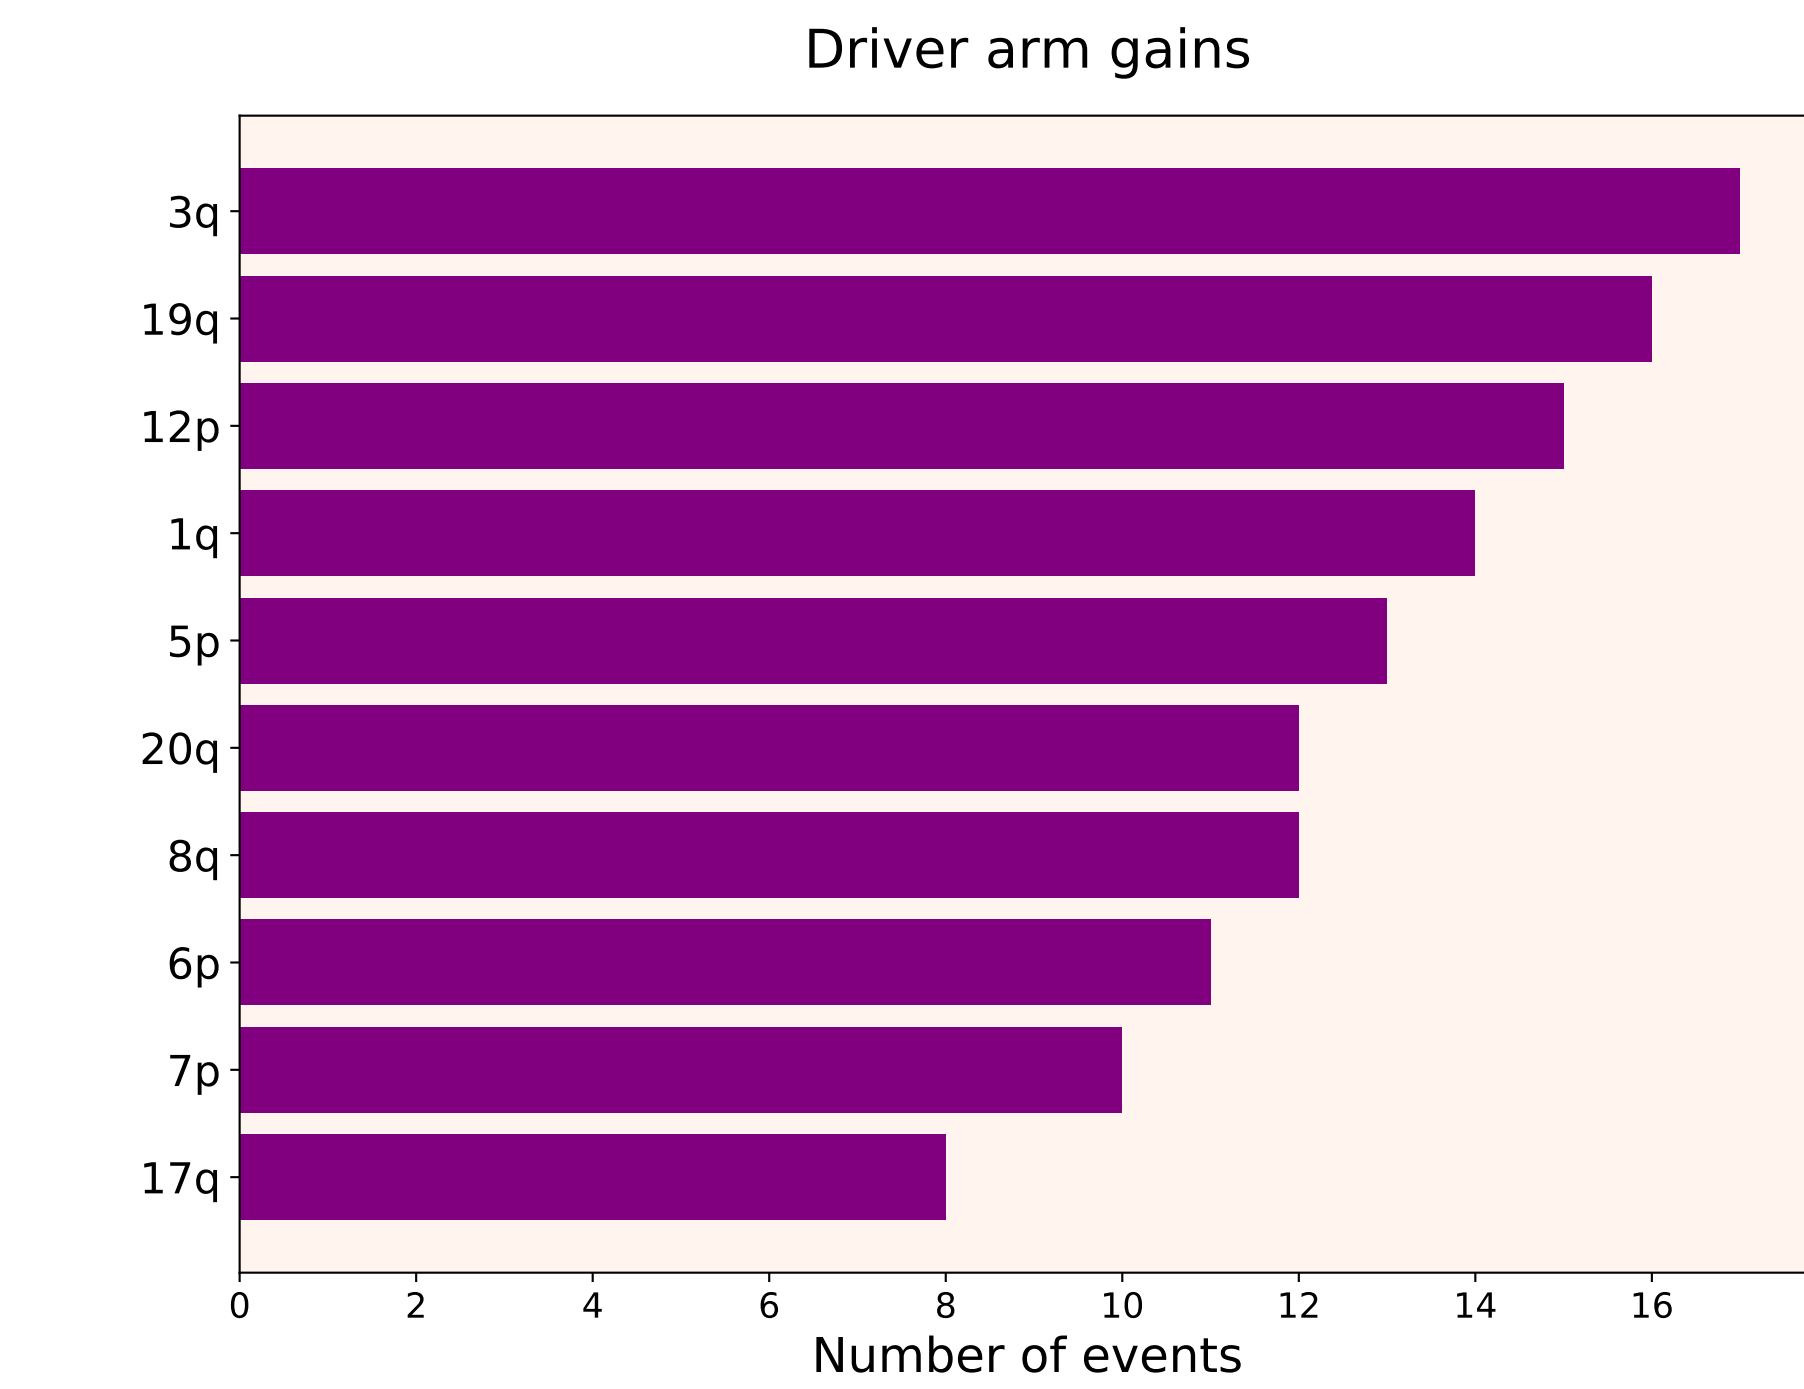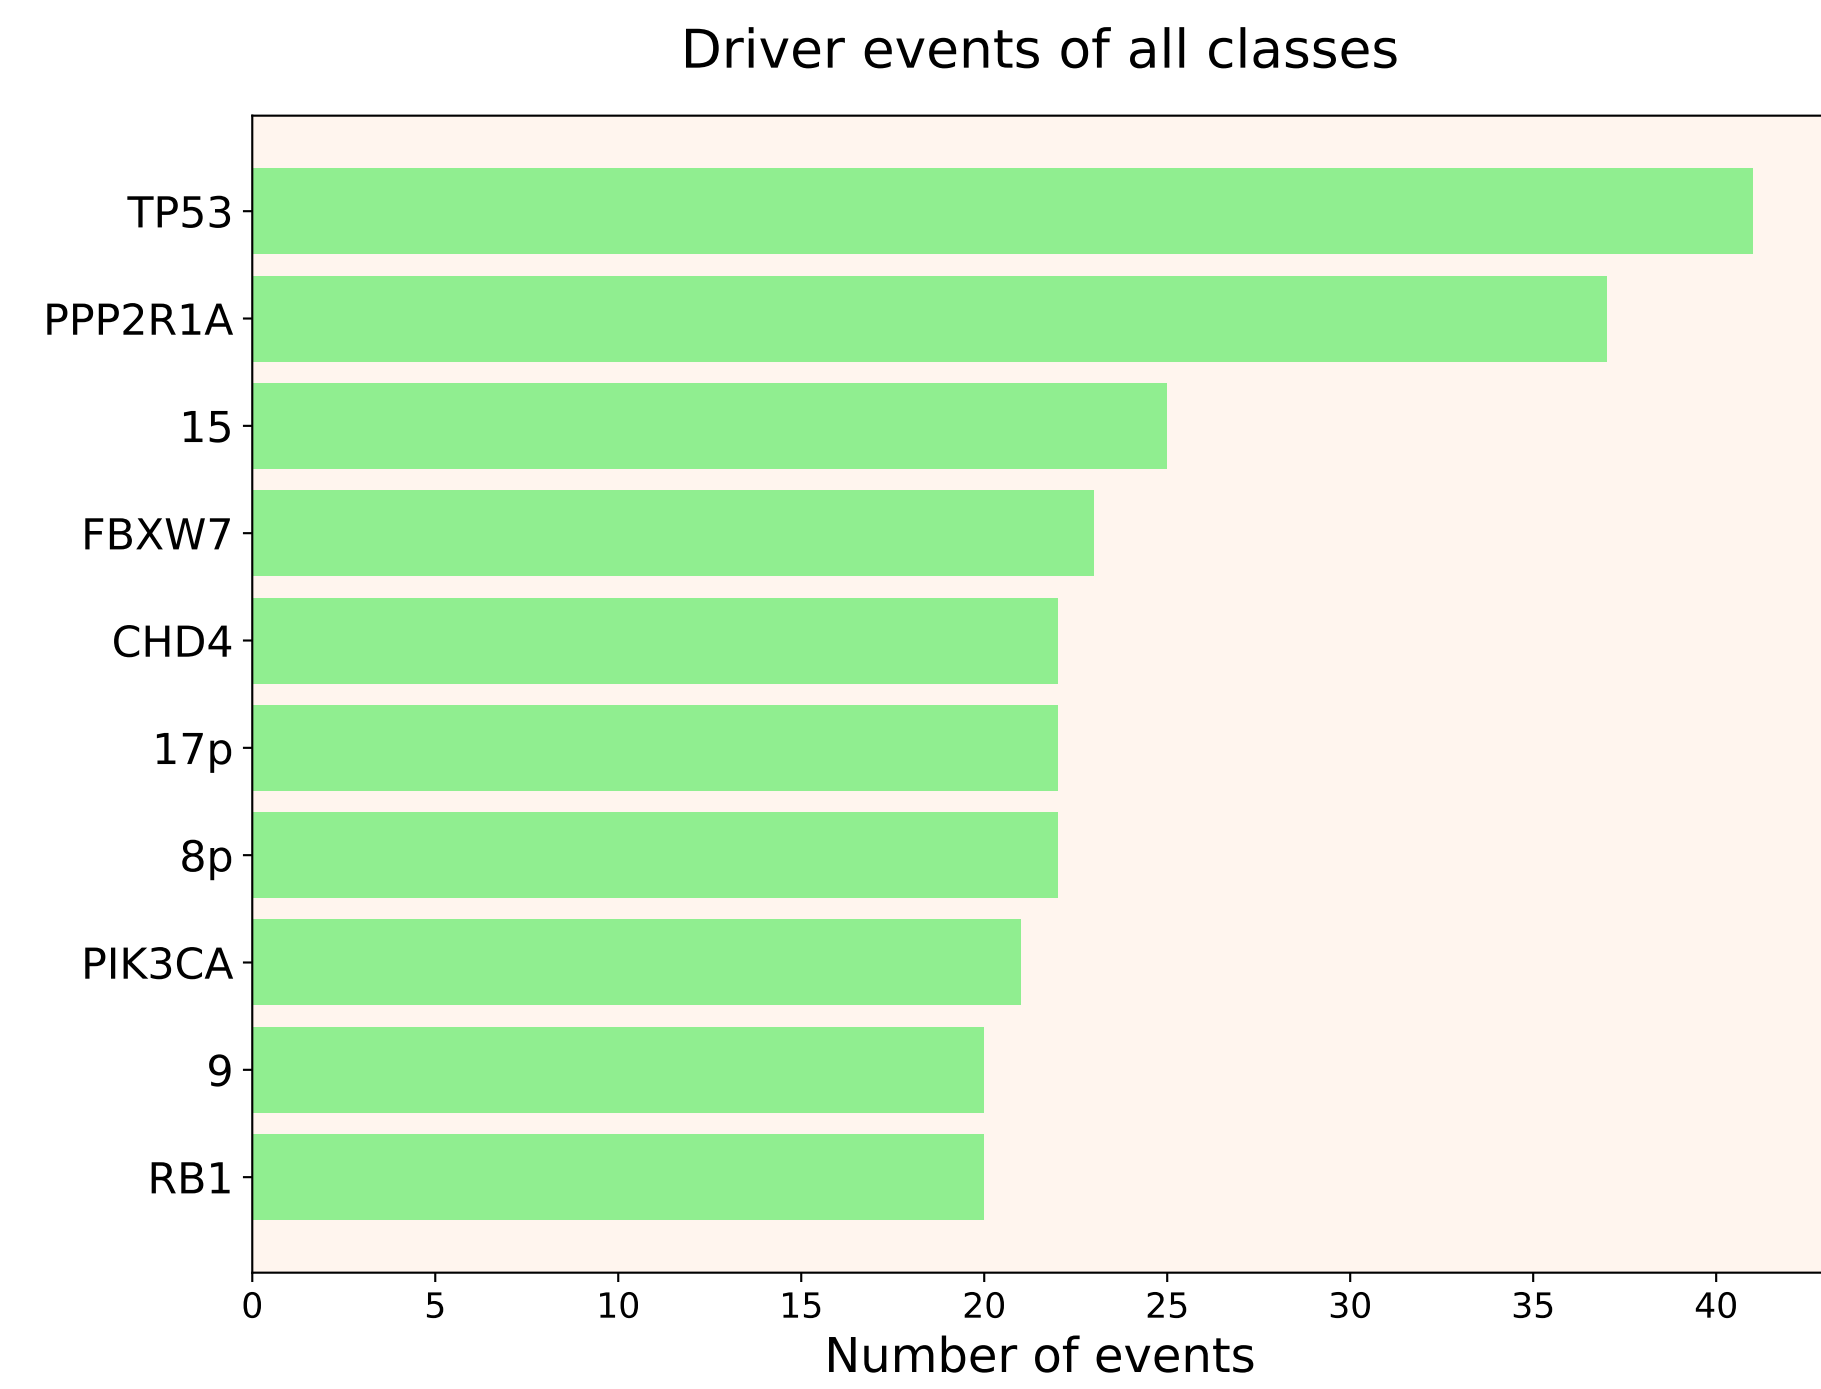

Supplement: Supplemental_Data_S1.zip [file Supplemental_Data_S1.zip]

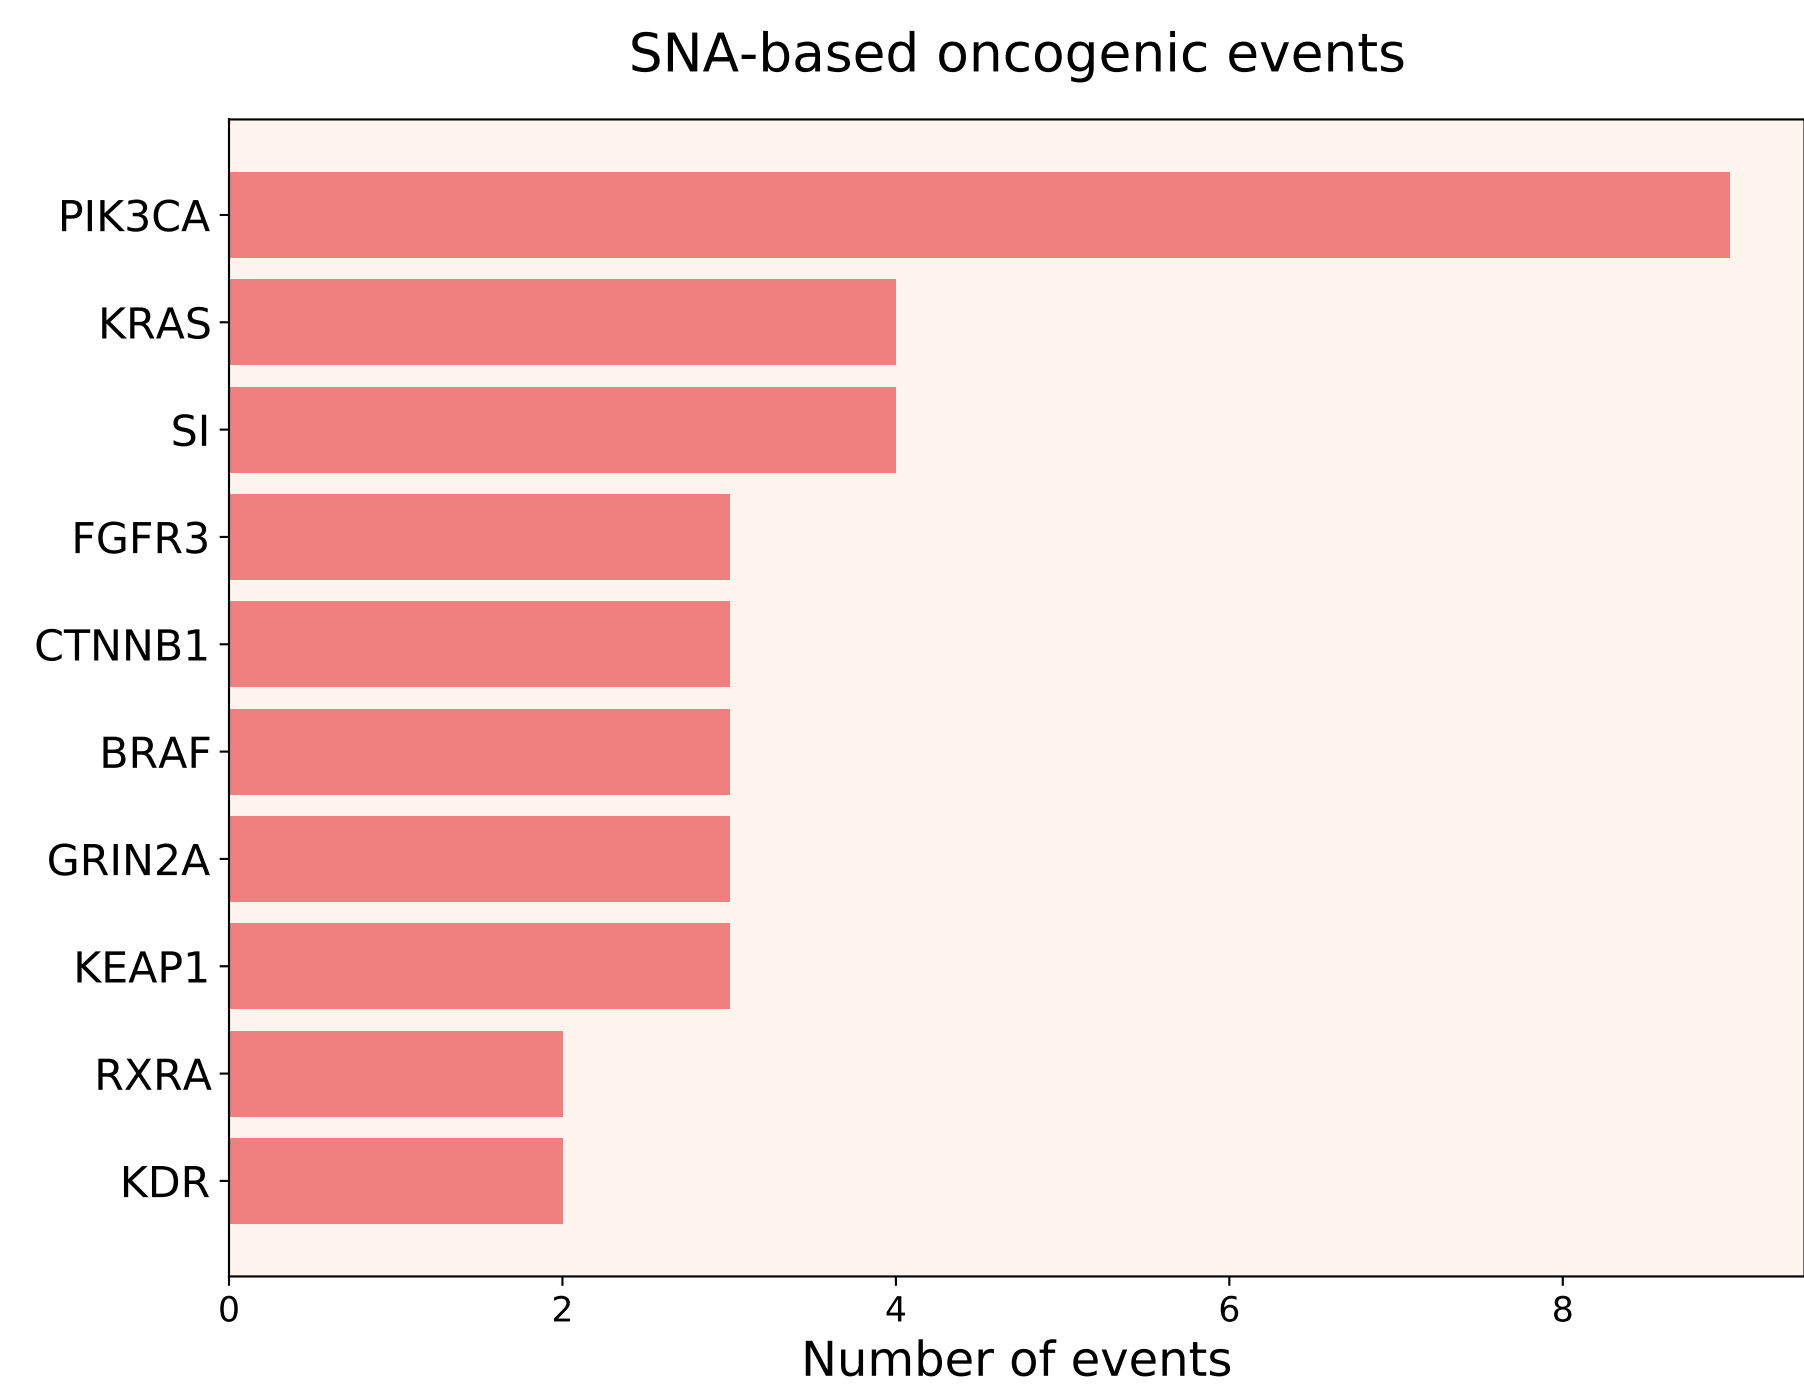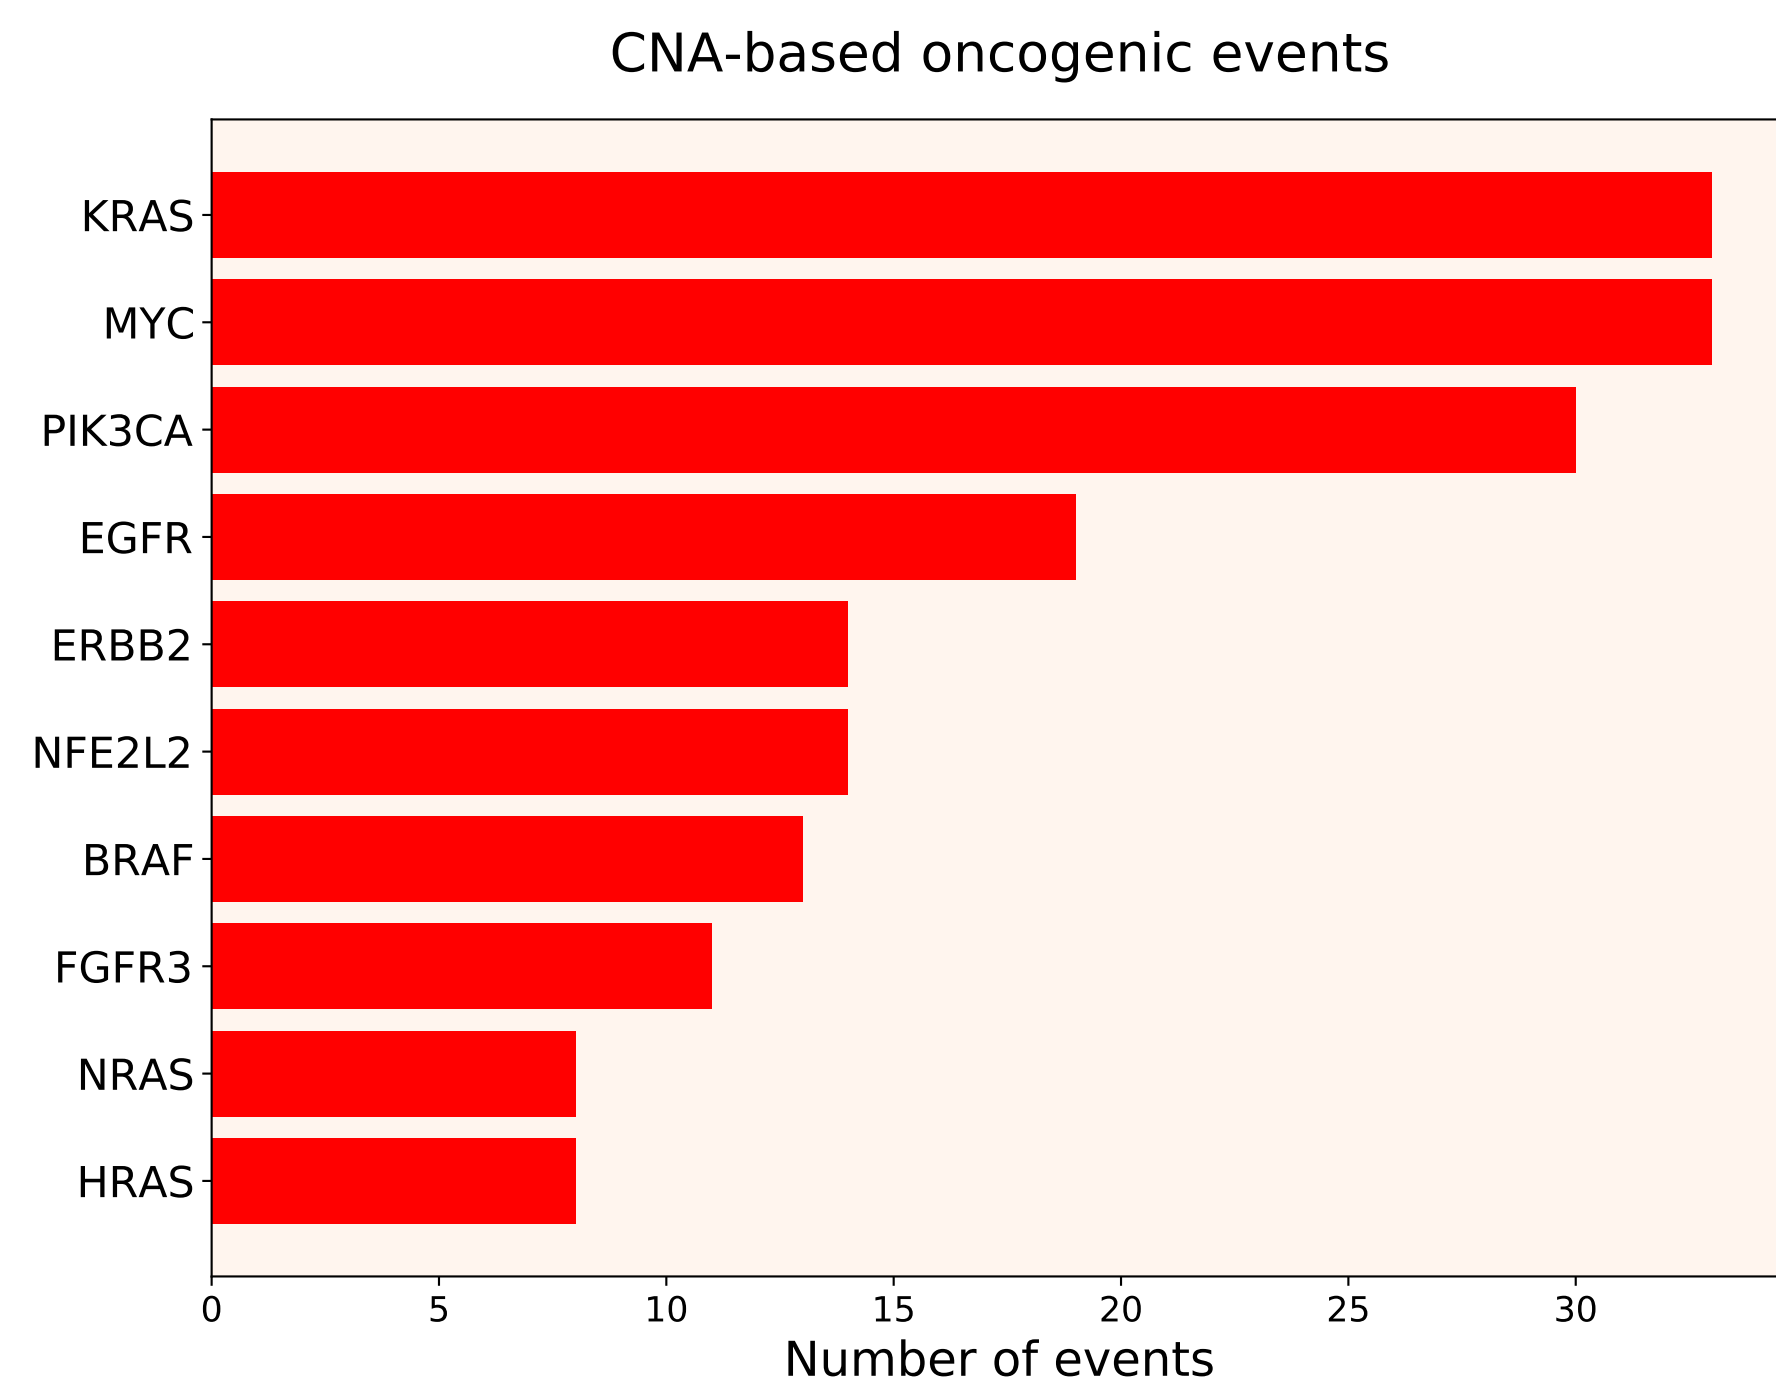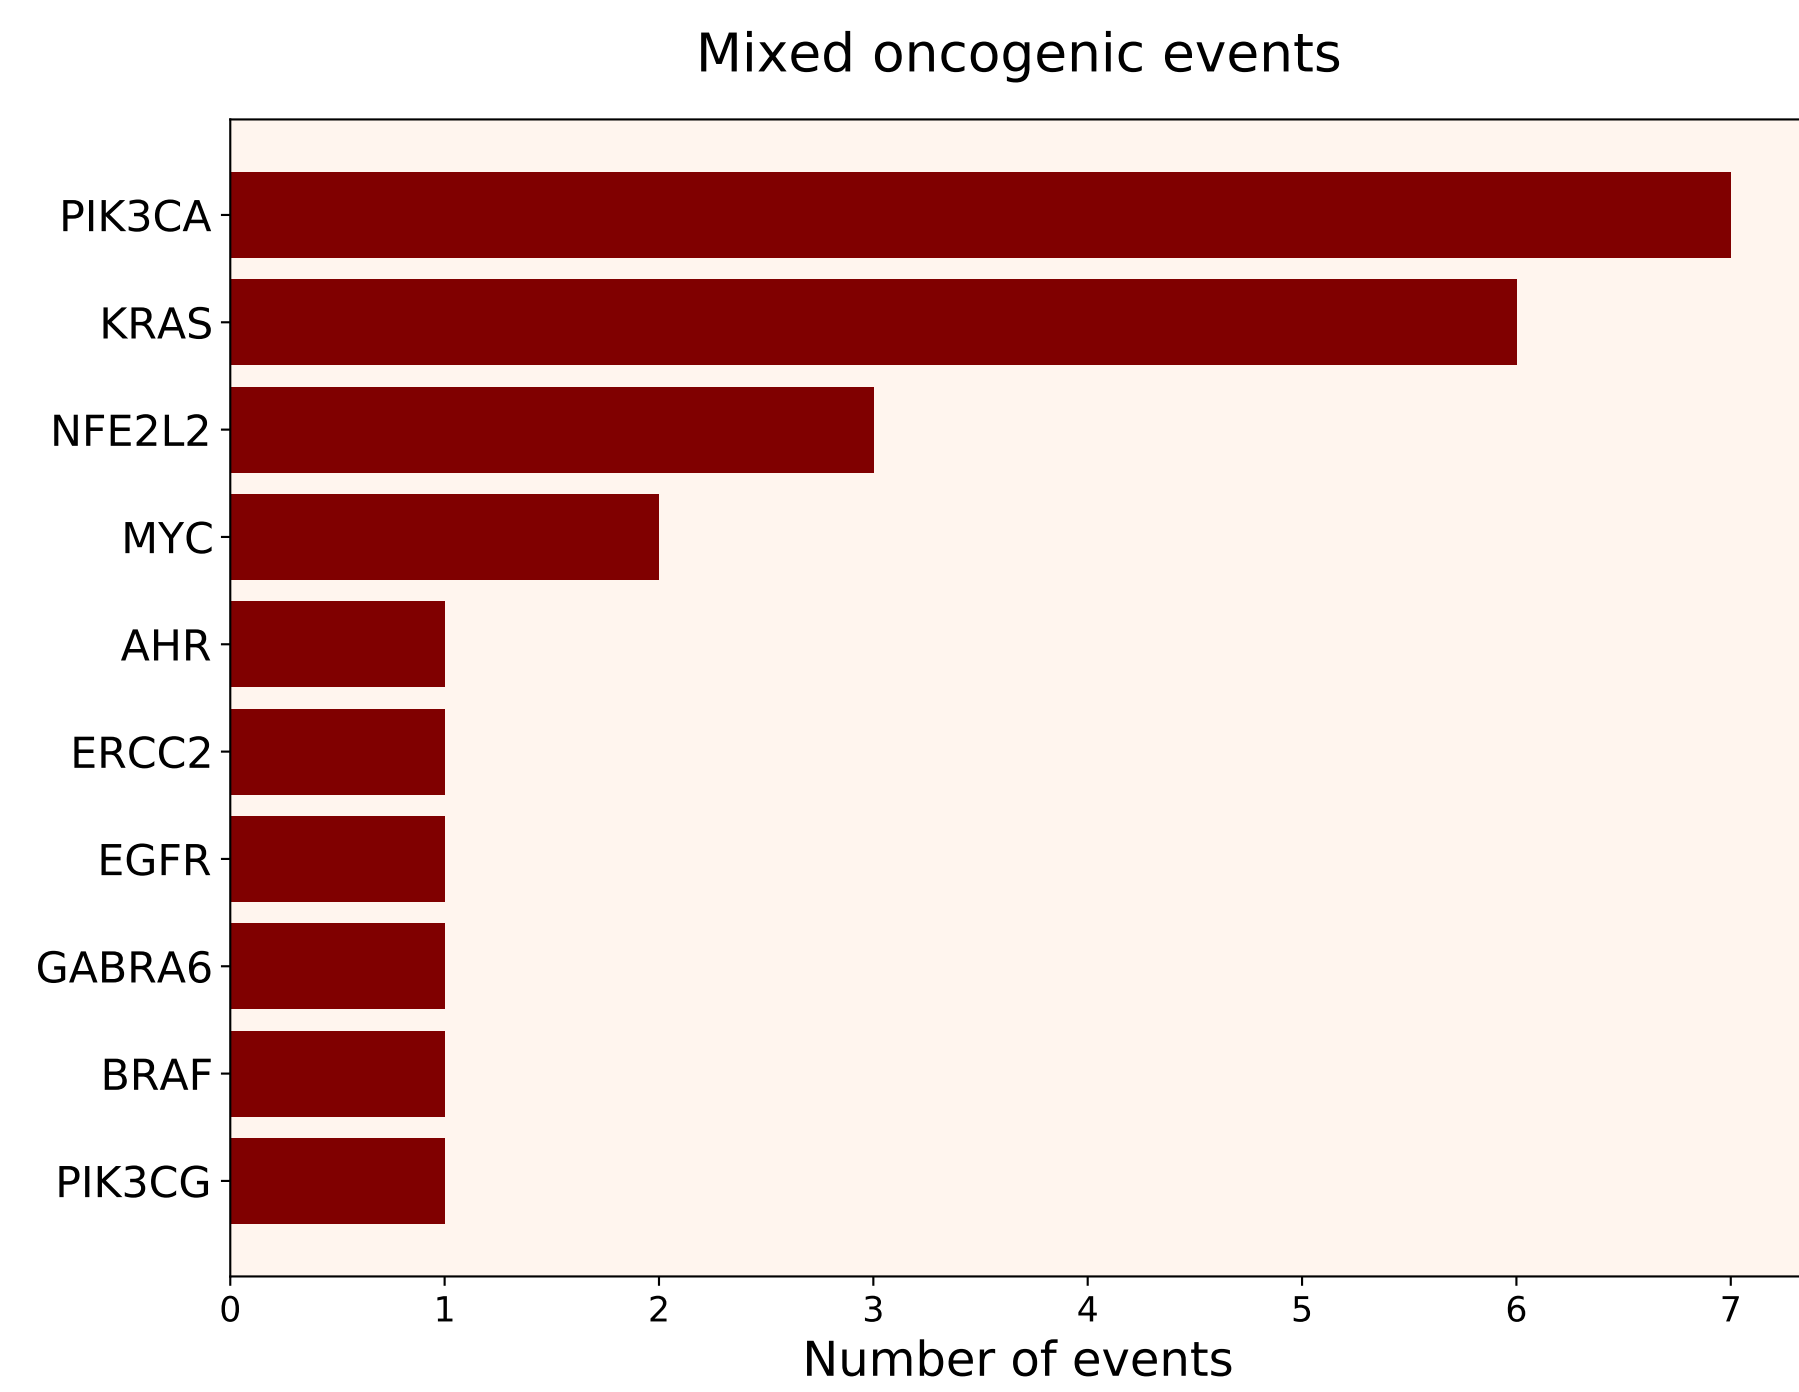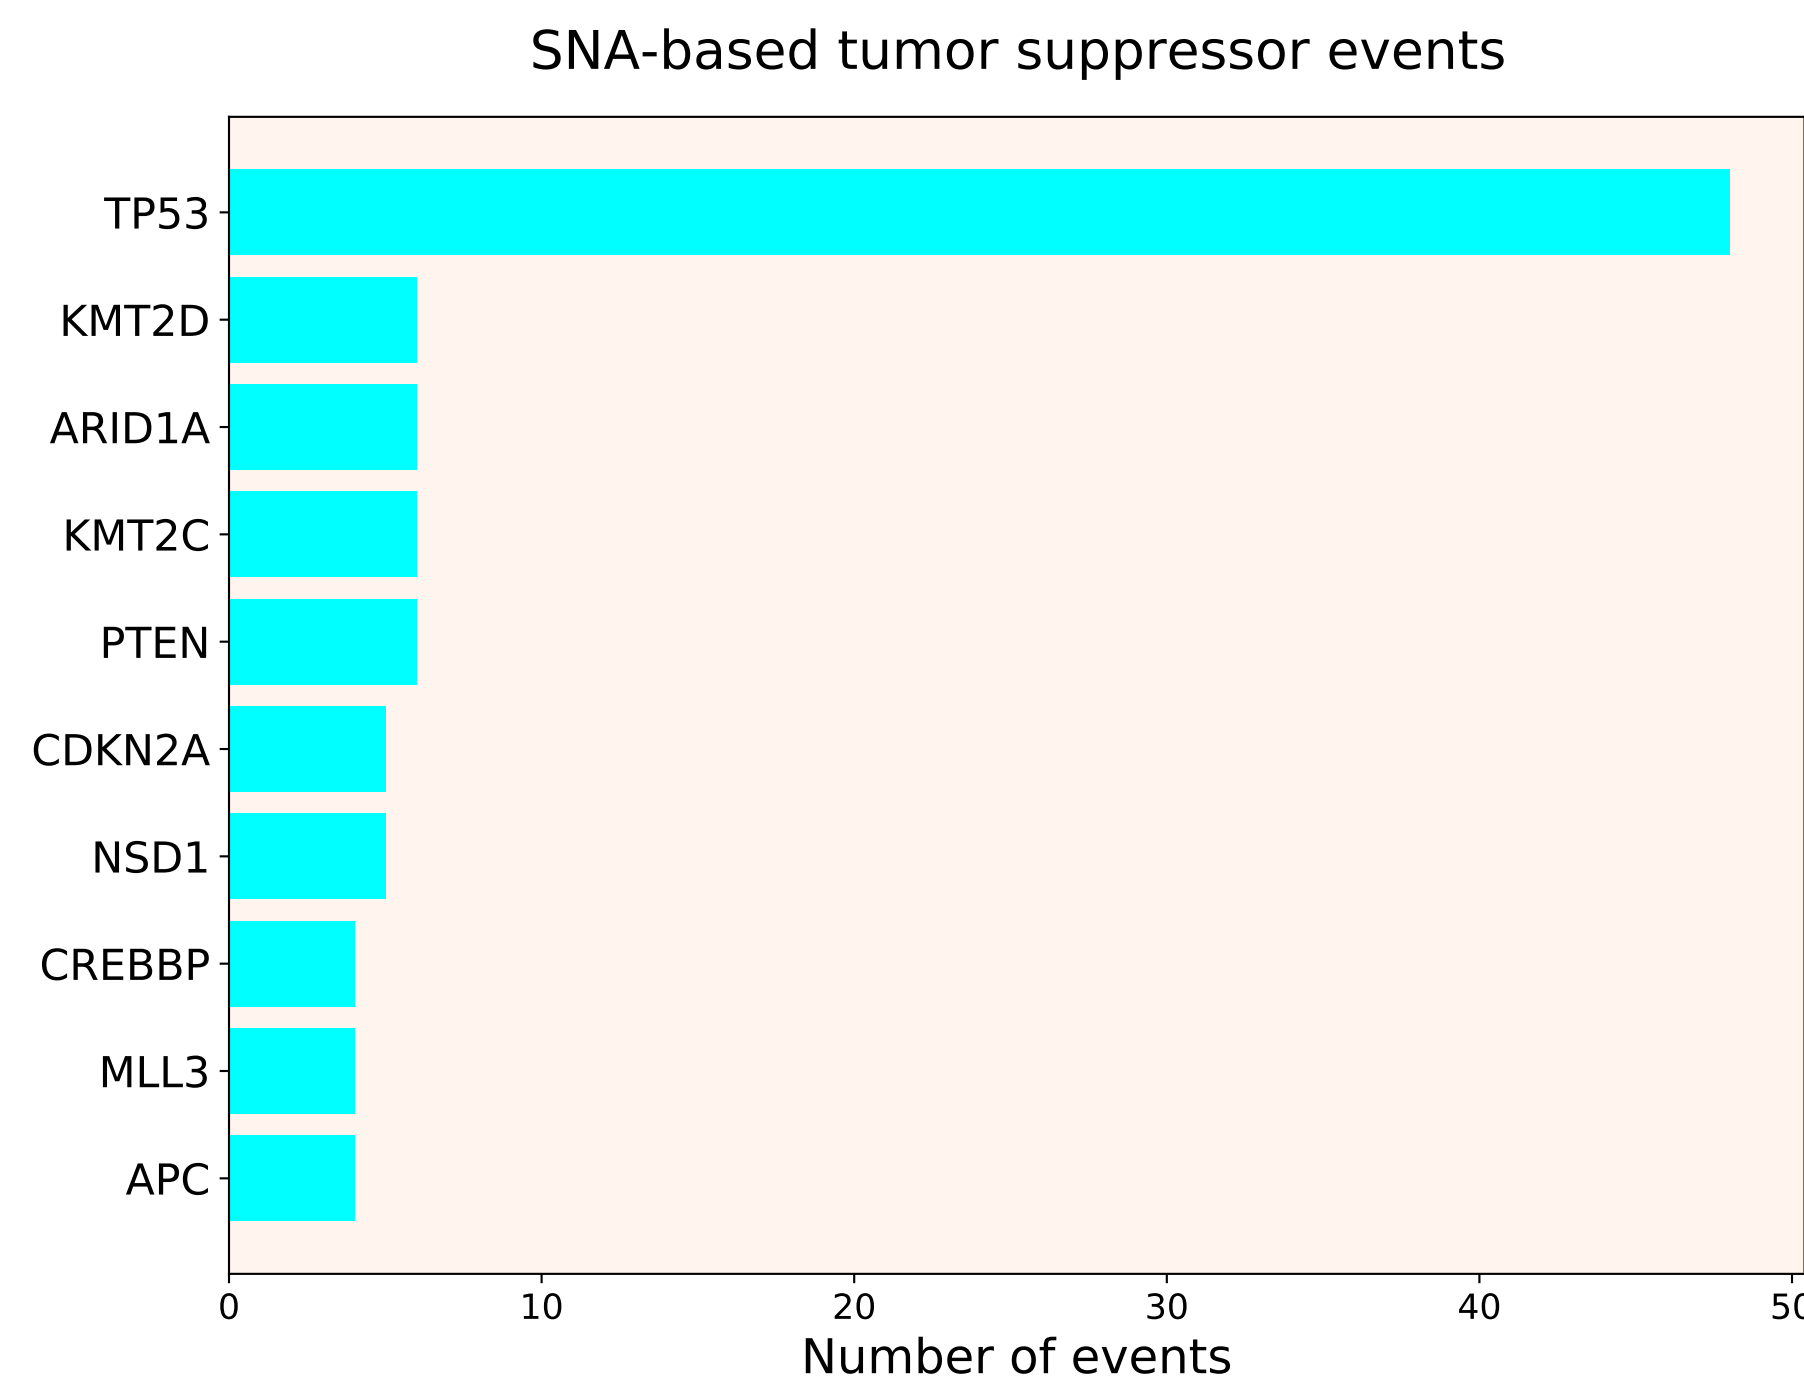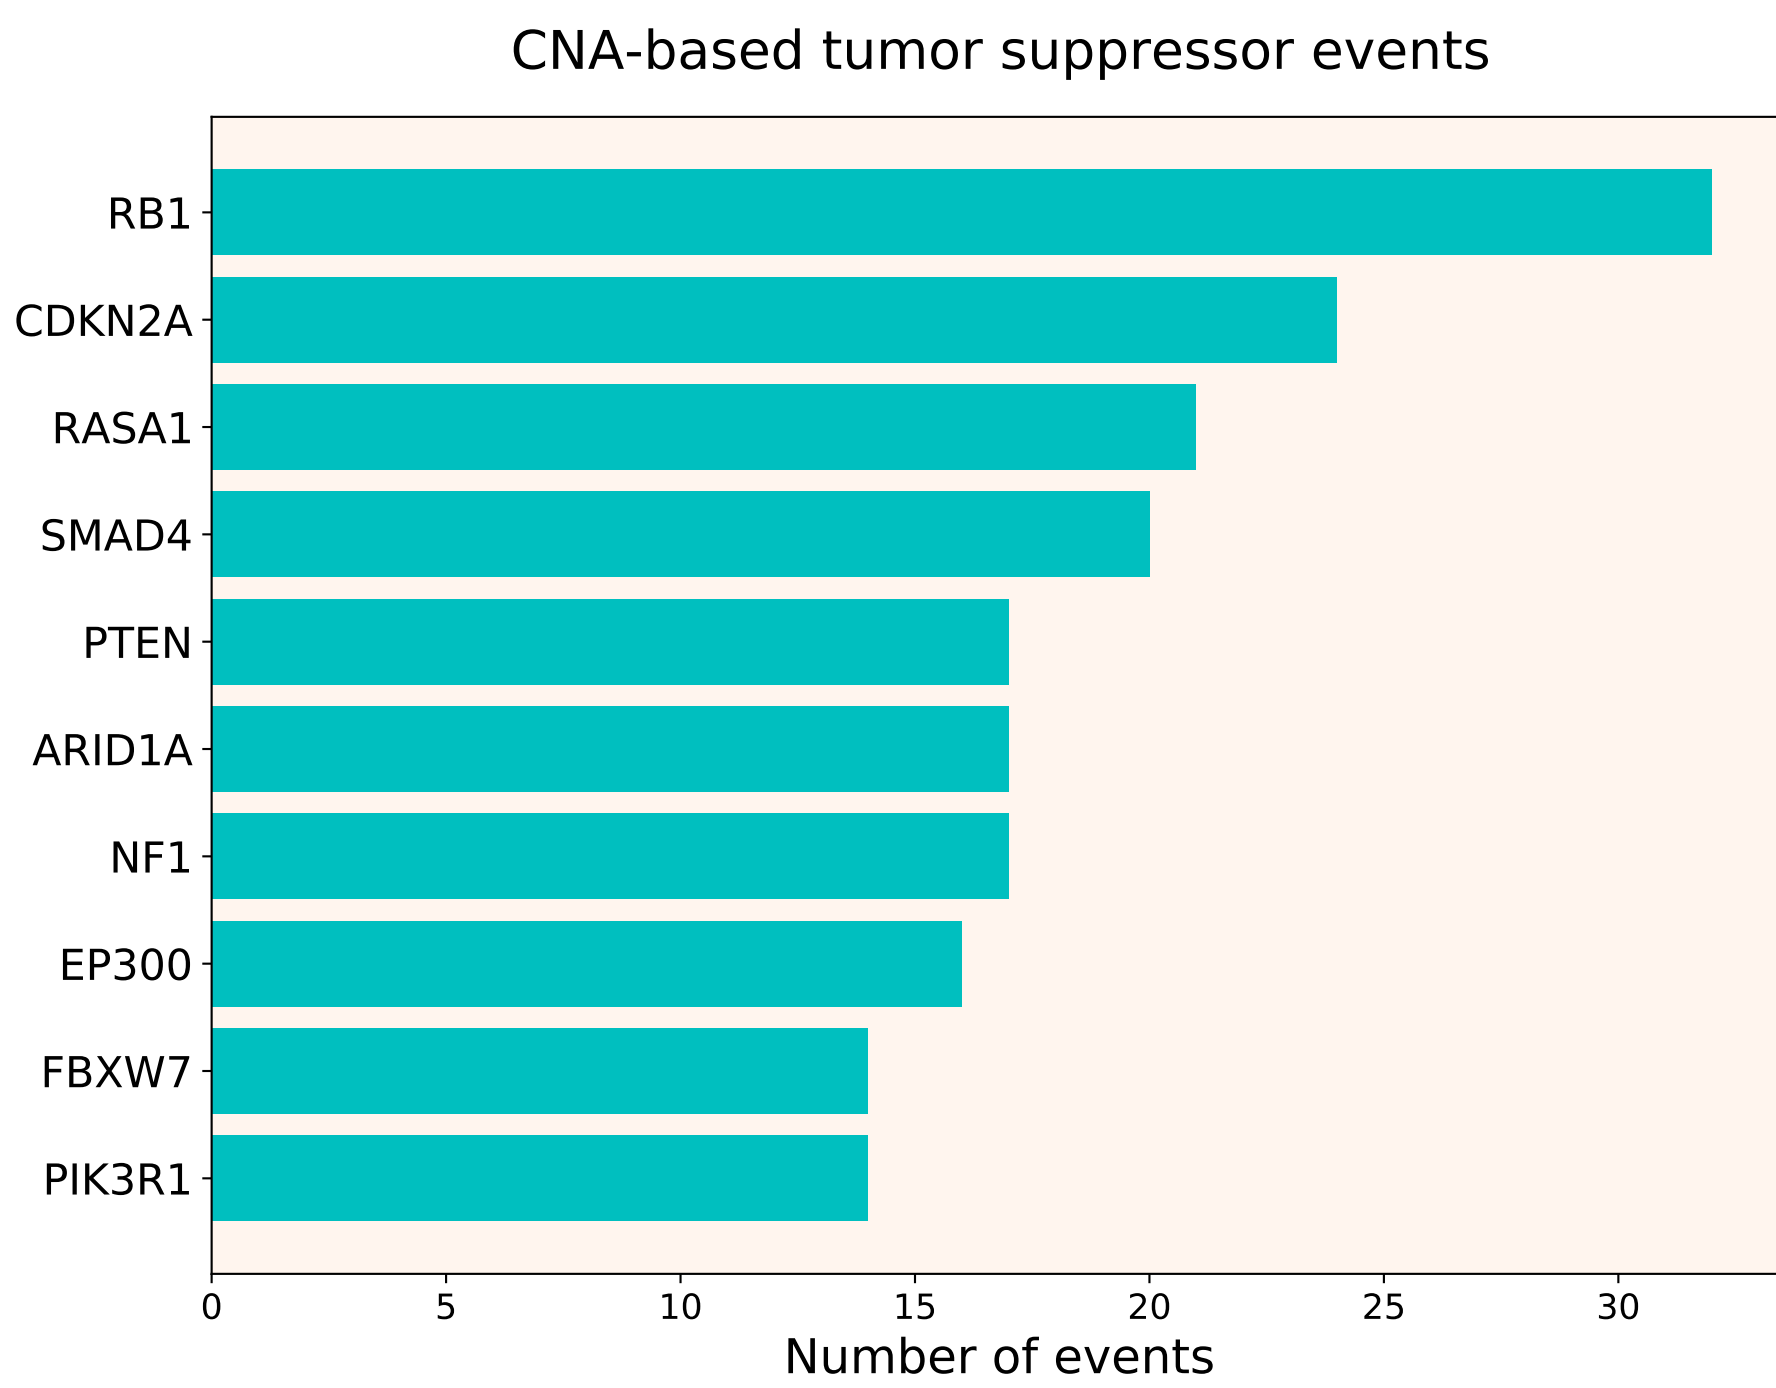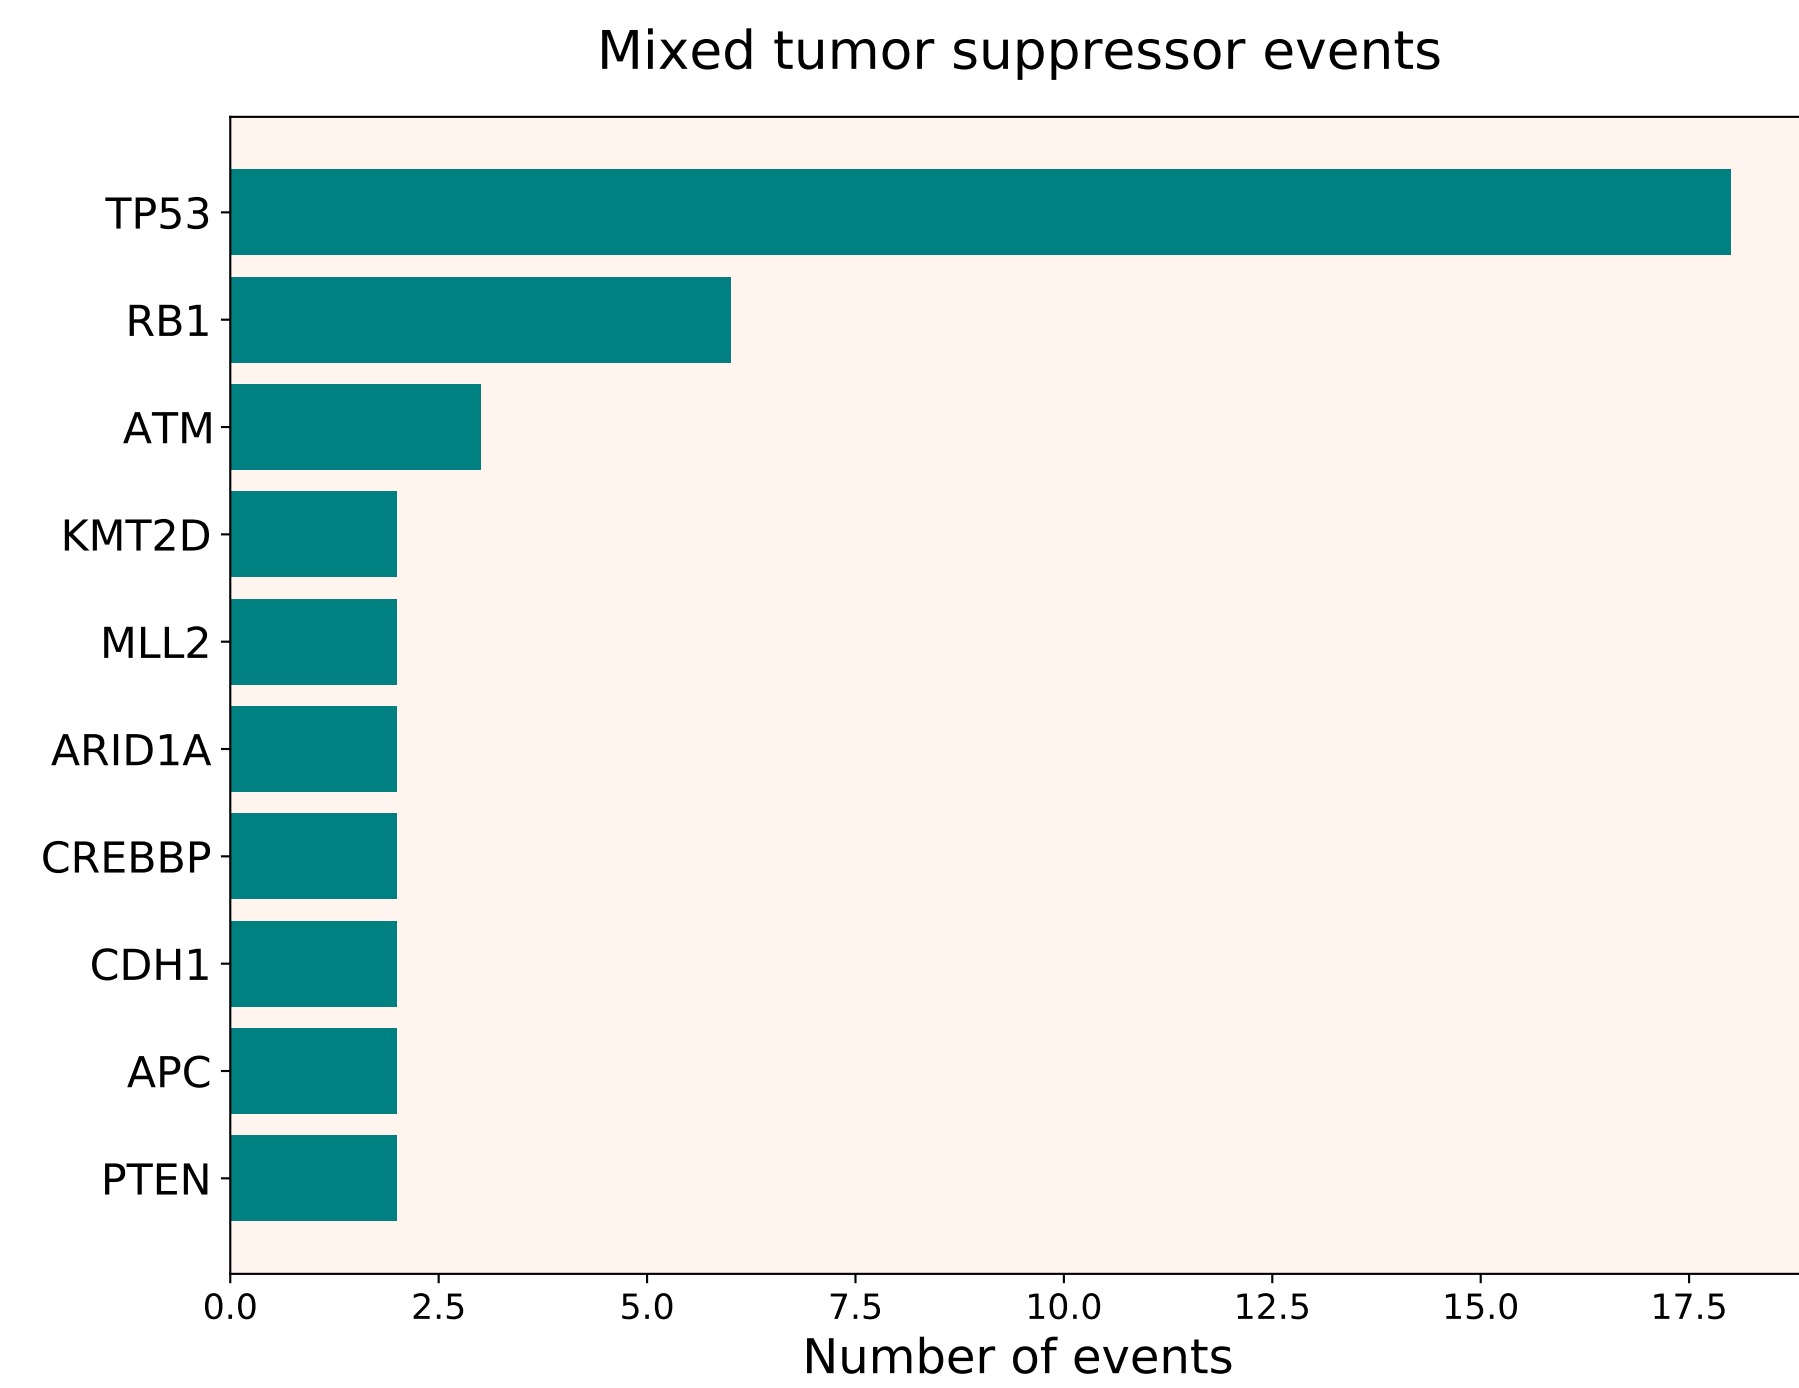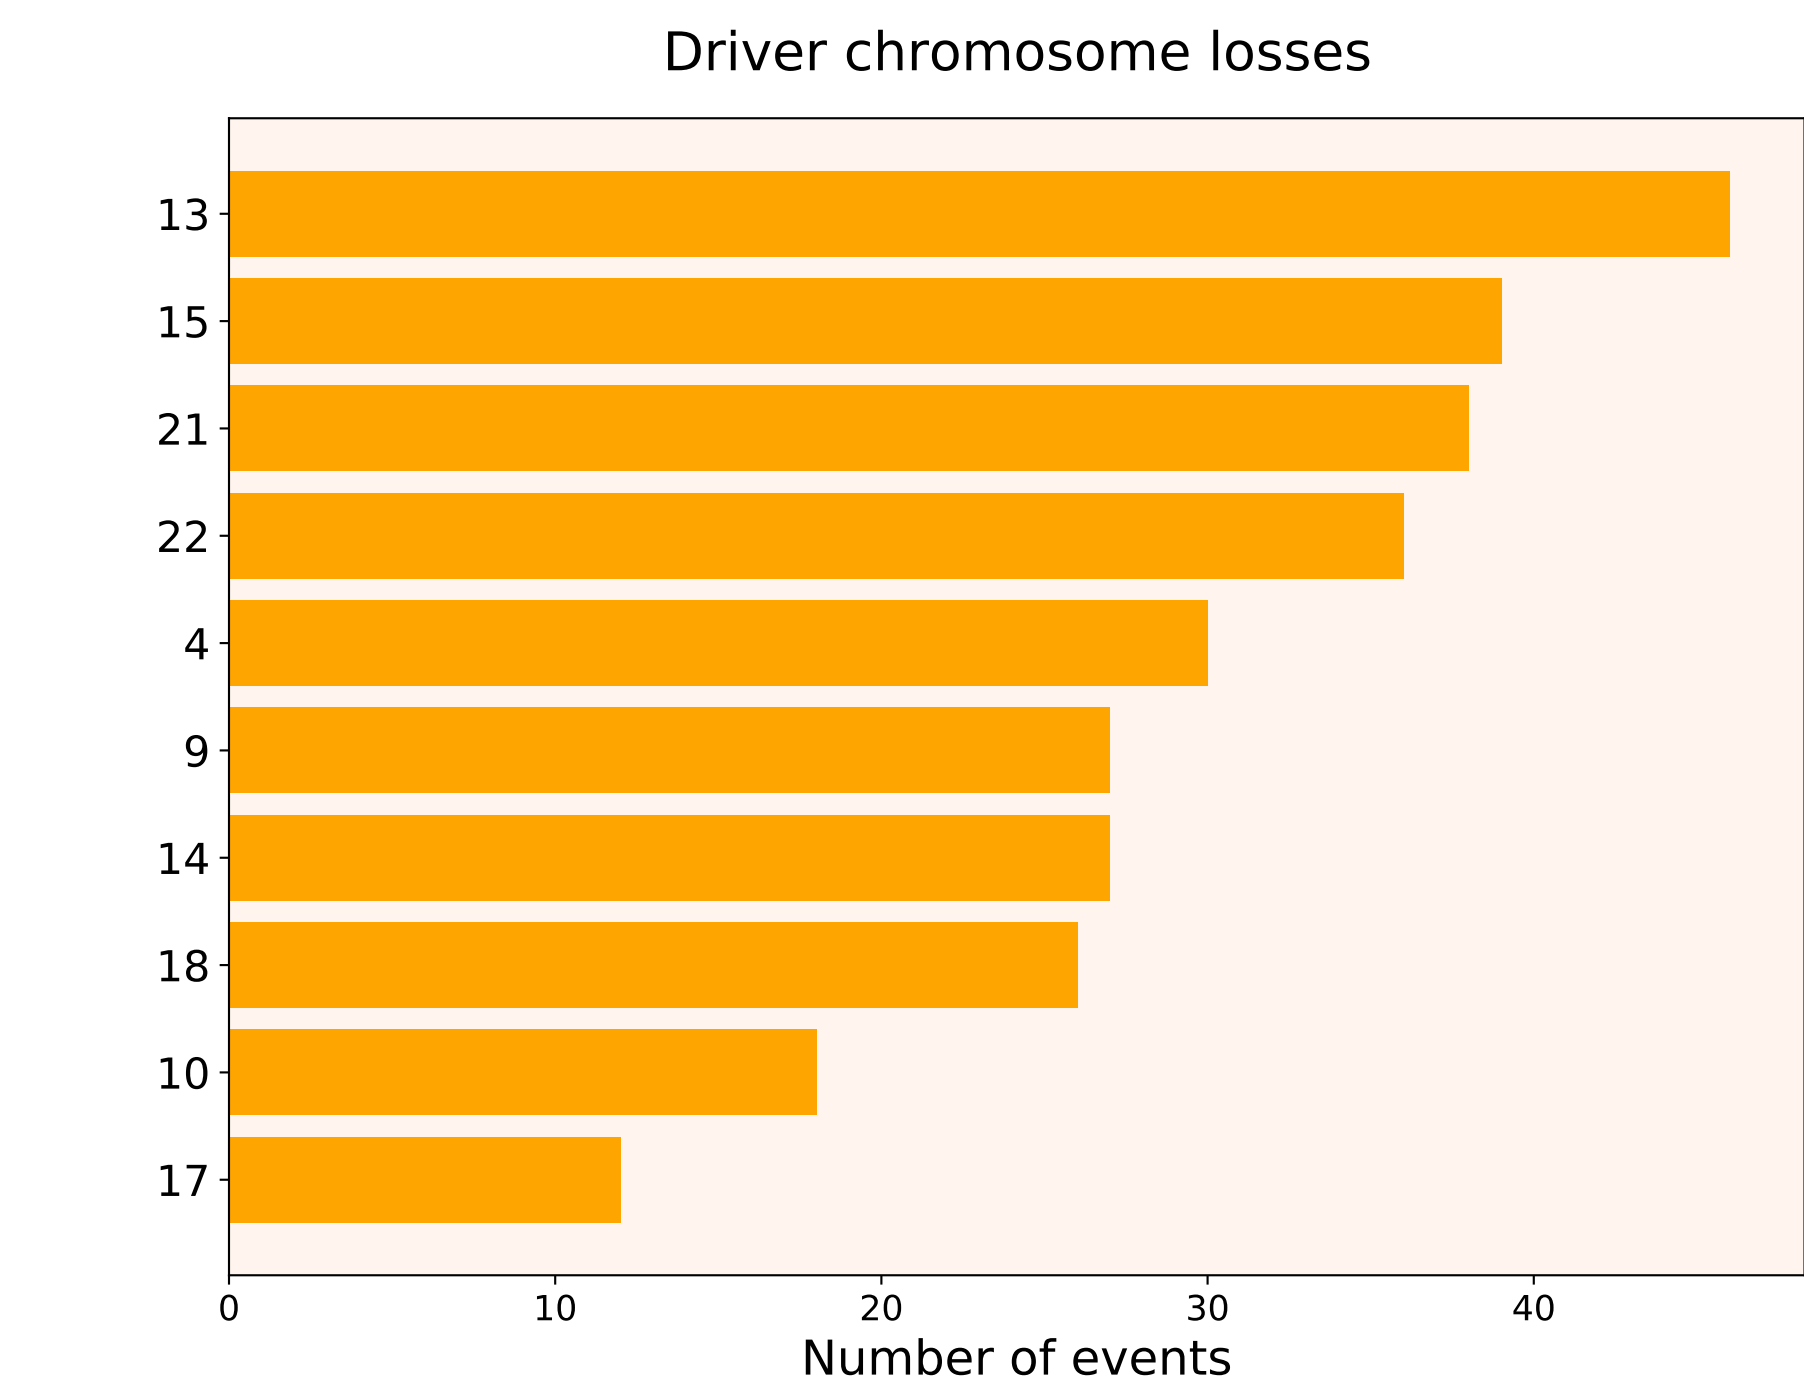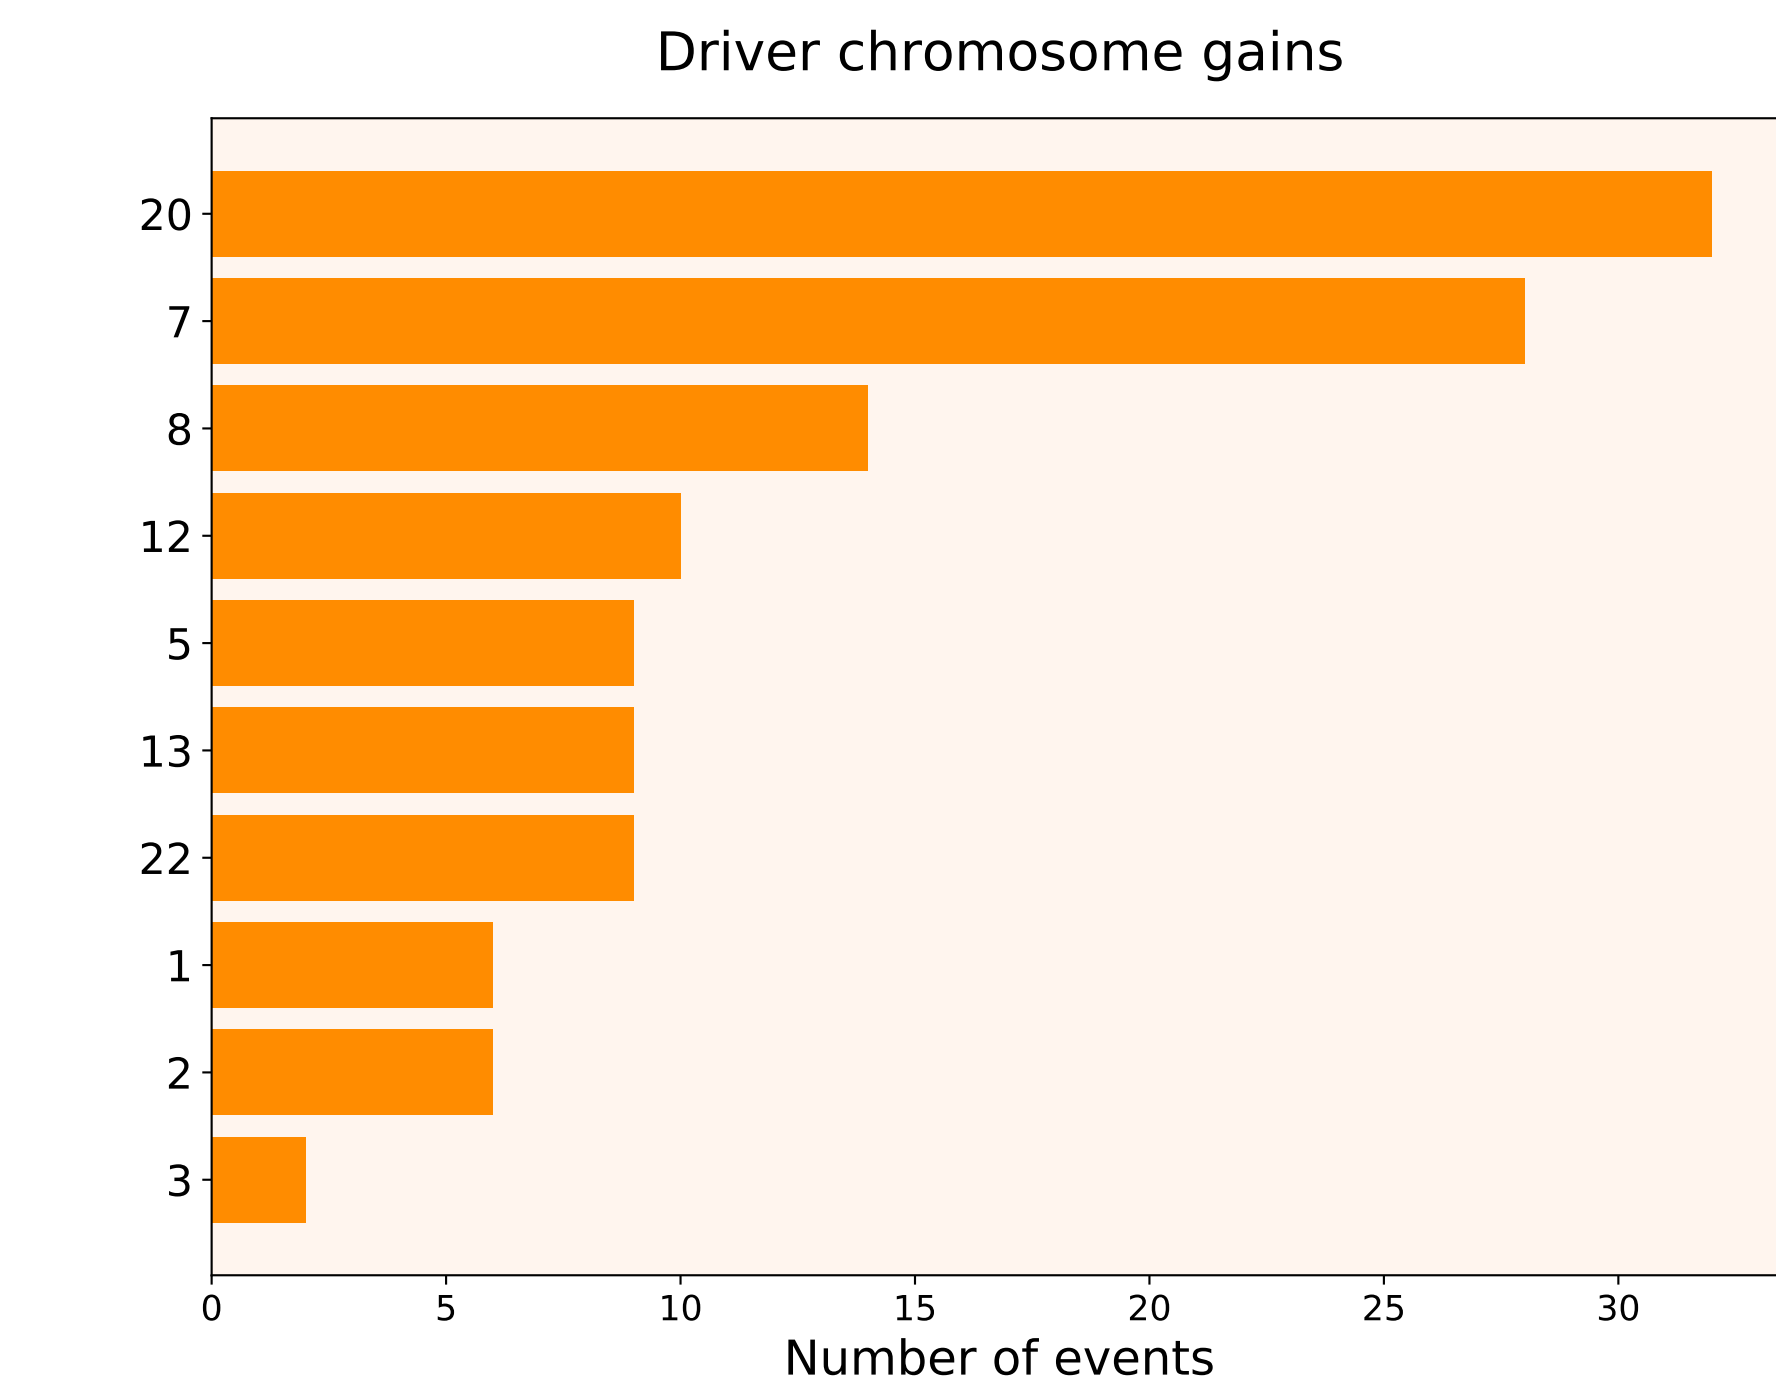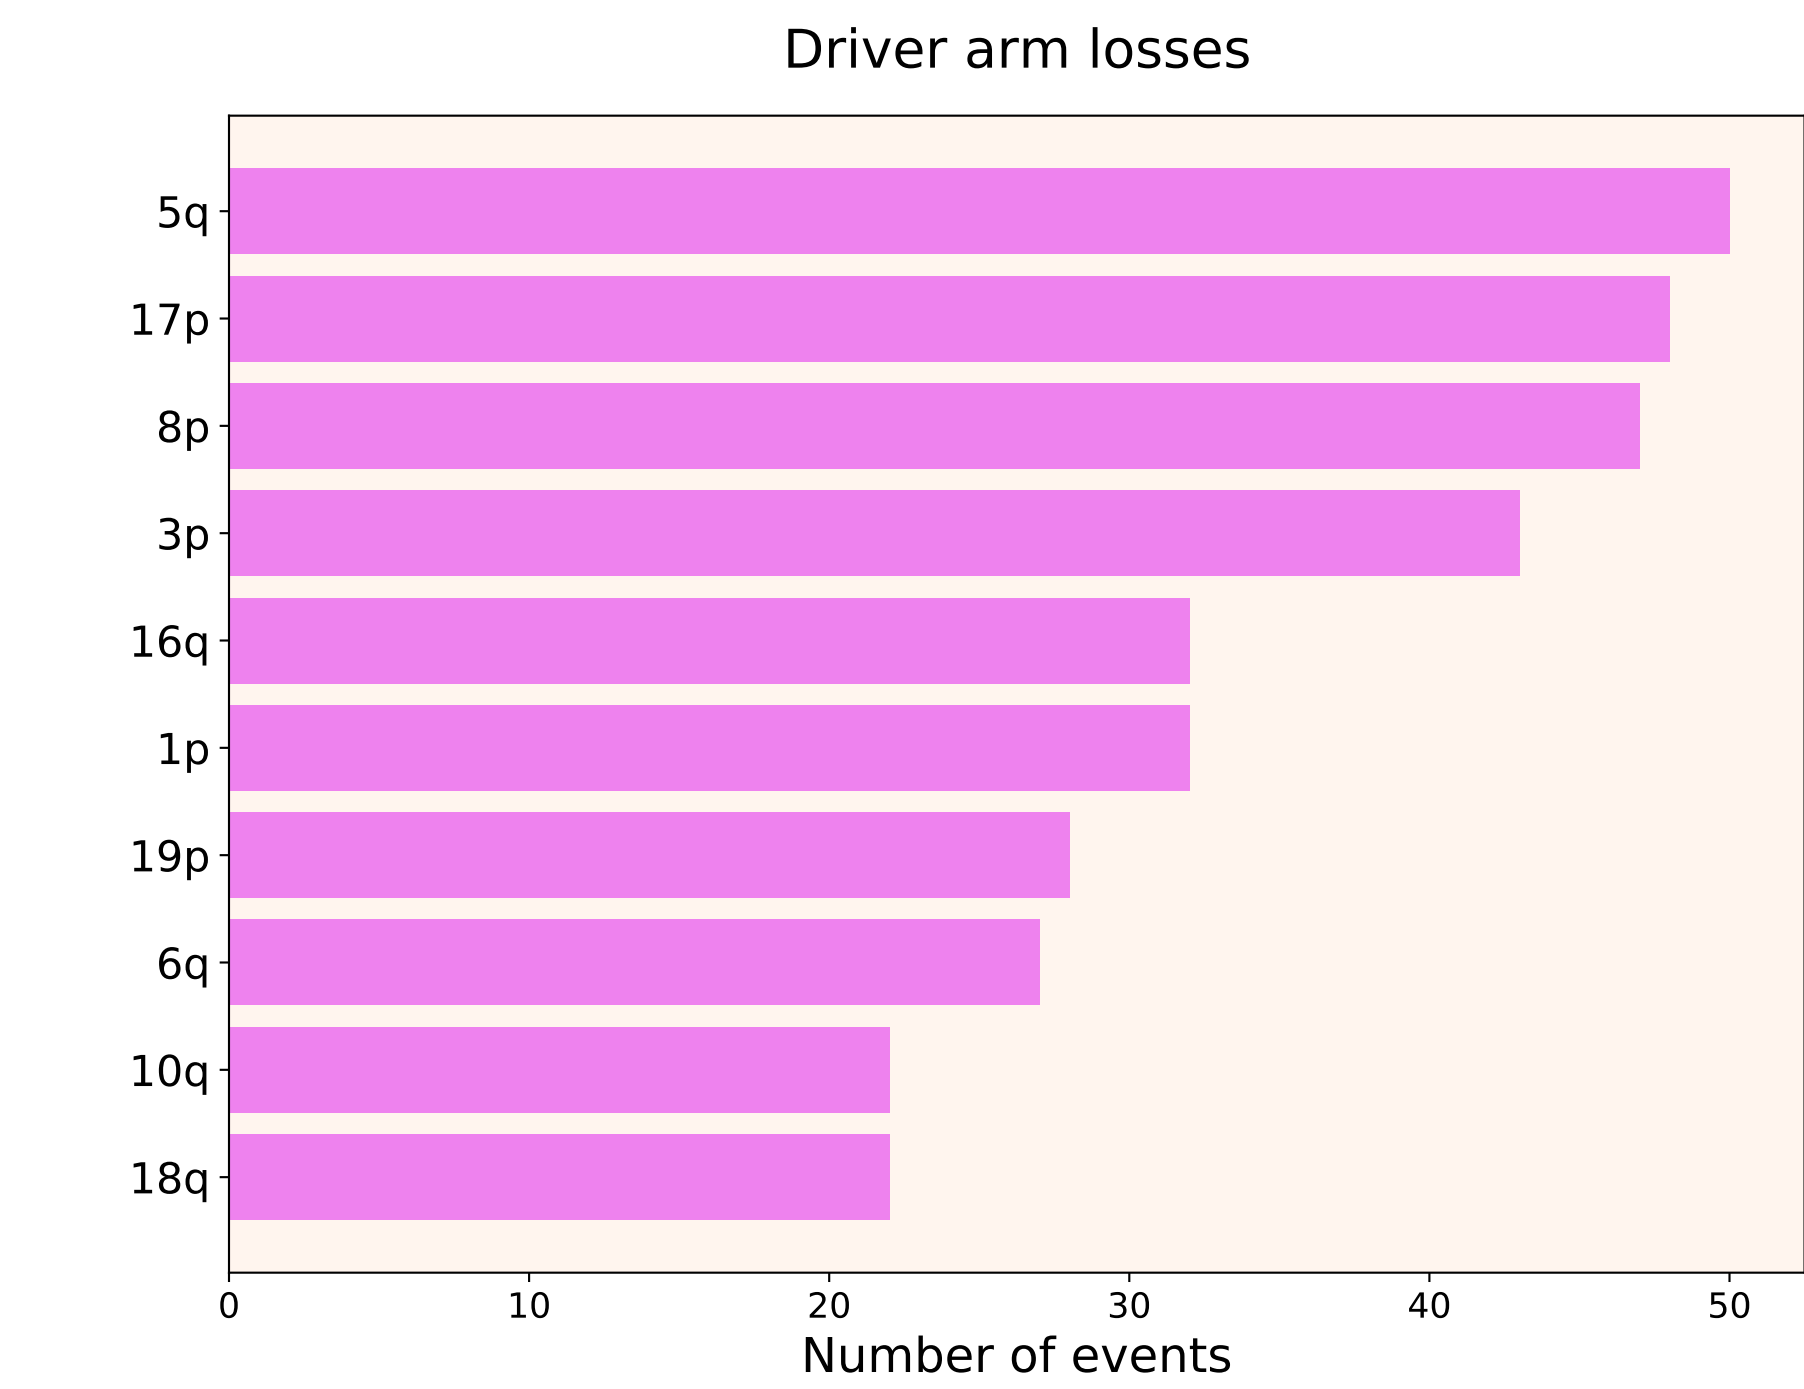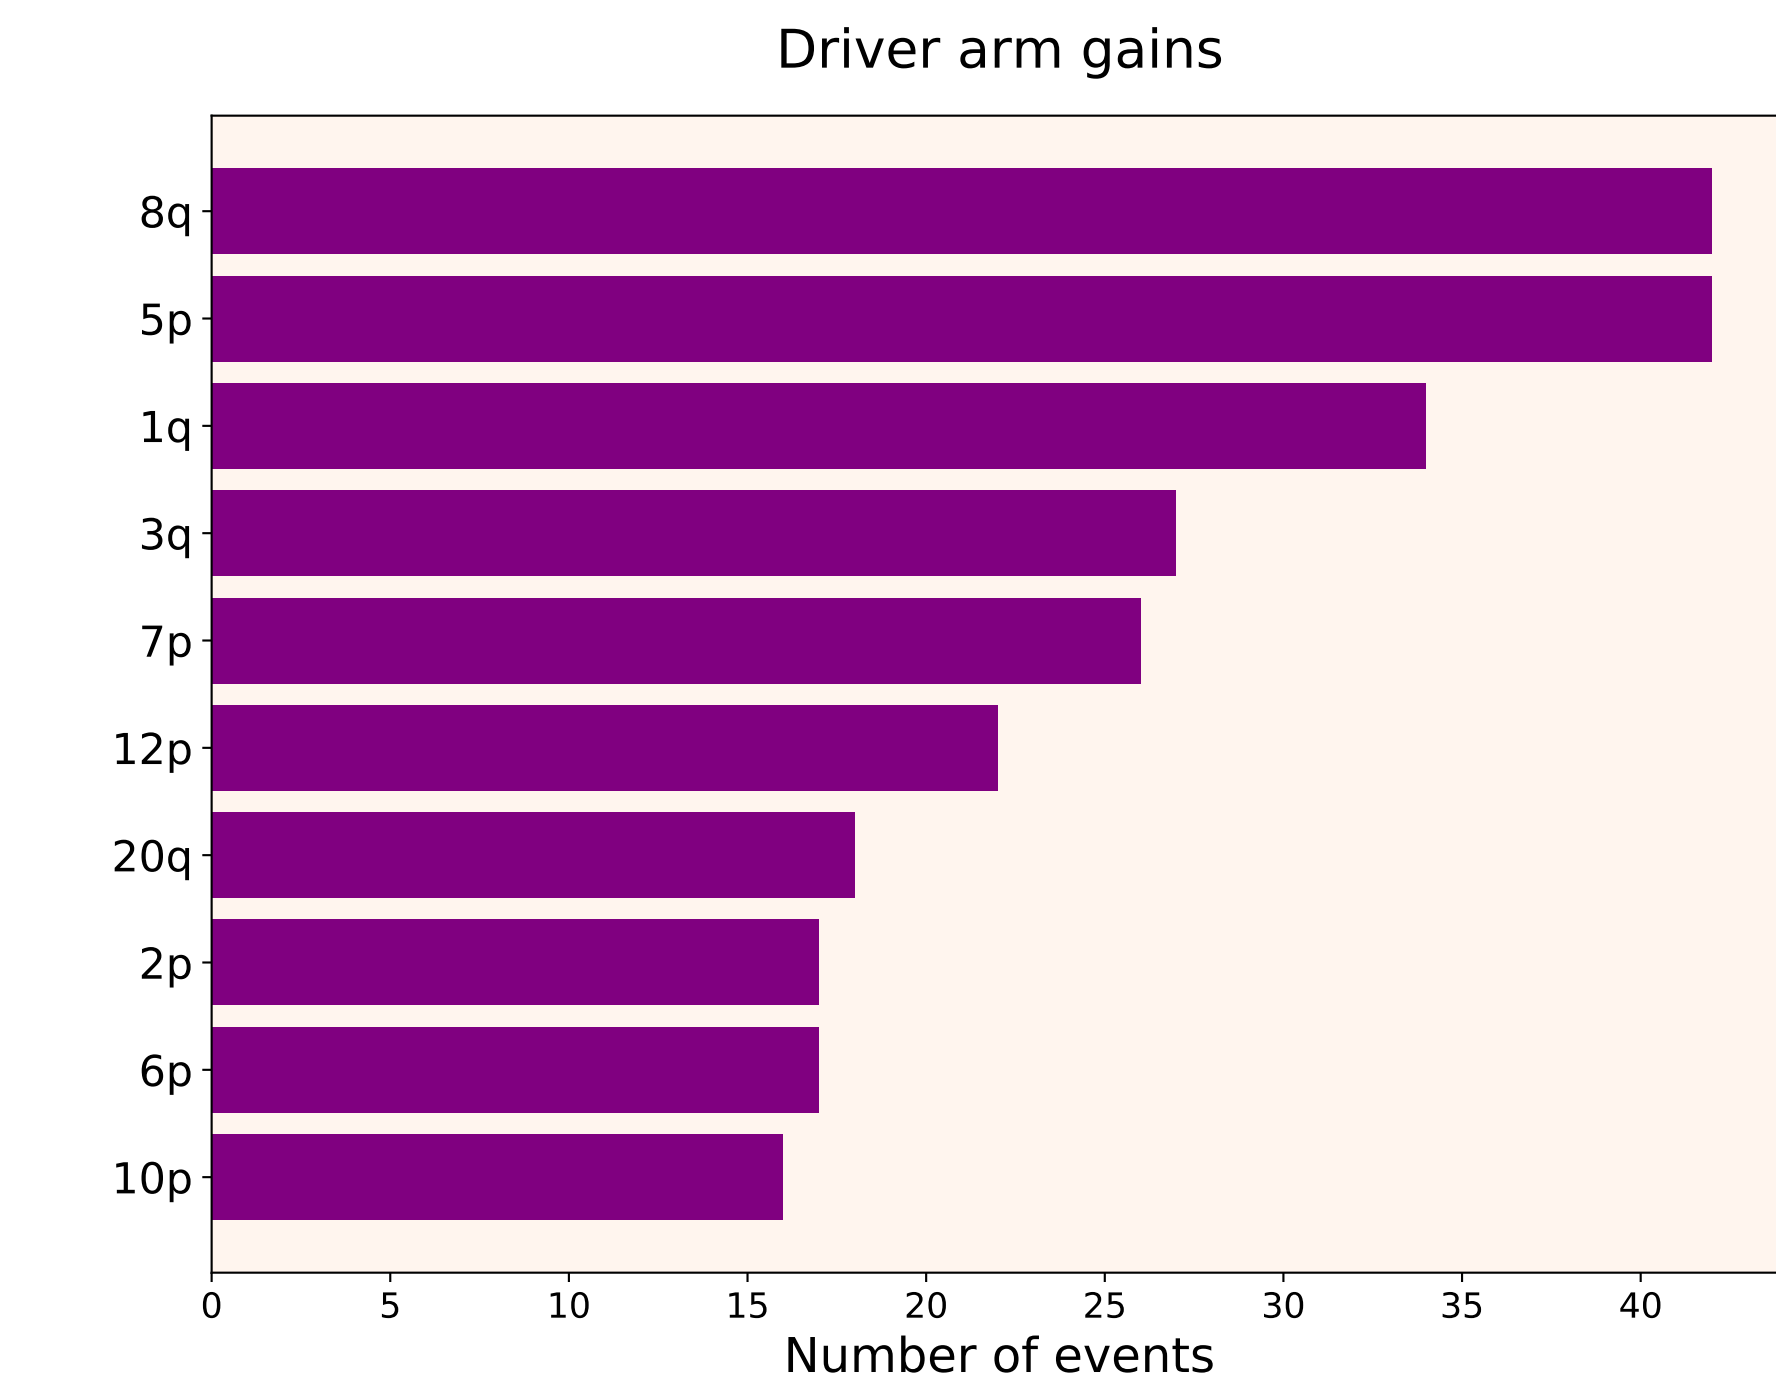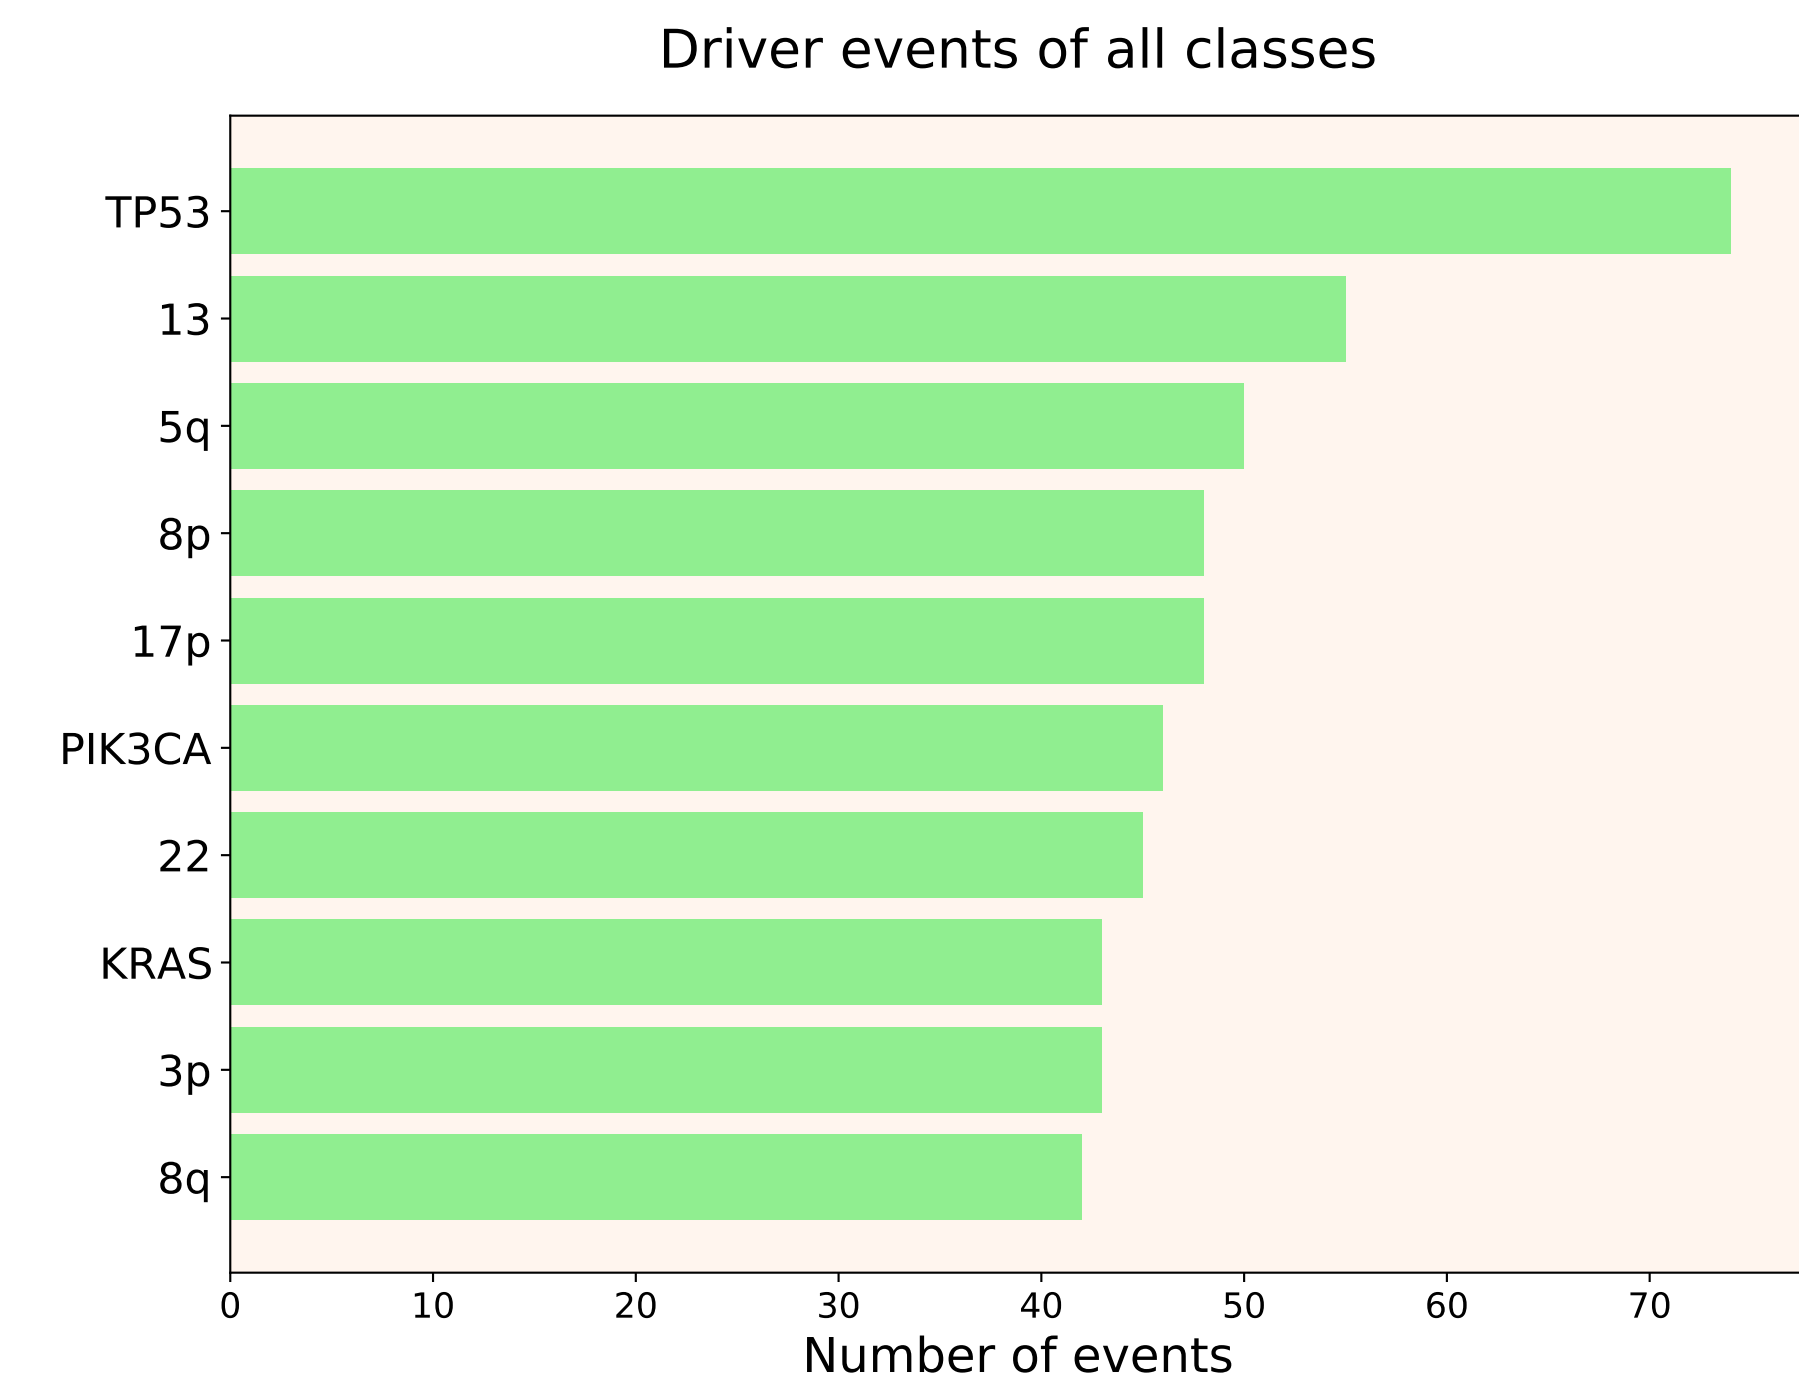

Supplement: Supplemental_Data_S1.zip [file Supplemental_Data_S1.zip]

# KICH\_MALE

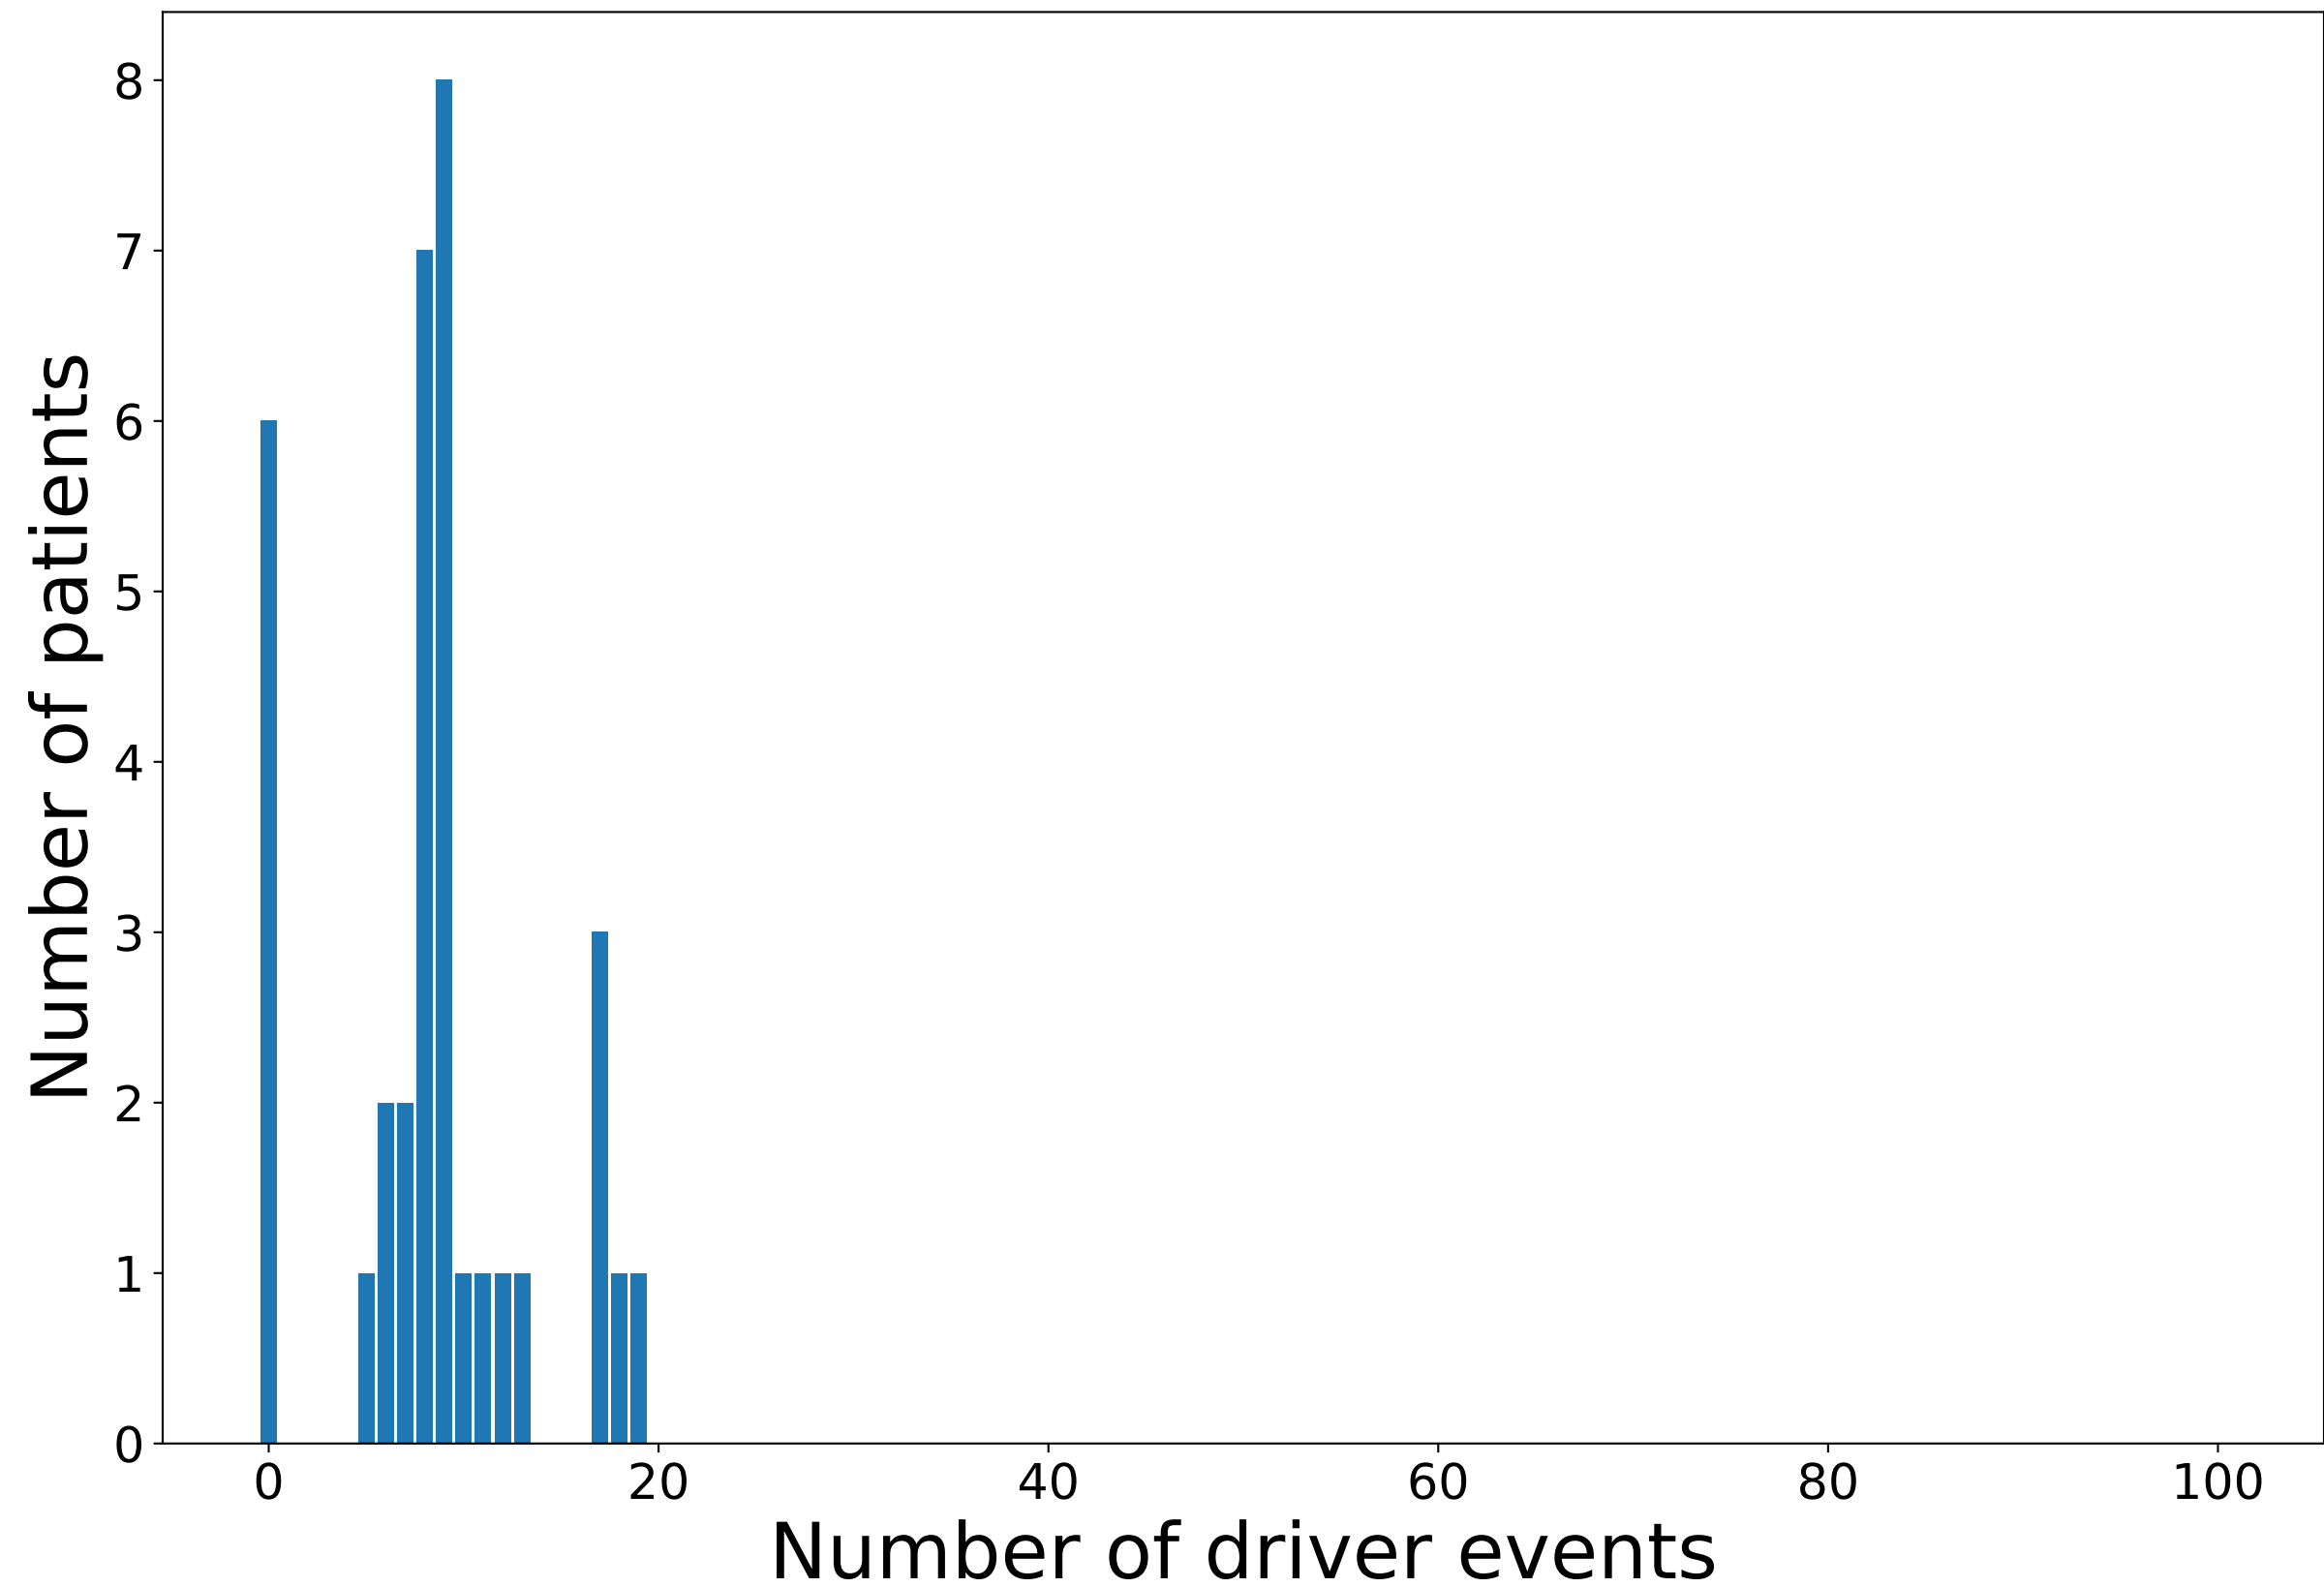

Supplement: Supplemental_Data_S1.zip [file Supplemental_Data_S1.zip]



Supplement: Supplemental_Data_S1.zip [file Supplemental_Data_S1.zip]

# MESO

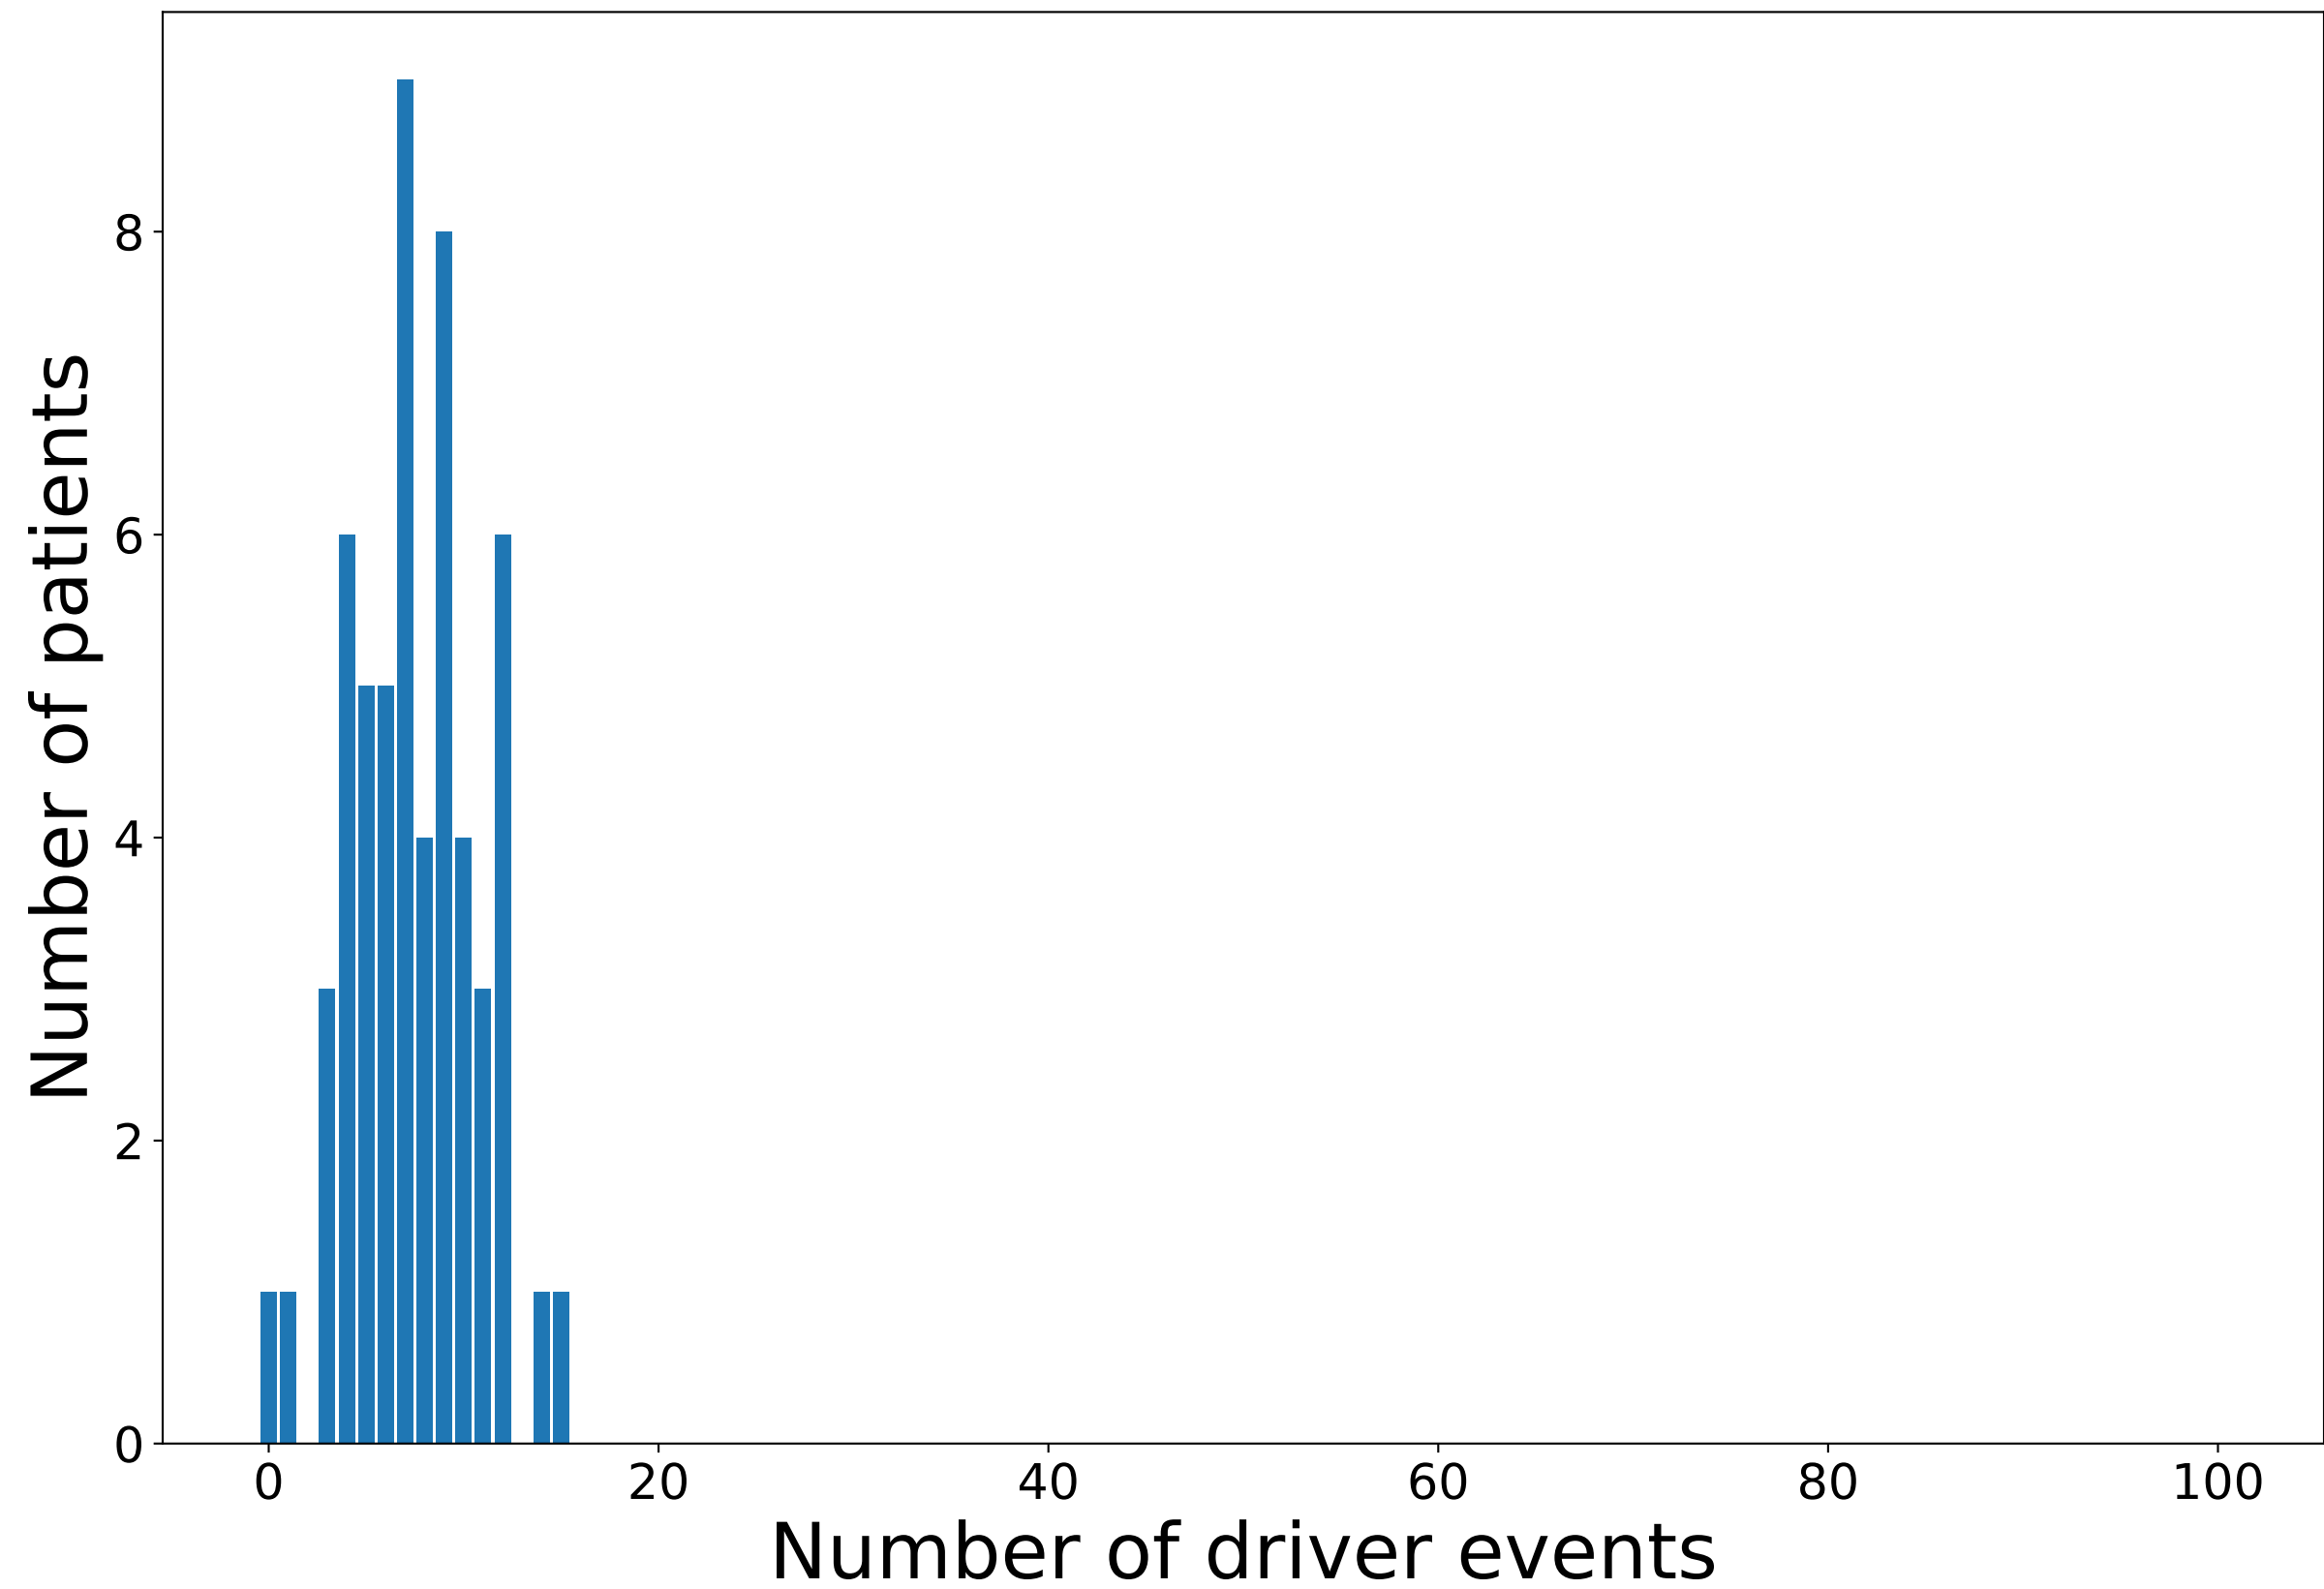

Supplement: Supplemental_Data_S1.zip [file Supplemental_Data_S1.zip]

# READ\_MALE

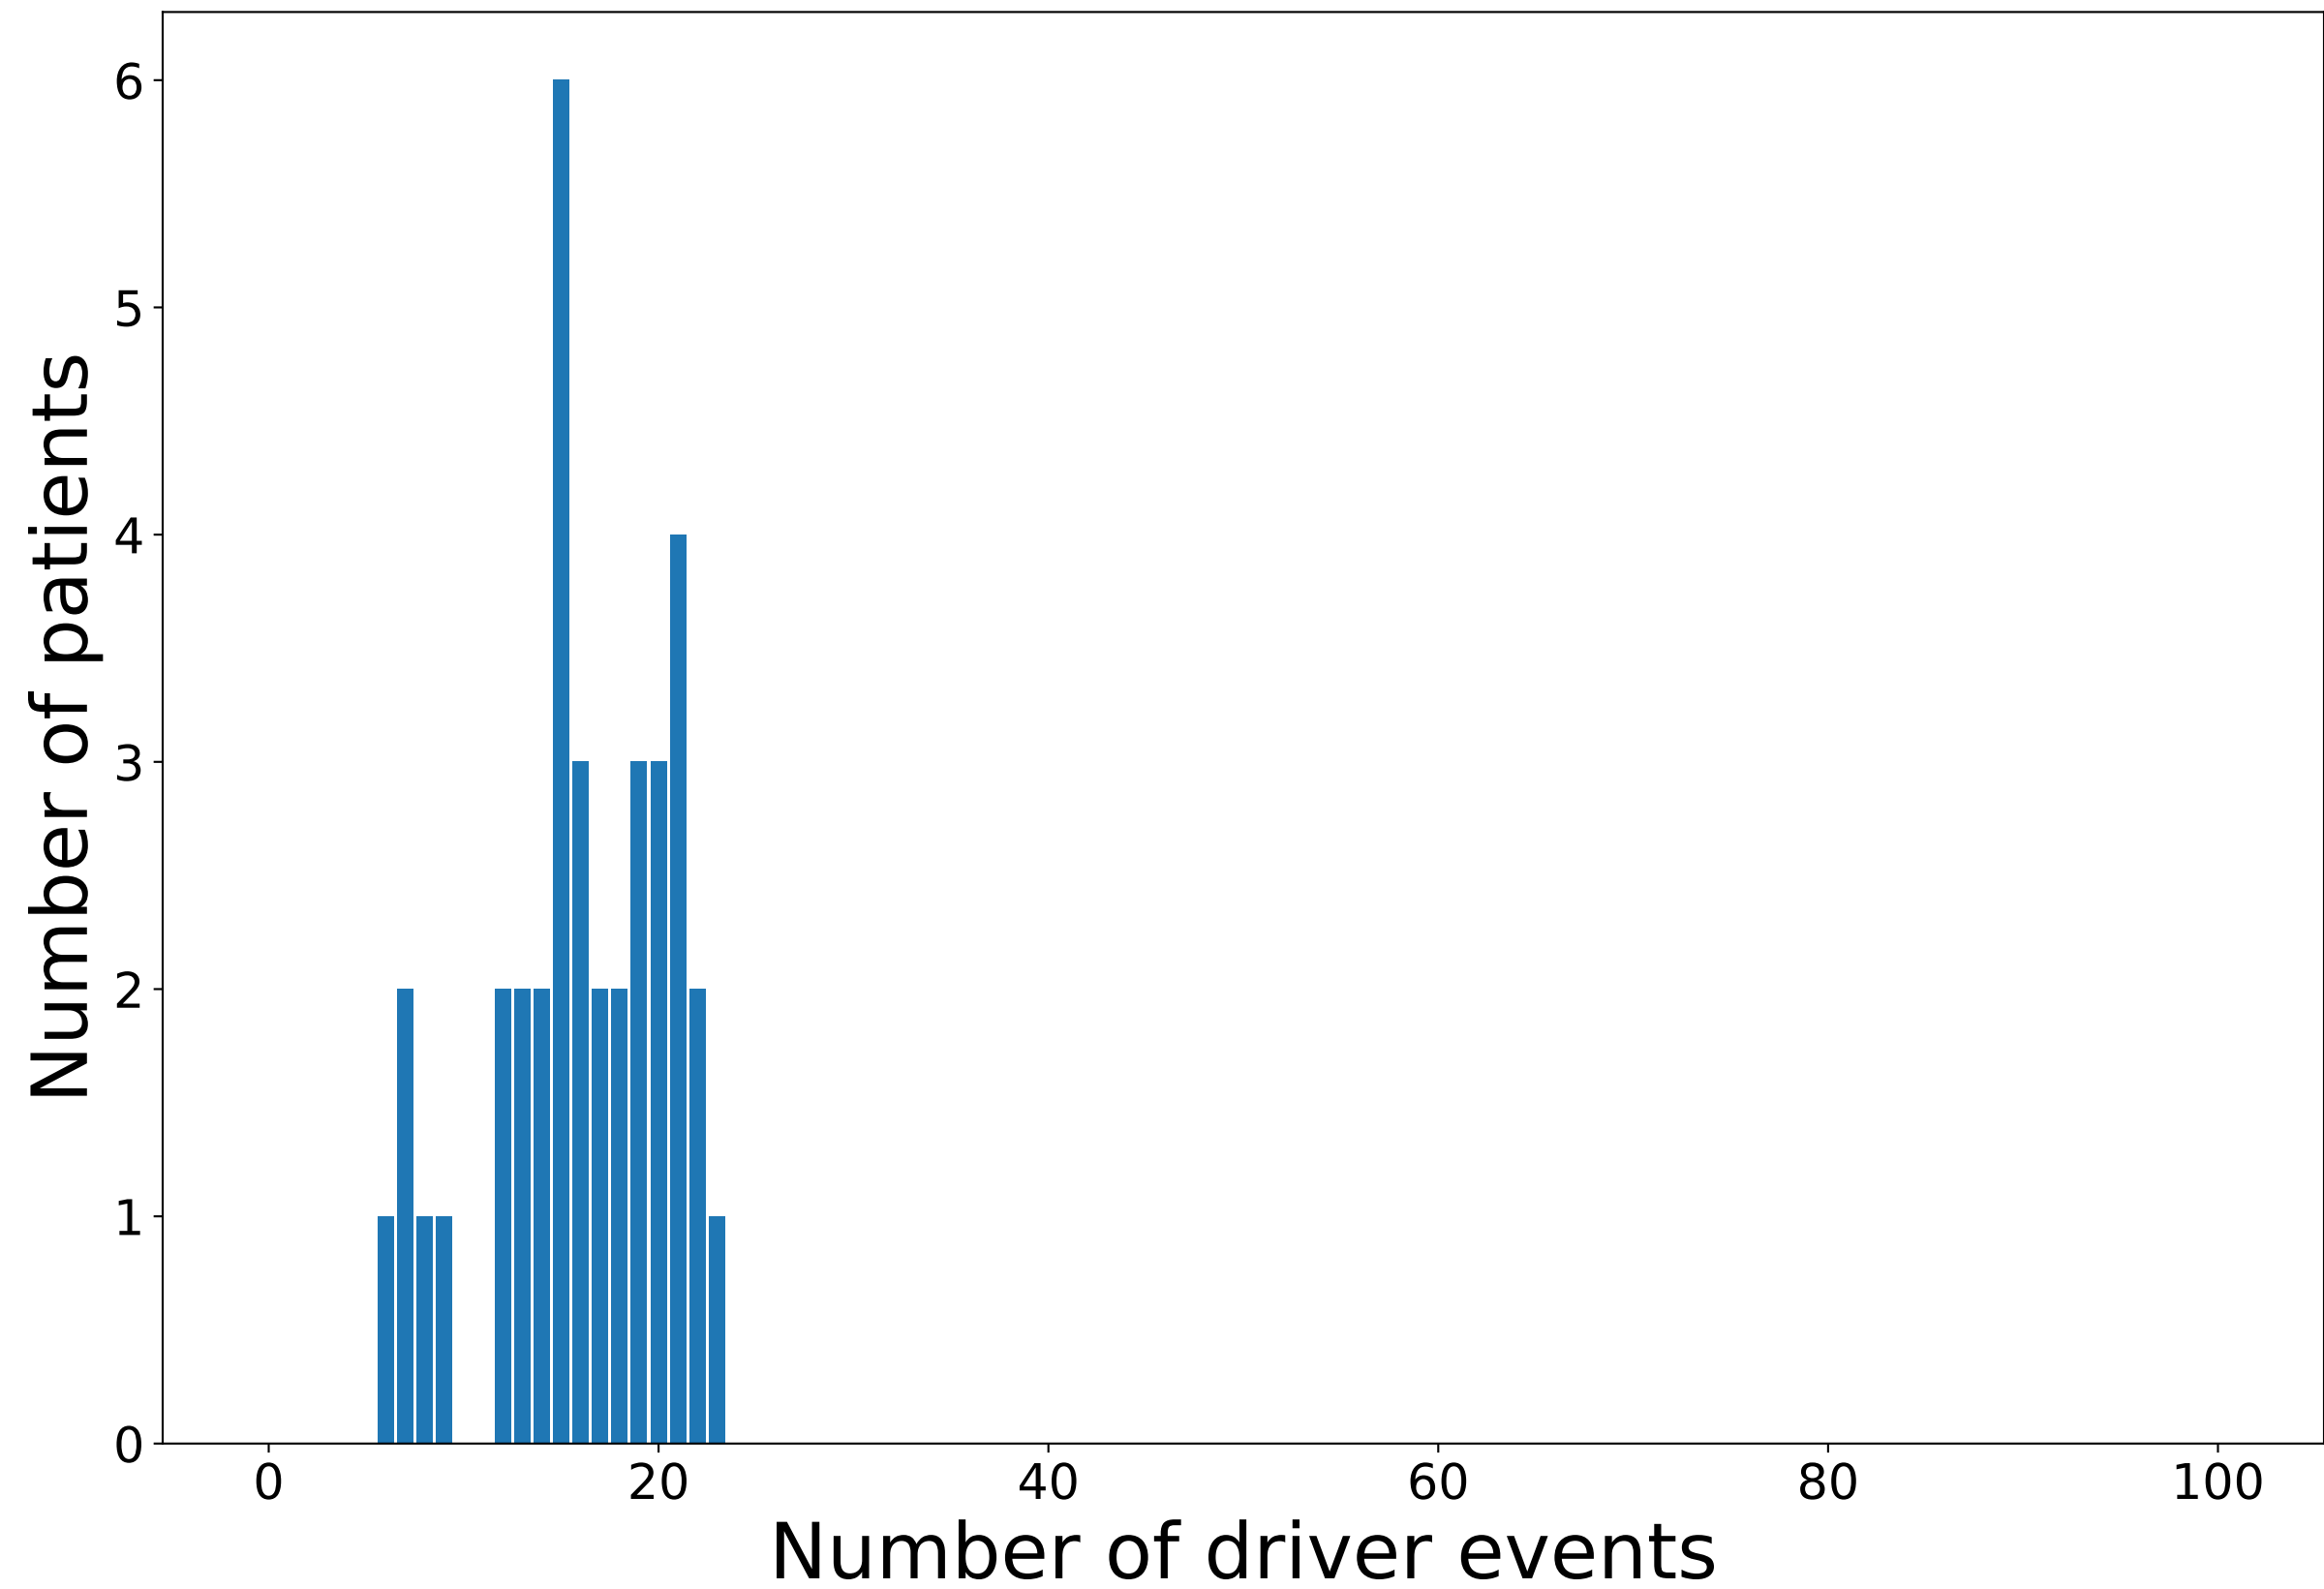

Supplement: Supplemental_Data_S1.zip [file Supplemental_Data_S1.zip]

# THCA\_FEMALE

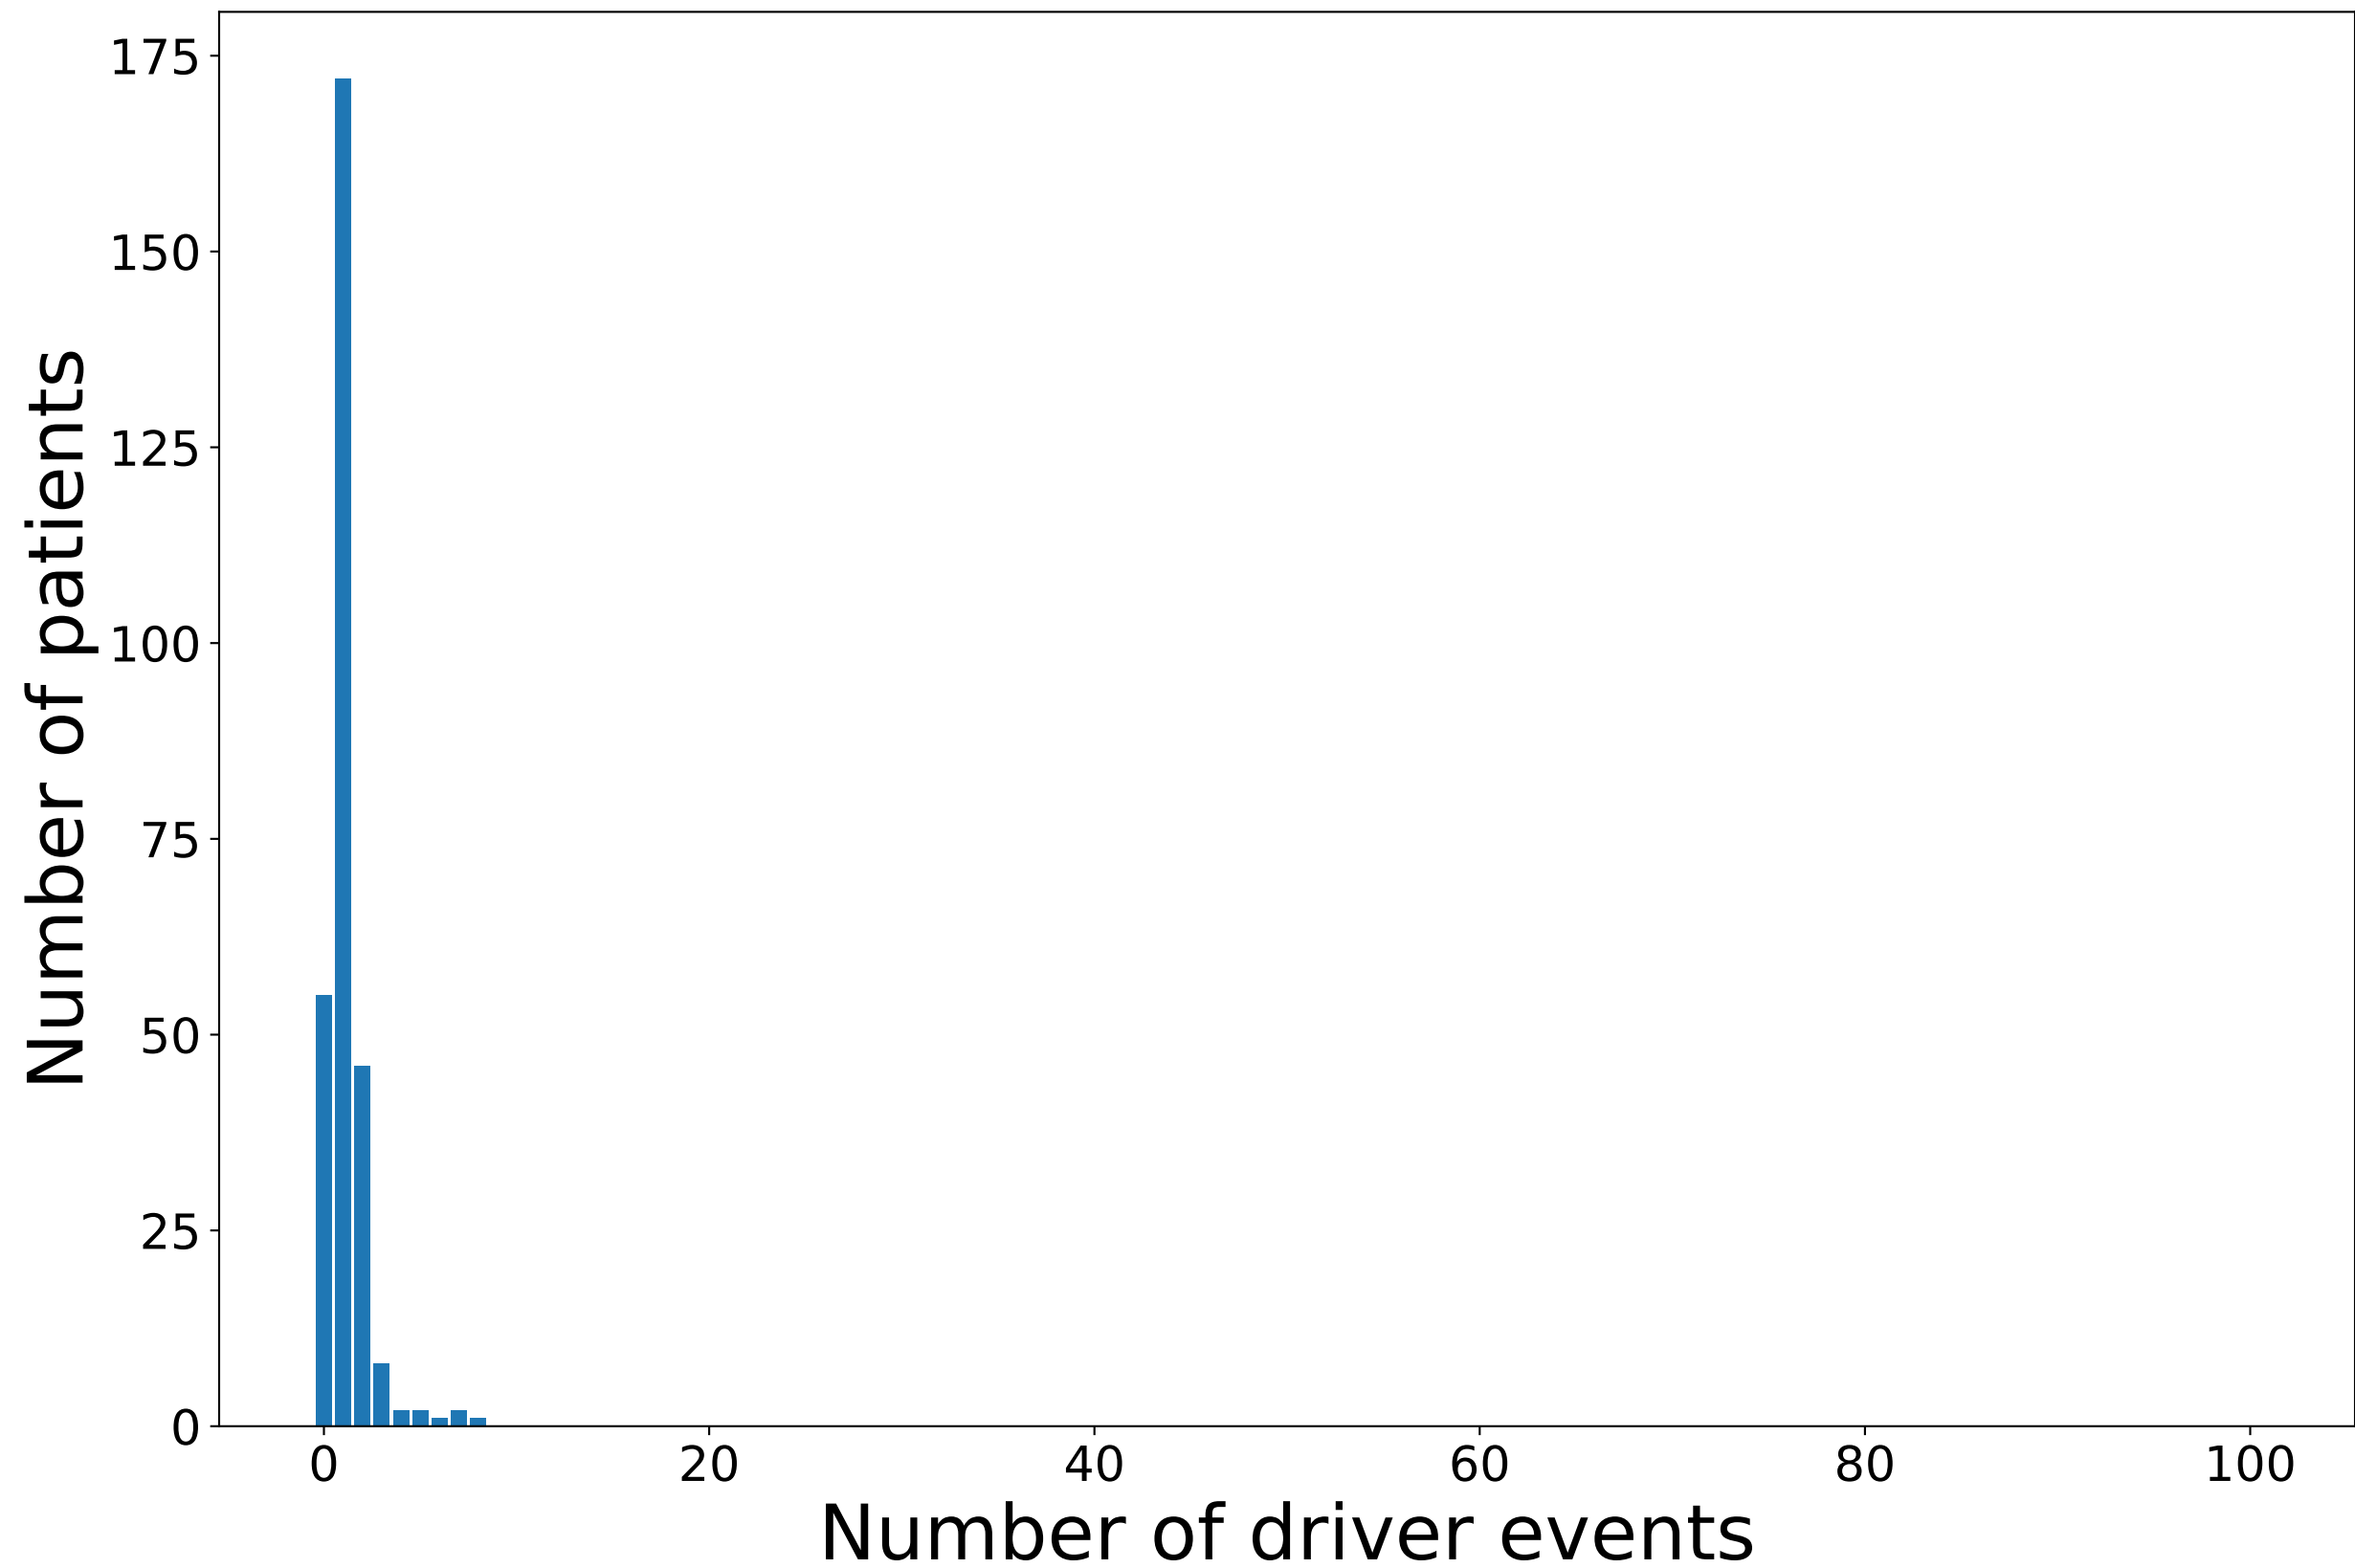

Supplement: Supplemental_Data_S1.zip [file Supplemental_Data_S1.zip]

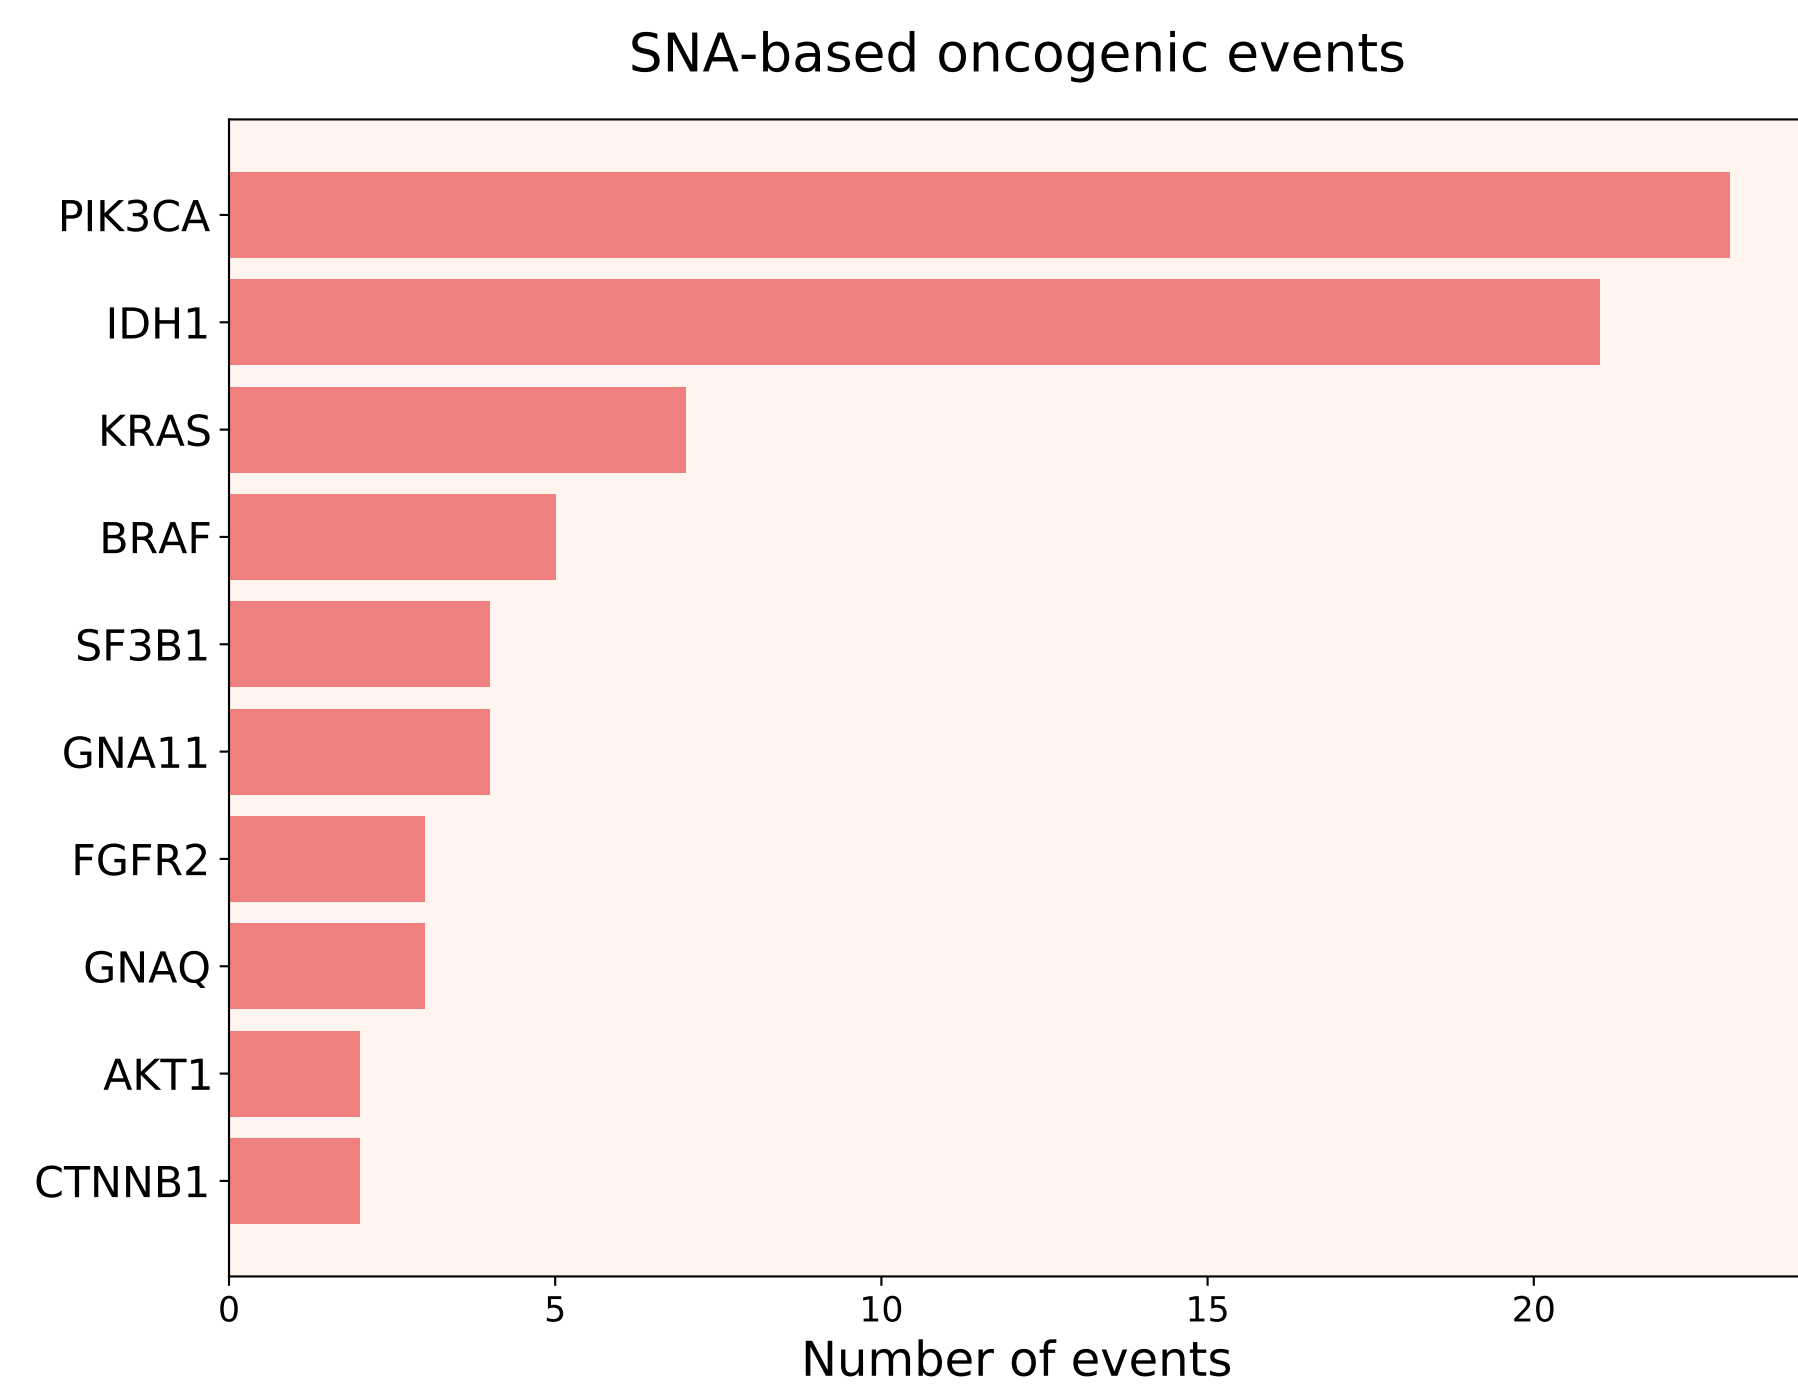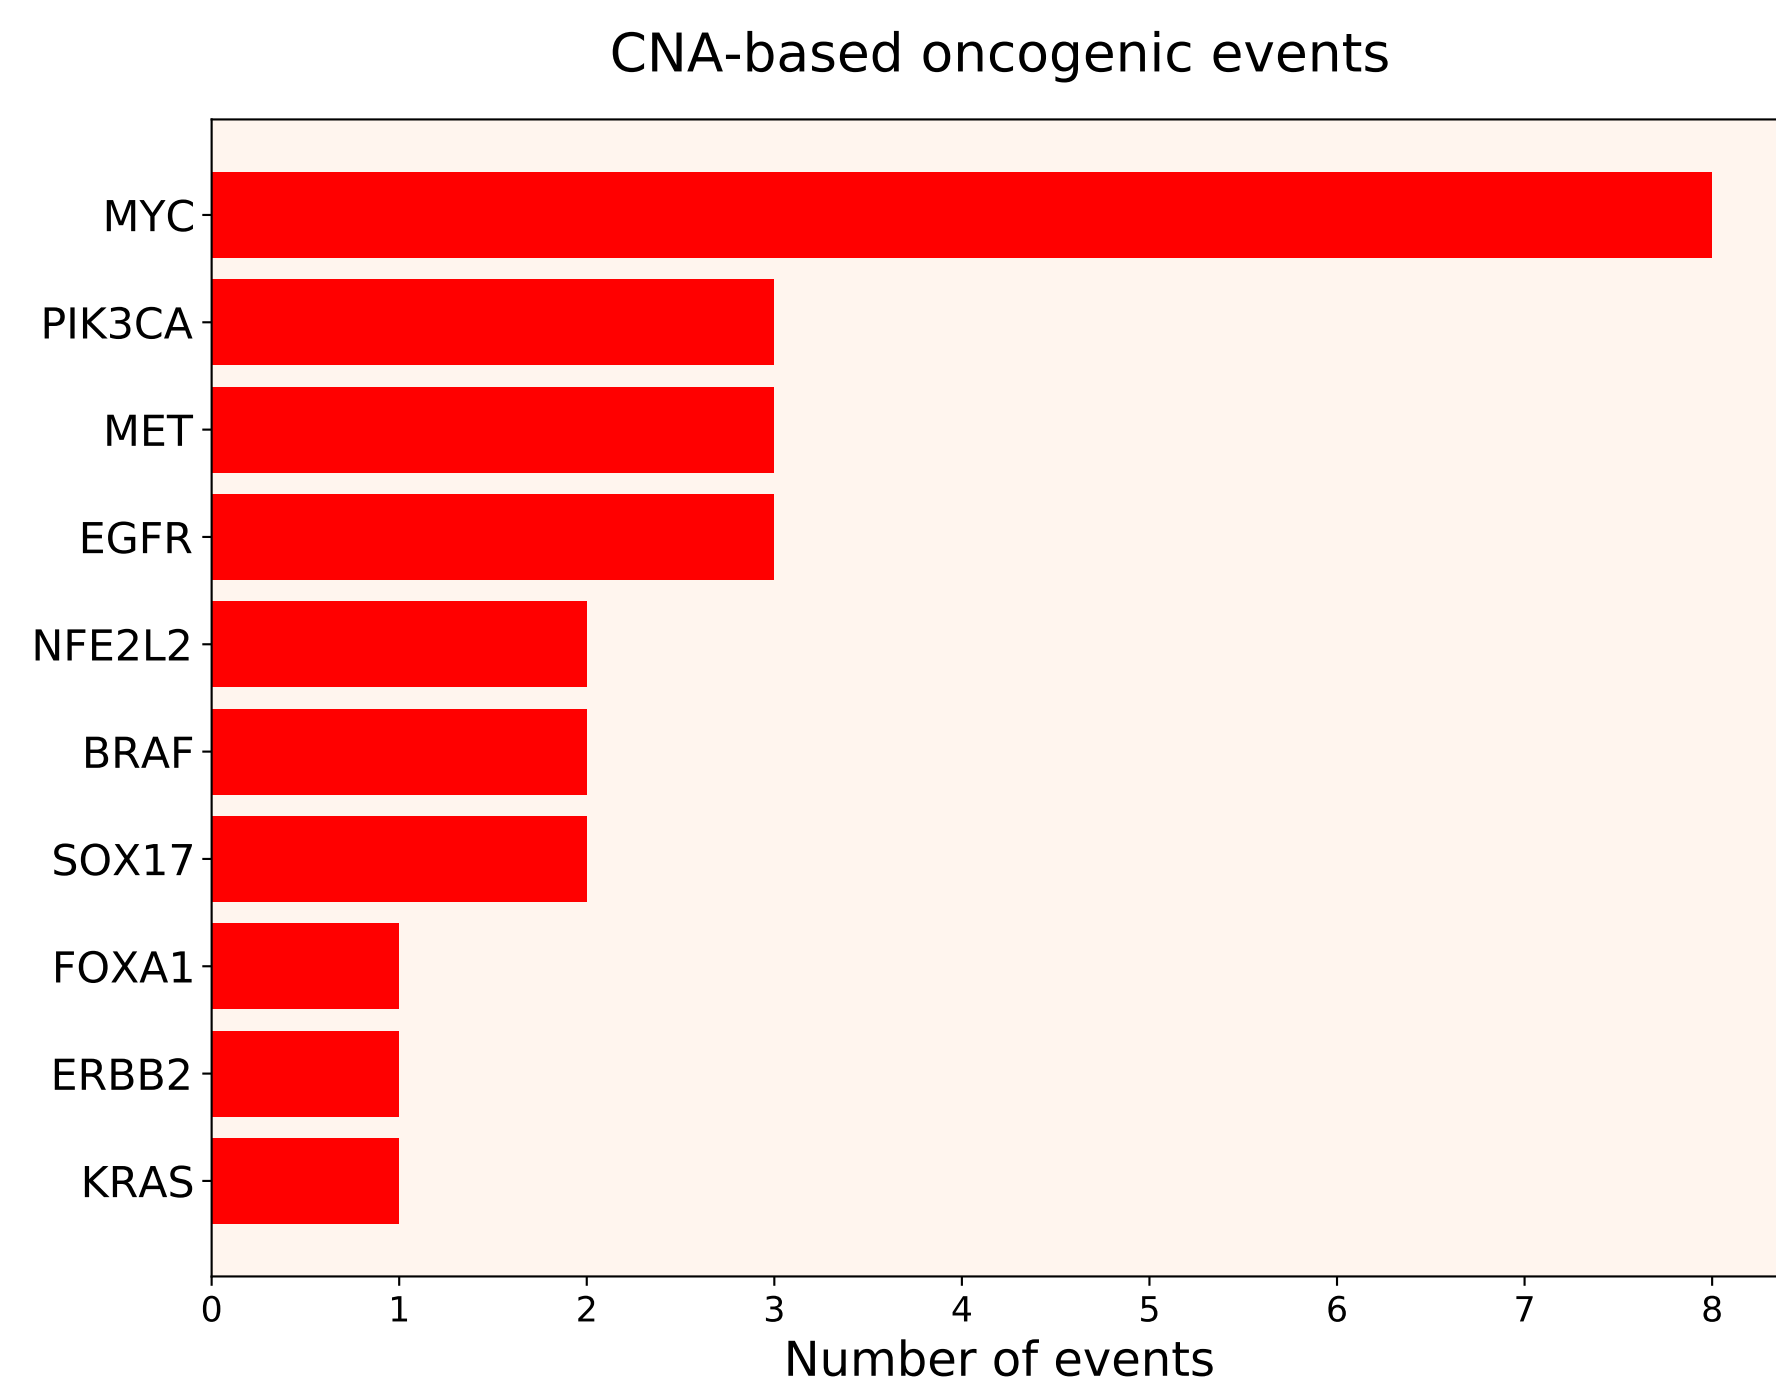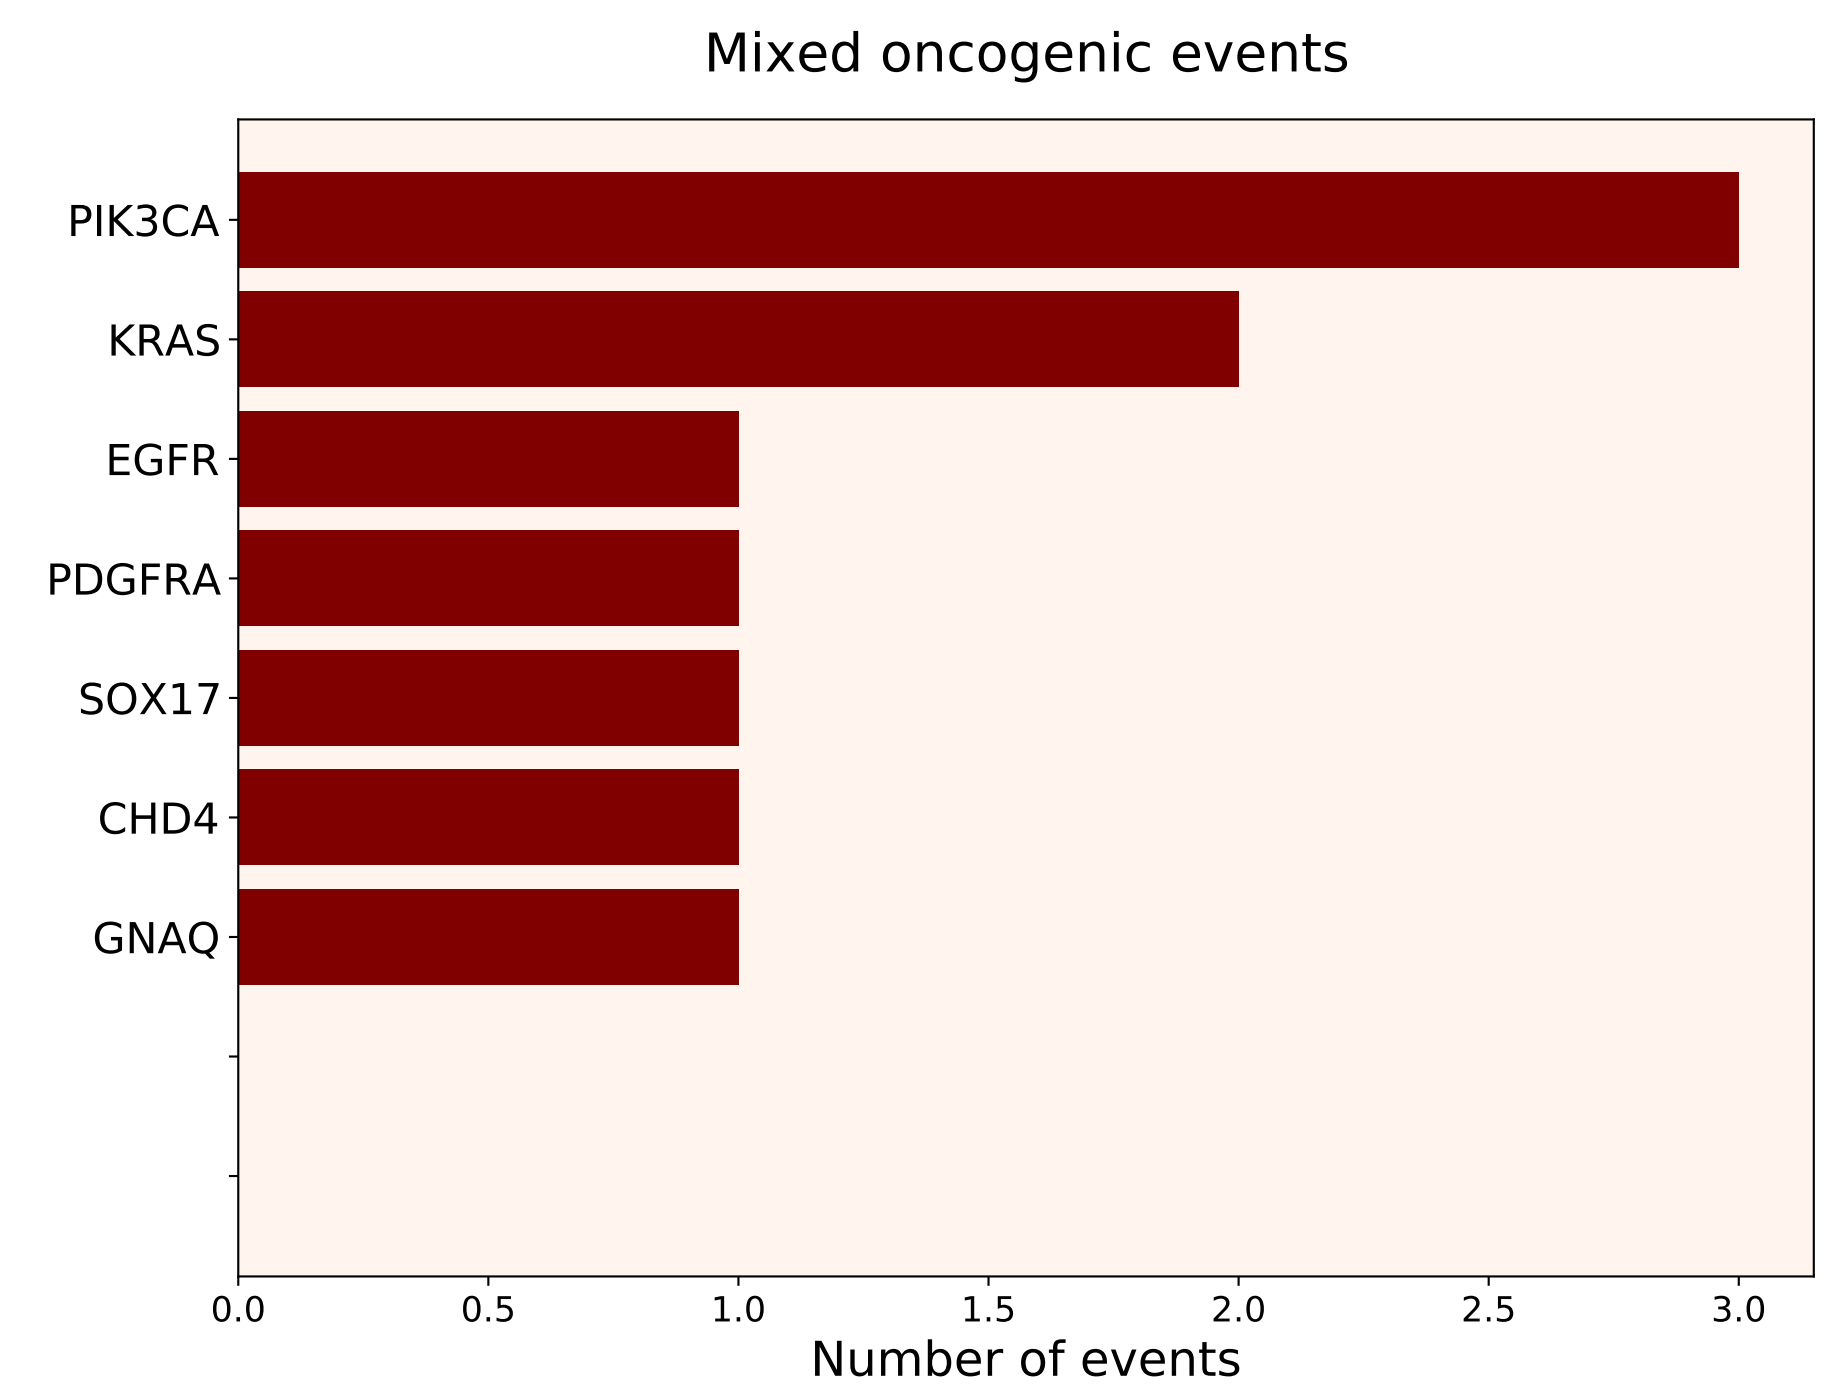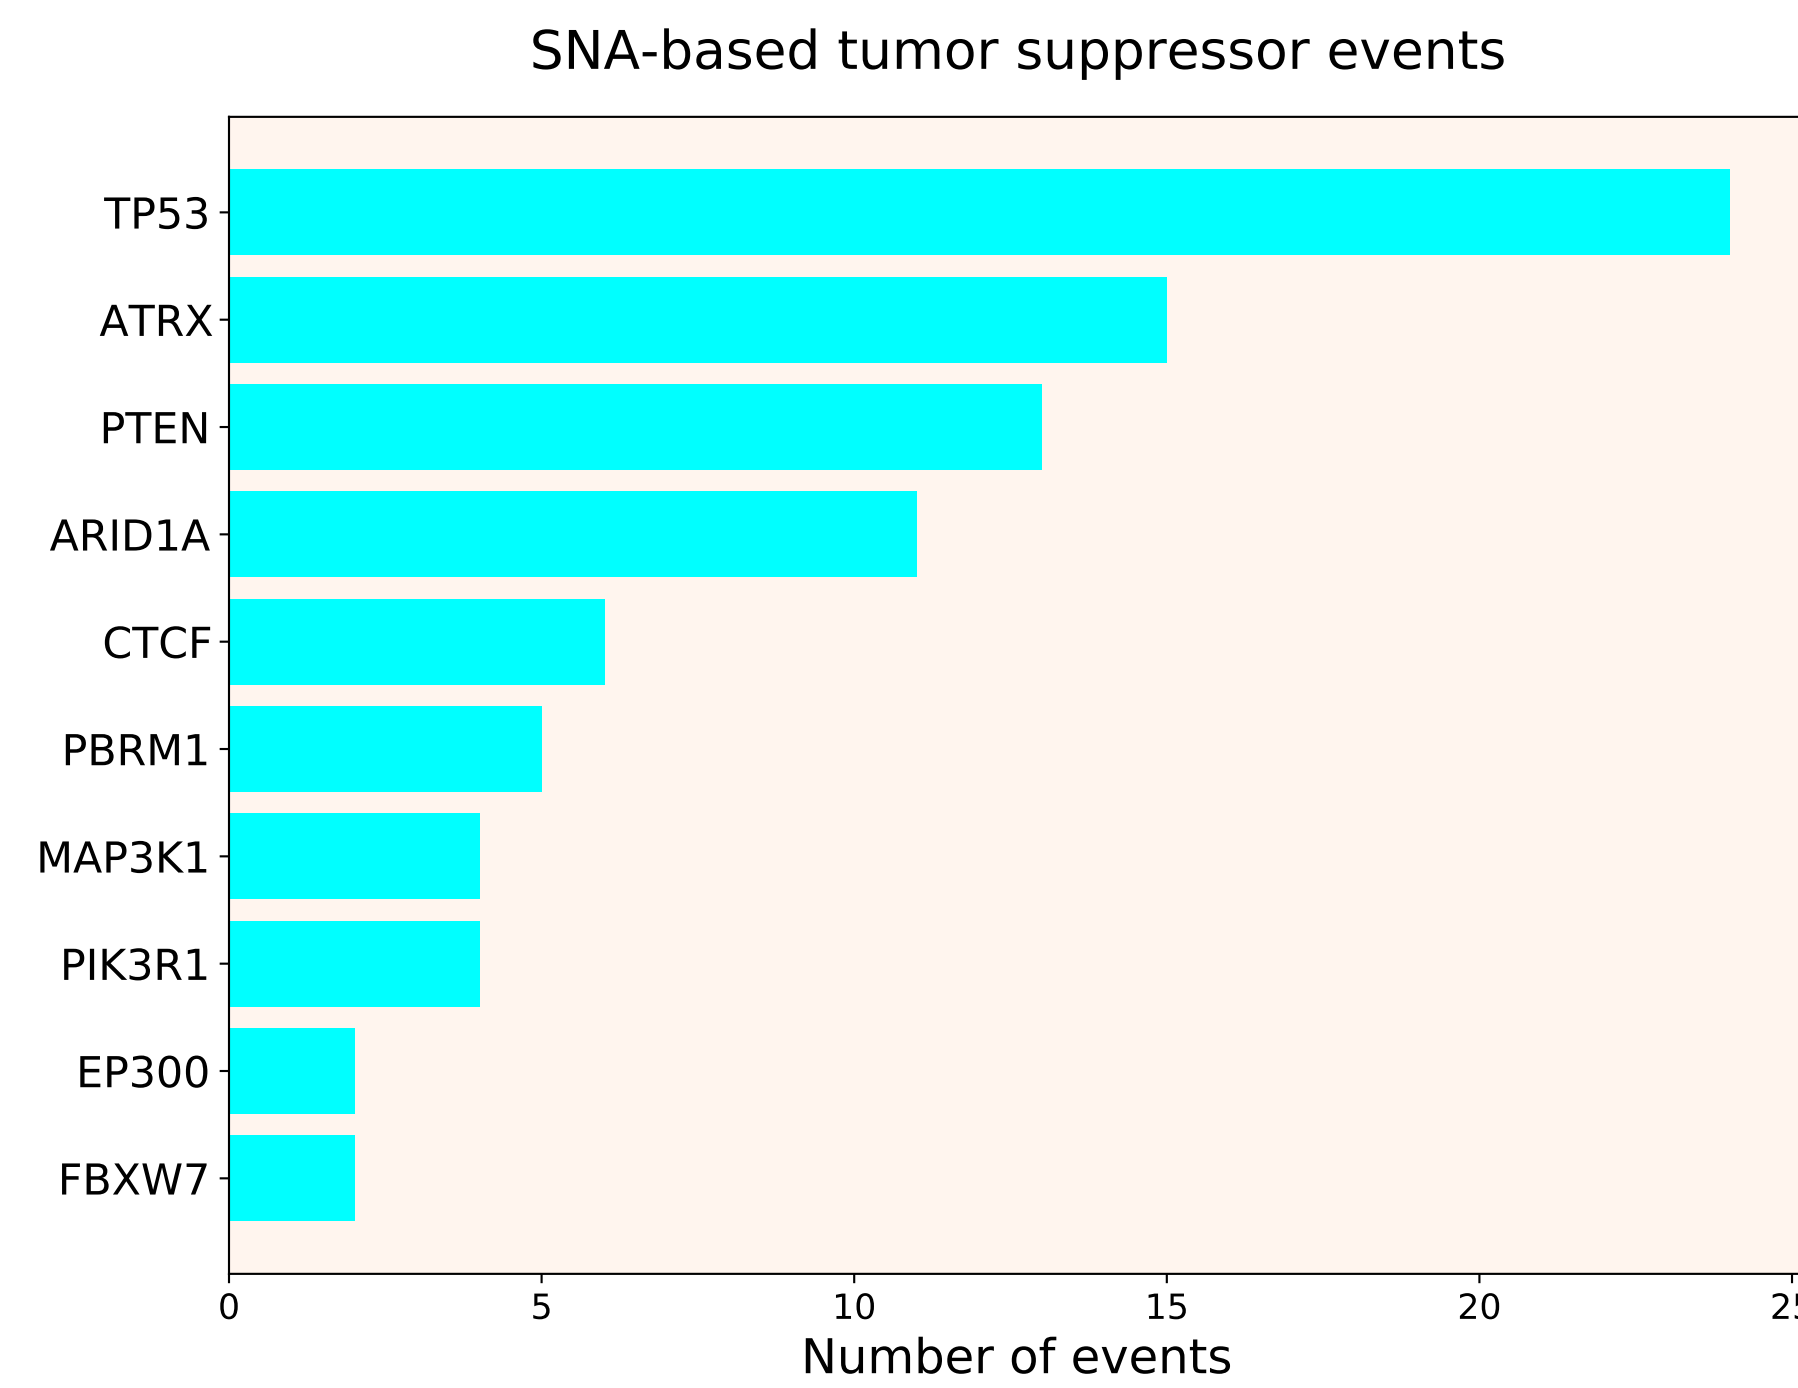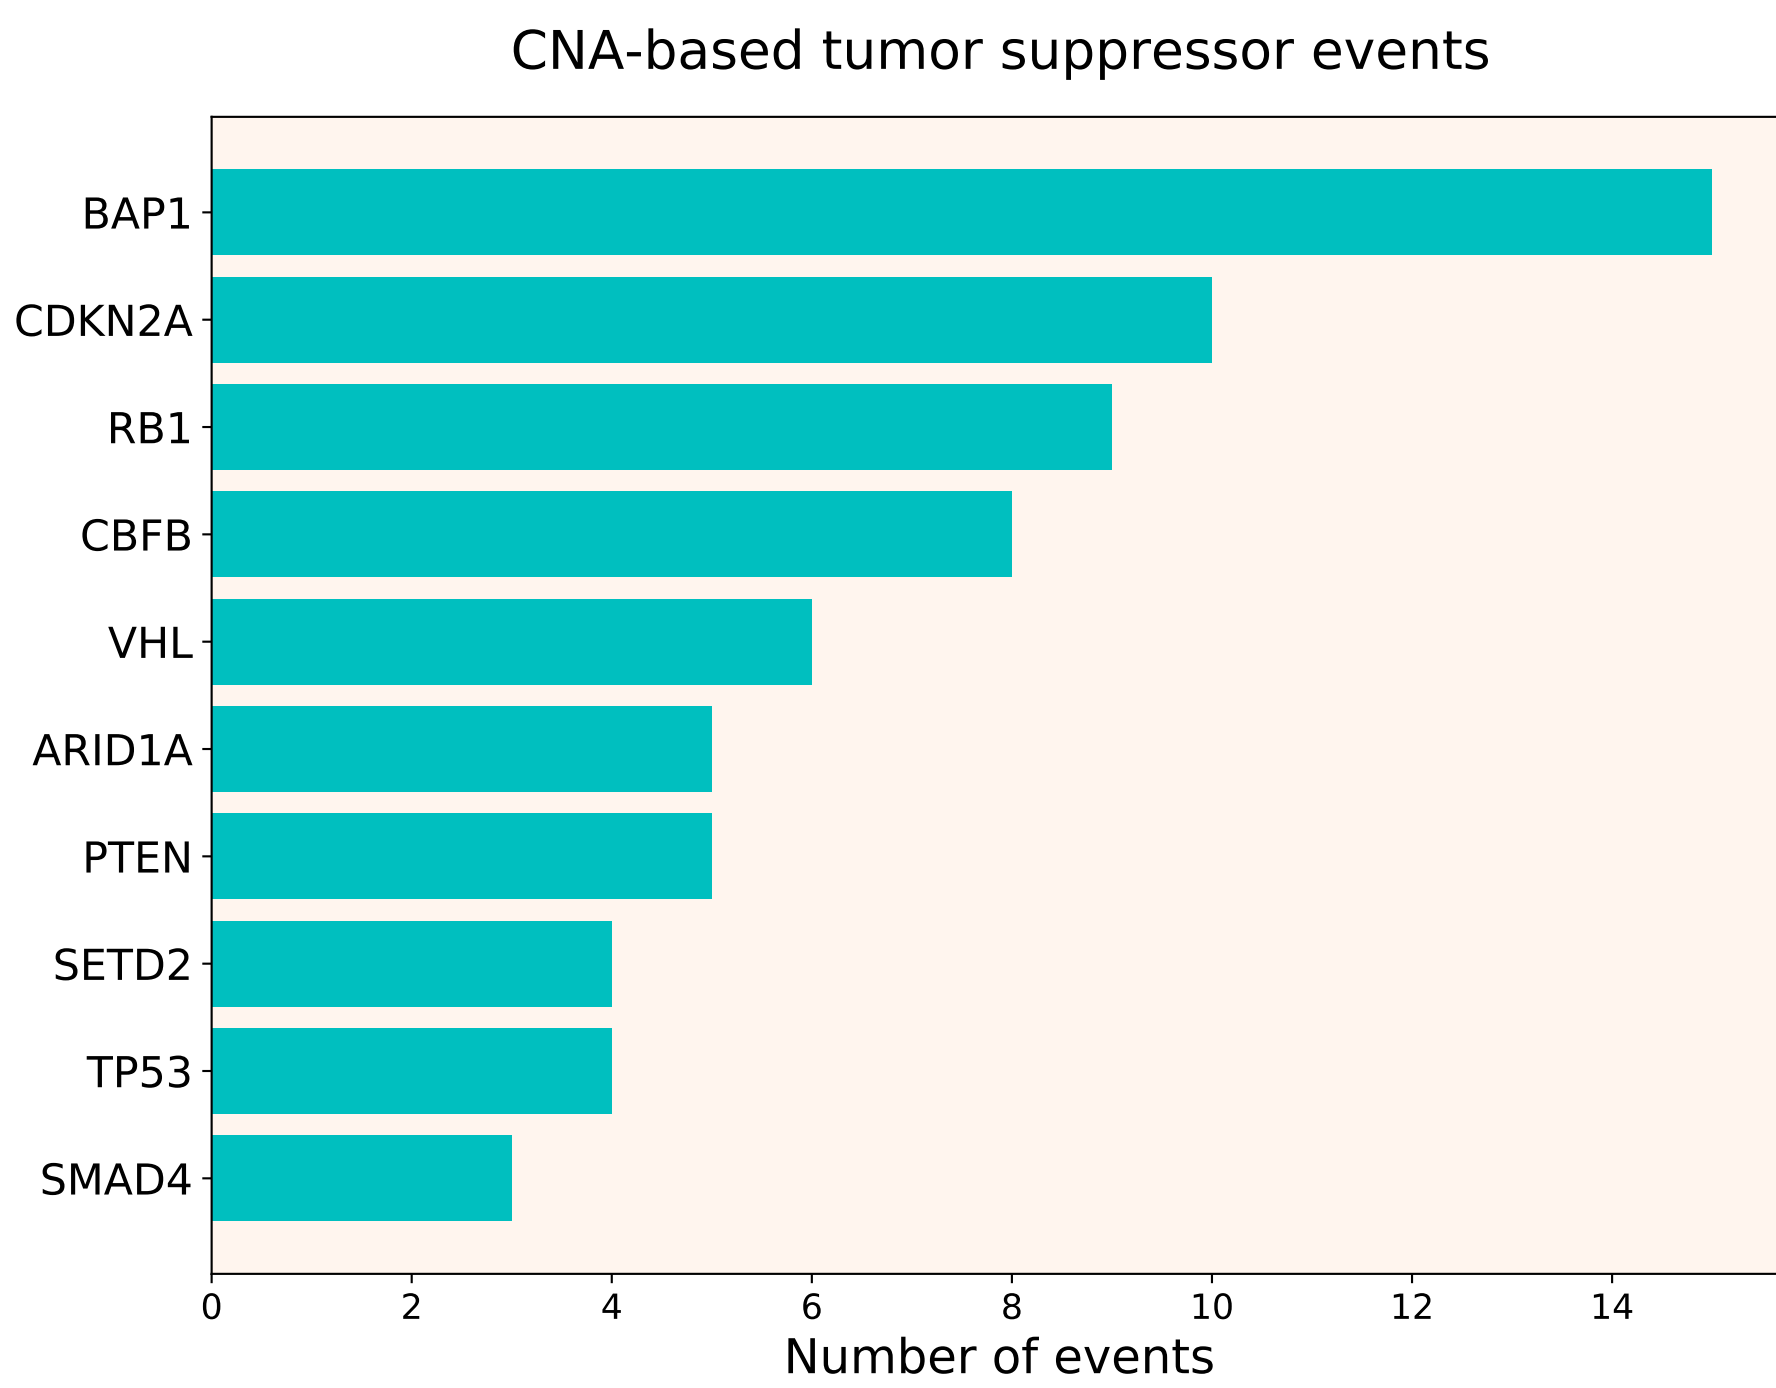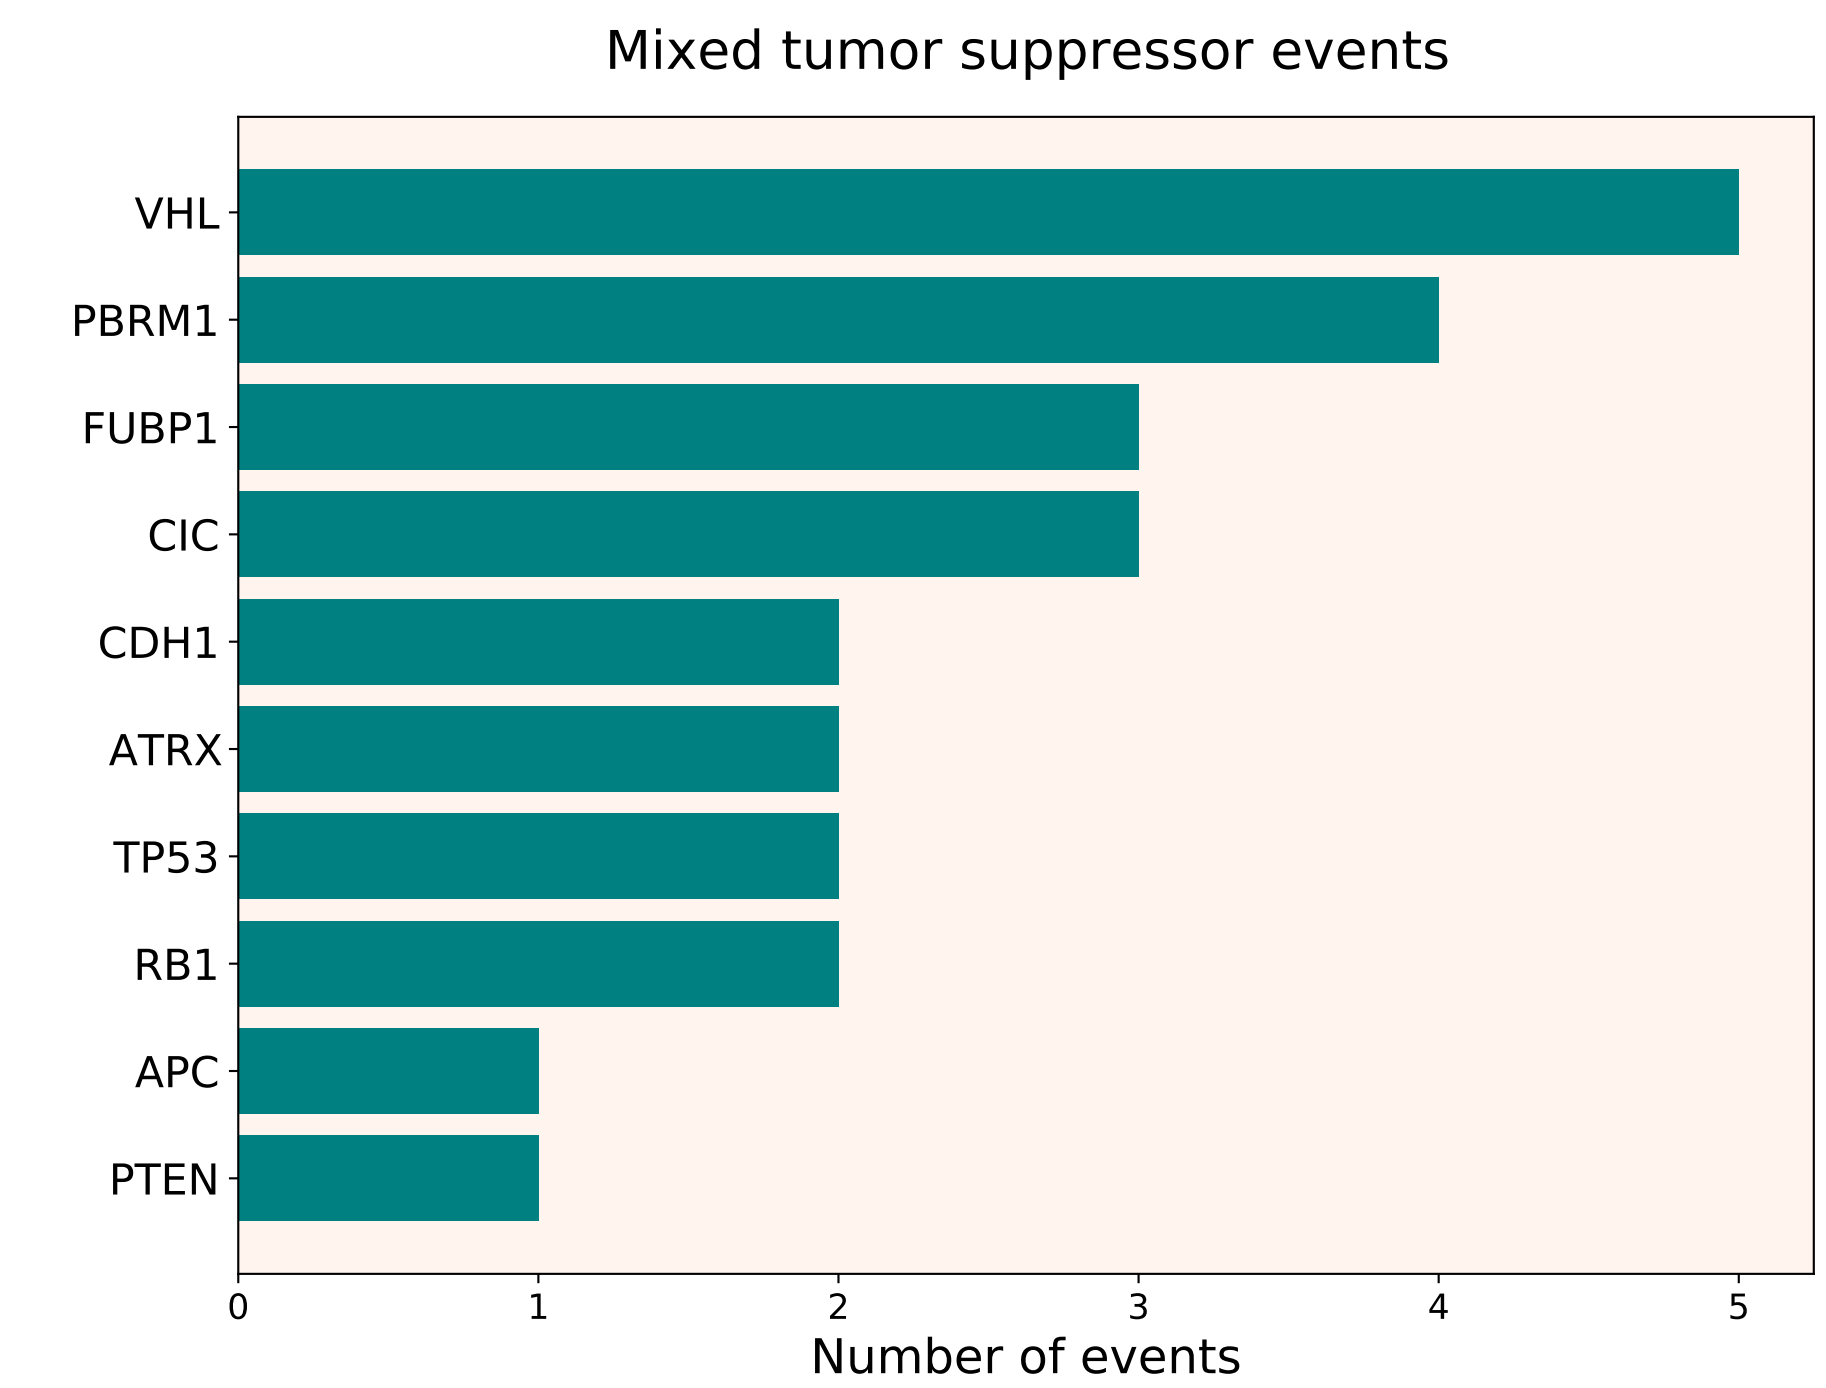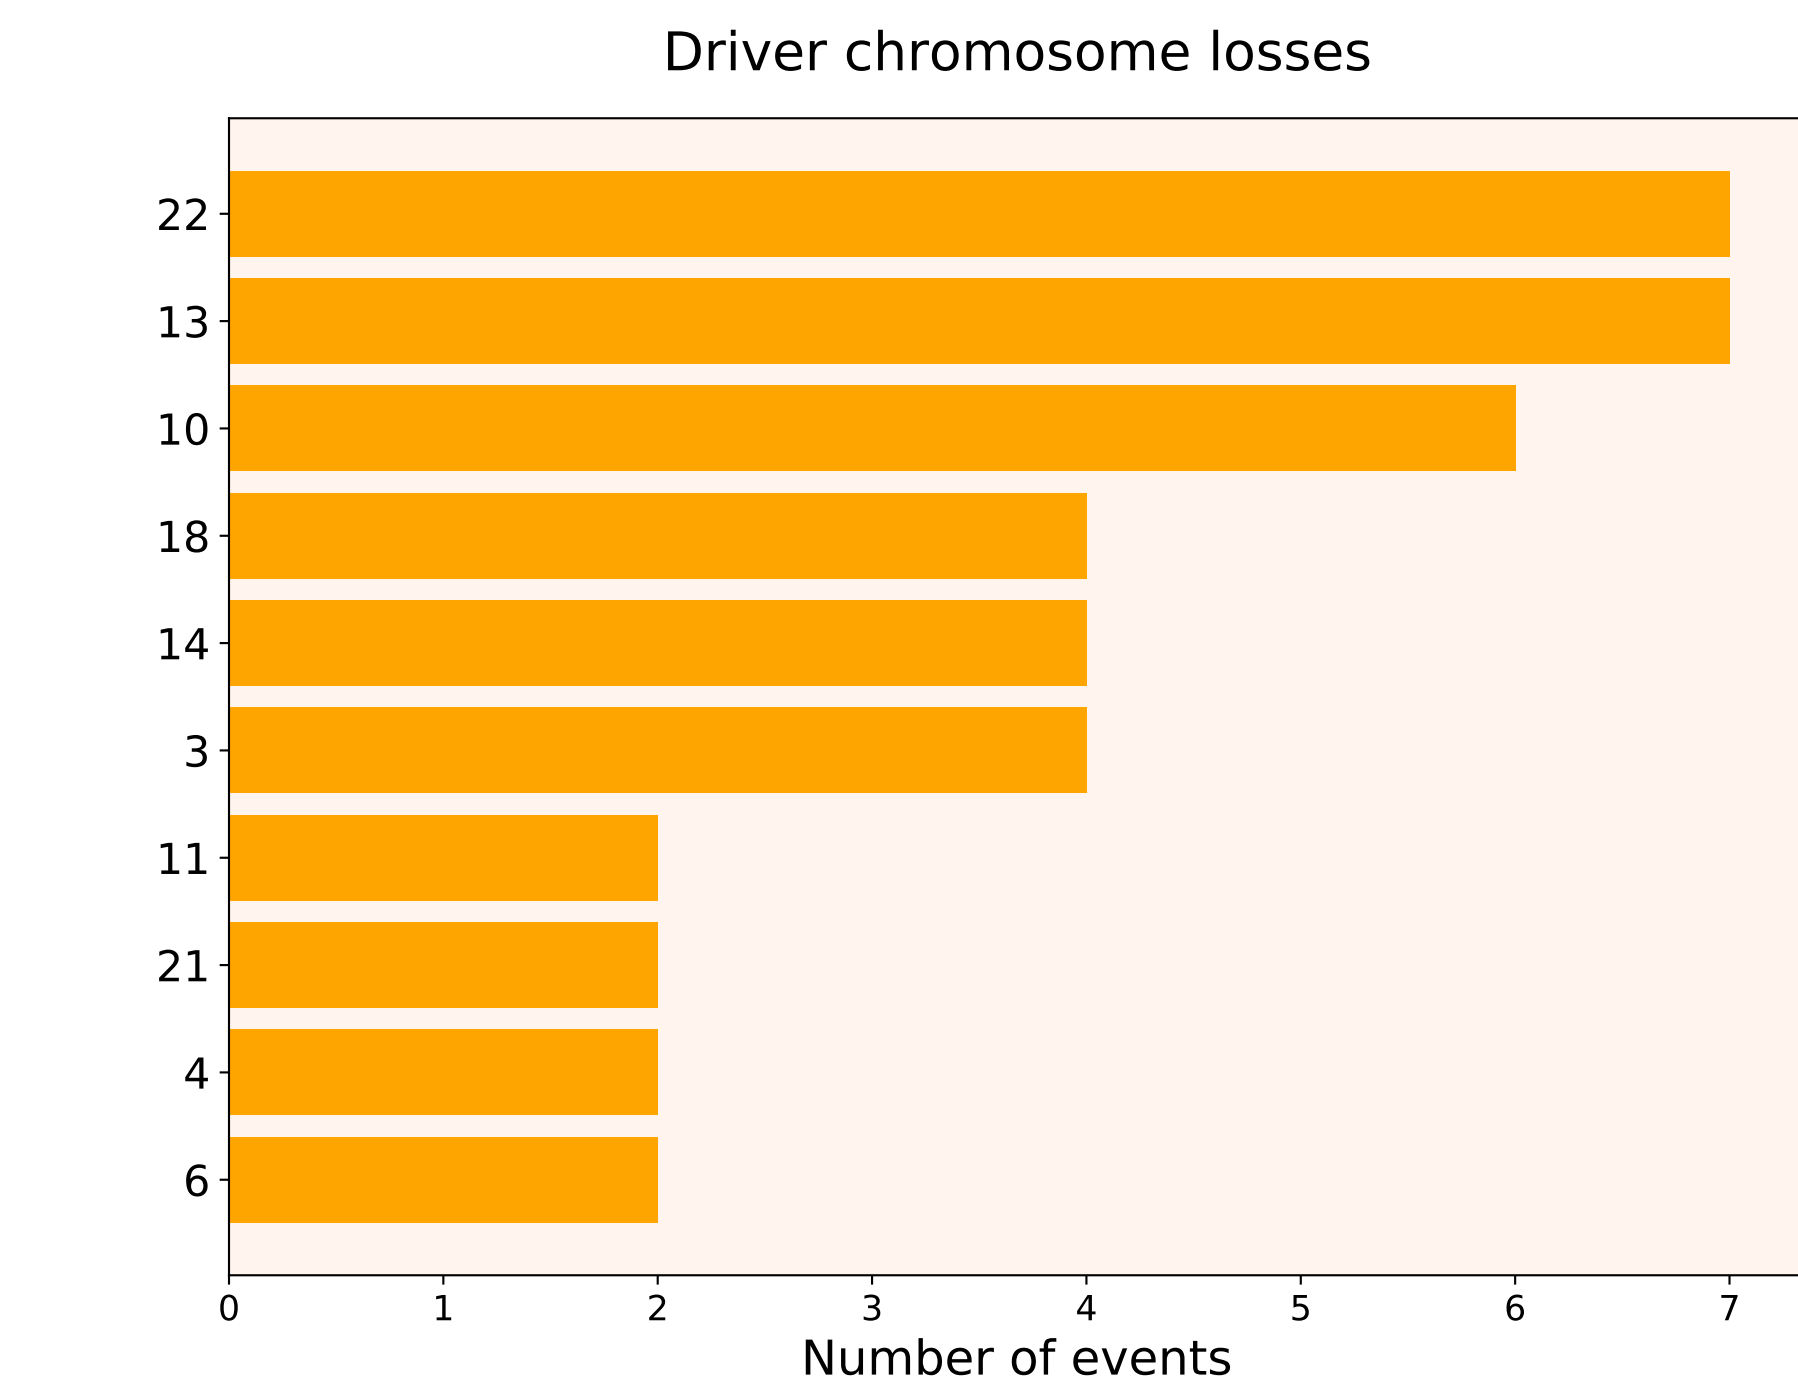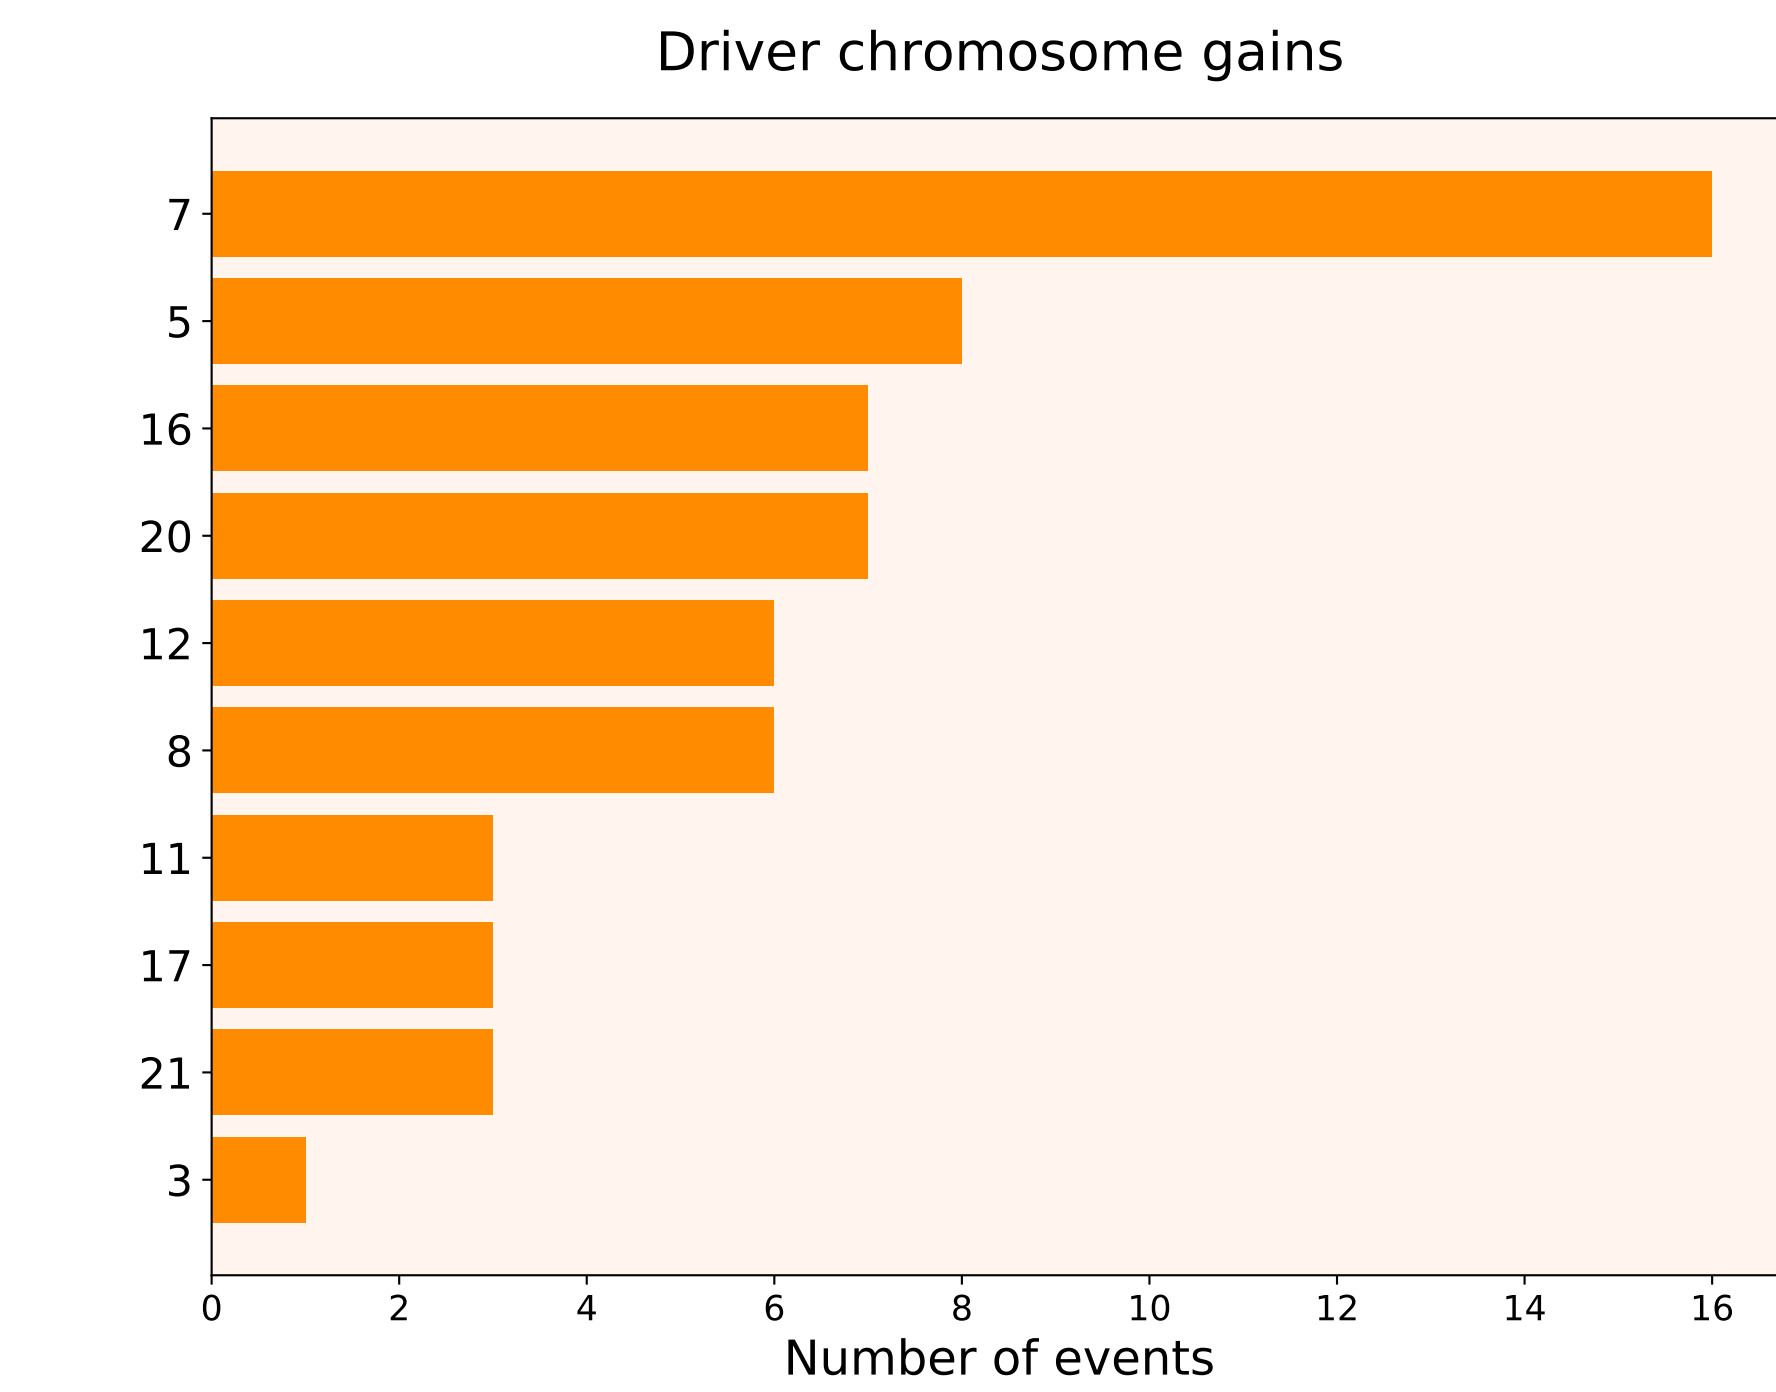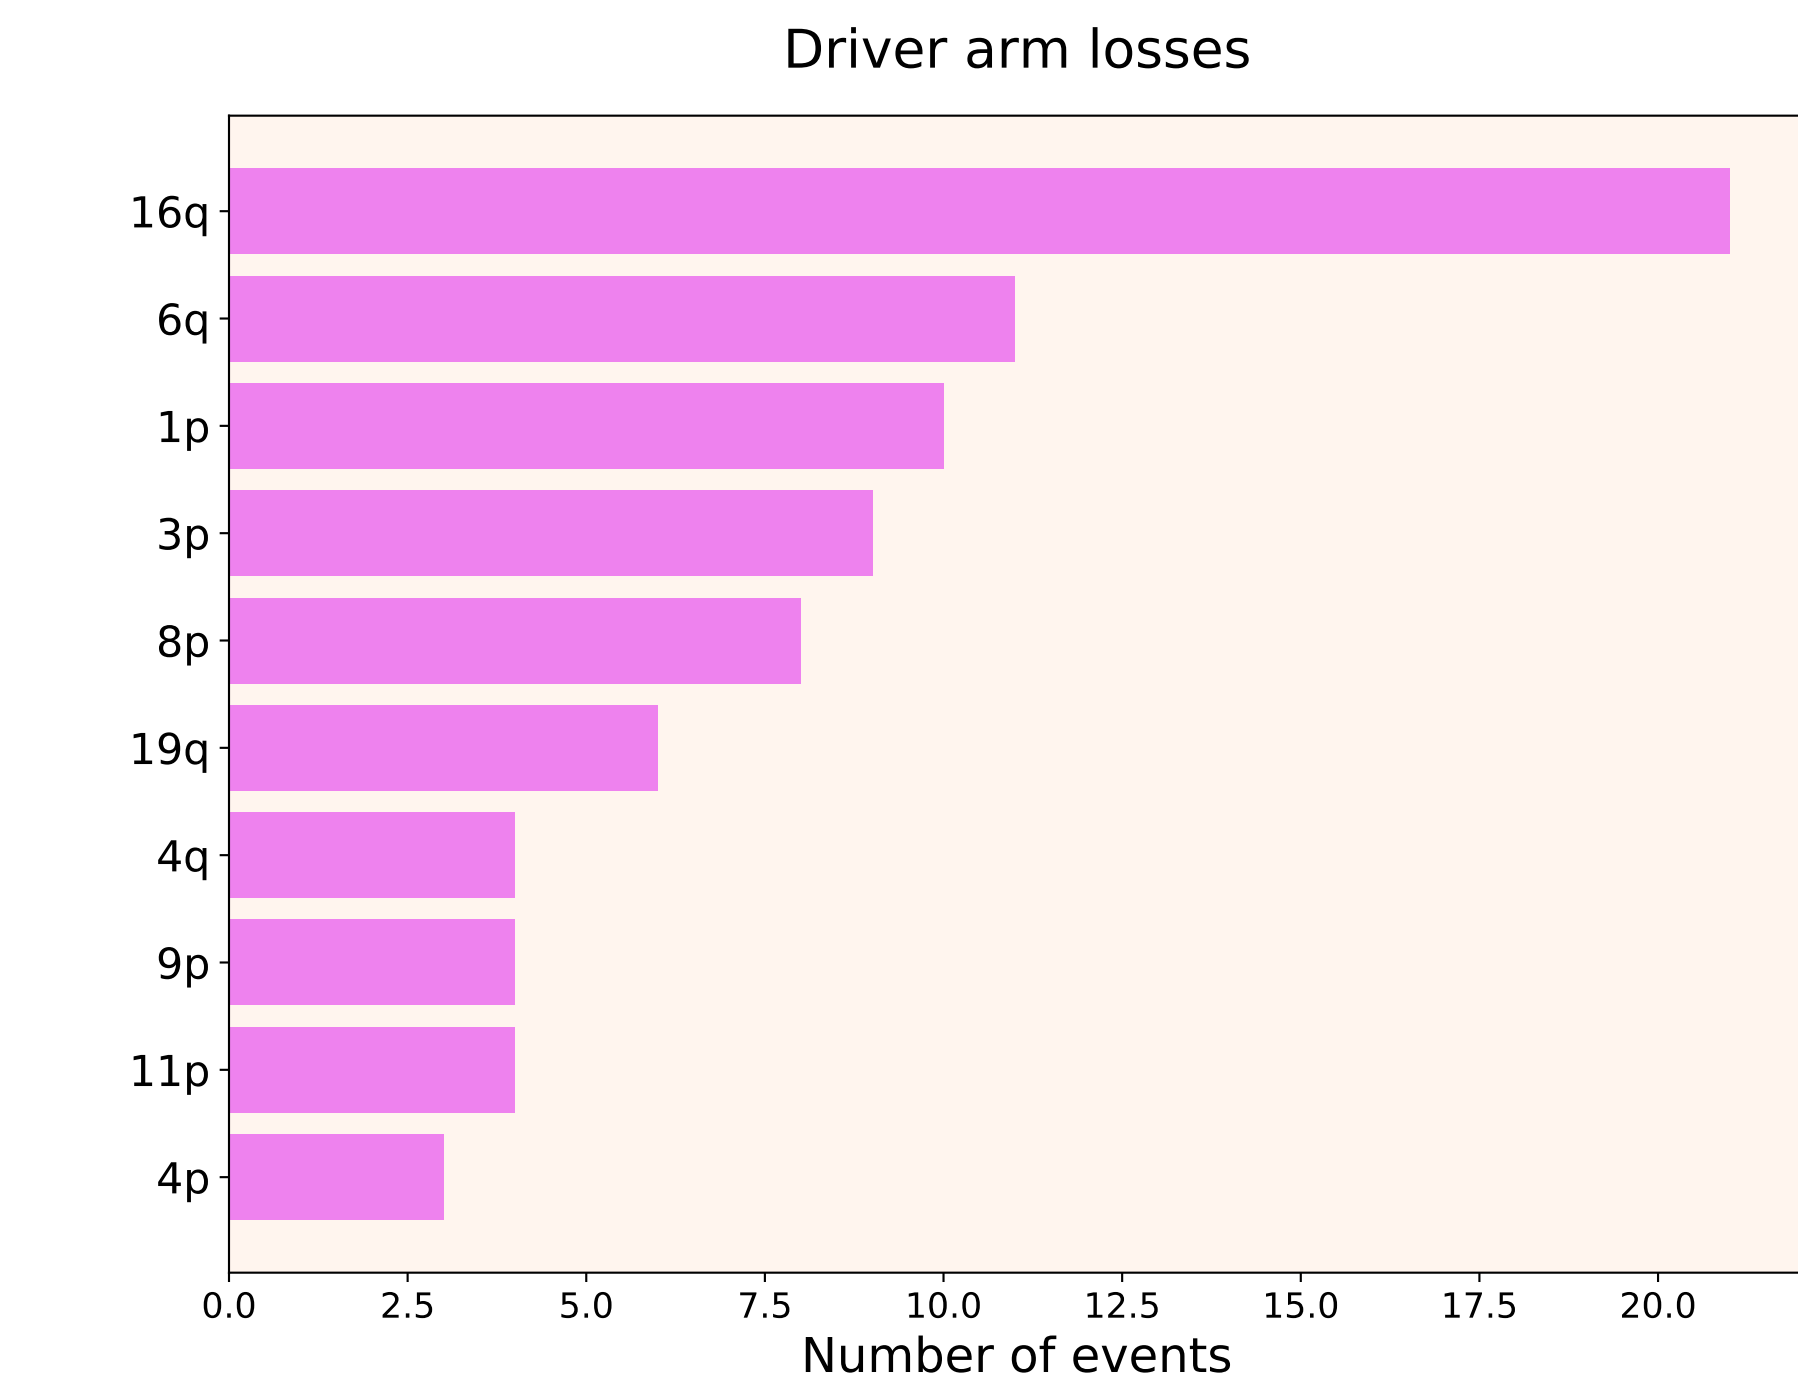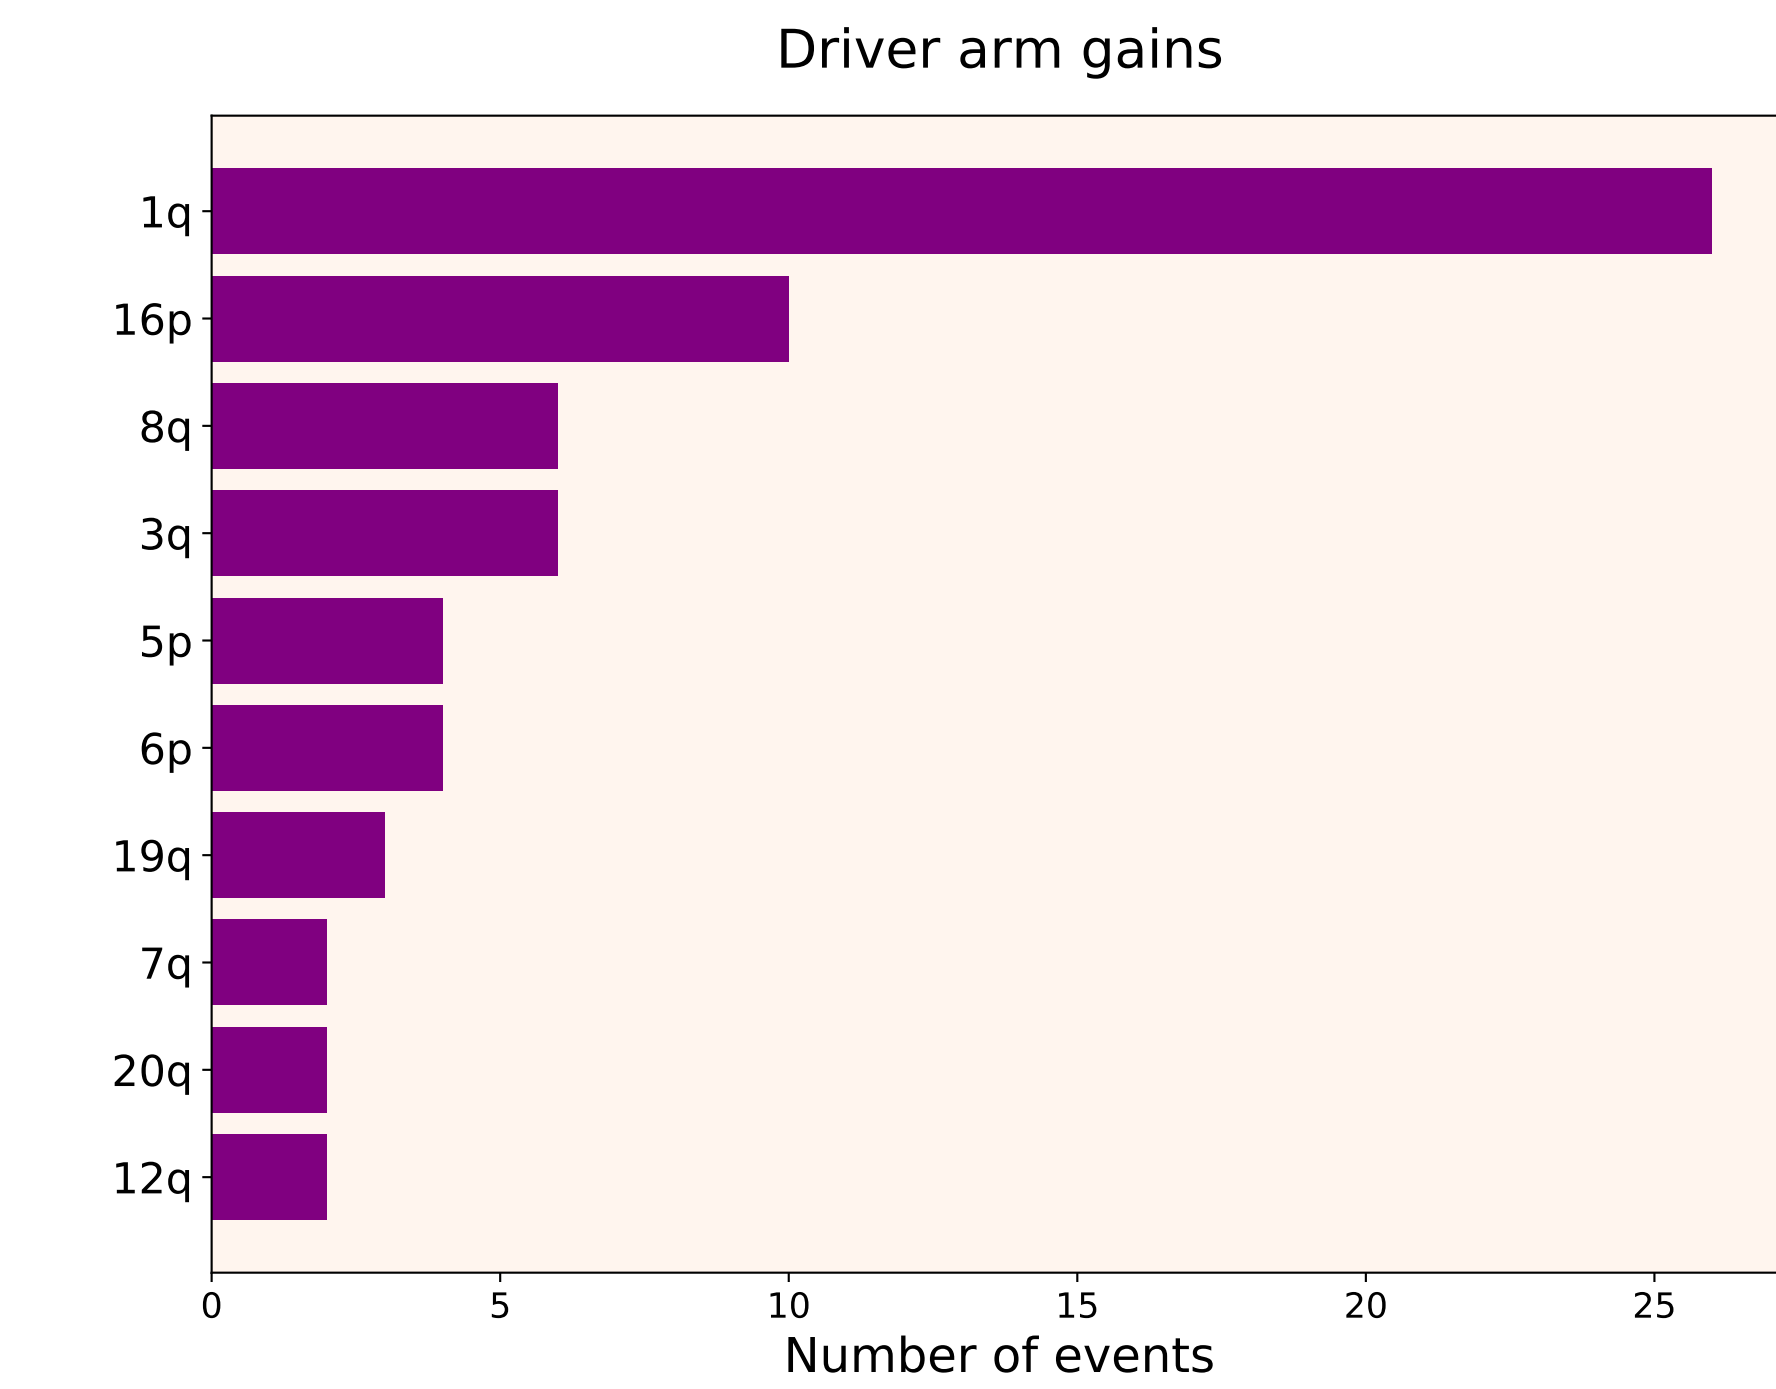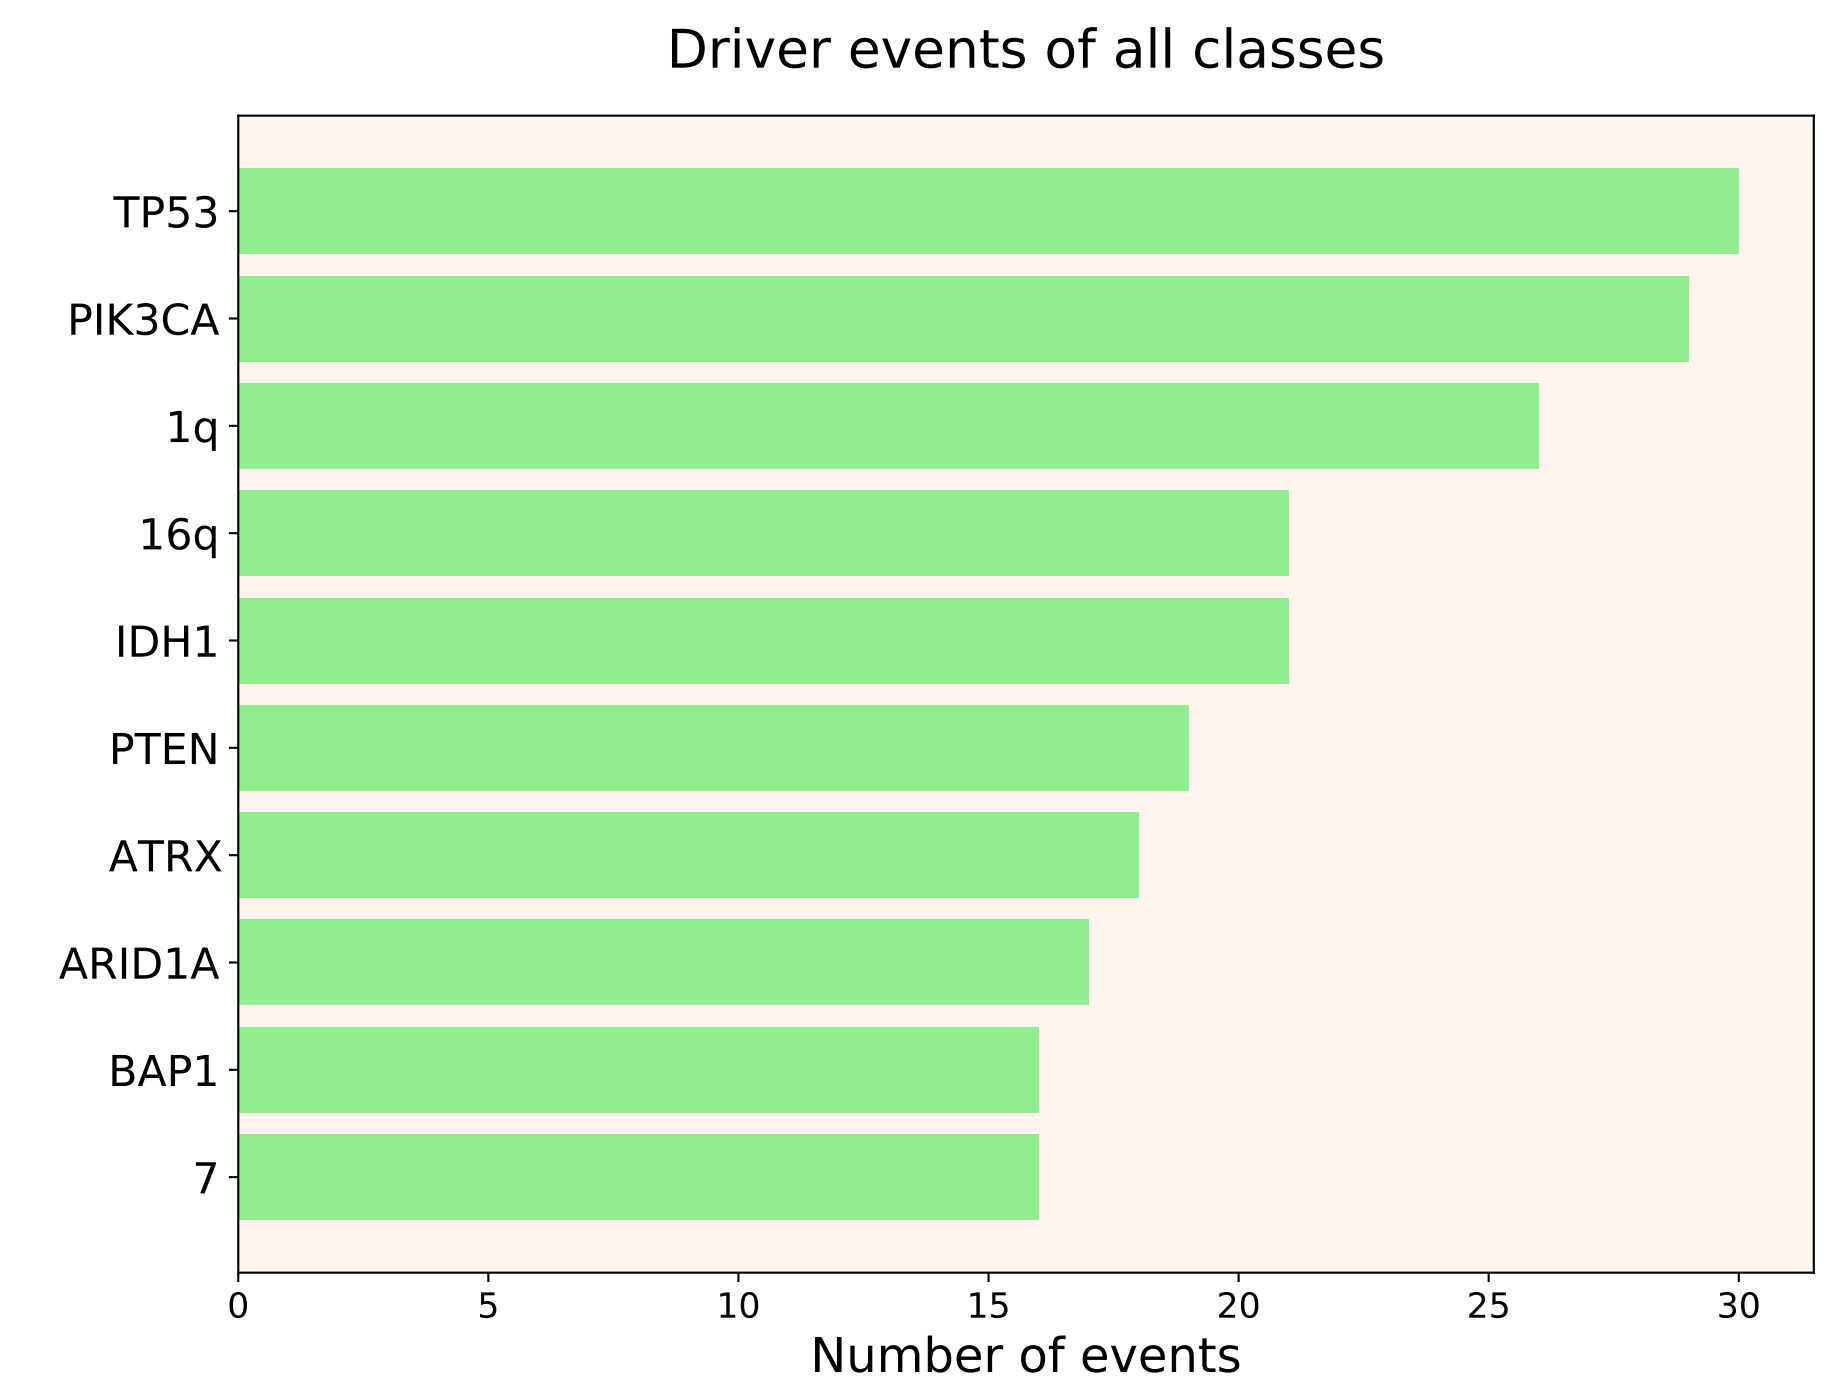

Supplement: Supplemental_Data_S1.zip [file Supplemental_Data_S1.zip]

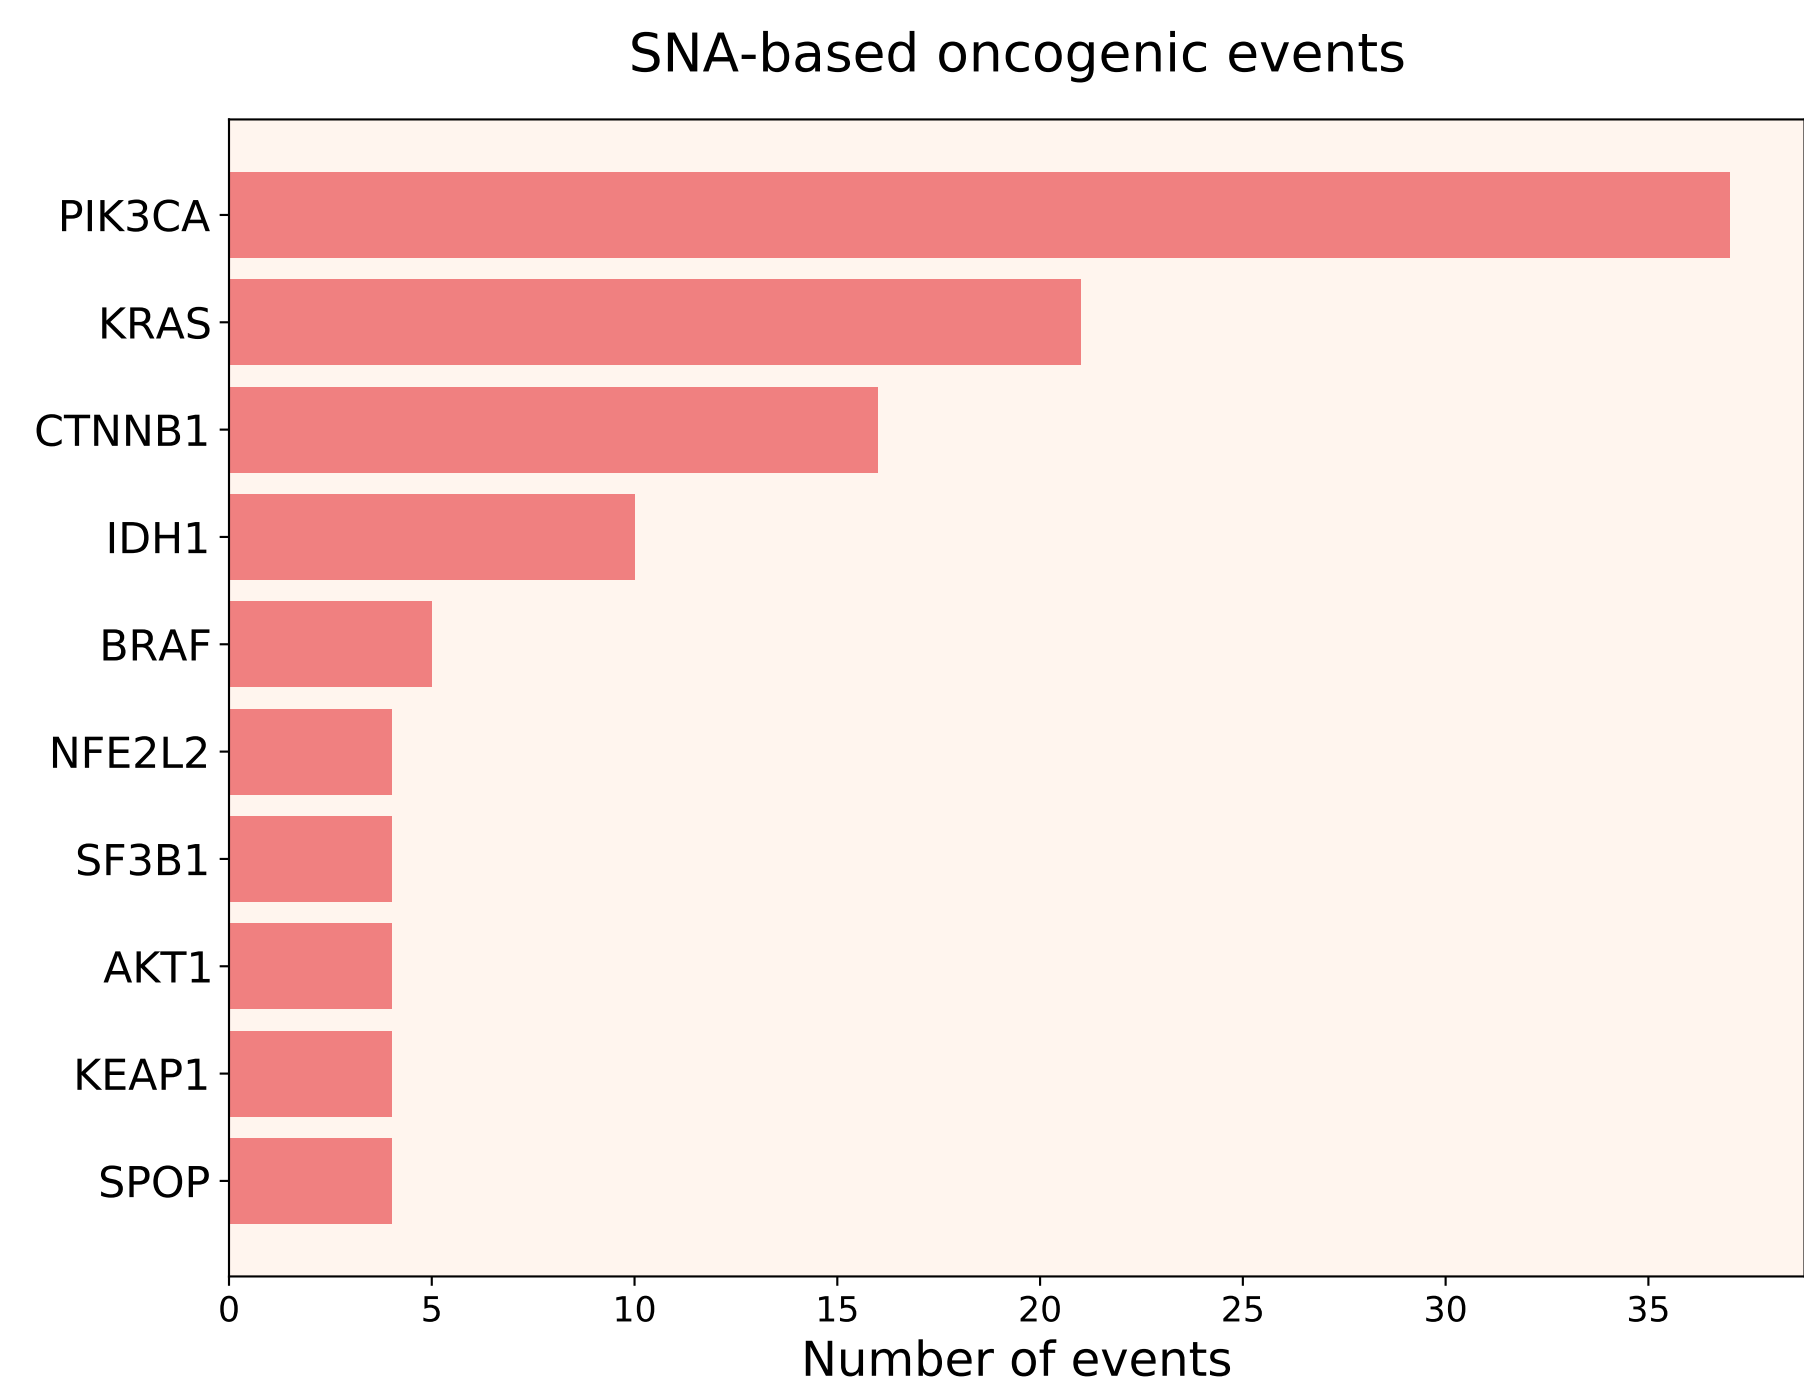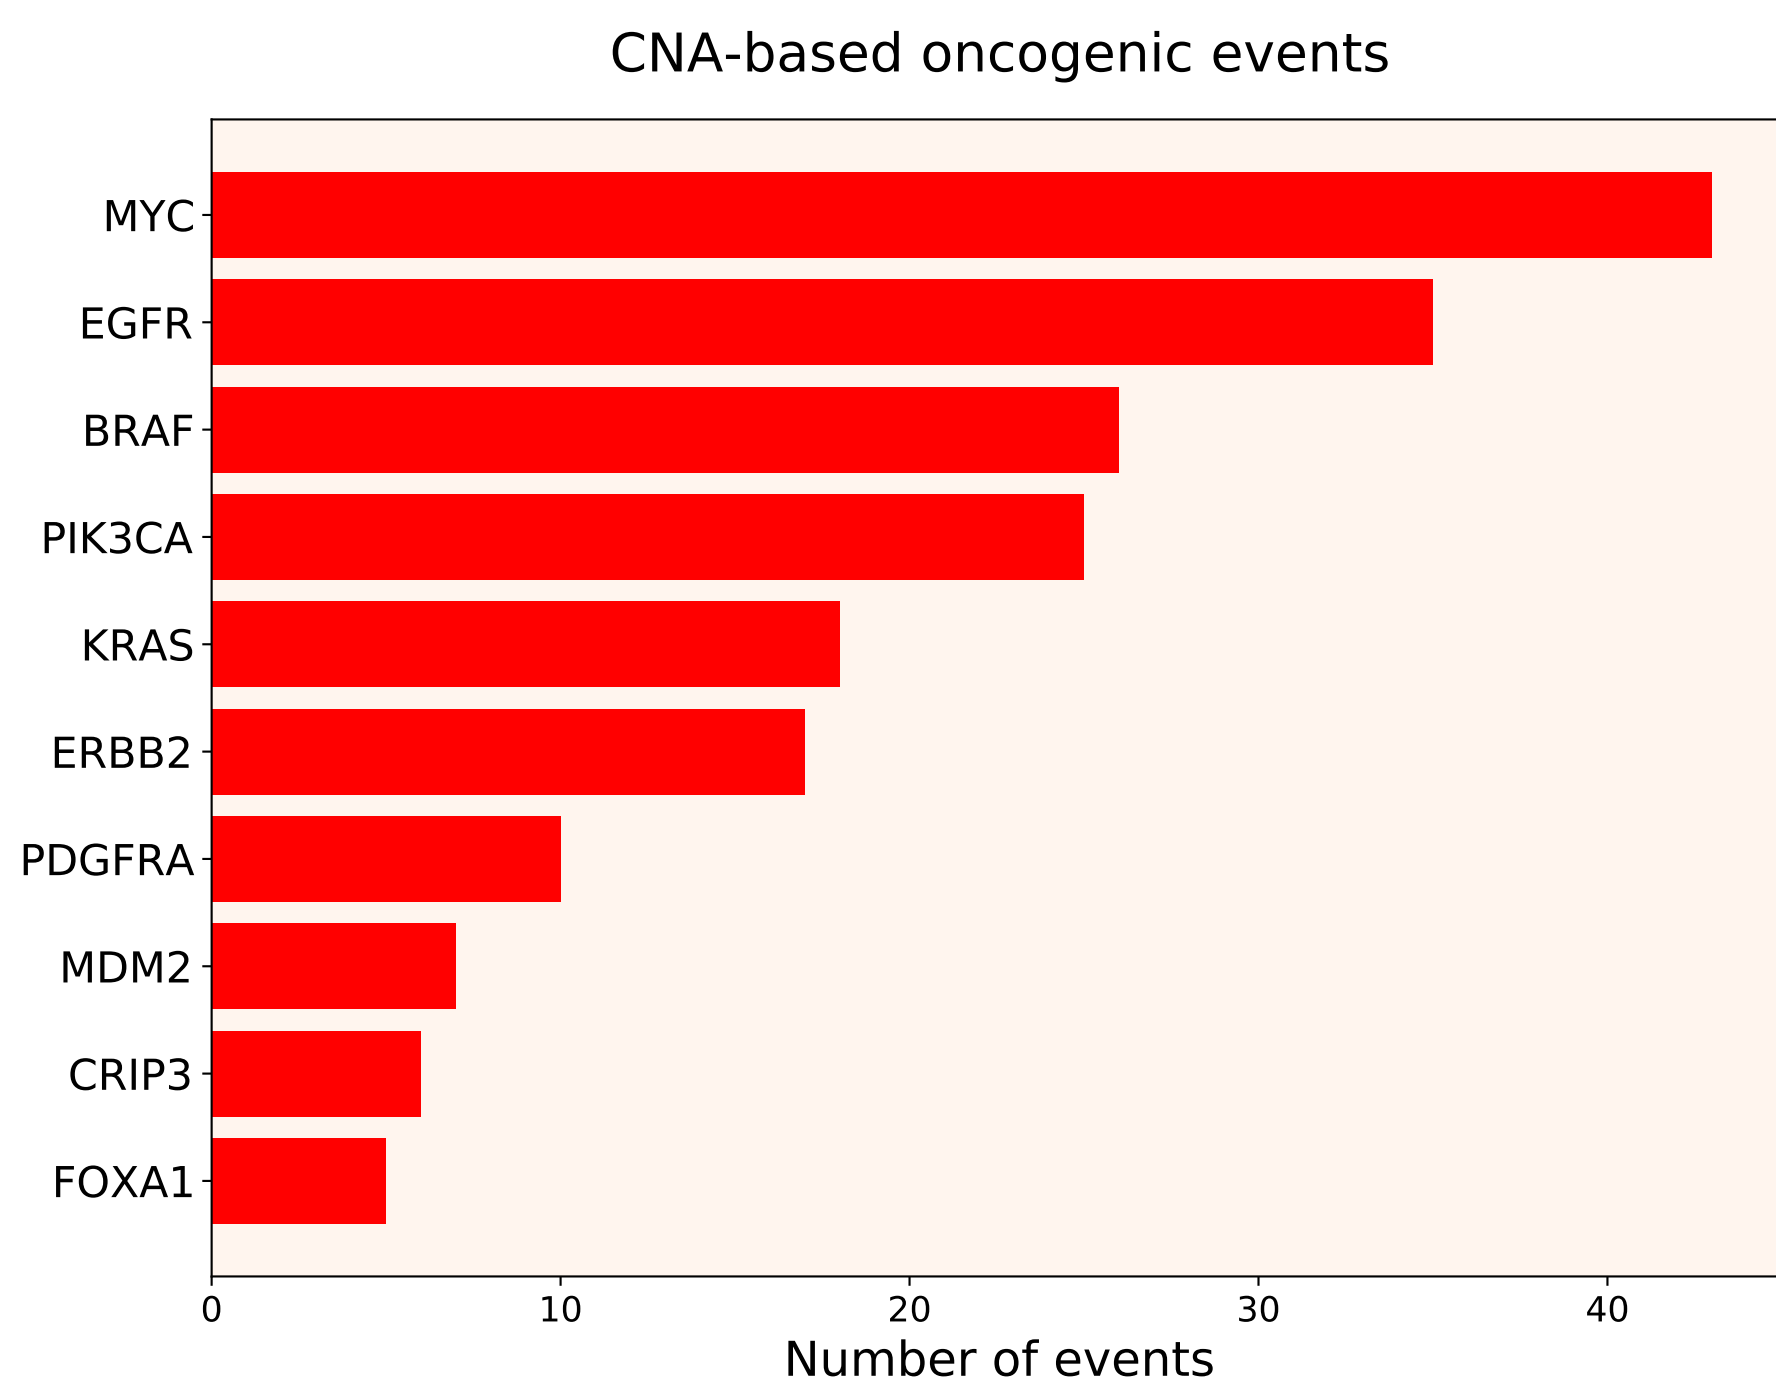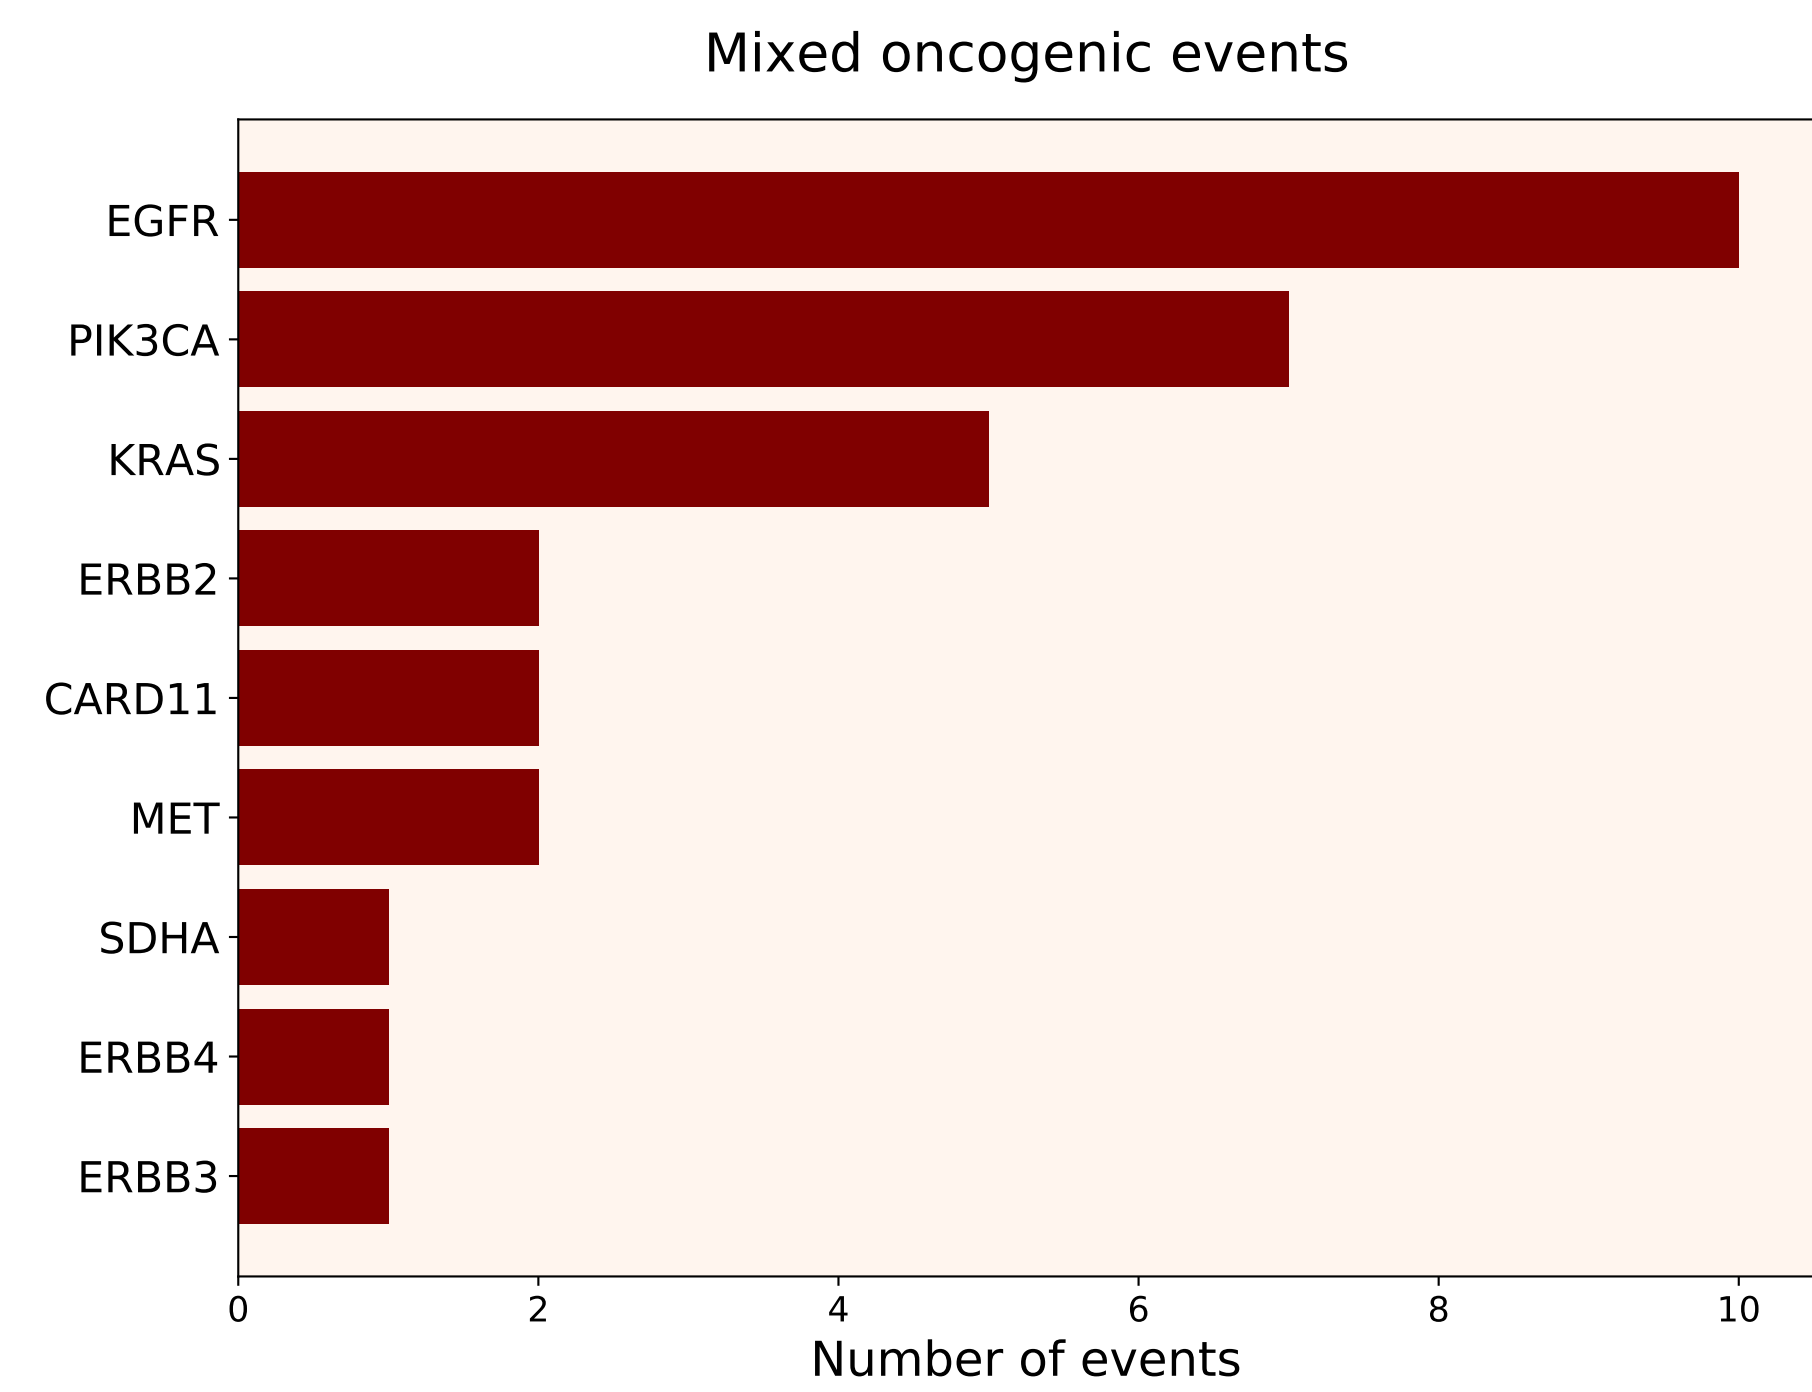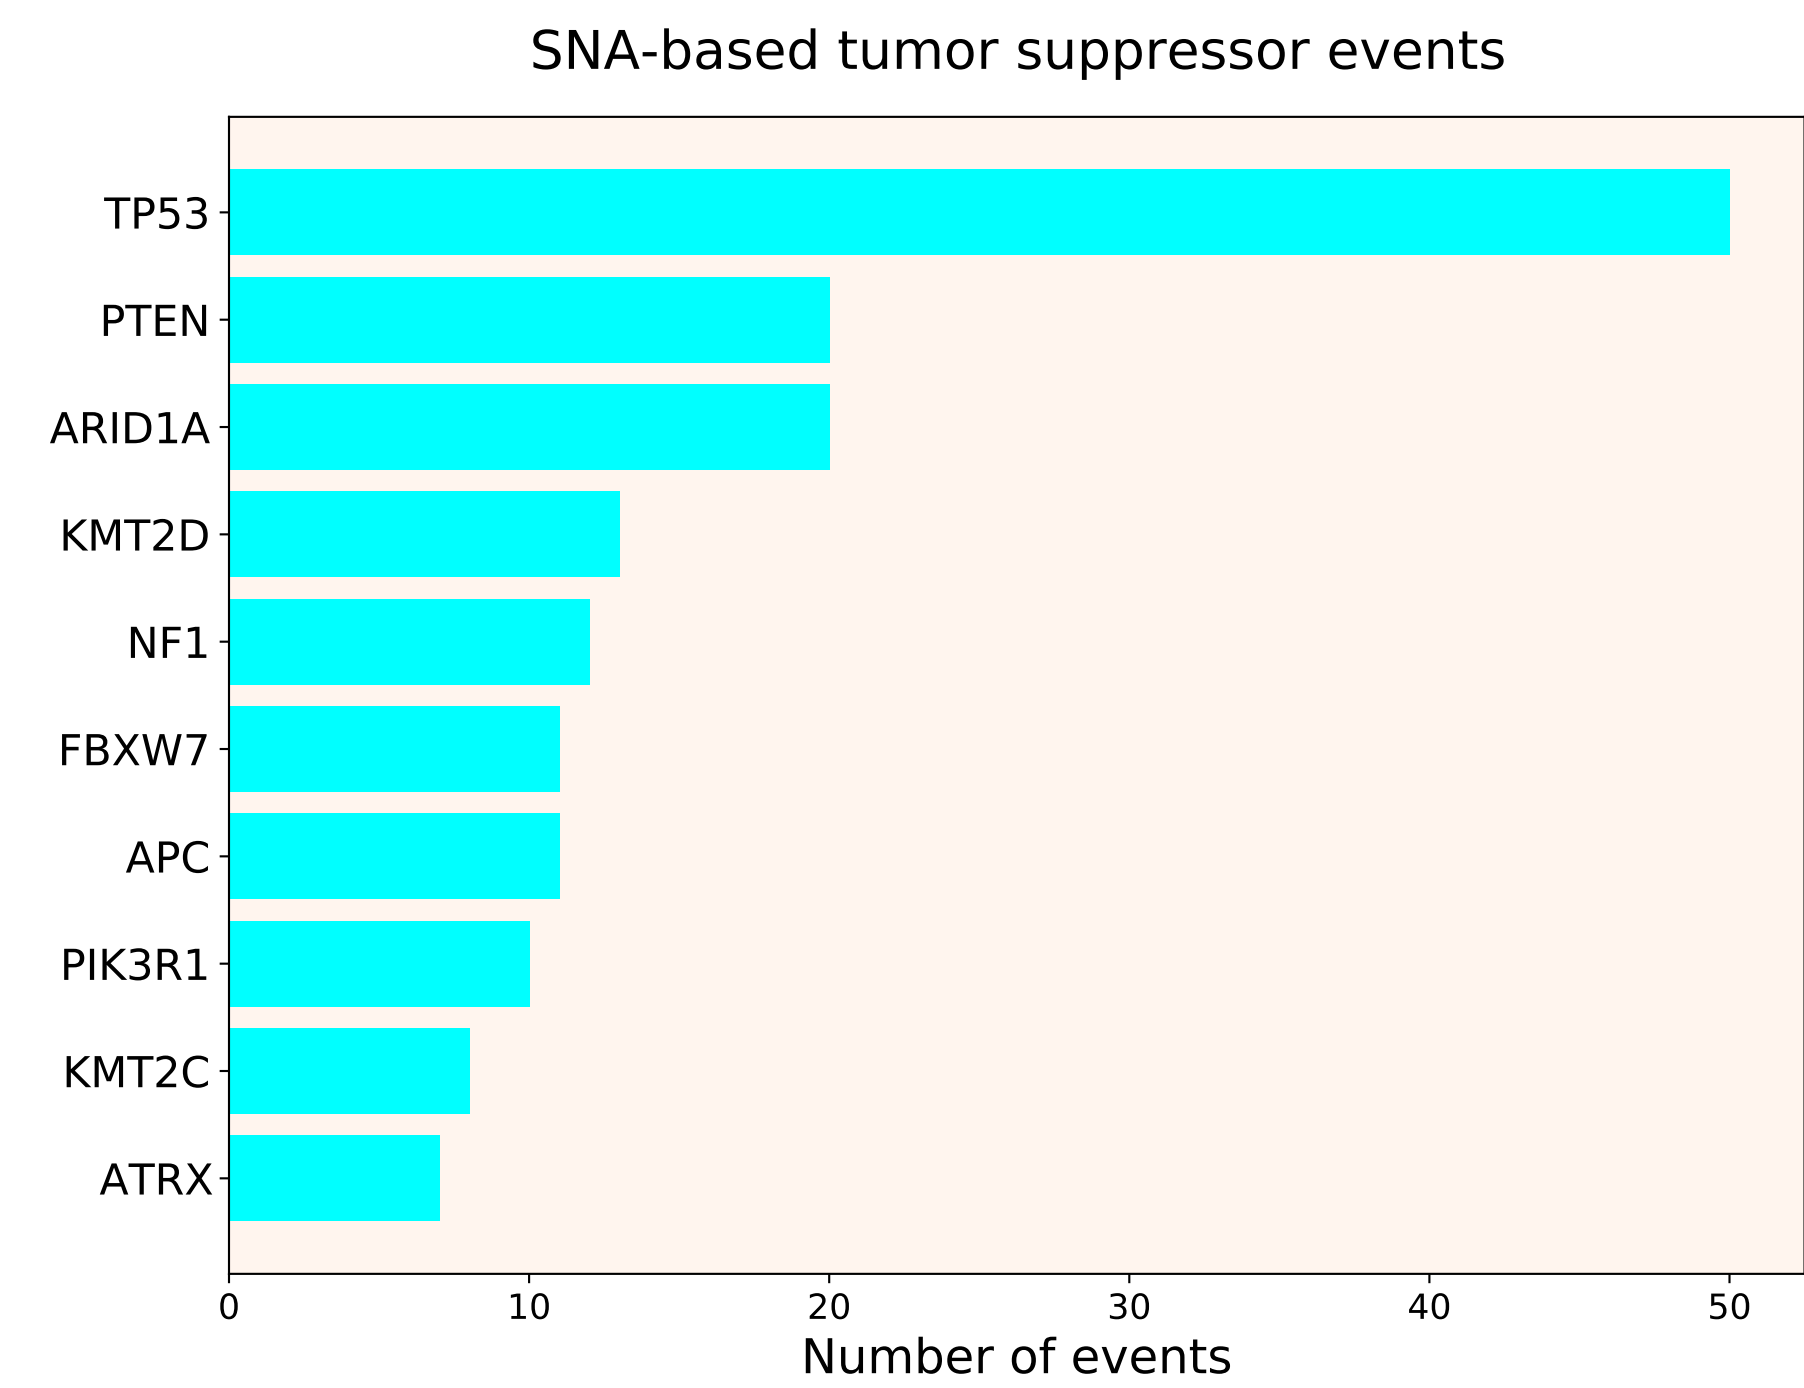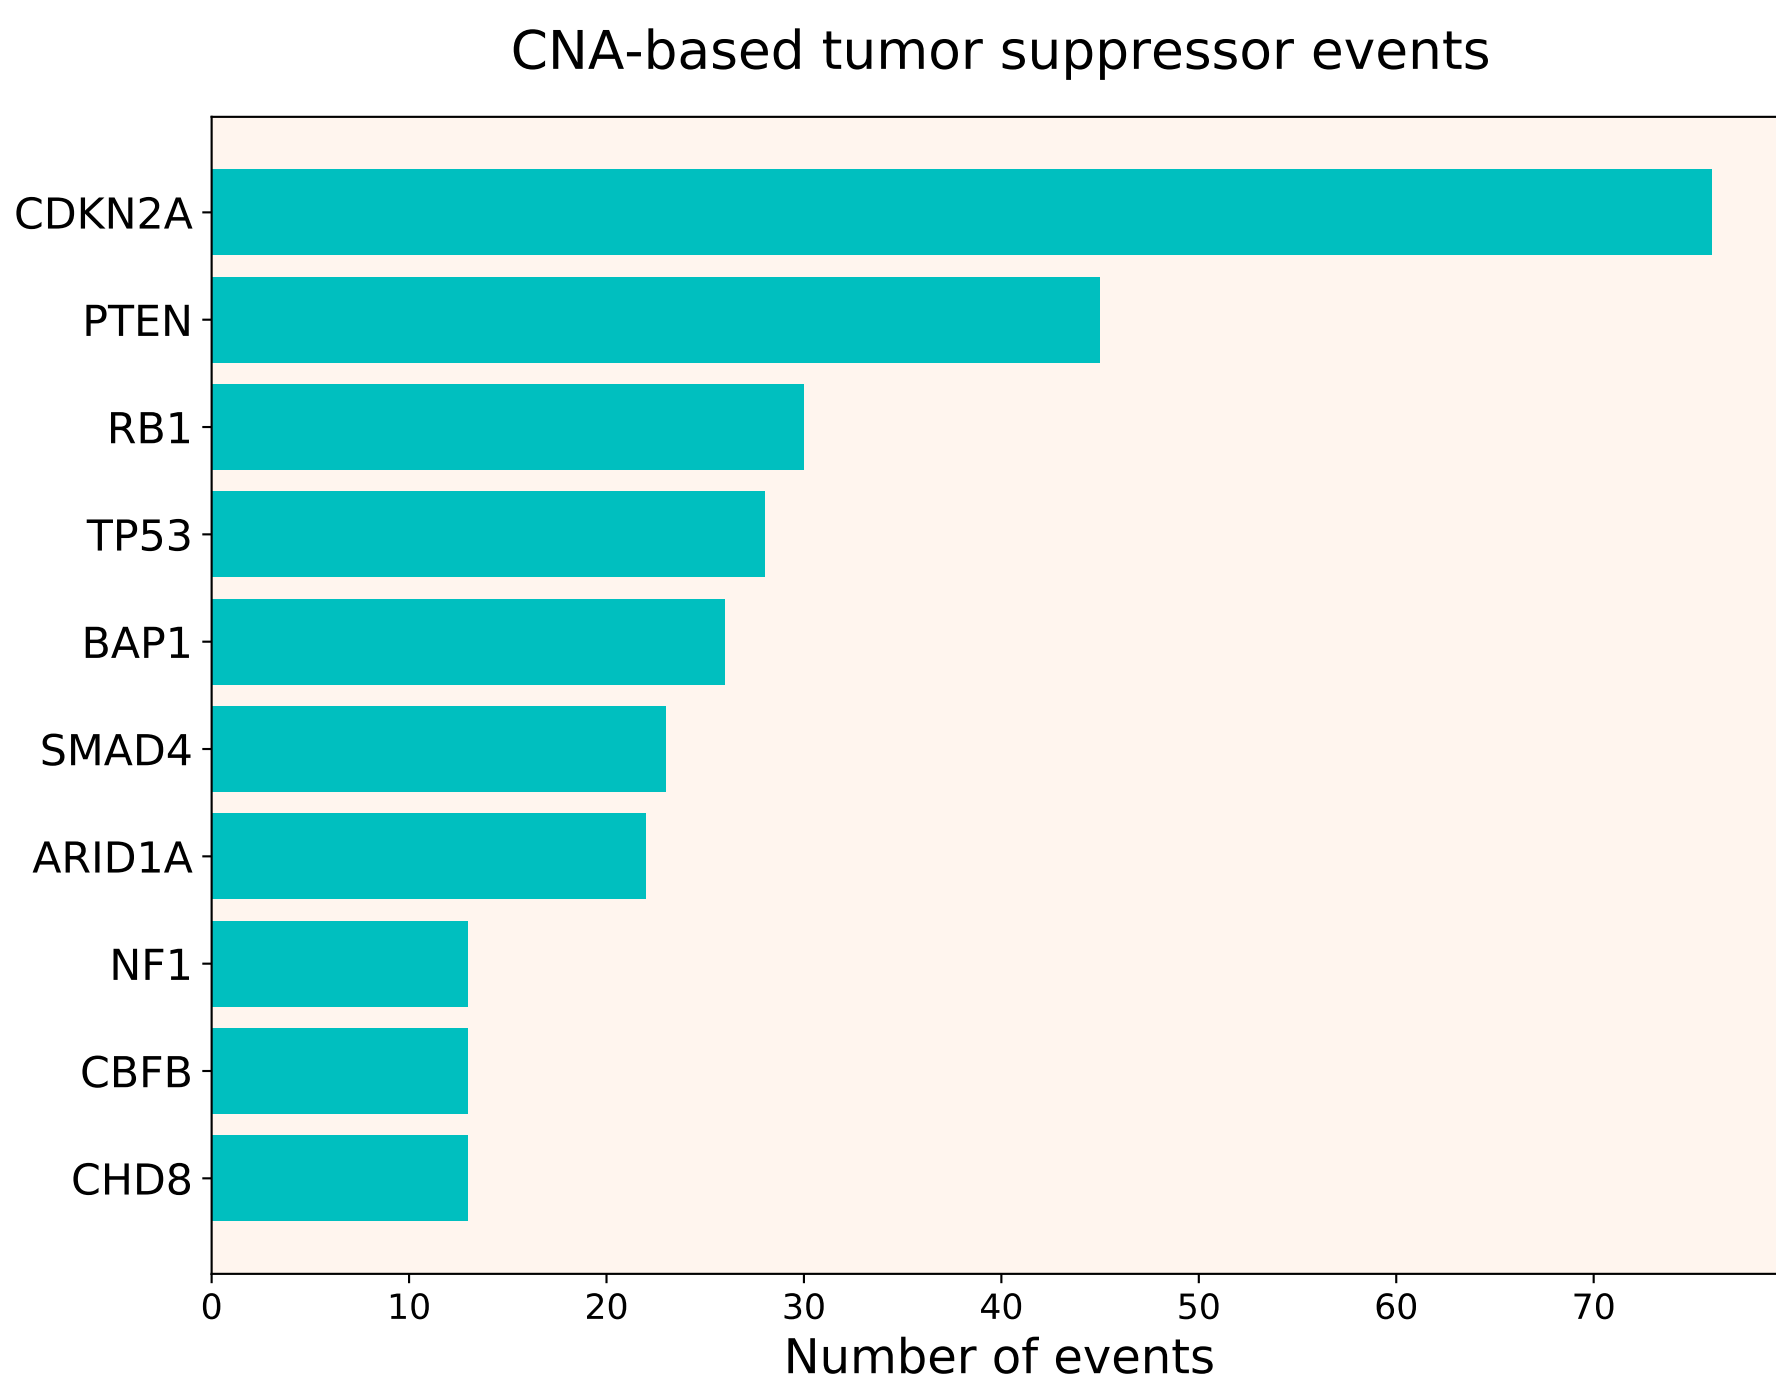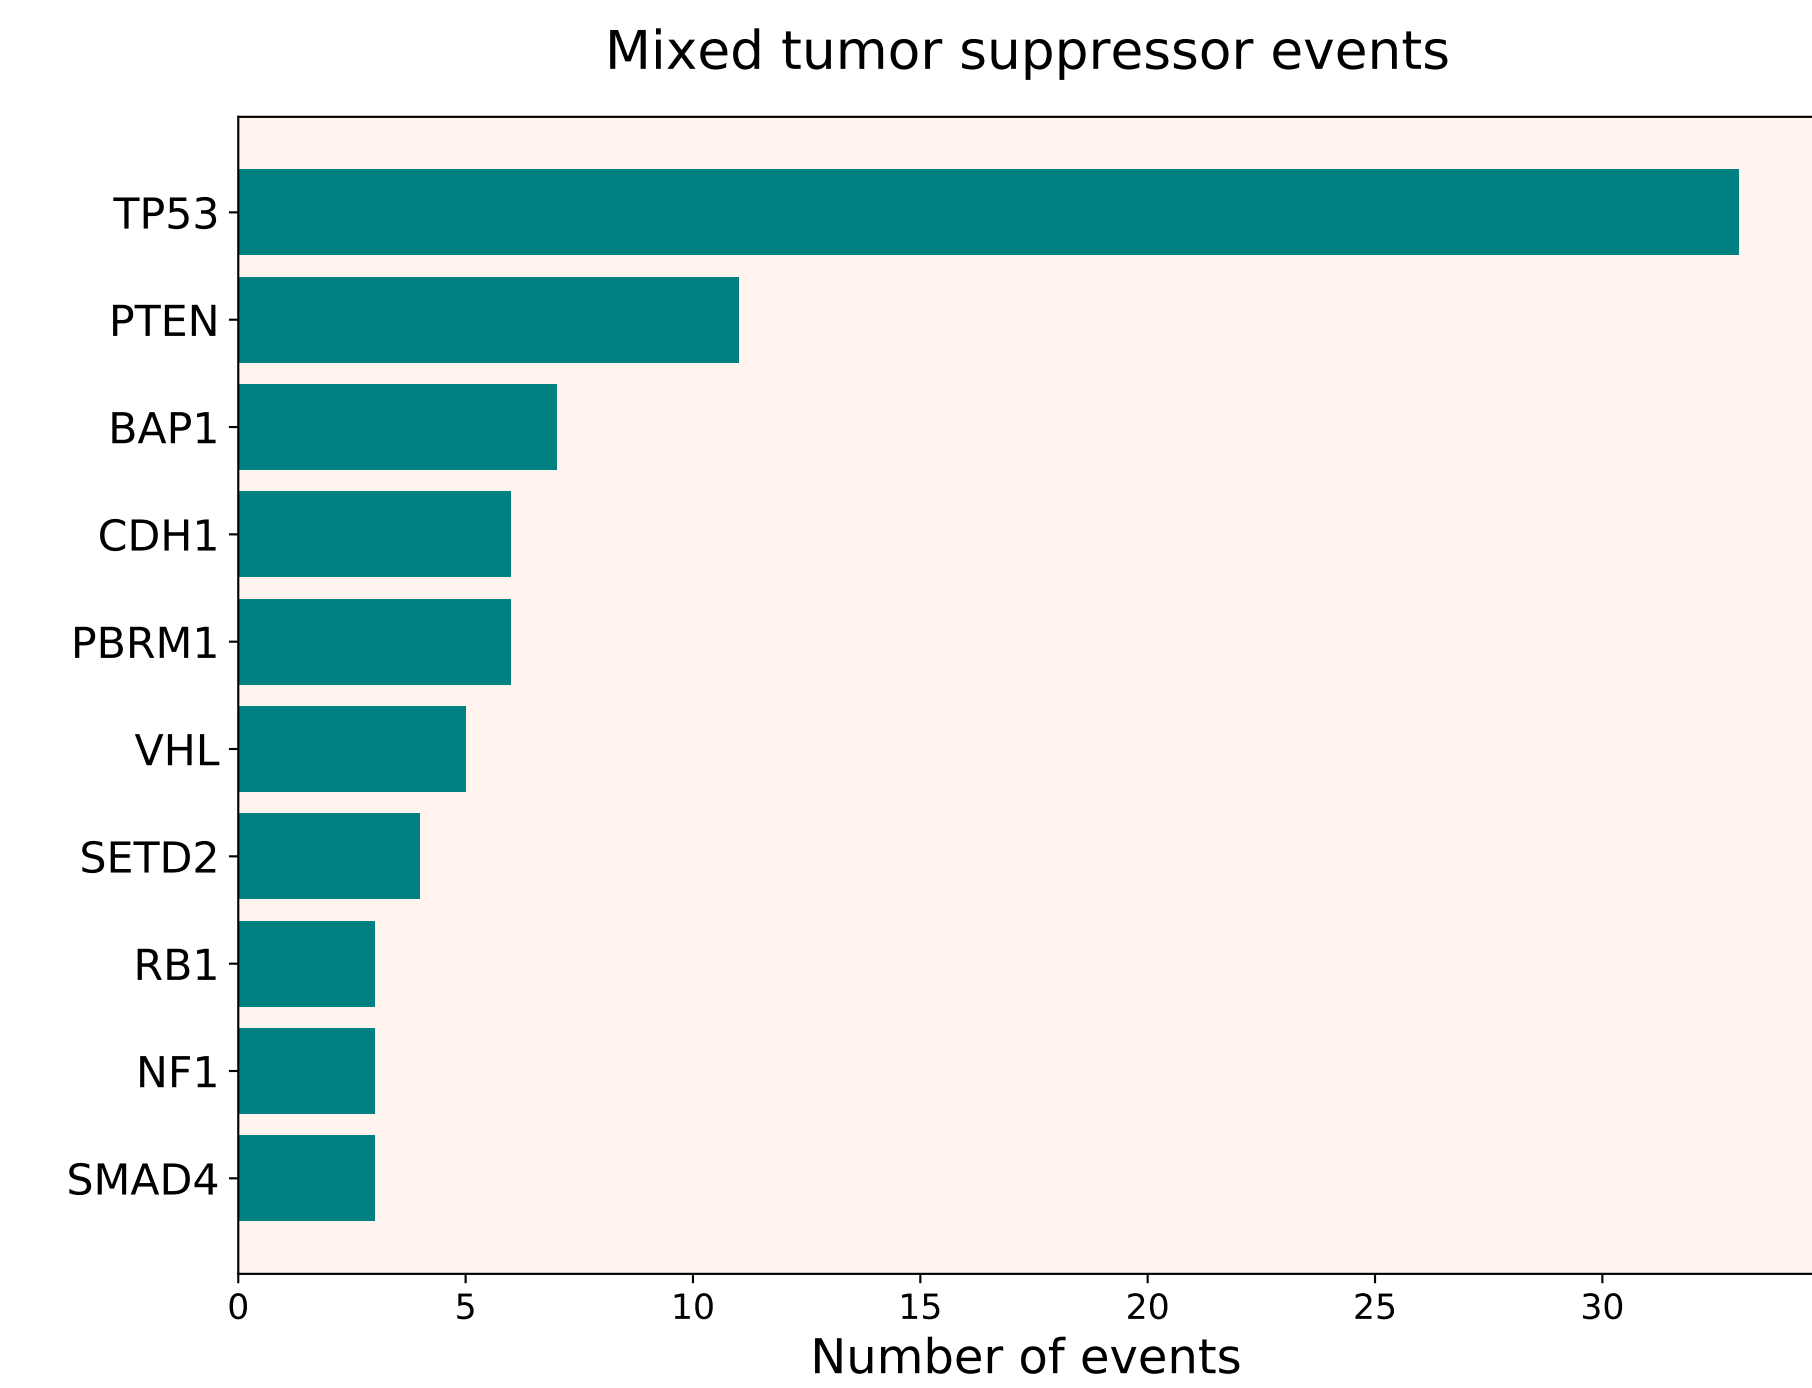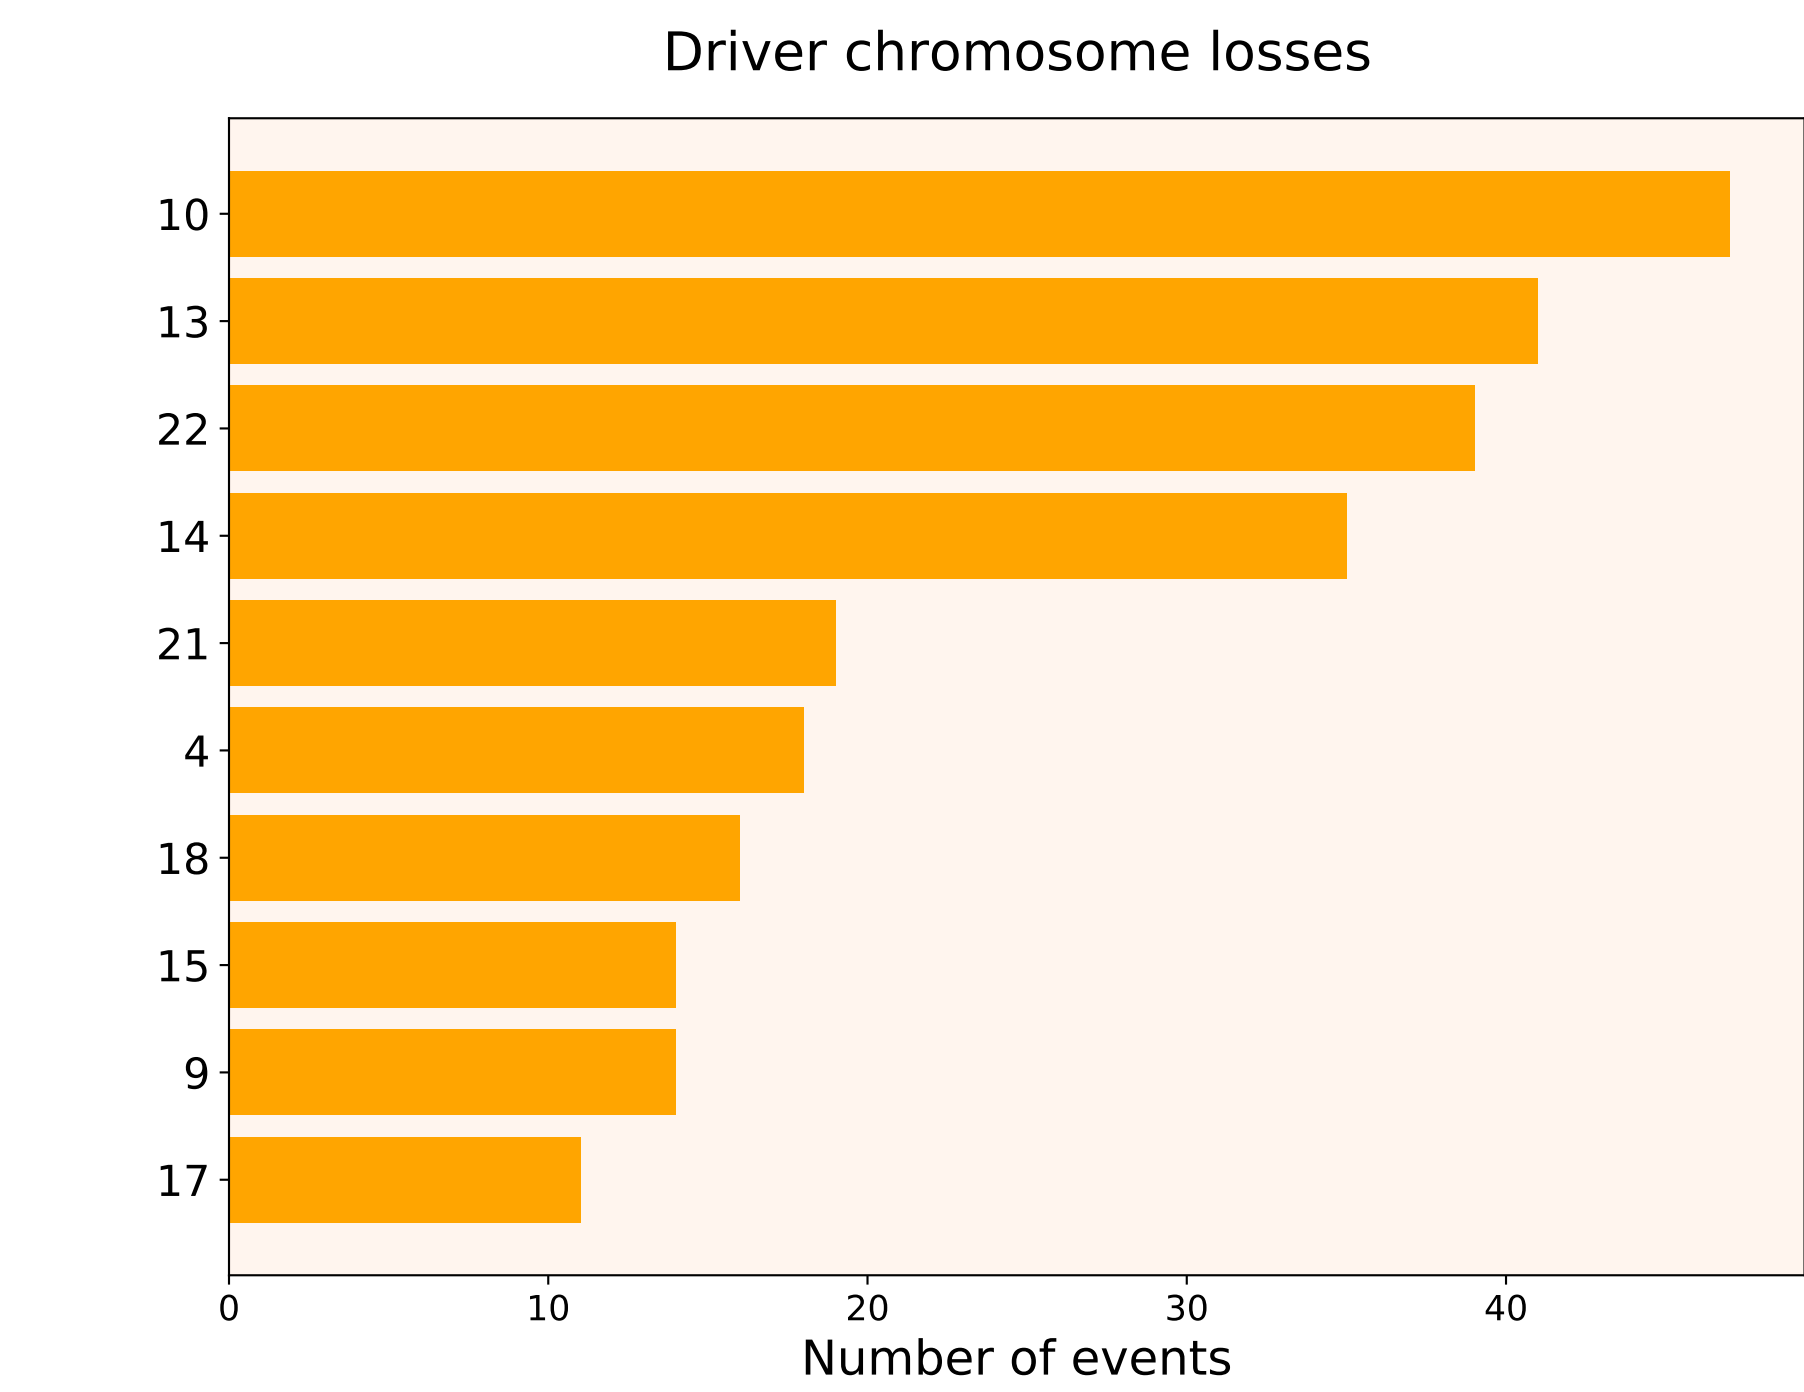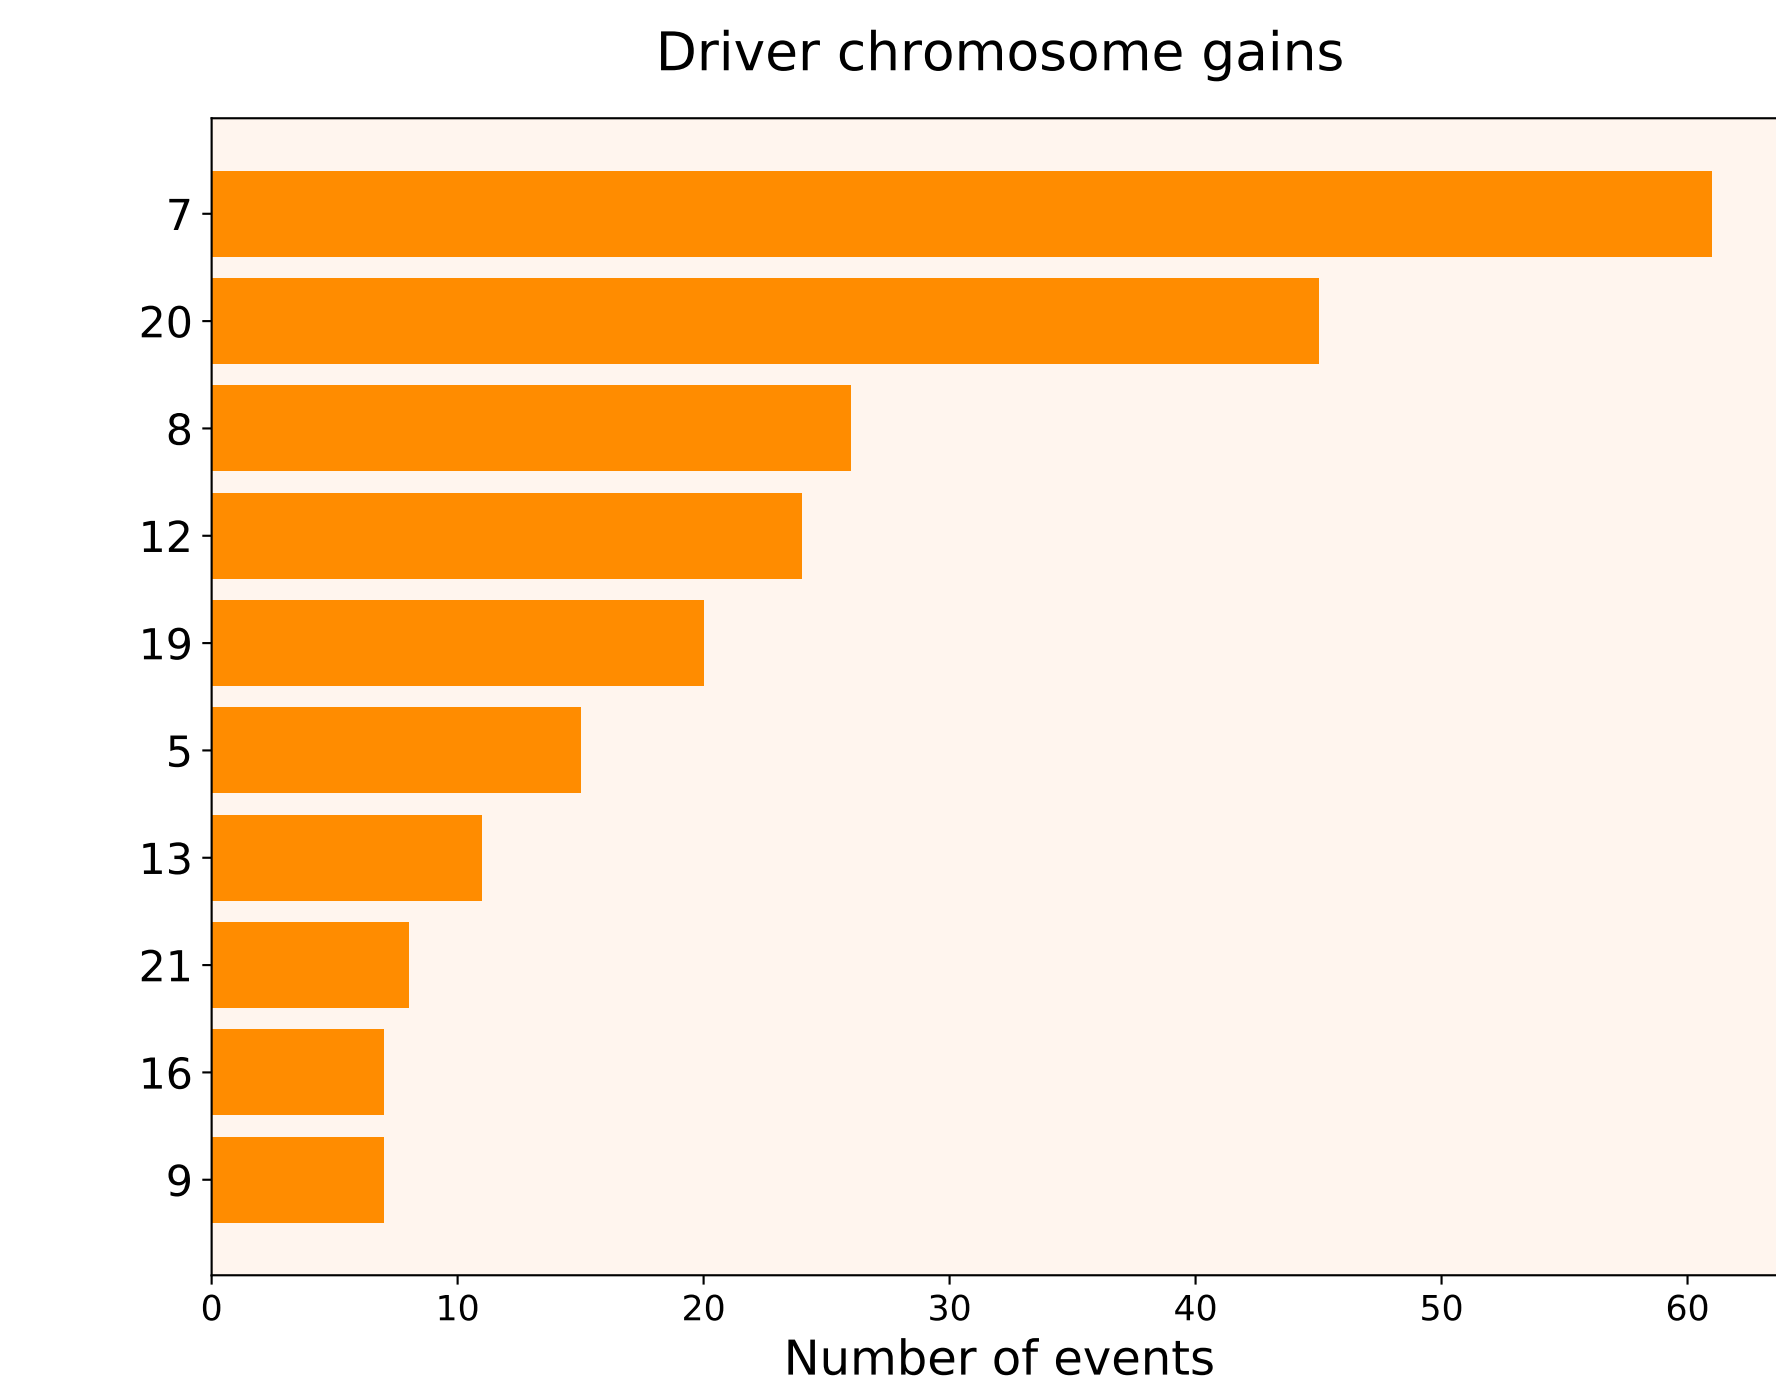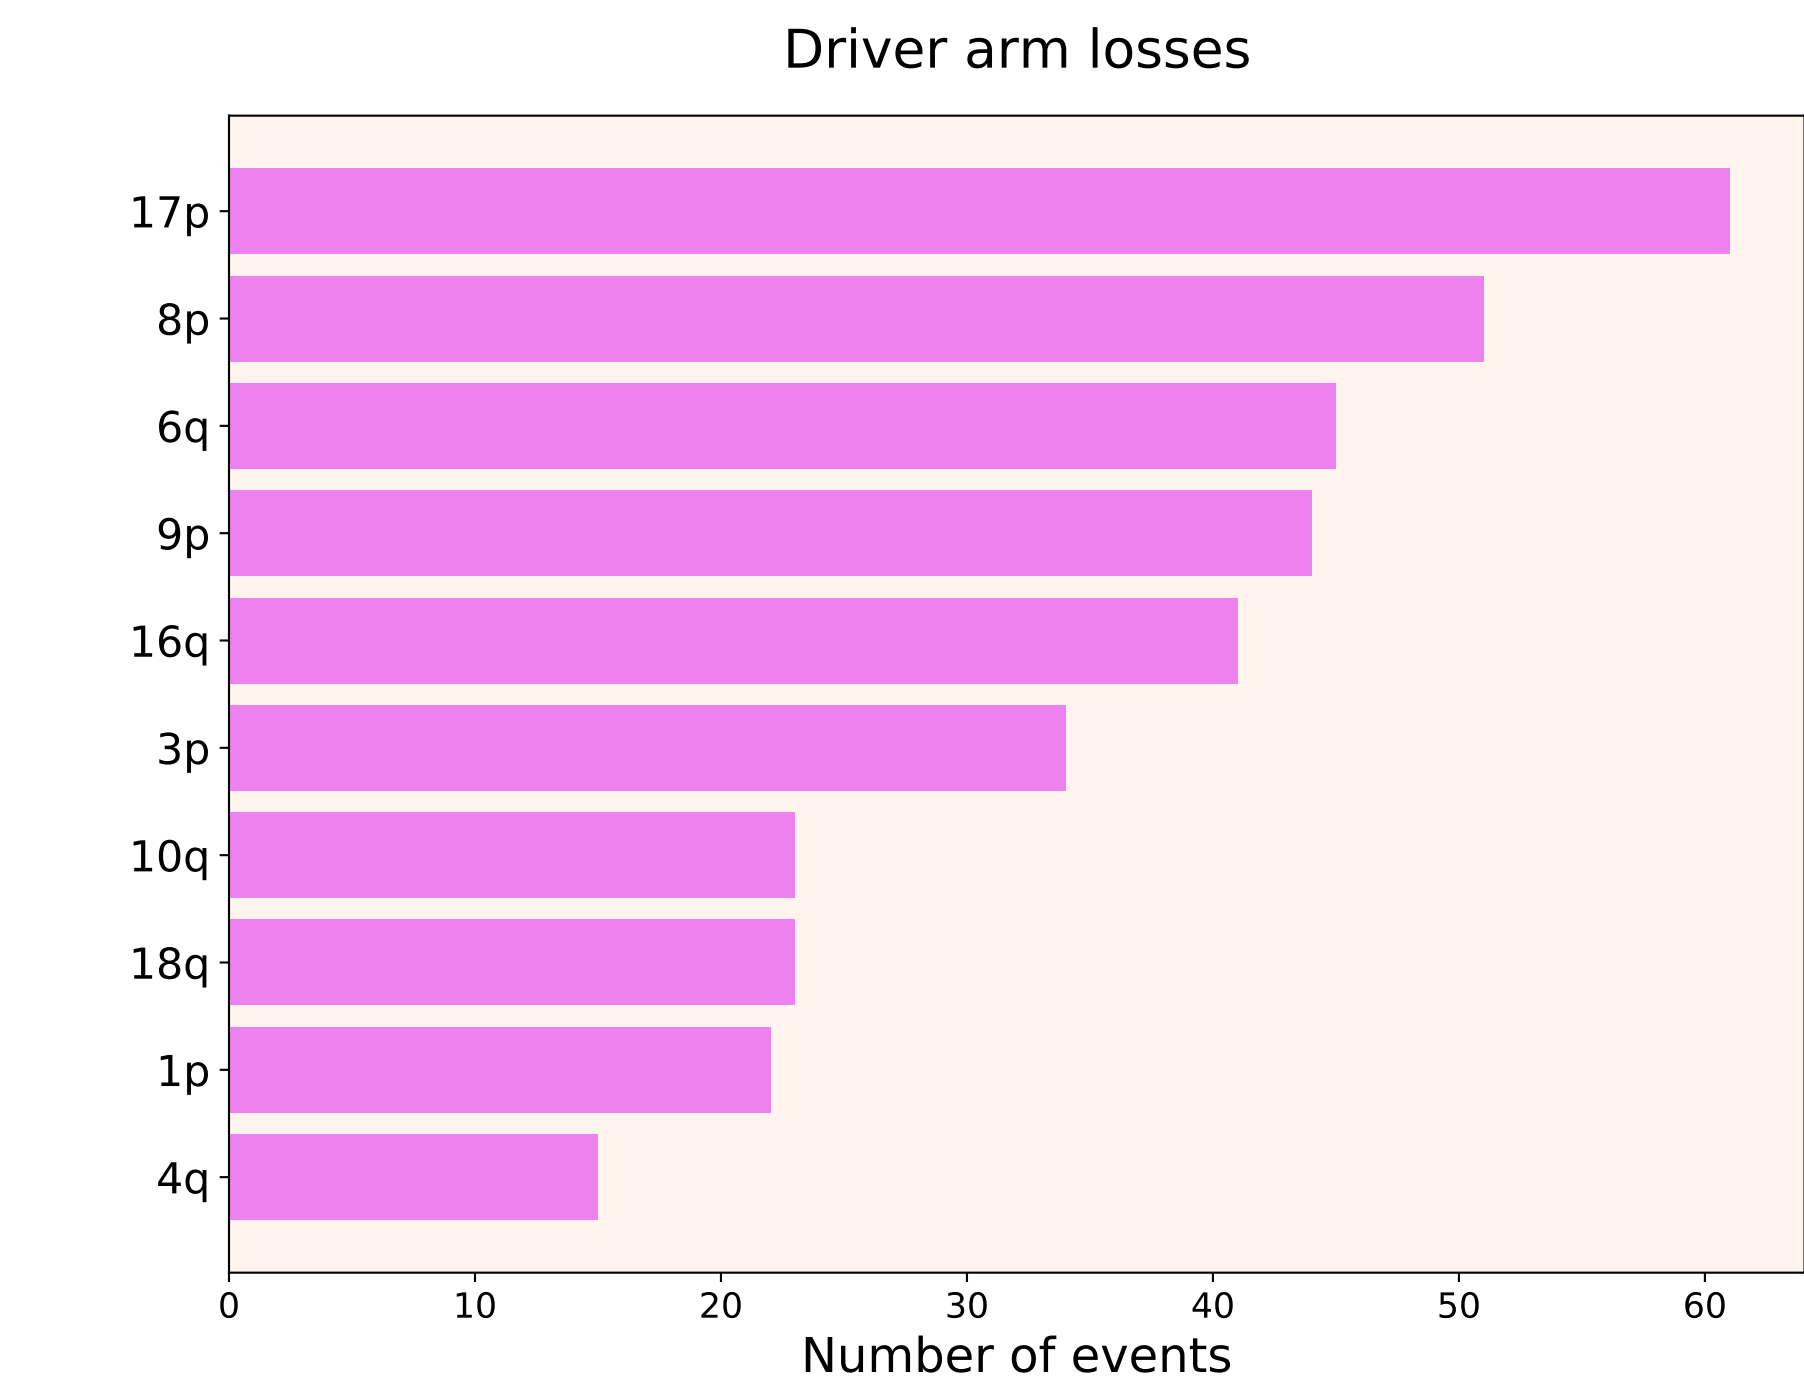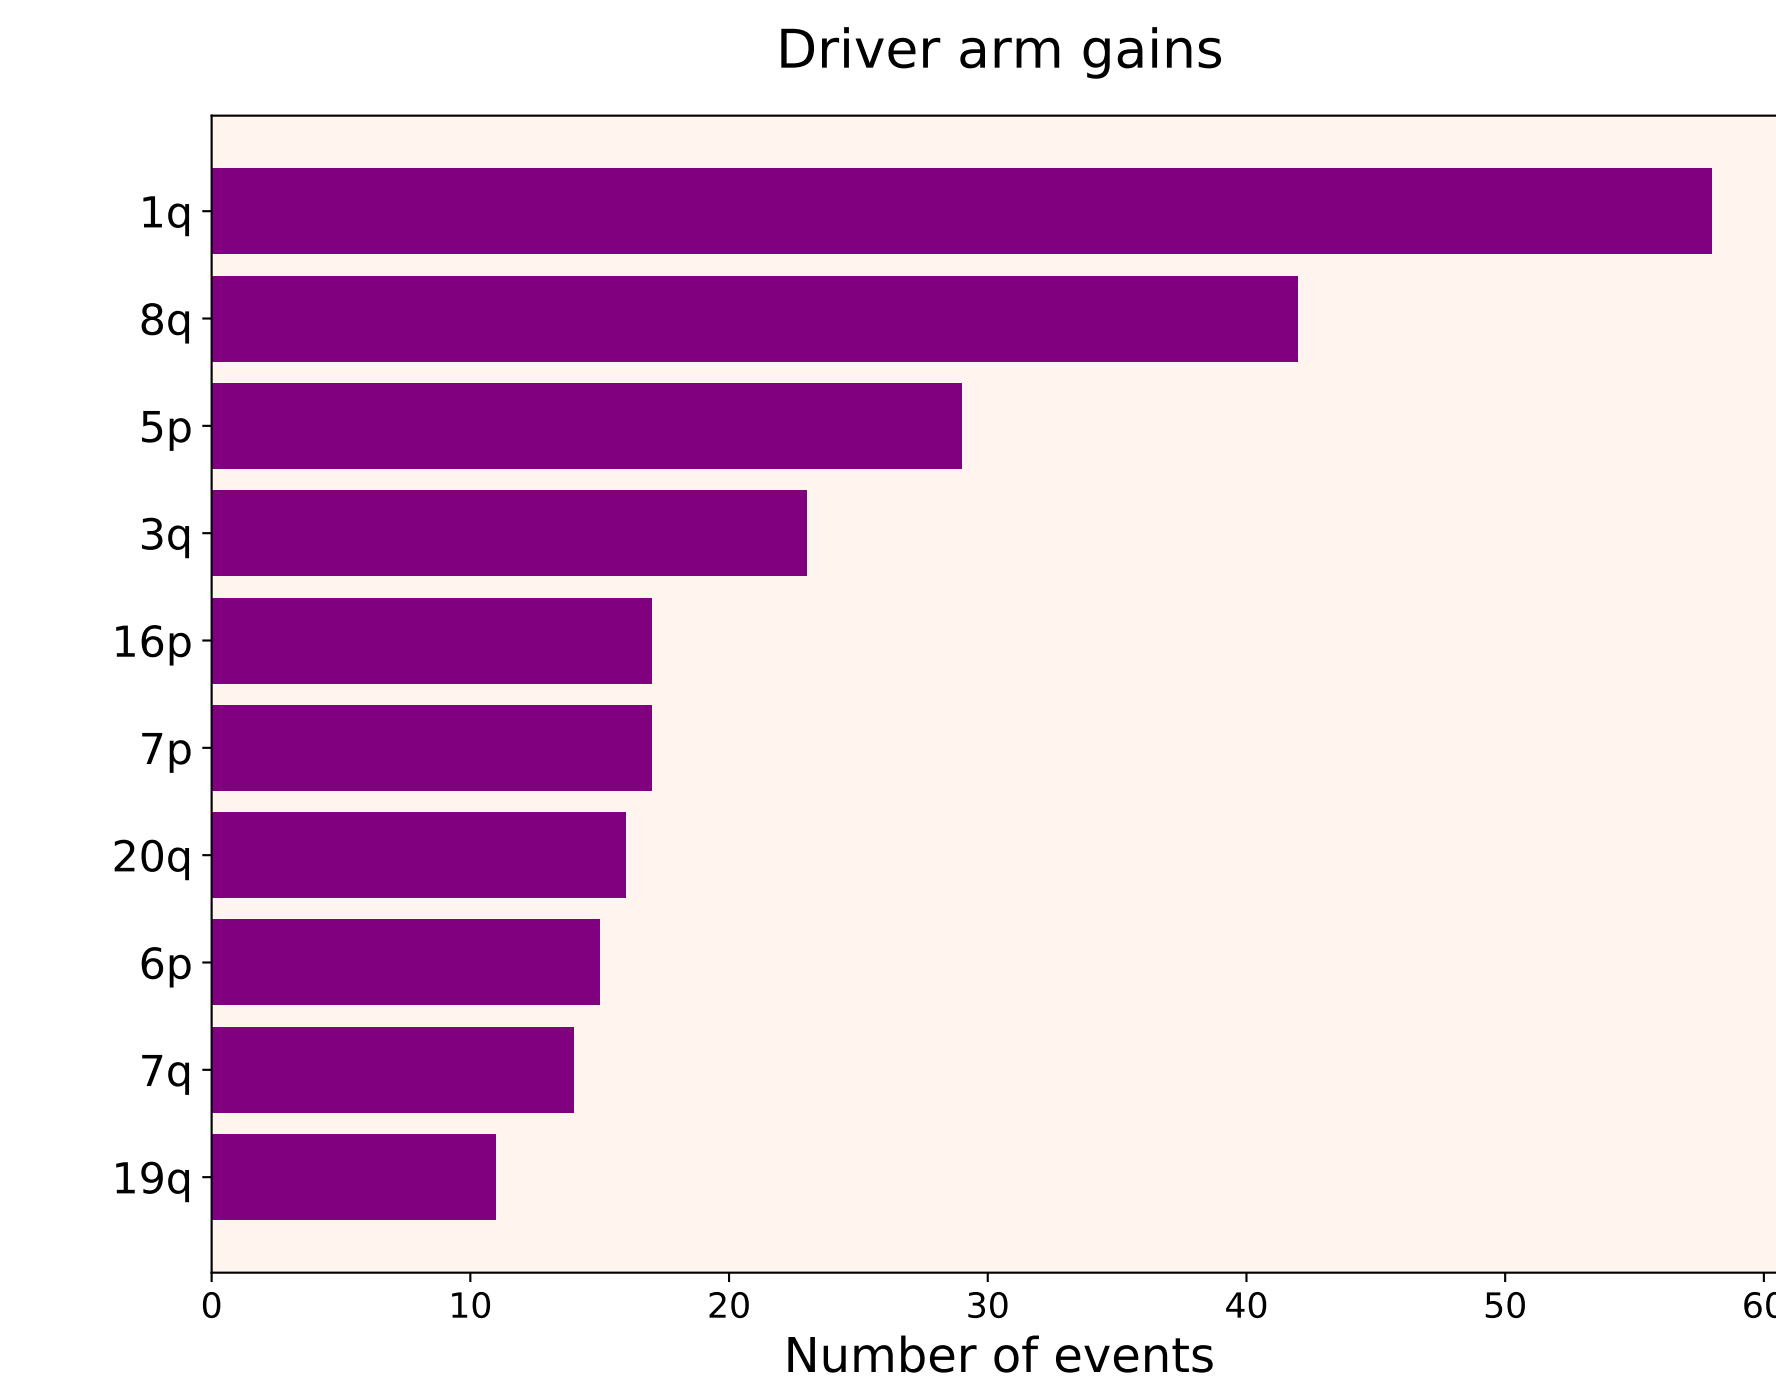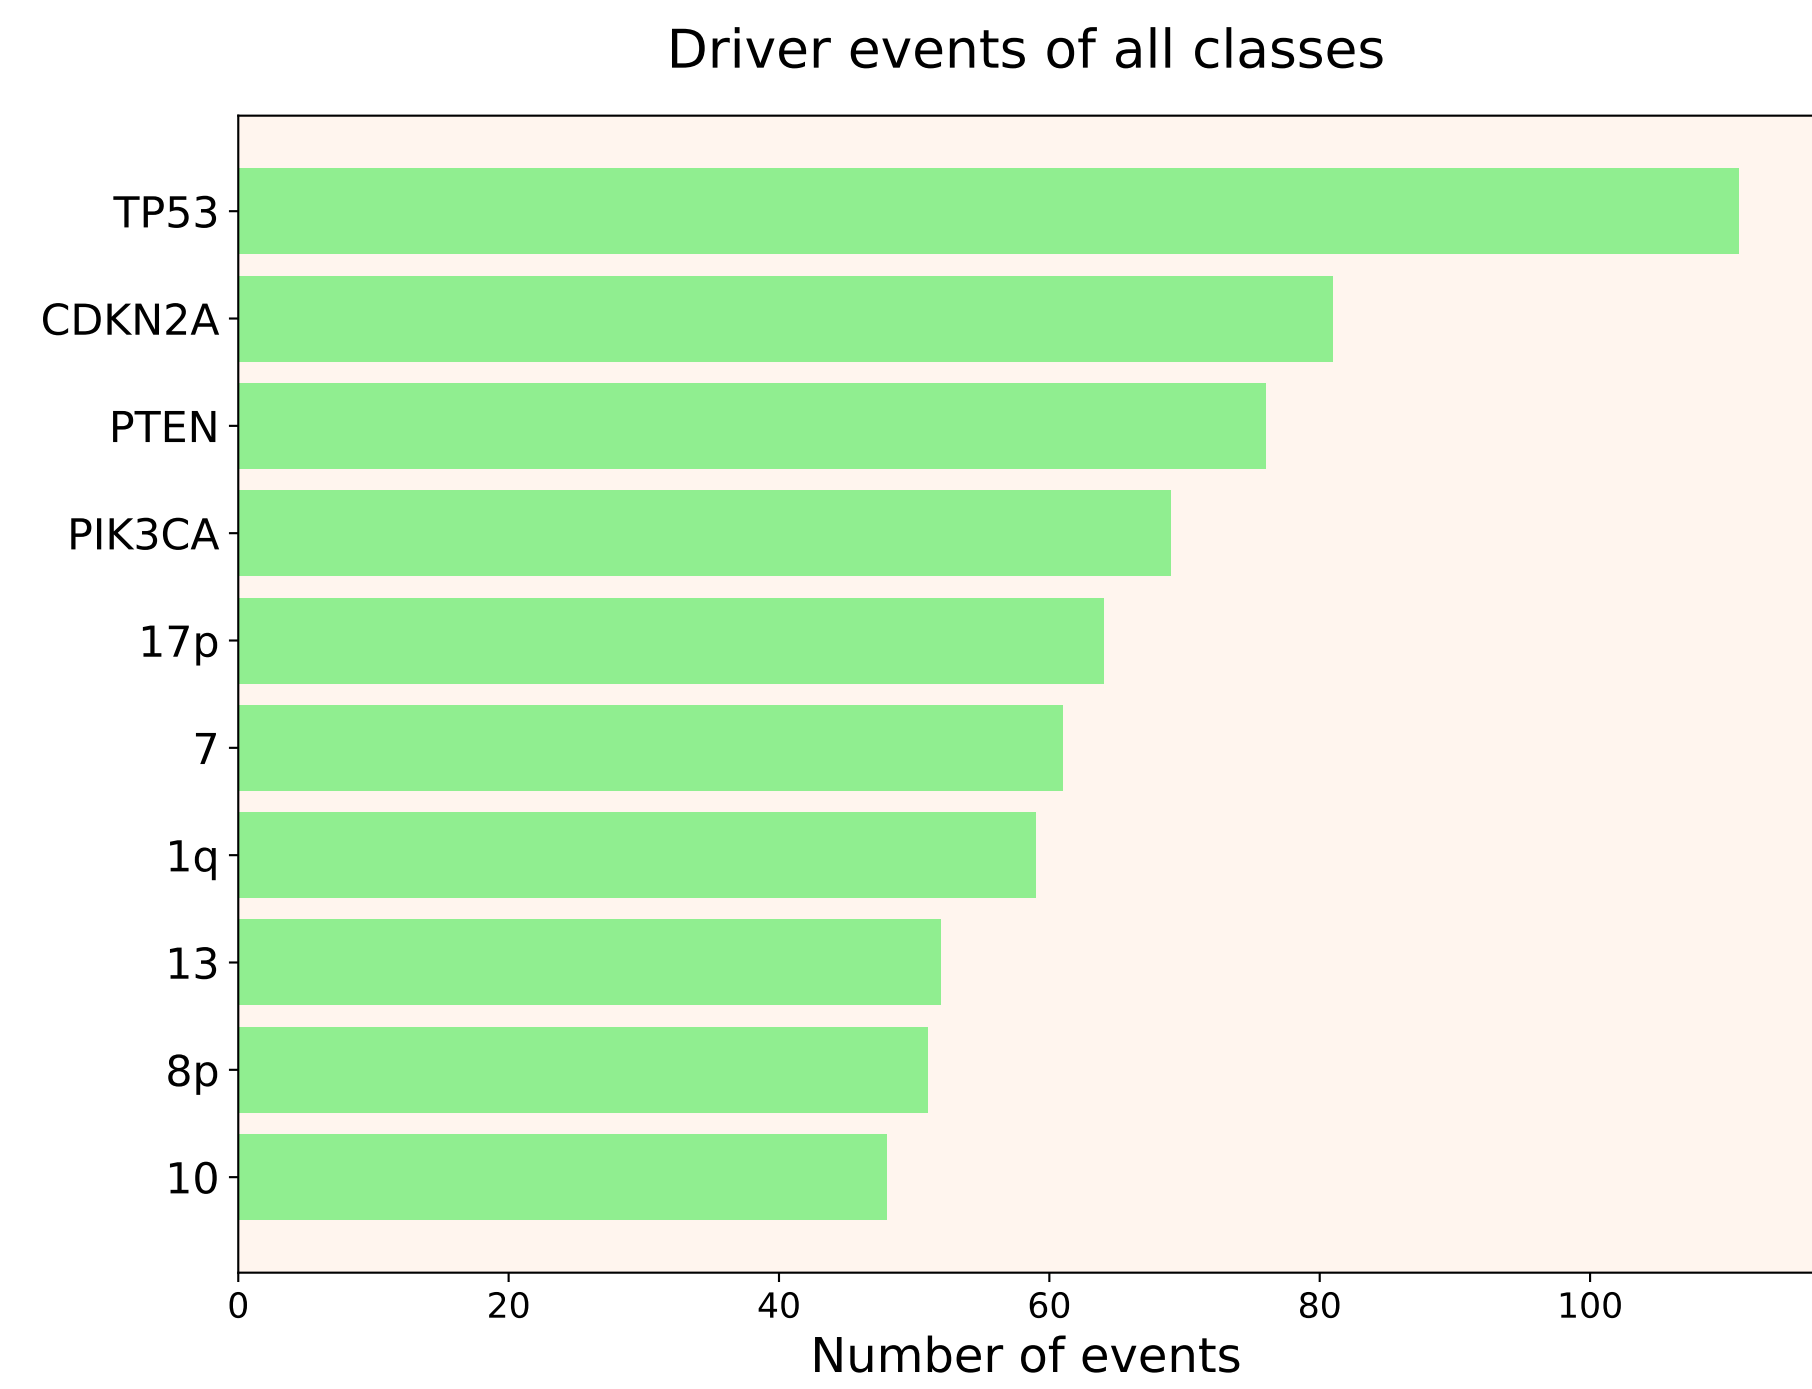

Supplement: Supplemental_Data_S1.zip [file Supplemental_Data_S1.zip]

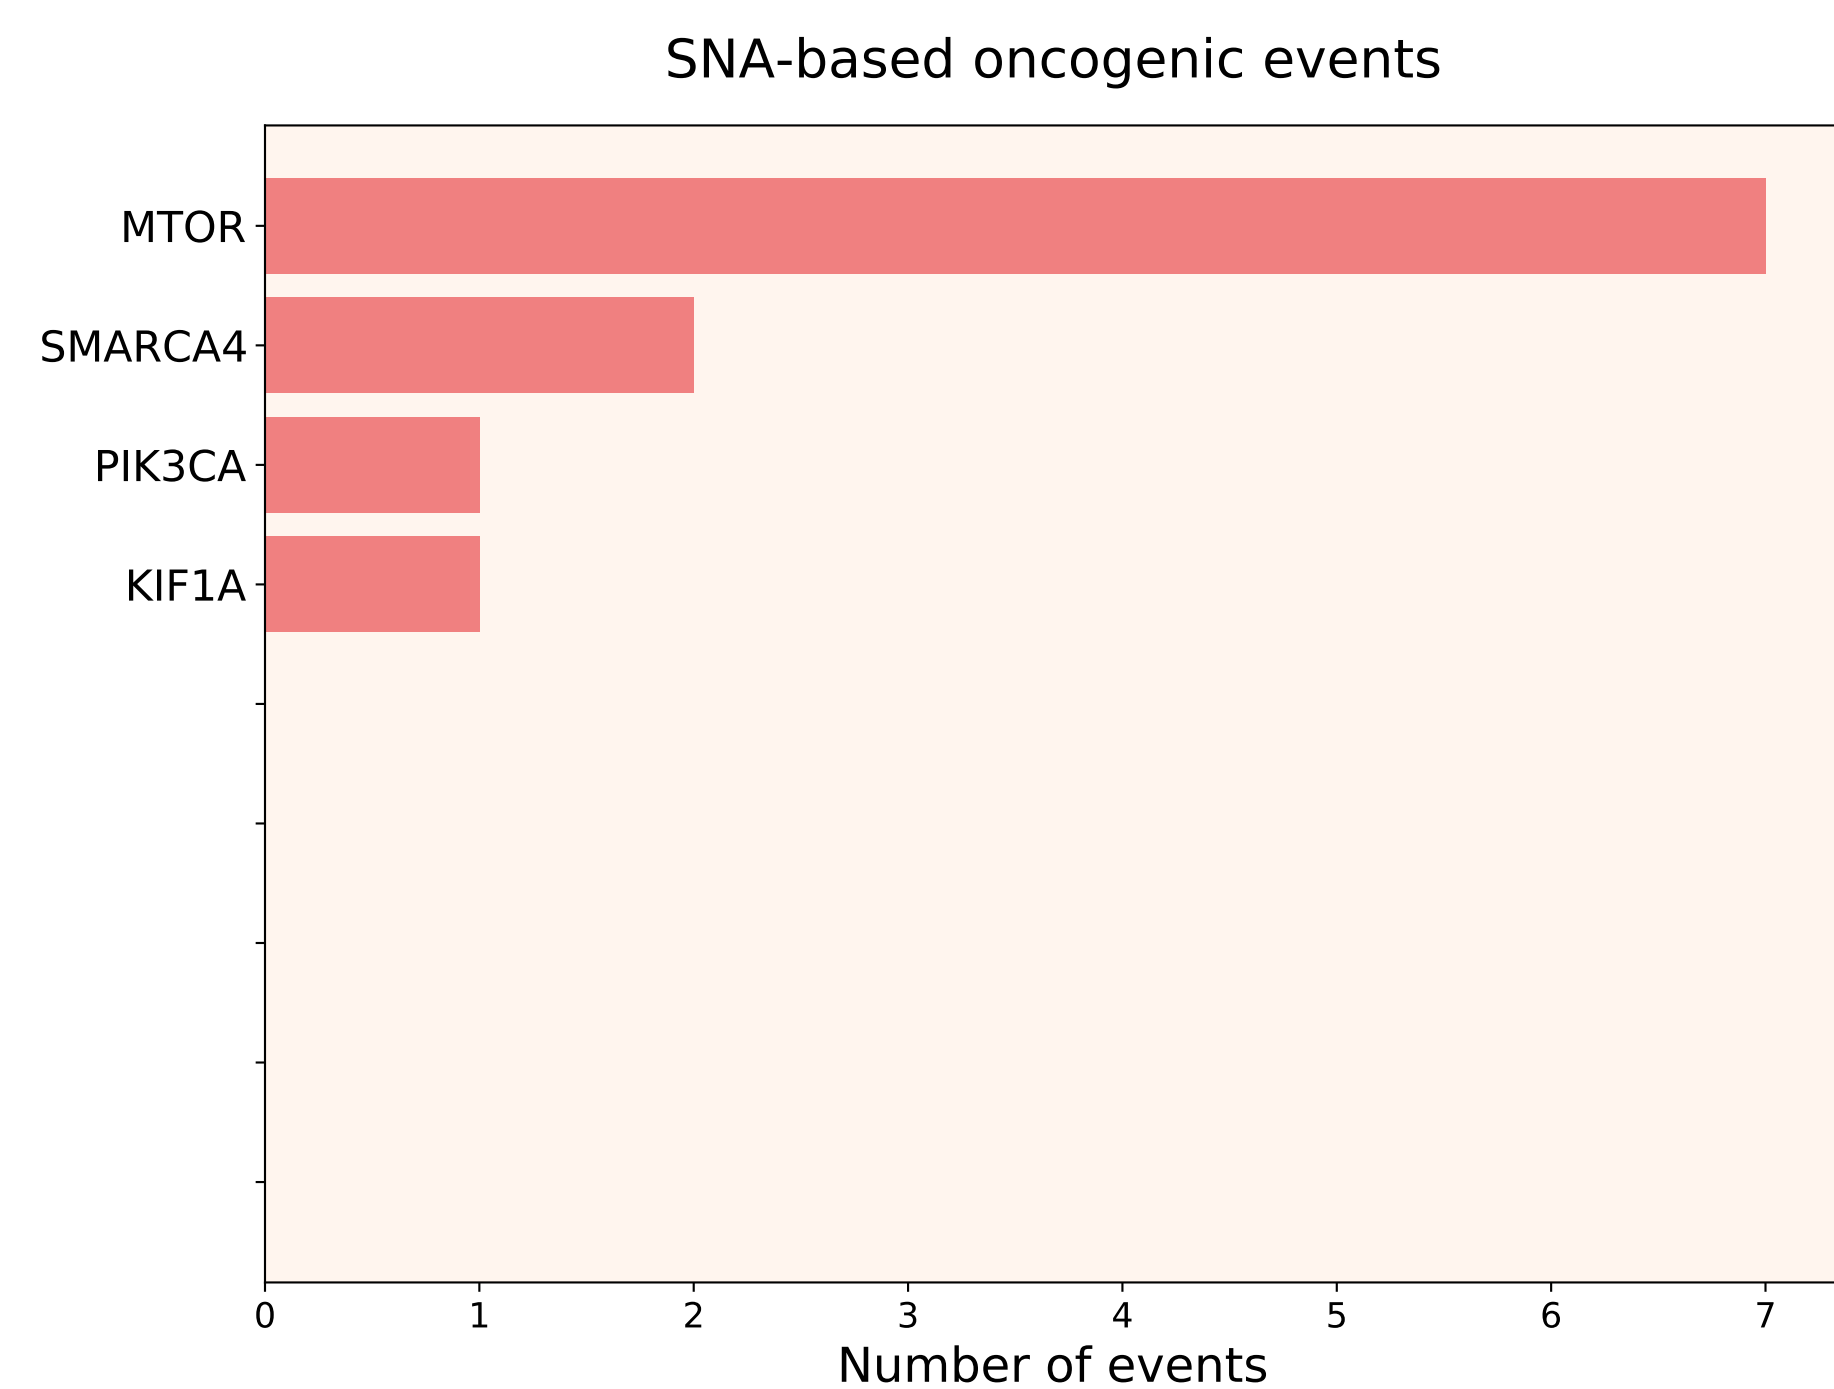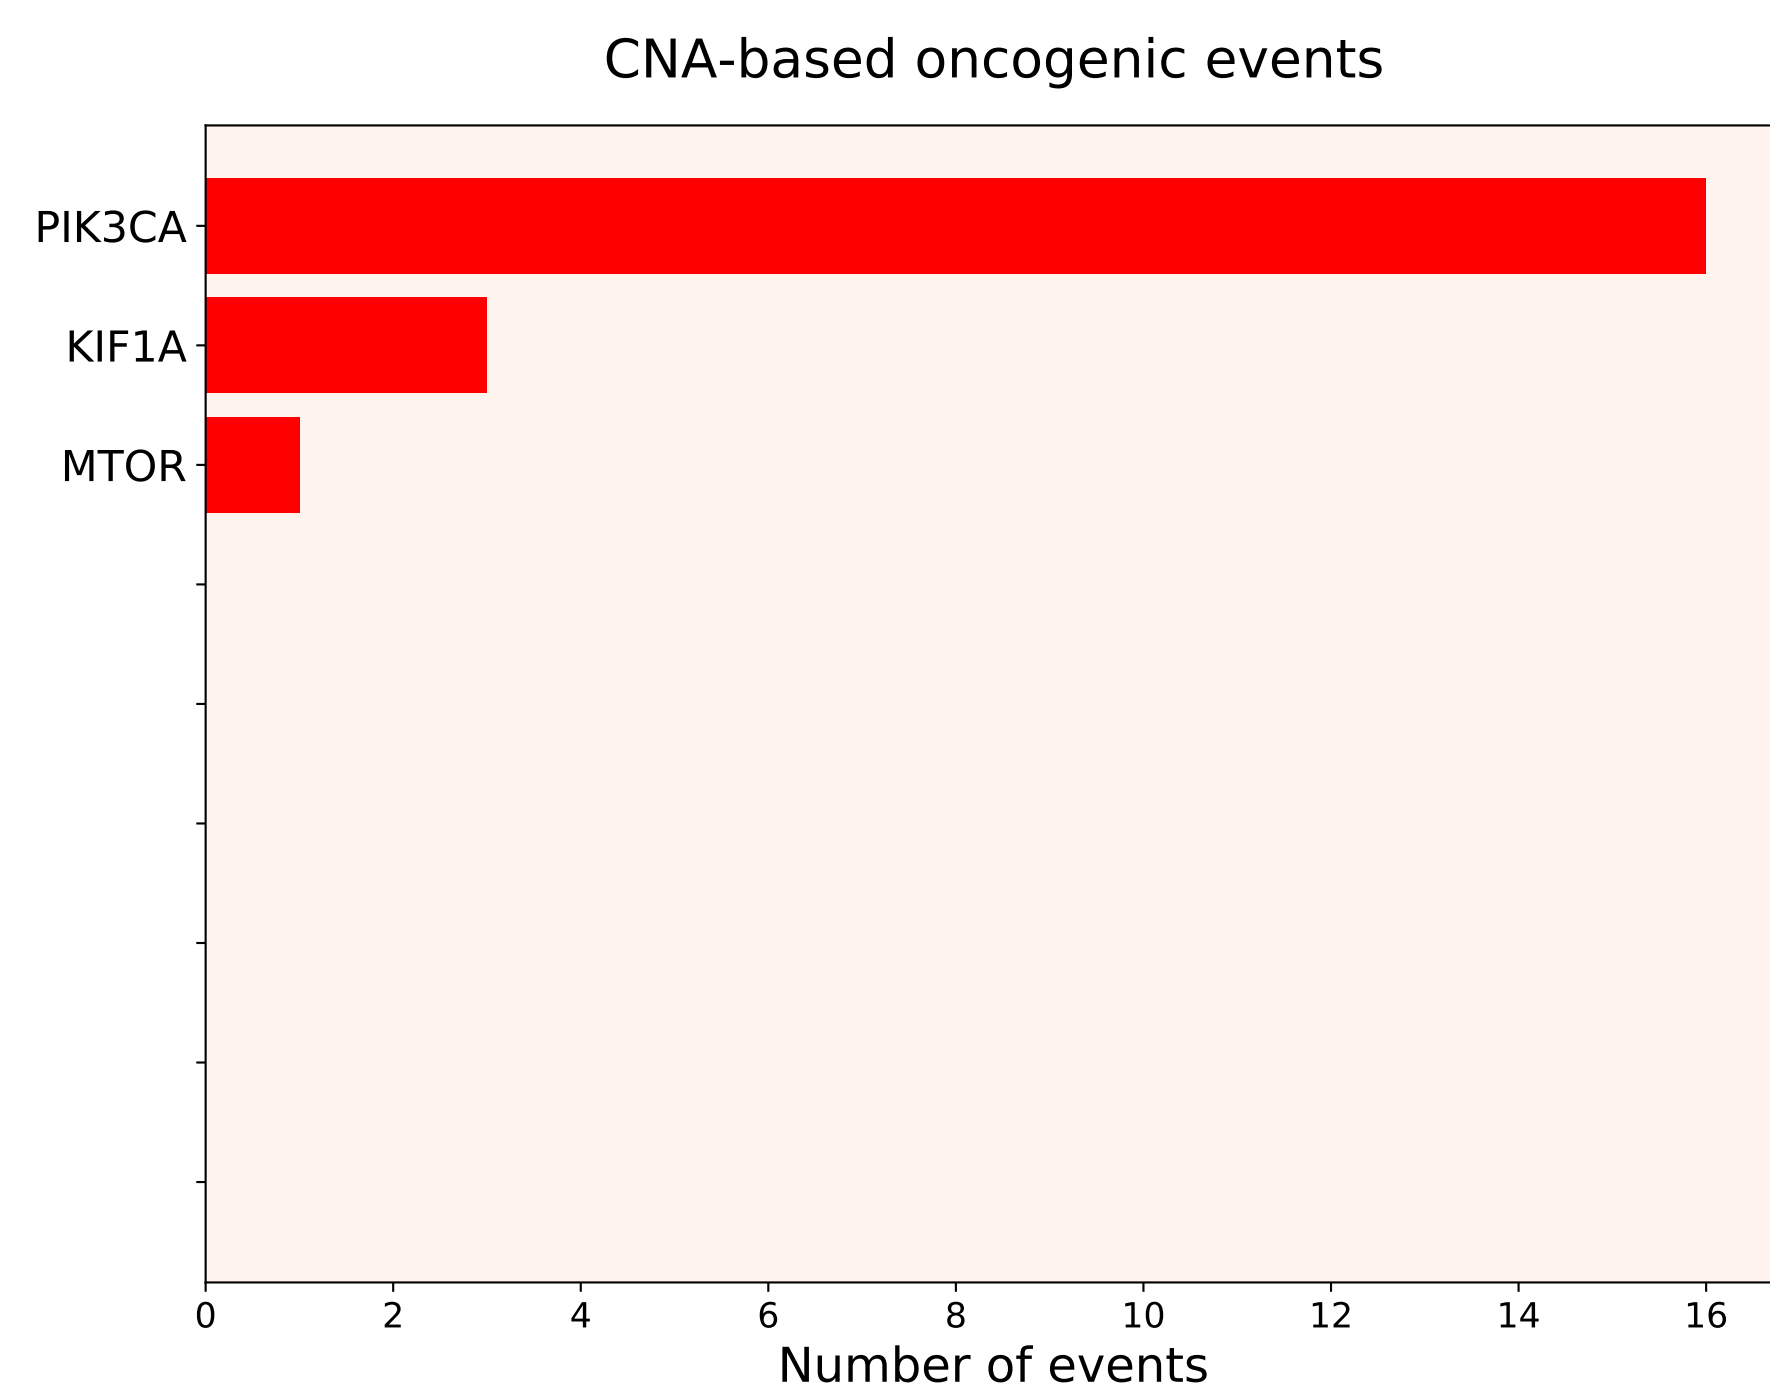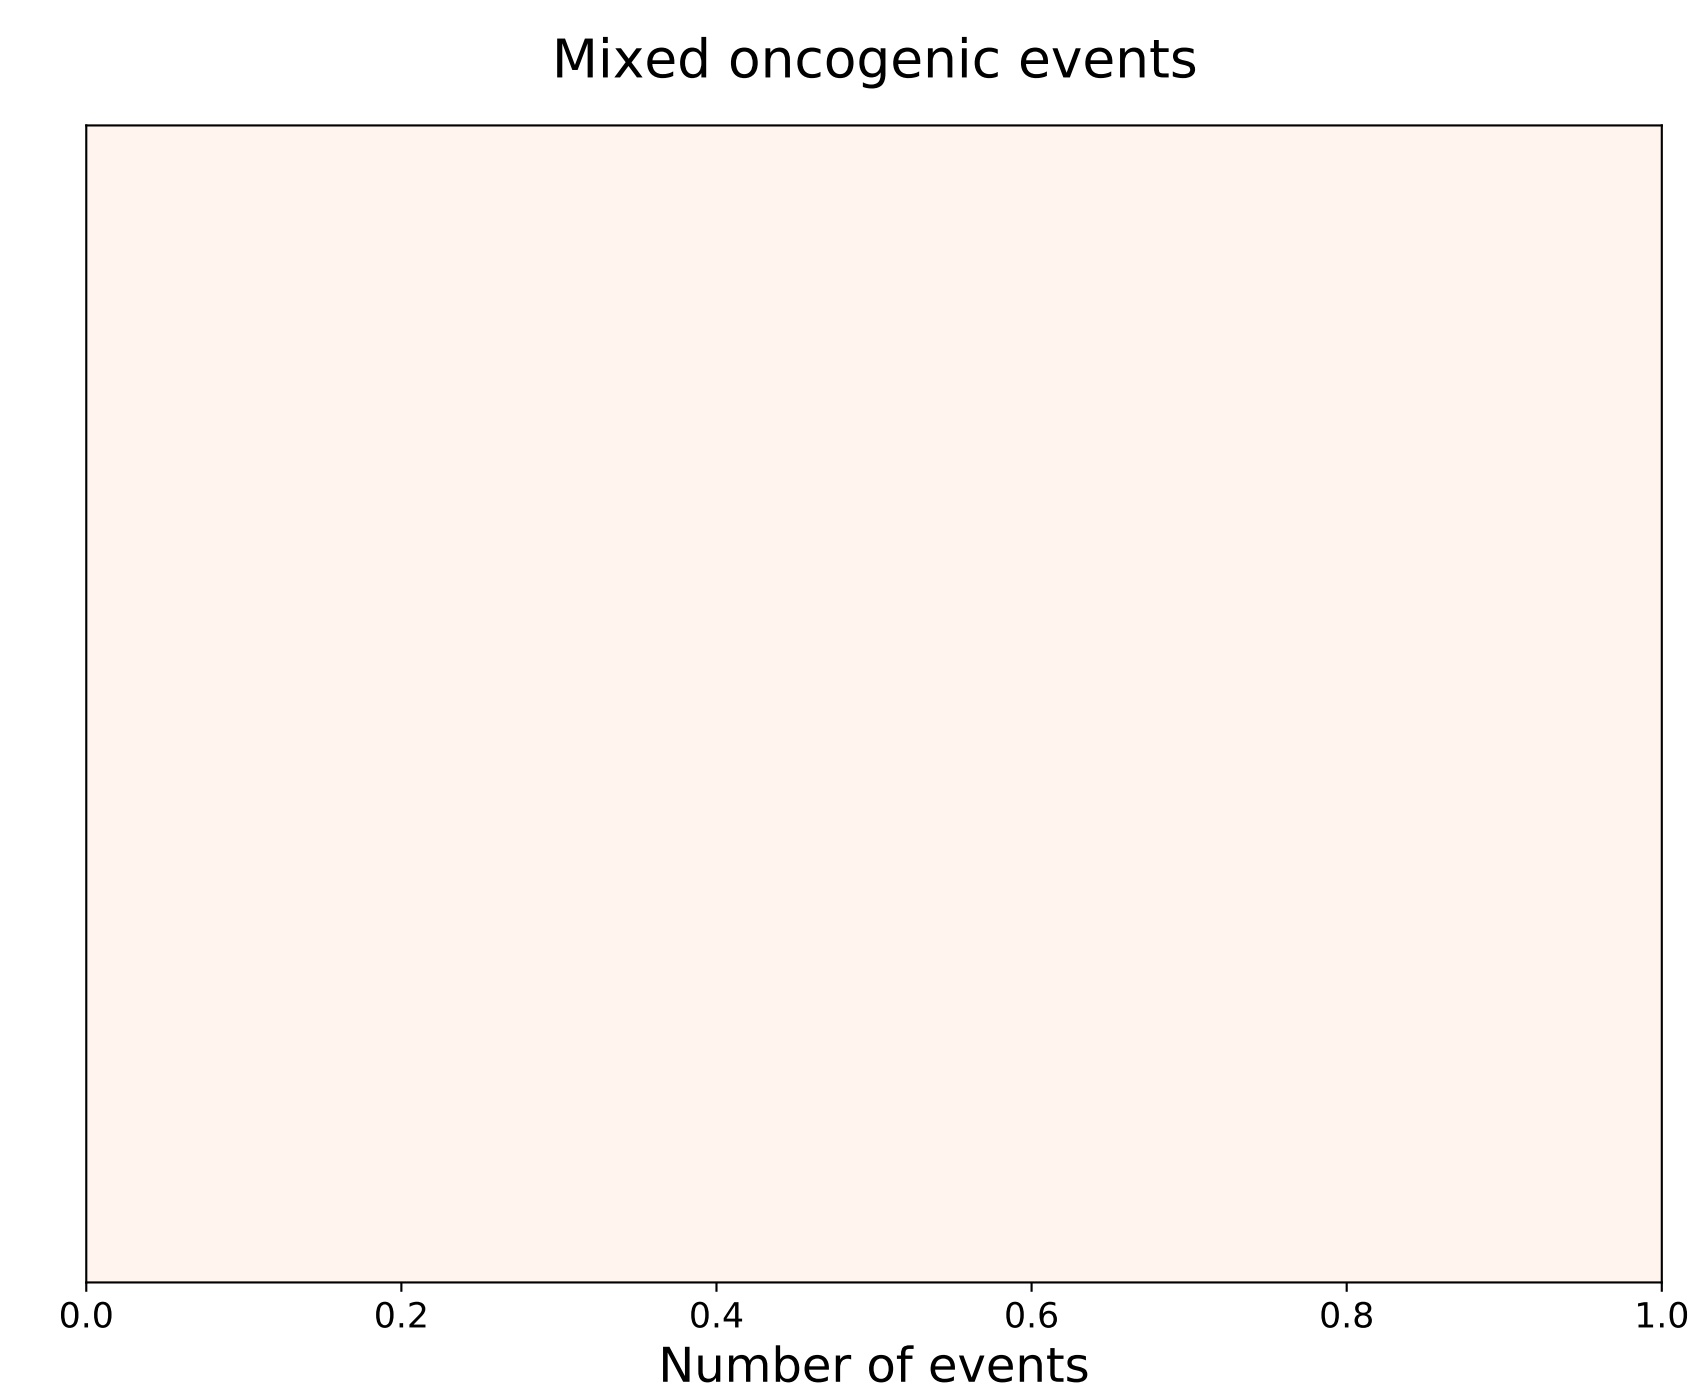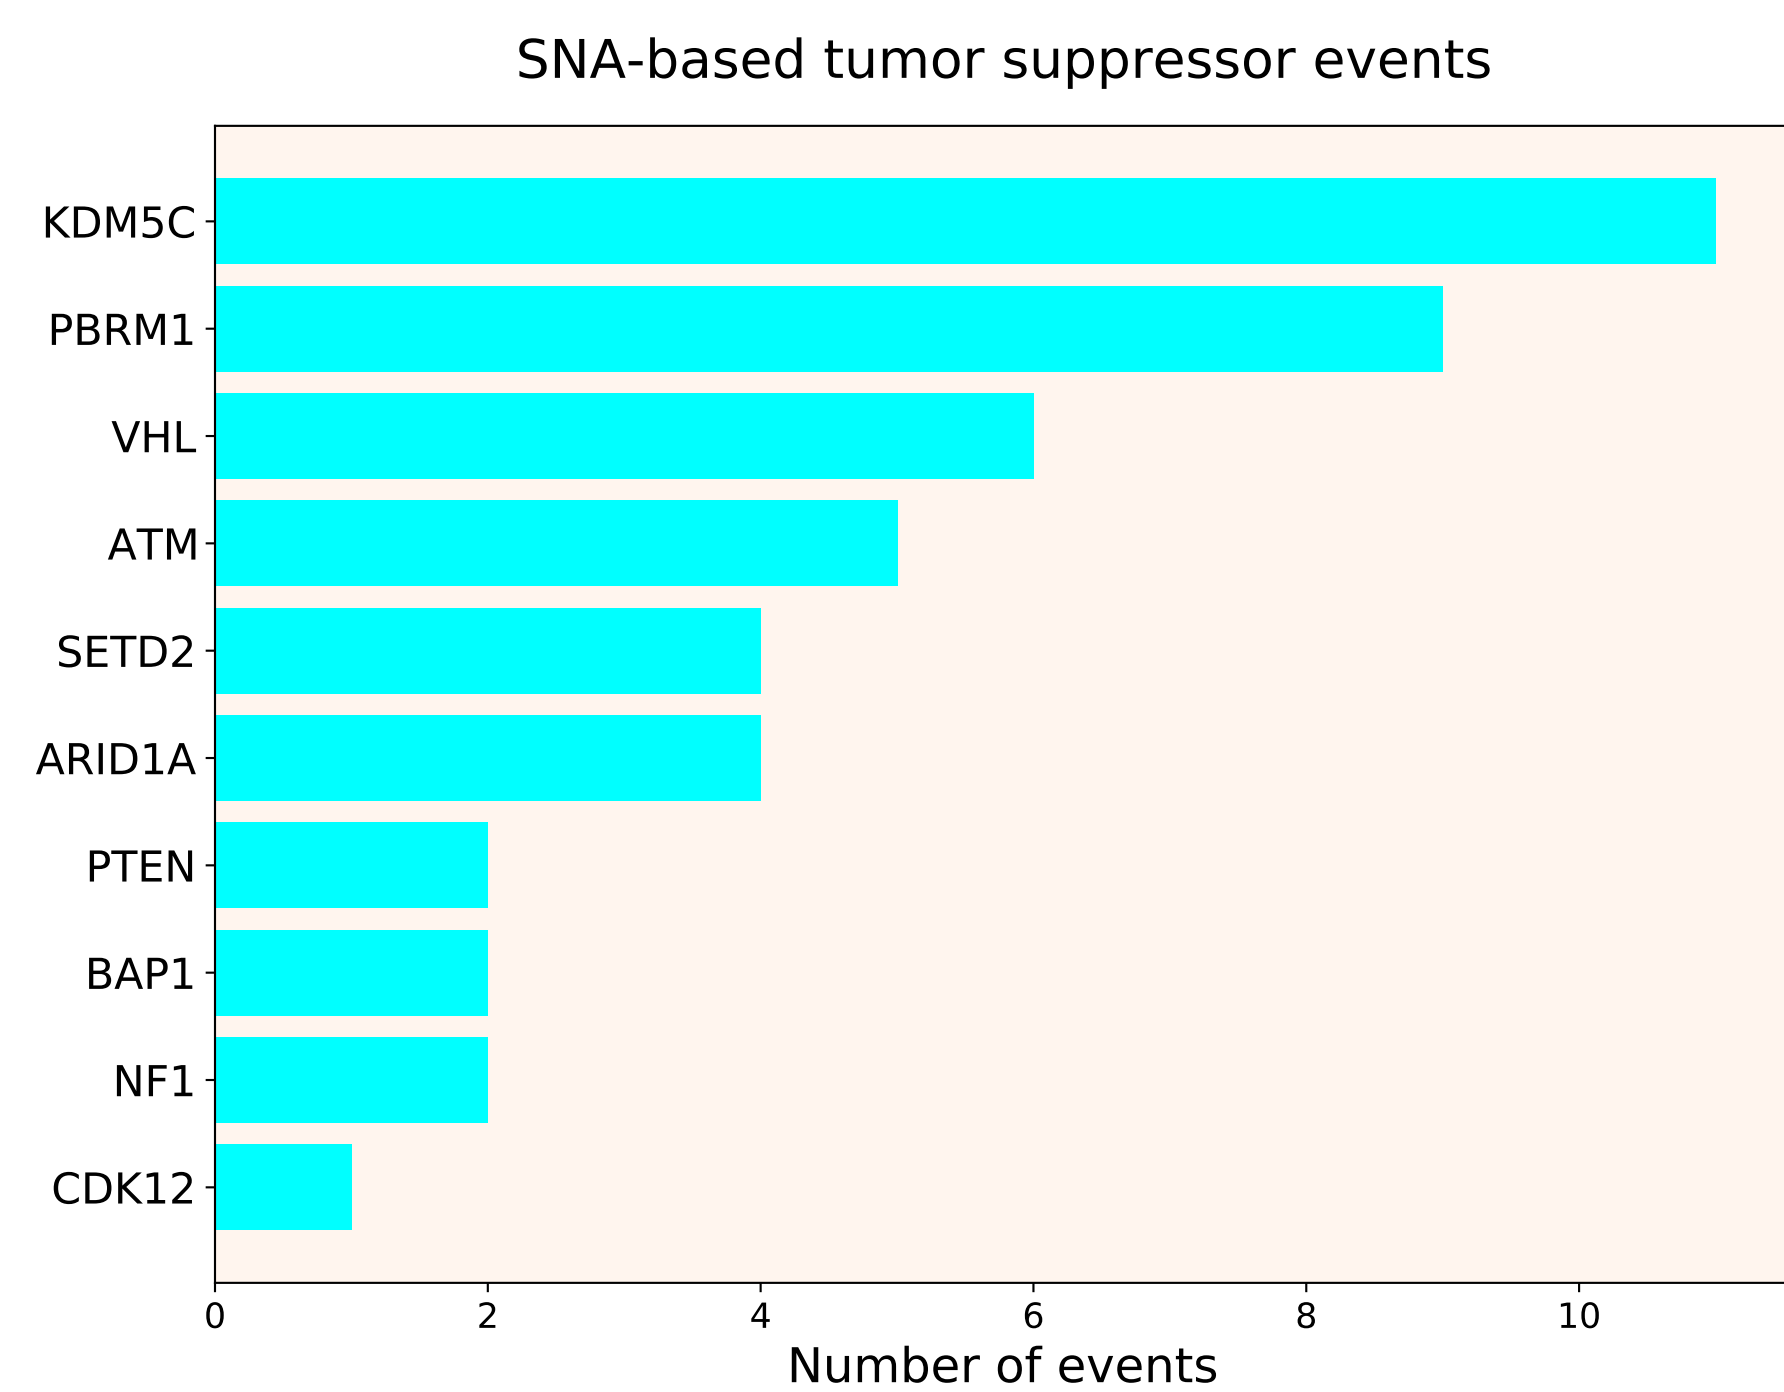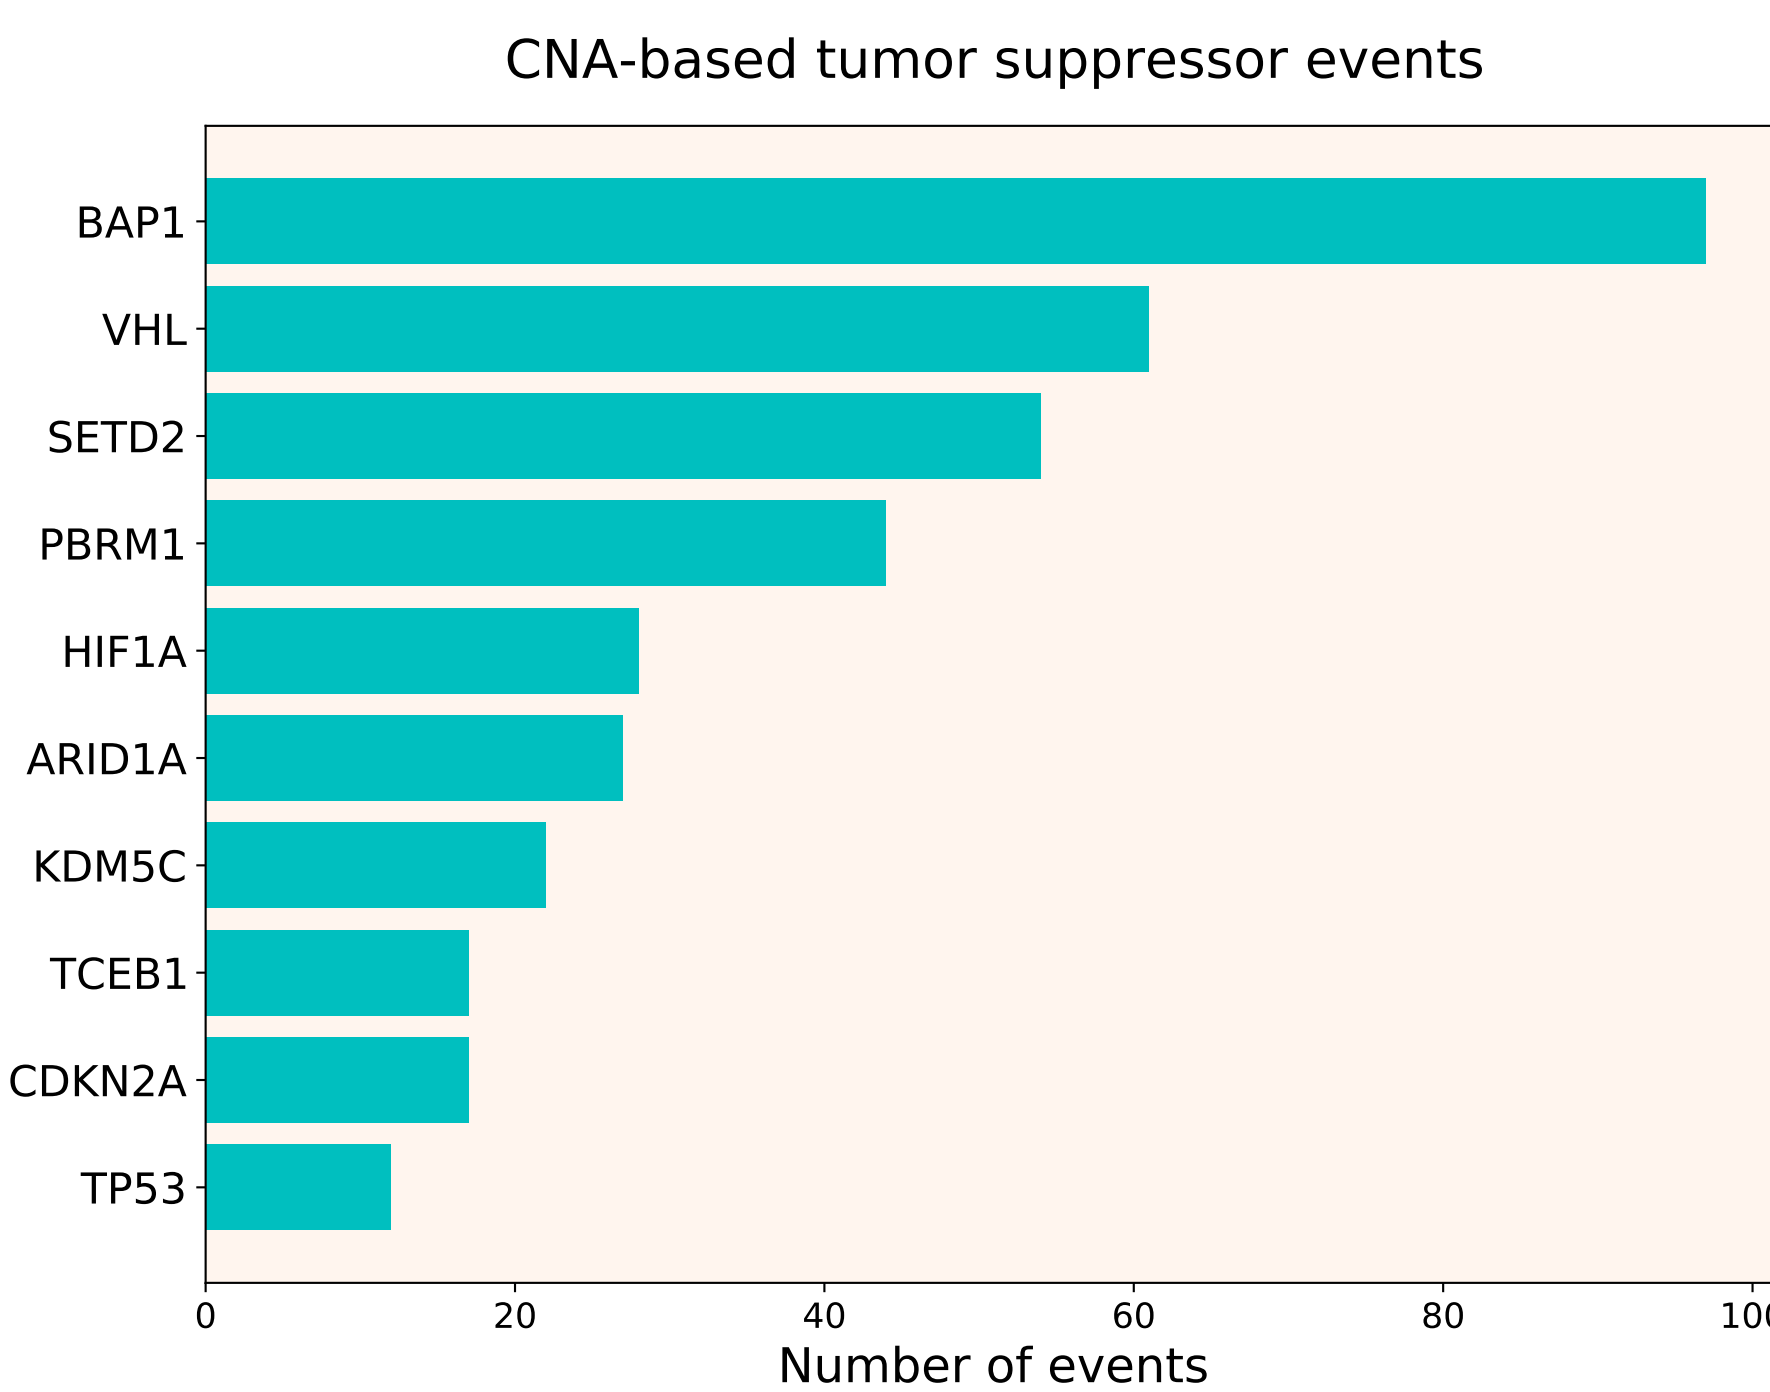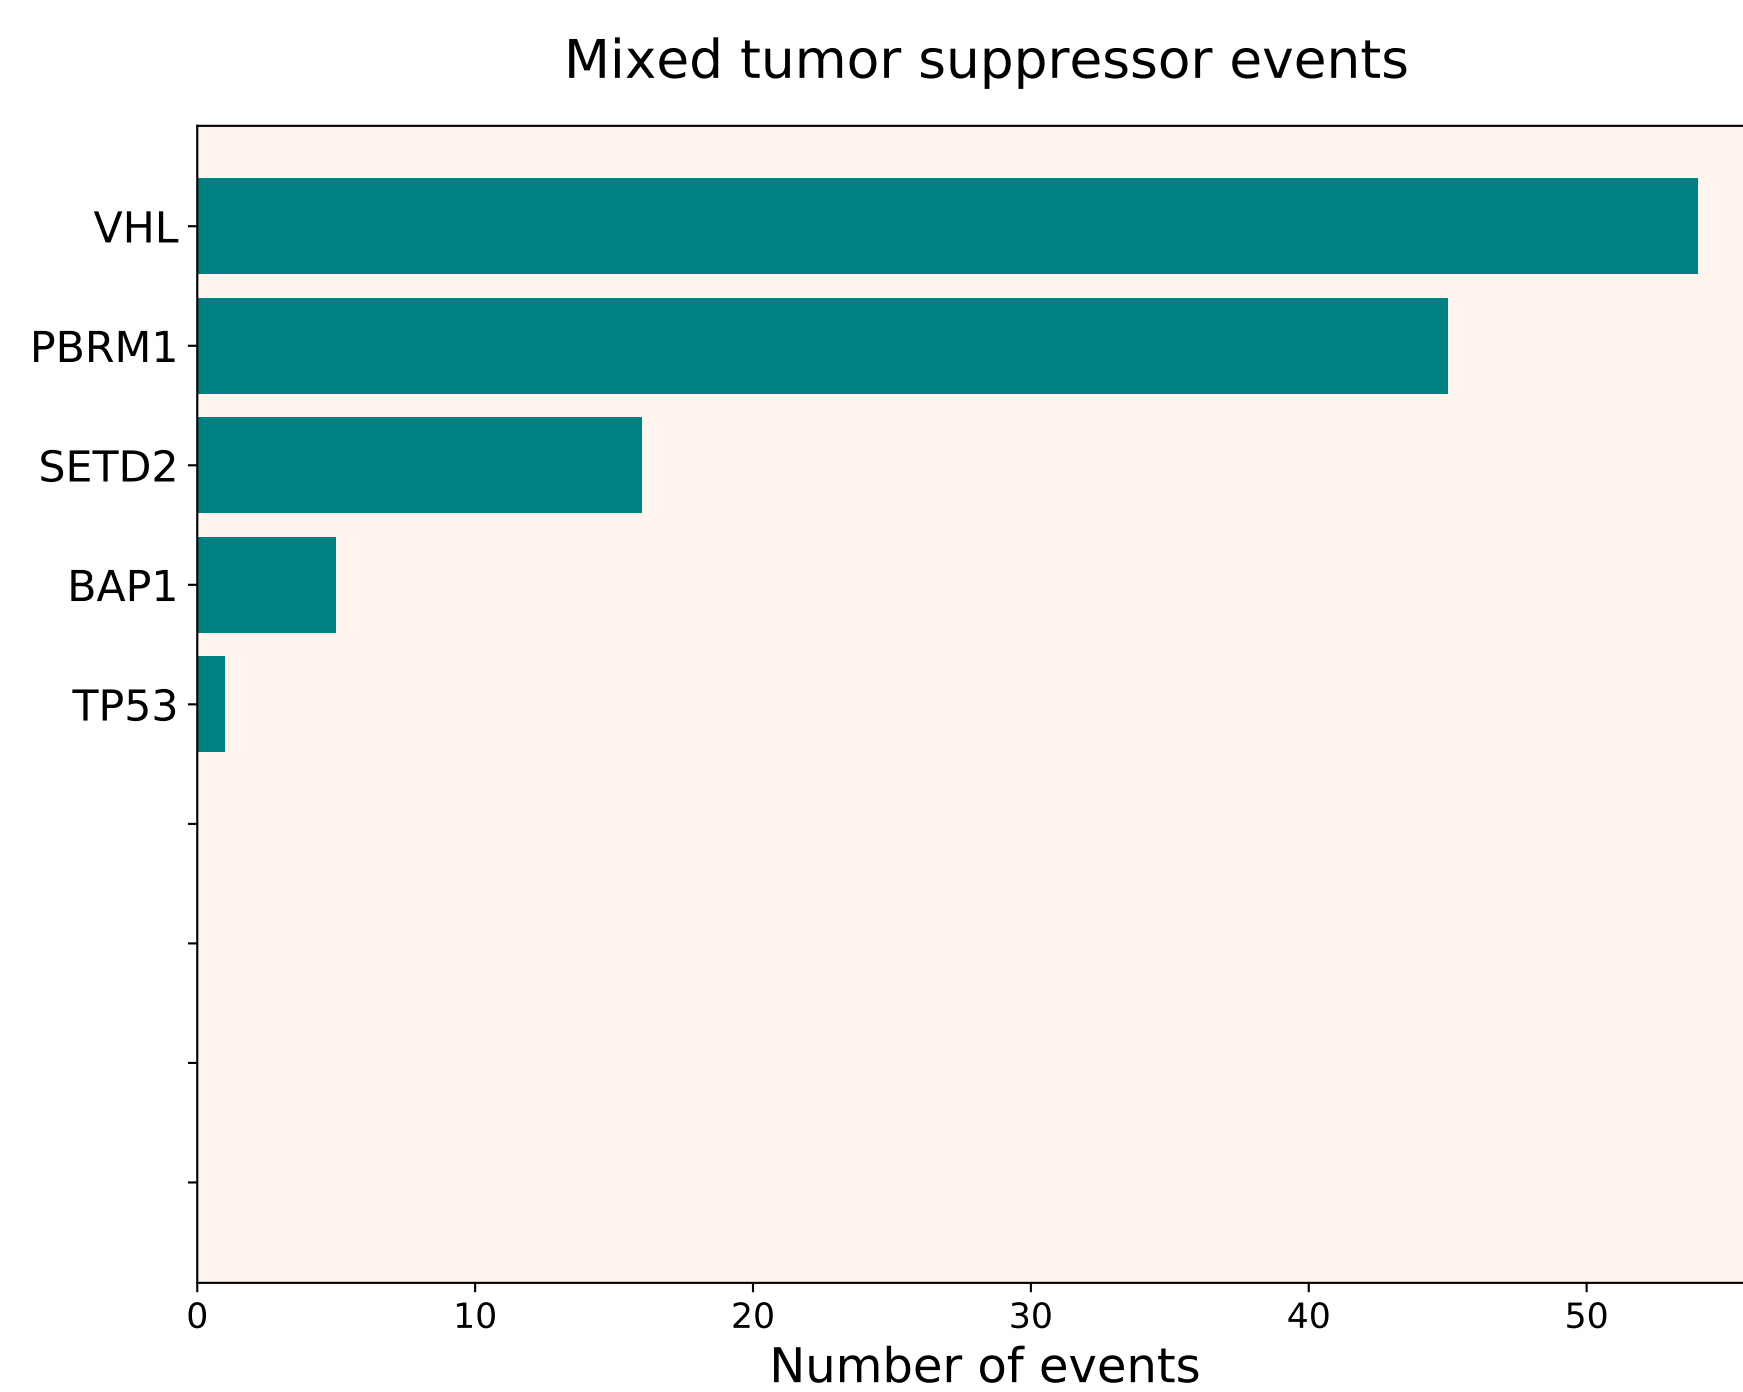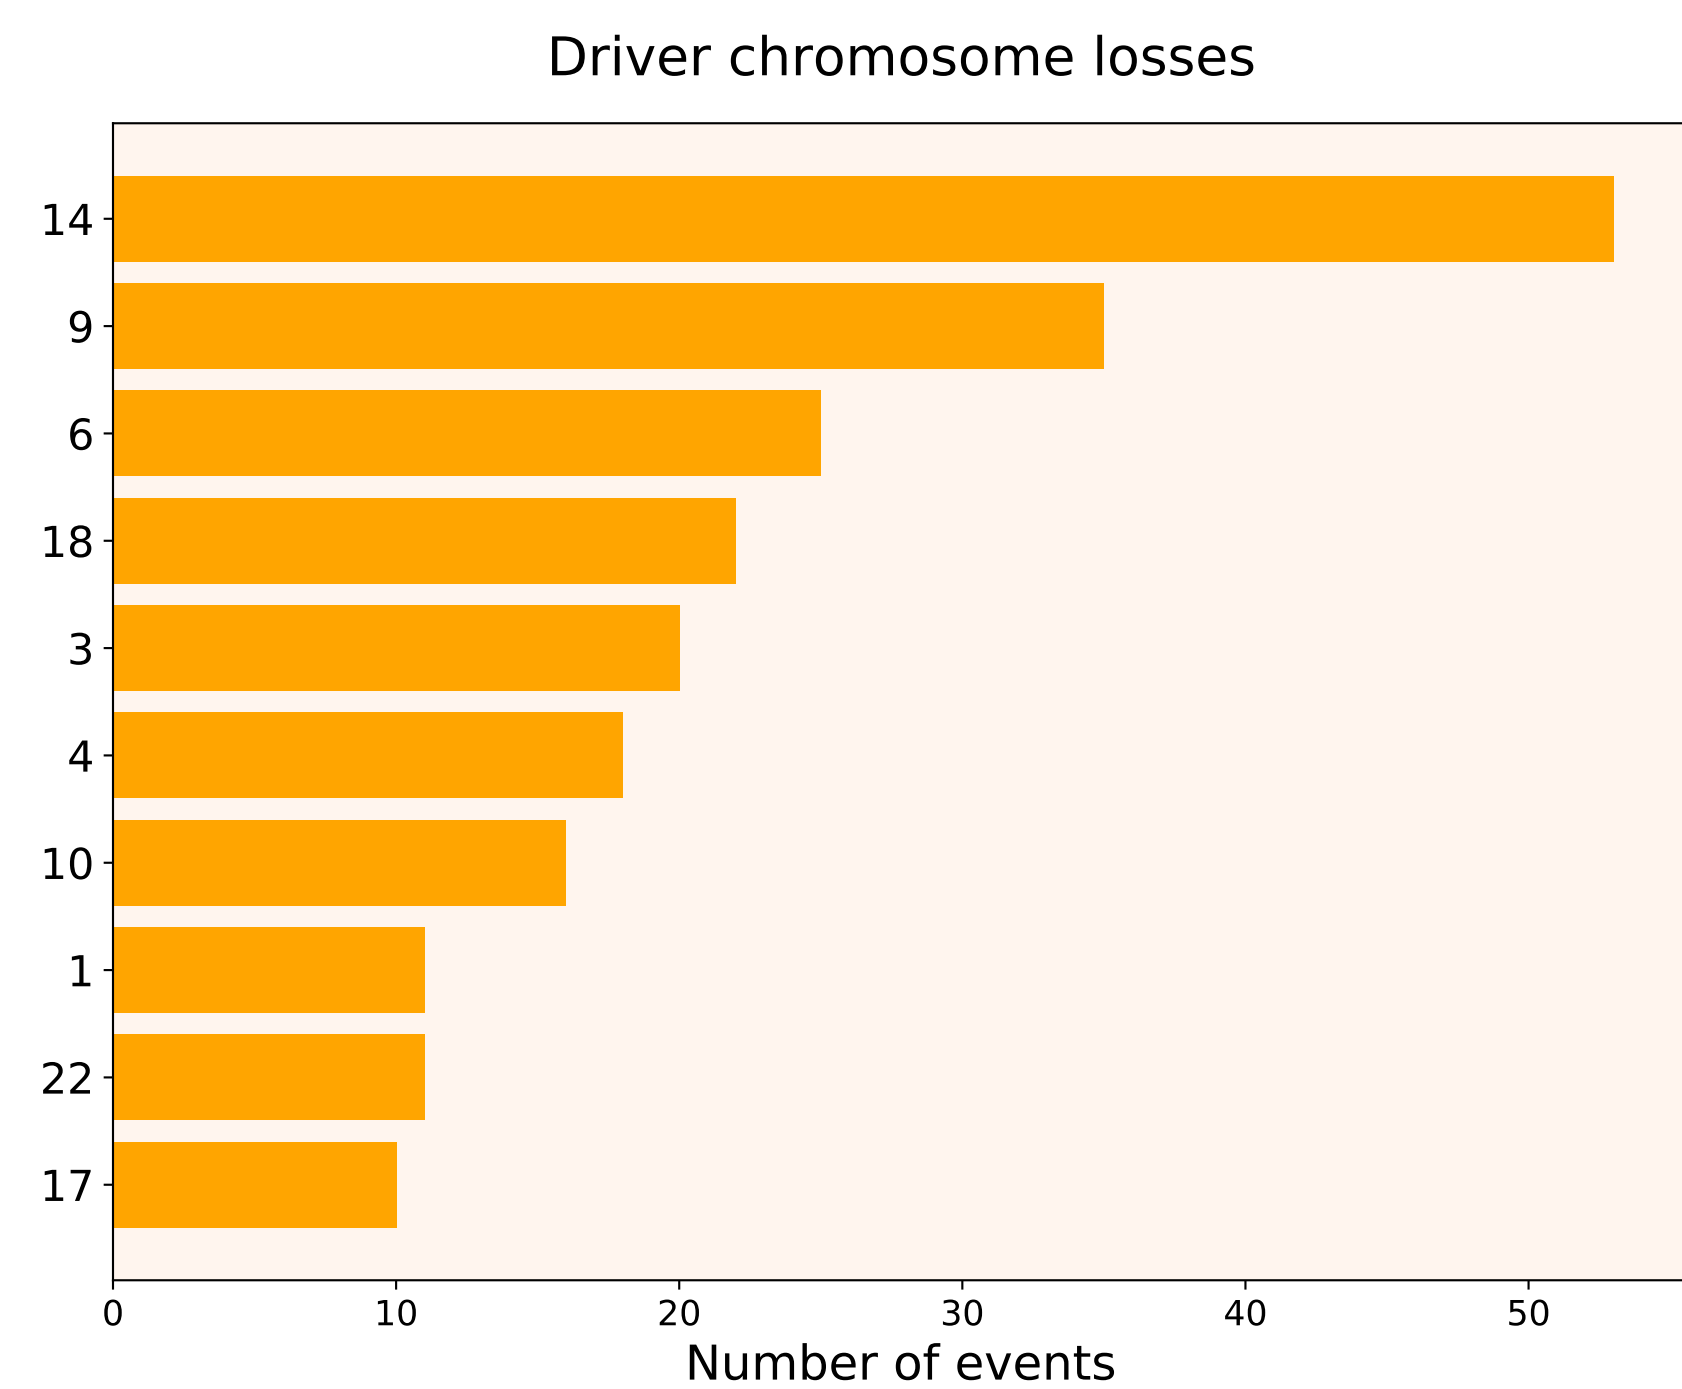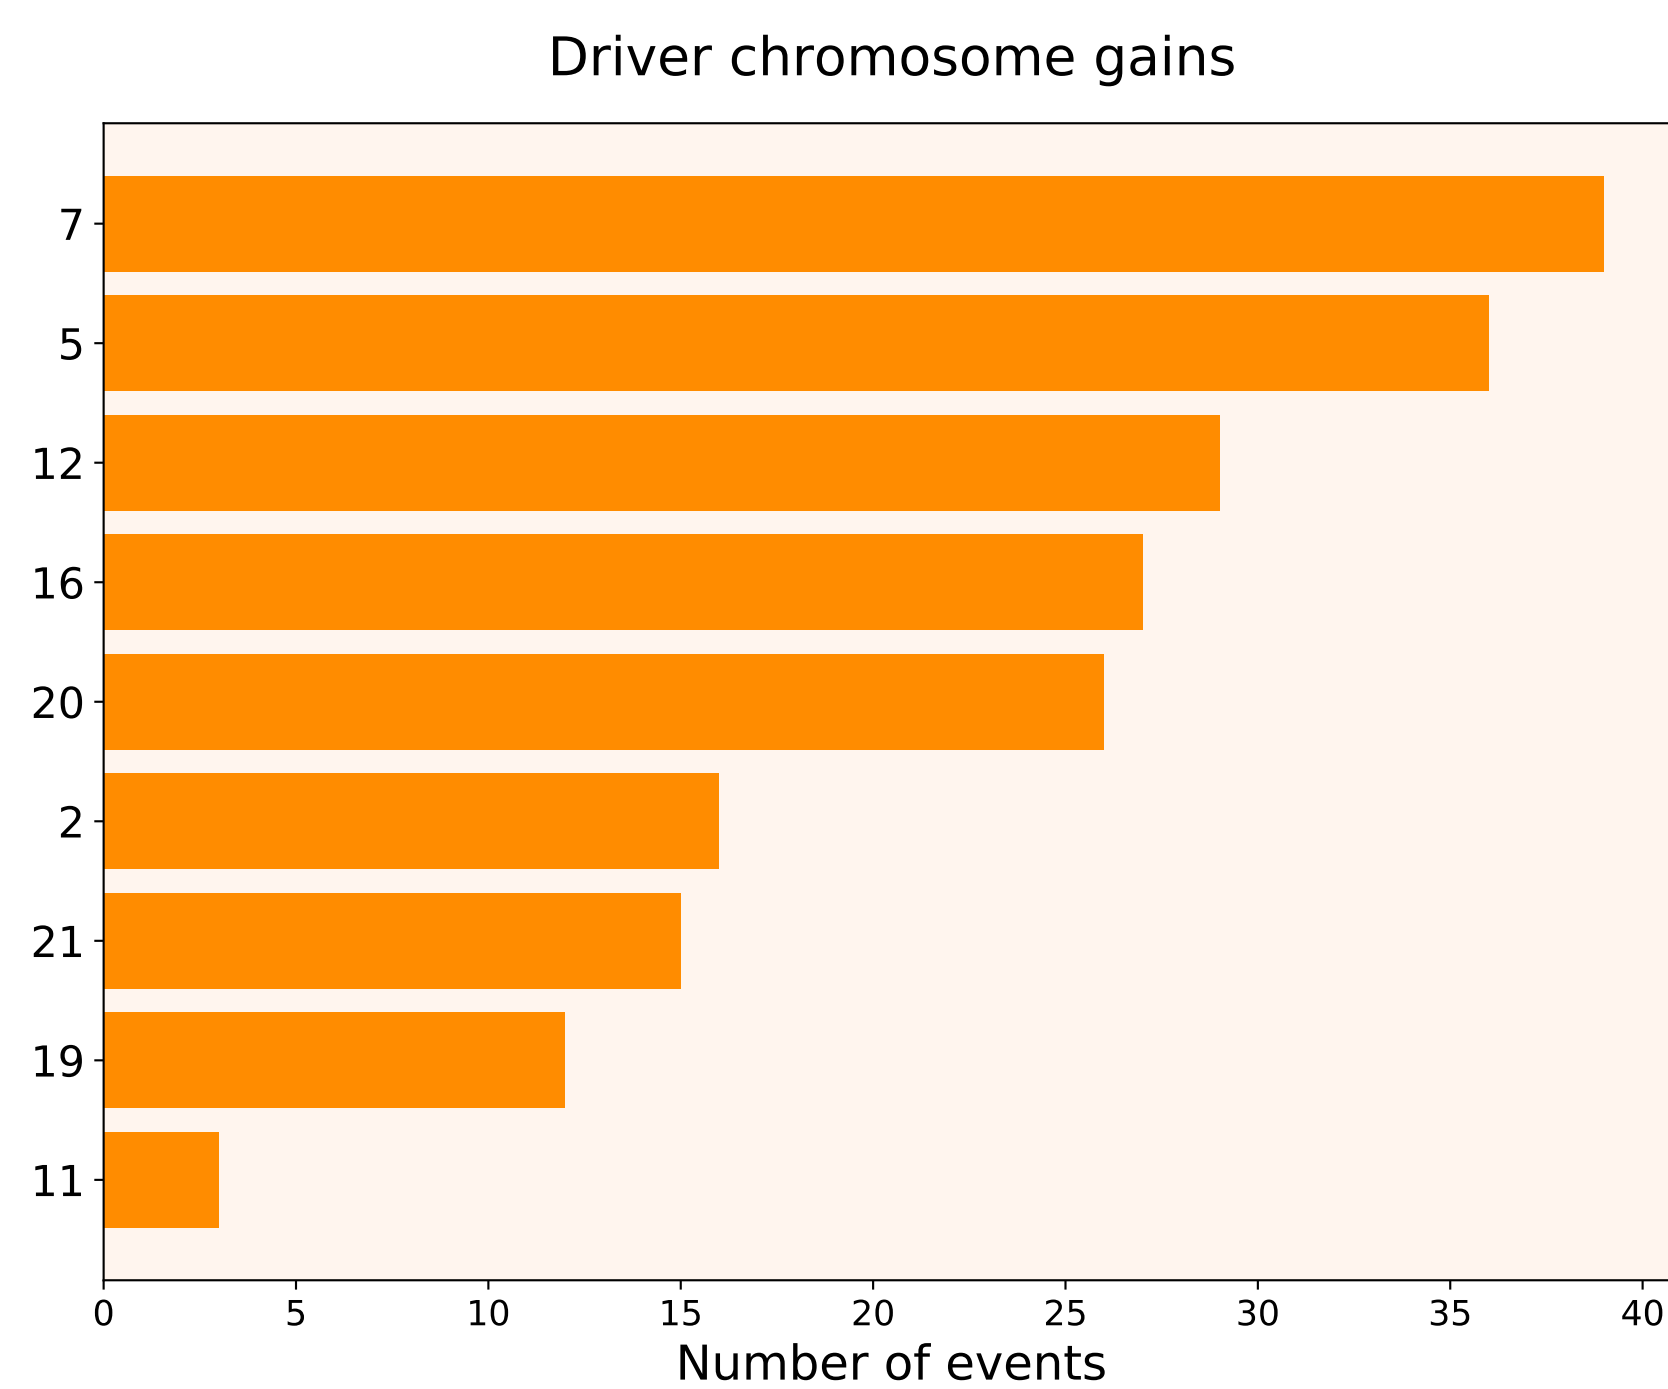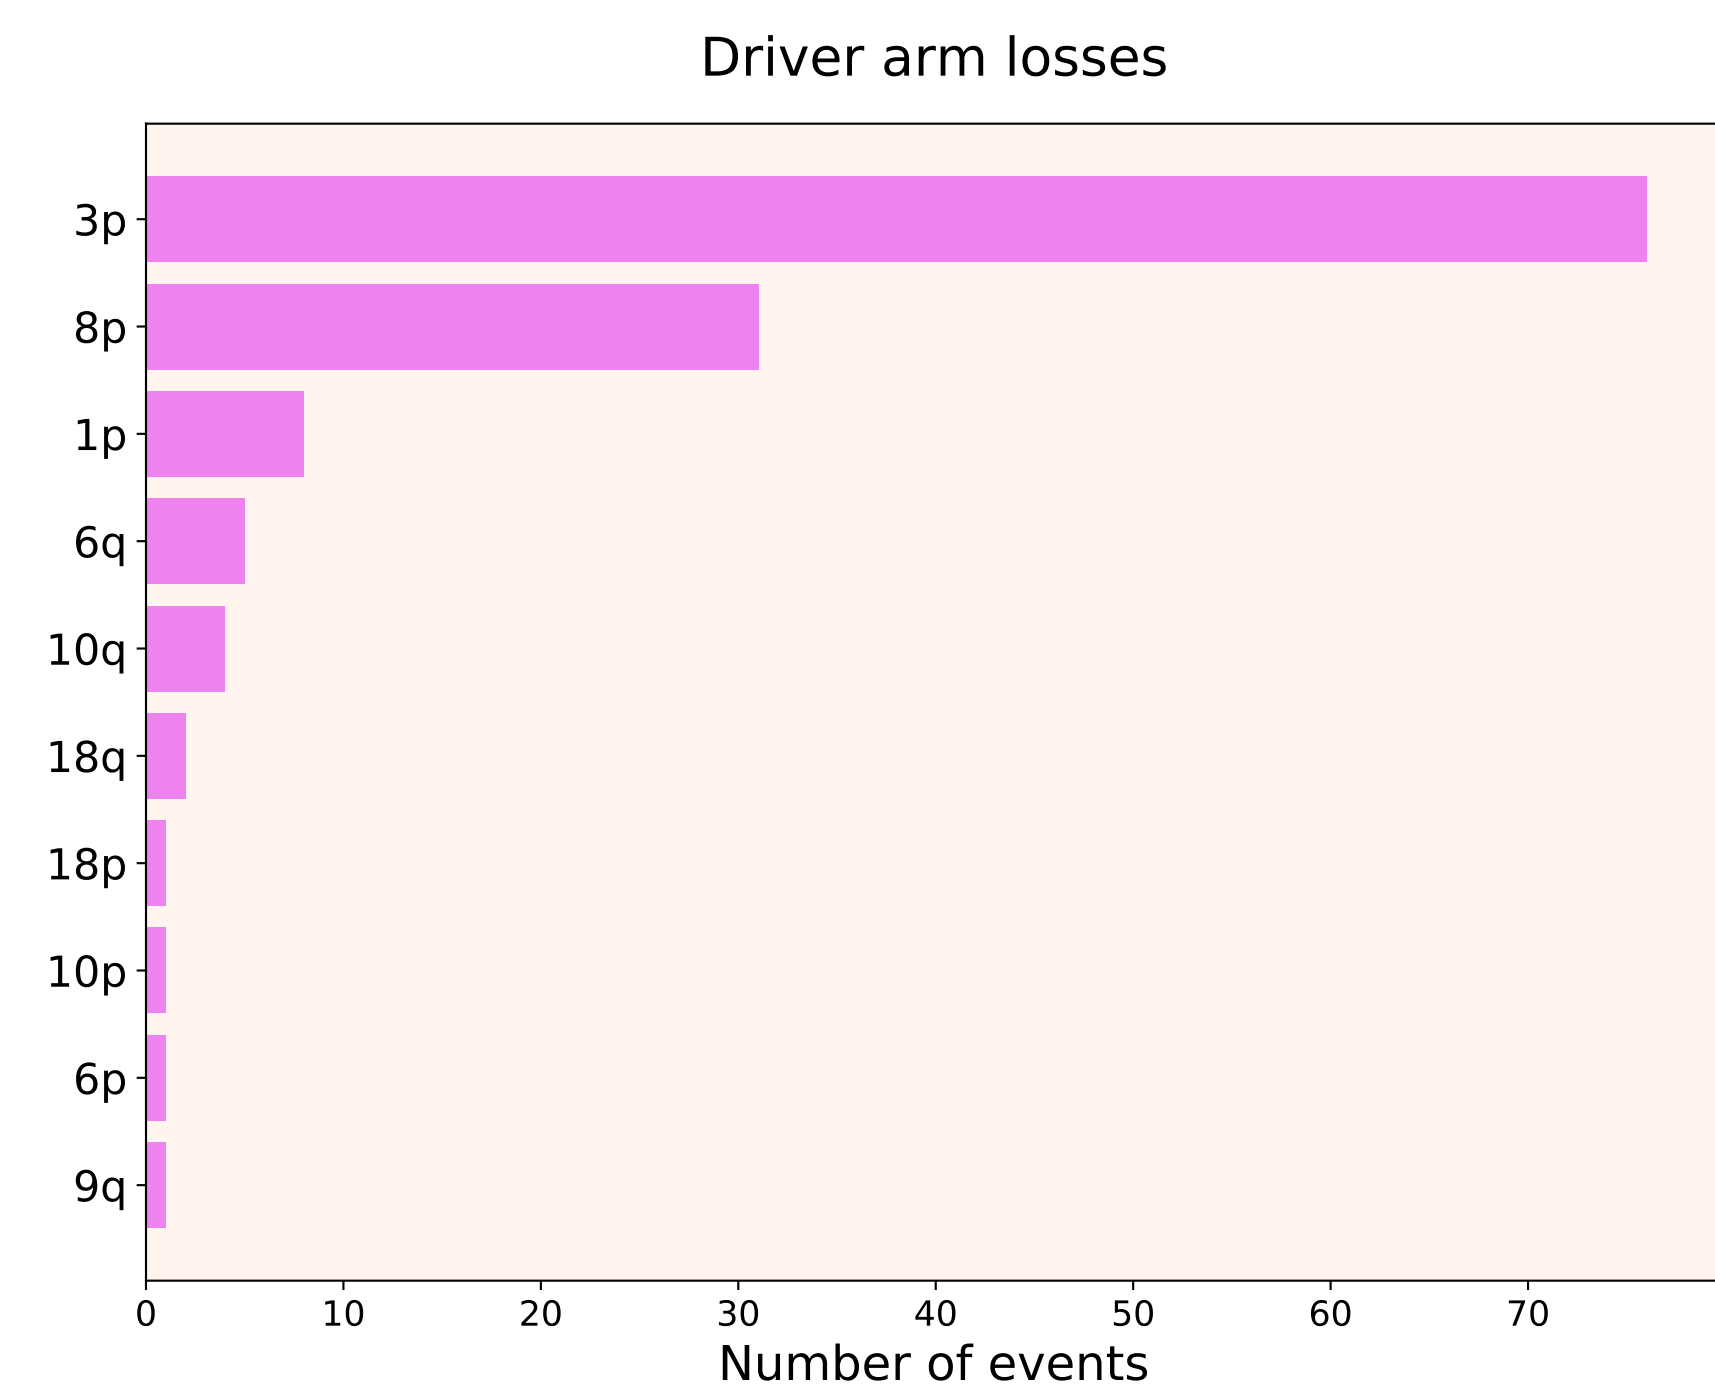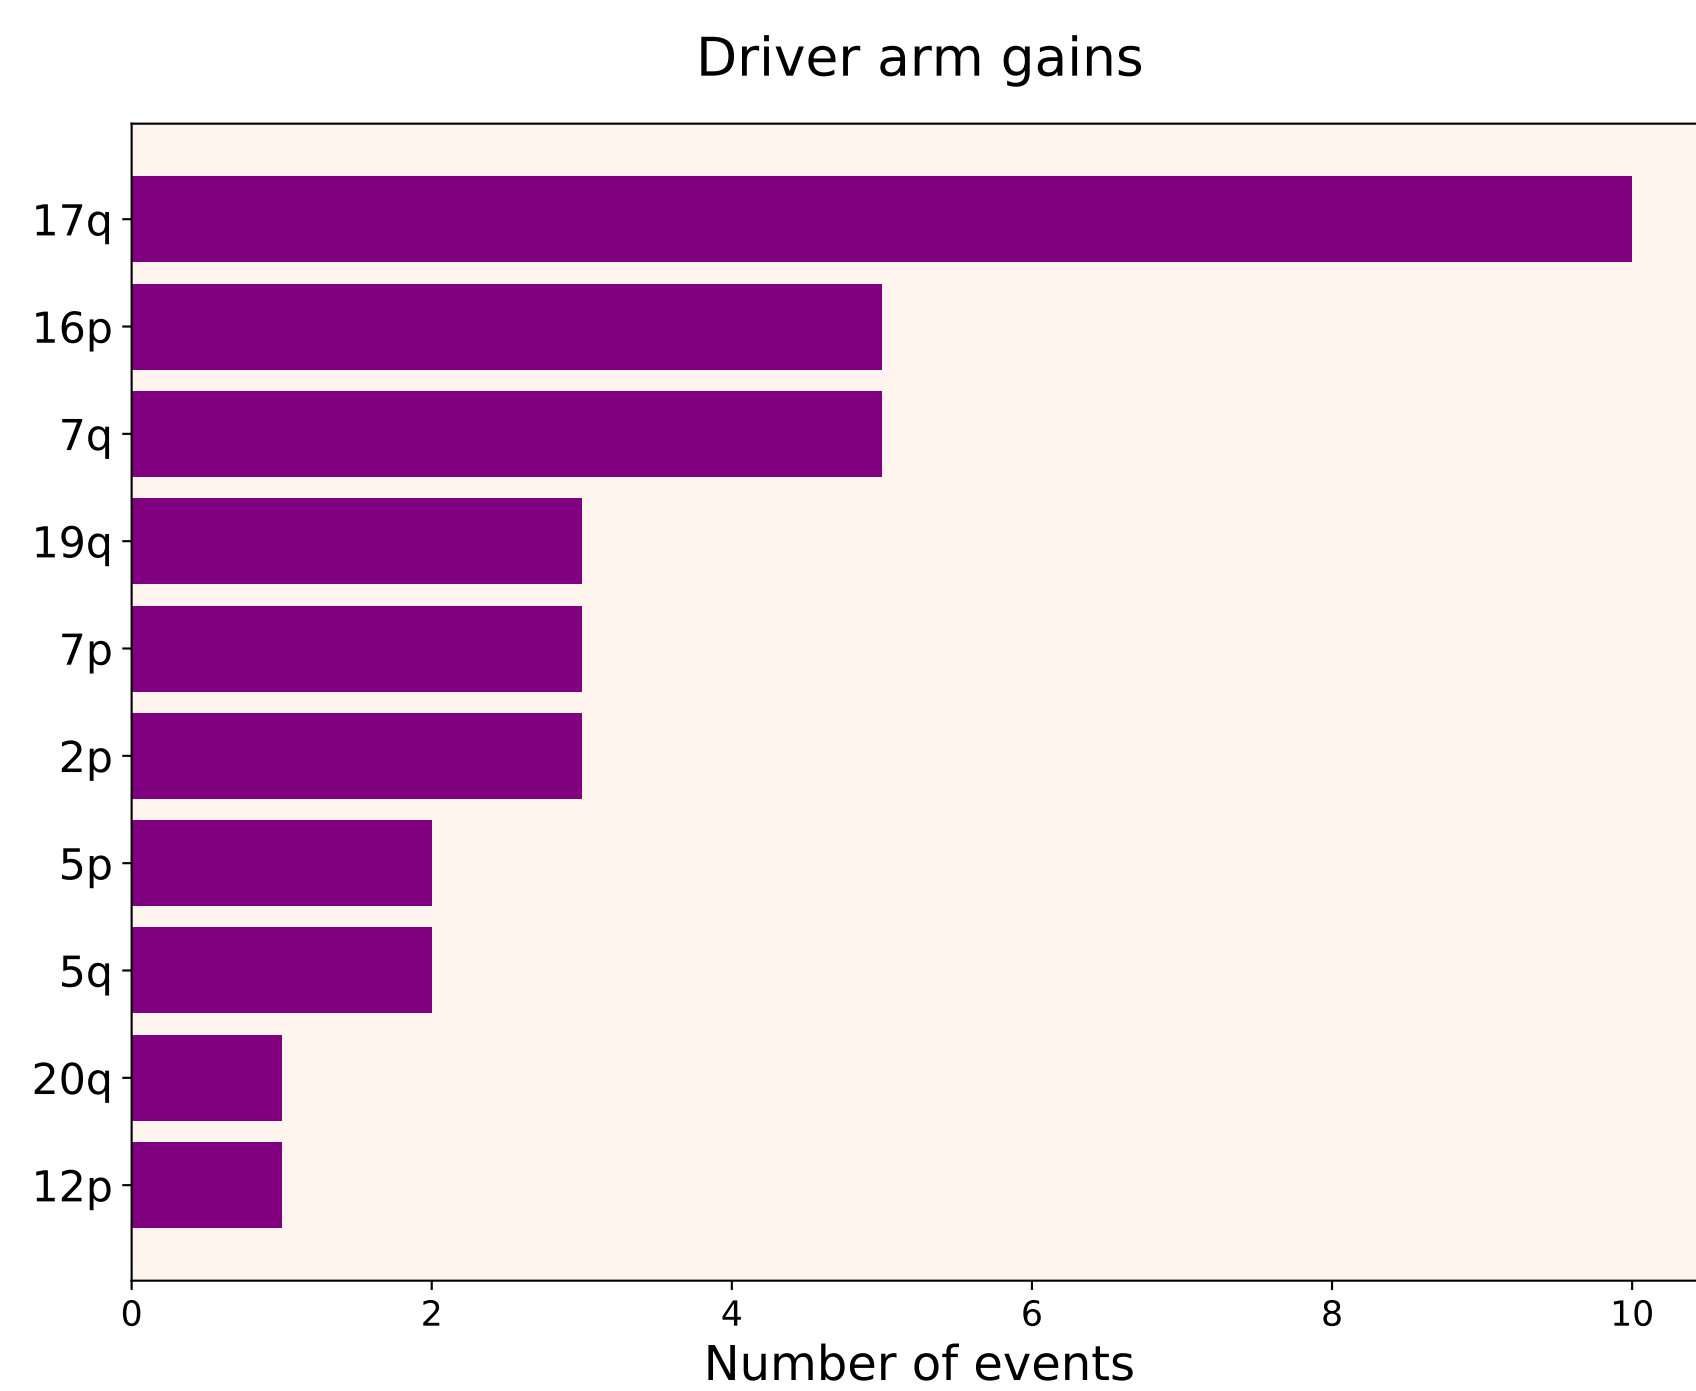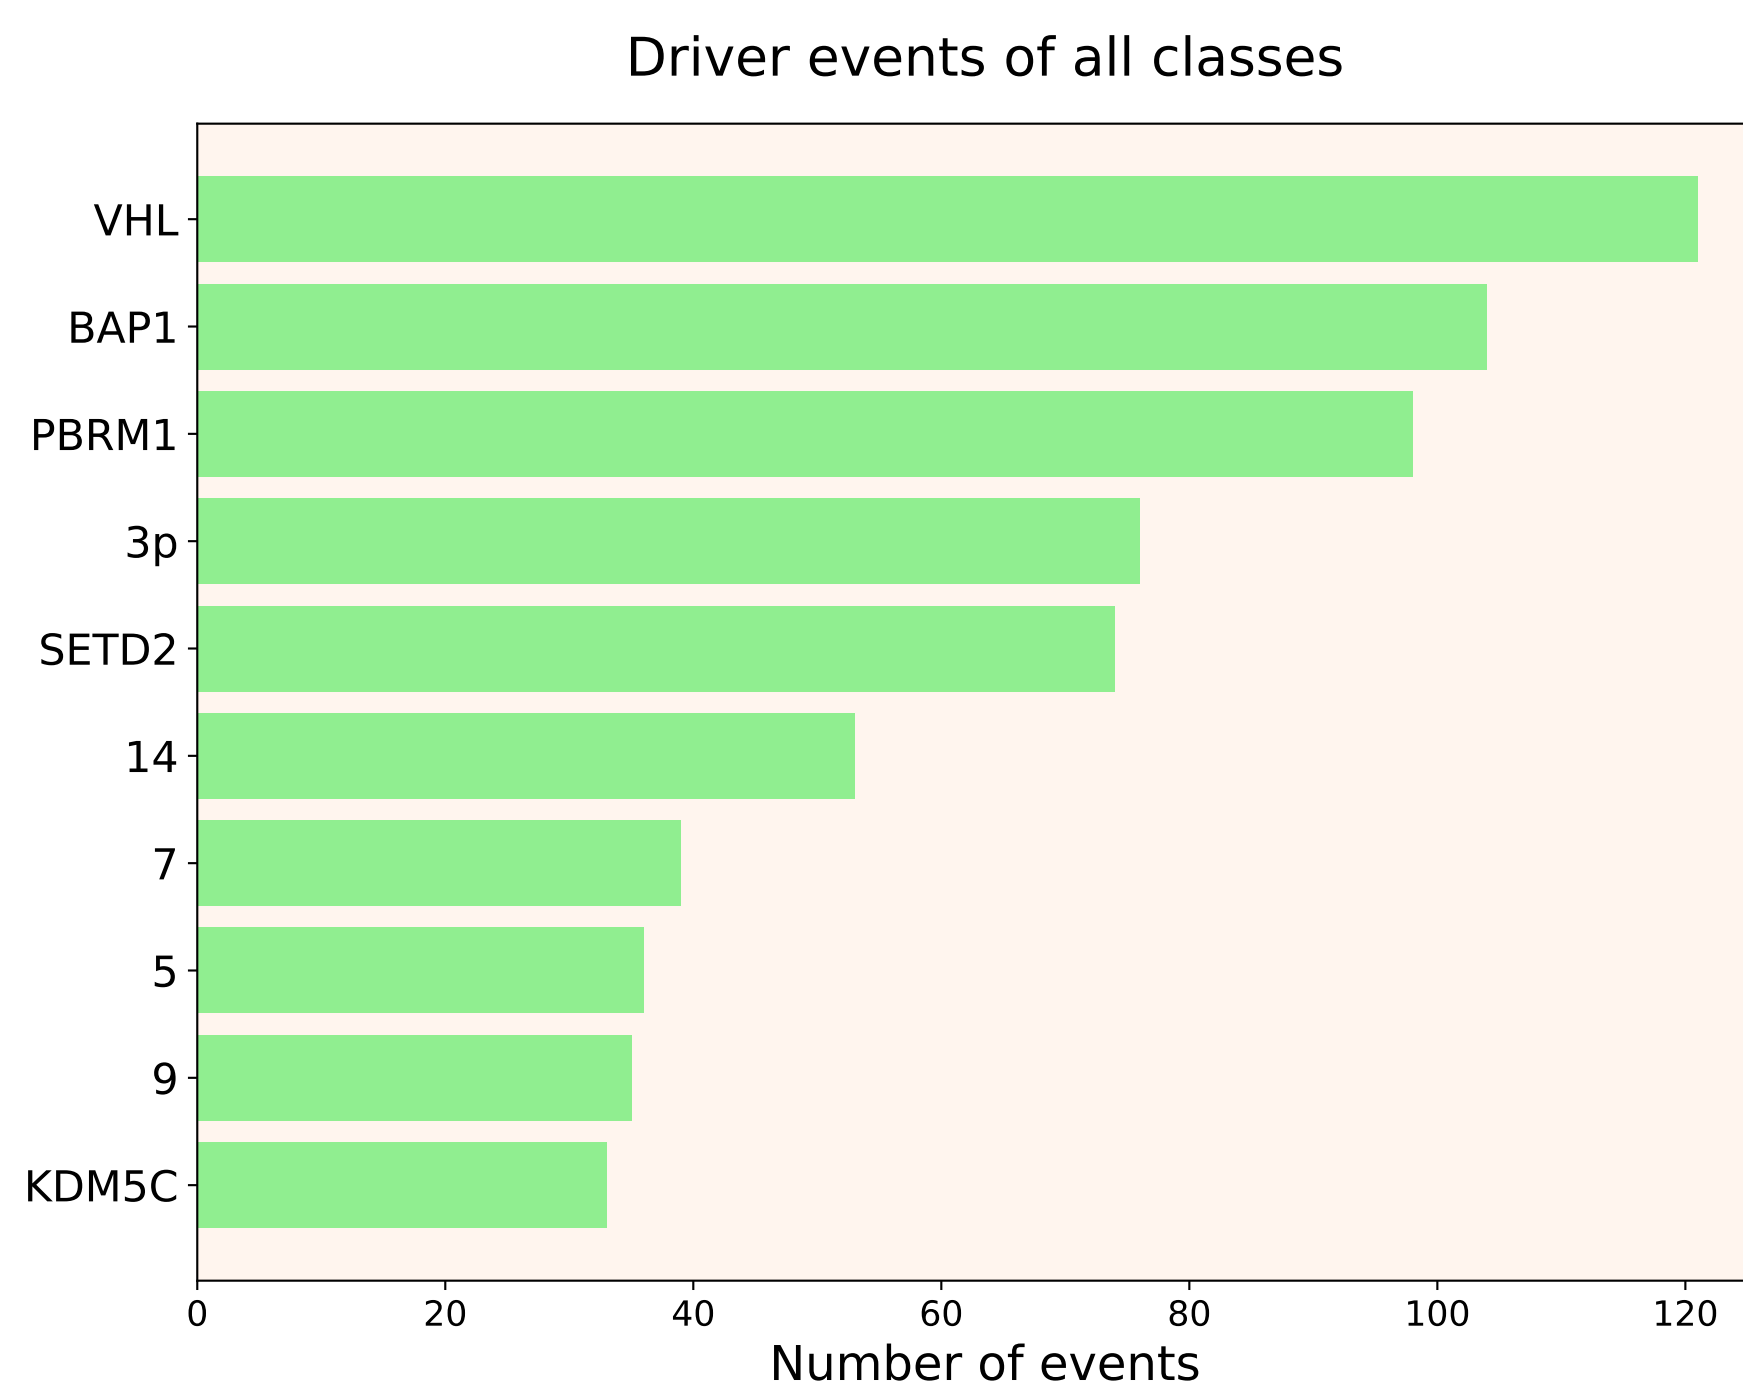

Supplement: Supplemental_Data_S1.zip [file Supplemental_Data_S1.zip]

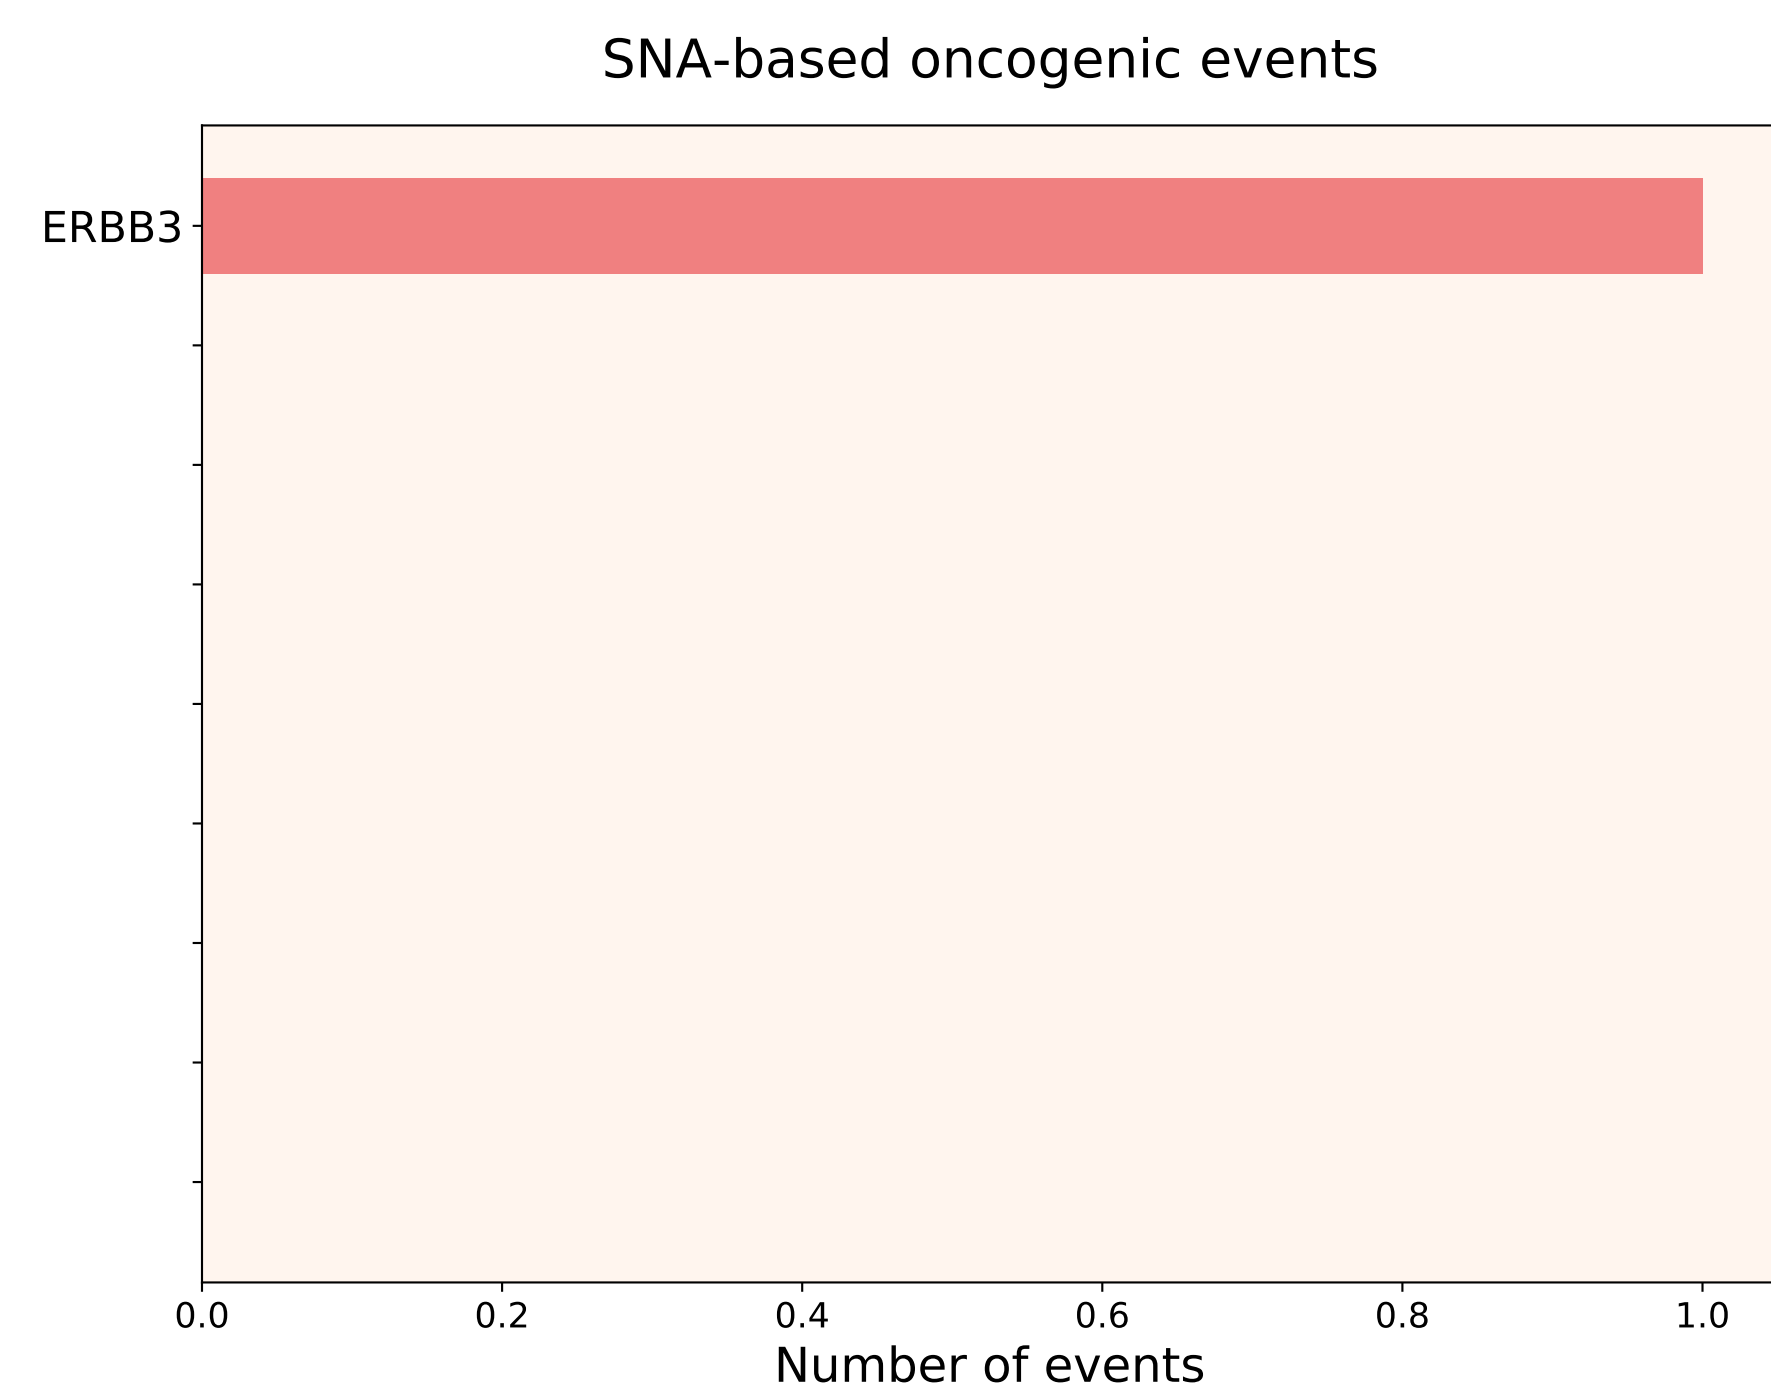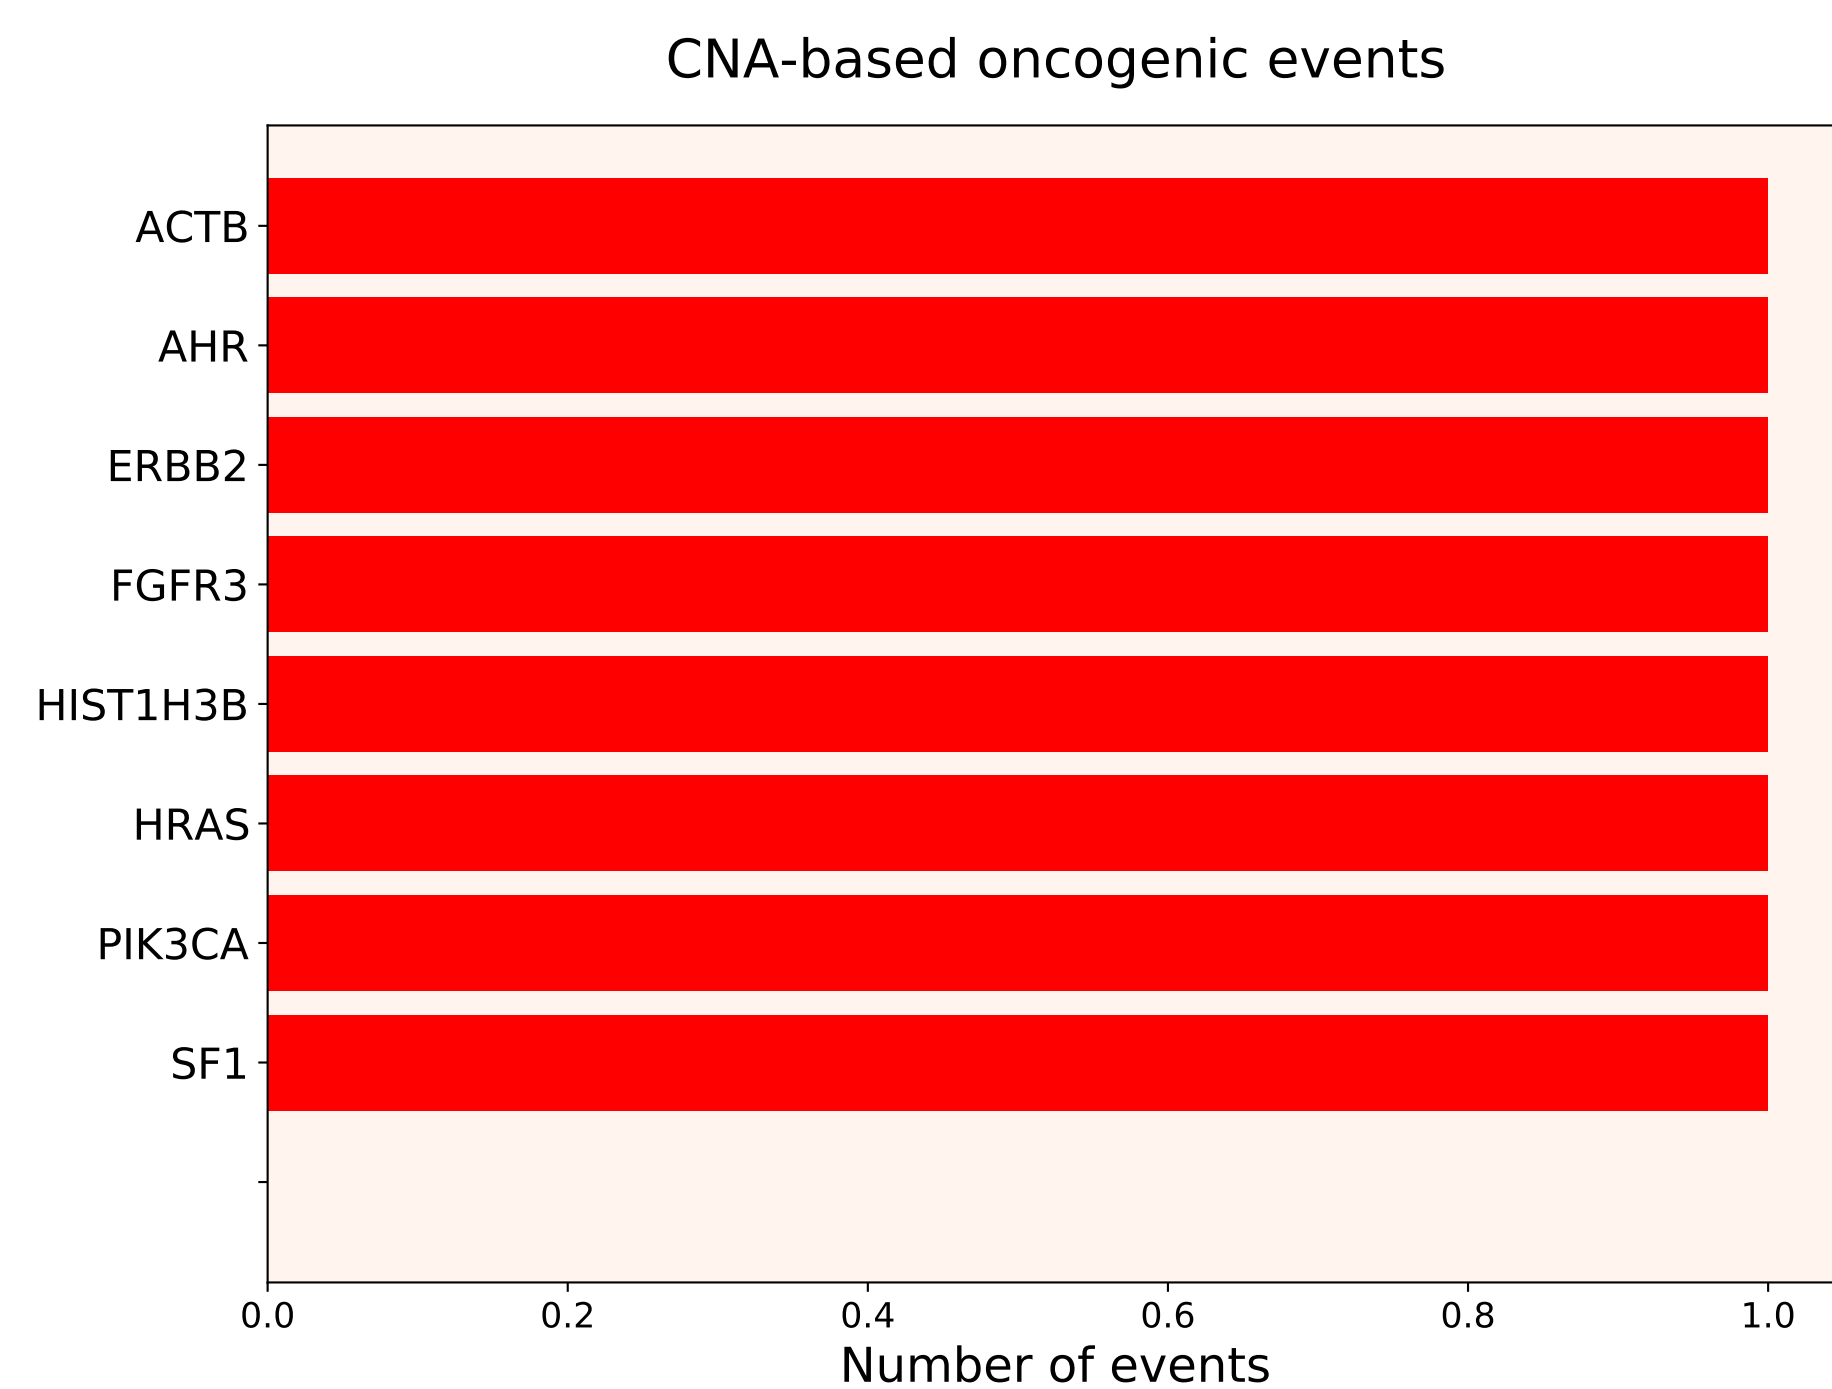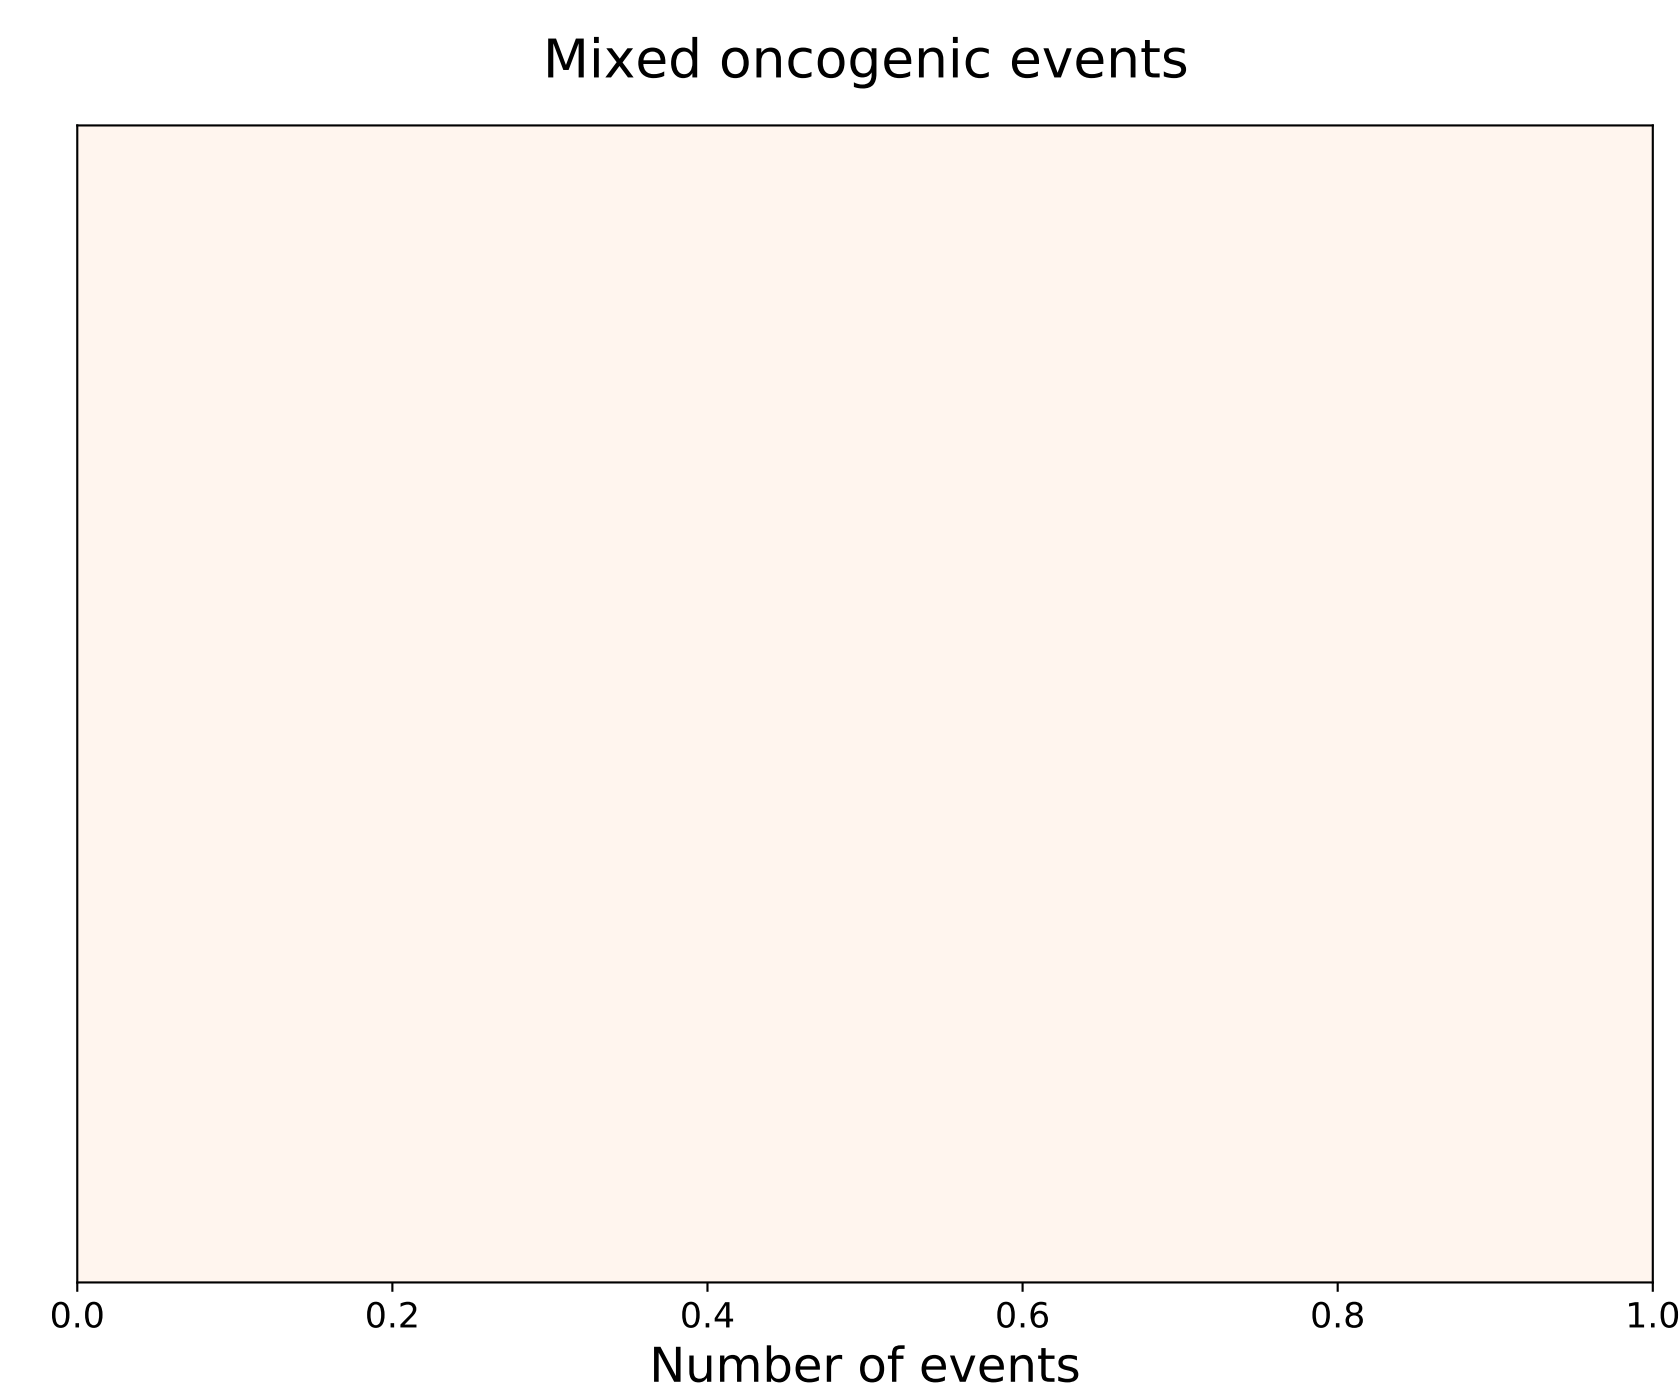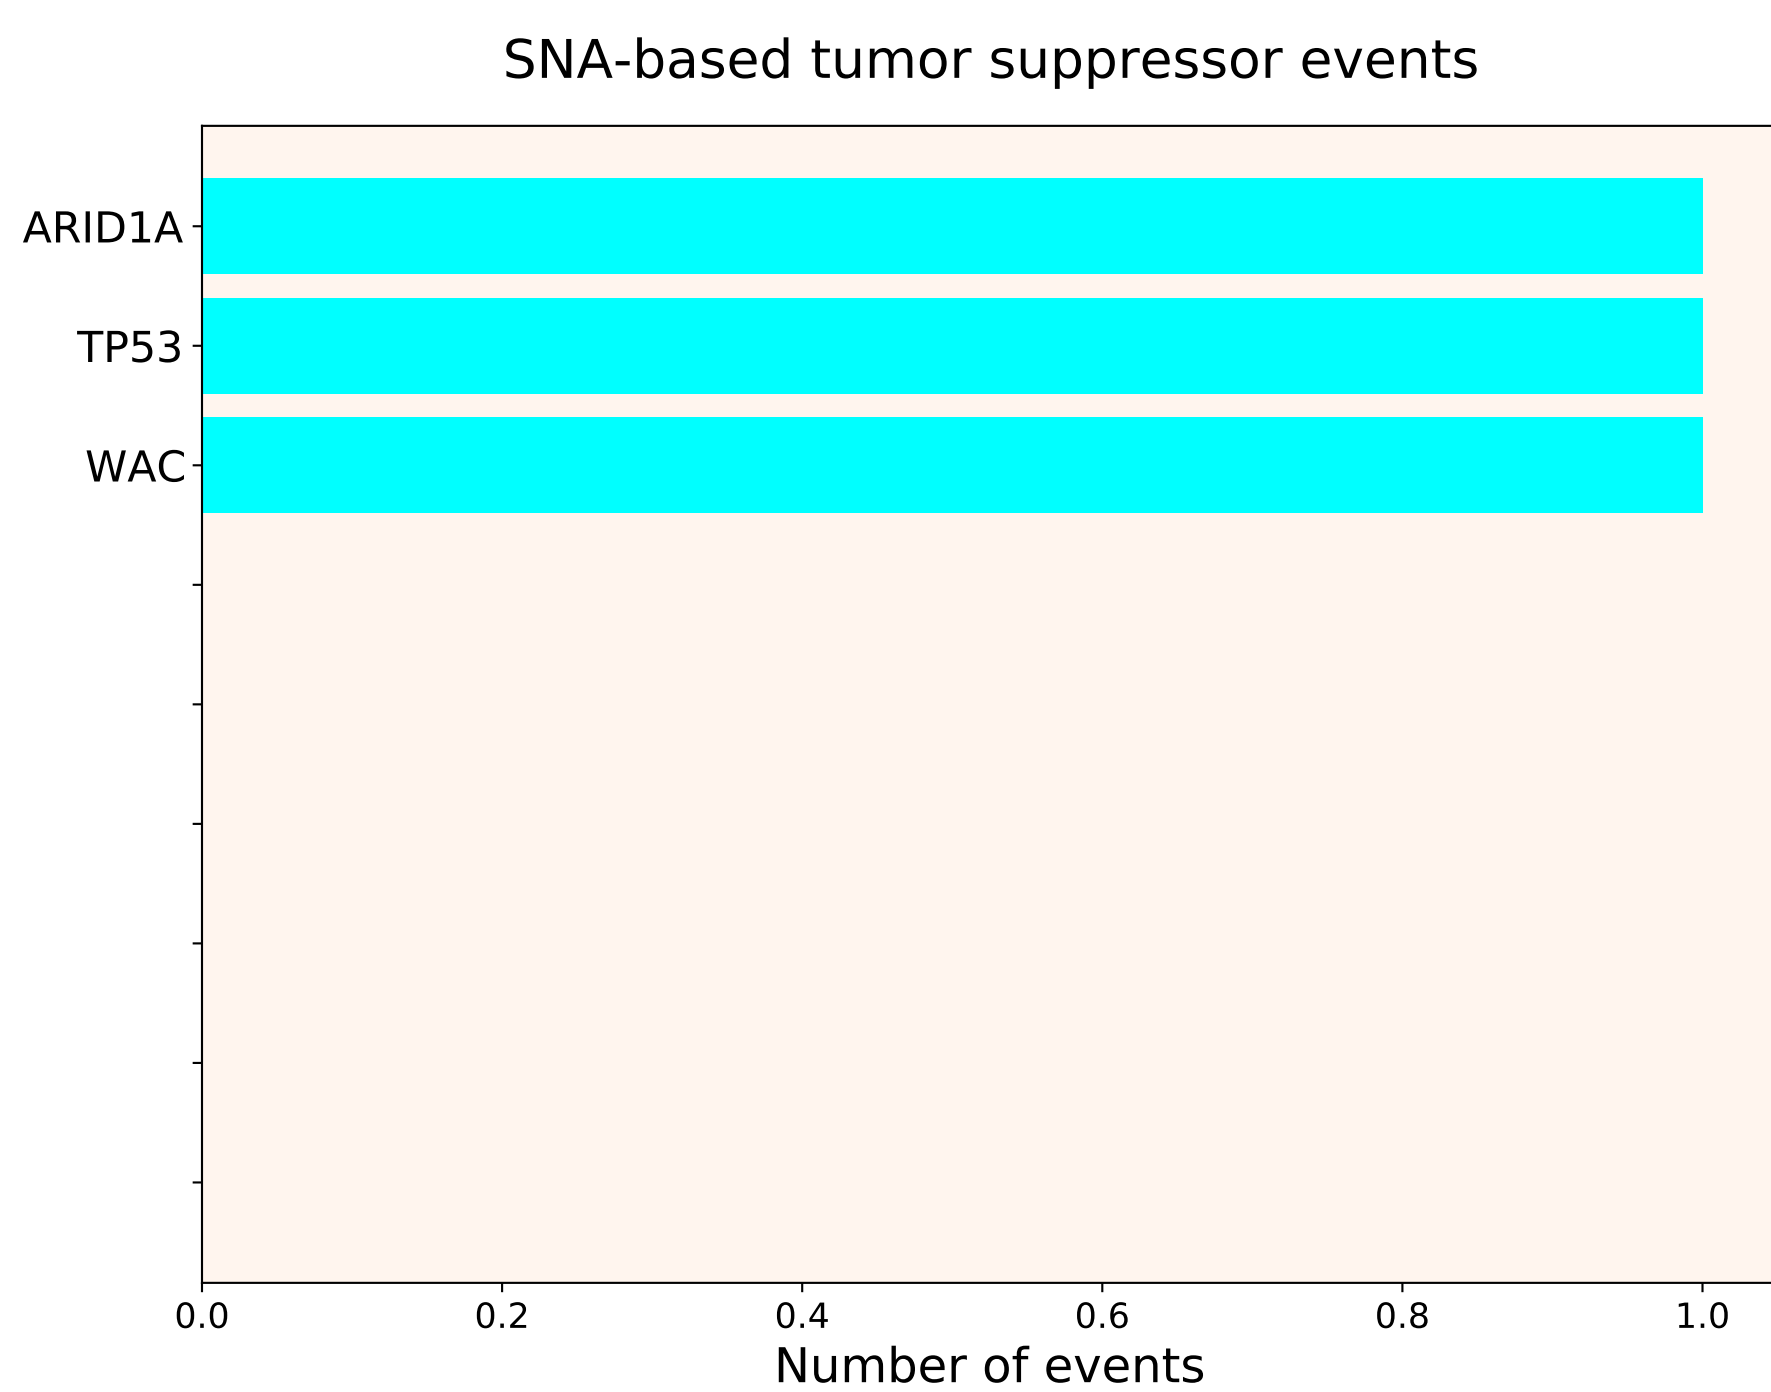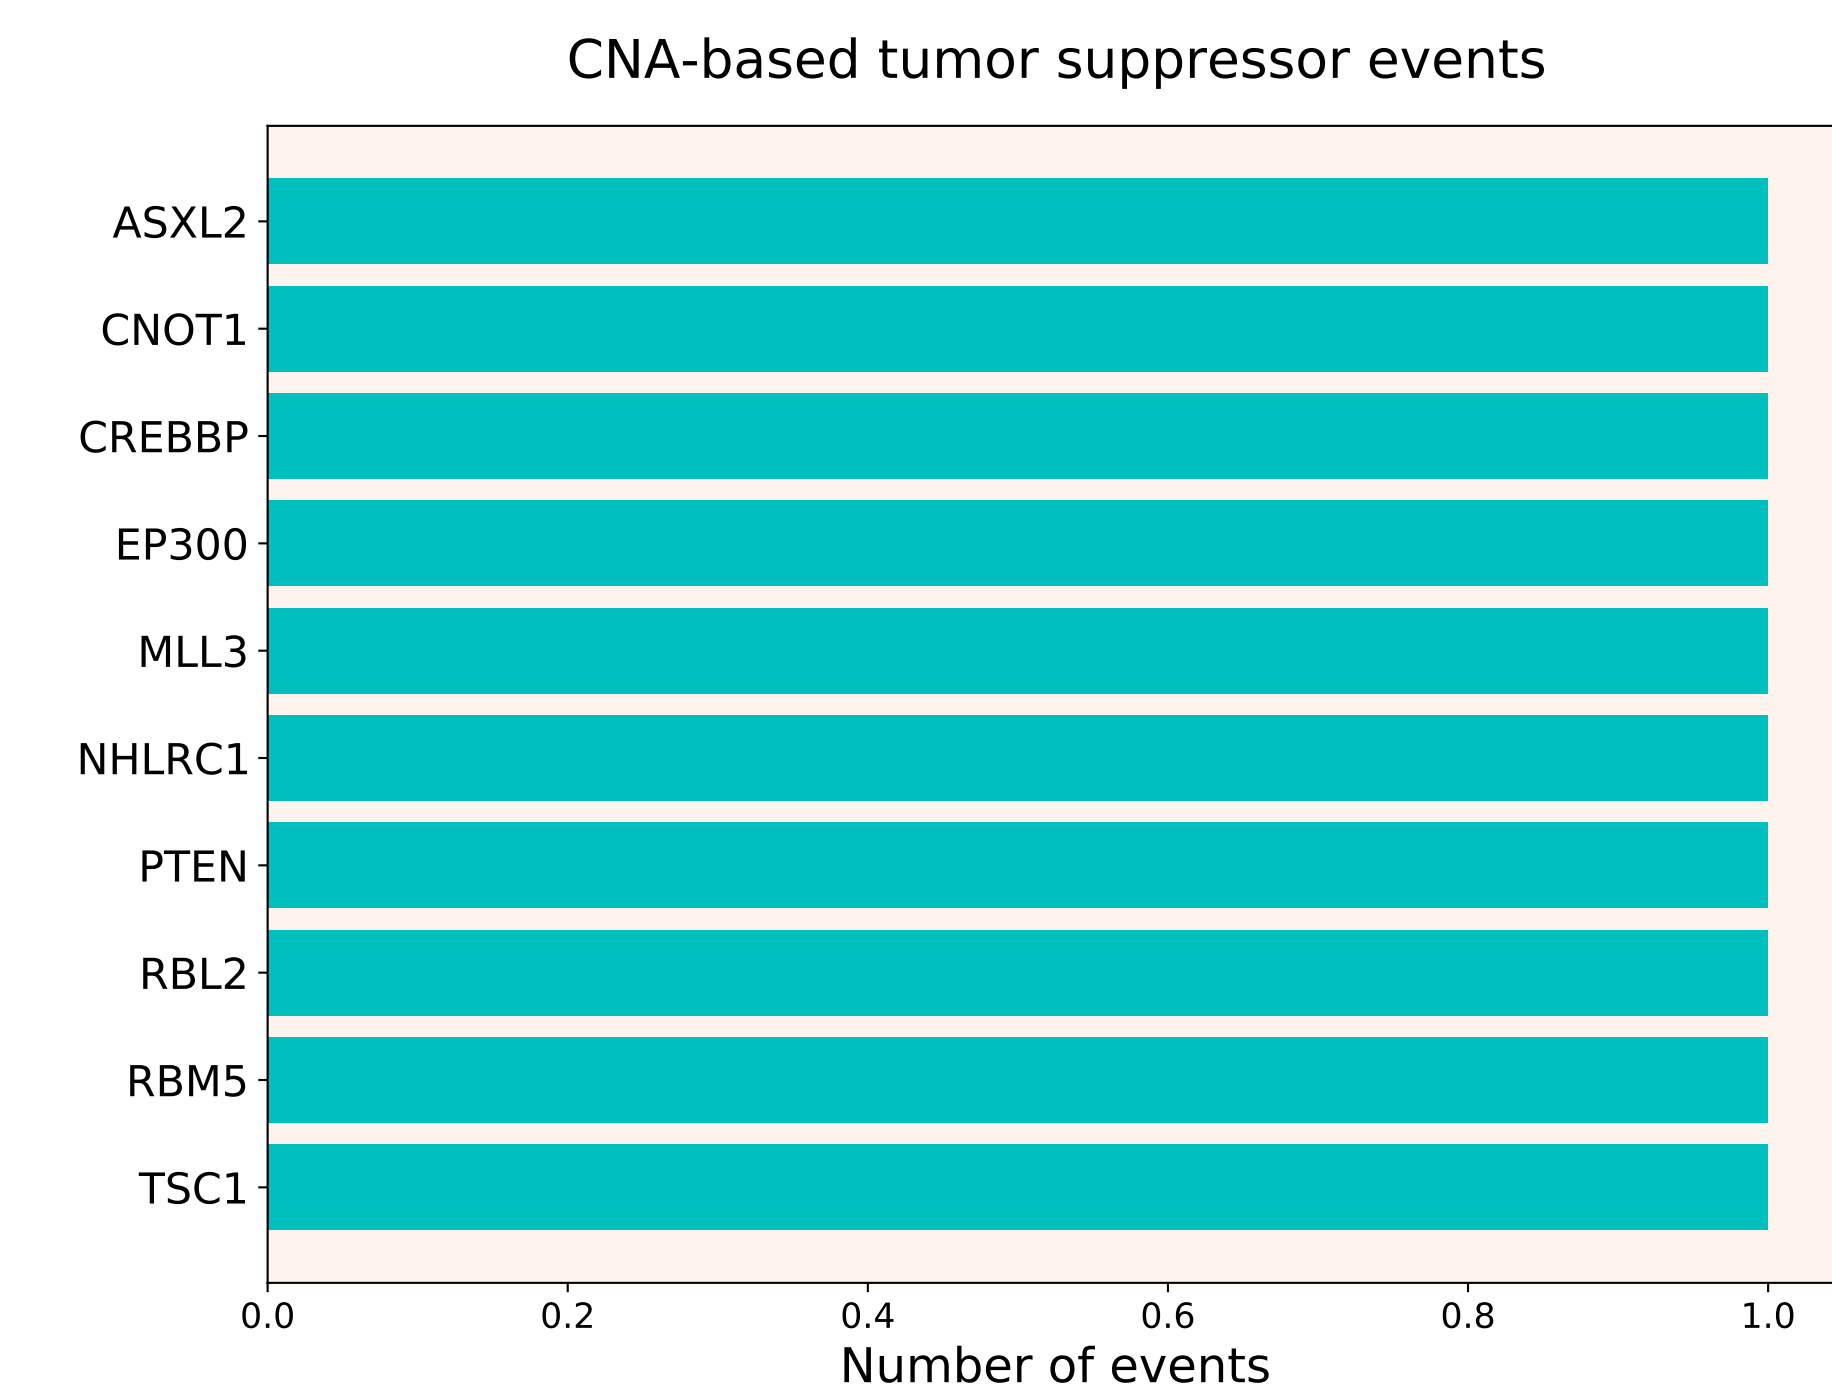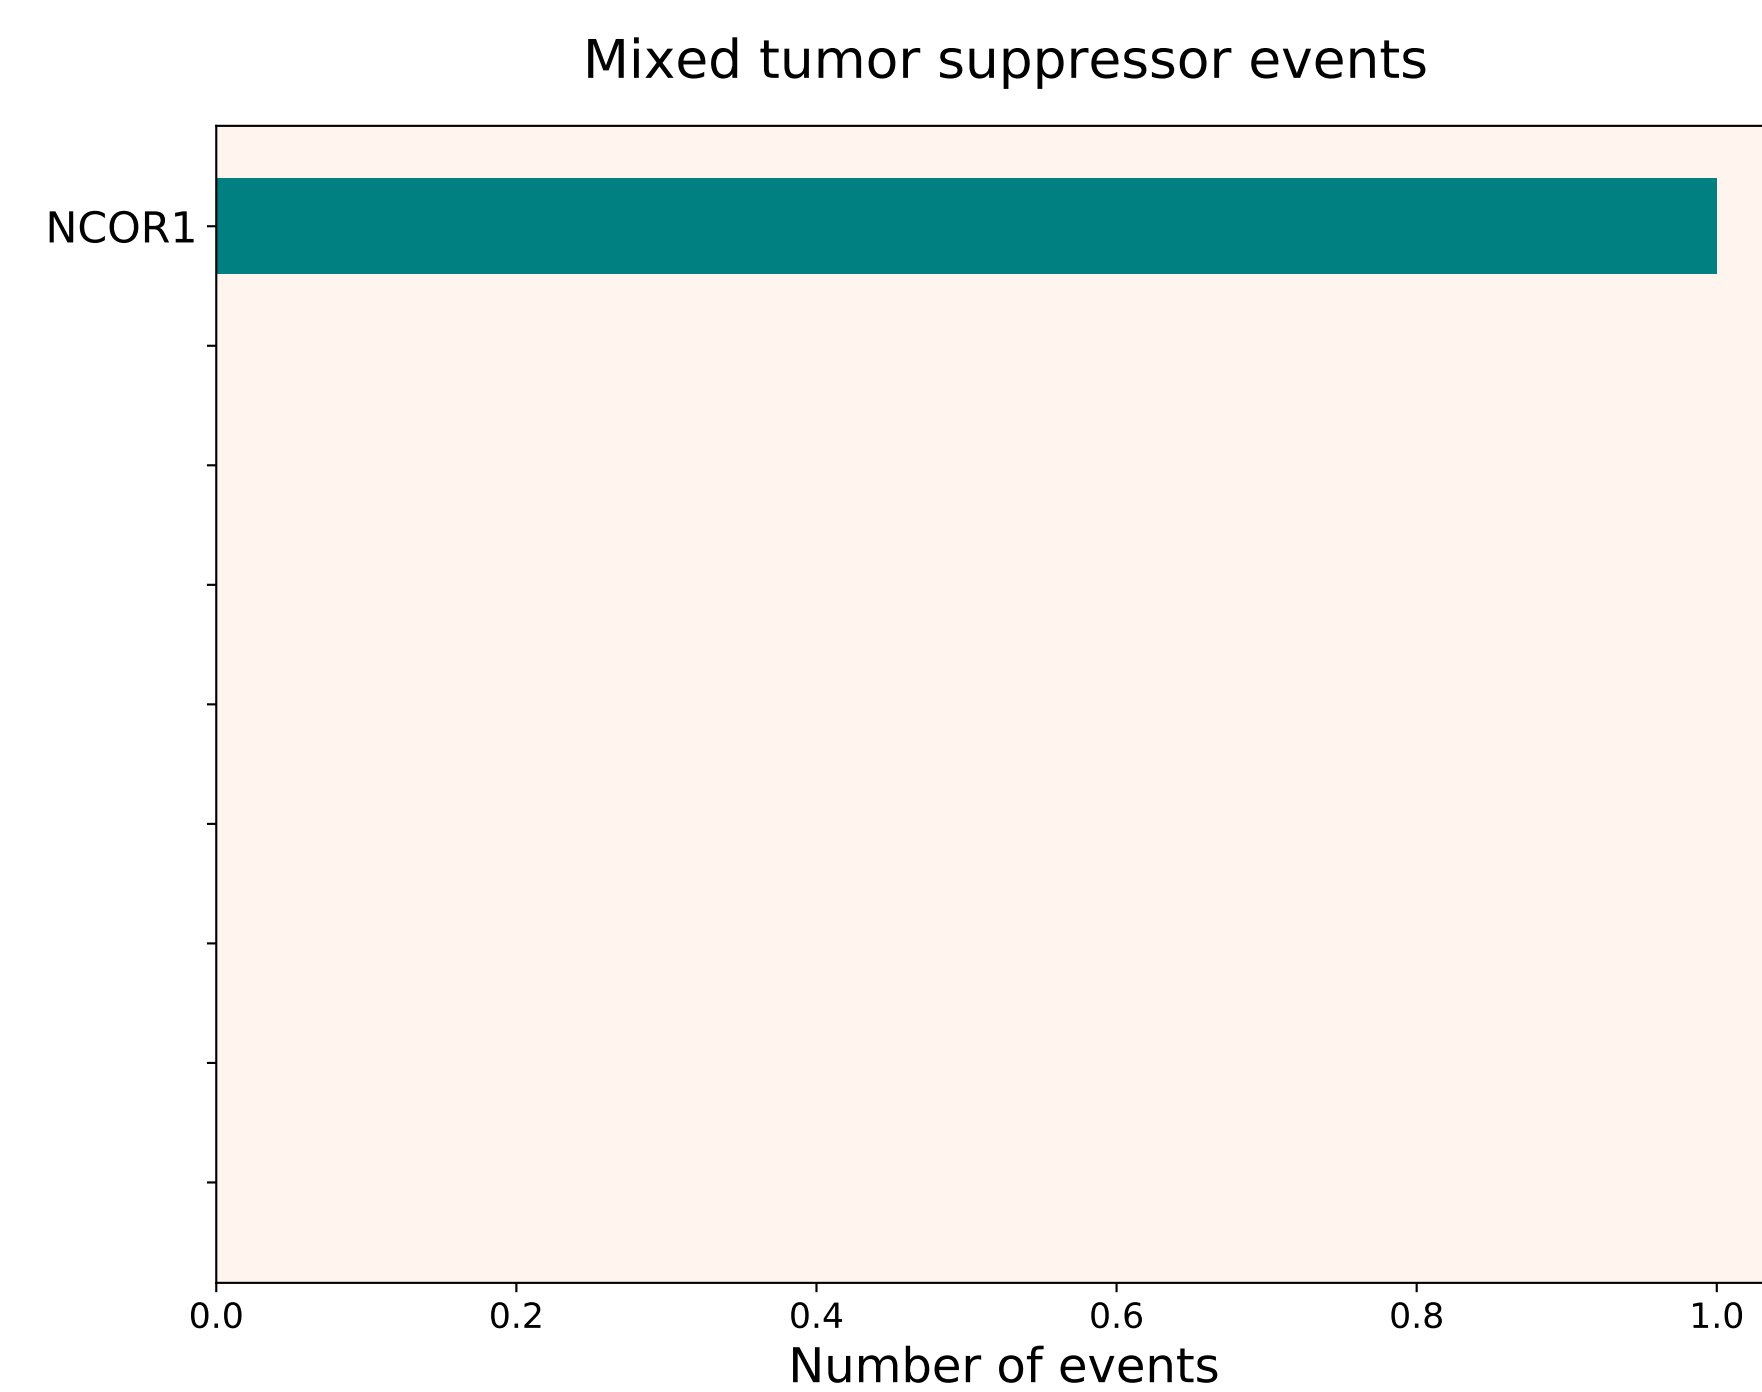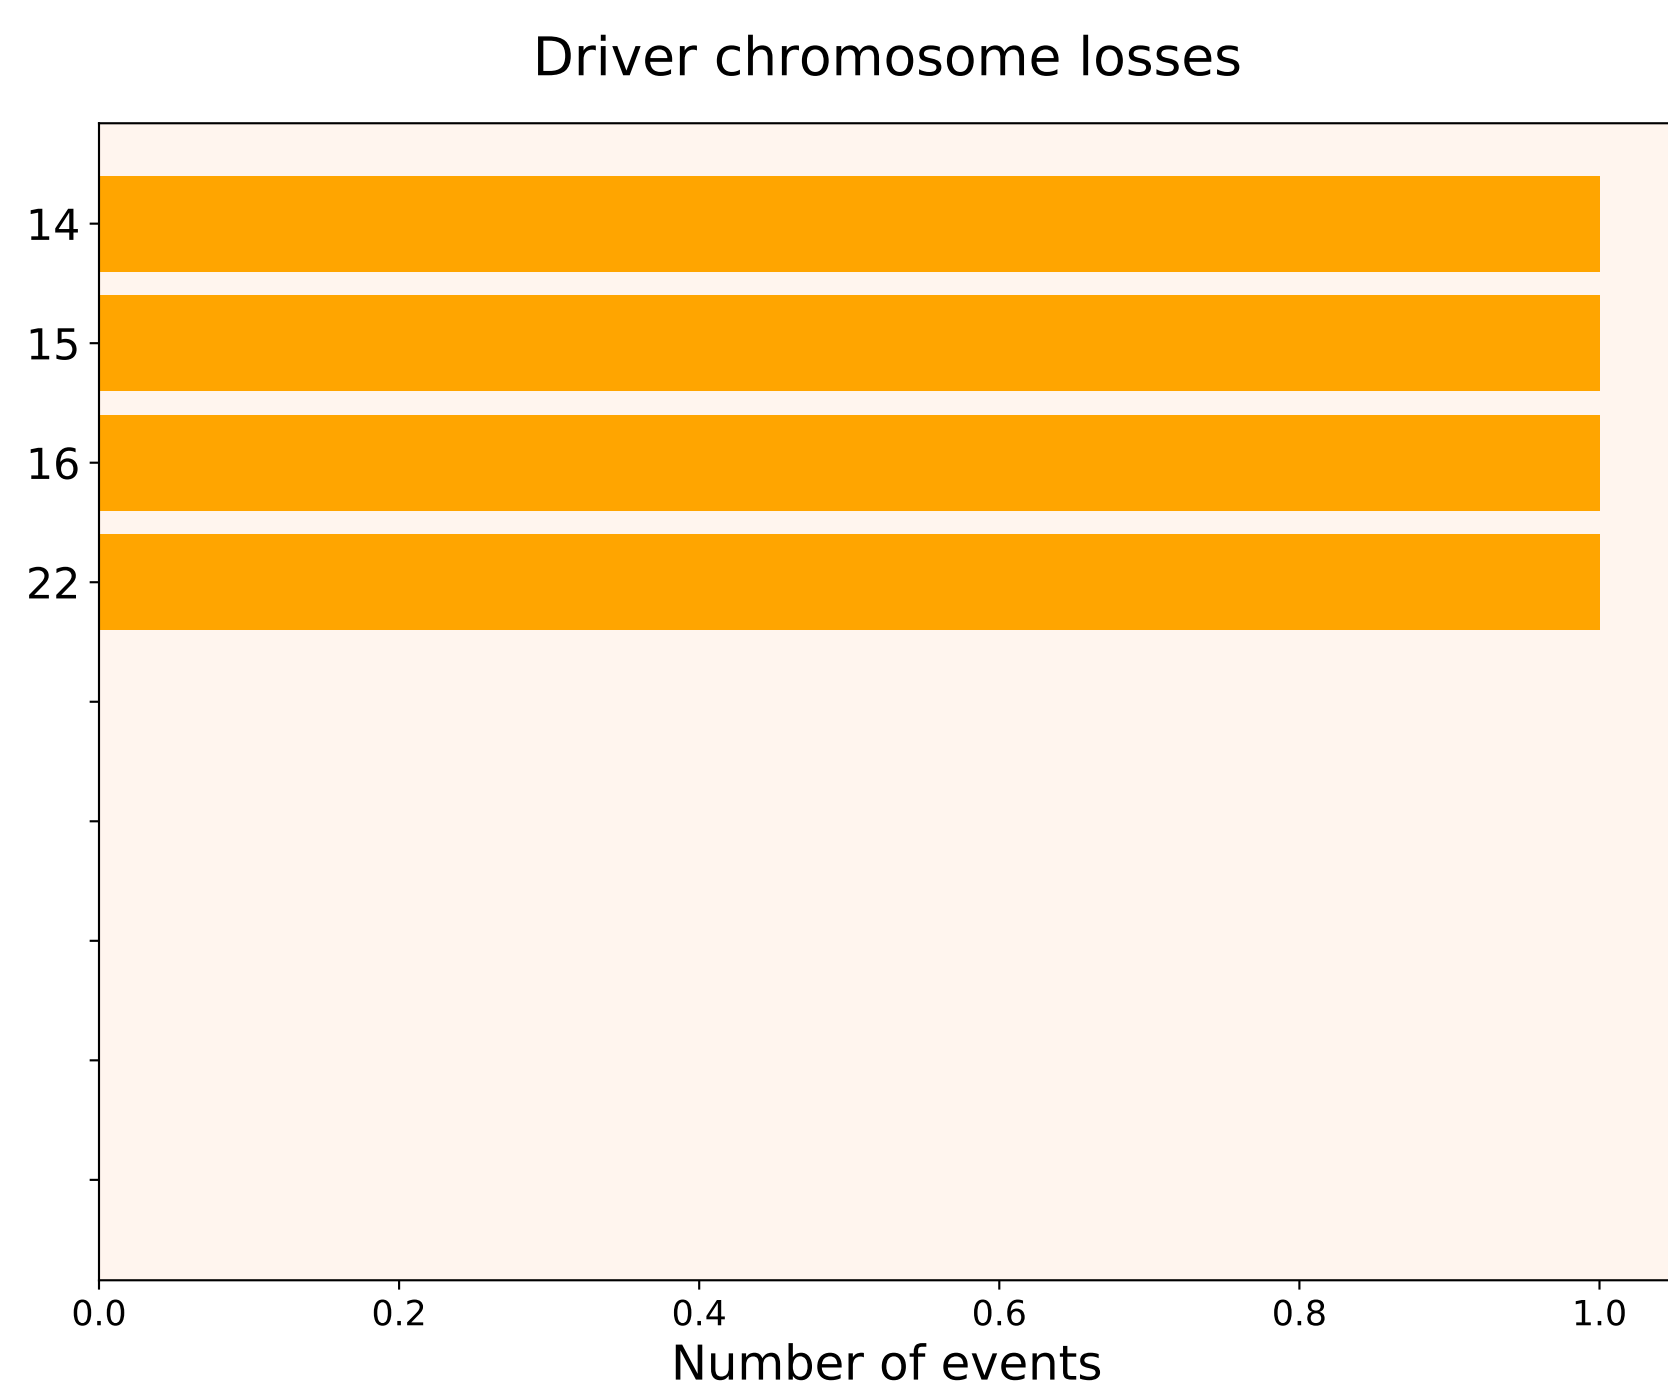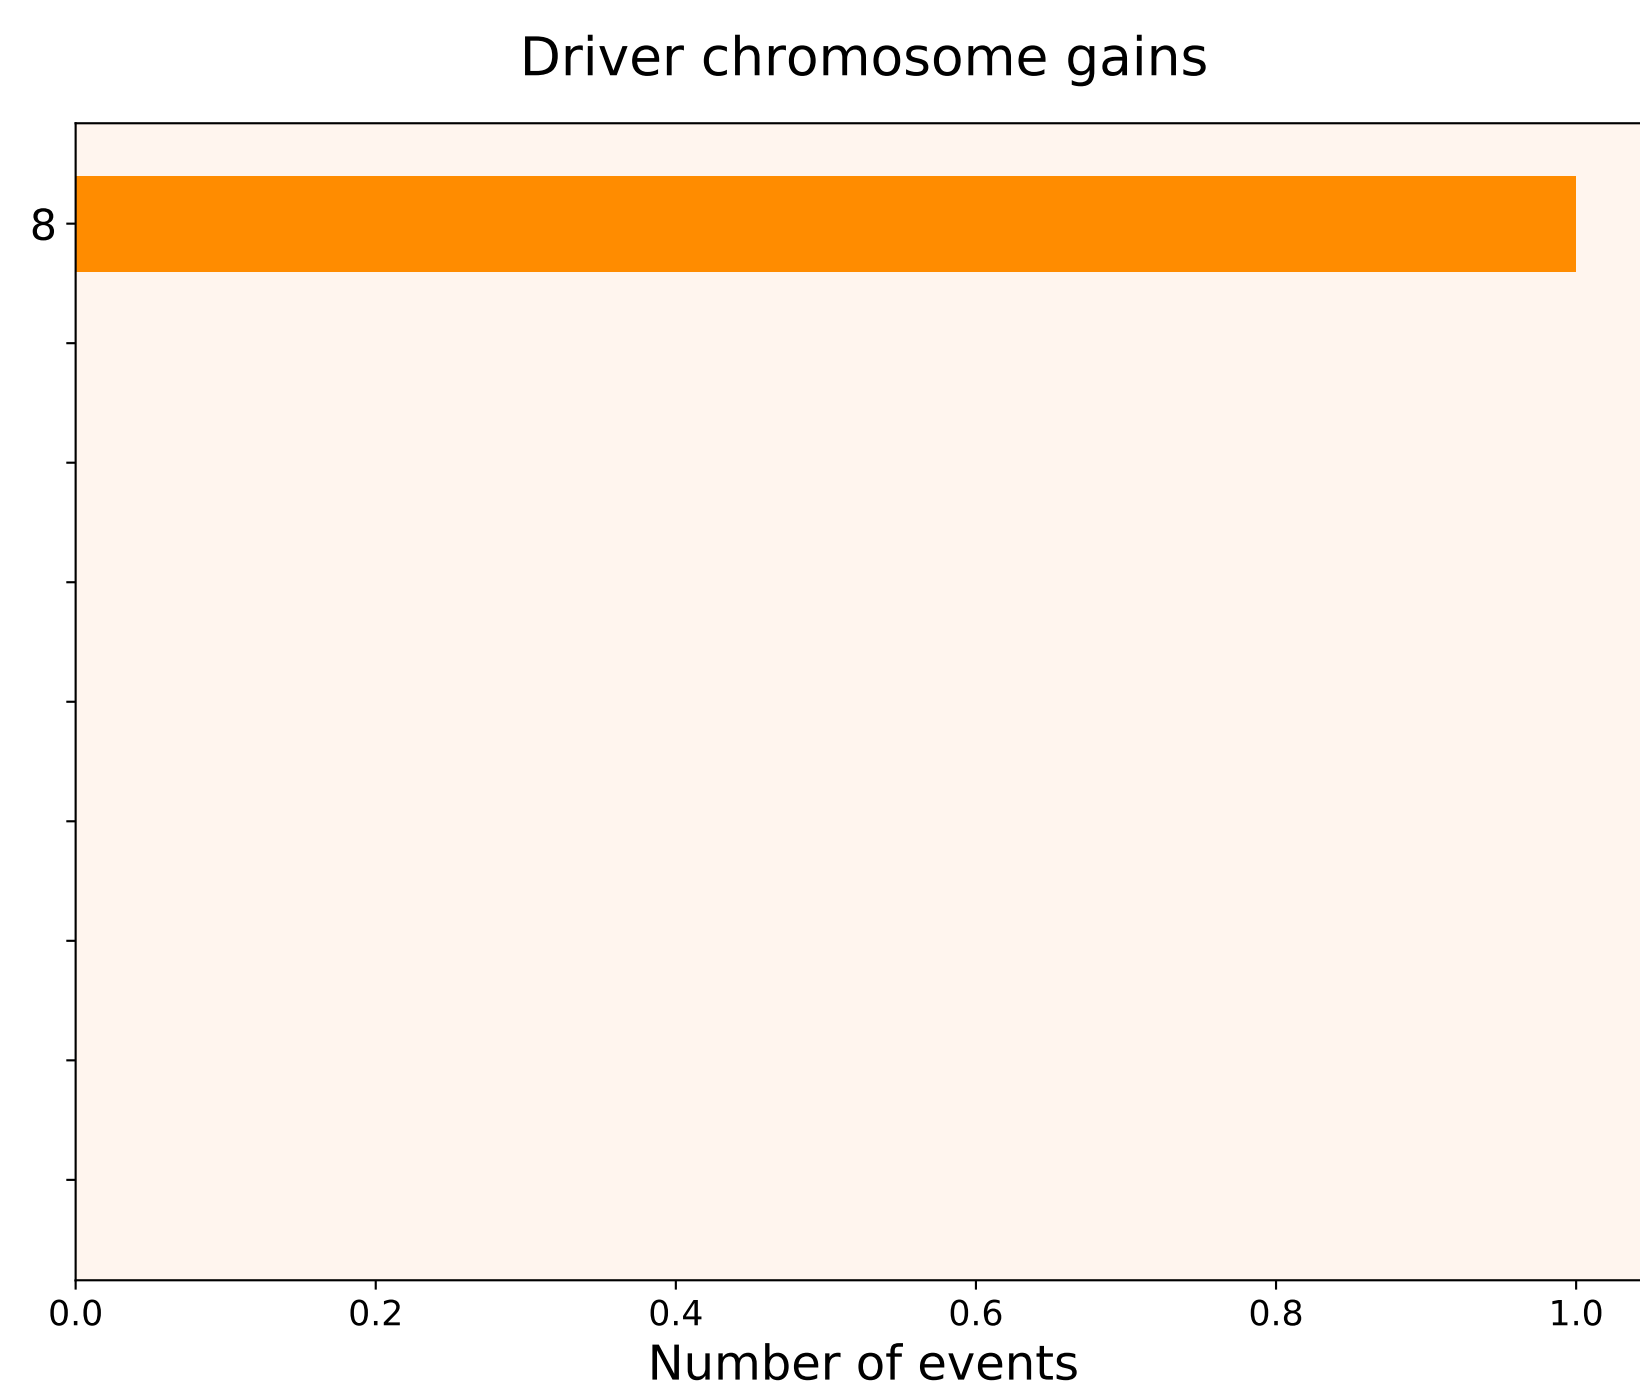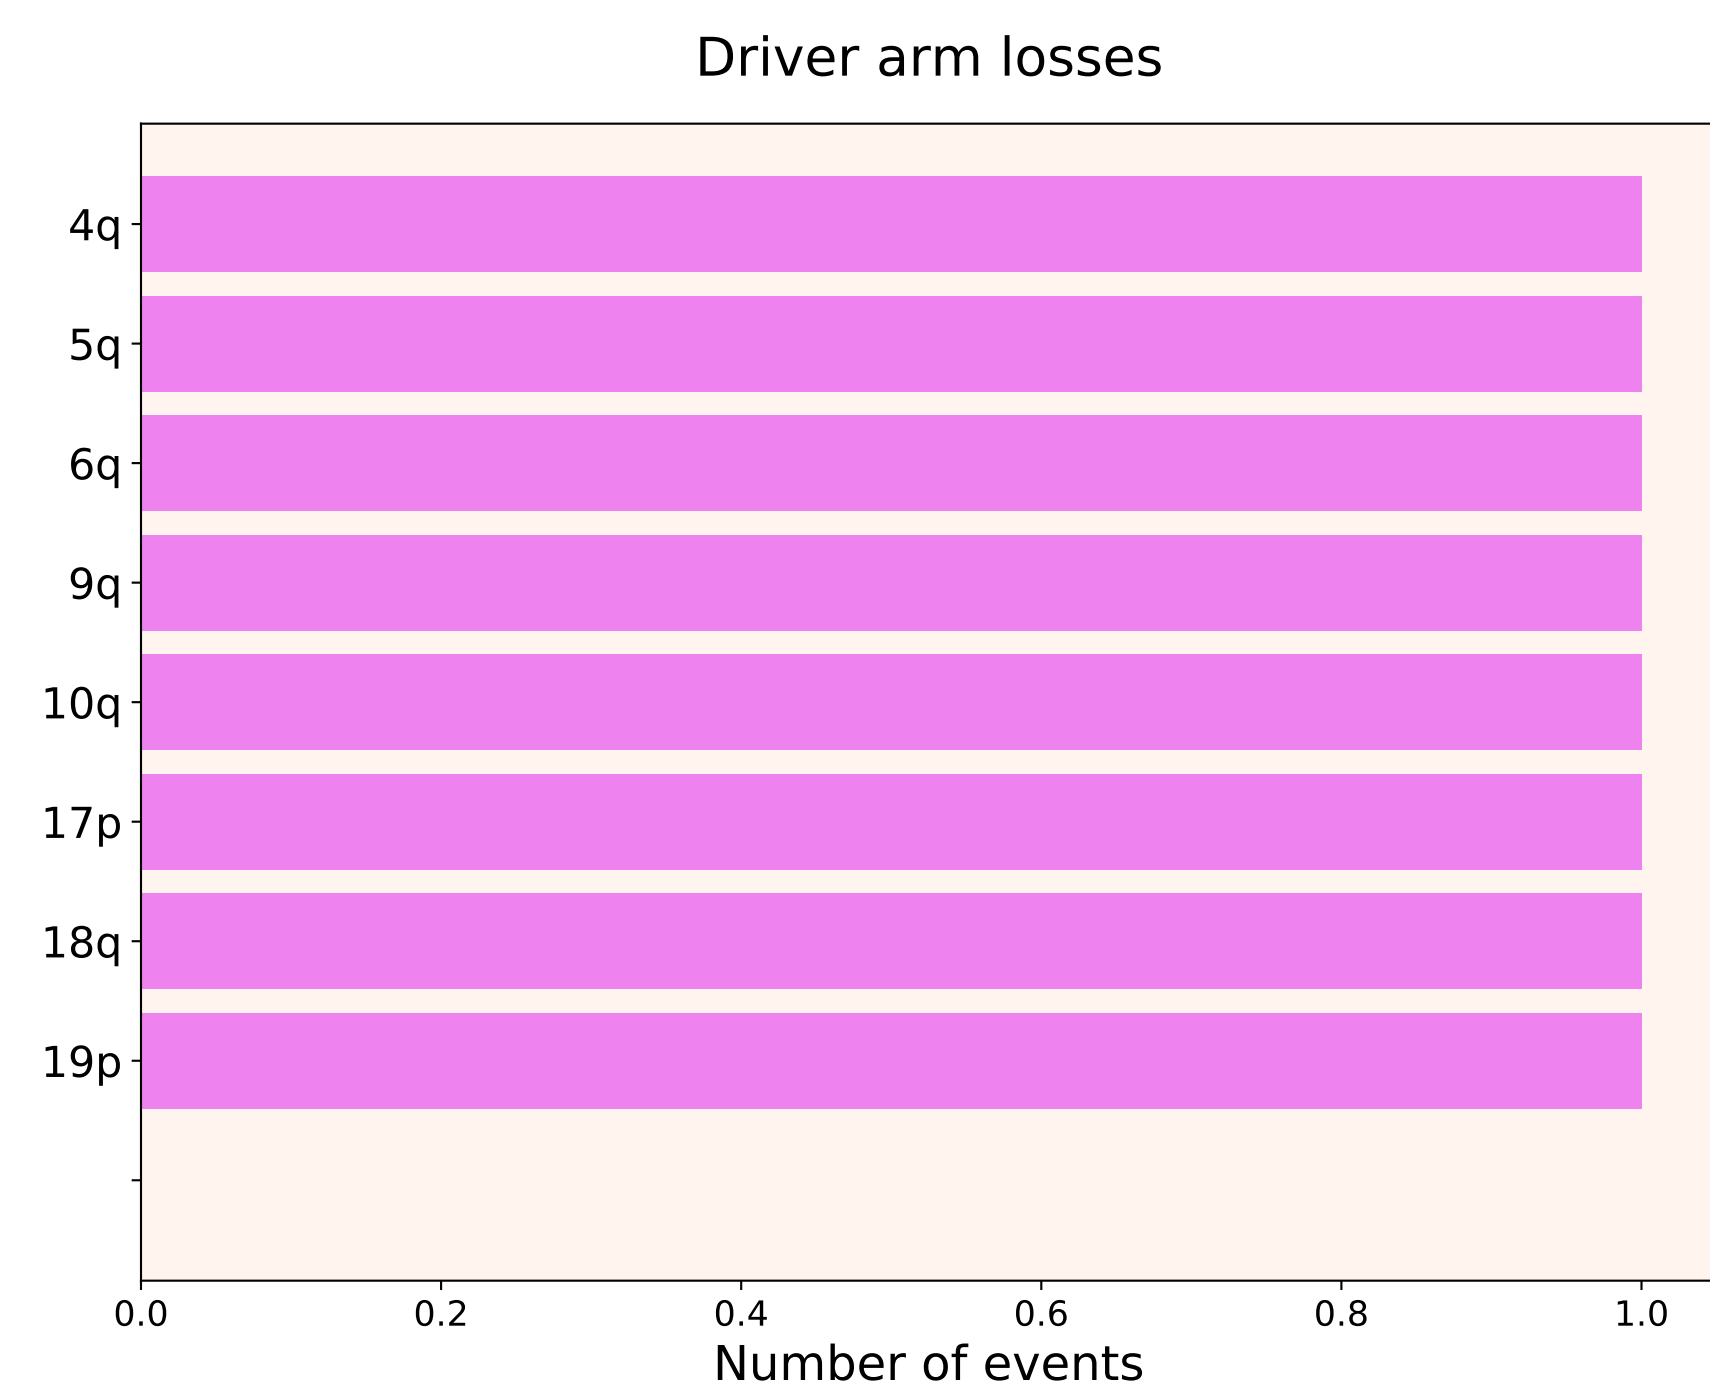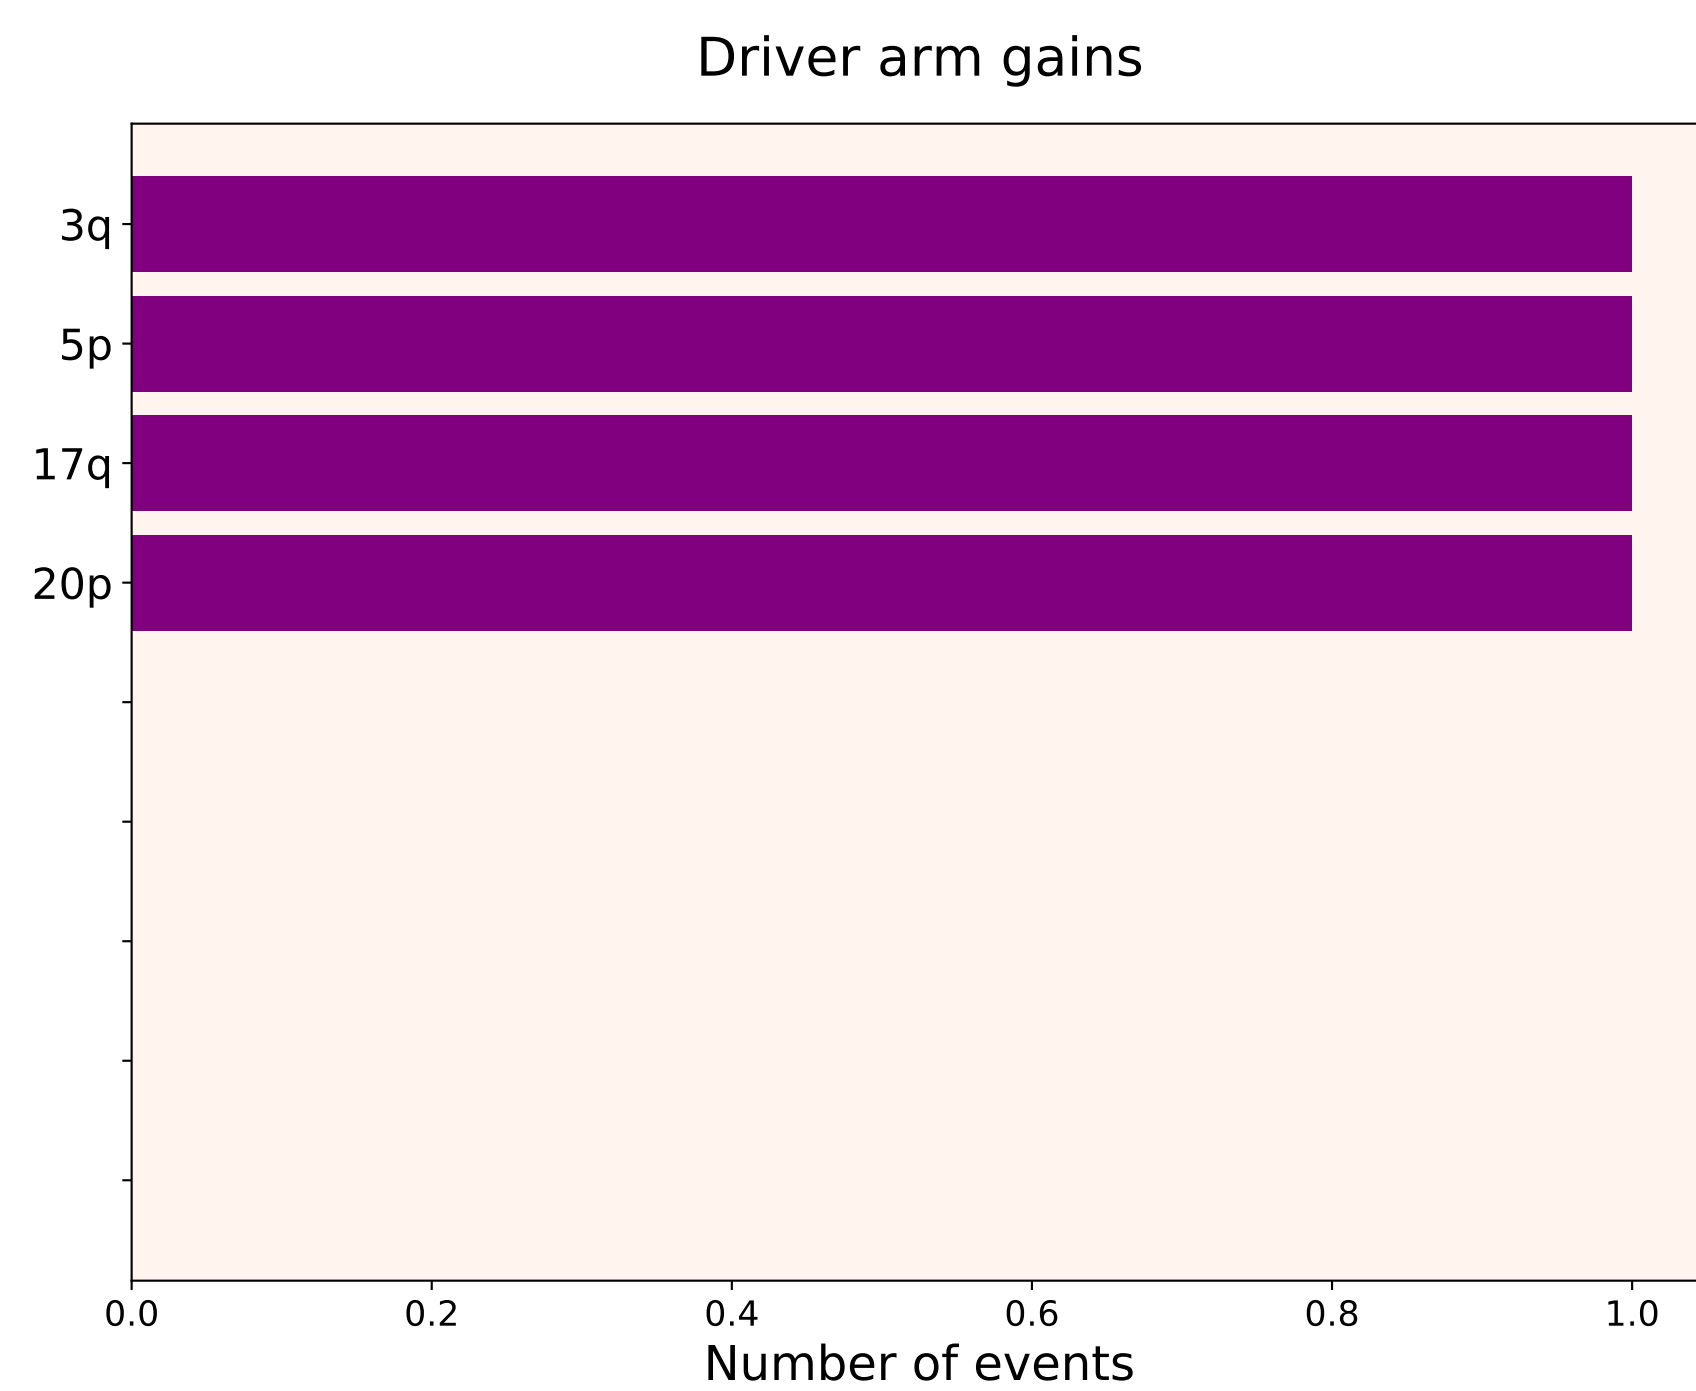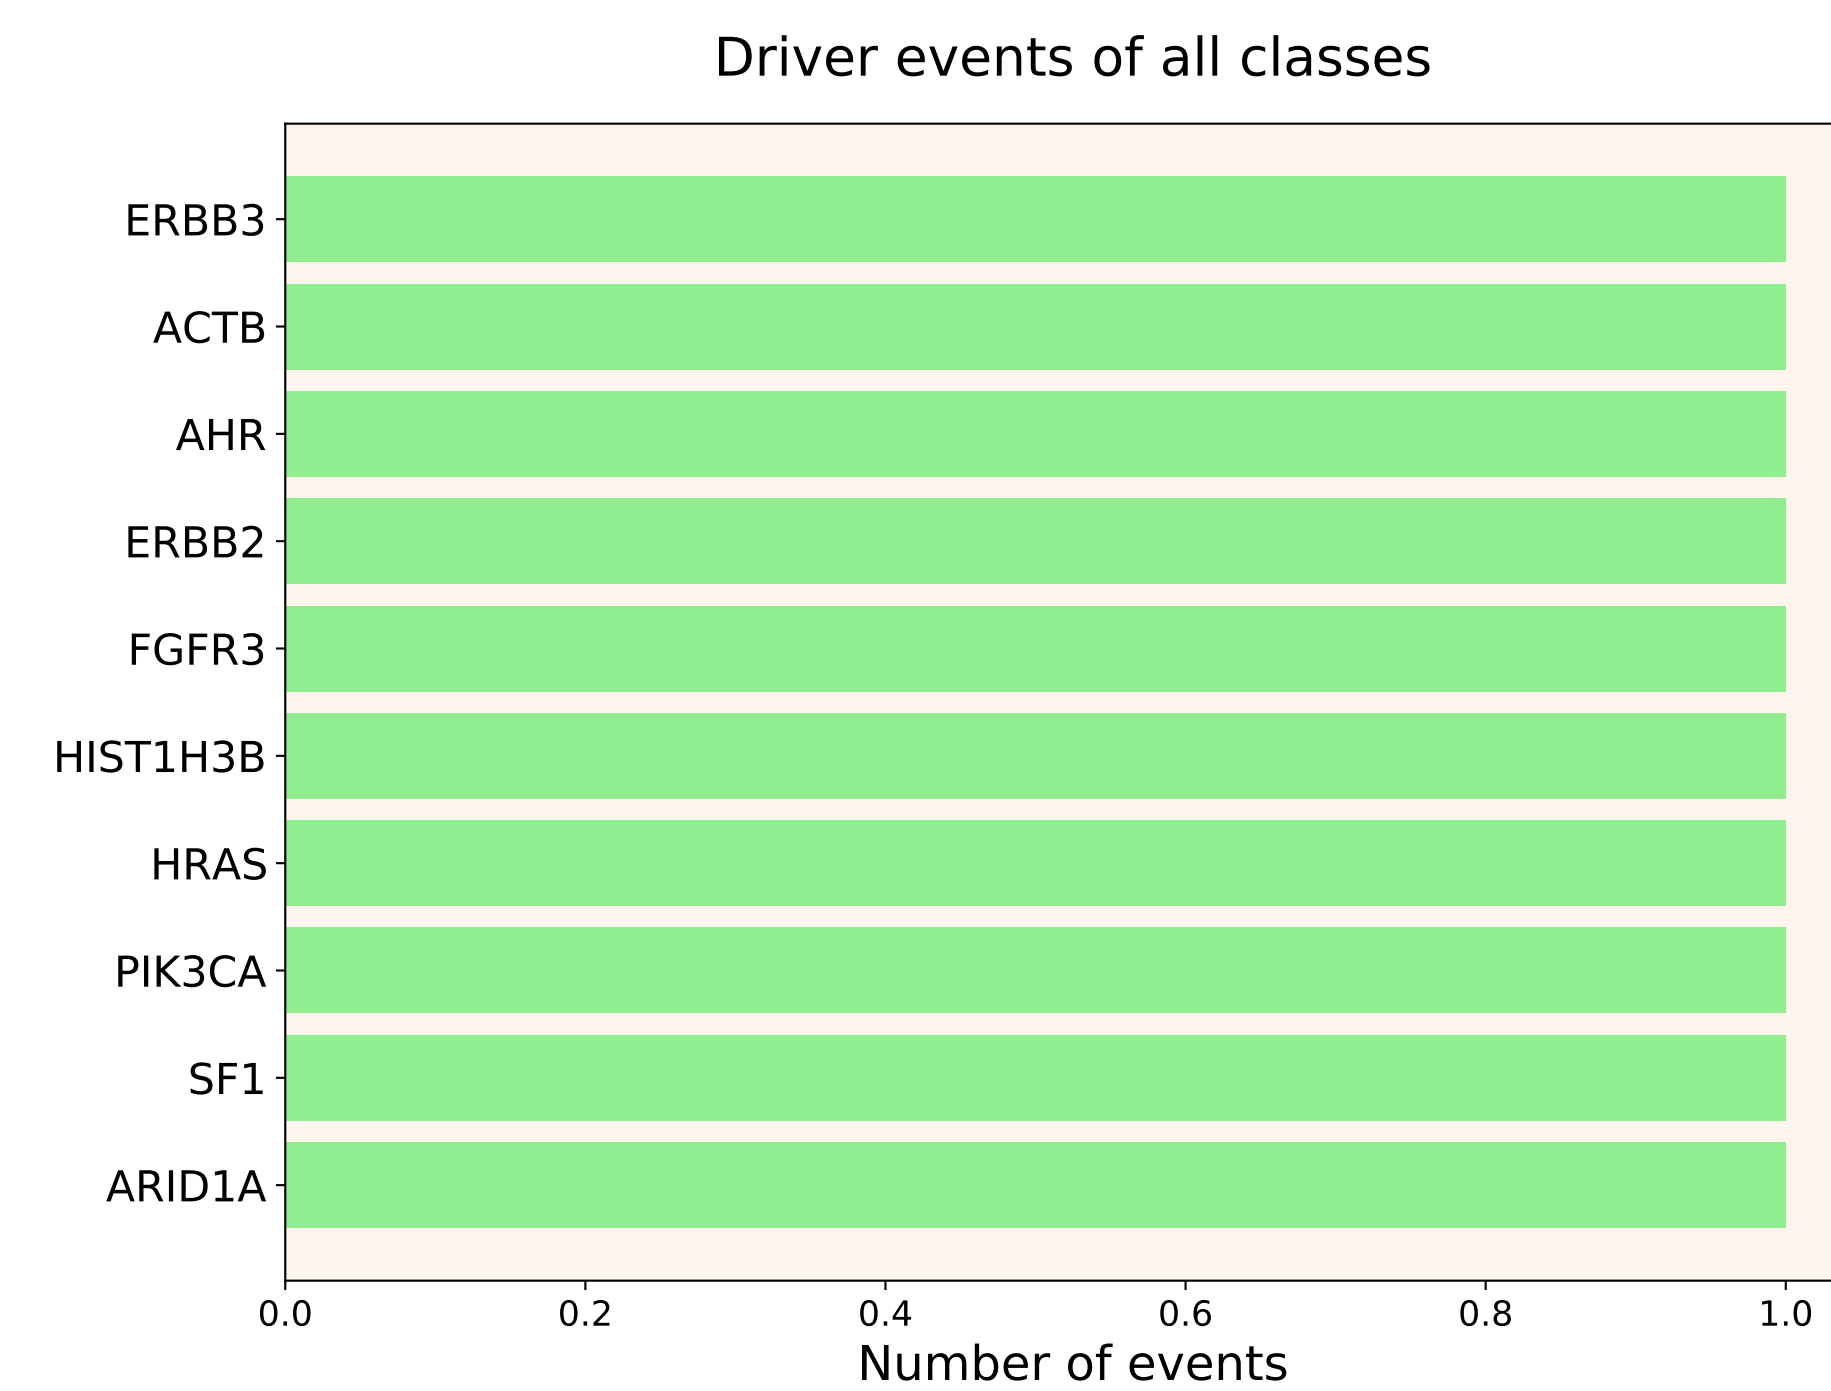

Supplement: Supplemental_Data_S1.zip [file Supplemental_Data_S1.zip]

# ESCA

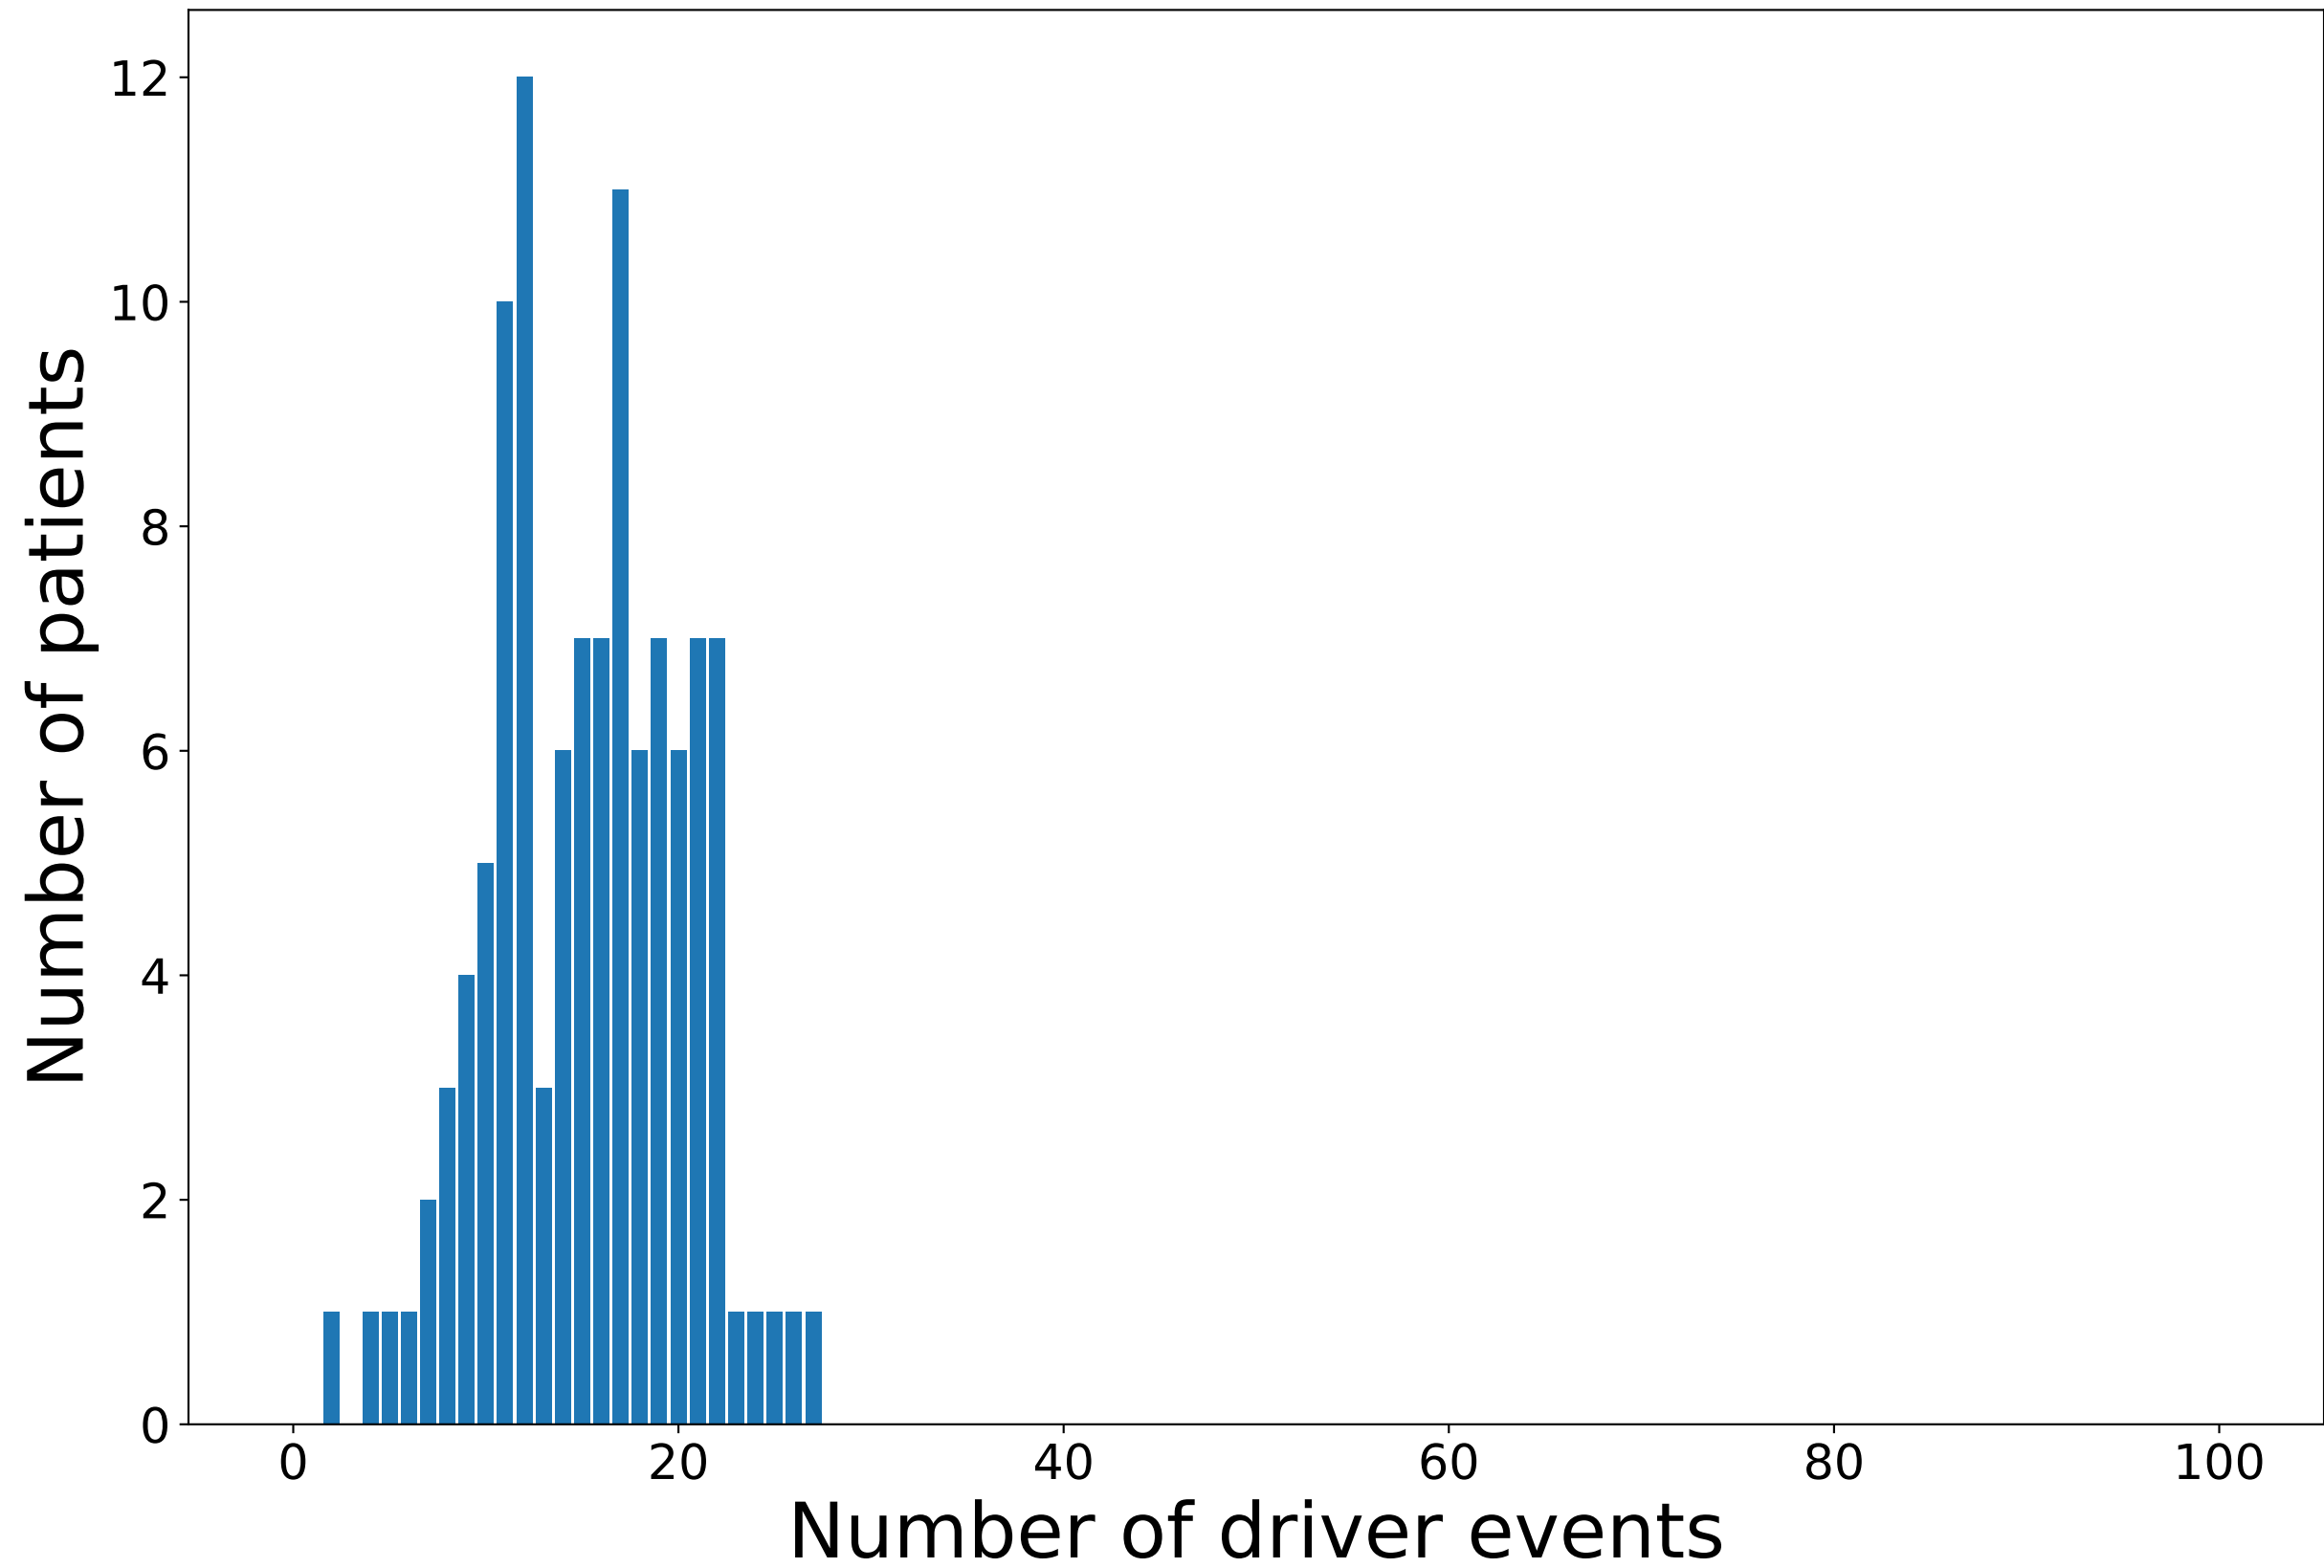

Supplement: Supplemental_Data_S1.zip [file Supplemental_Data_S1.zip]

# HNSC\_FEMALE

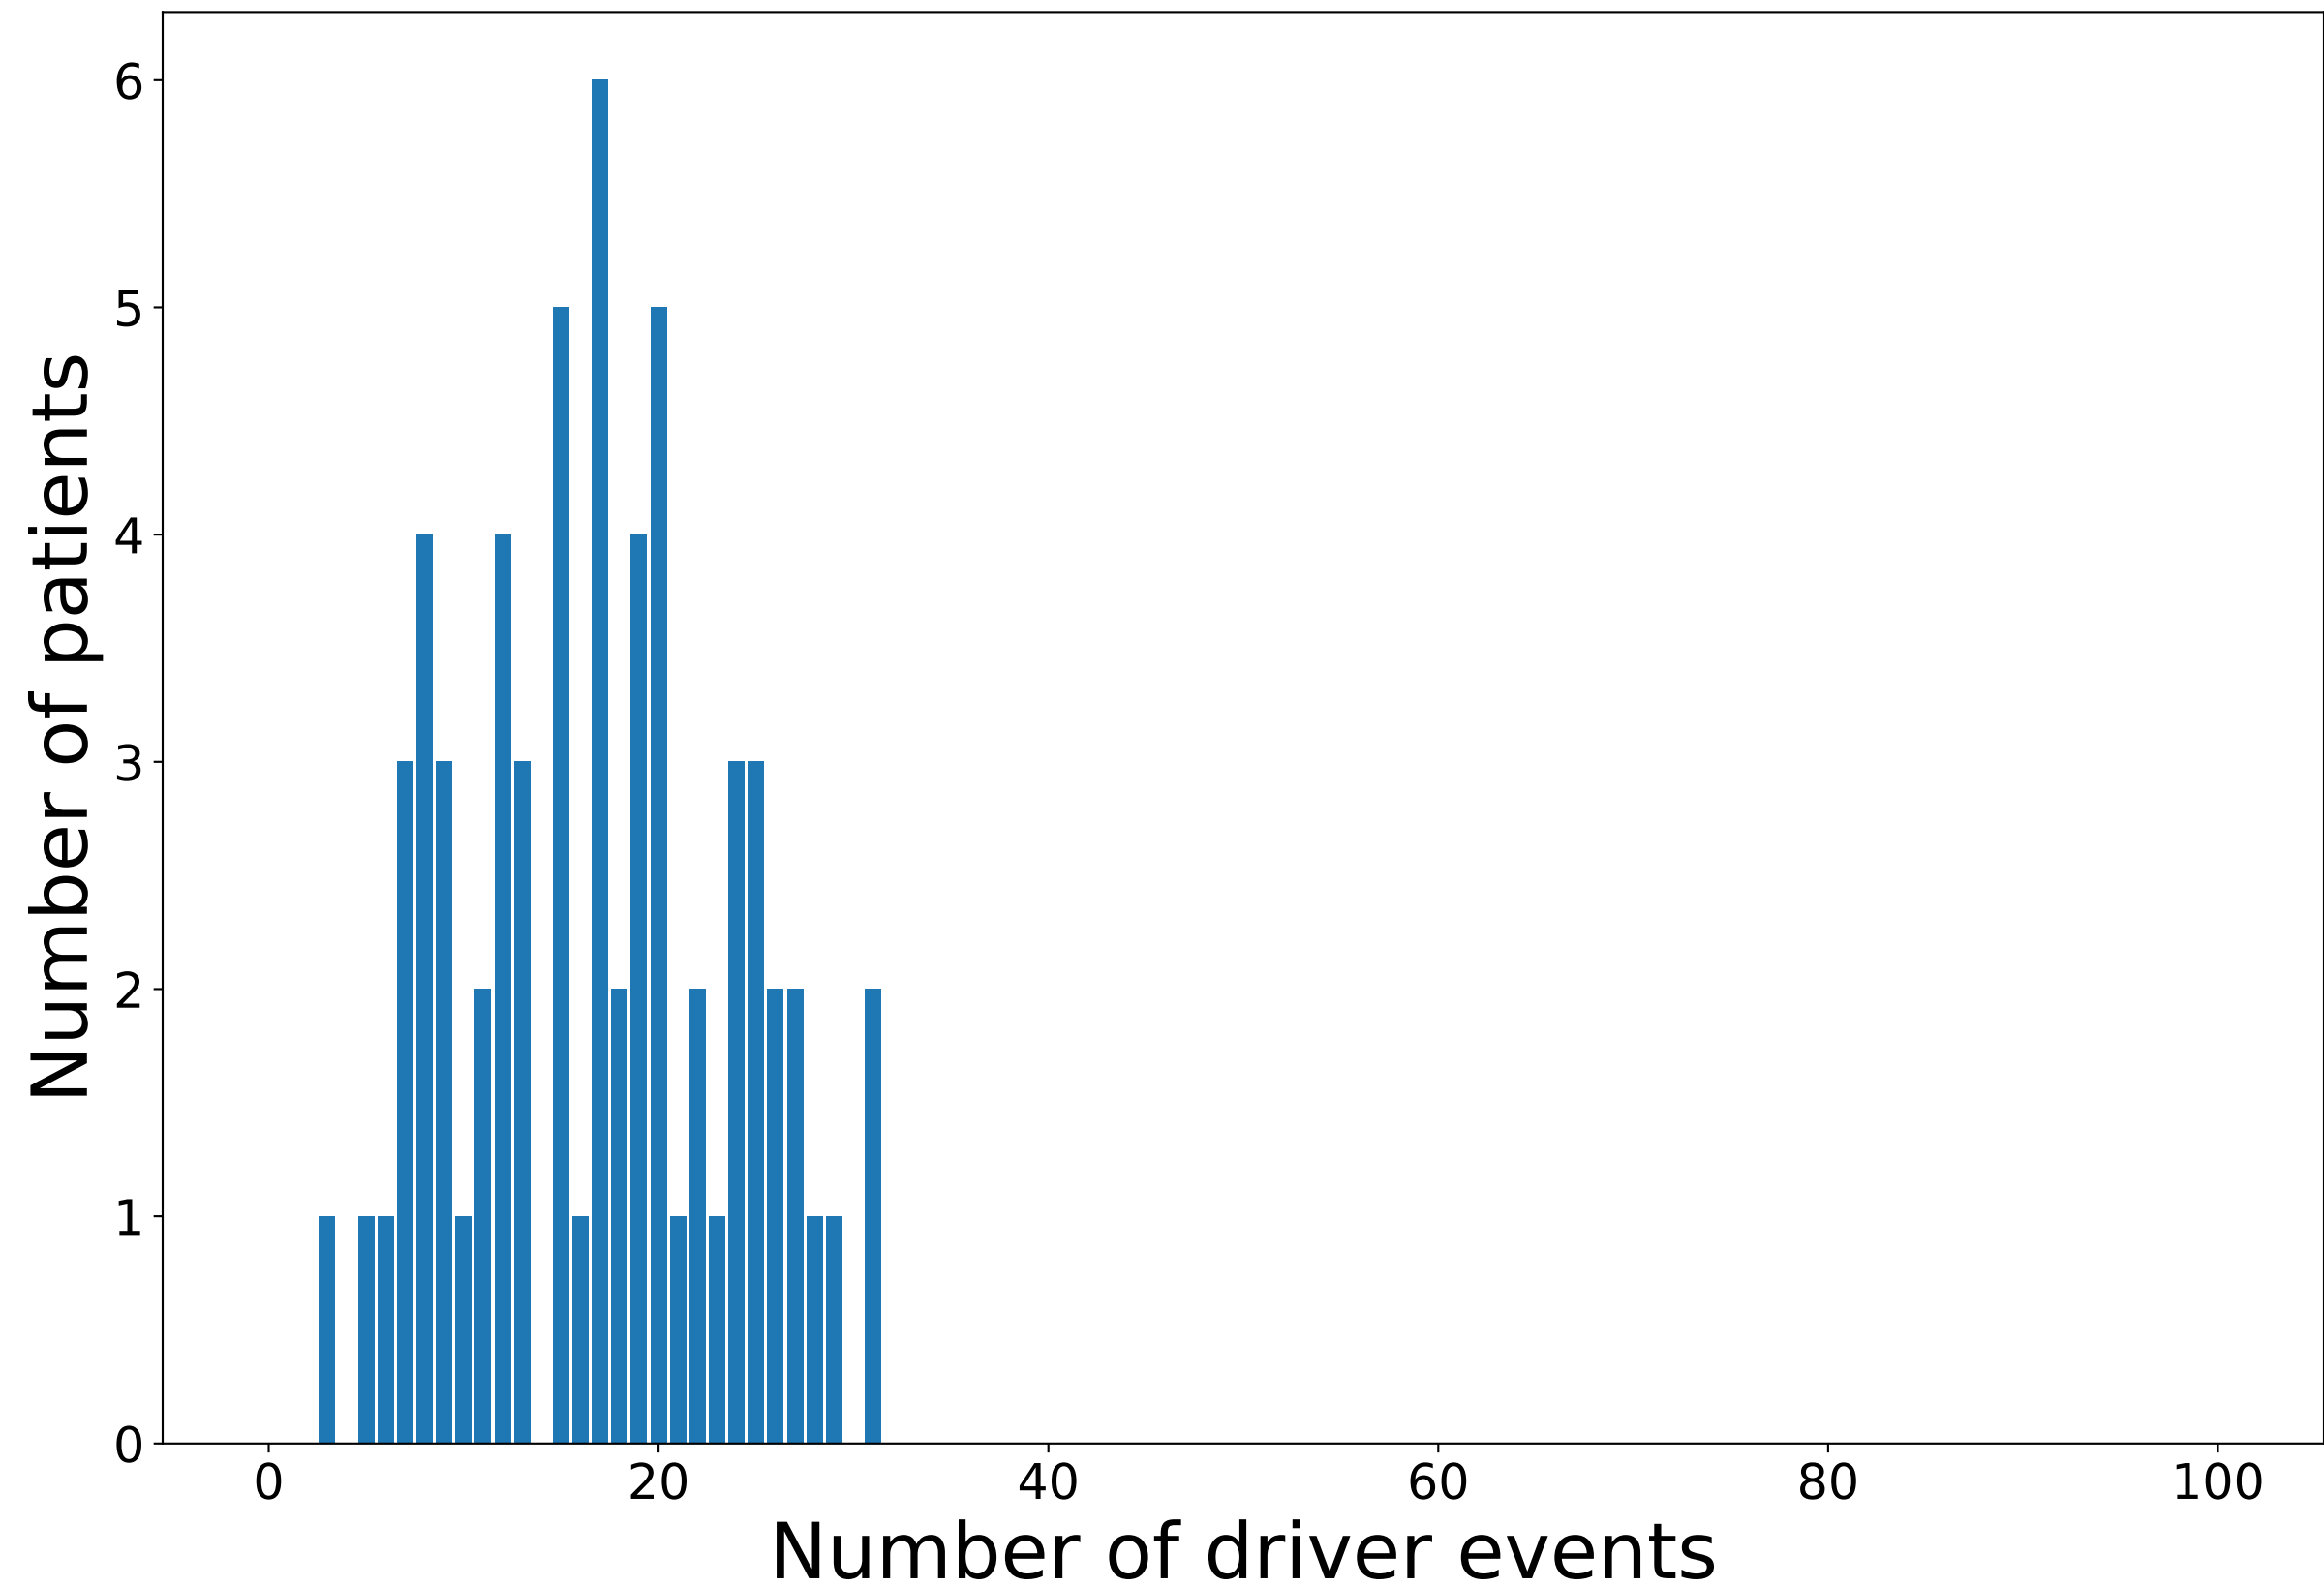

Supplement: Supplemental_Data_S1.zip [file Supplemental_Data_S1.zip]

# UCS

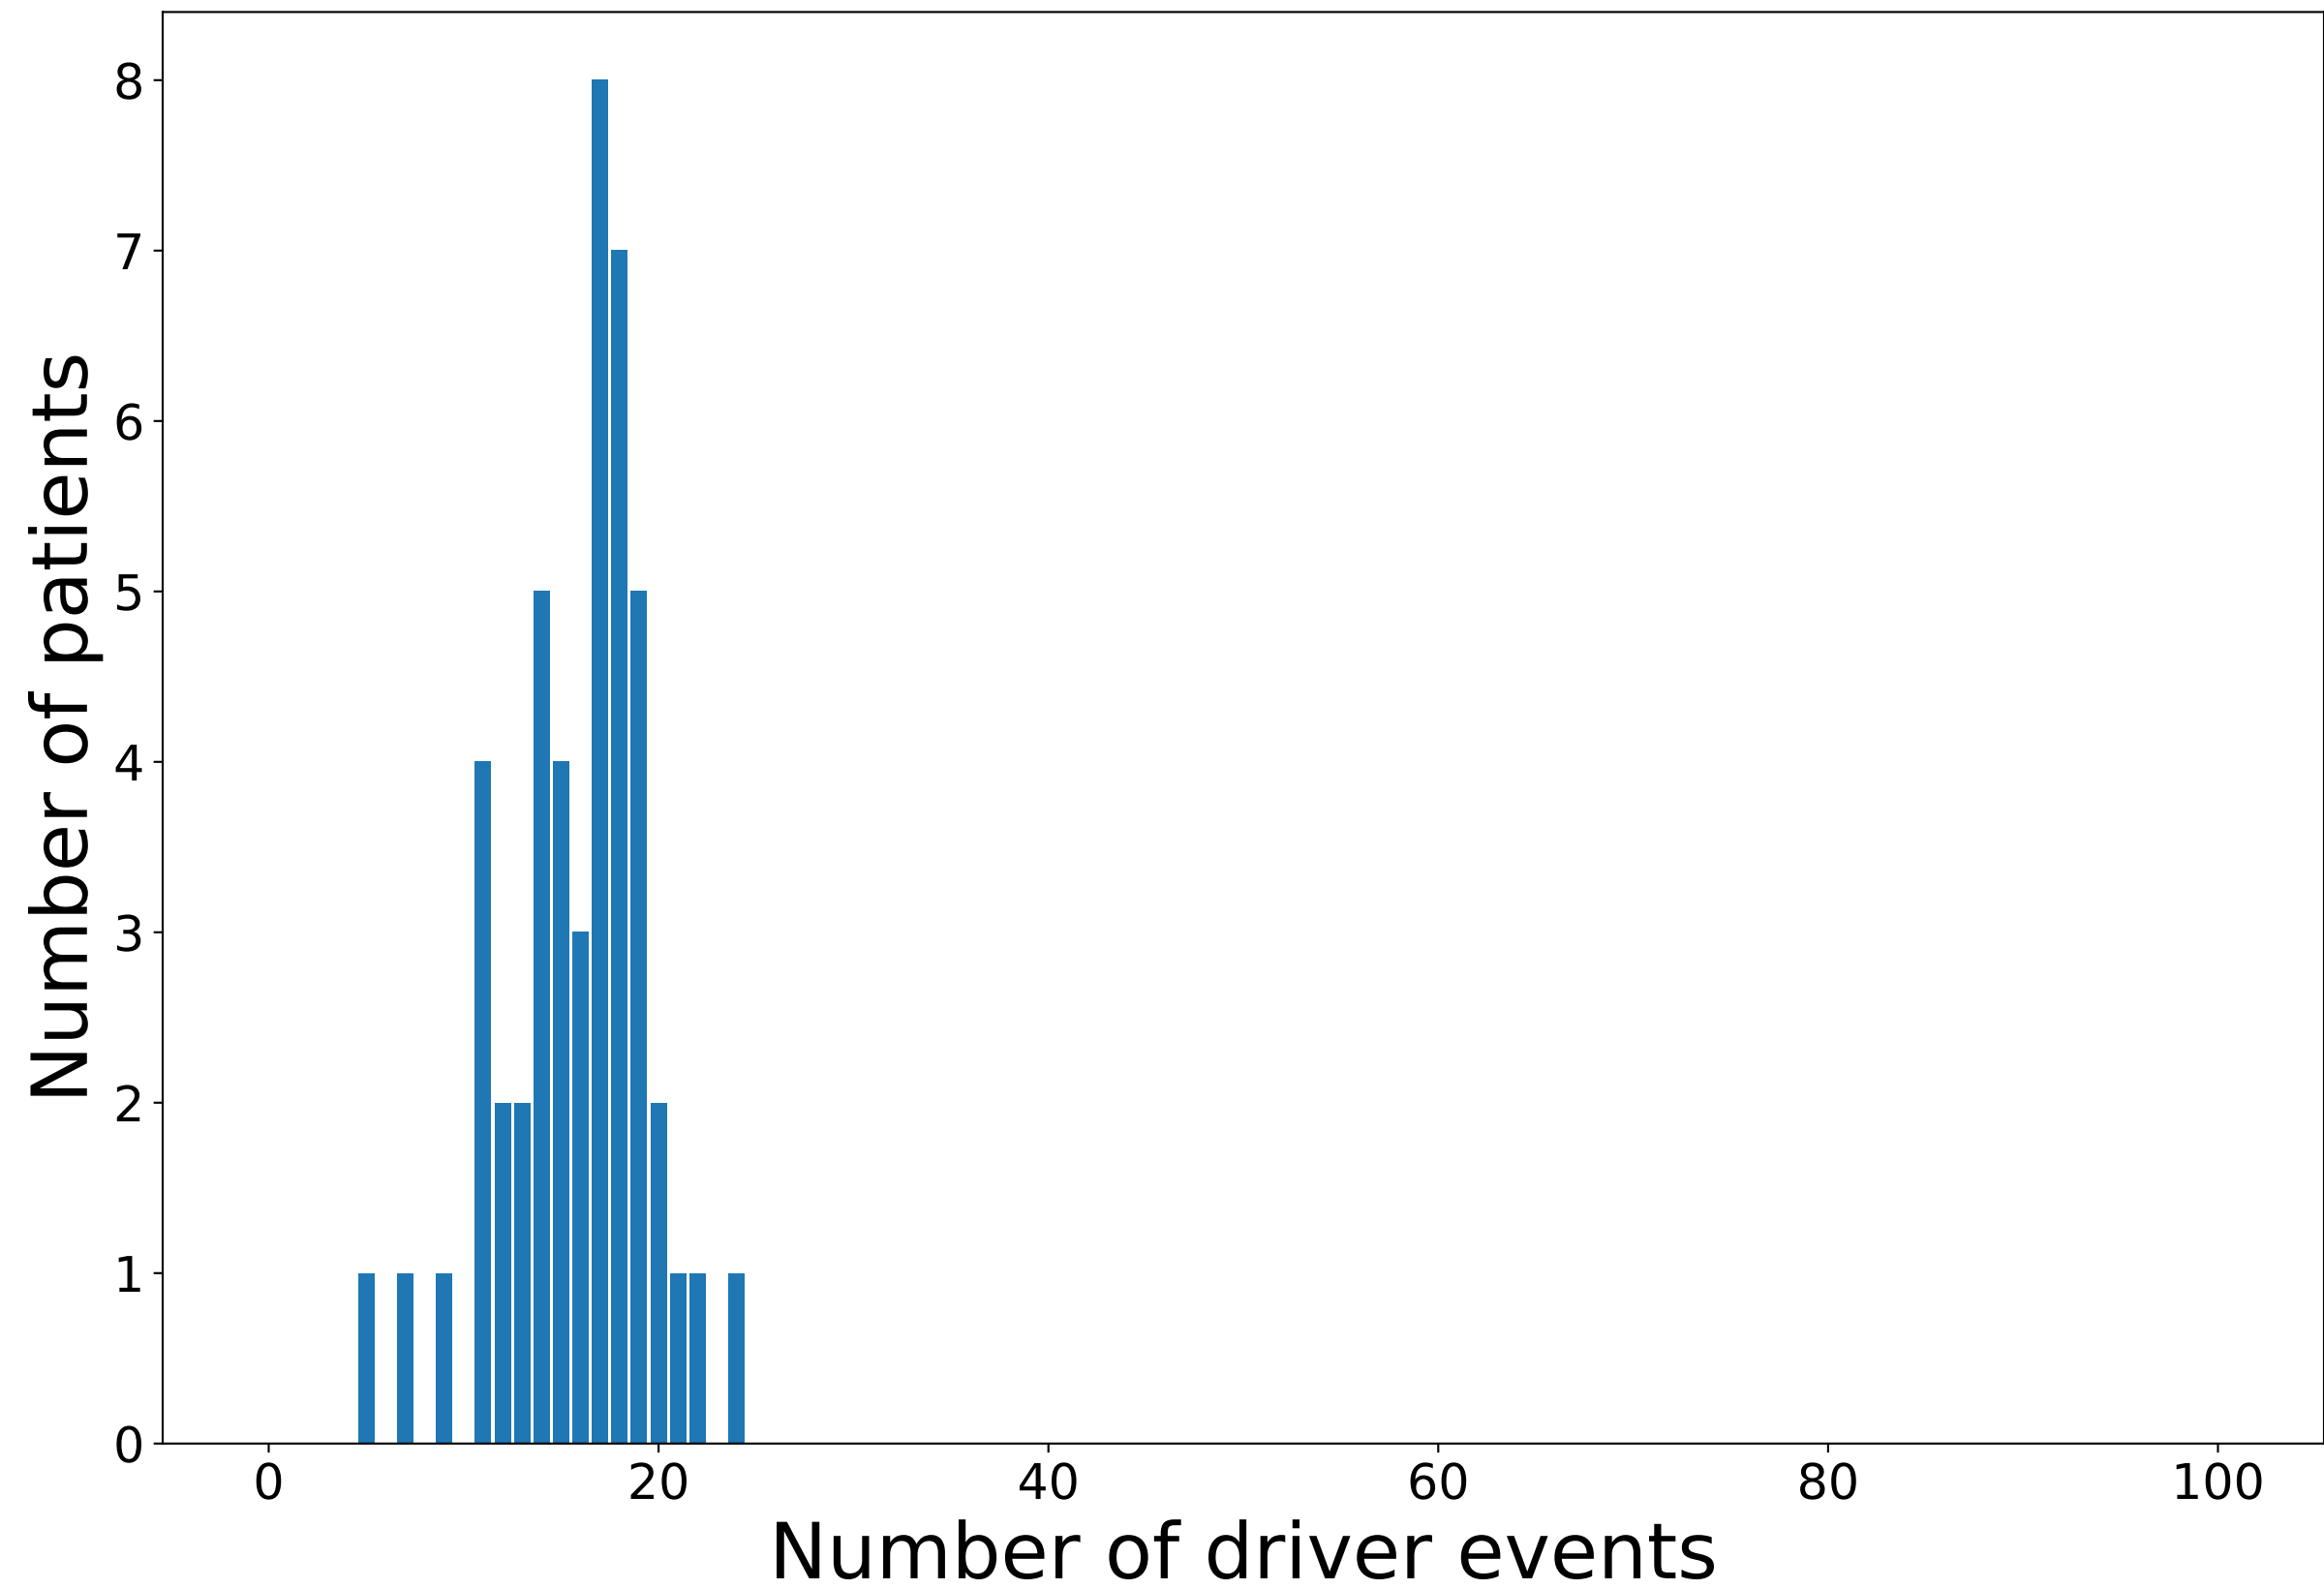

Supplement: Supplemental_Data_S1.zip [file Supplemental_Data_S1.zip]

PRAD

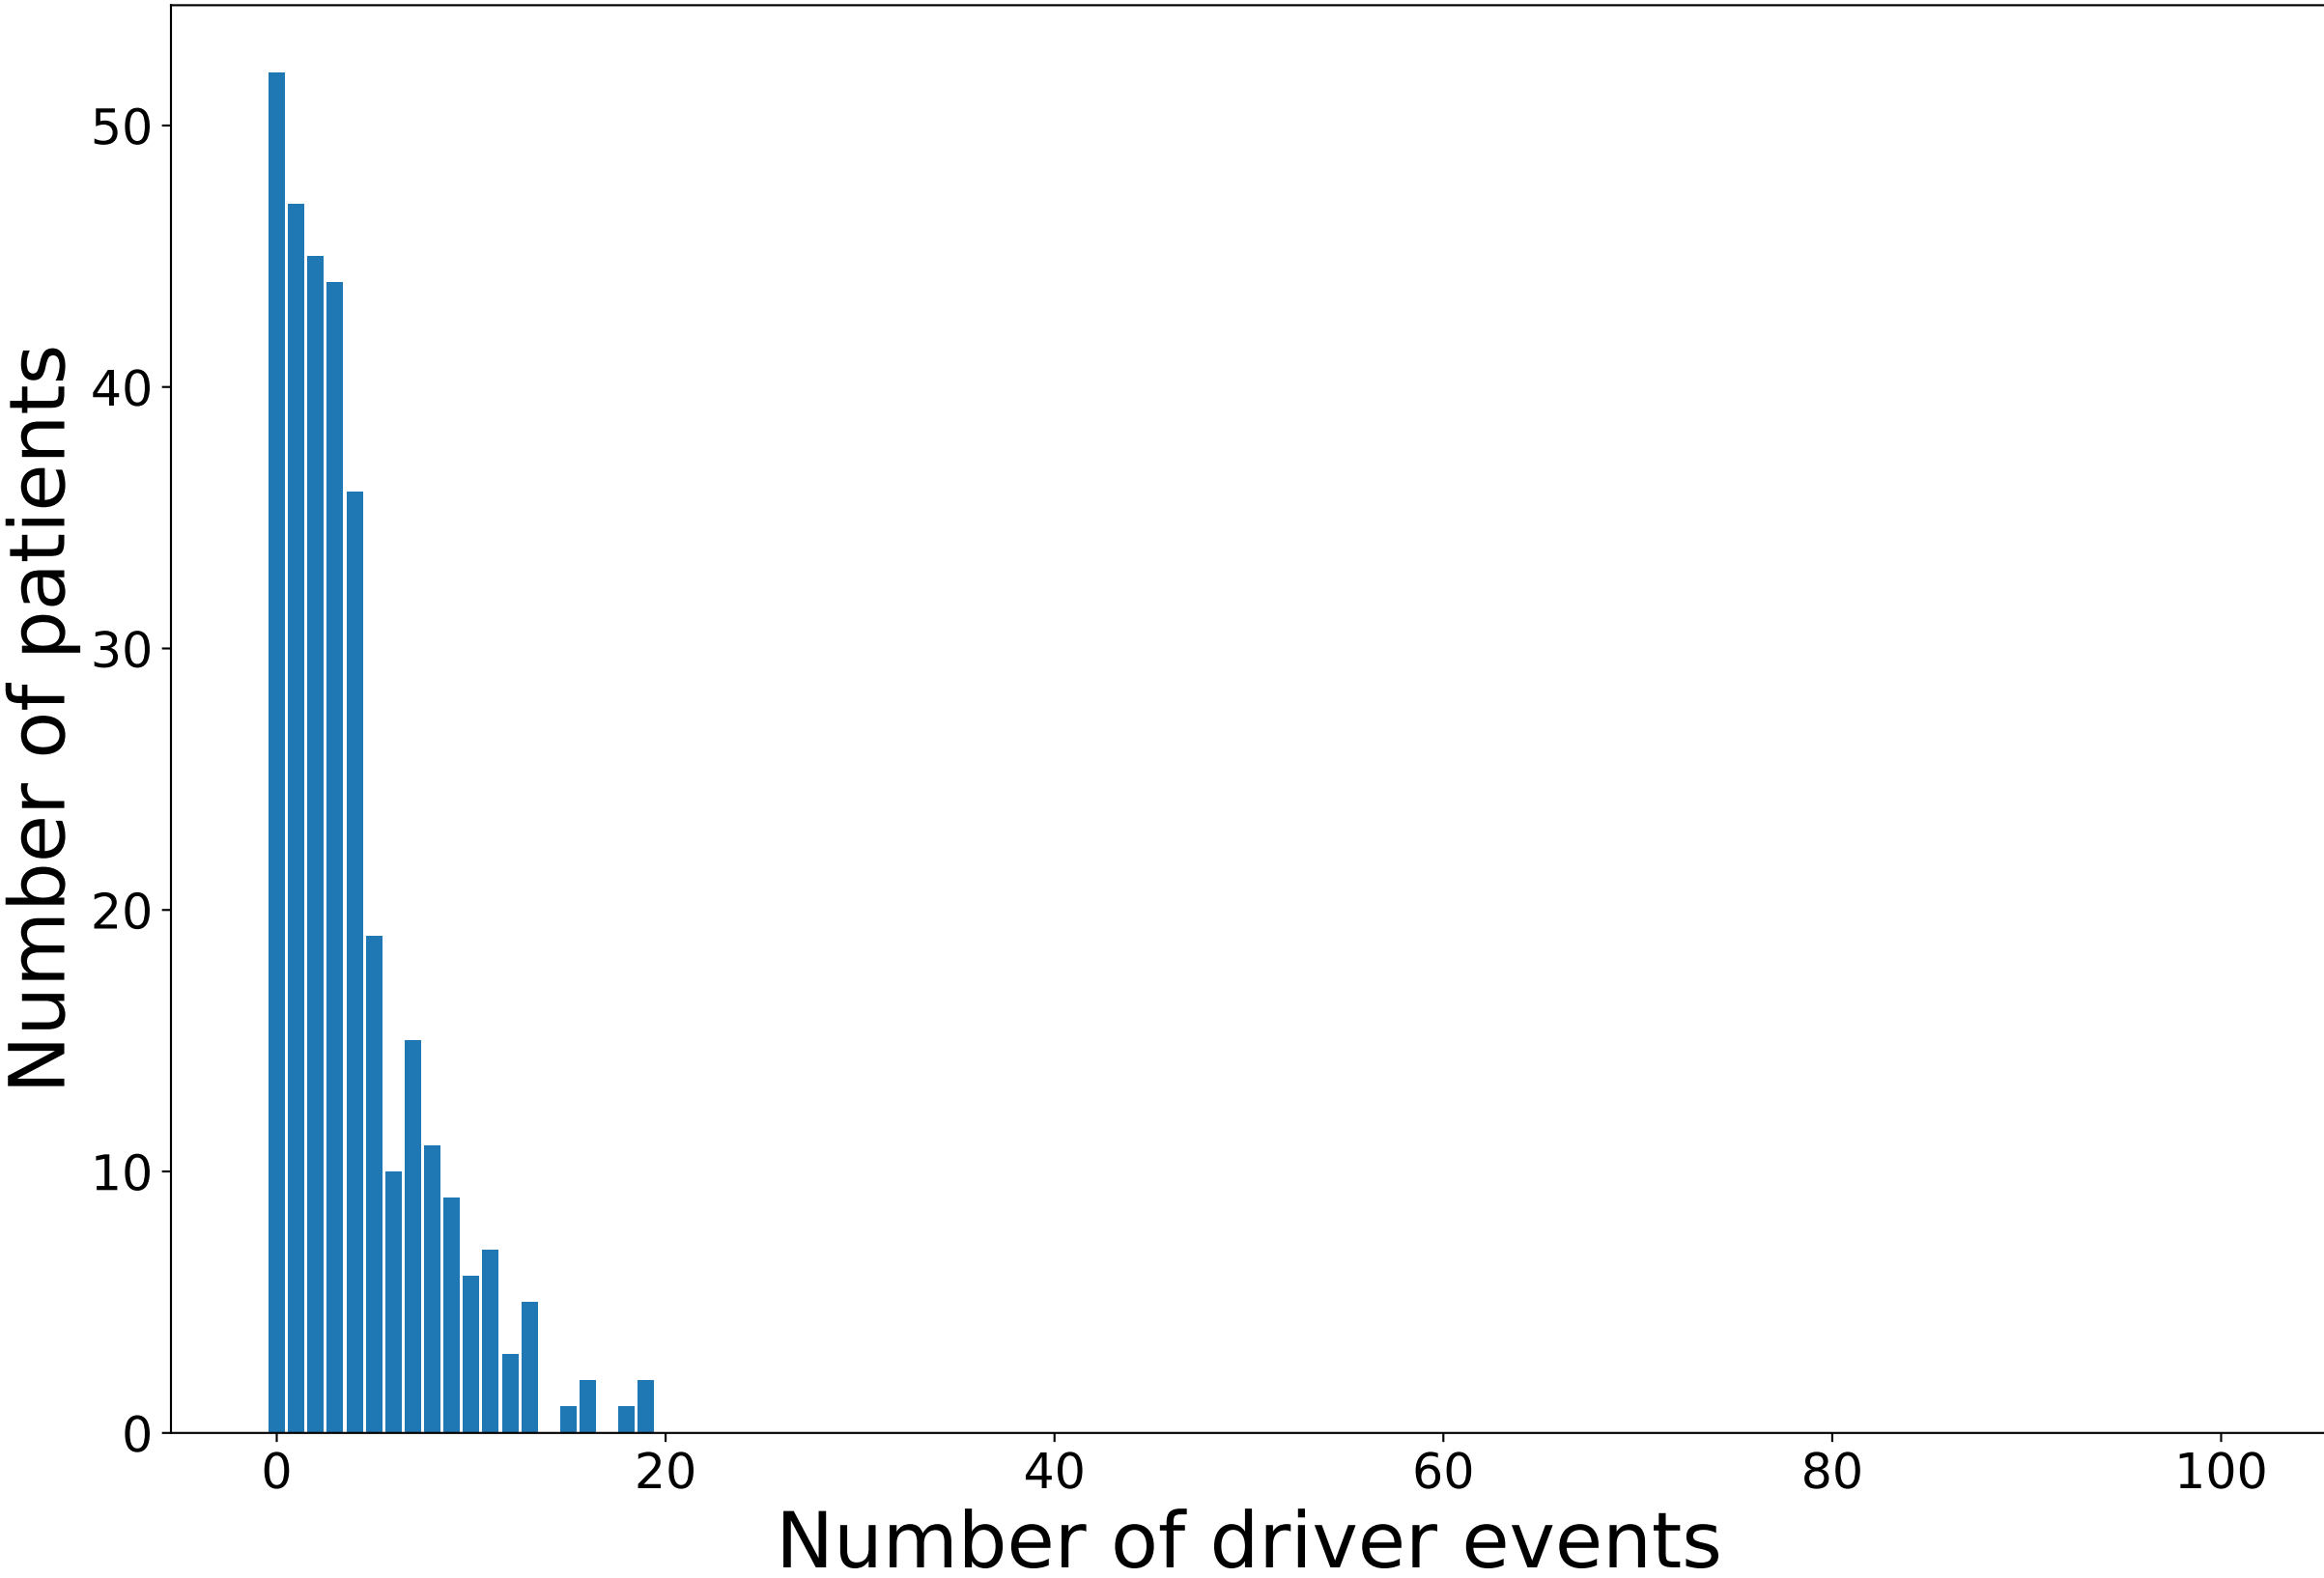

Supplement: Supplemental_Data_S1.zip [file Supplemental_Data_S1.zip]

# LUAD\_FEMALE

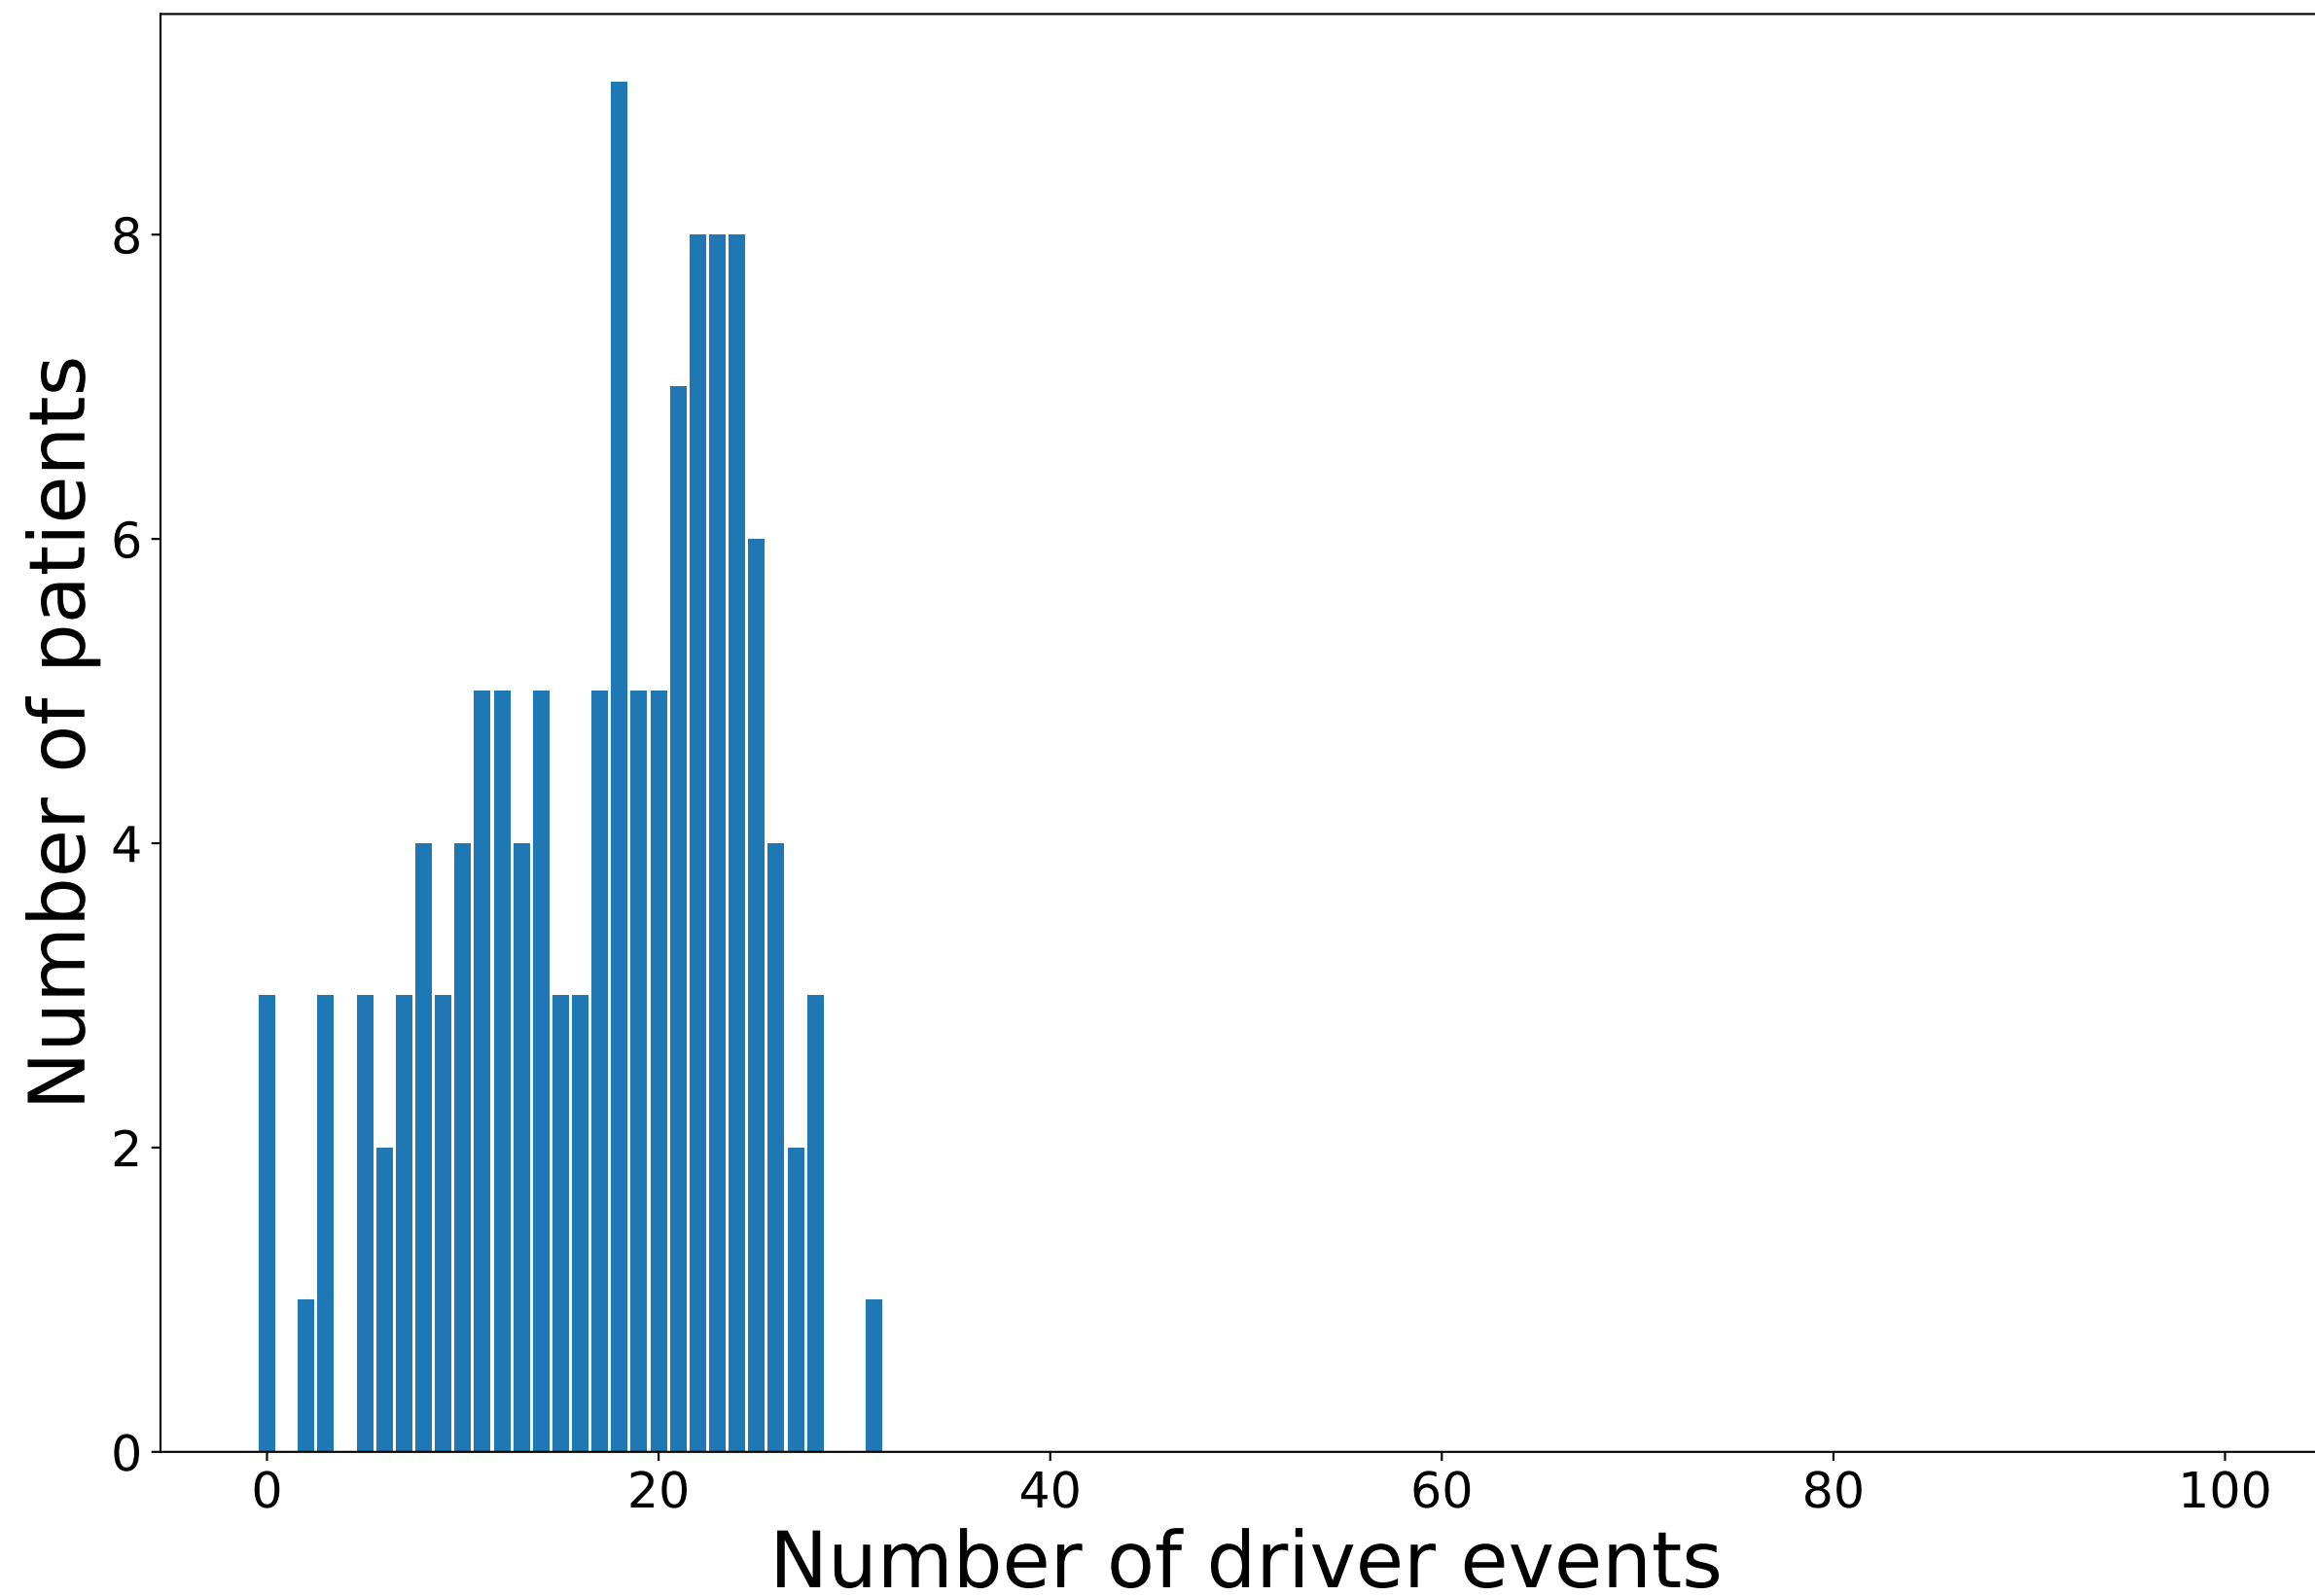

Supplement: Supplemental_Data_S1.zip [file Supplemental_Data_S1.zip]

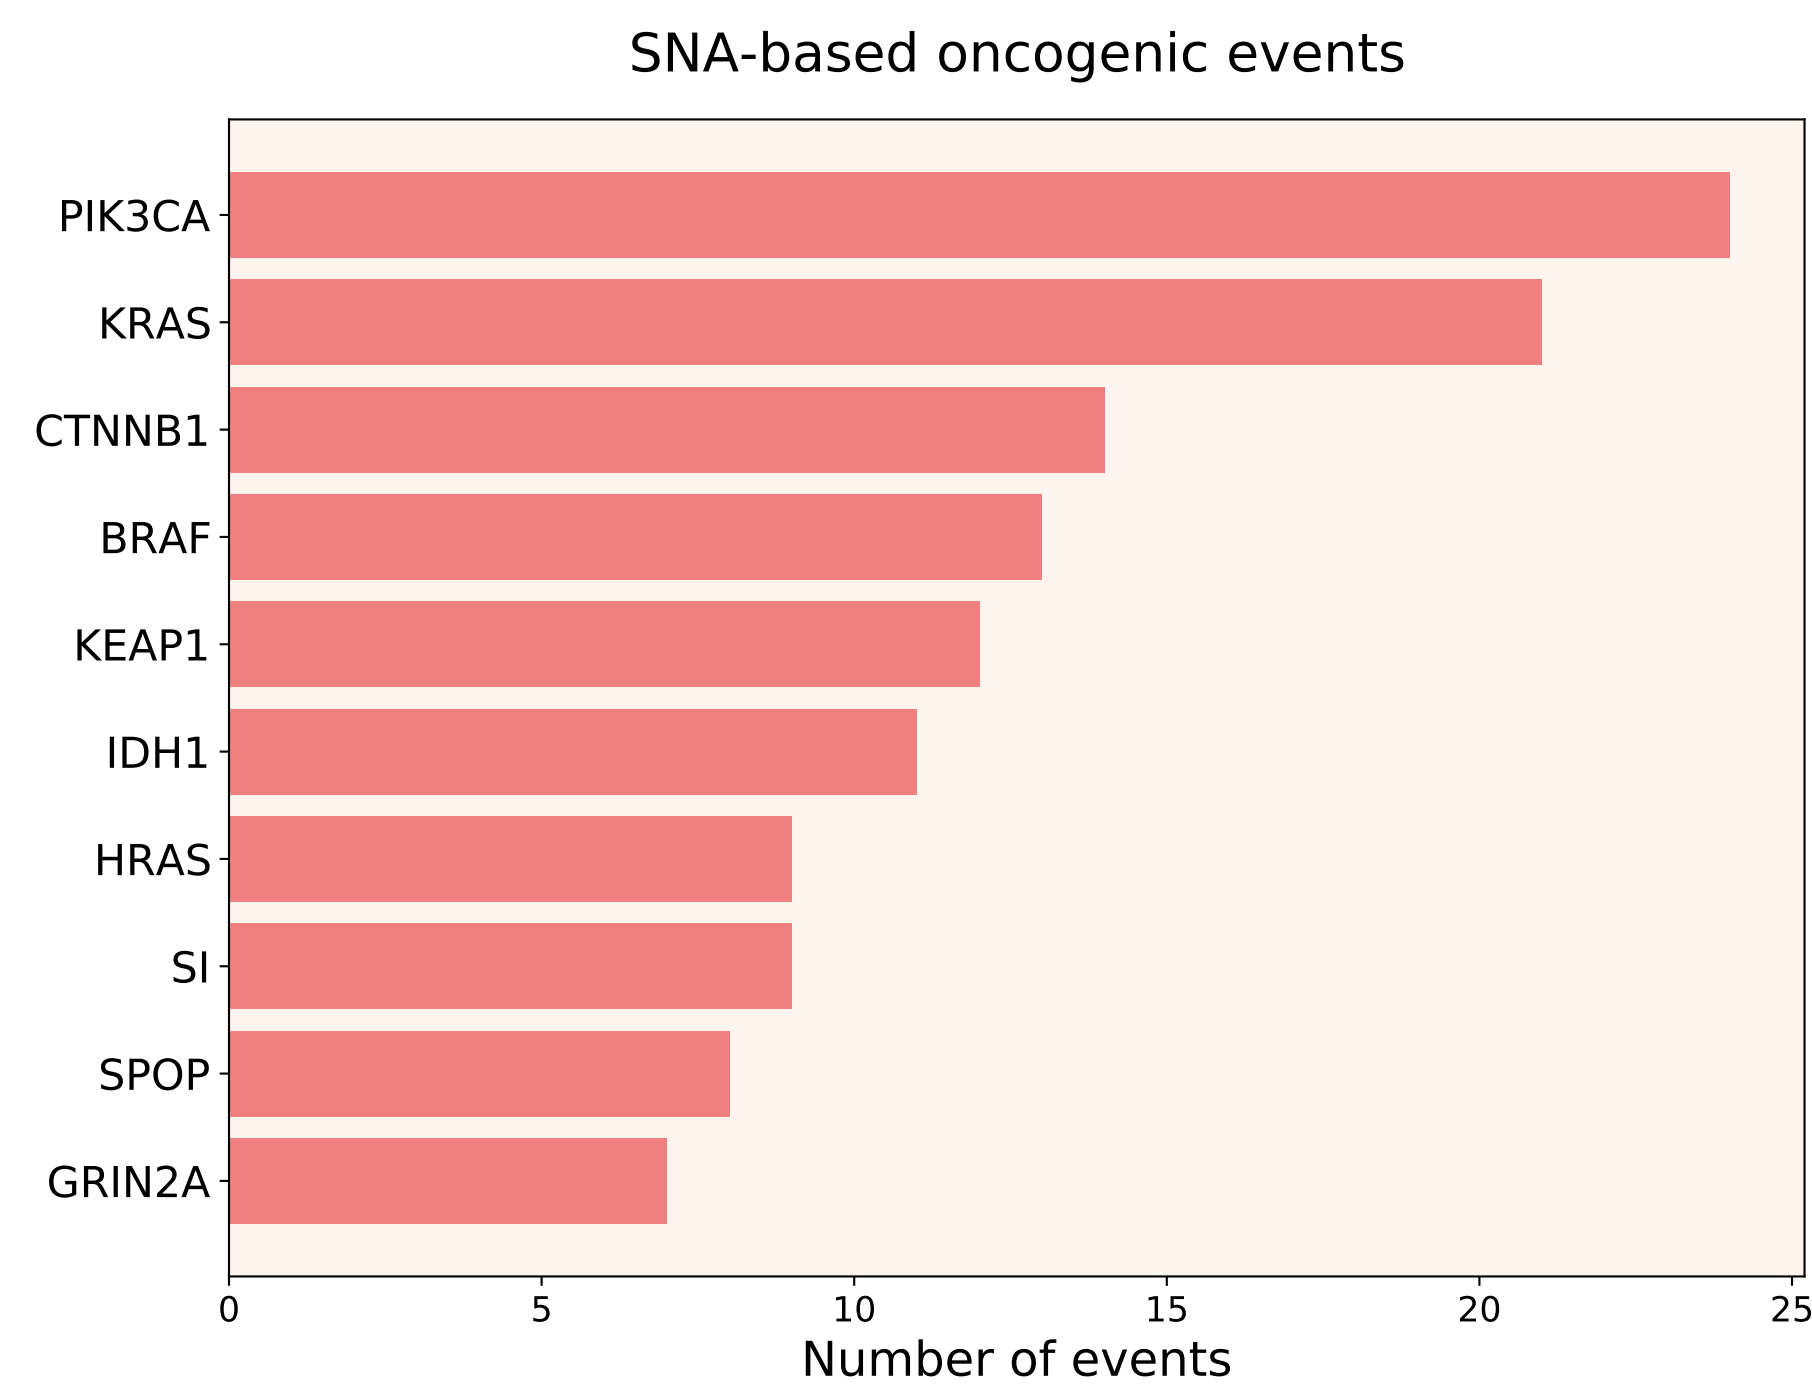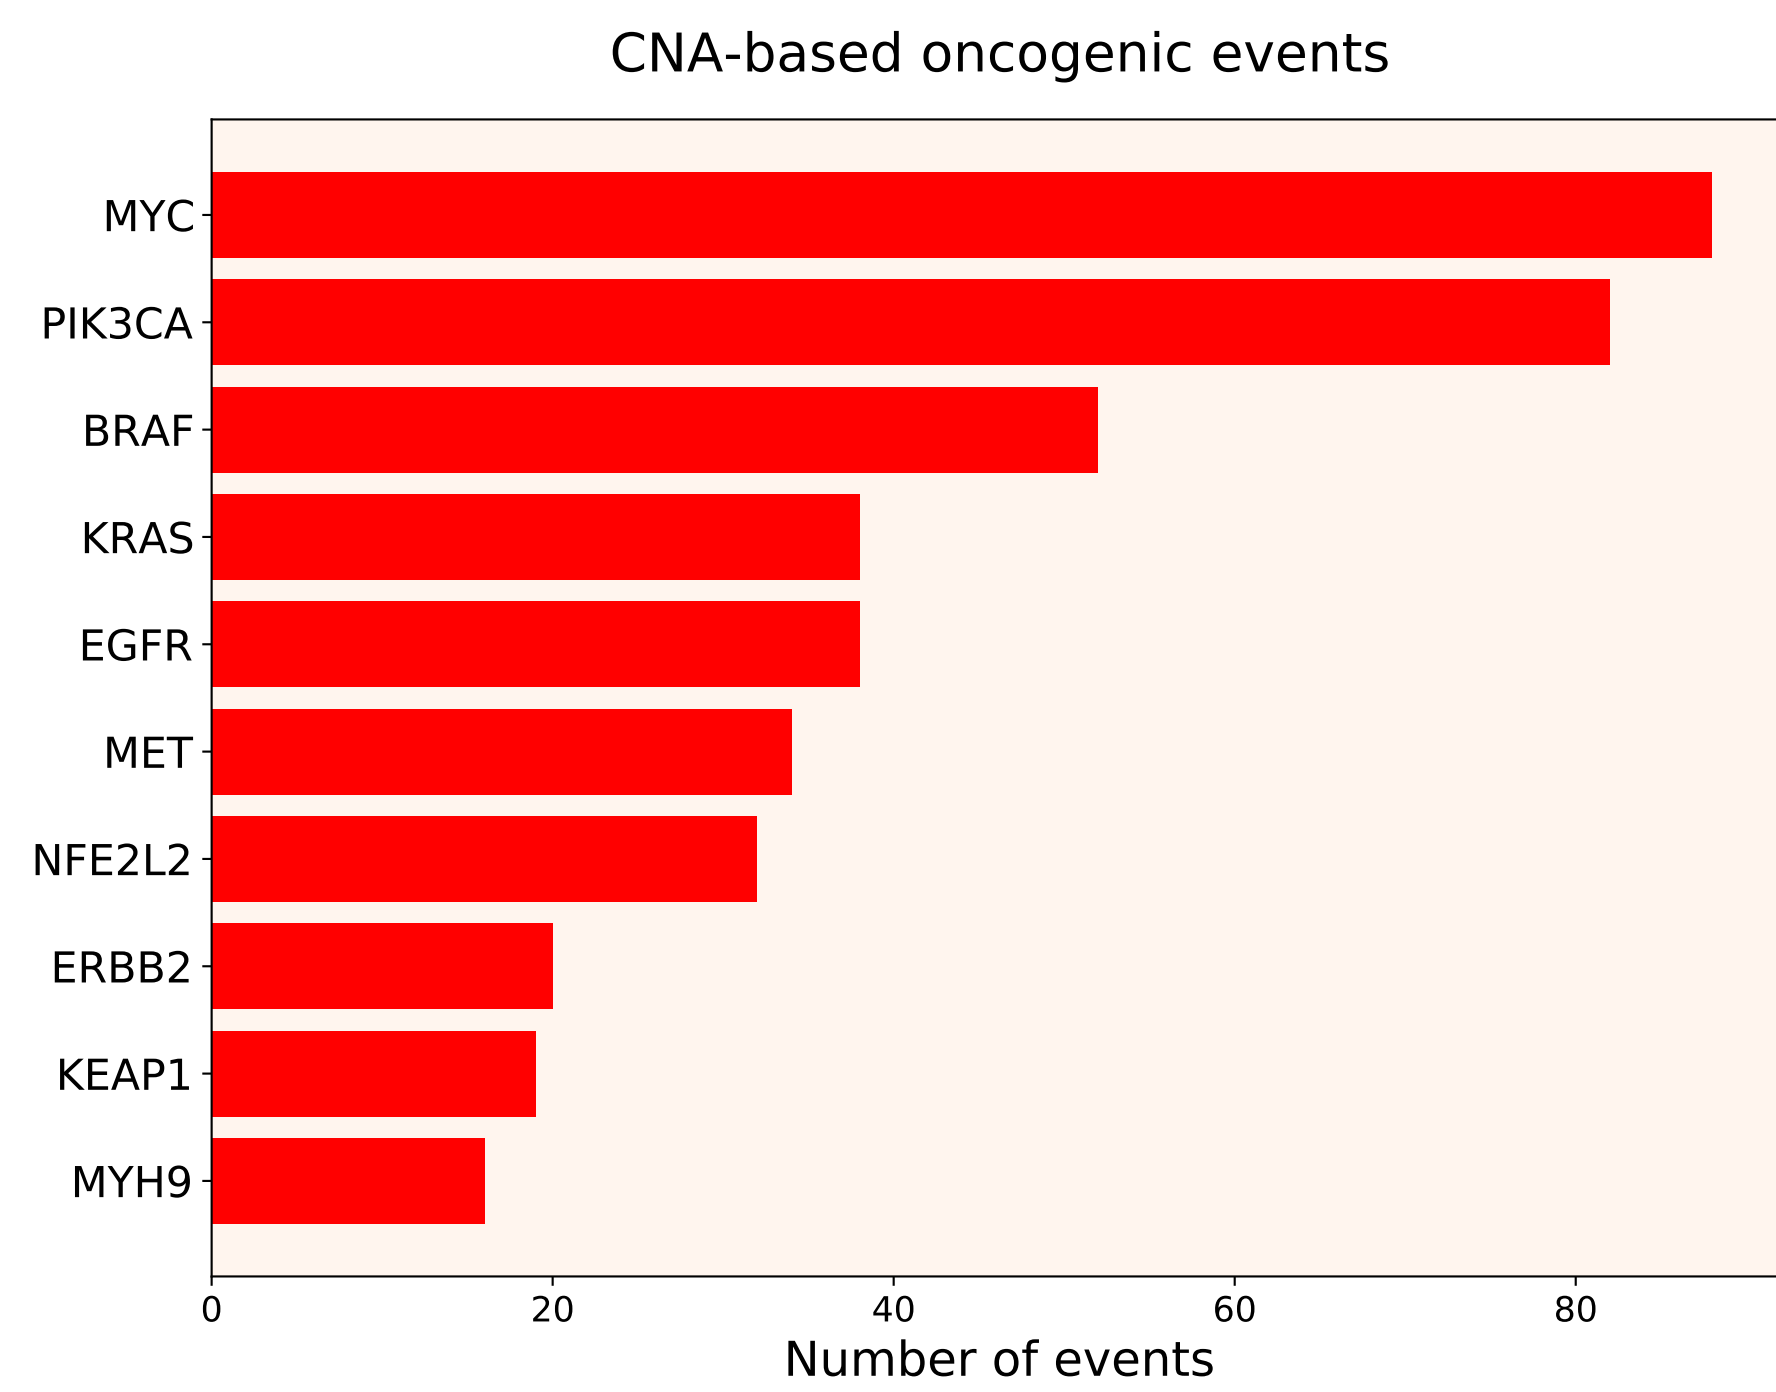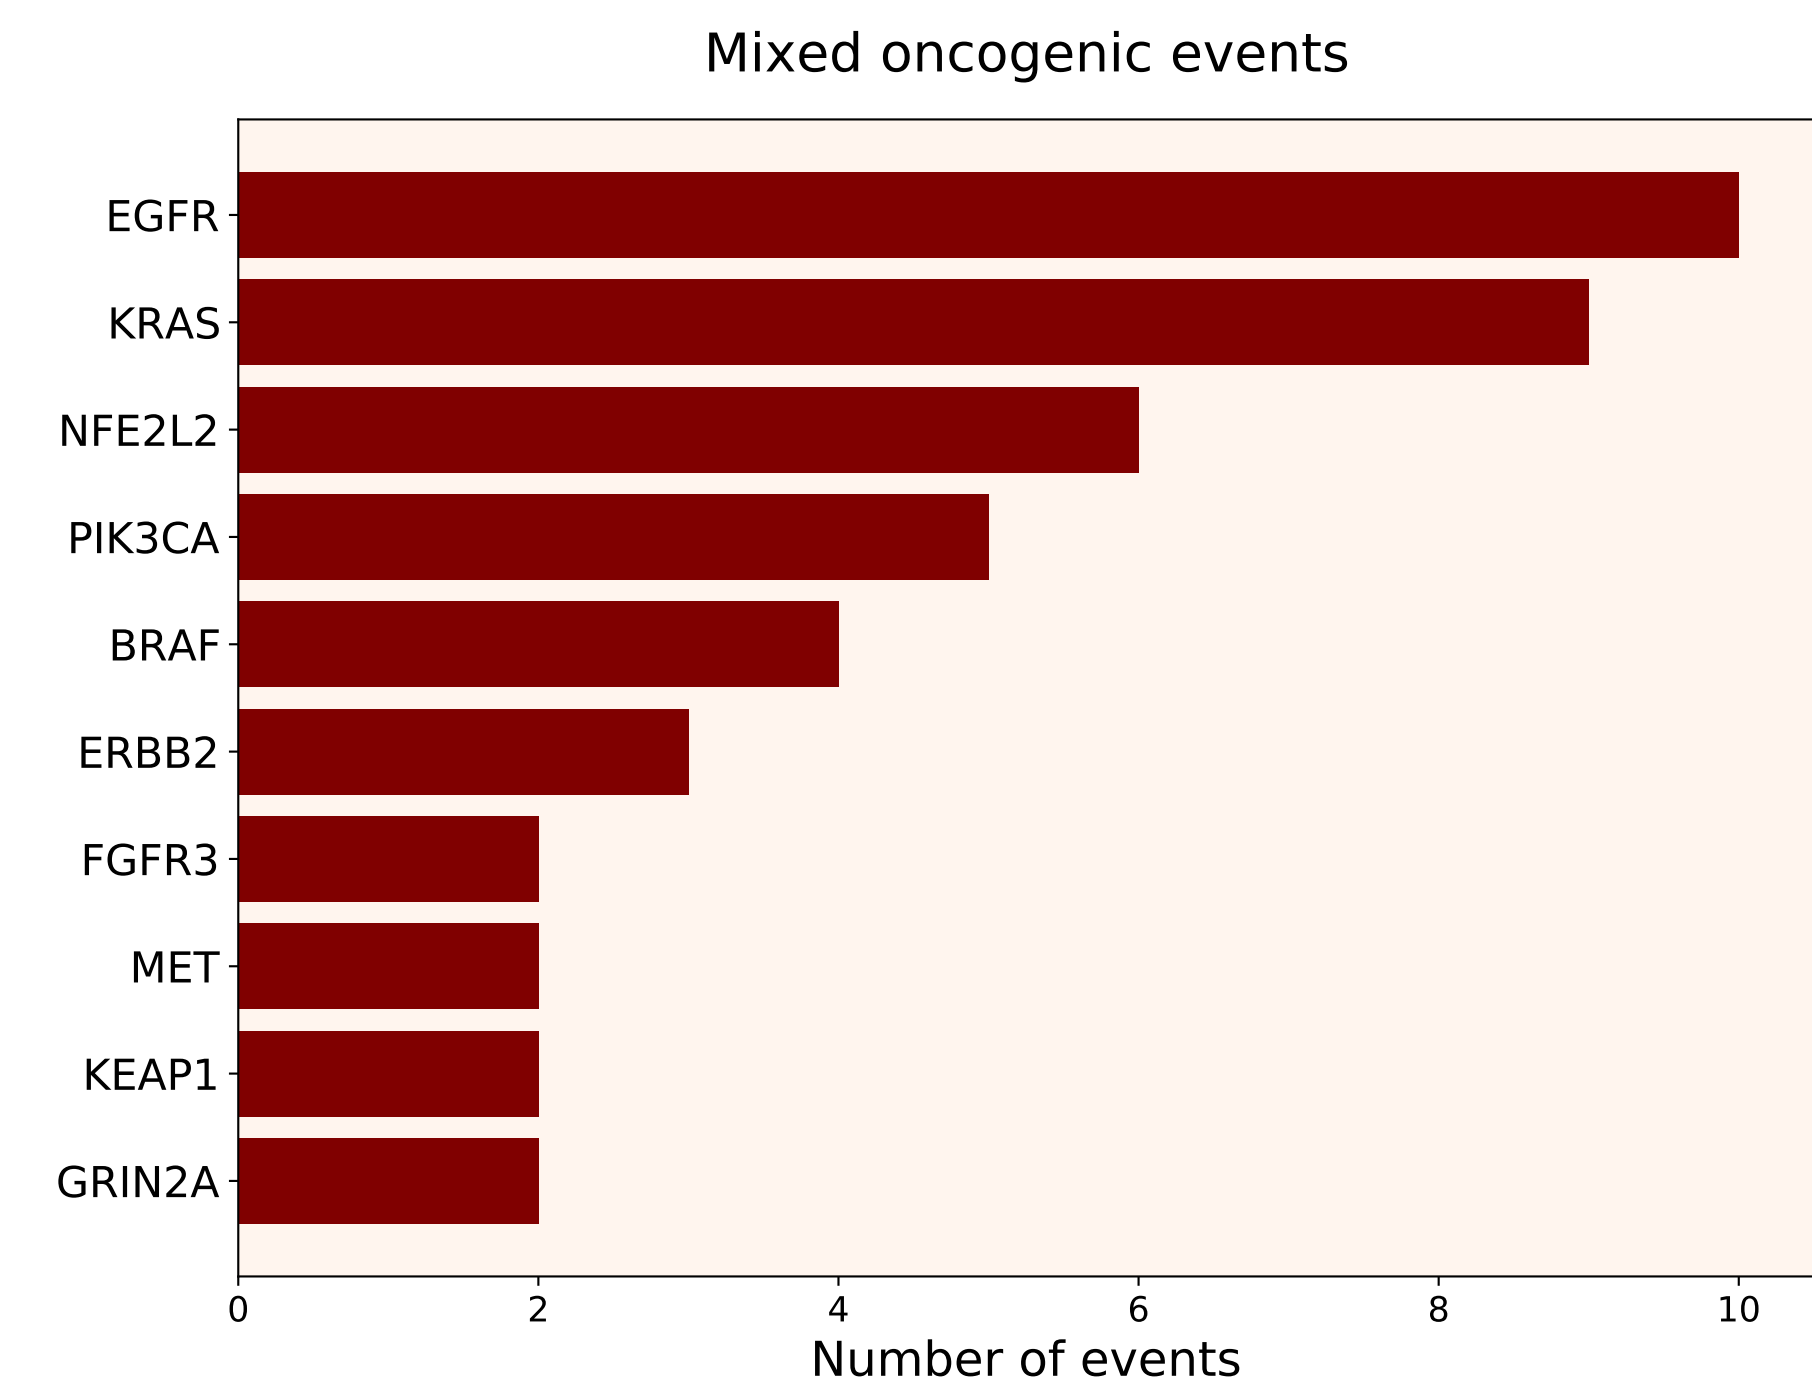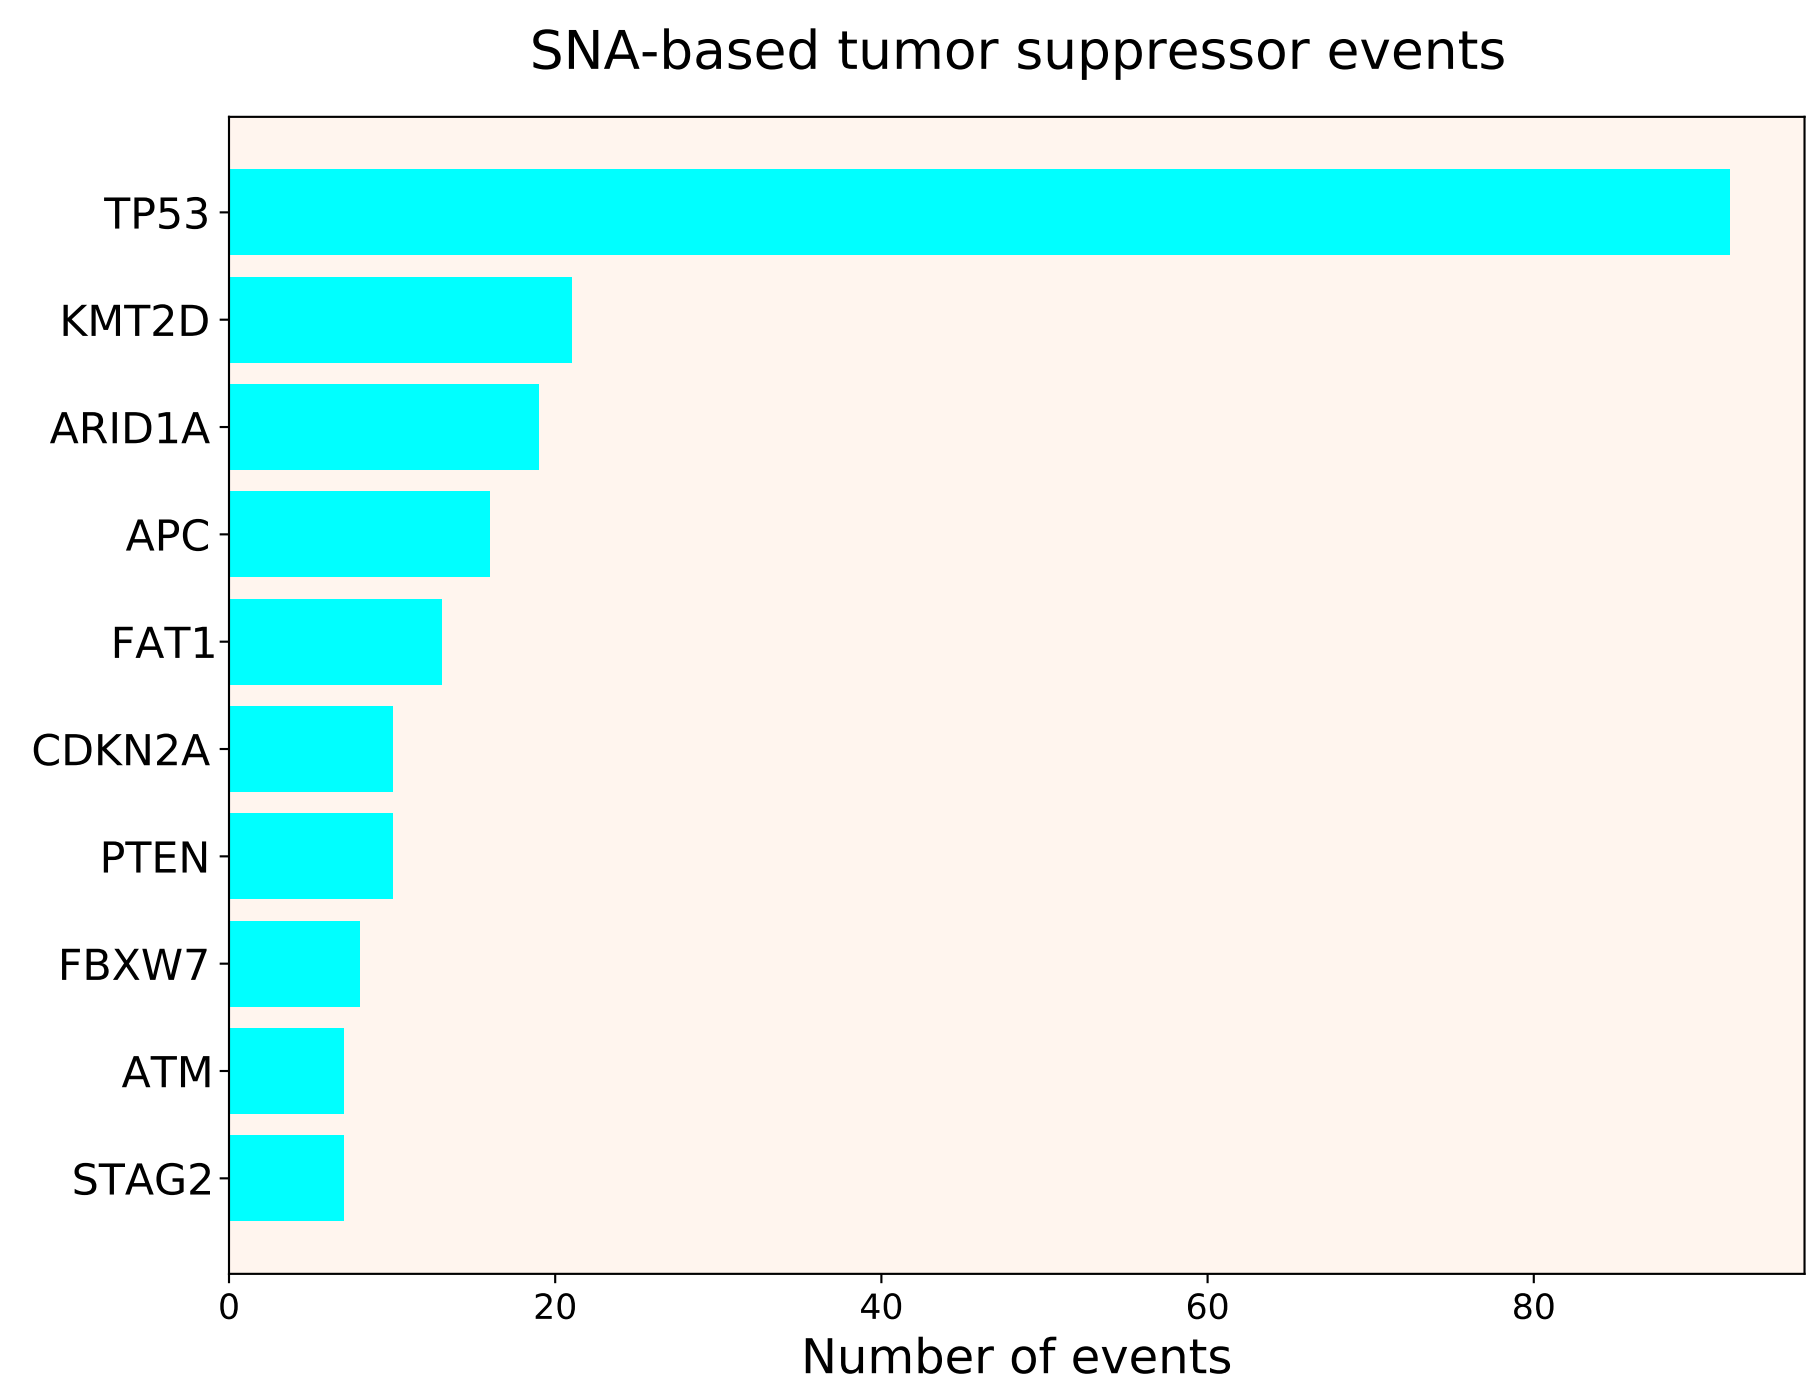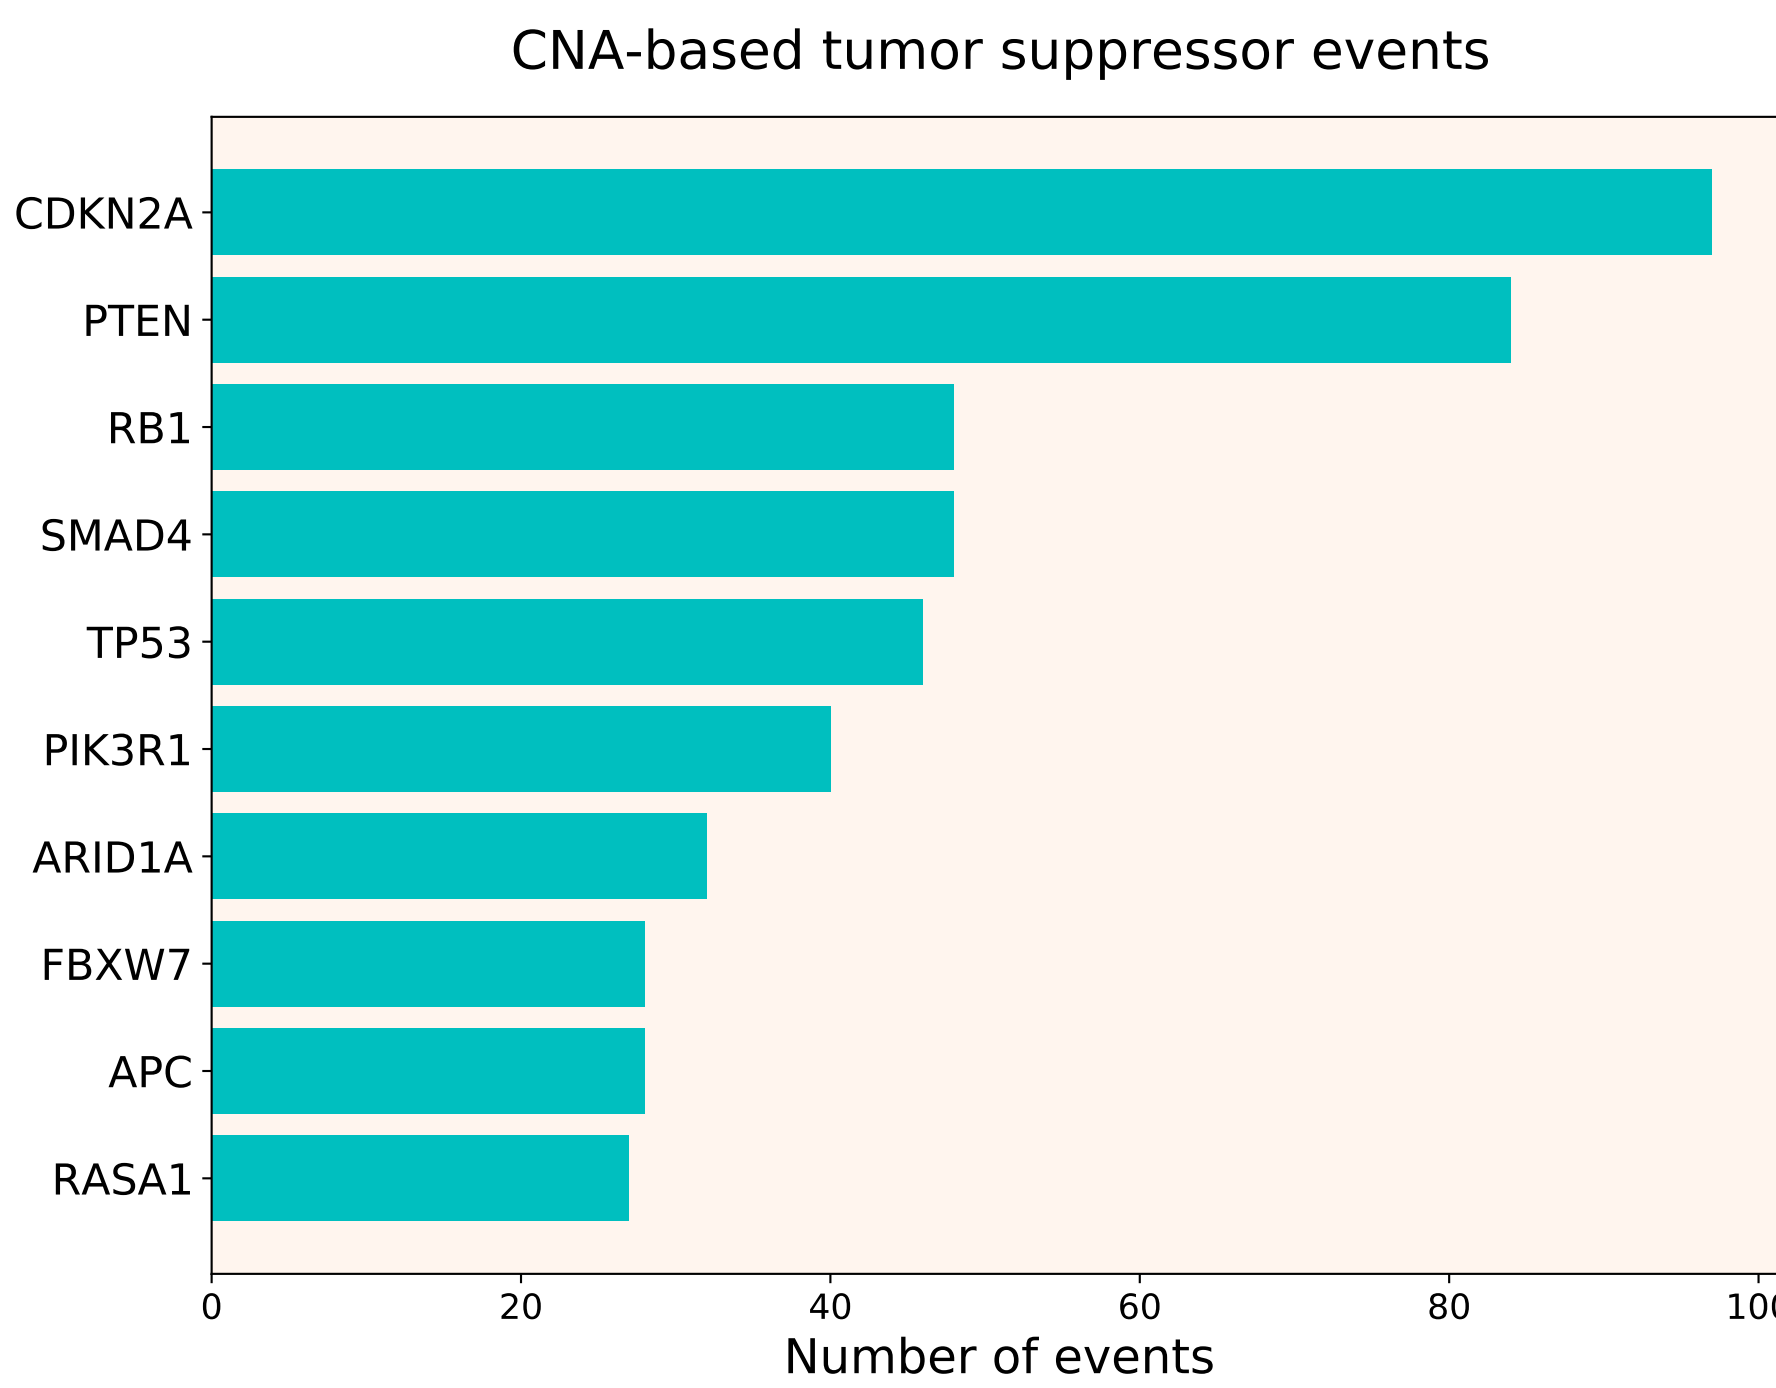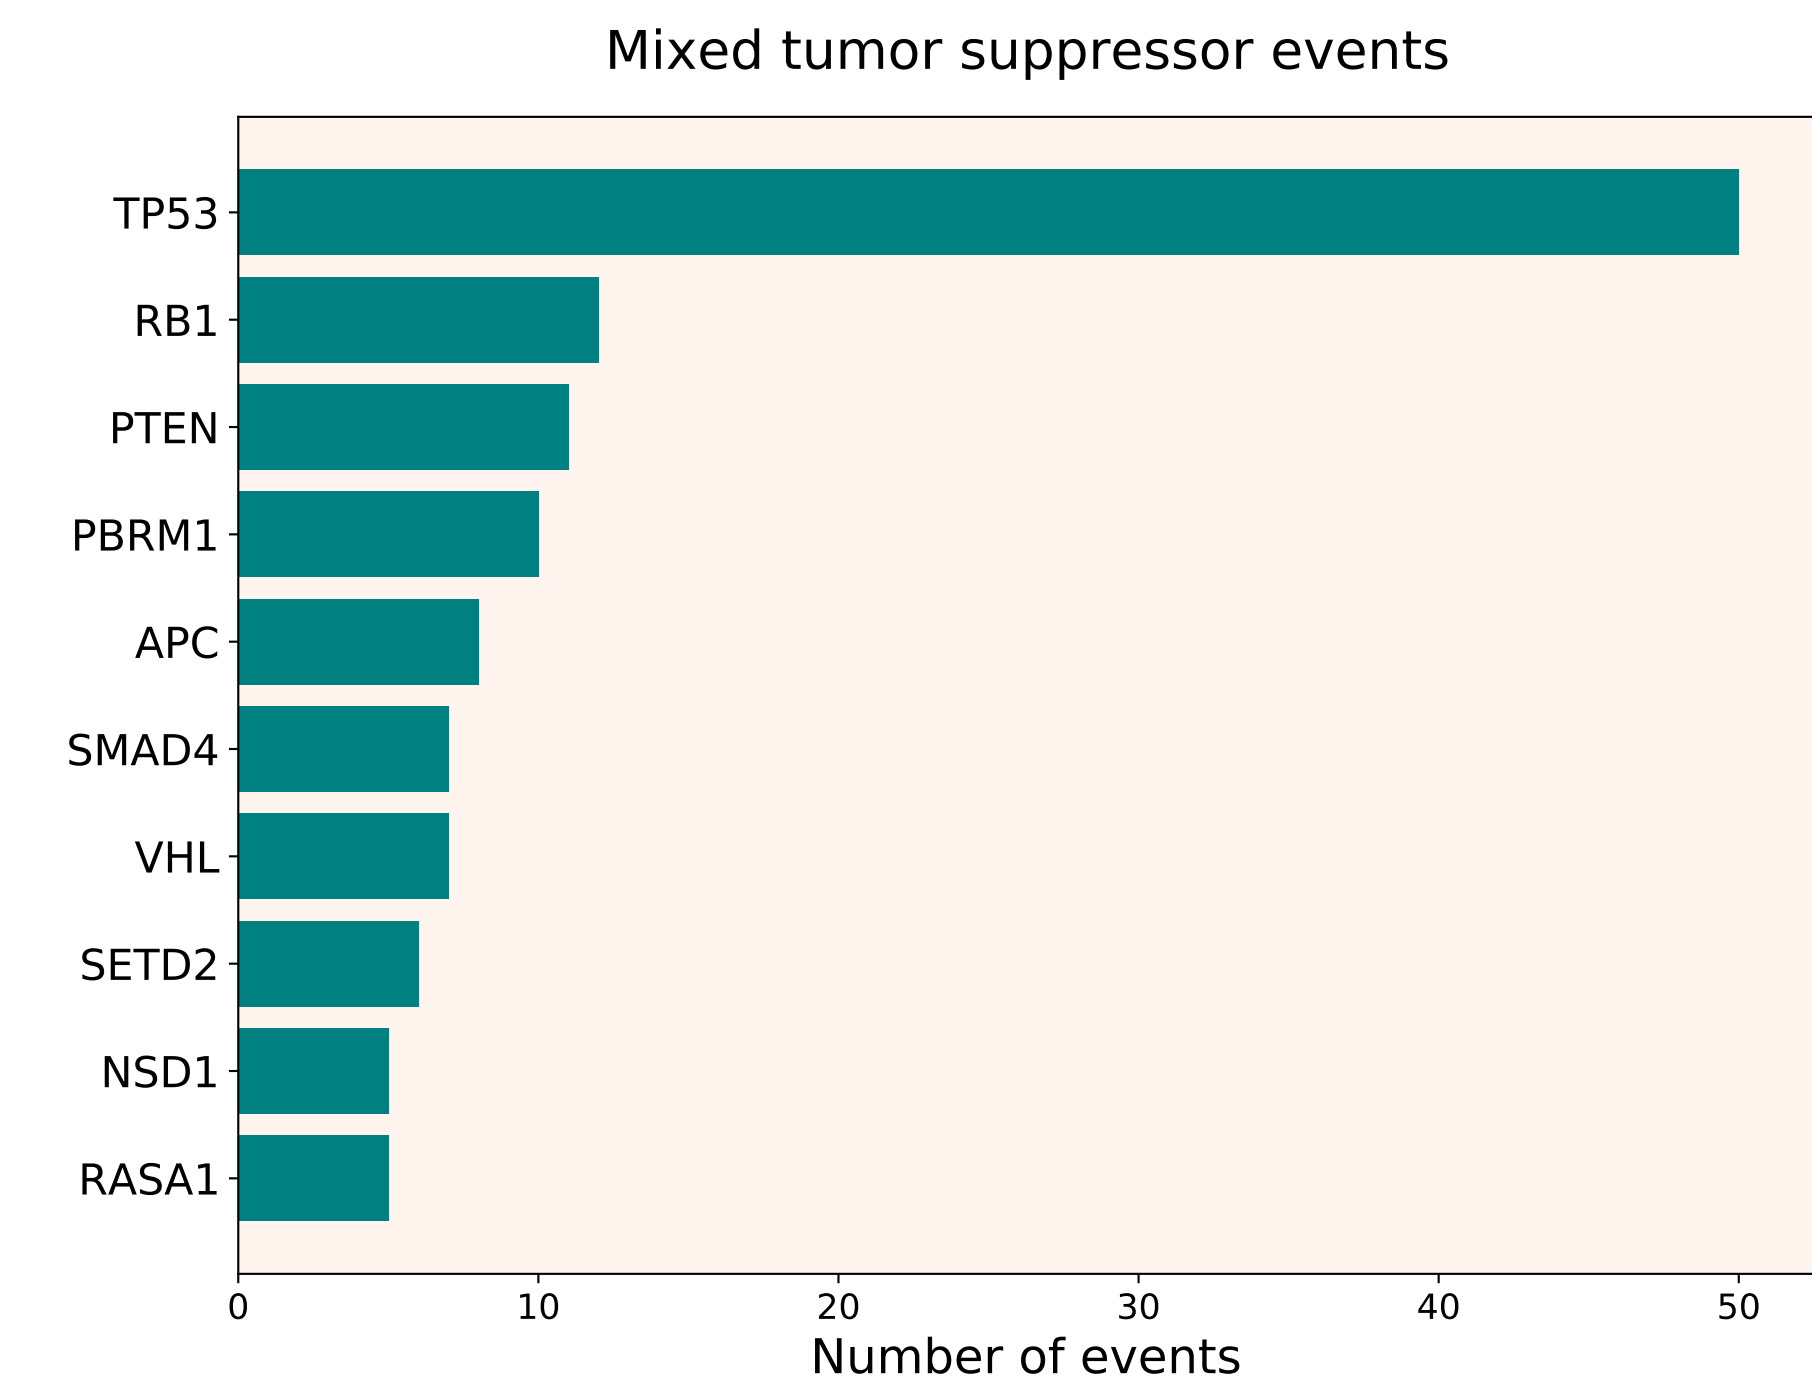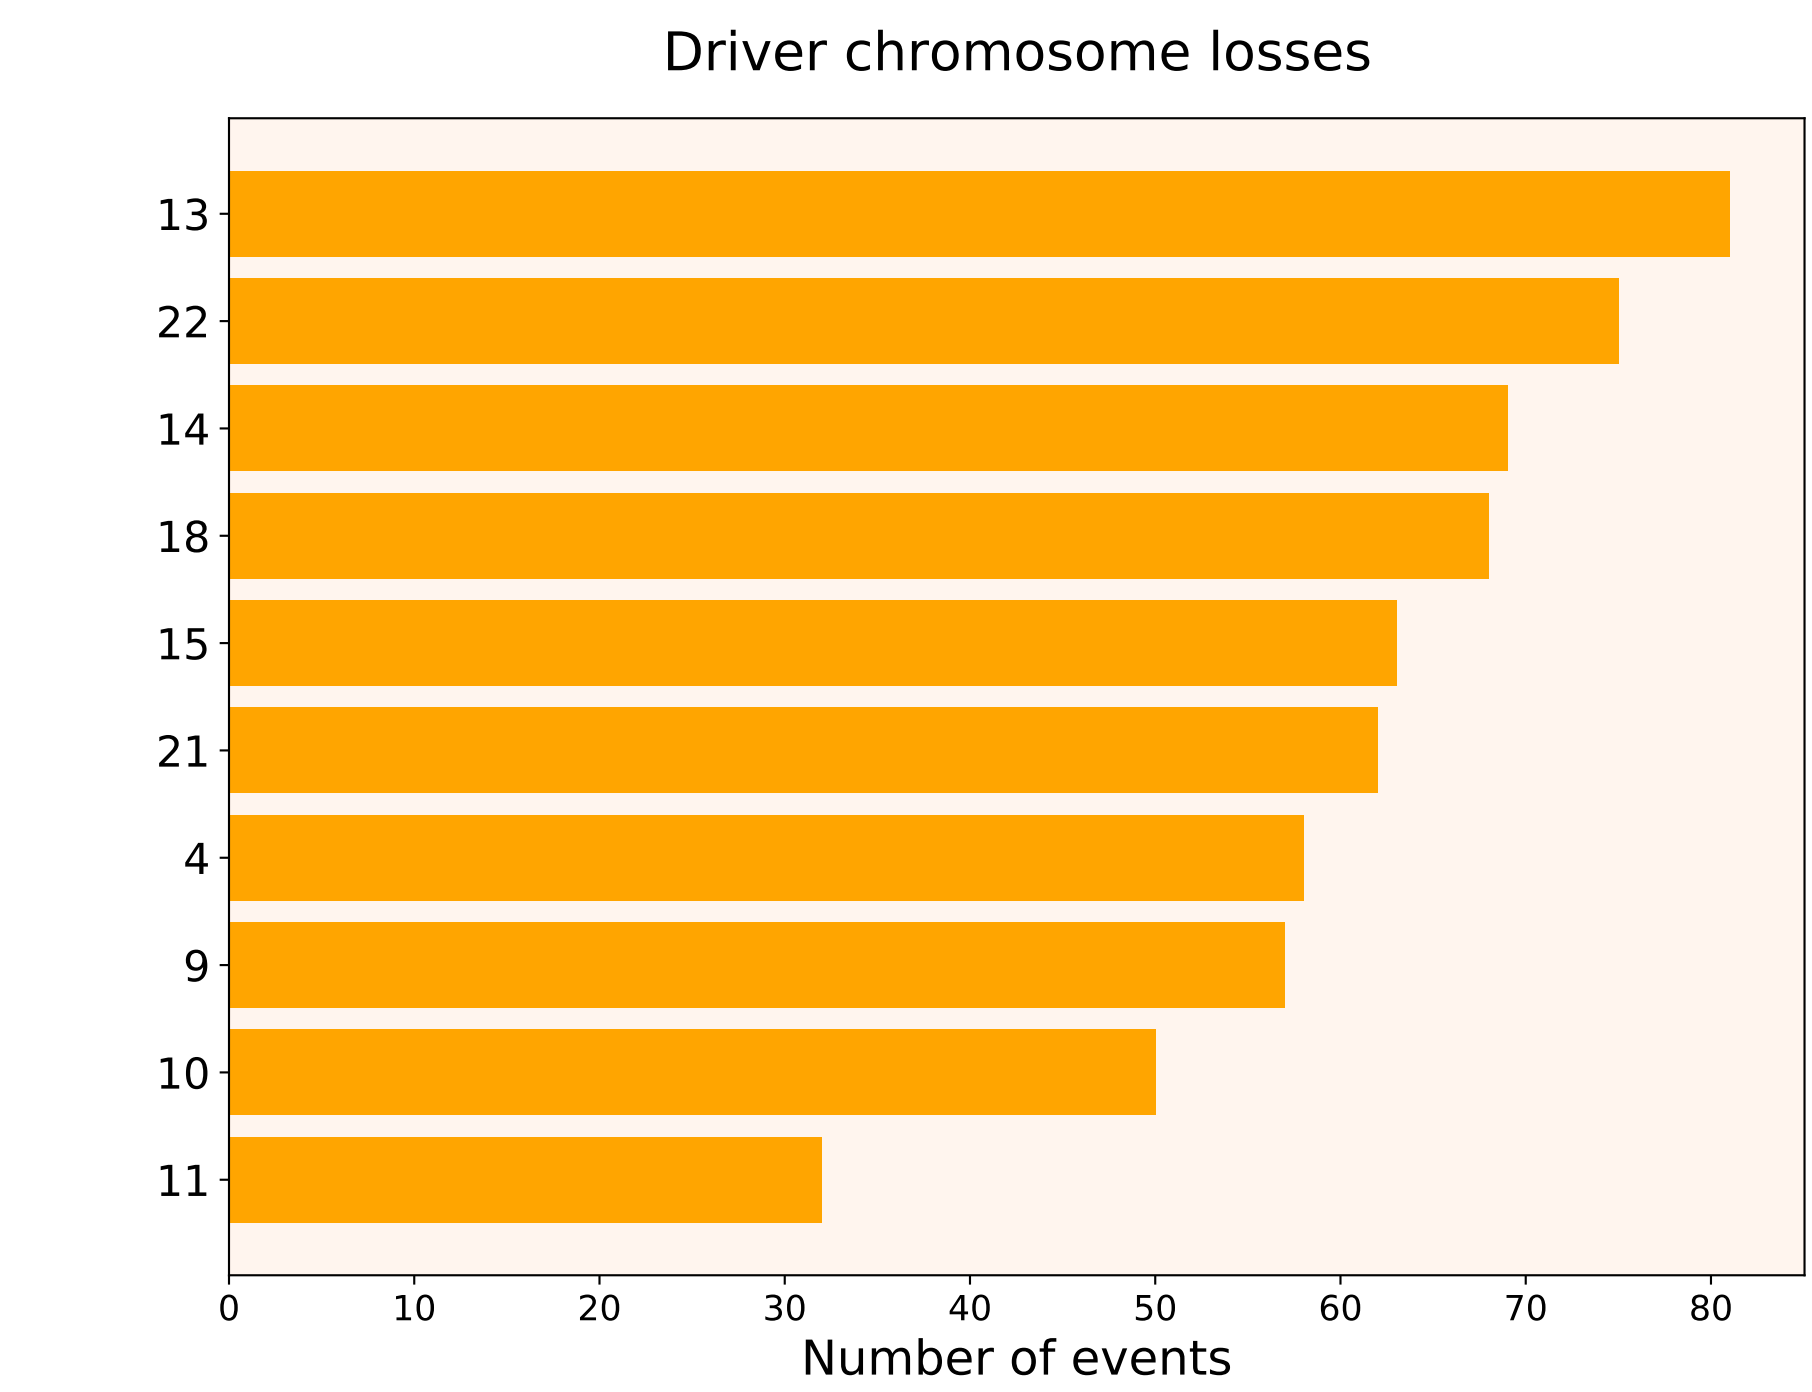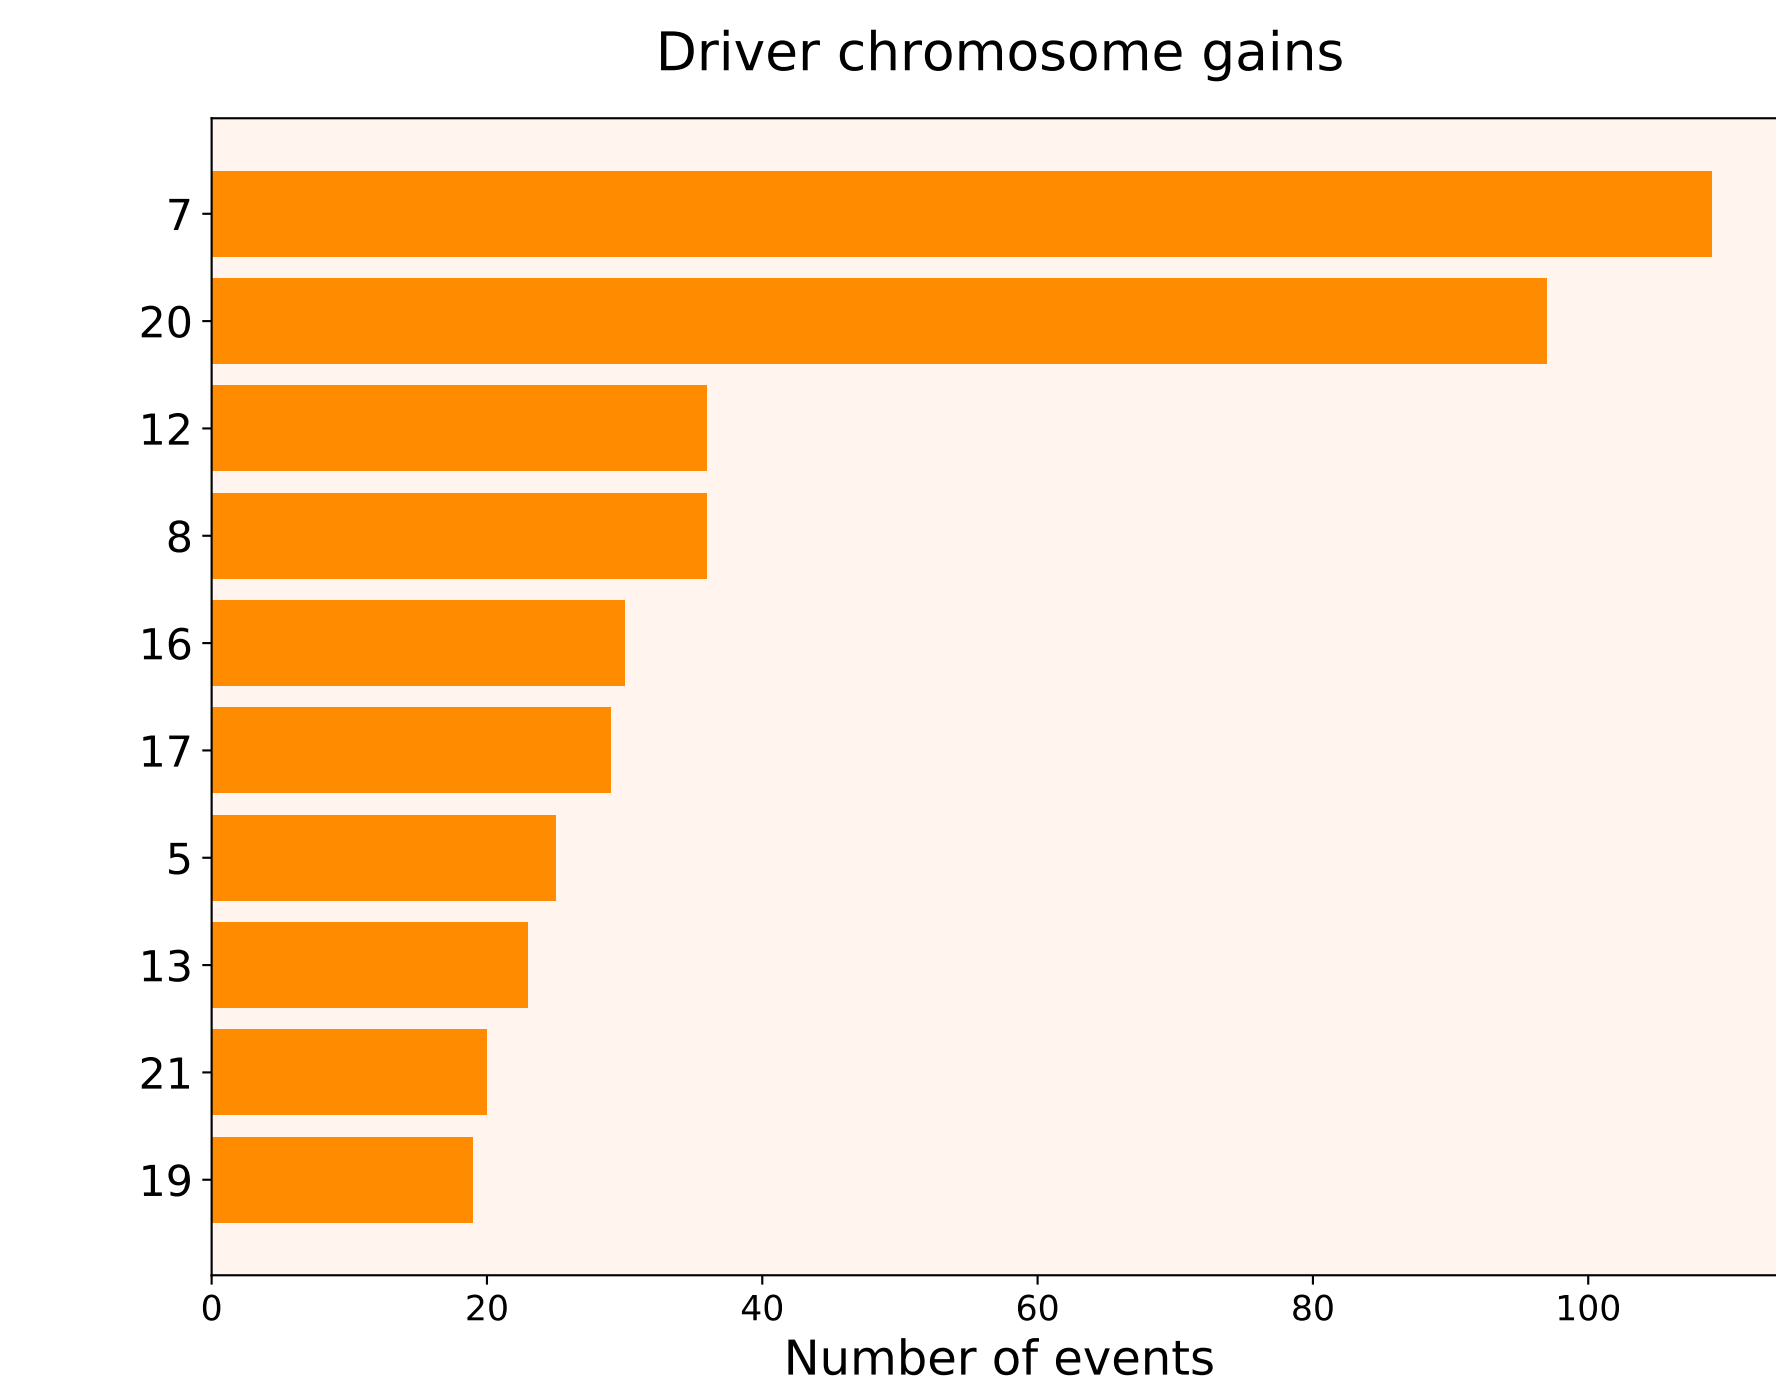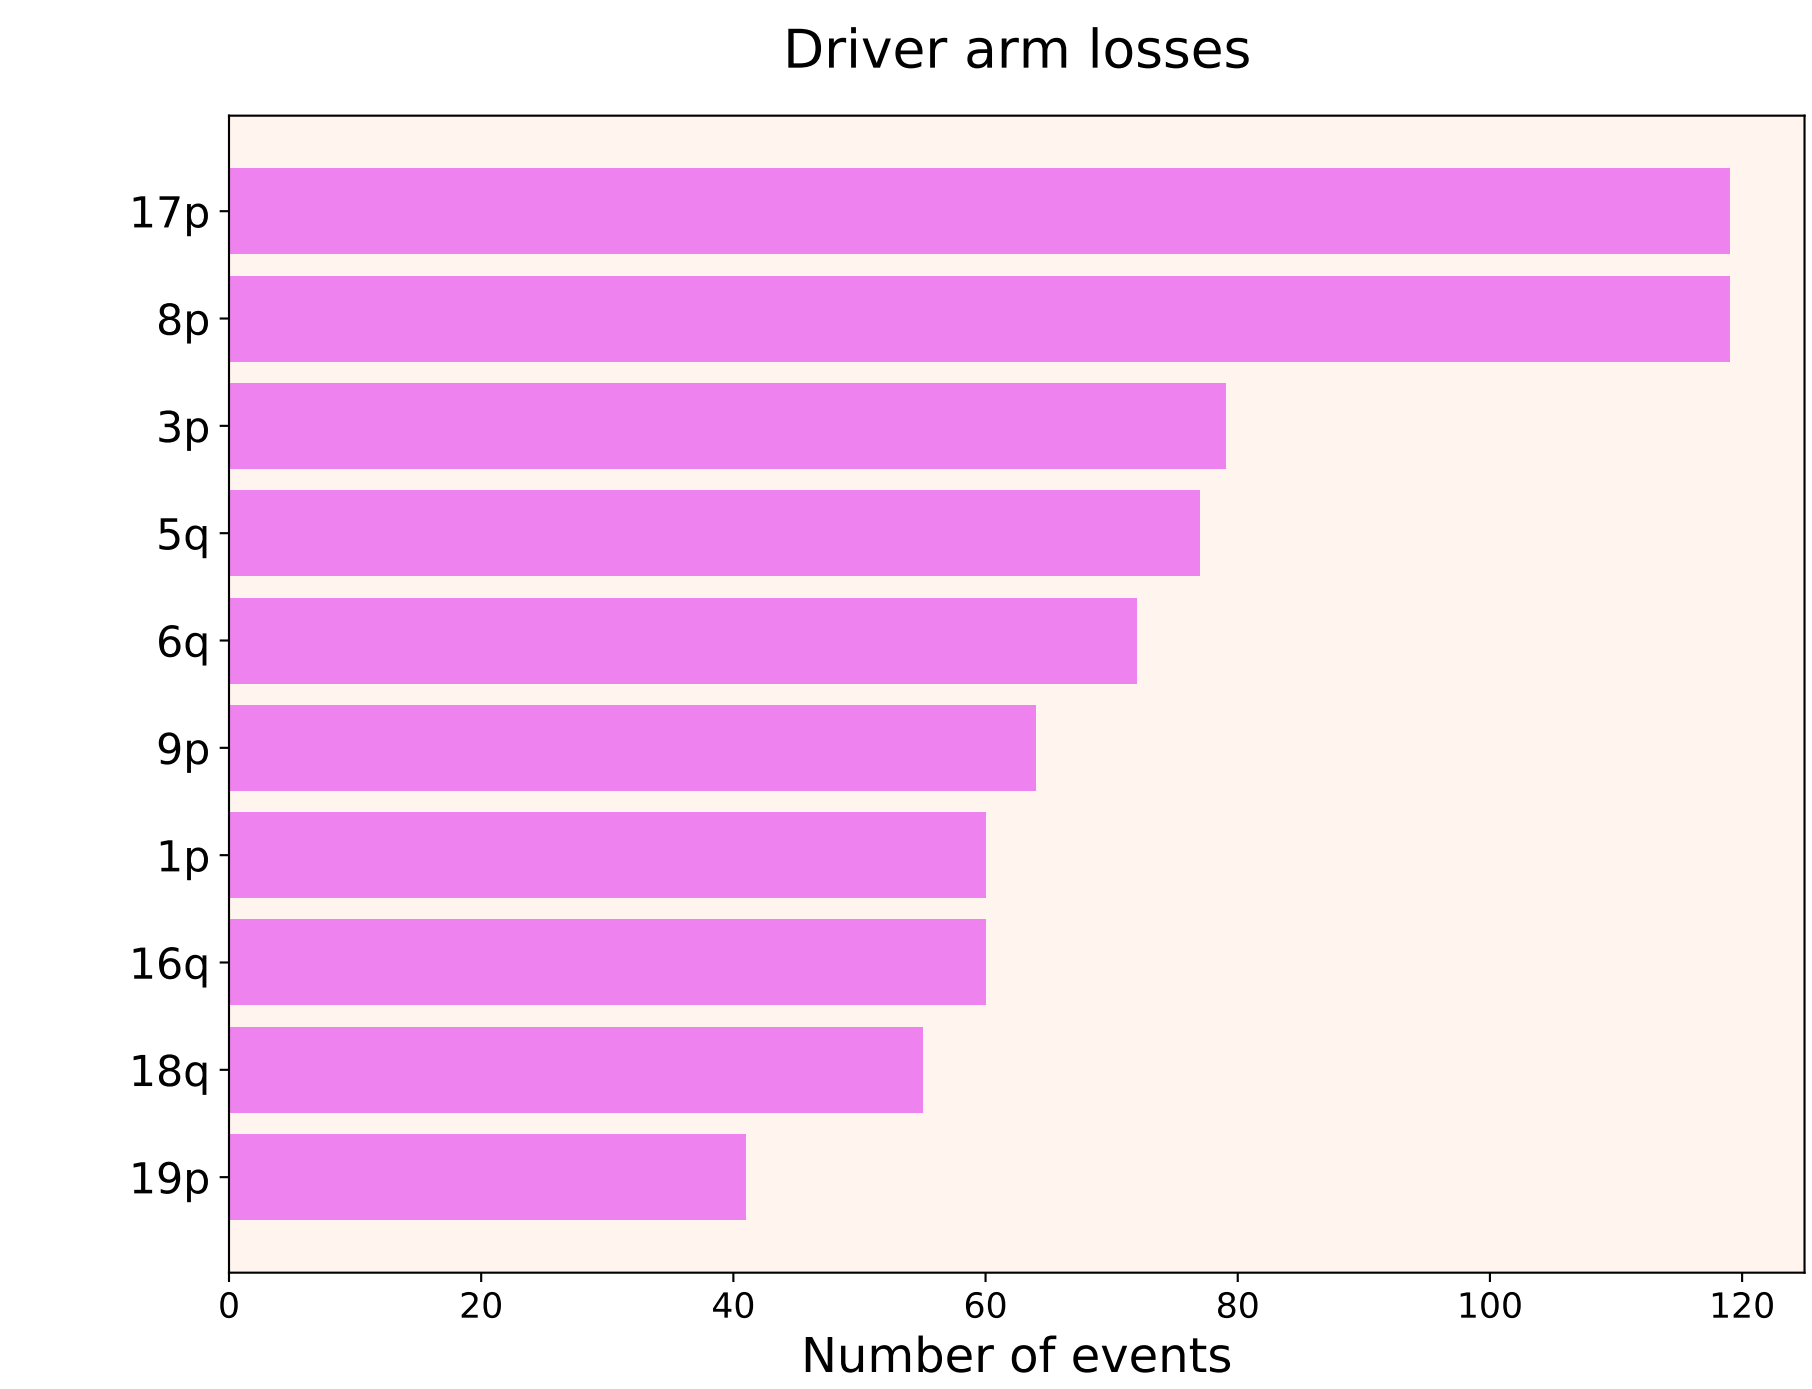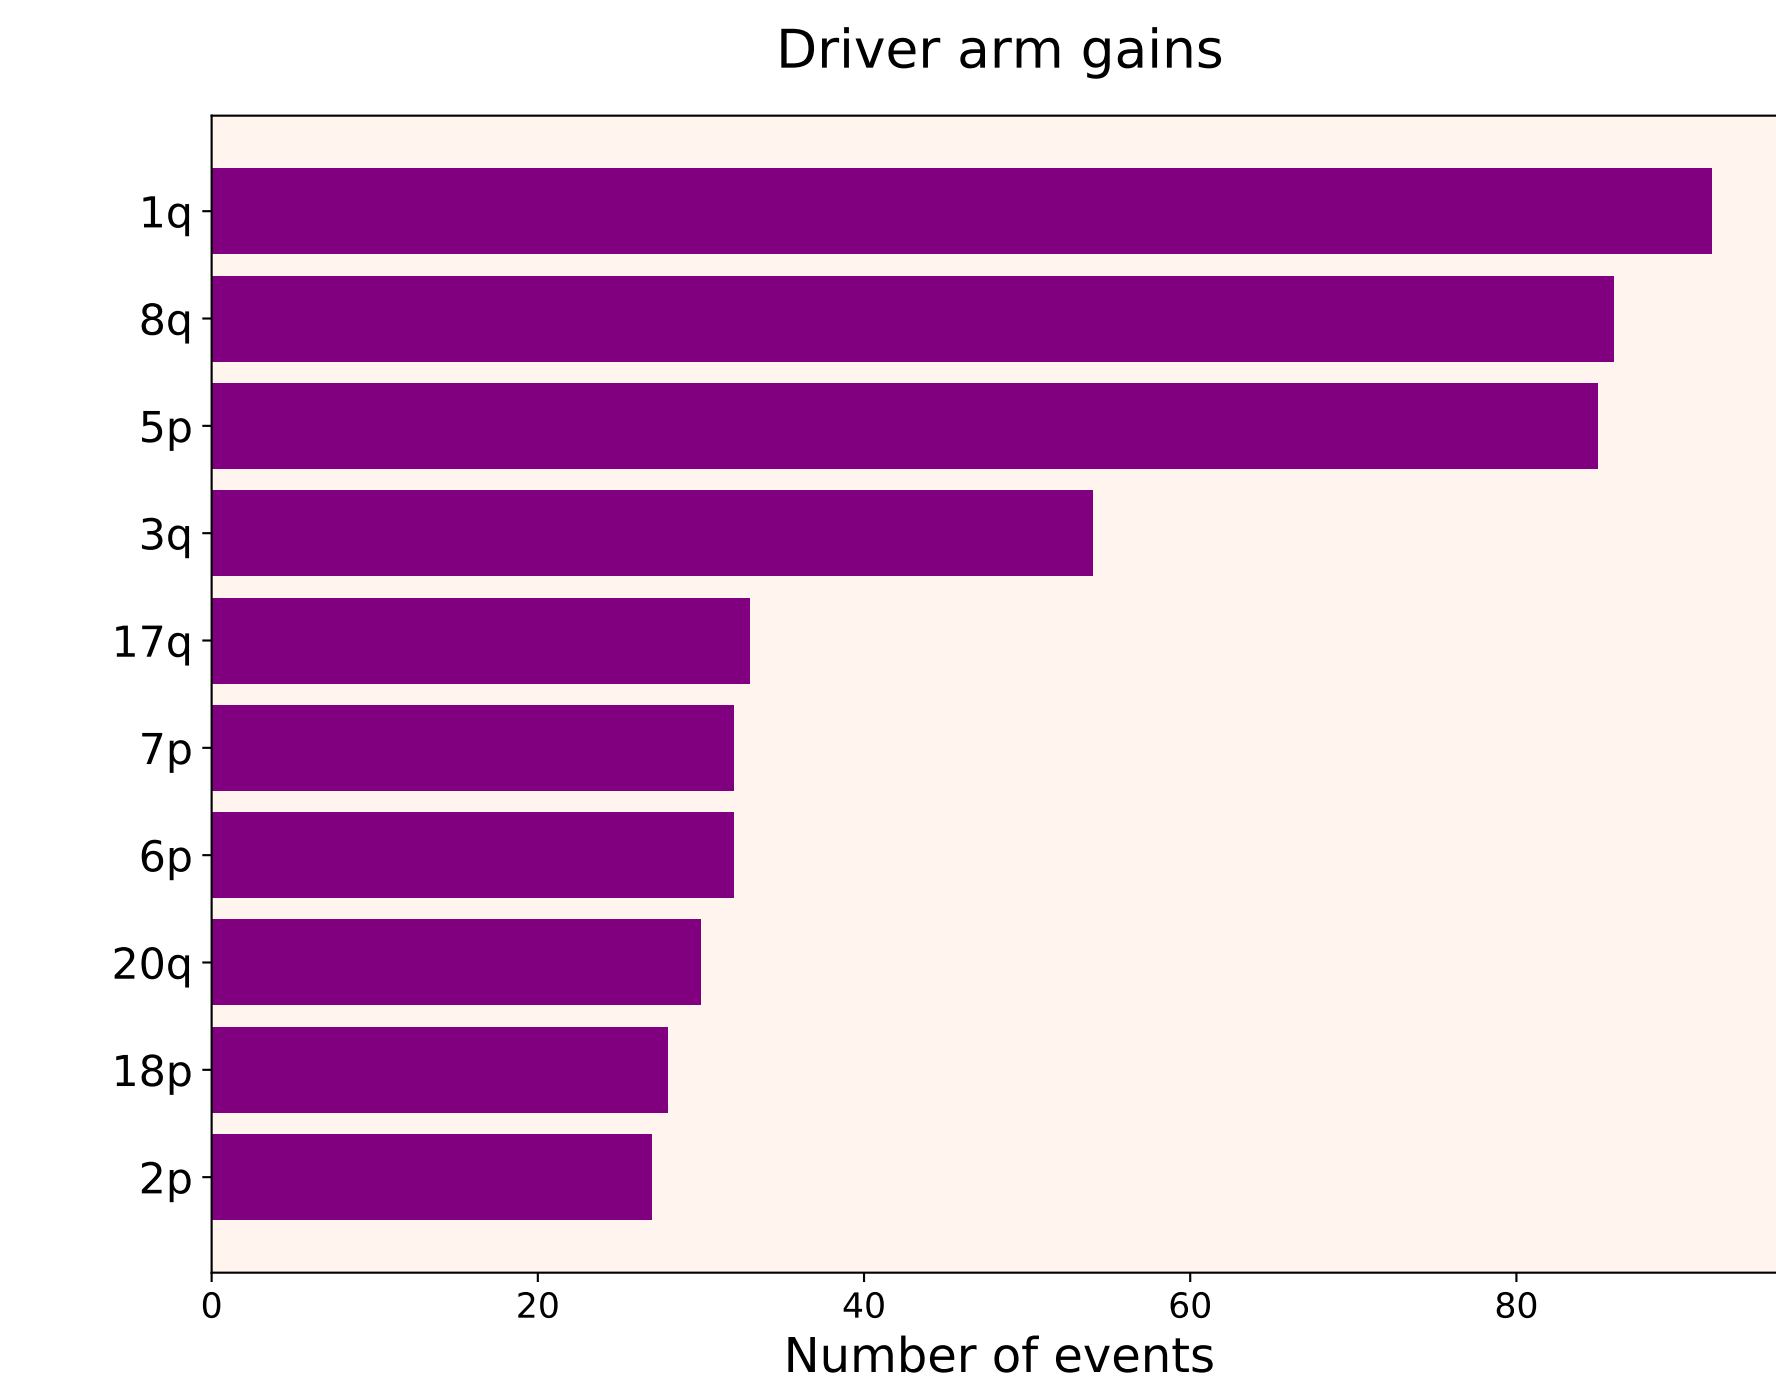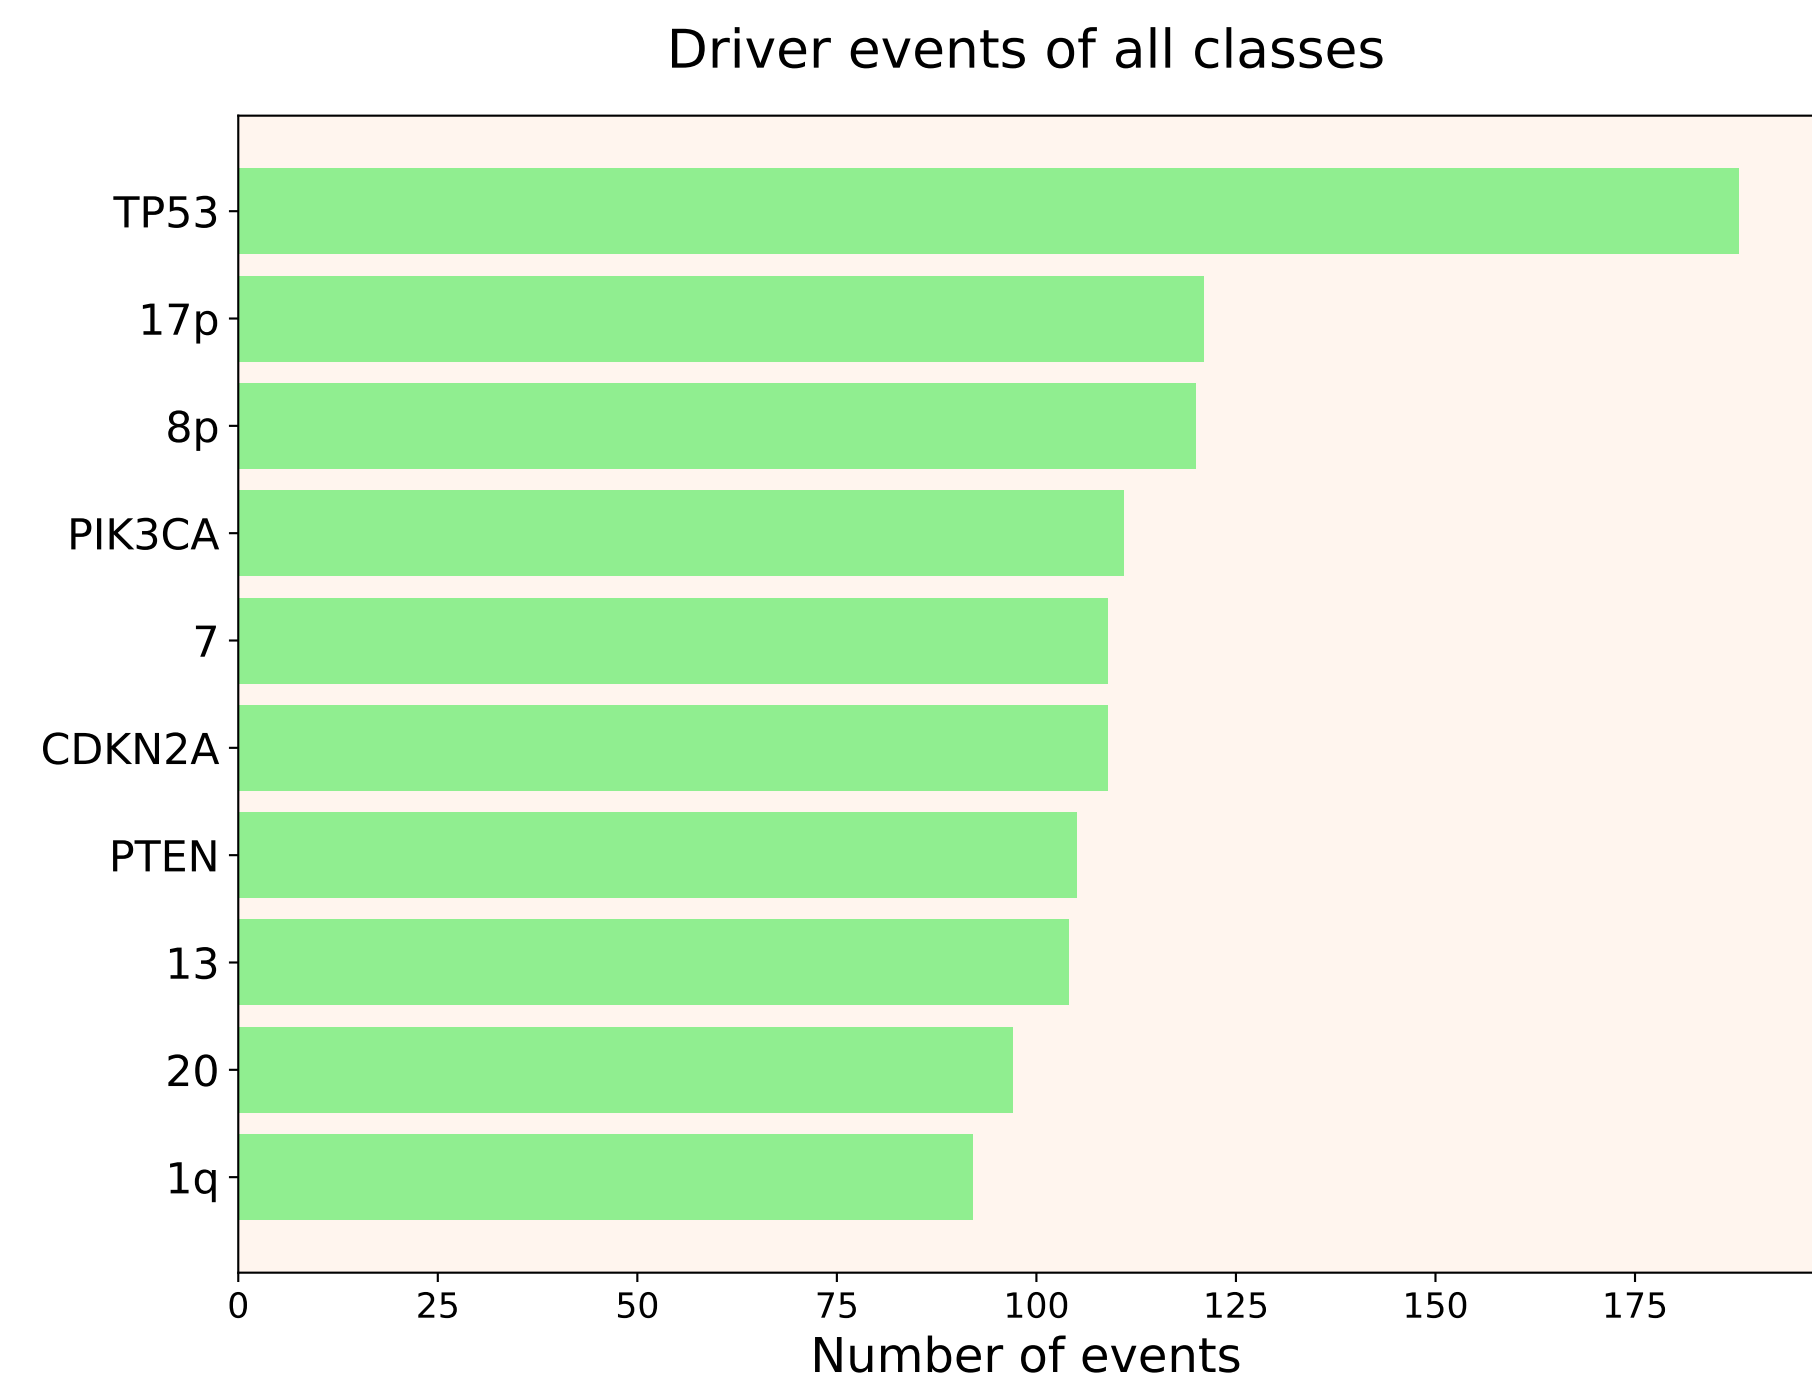

Supplement: Supplemental_Data_S1.zip [file Supplemental_Data_S1.zip]

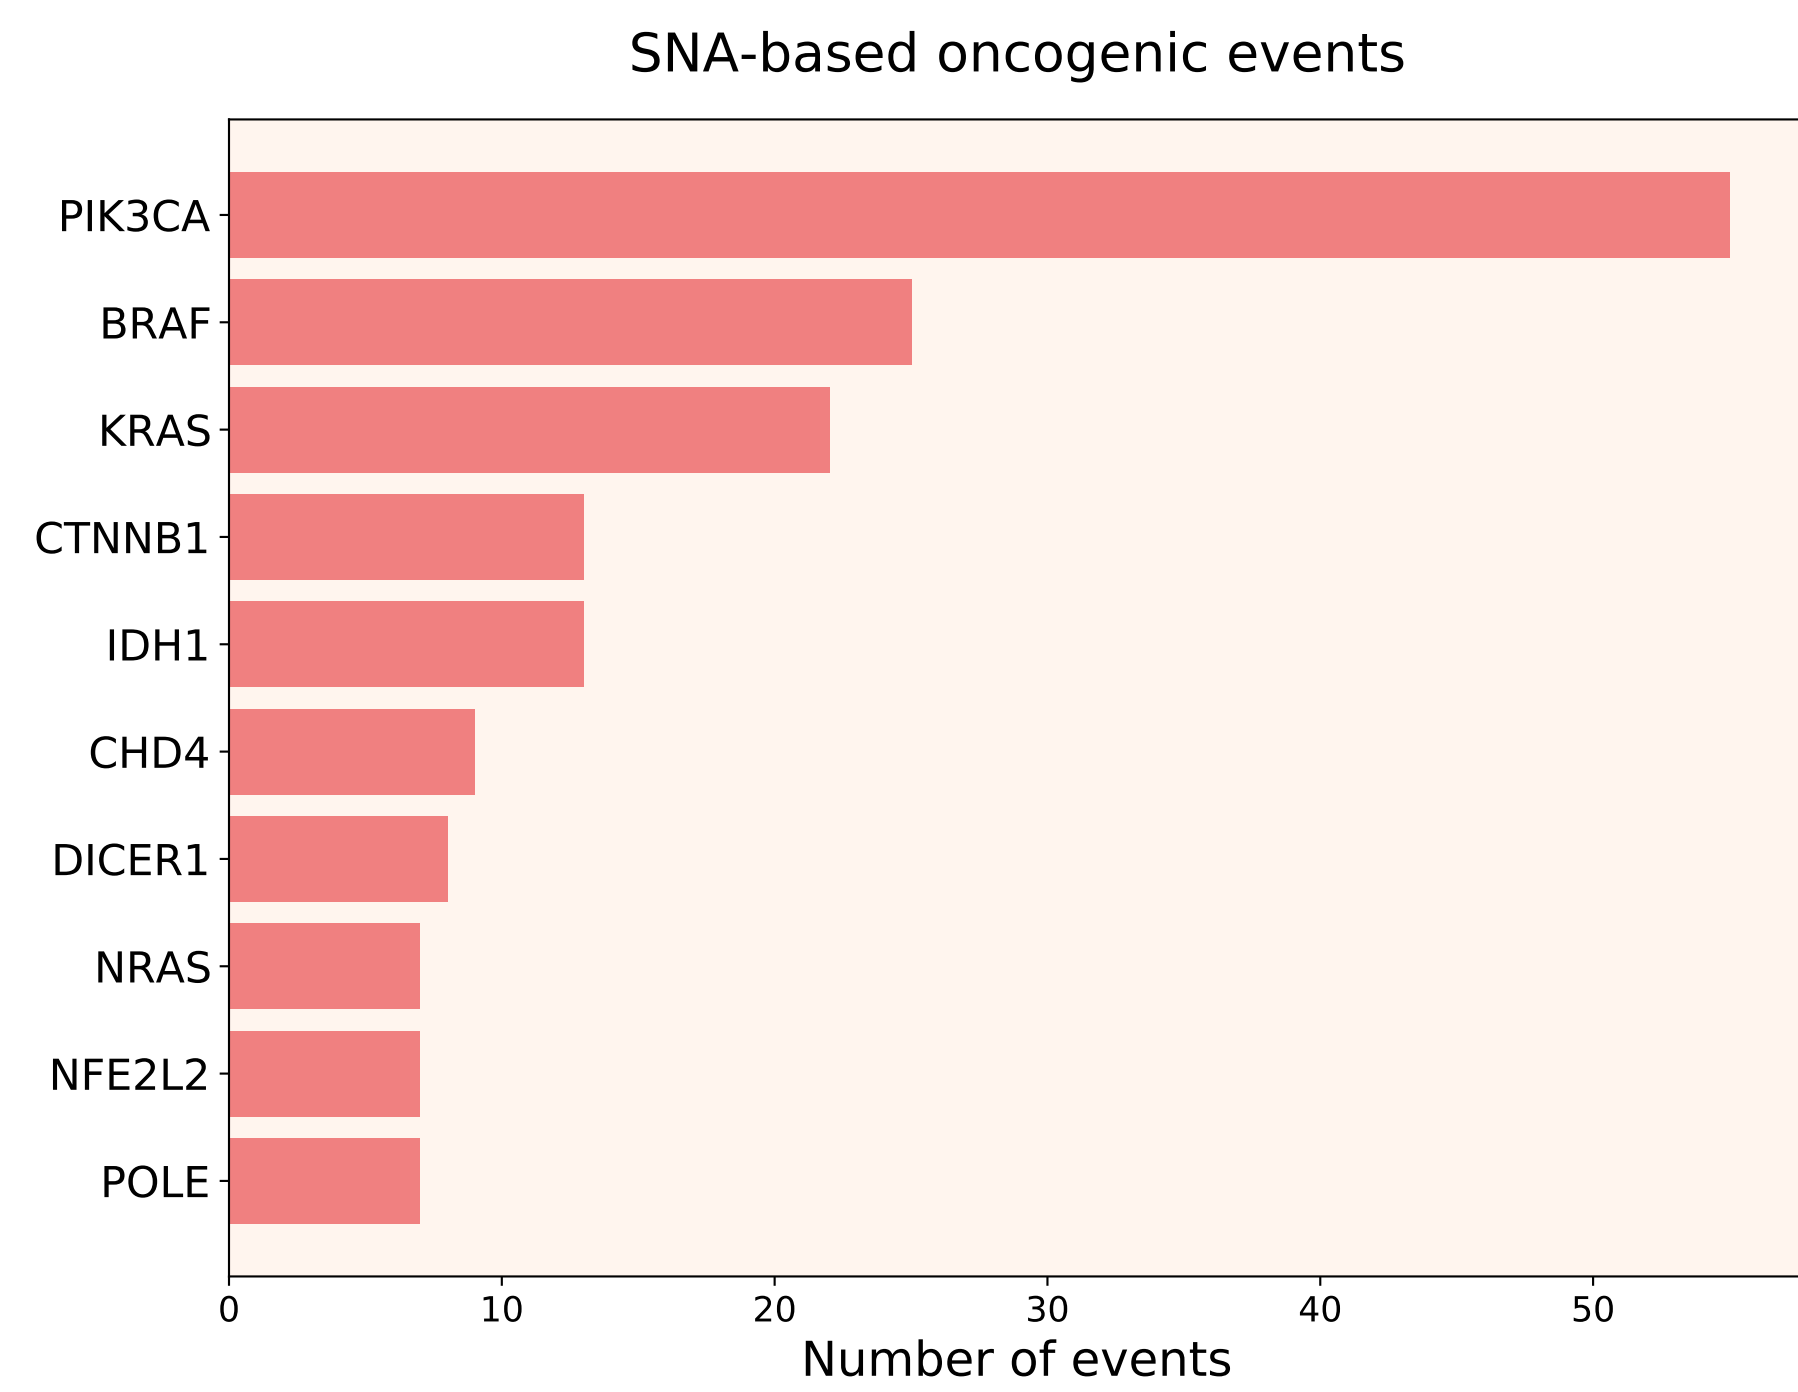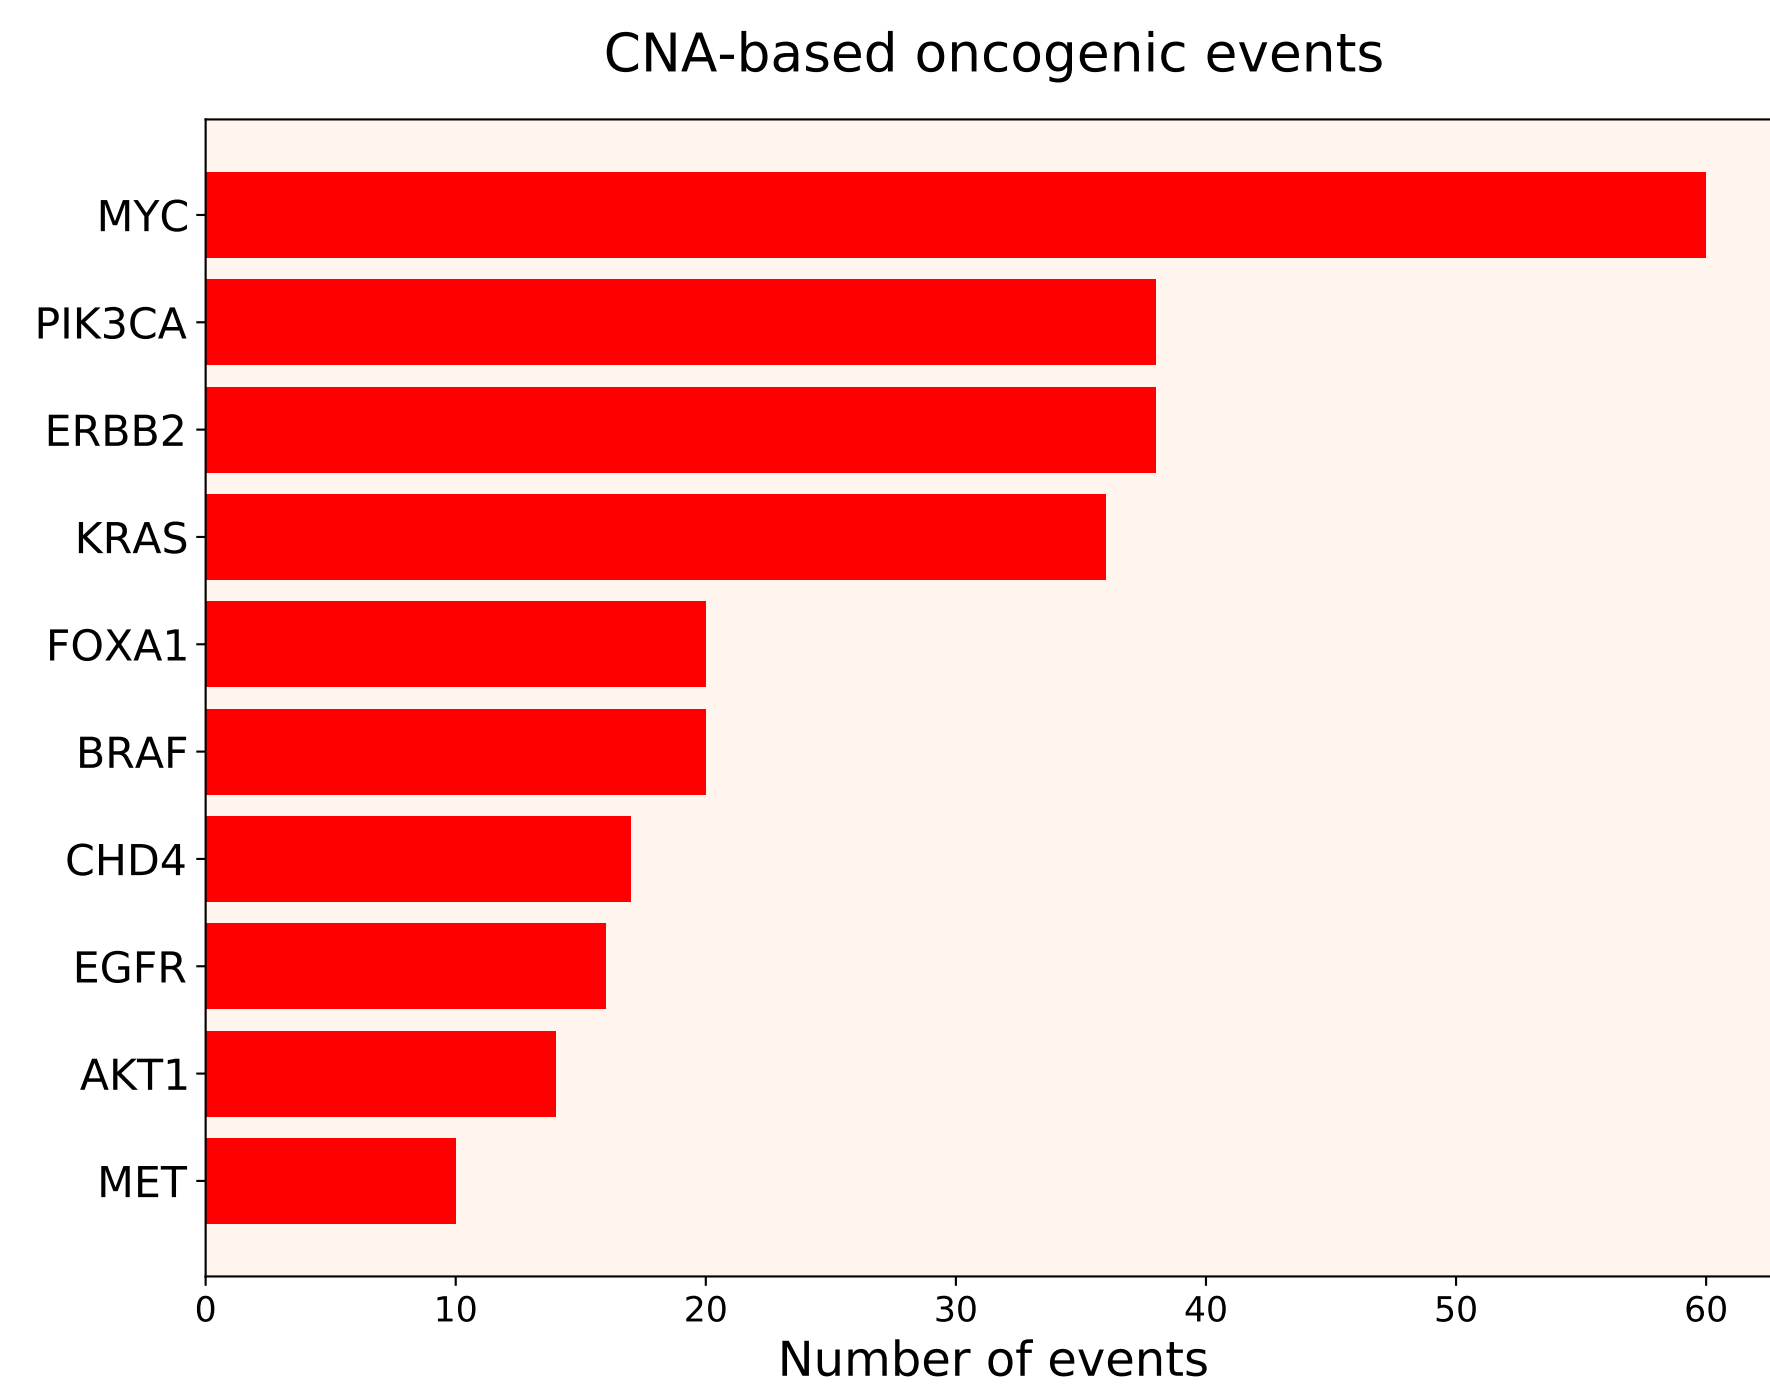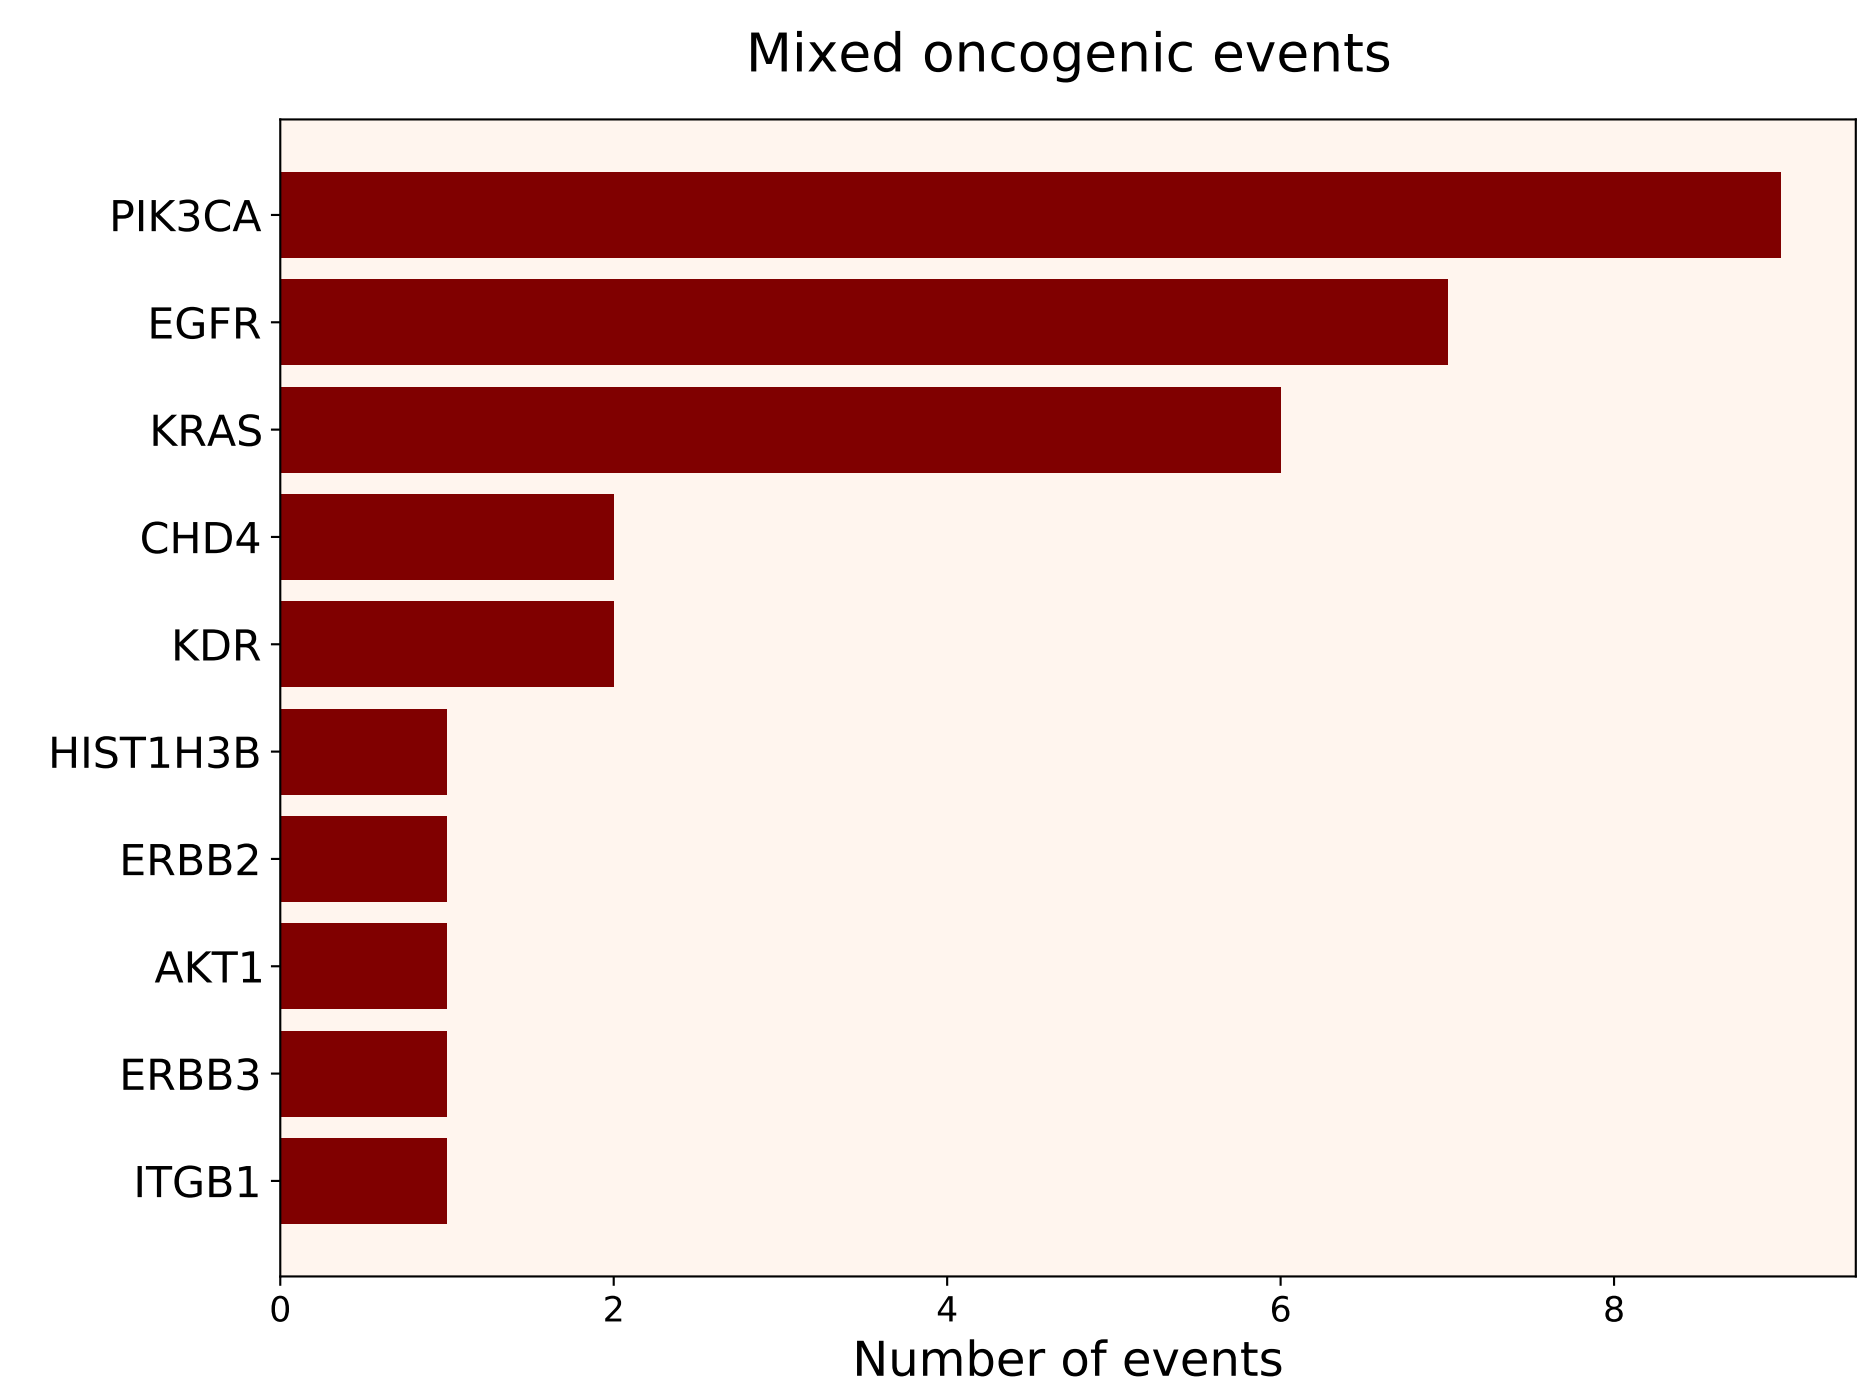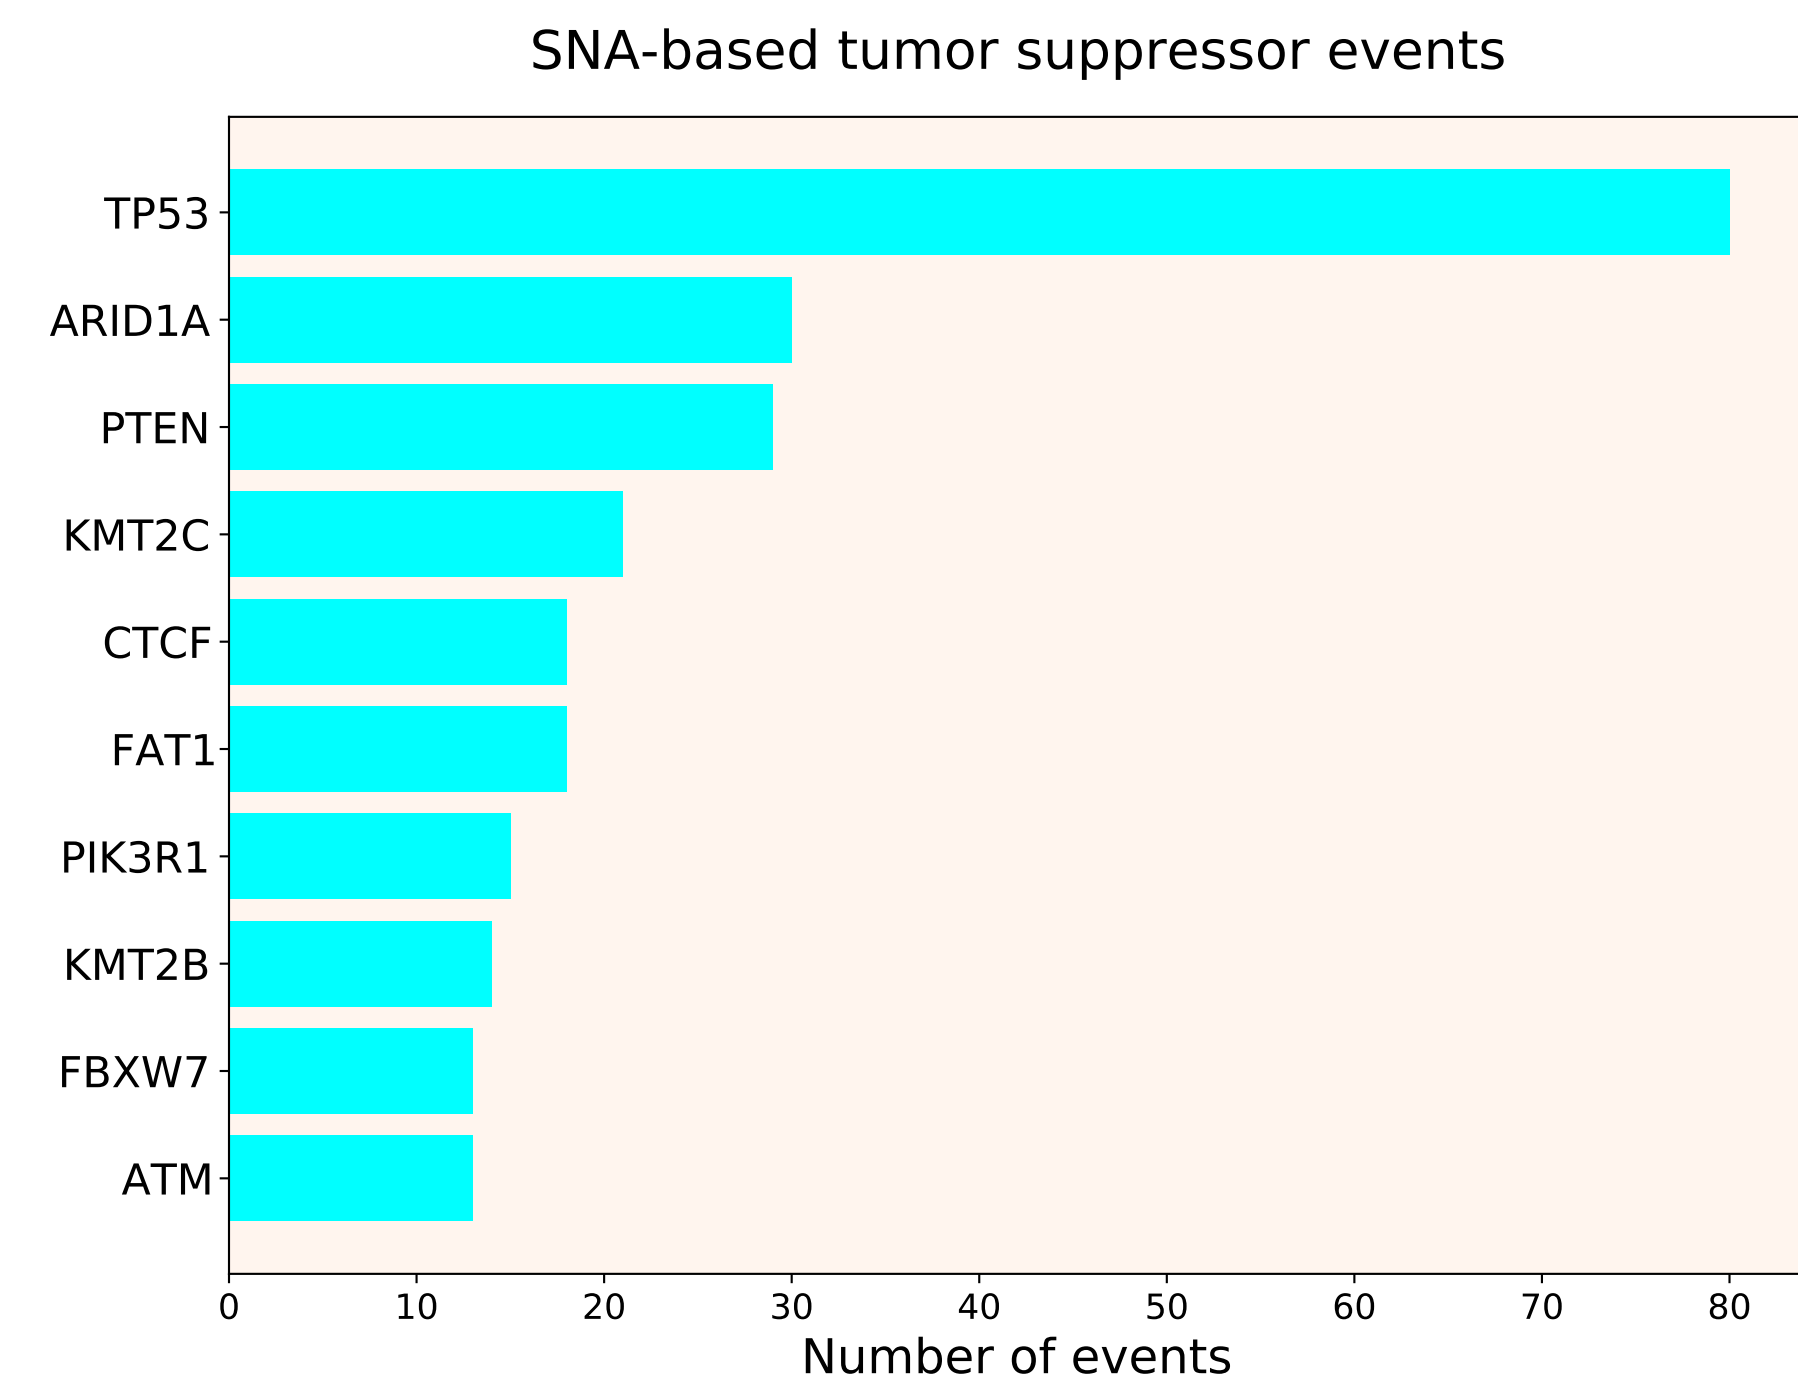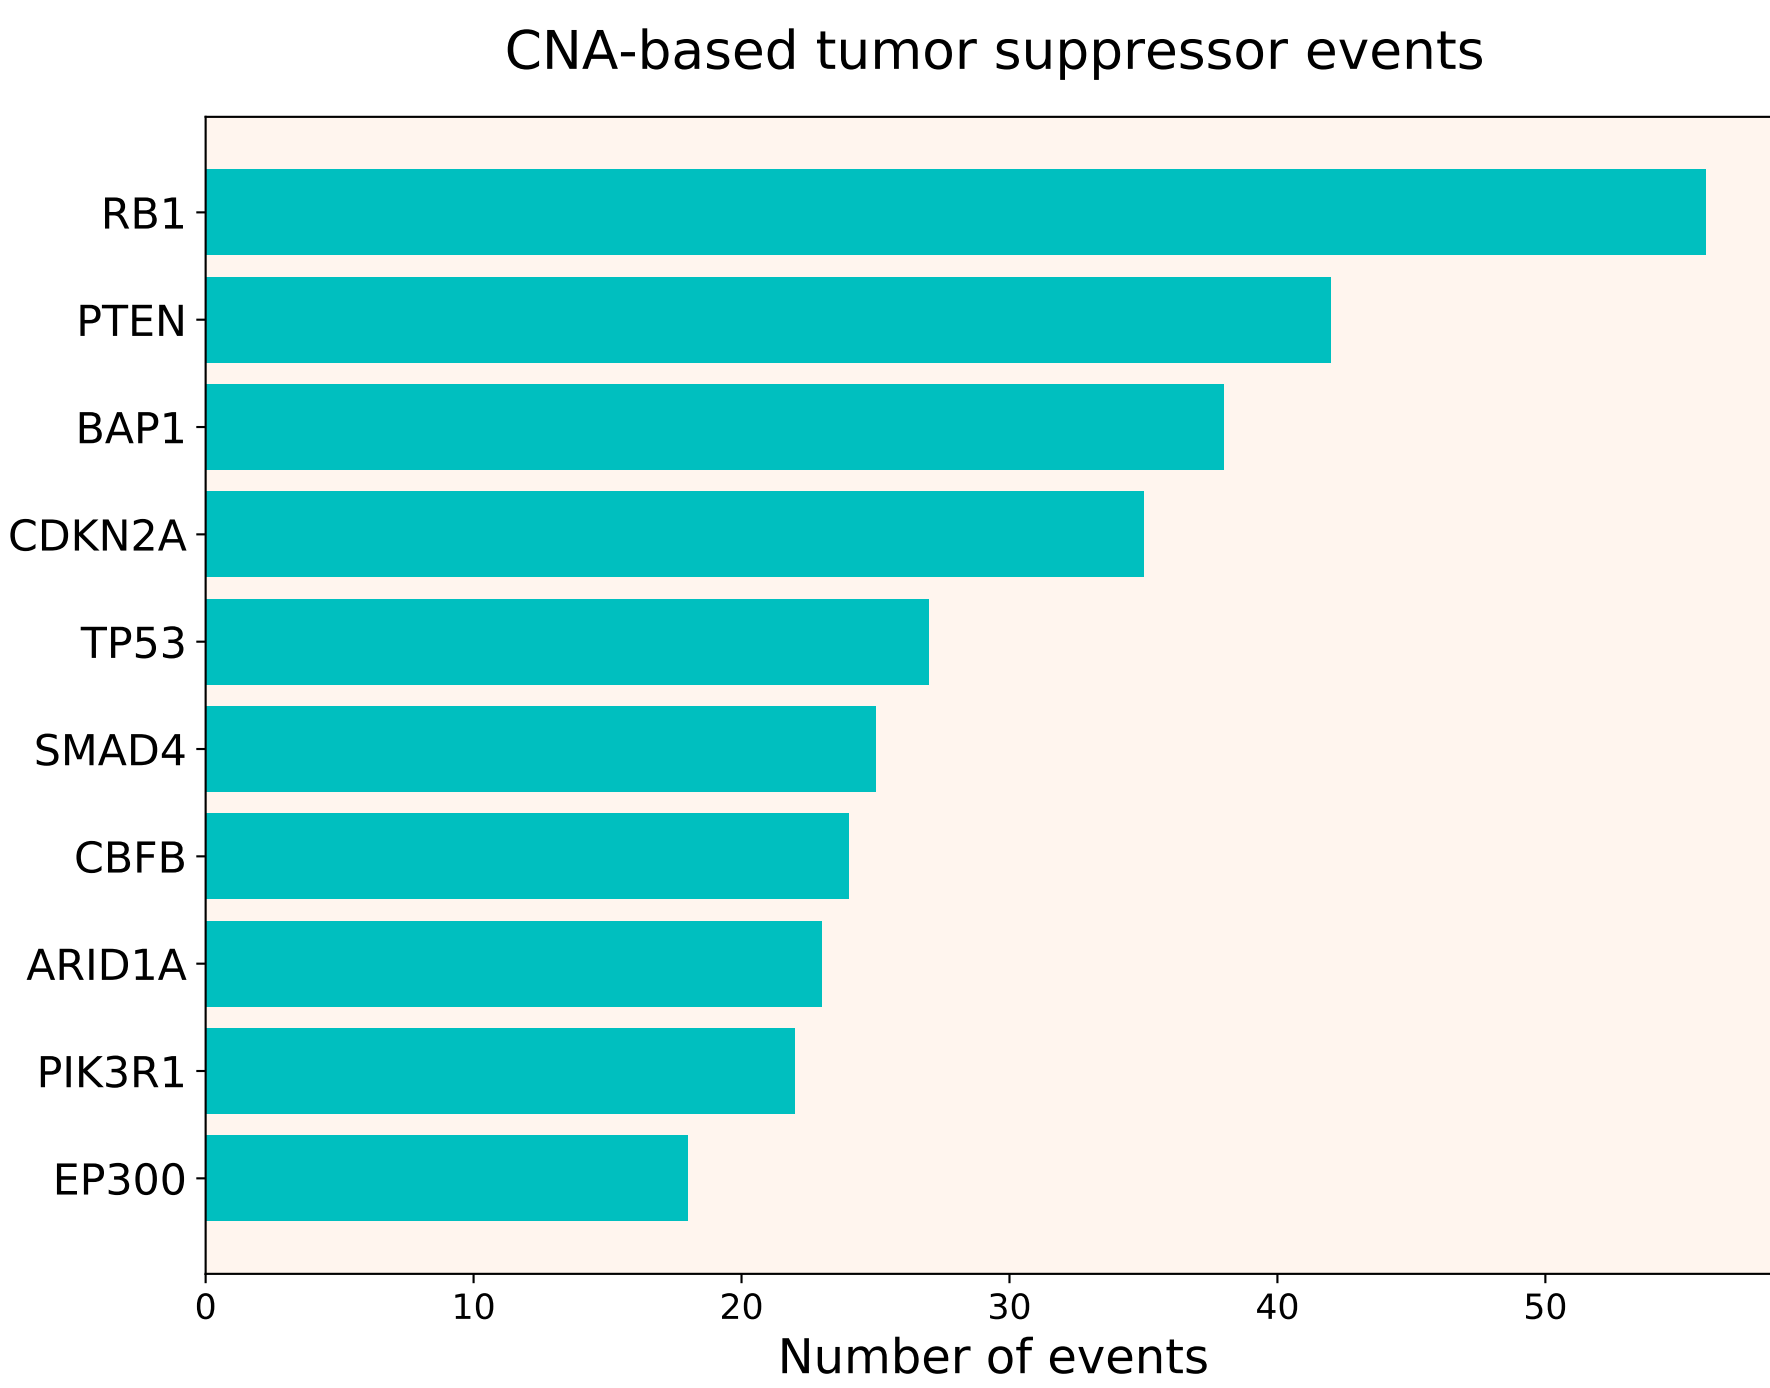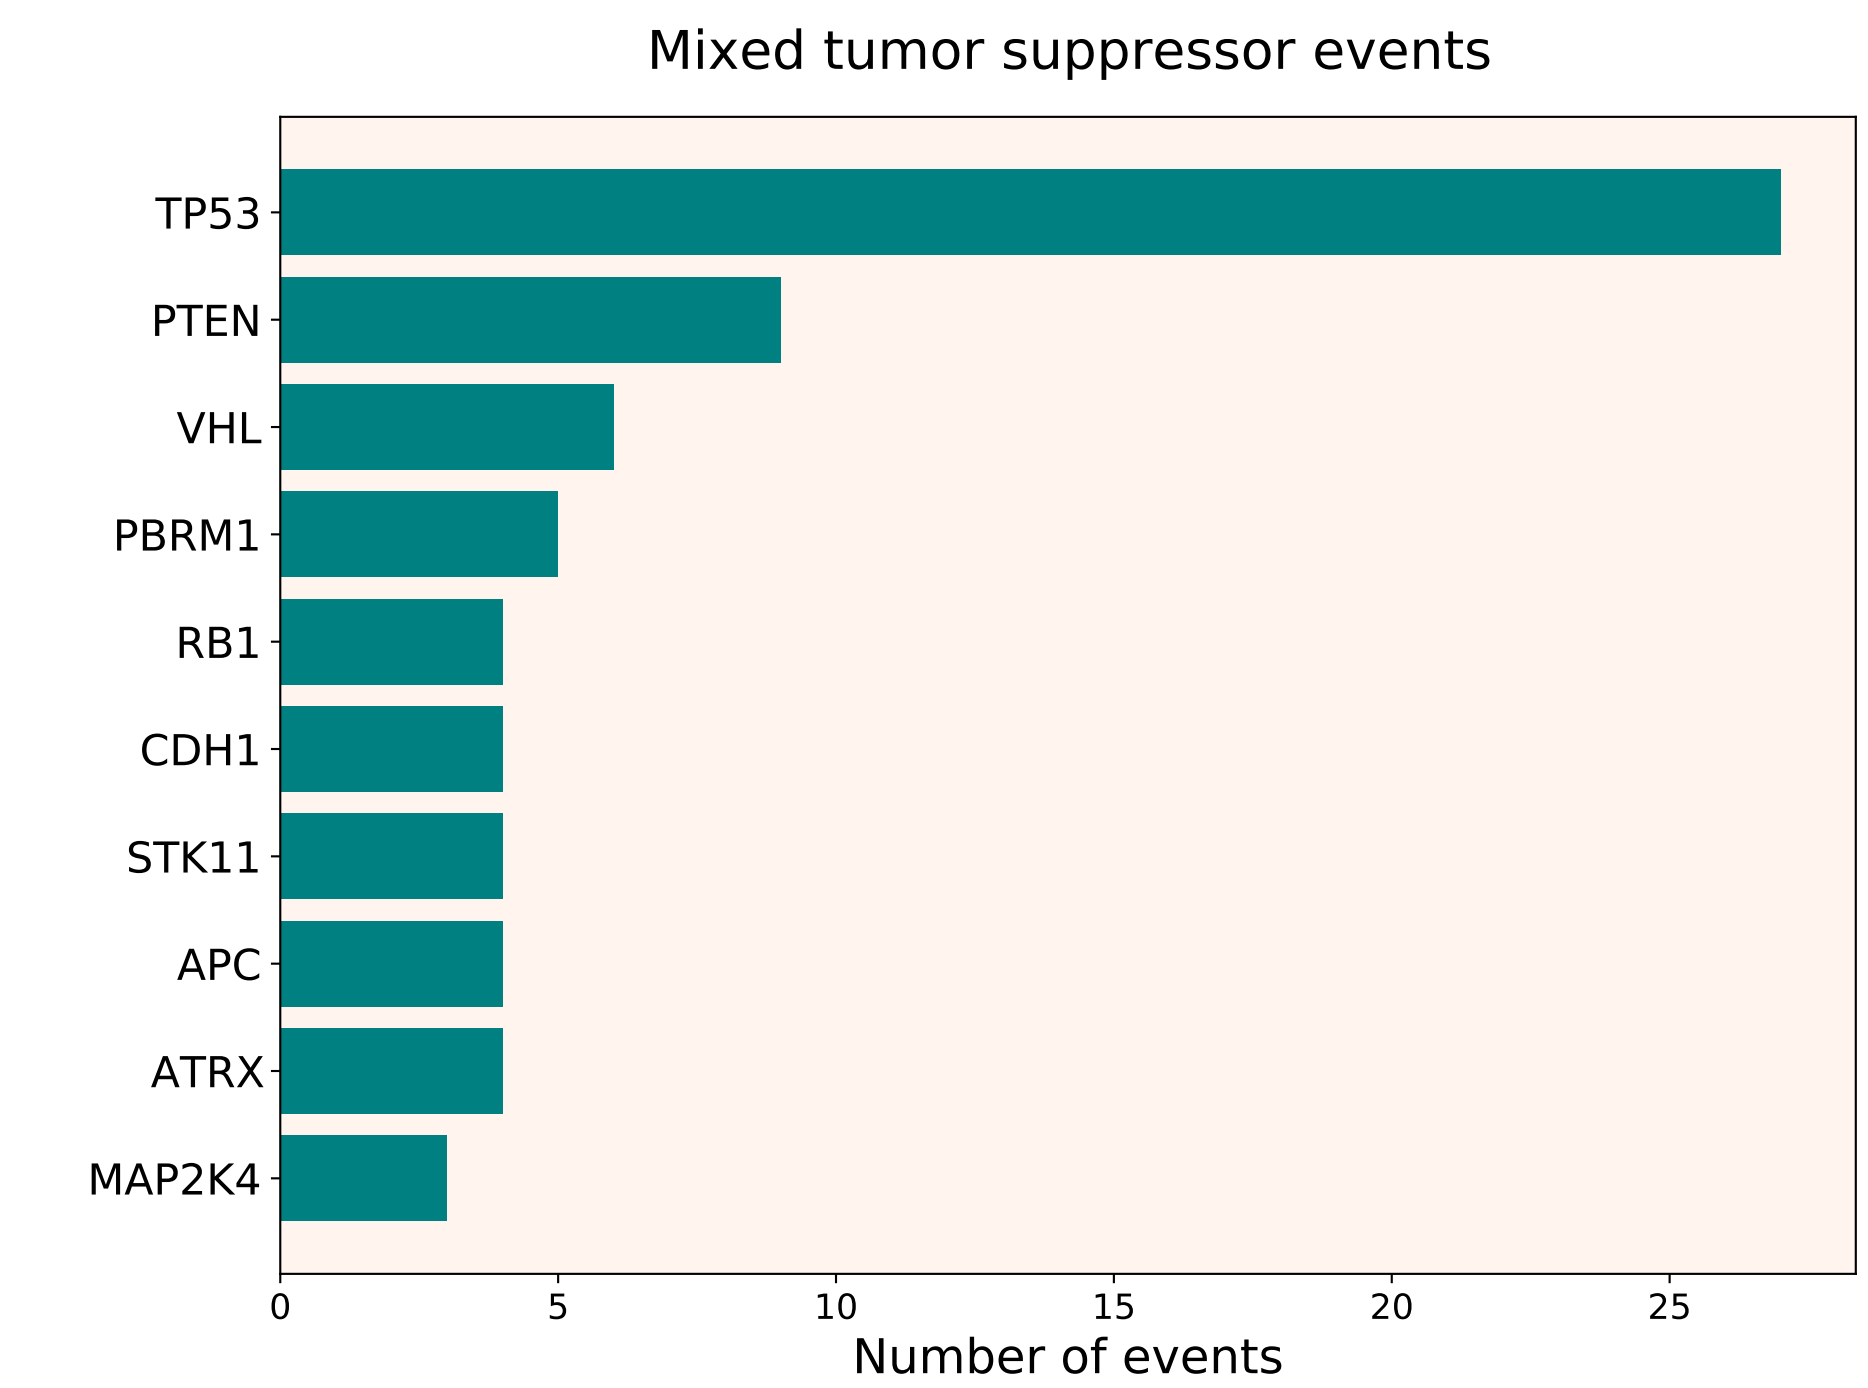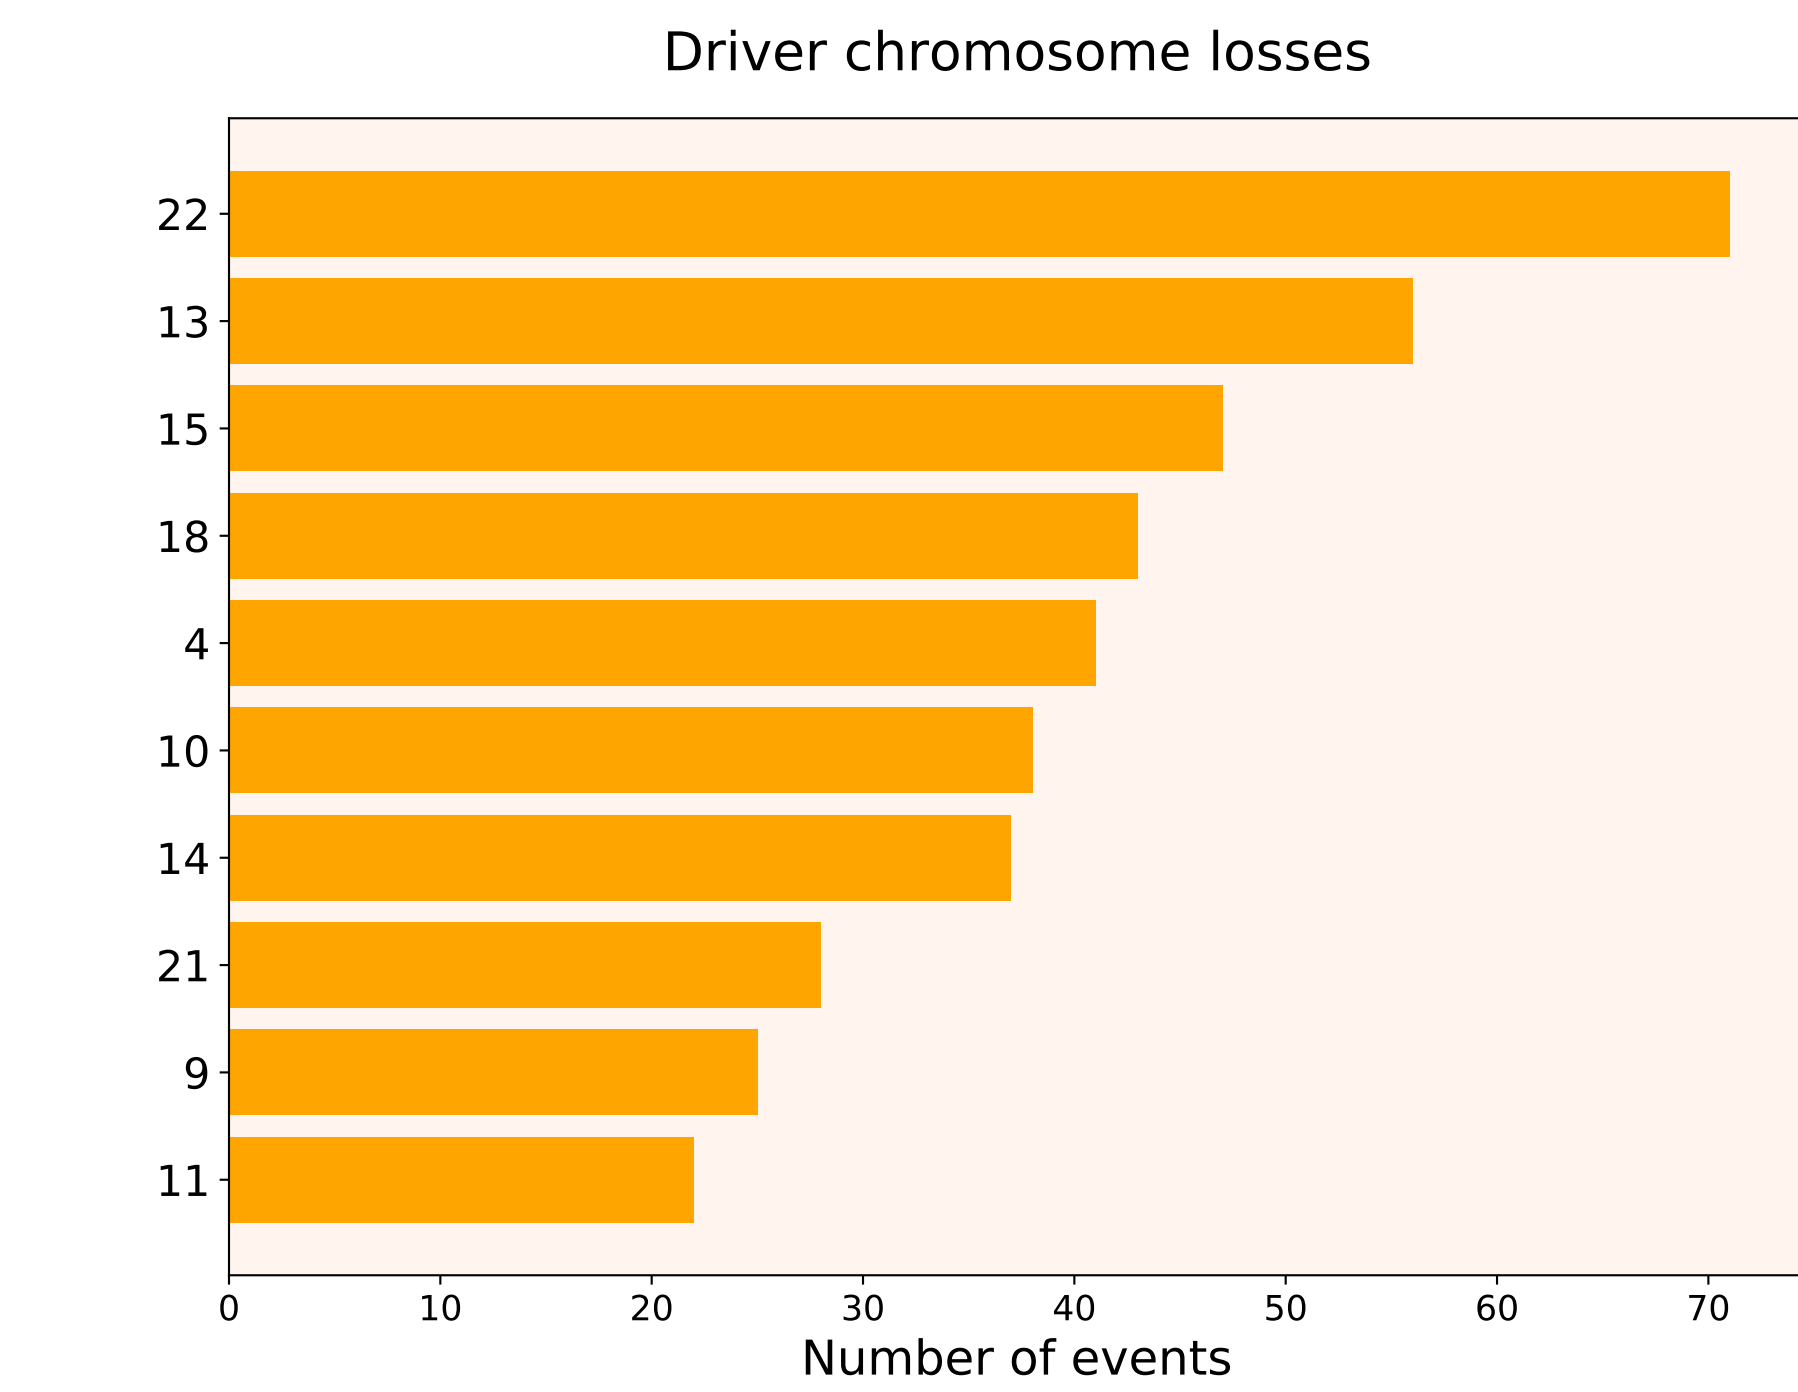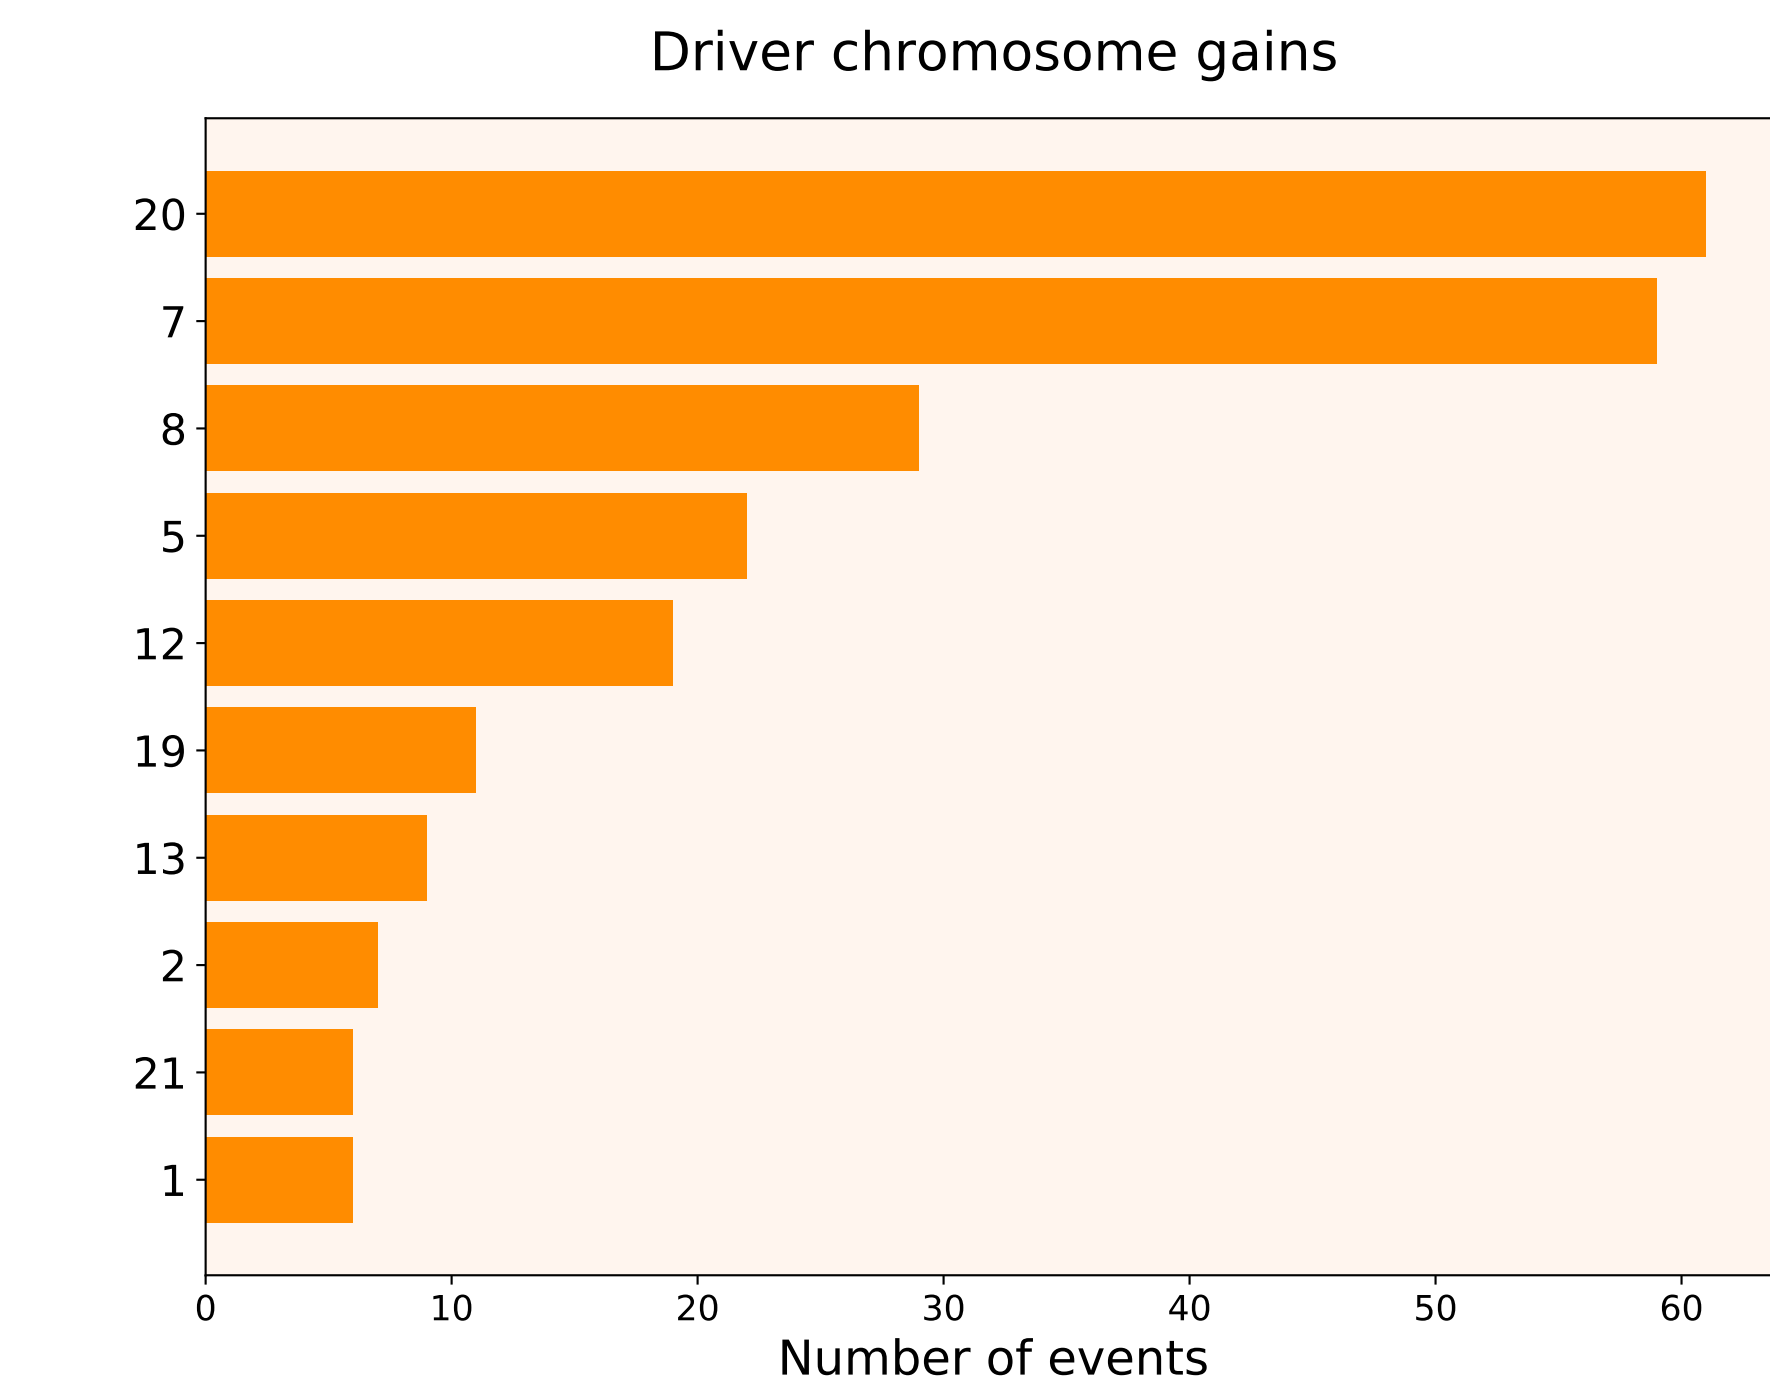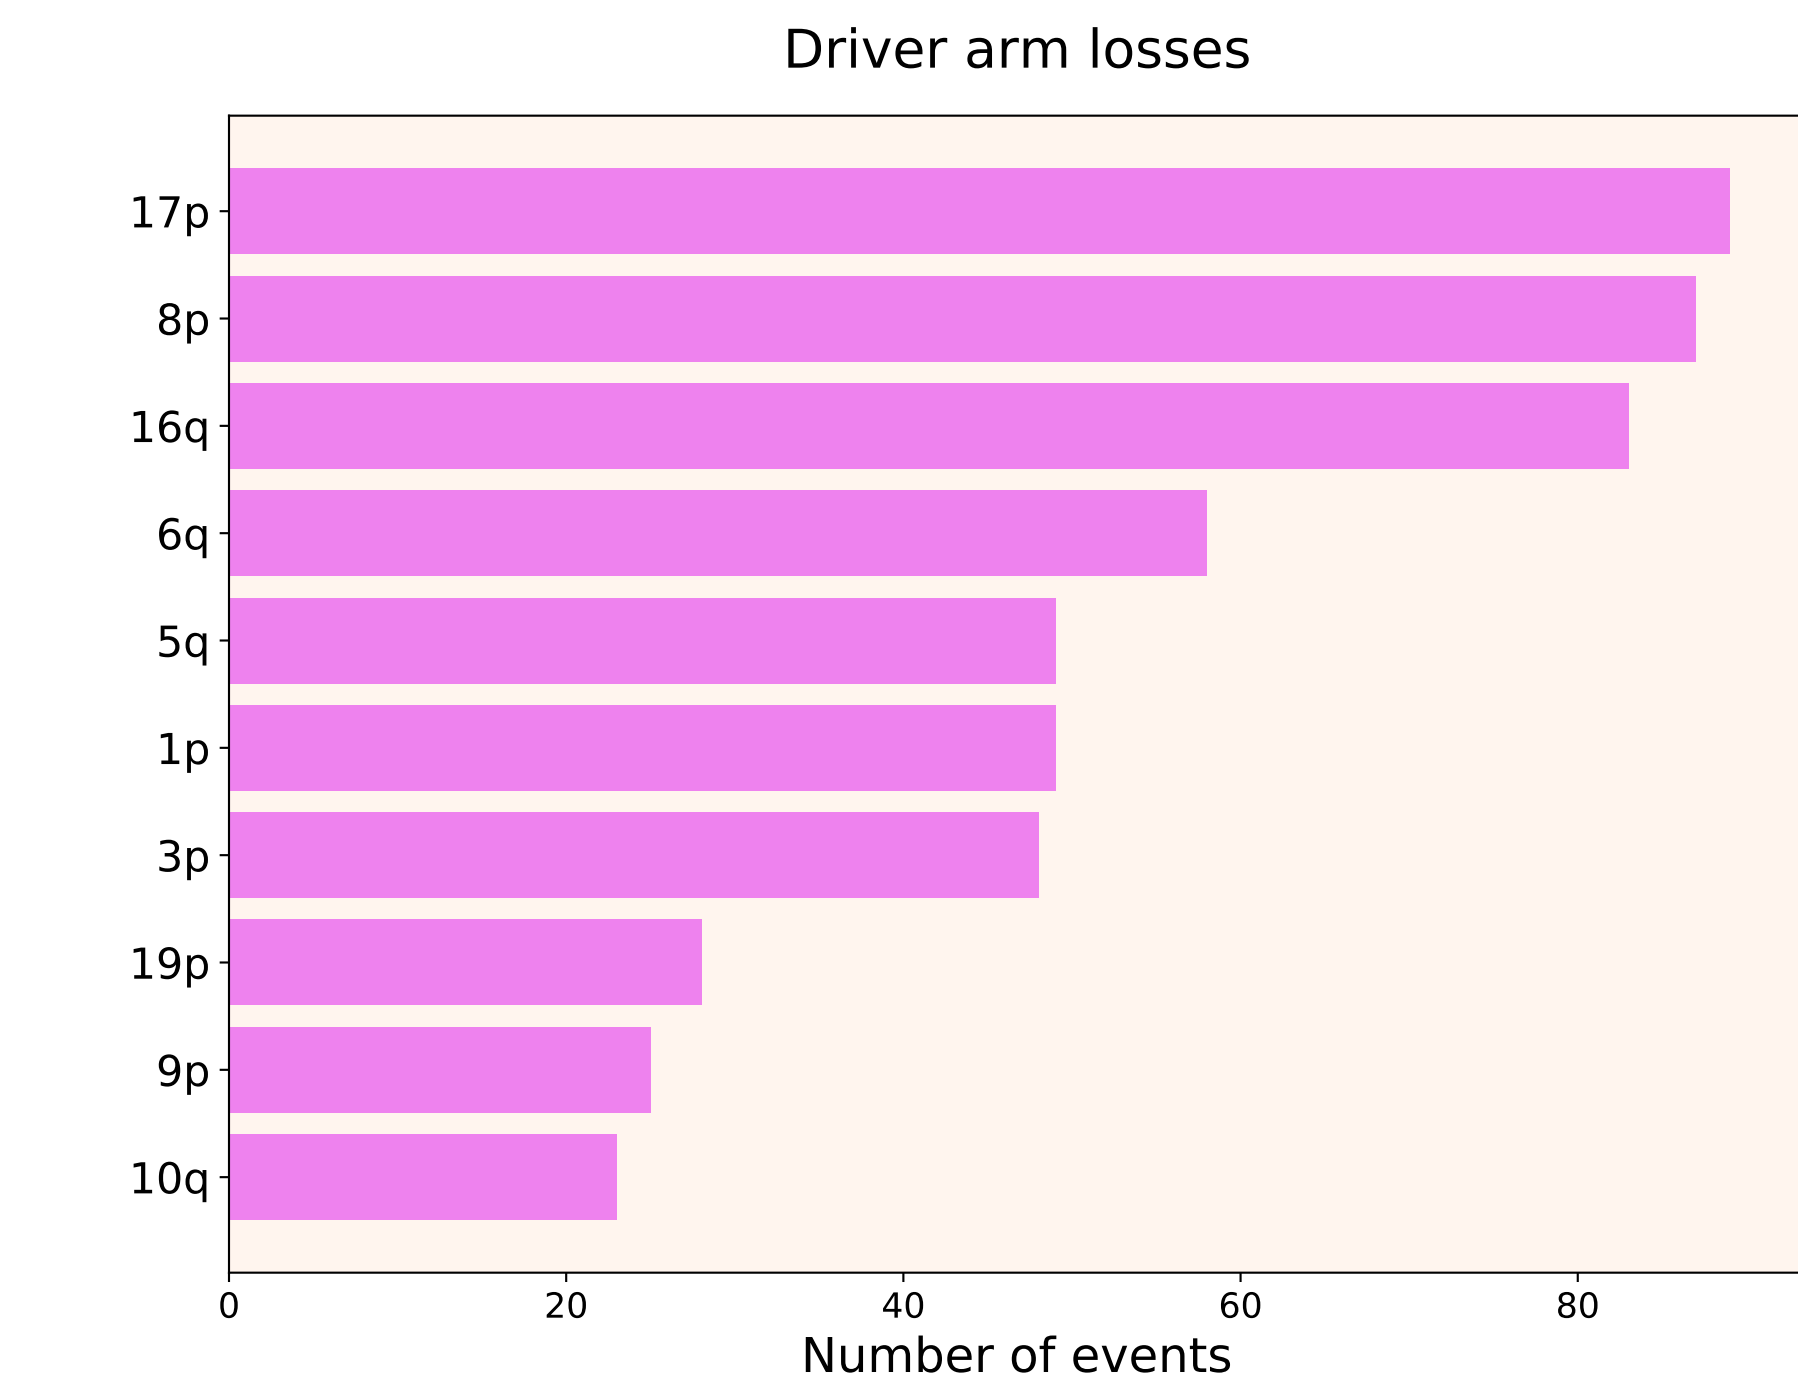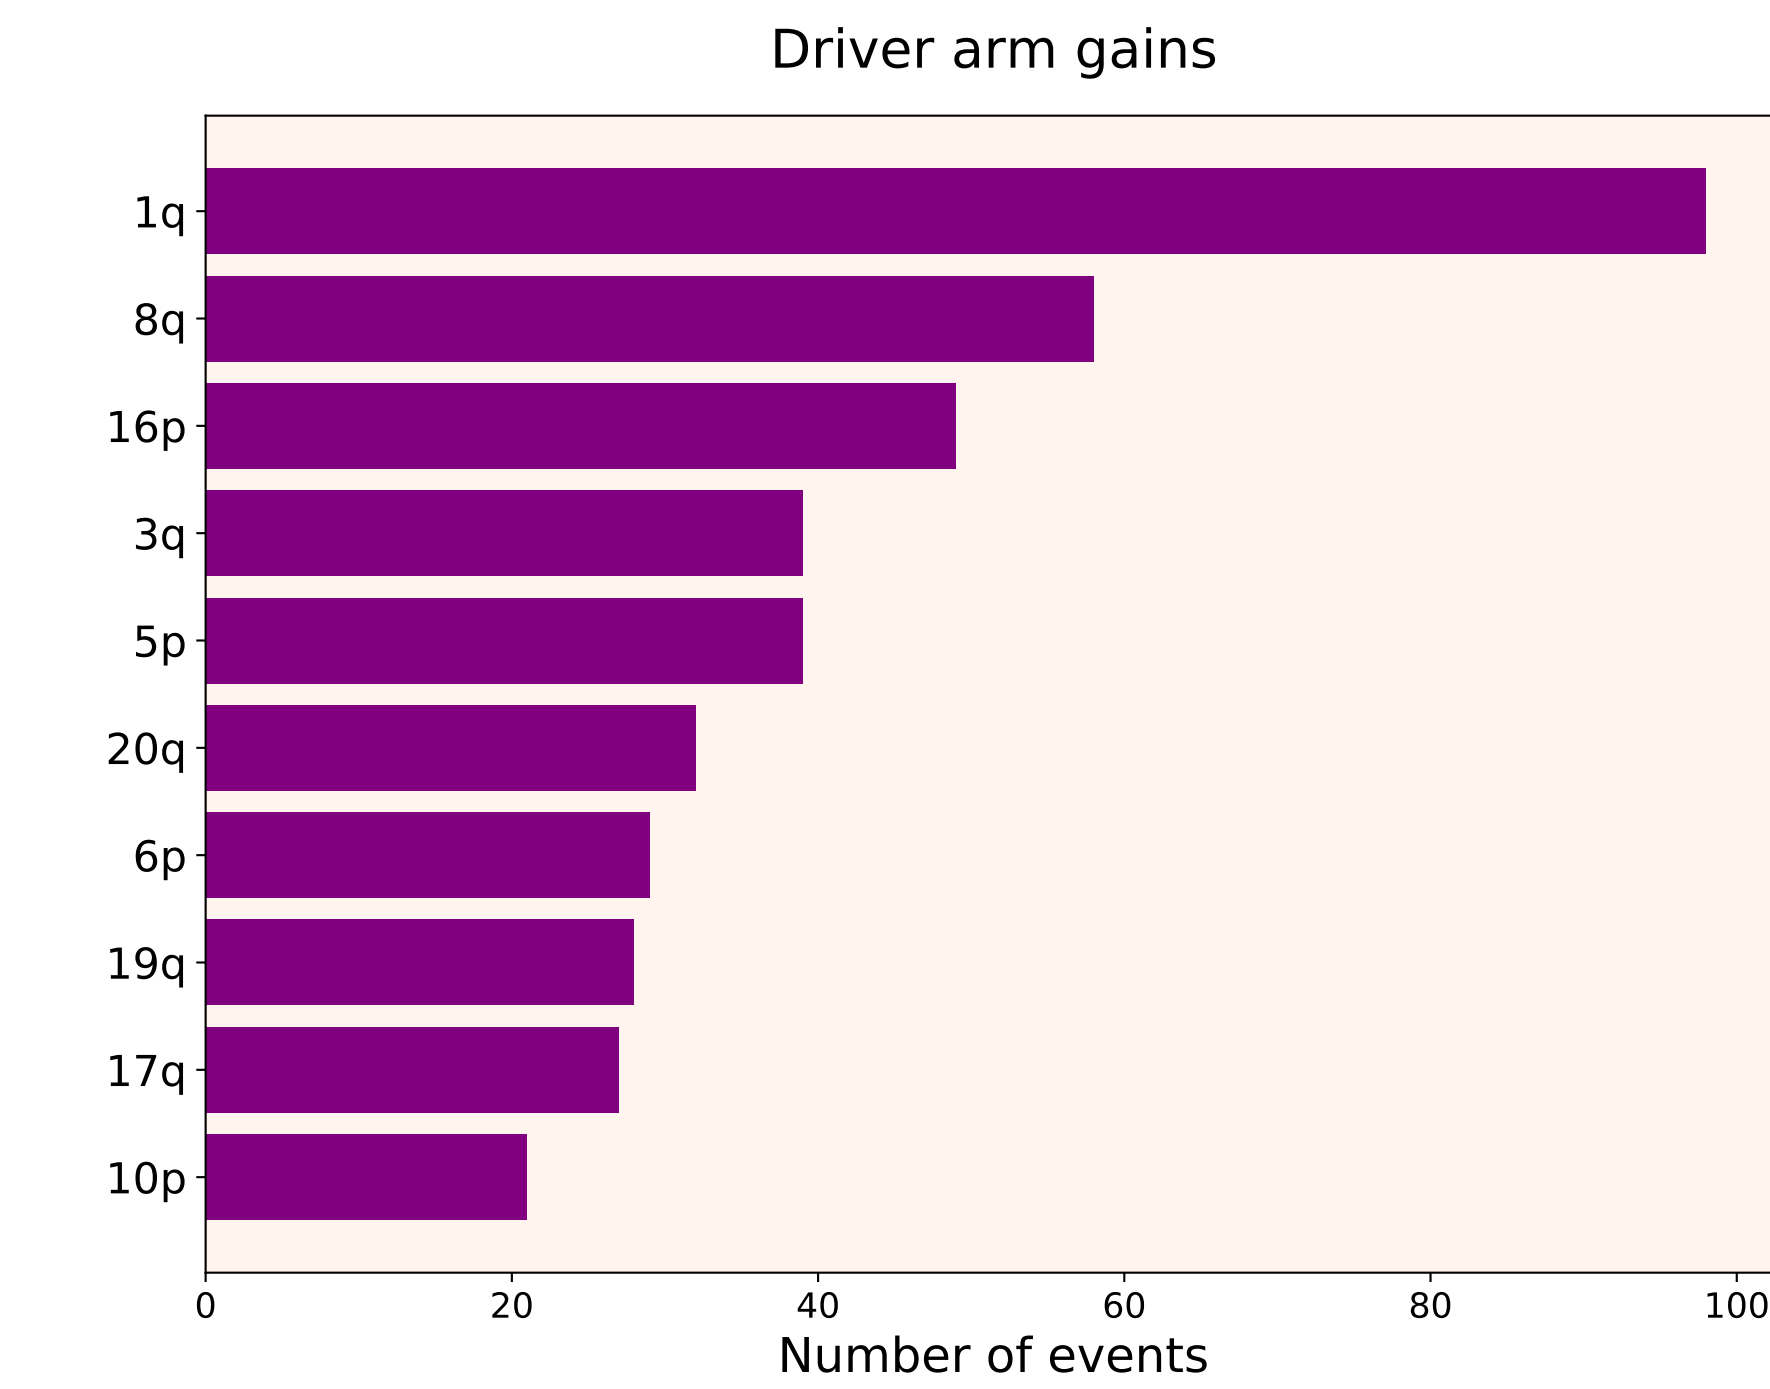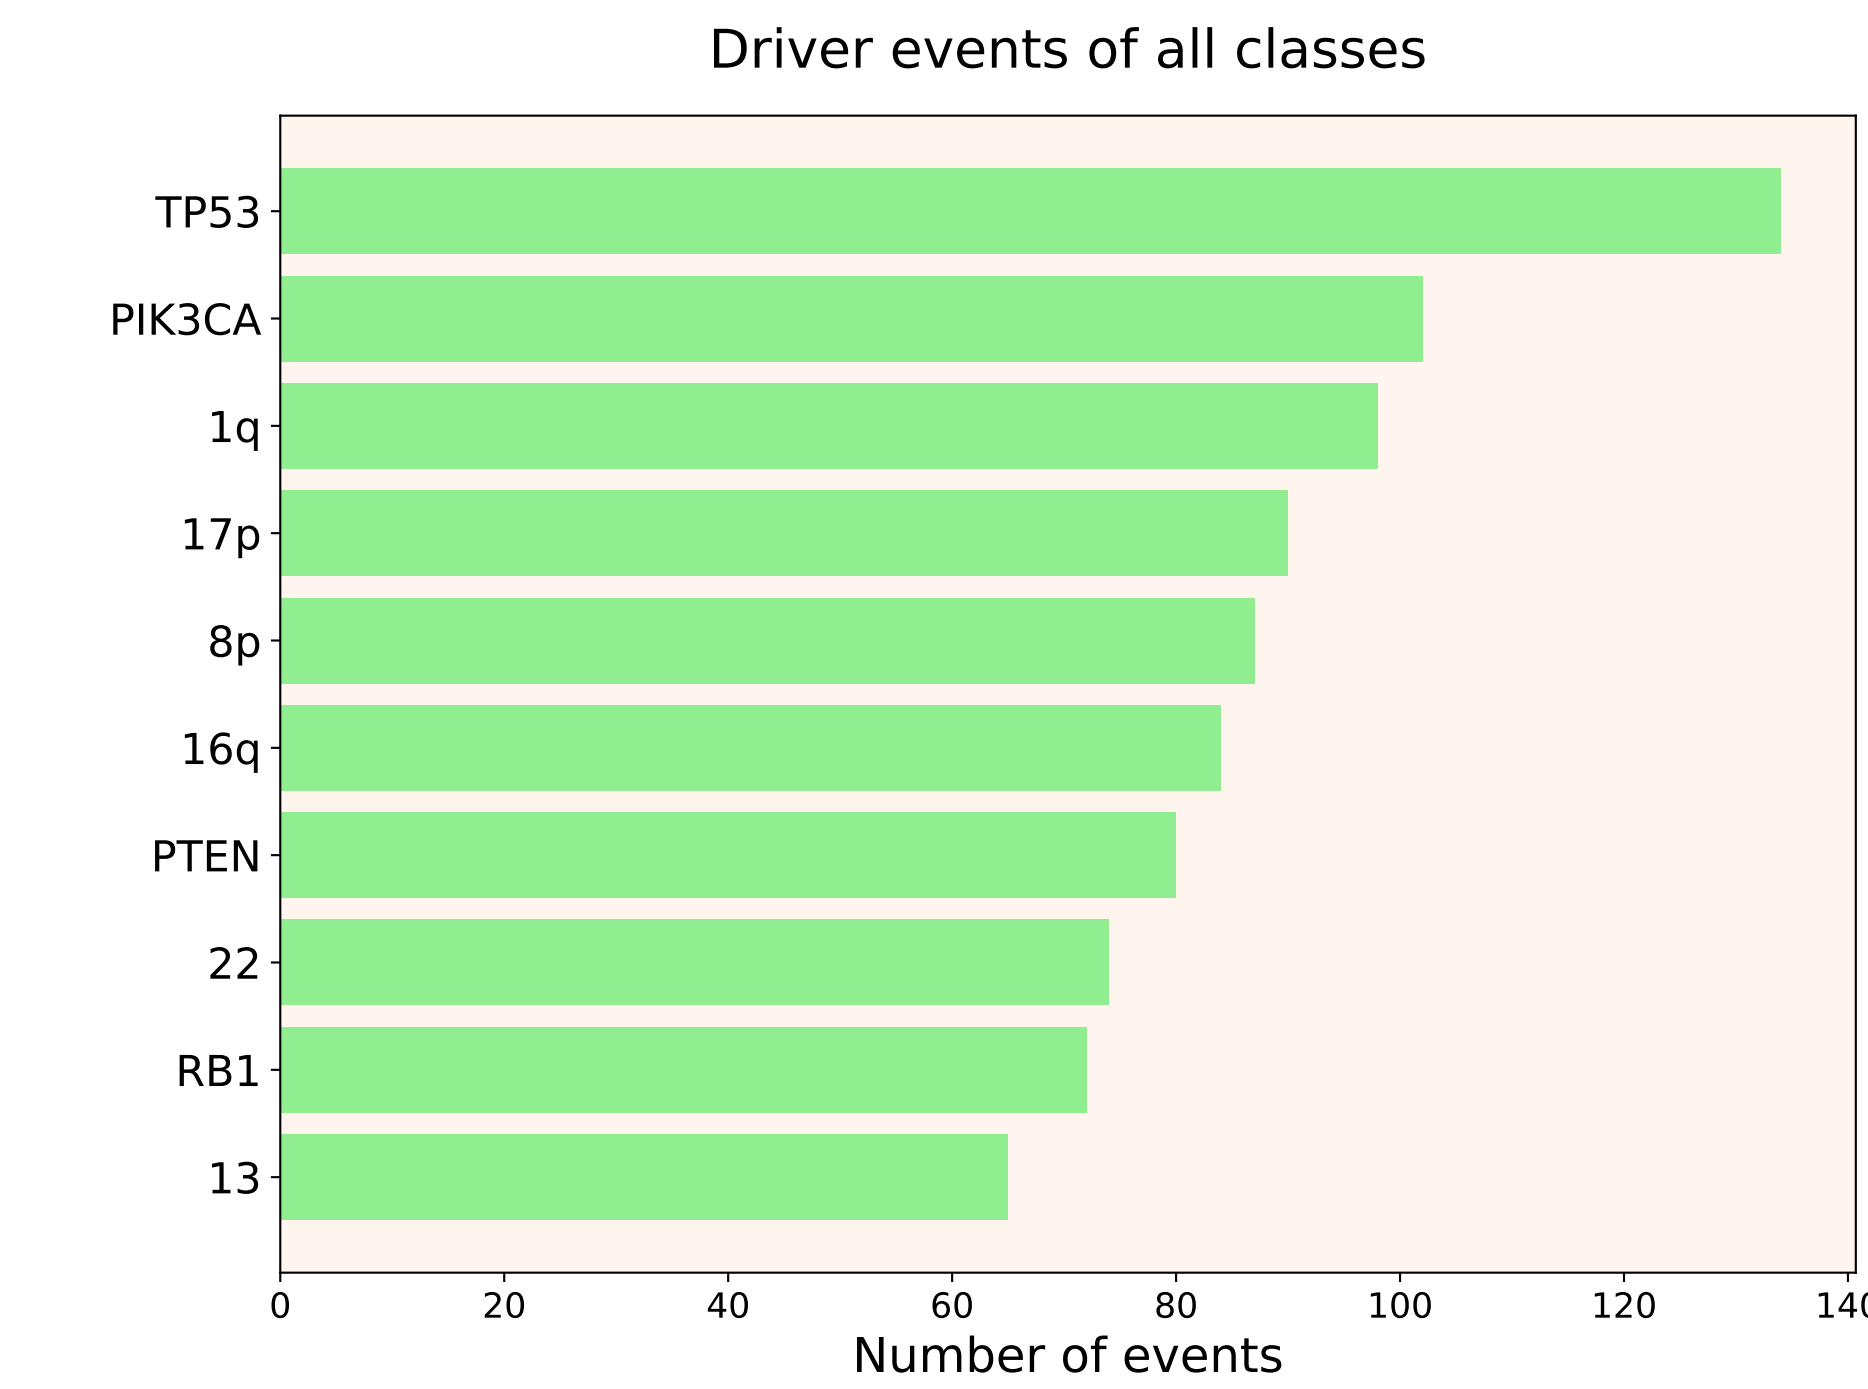

Supplement: Supplemental_Data_S1.zip [file Supplemental_Data_S1.zip]

# HNSC\_MALE

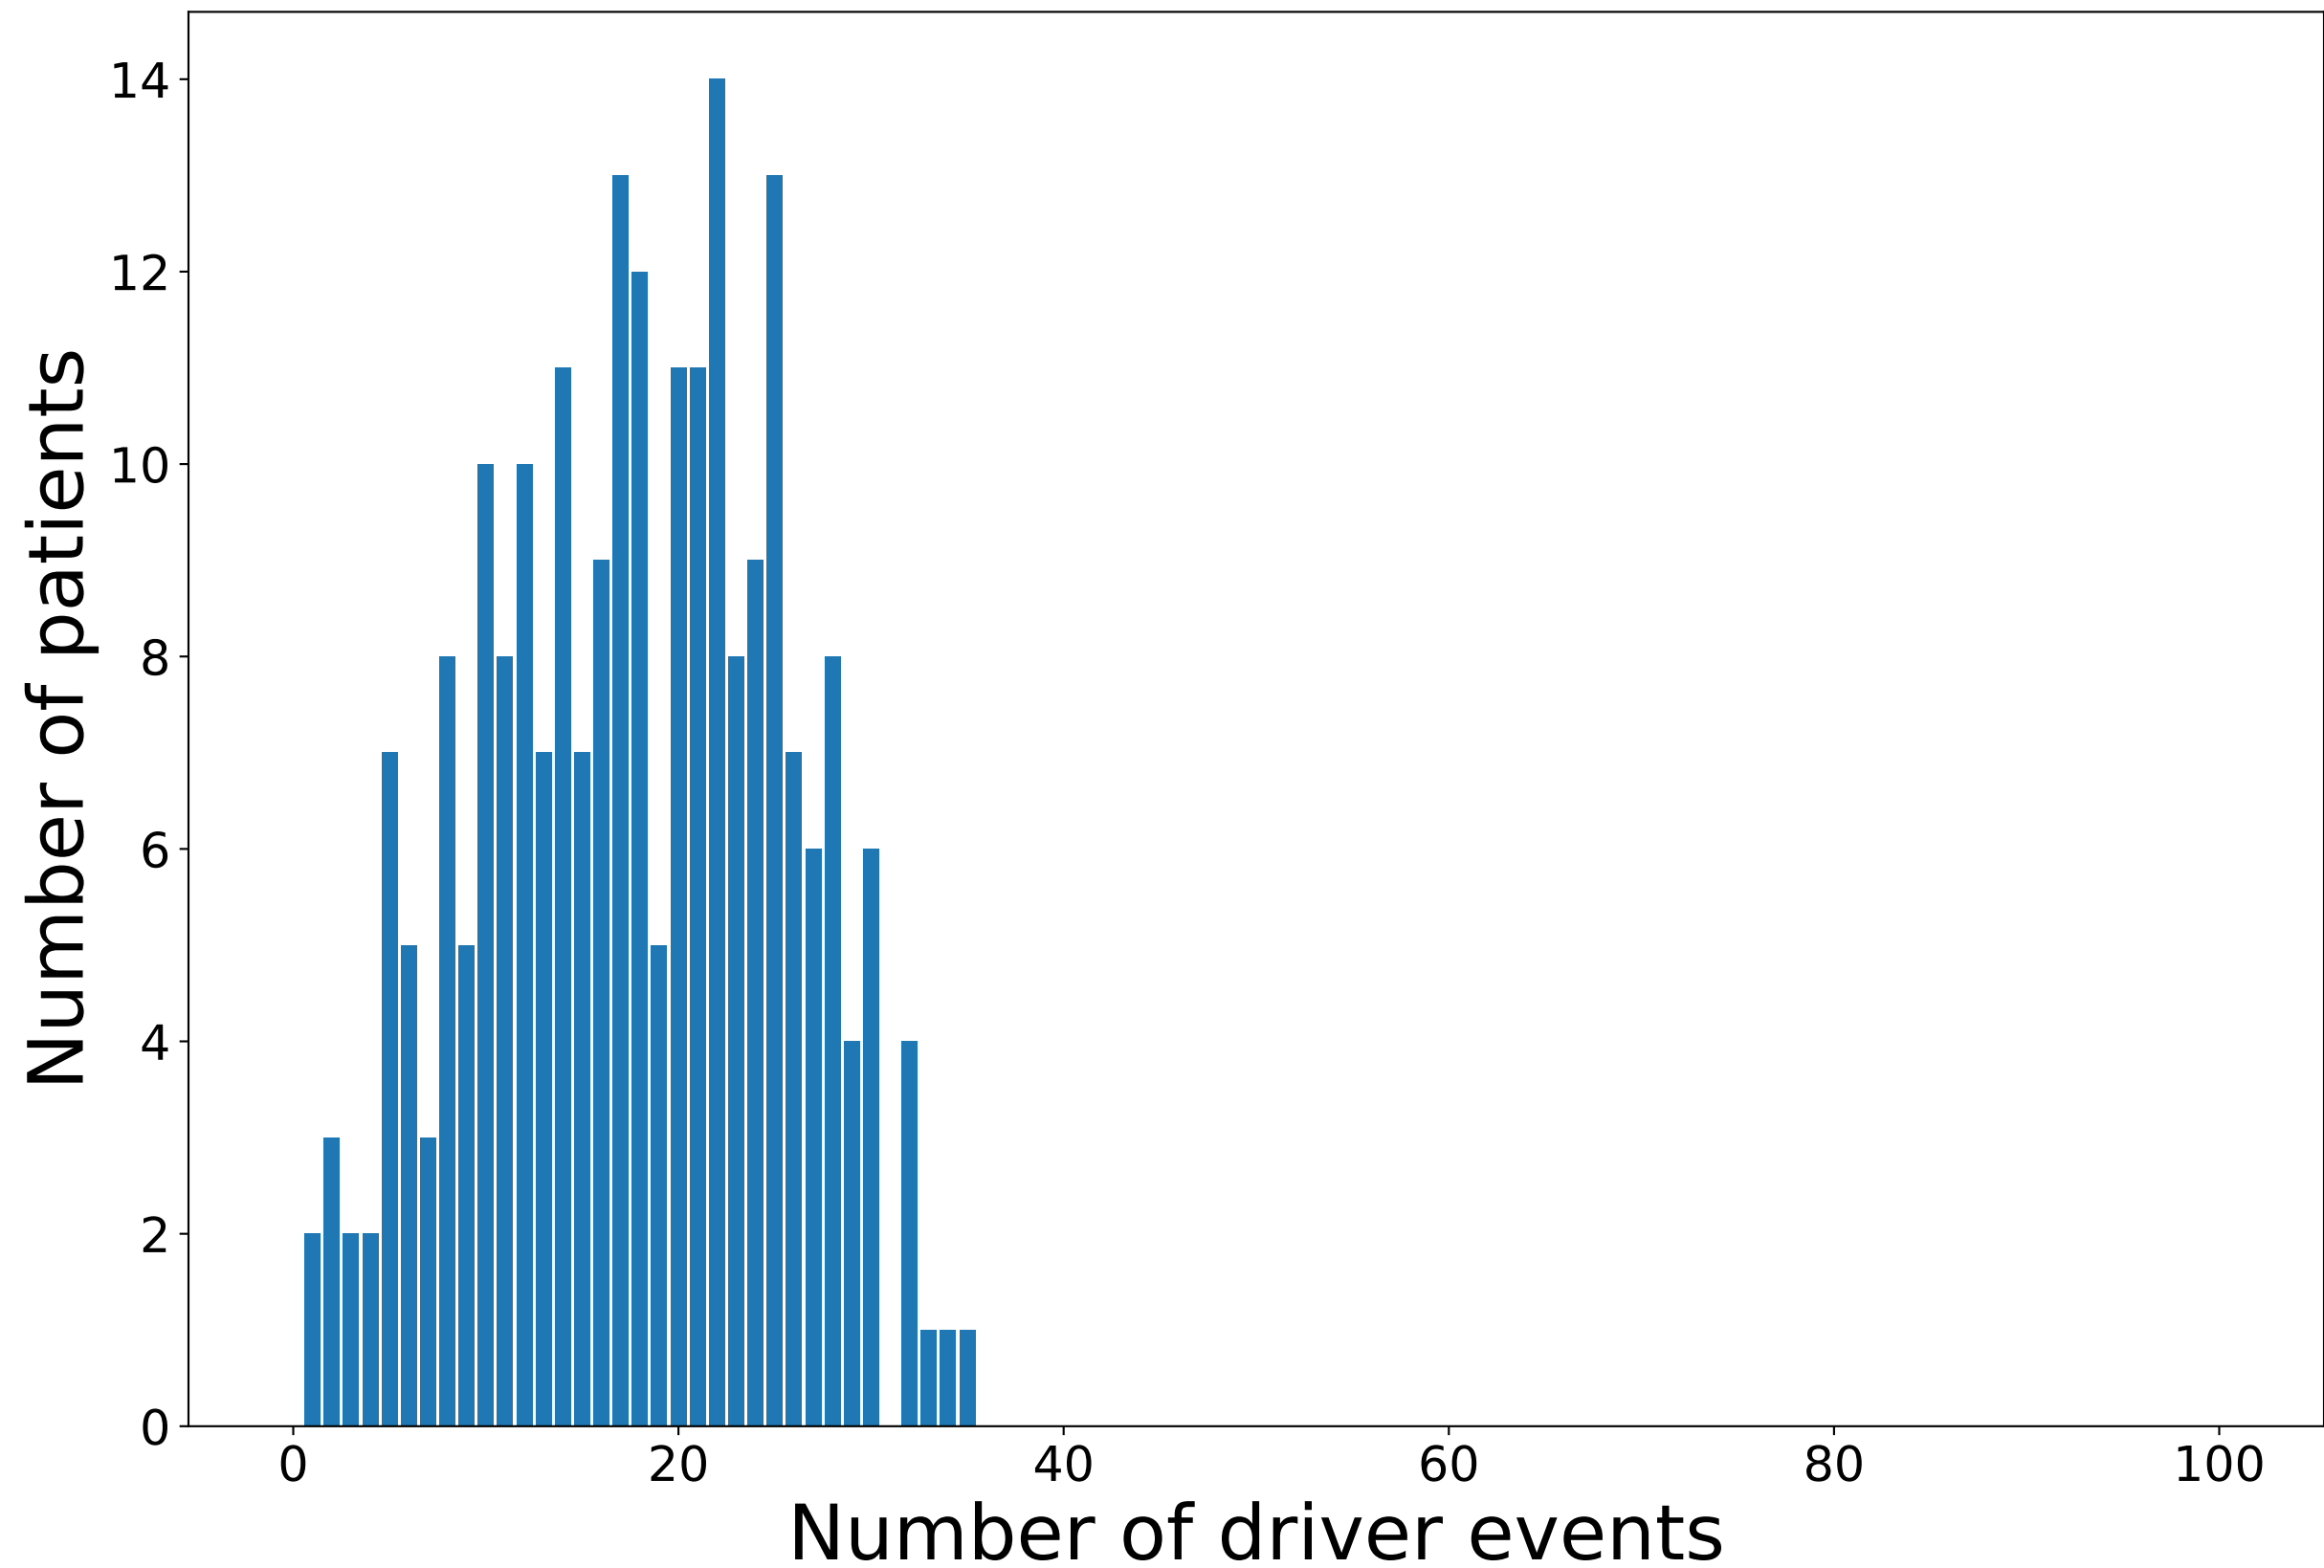

Supplement: Supplemental_Data_S1.zip [file Supplemental_Data_S1.zip]

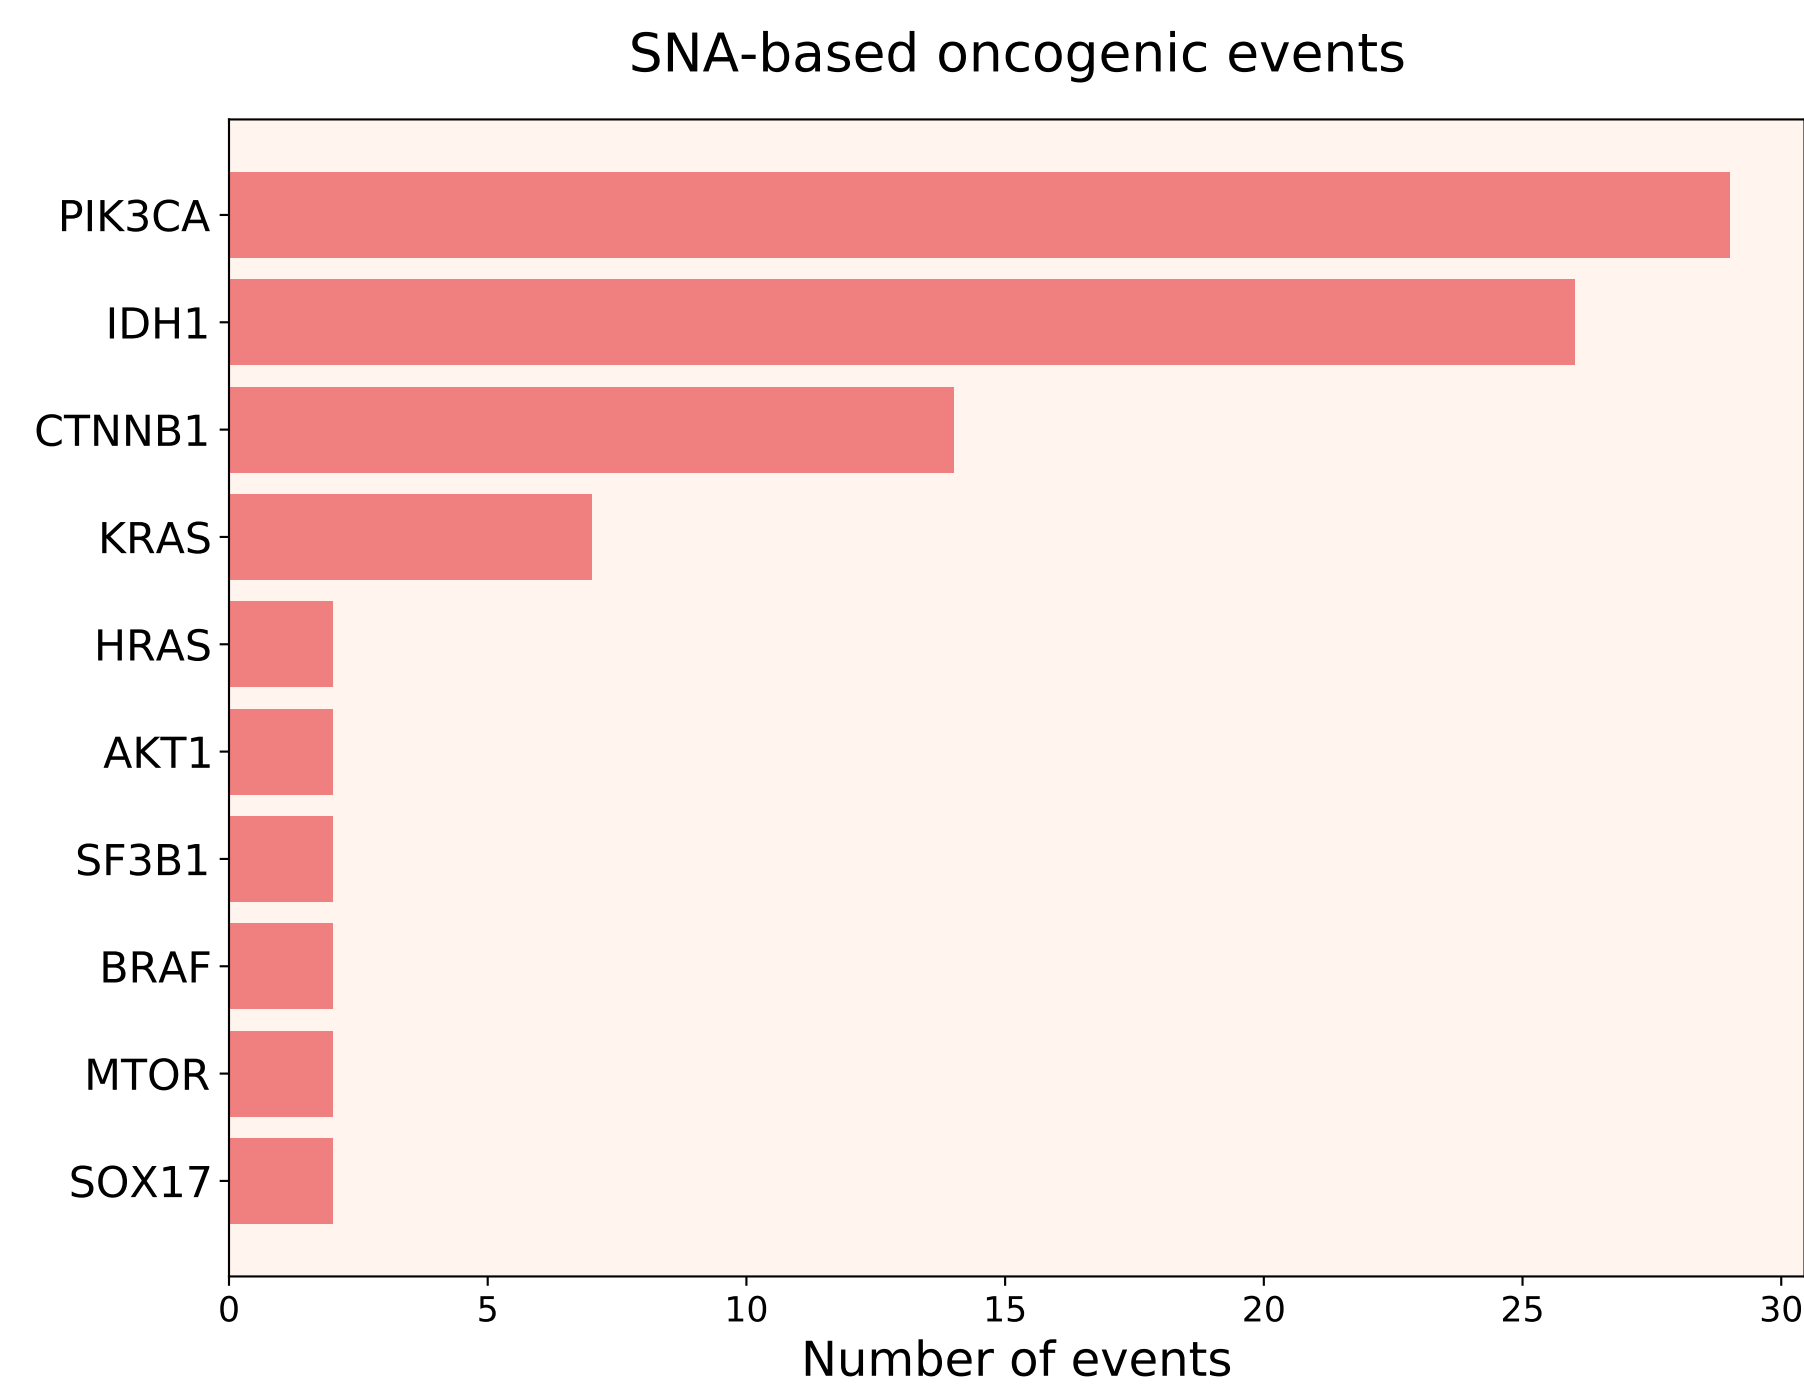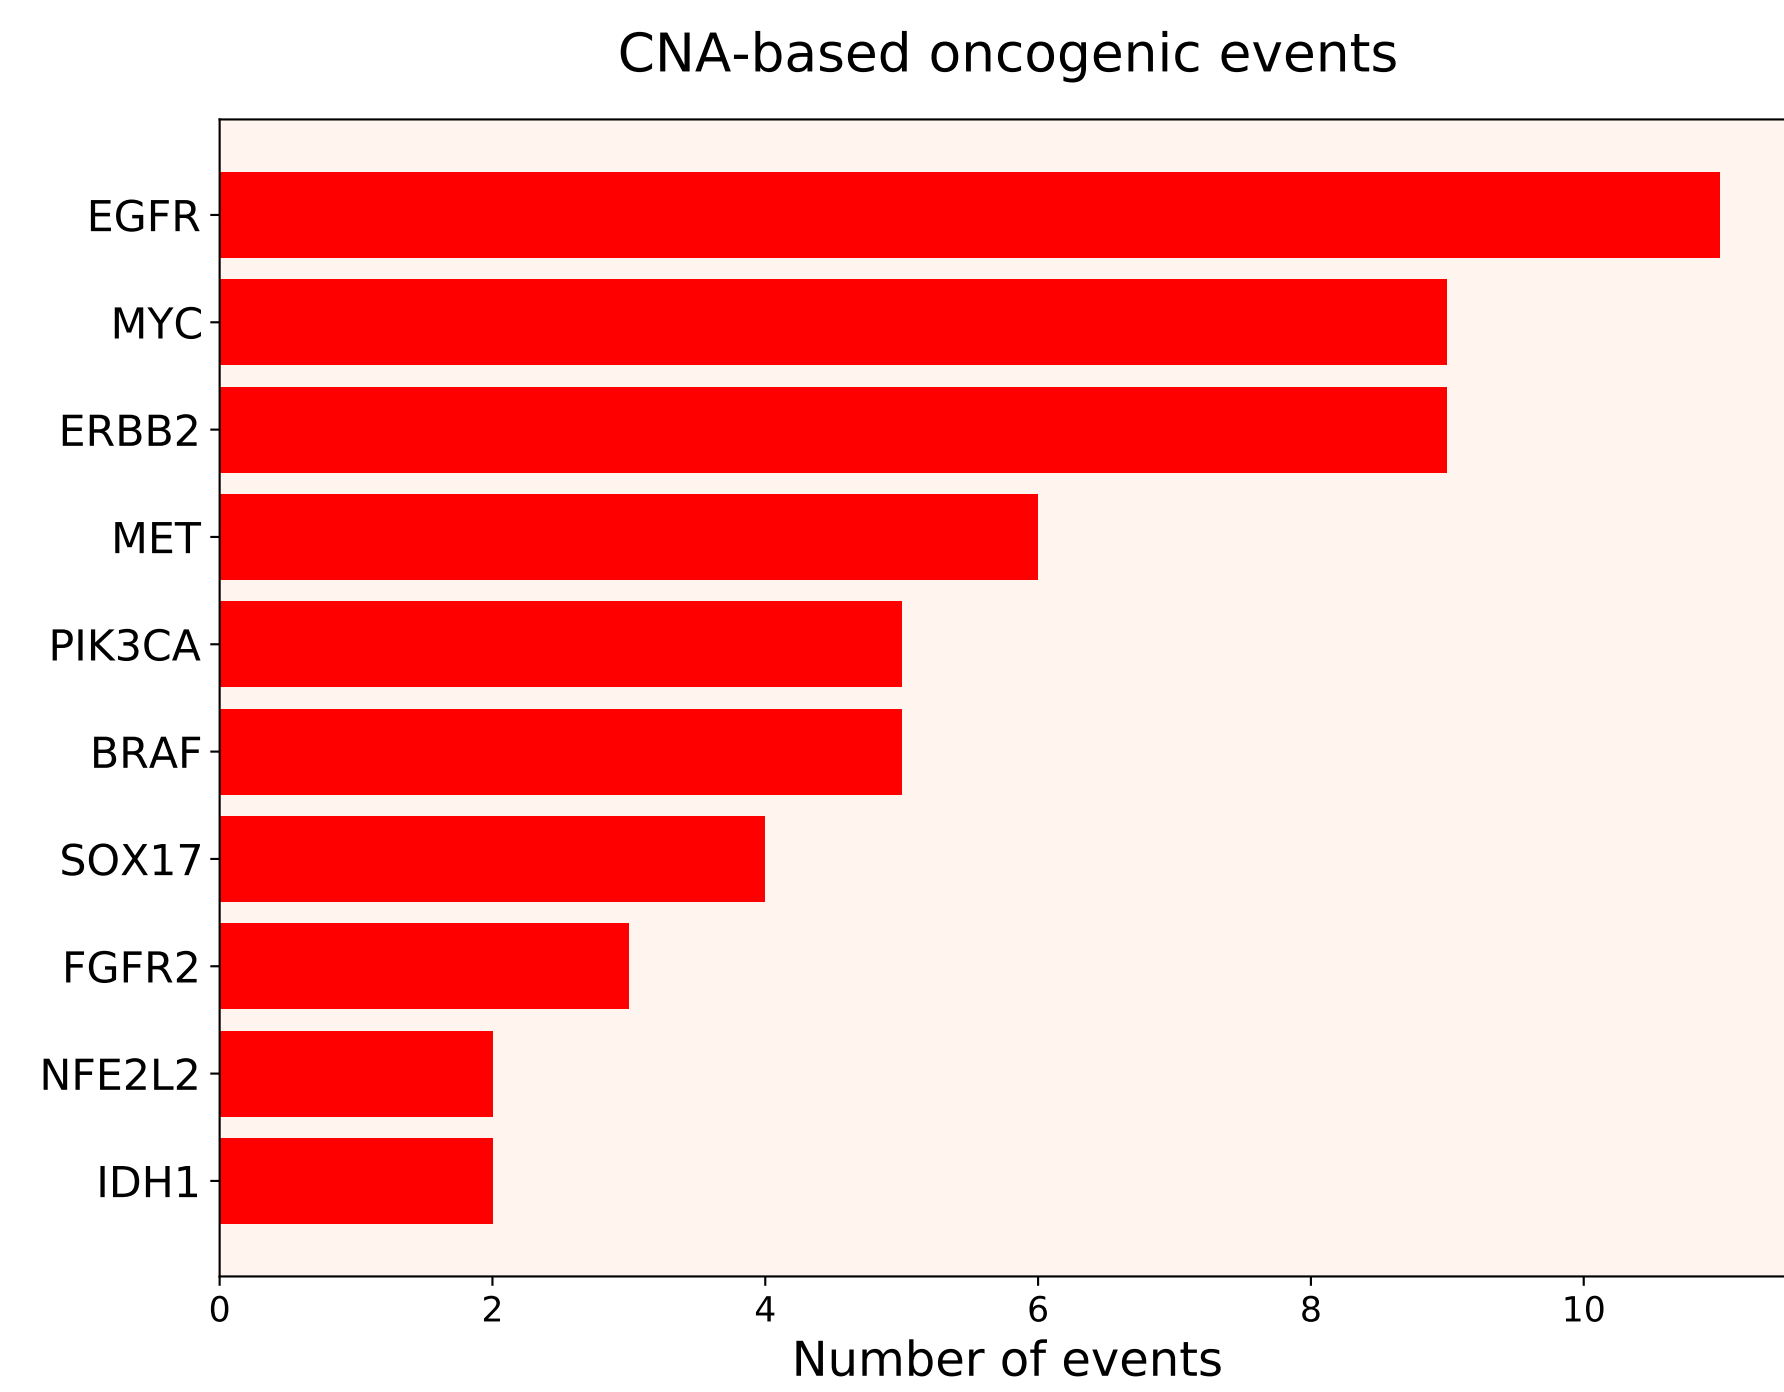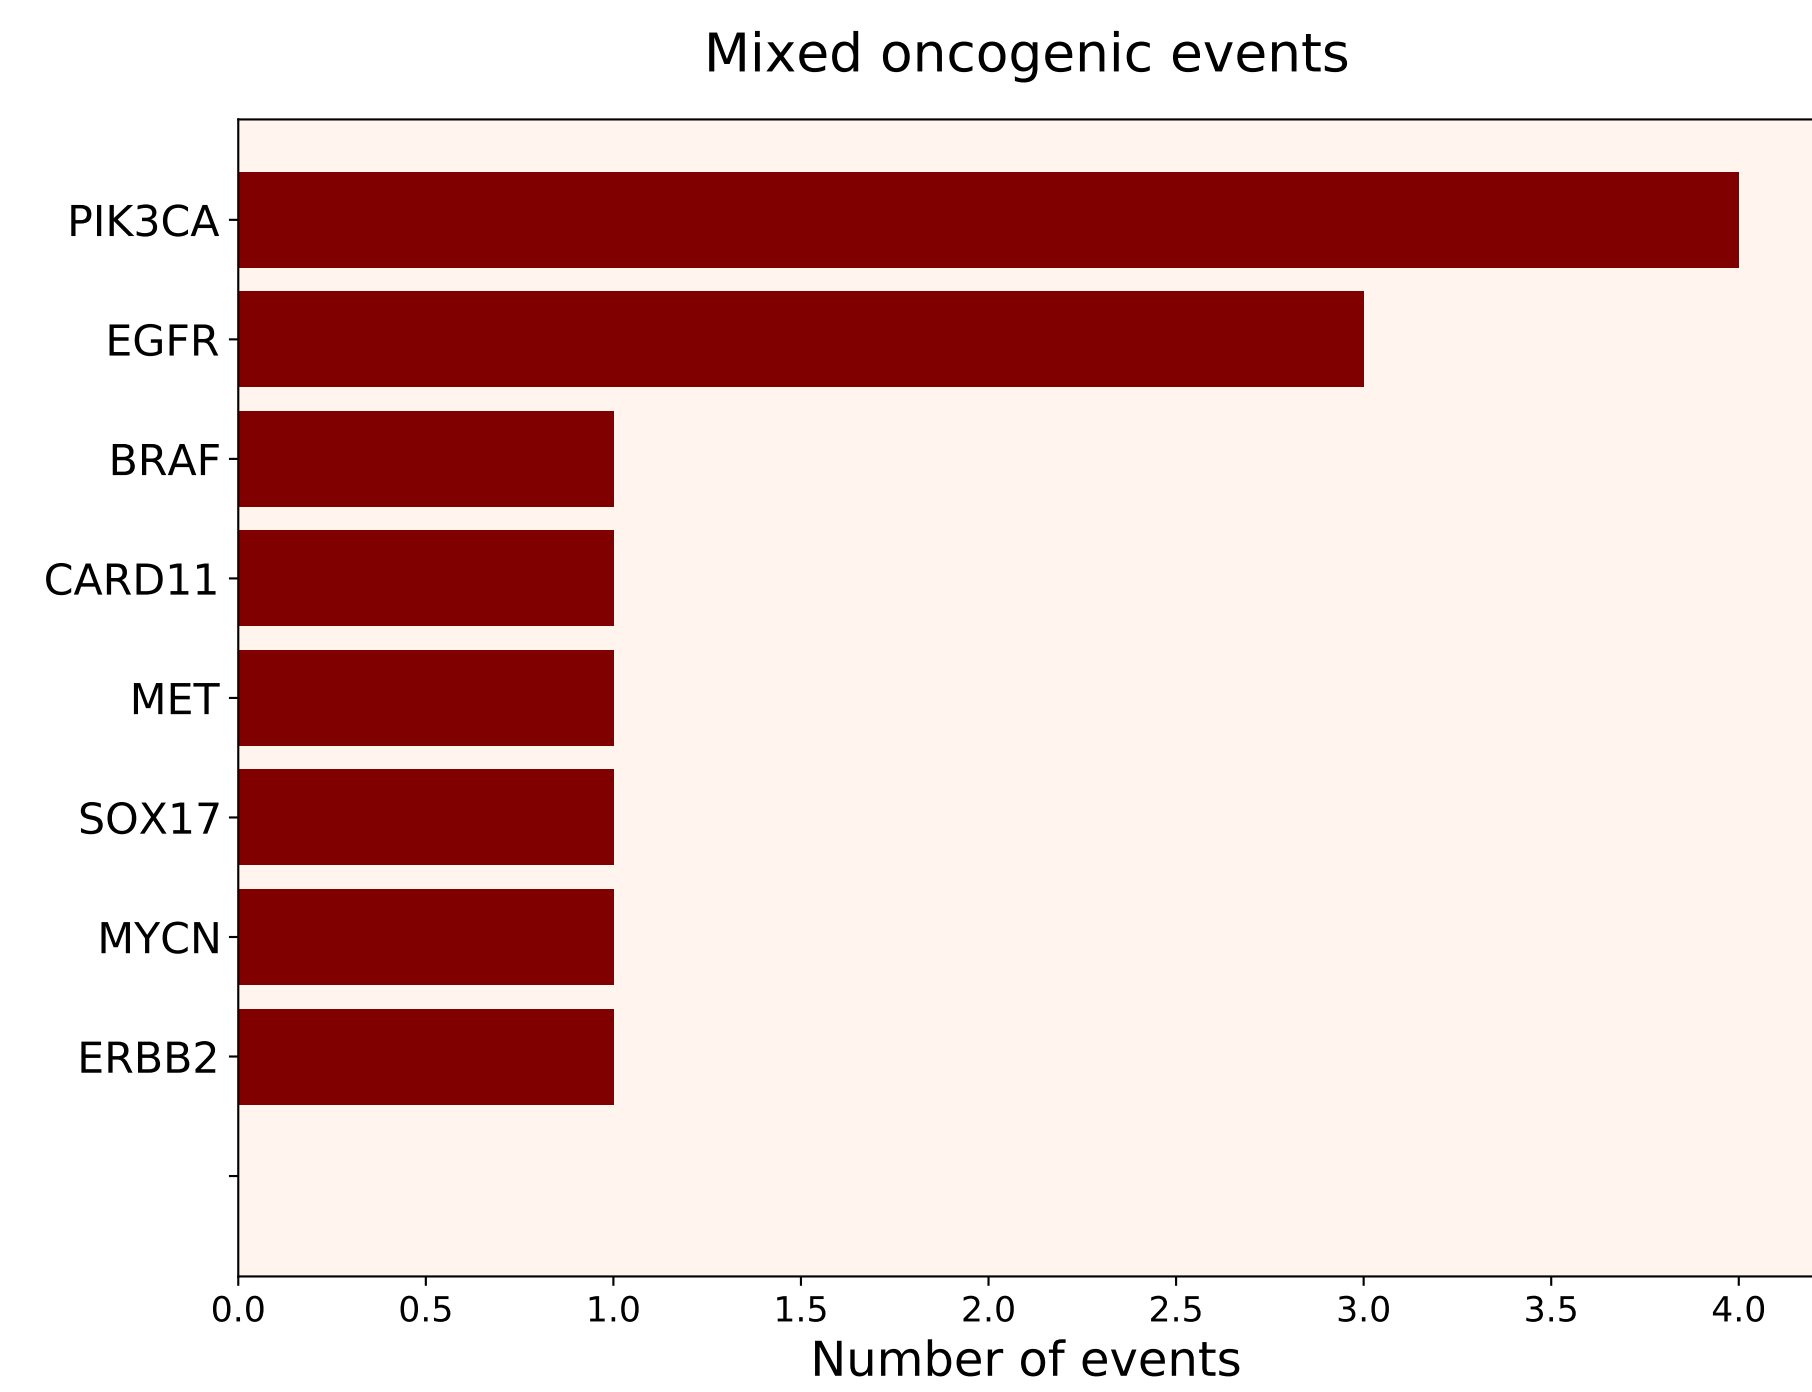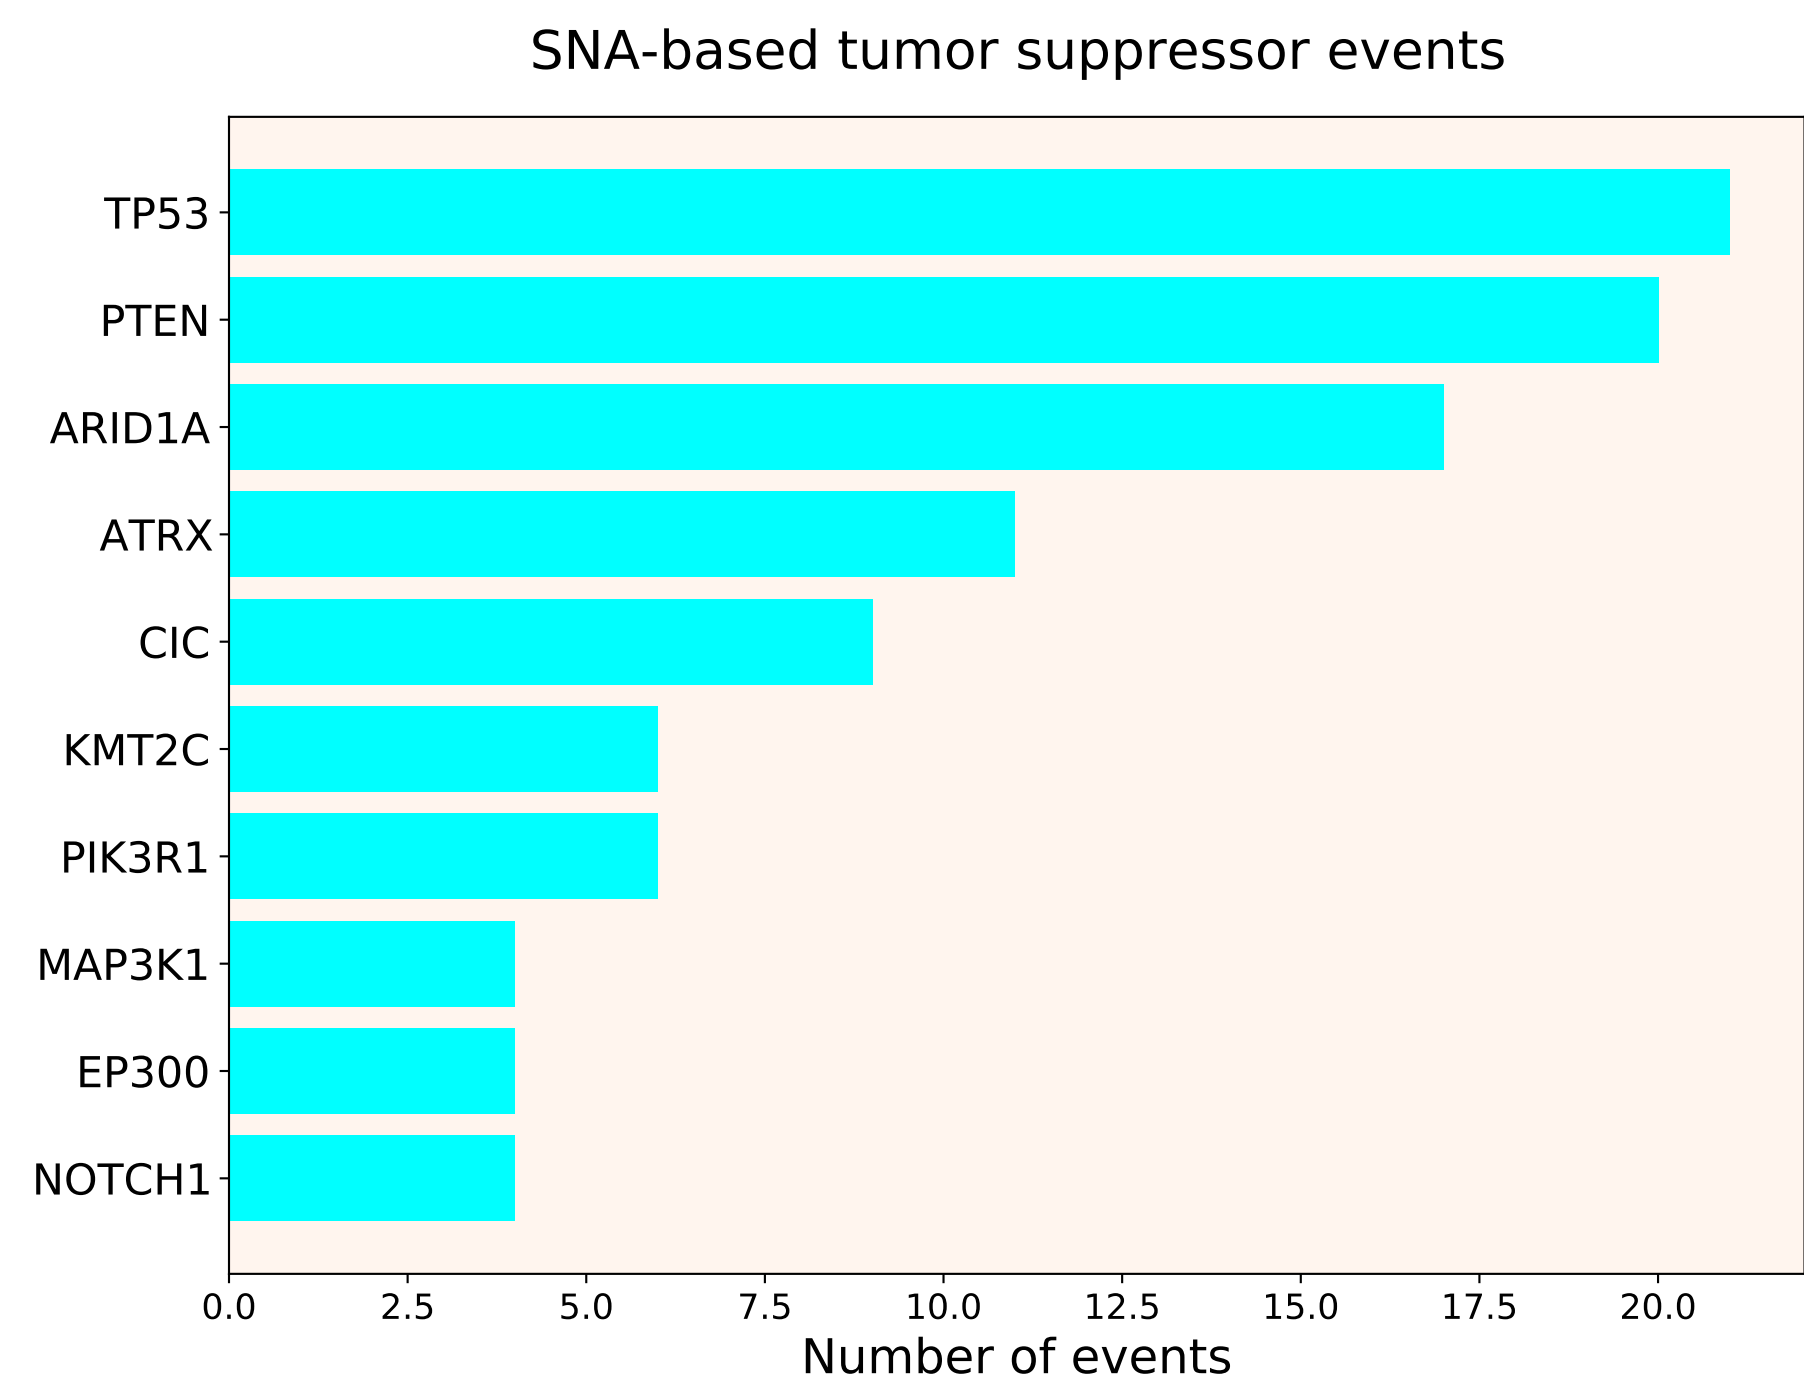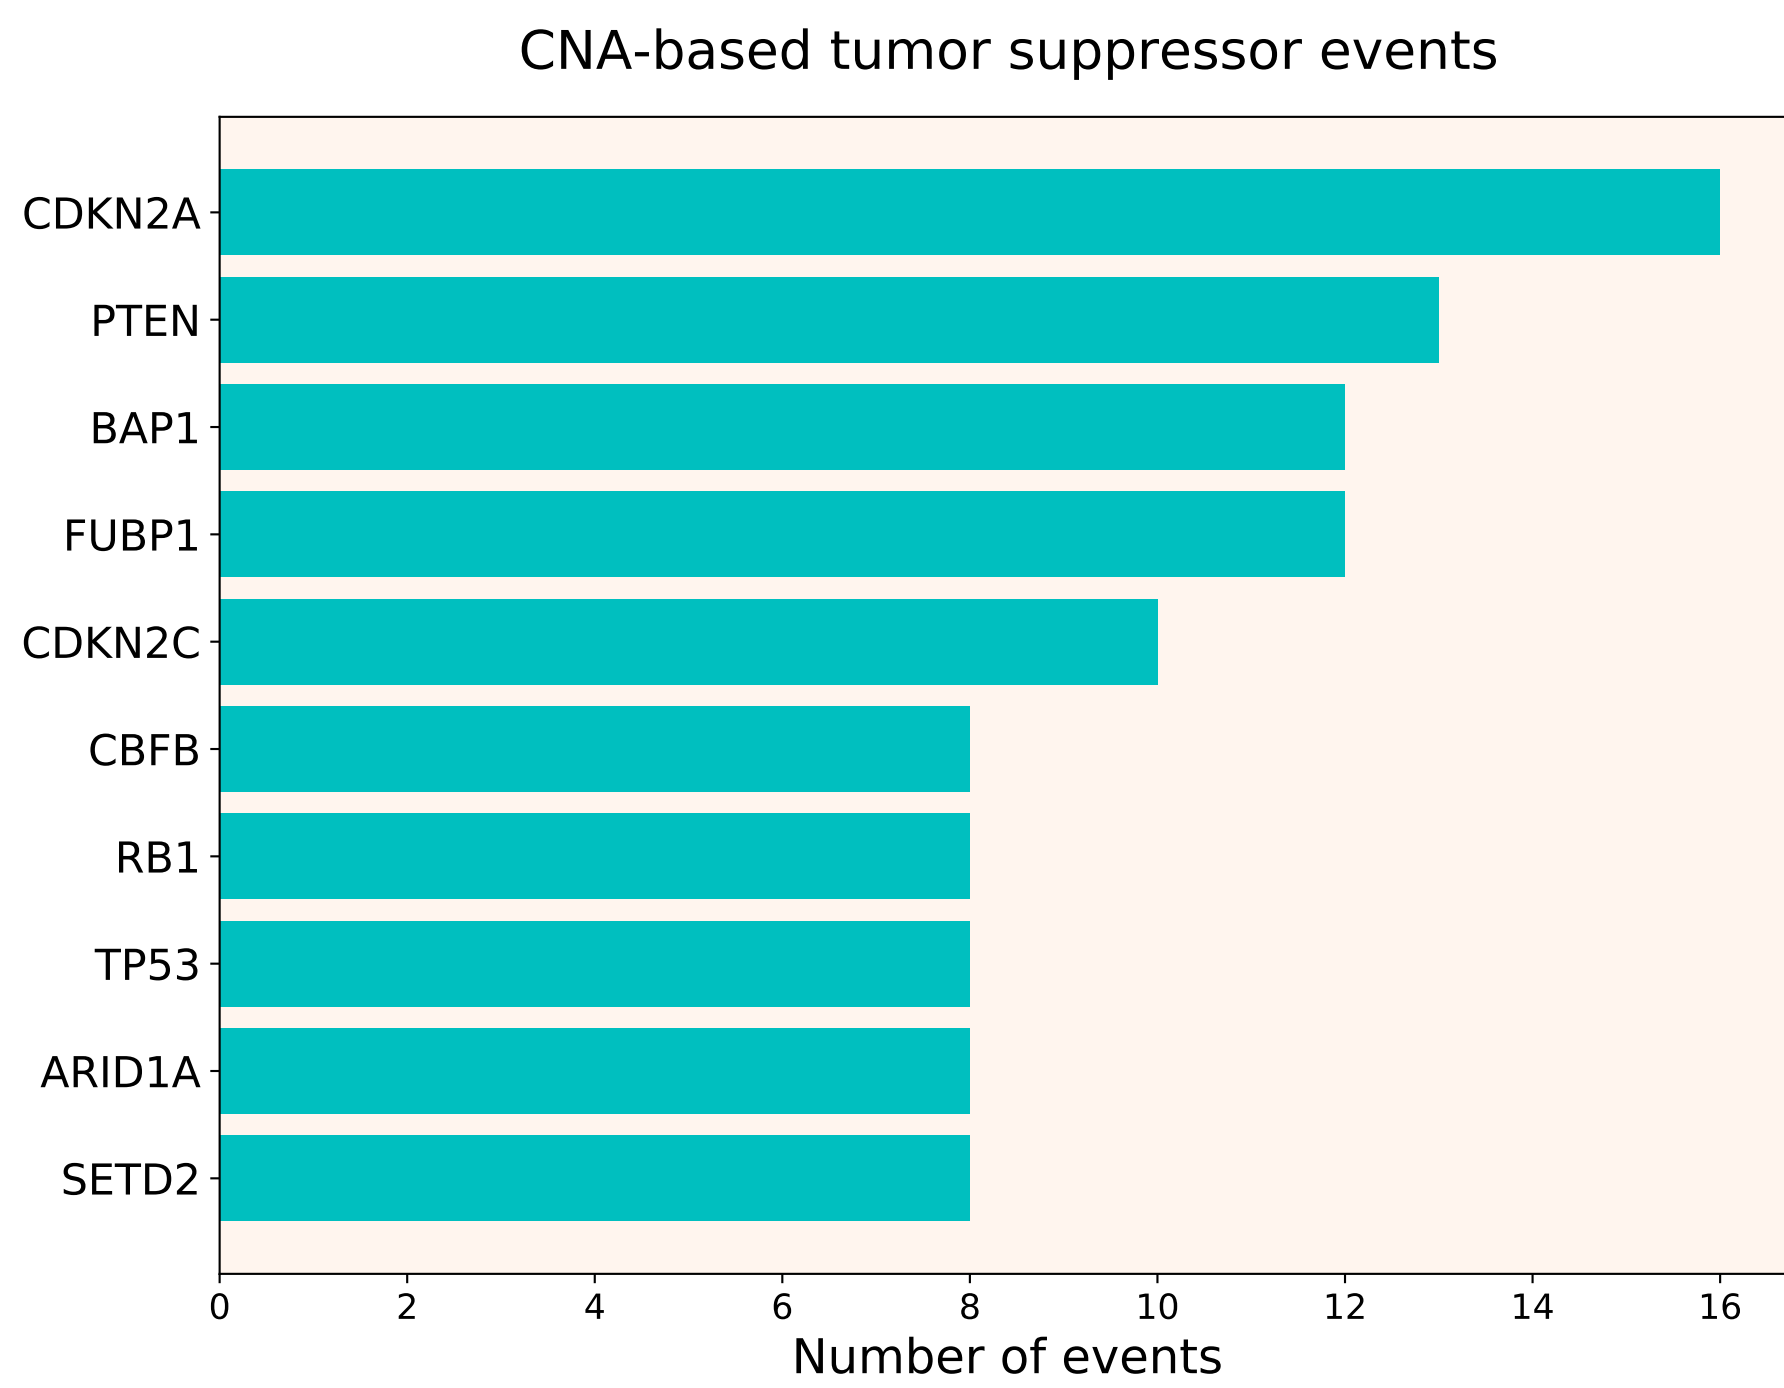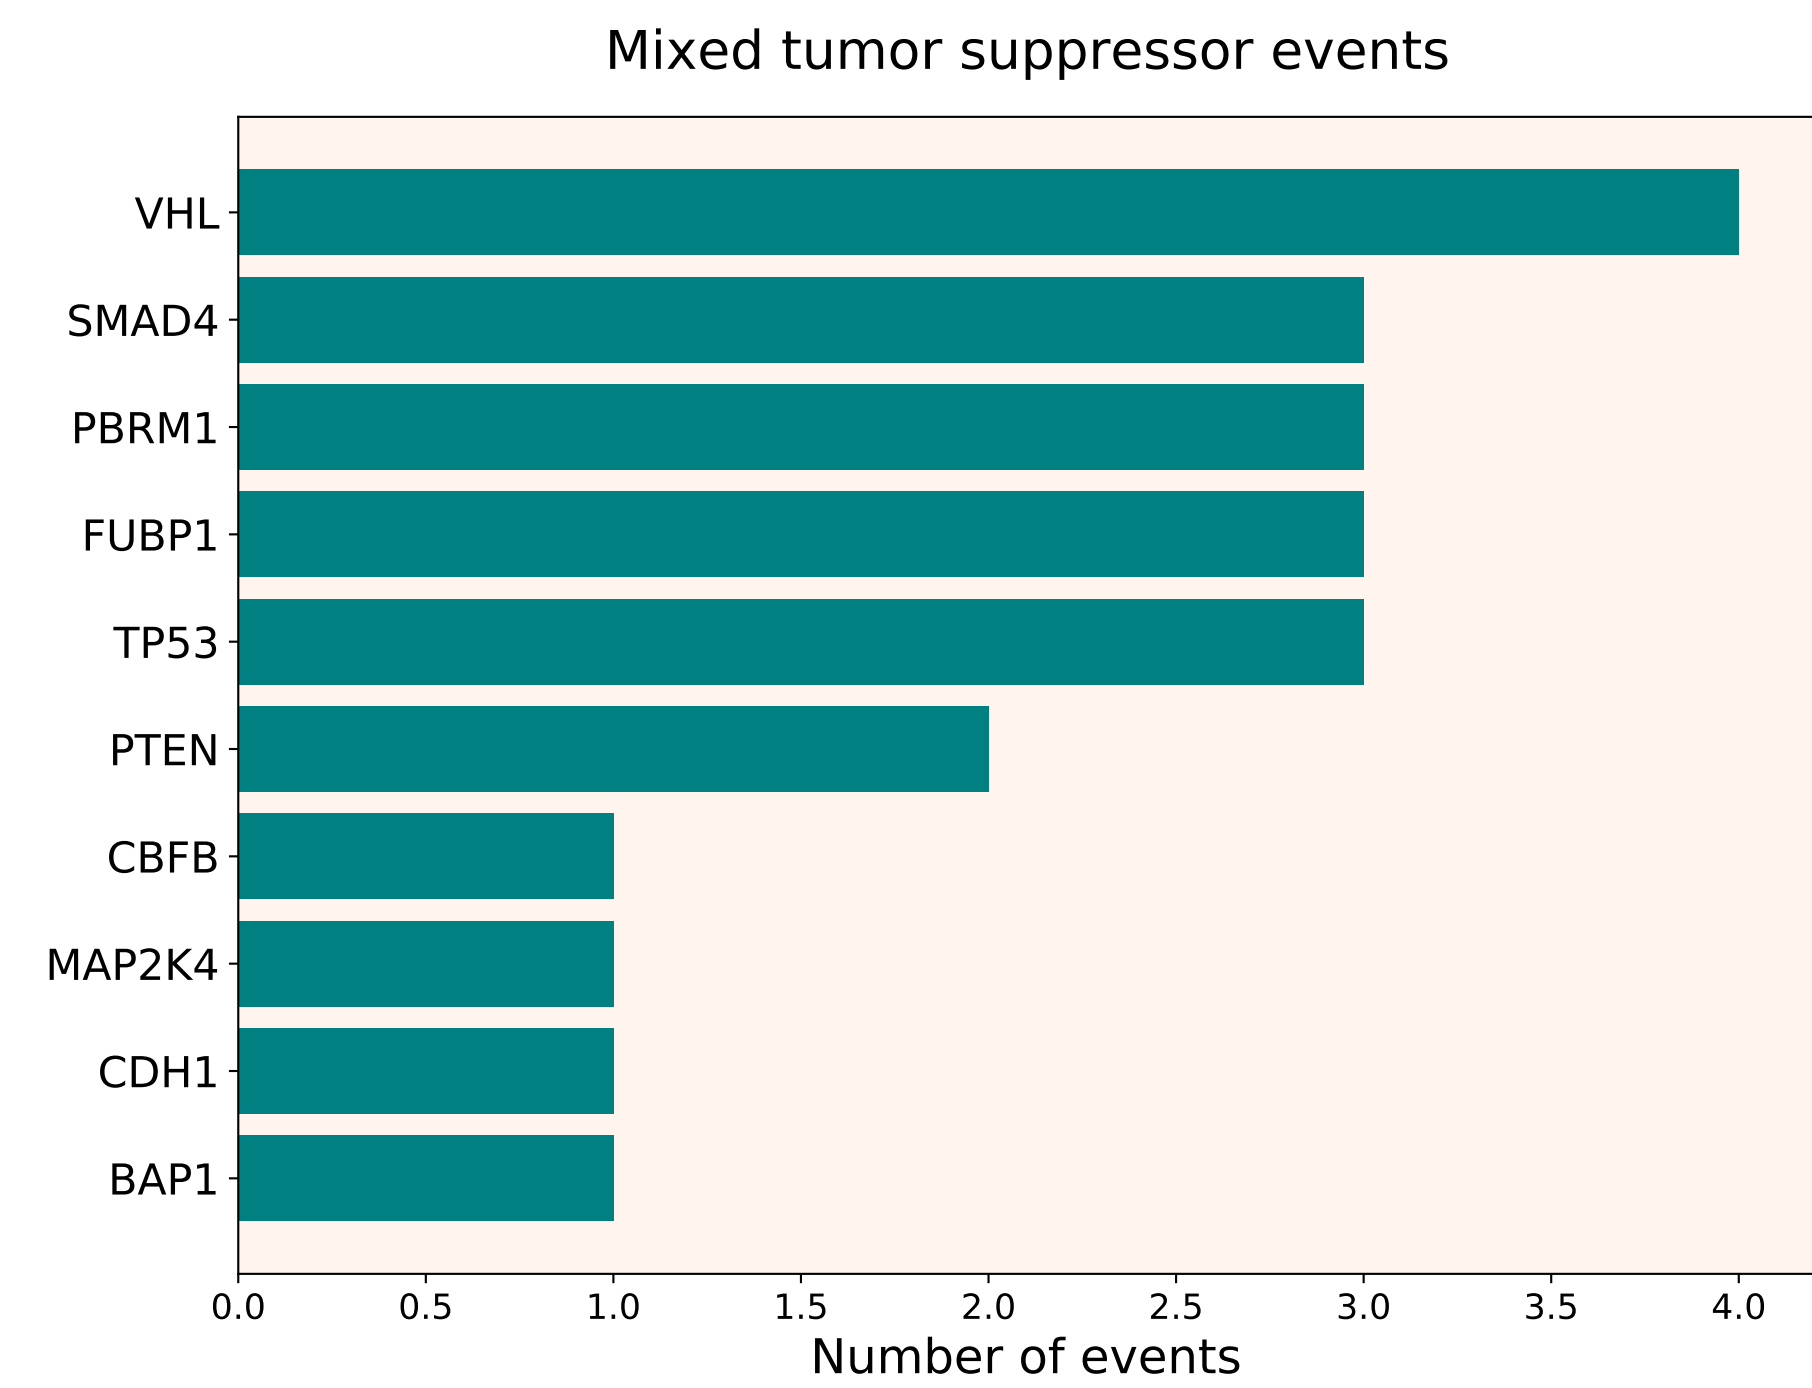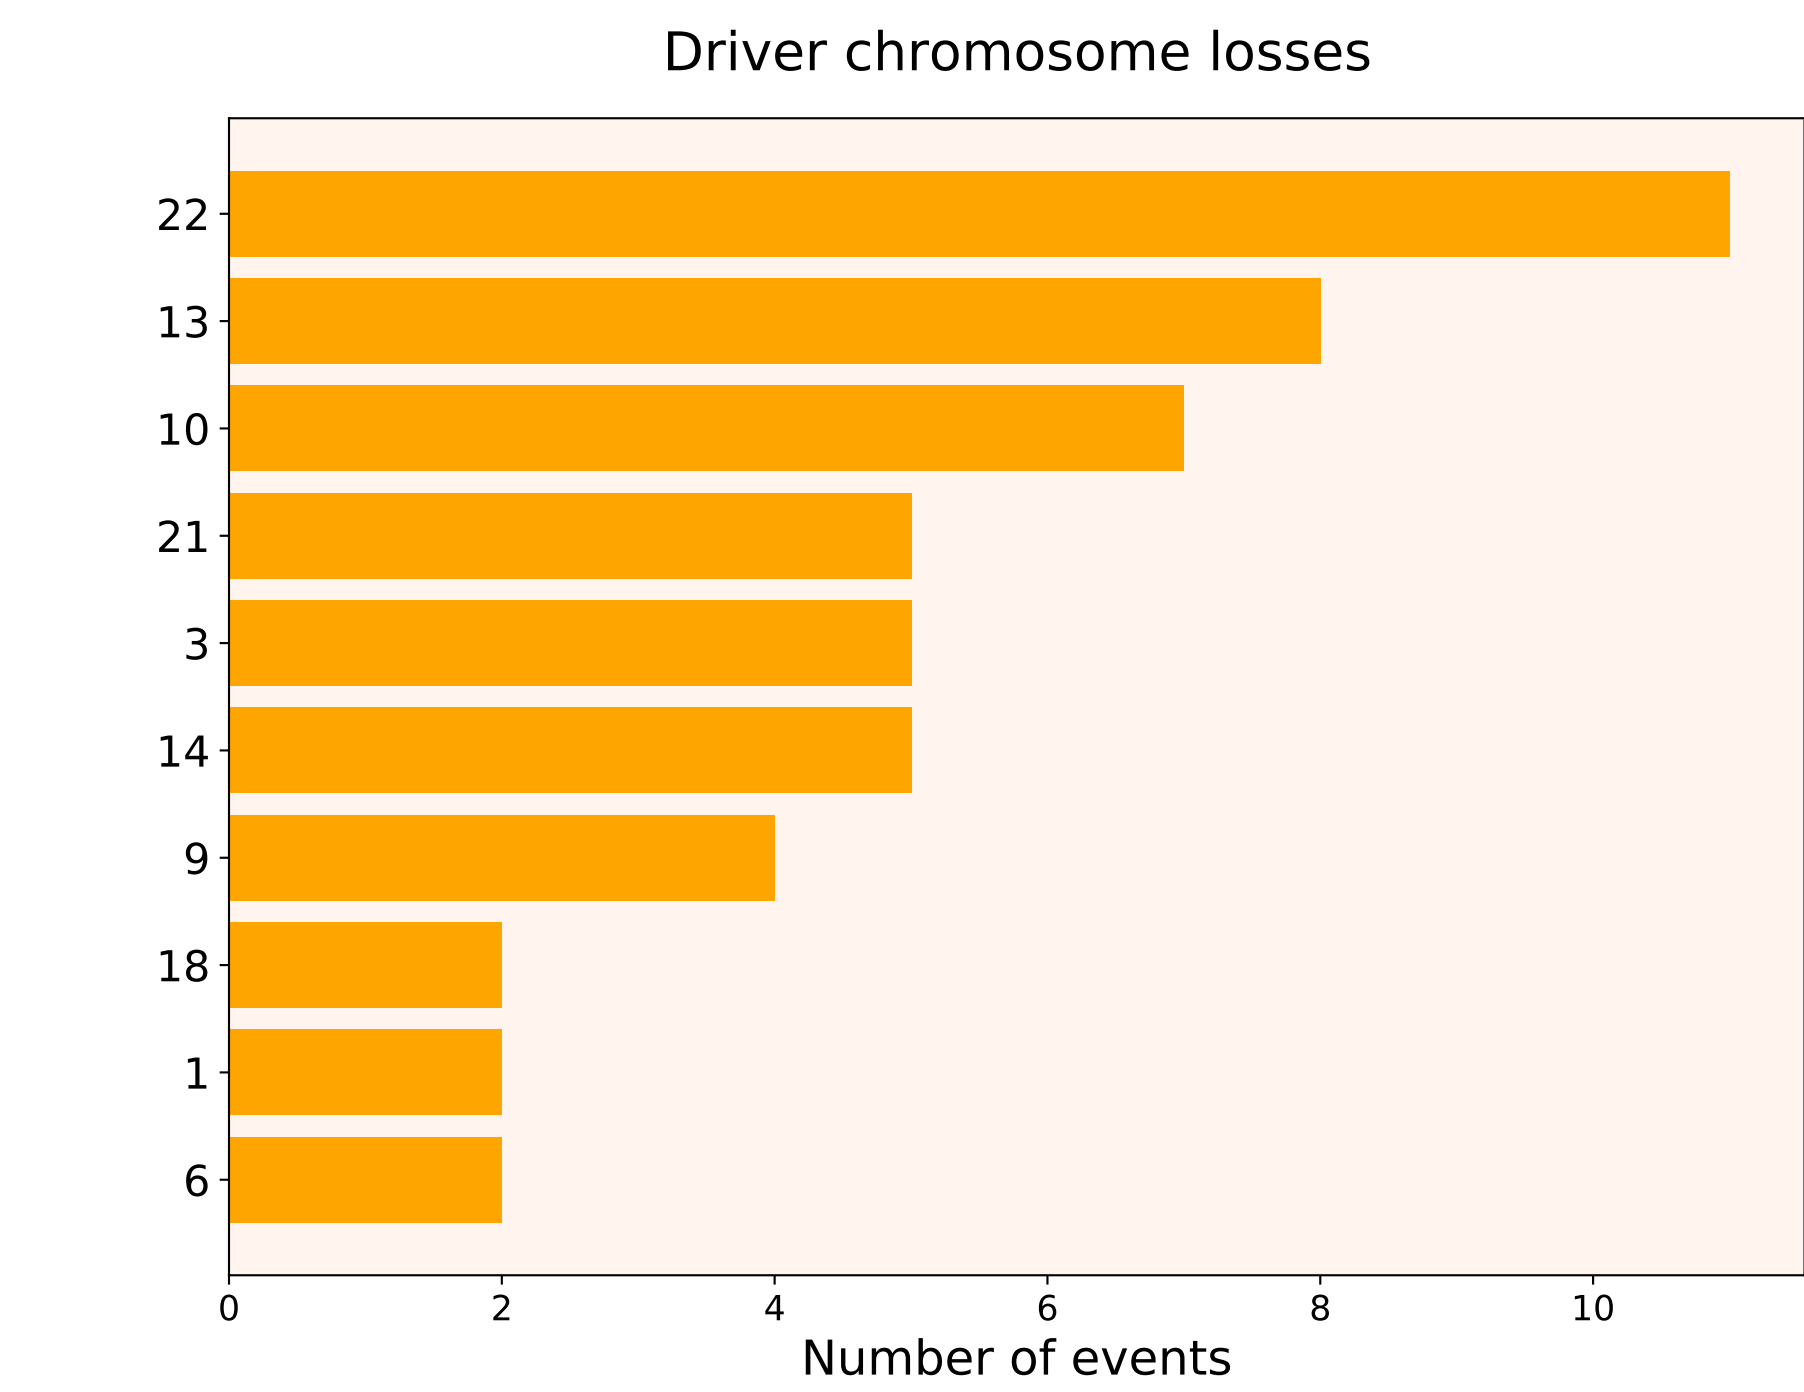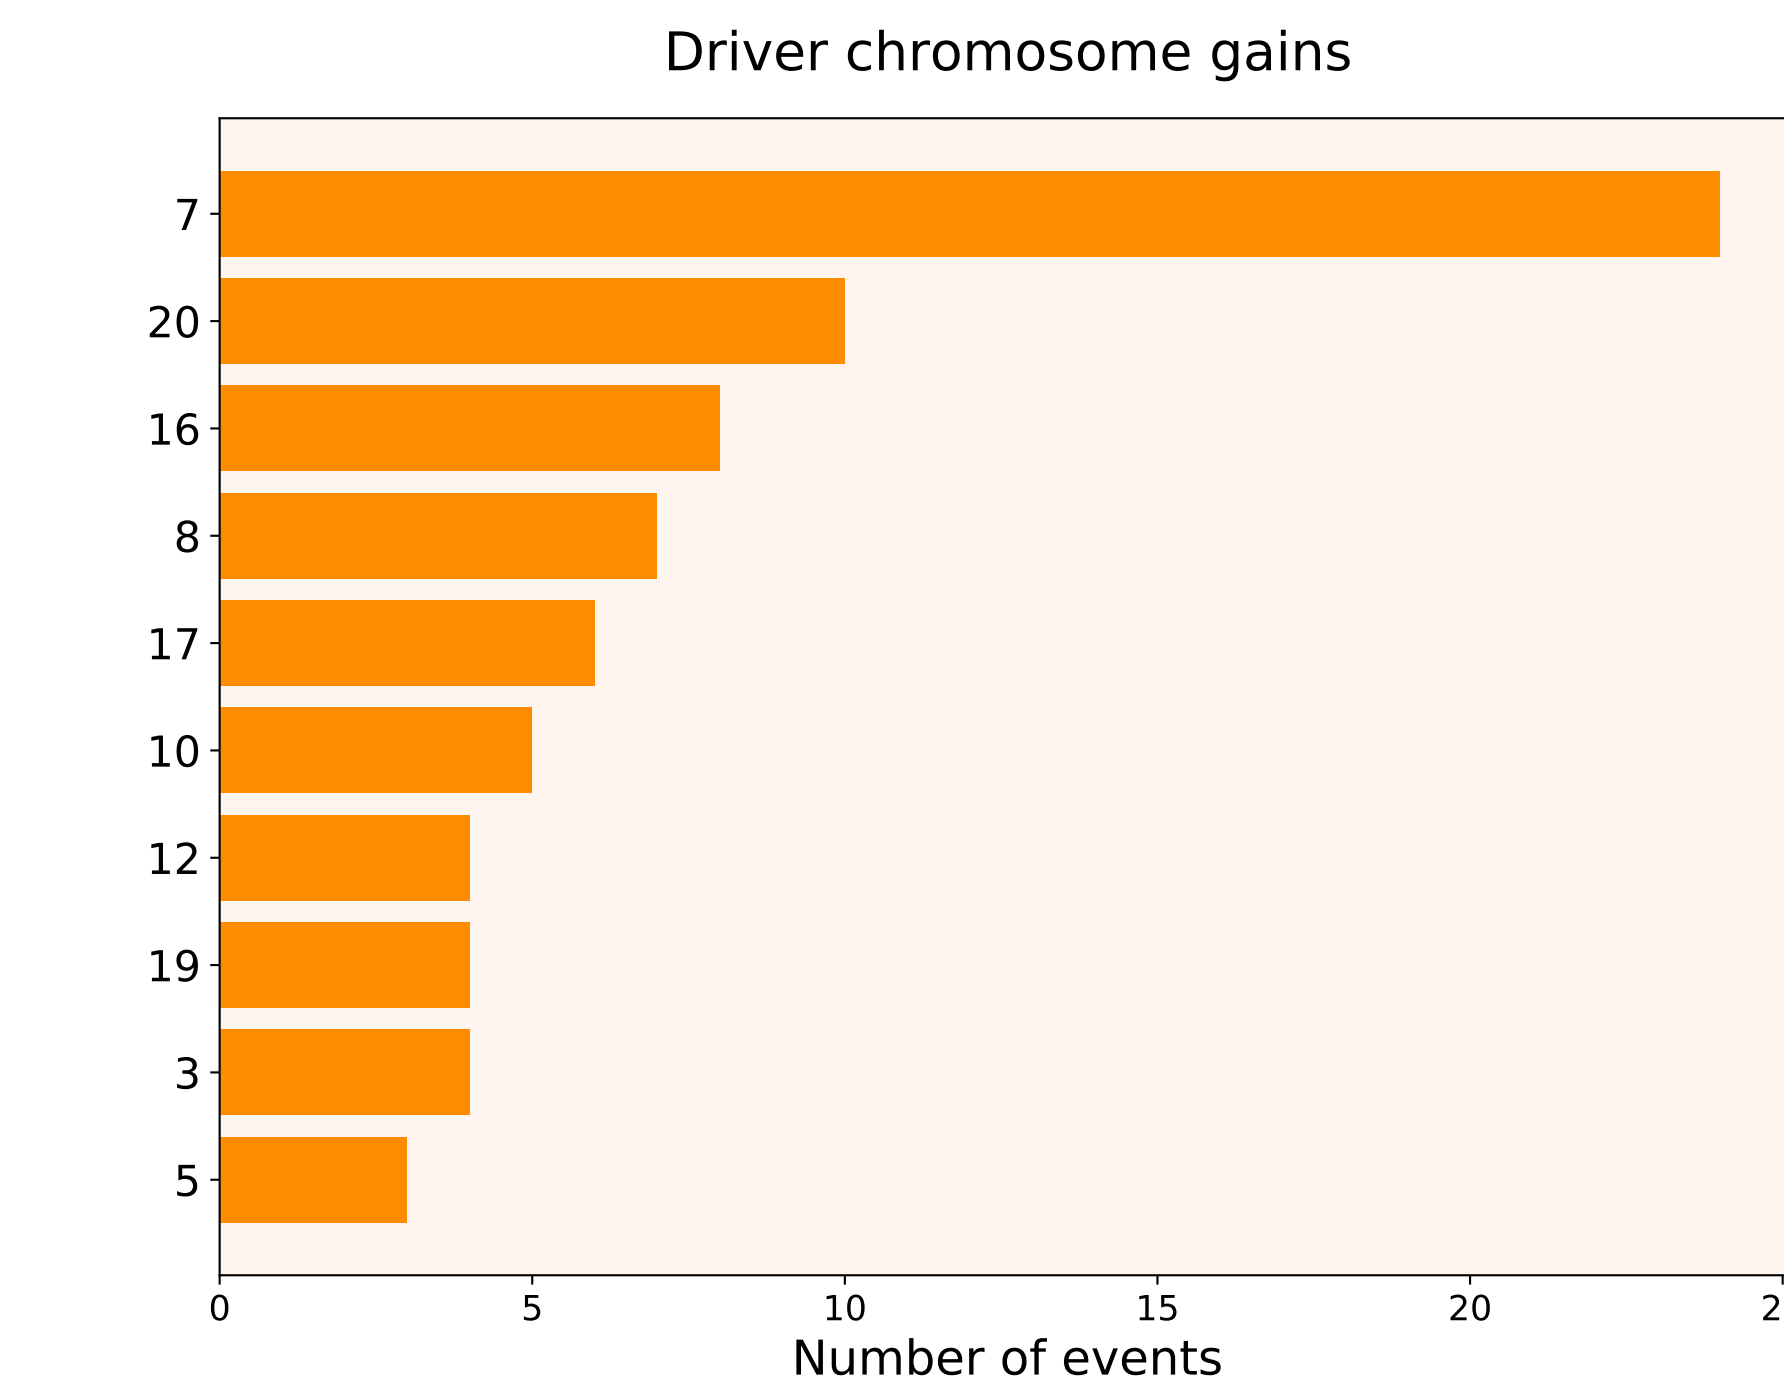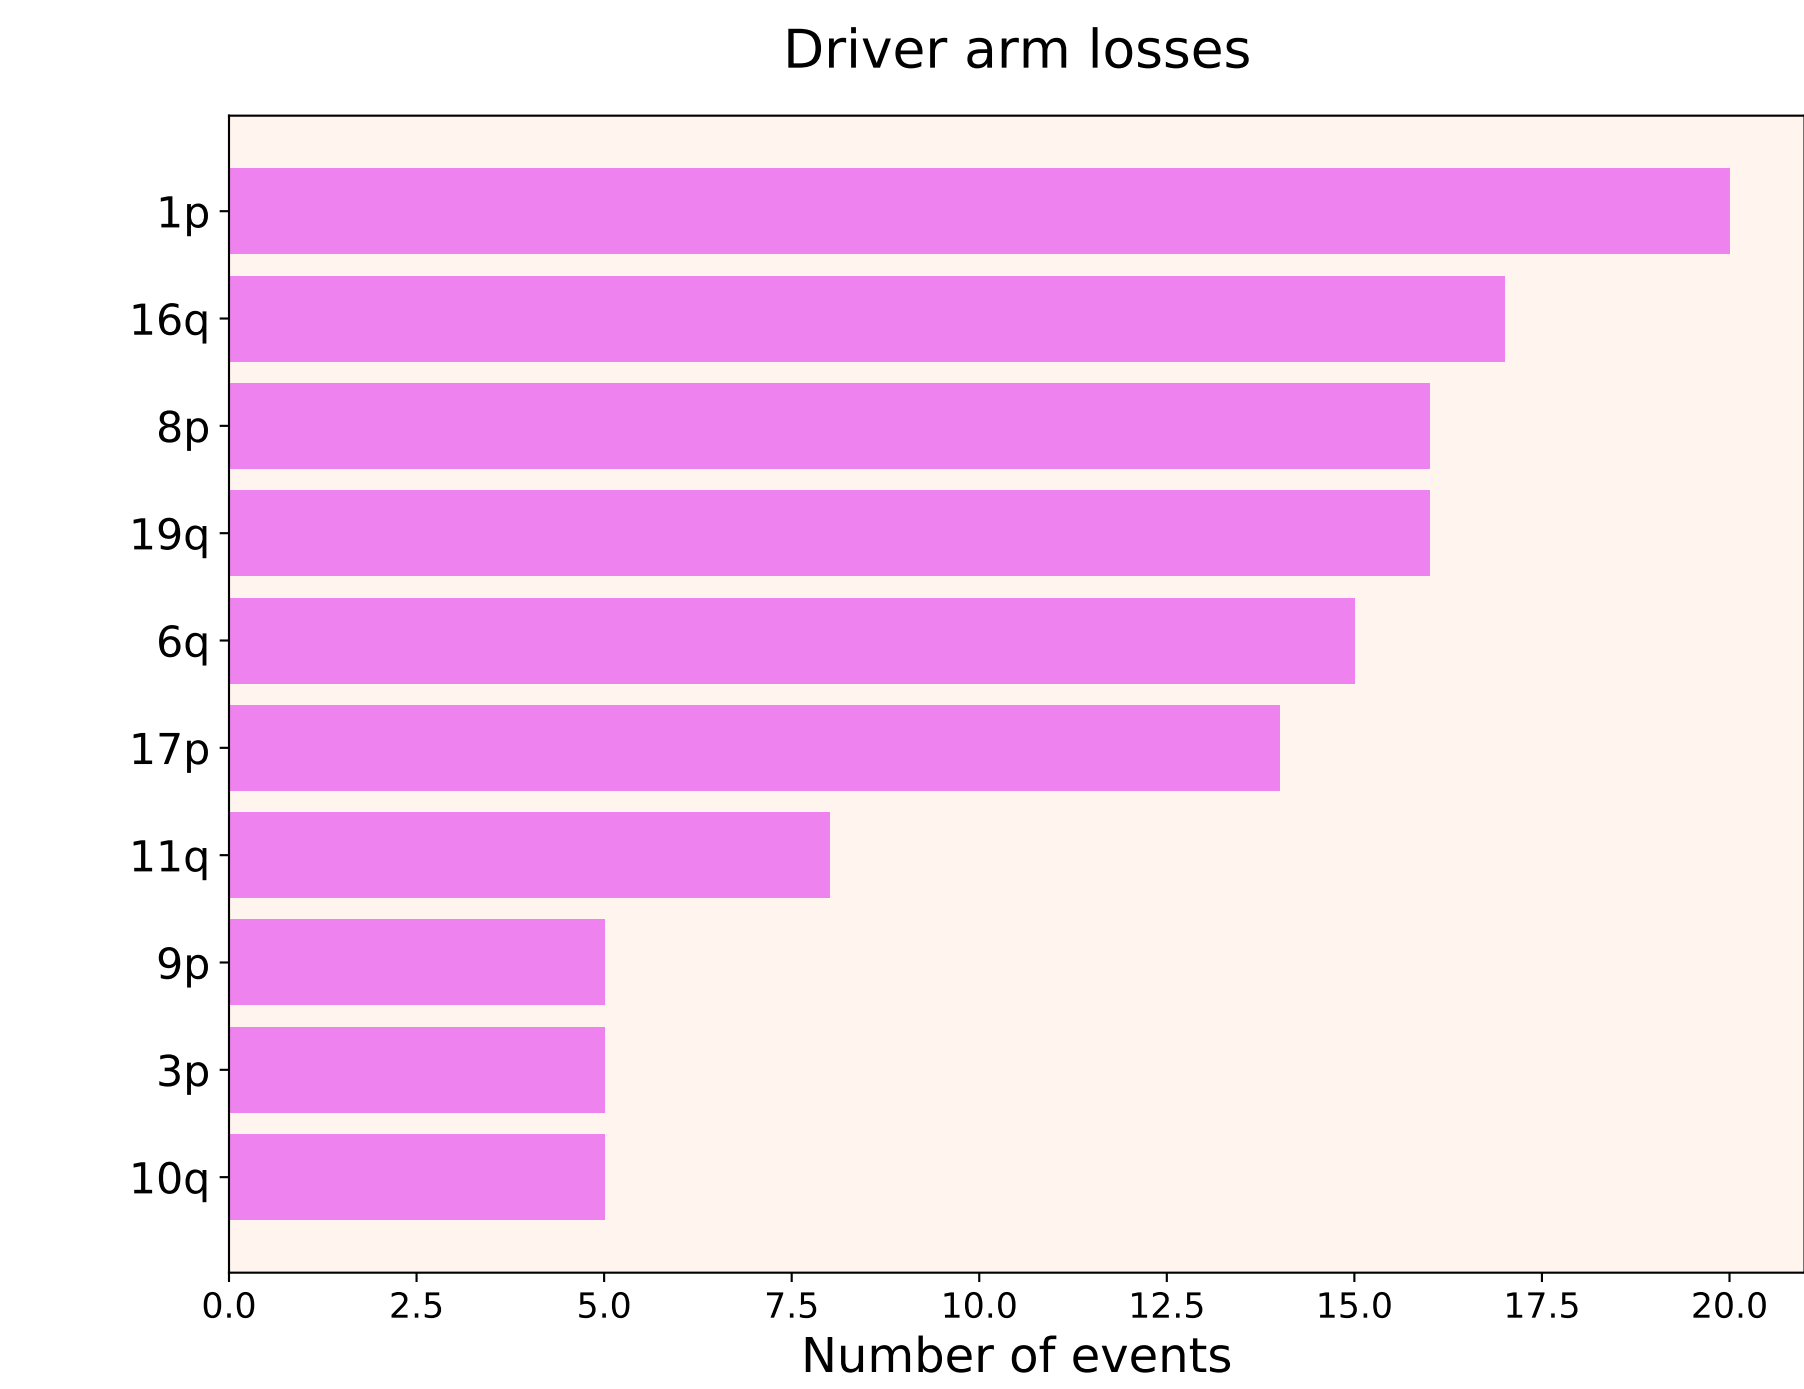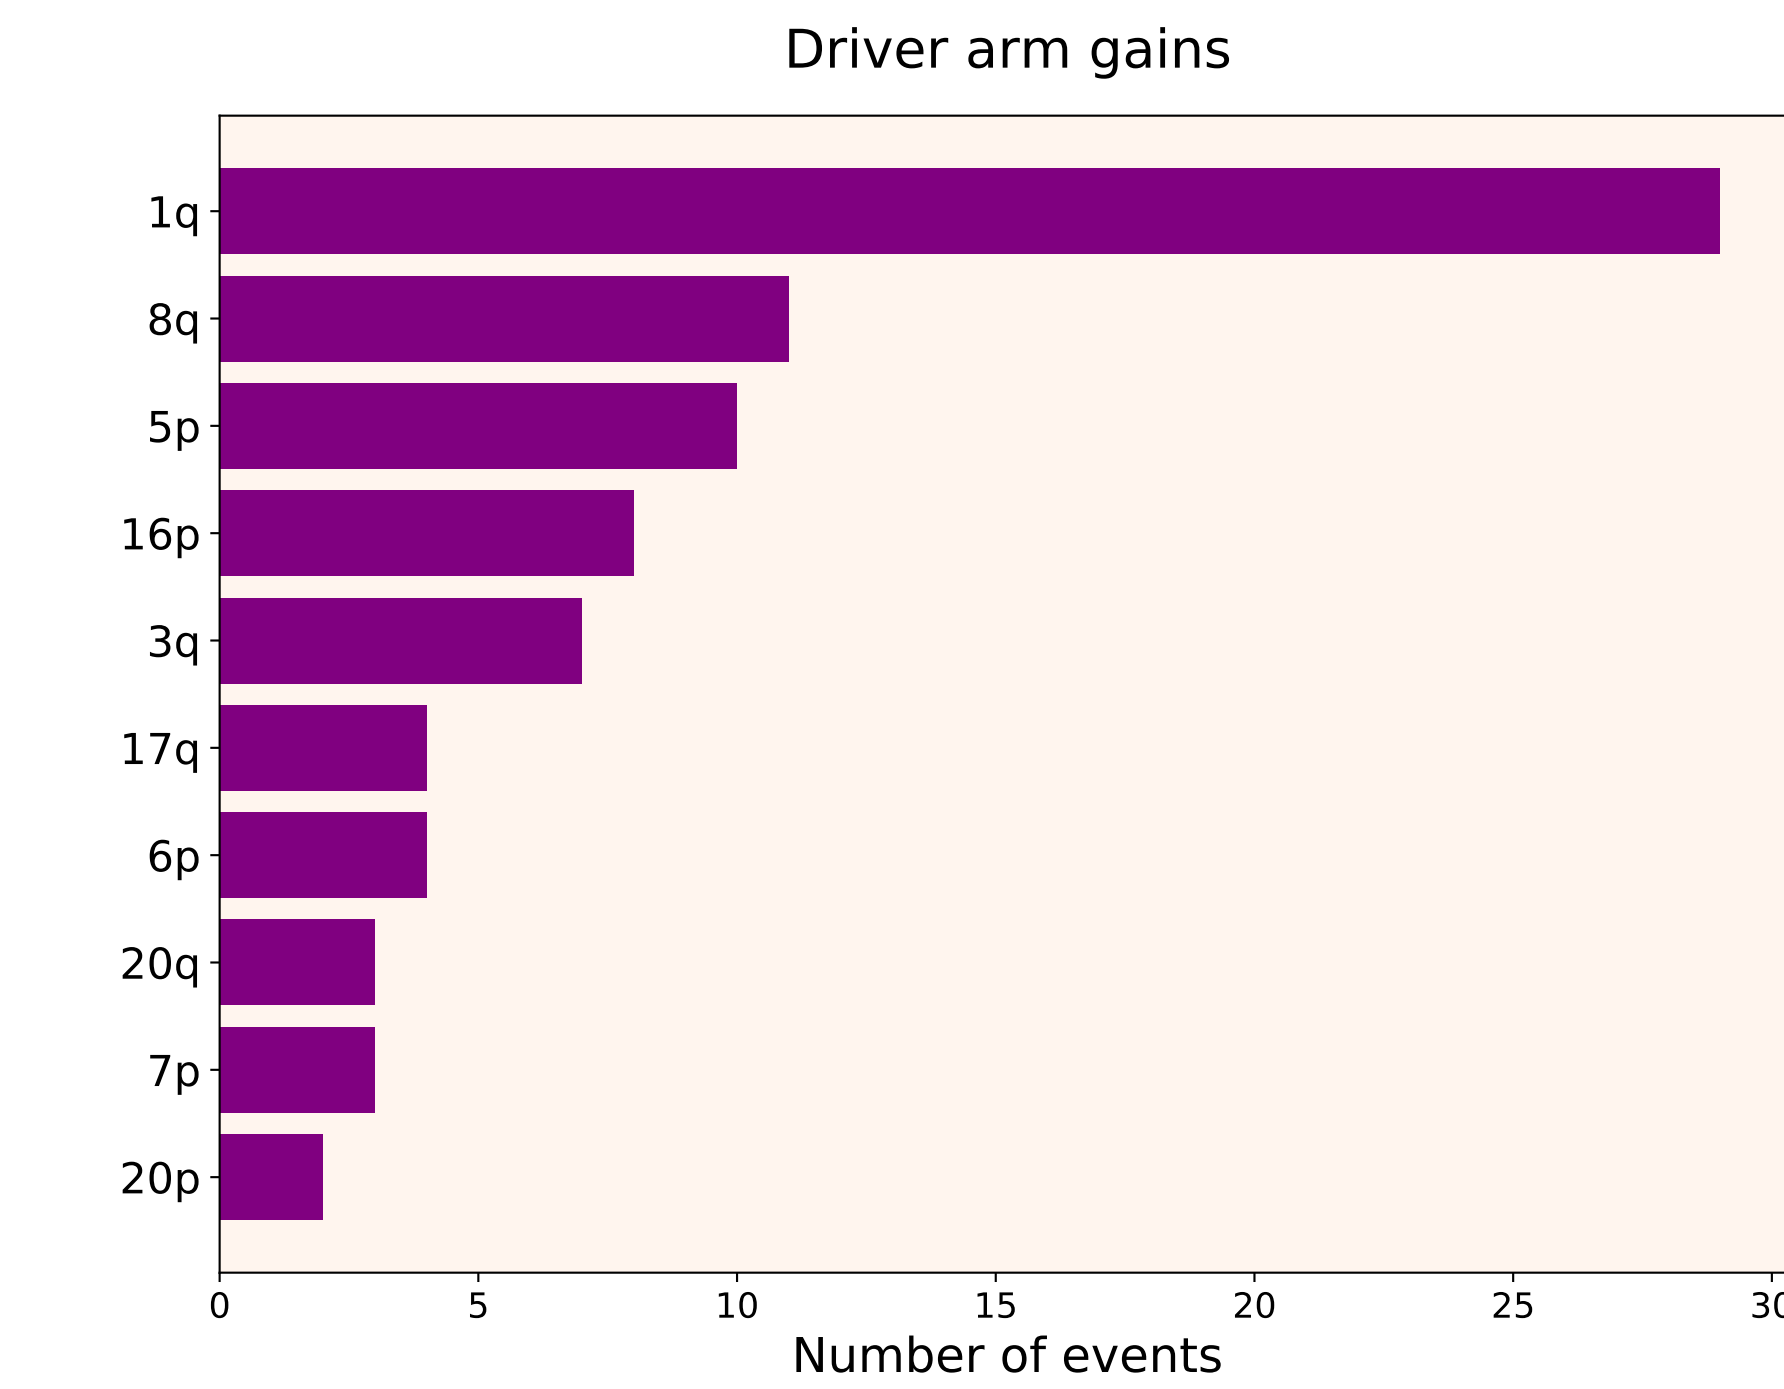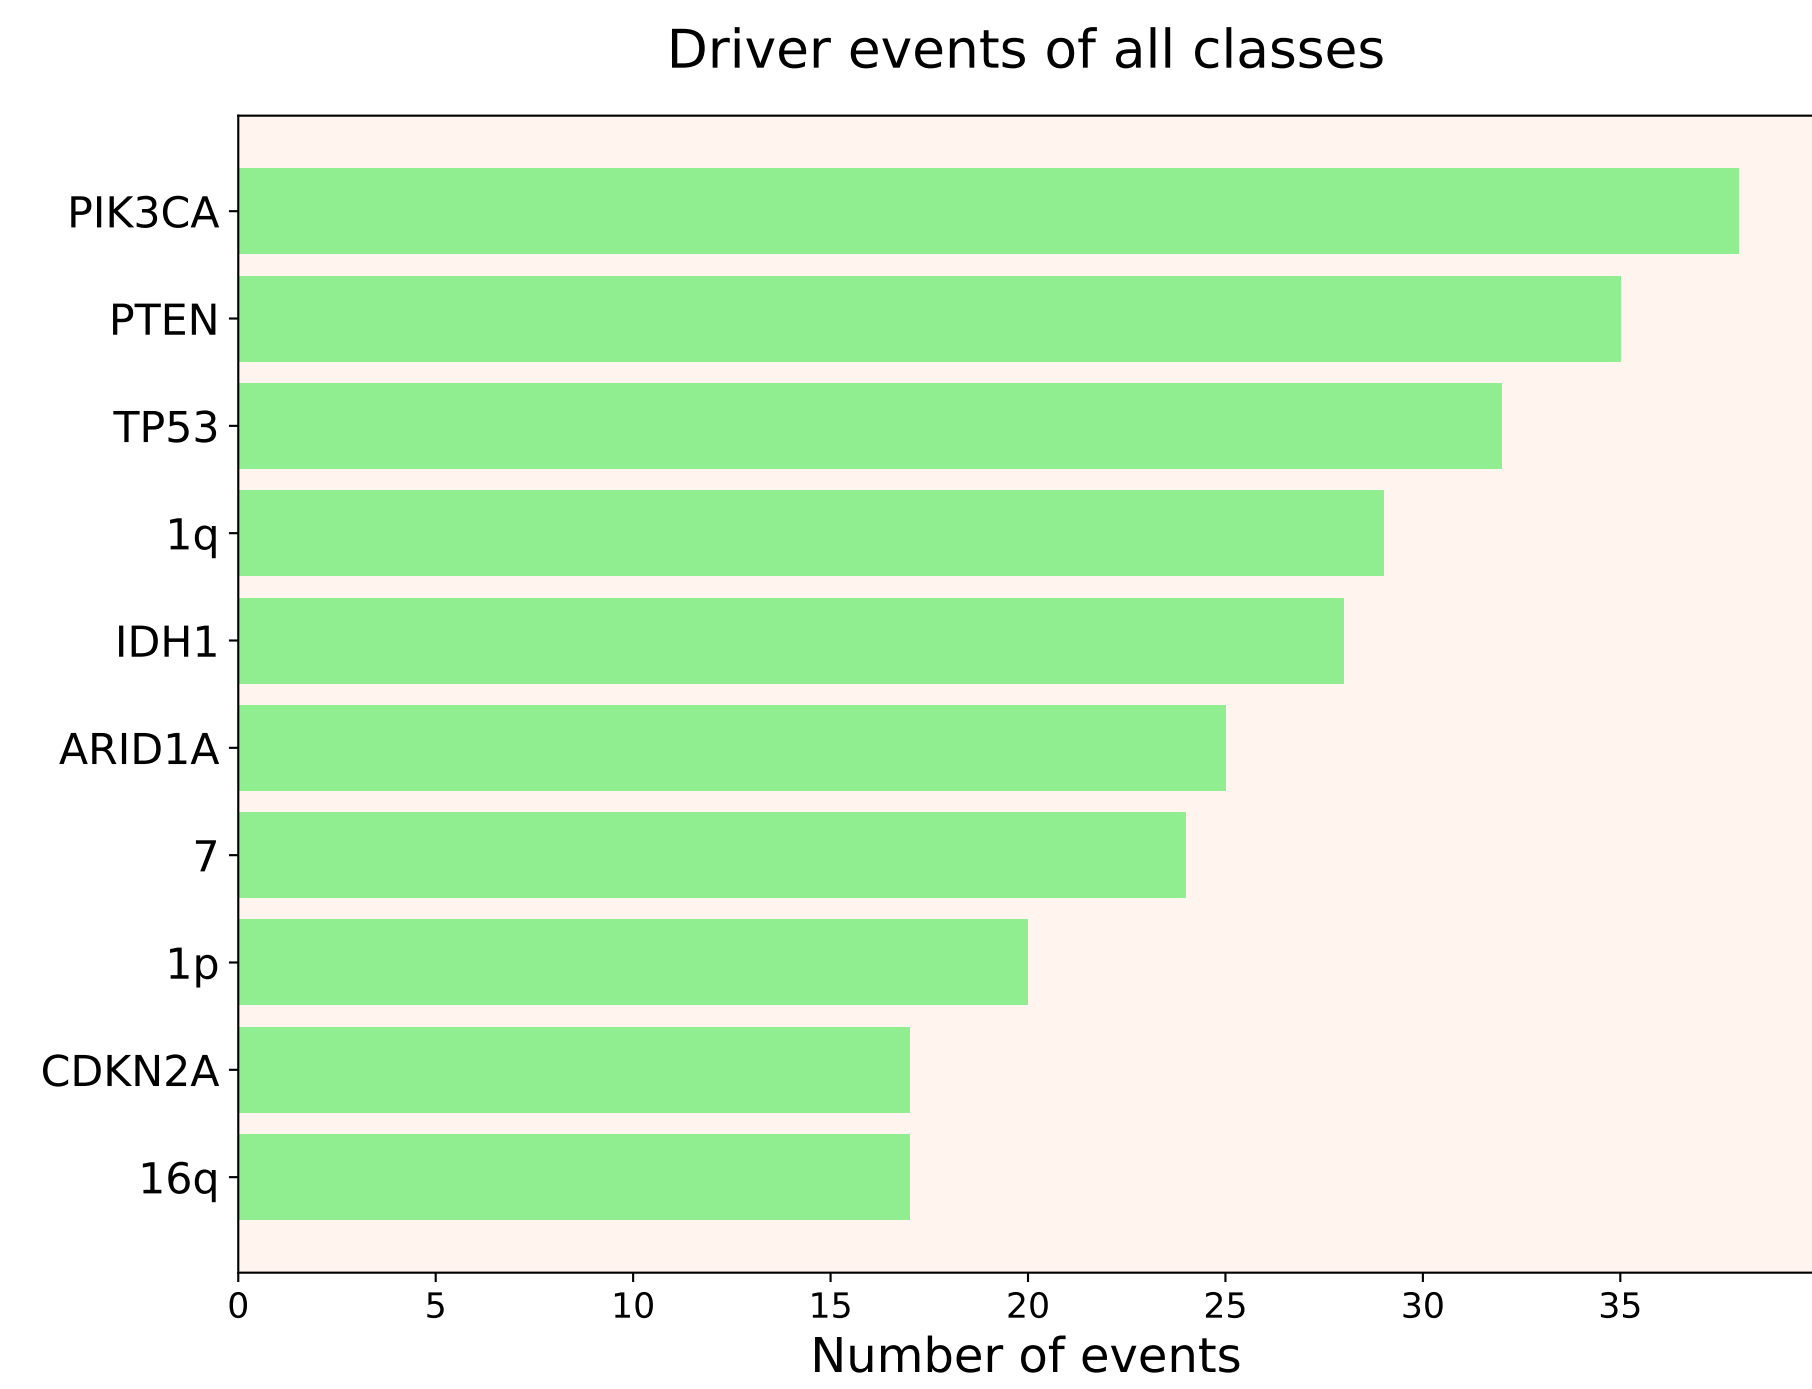

Supplement: Supplemental_Data_S1.zip [file Supplemental_Data_S1.zip]

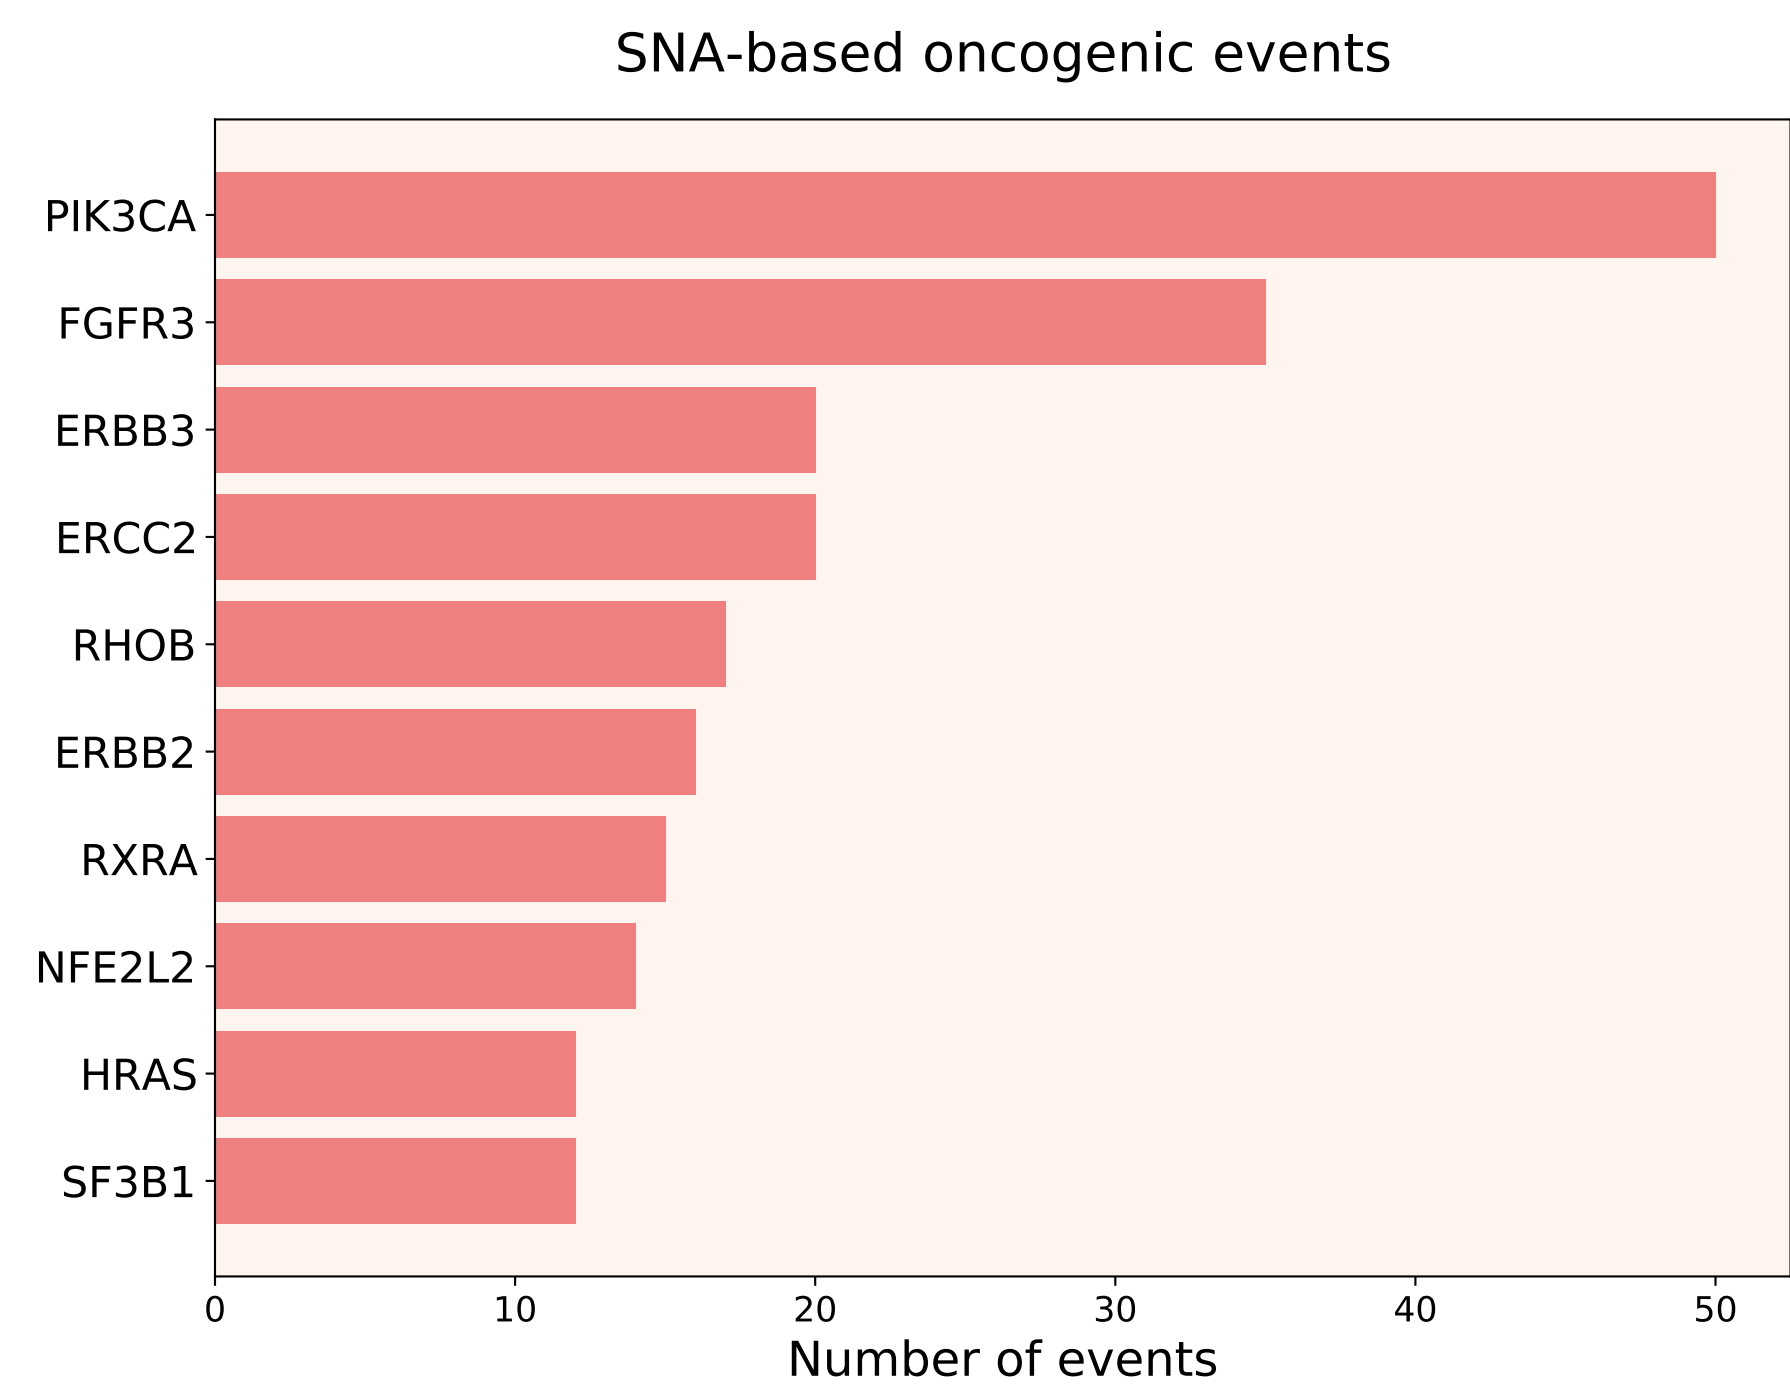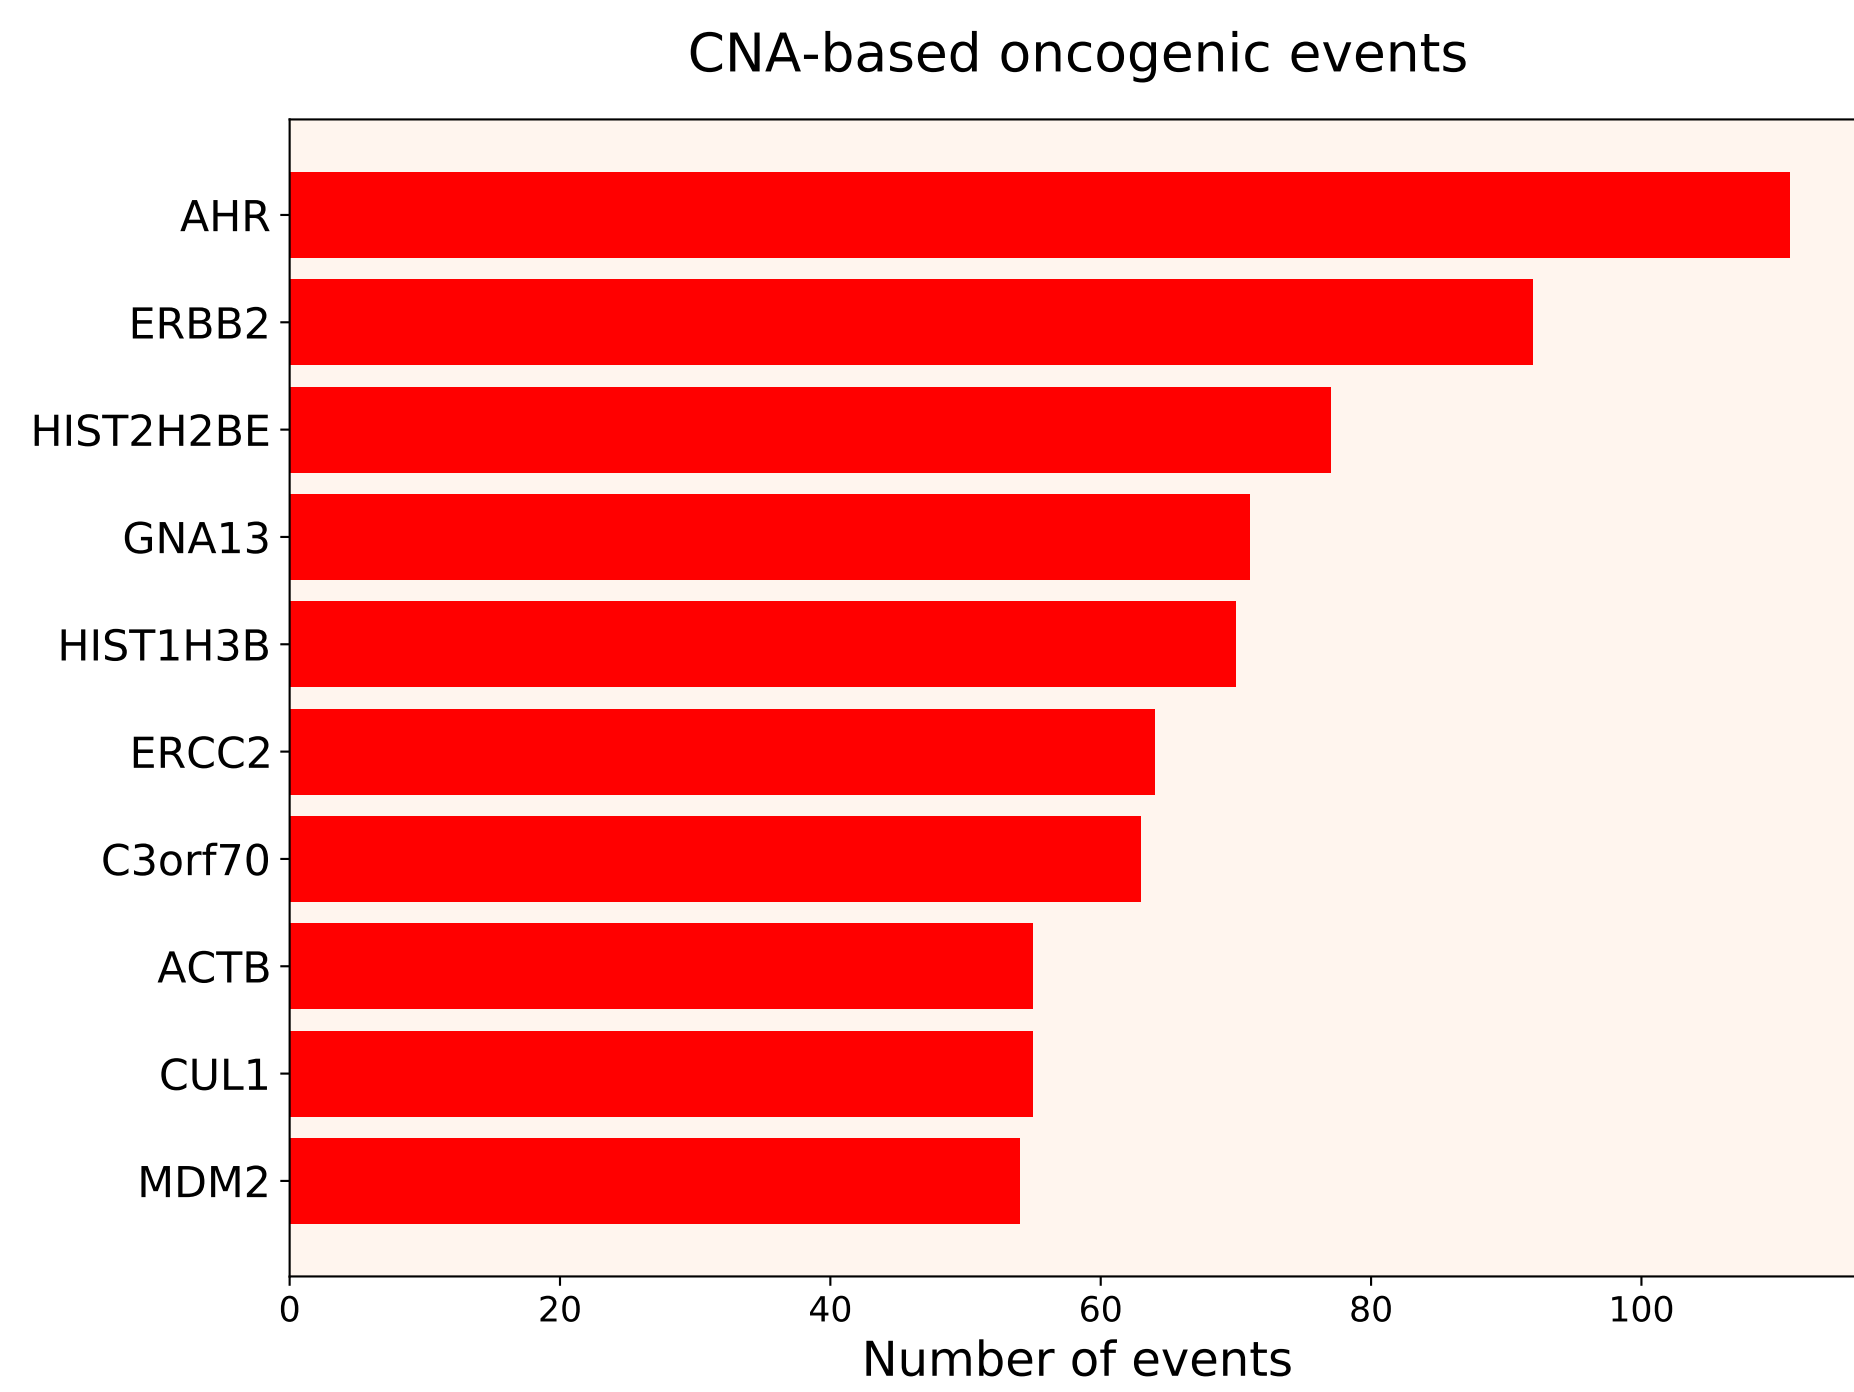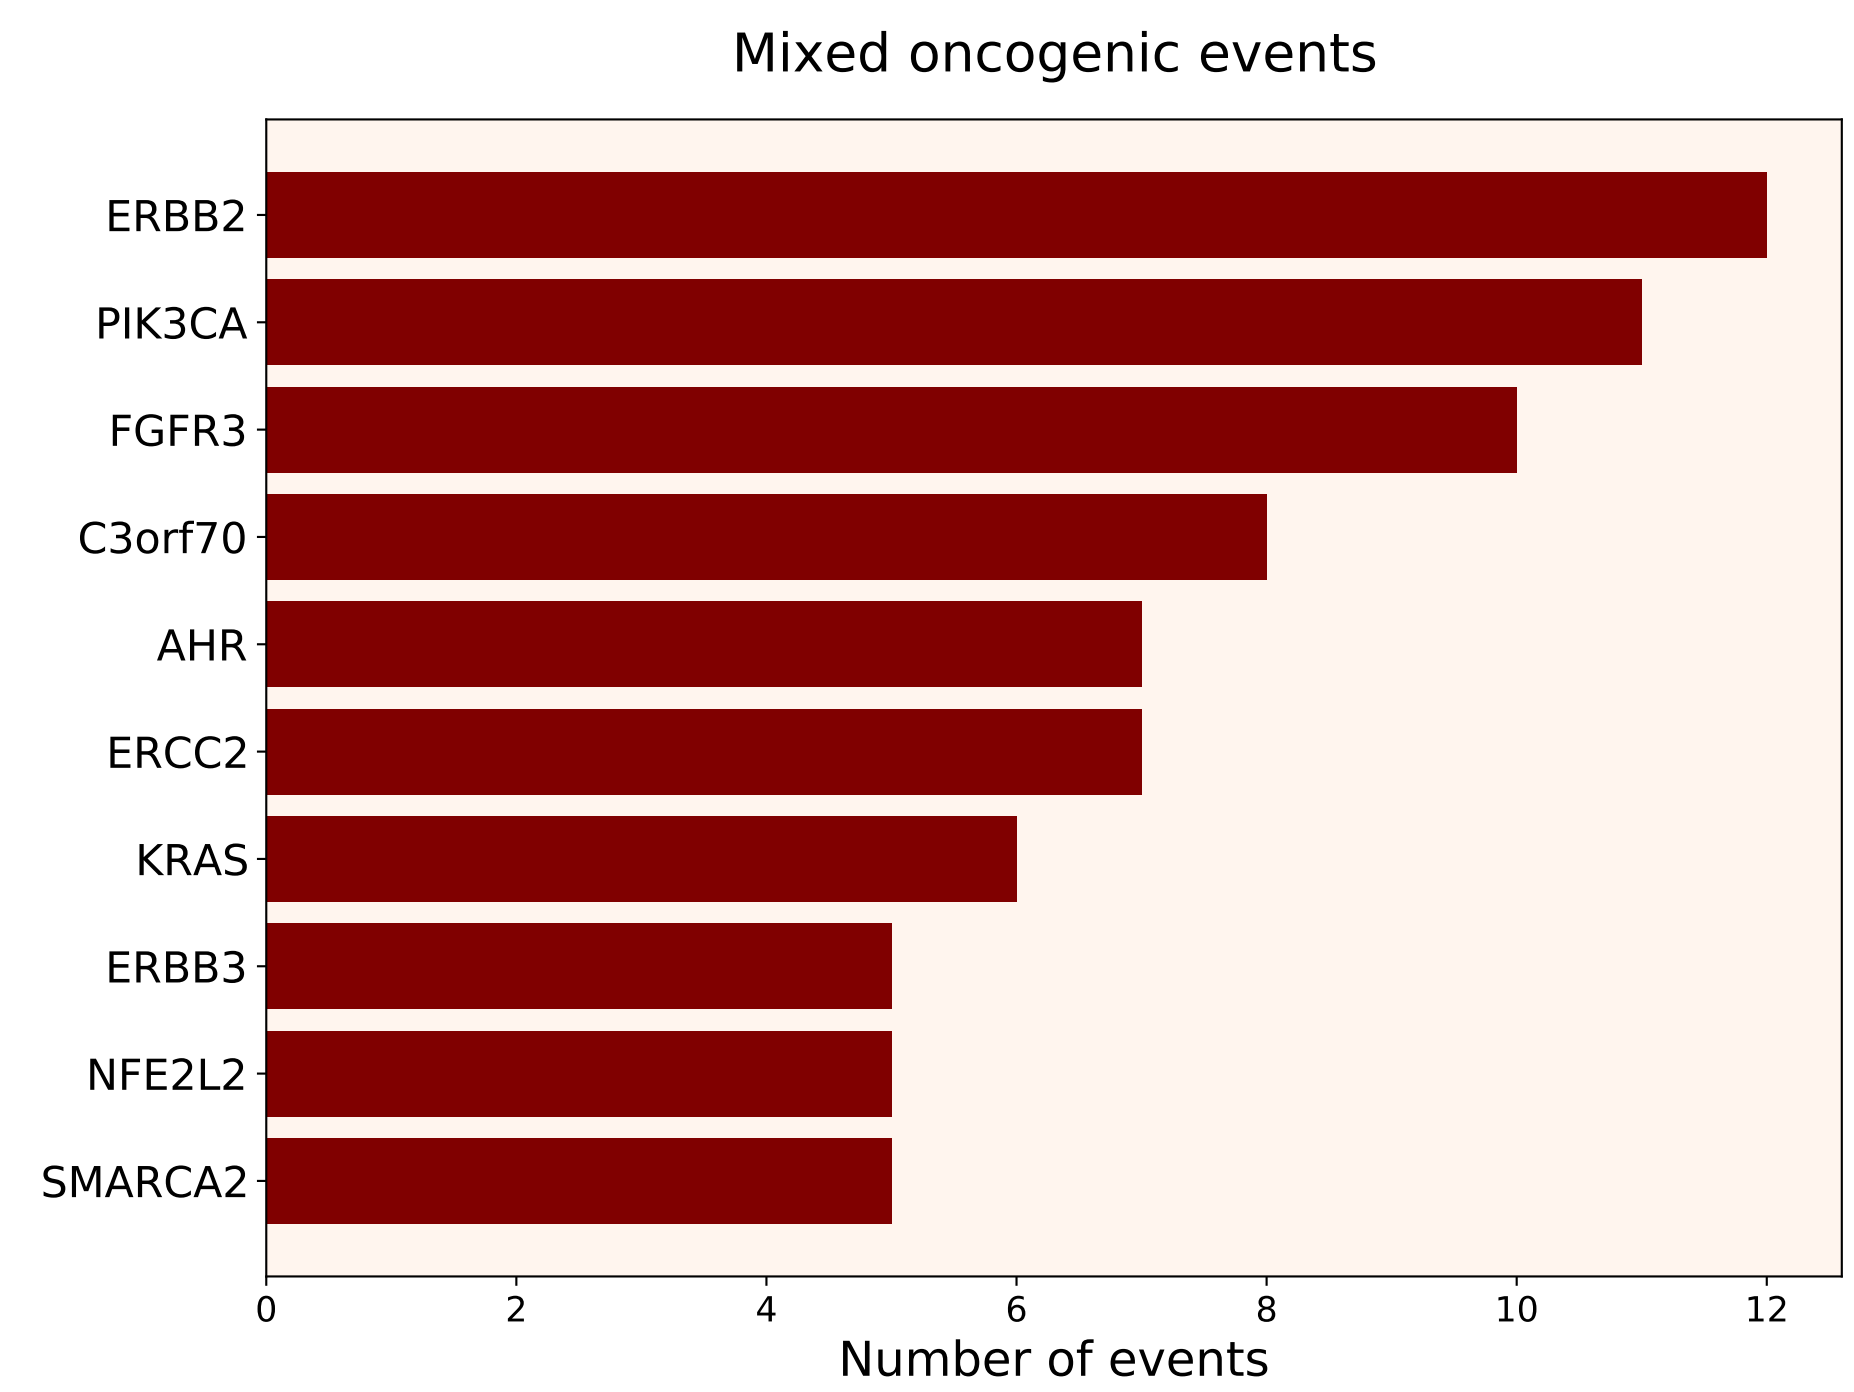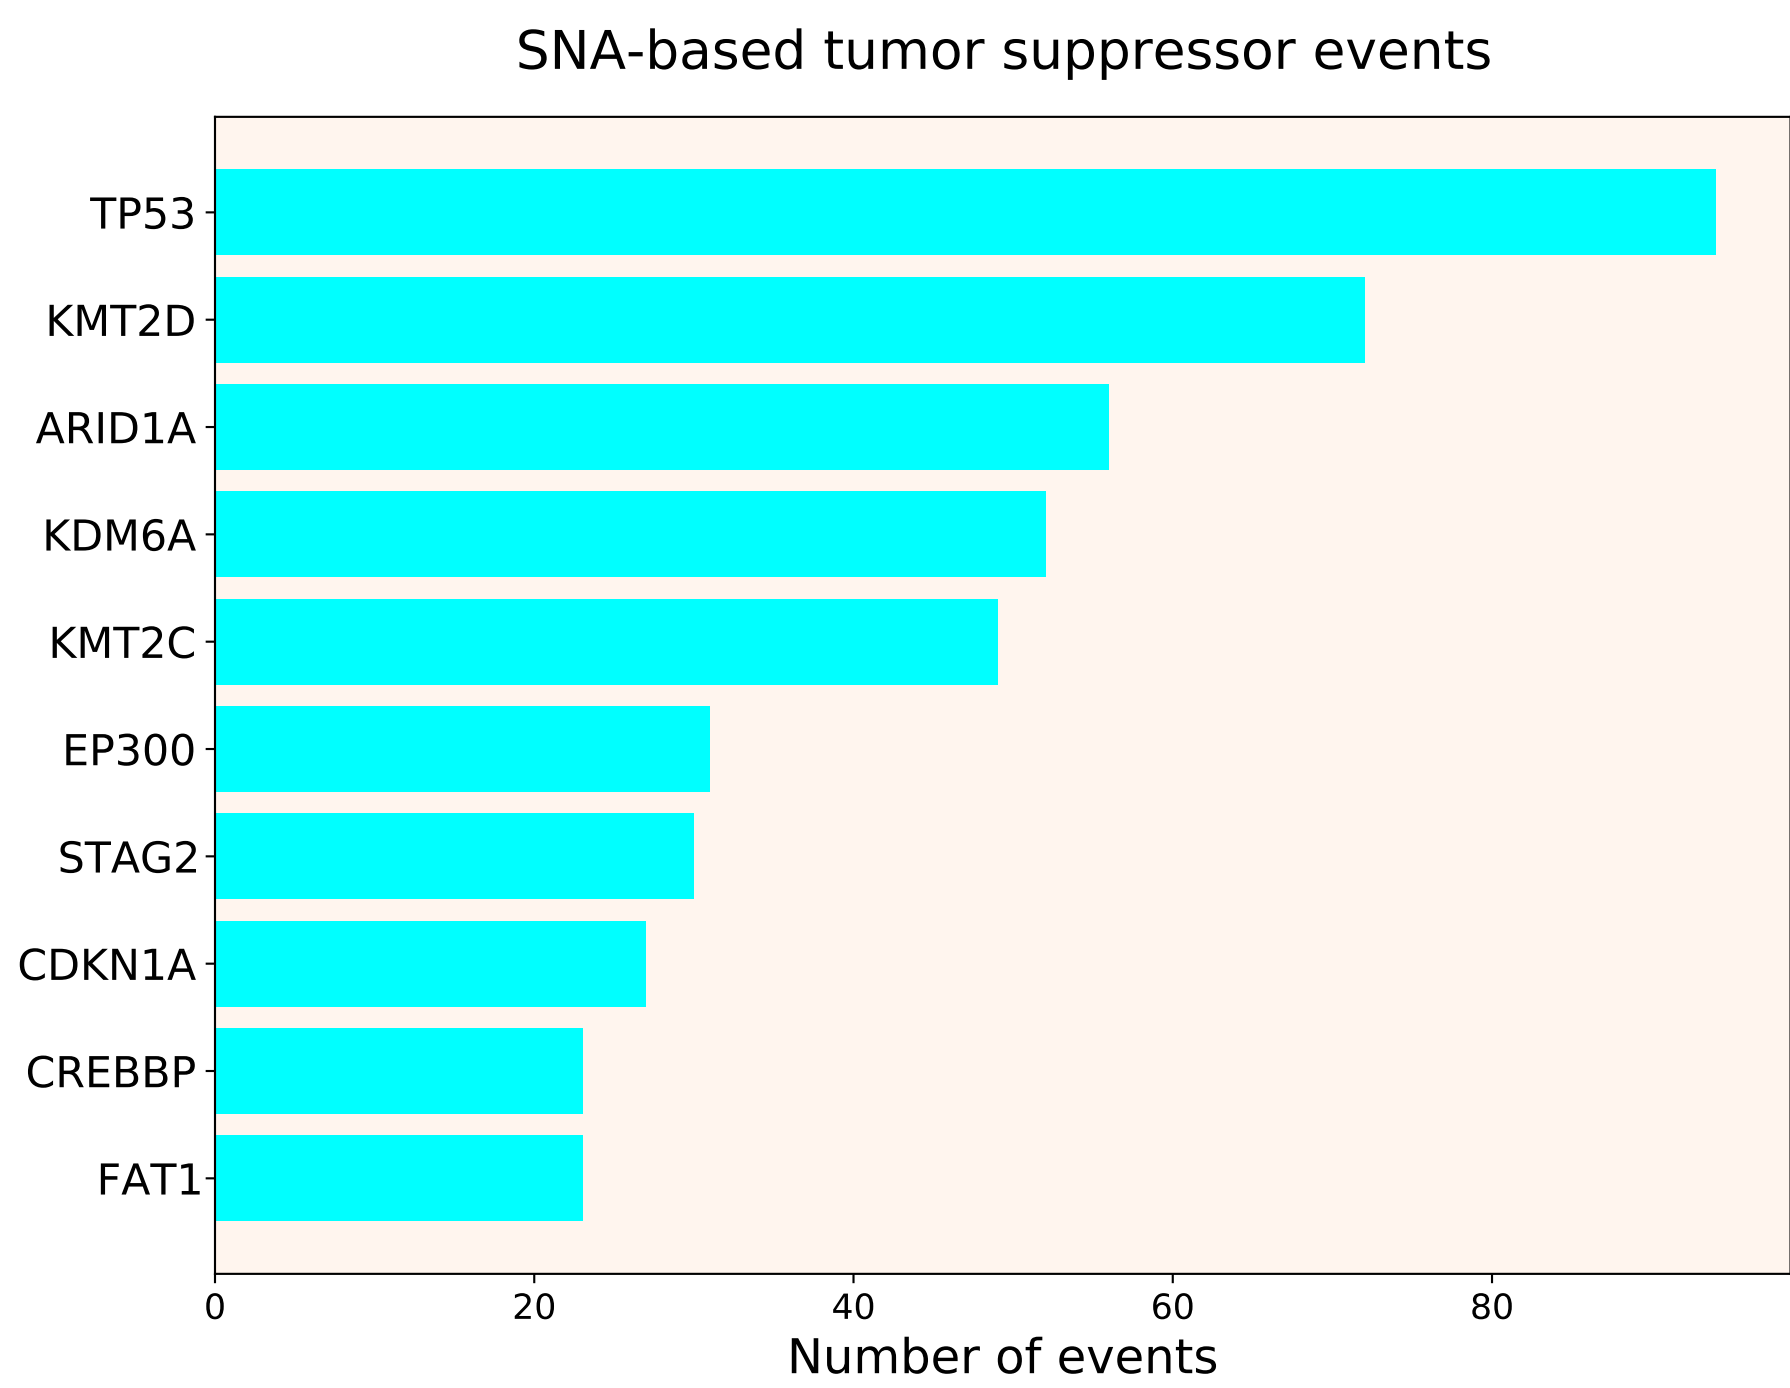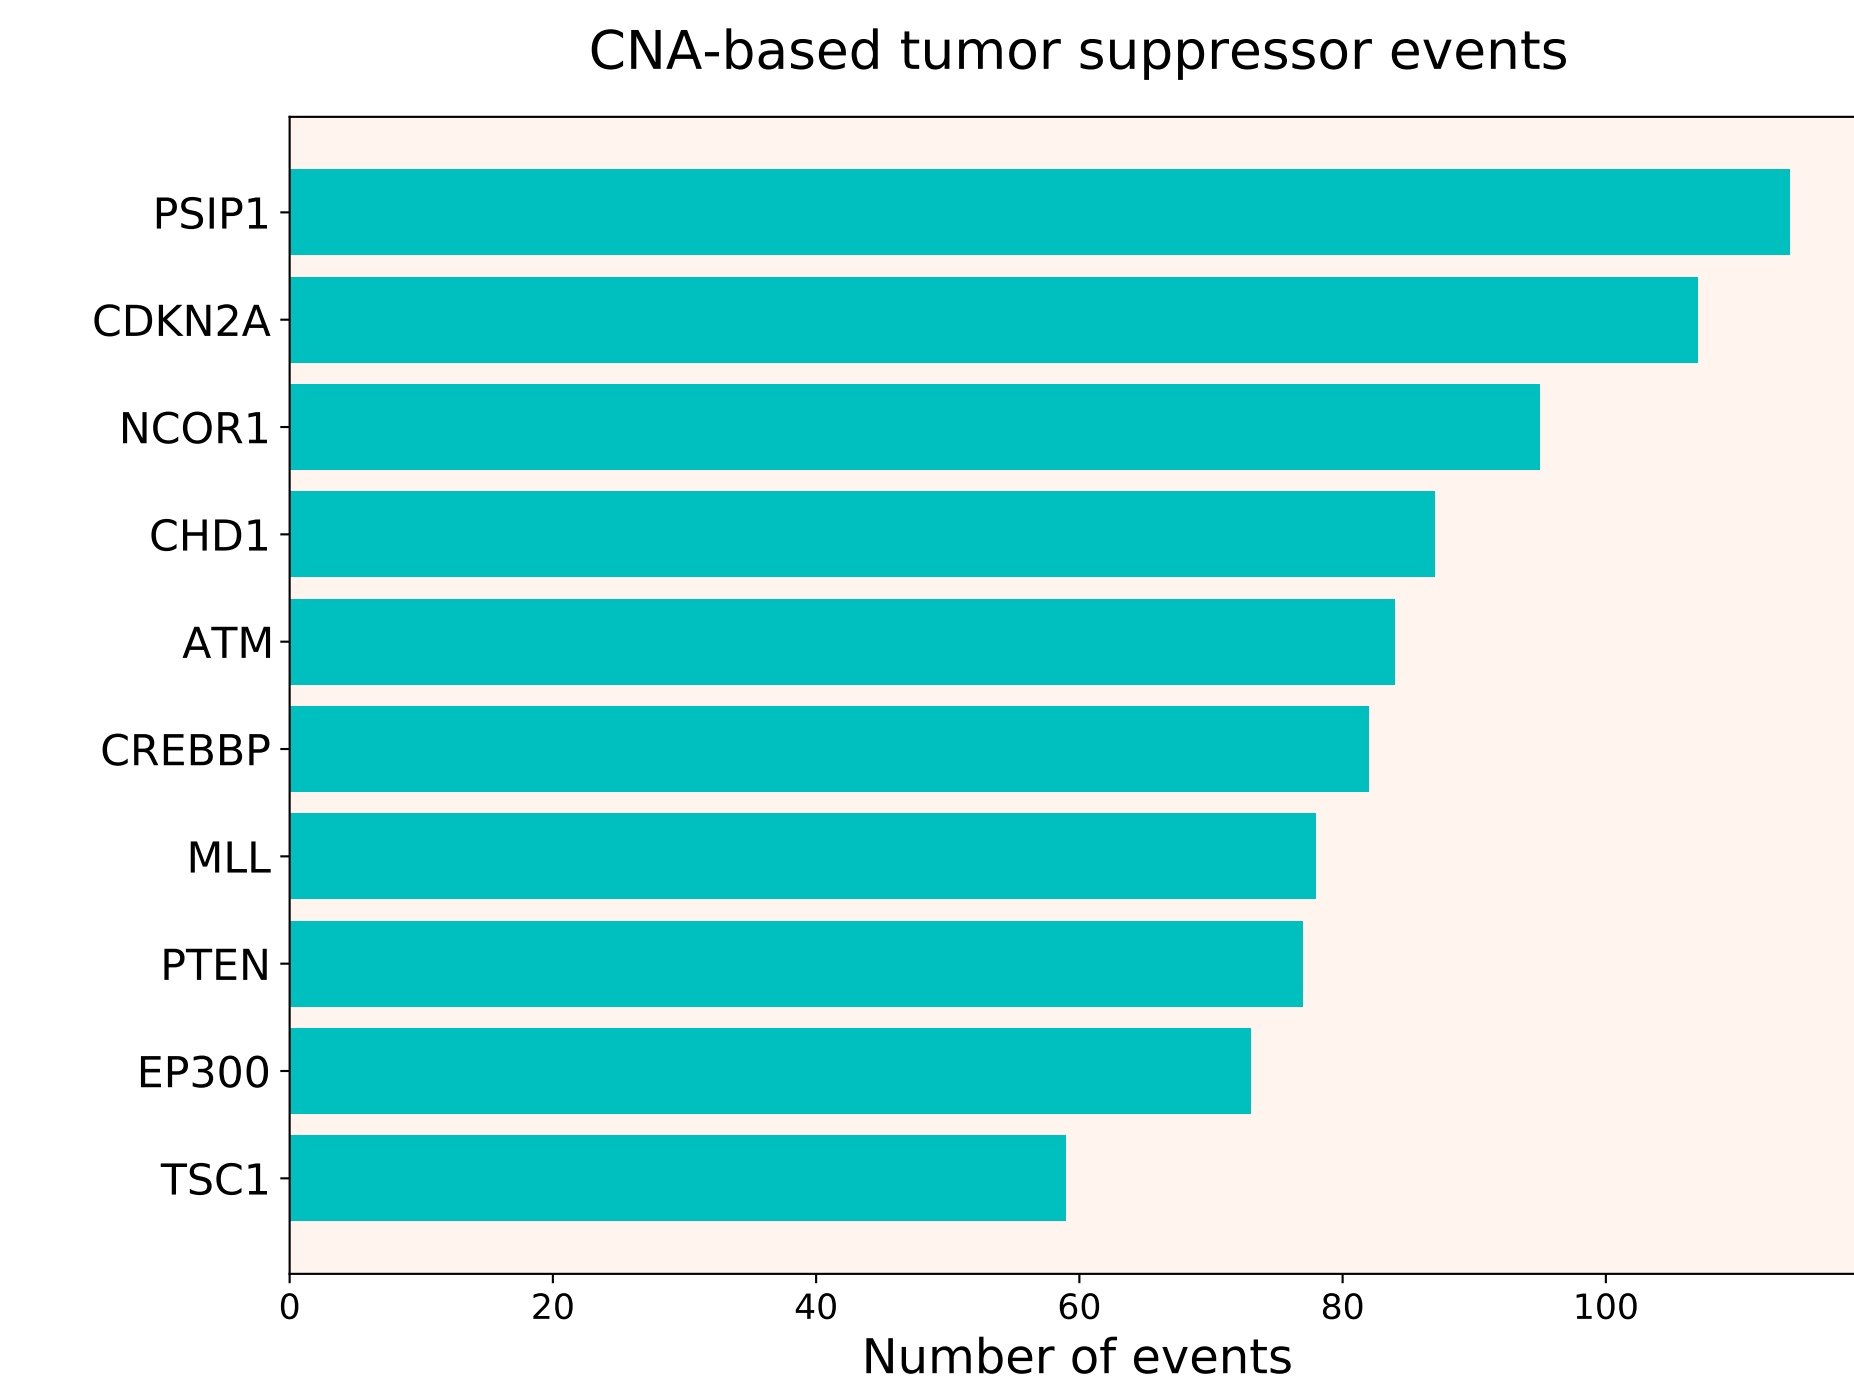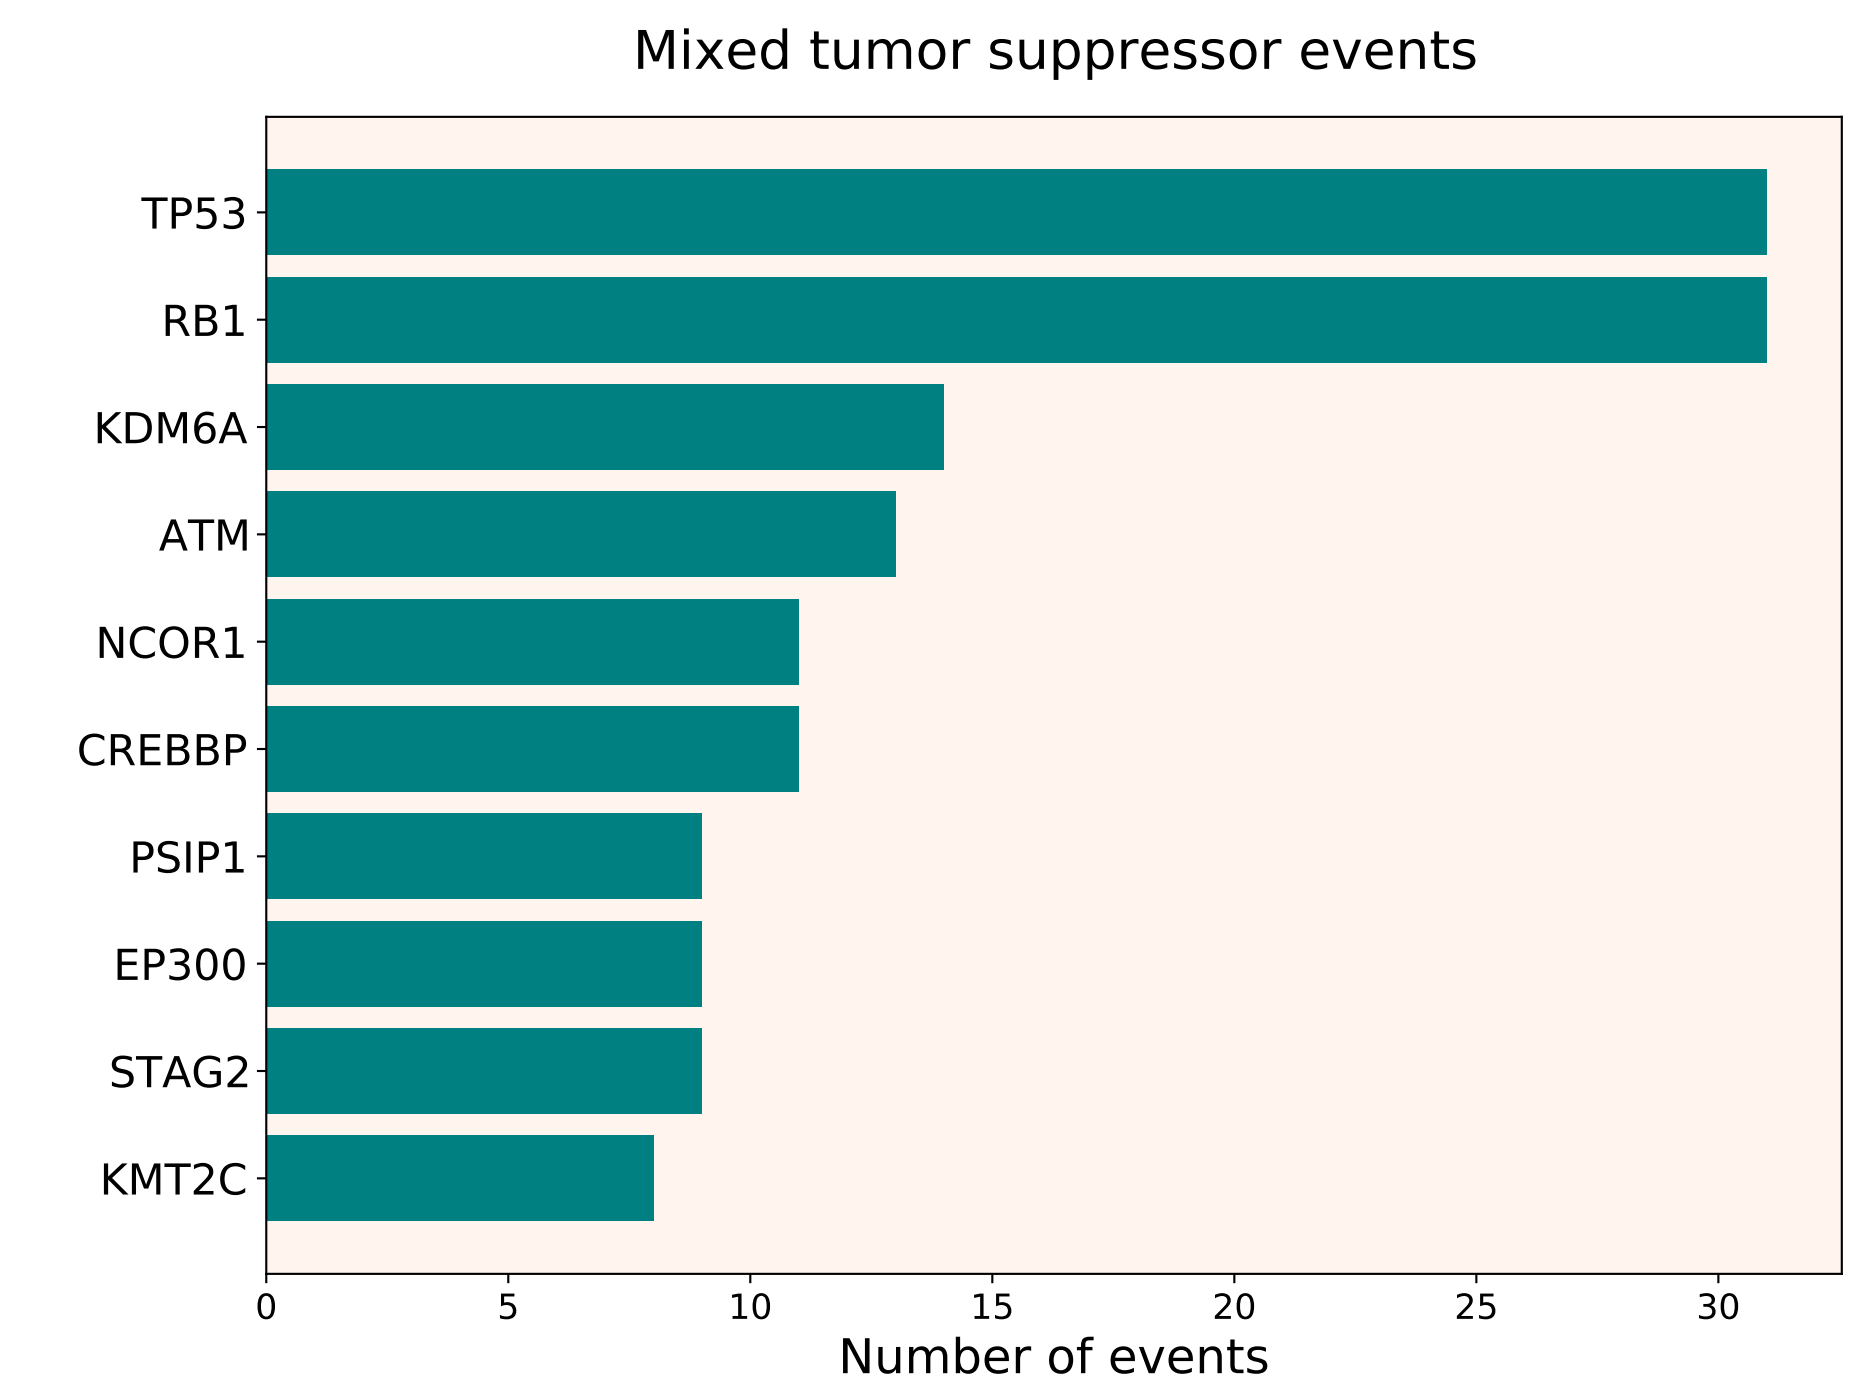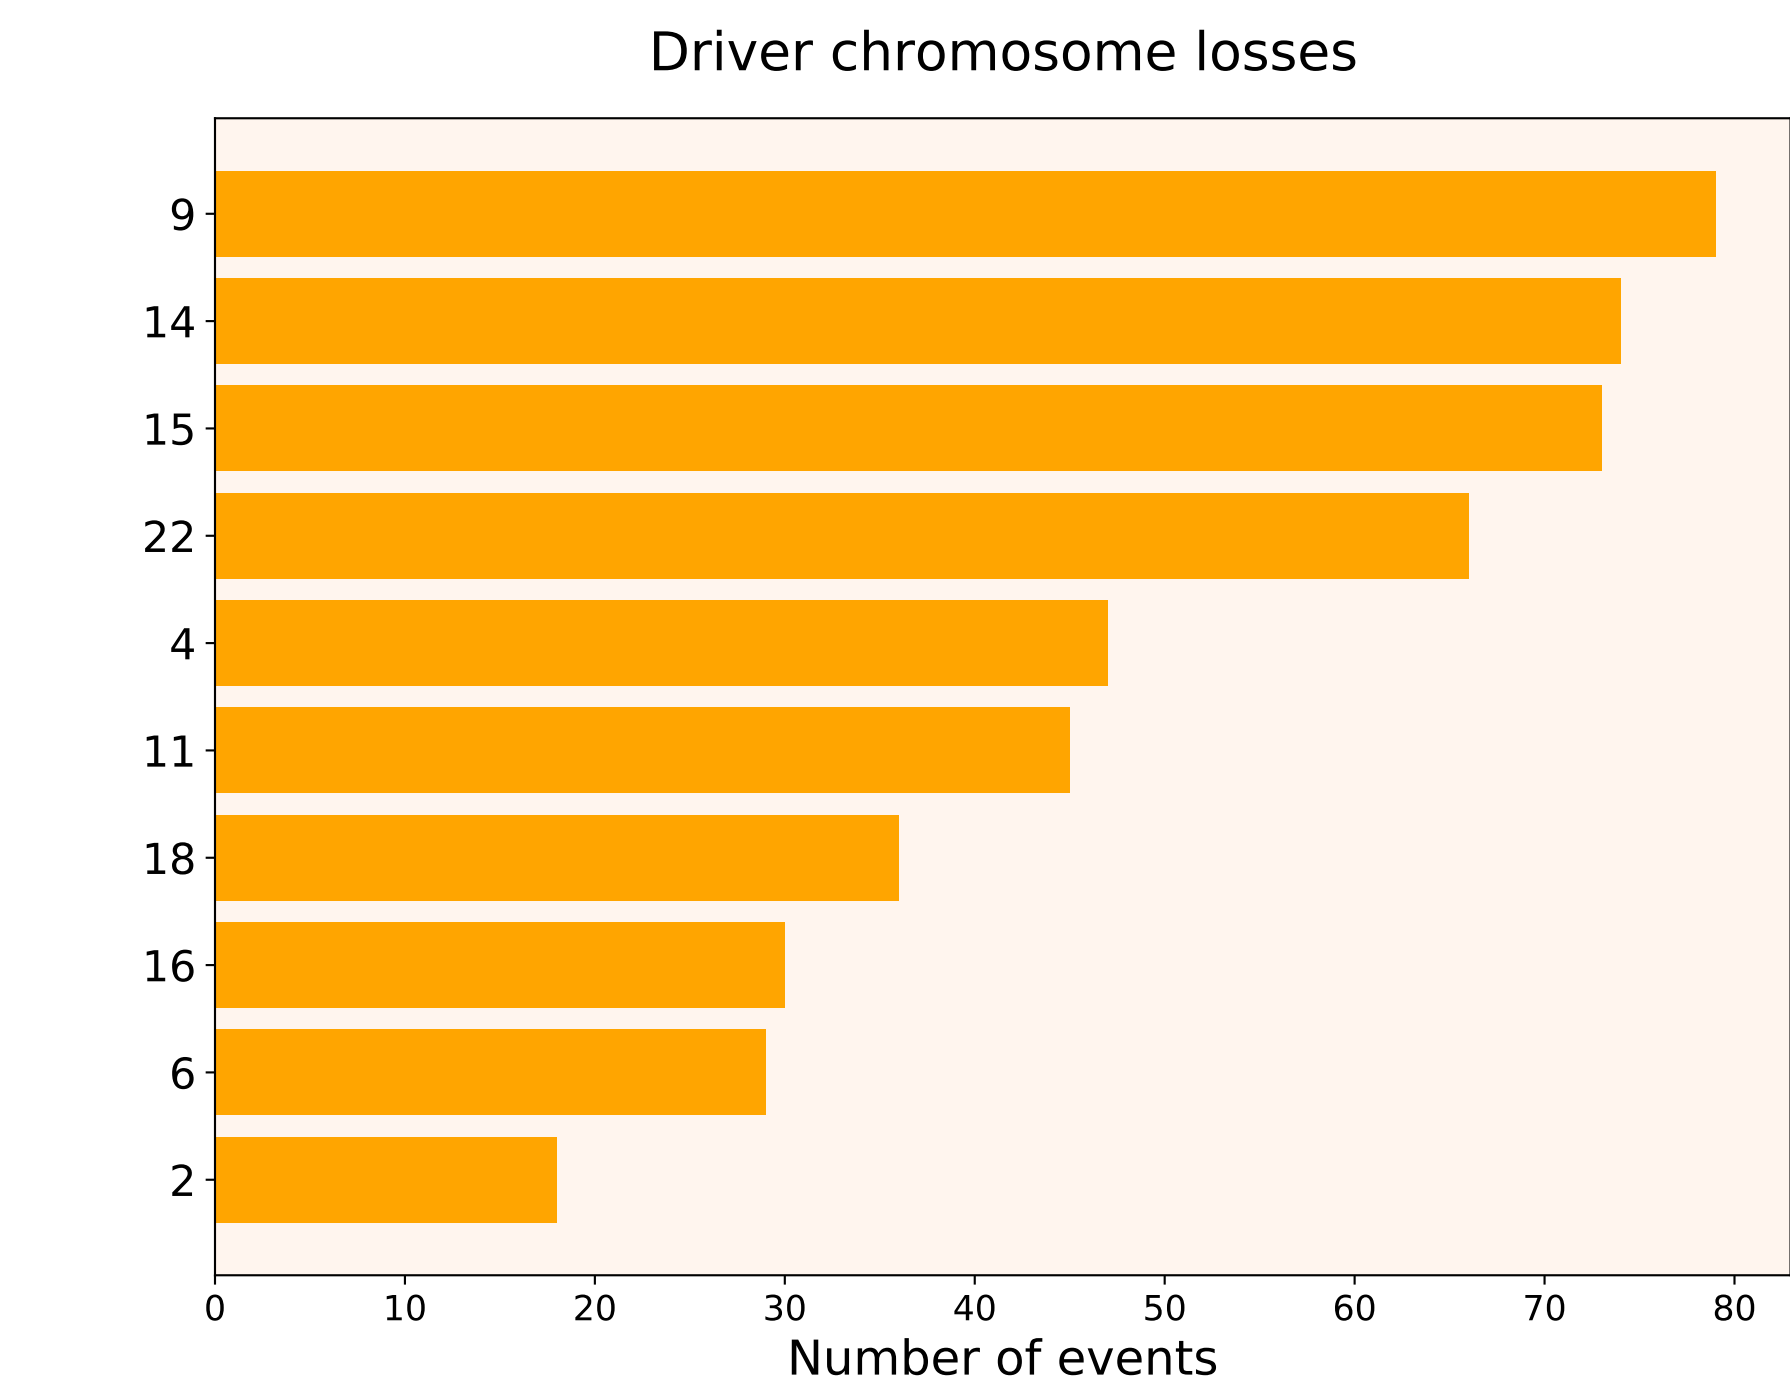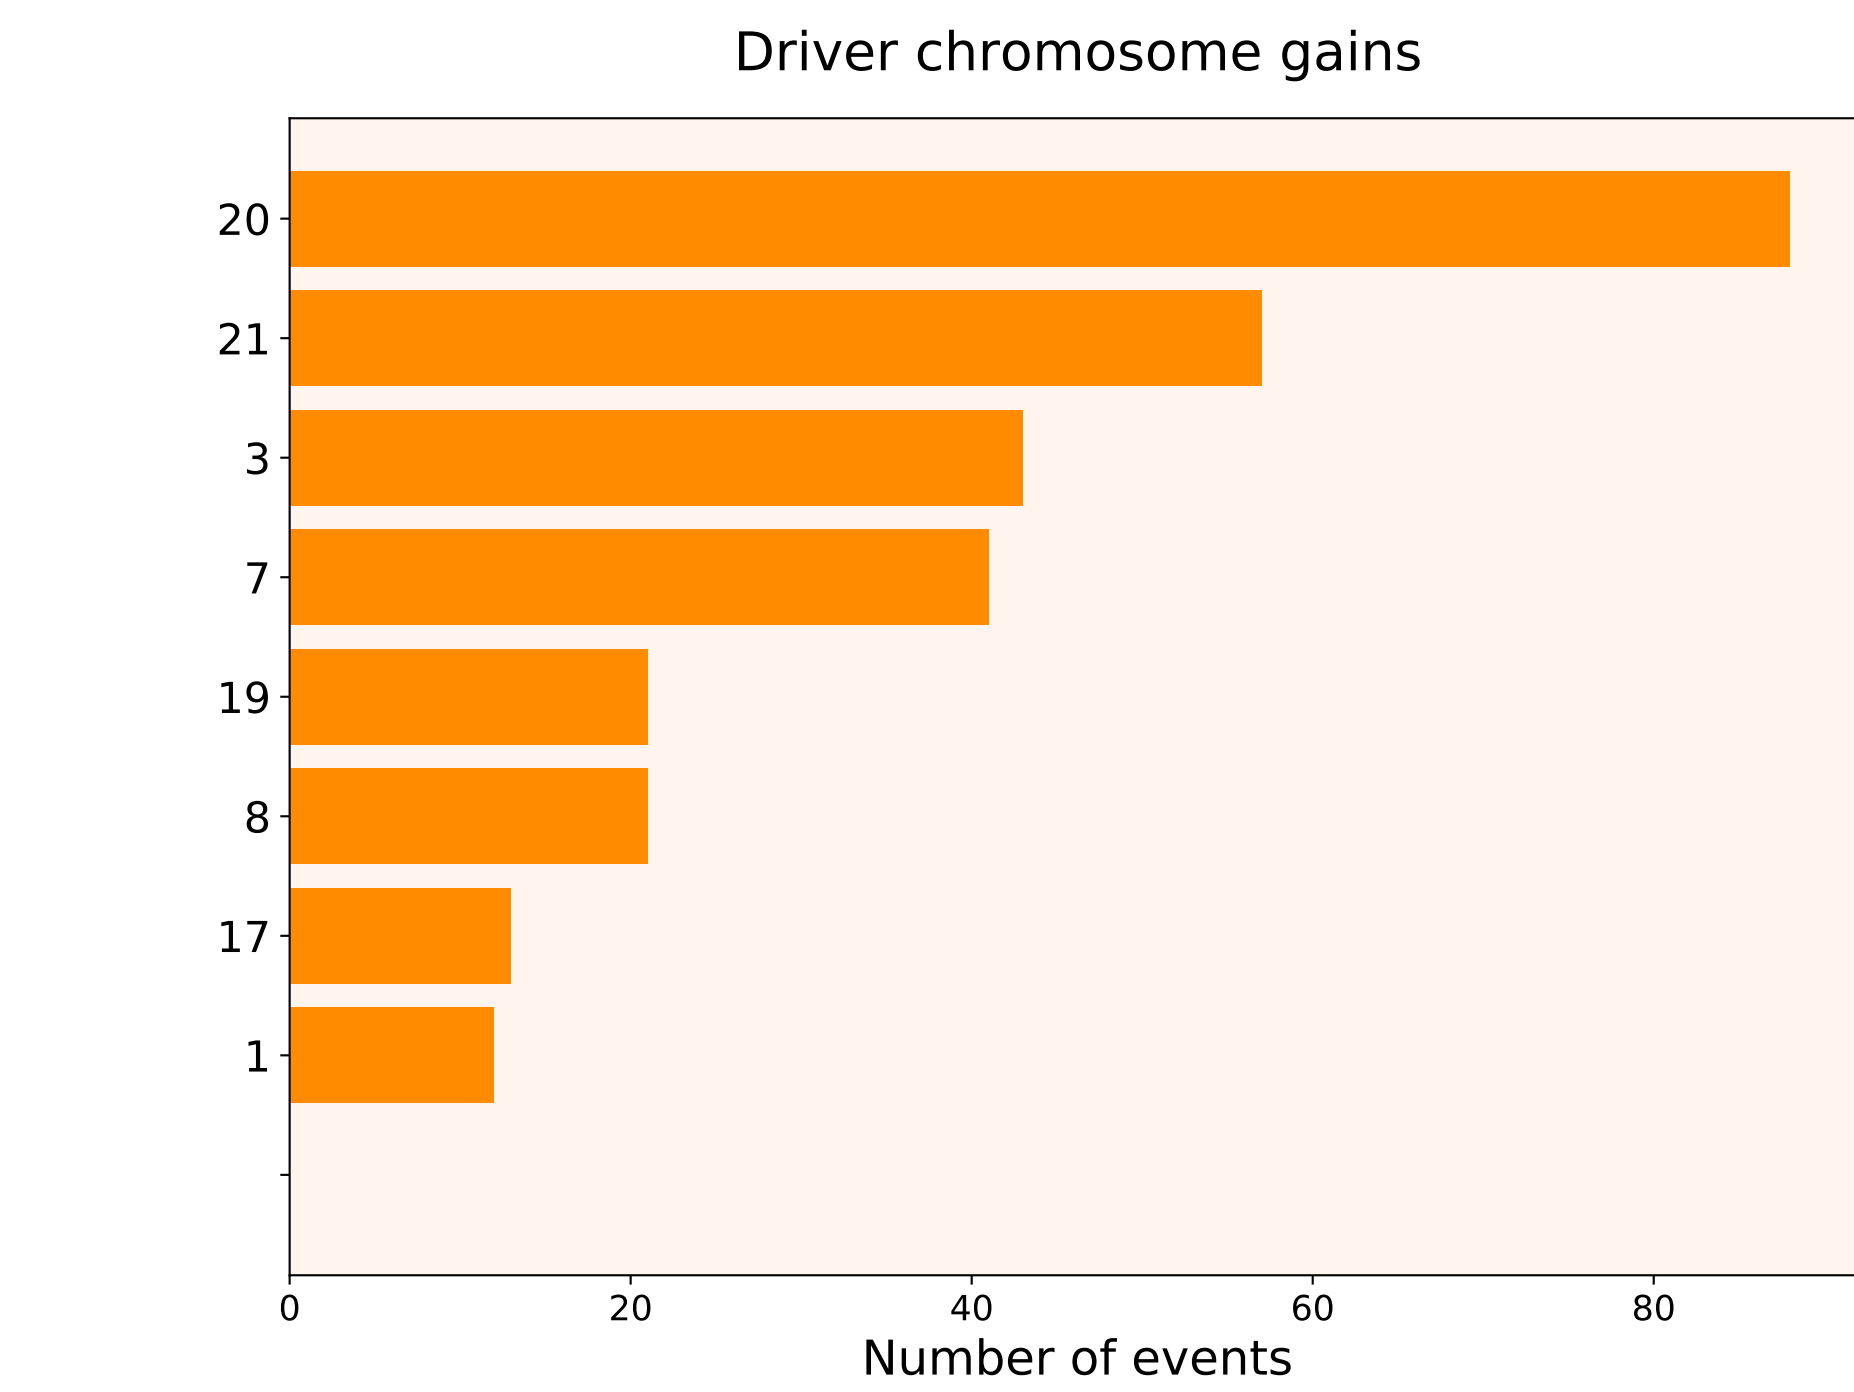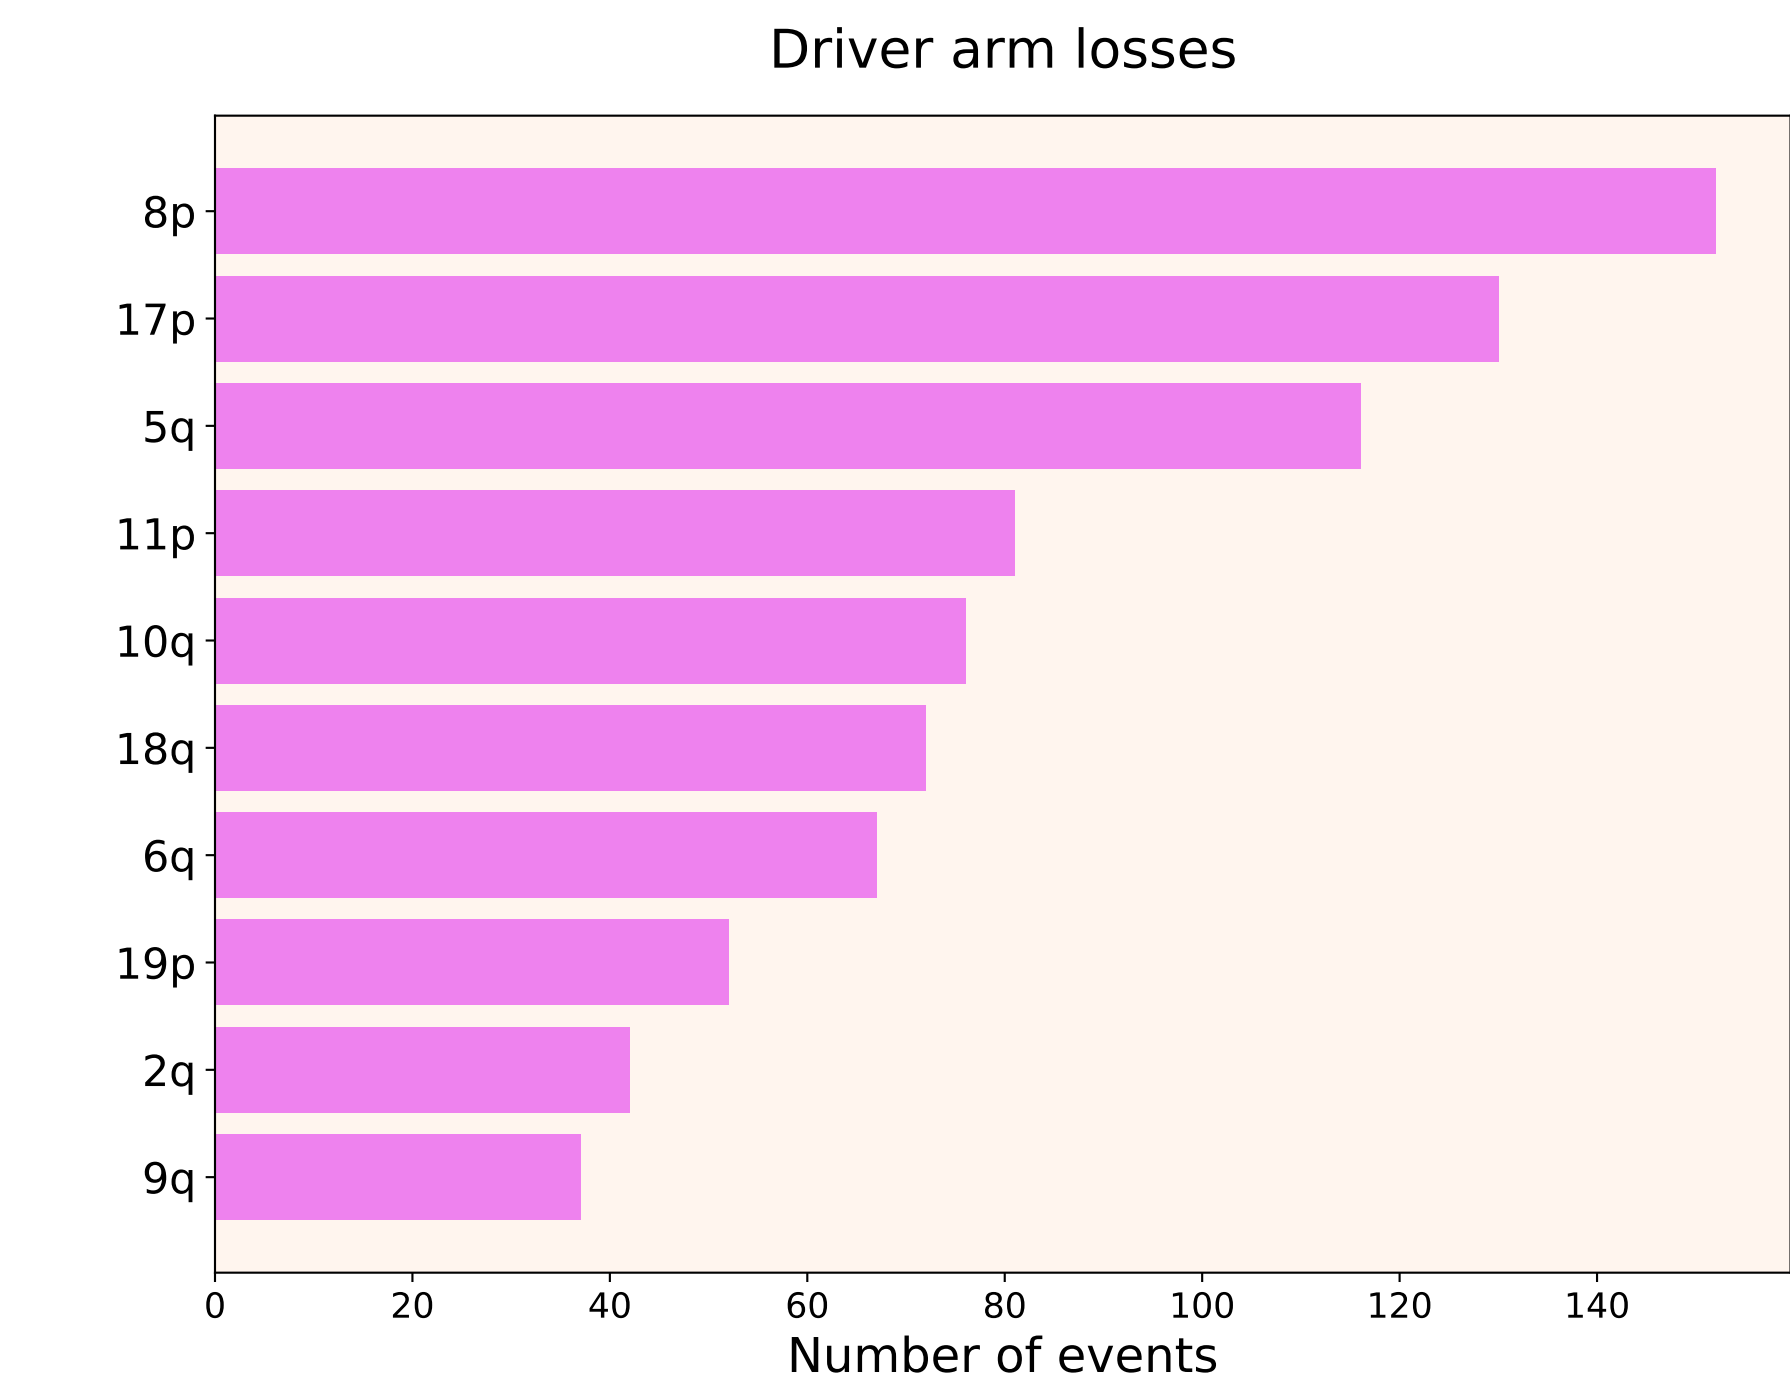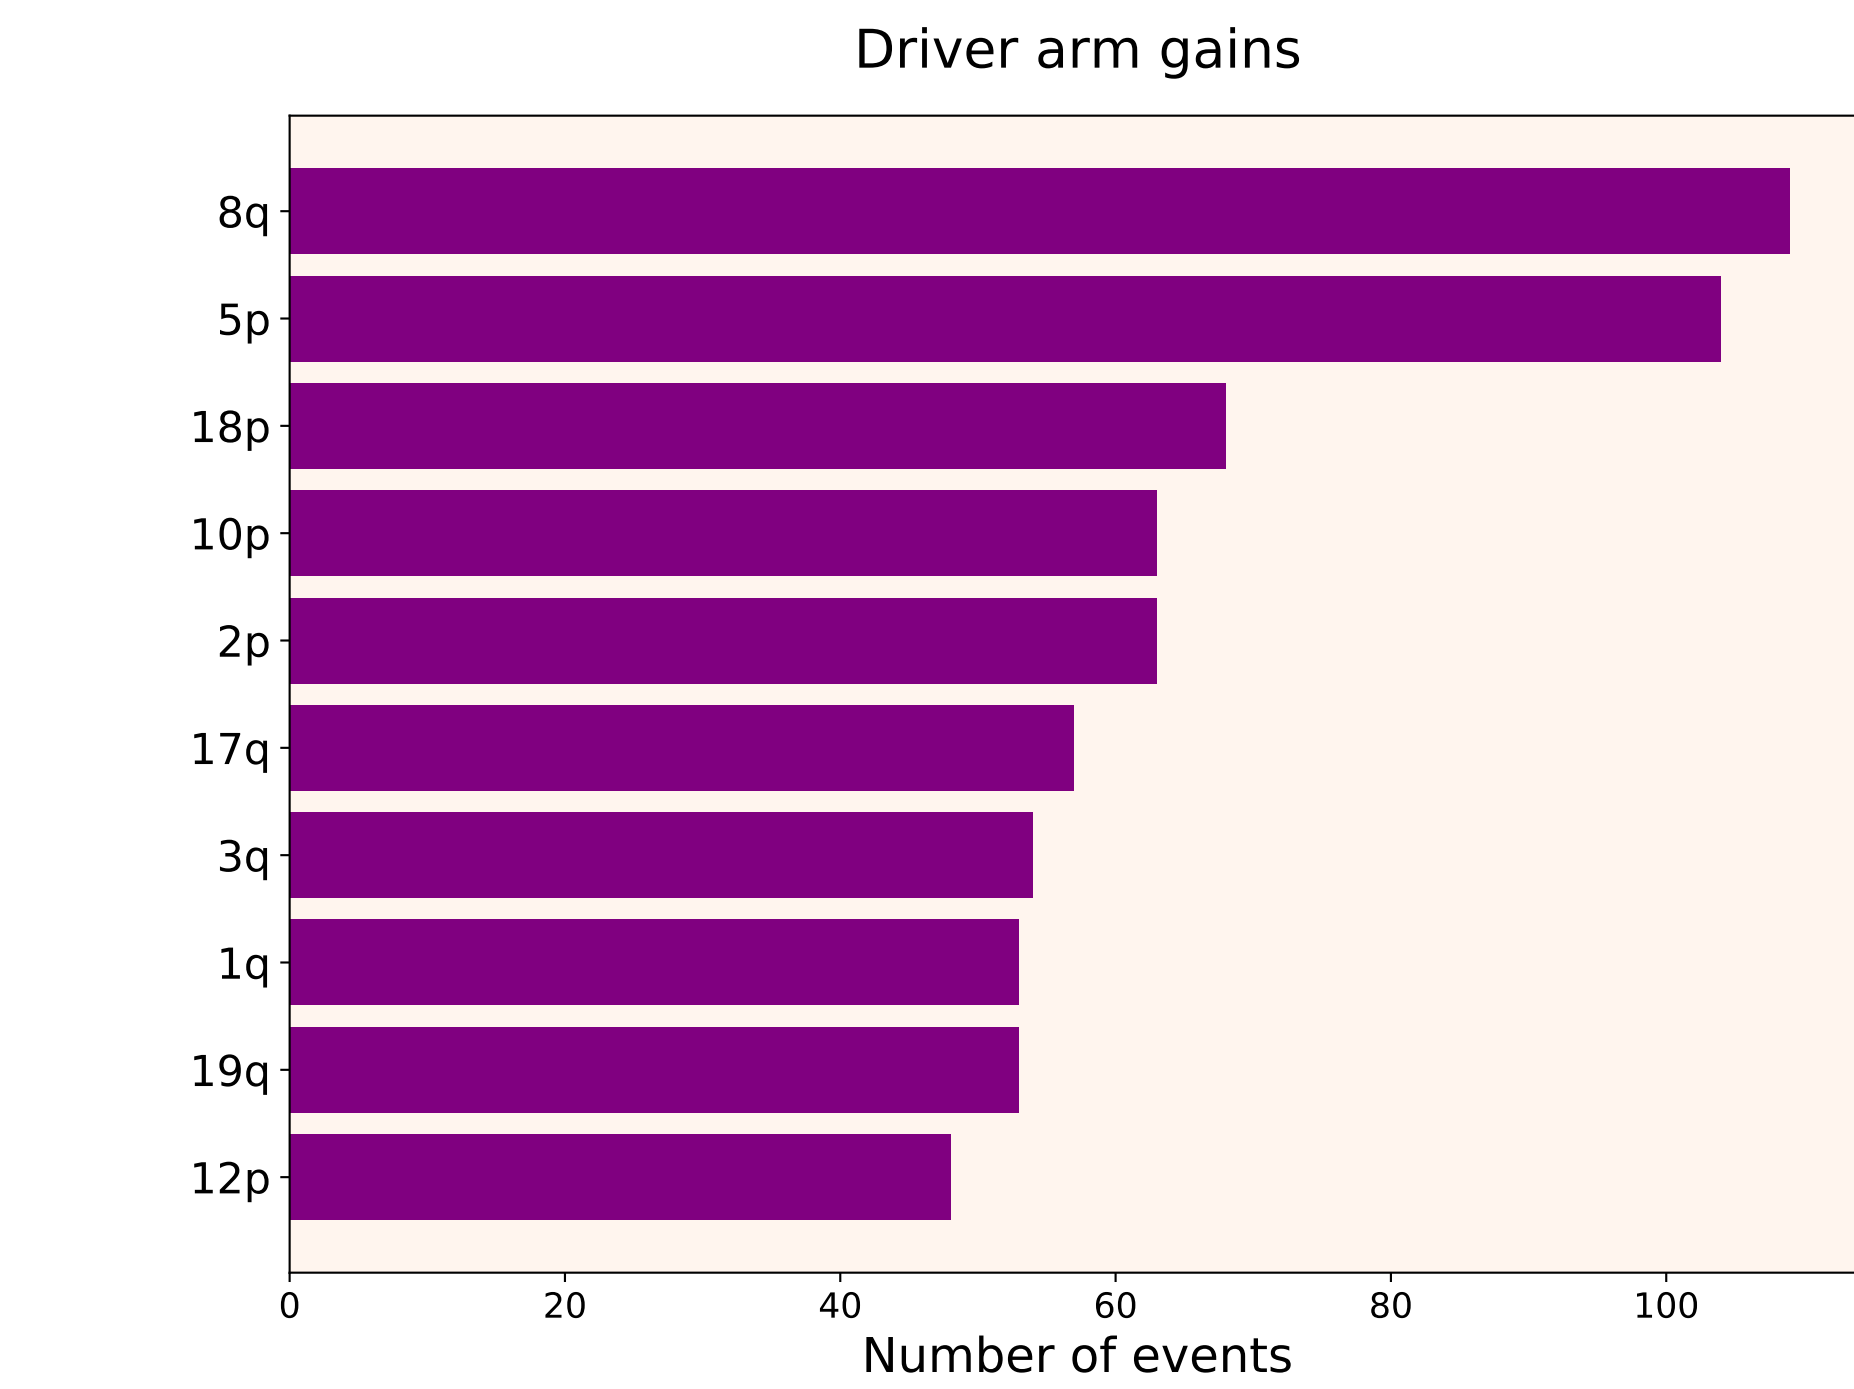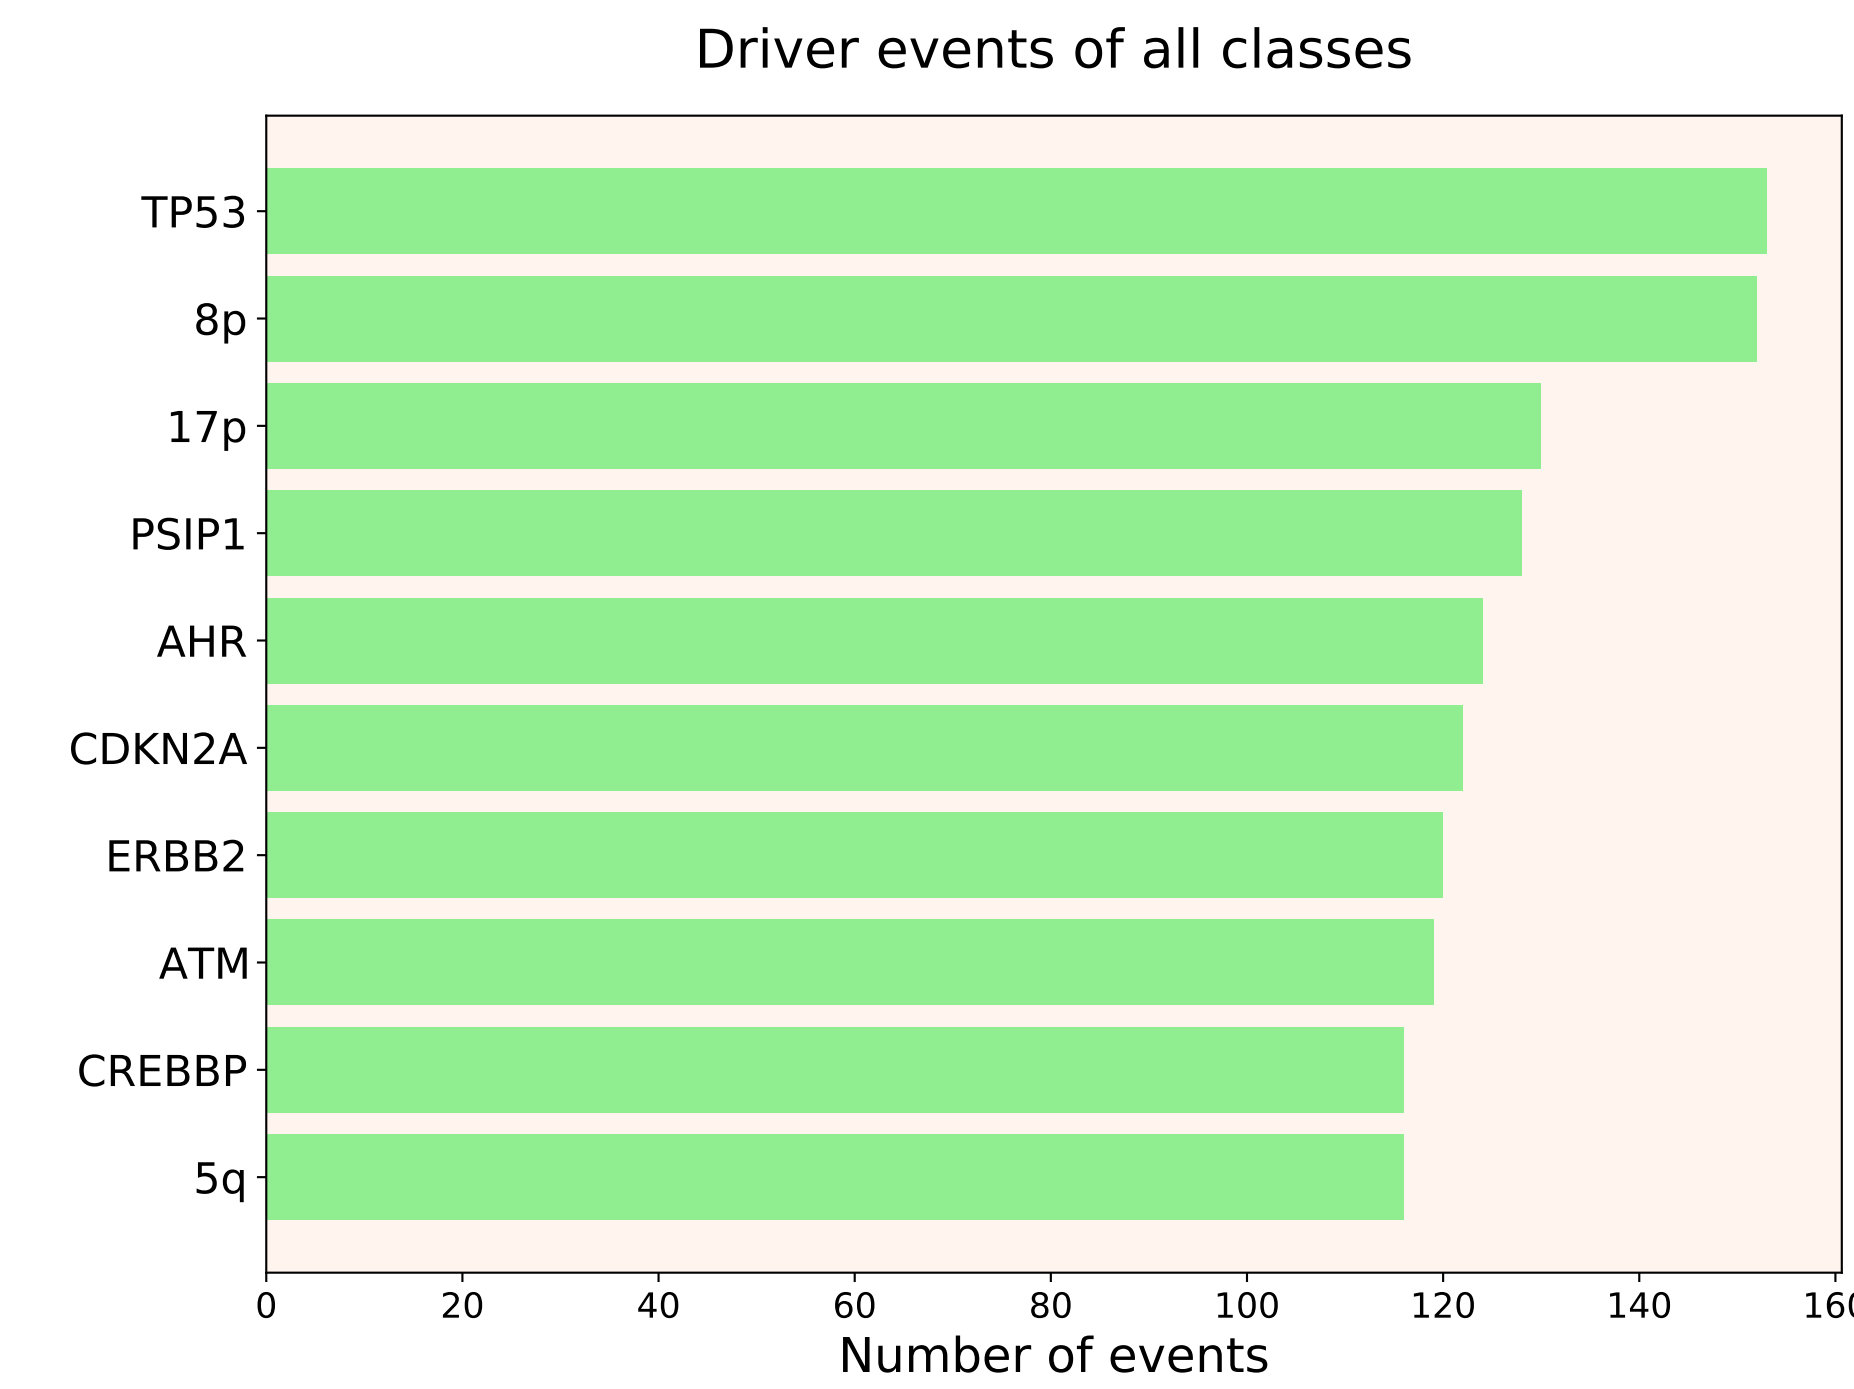

Supplement: Supplemental_Data_S1.zip [file Supplemental_Data_S1.zip]

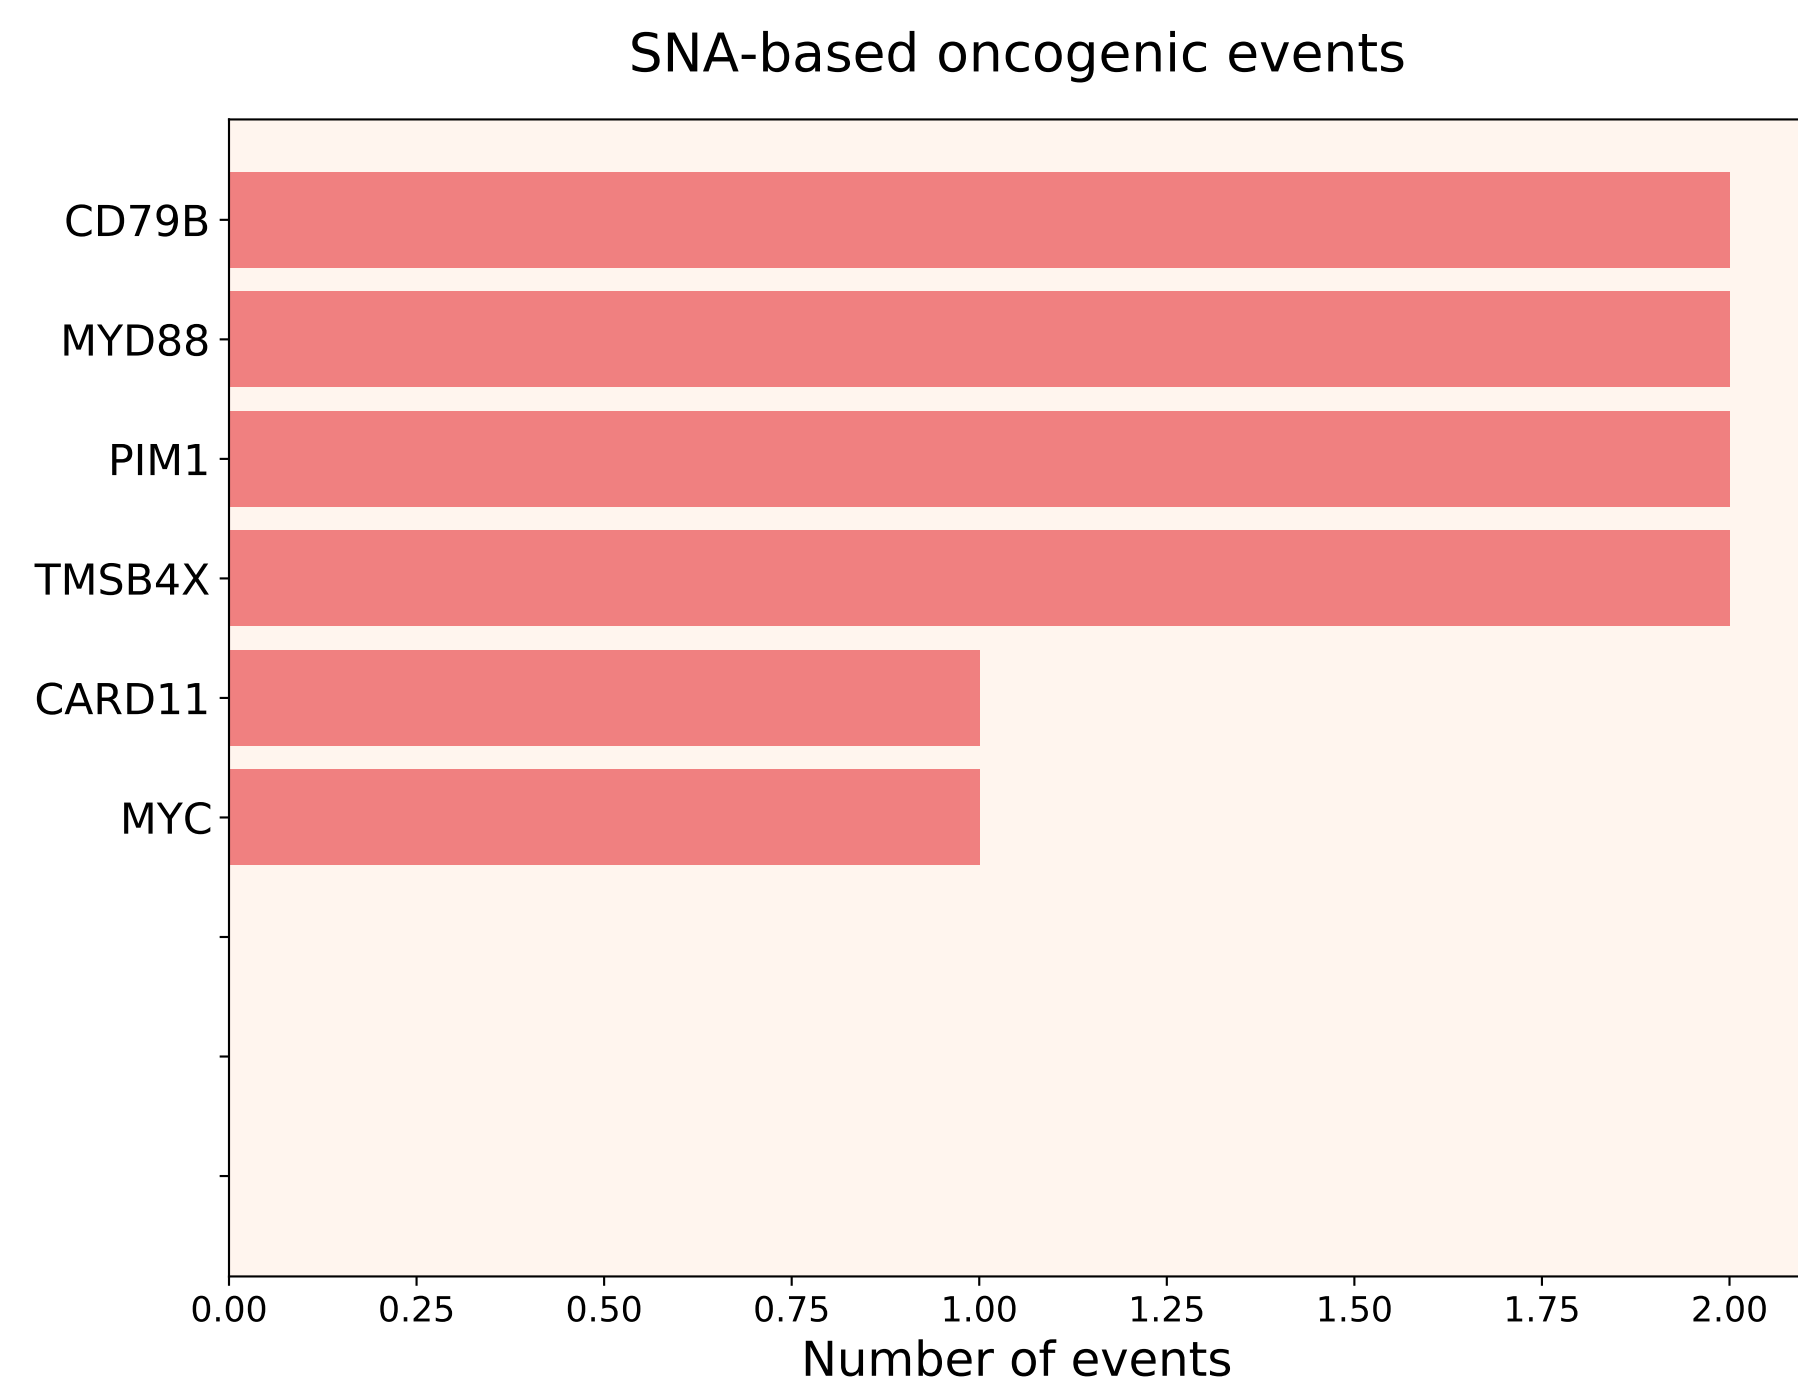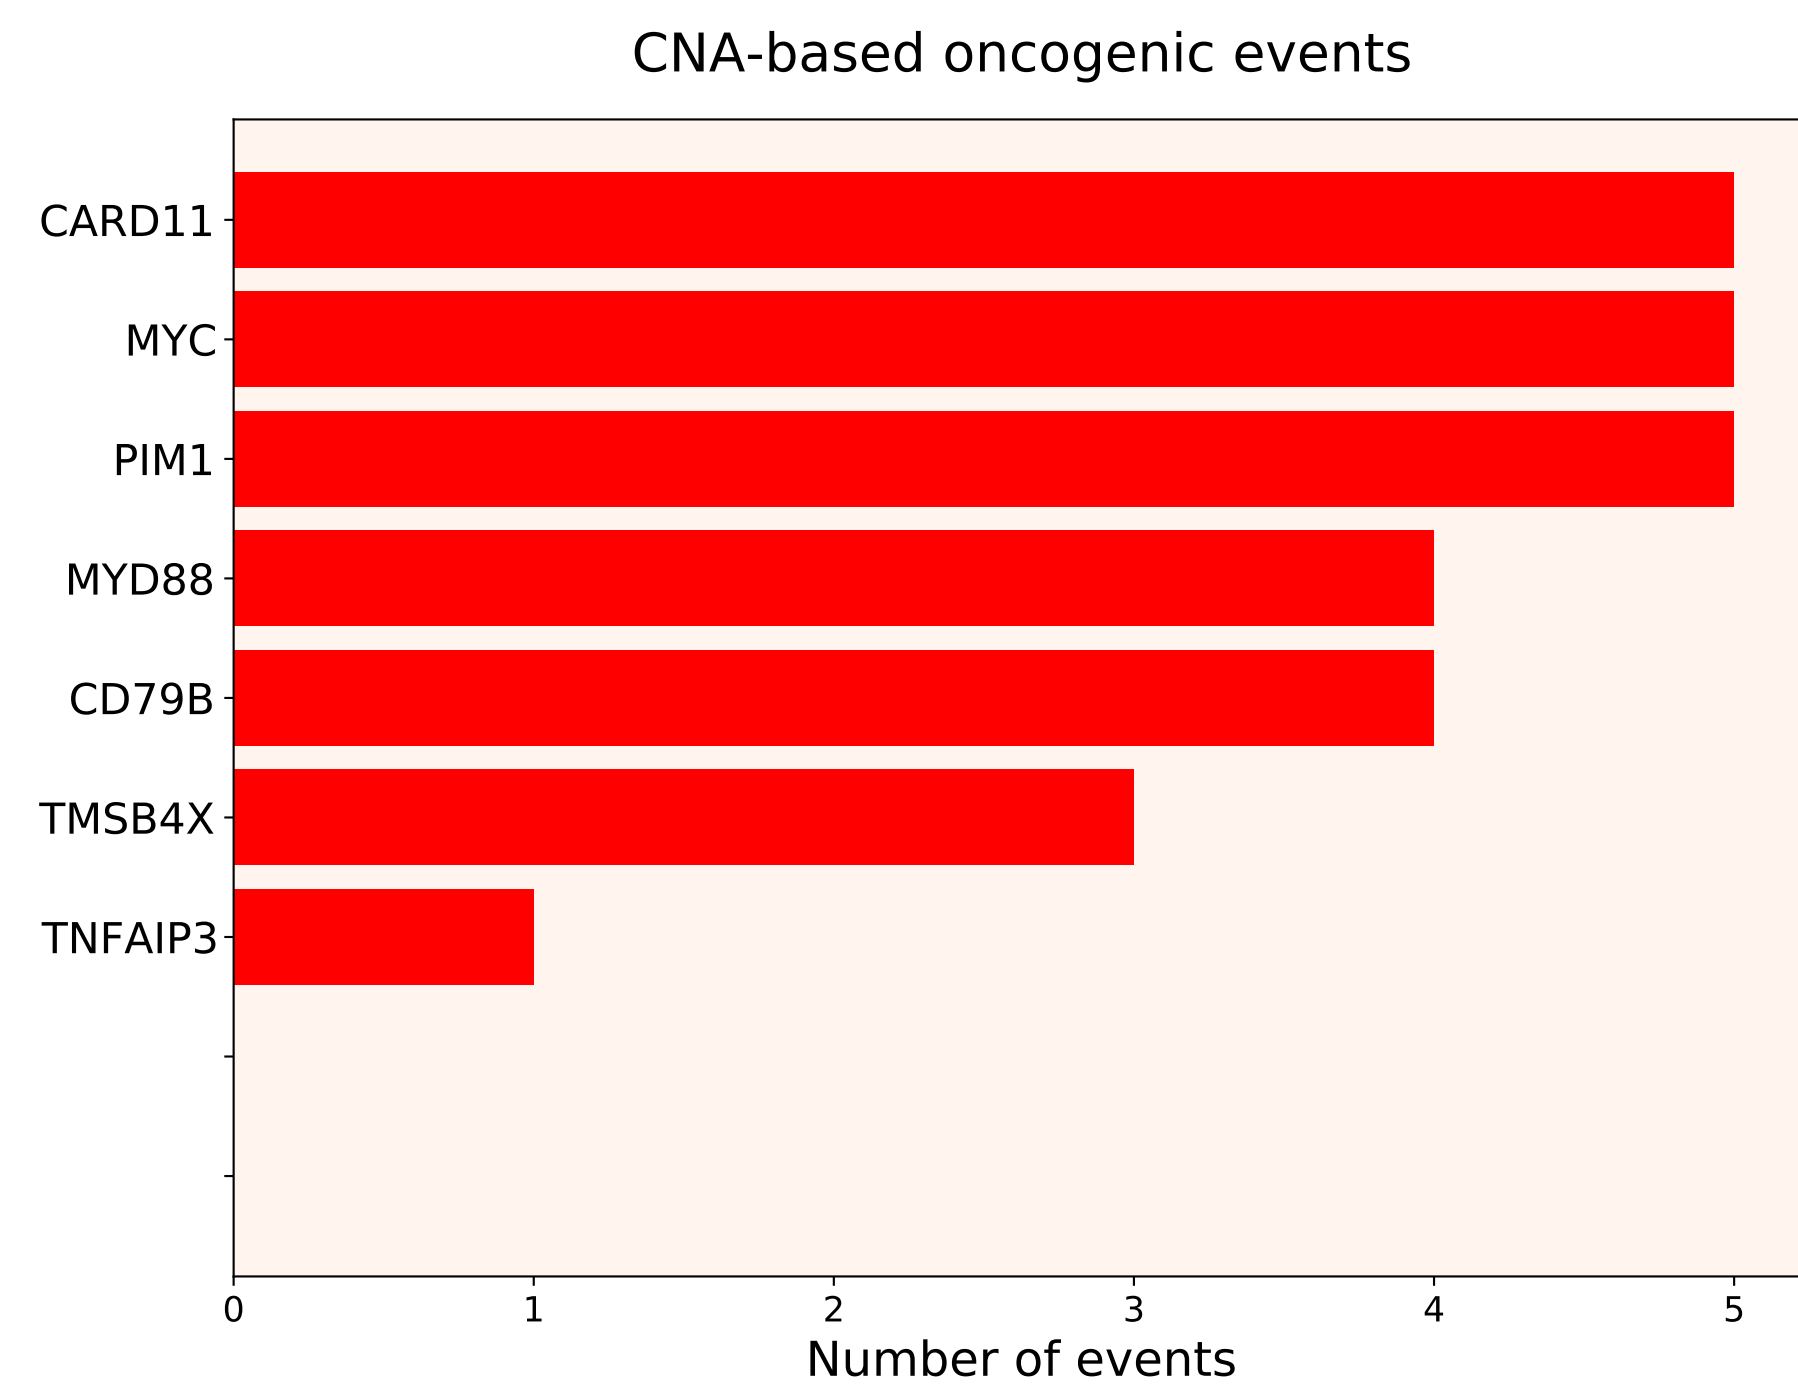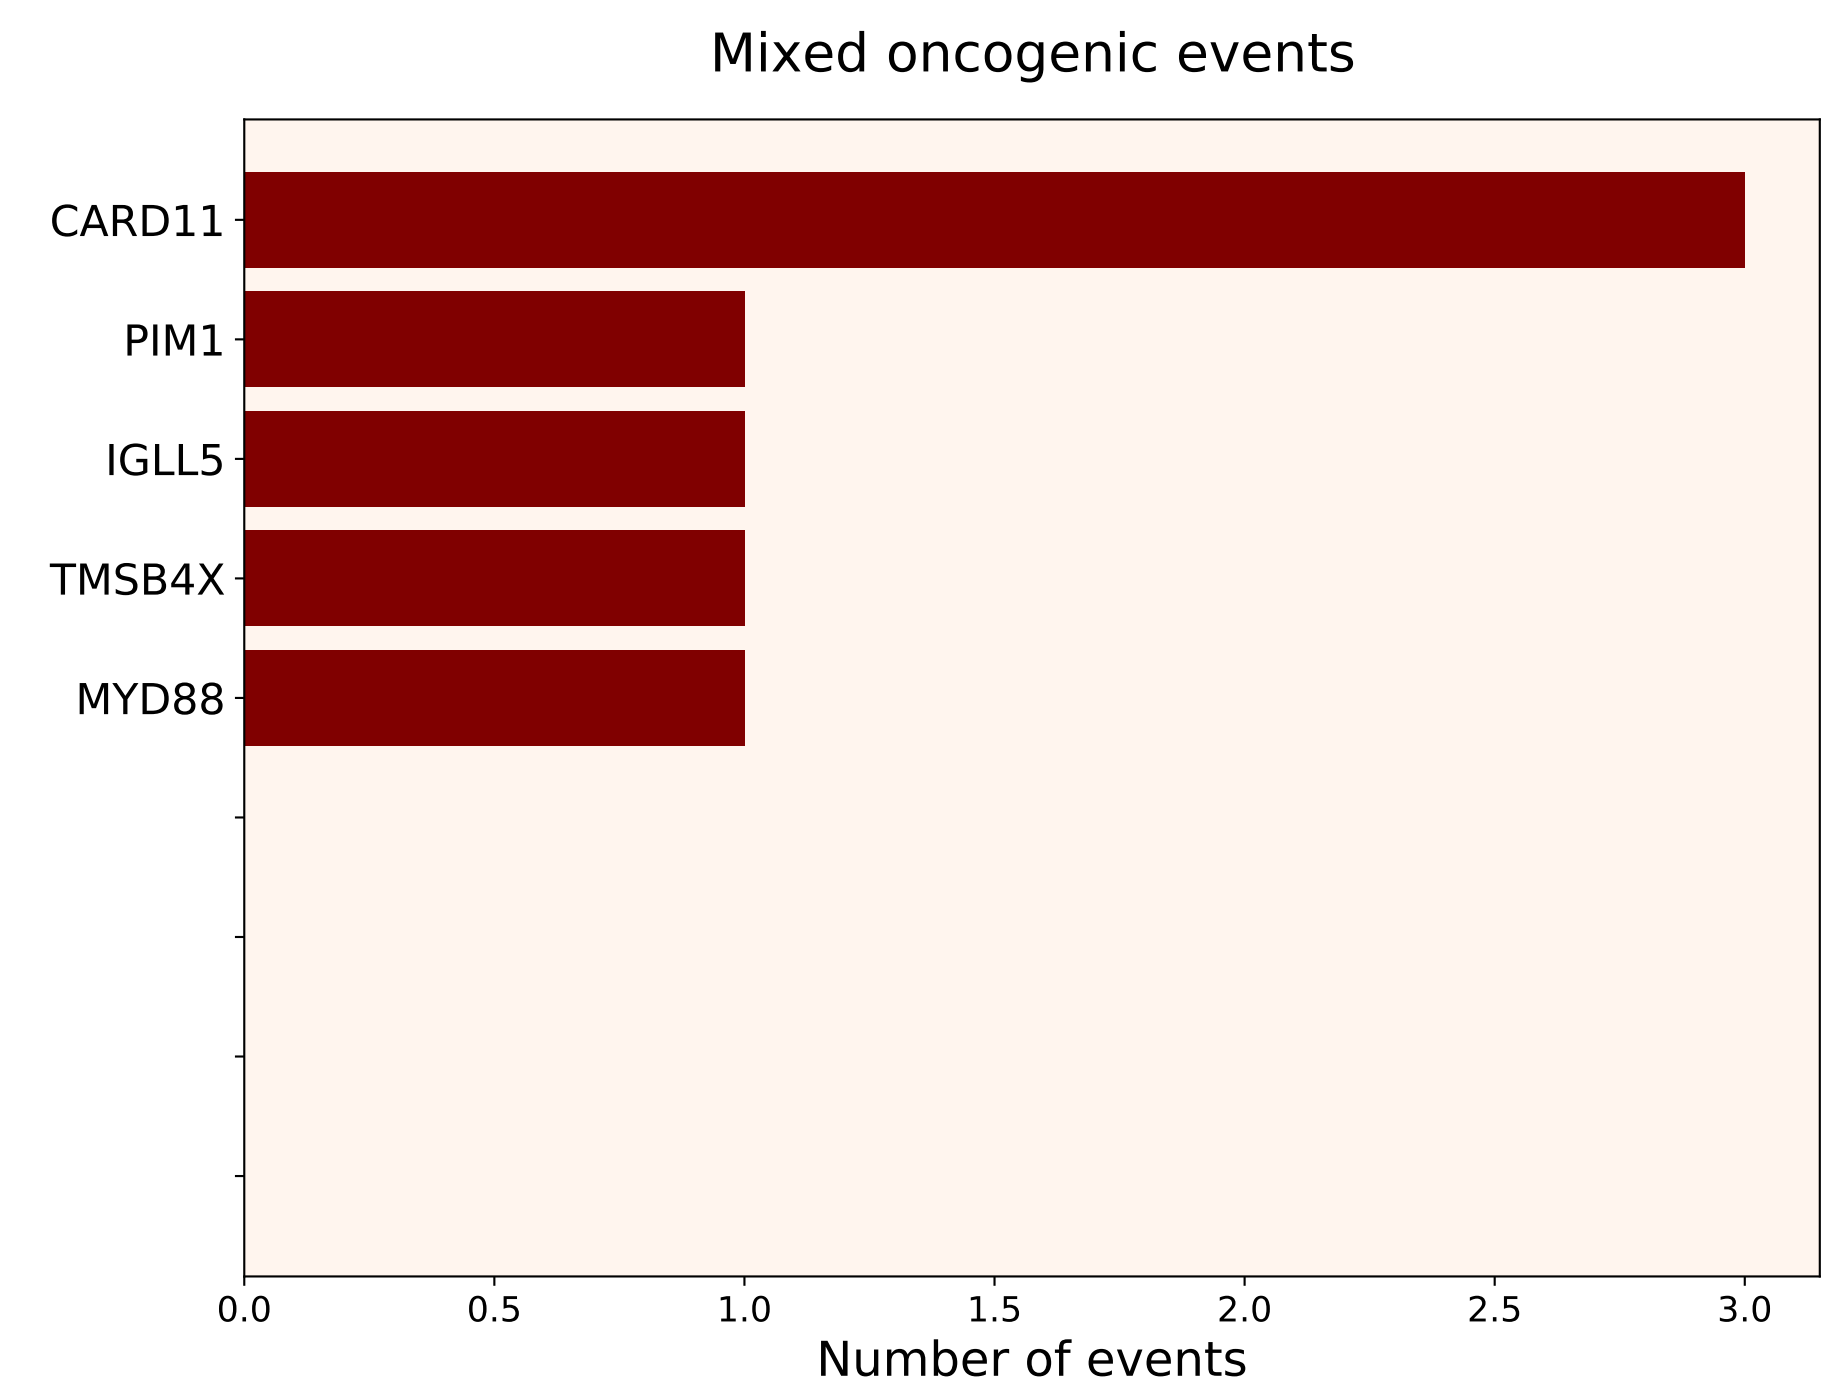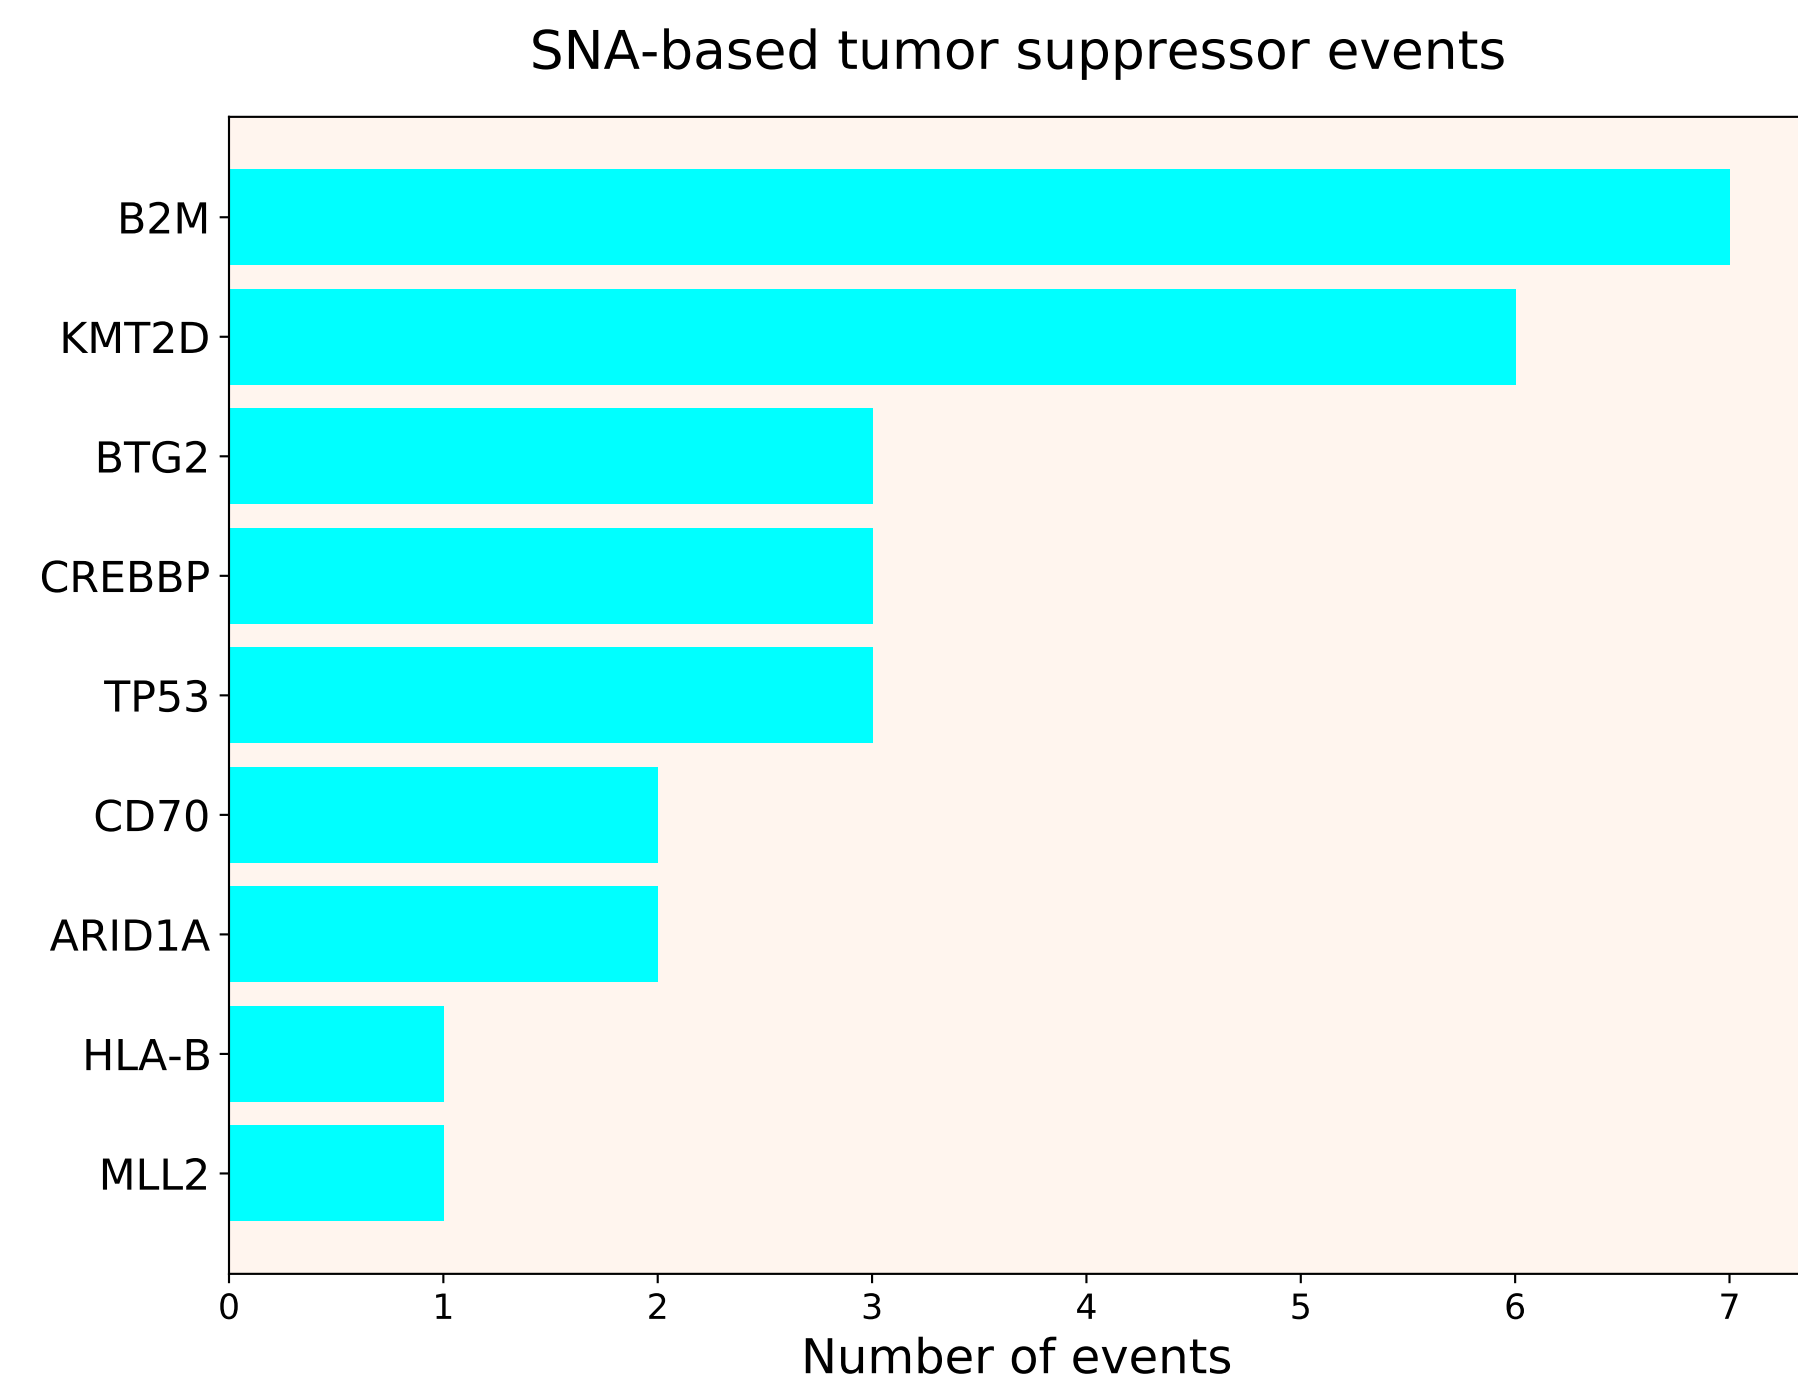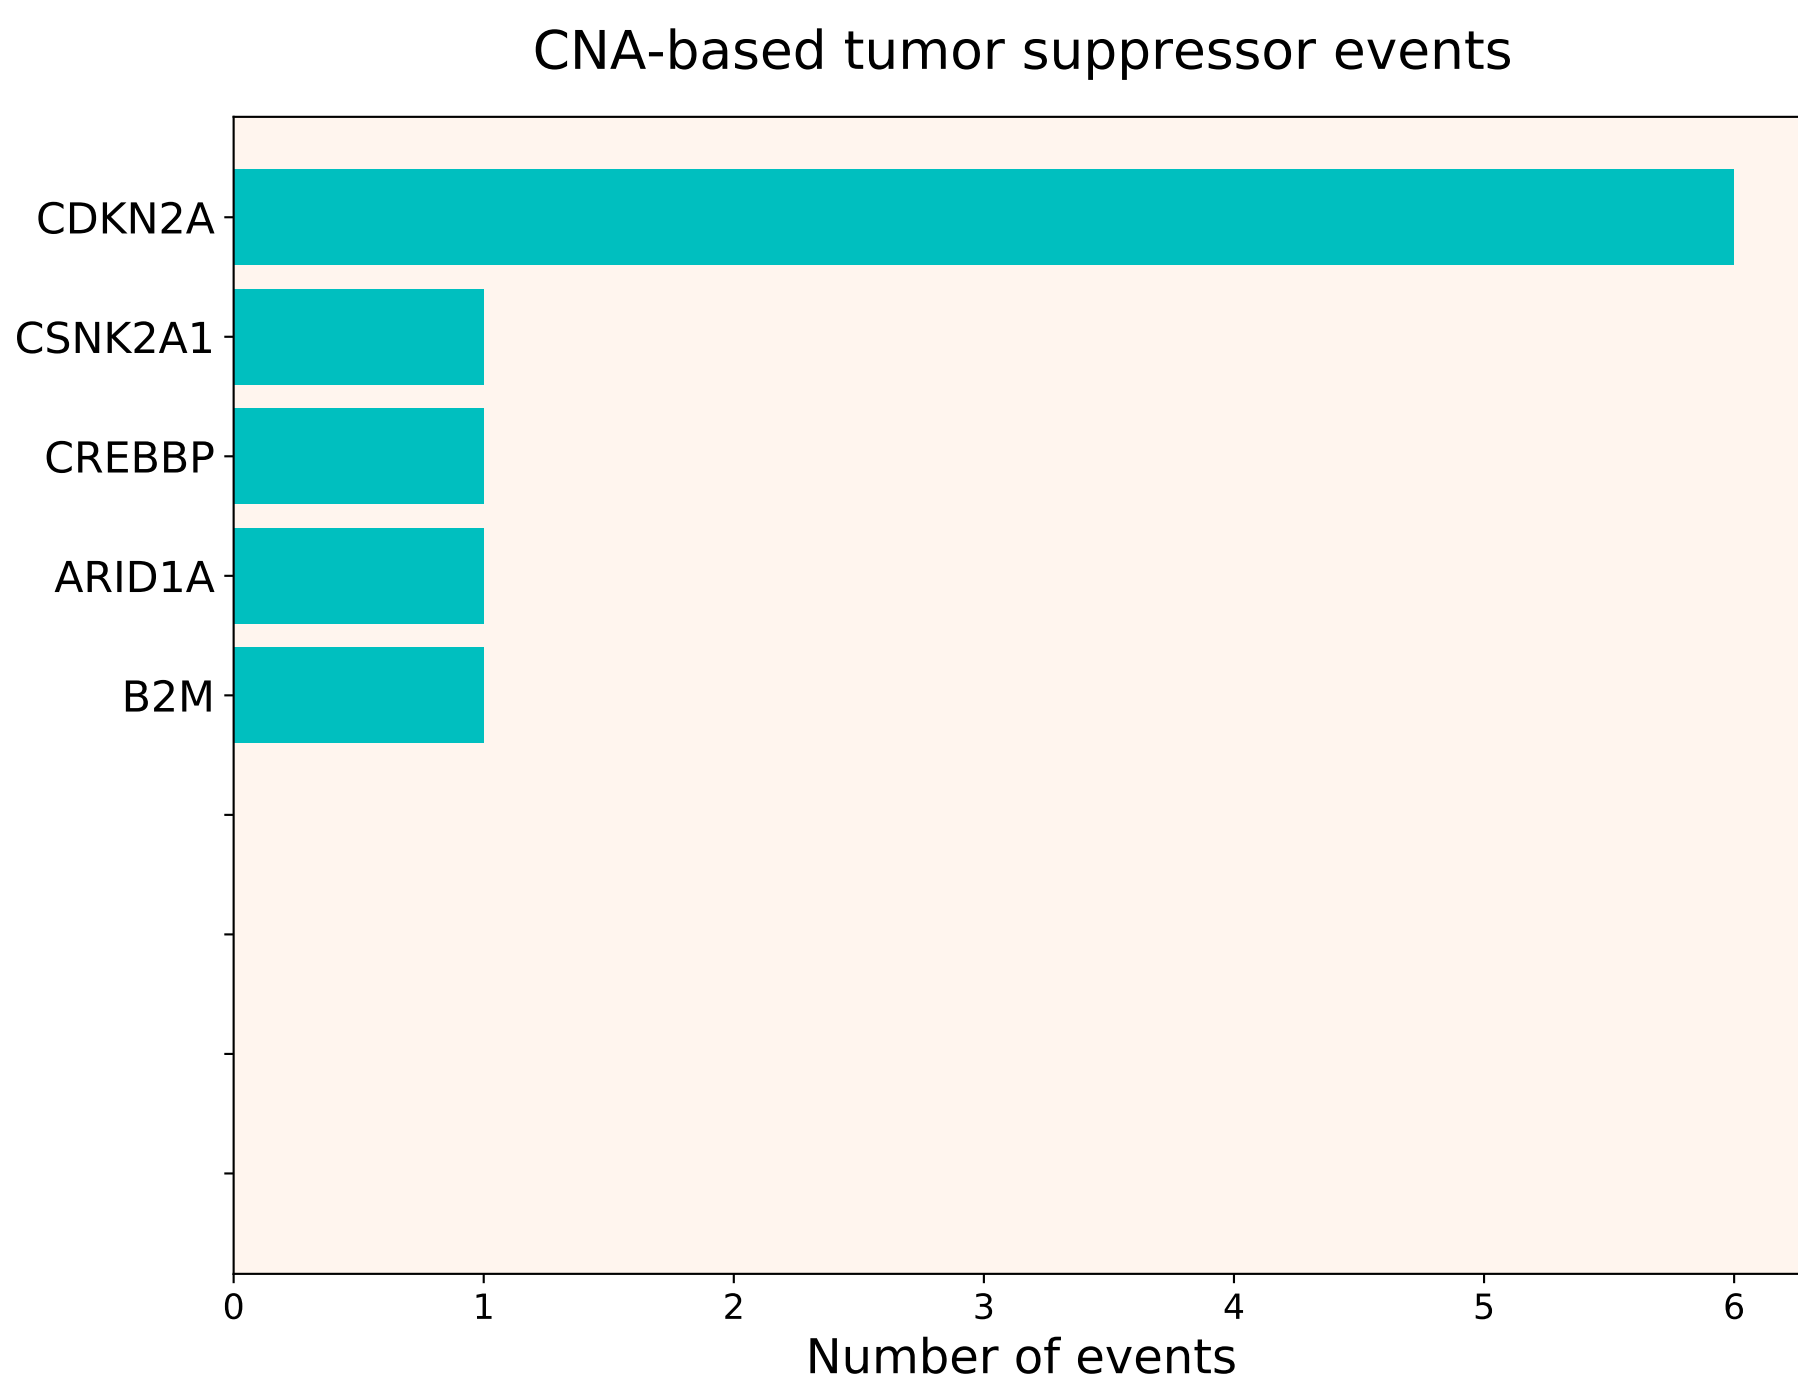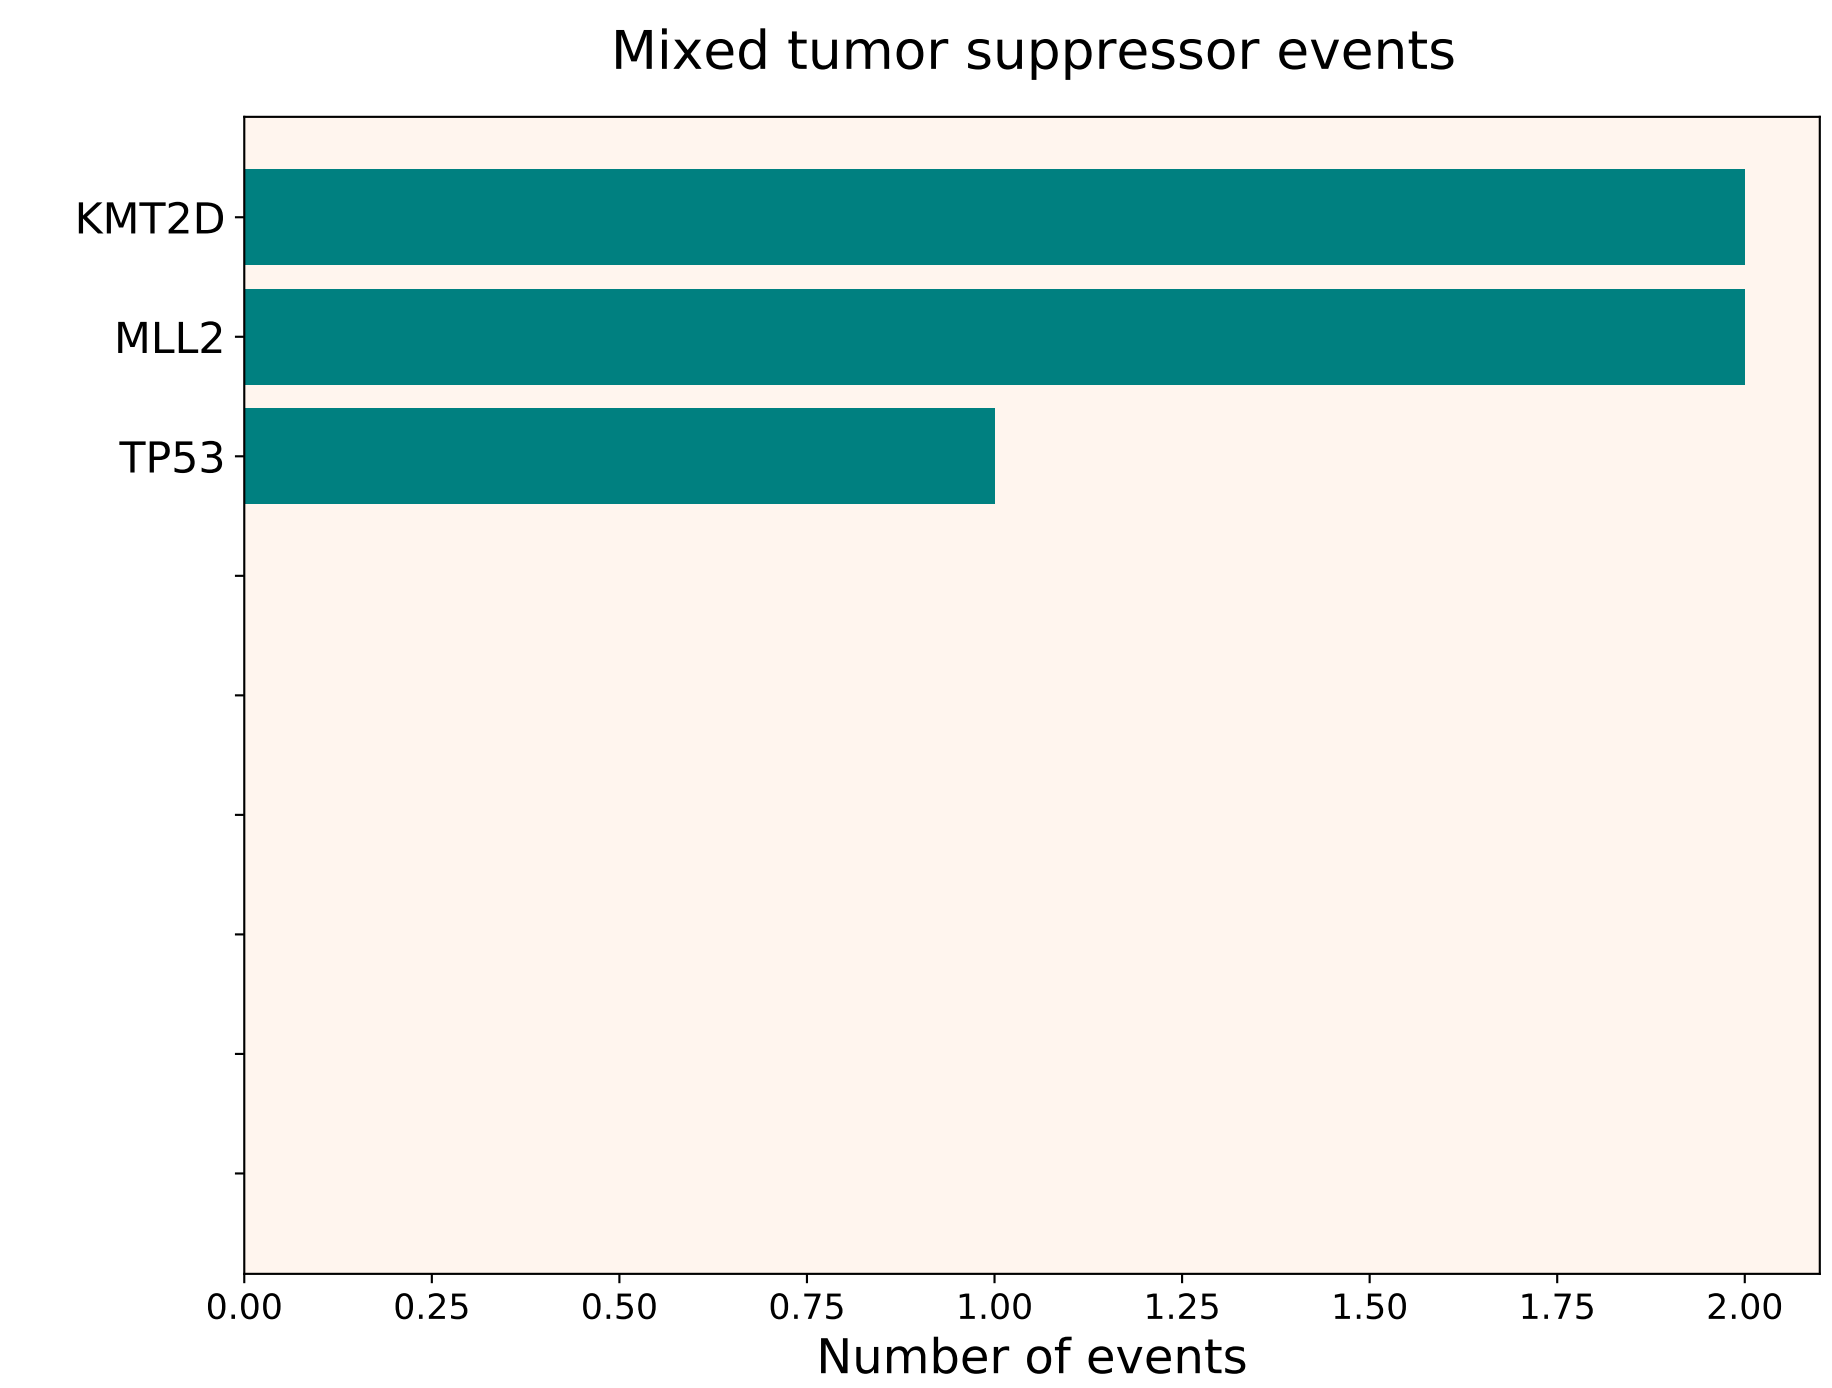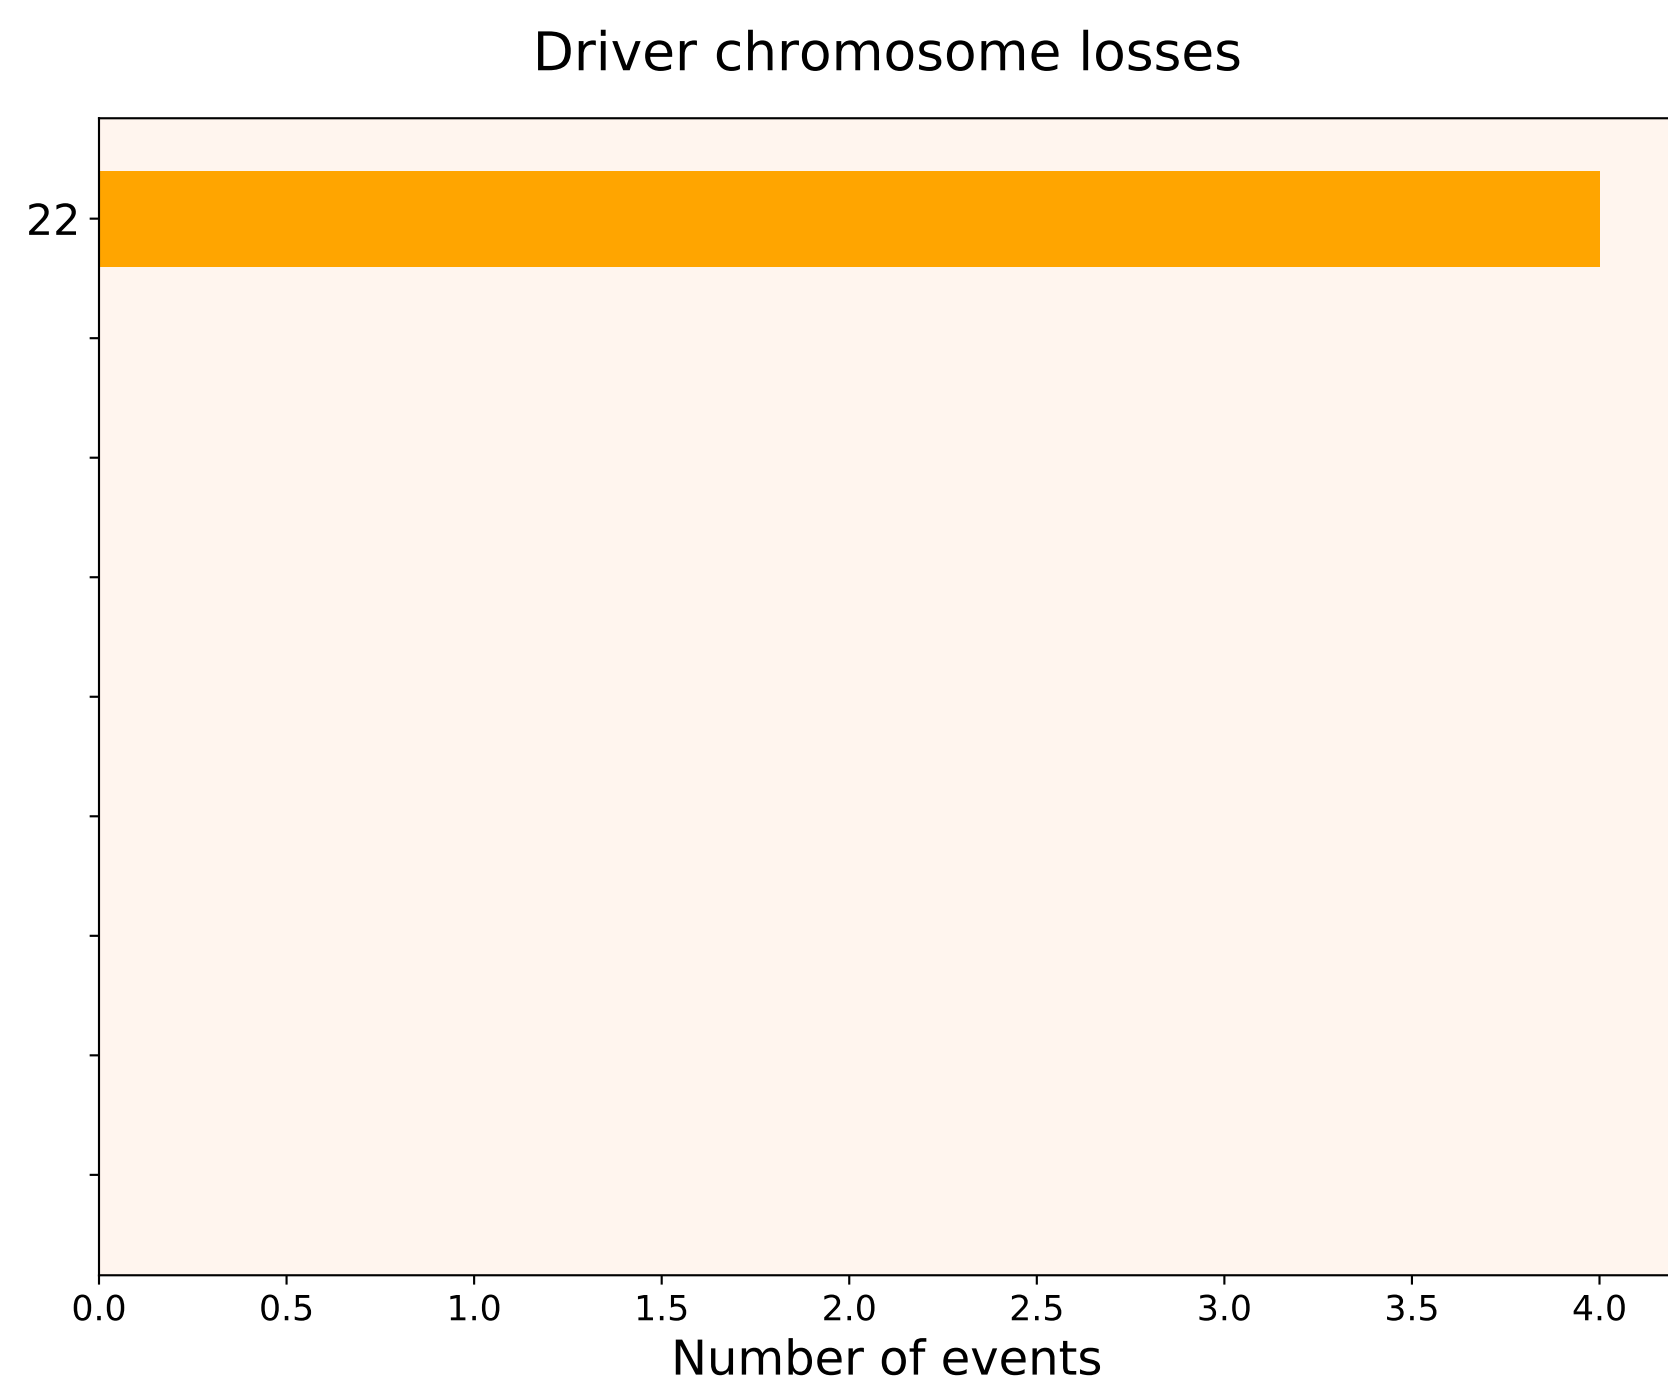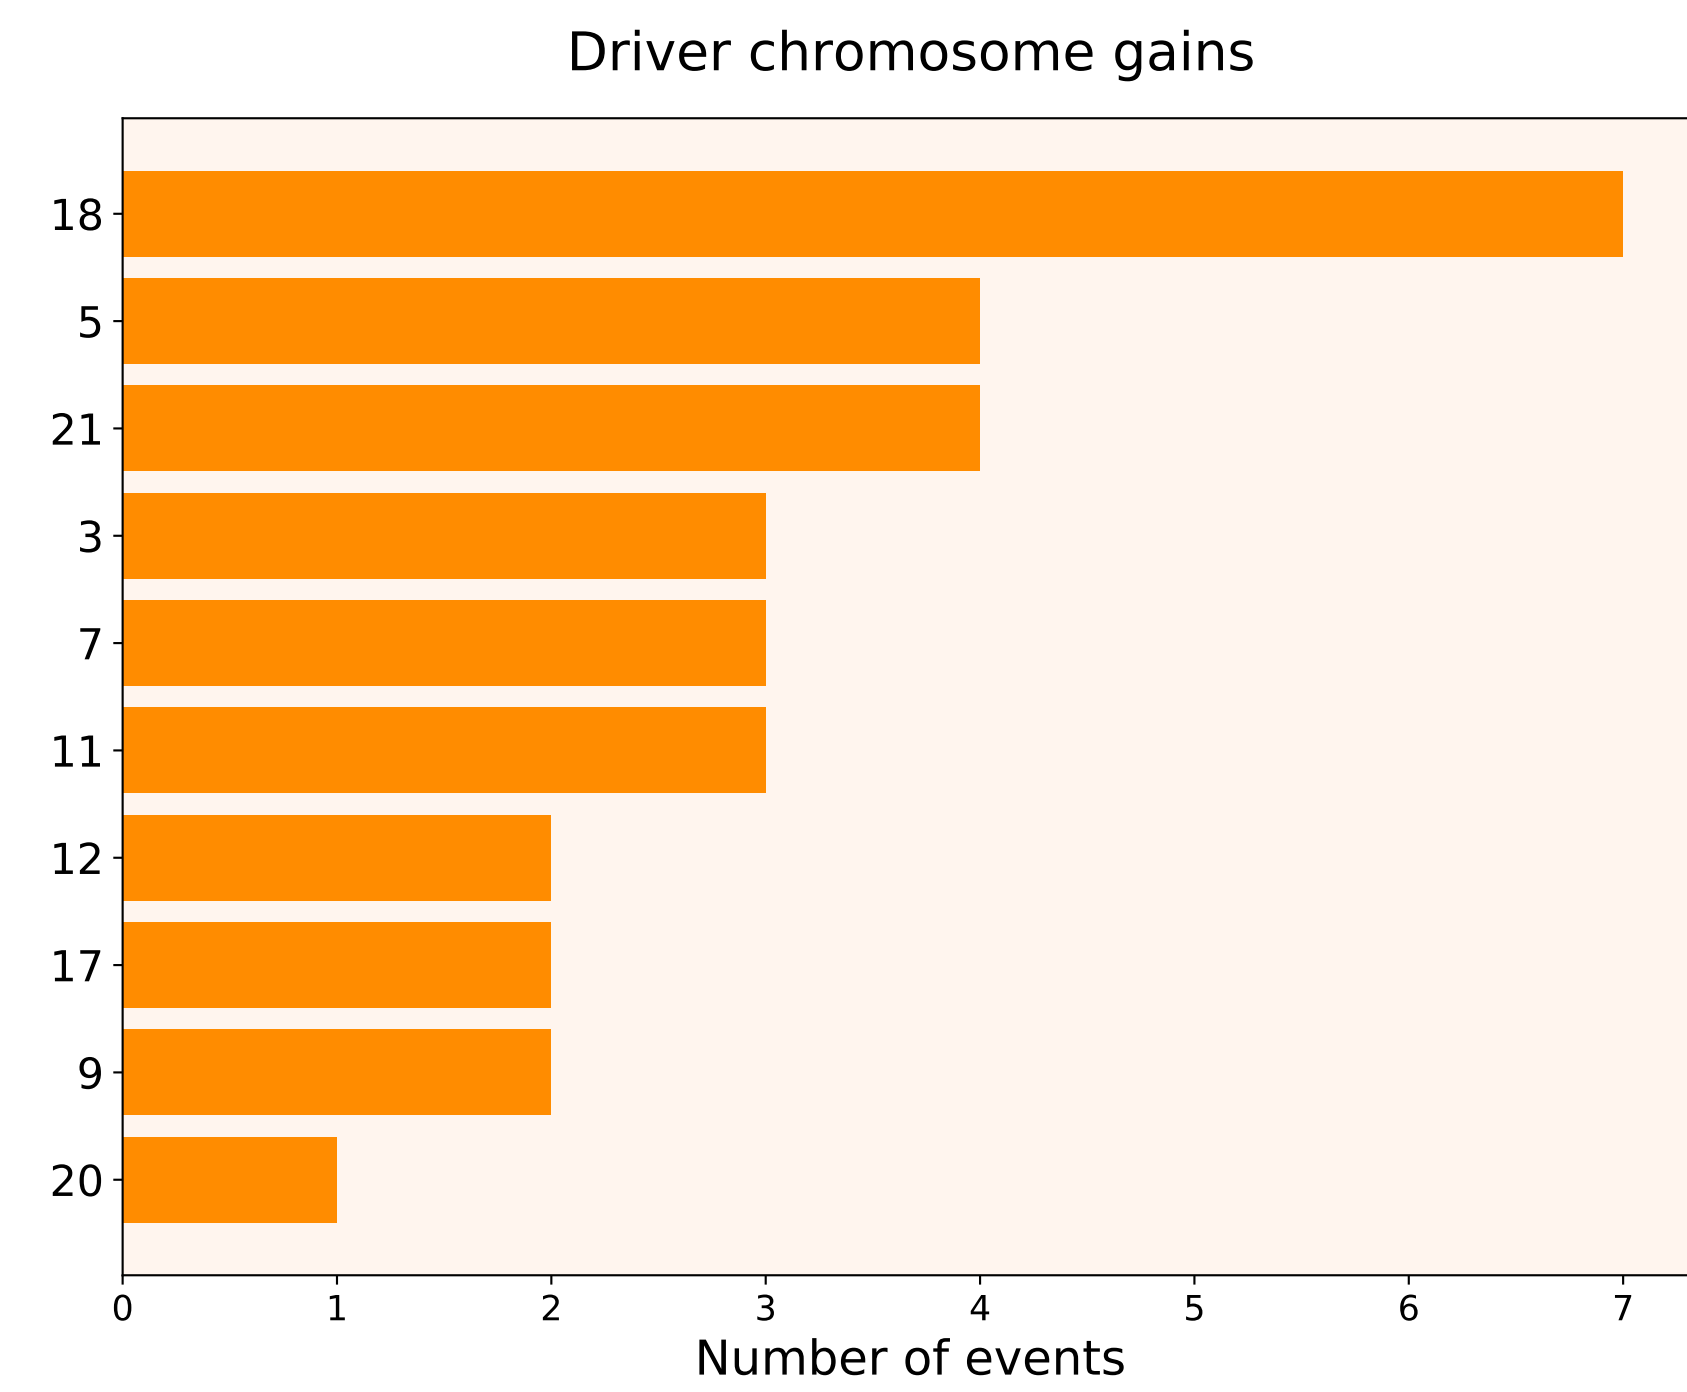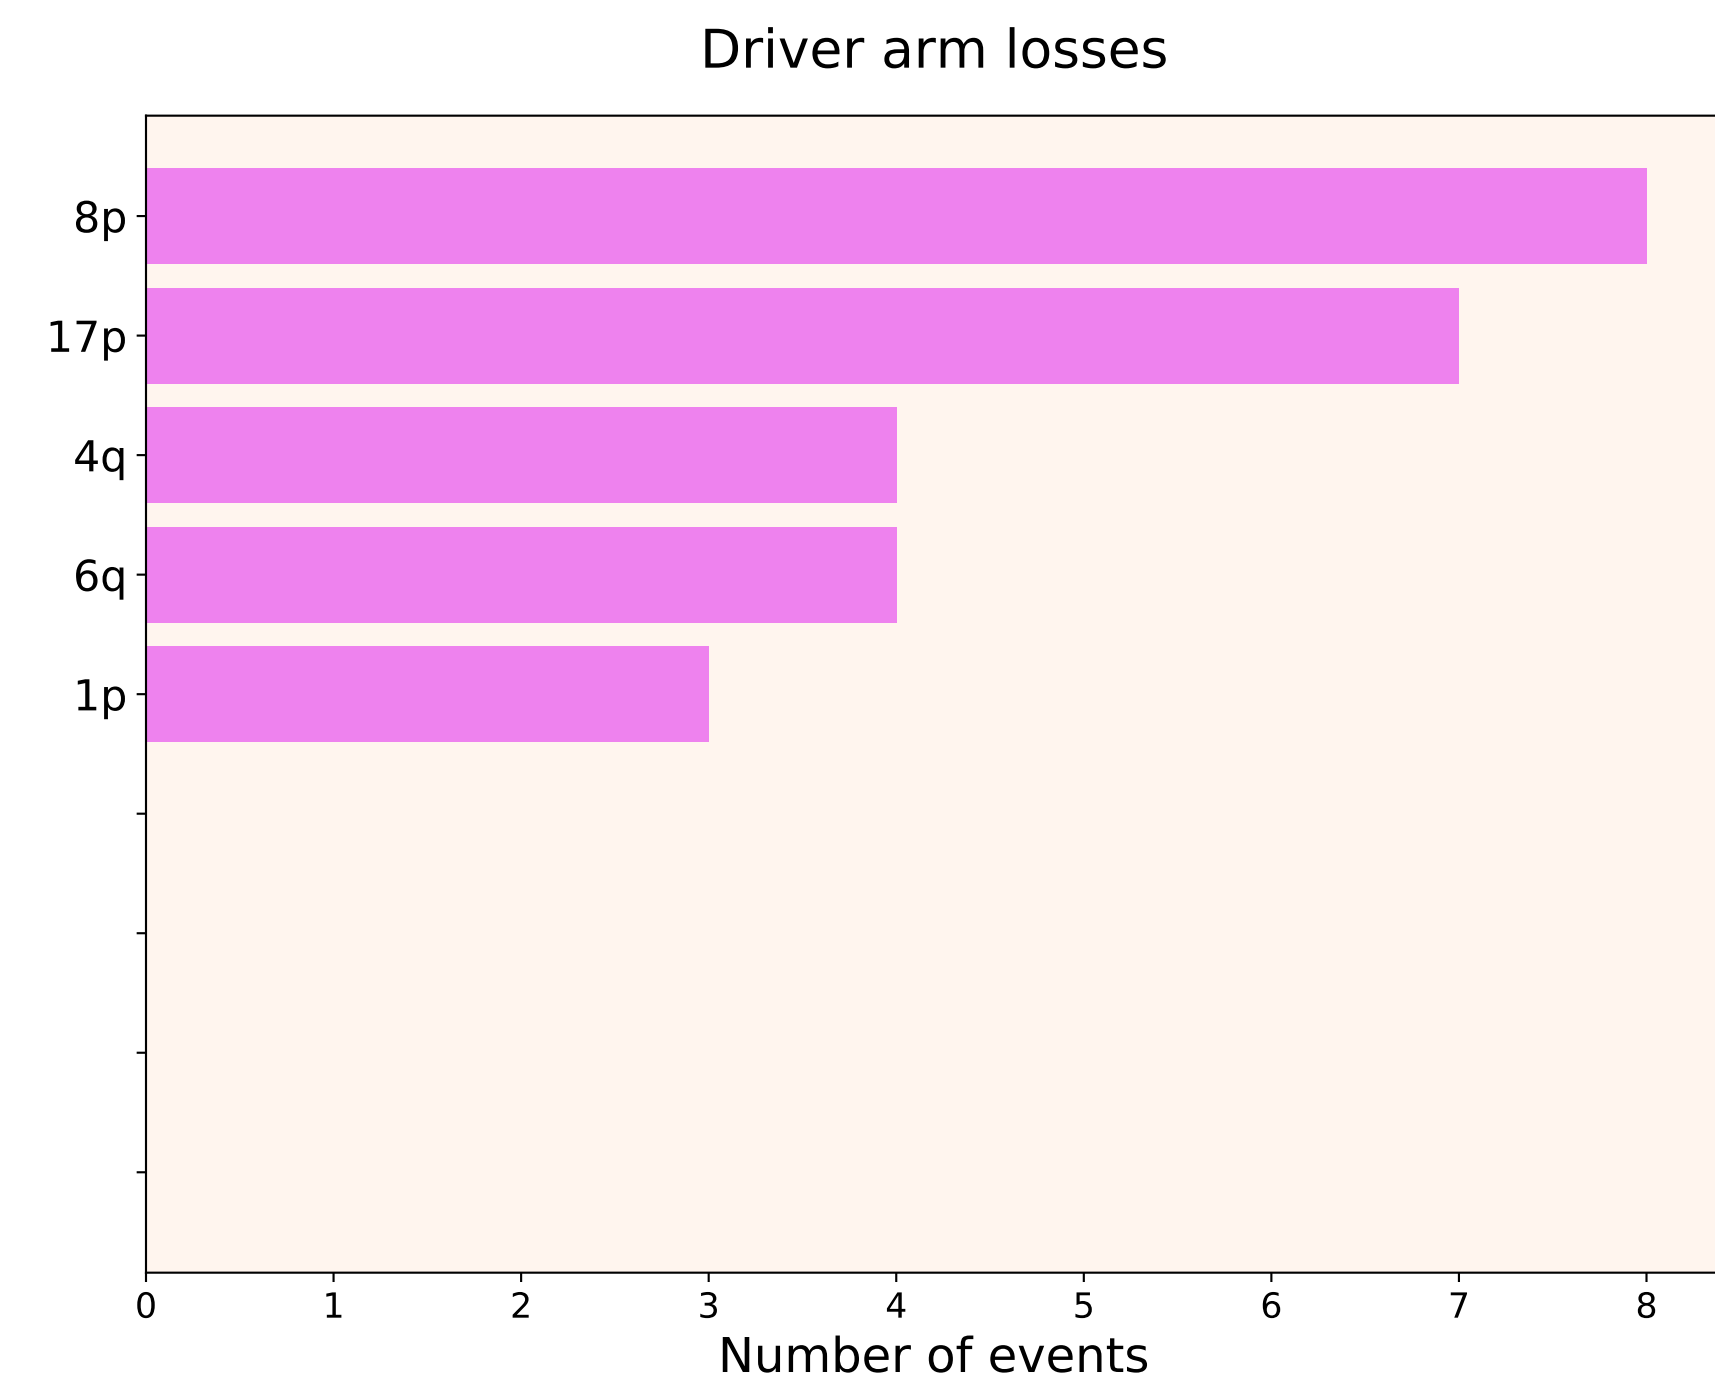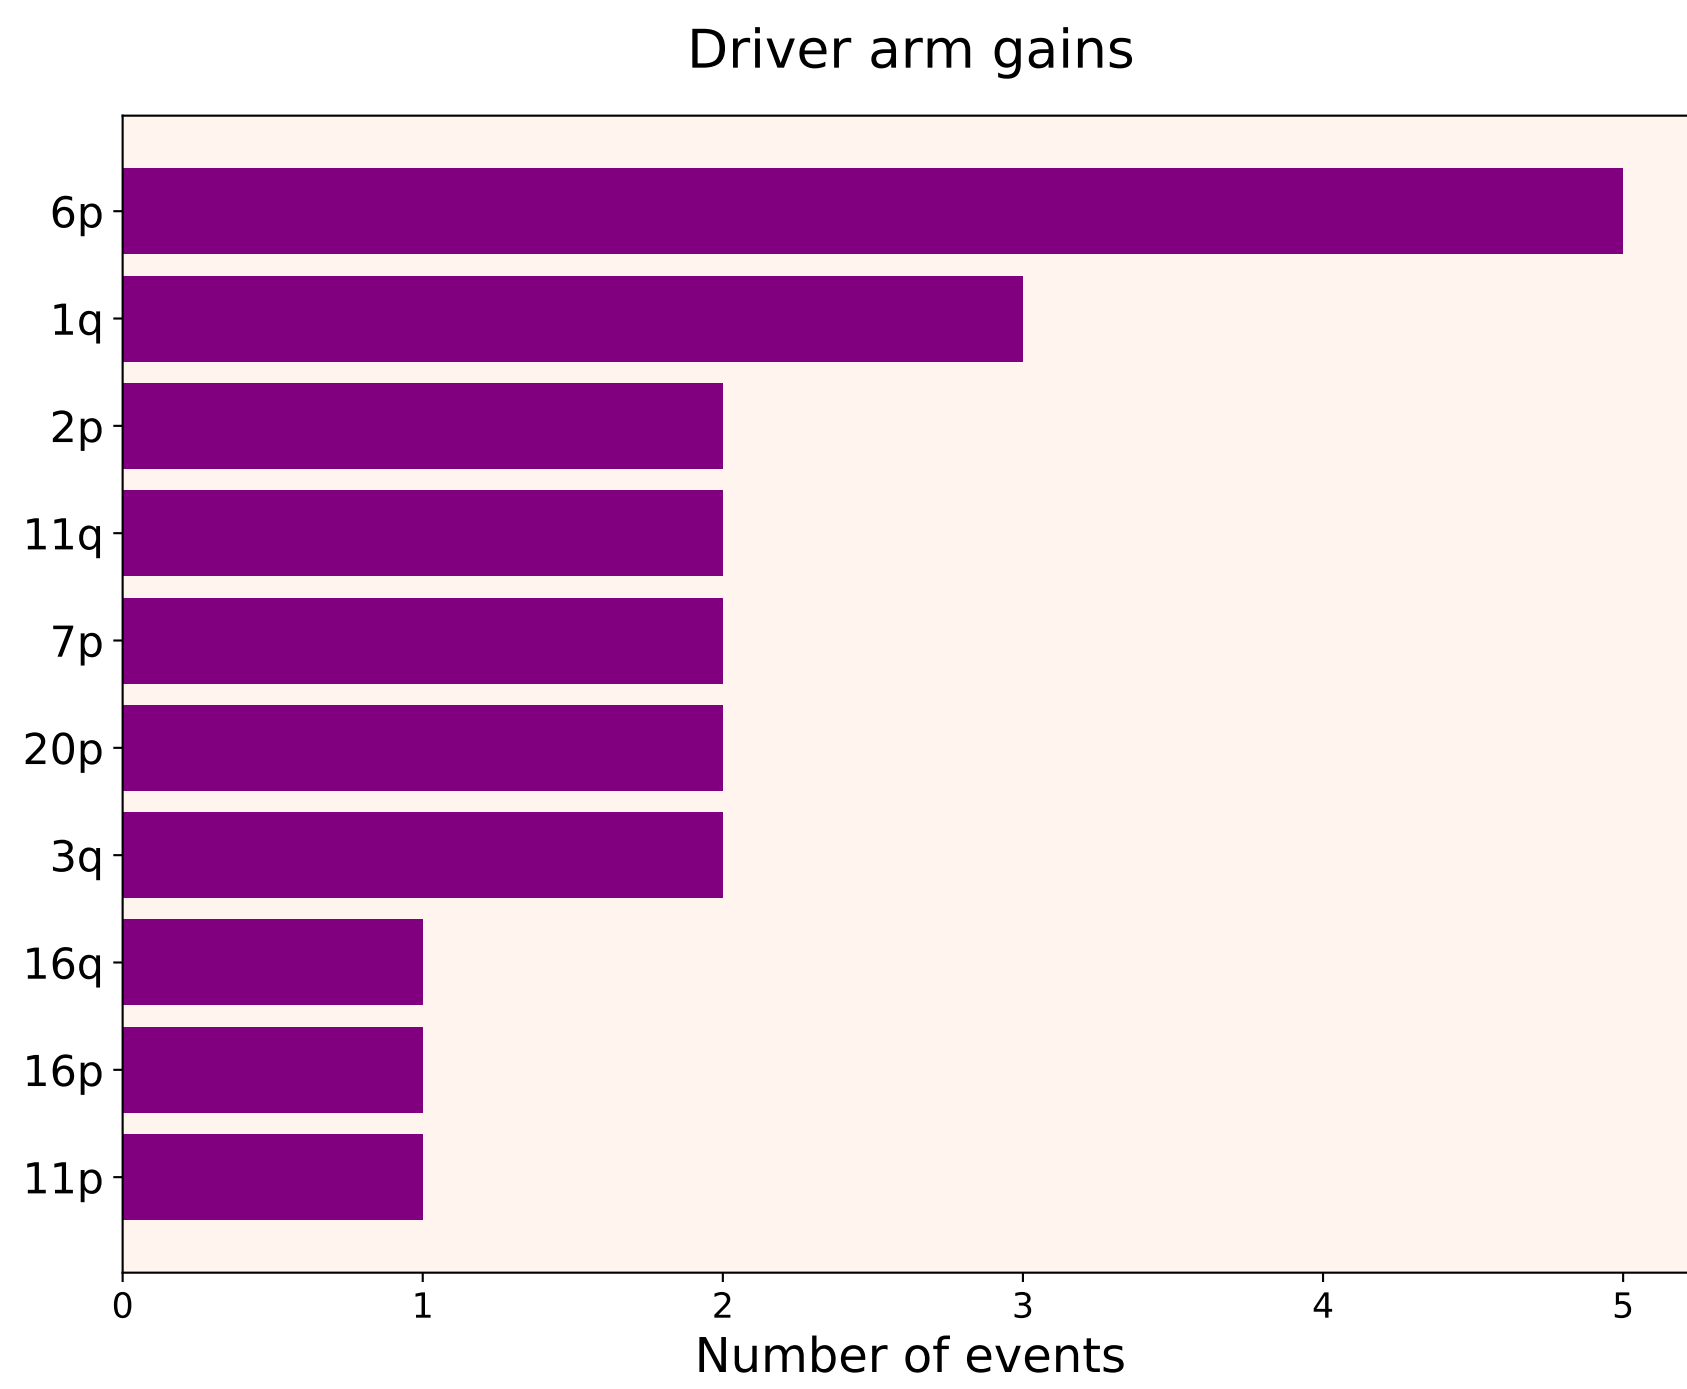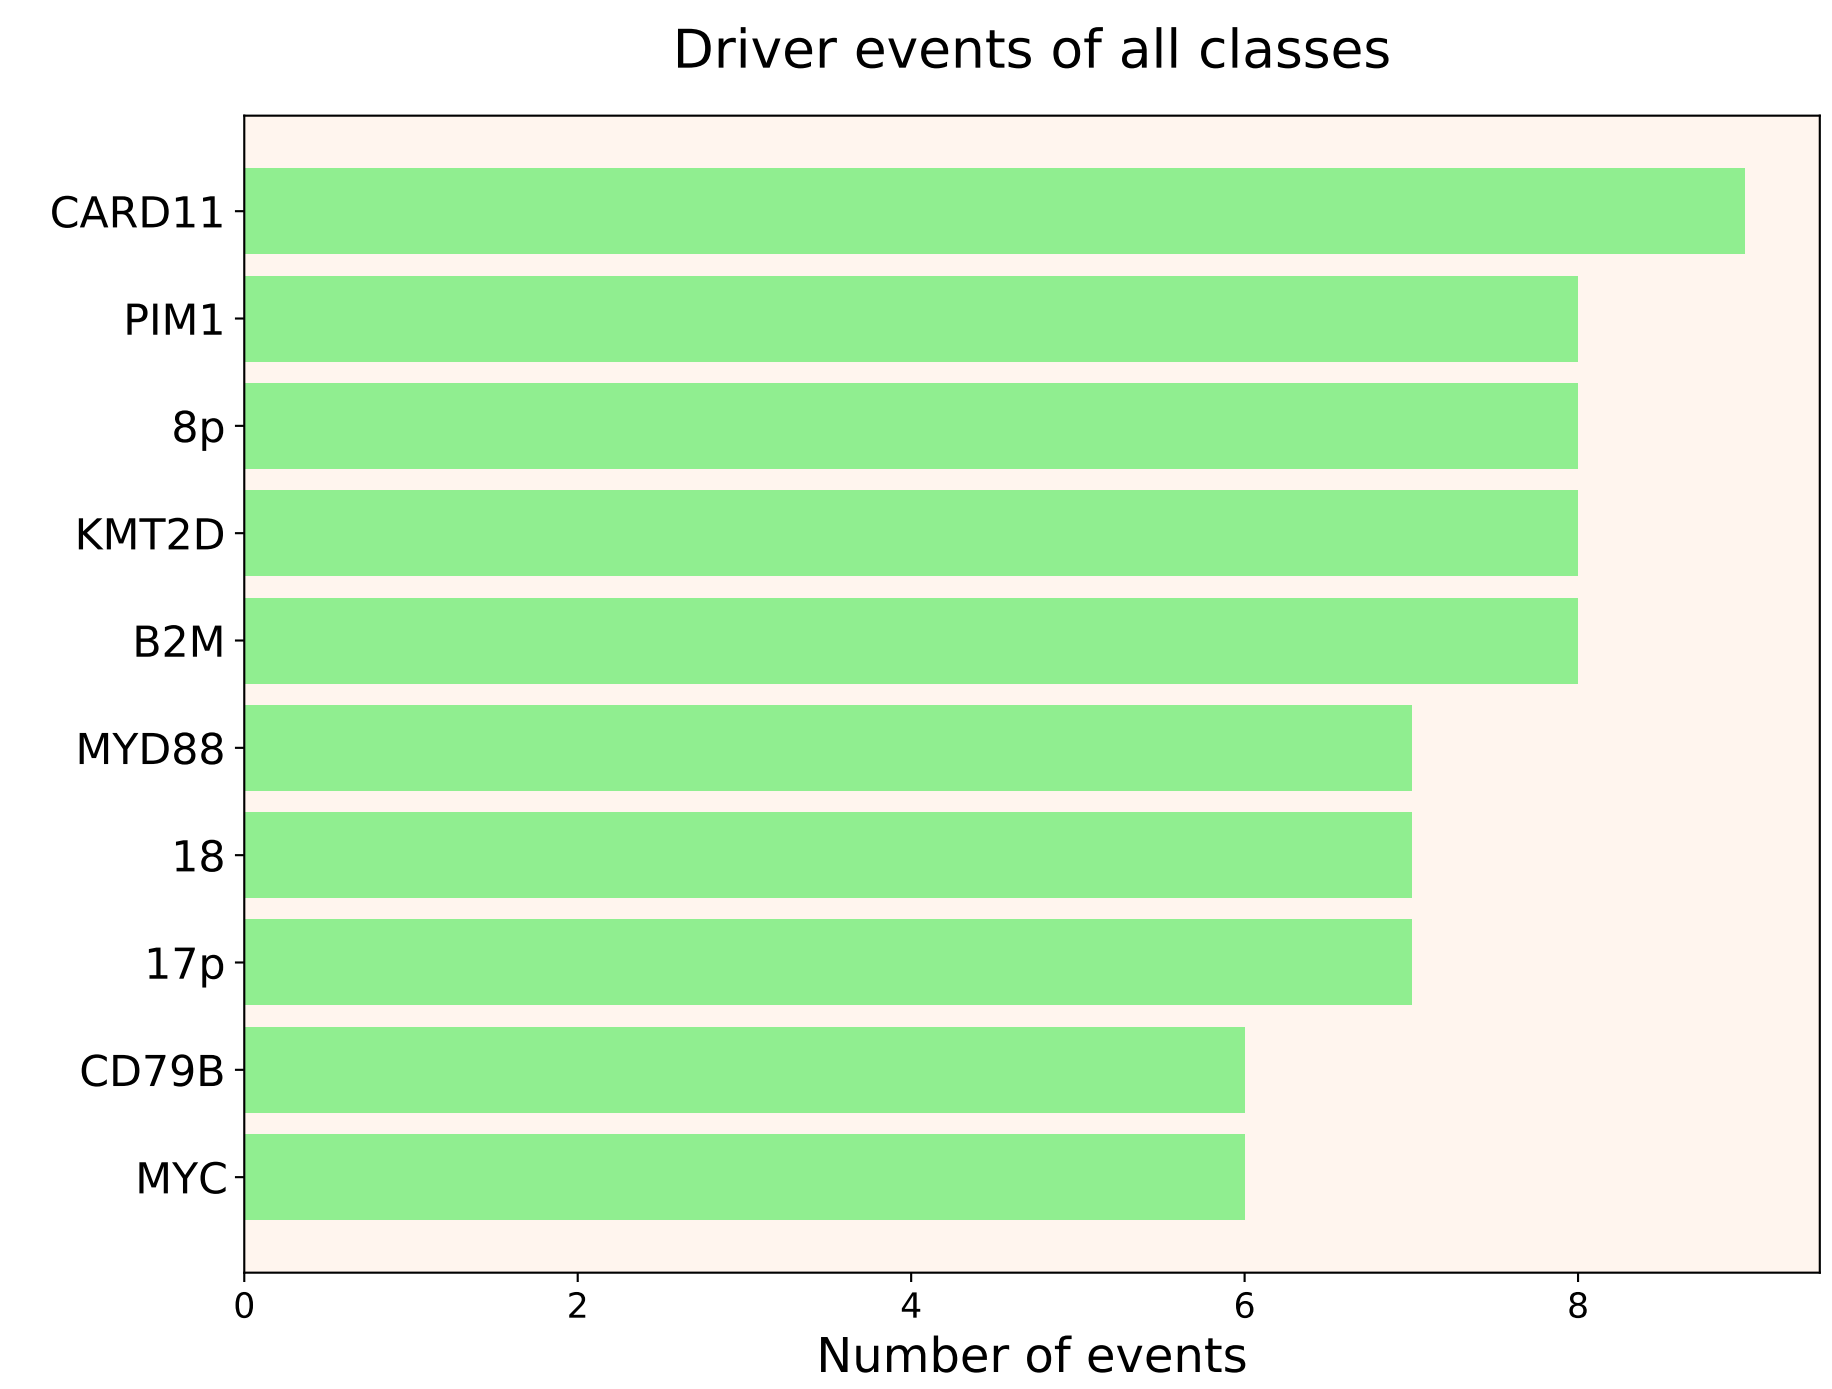

Supplement: Supplemental_Data_S1.zip [file Supplemental_Data_S1.zip]

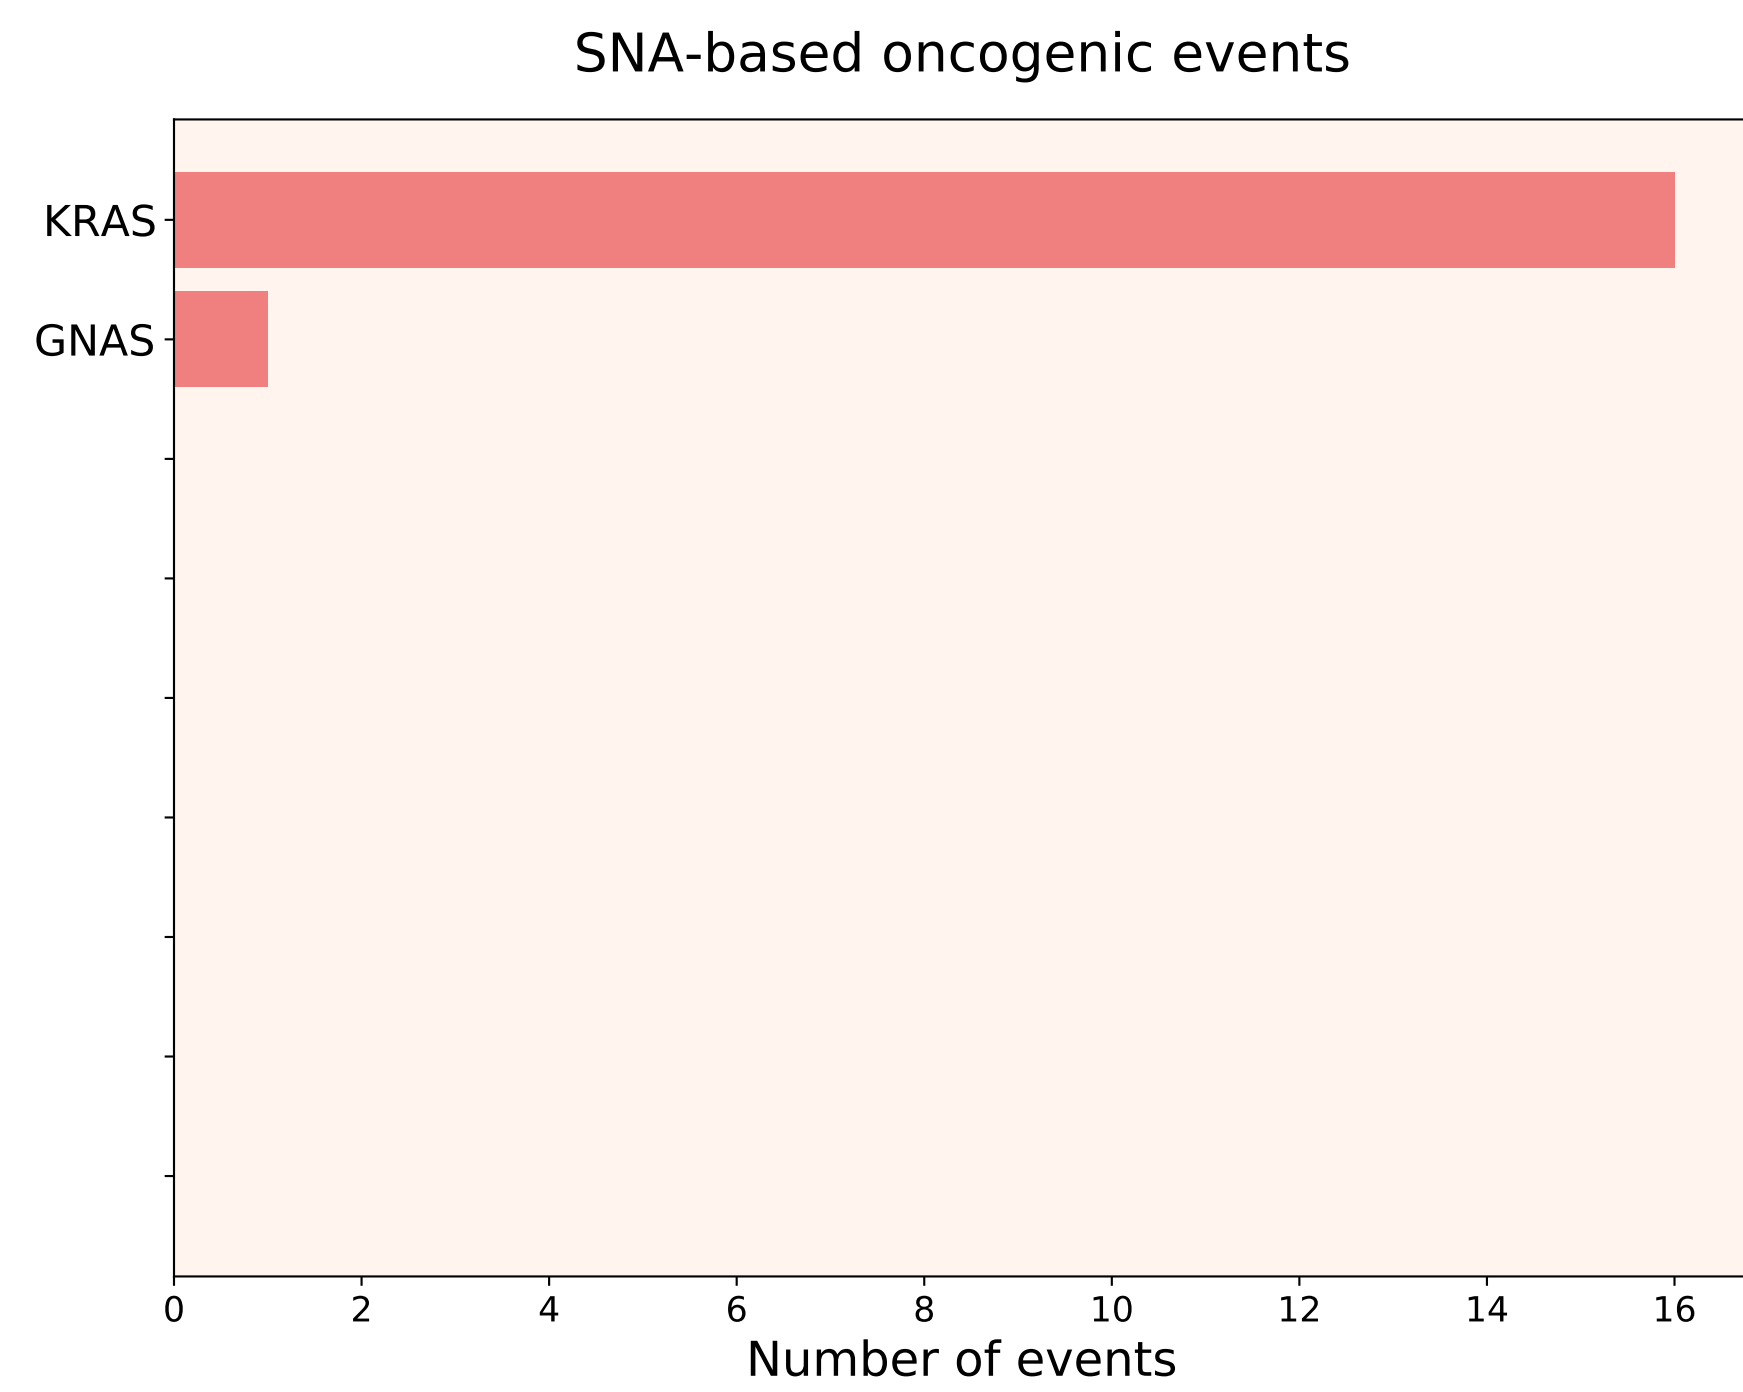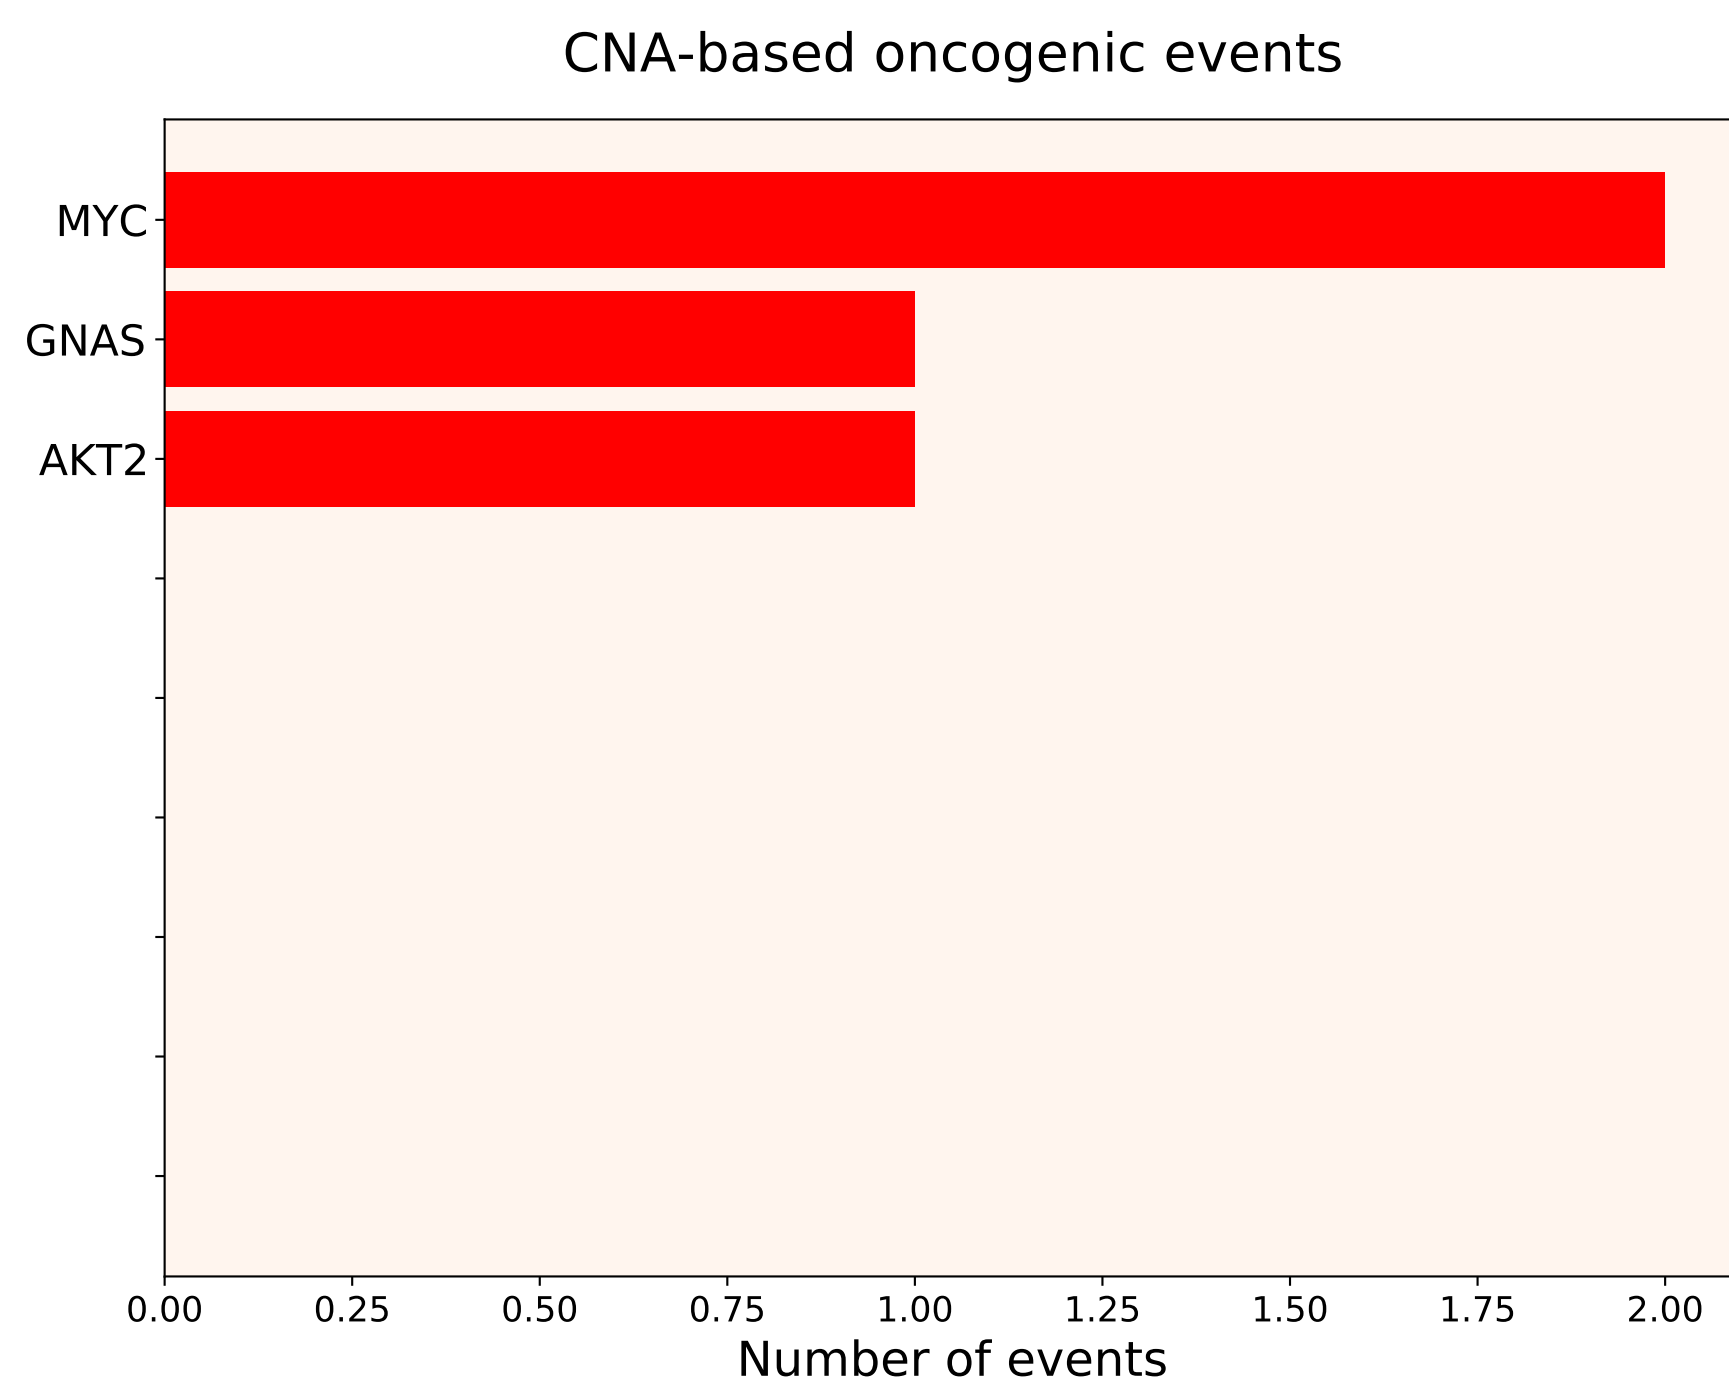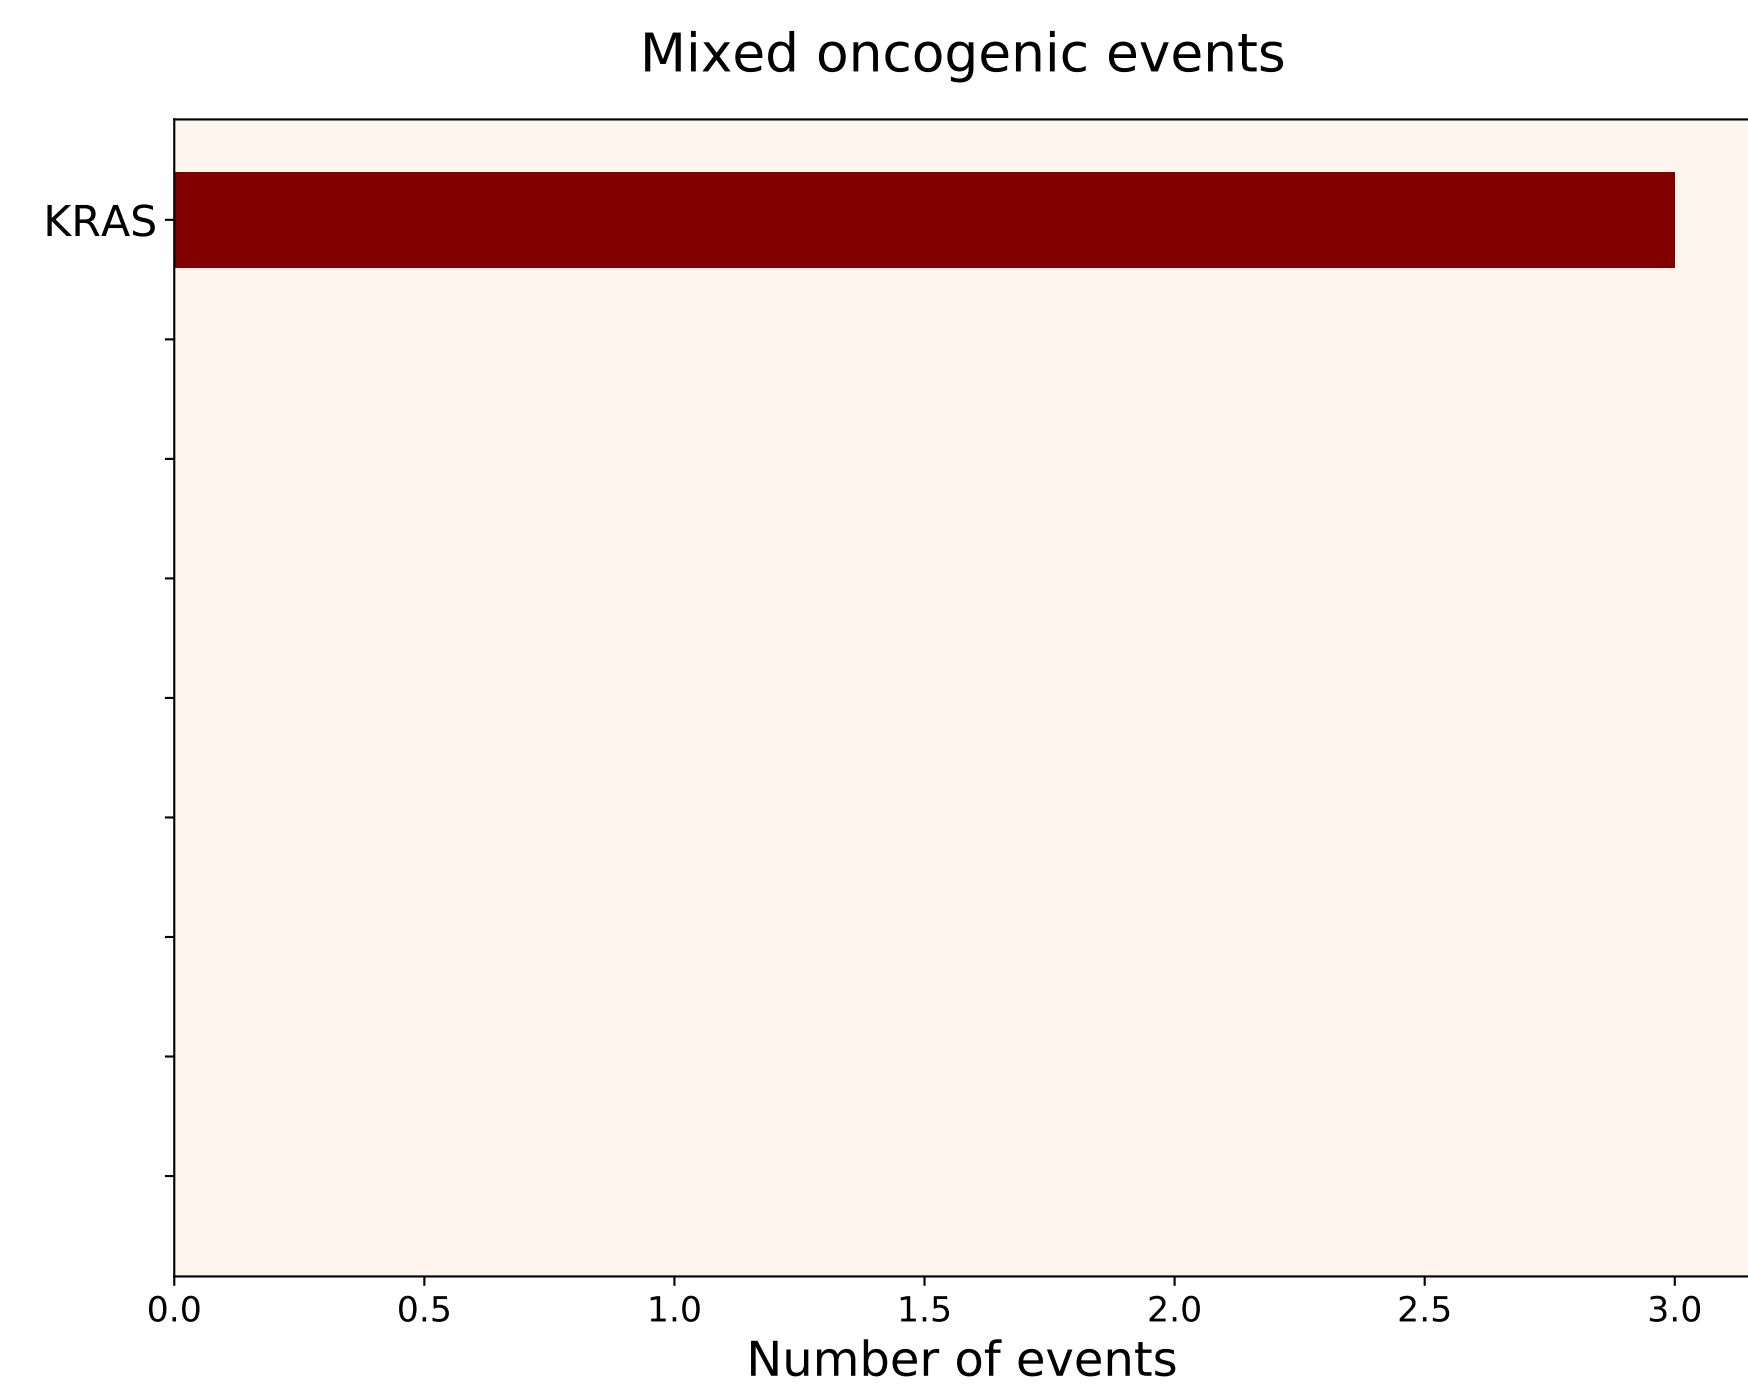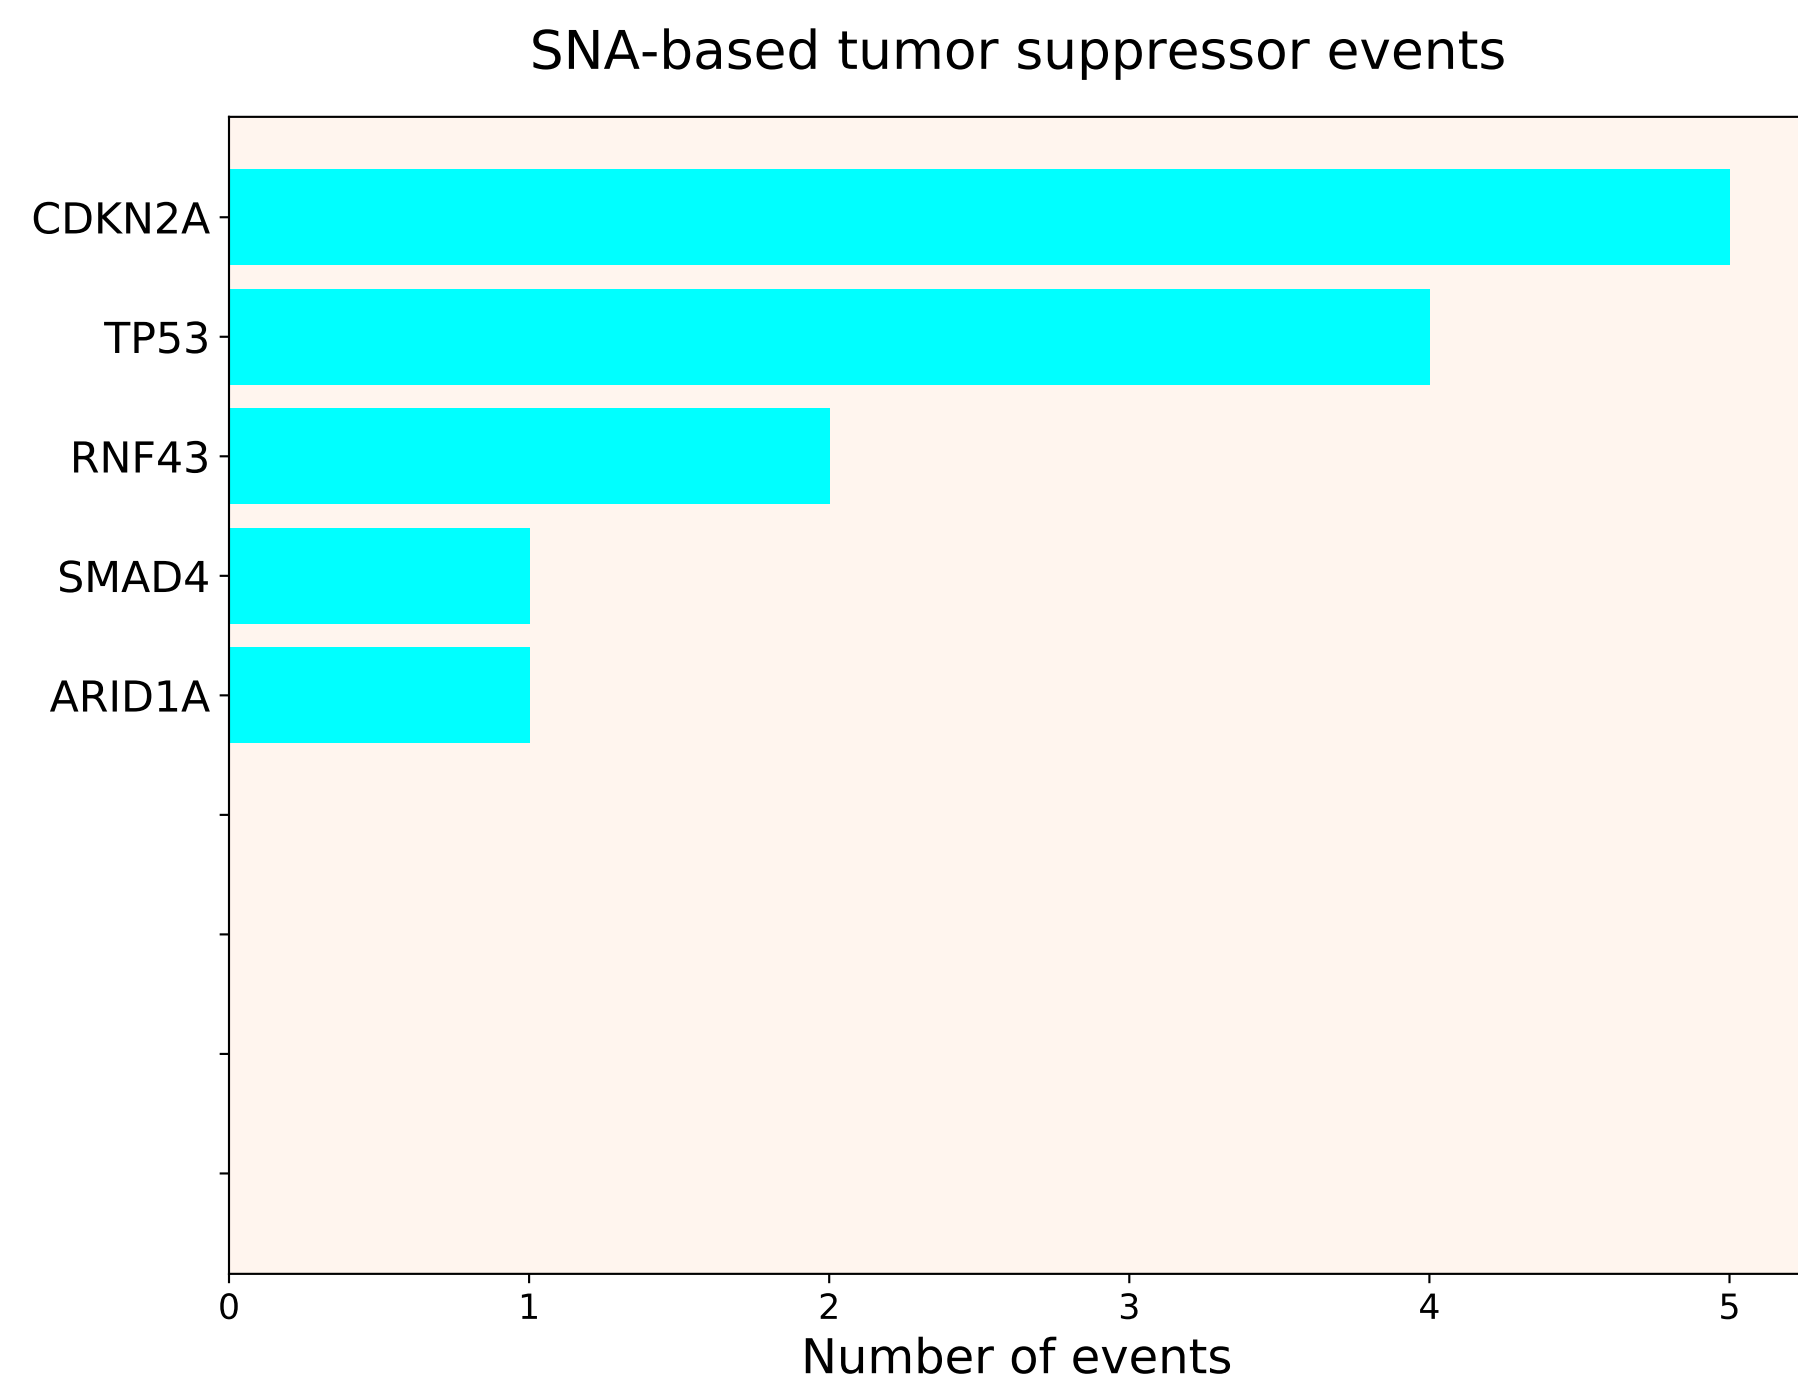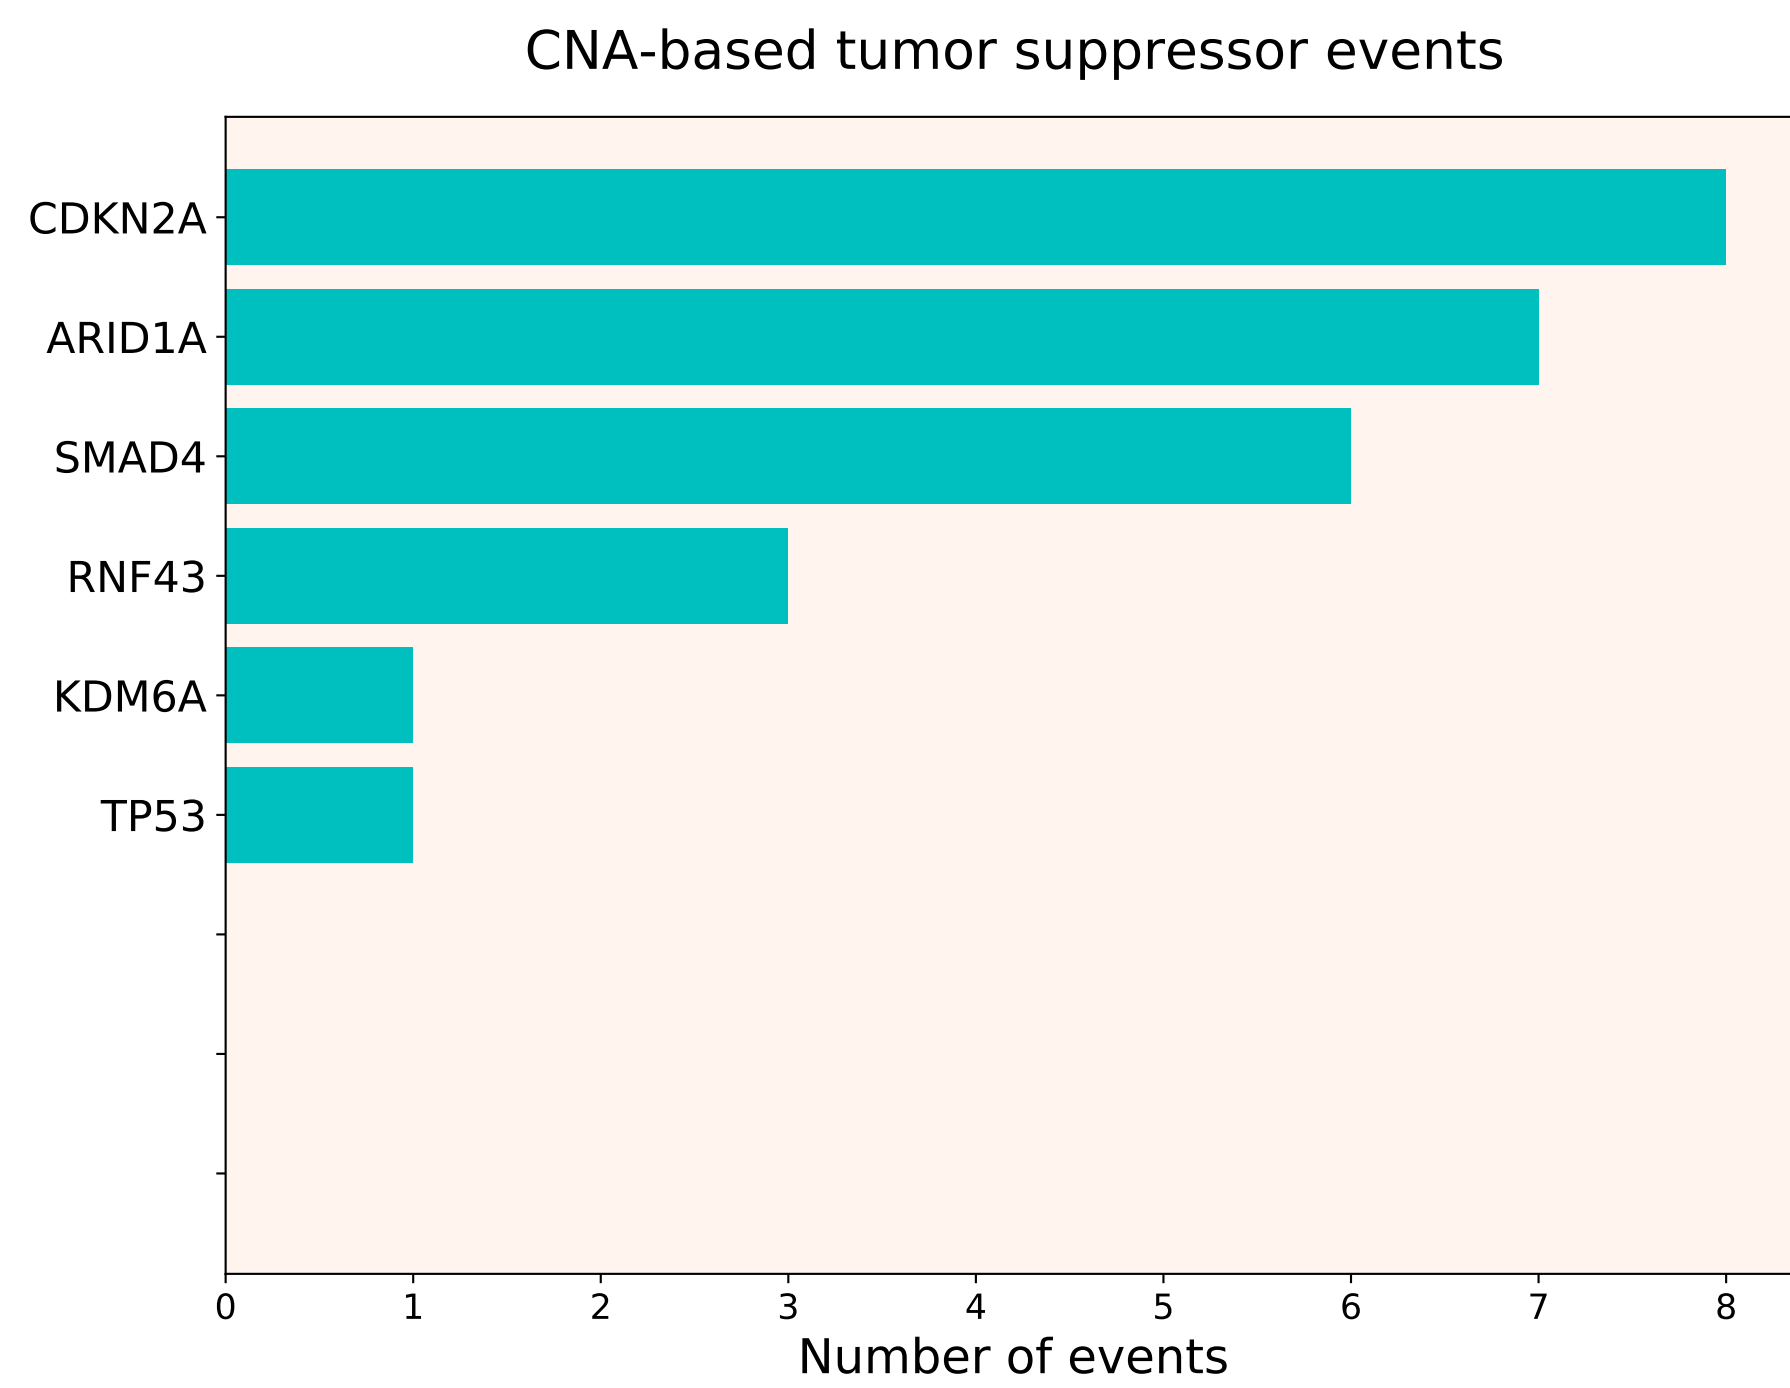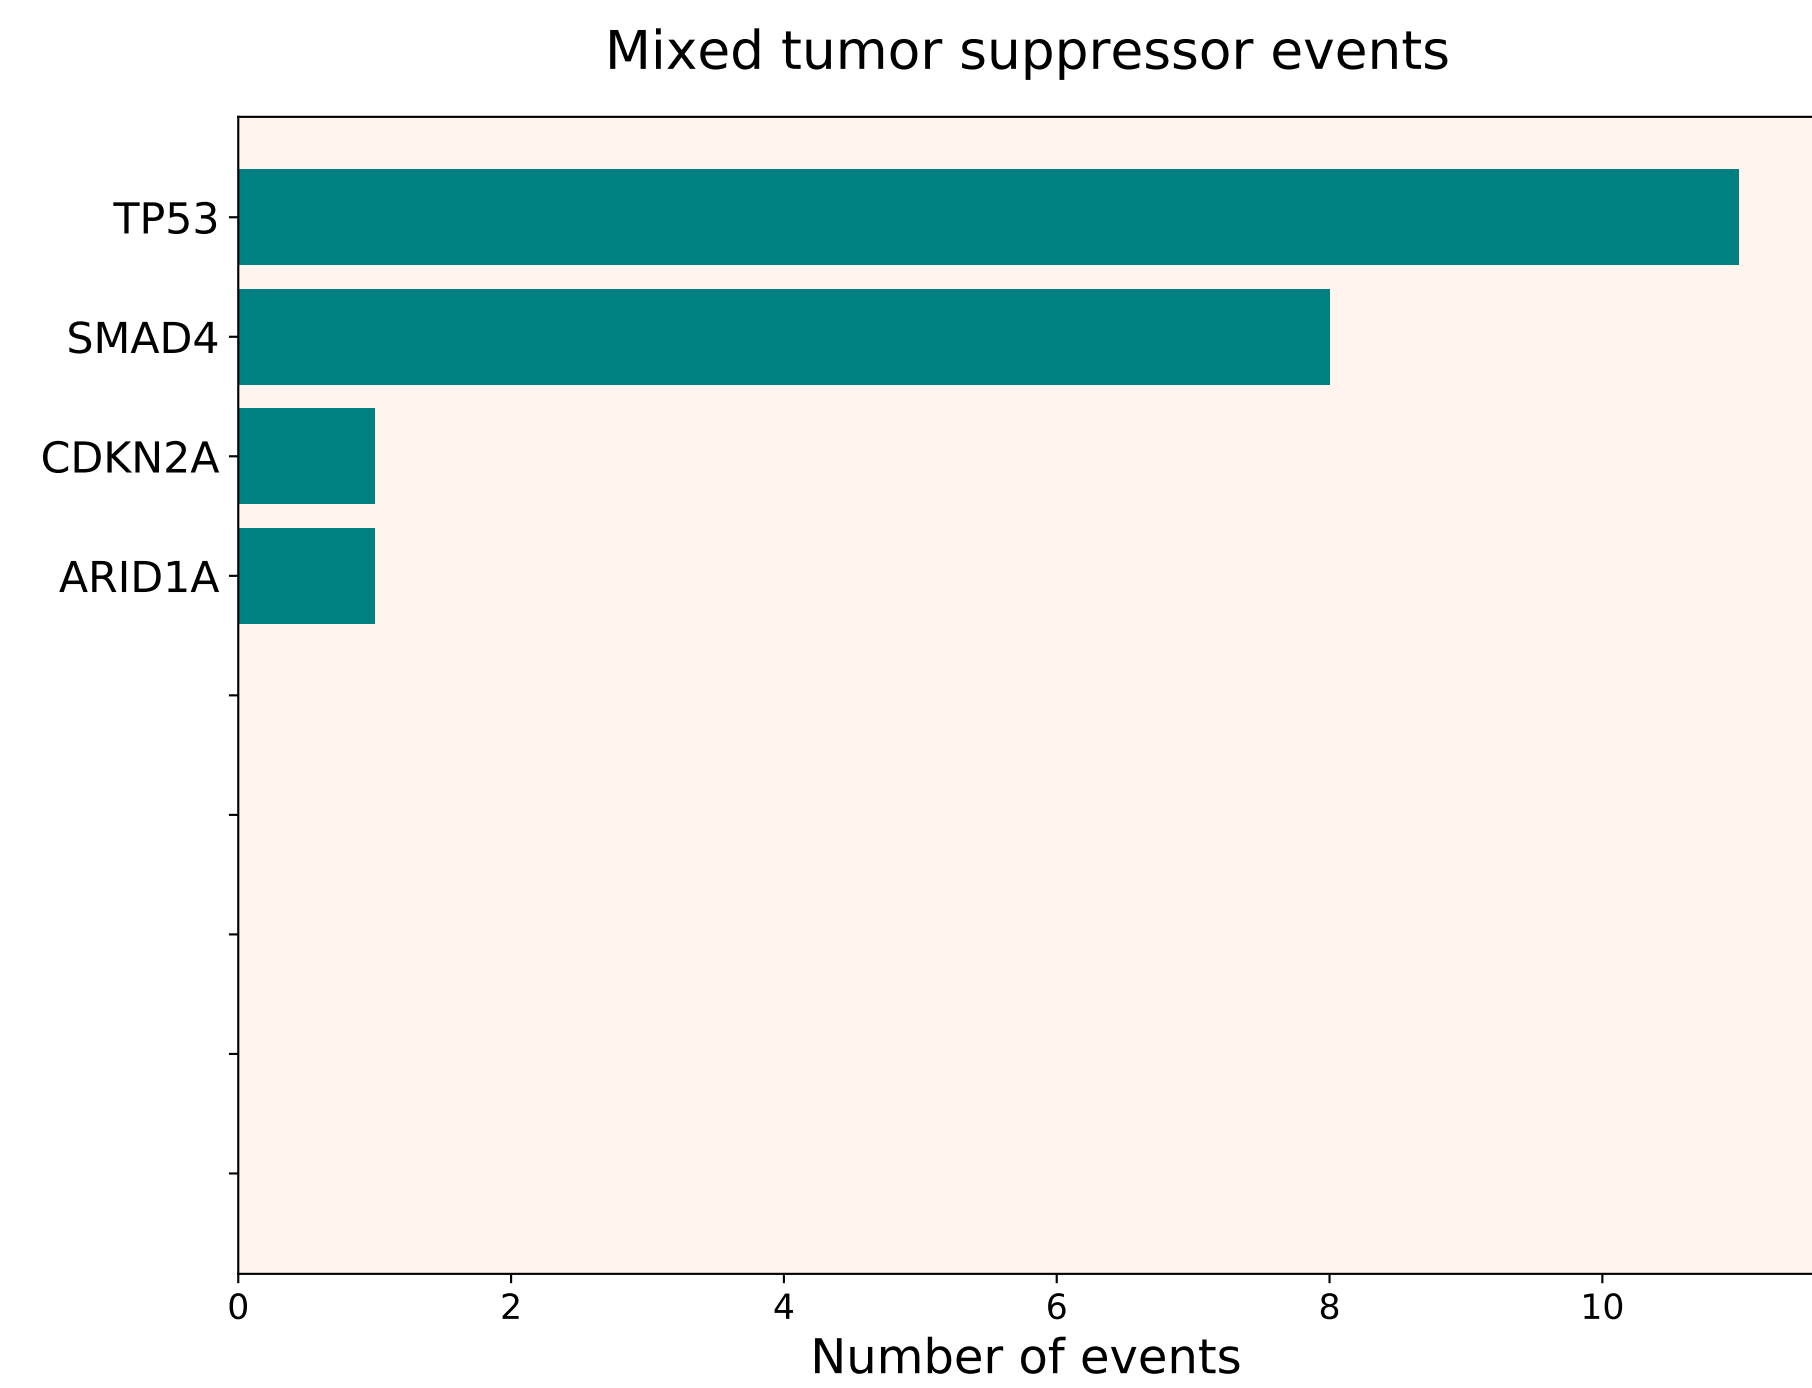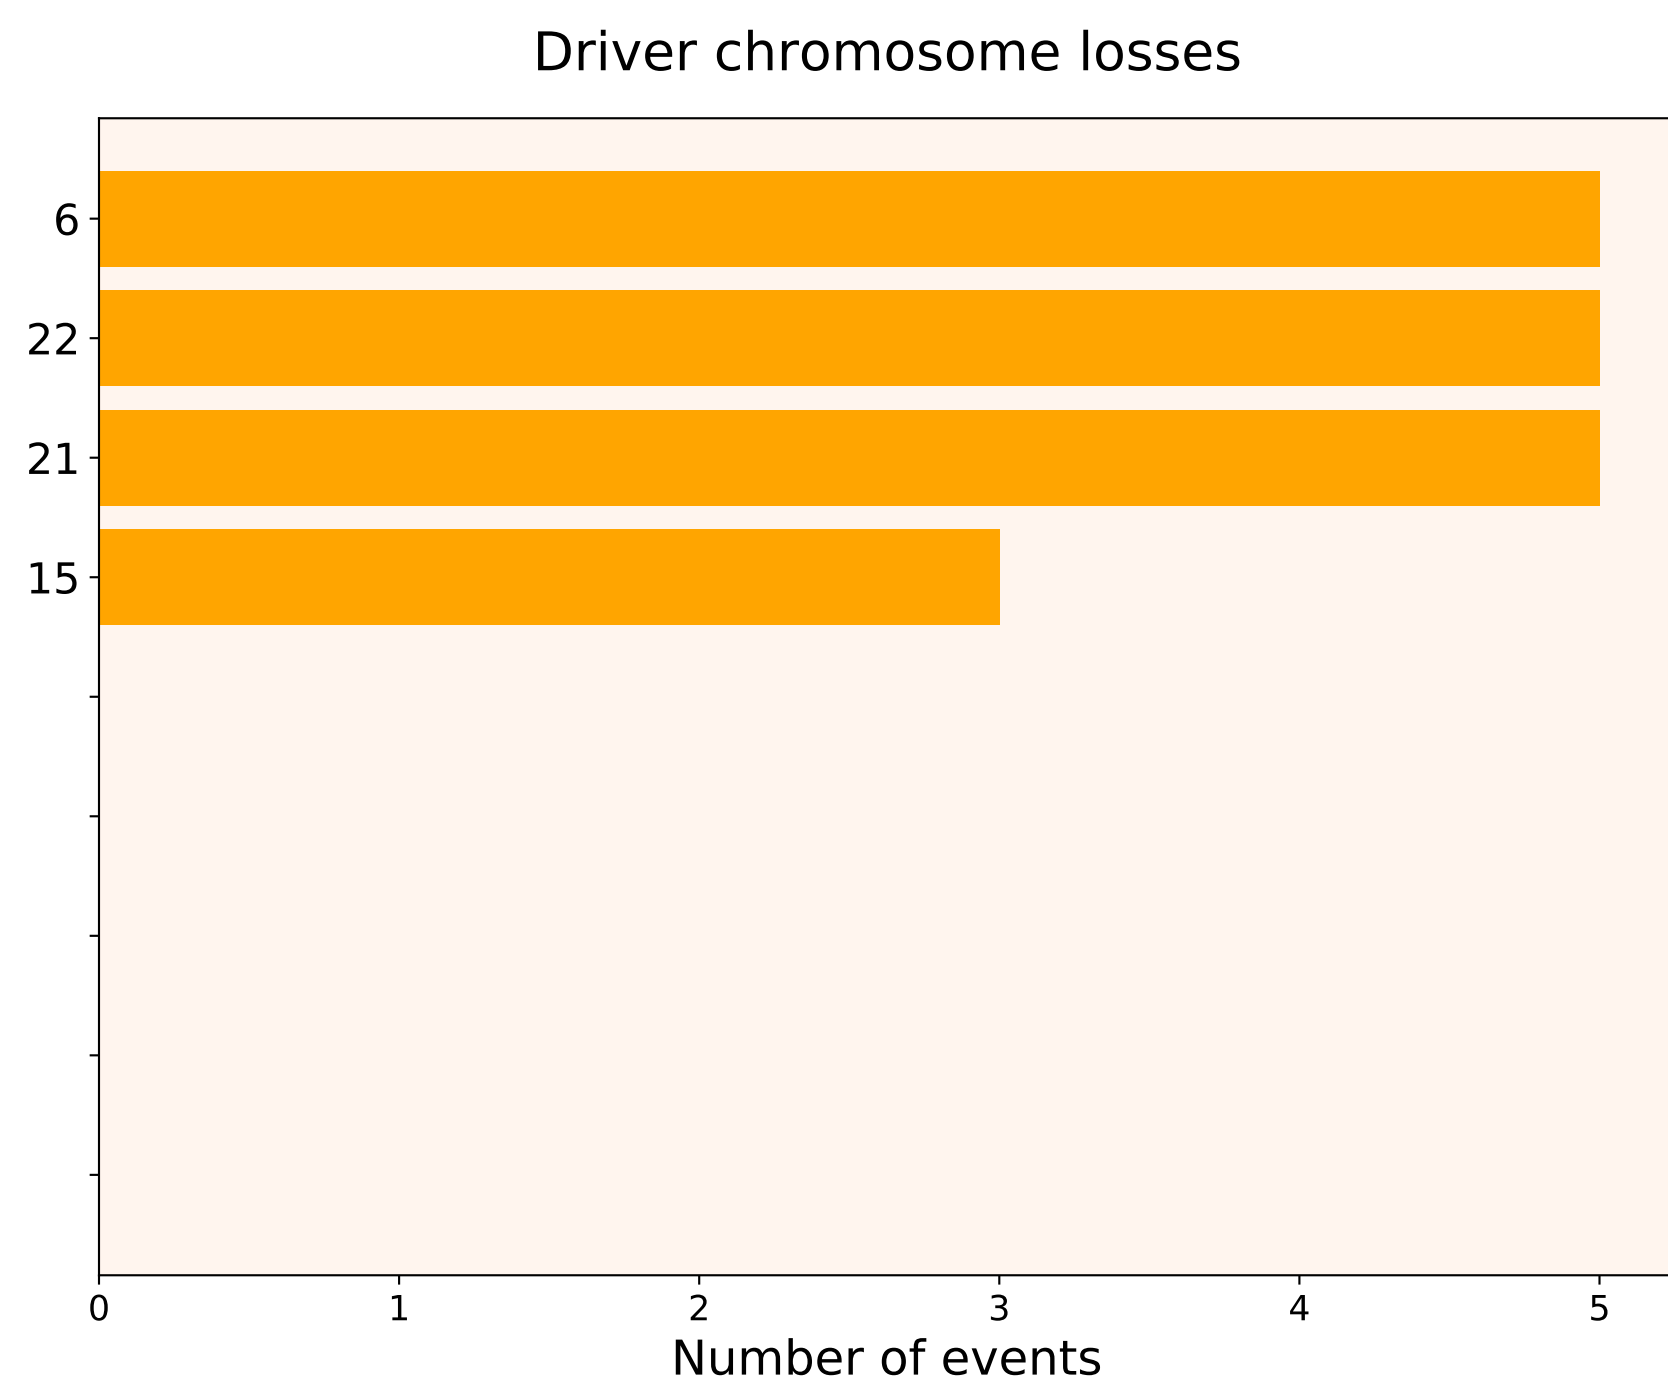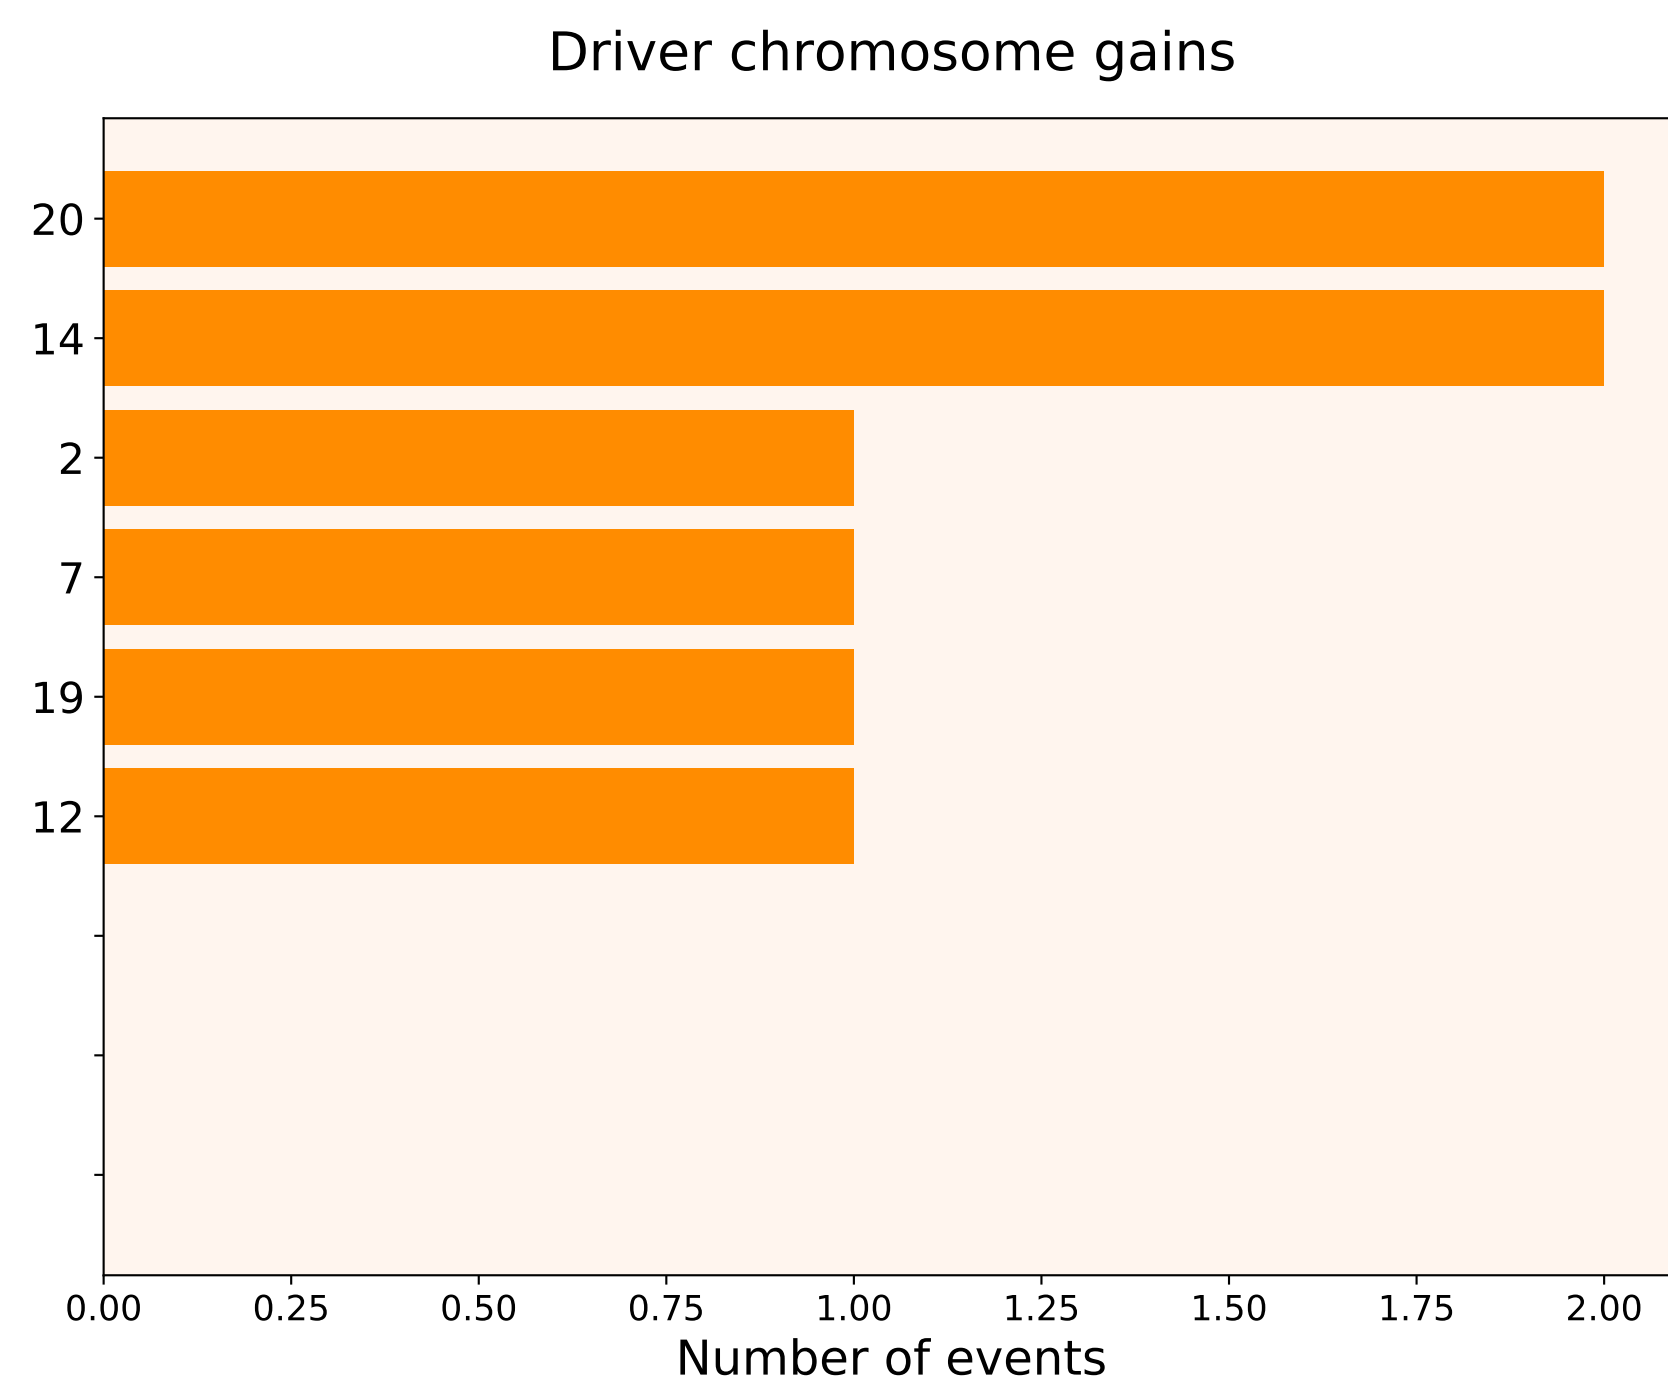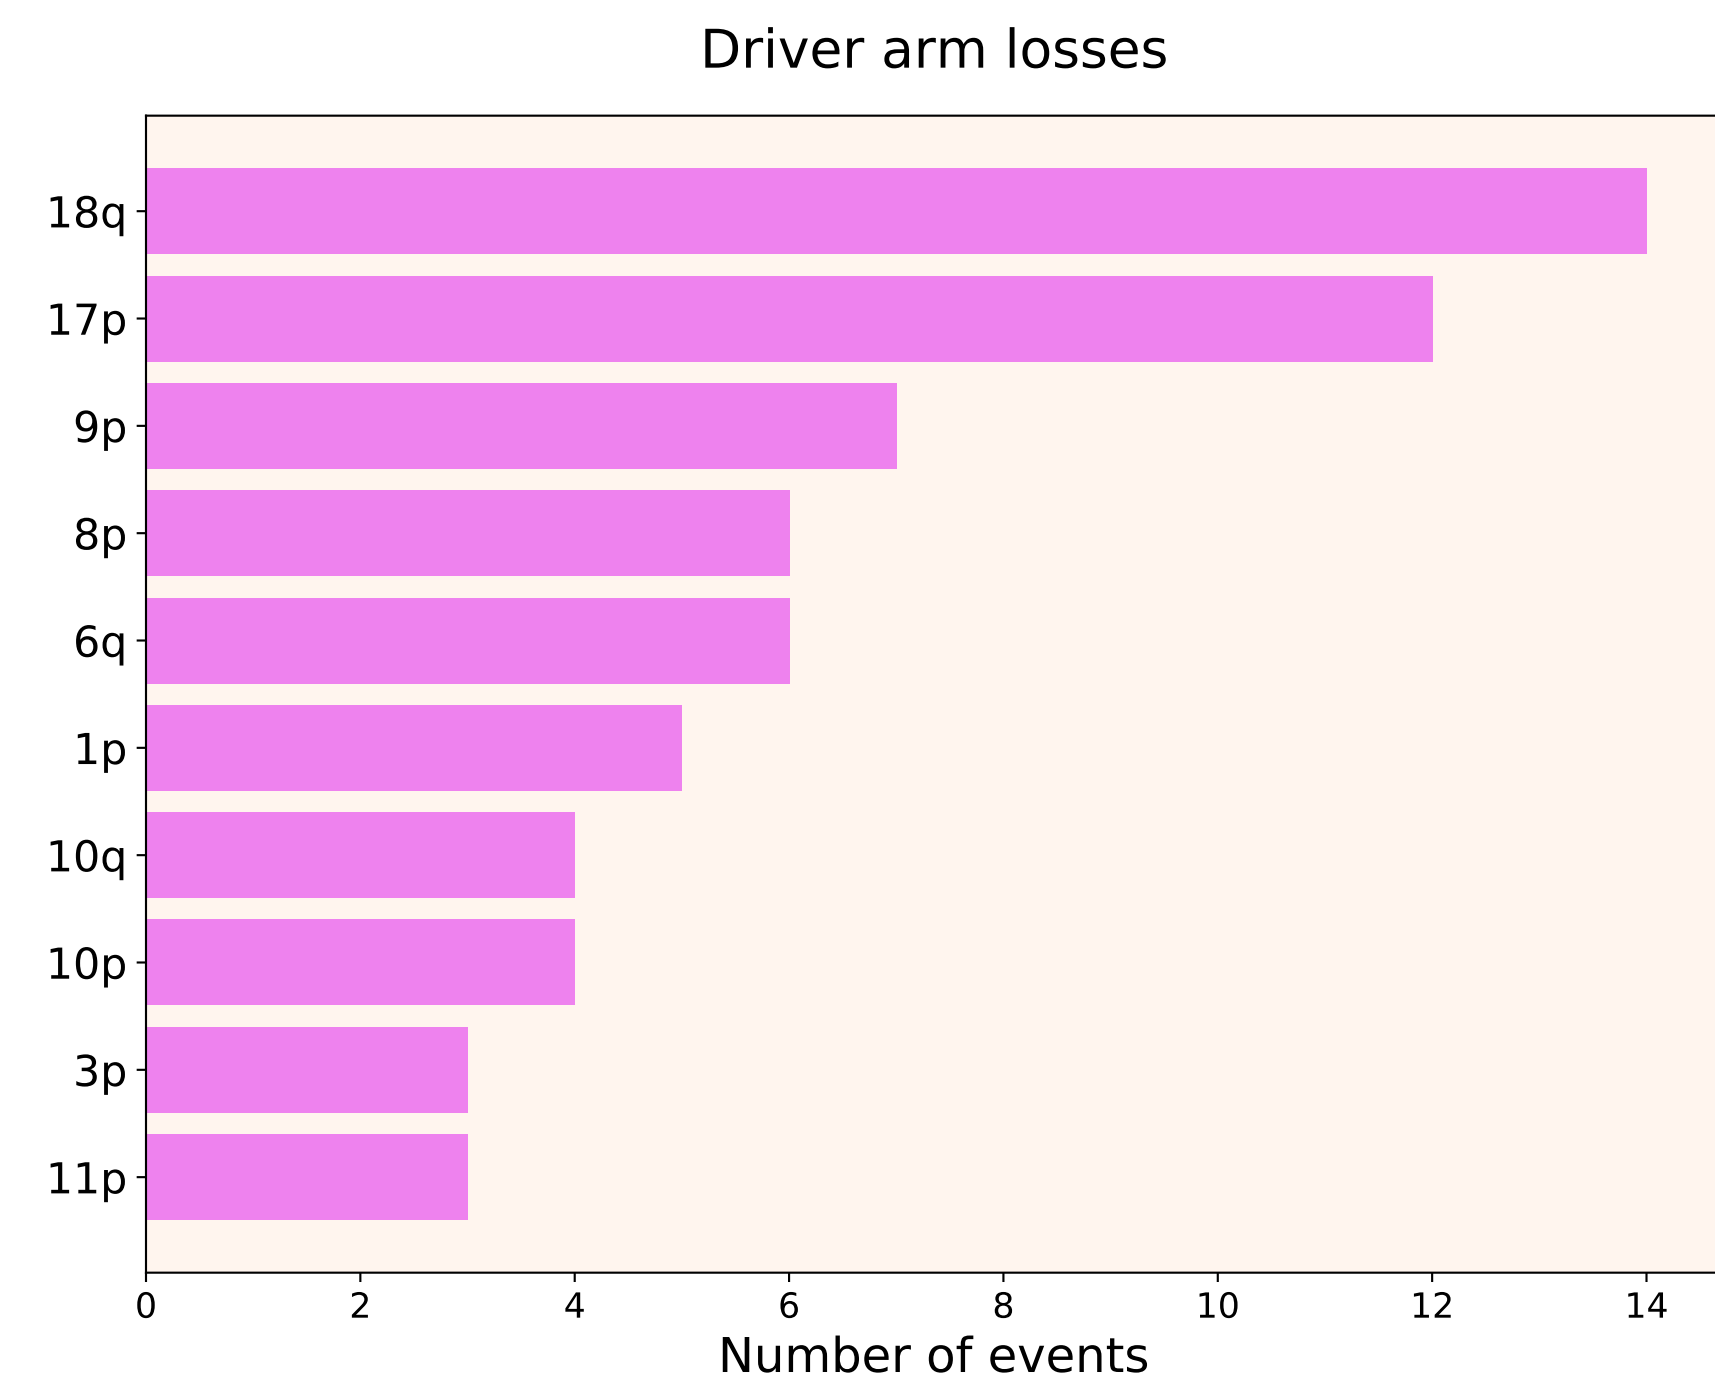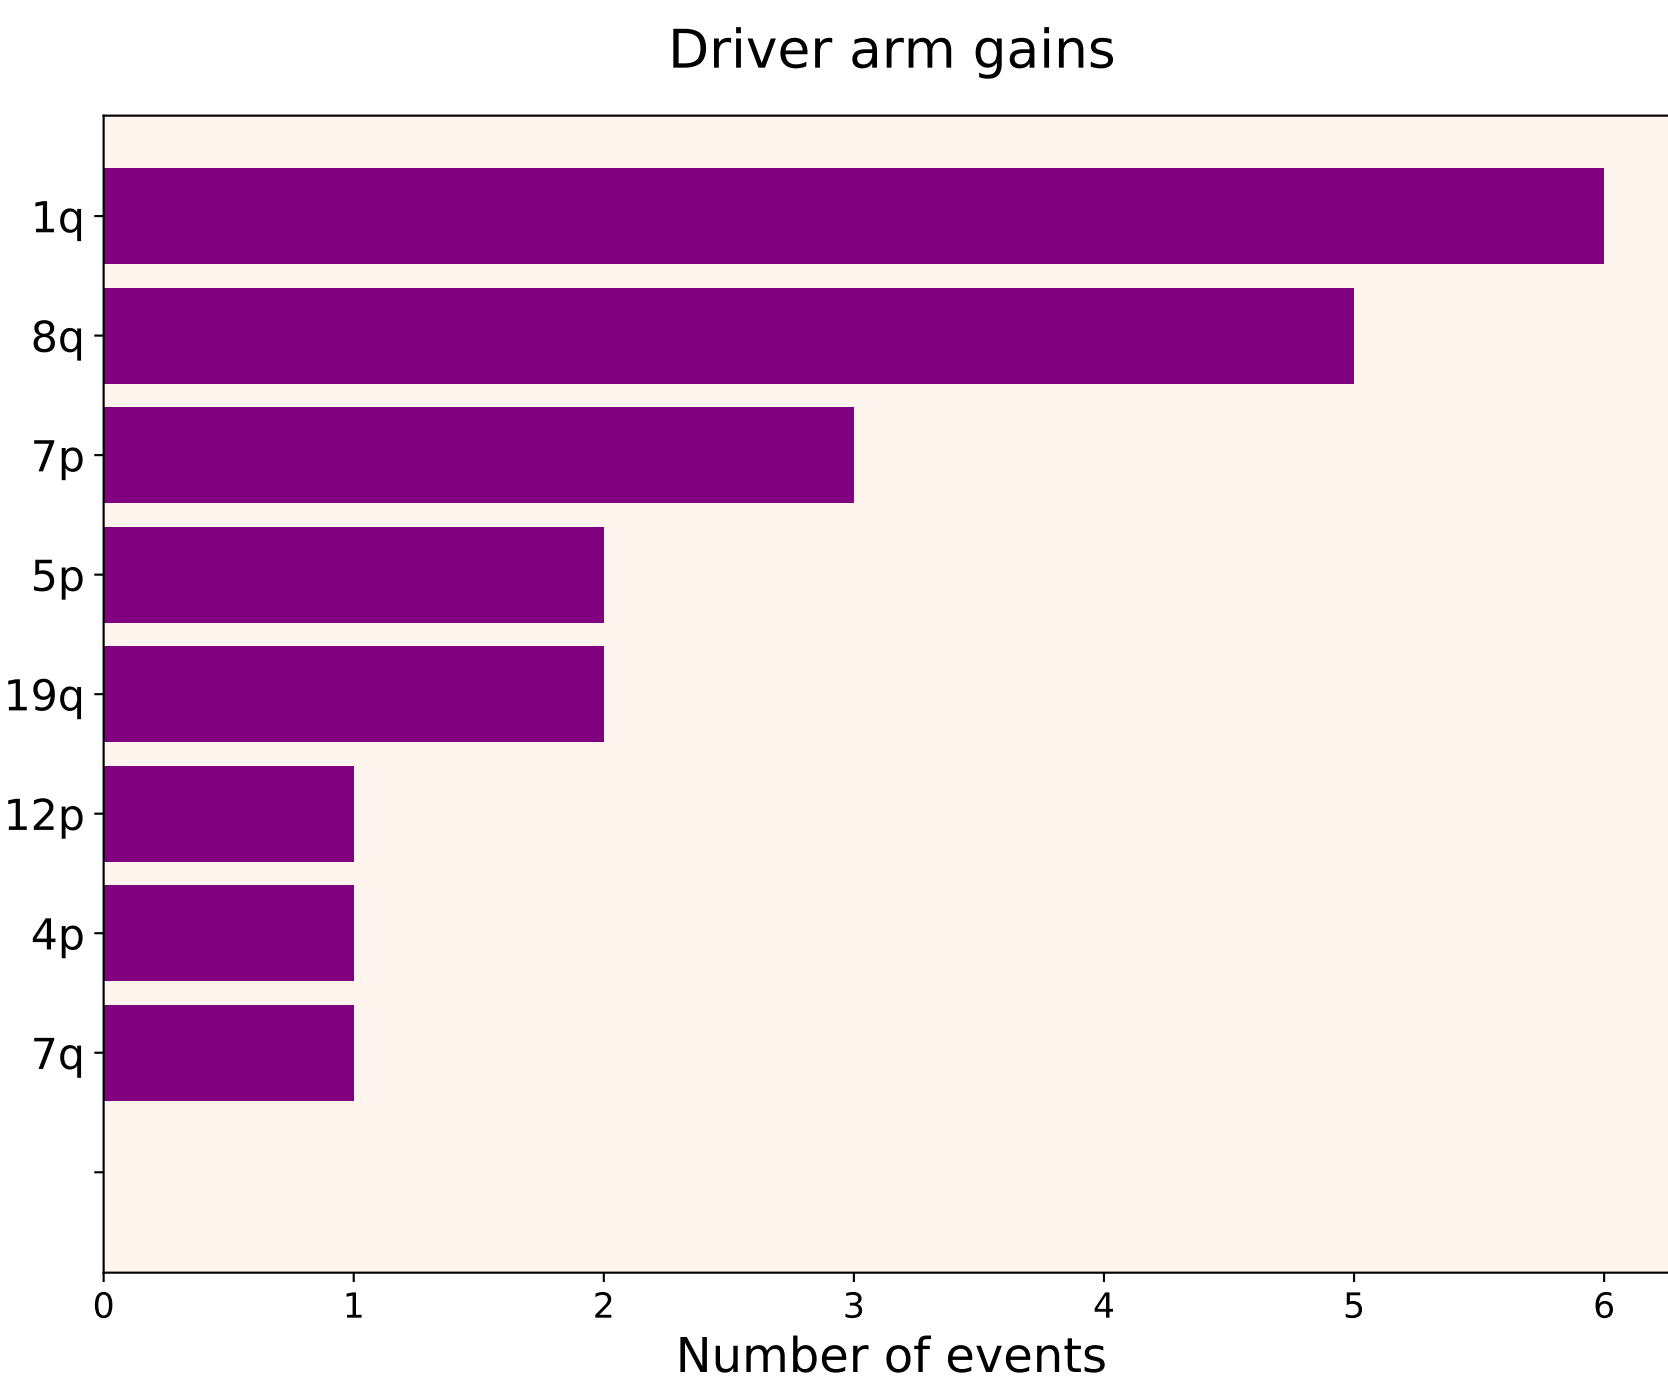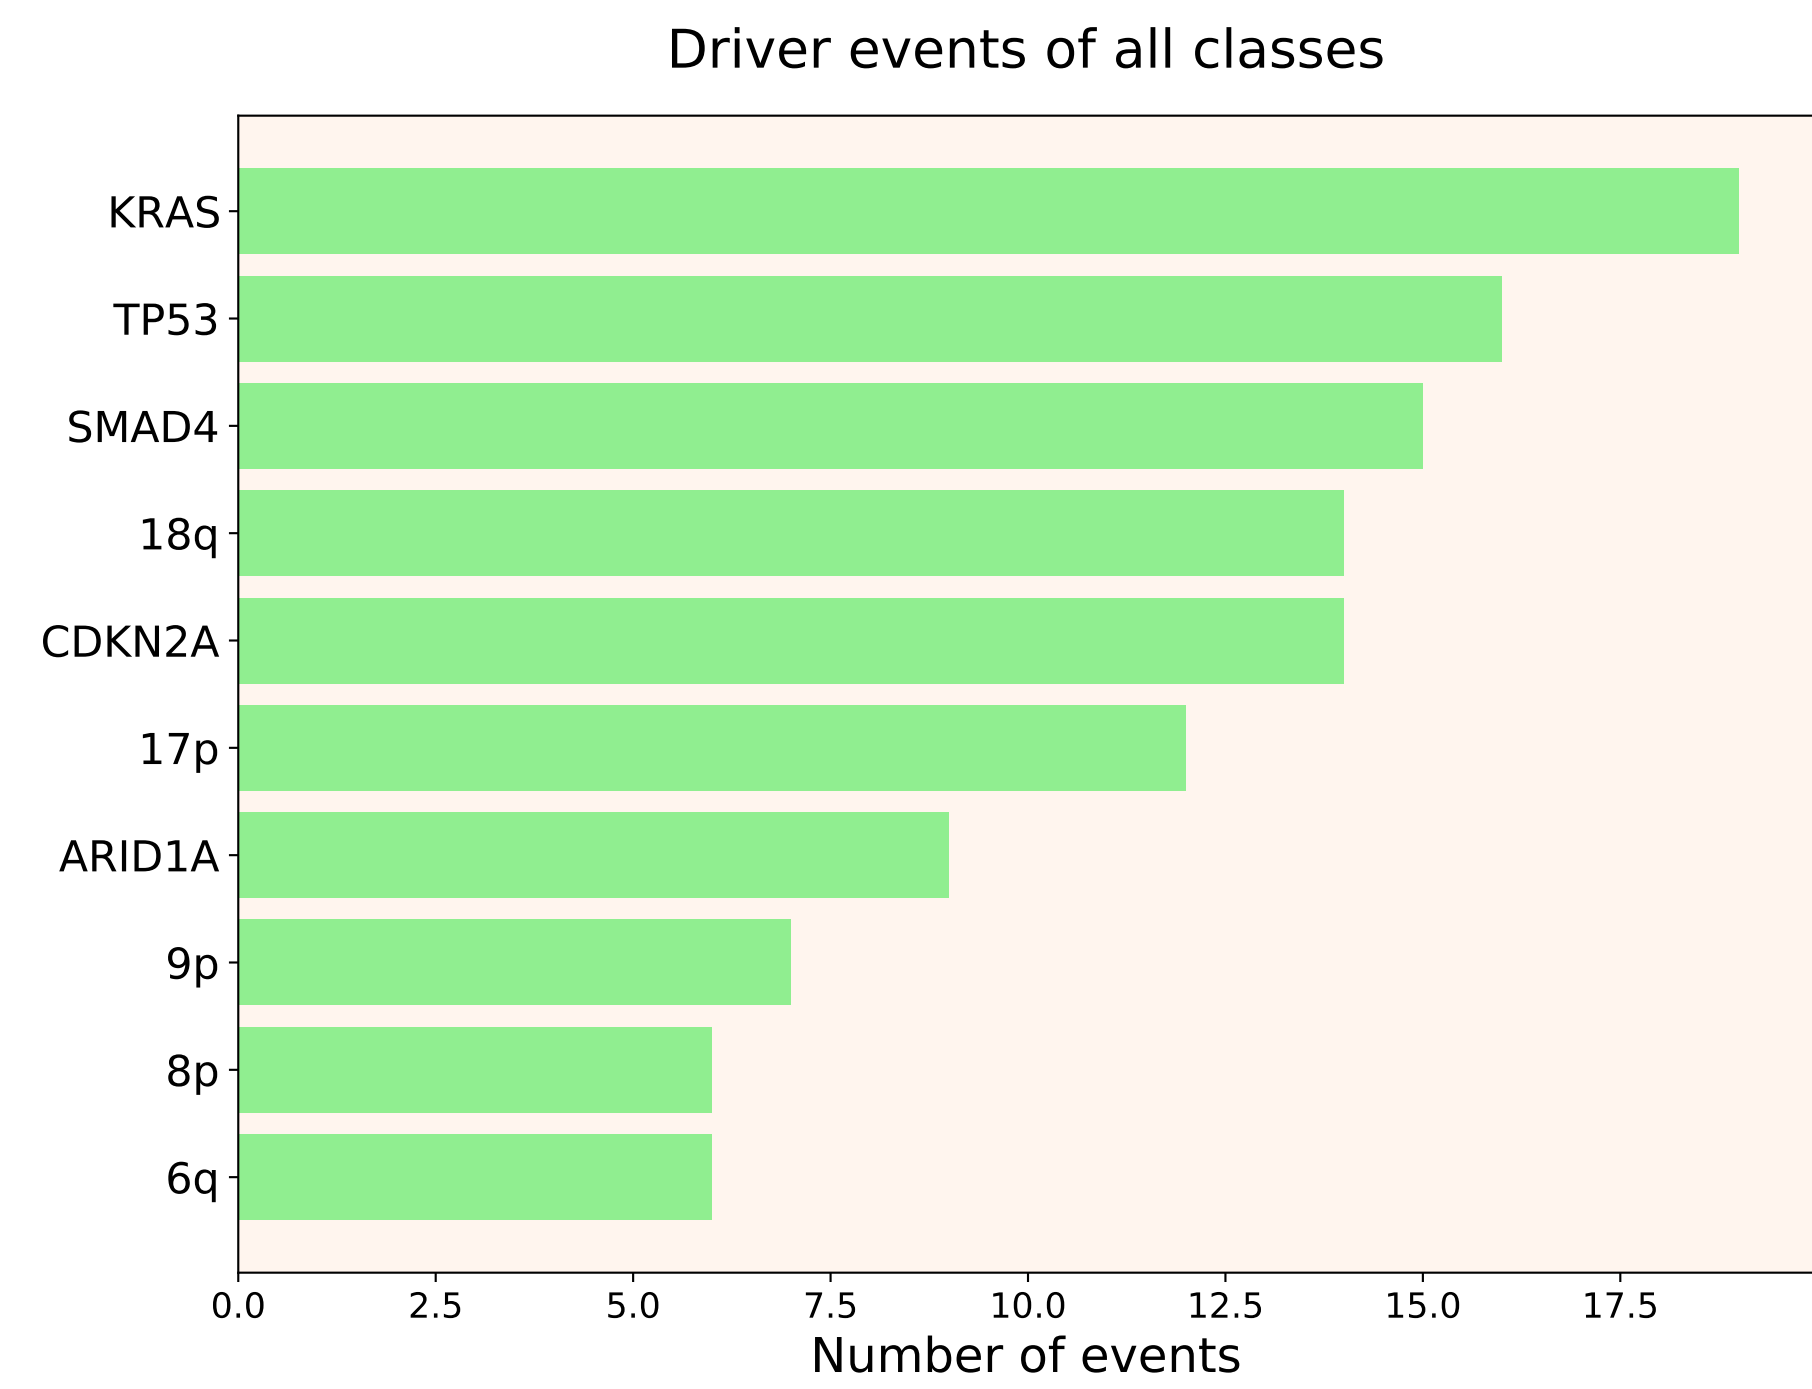

Supplement: Supplemental_Data_S1.zip [file Supplemental_Data_S1.zip]

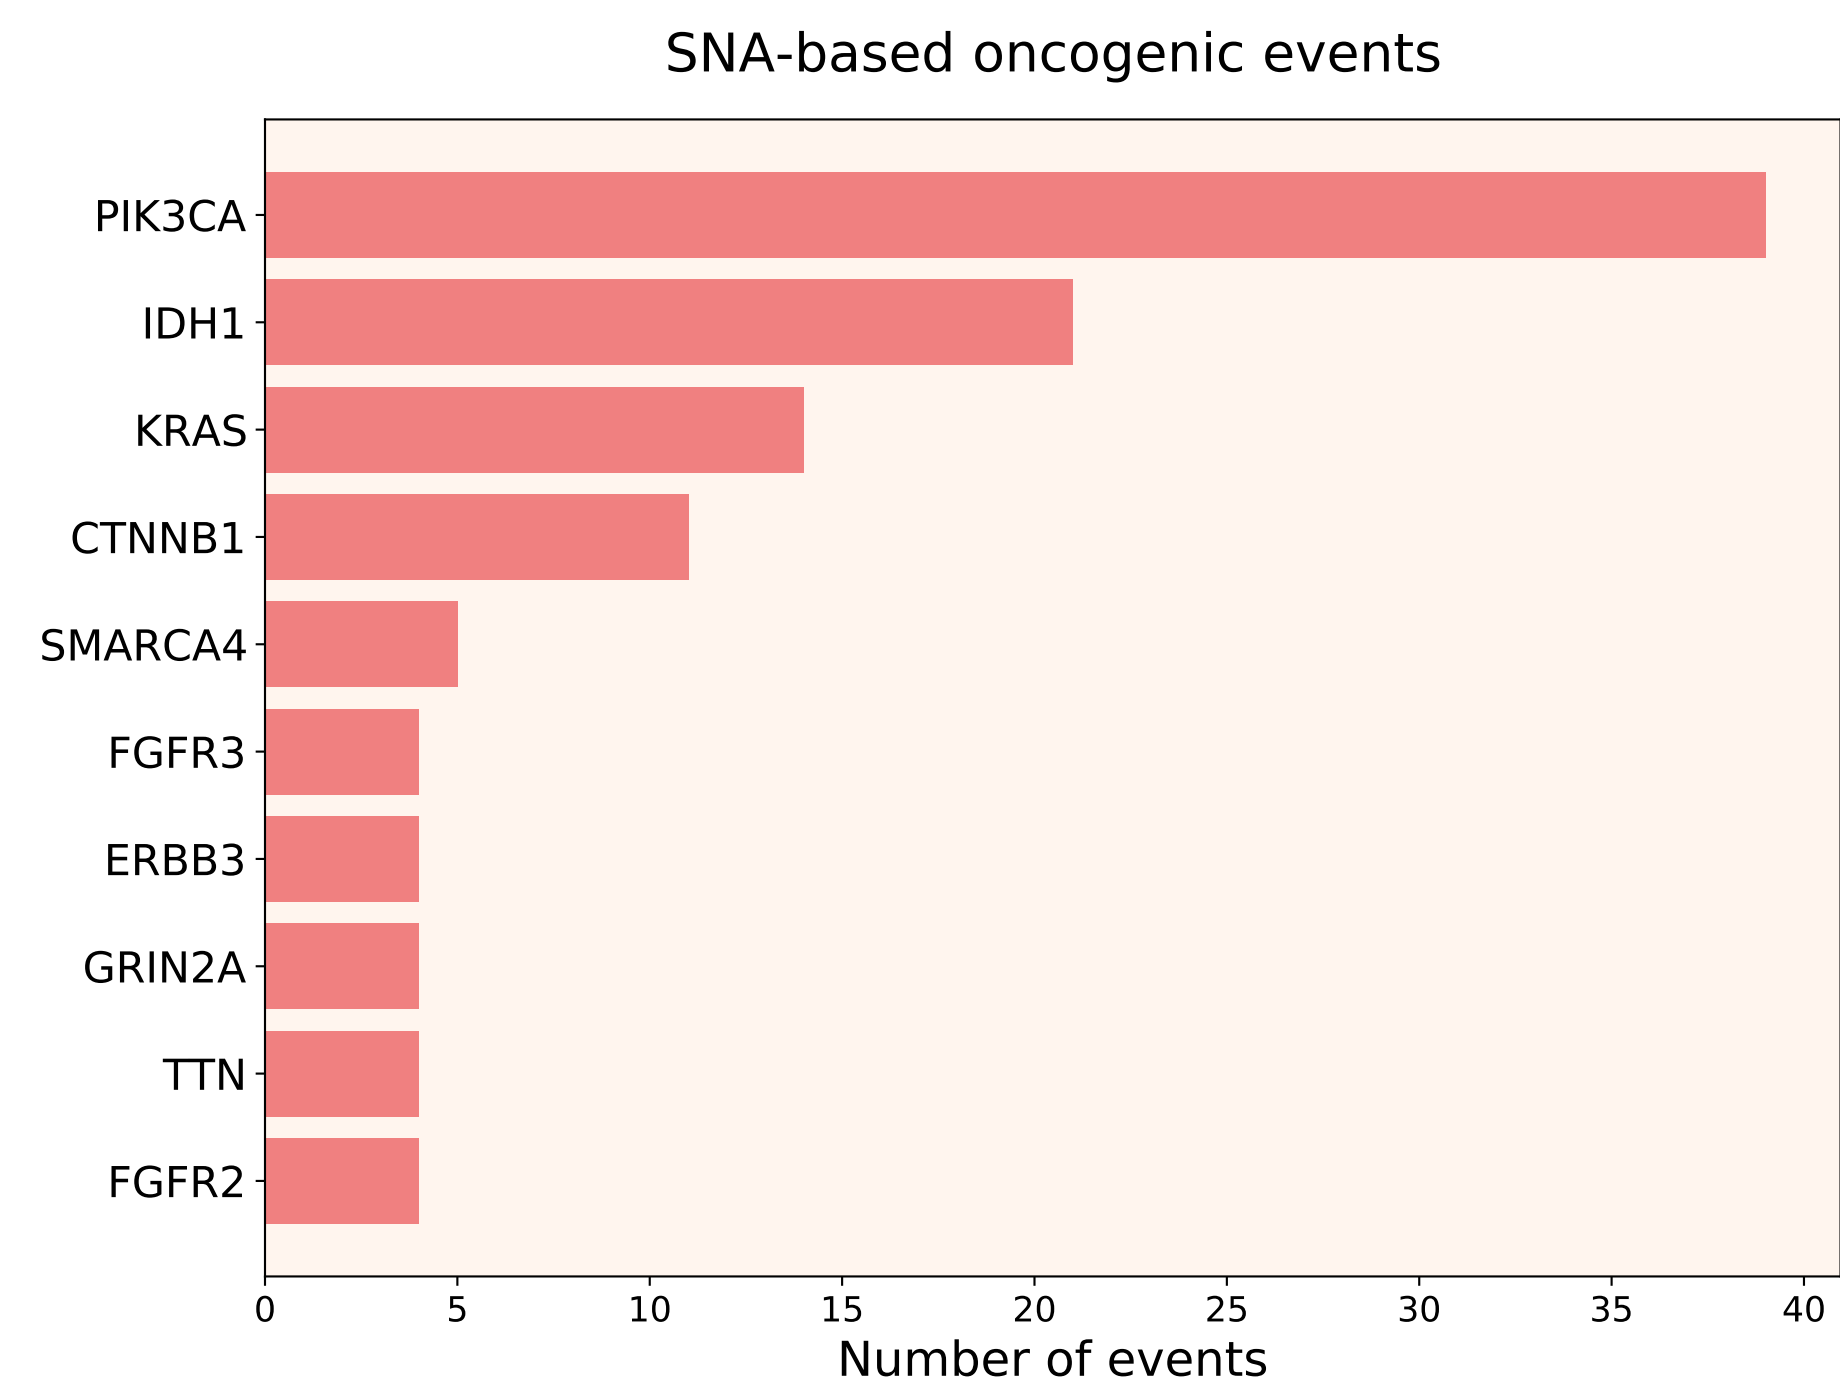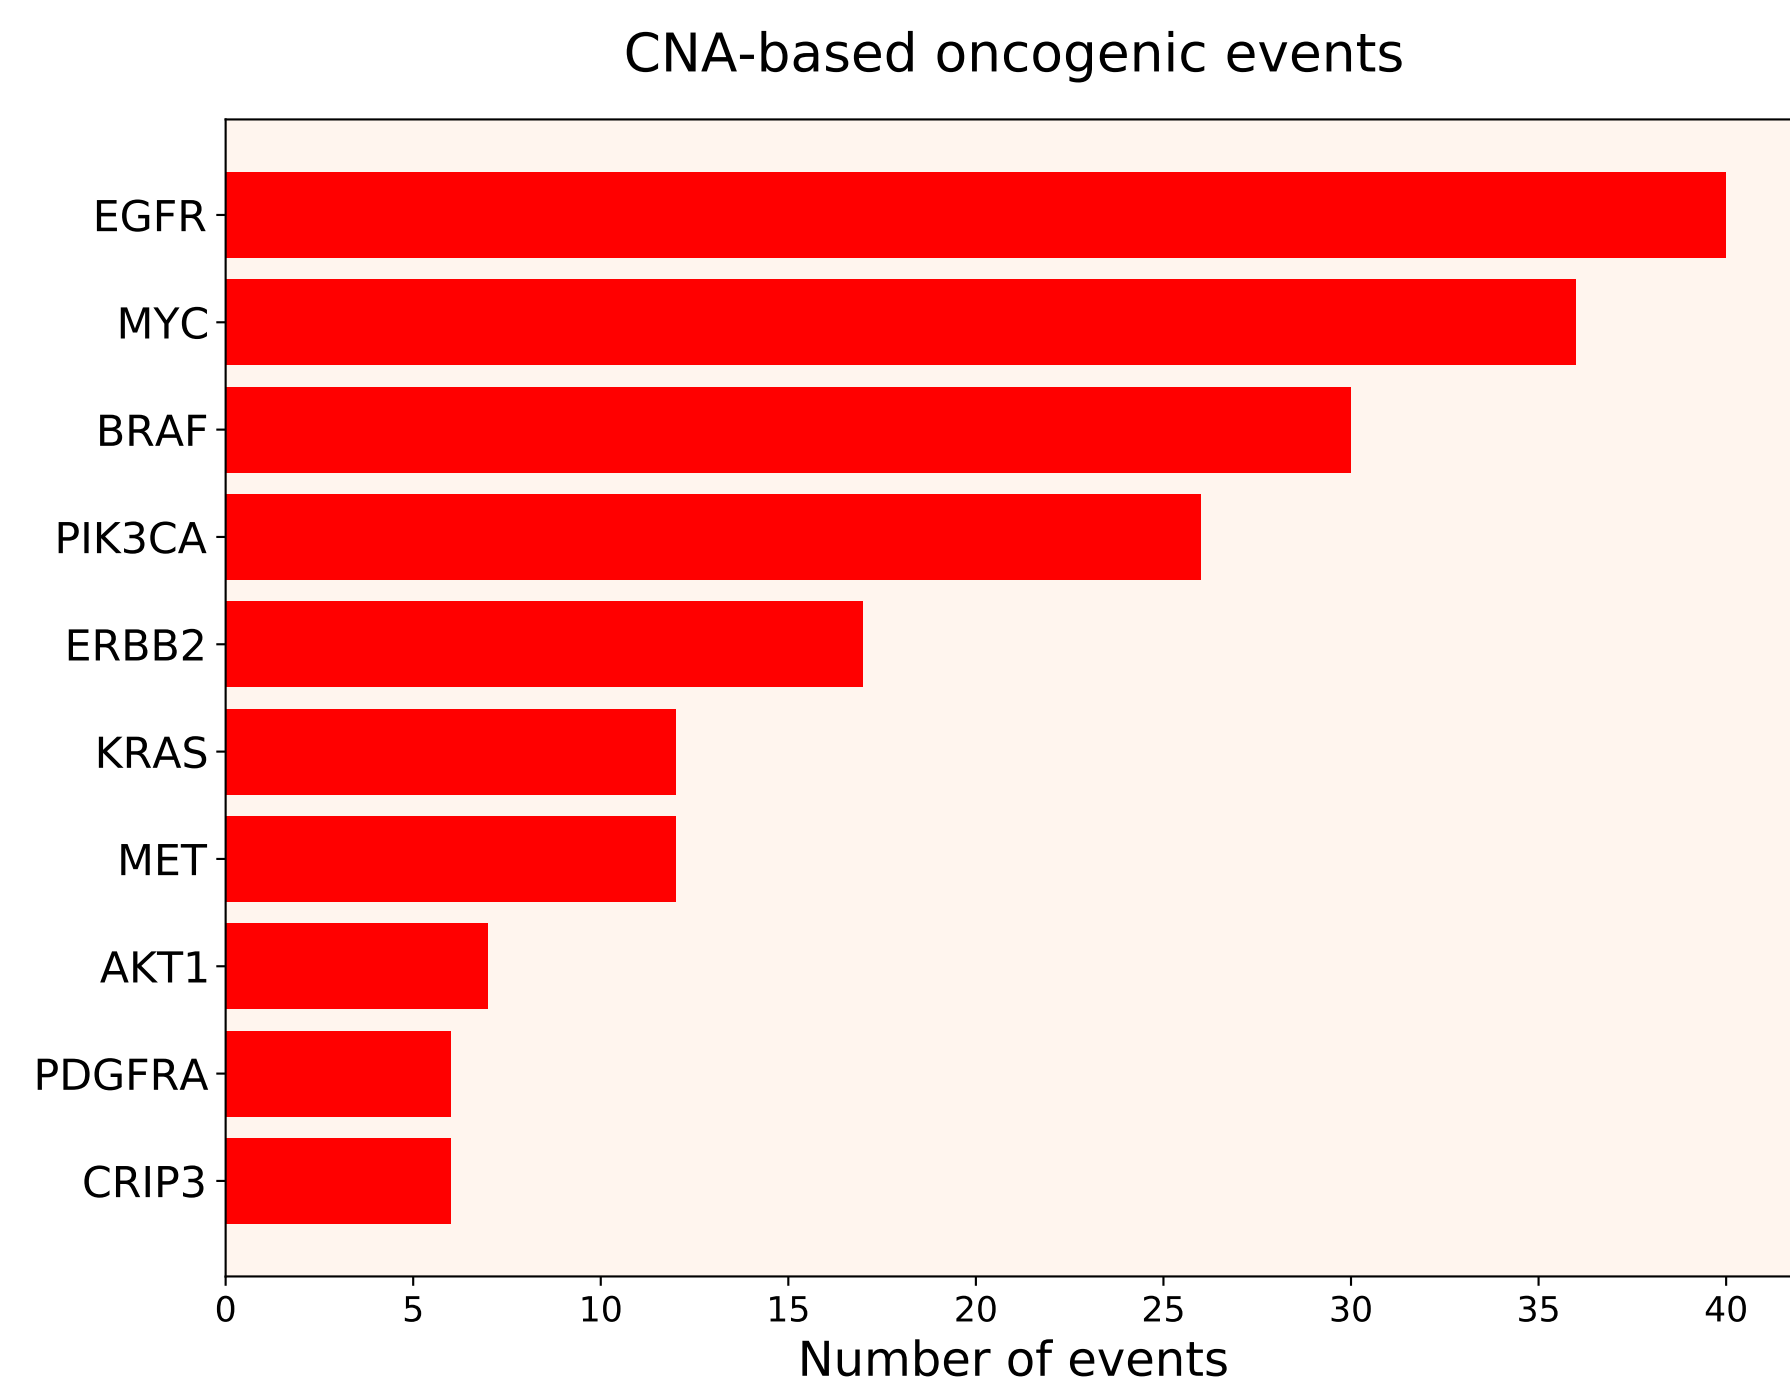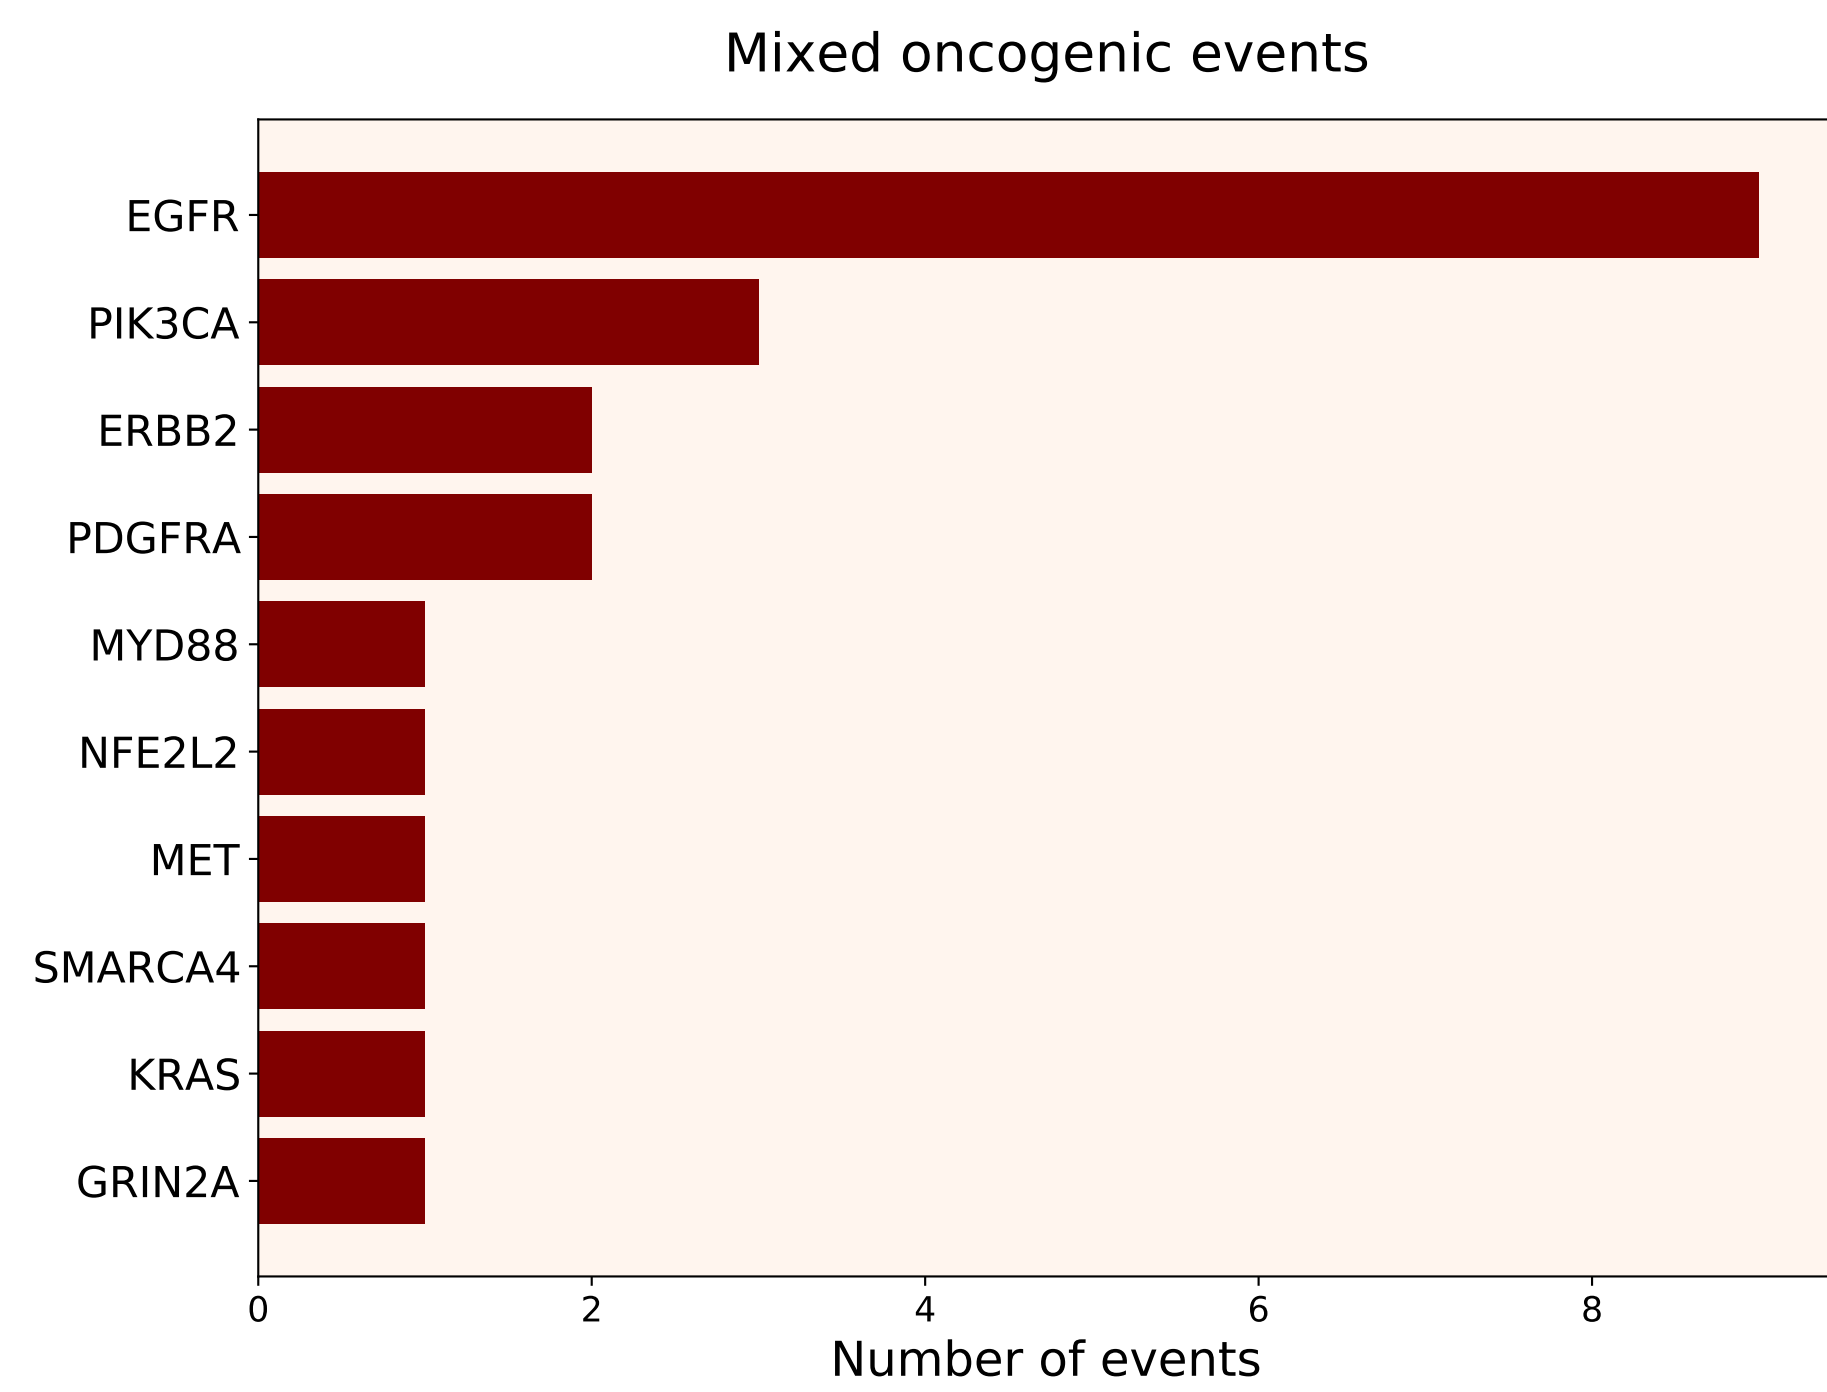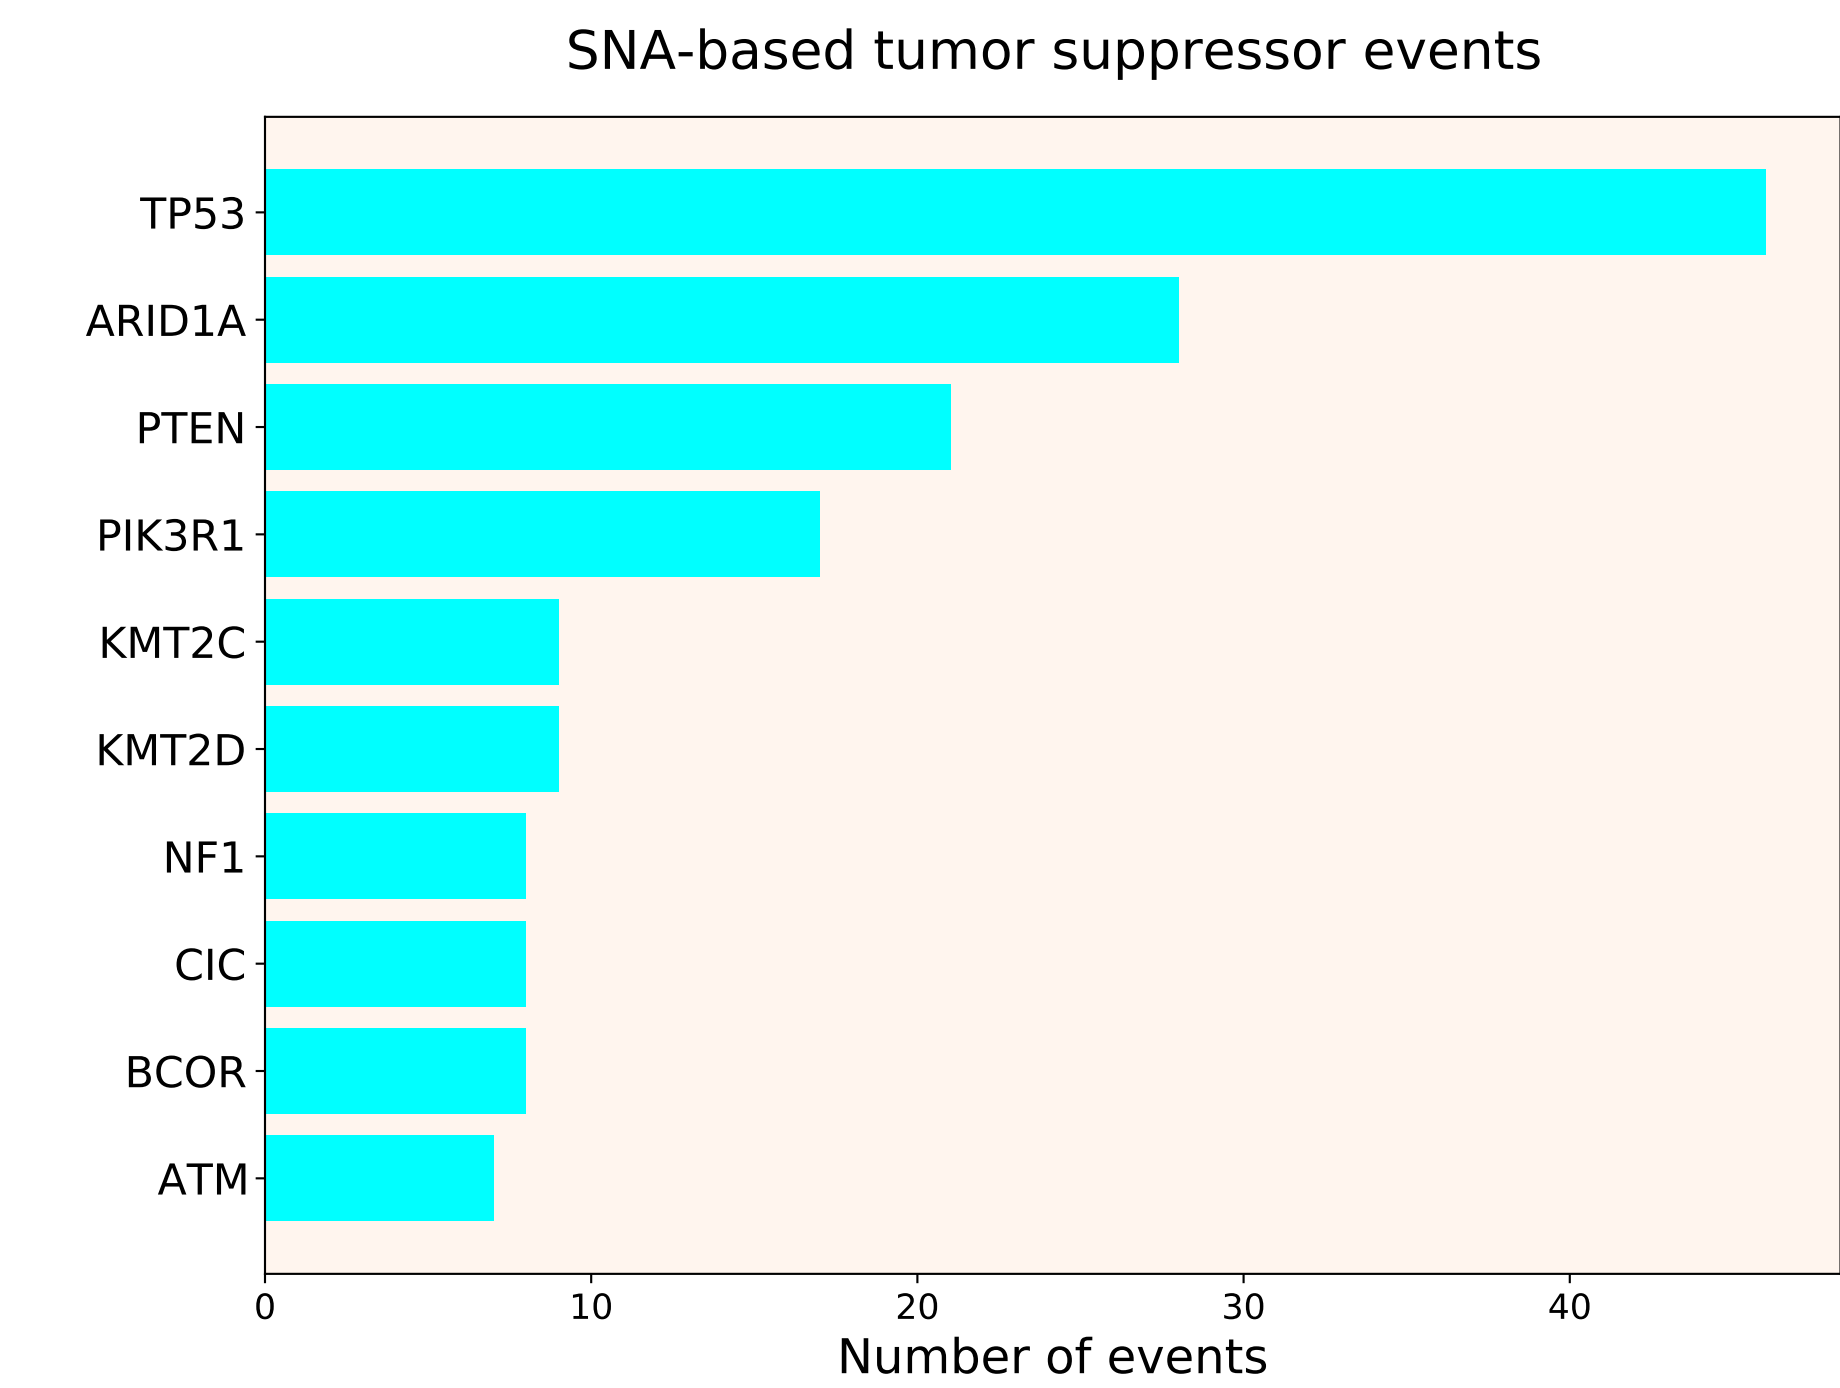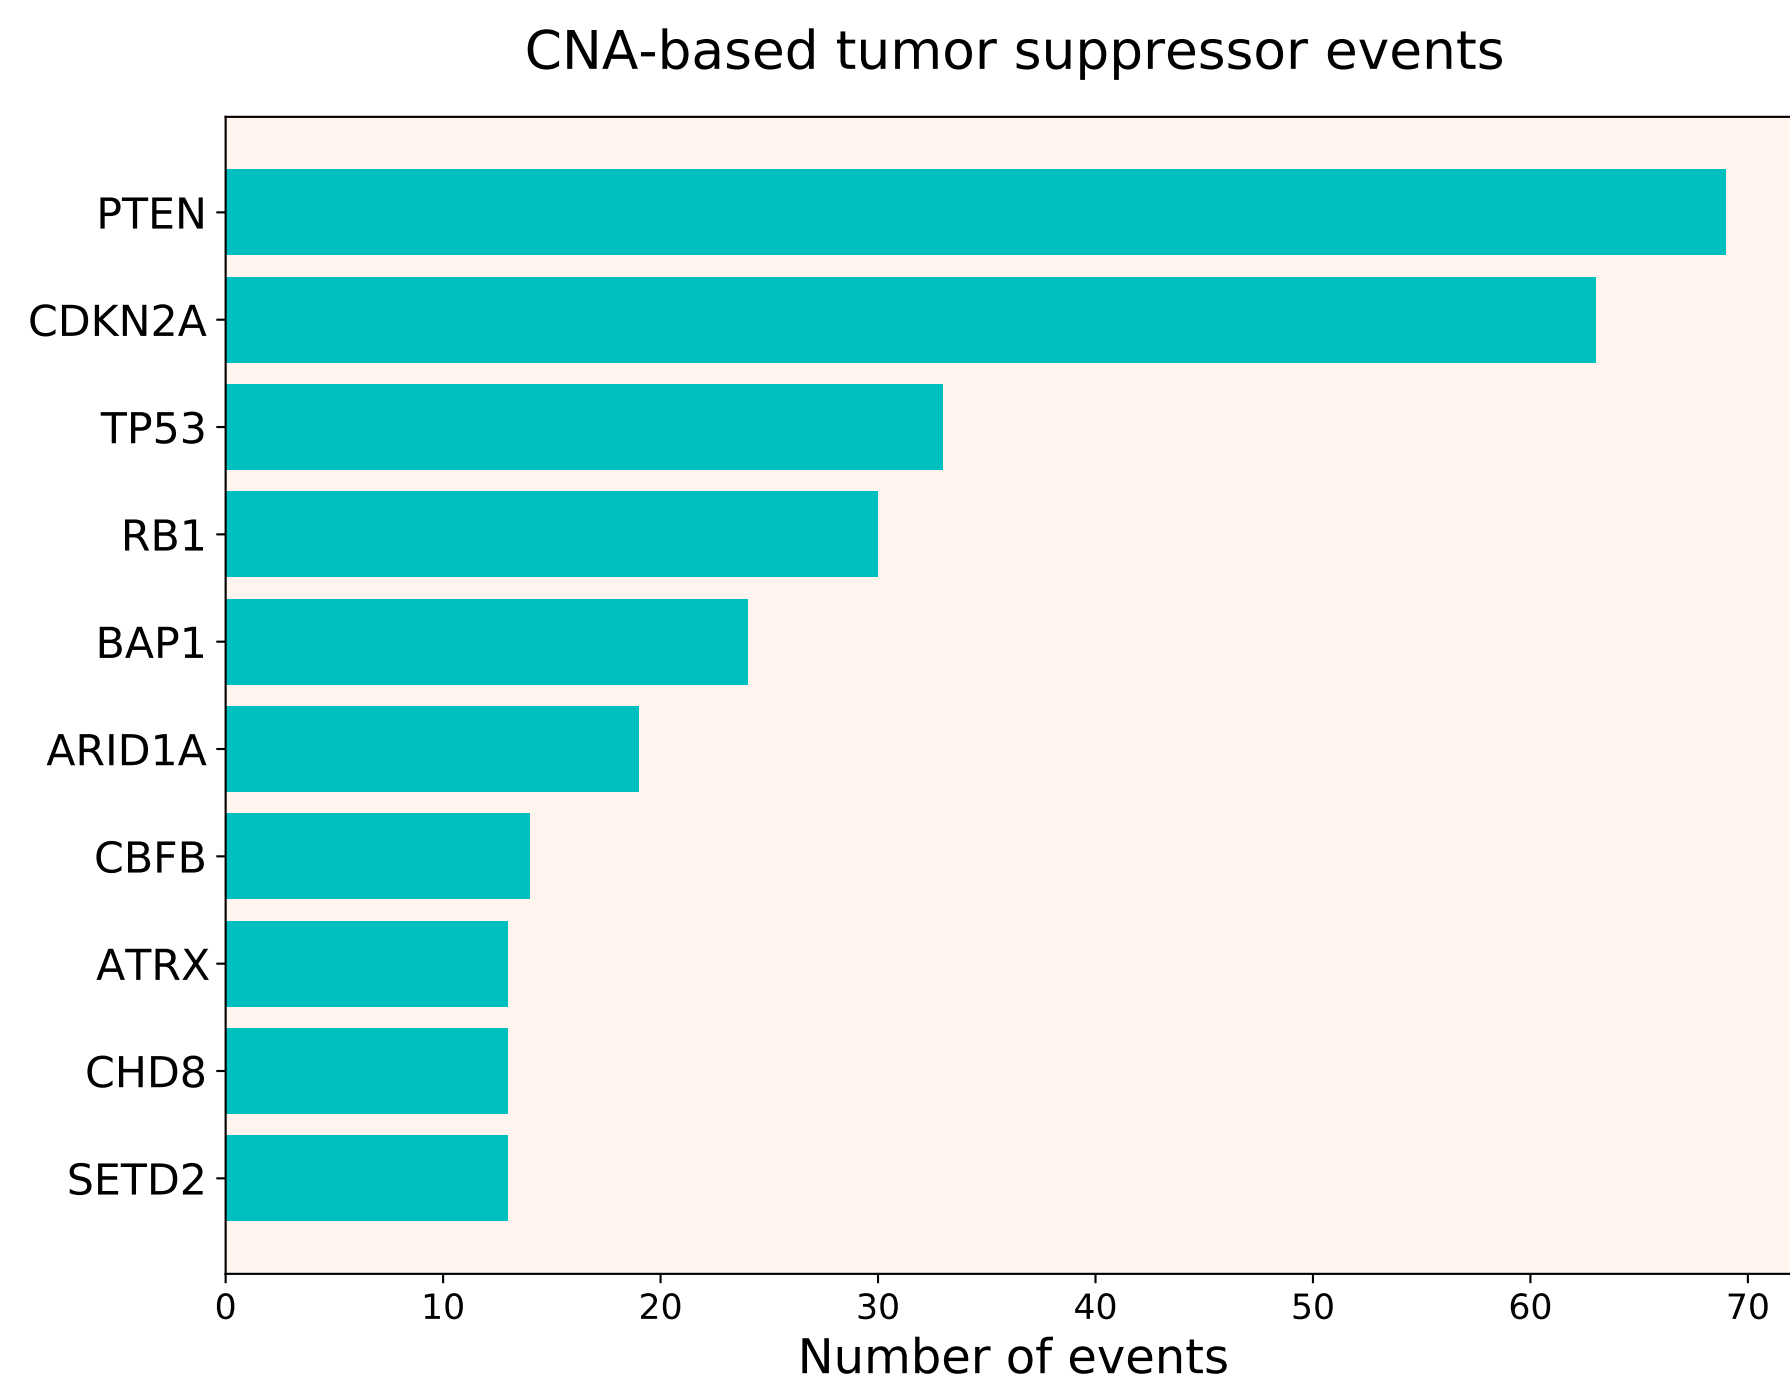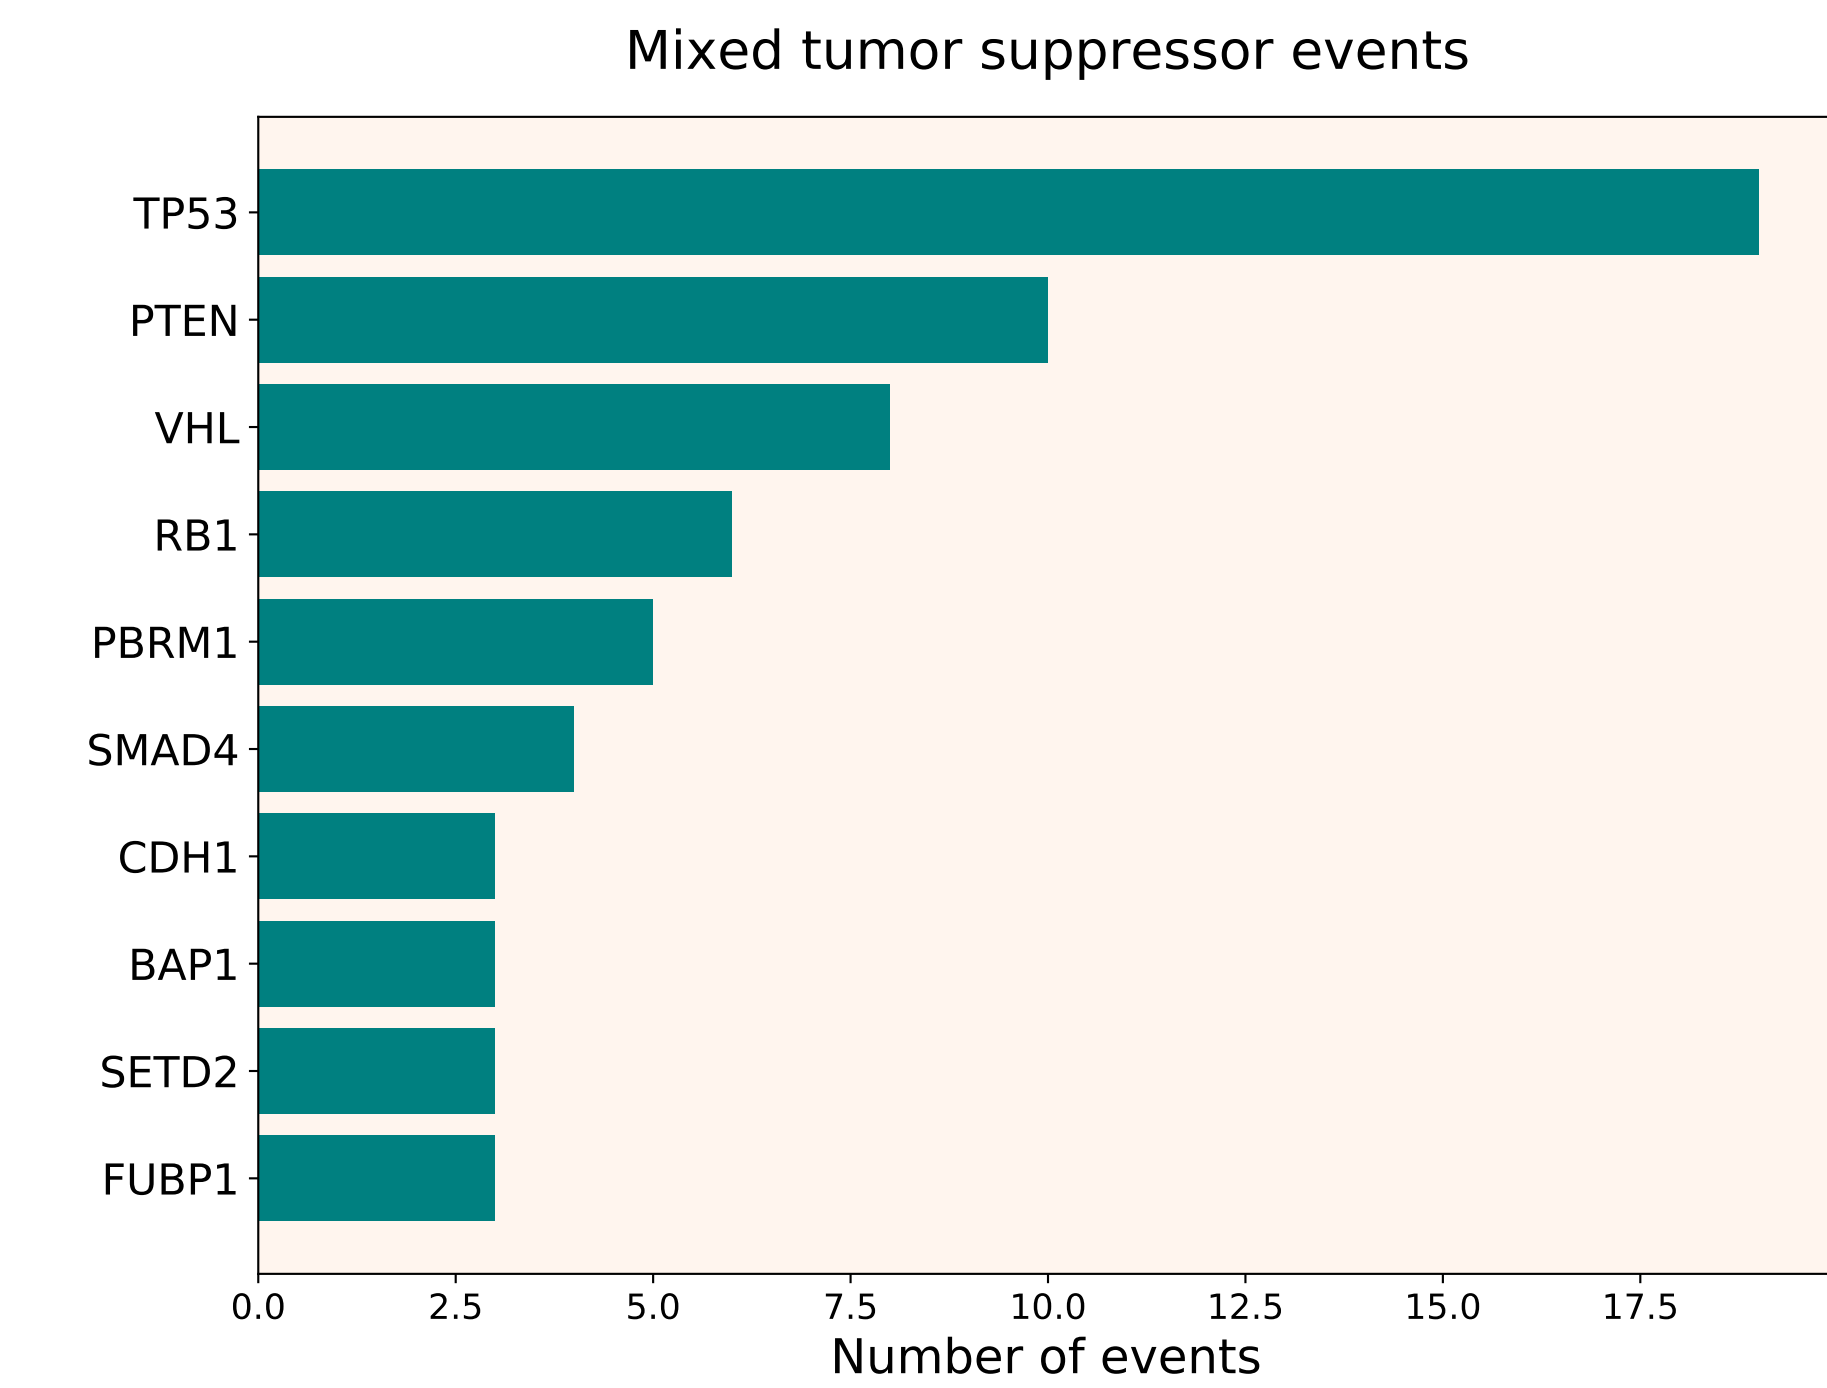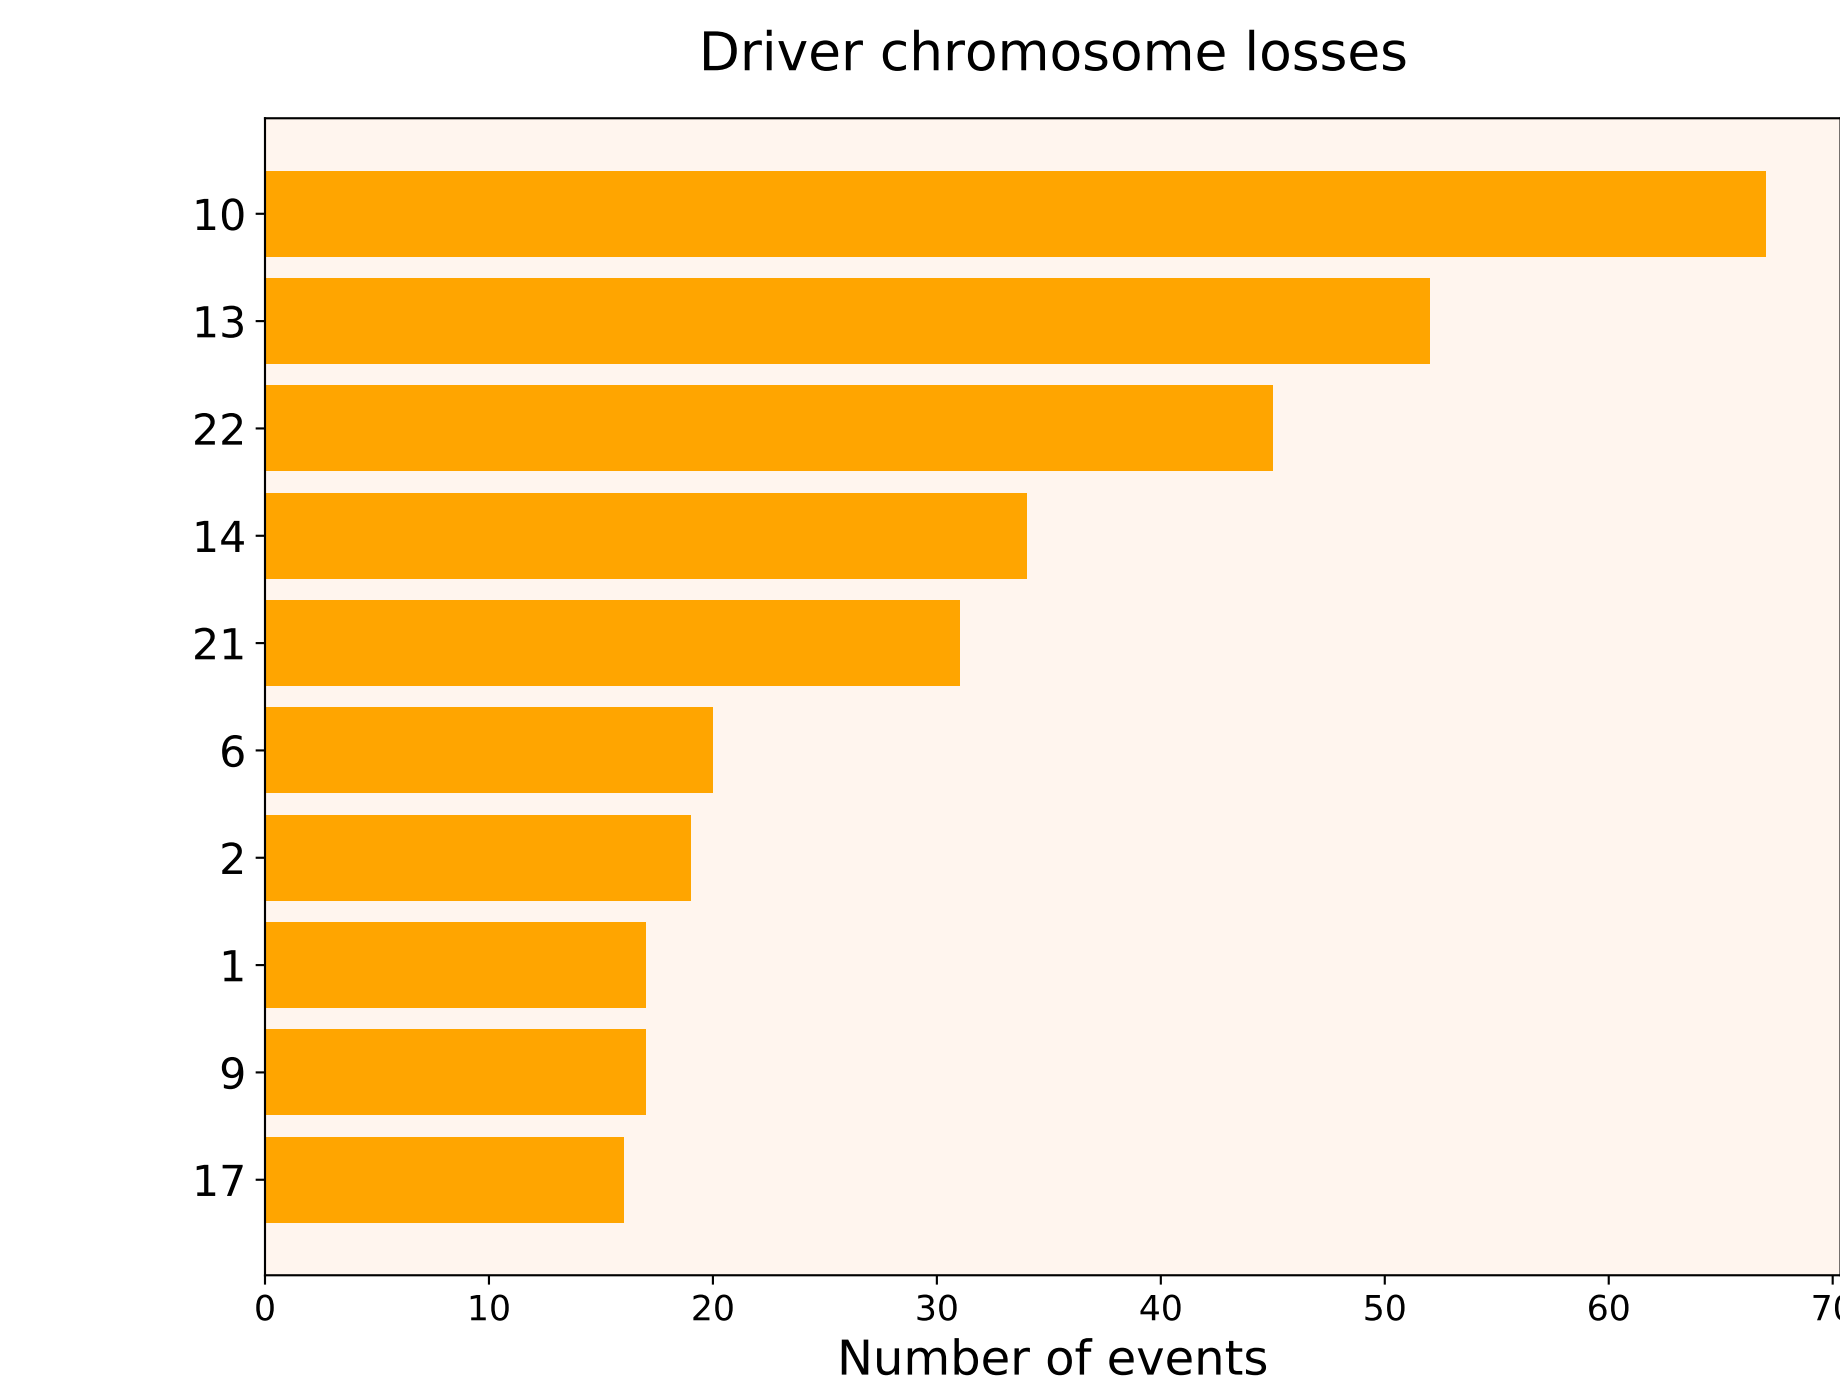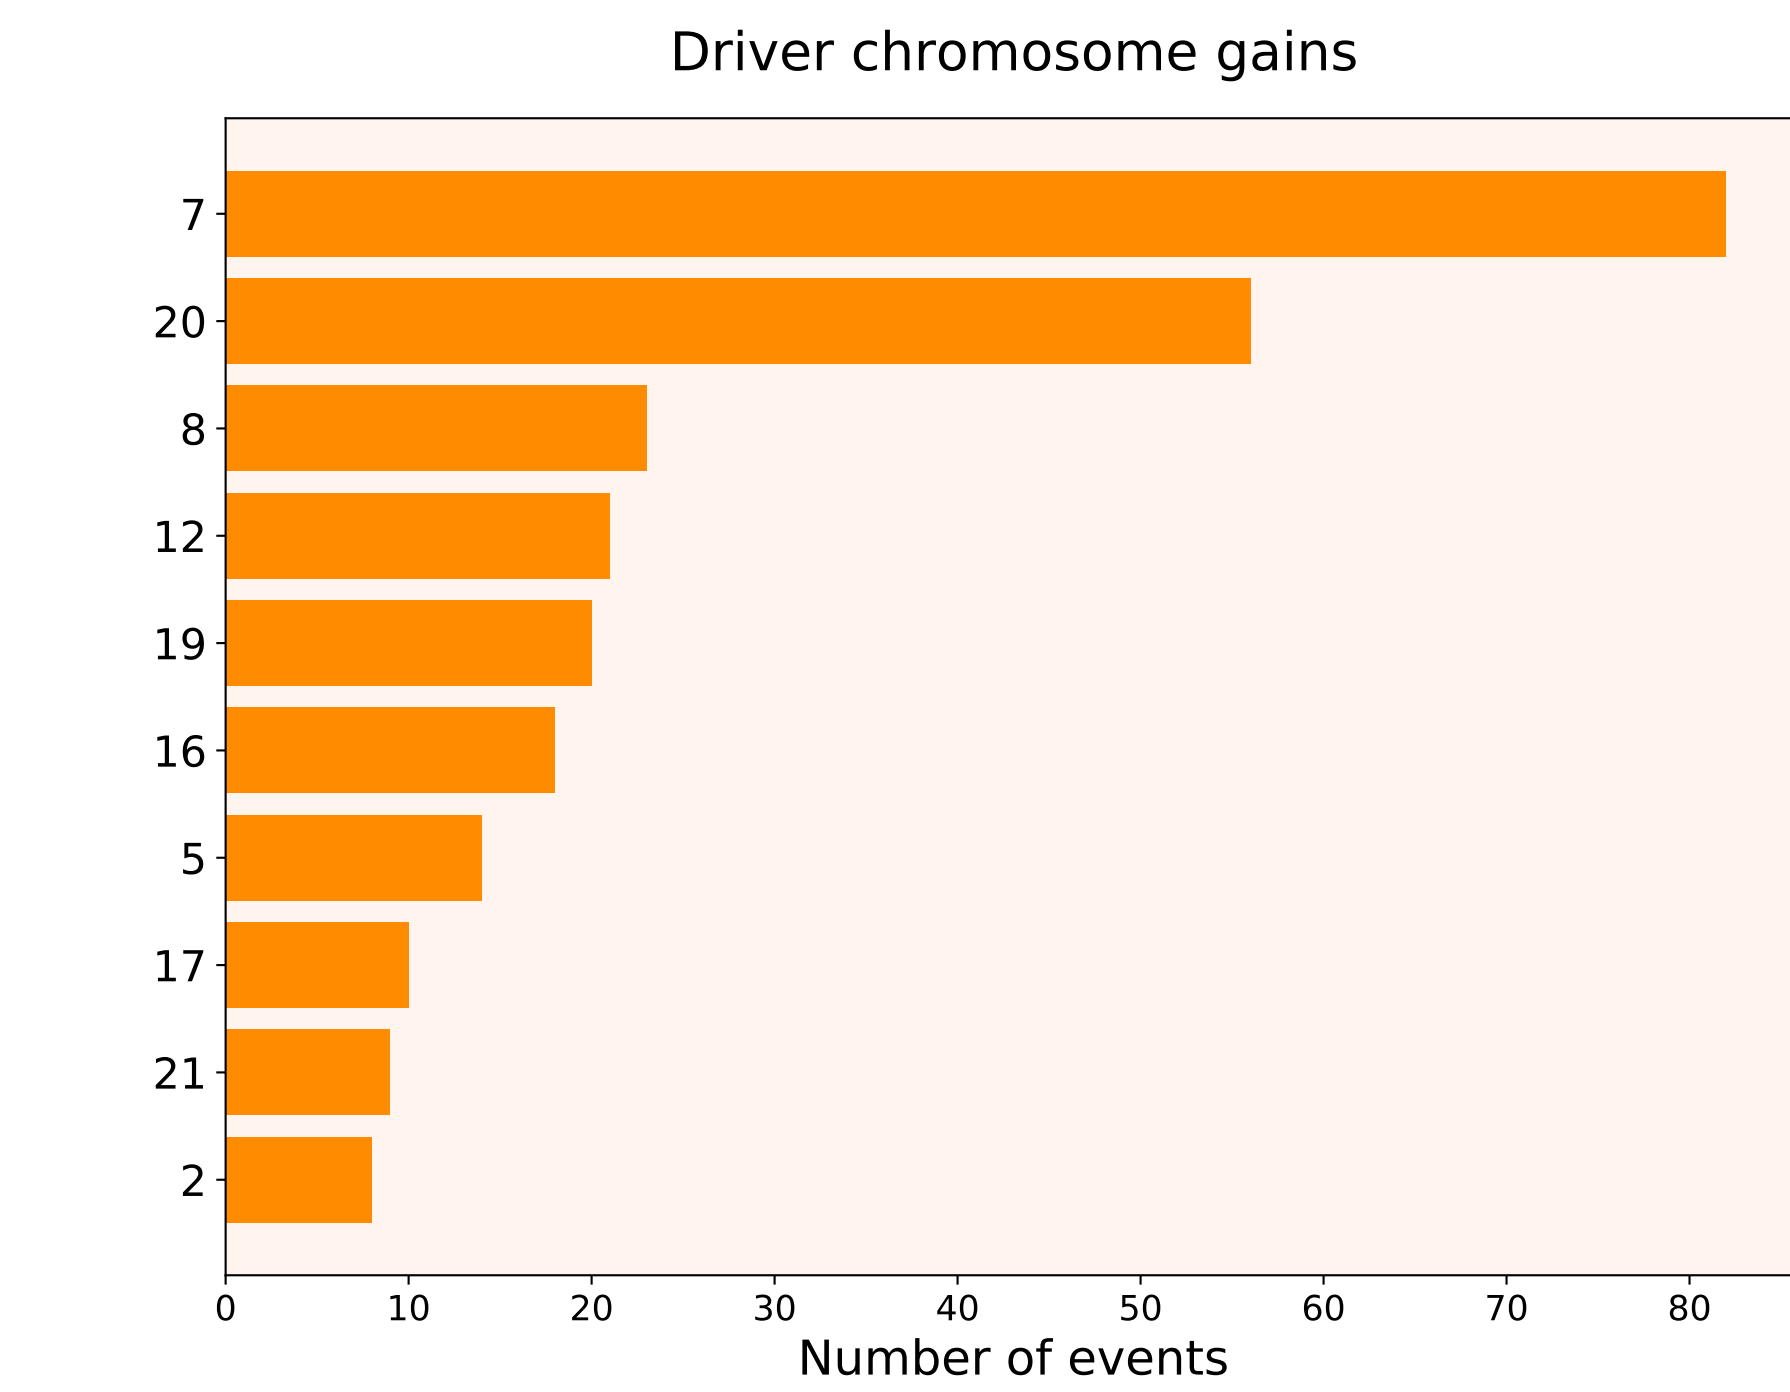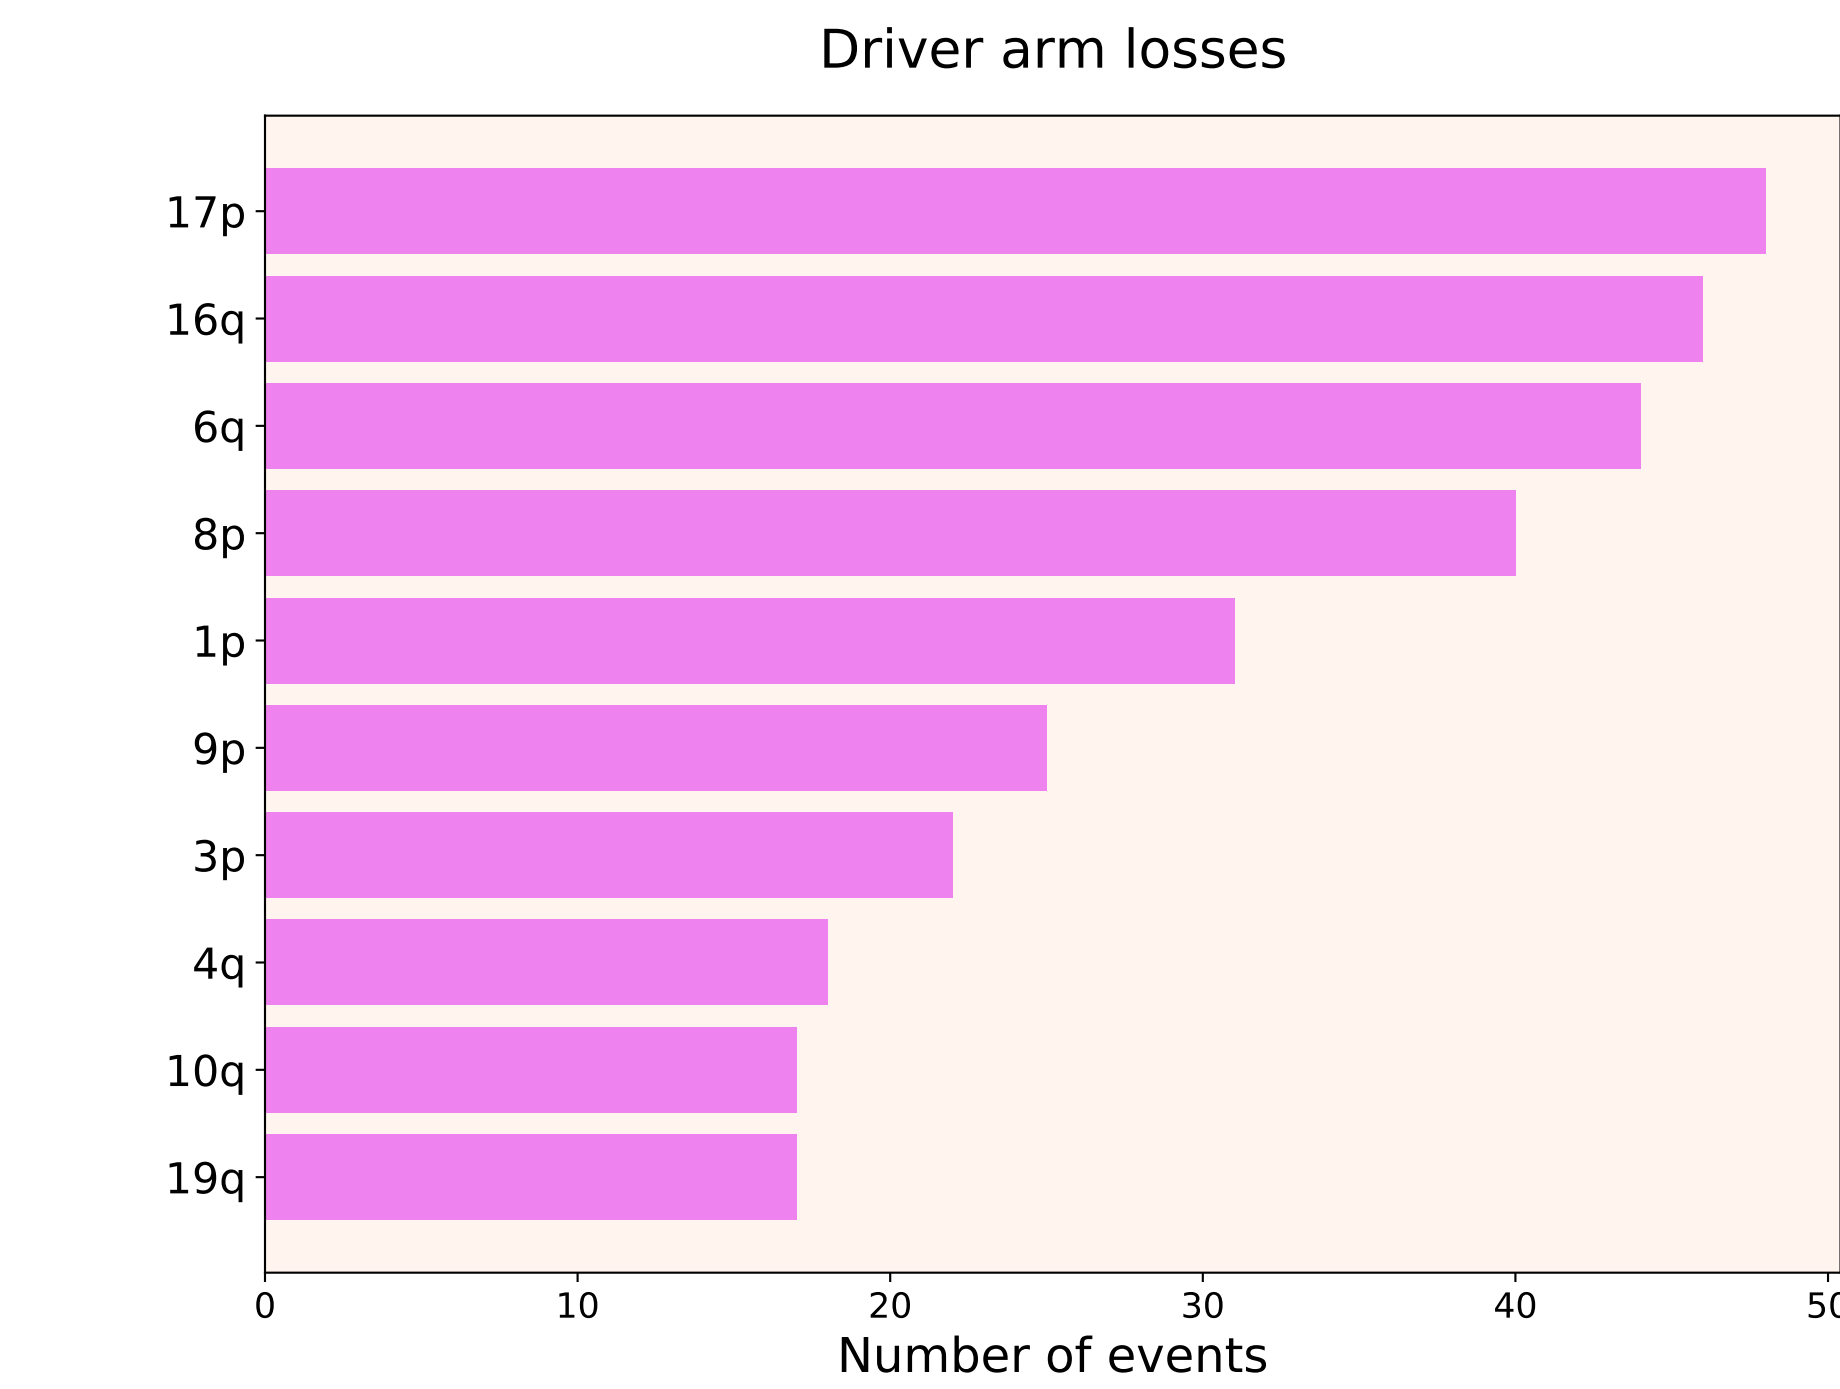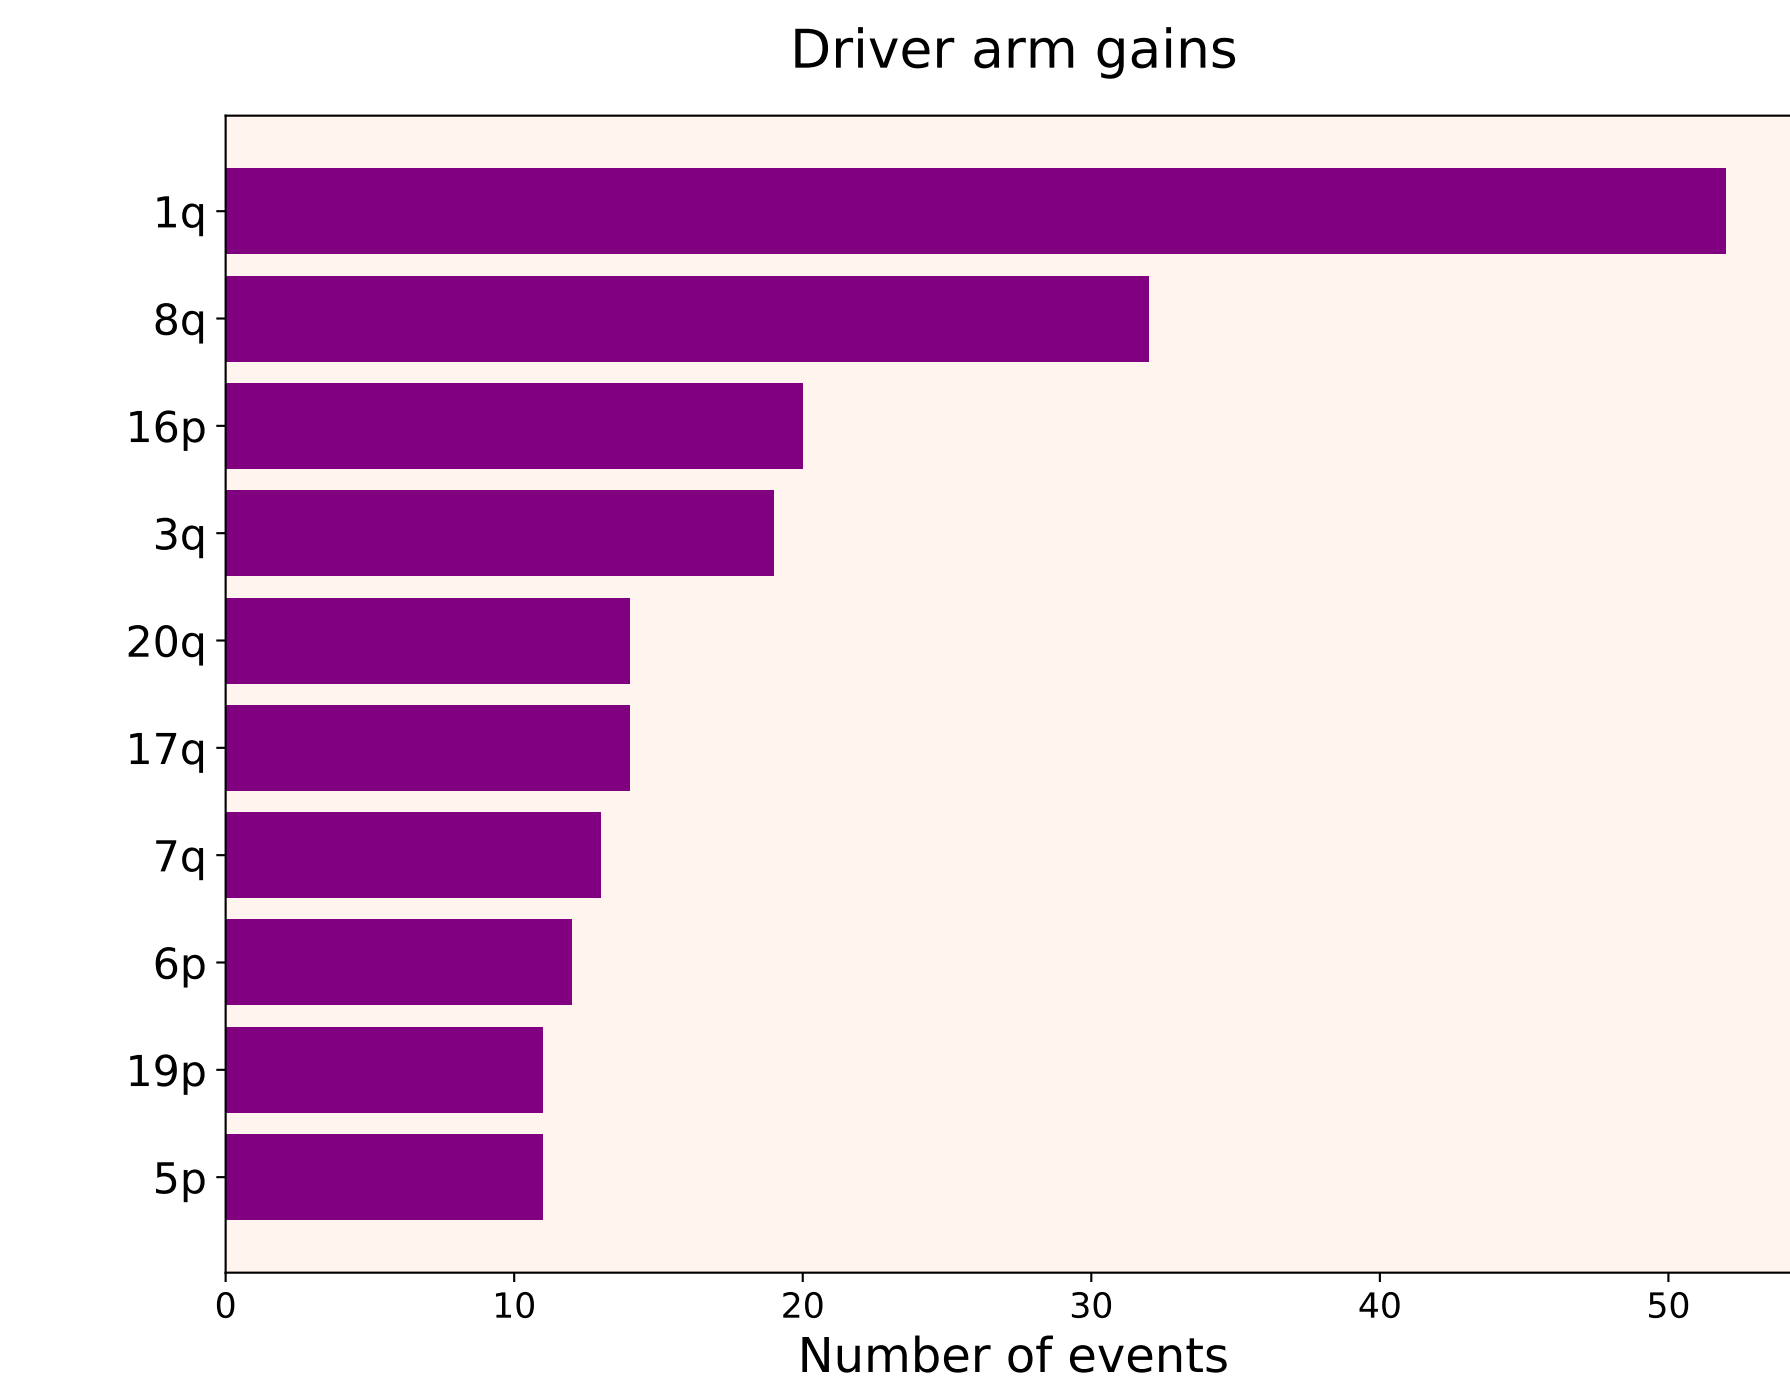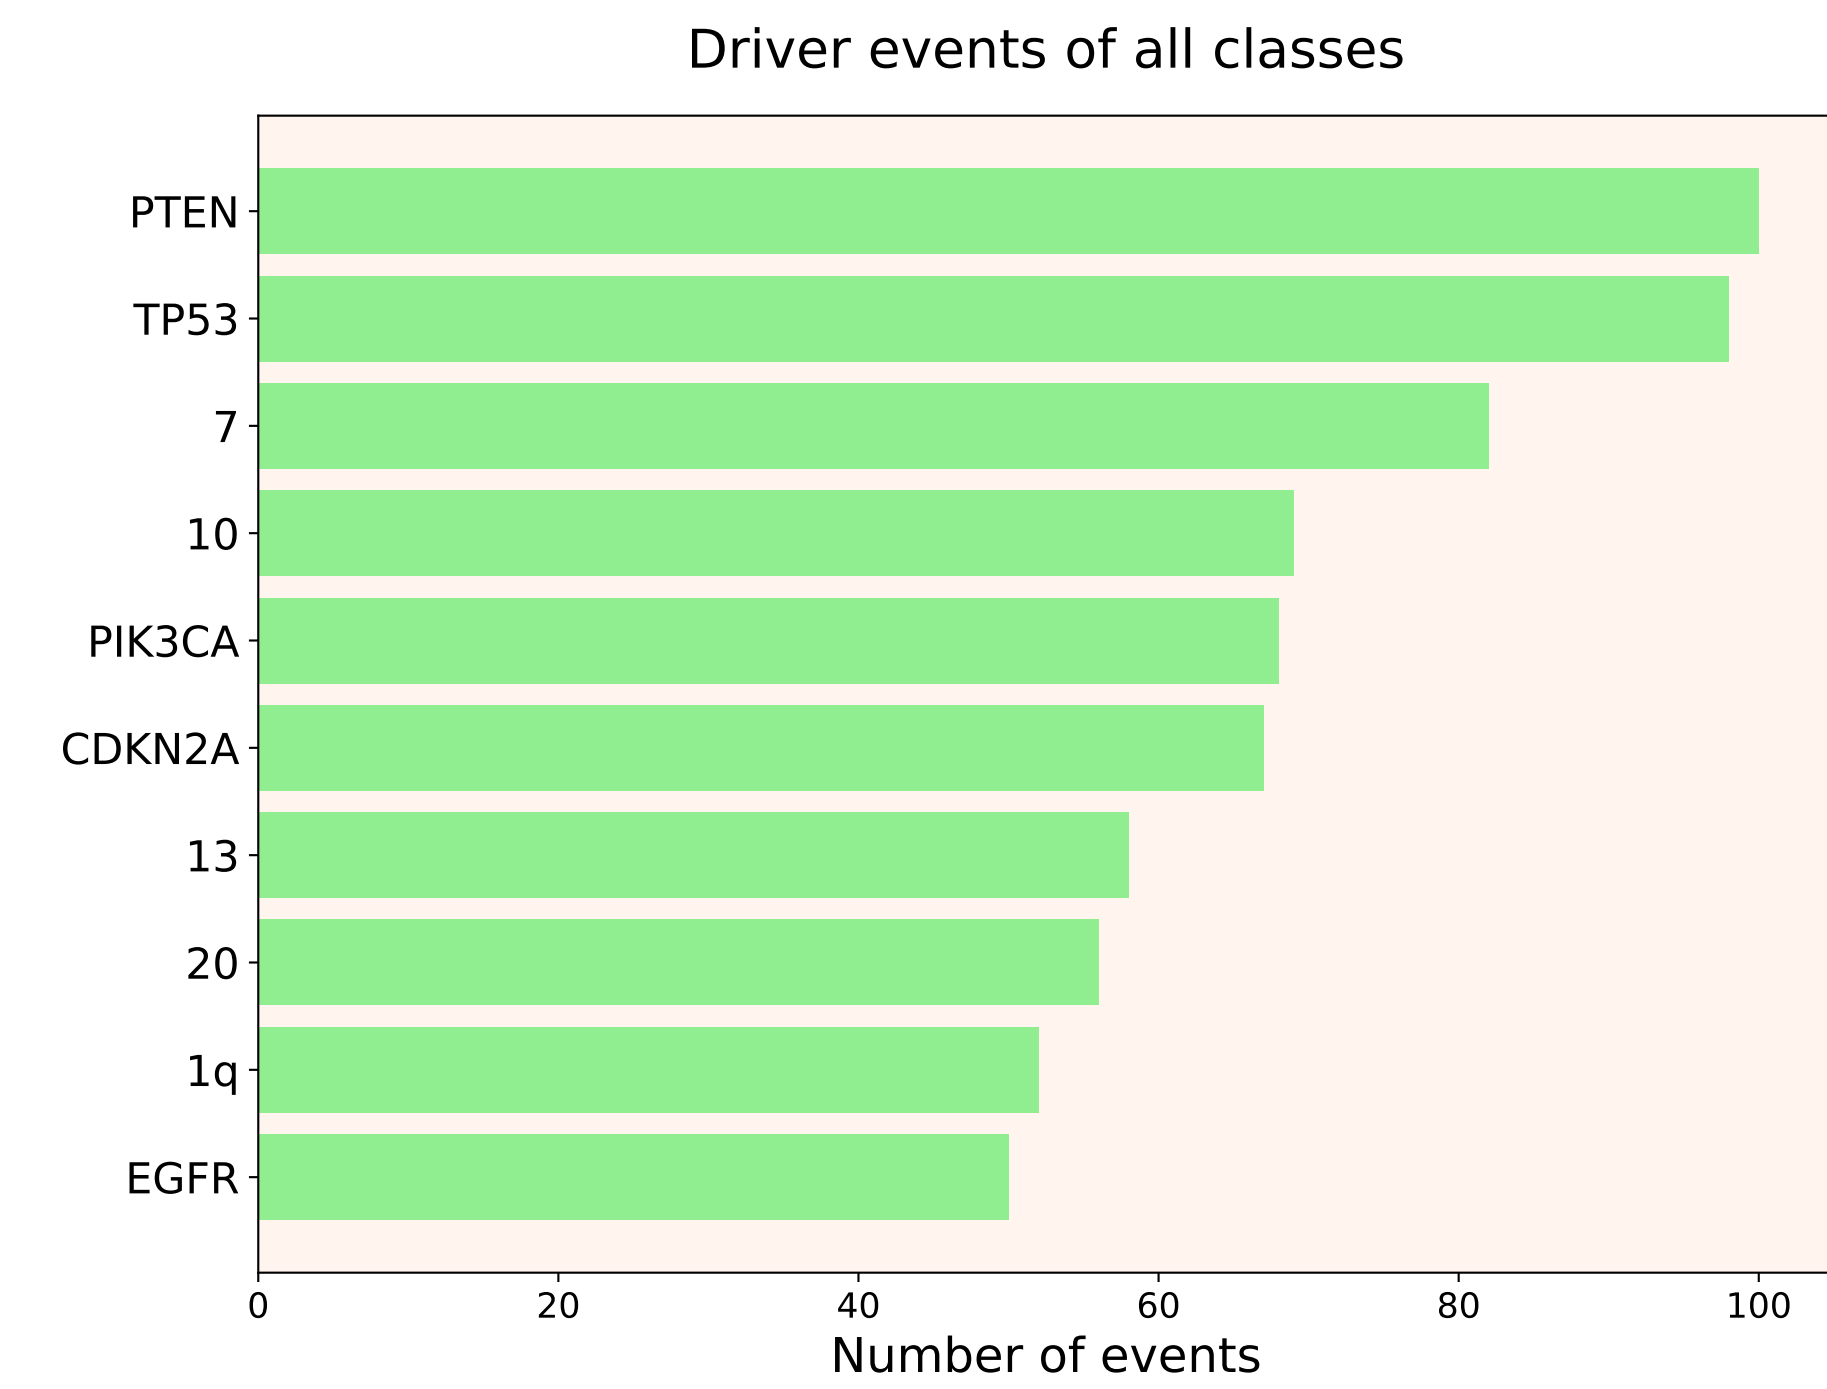

Supplement: Supplemental_Data_S1.zip [file Supplemental_Data_S1.zip]

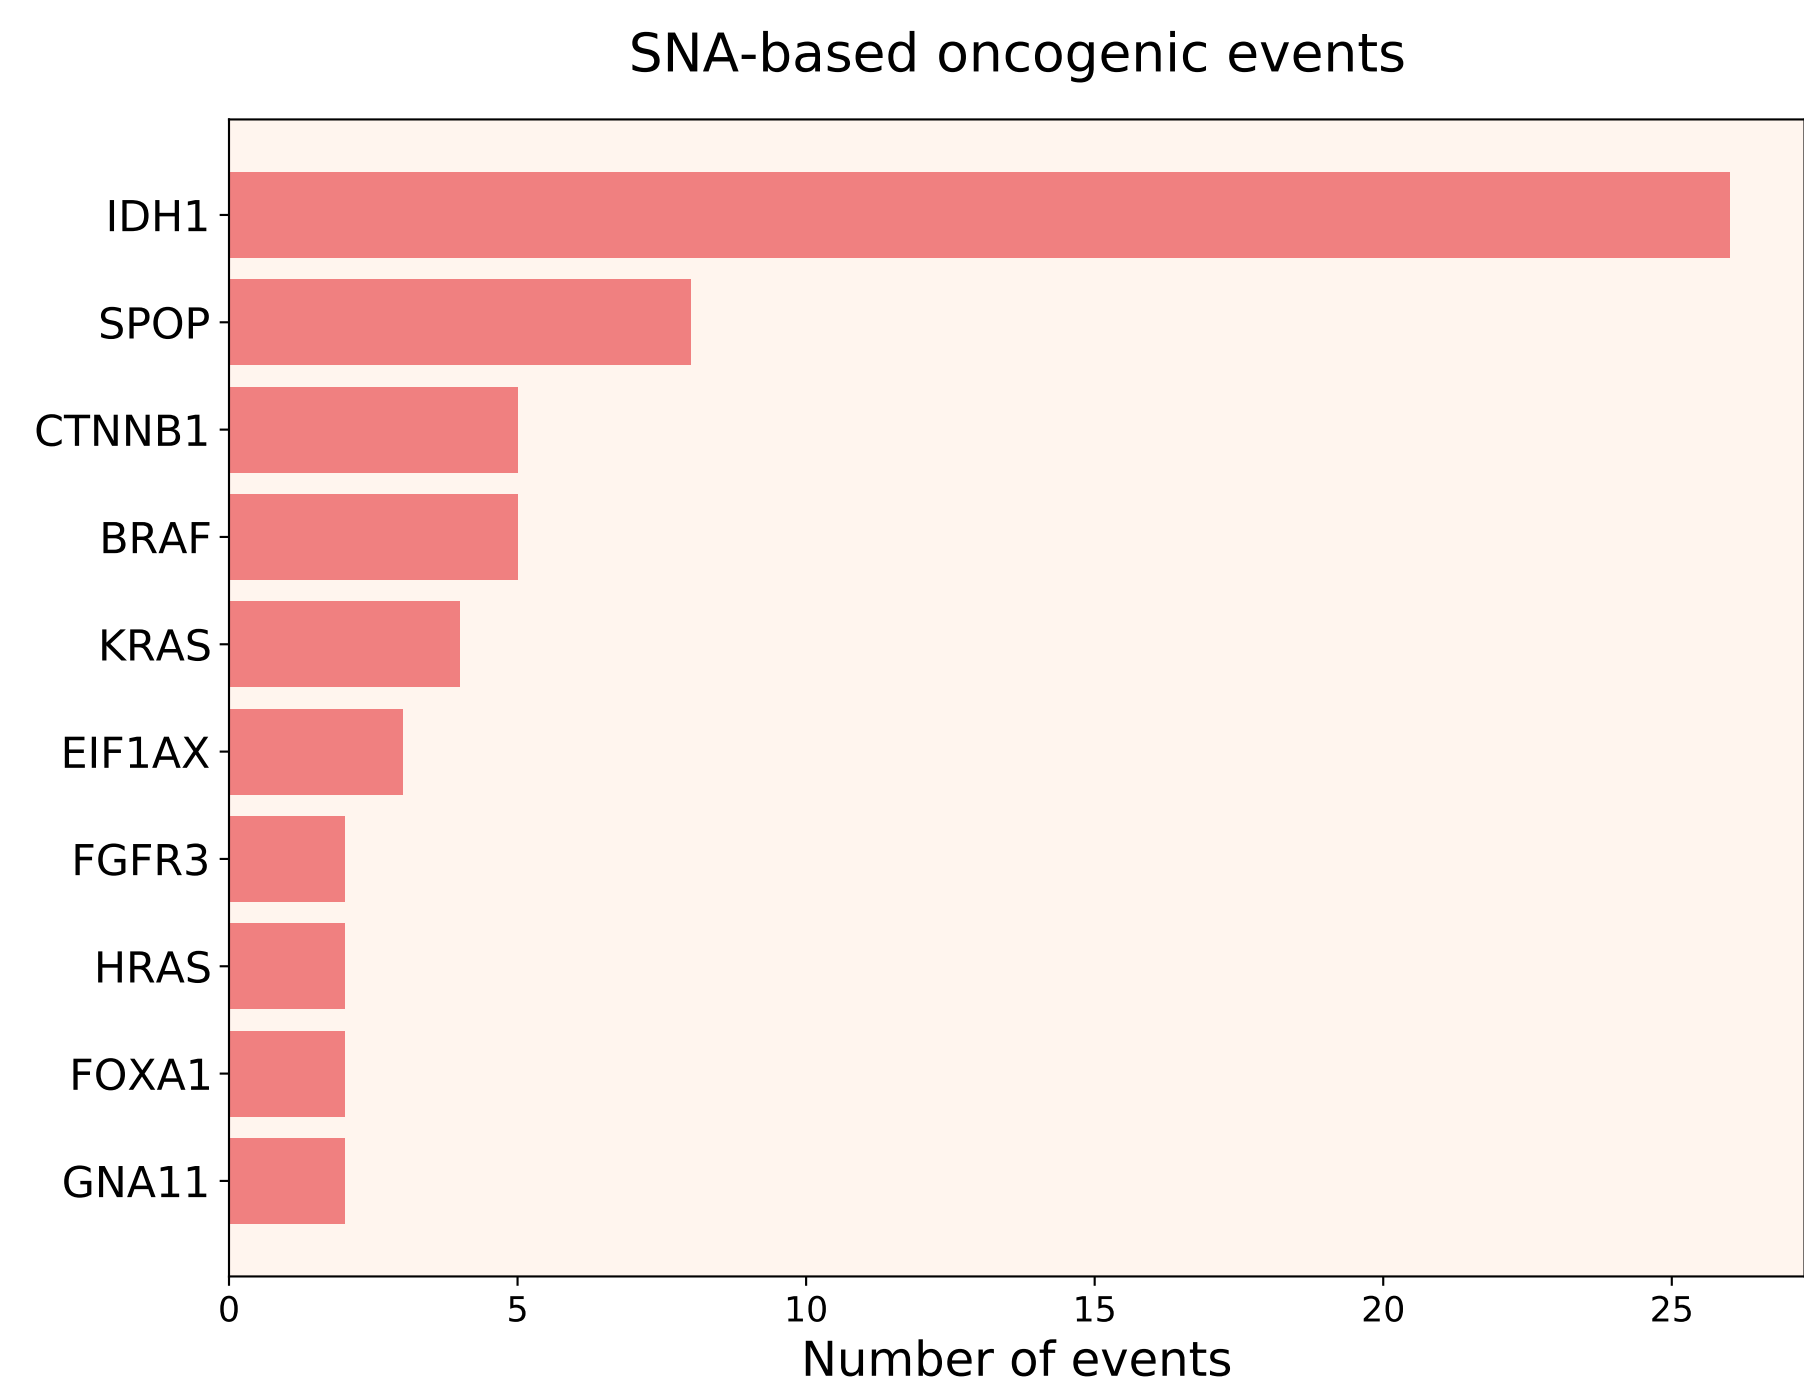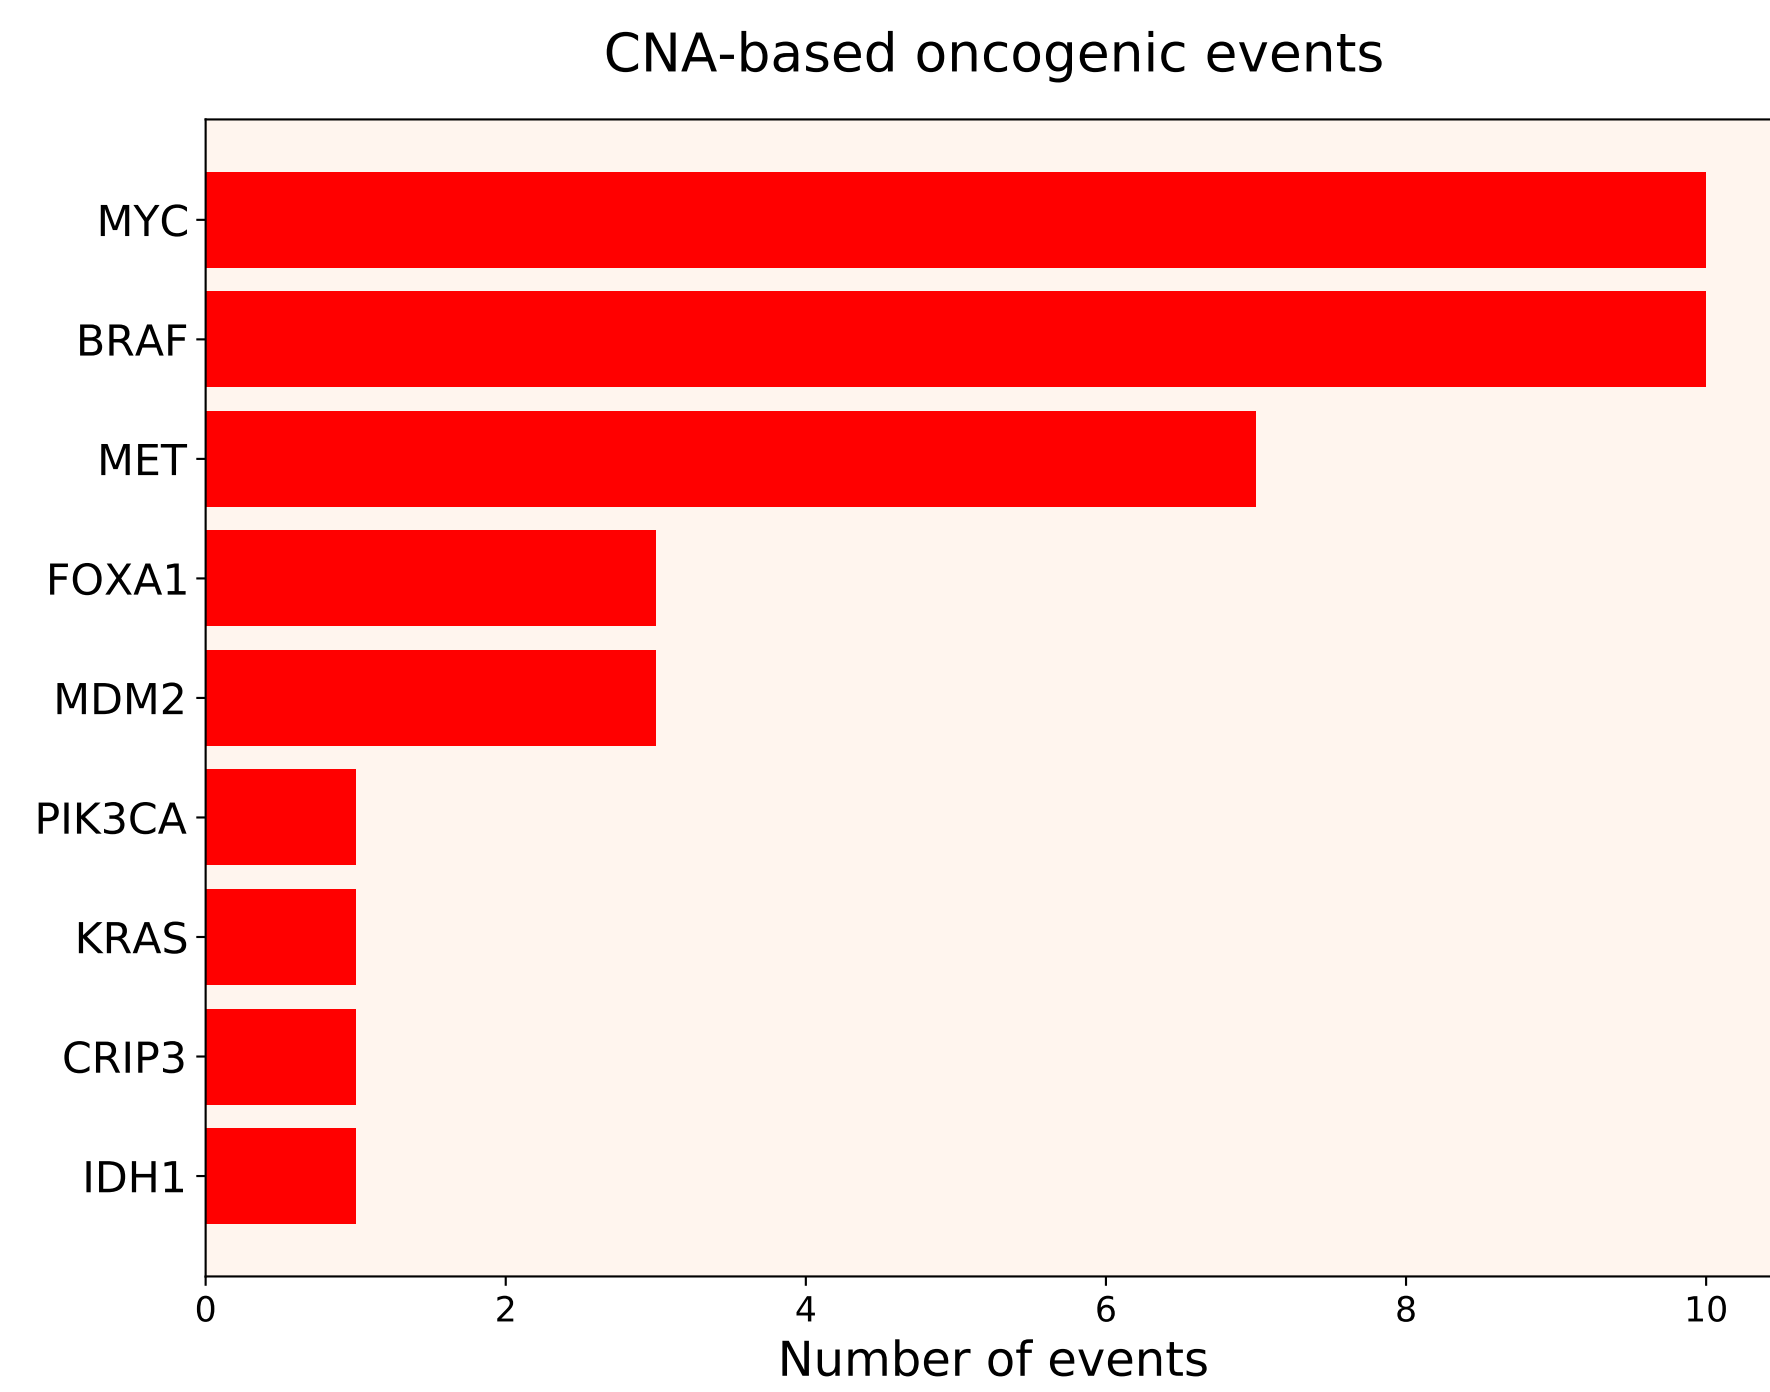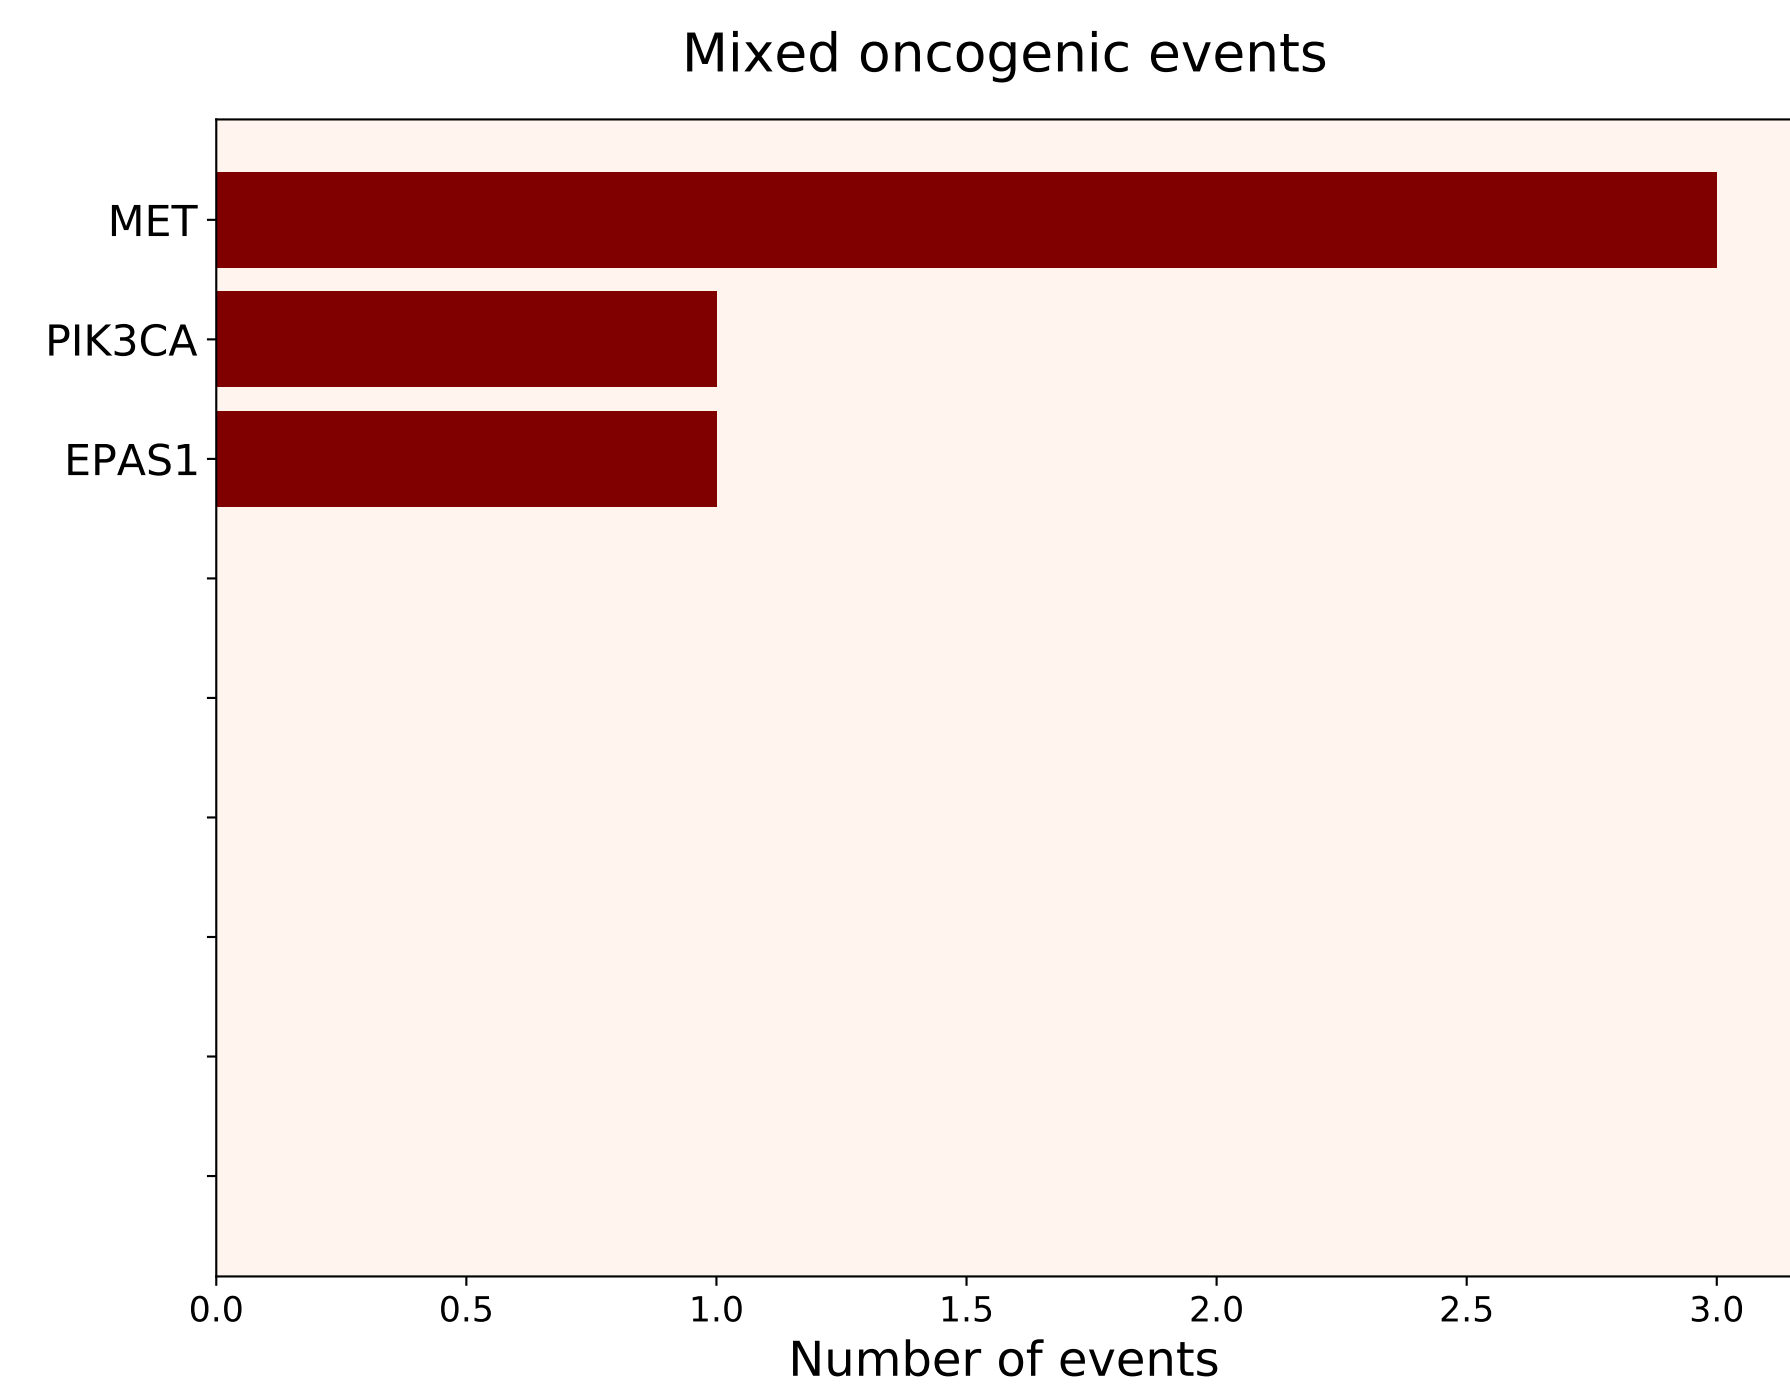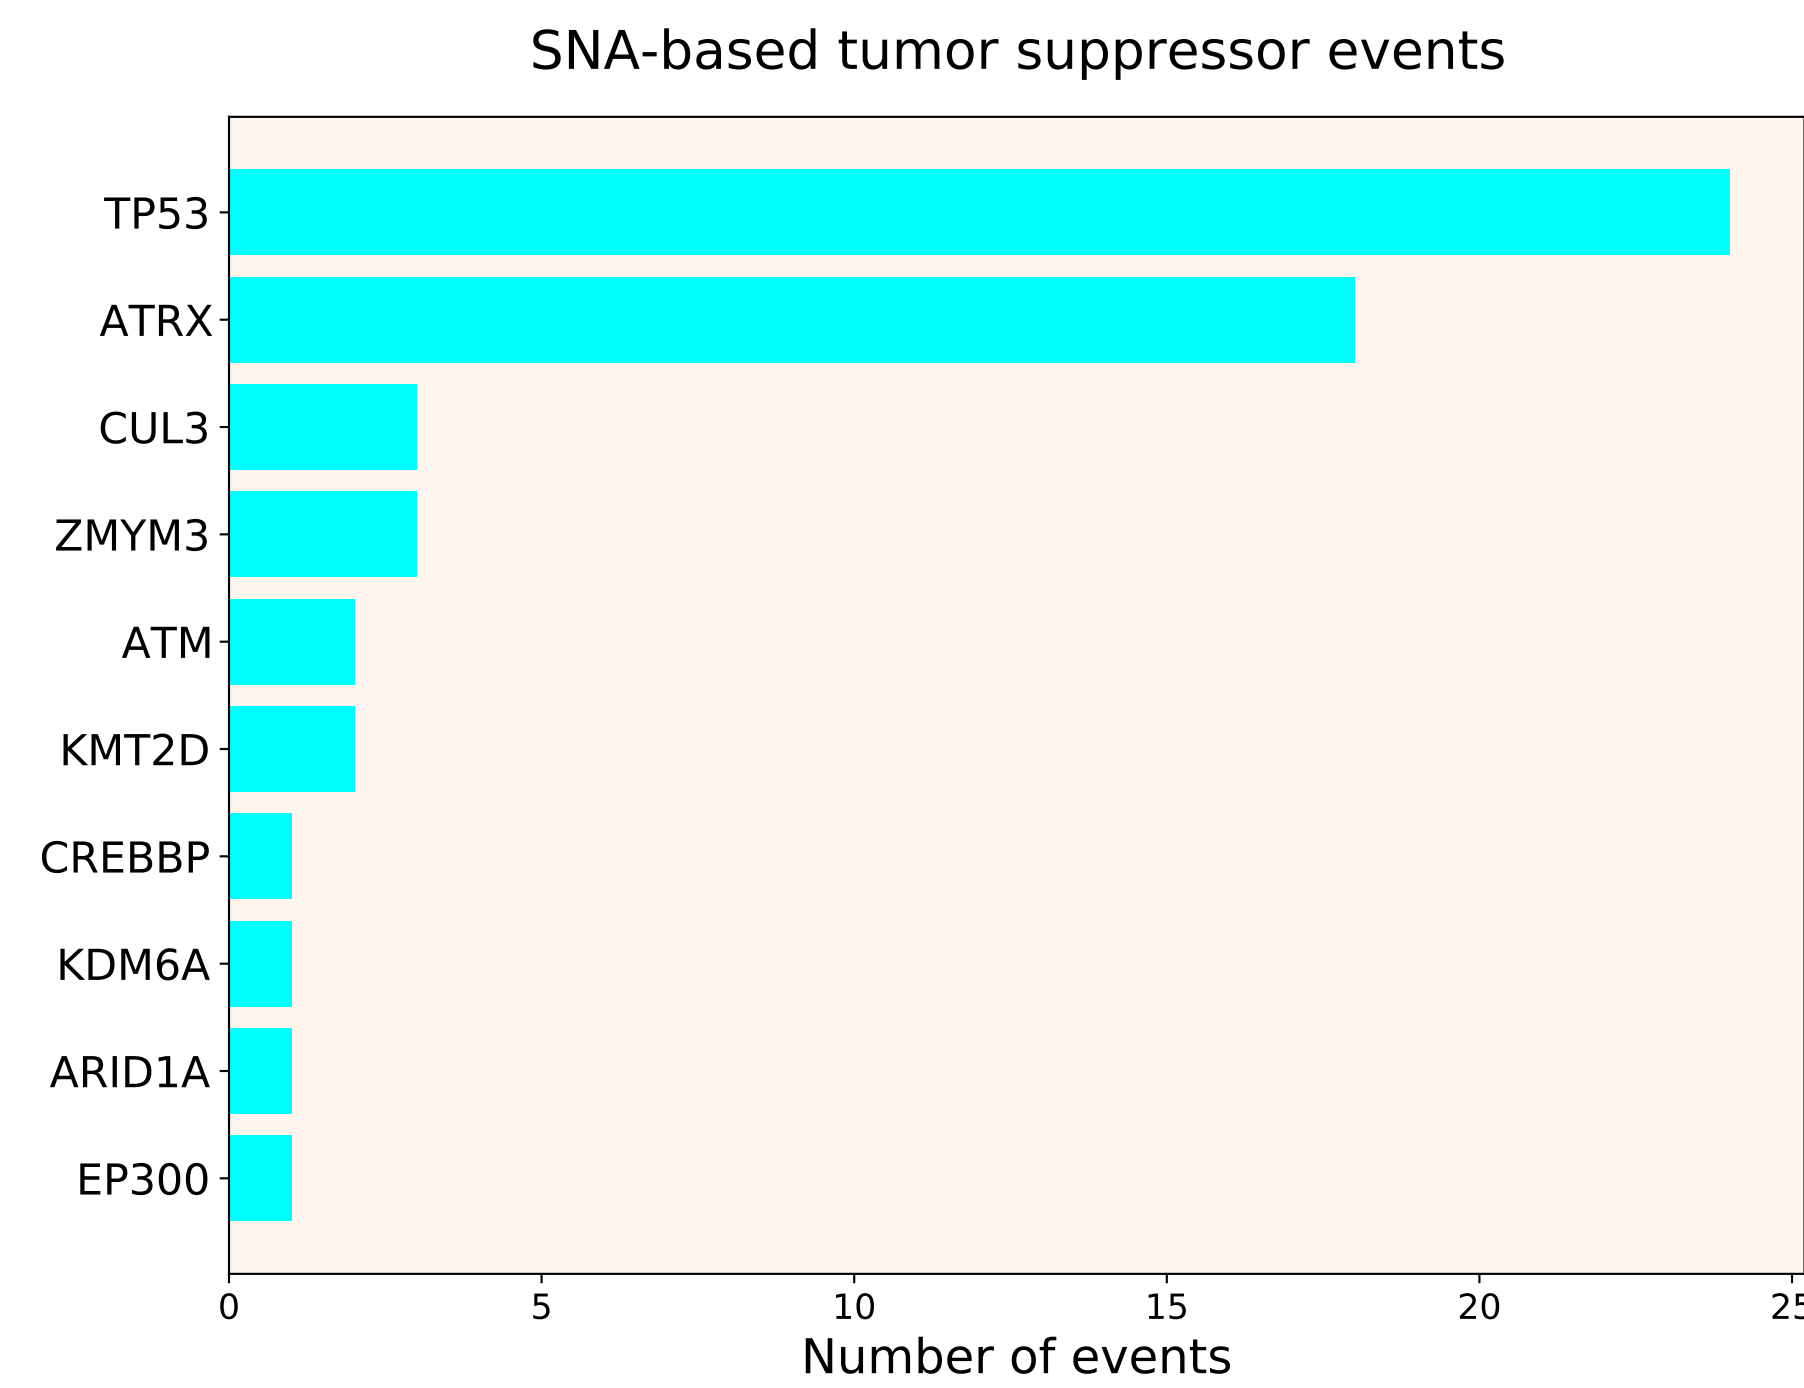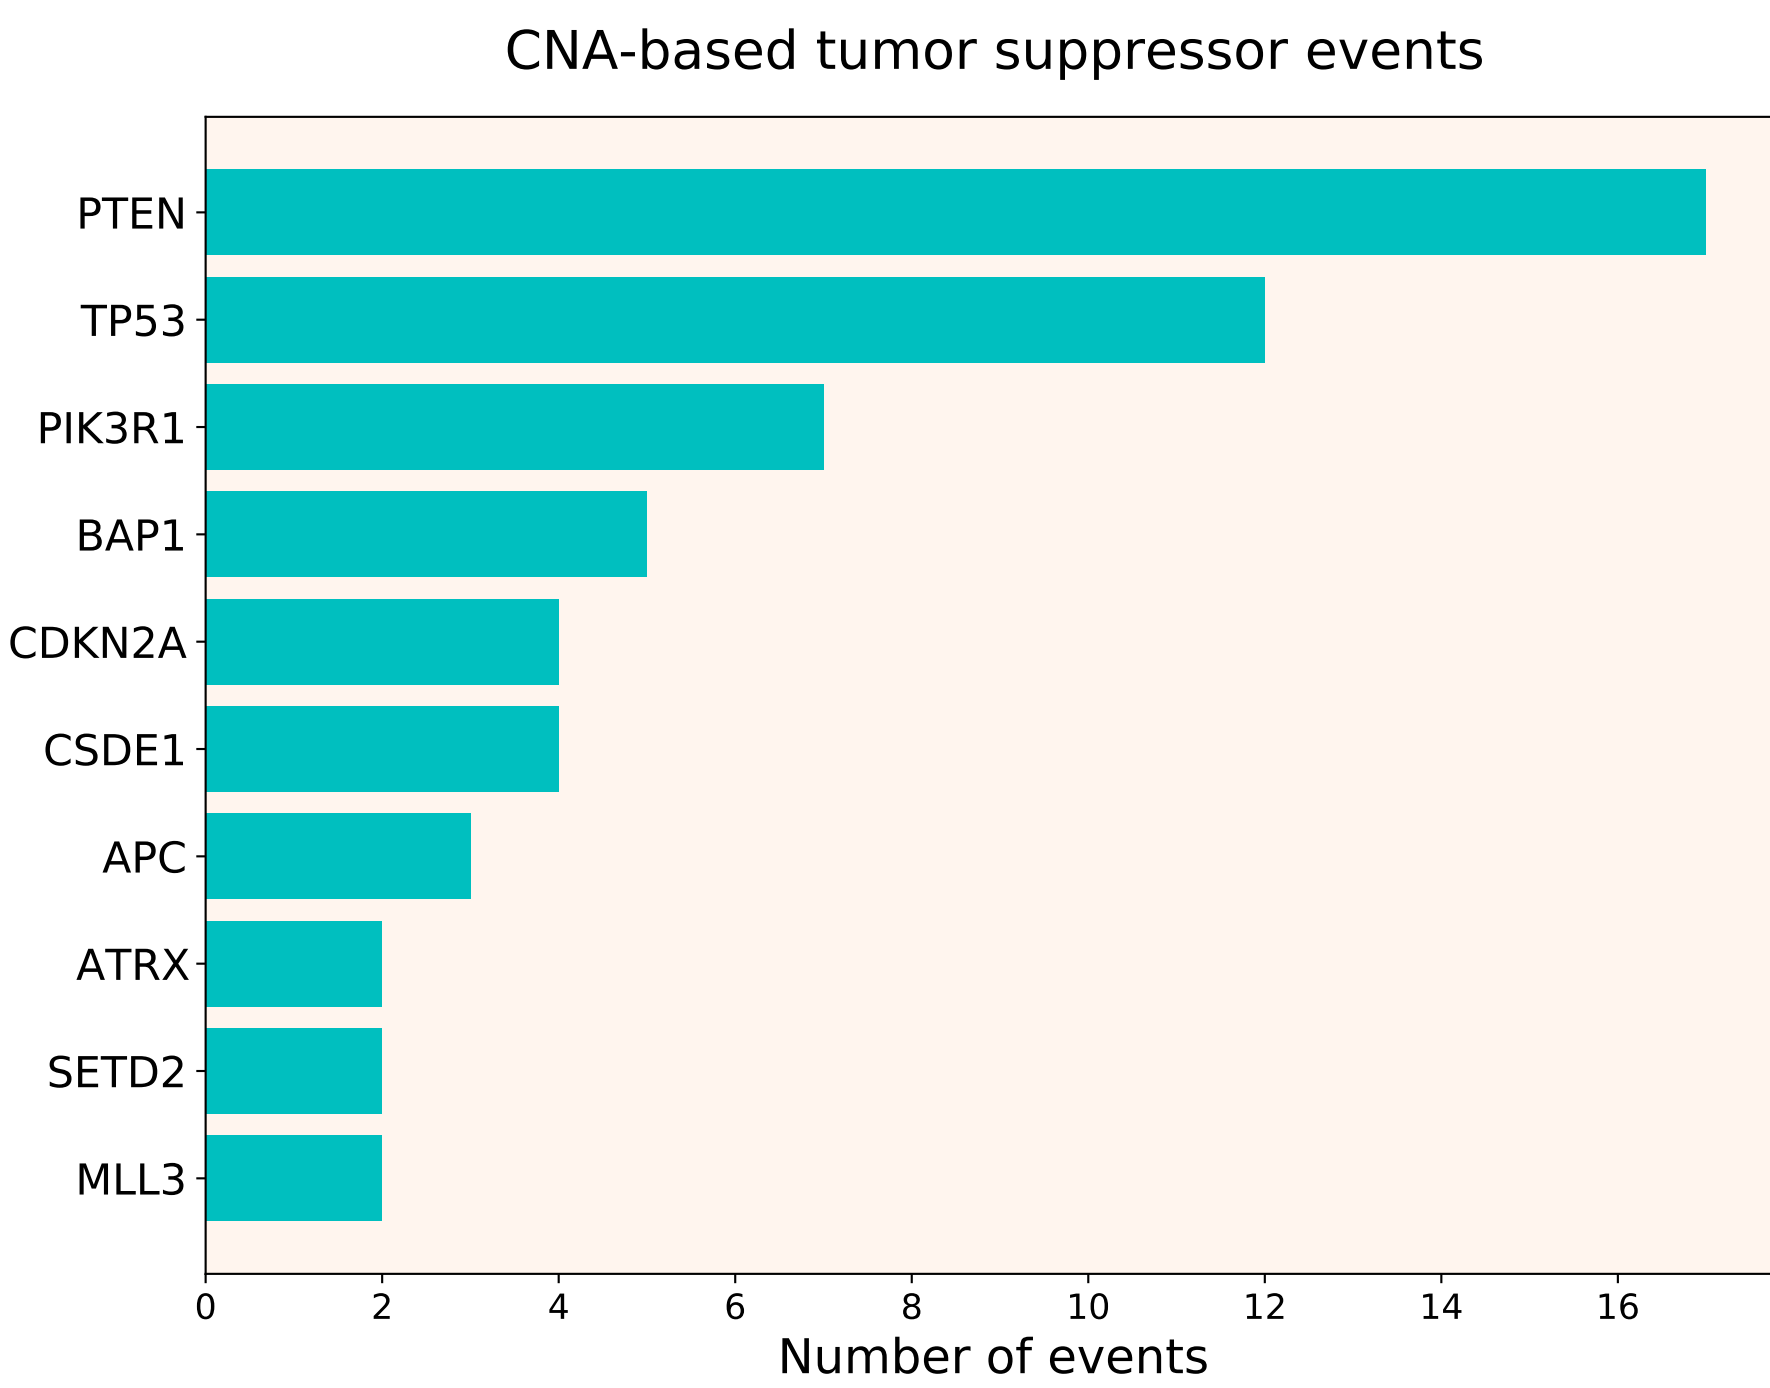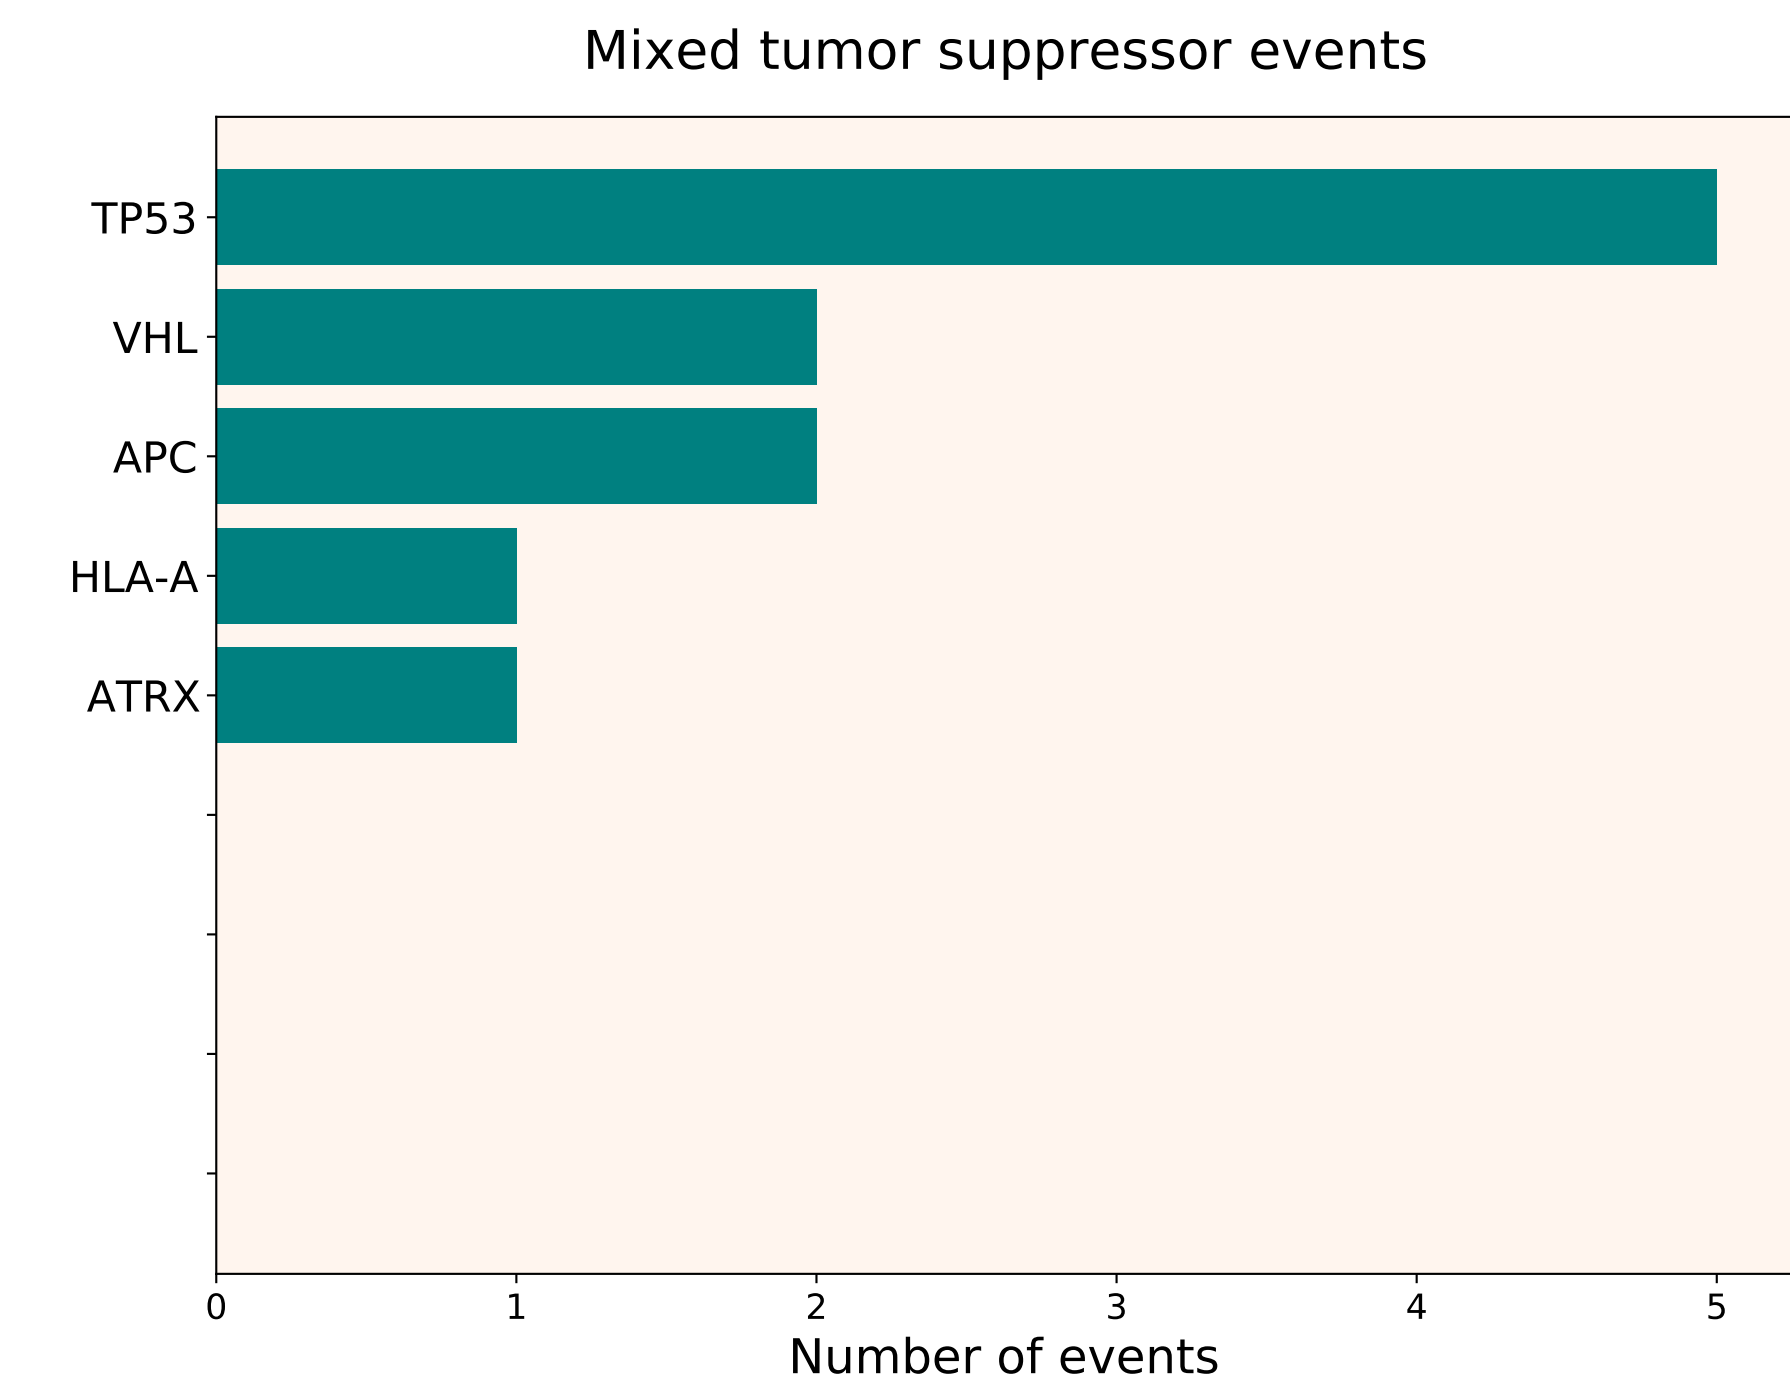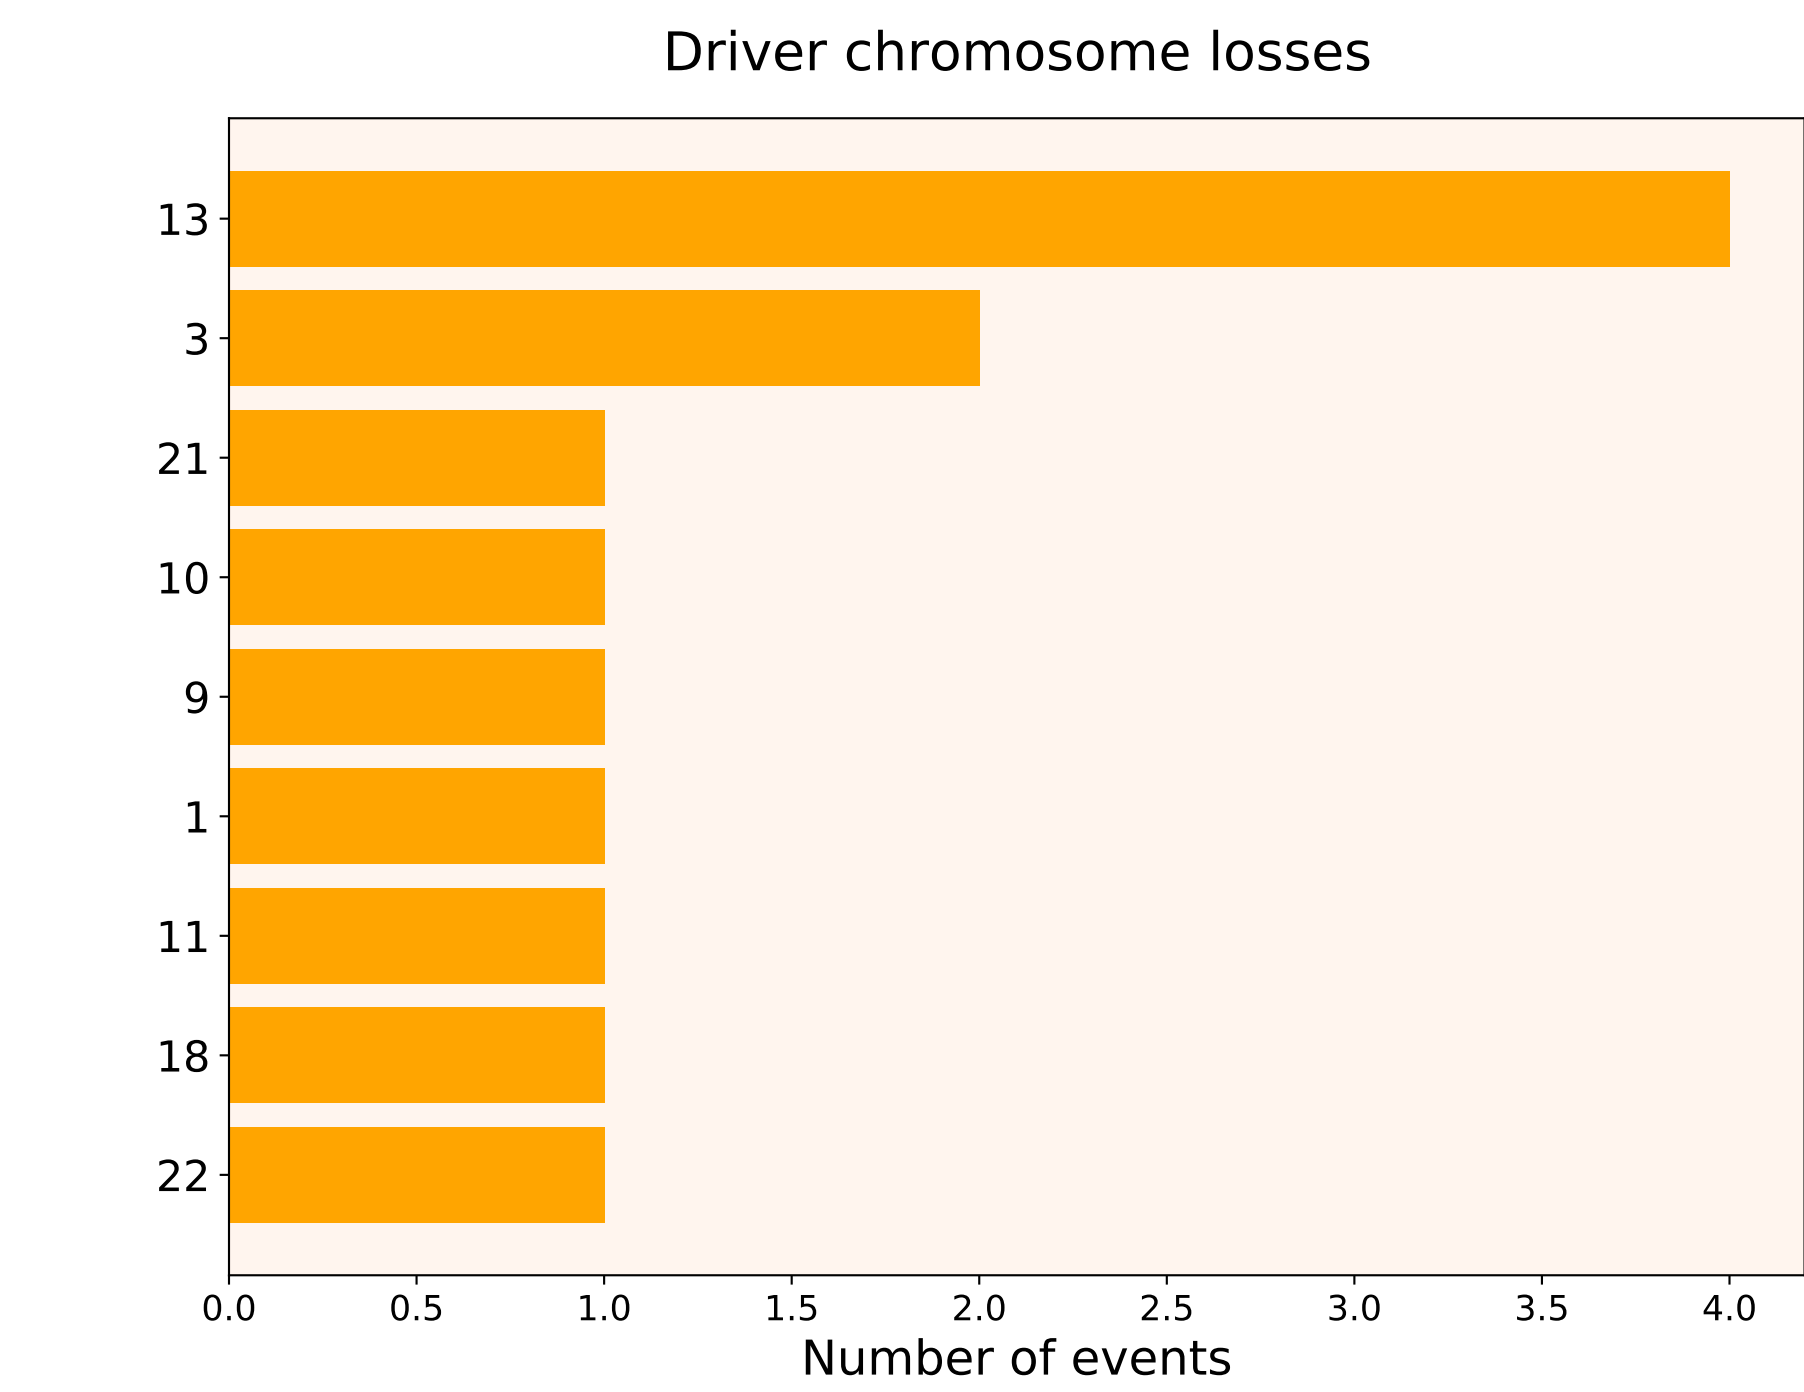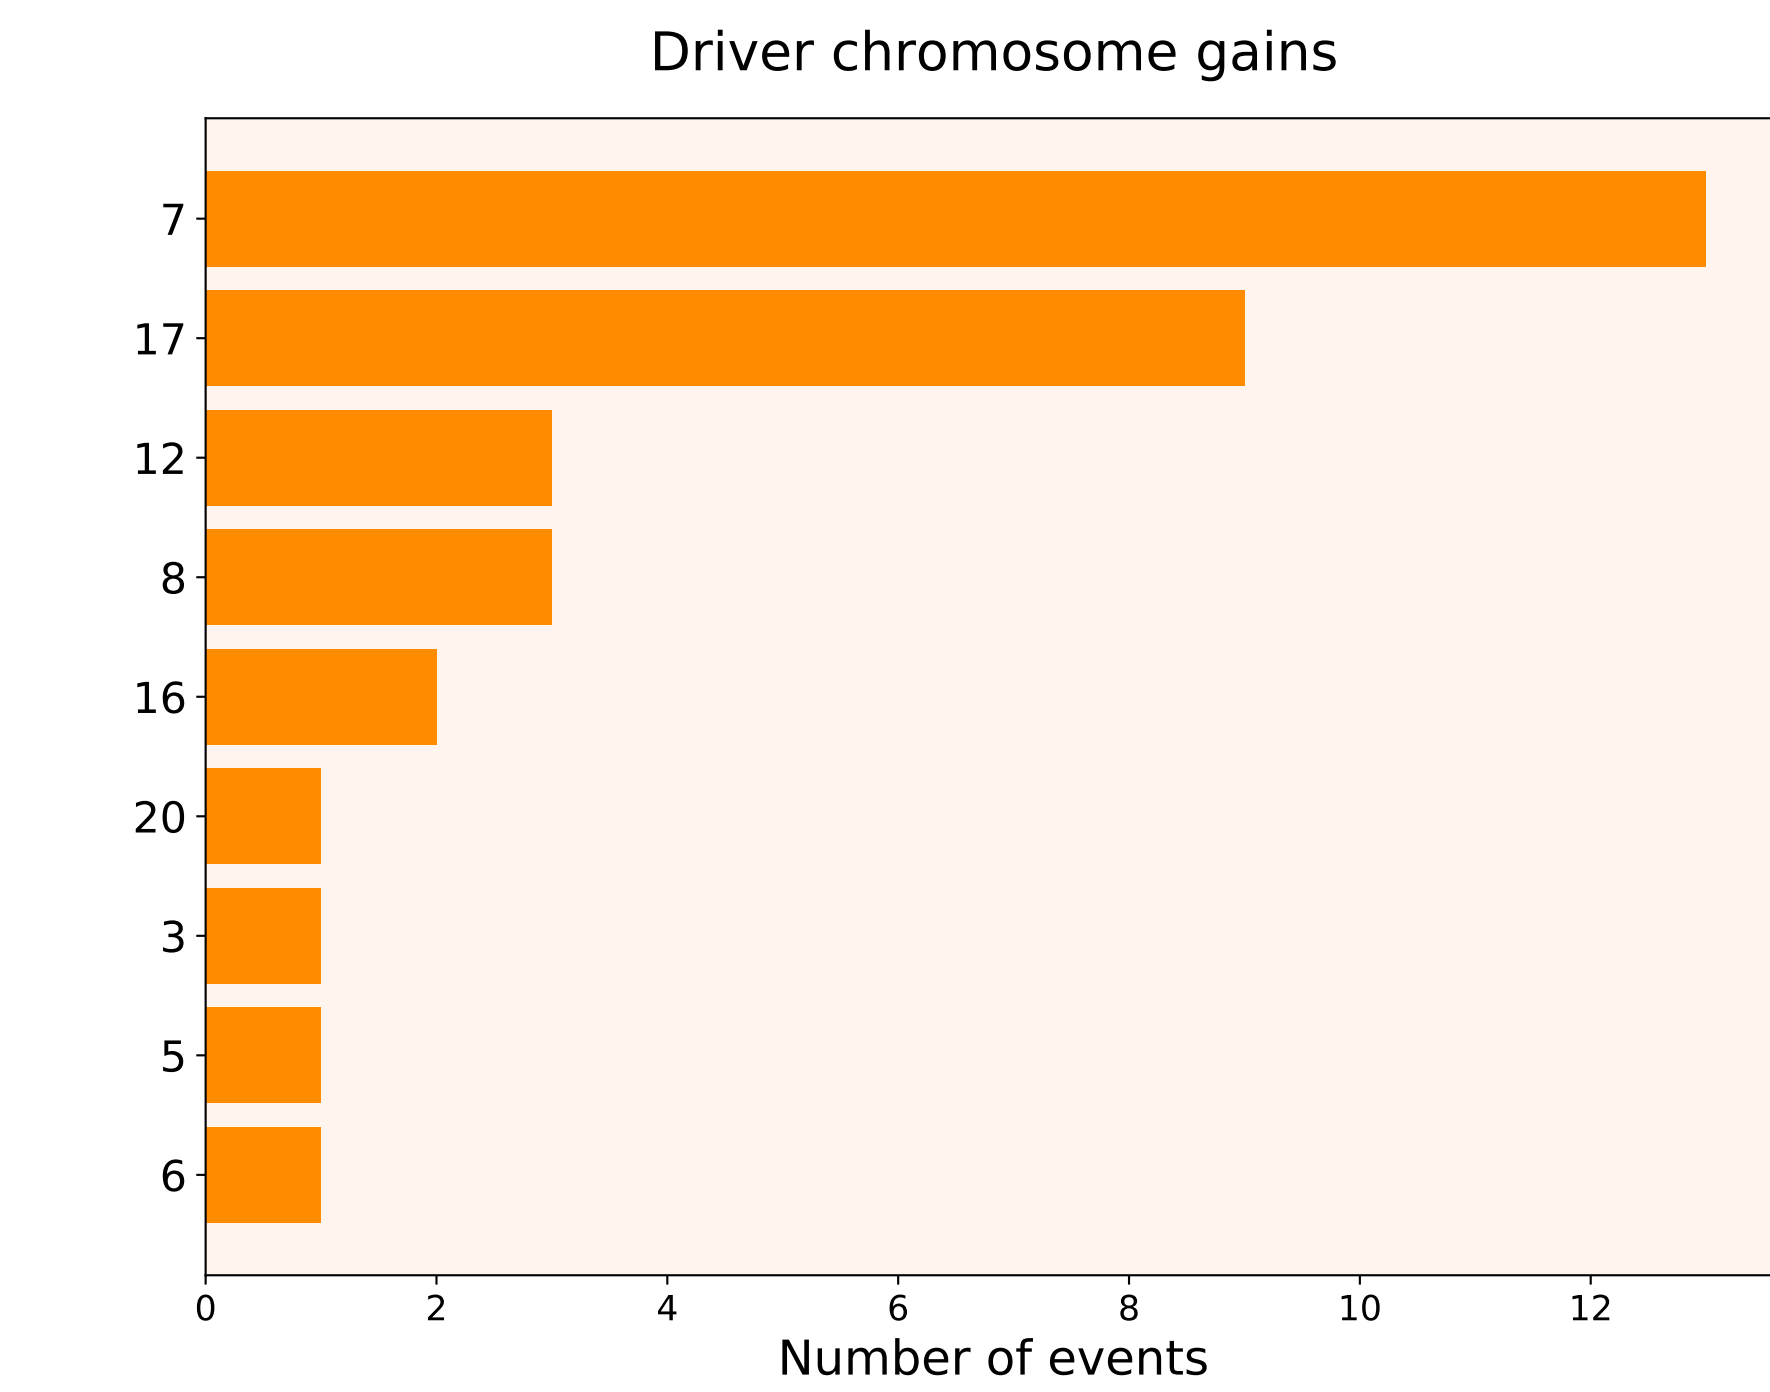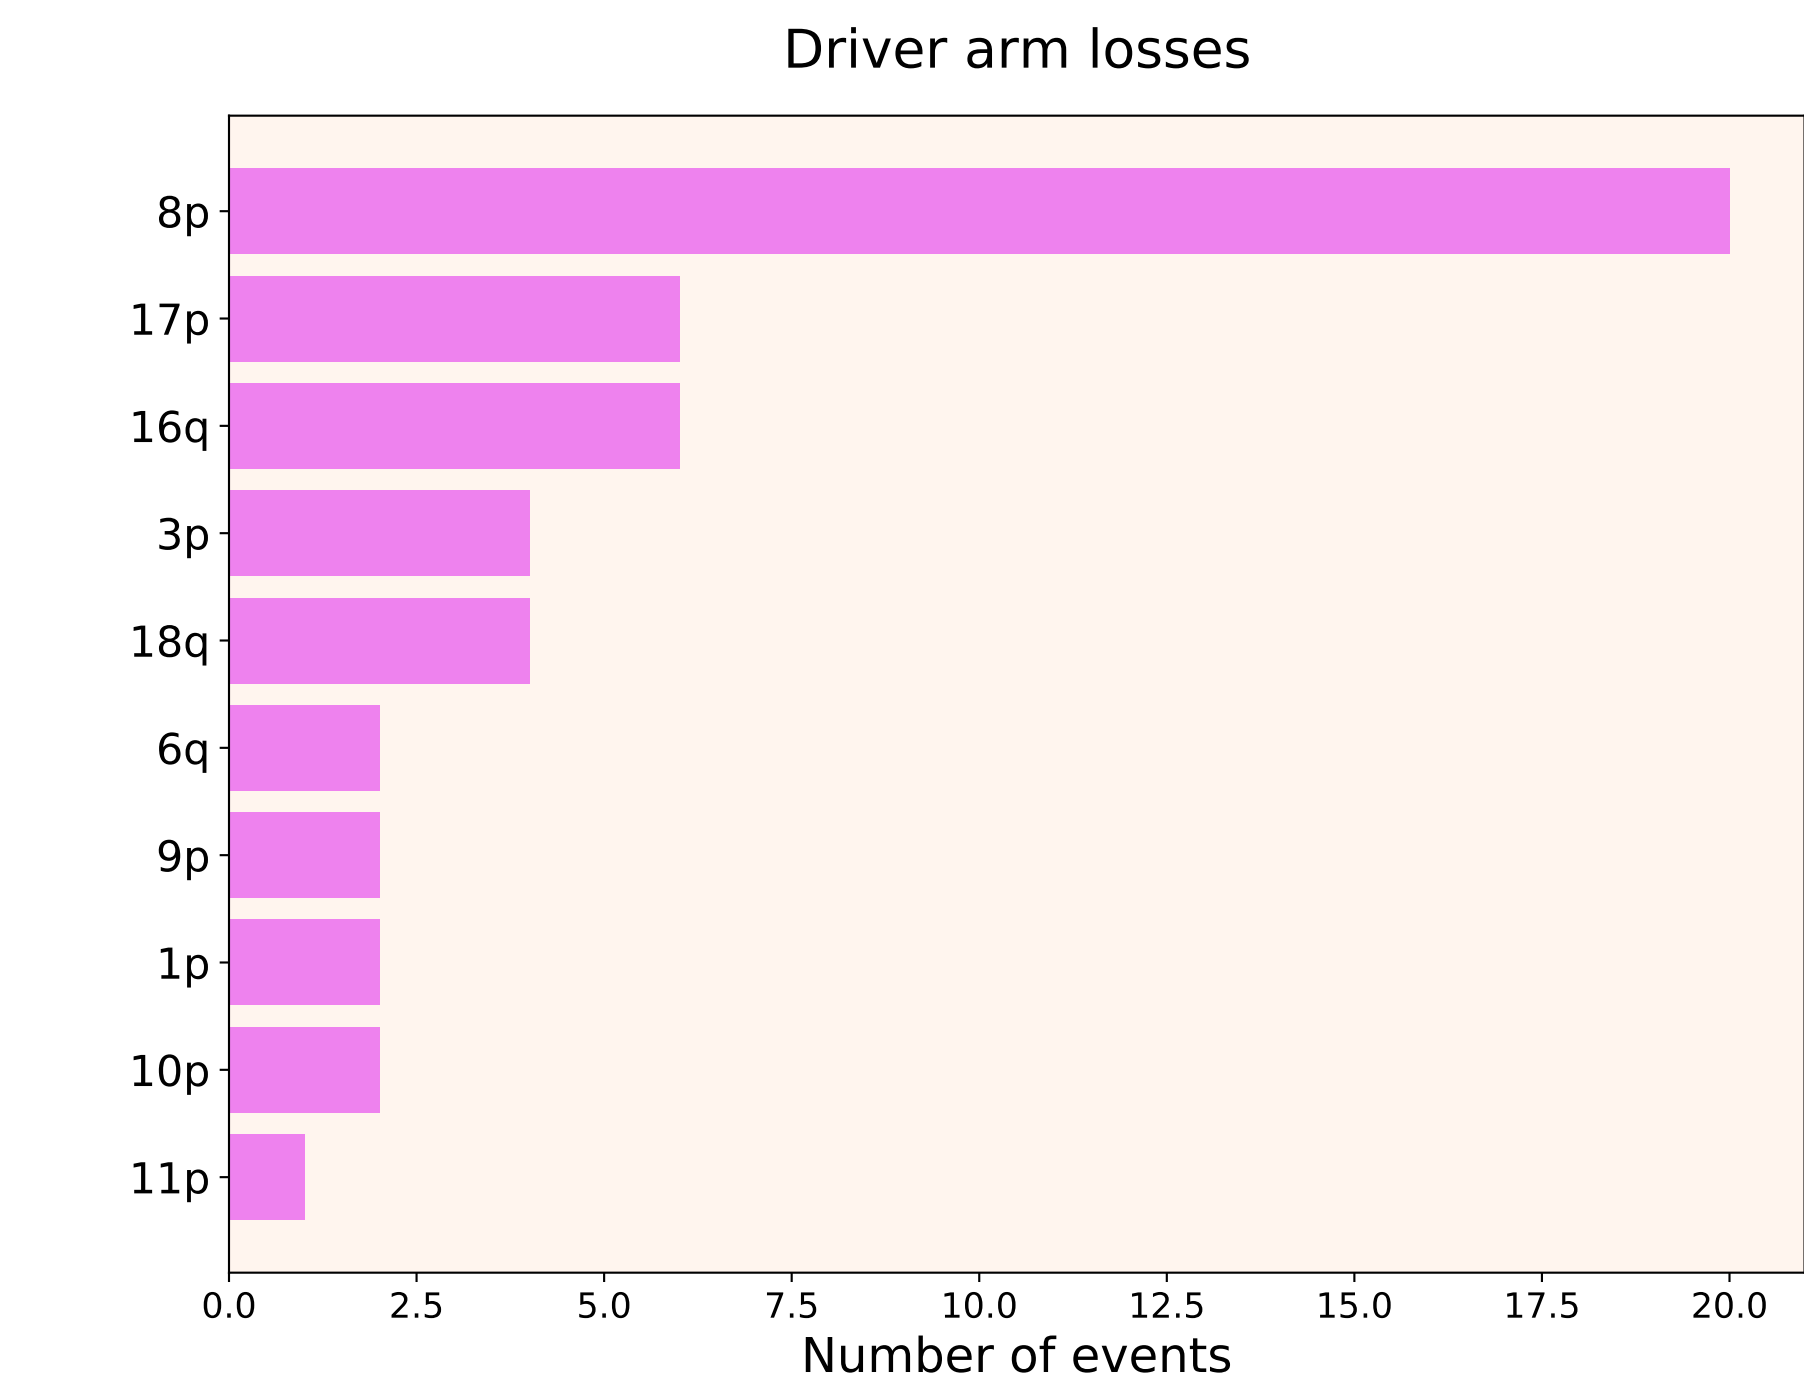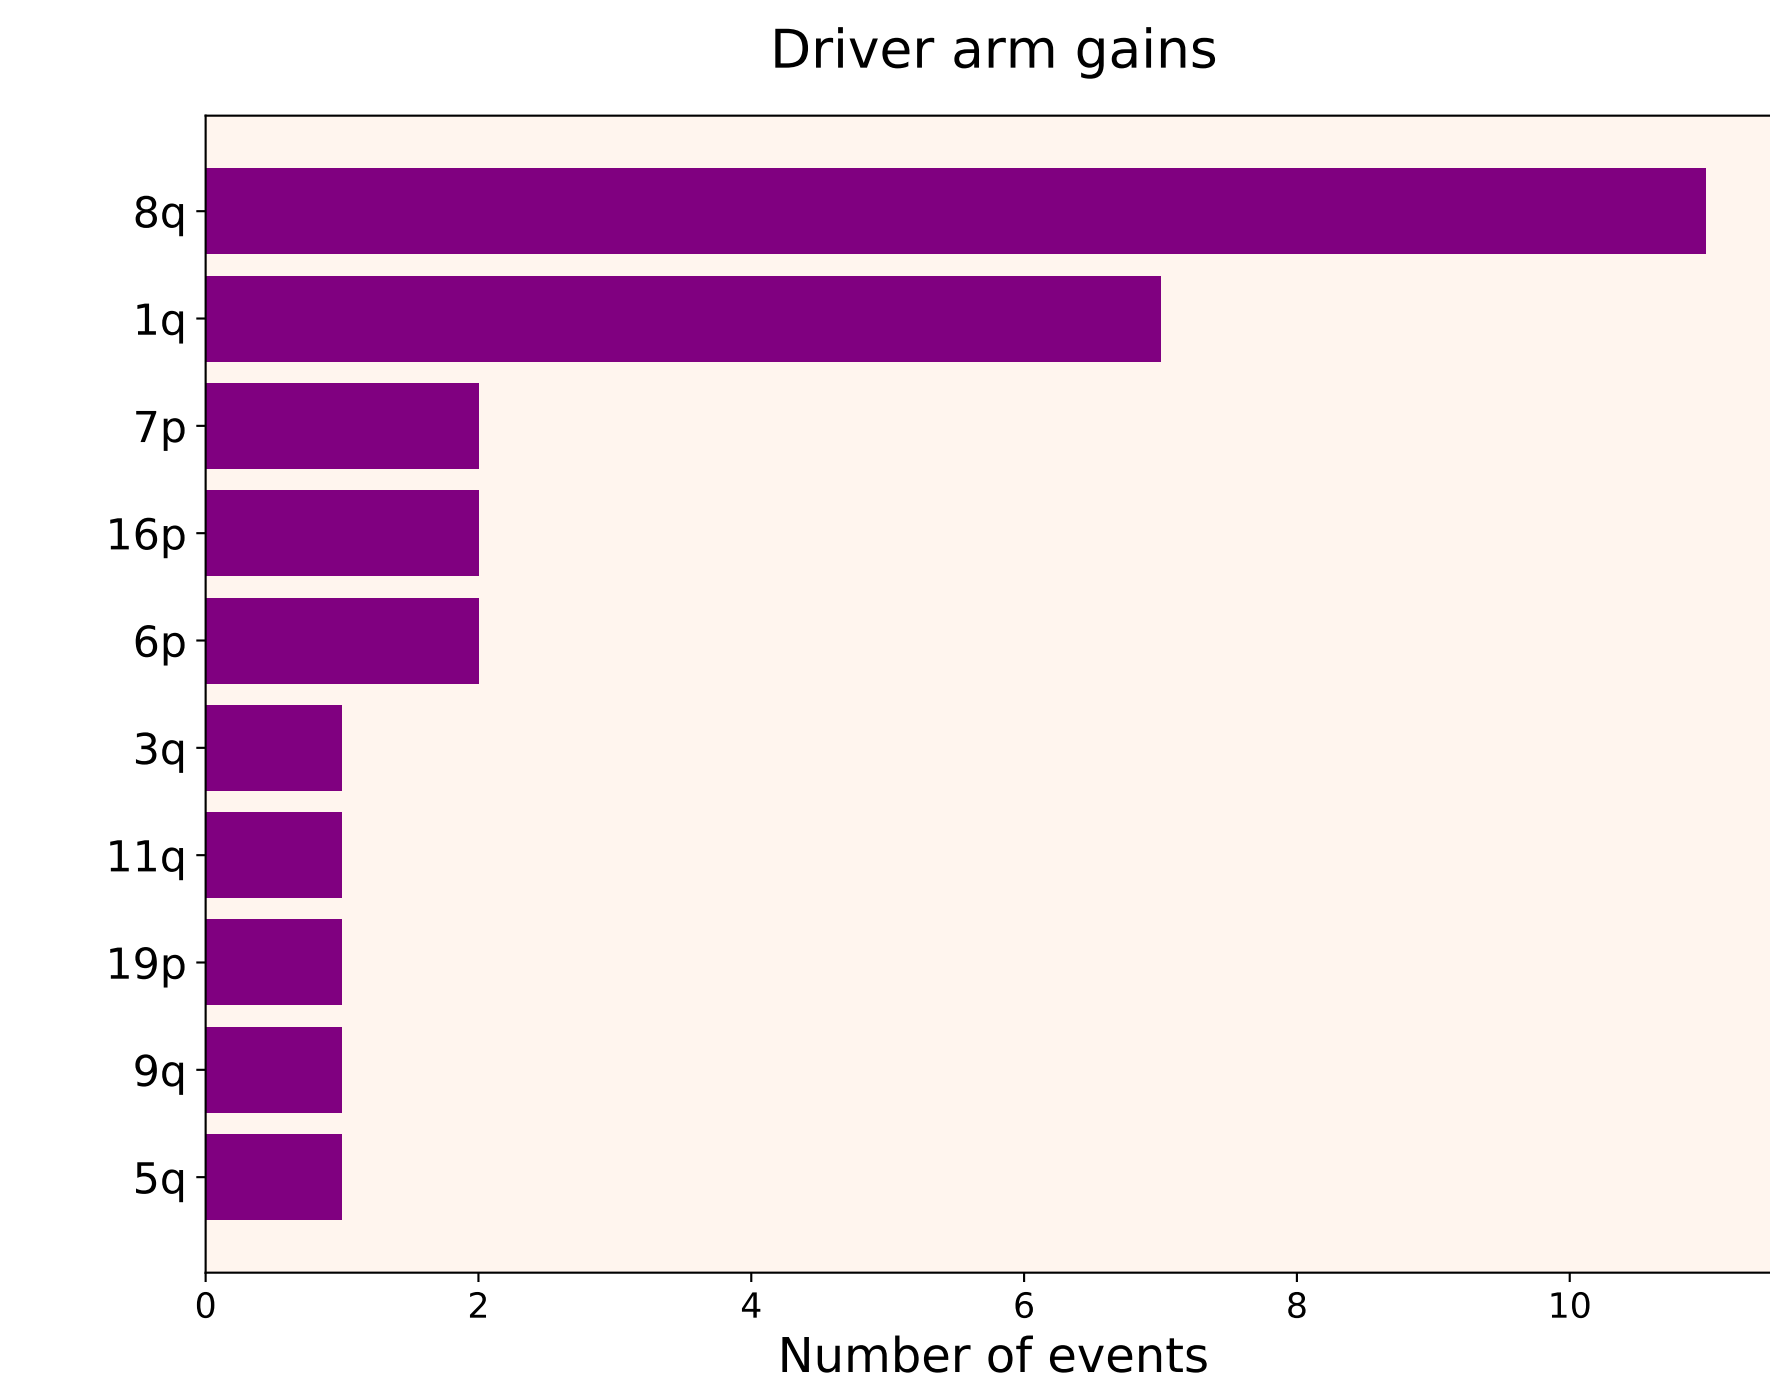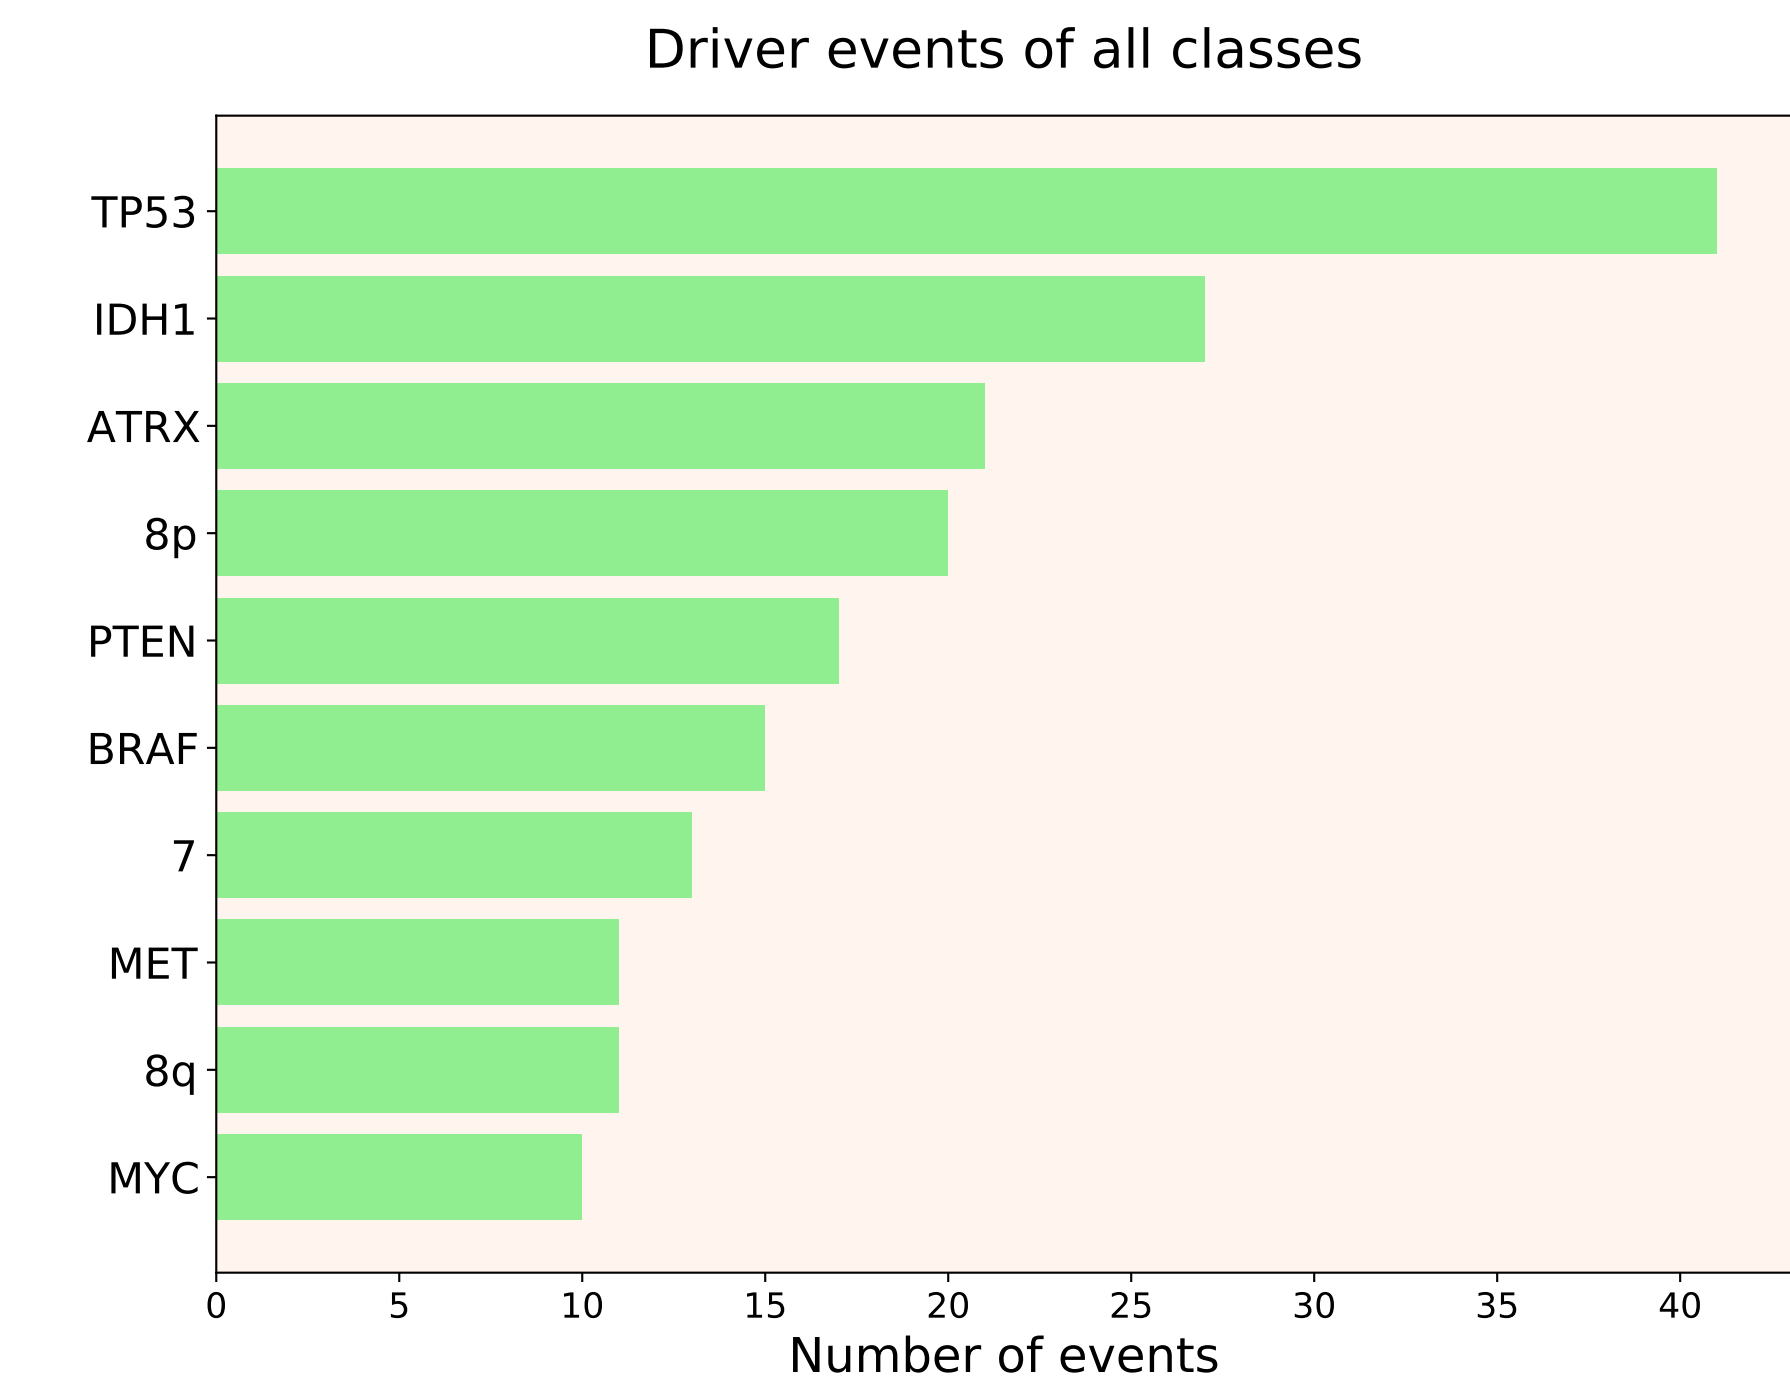

Supplement: Supplemental_Data_S1.zip [file Supplemental_Data_S1.zip]

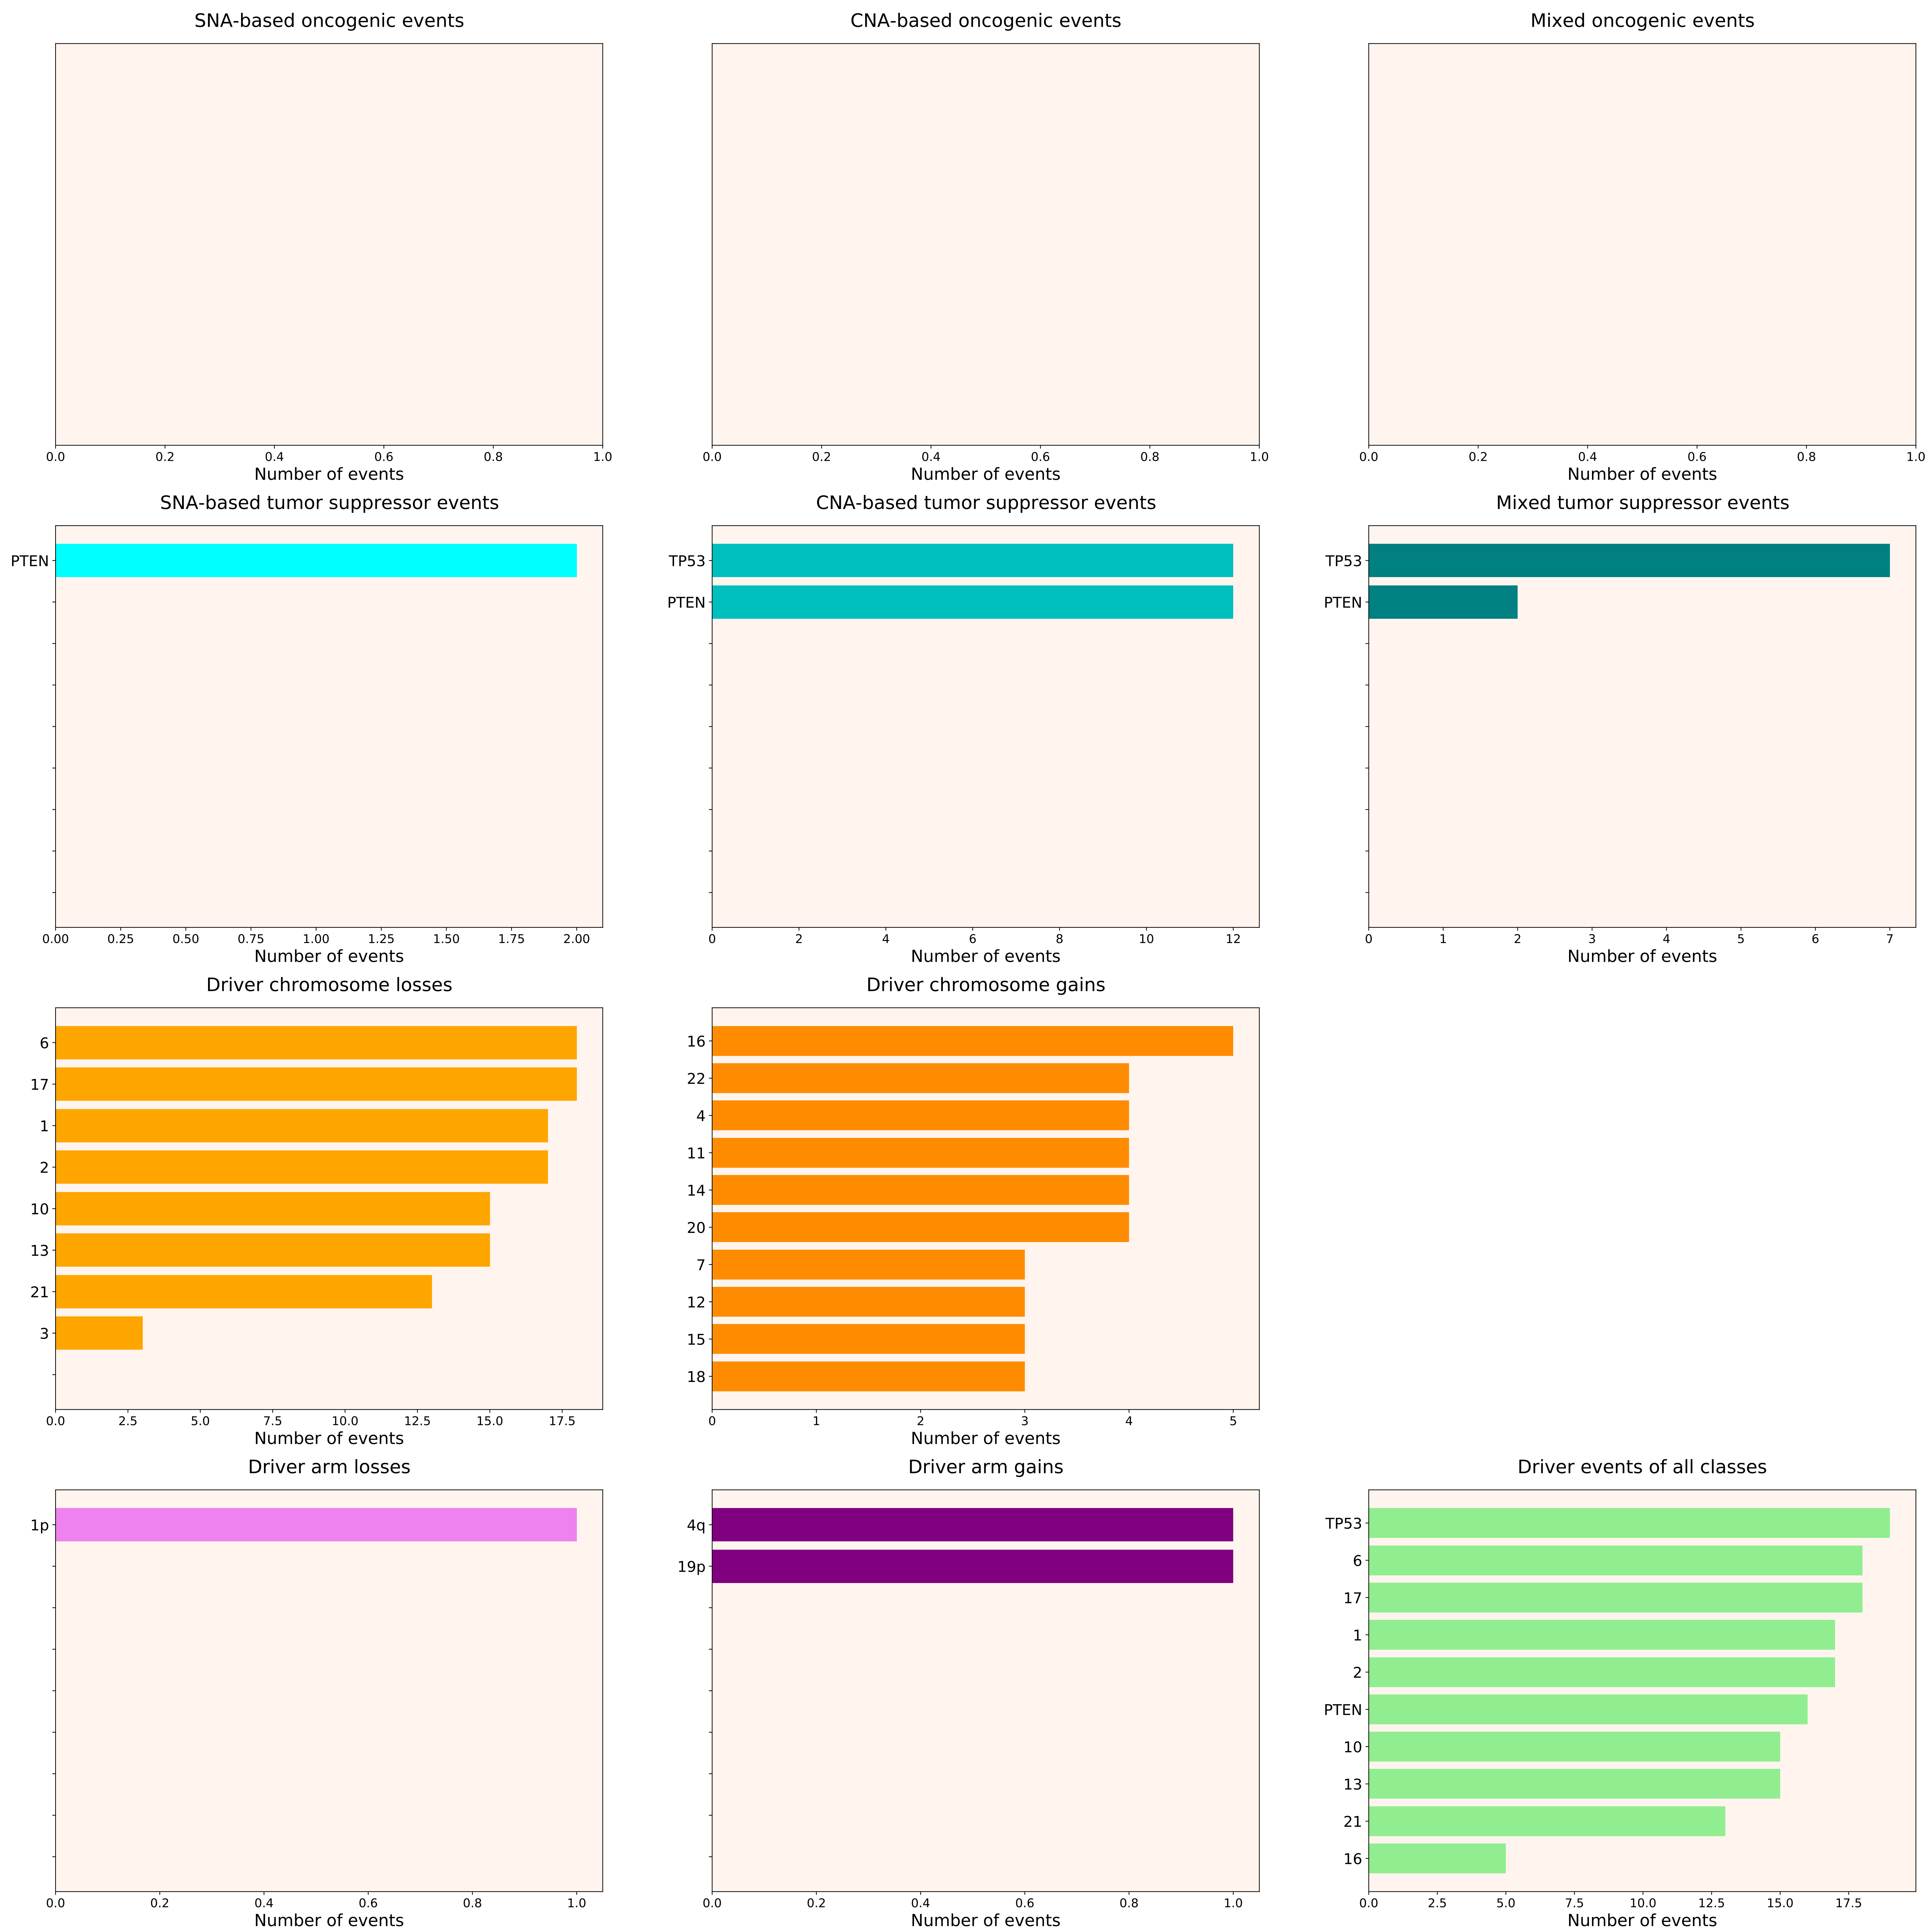

Supplement: Supplemental_Data_S1.zip [file Supplemental_Data_S1.zip]

ACC

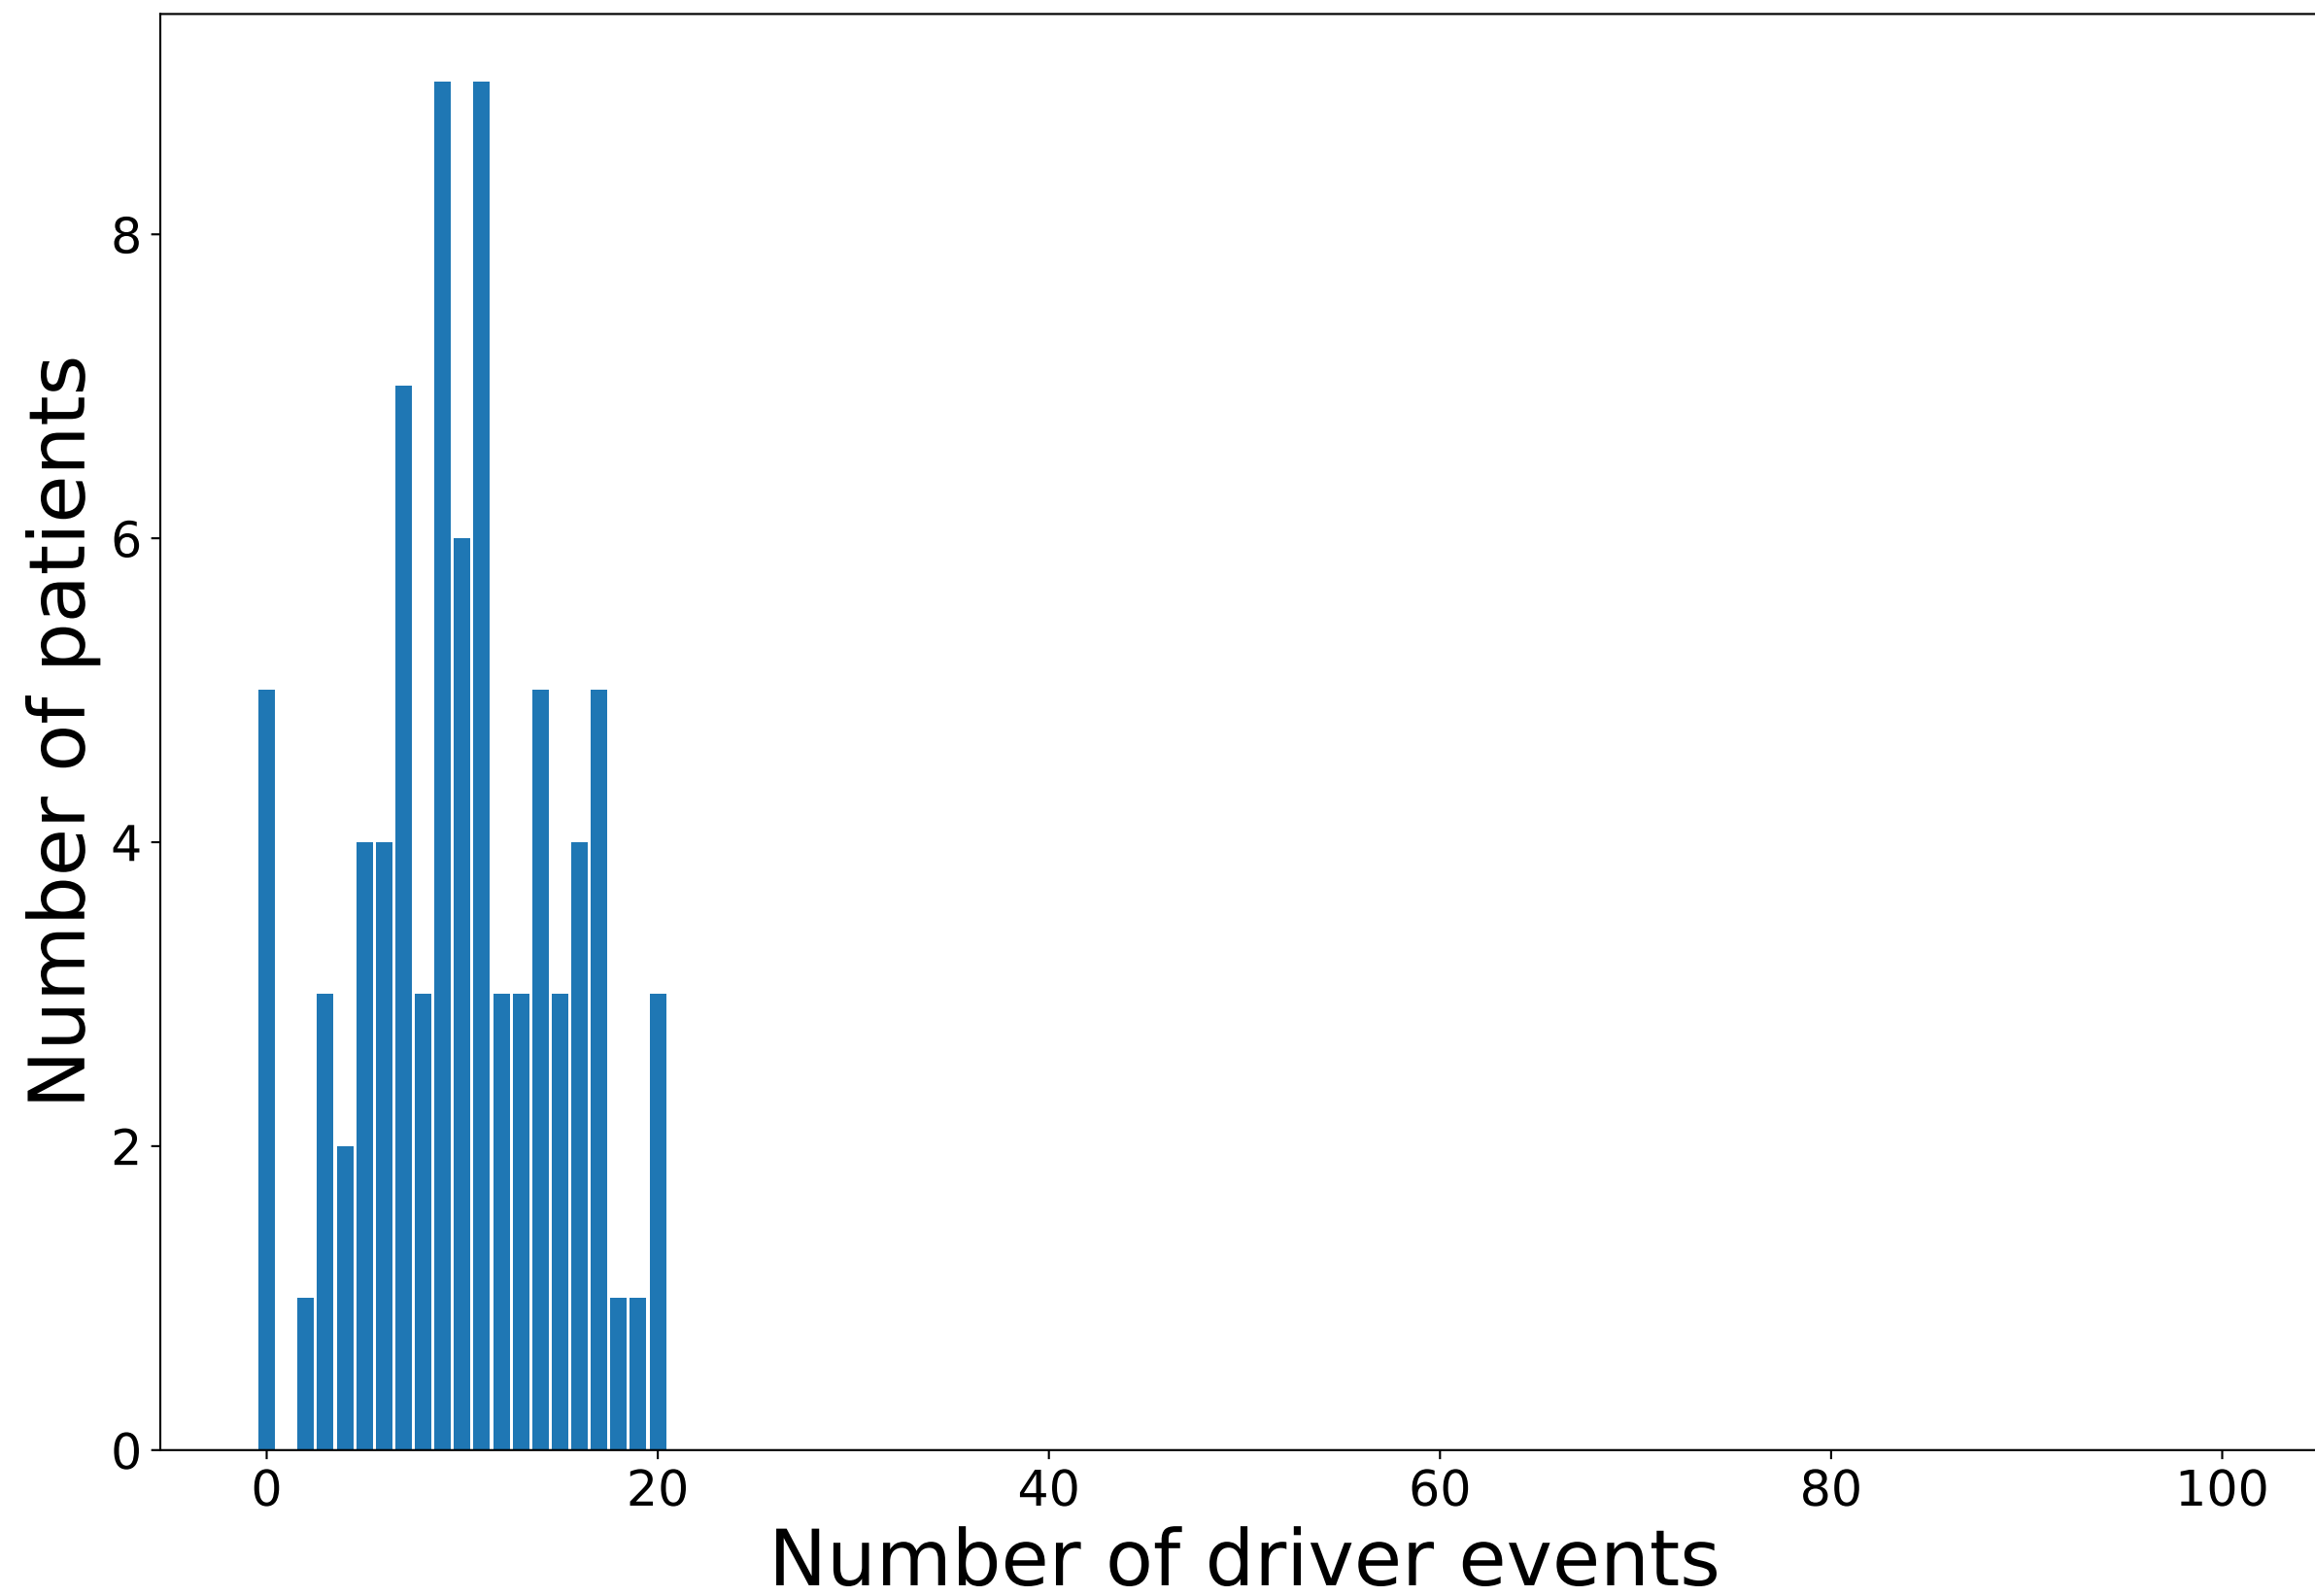

Supplement: Supplemental_Data_S1.zip [file Supplemental_Data_S1.zip]

# KIRP

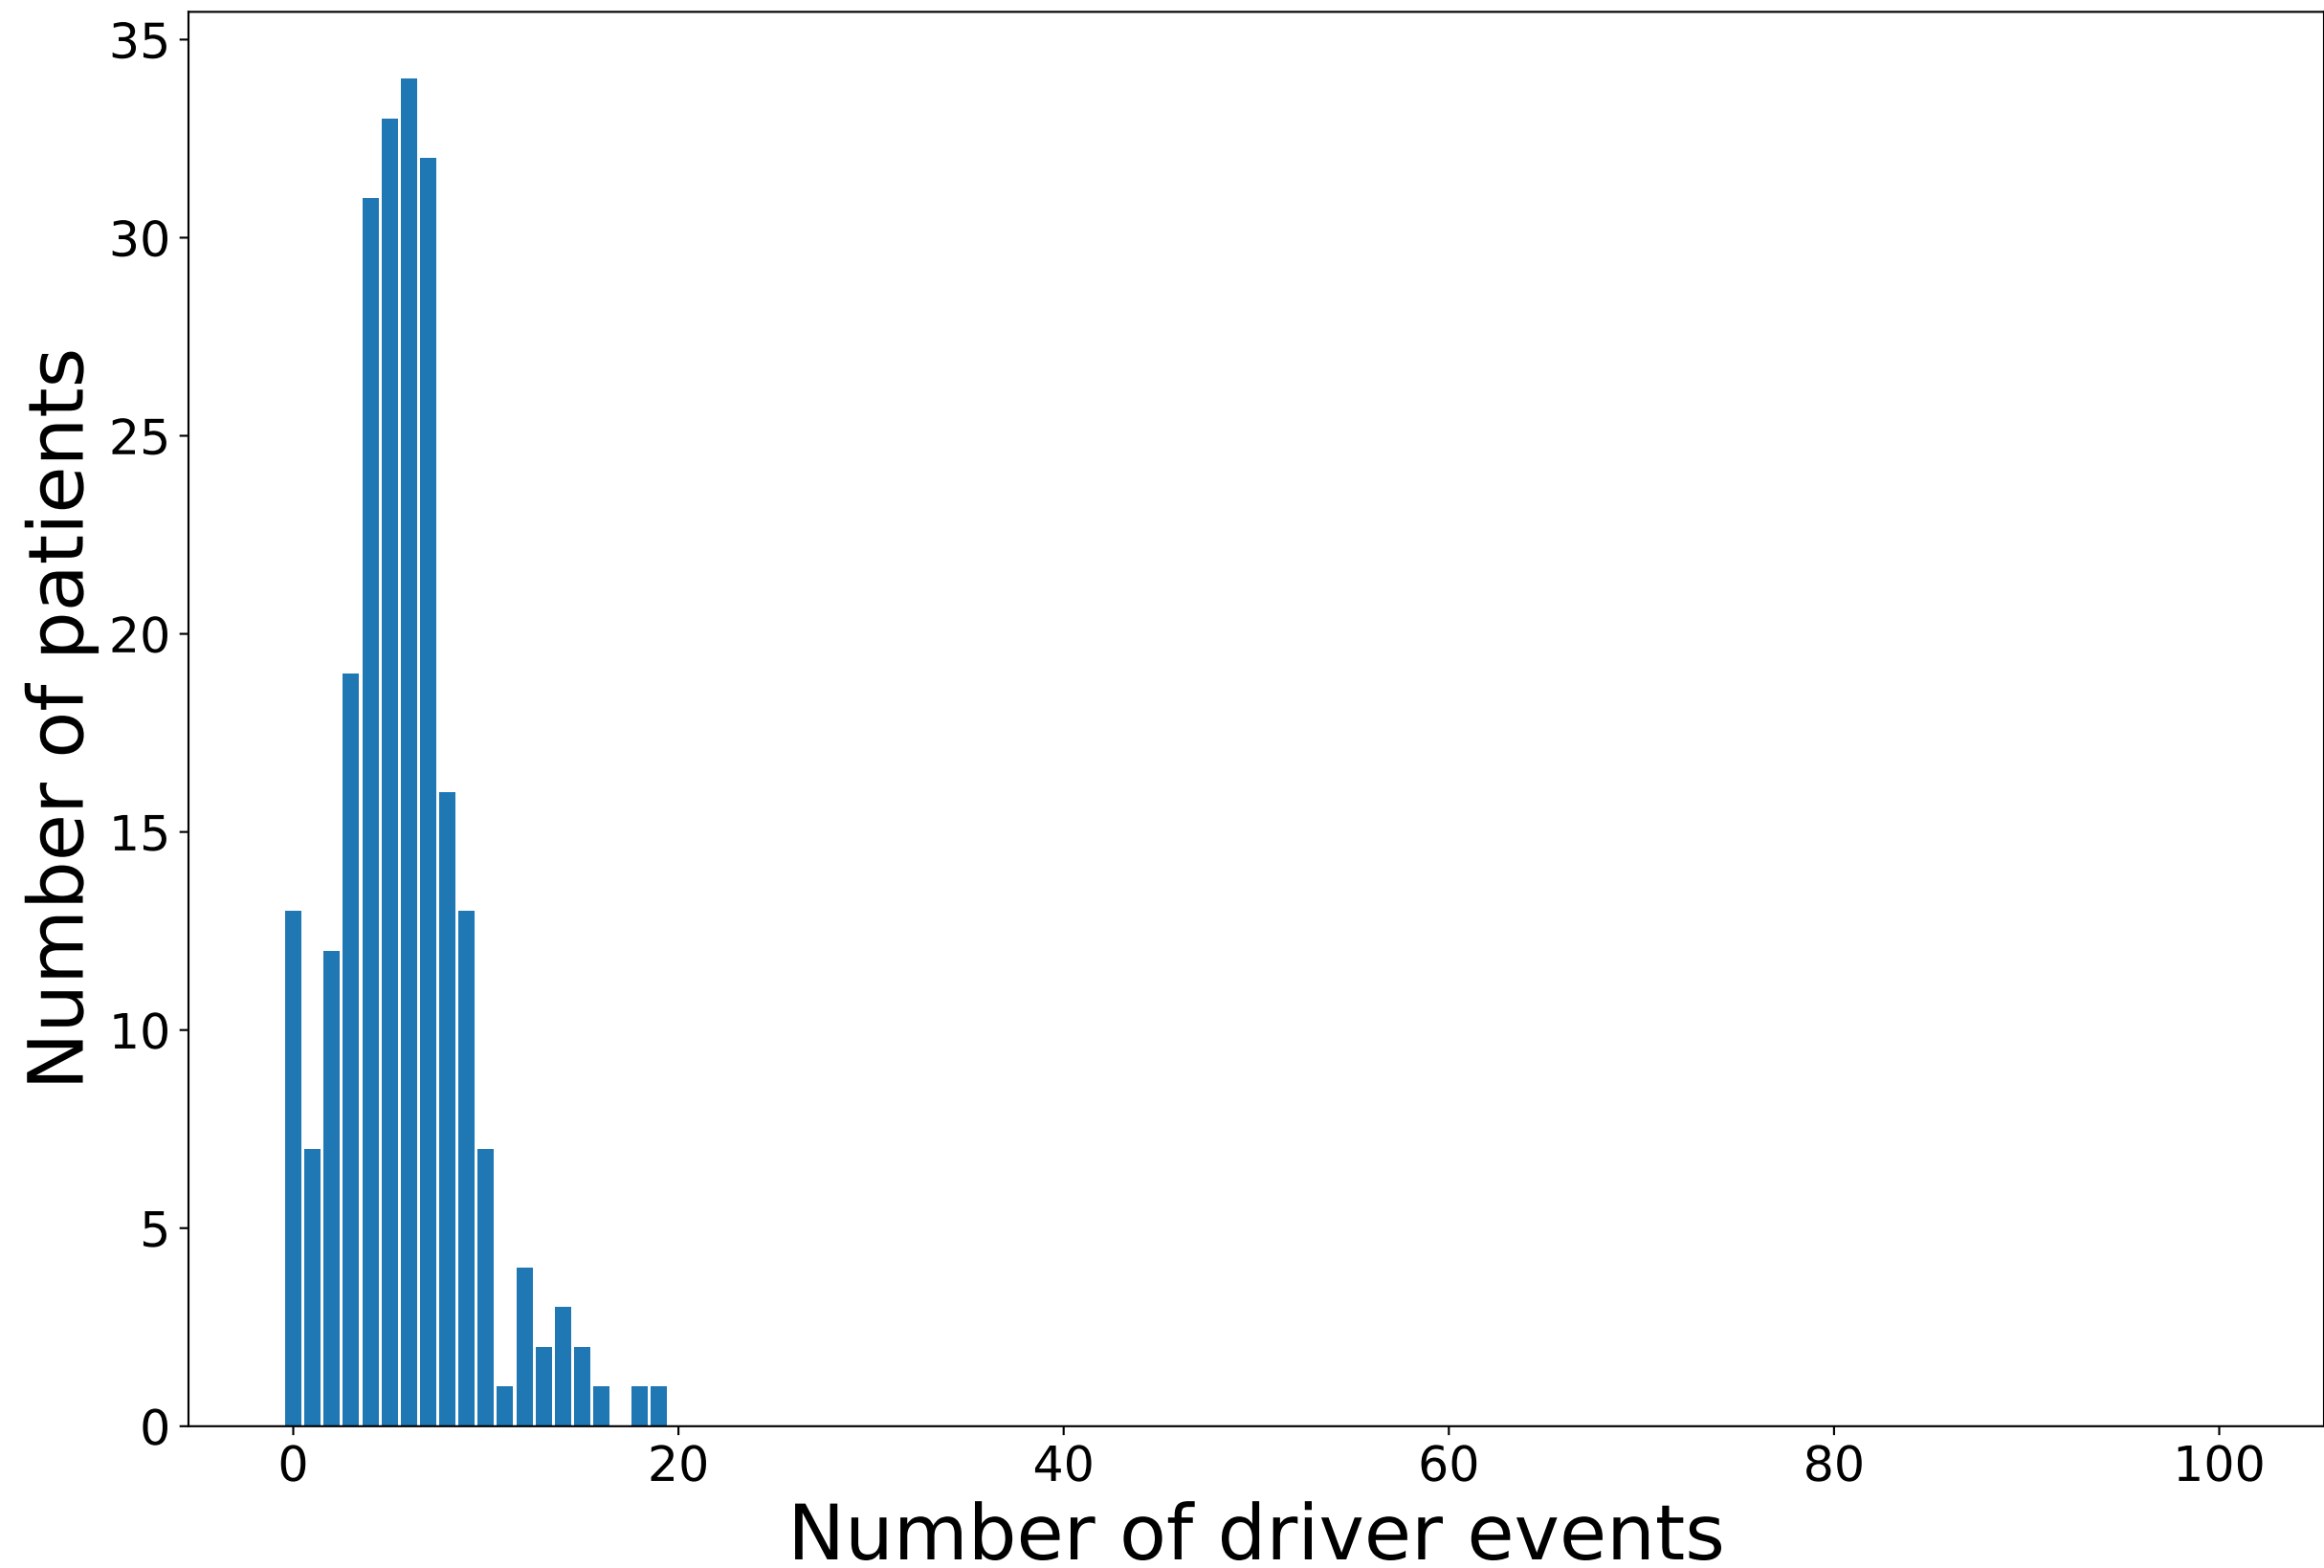

Supplement: Supplemental_Data_S1.zip [file Supplemental_Data_S1.zip]

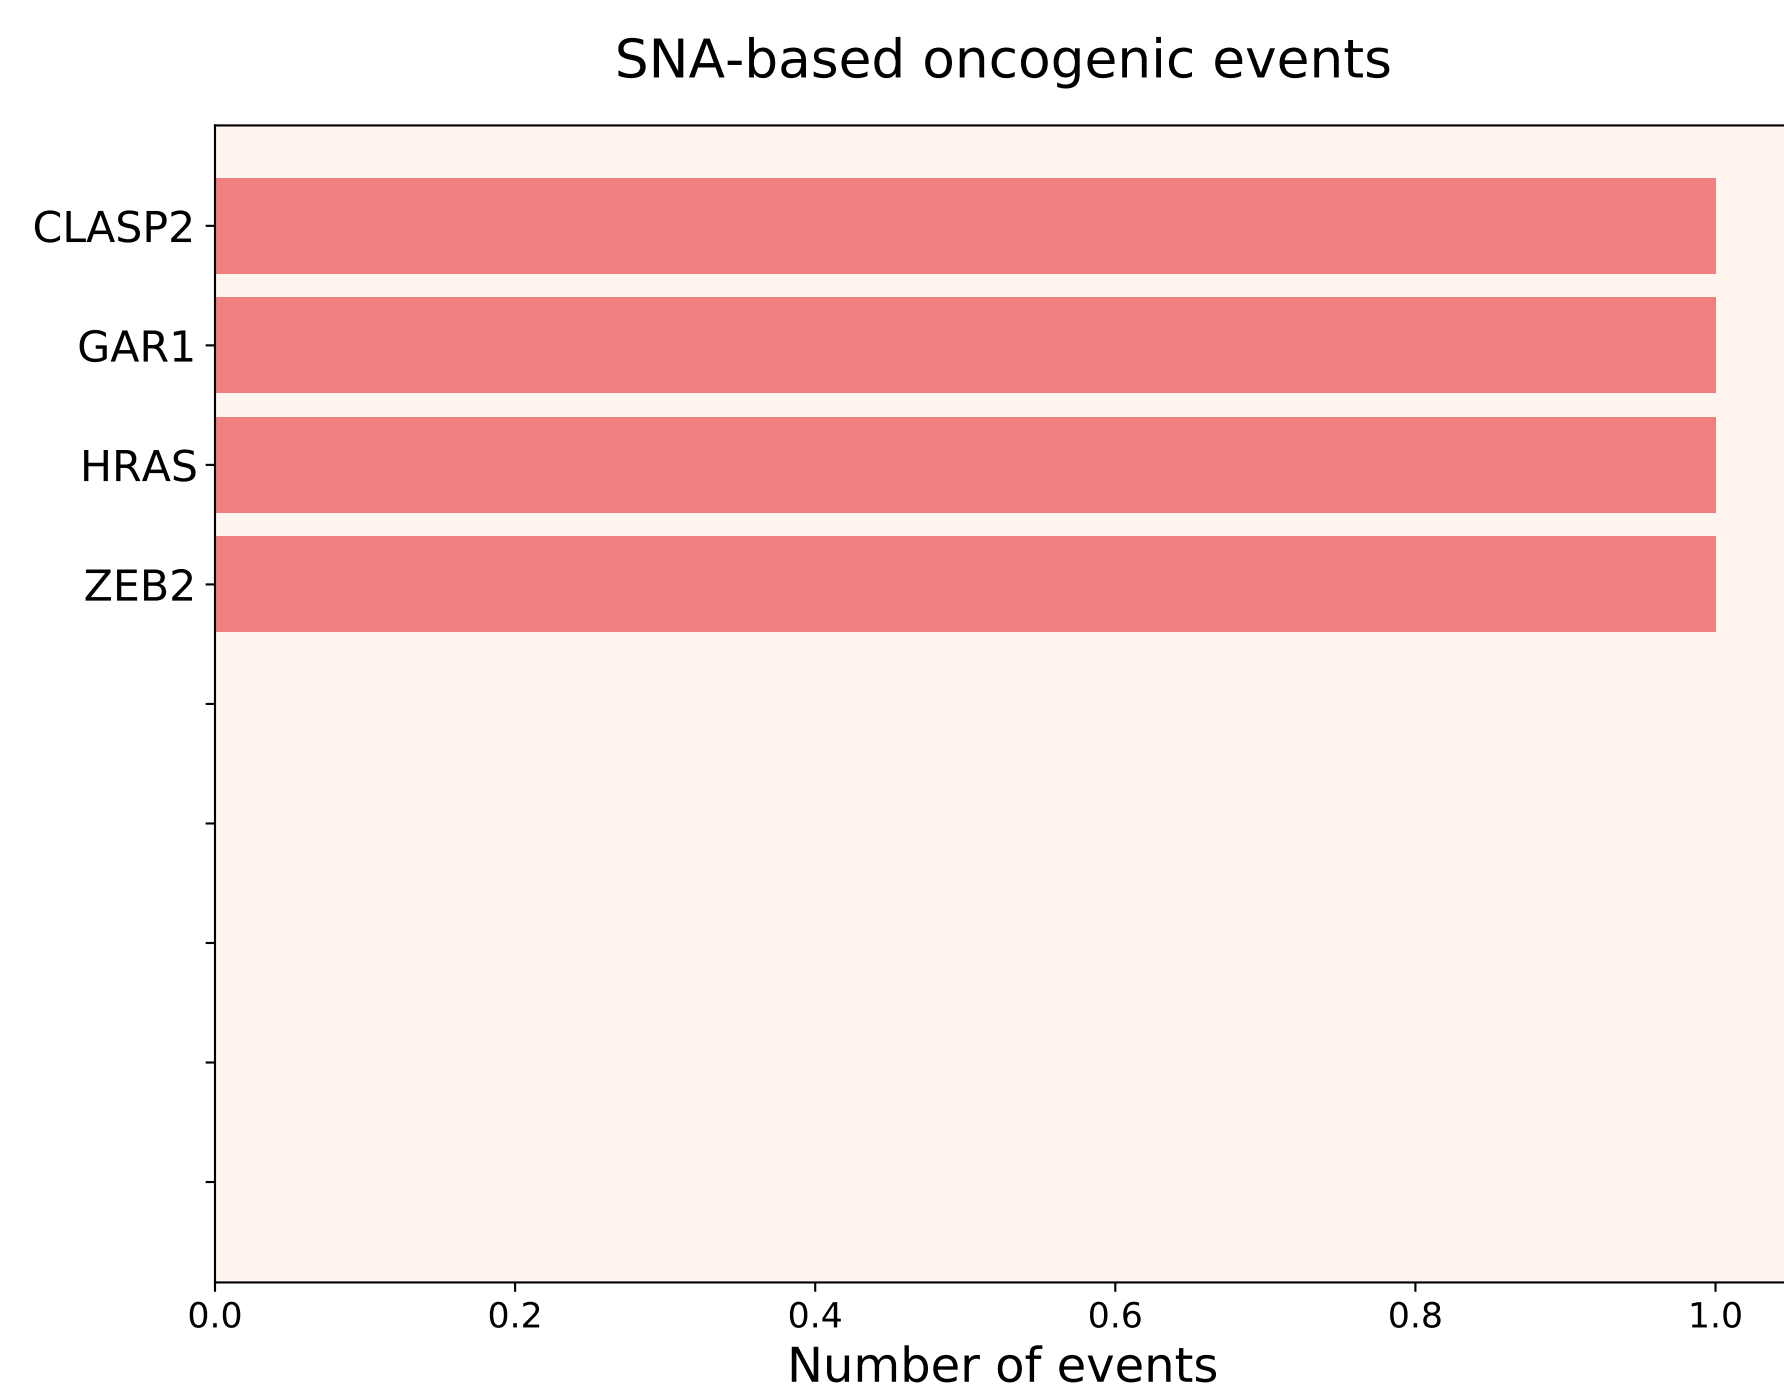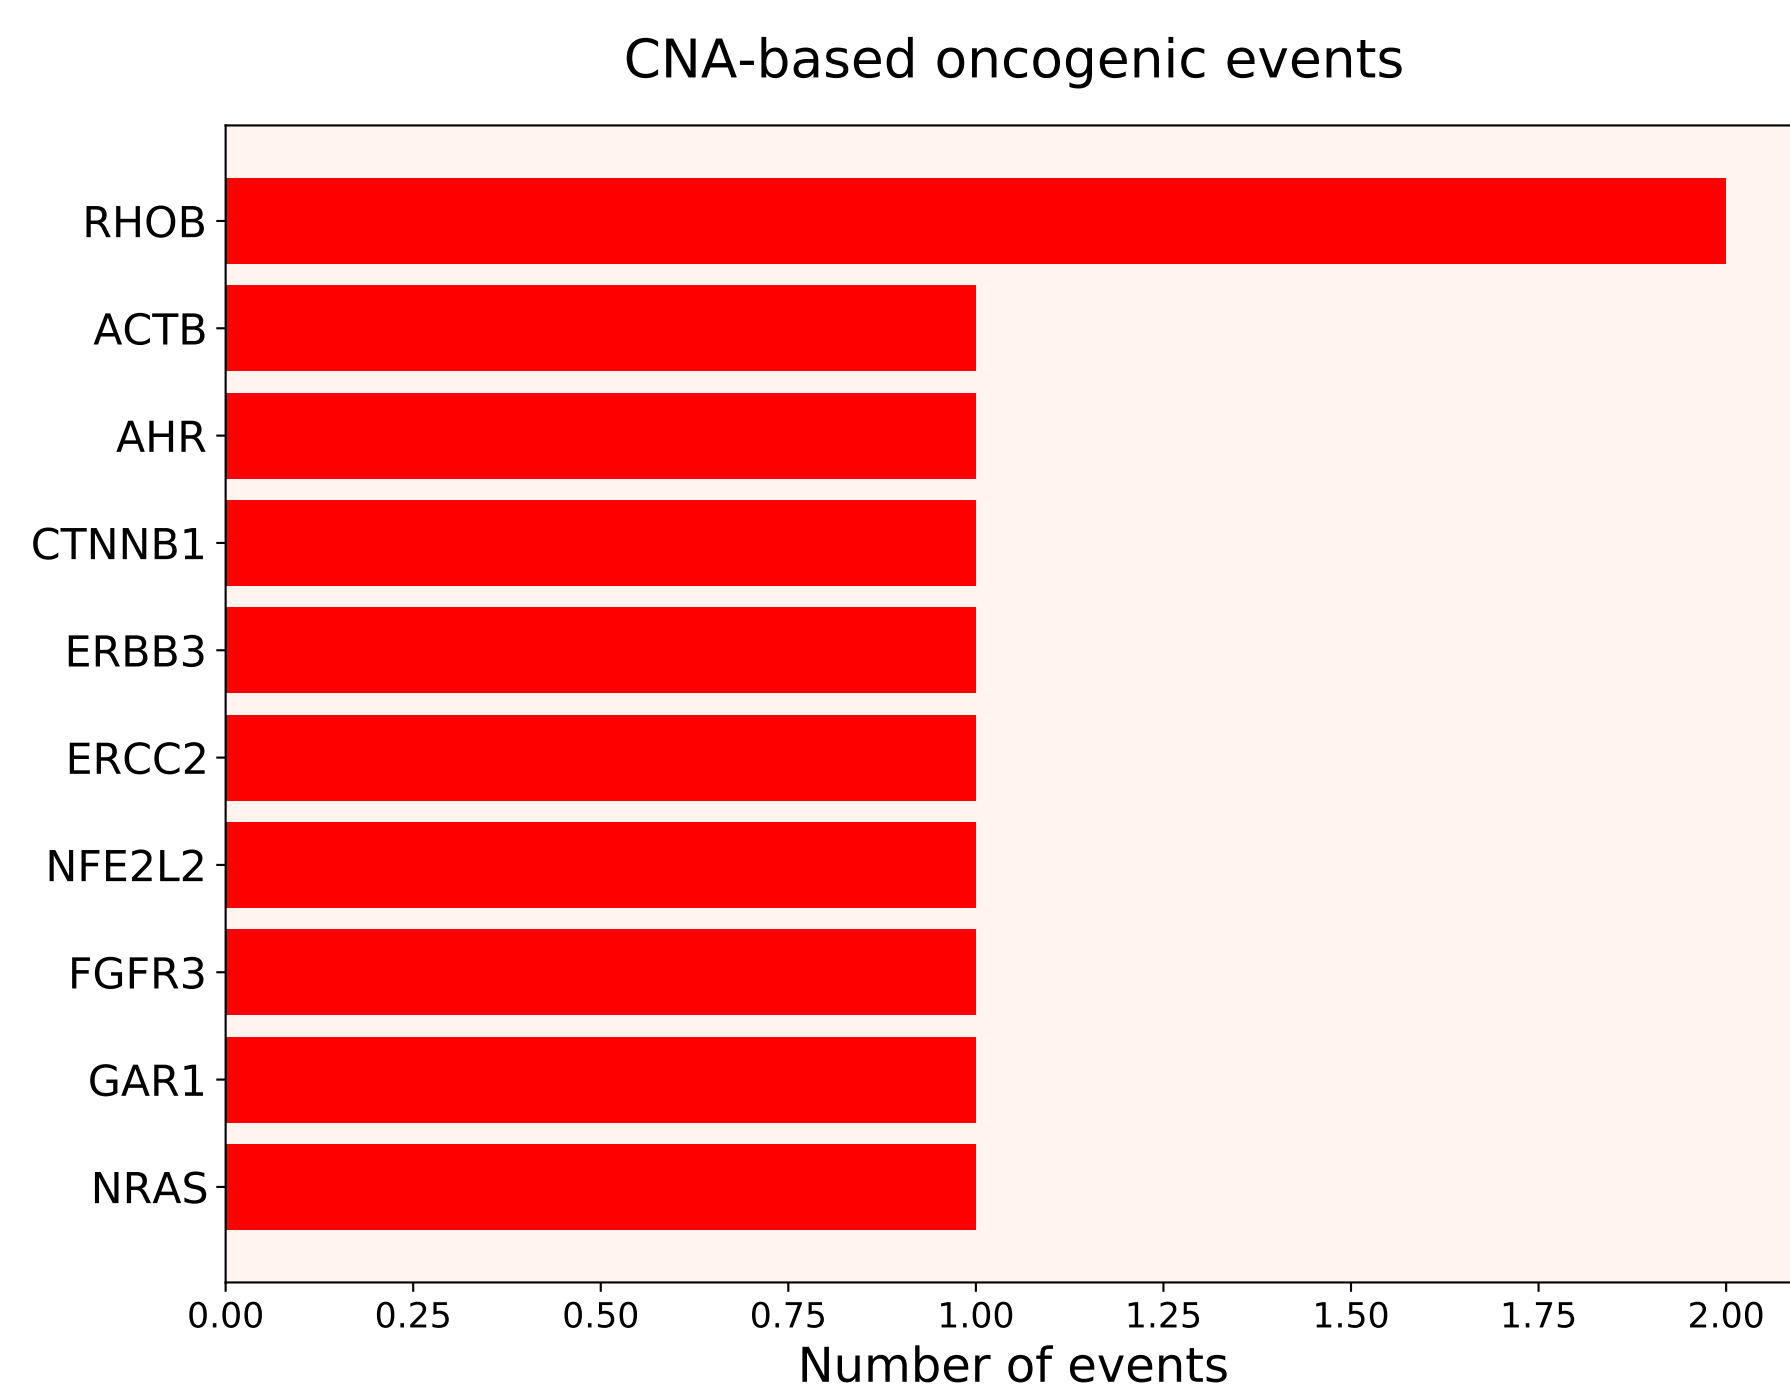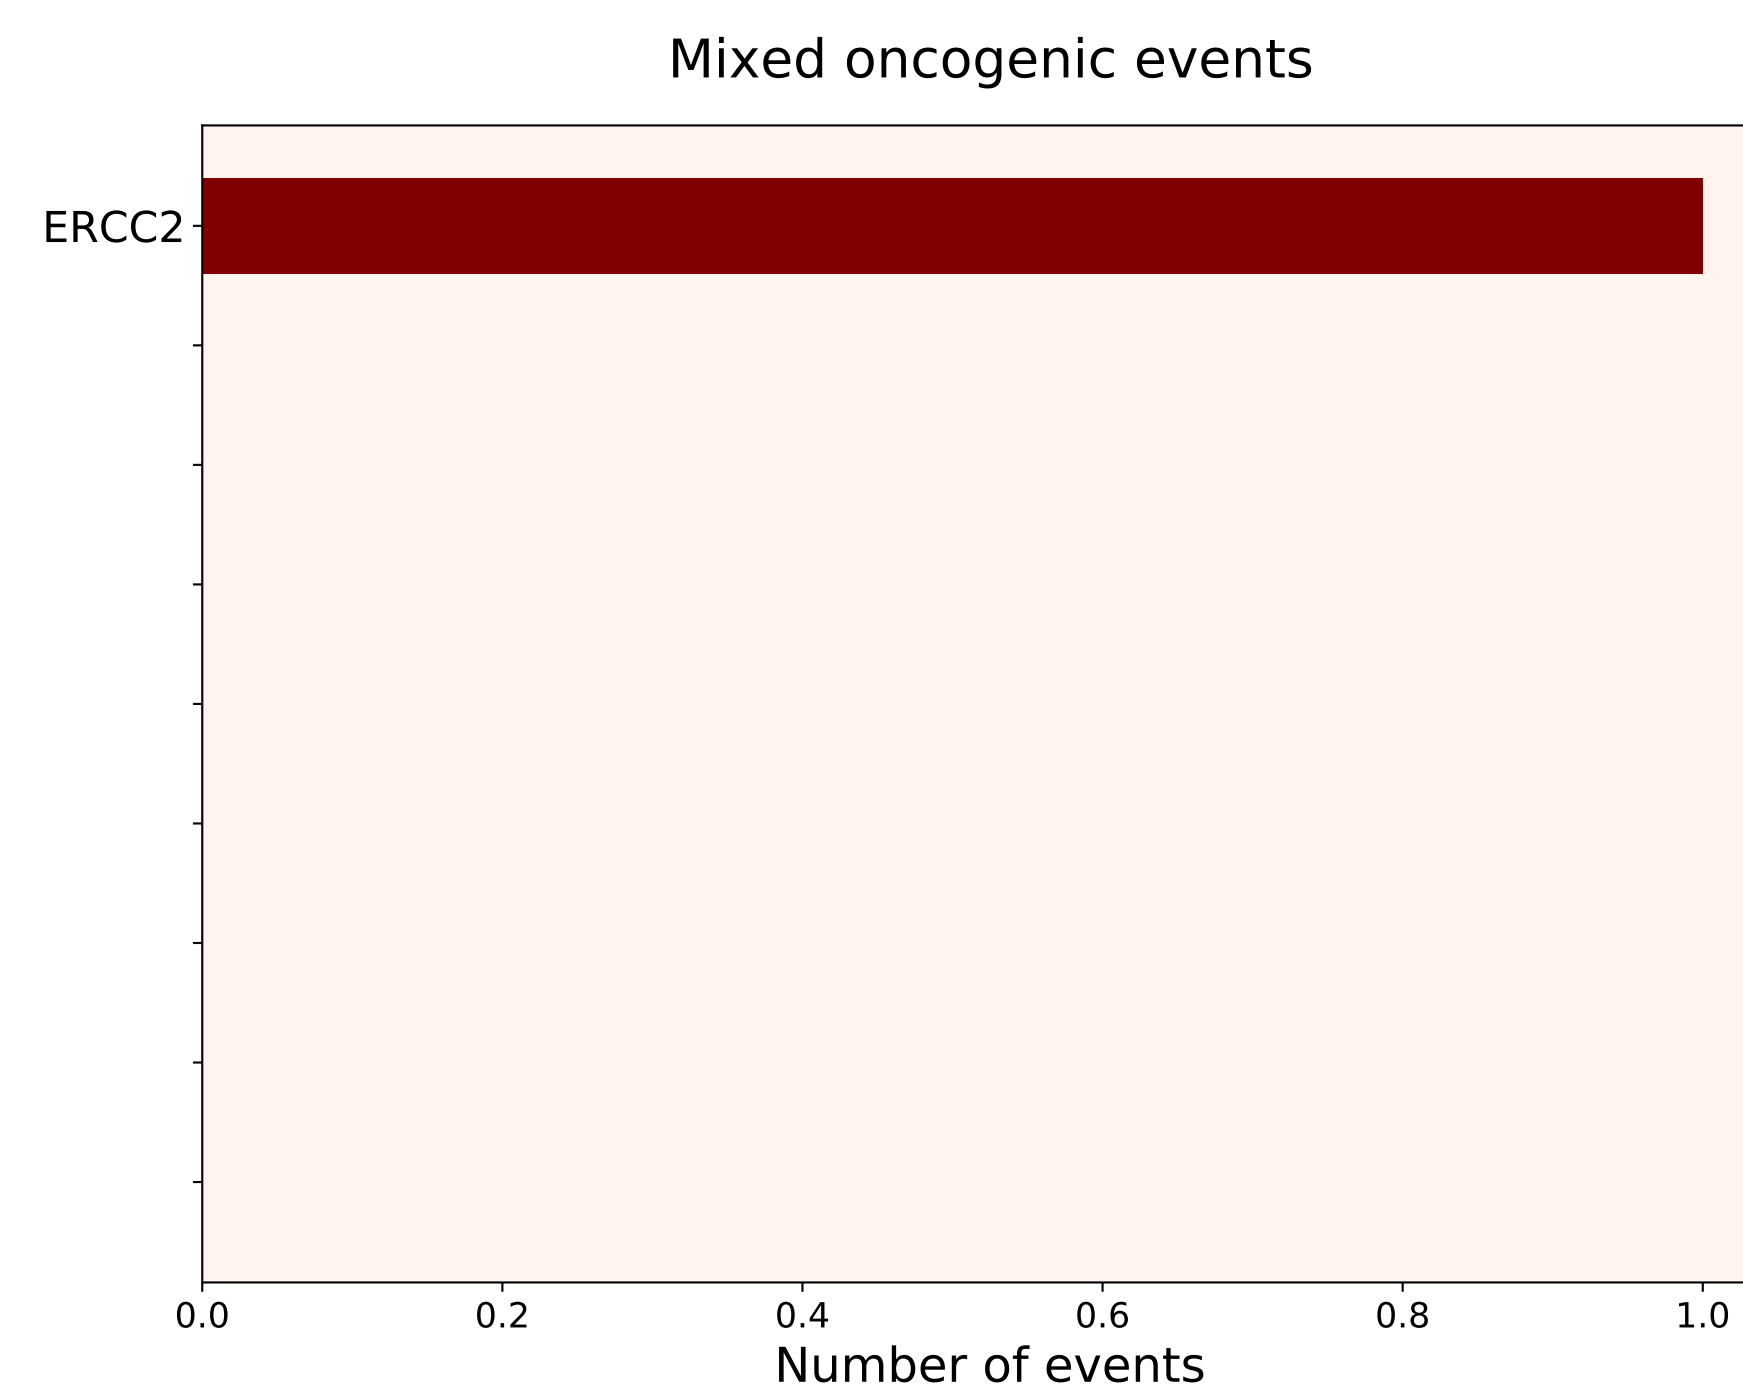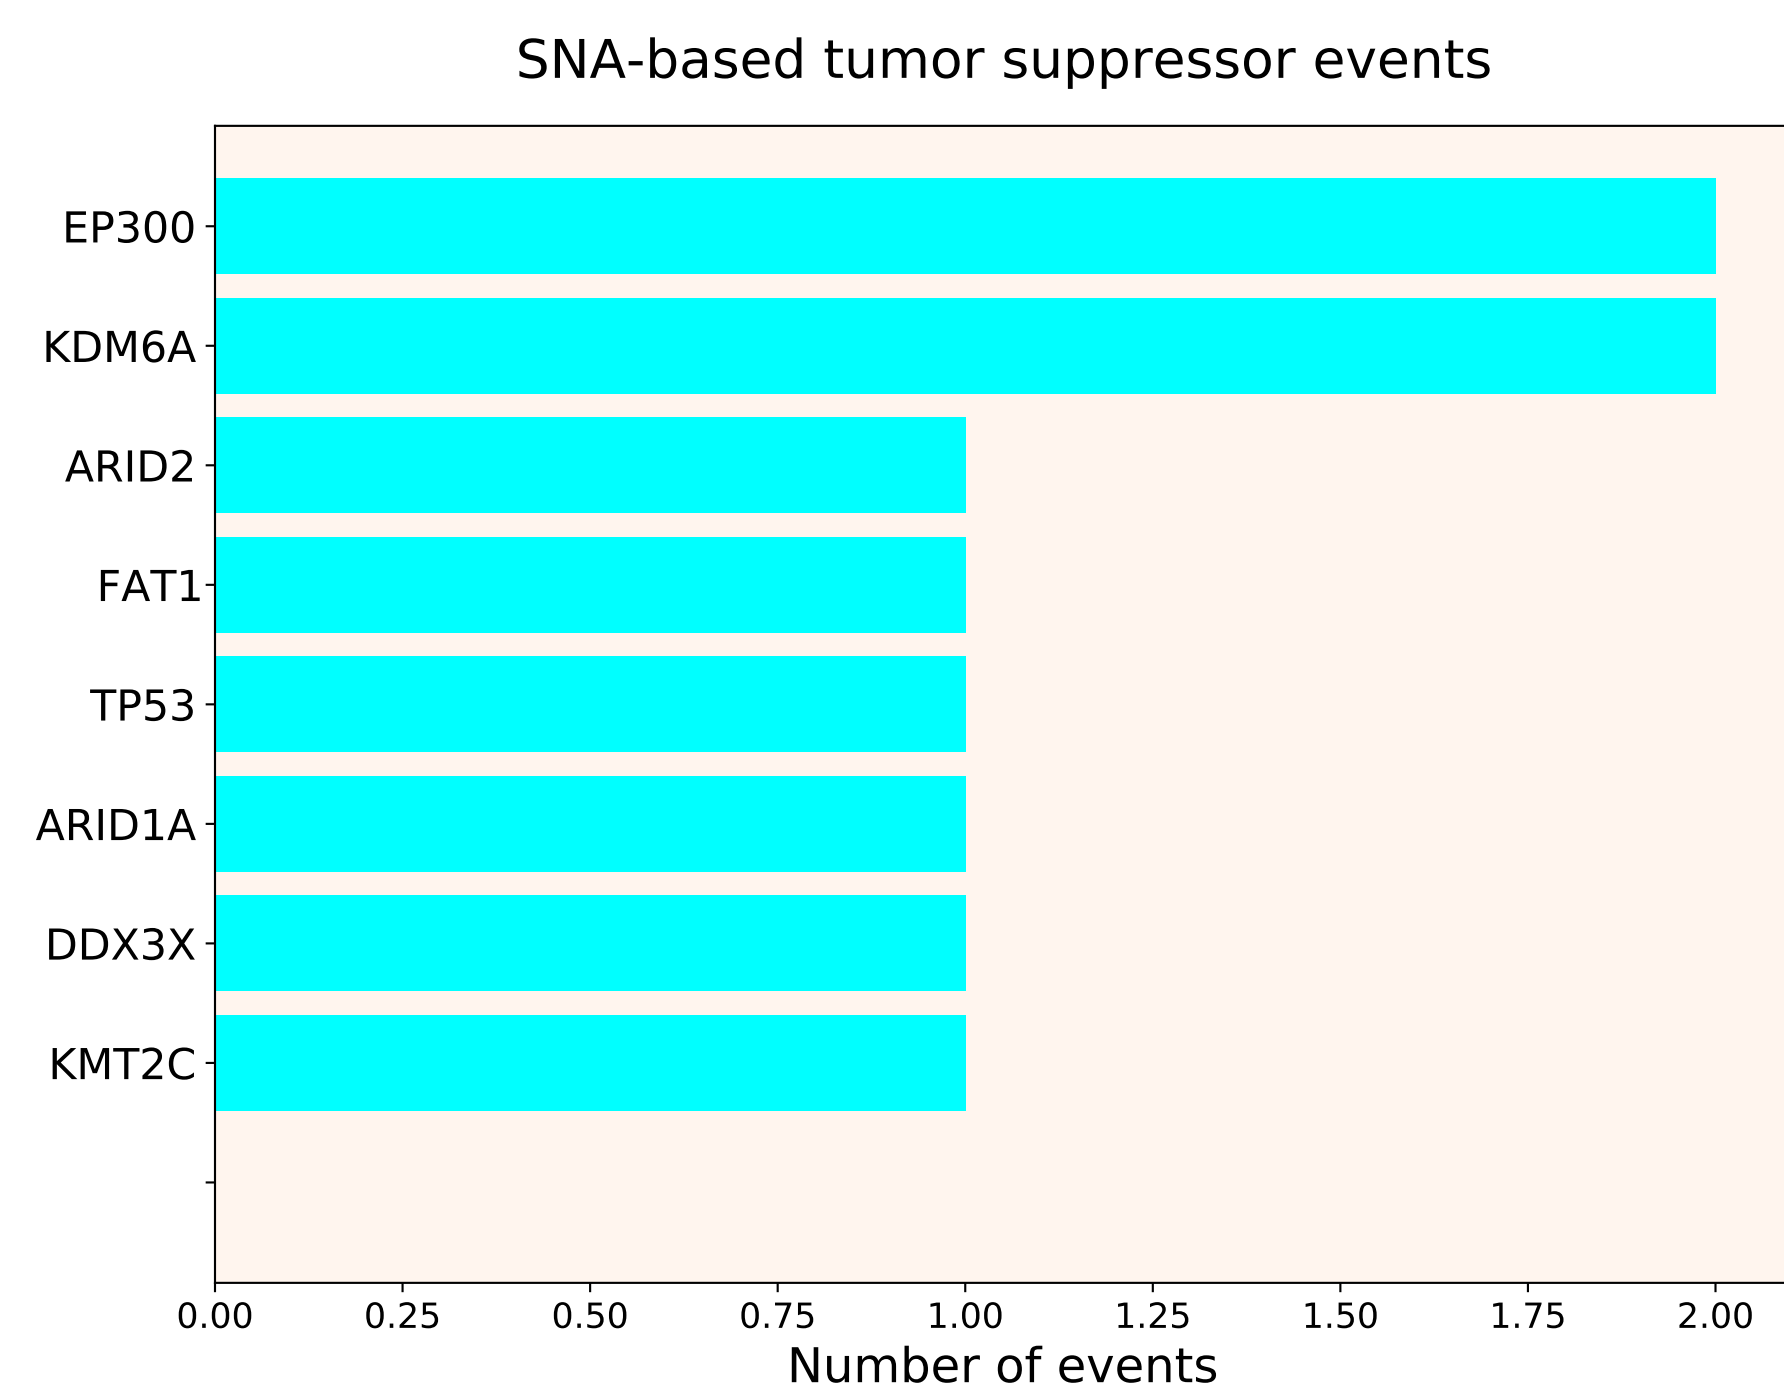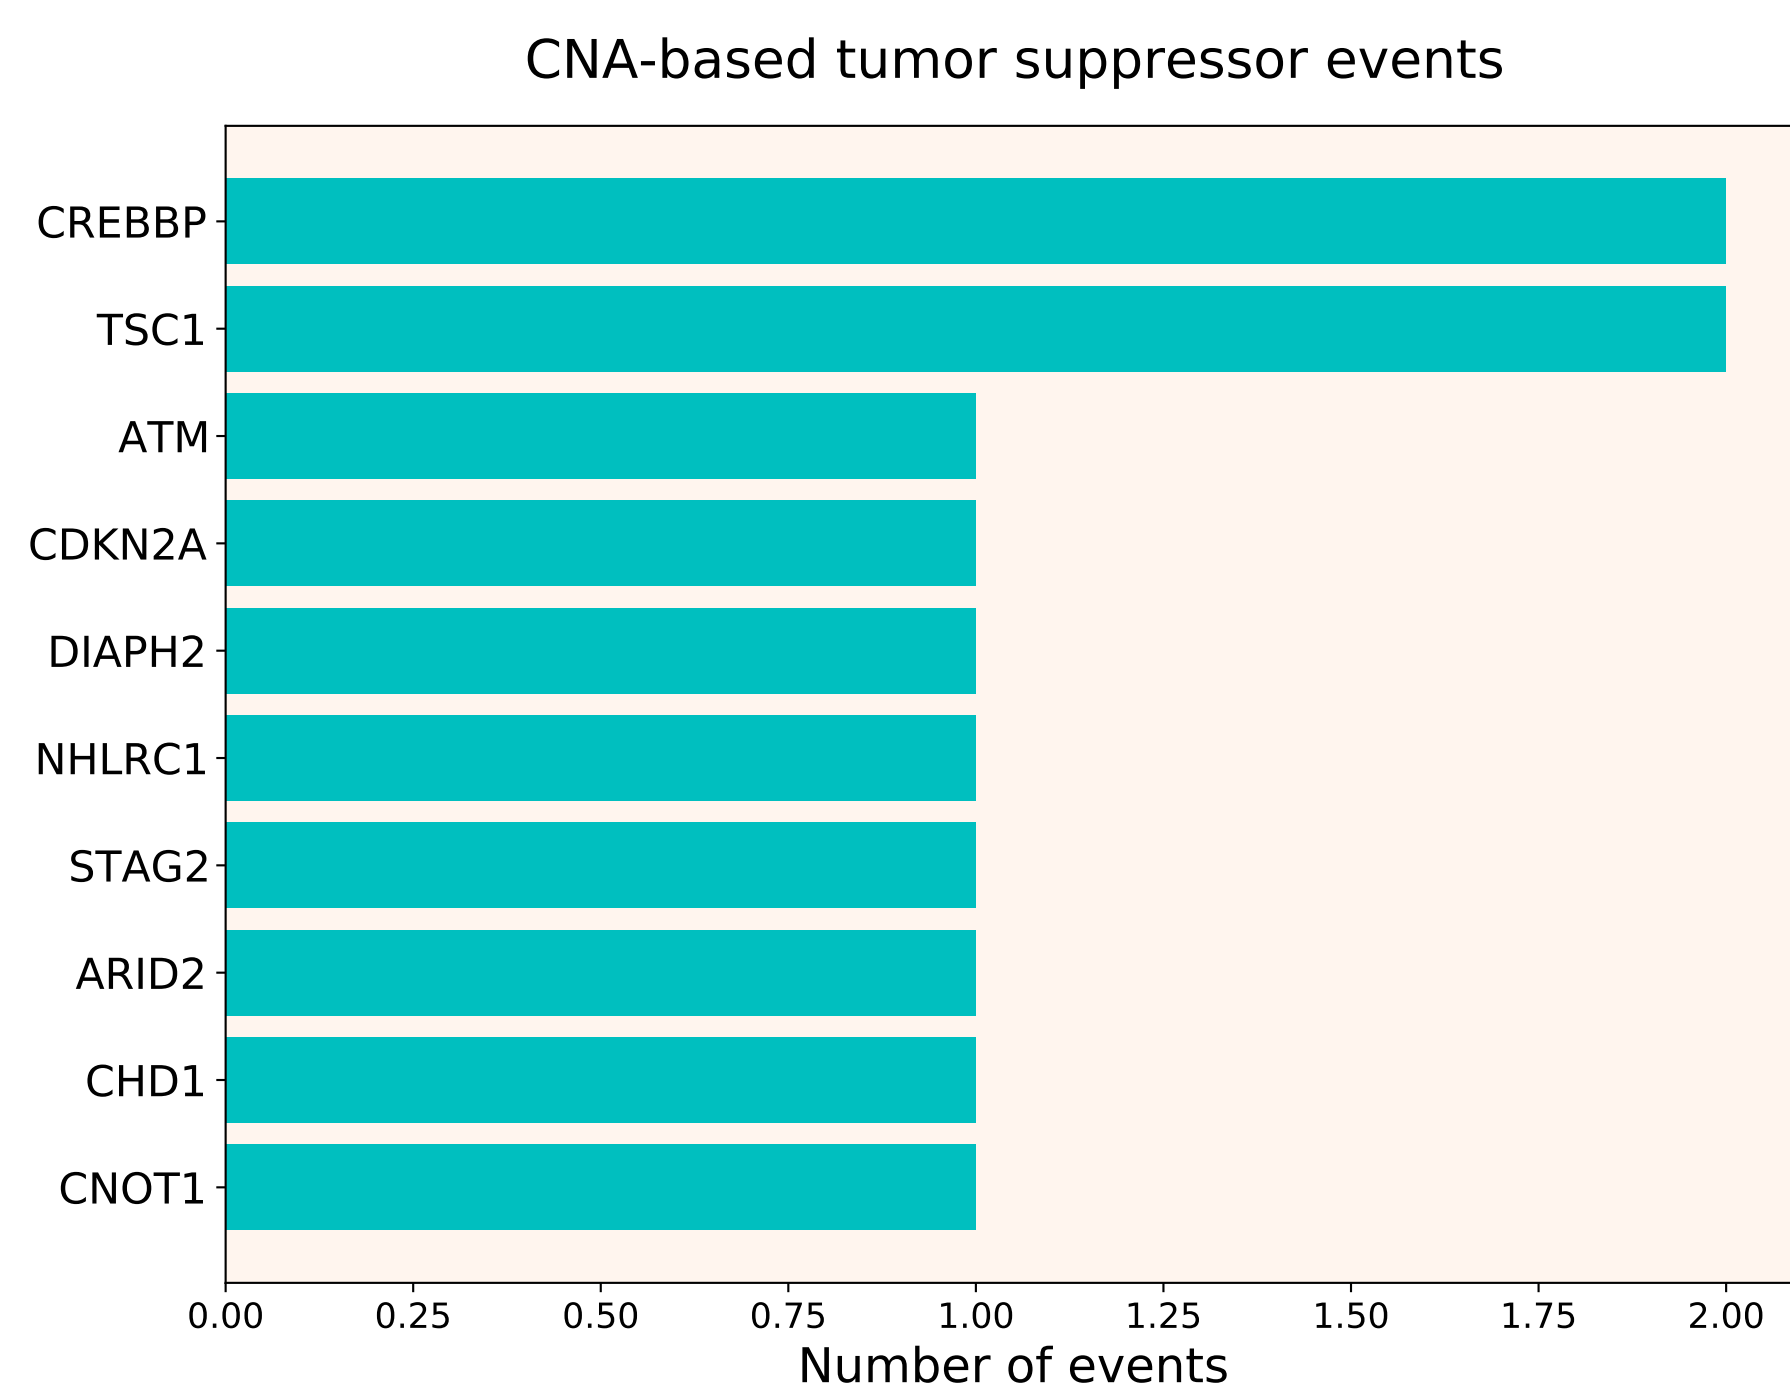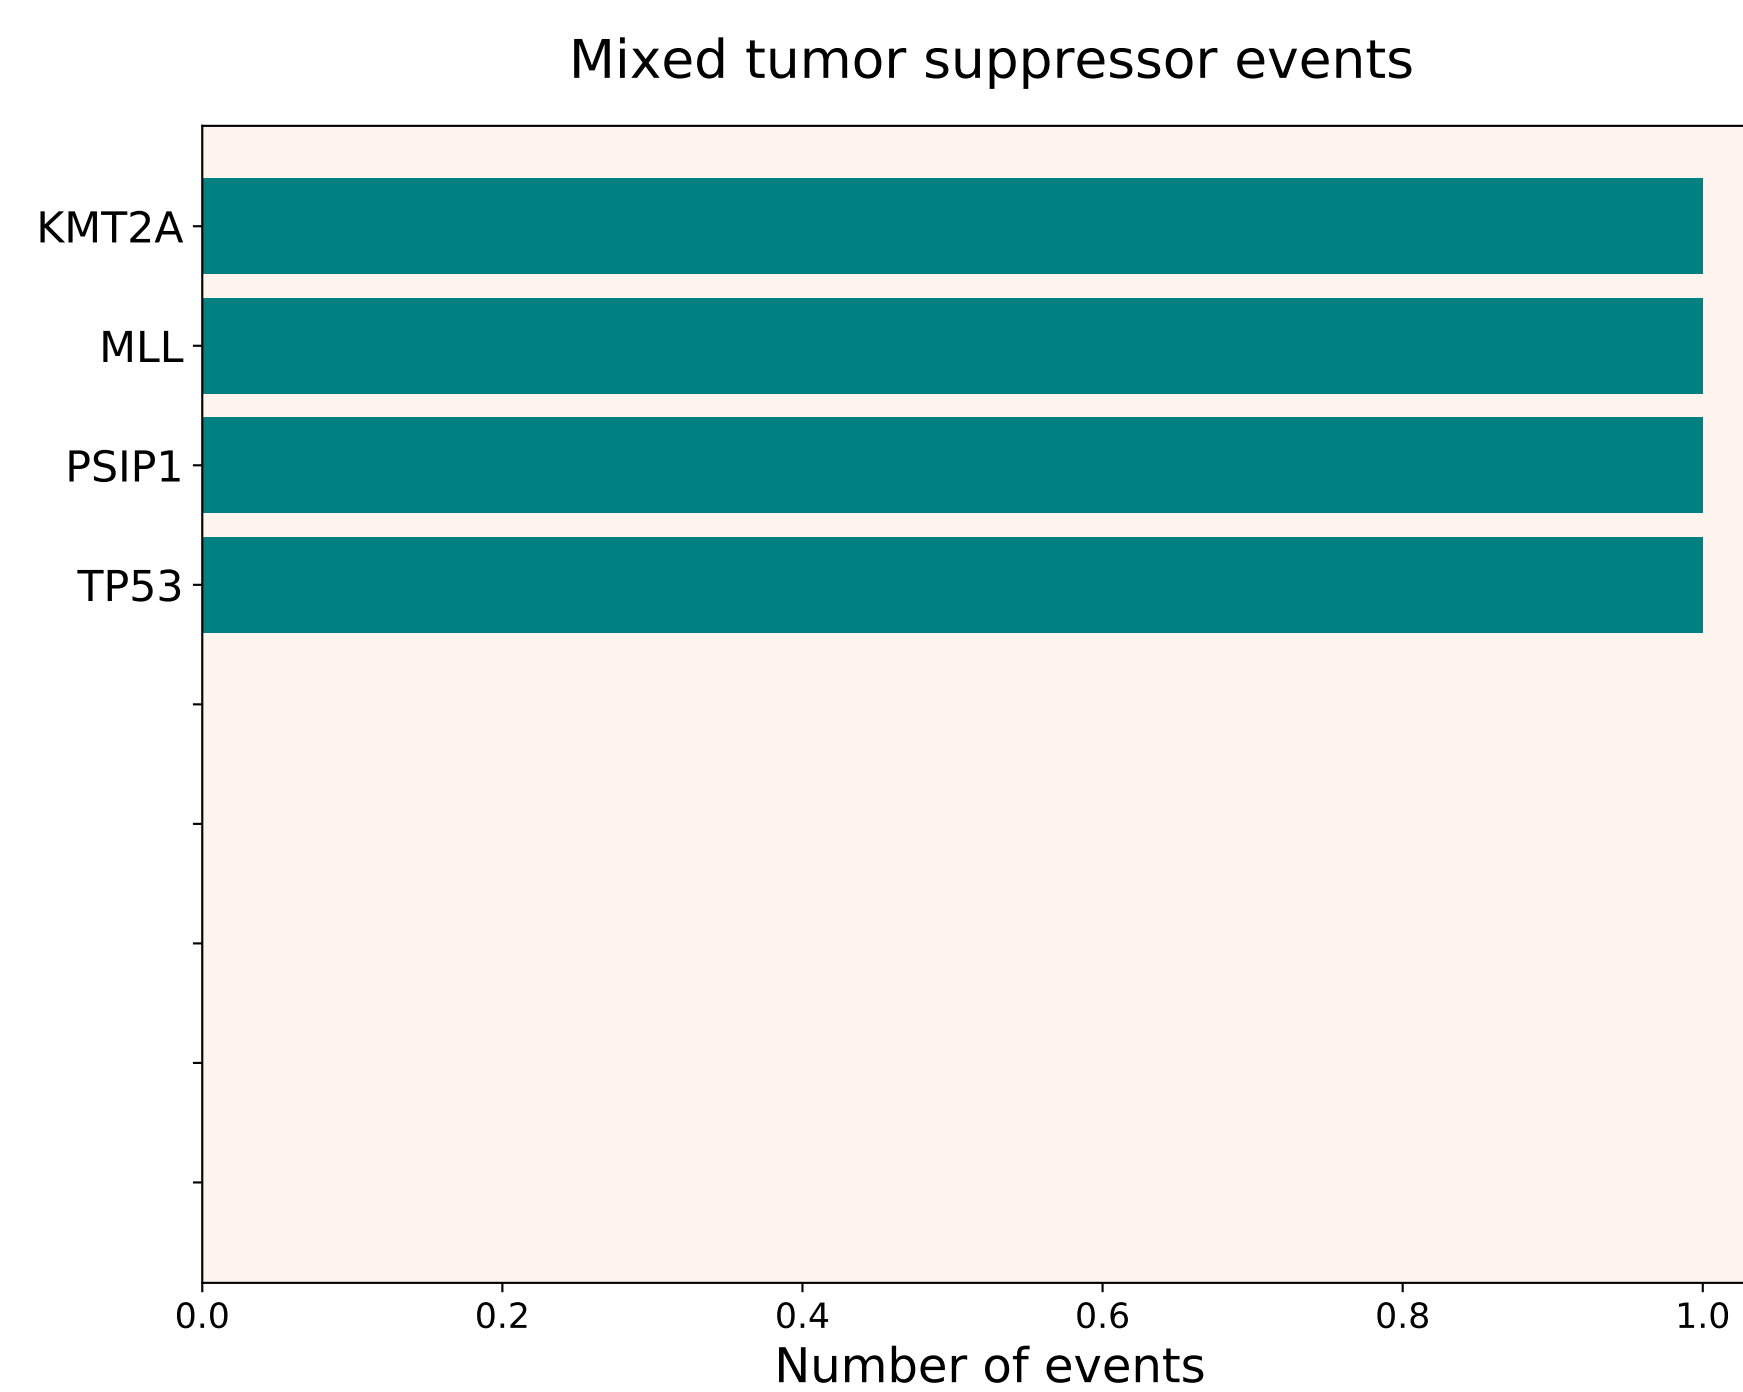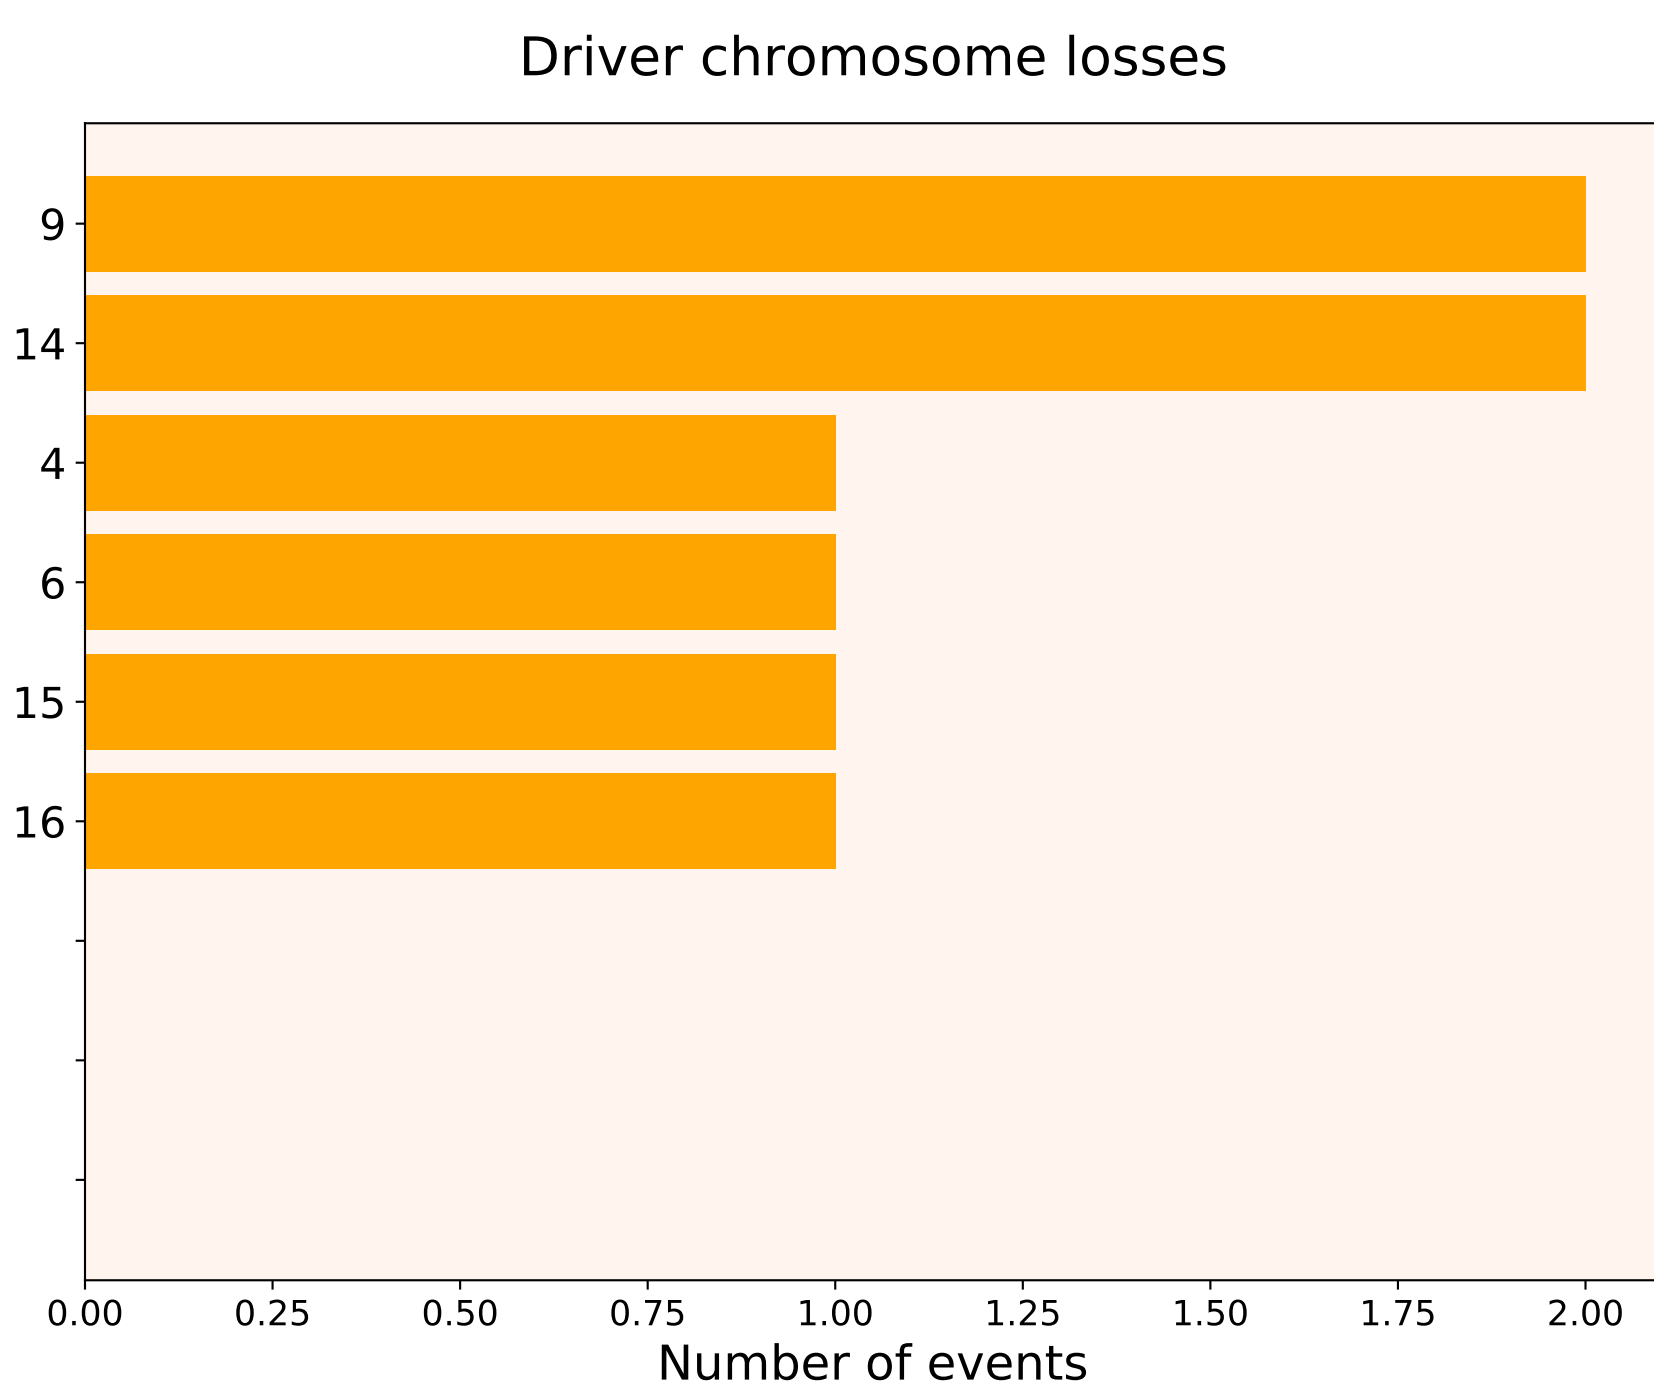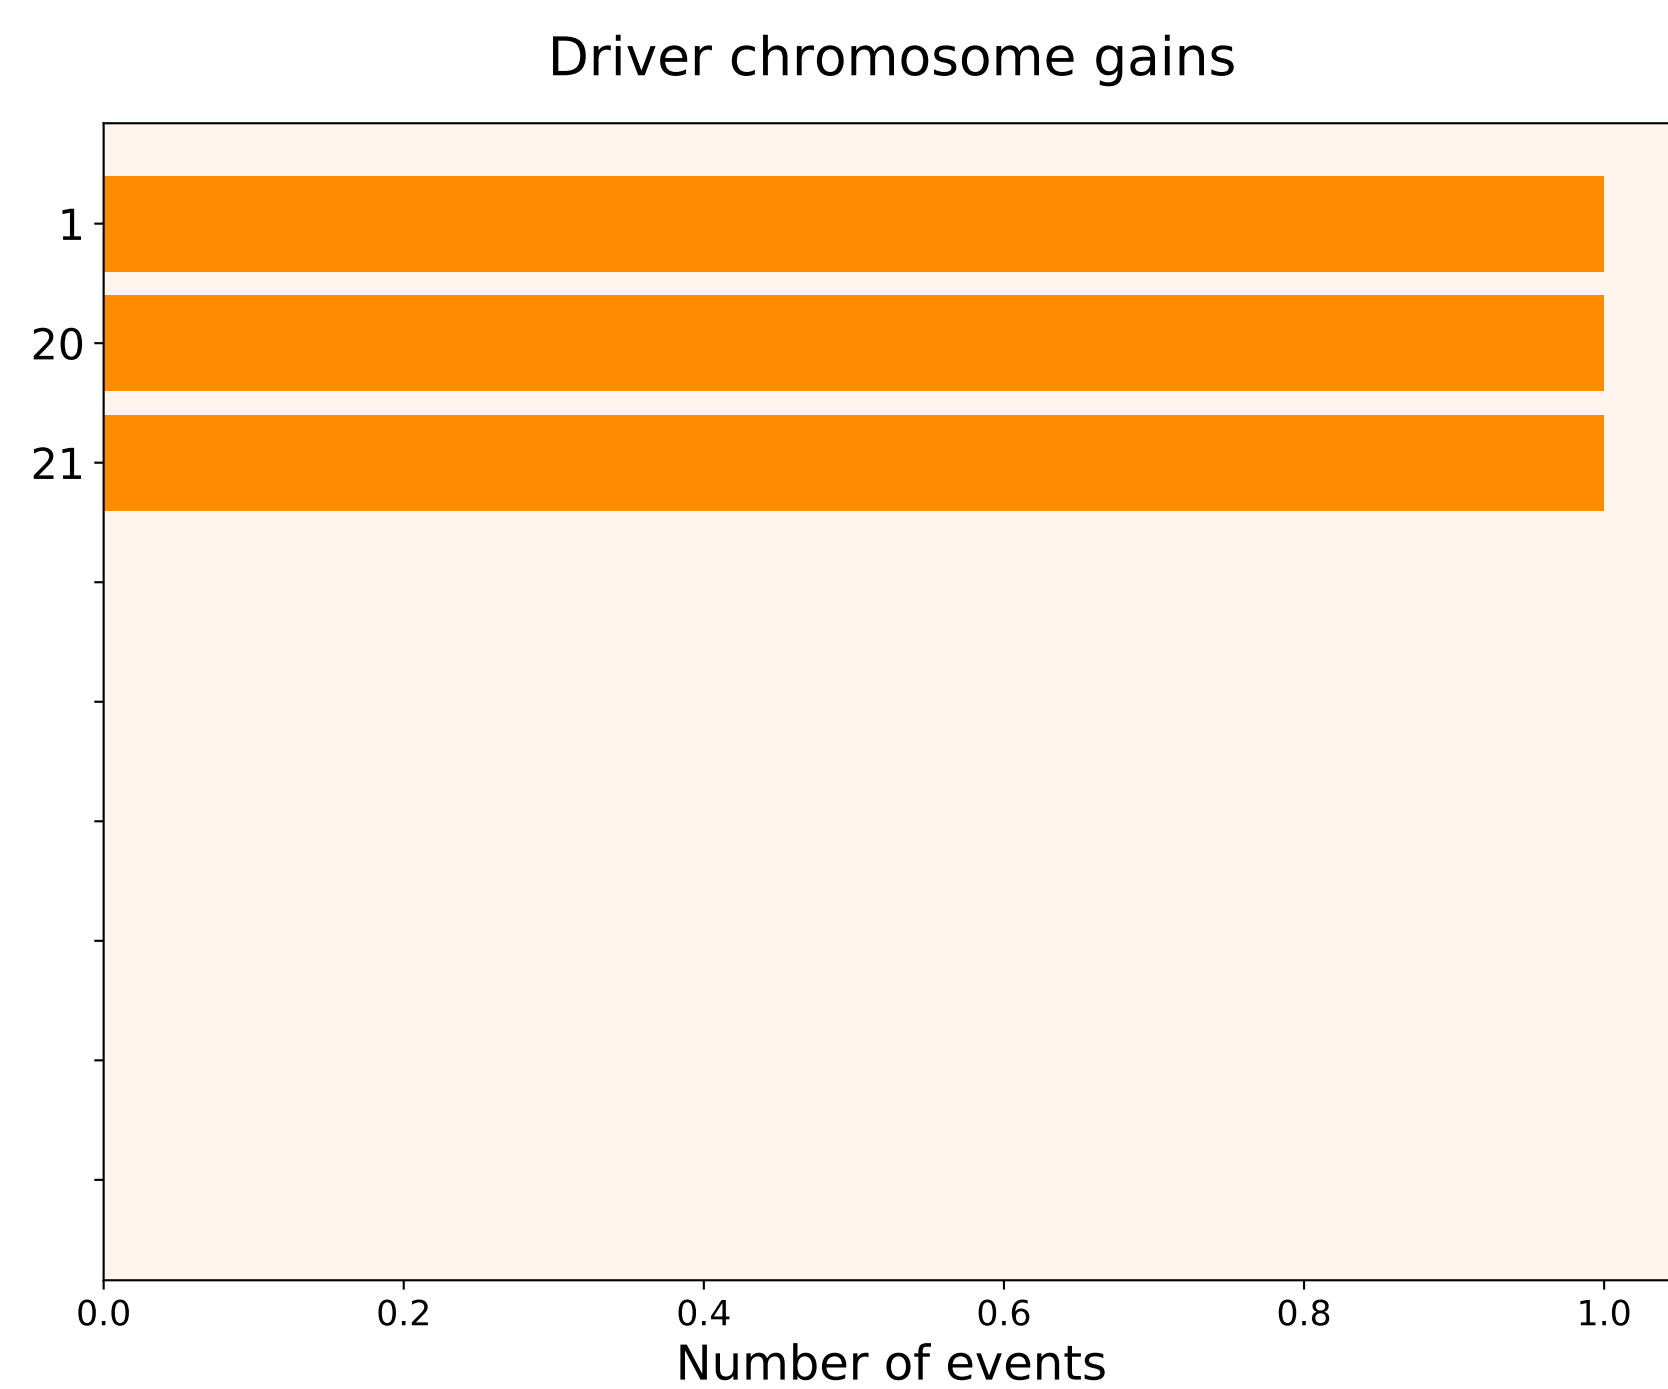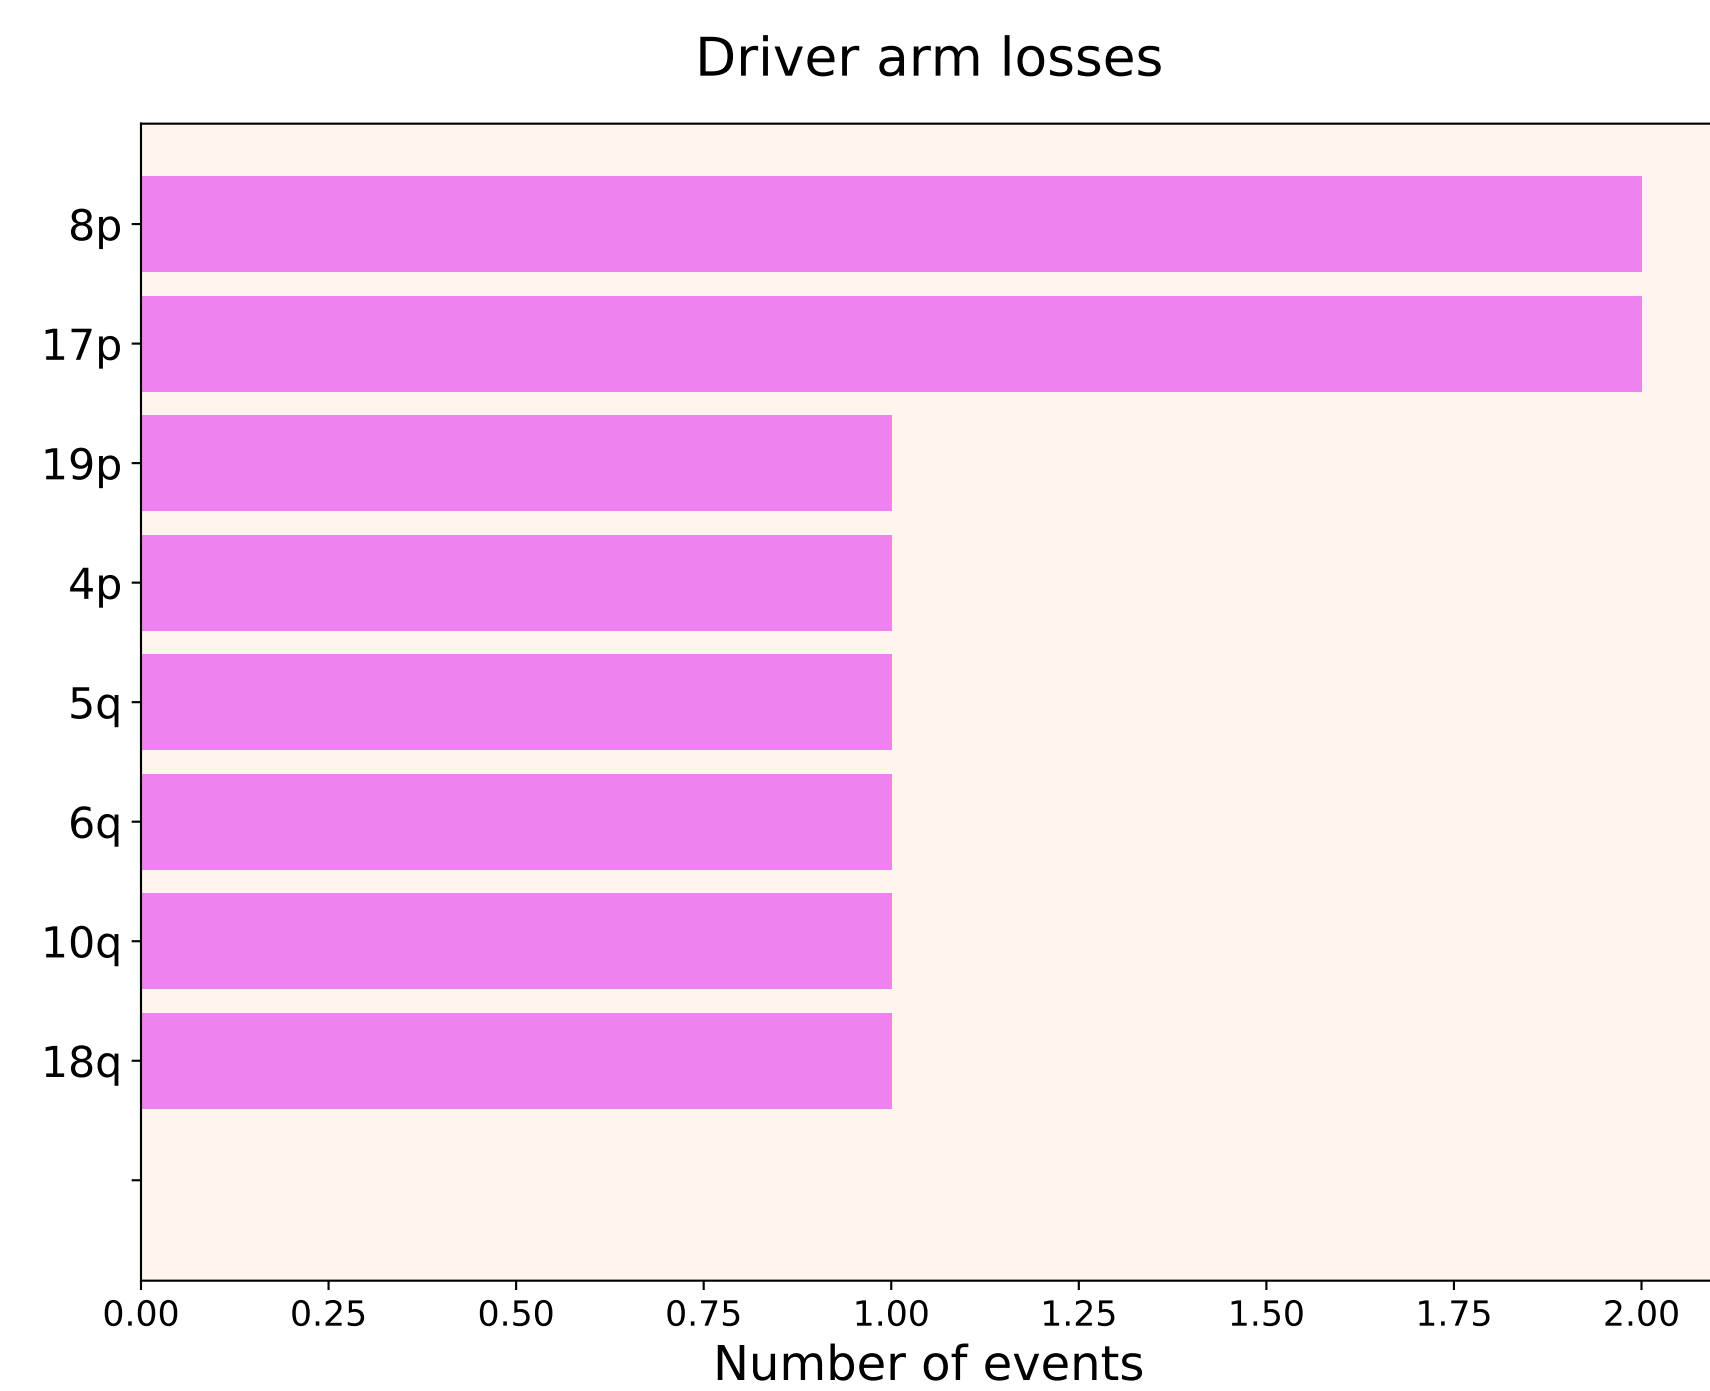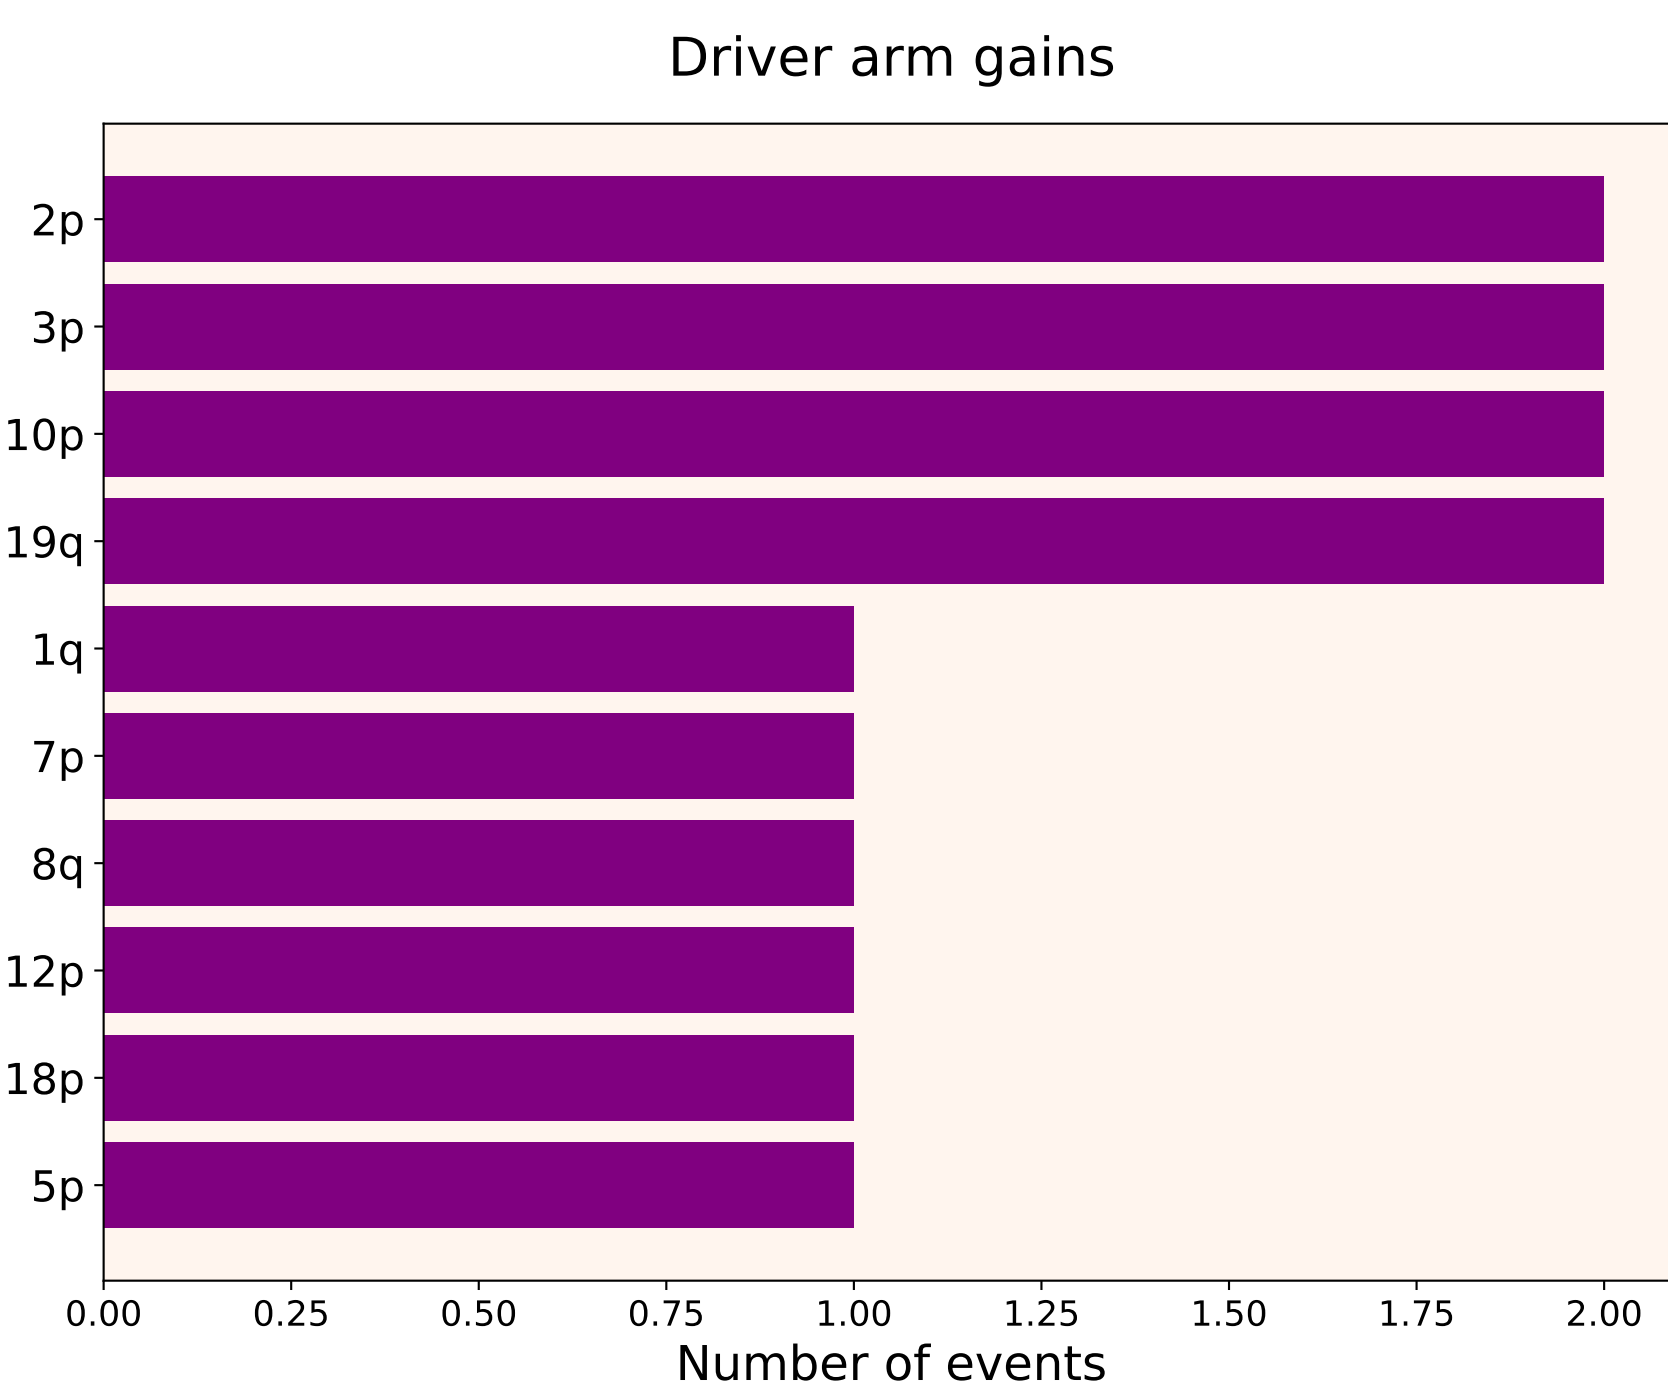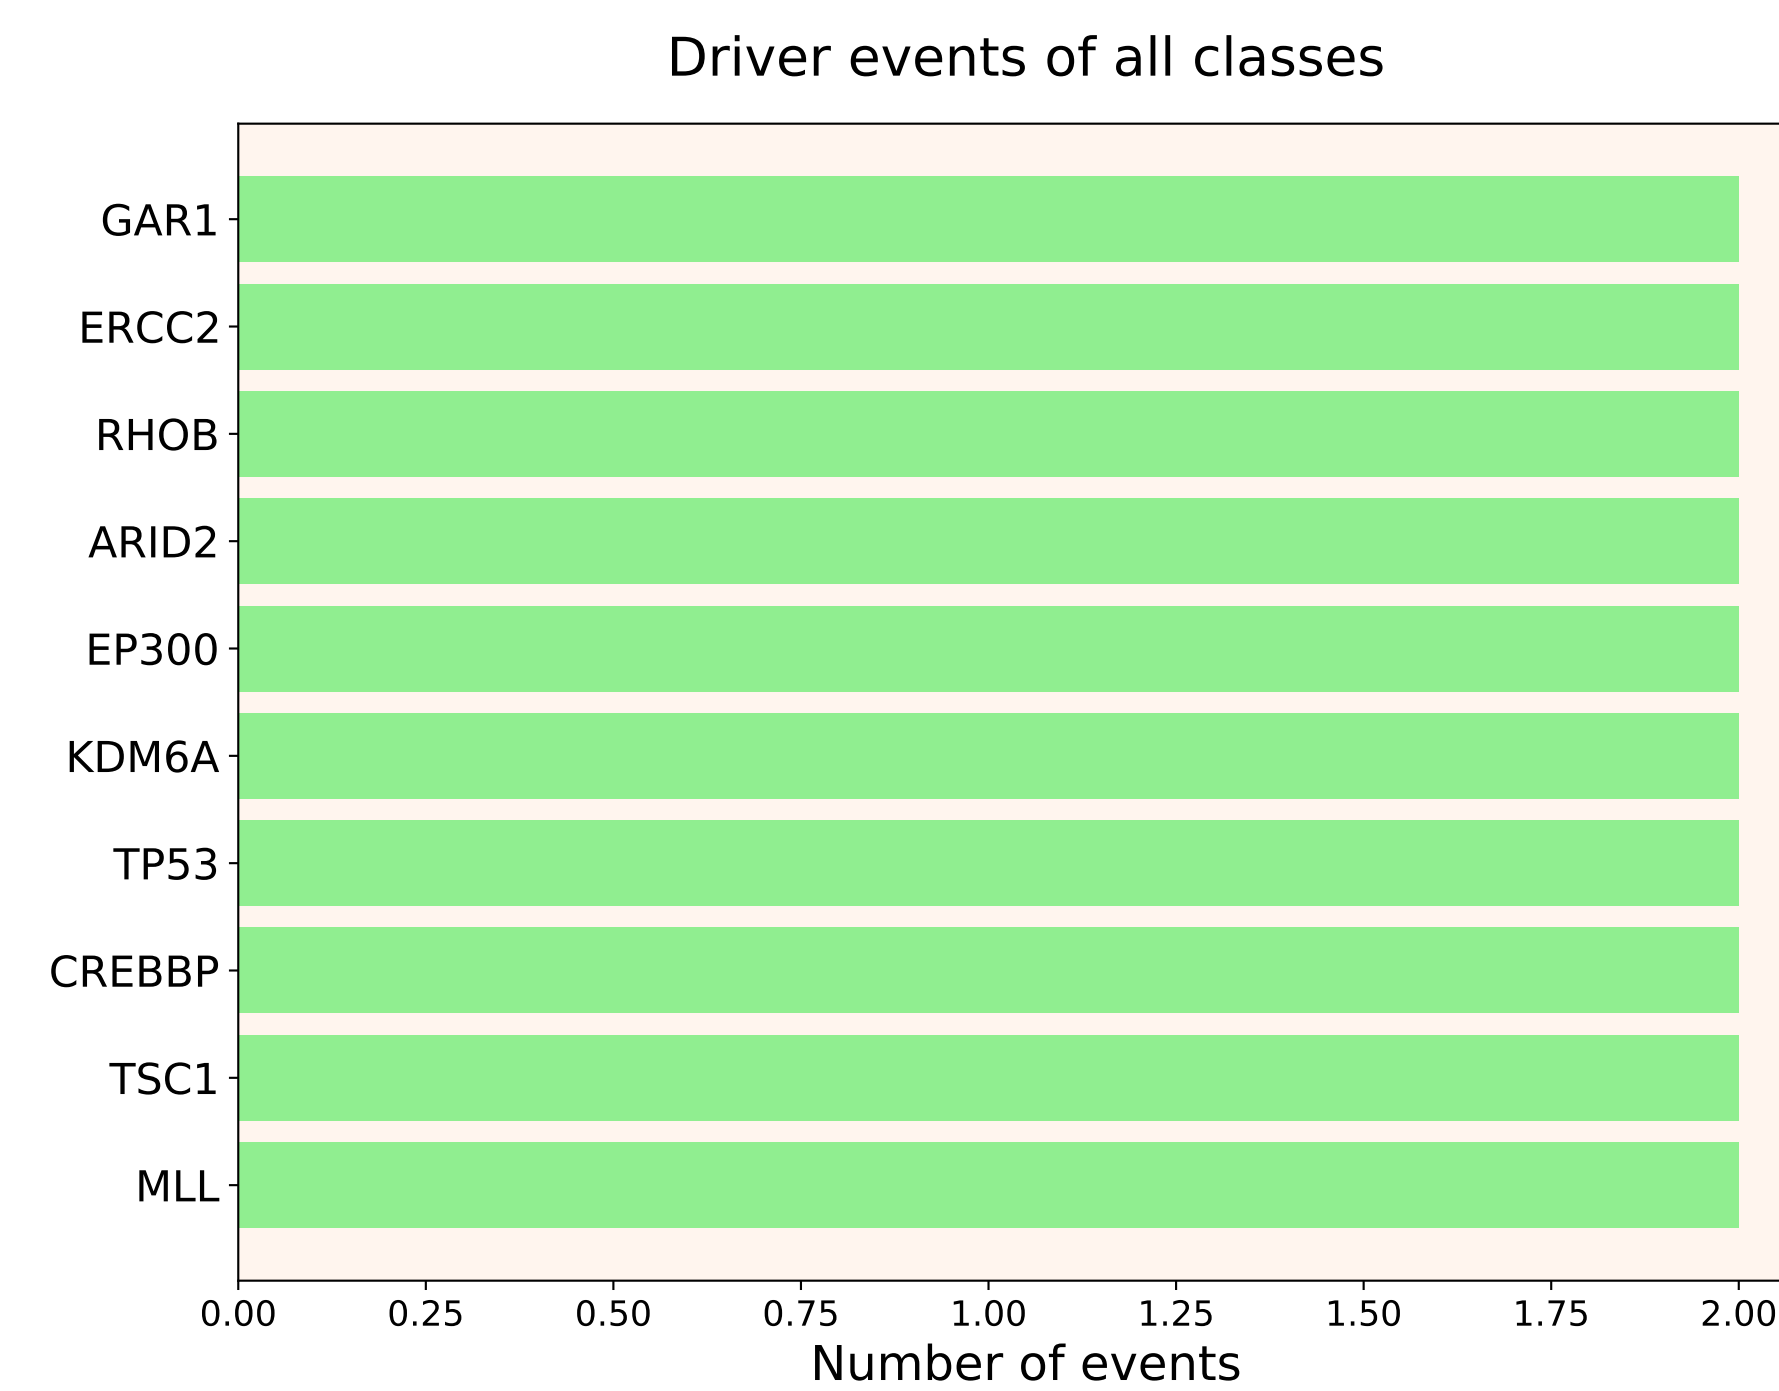

Supplement: Supplemental_Data_S1.zip [file Supplemental_Data_S1.zip]

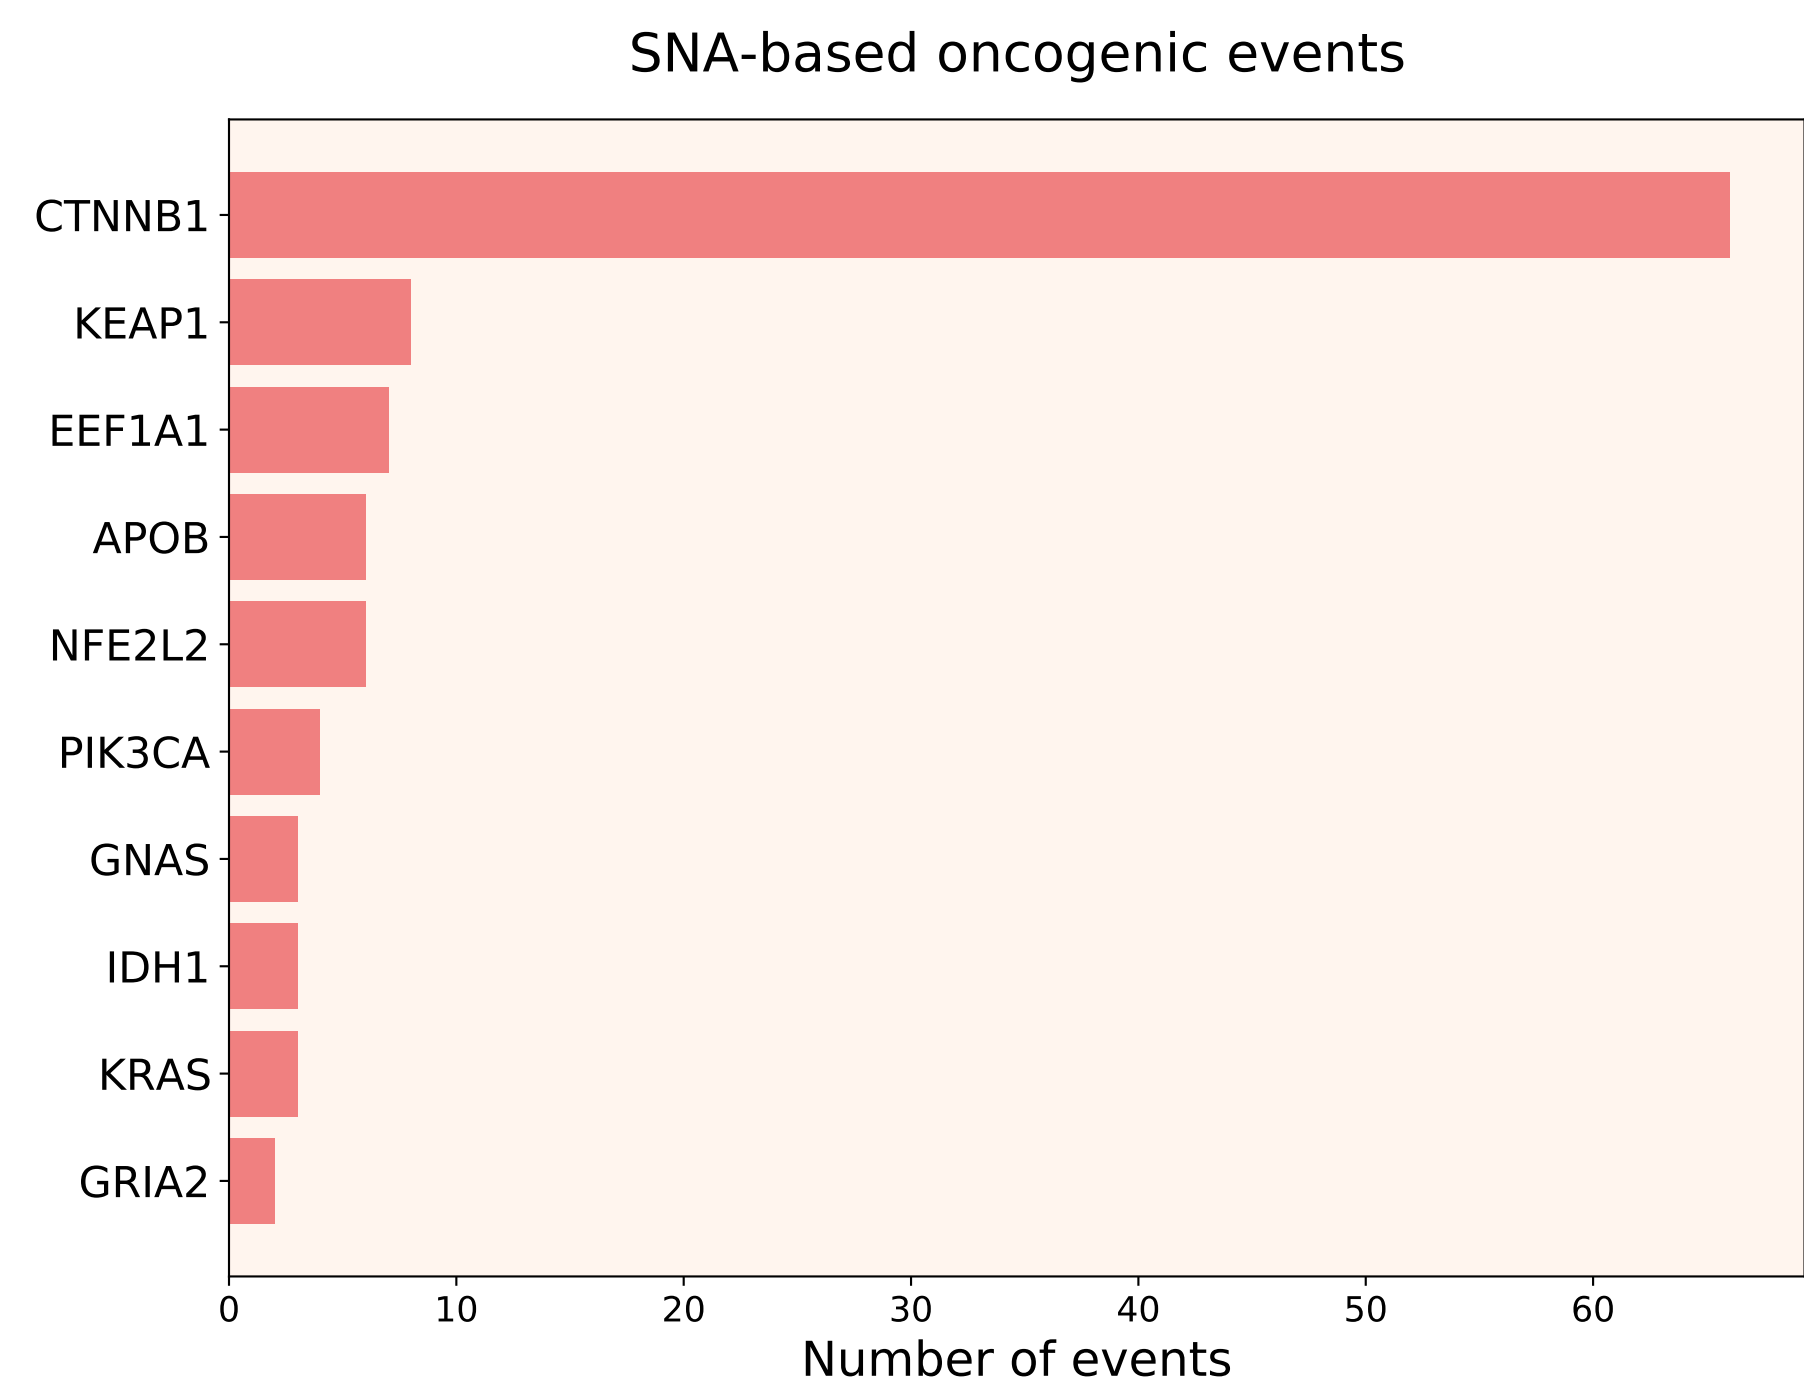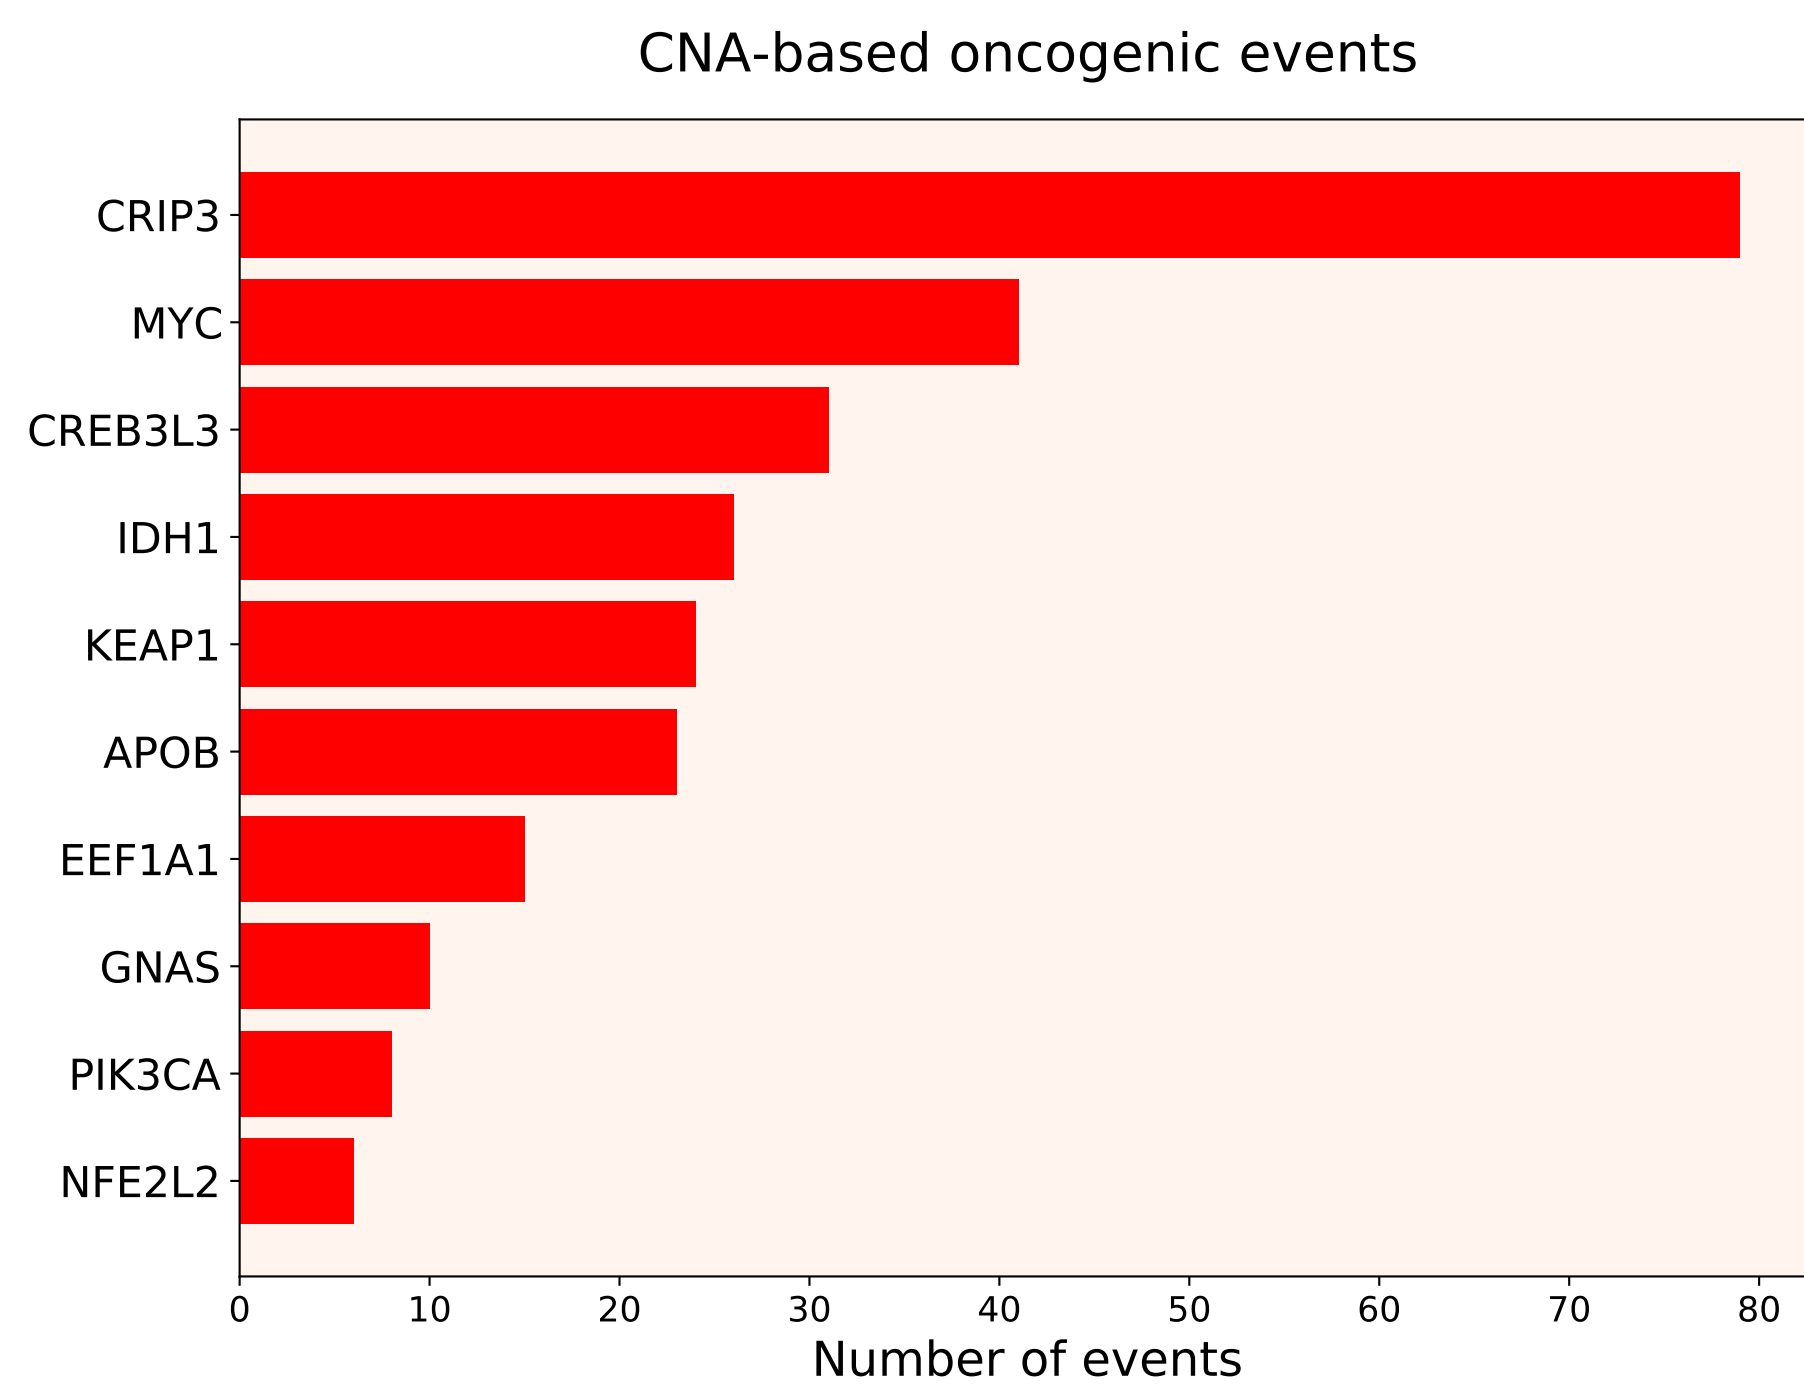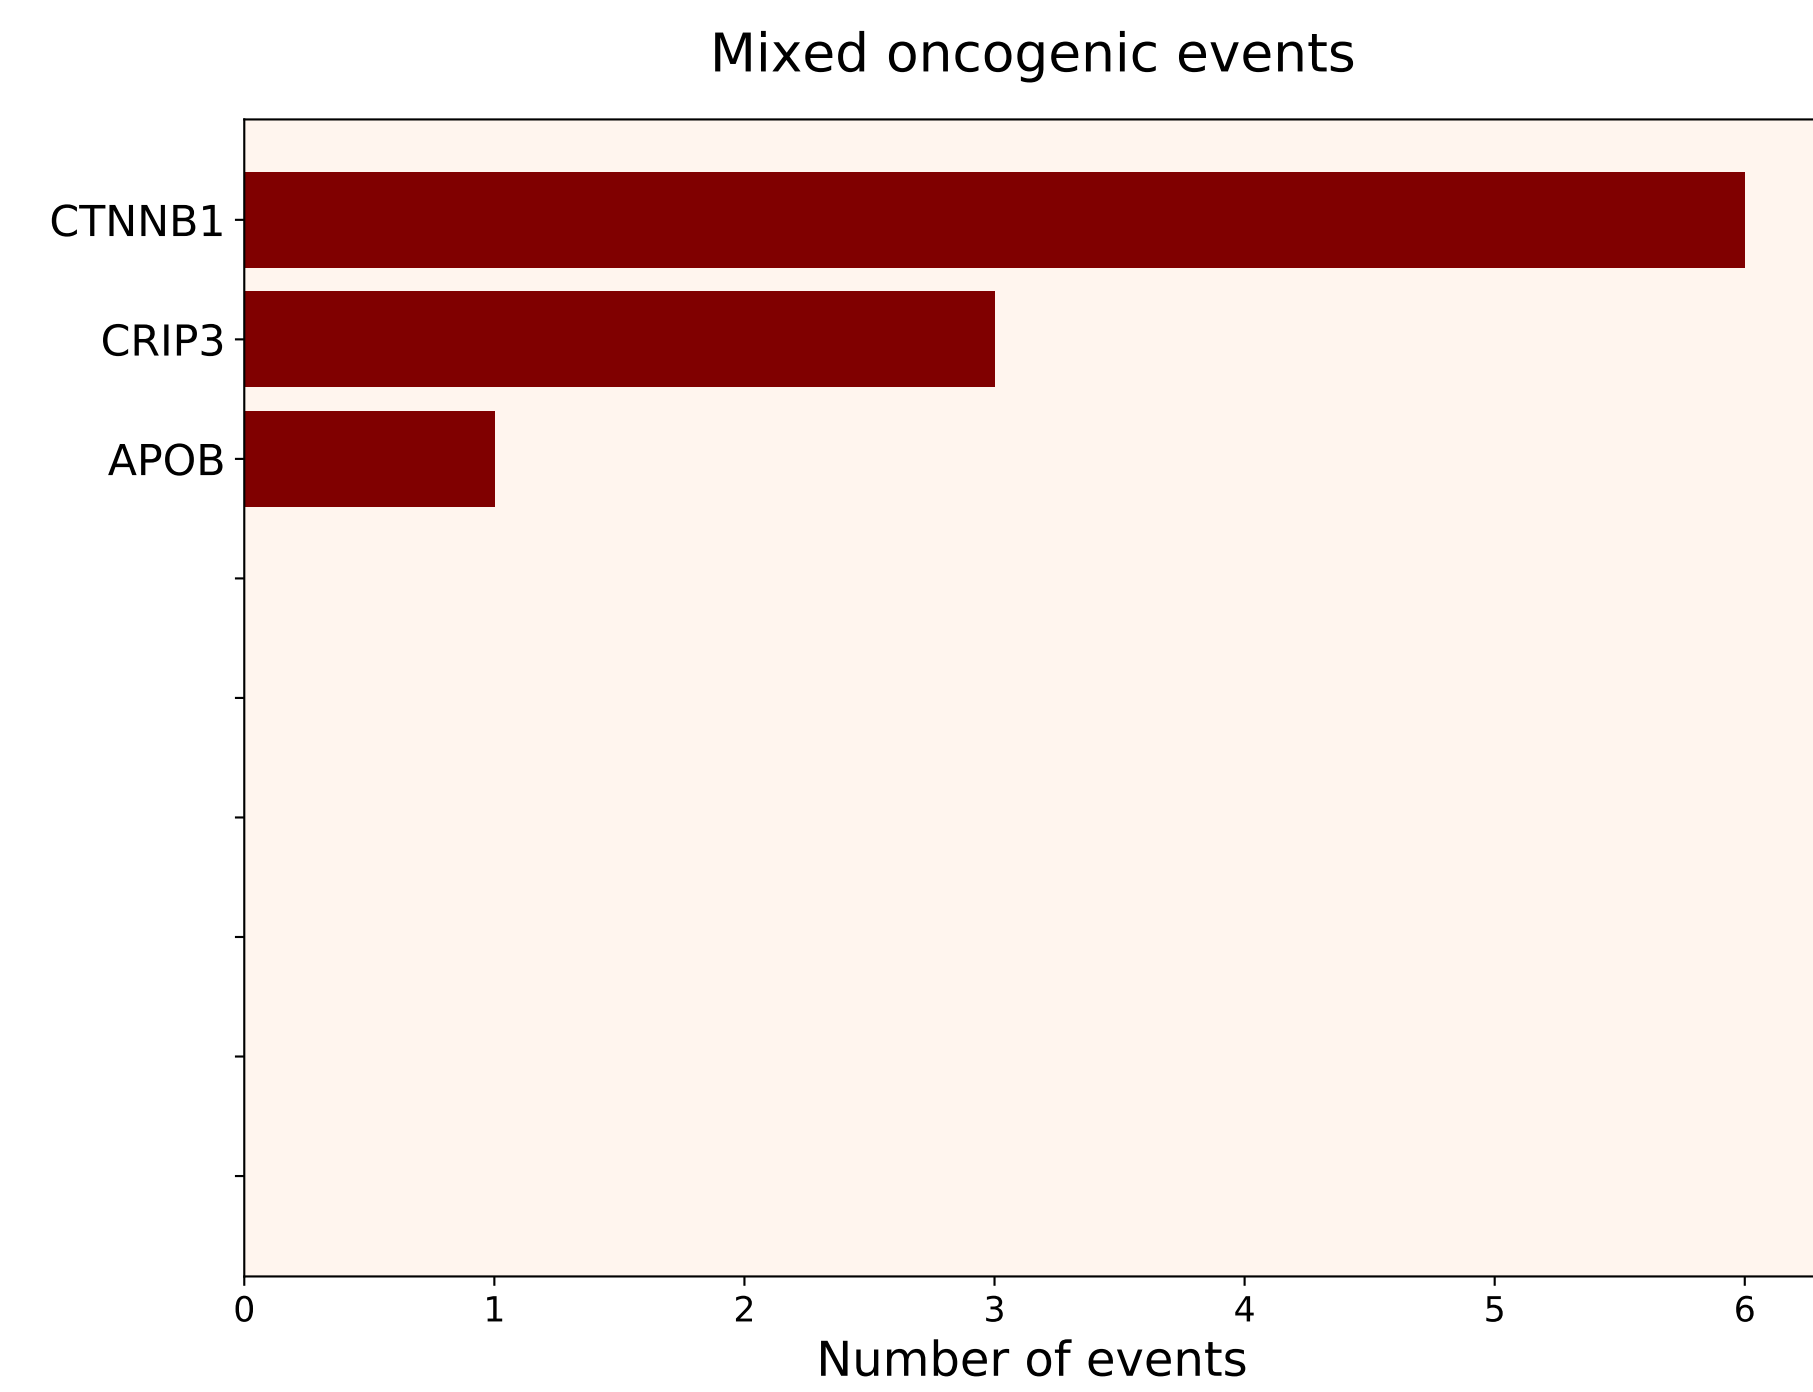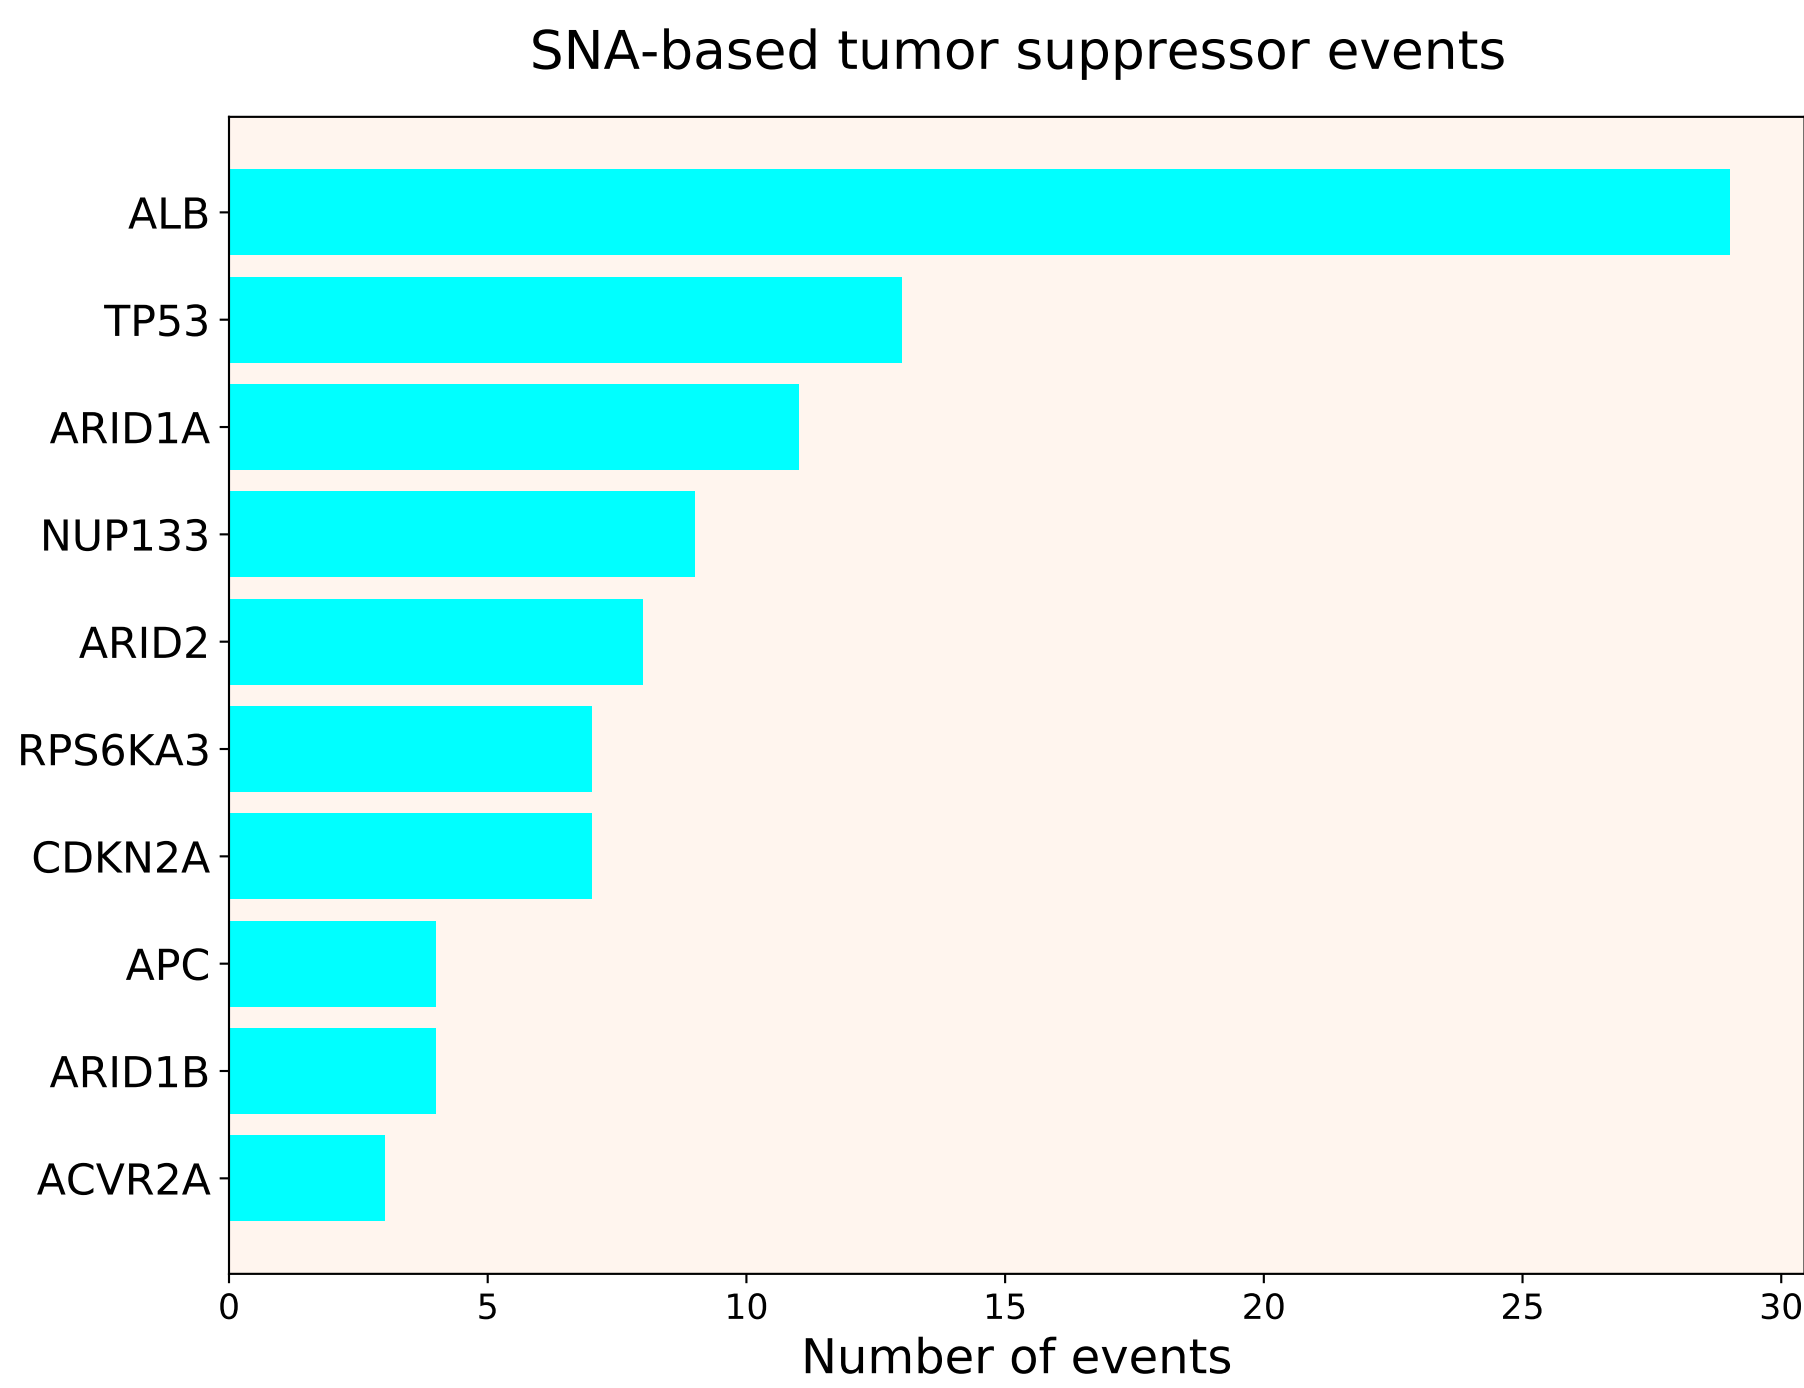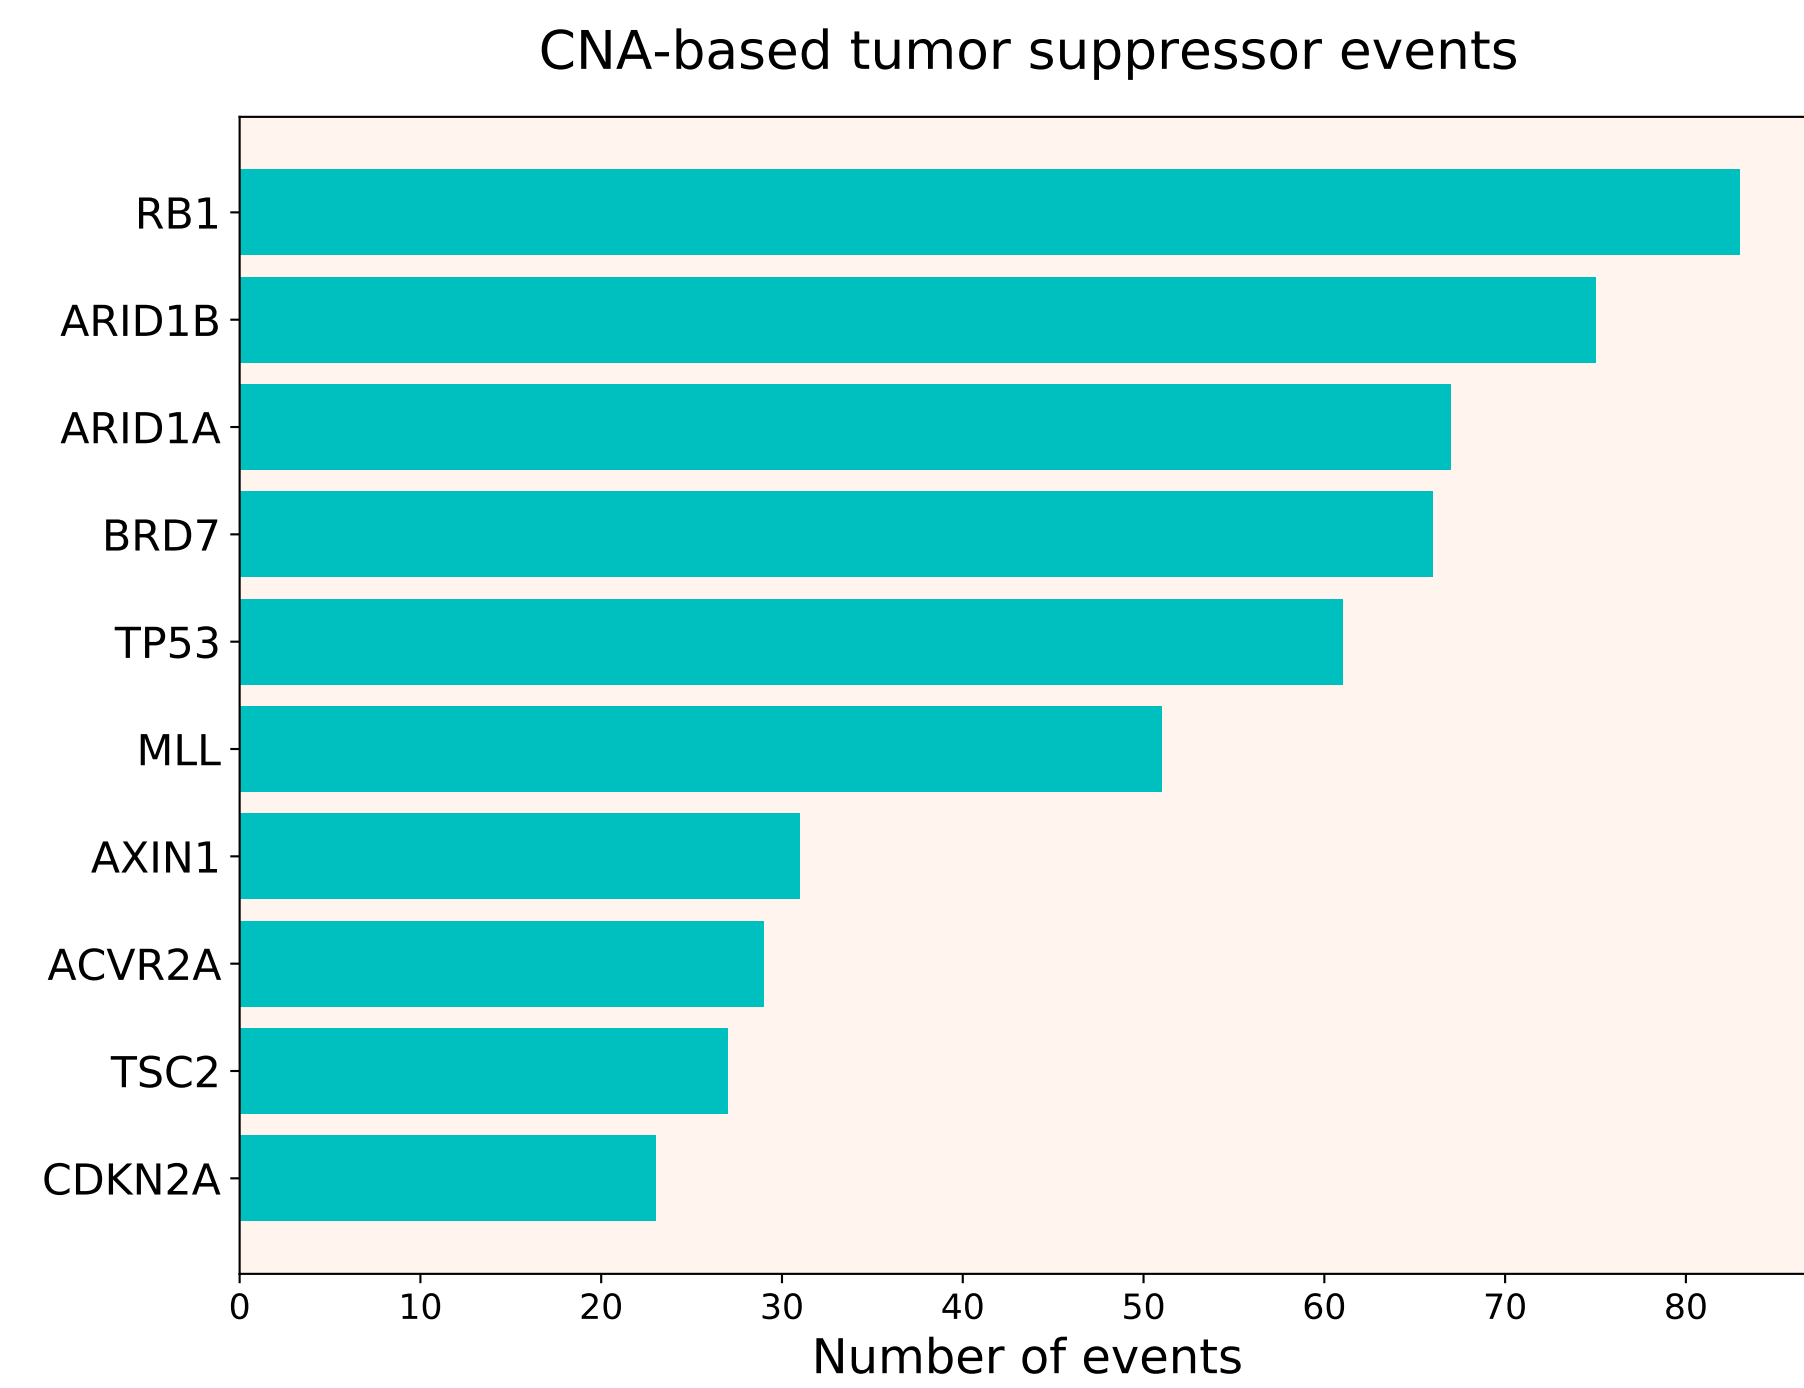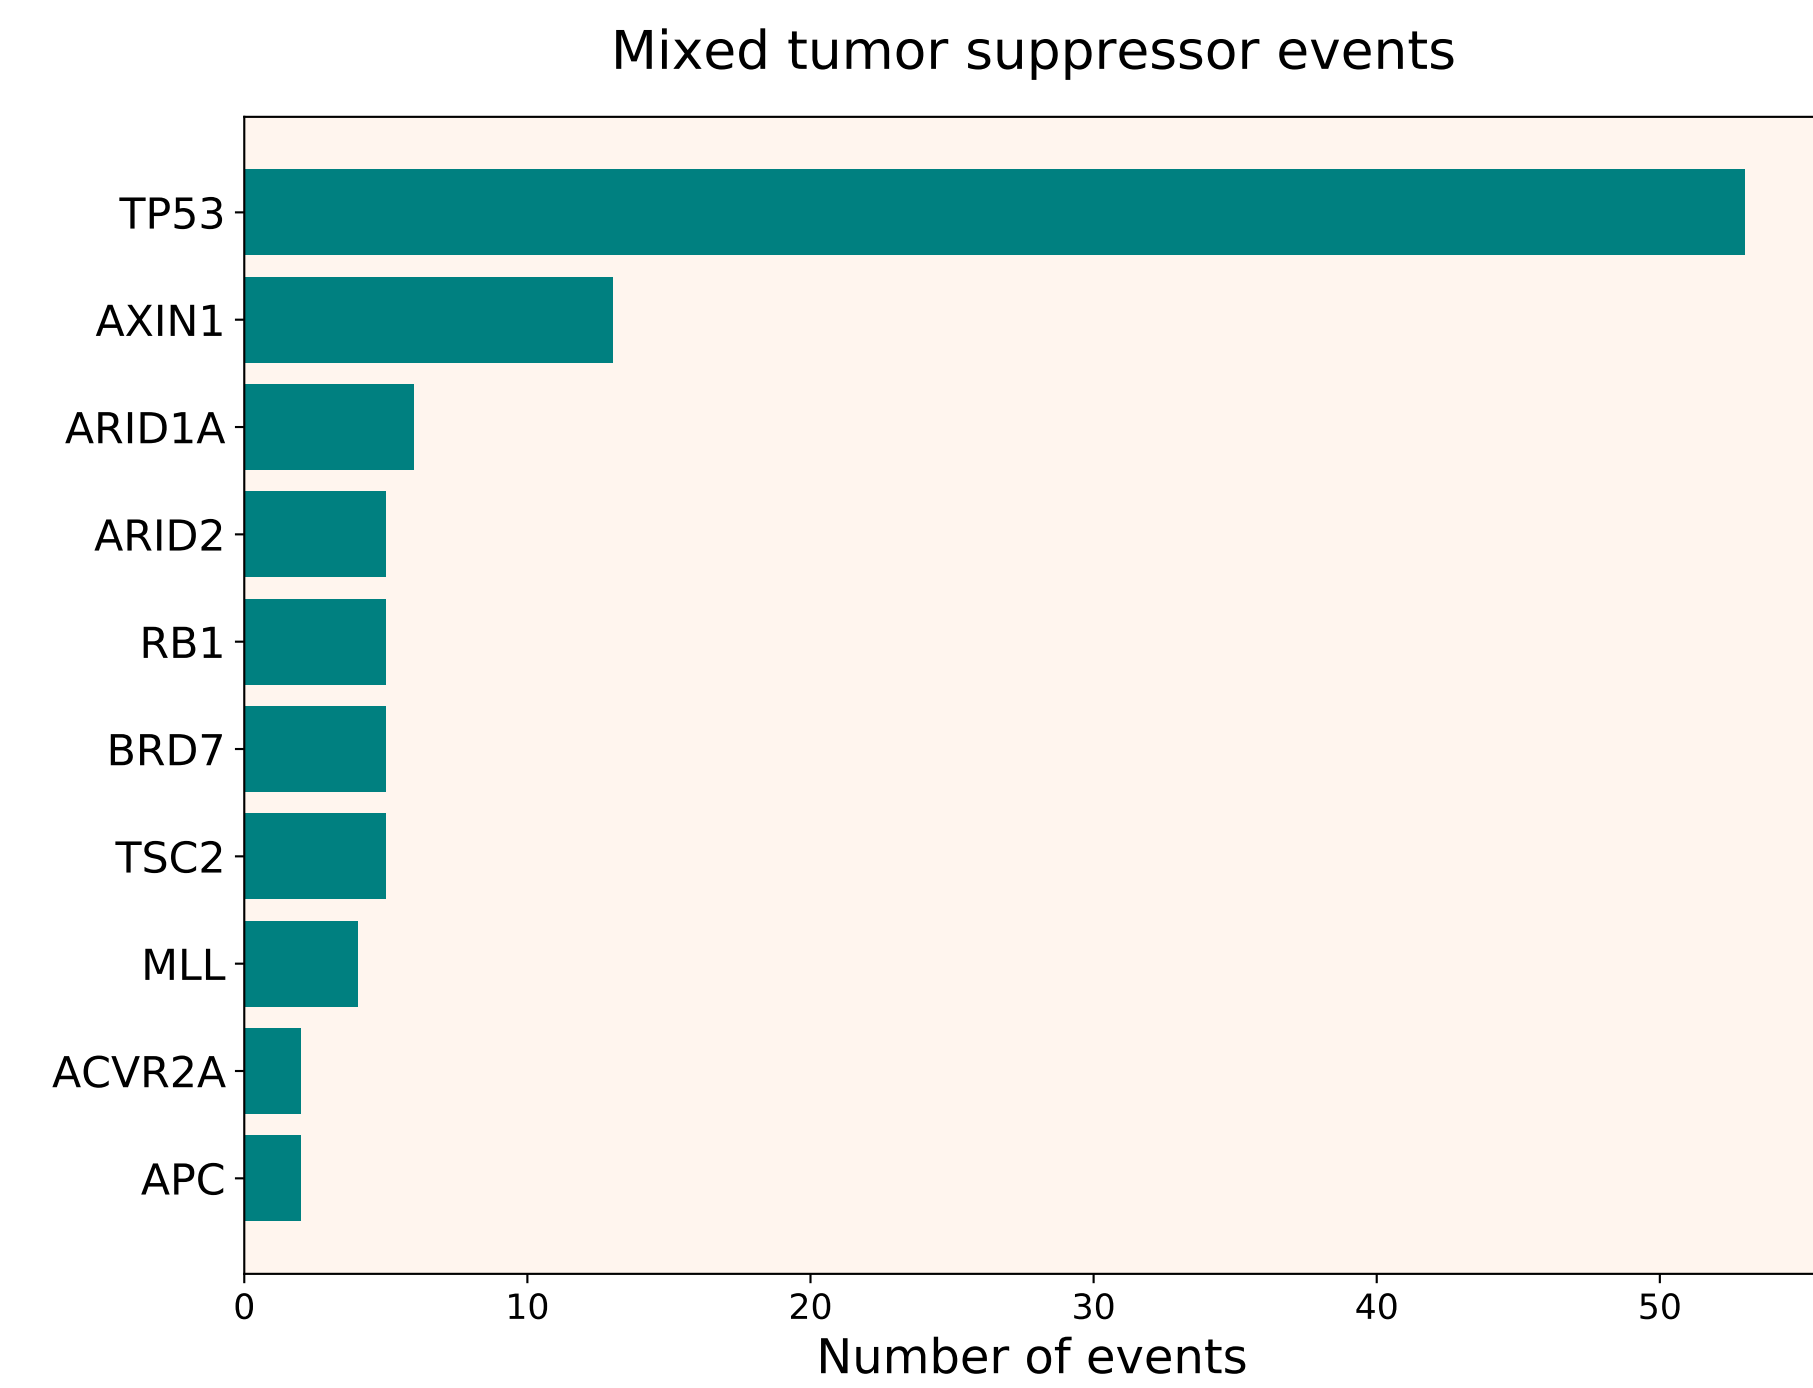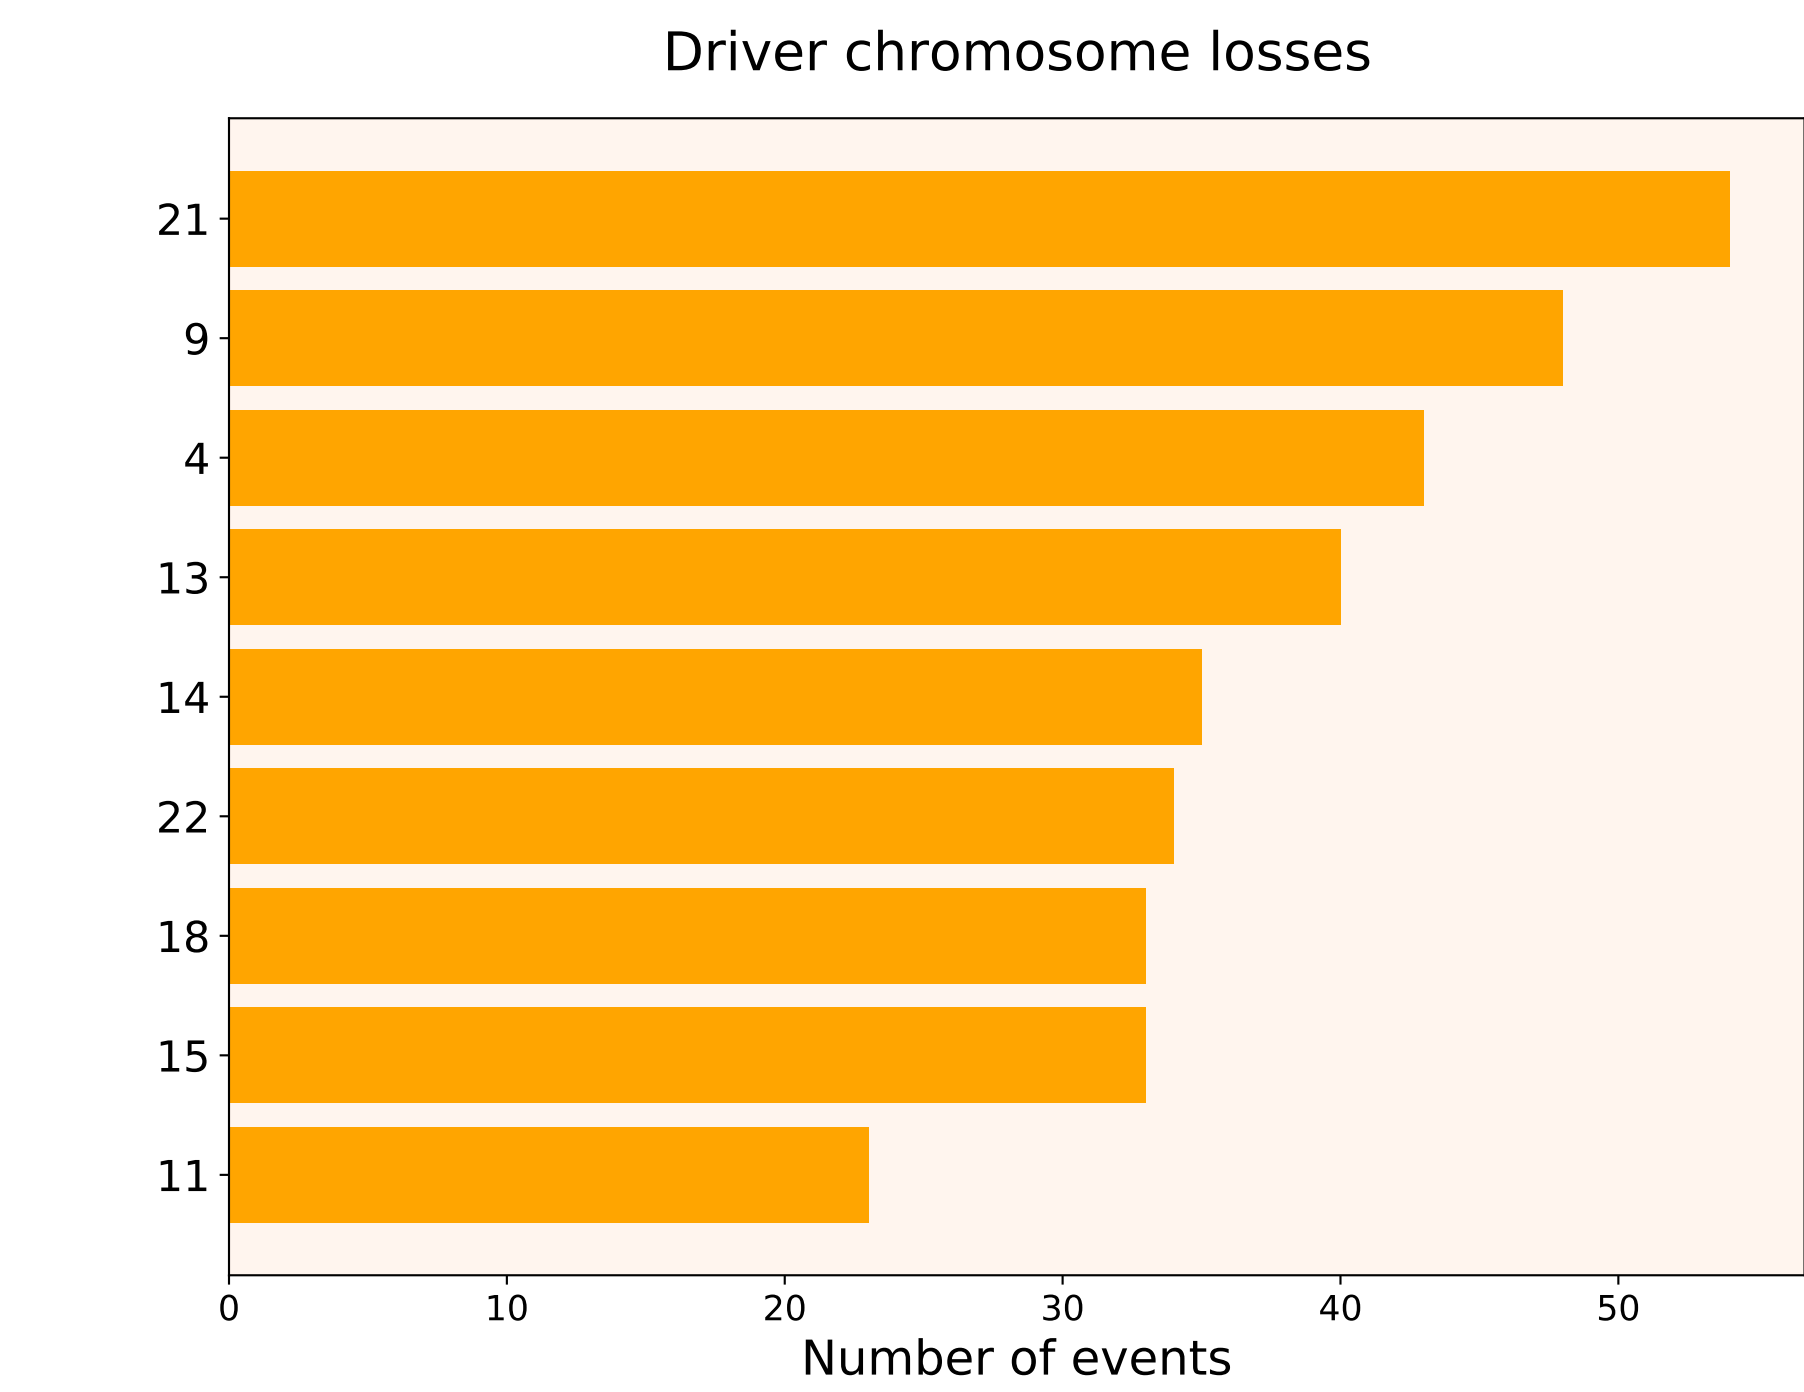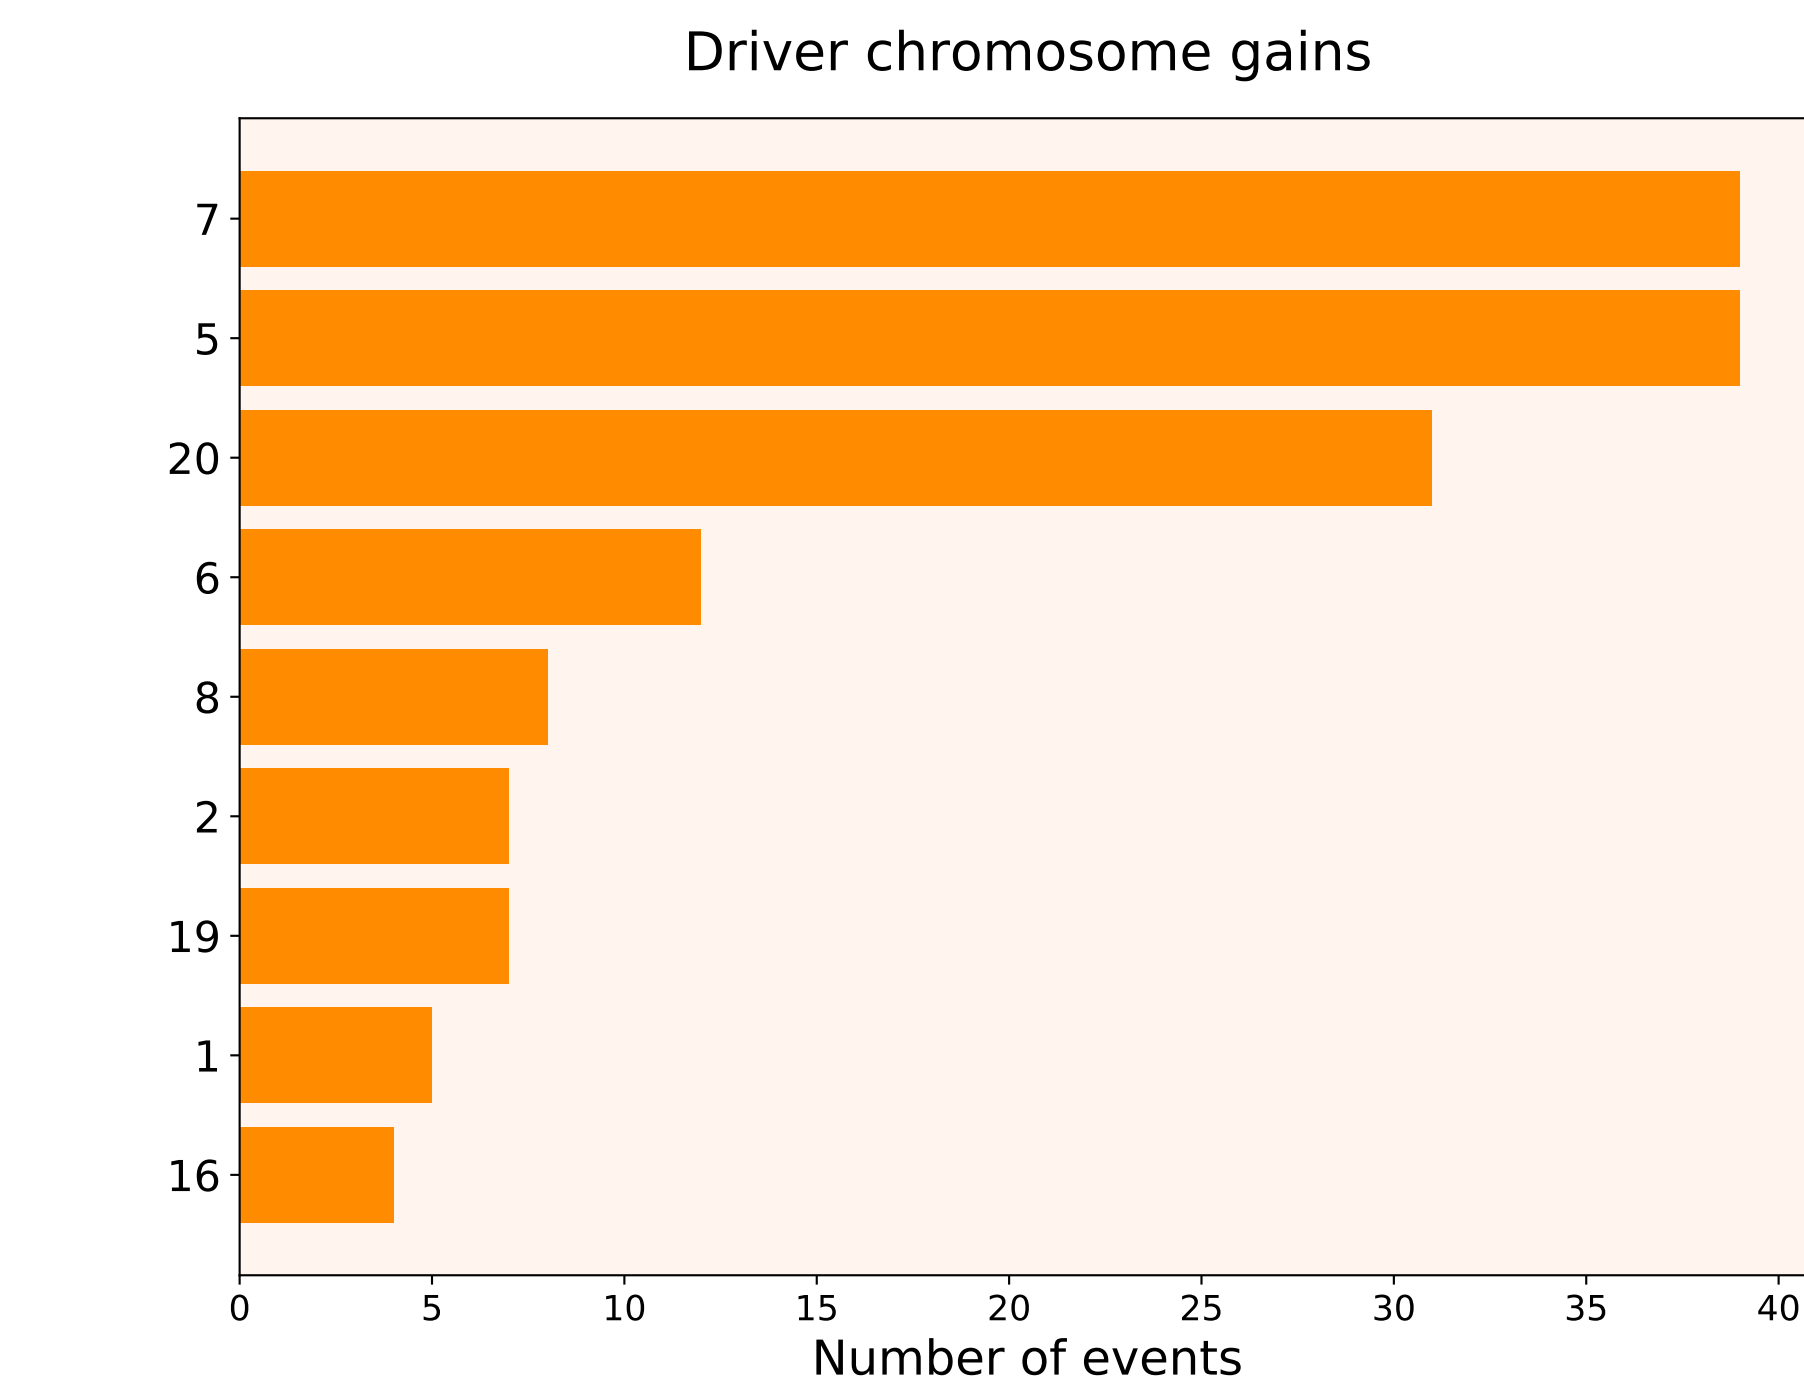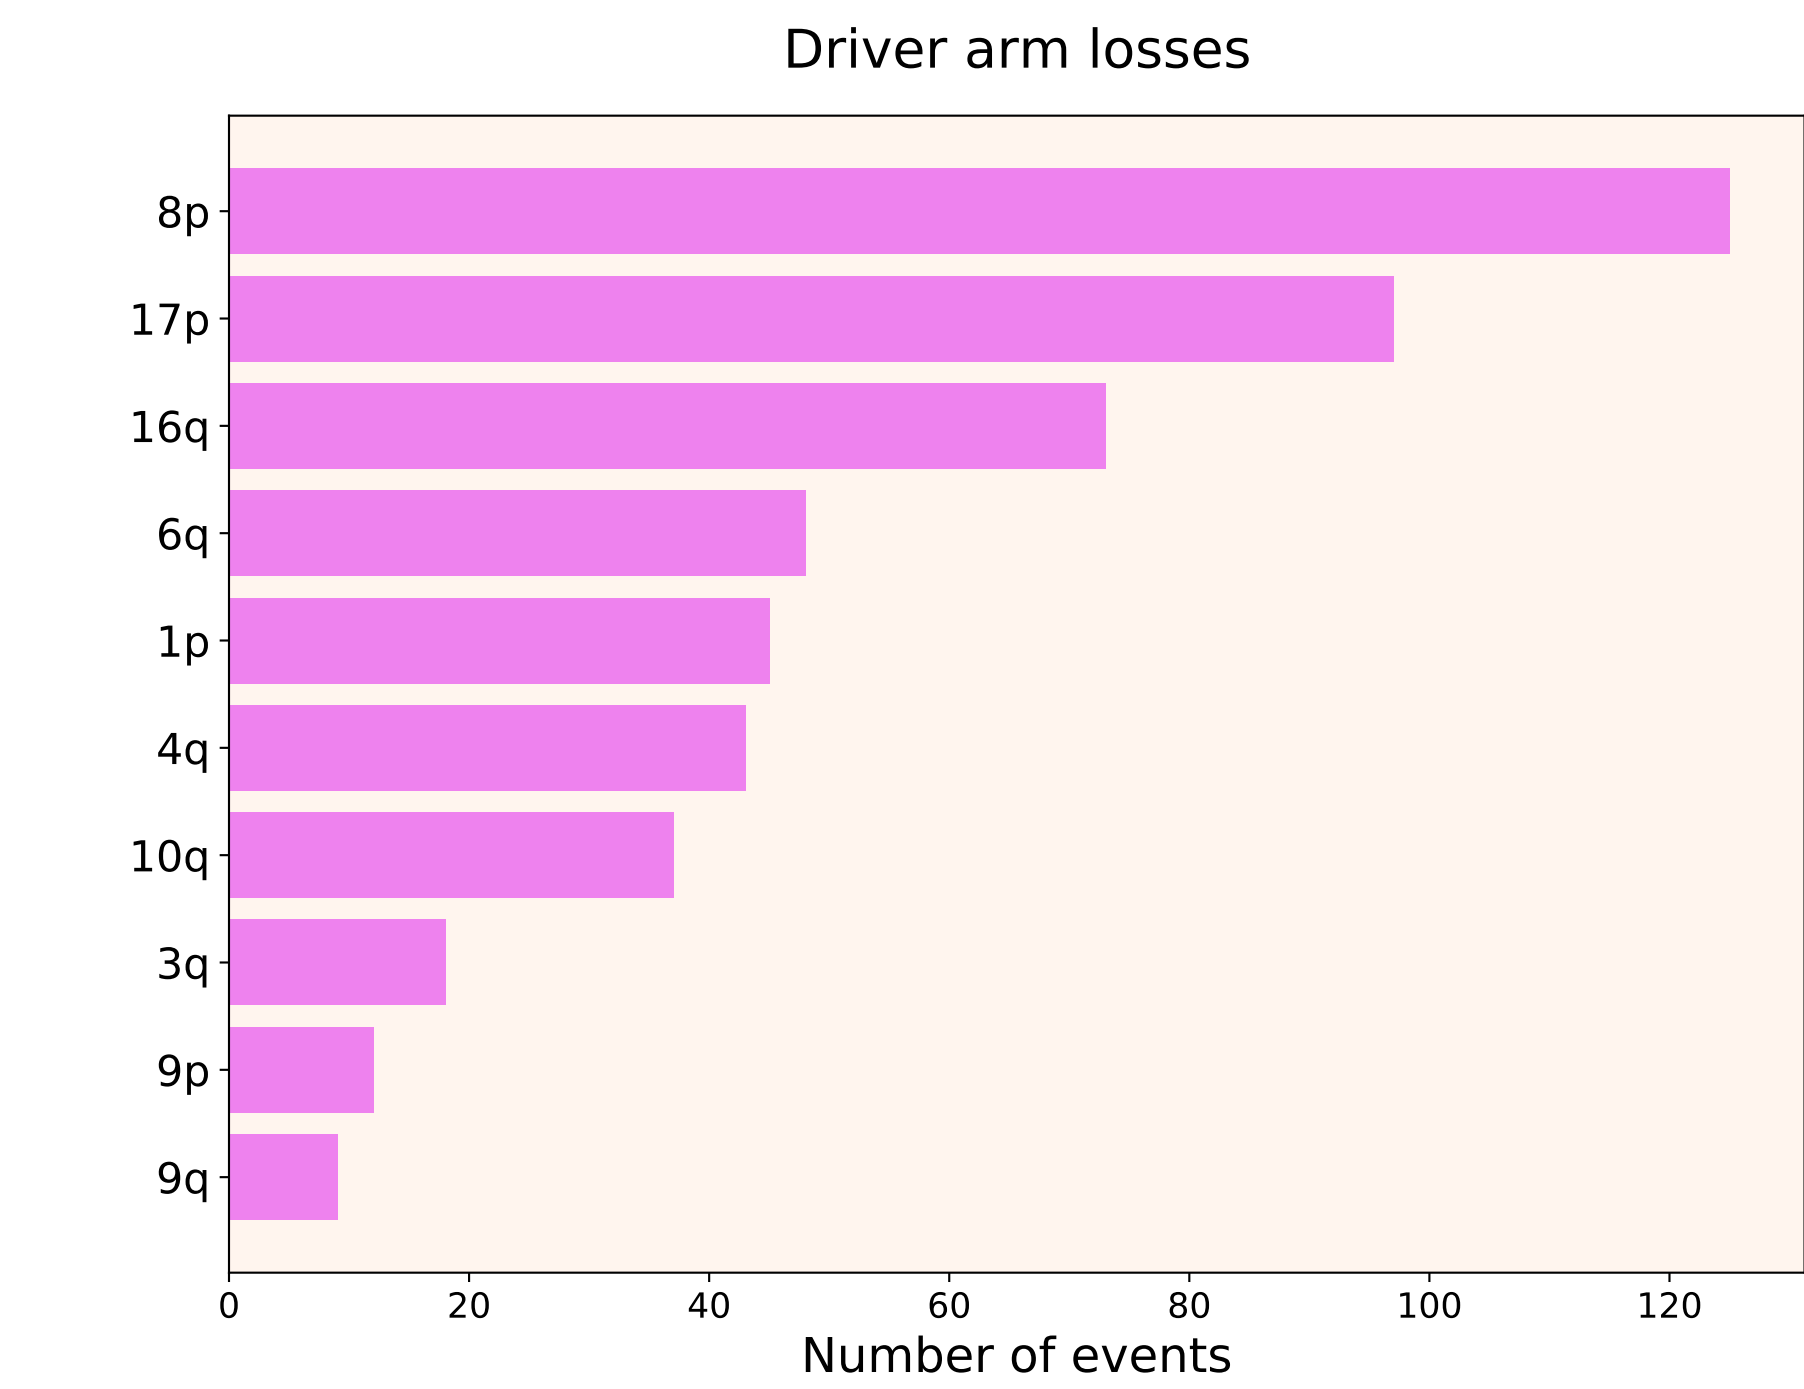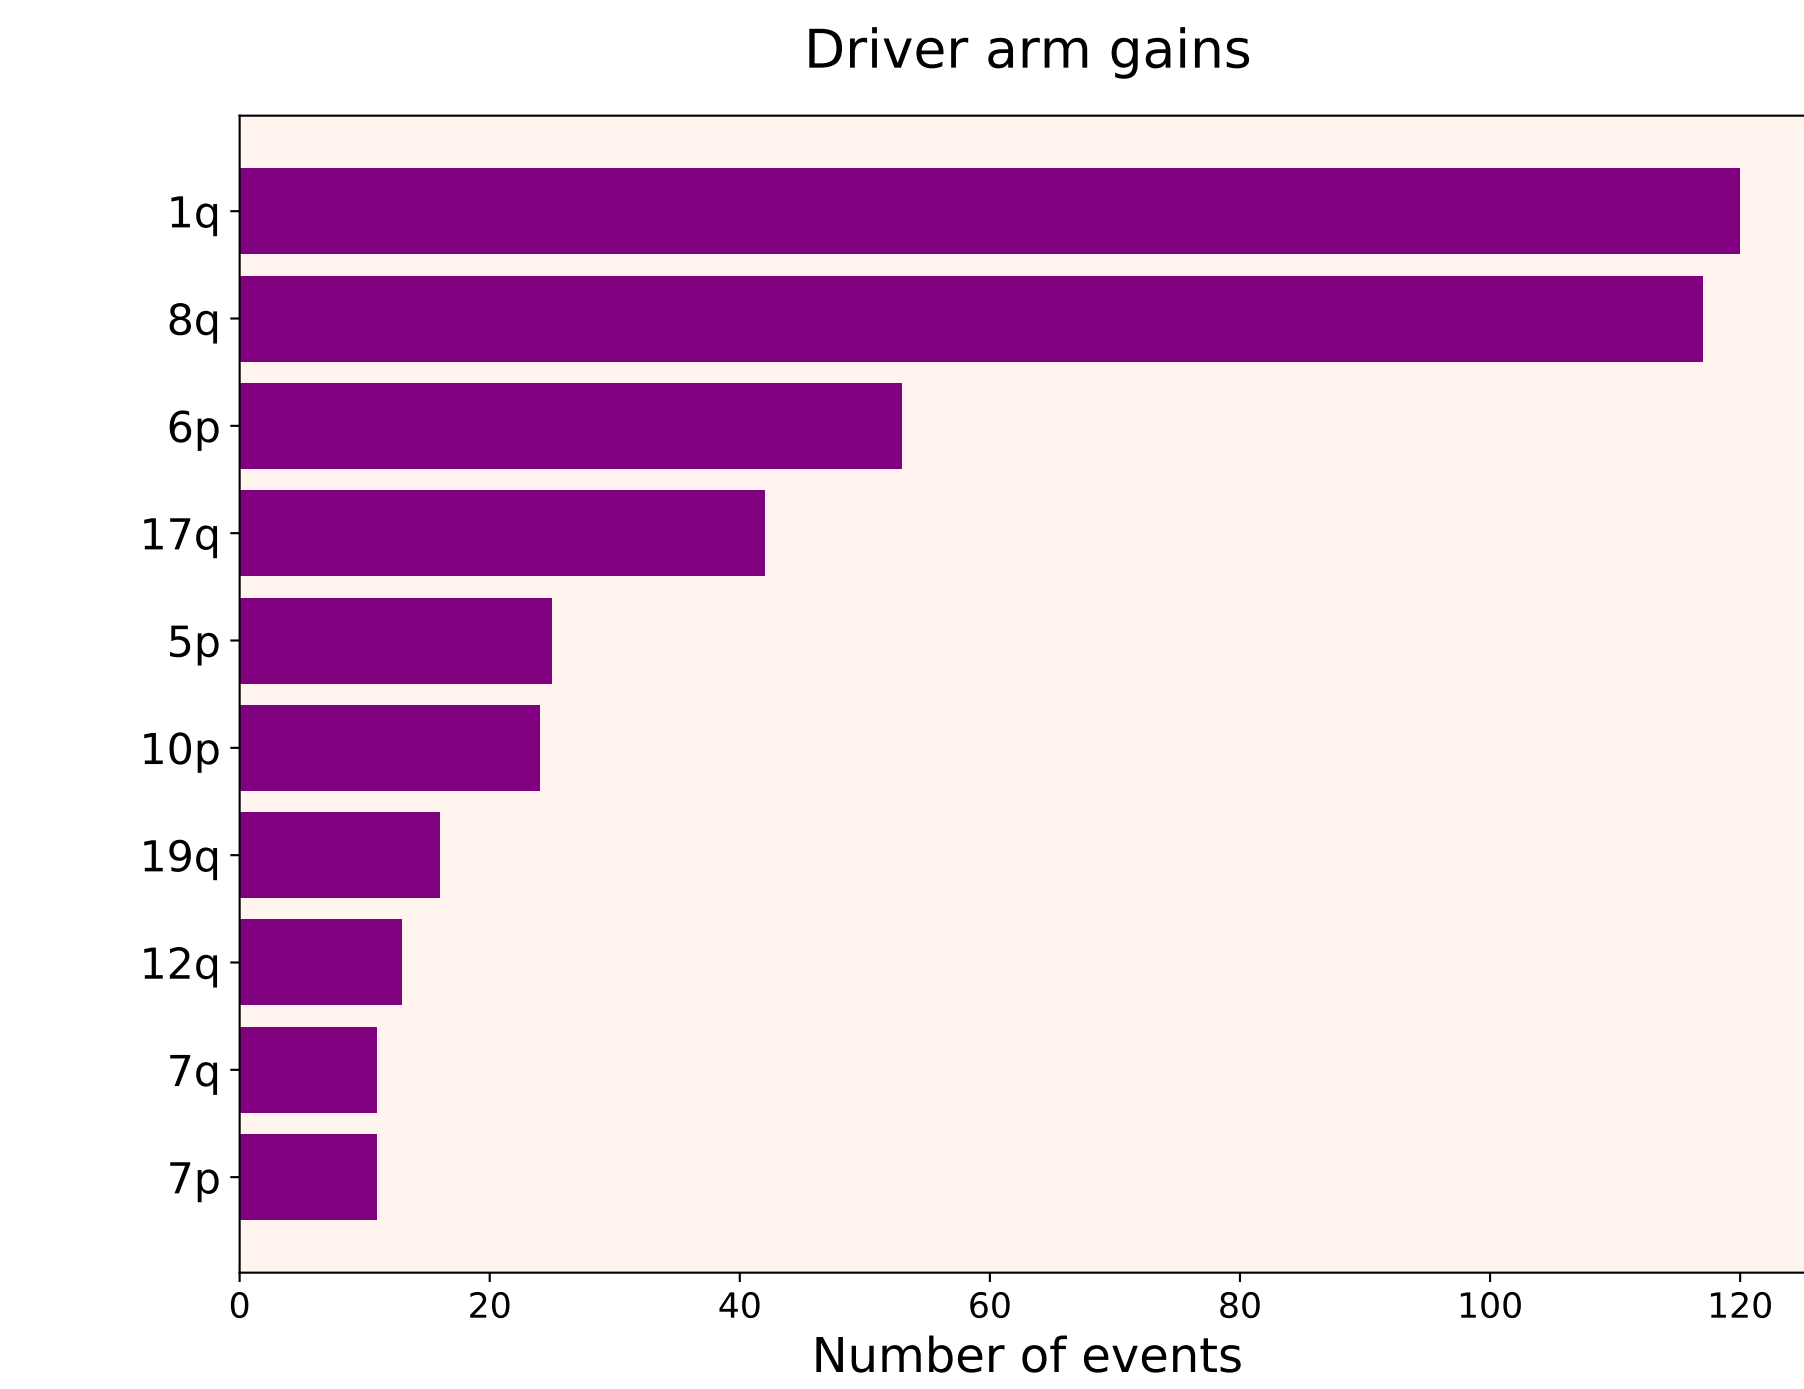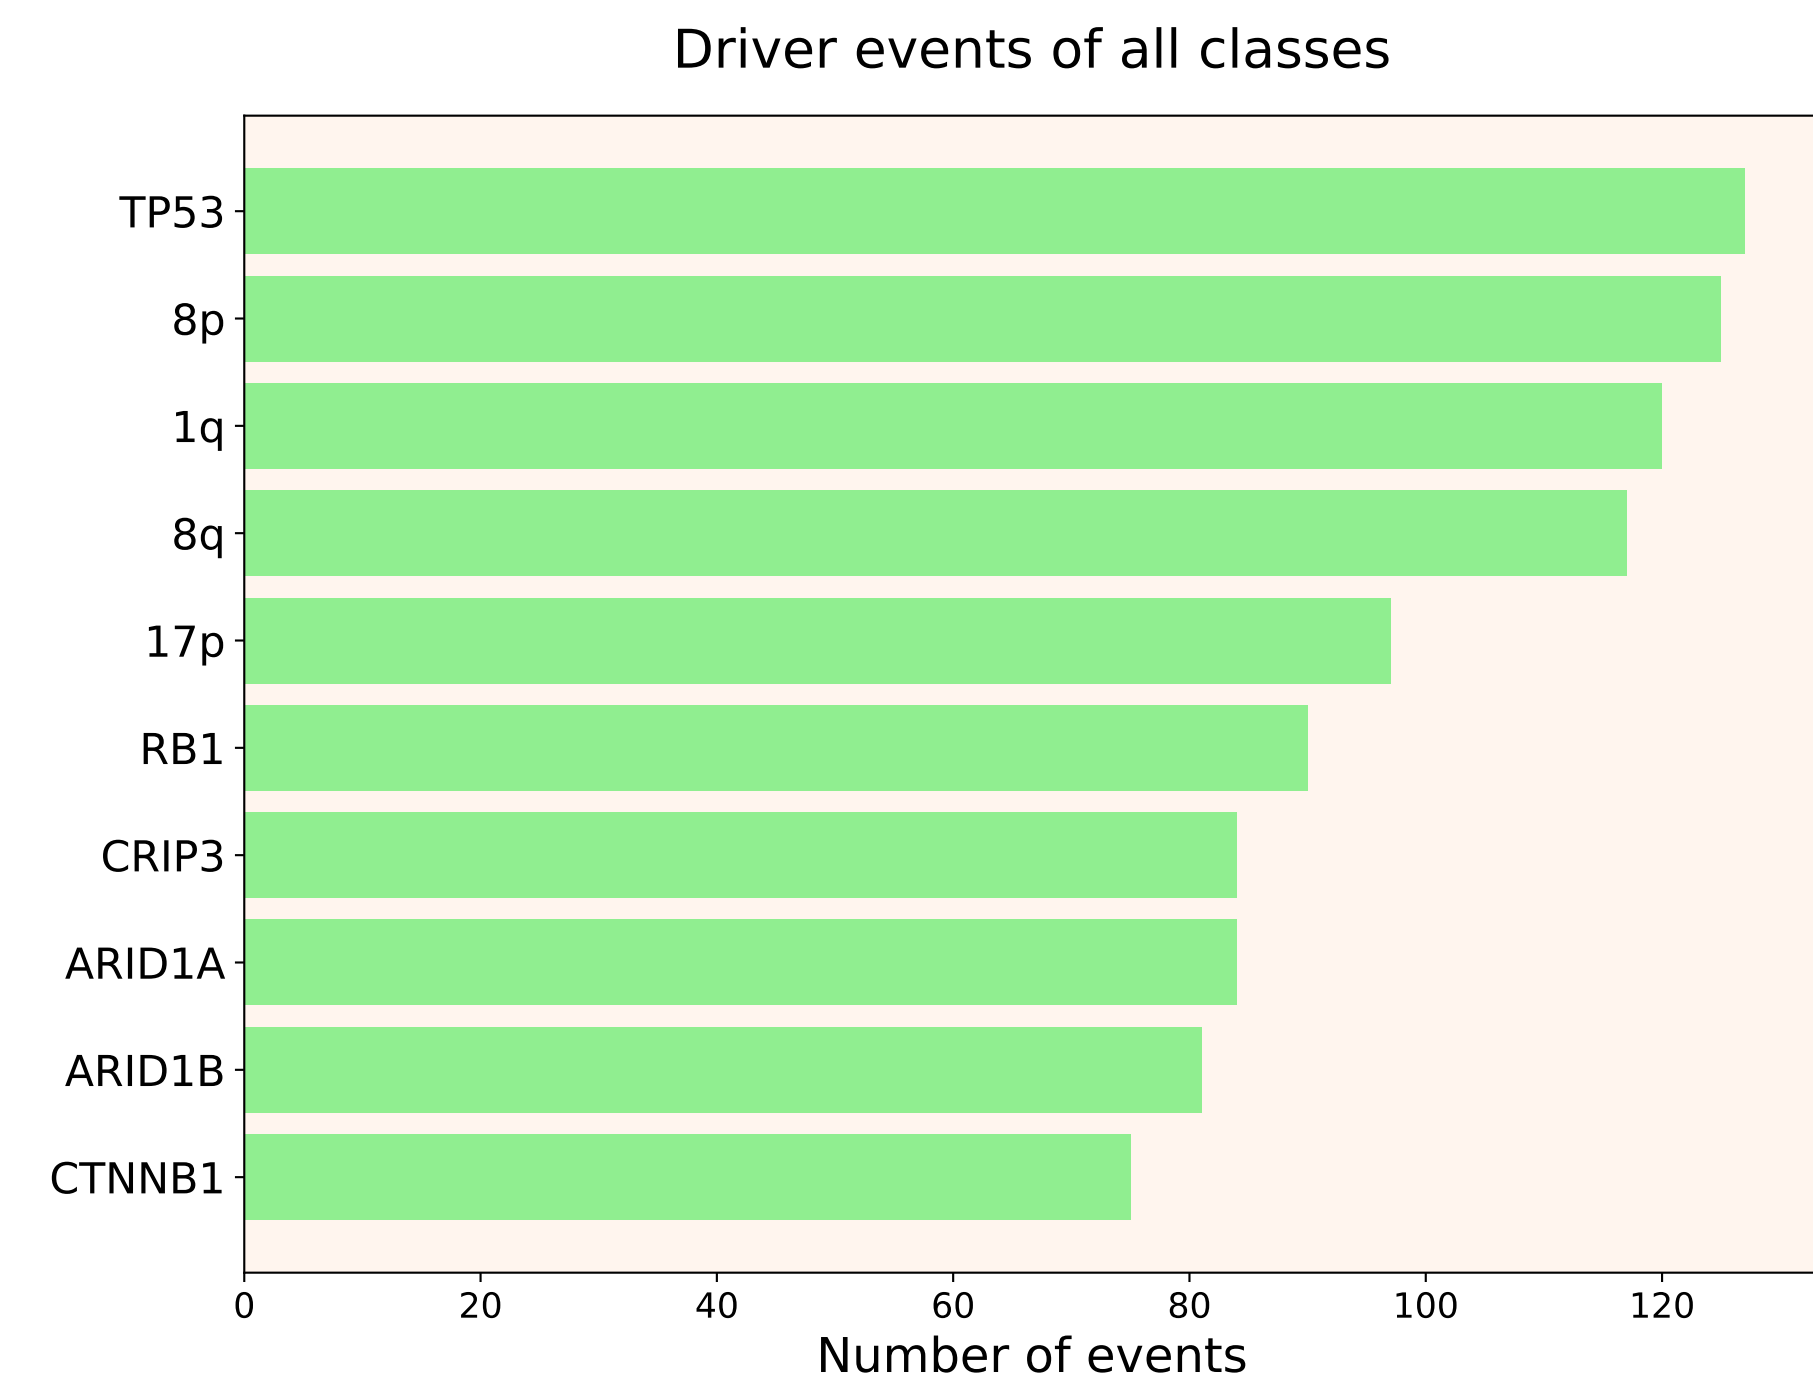

Supplement: Supplemental_Data_S1.zip [file Supplemental_Data_S1.zip]

# LIHC\_FEMALE

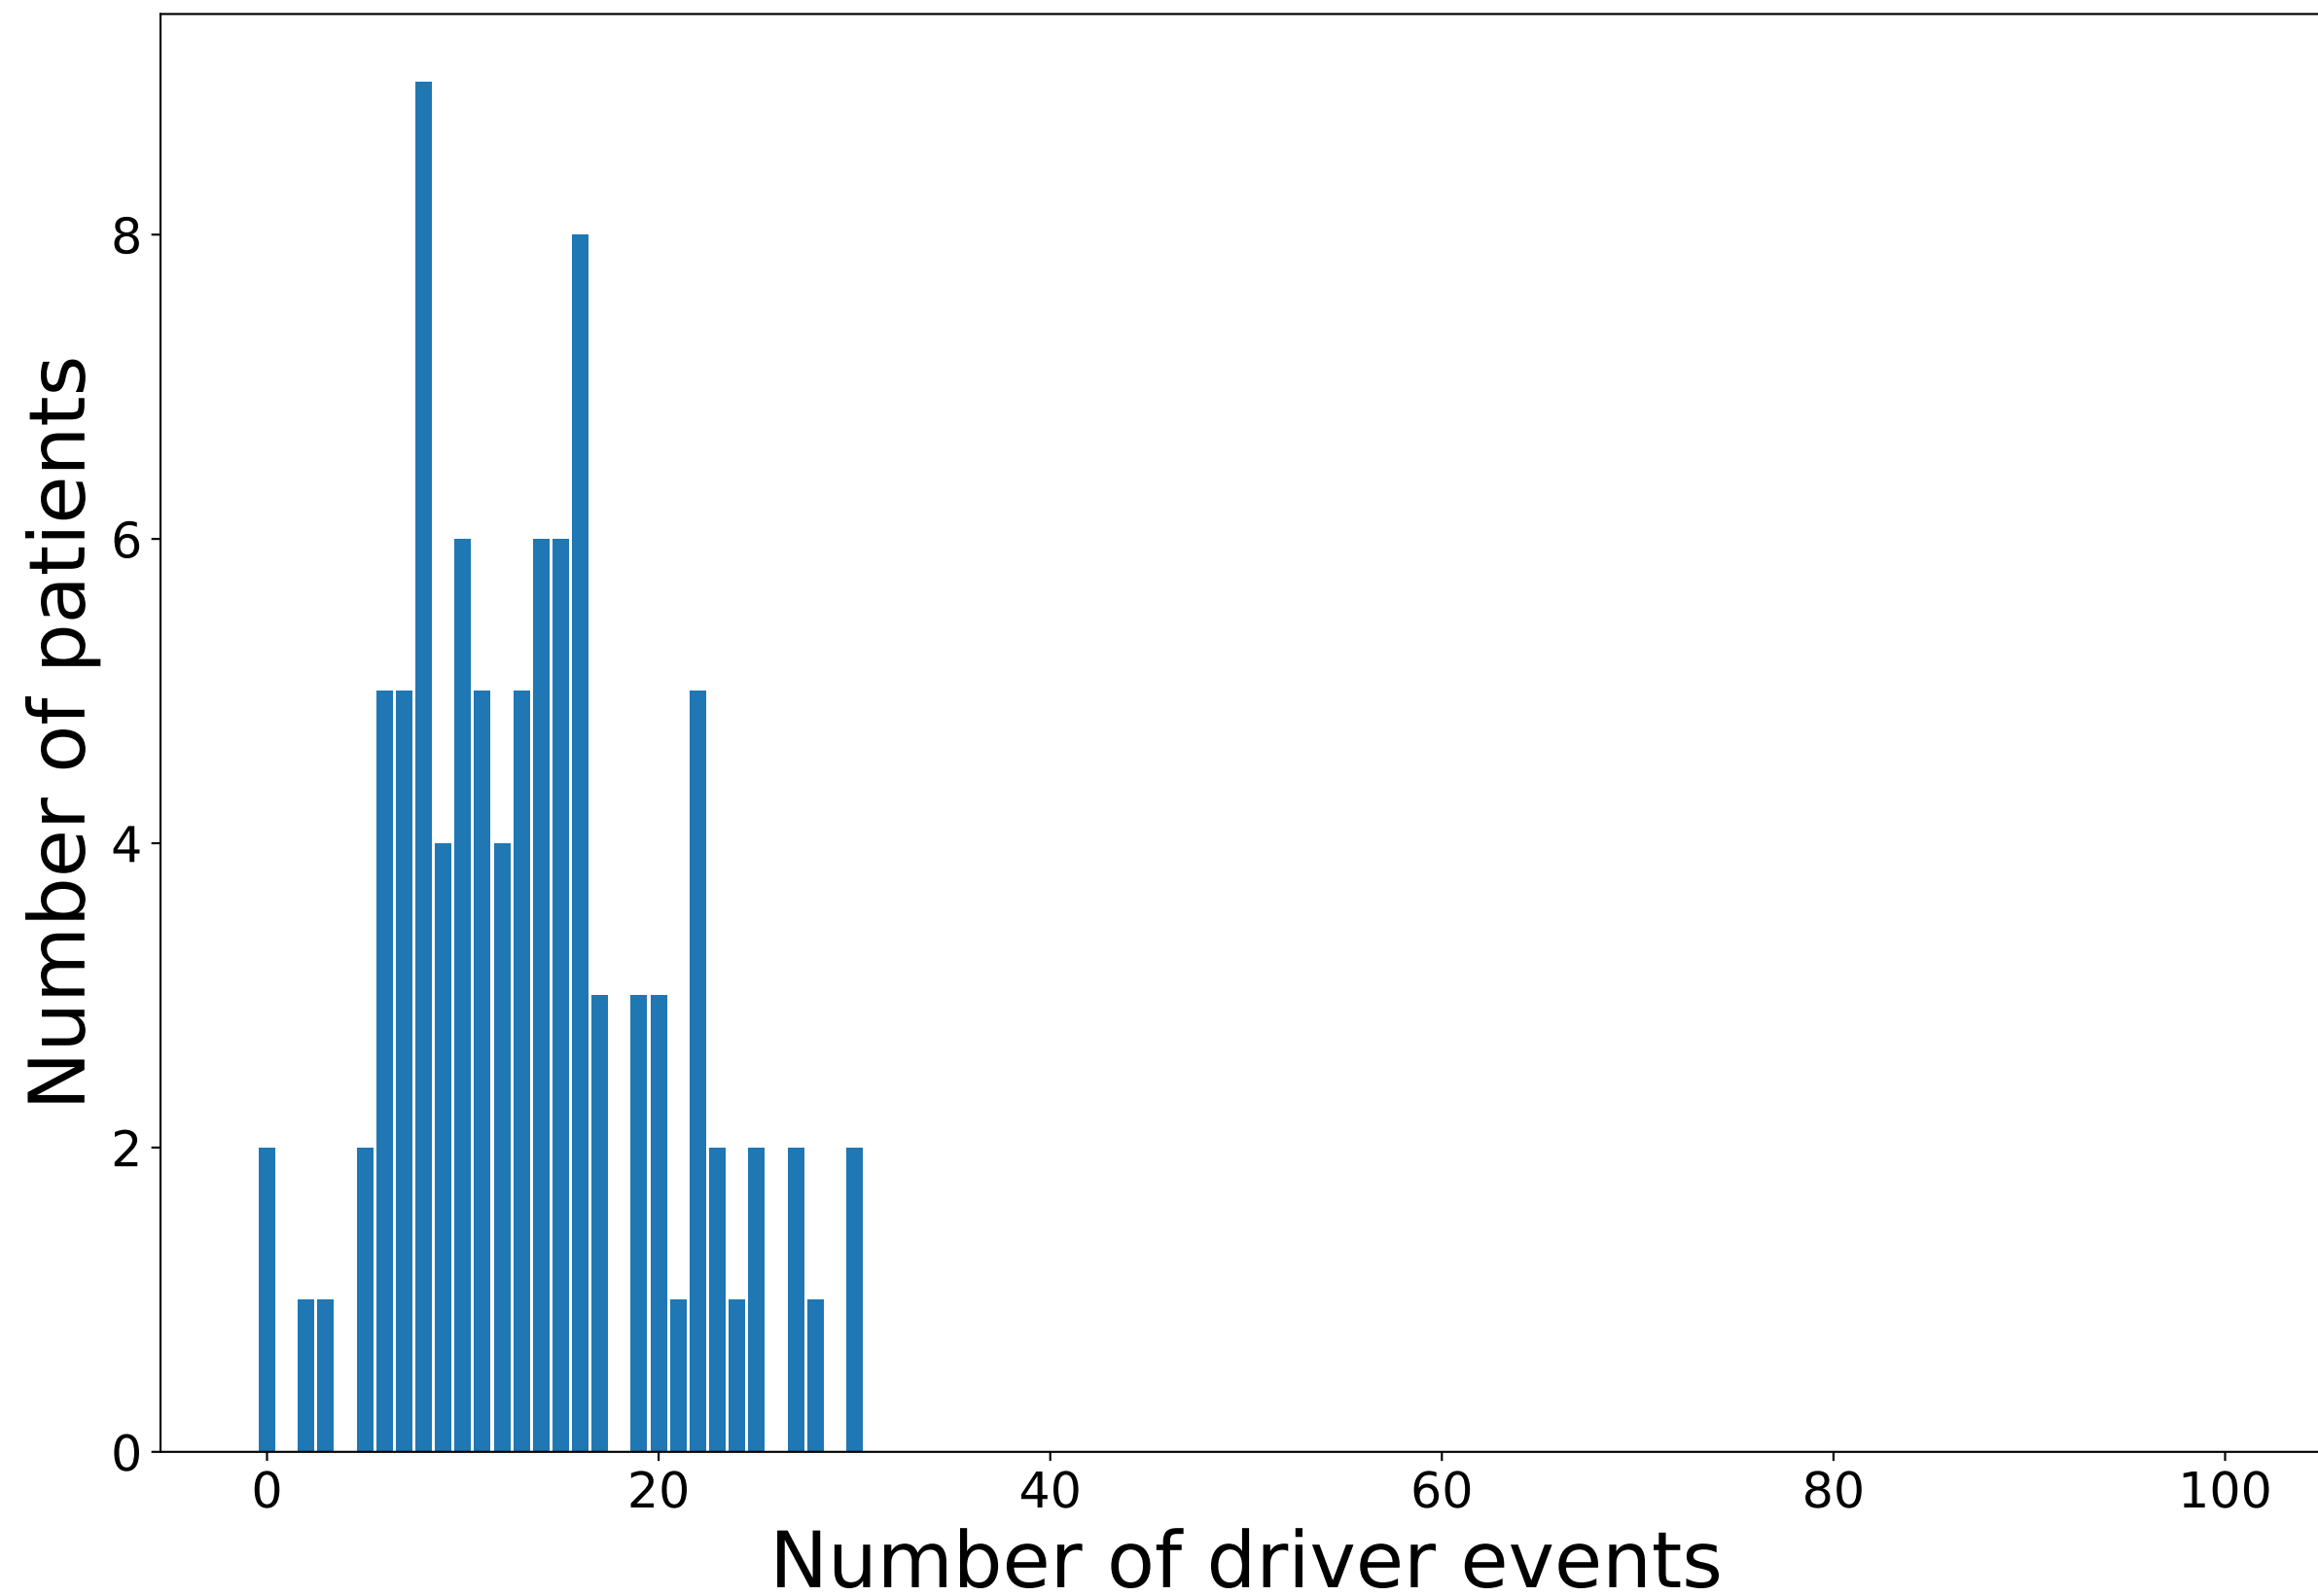

Supplement: Supplemental_Data_S1.zip [file Supplemental_Data_S1.zip]

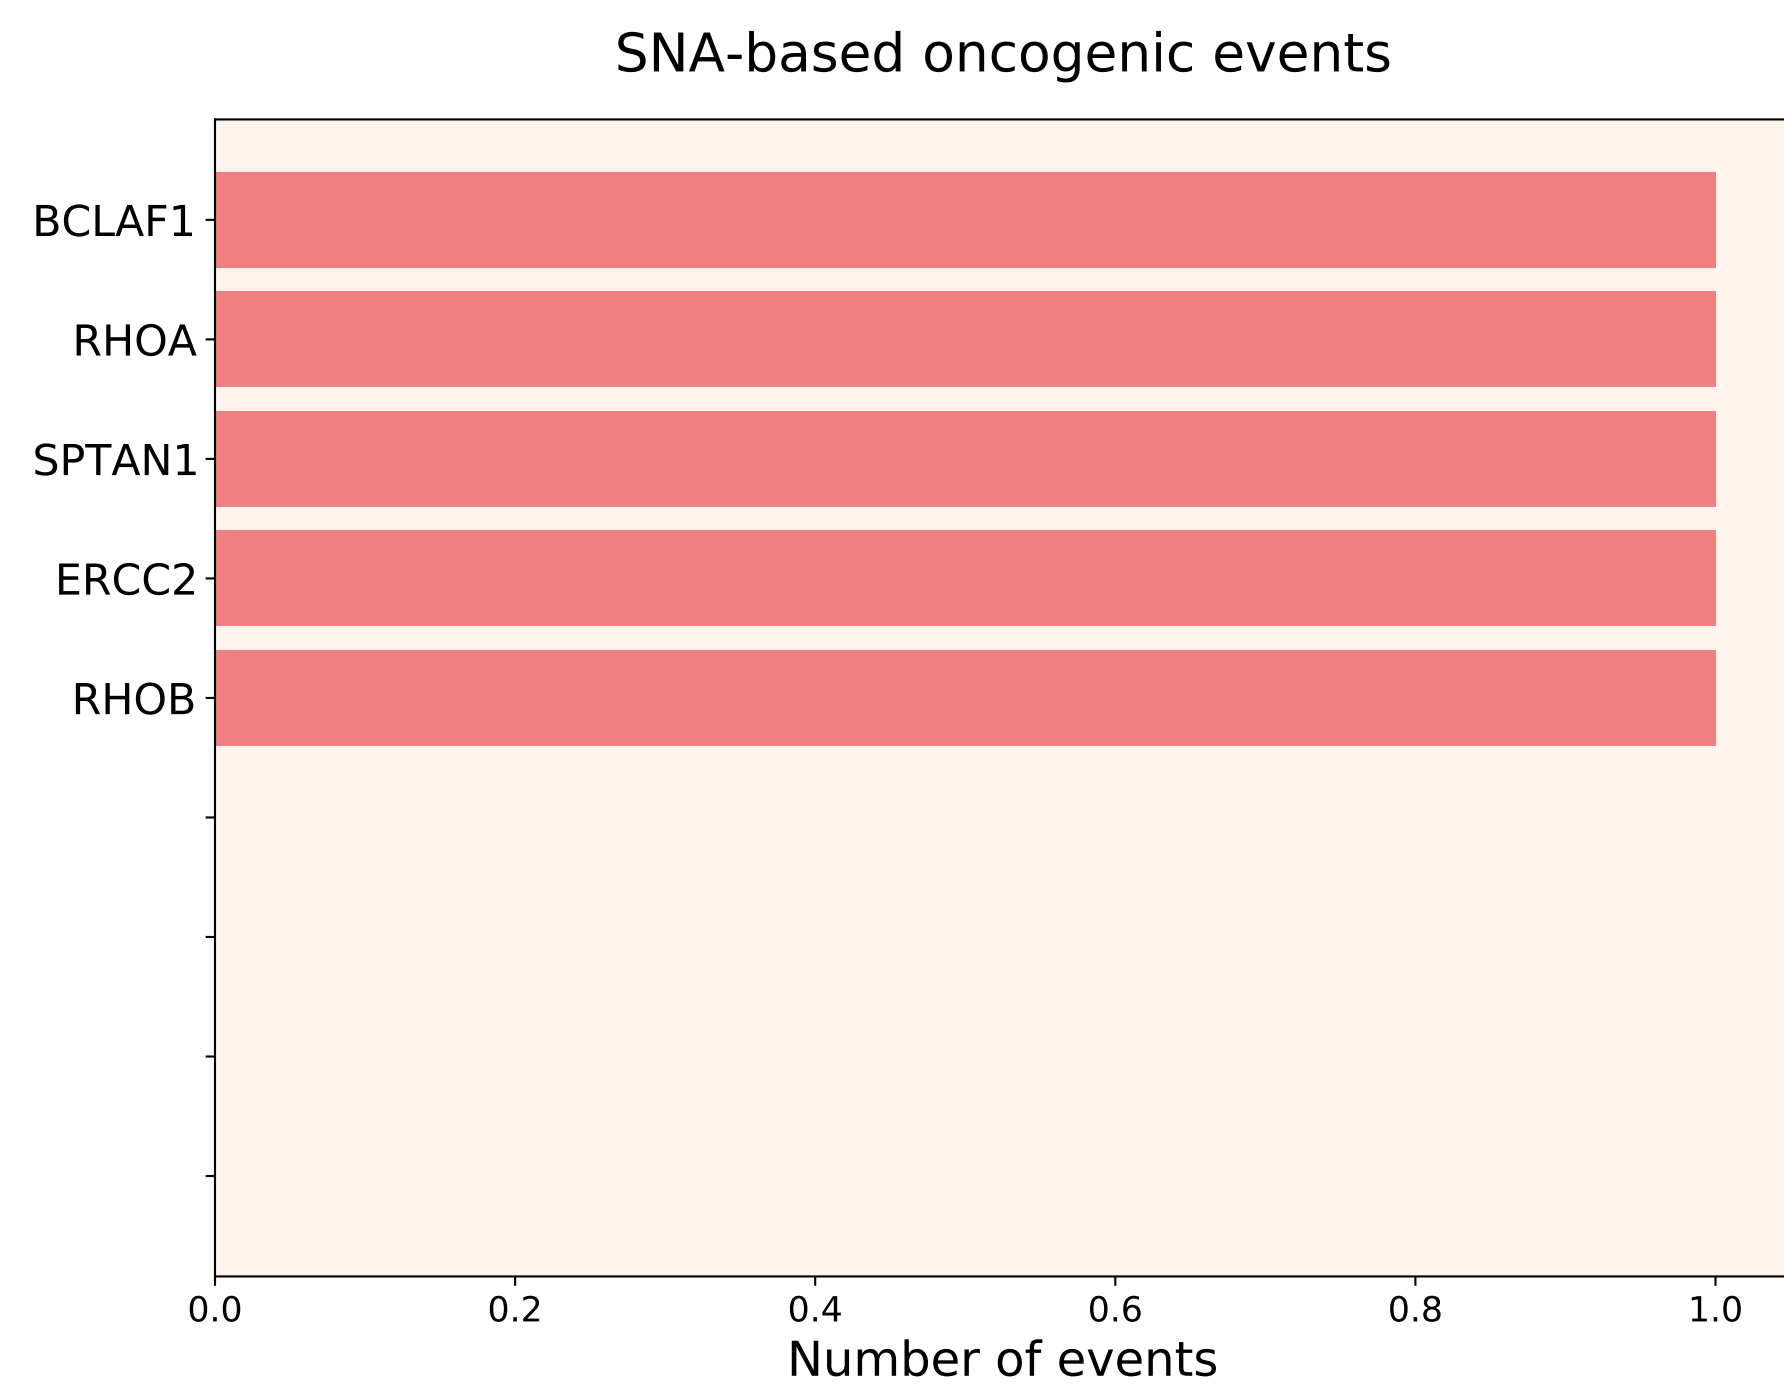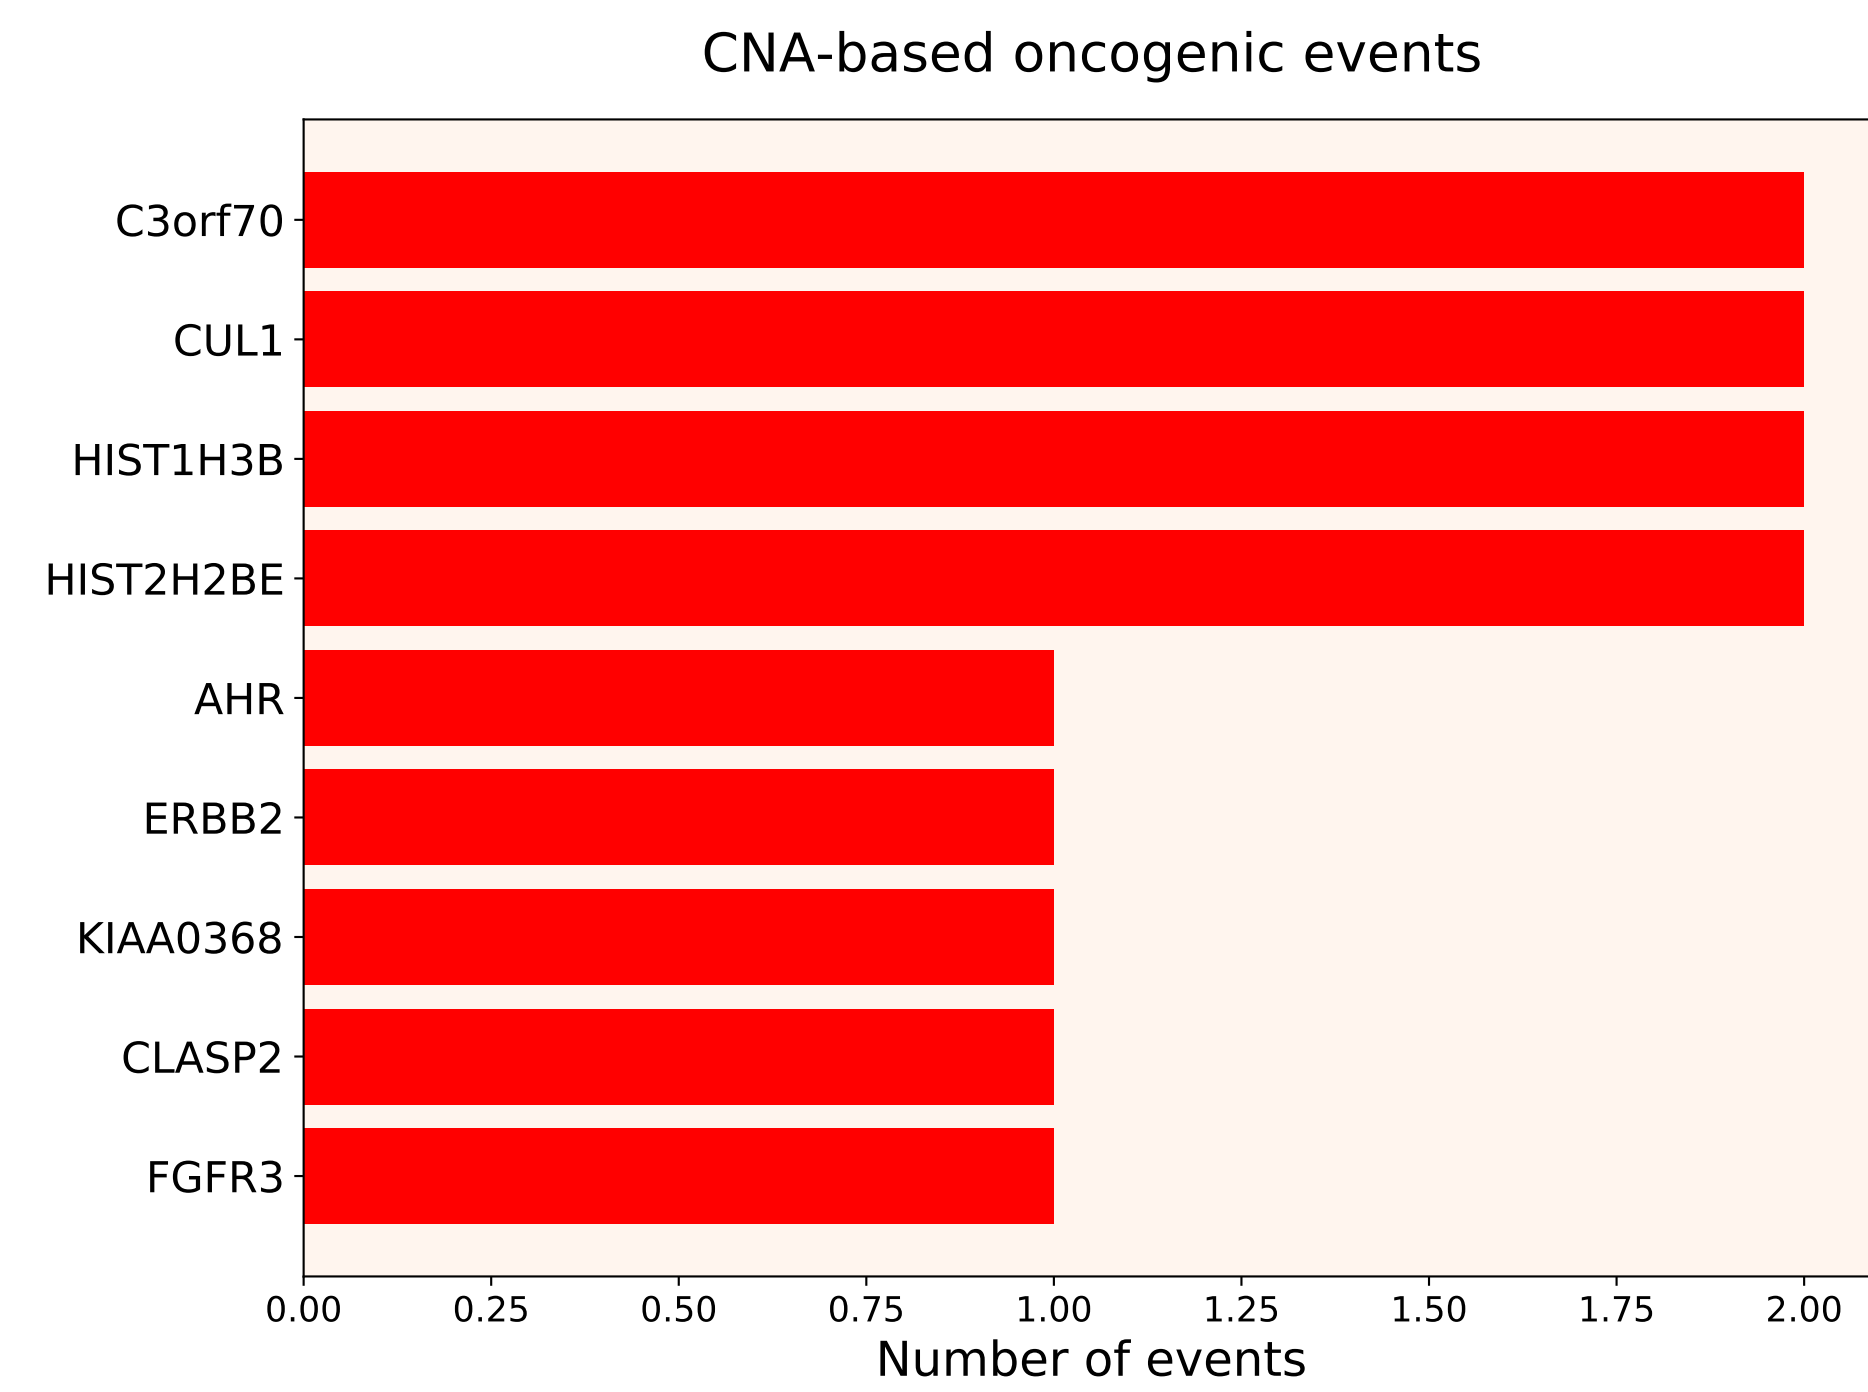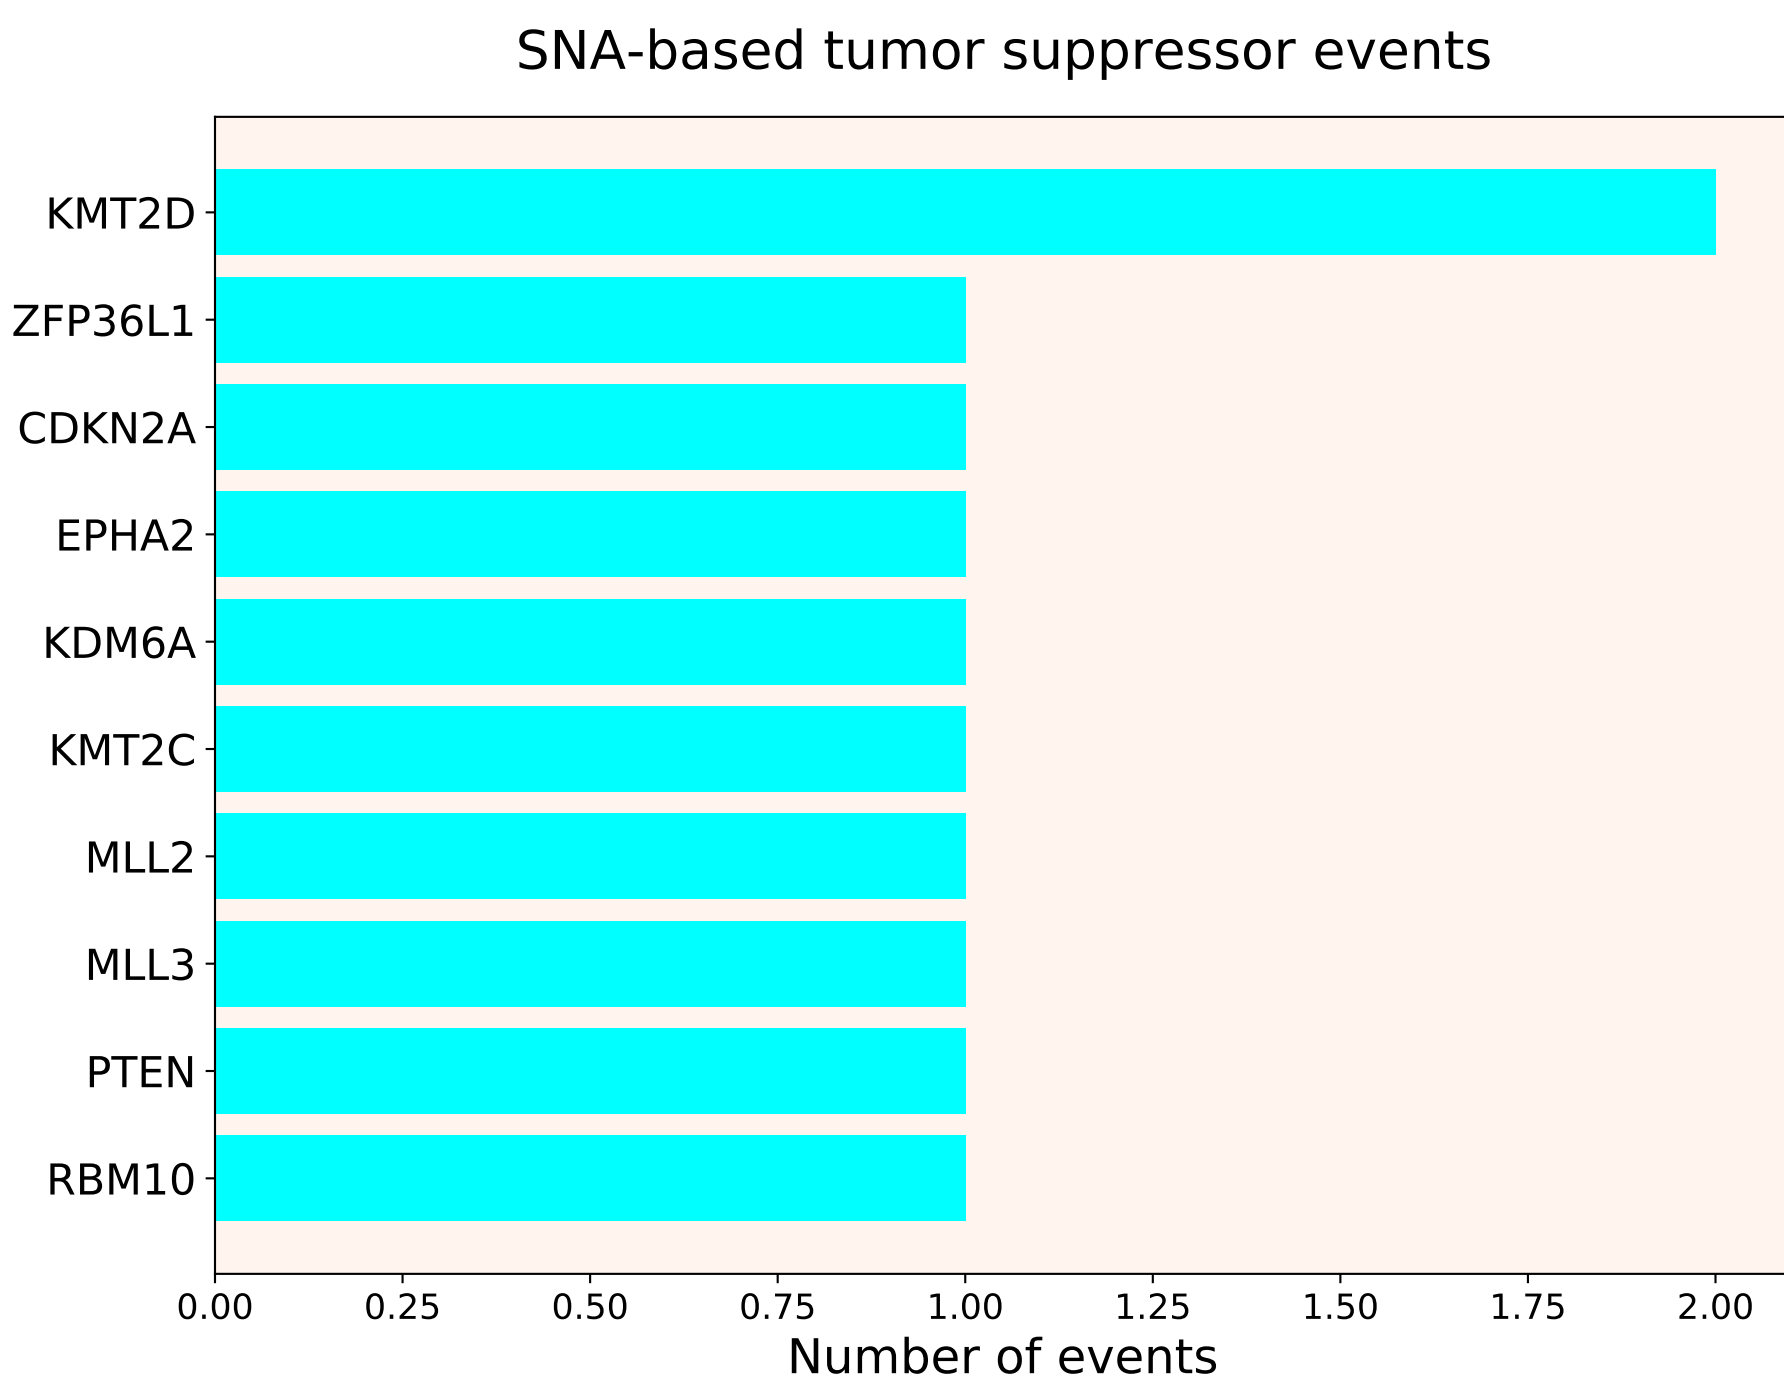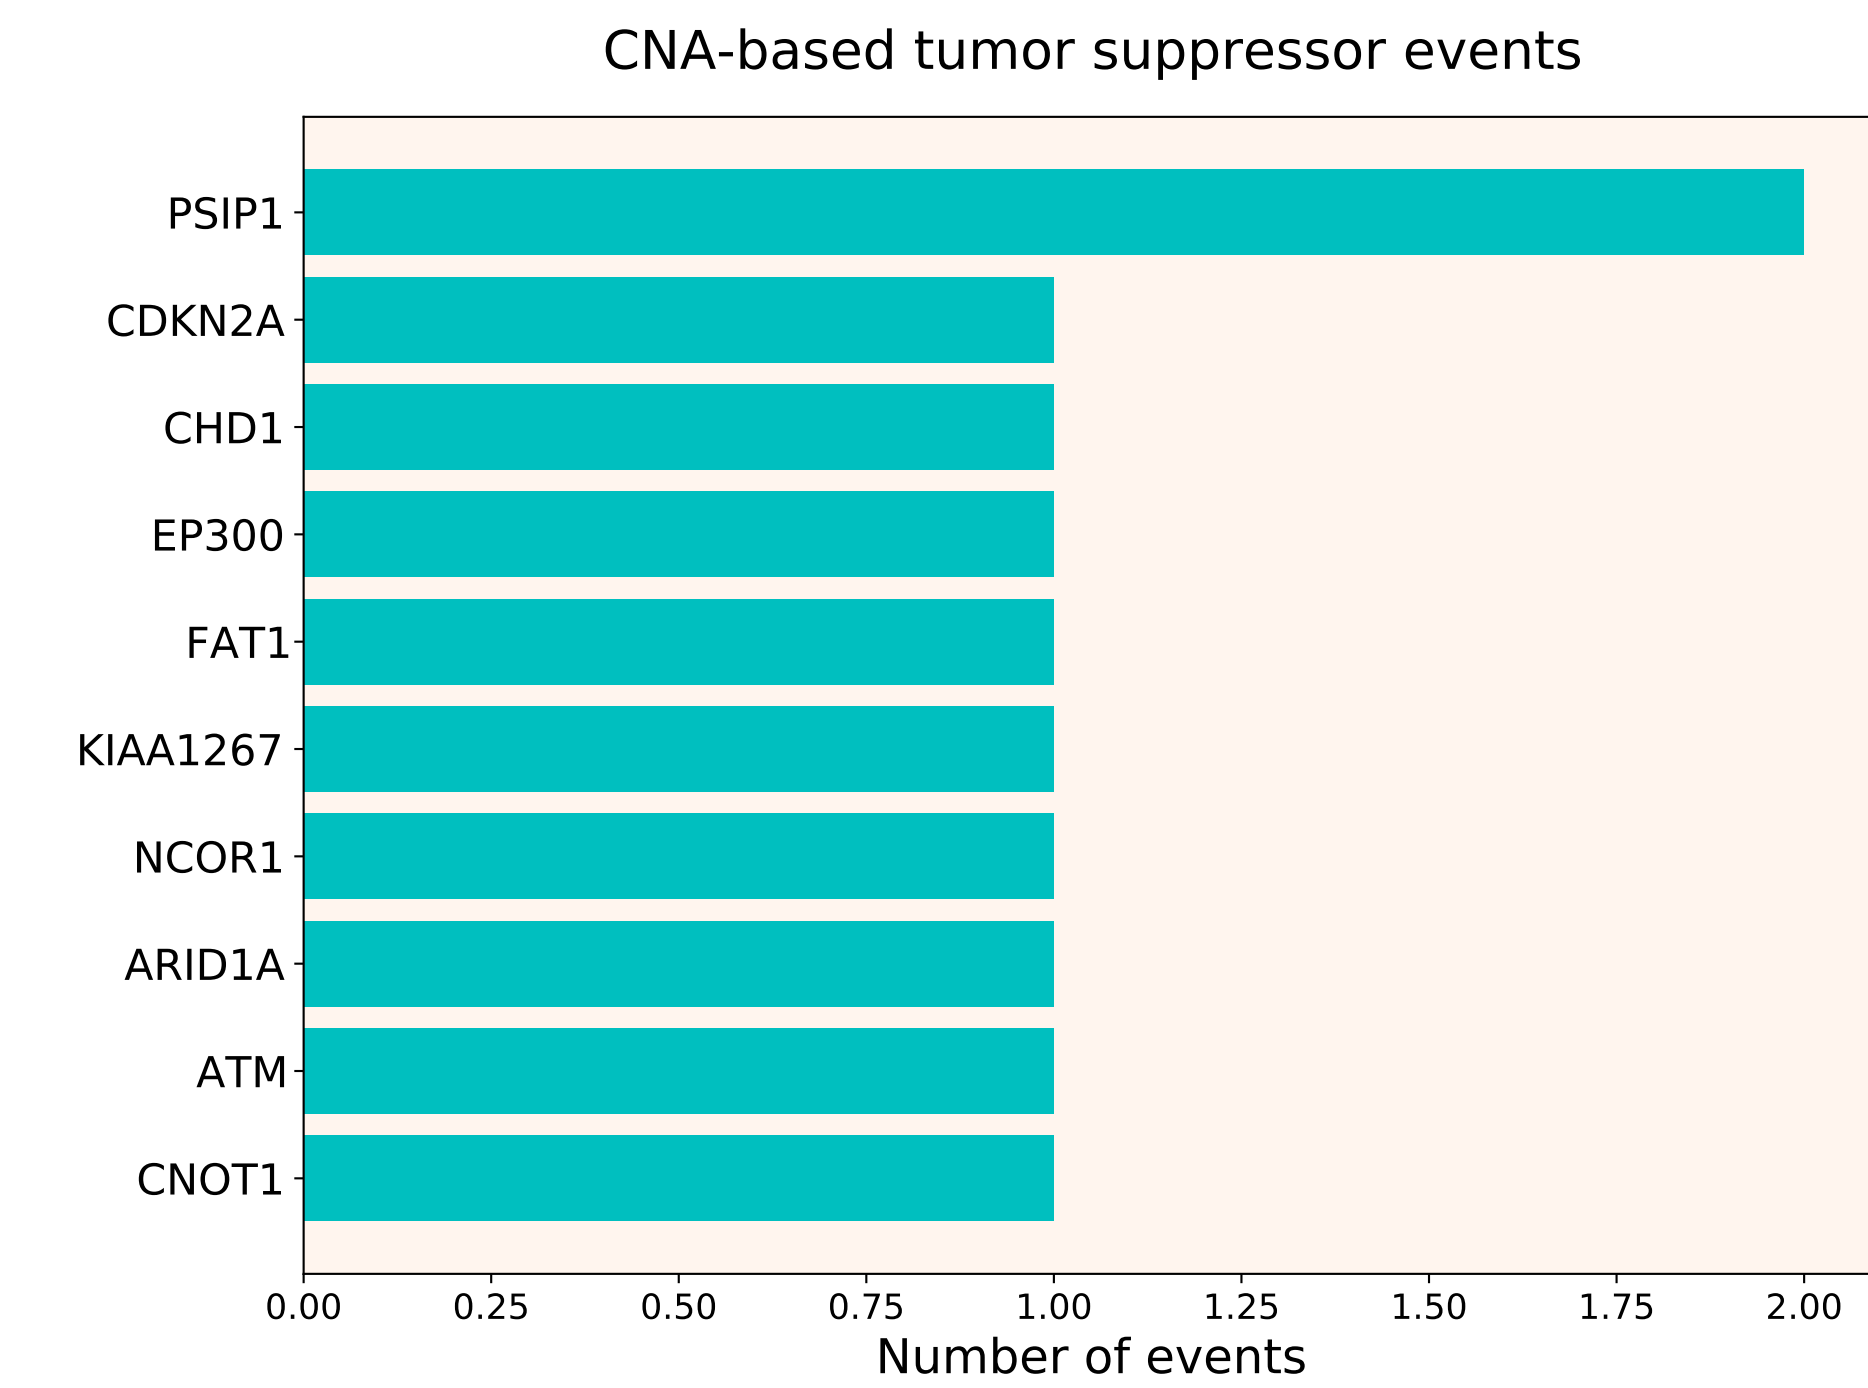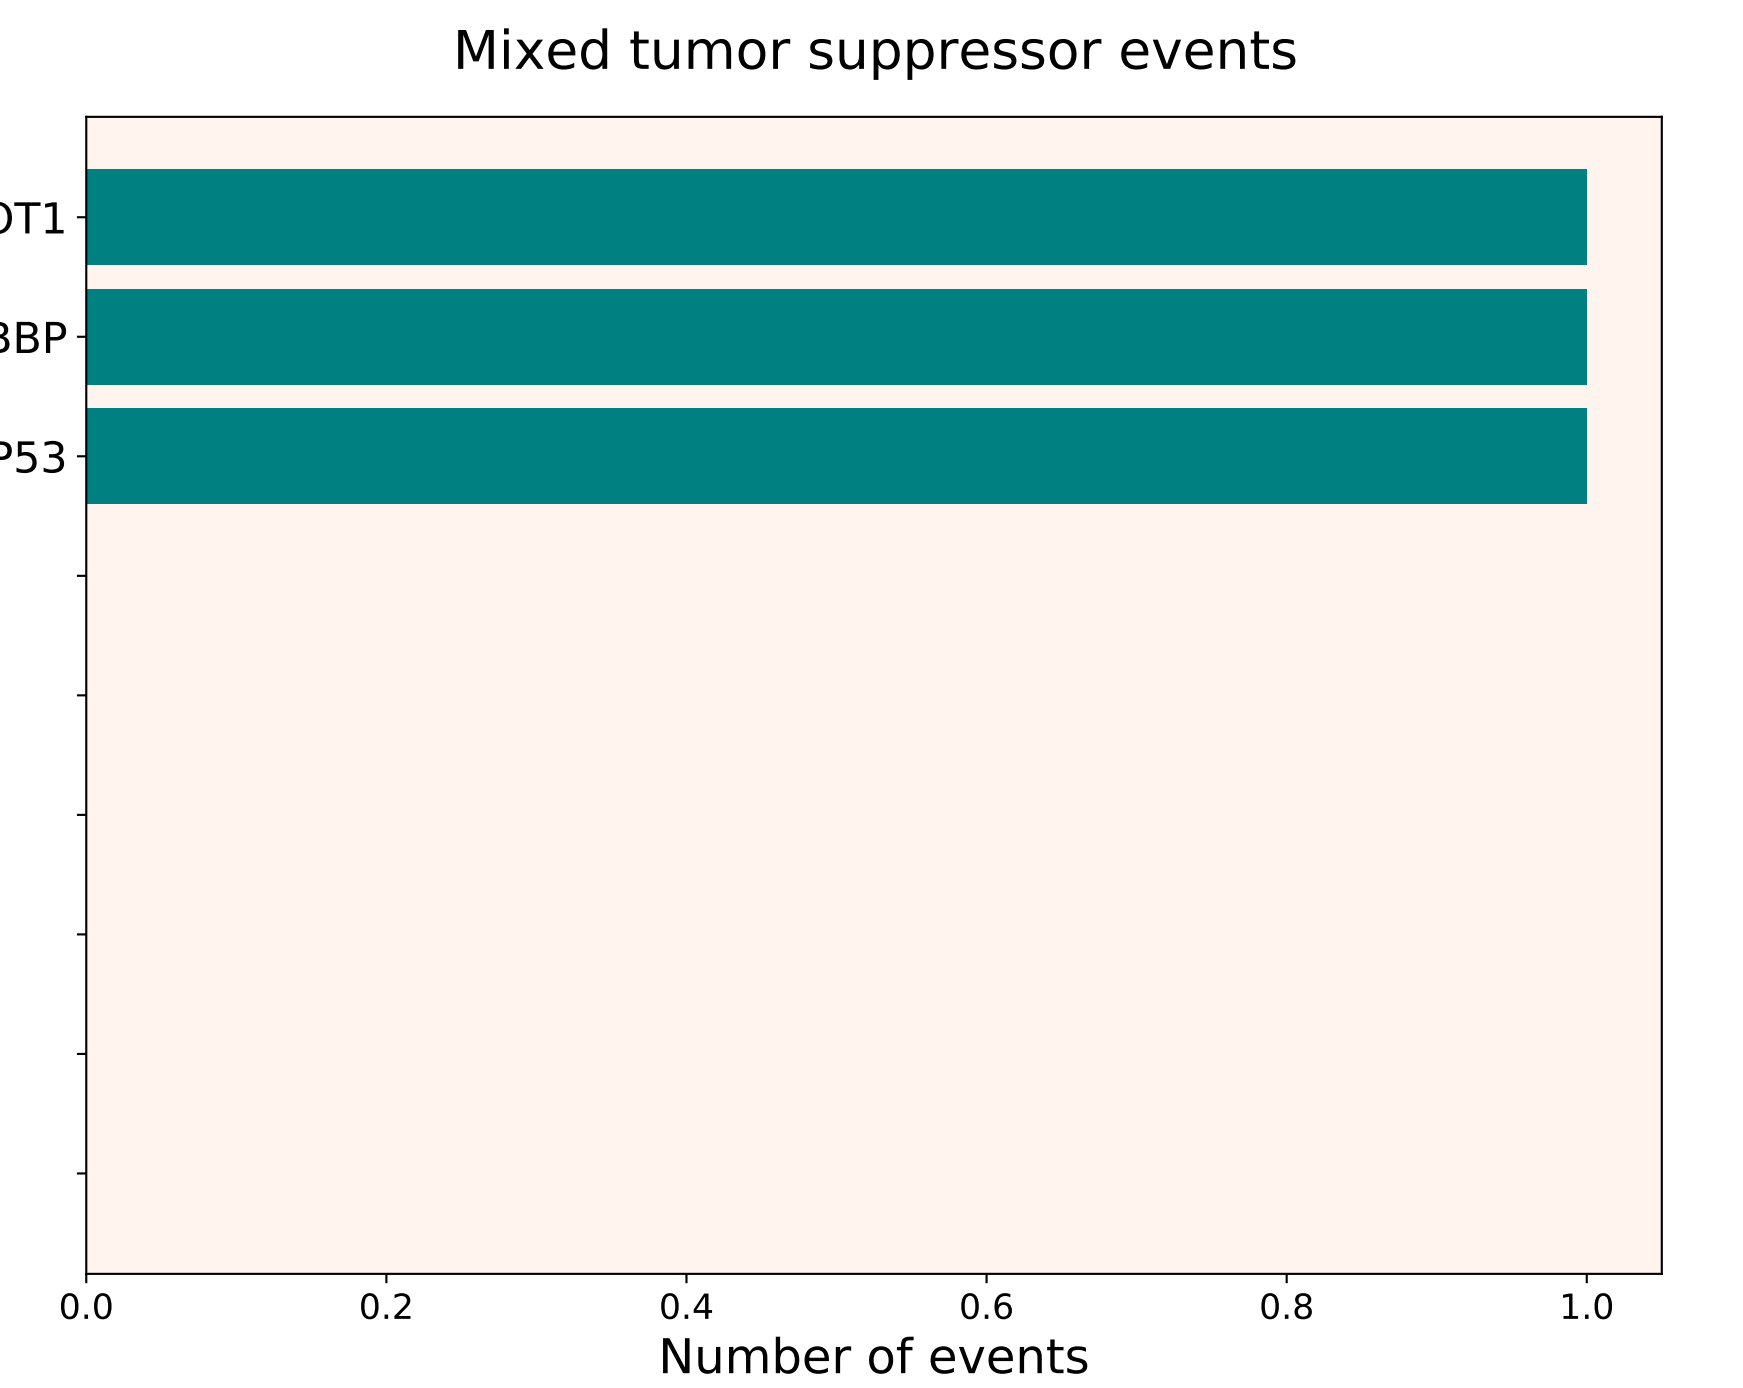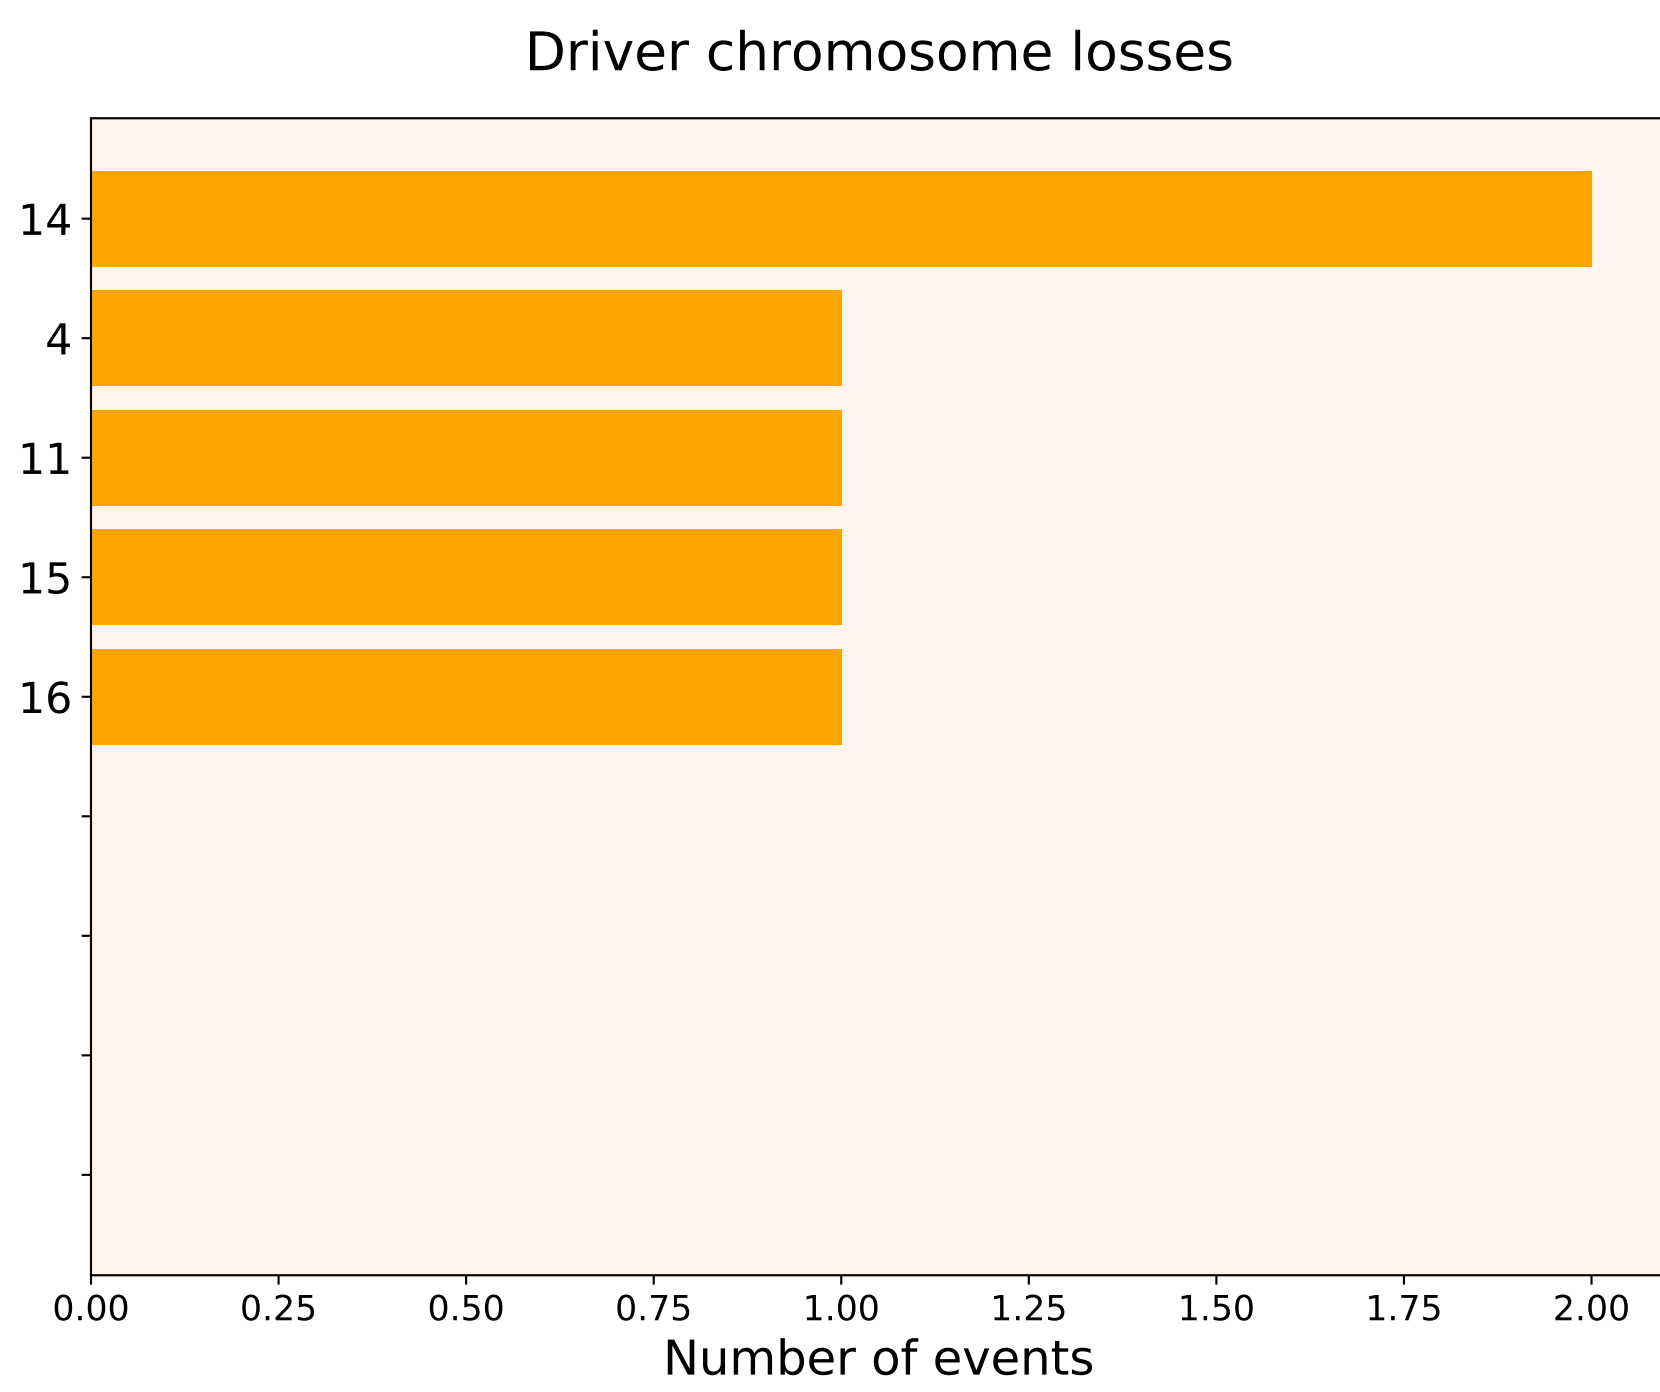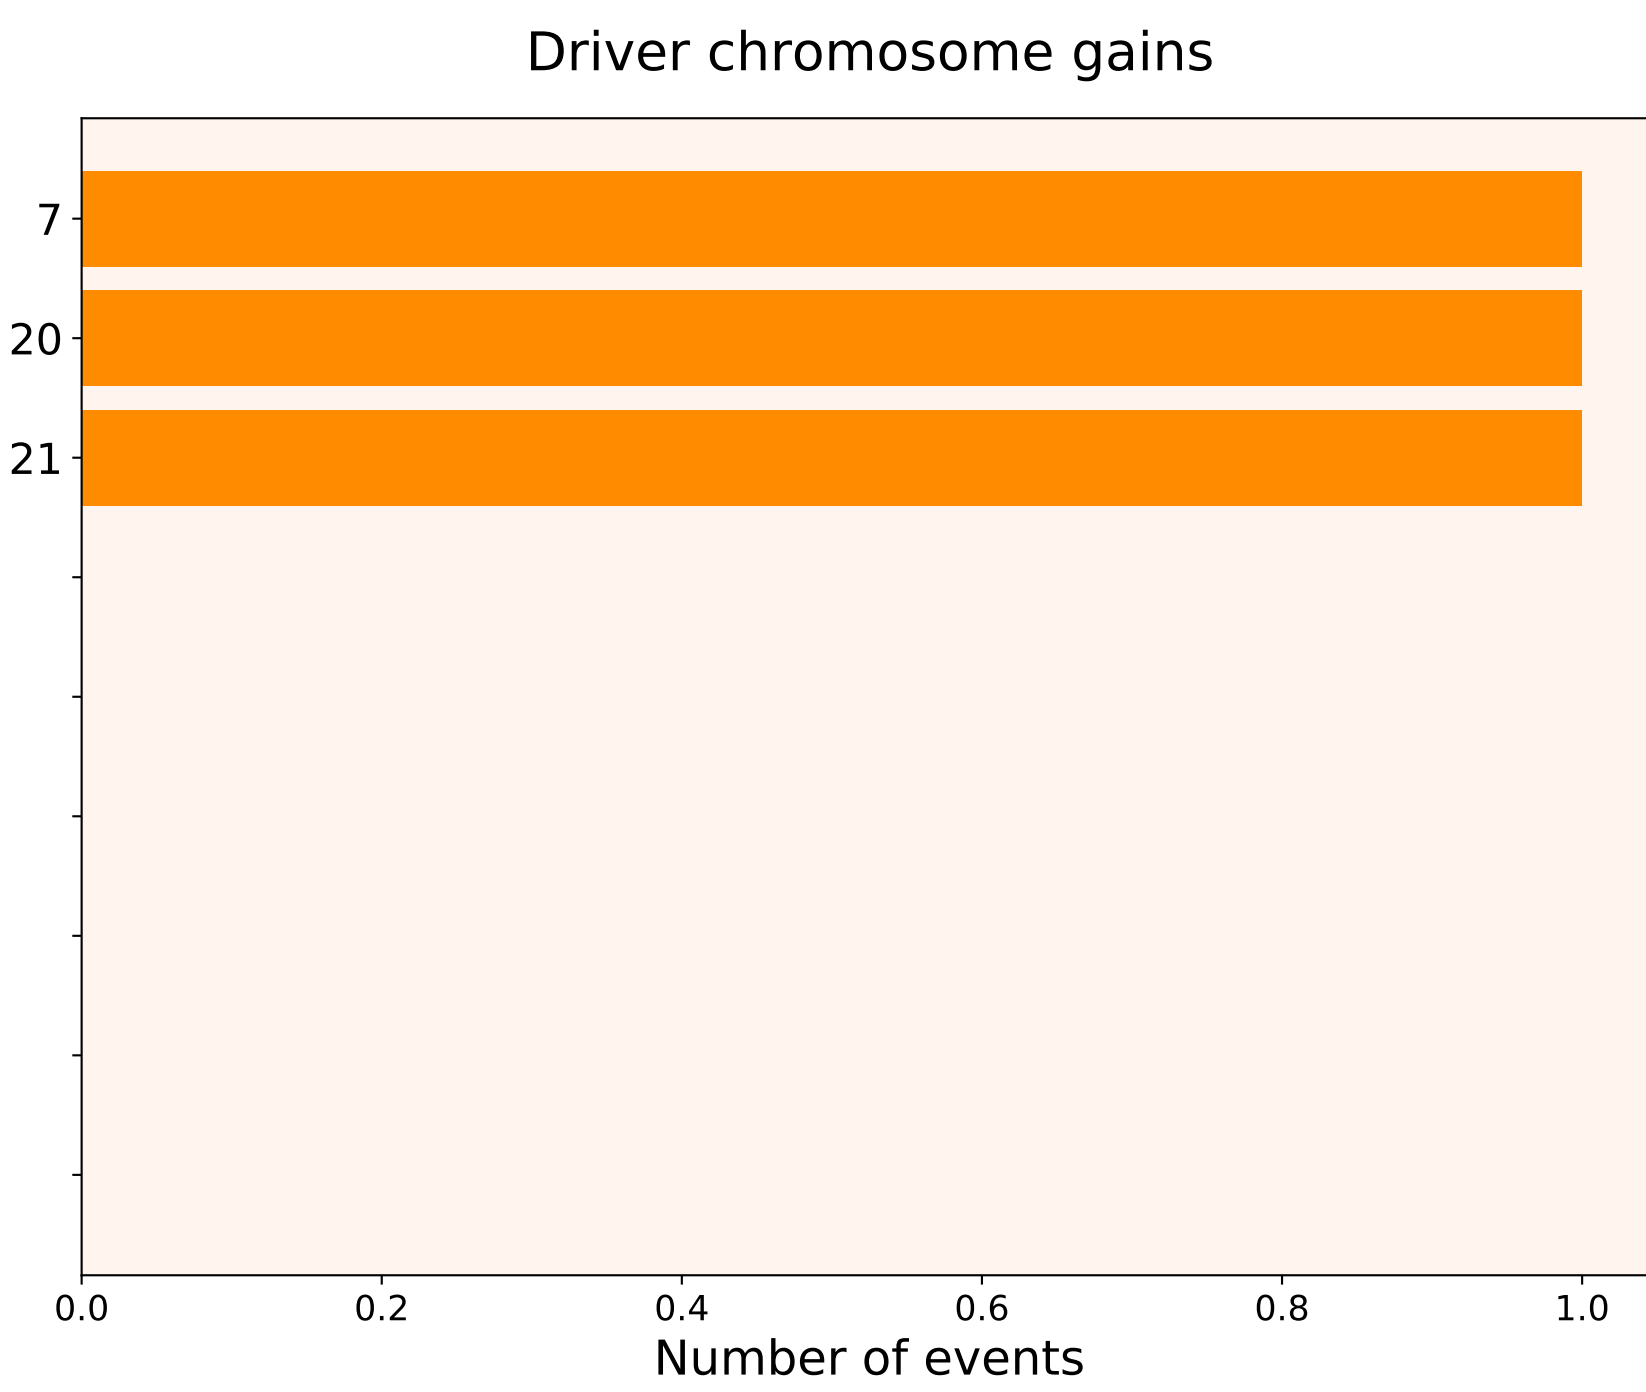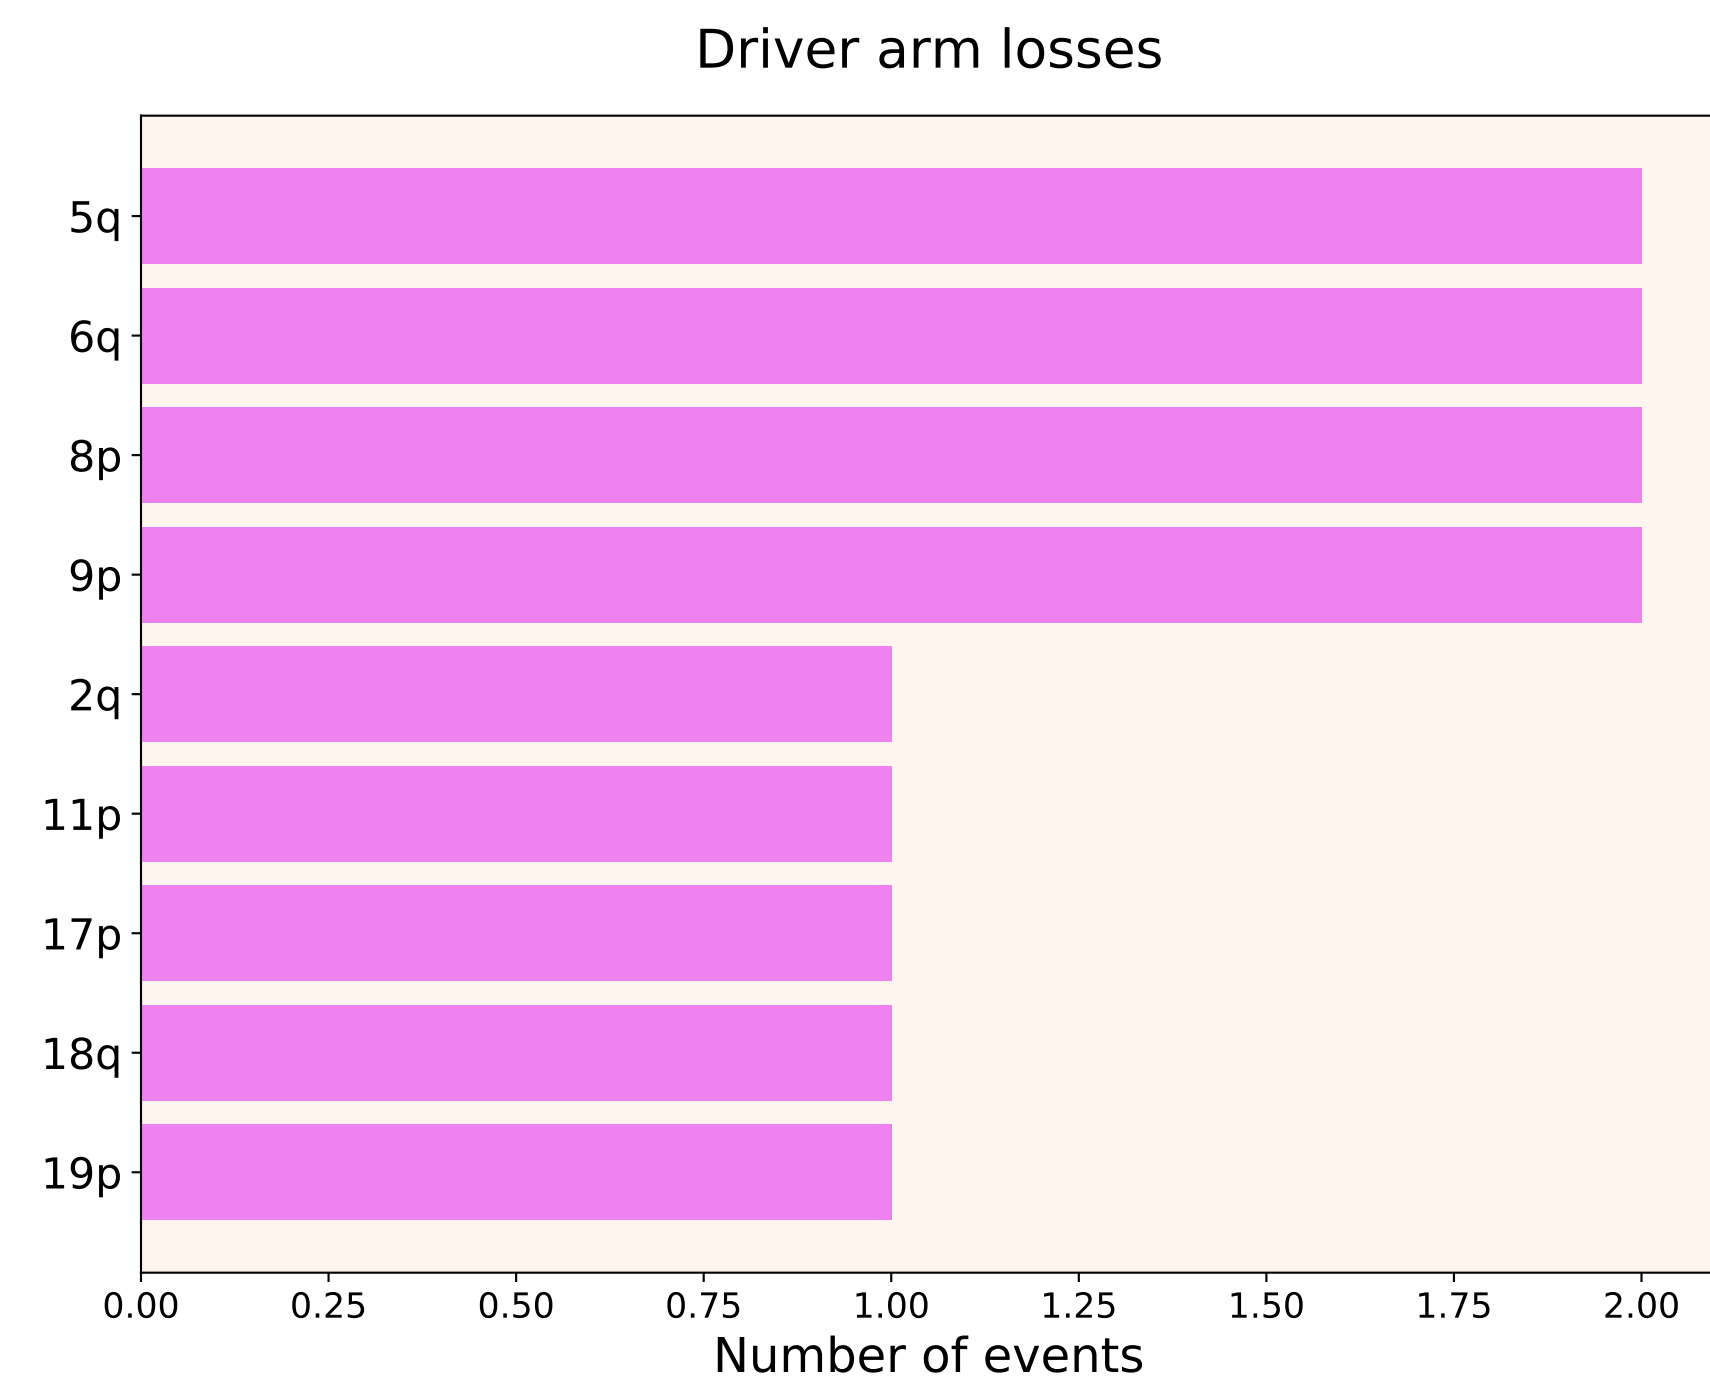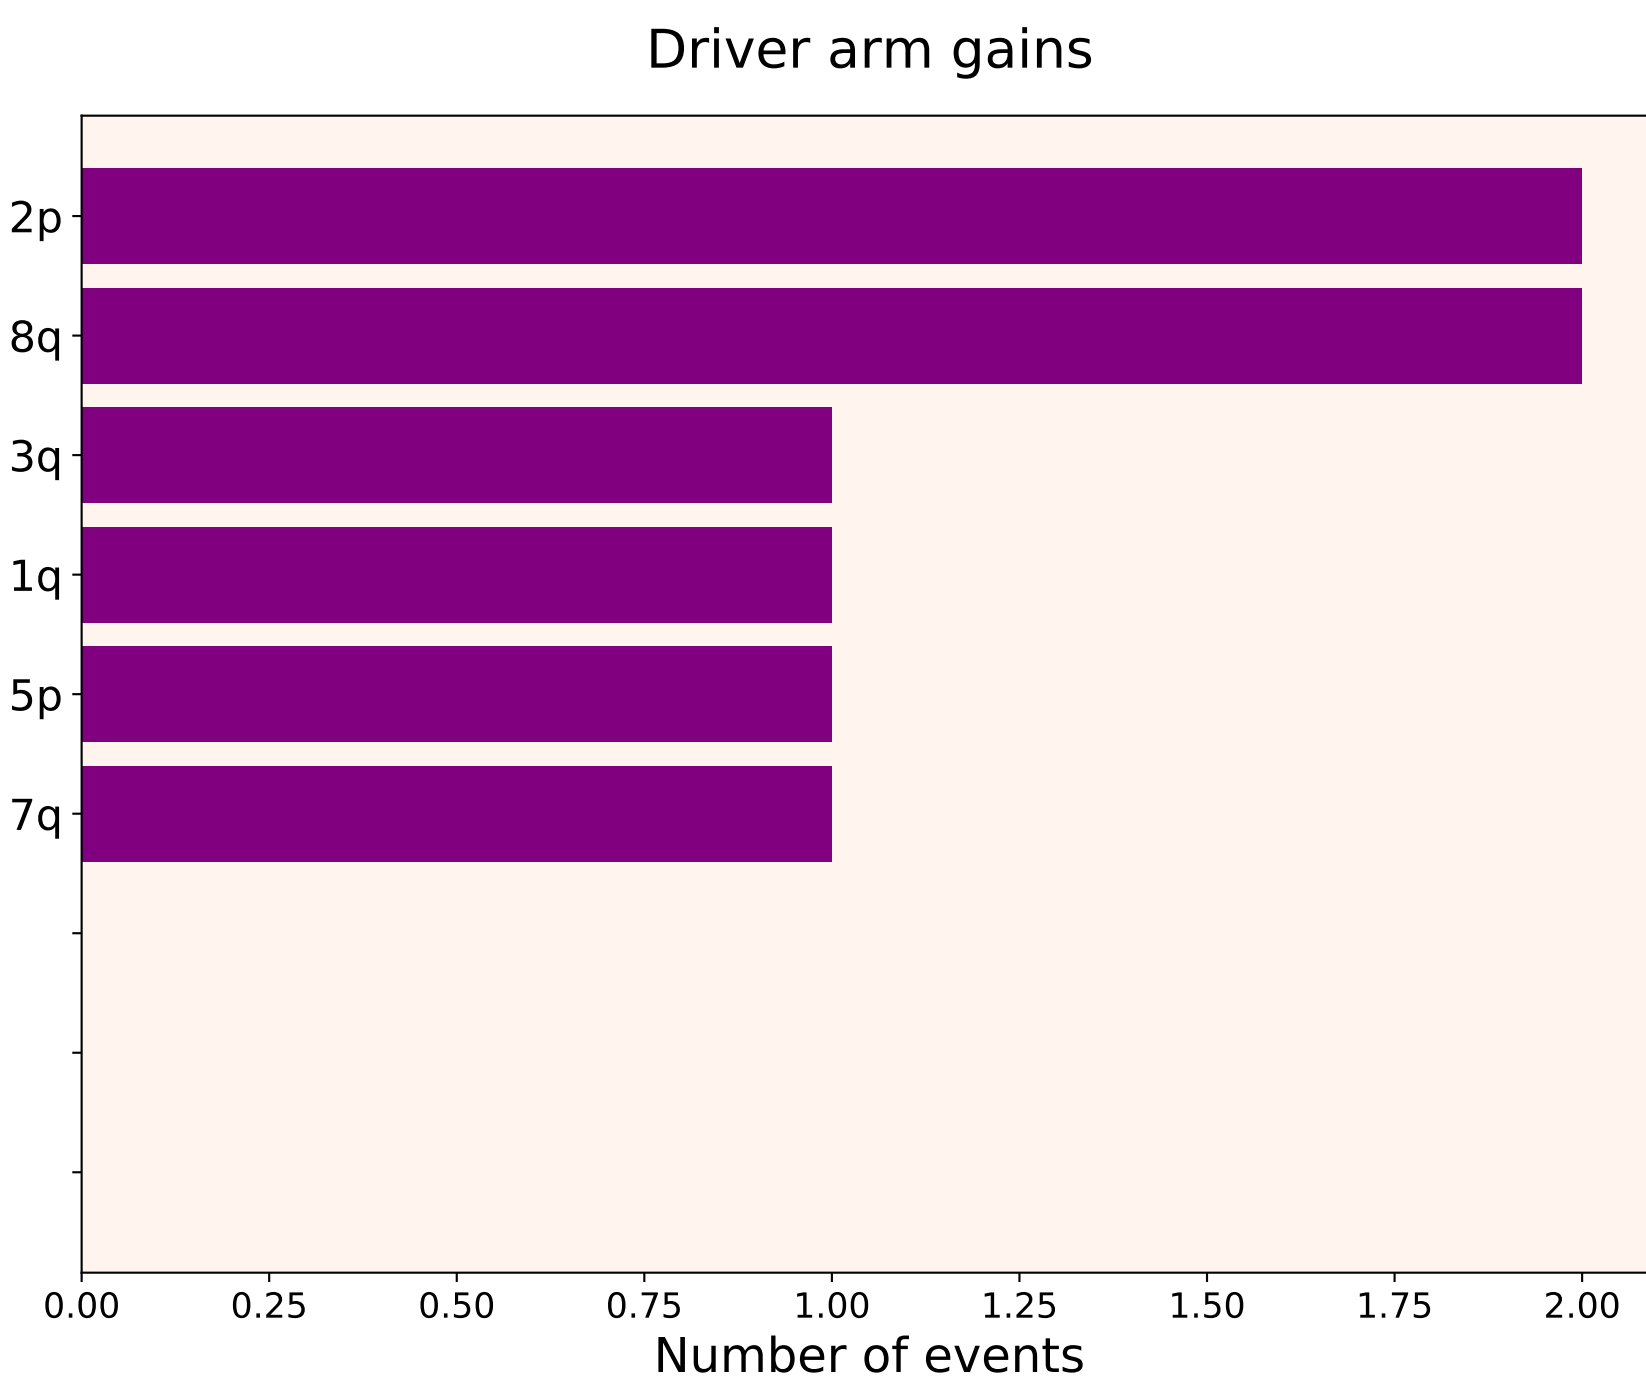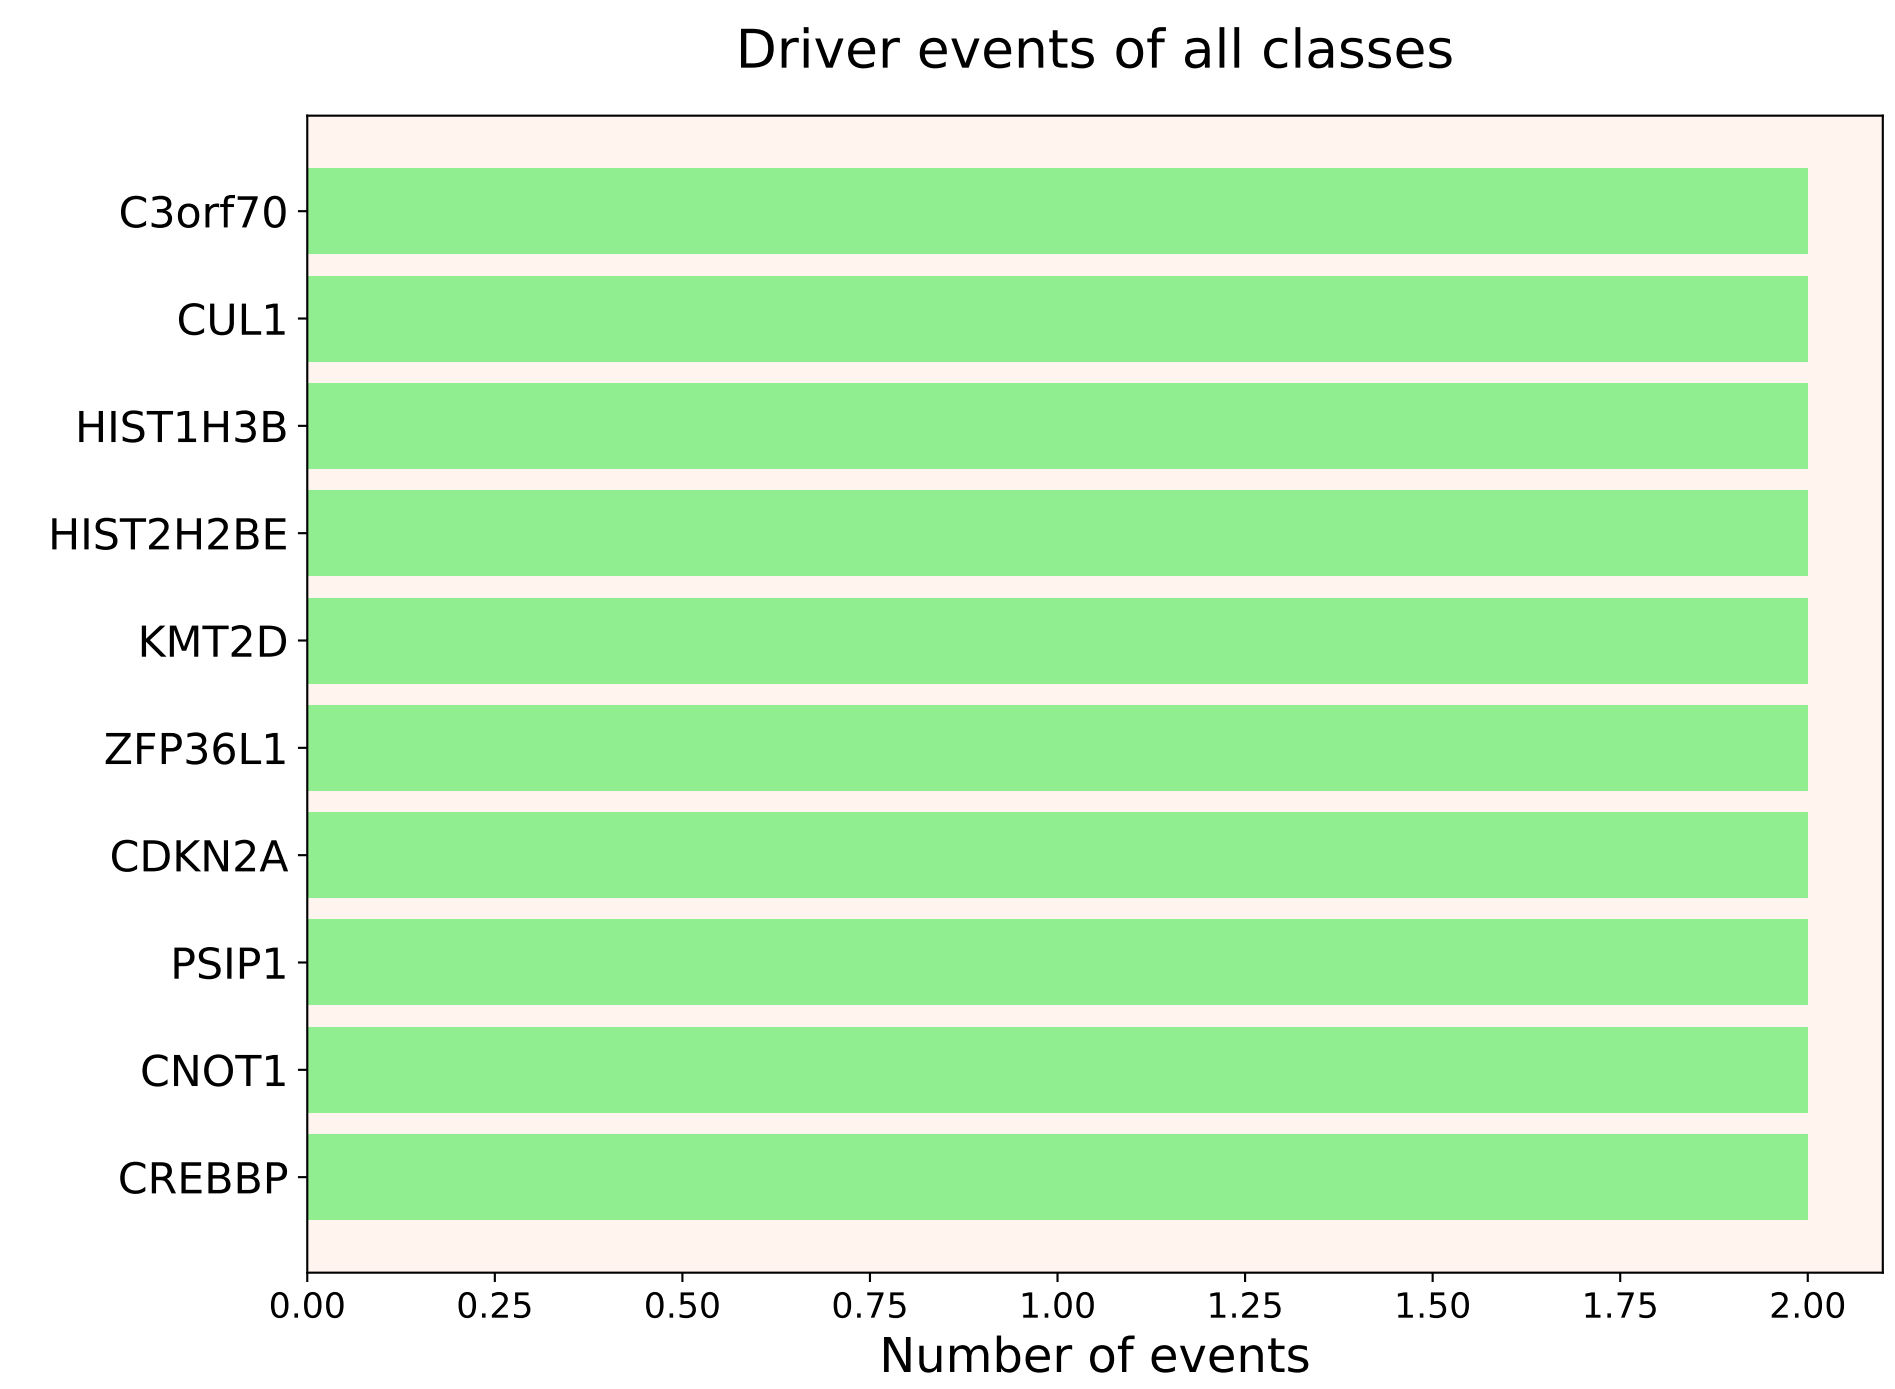

Supplement: Supplemental_Data_S1.zip [file Supplemental_Data_S1.zip]

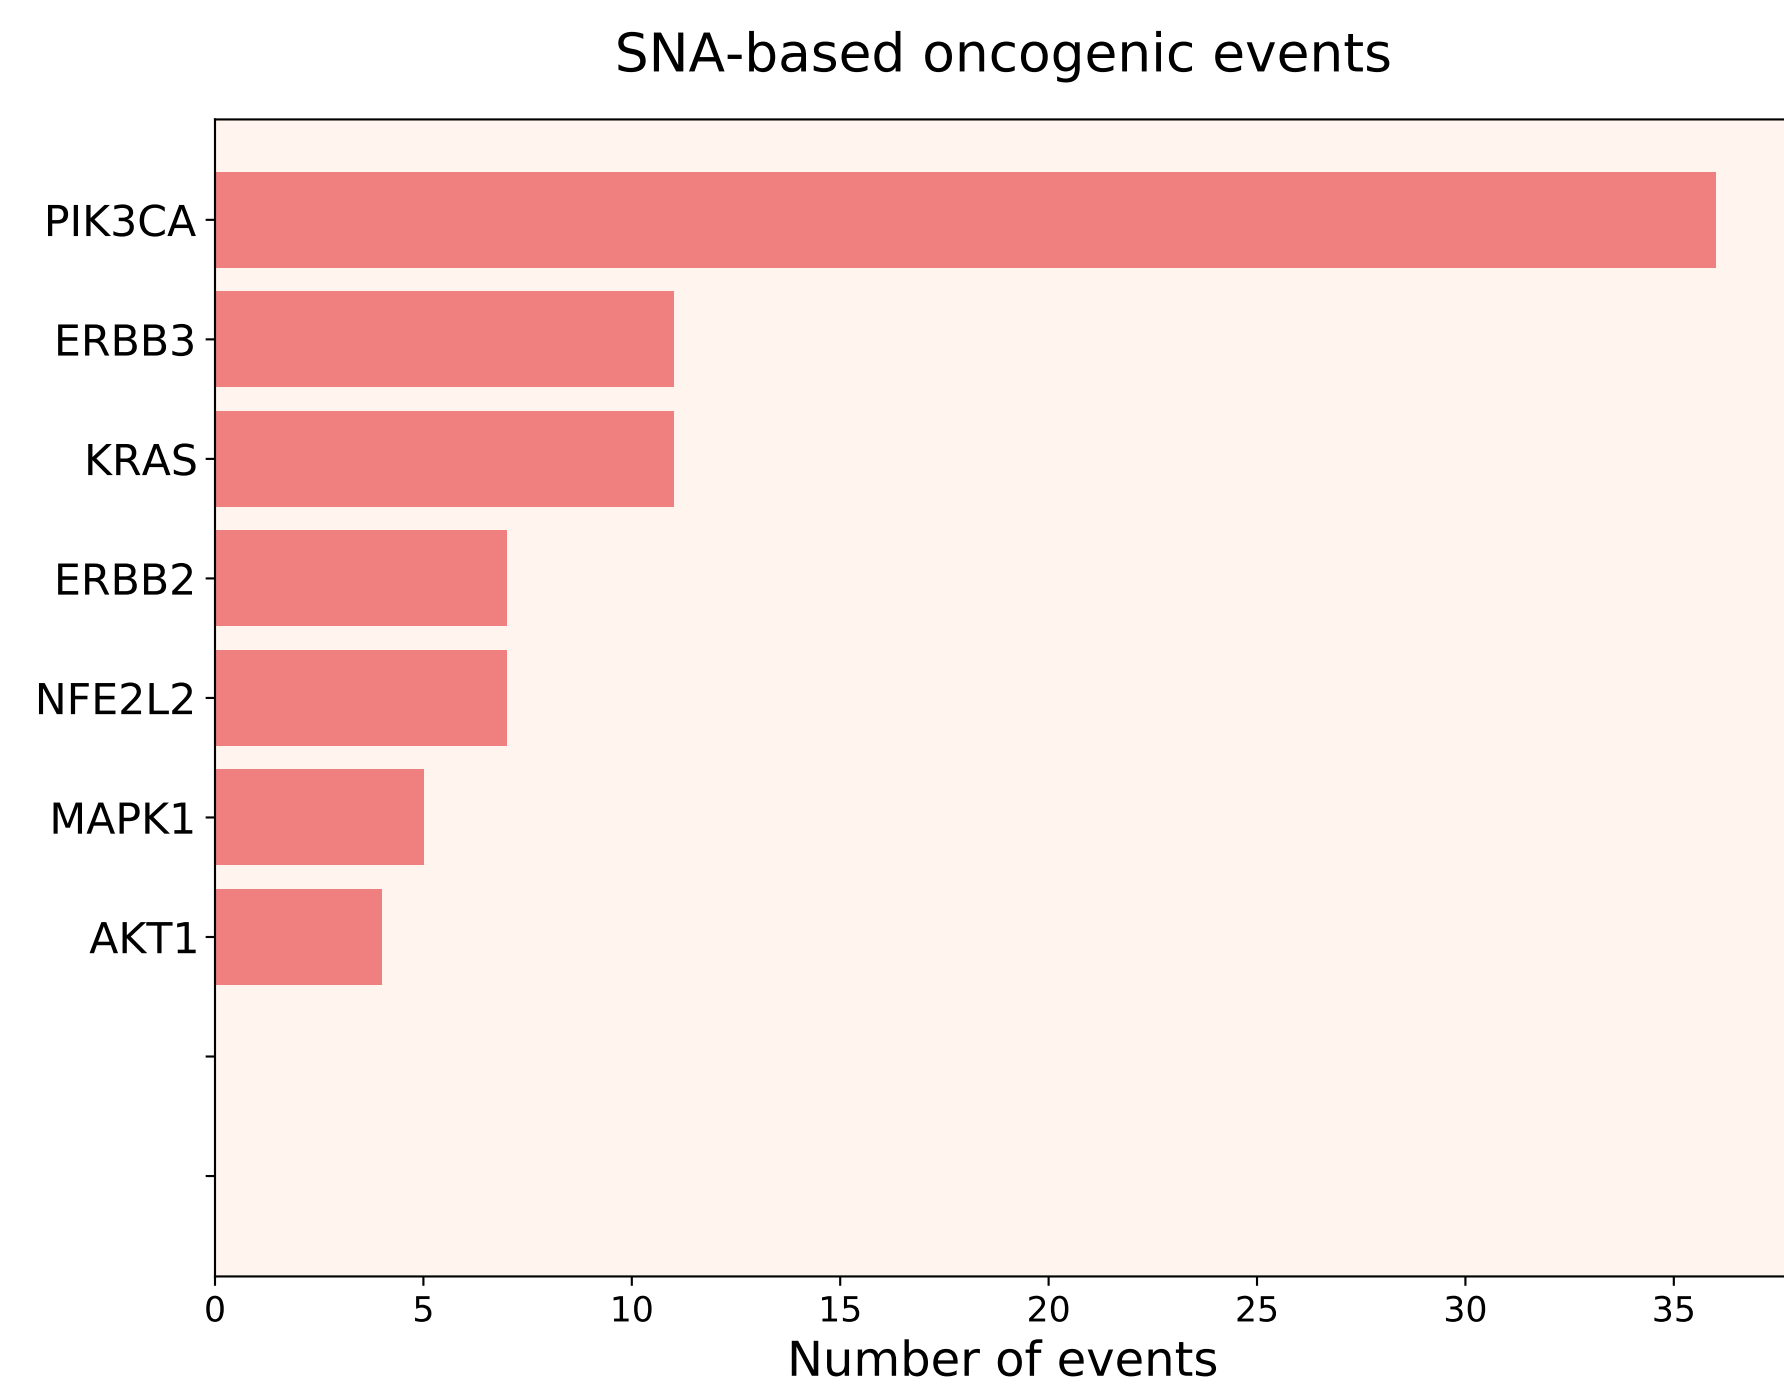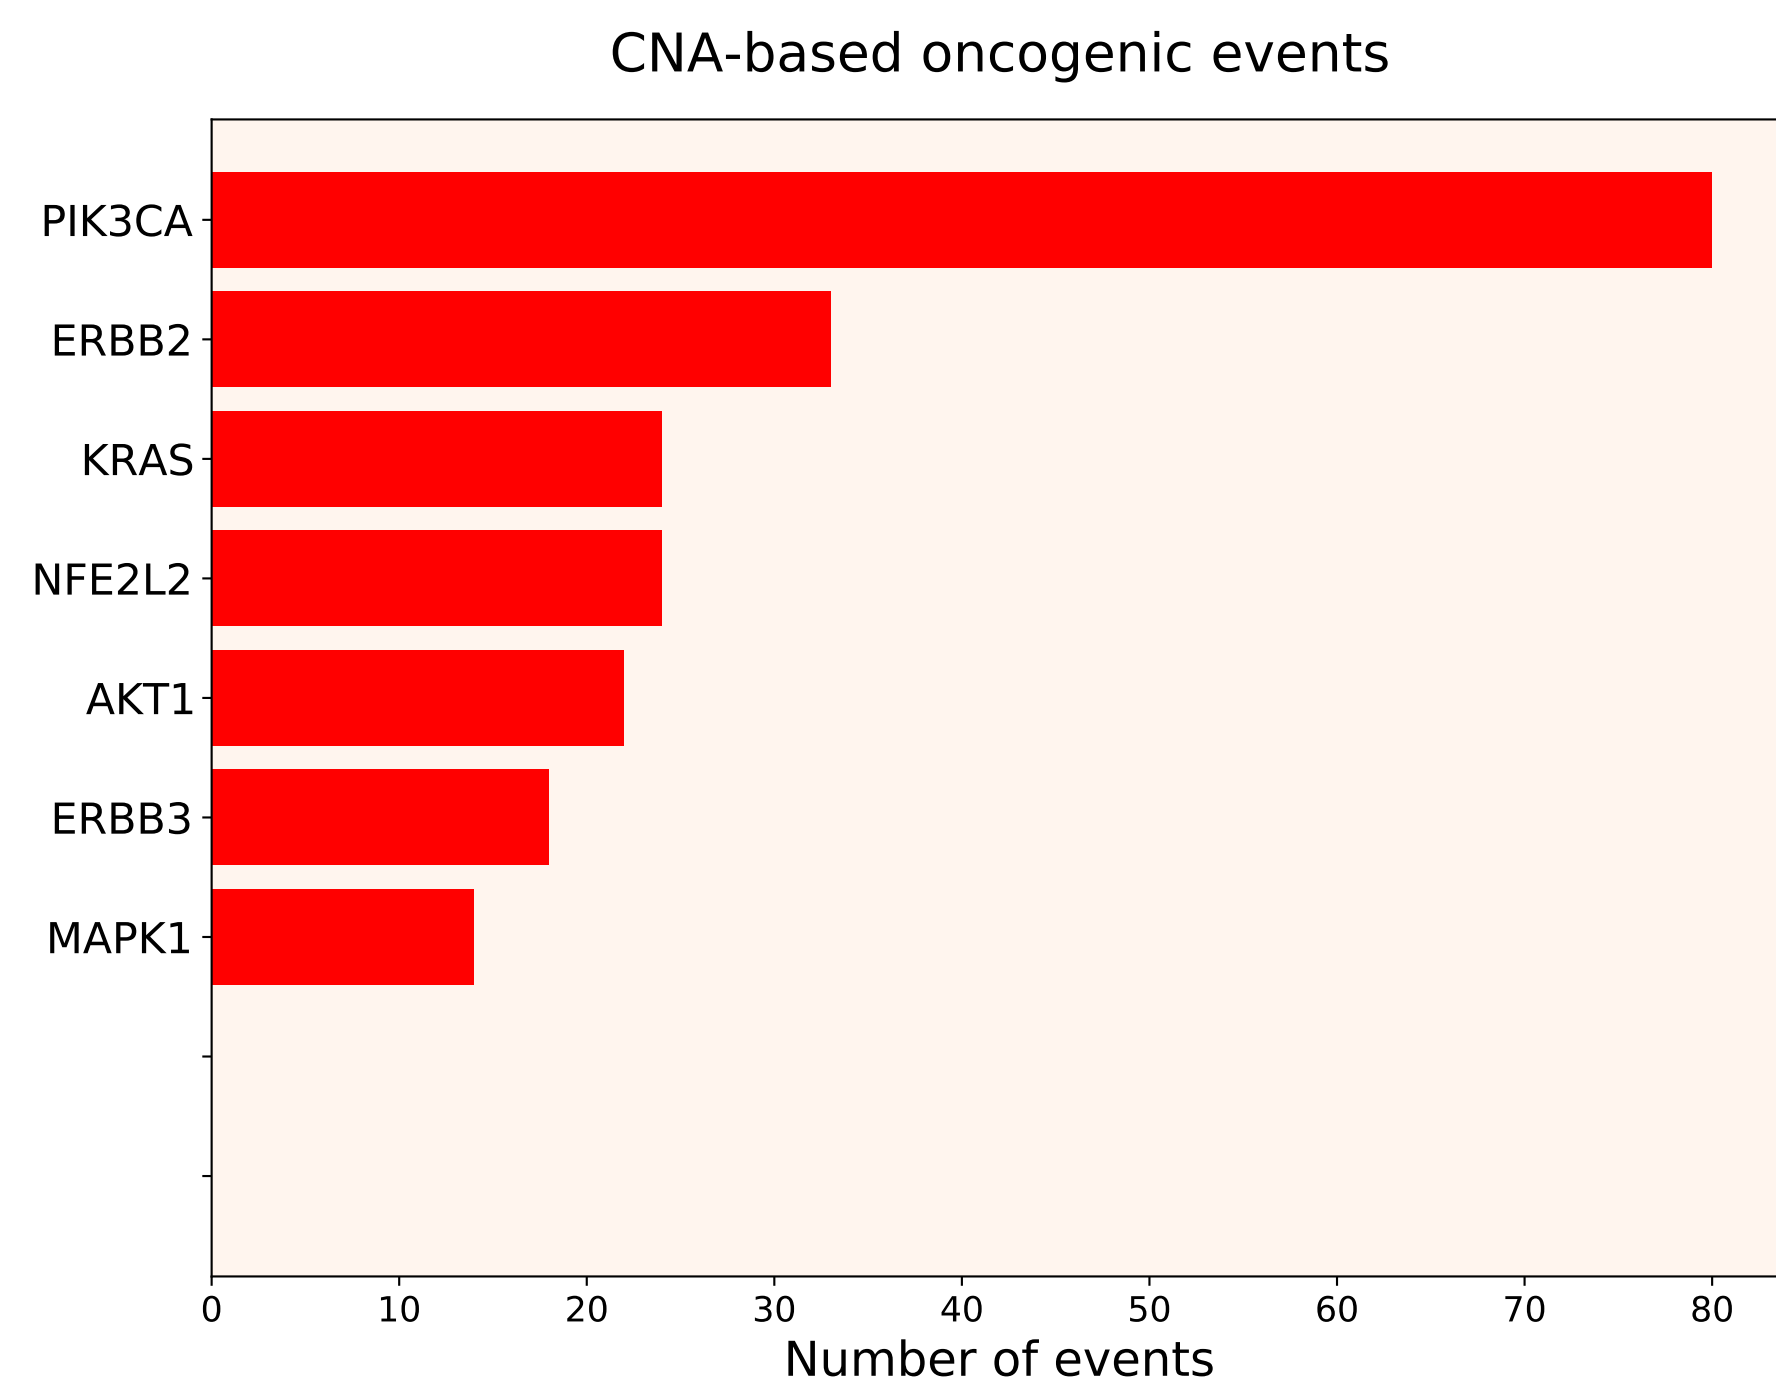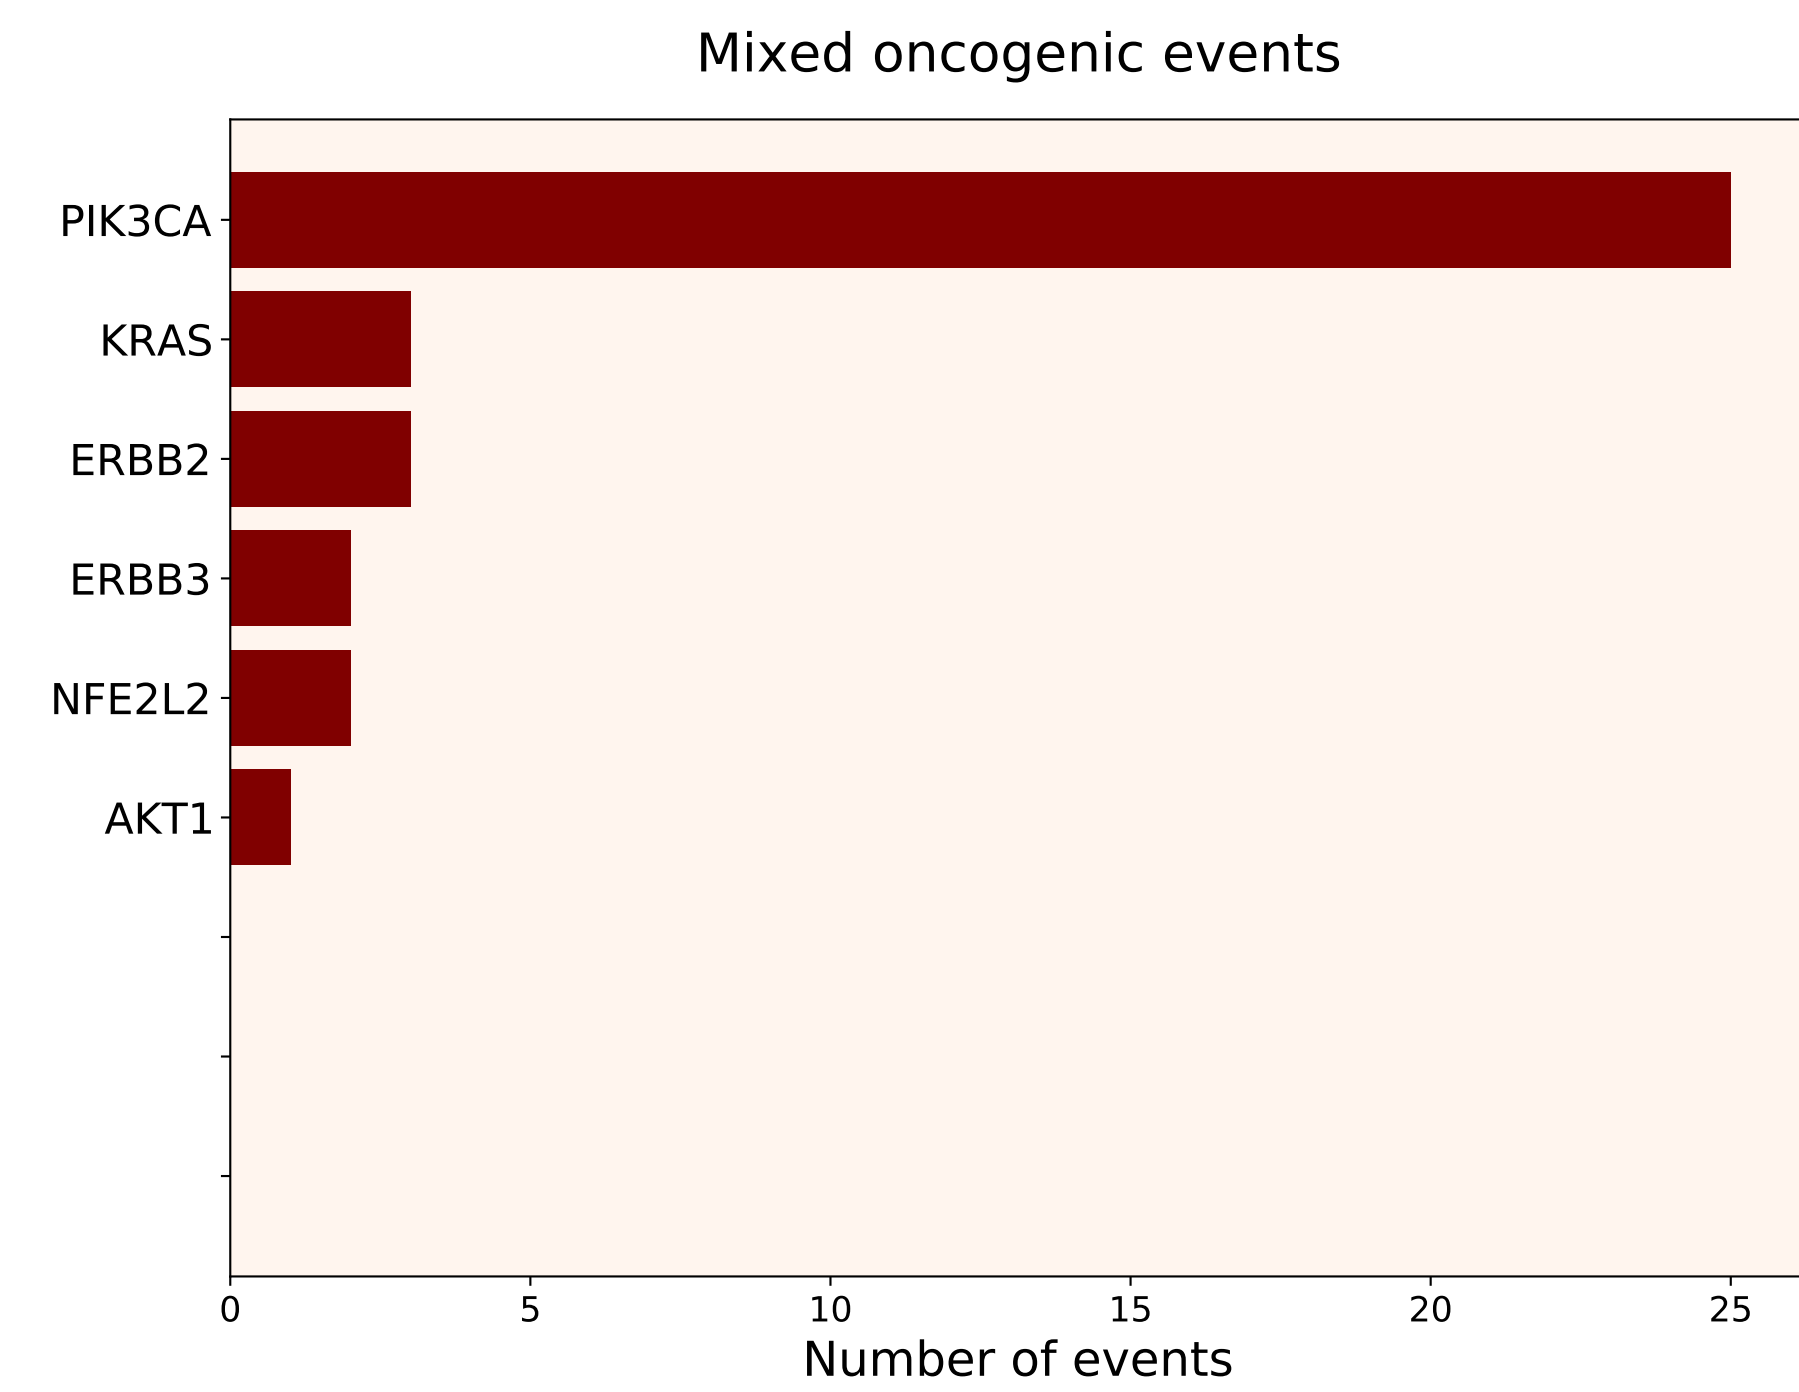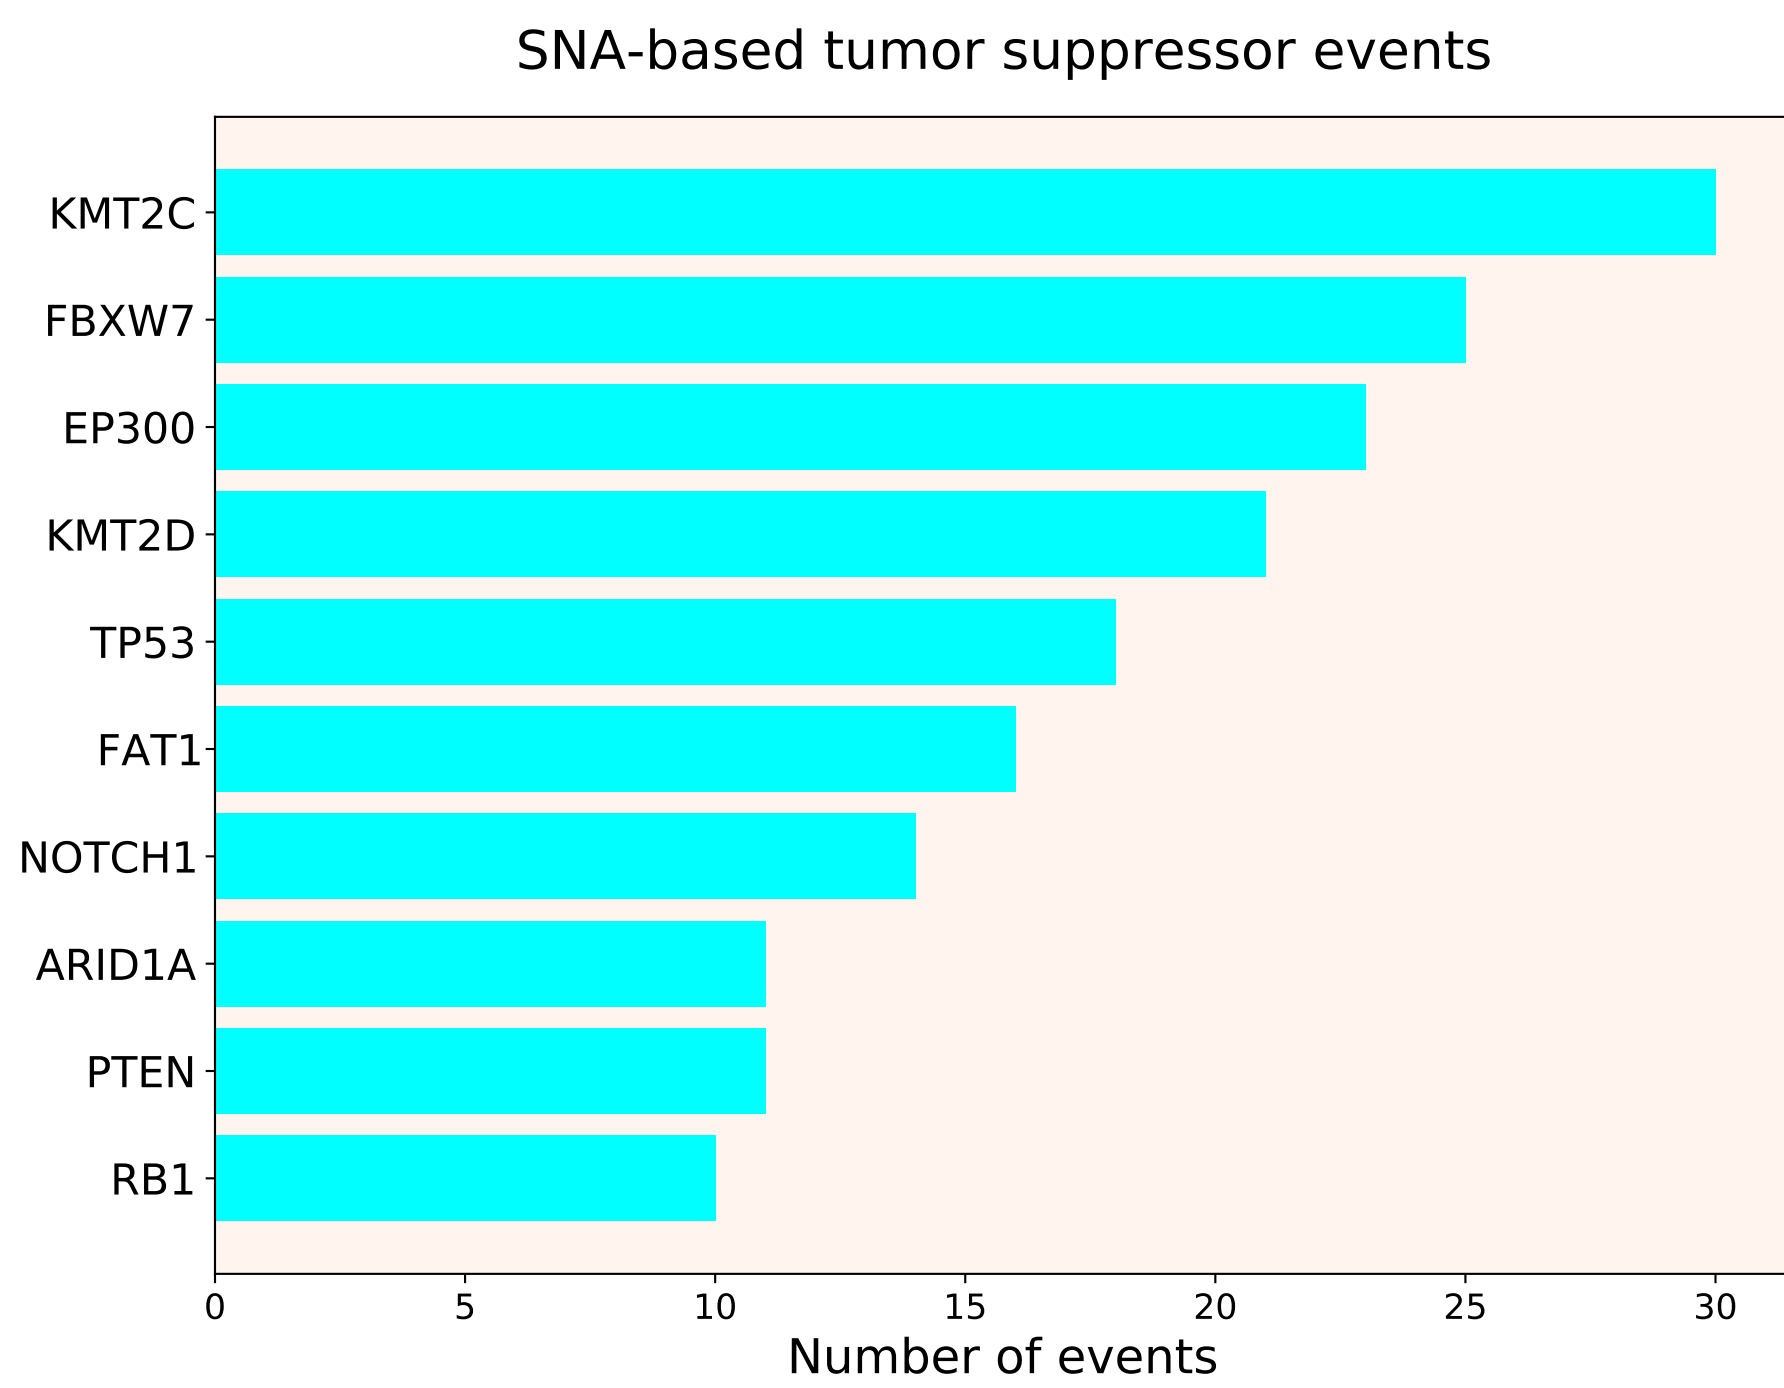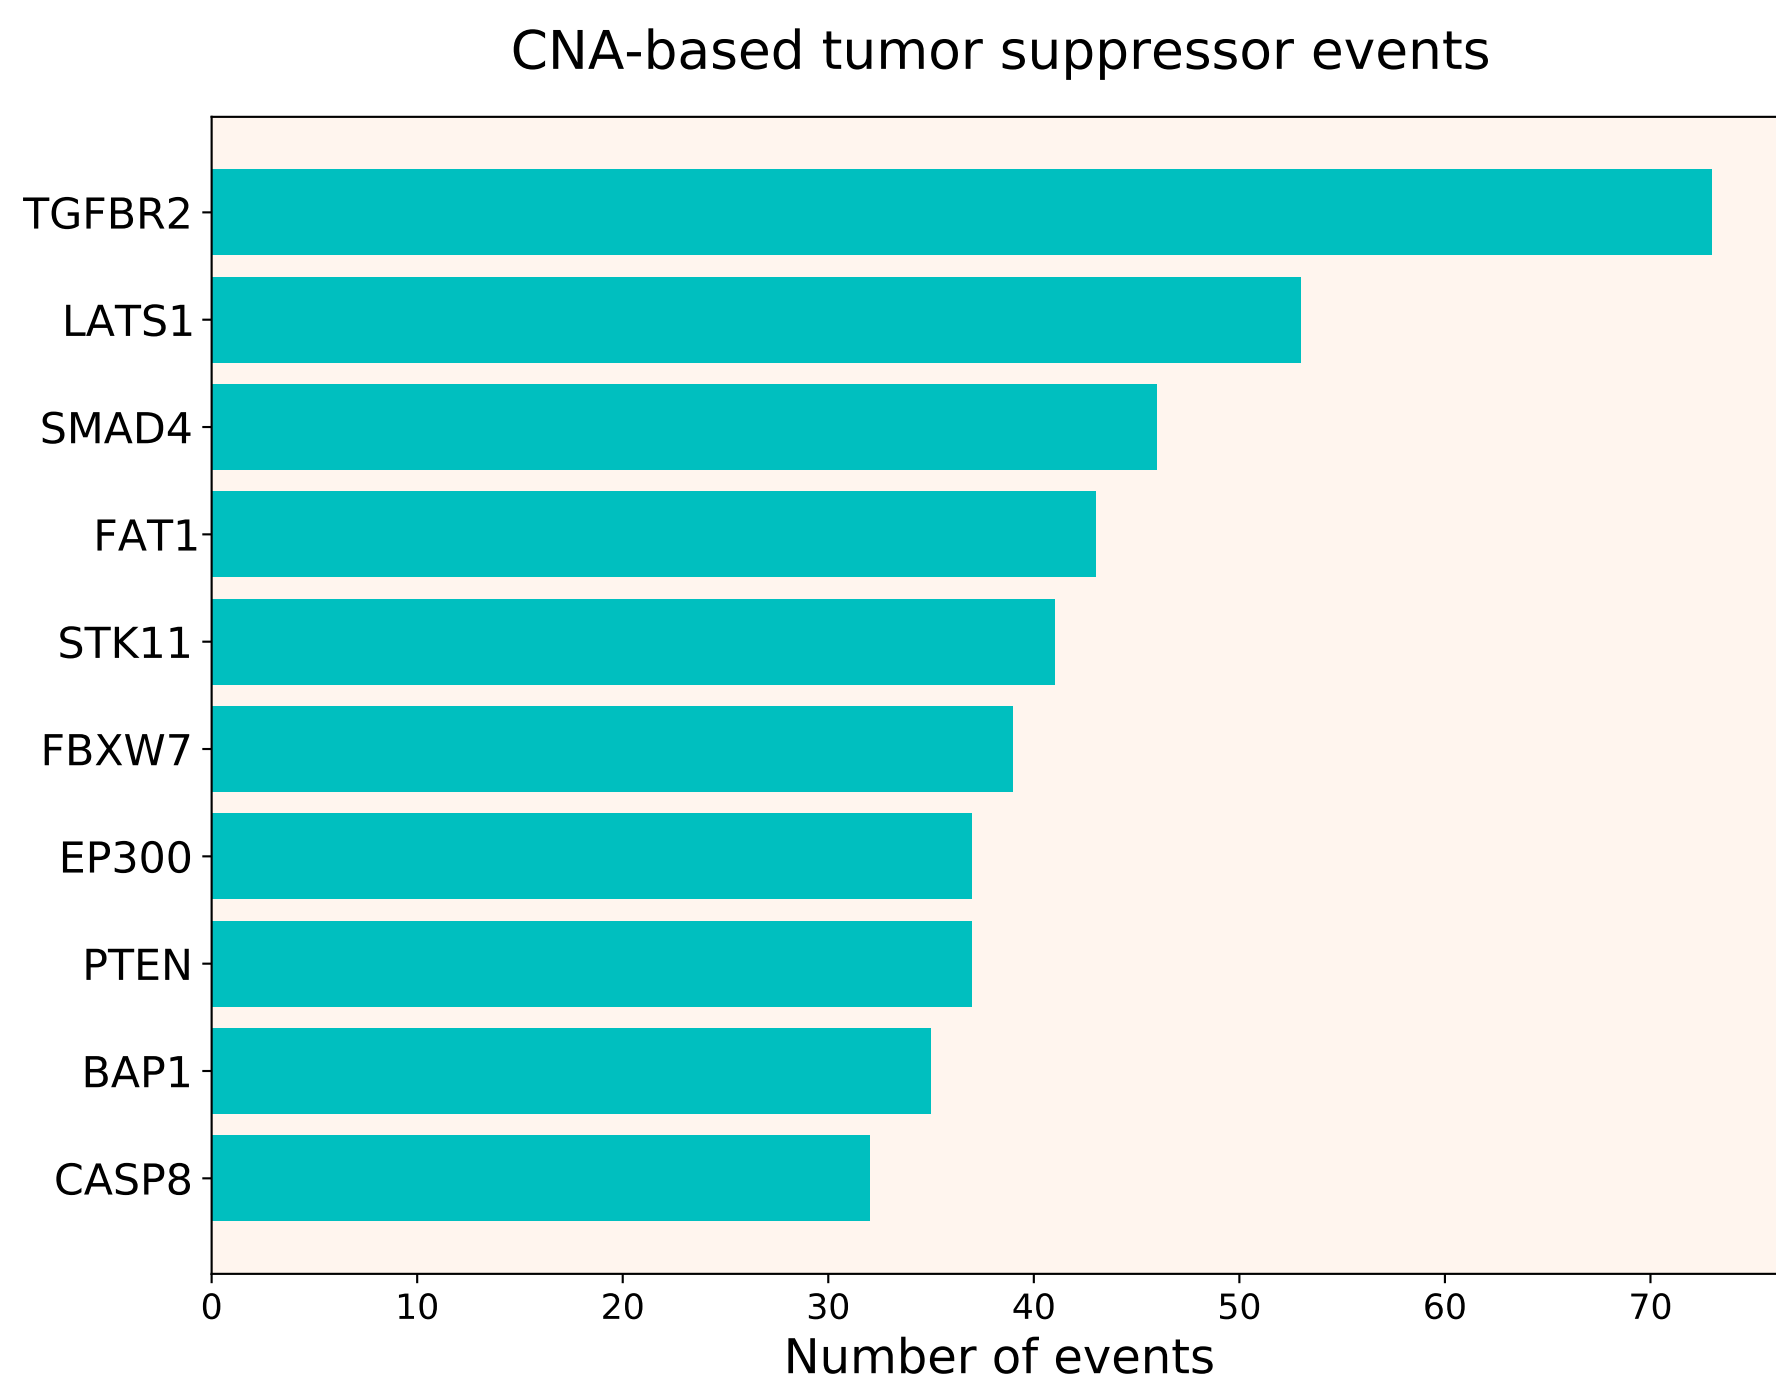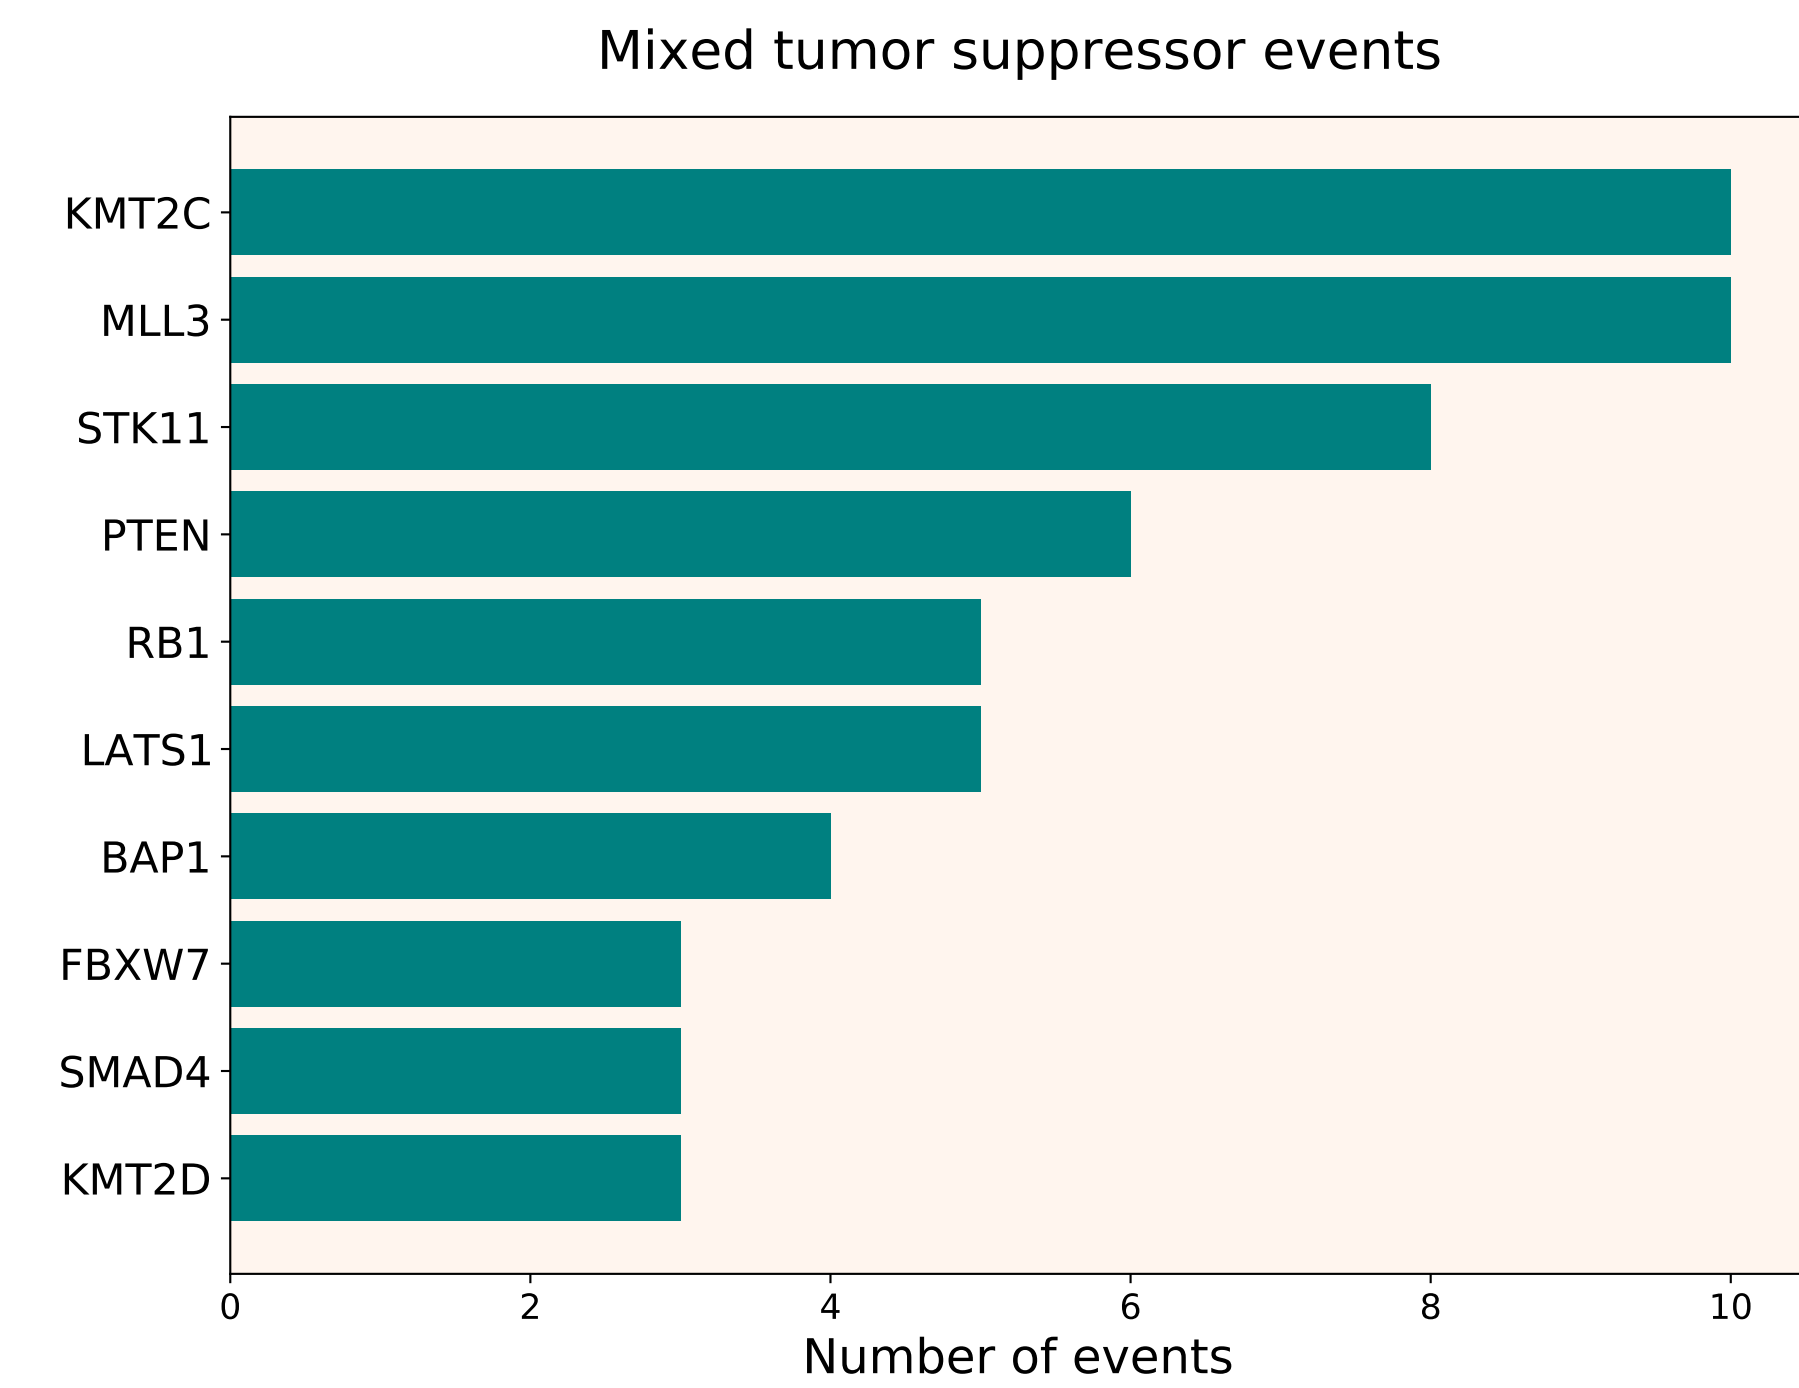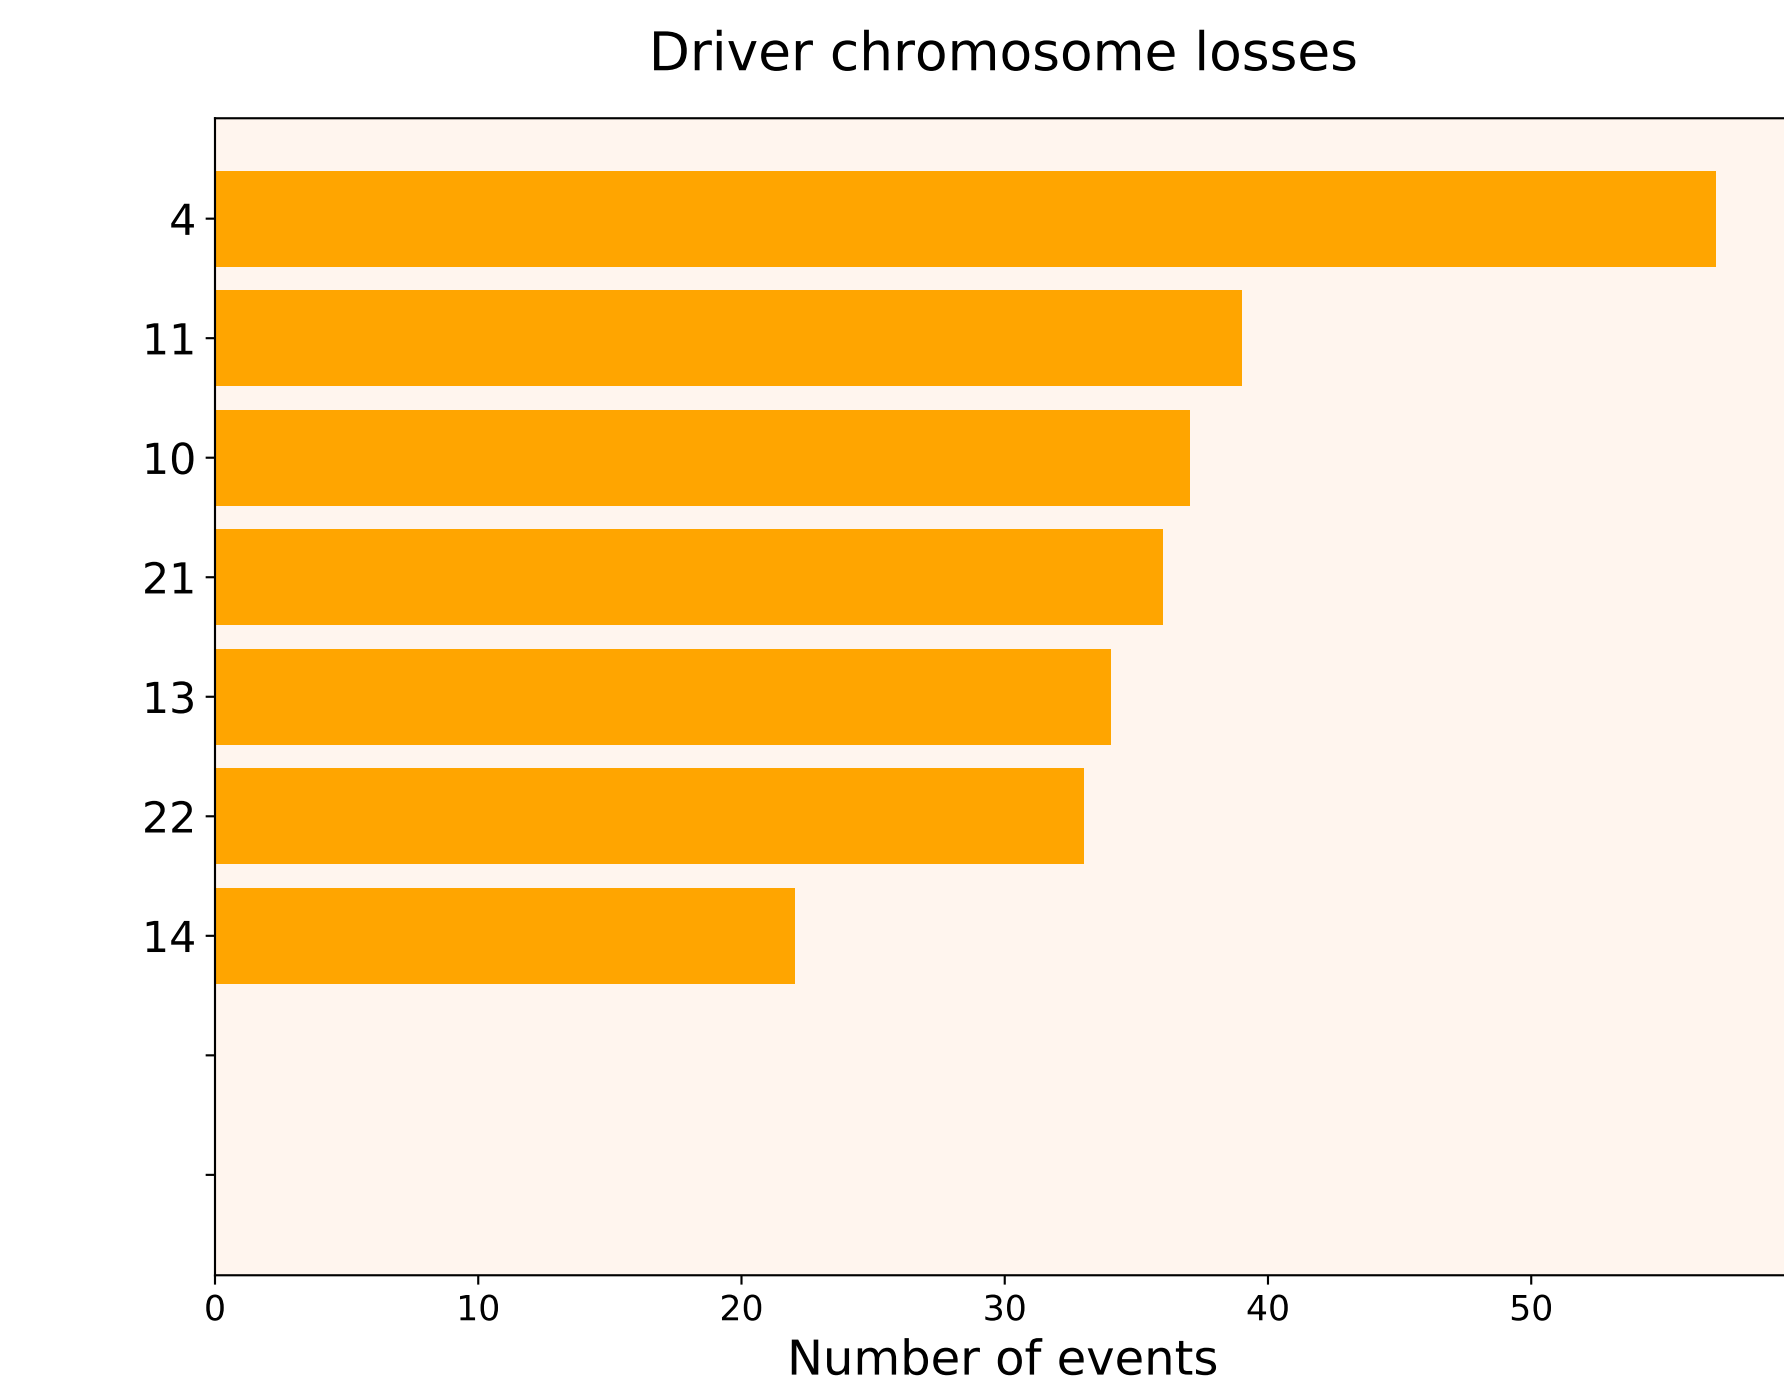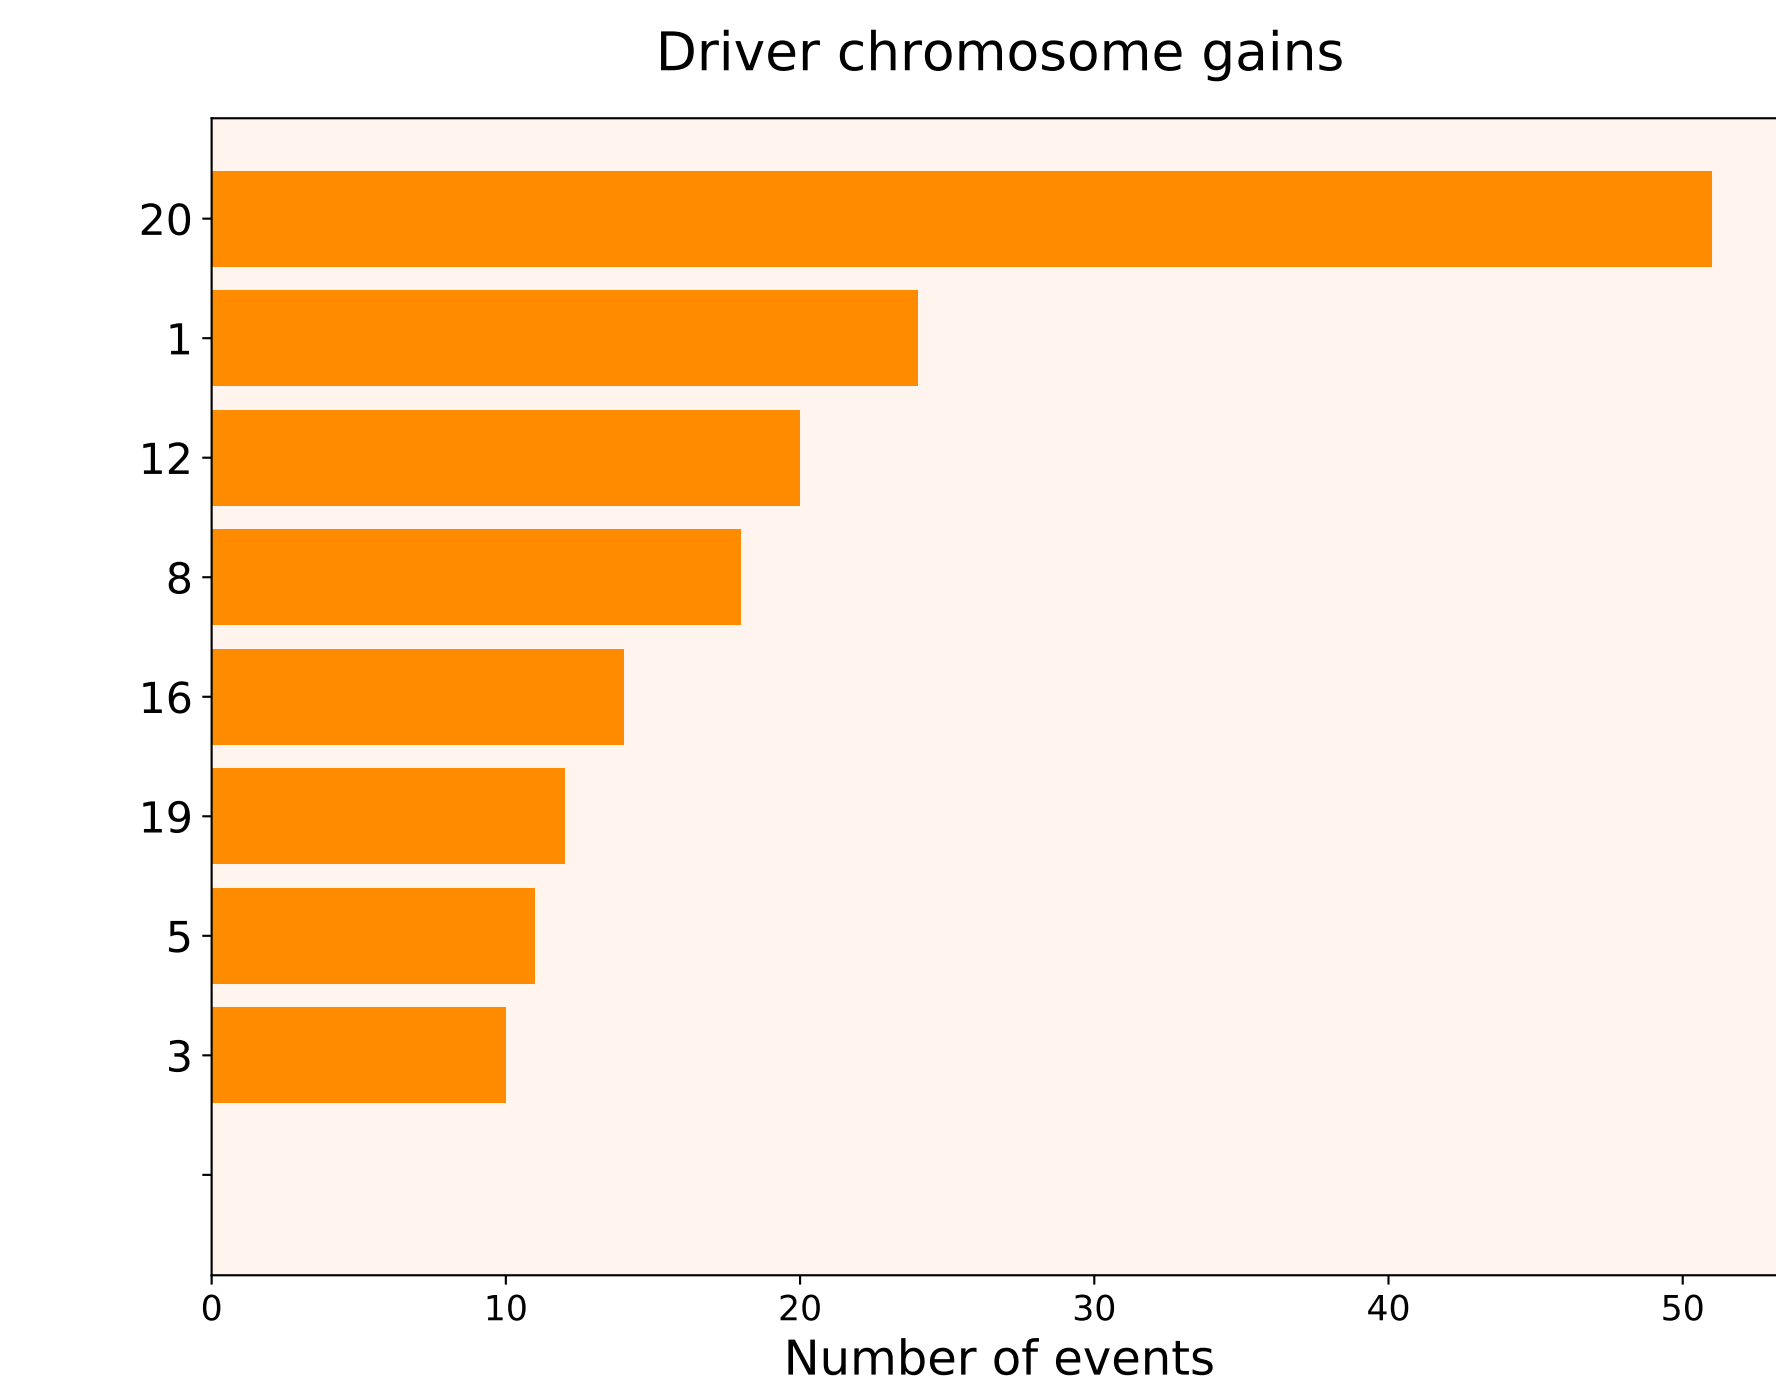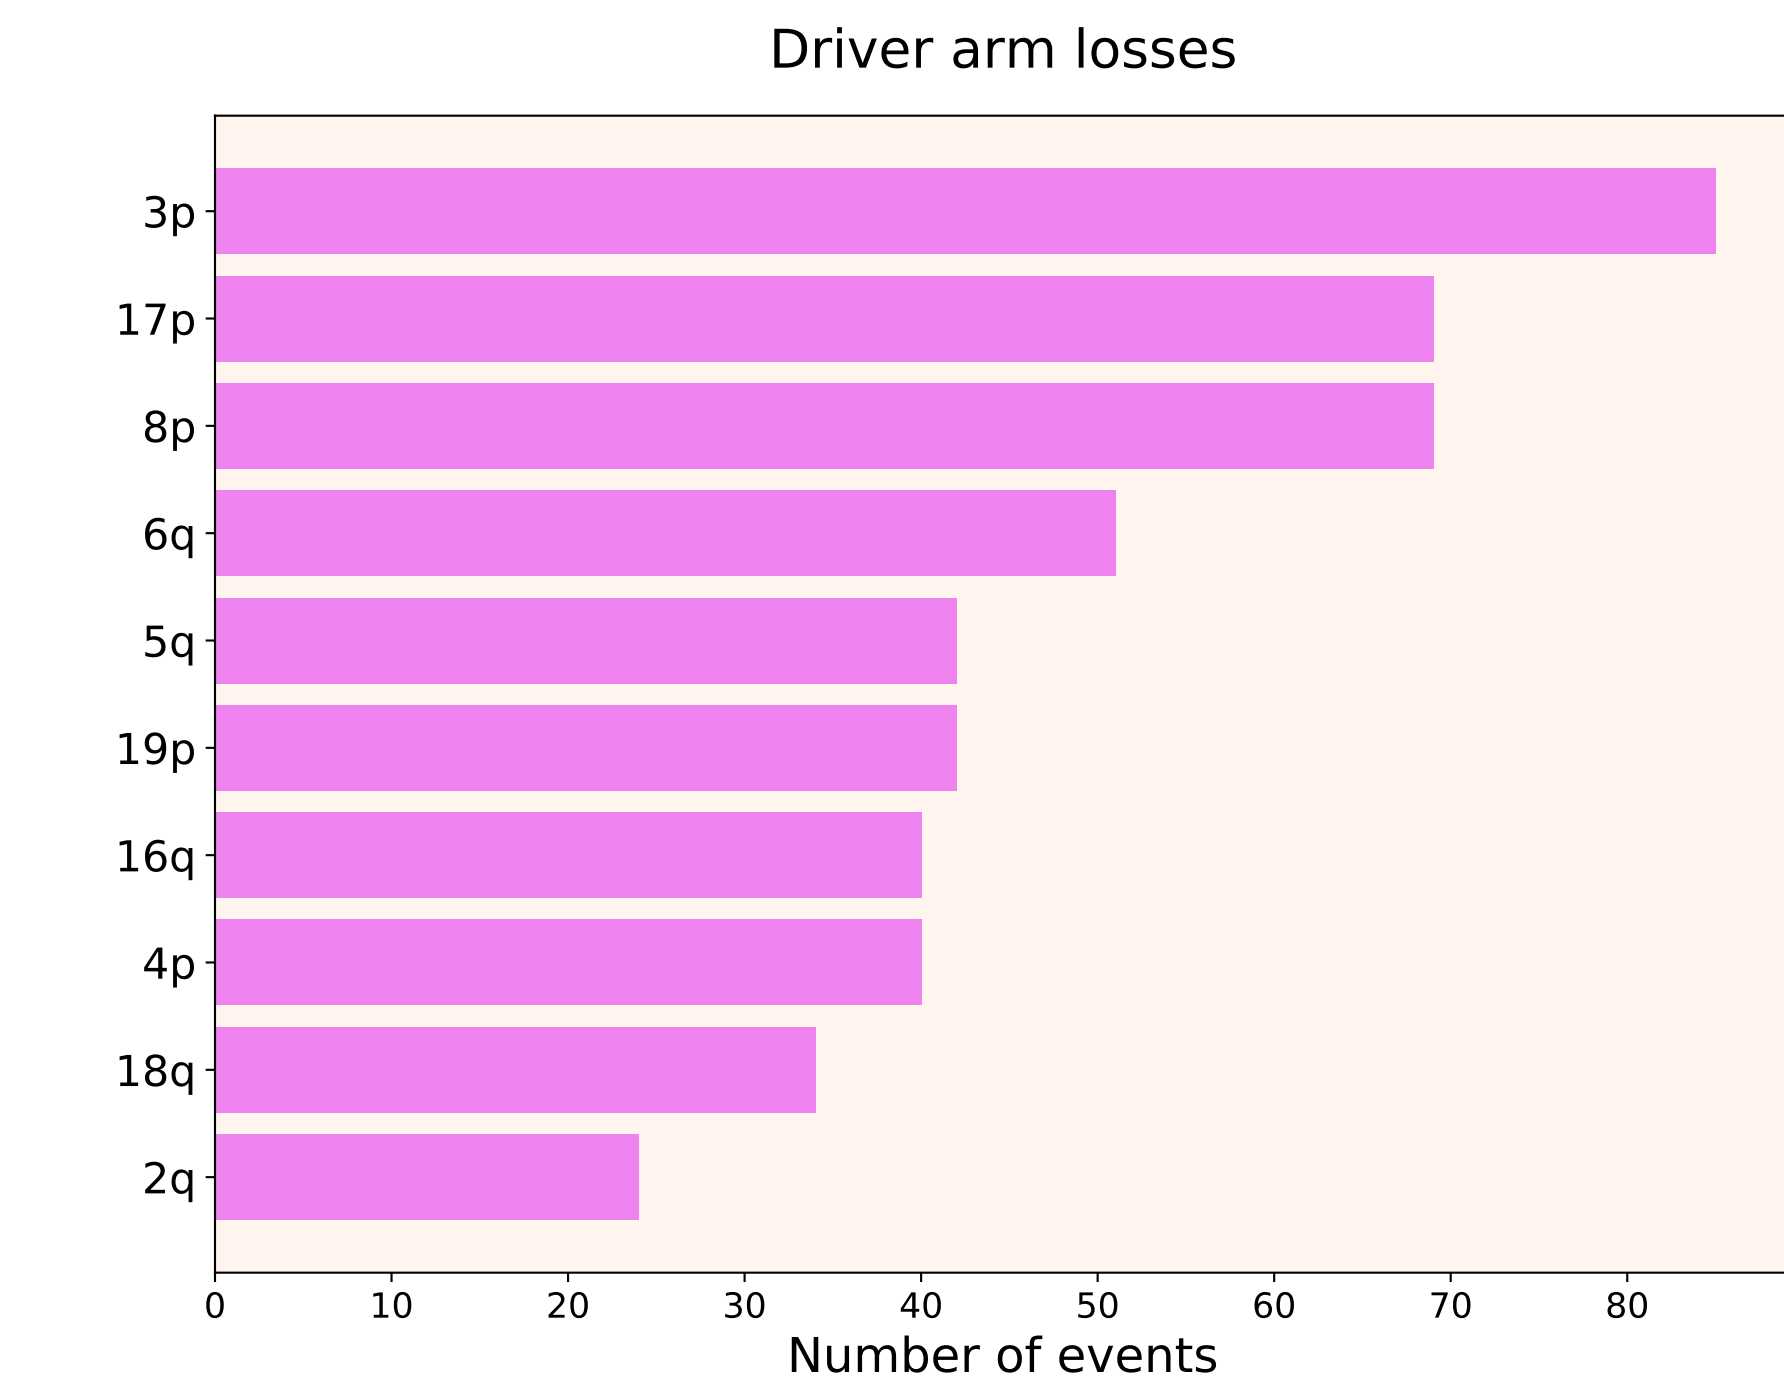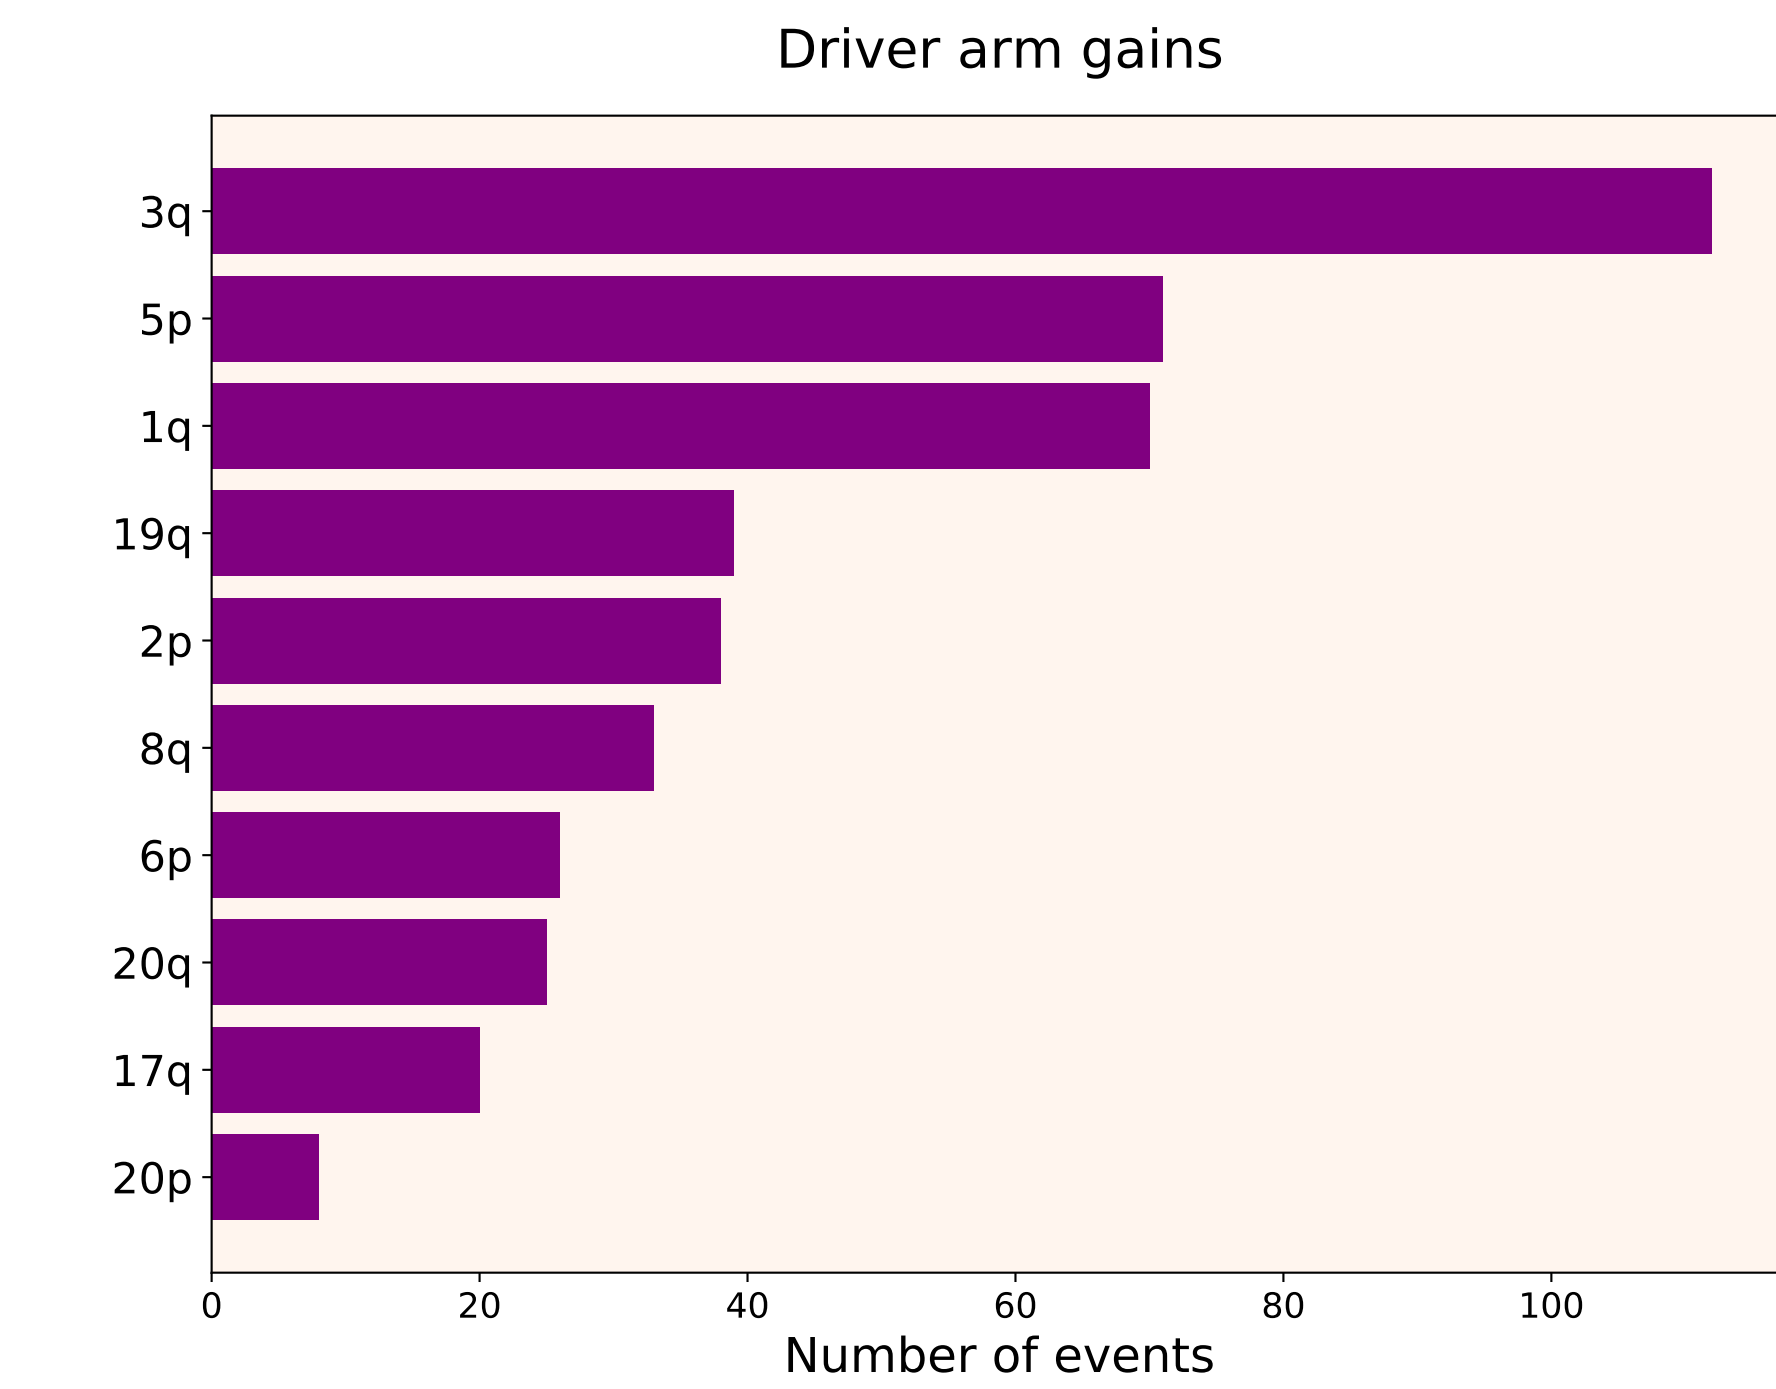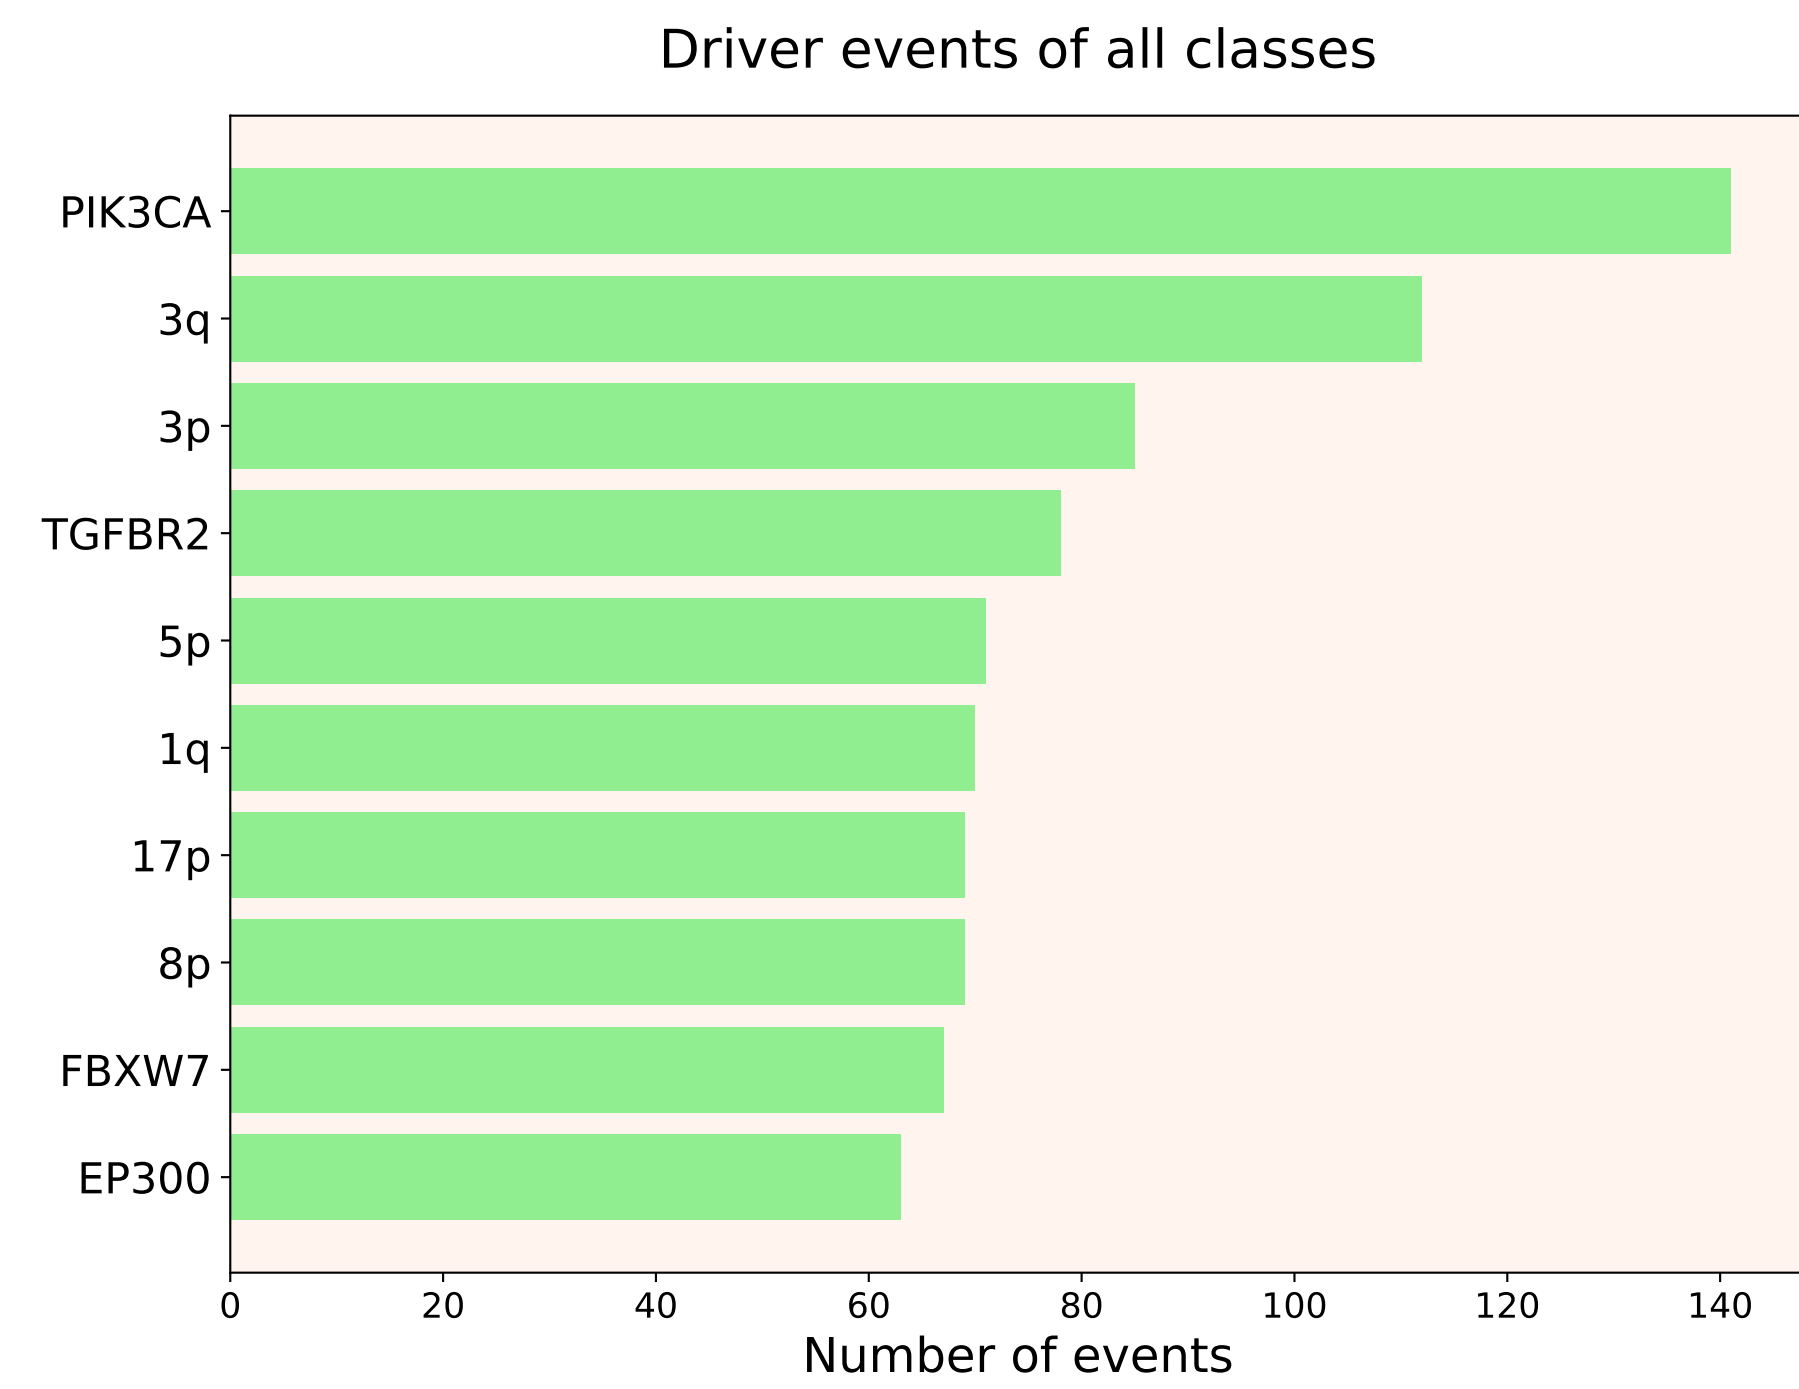

Supplement: Supplemental_Data_S1.zip [file Supplemental_Data_S1.zip]

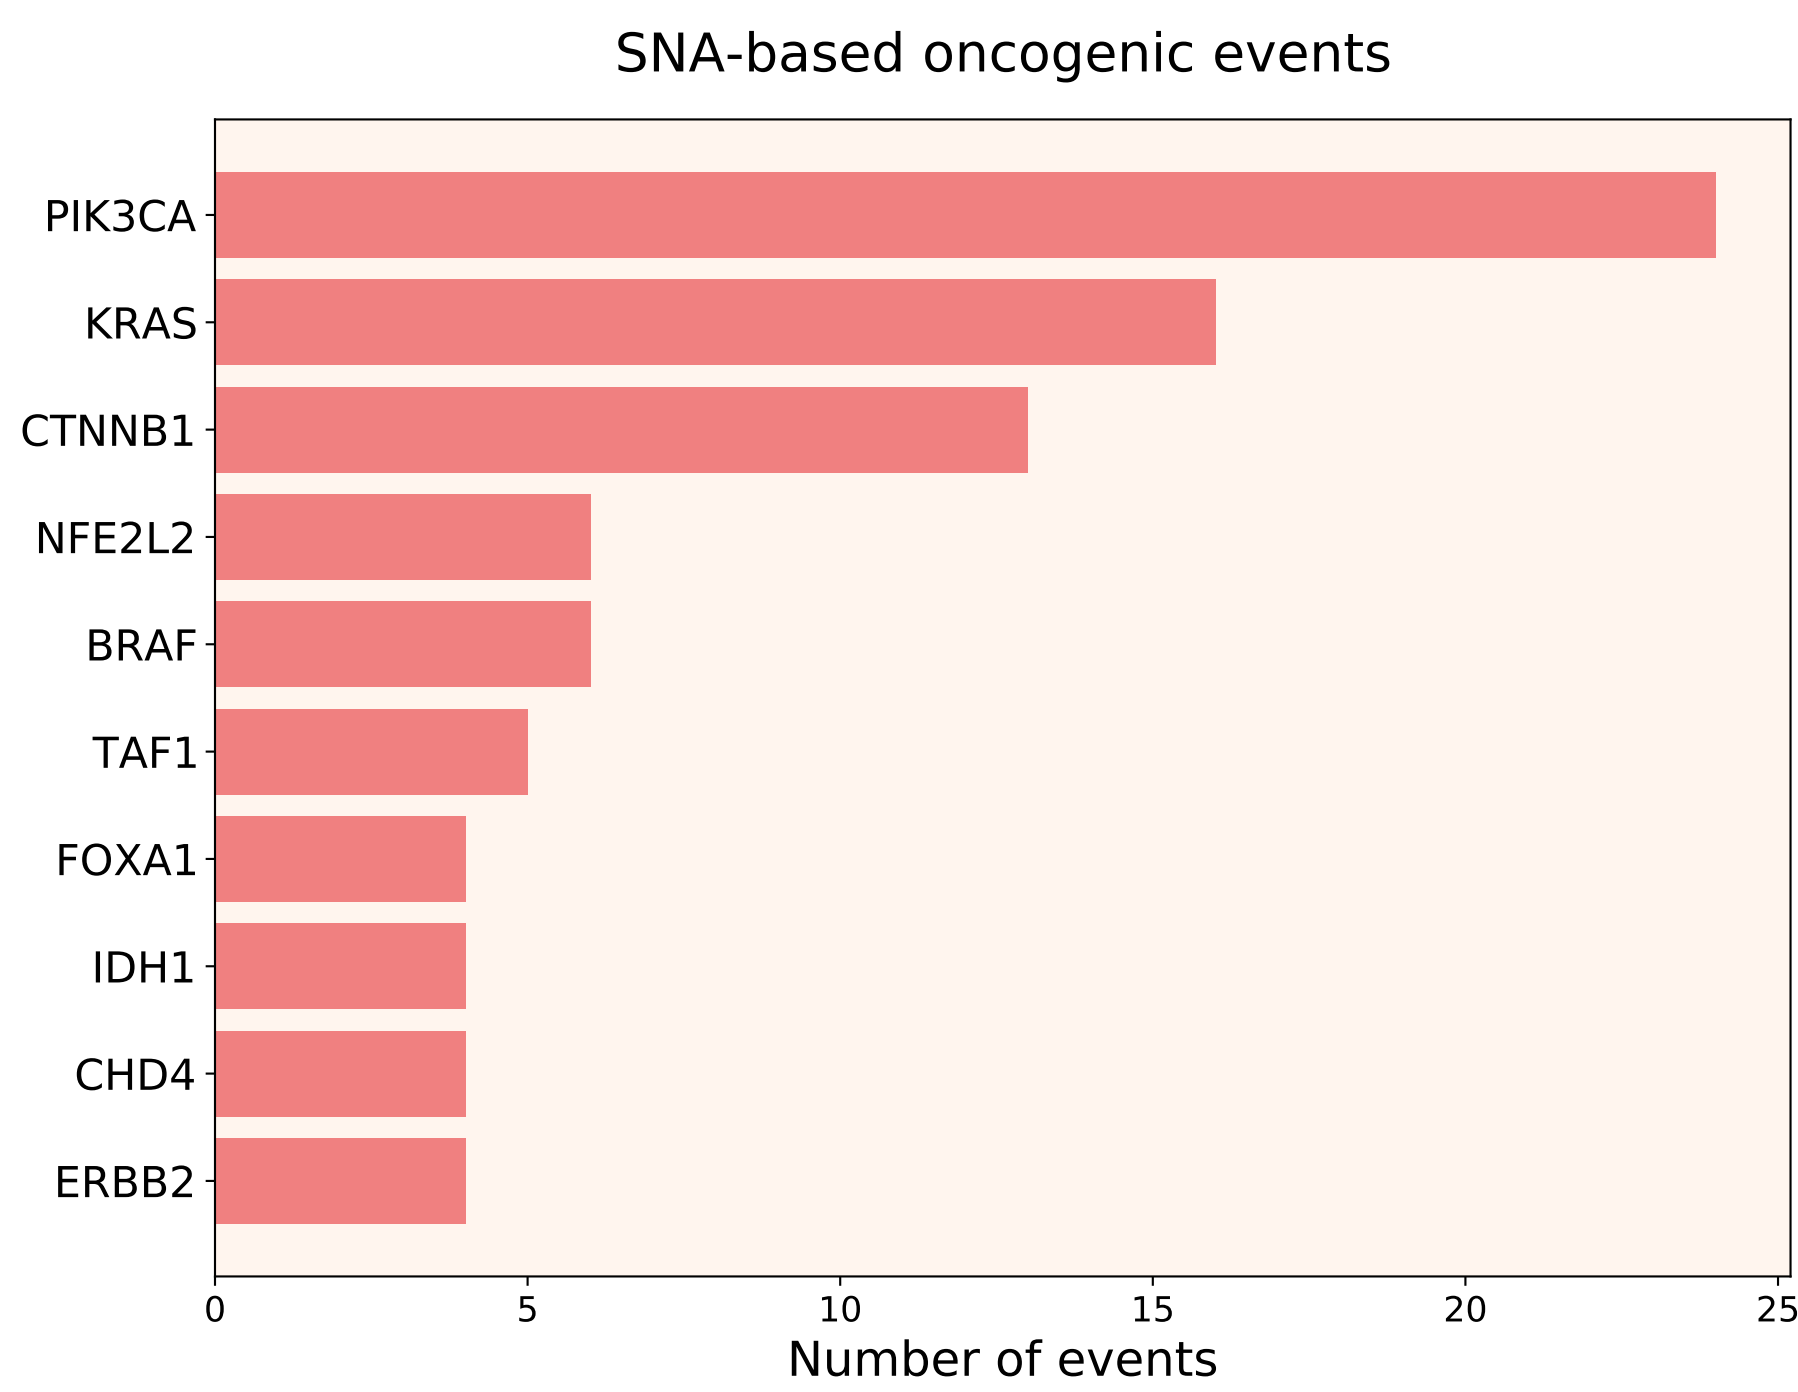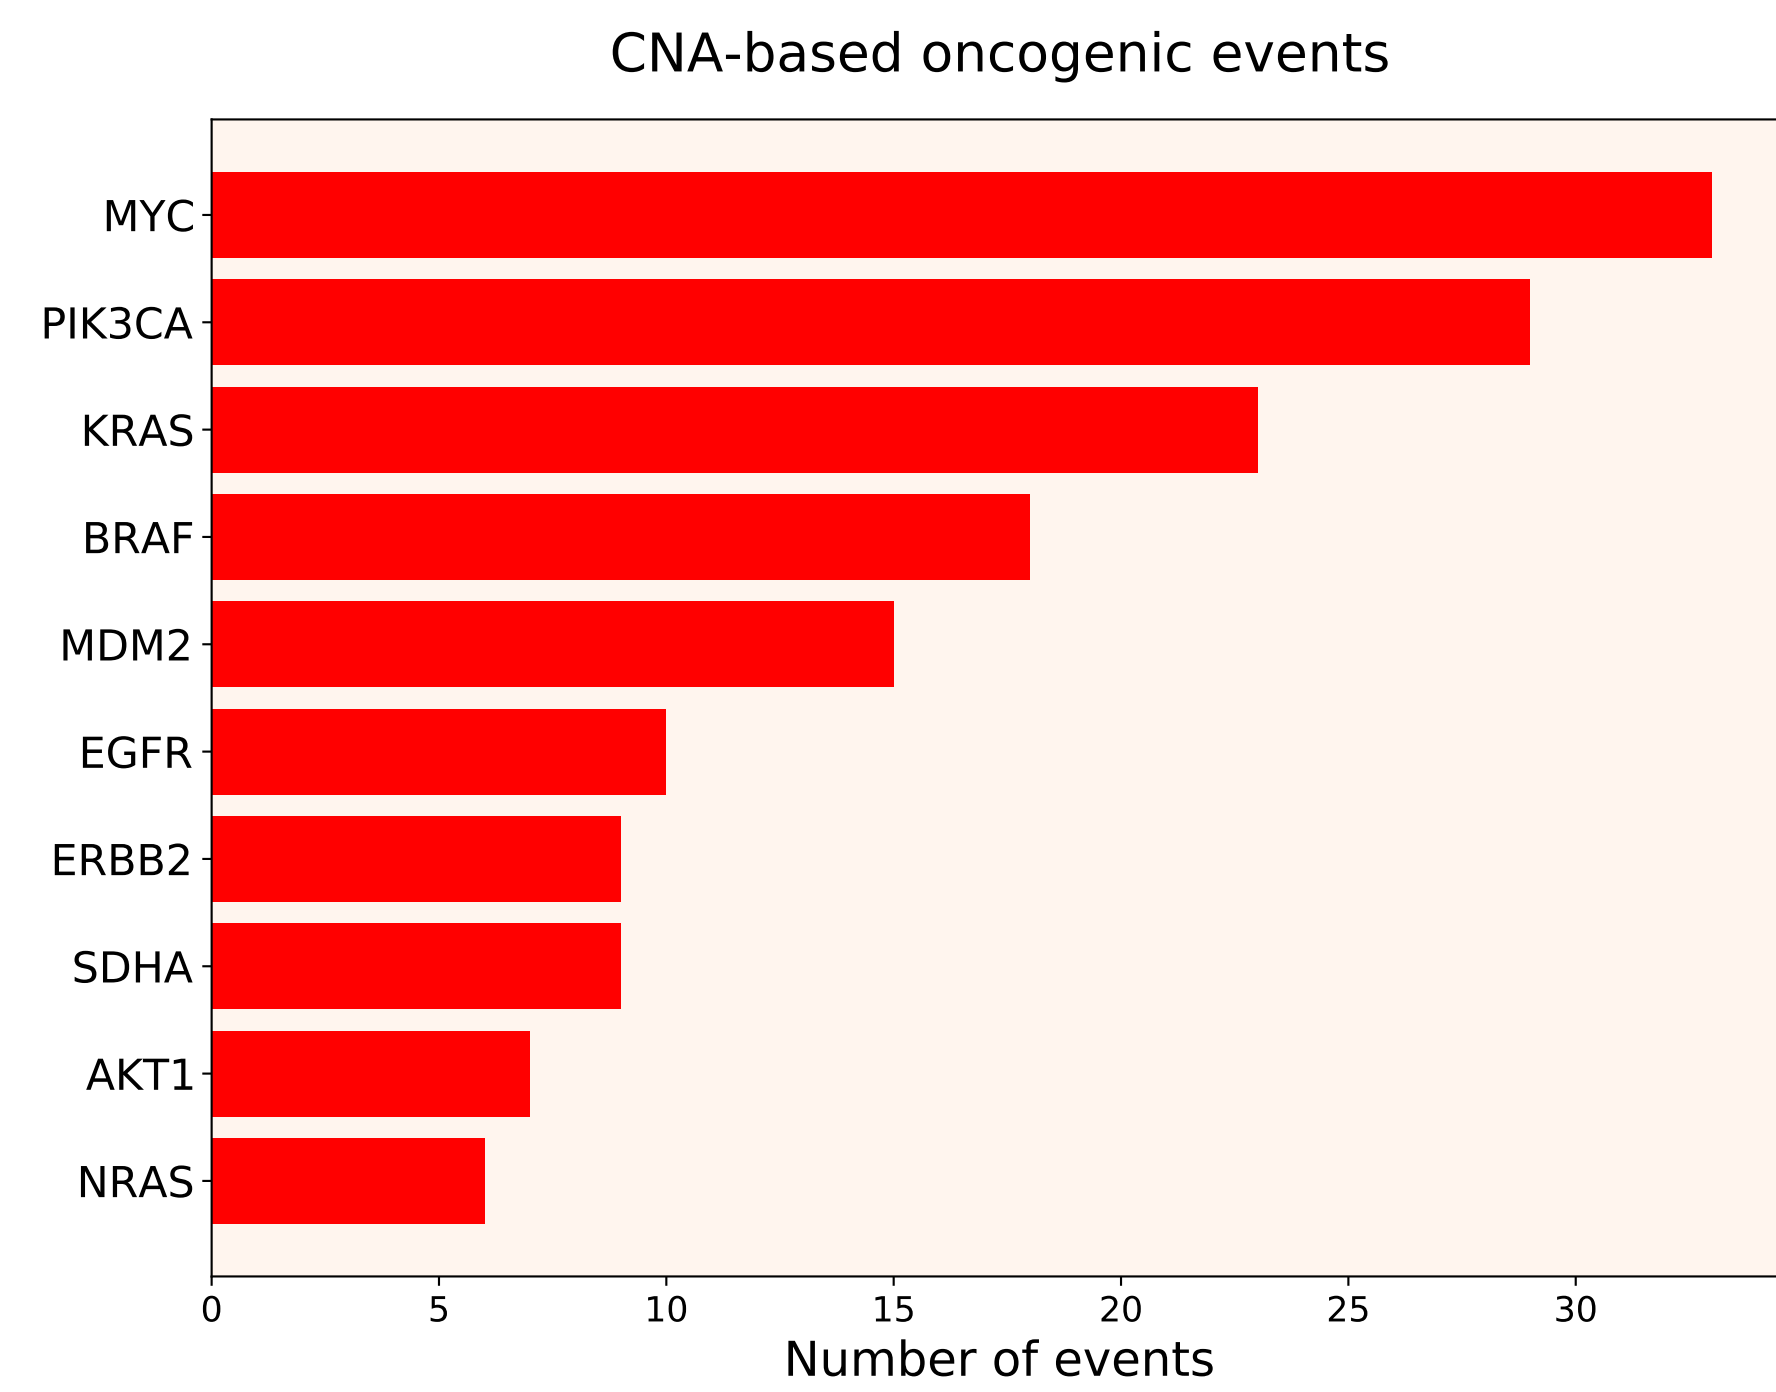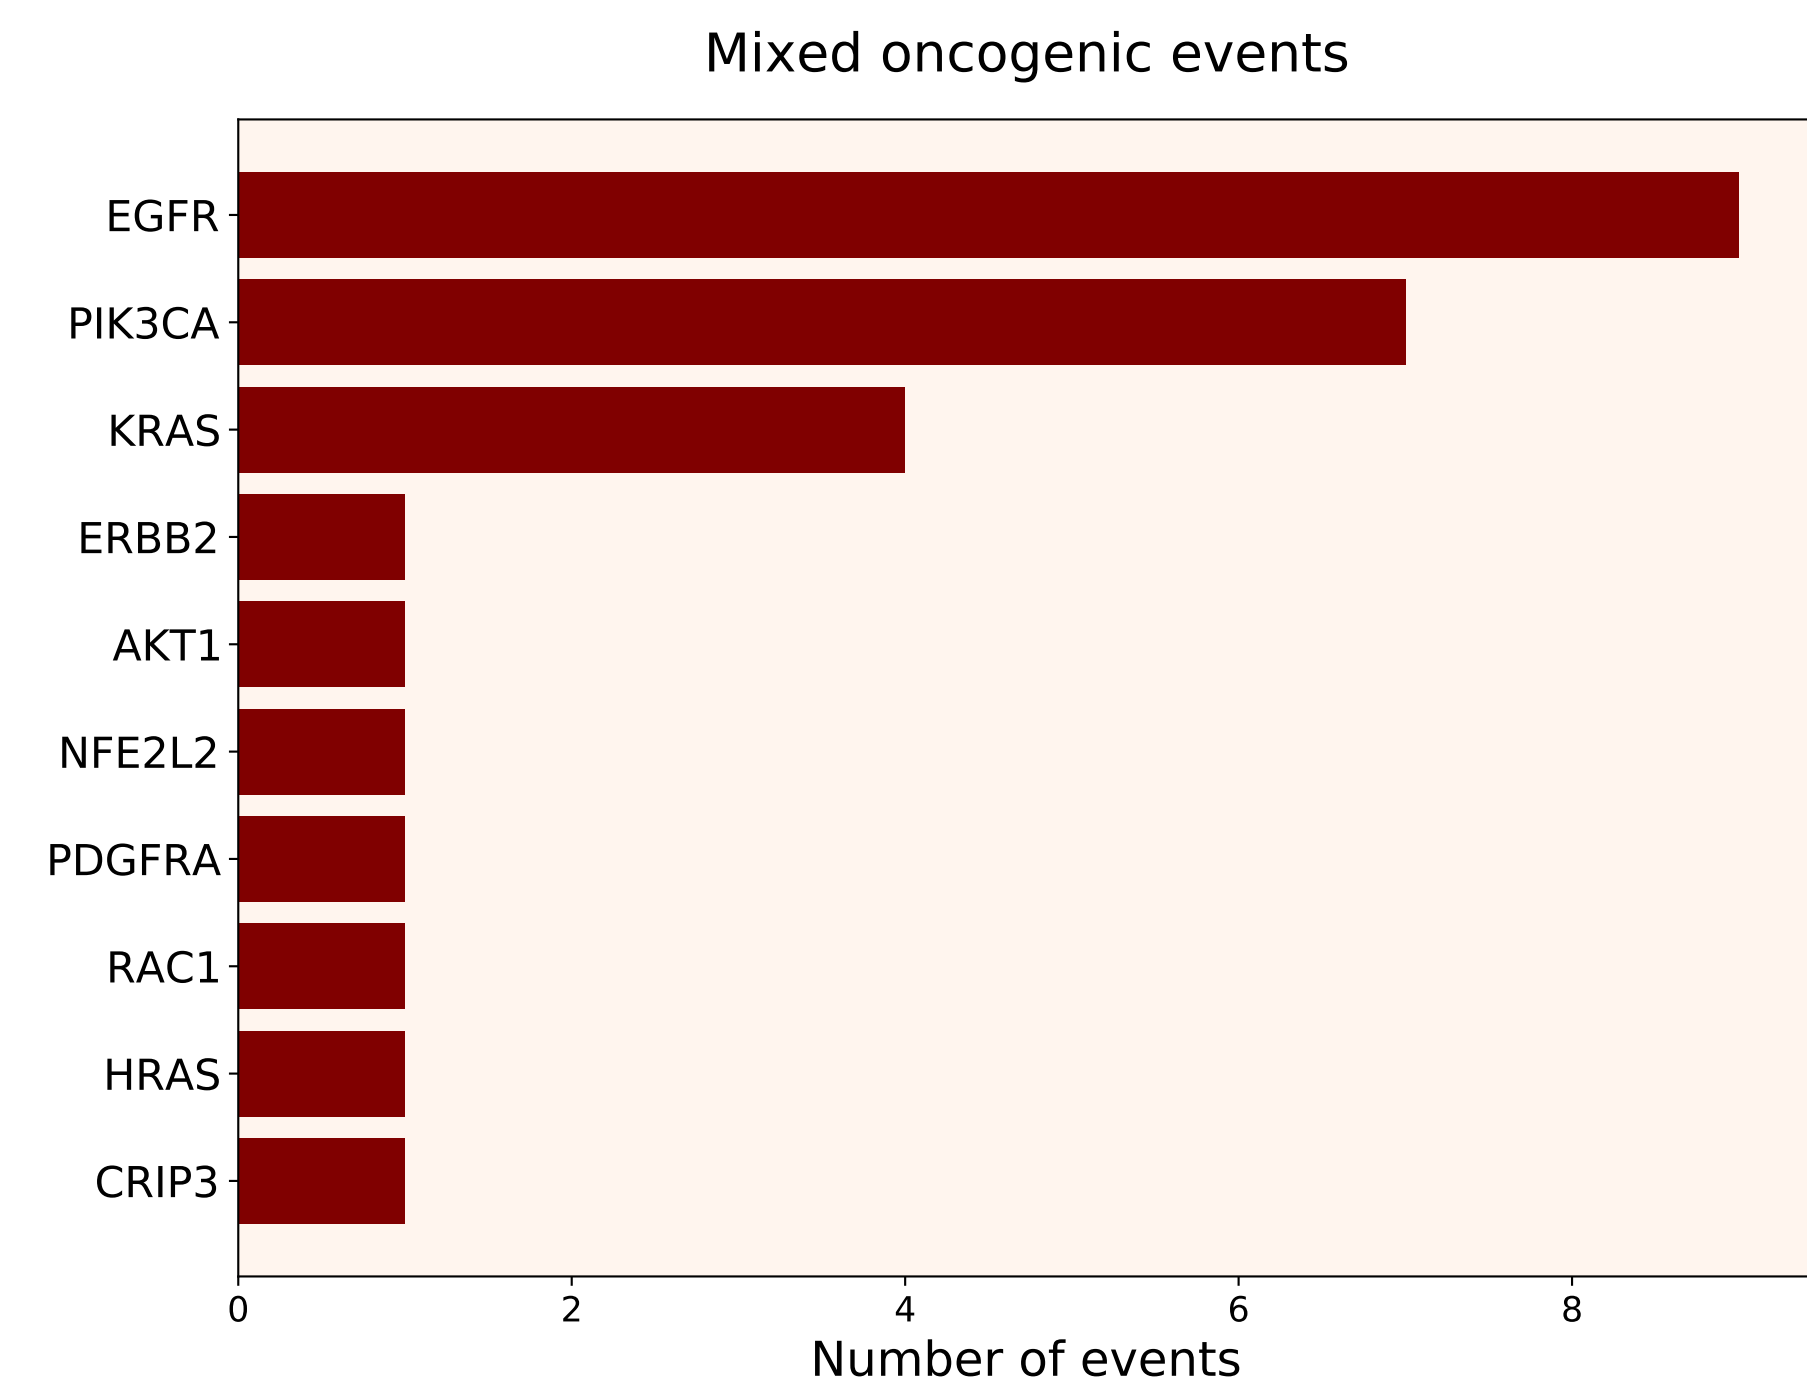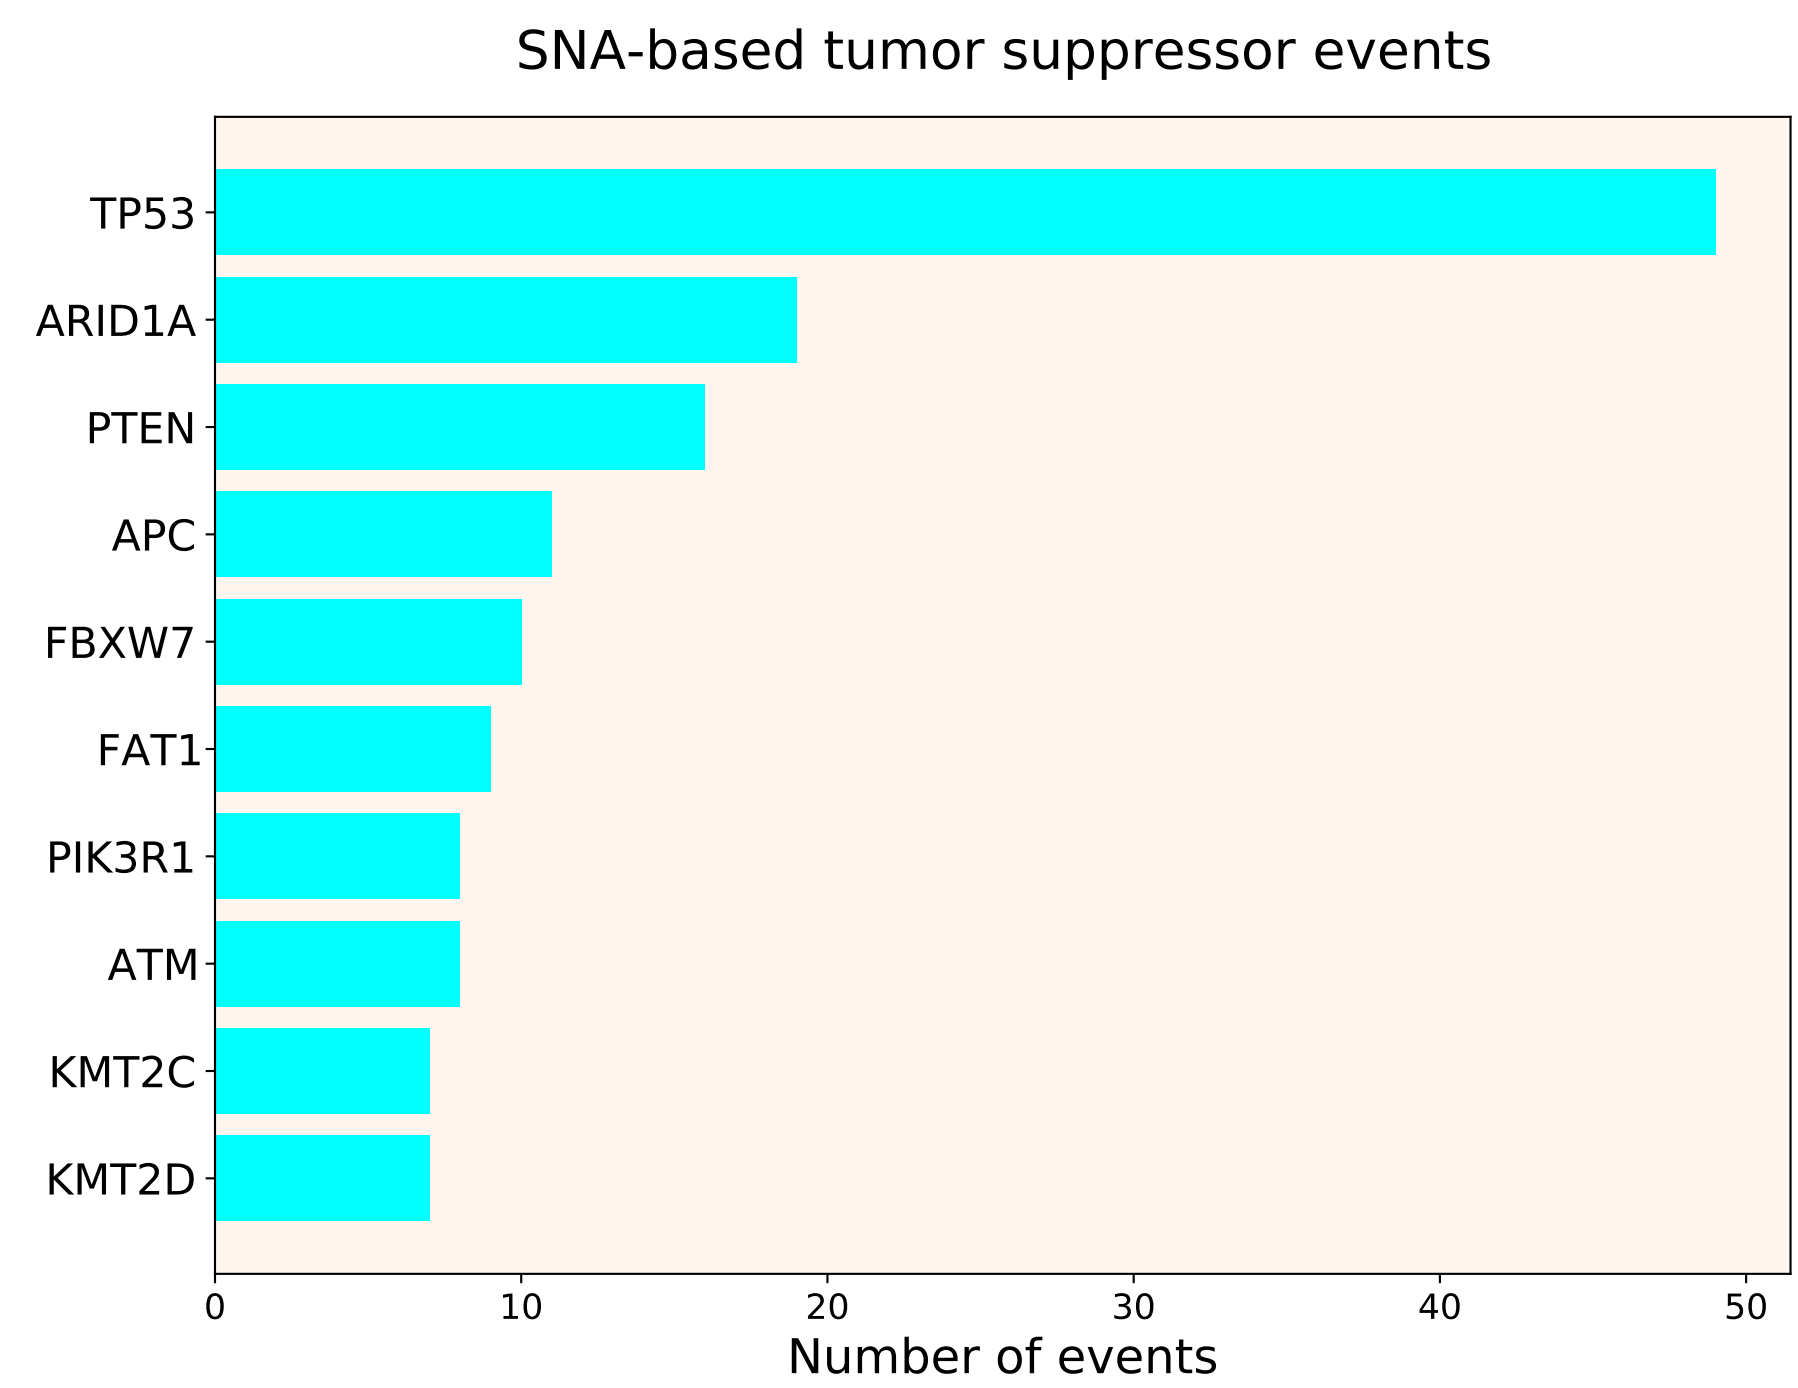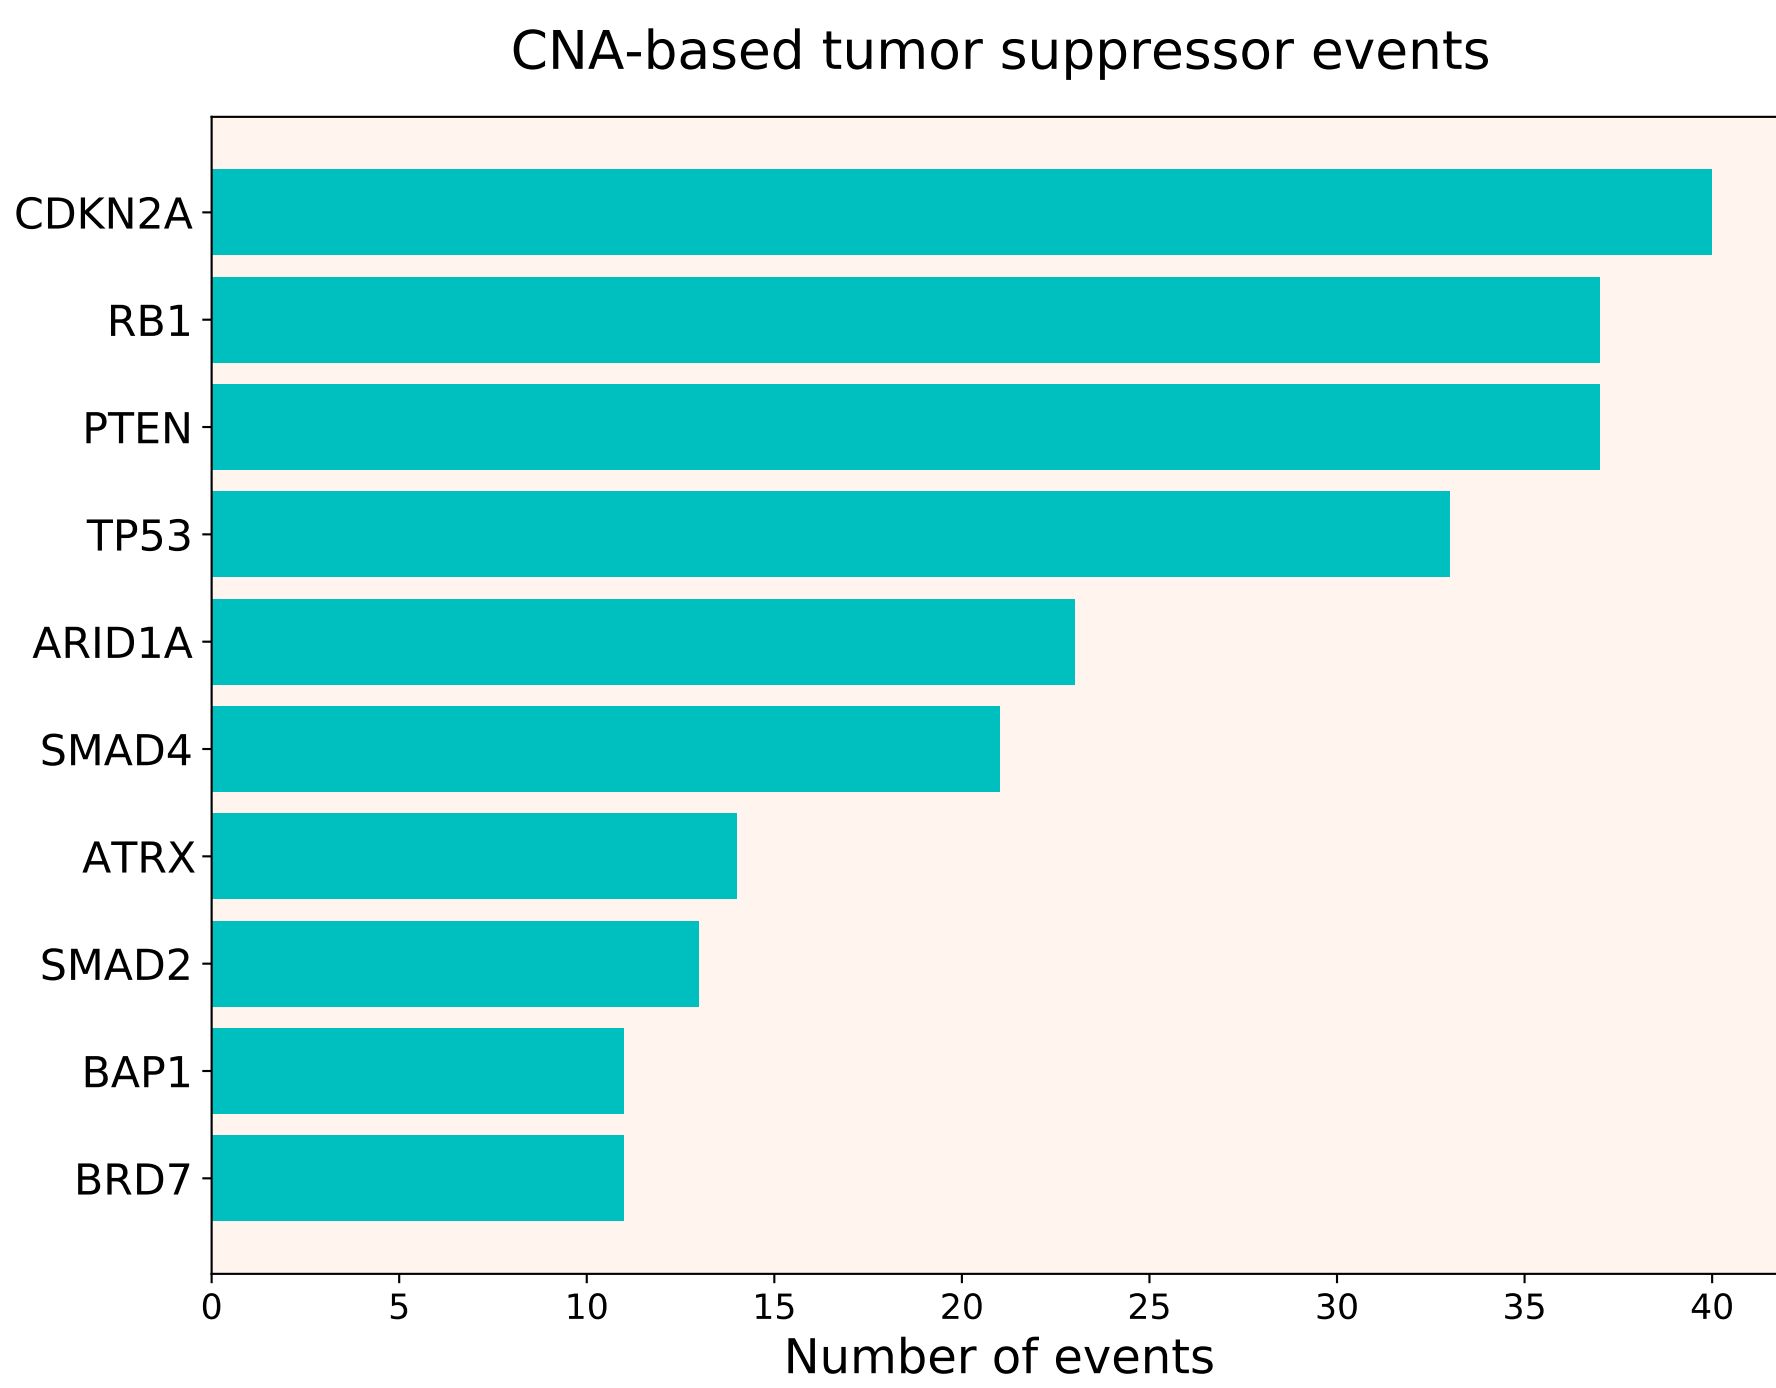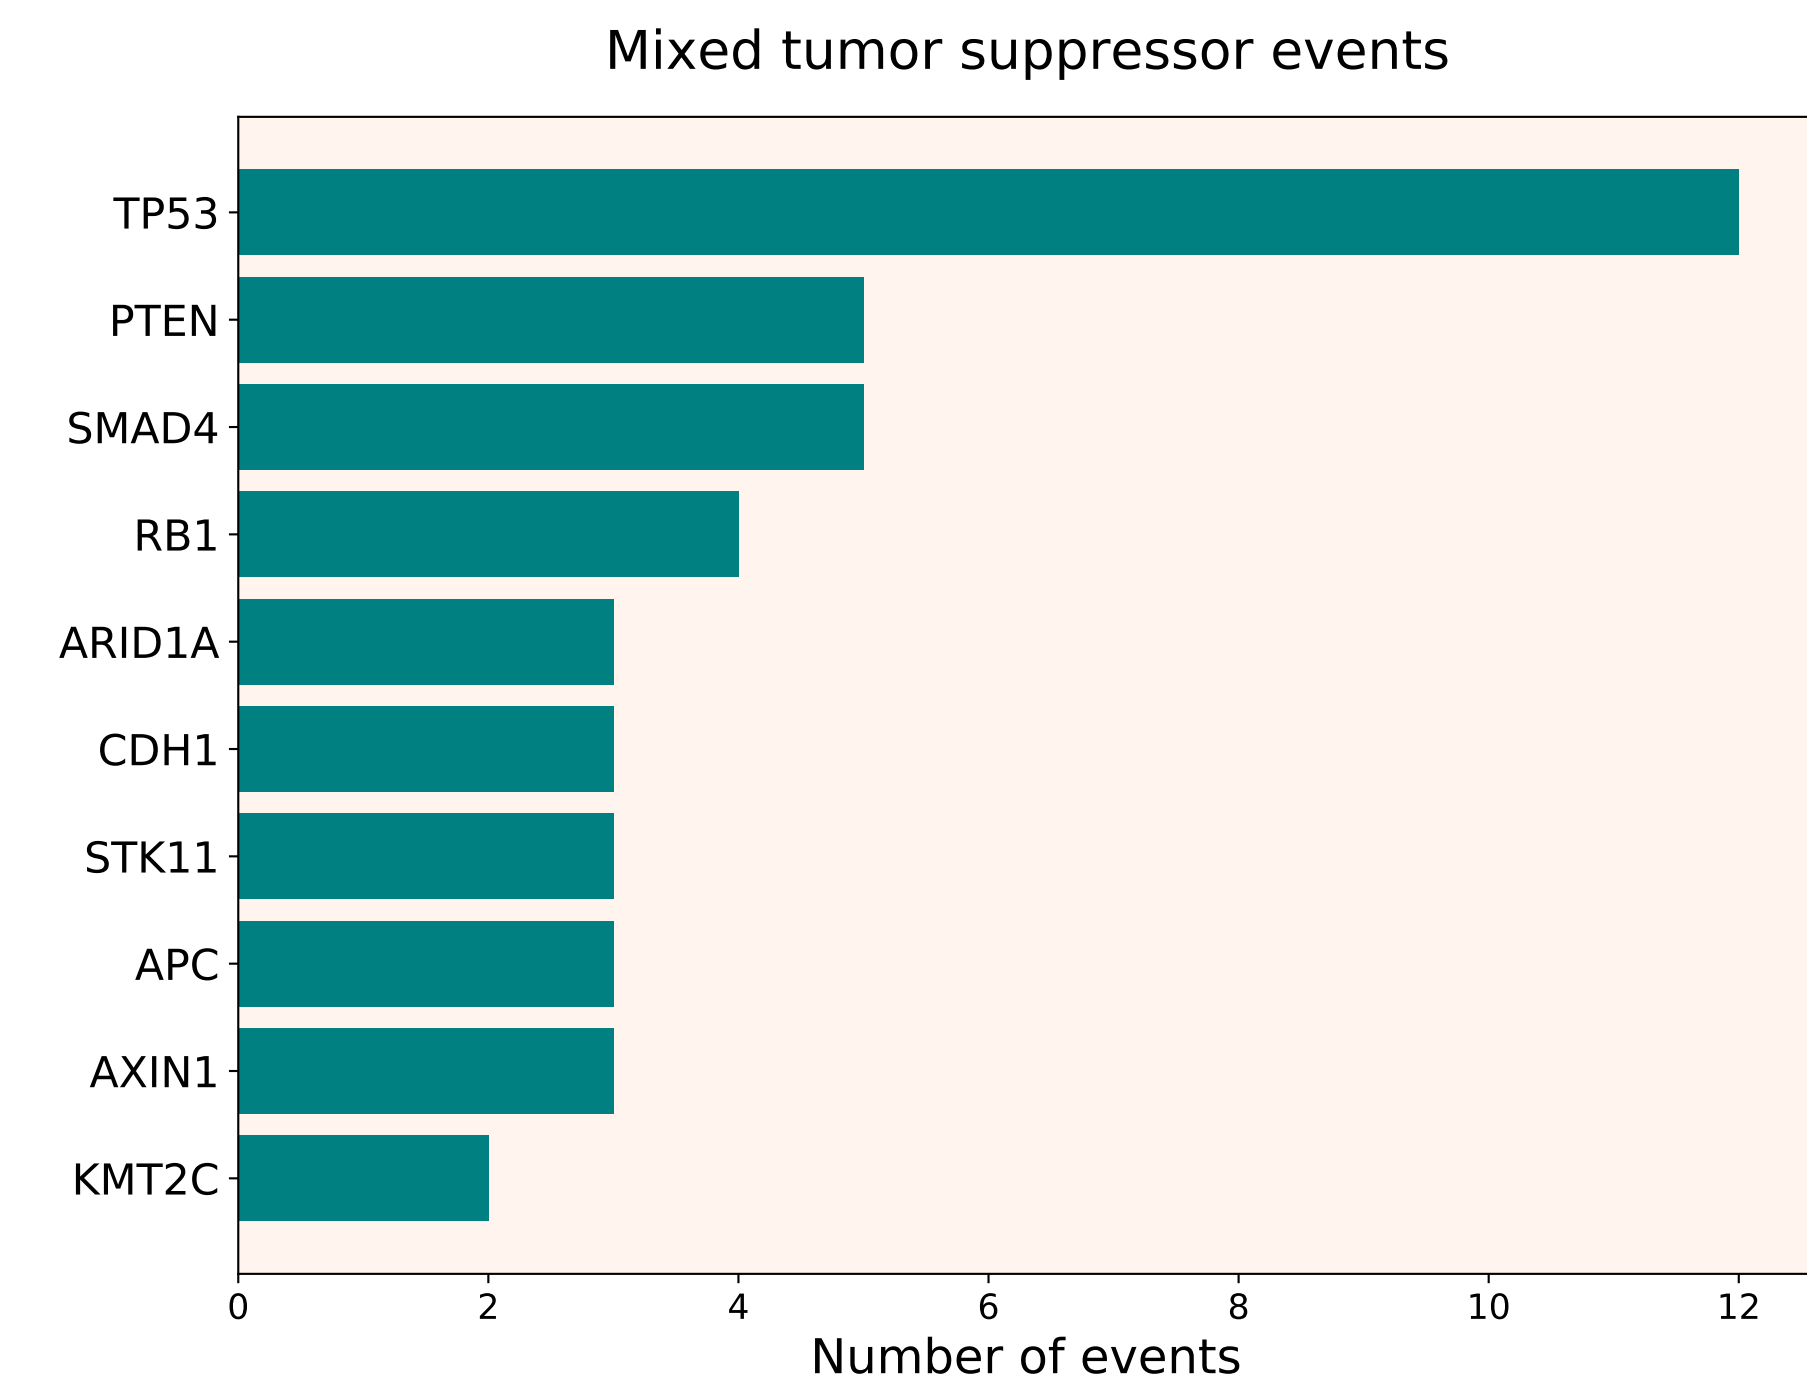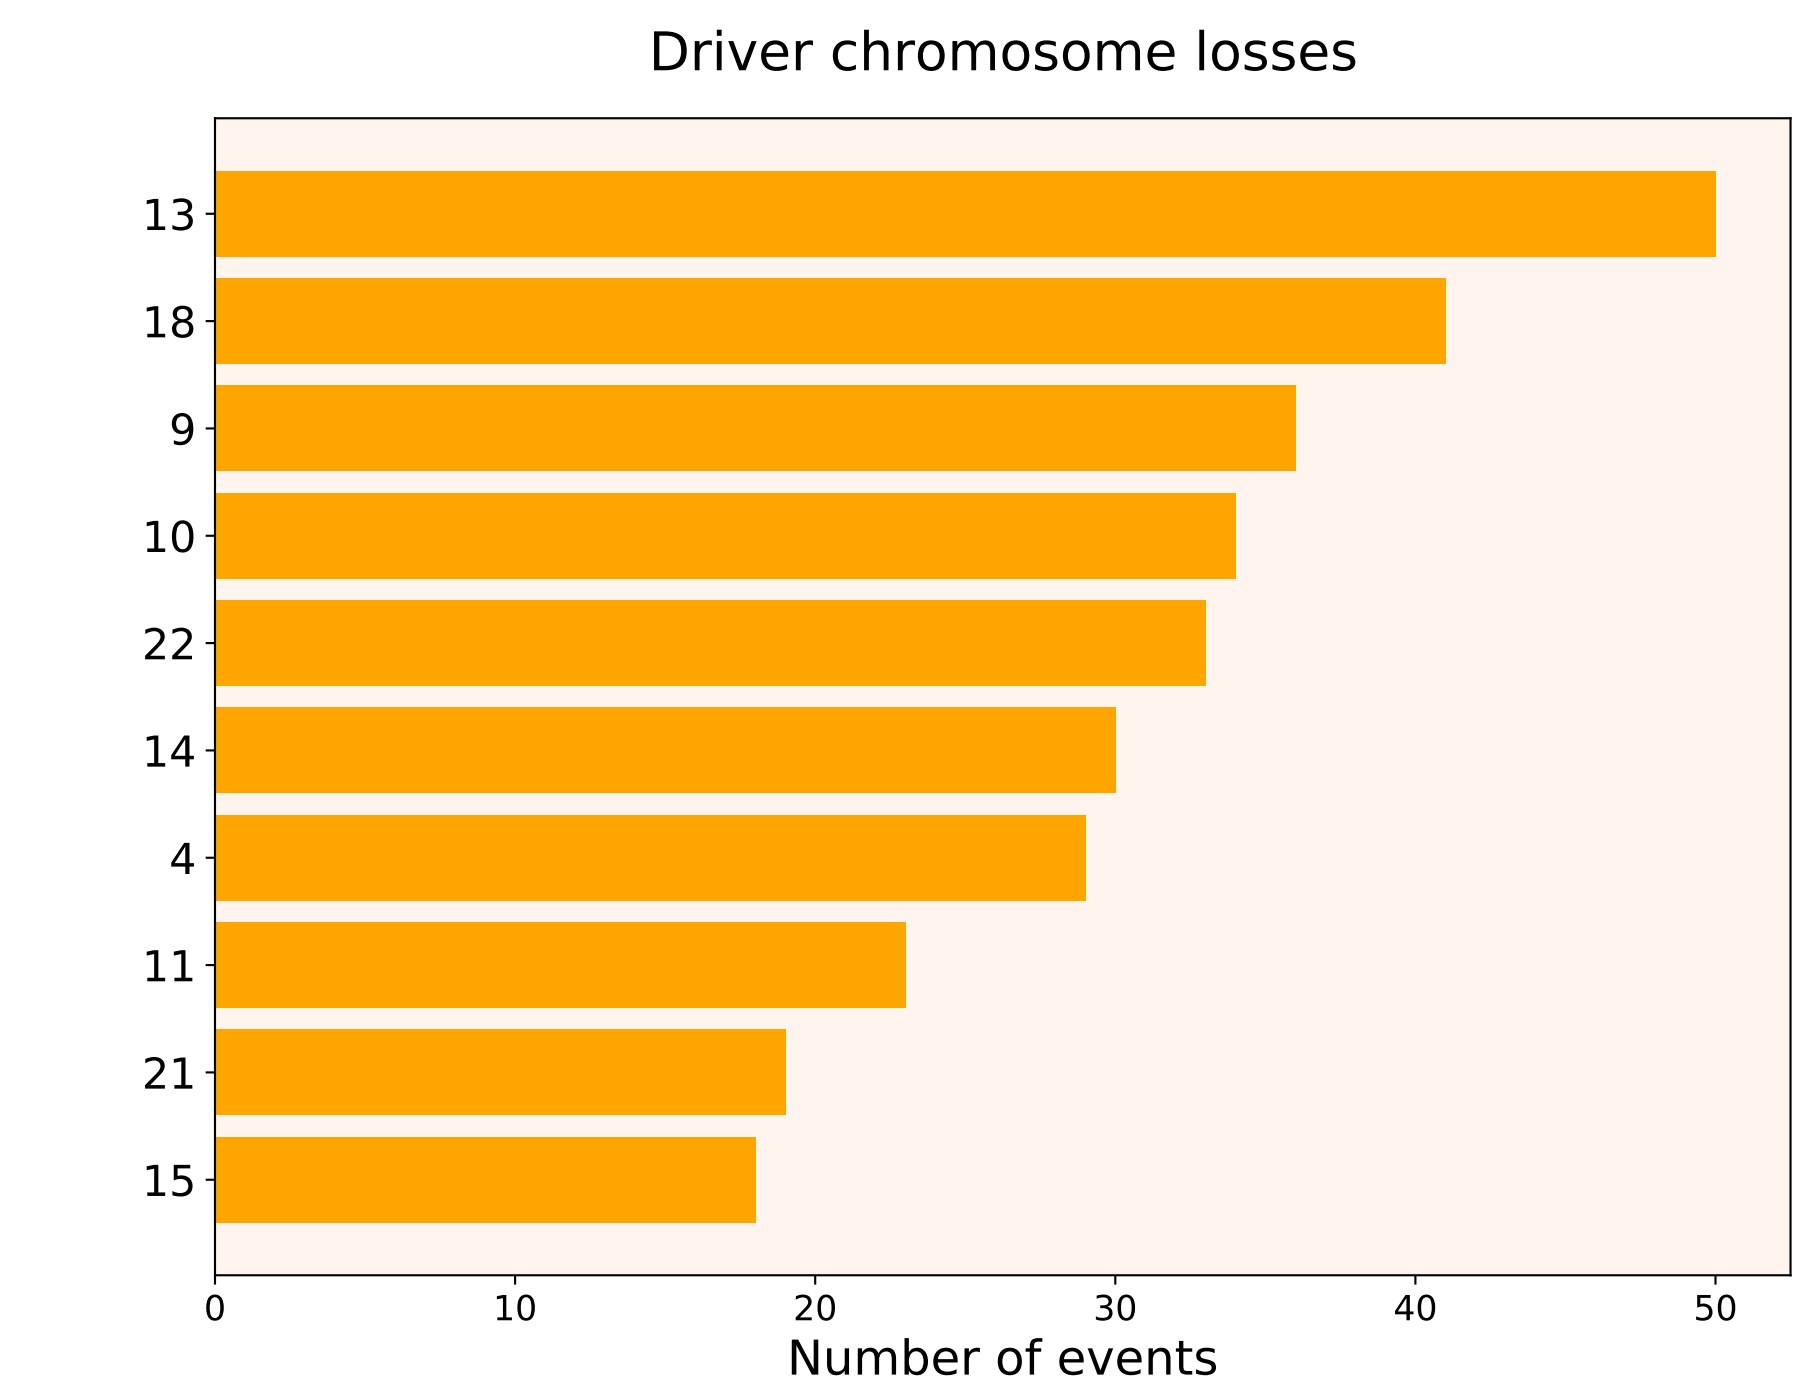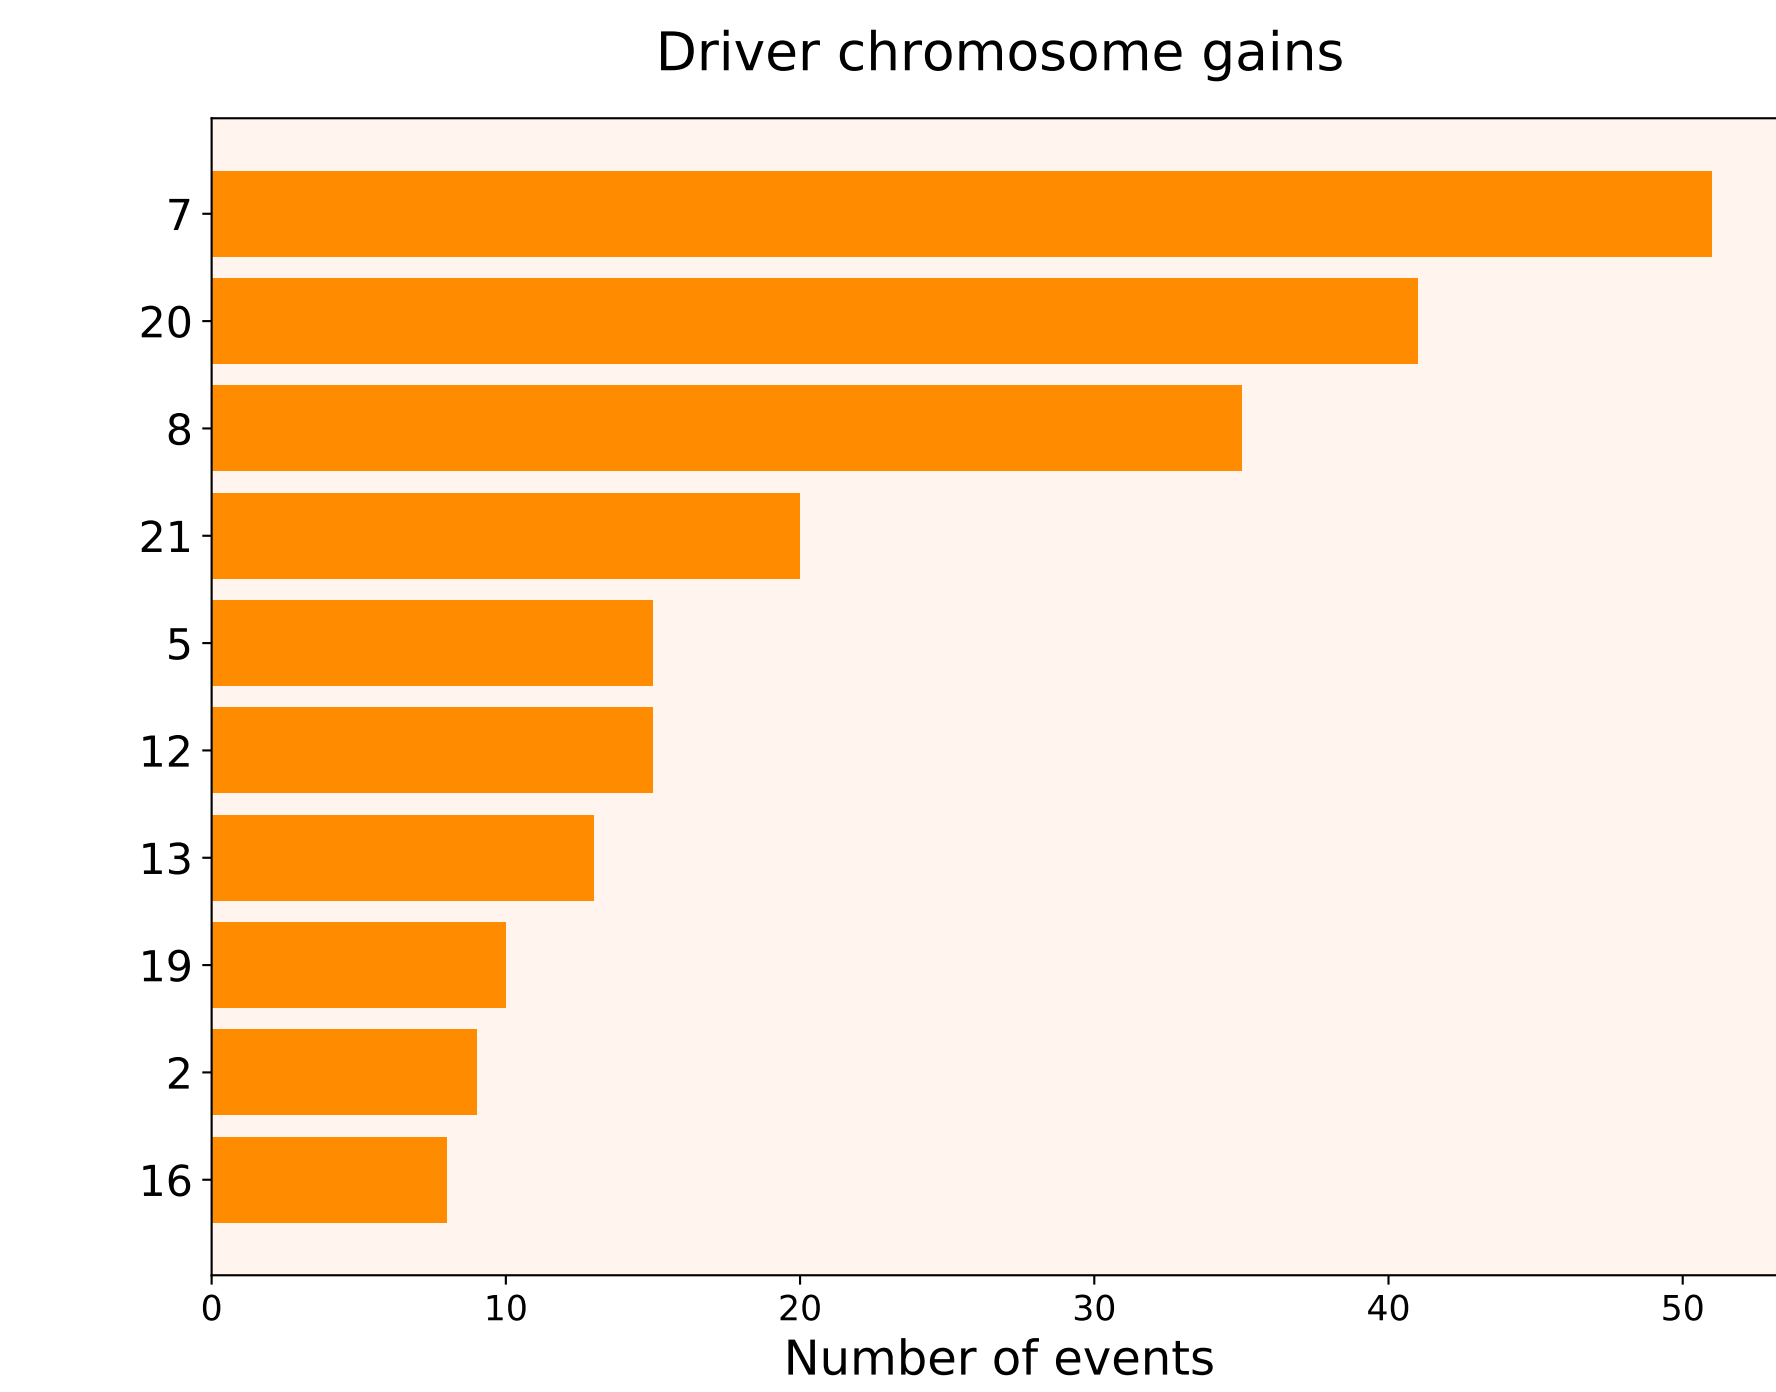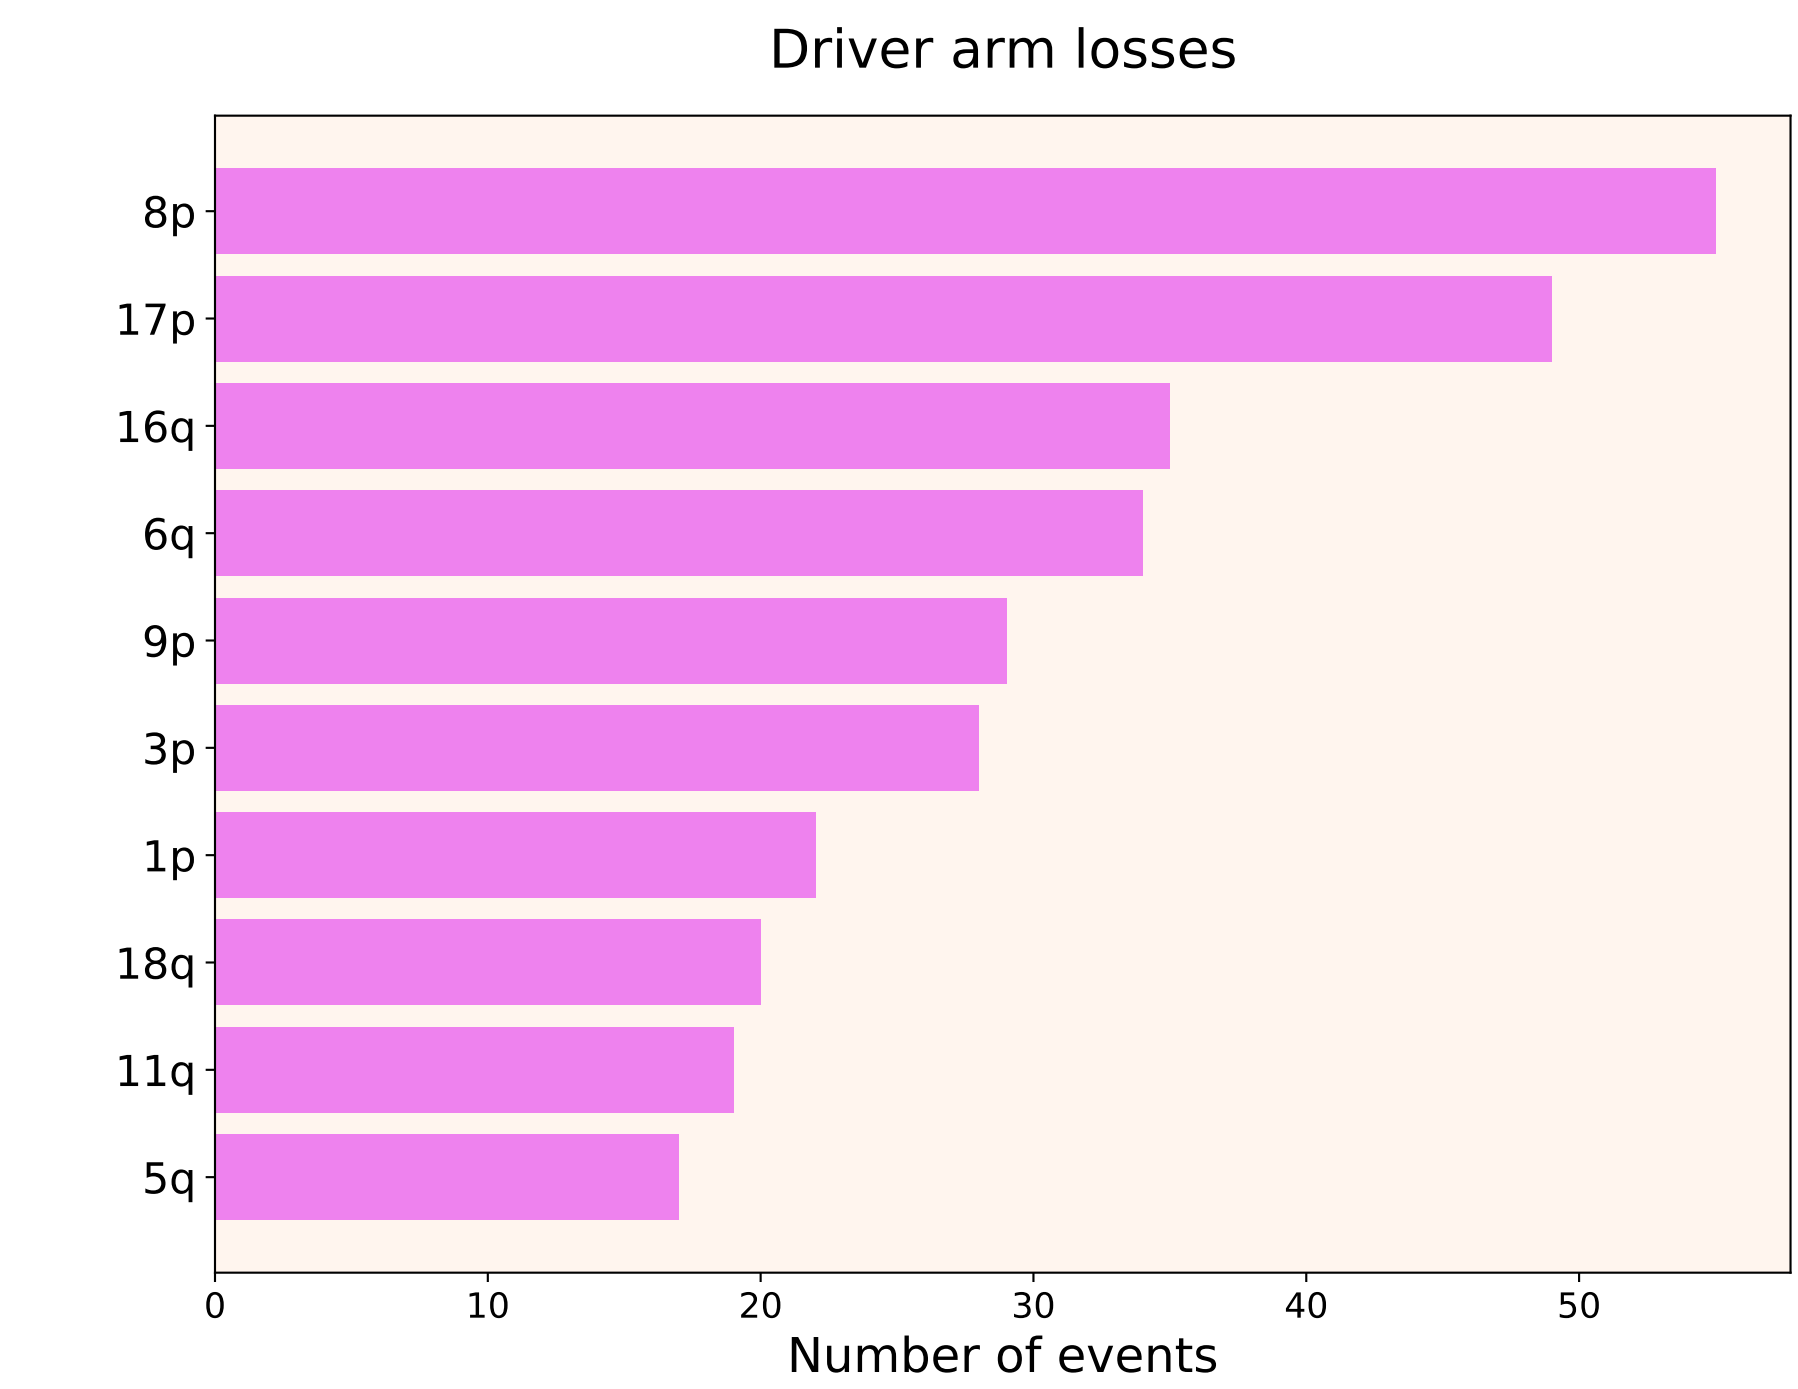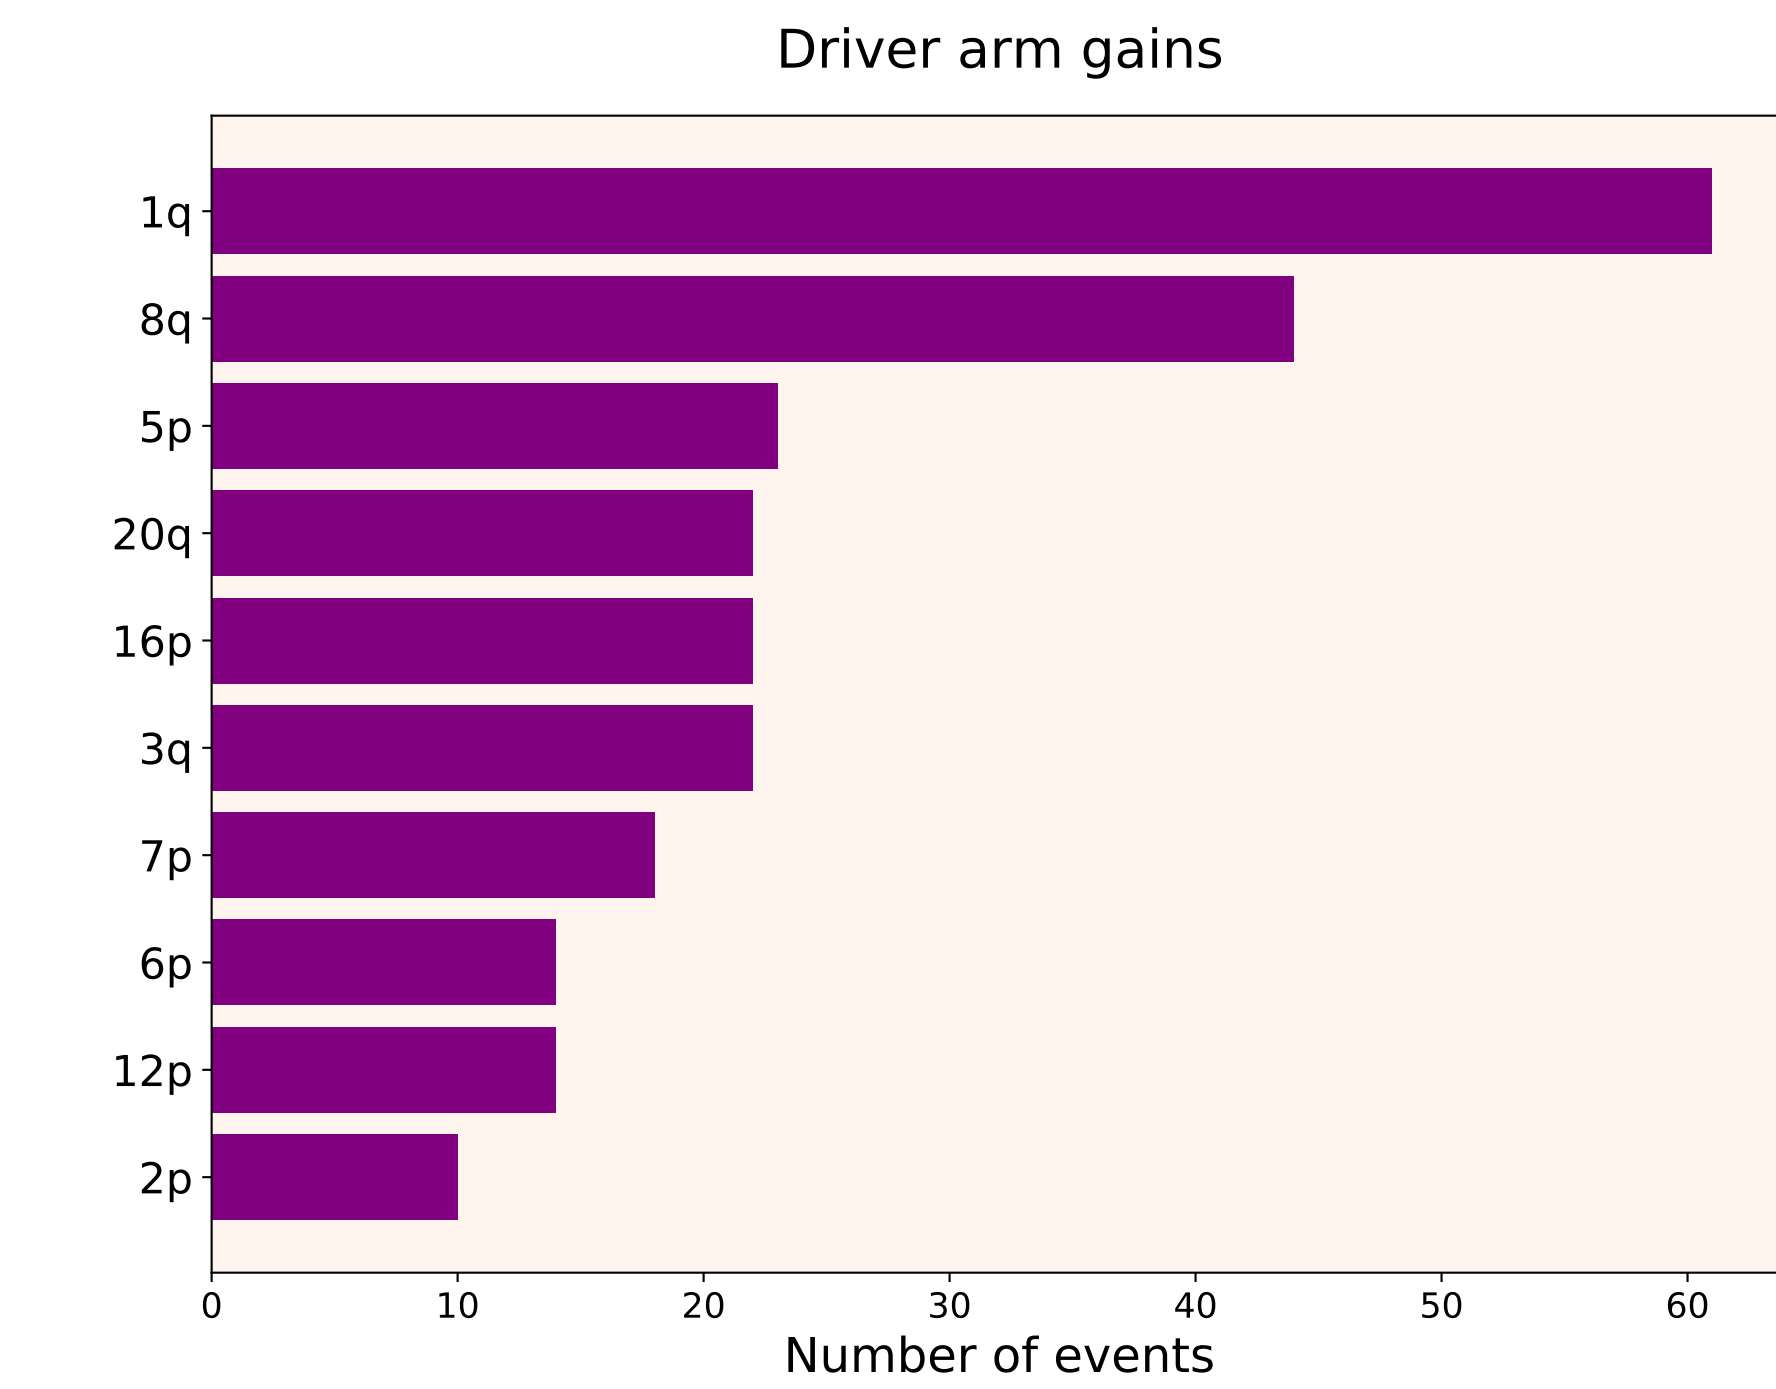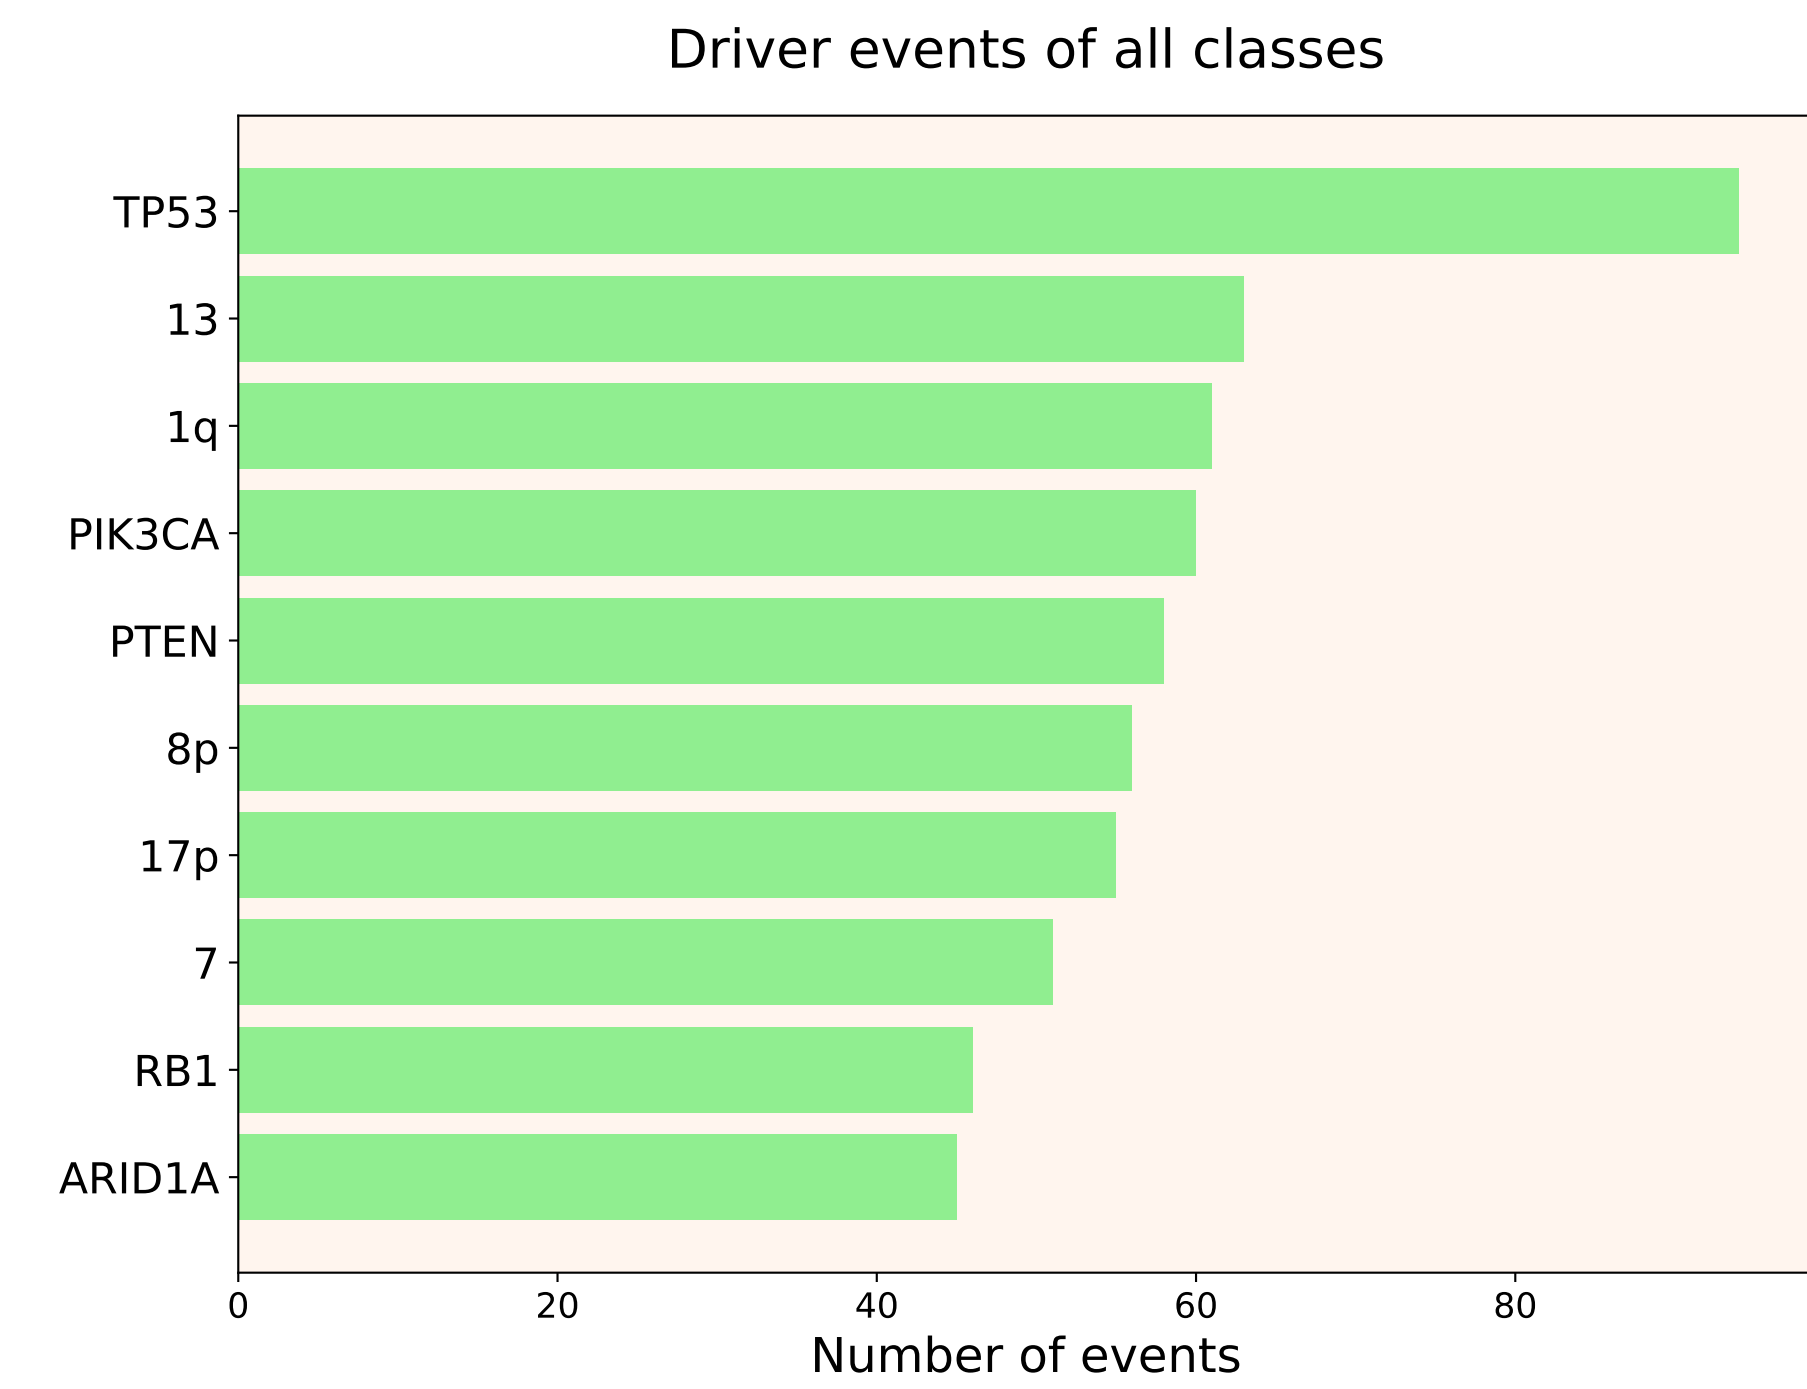

Supplement: Supplemental_Data_S1.zip [file Supplemental_Data_S1.zip]

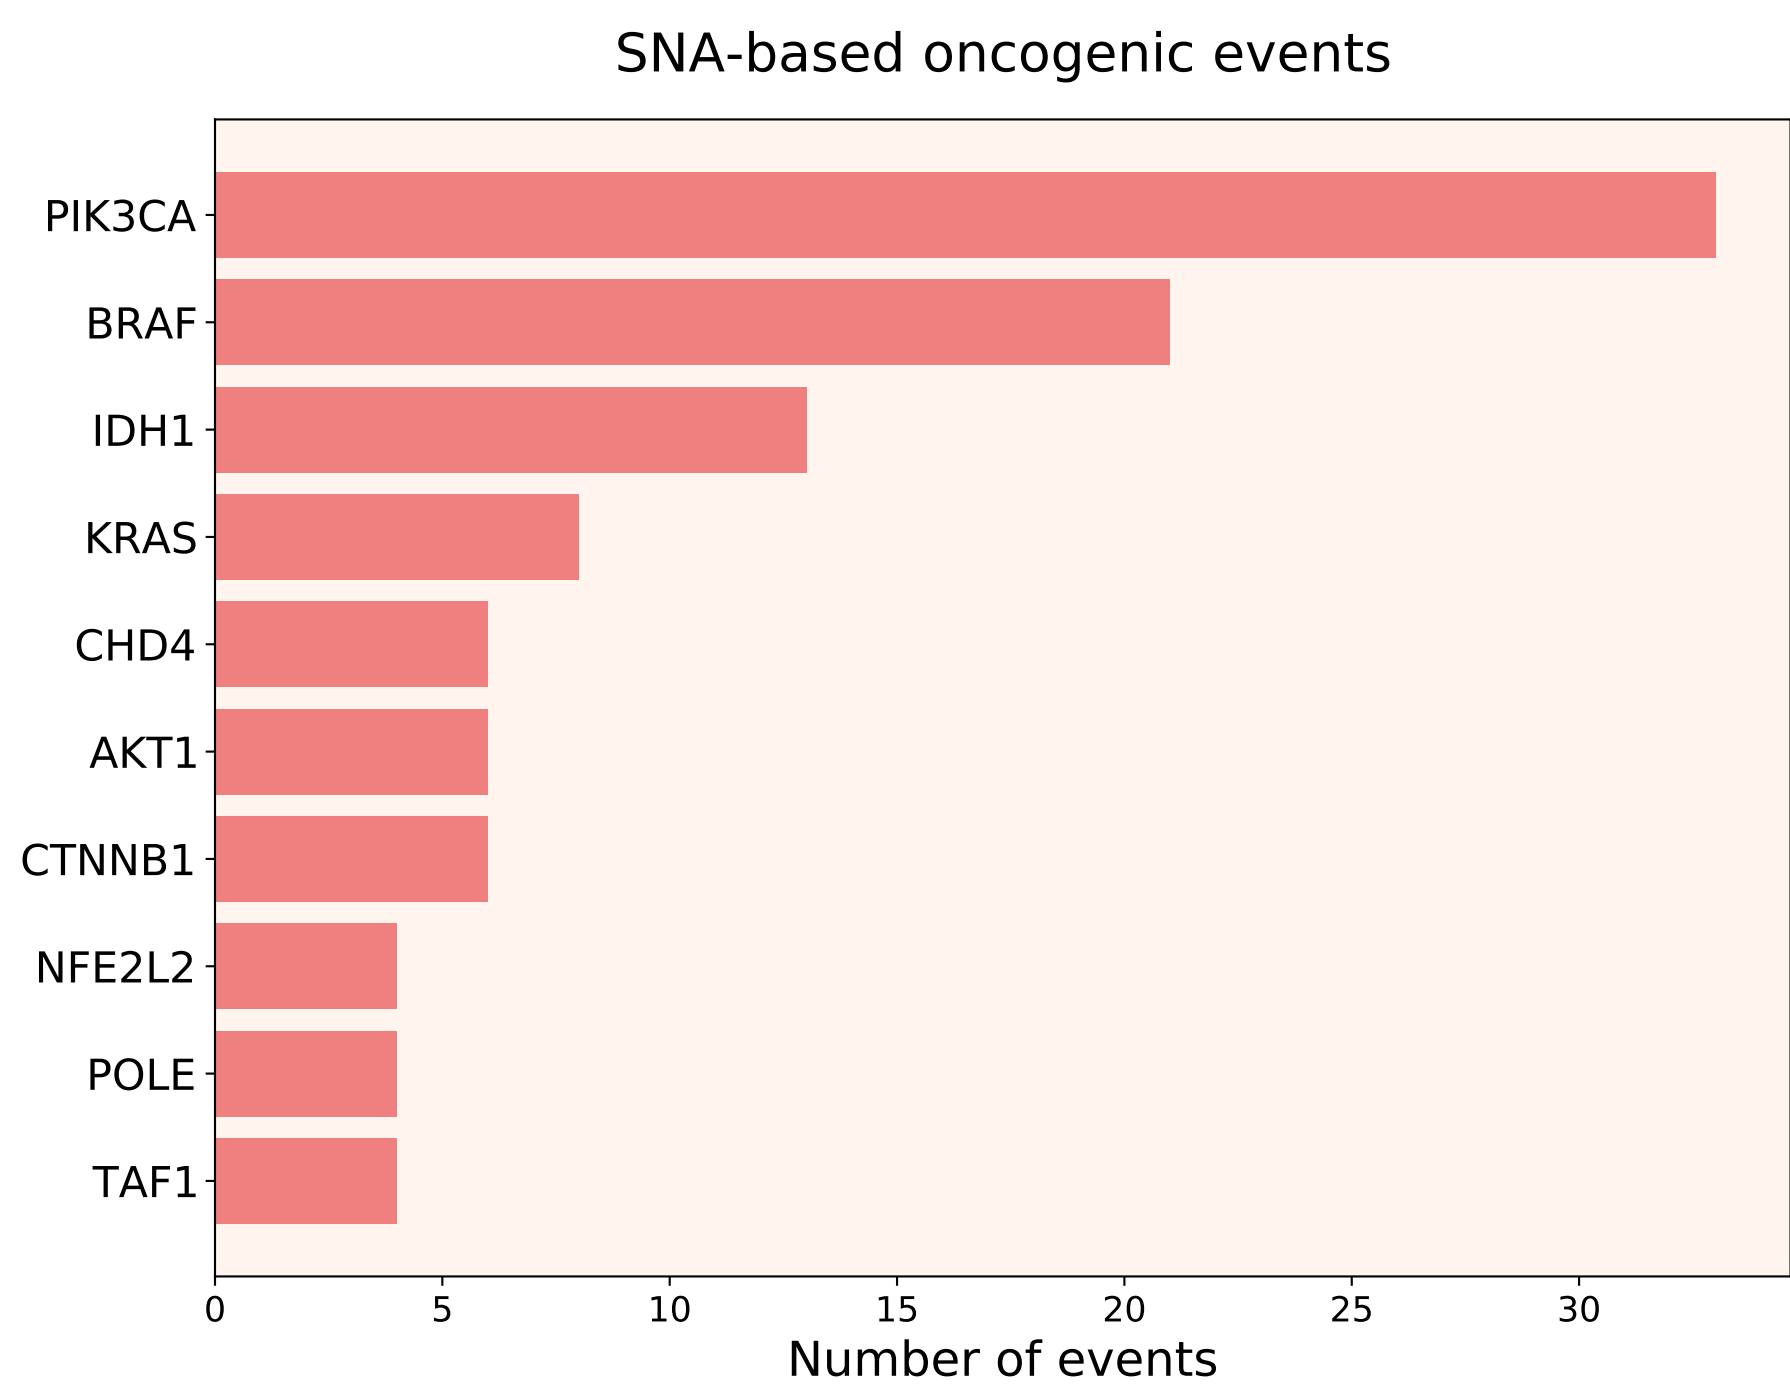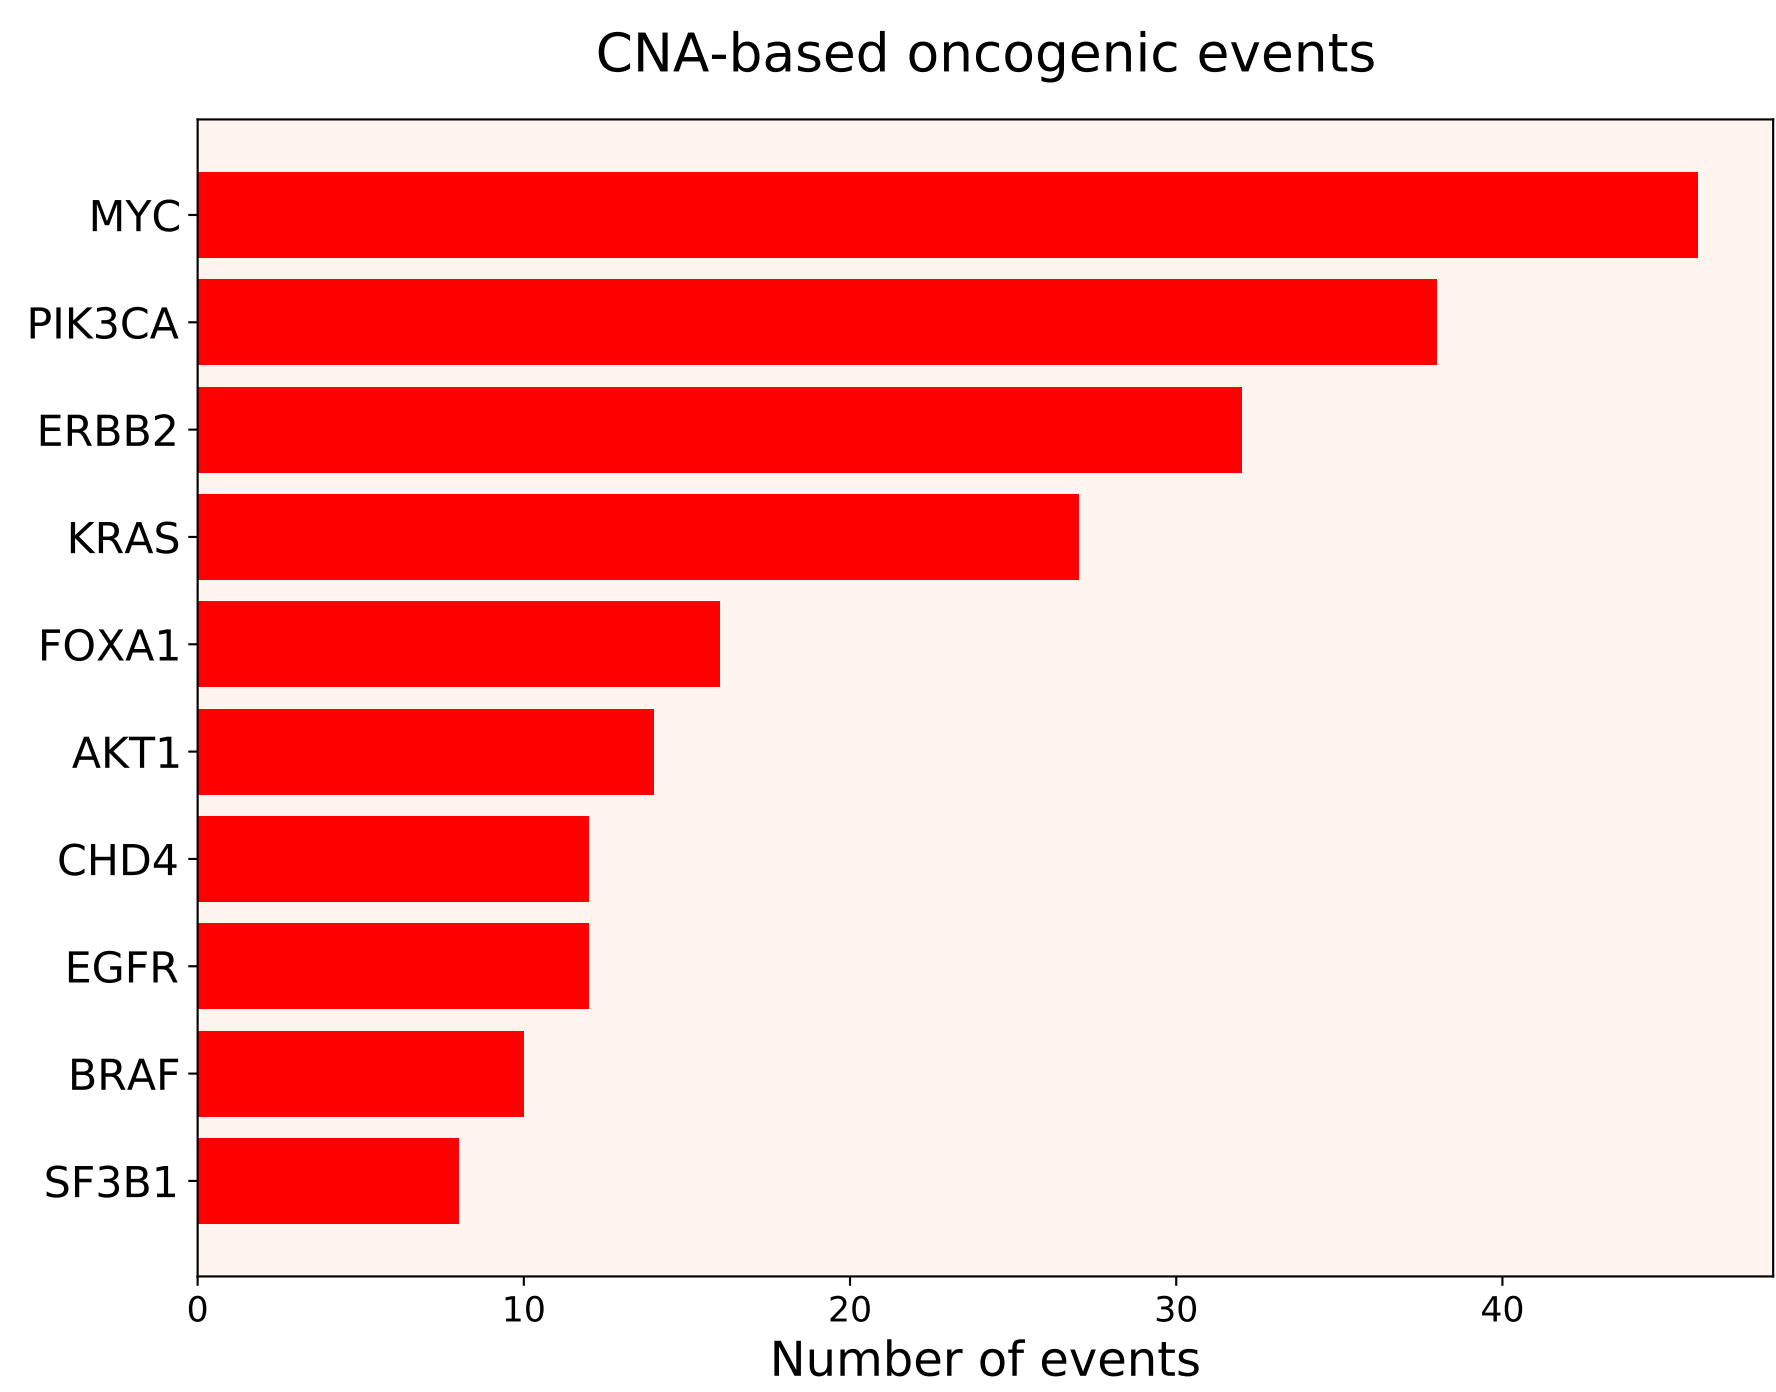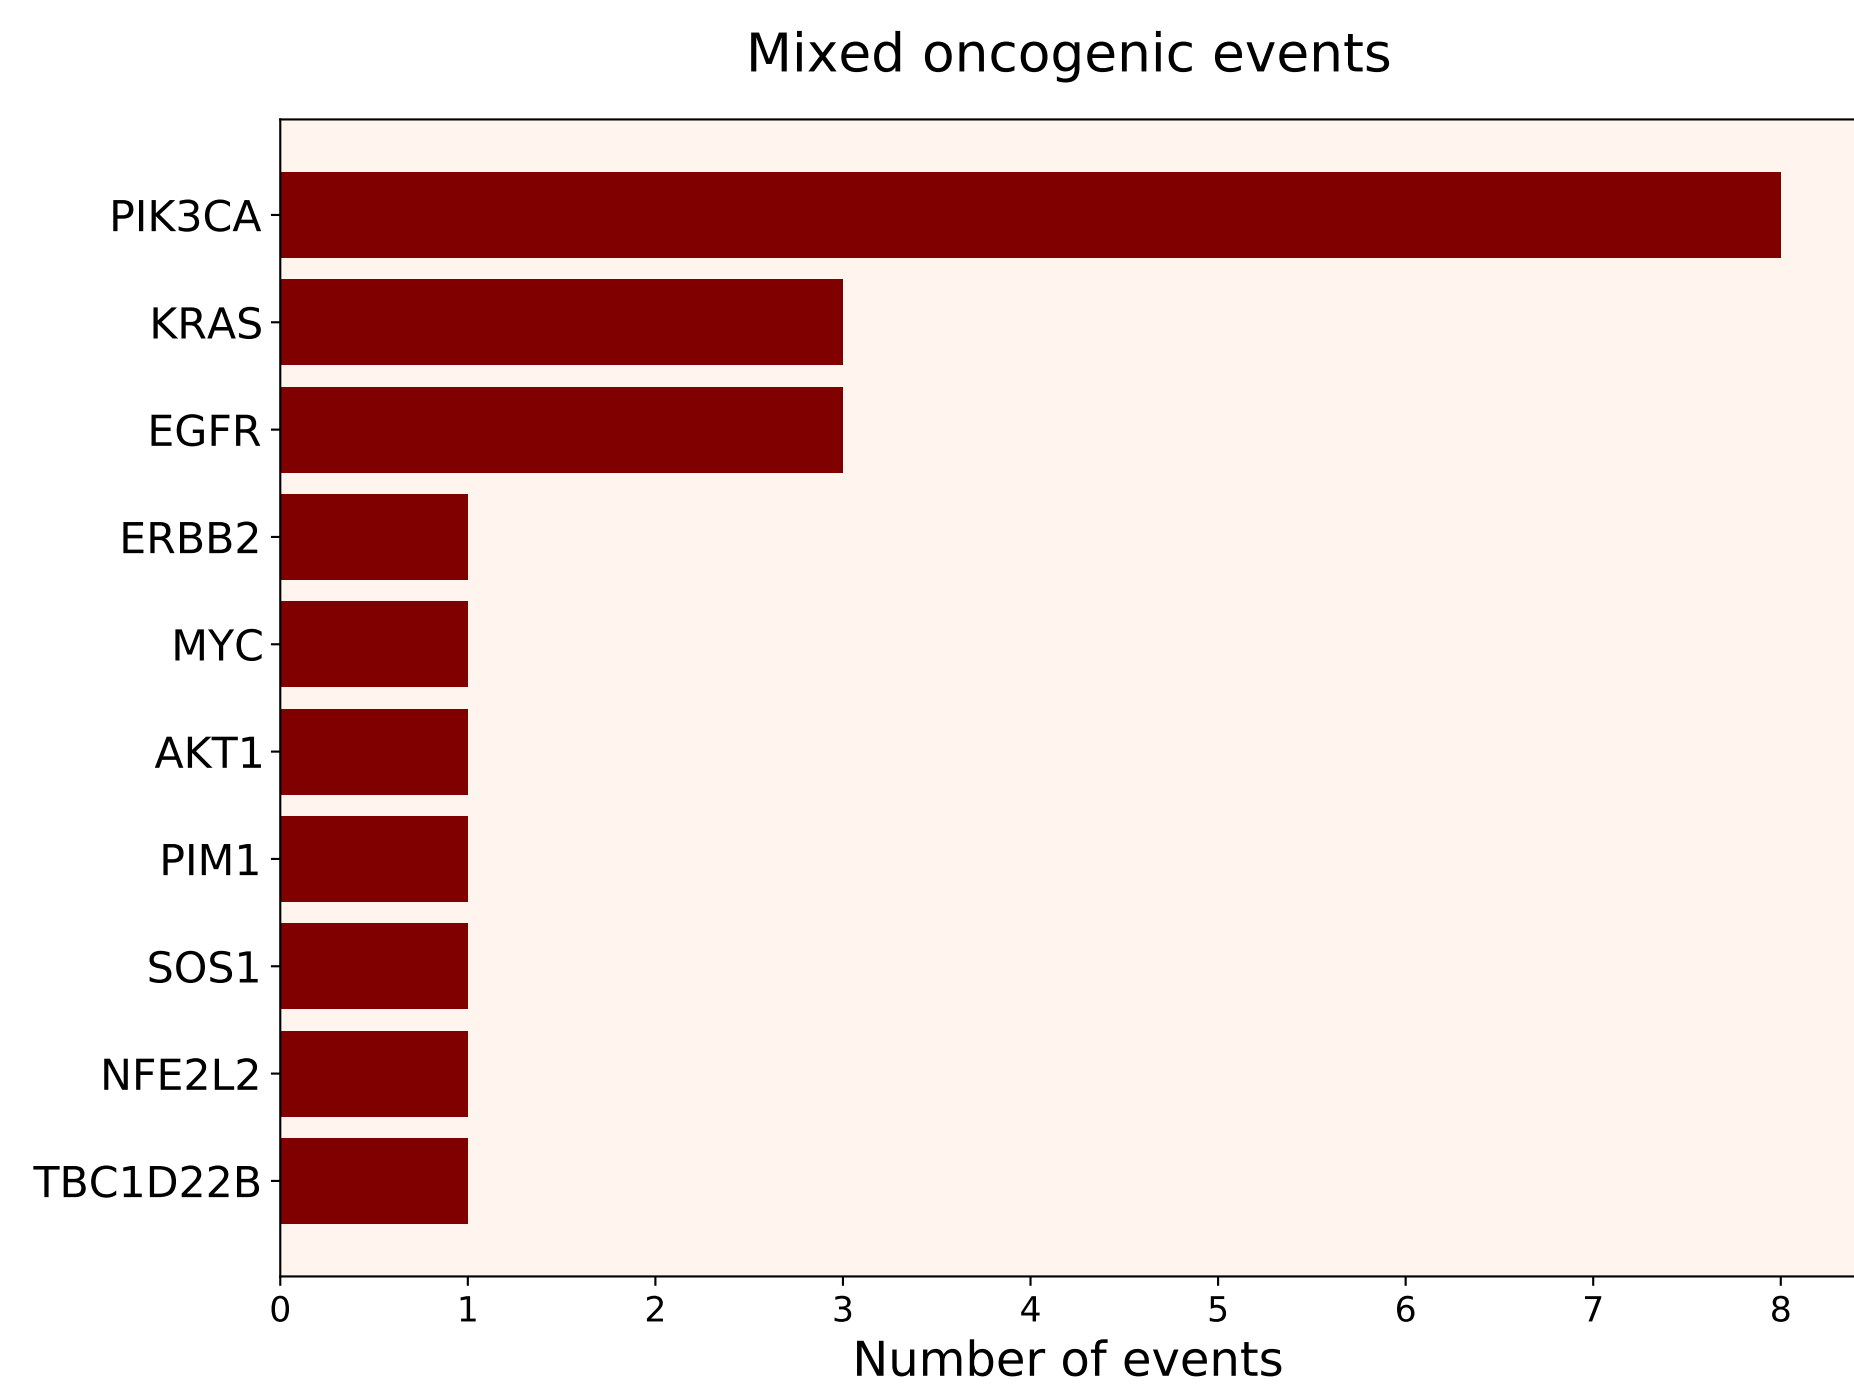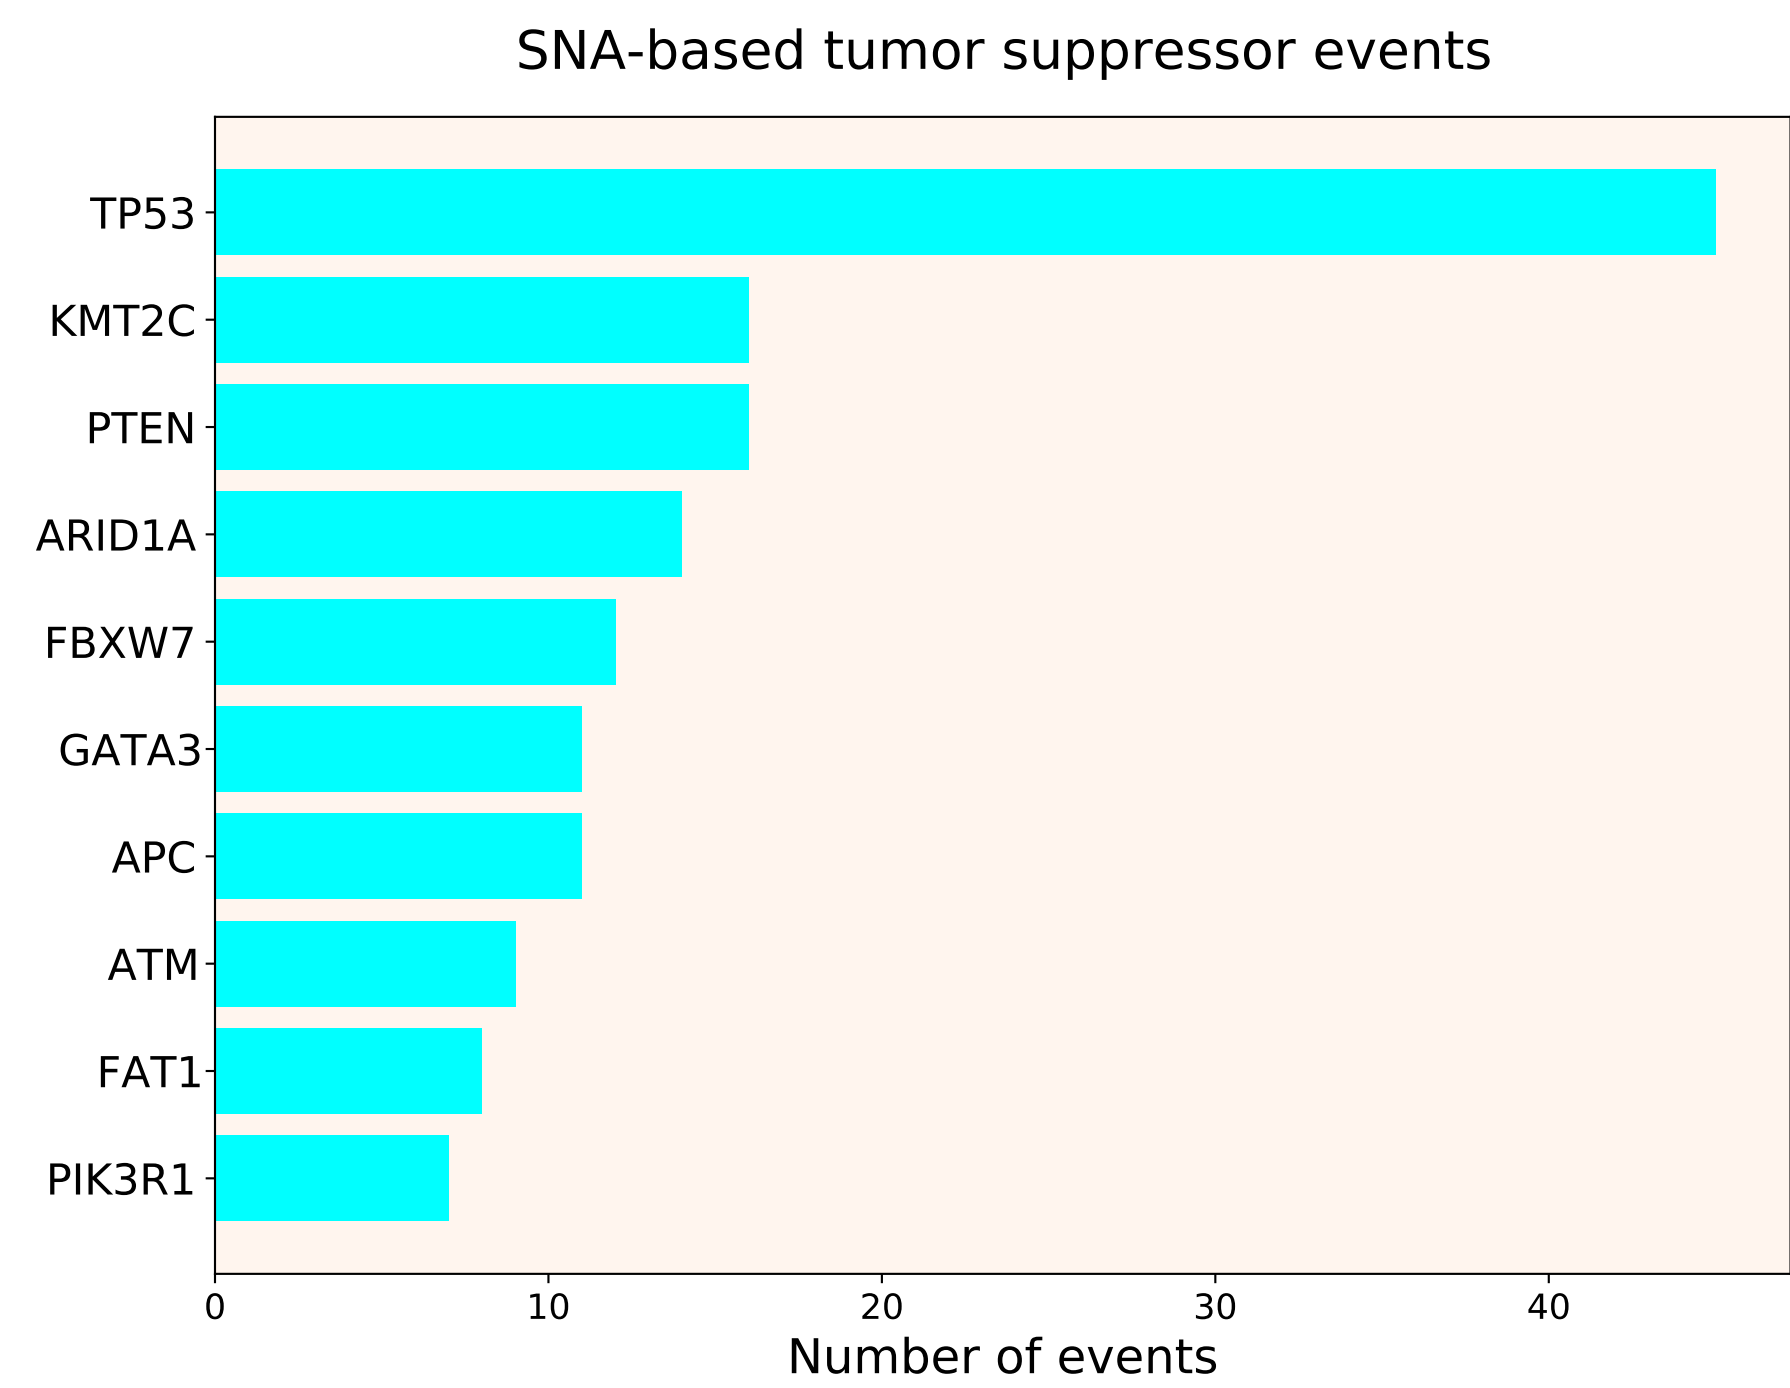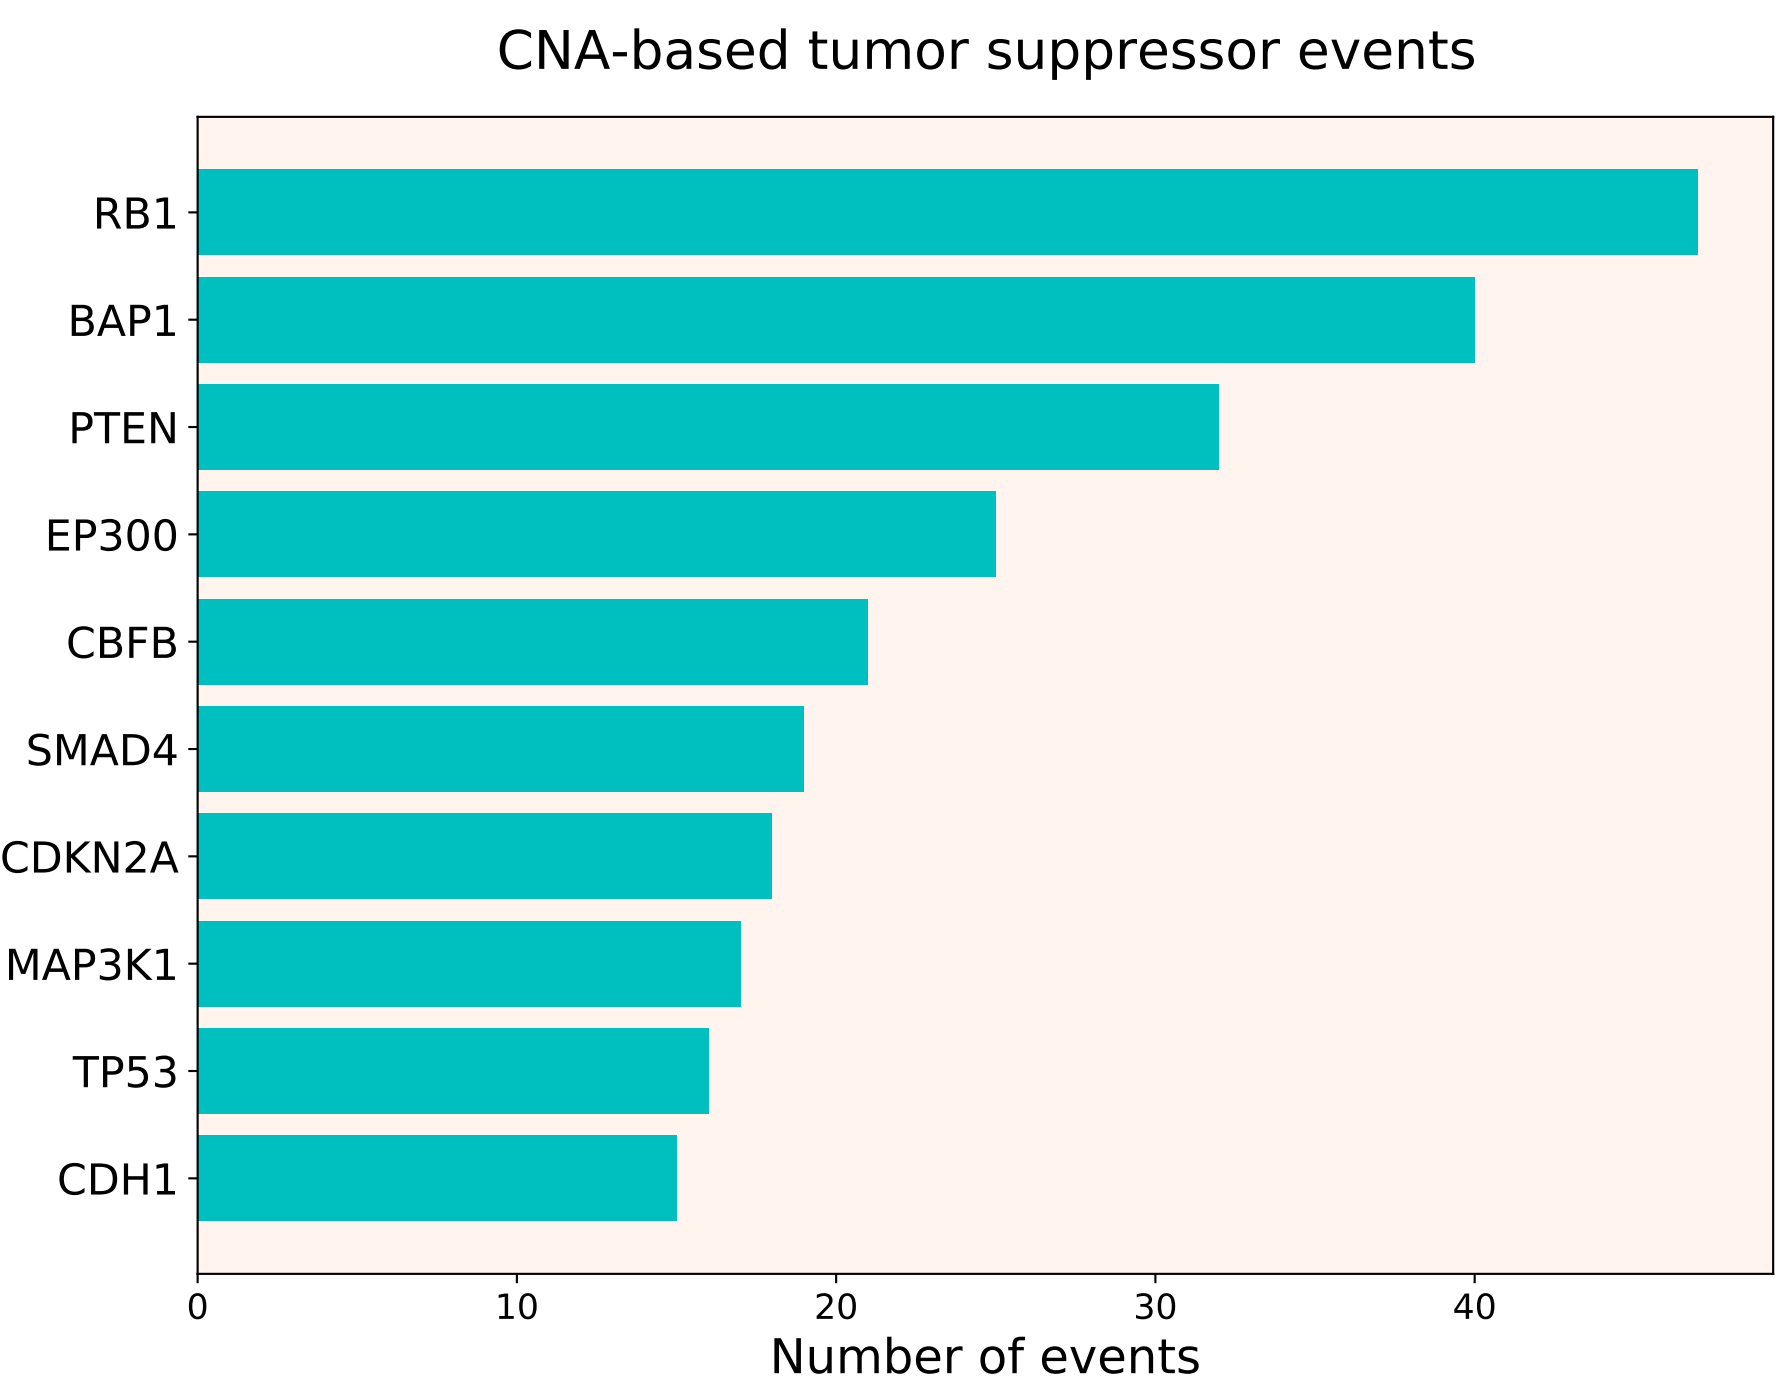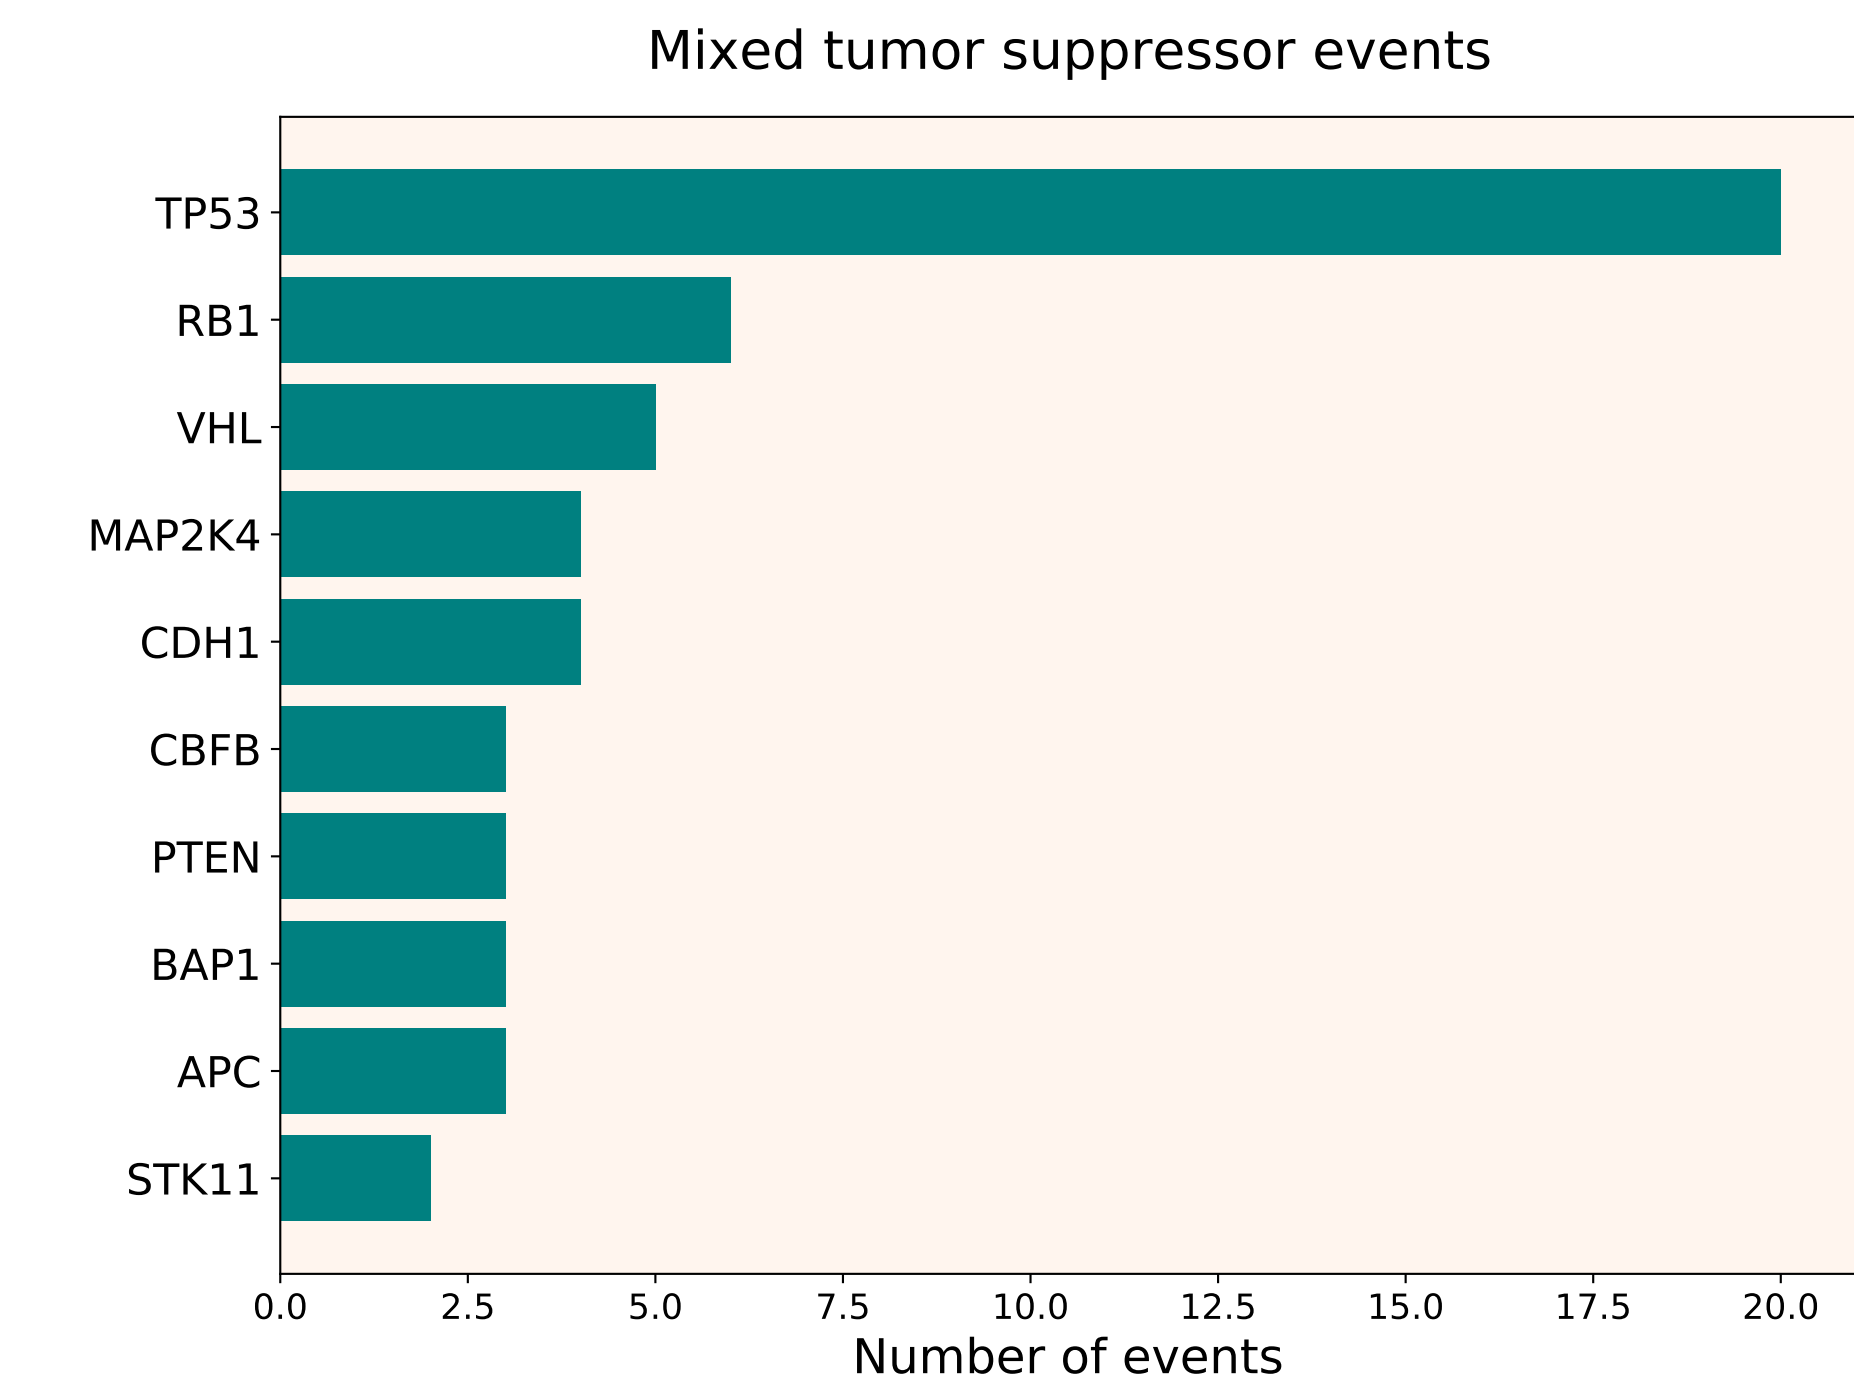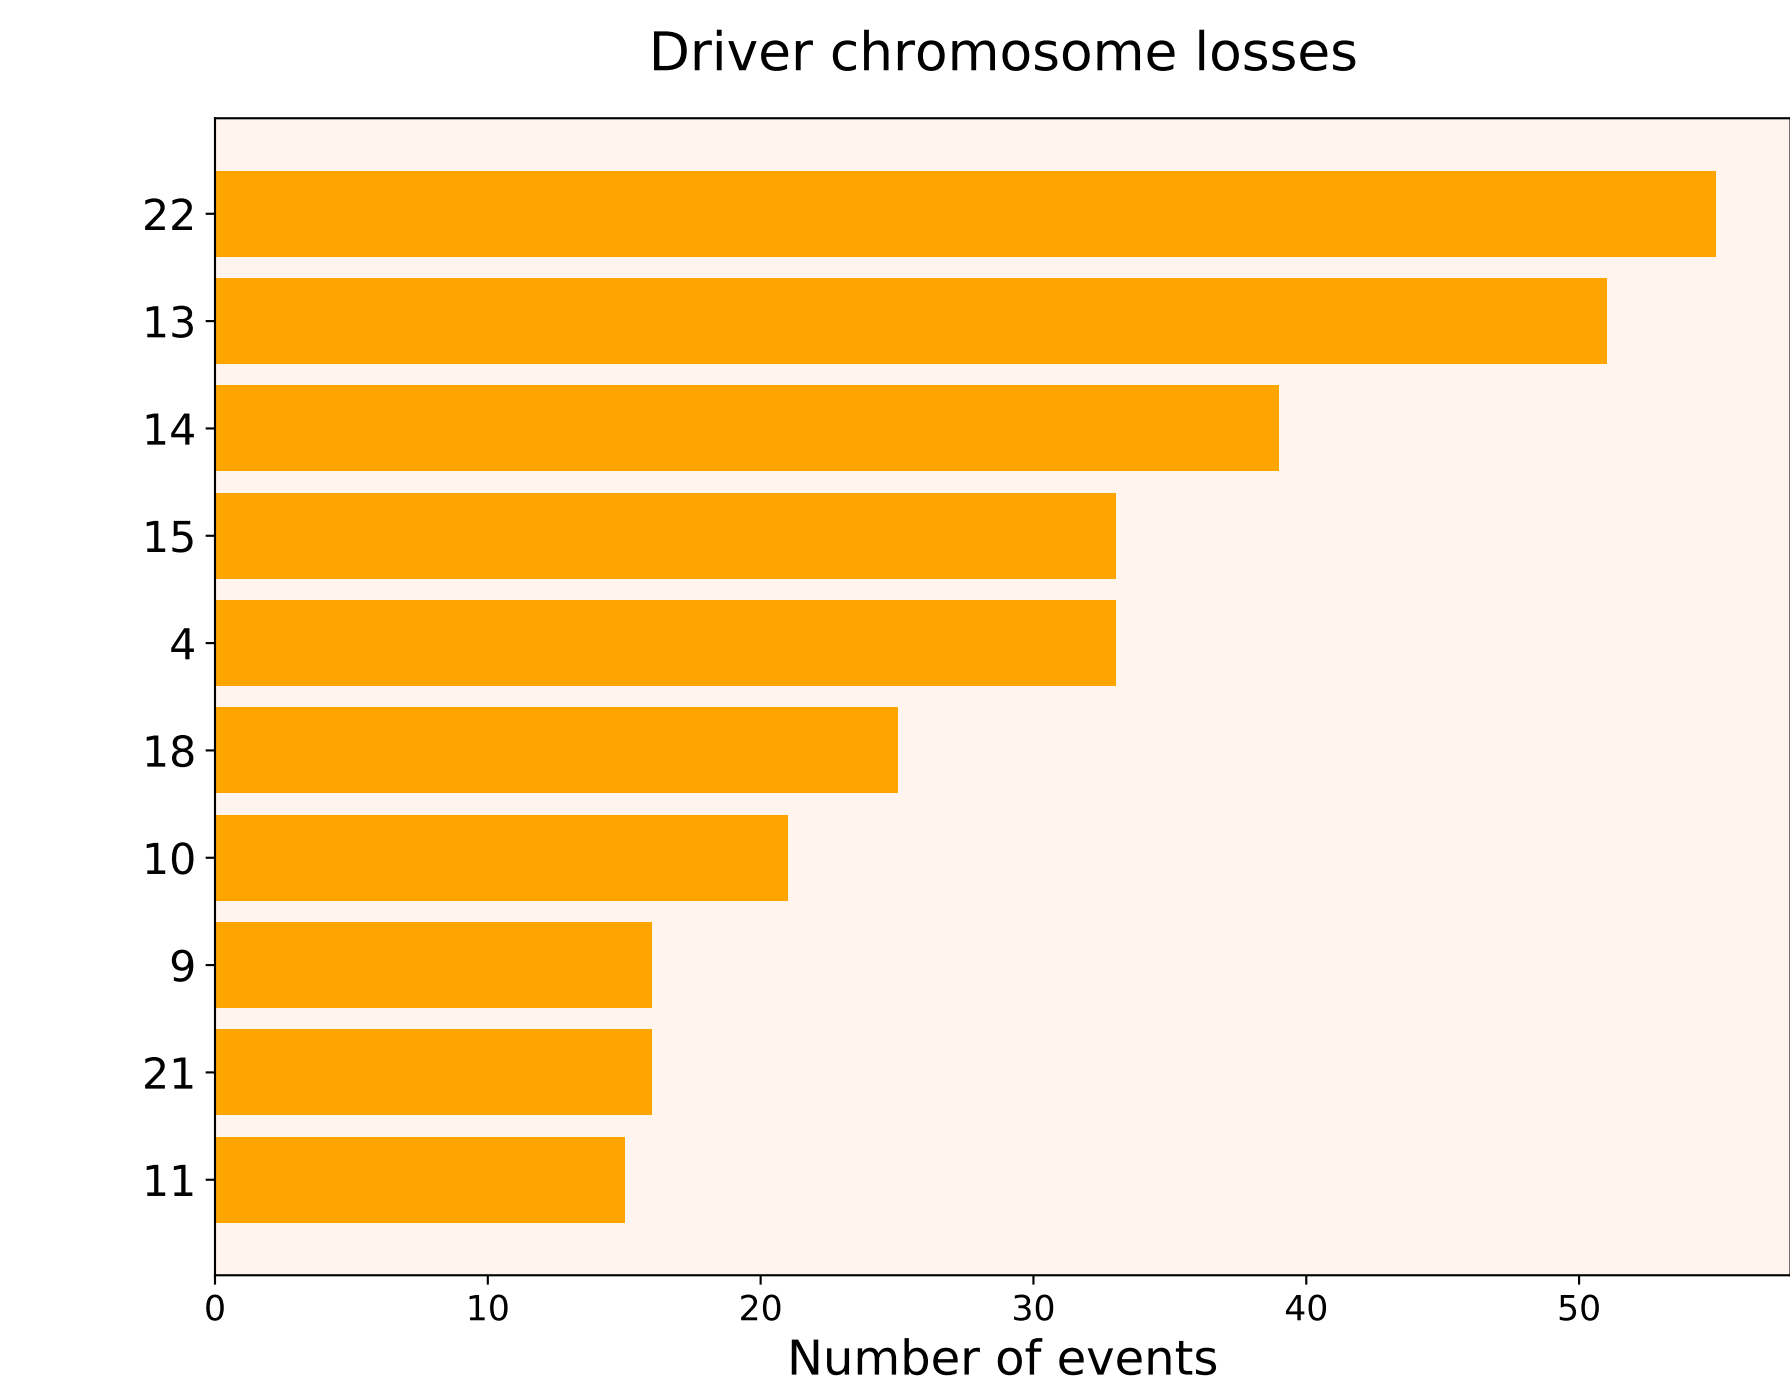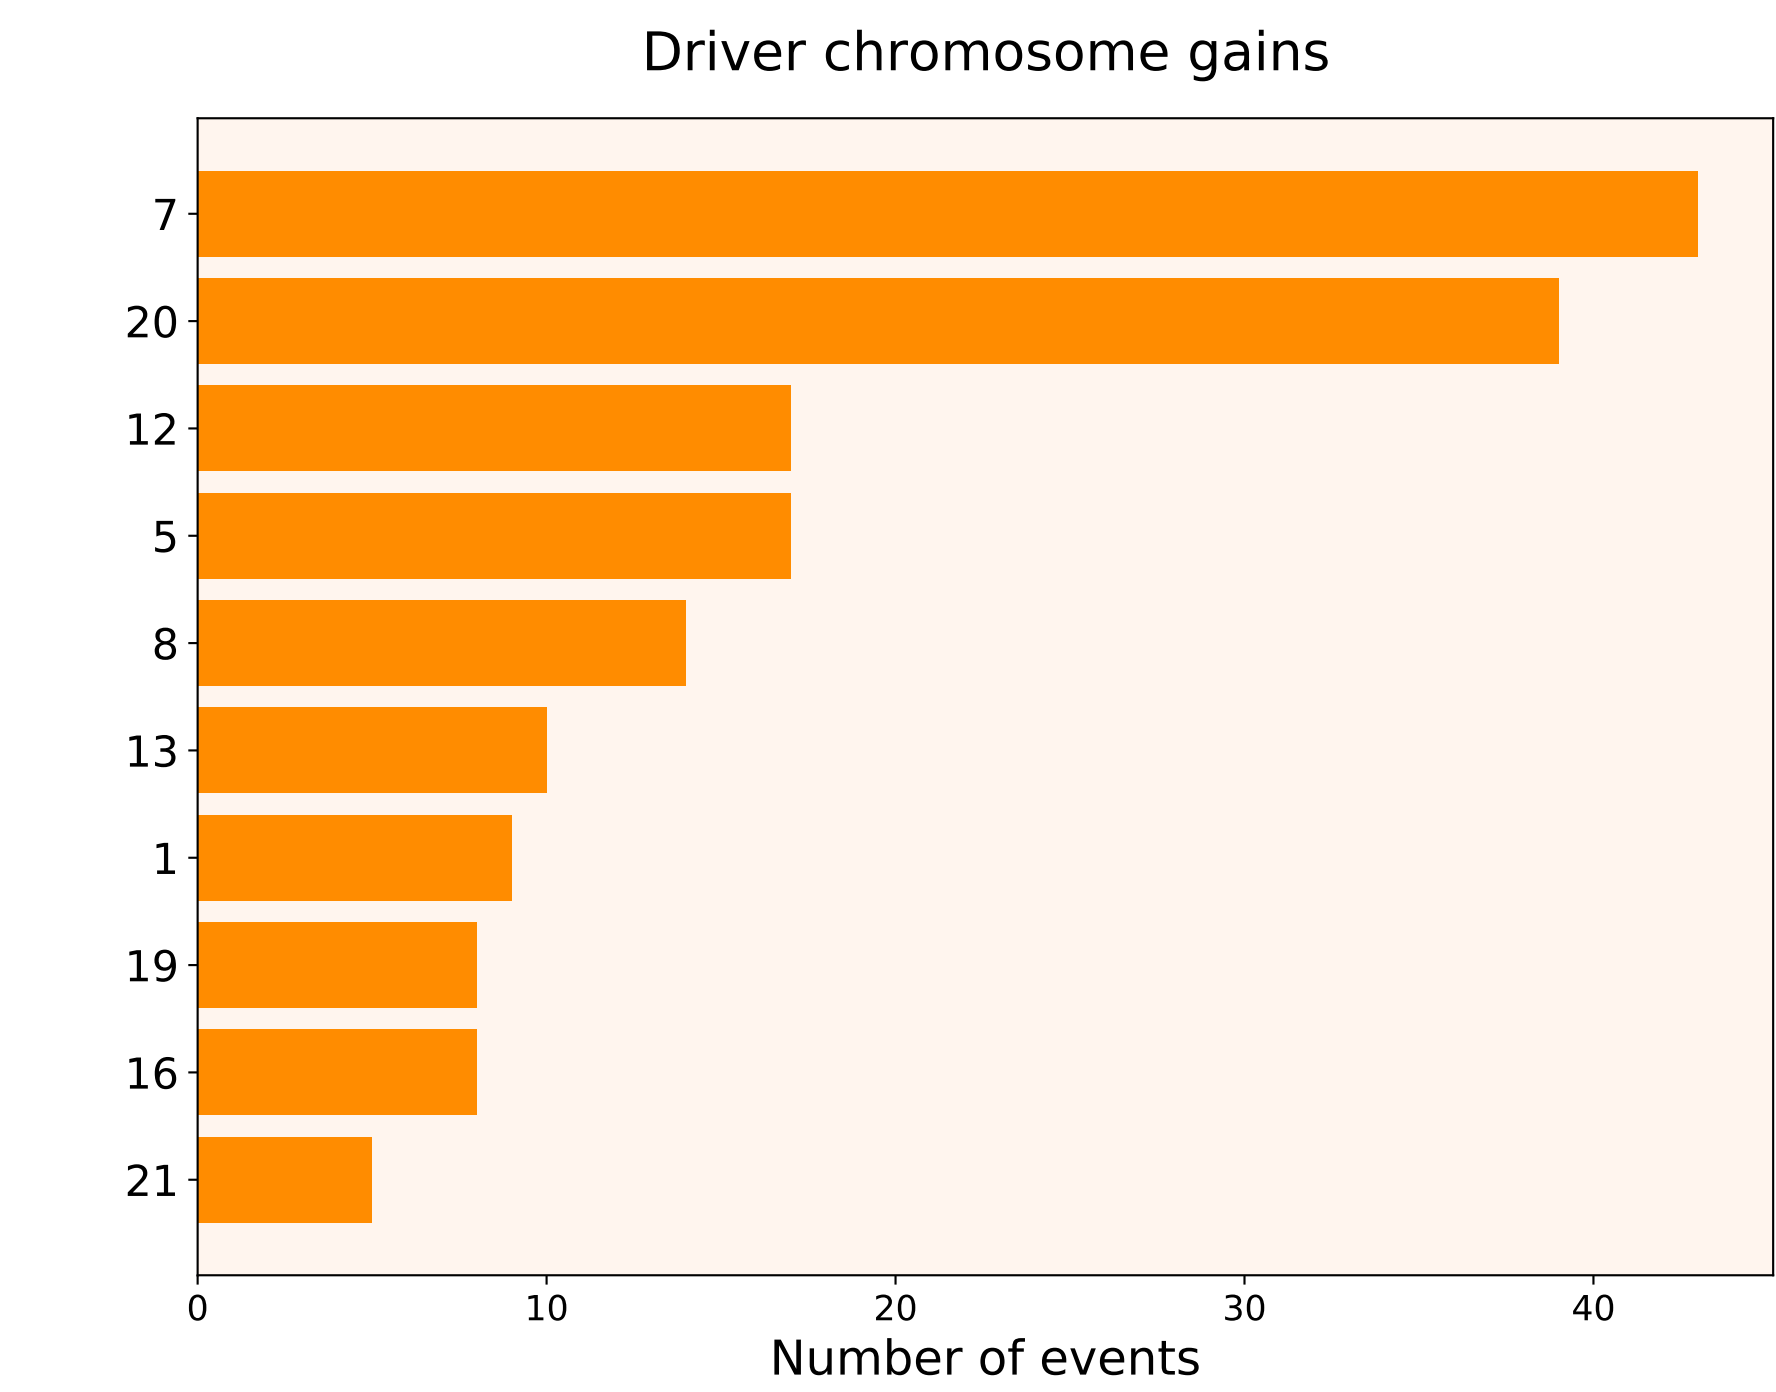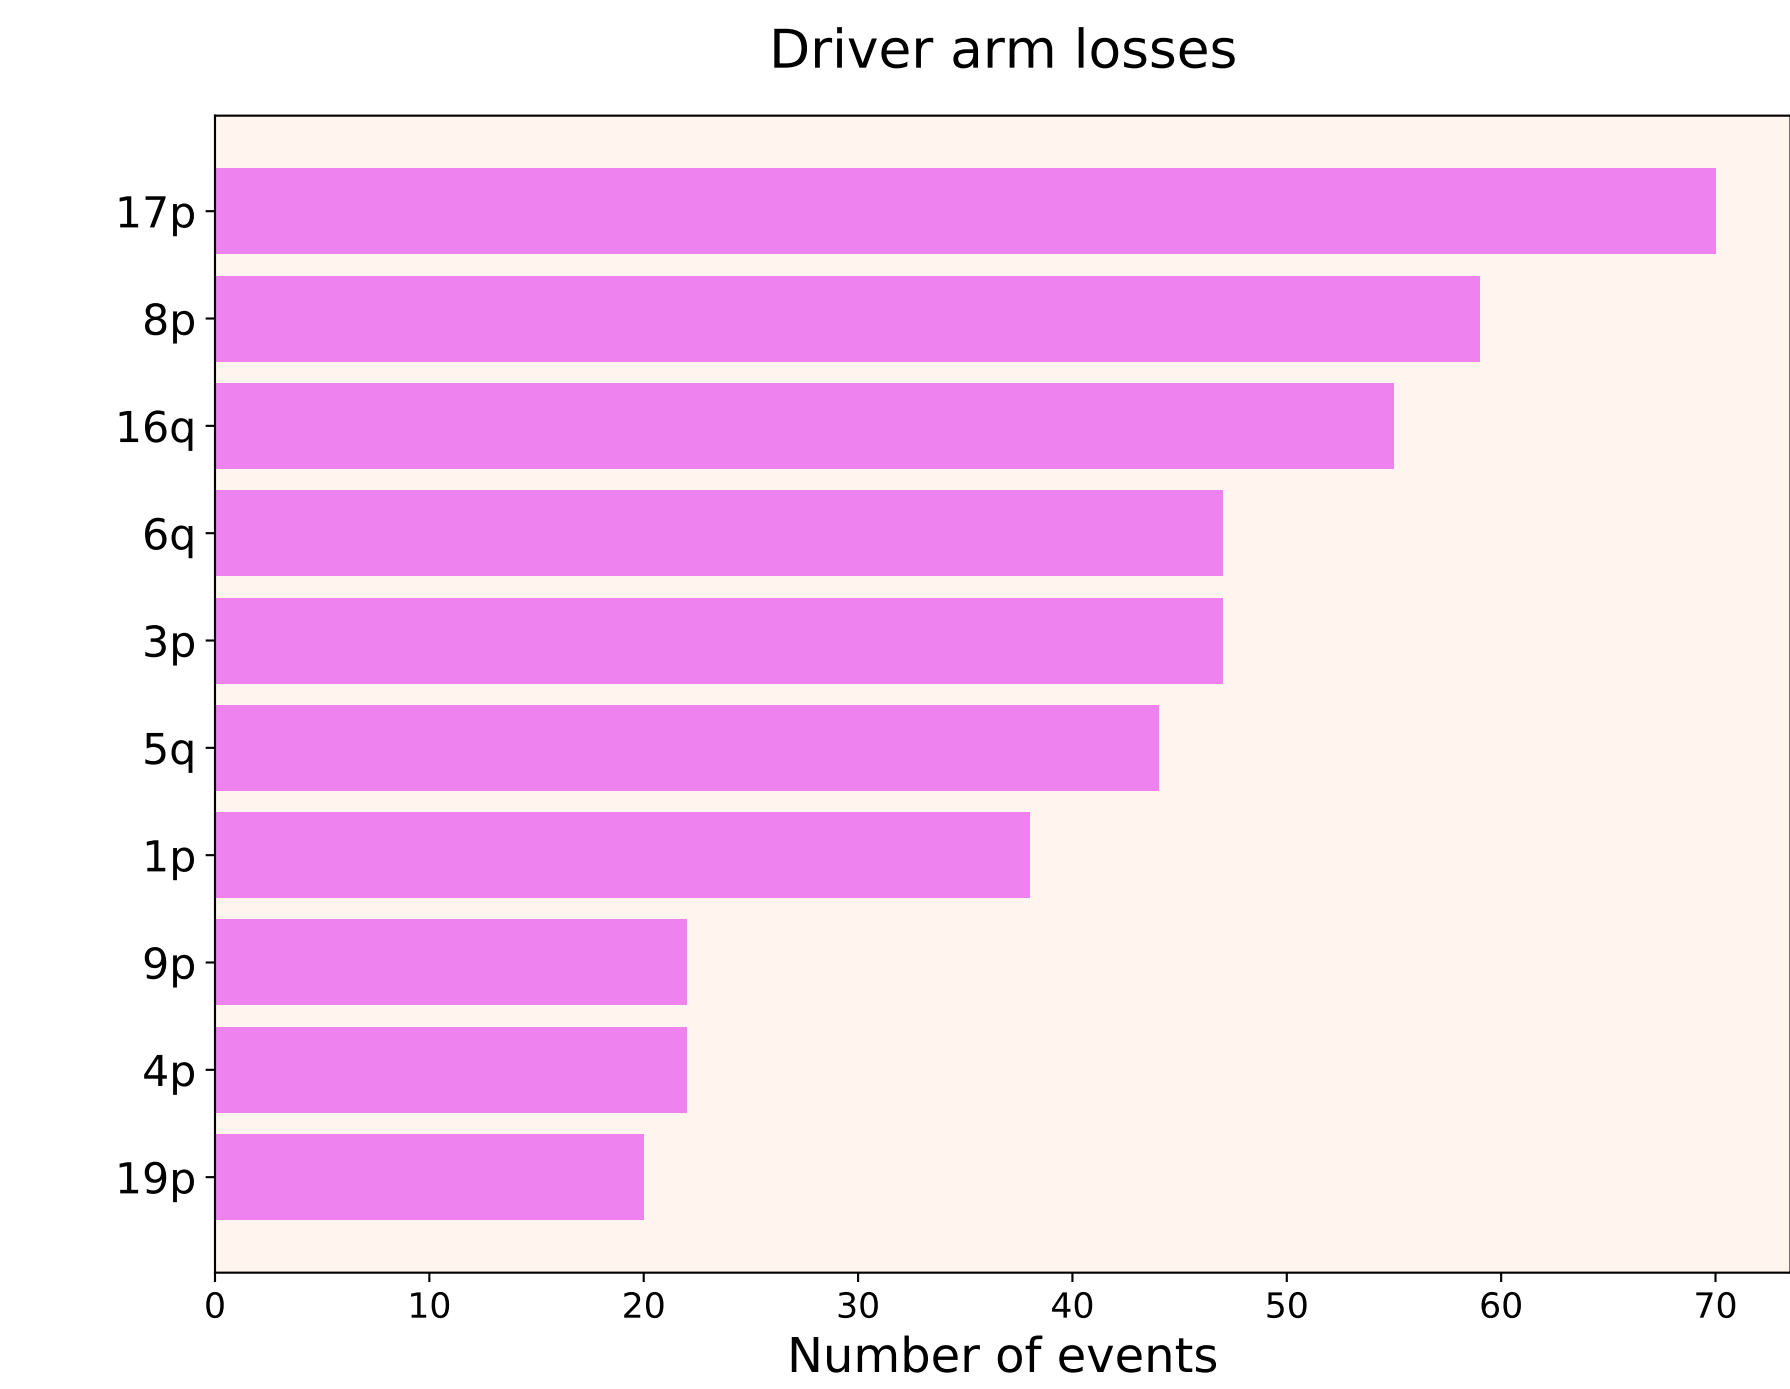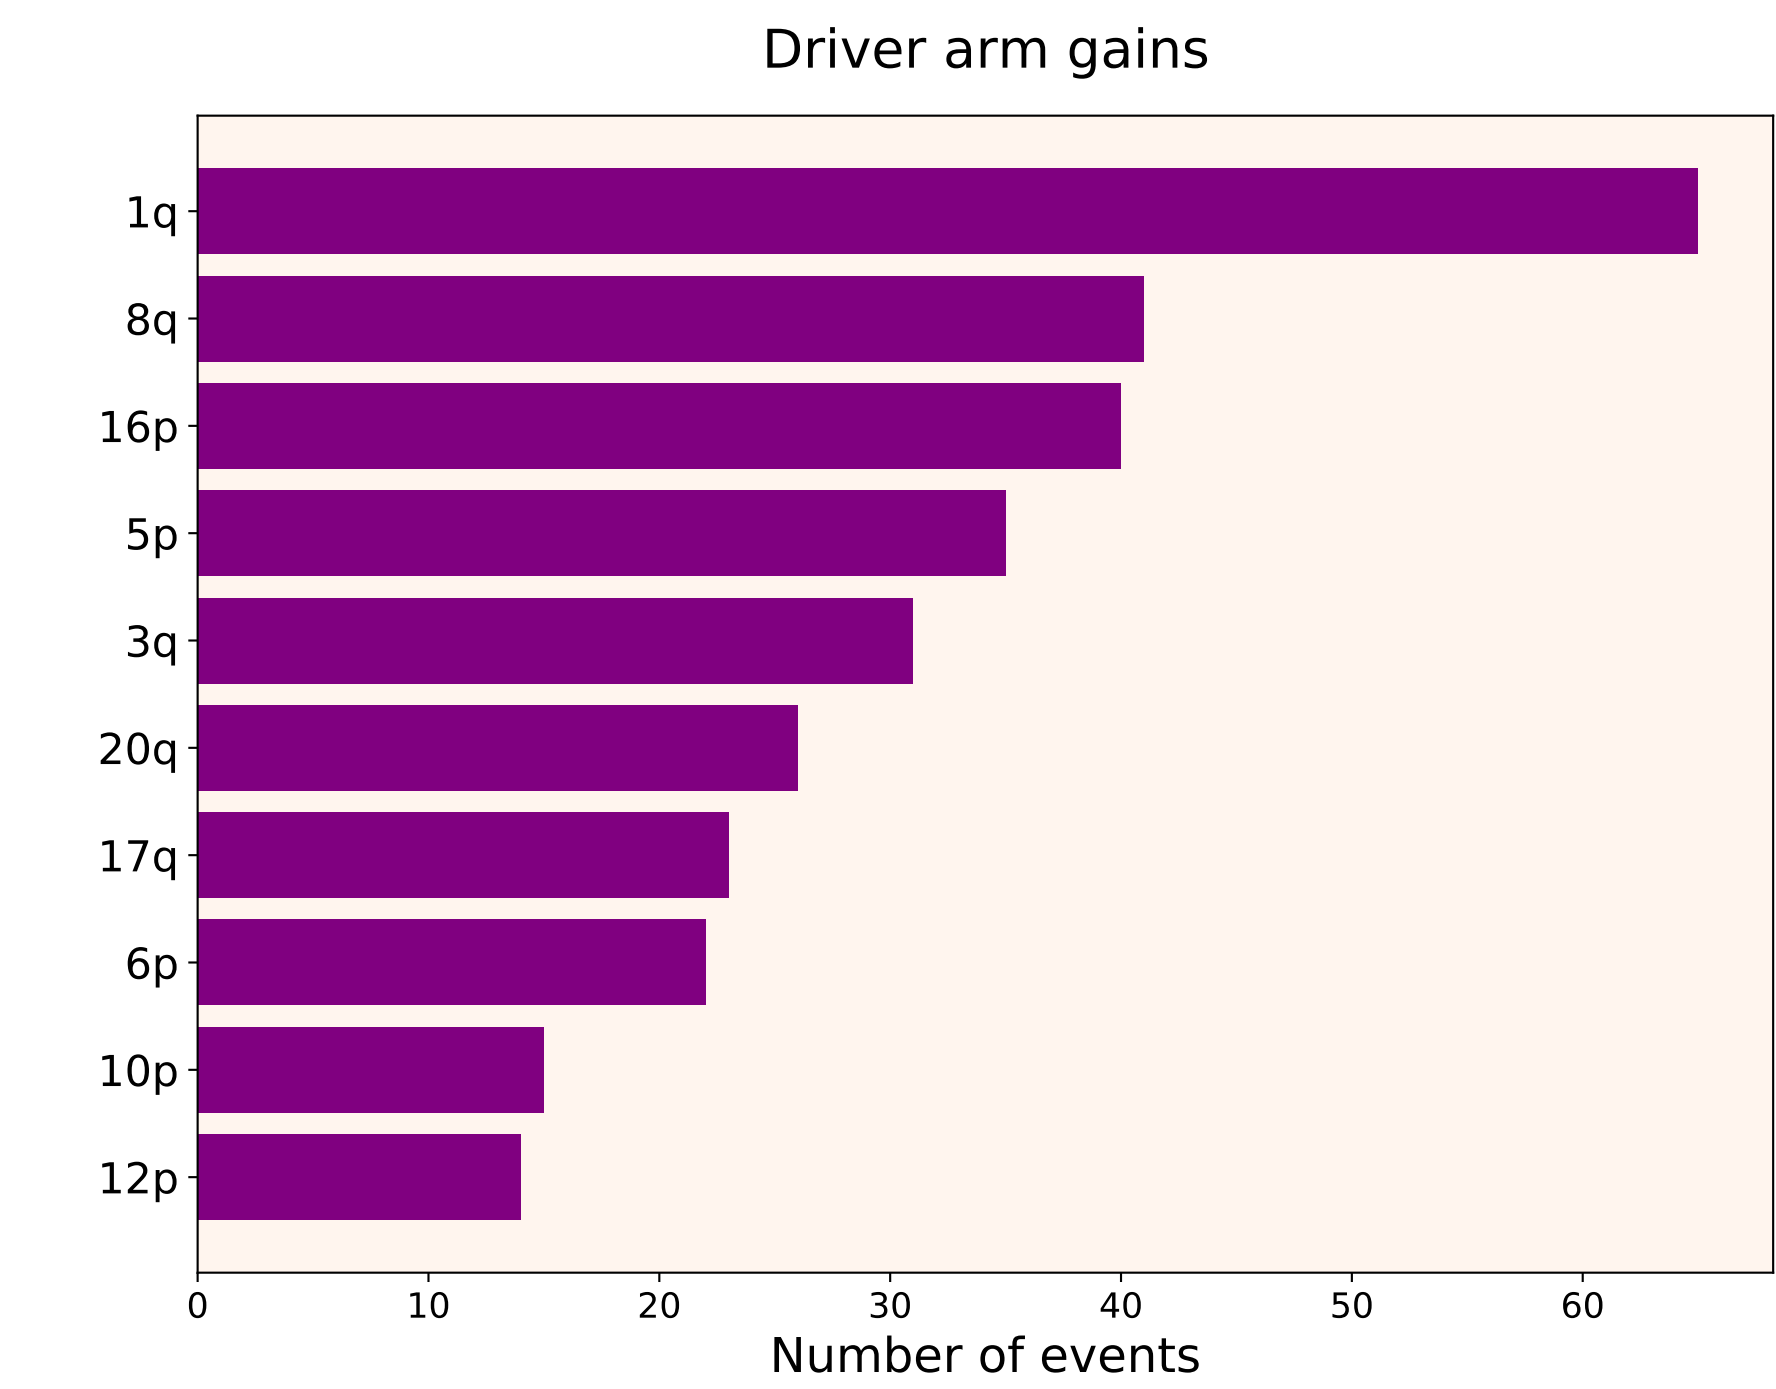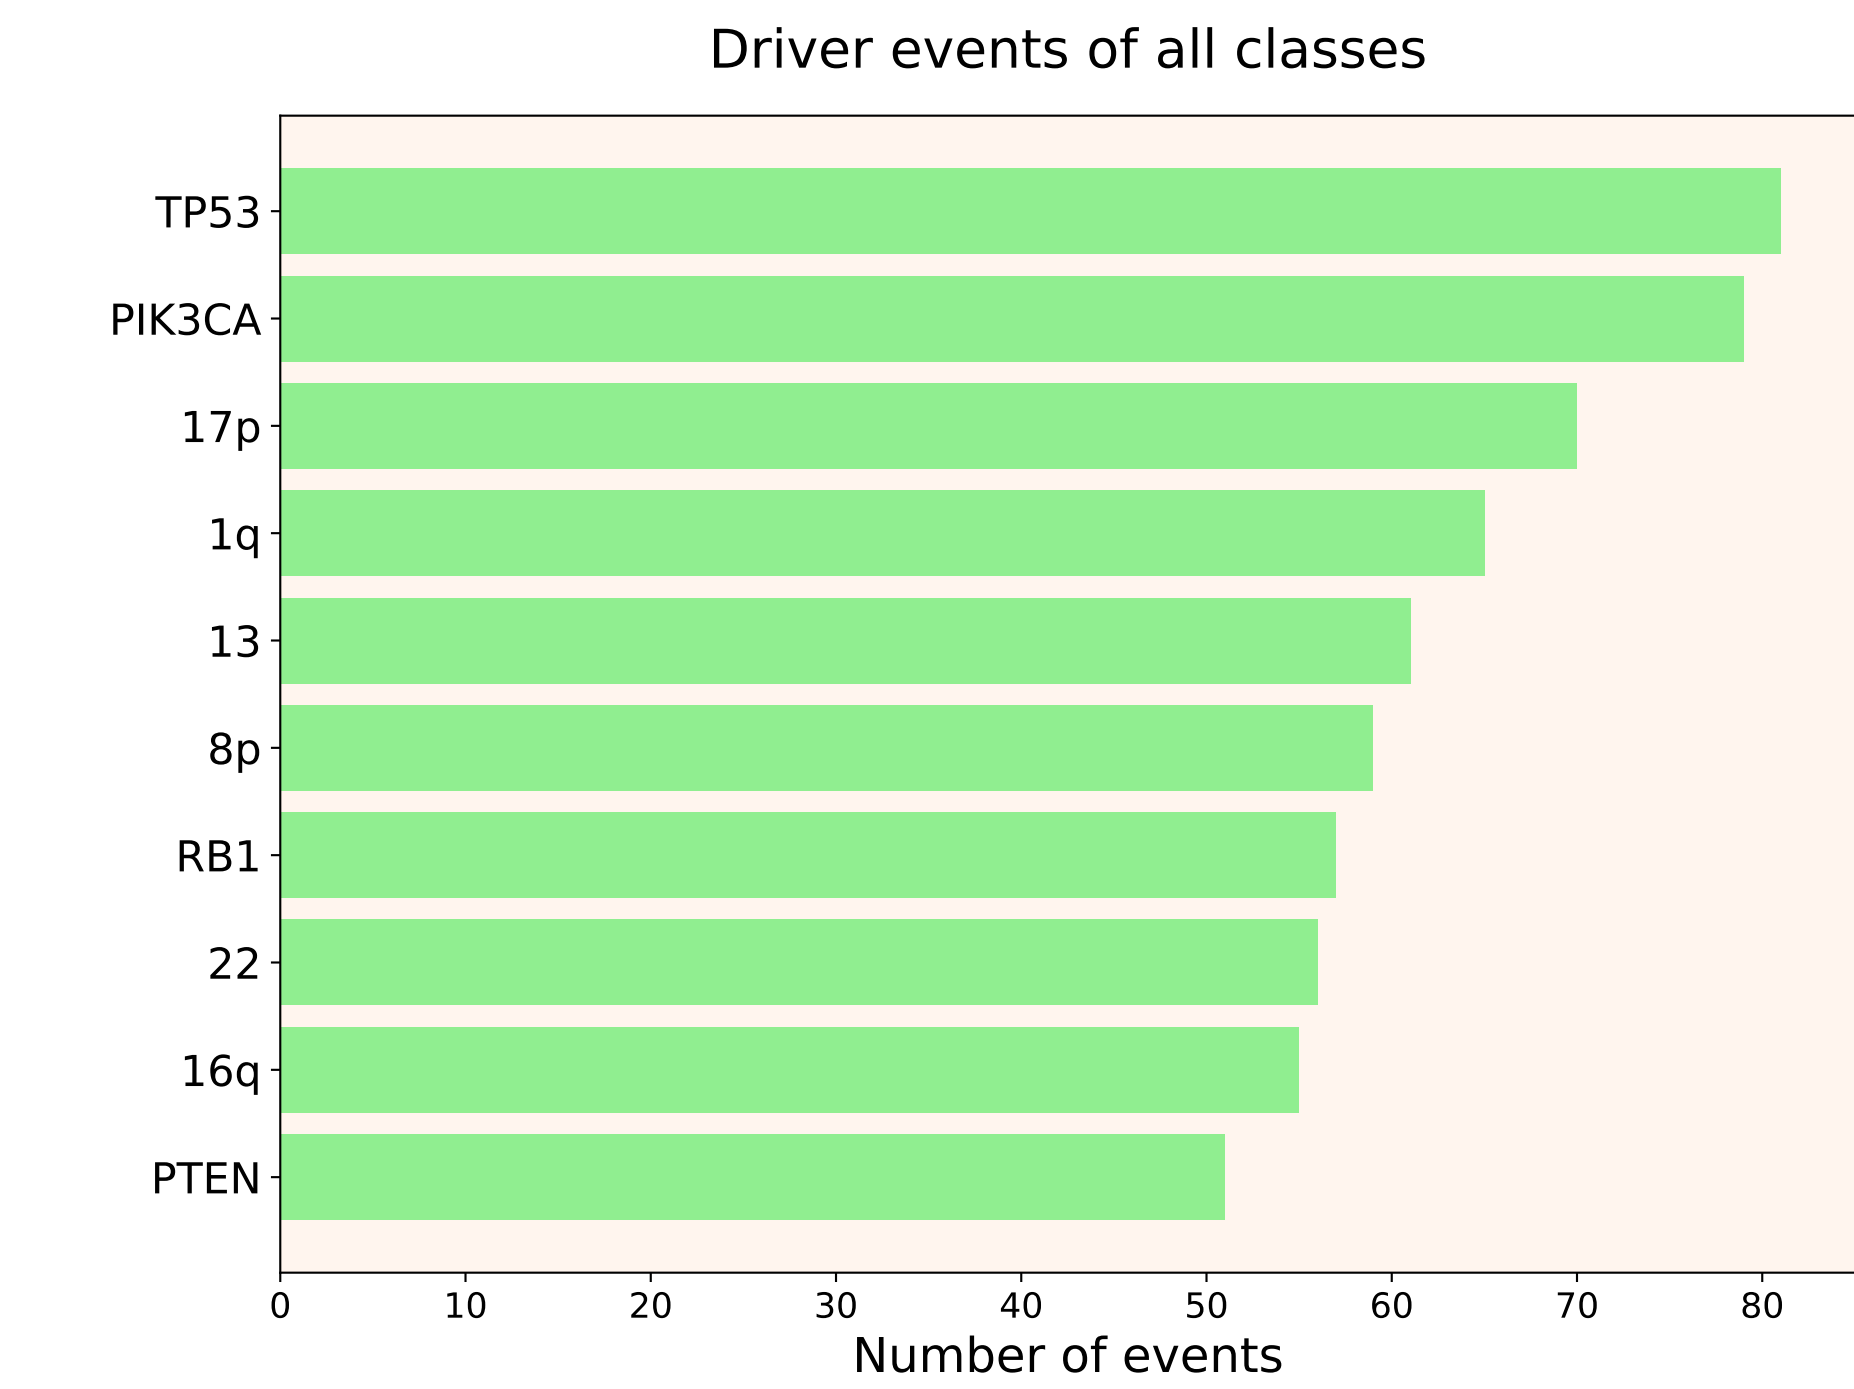

Supplement: Supplemental_Data_S1.zip [file Supplemental_Data_S1.zip]

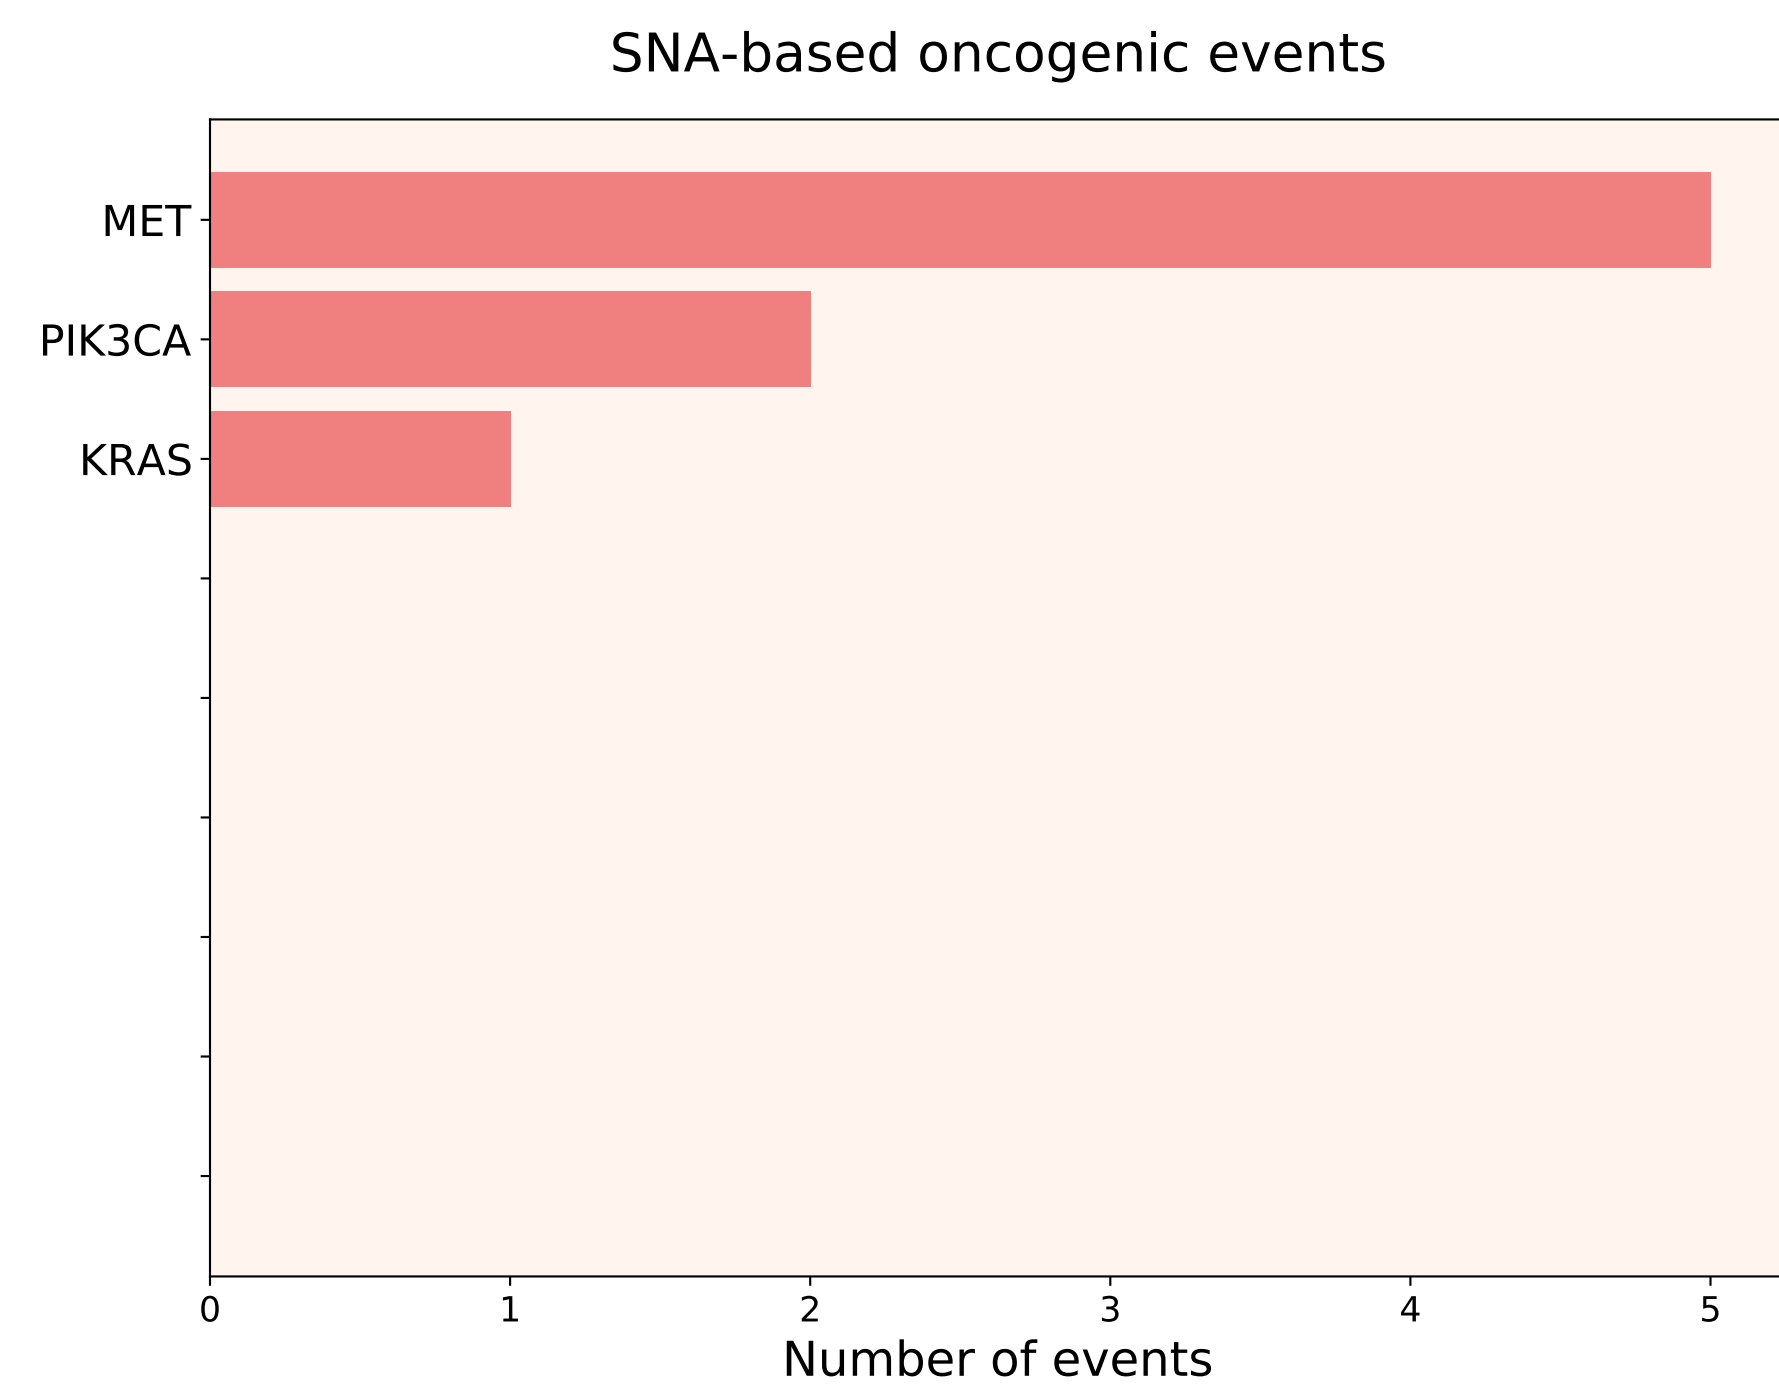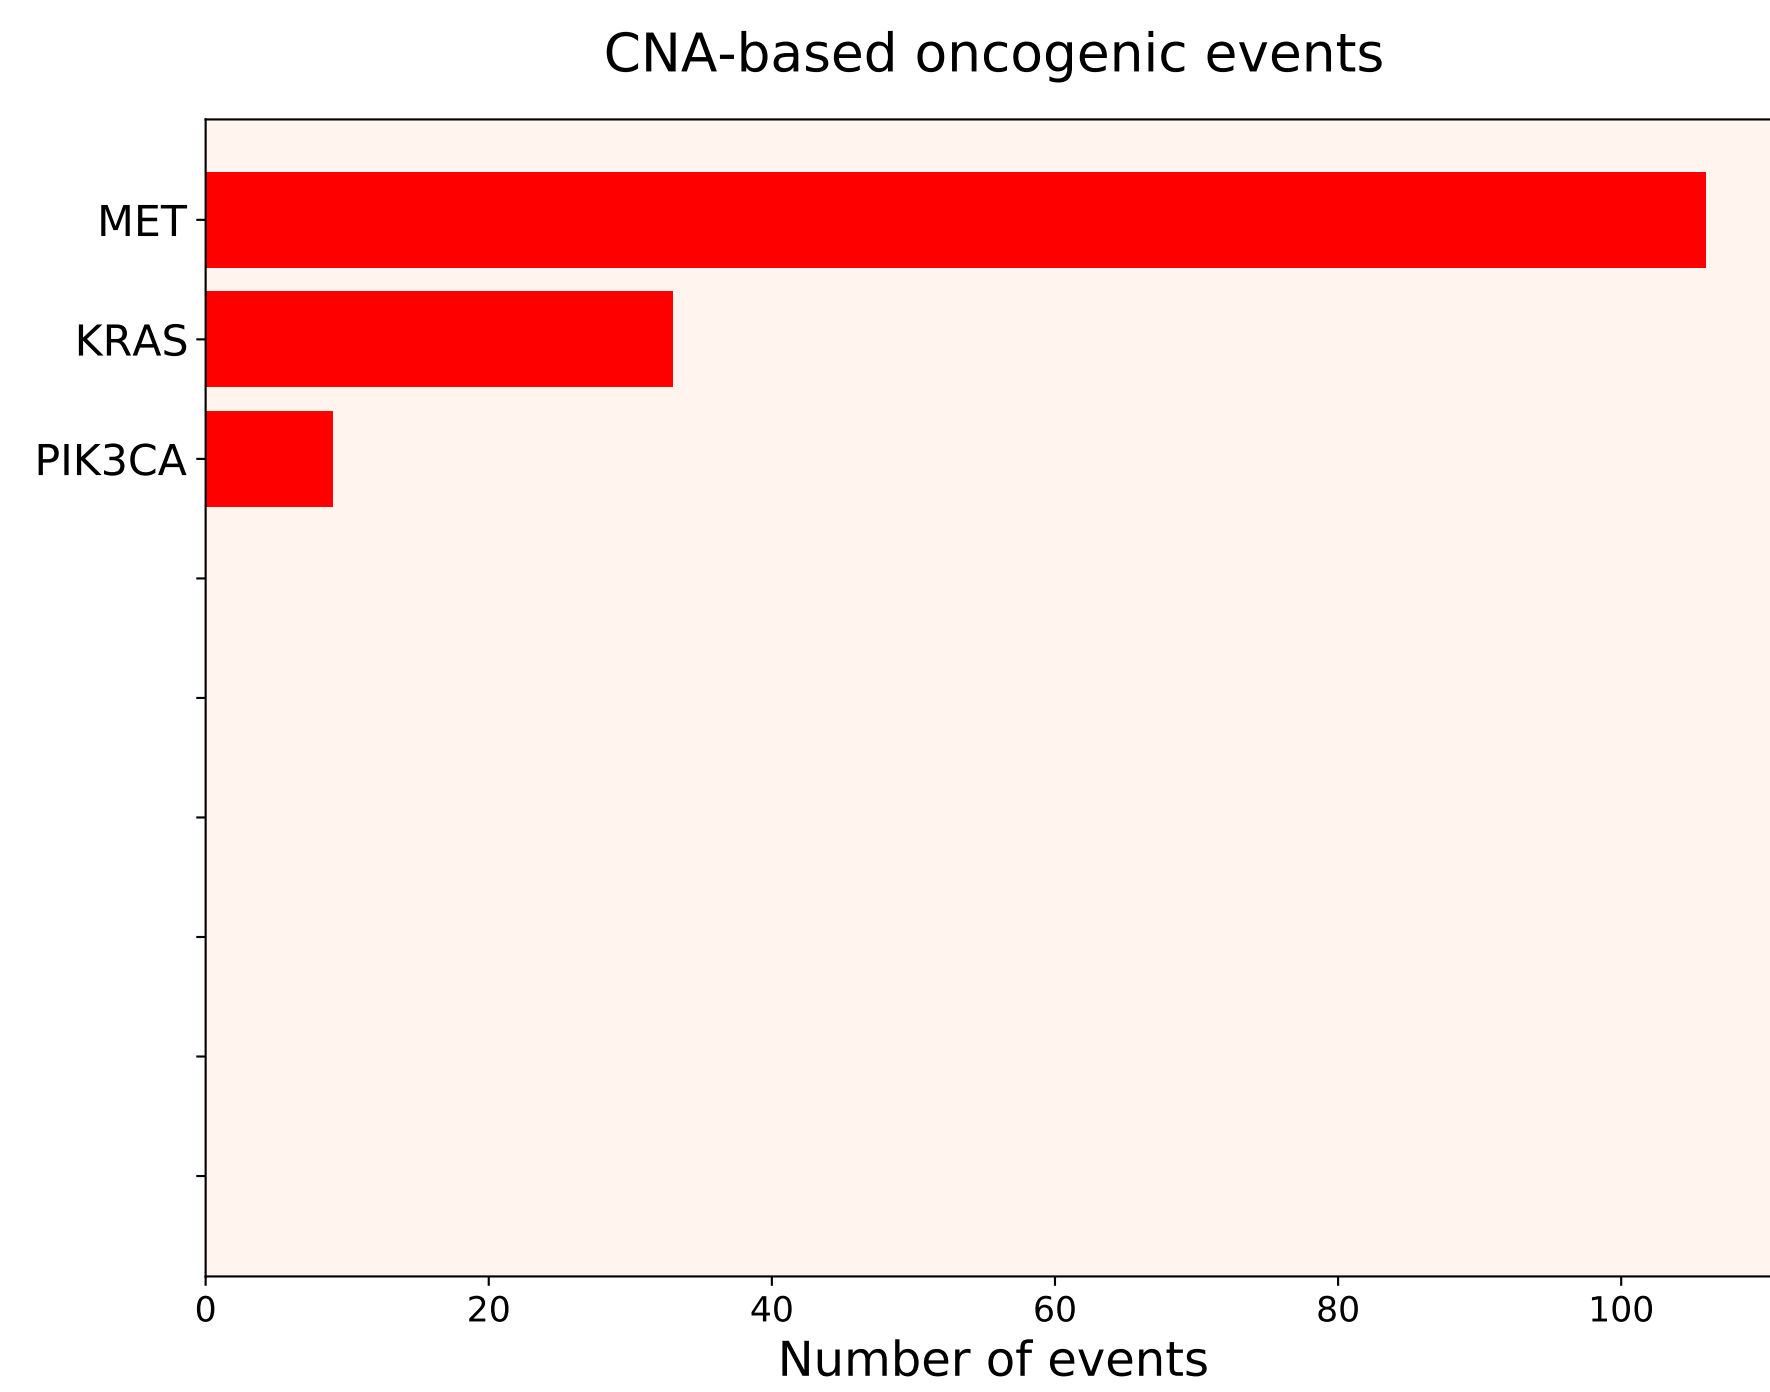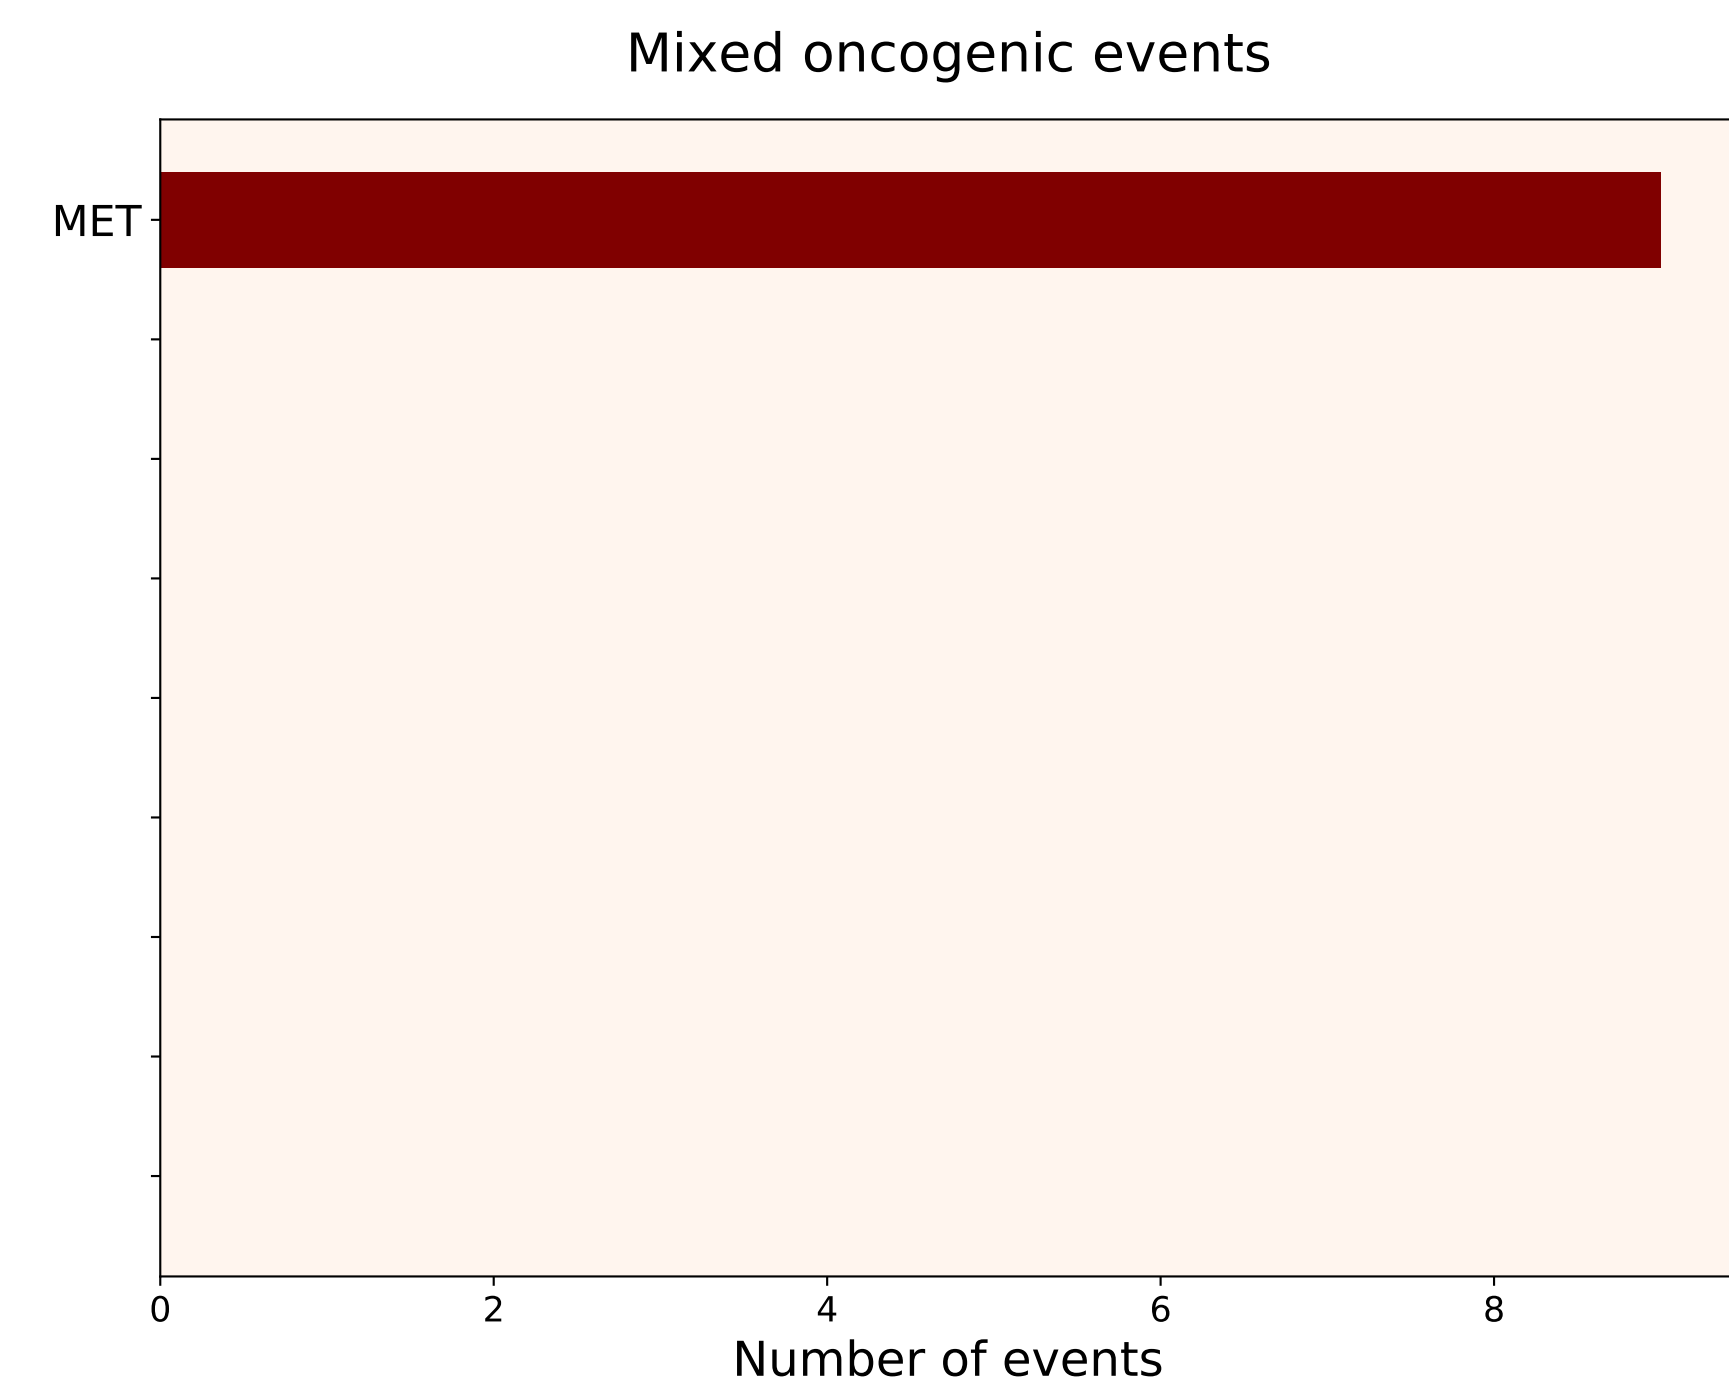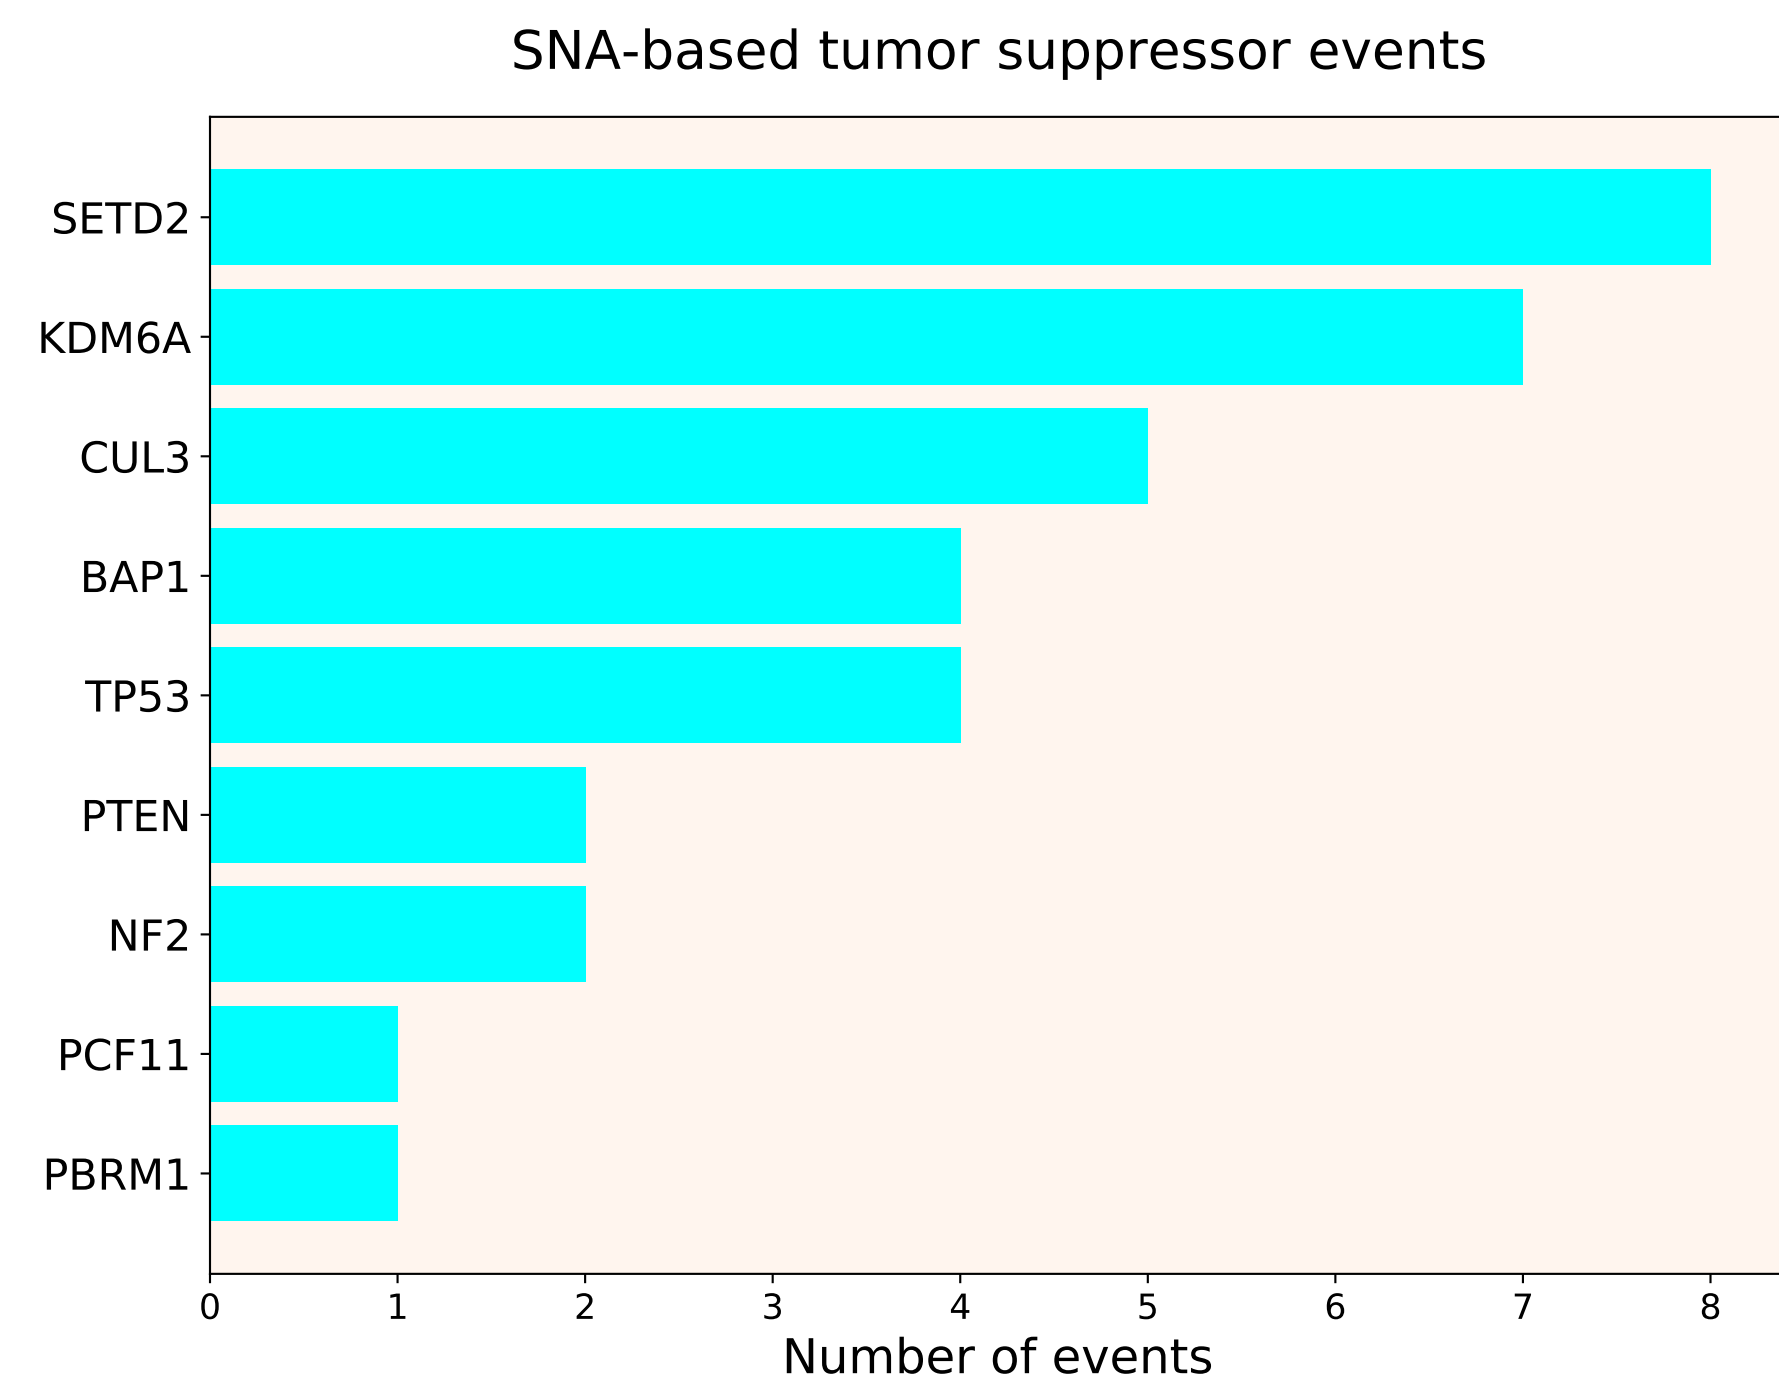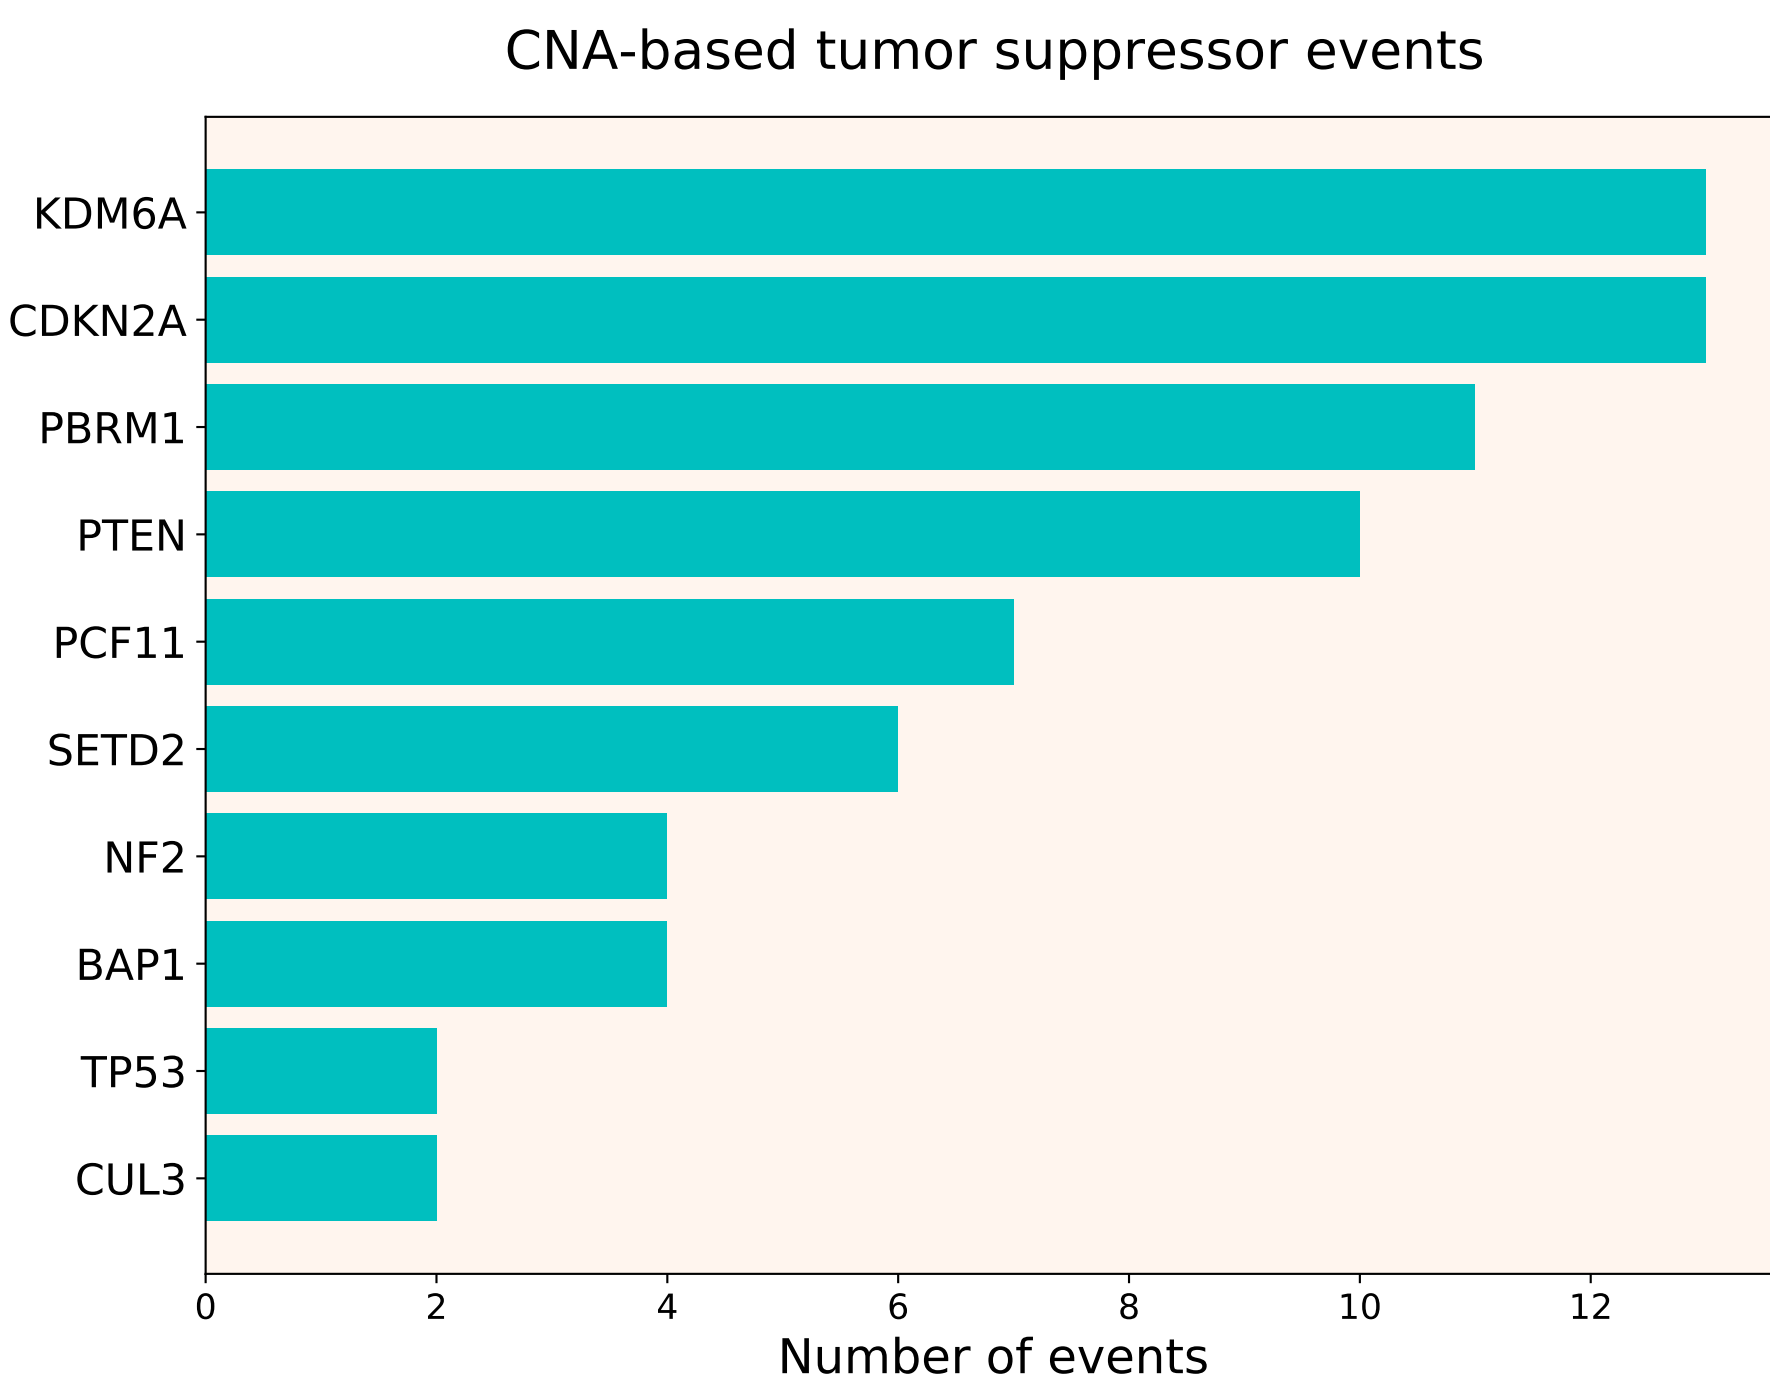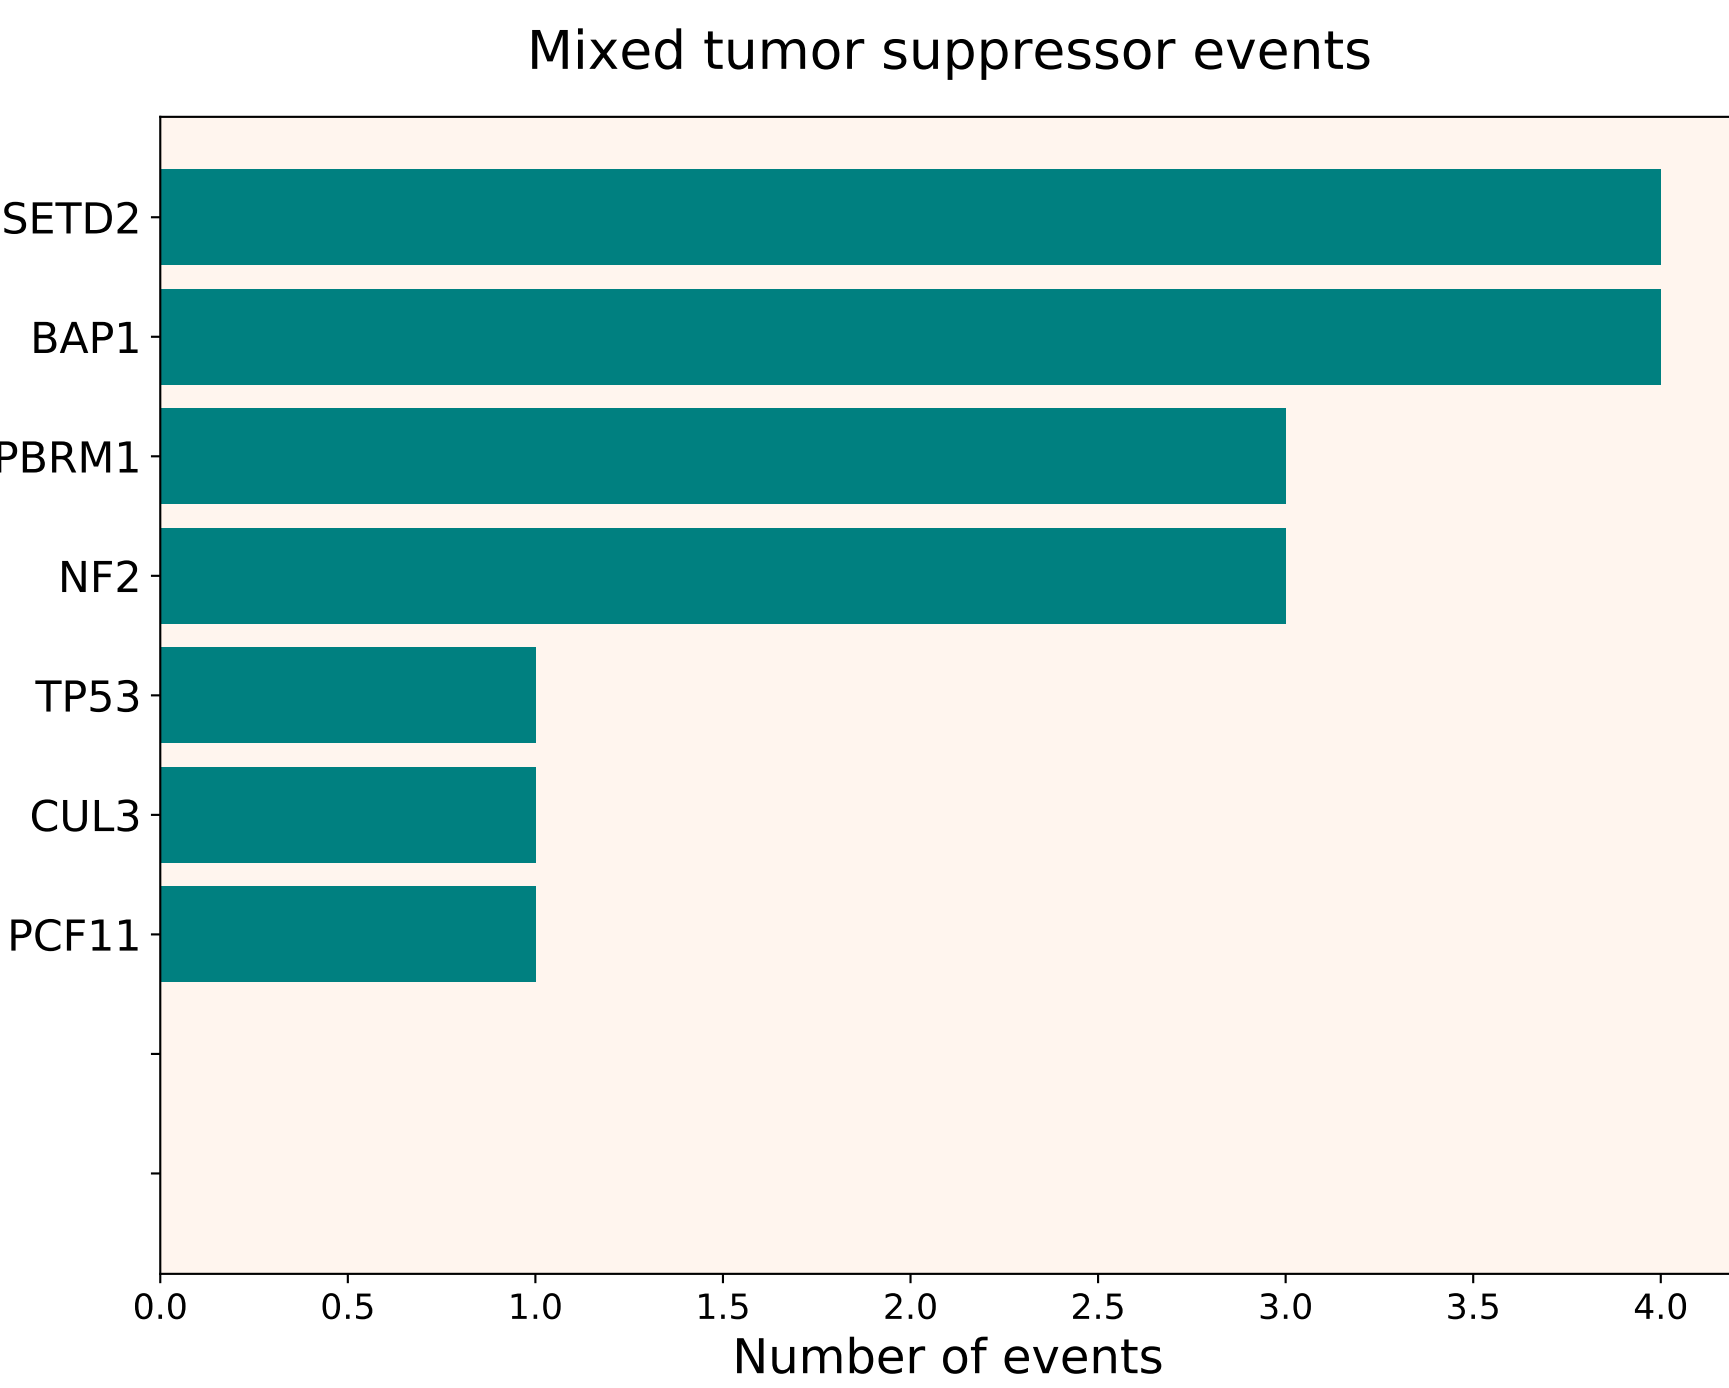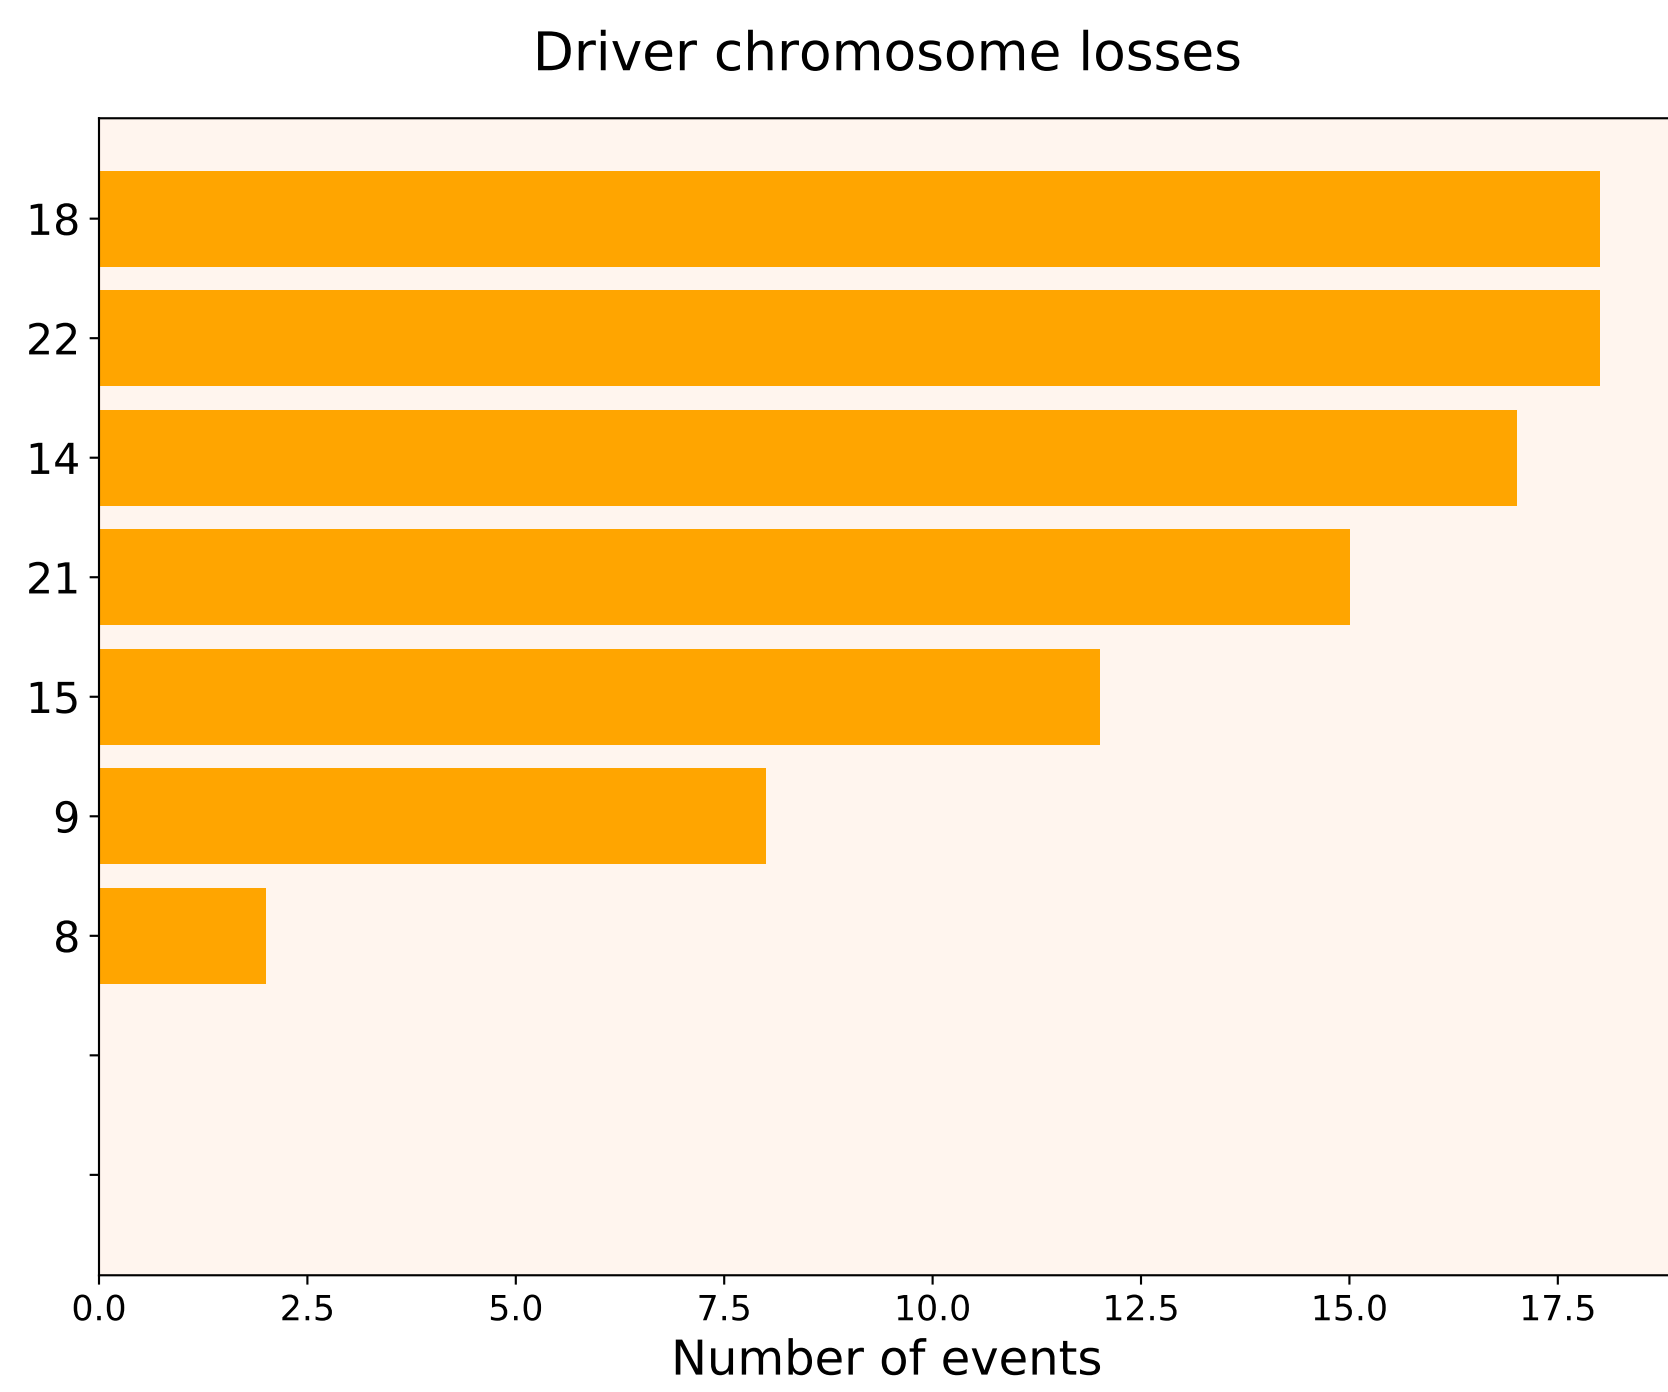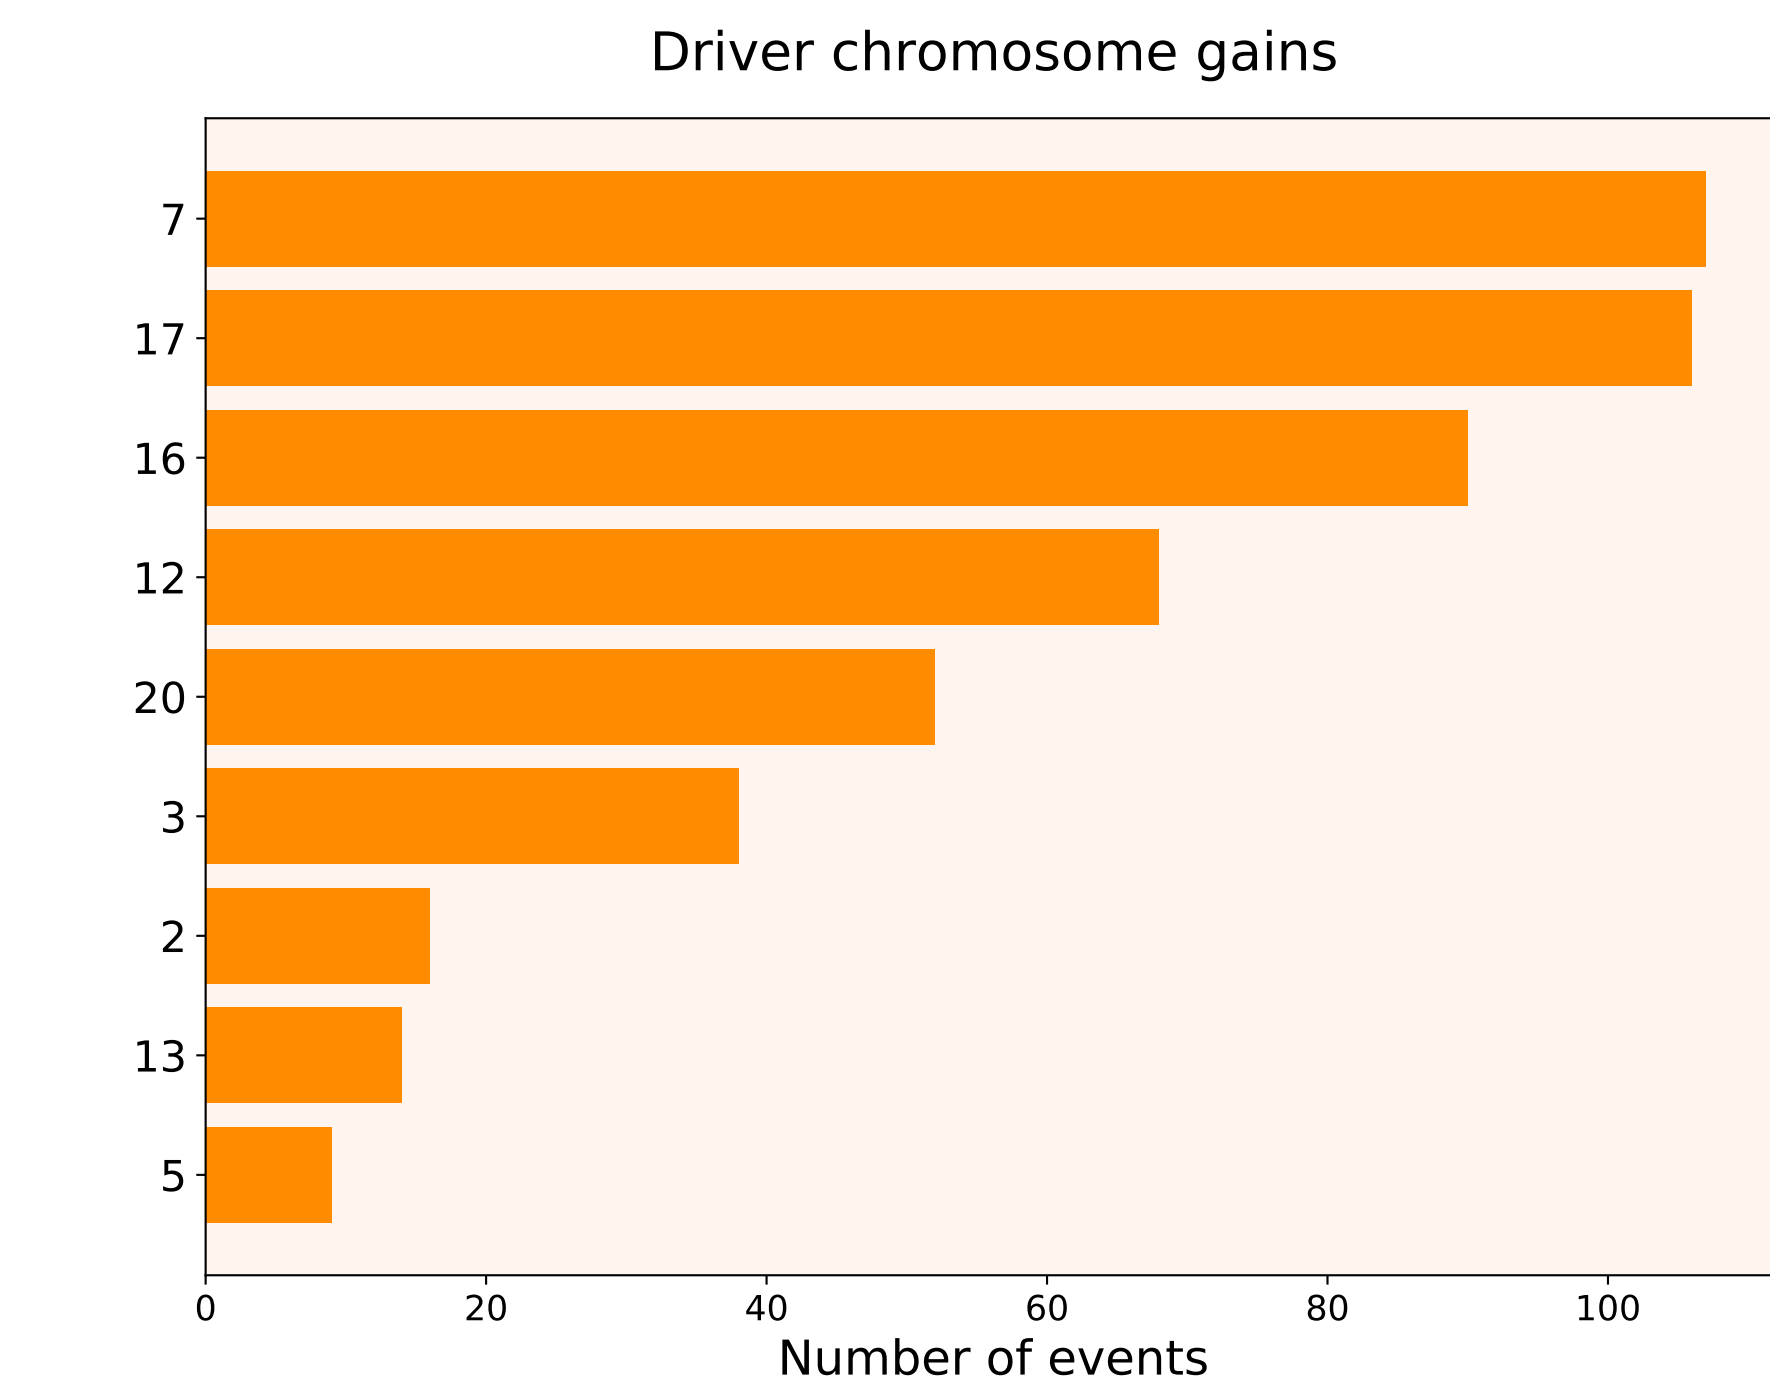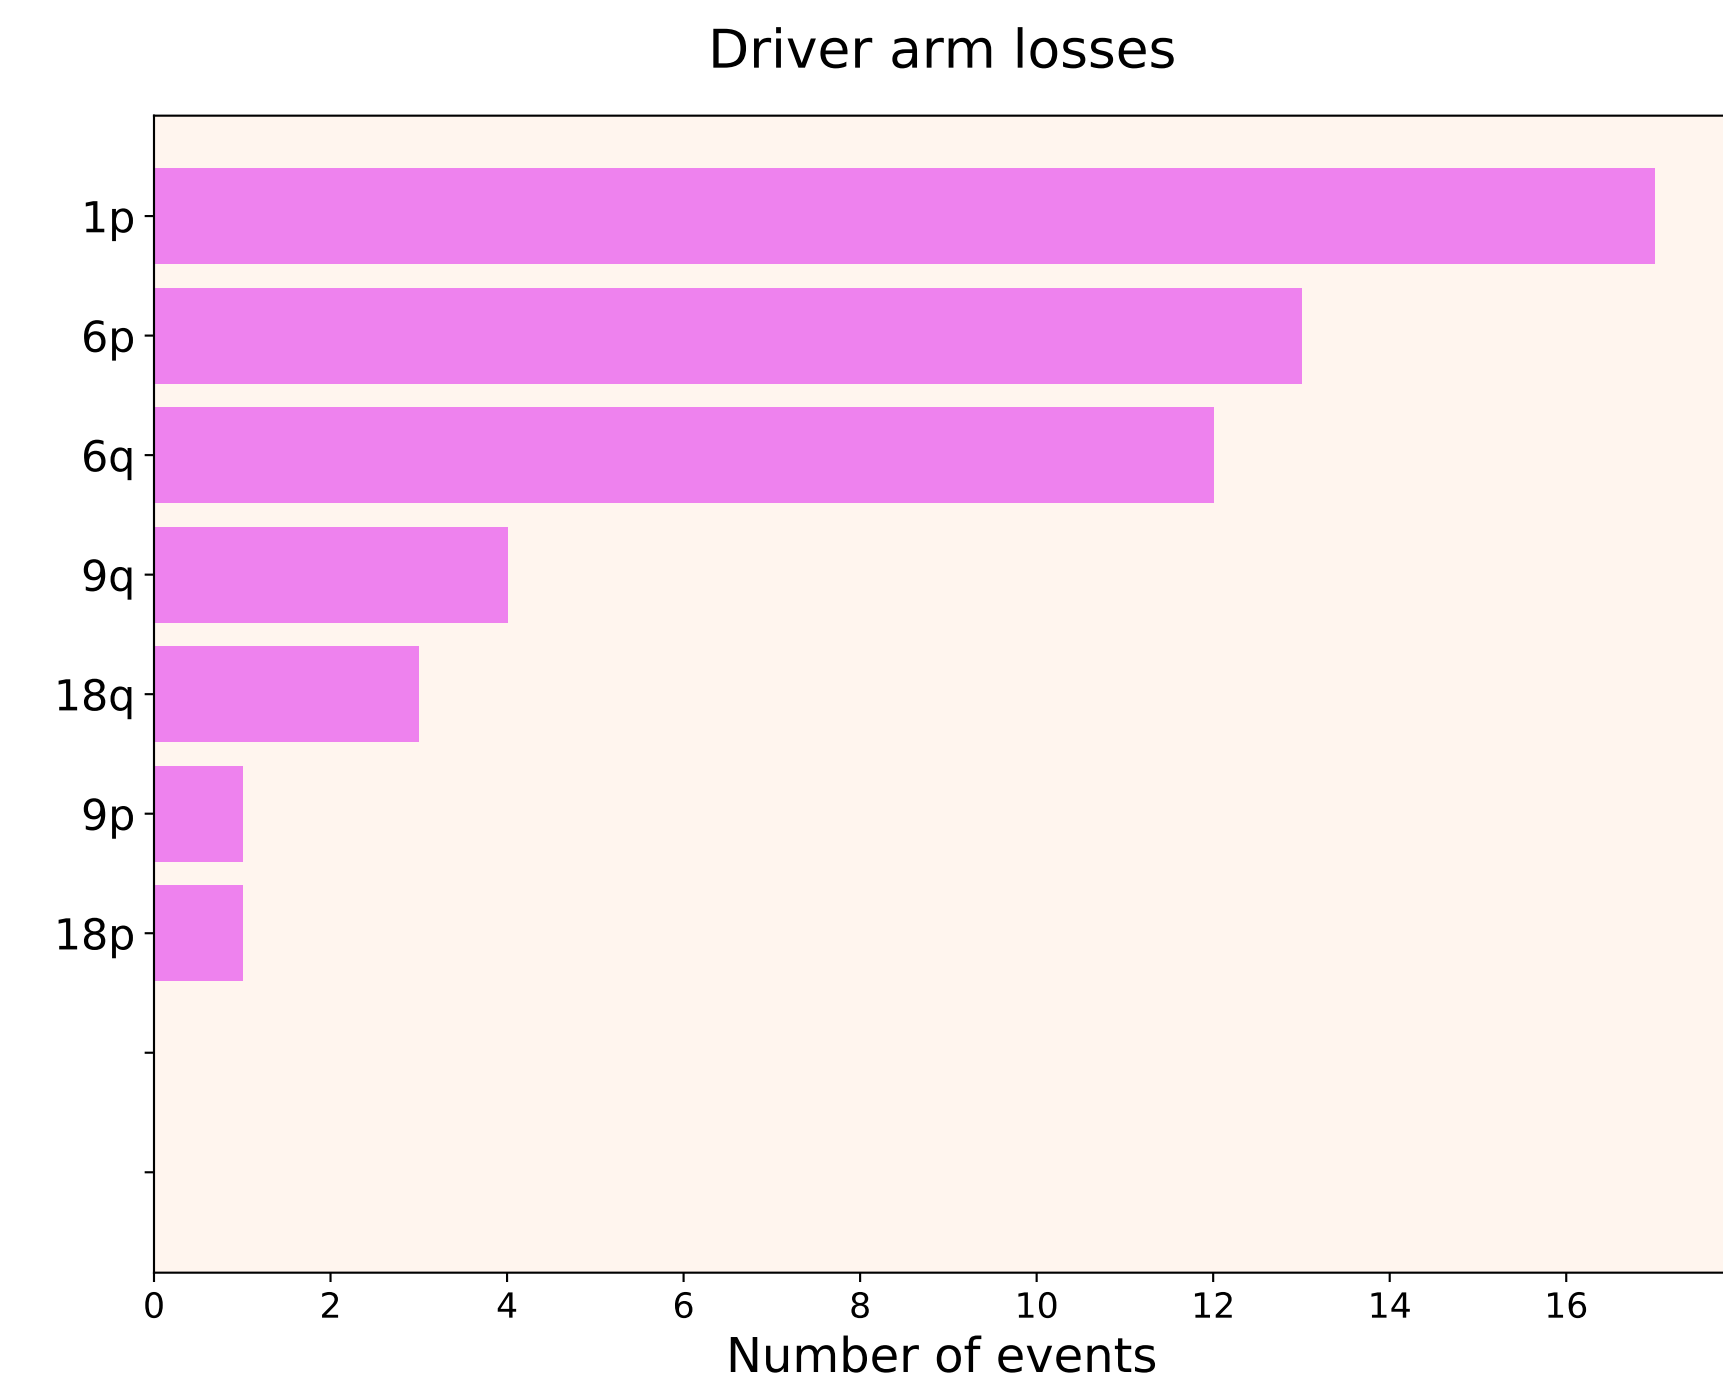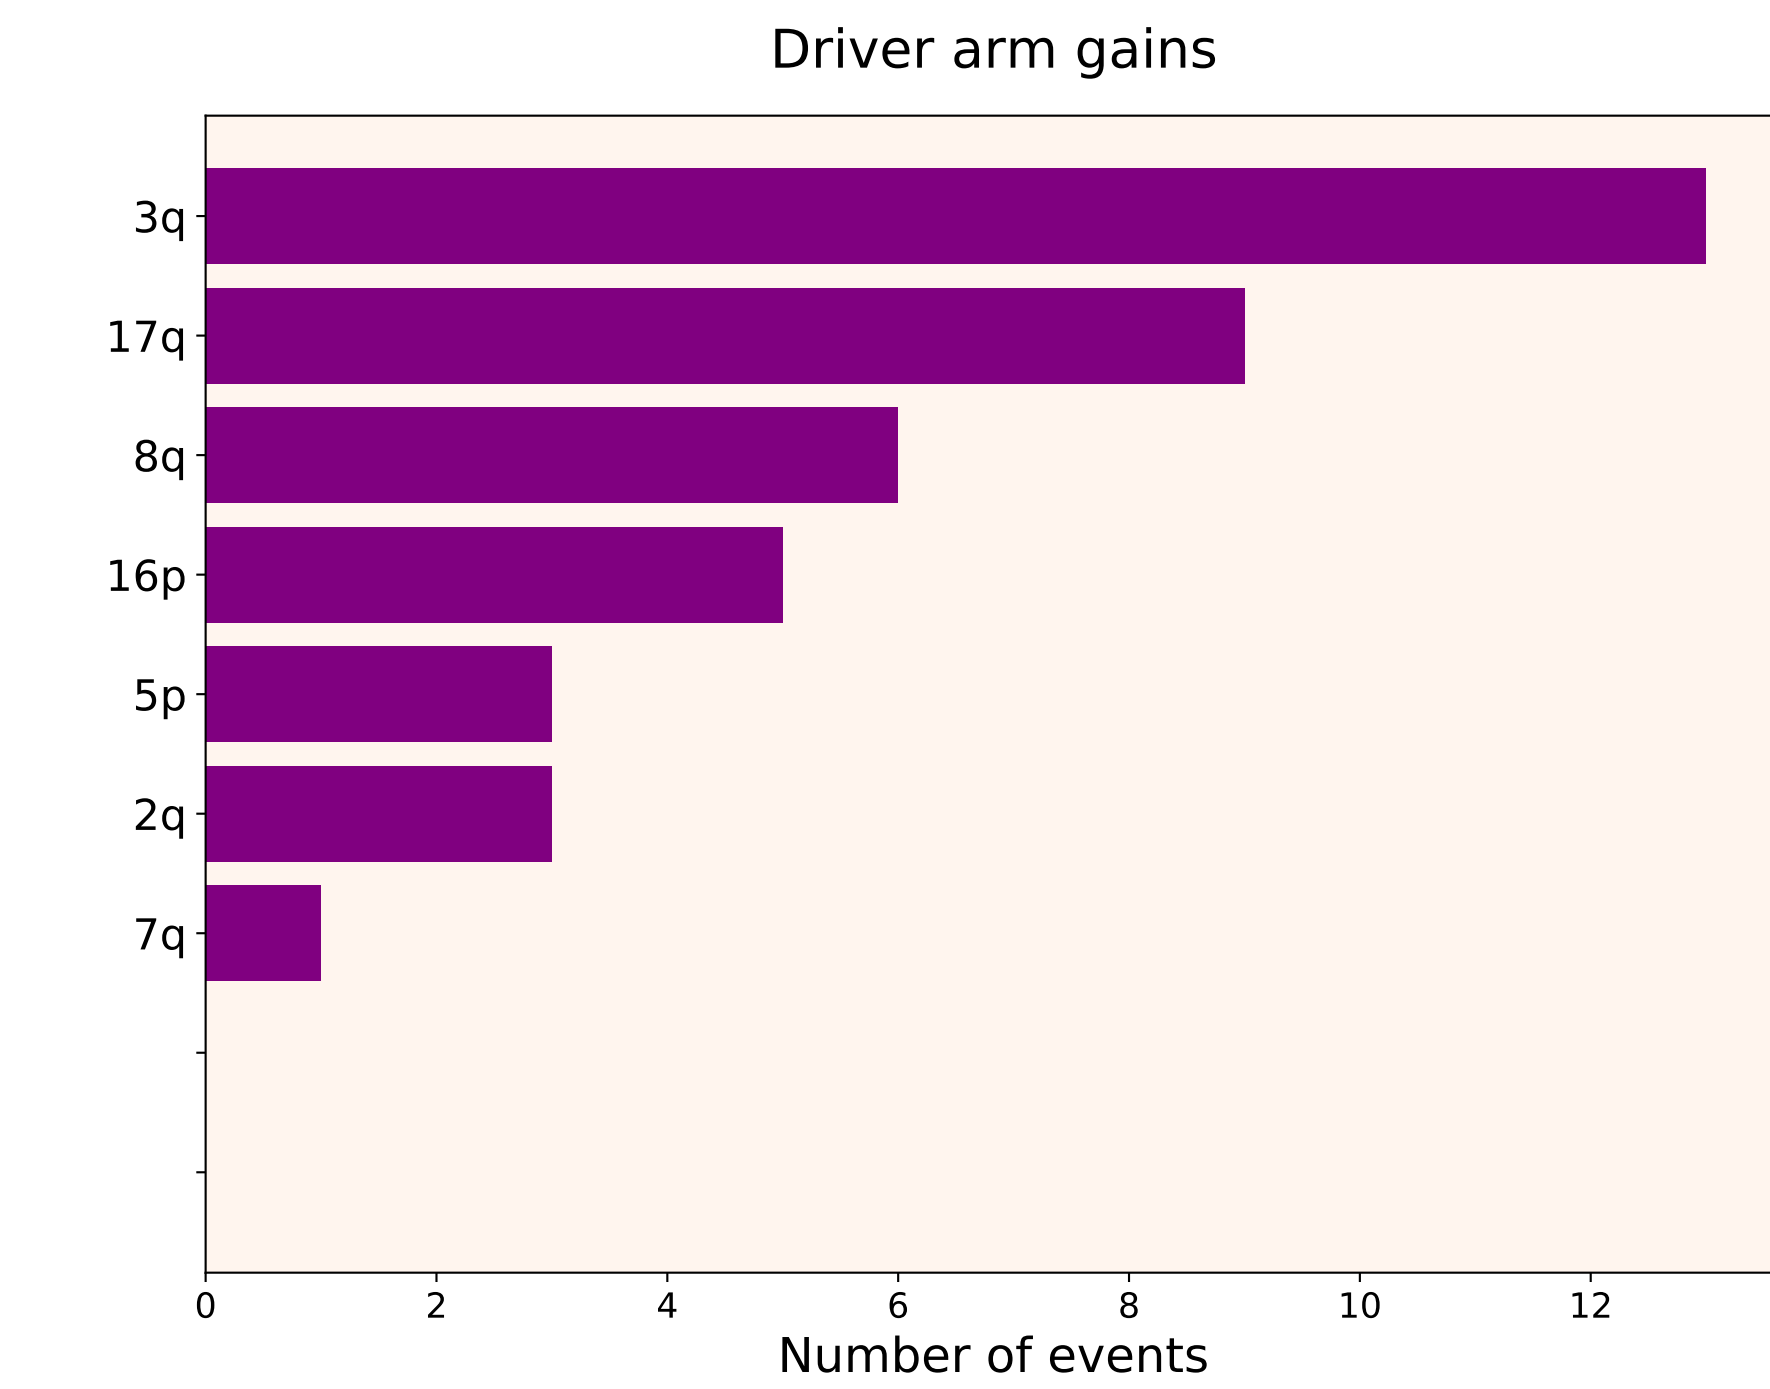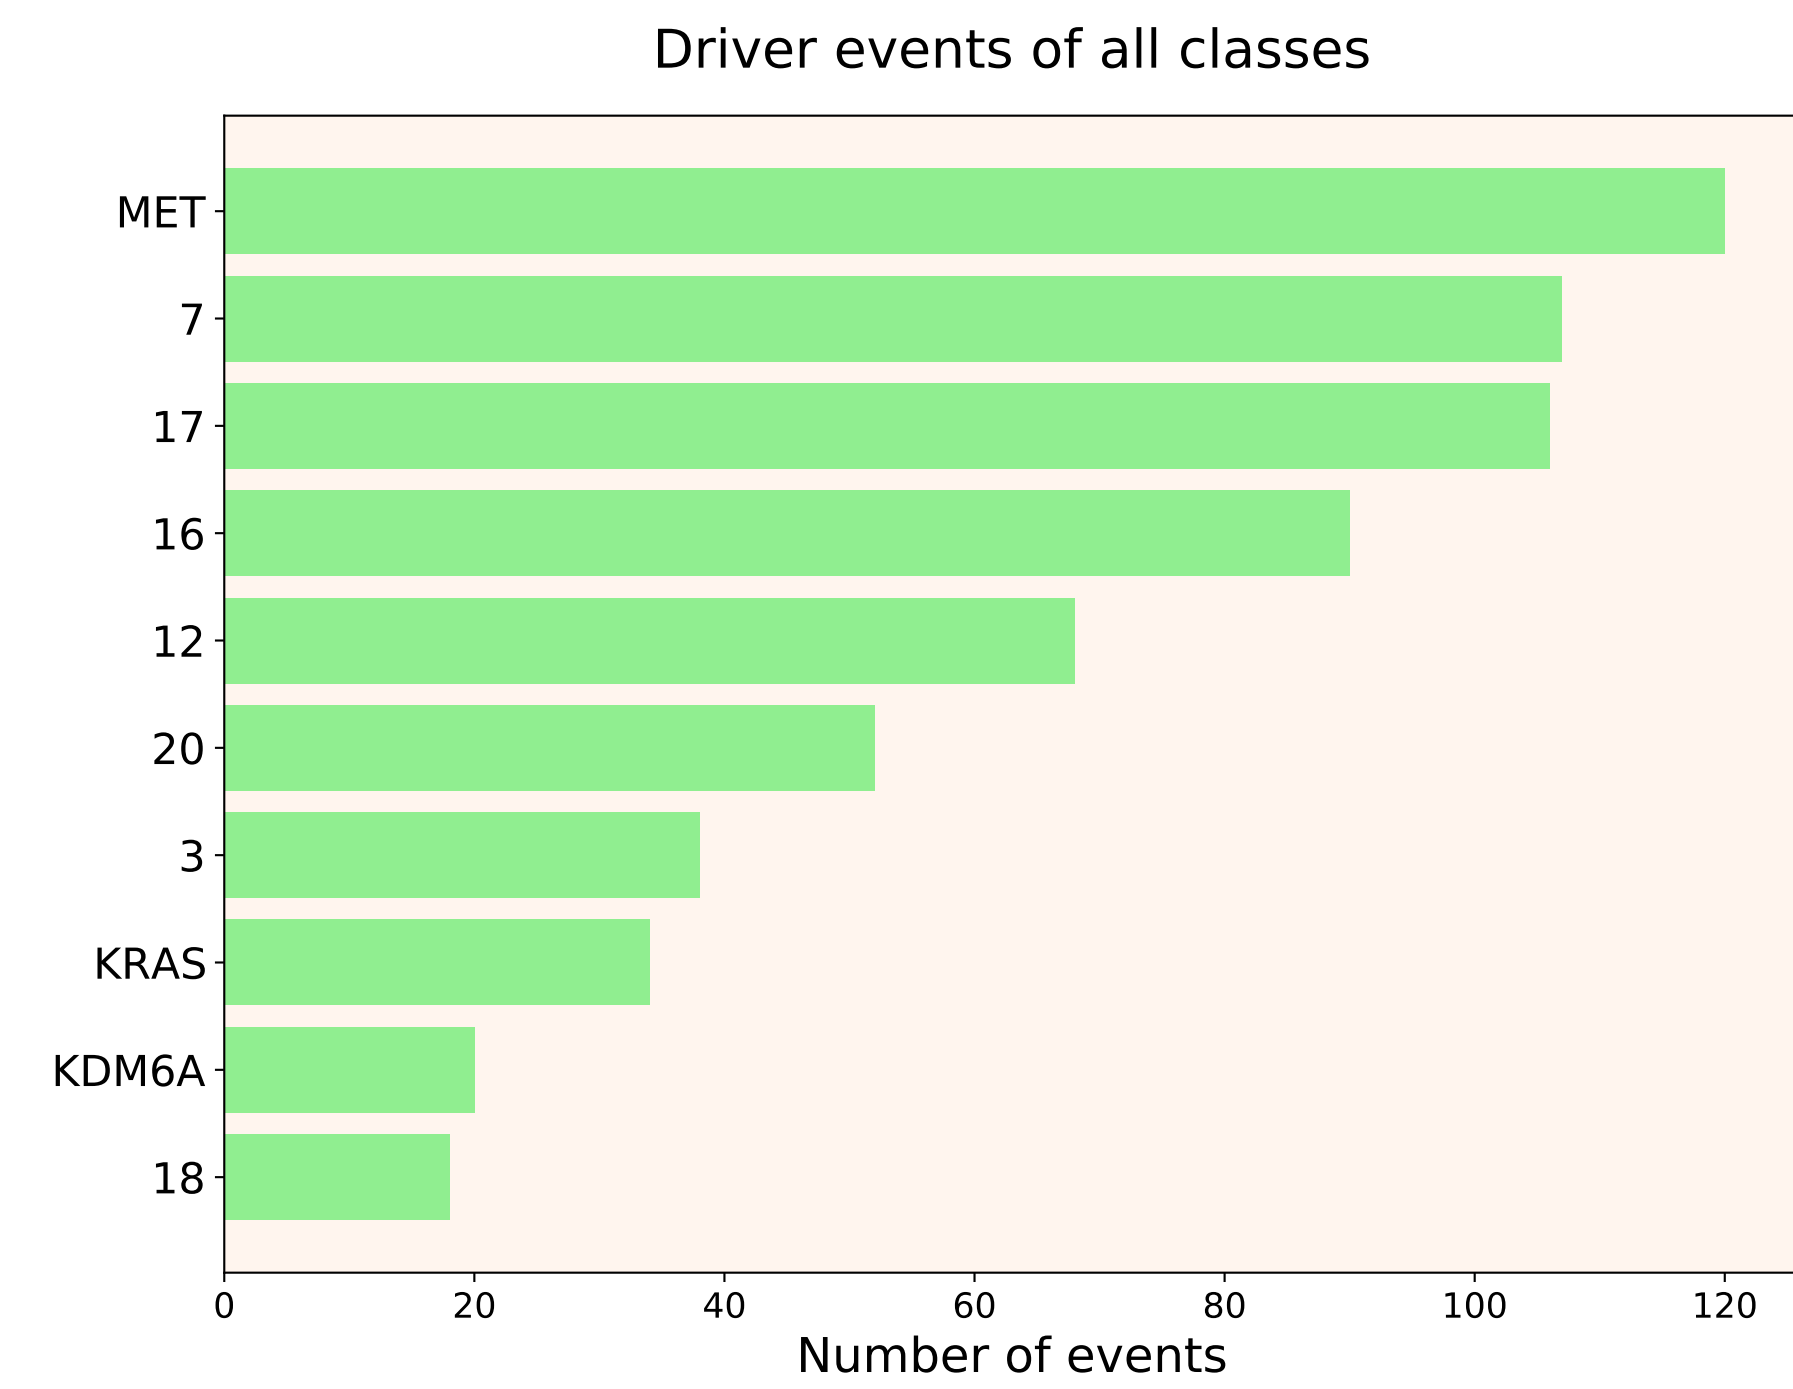

Supplement: Supplemental_Data_S1.zip [file Supplemental_Data_S1.zip]

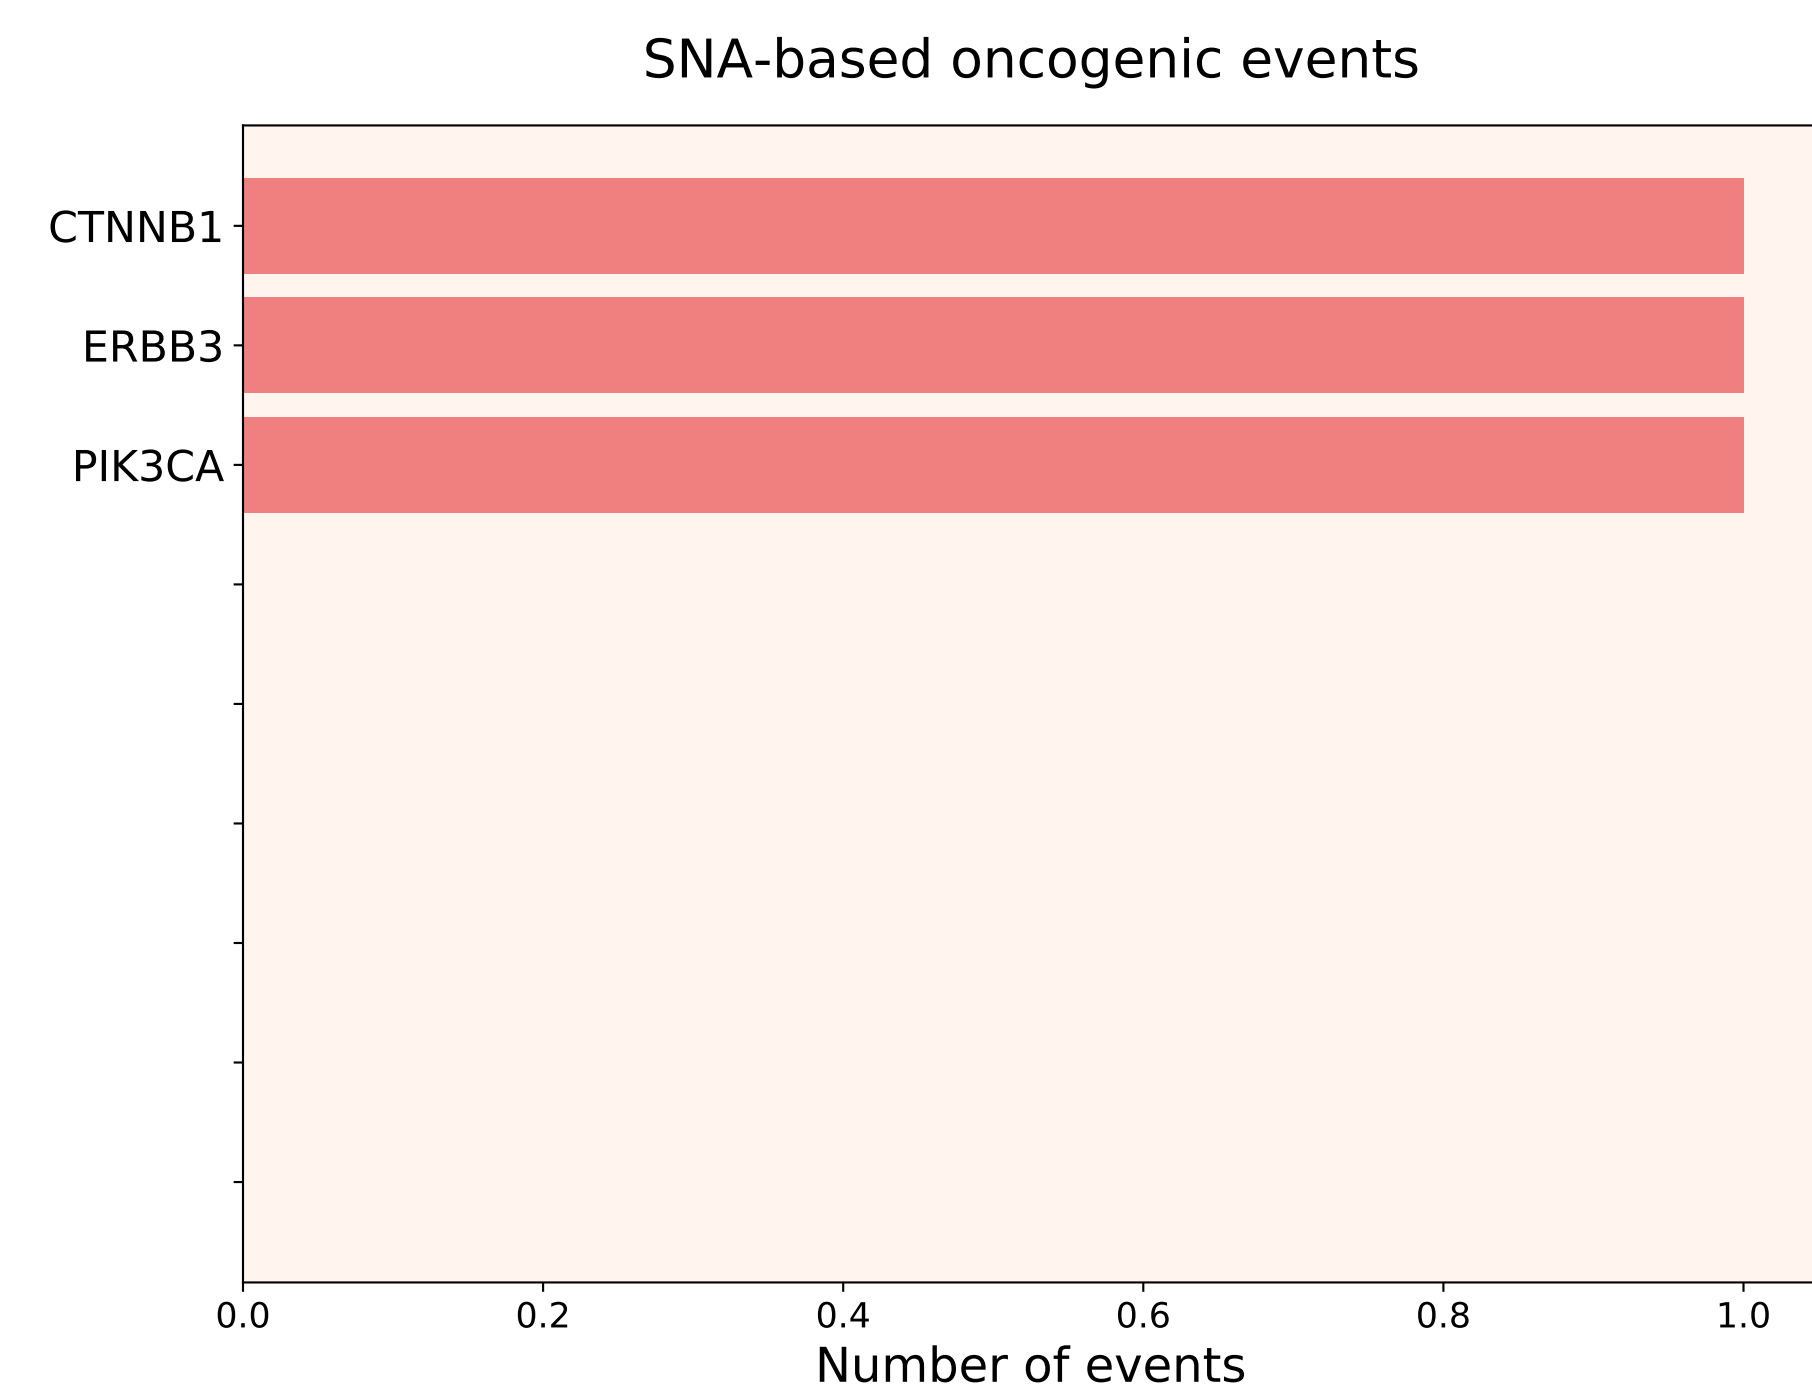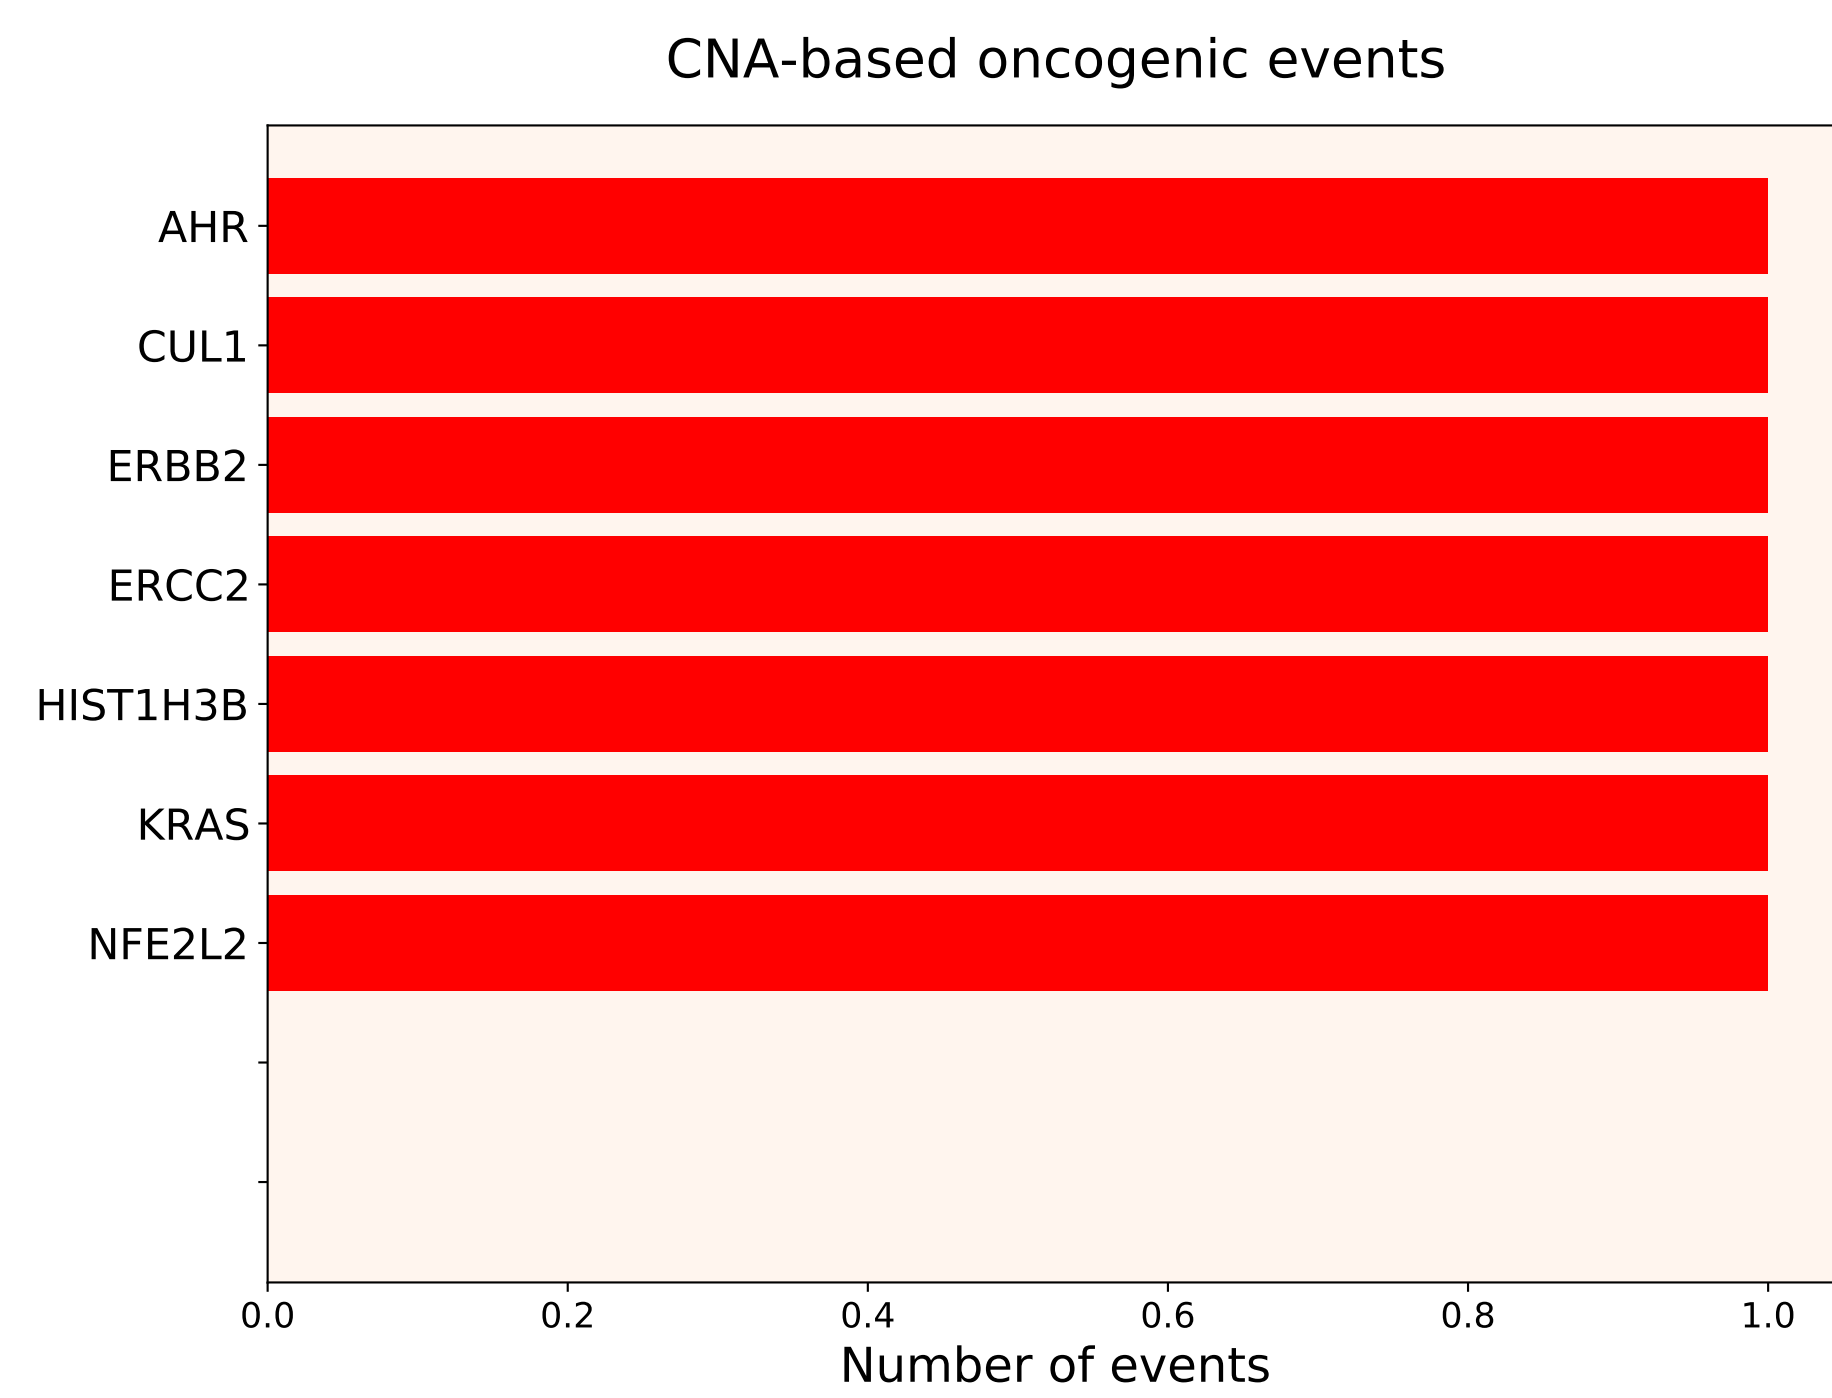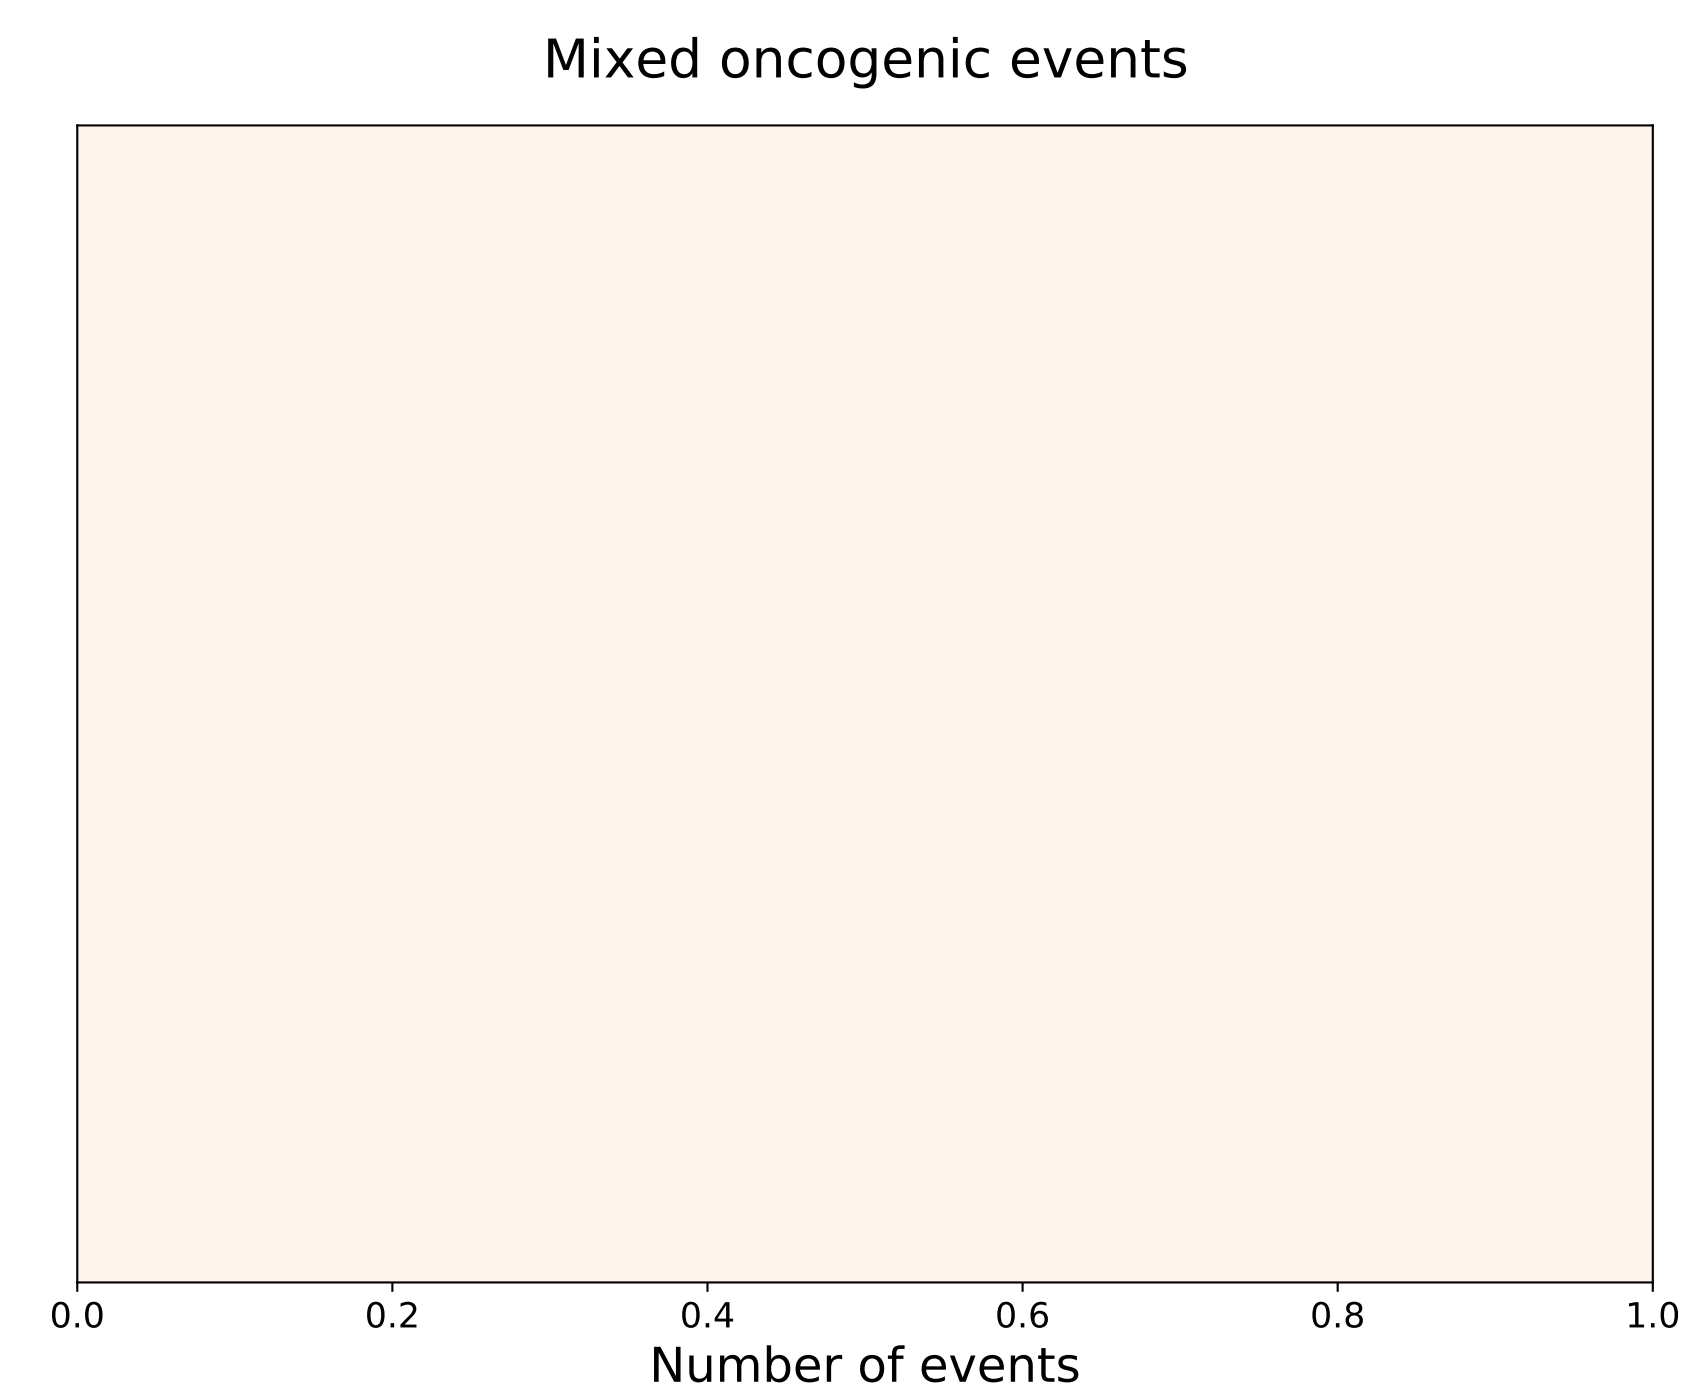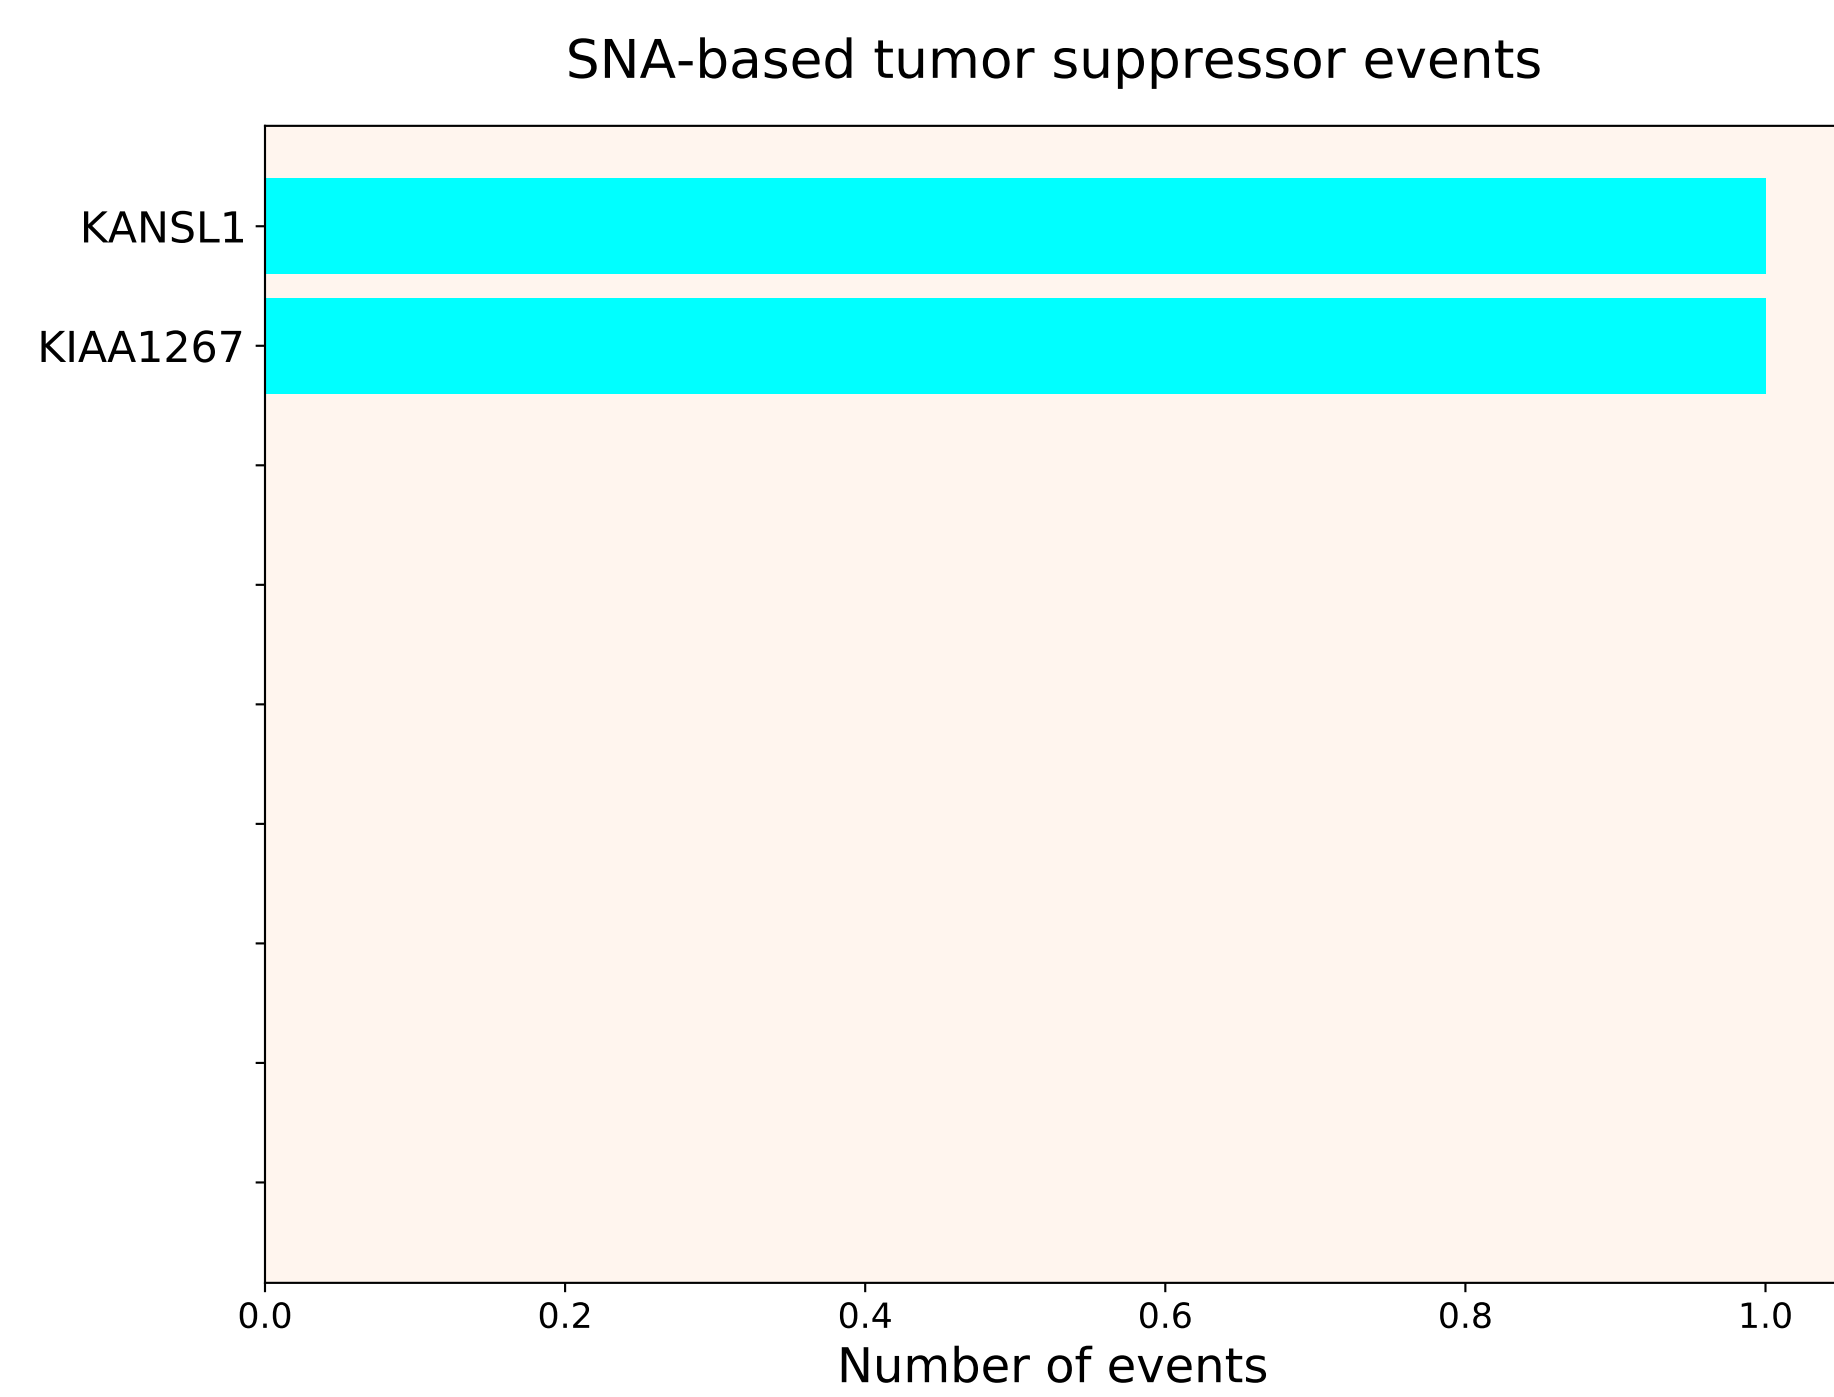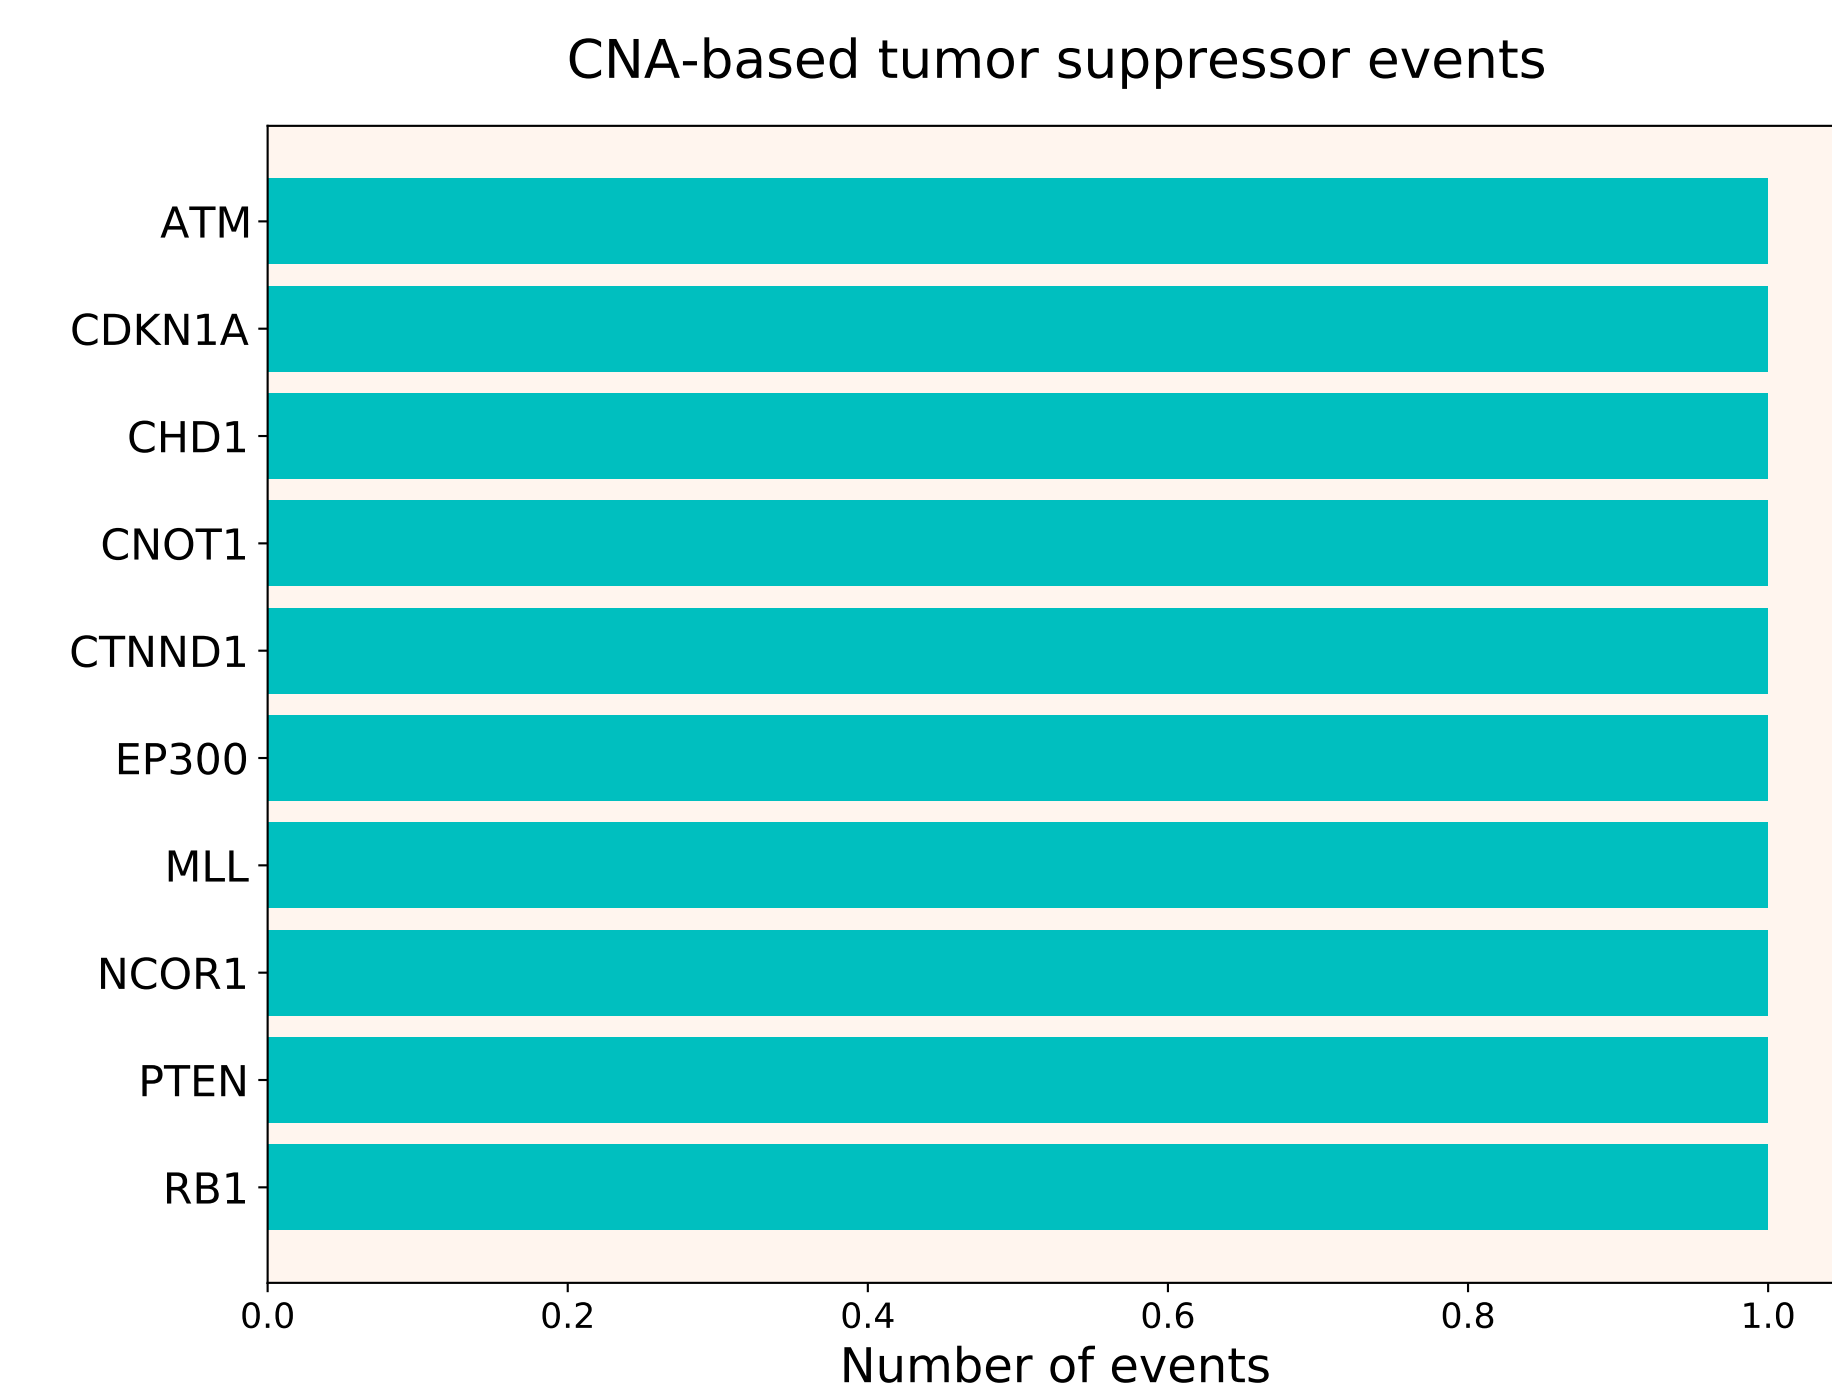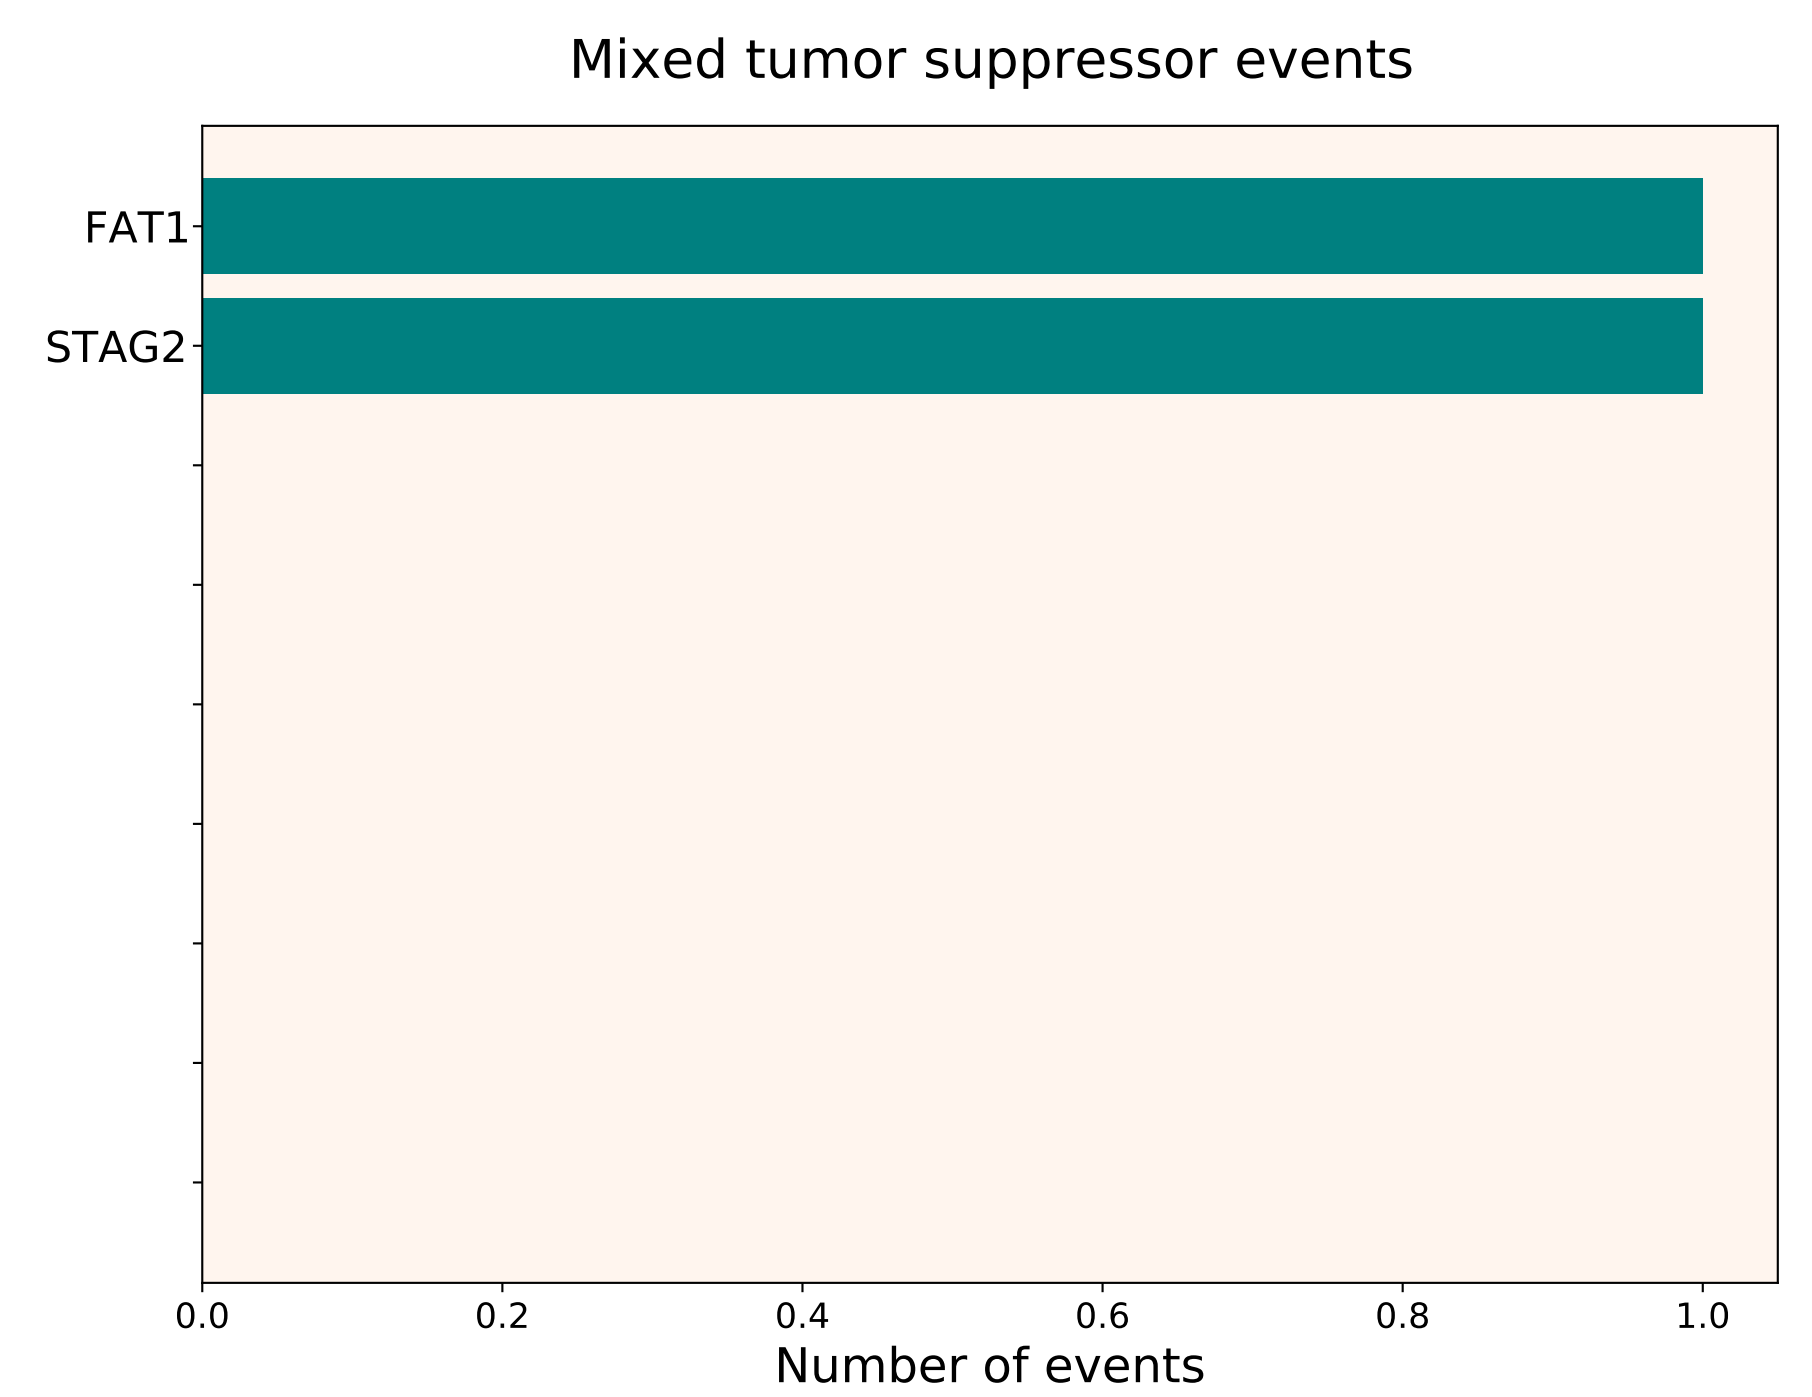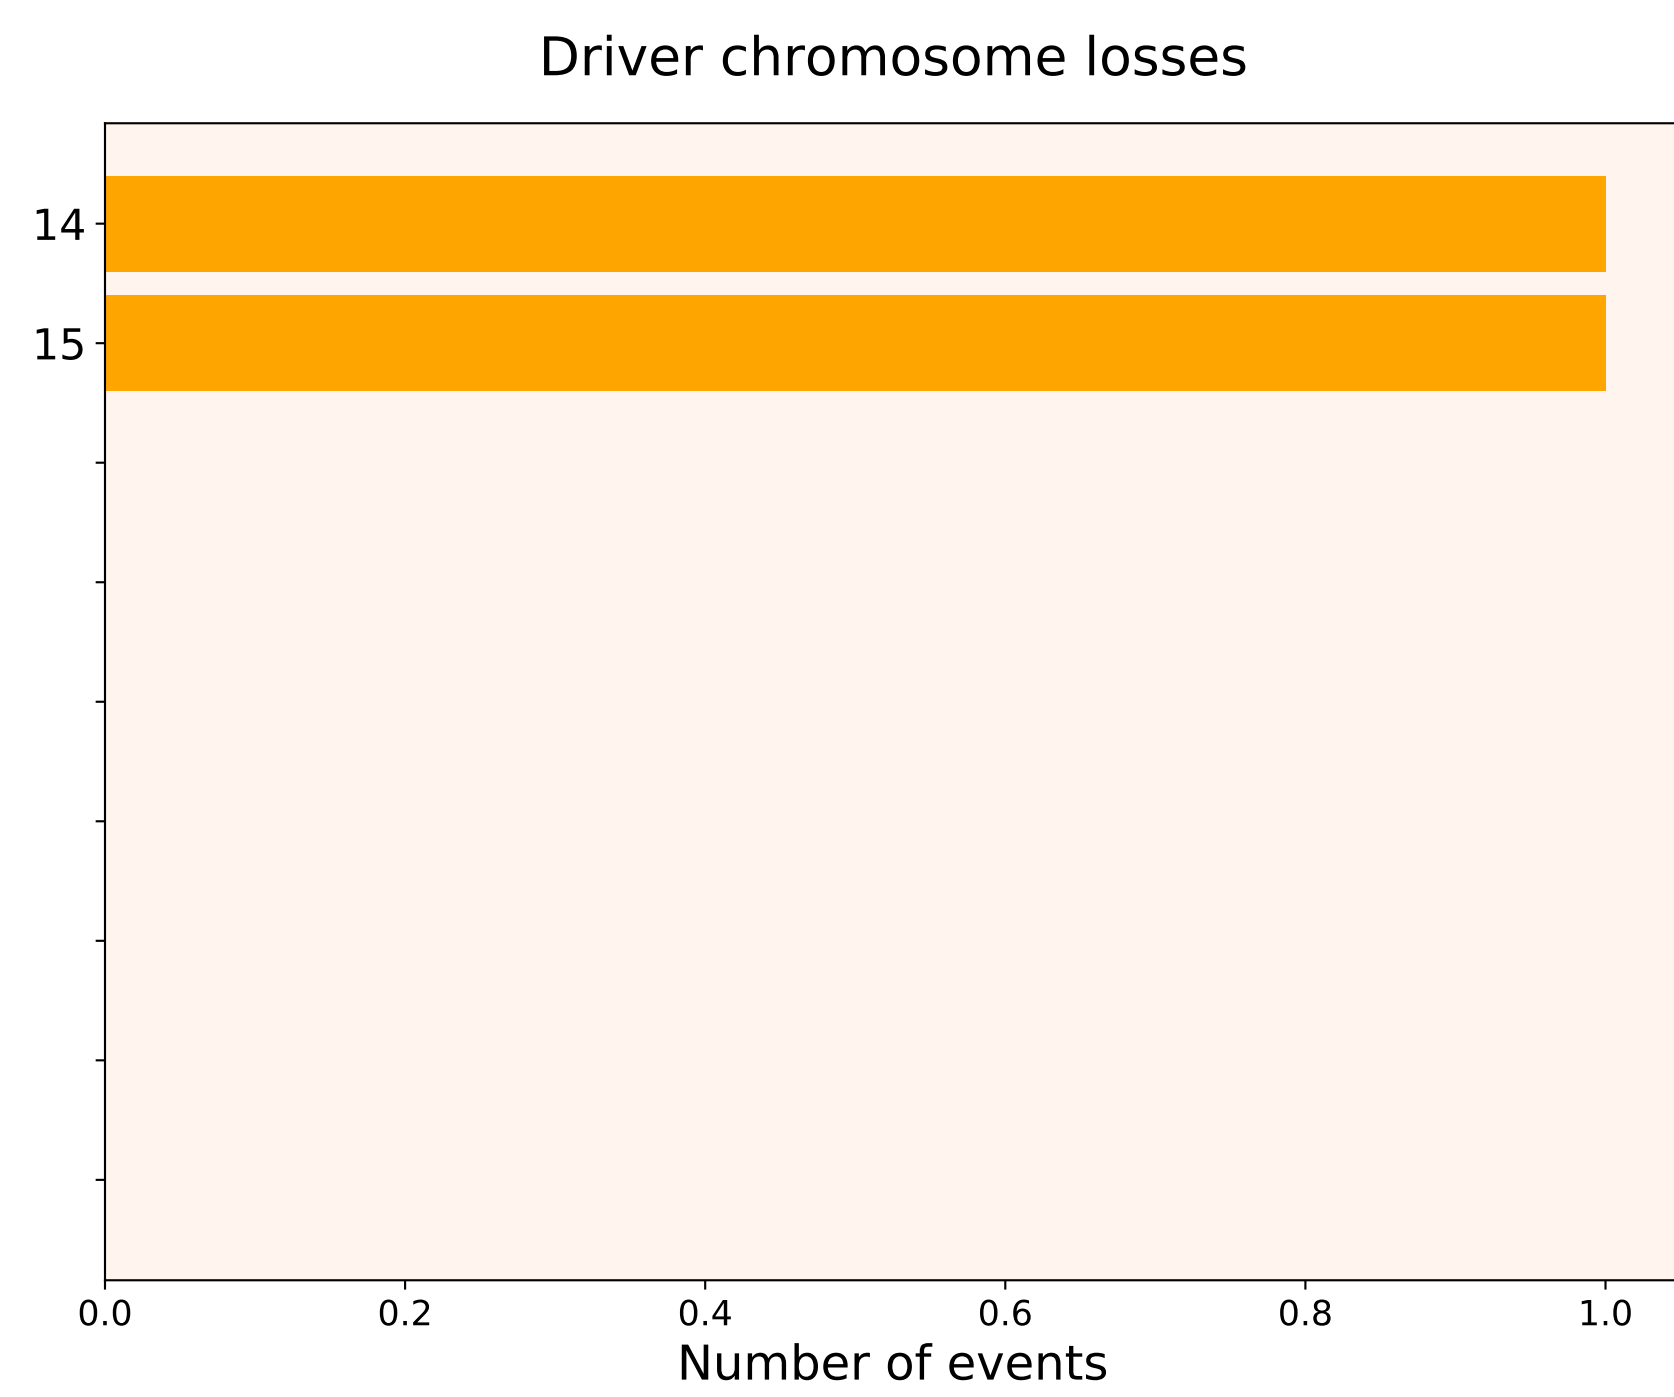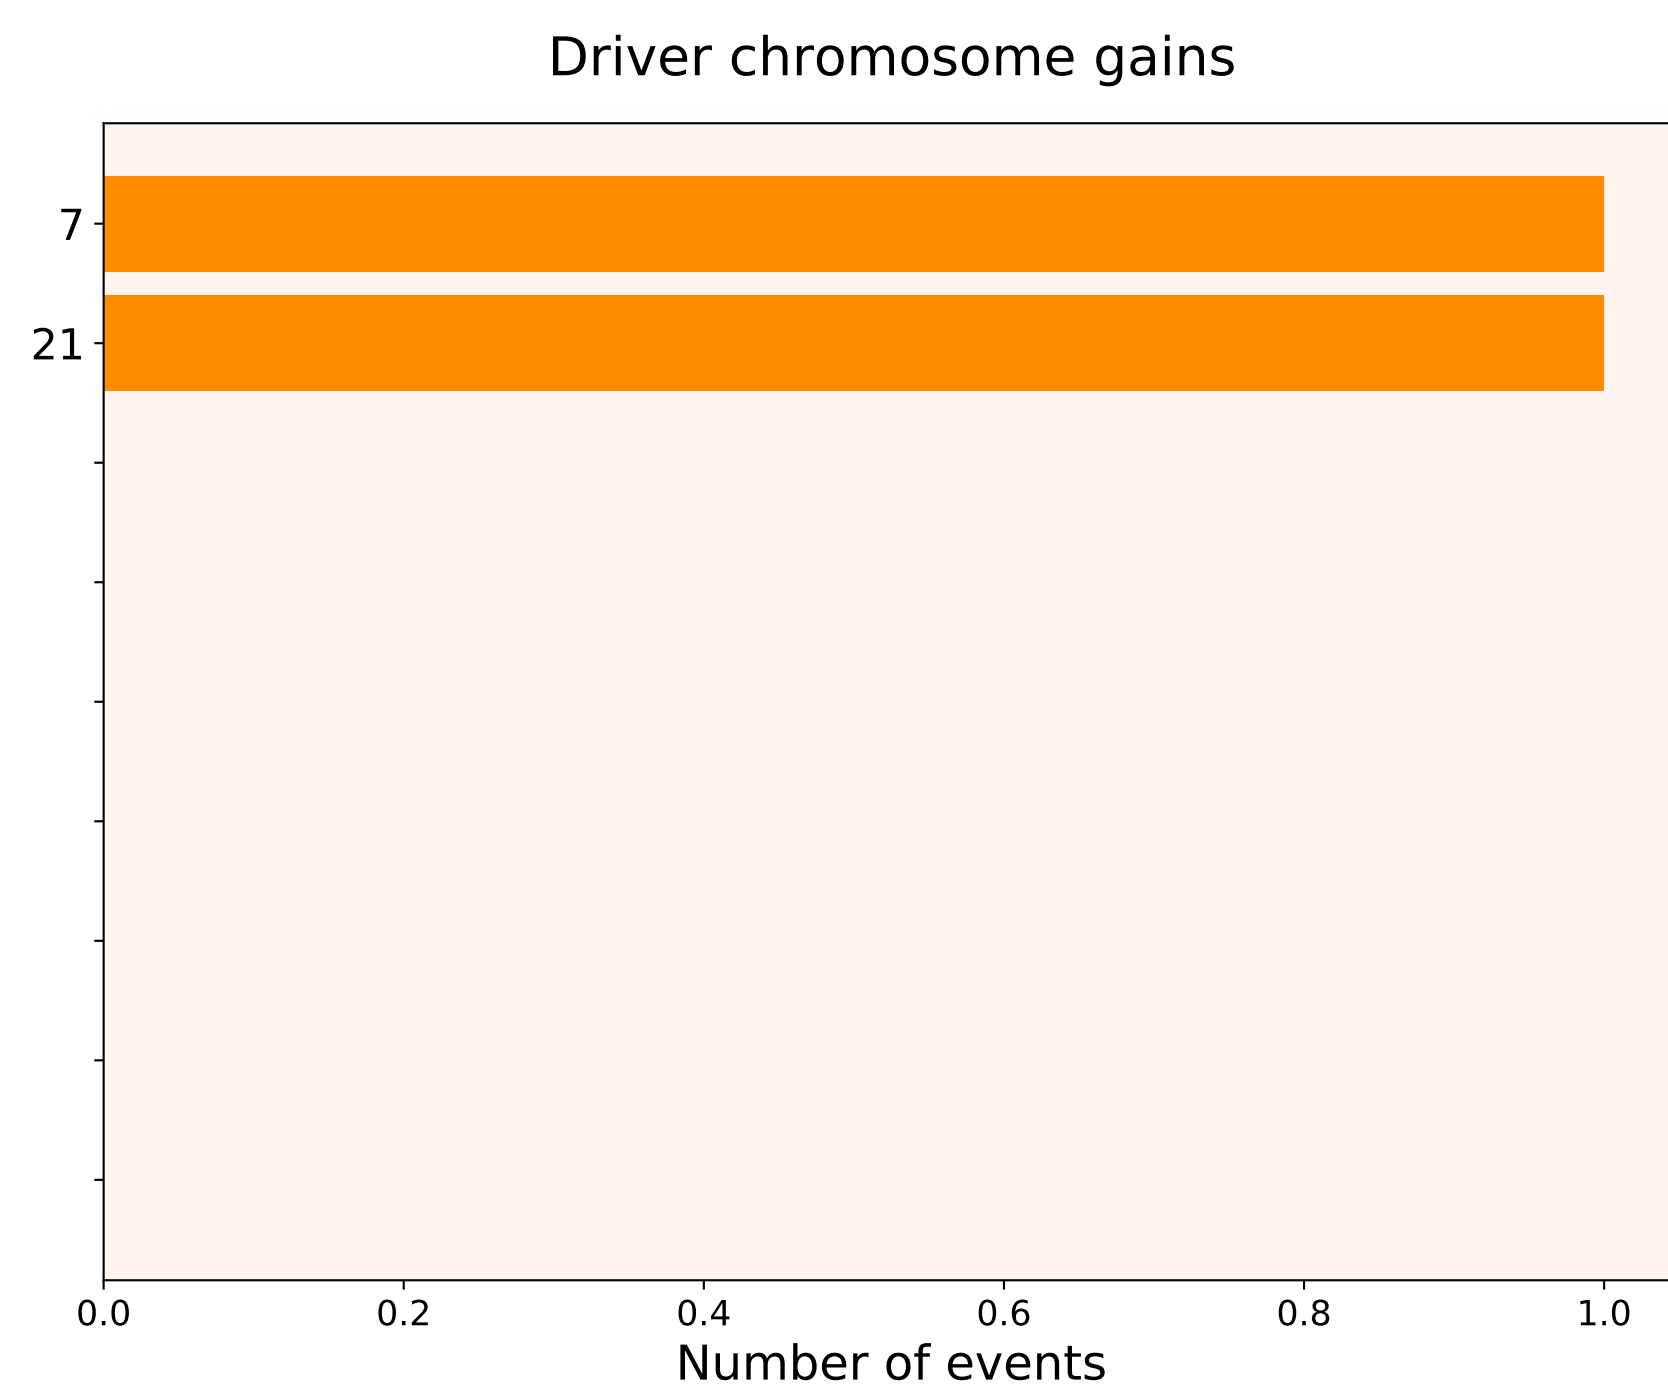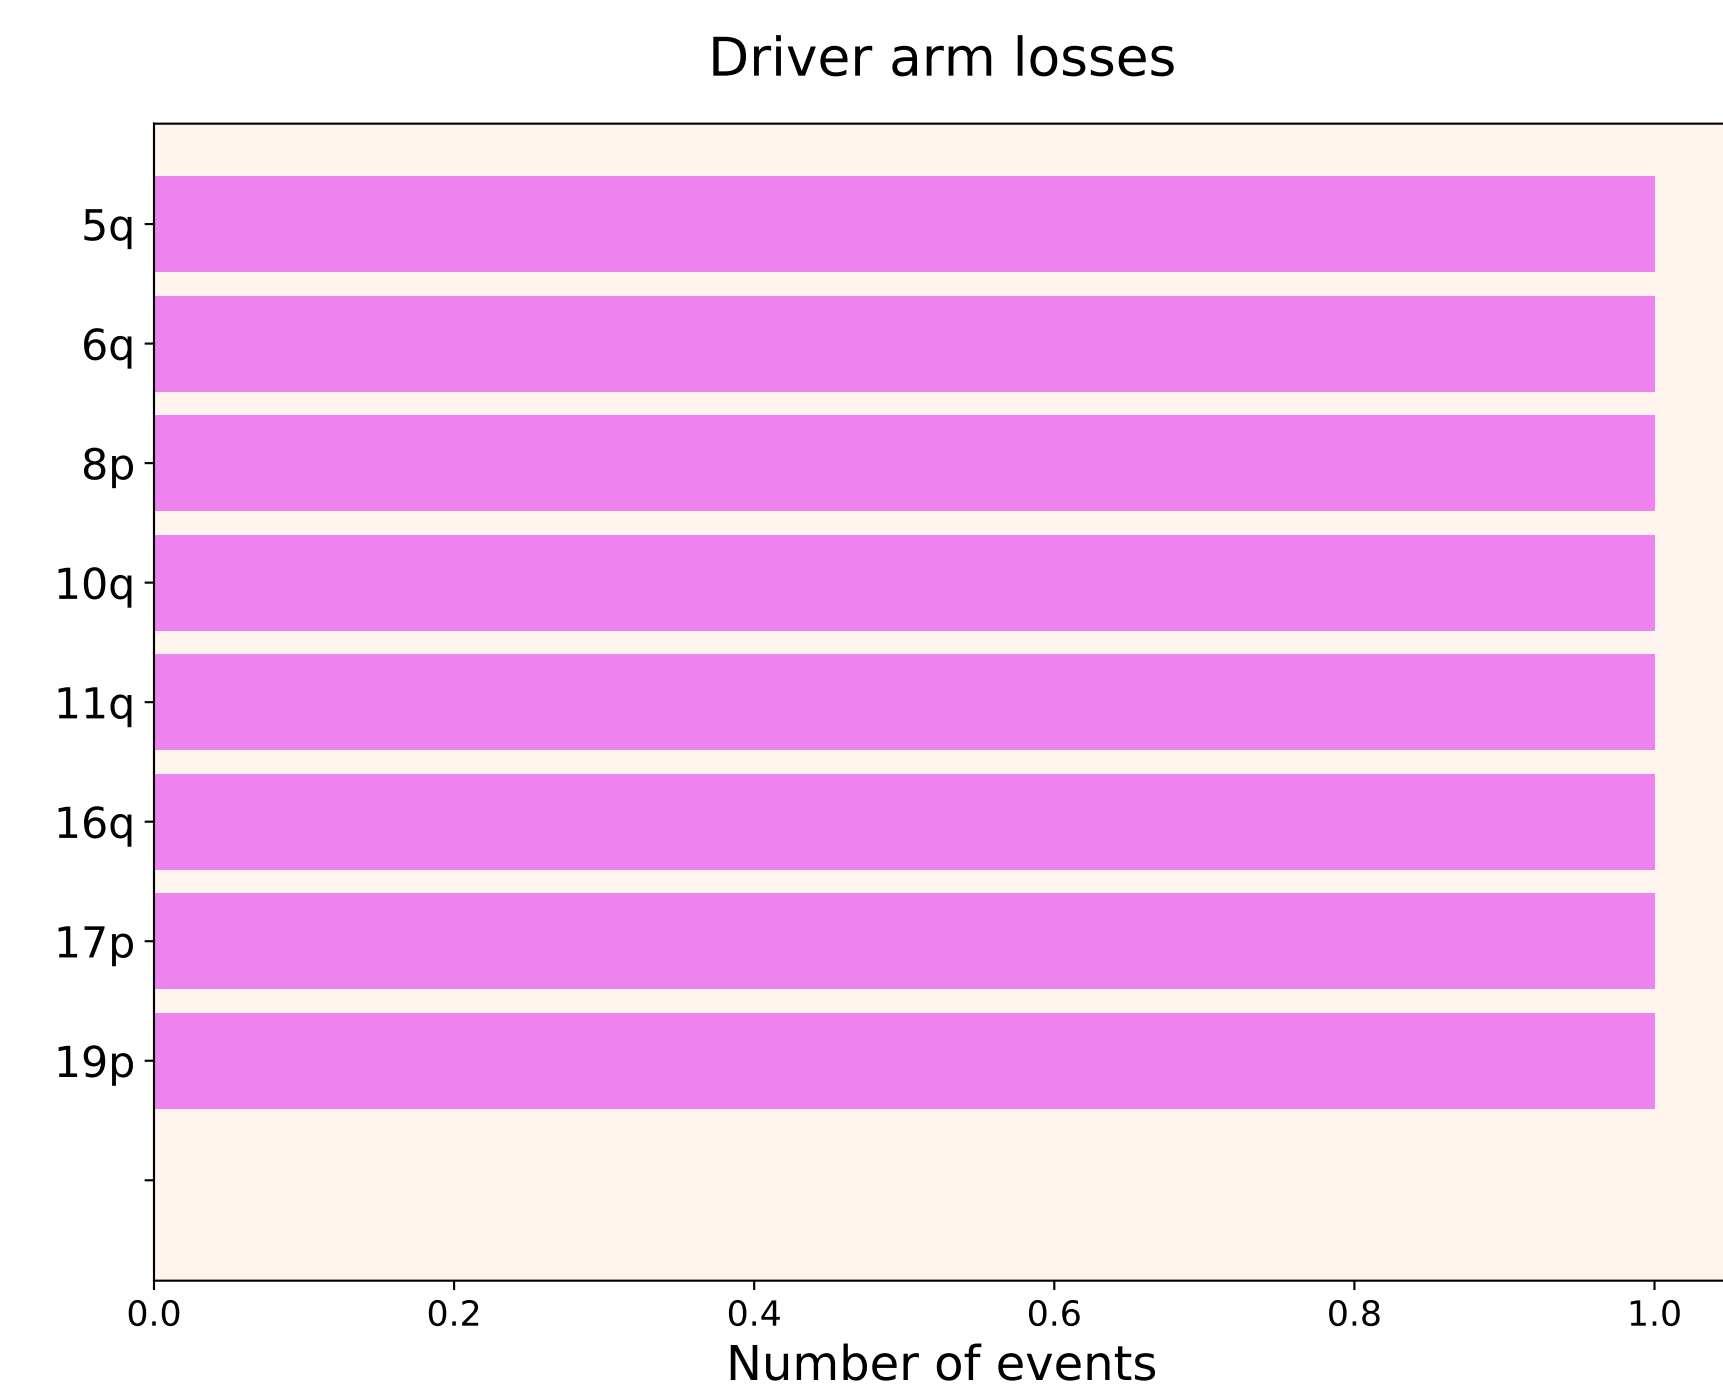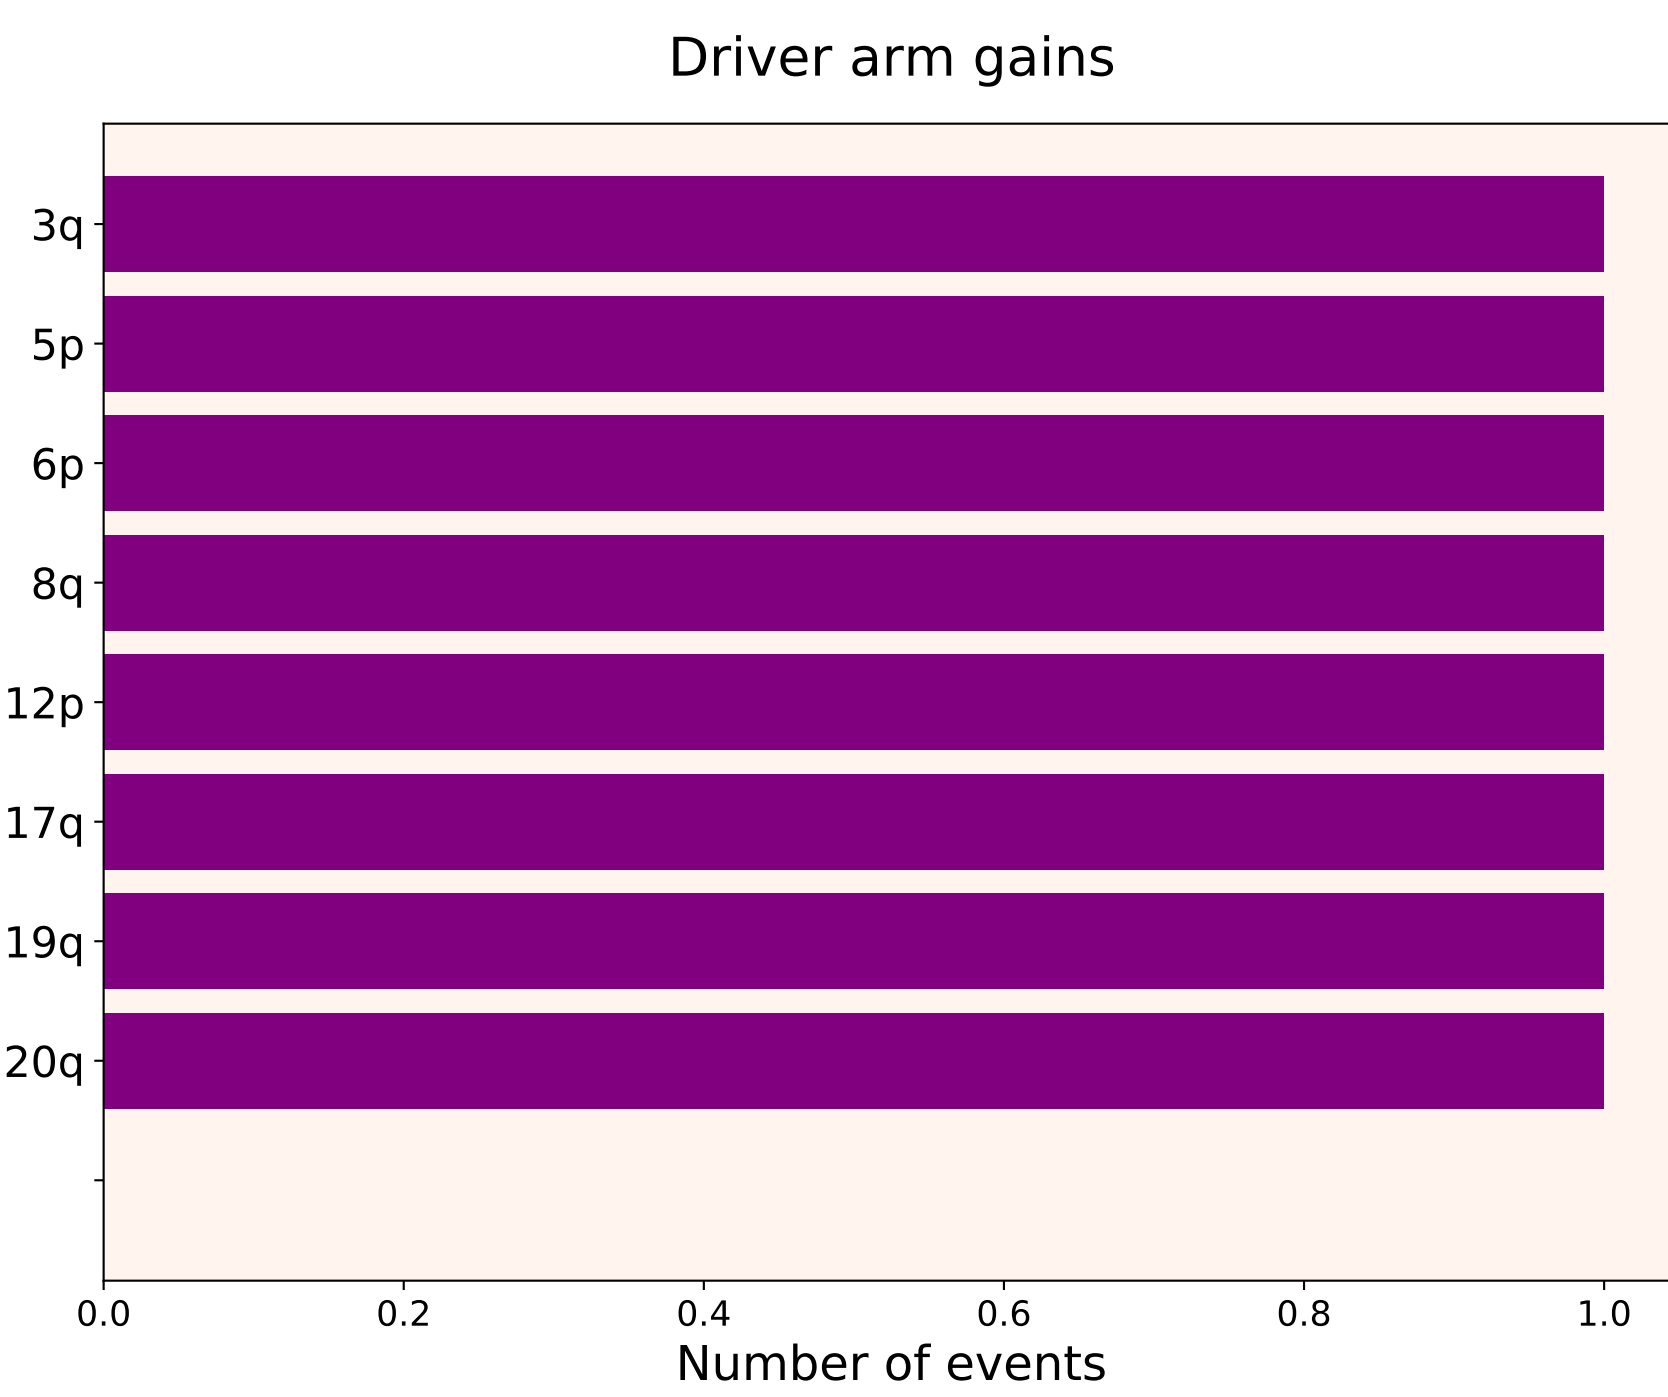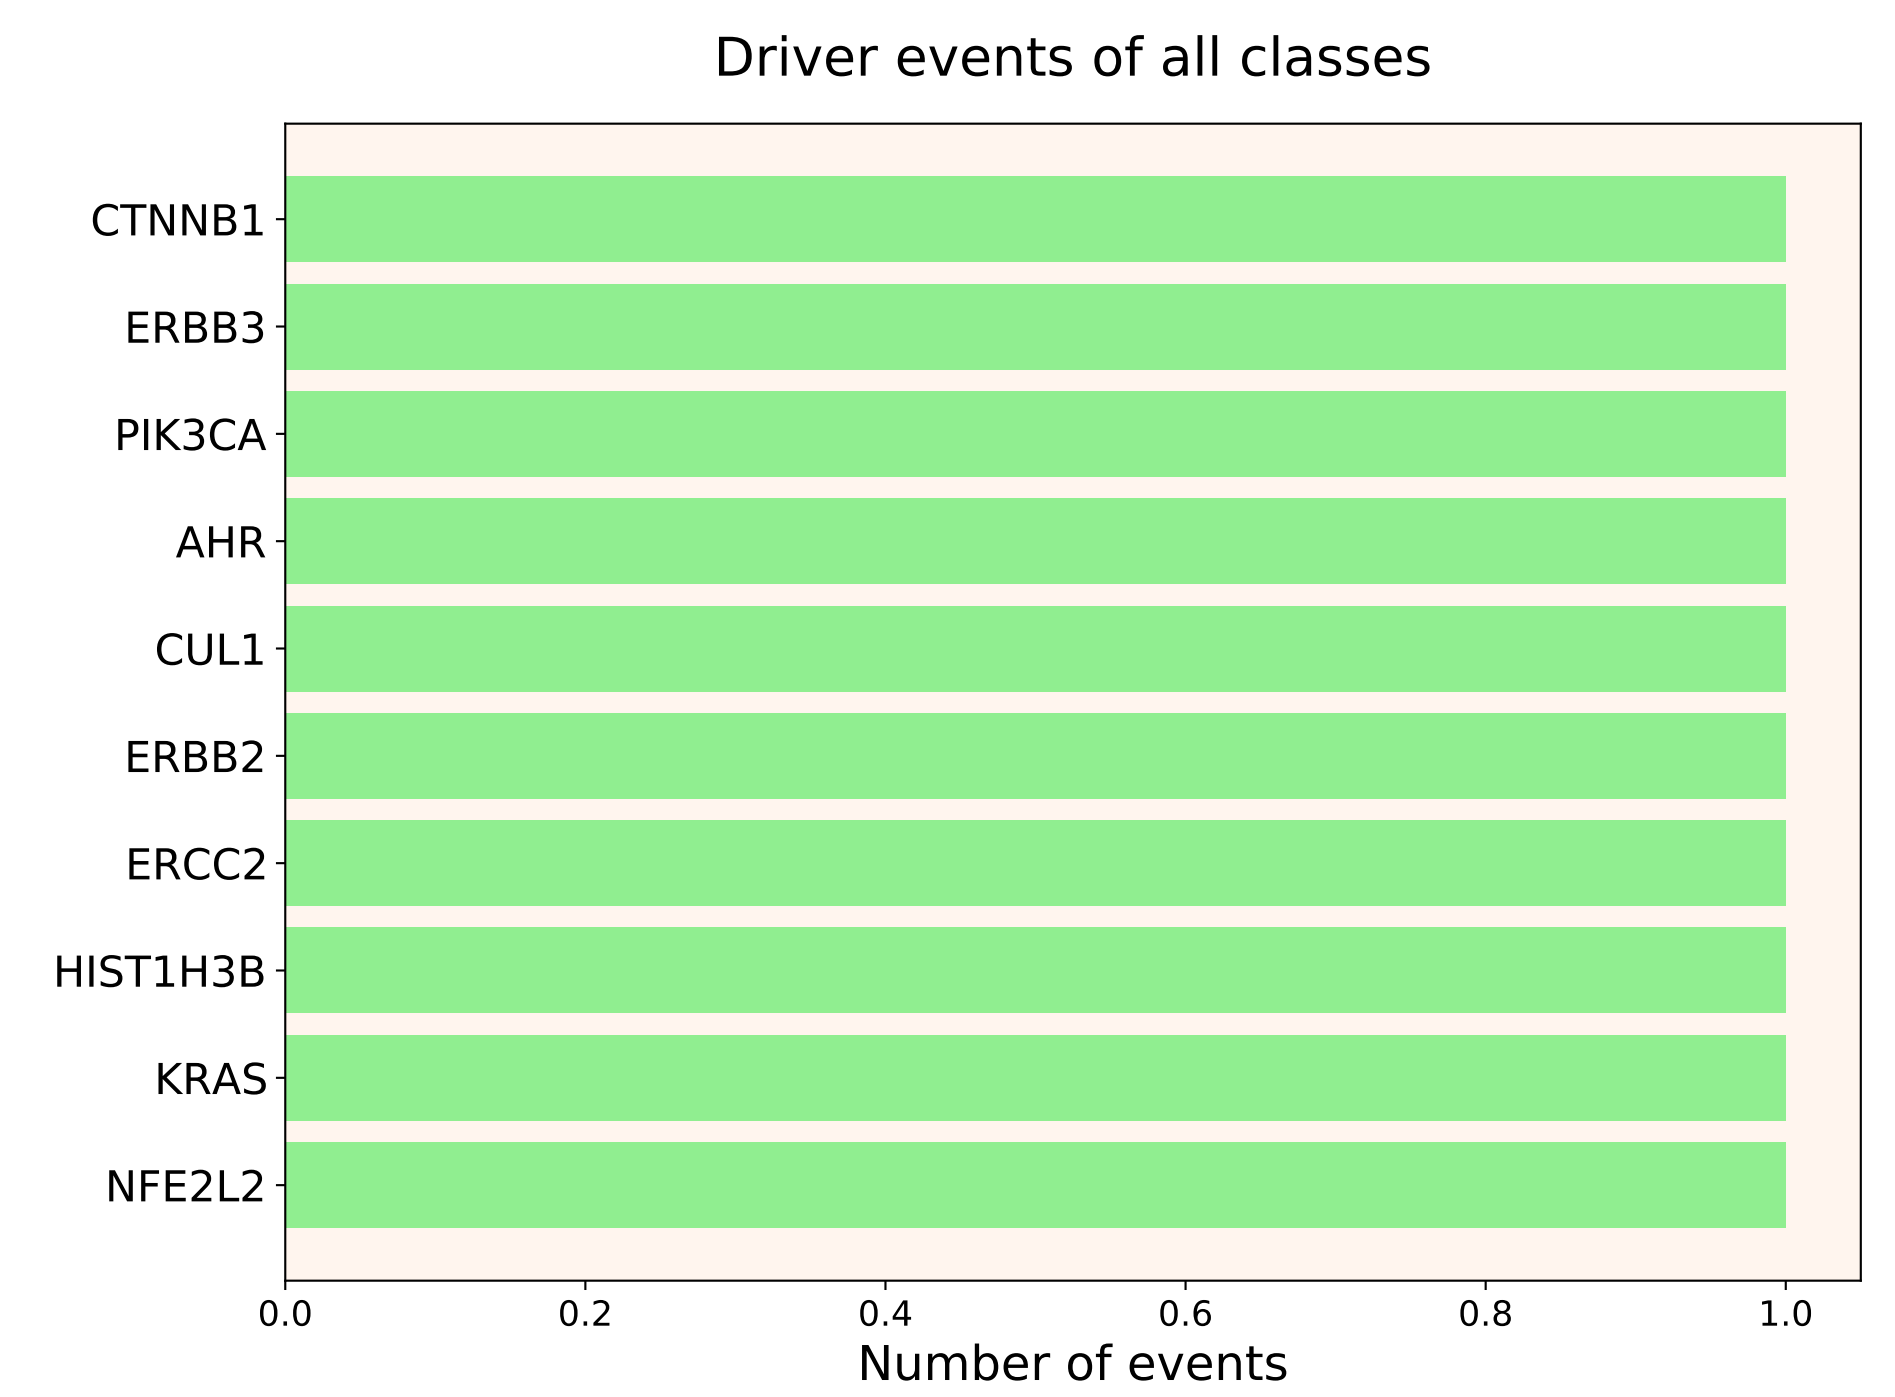

Supplement: Supplemental_Data_S1.zip [file Supplemental_Data_S1.zip]

# KIRP\_MALE

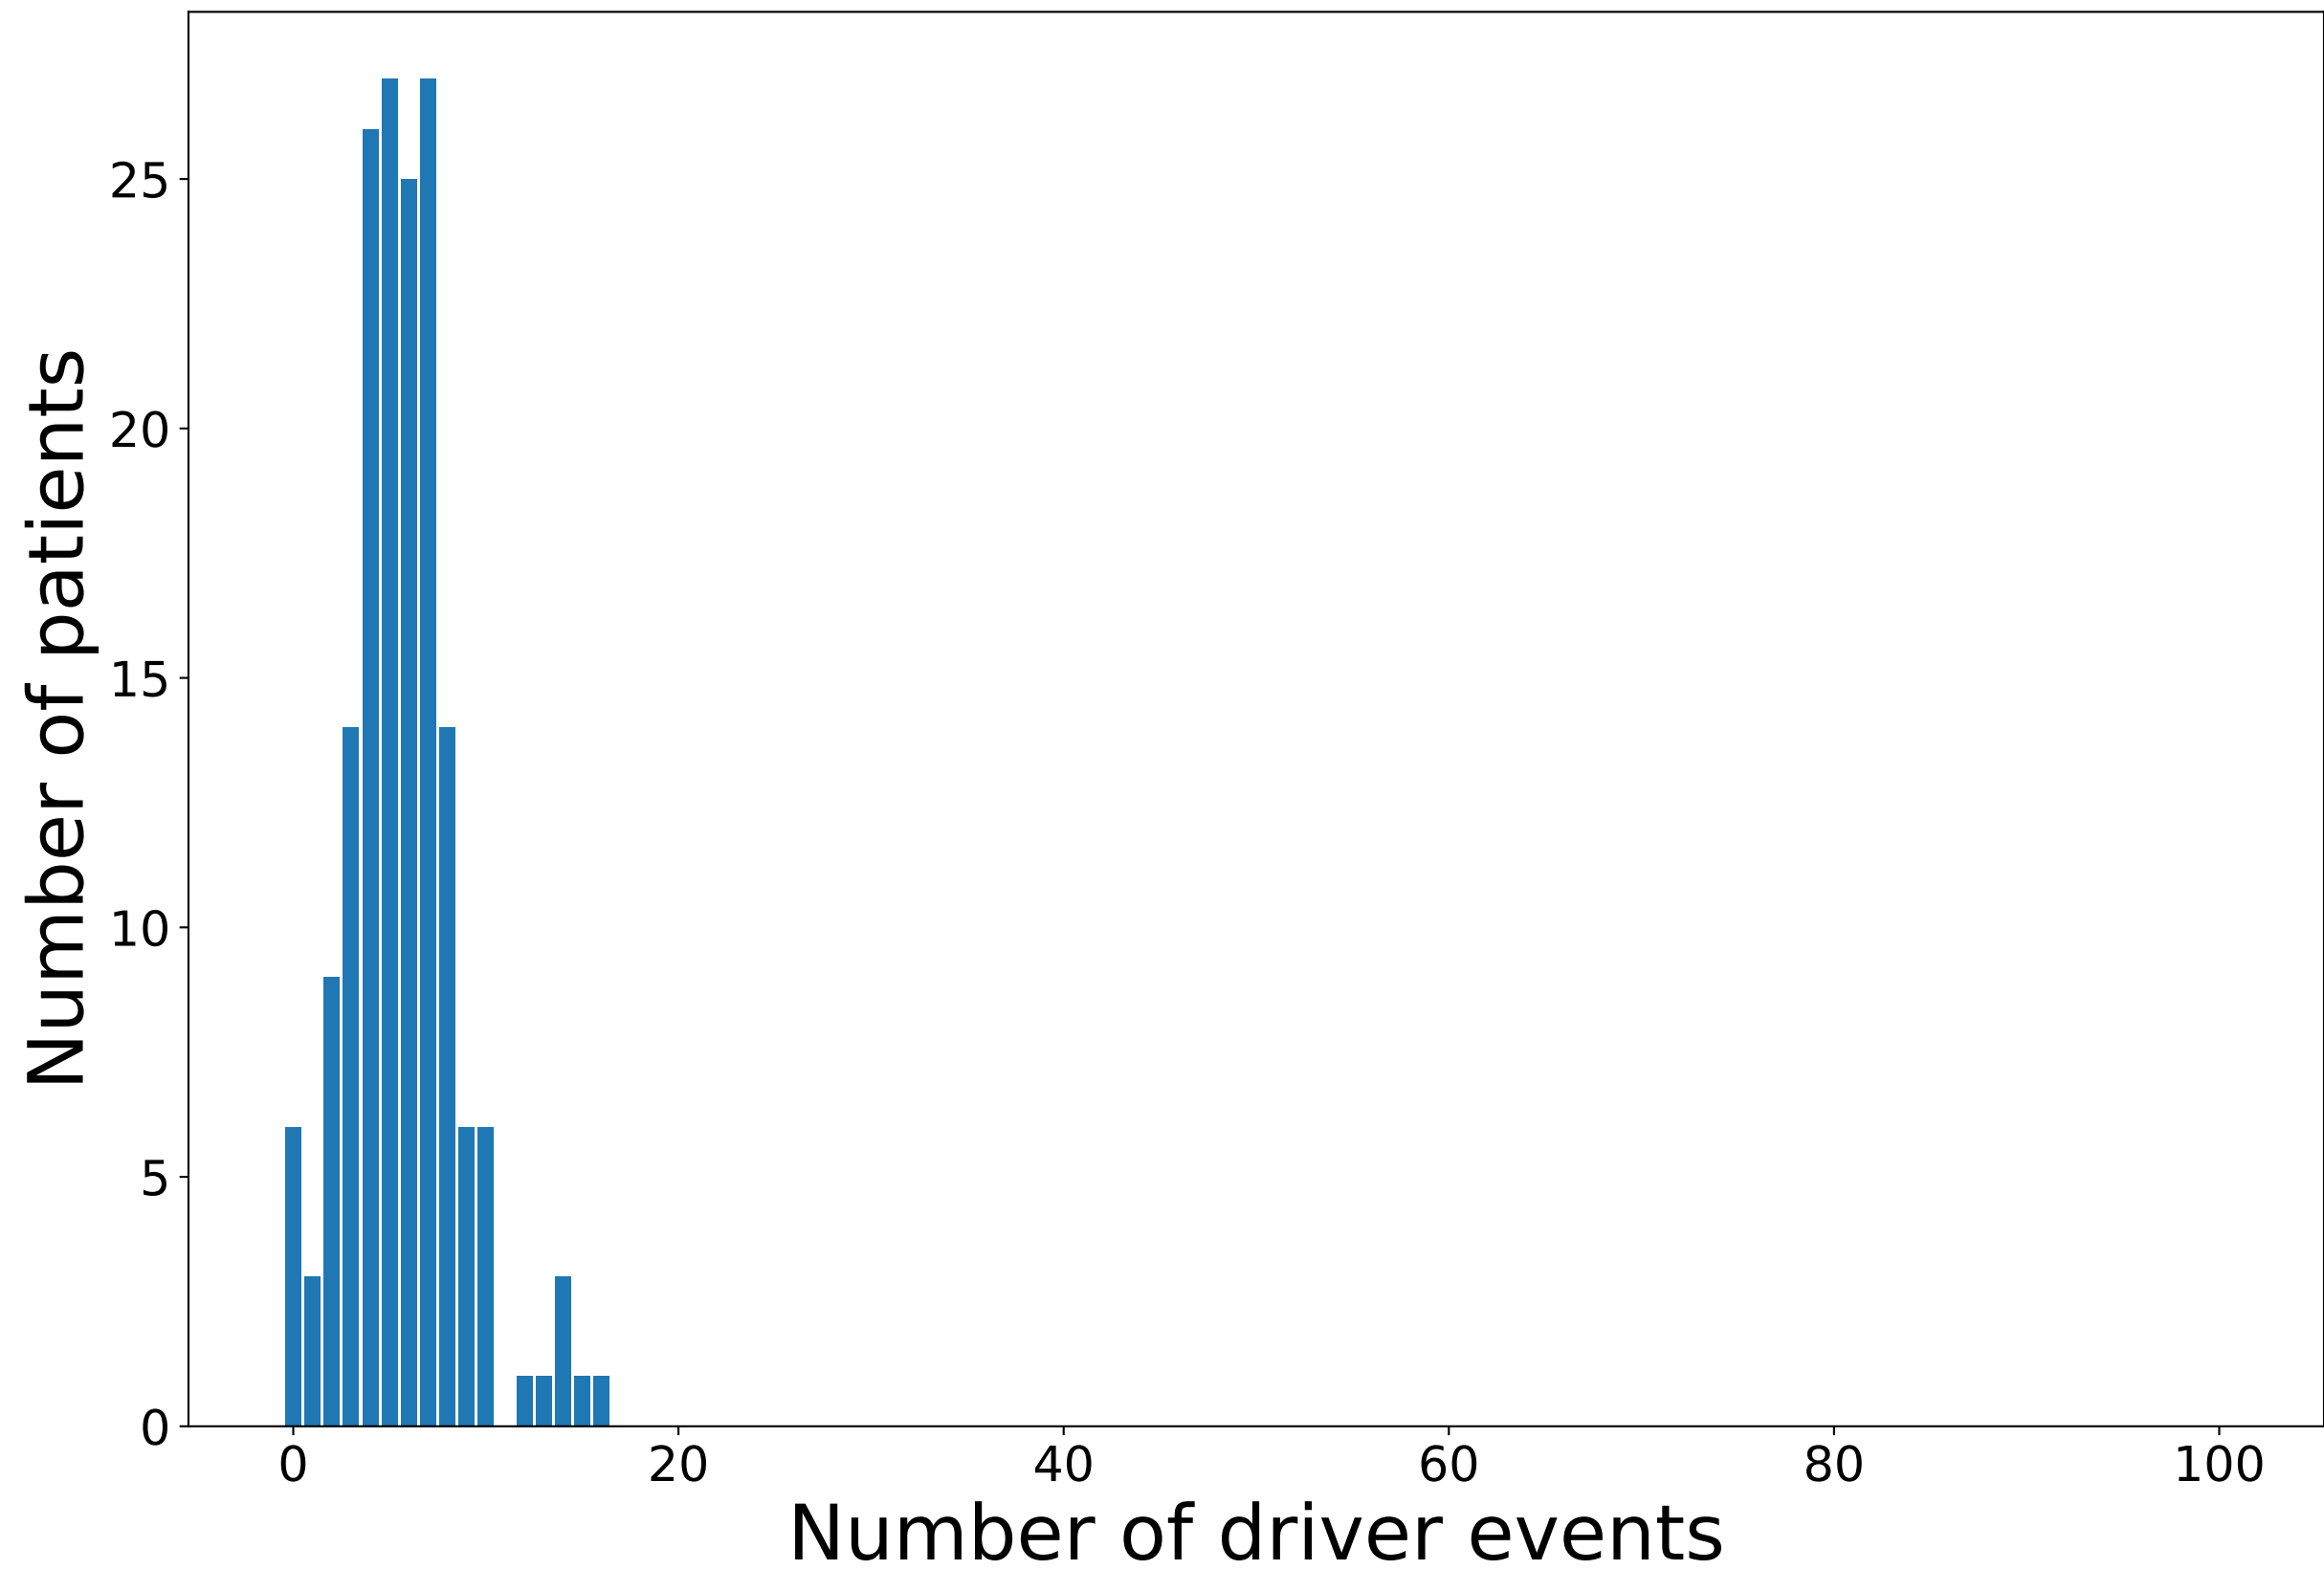

Supplement: Supplemental_Data_S1.zip [file Supplemental_Data_S1.zip]

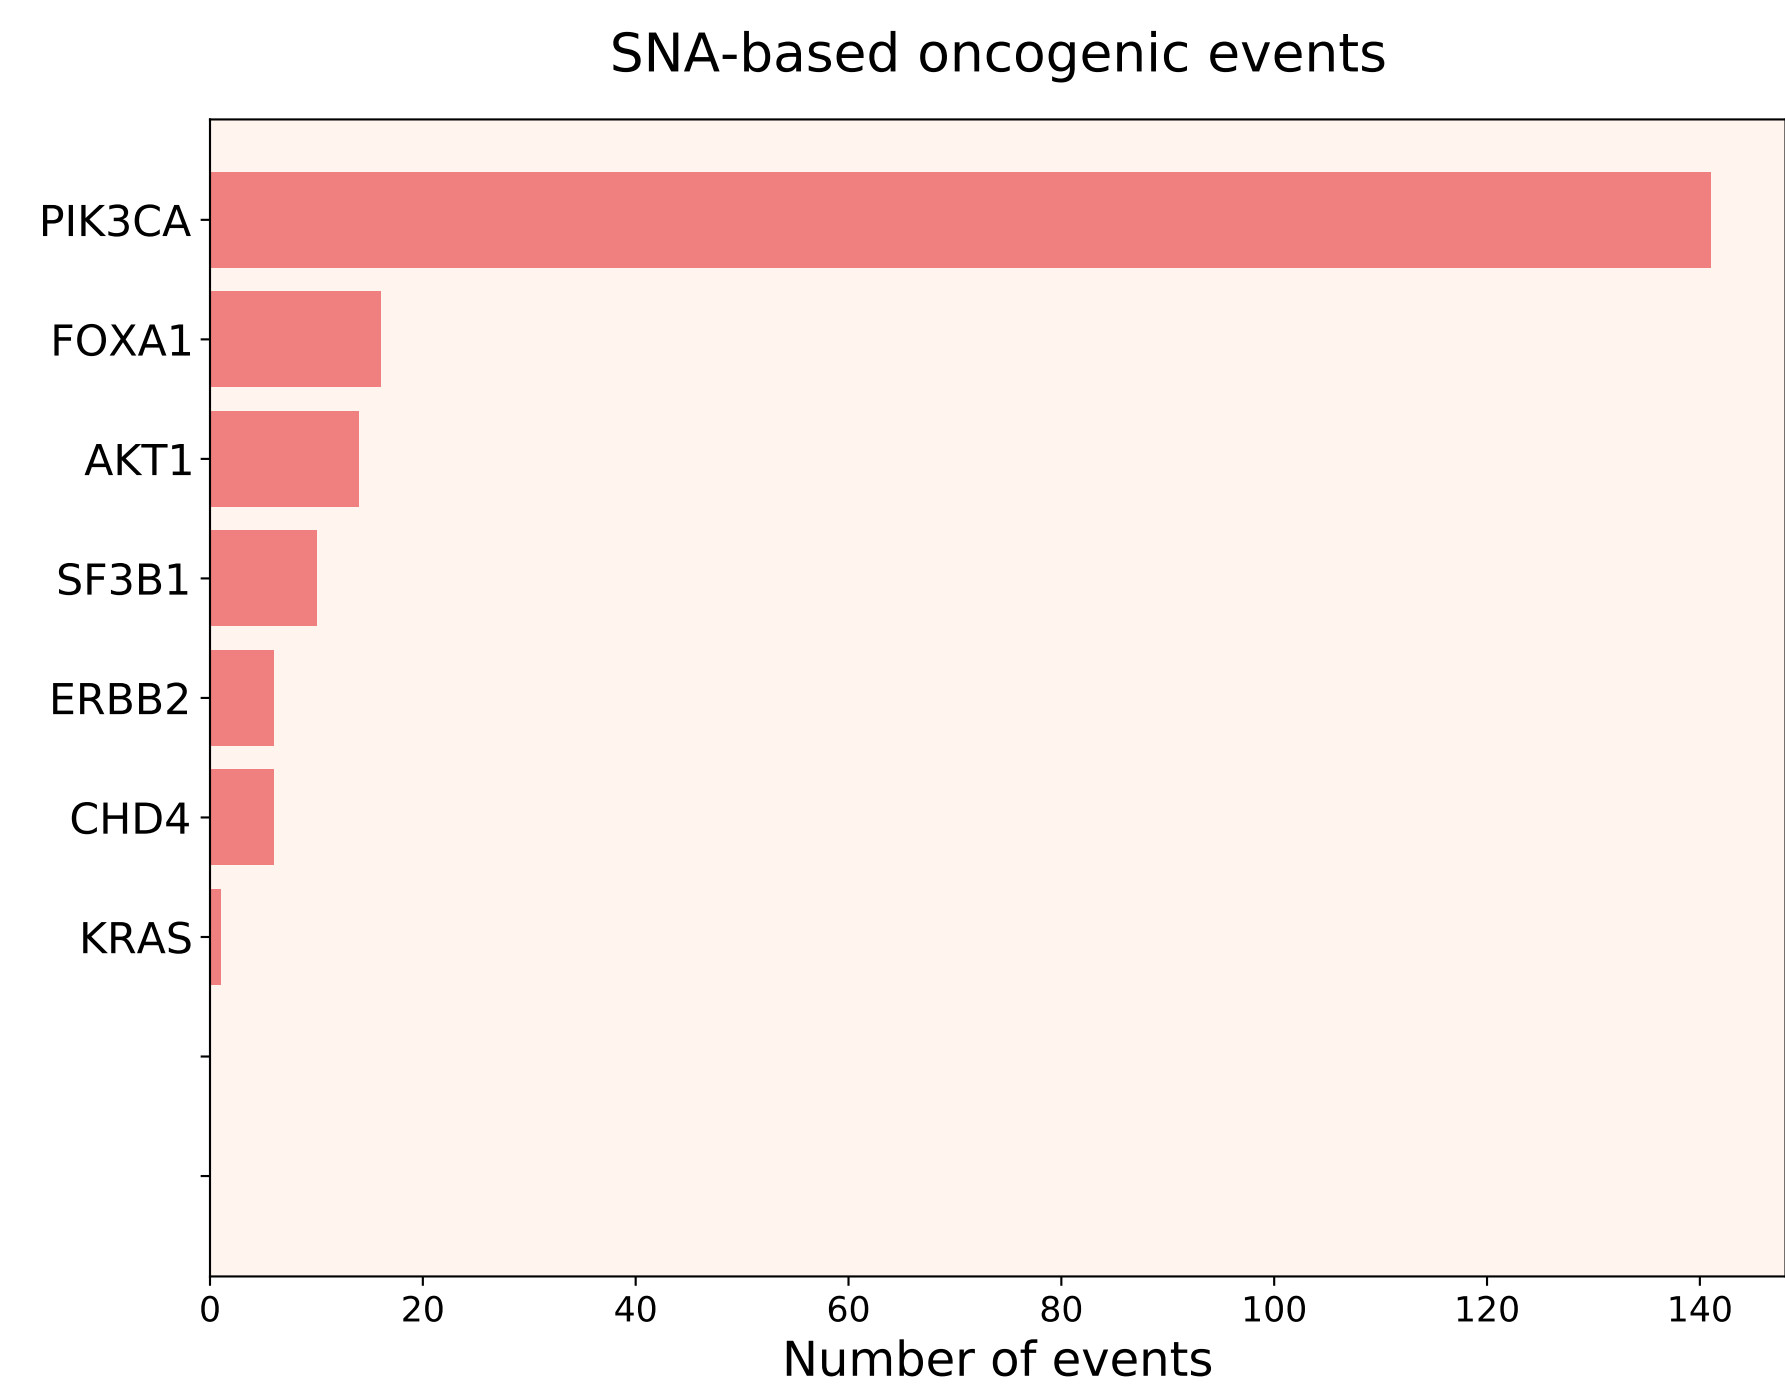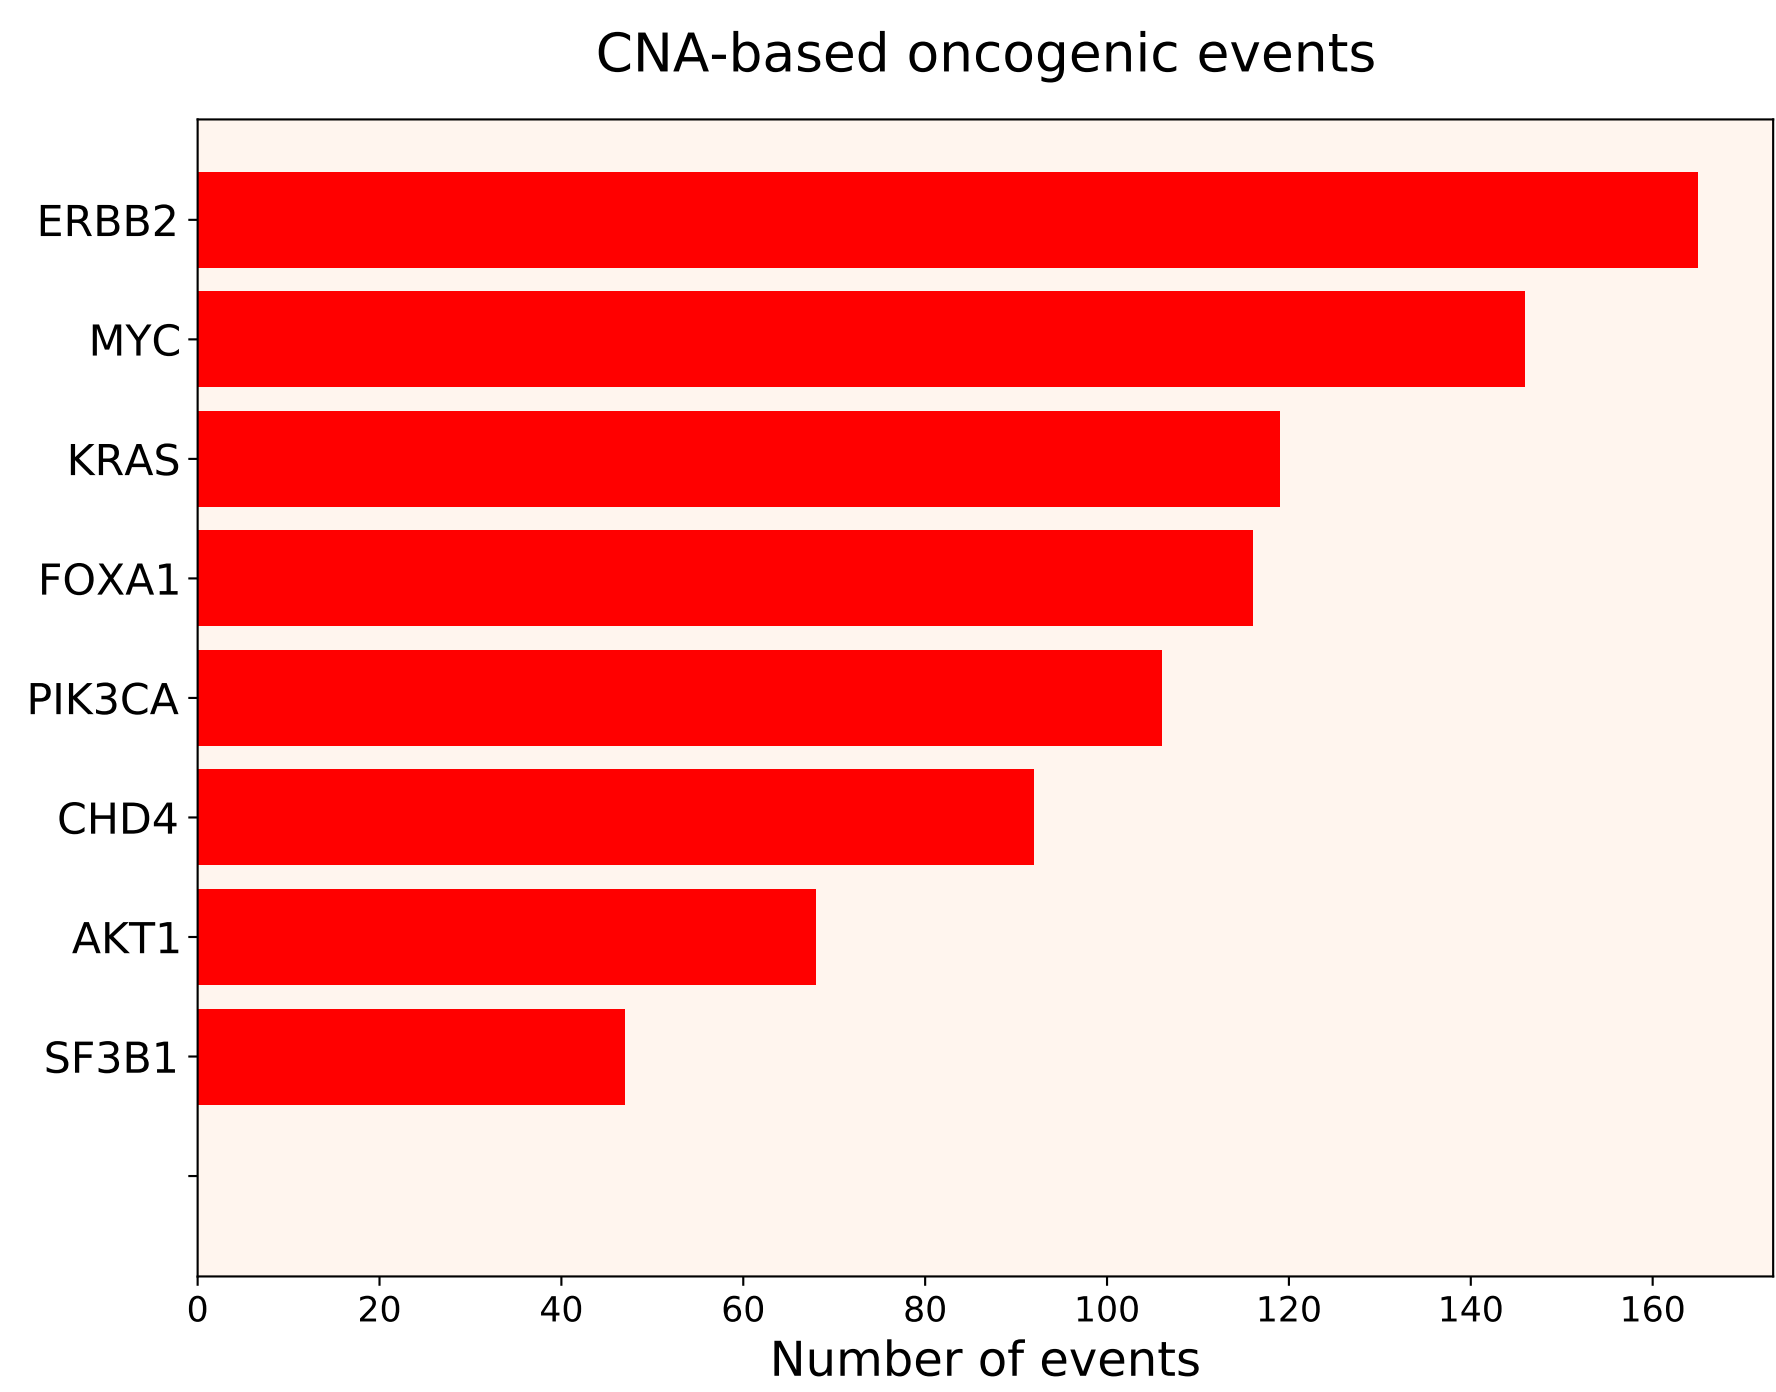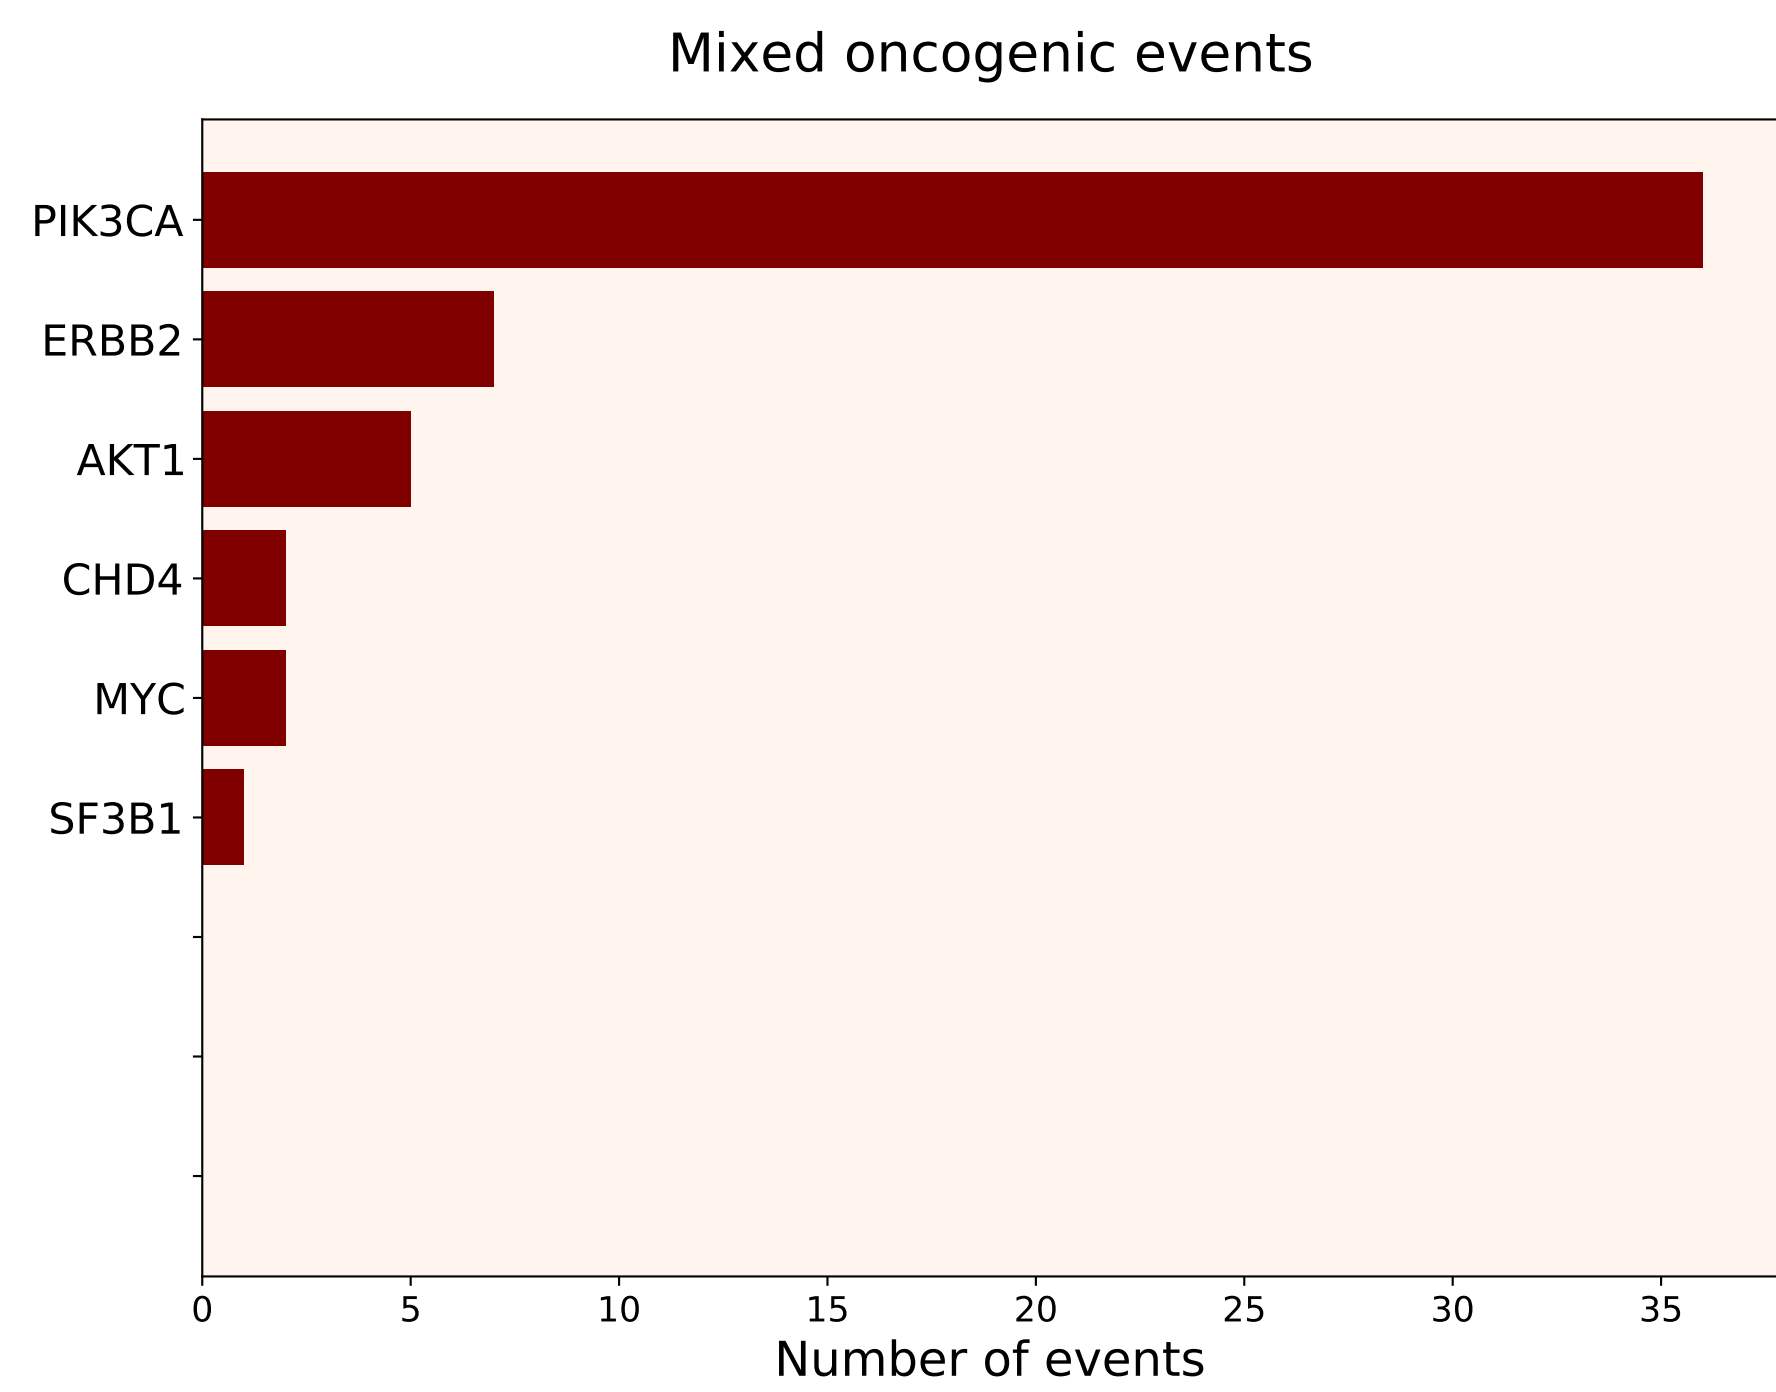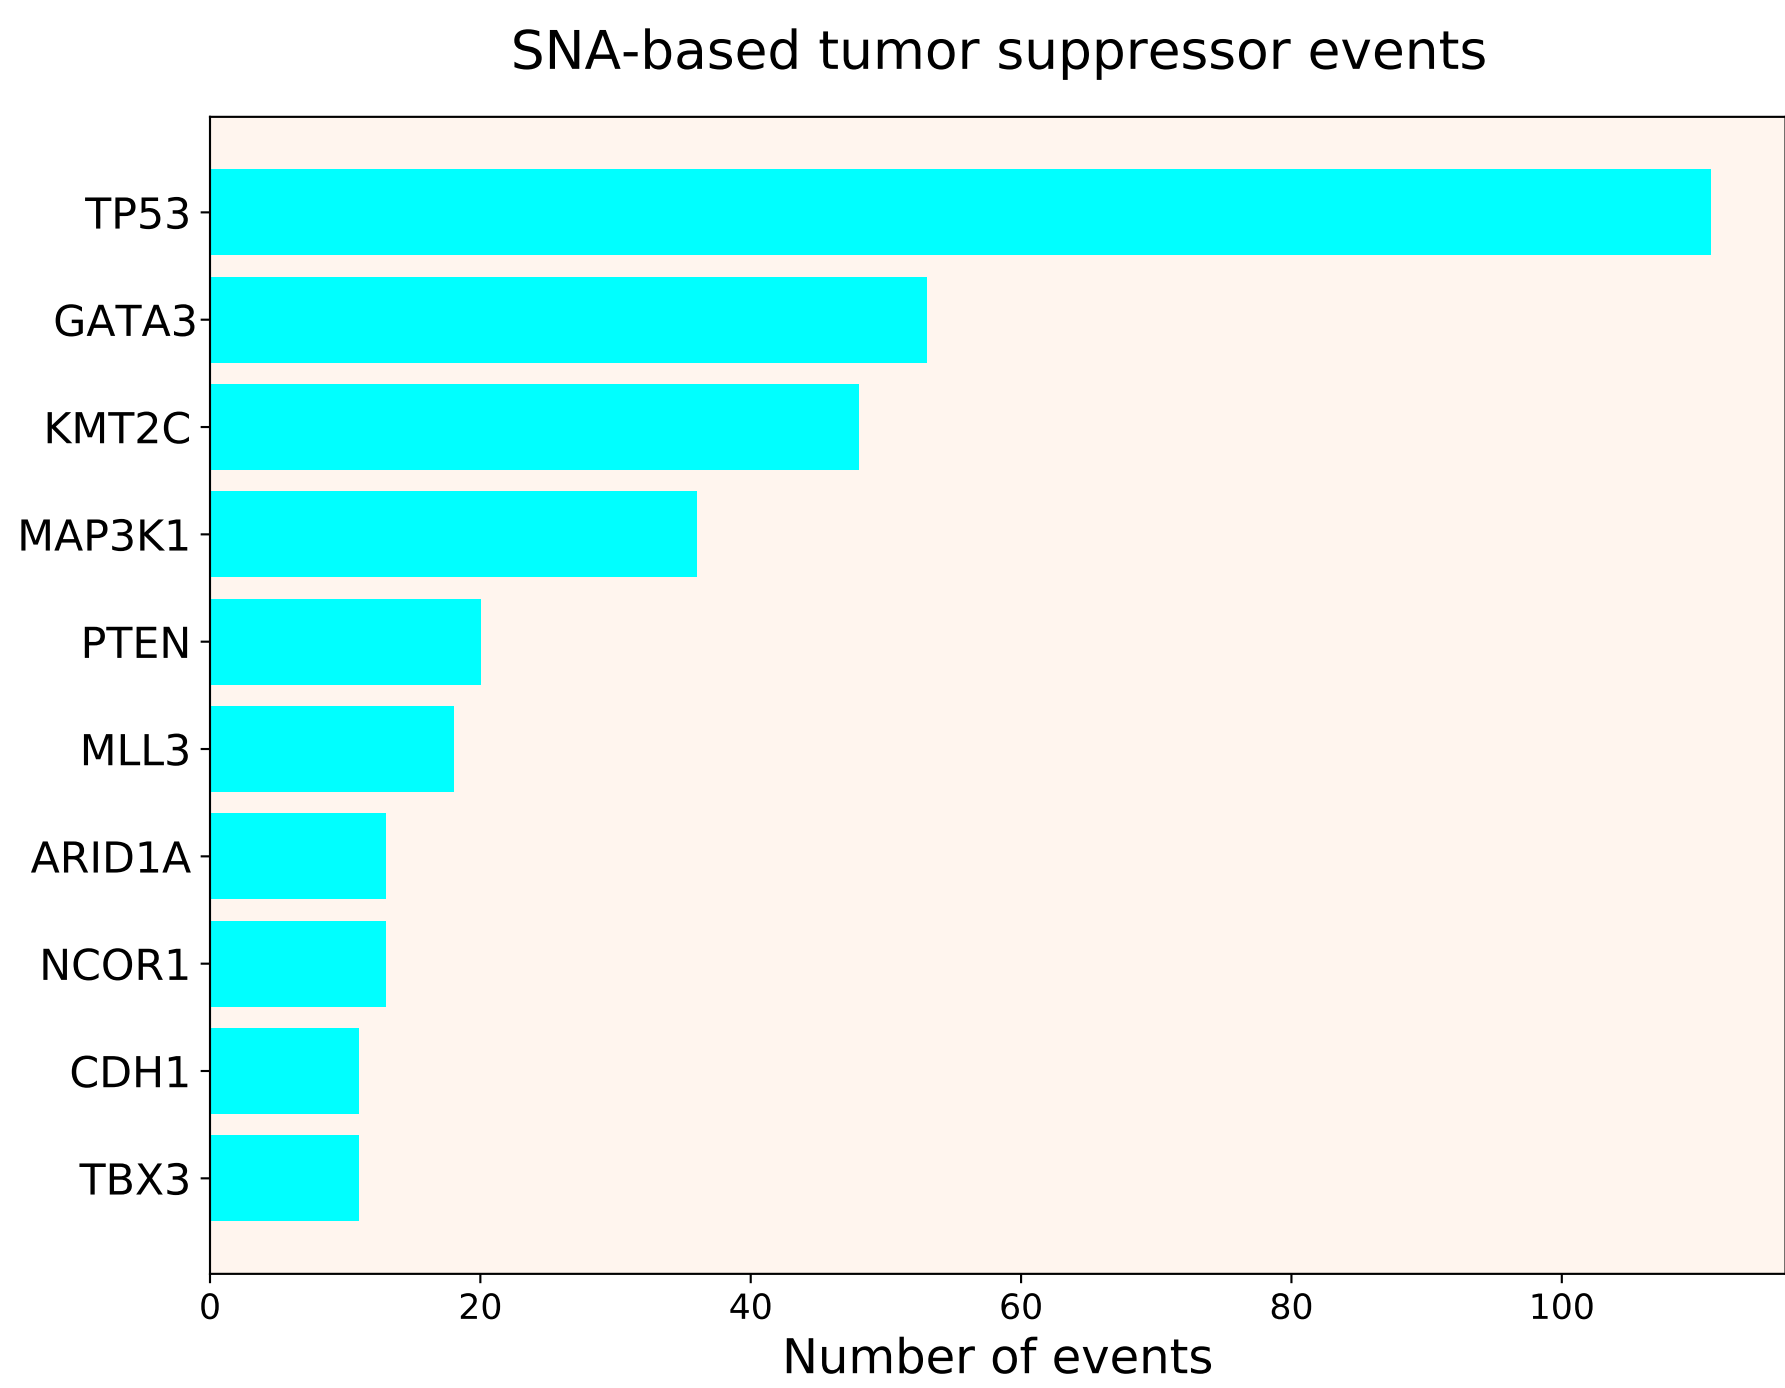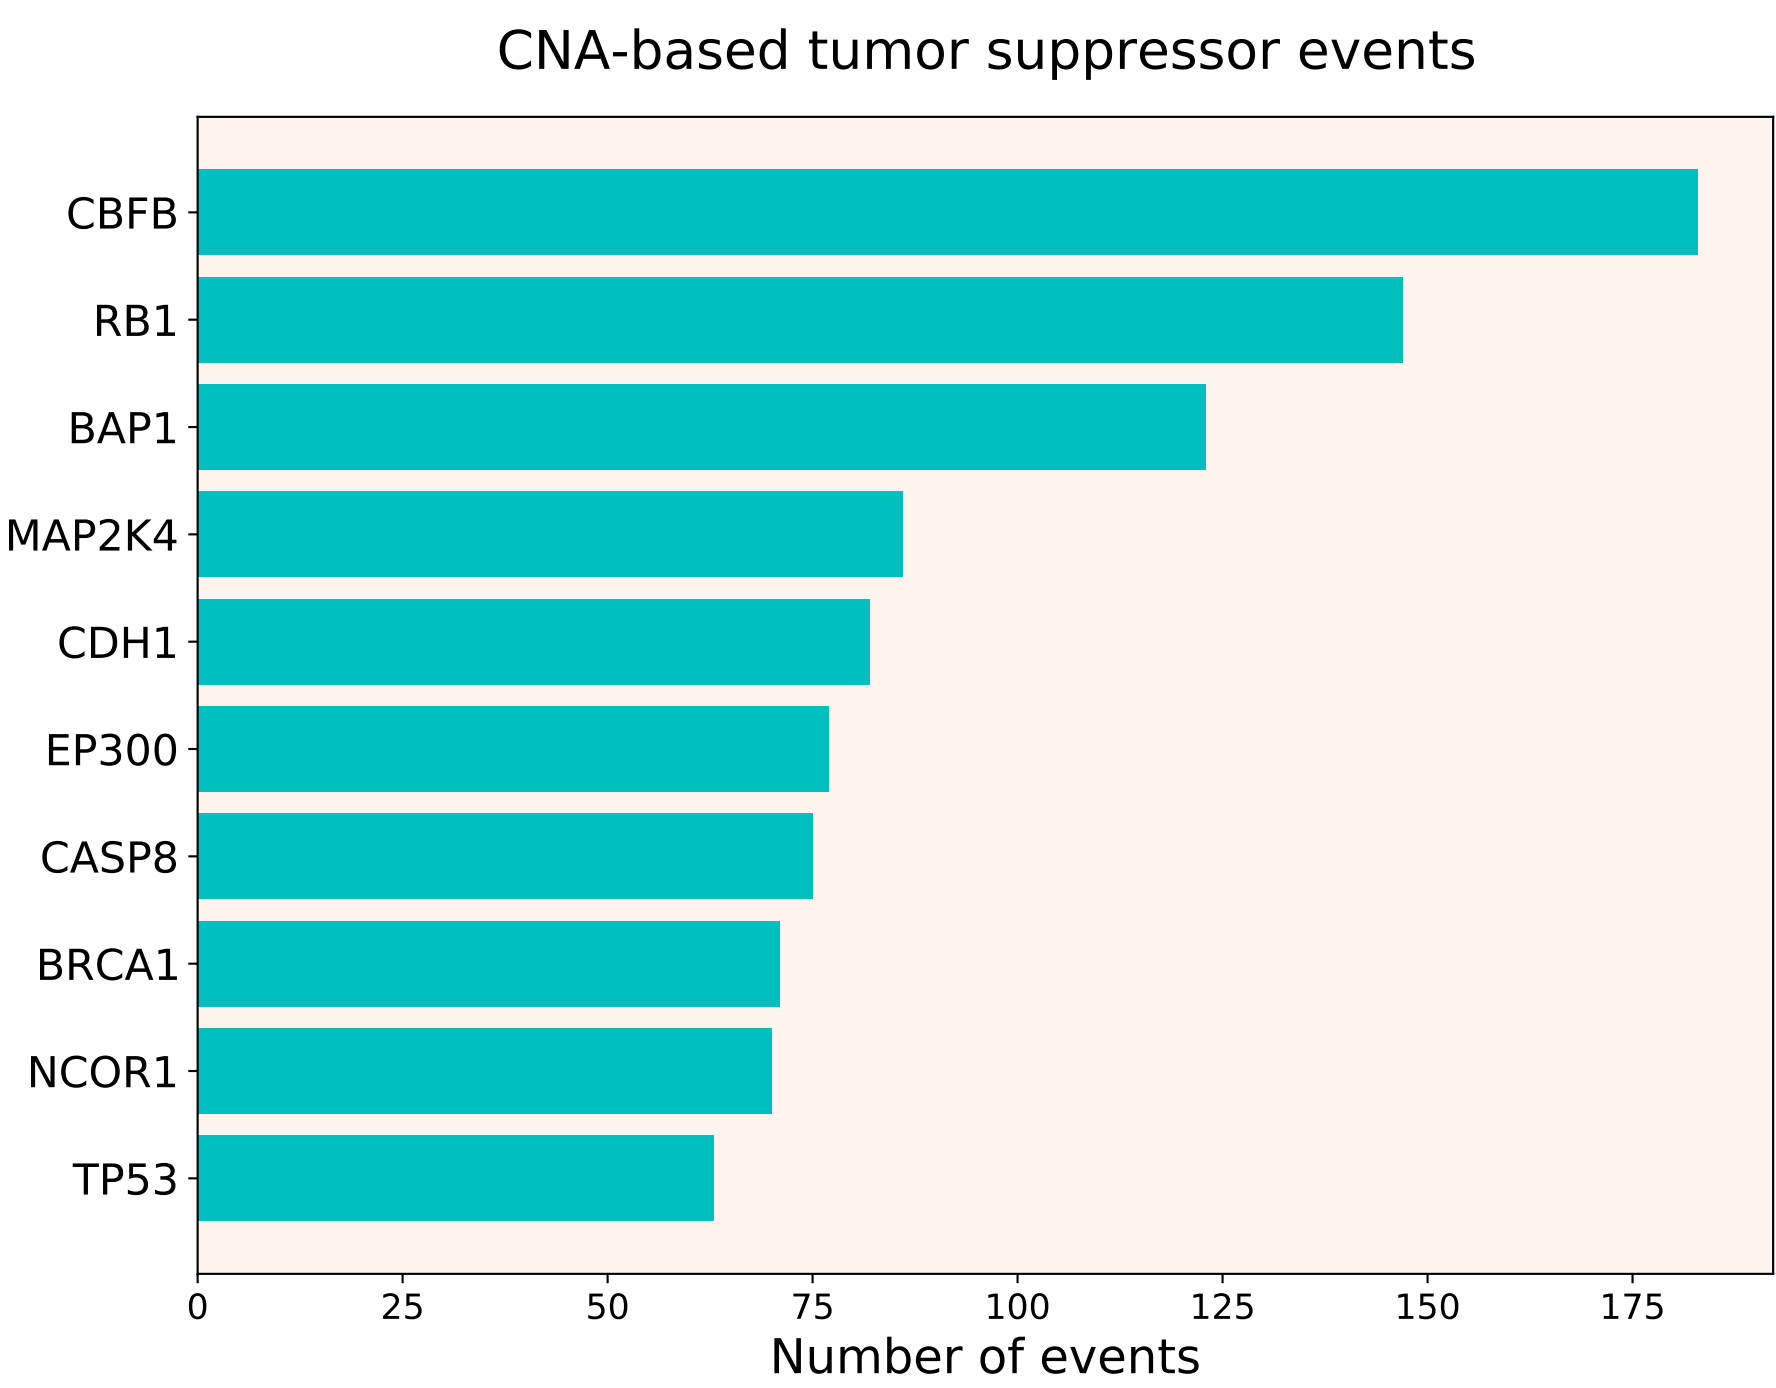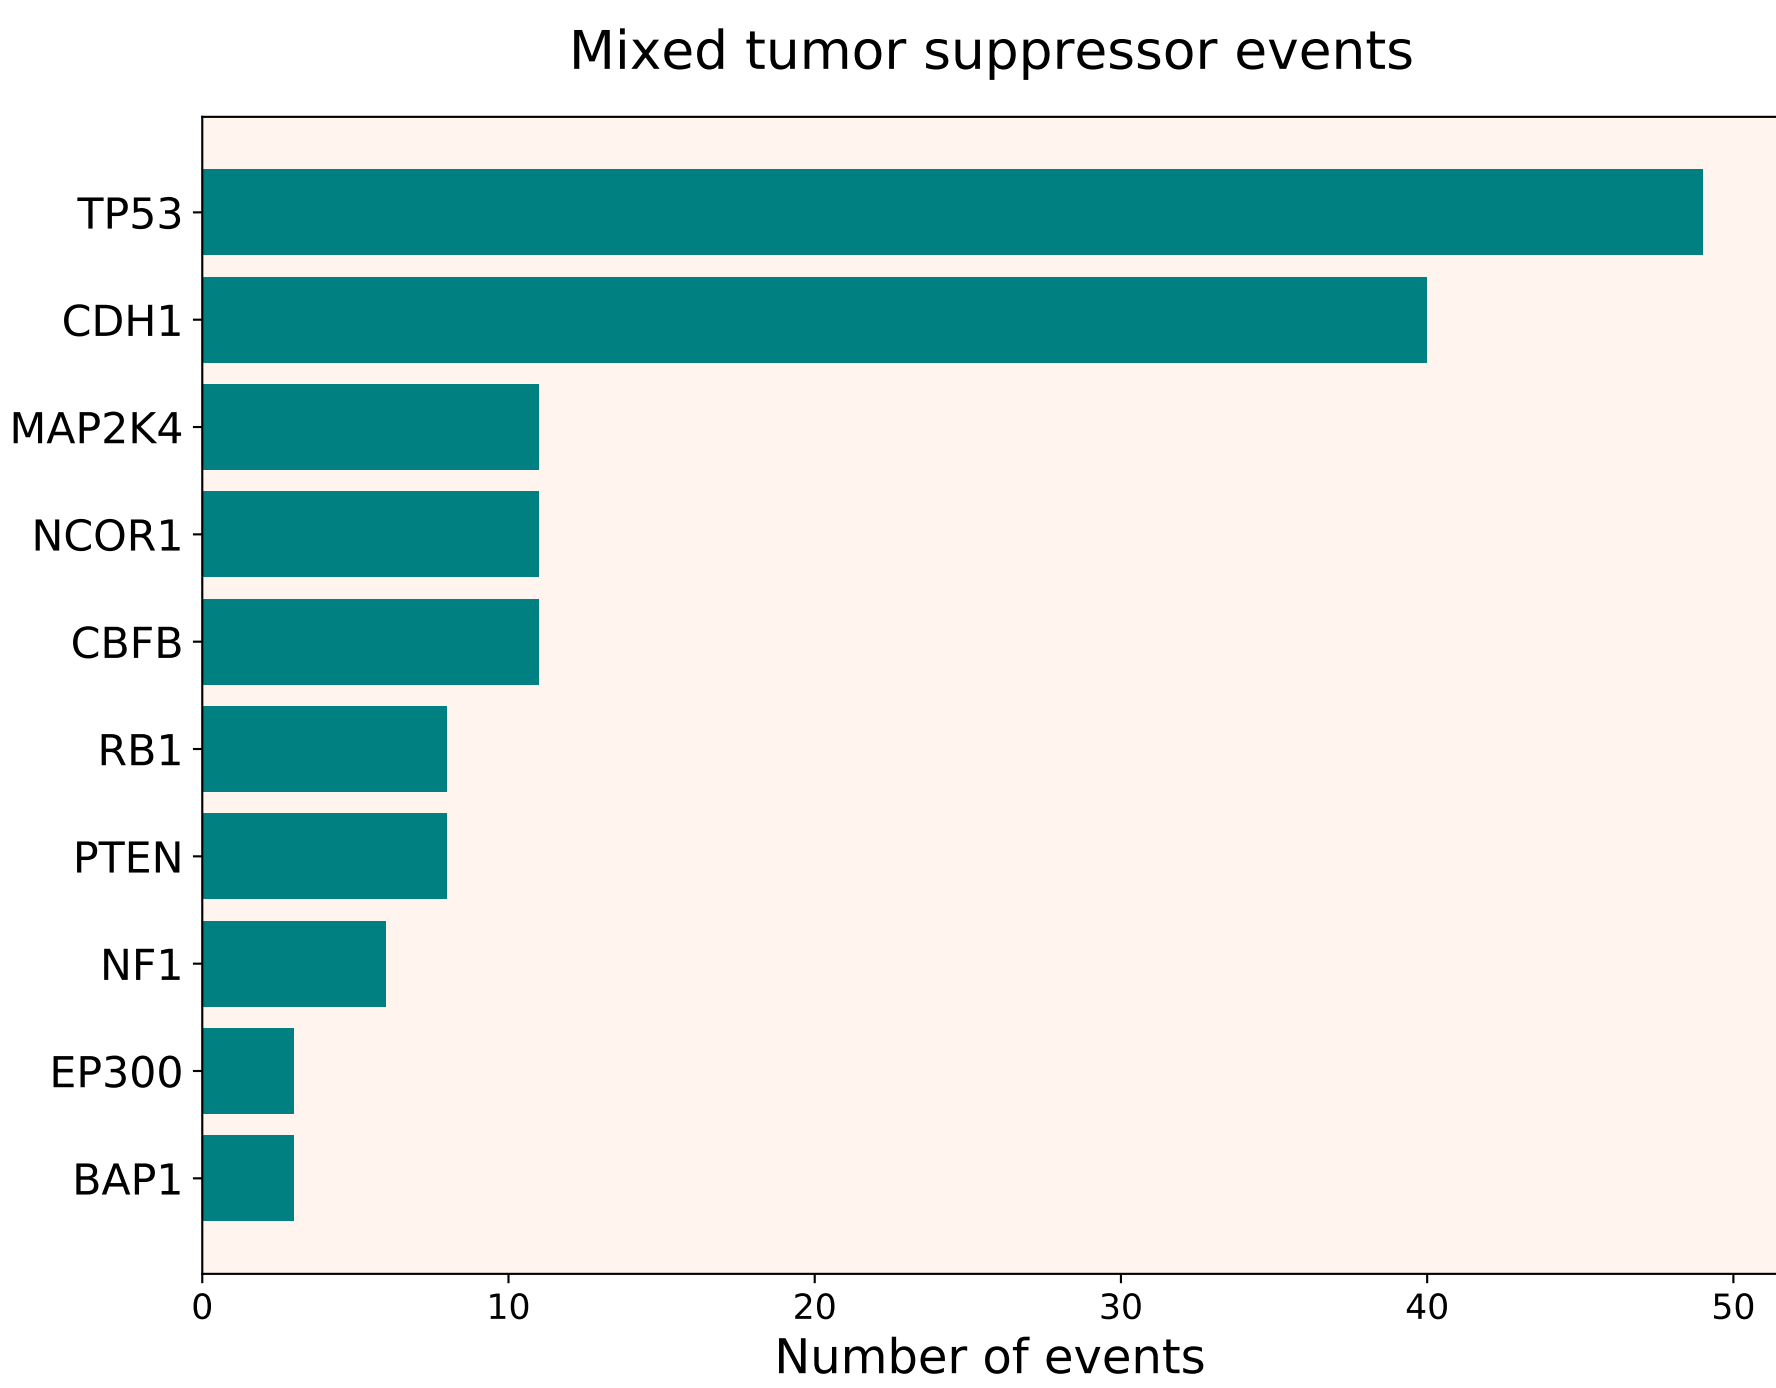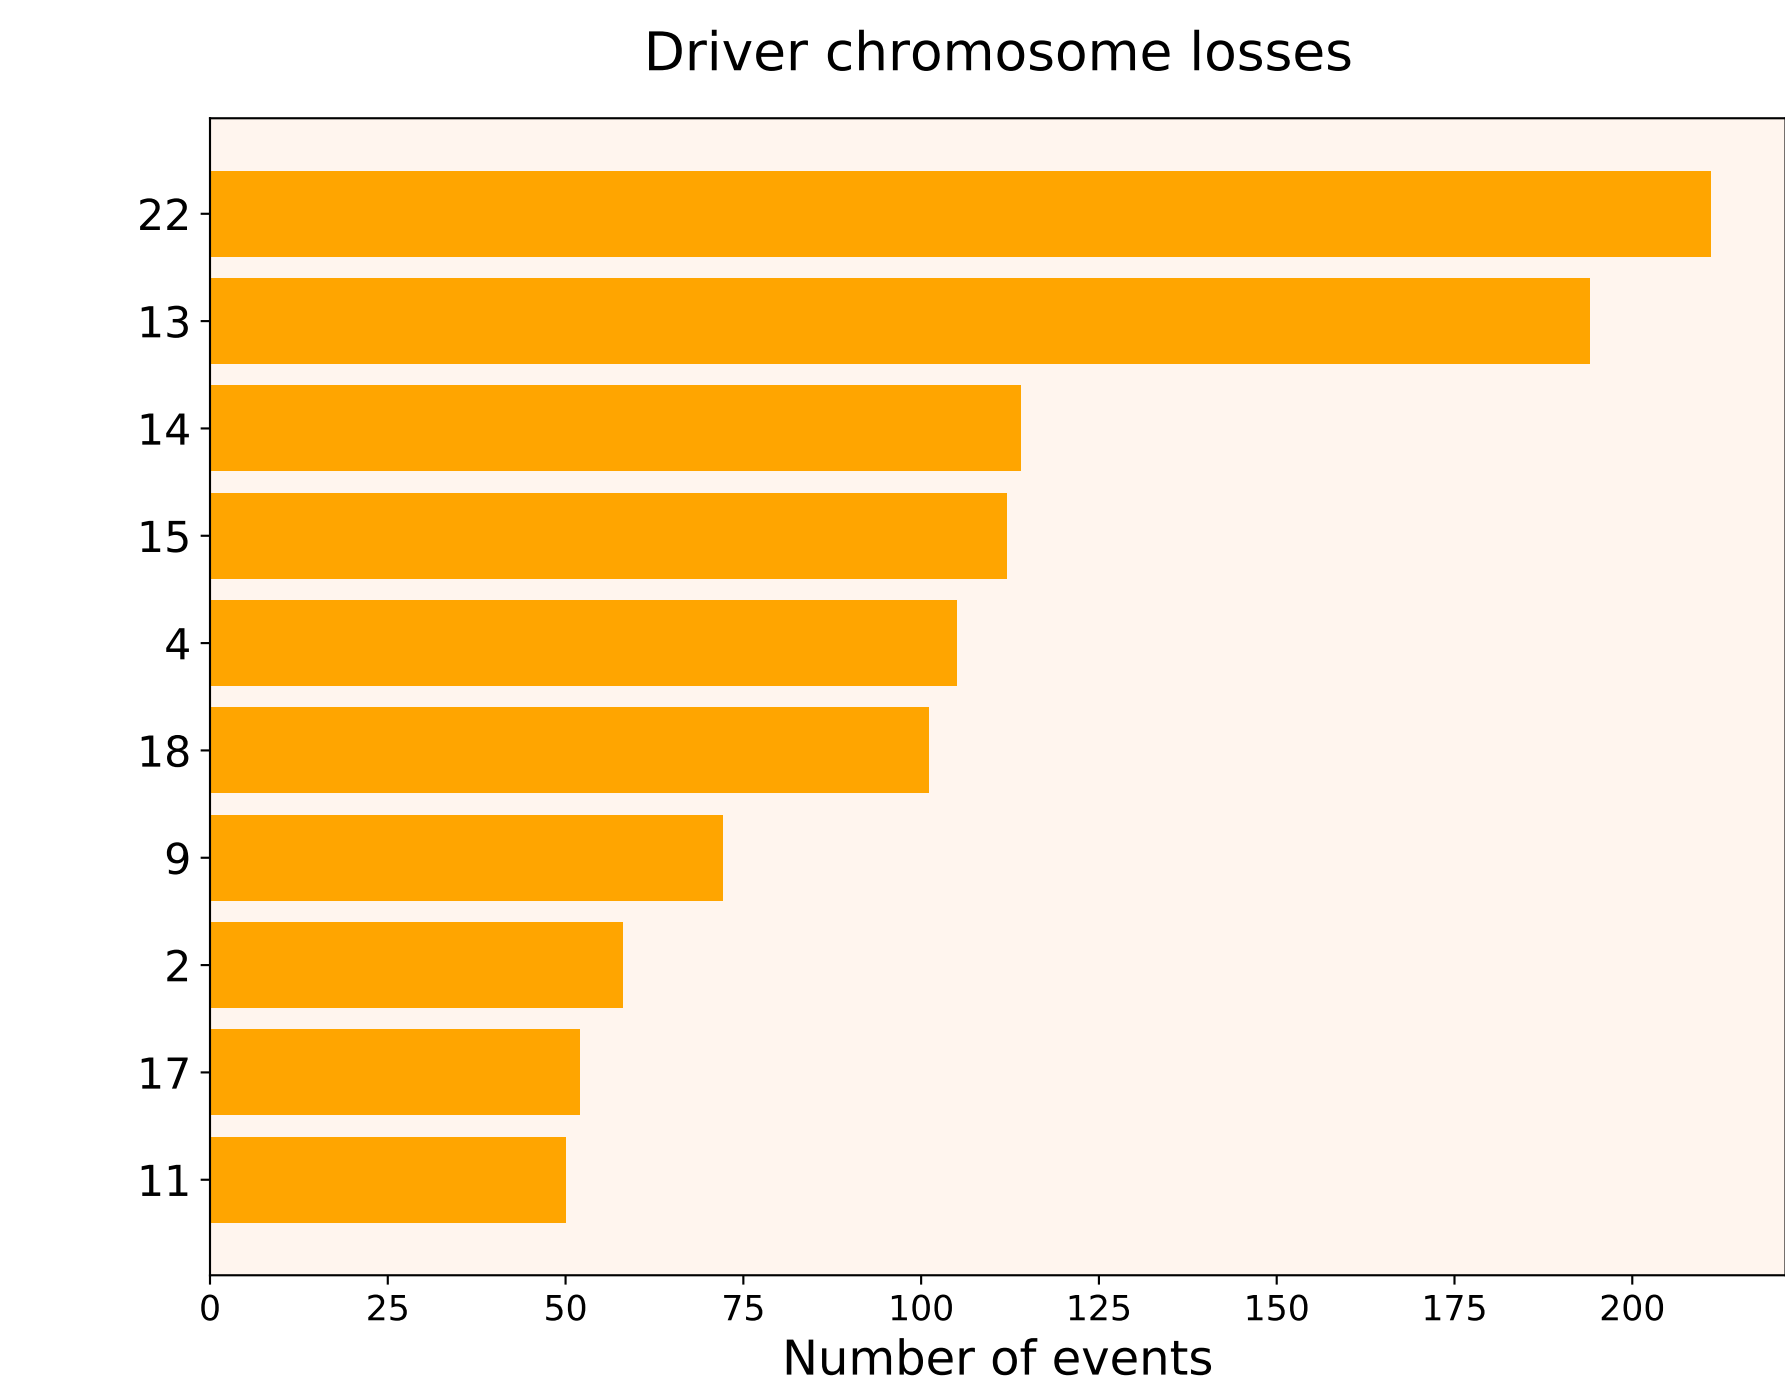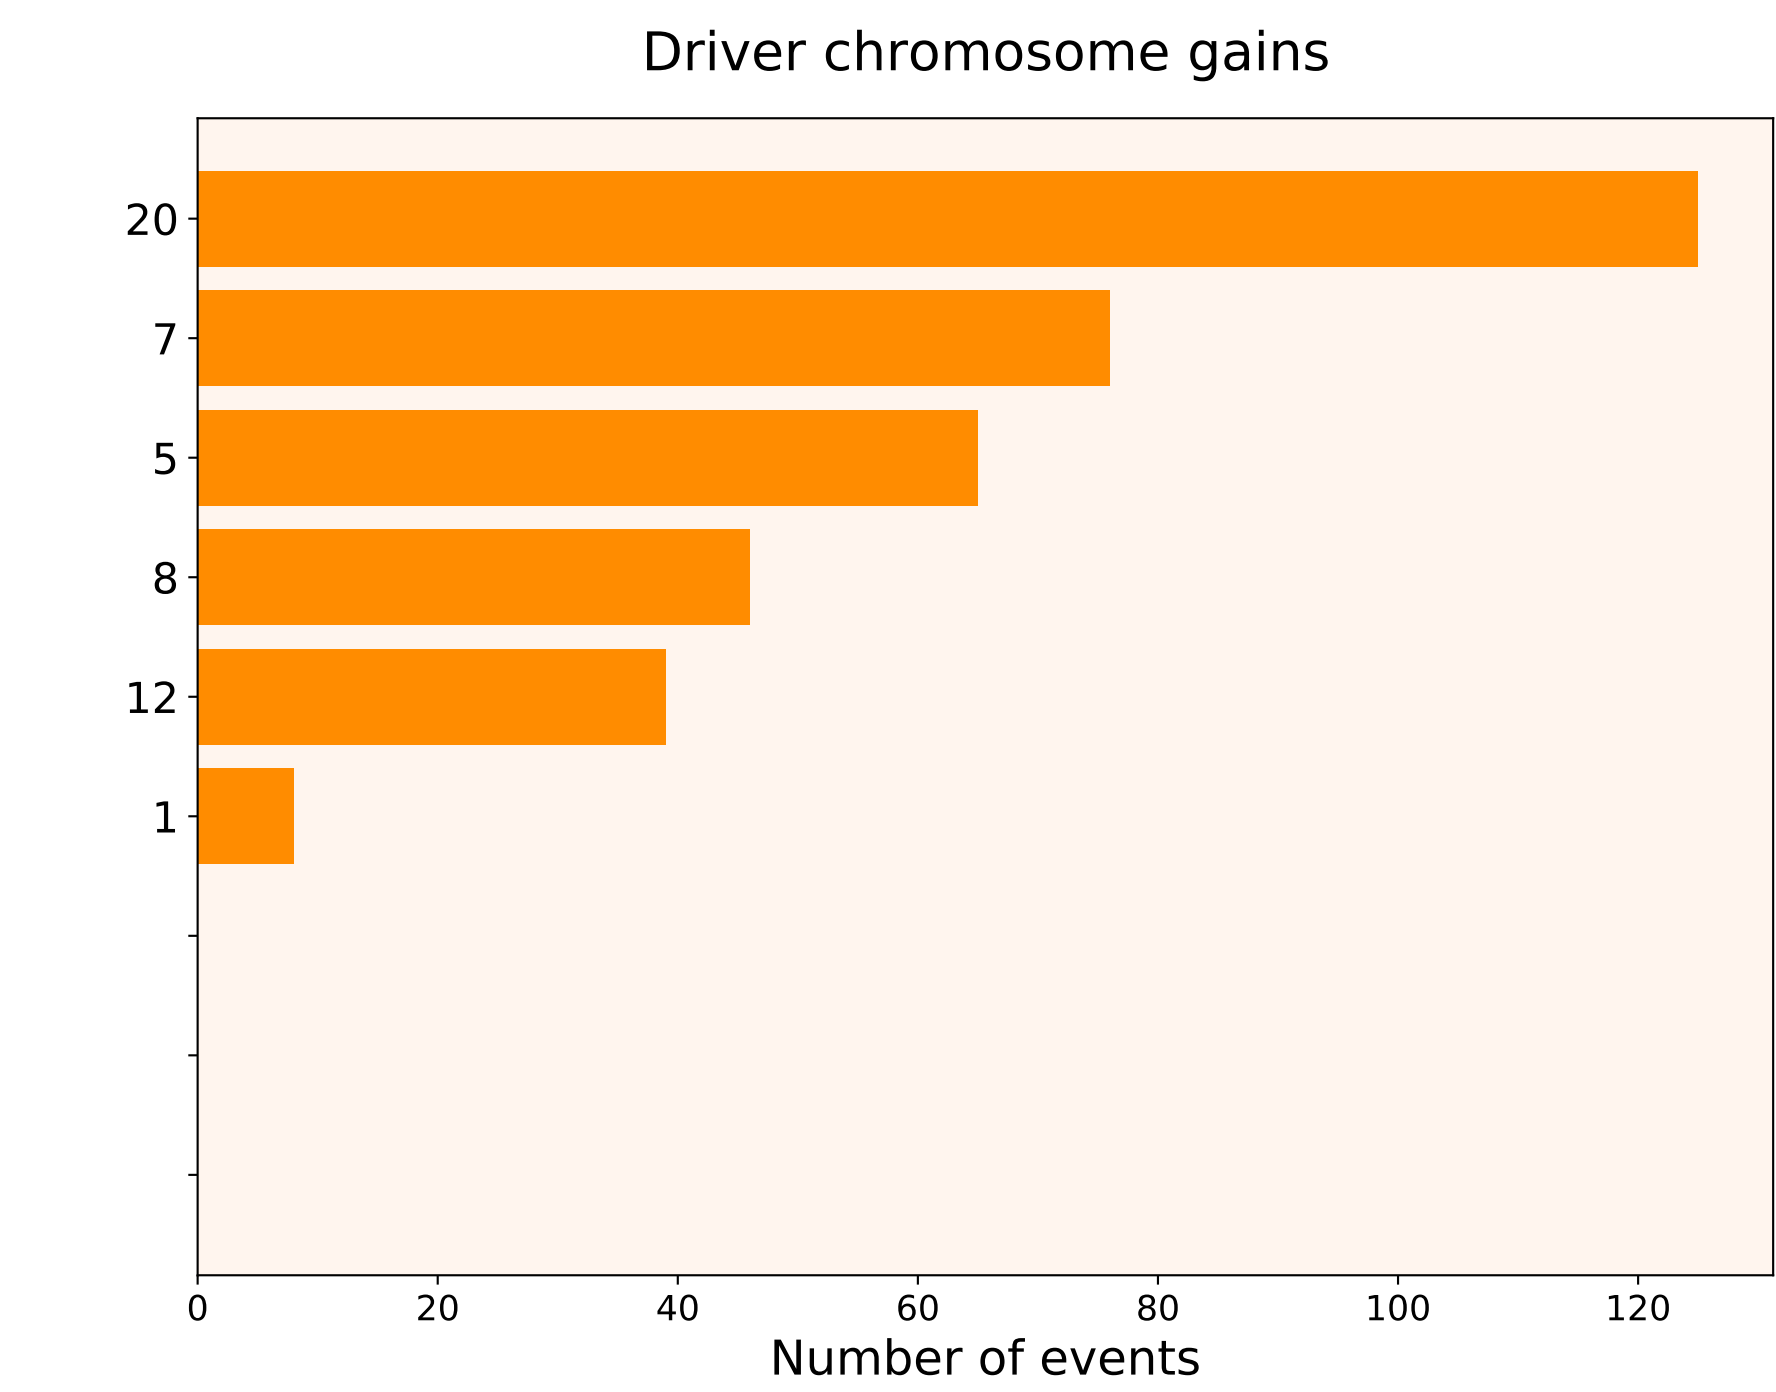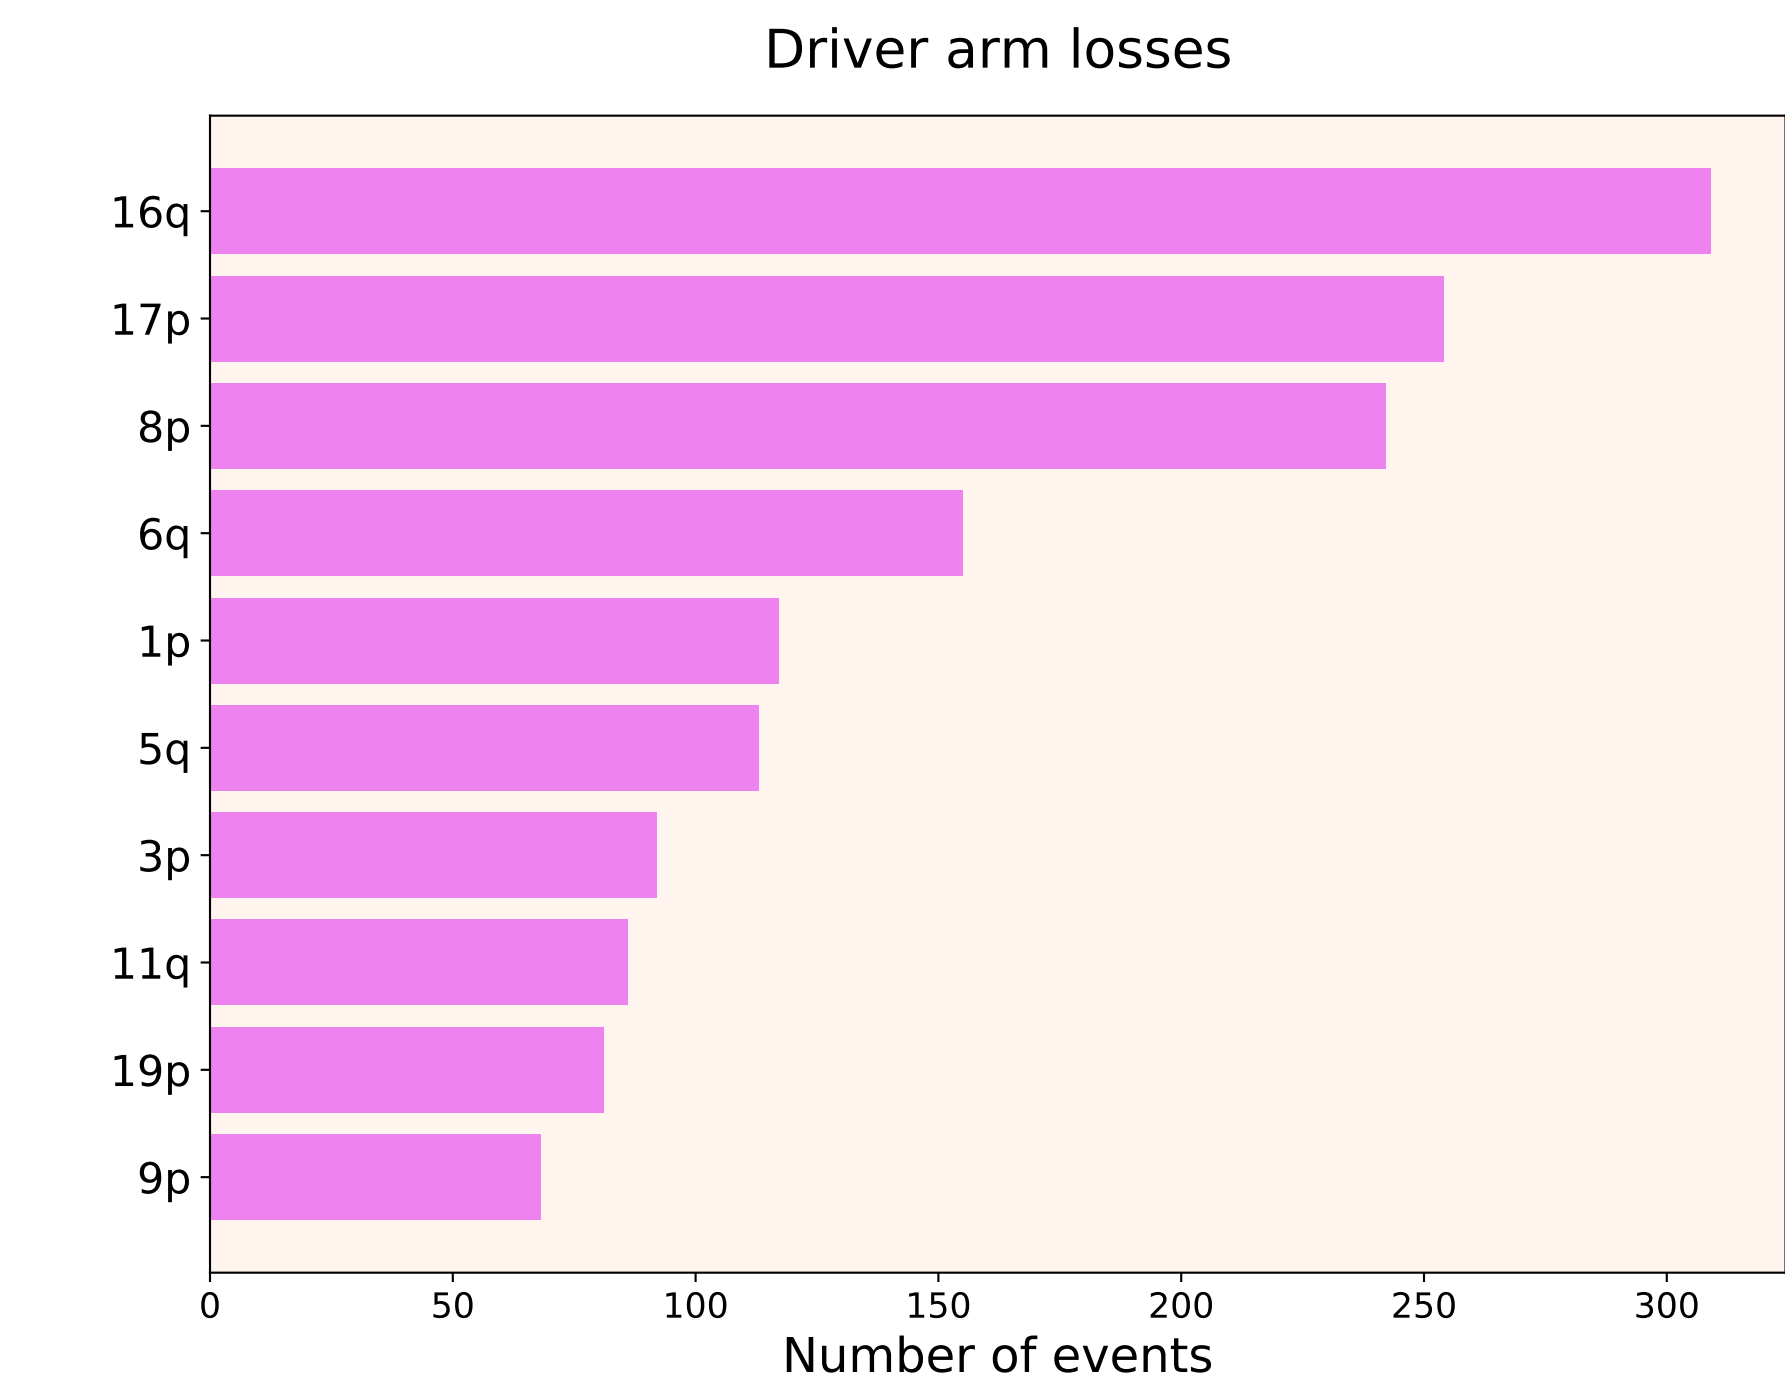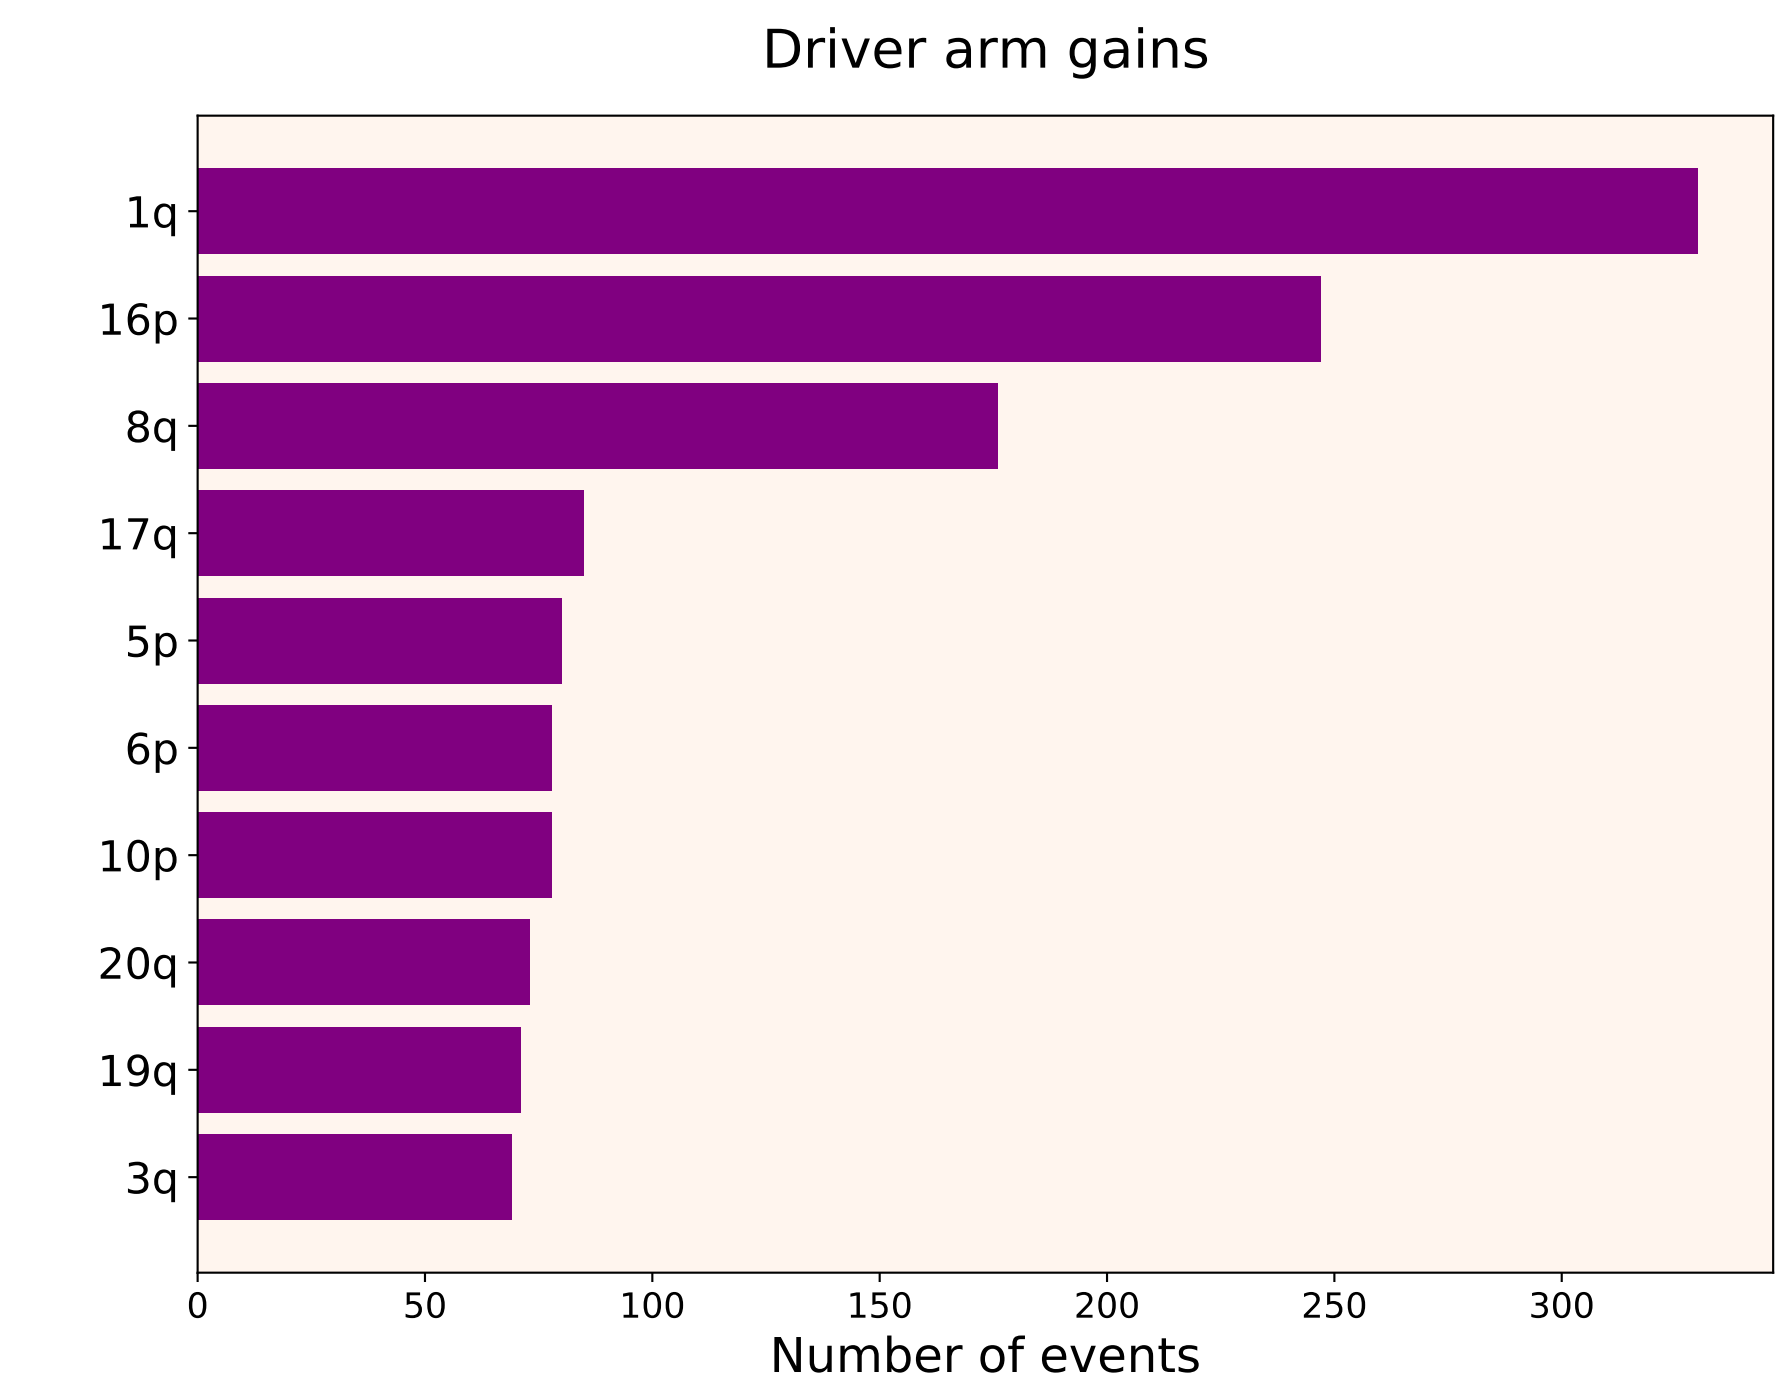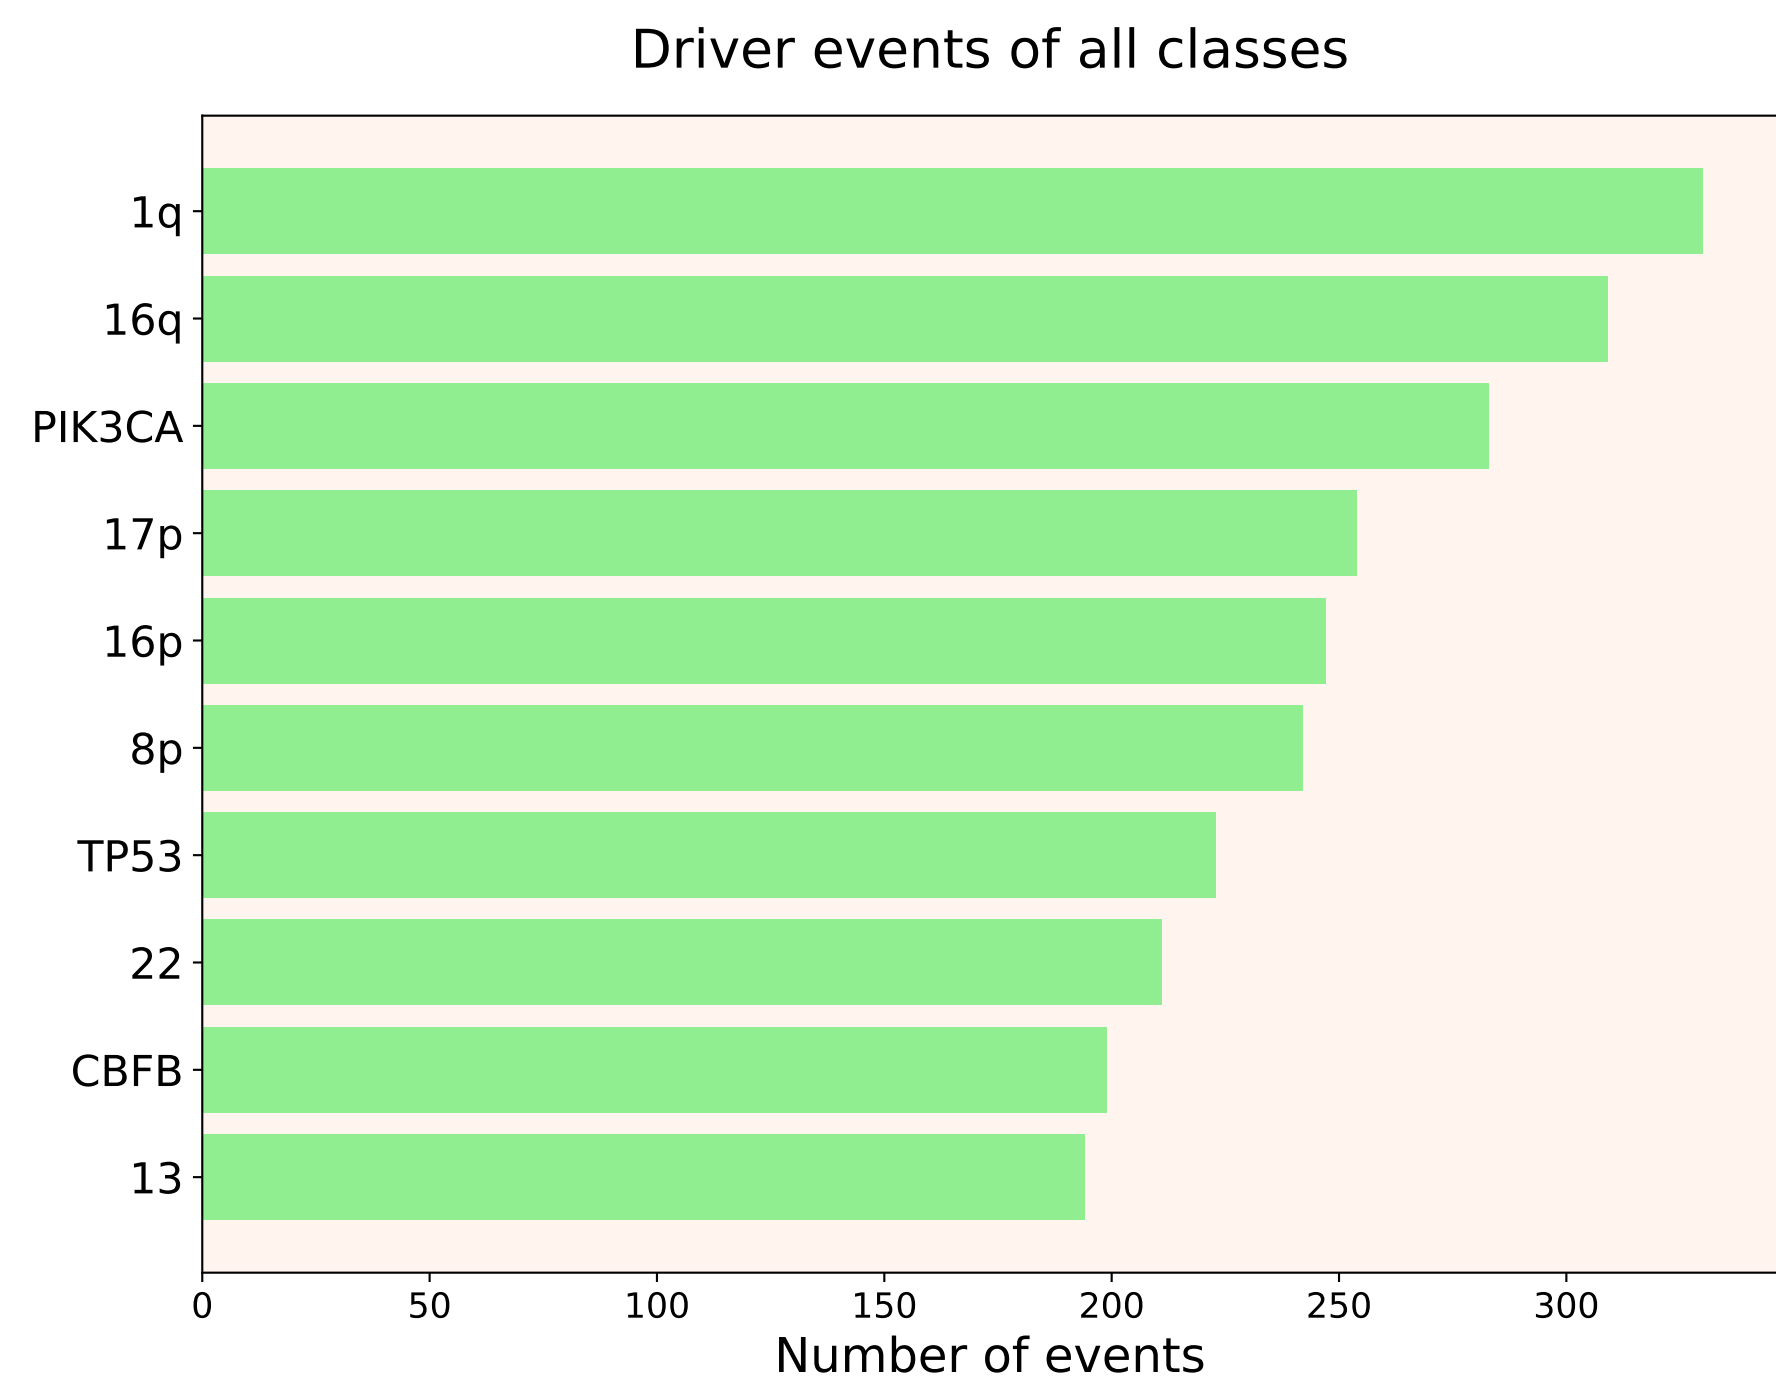

Supplement: Supplemental_Data_S1.zip [file Supplemental_Data_S1.zip]



Supplement: Supplemental_Data_S1.zip [file Supplemental_Data_S1.zip]

# PANCAN

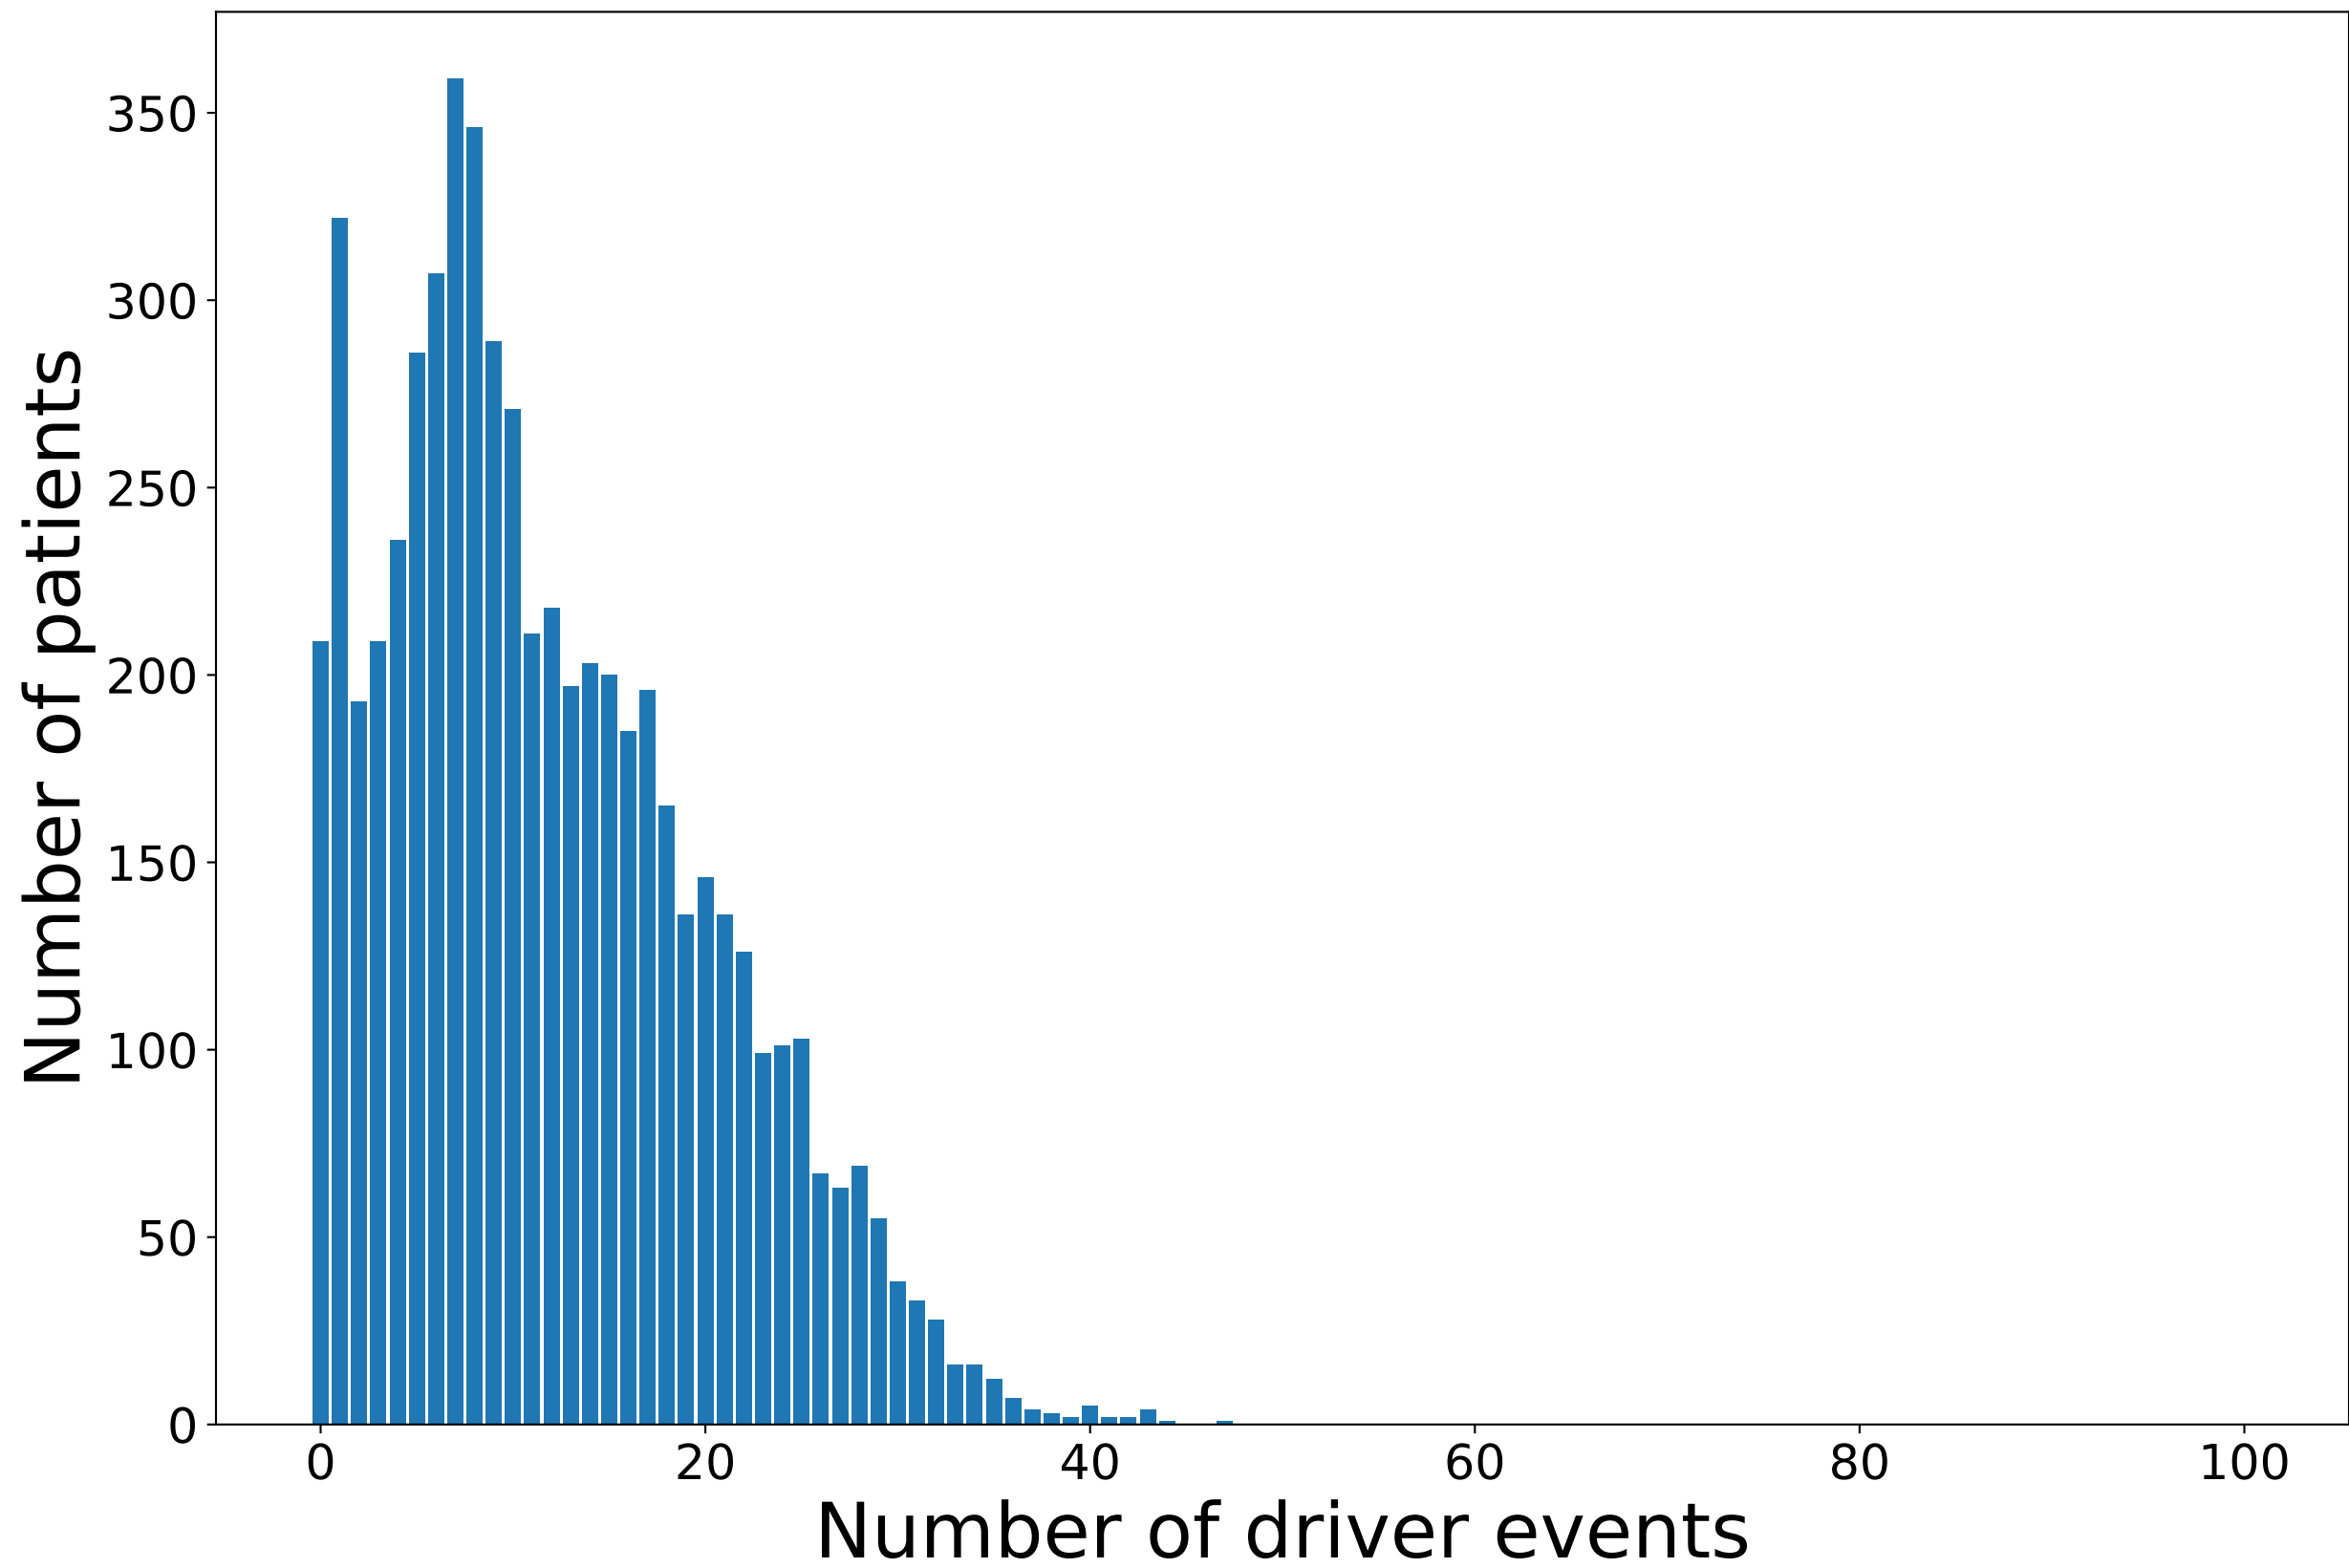

Supplement: Supplemental_Data_S1.zip [file Supplemental_Data_S1.zip]

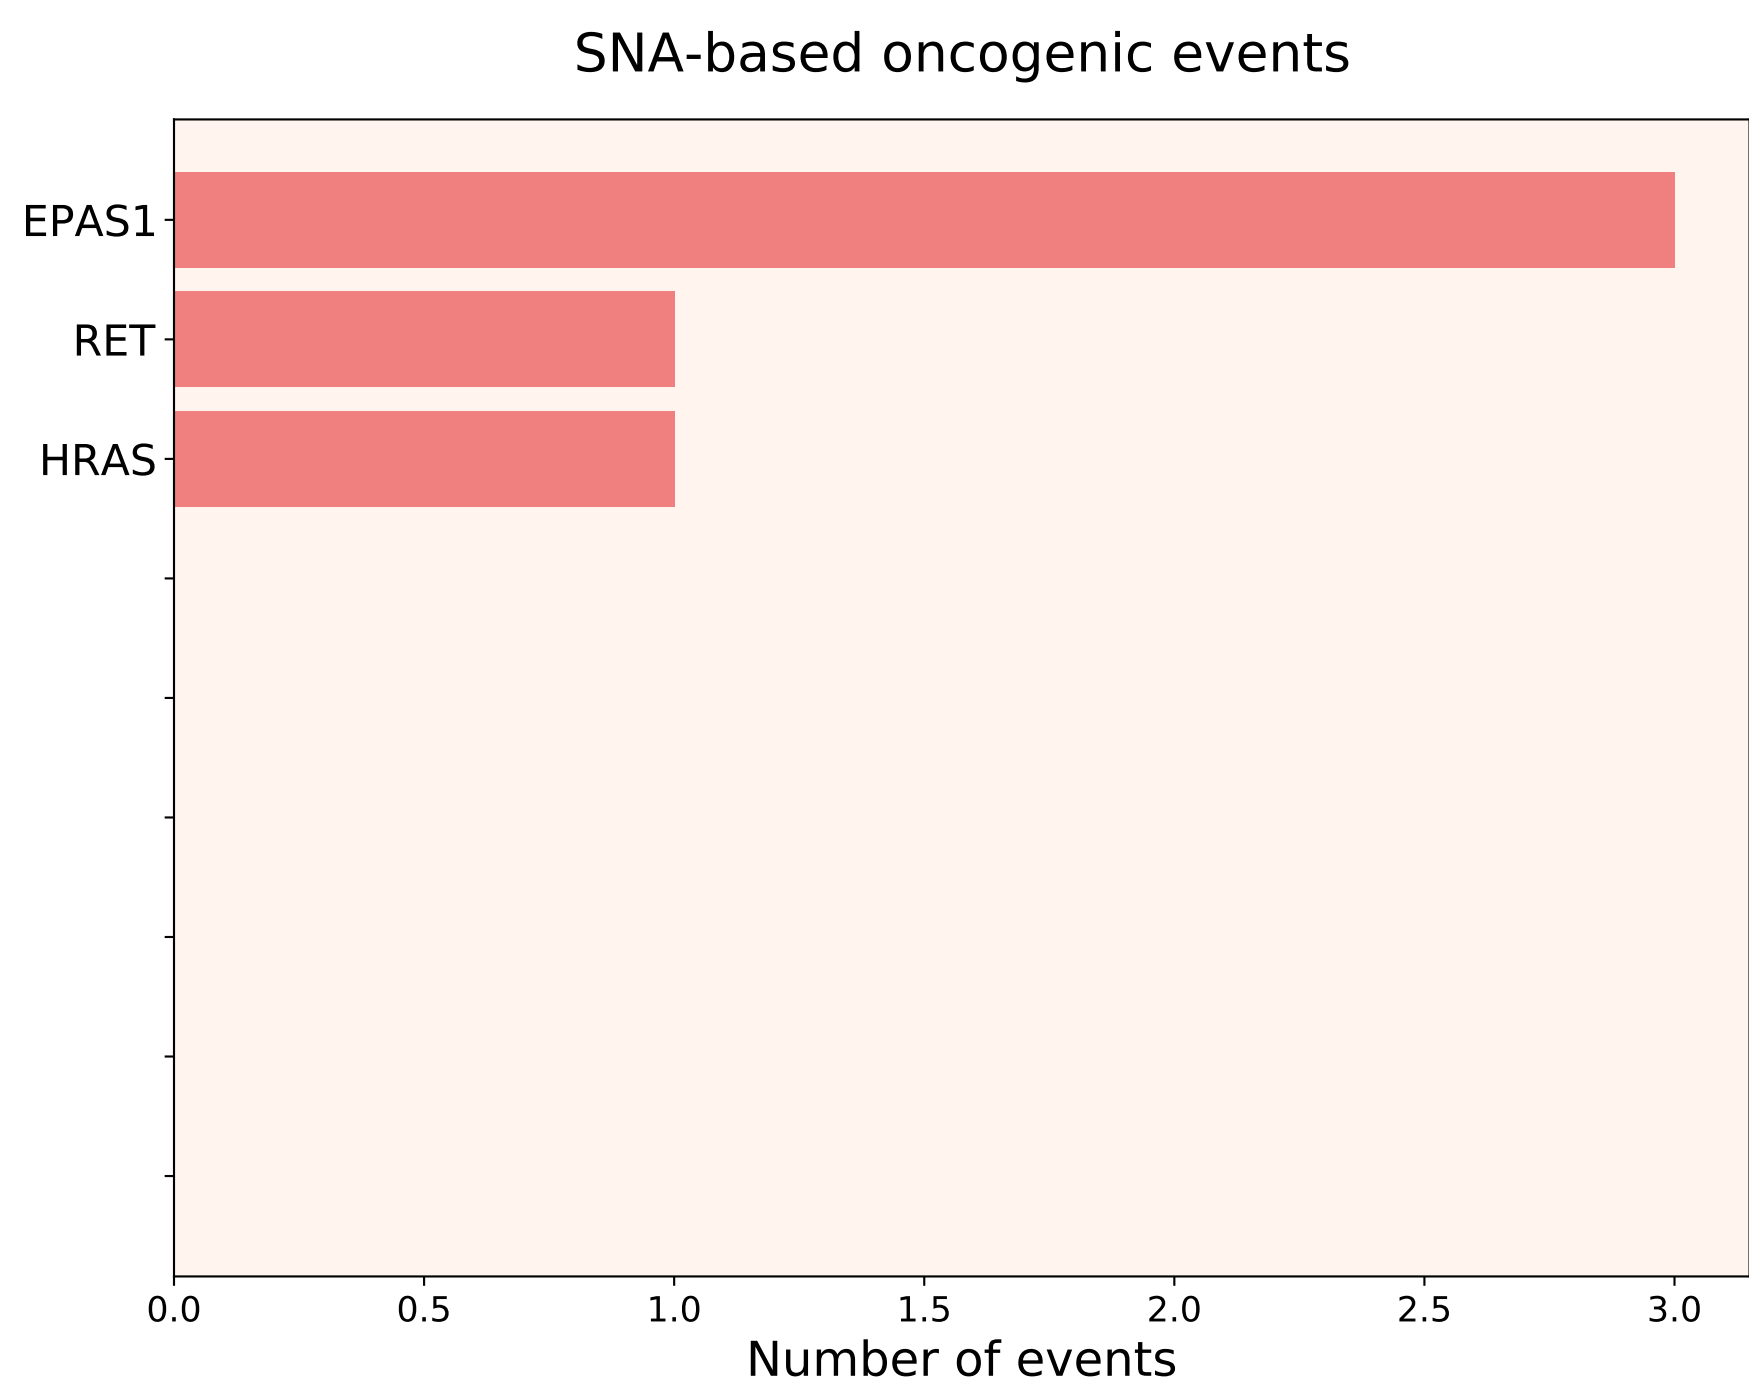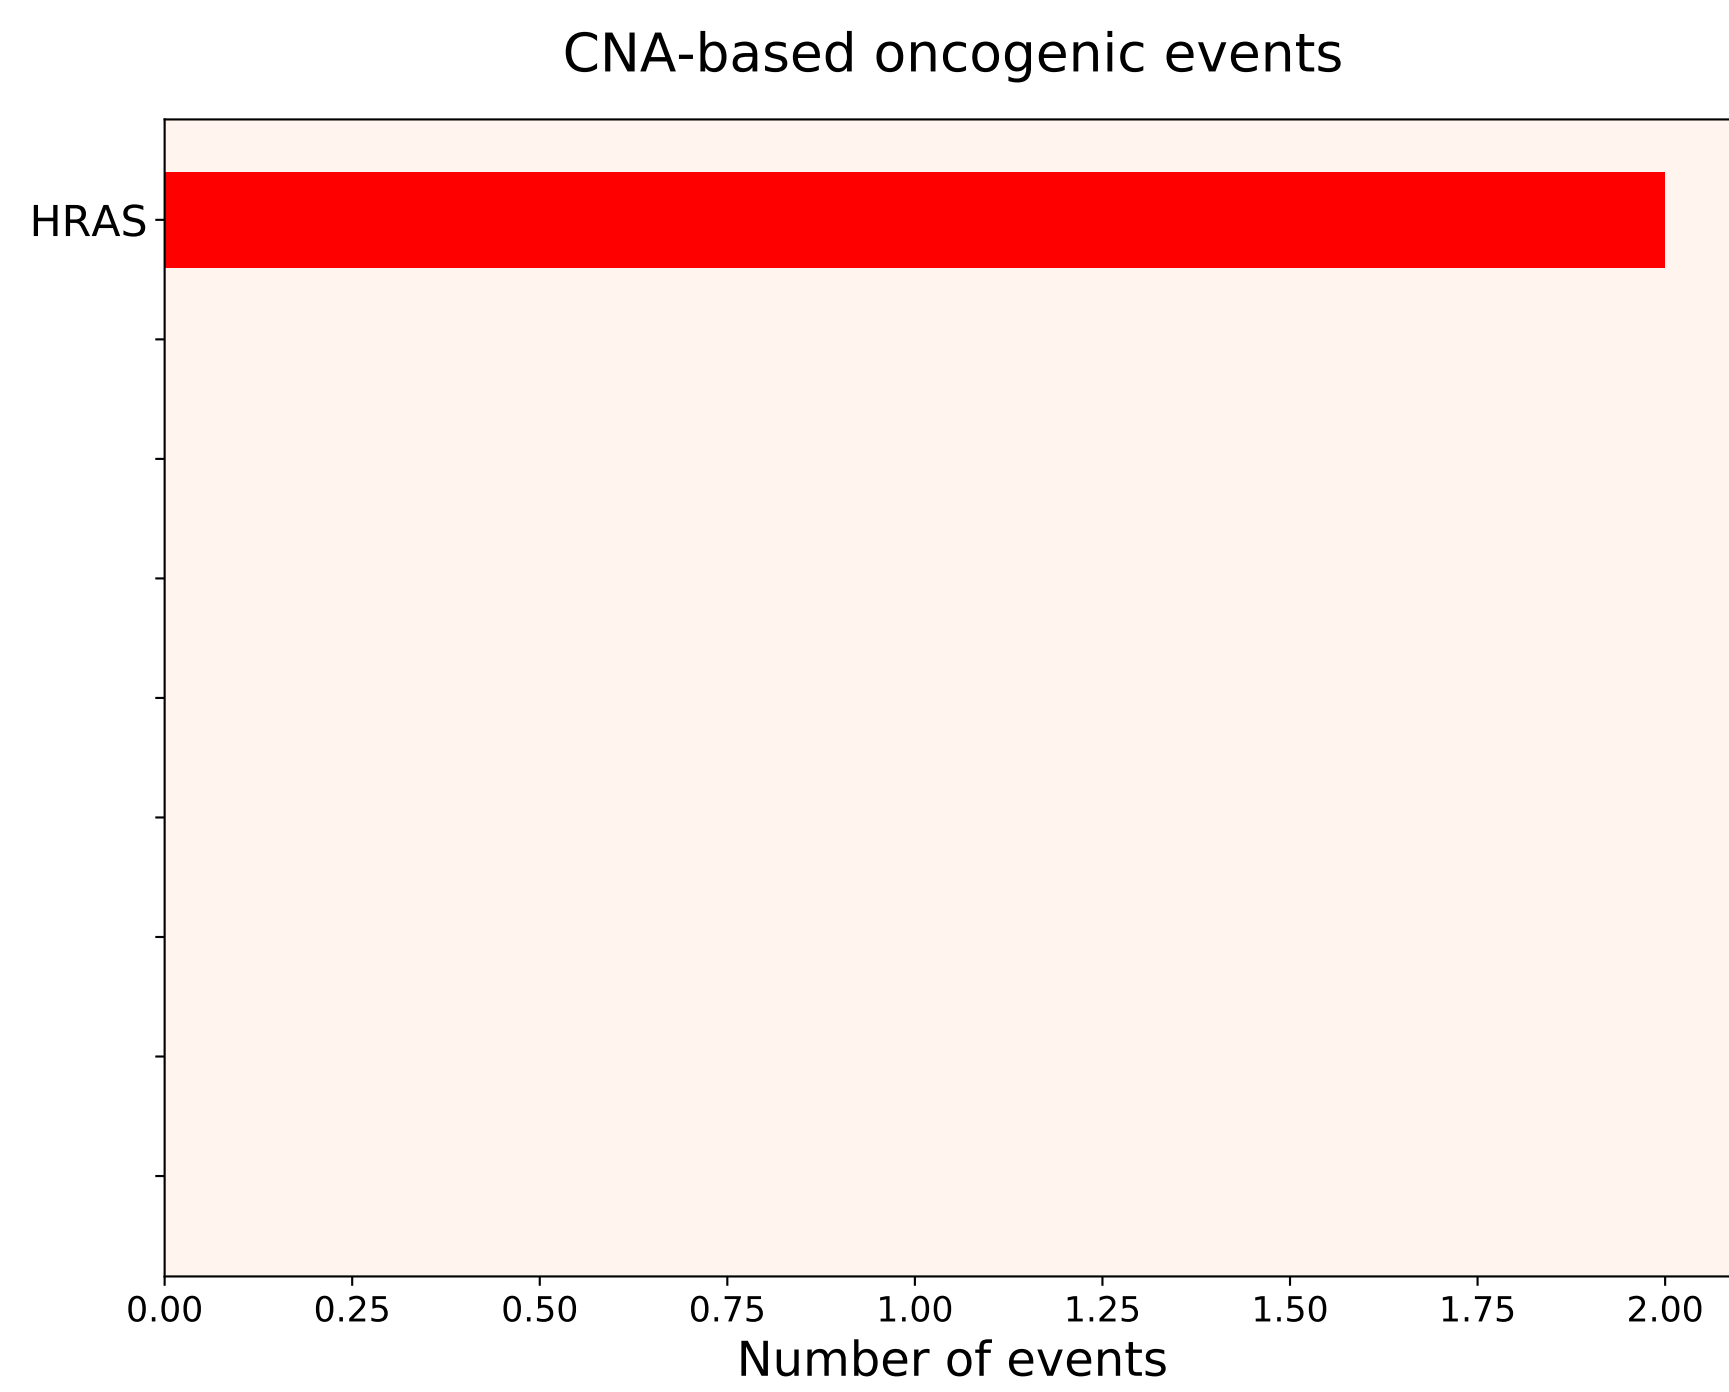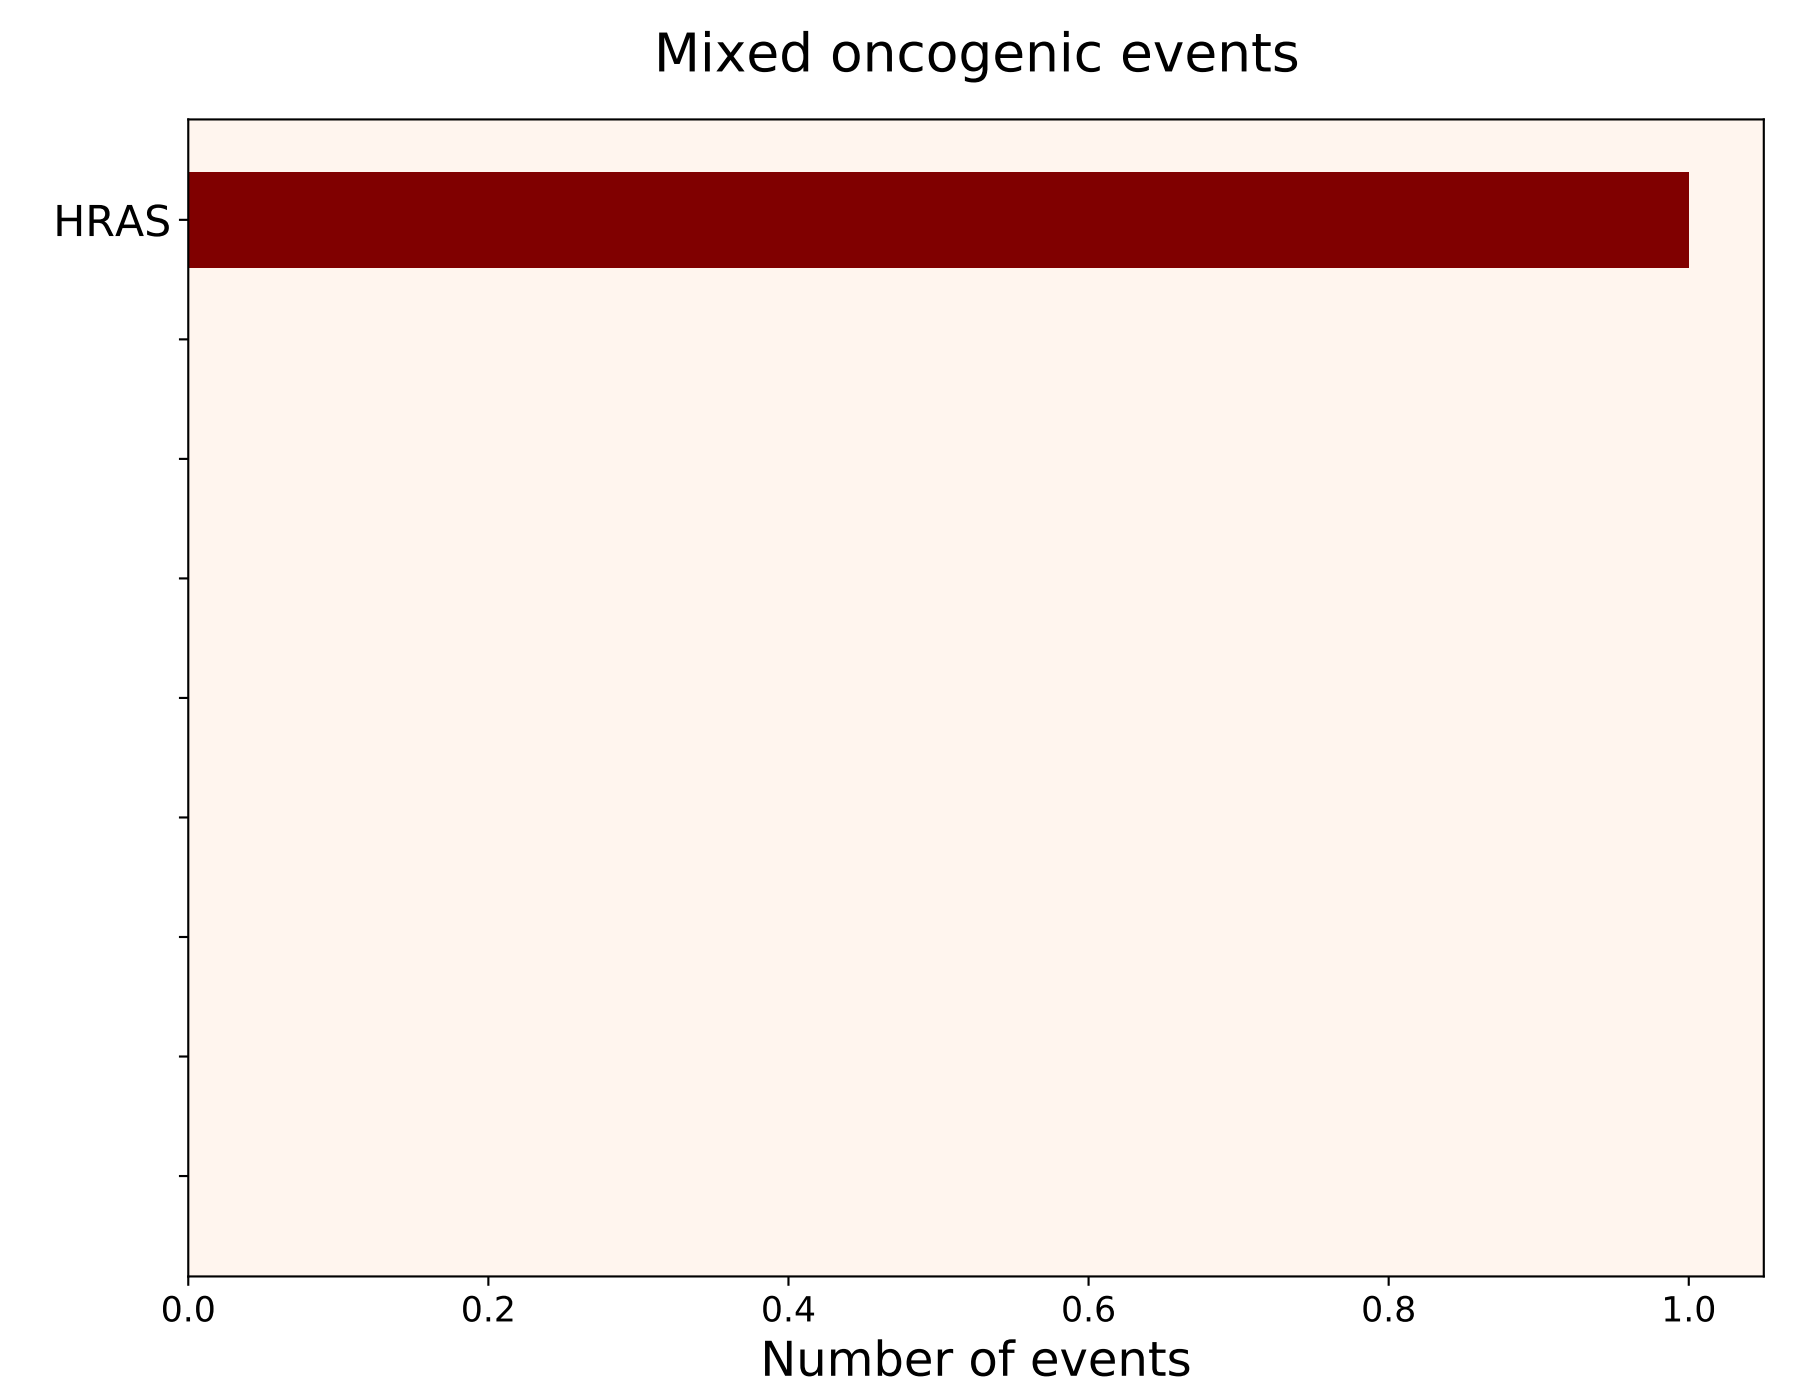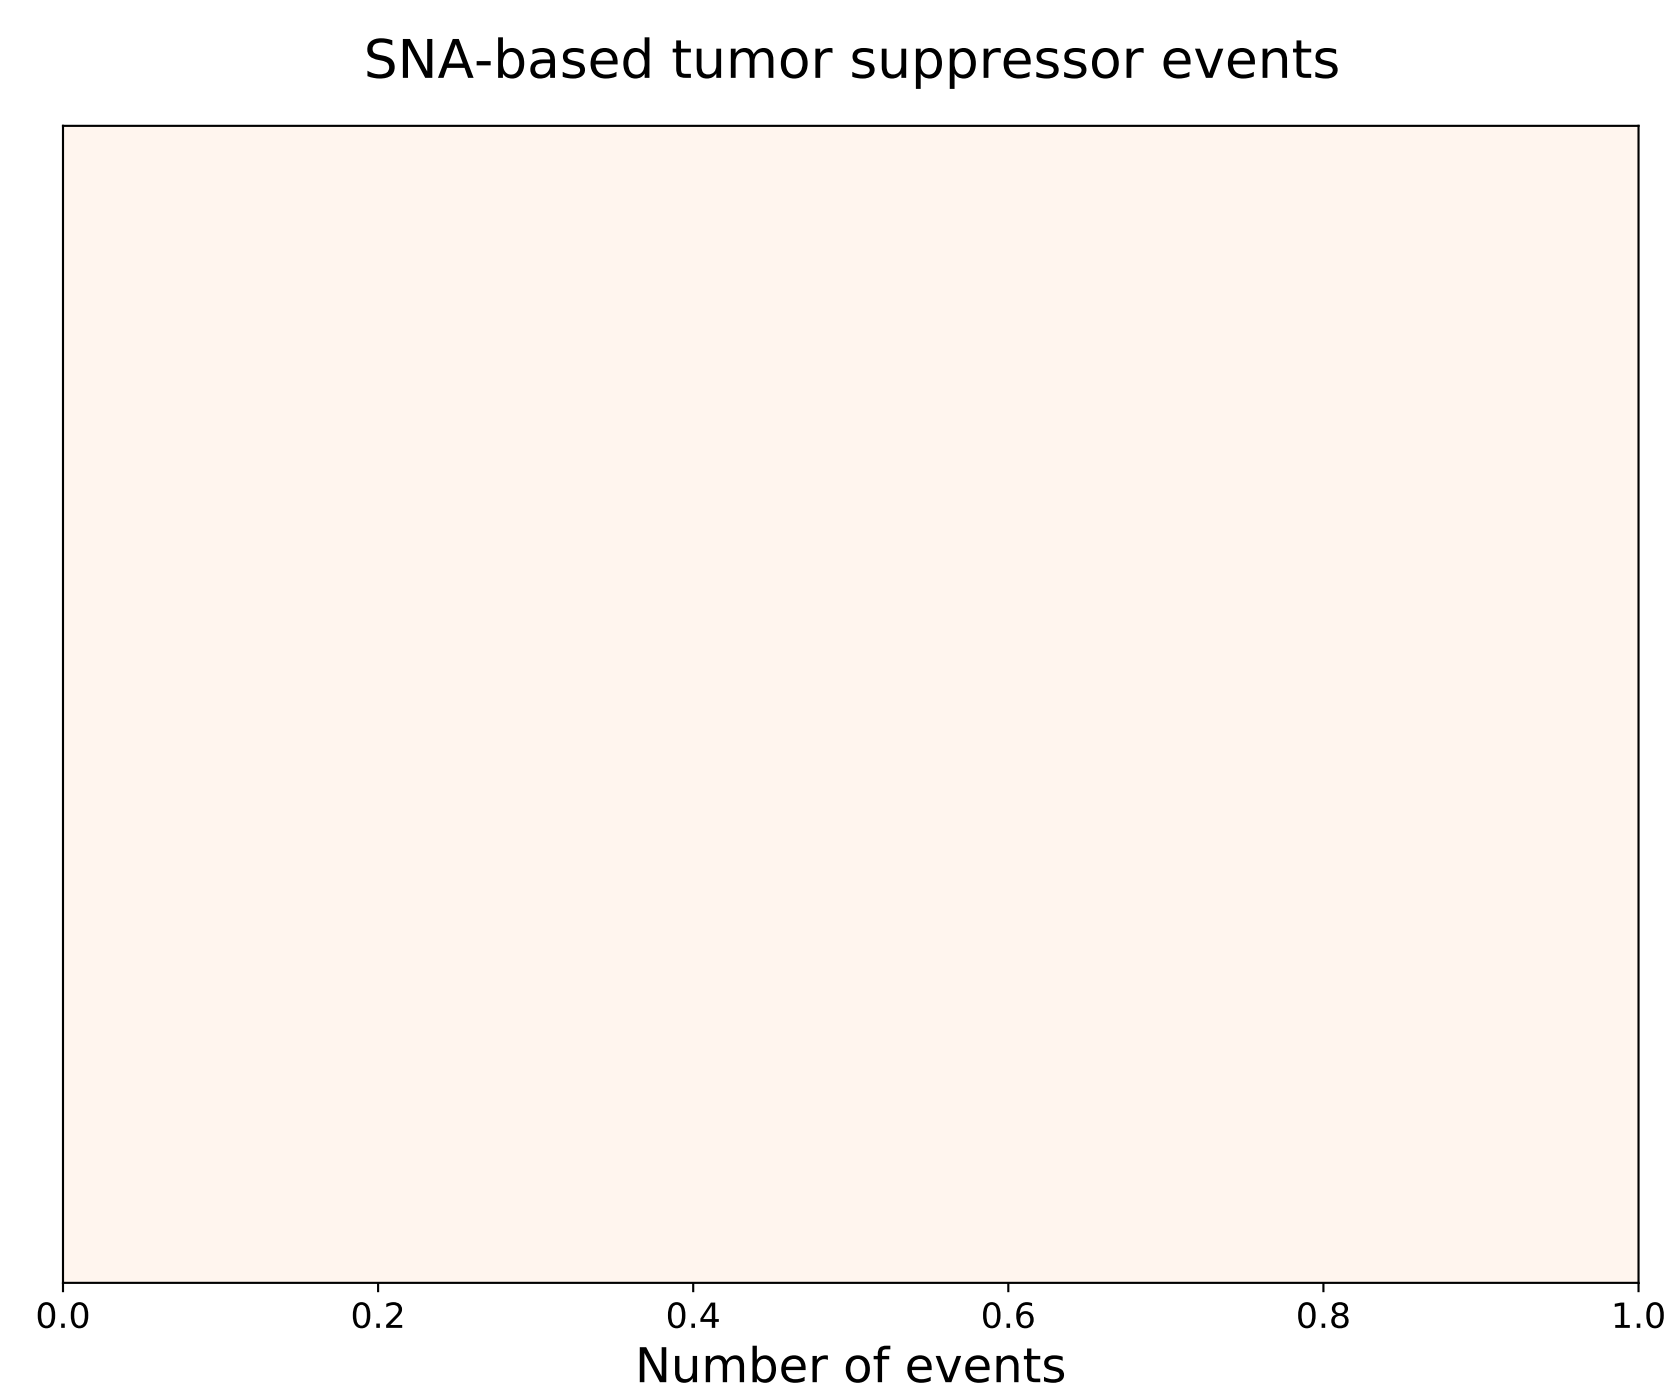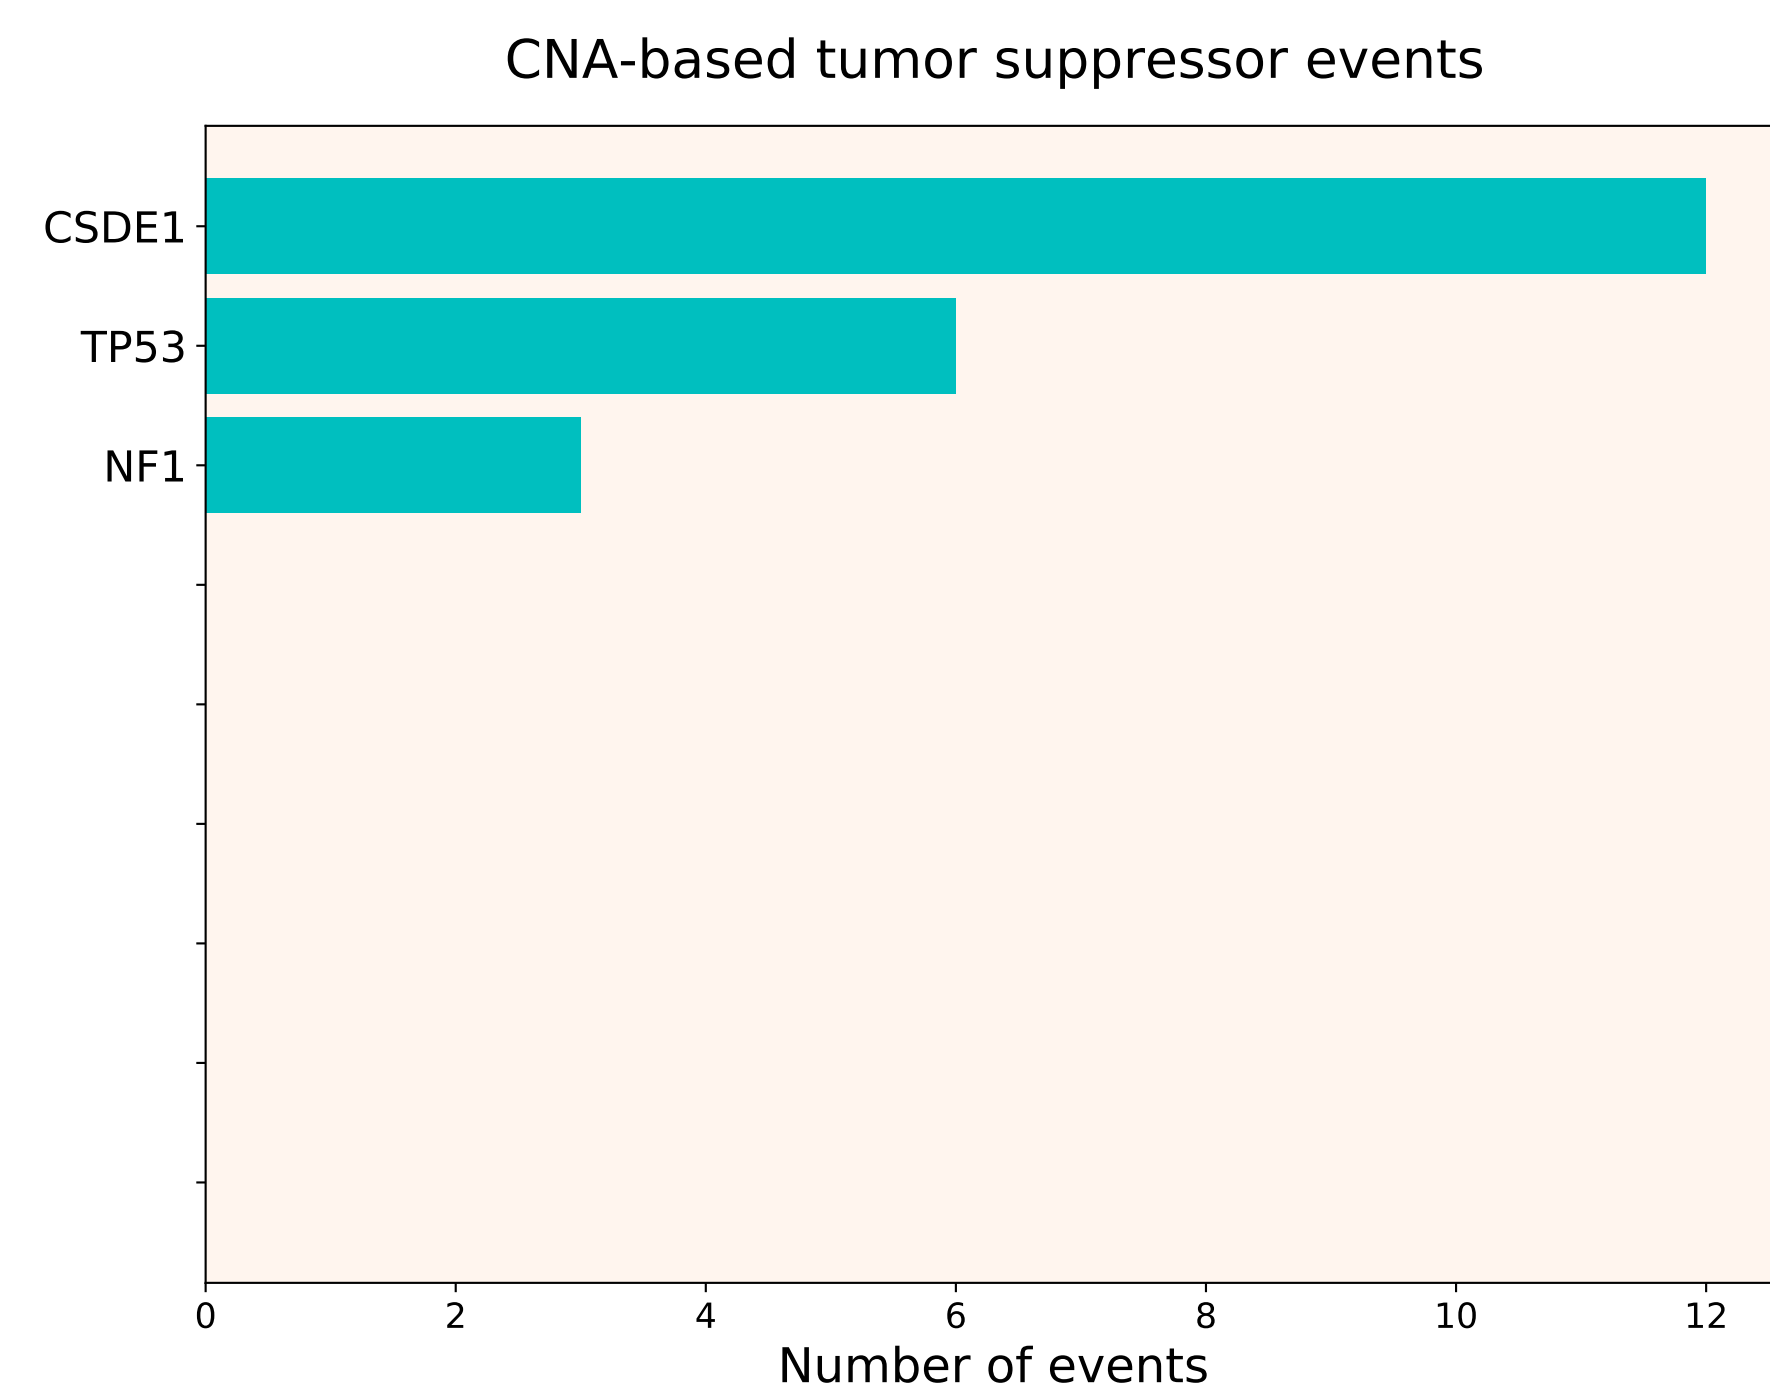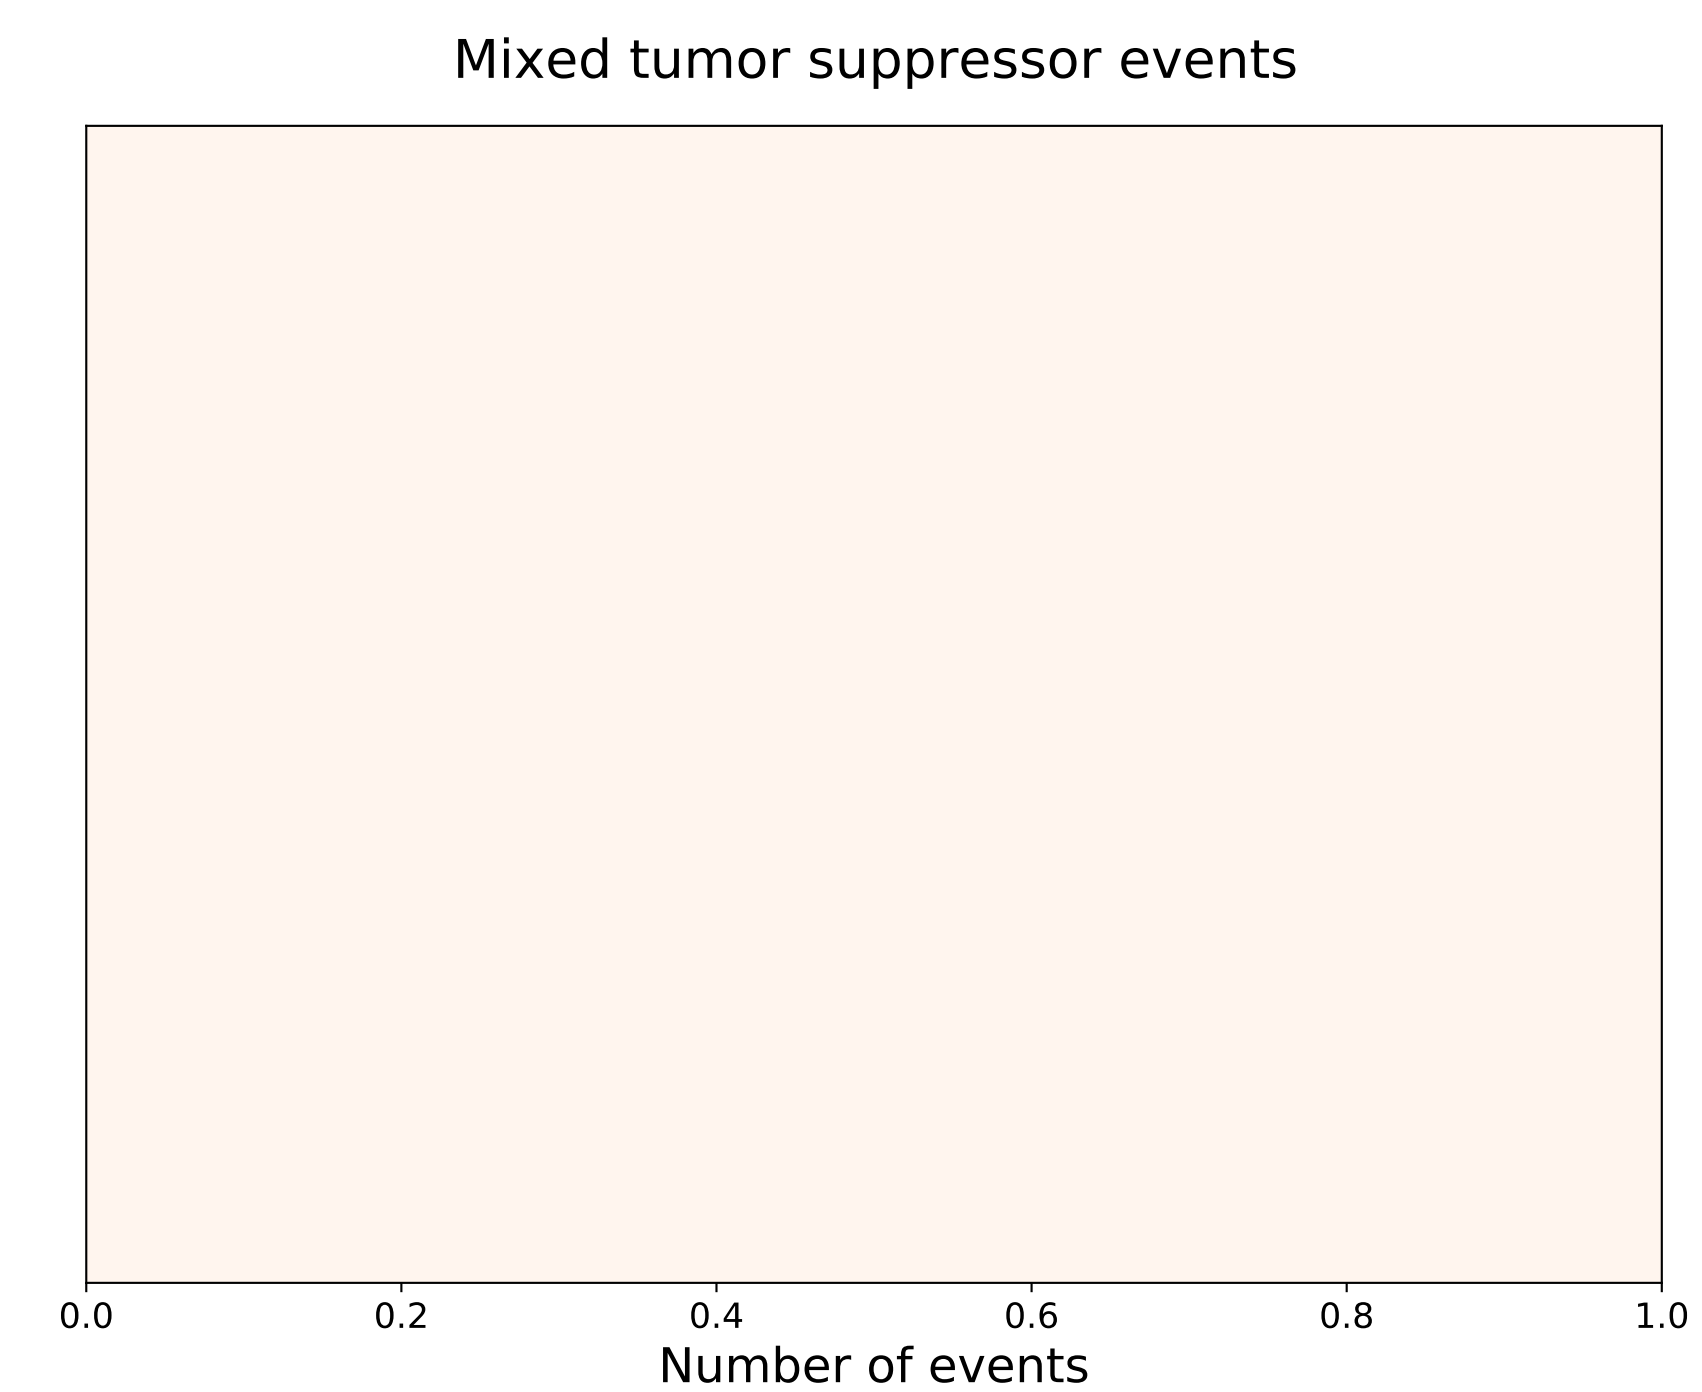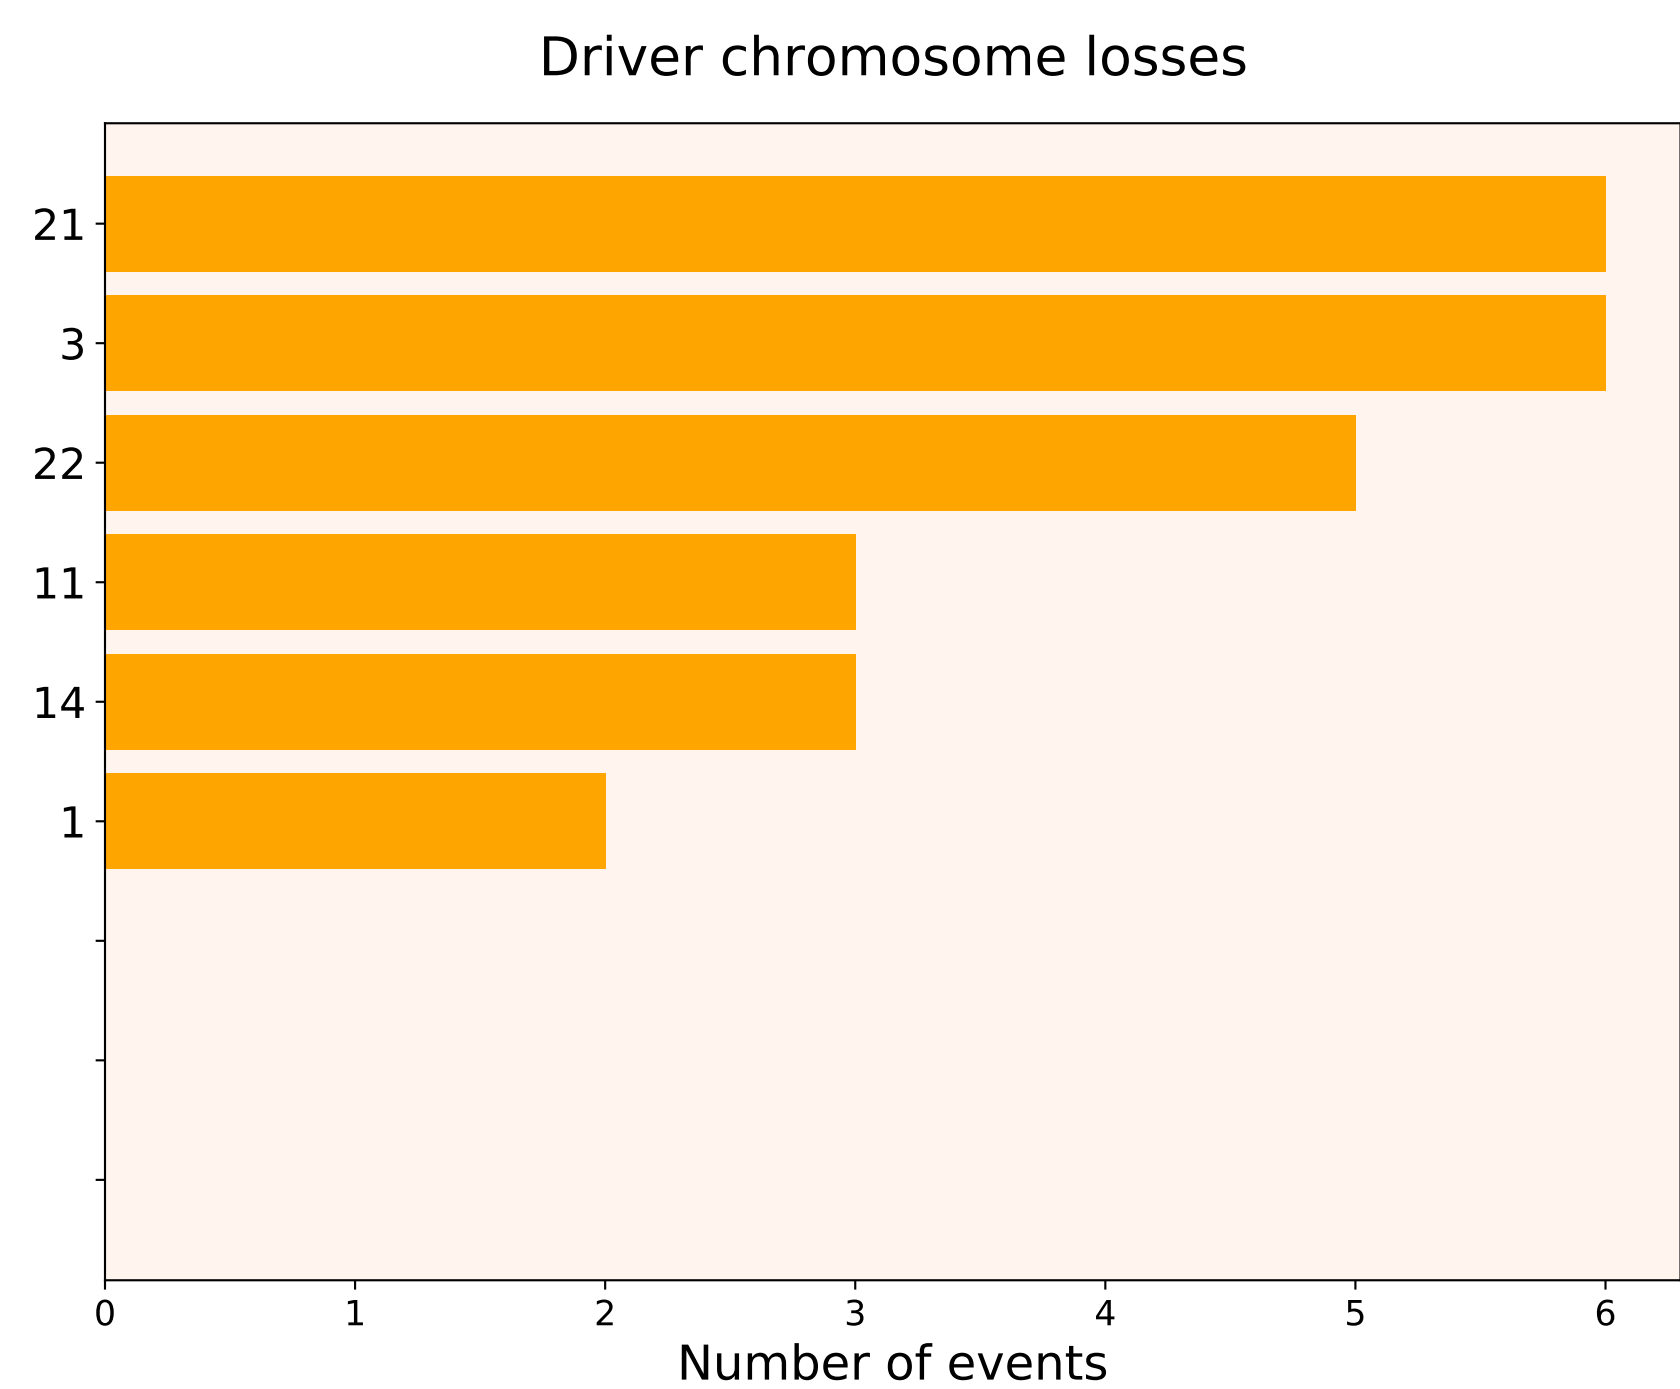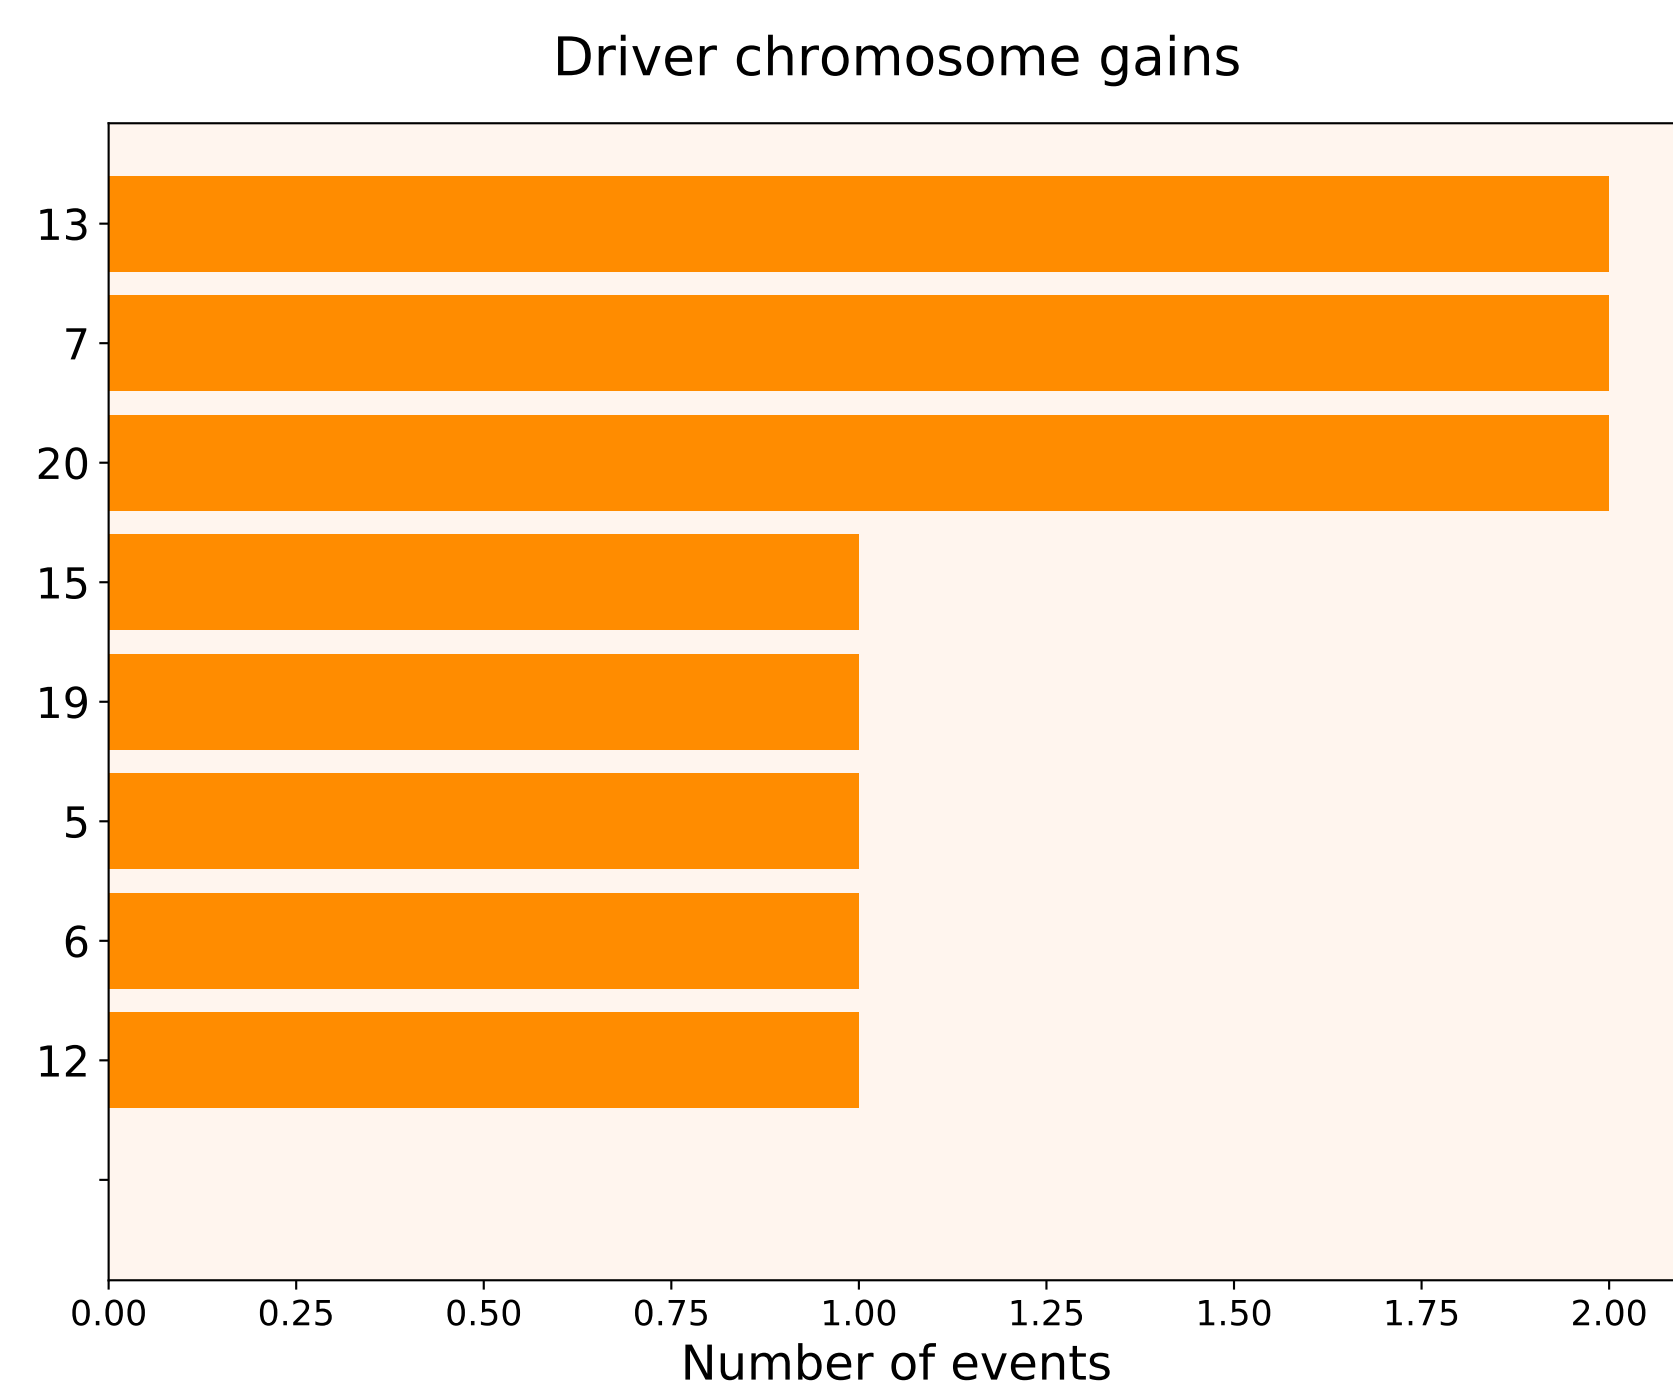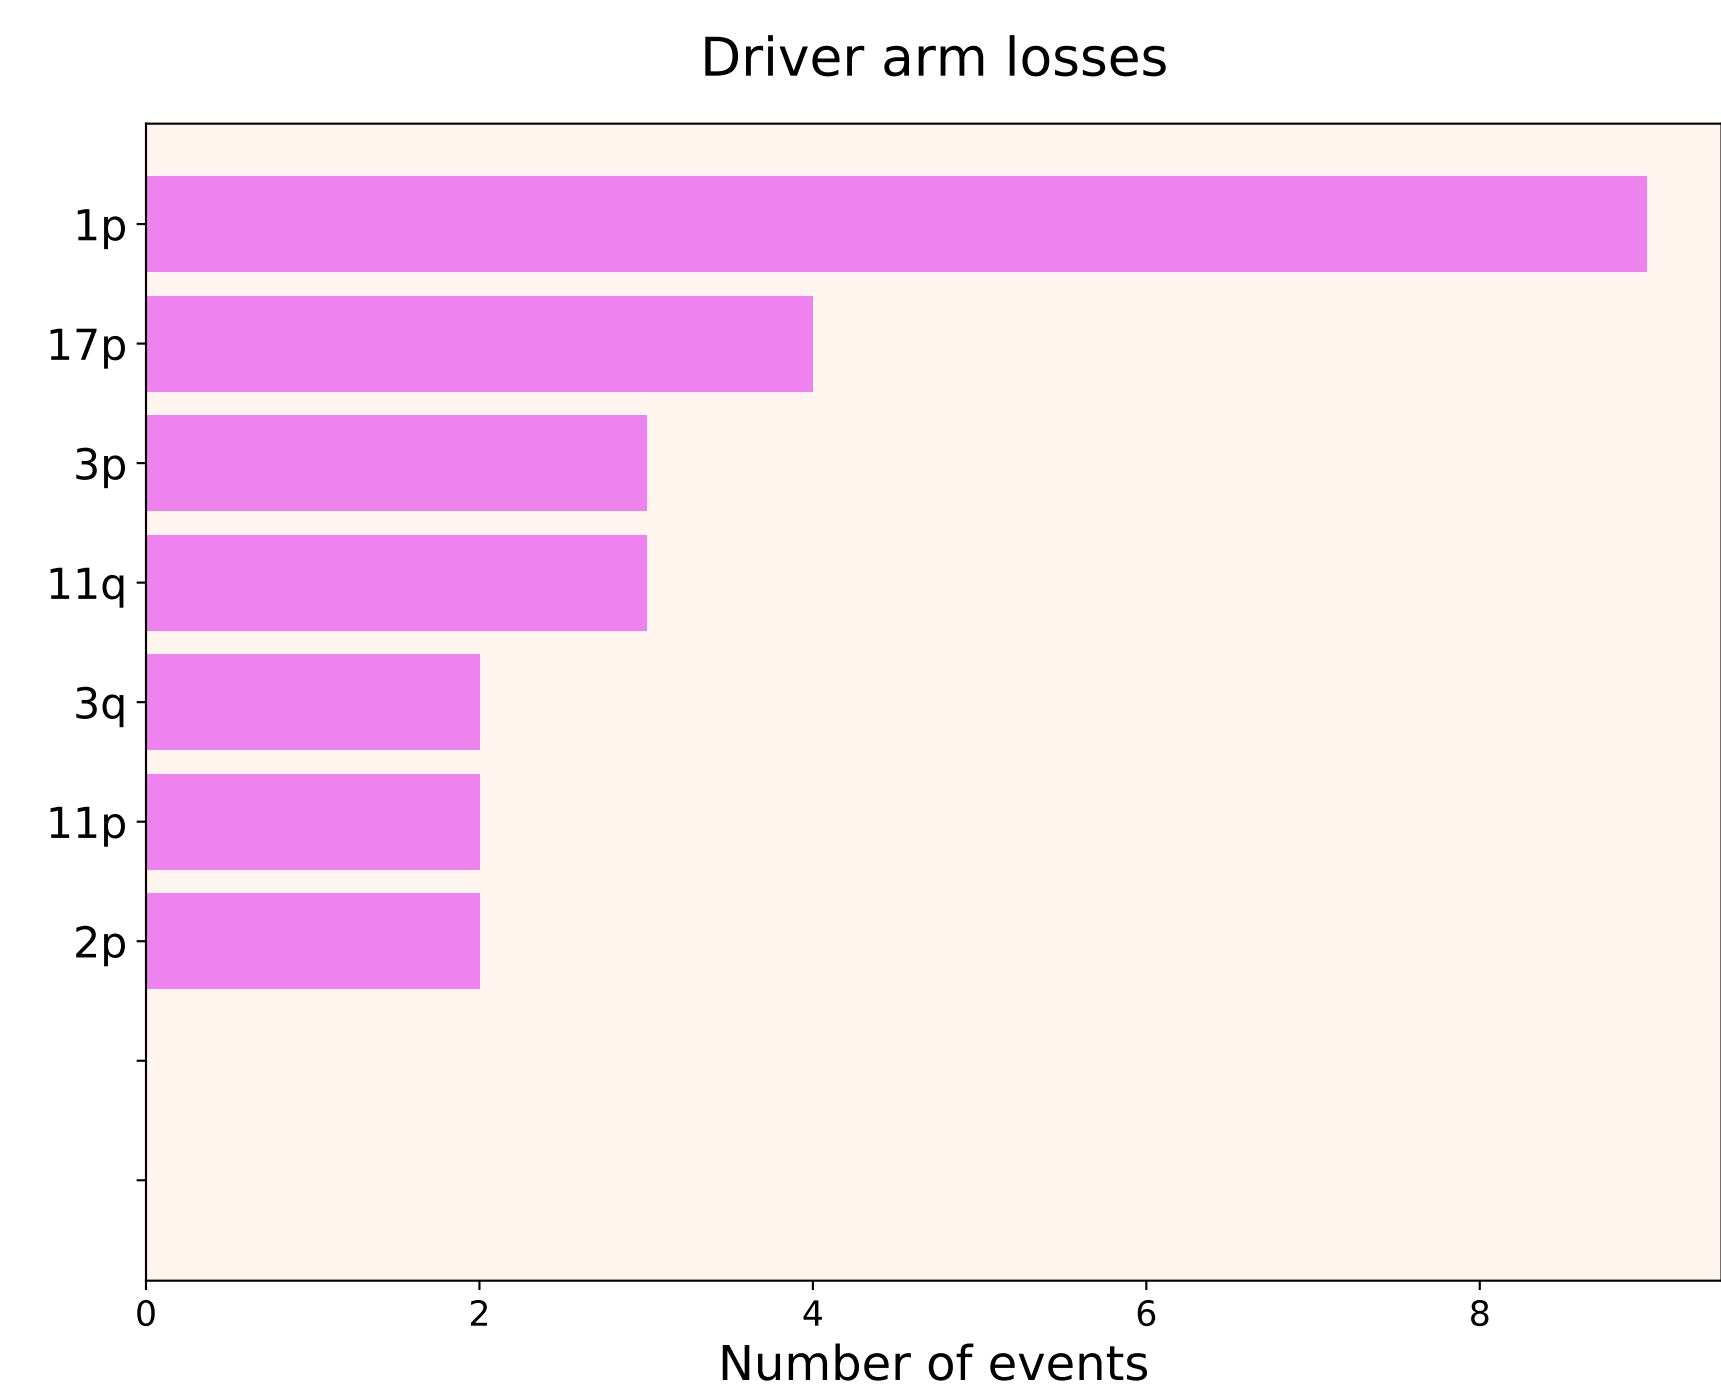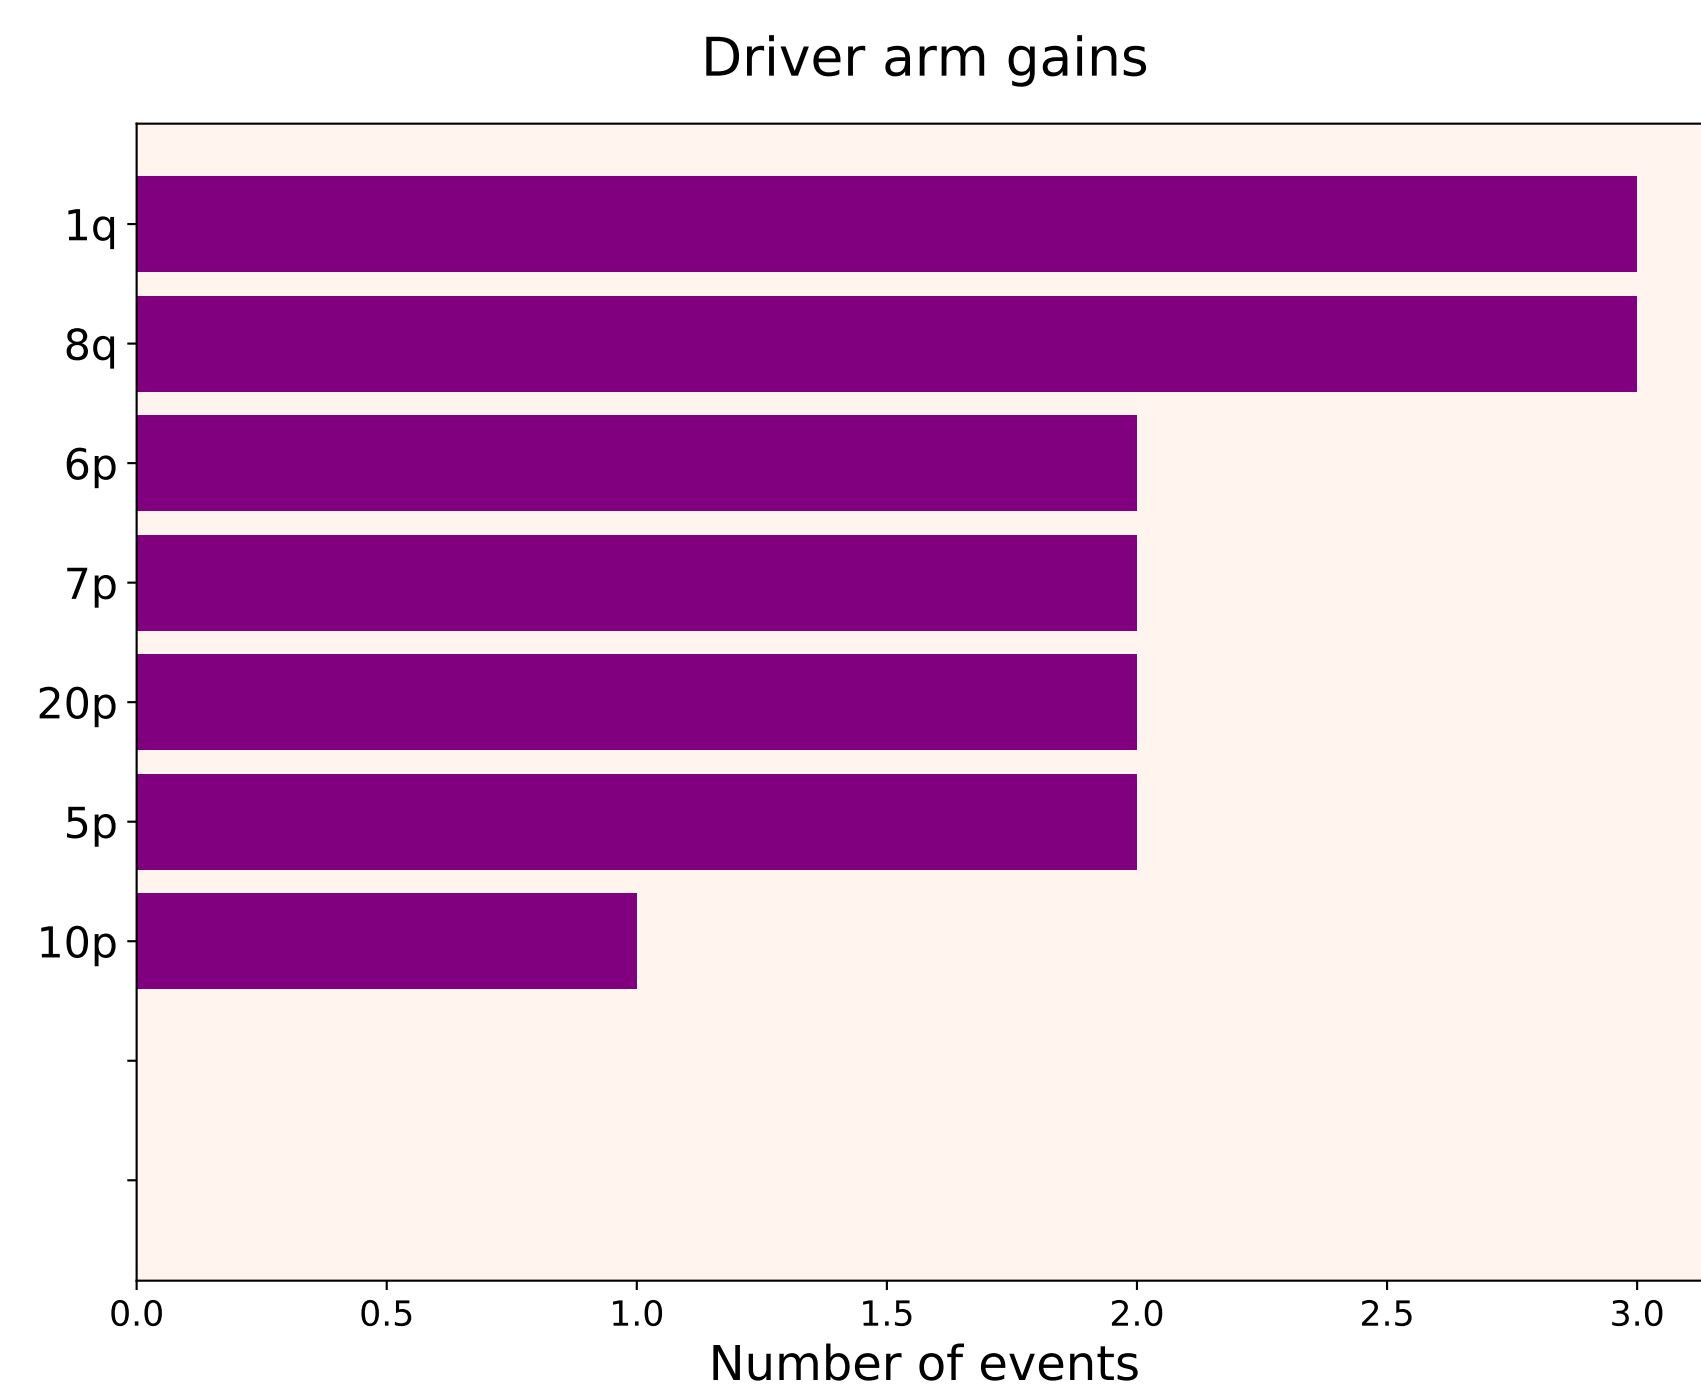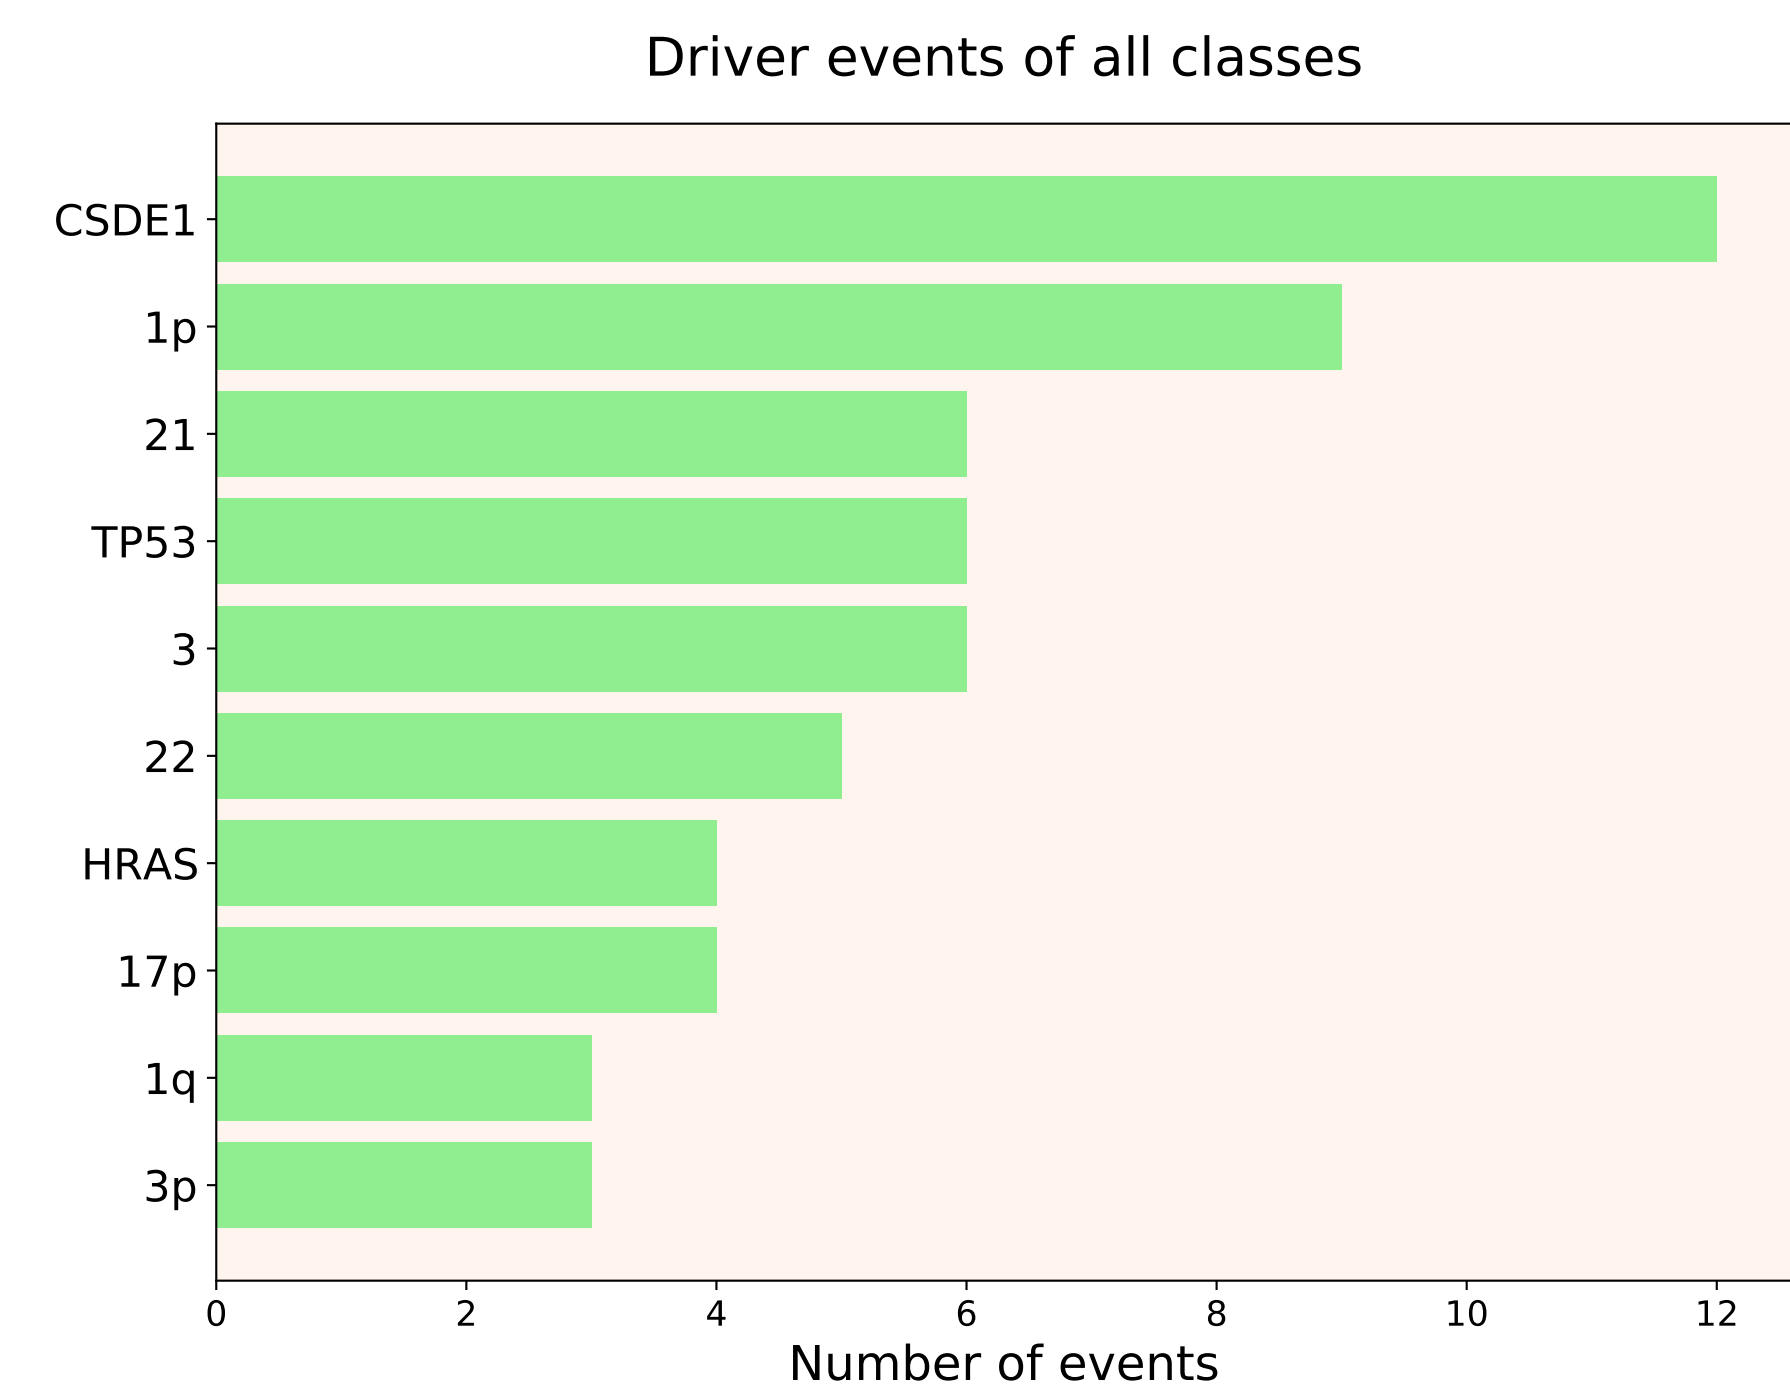

Supplement: Supplemental_Data_S1.zip [file Supplemental_Data_S1.zip]

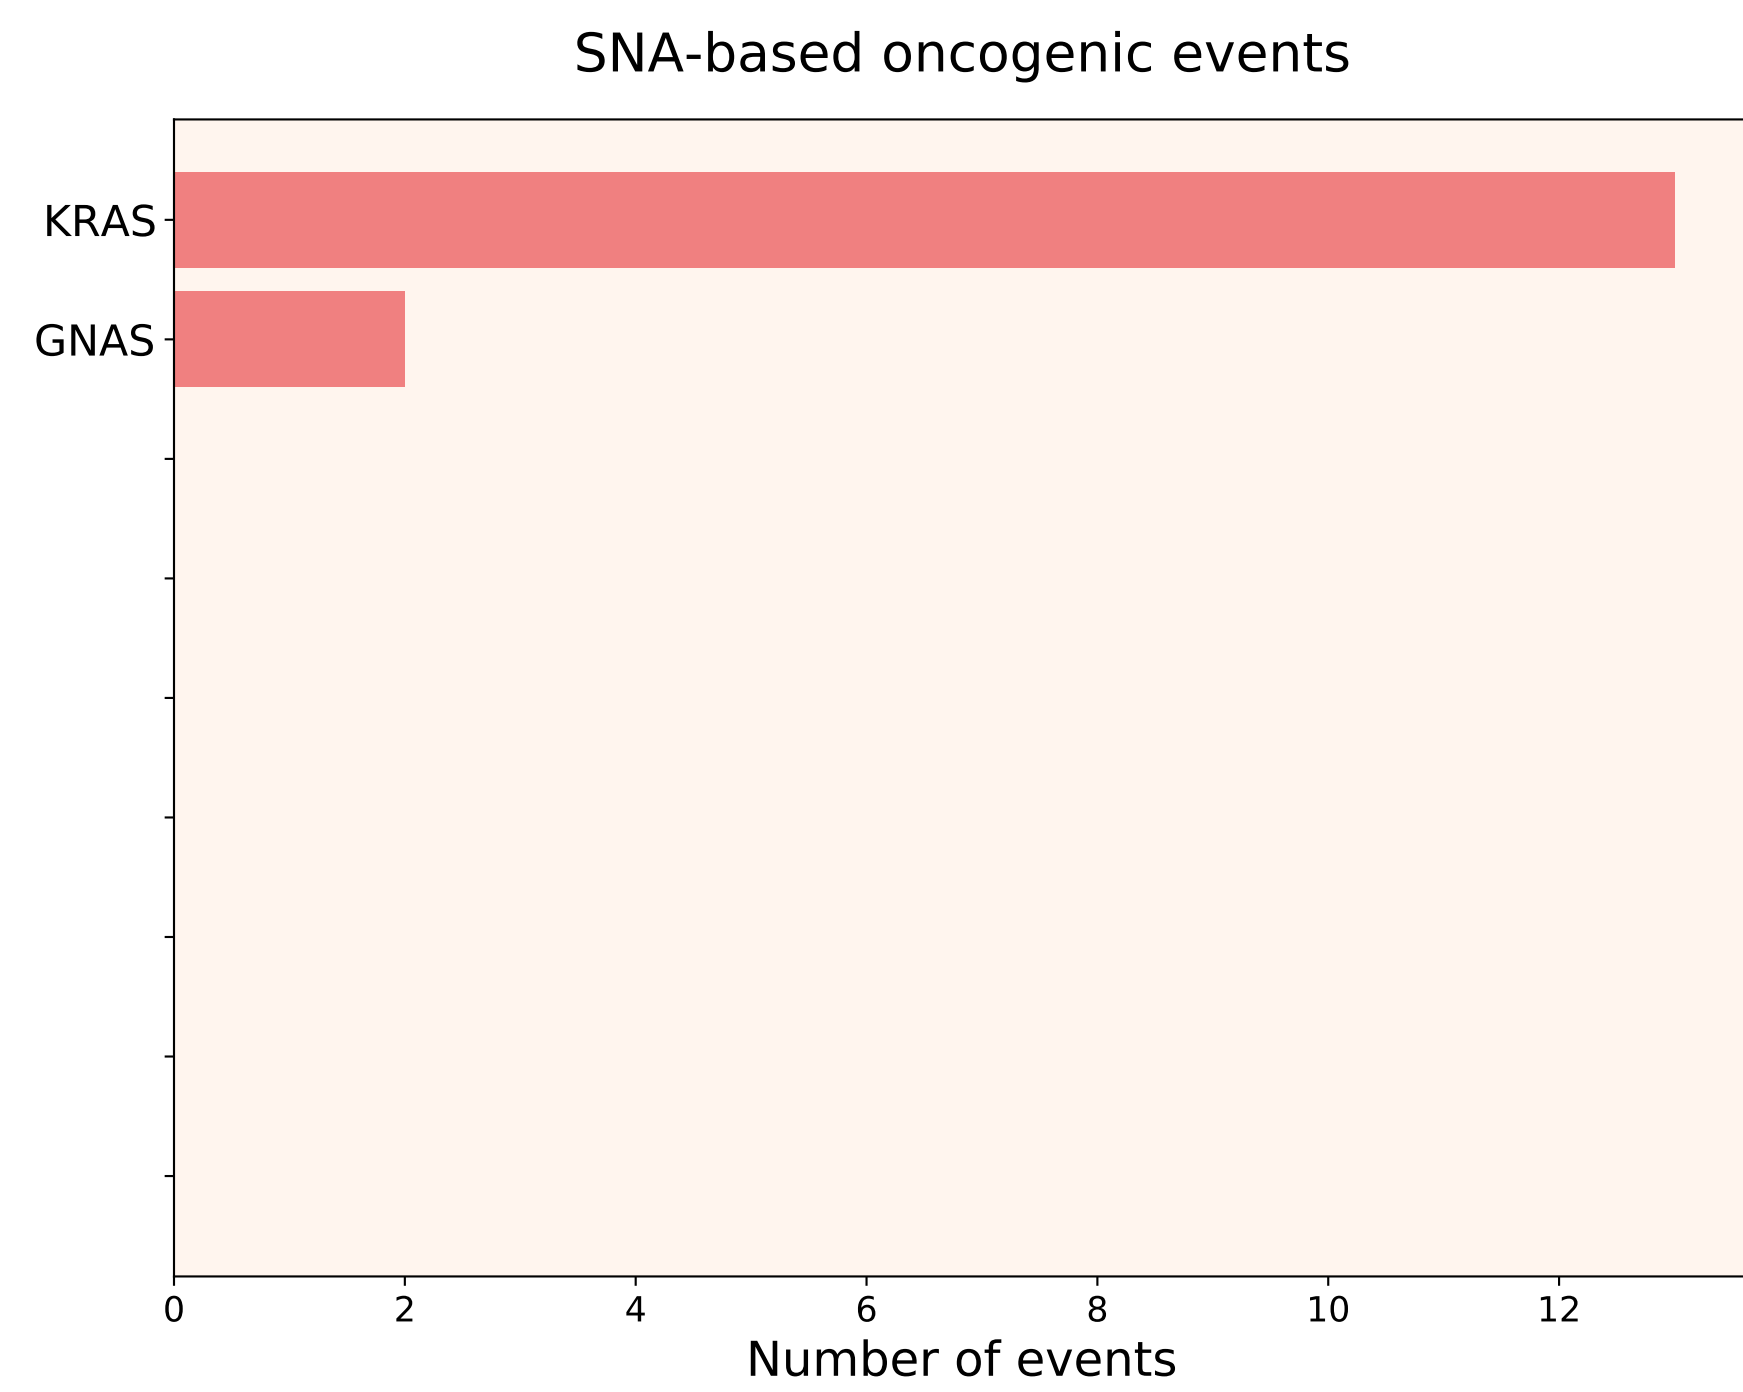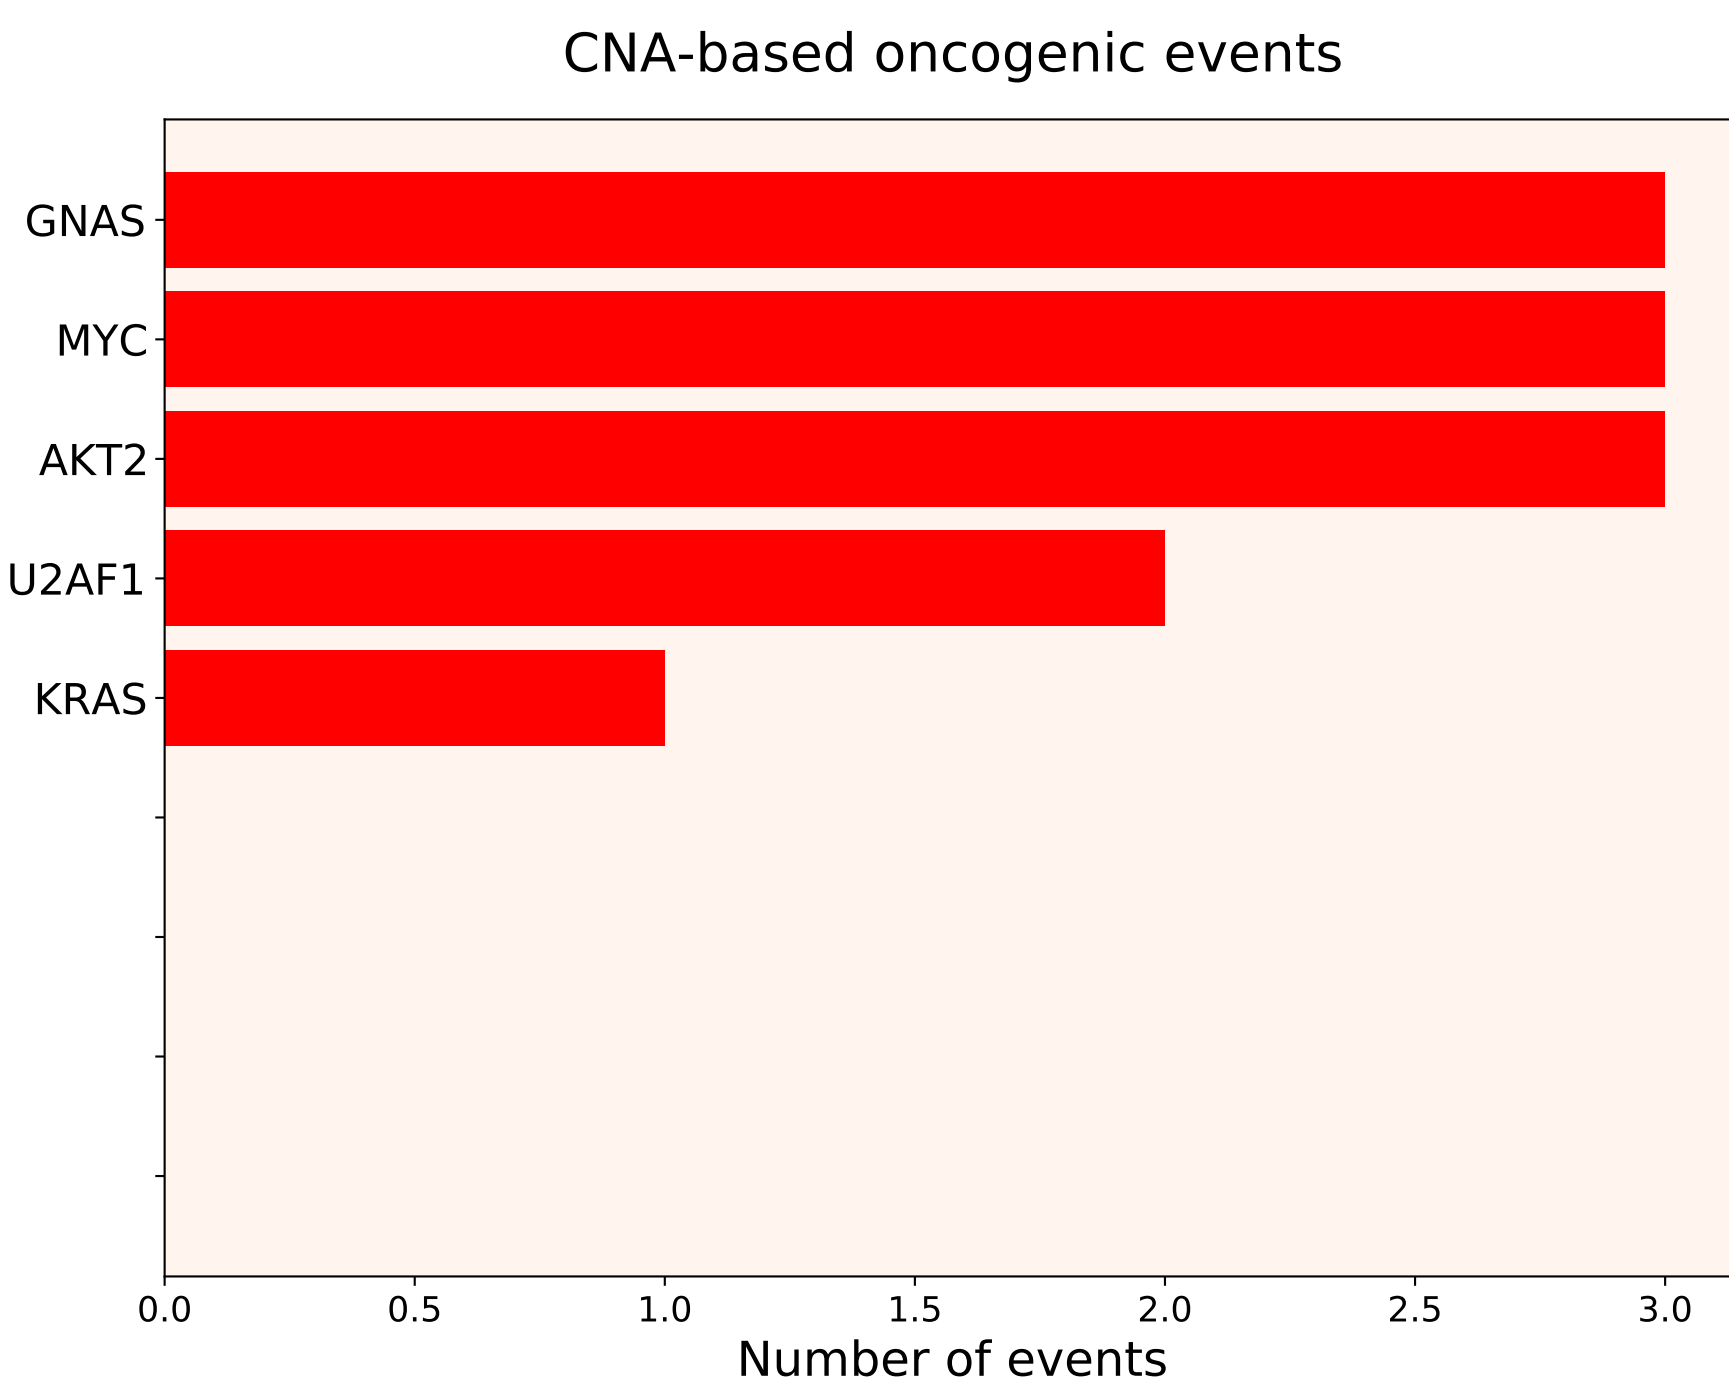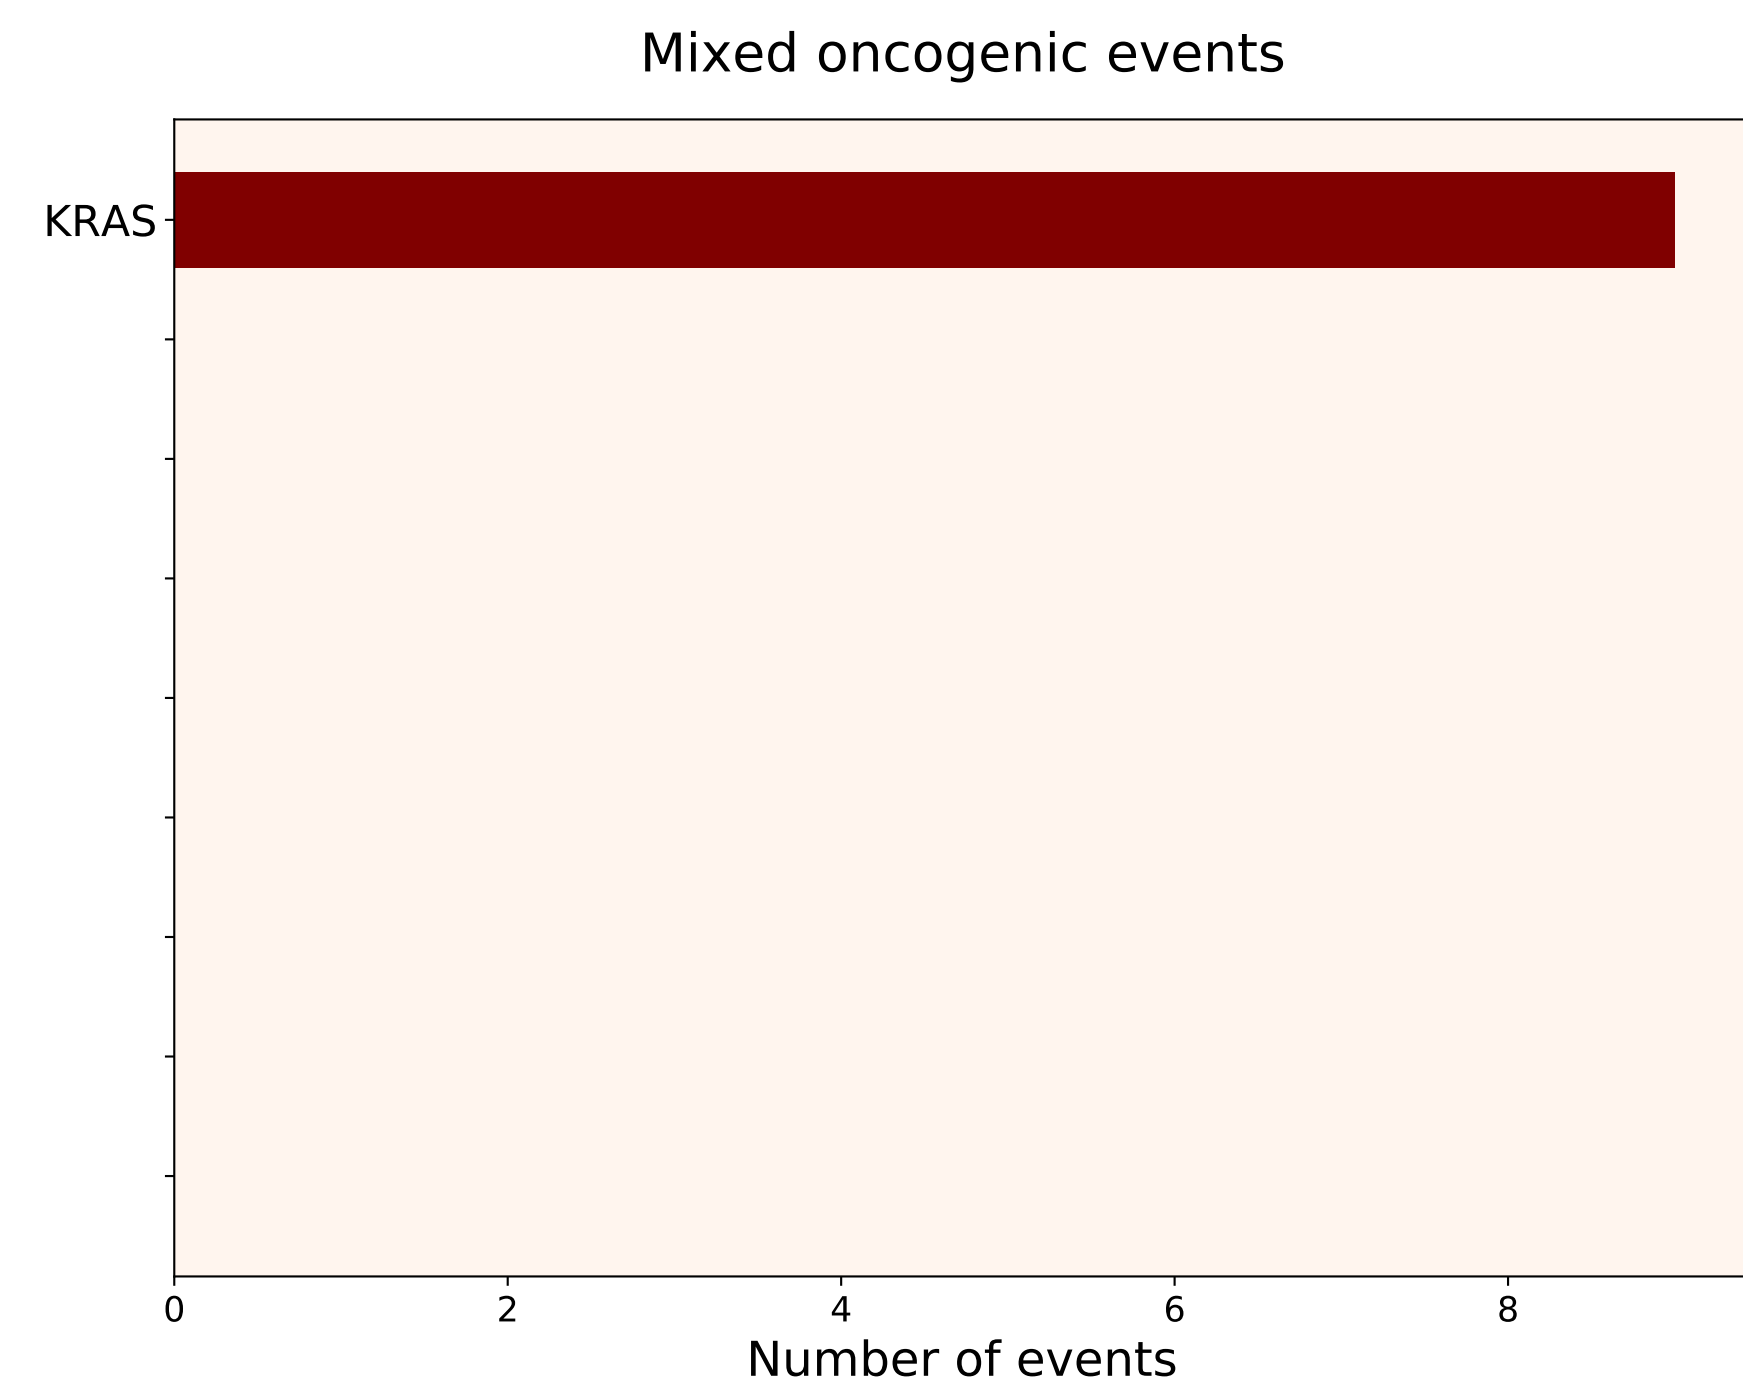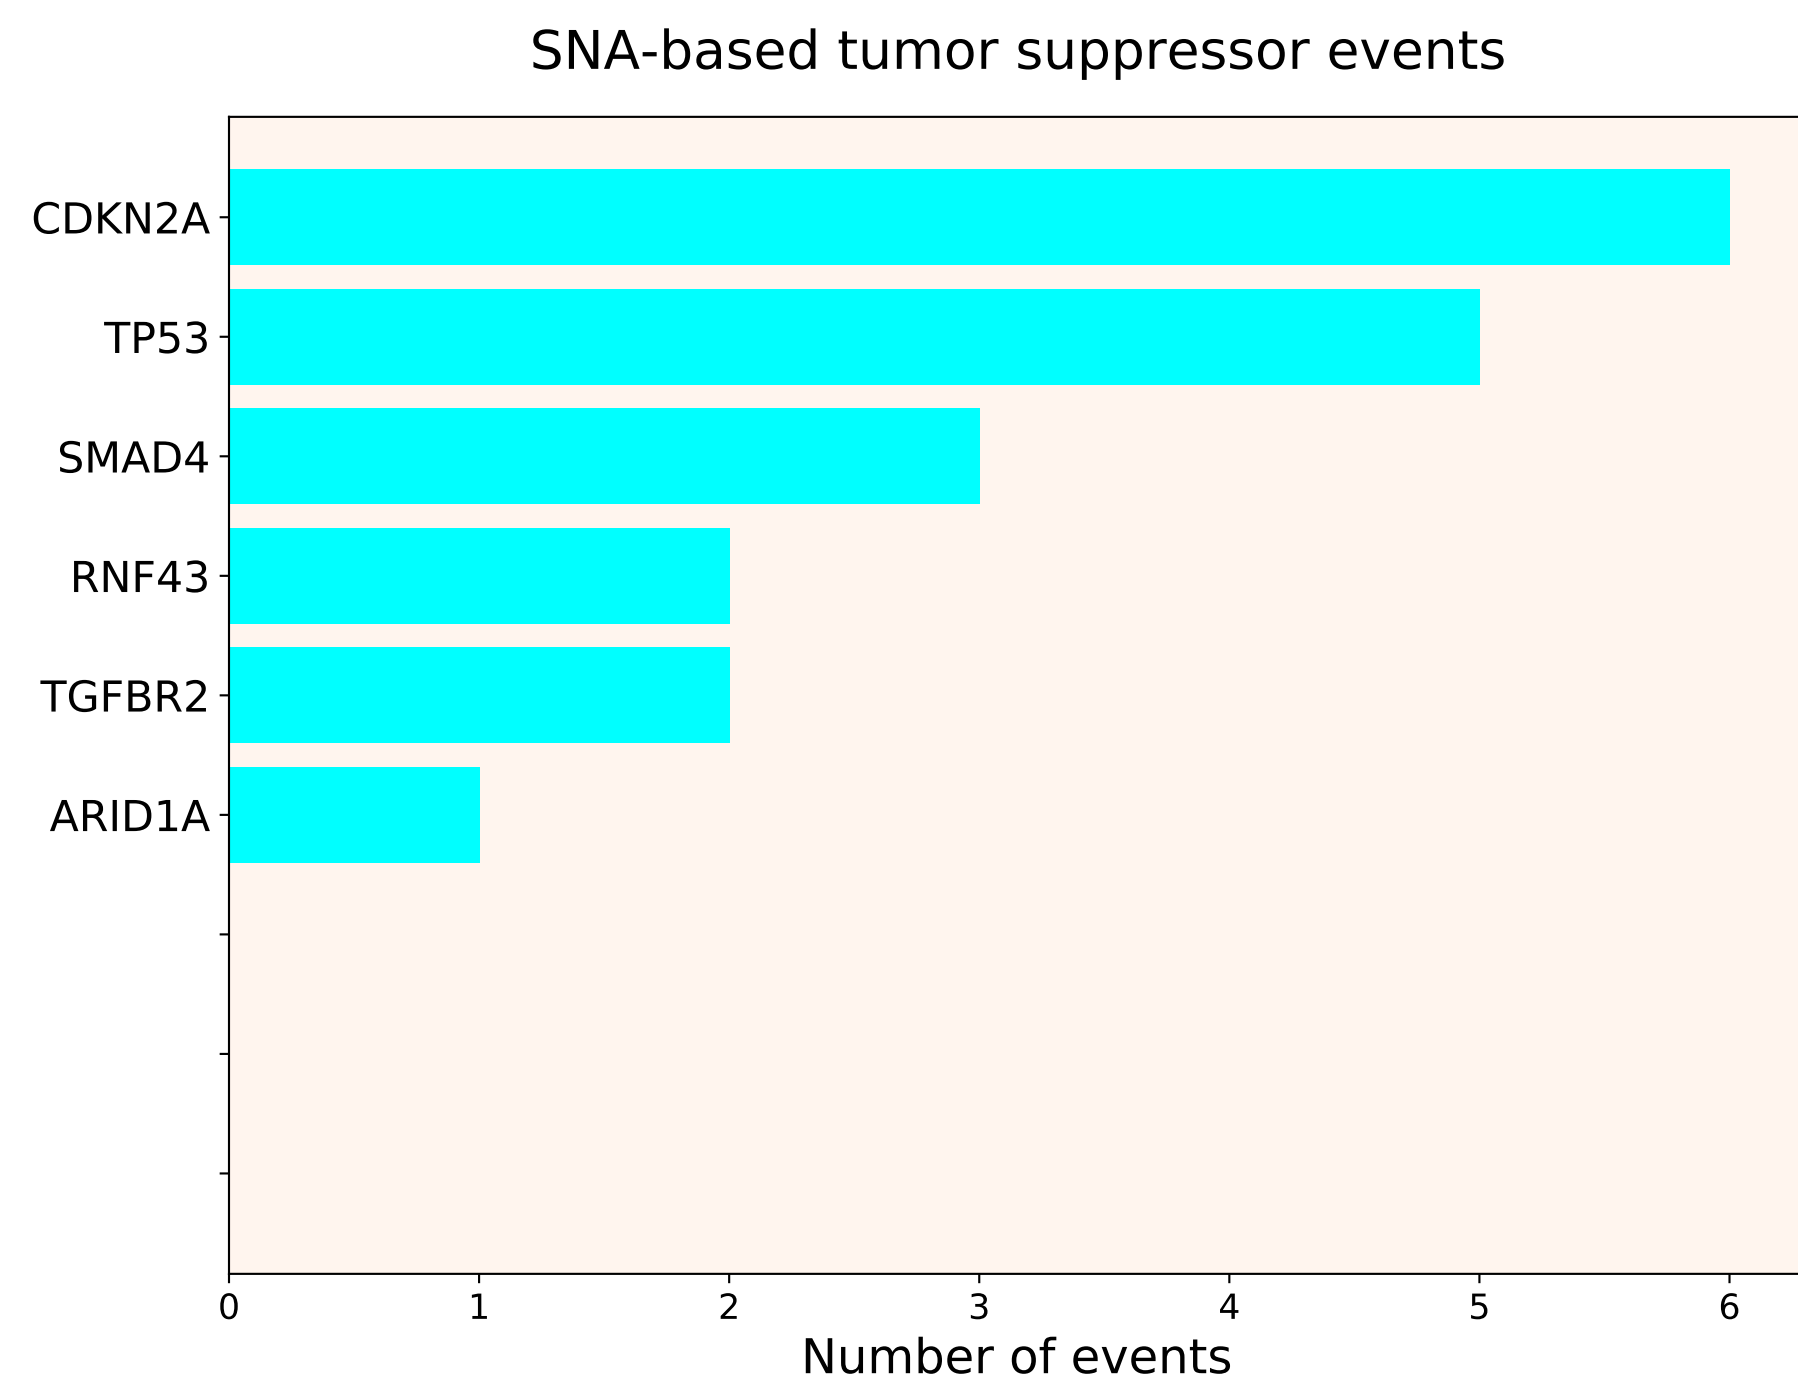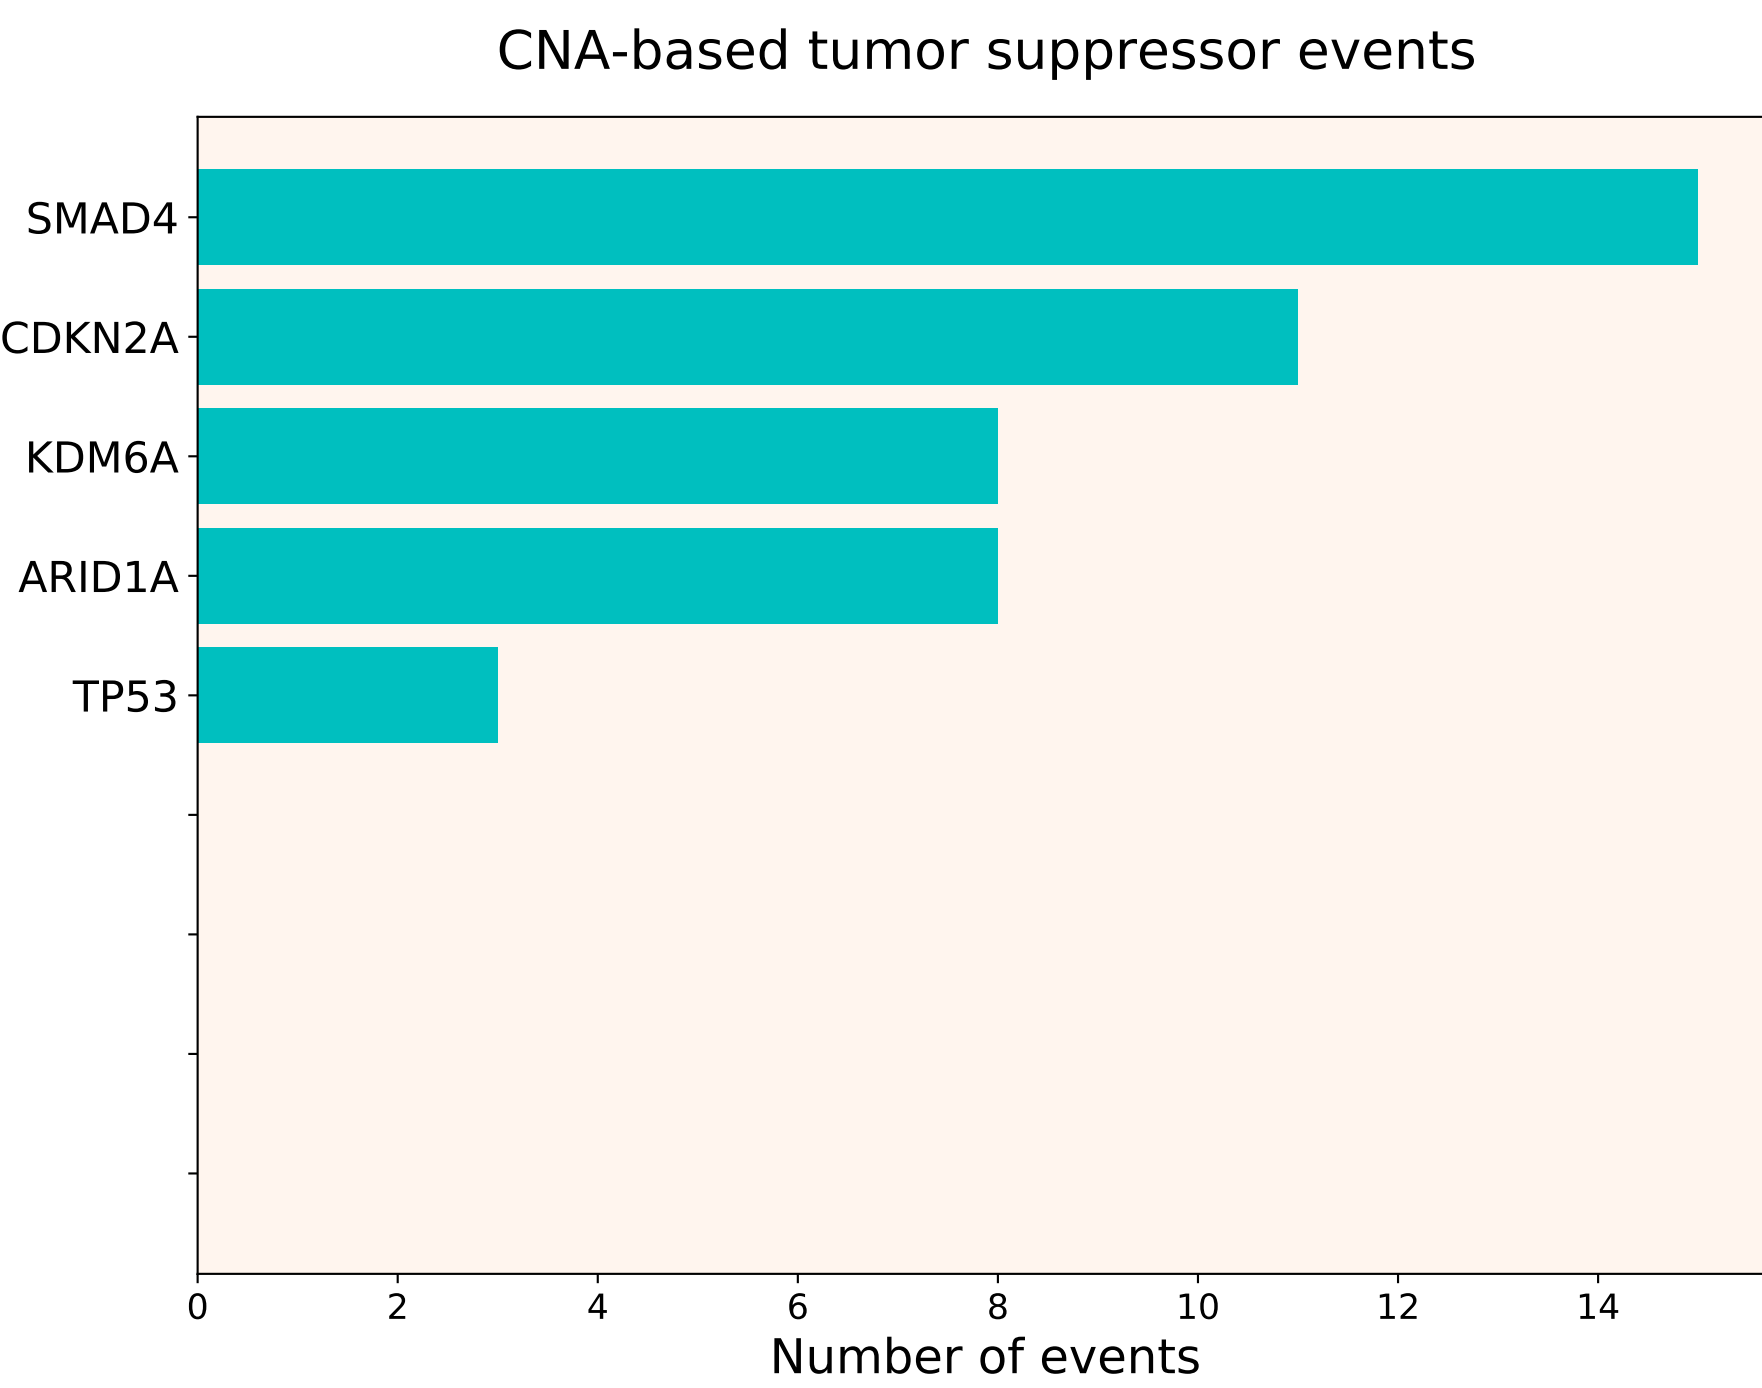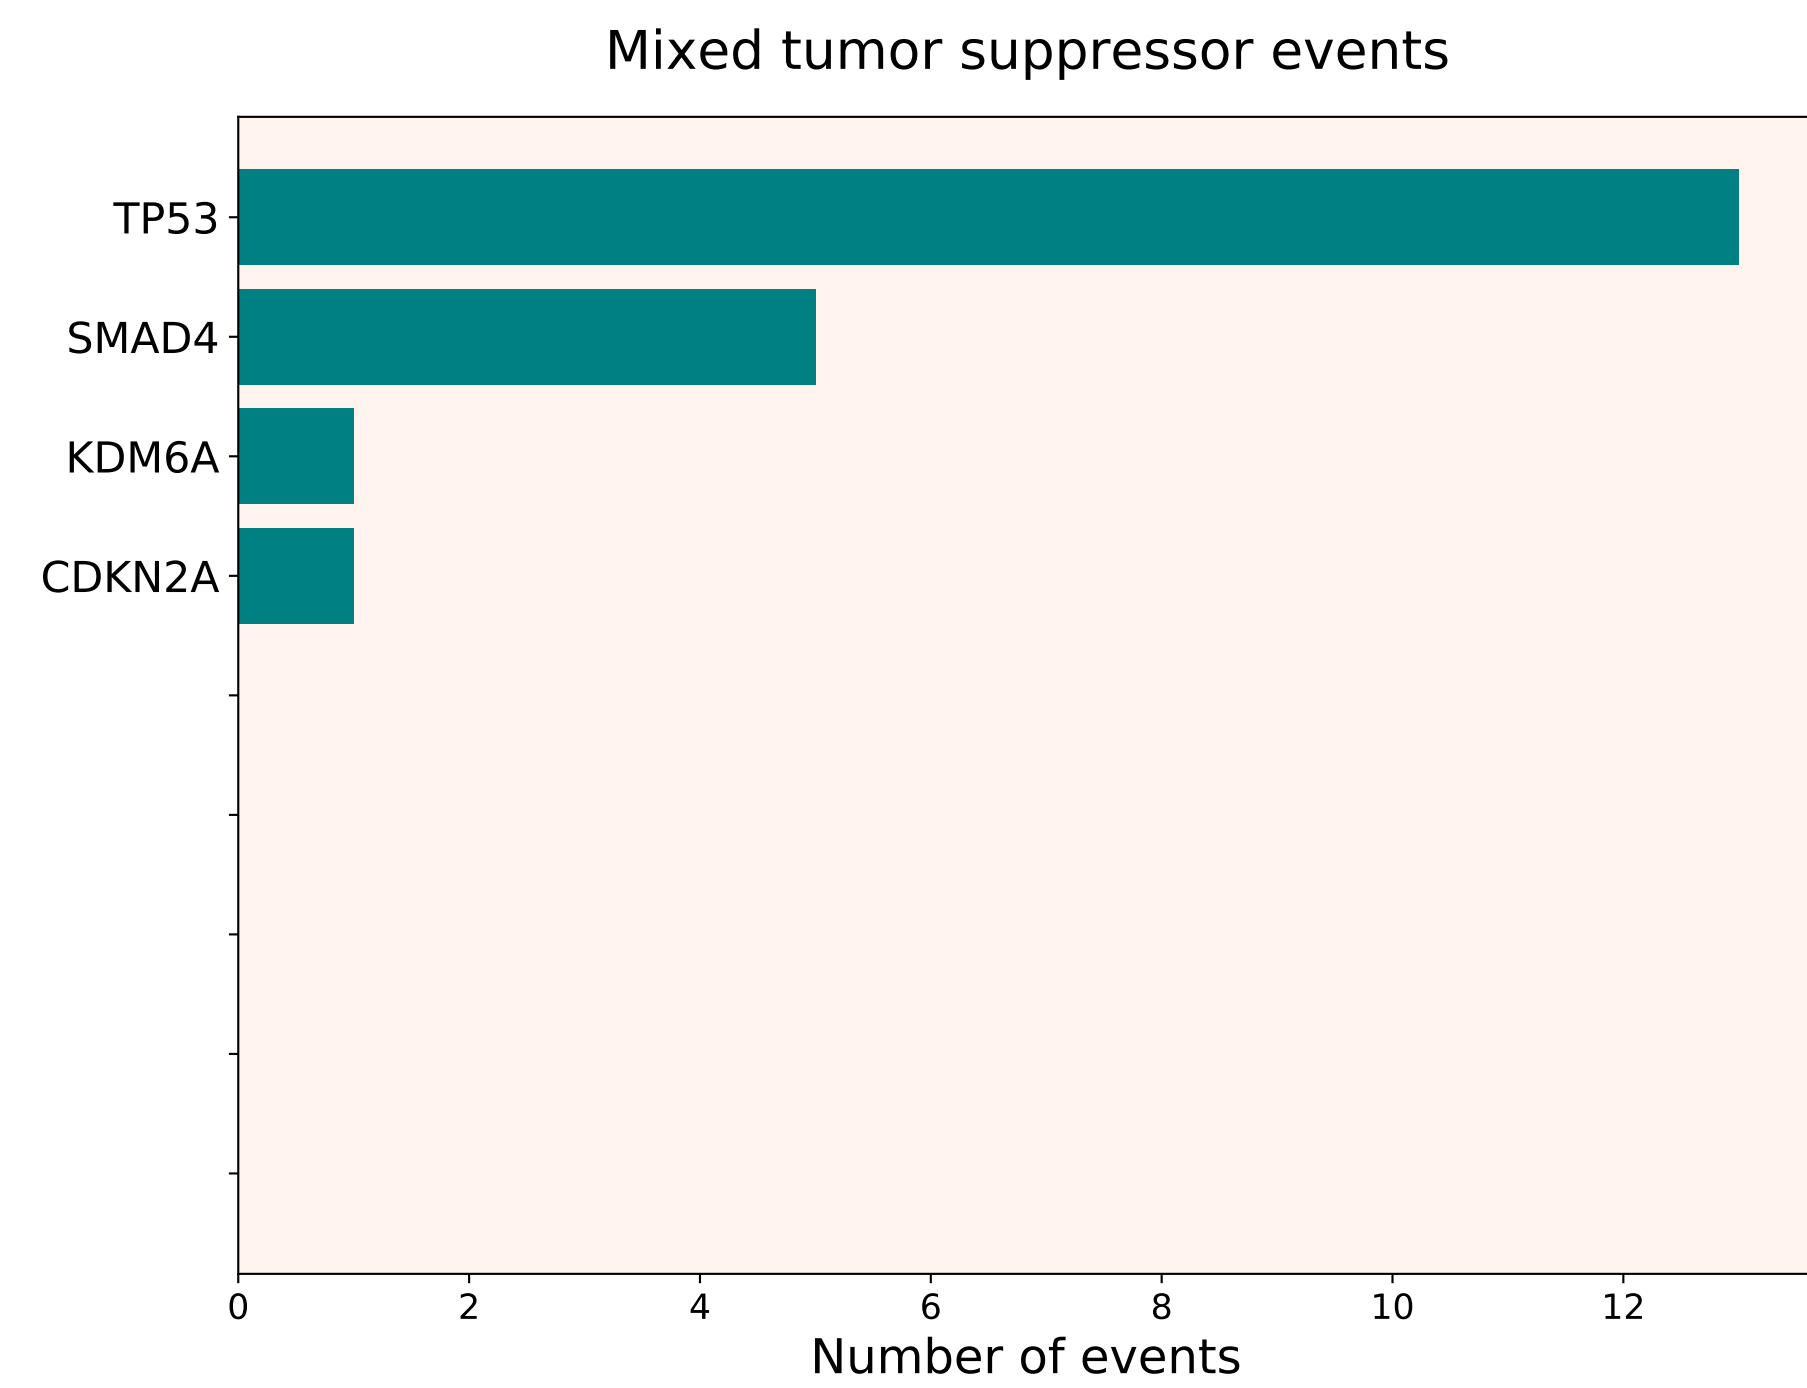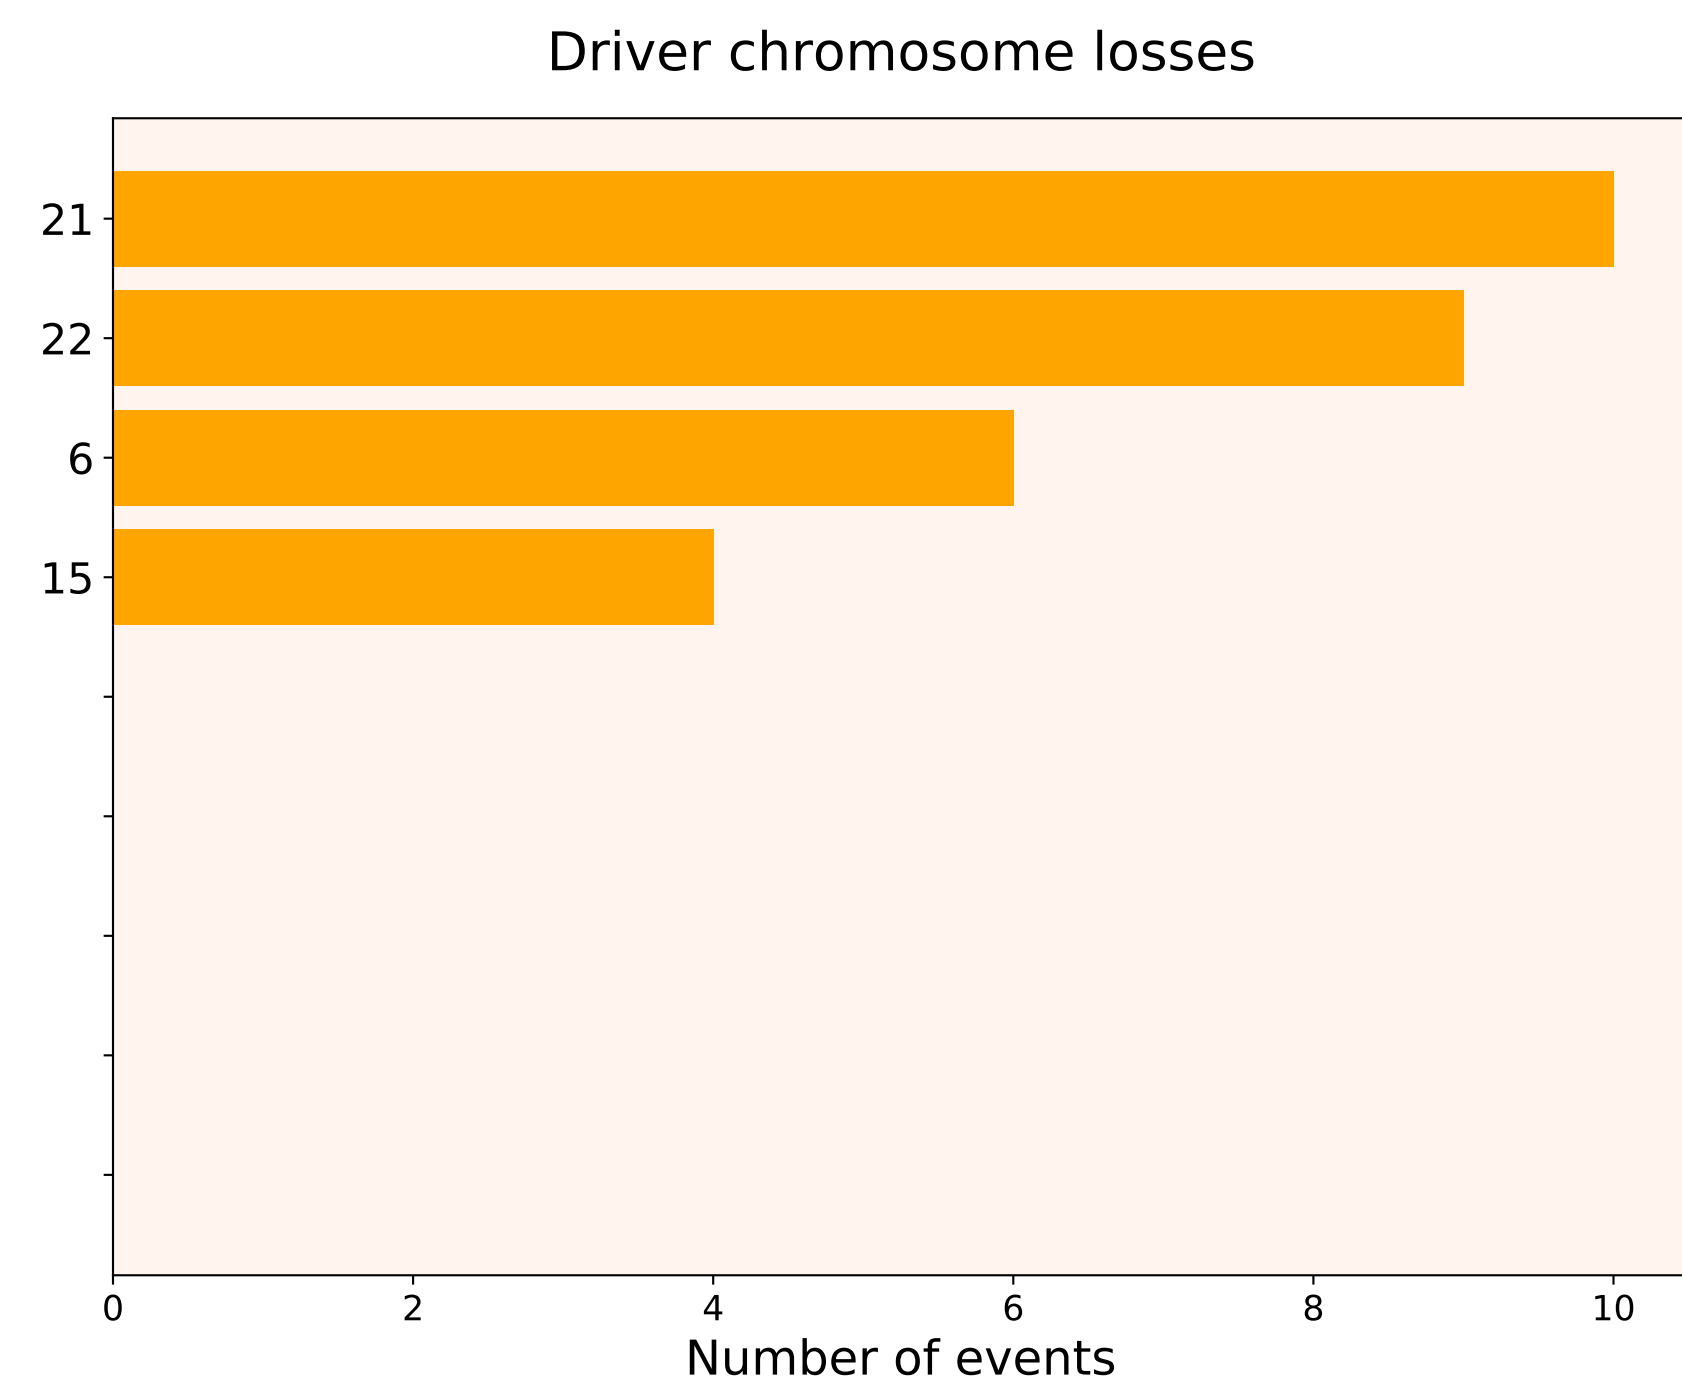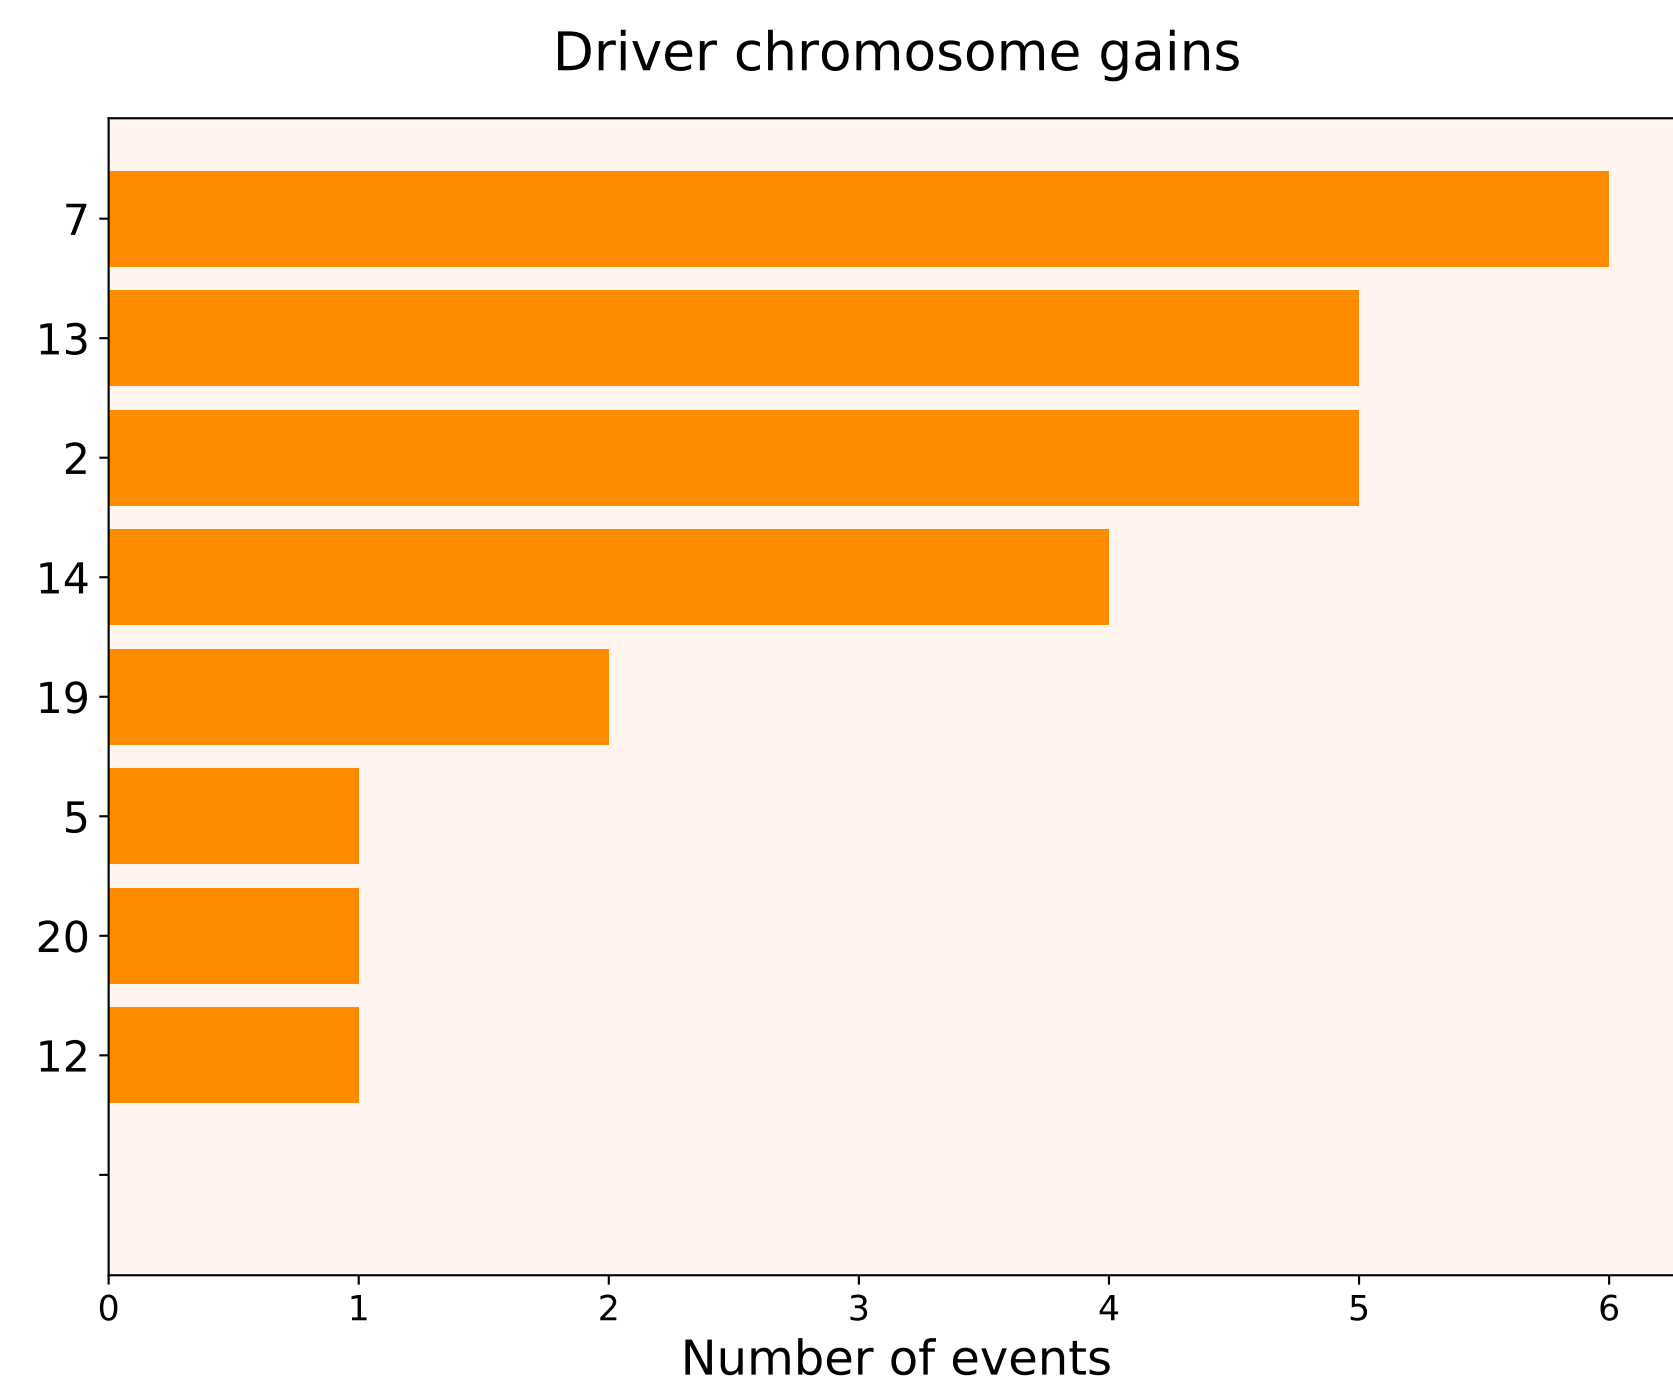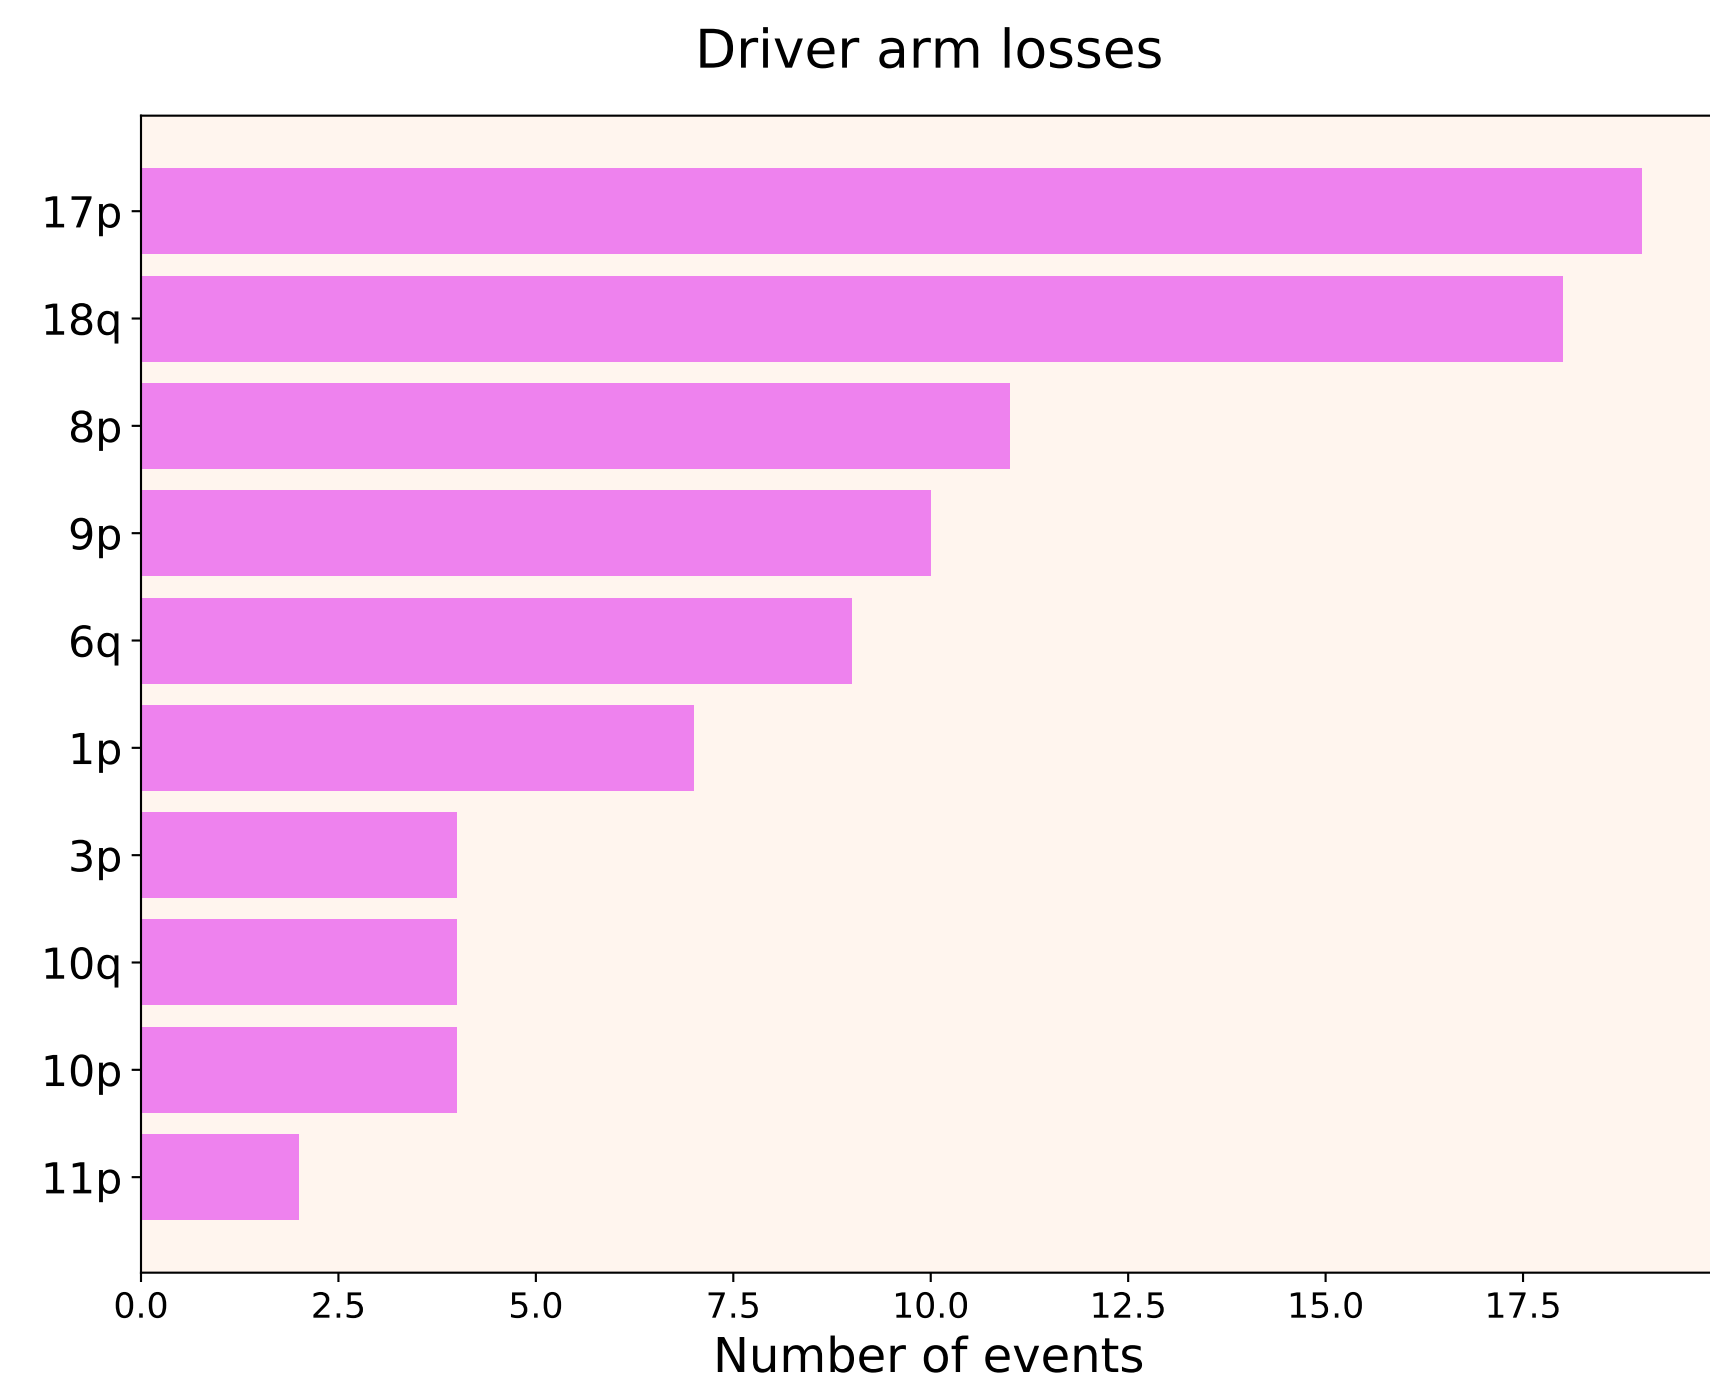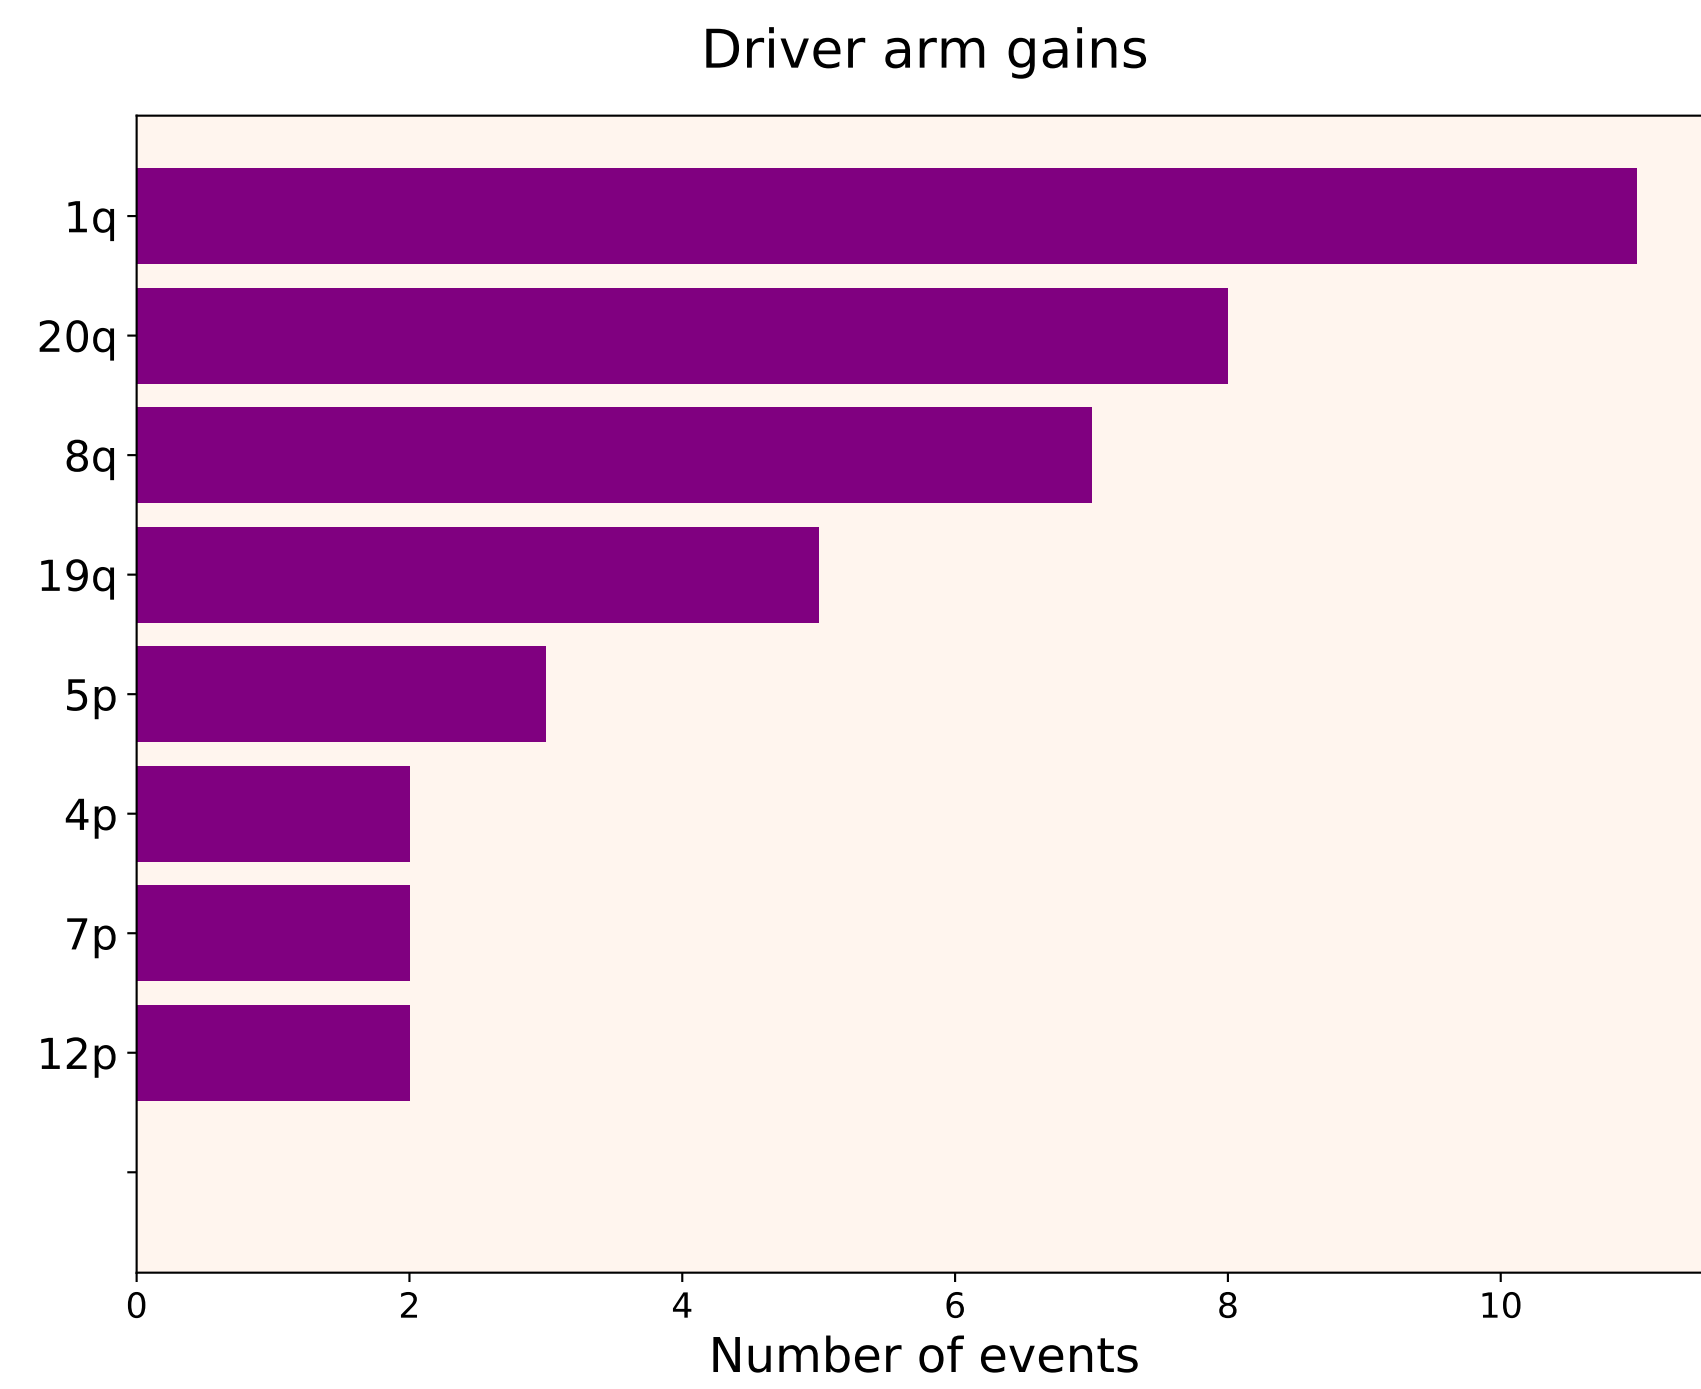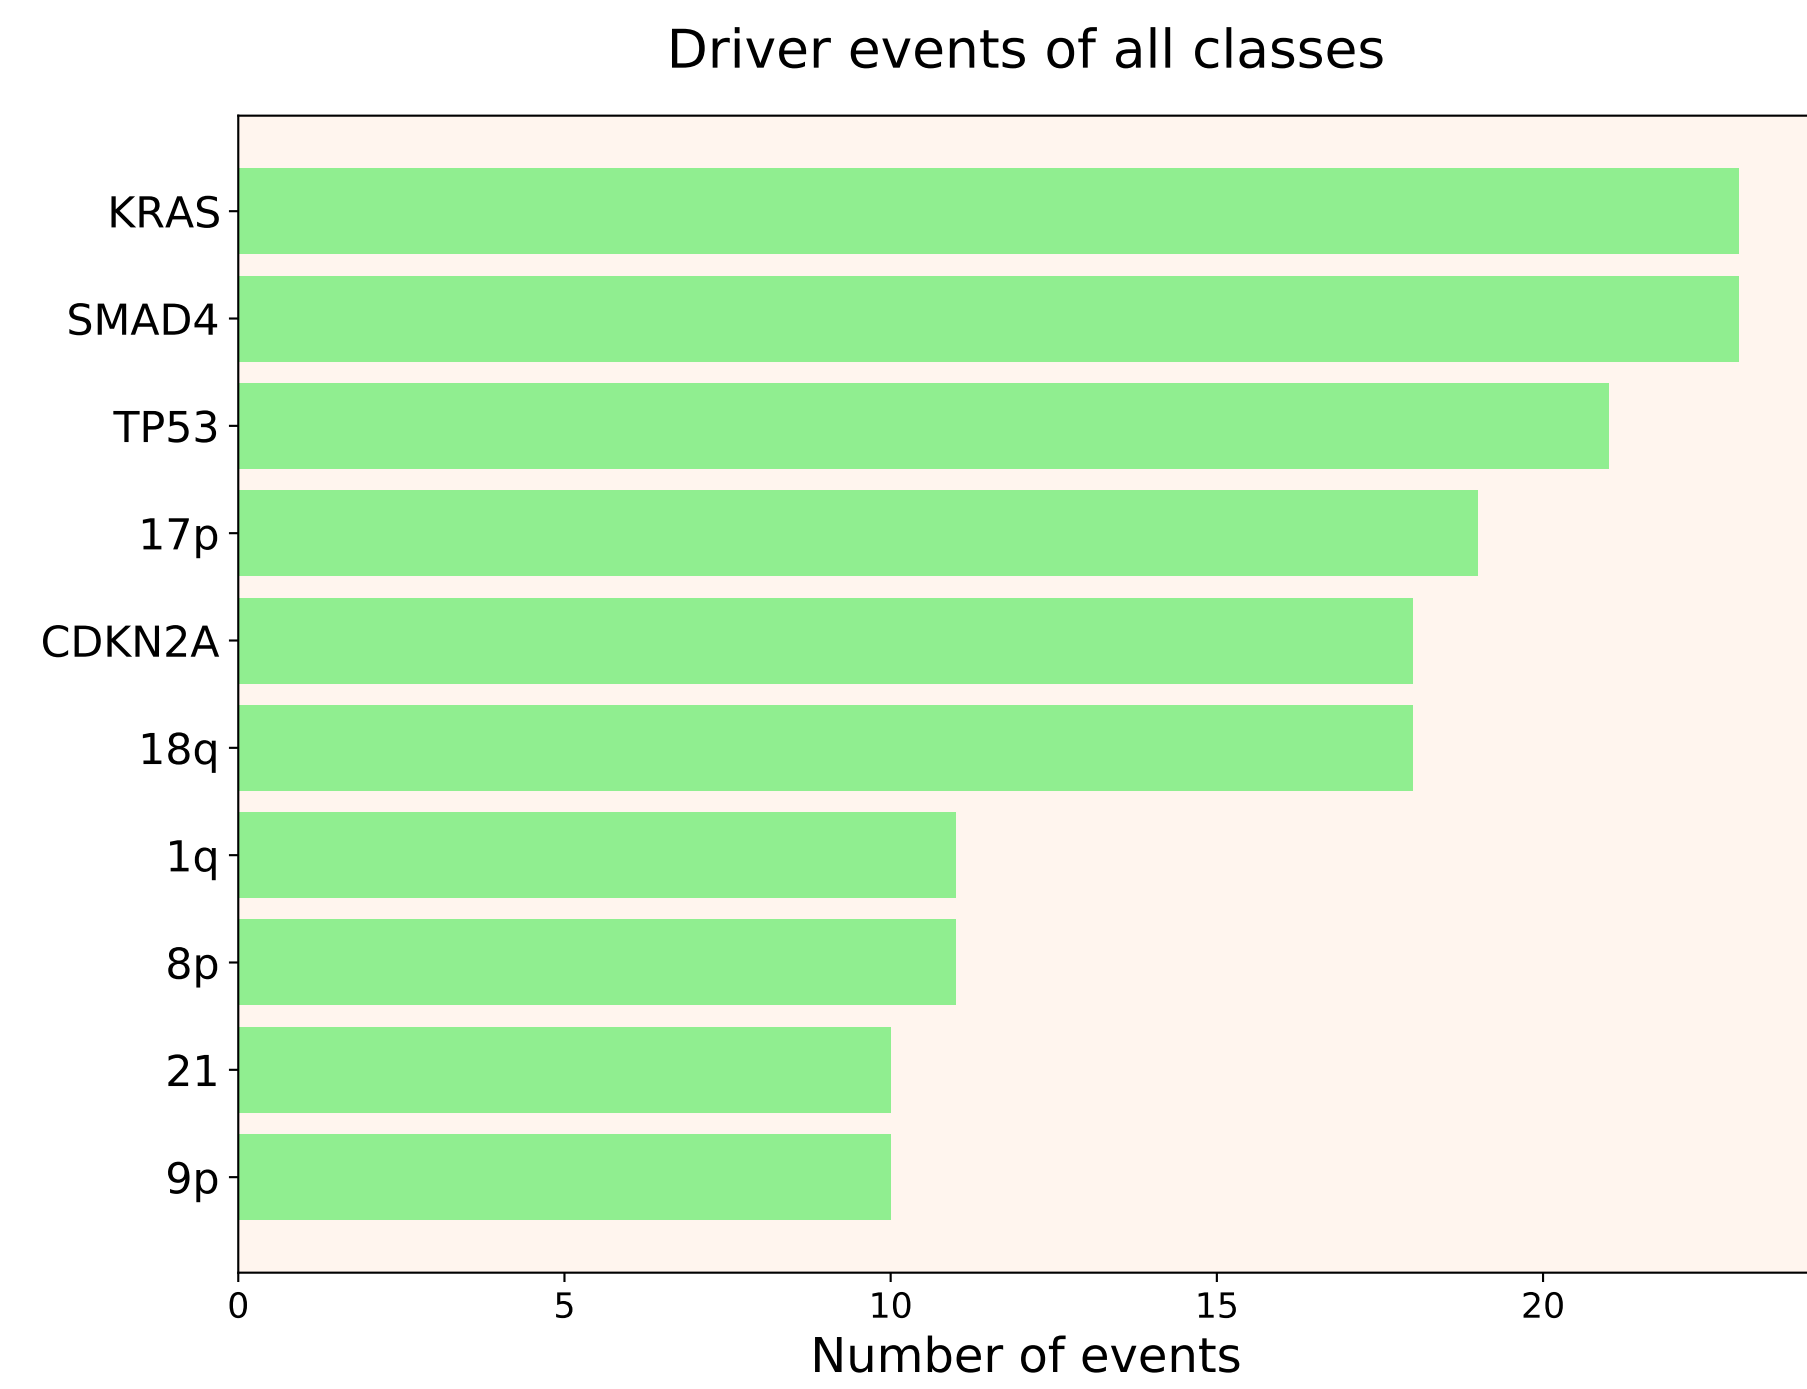

Supplement: Supplemental_Data_S1.zip [file Supplemental_Data_S1.zip]

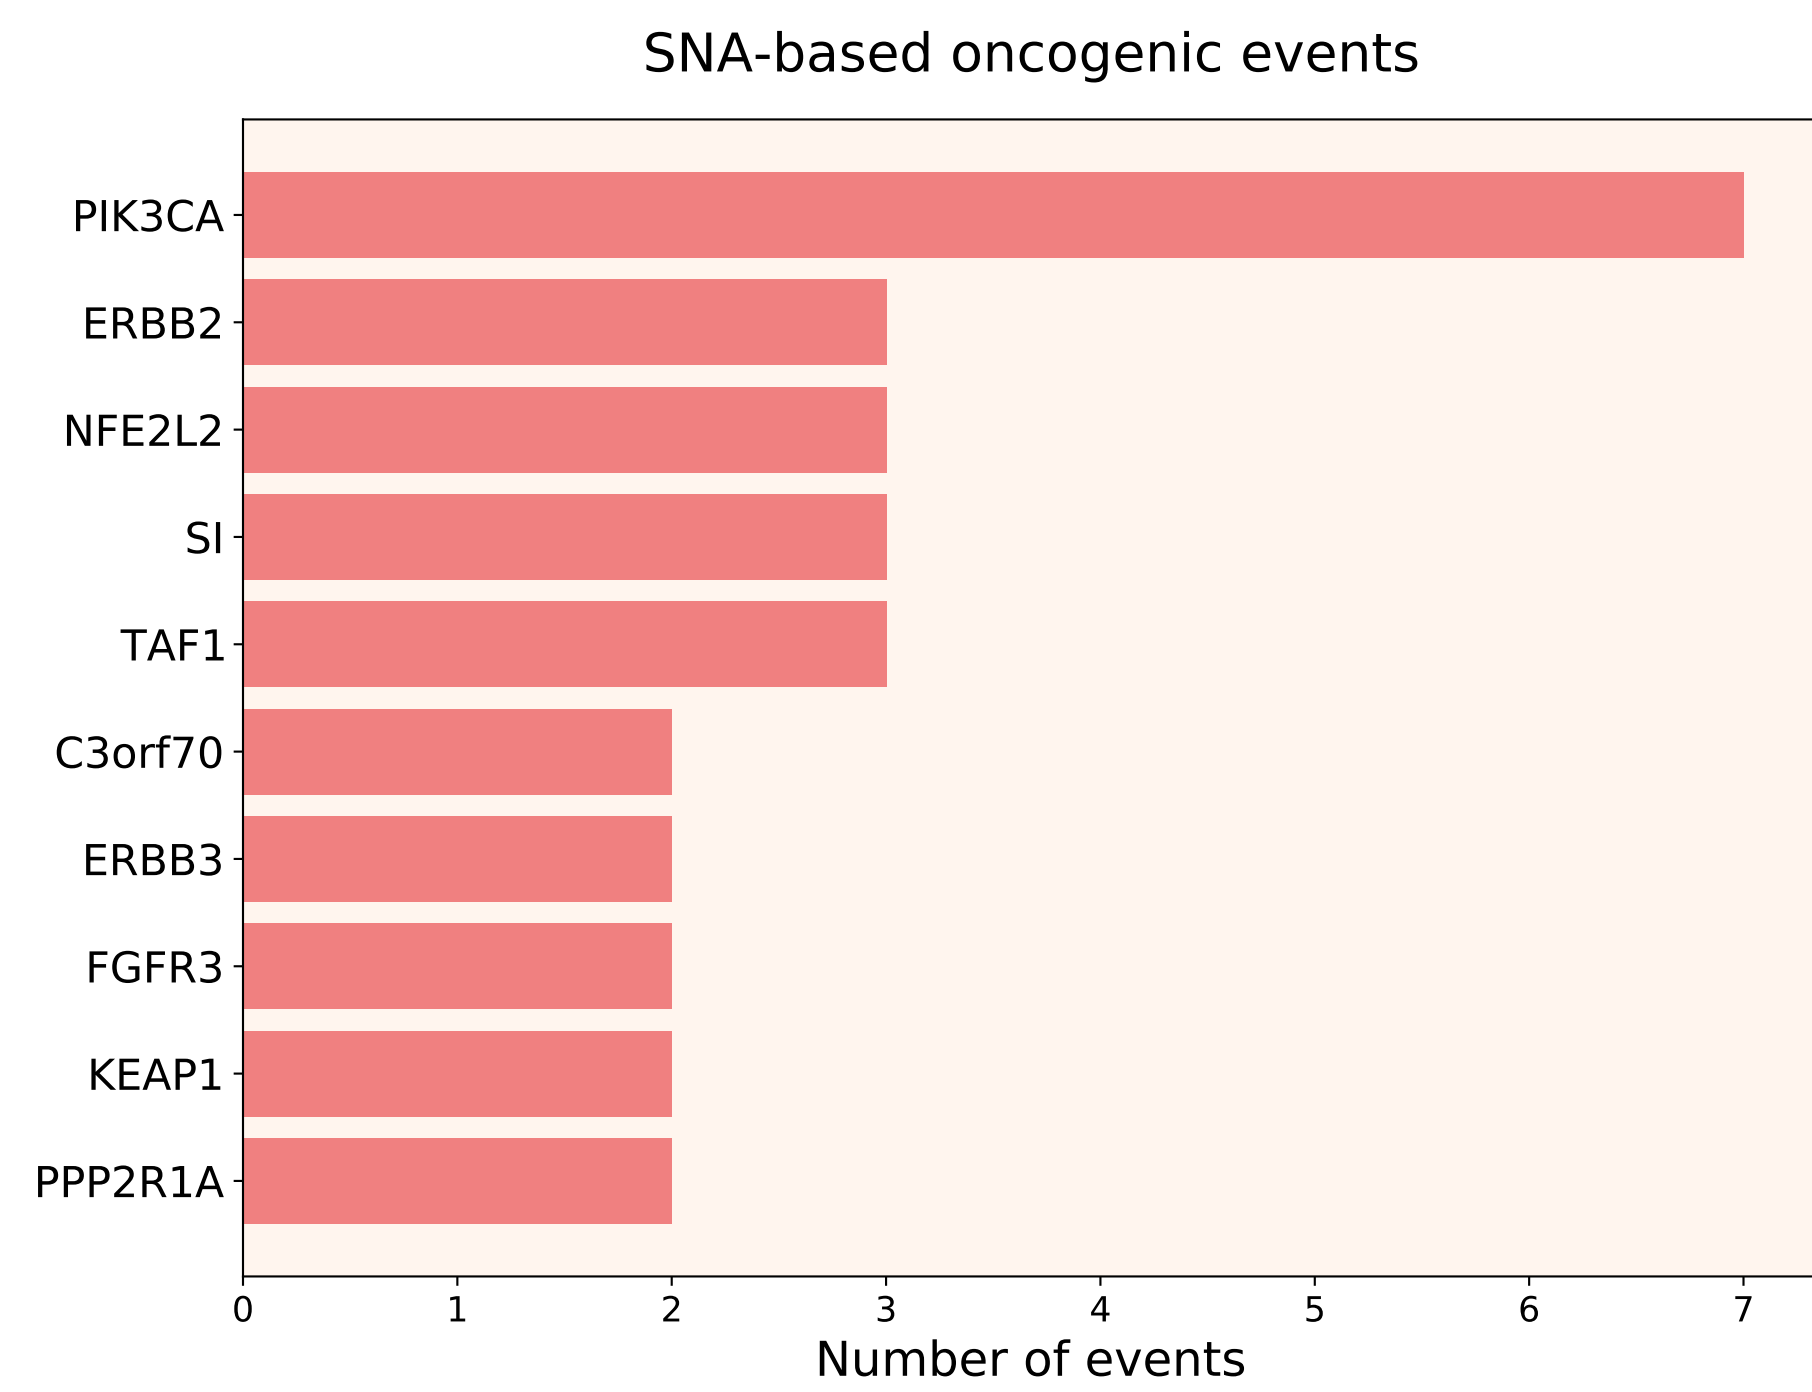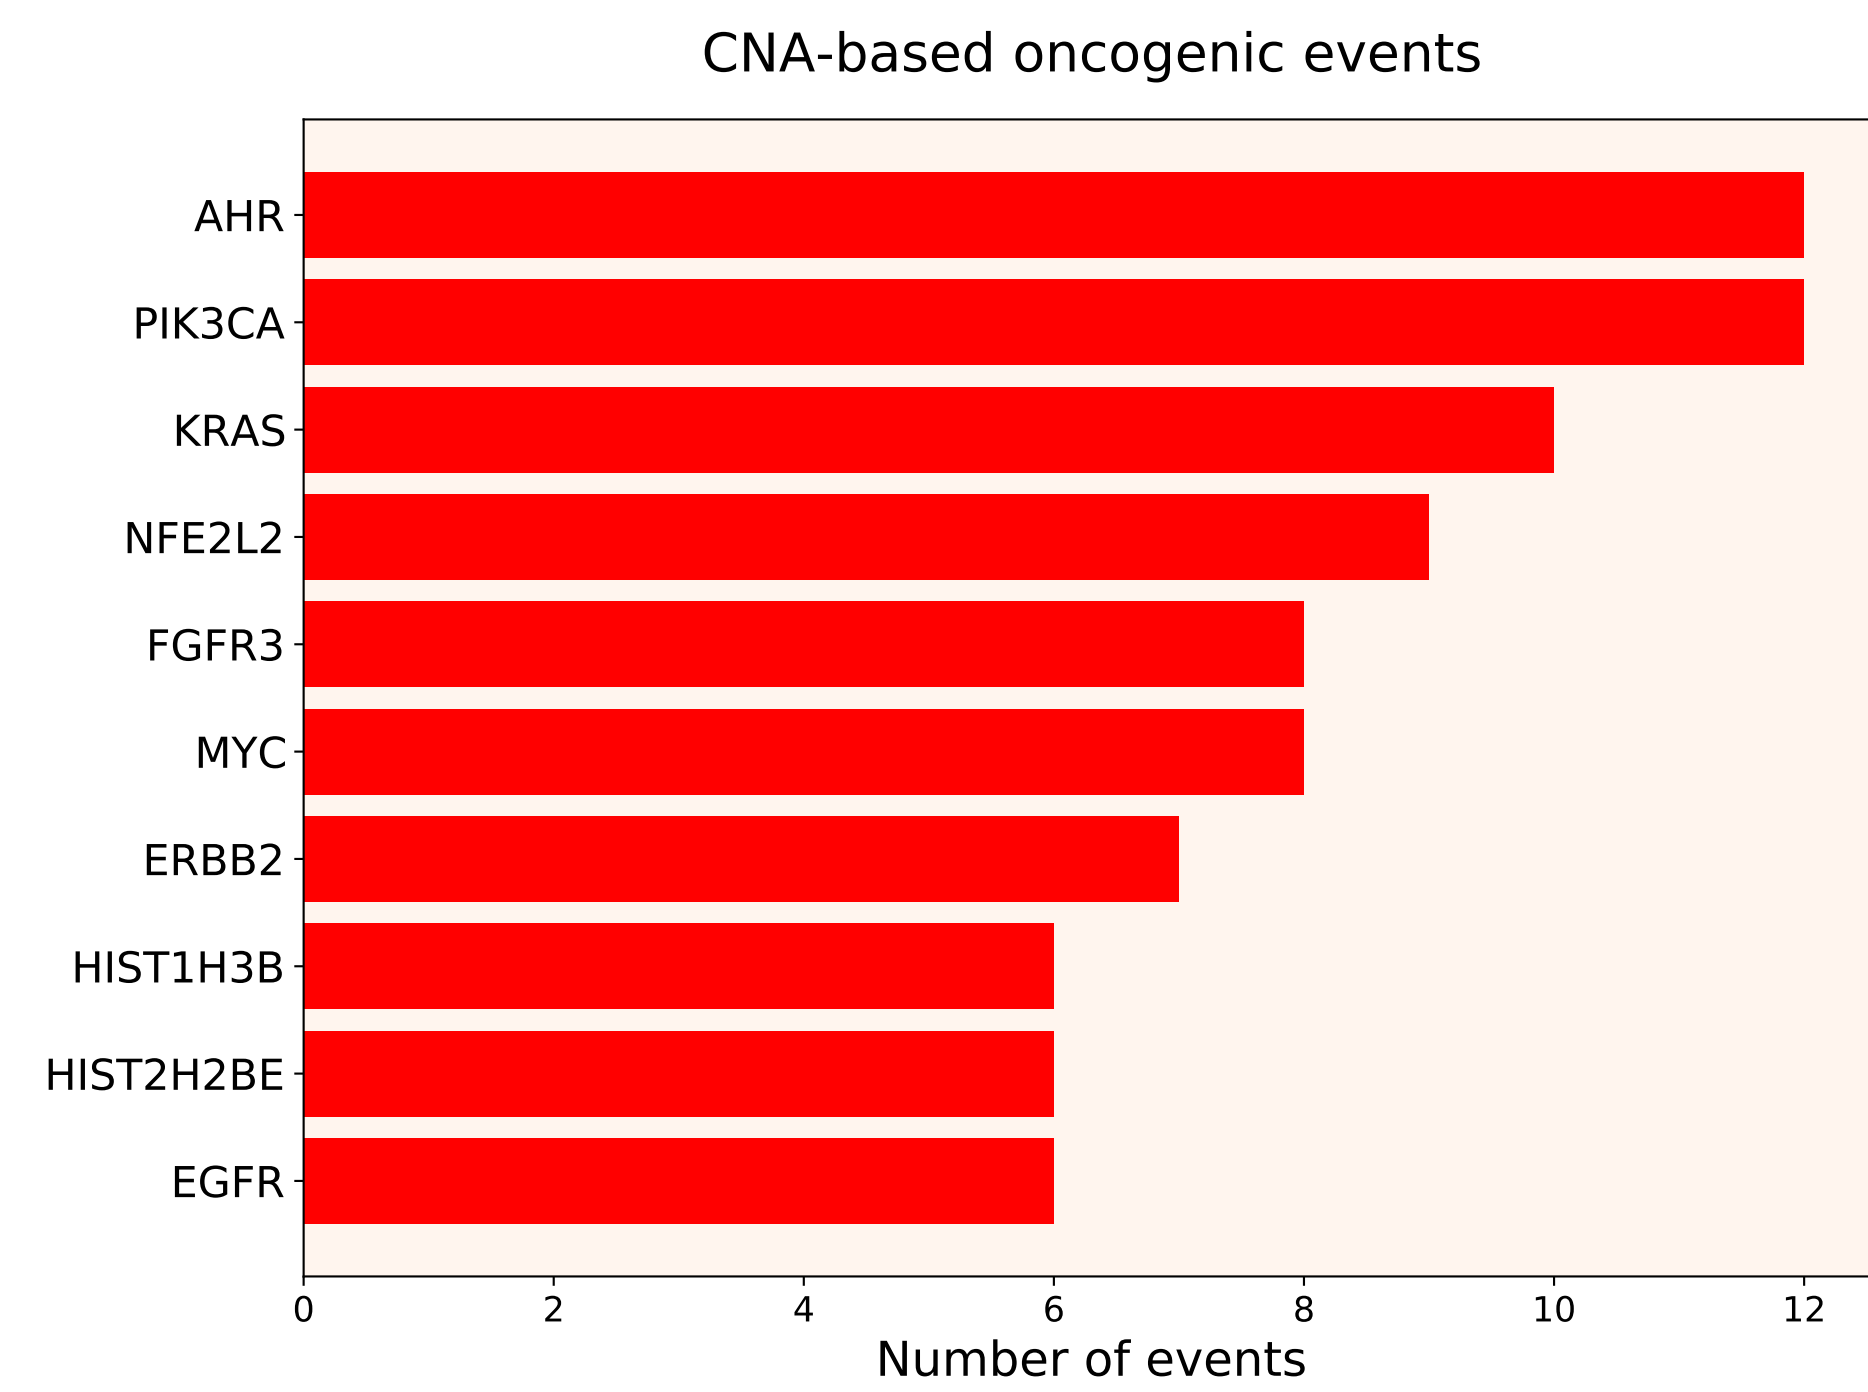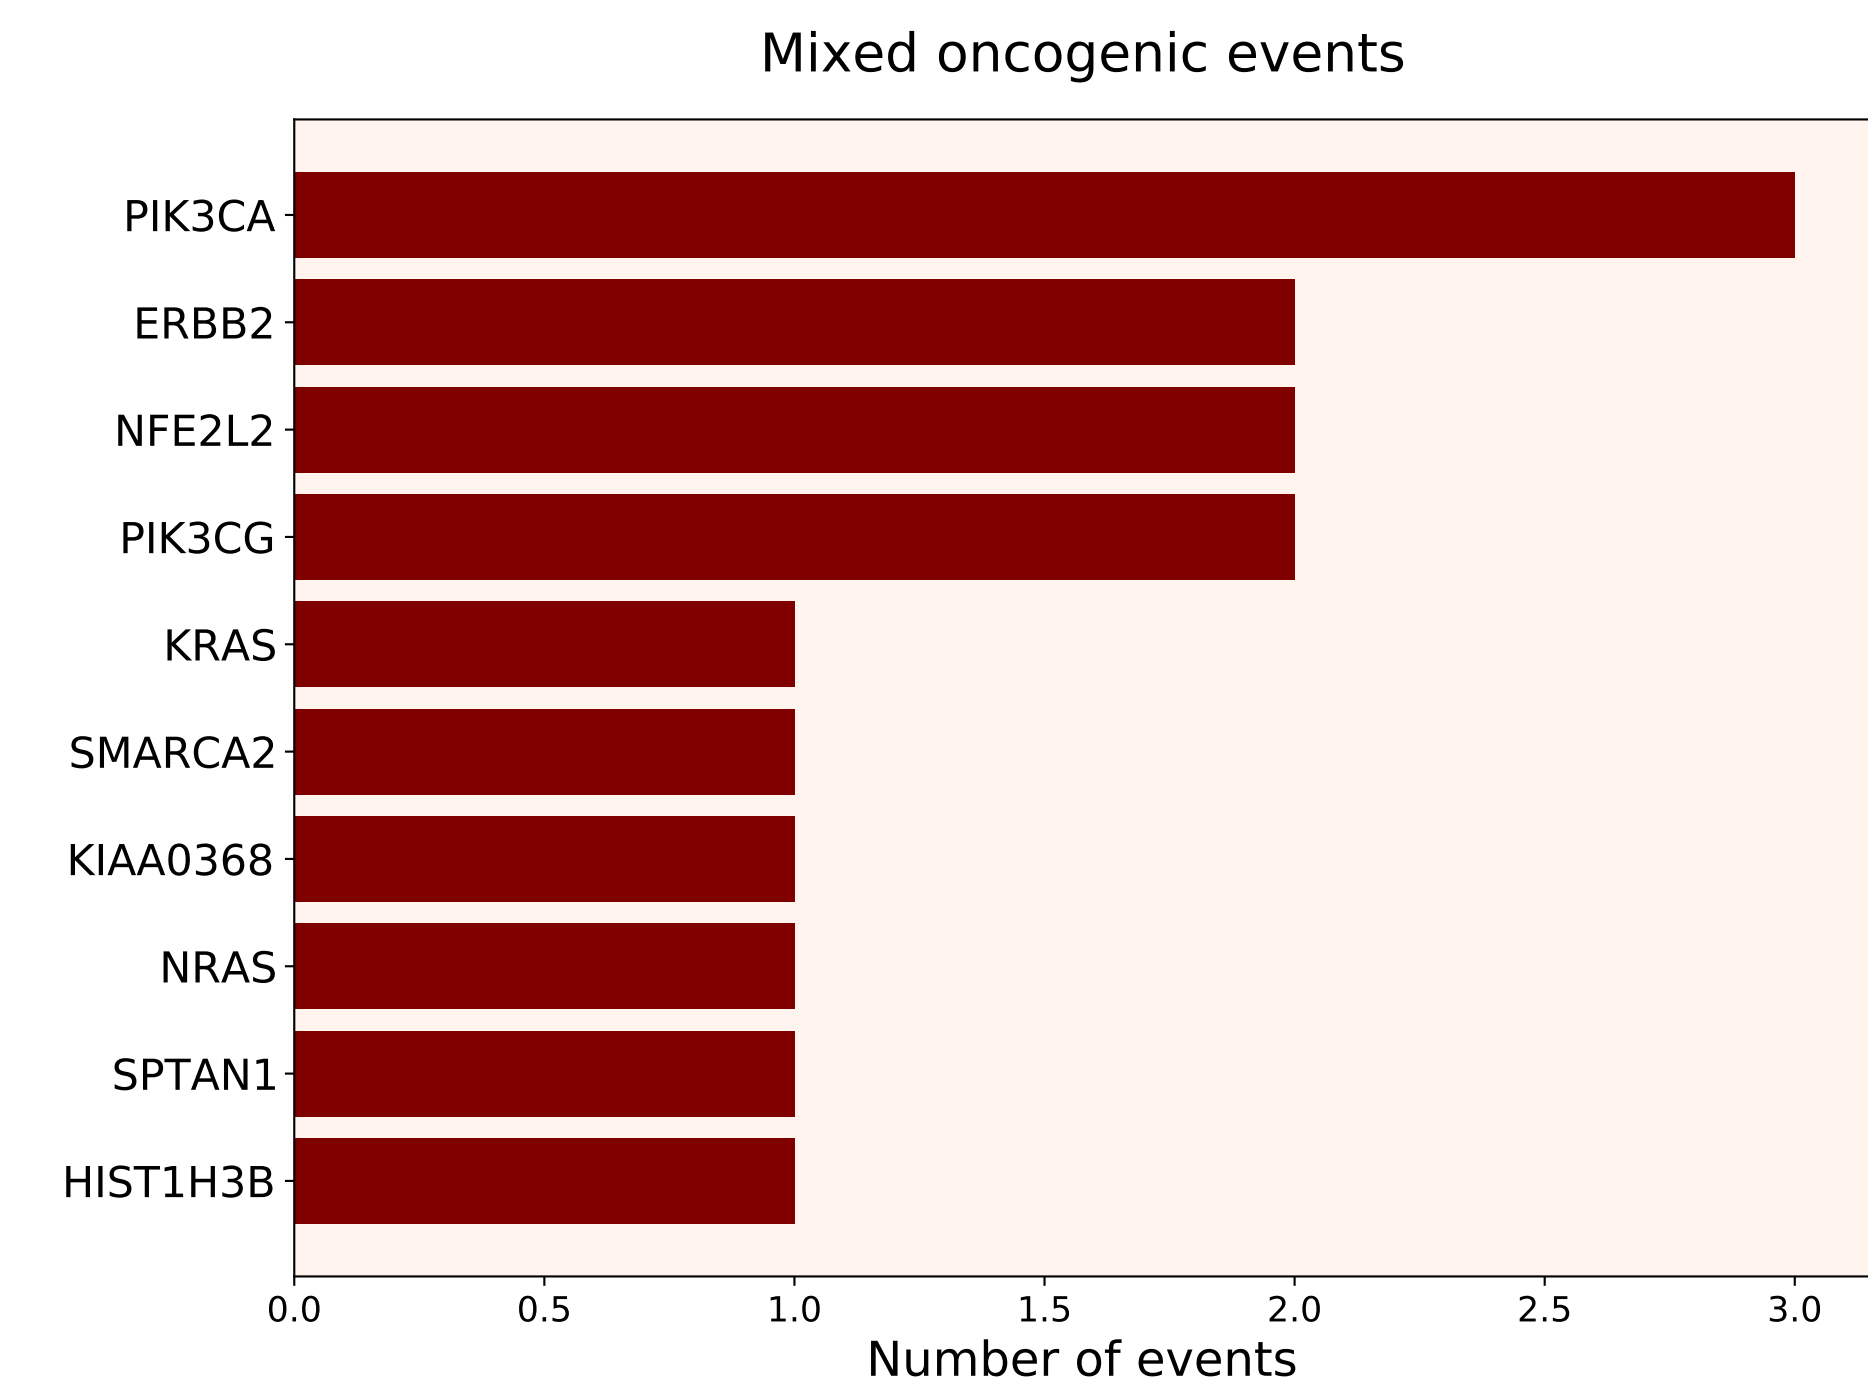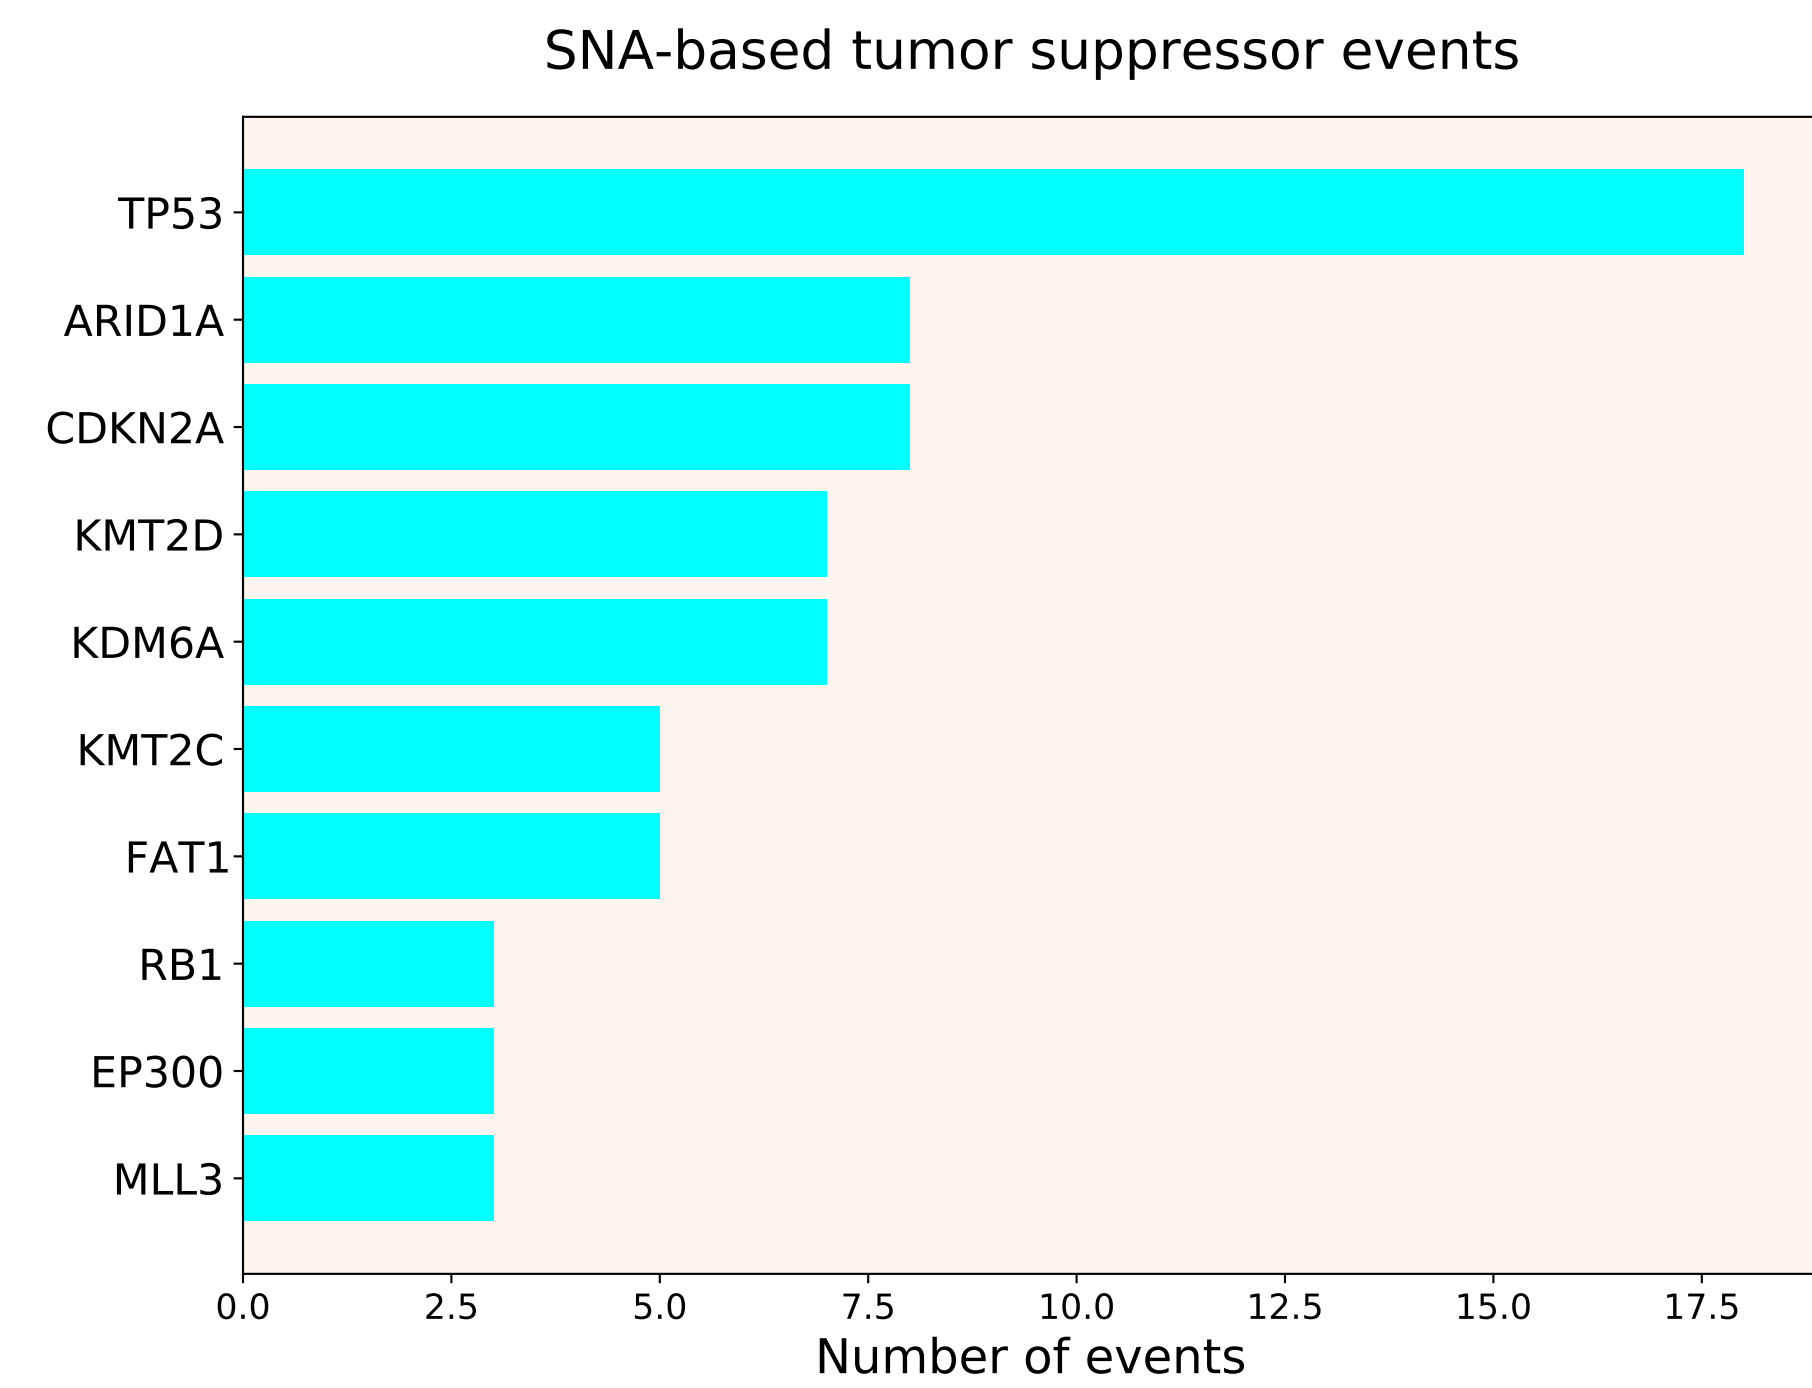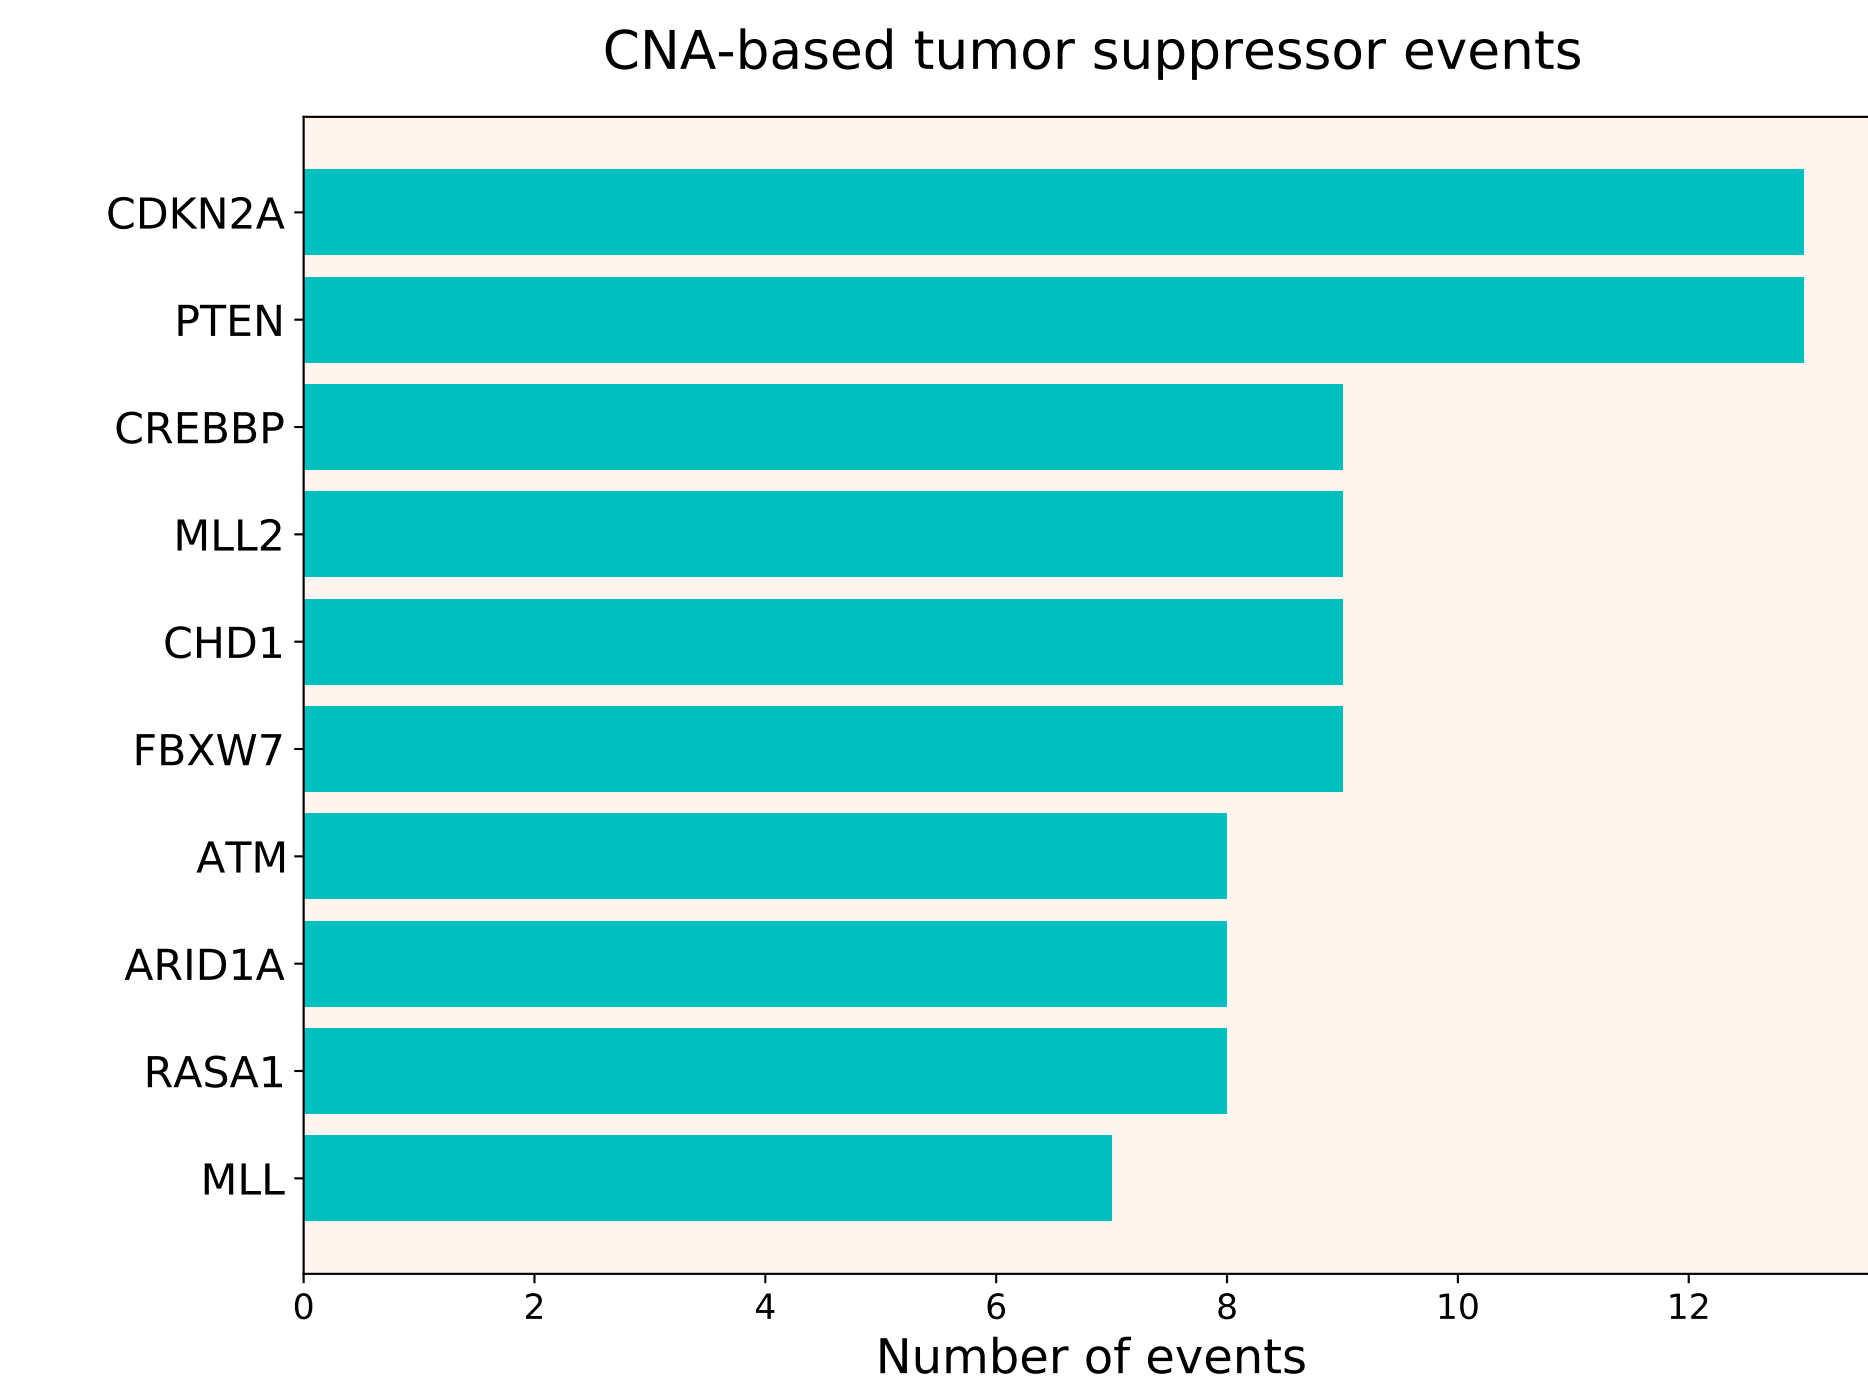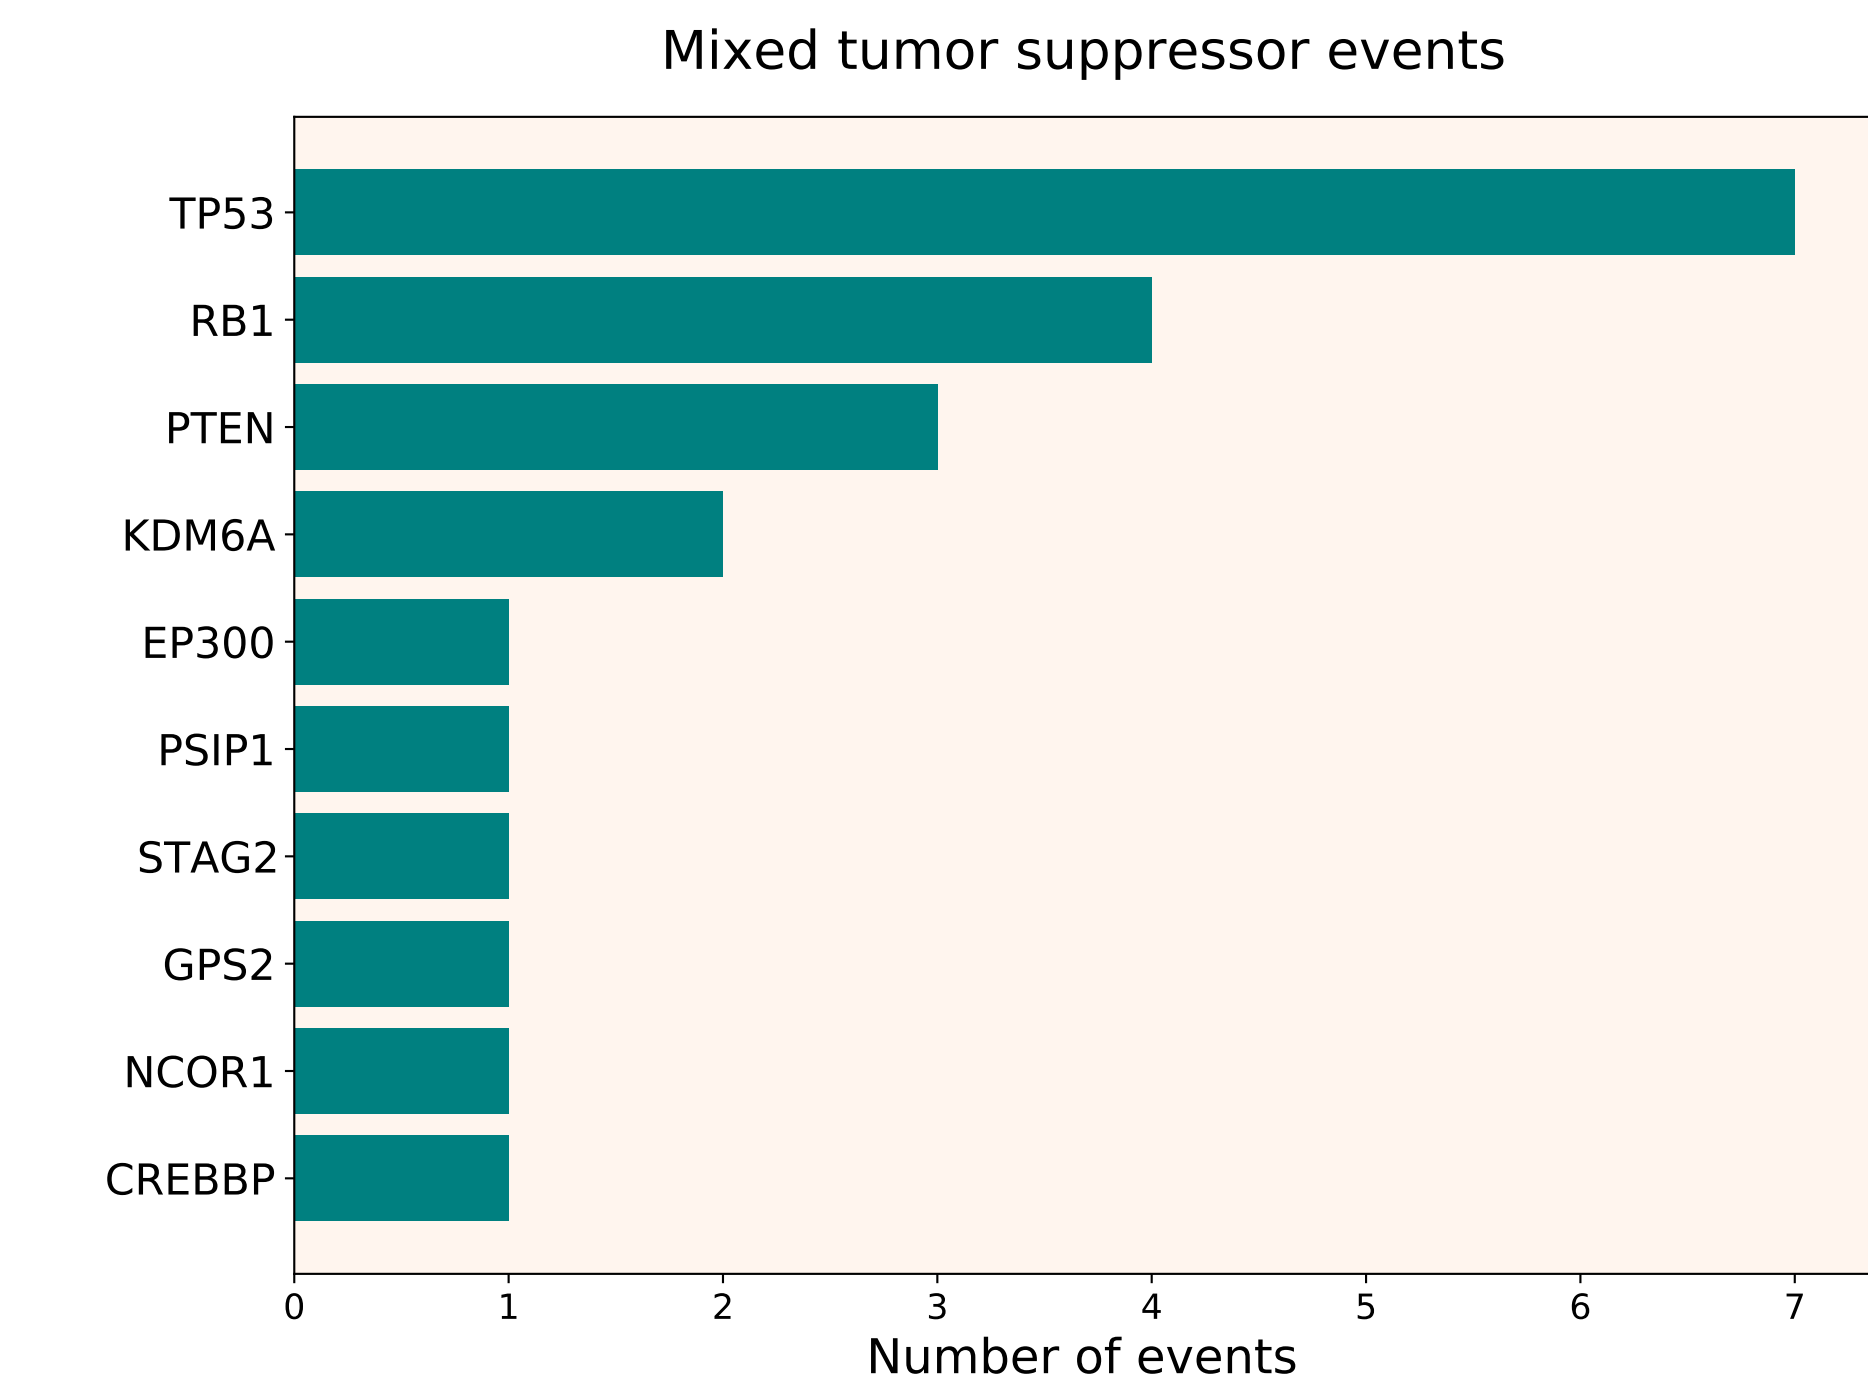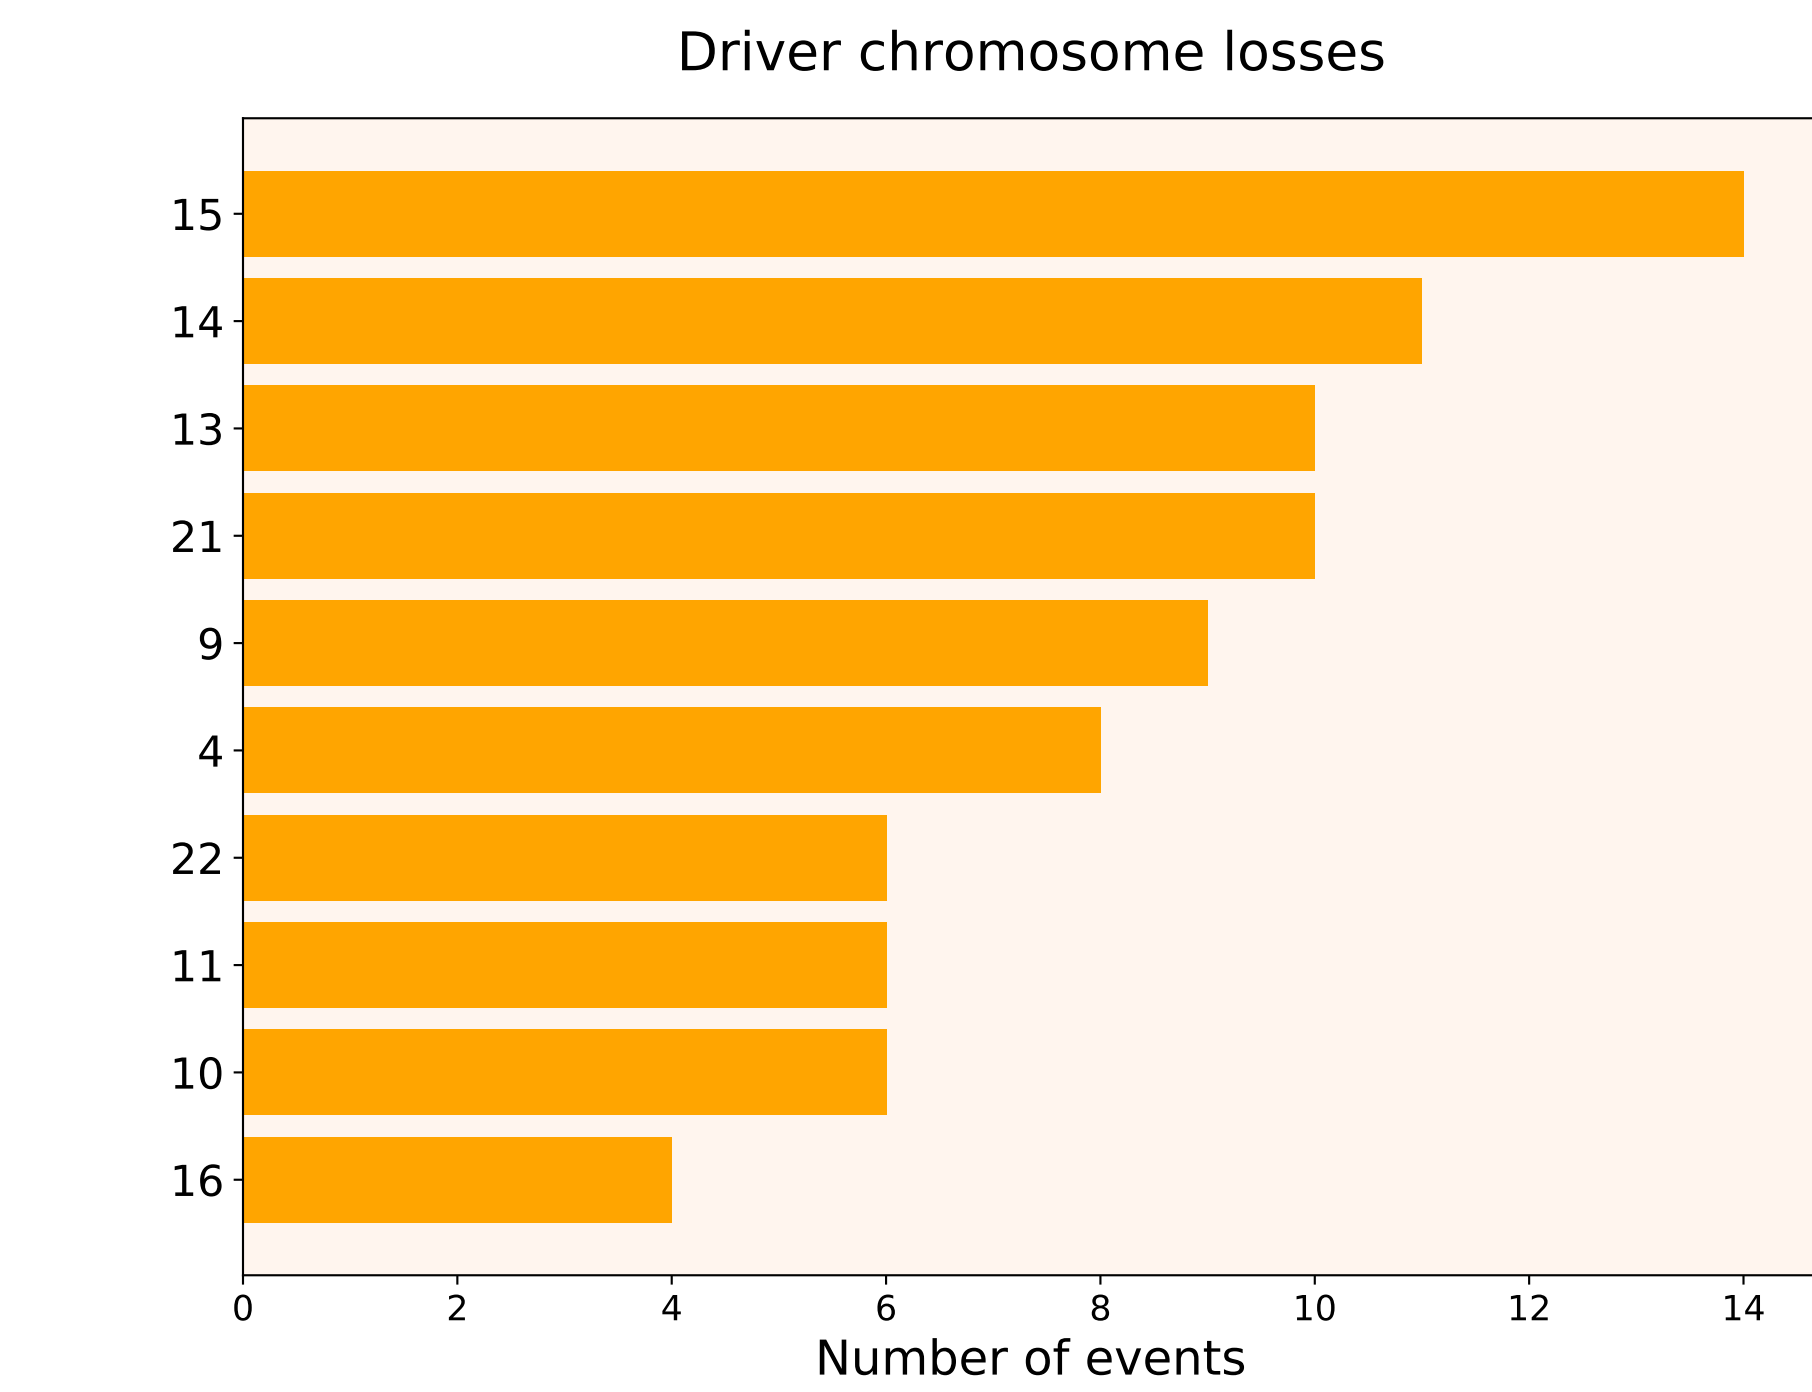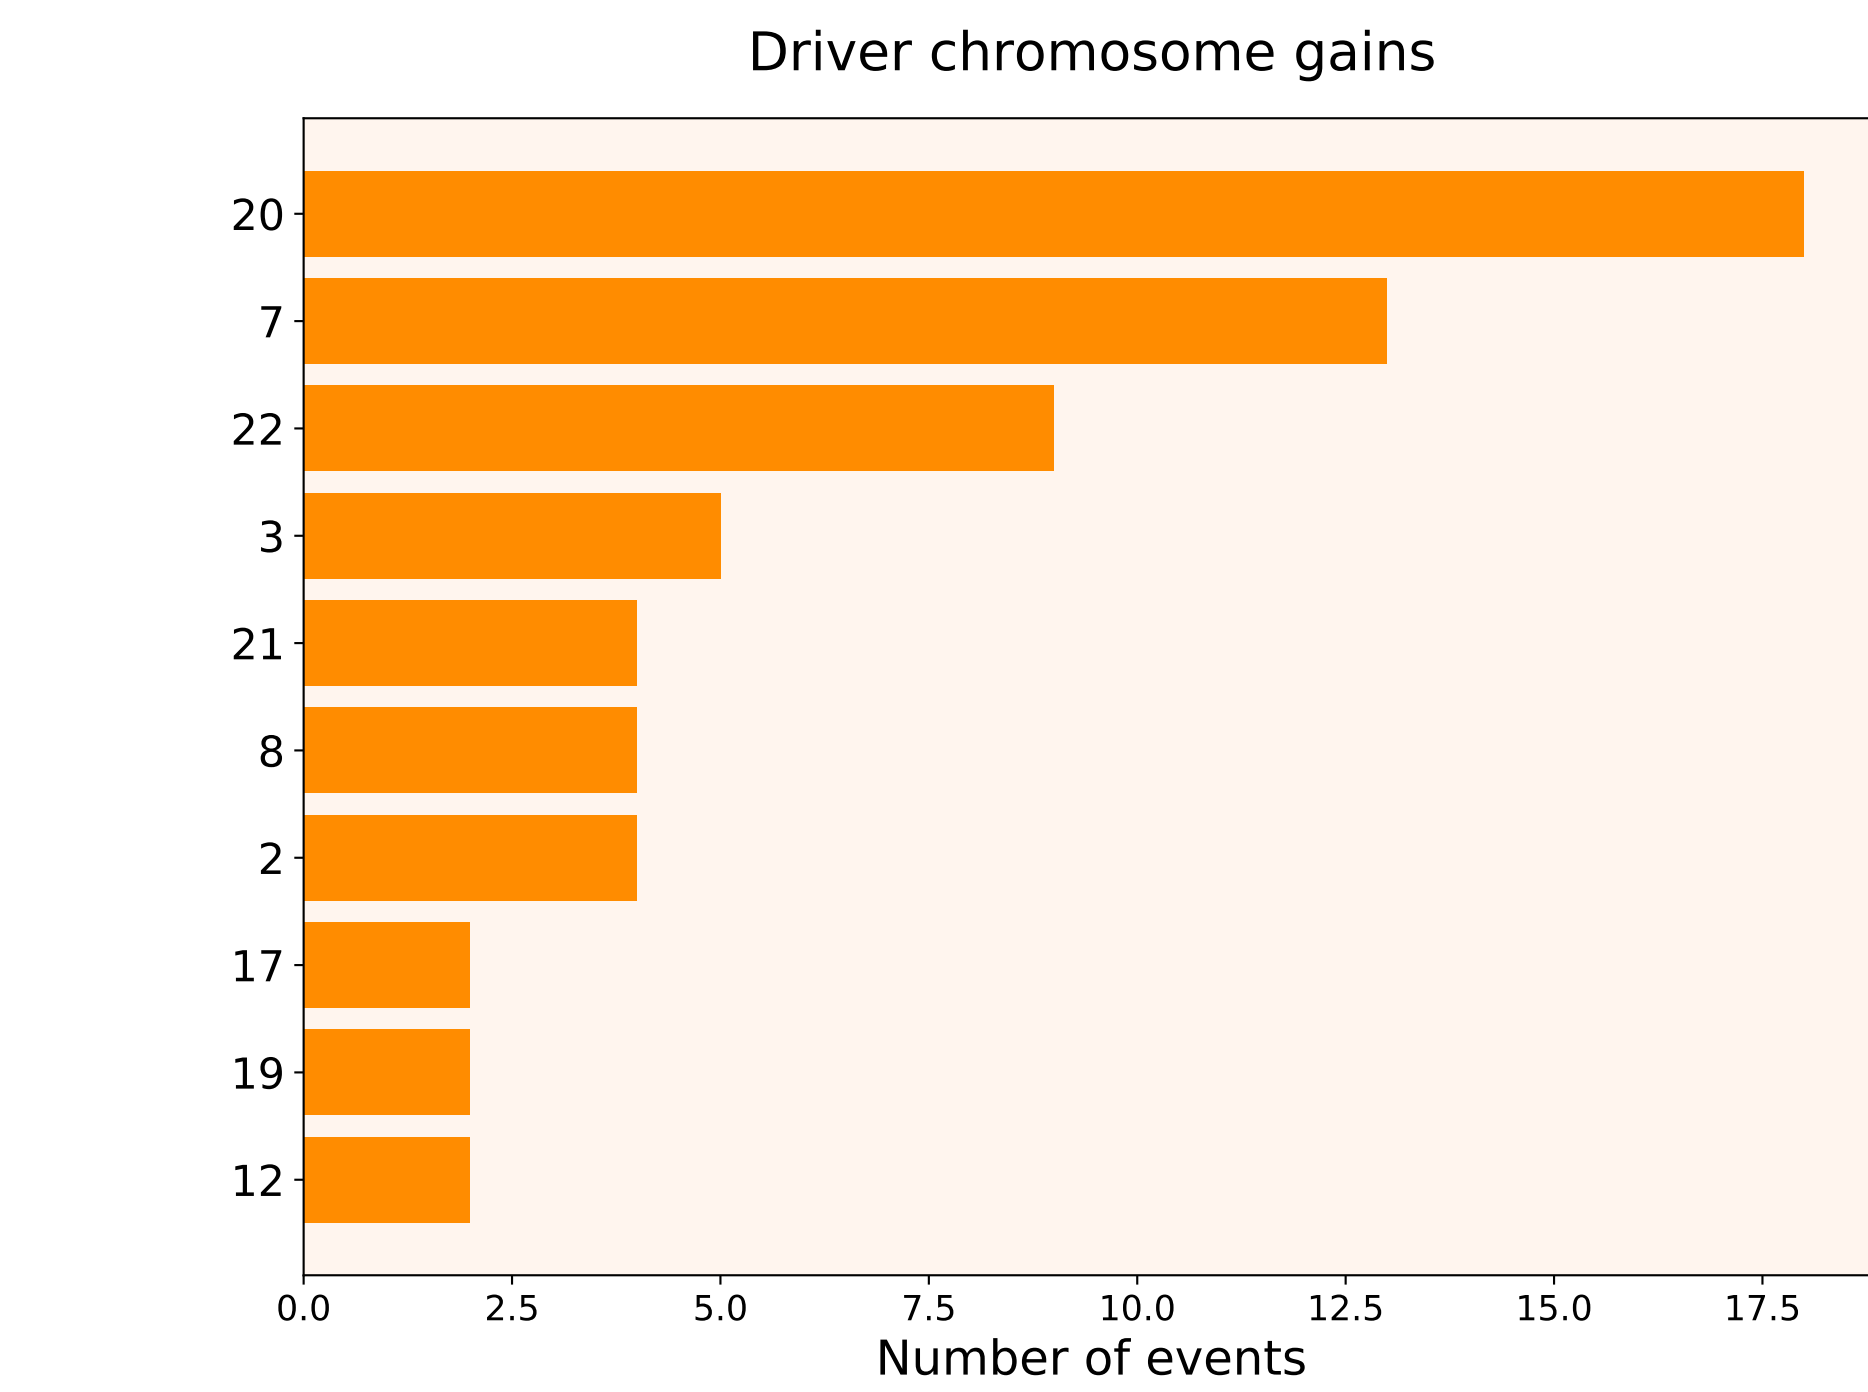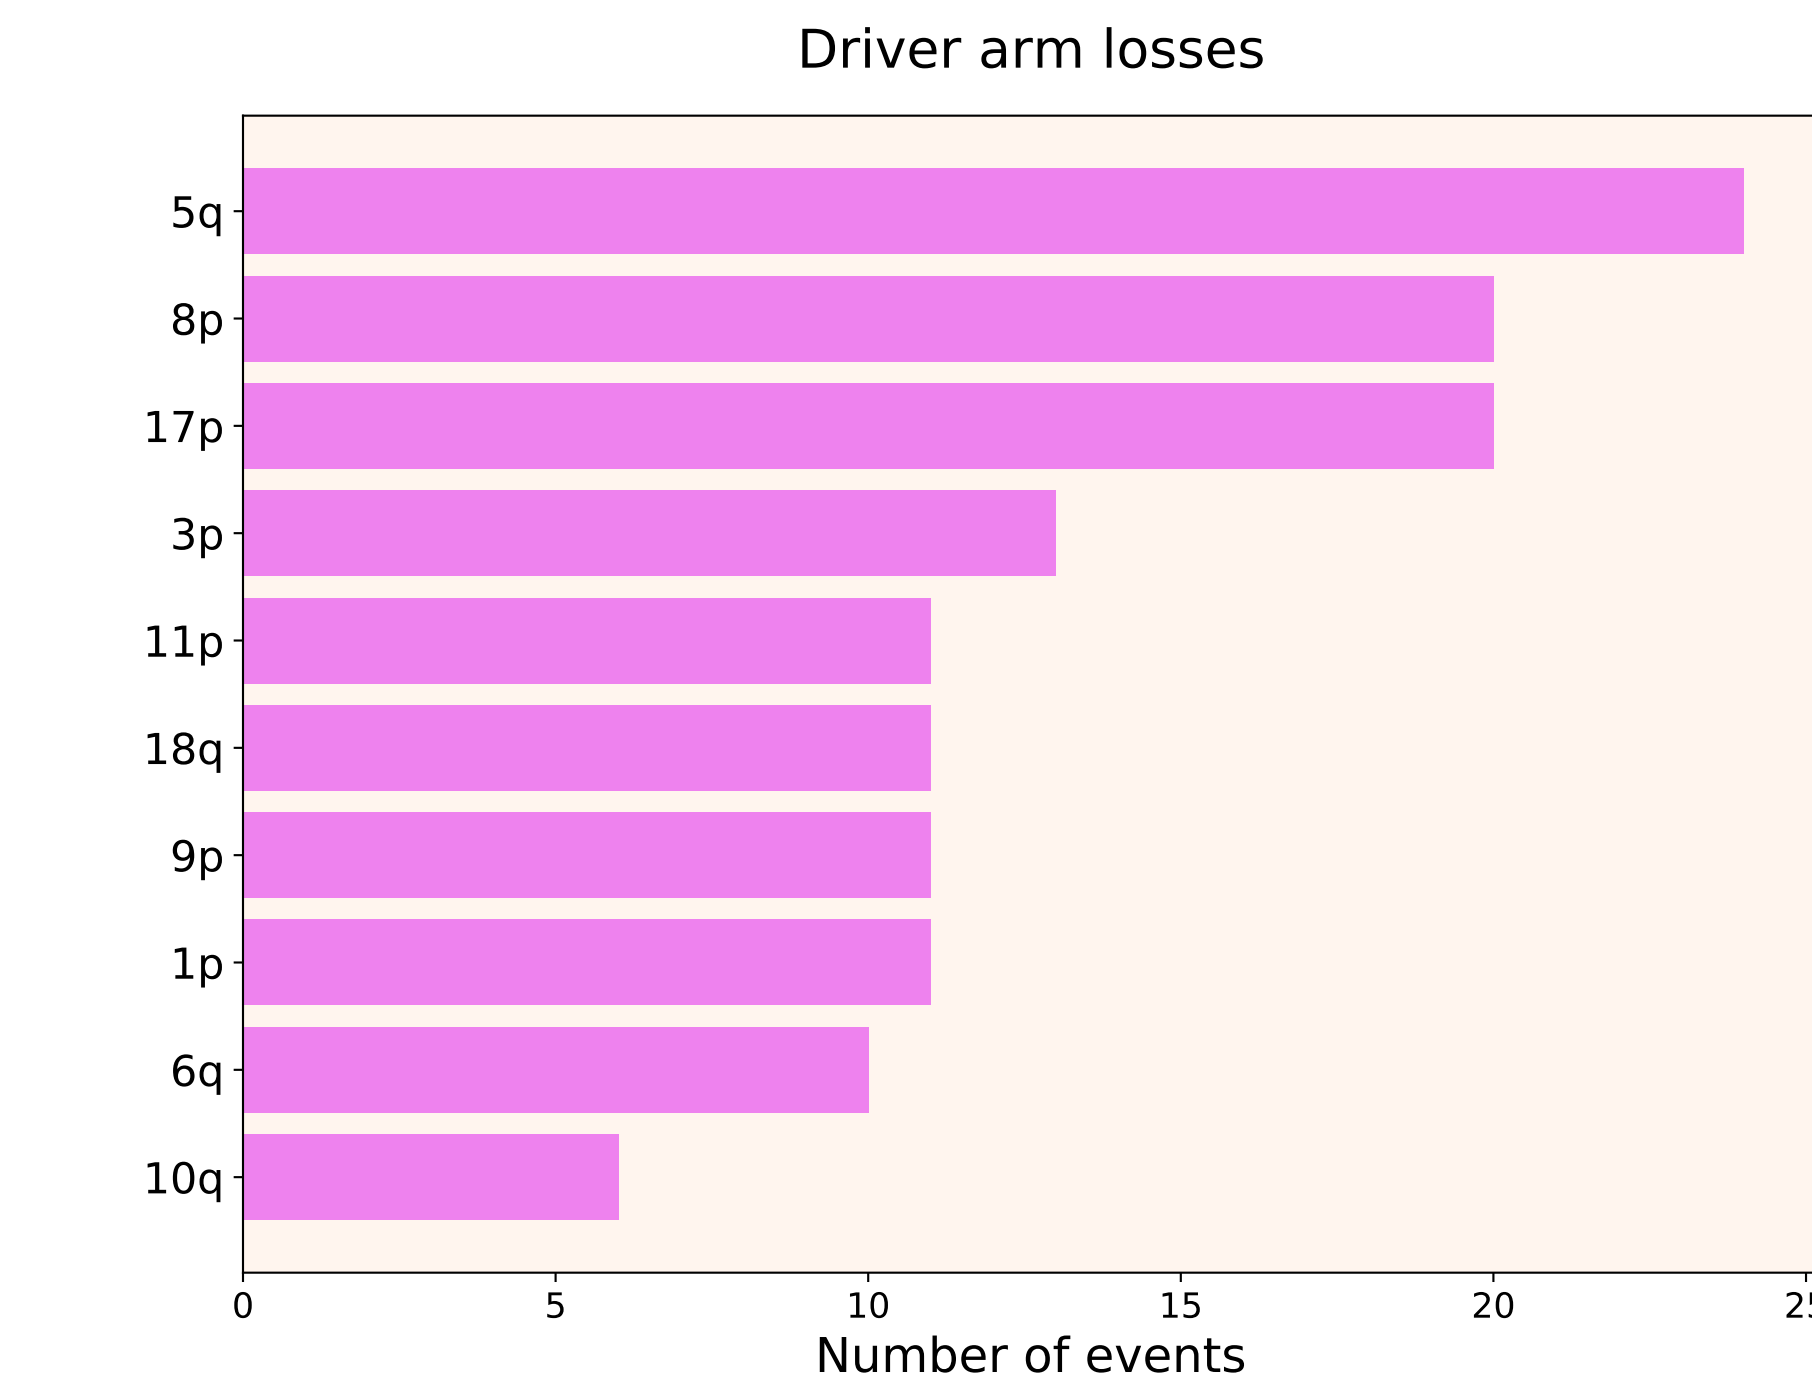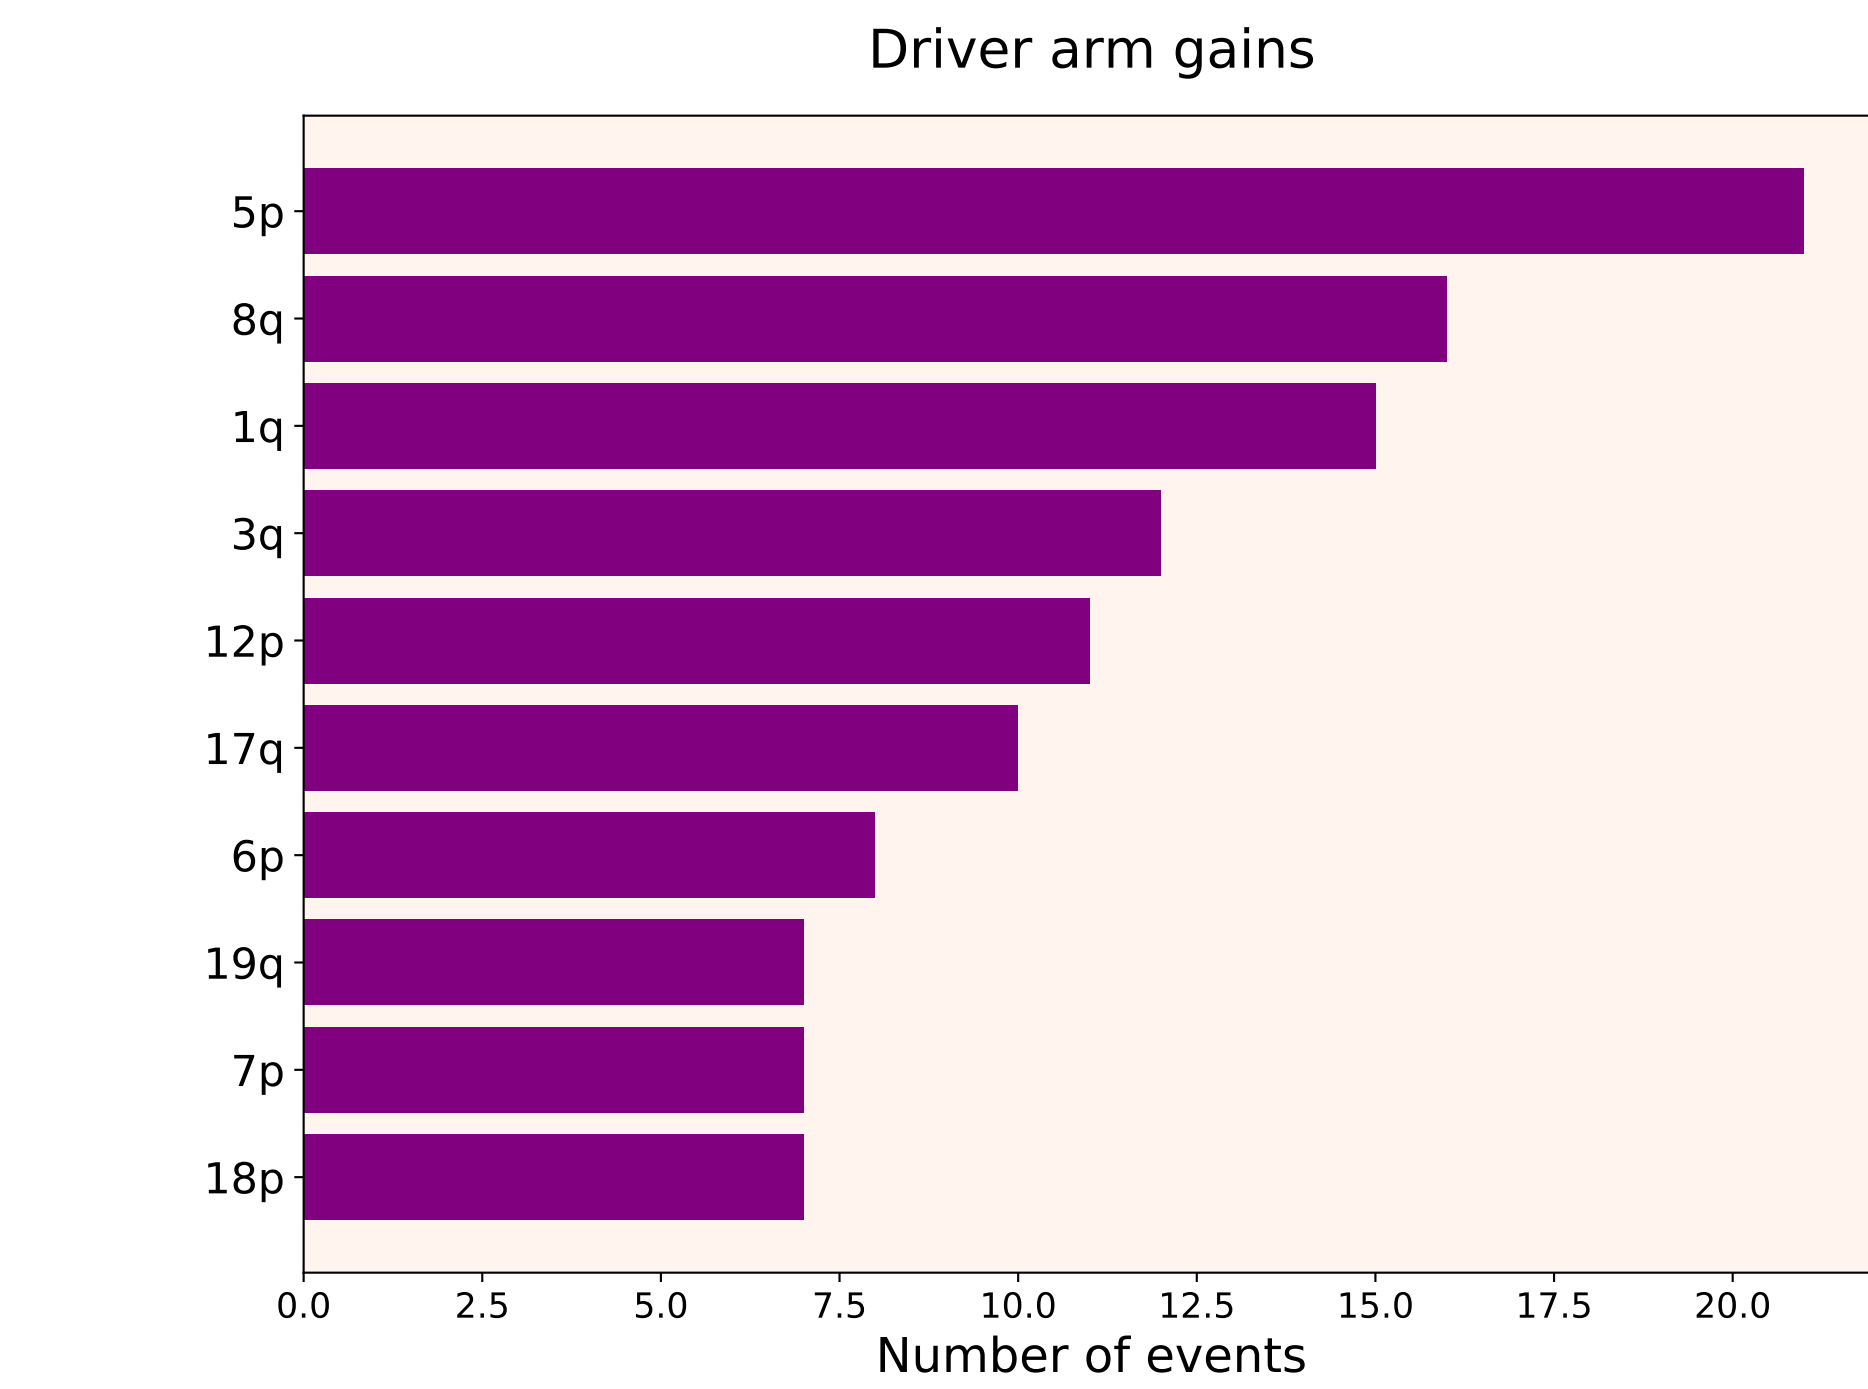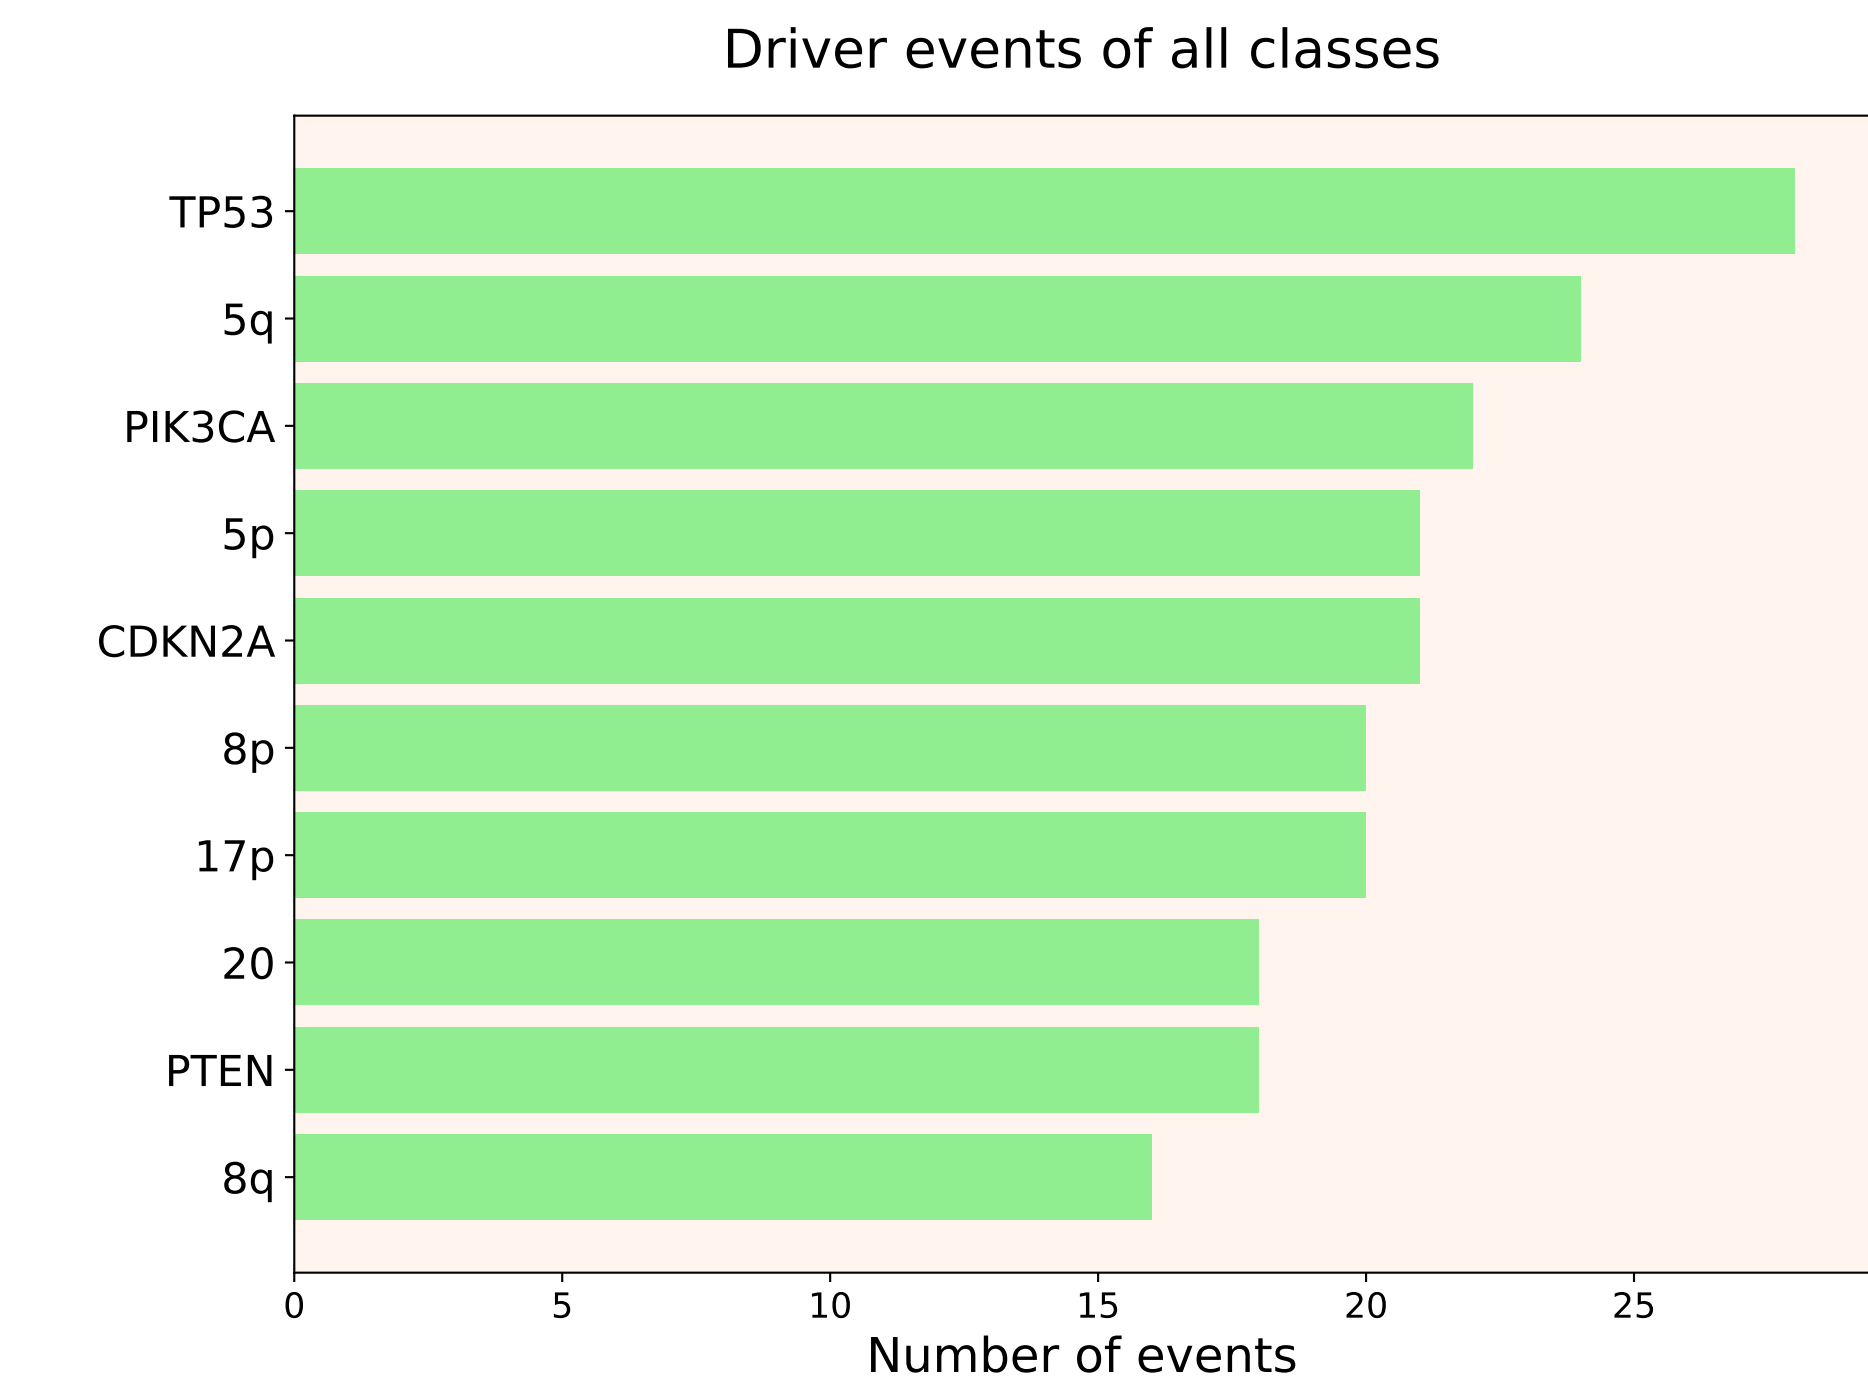

Supplement: Supplemental_Data_S1.zip [file Supplemental_Data_S1.zip]

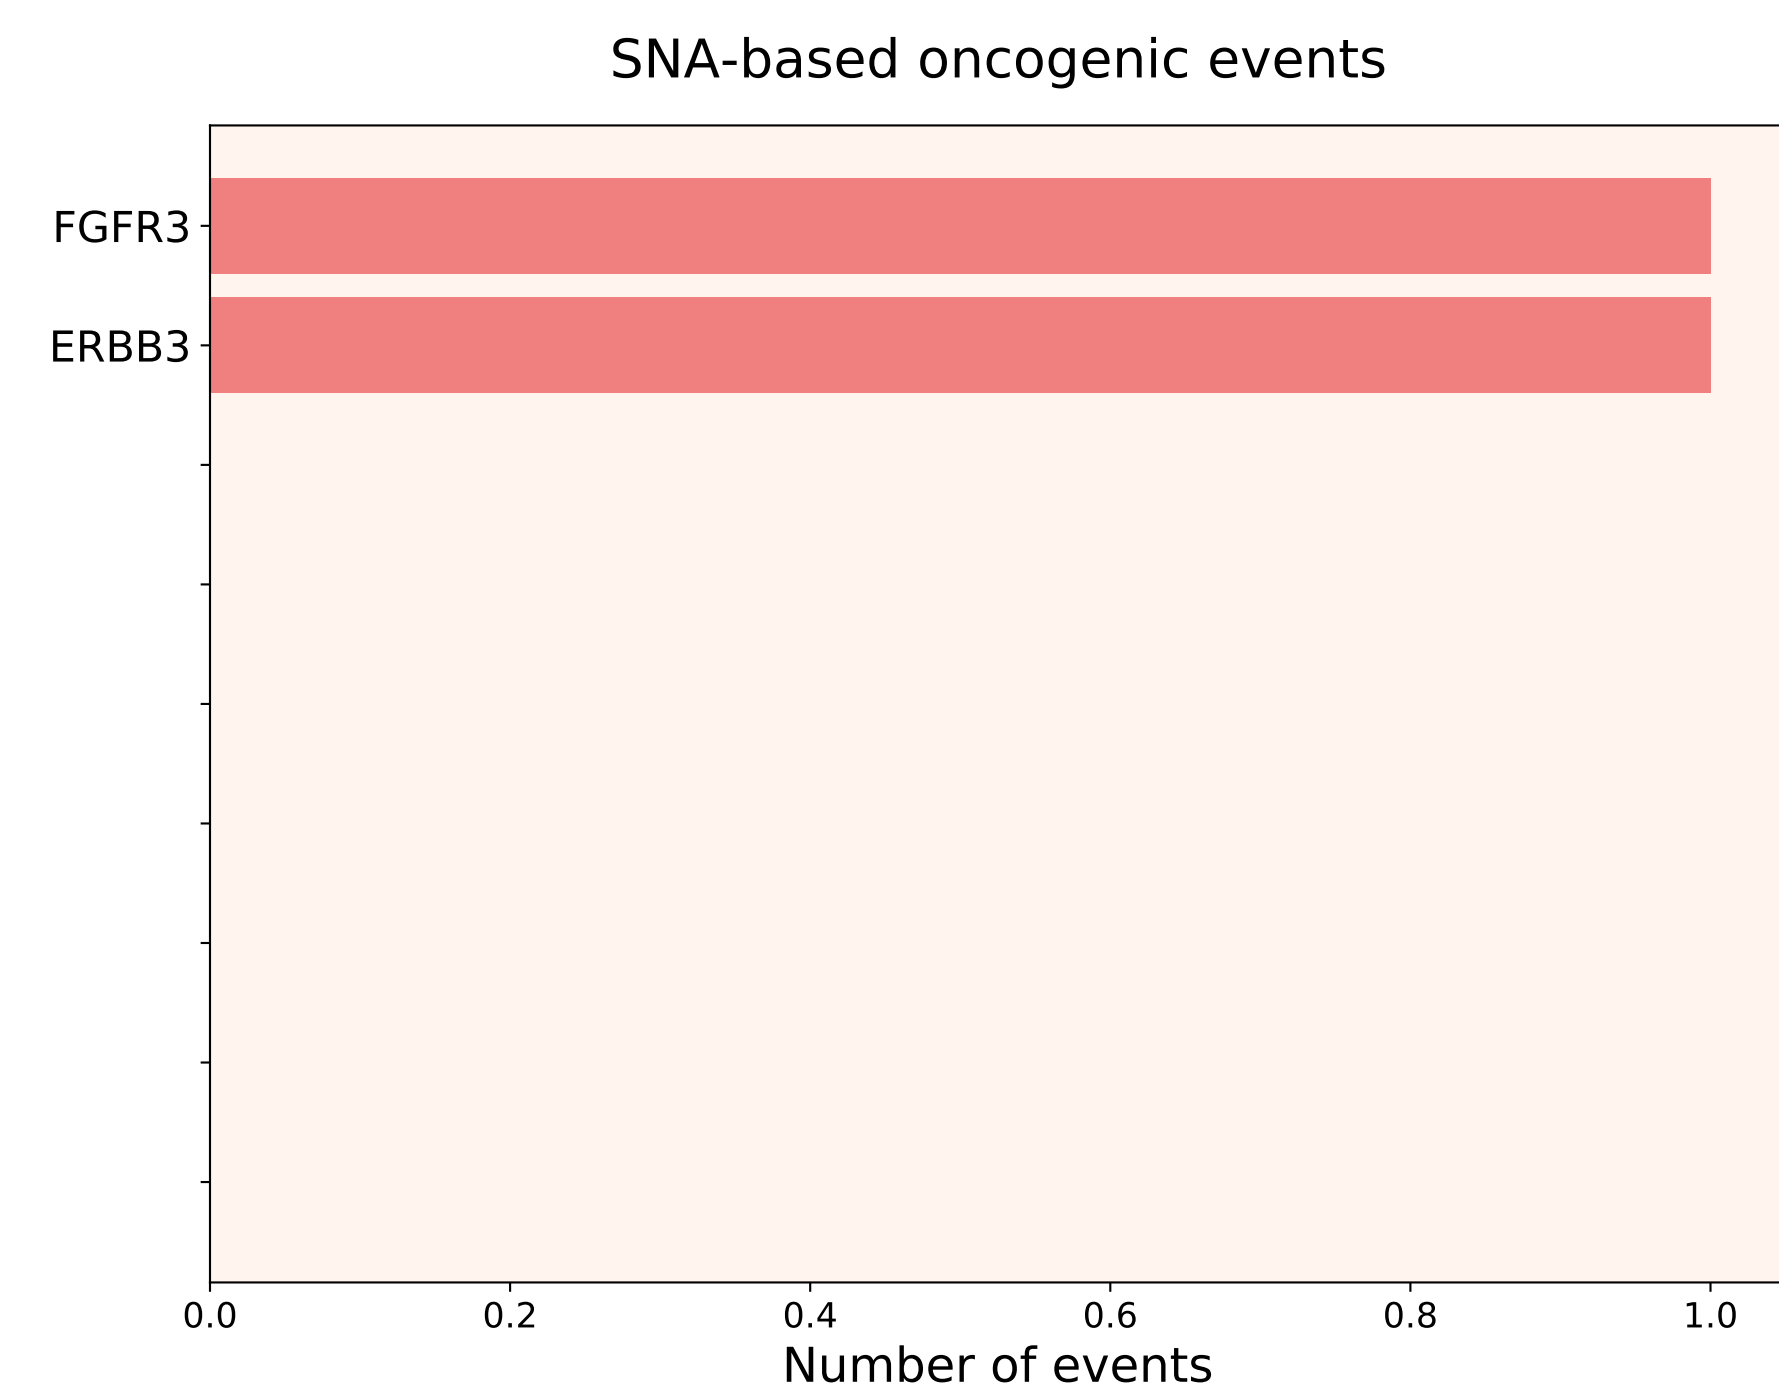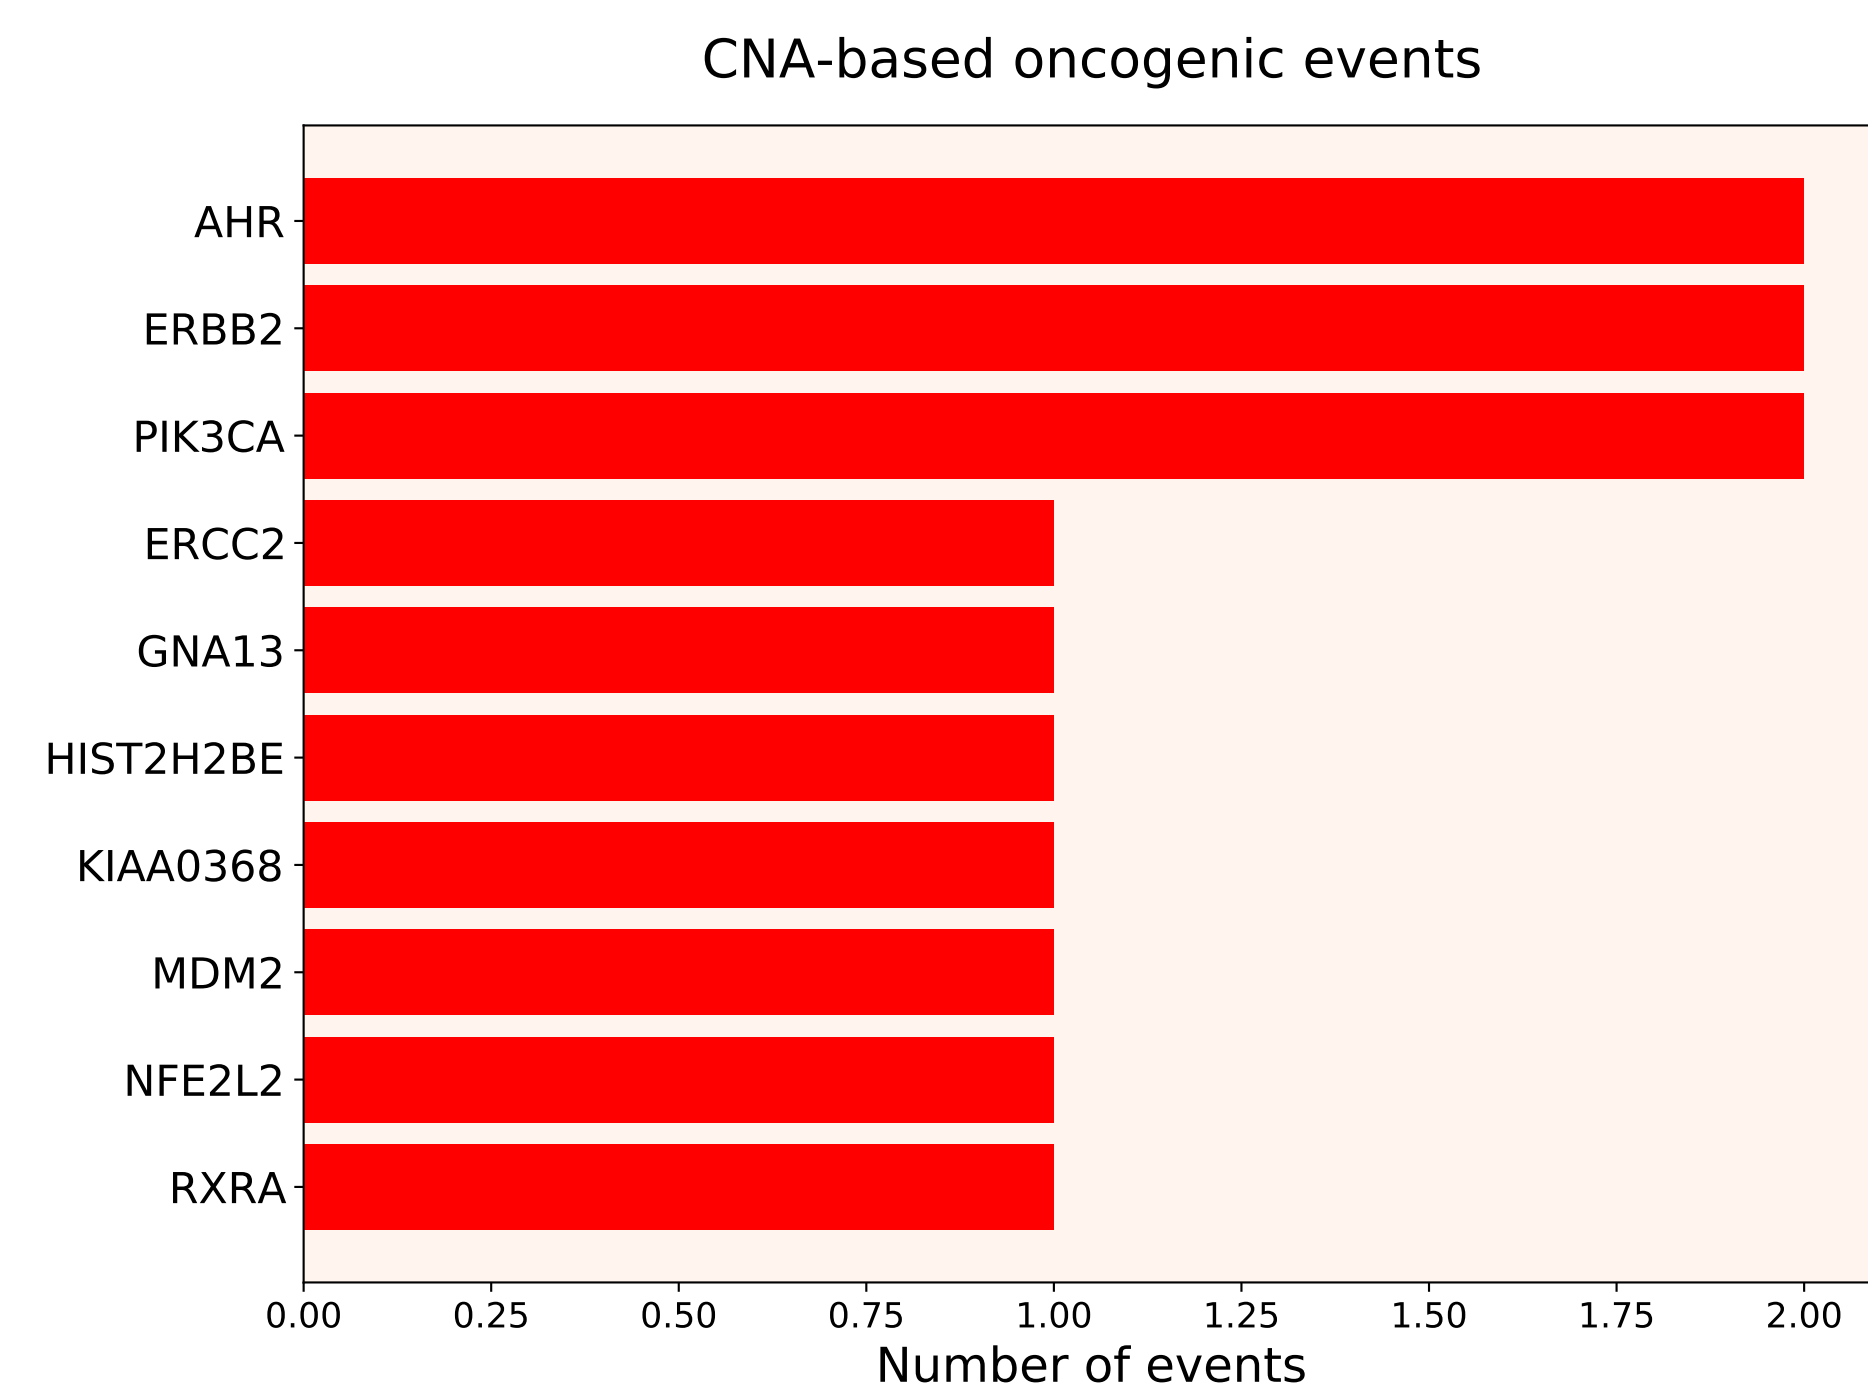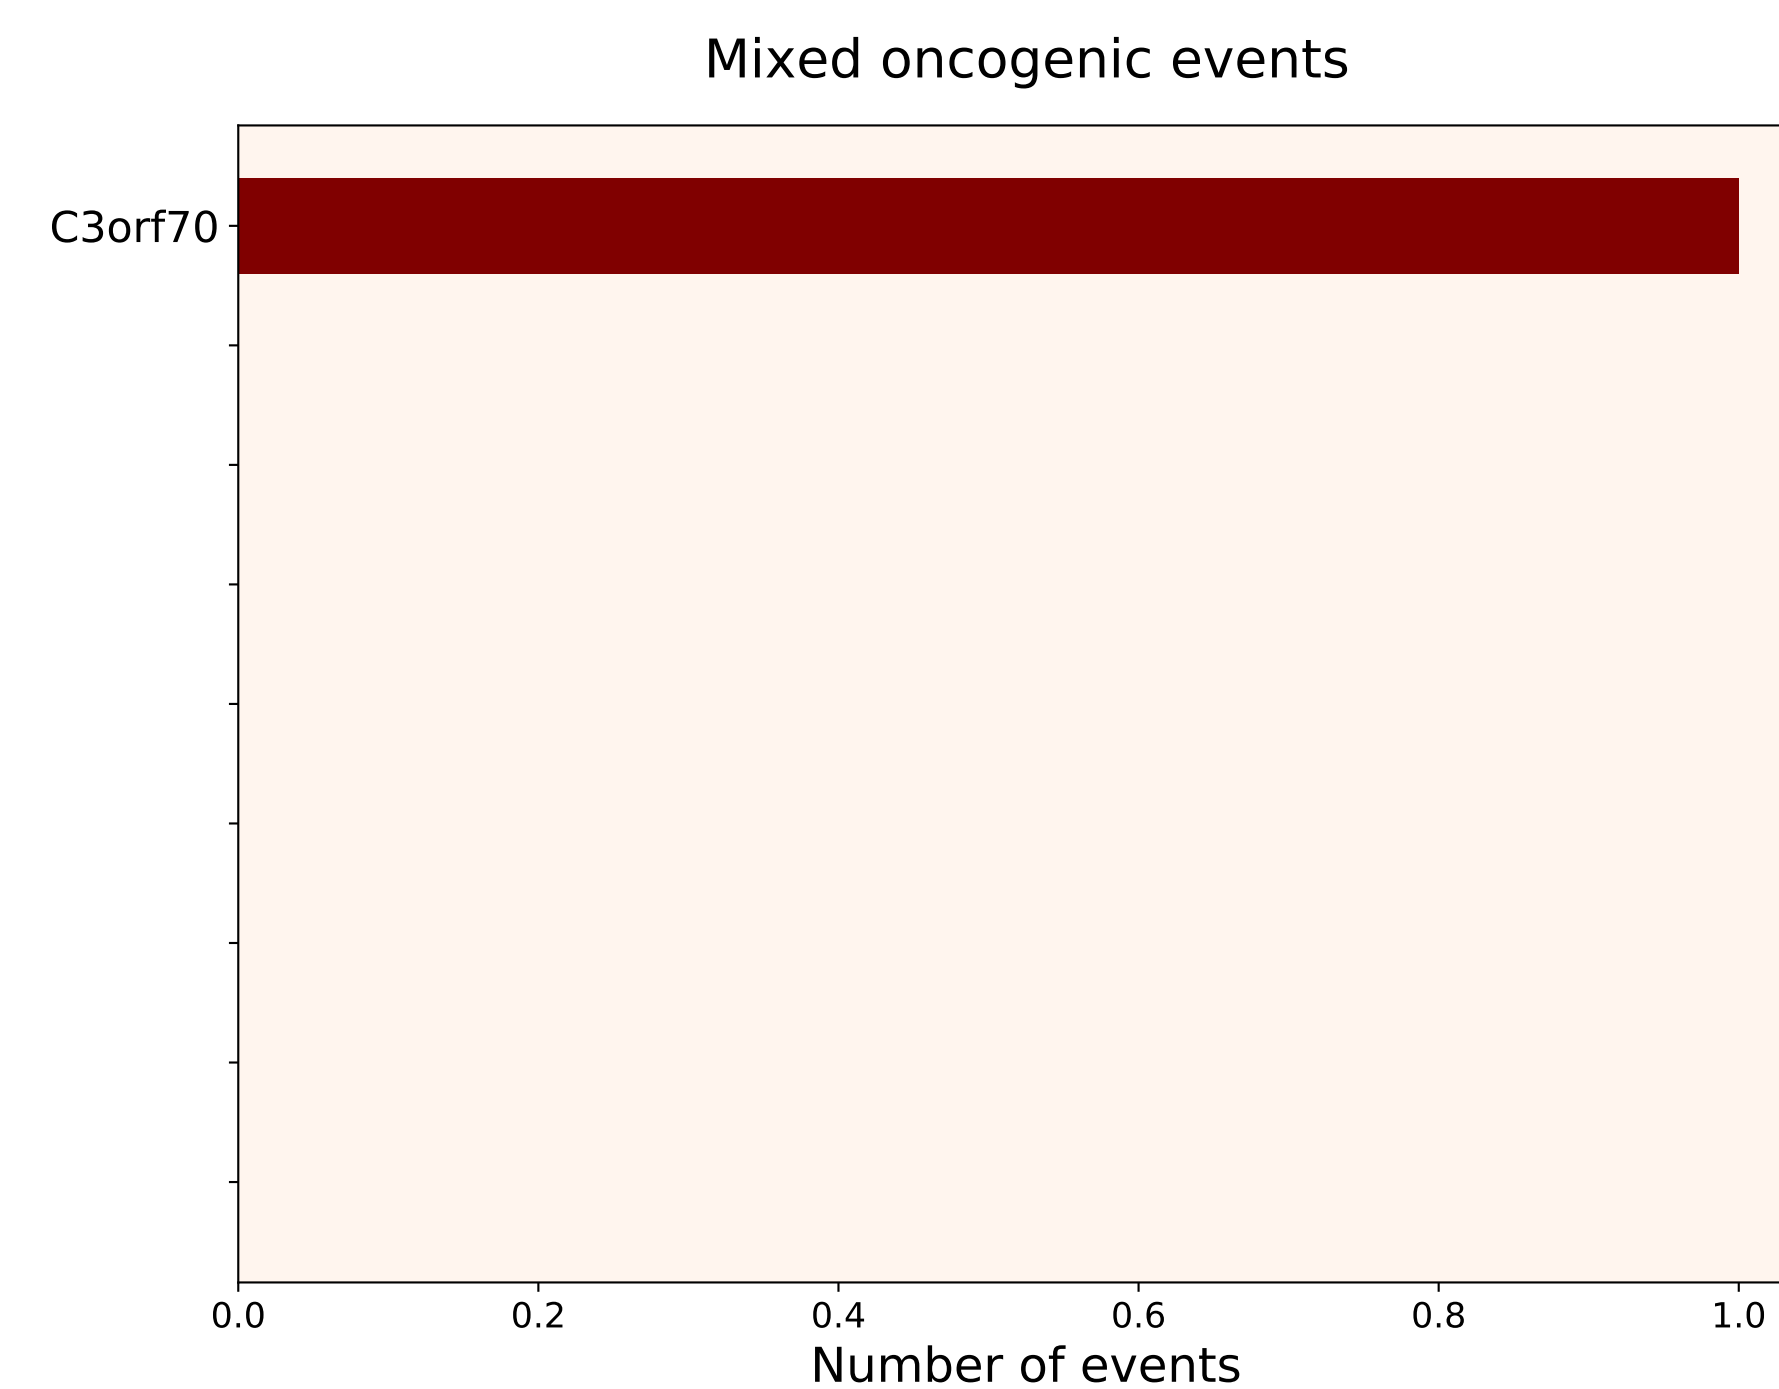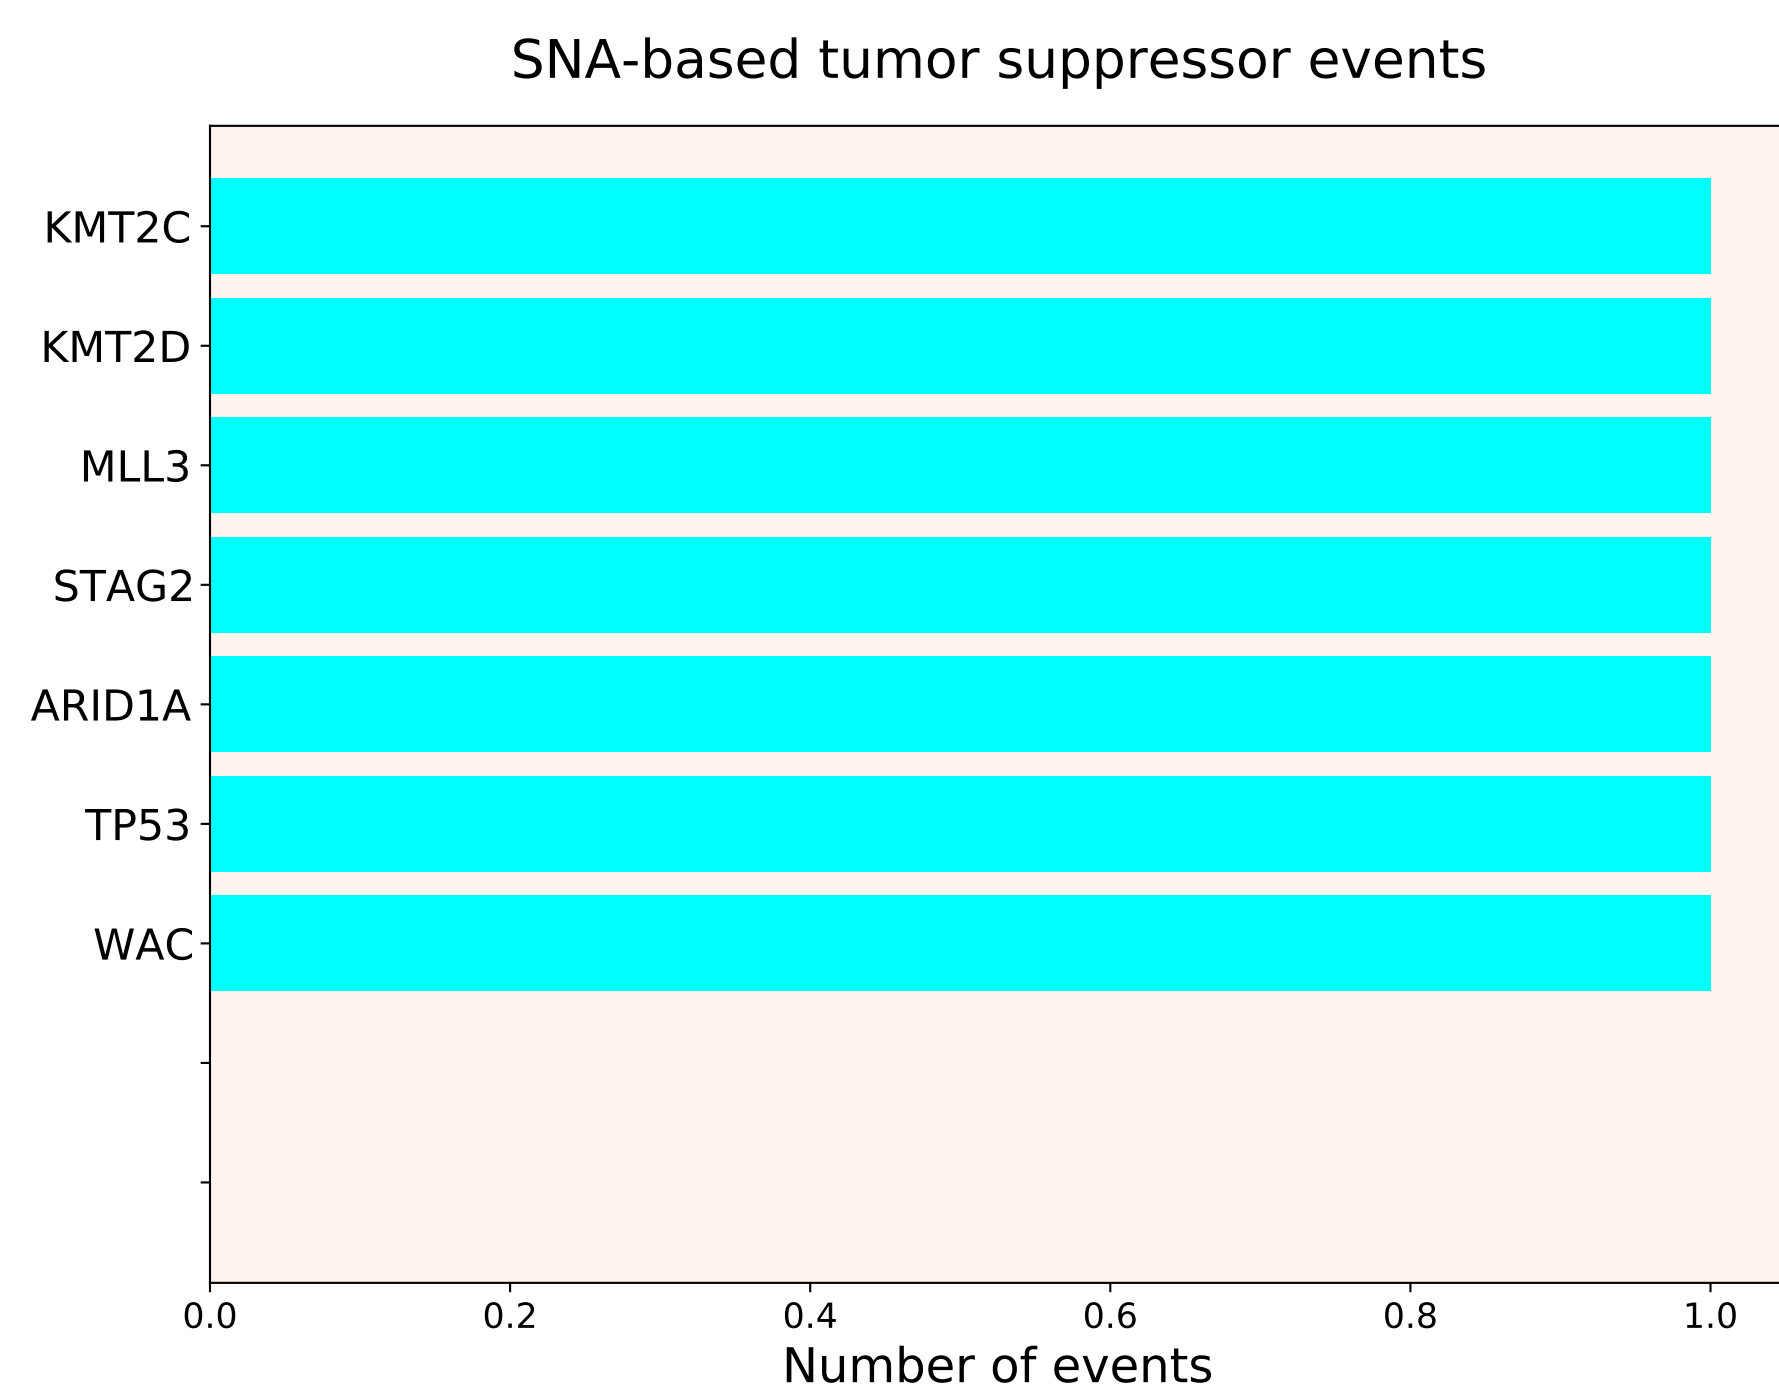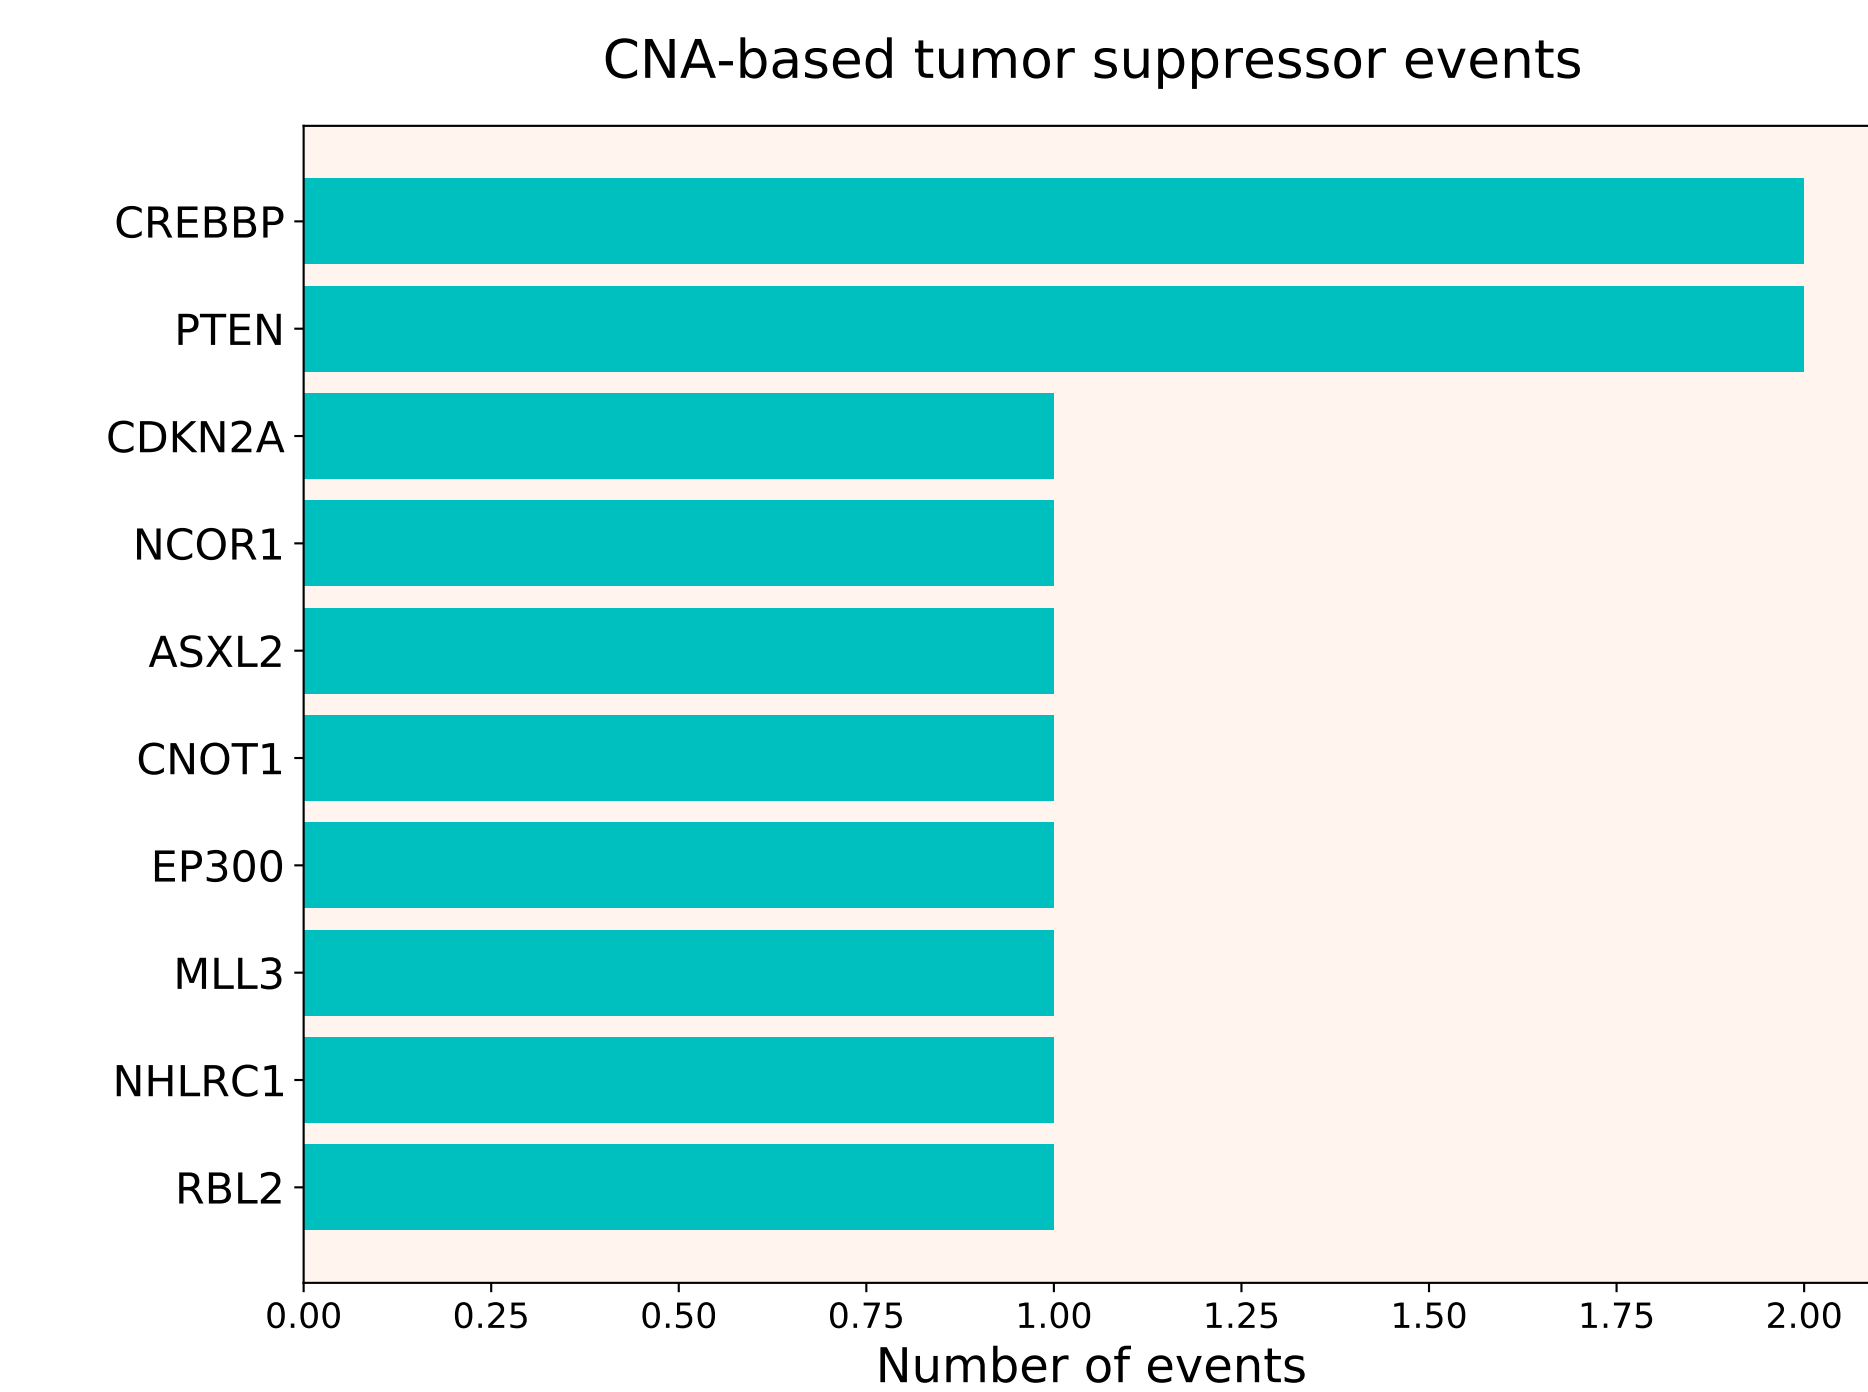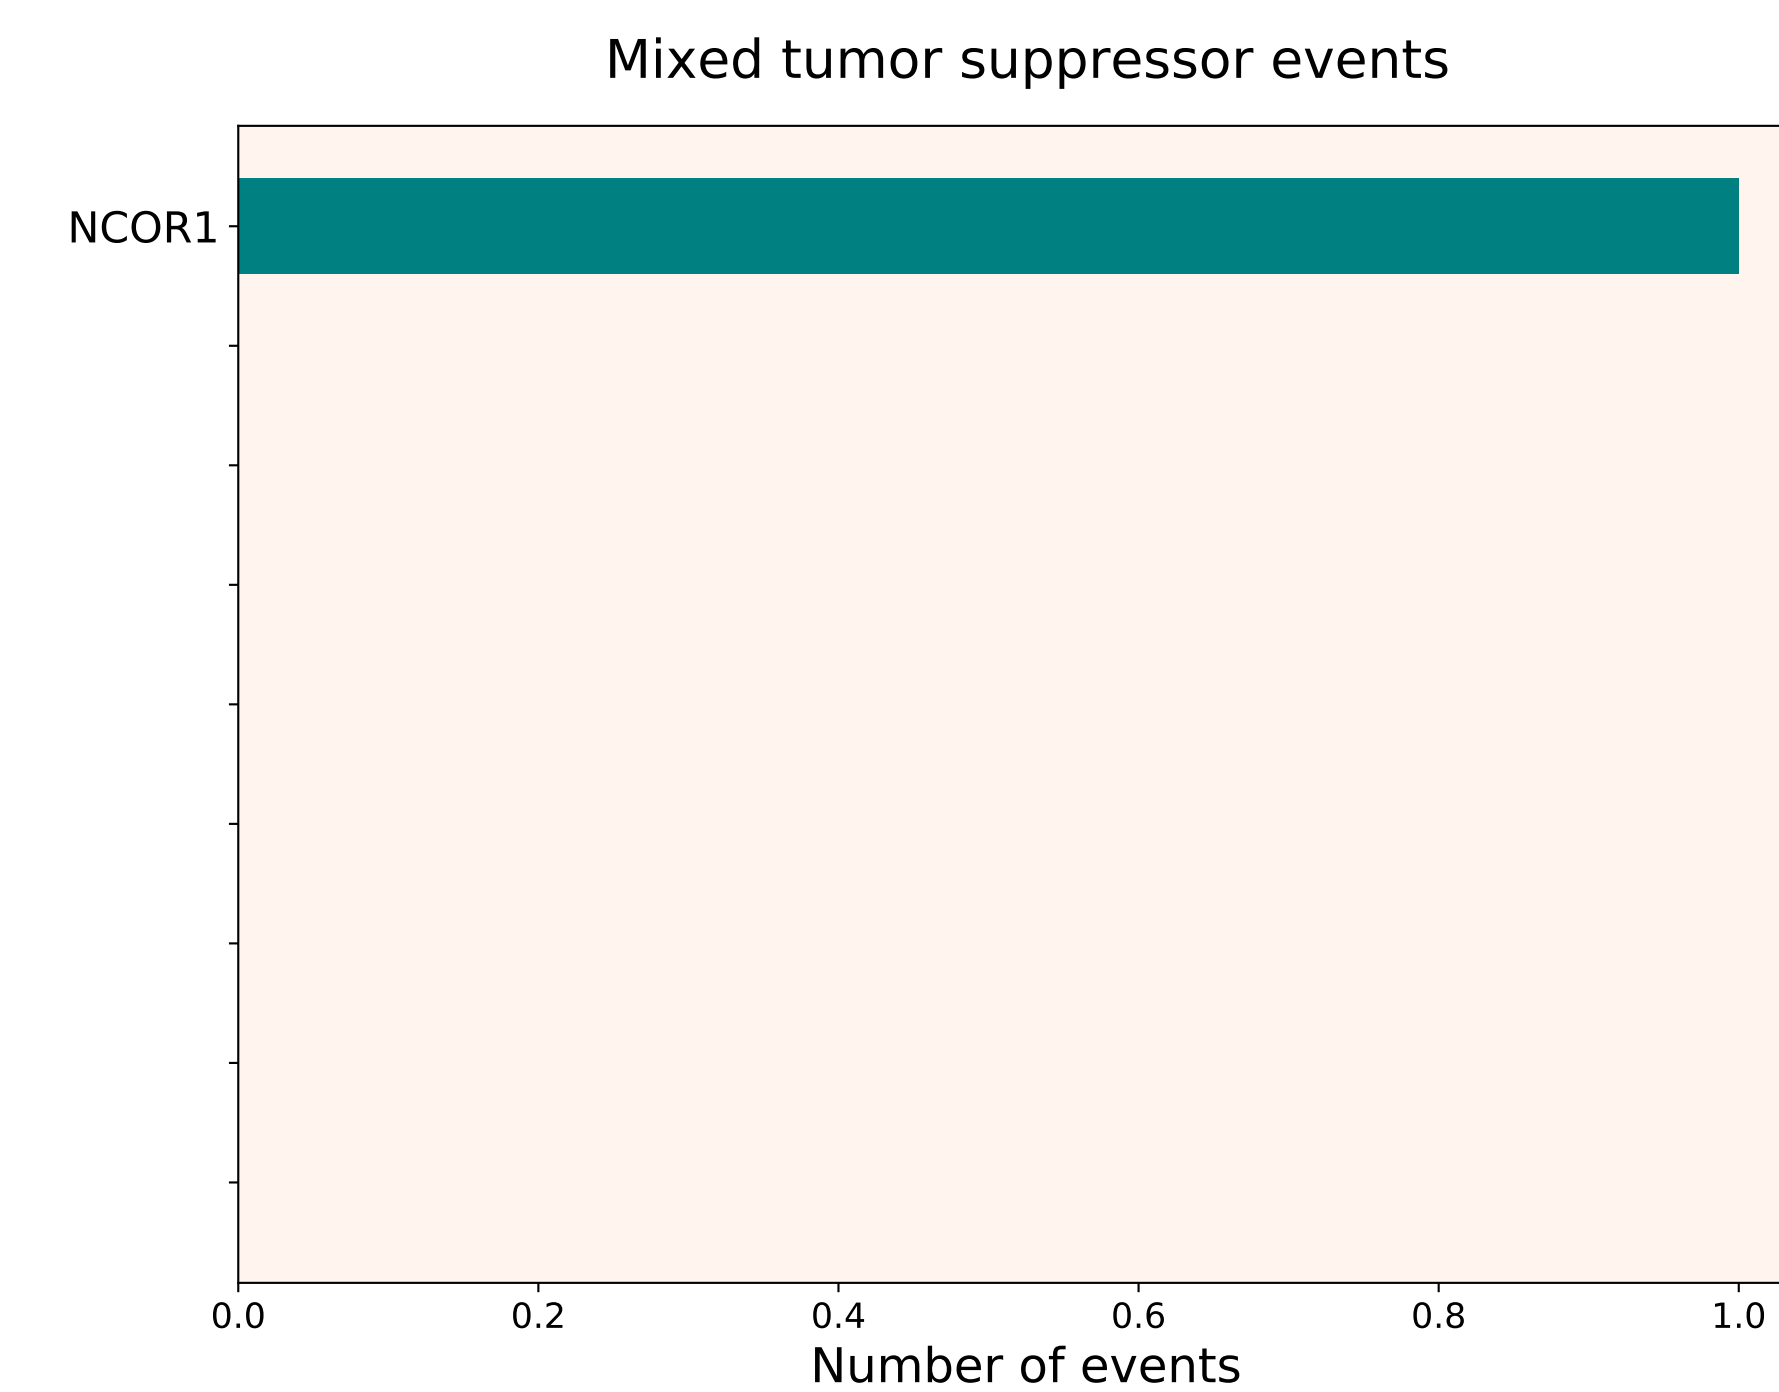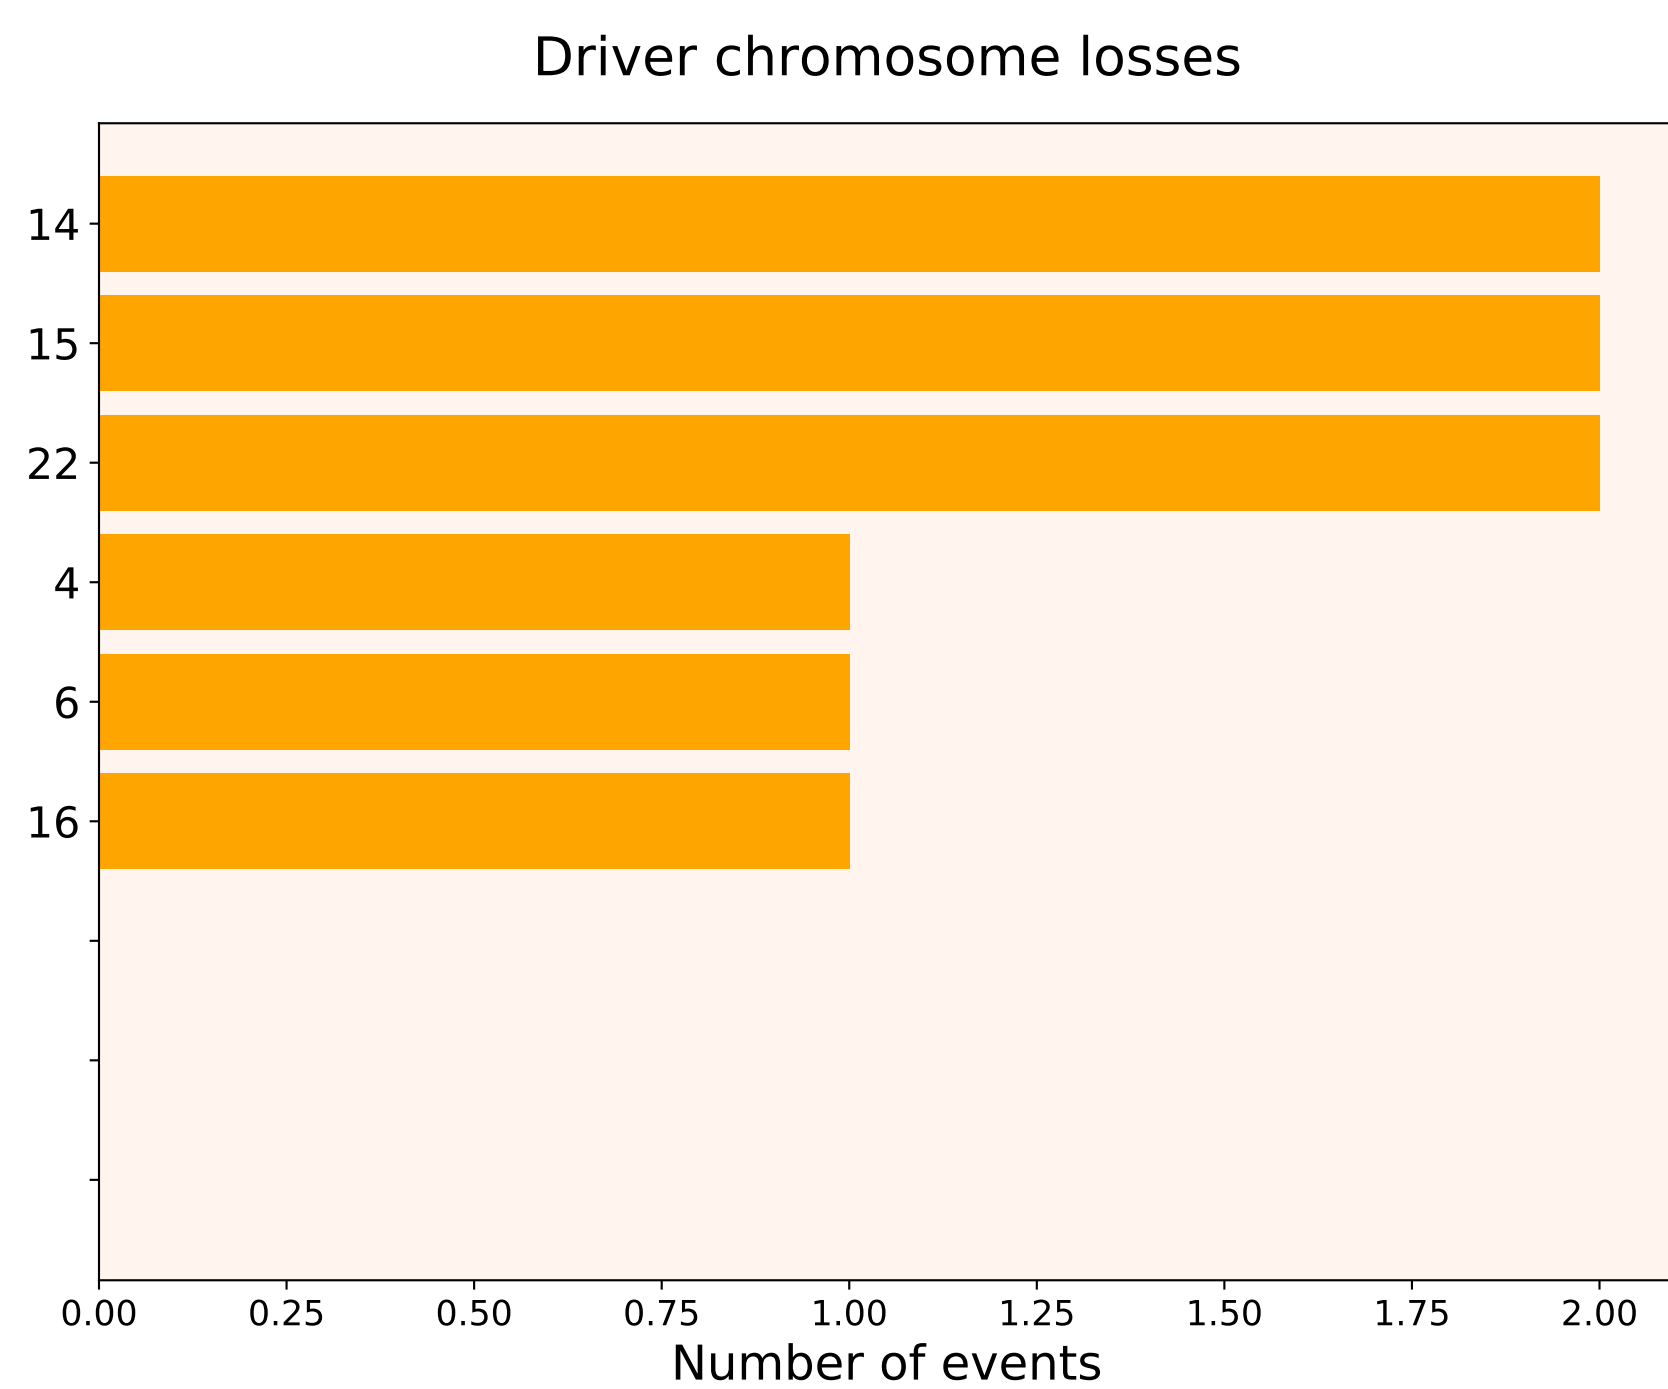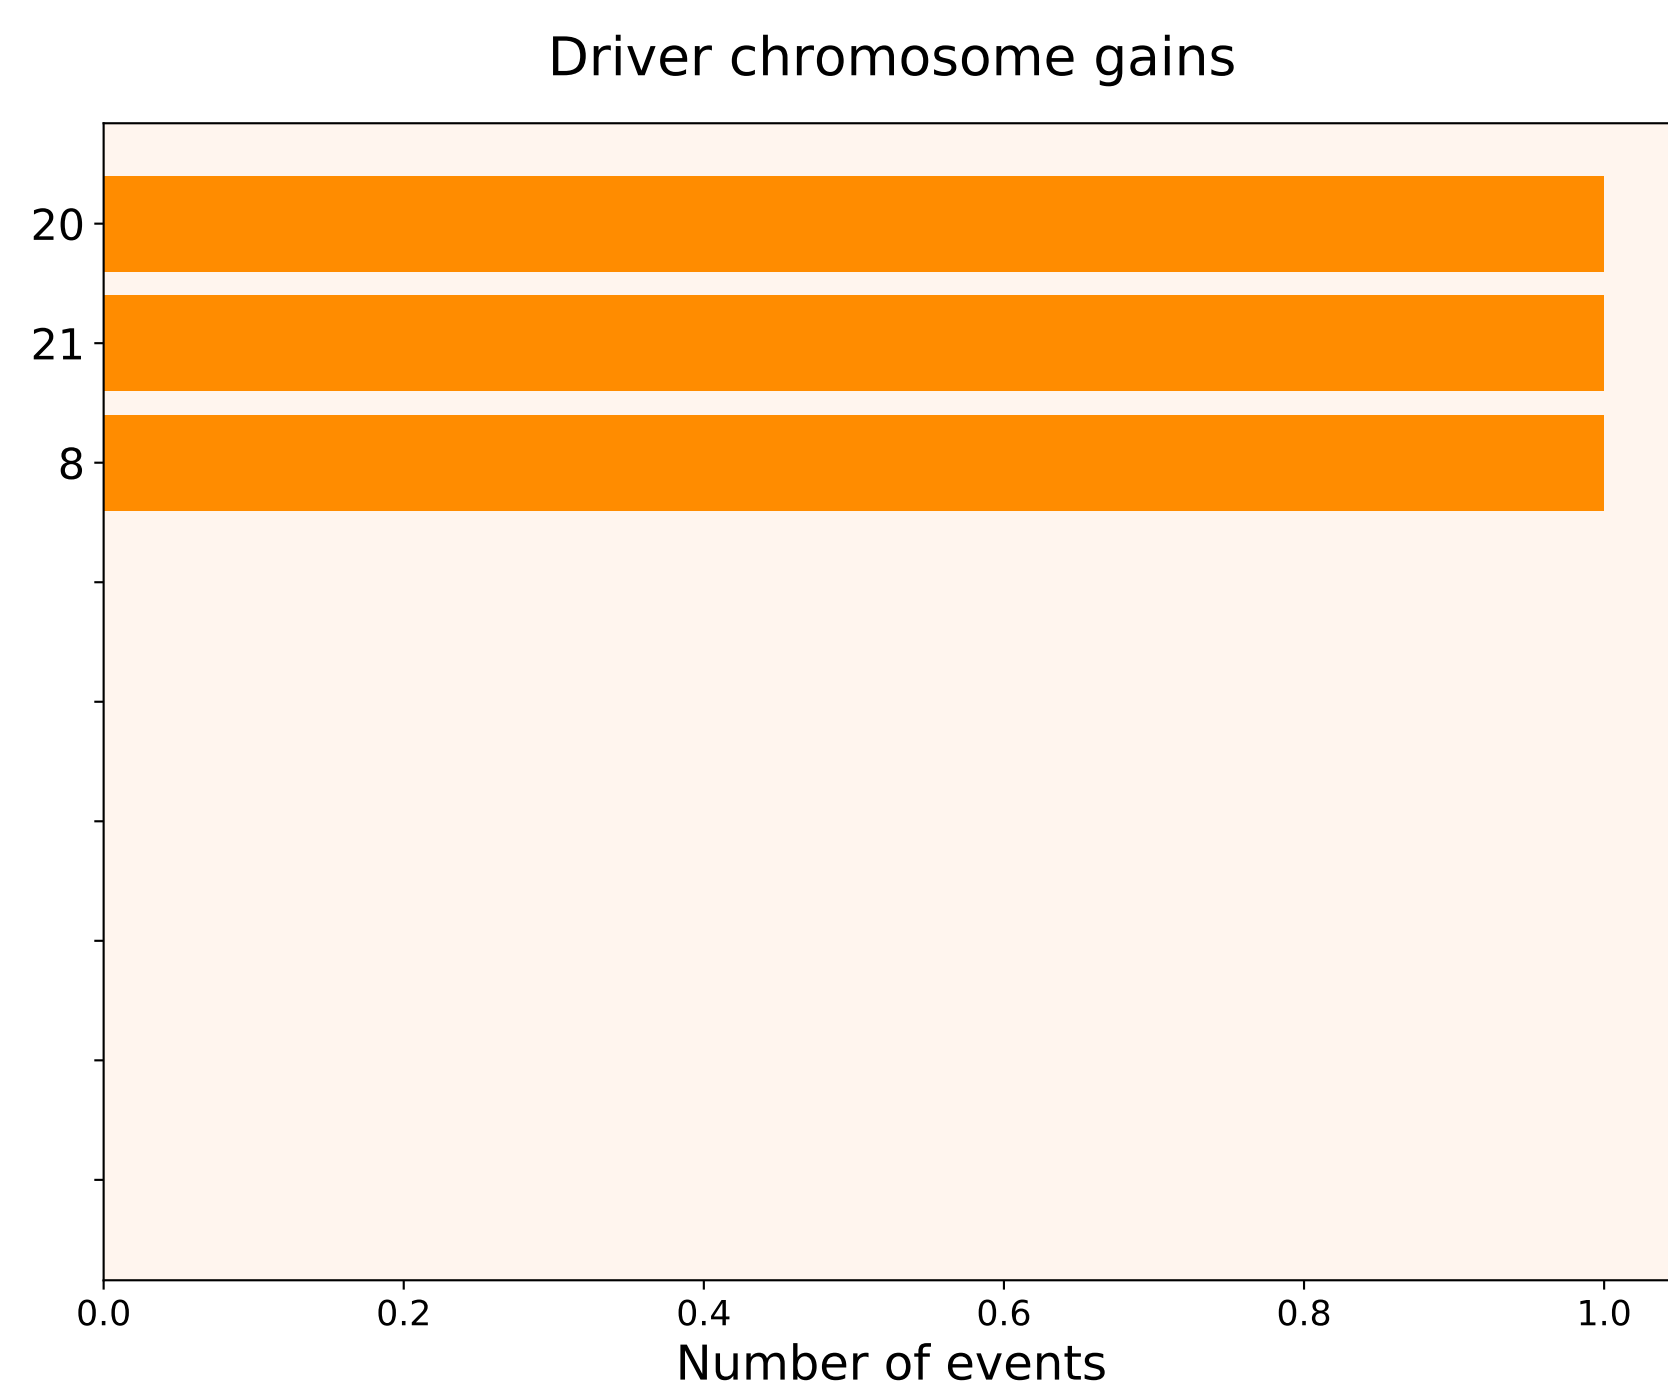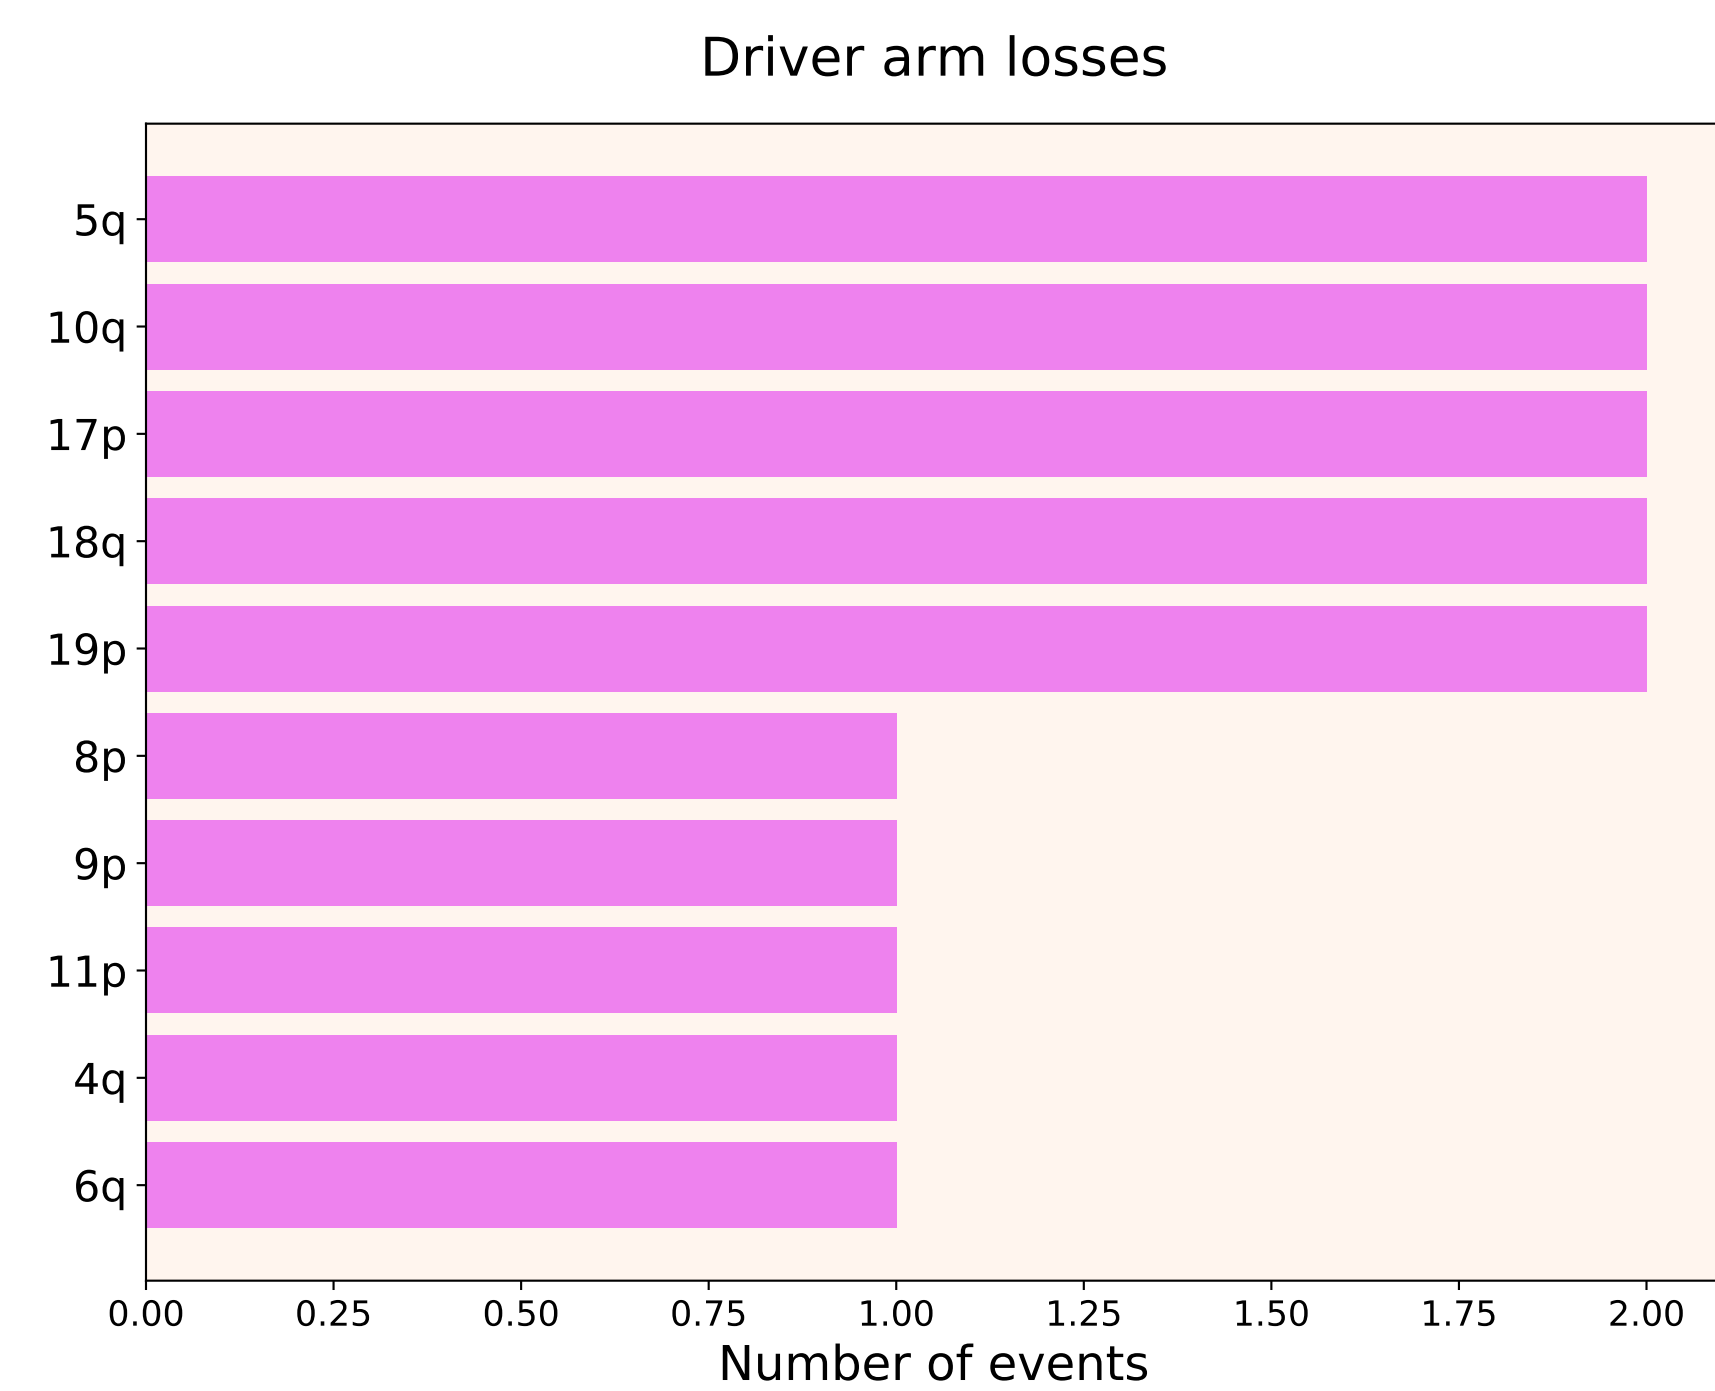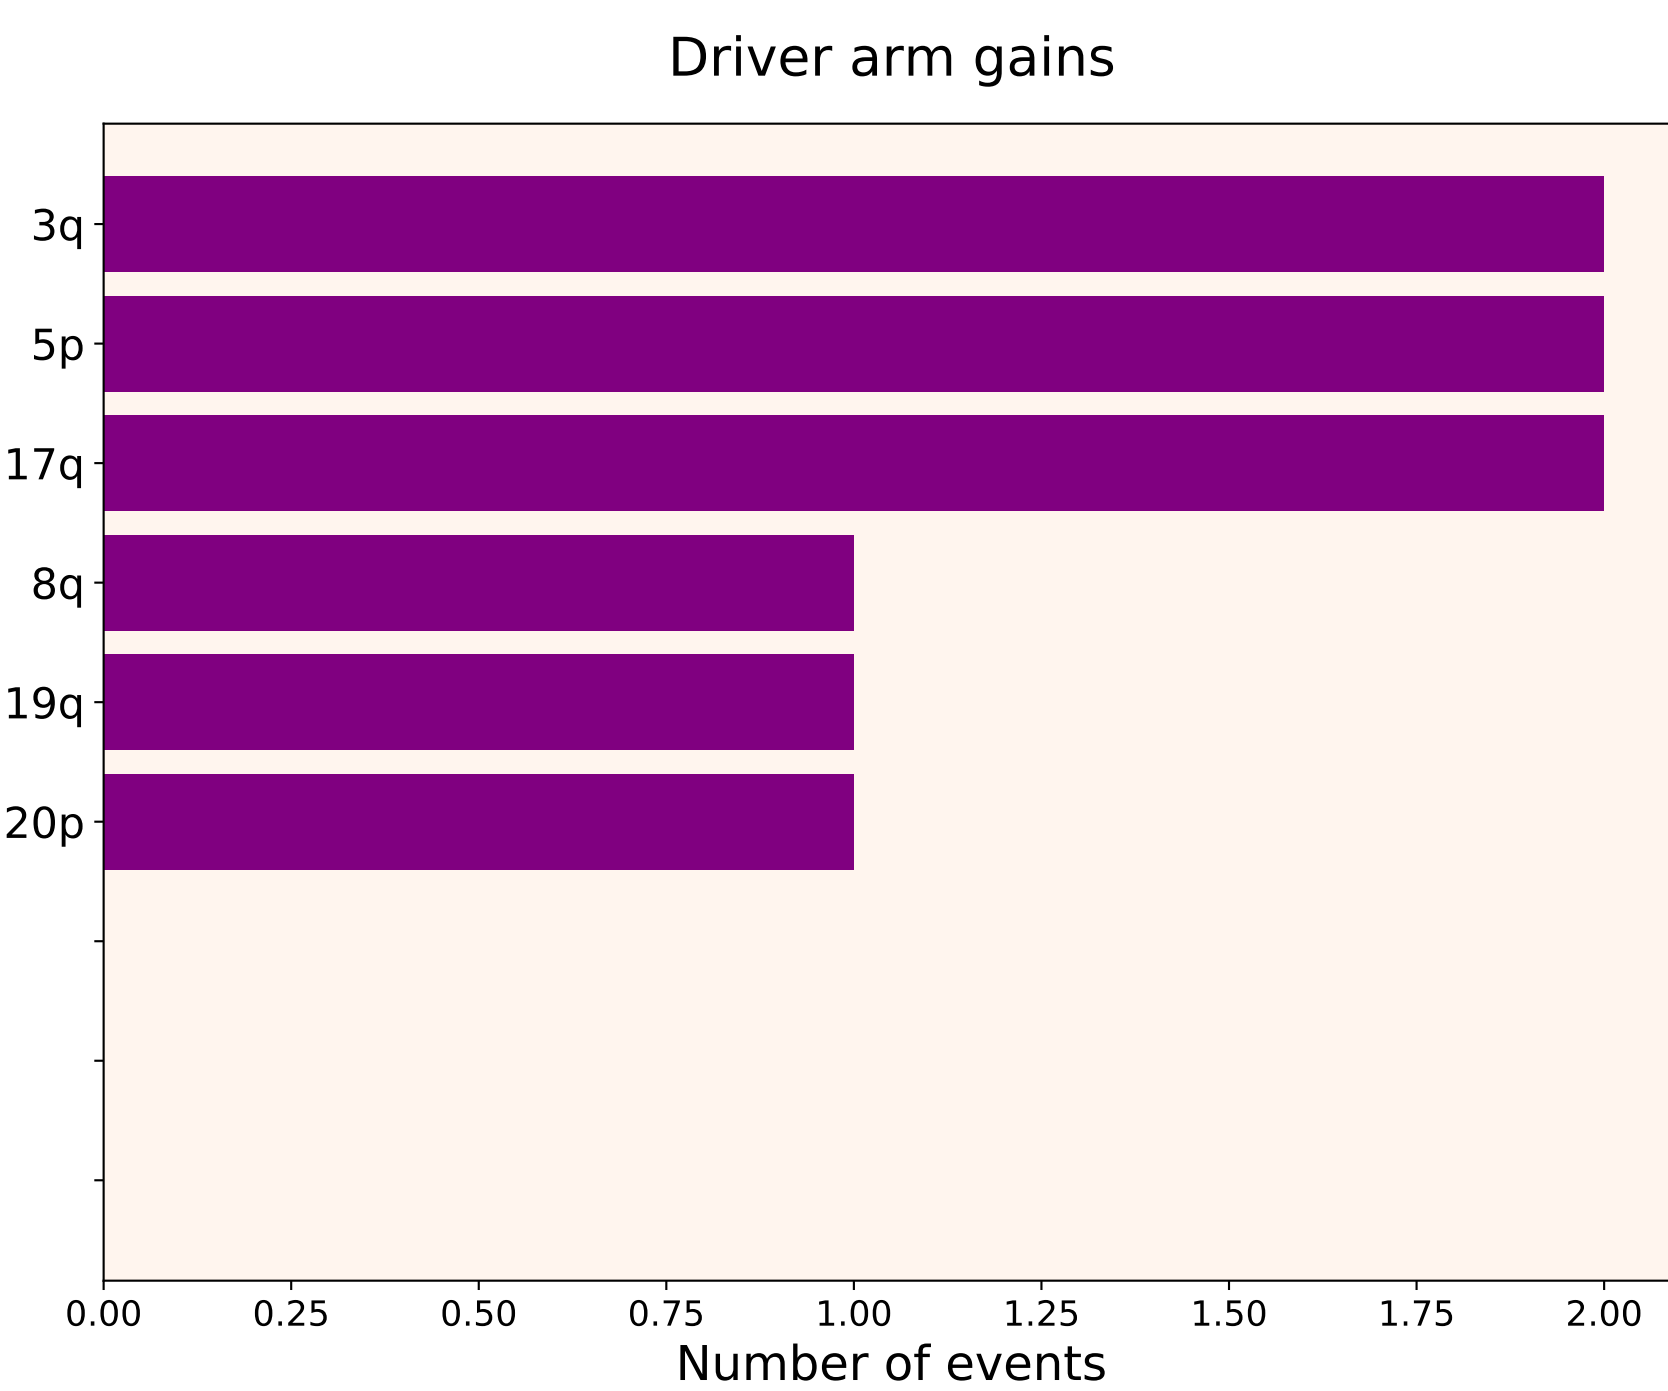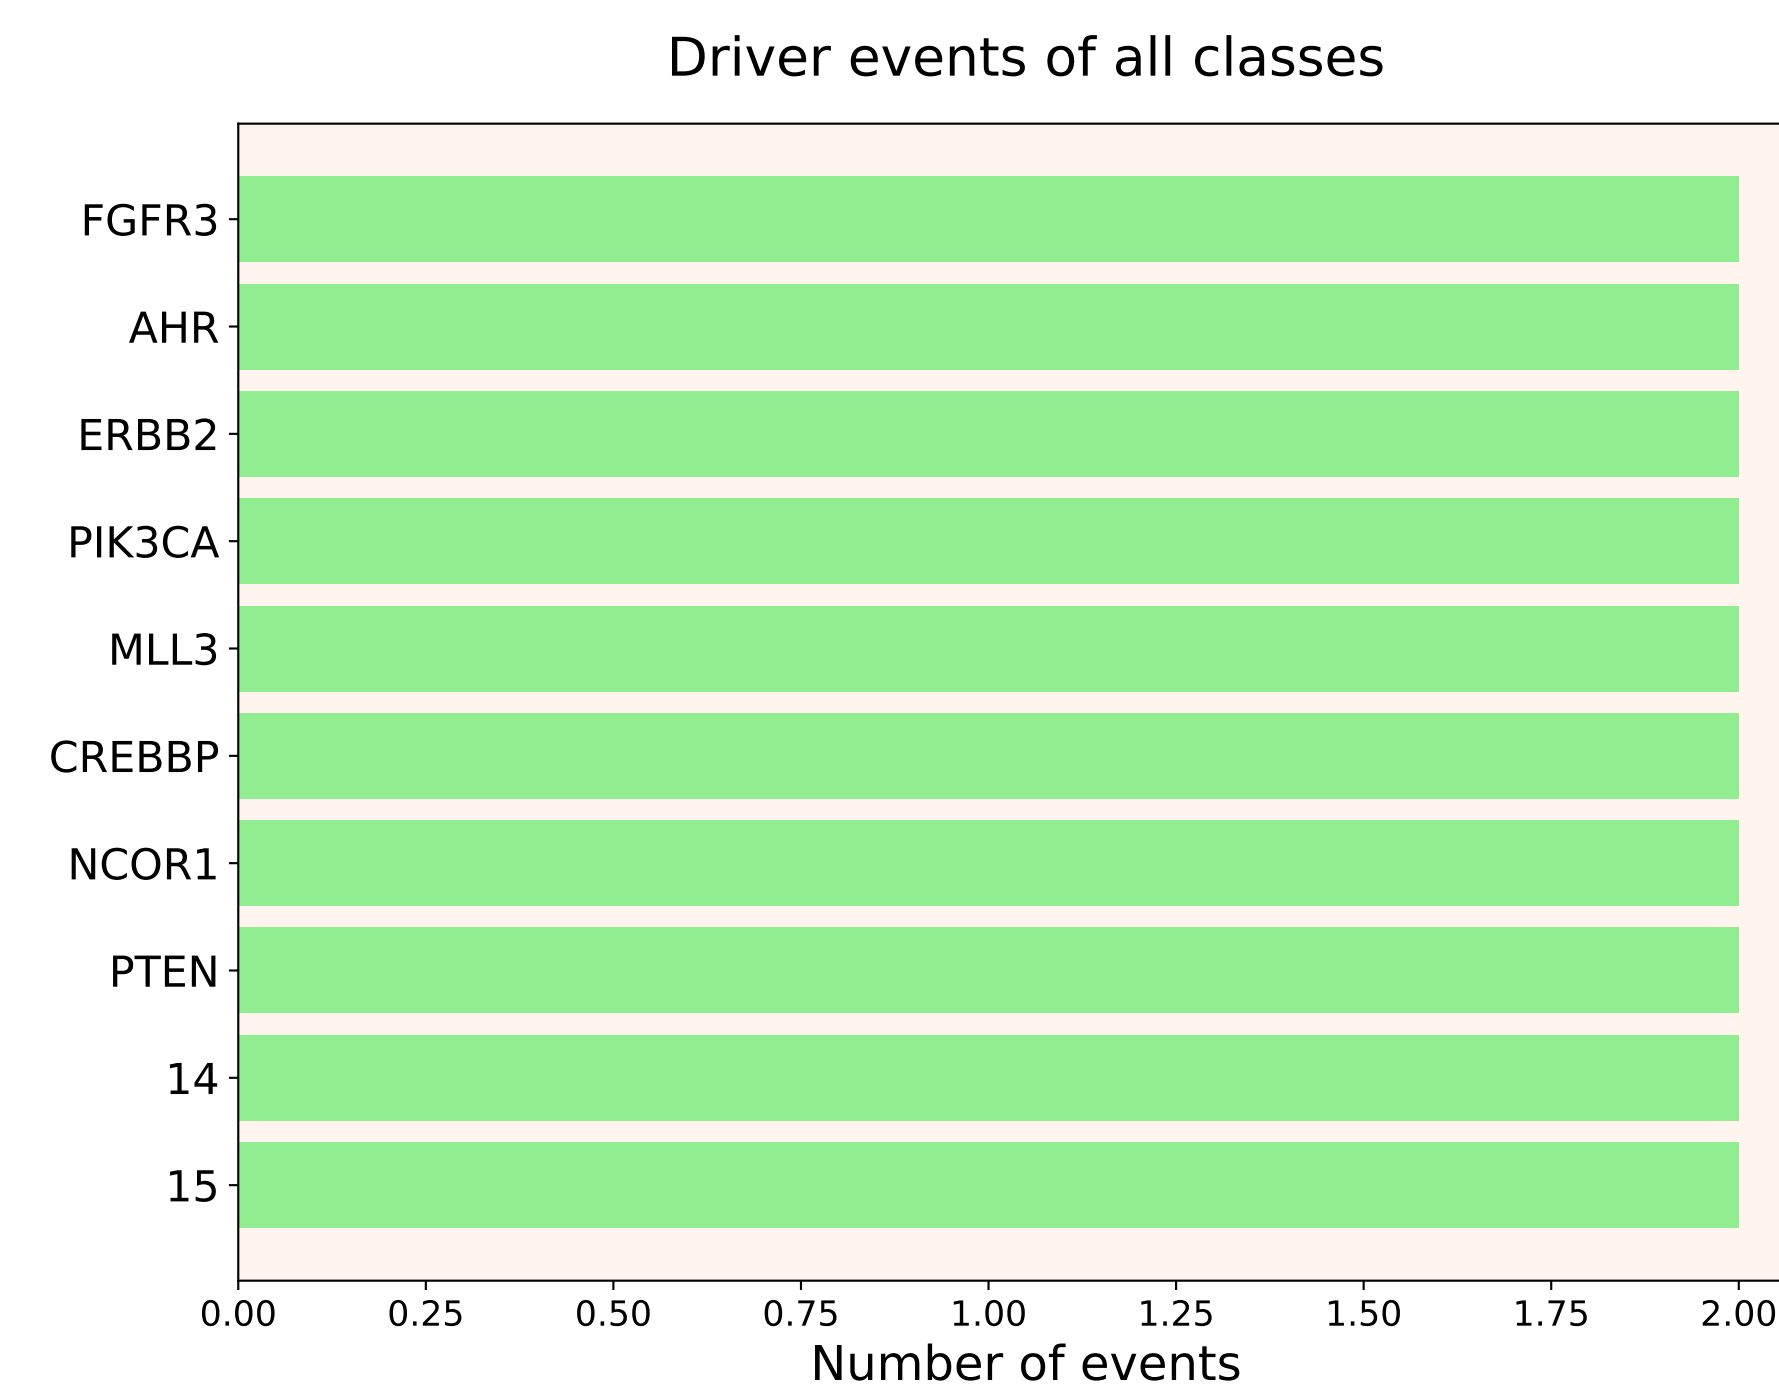

Supplement: Supplemental_Data_S1.zip [file Supplemental_Data_S1.zip]

# STAD\_FEMALE

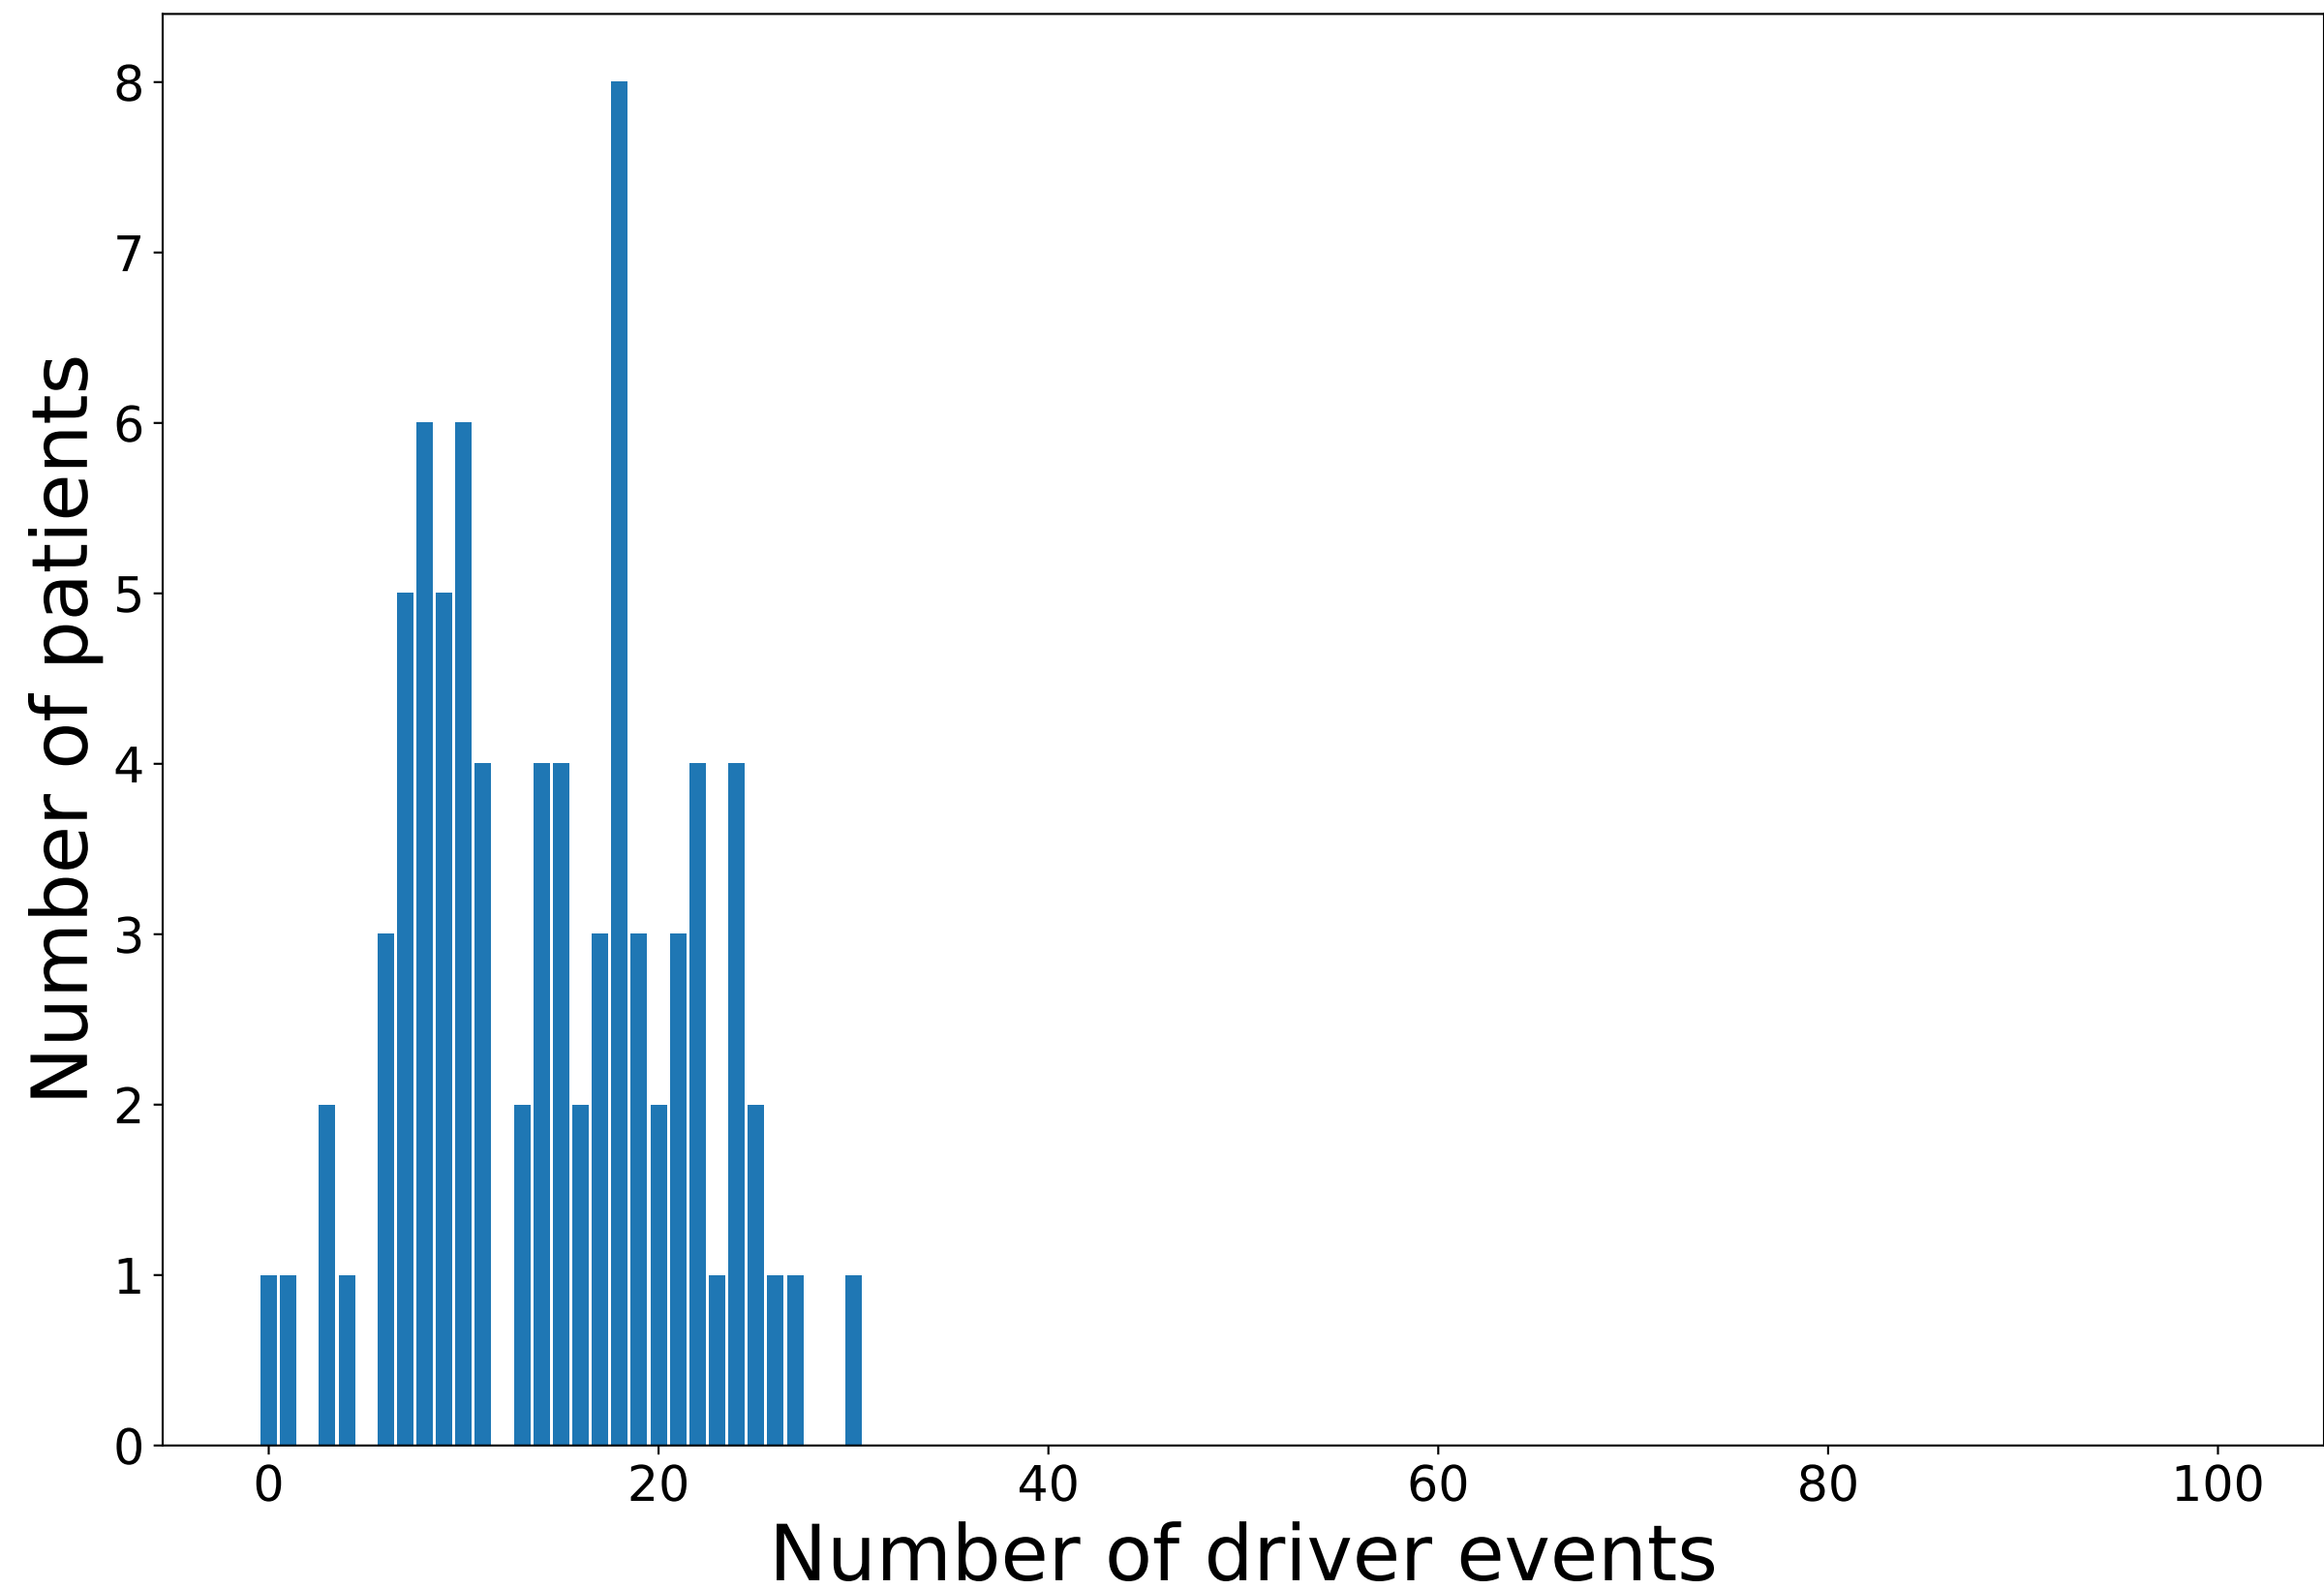

Supplement: Supplemental_Data_S1.zip [file Supplemental_Data_S1.zip]

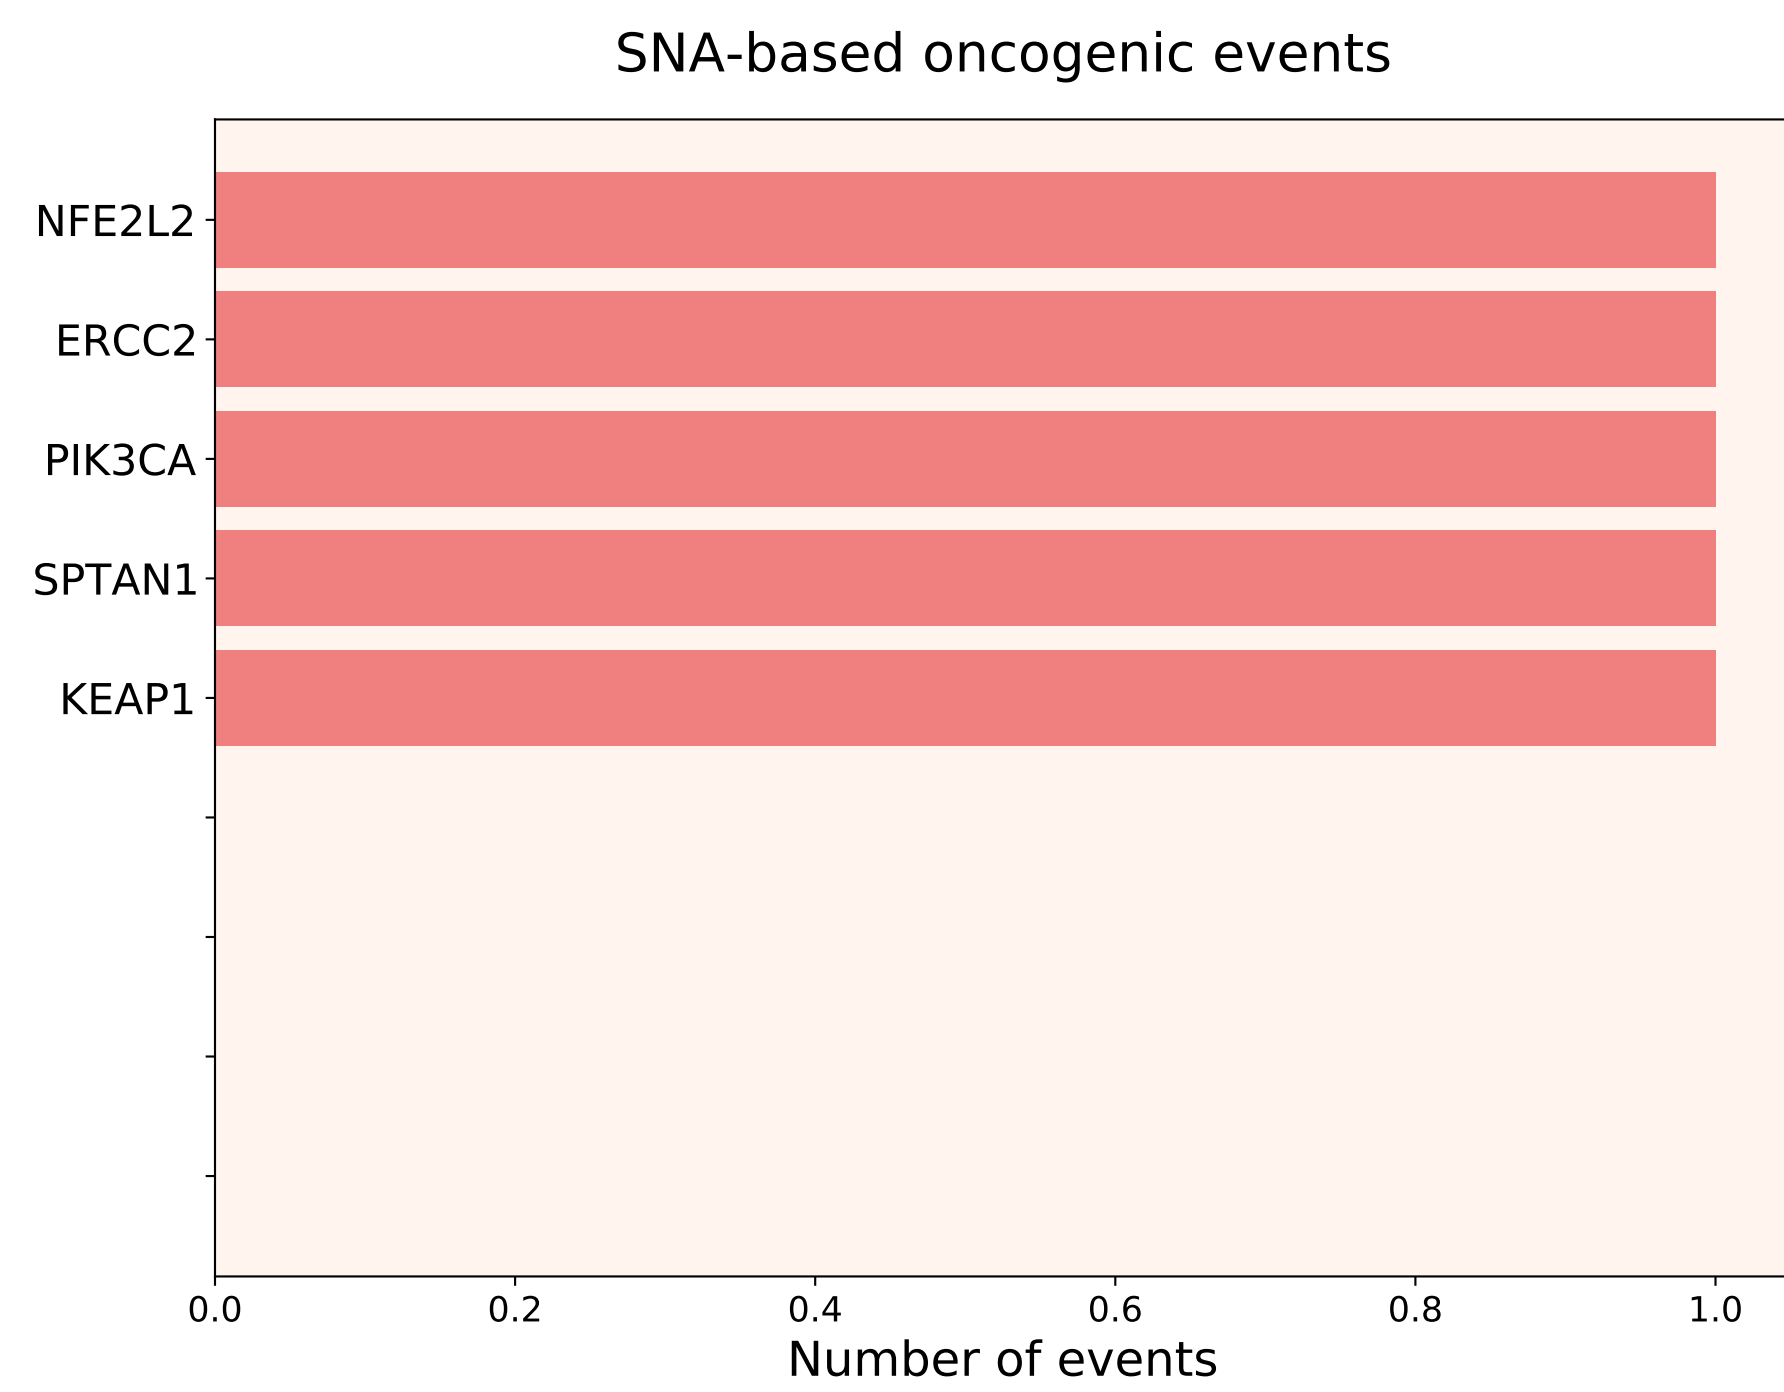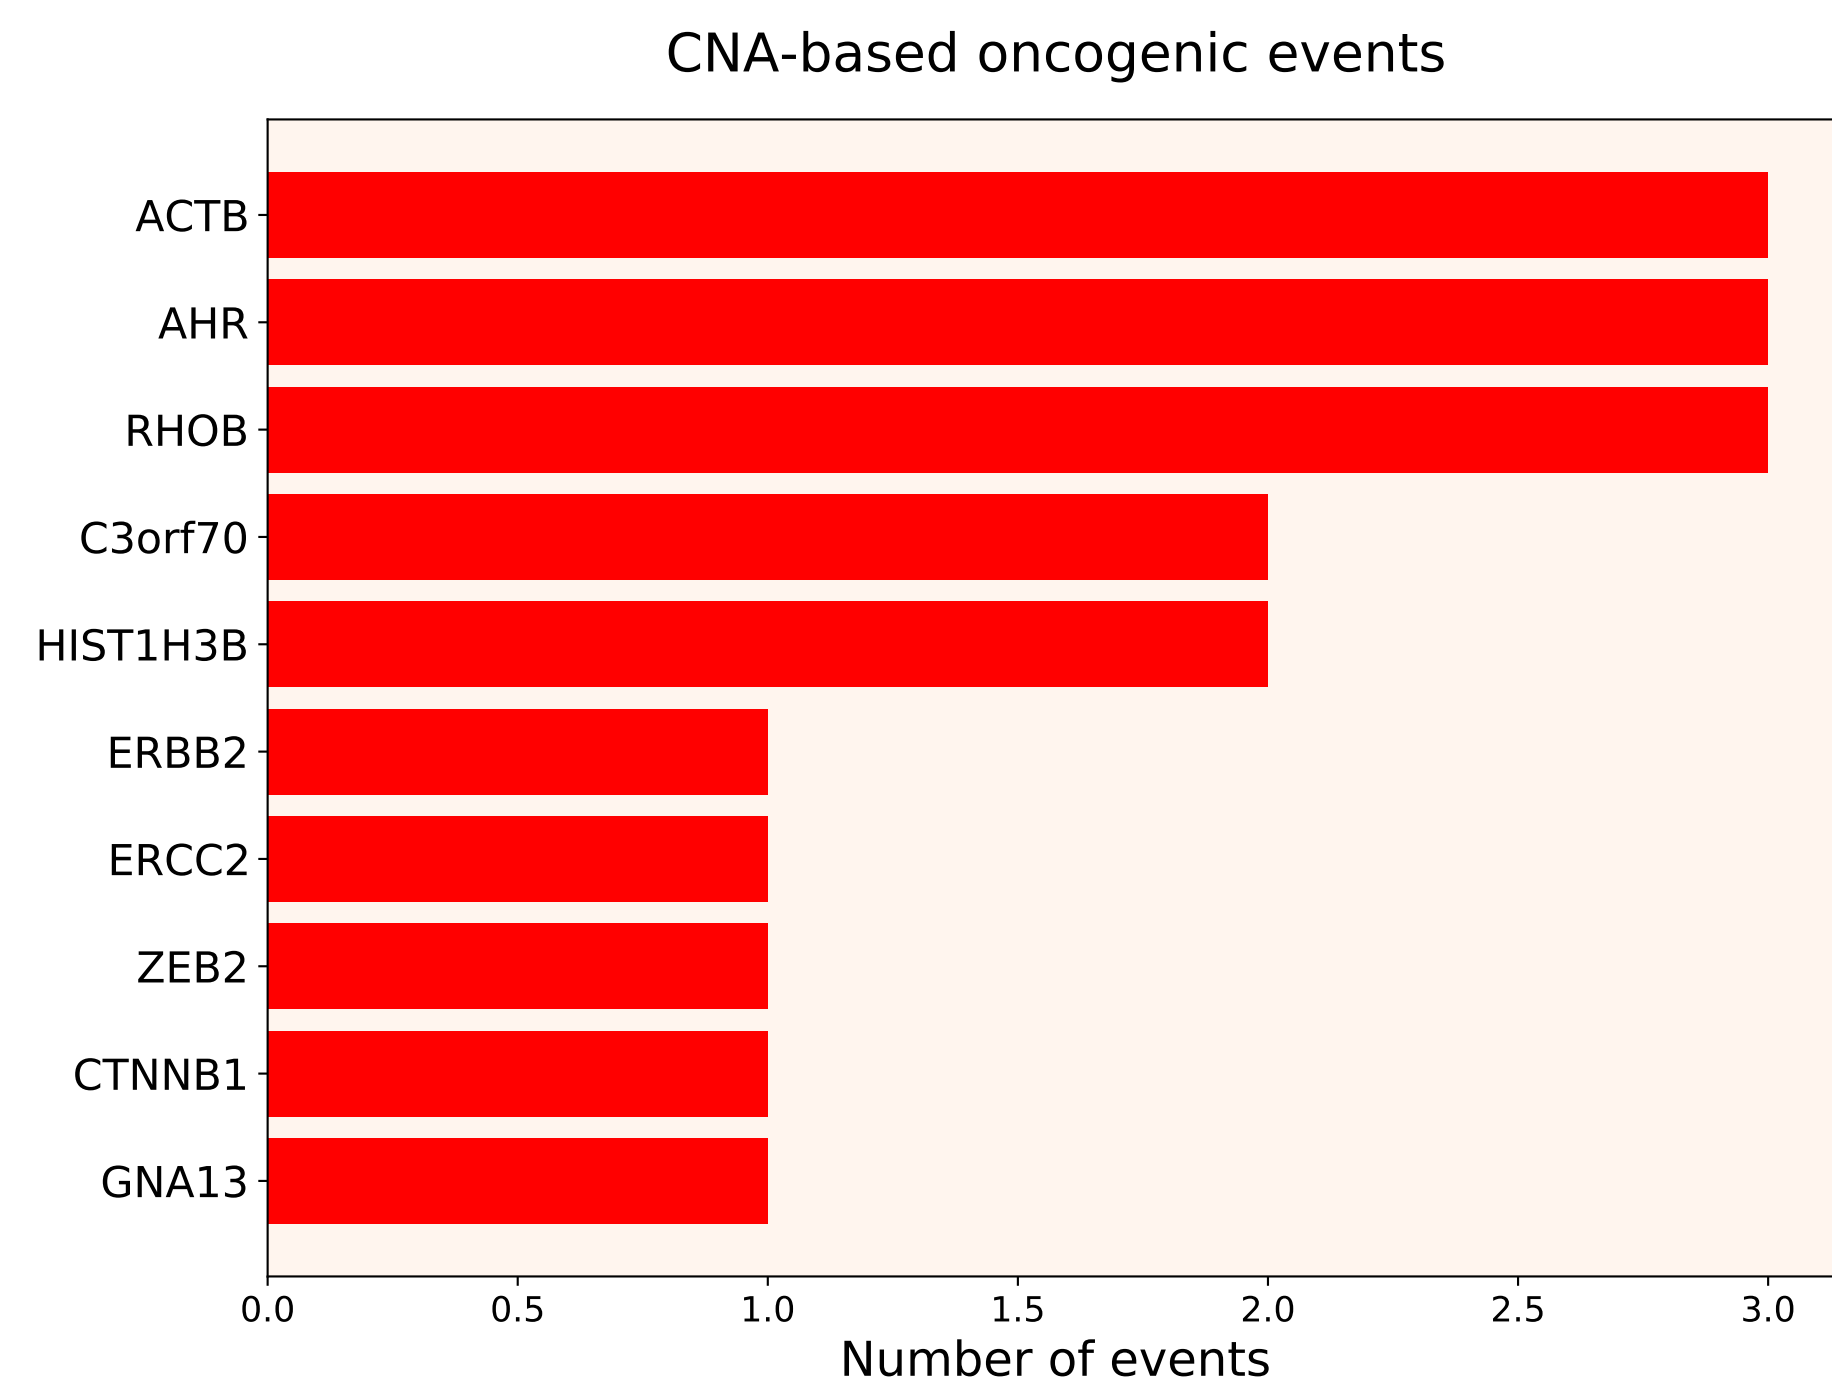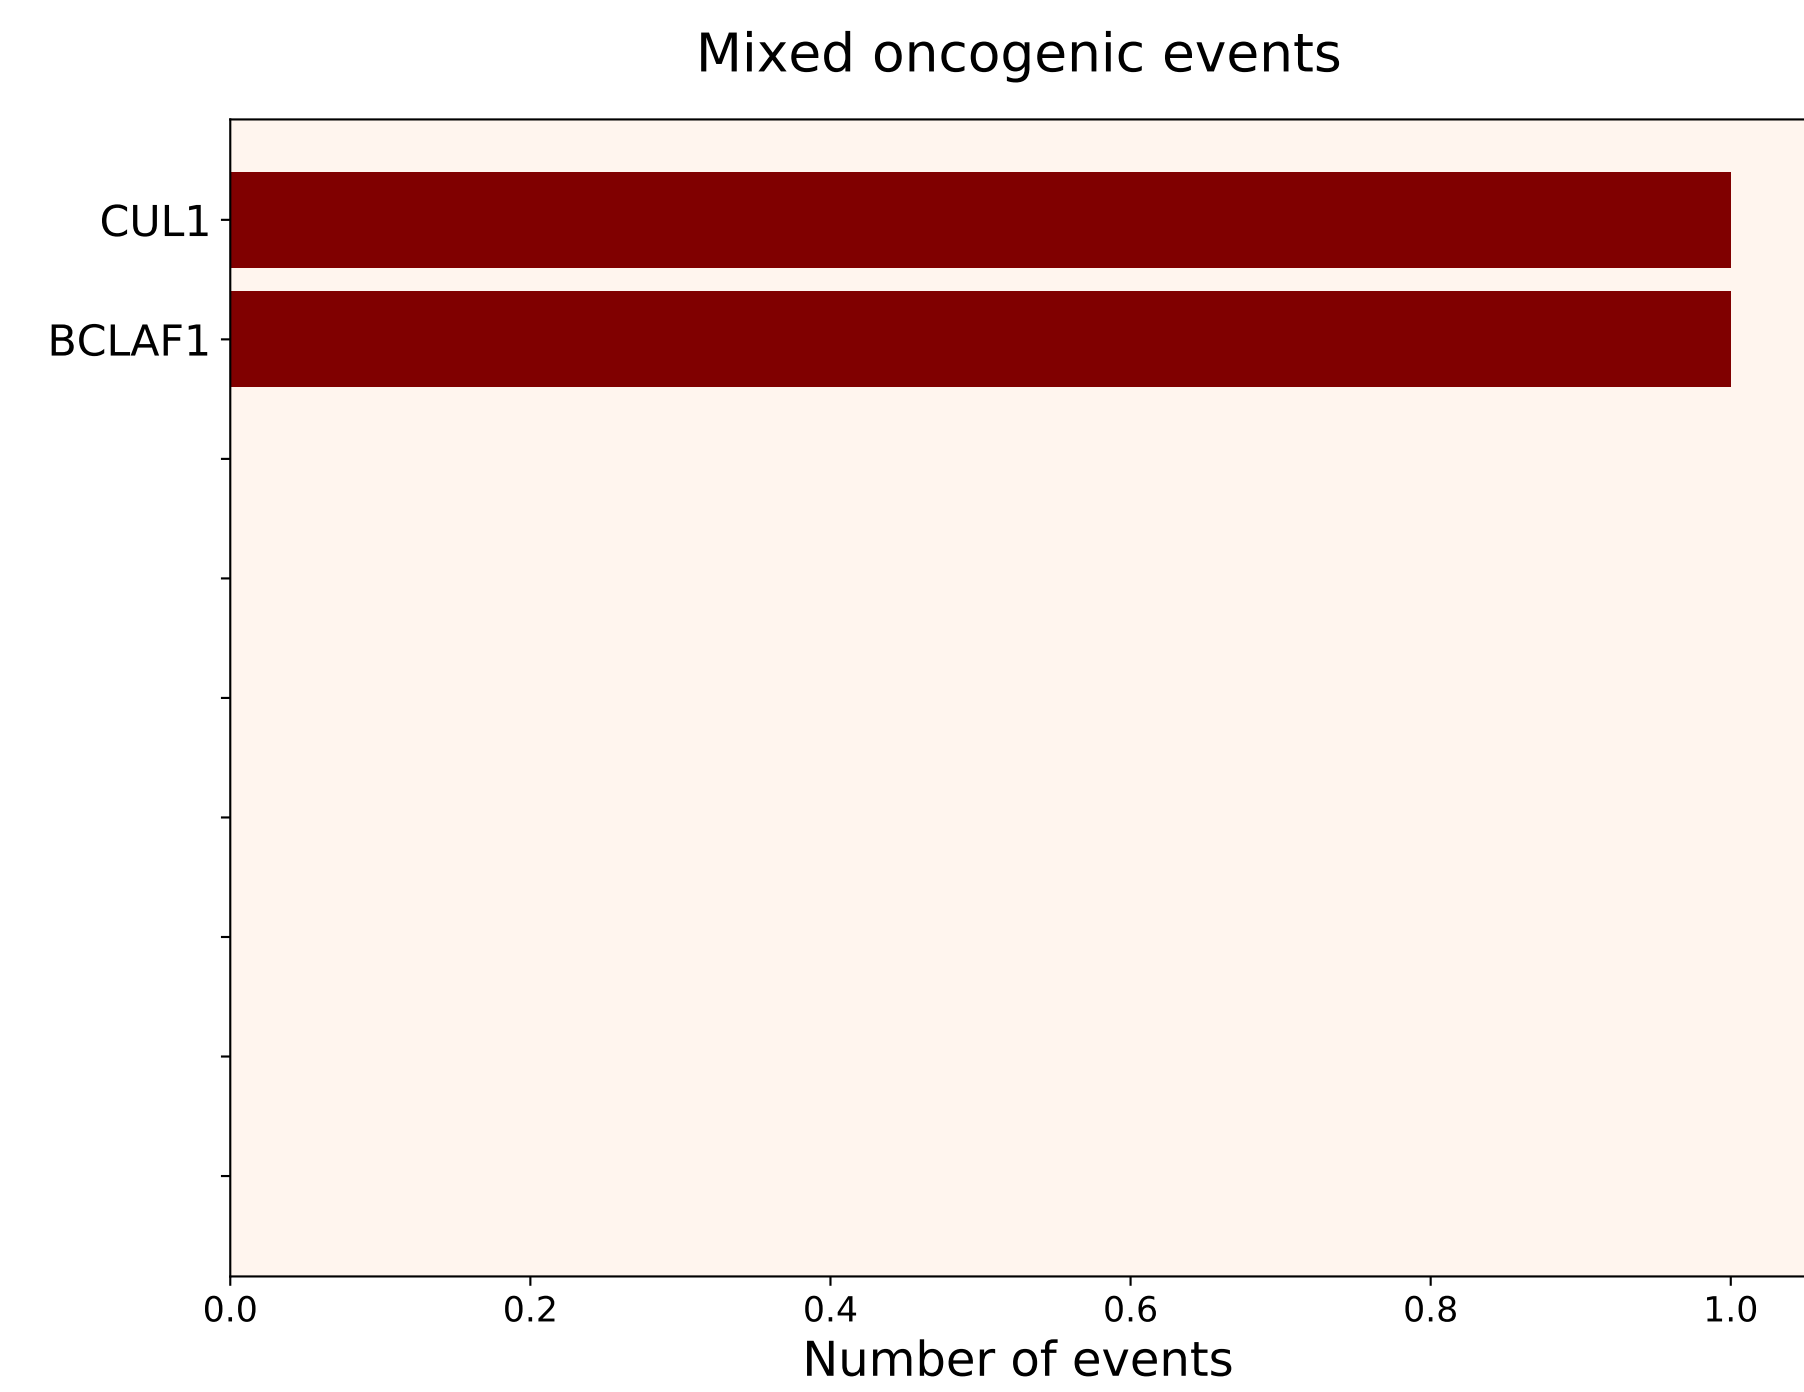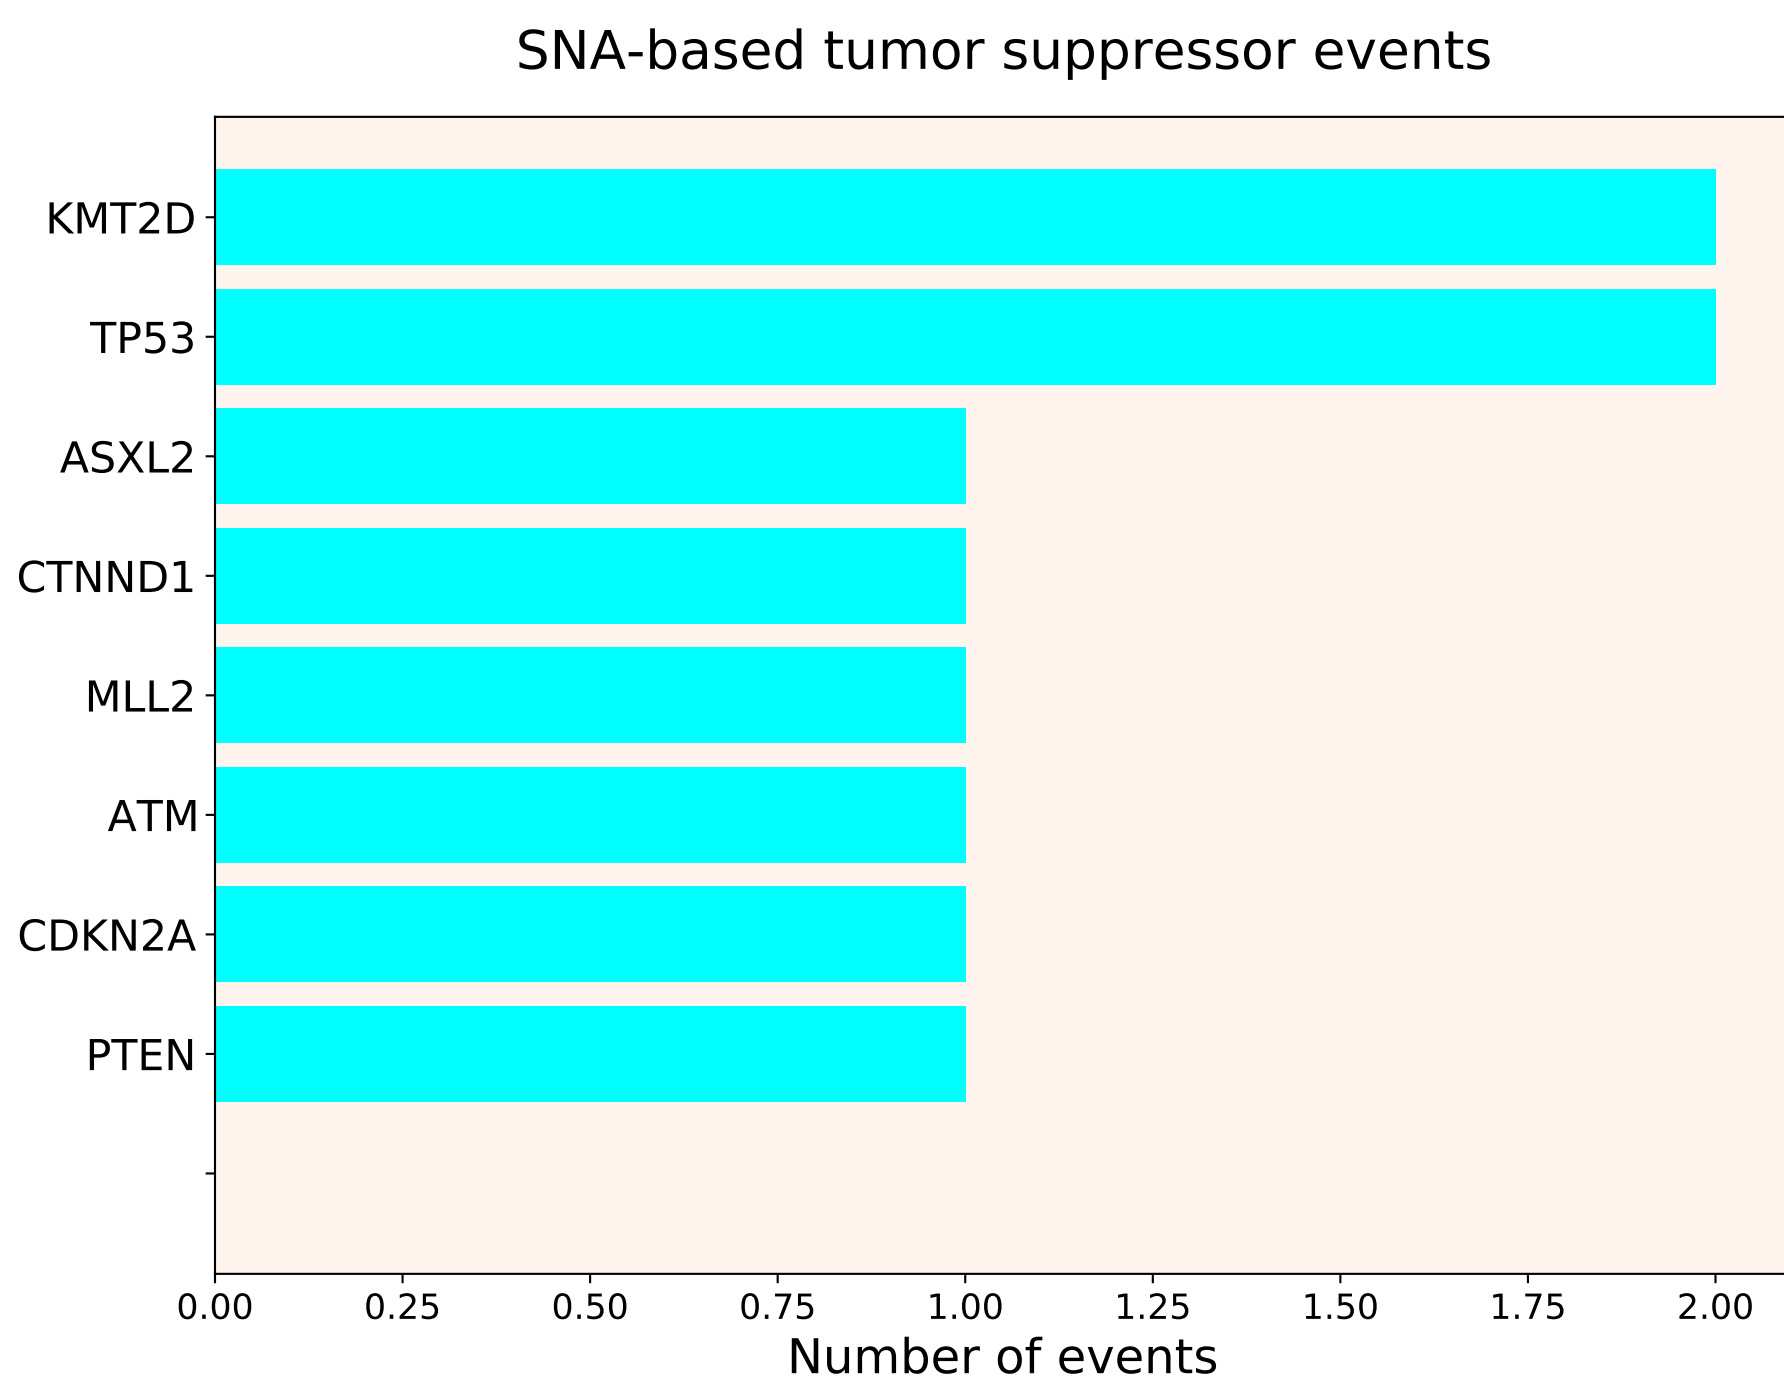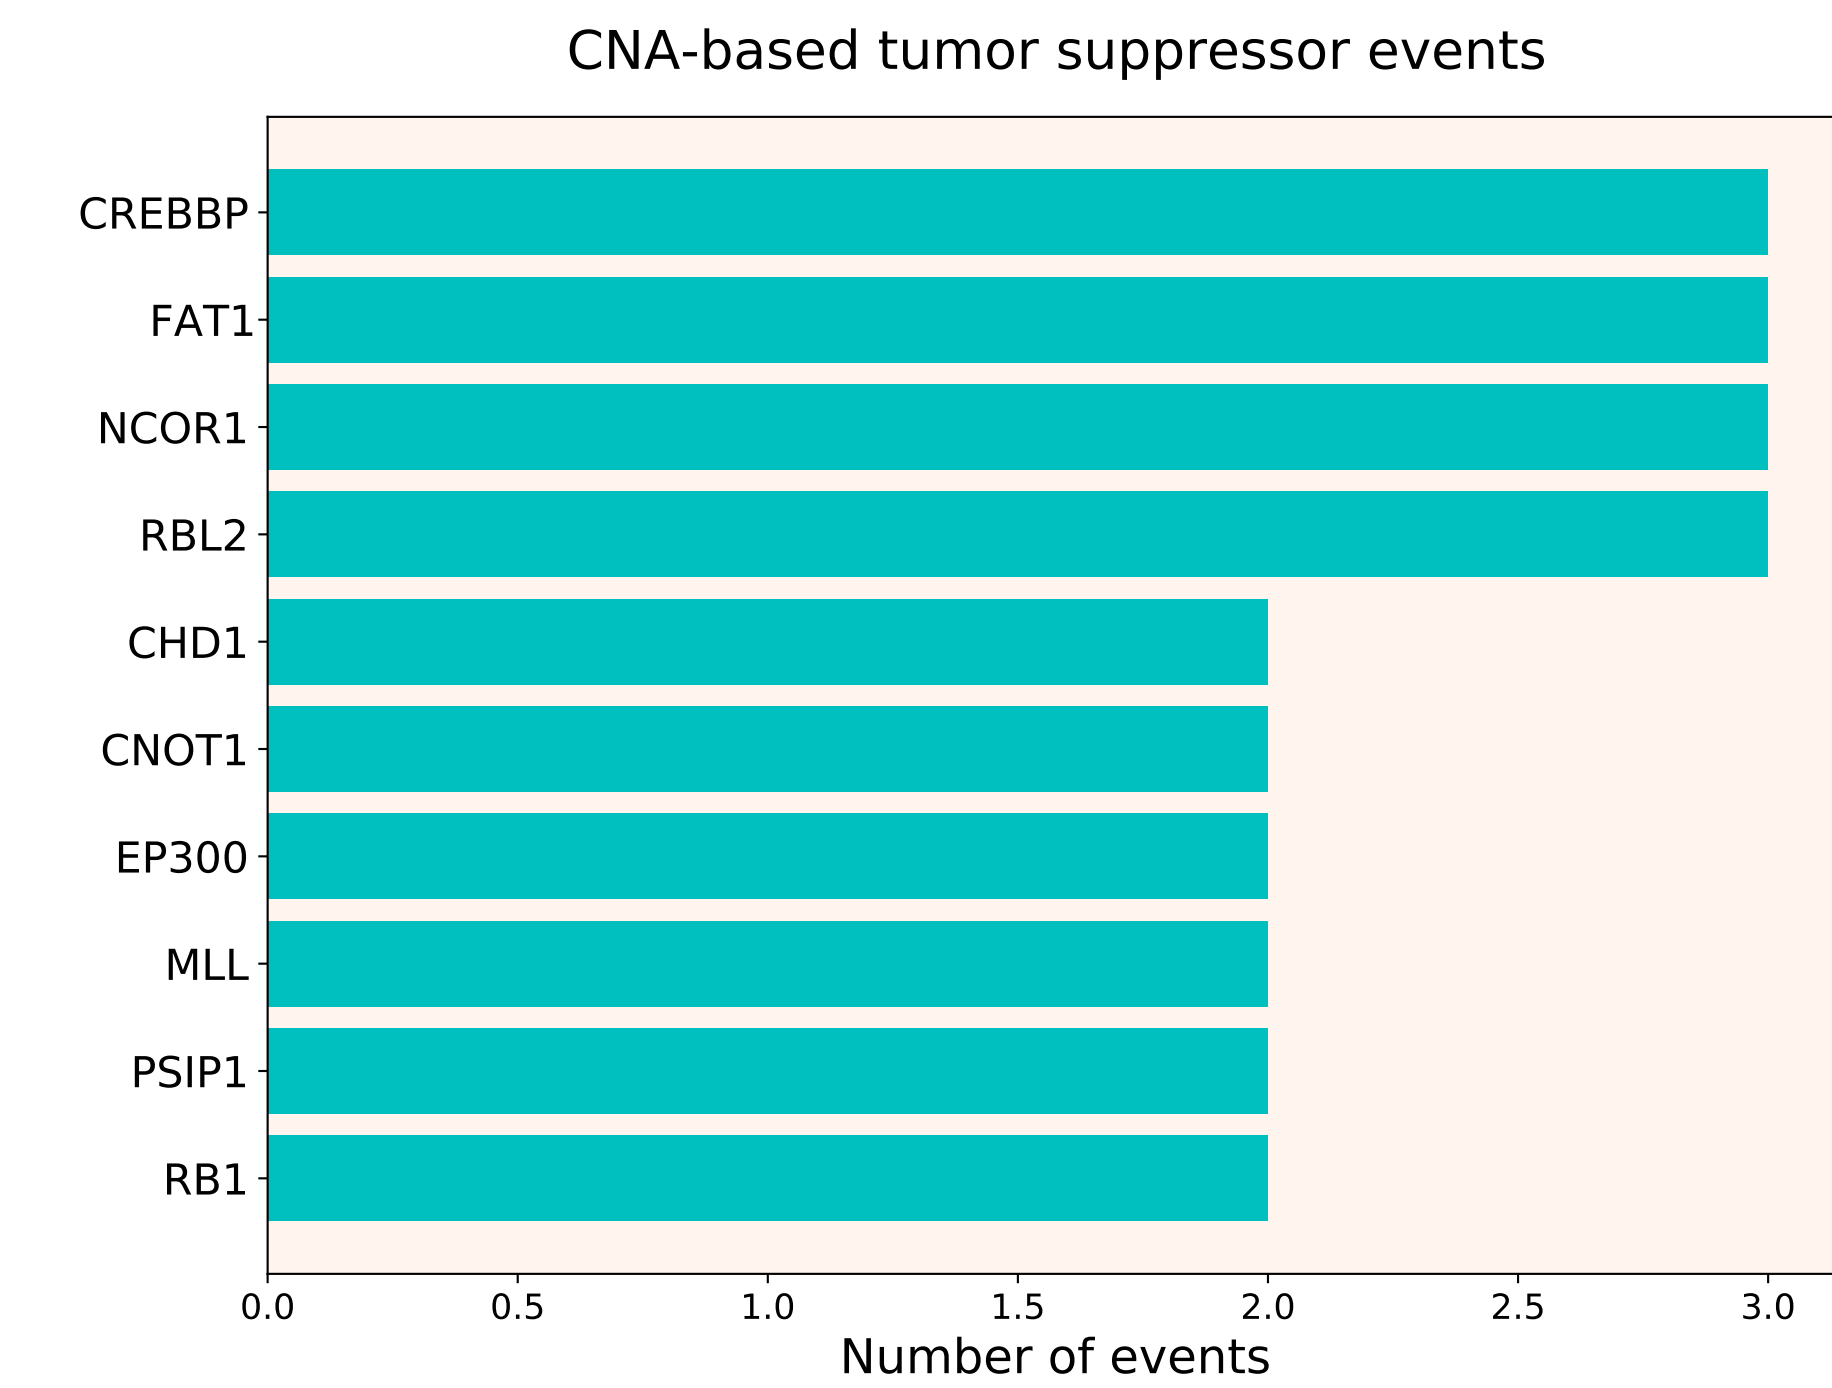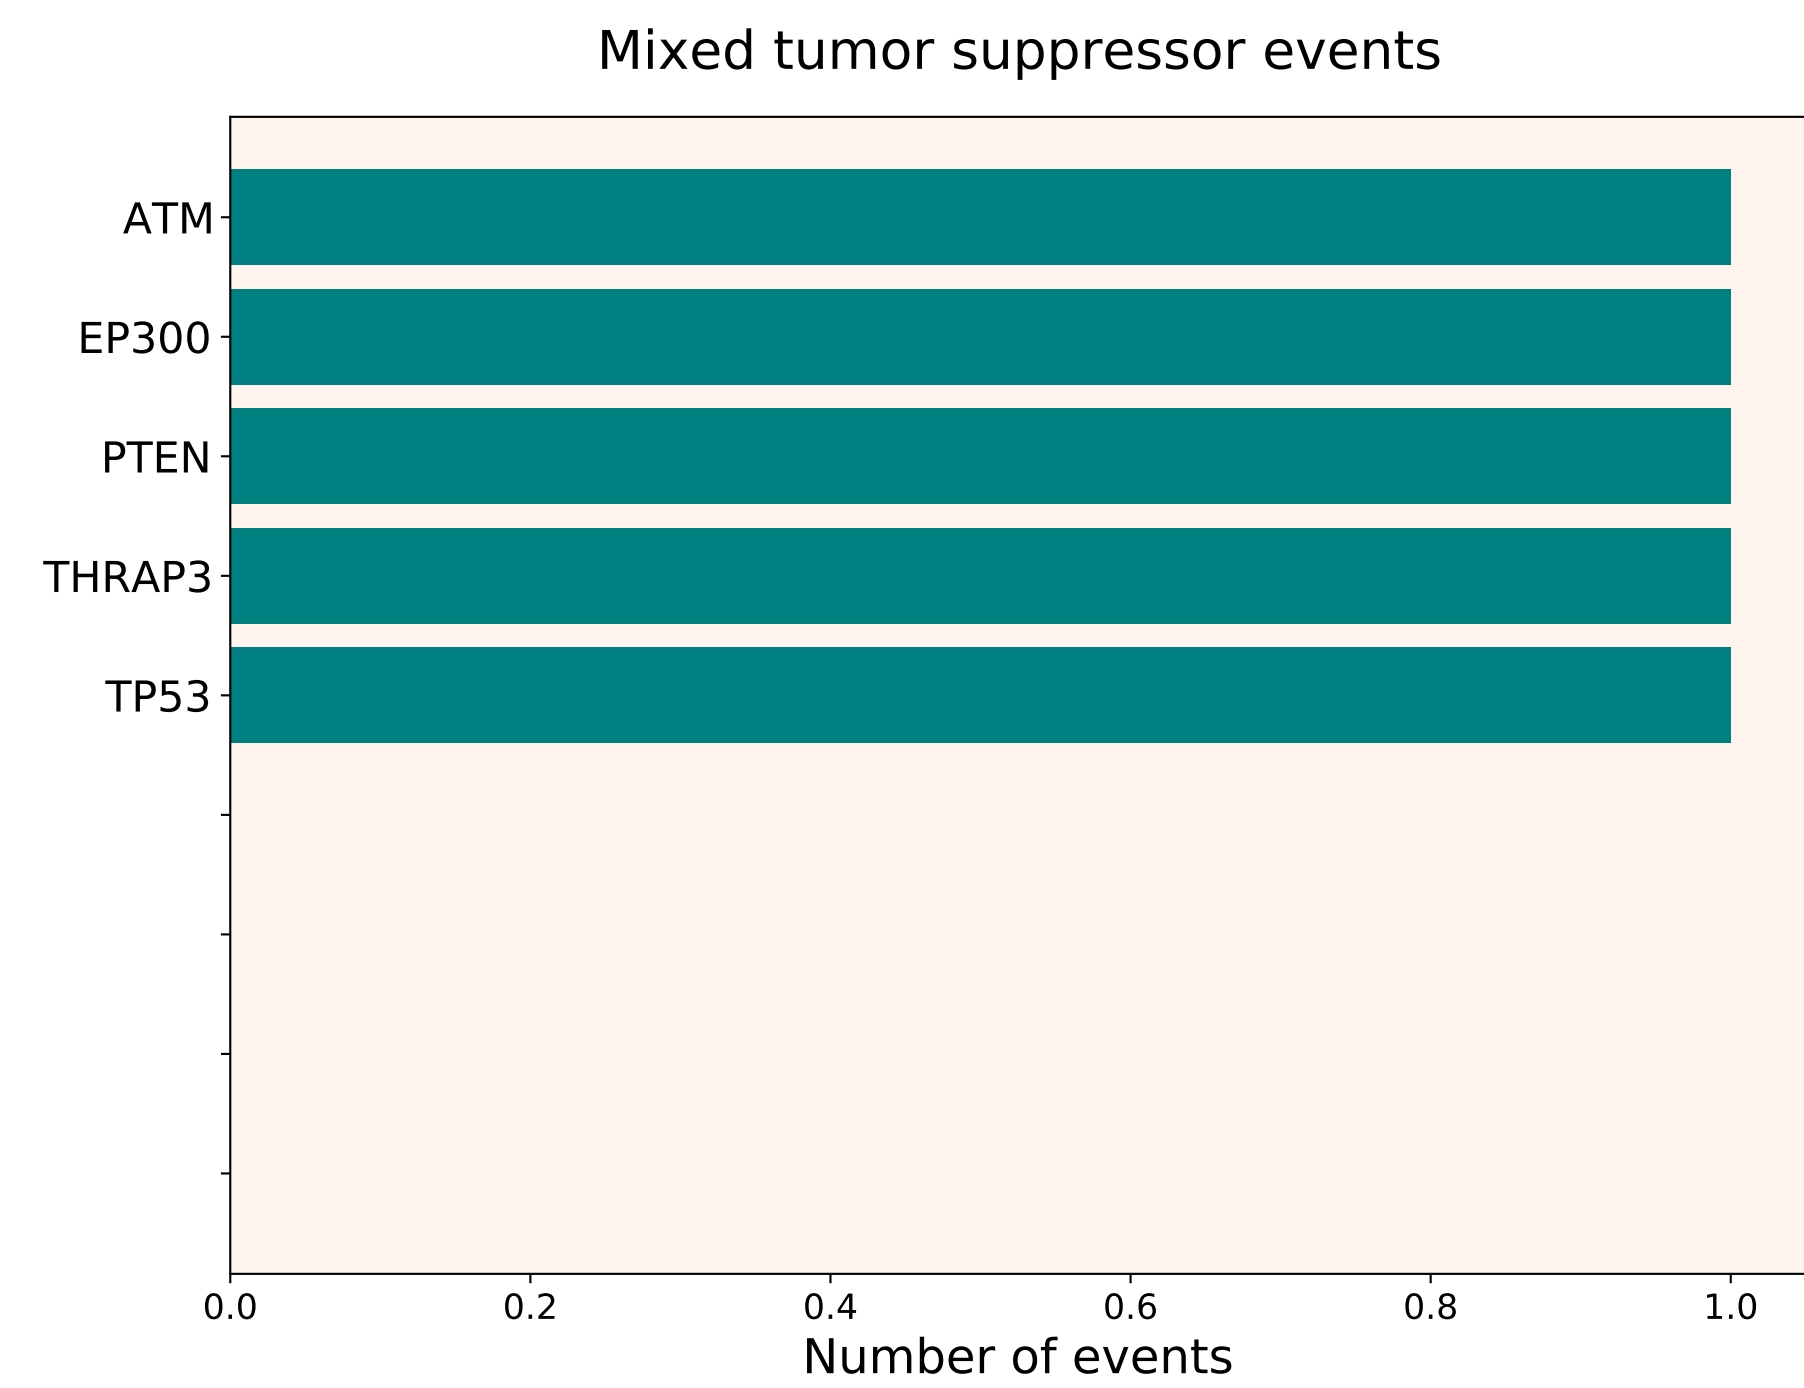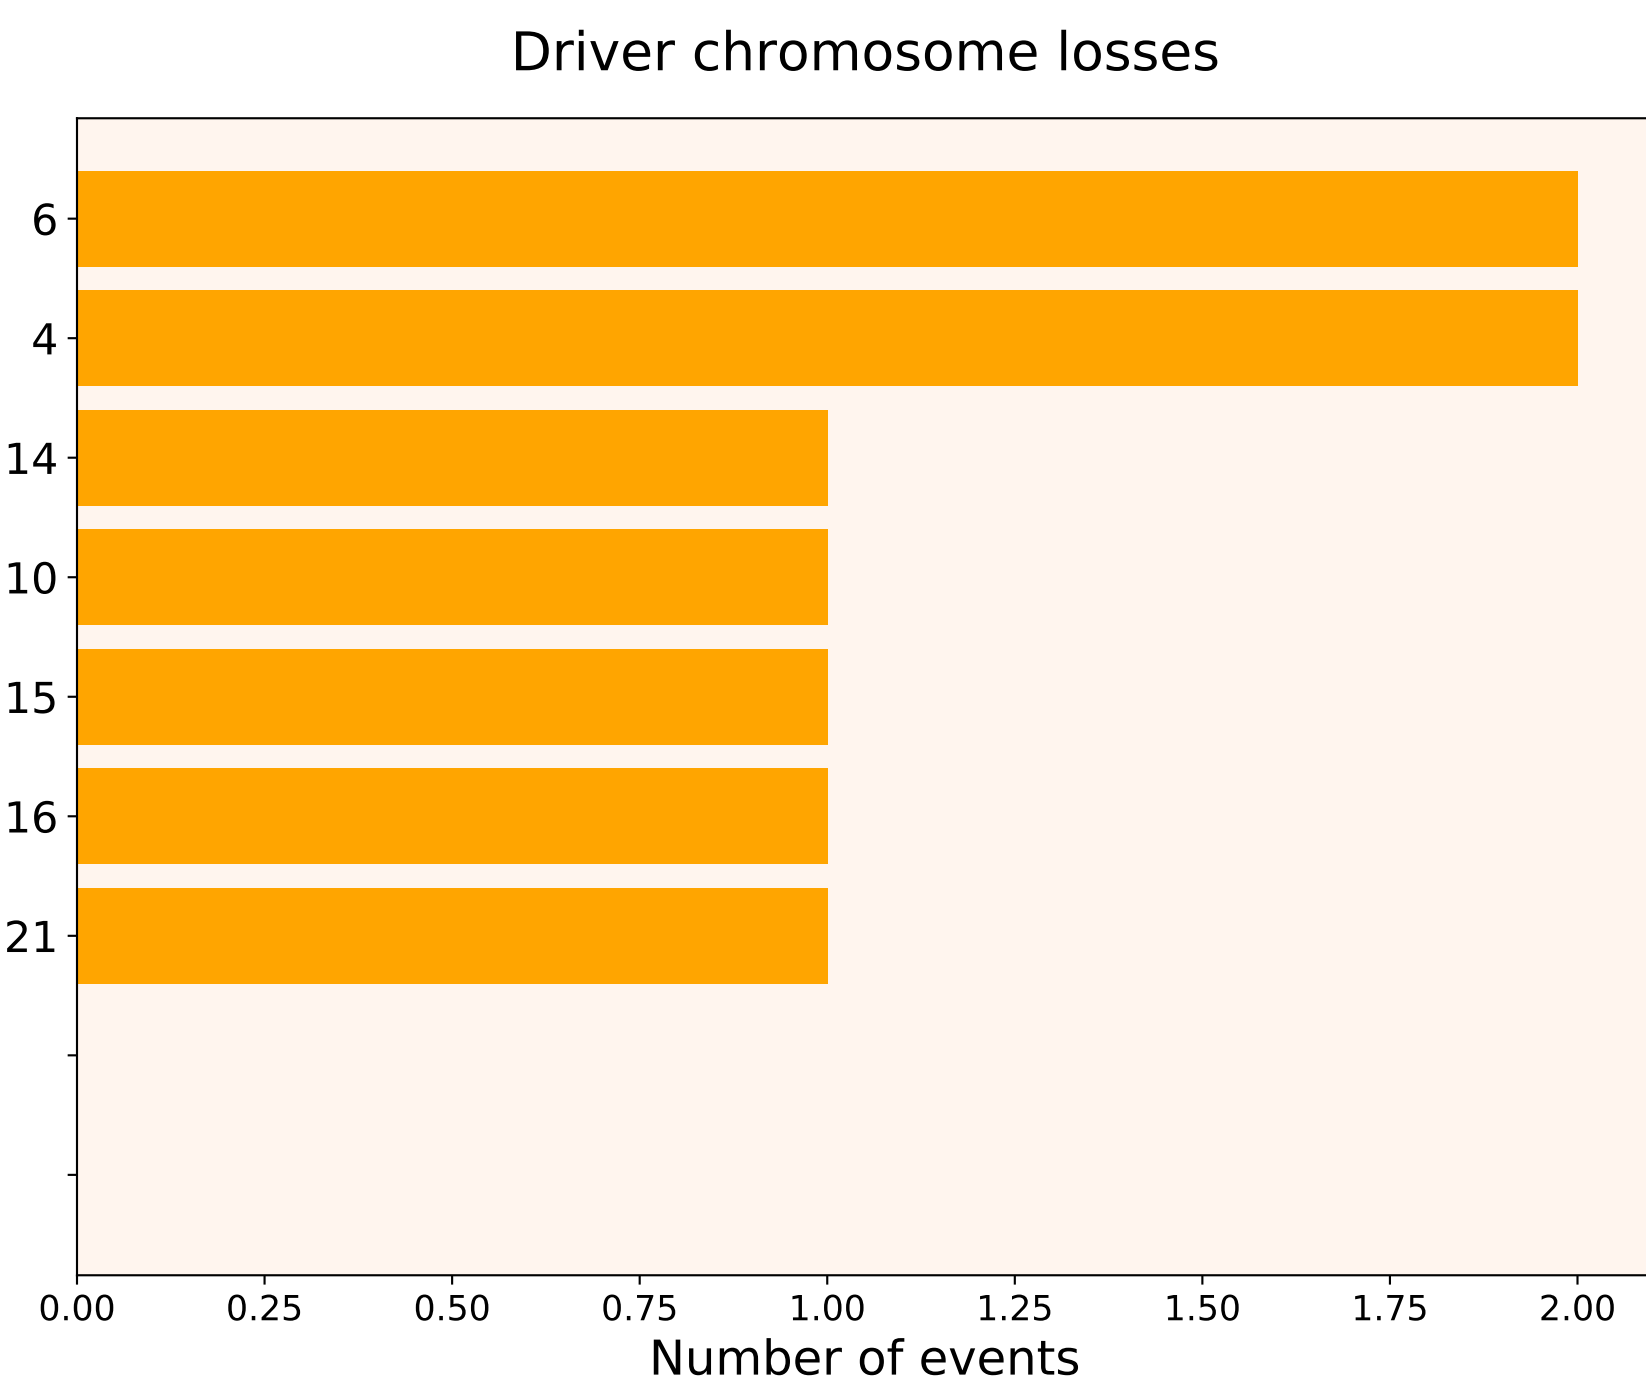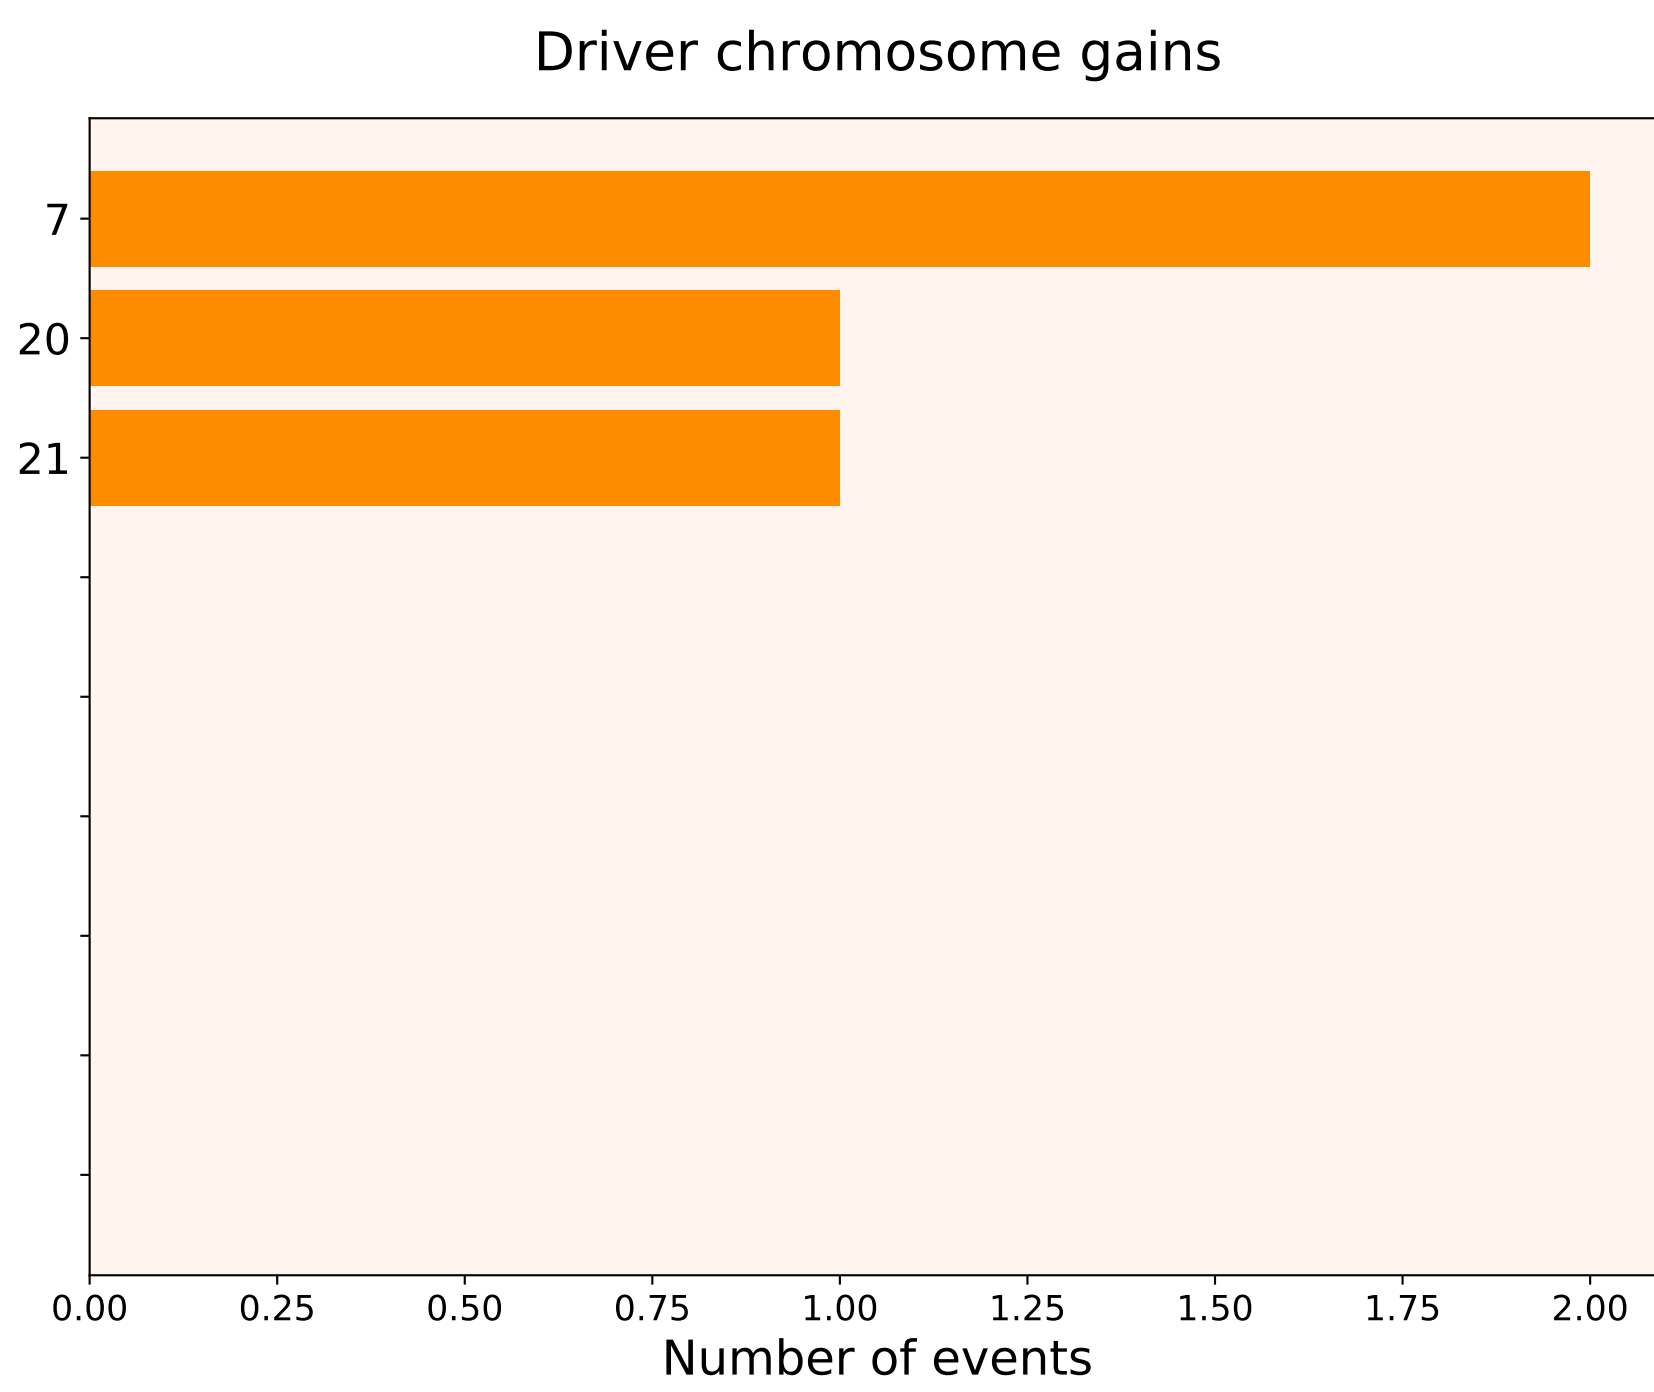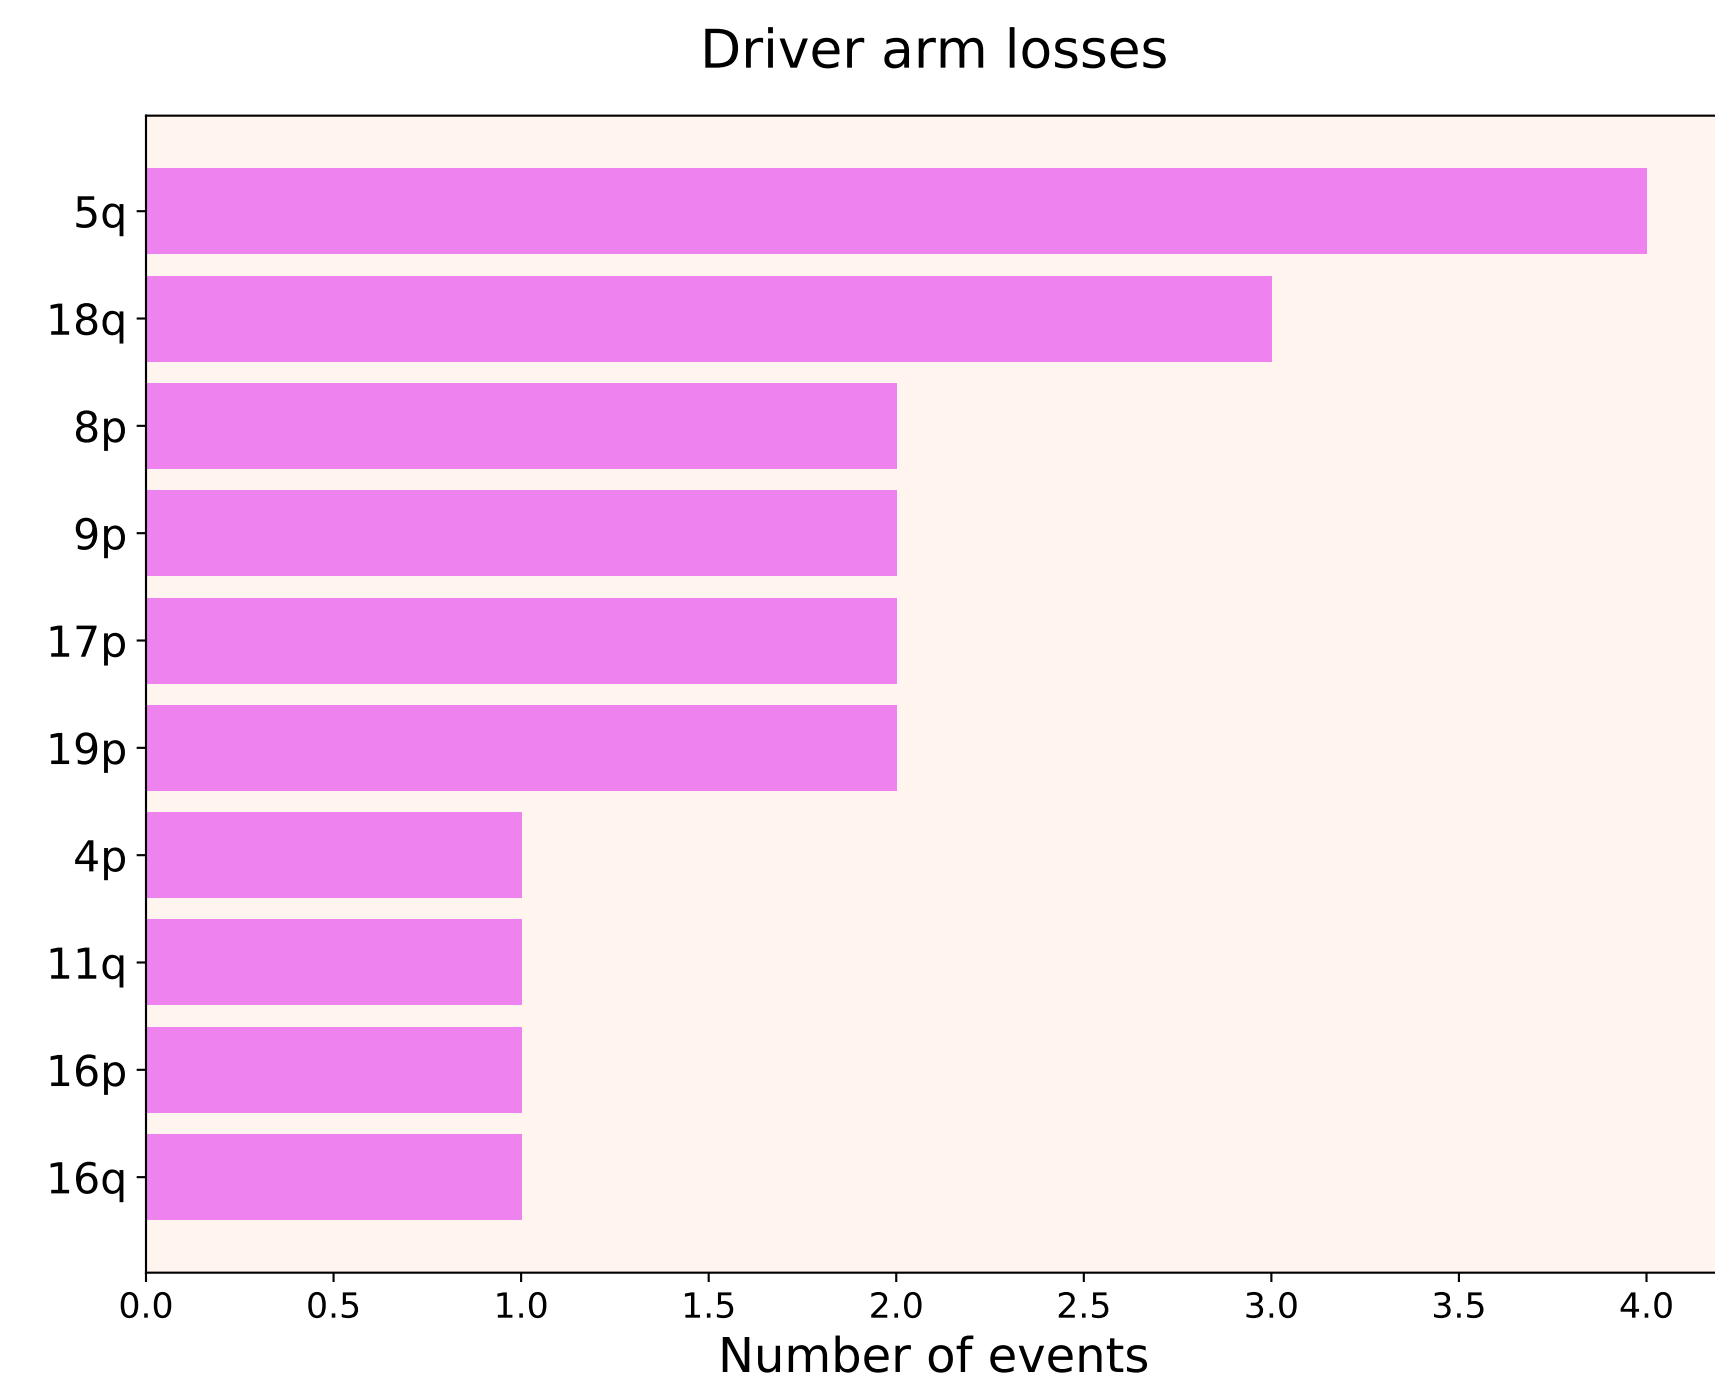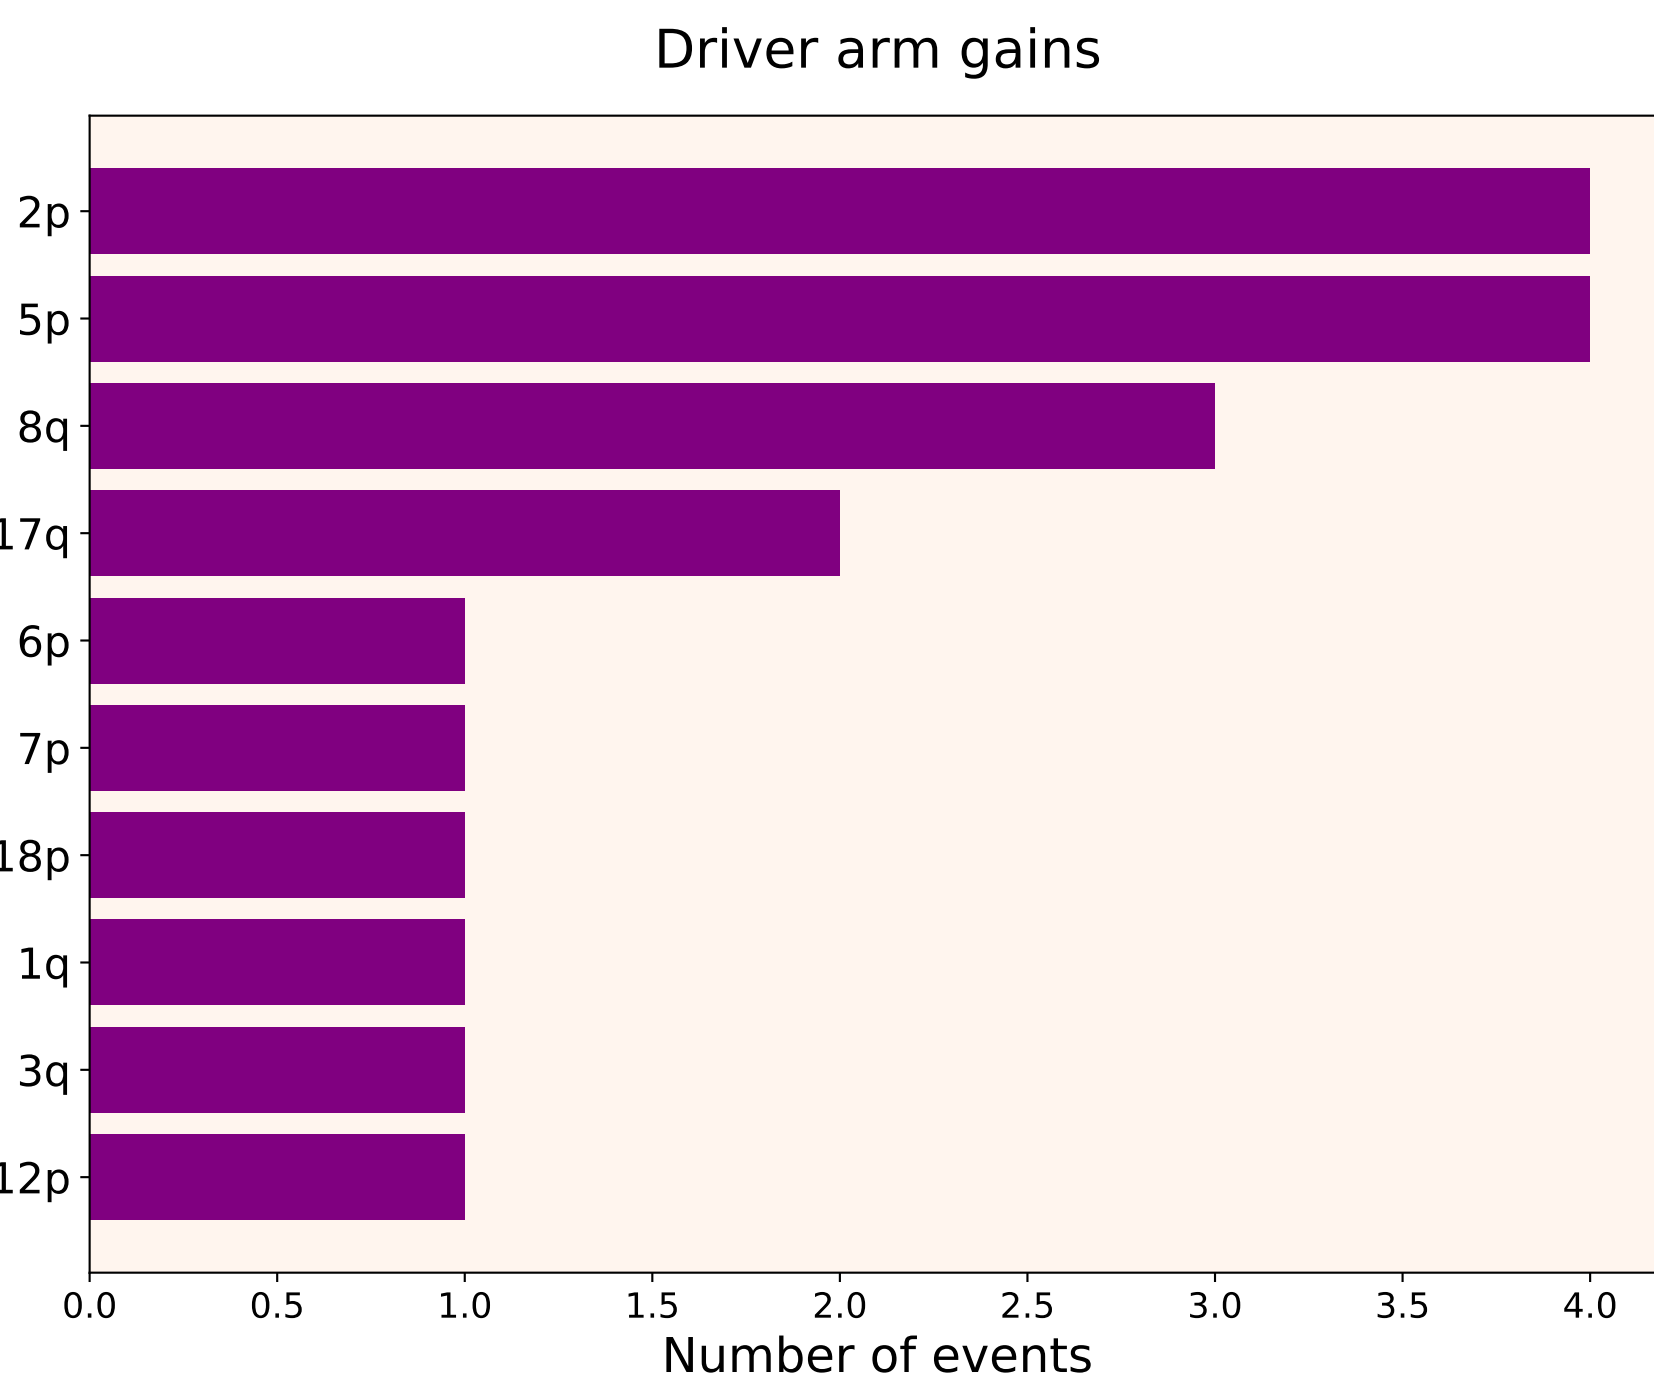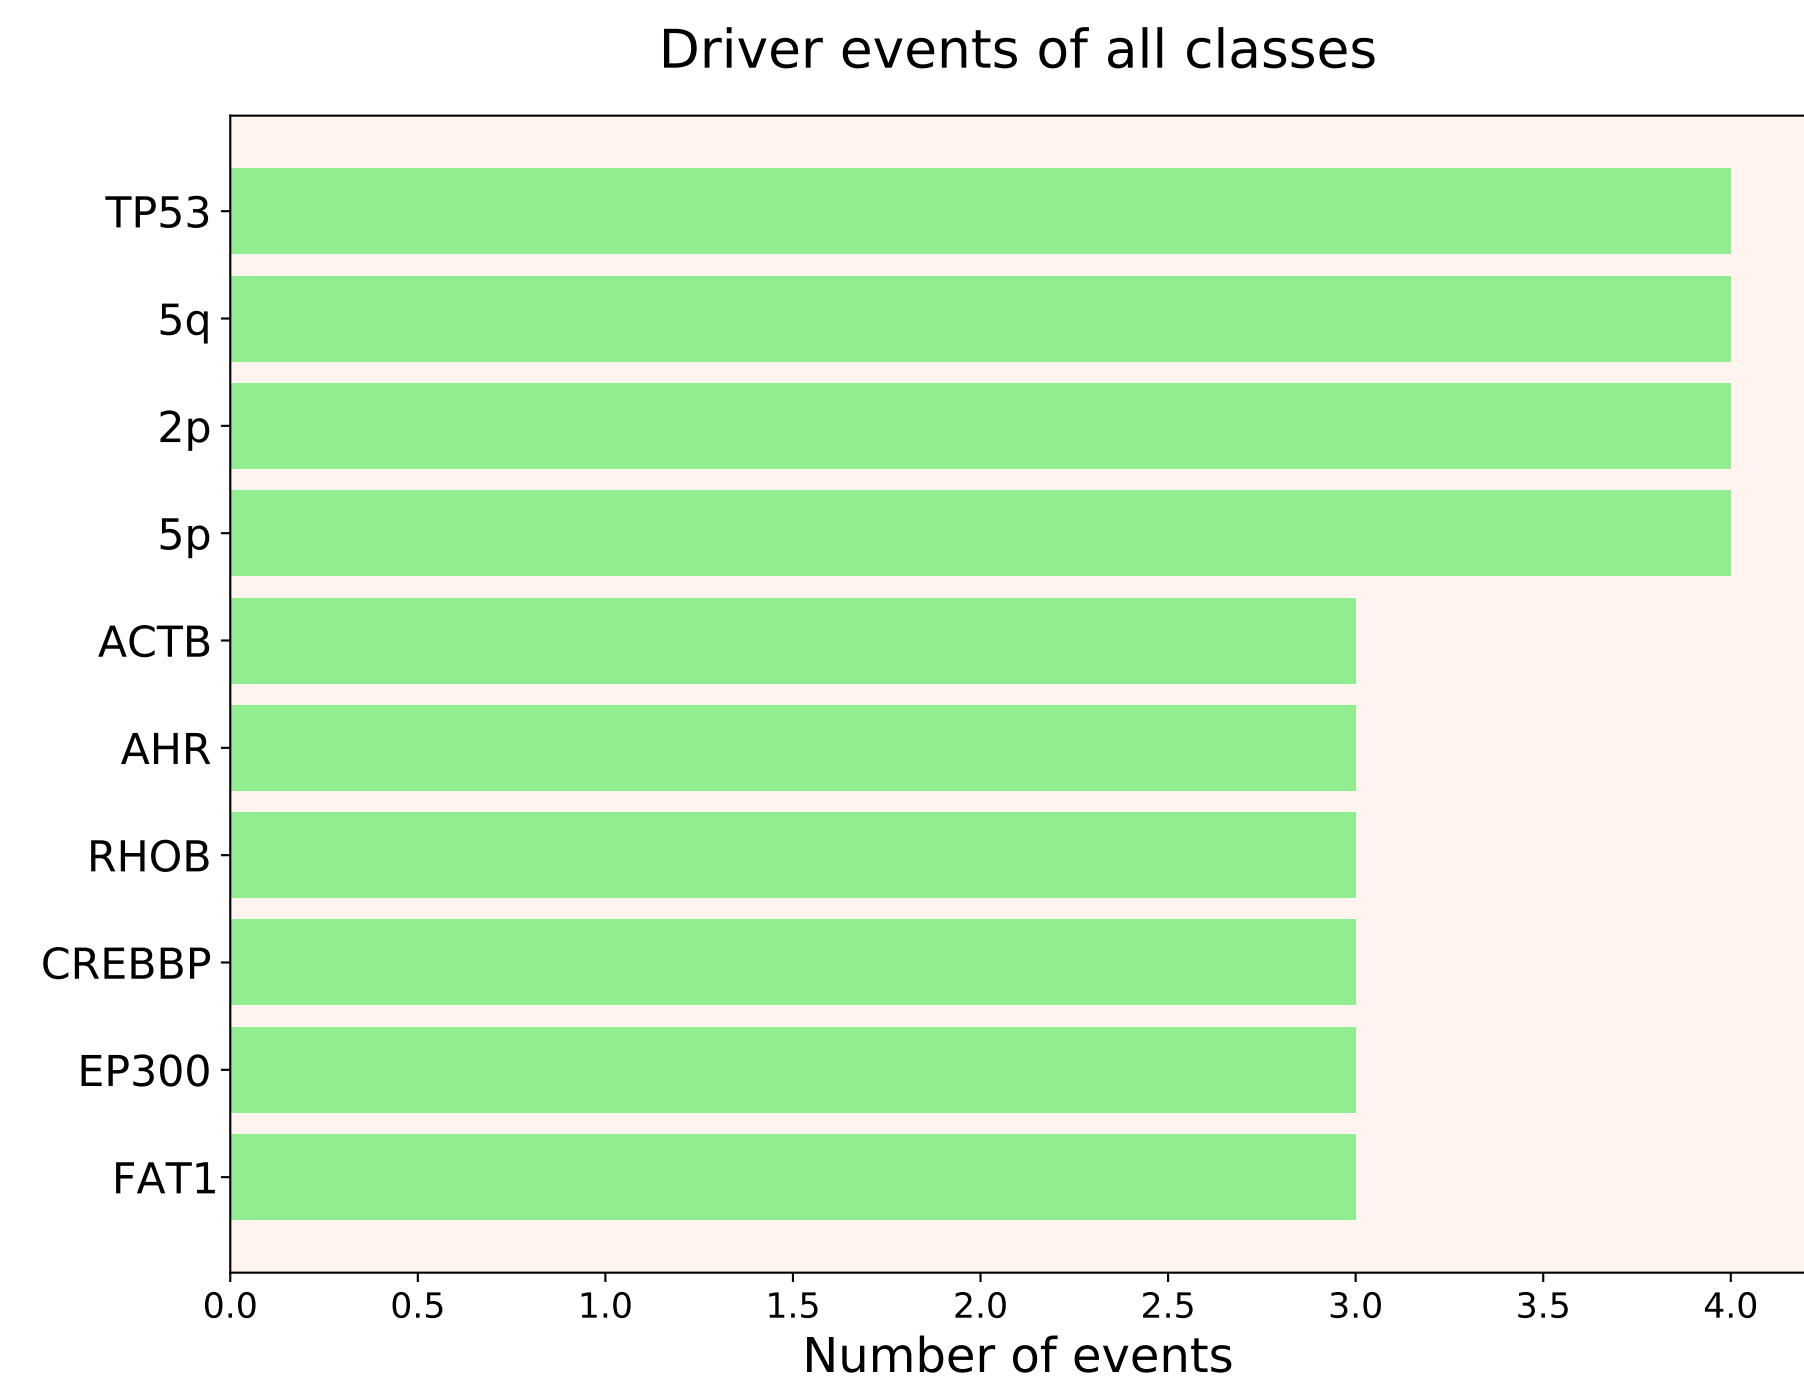

Supplement: Supplemental_Data_S1.zip [file Supplemental_Data_S1.zip]

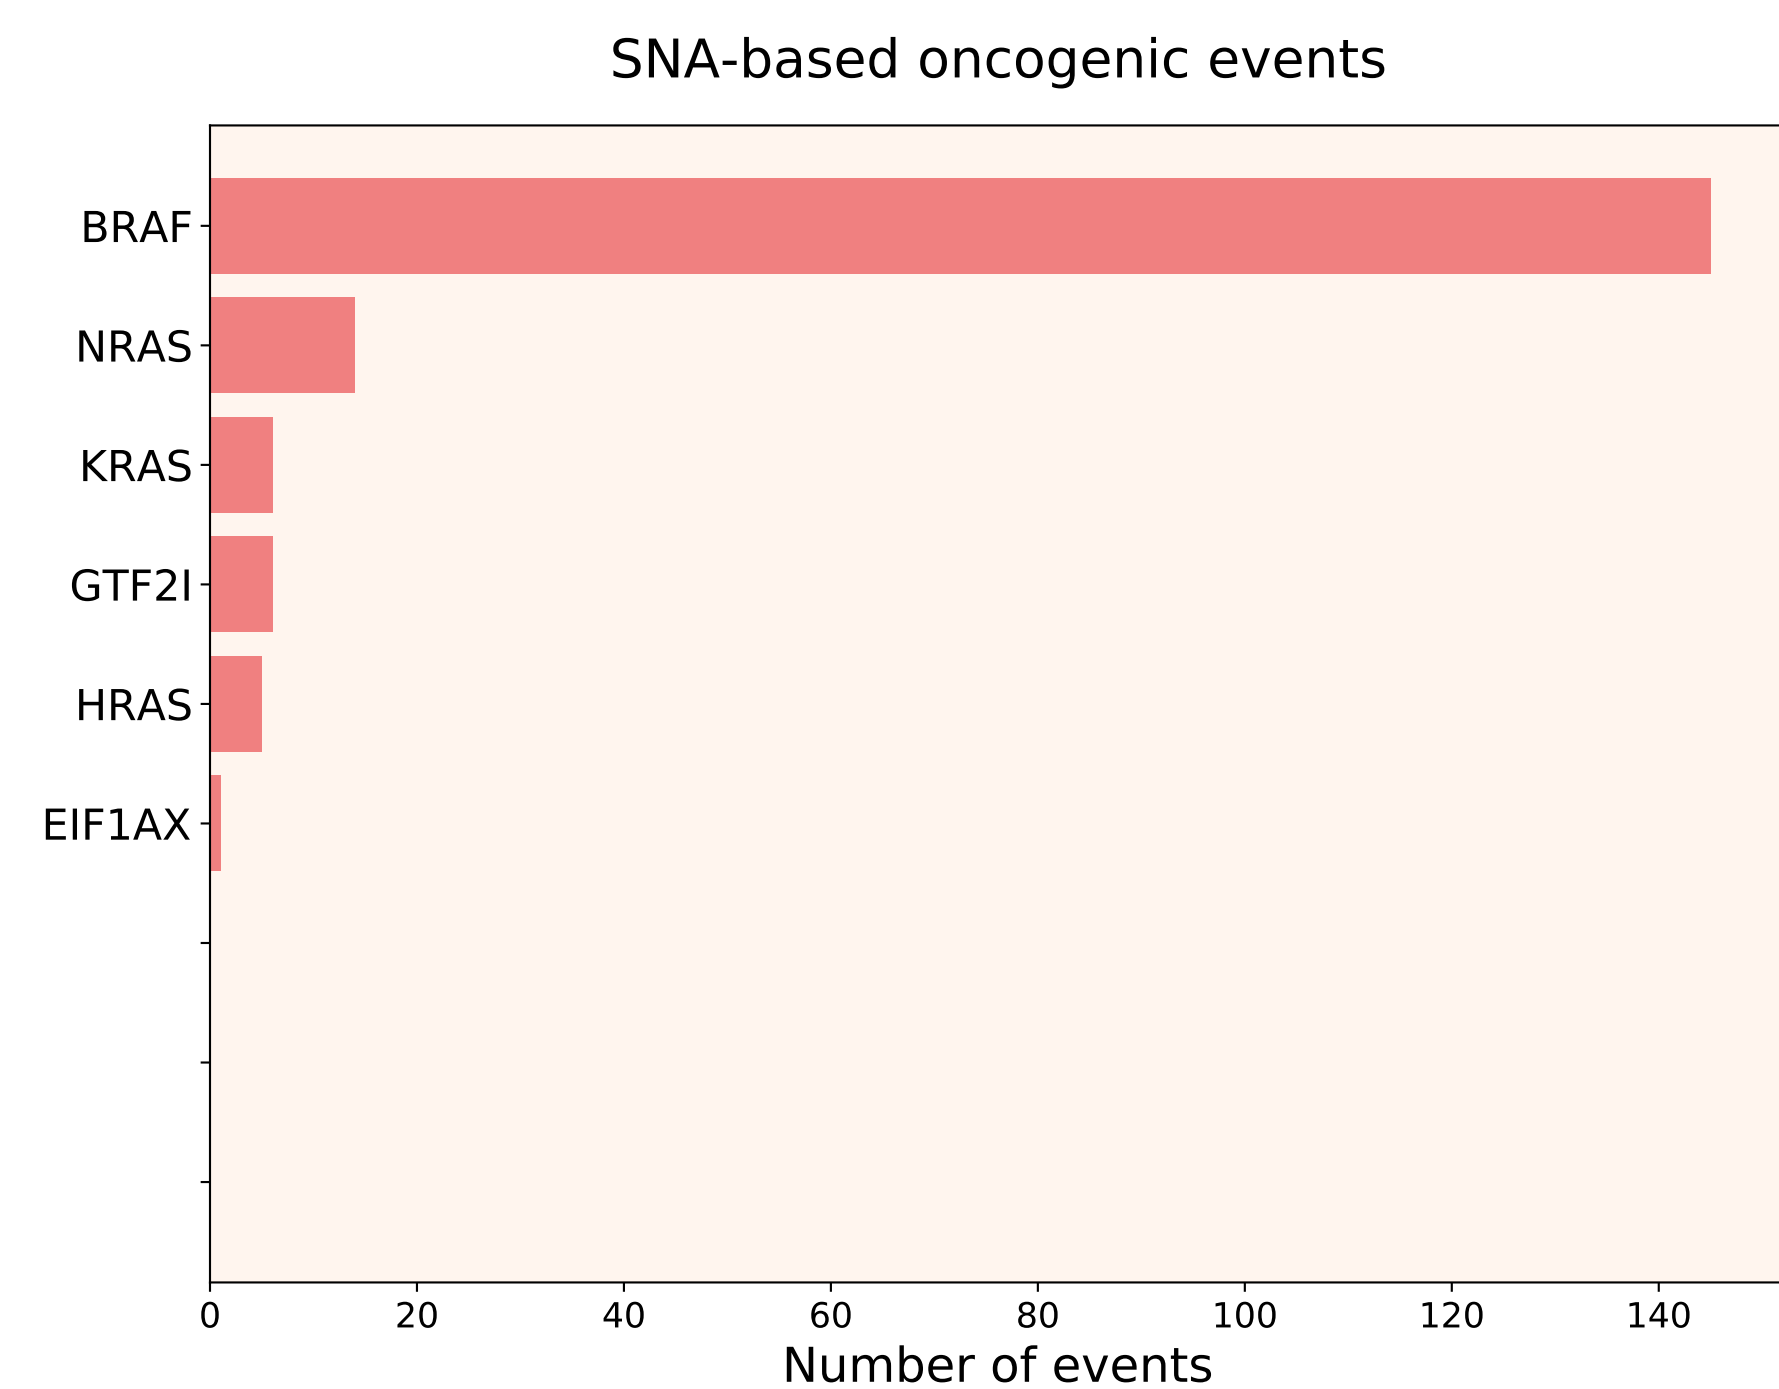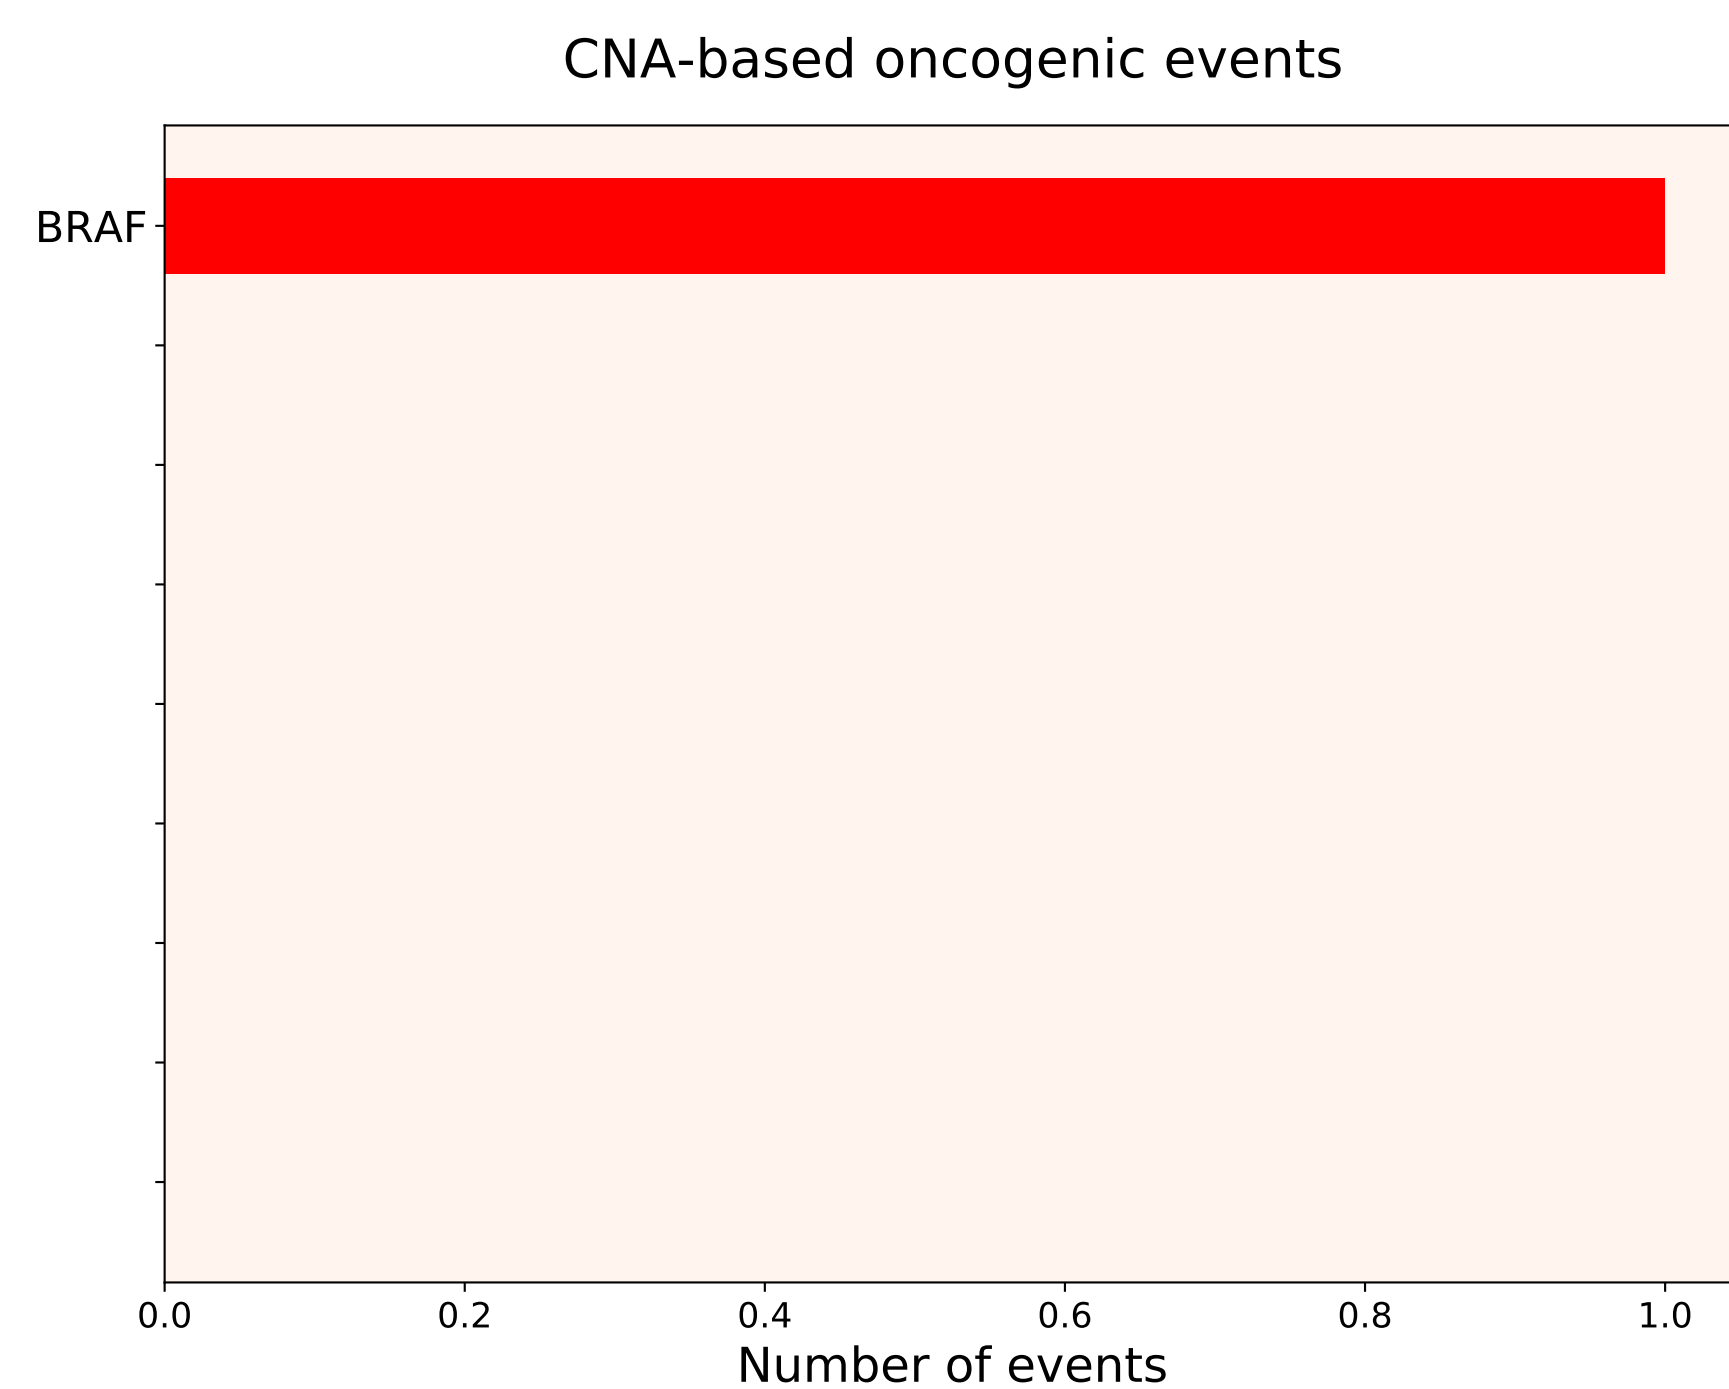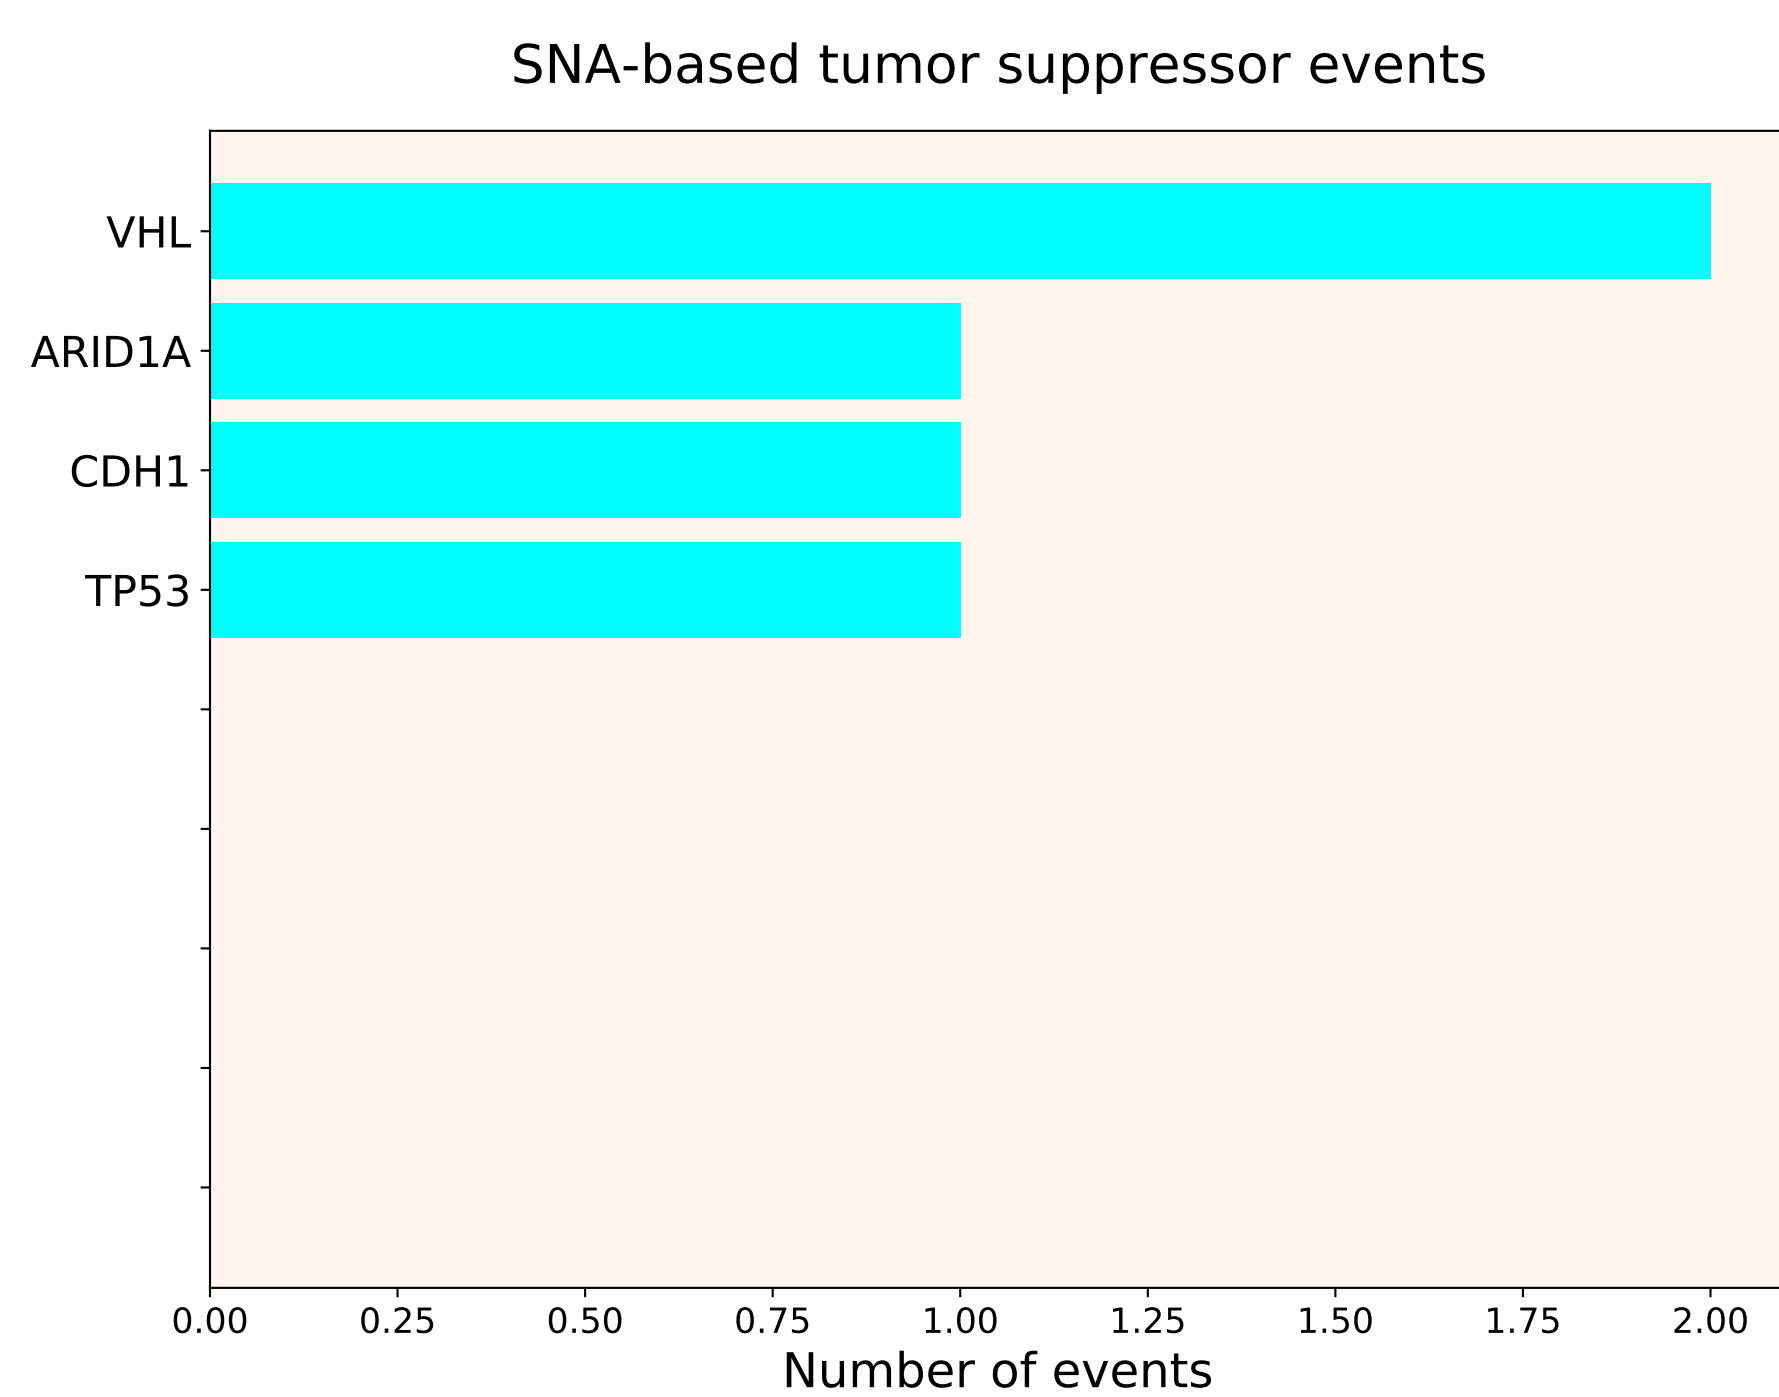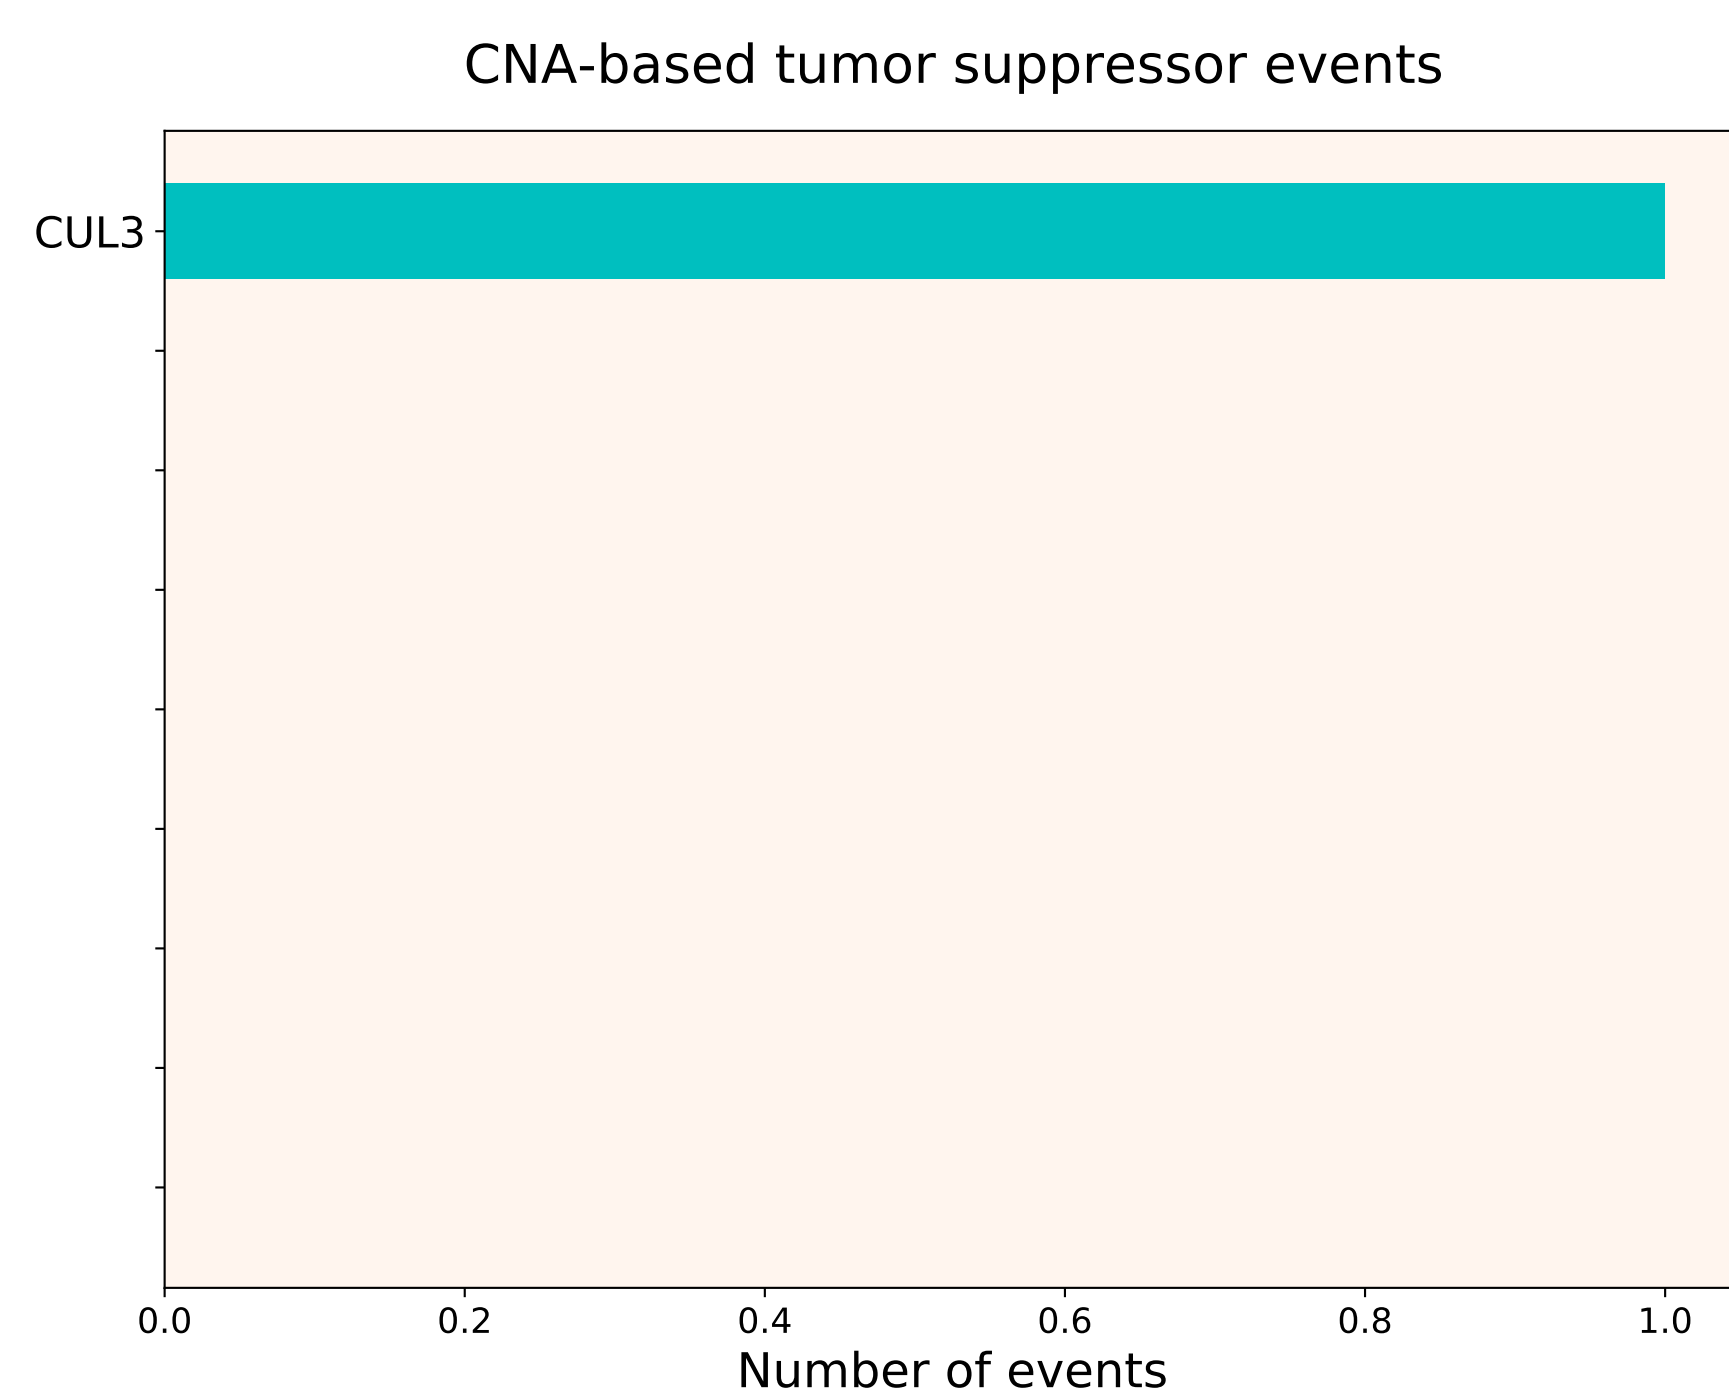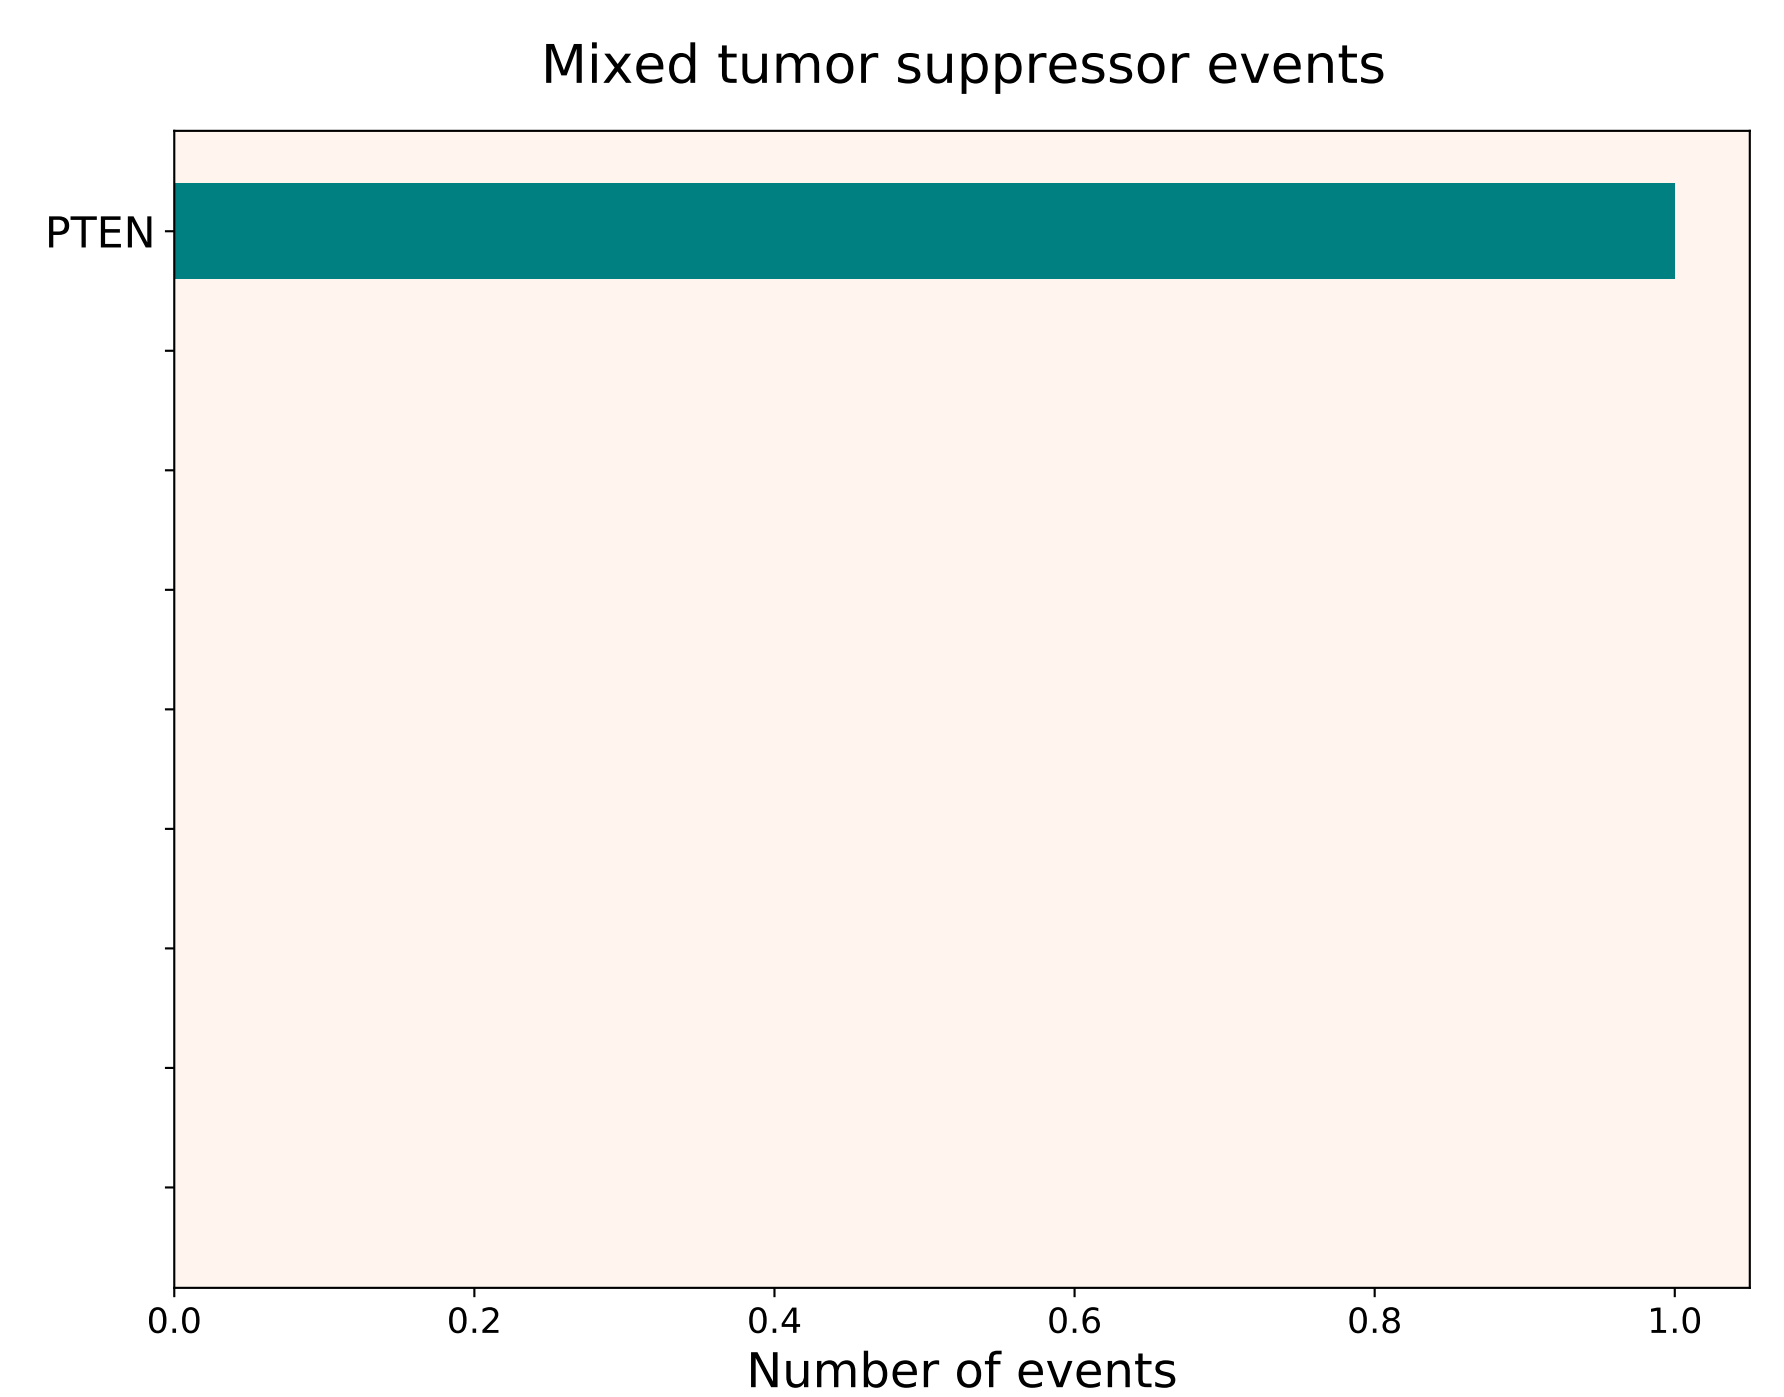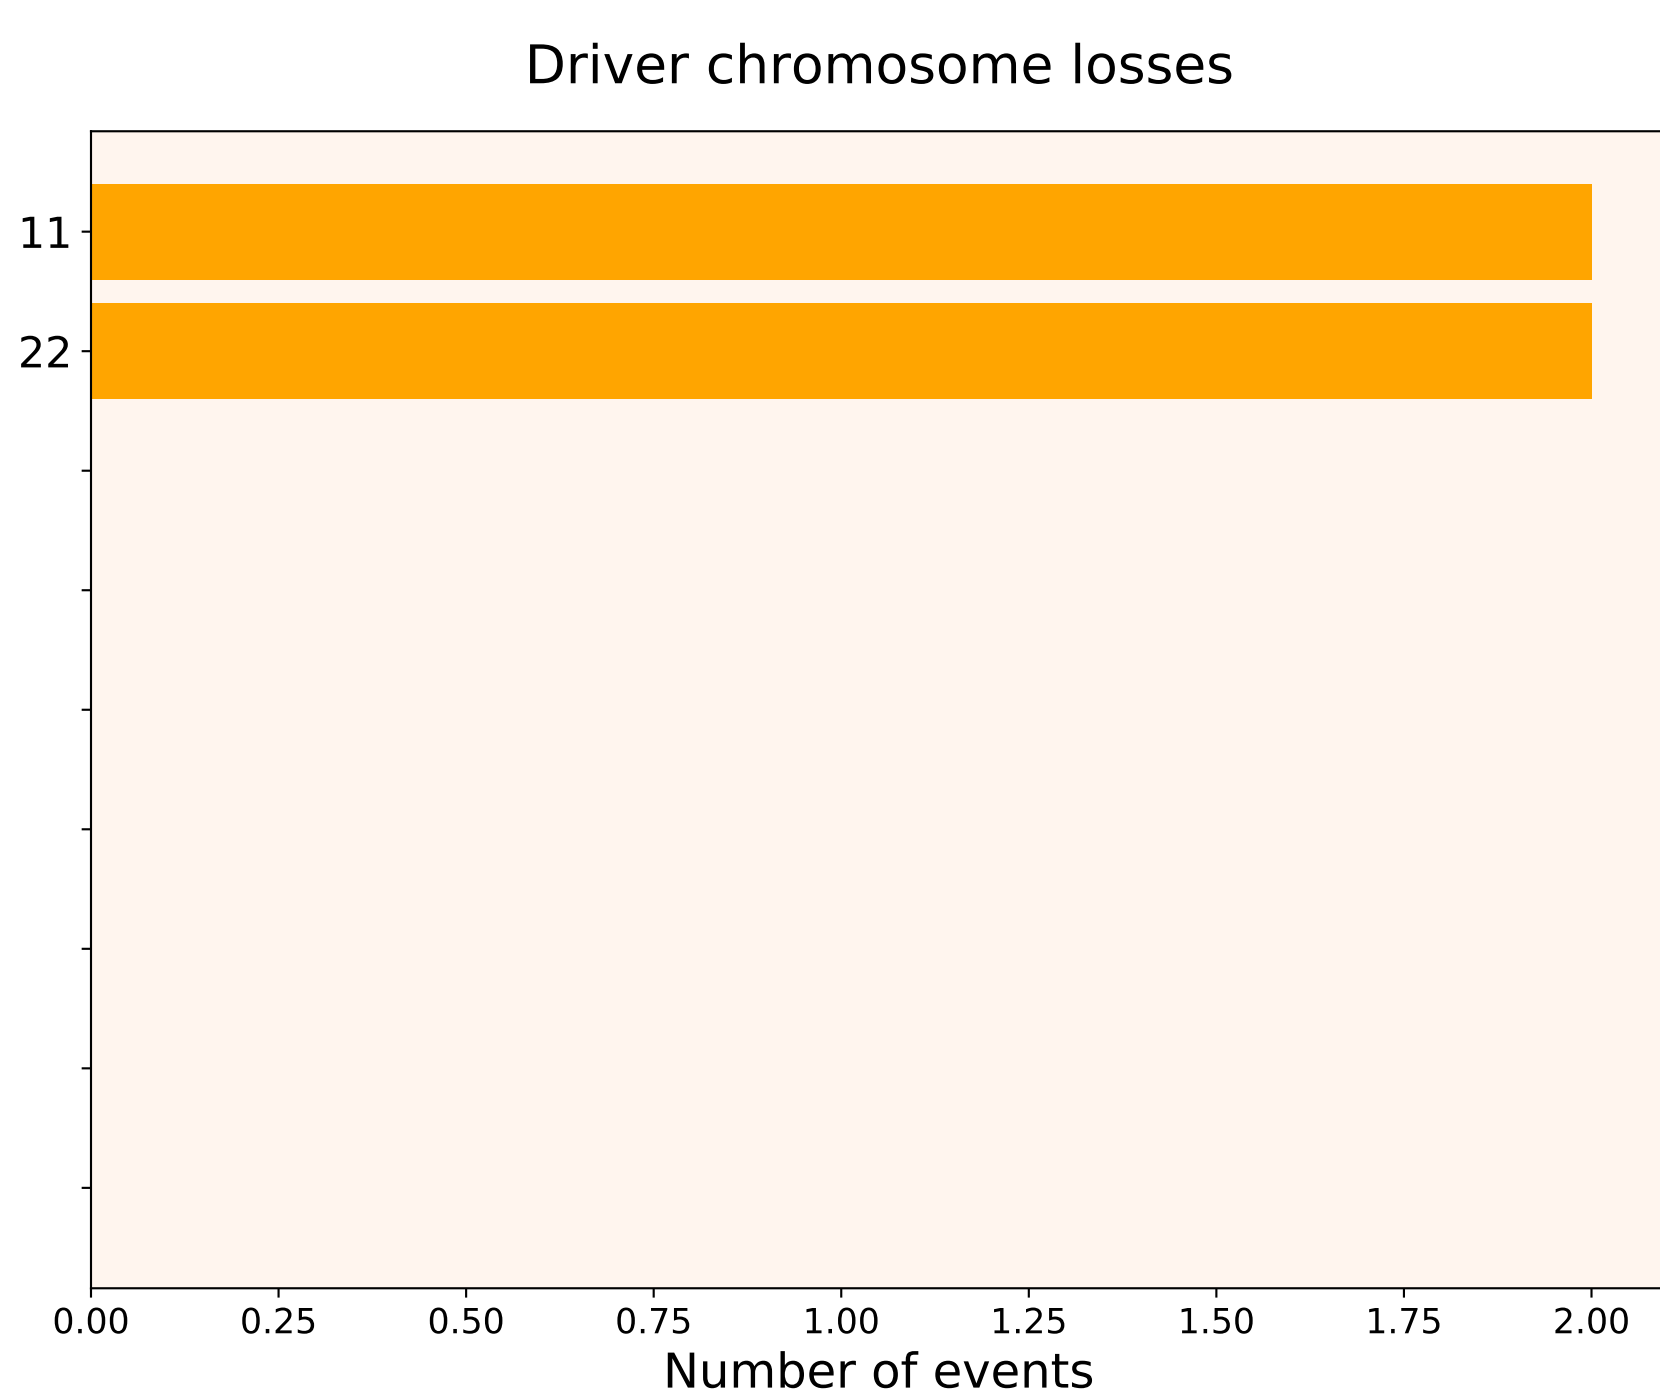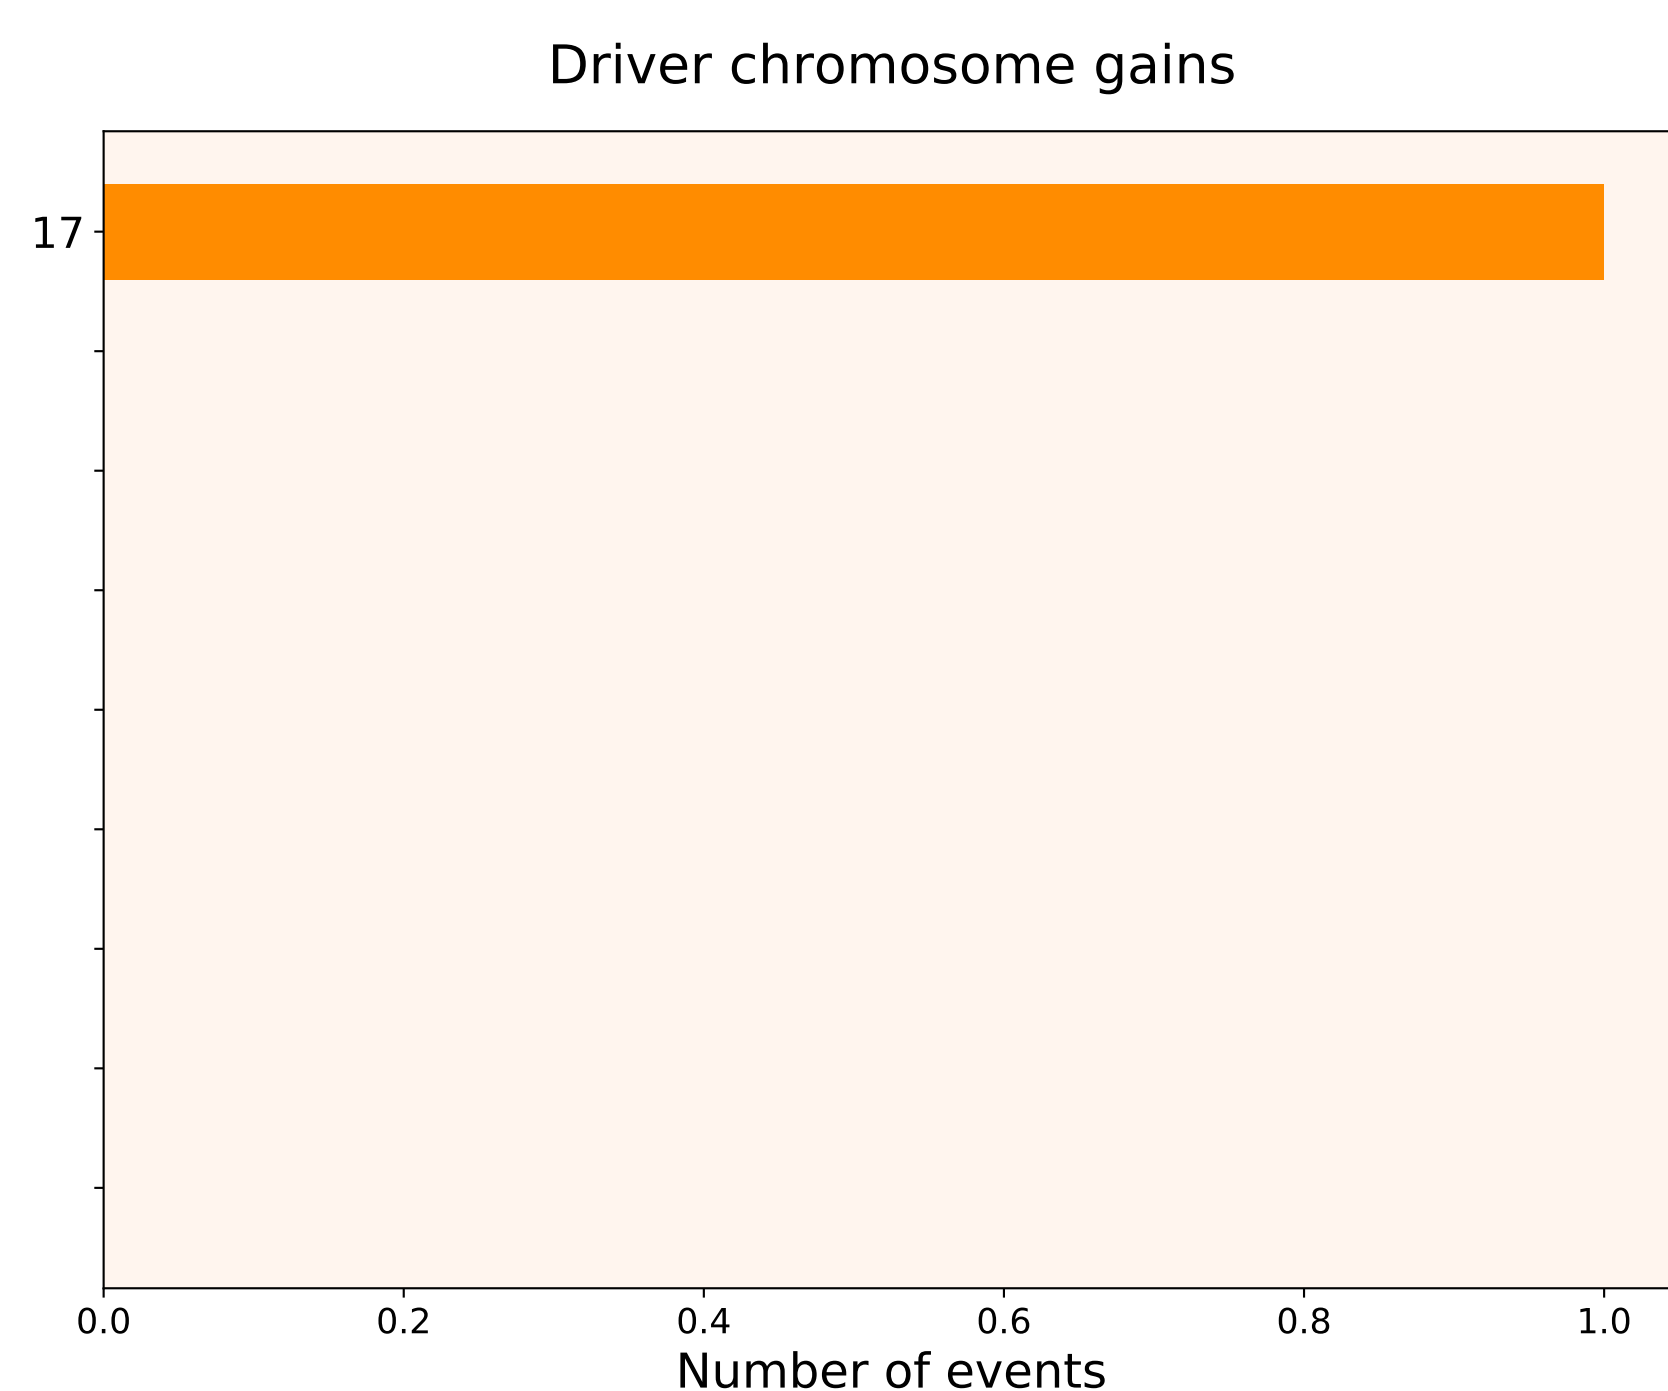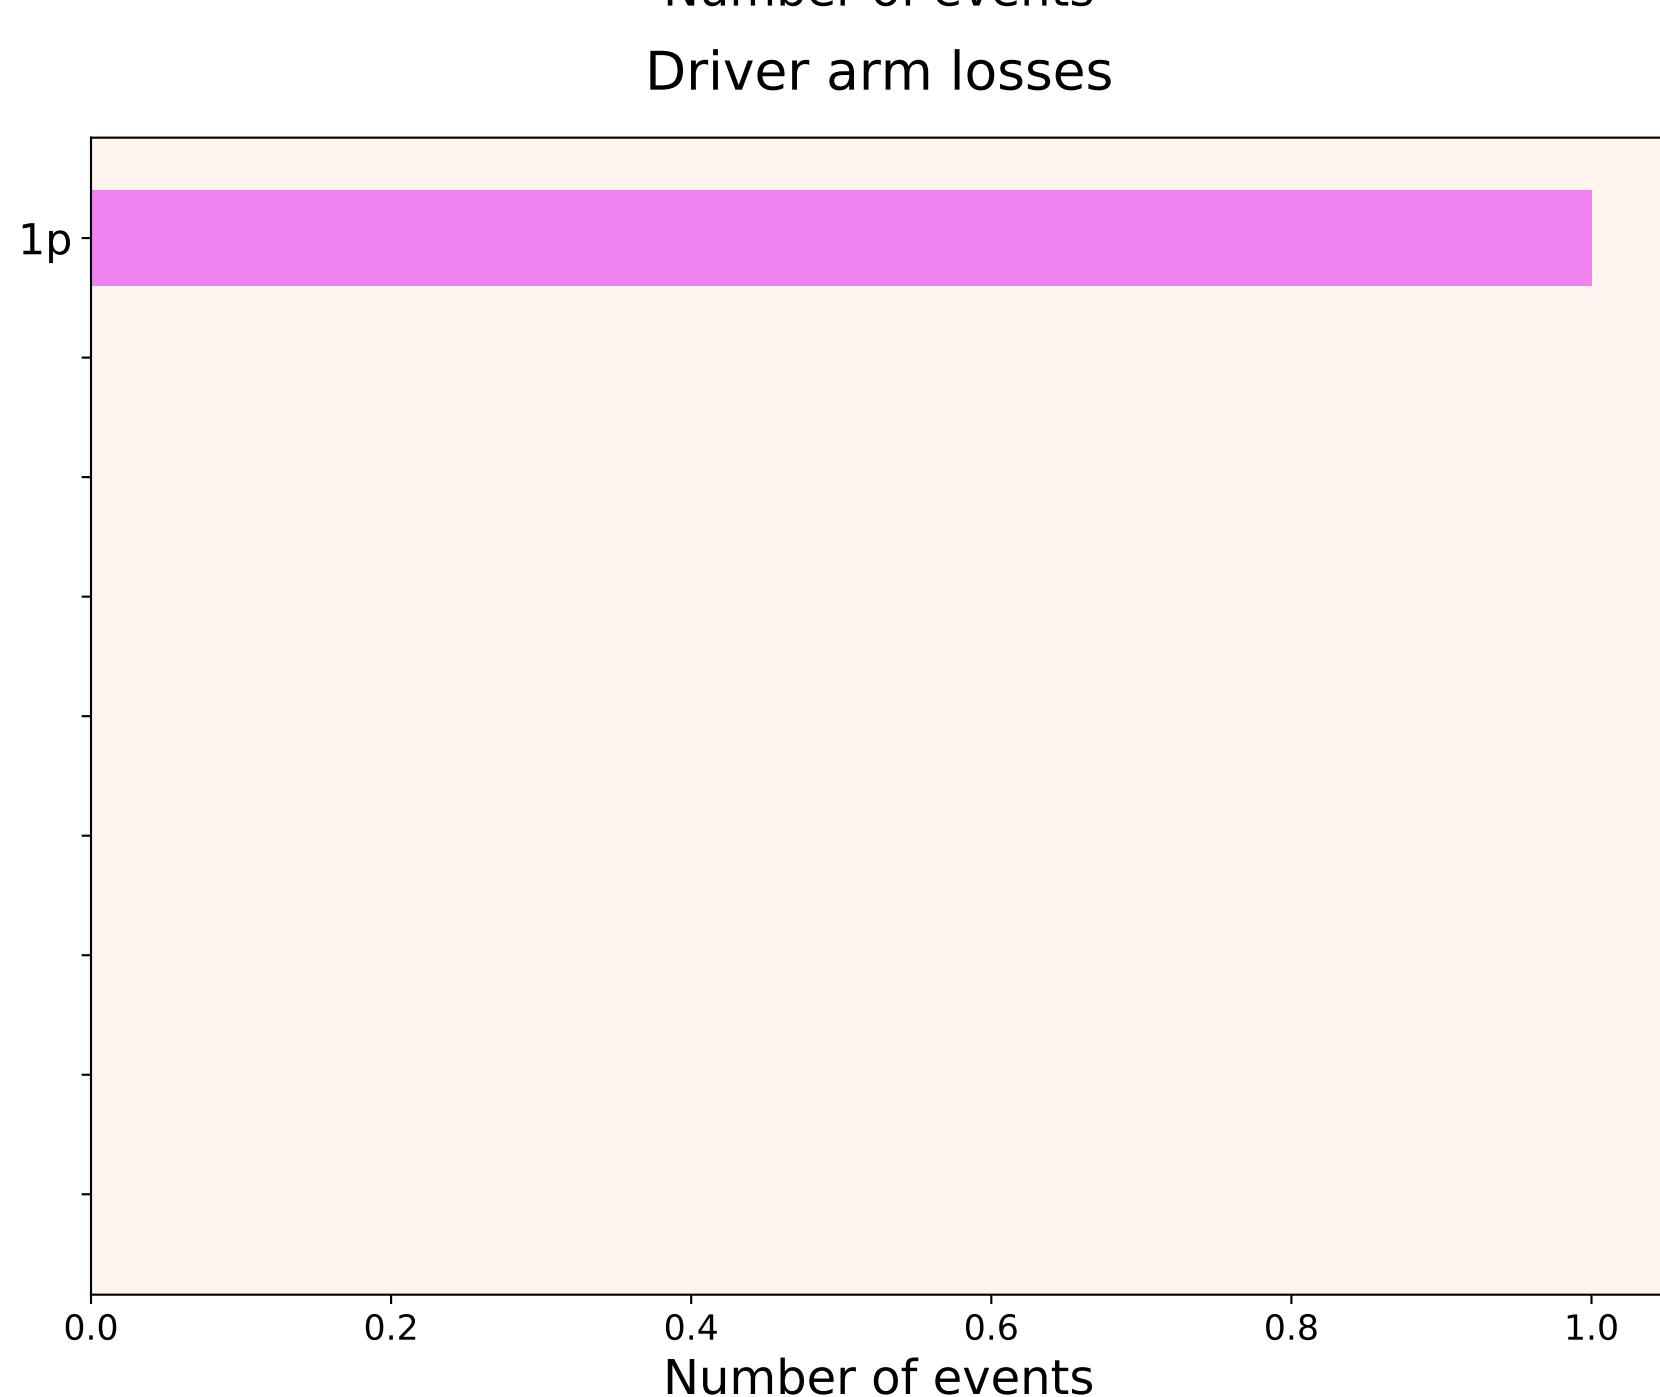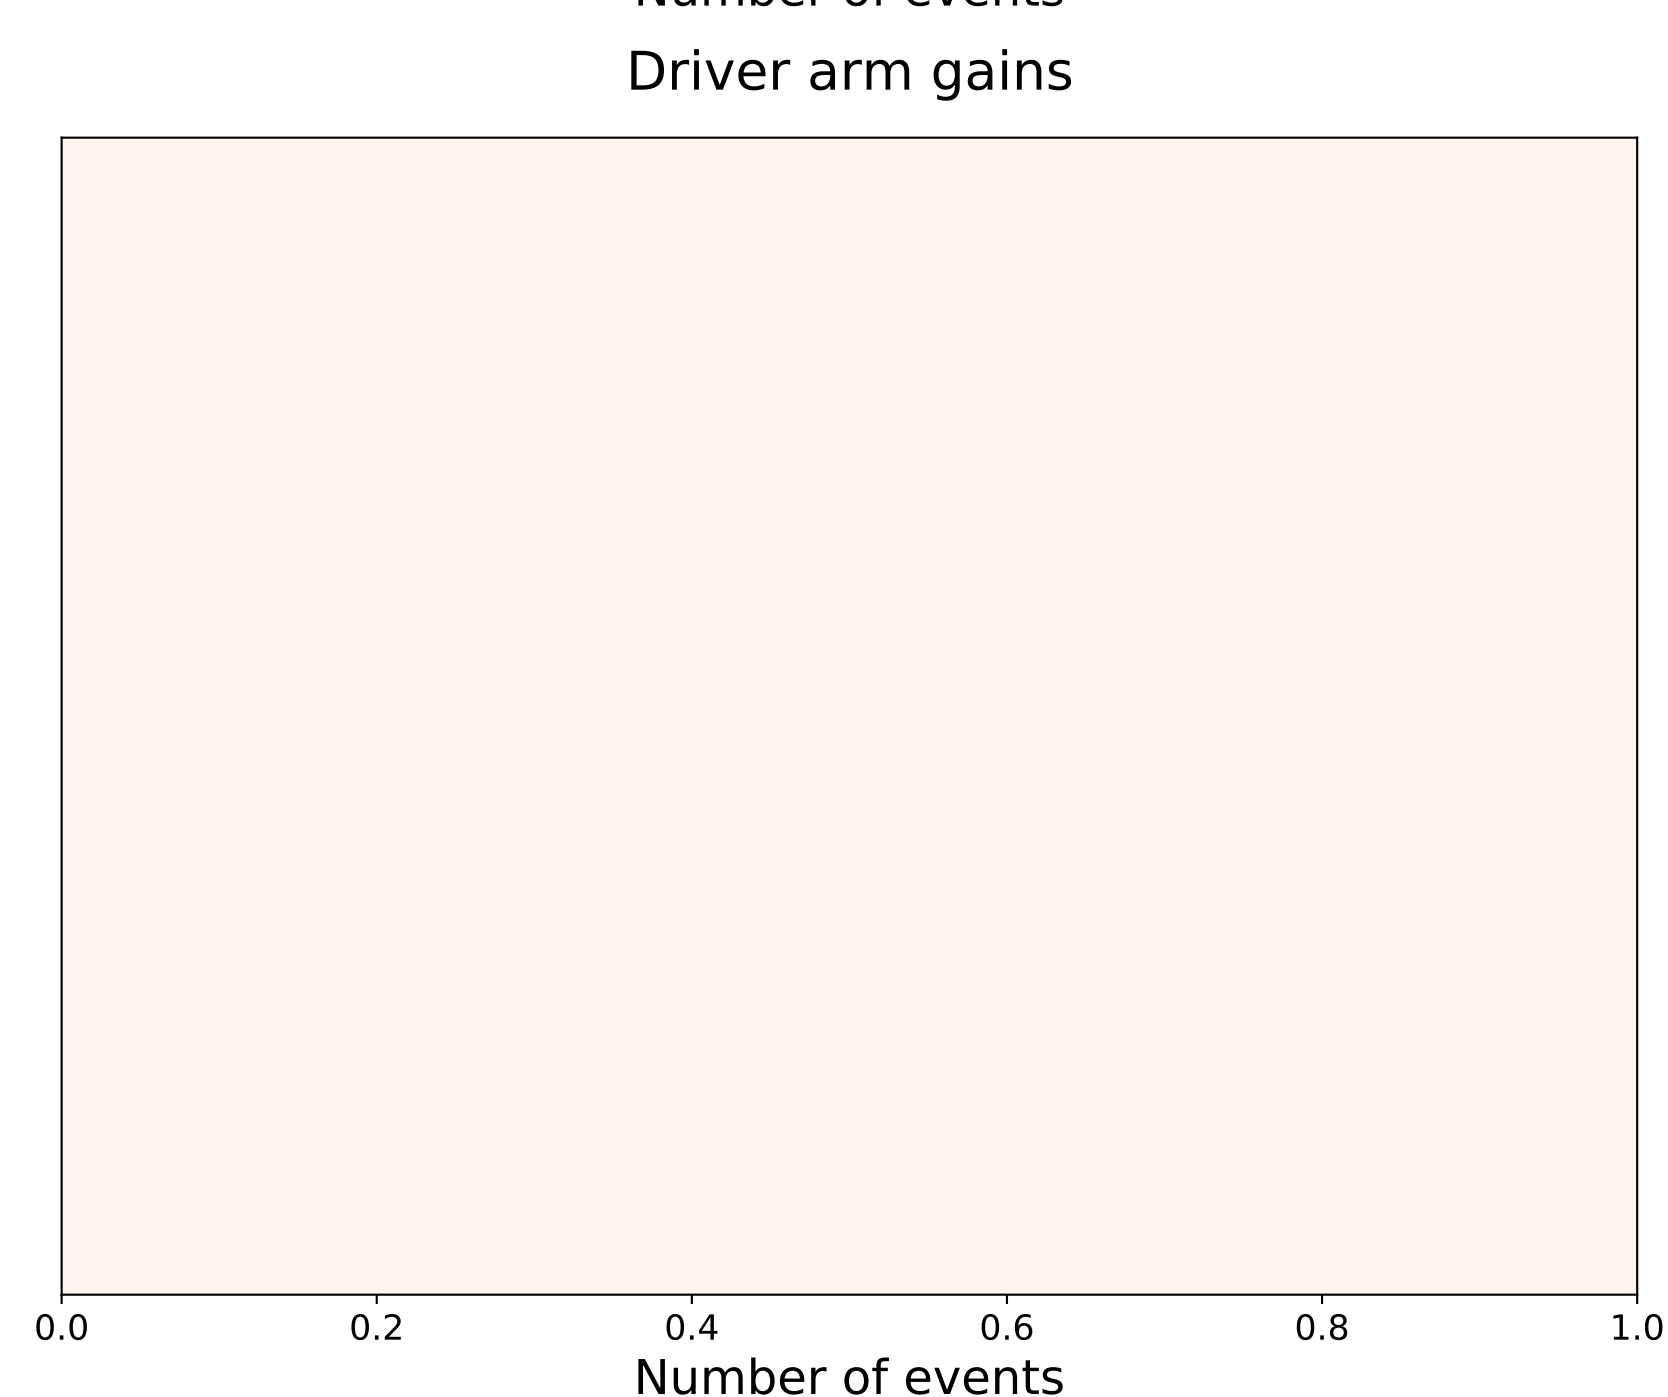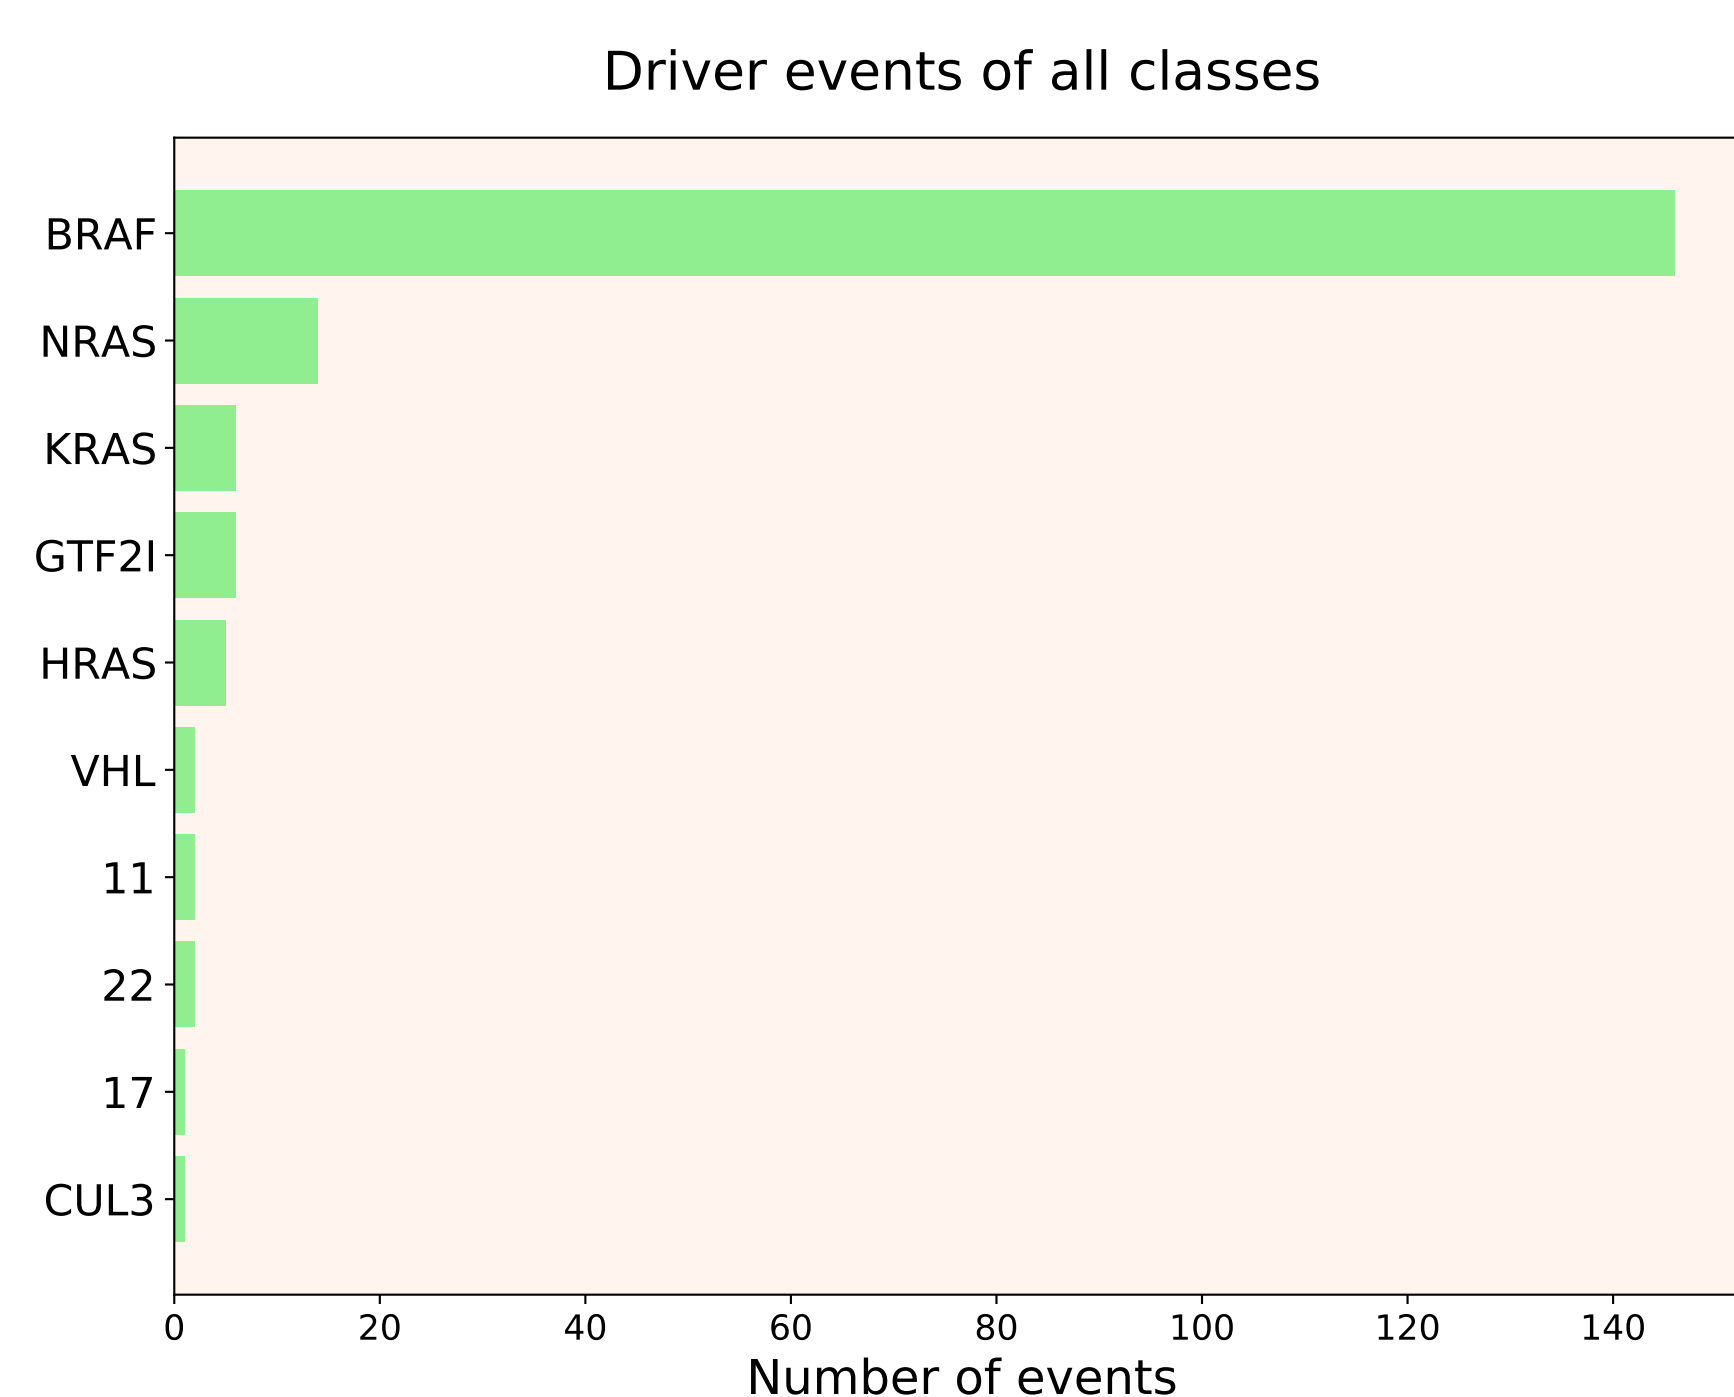

Supplement: Supplemental_Data_S1.zip [file Supplemental_Data_S1.zip]

# KIRC

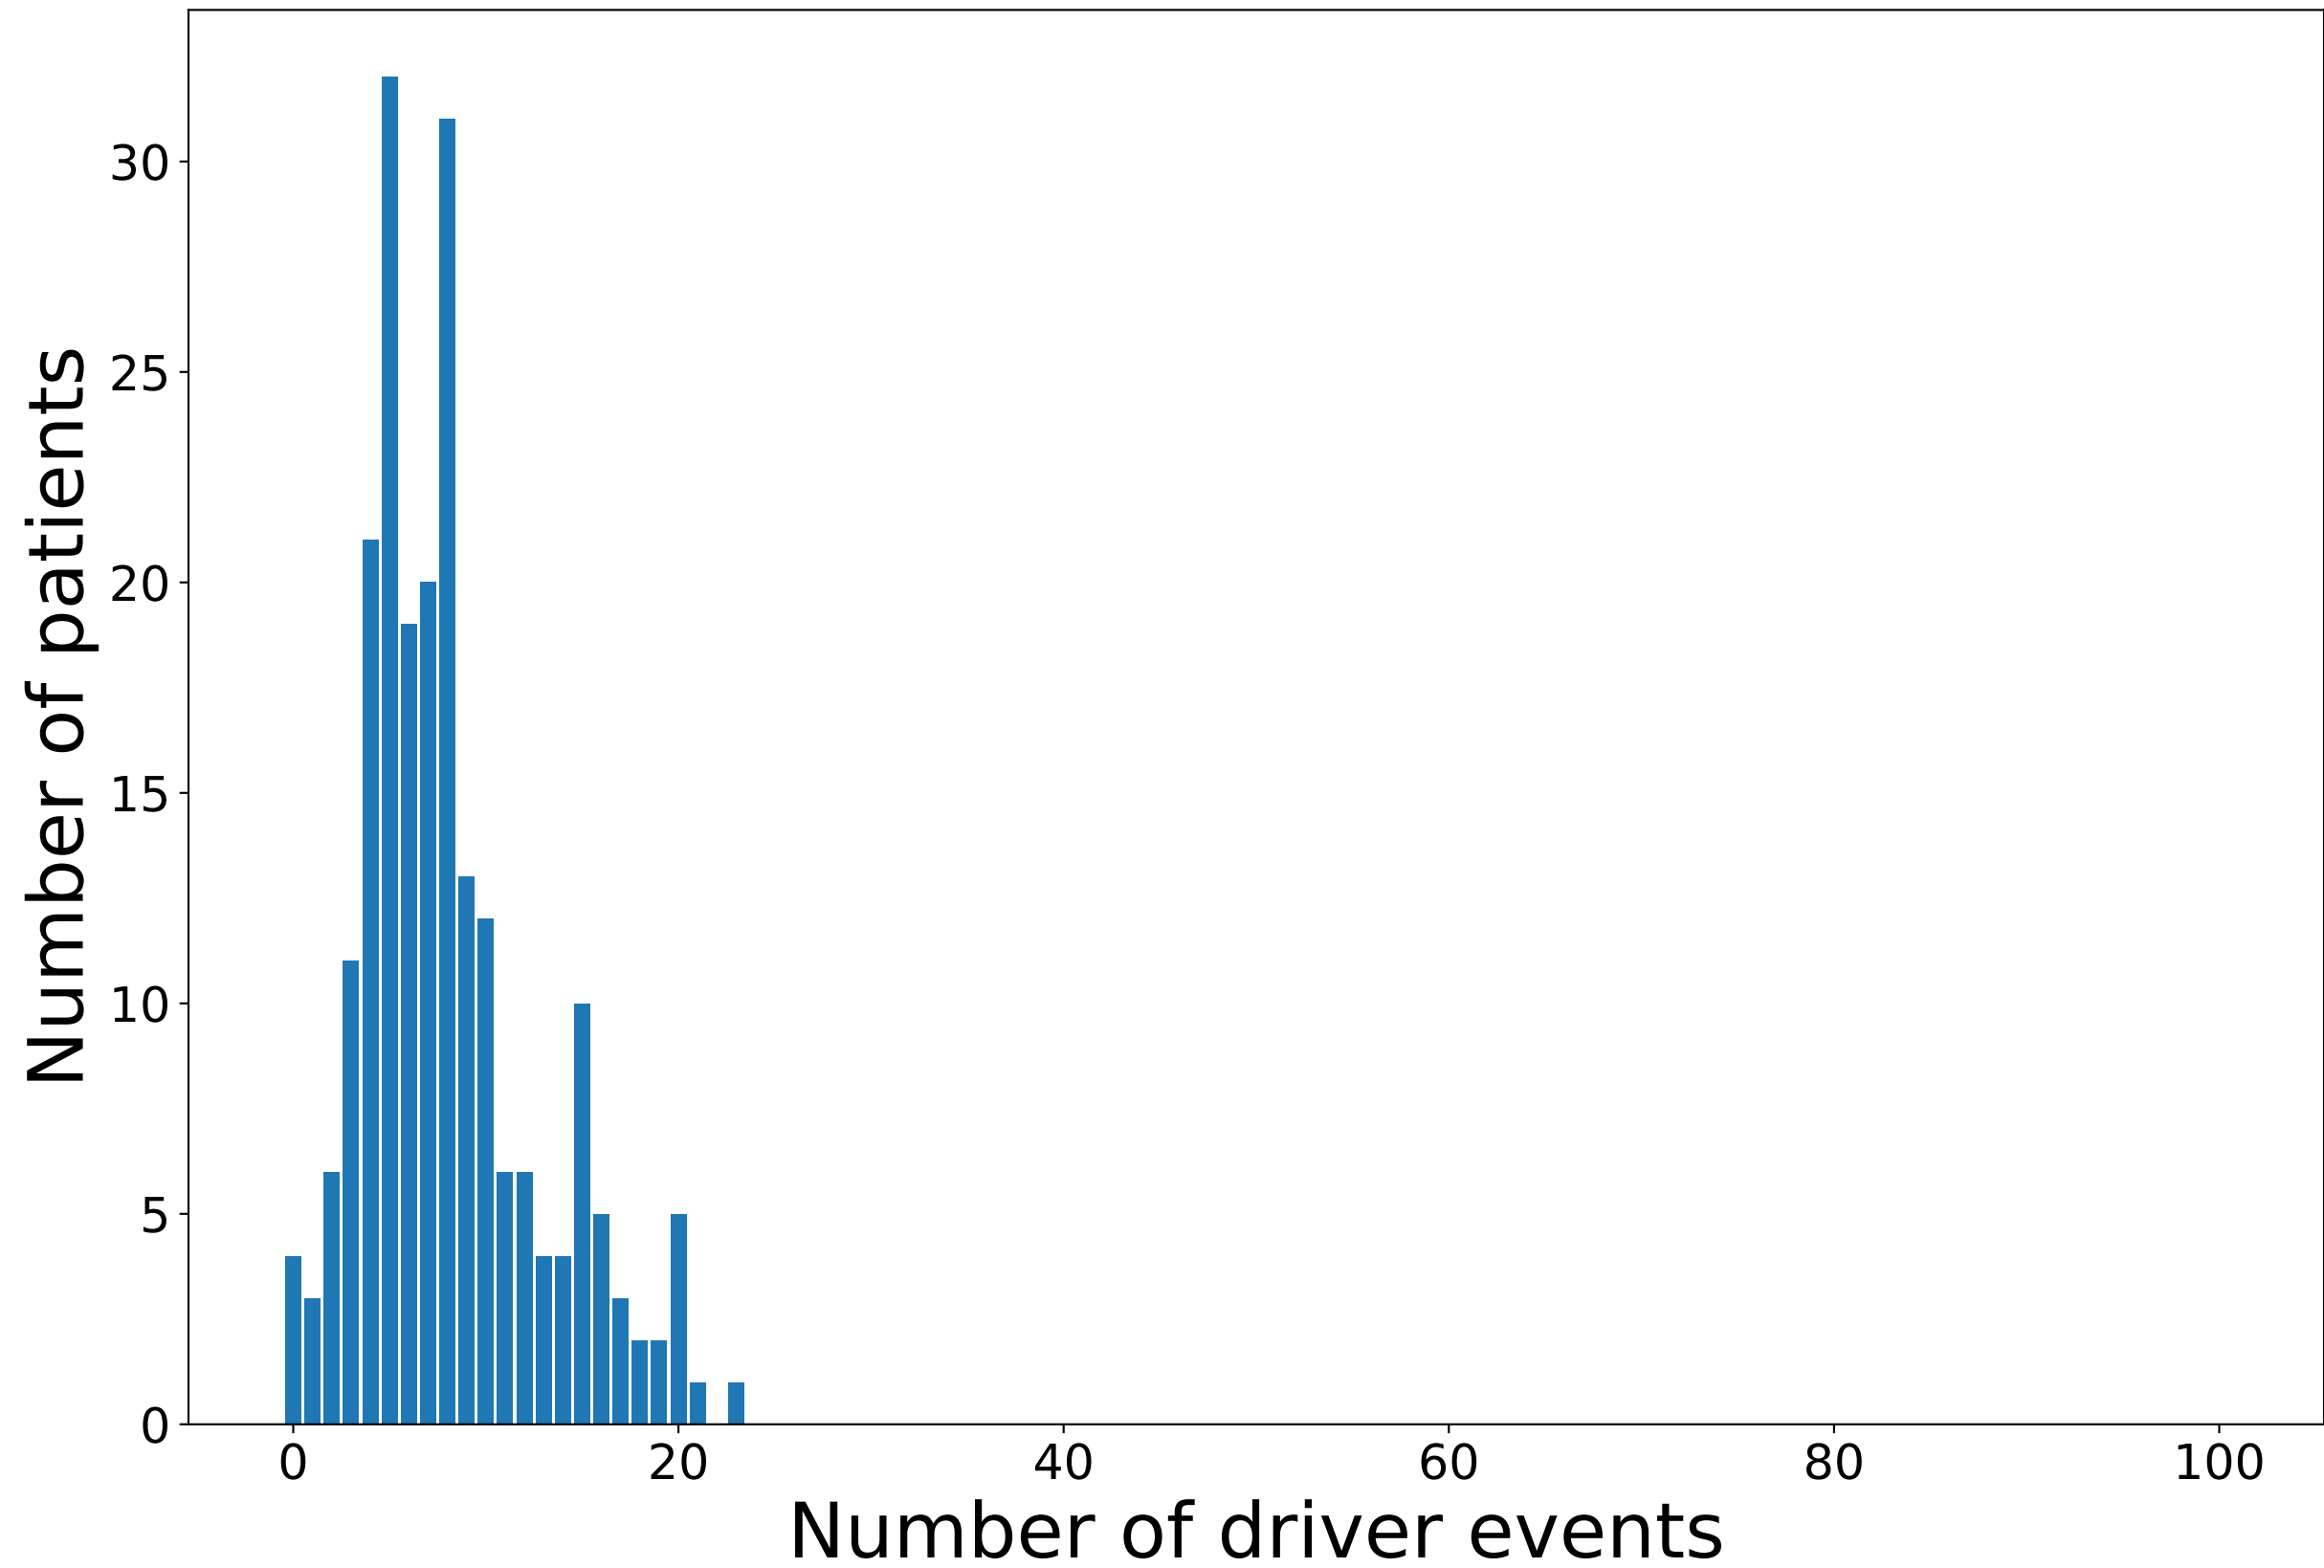

Supplement: Supplemental_Data_S1.zip [file Supplemental_Data_S1.zip]

# DLBC\_FEMALE

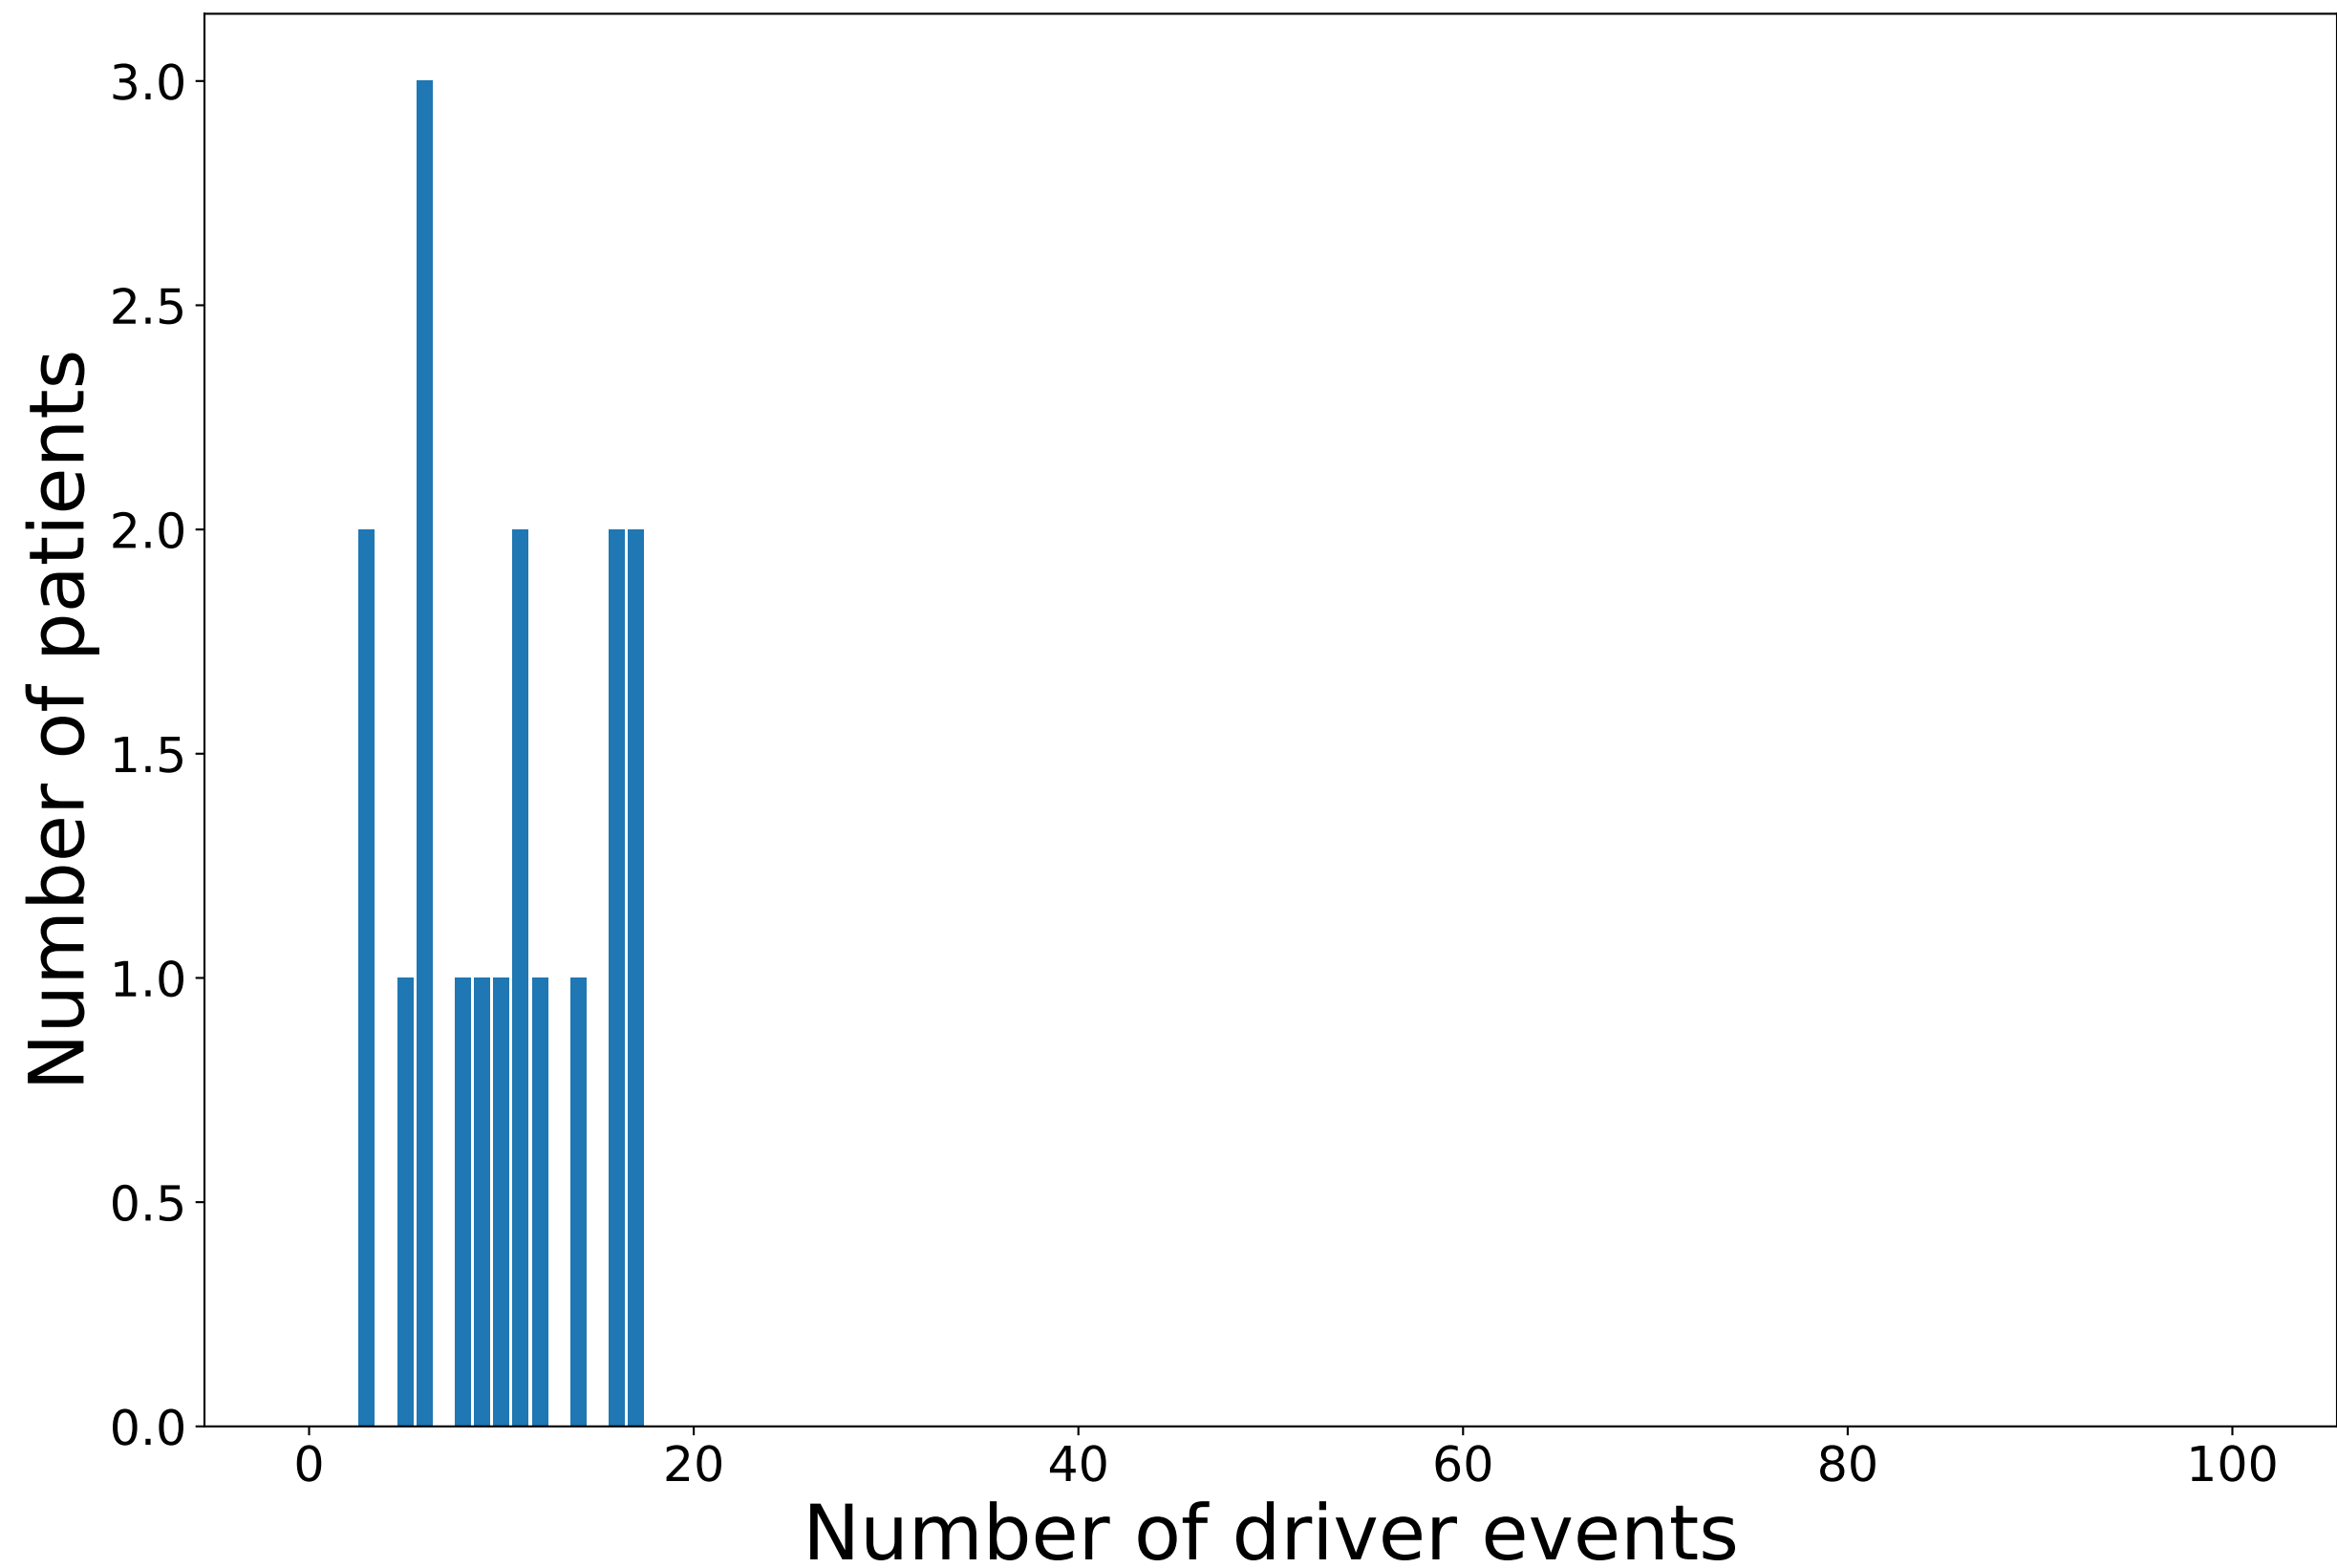

Supplement: Supplemental_Data_S1.zip [file Supplemental_Data_S1.zip]

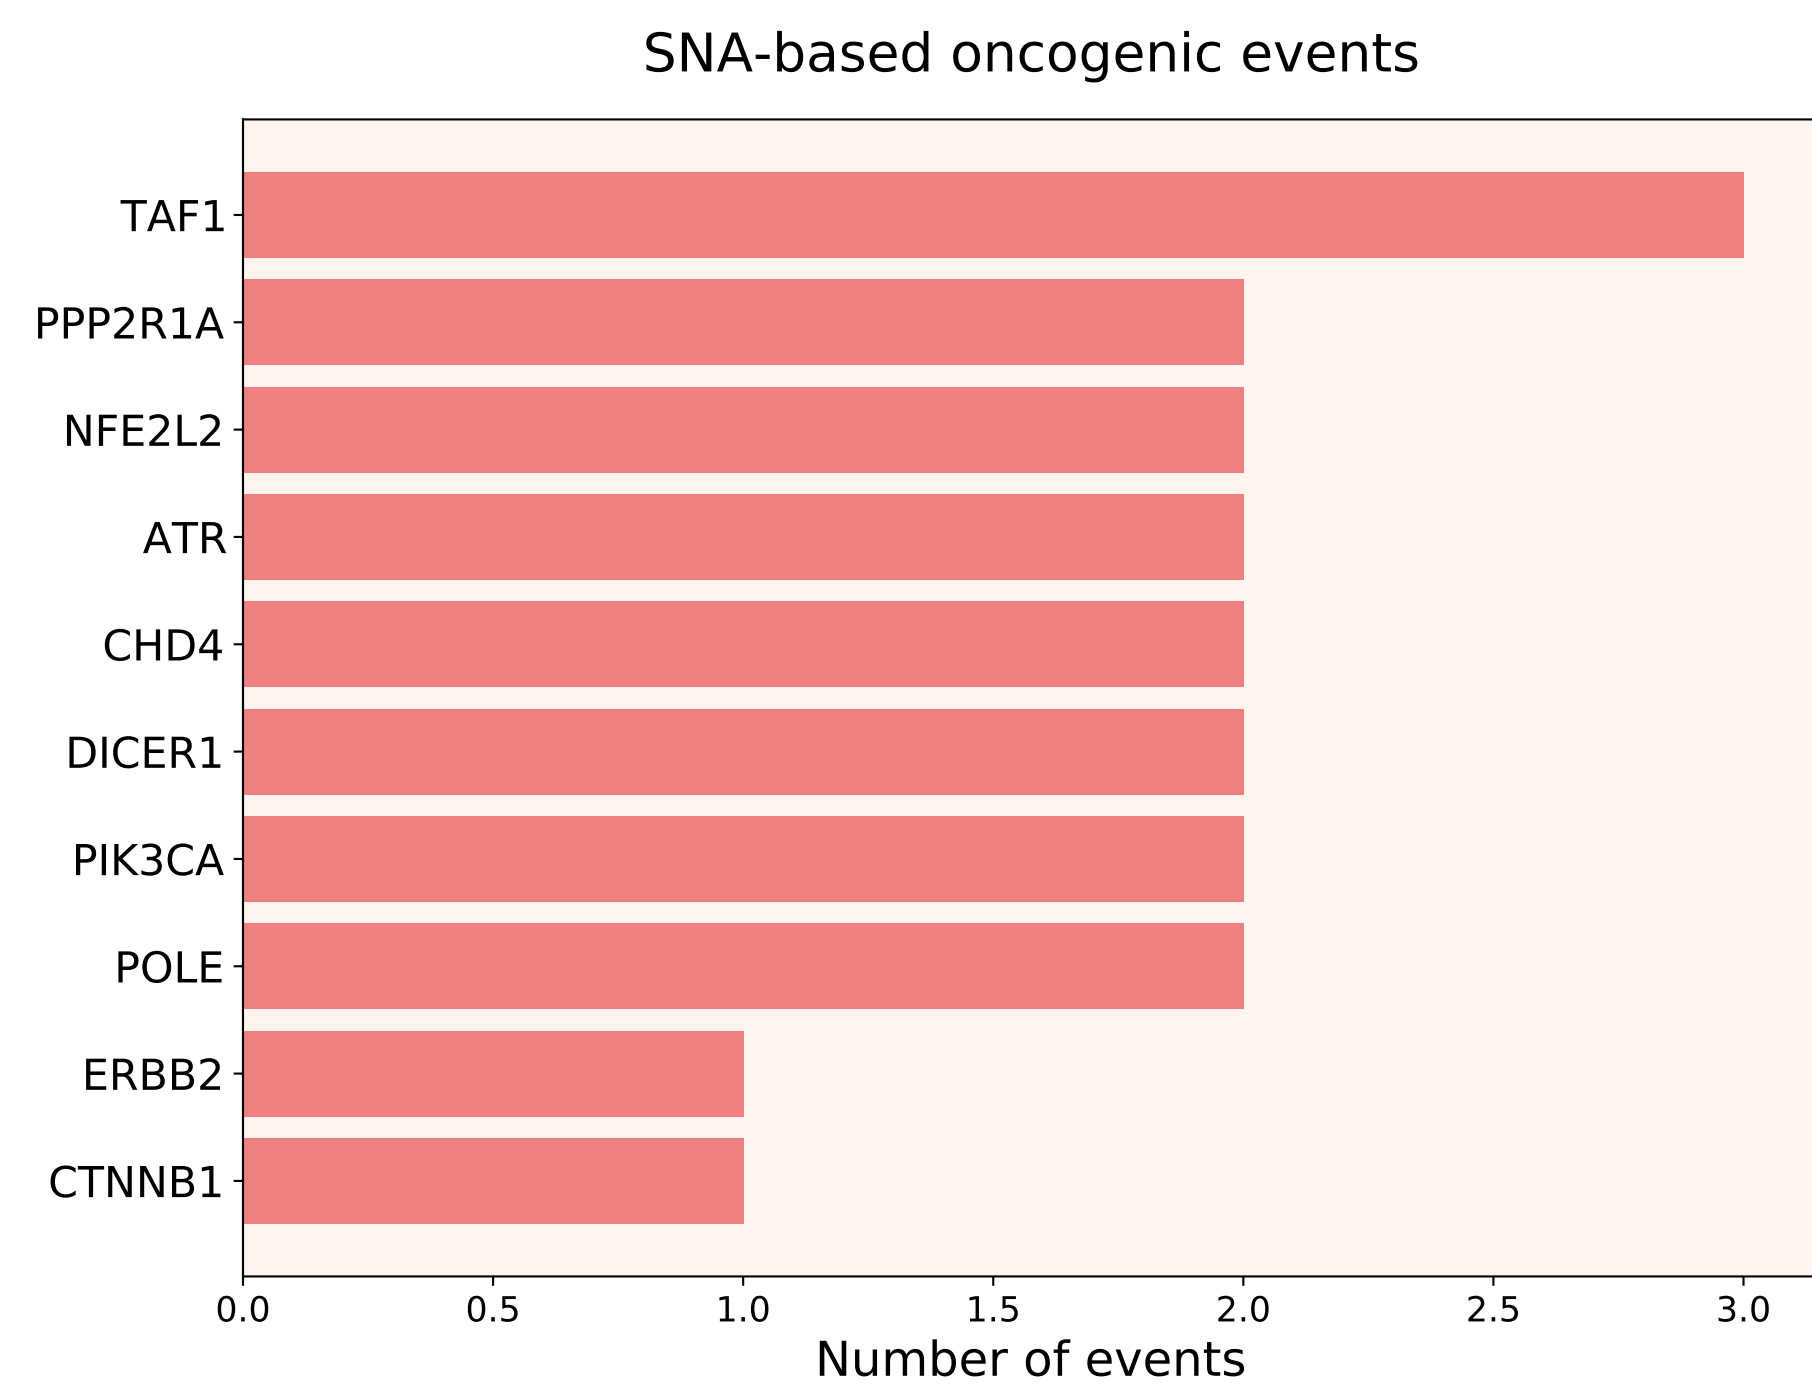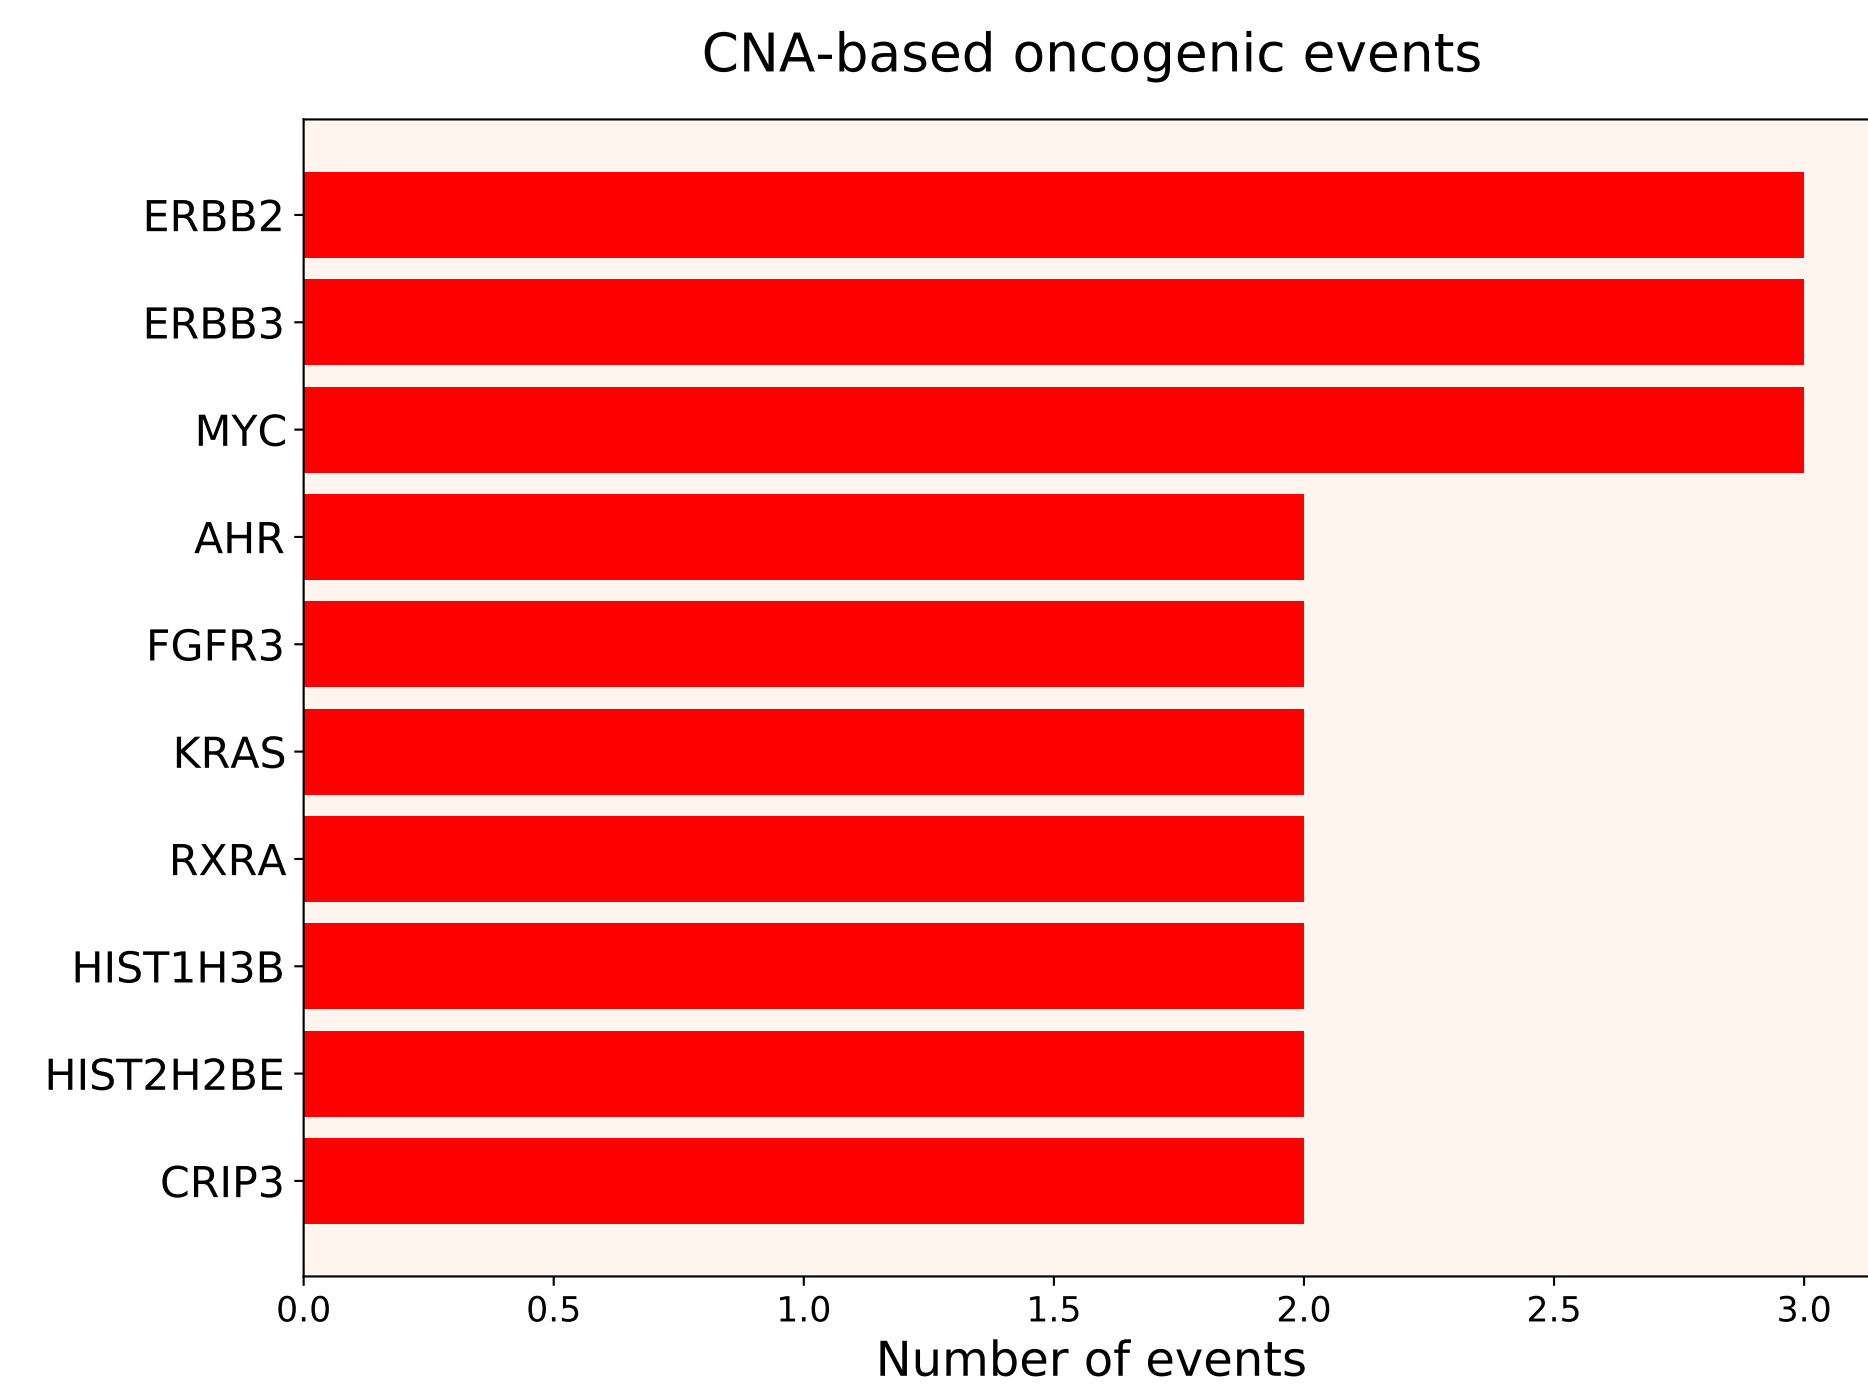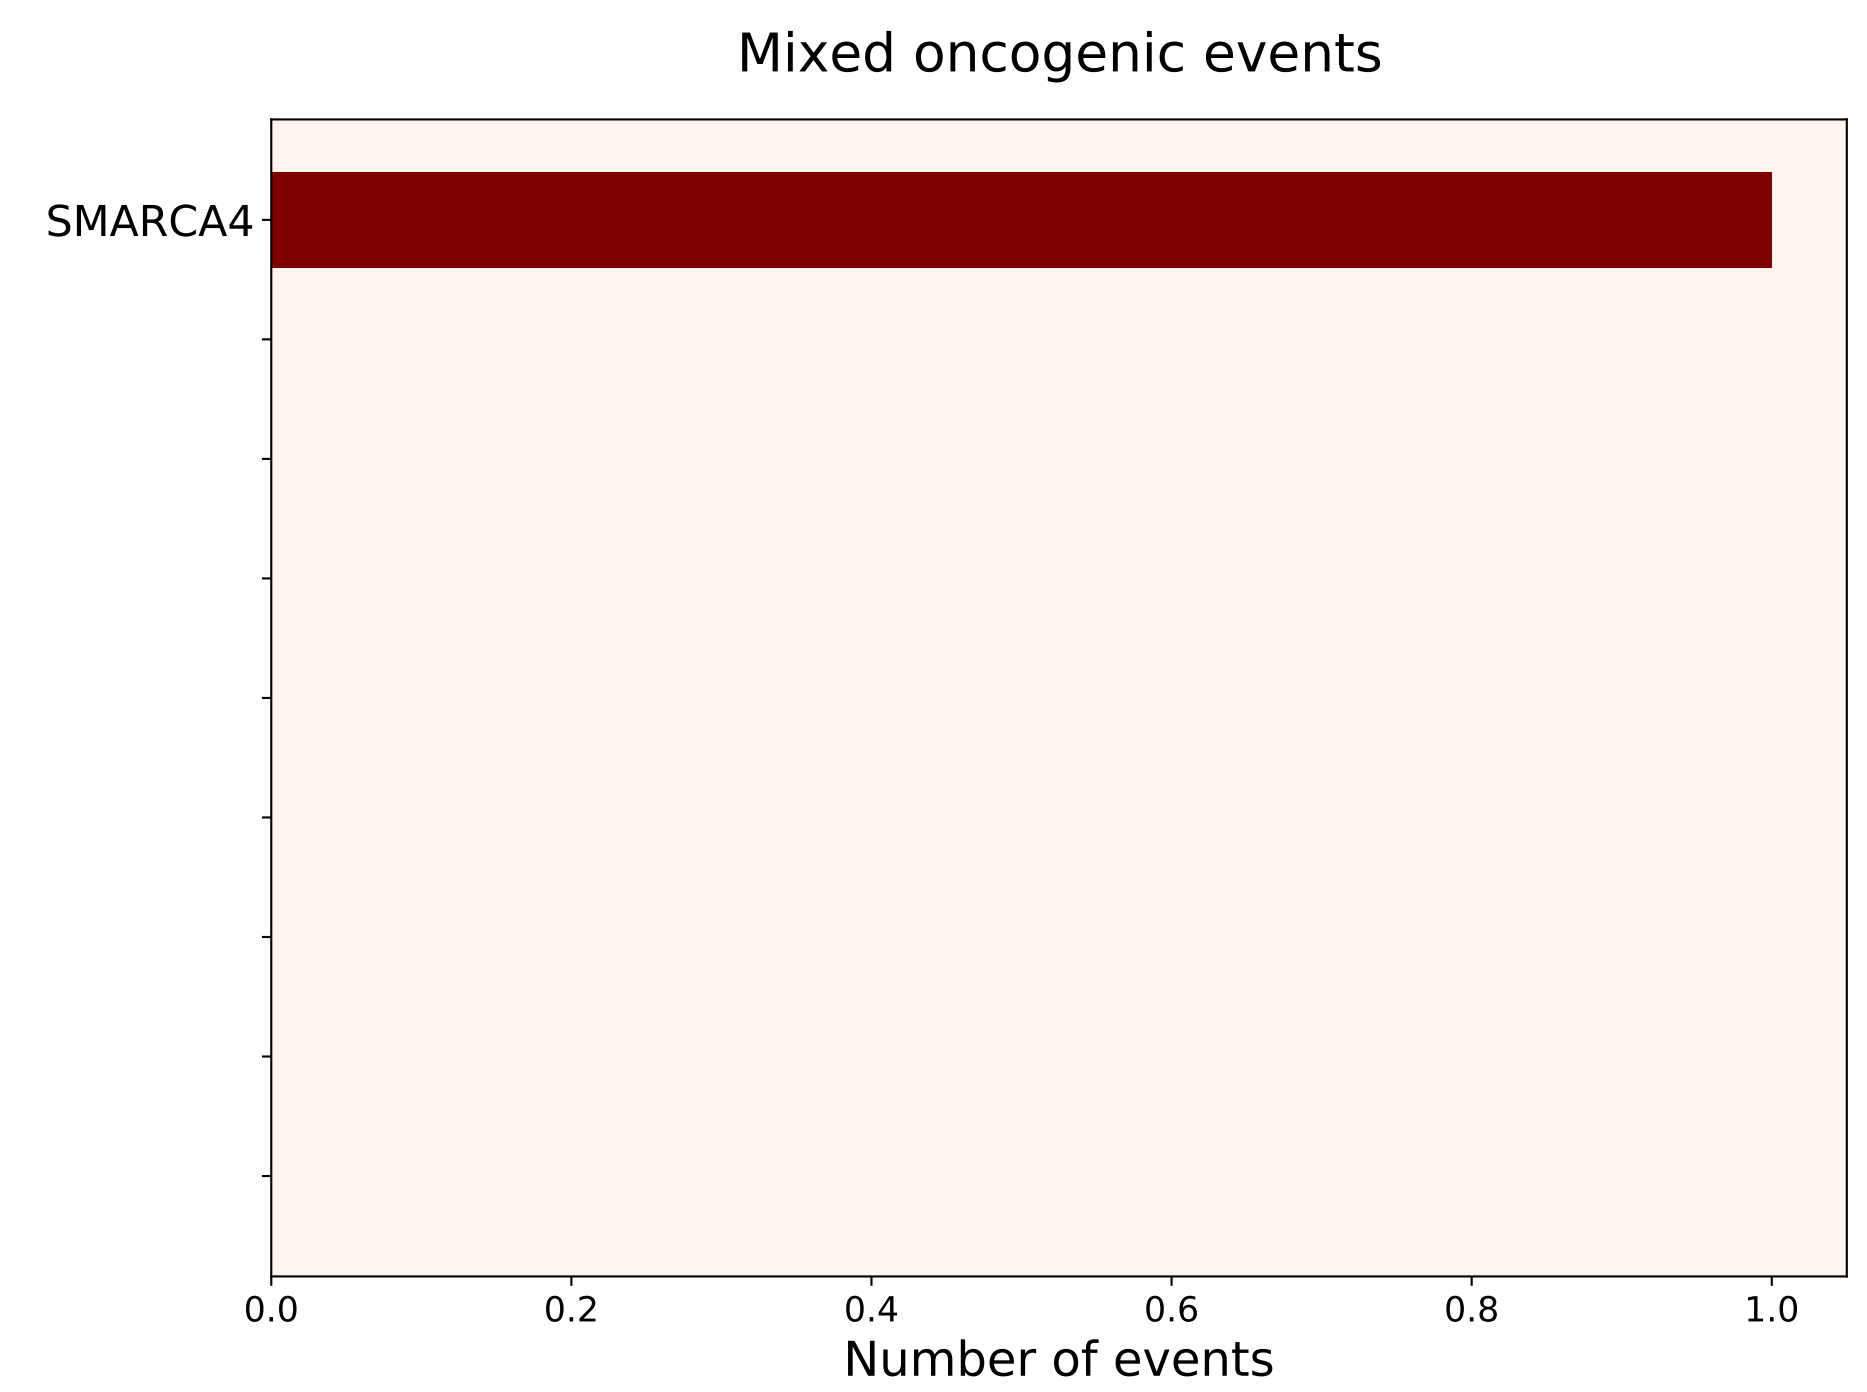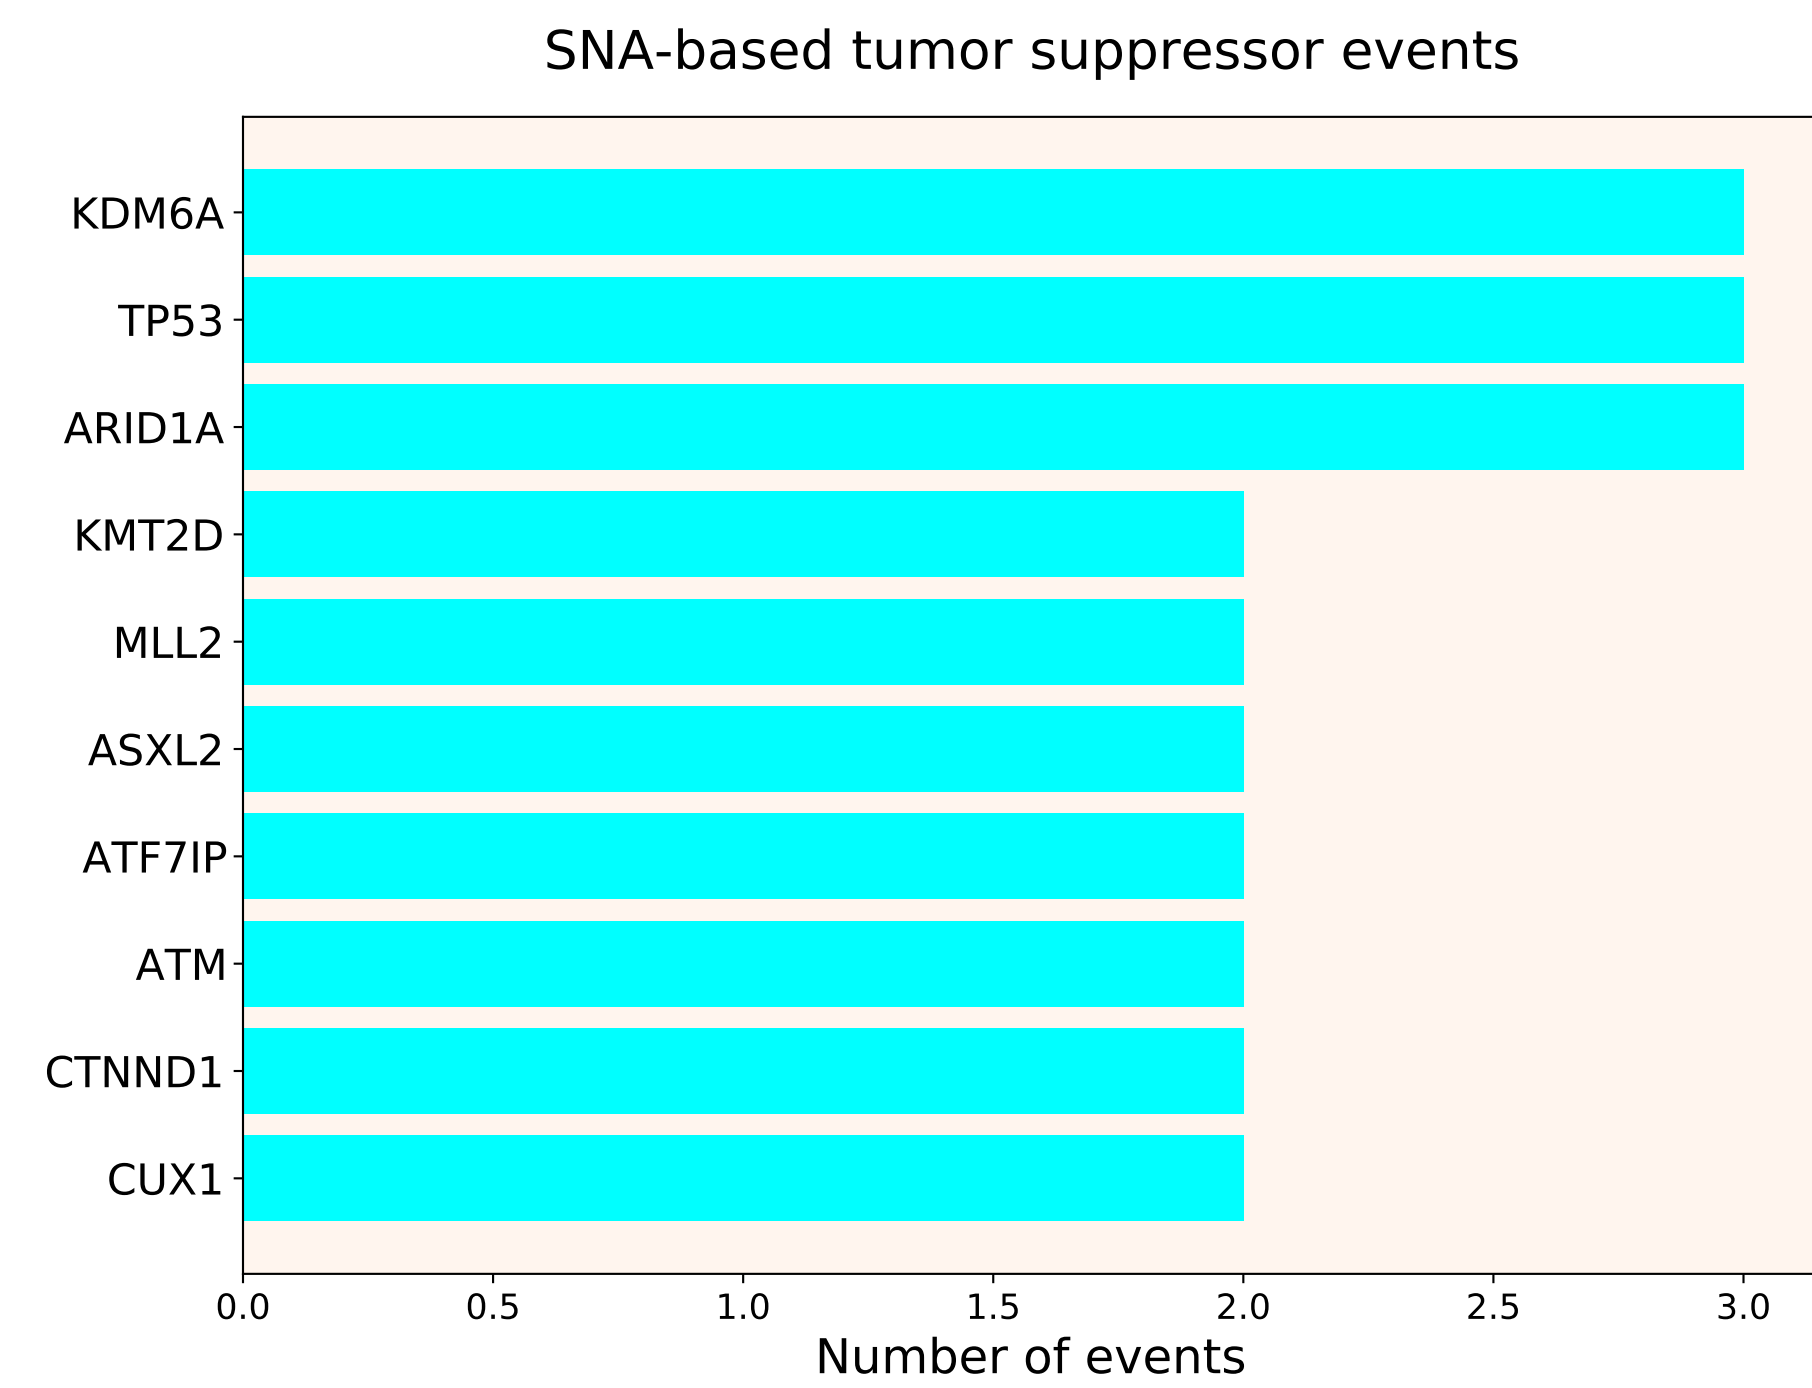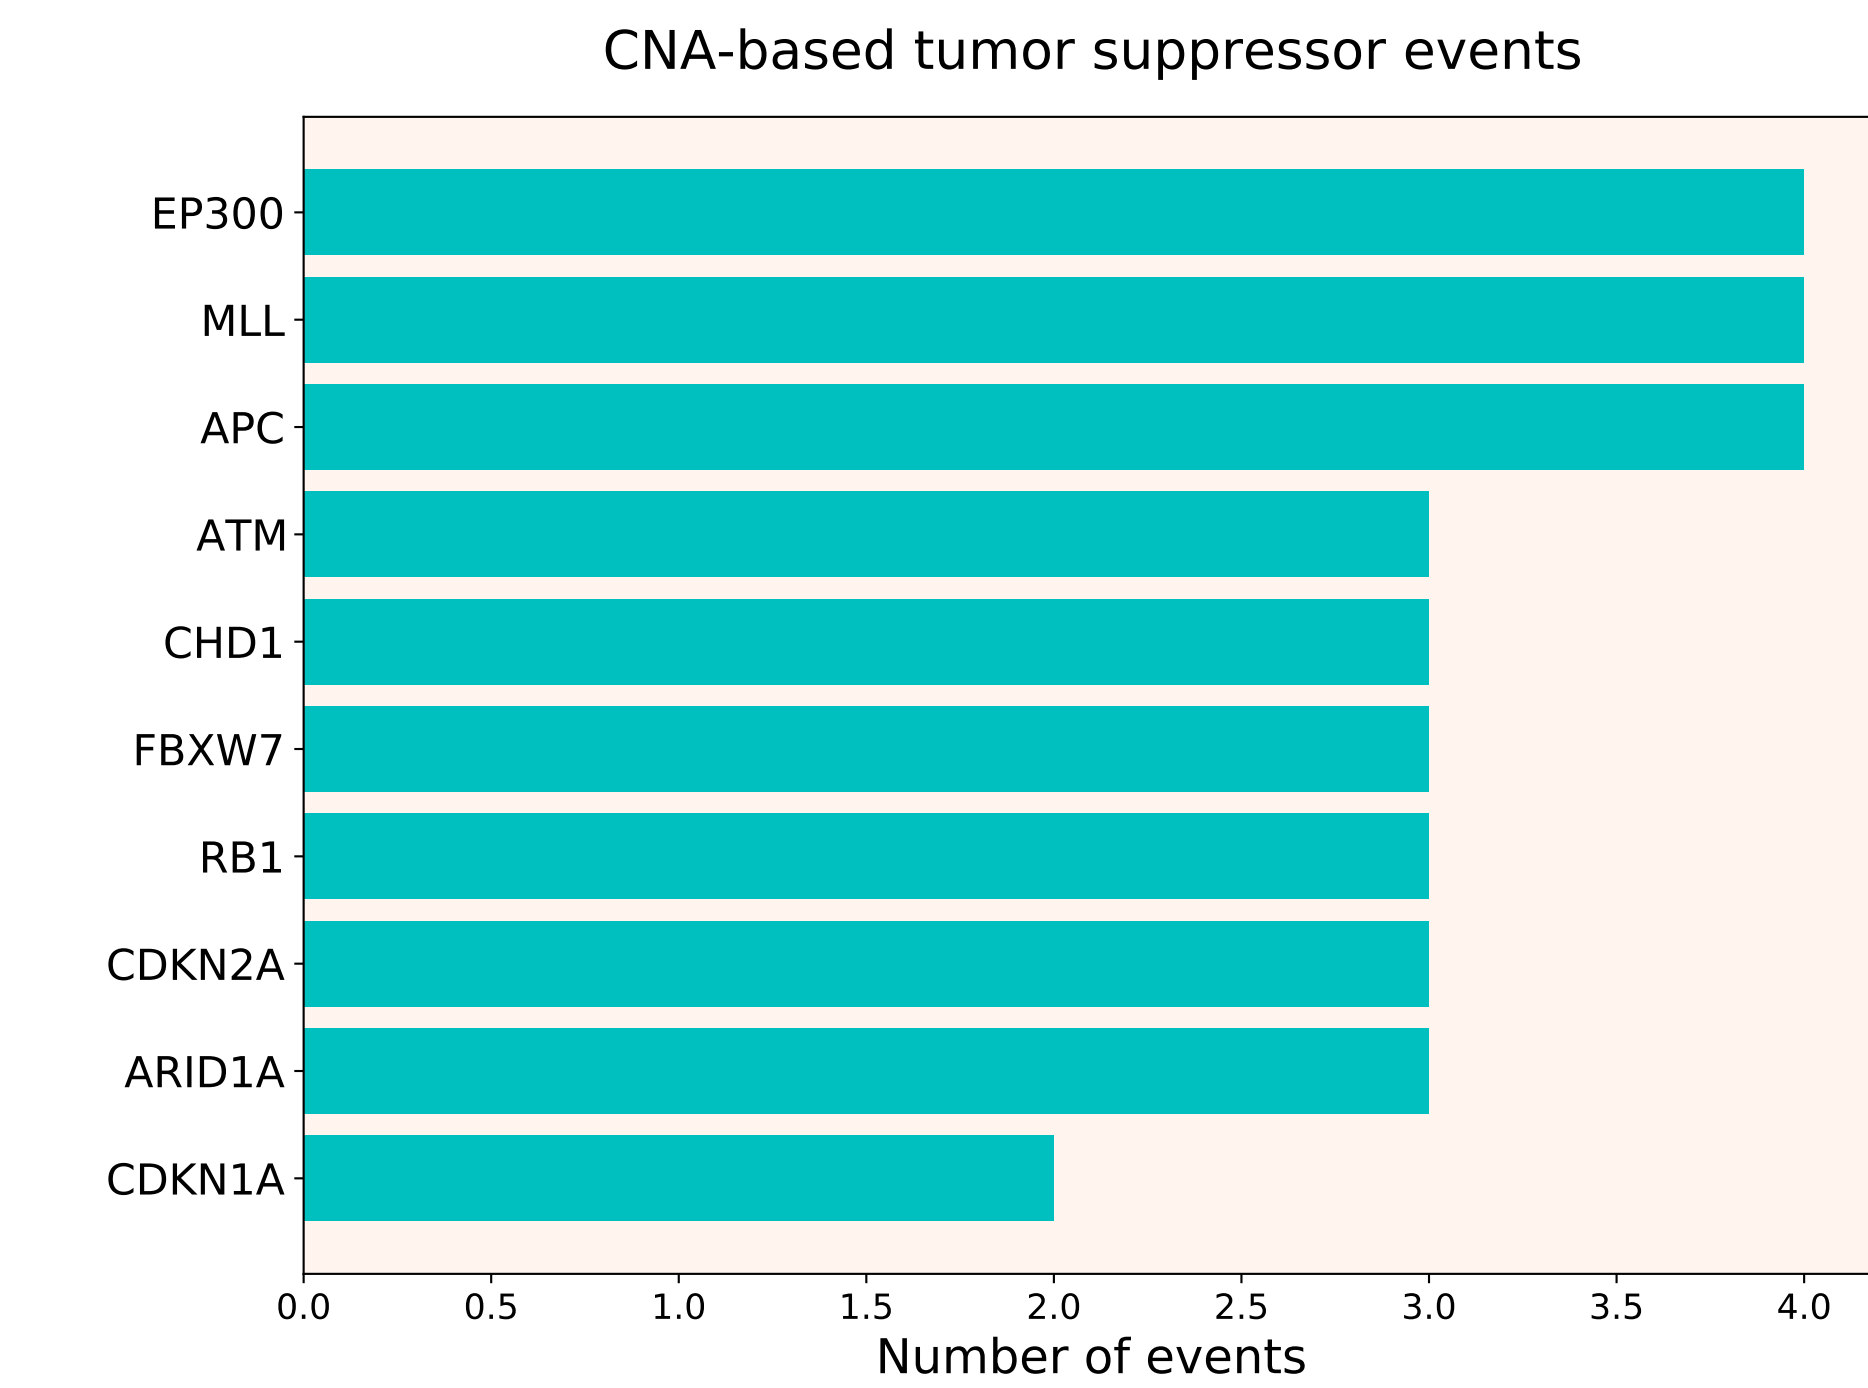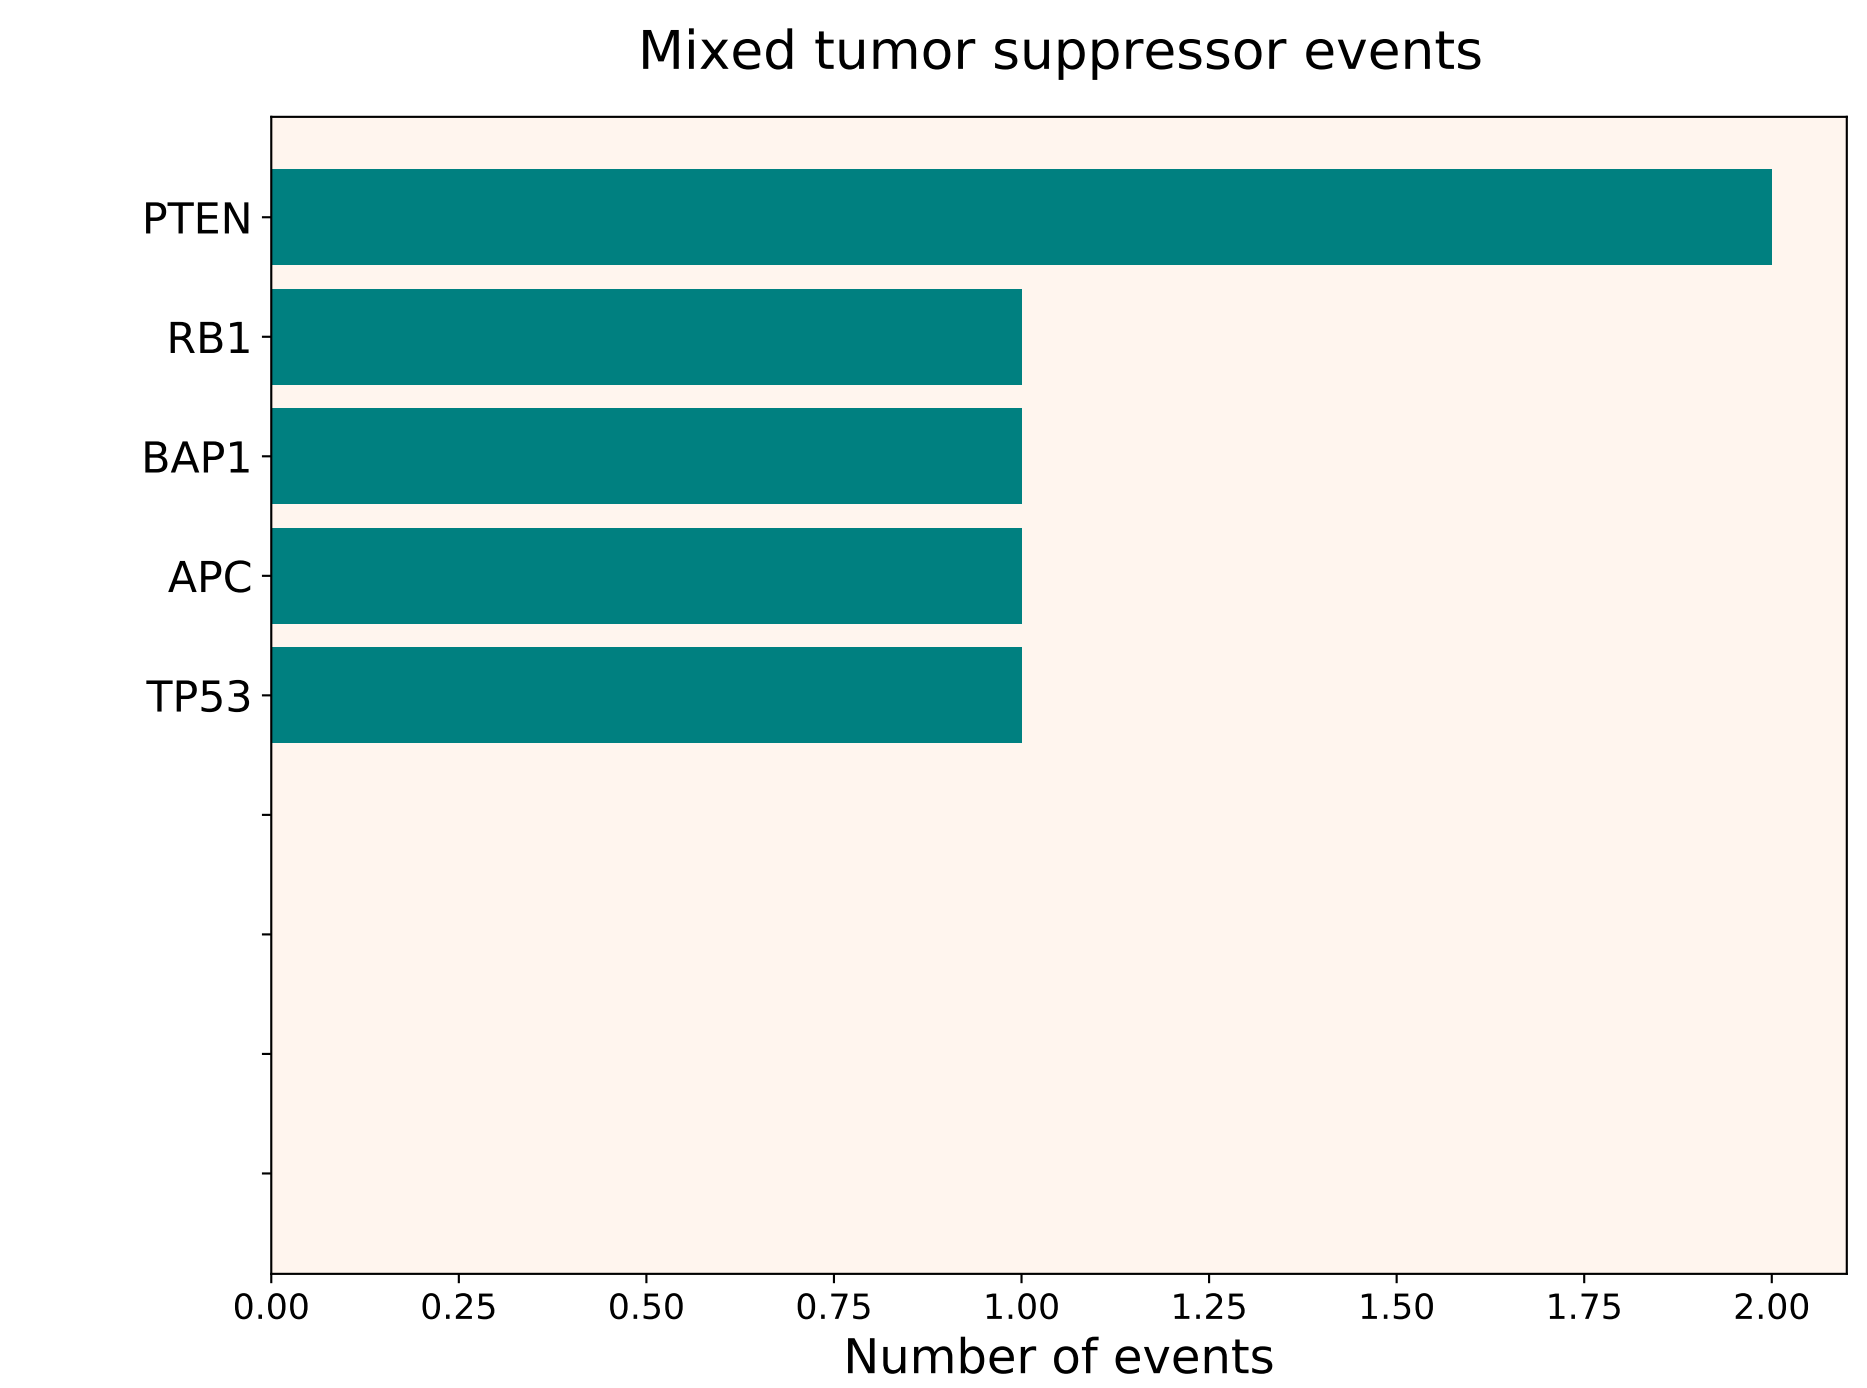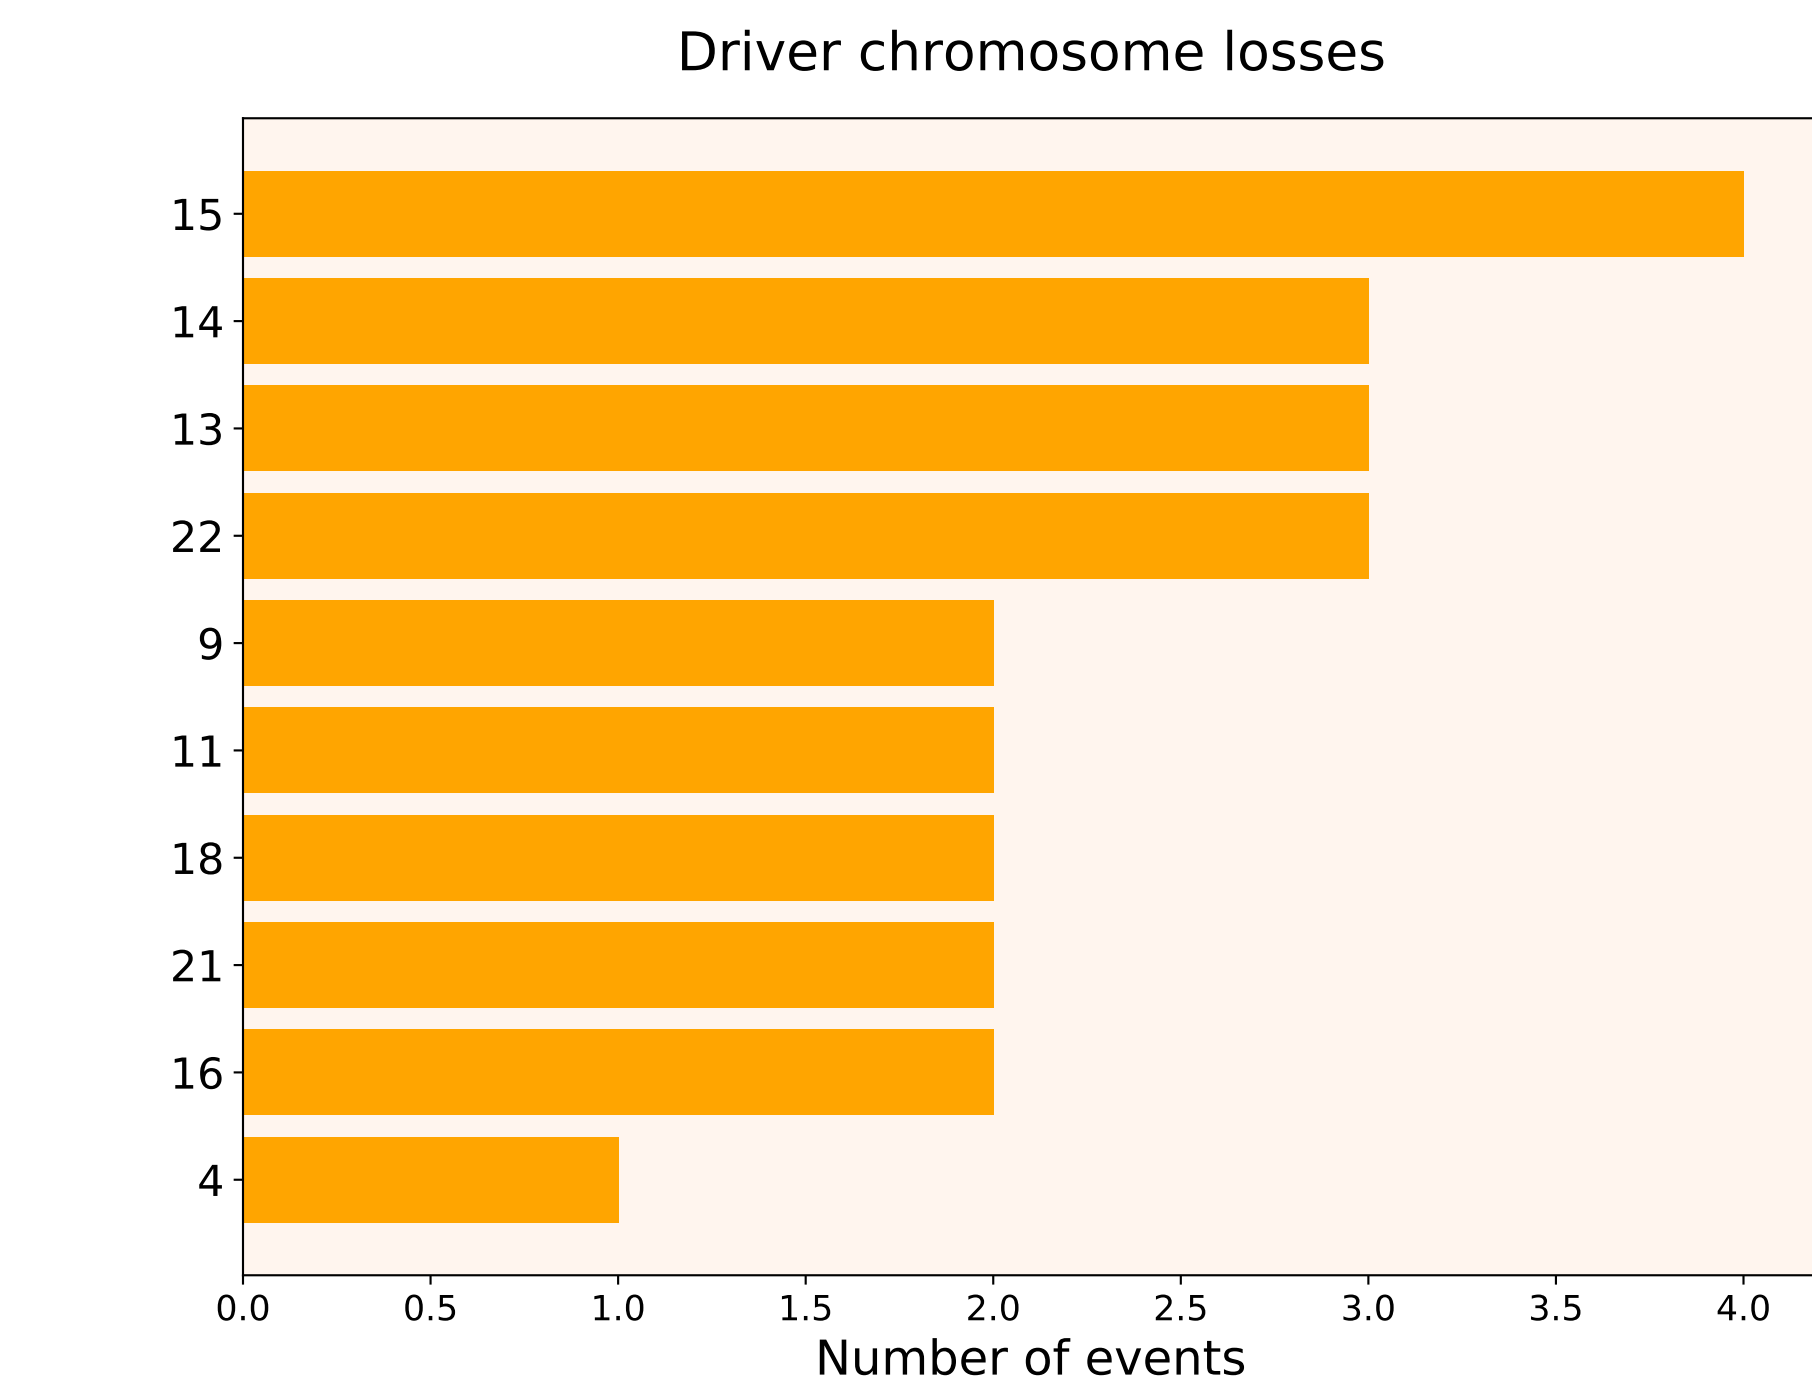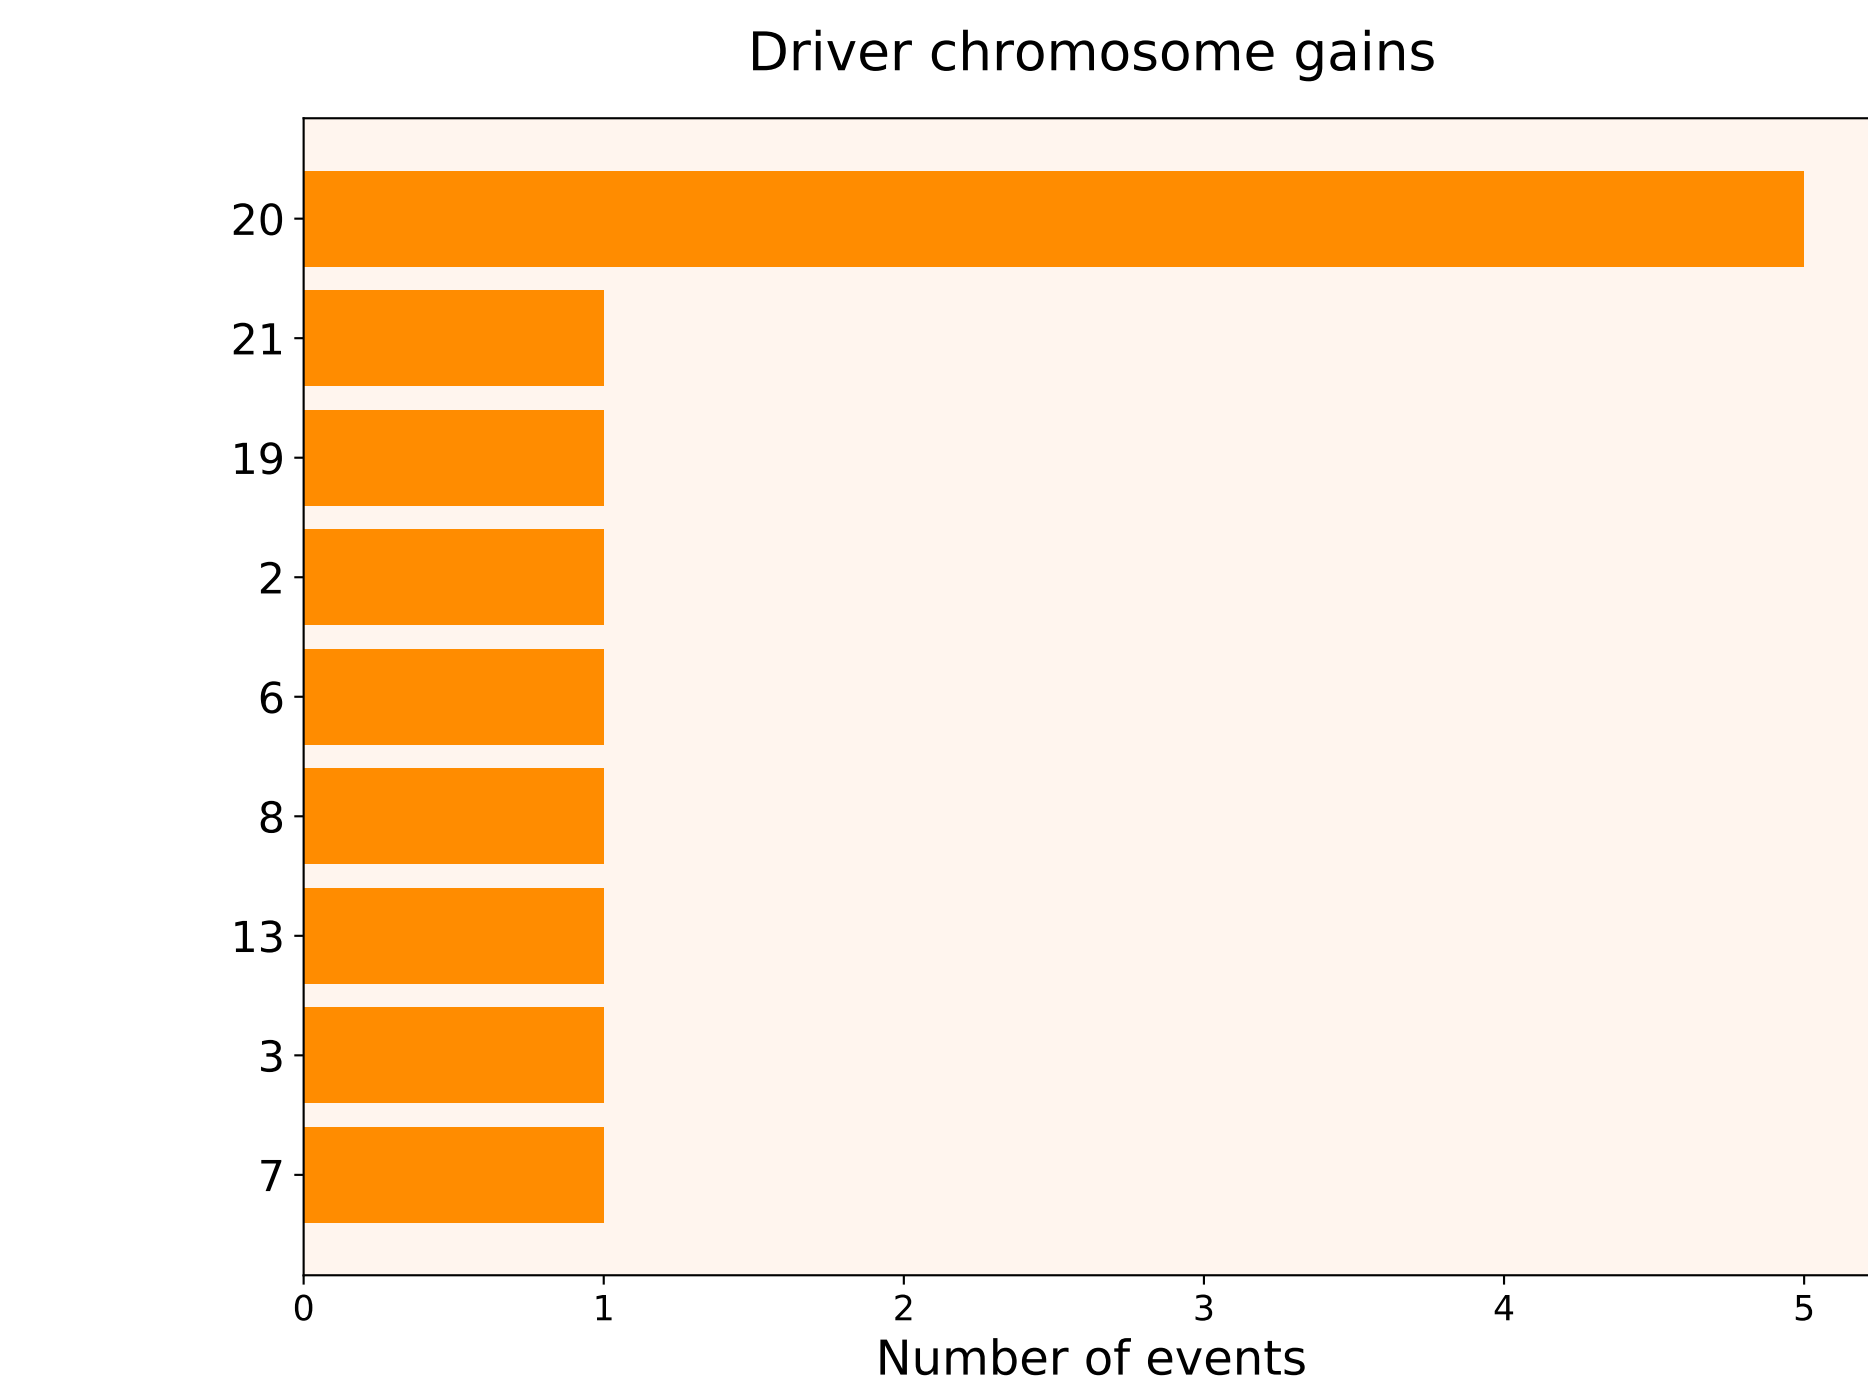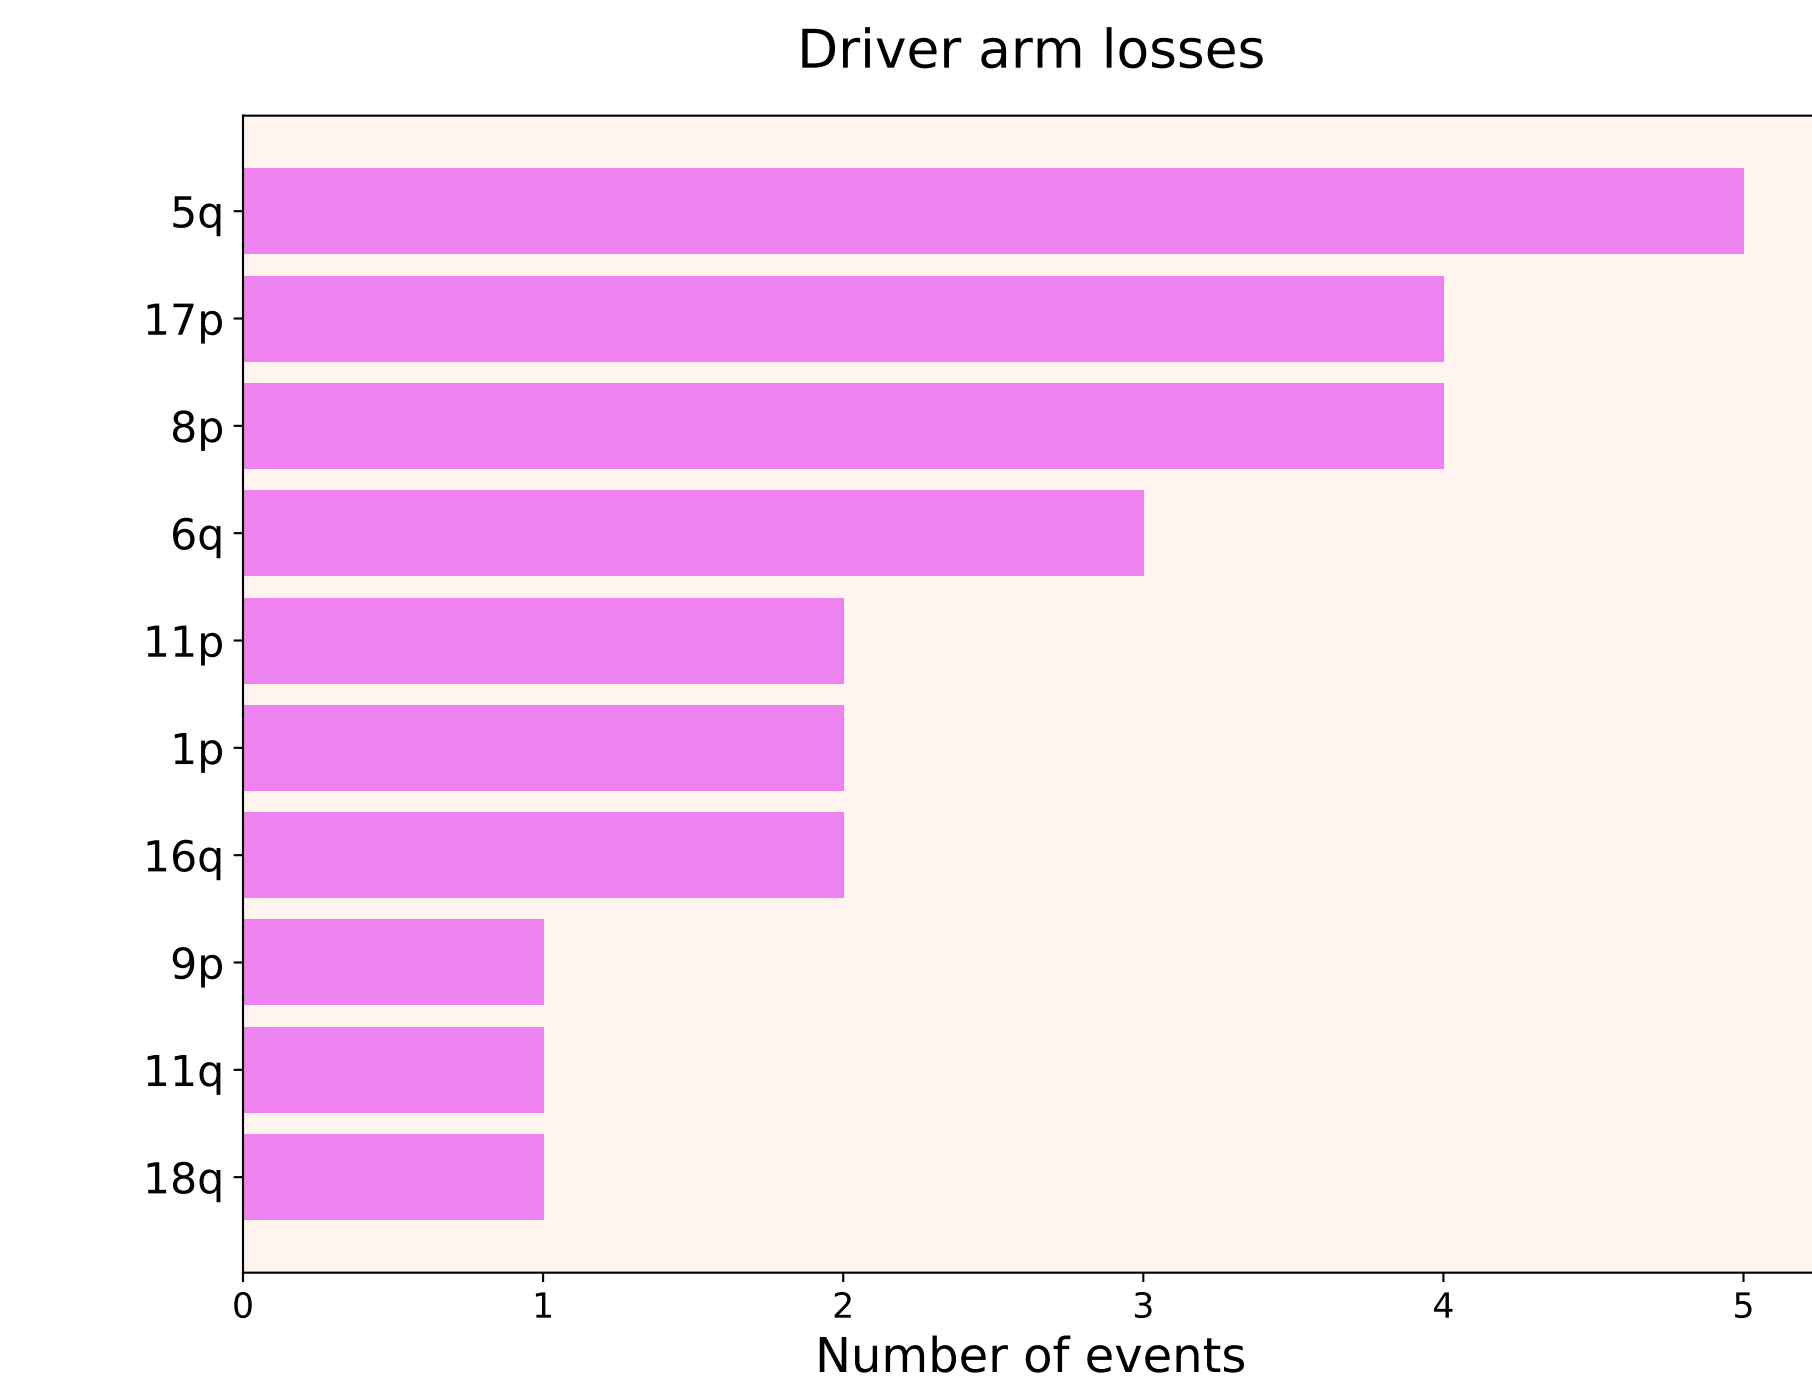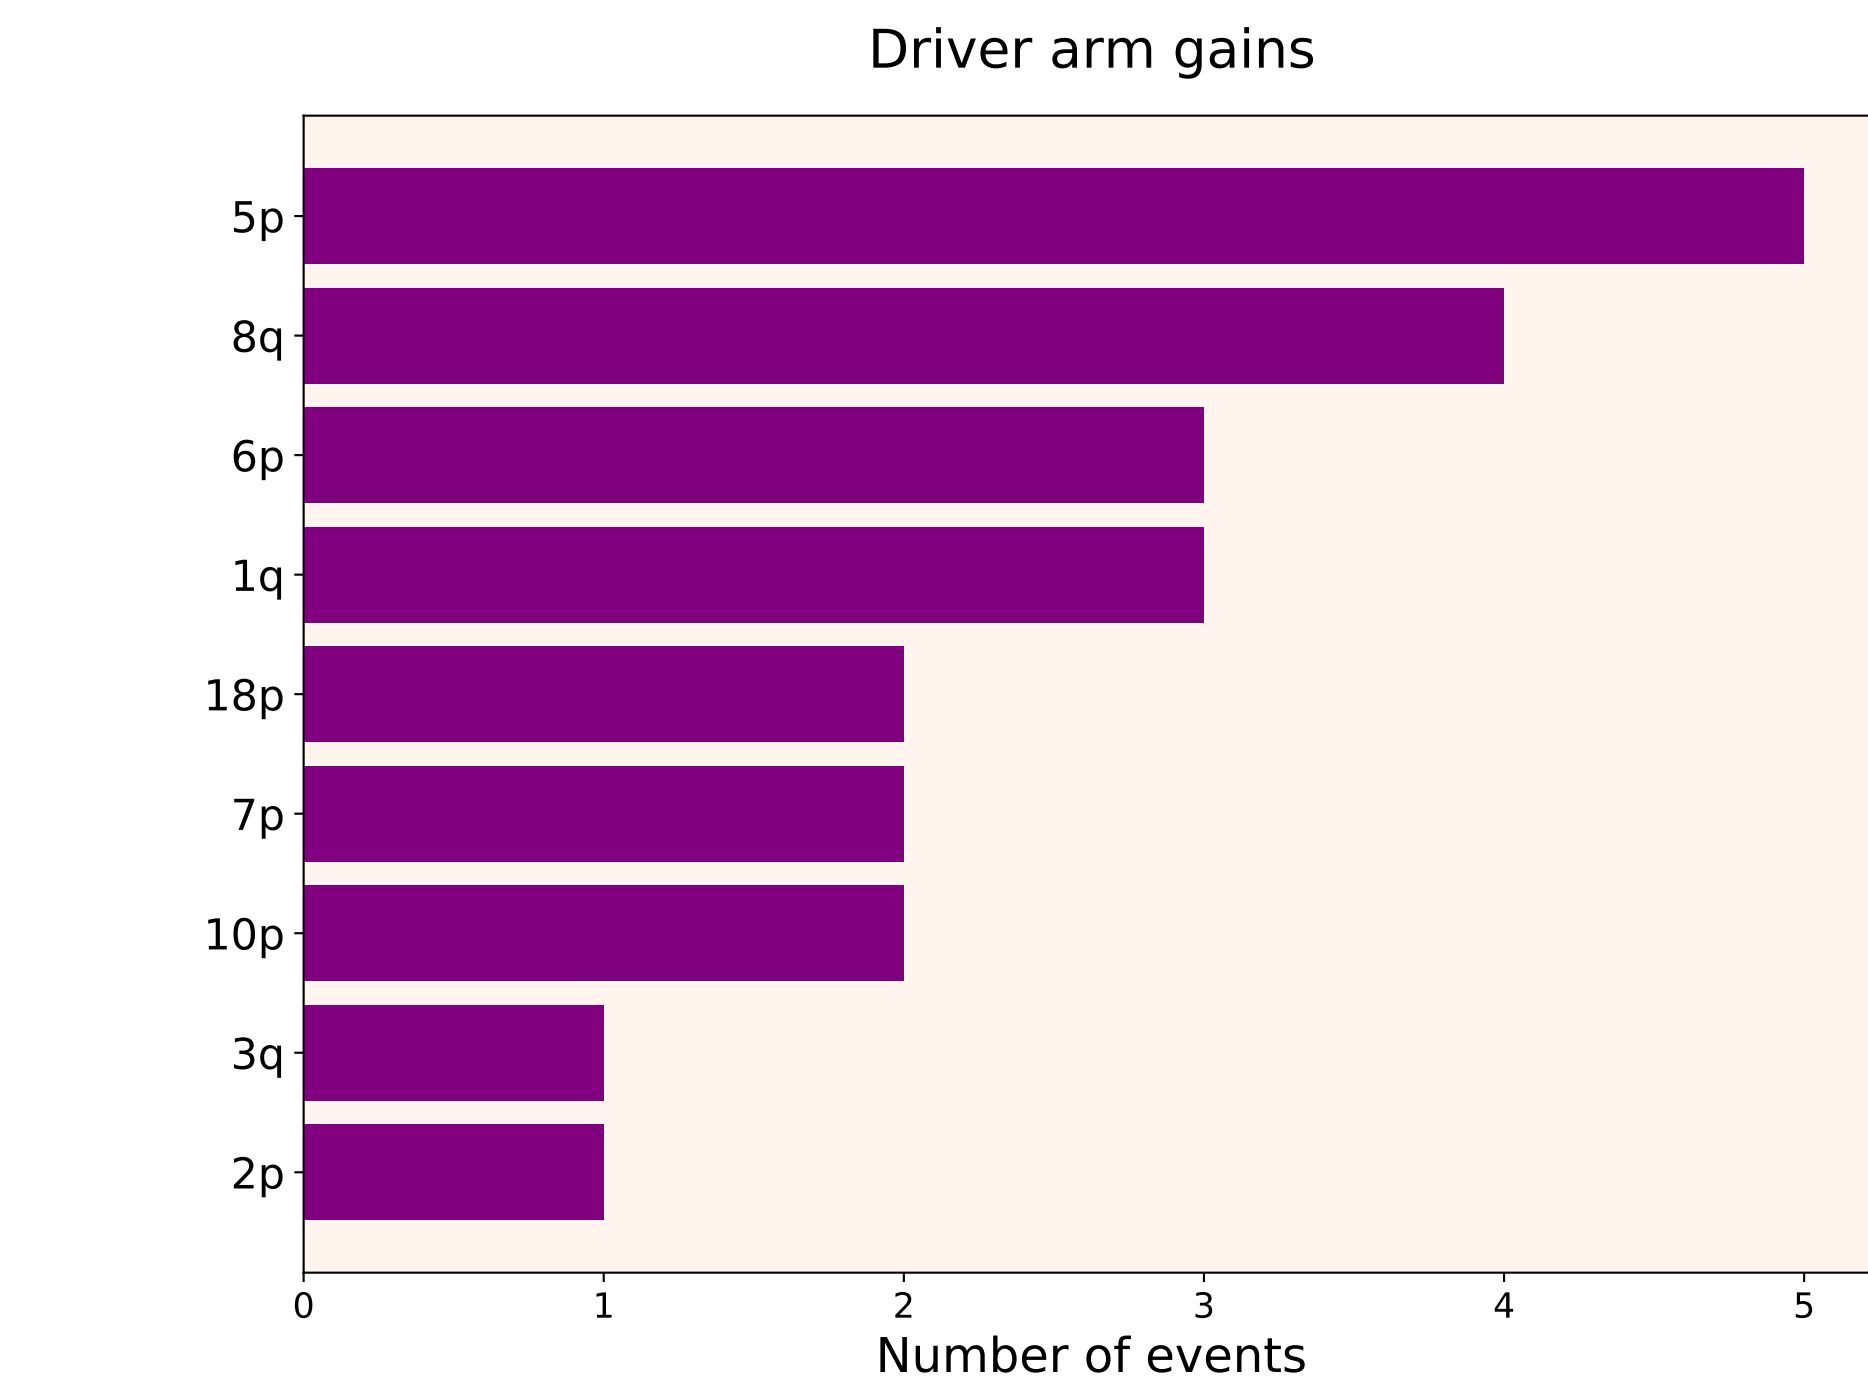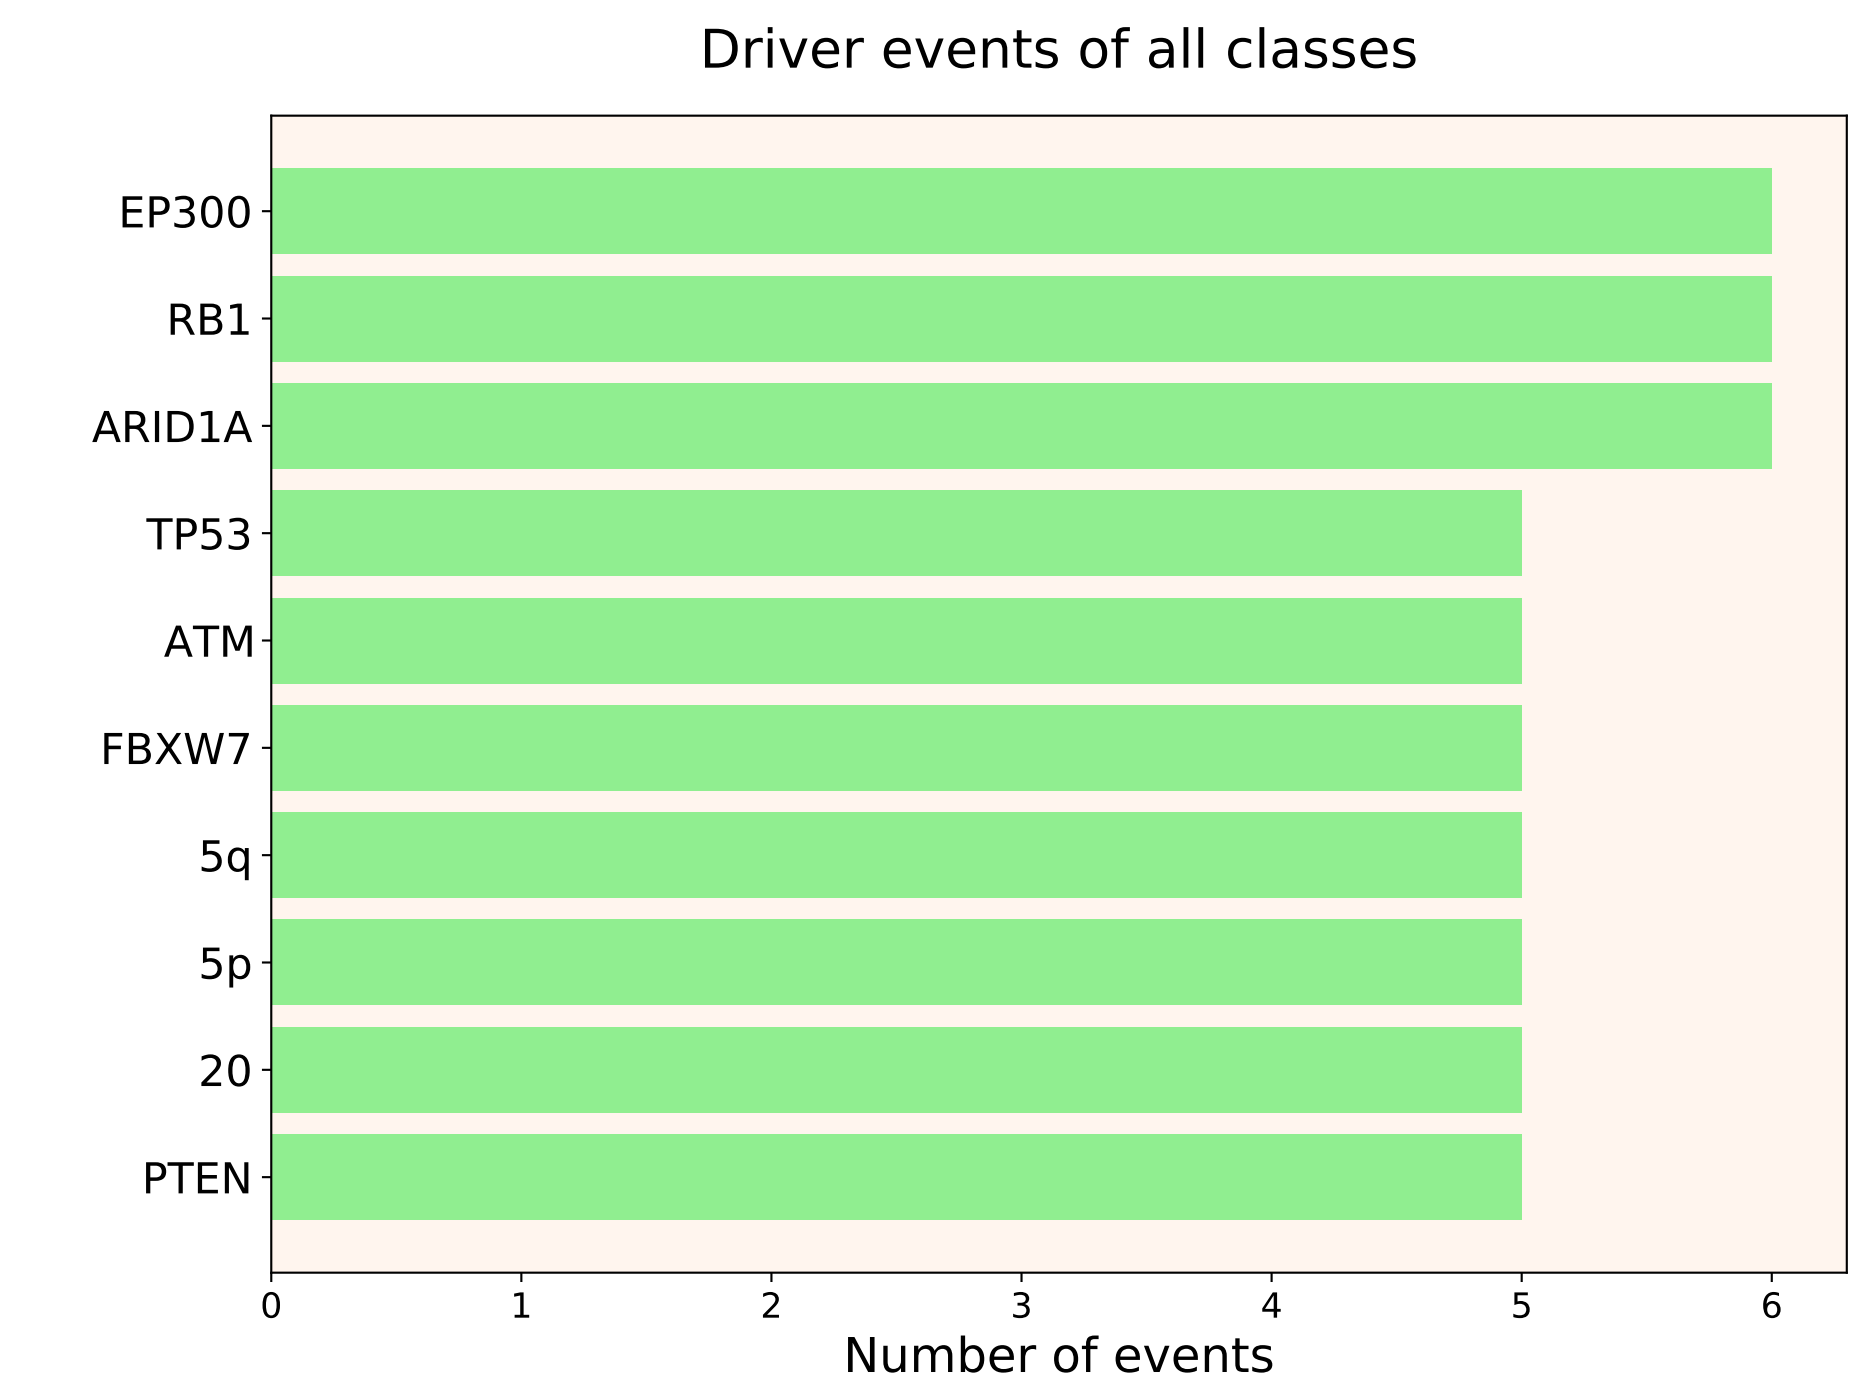

Supplement: Supplemental_Data_S1.zip [file Supplemental_Data_S1.zip]

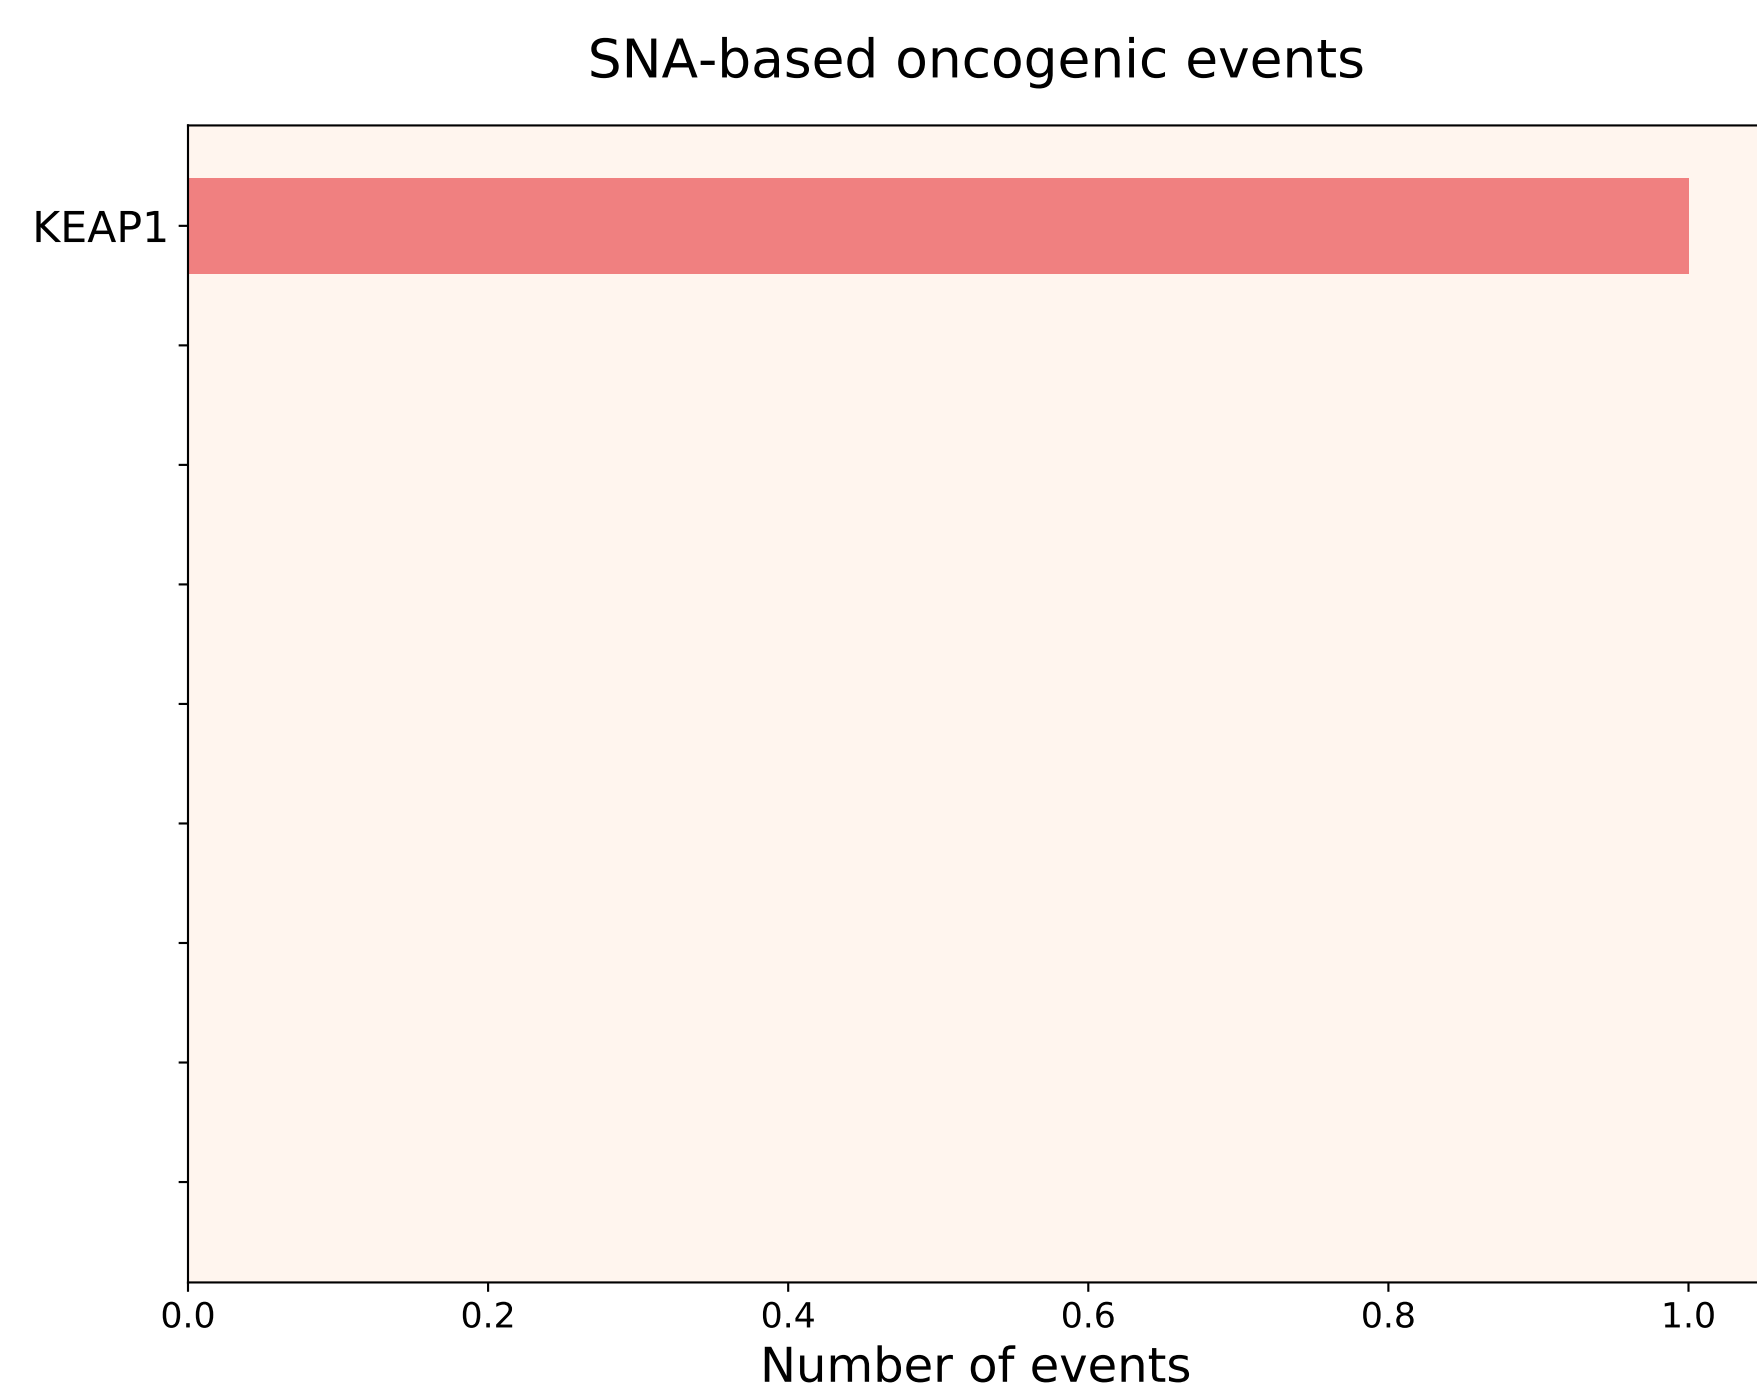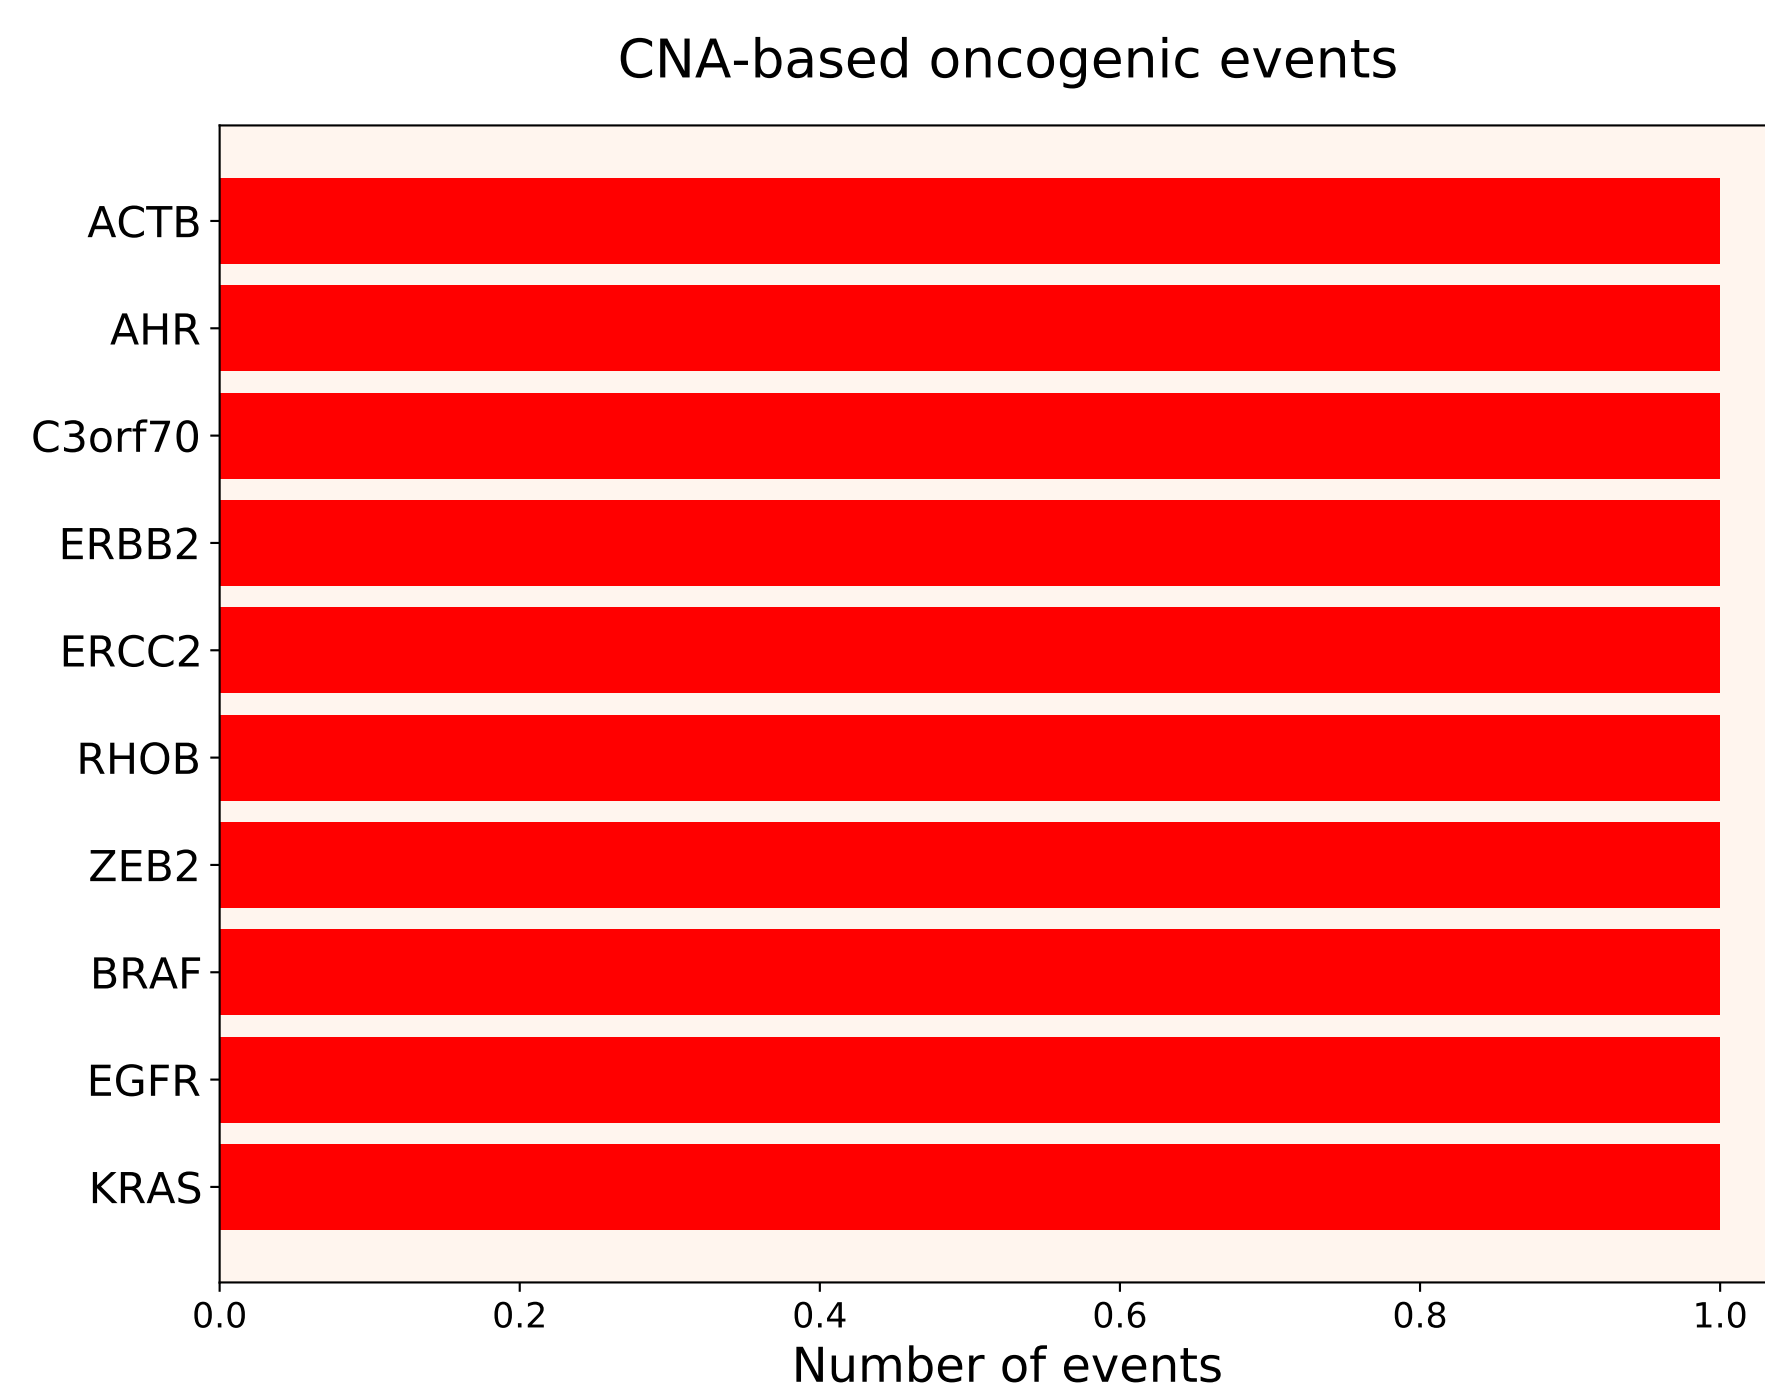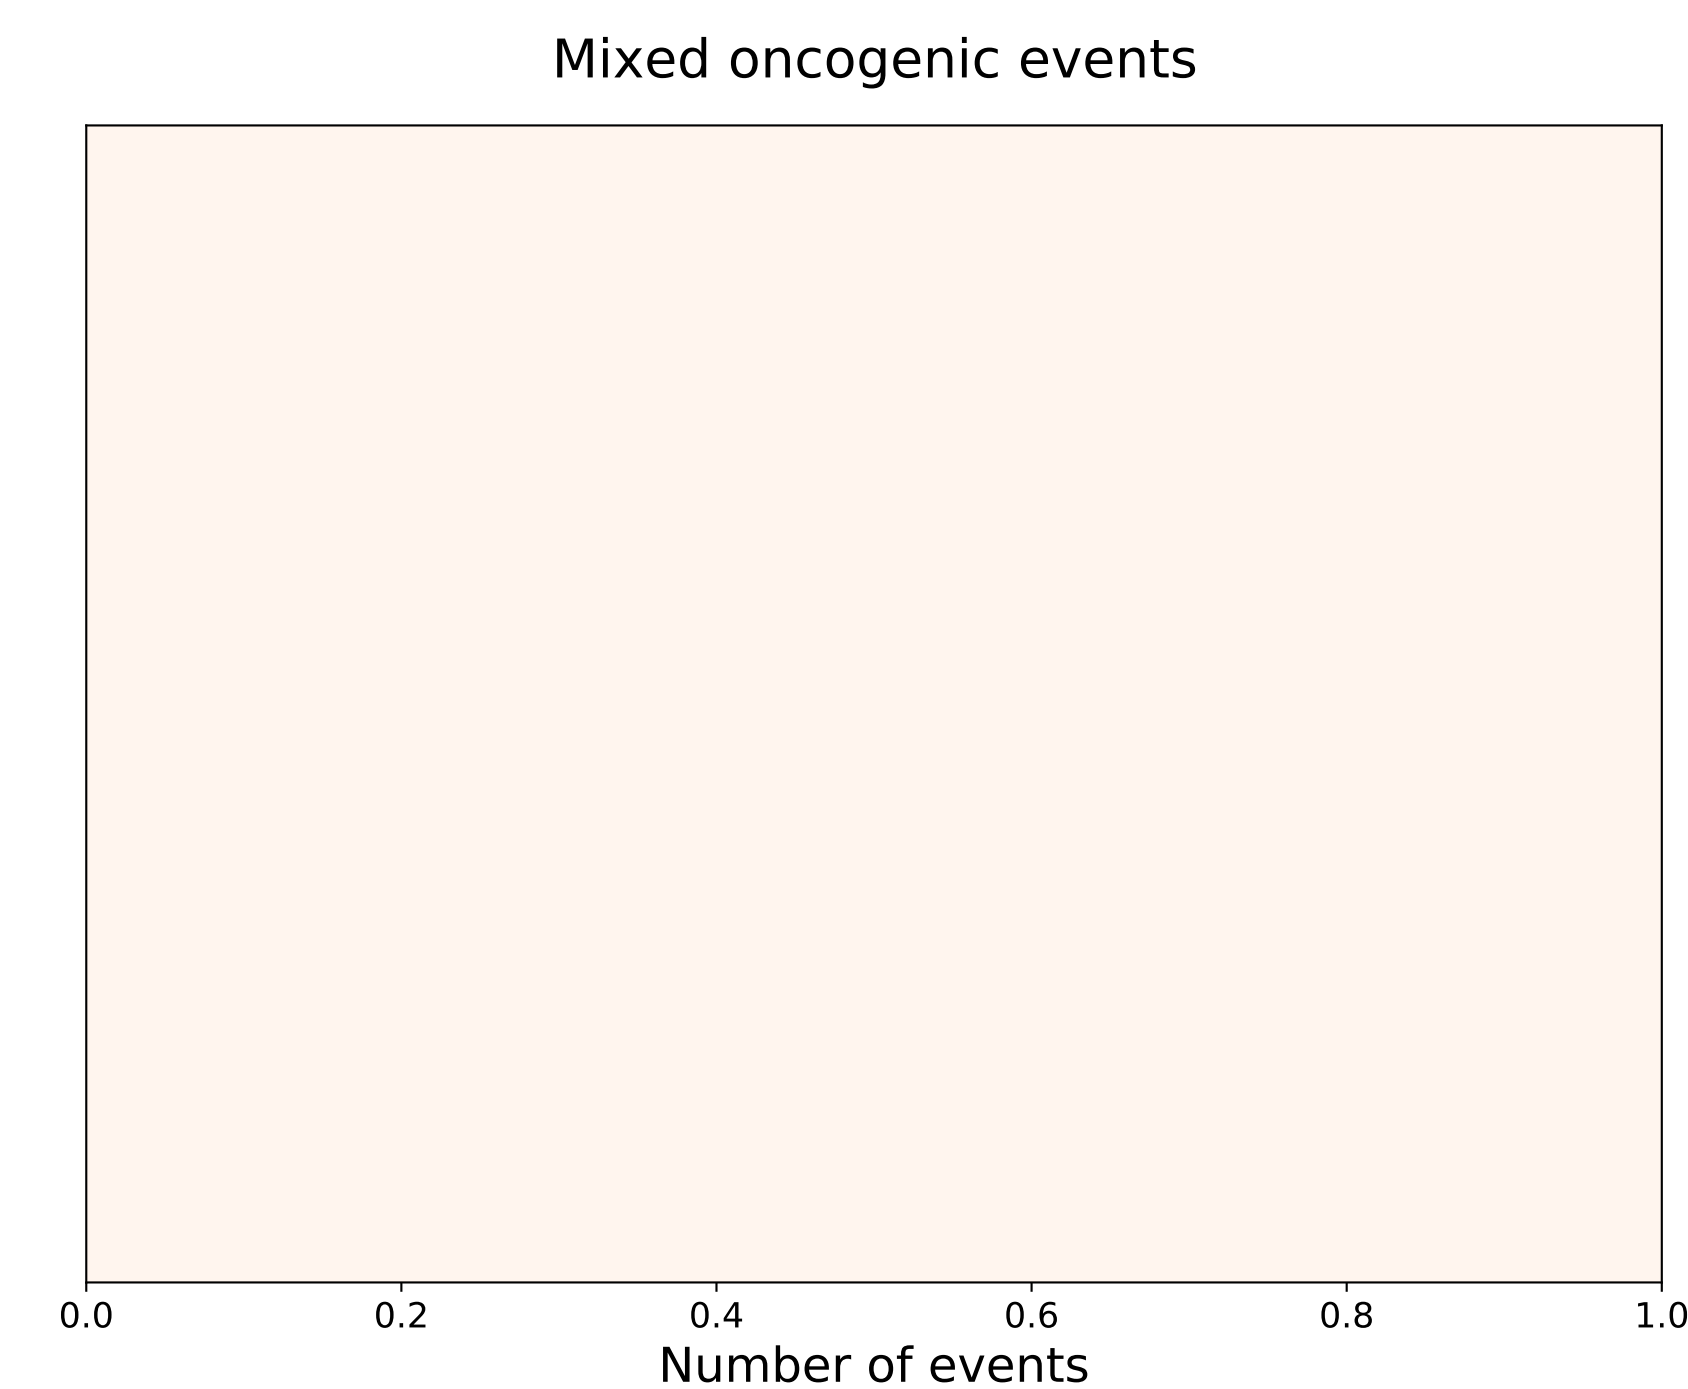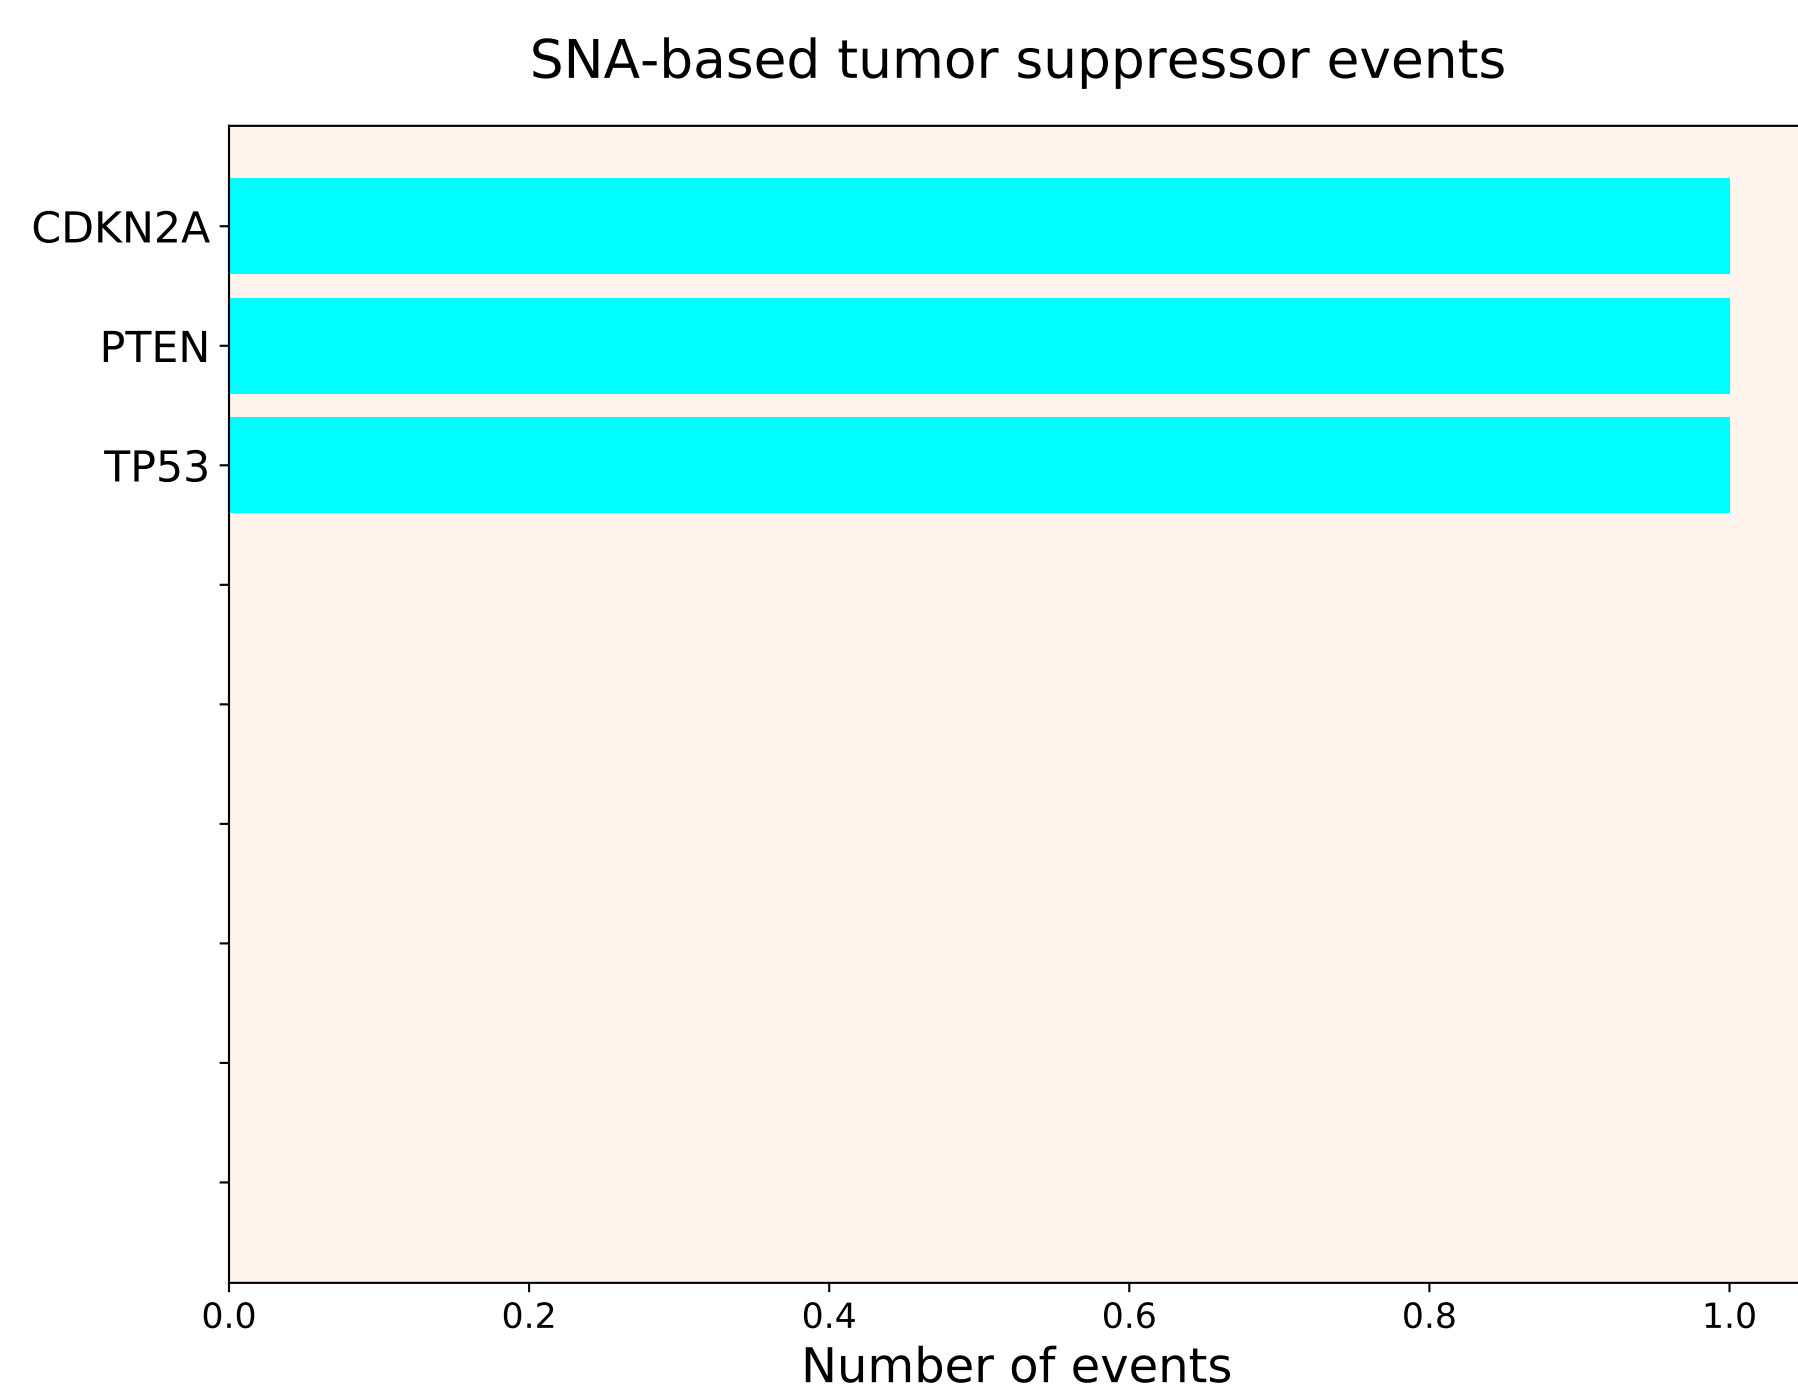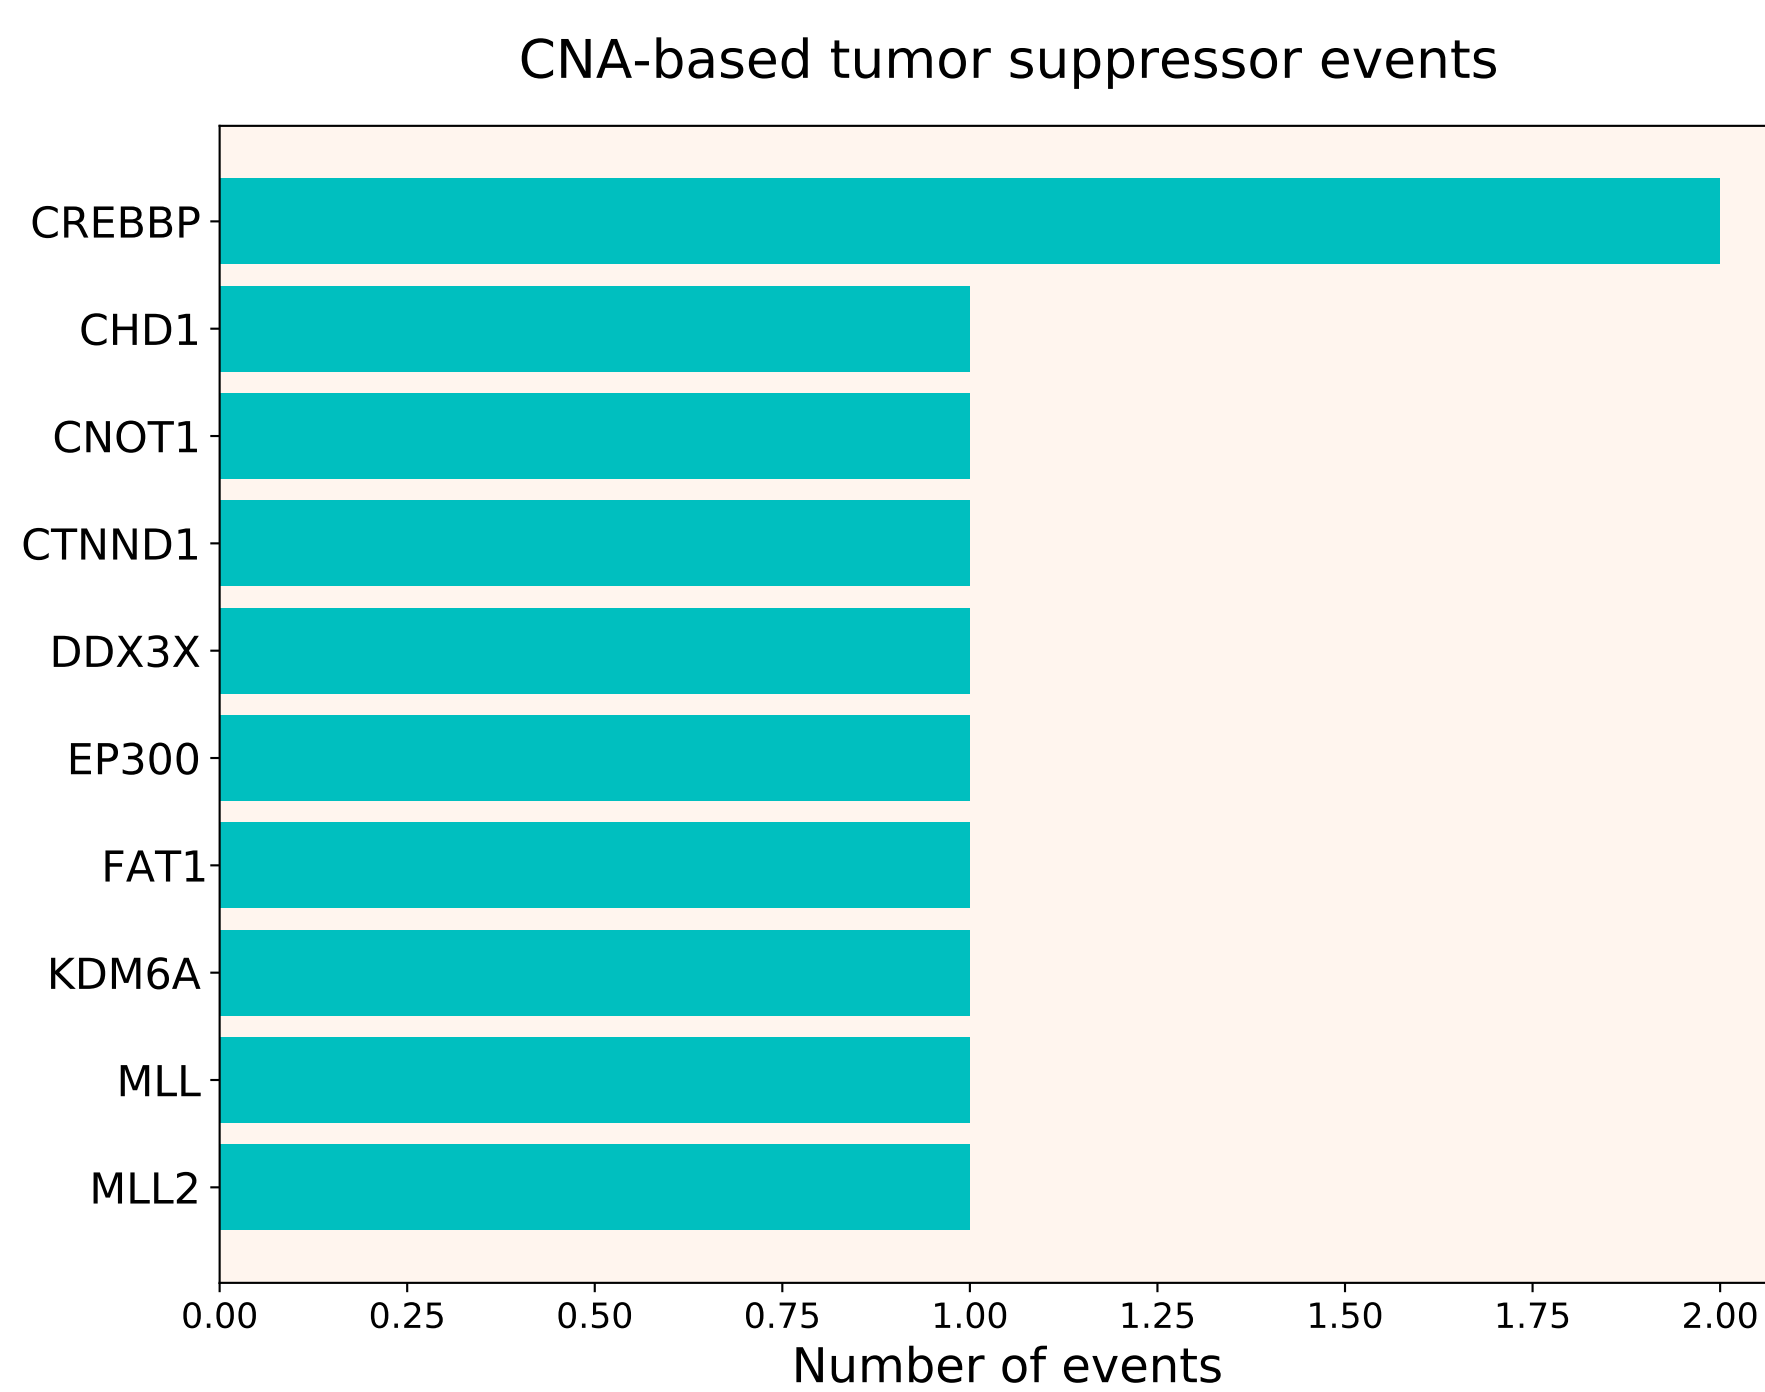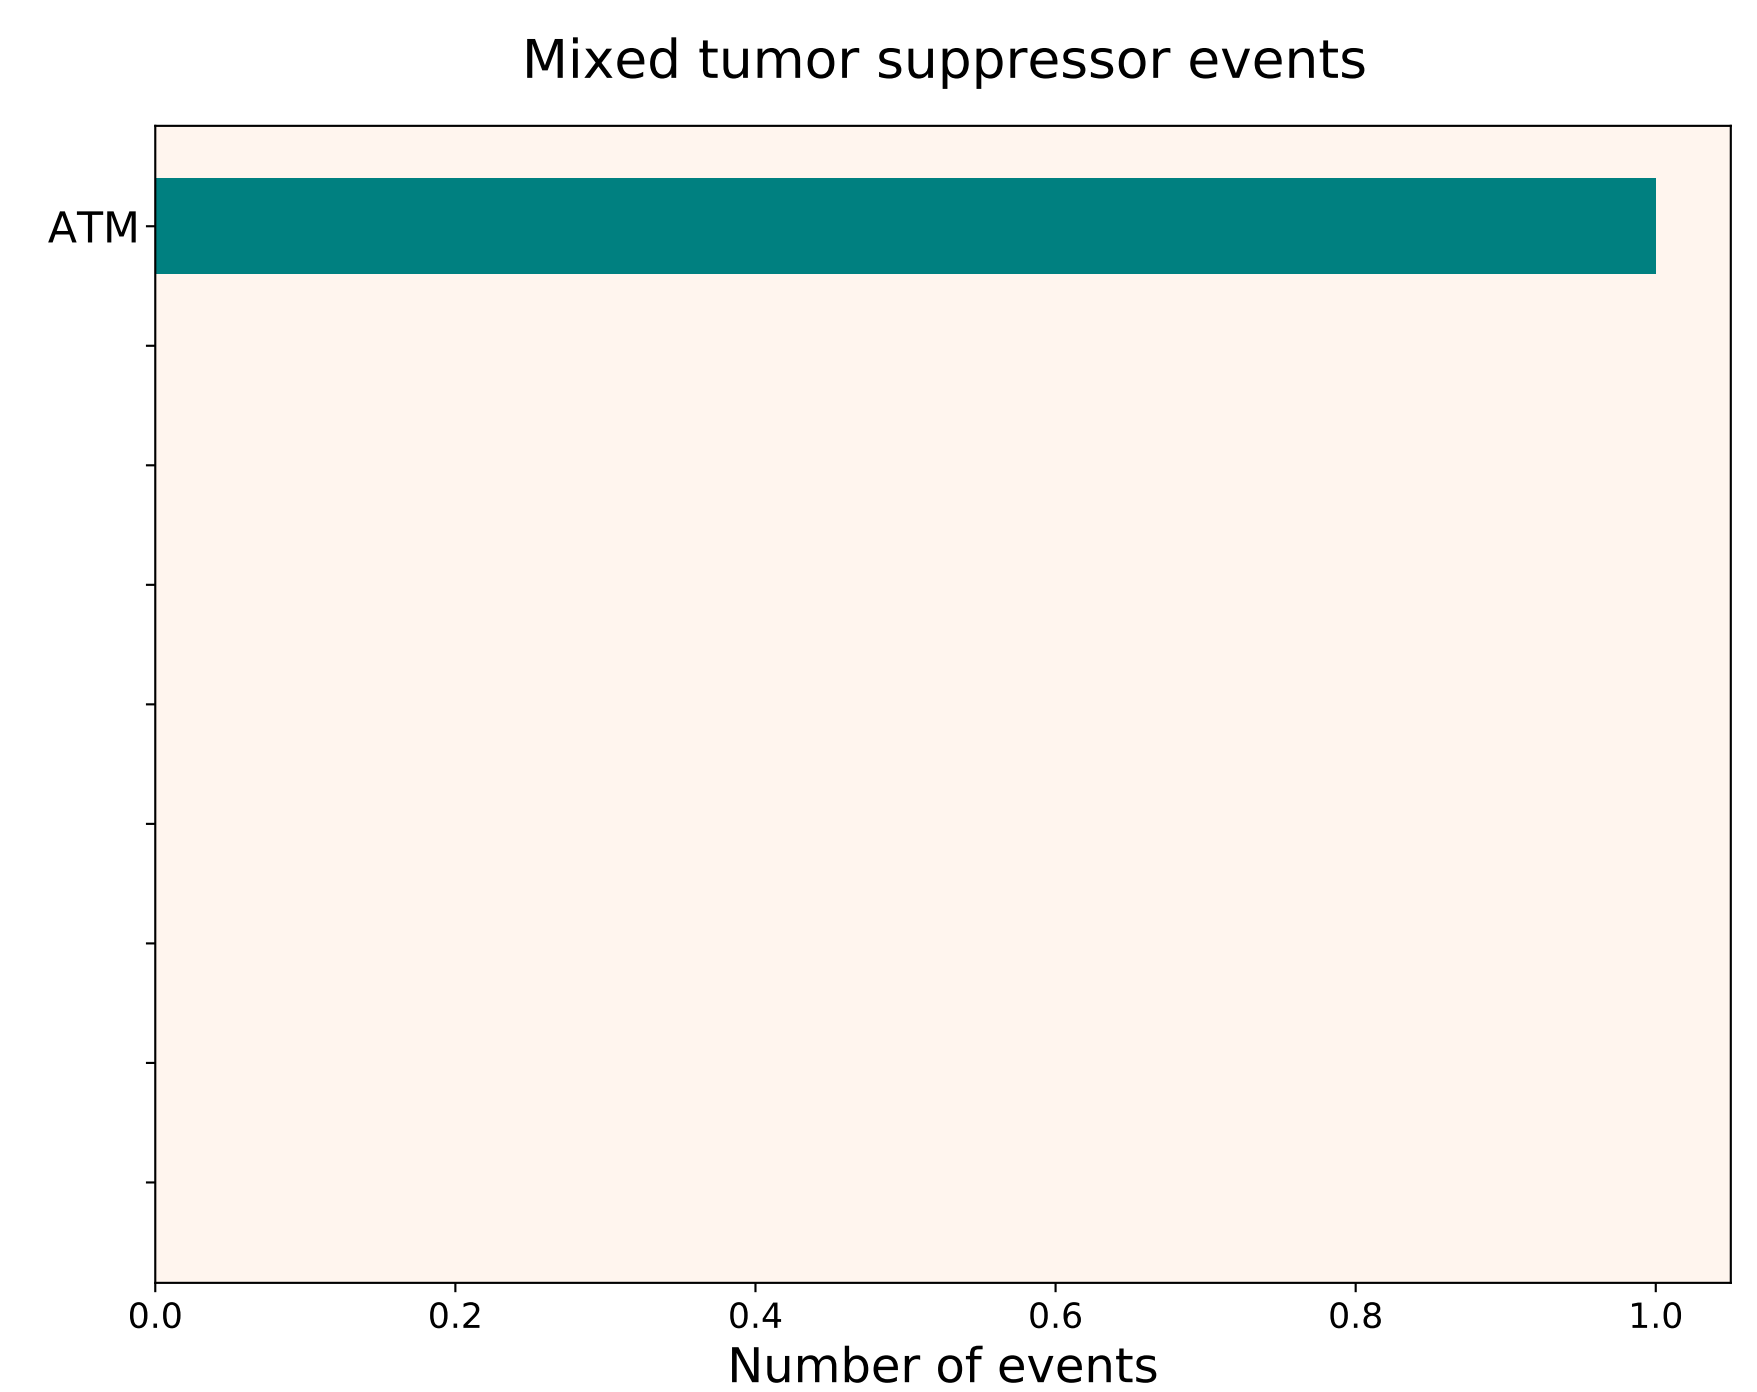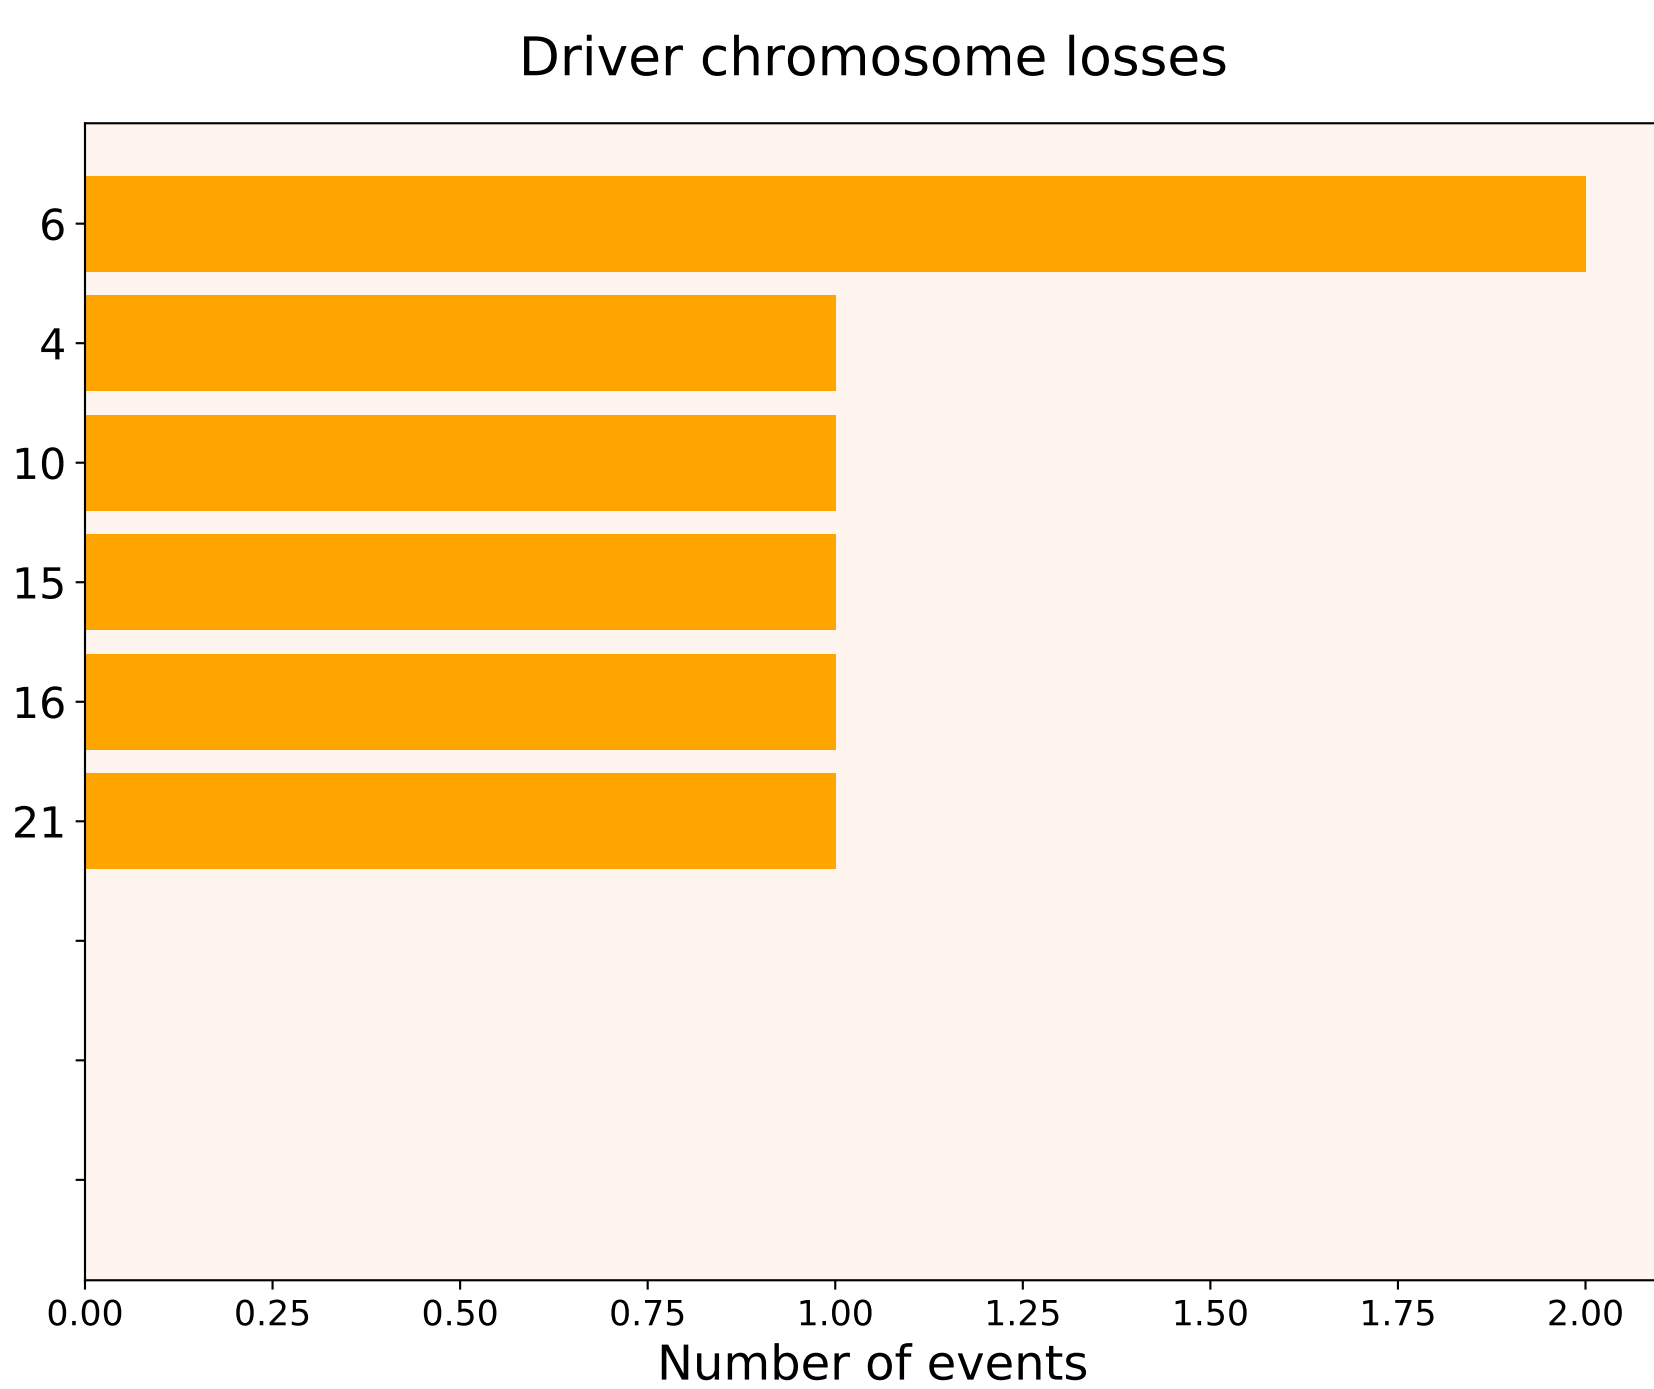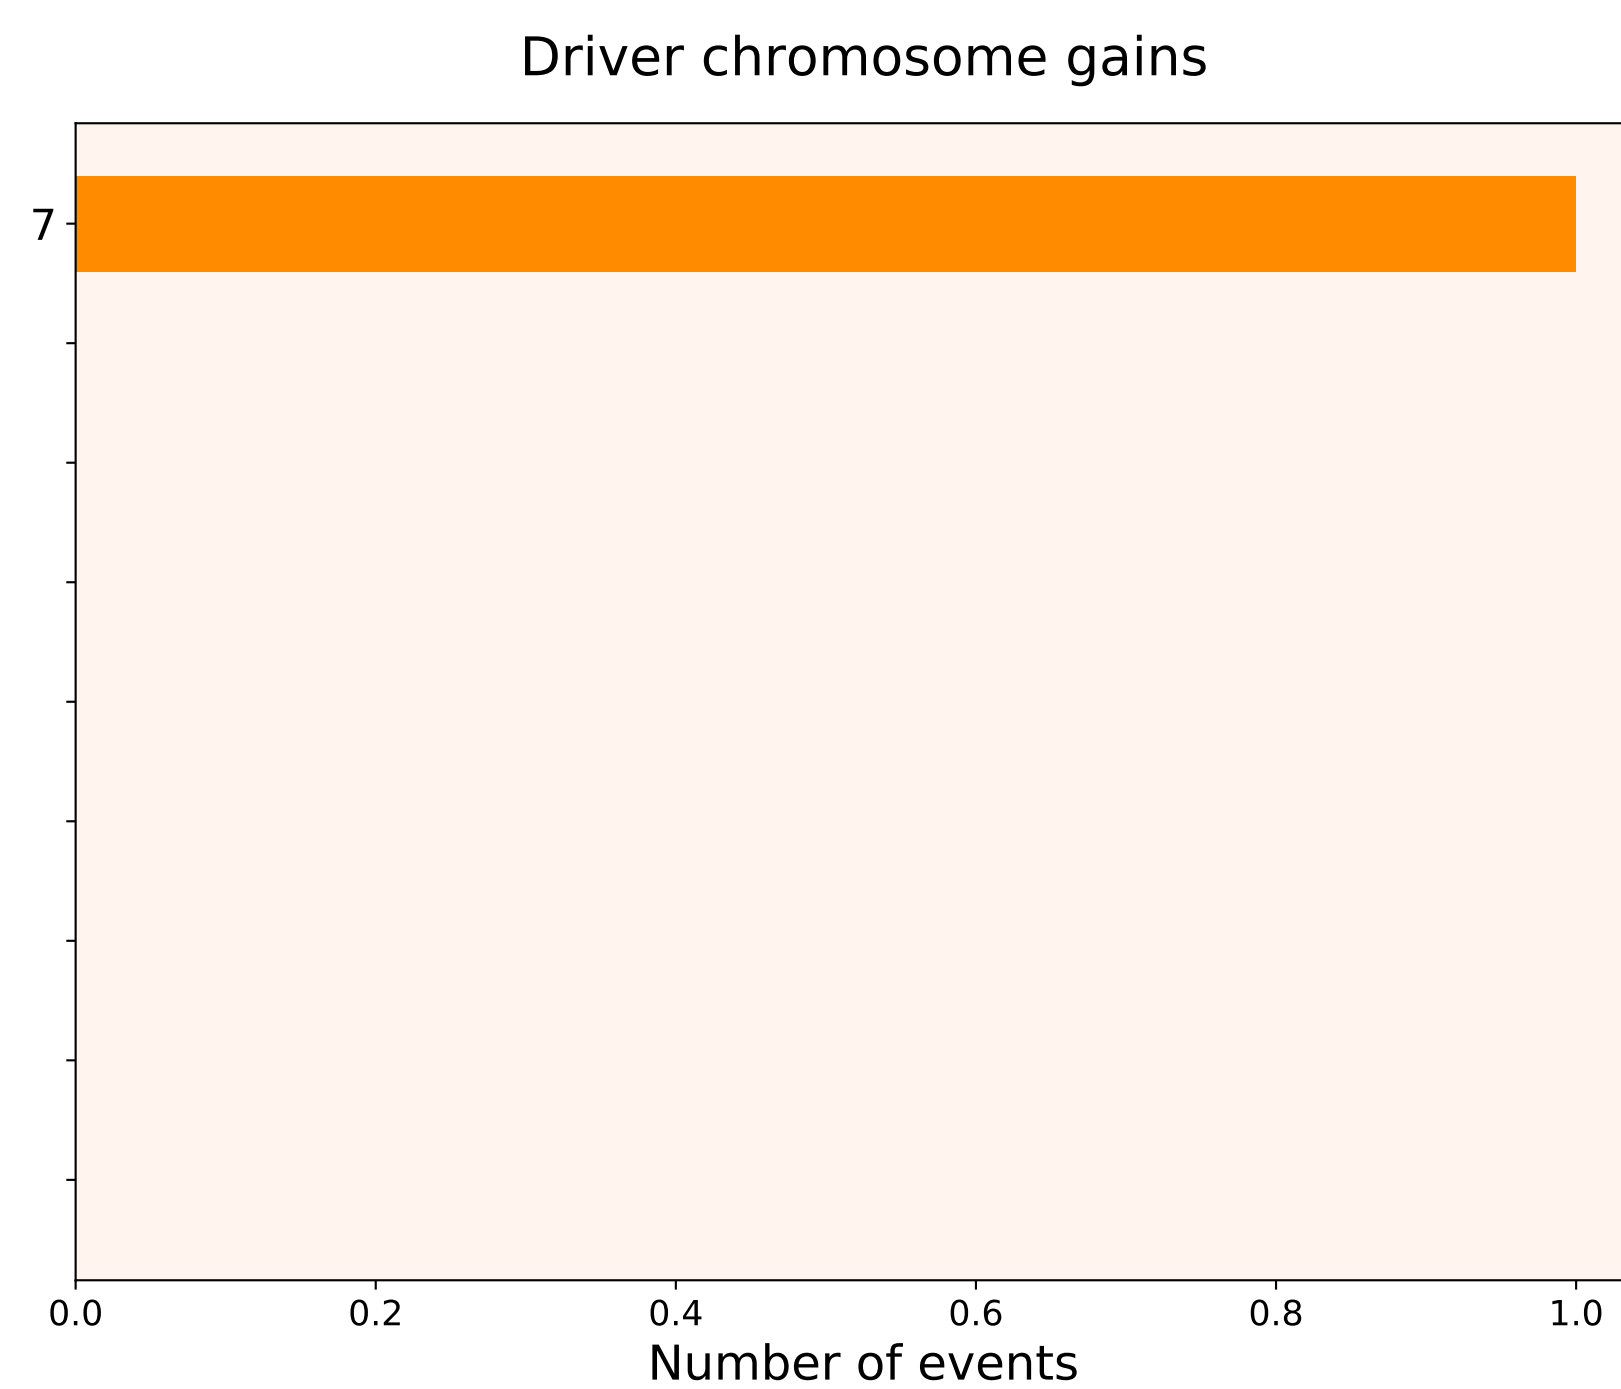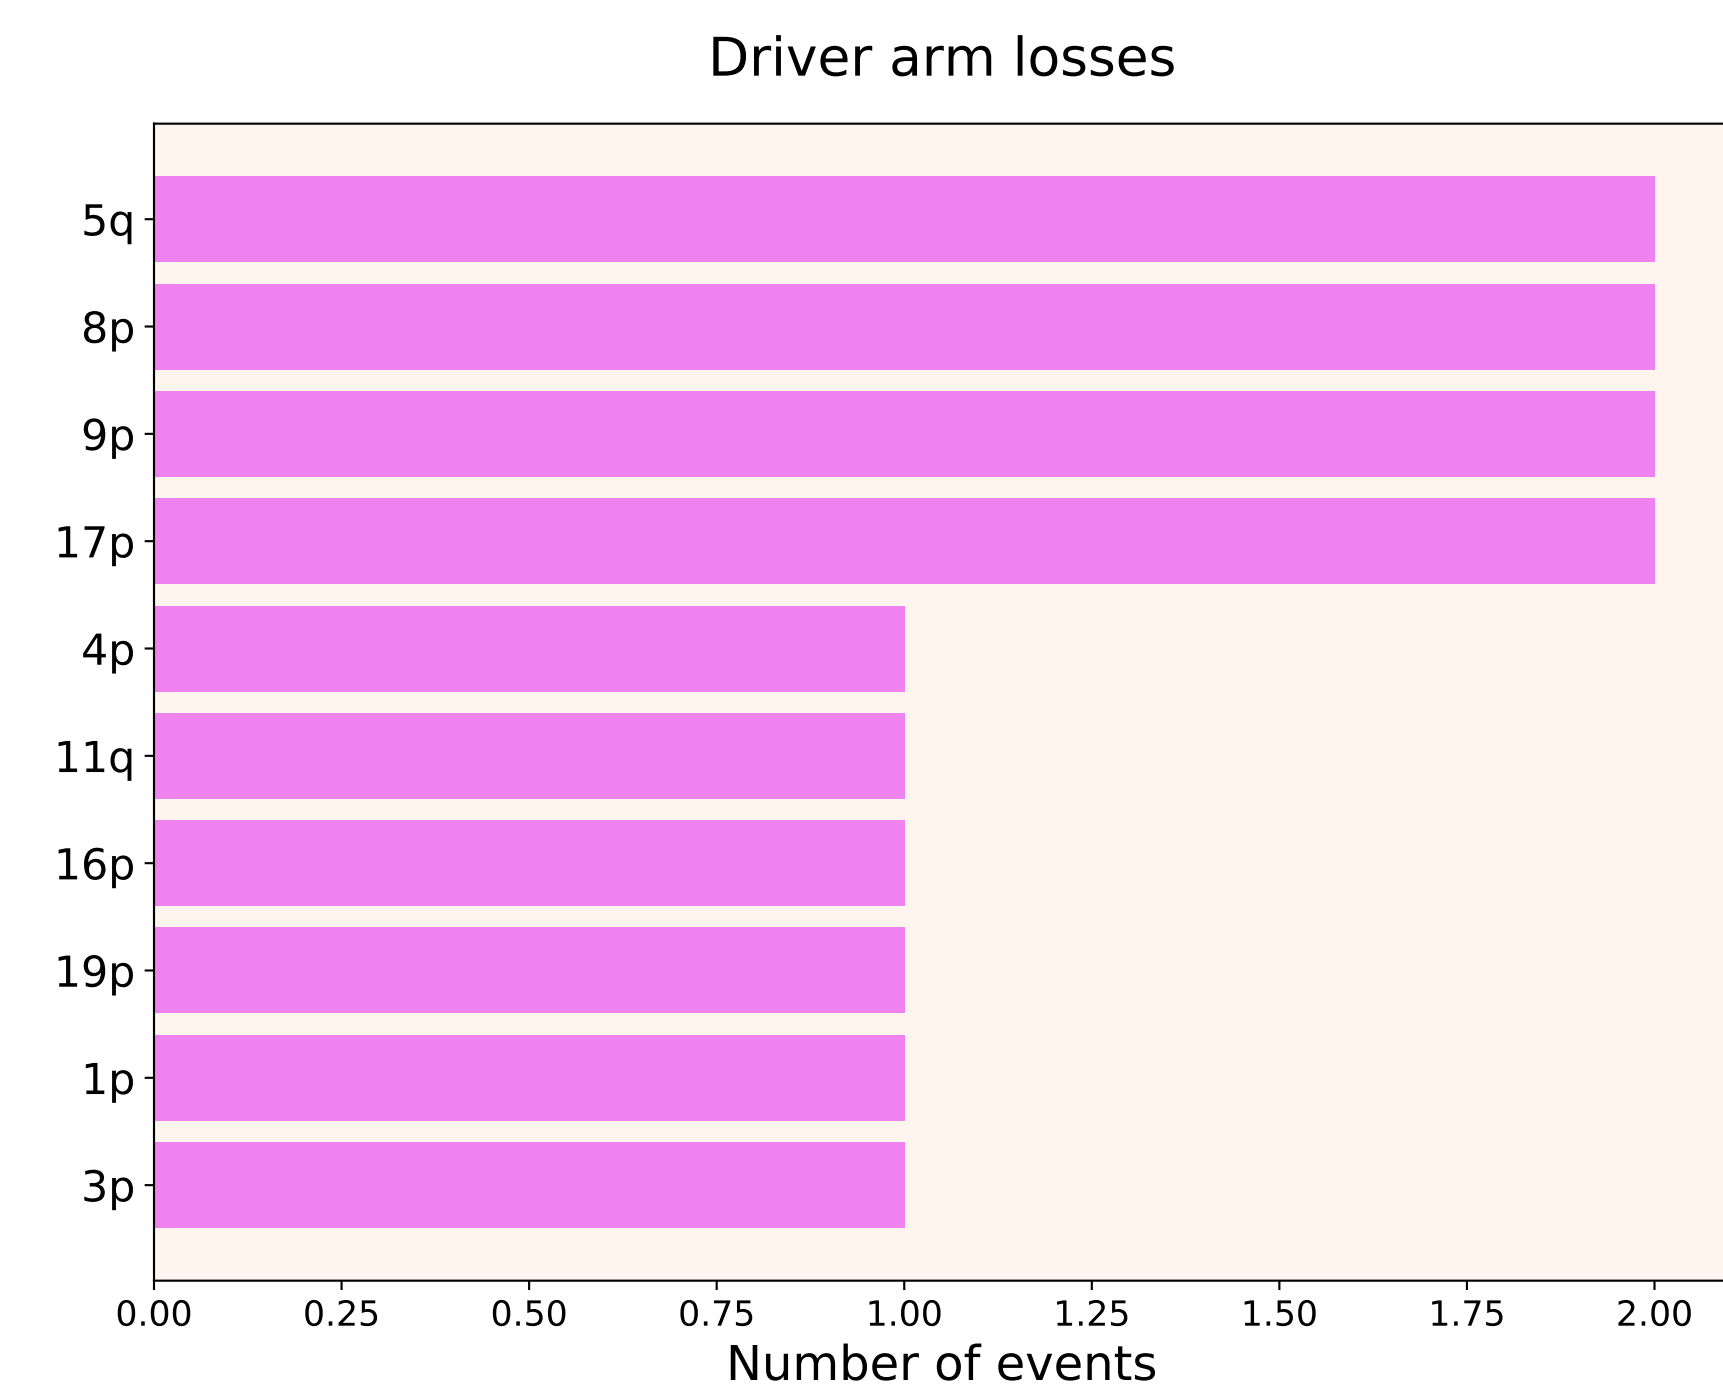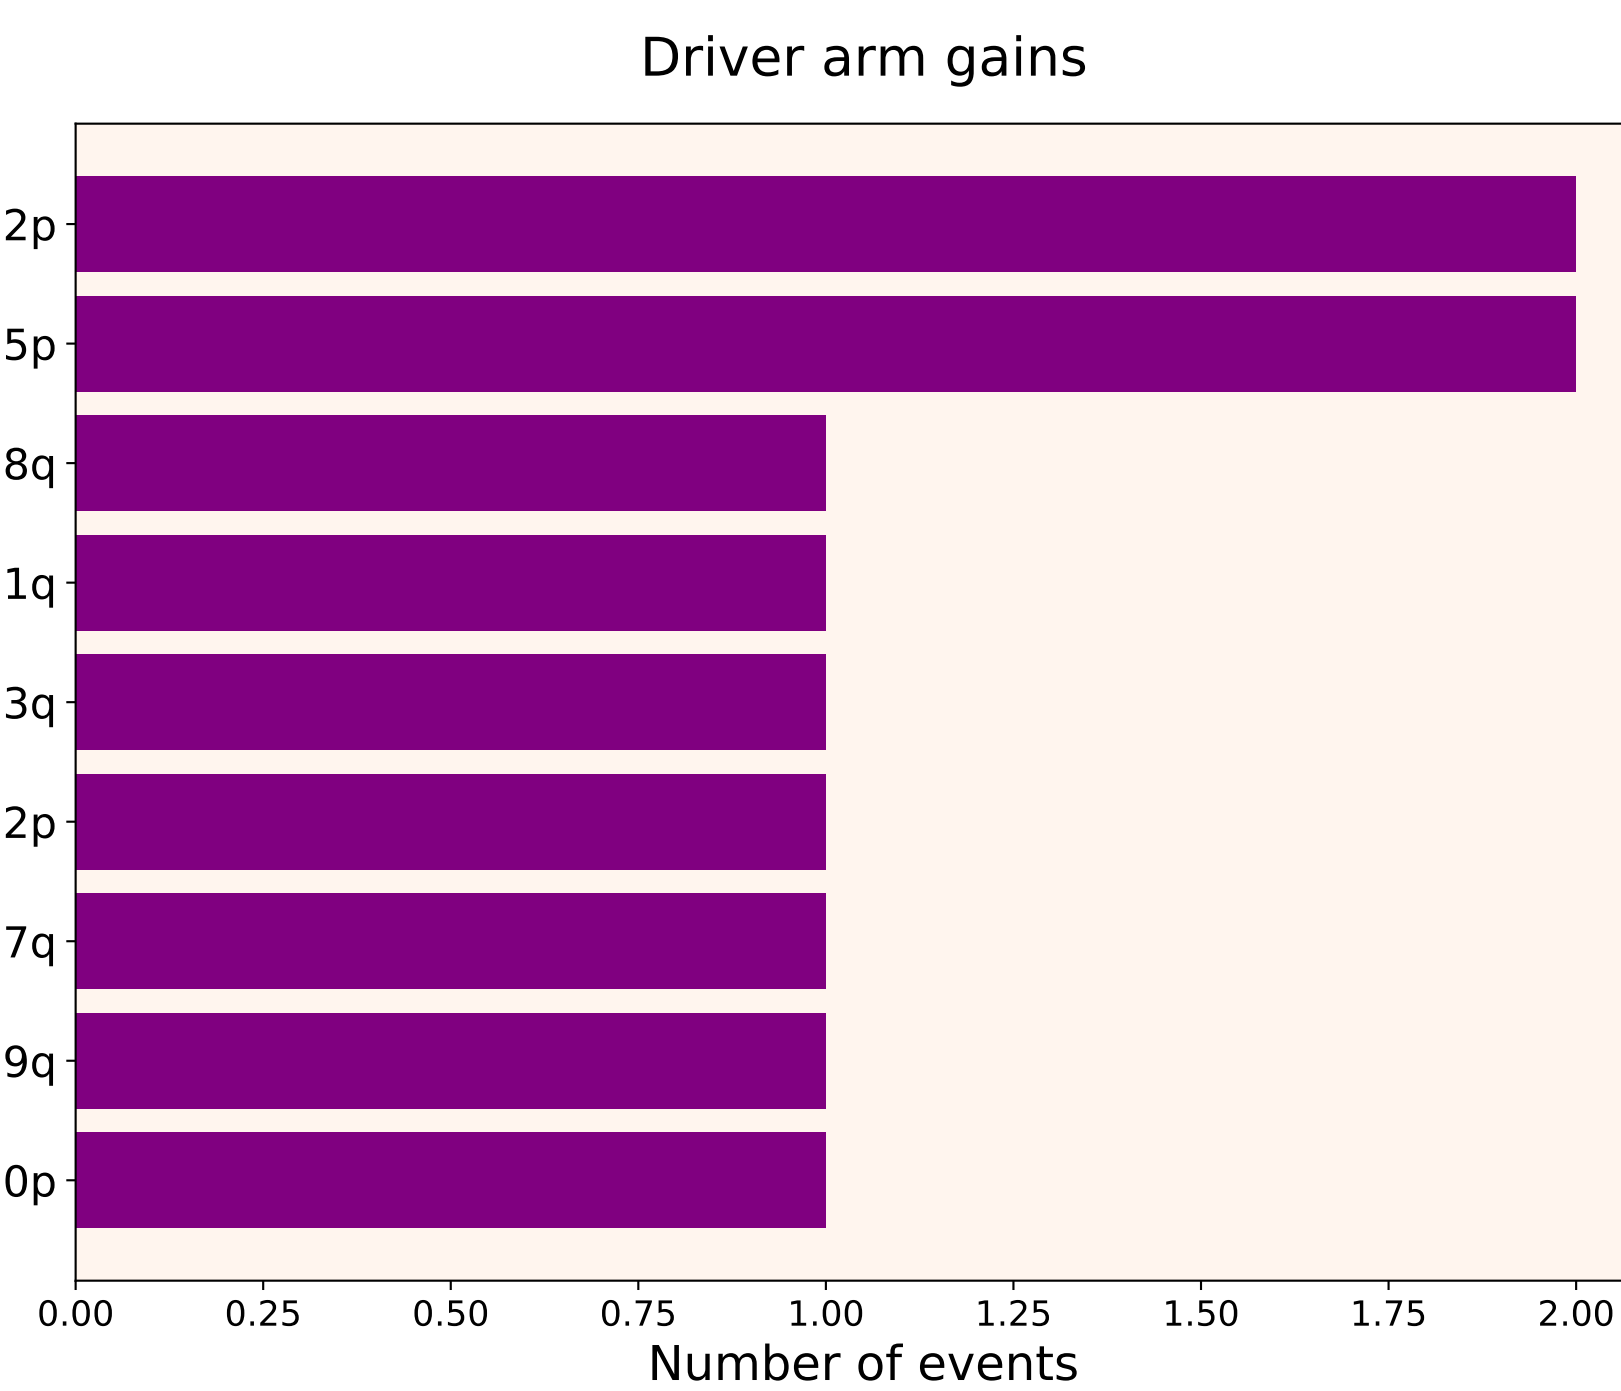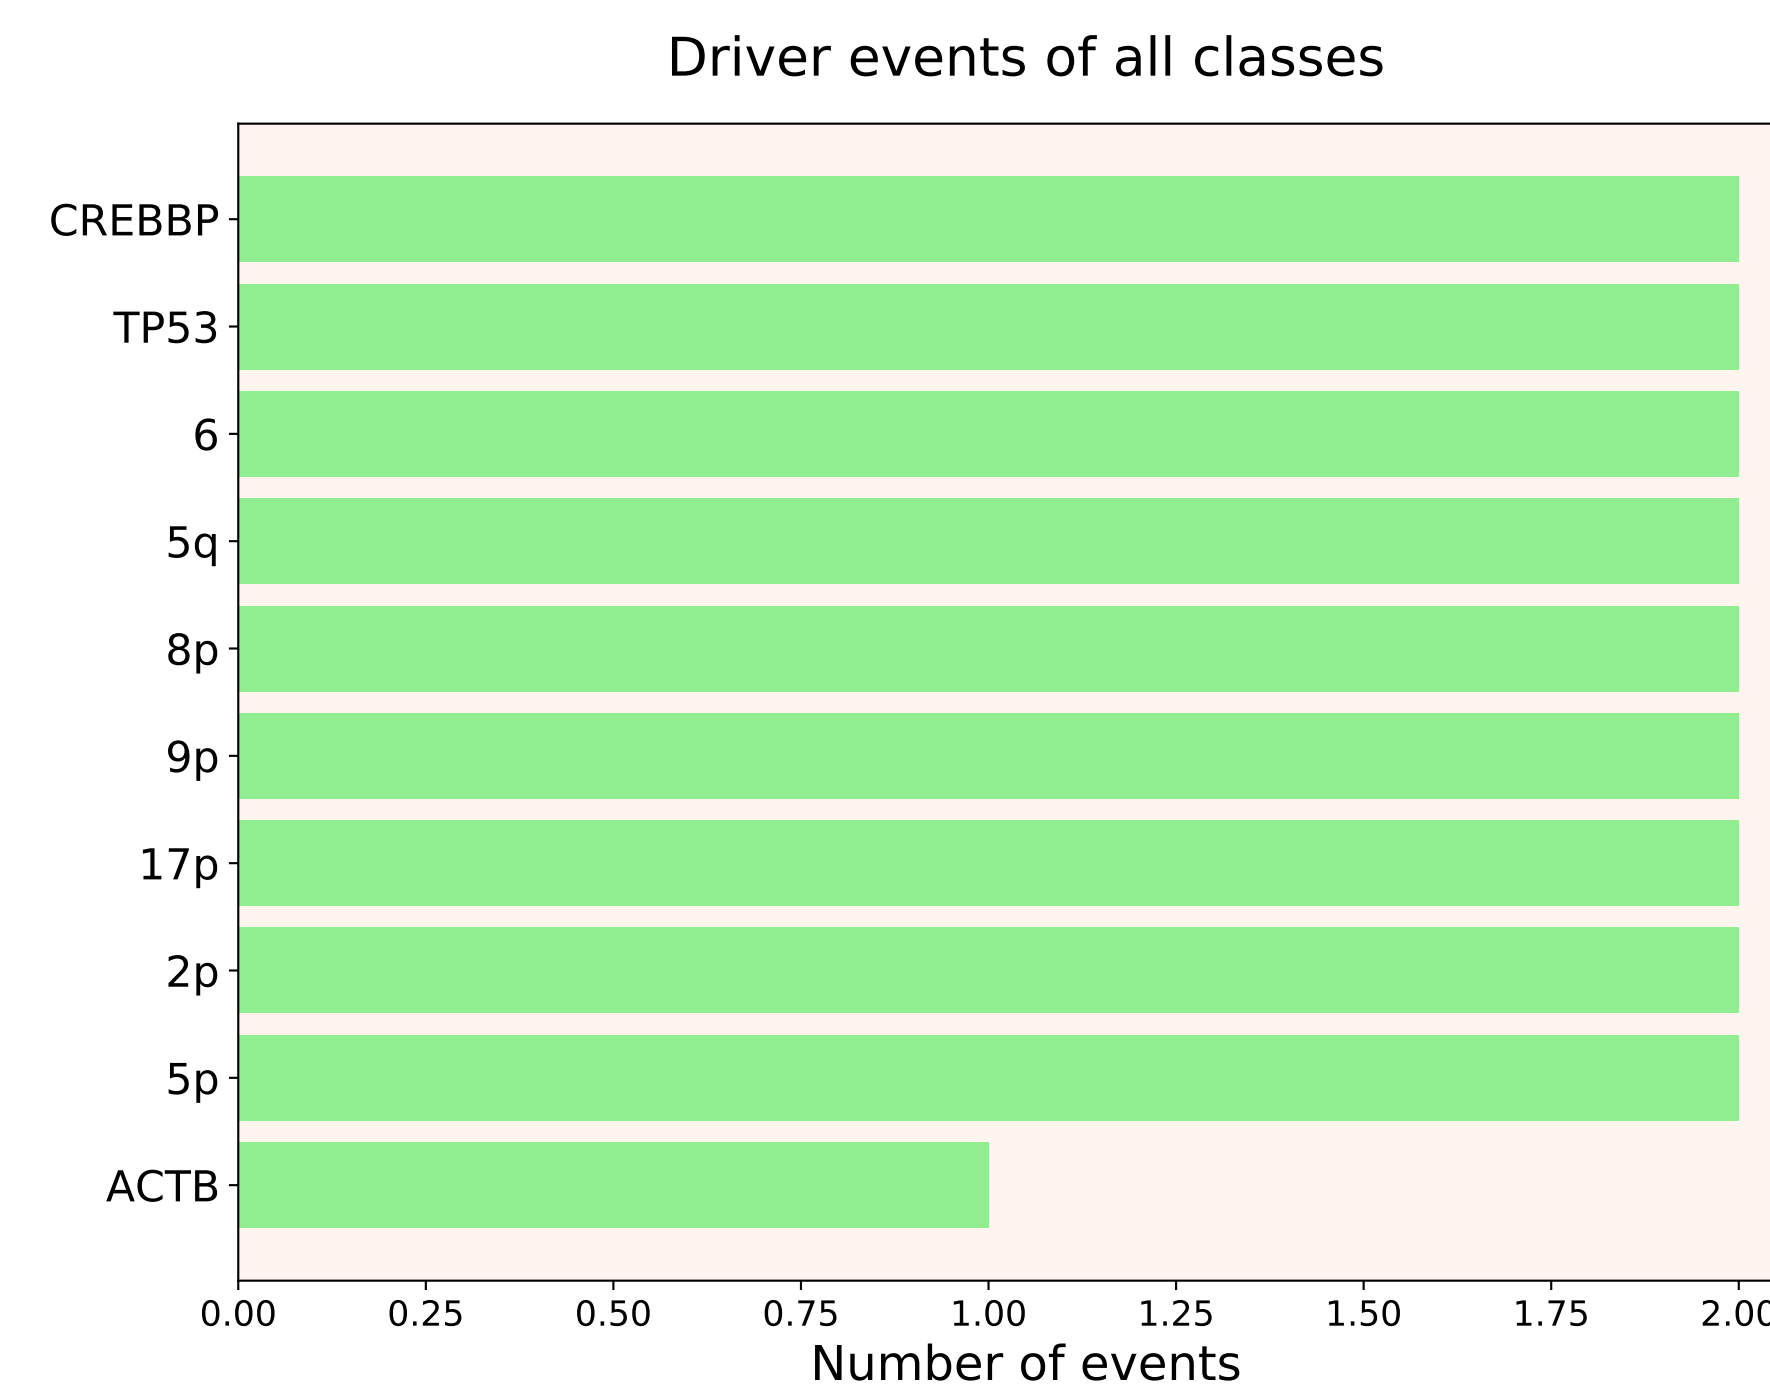

Supplement: Supplemental_Data_S1.zip [file Supplemental_Data_S1.zip]

# HNSC

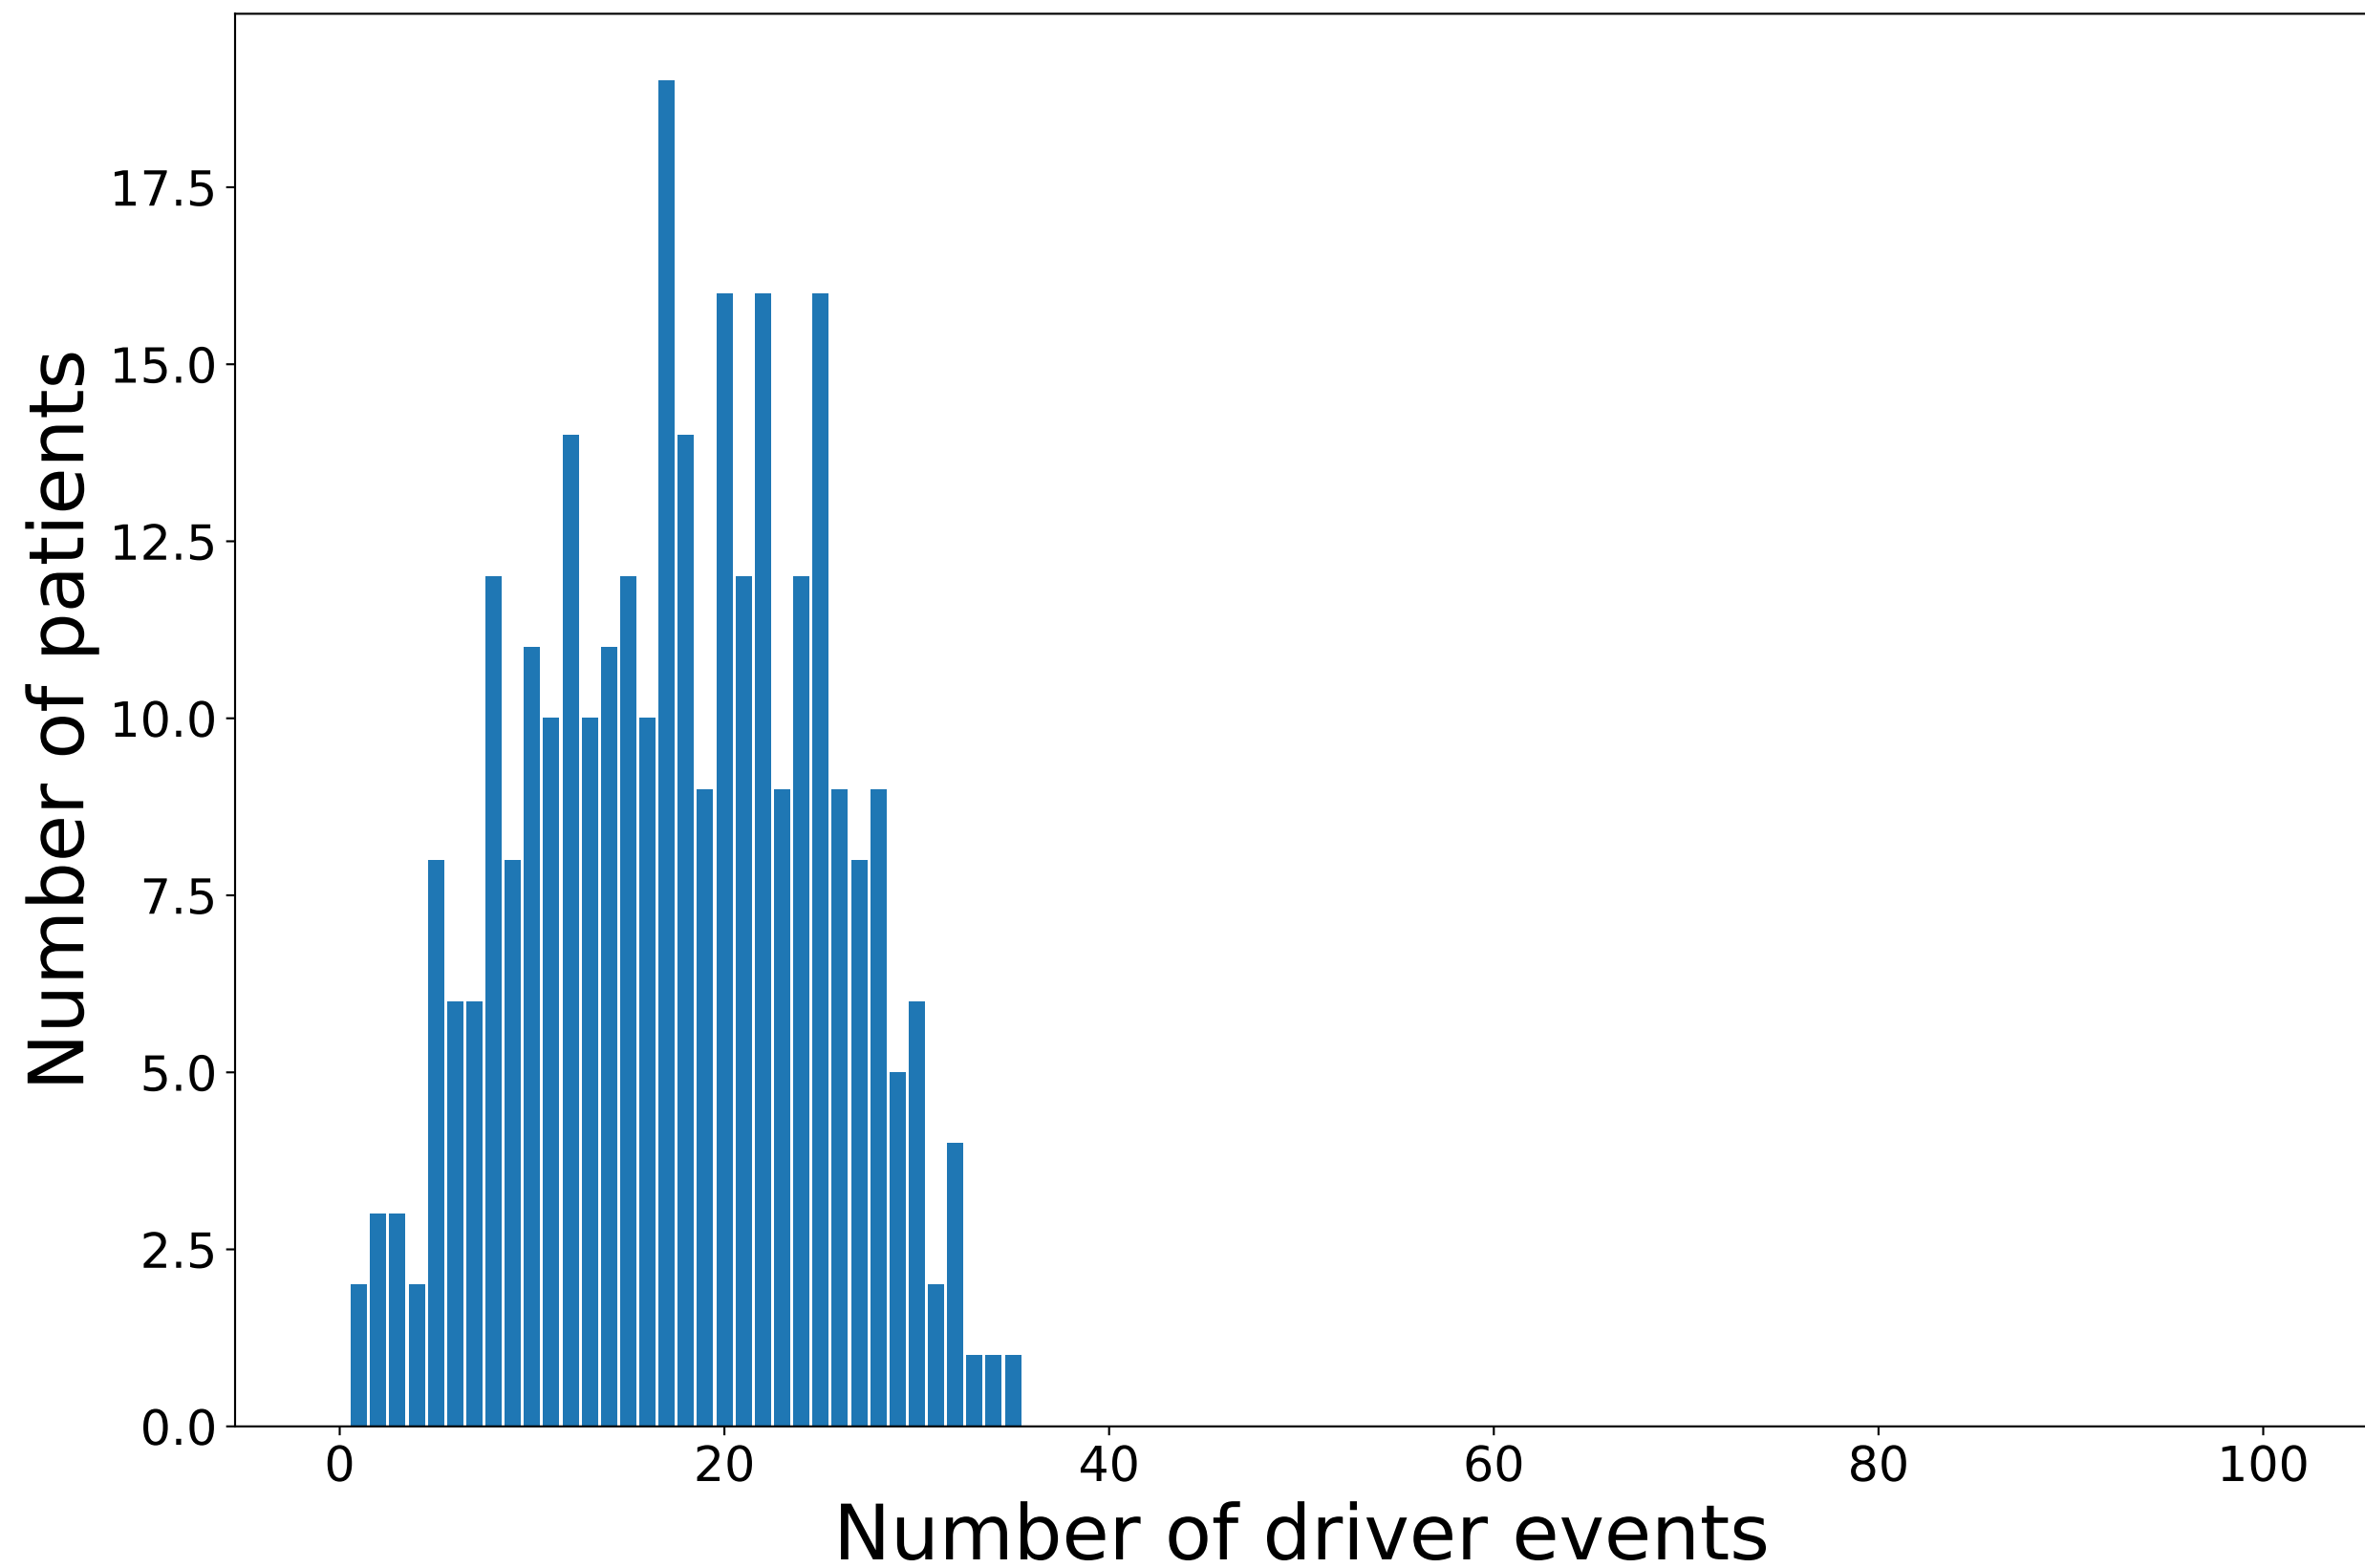

Supplement: Supplemental_Data_S1.zip [file Supplemental_Data_S1.zip]

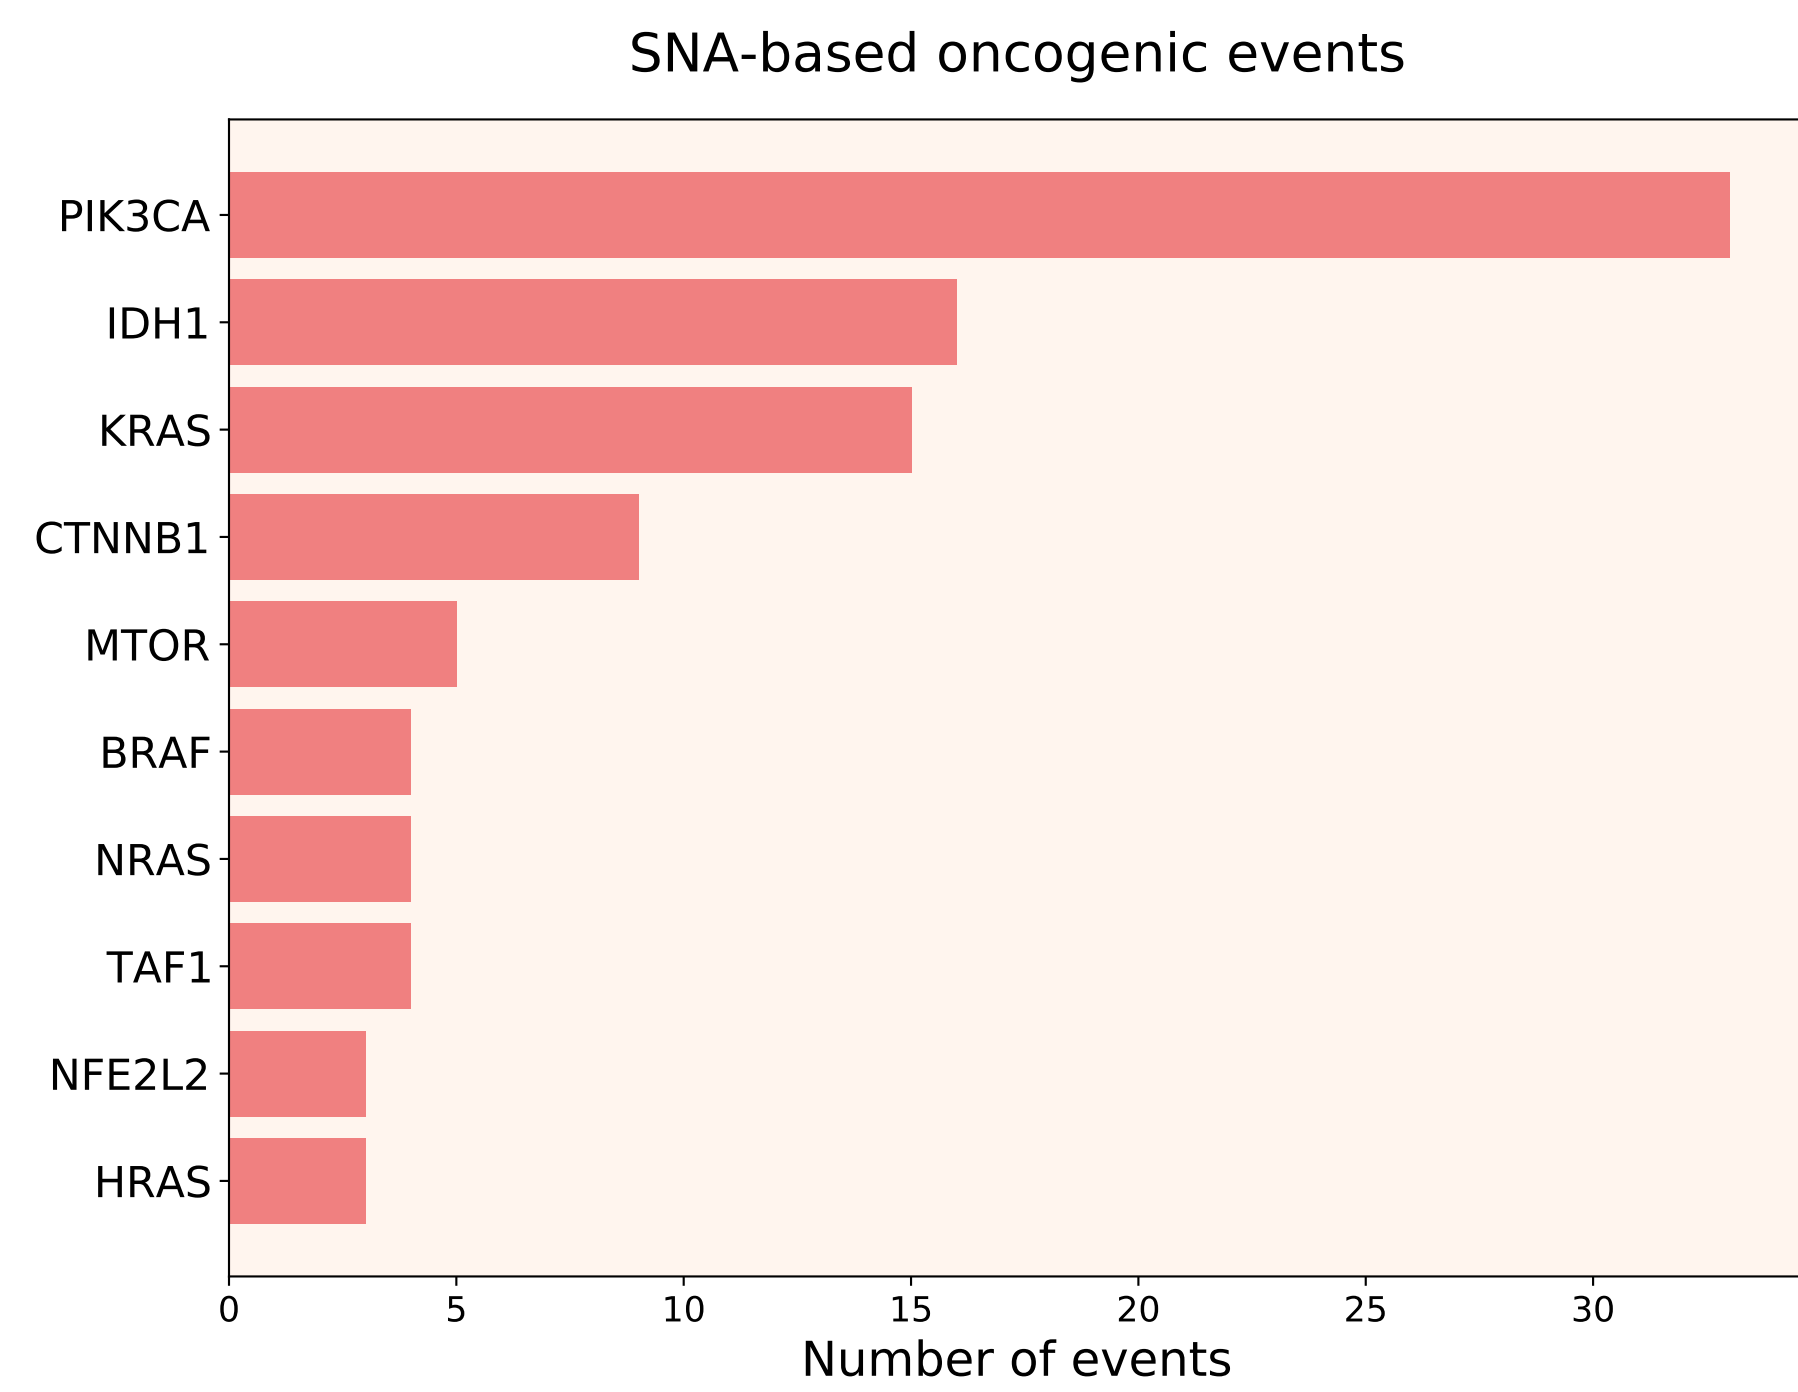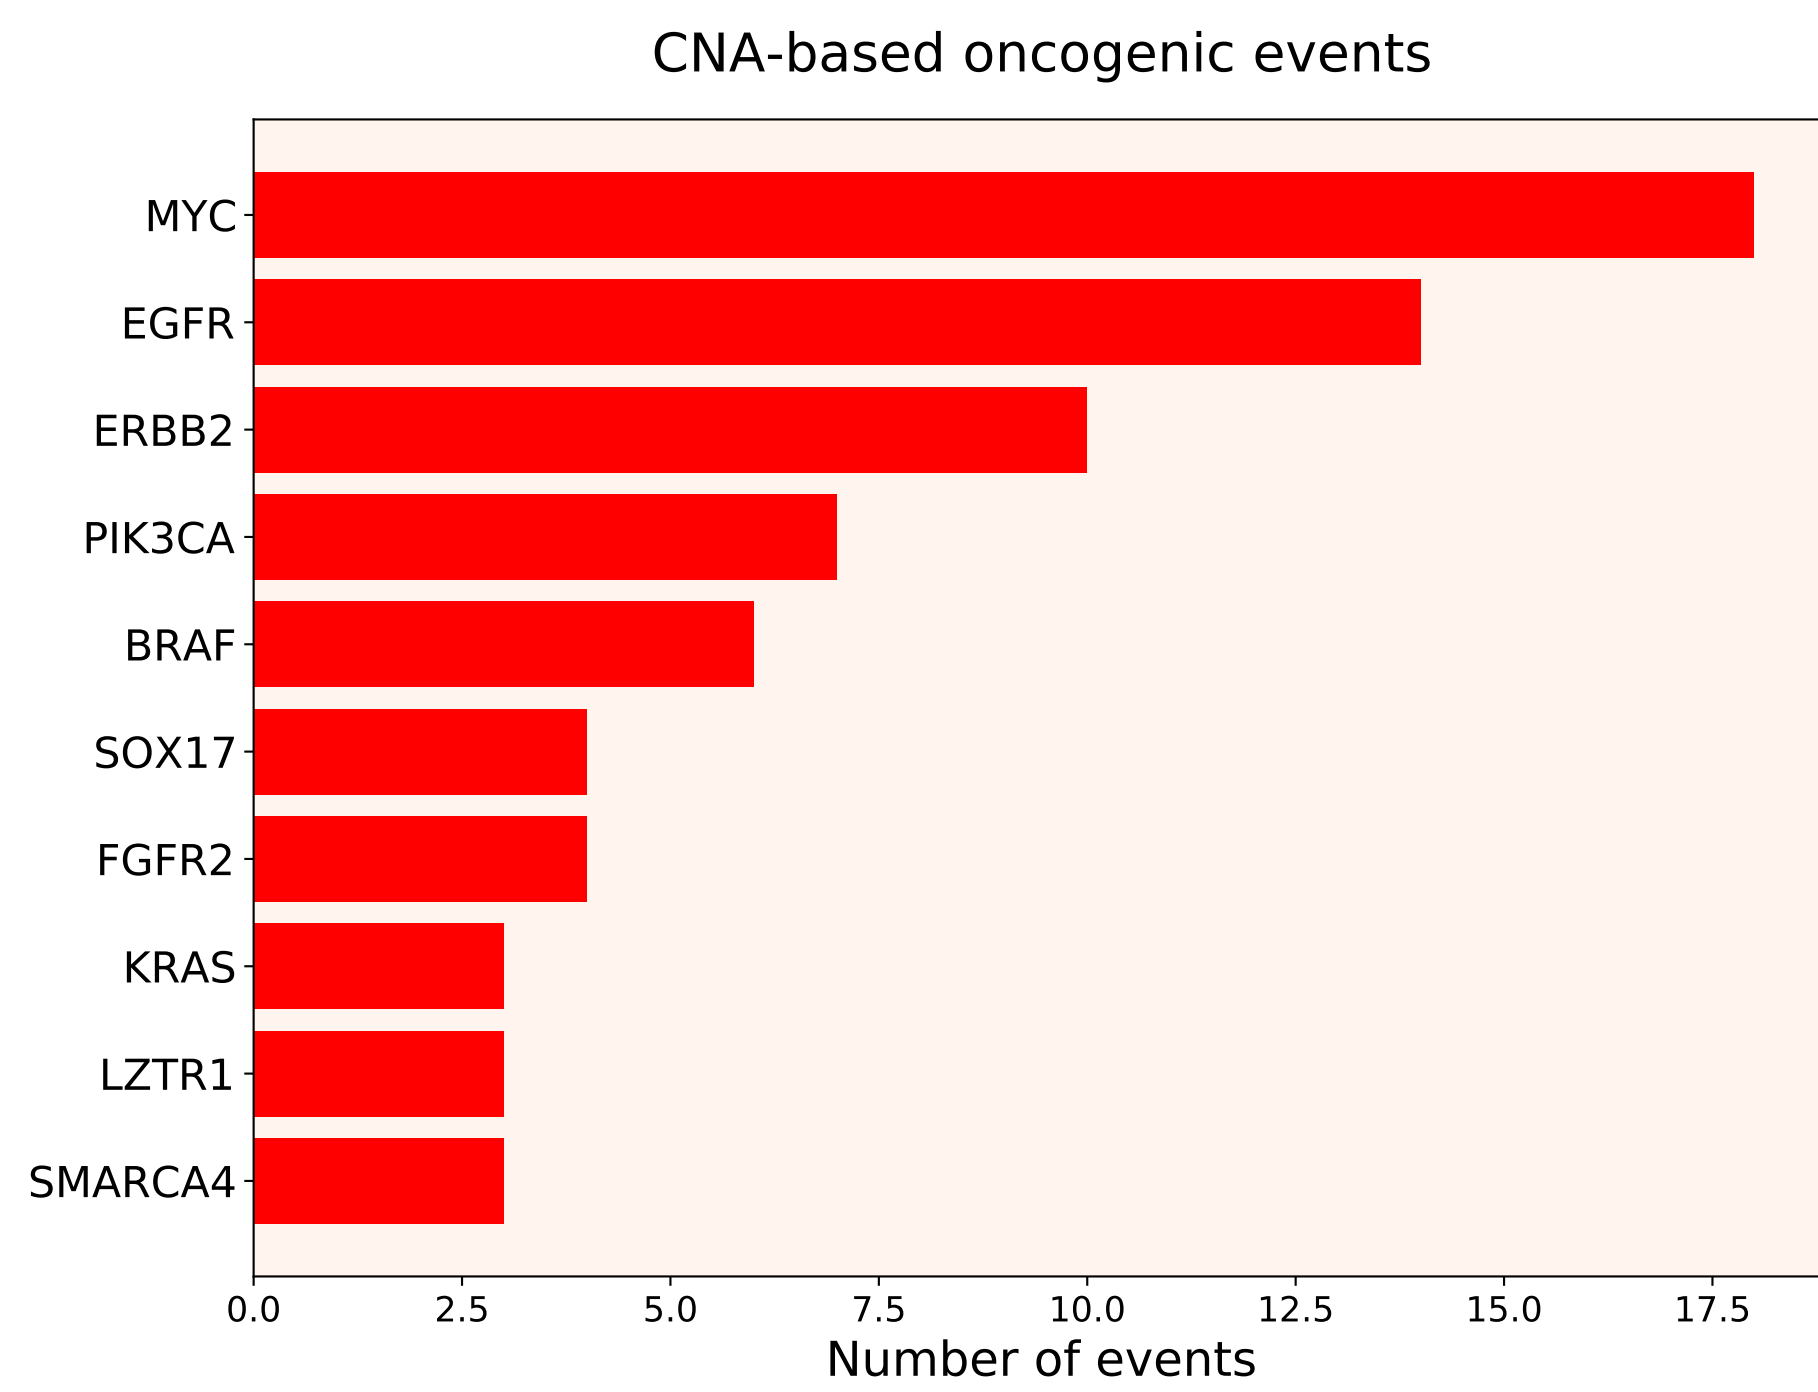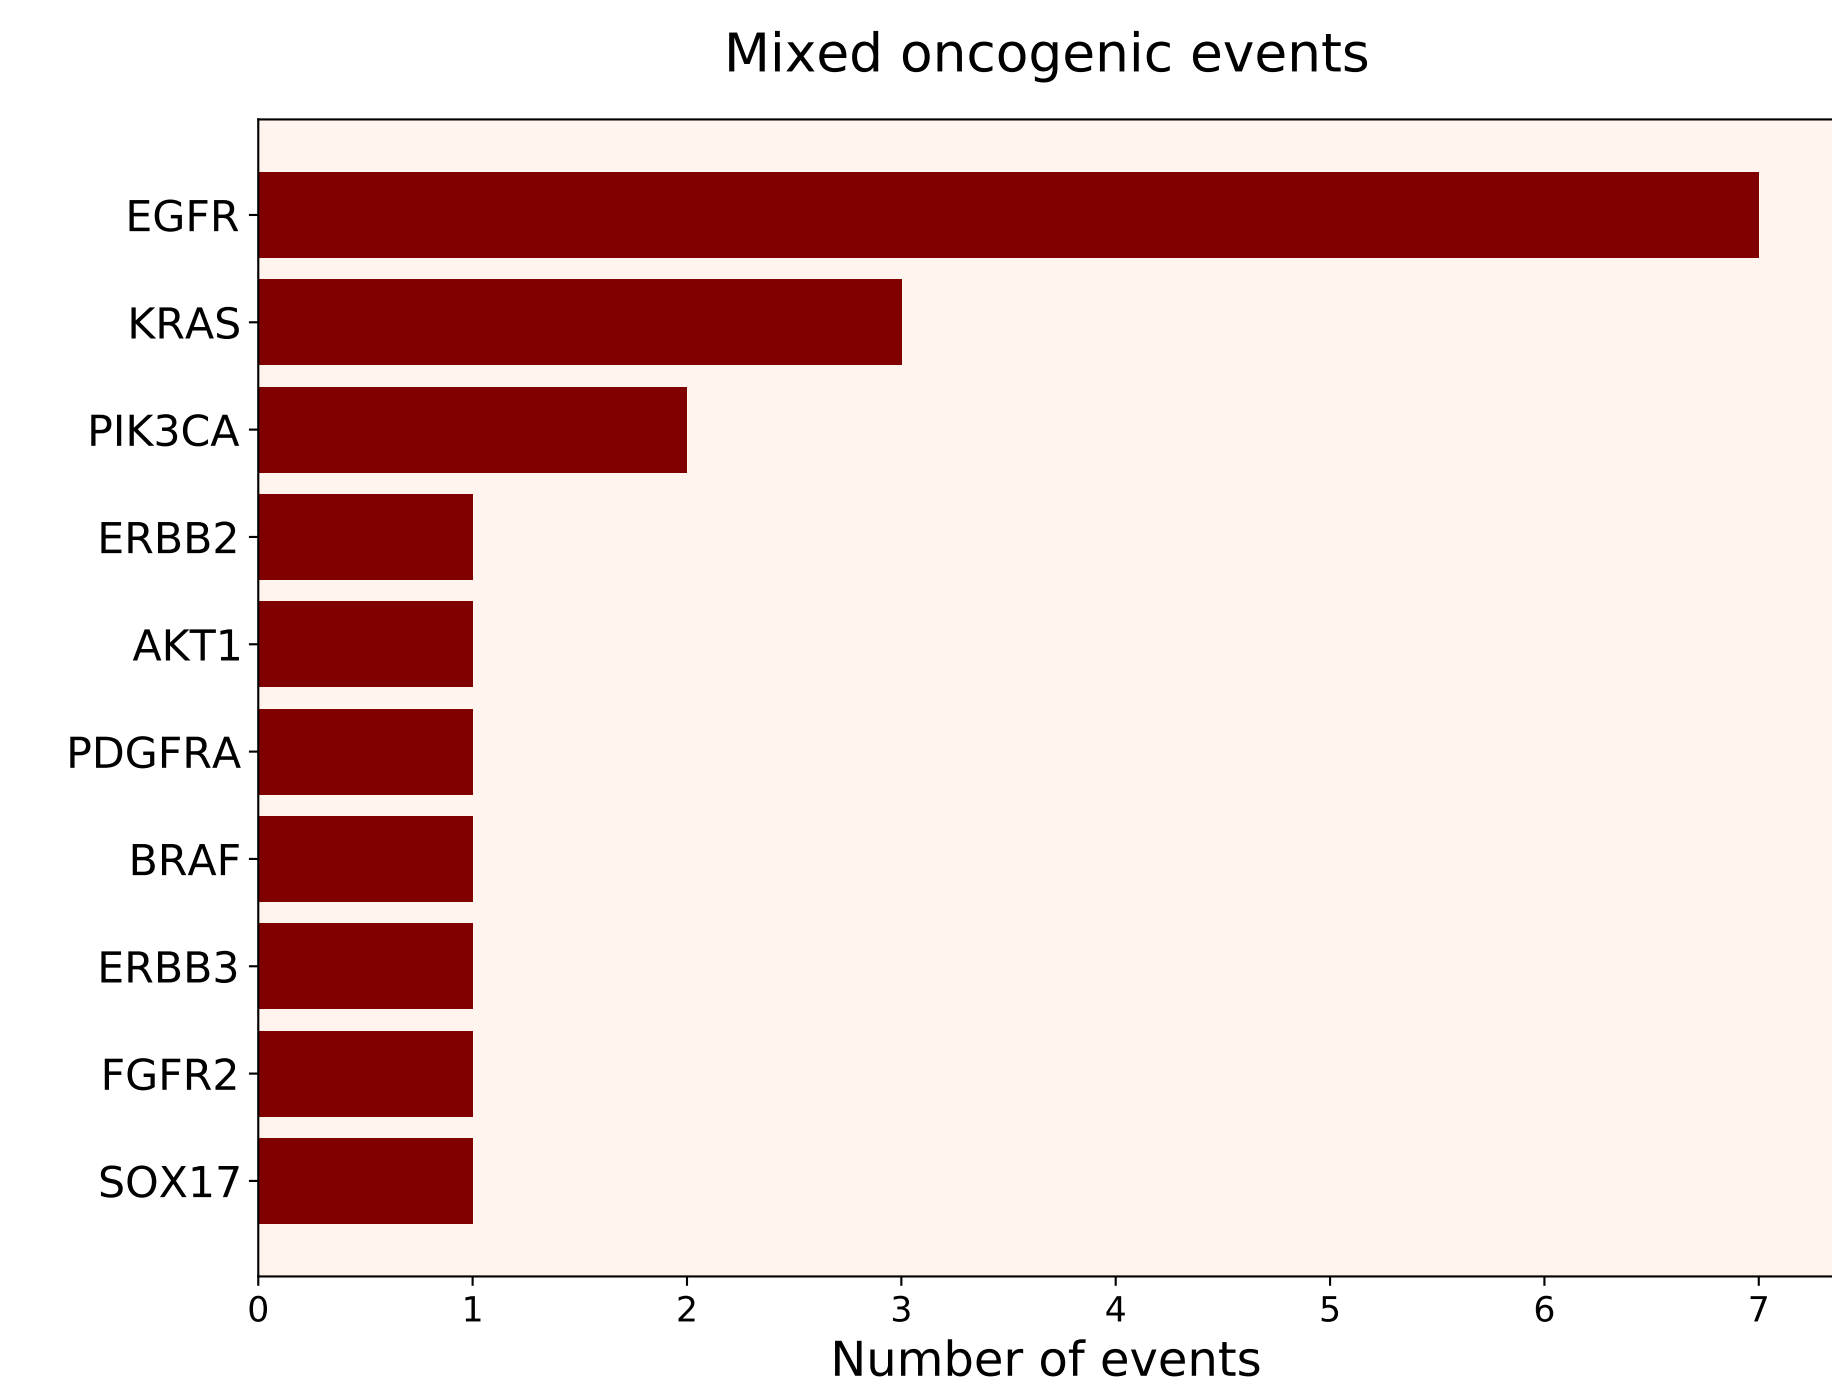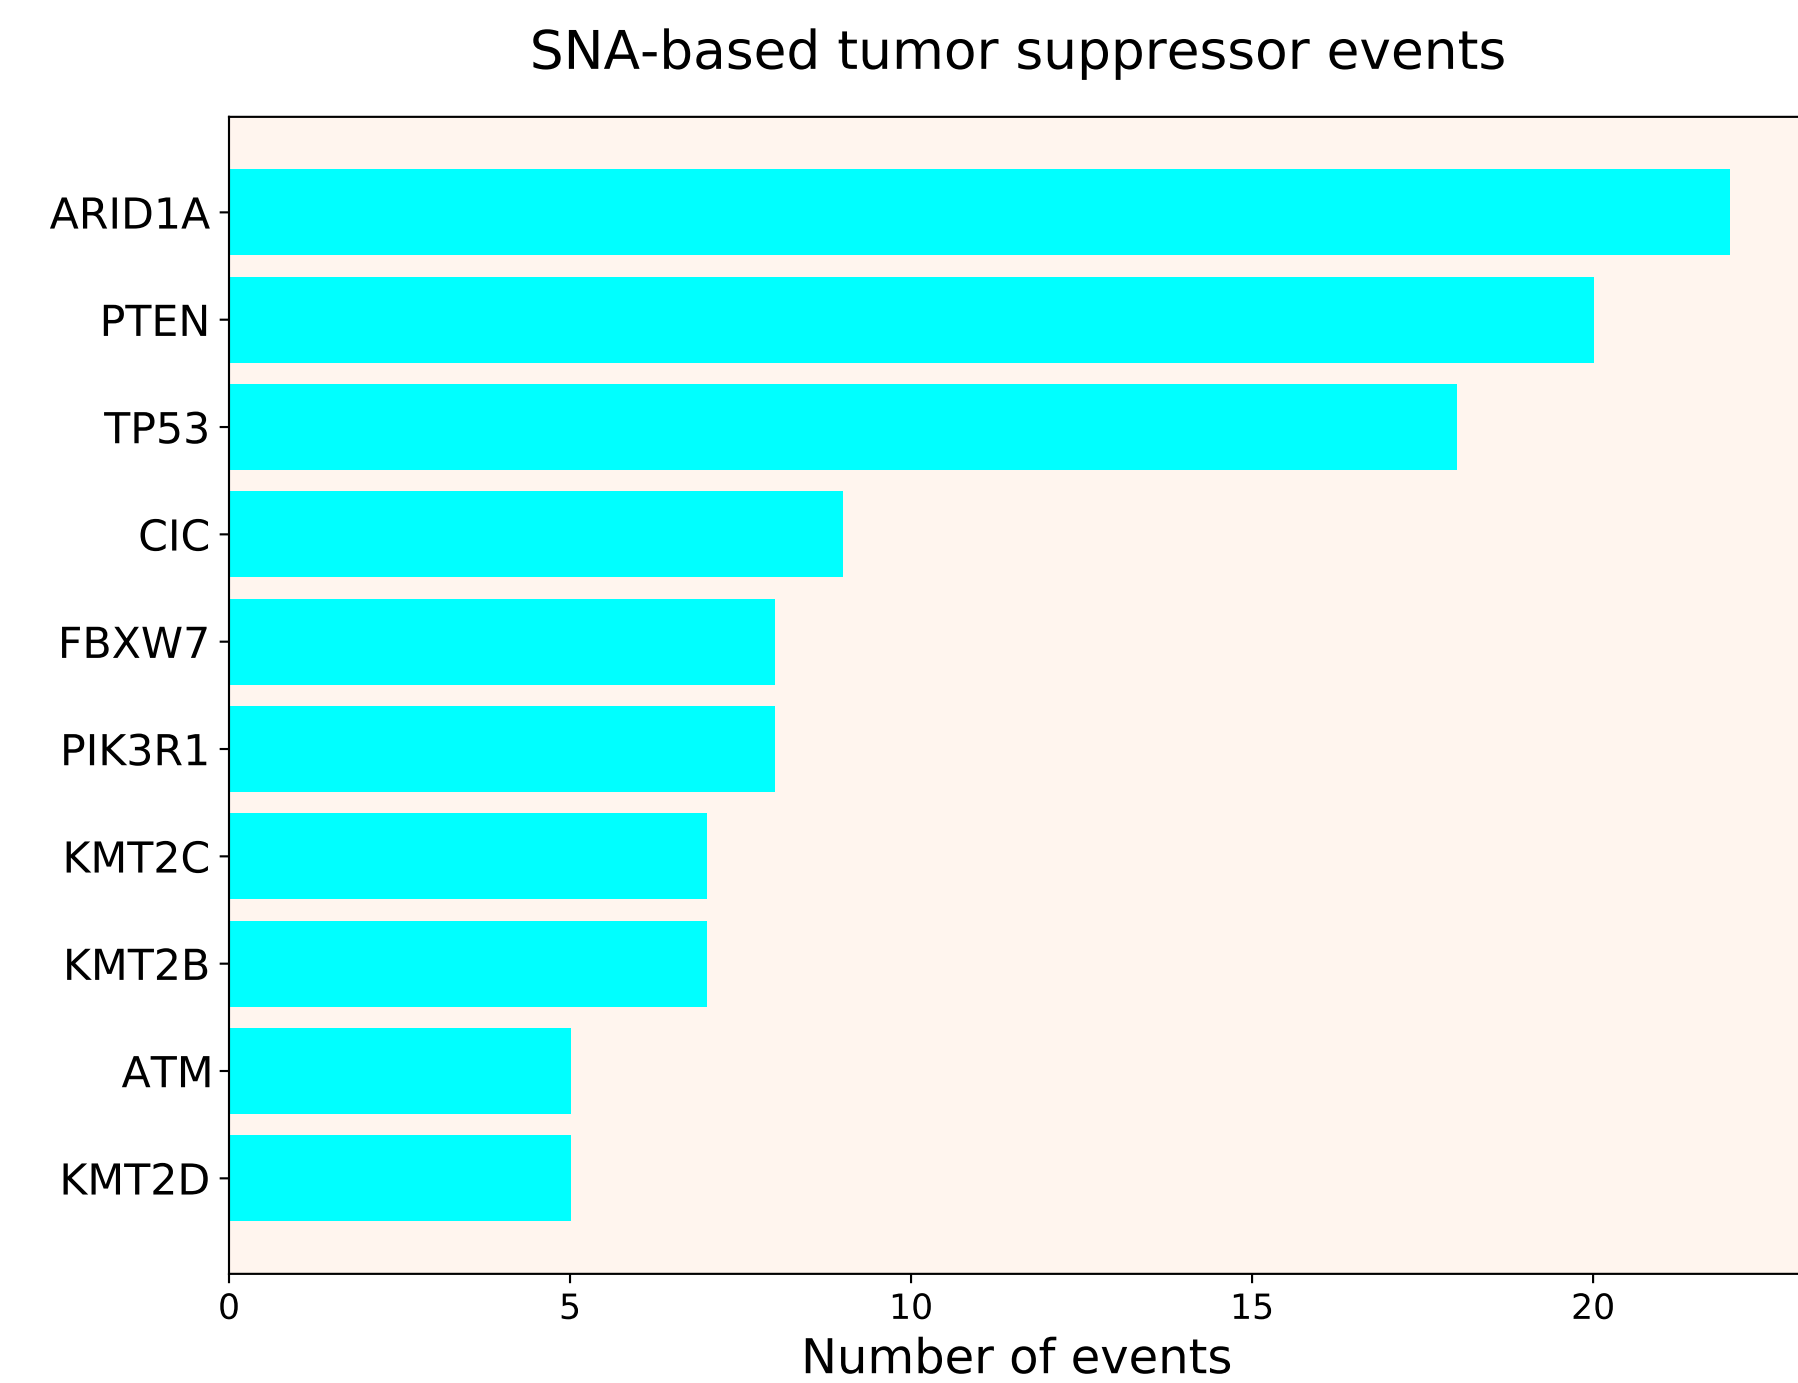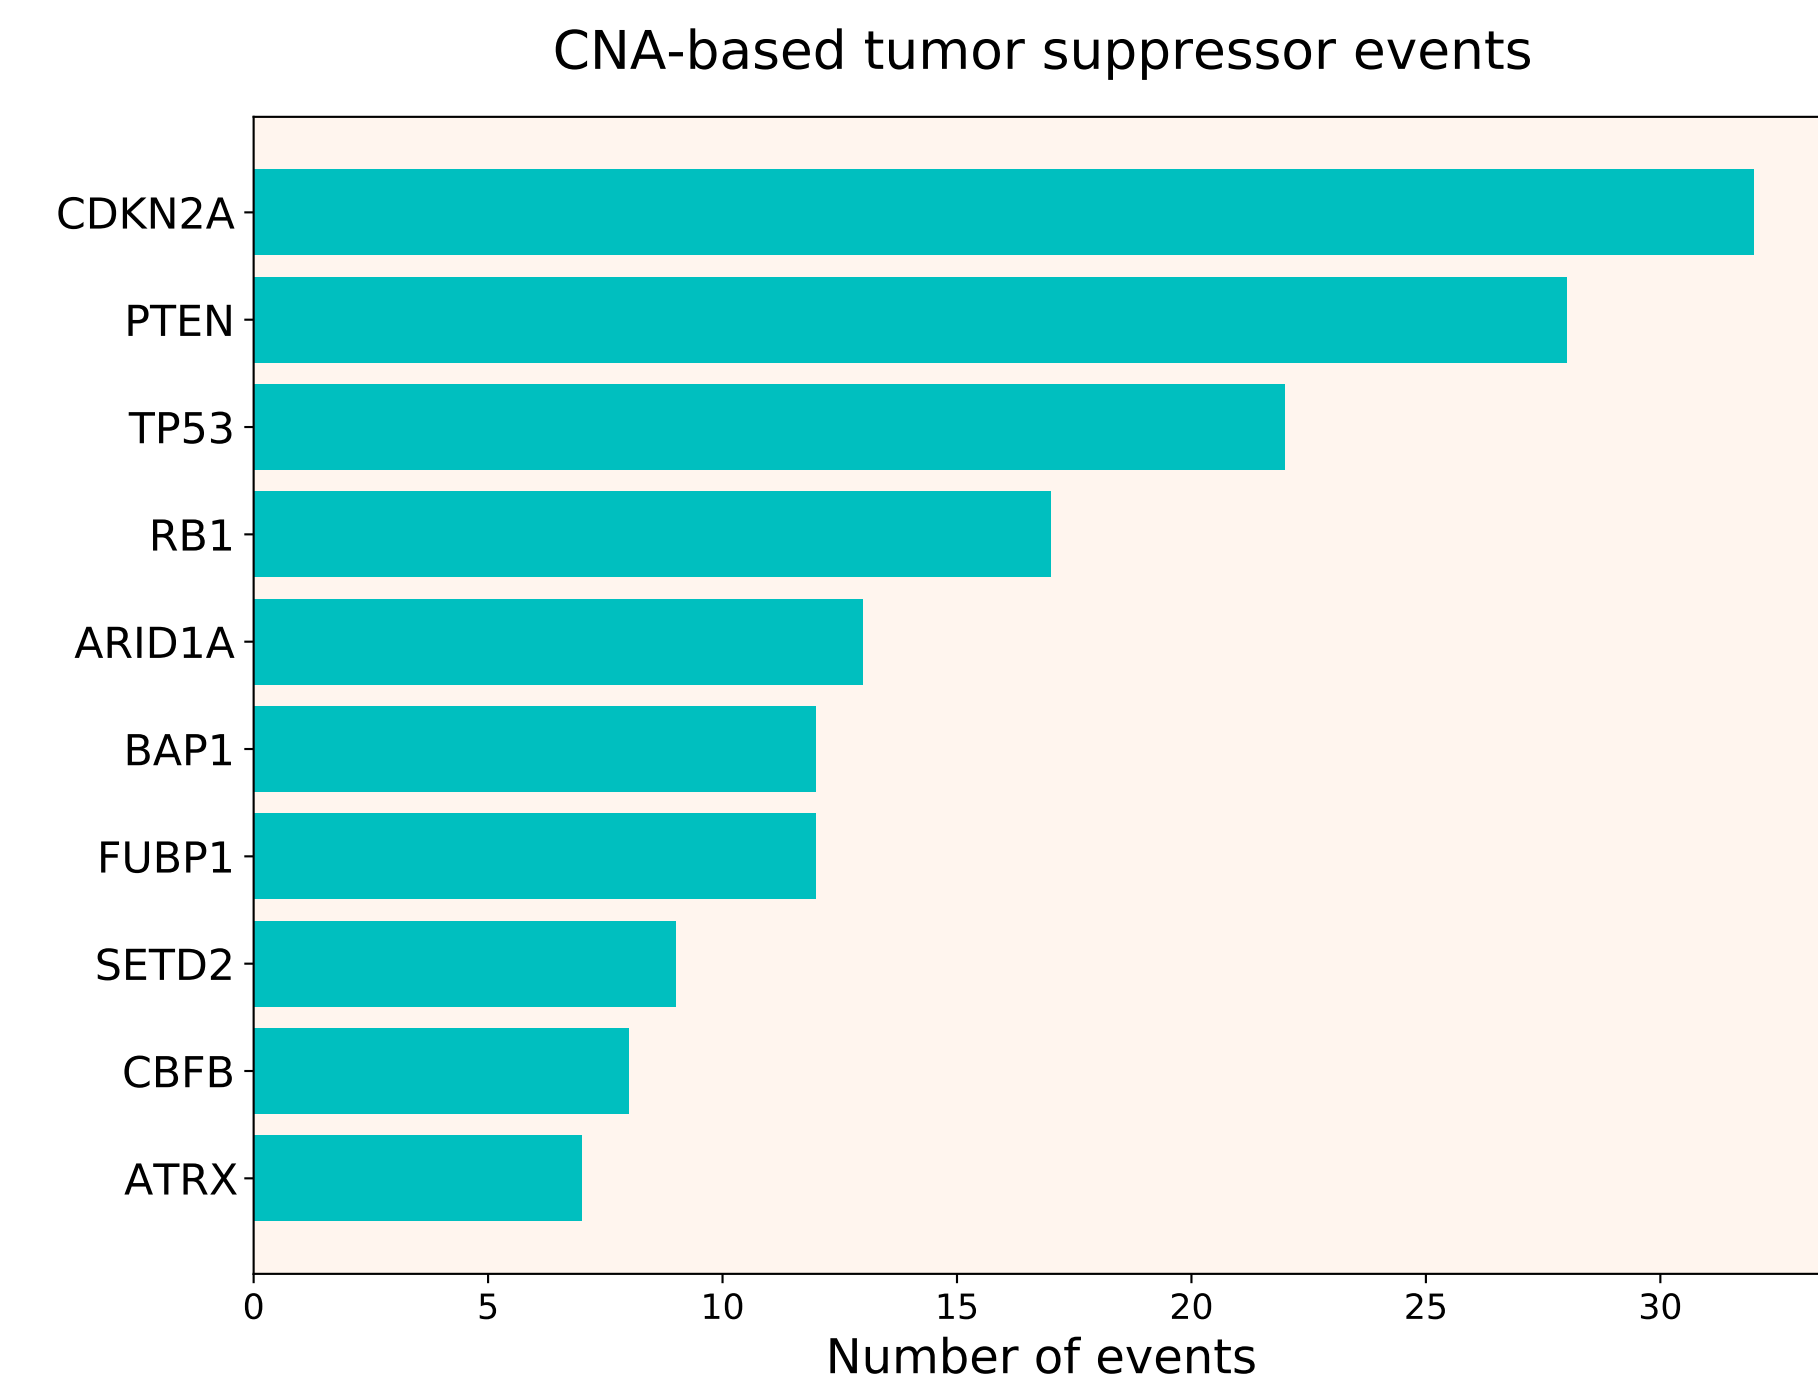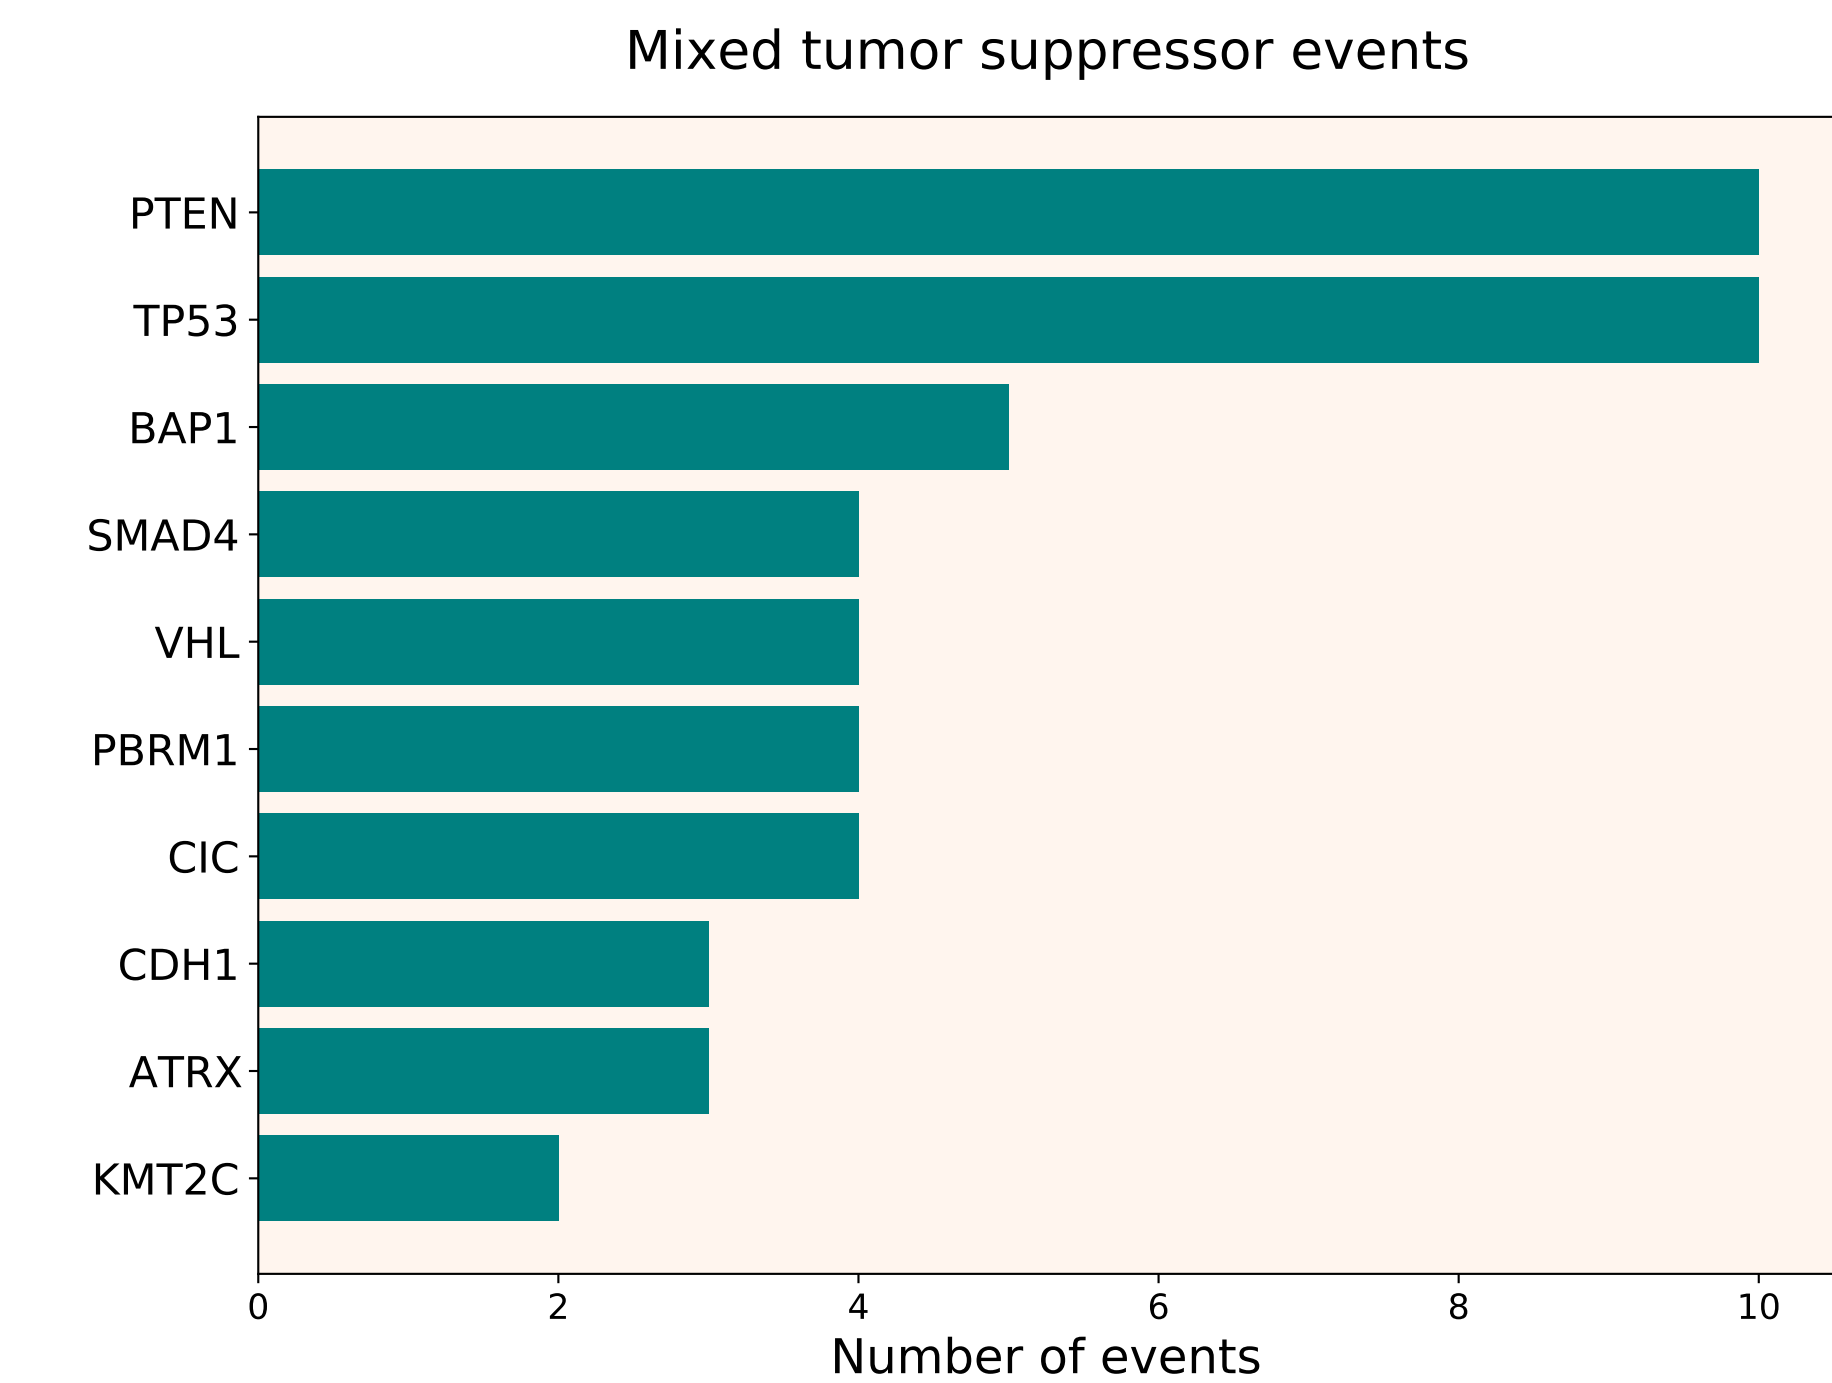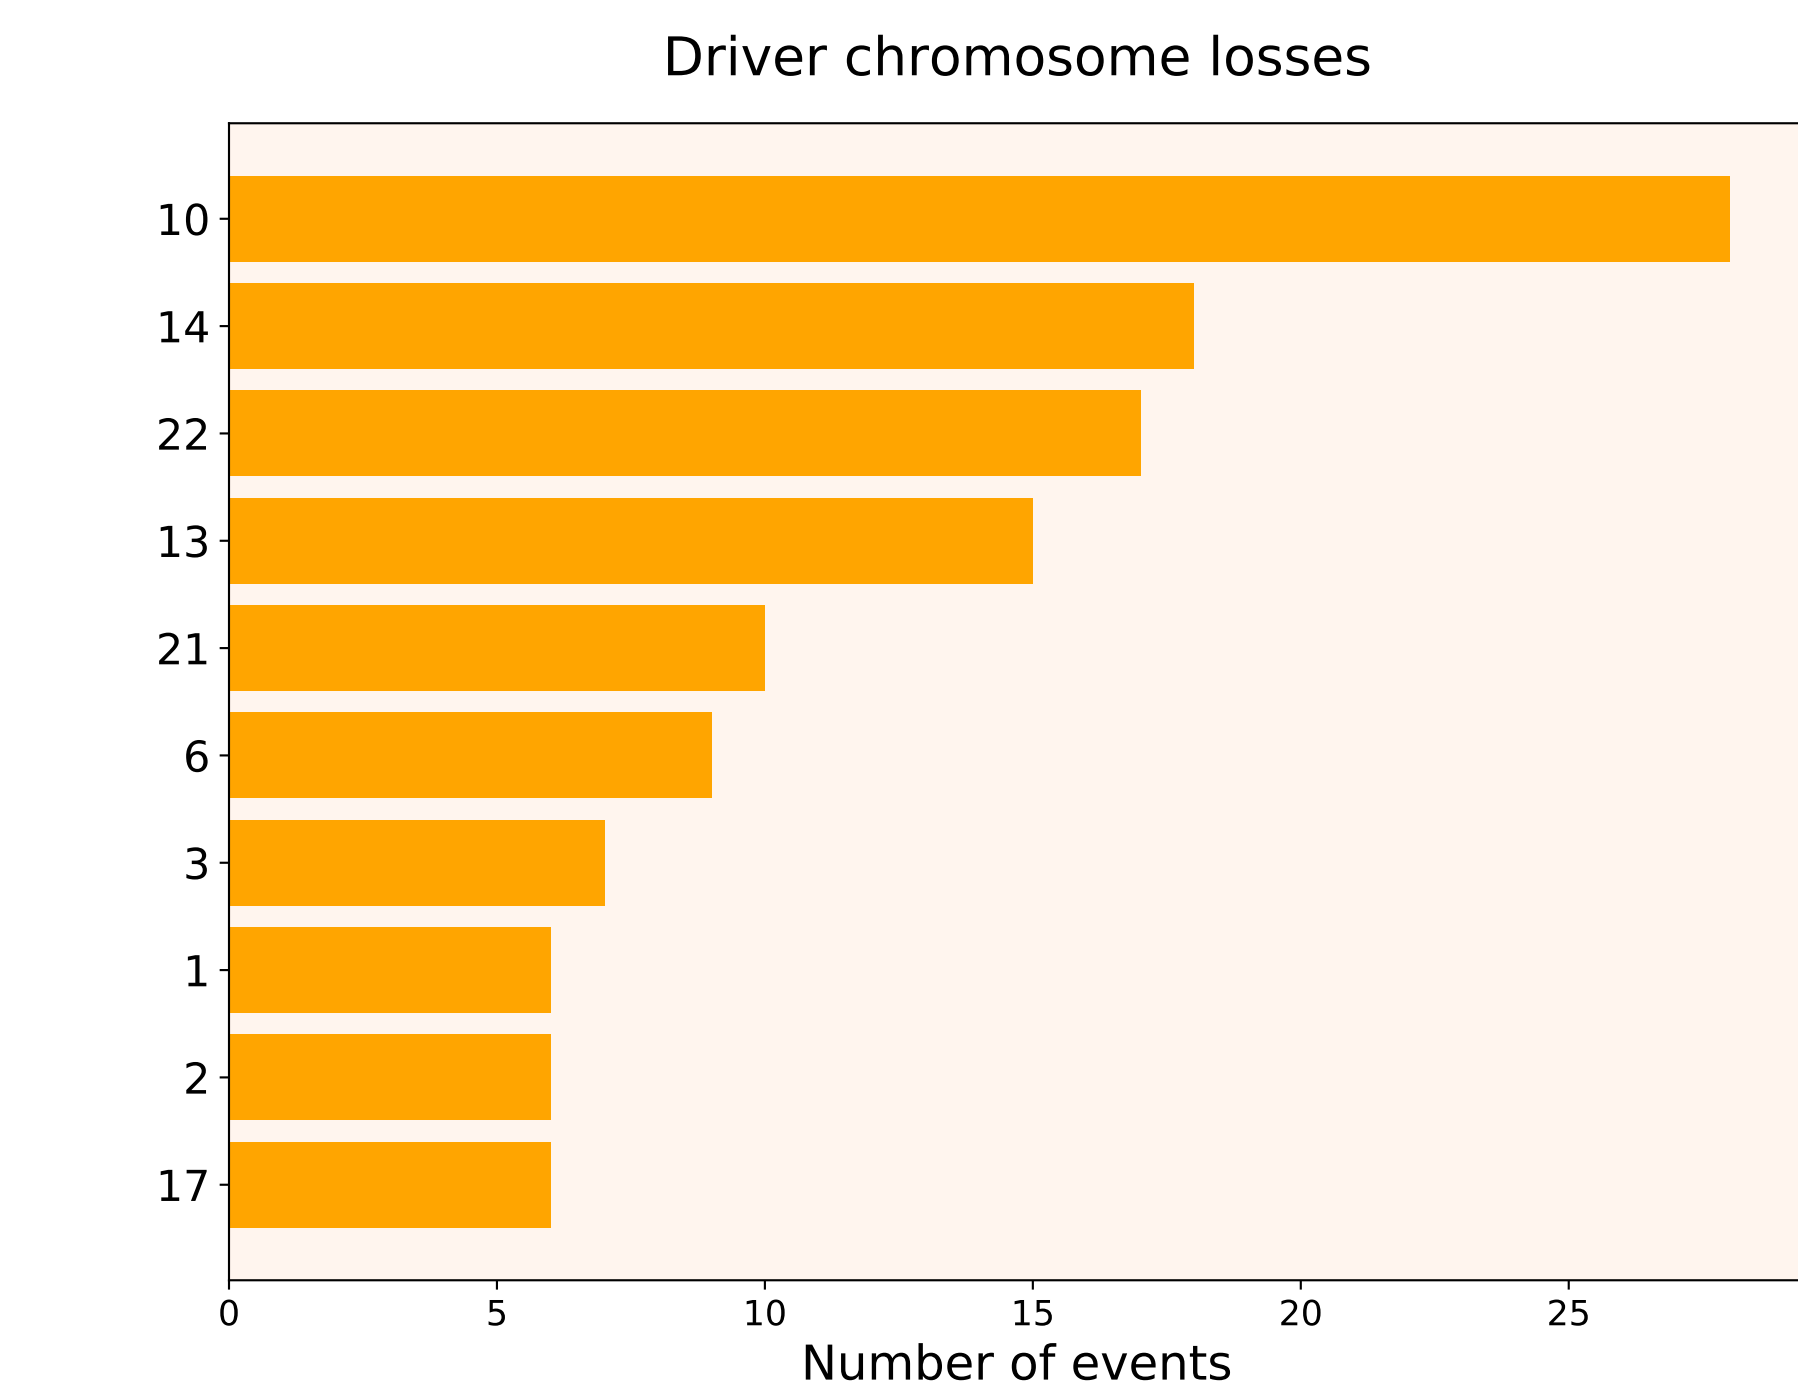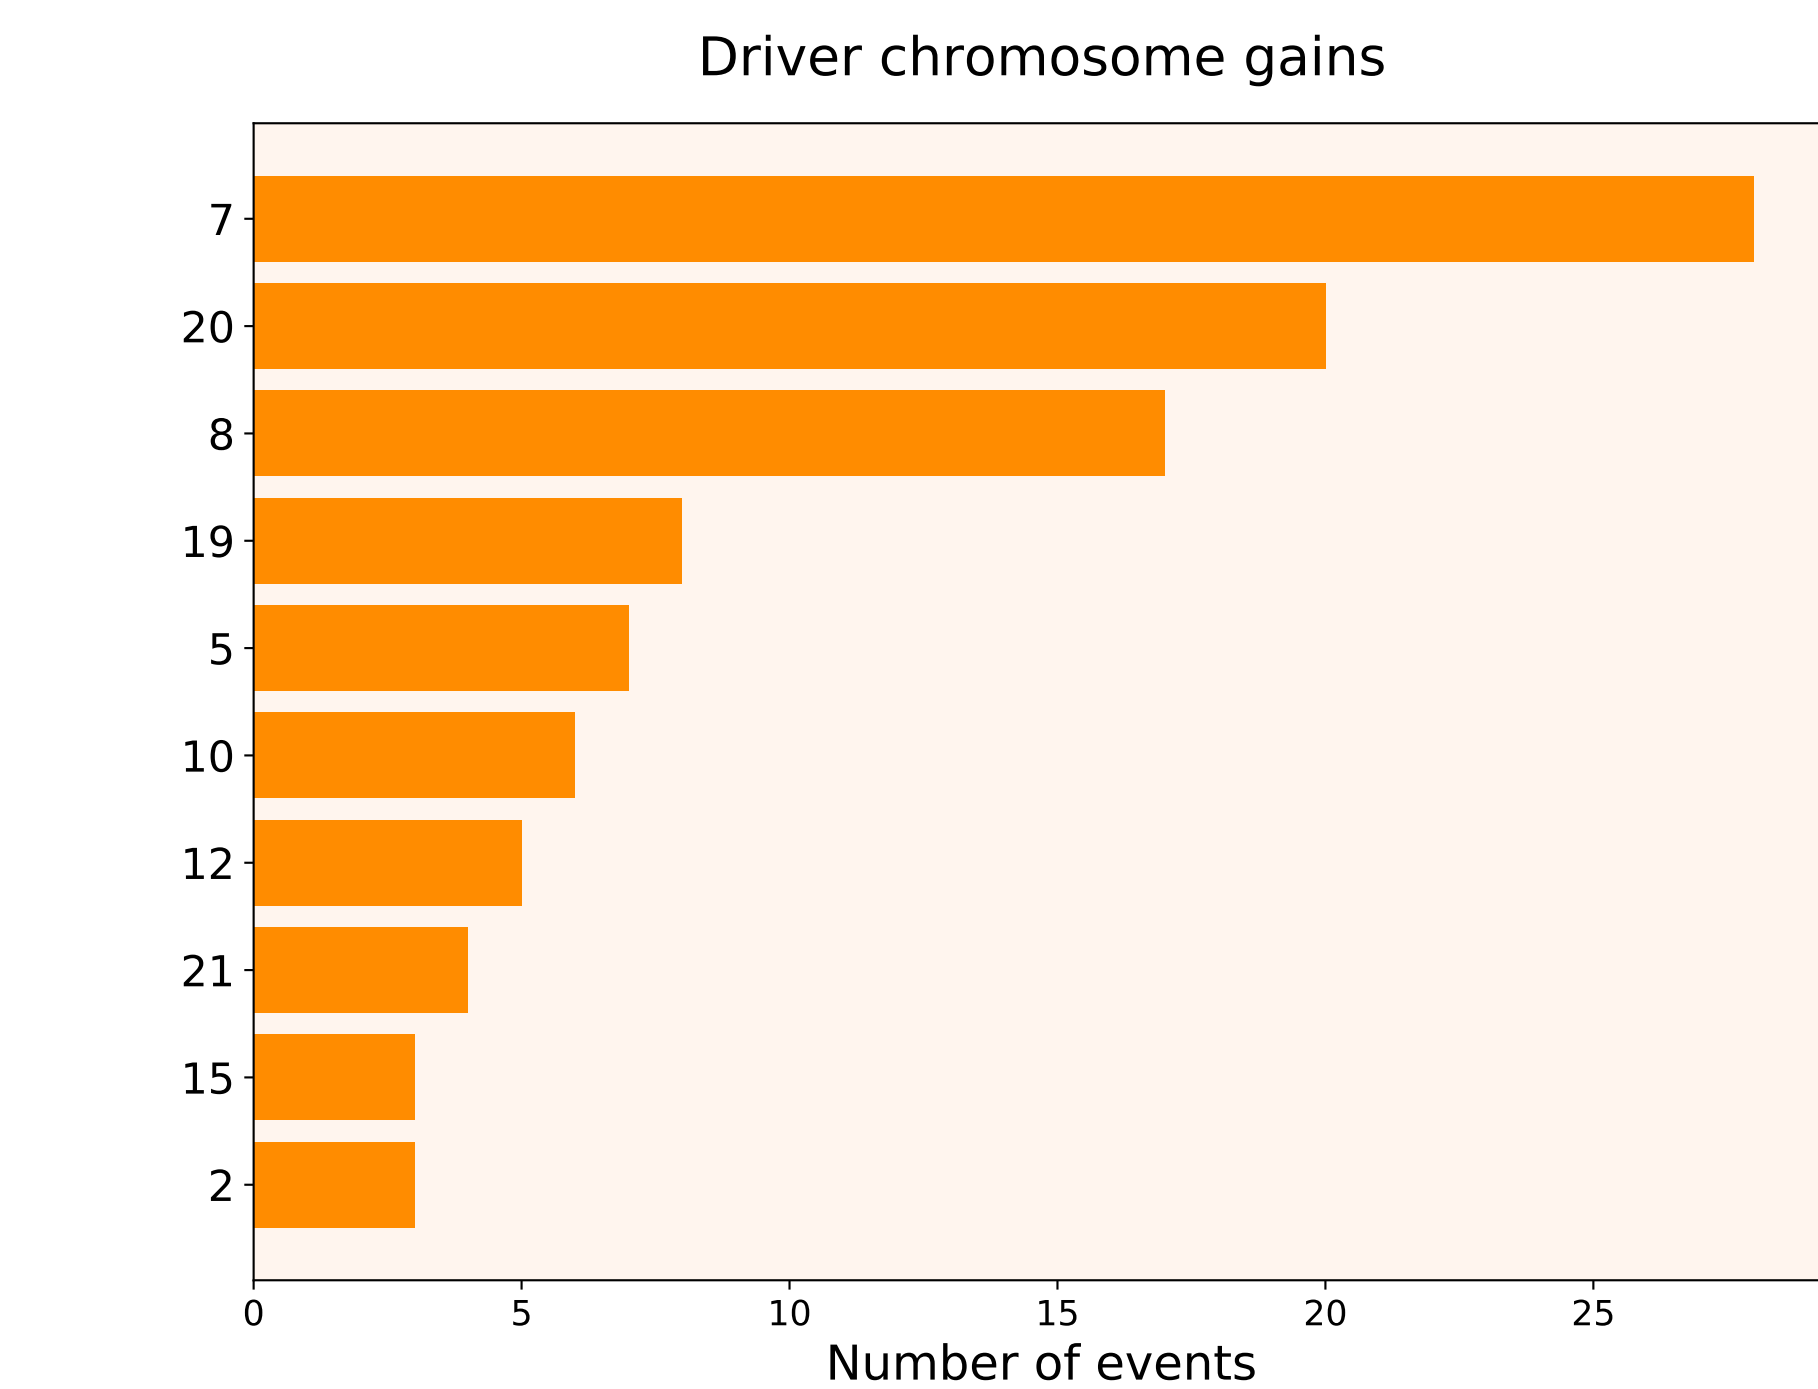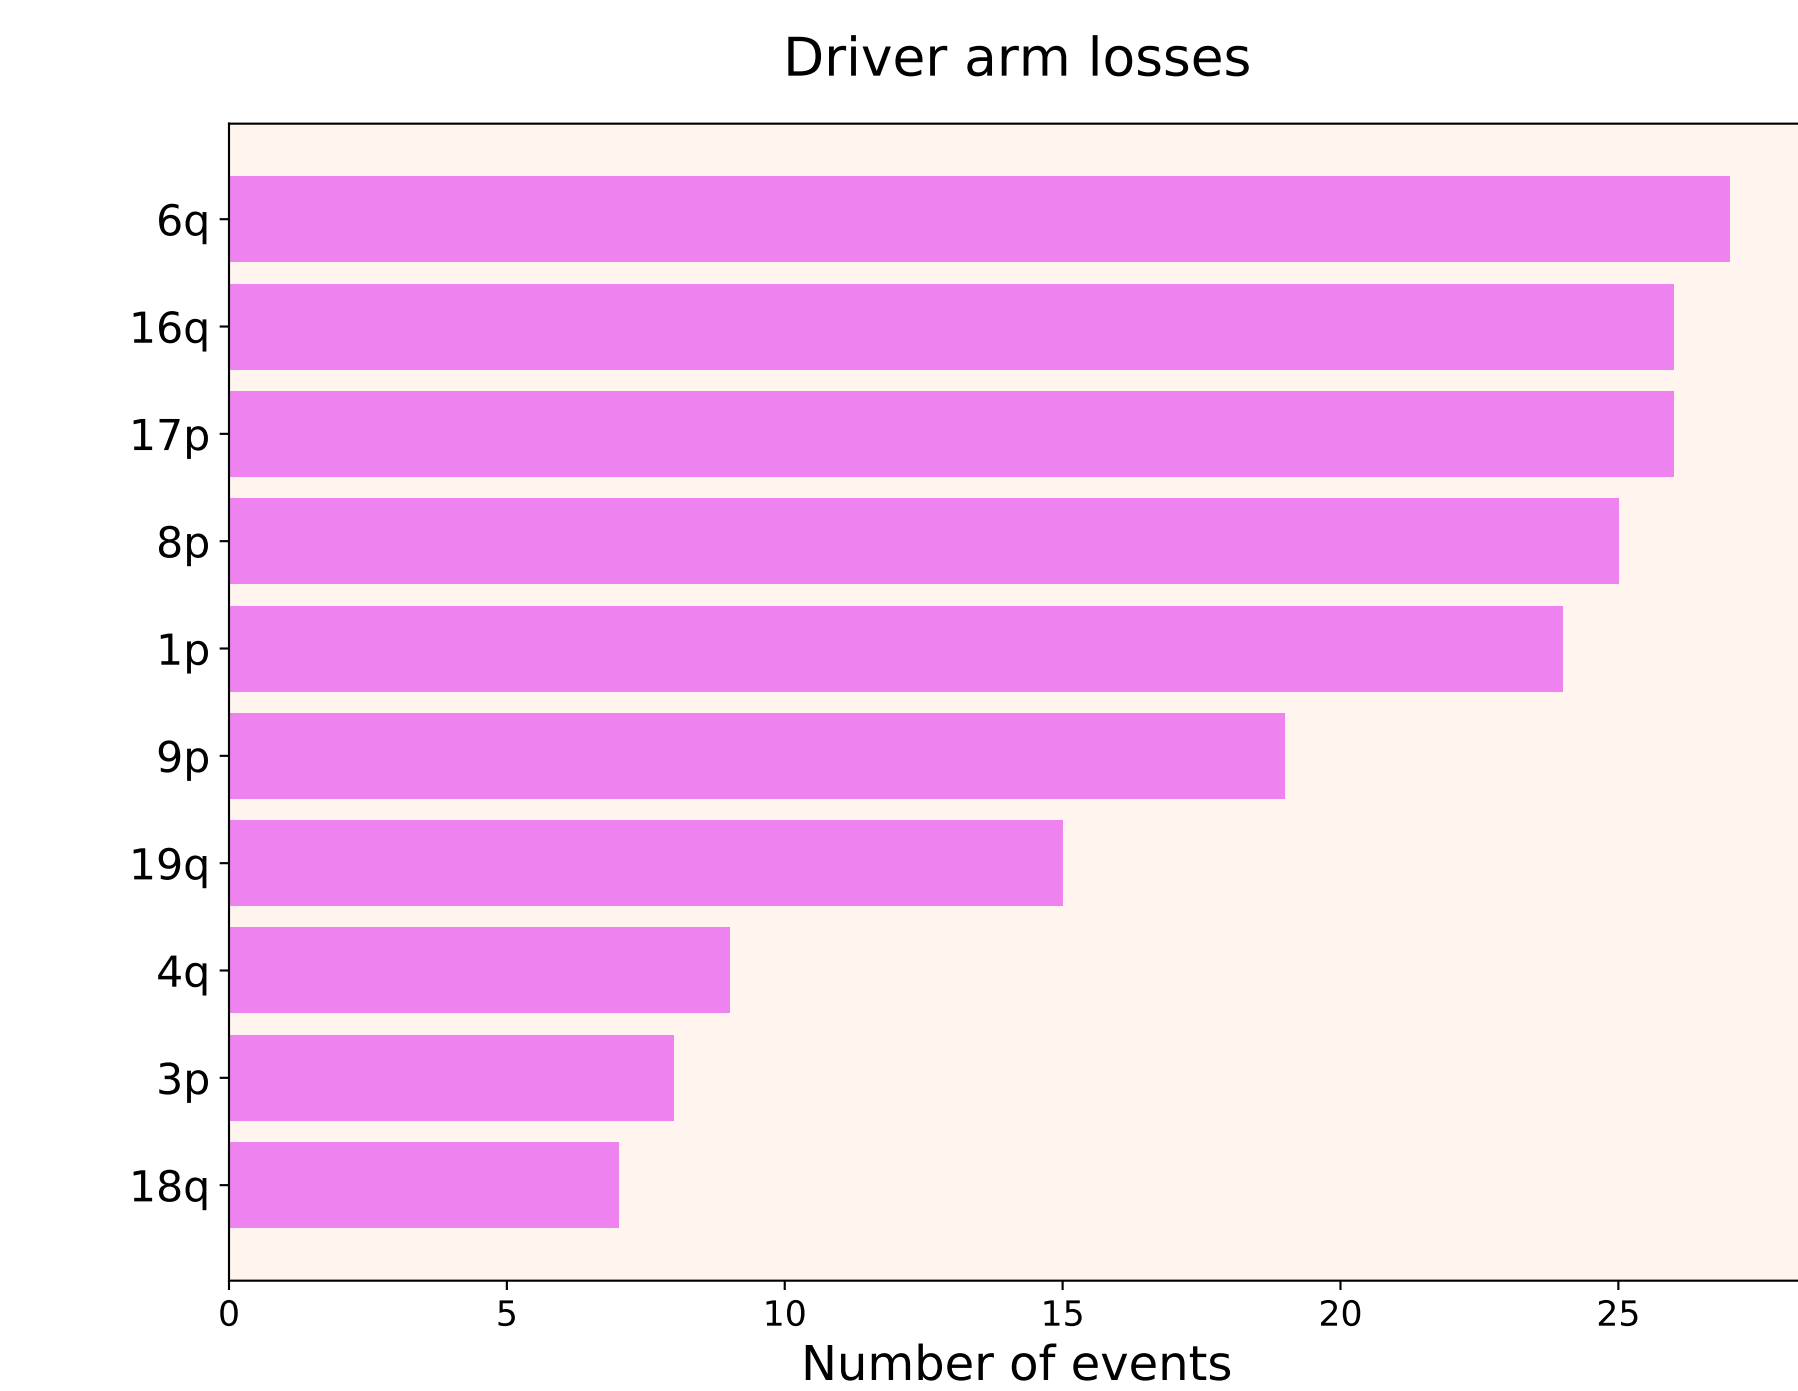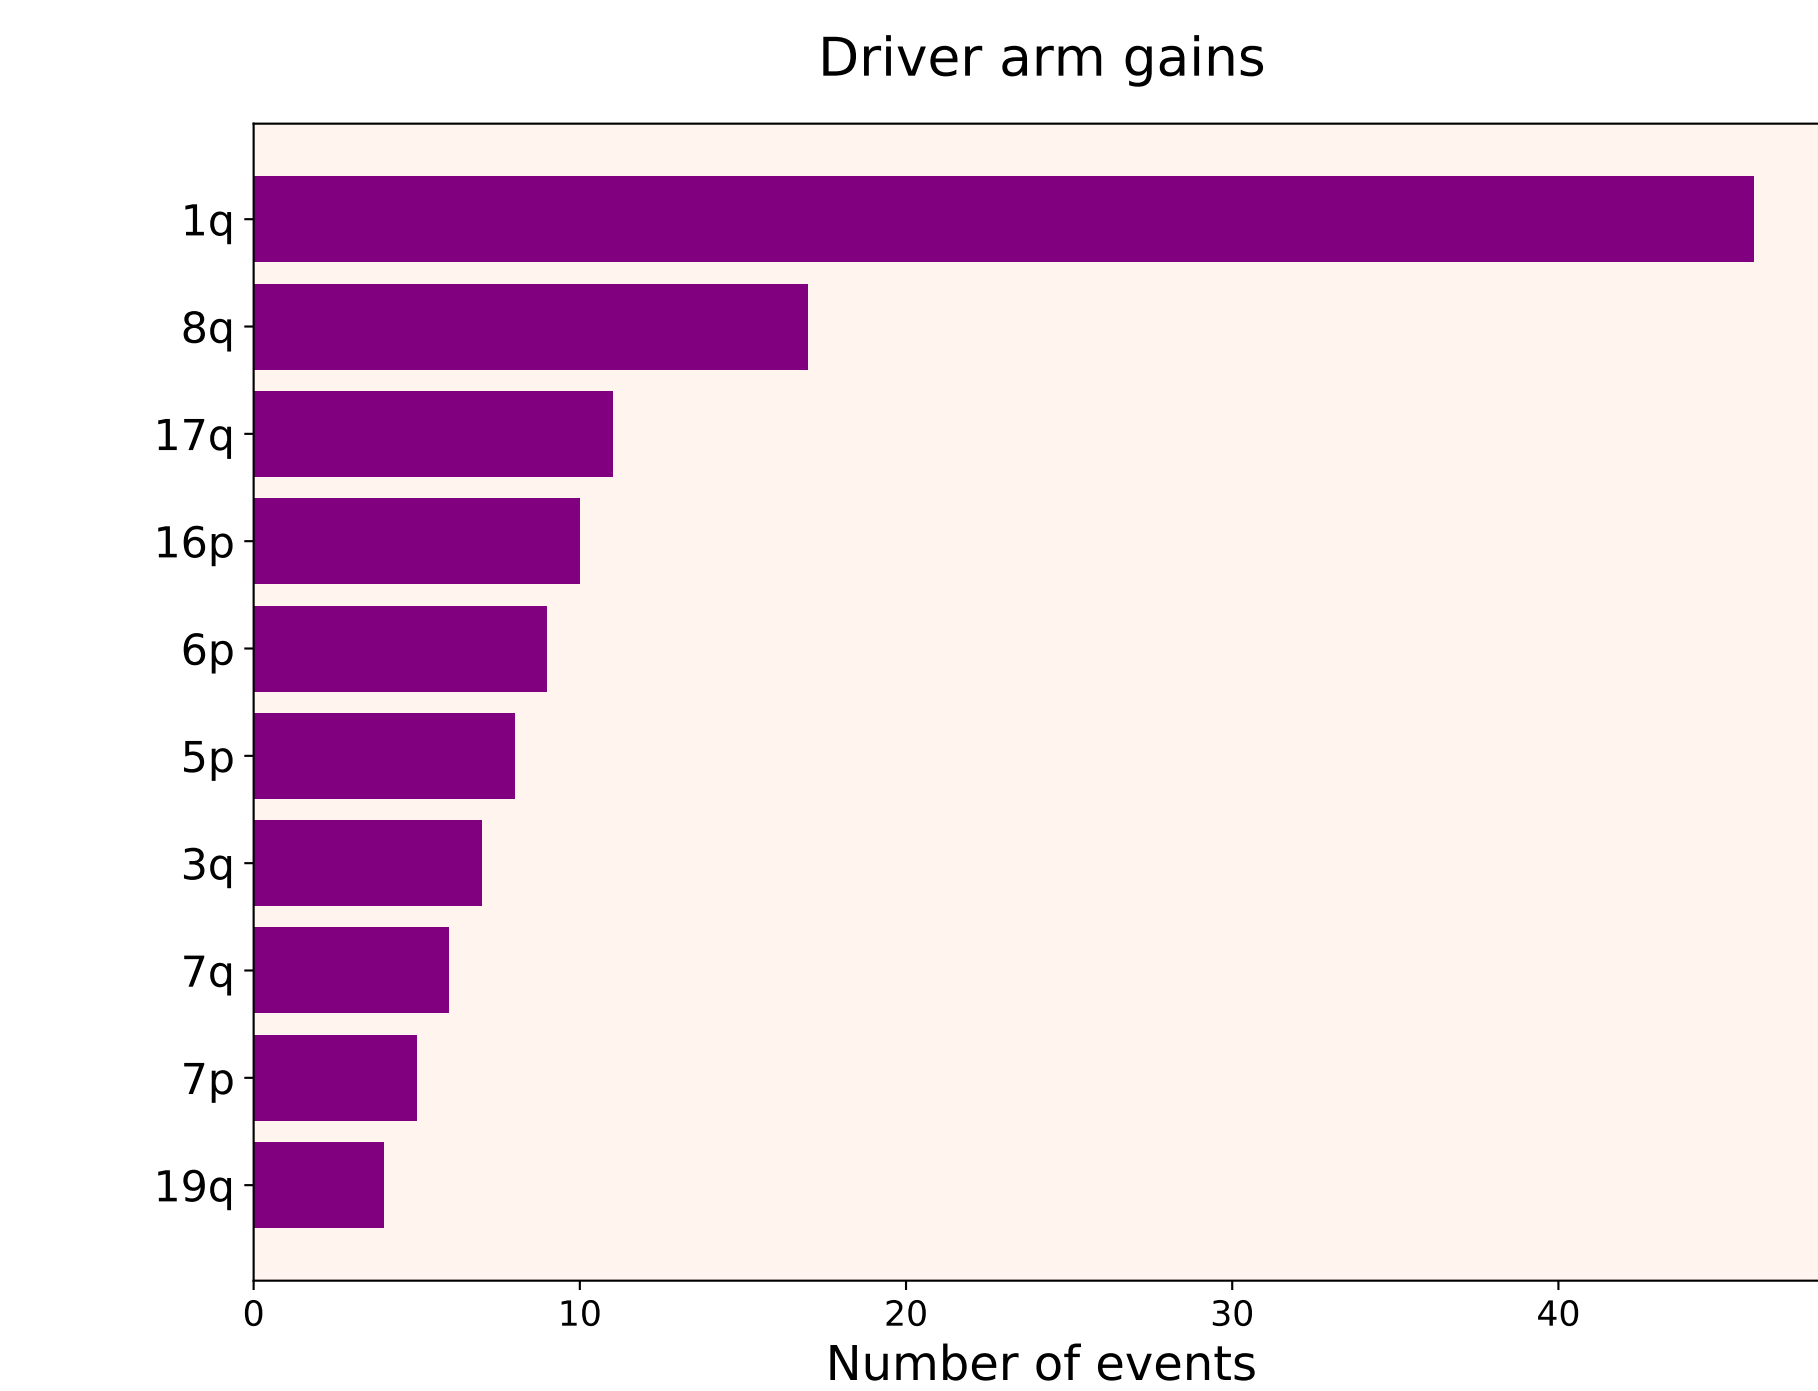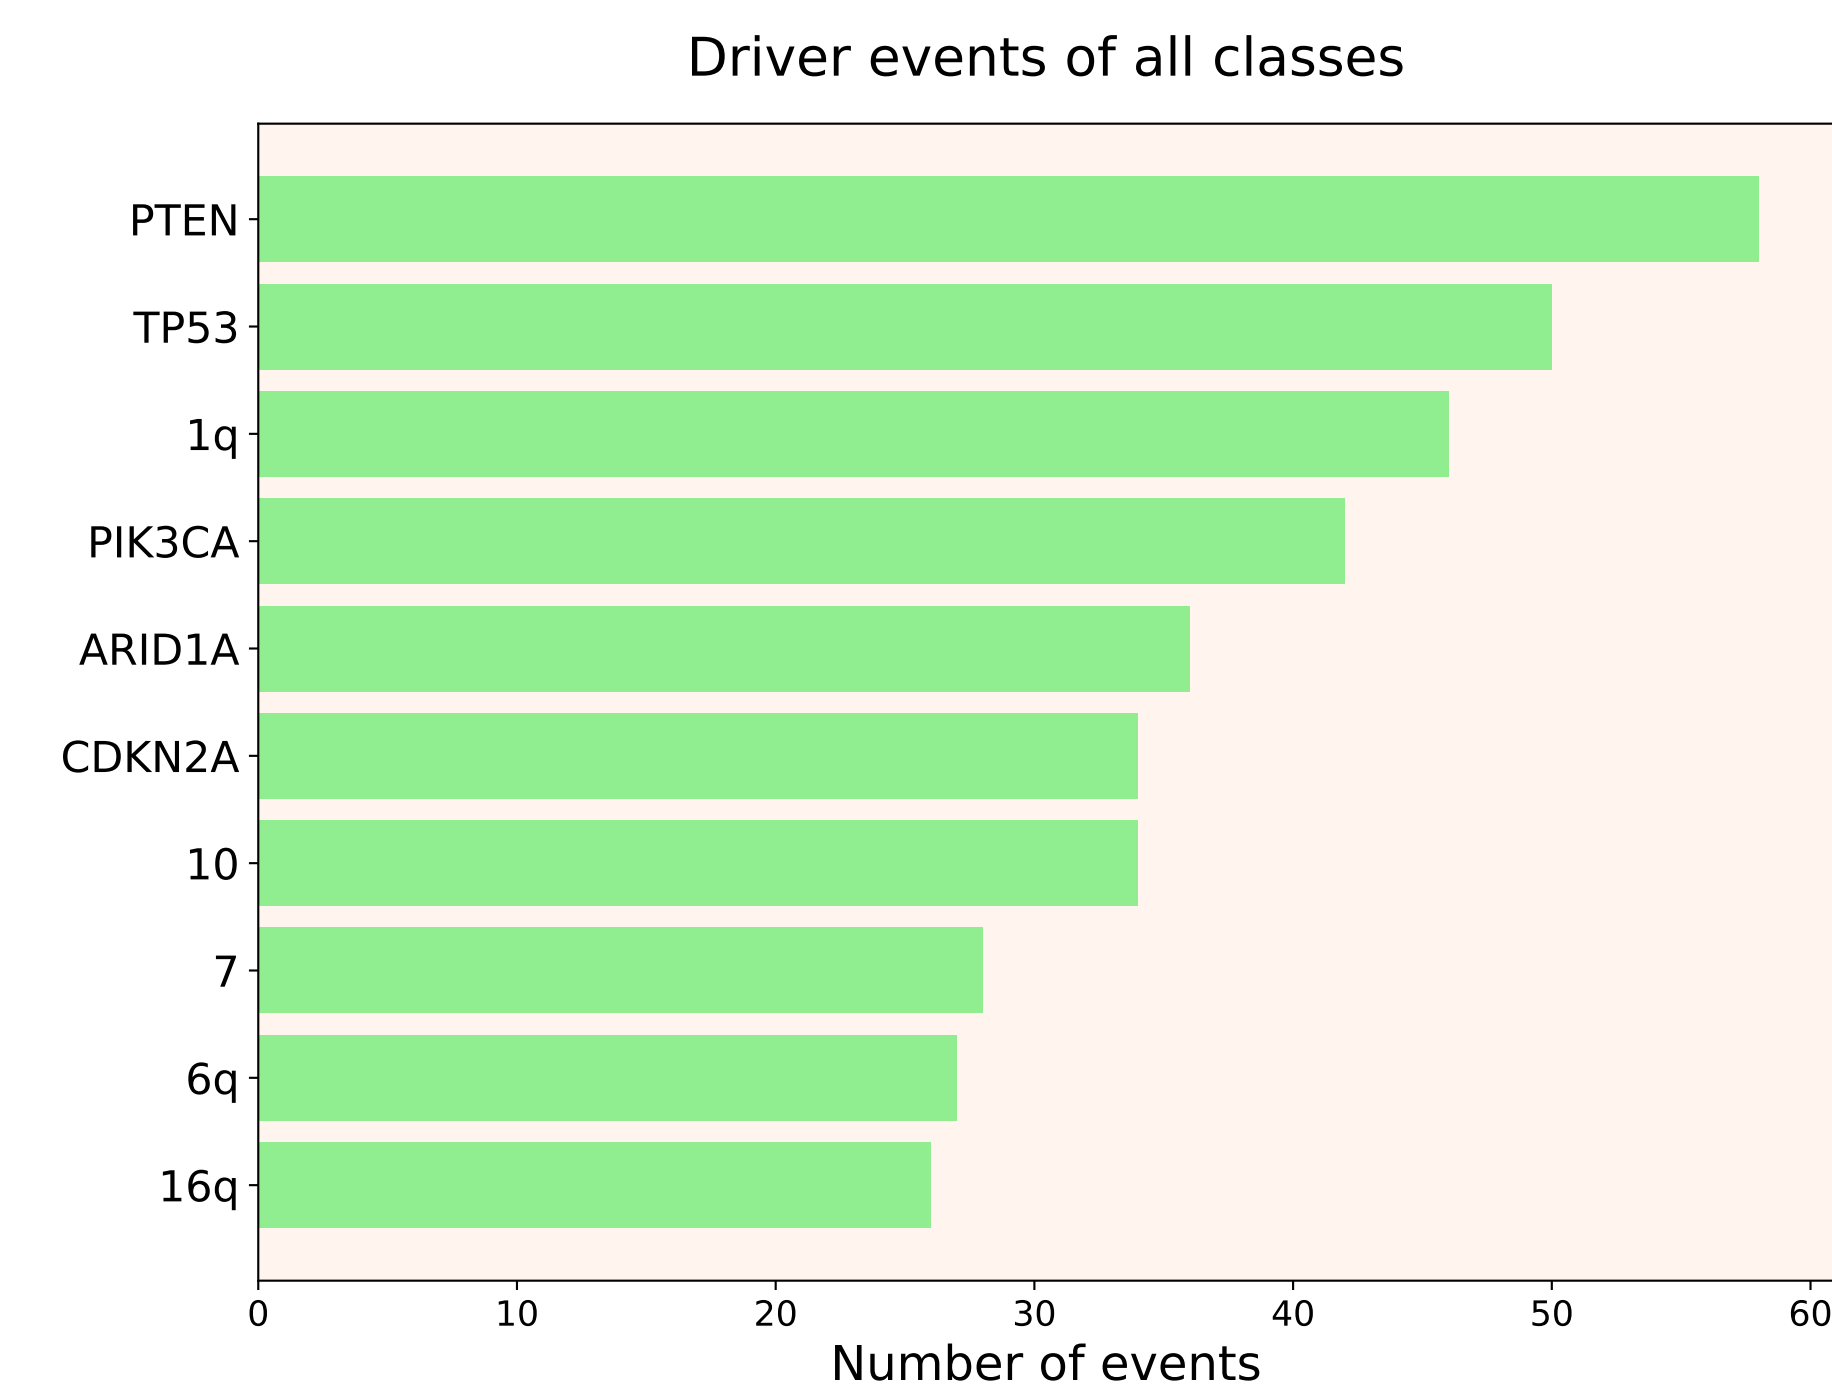

Supplement: Supplemental_Data_S1.zip [file Supplemental_Data_S1.zip]

# ESCA\_MALE

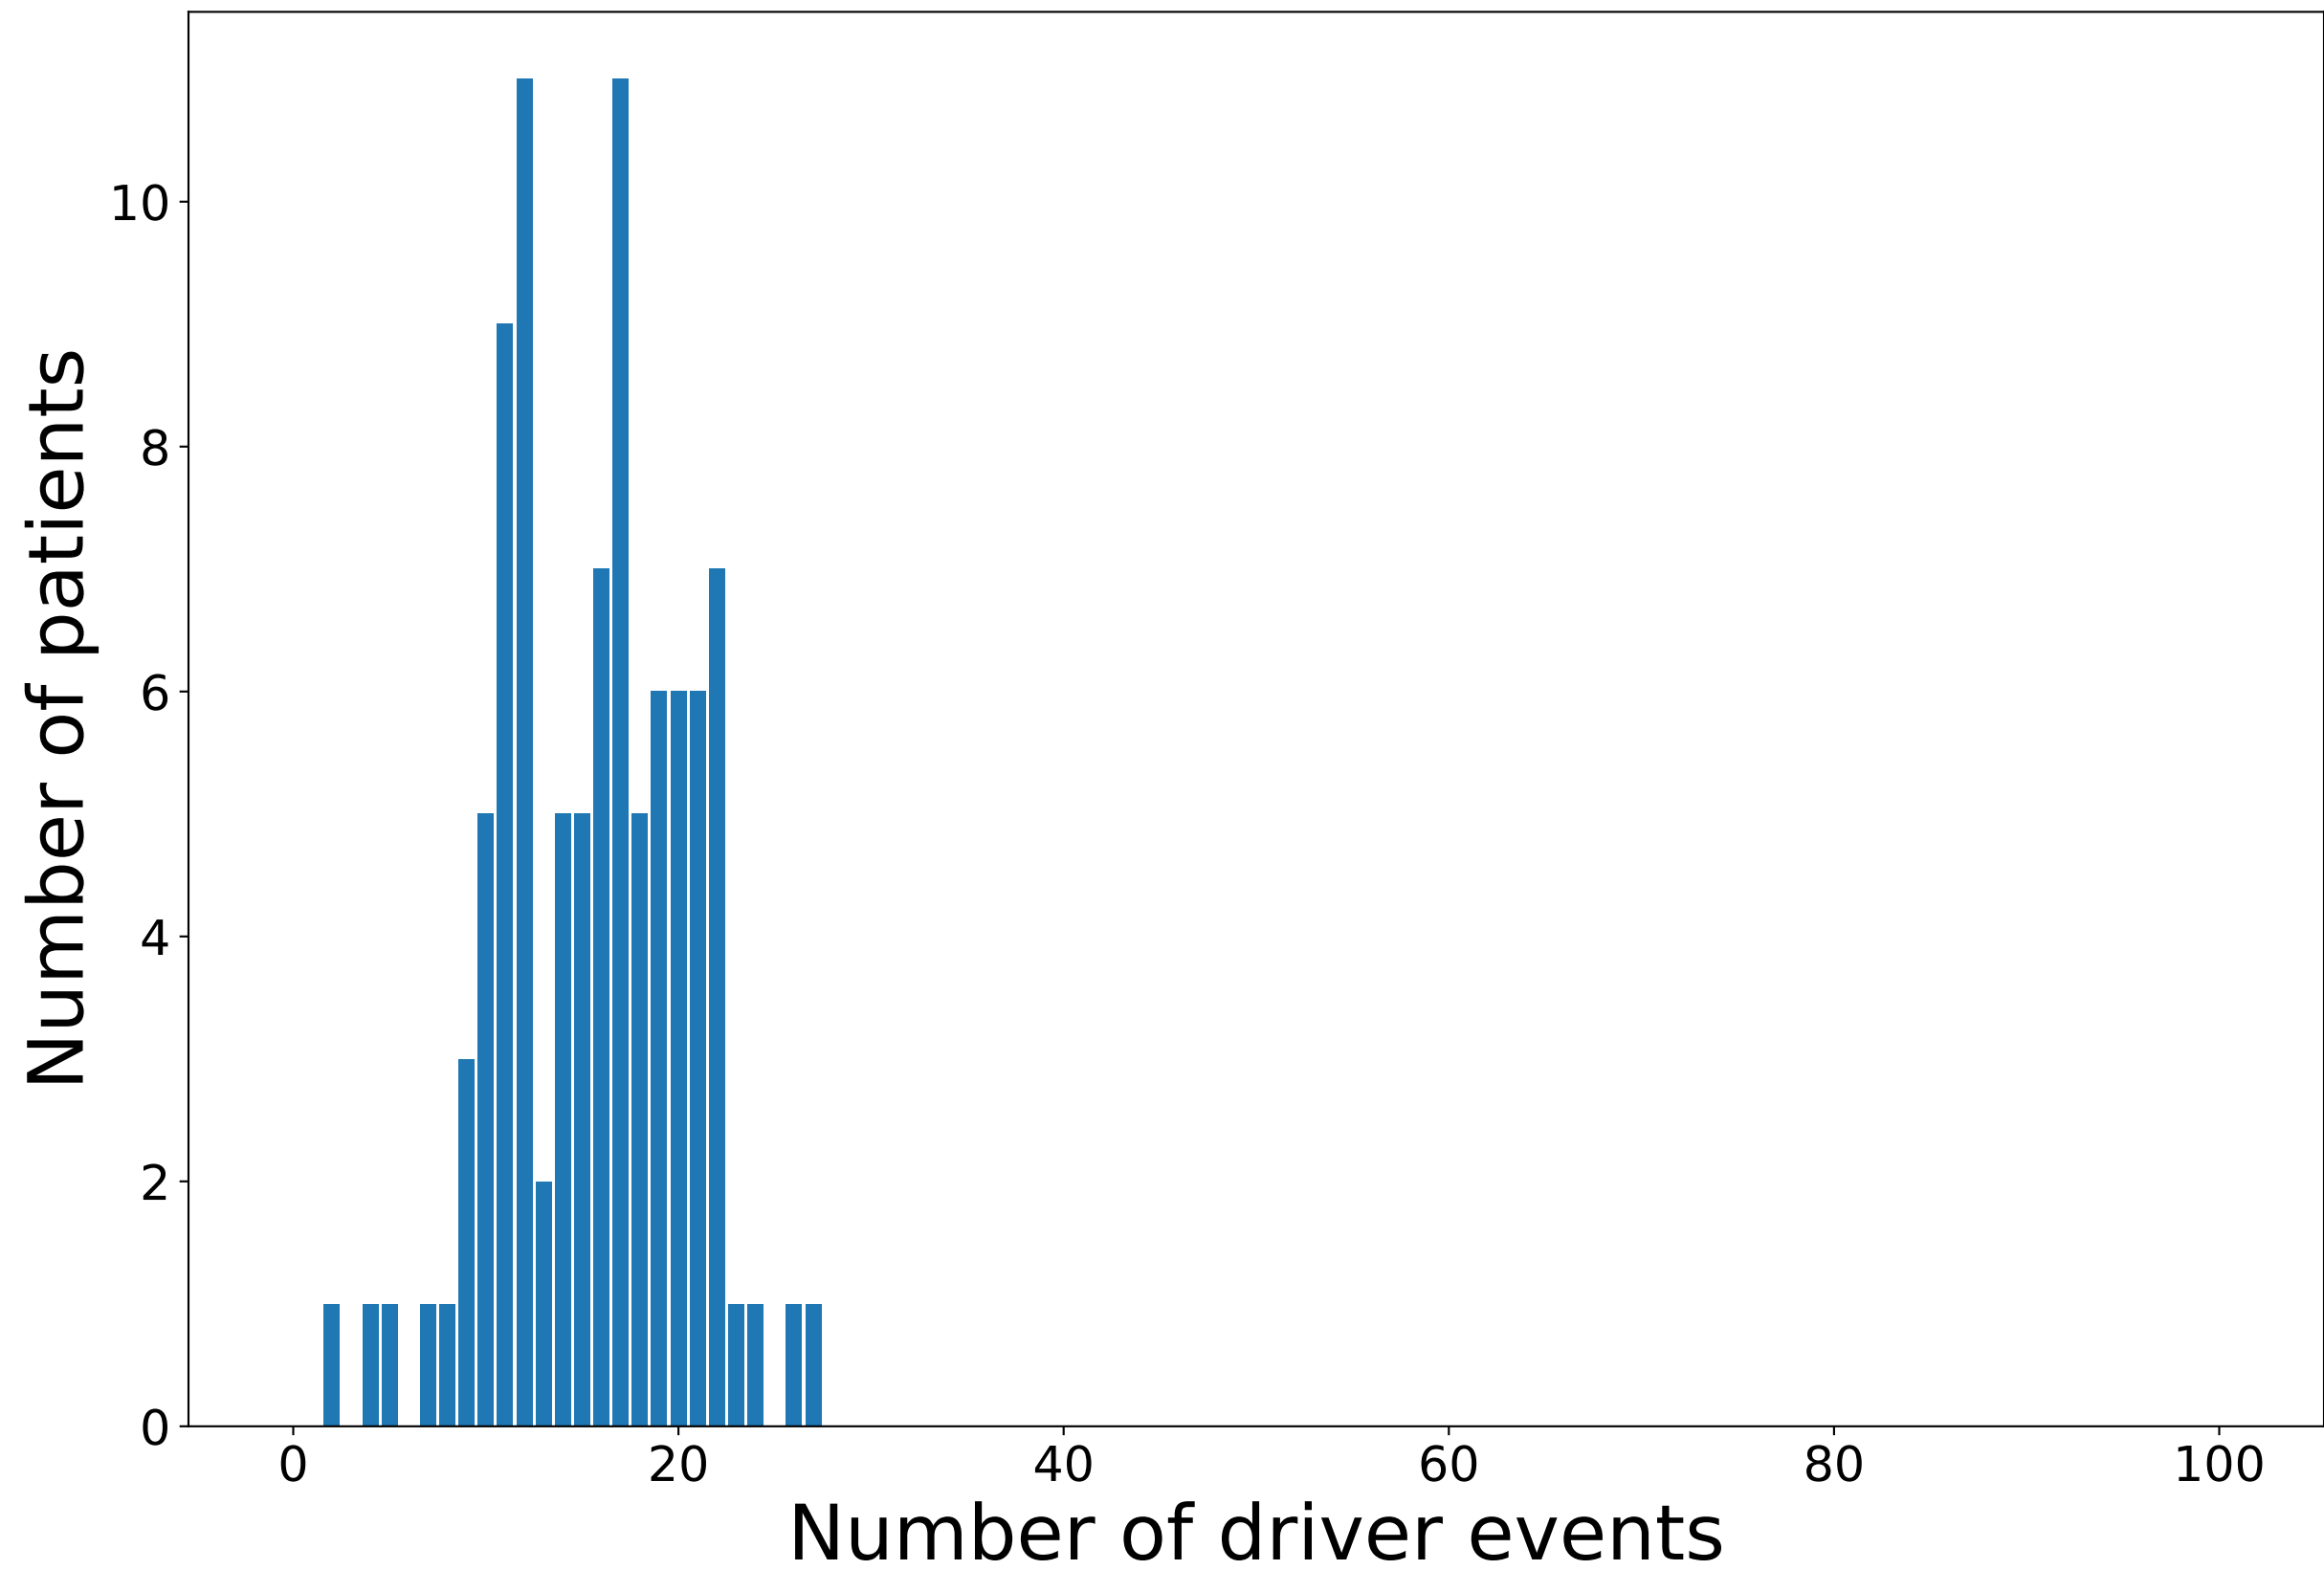

Supplement: Supplemental_Data_S1.zip [file Supplemental_Data_S1.zip]

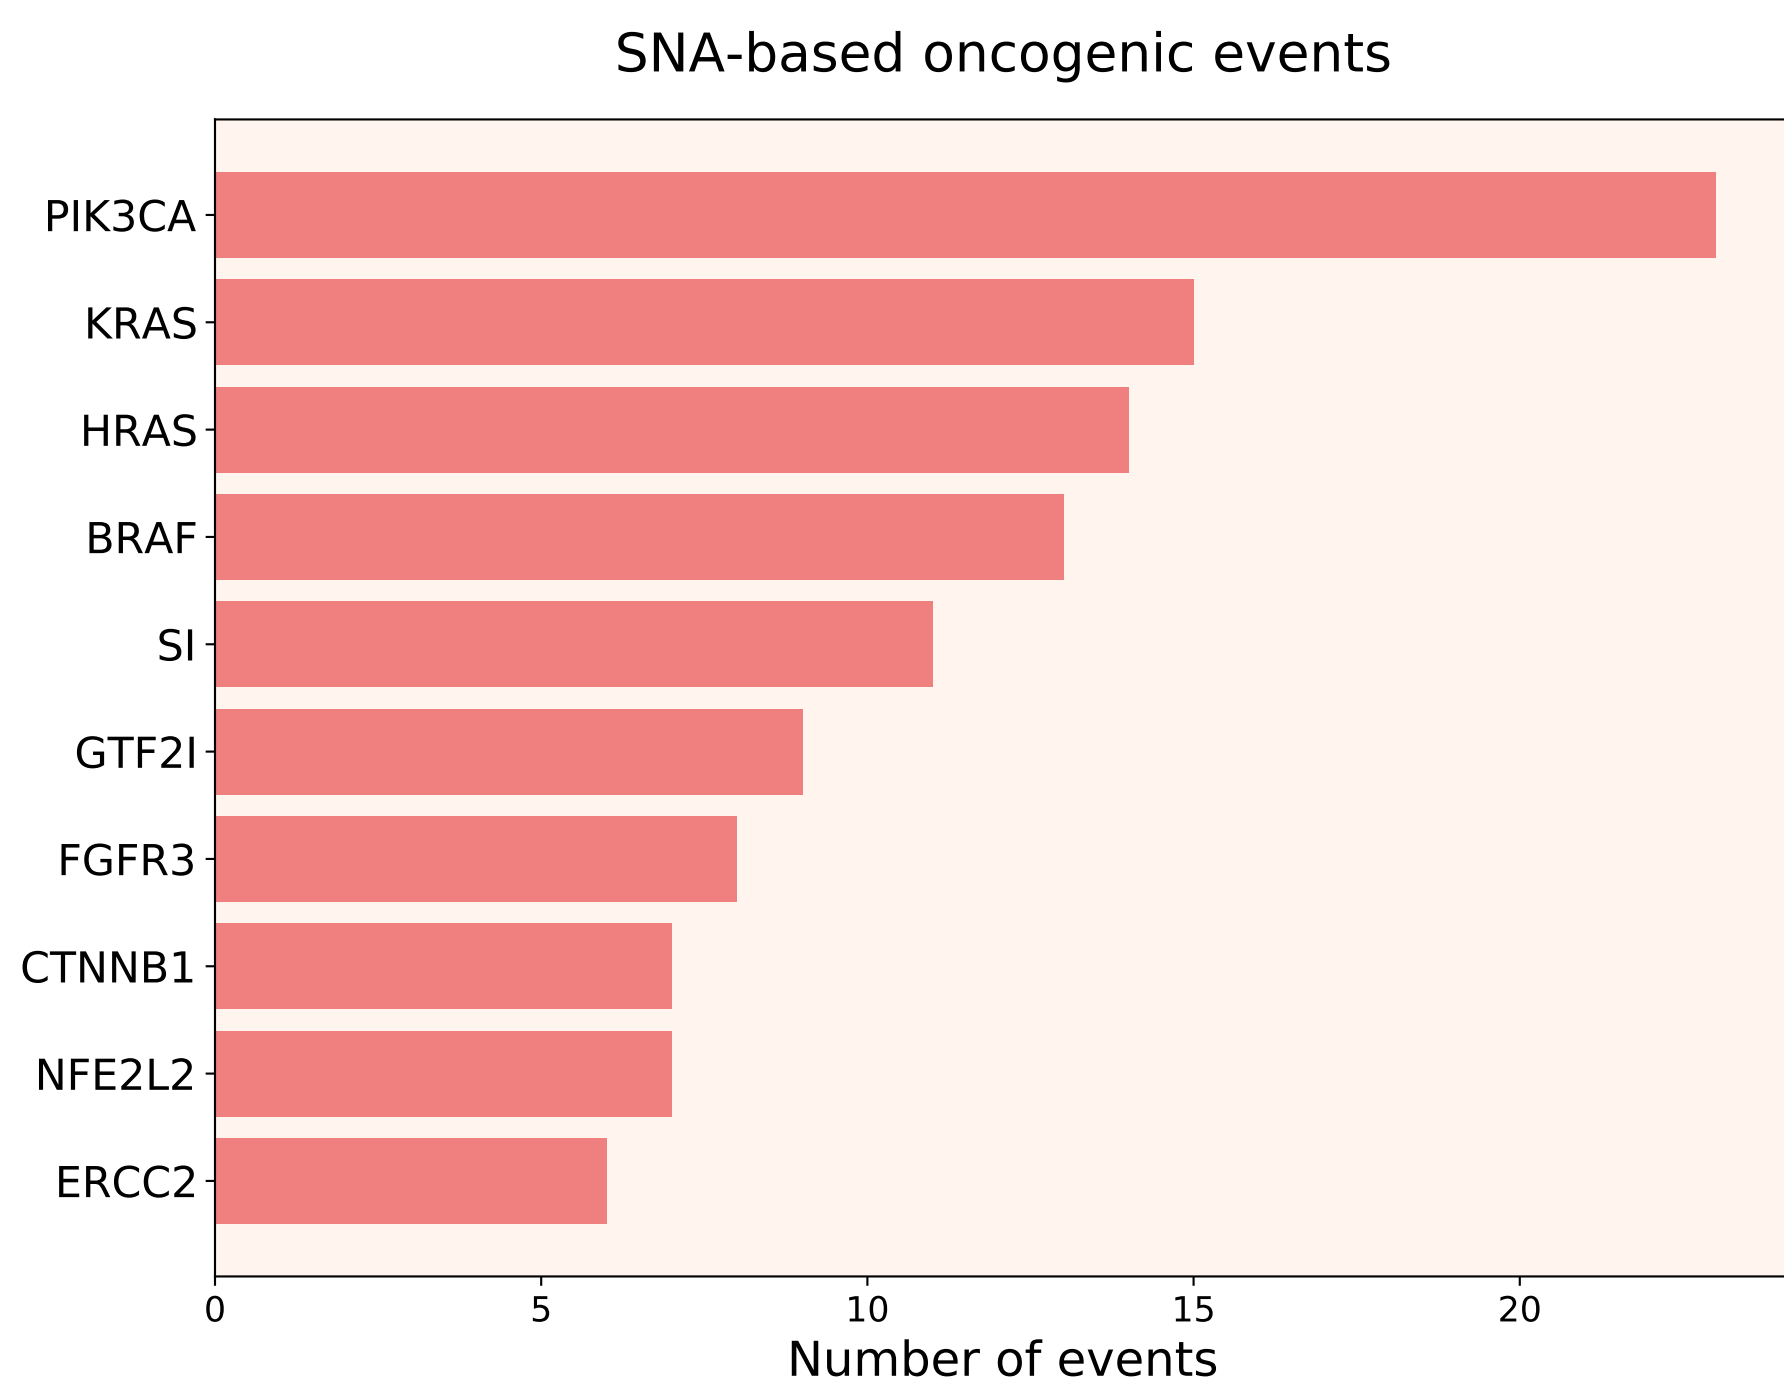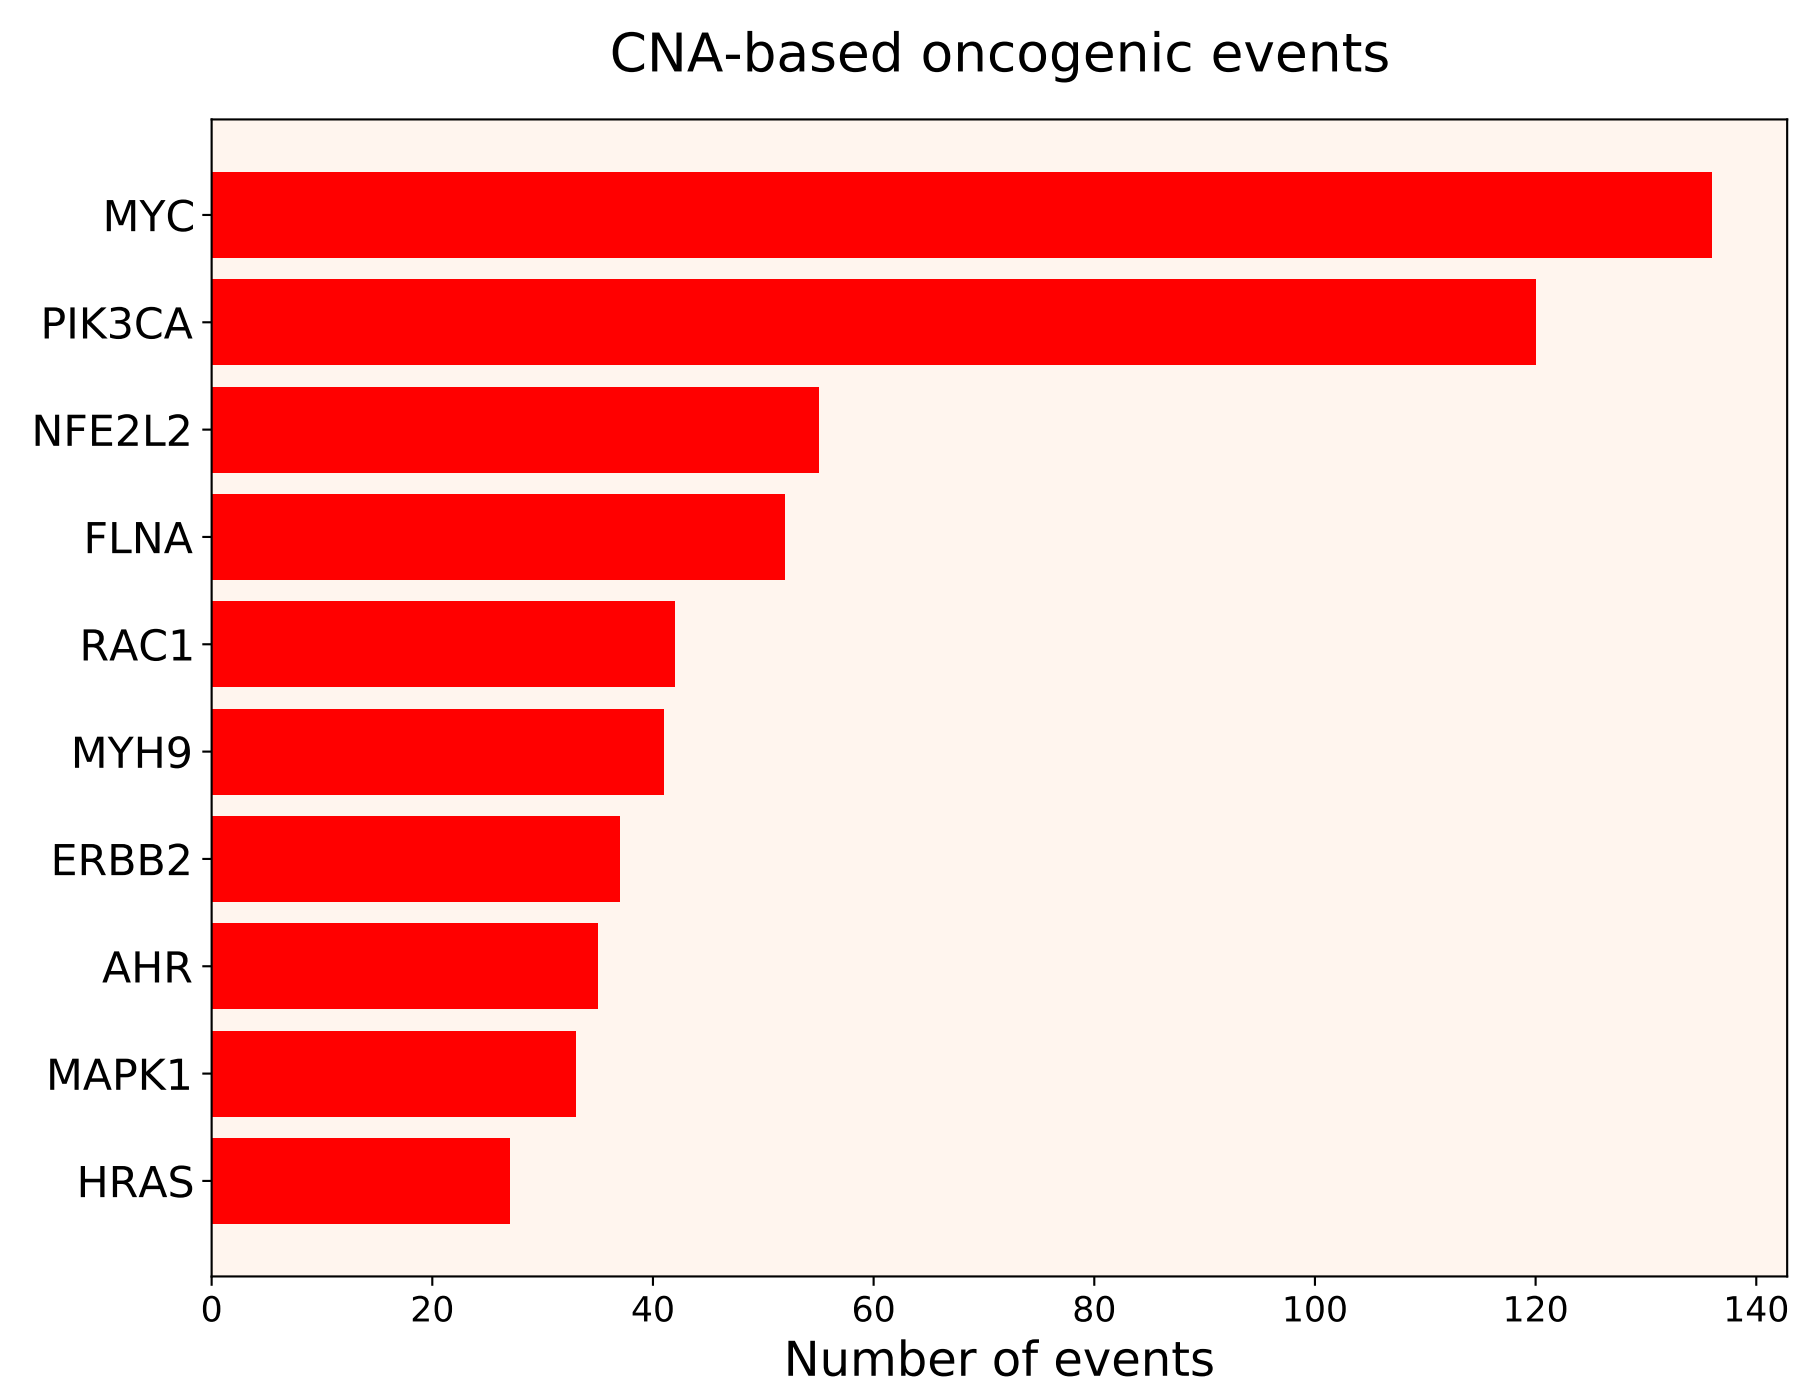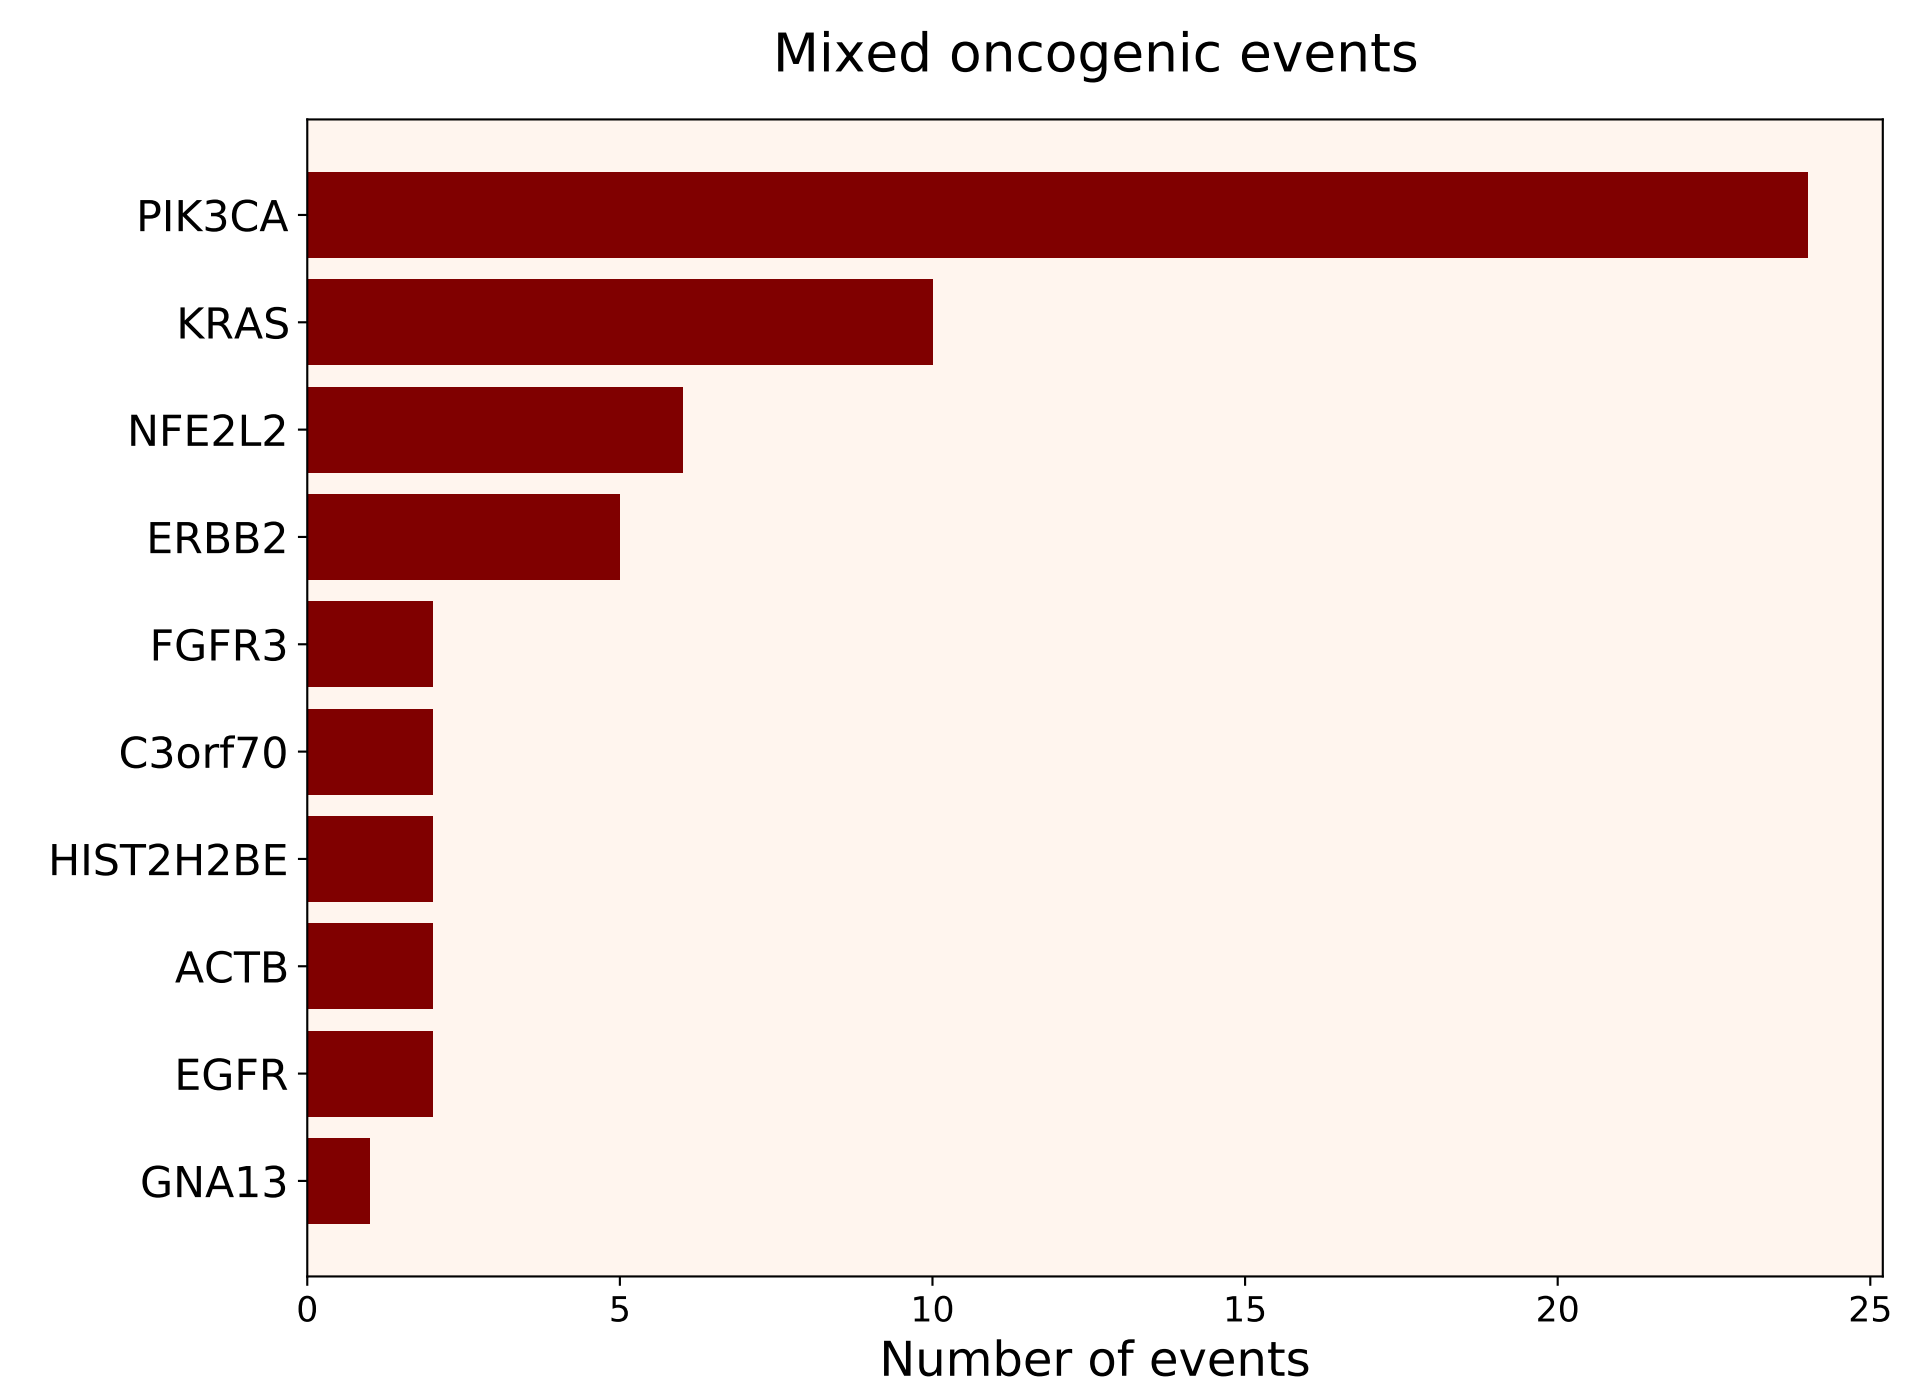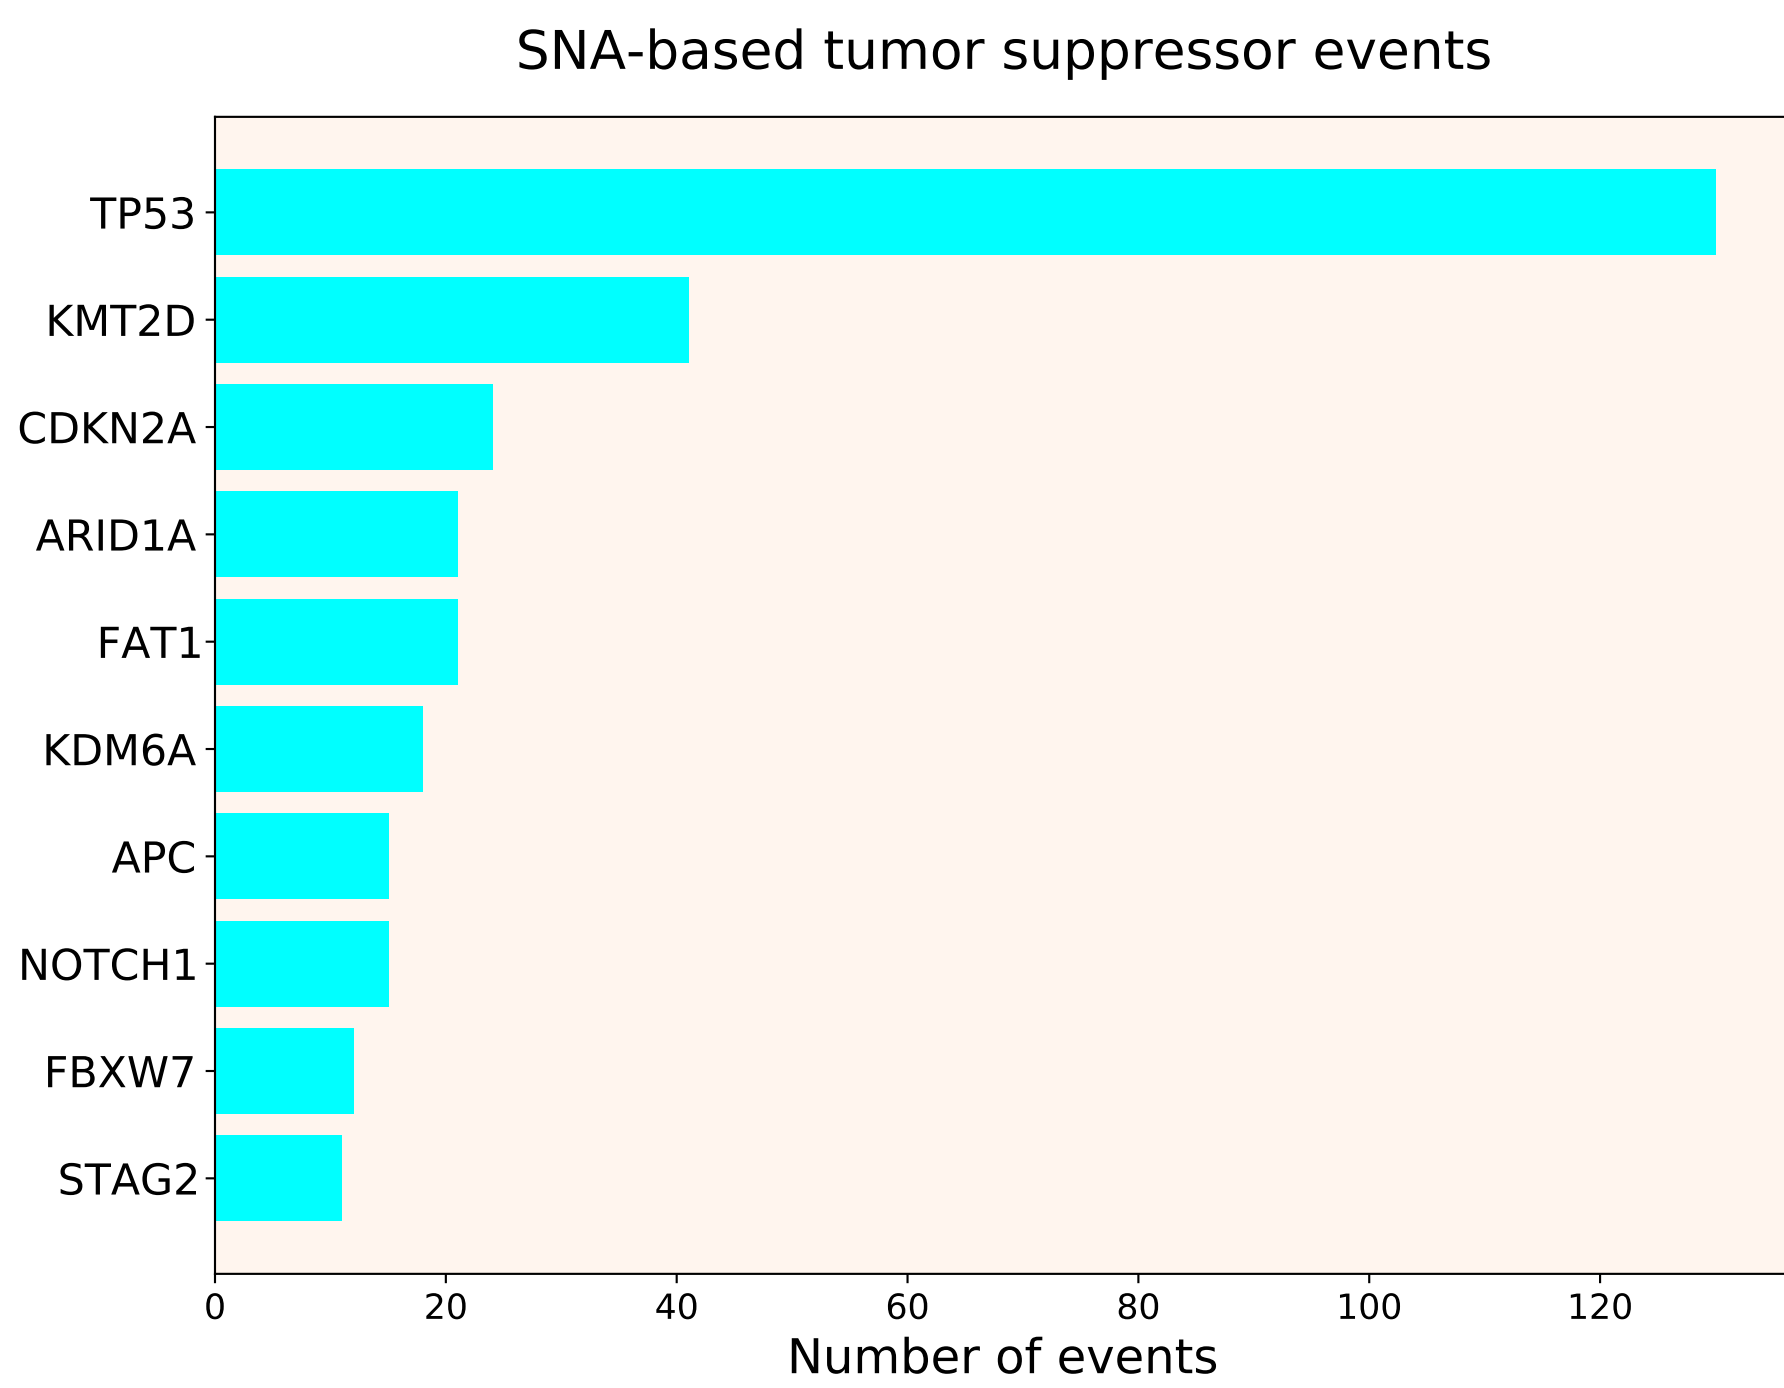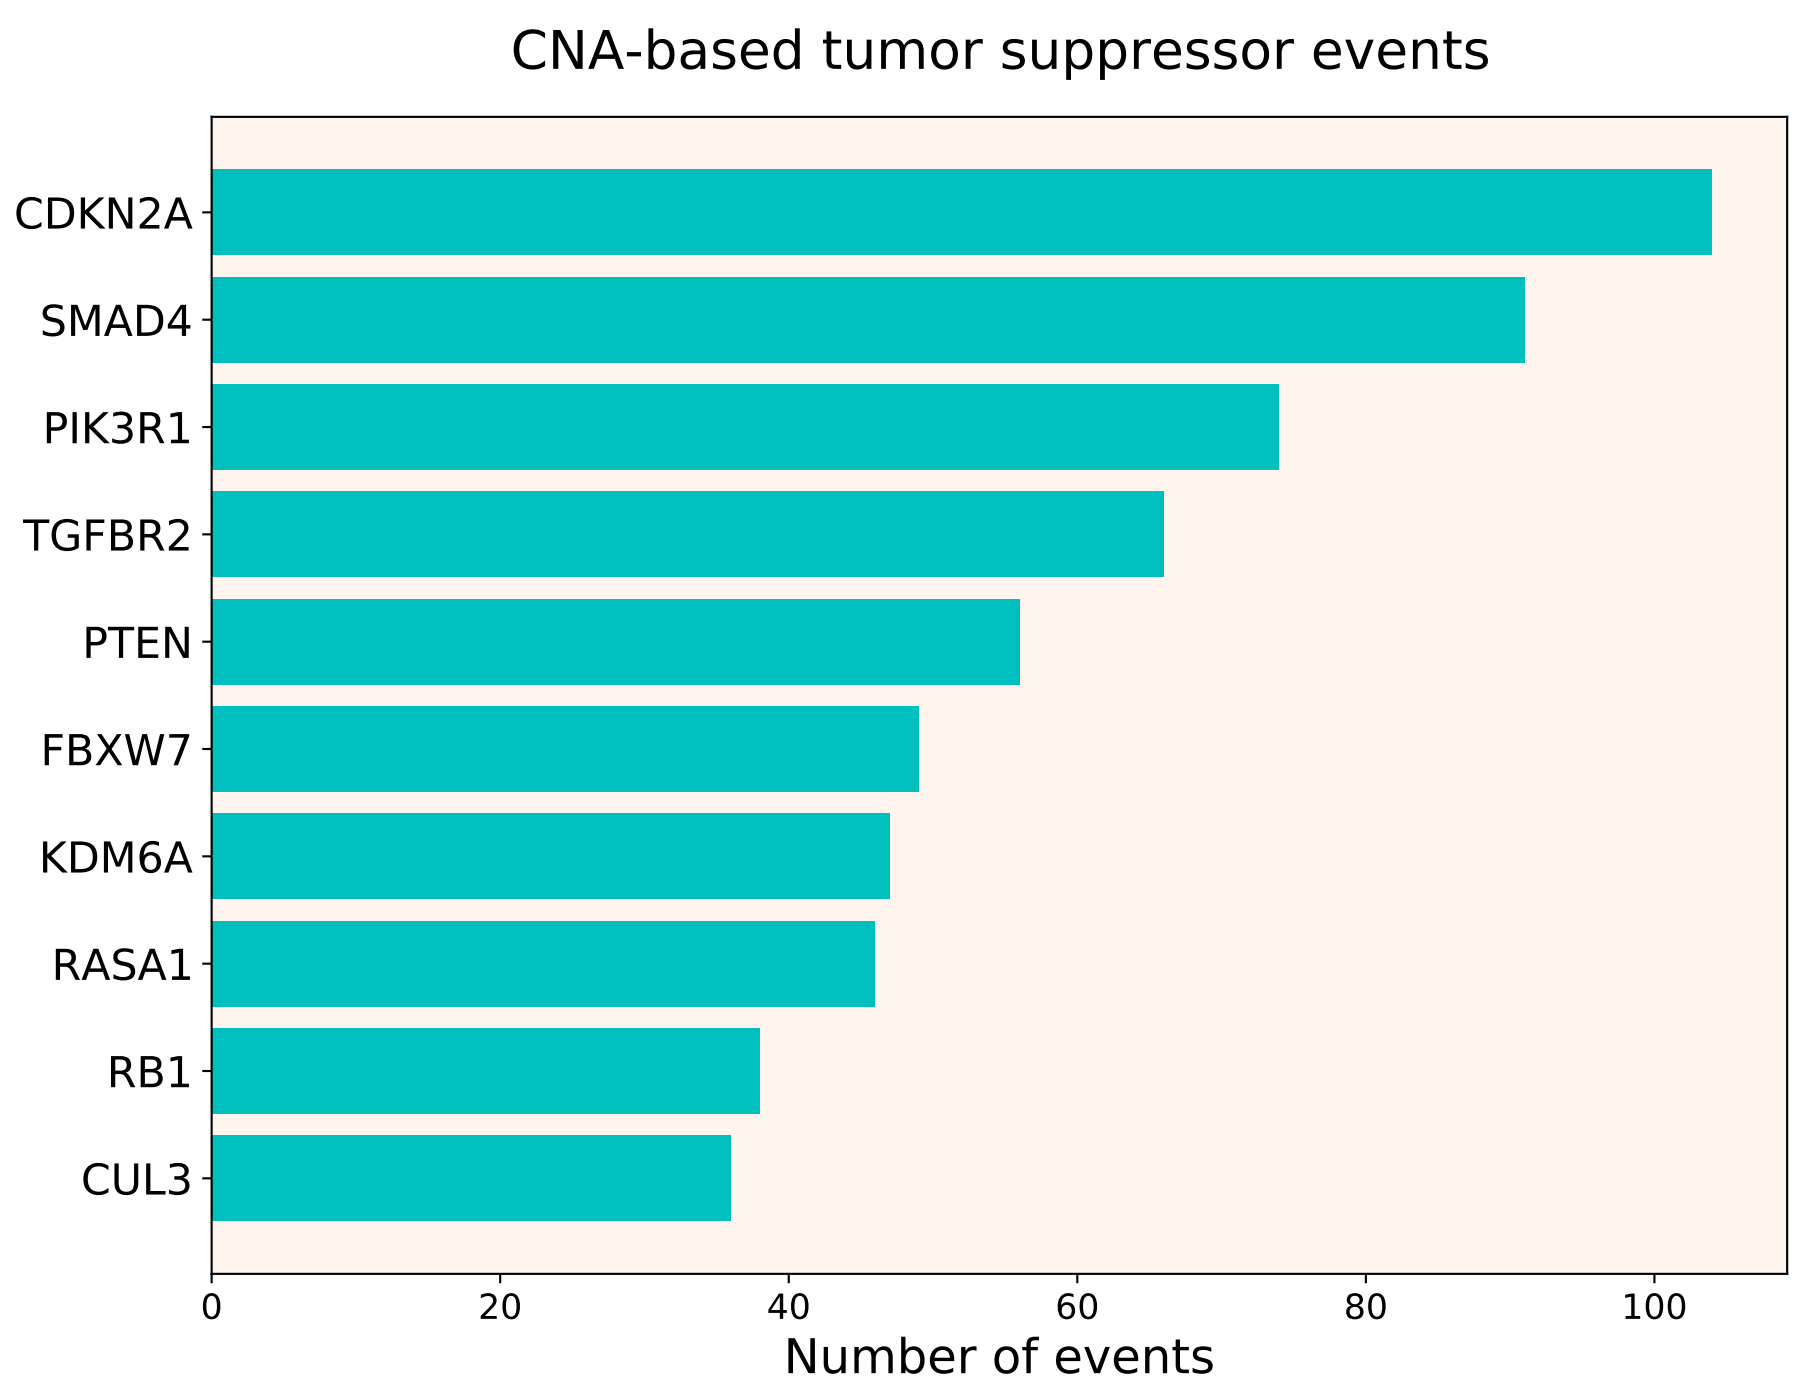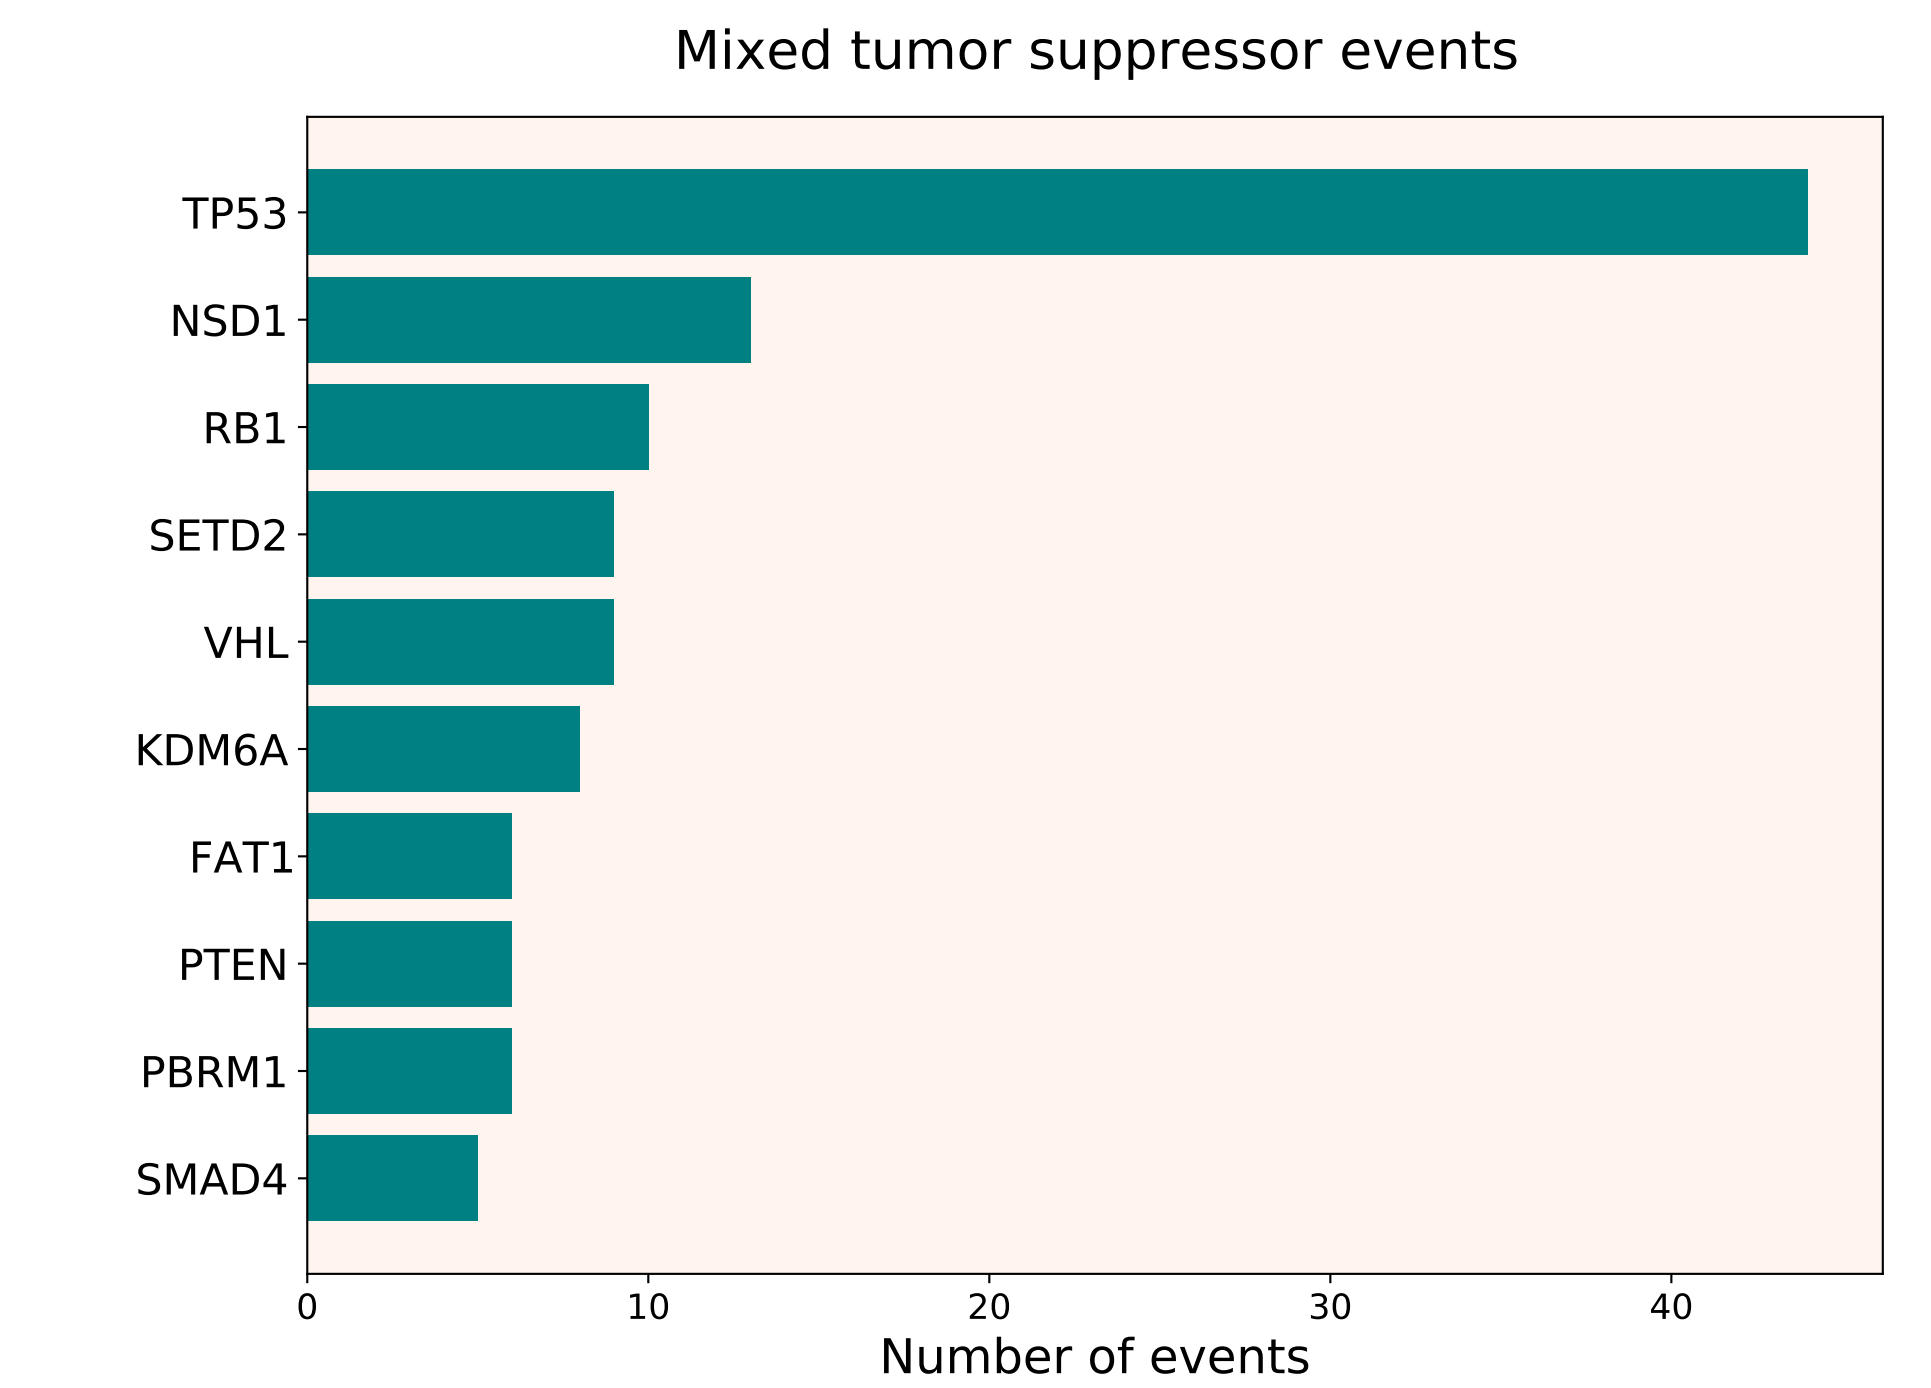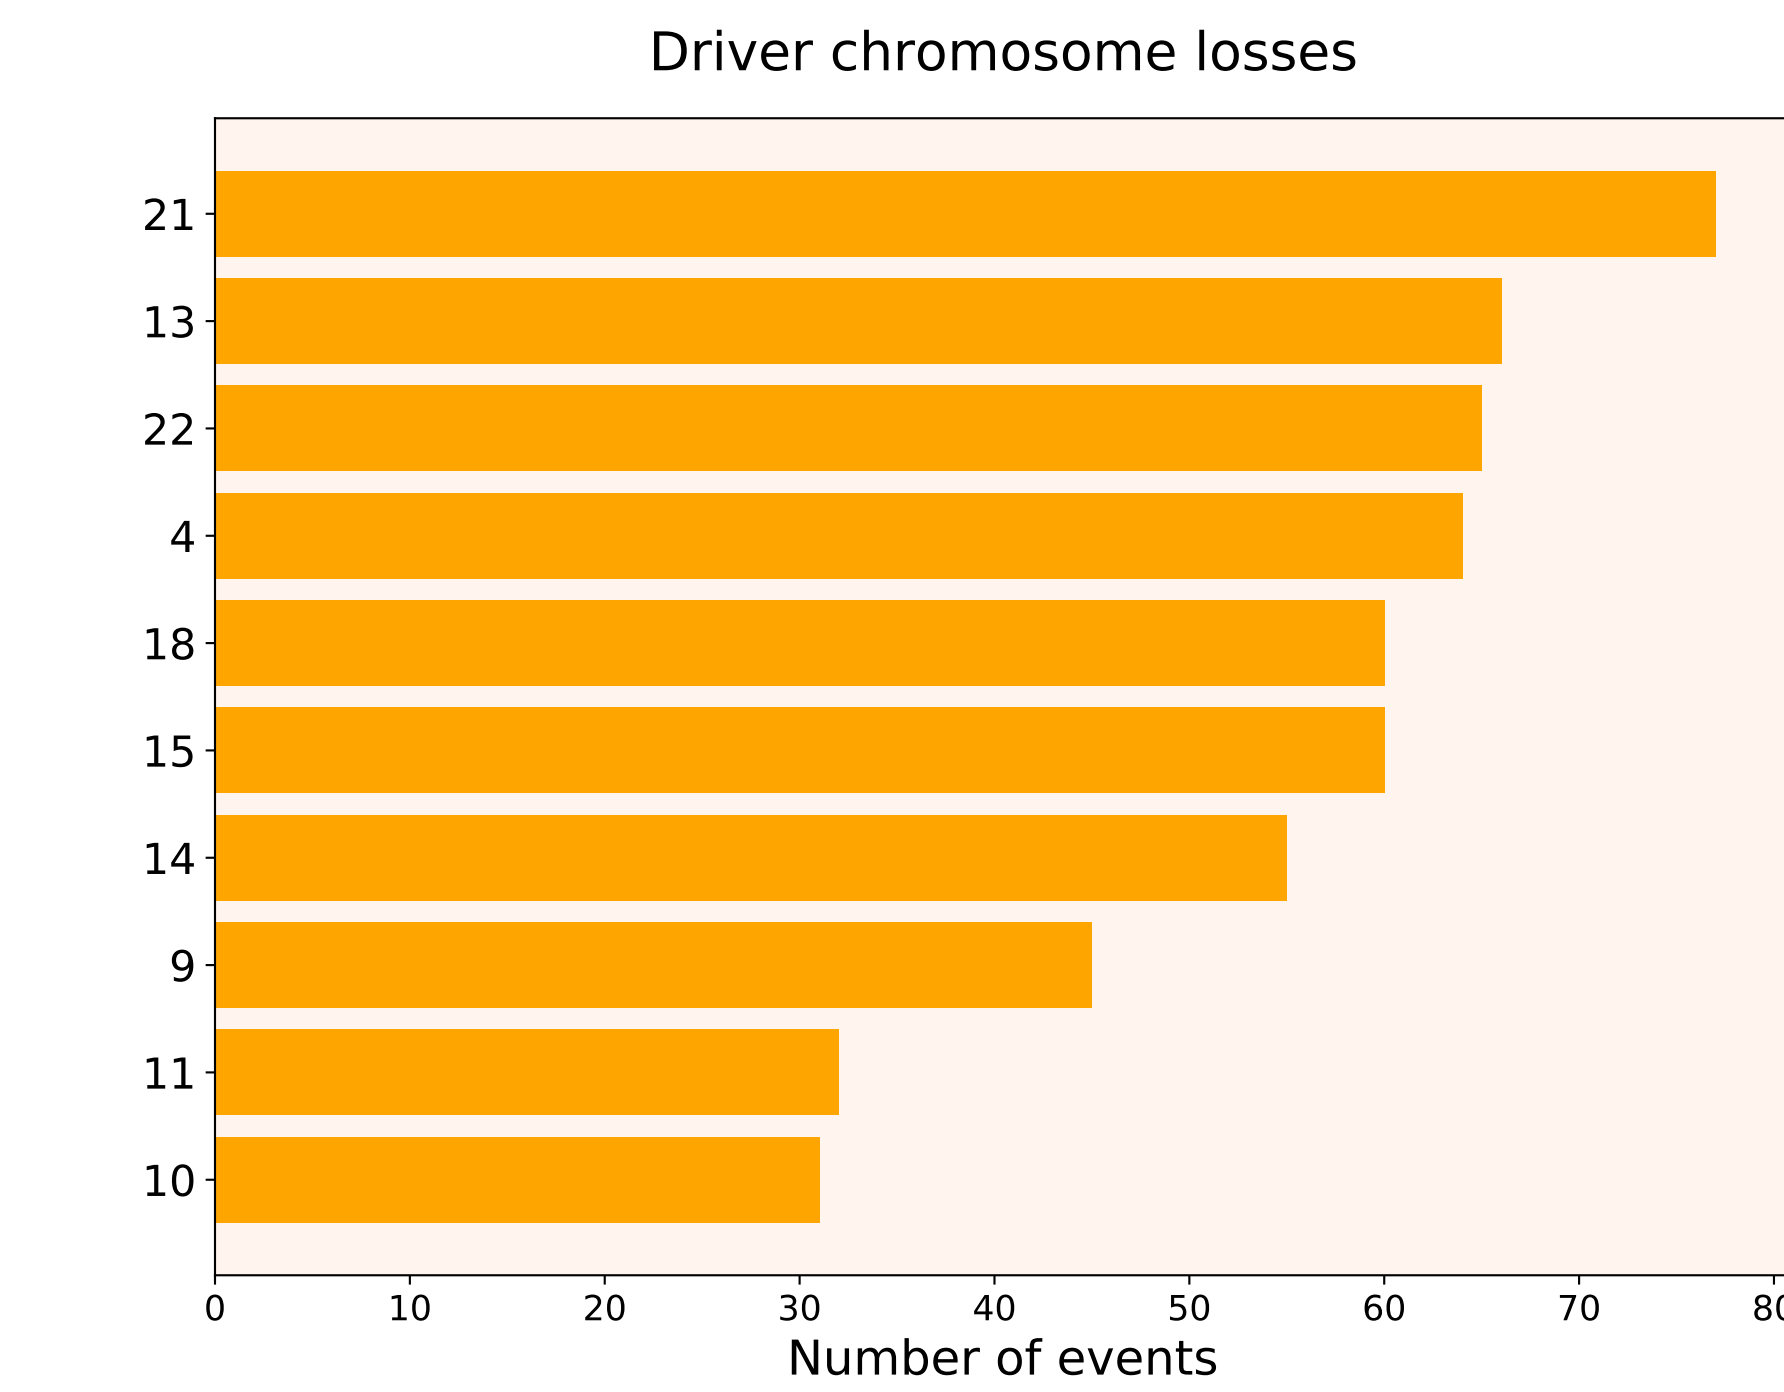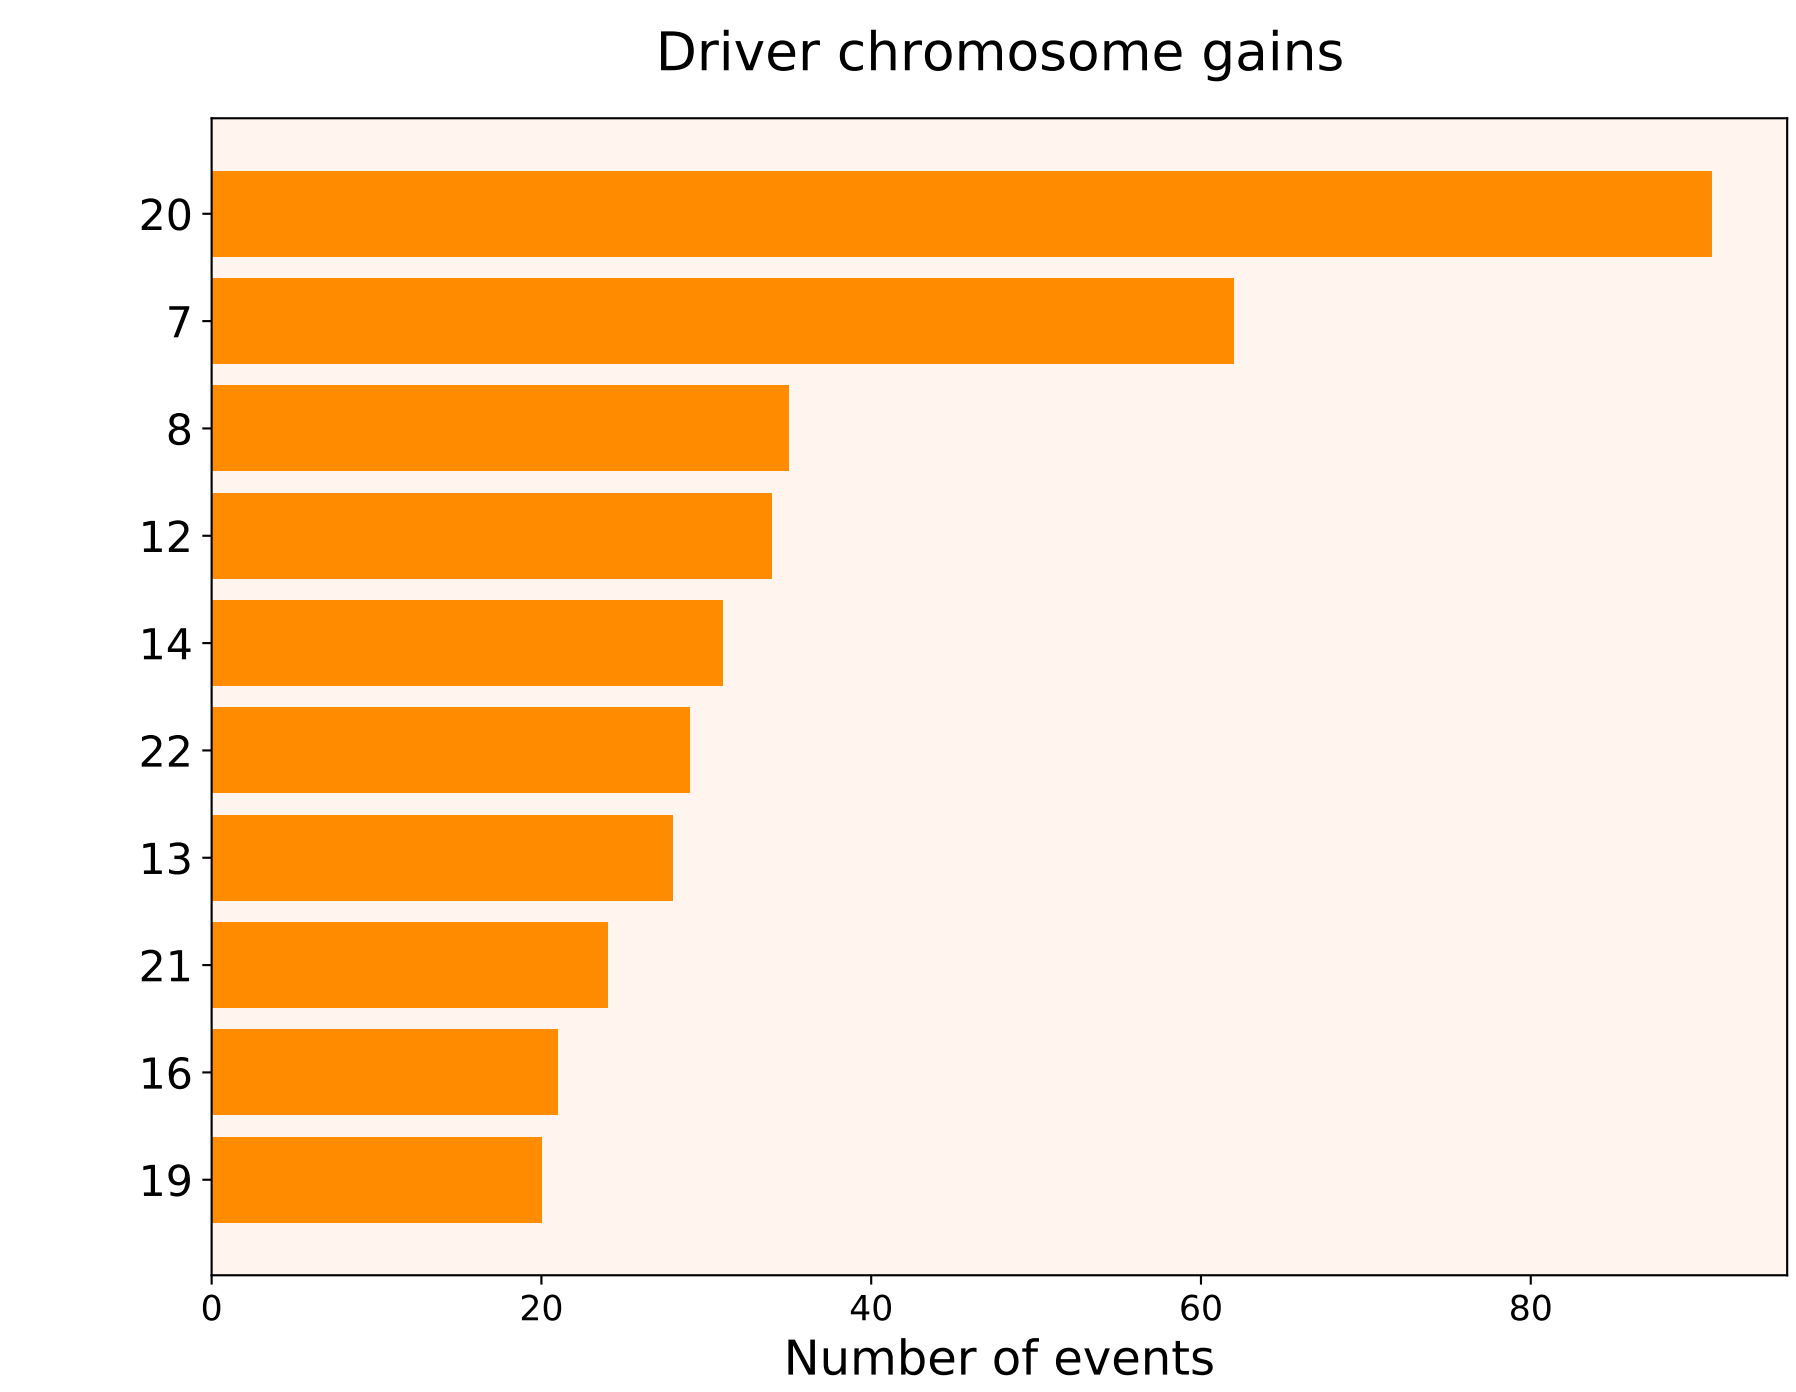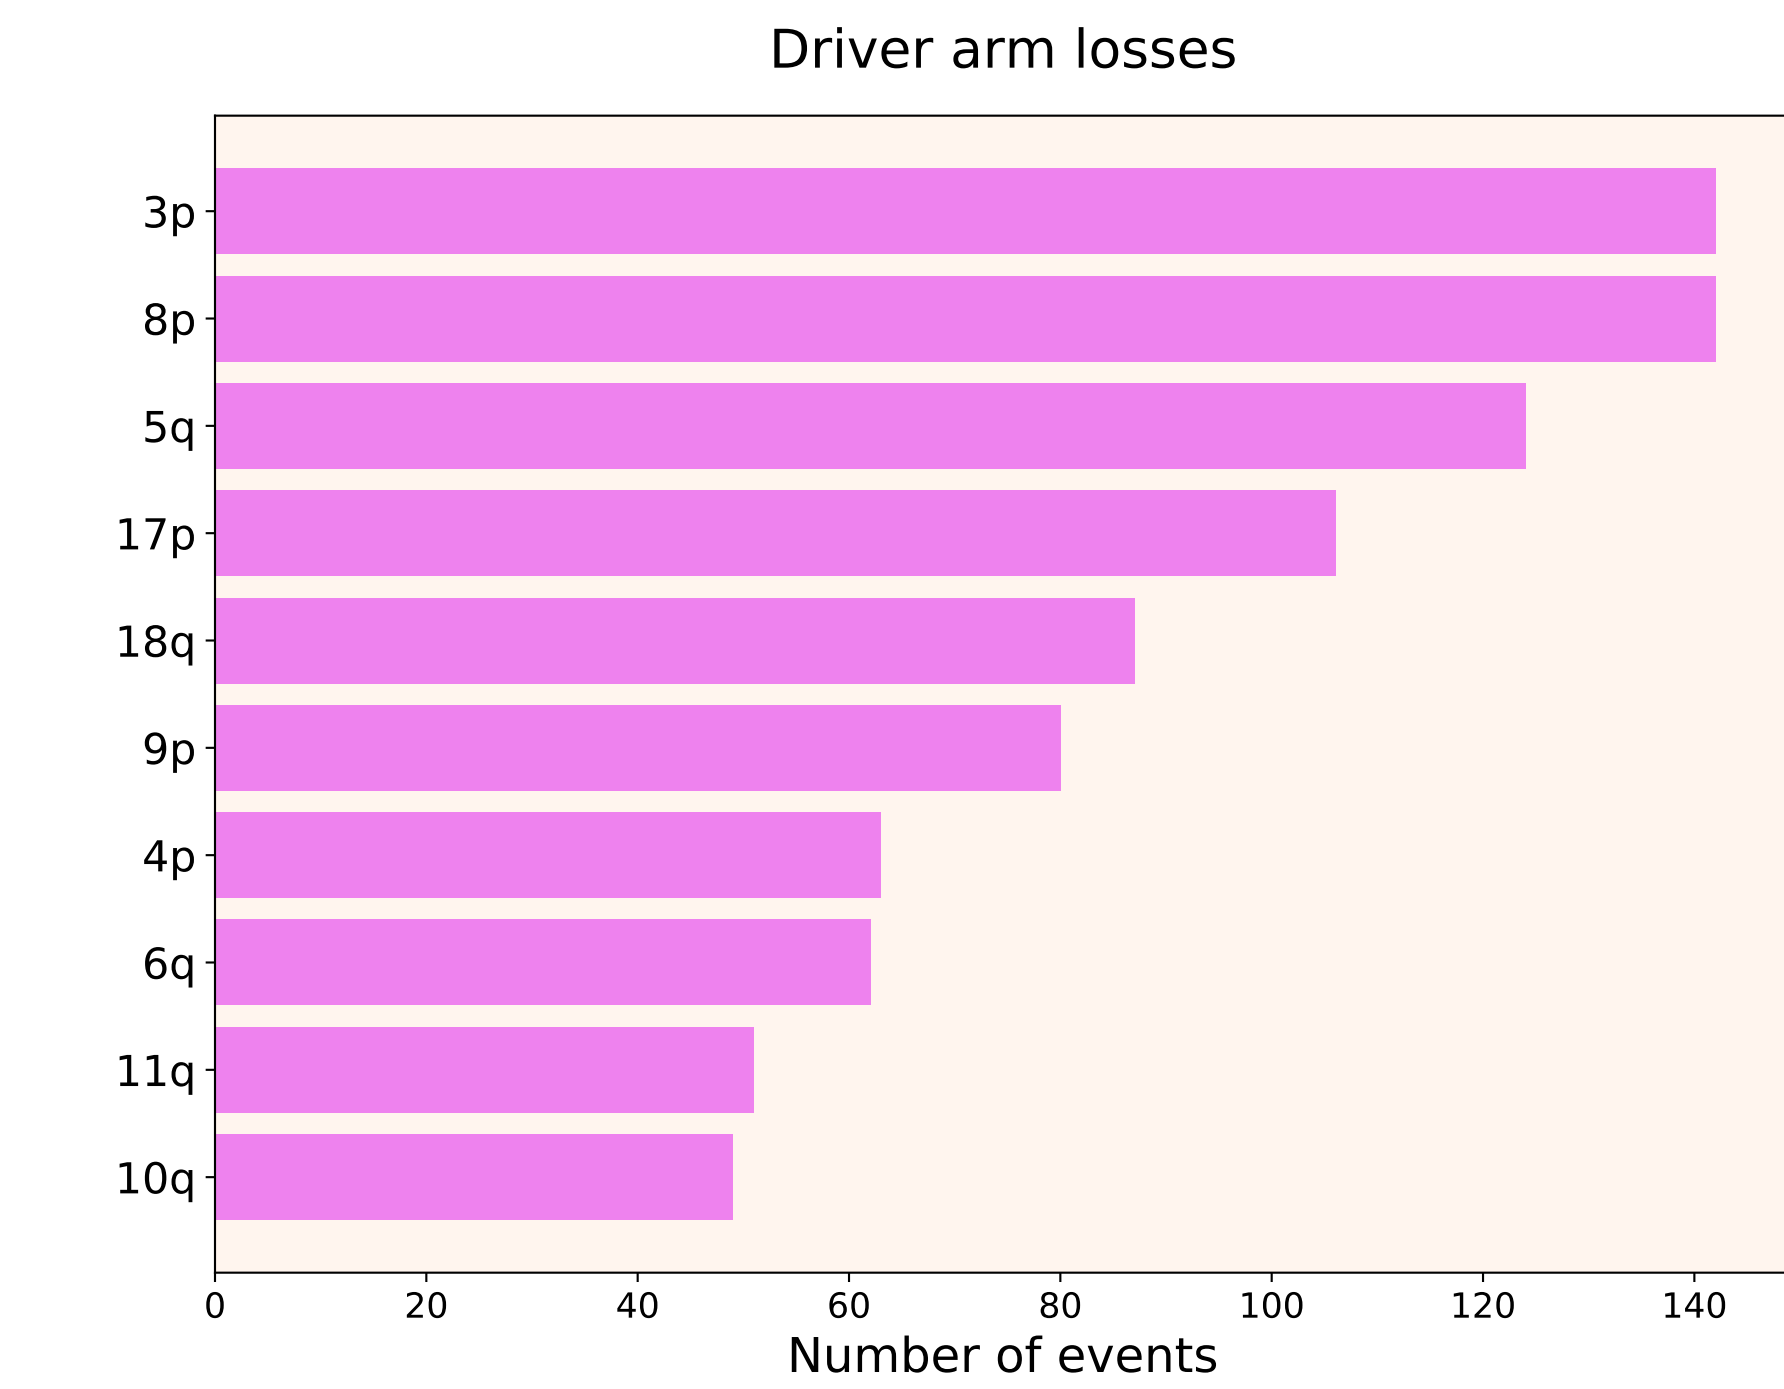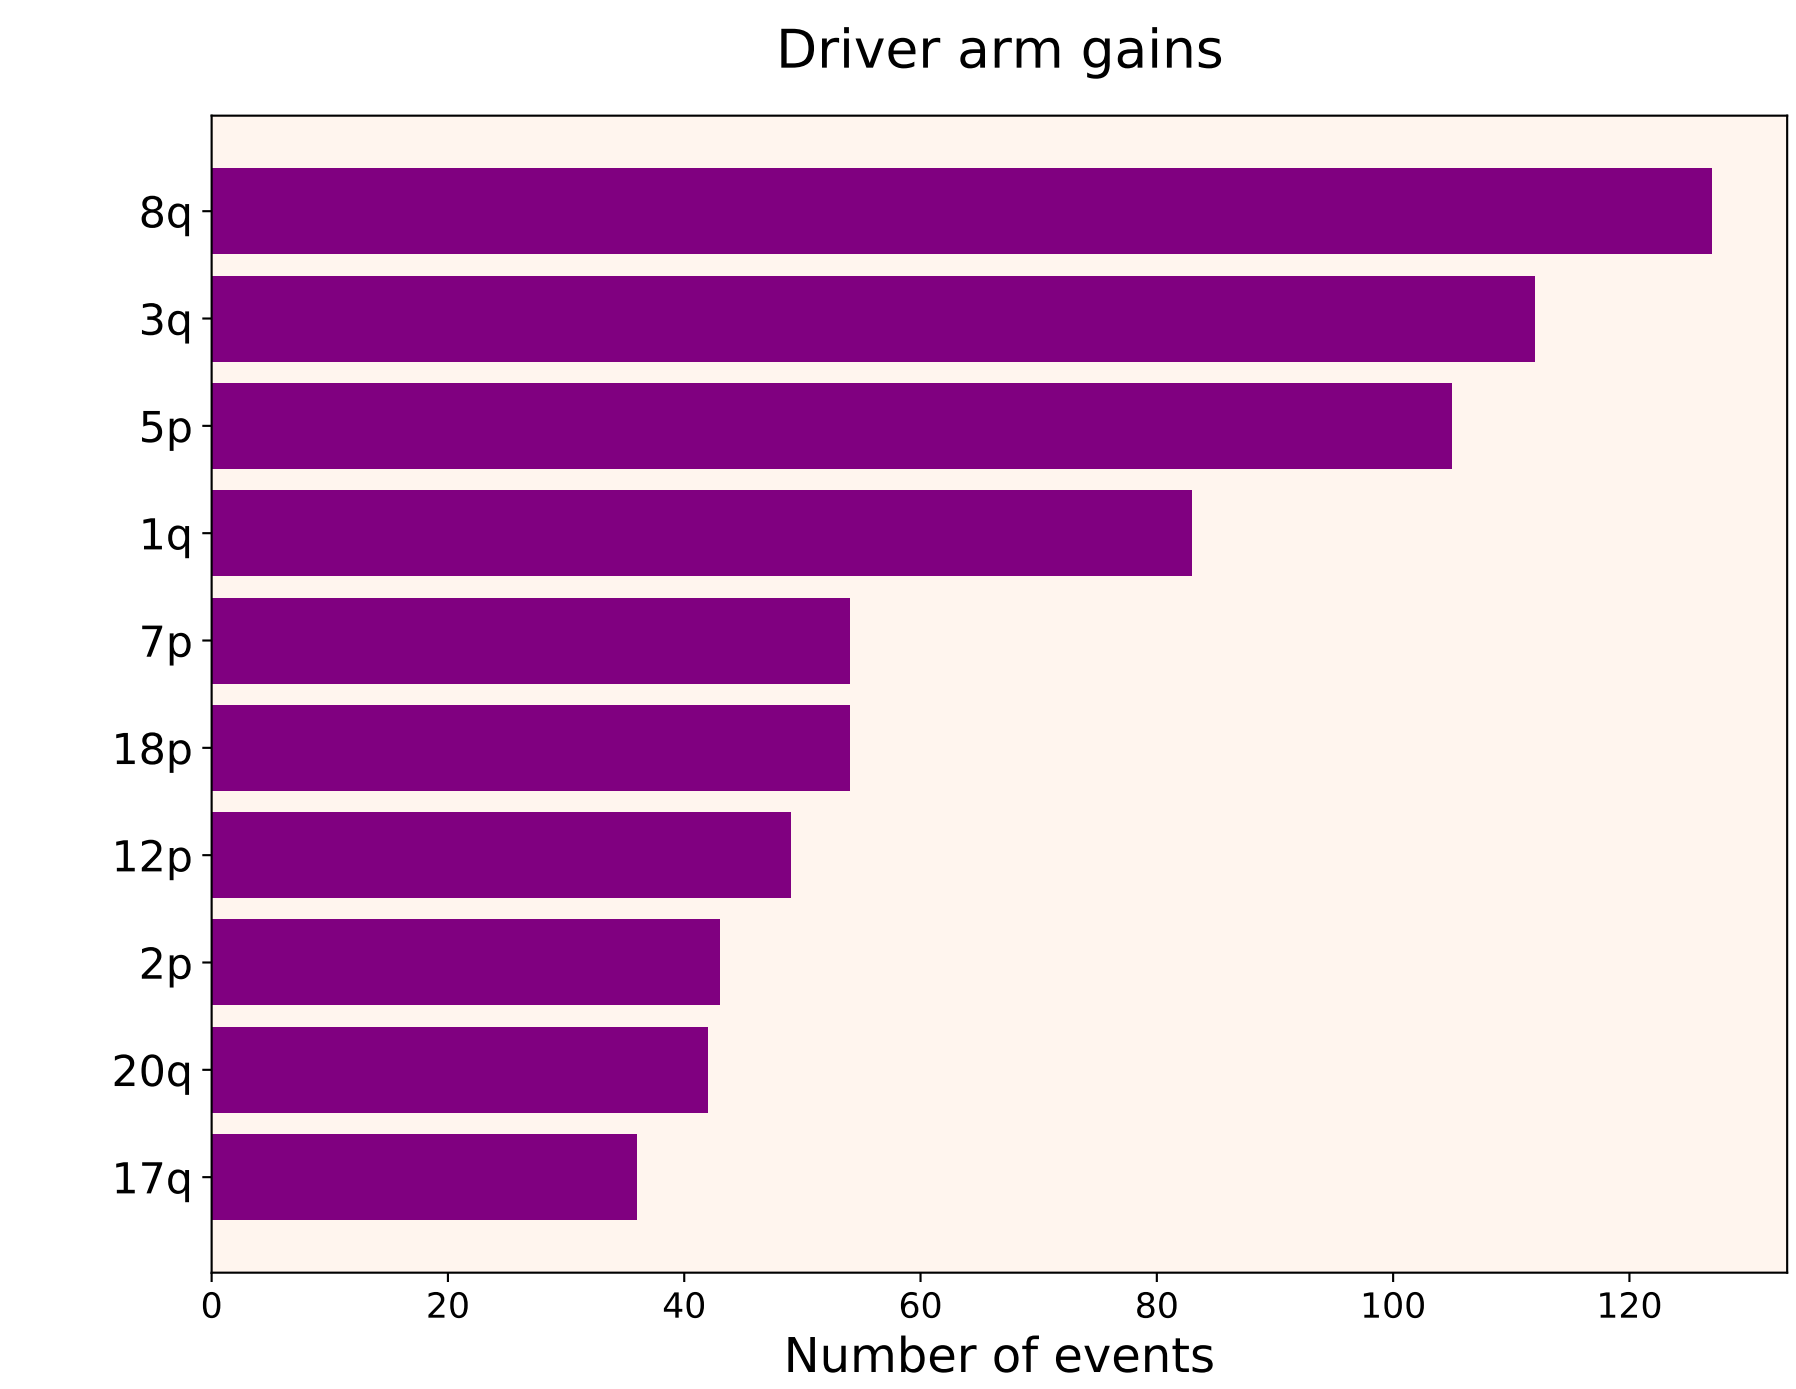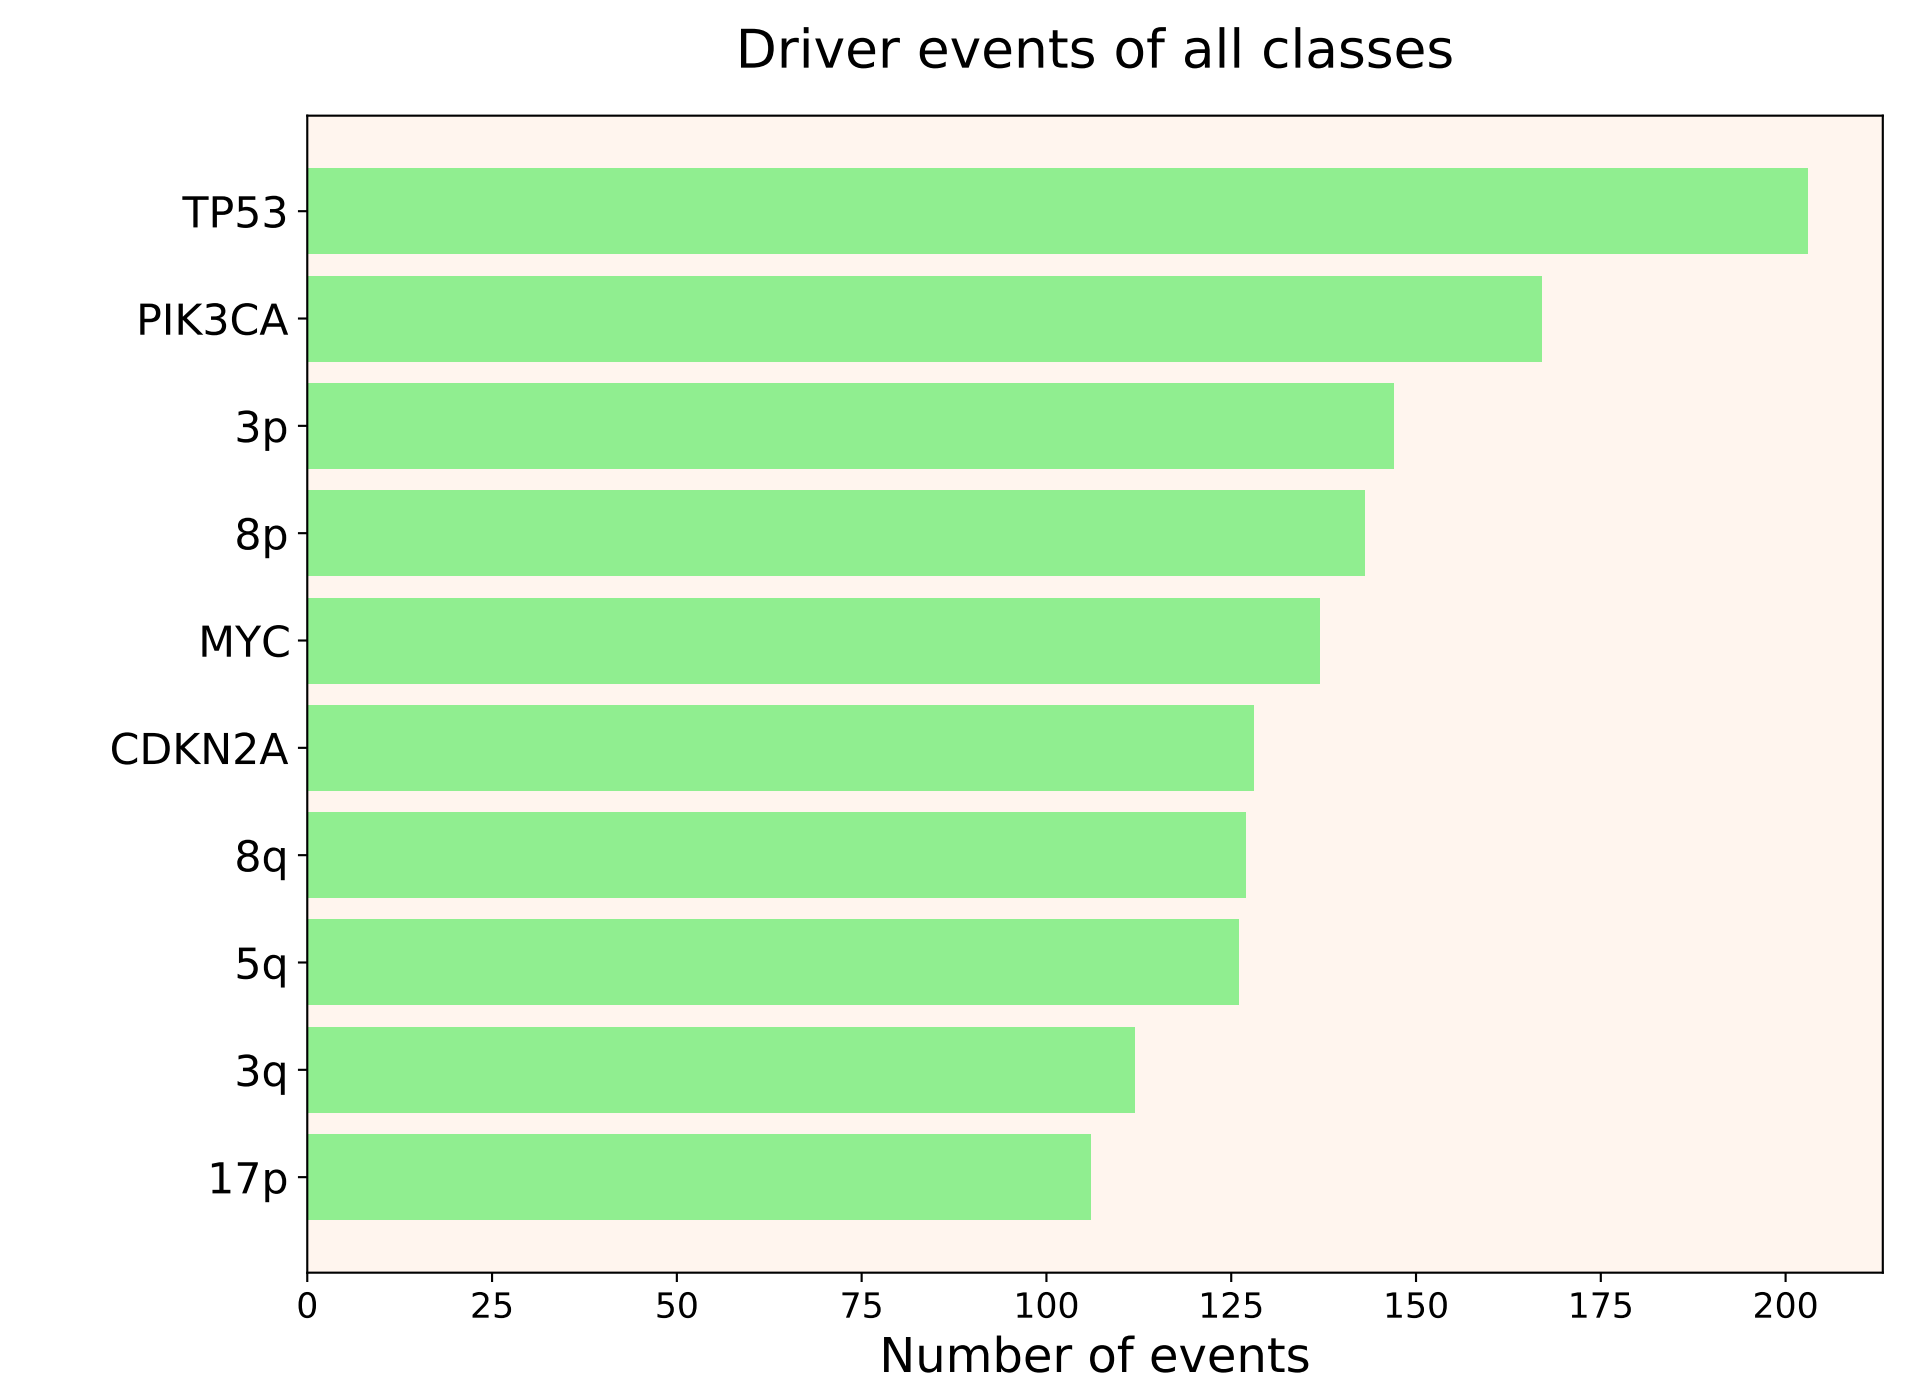

Supplement: Supplemental_Data_S1.zip [file Supplemental_Data_S1.zip]

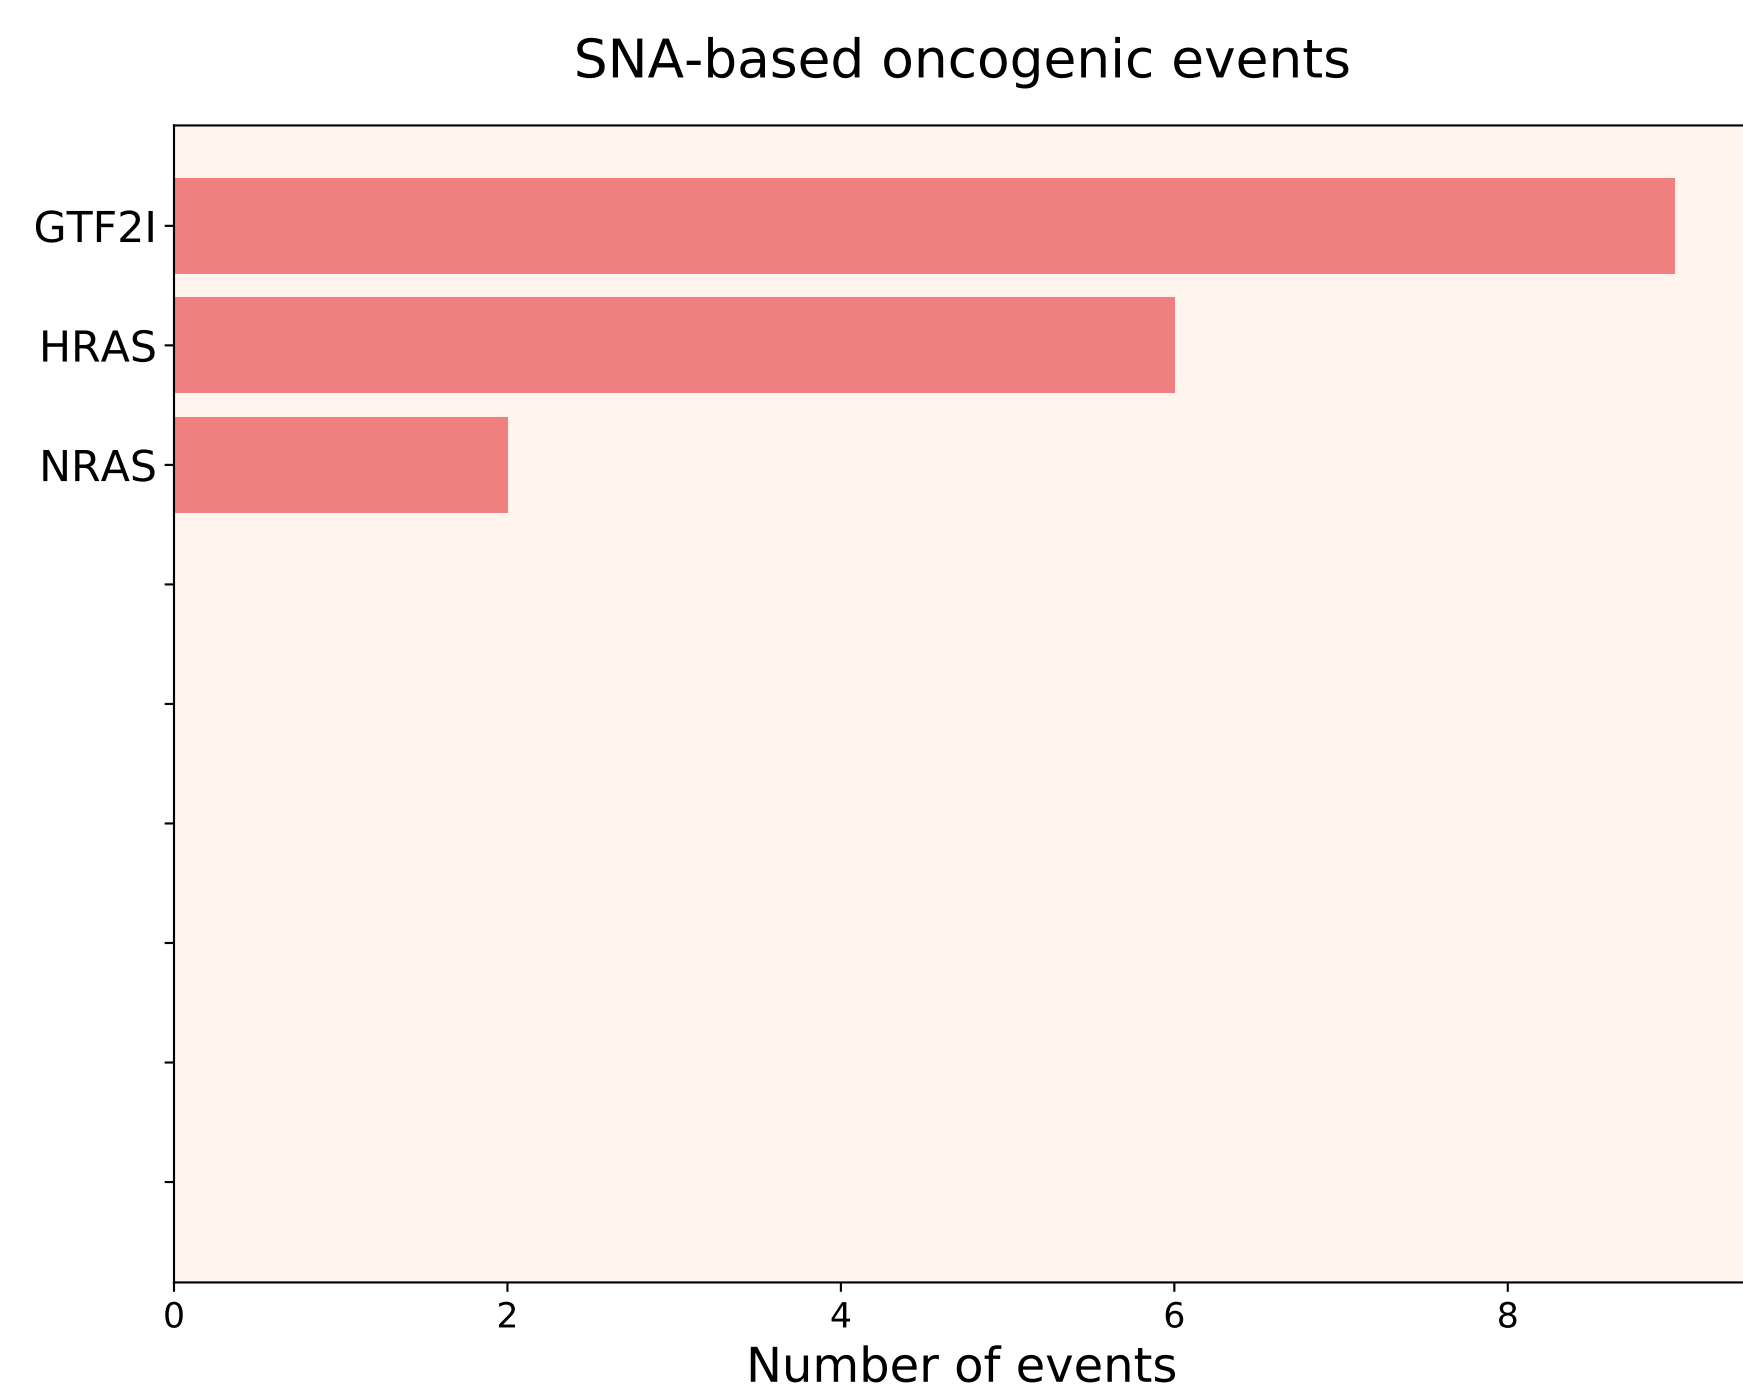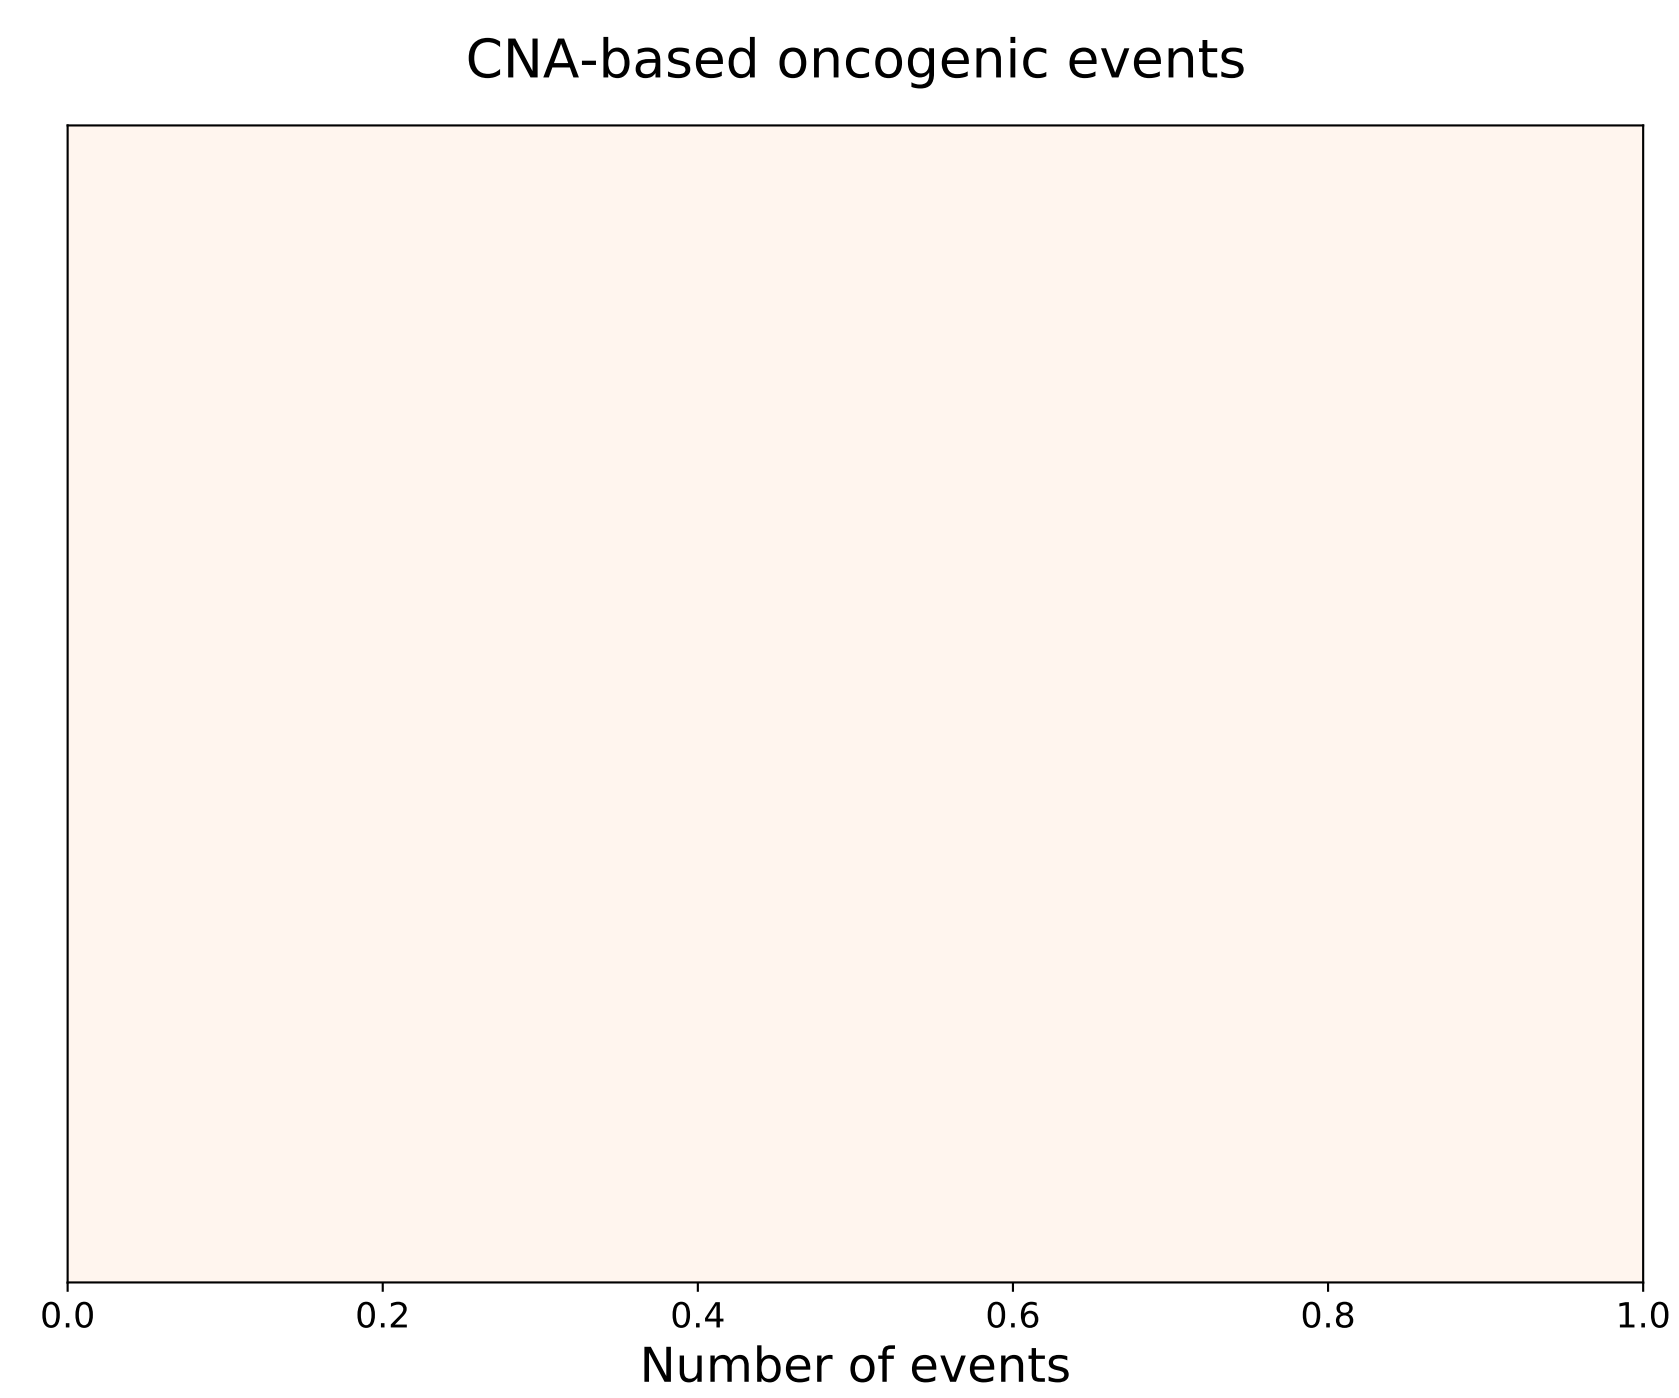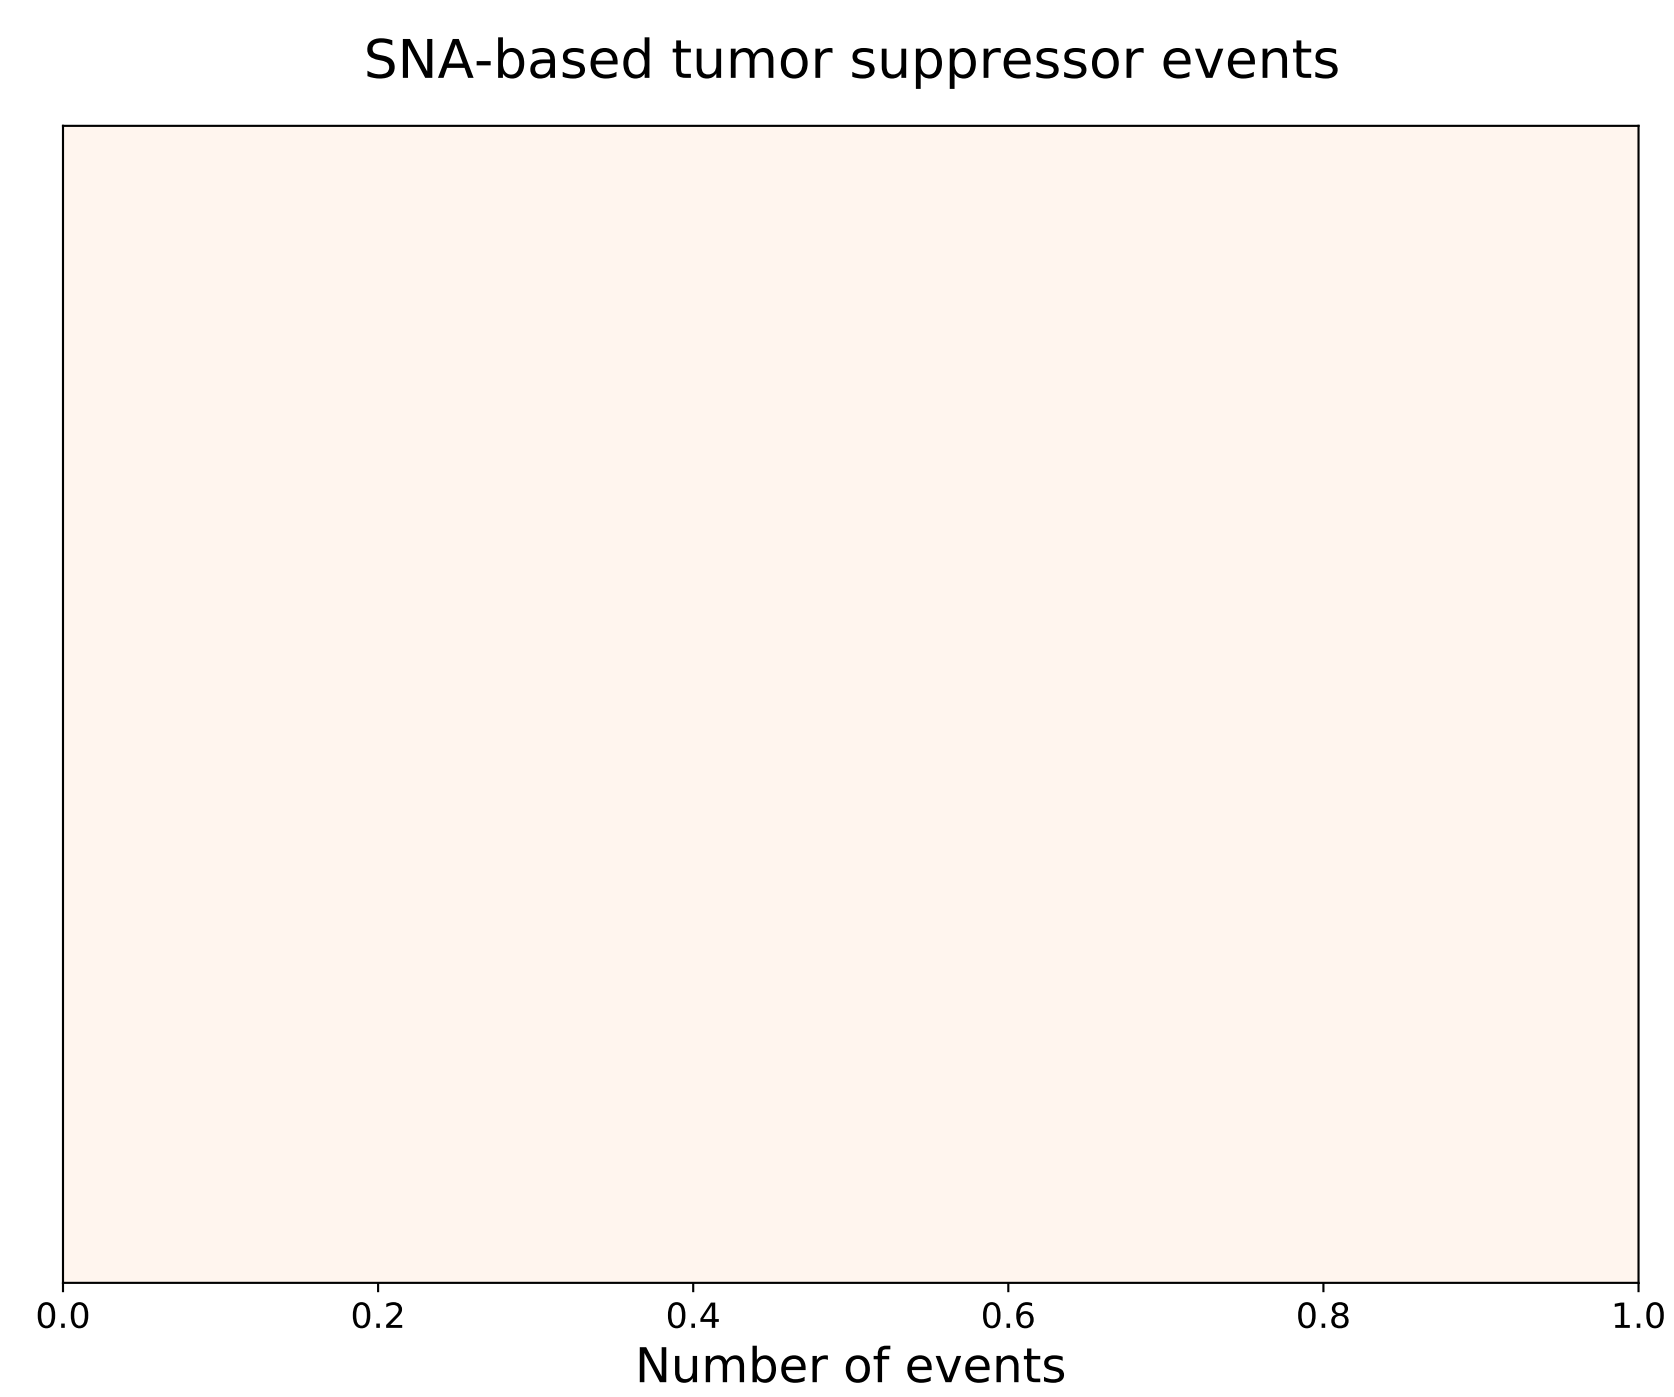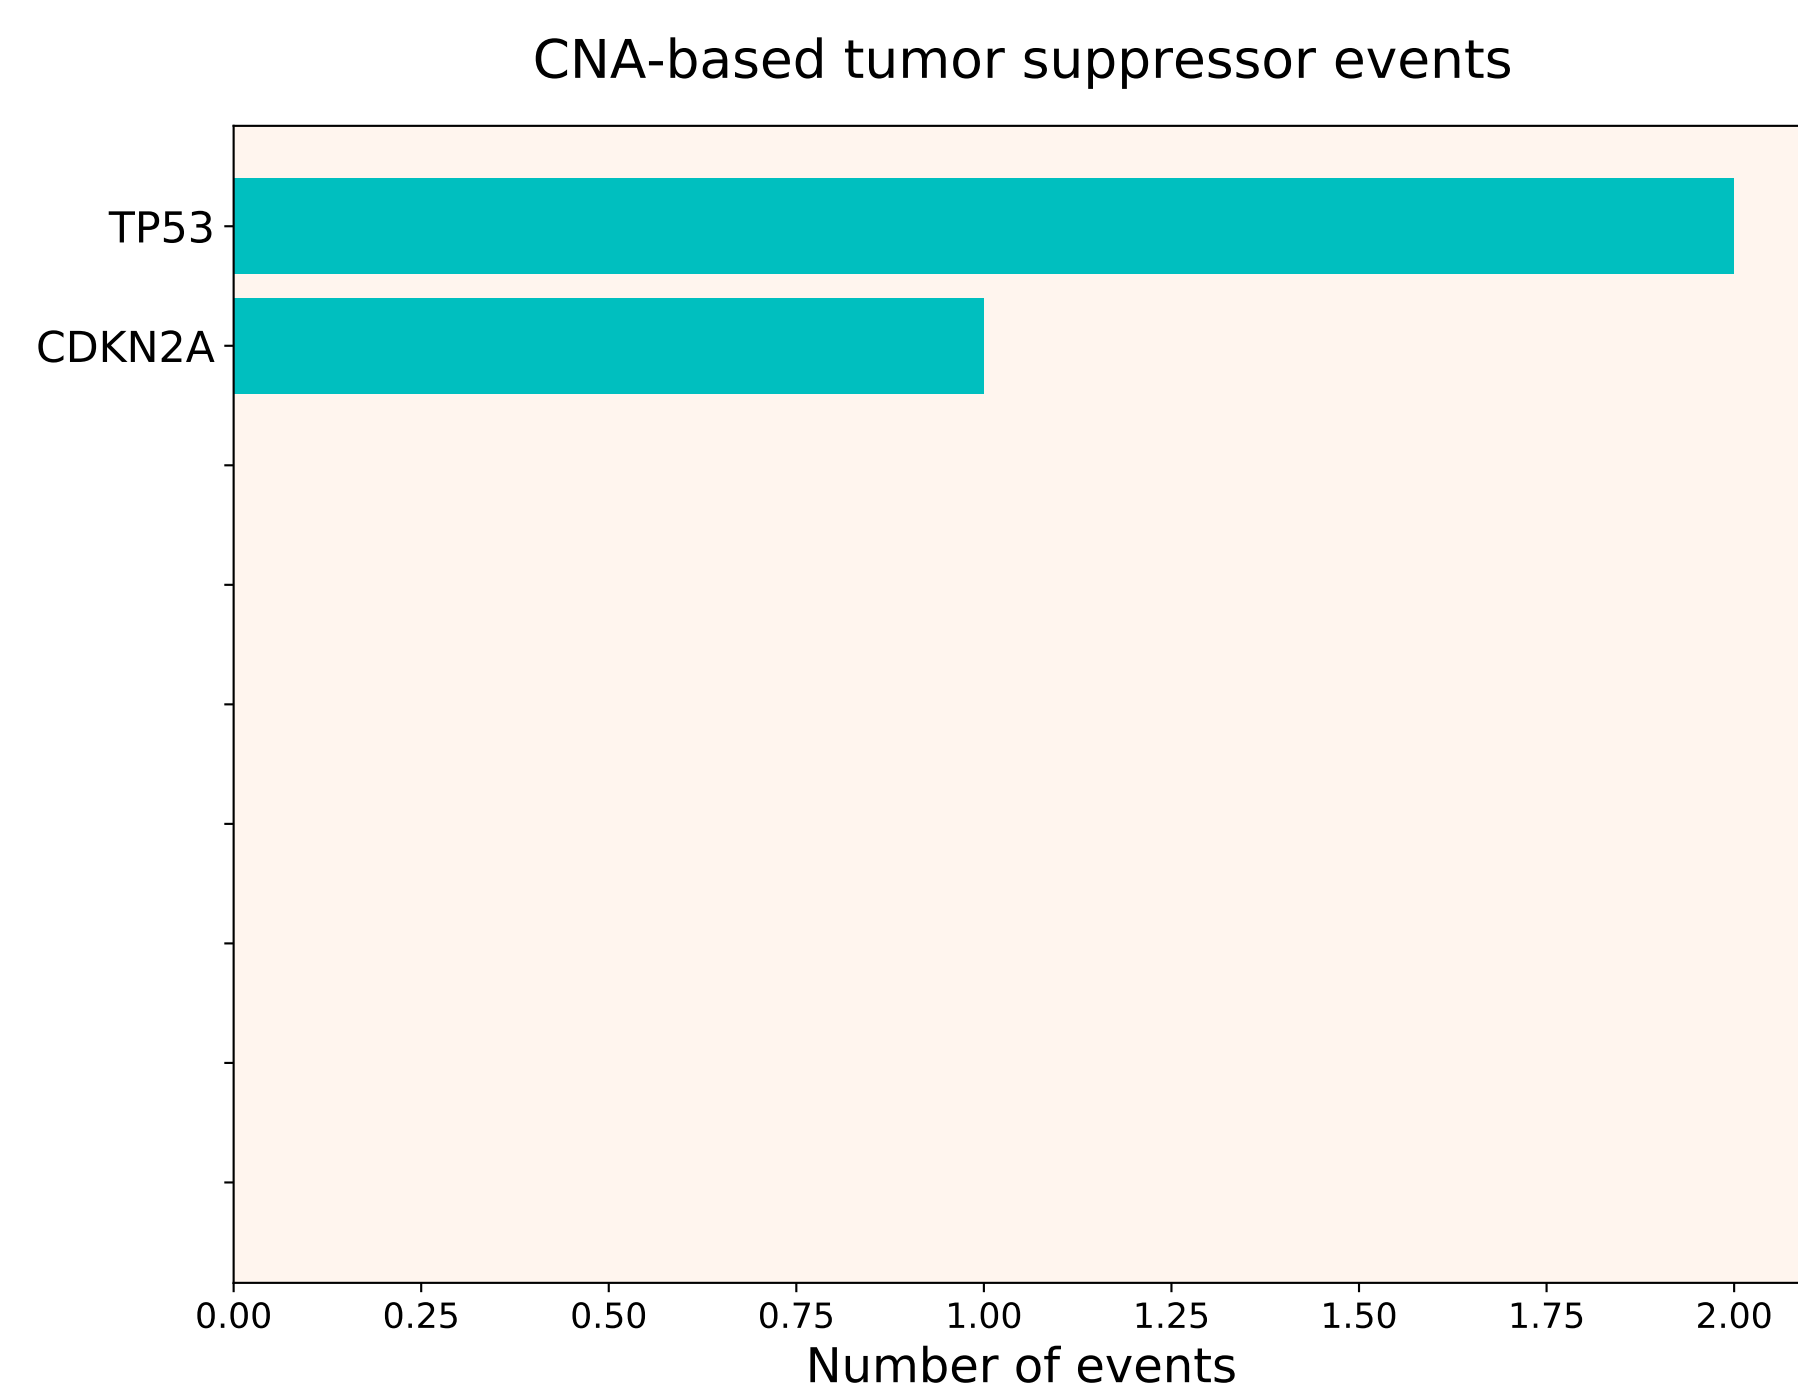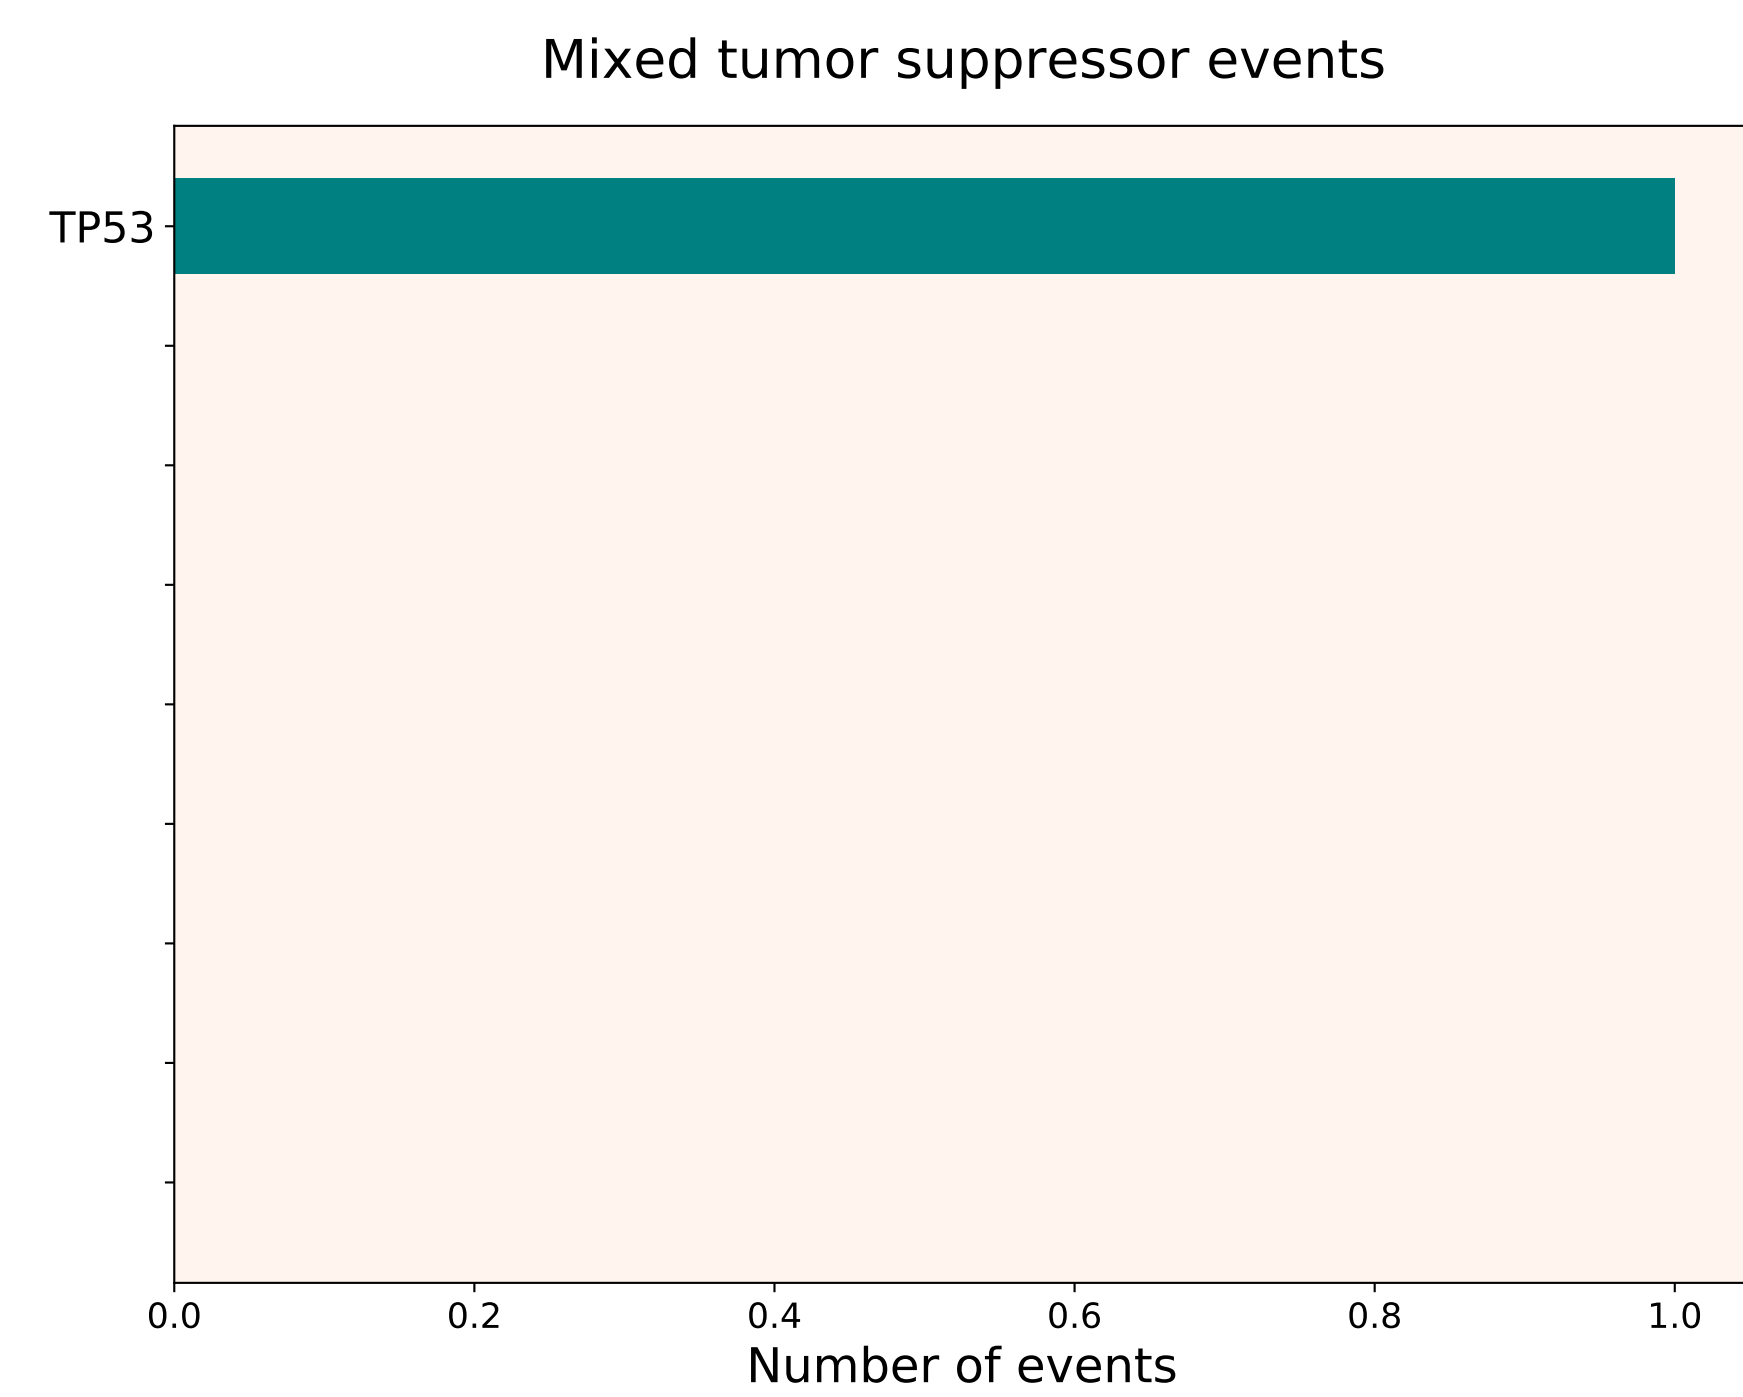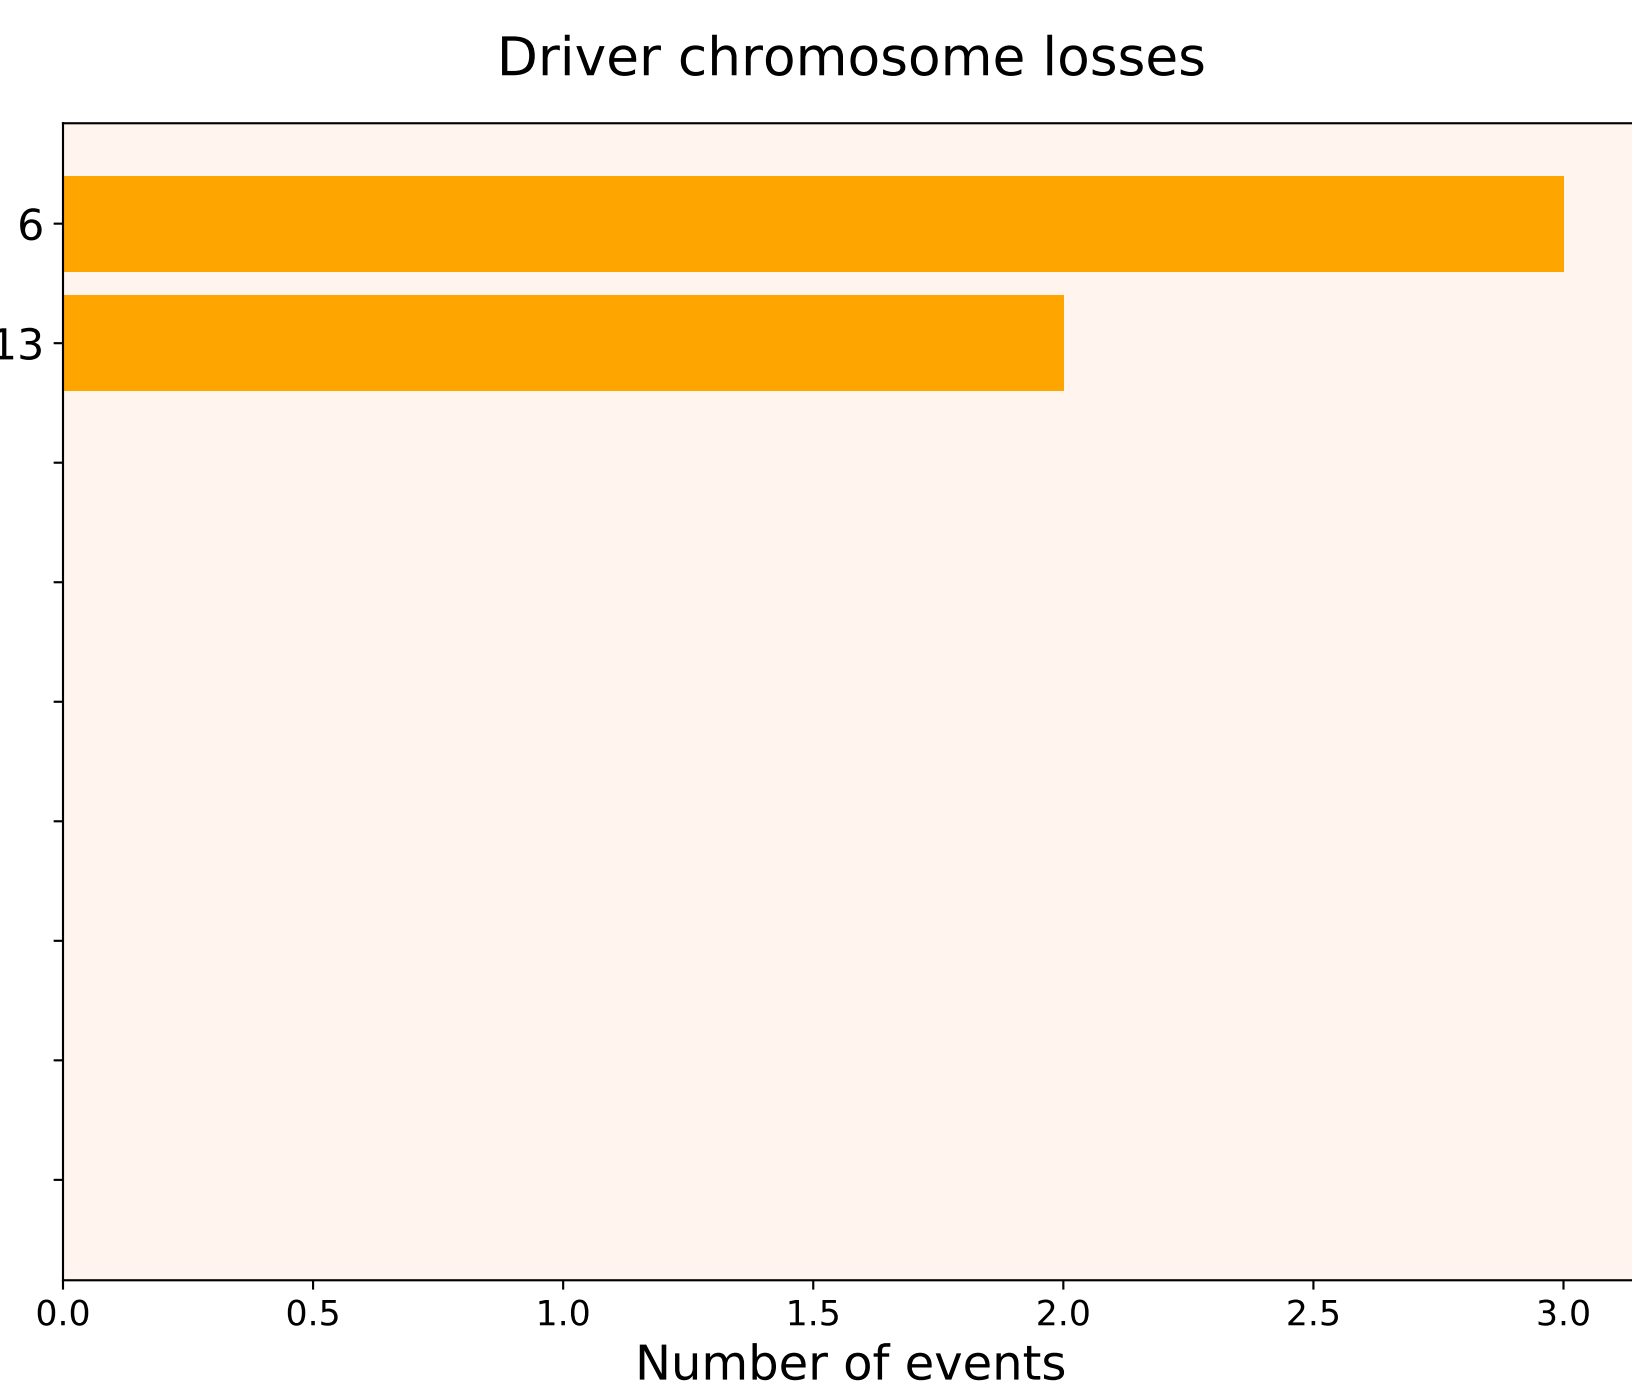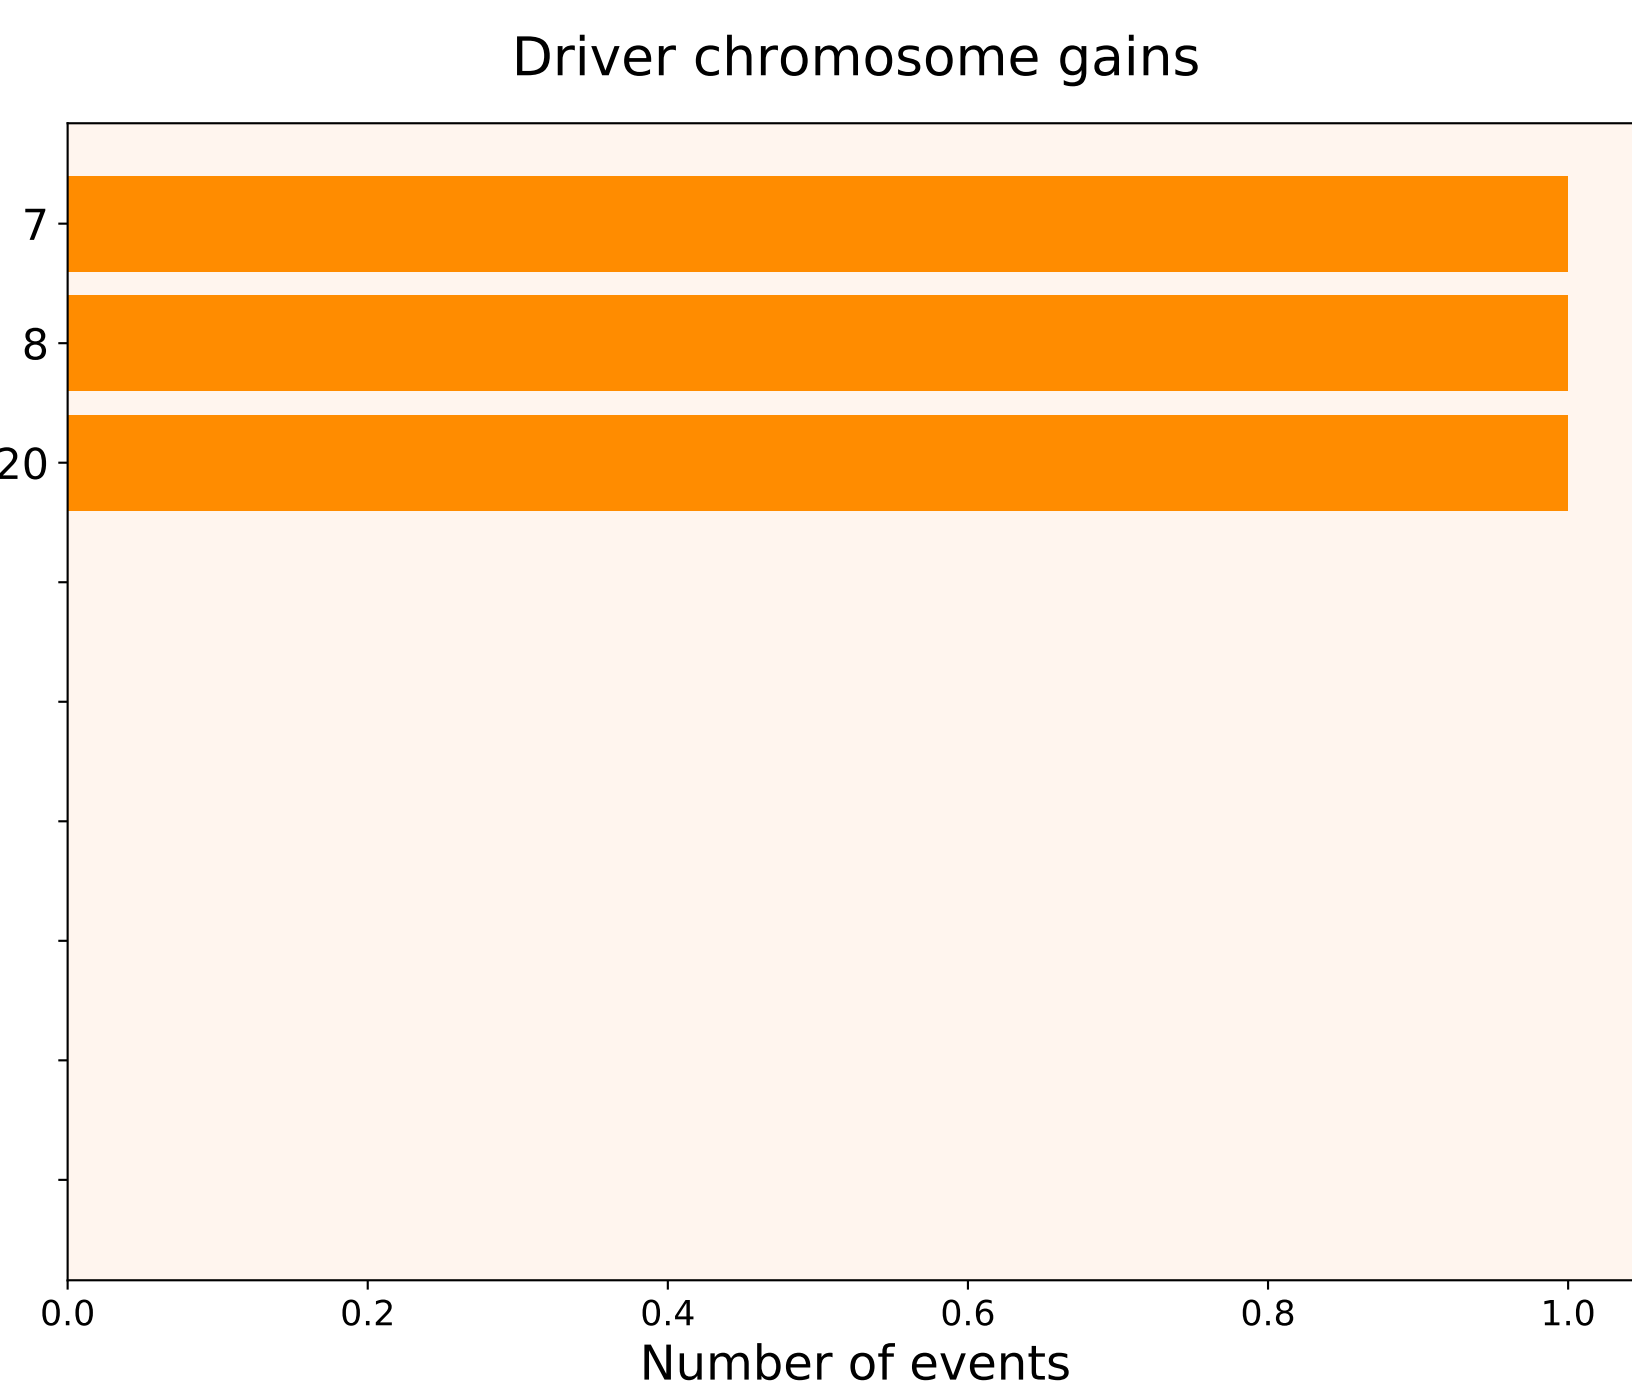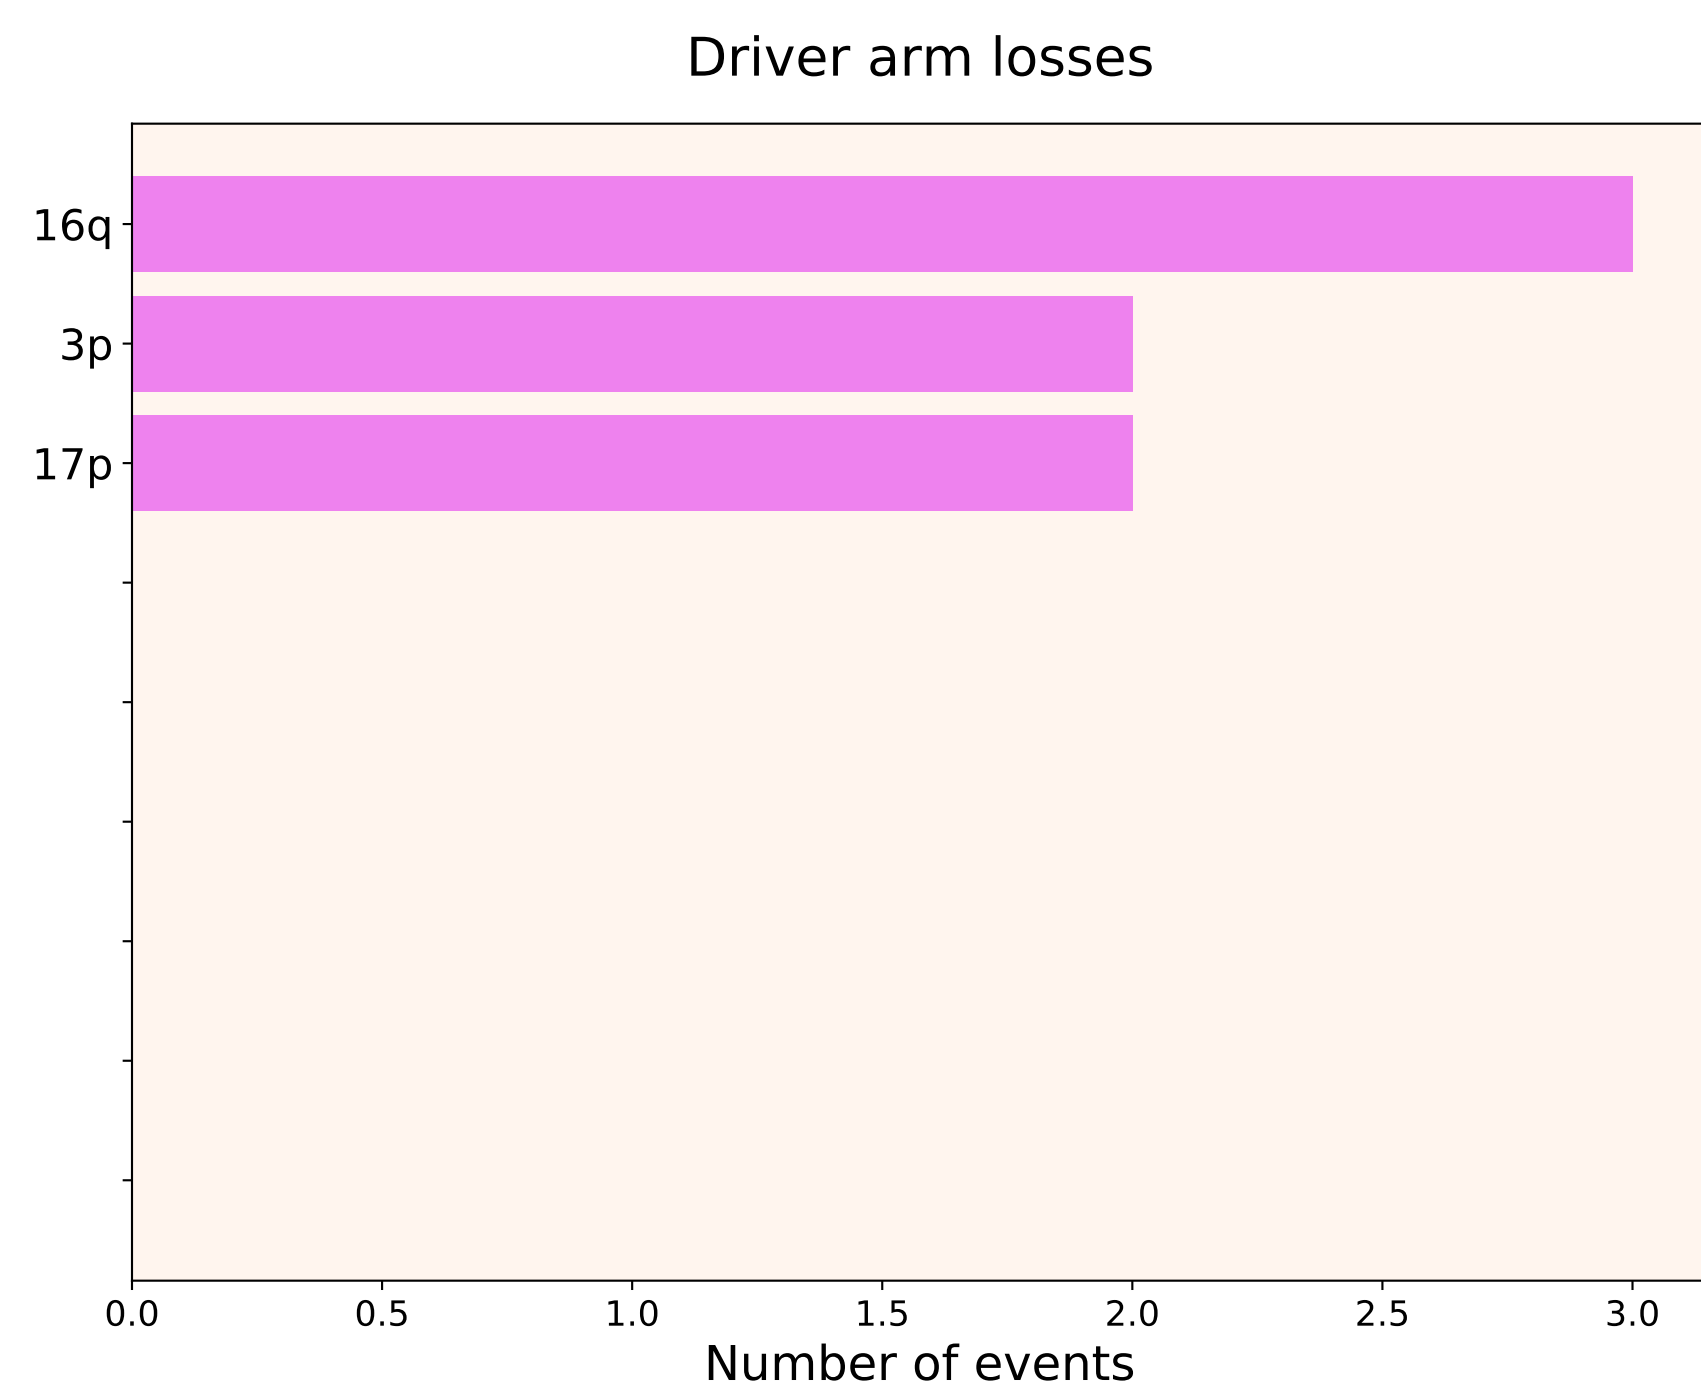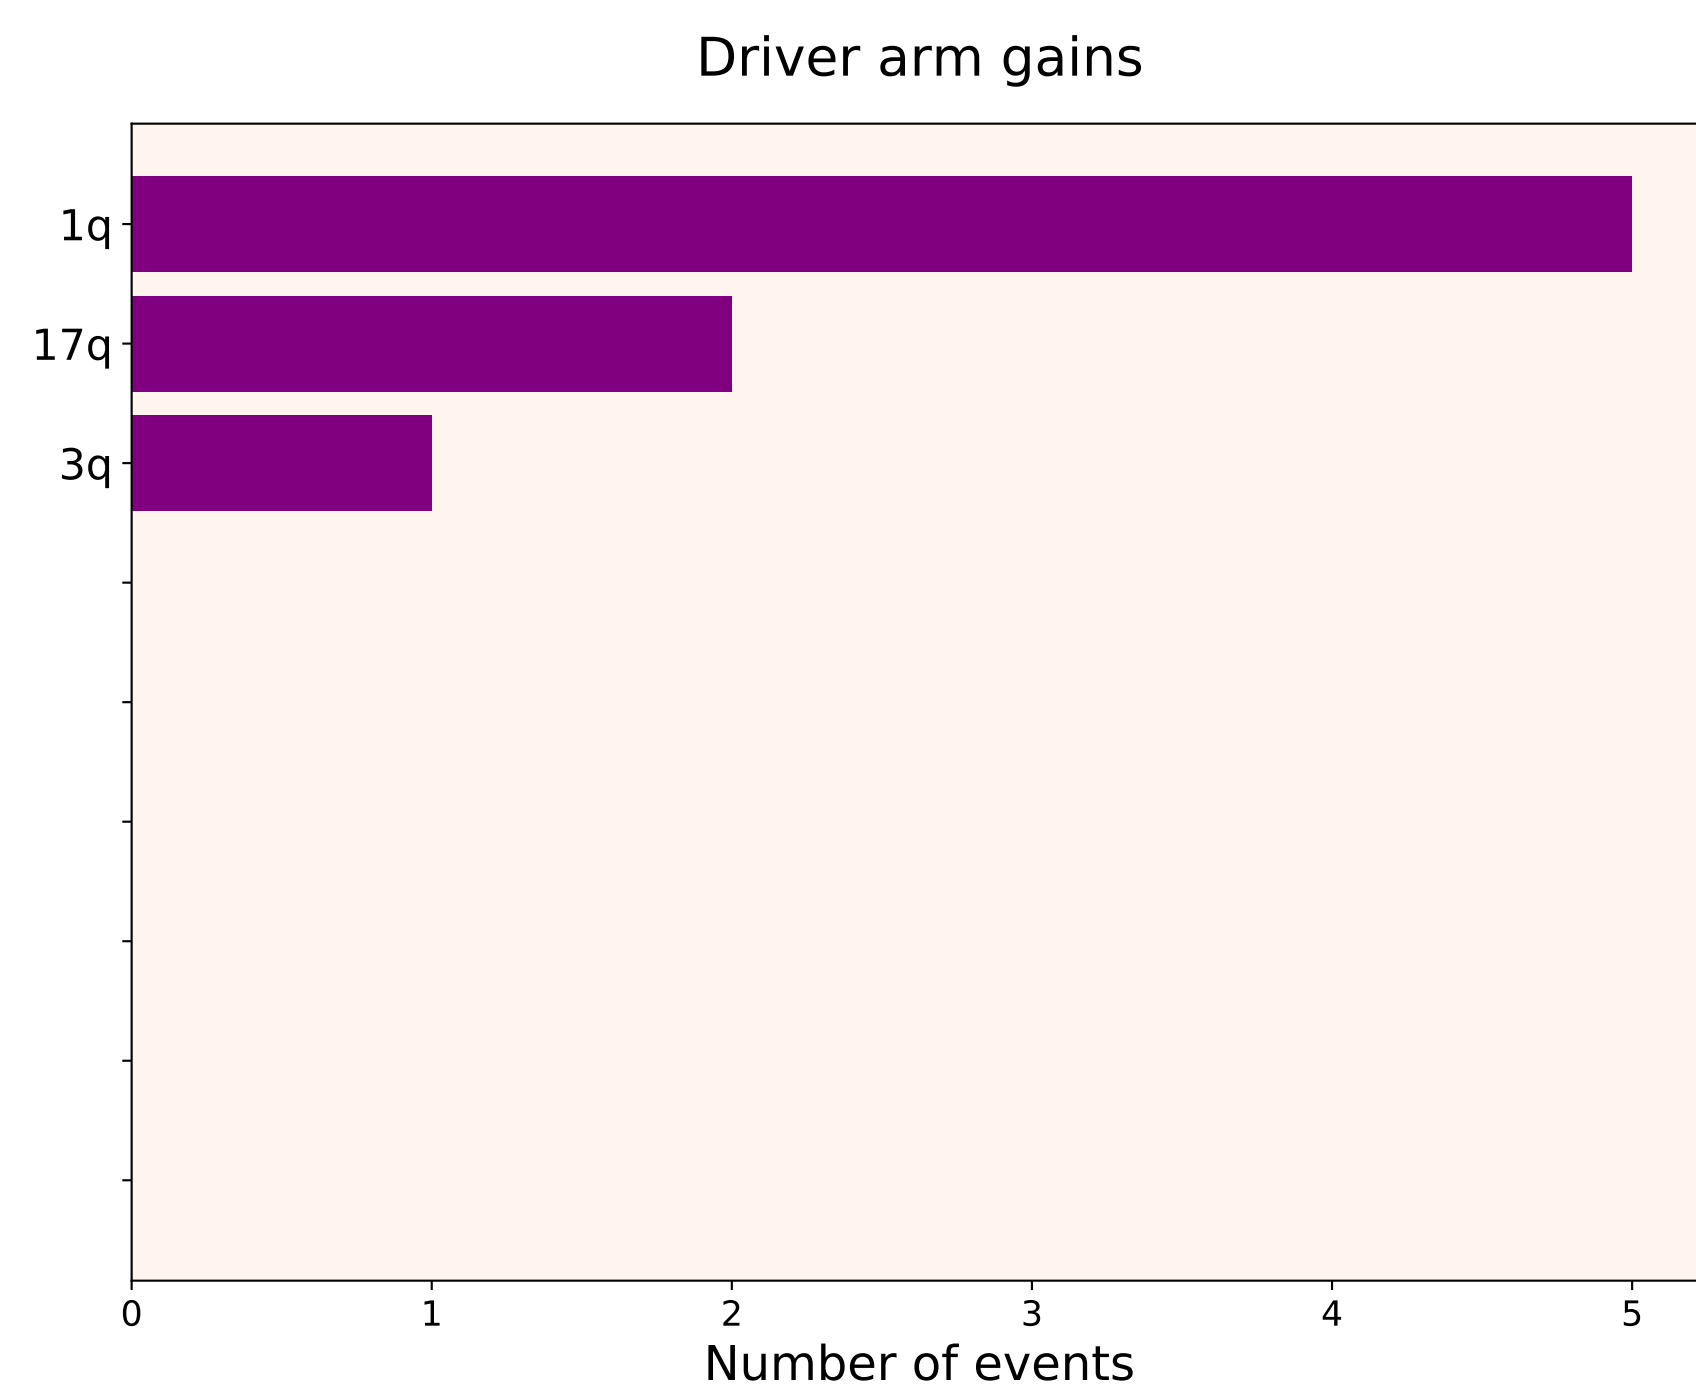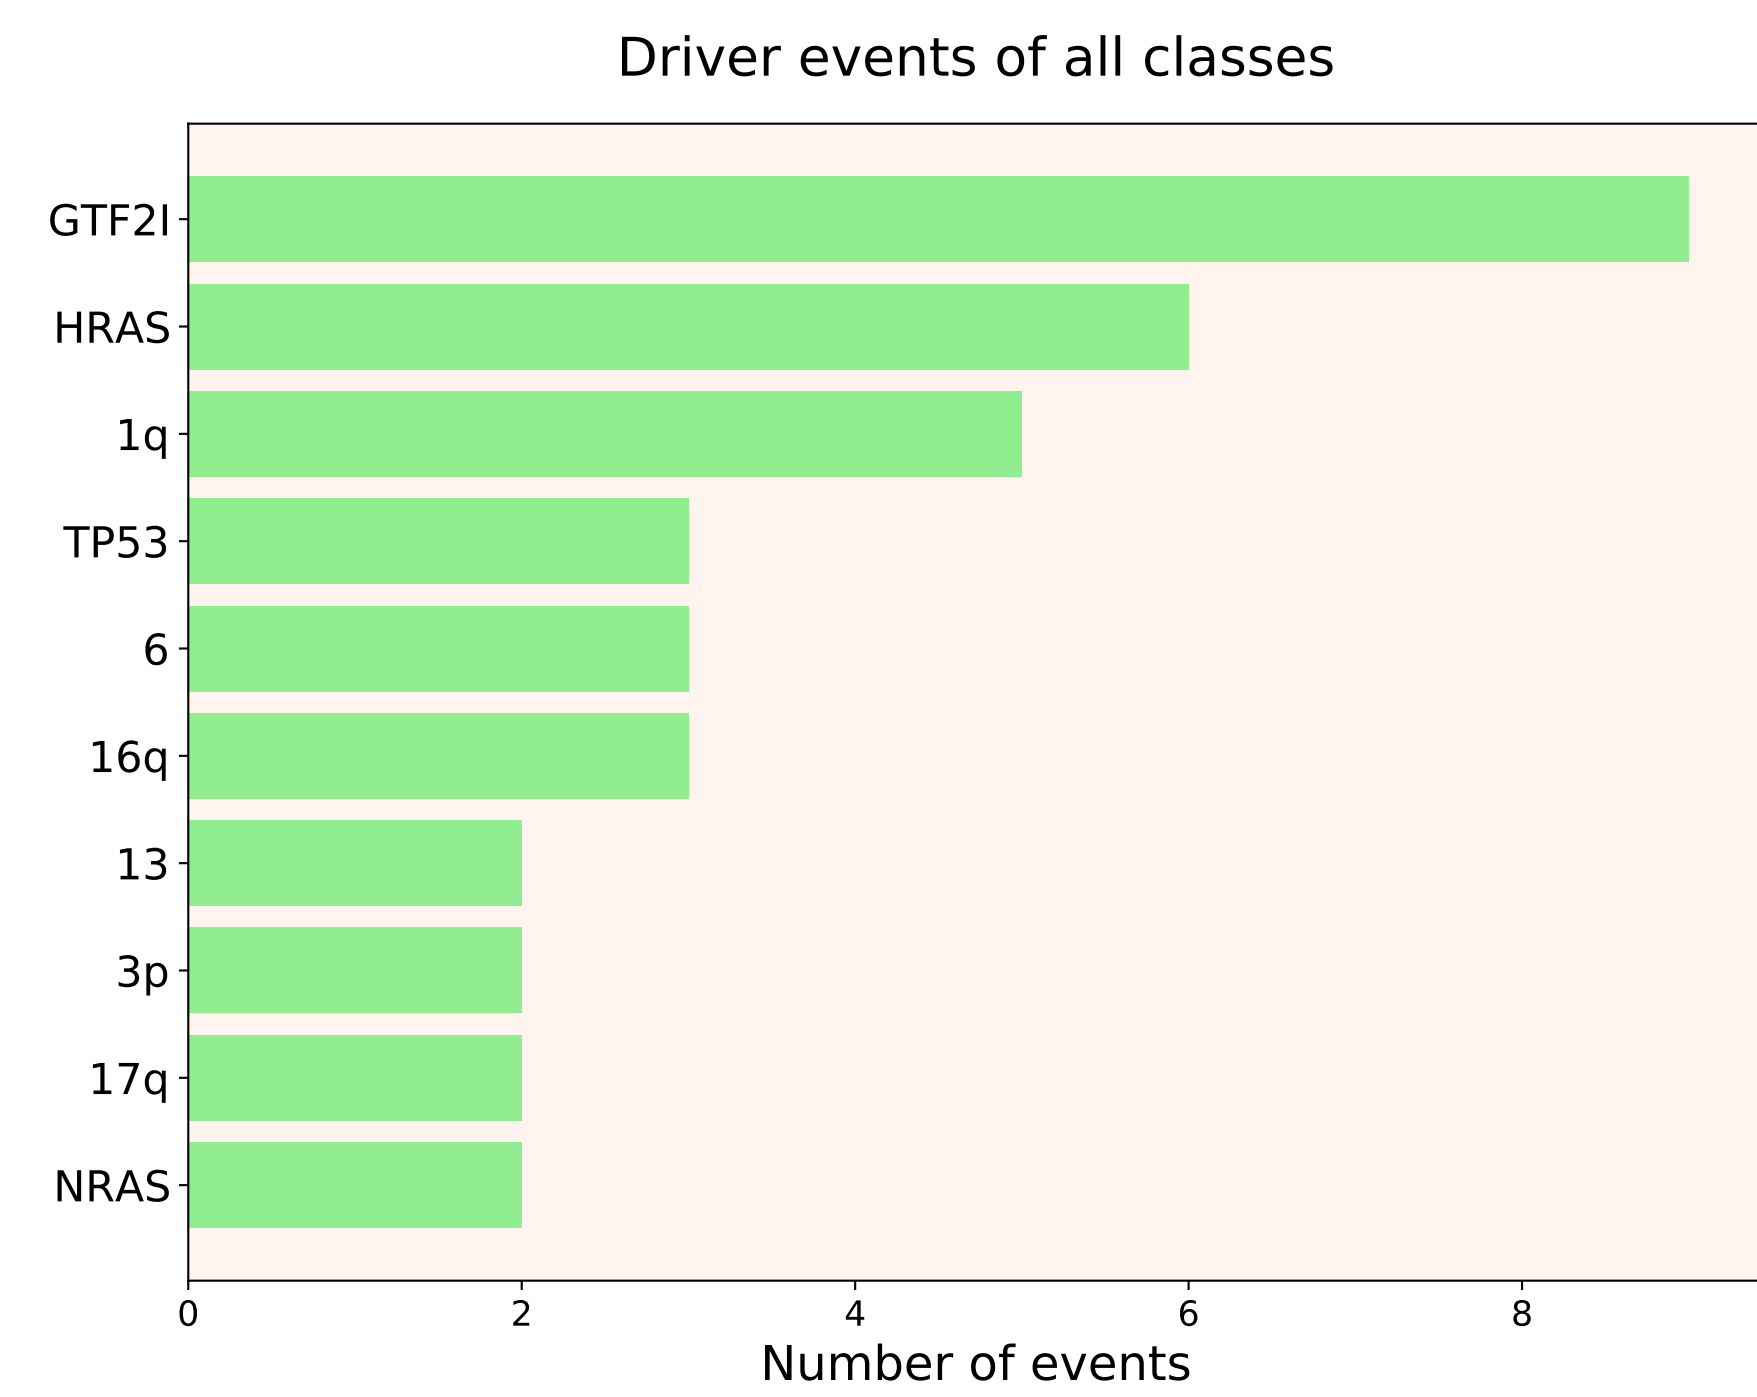

Supplement: Supplemental_Data_S1.zip [file Supplemental_Data_S1.zip]

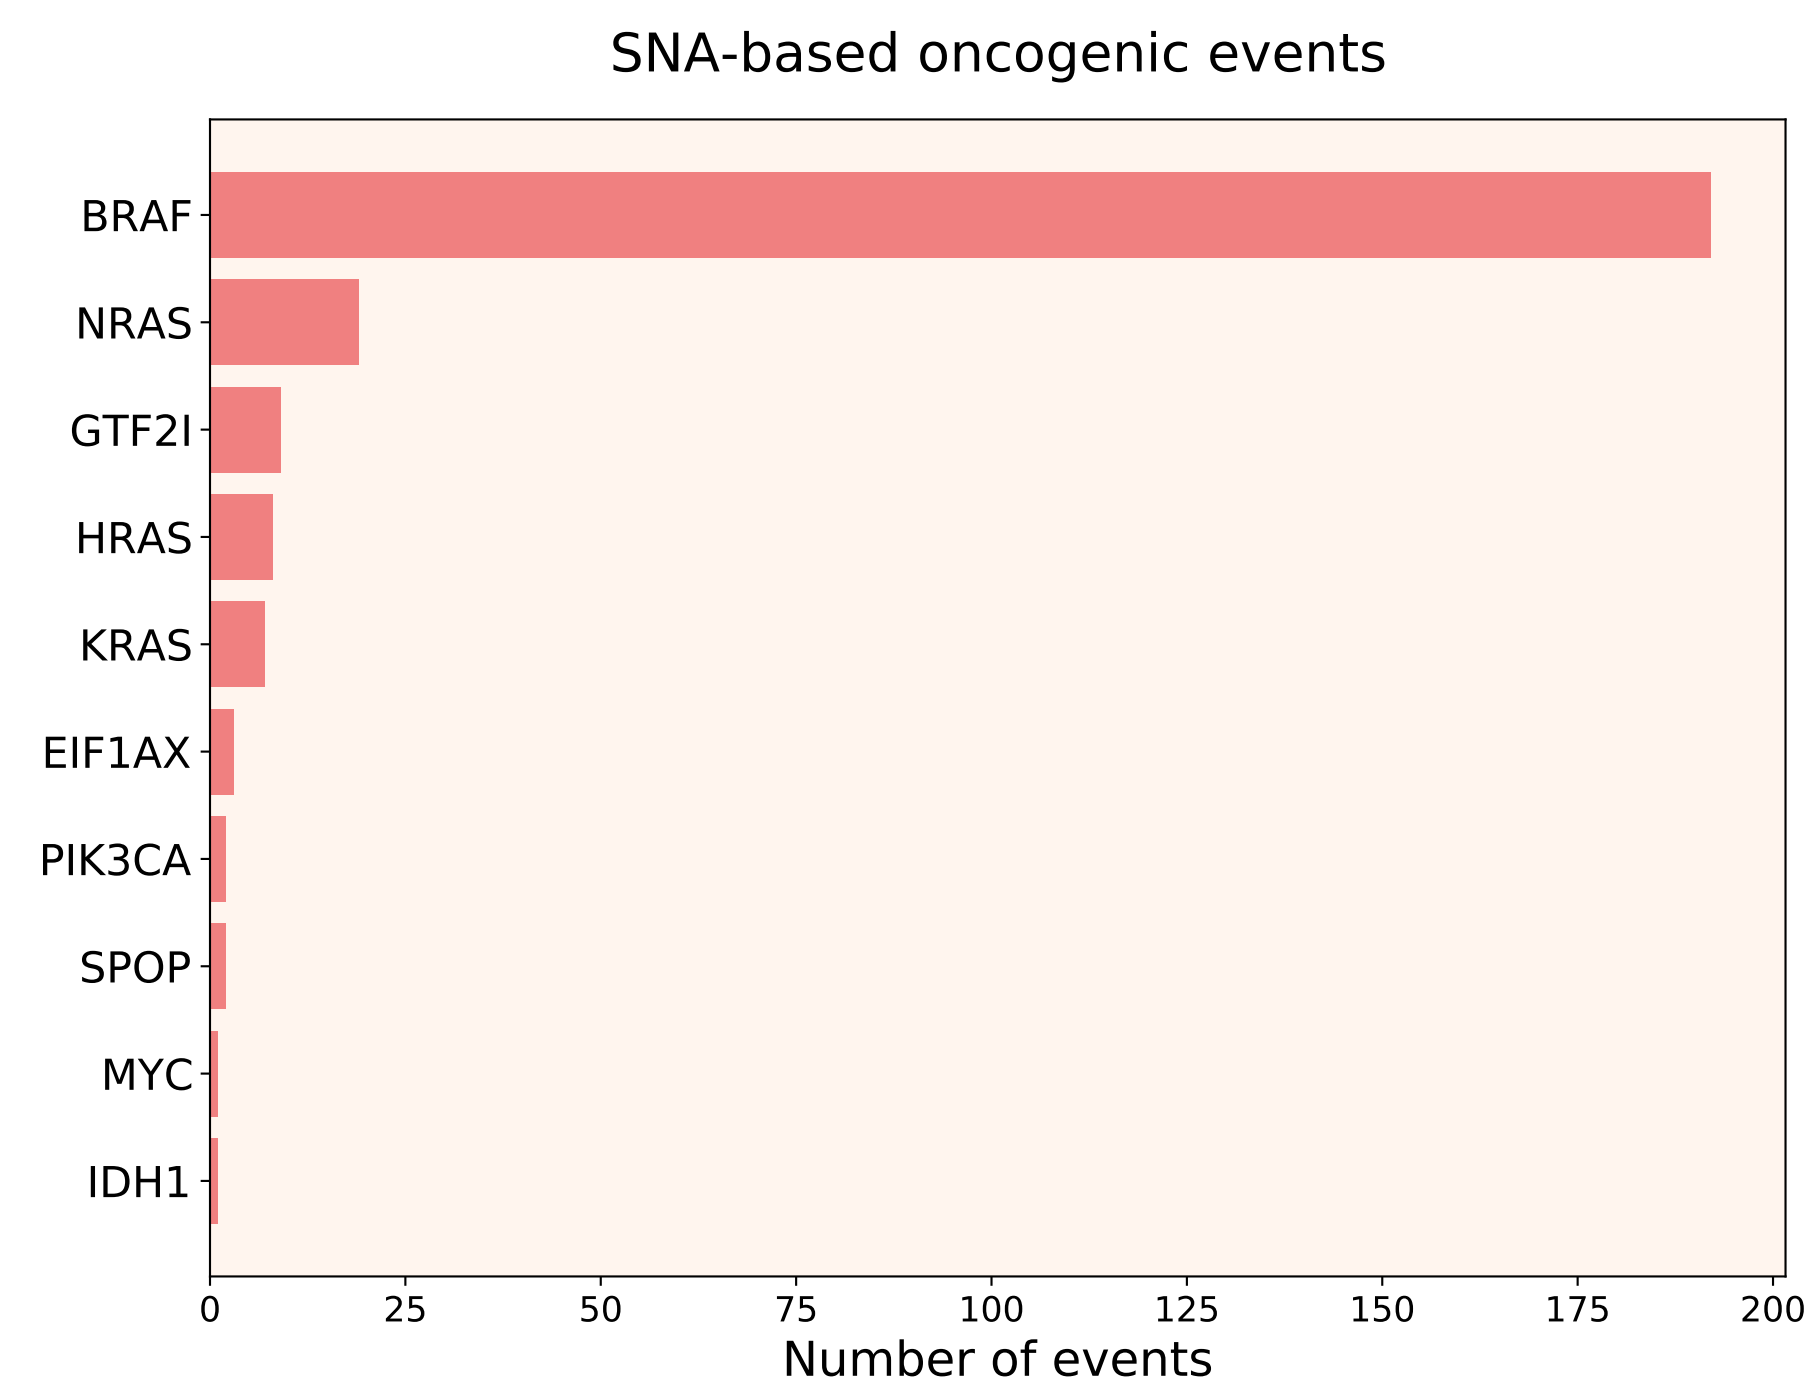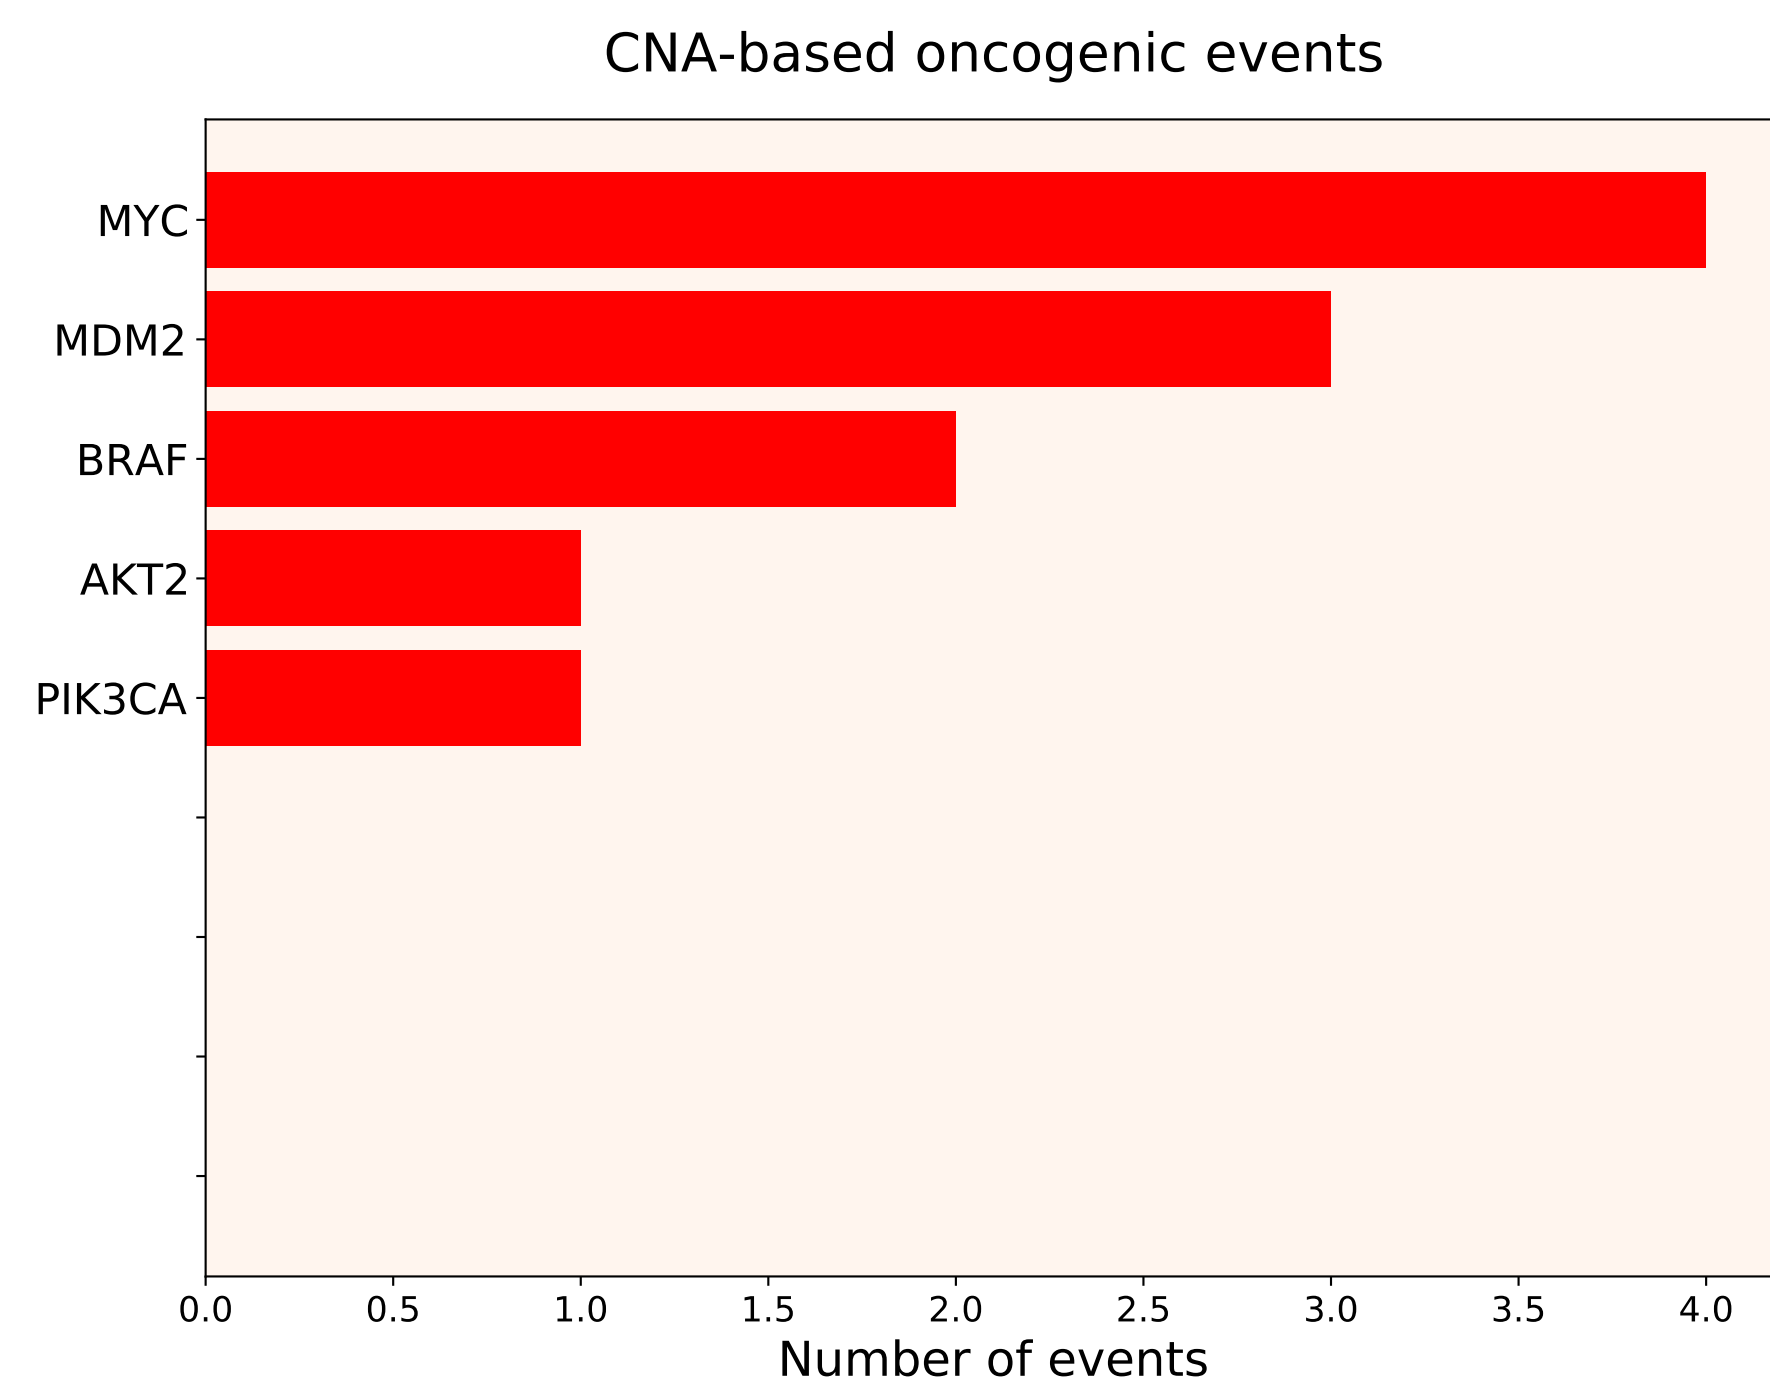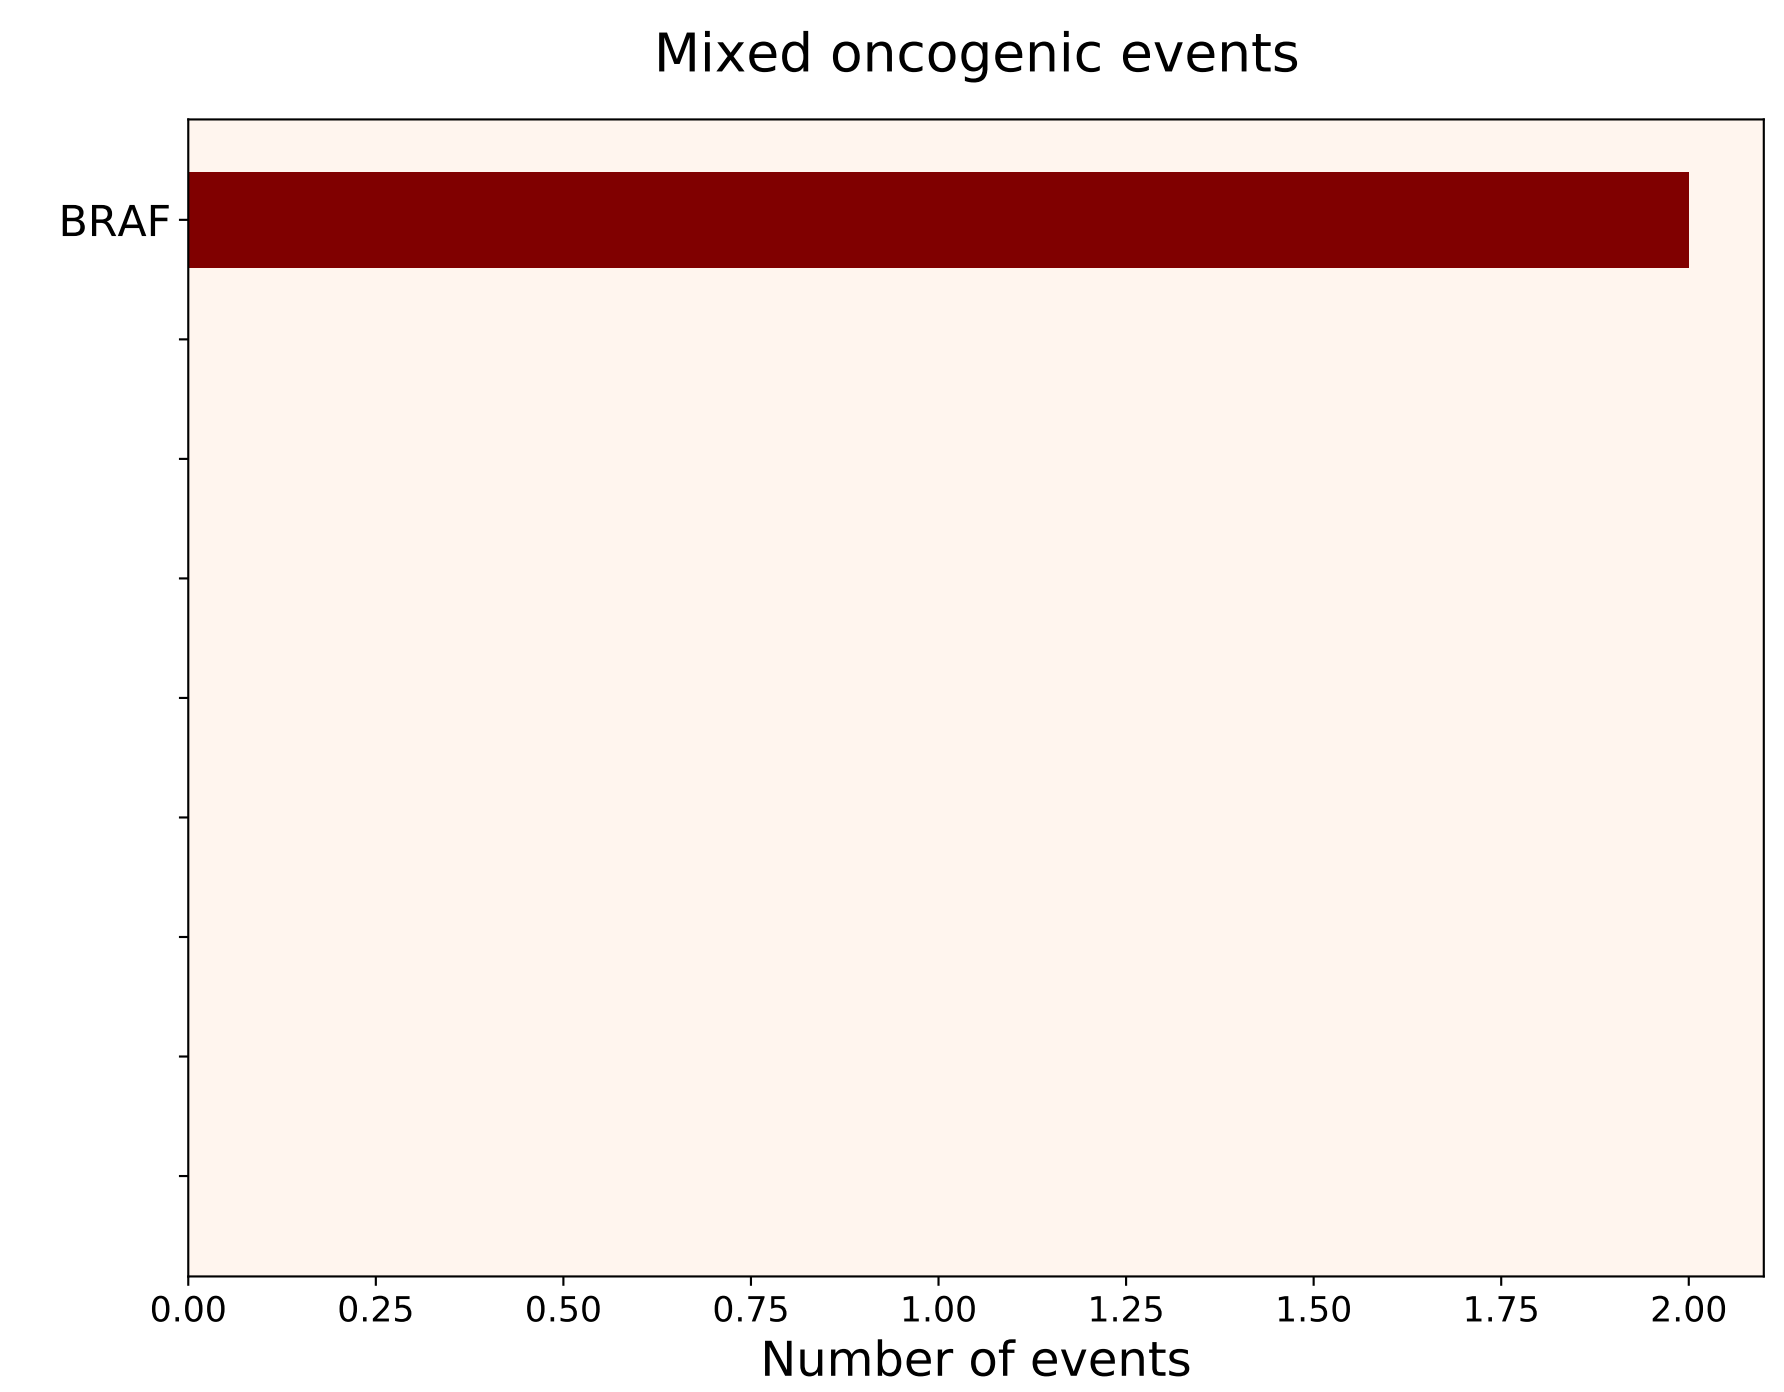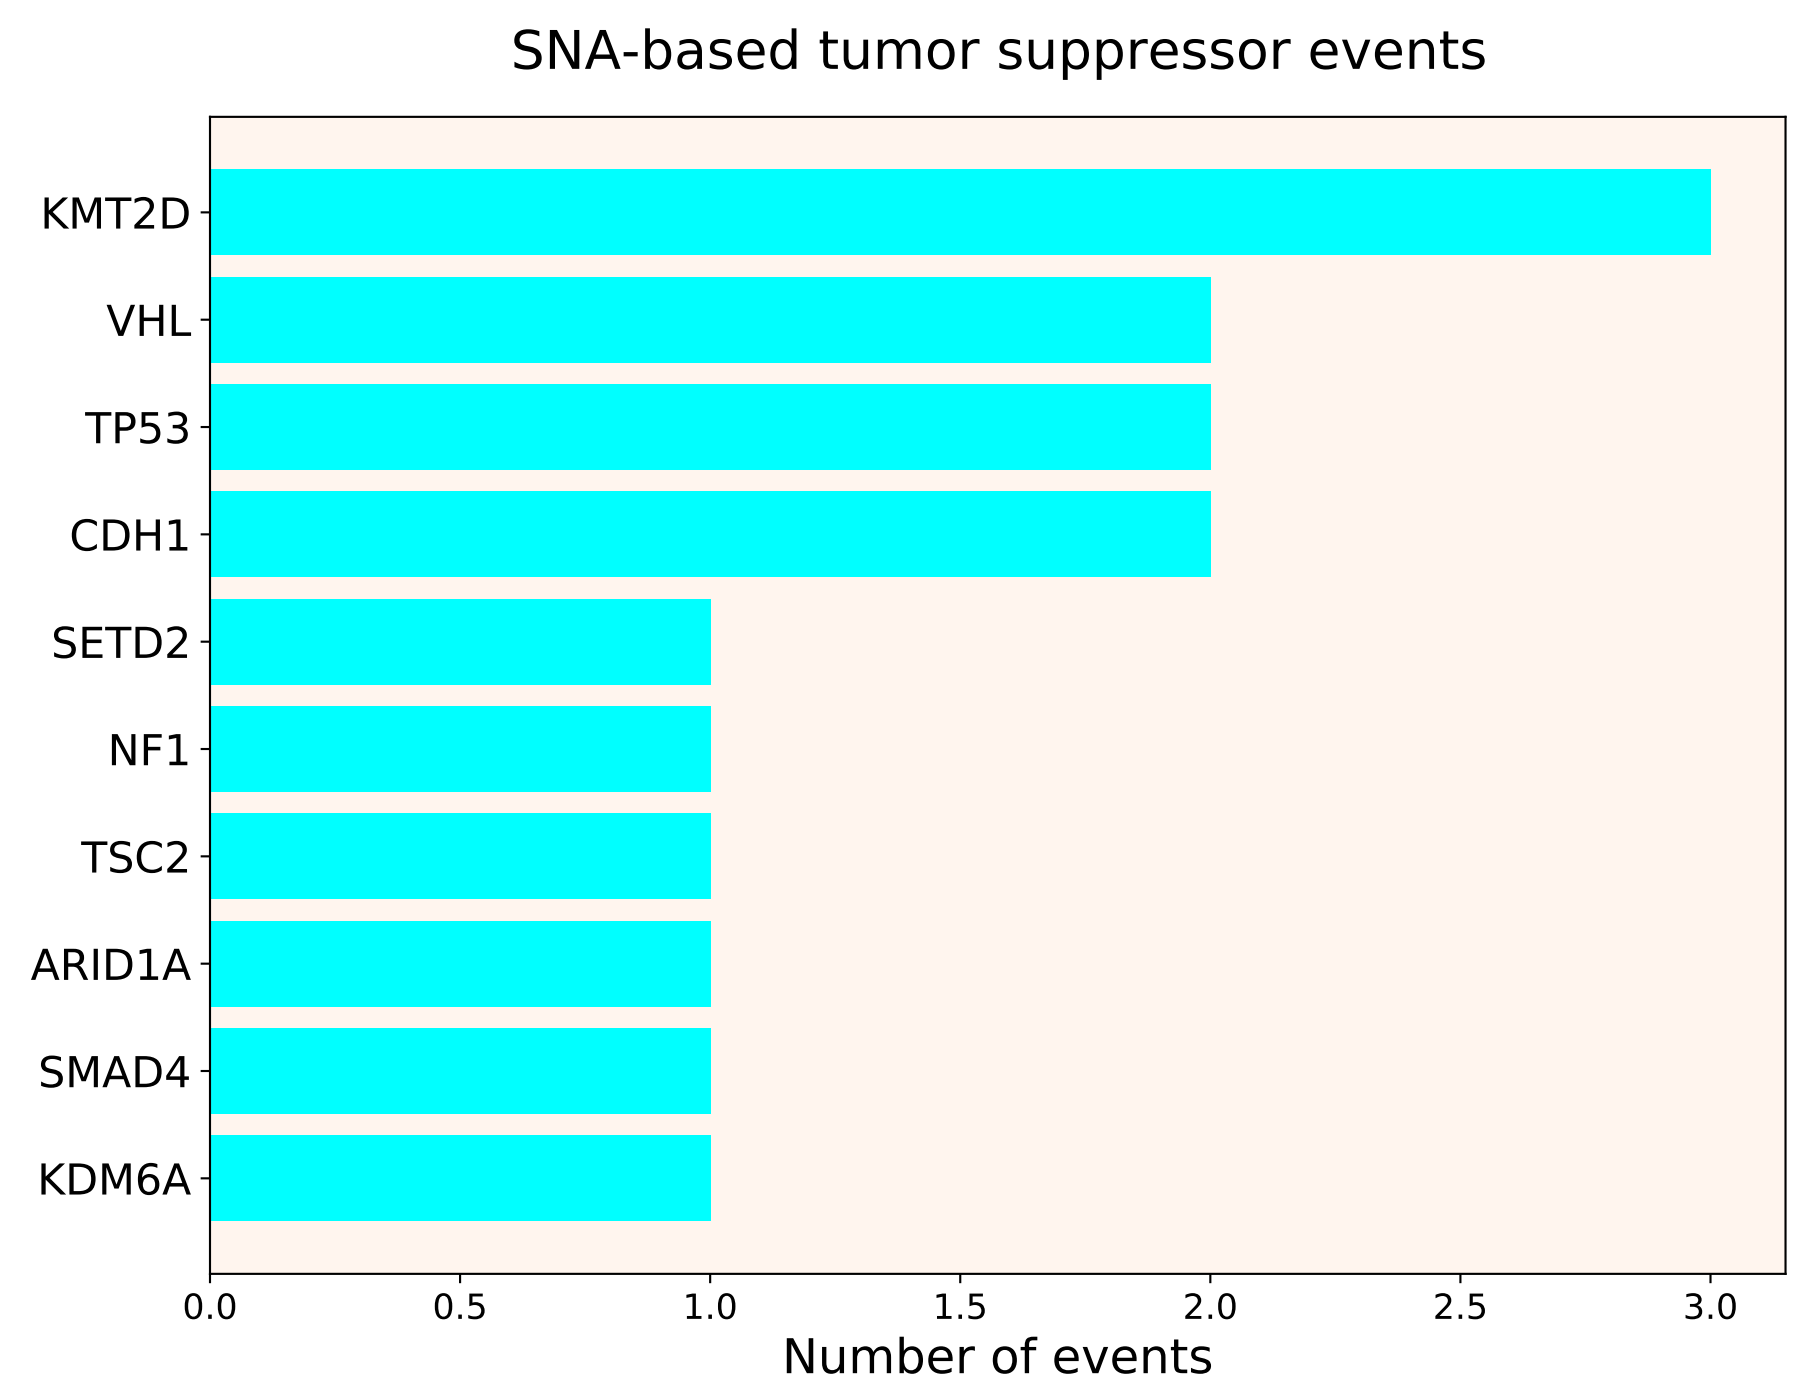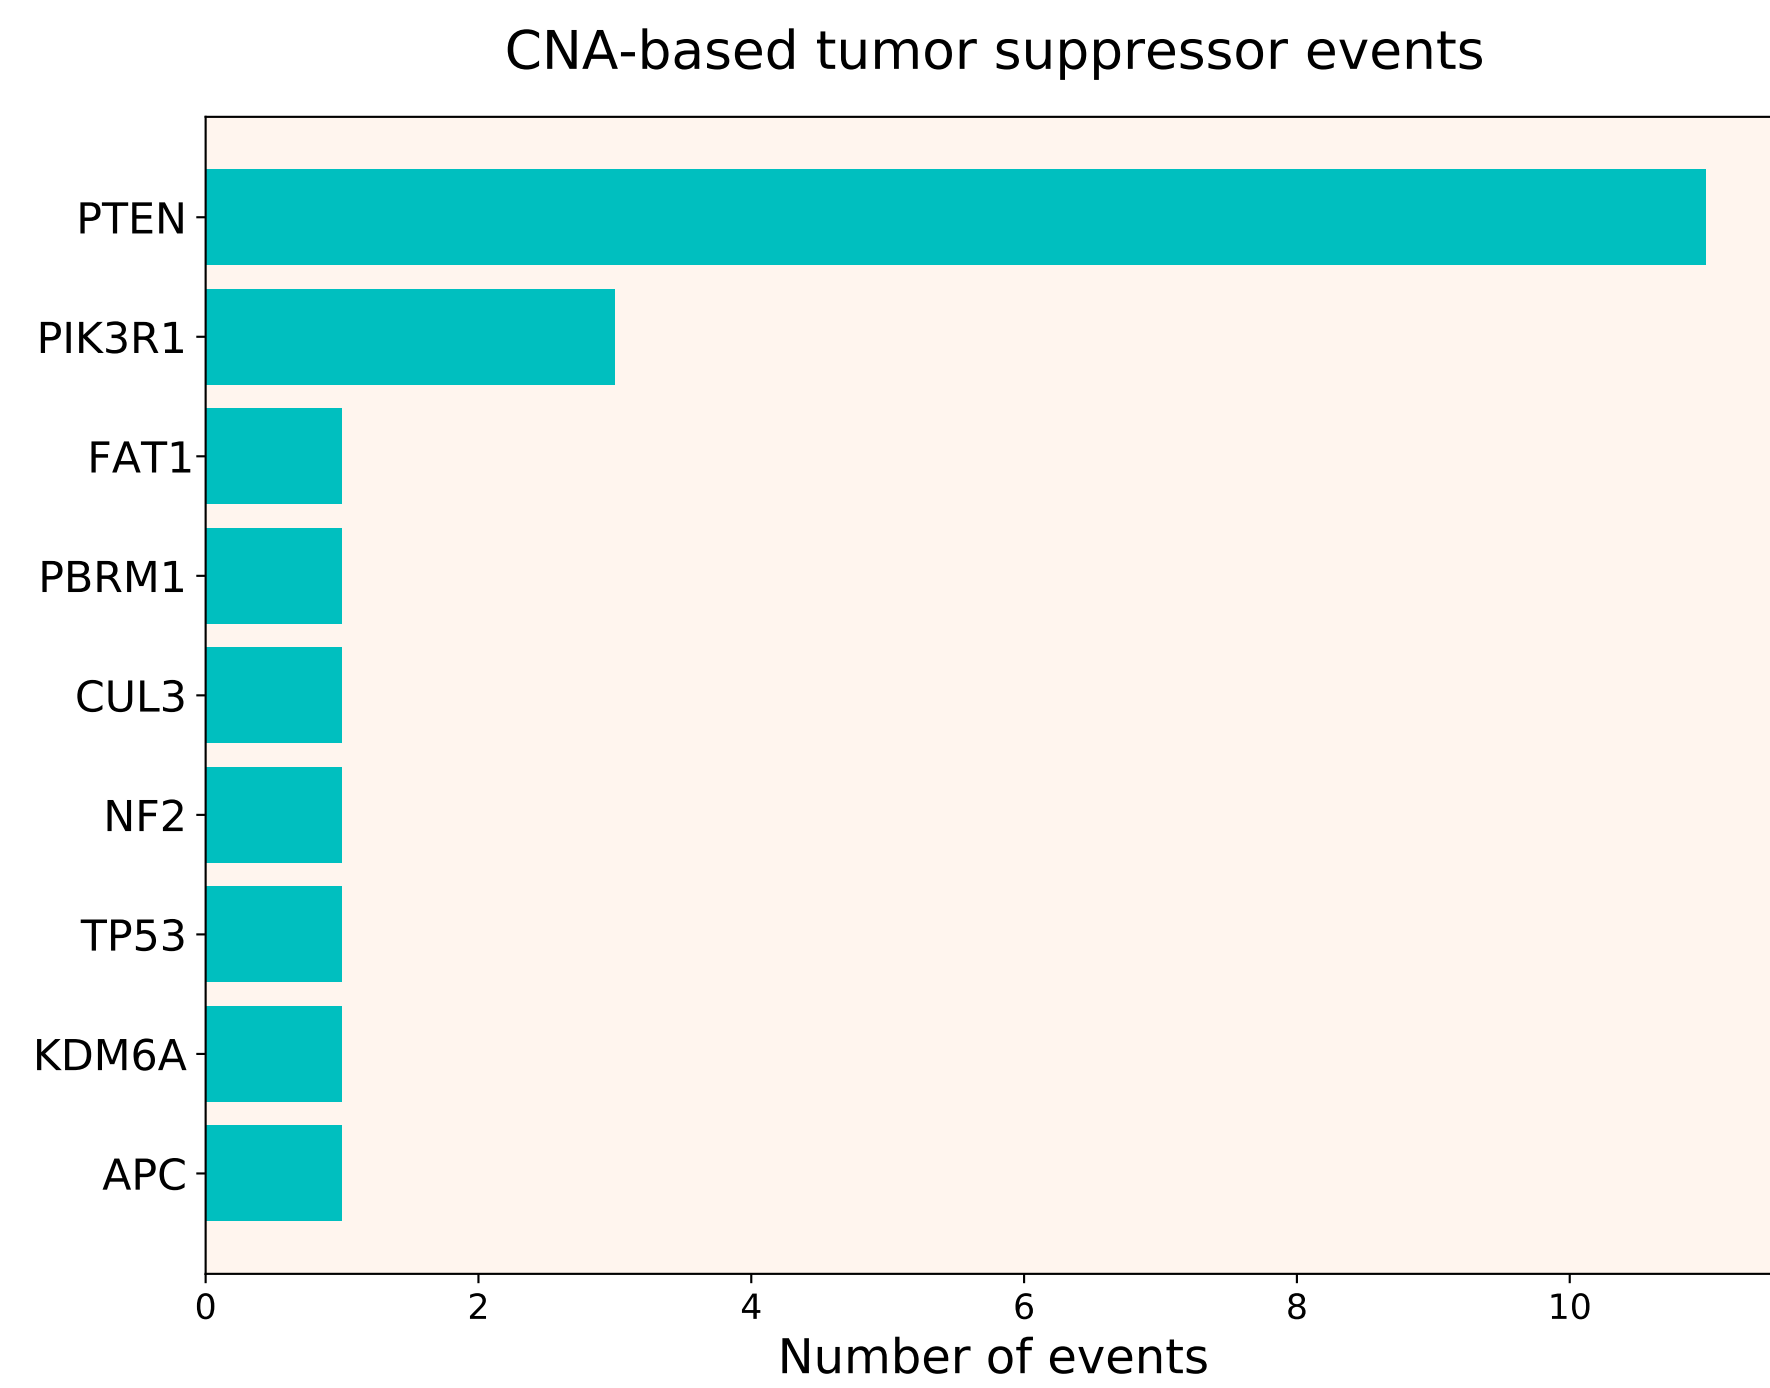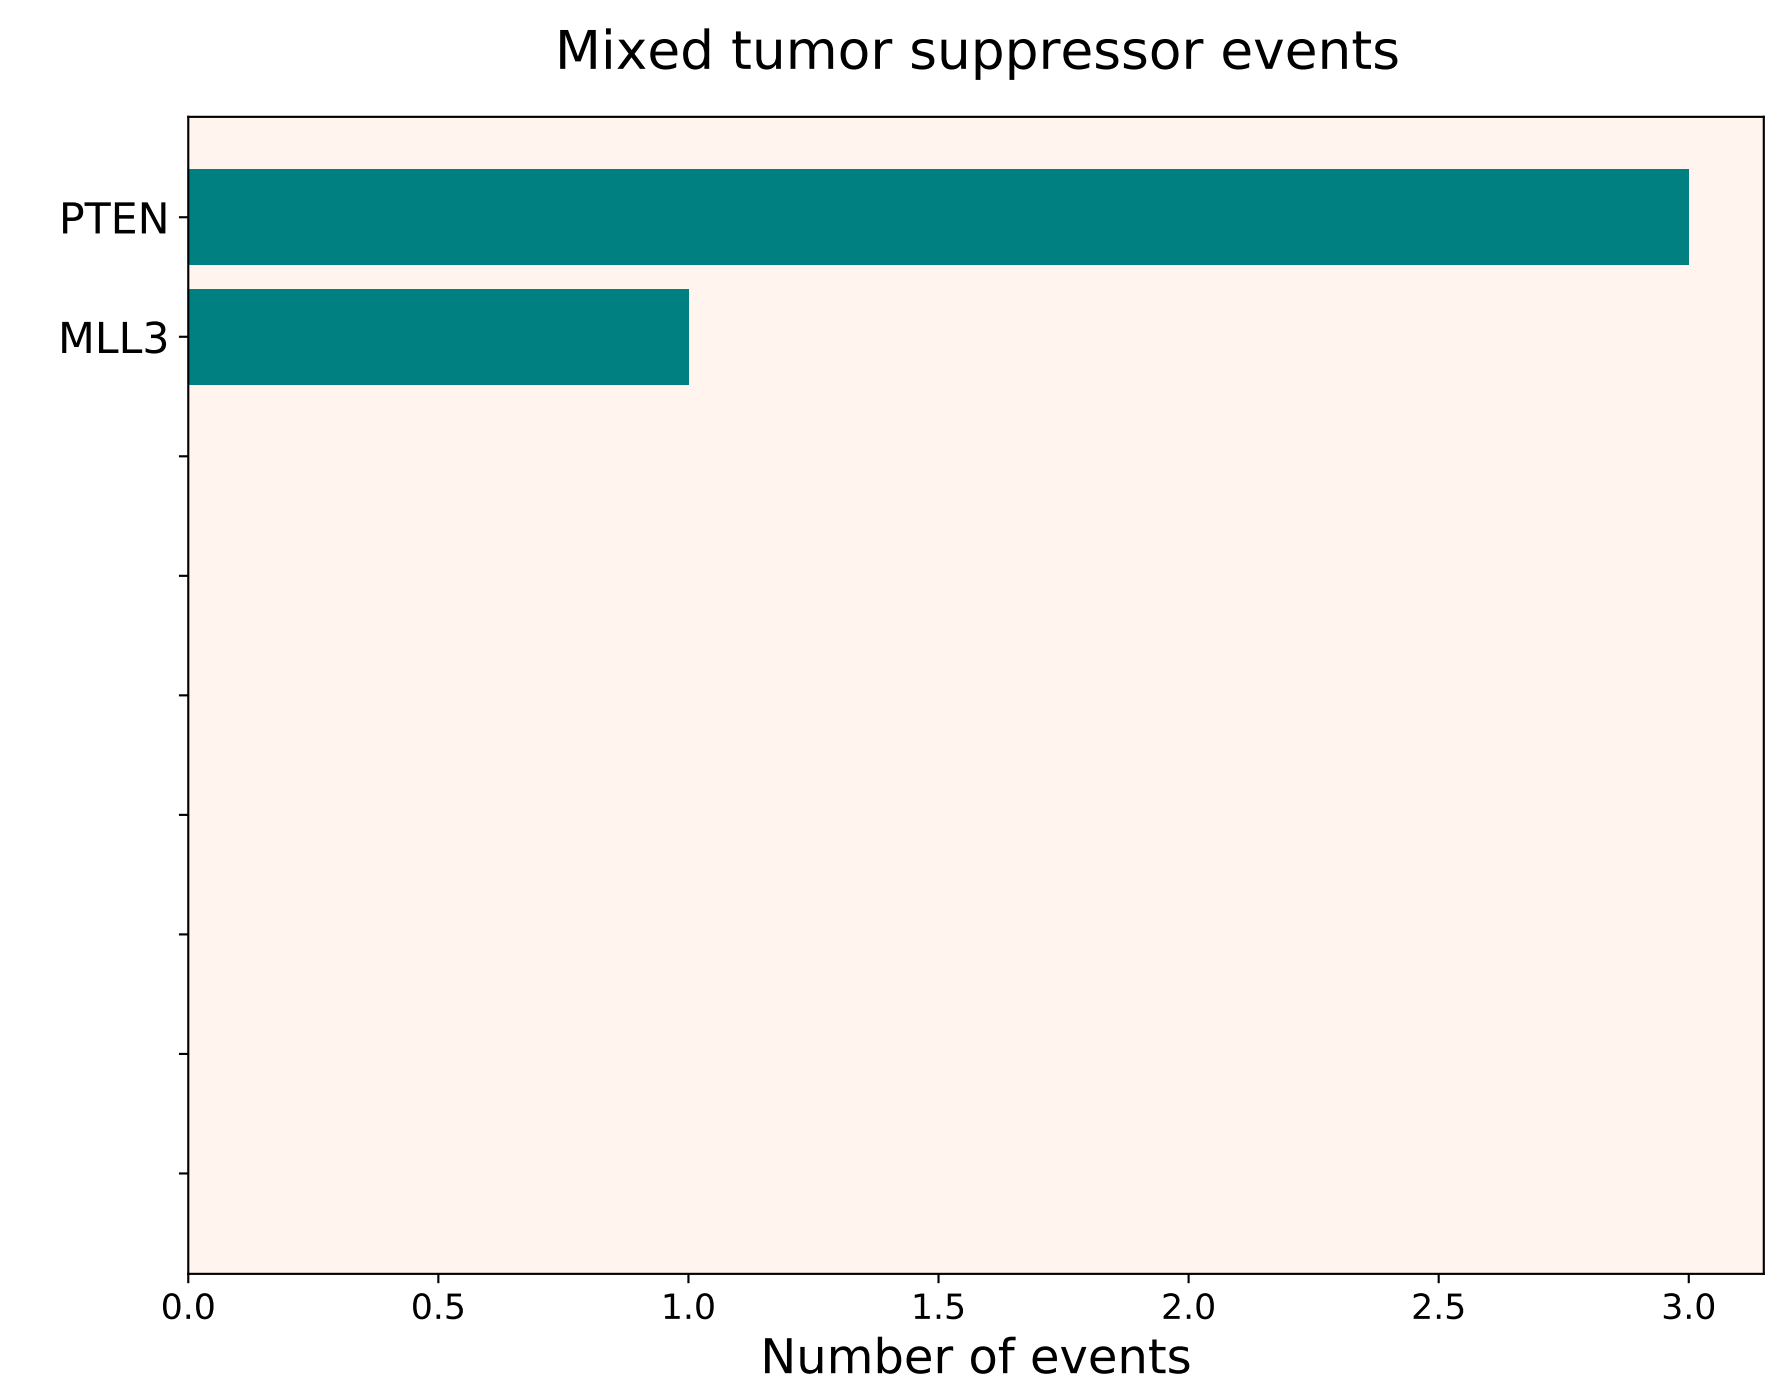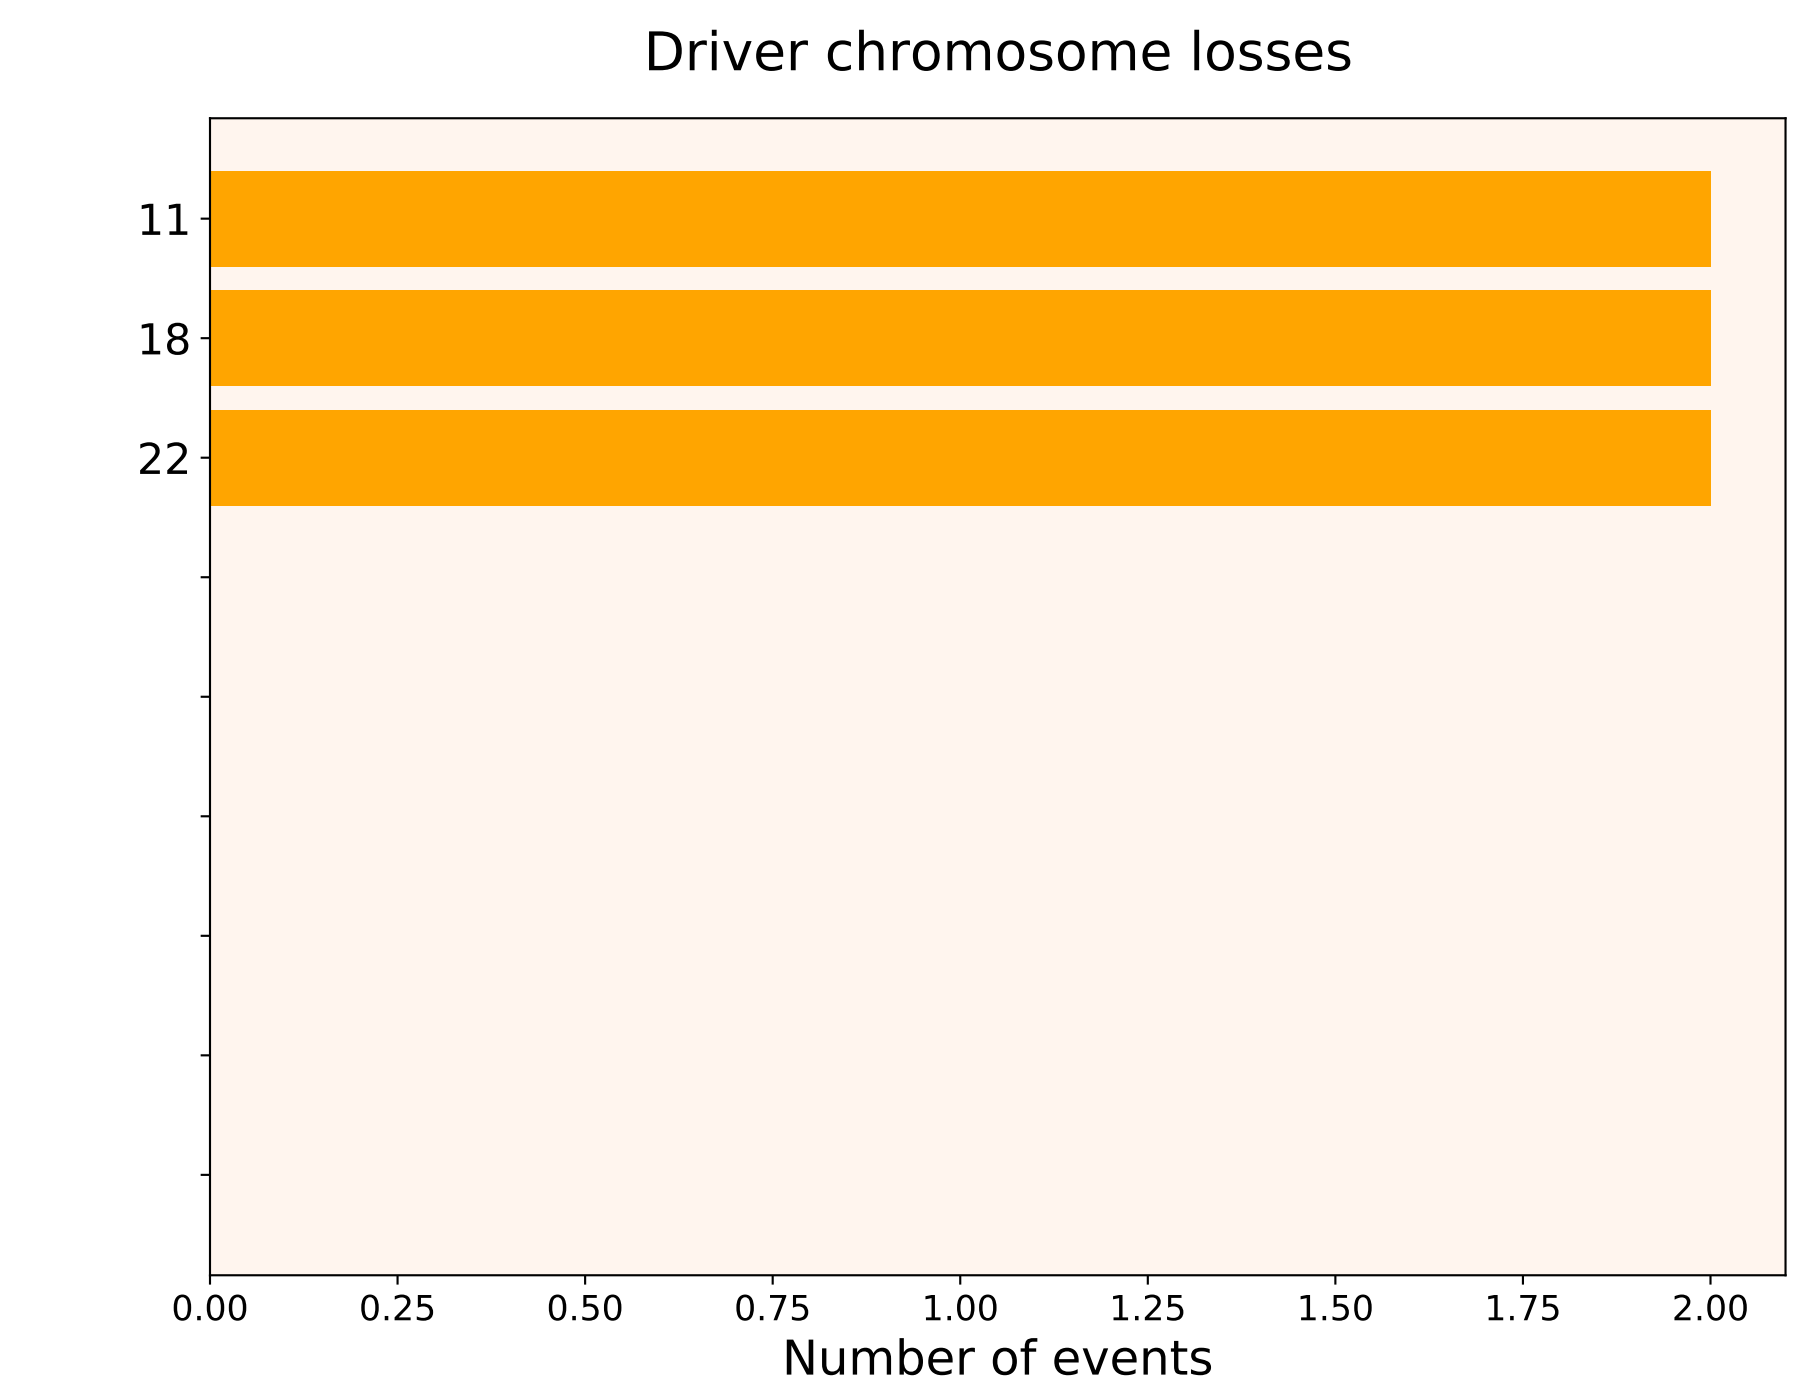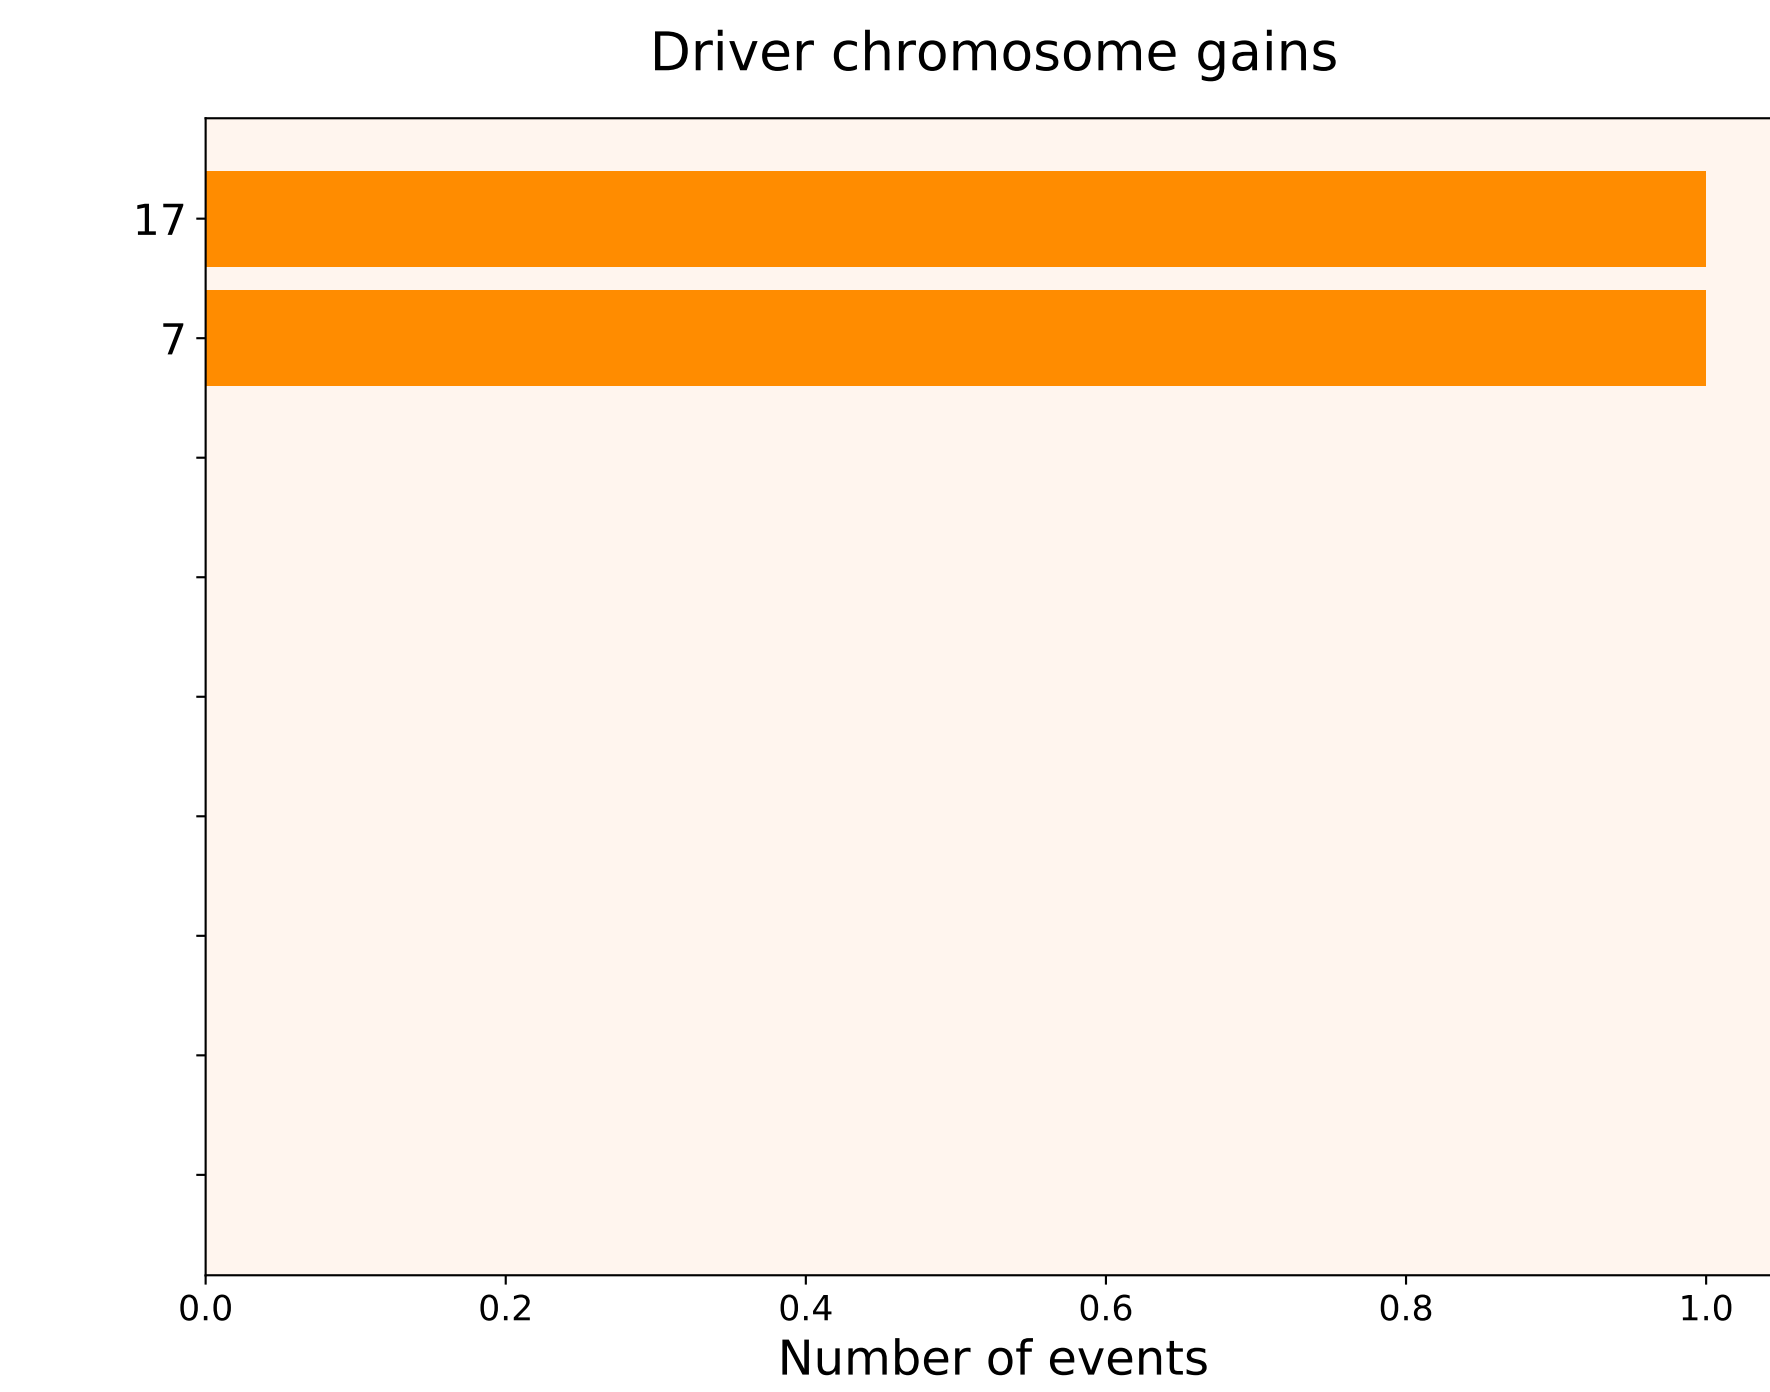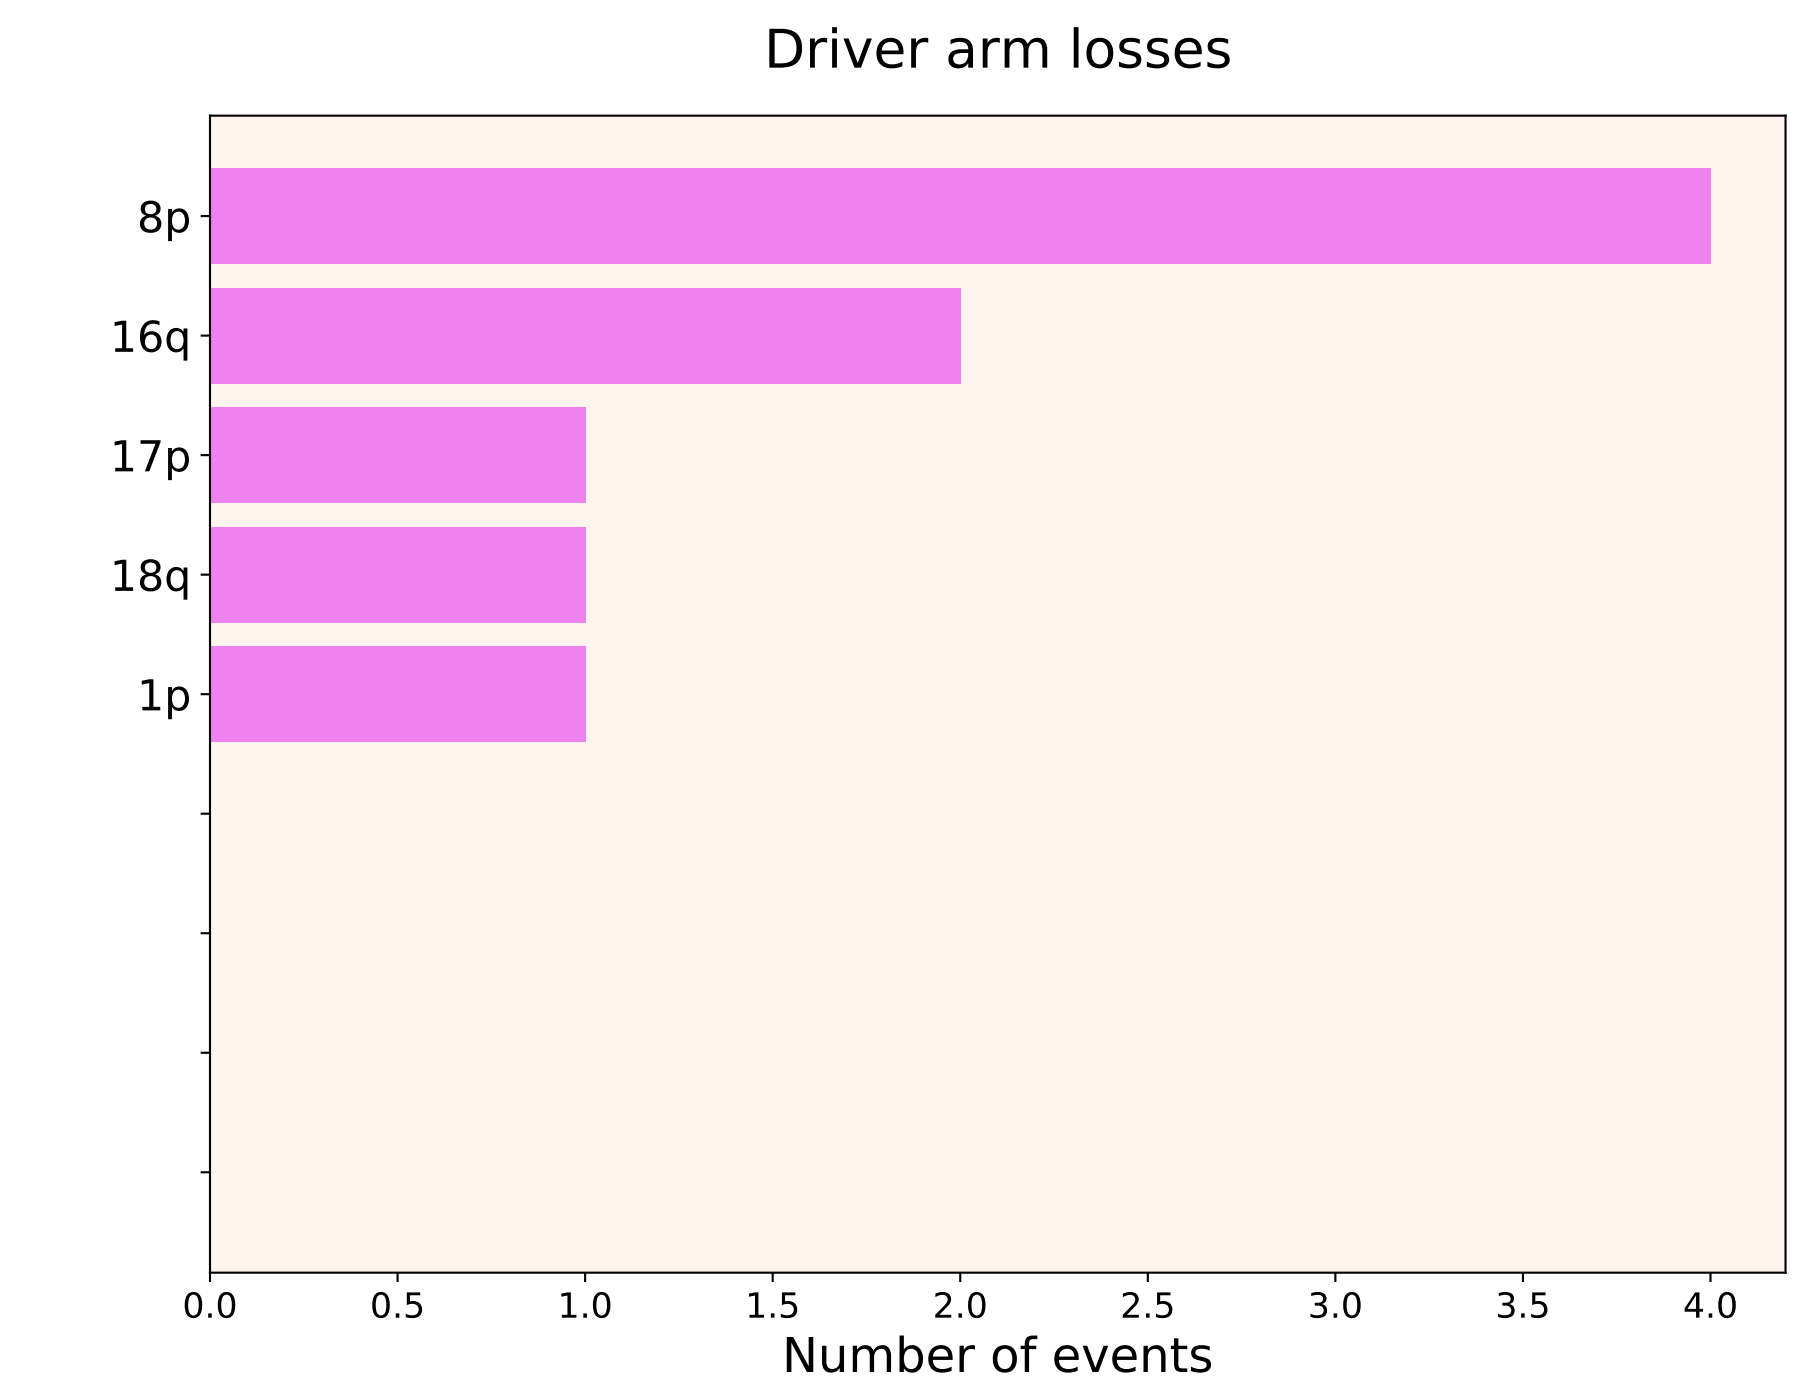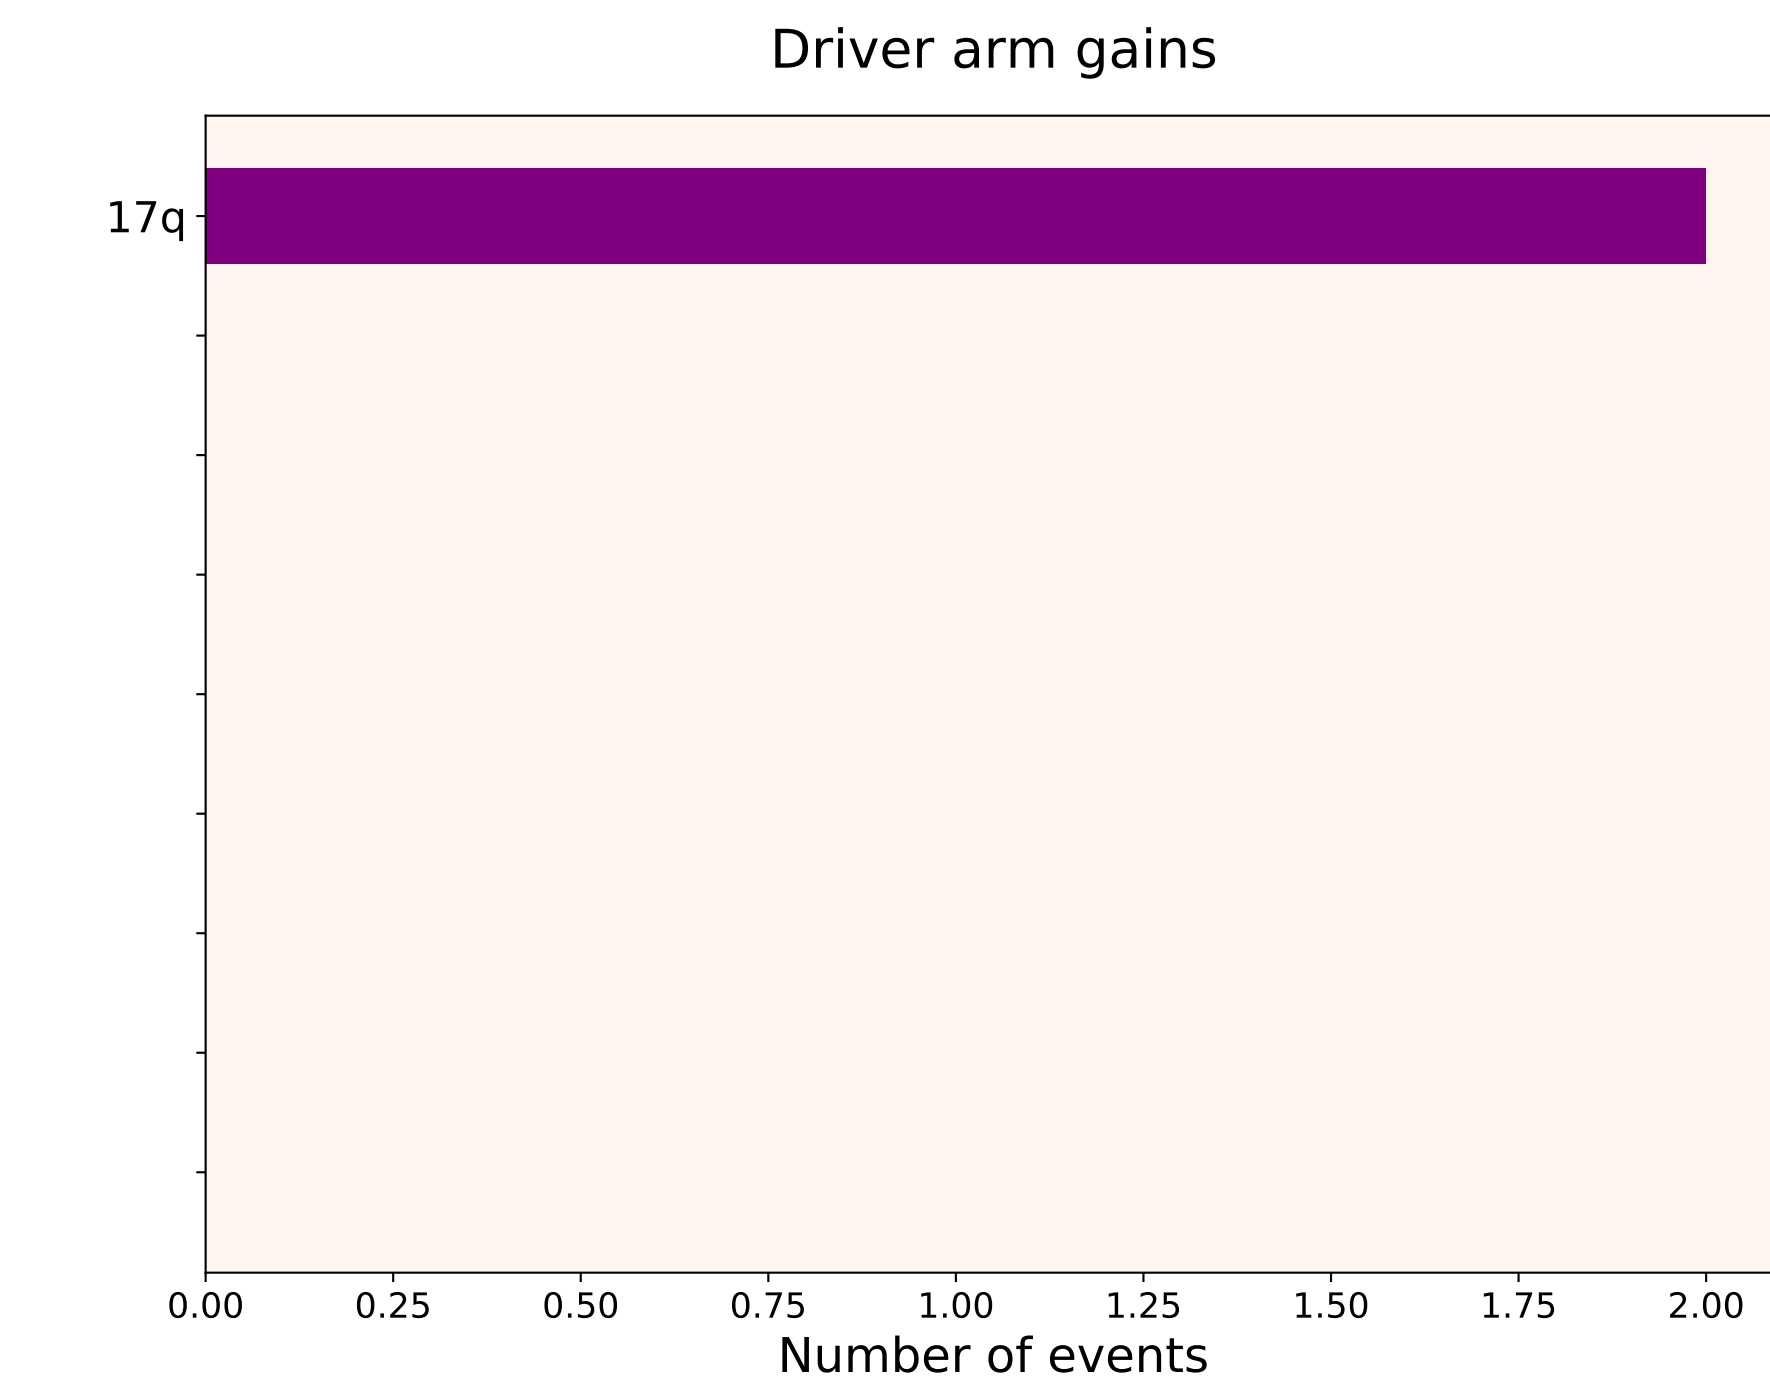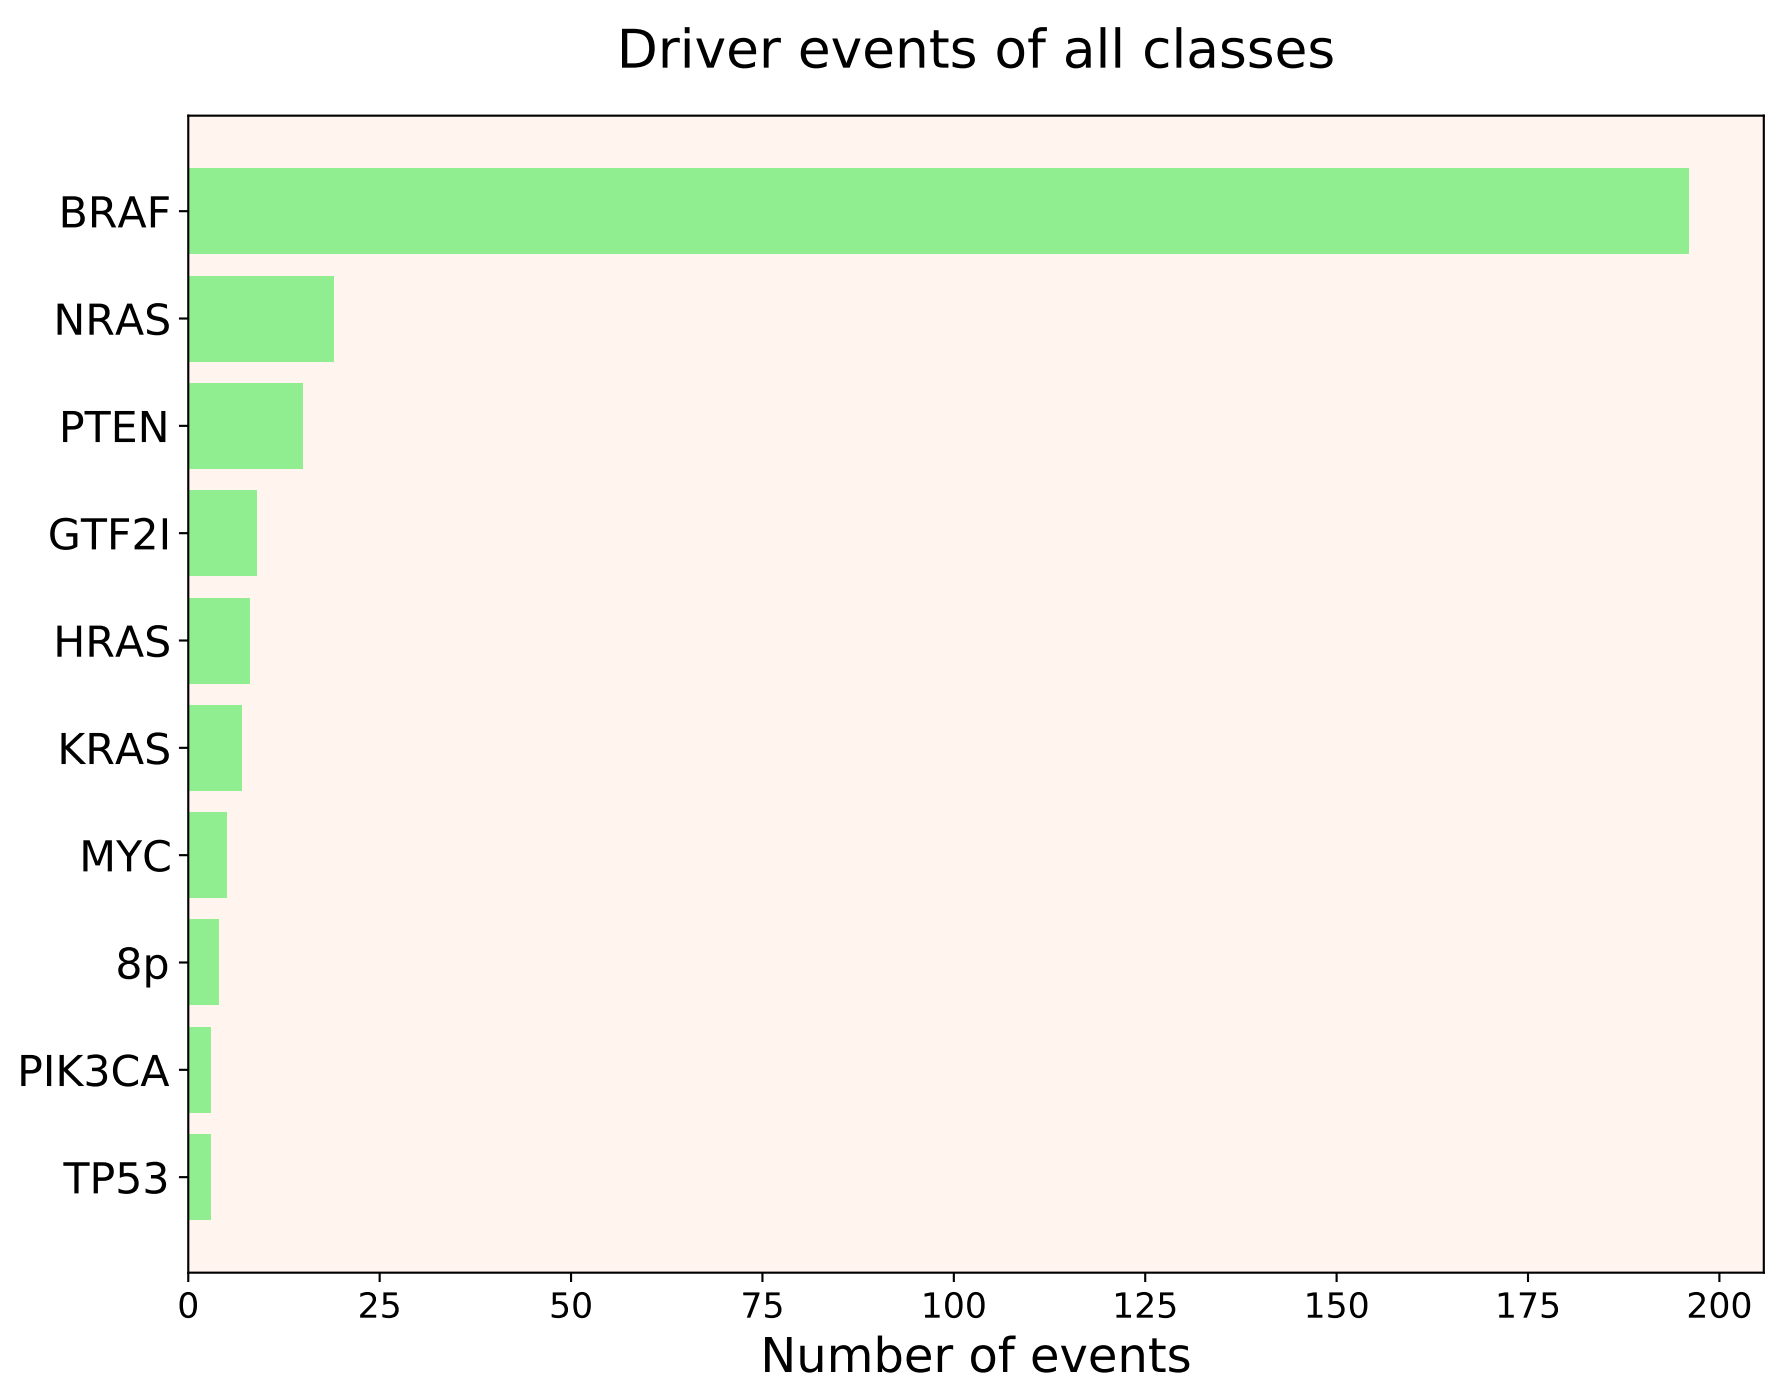

Supplement: Supplemental_Data_S1.zip [file Supplemental_Data_S1.zip]

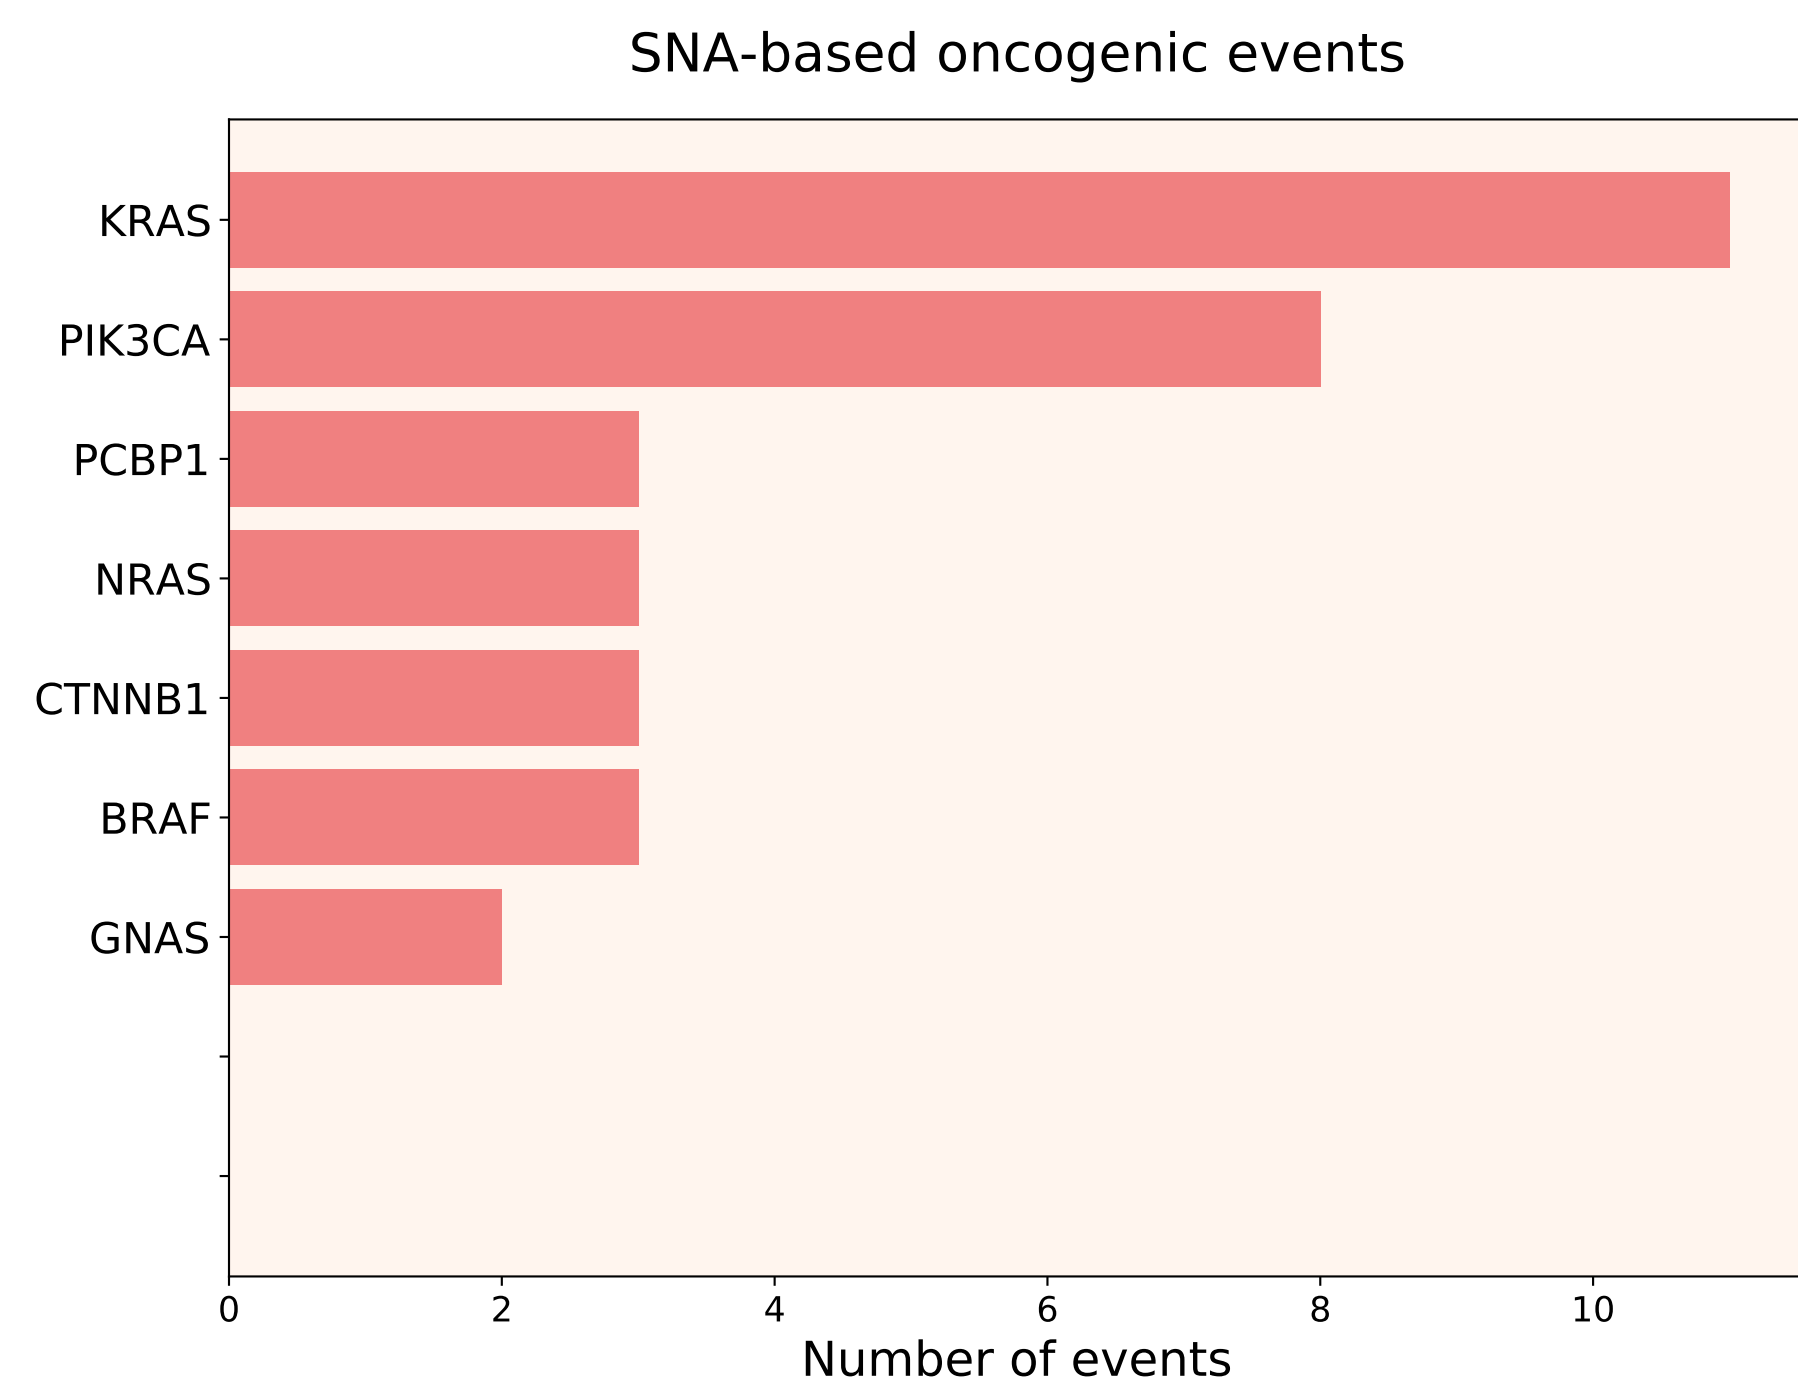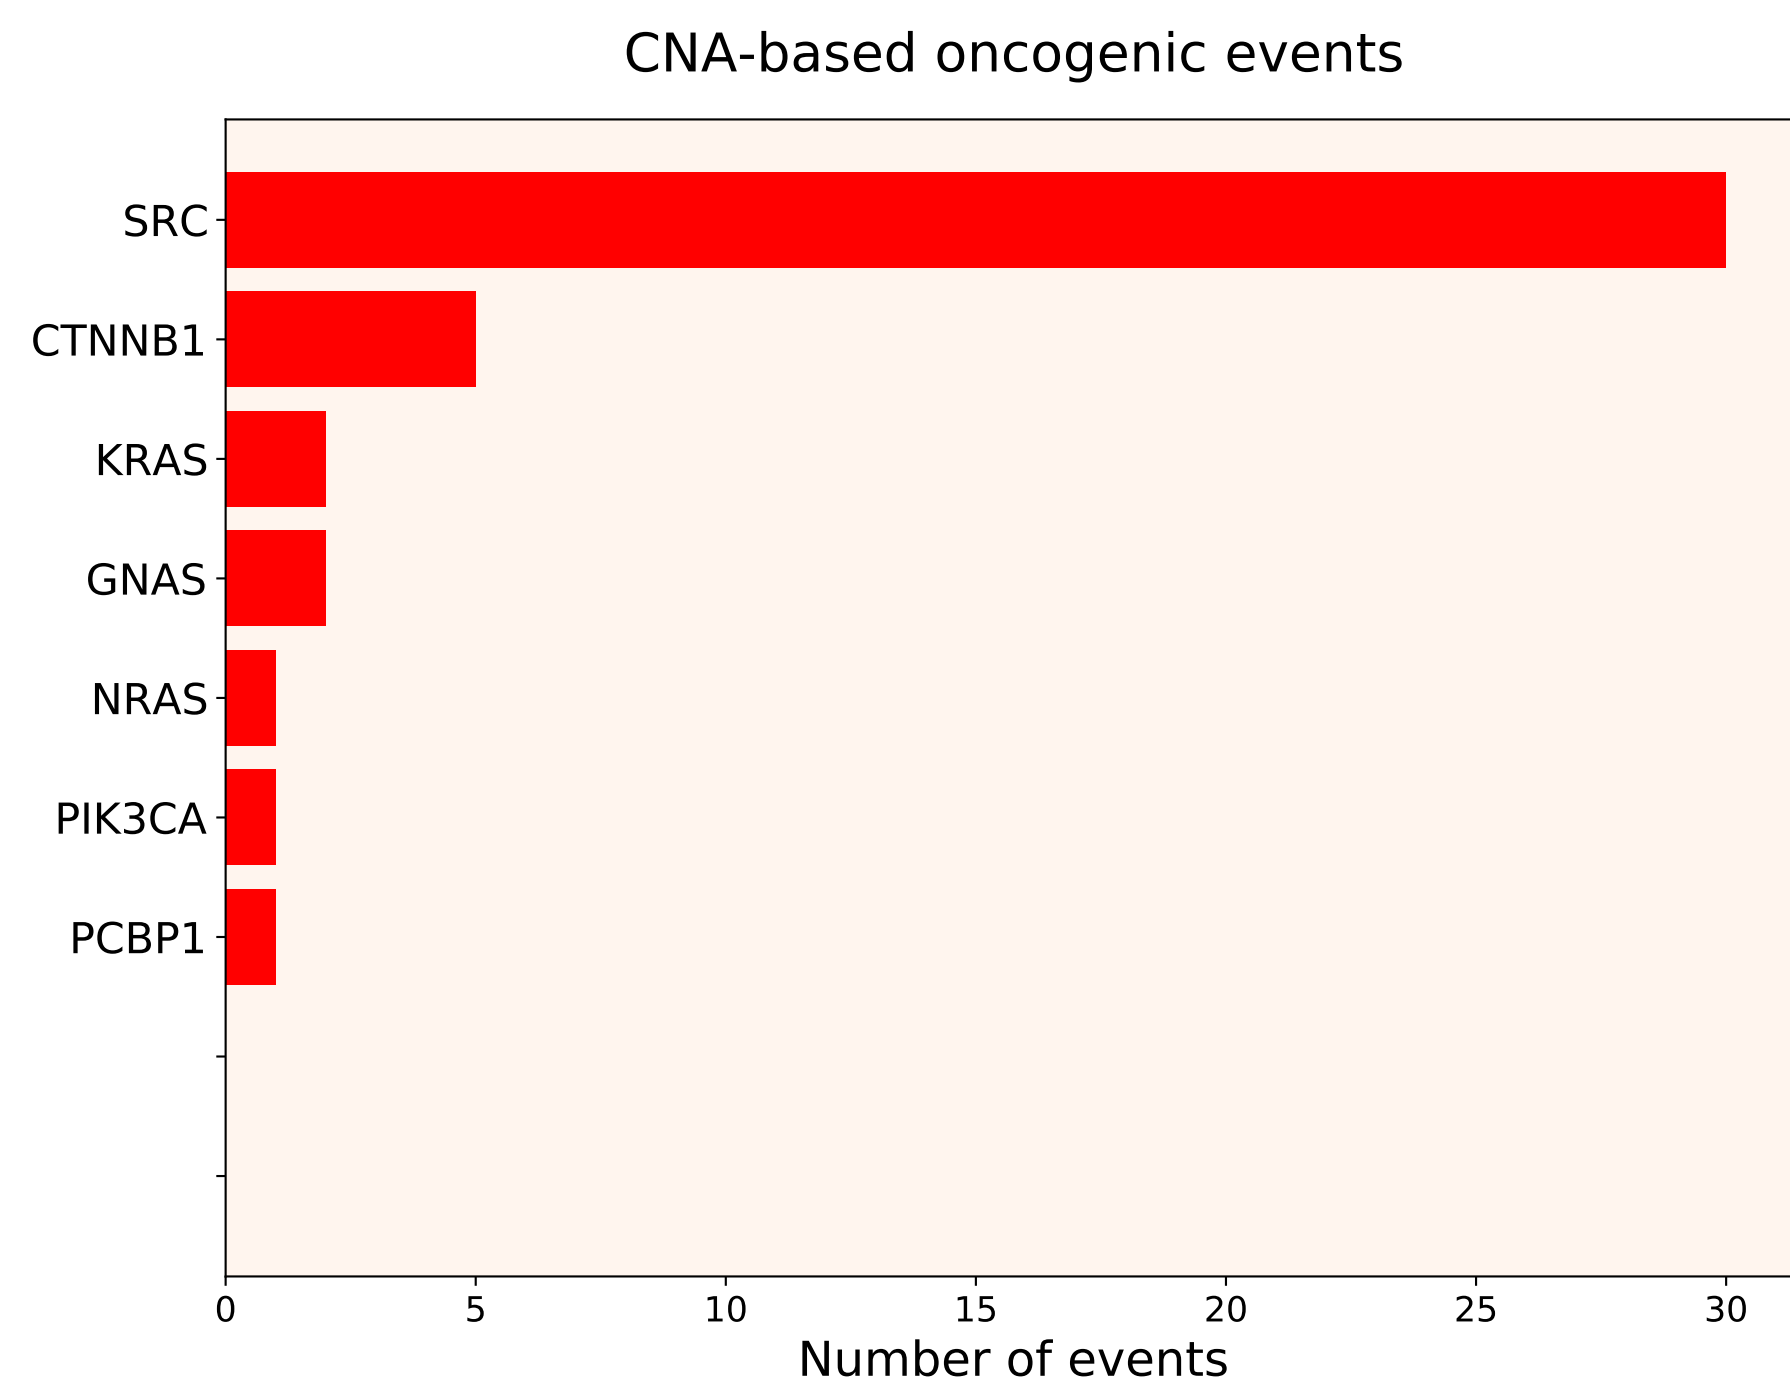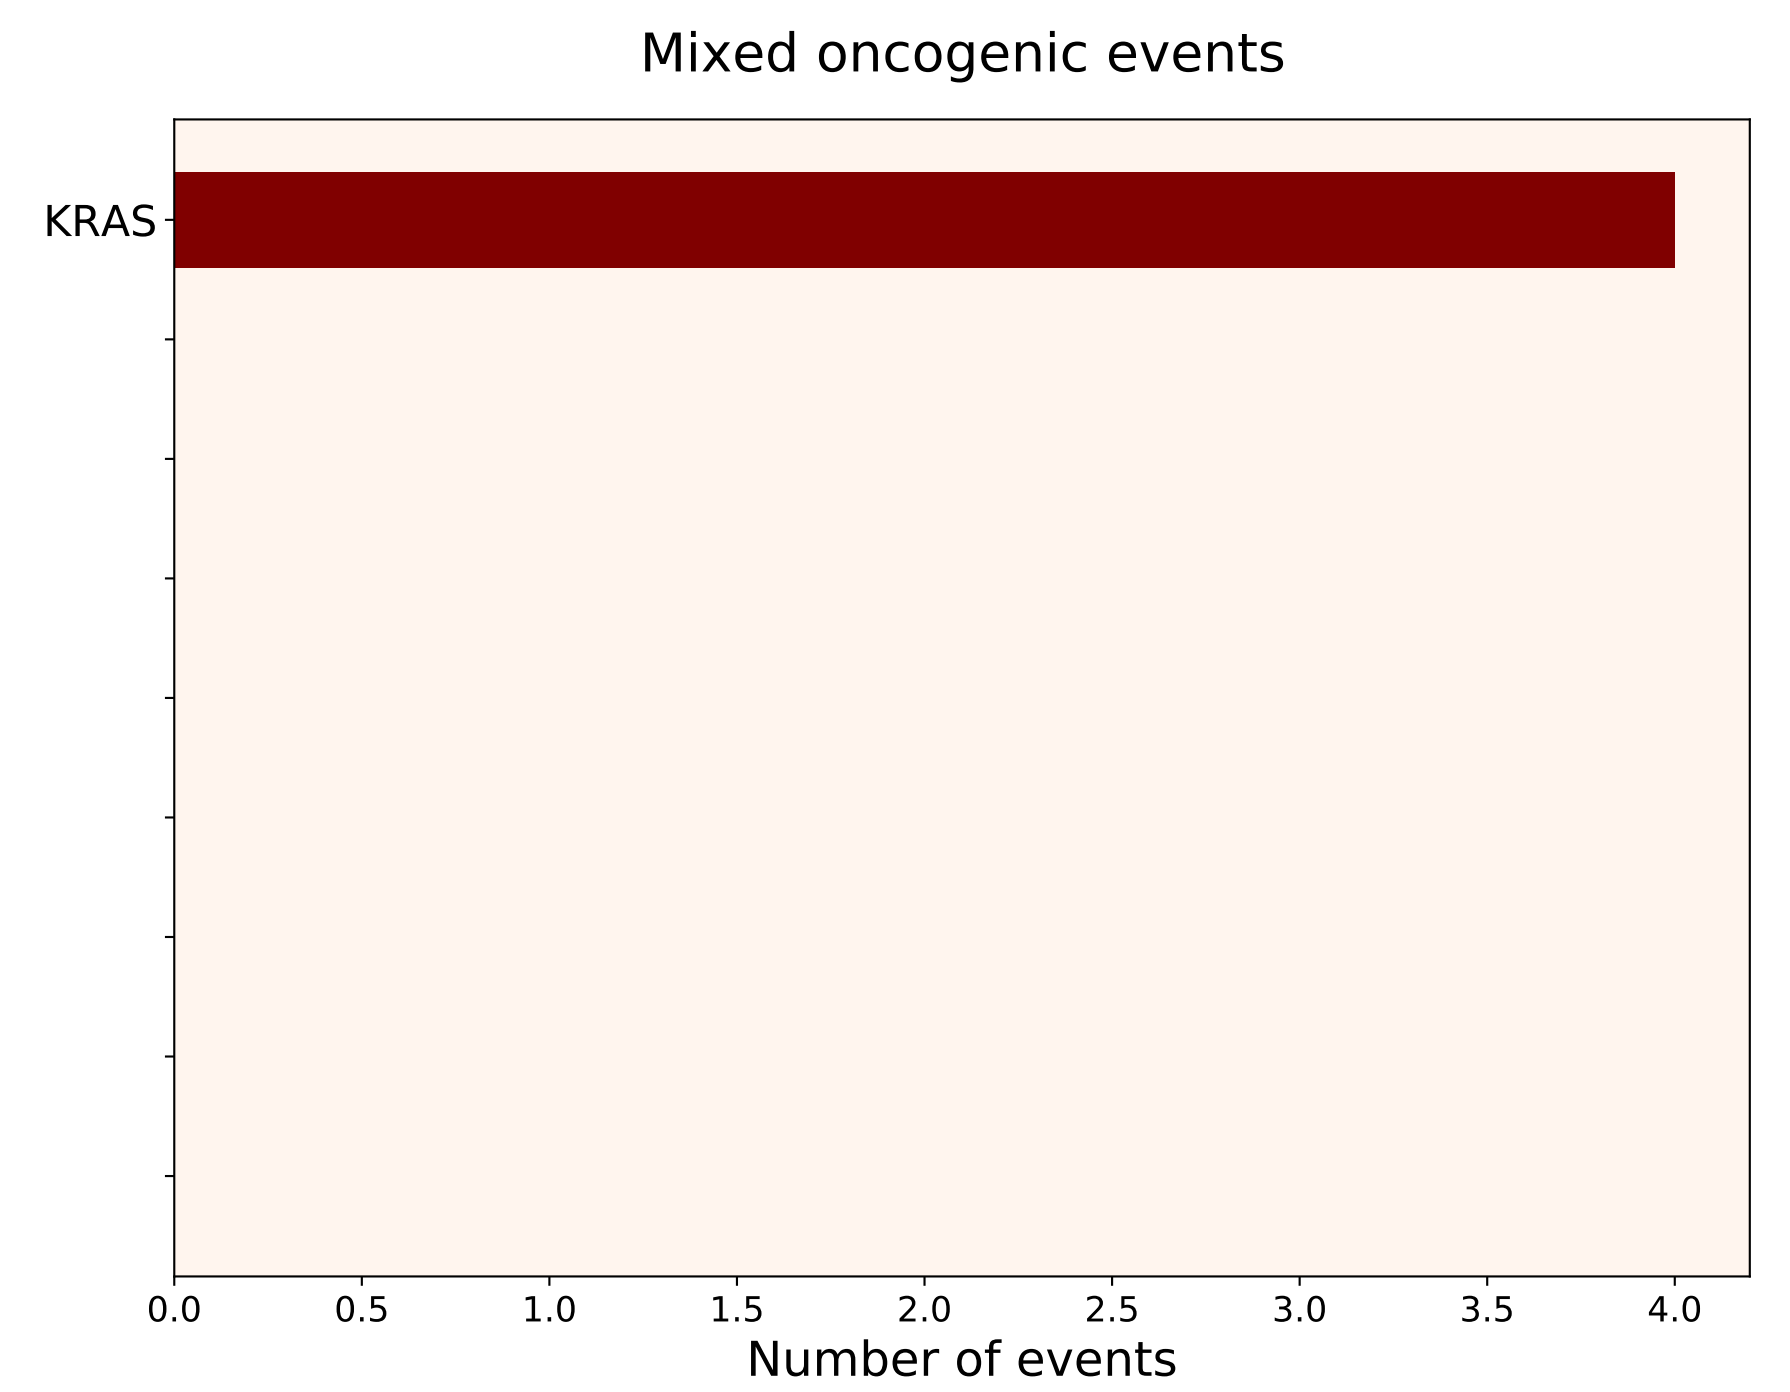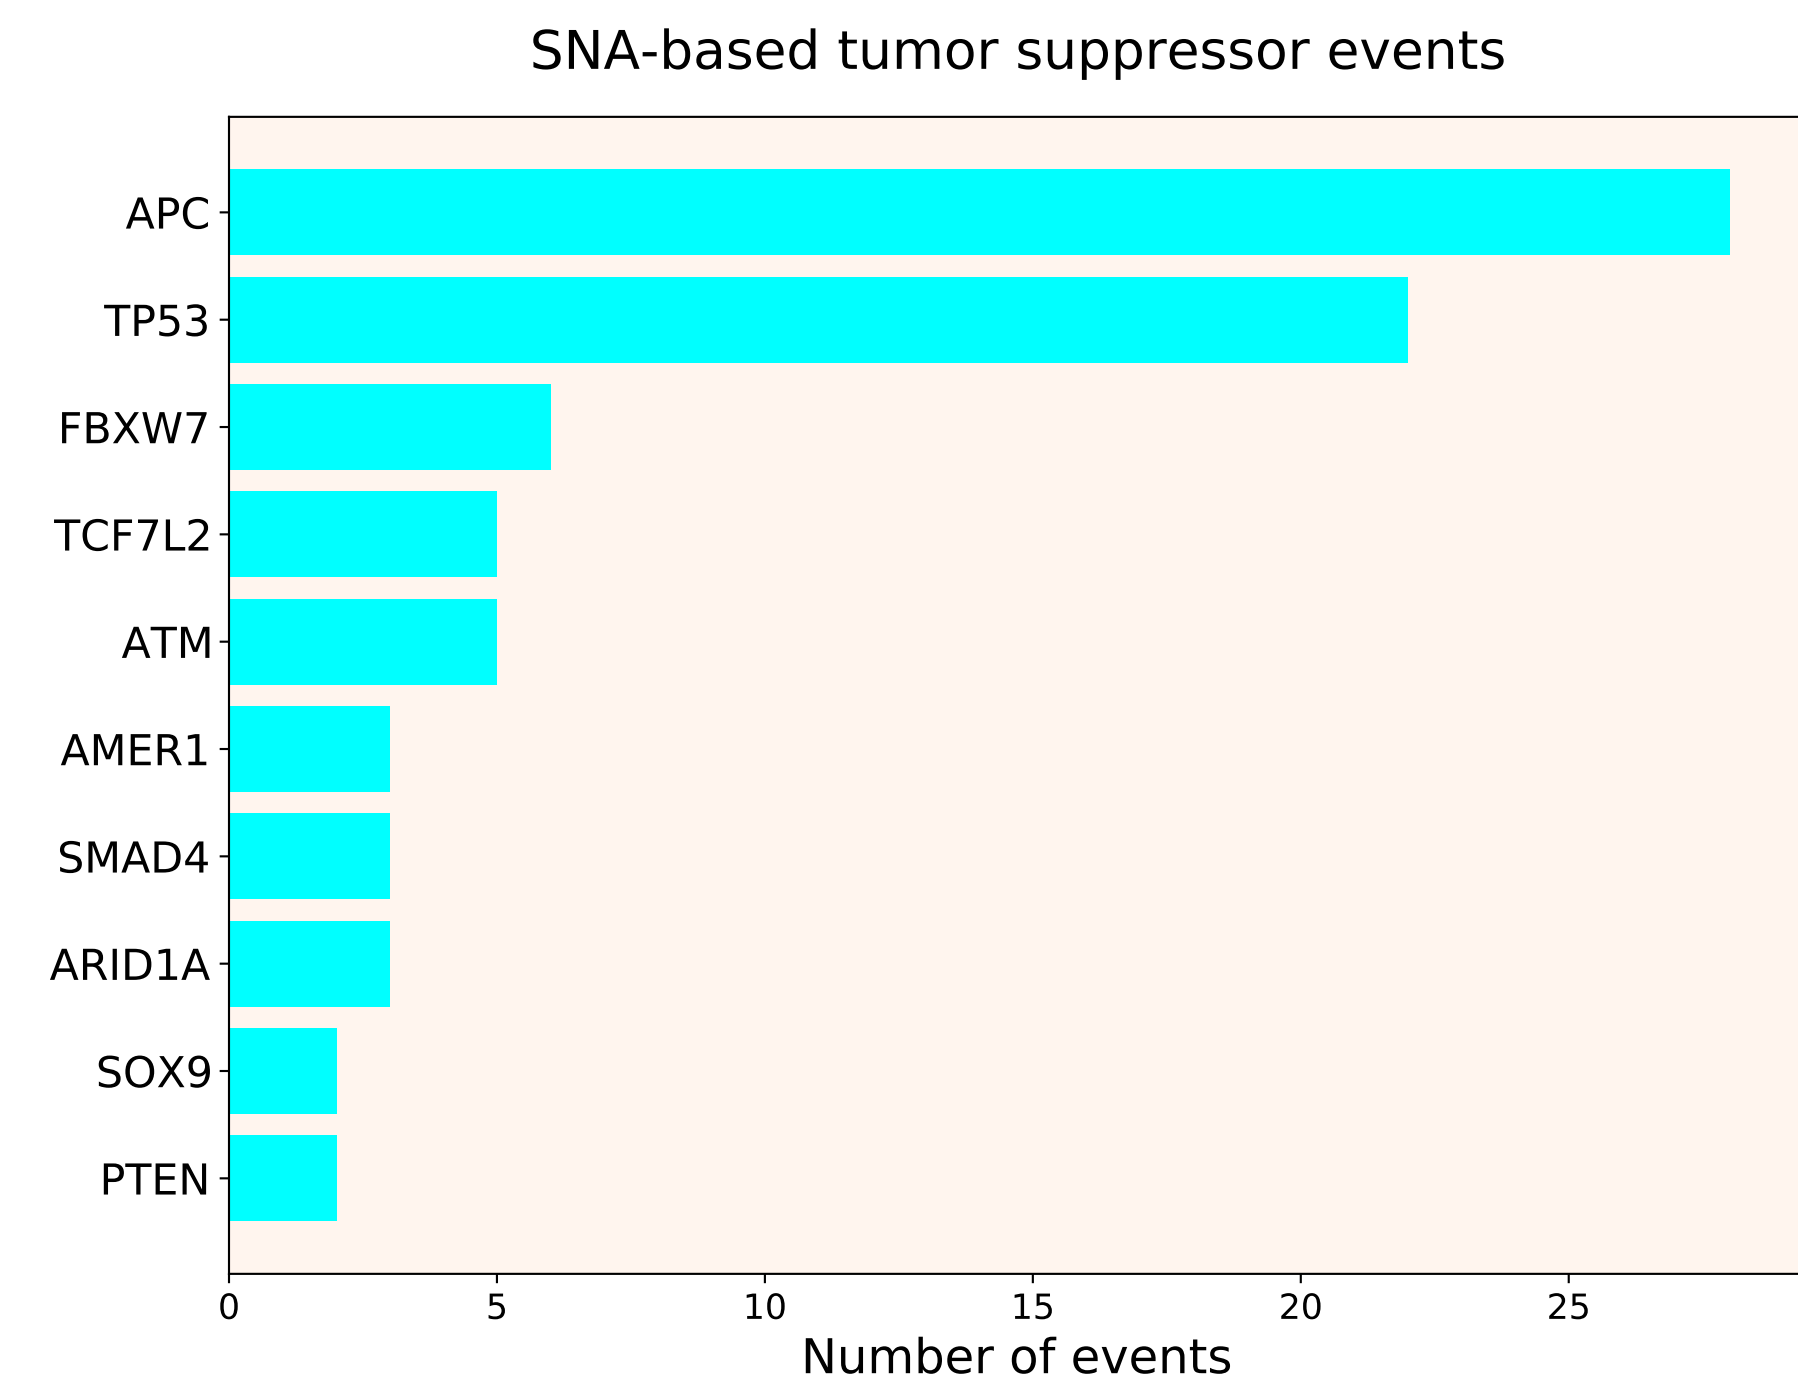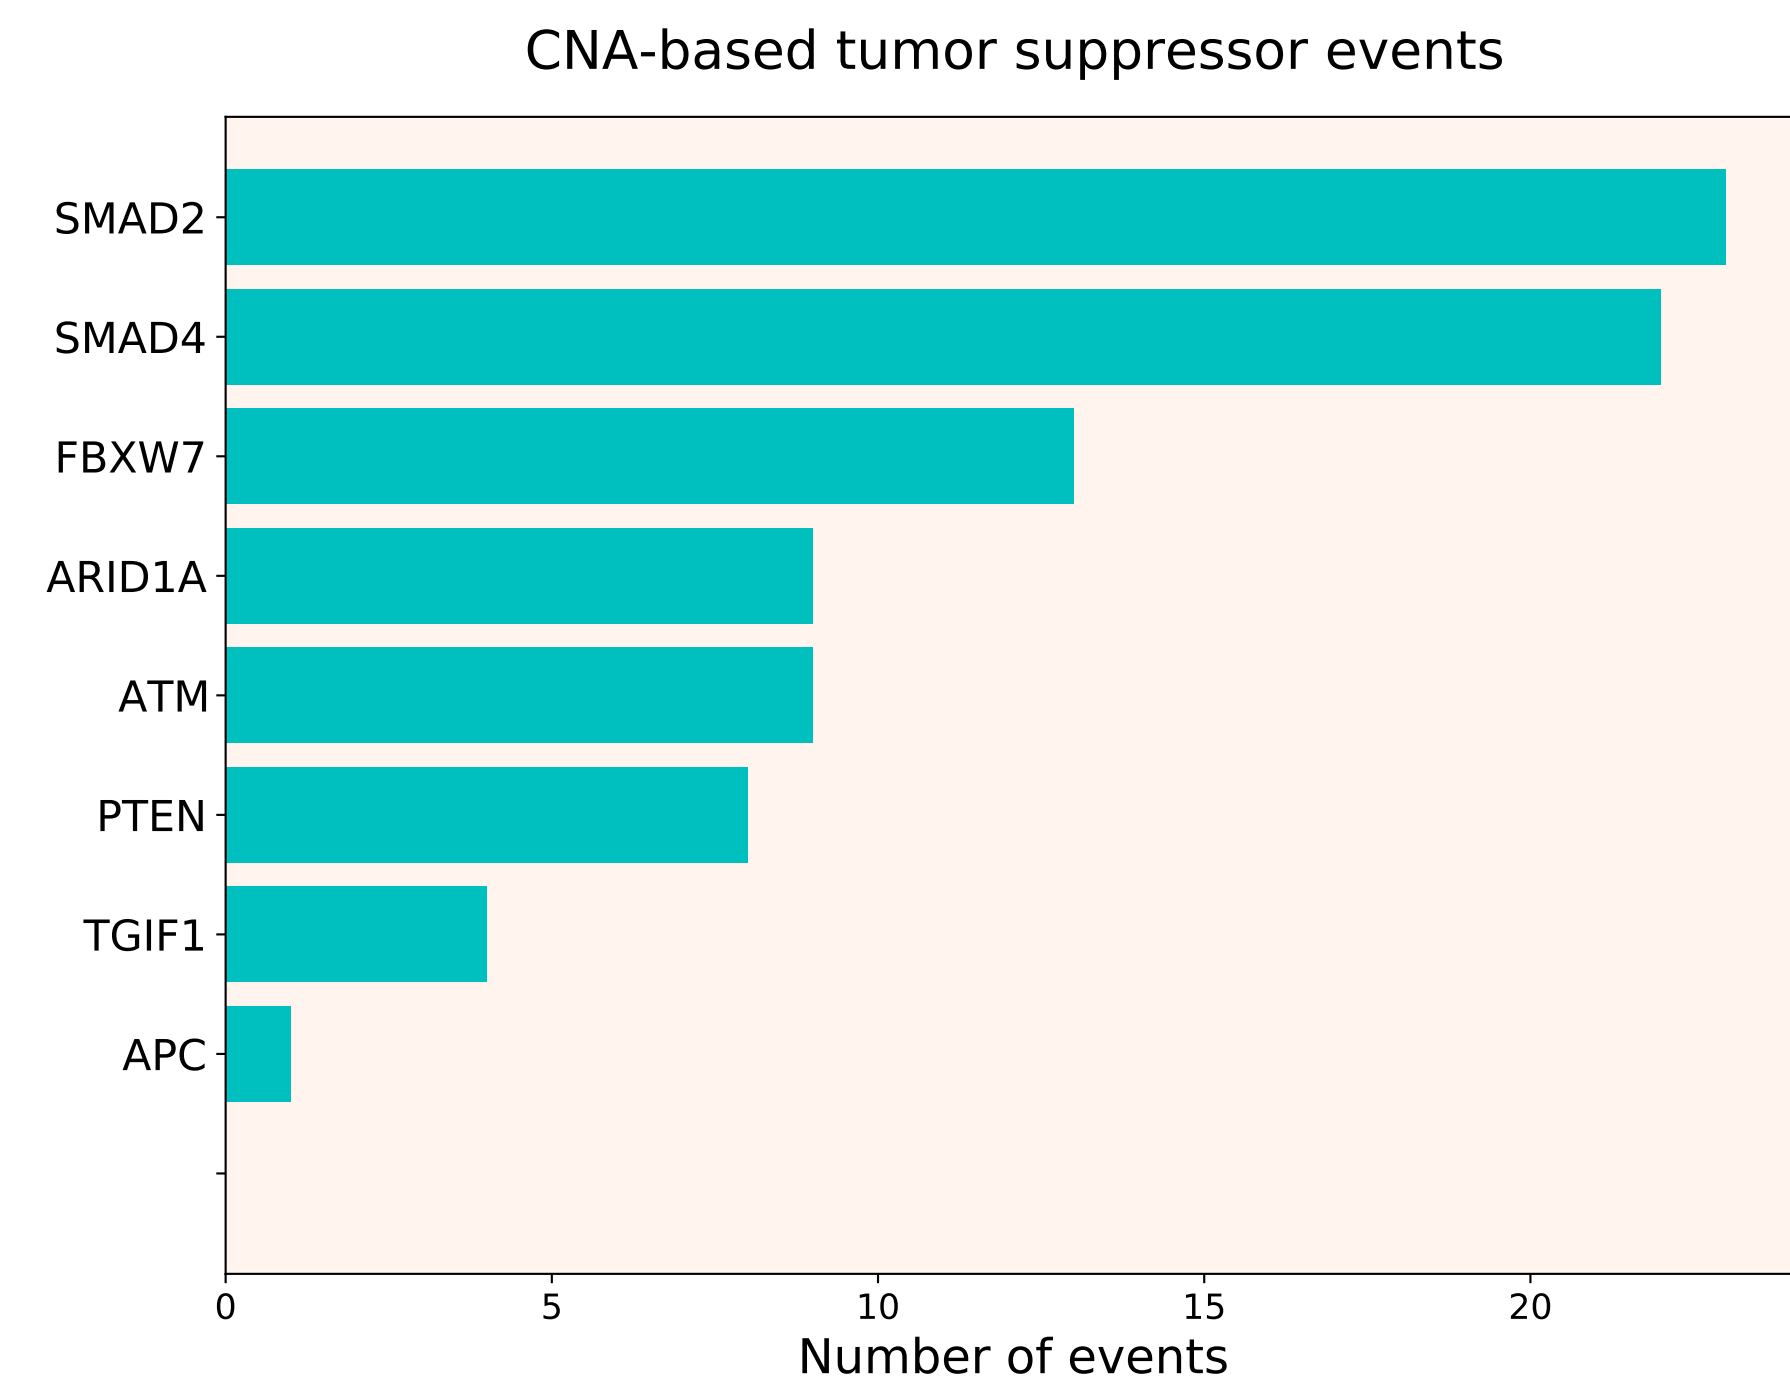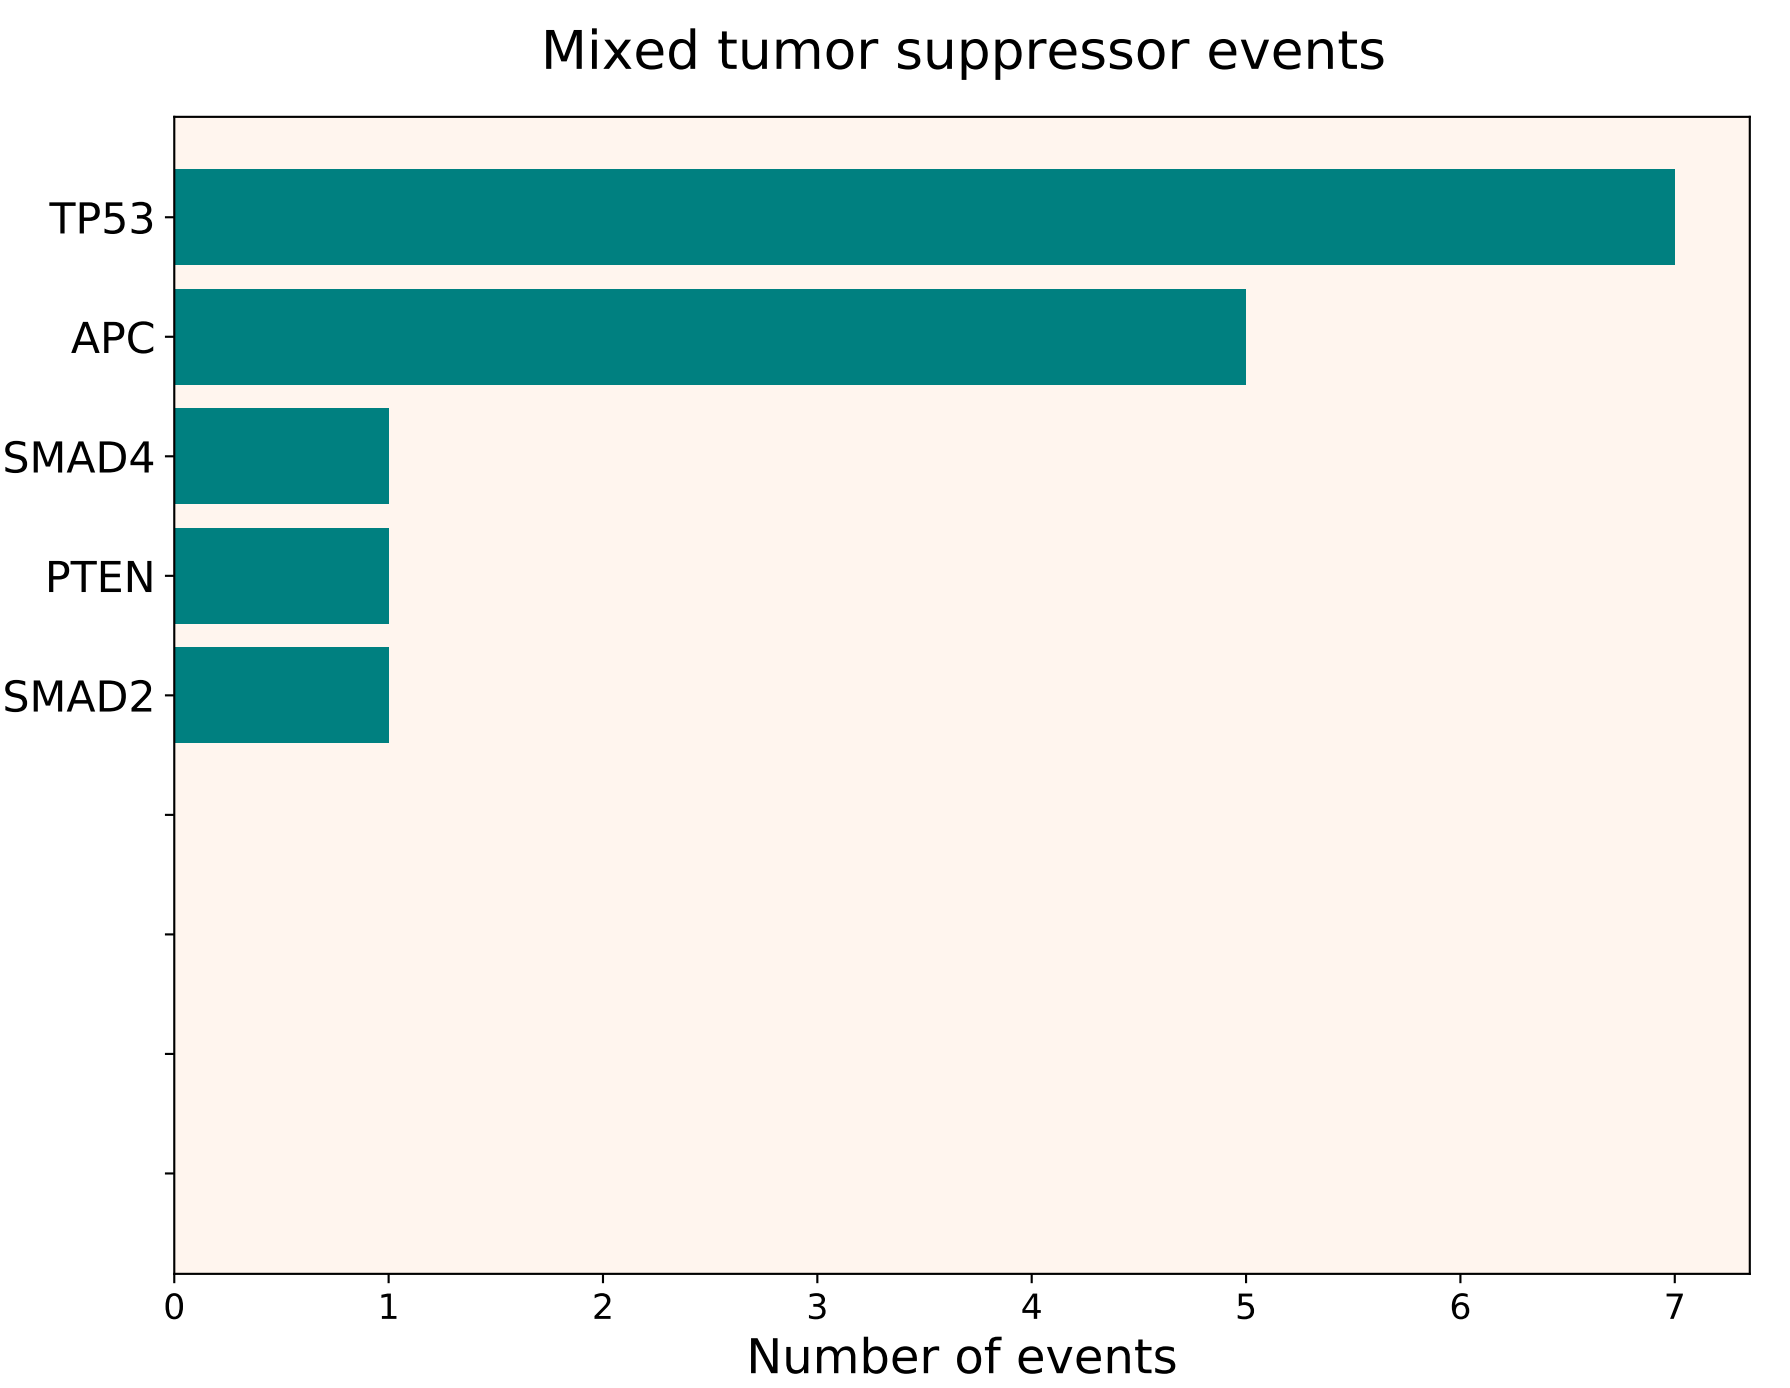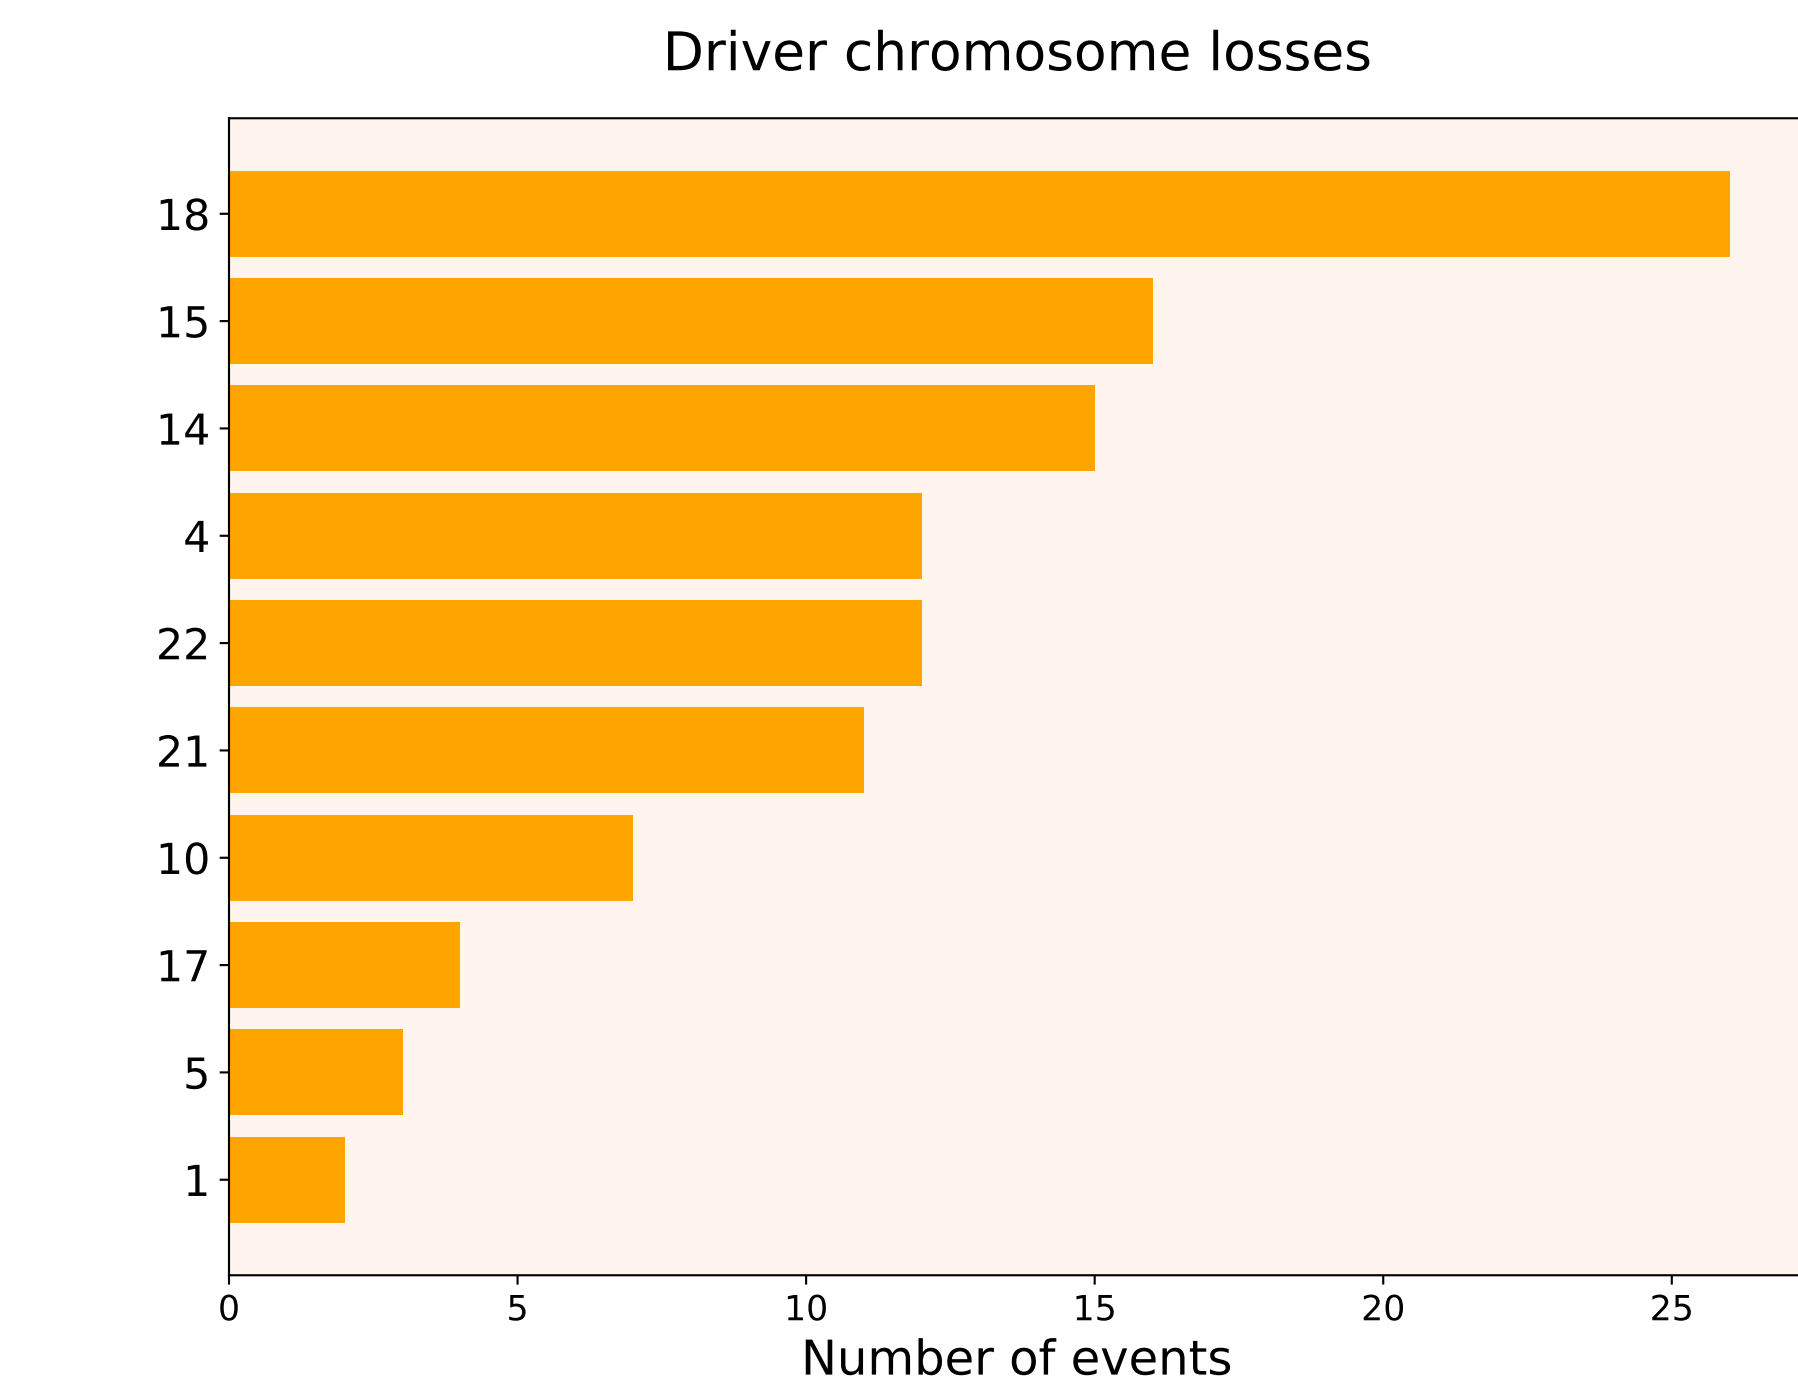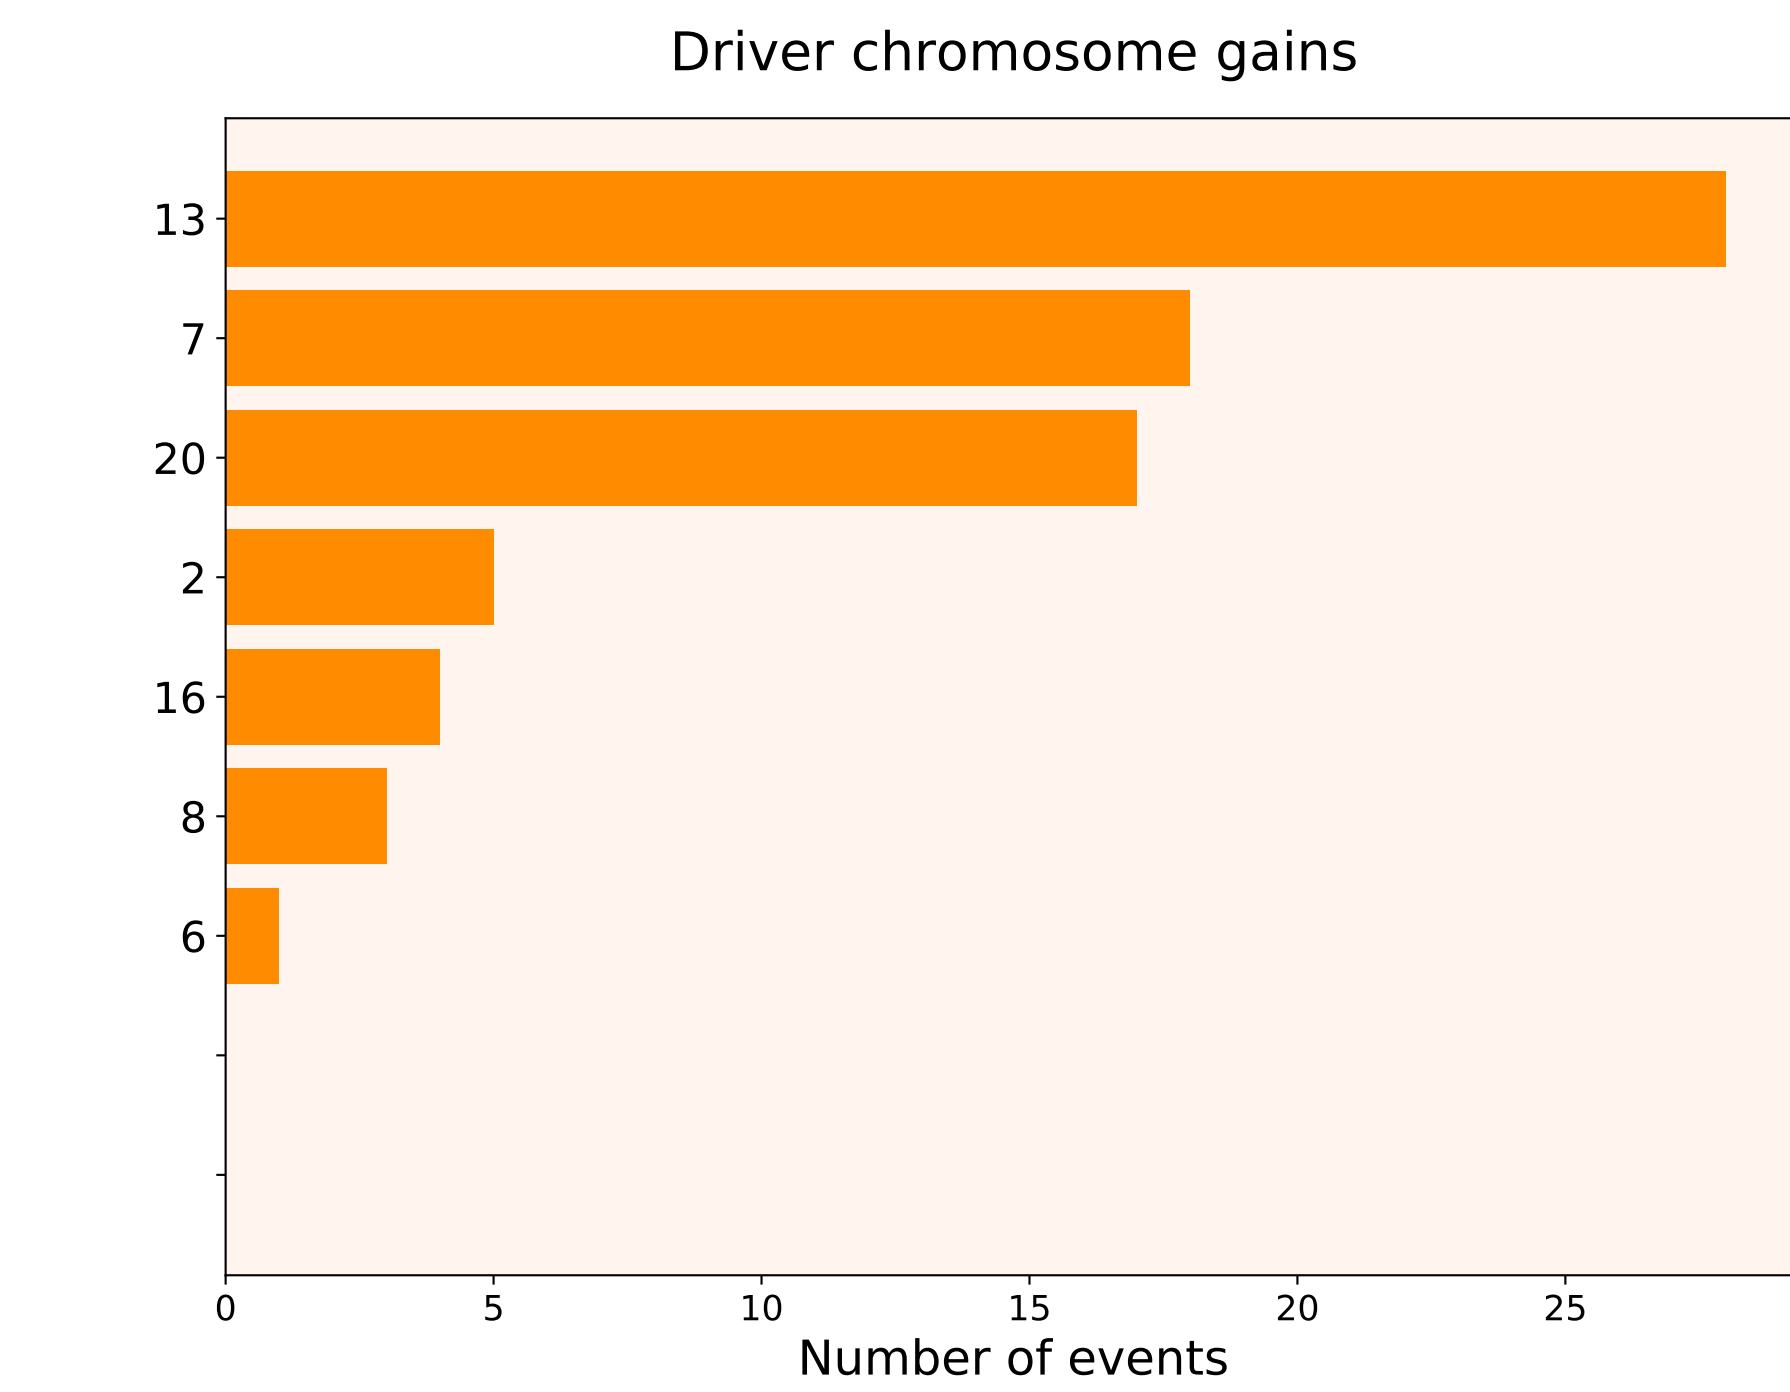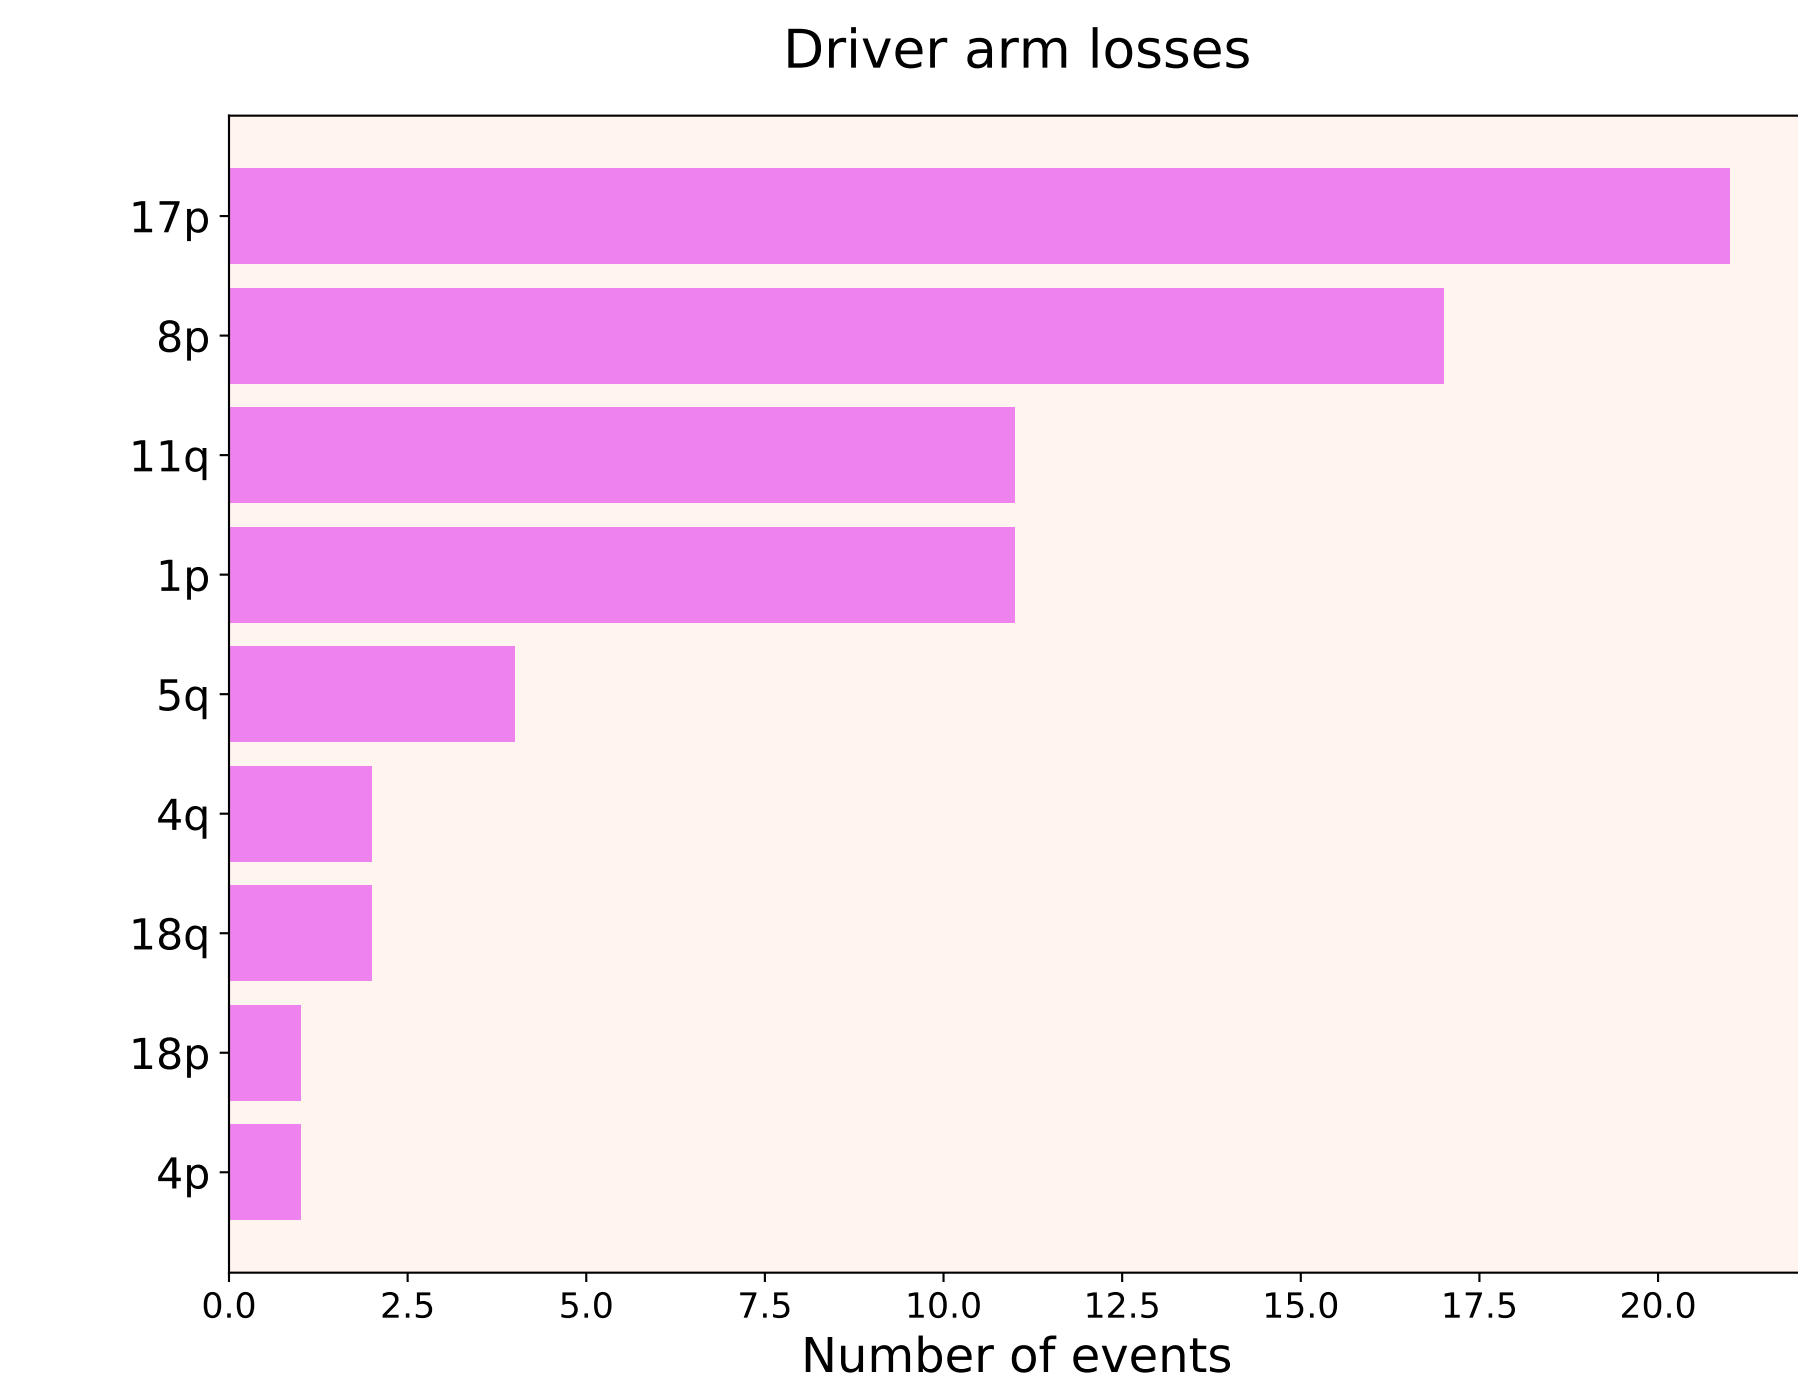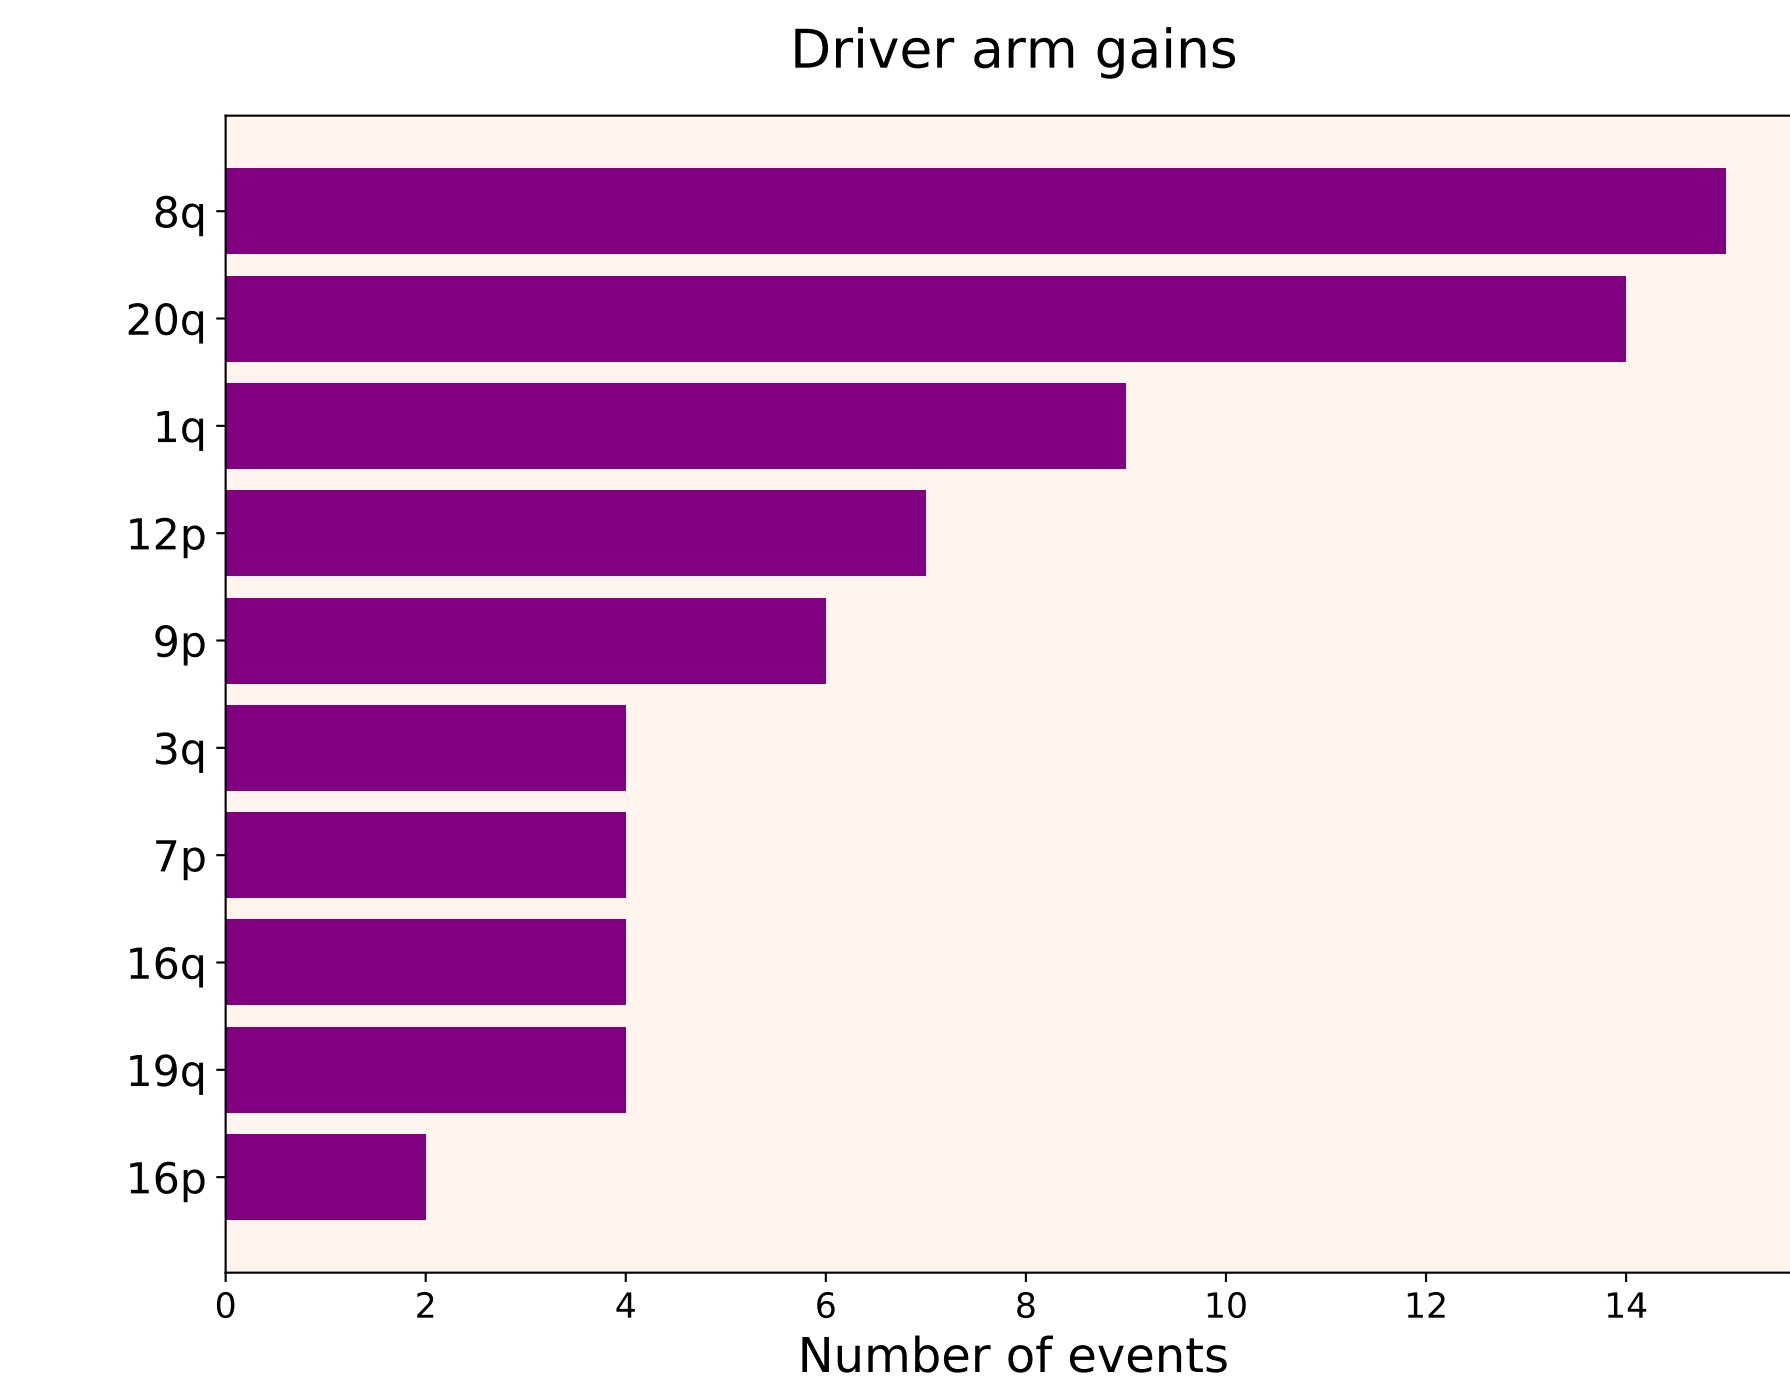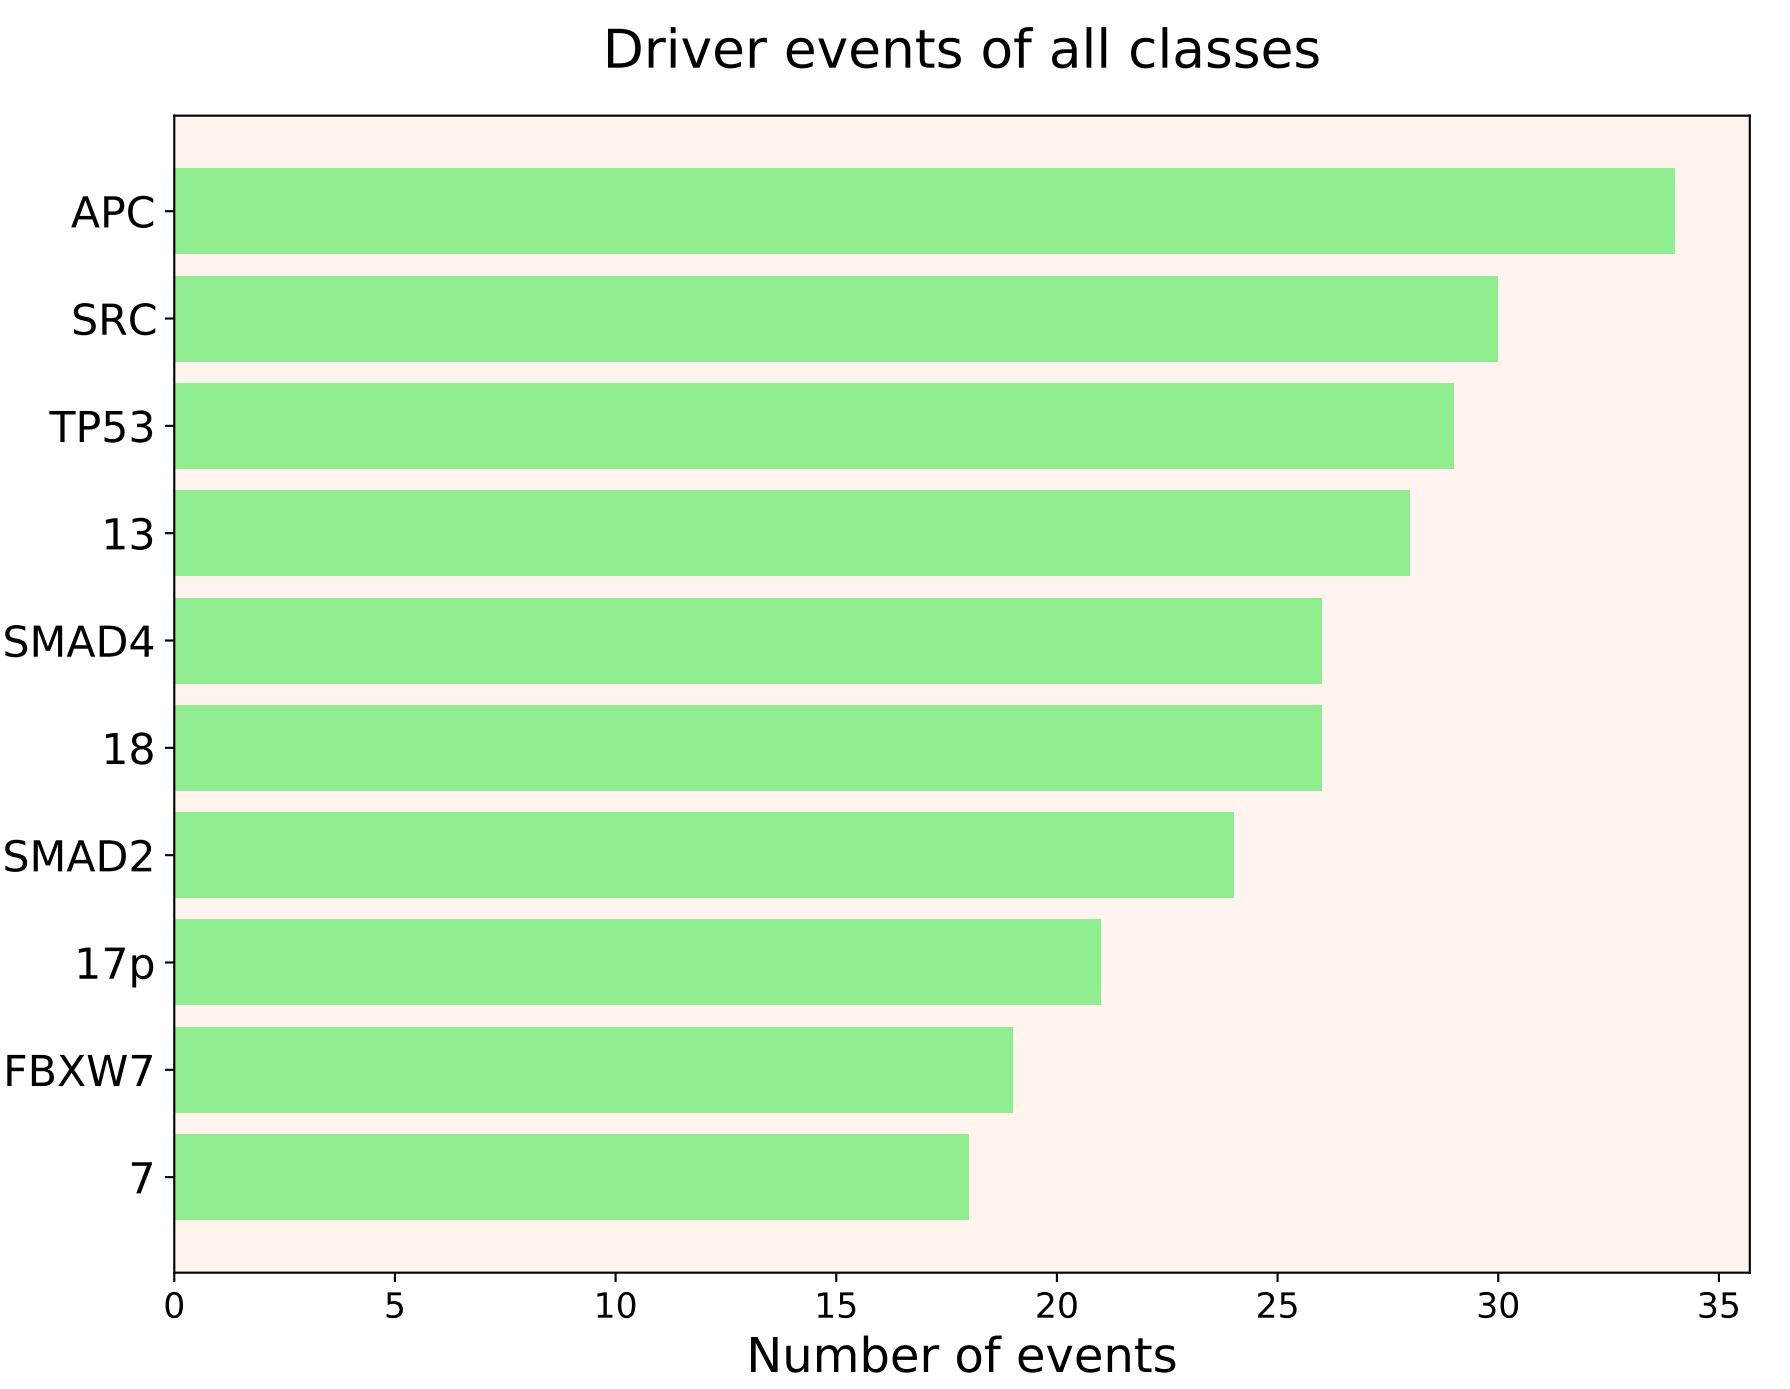

Supplement: Supplemental_Data_S1.zip [file Supplemental_Data_S1.zip]

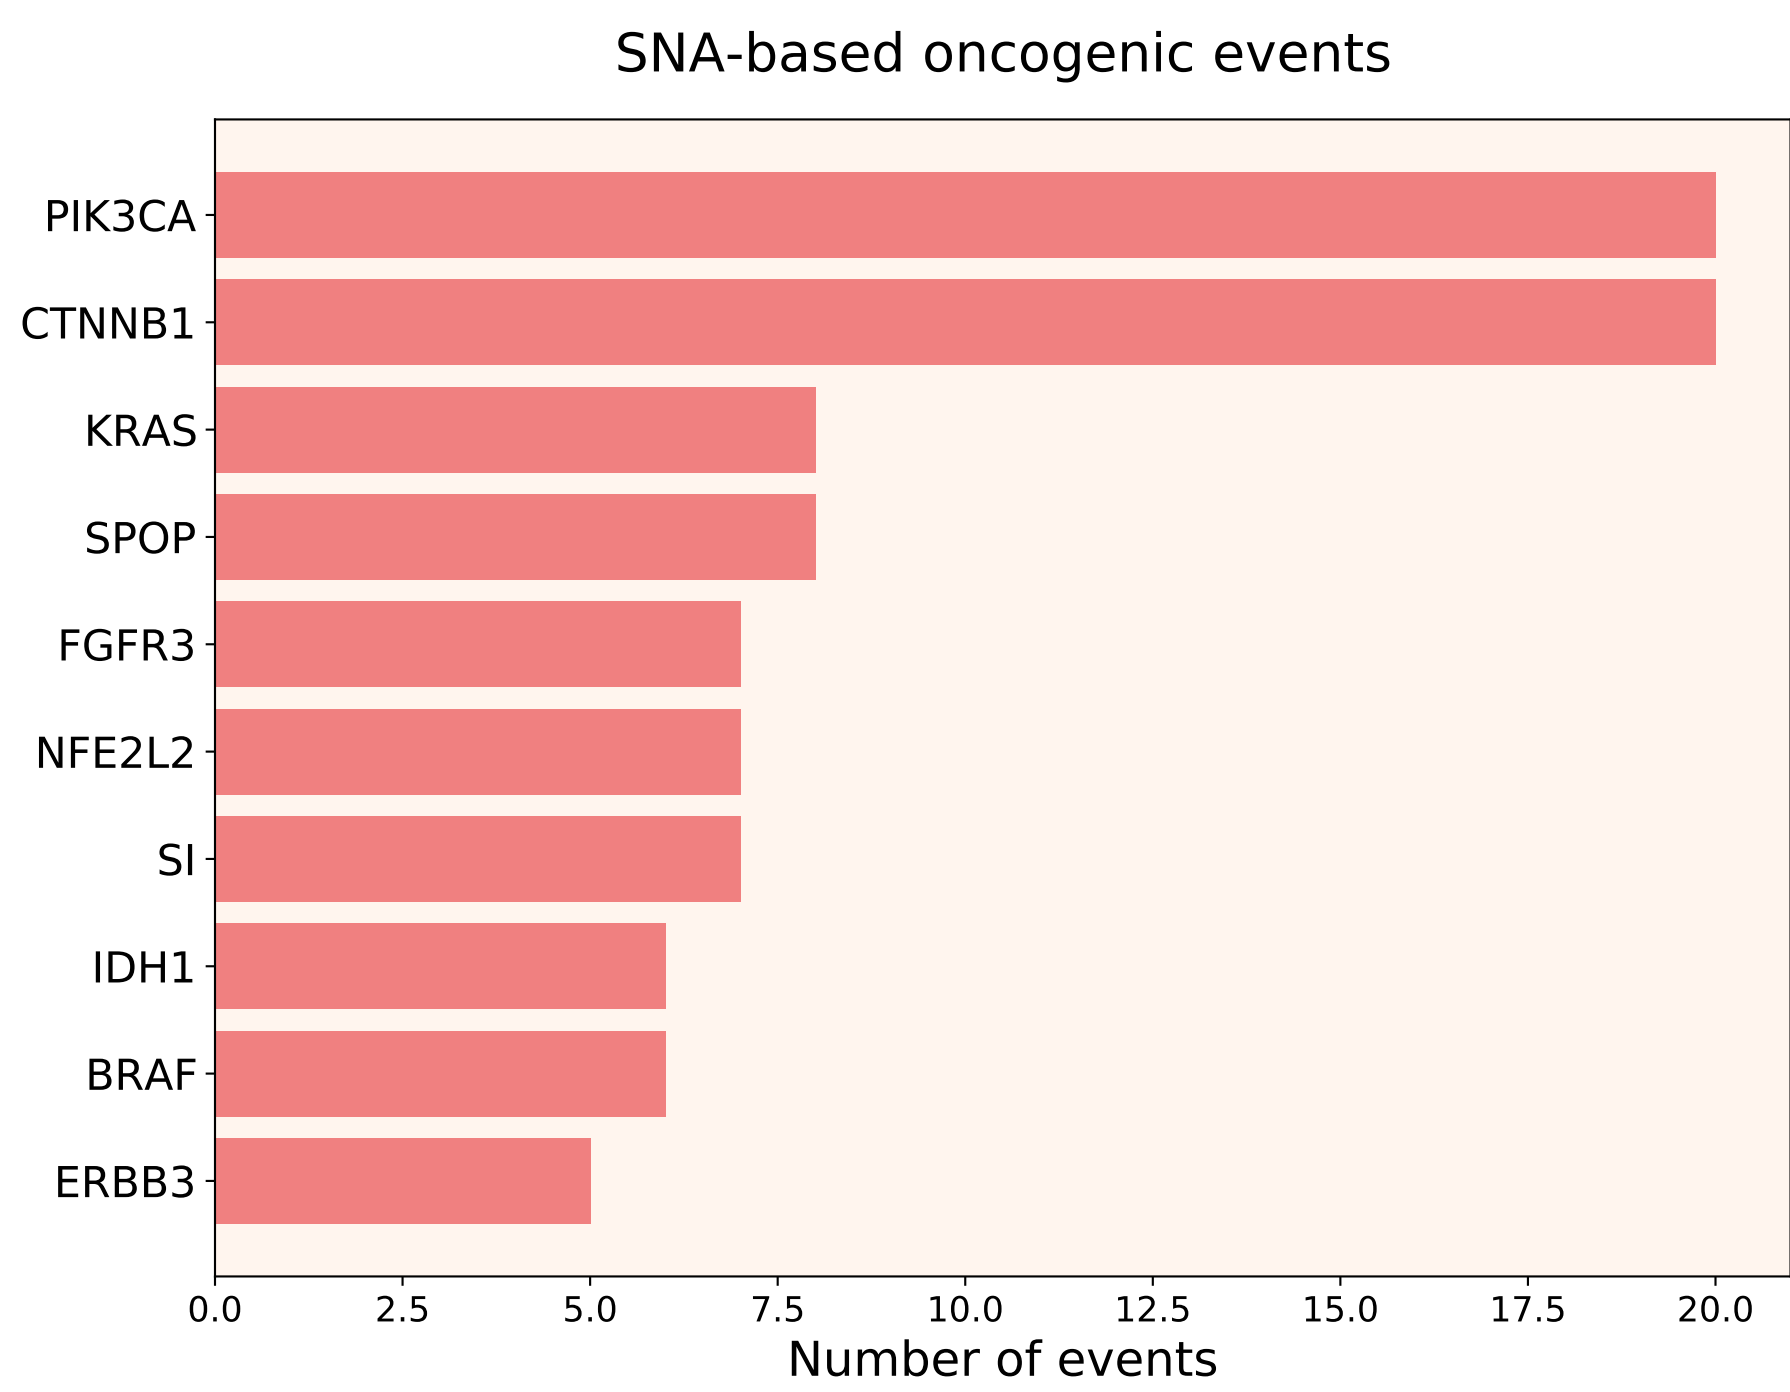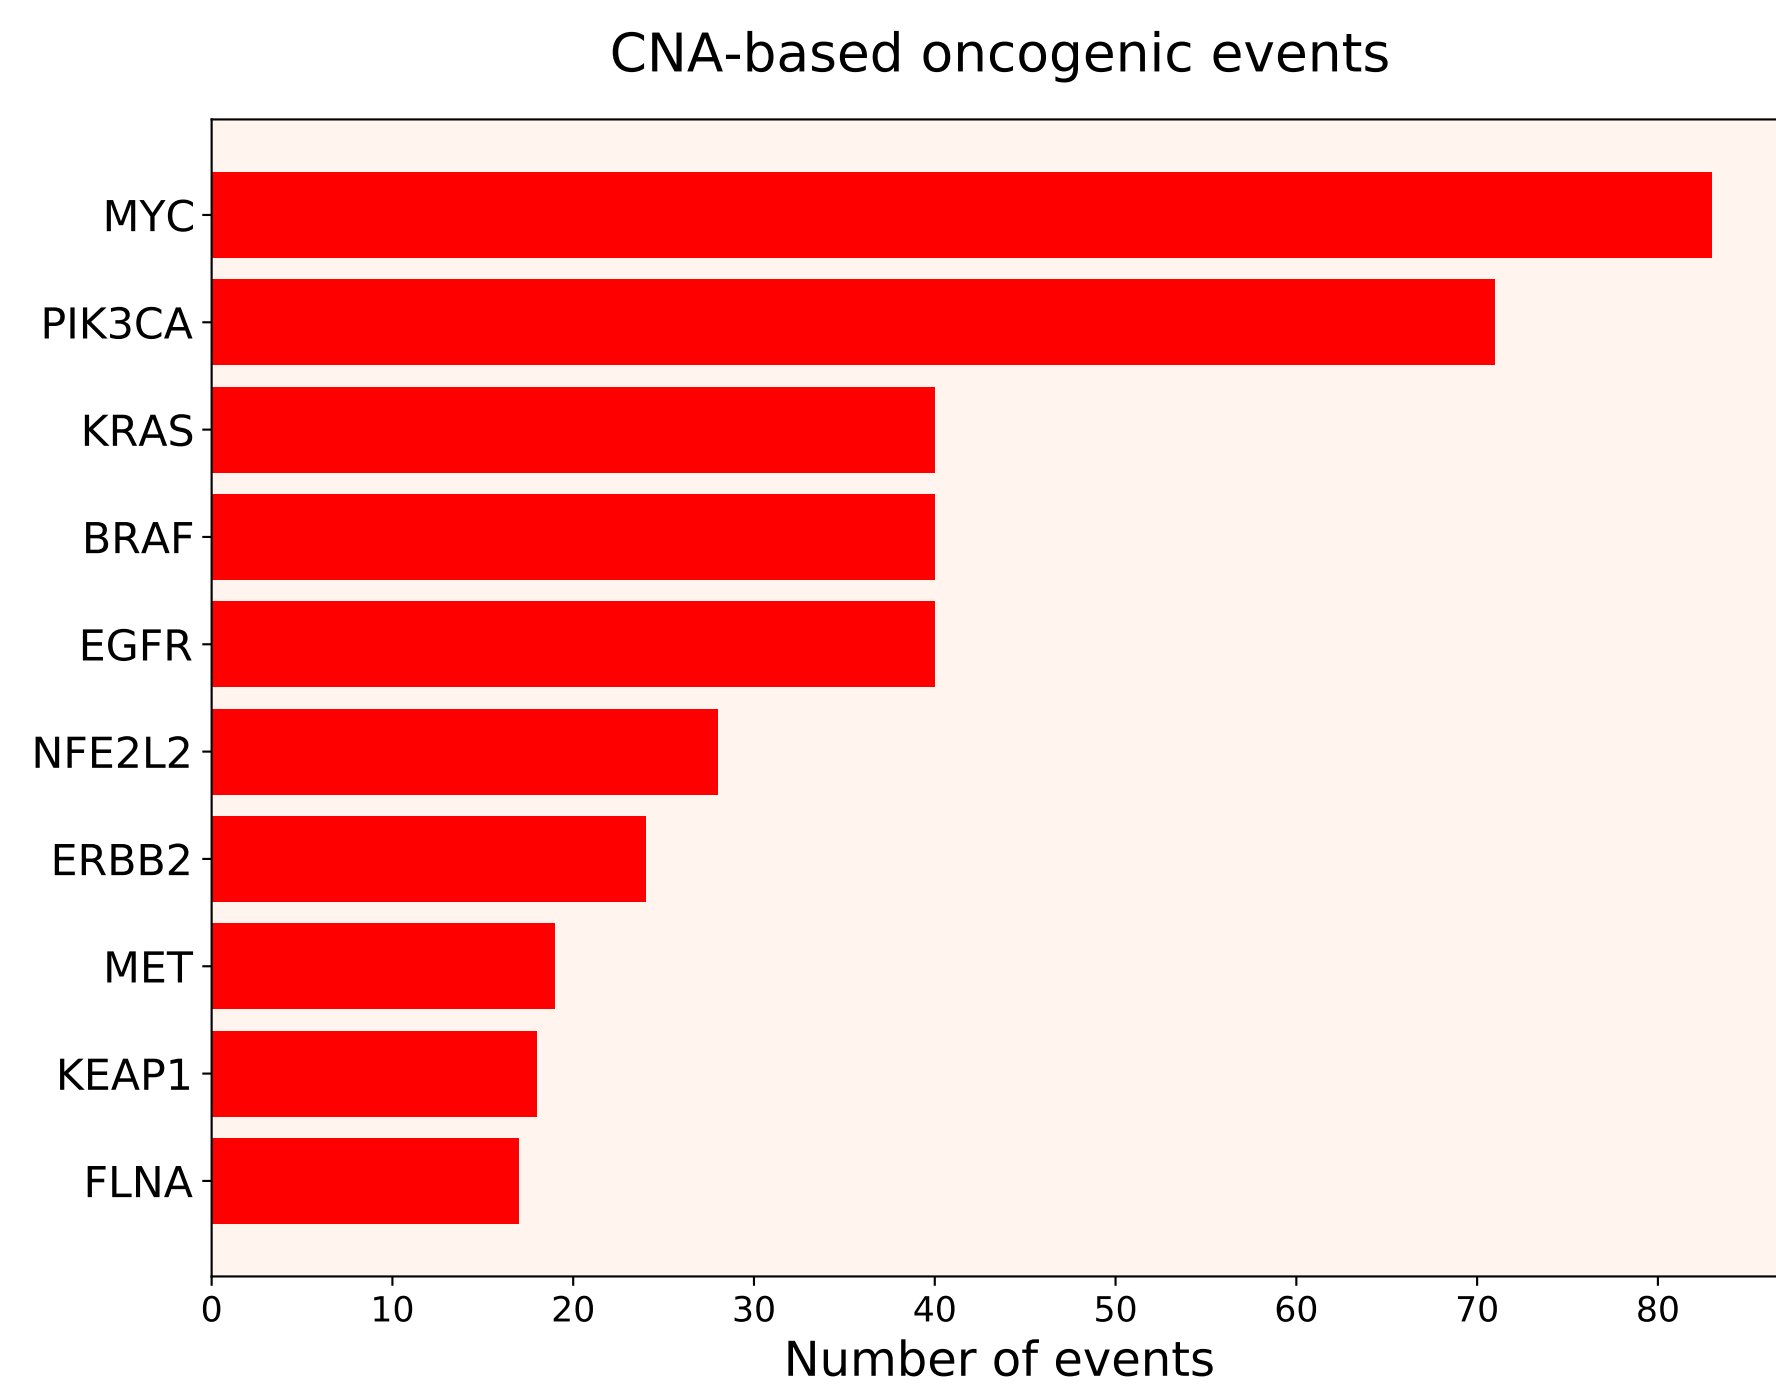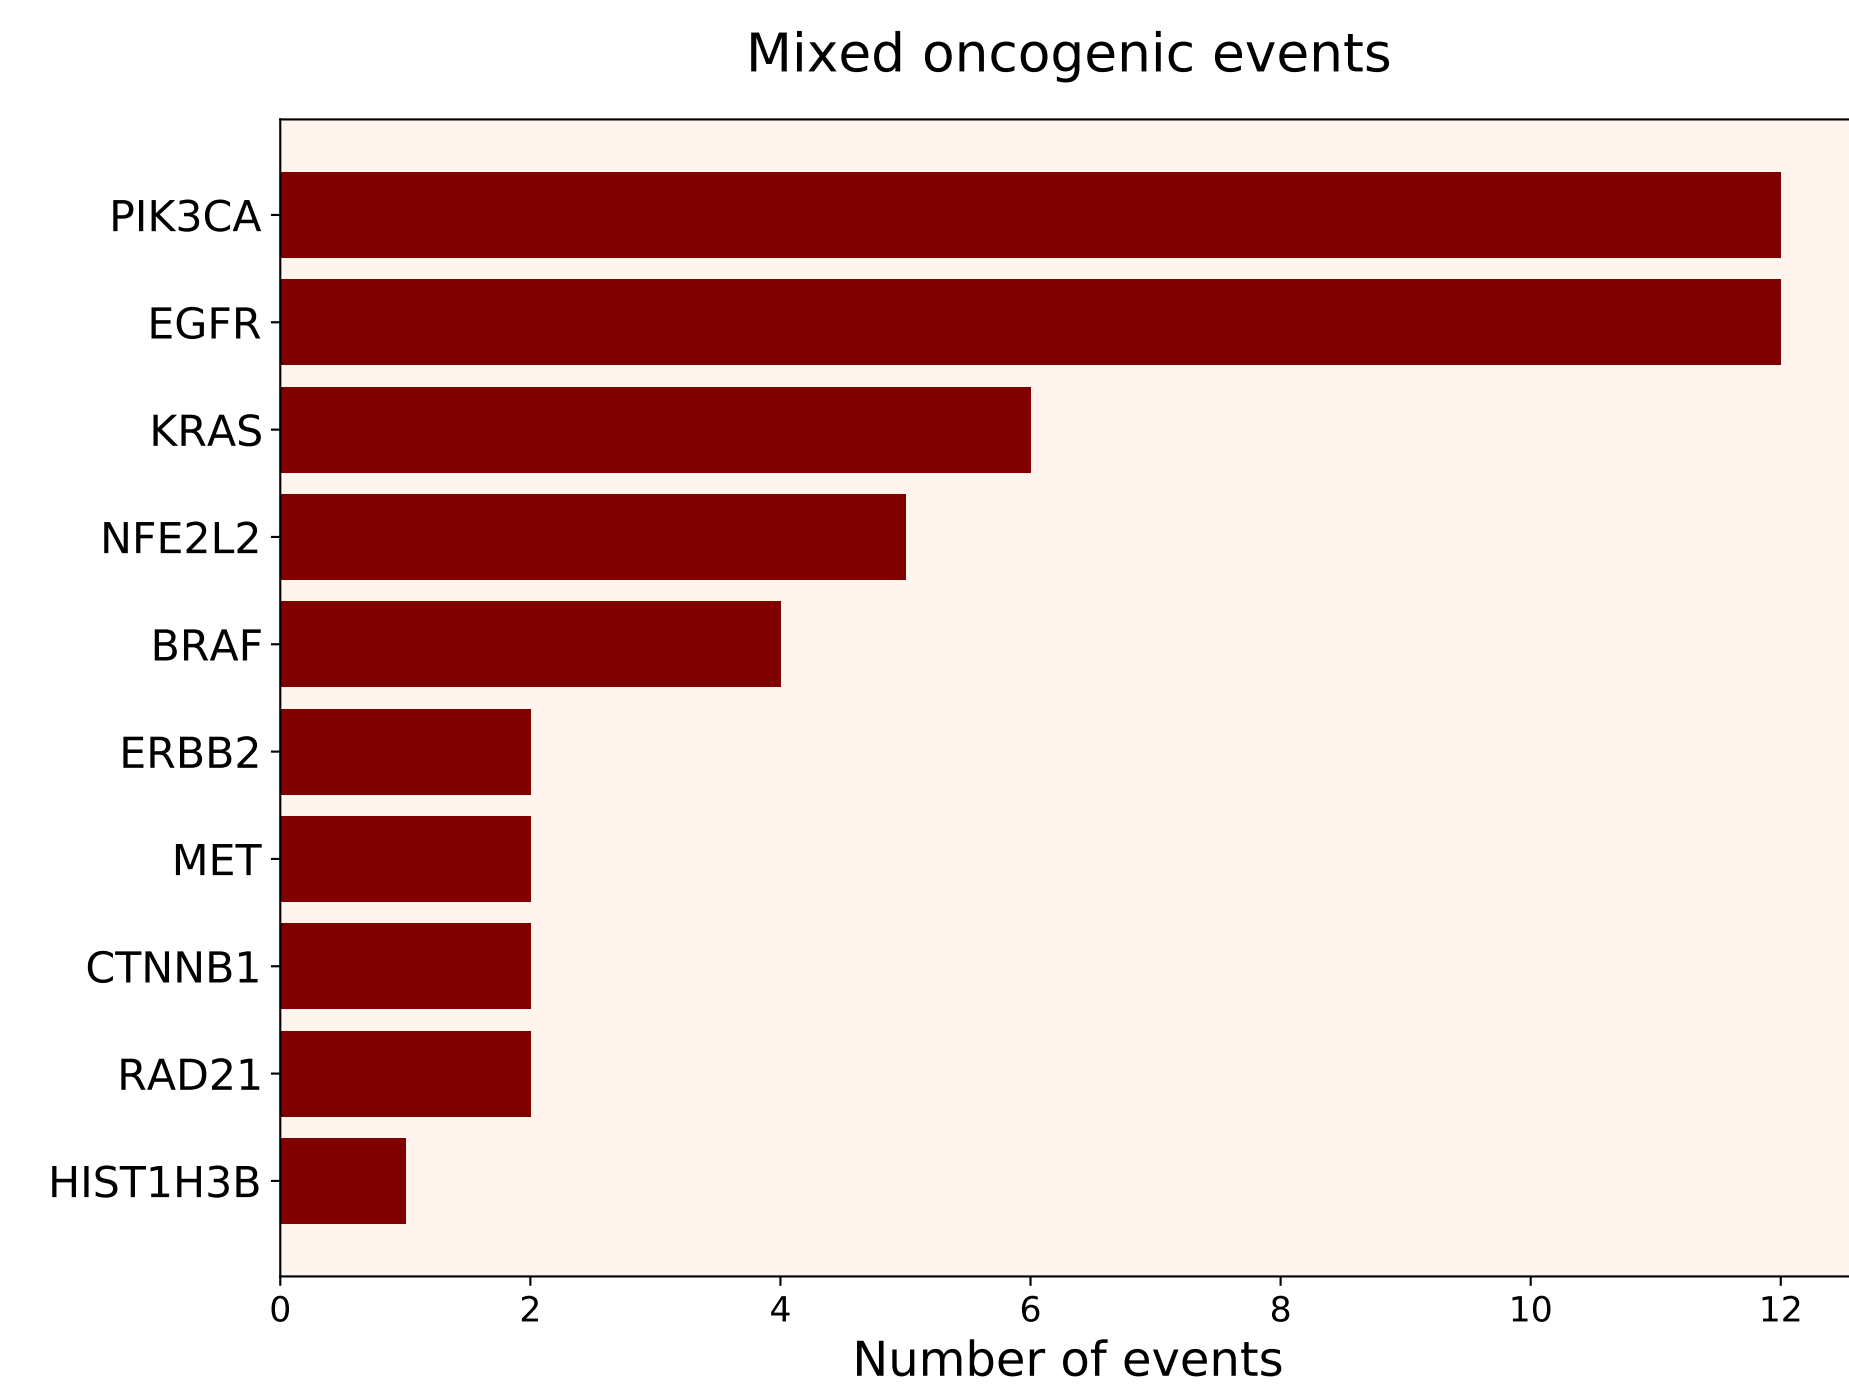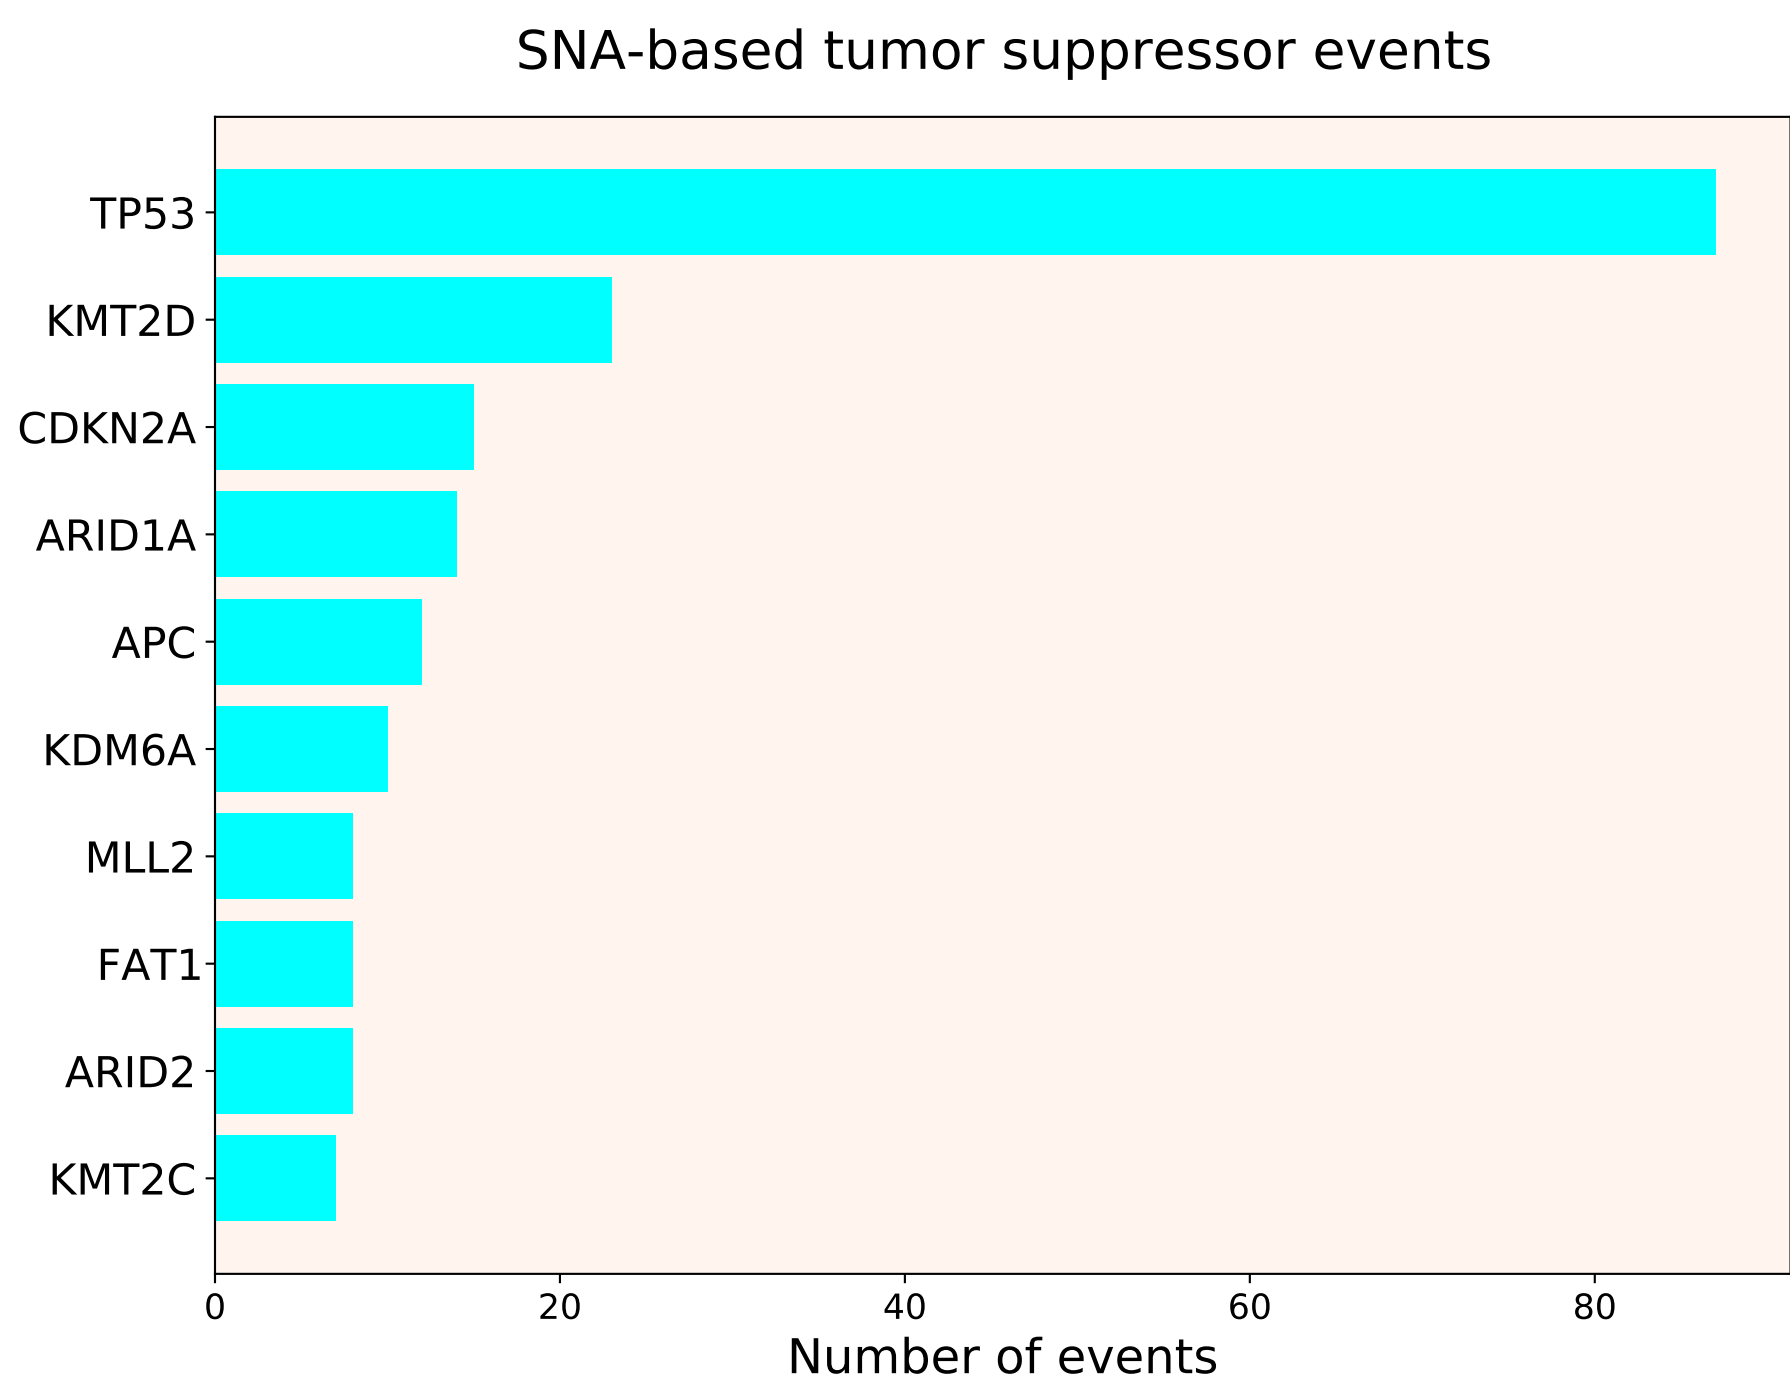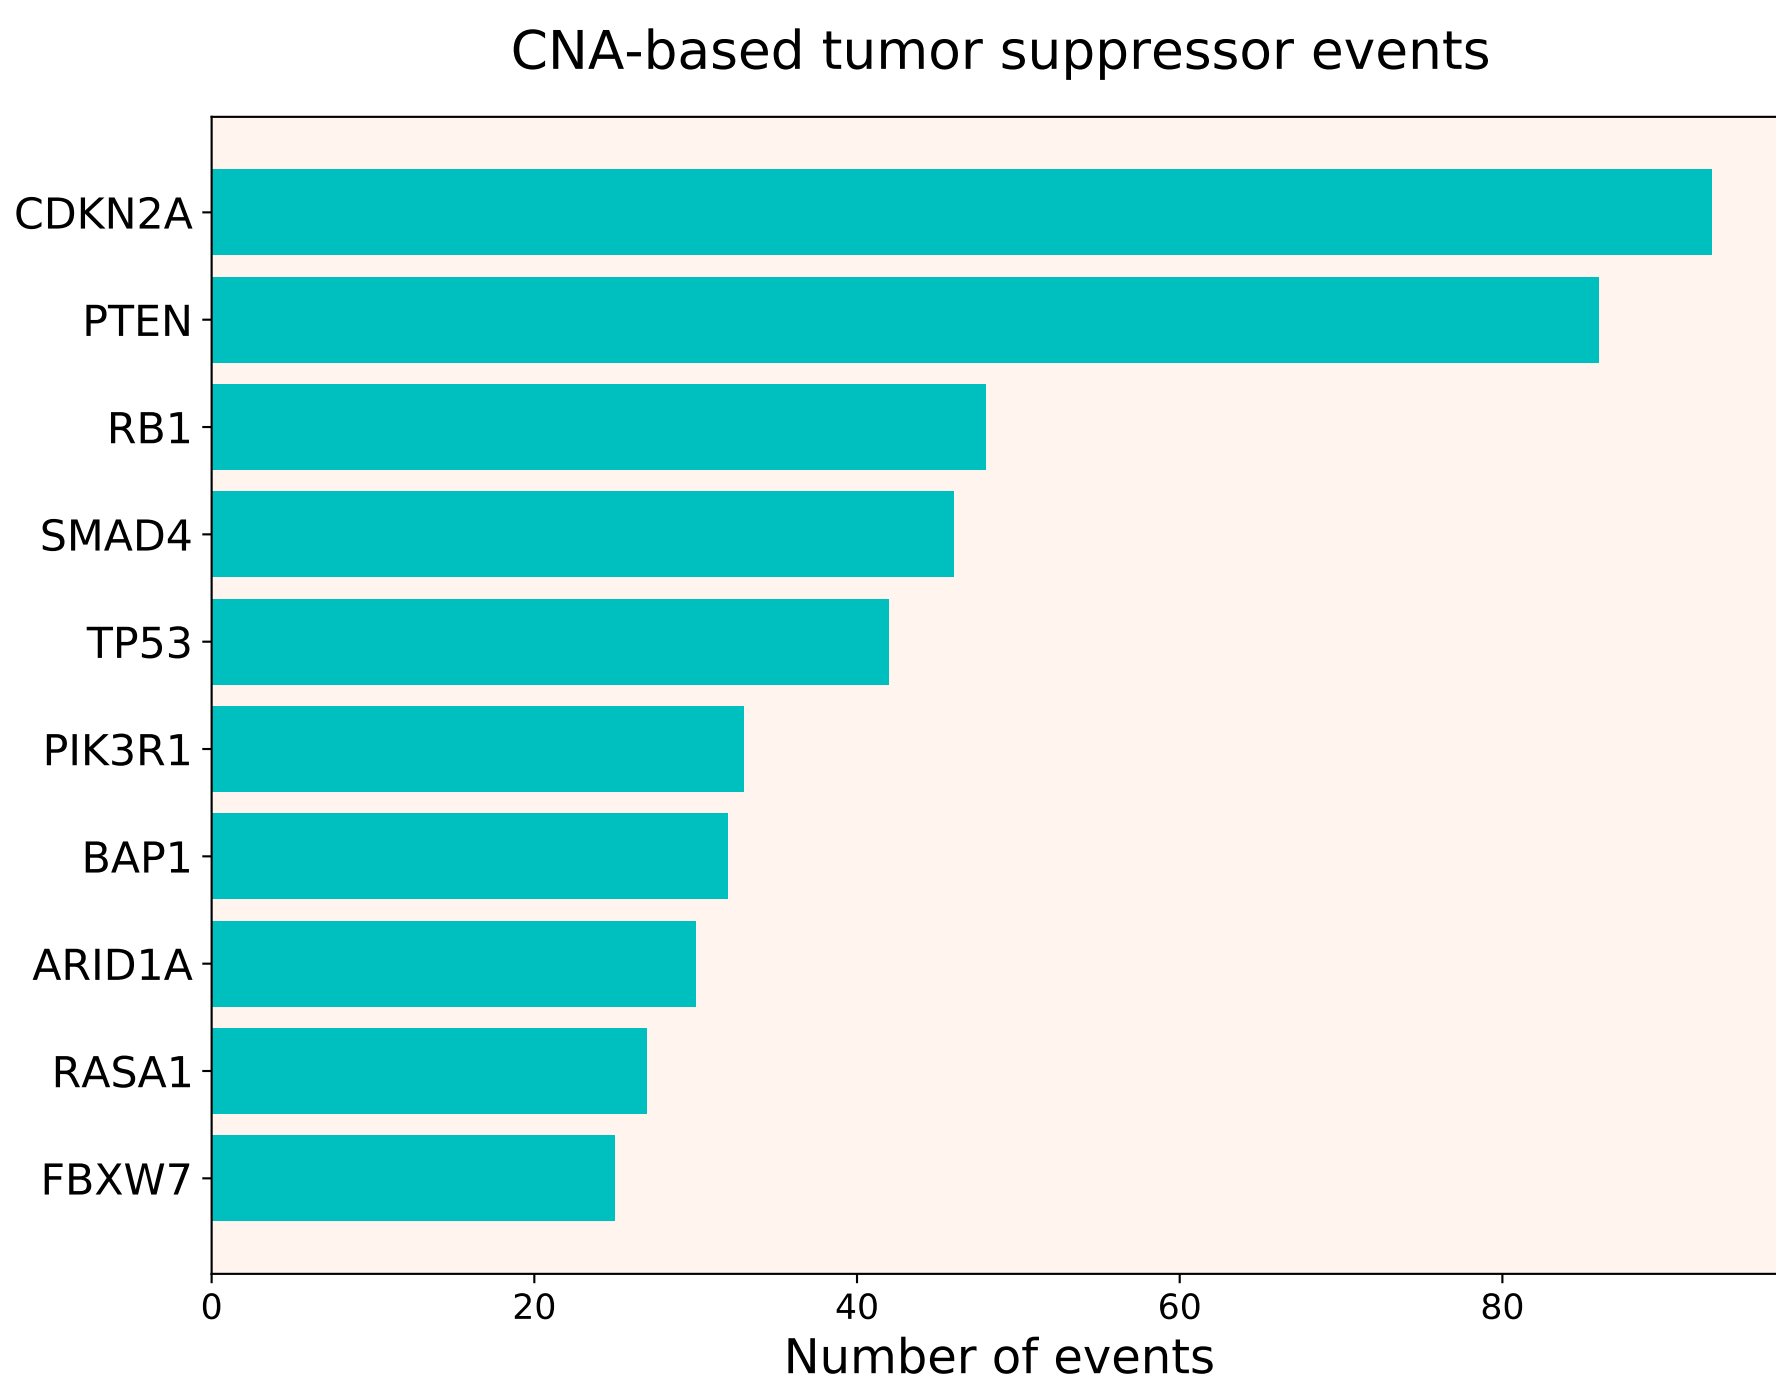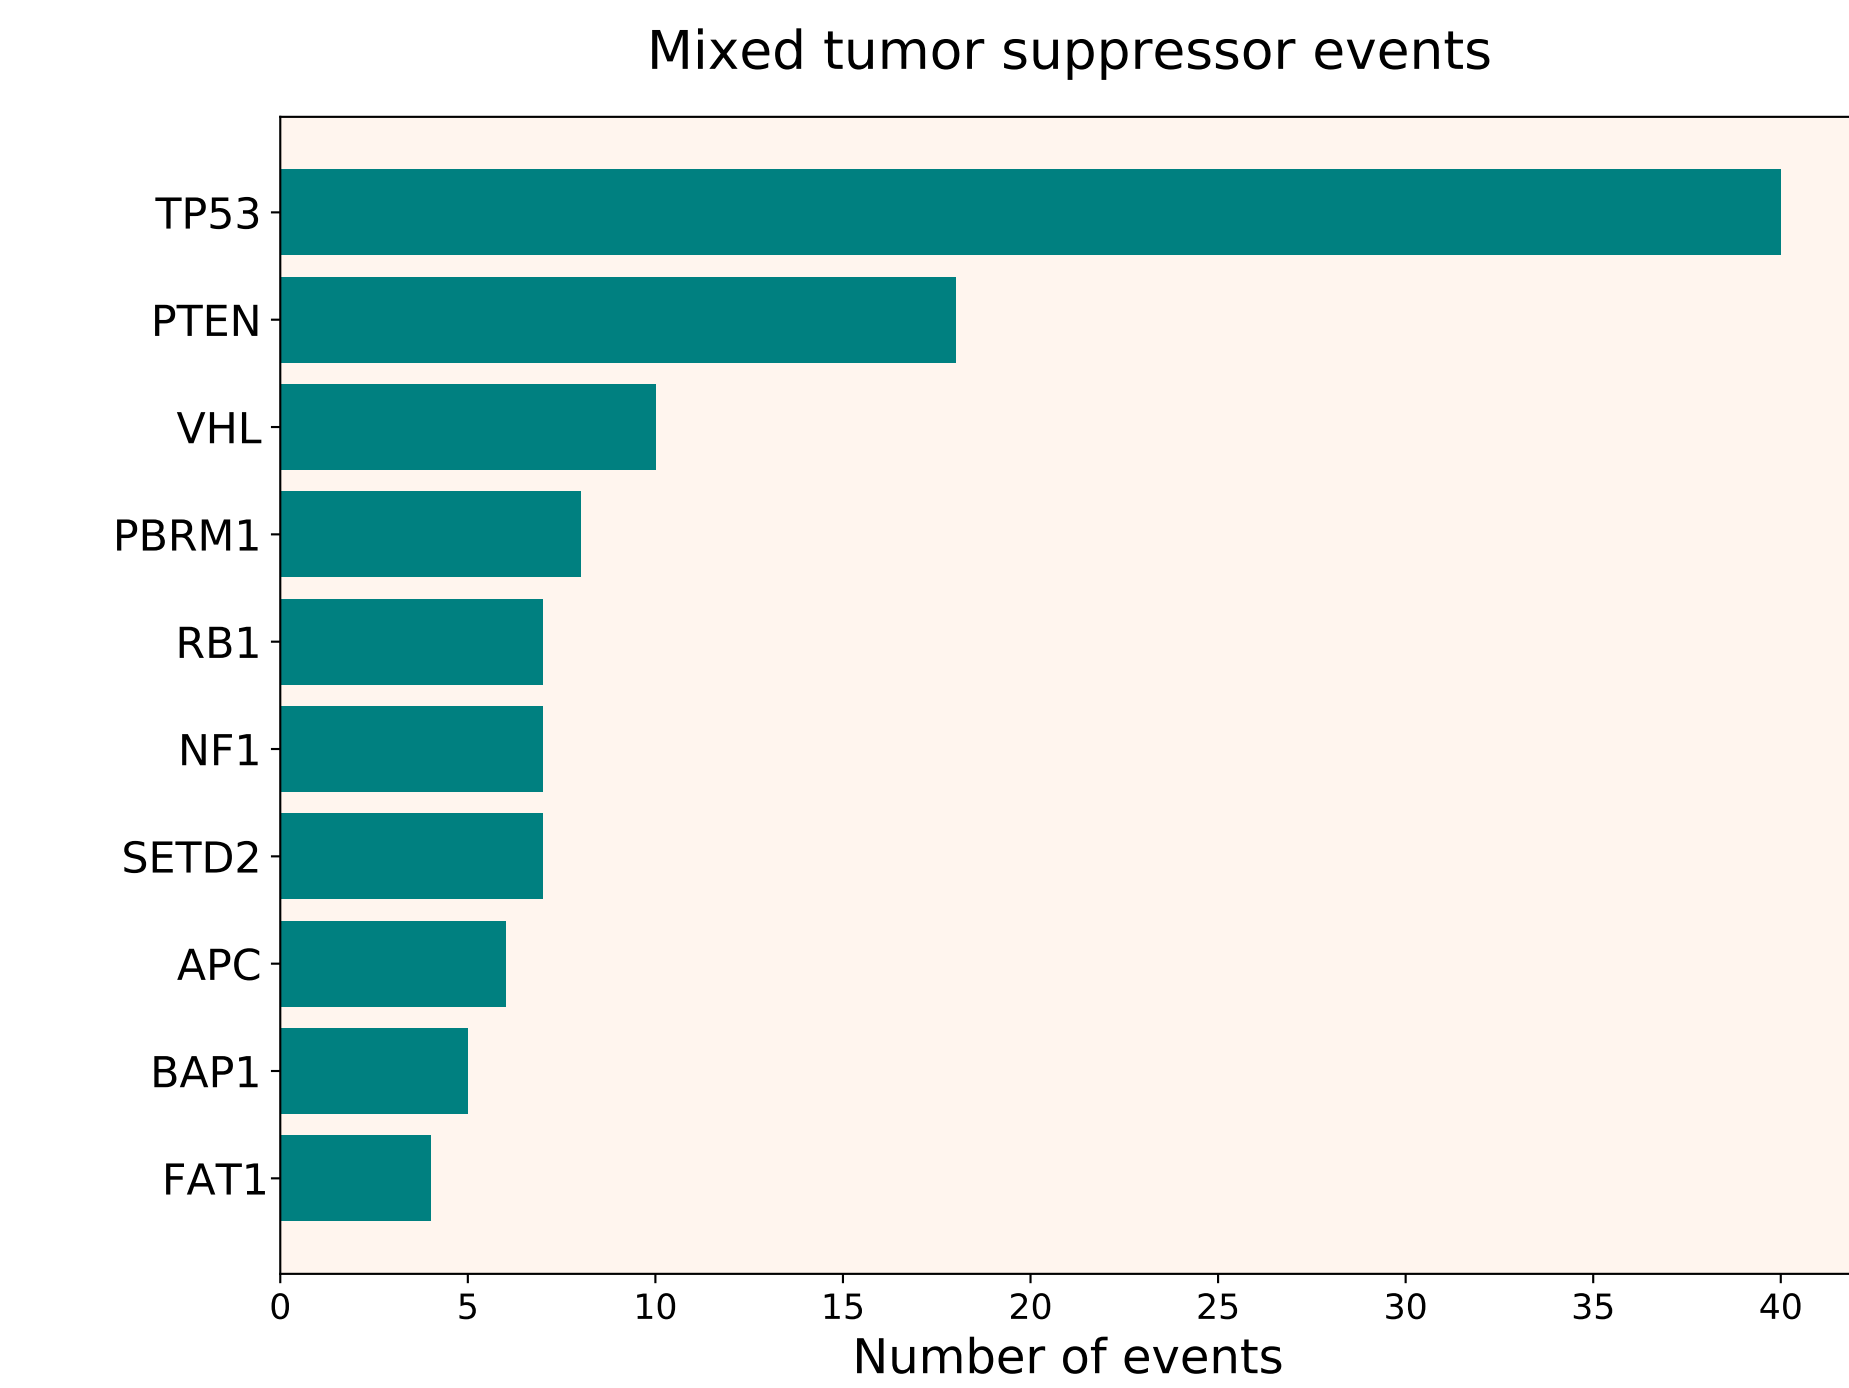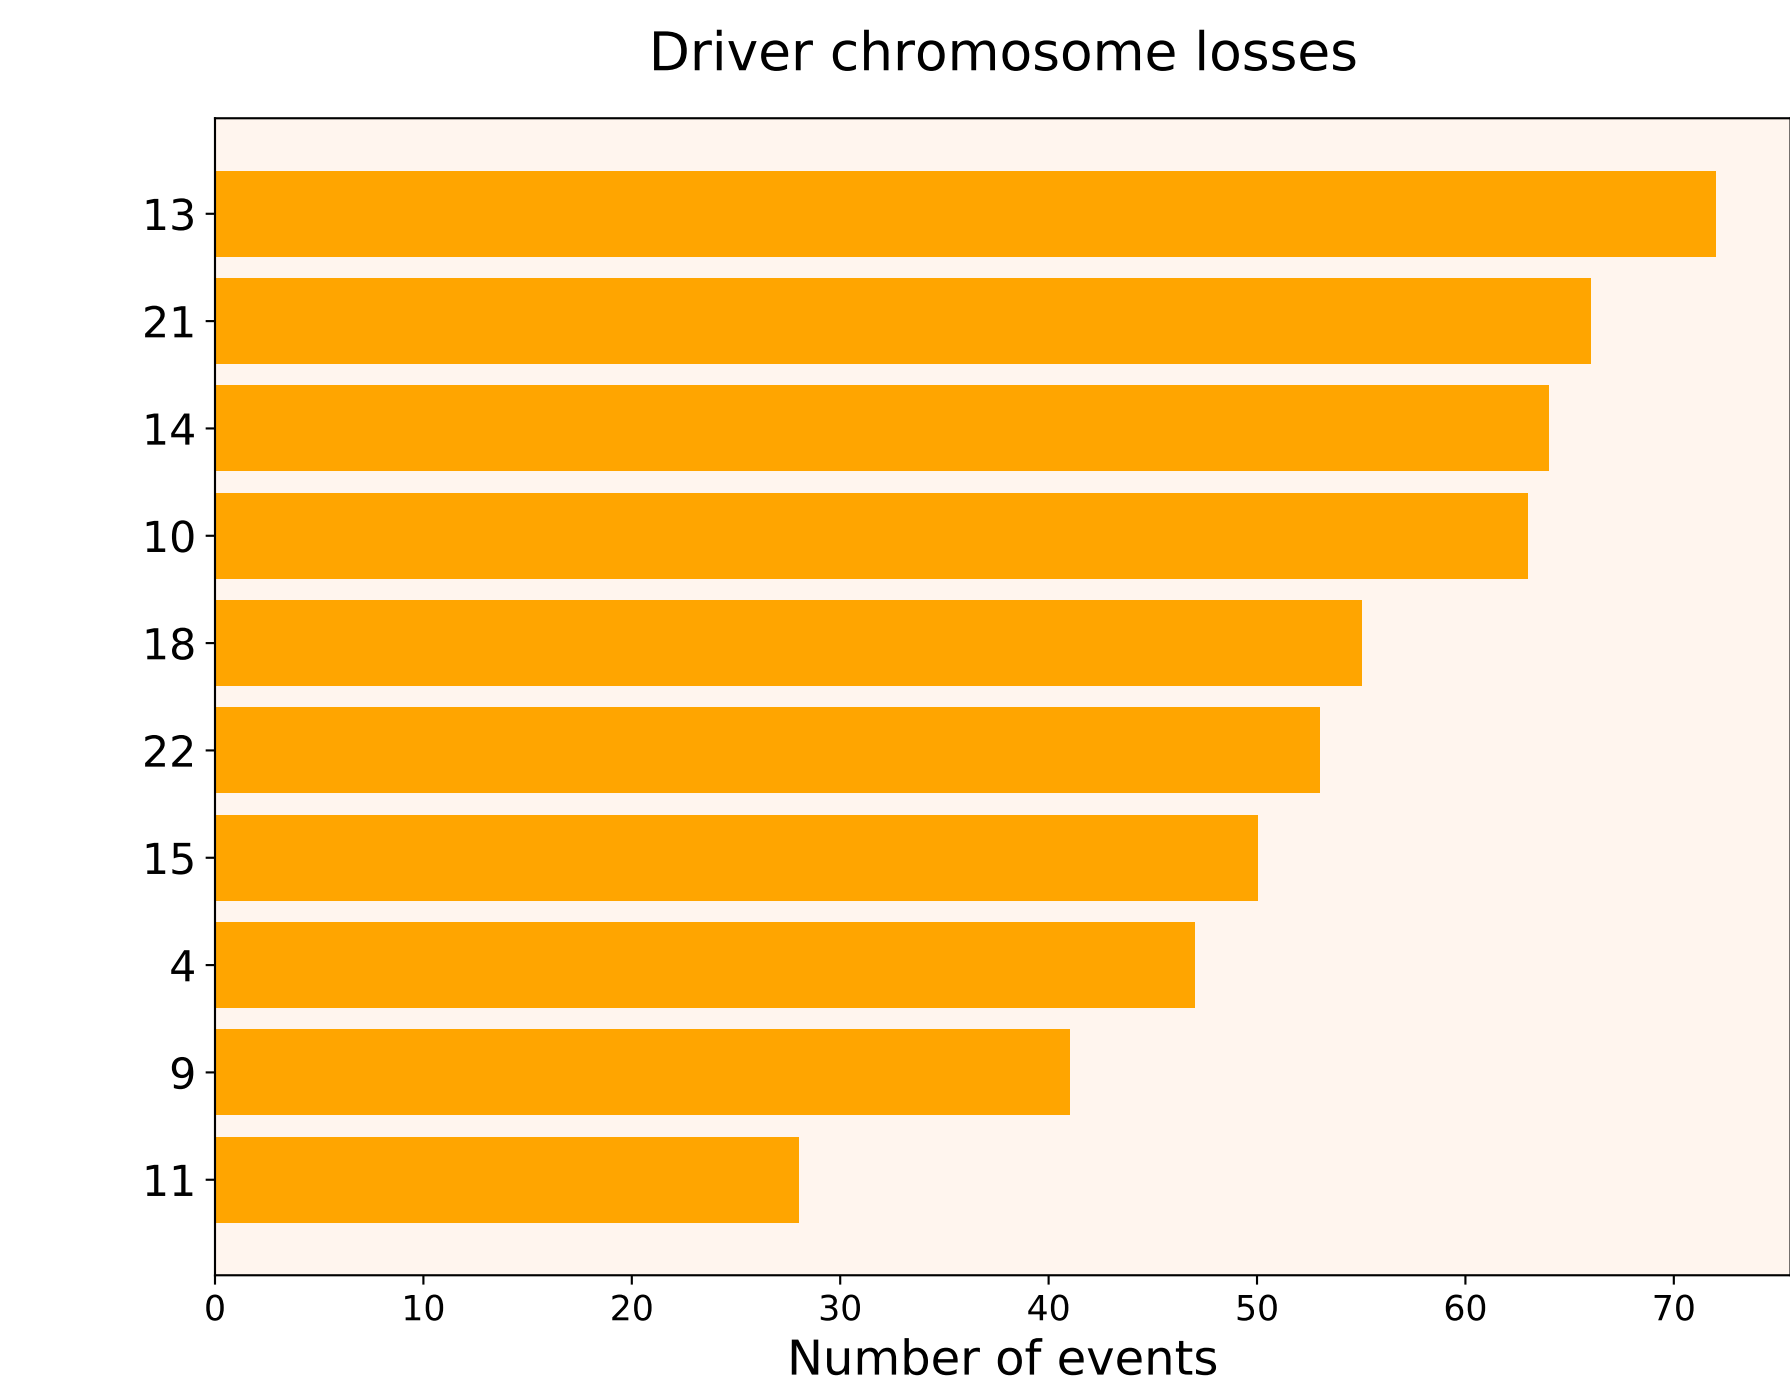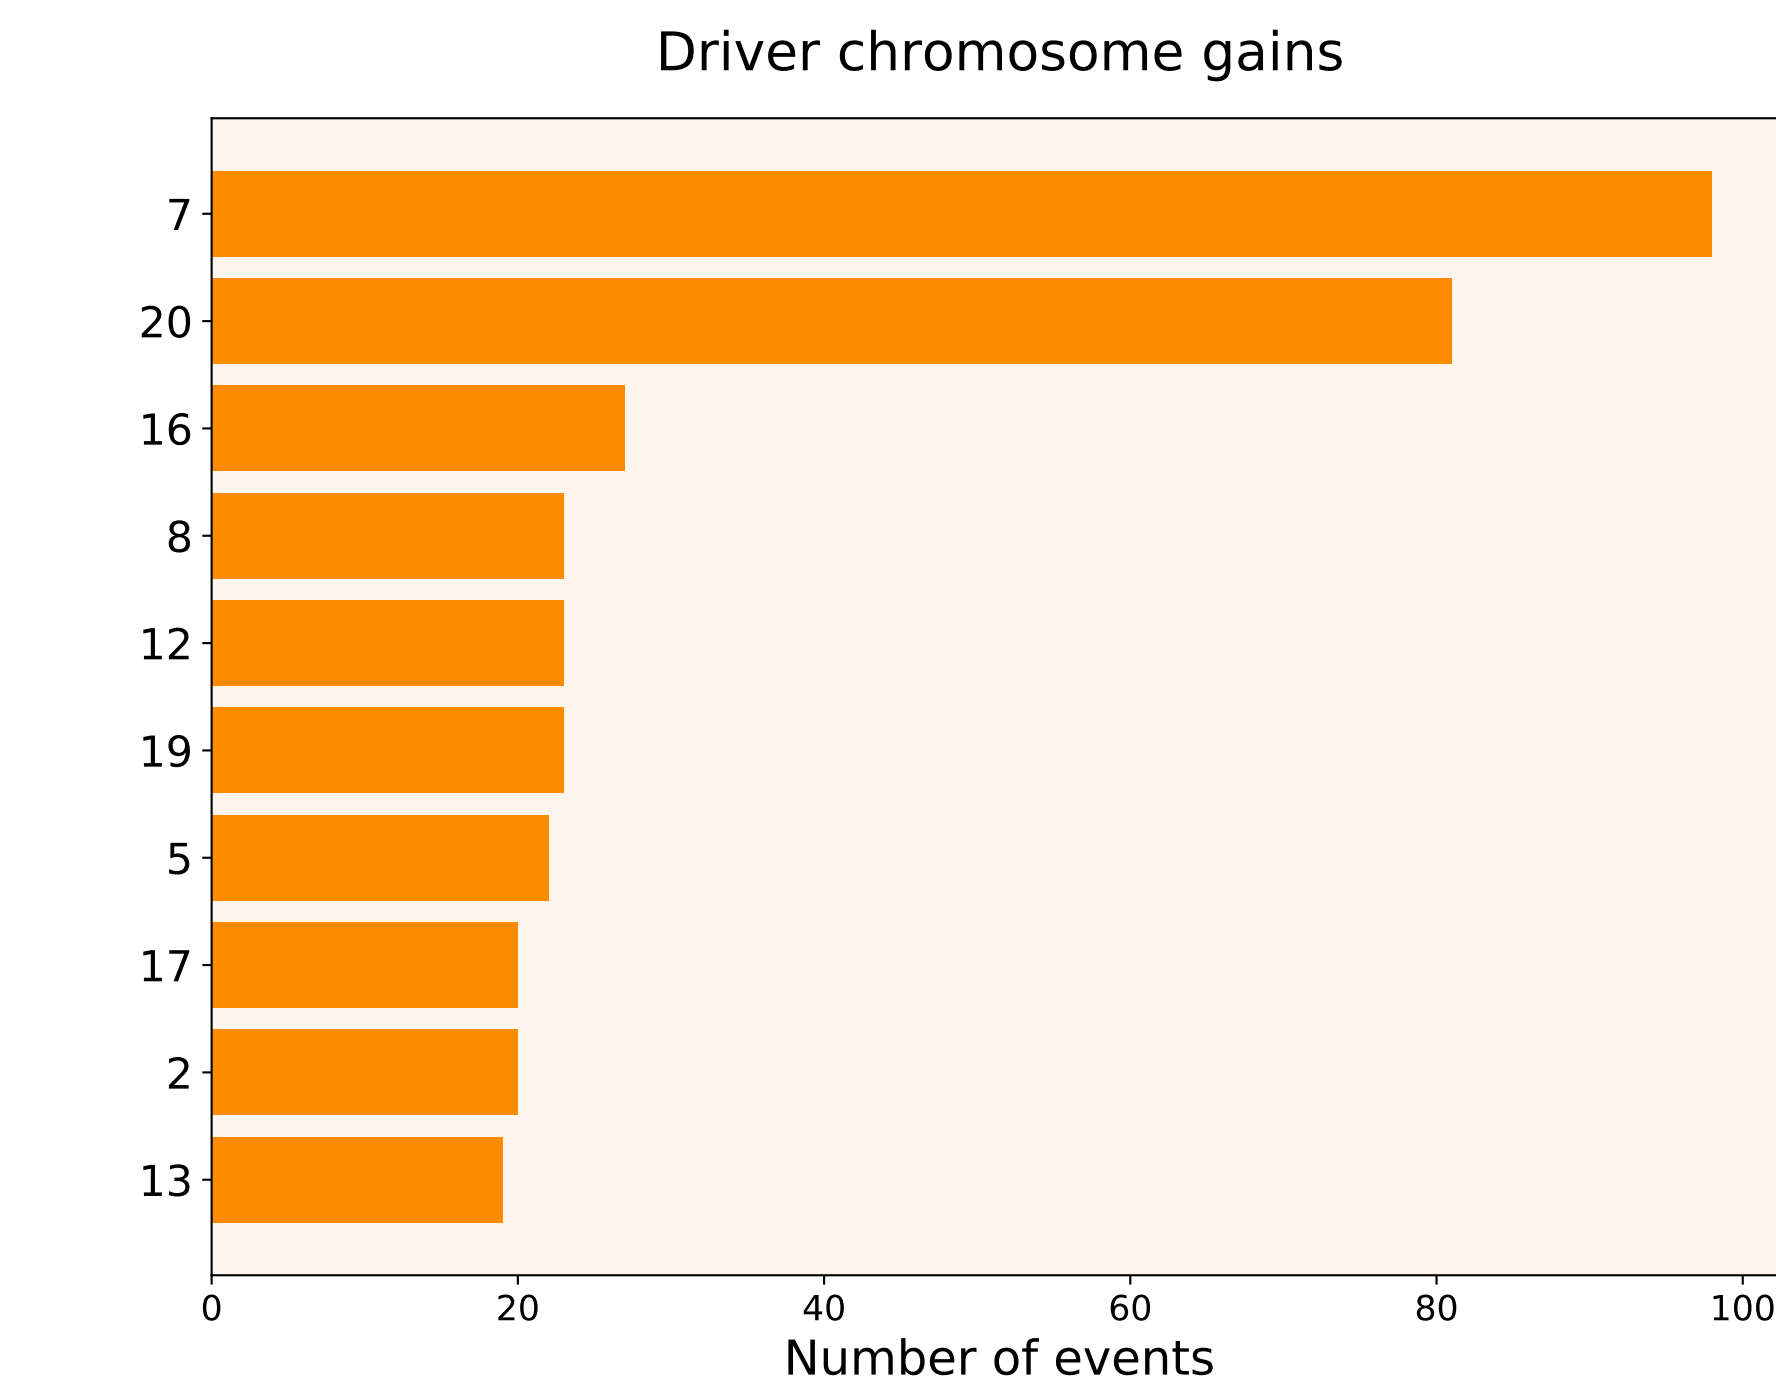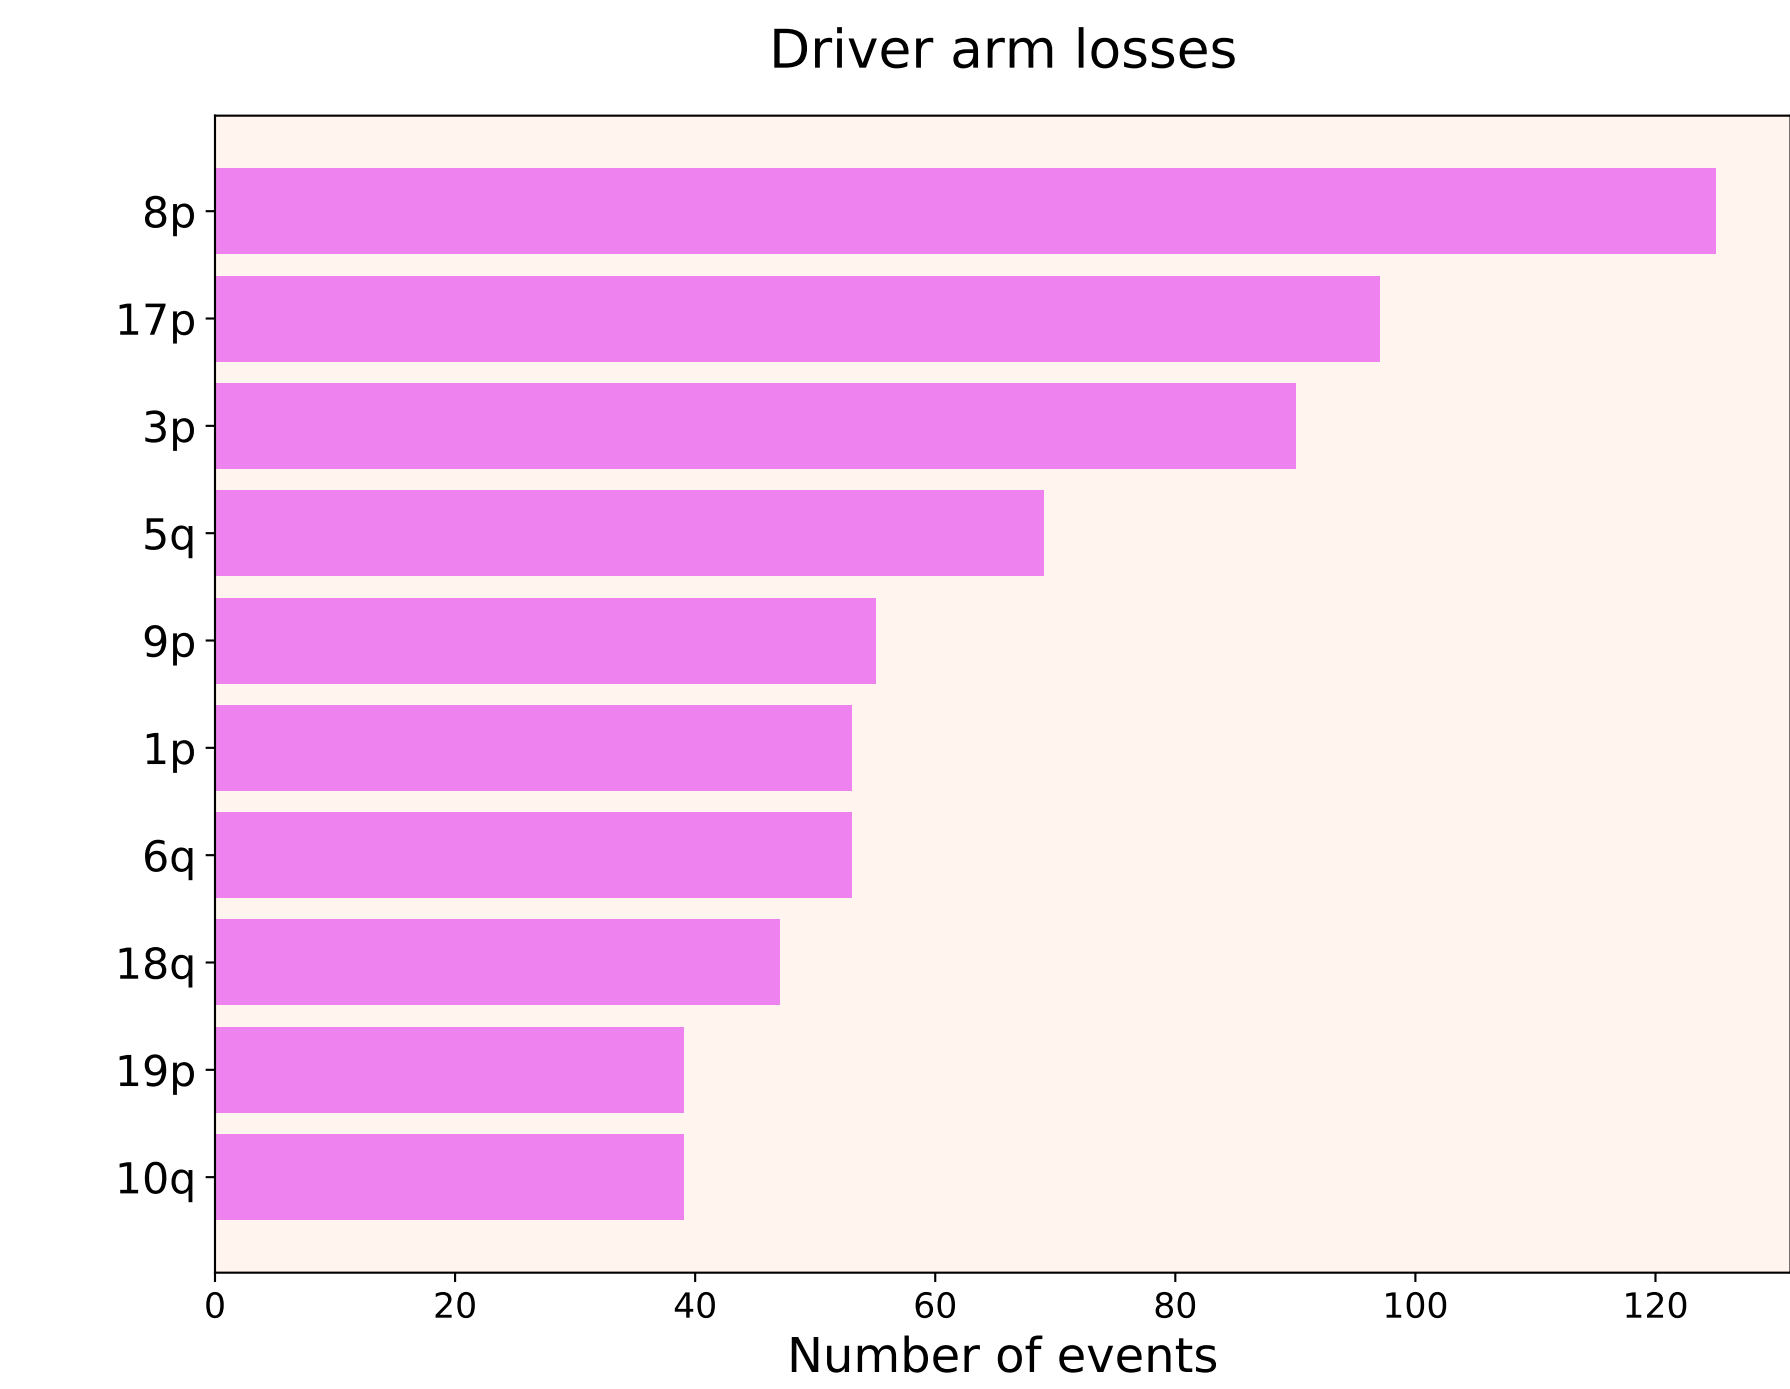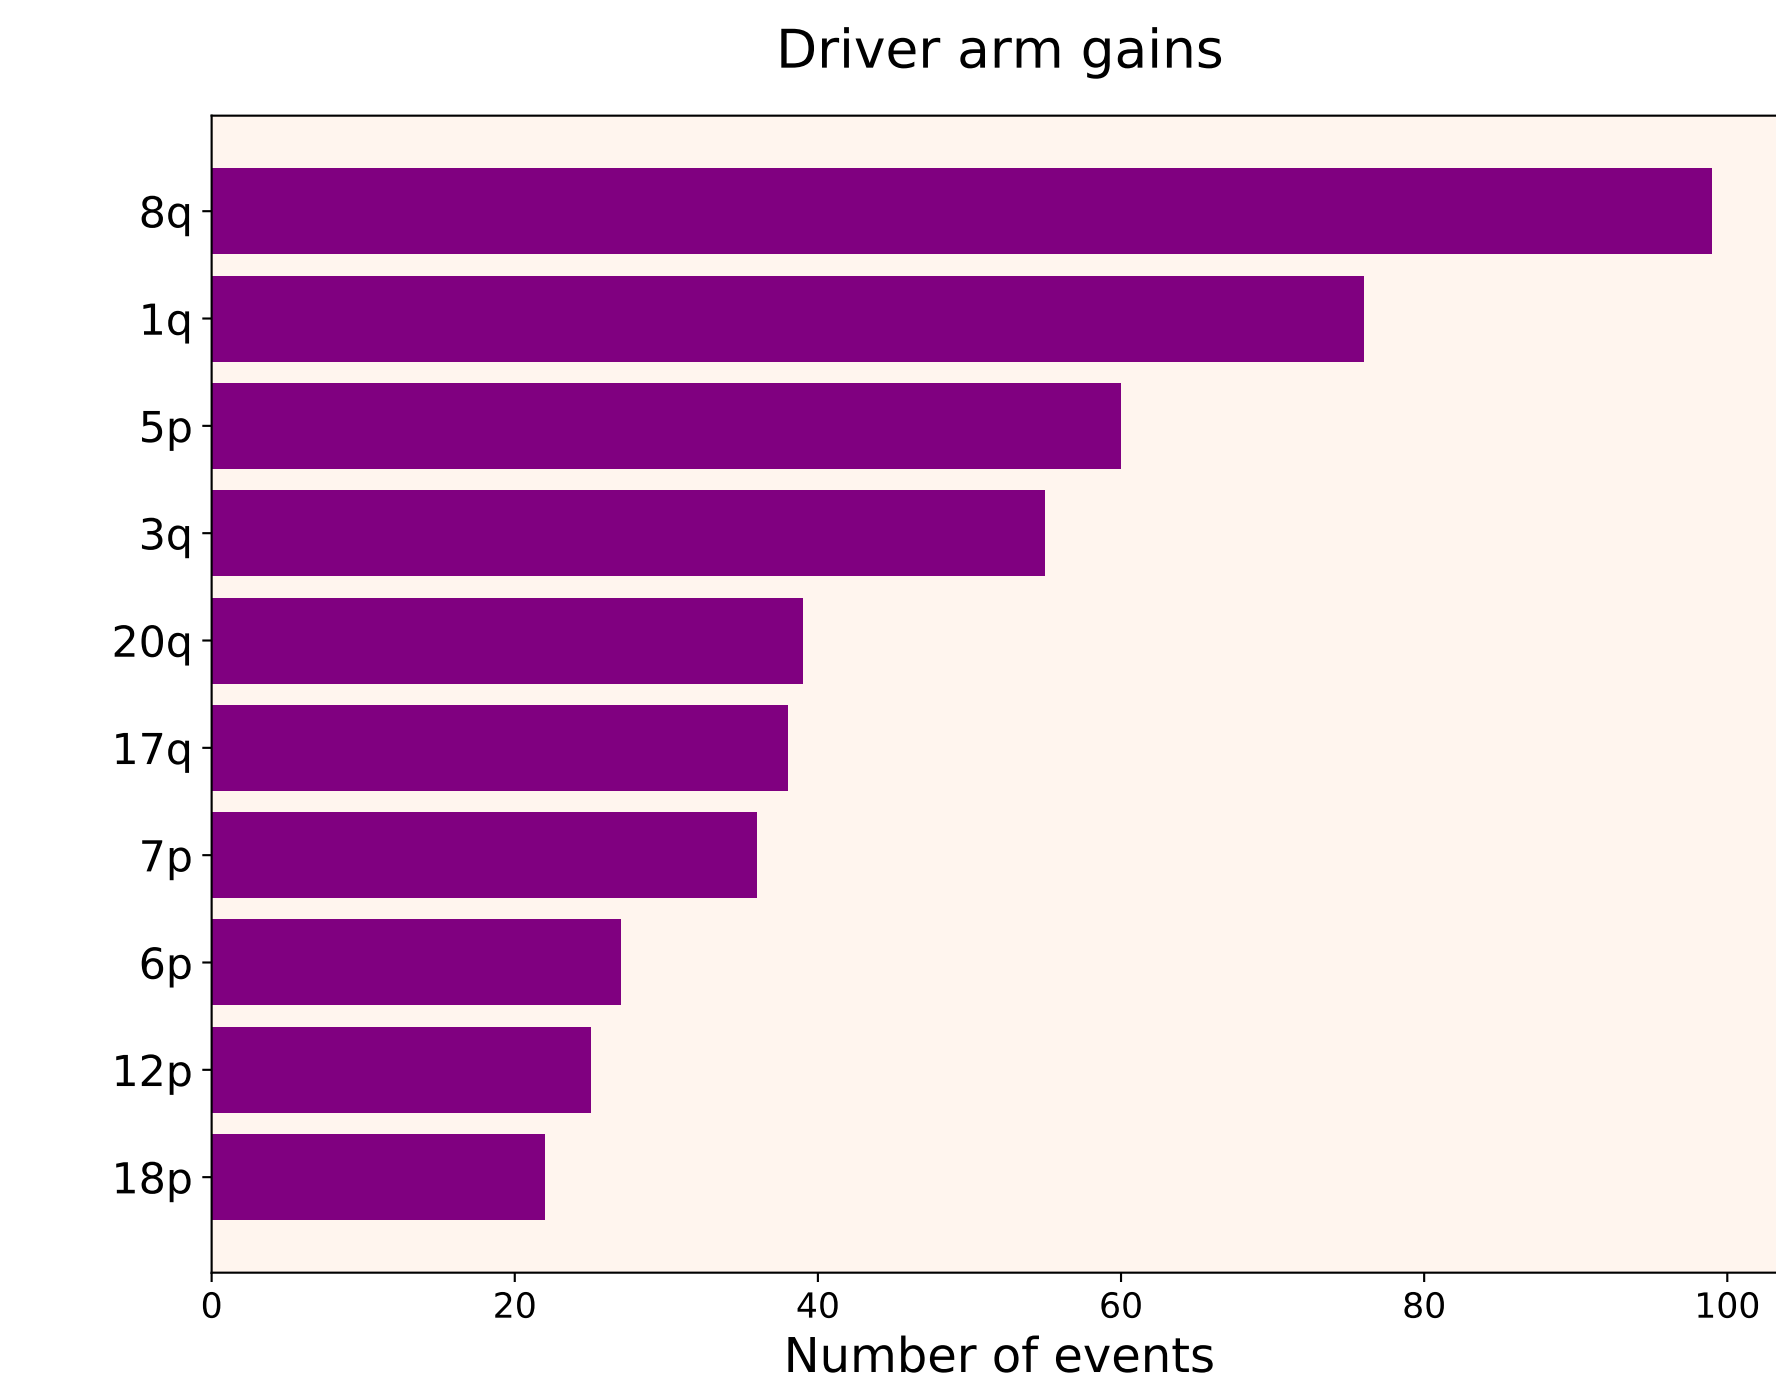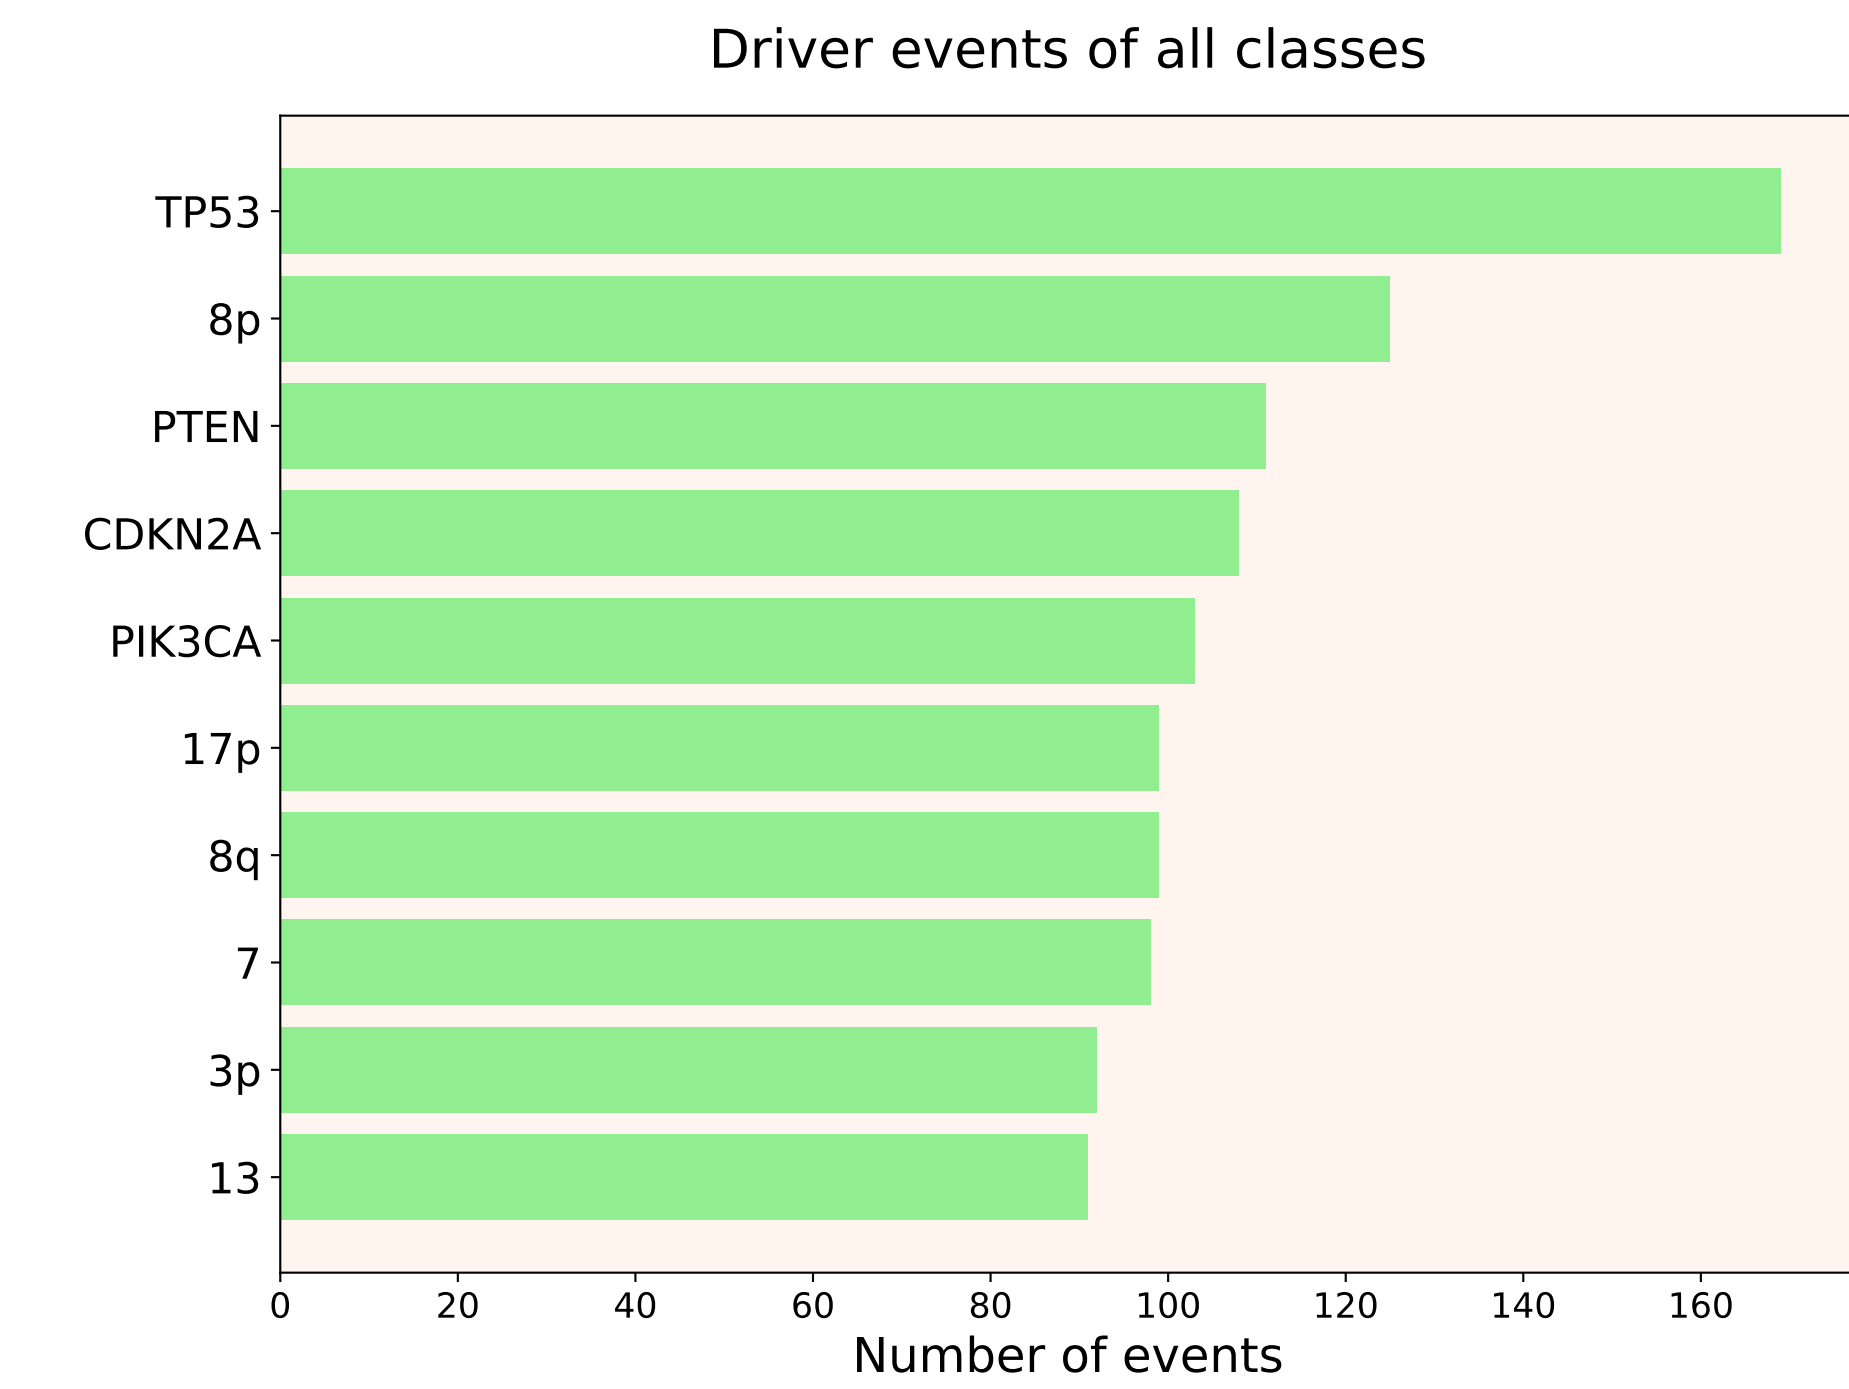

Supplement: Supplemental_Data_S1.zip [file Supplemental_Data_S1.zip]

Driver event distribution by age

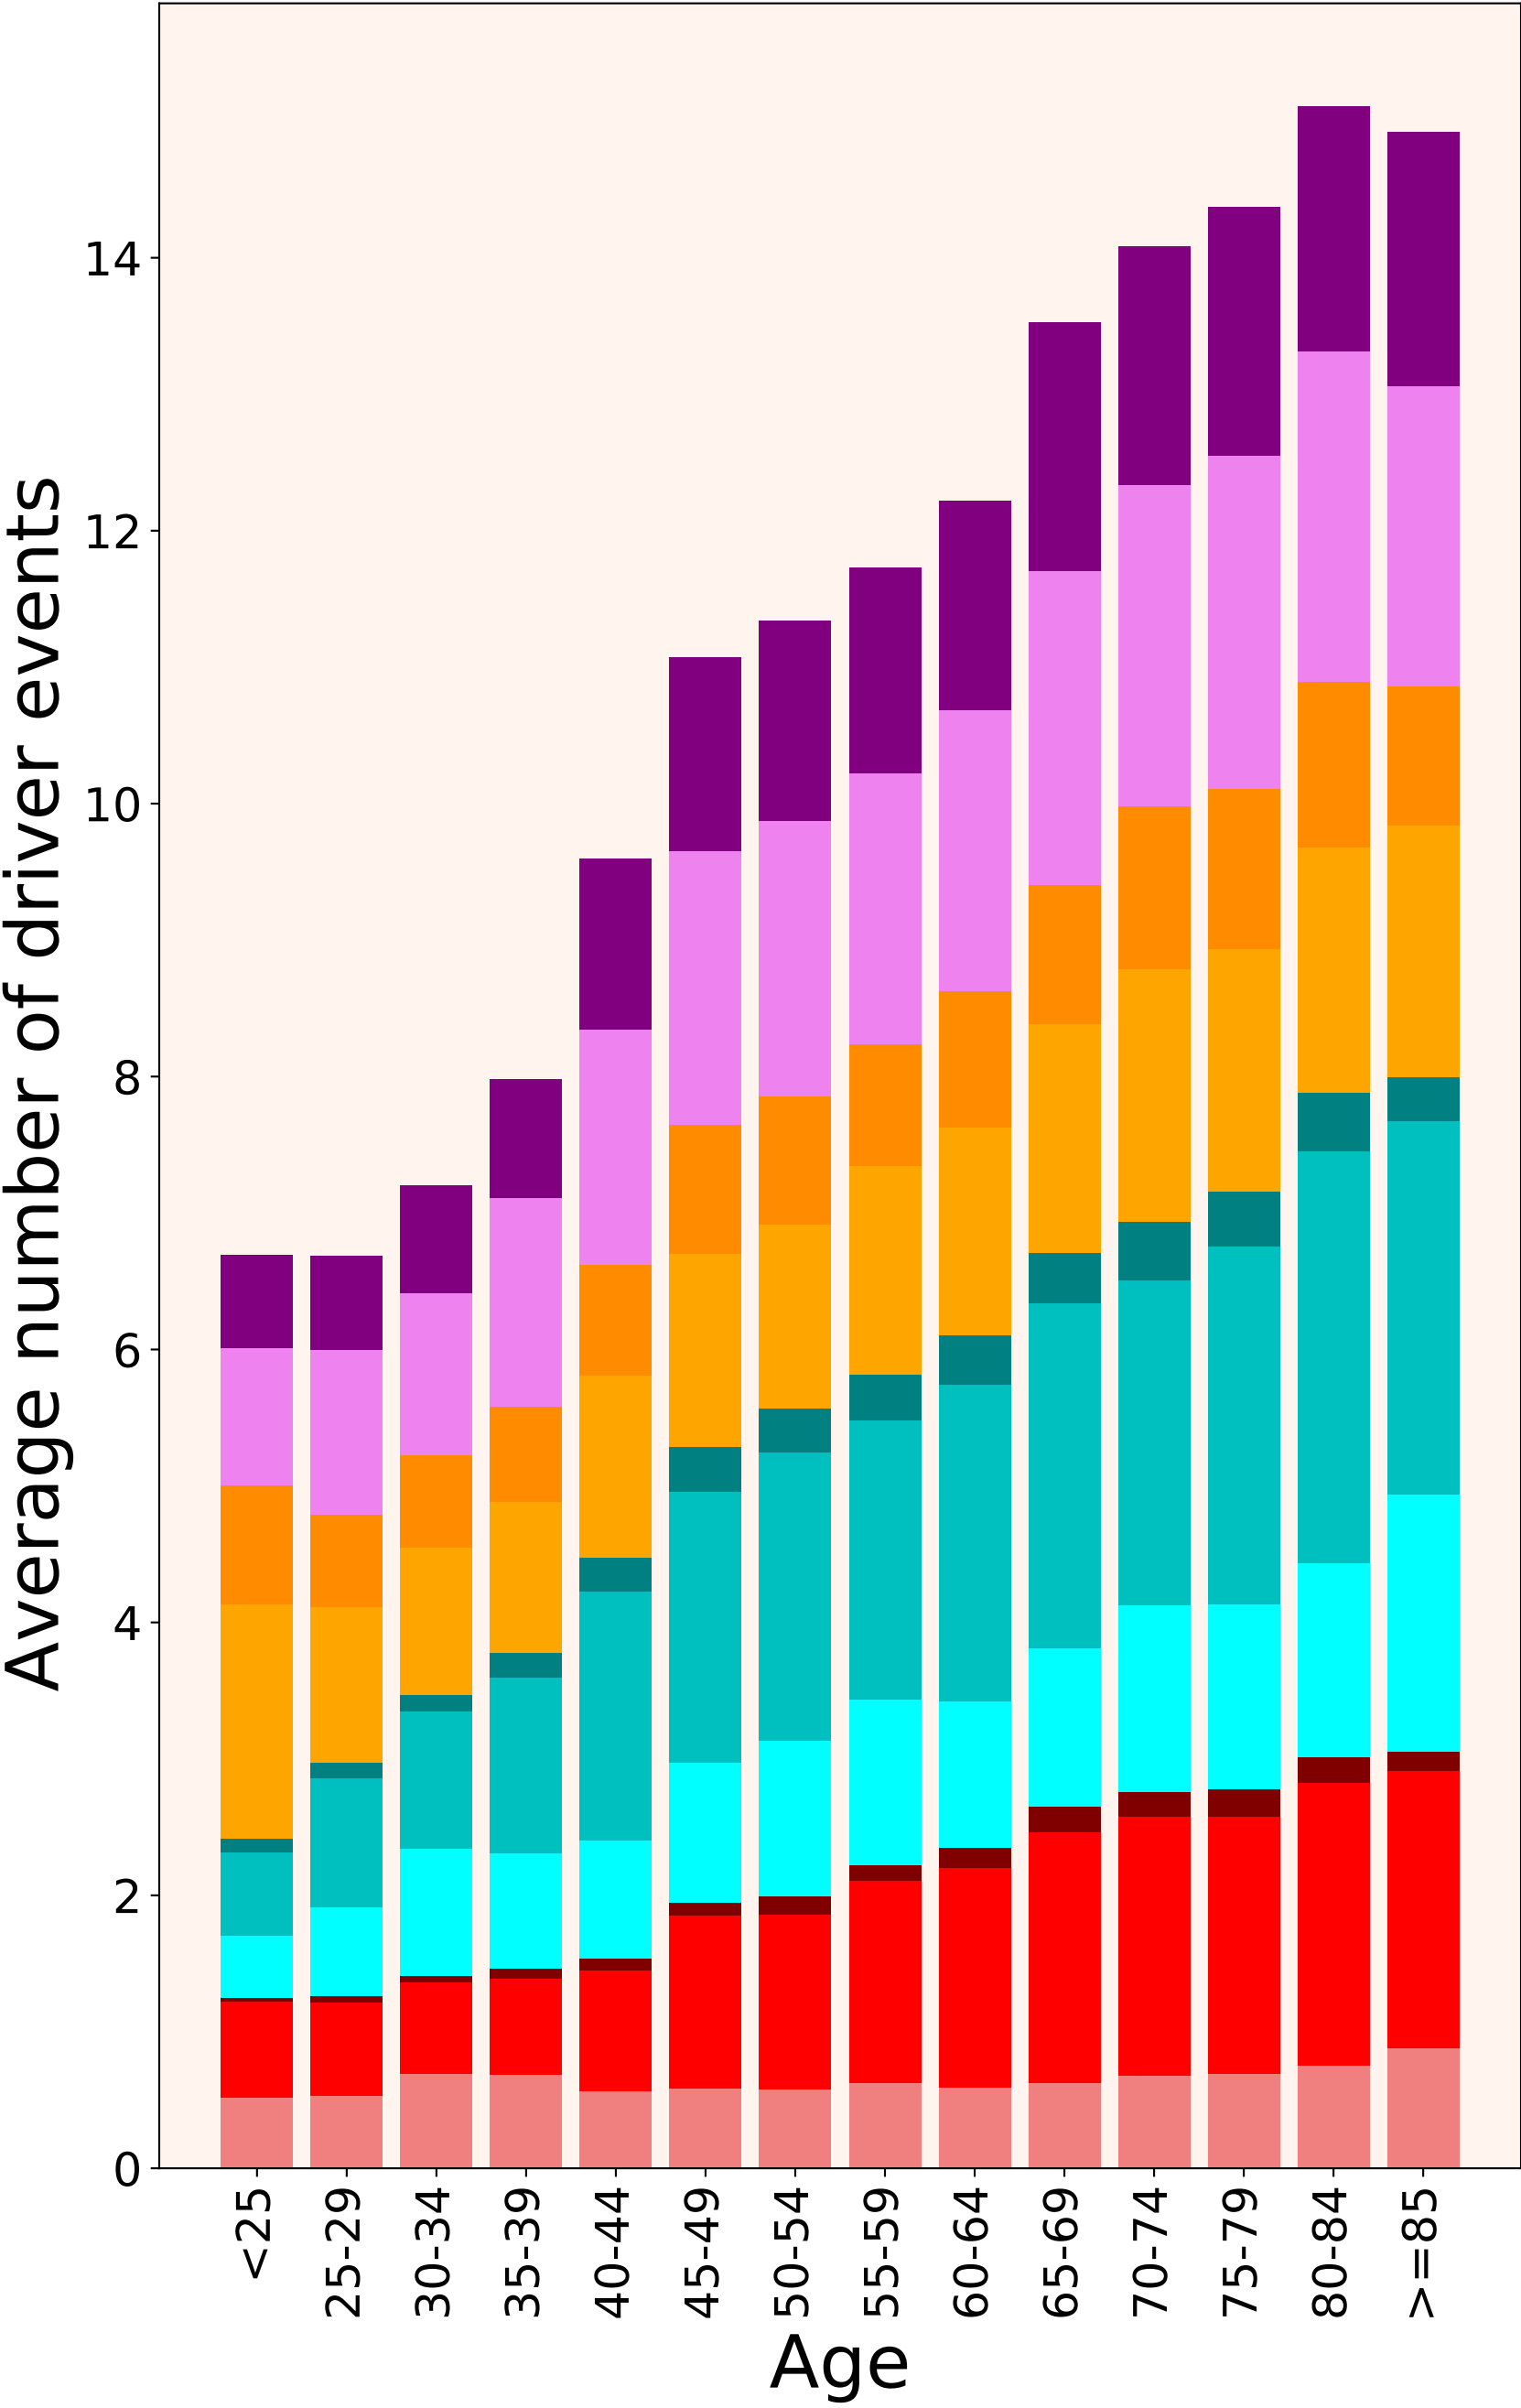

Supplement: Supplemental_Data_S1.zip [file Supplemental_Data_S1.zip]

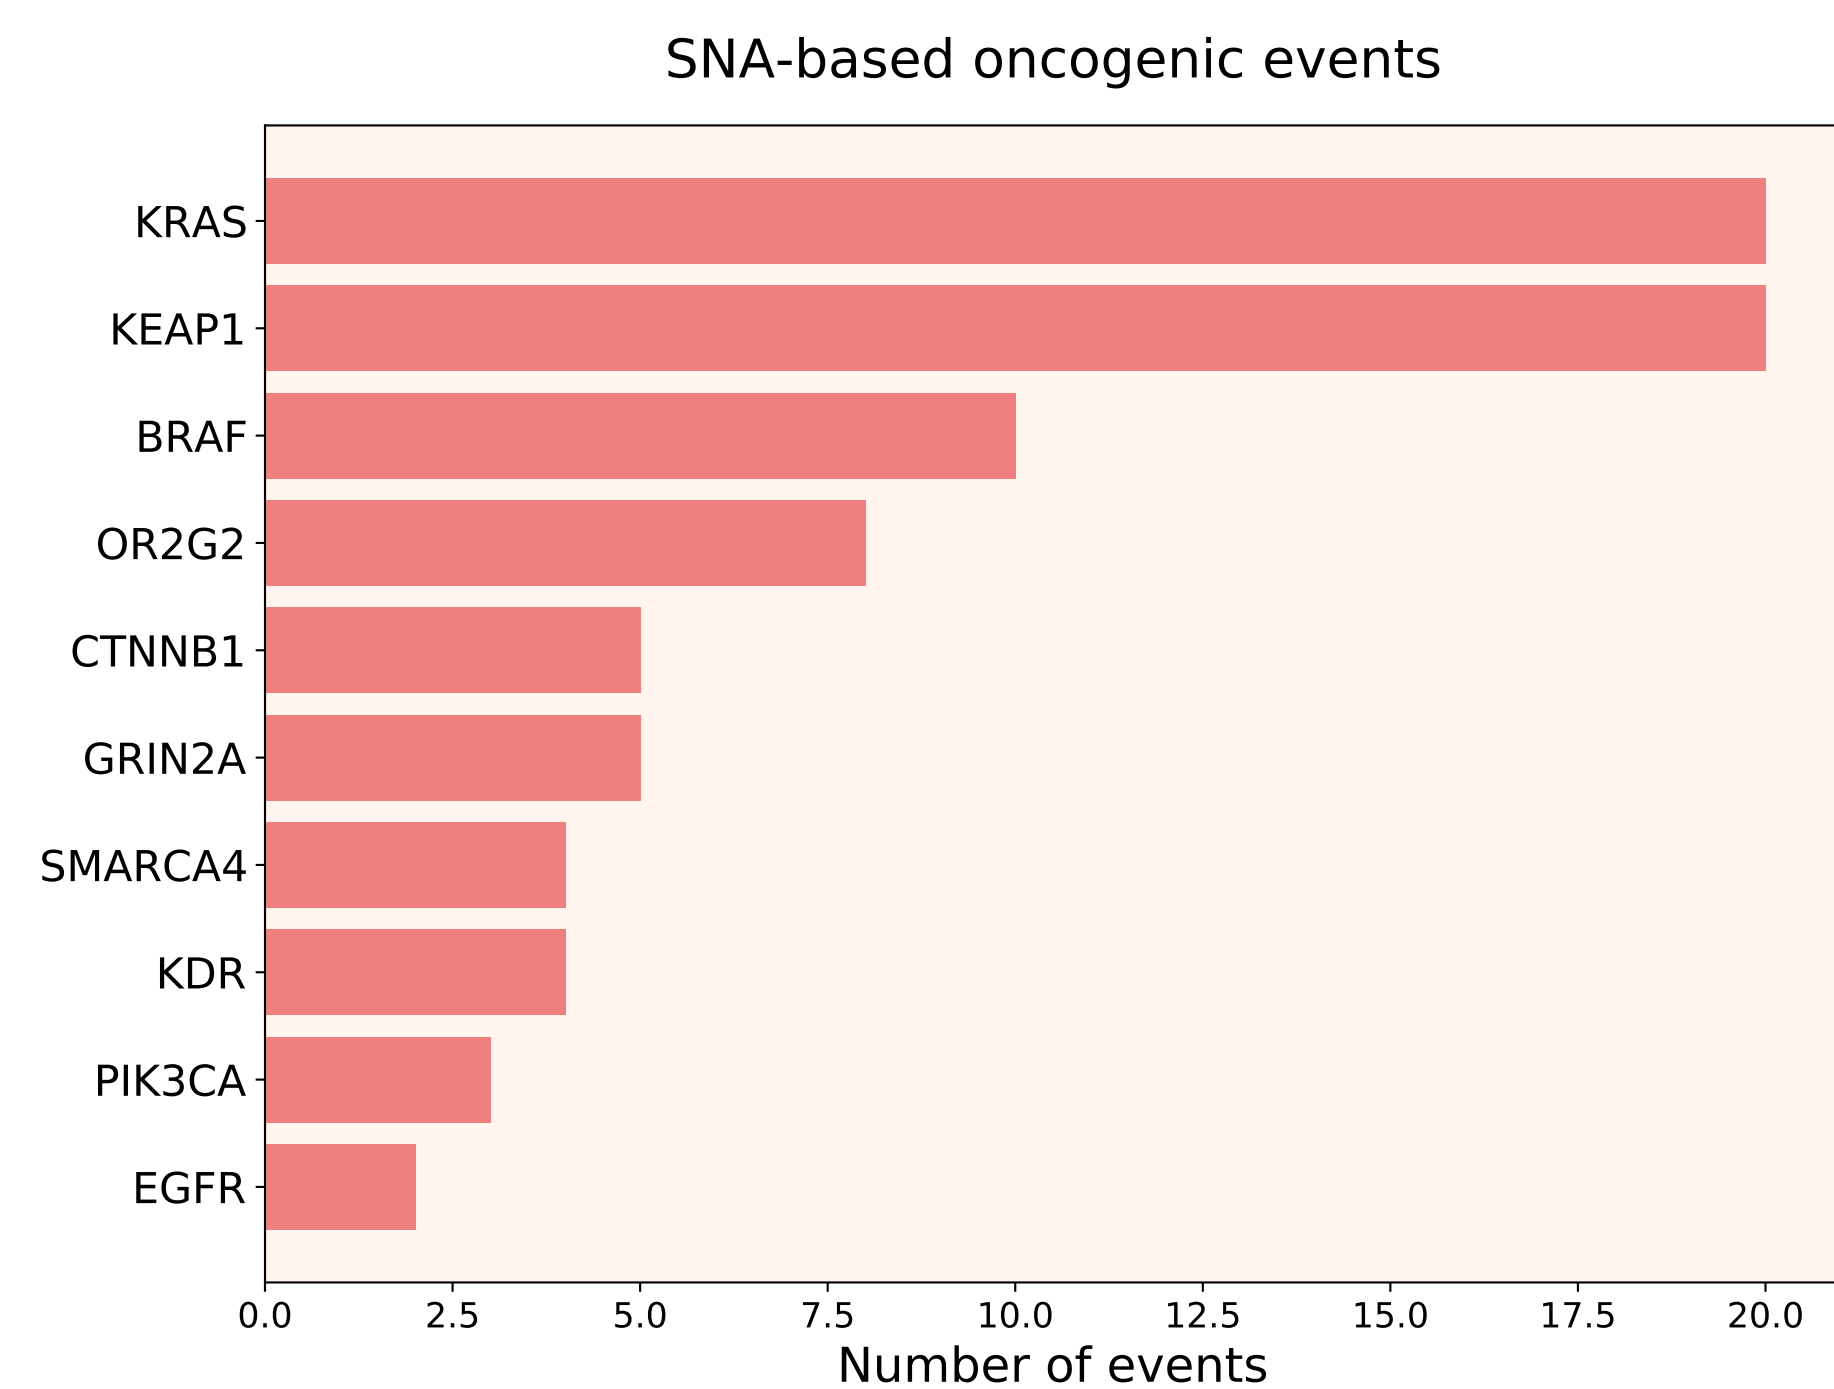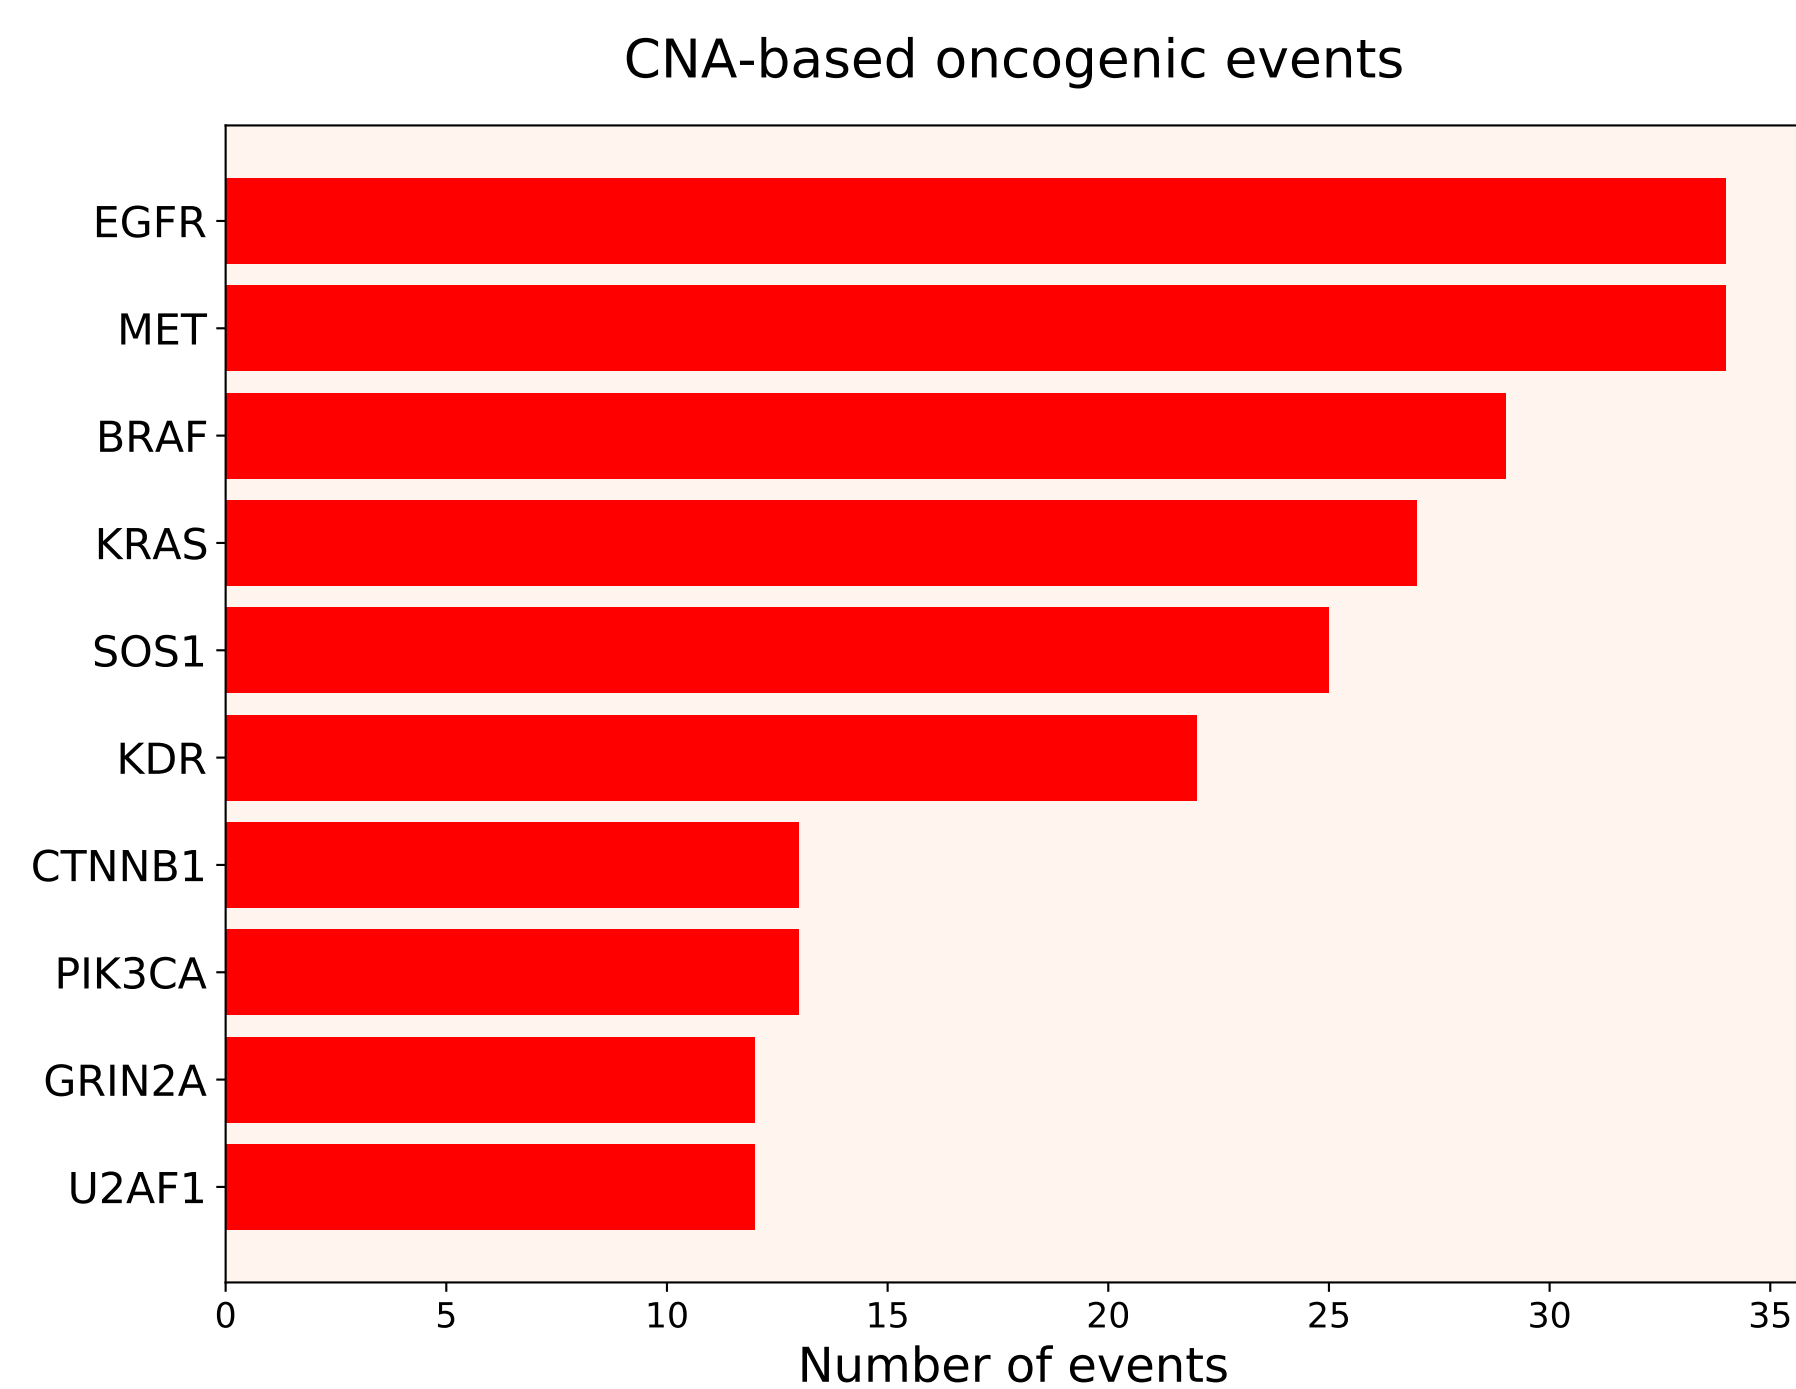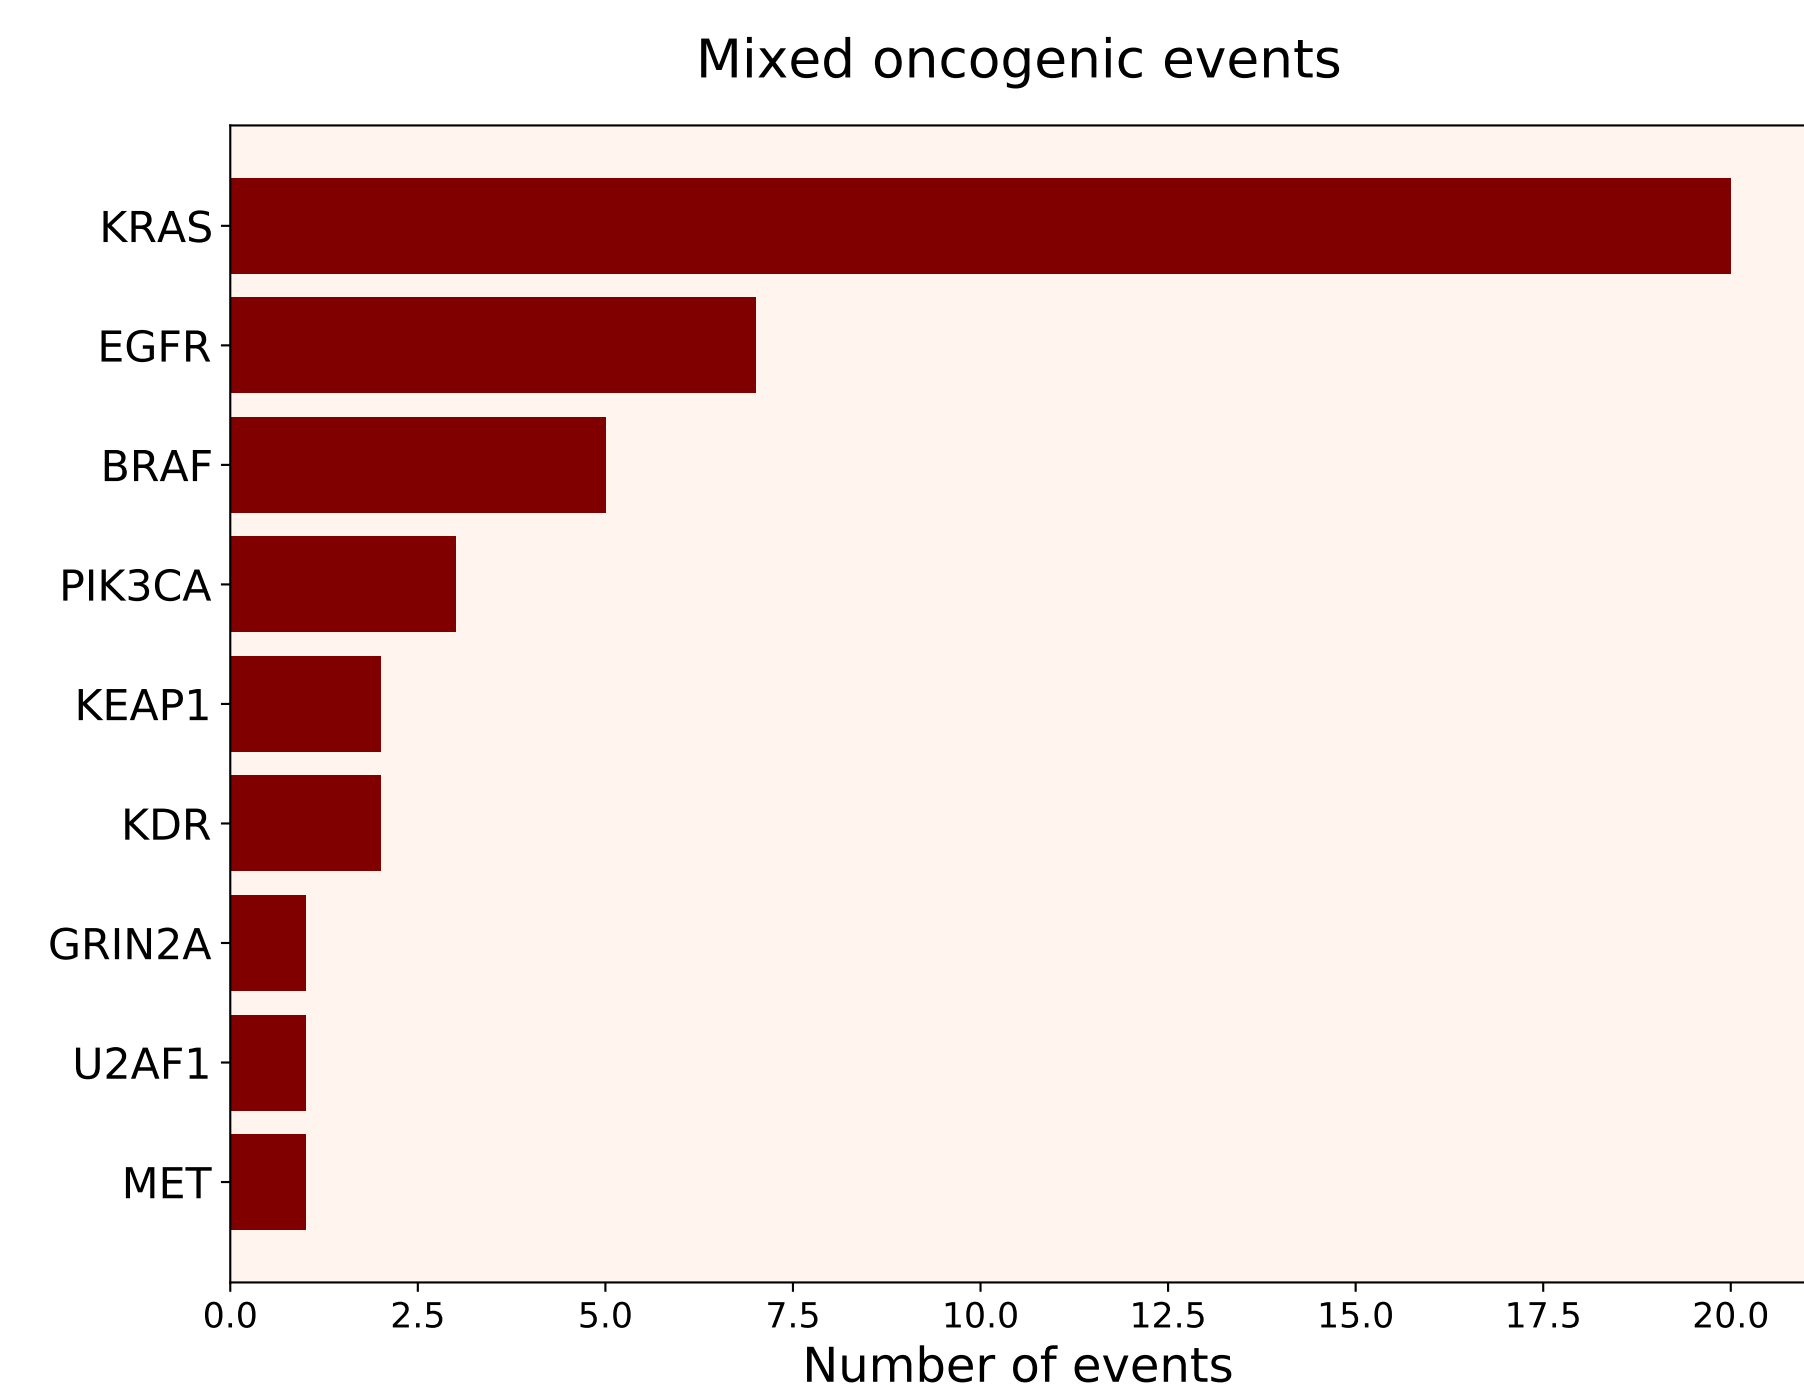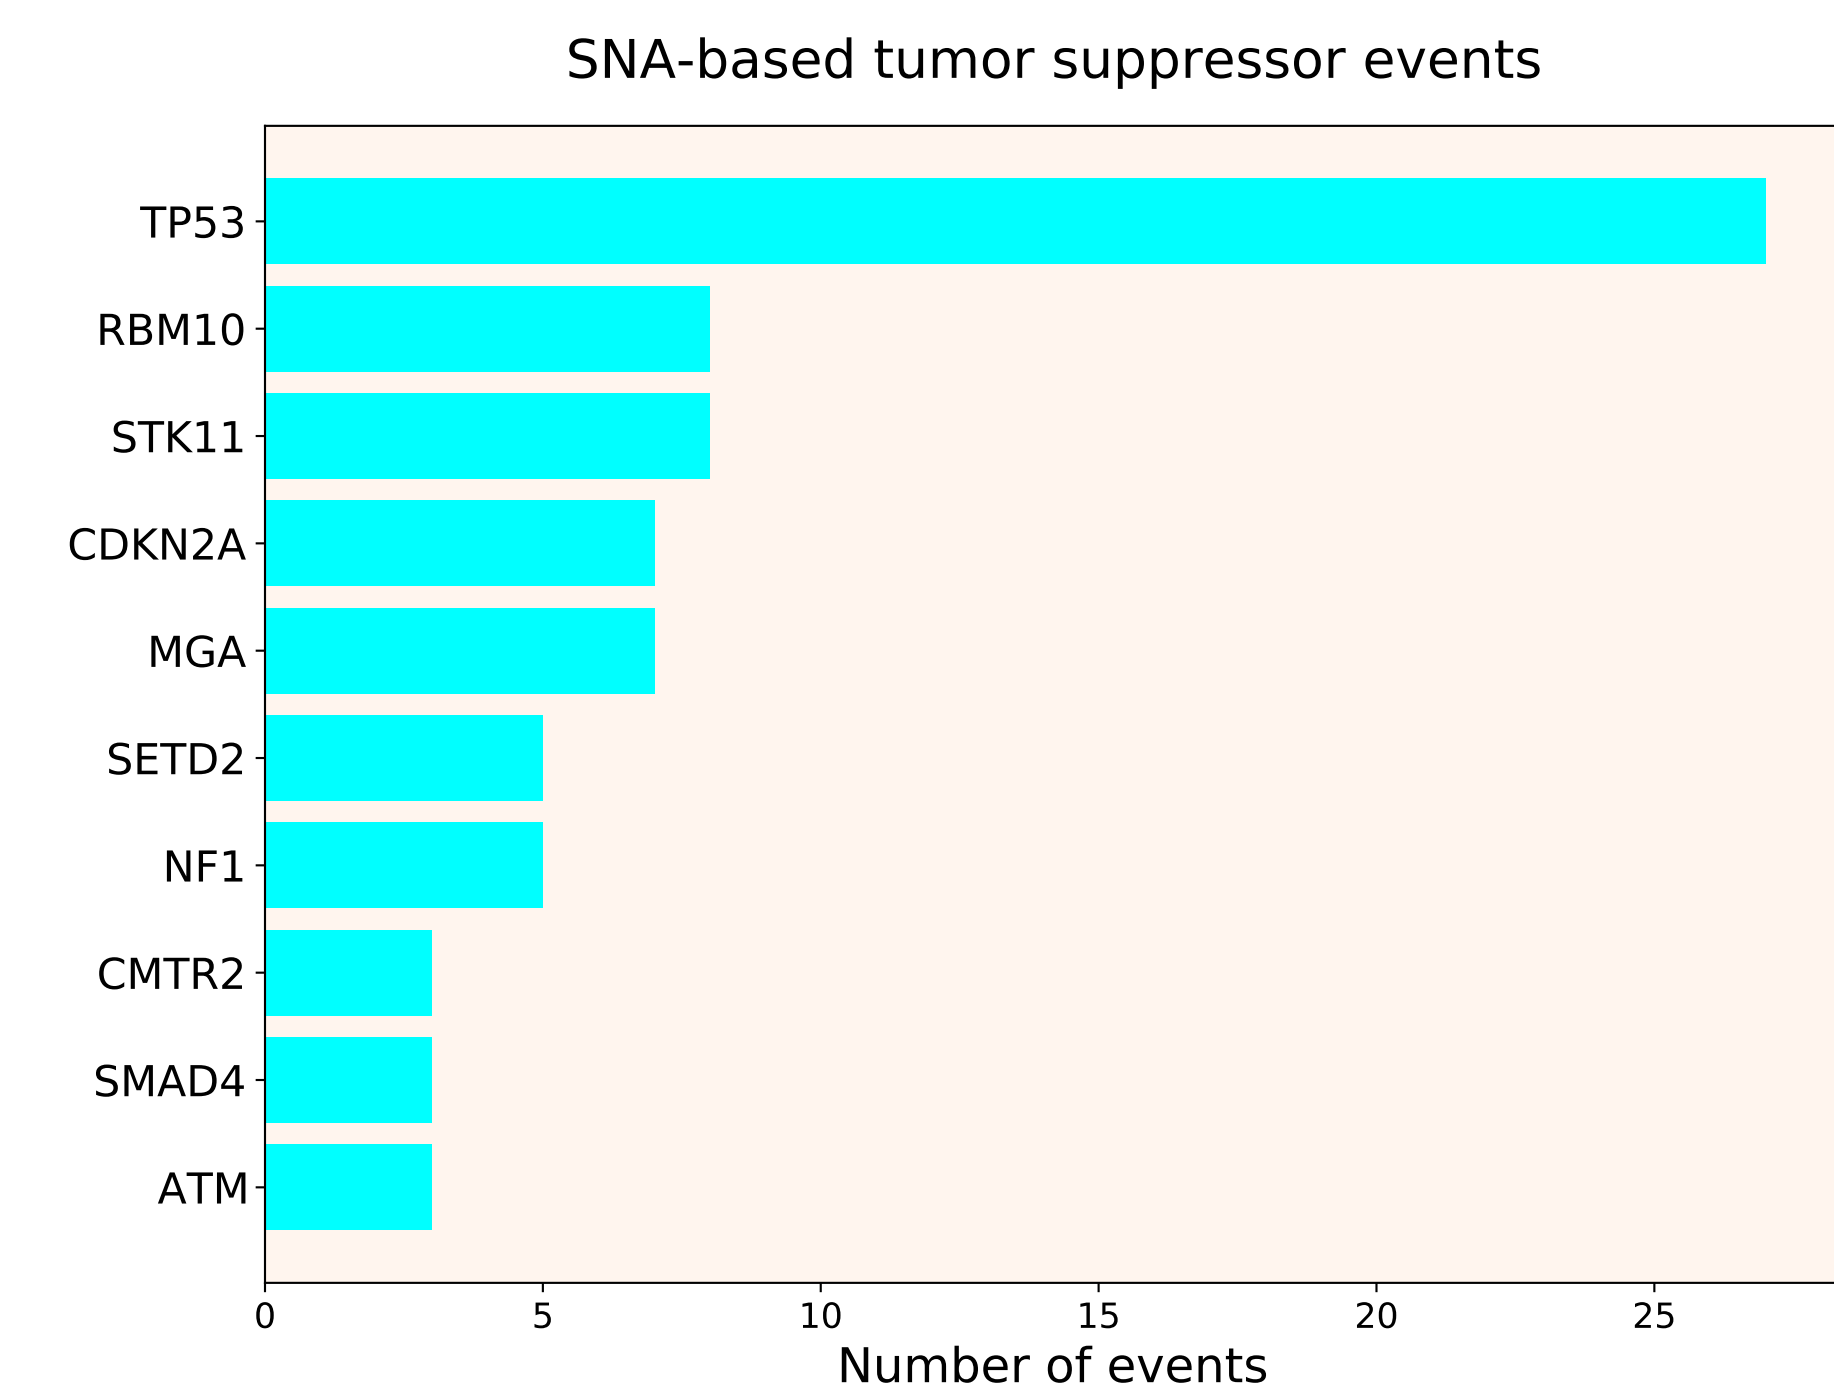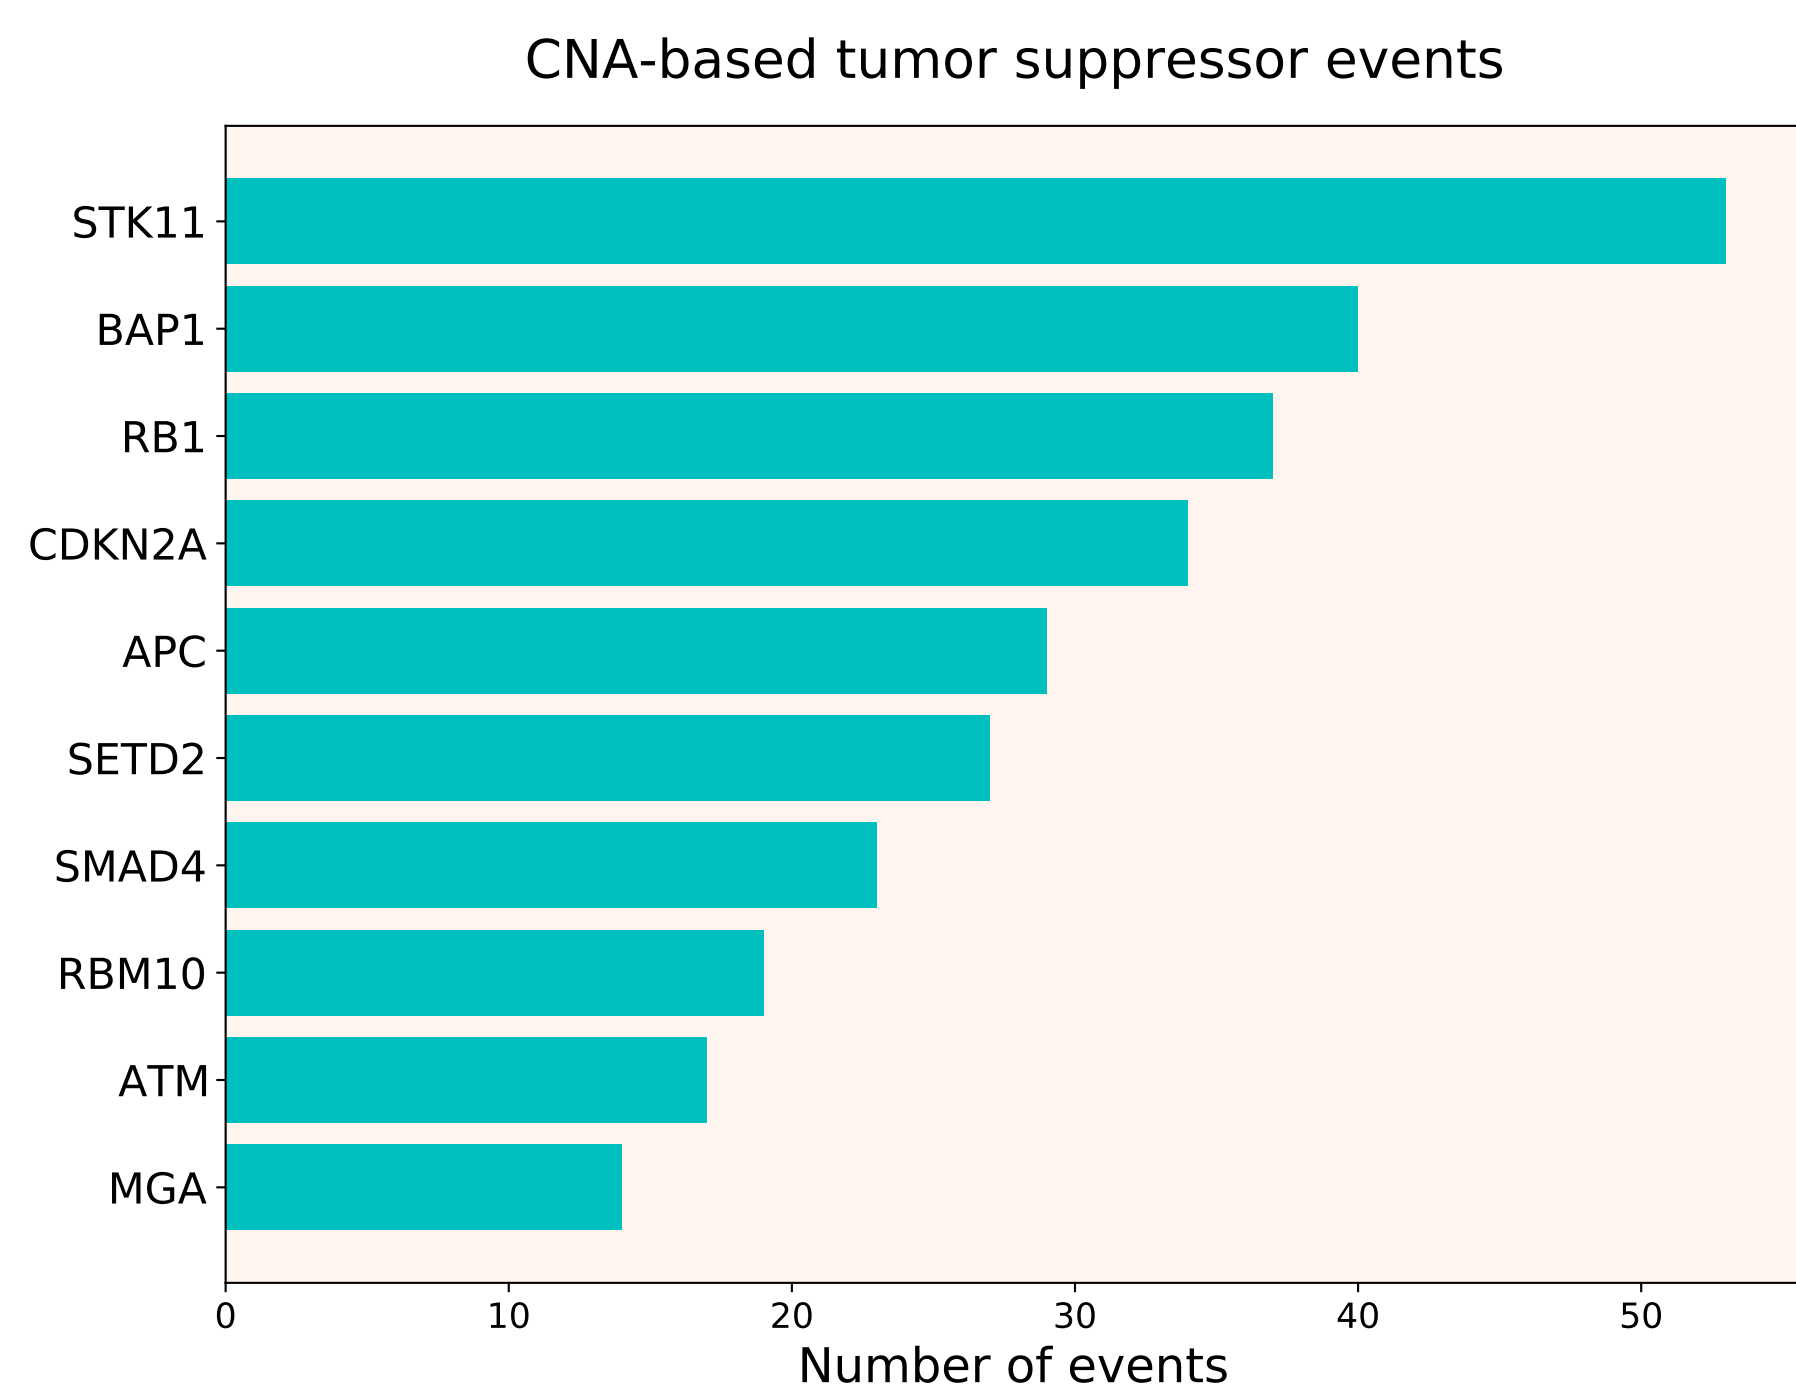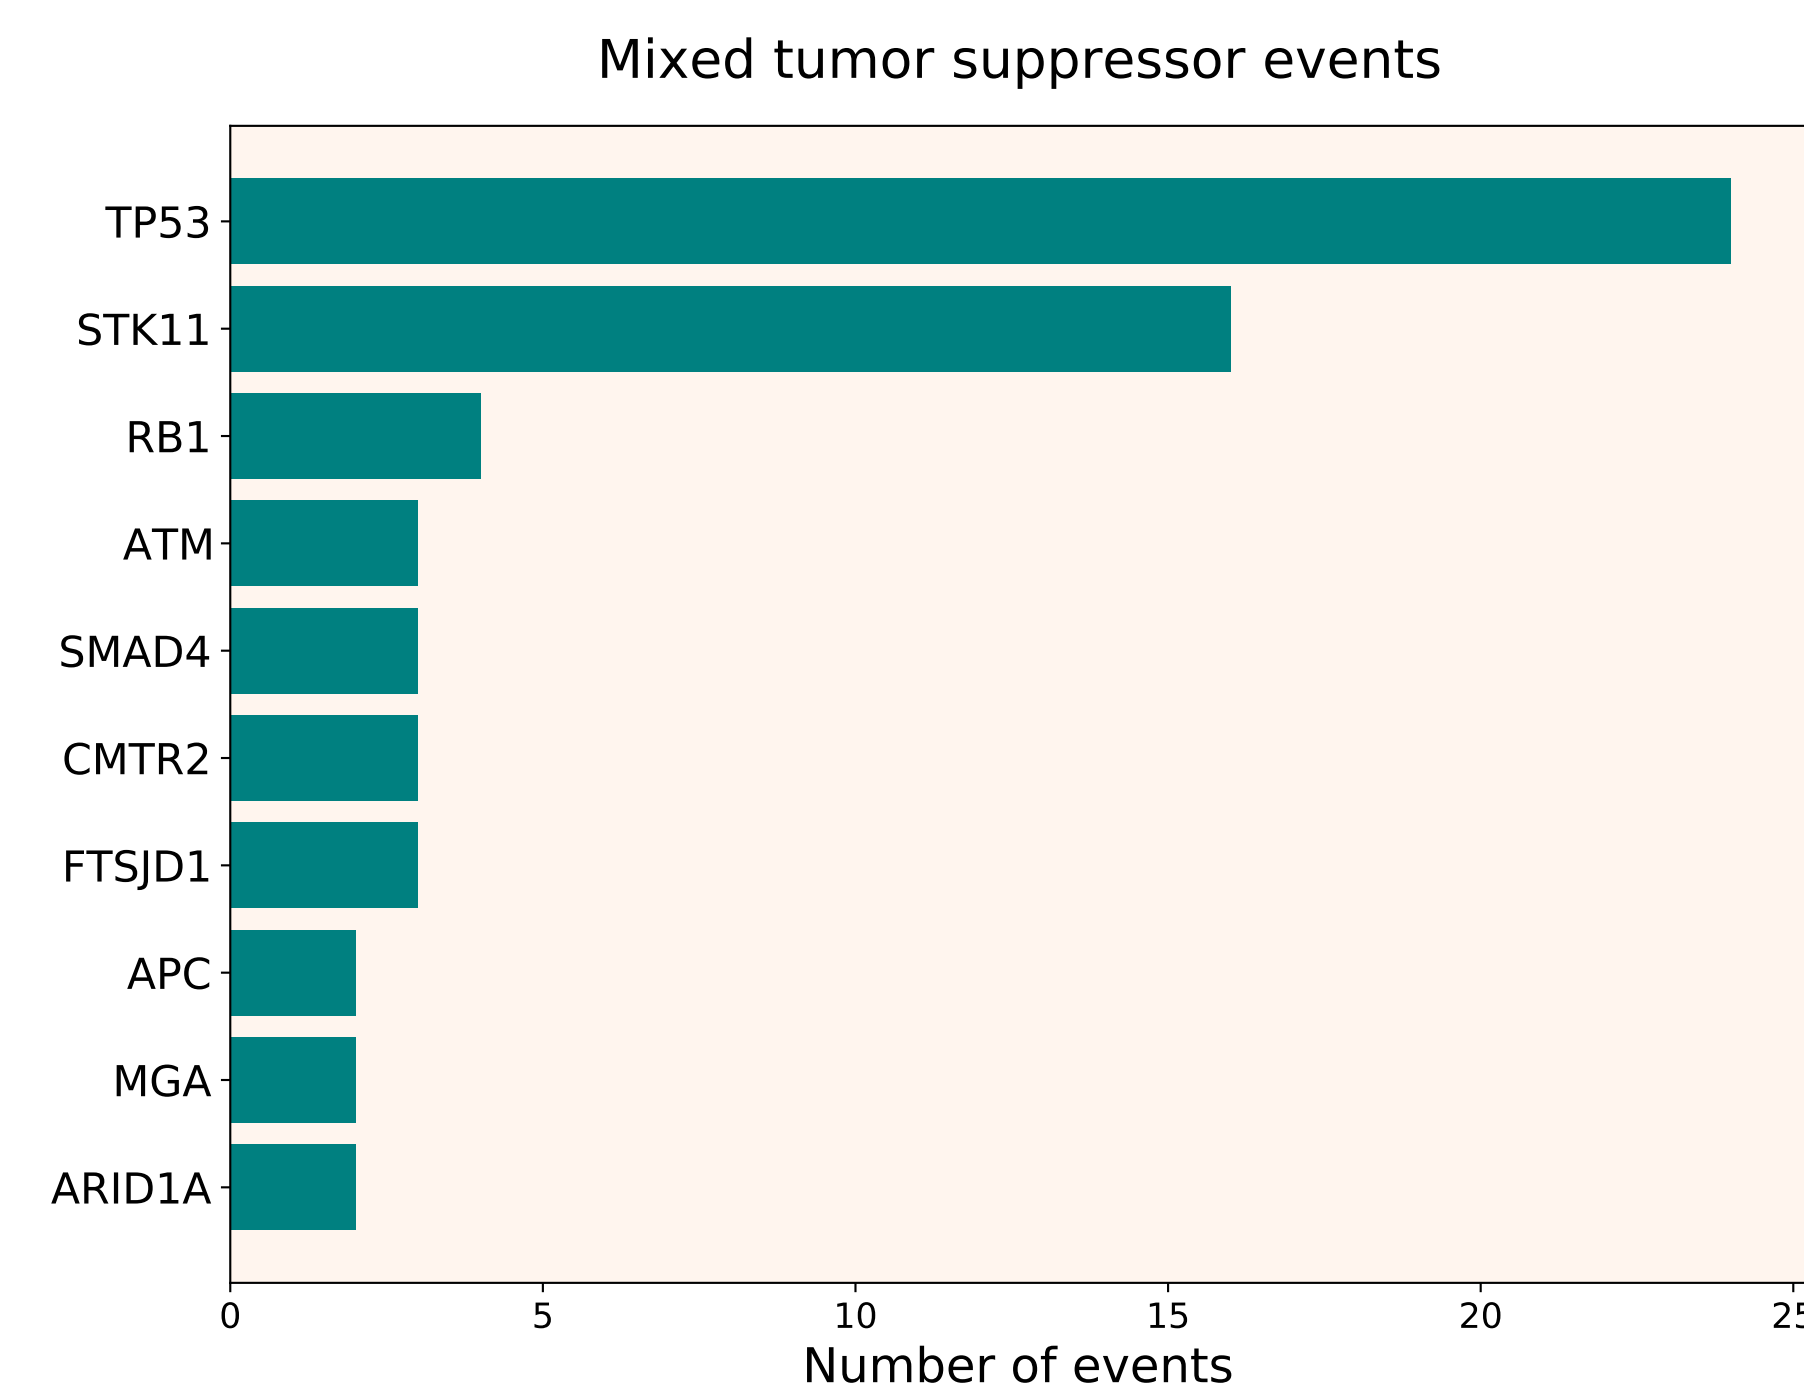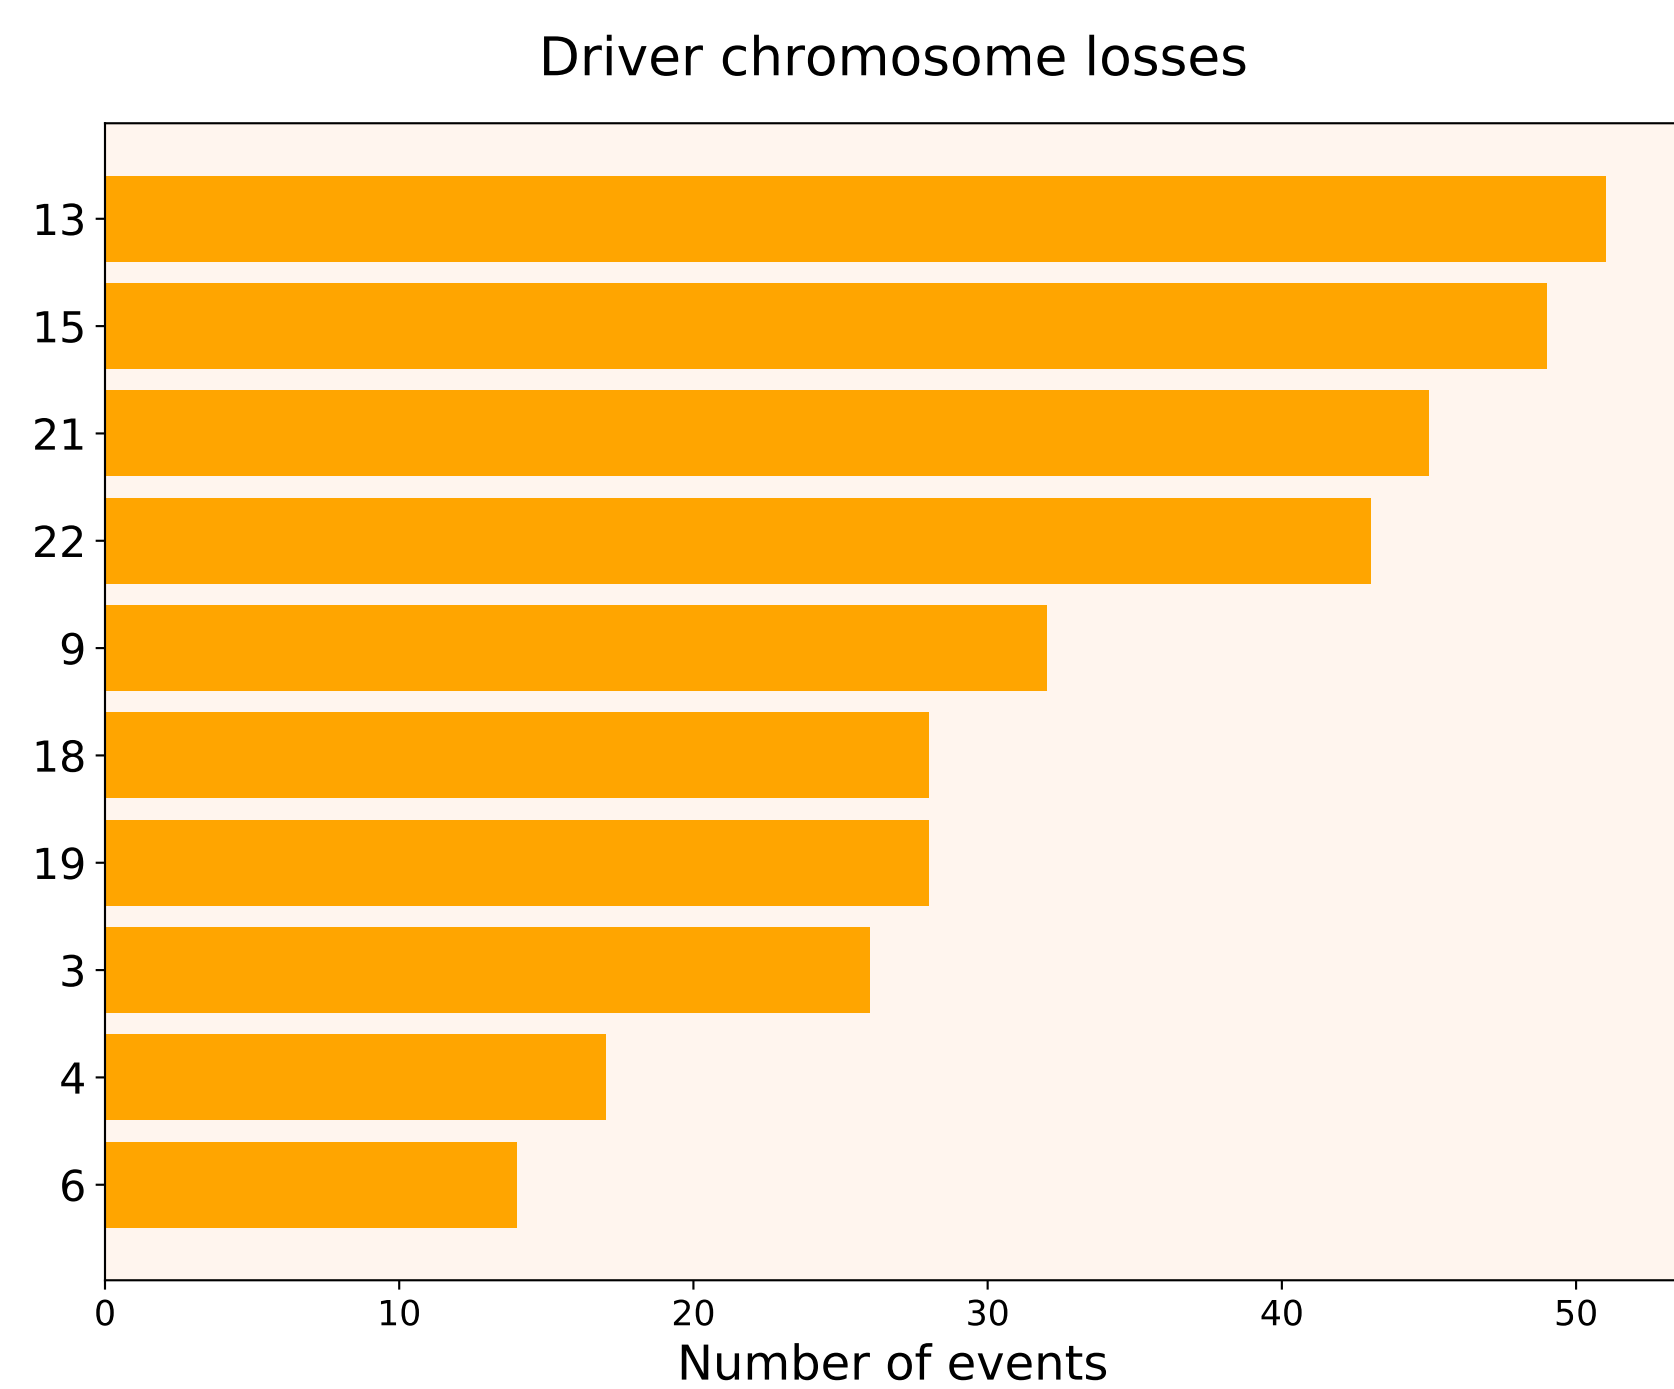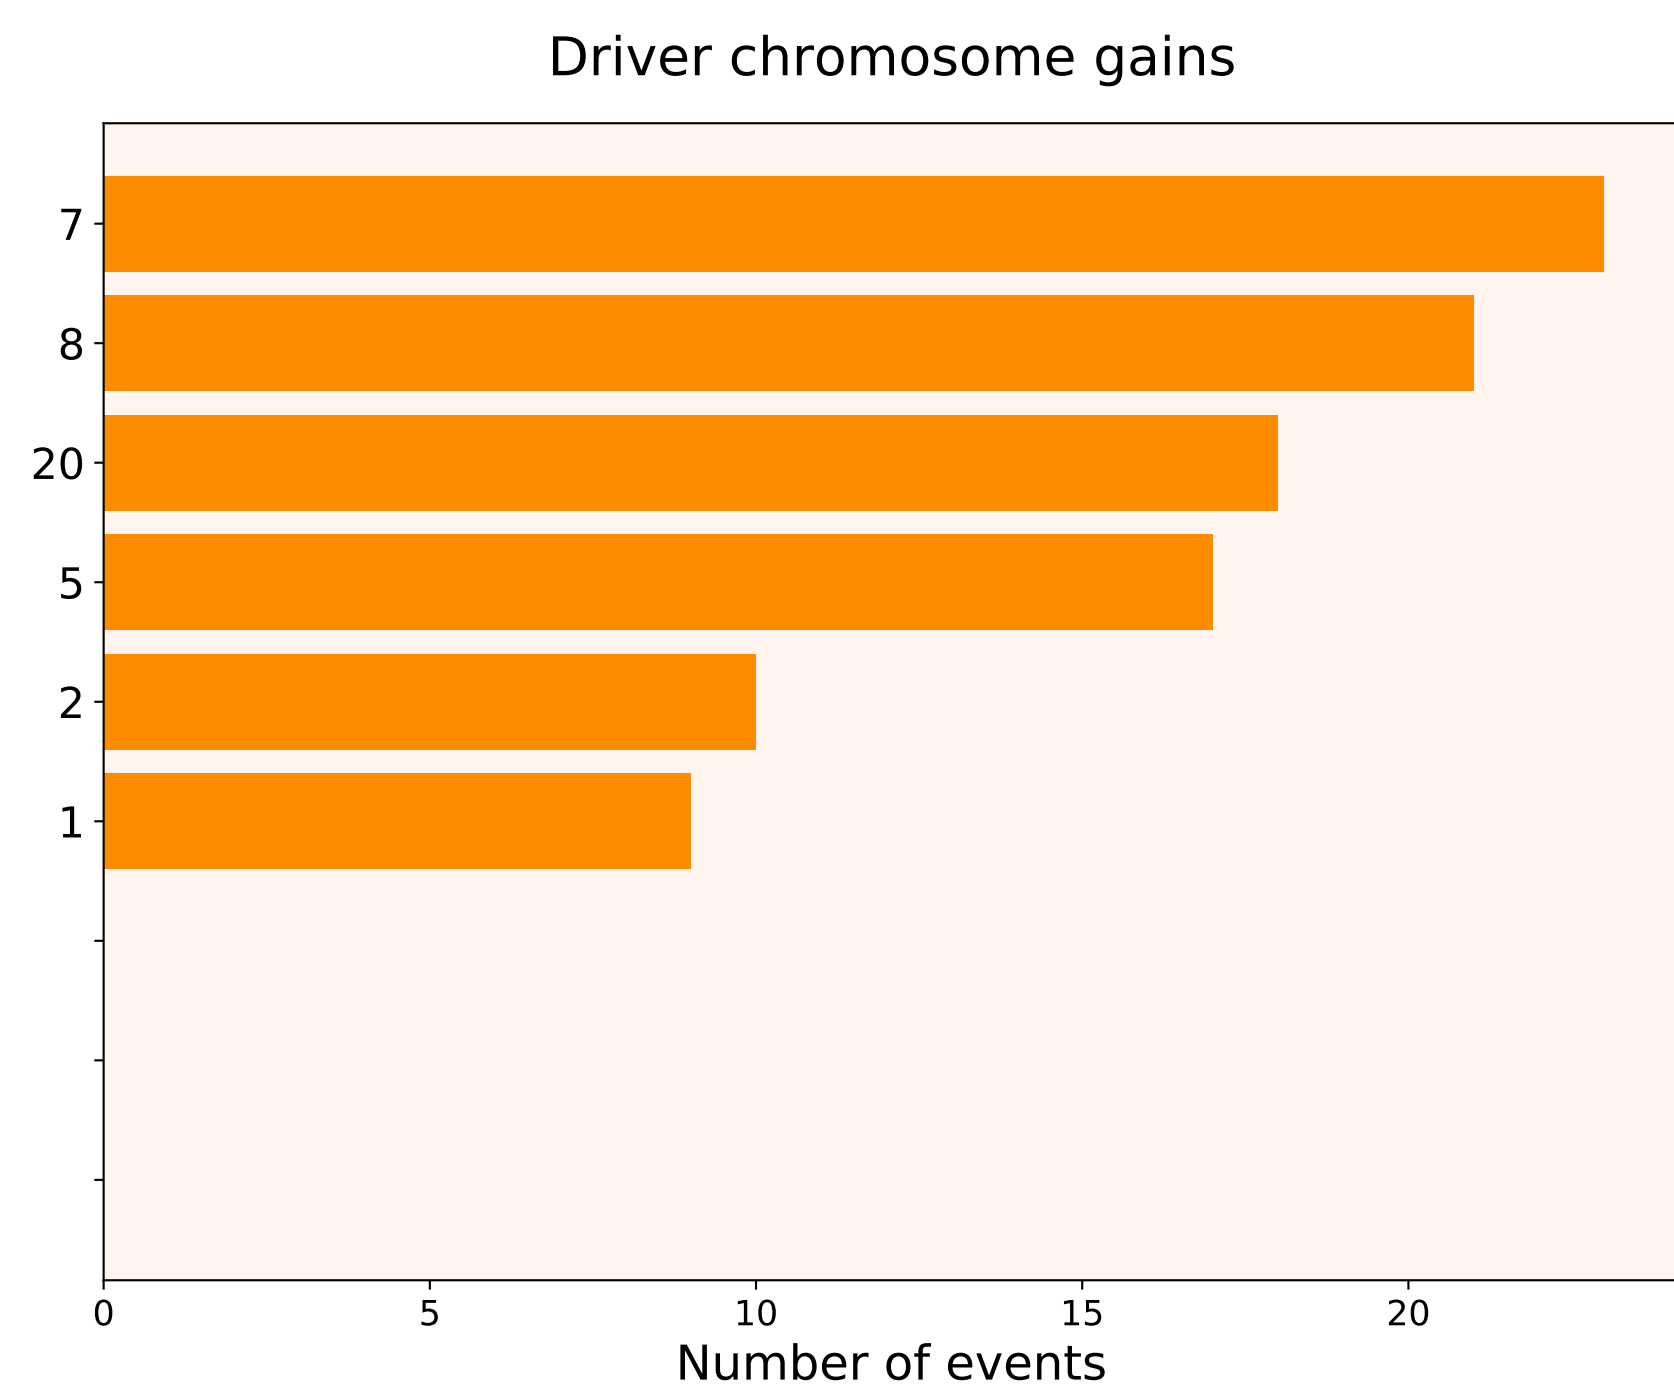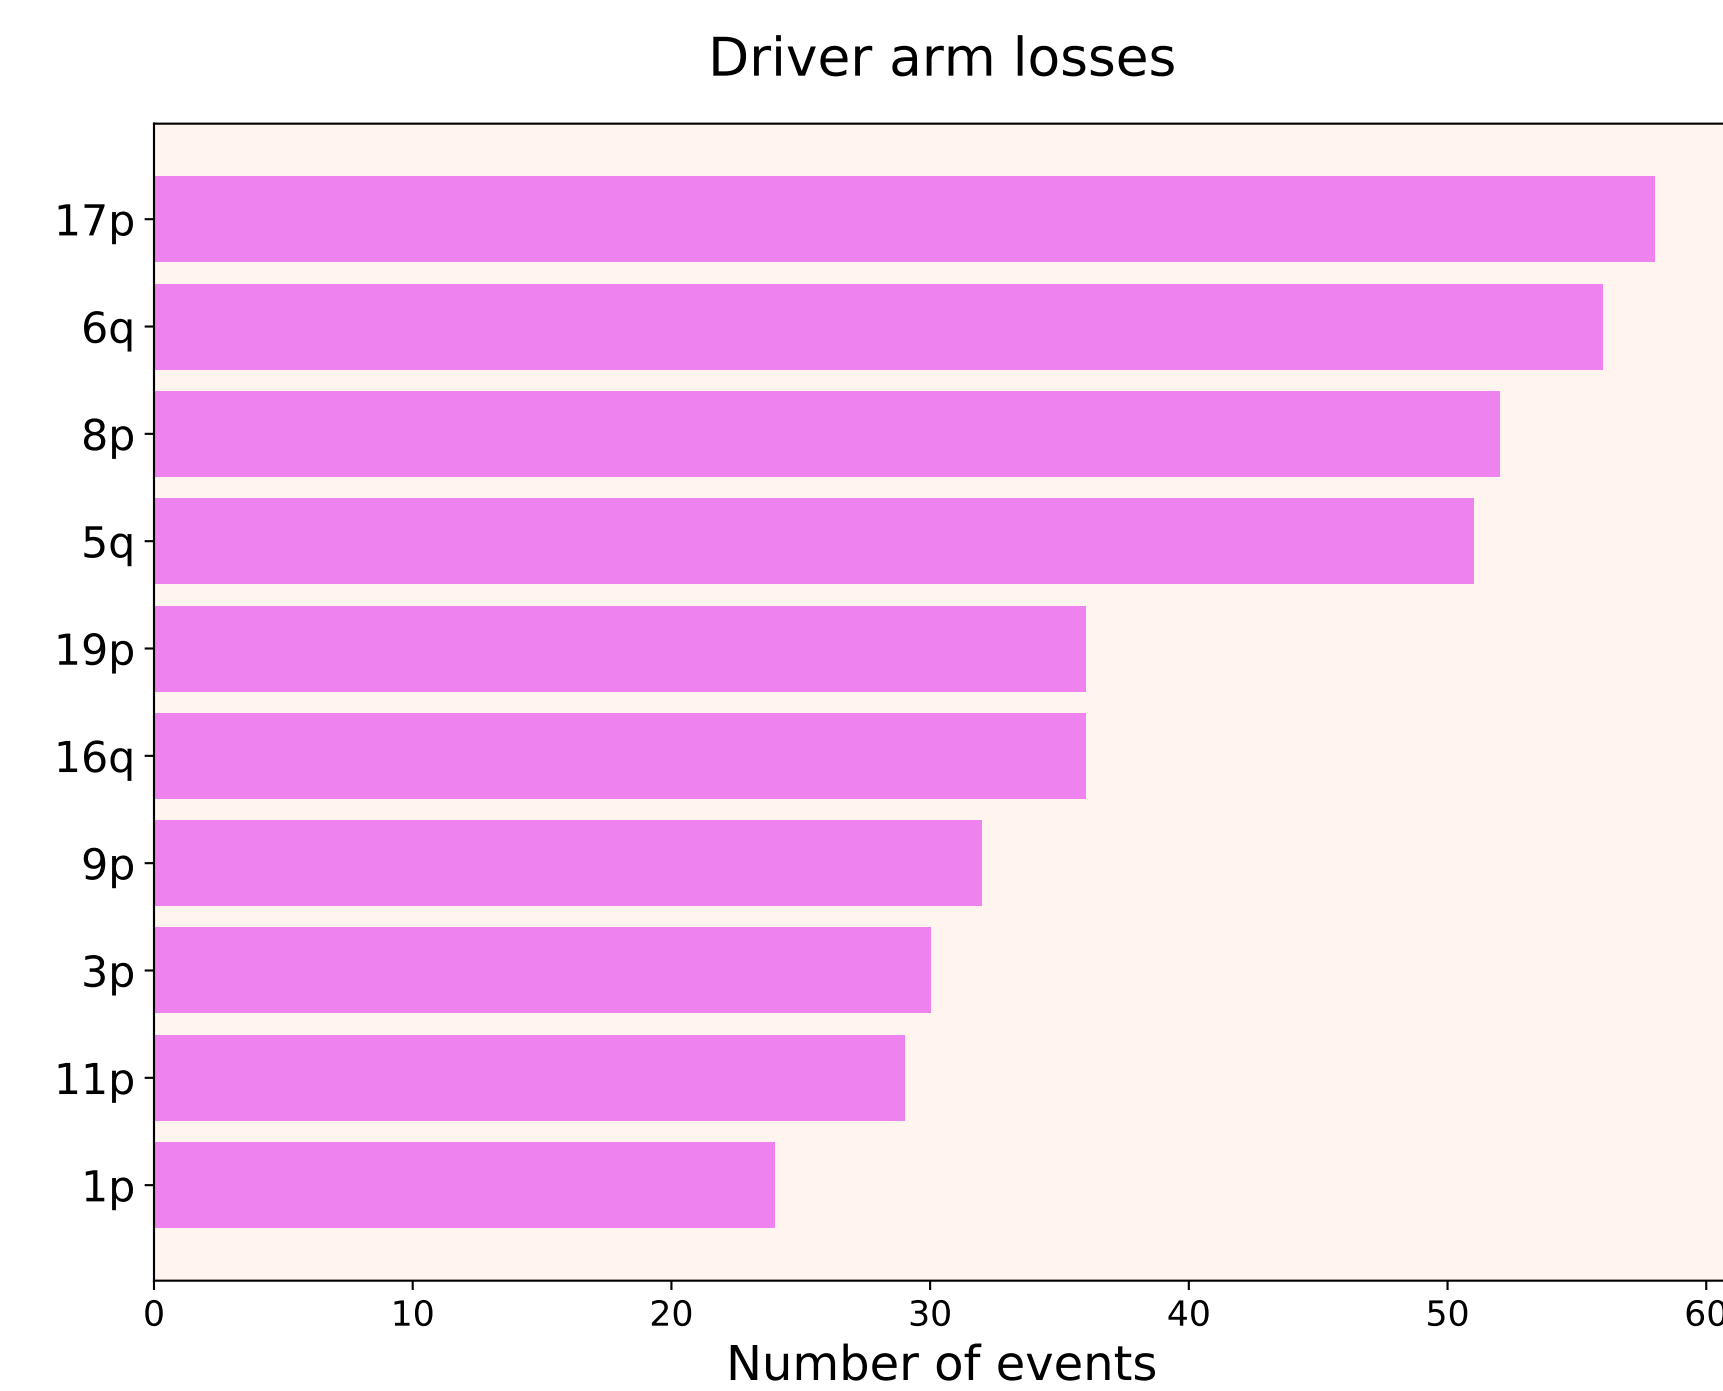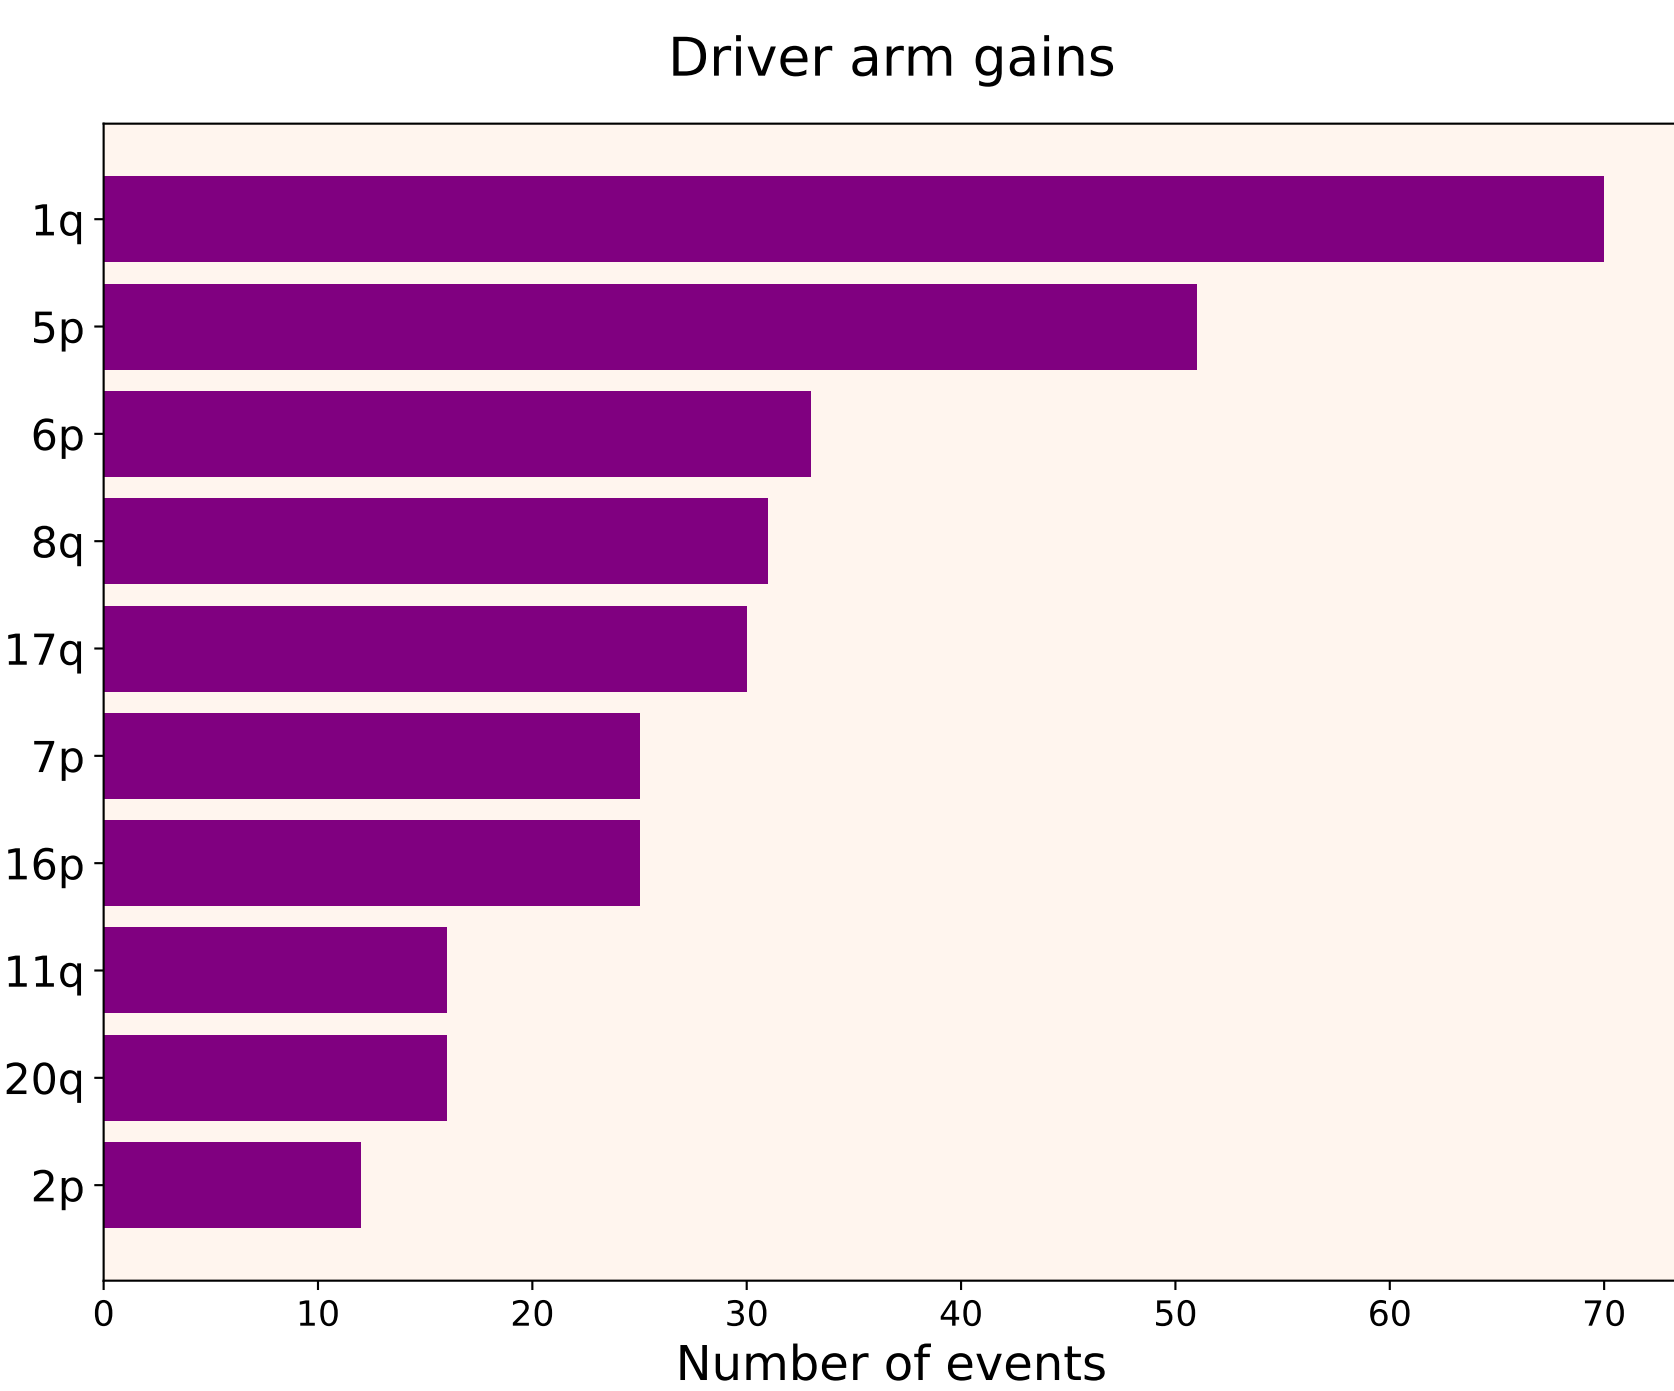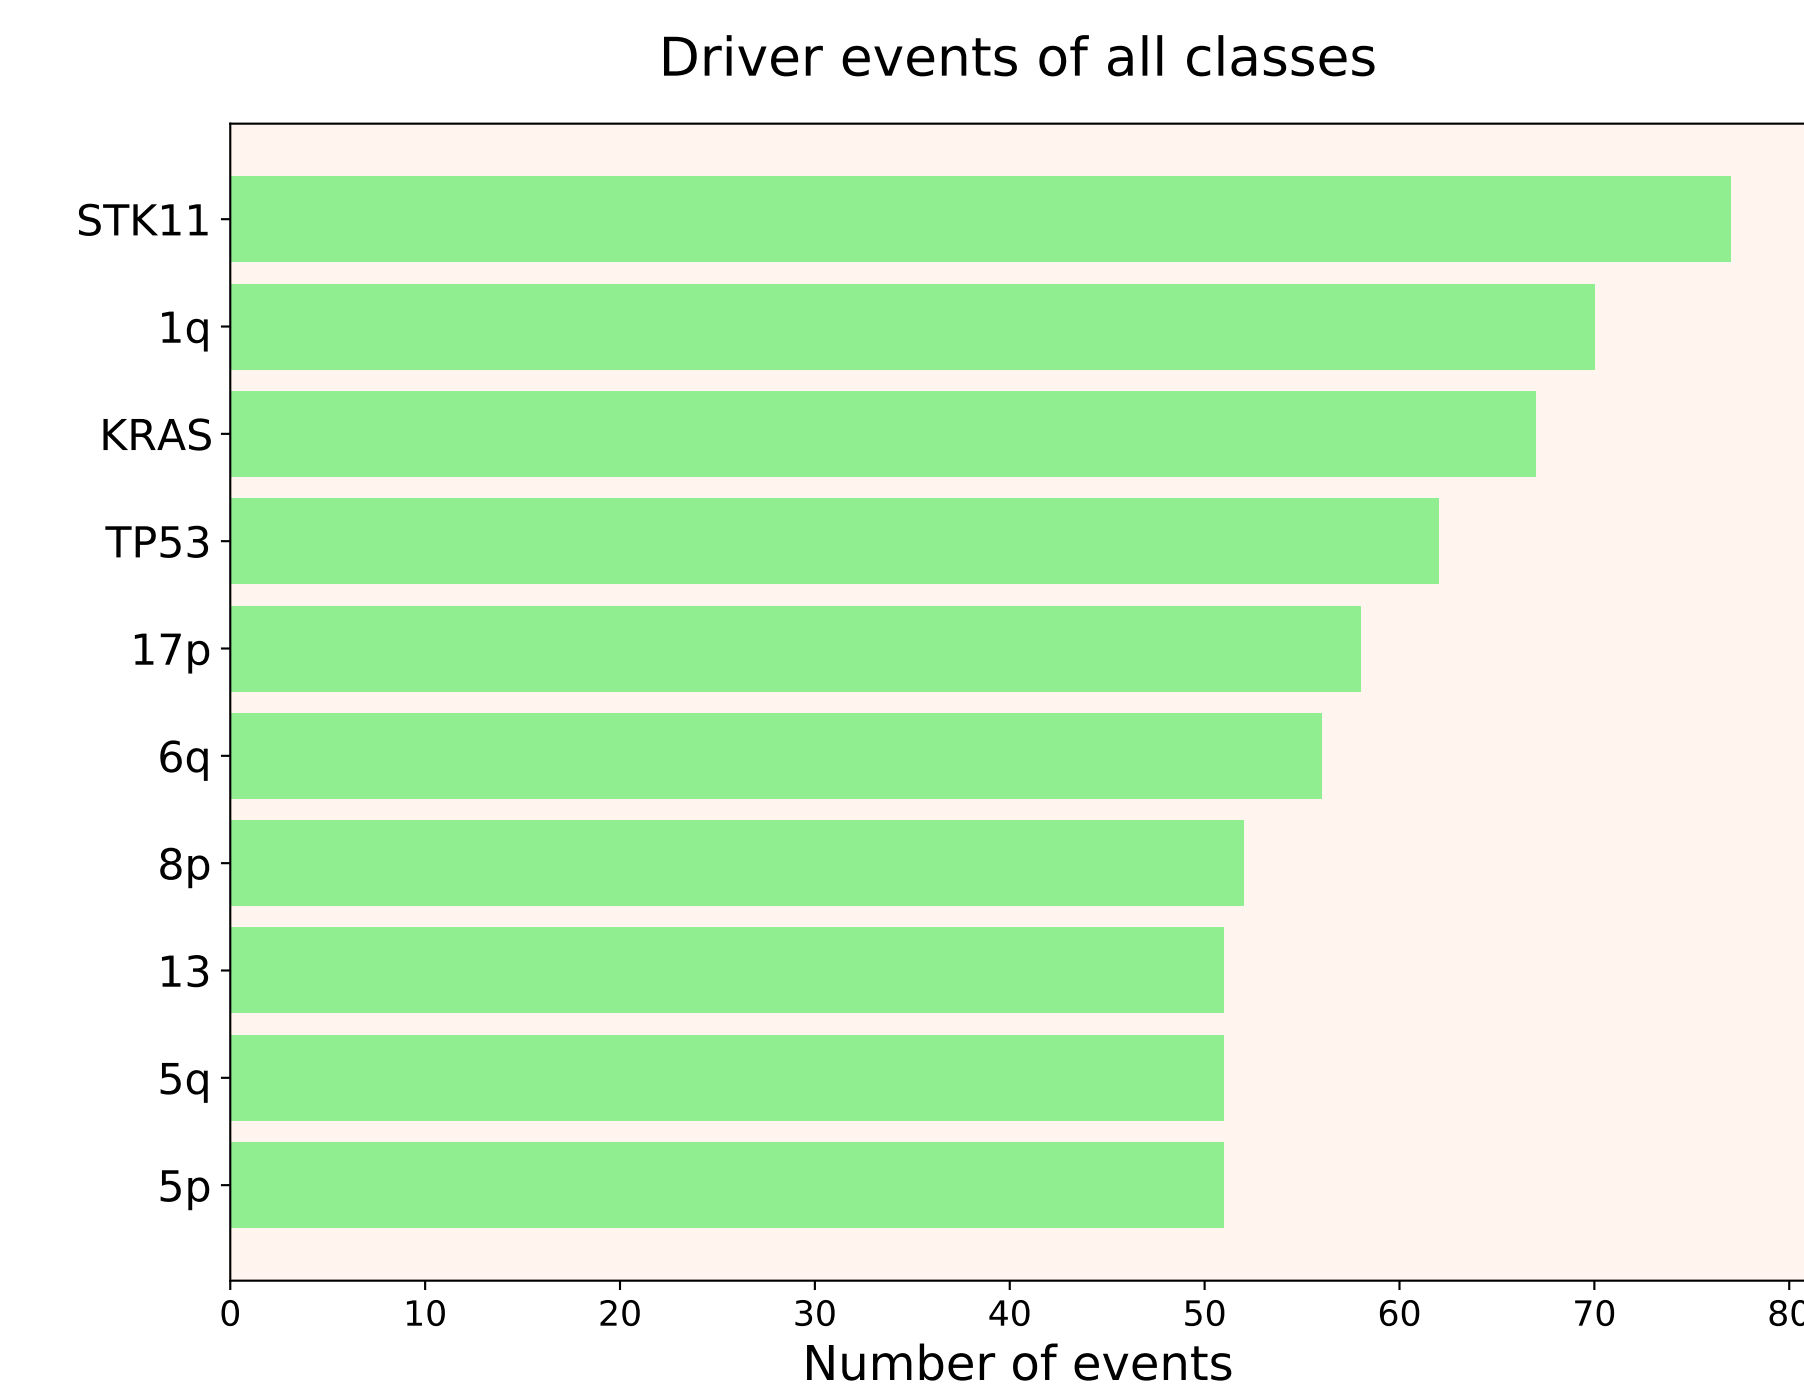

Supplement: Supplemental_Data_S1.zip [file Supplemental_Data_S1.zip]

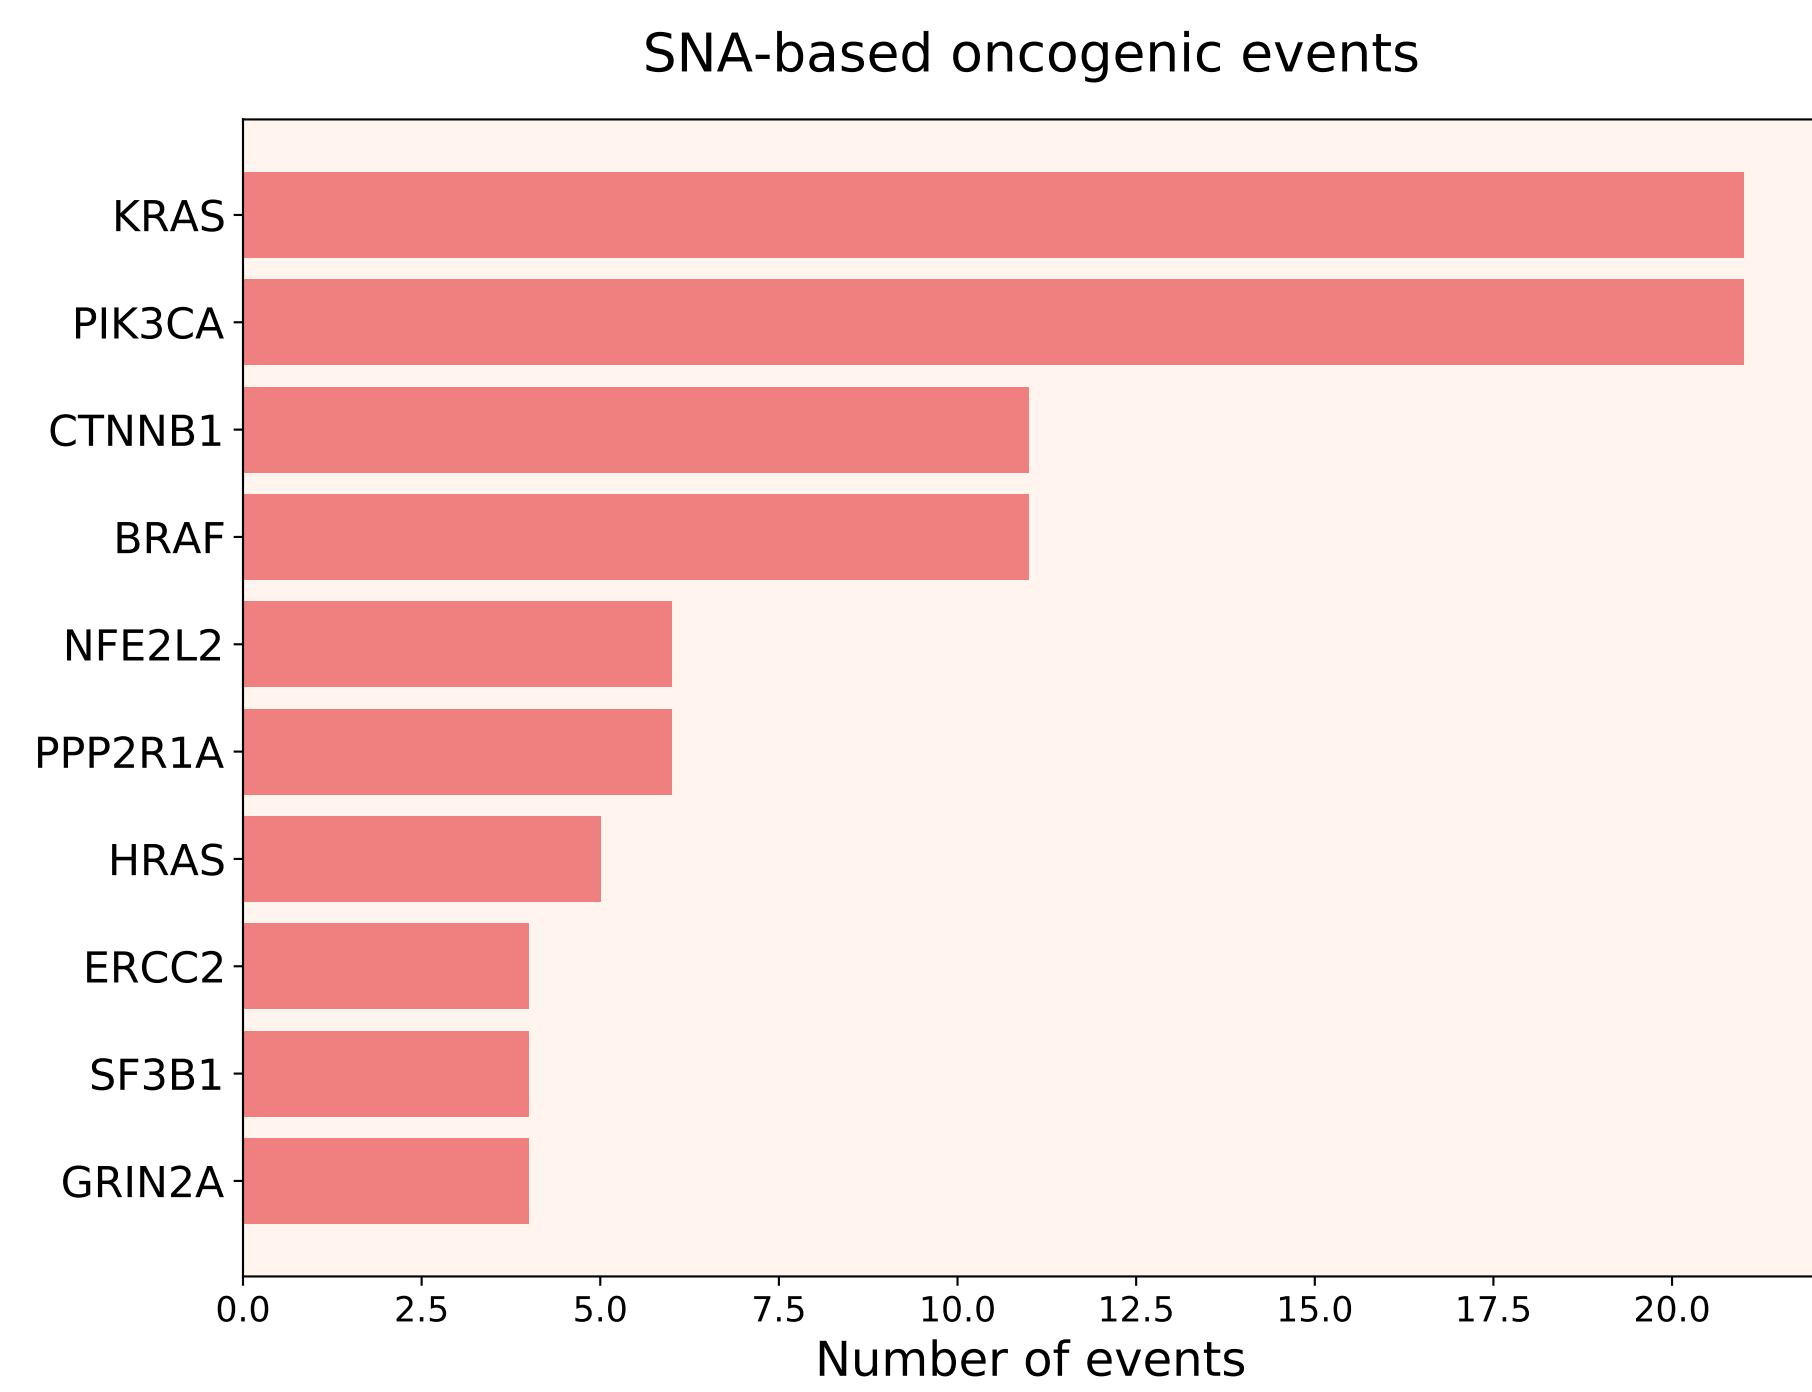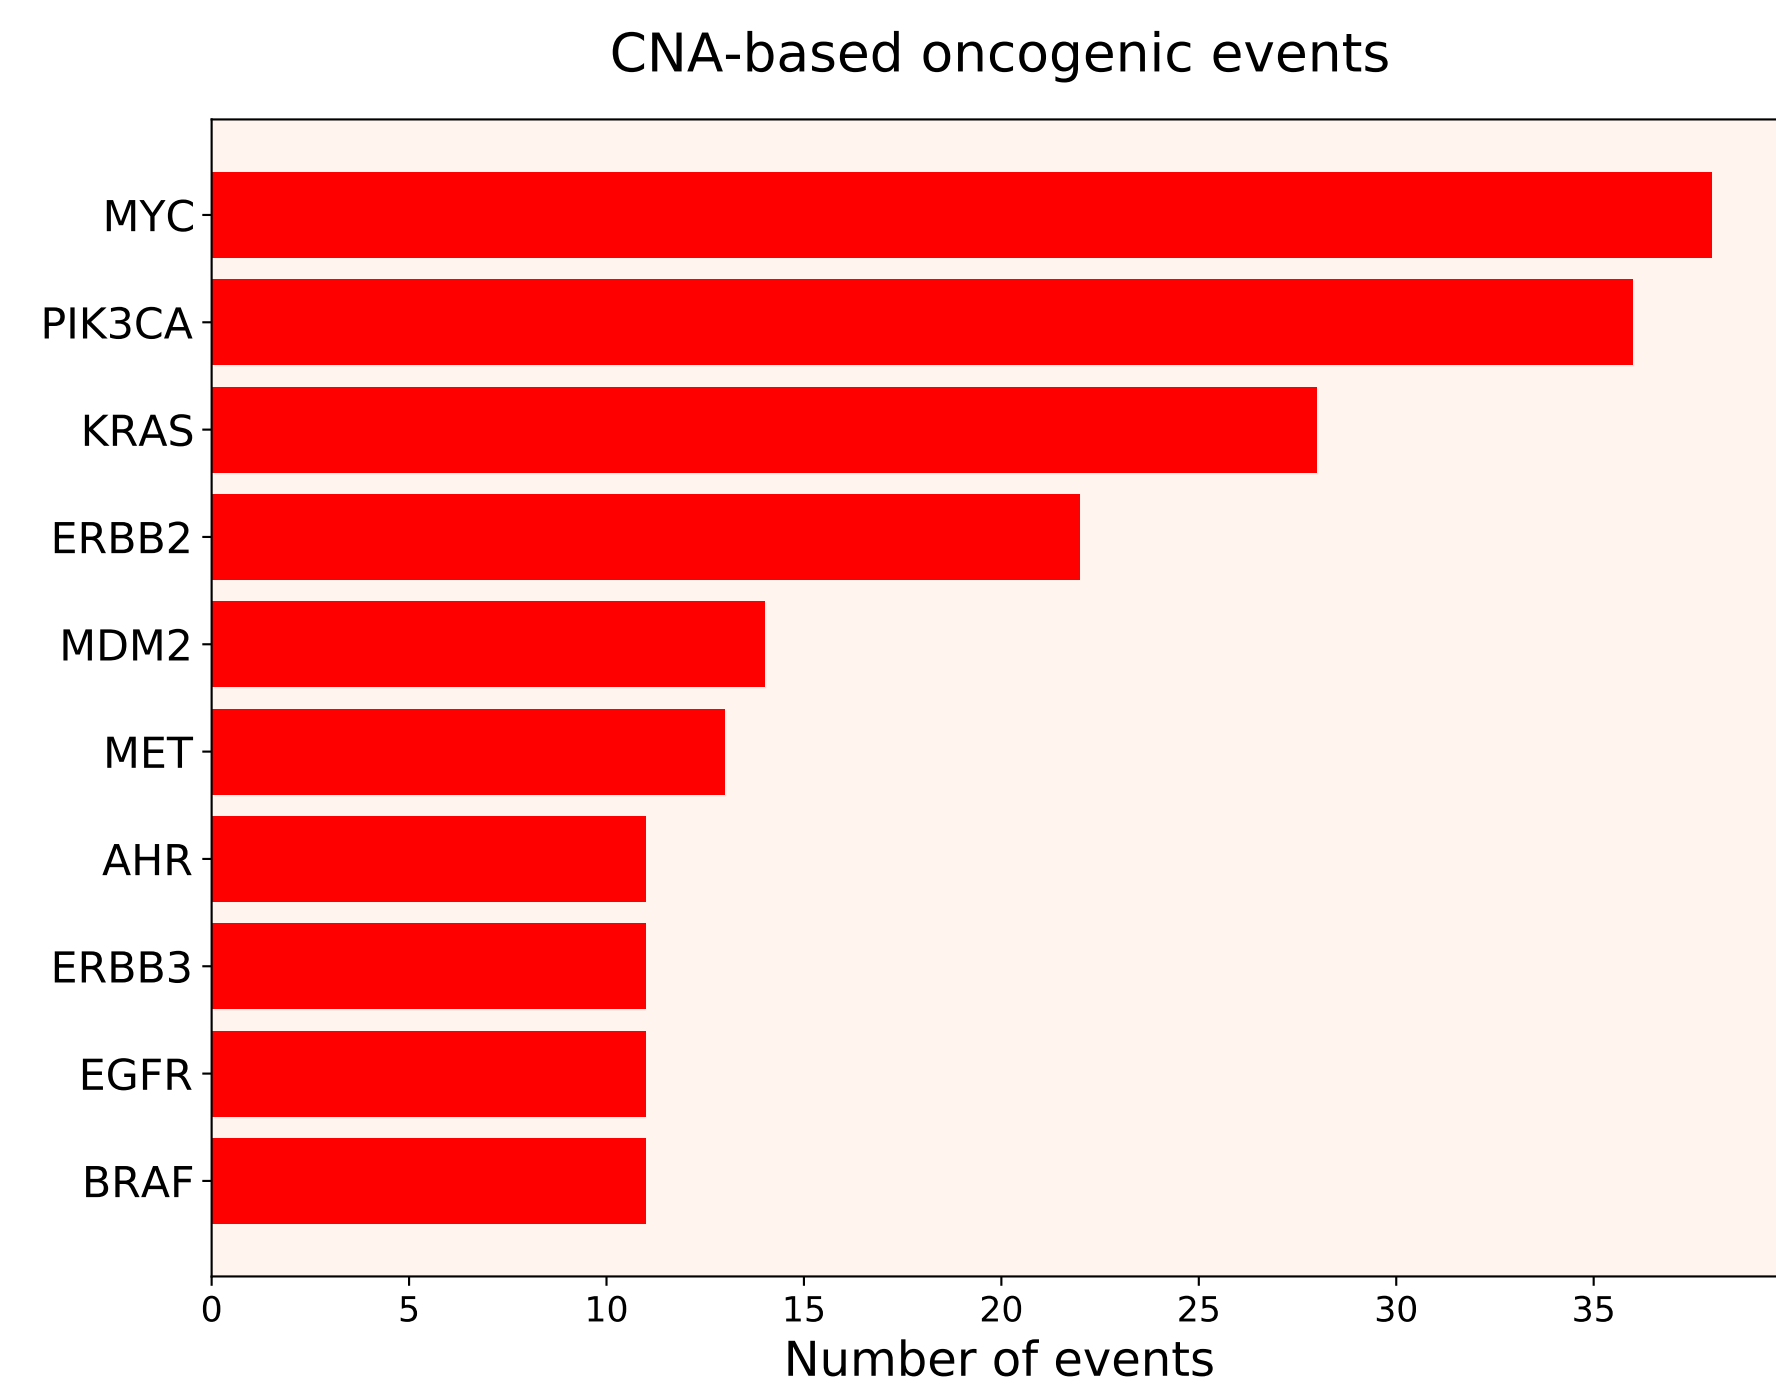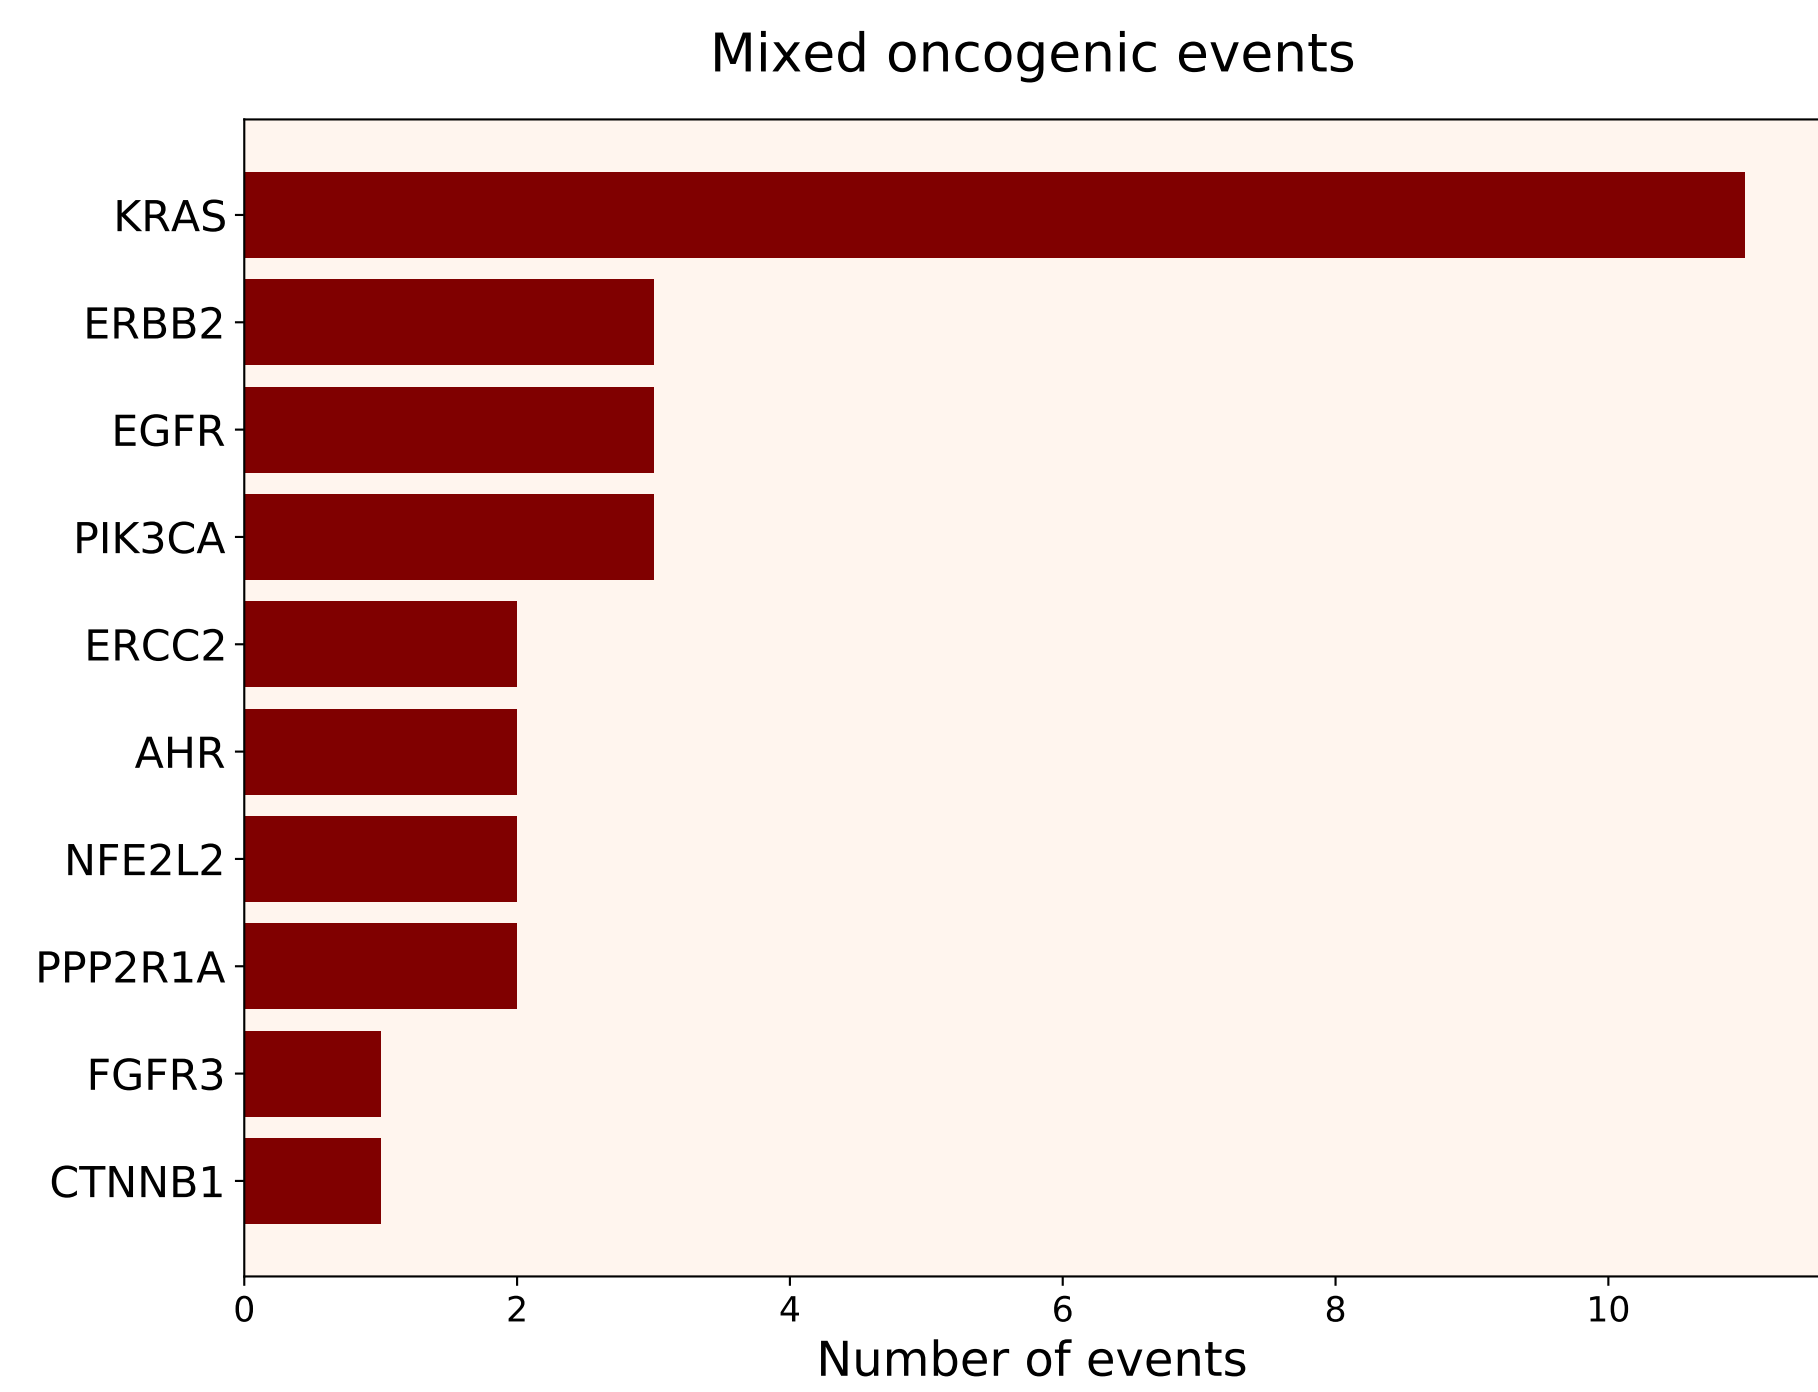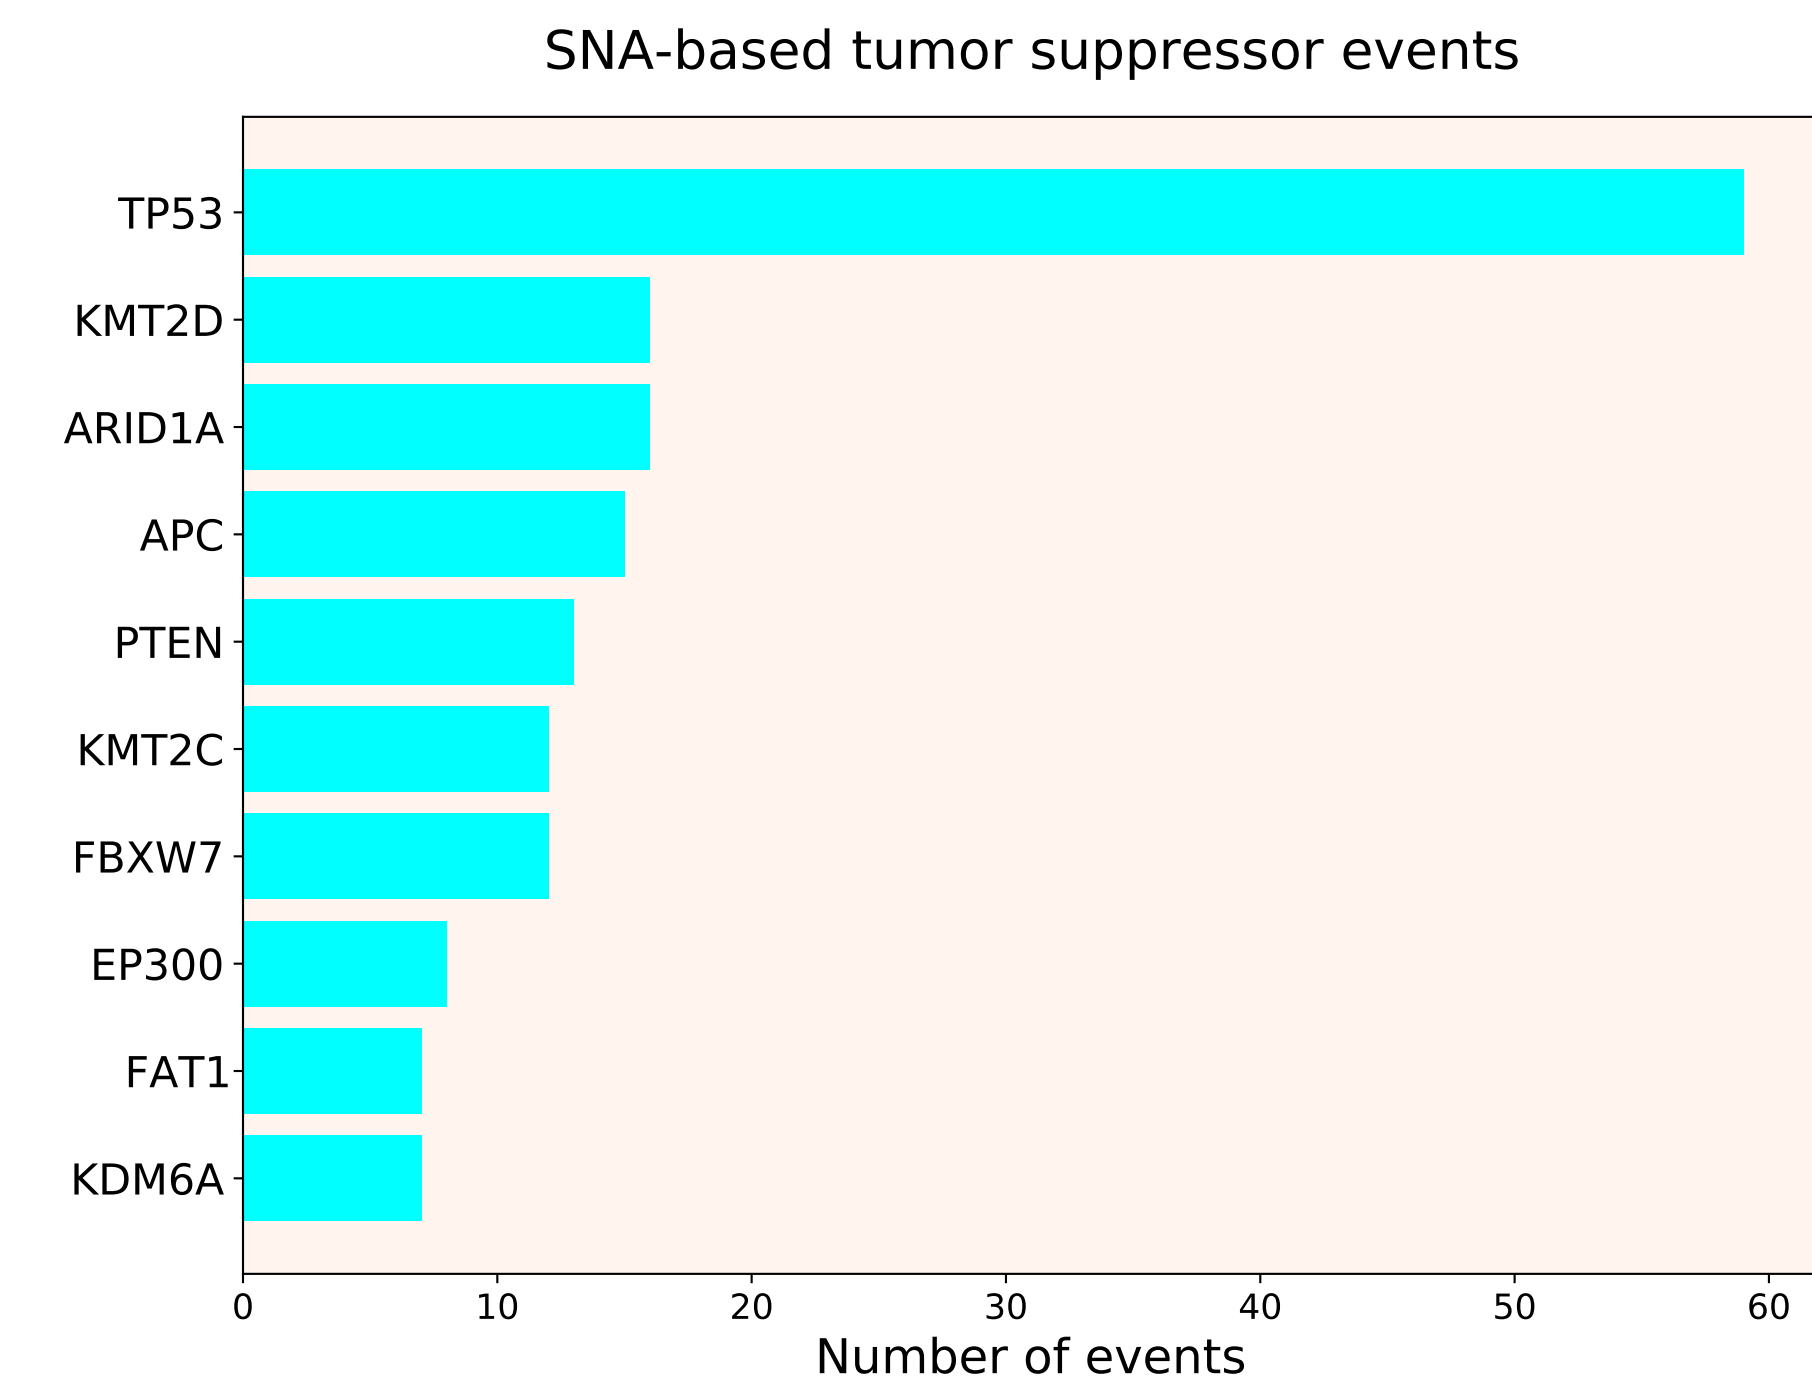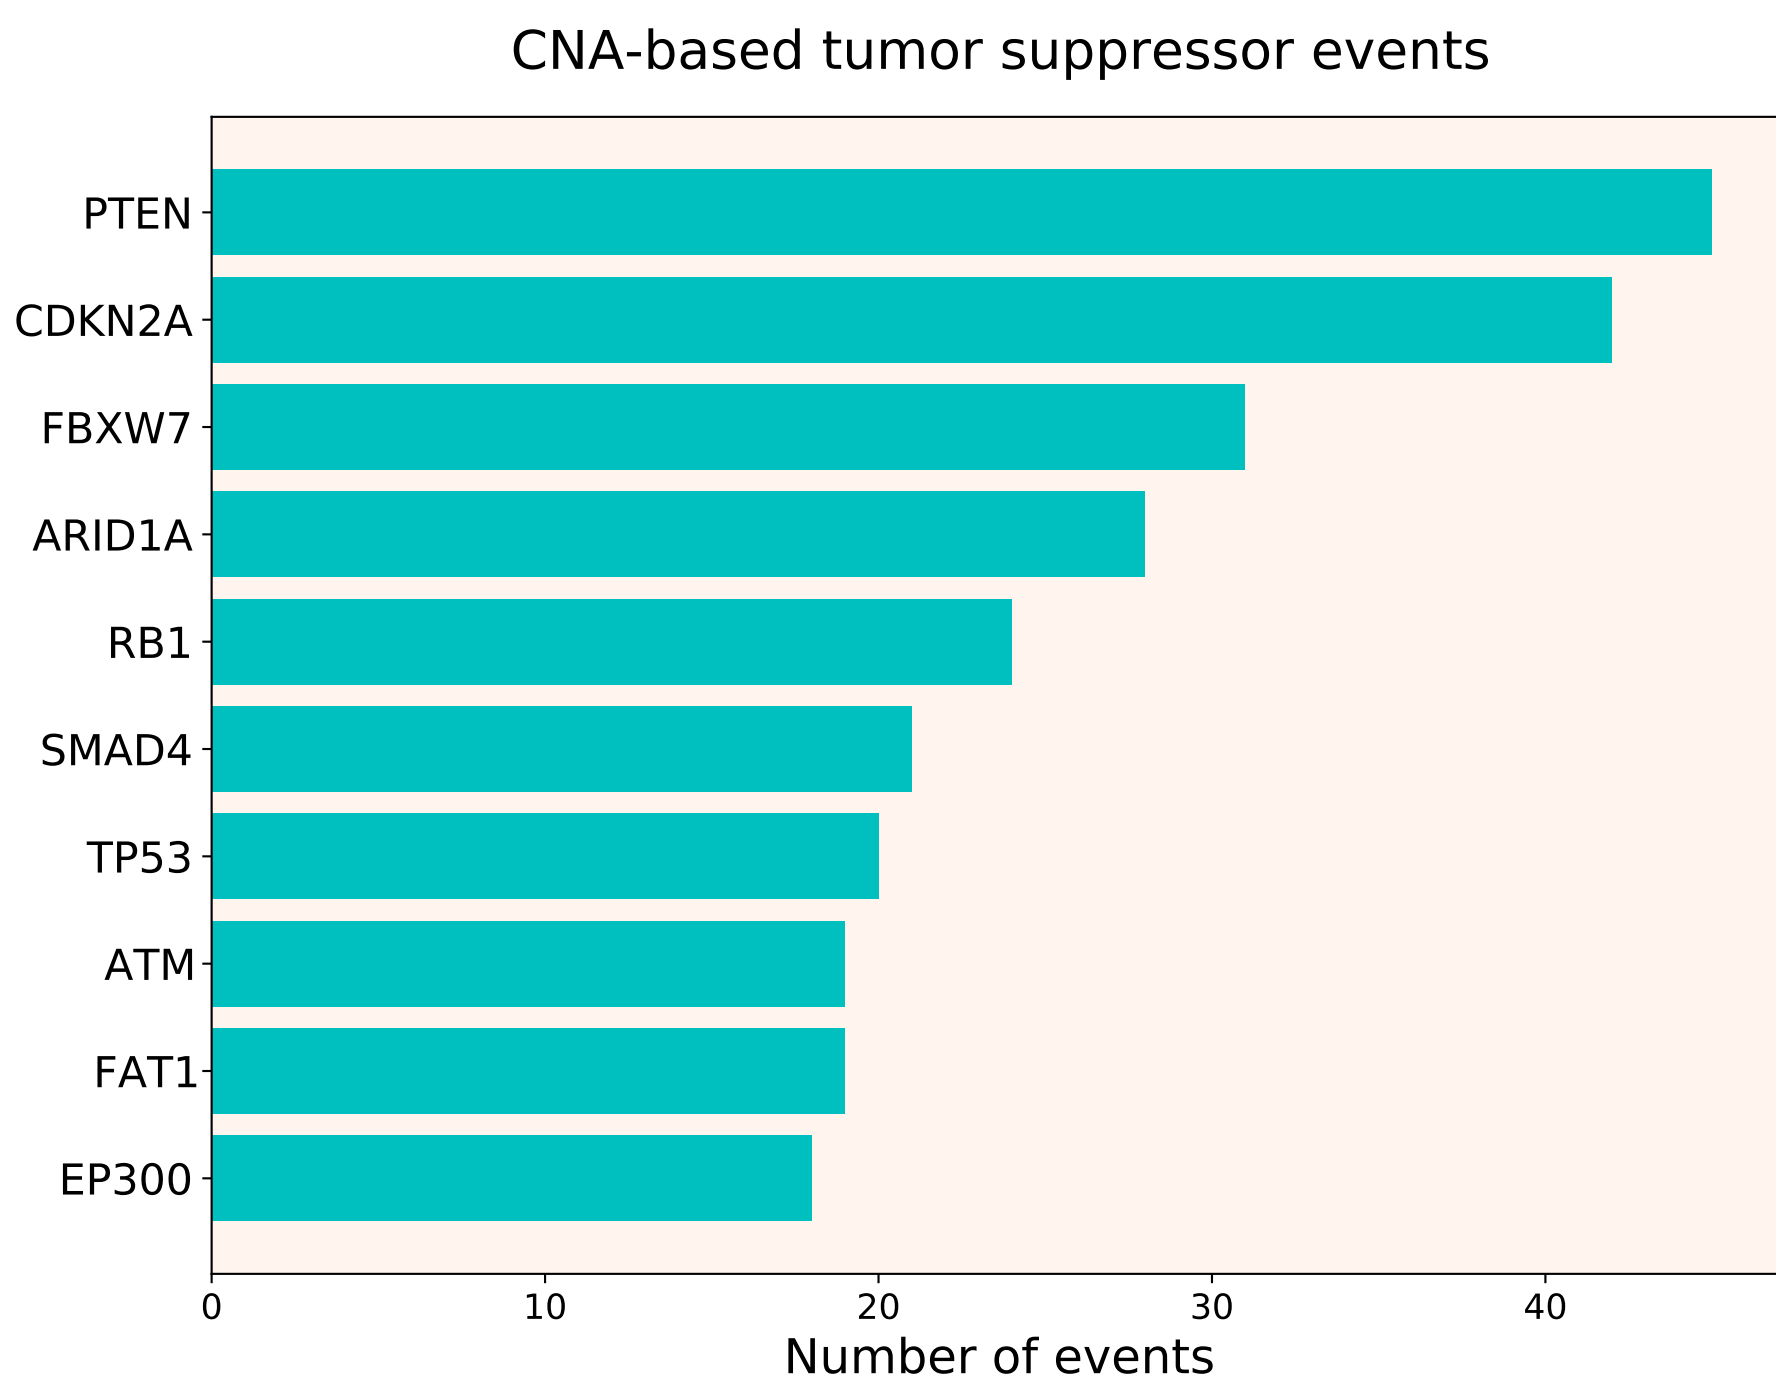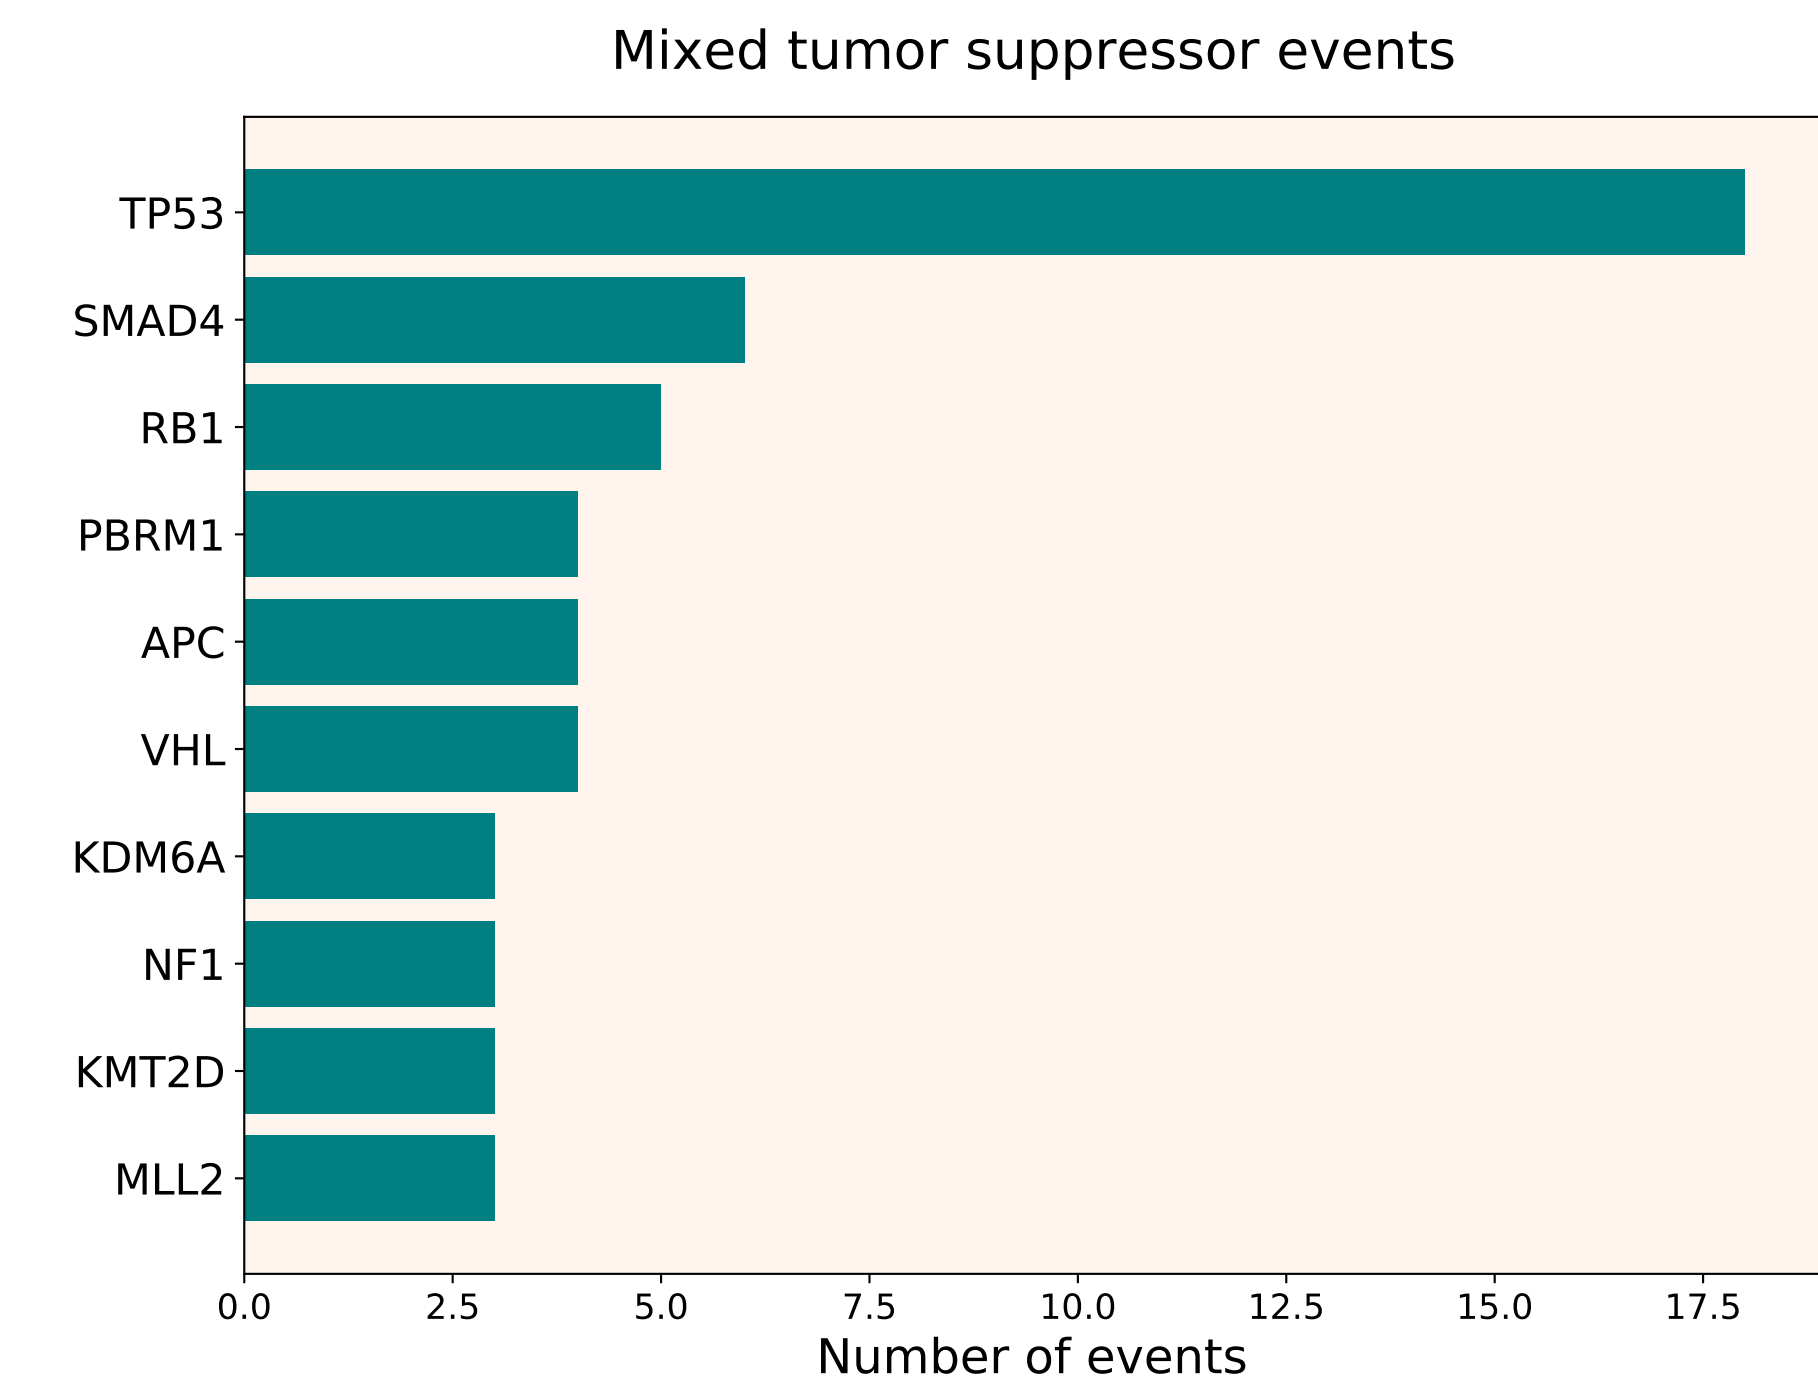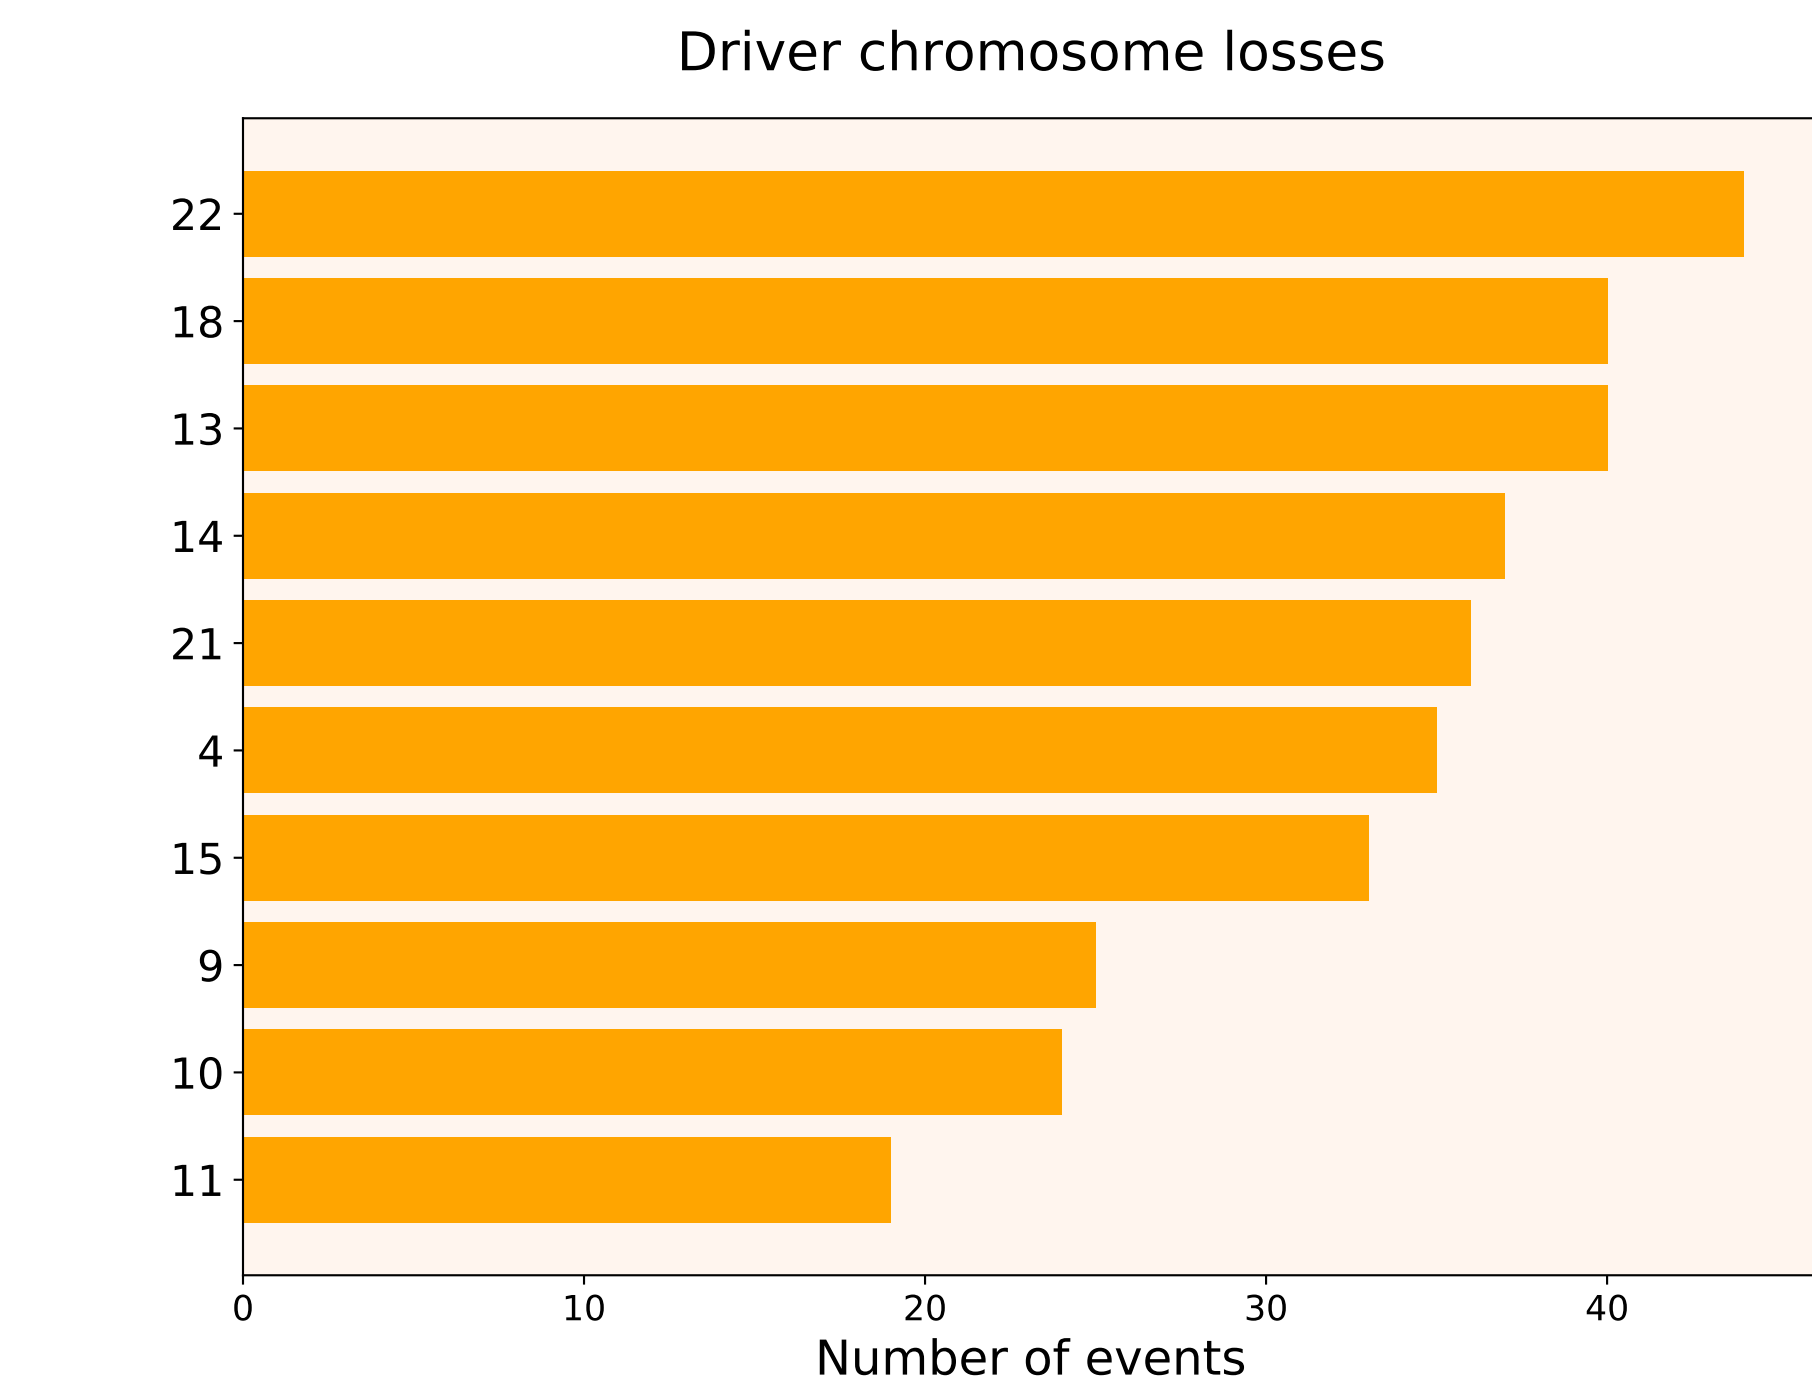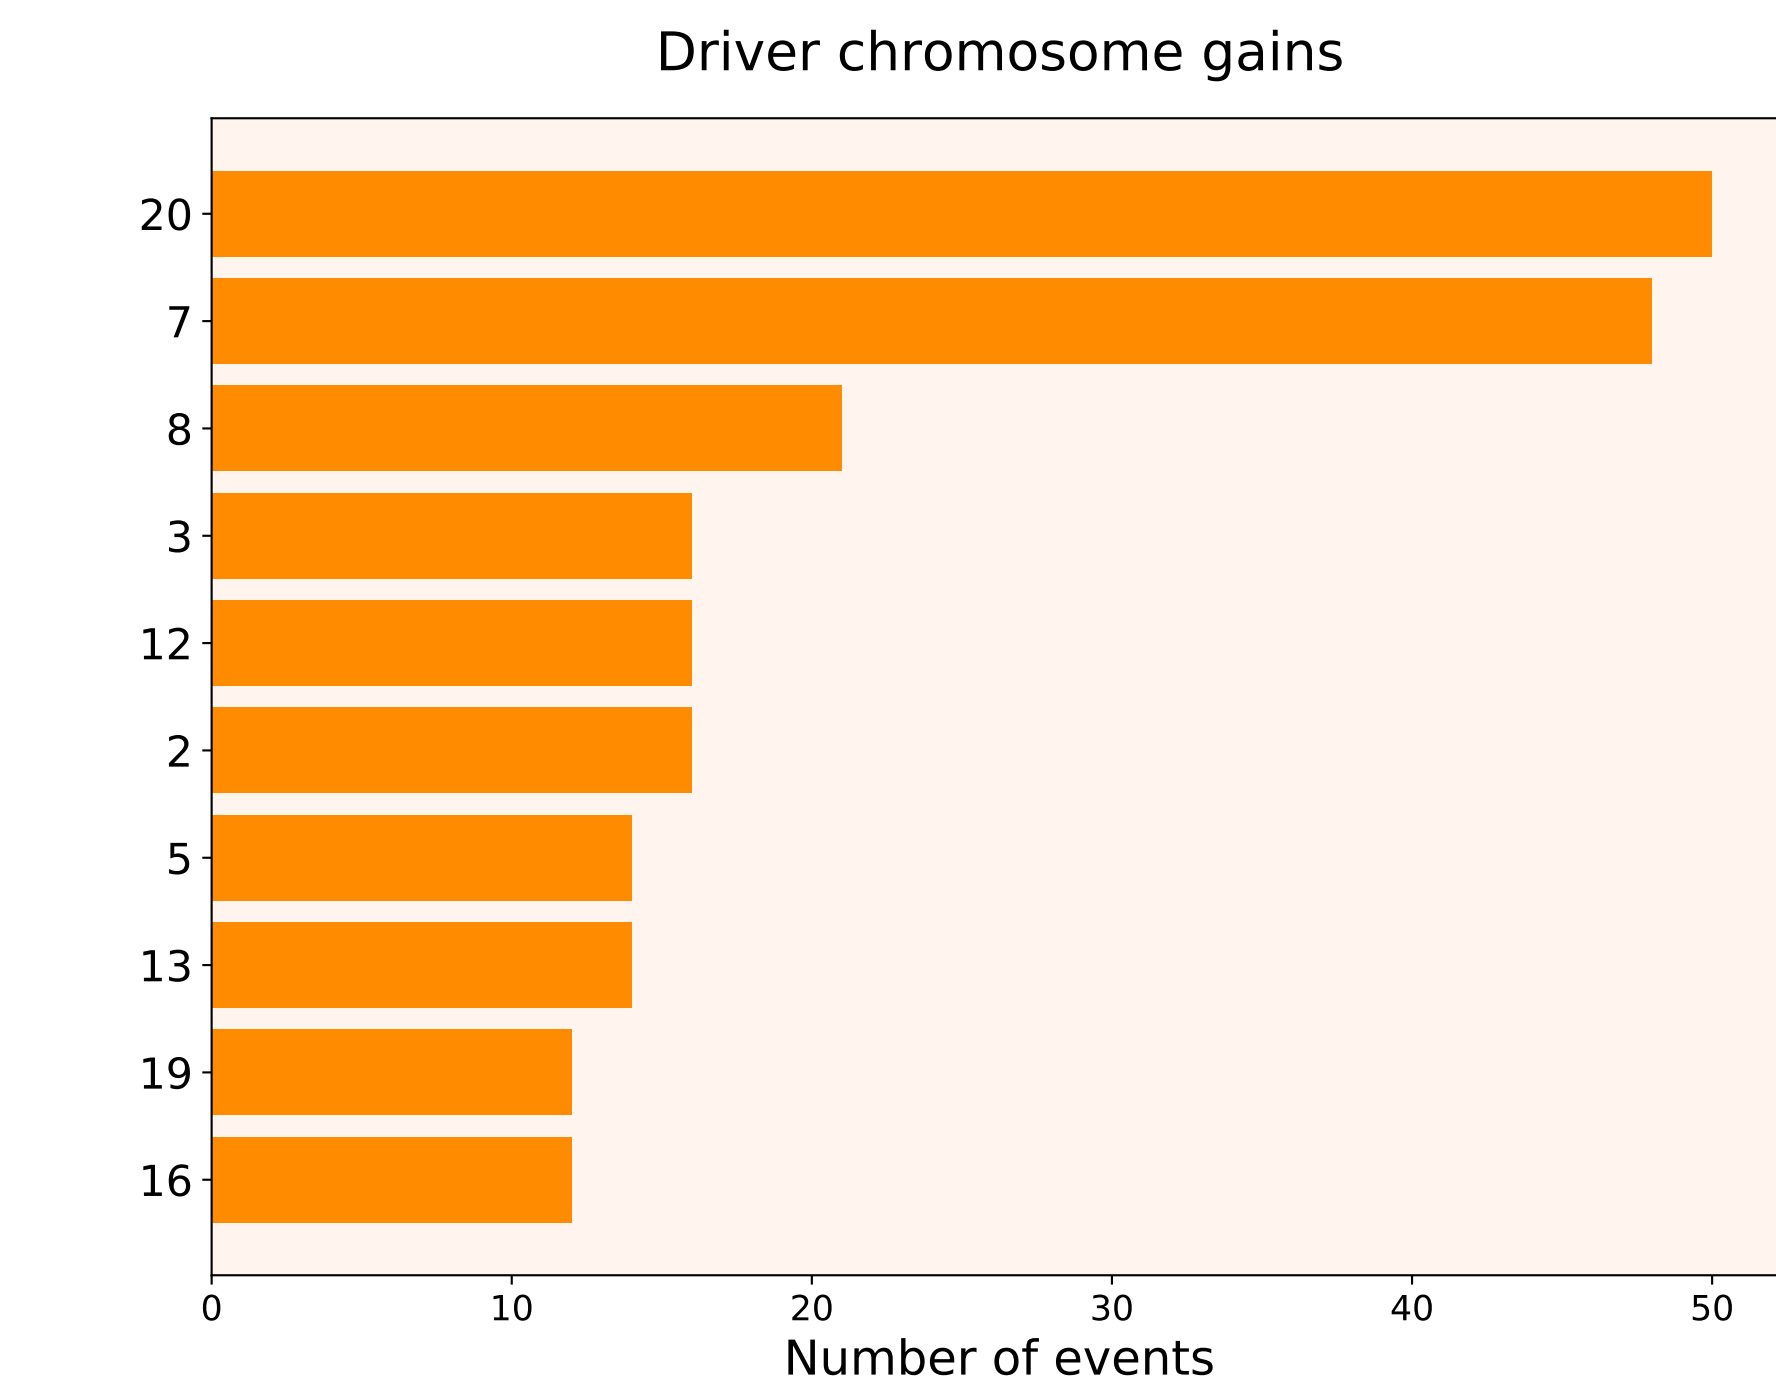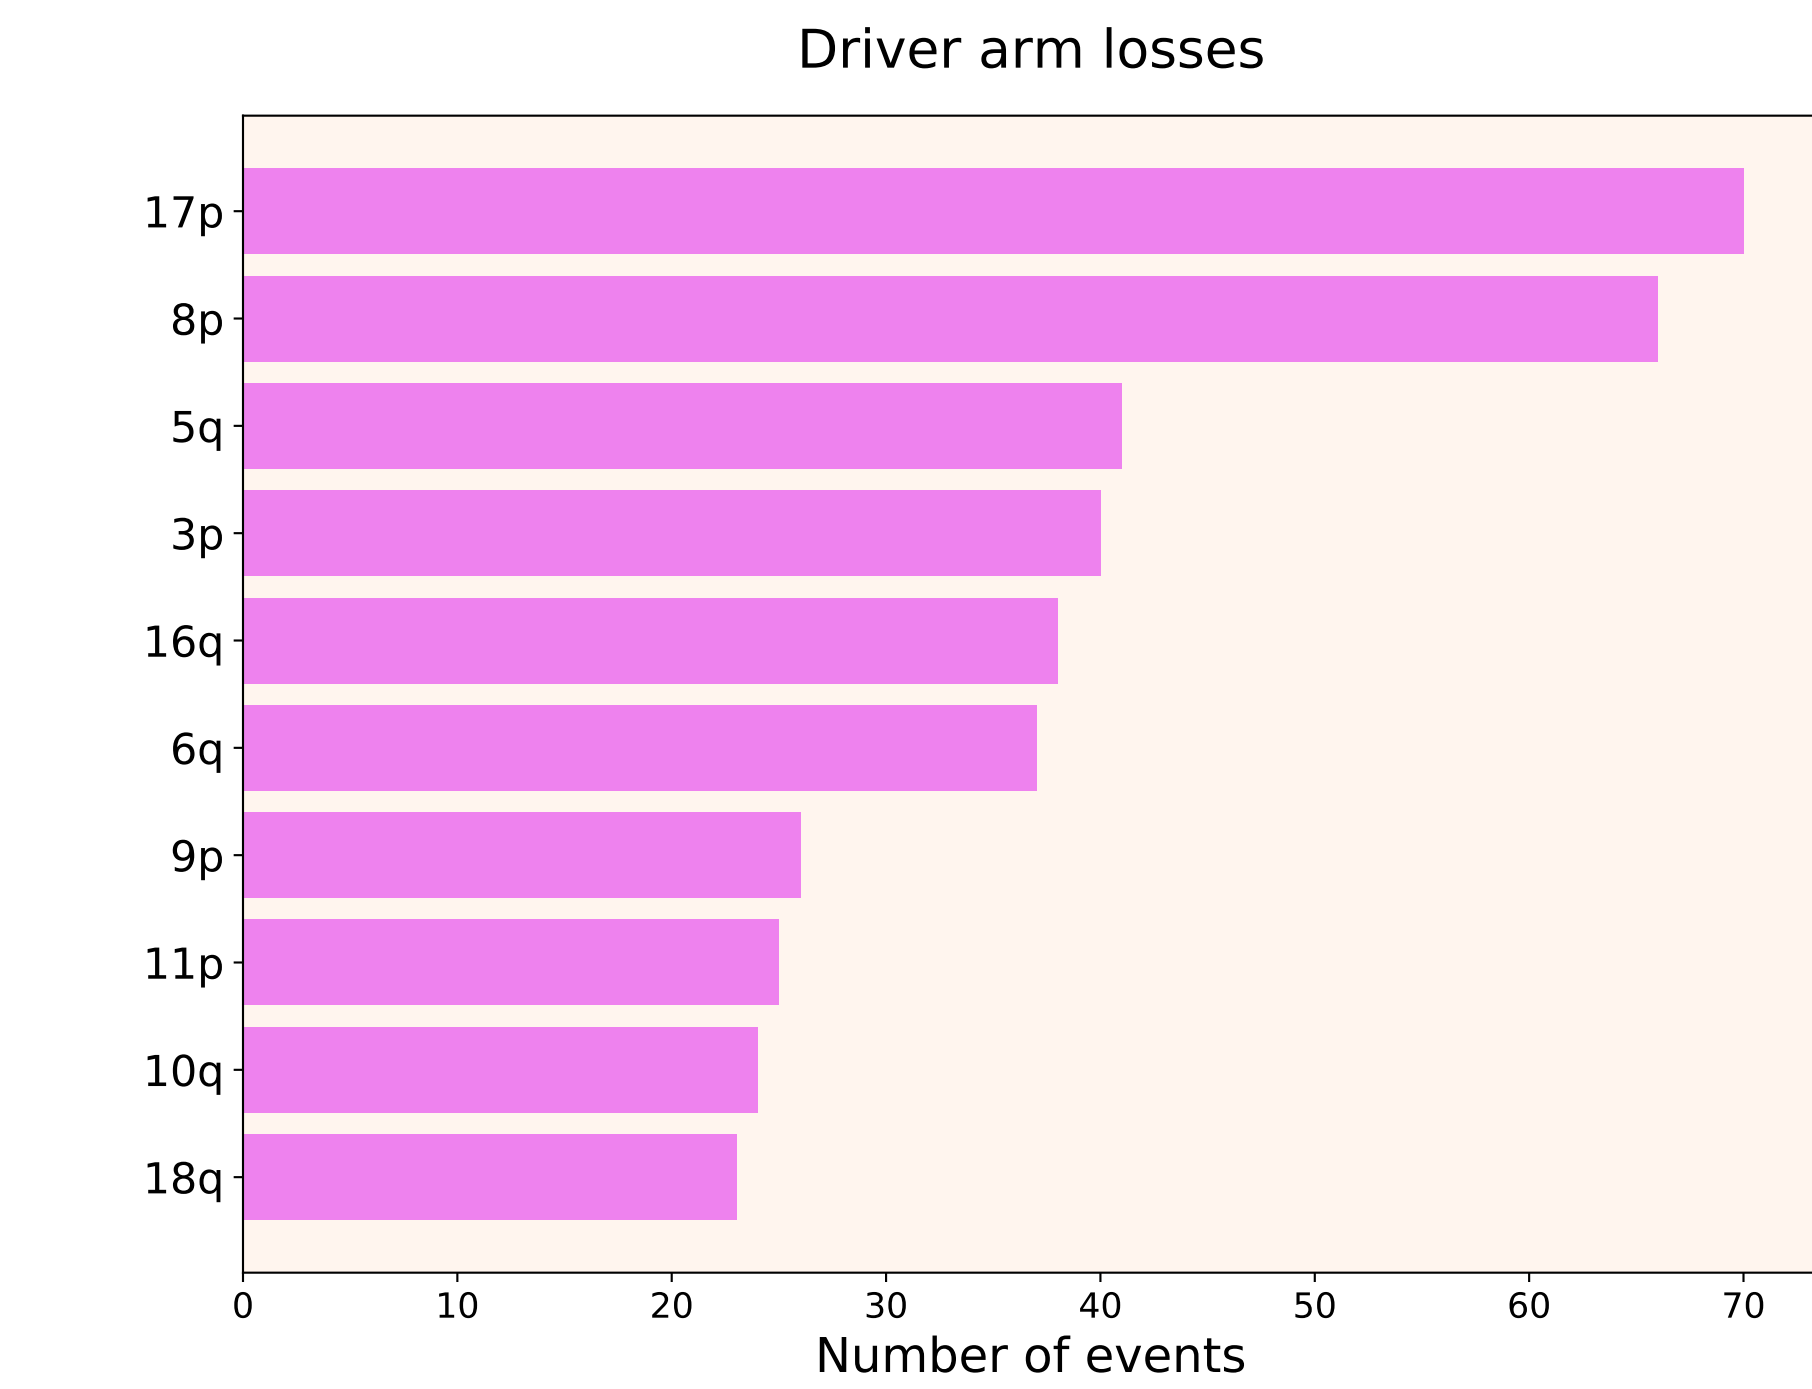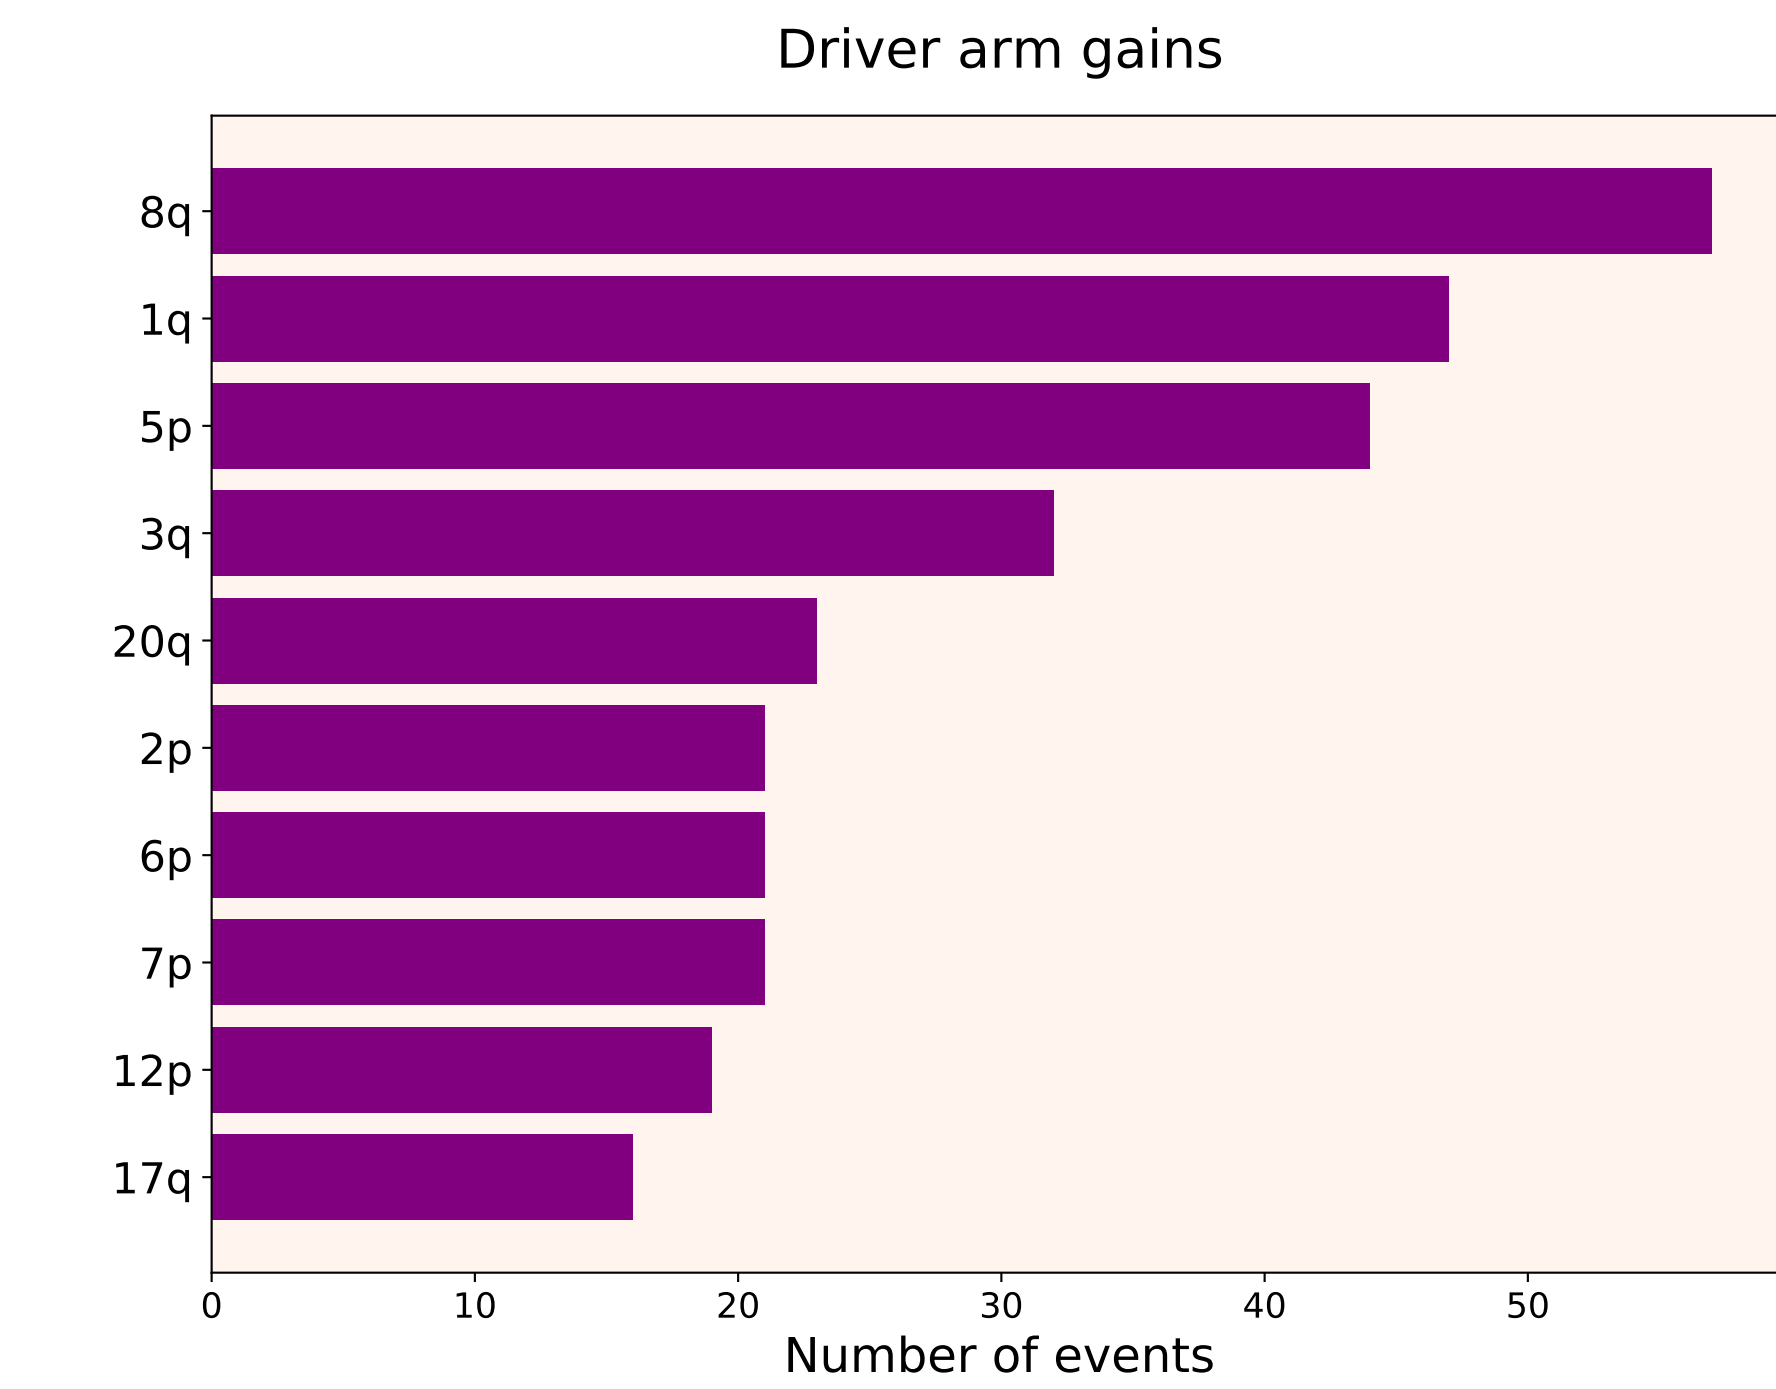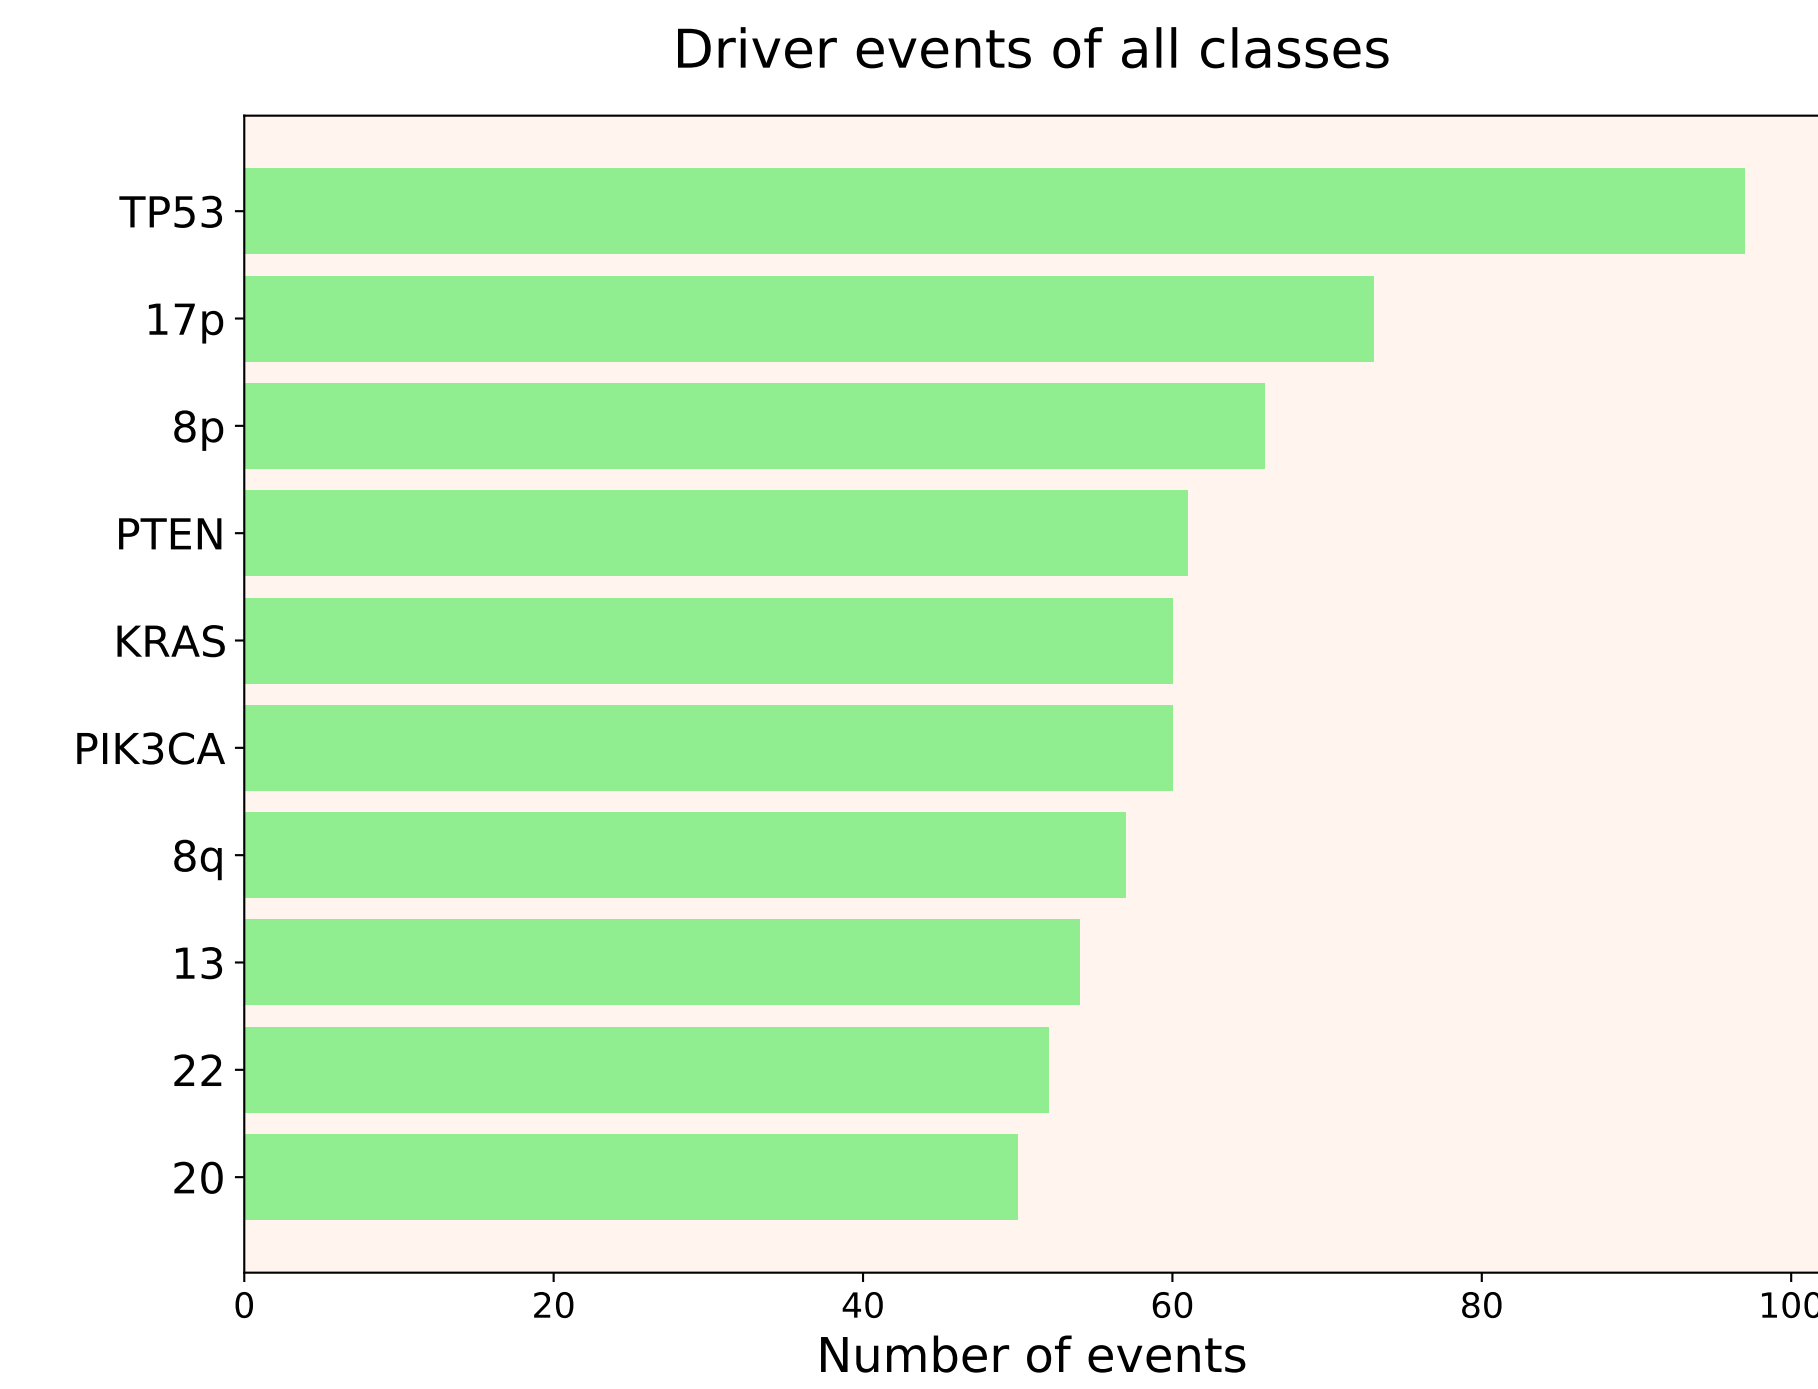

Supplement: Supplemental_Data_S1.zip [file Supplemental_Data_S1.zip]

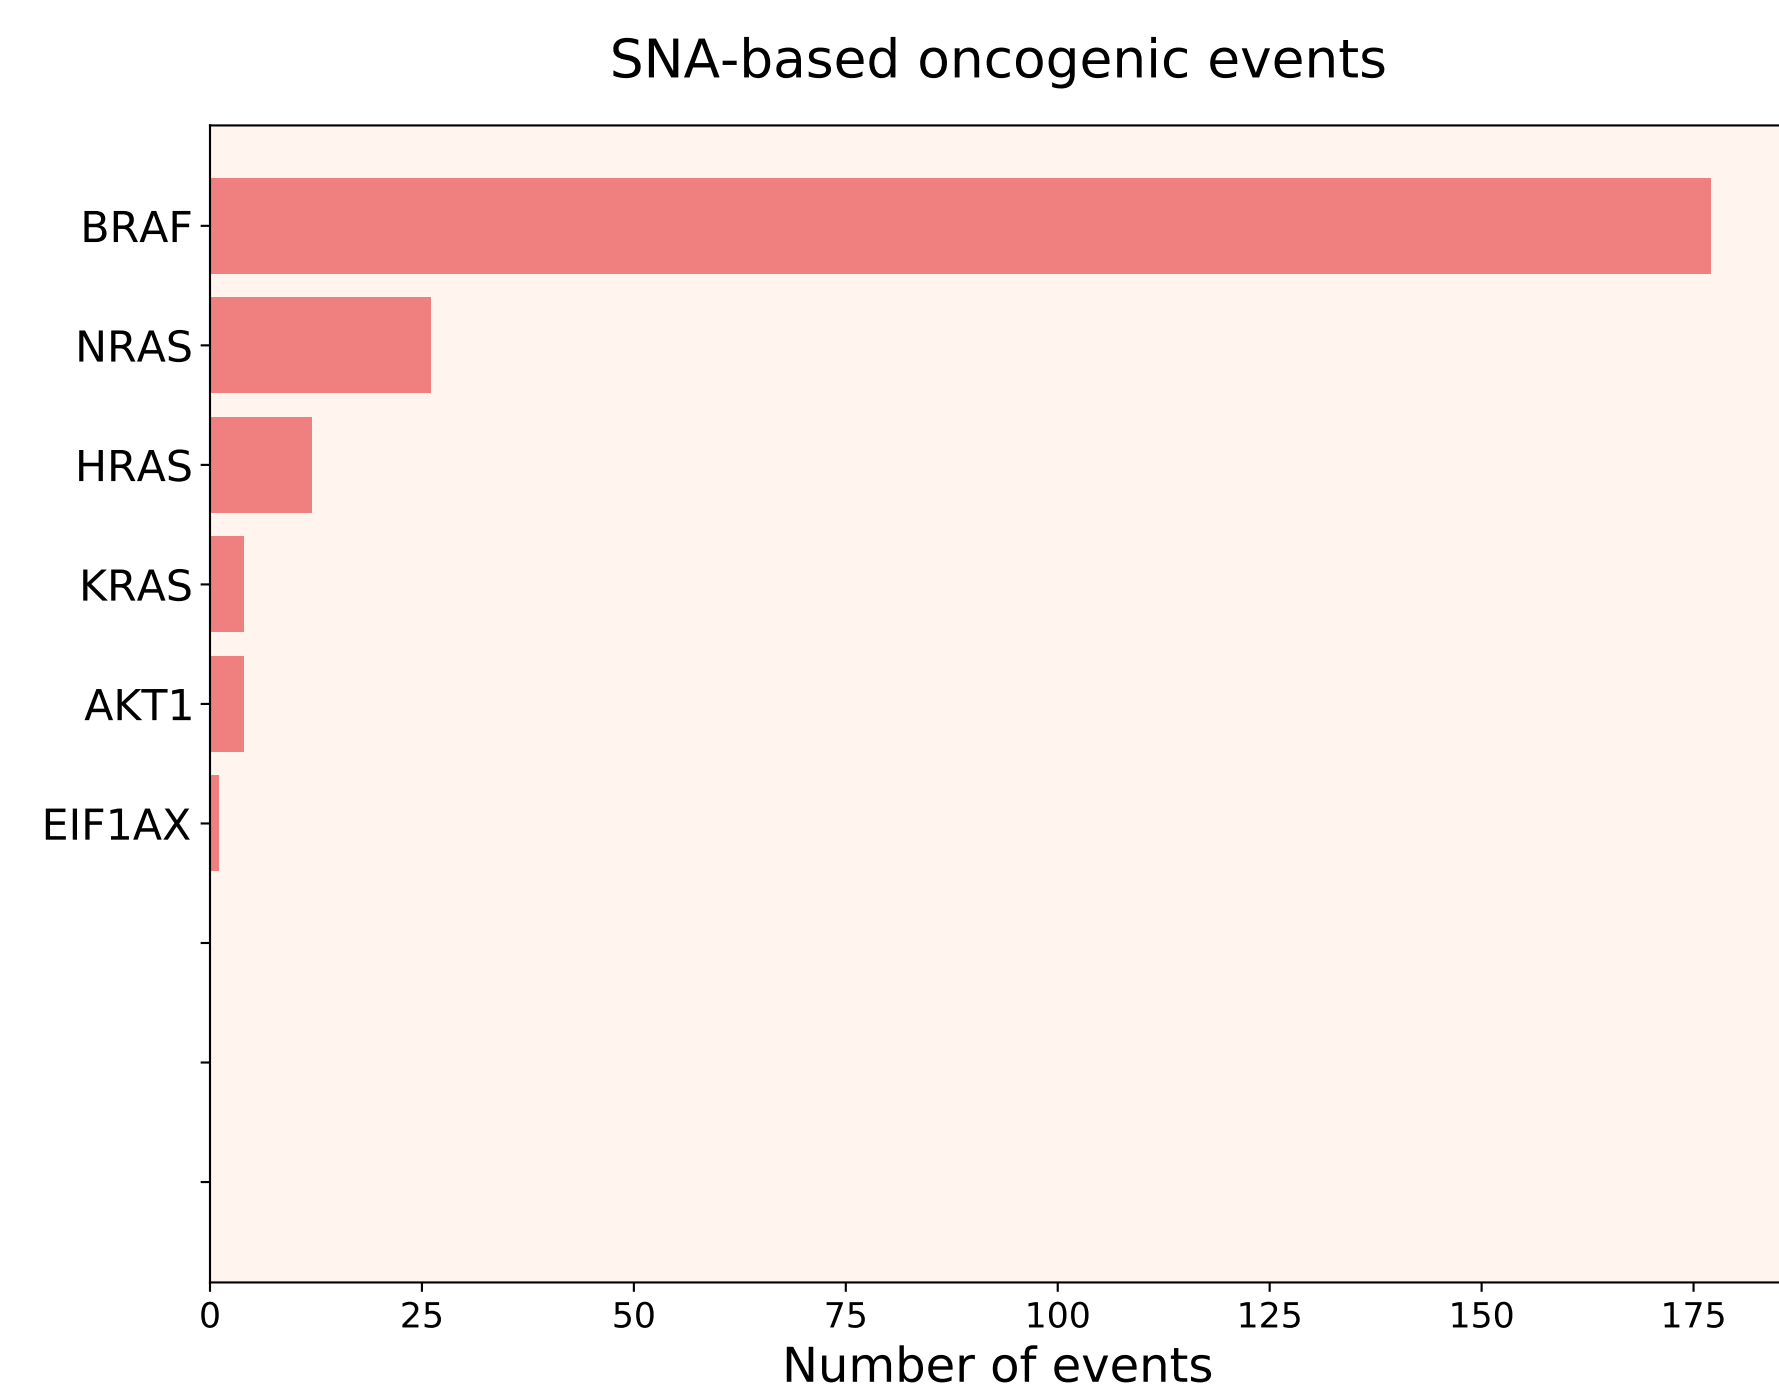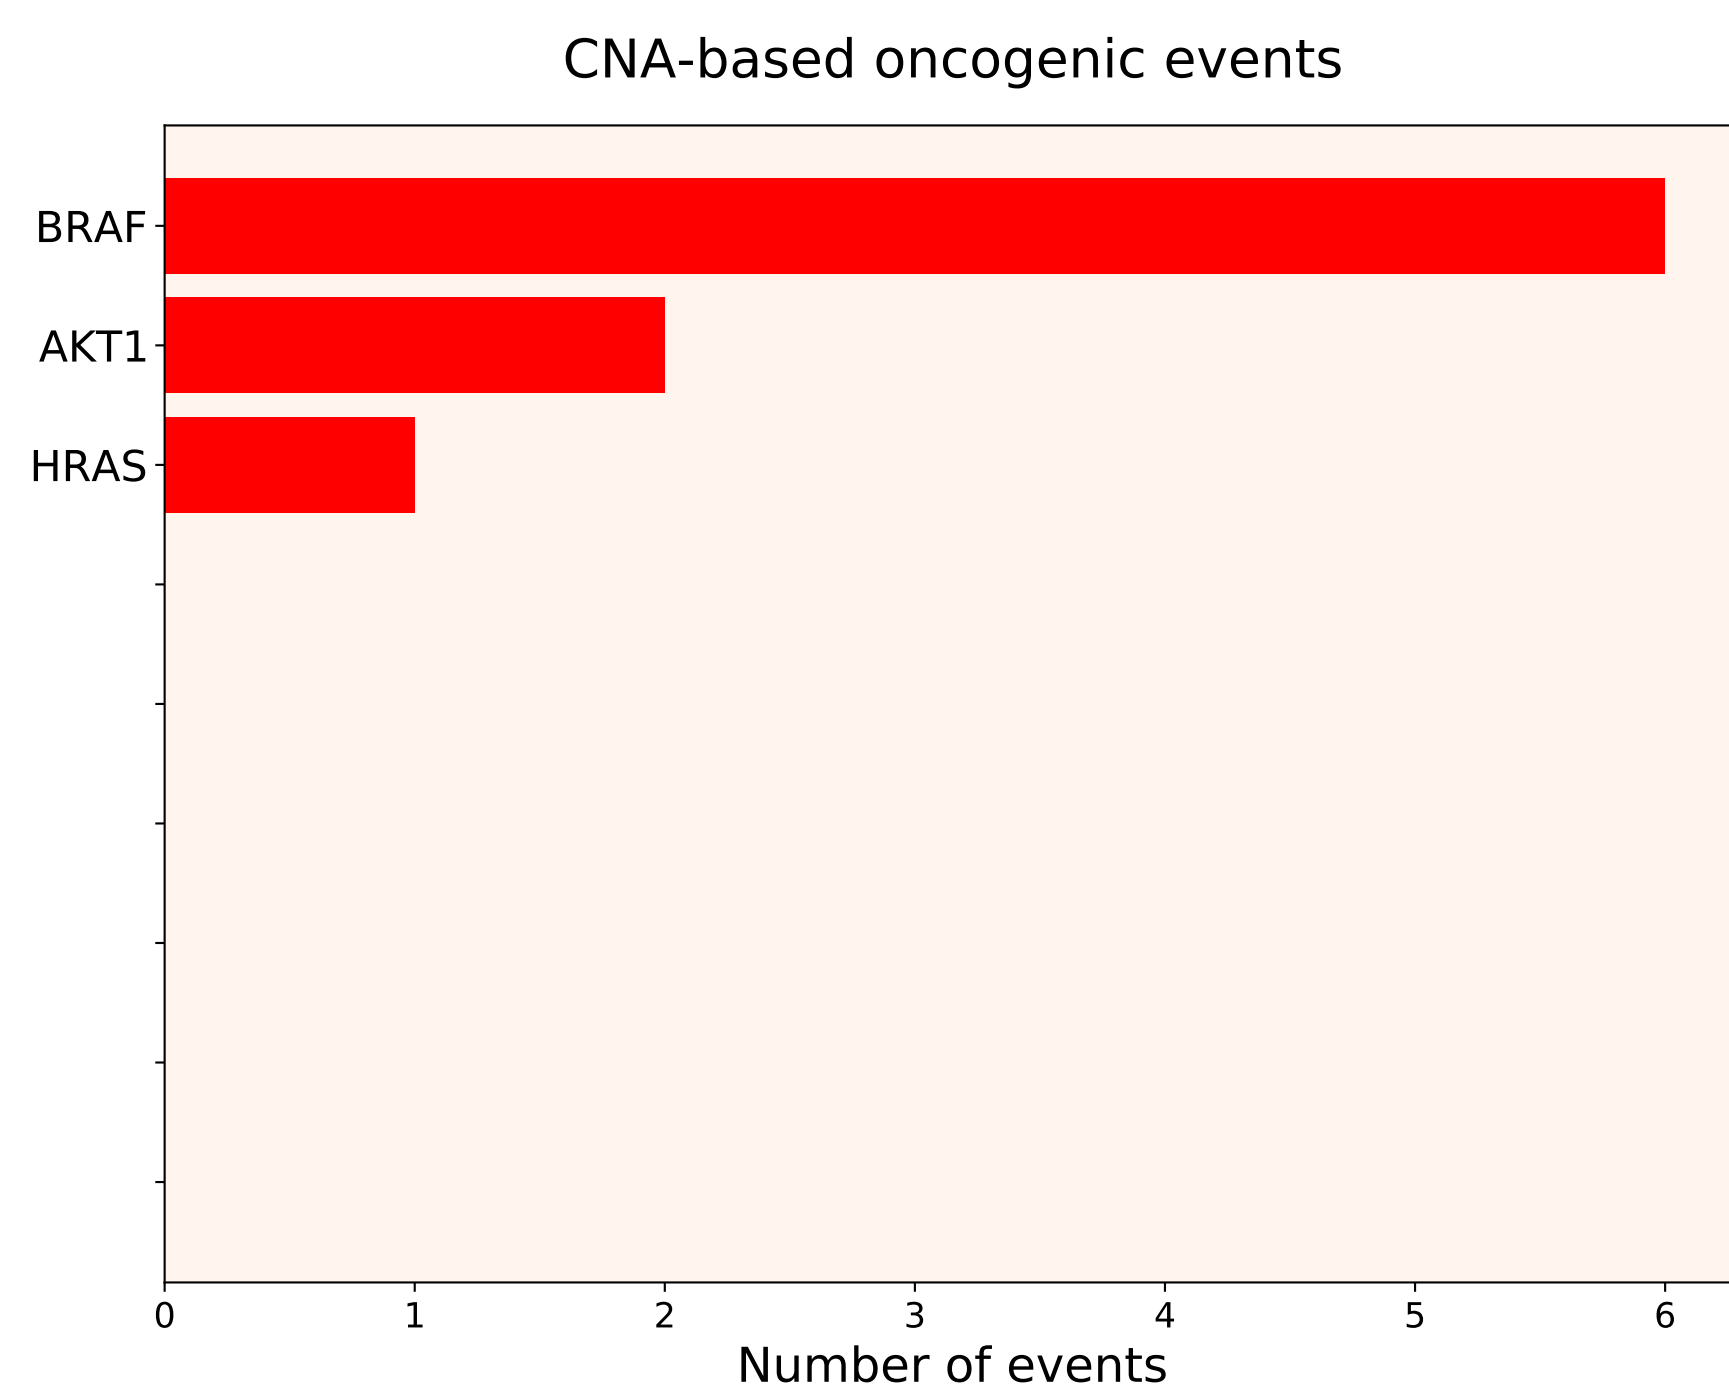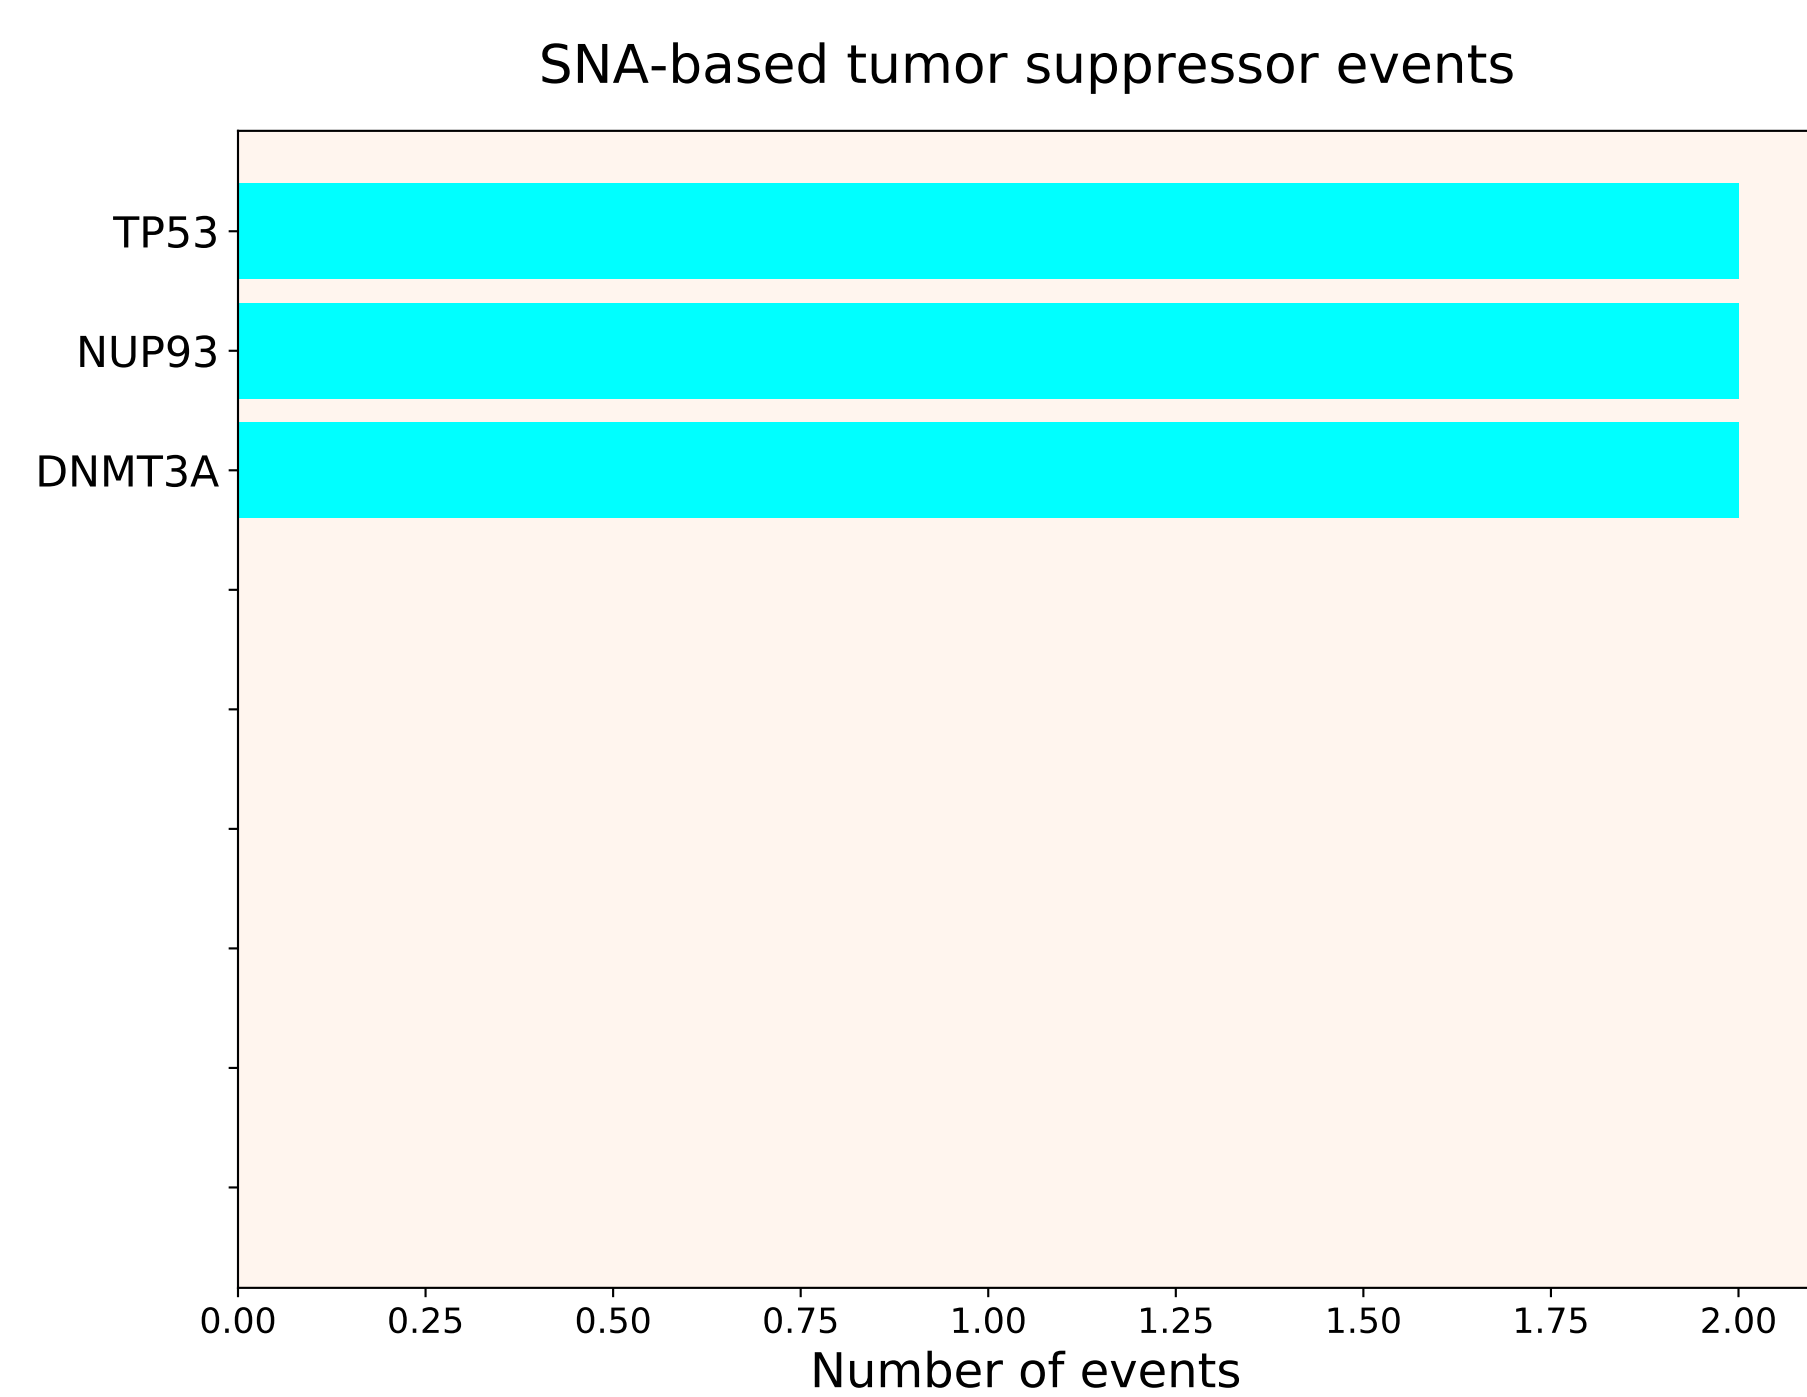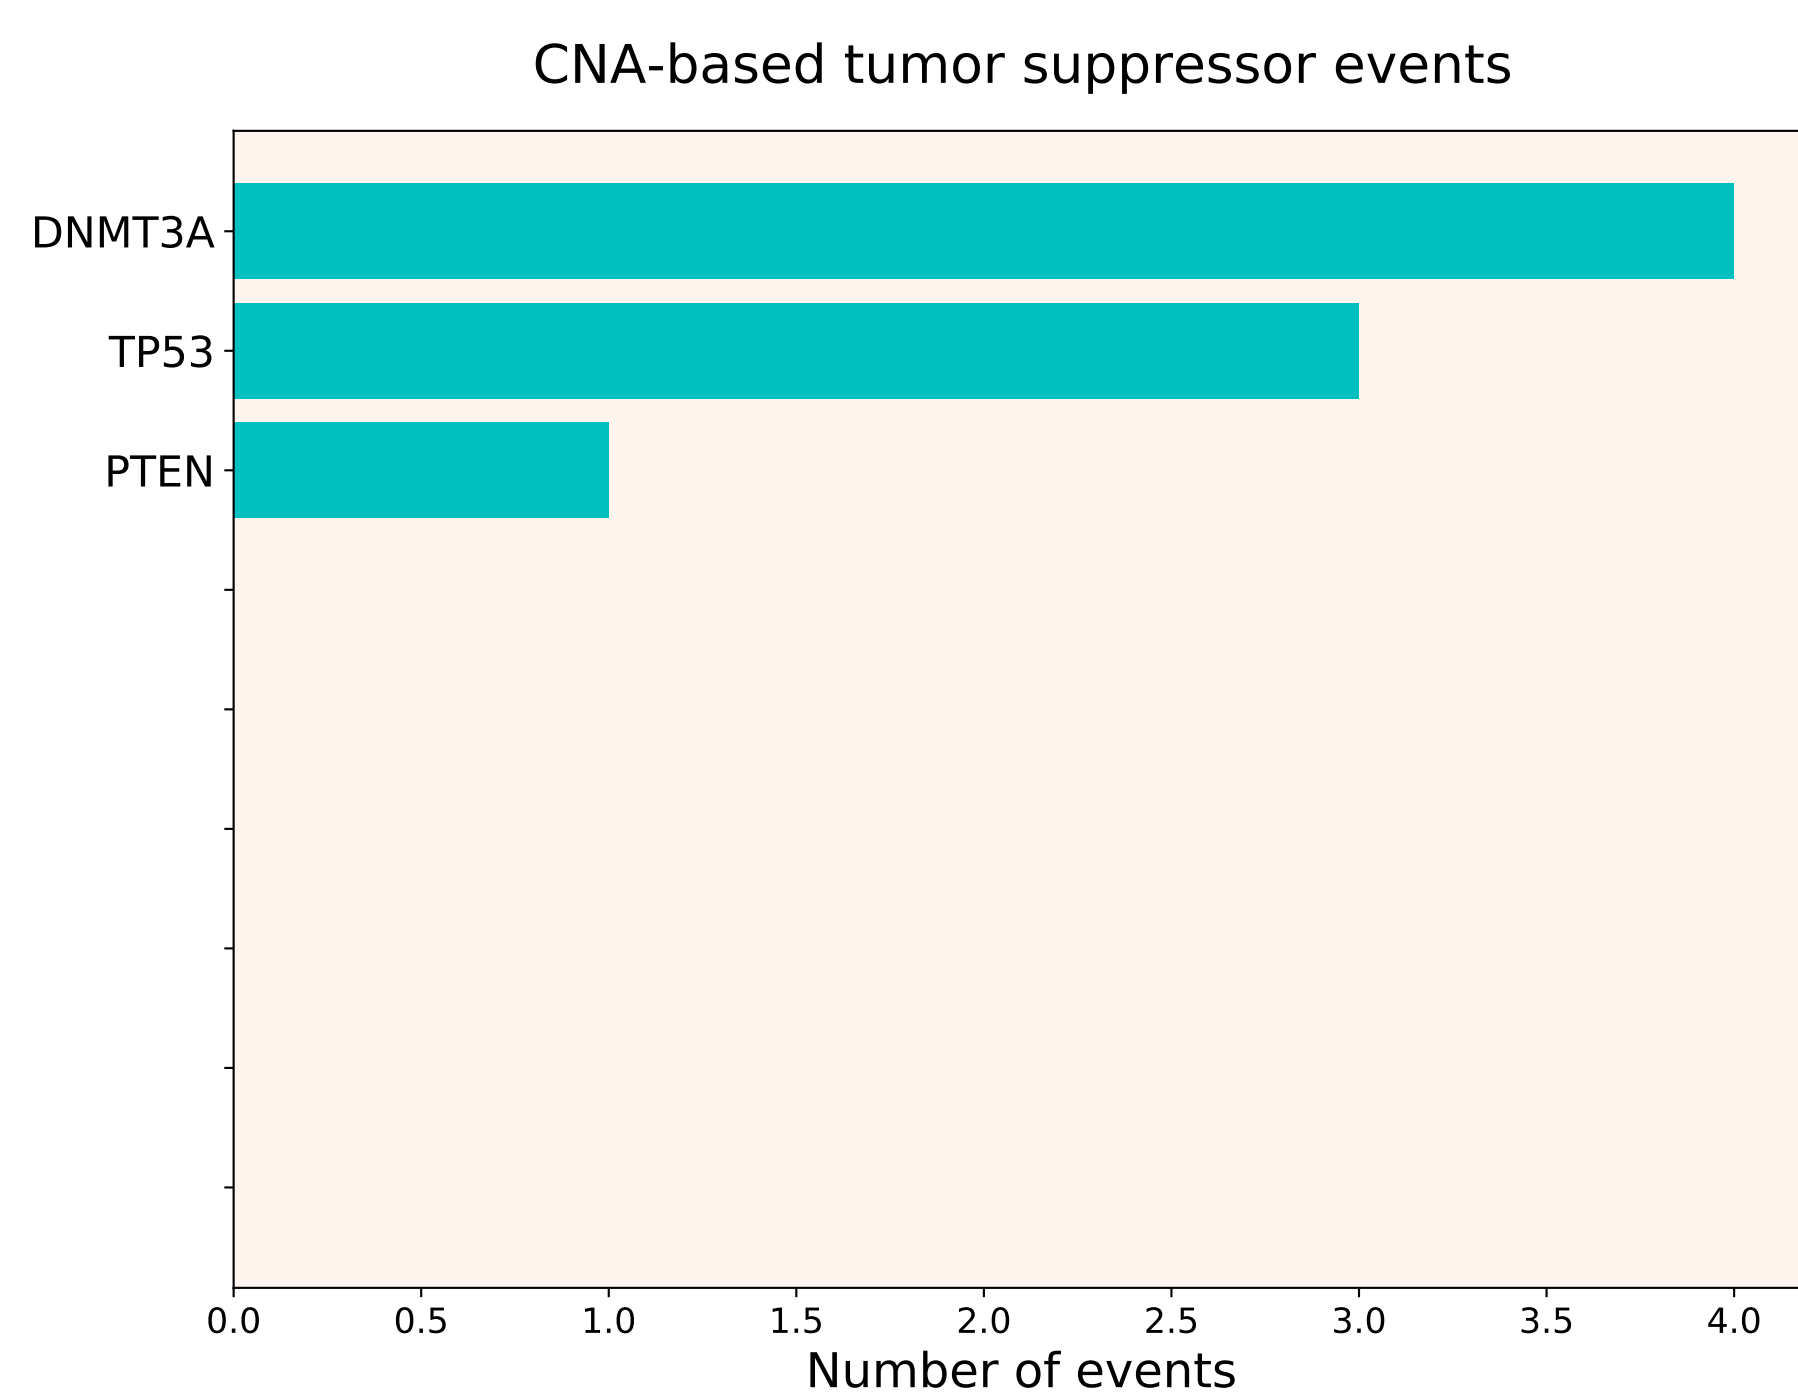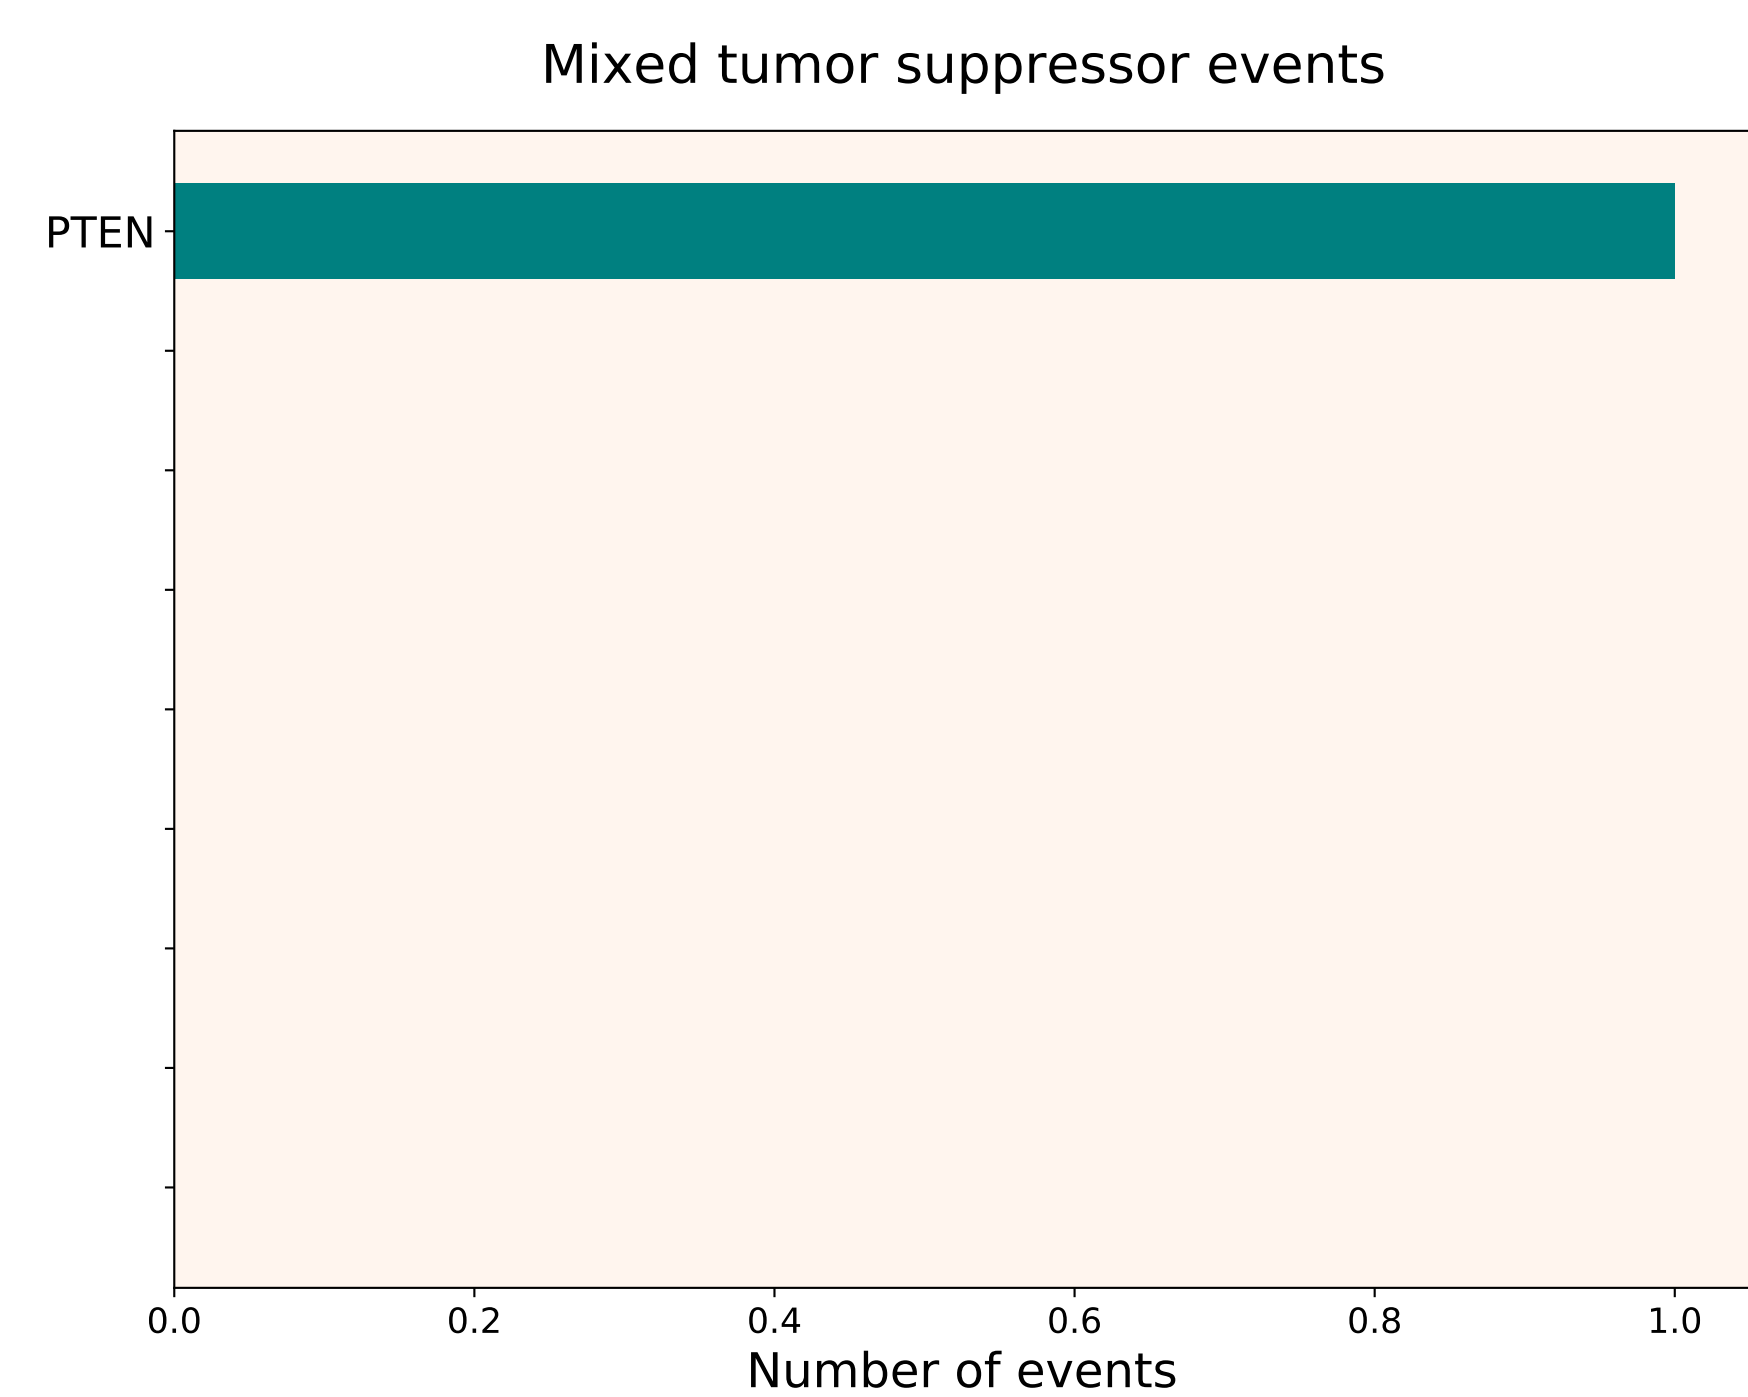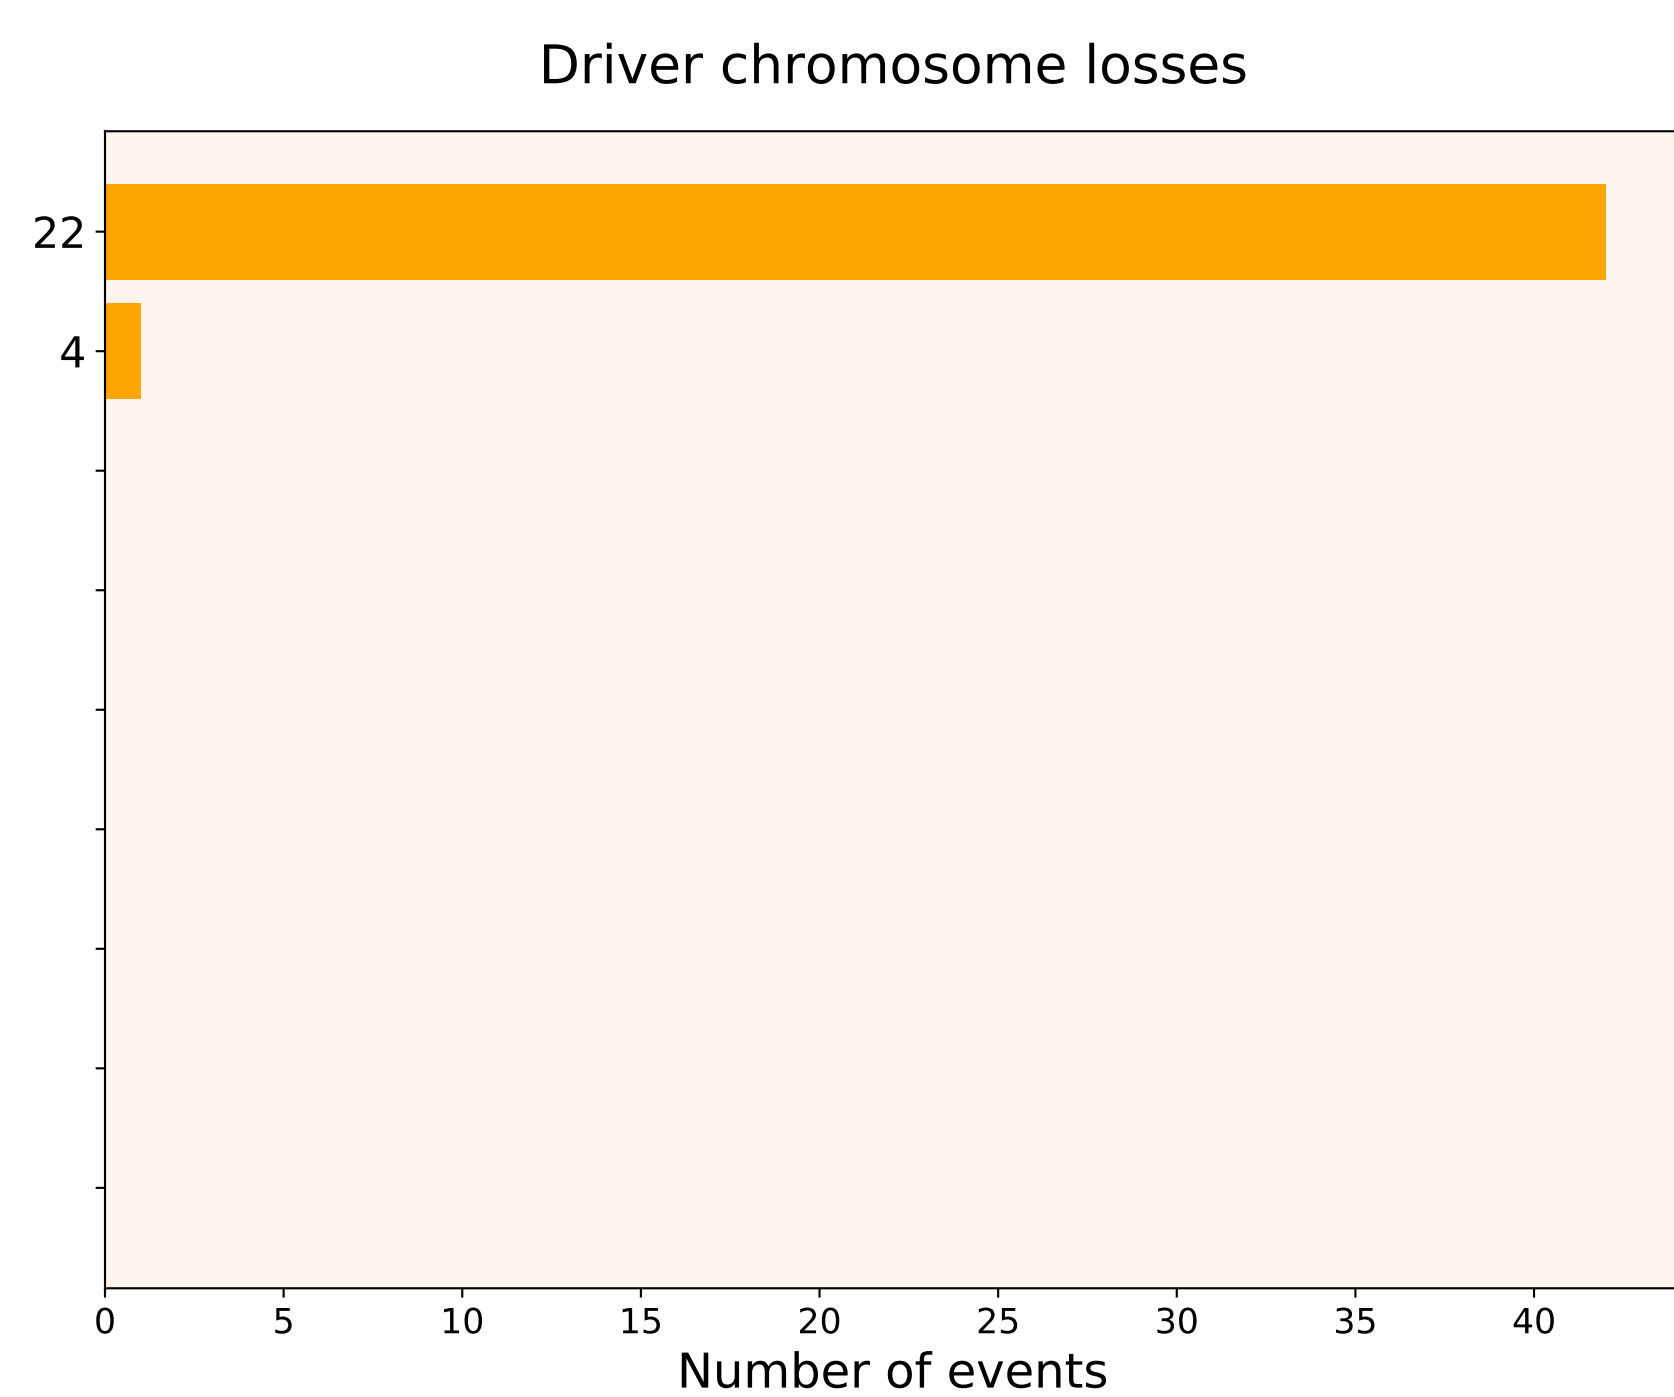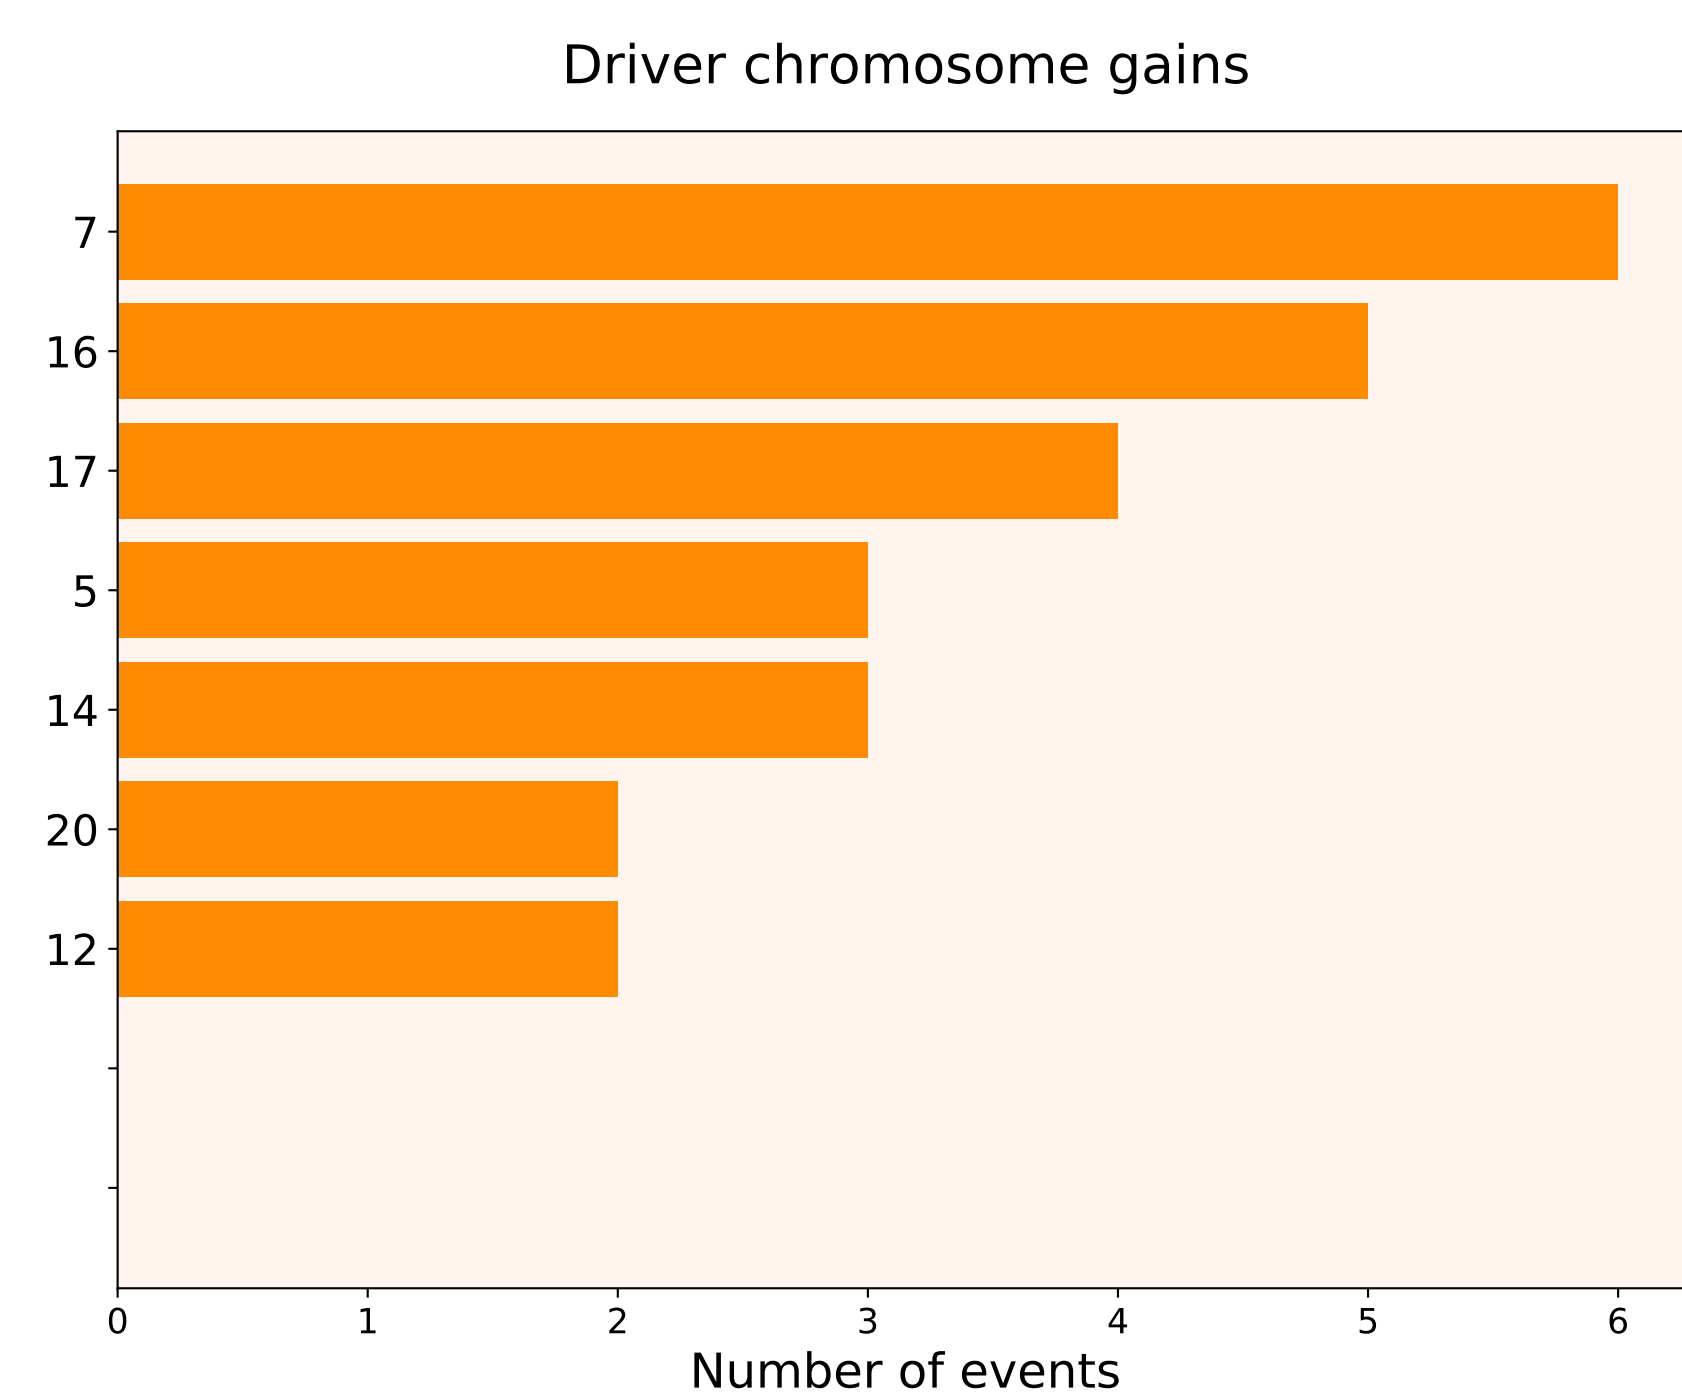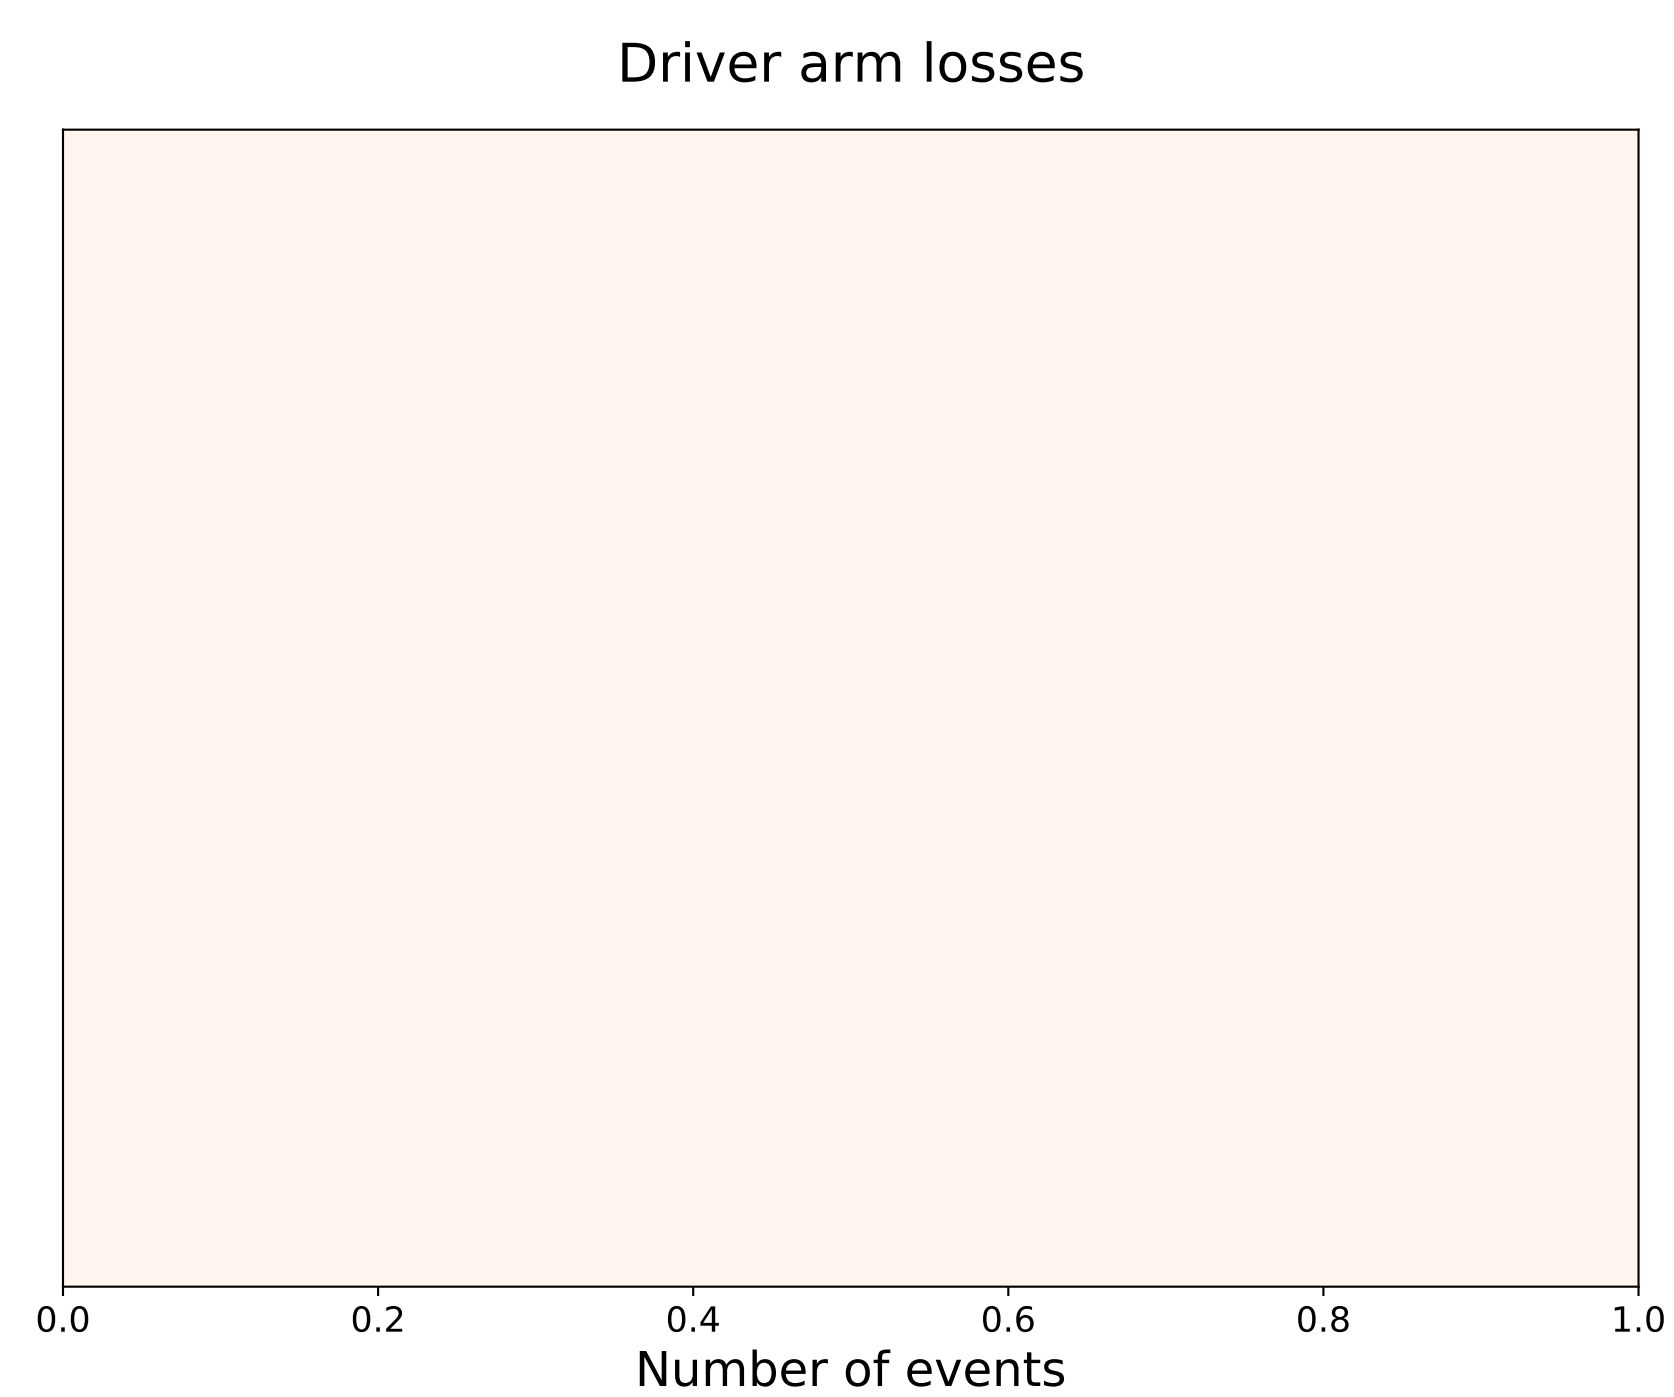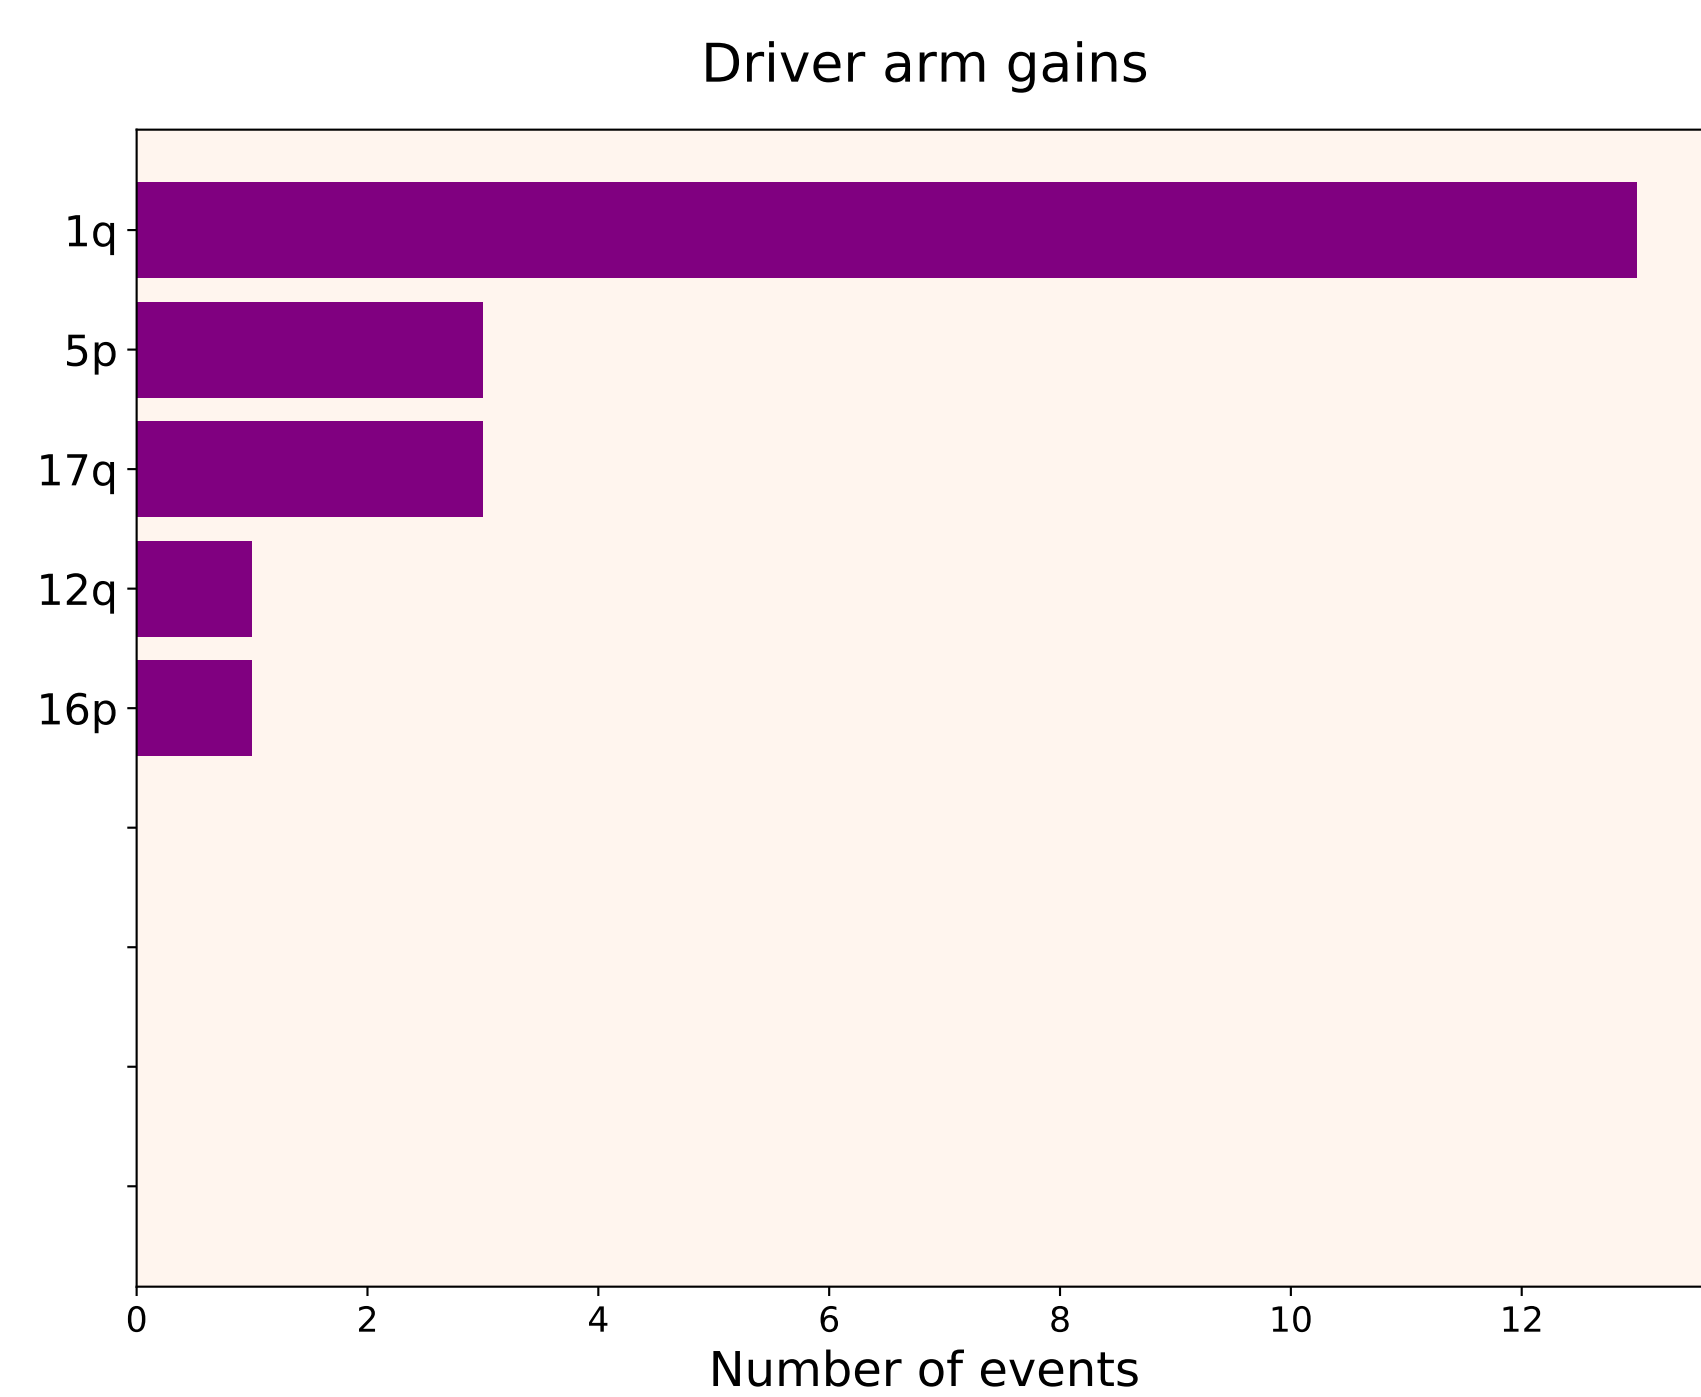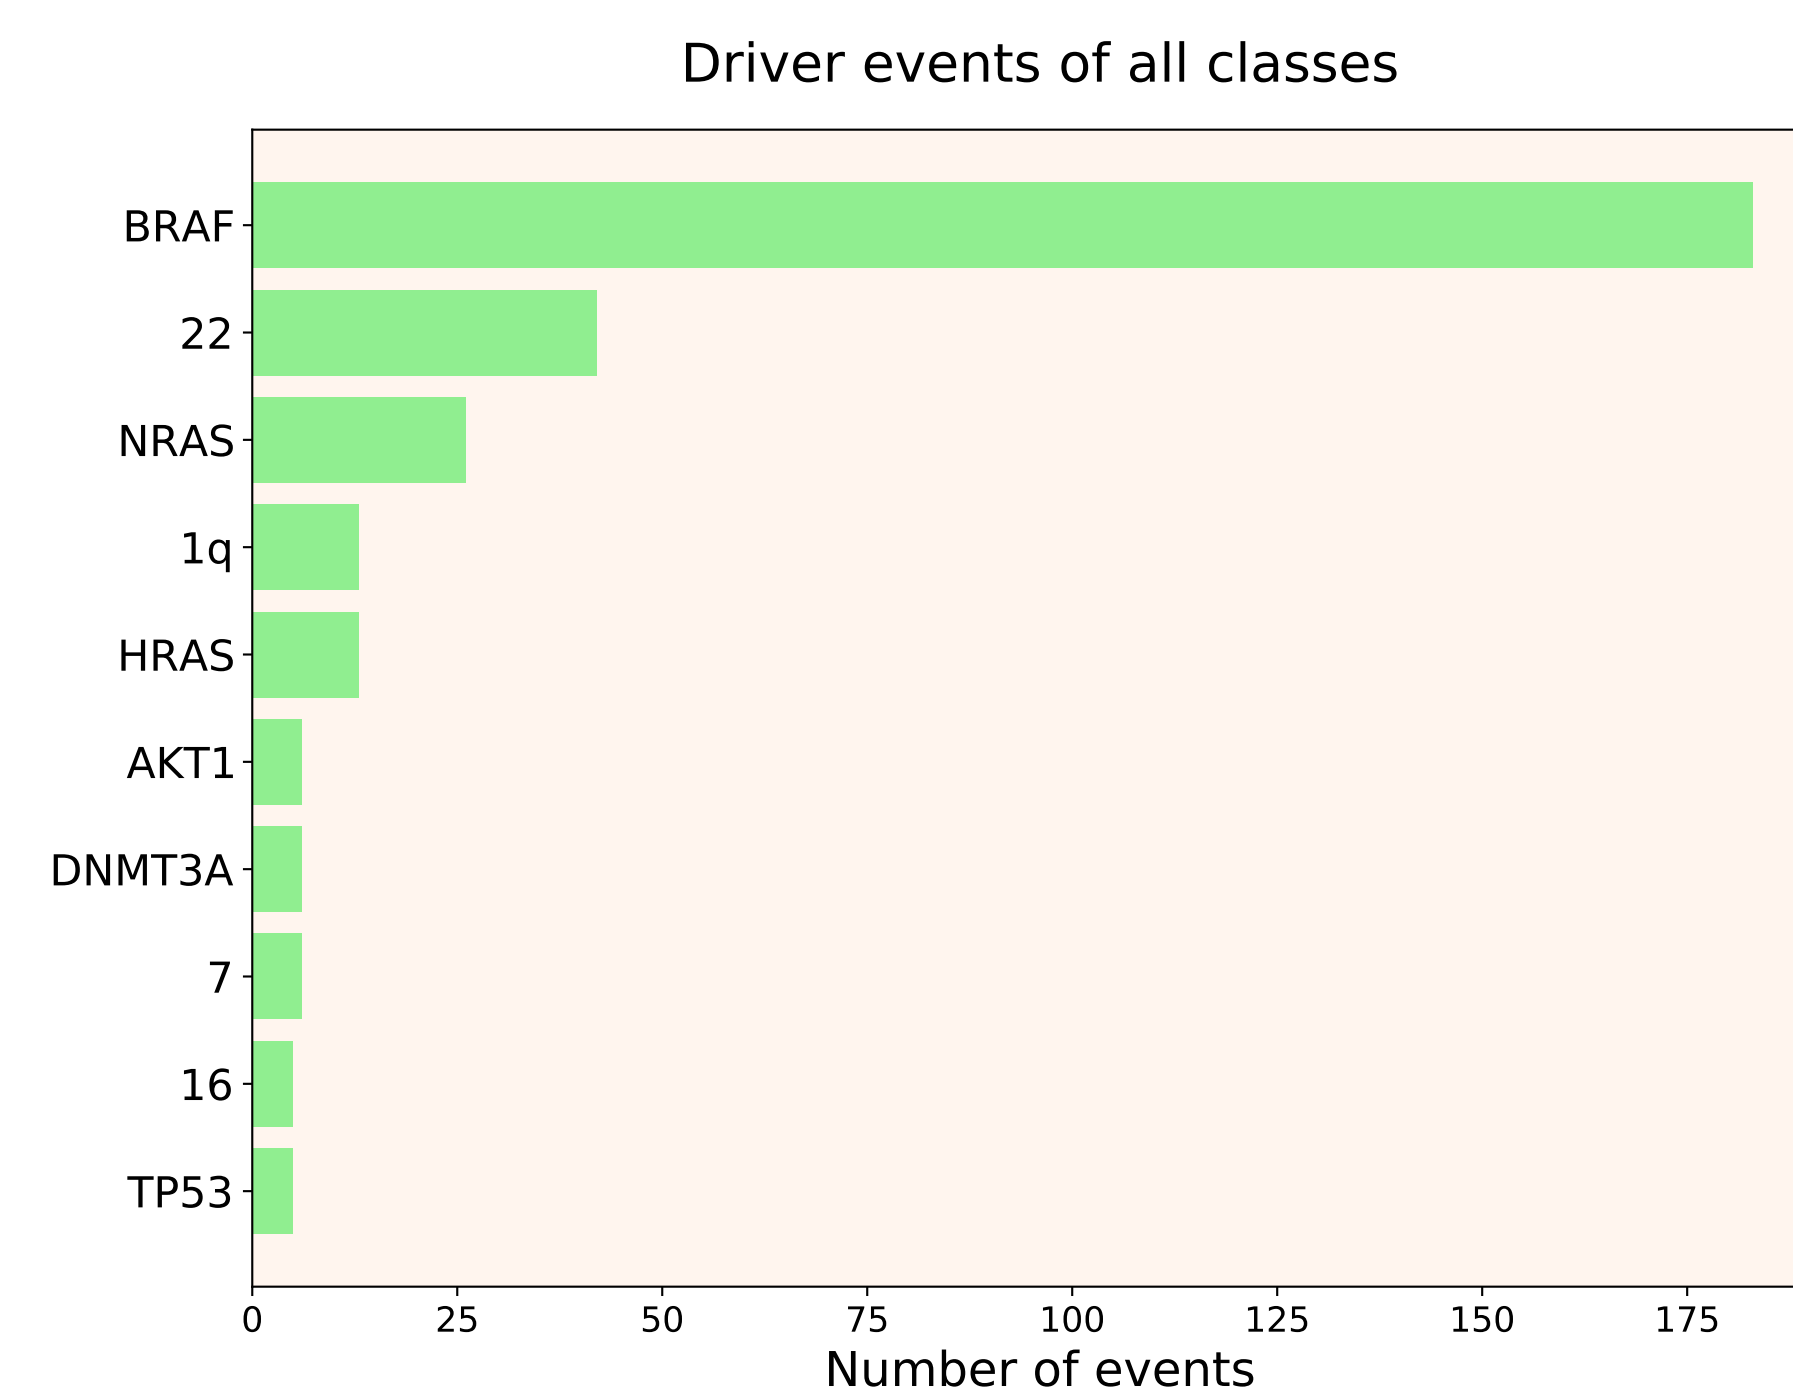

Supplement: Supplemental_Data_S1.zip [file Supplemental_Data_S1.zip]
