# Supplementary figures and images for: Novel Driver Strength Index highlights important cancer genes in TCGA PanCanAtlas patients (part 2 of 4)
Source: PeerJ journal article supplement (doi:10.7717/peerj.13860), 2022-08-11

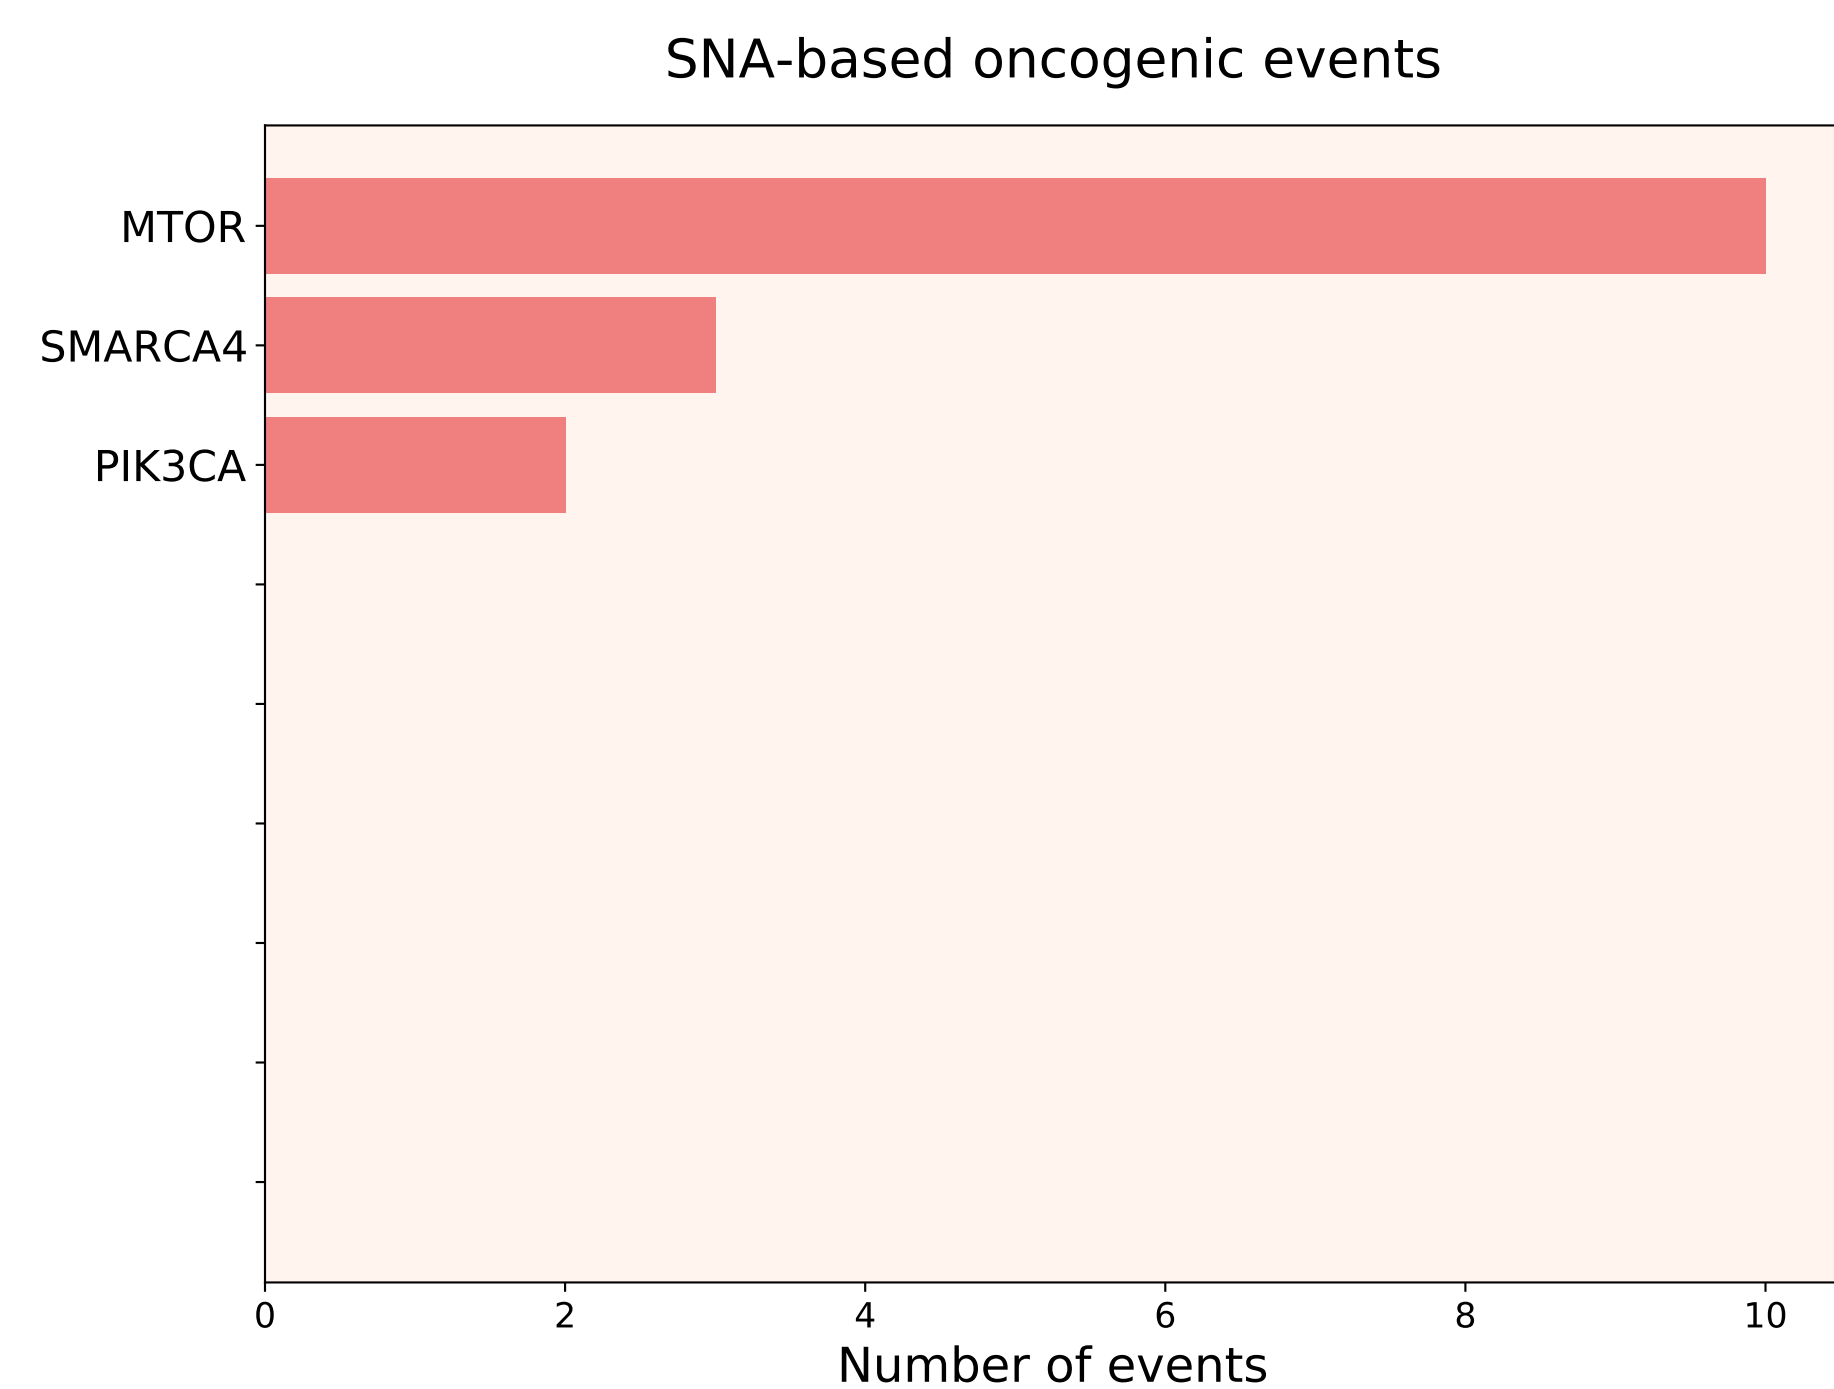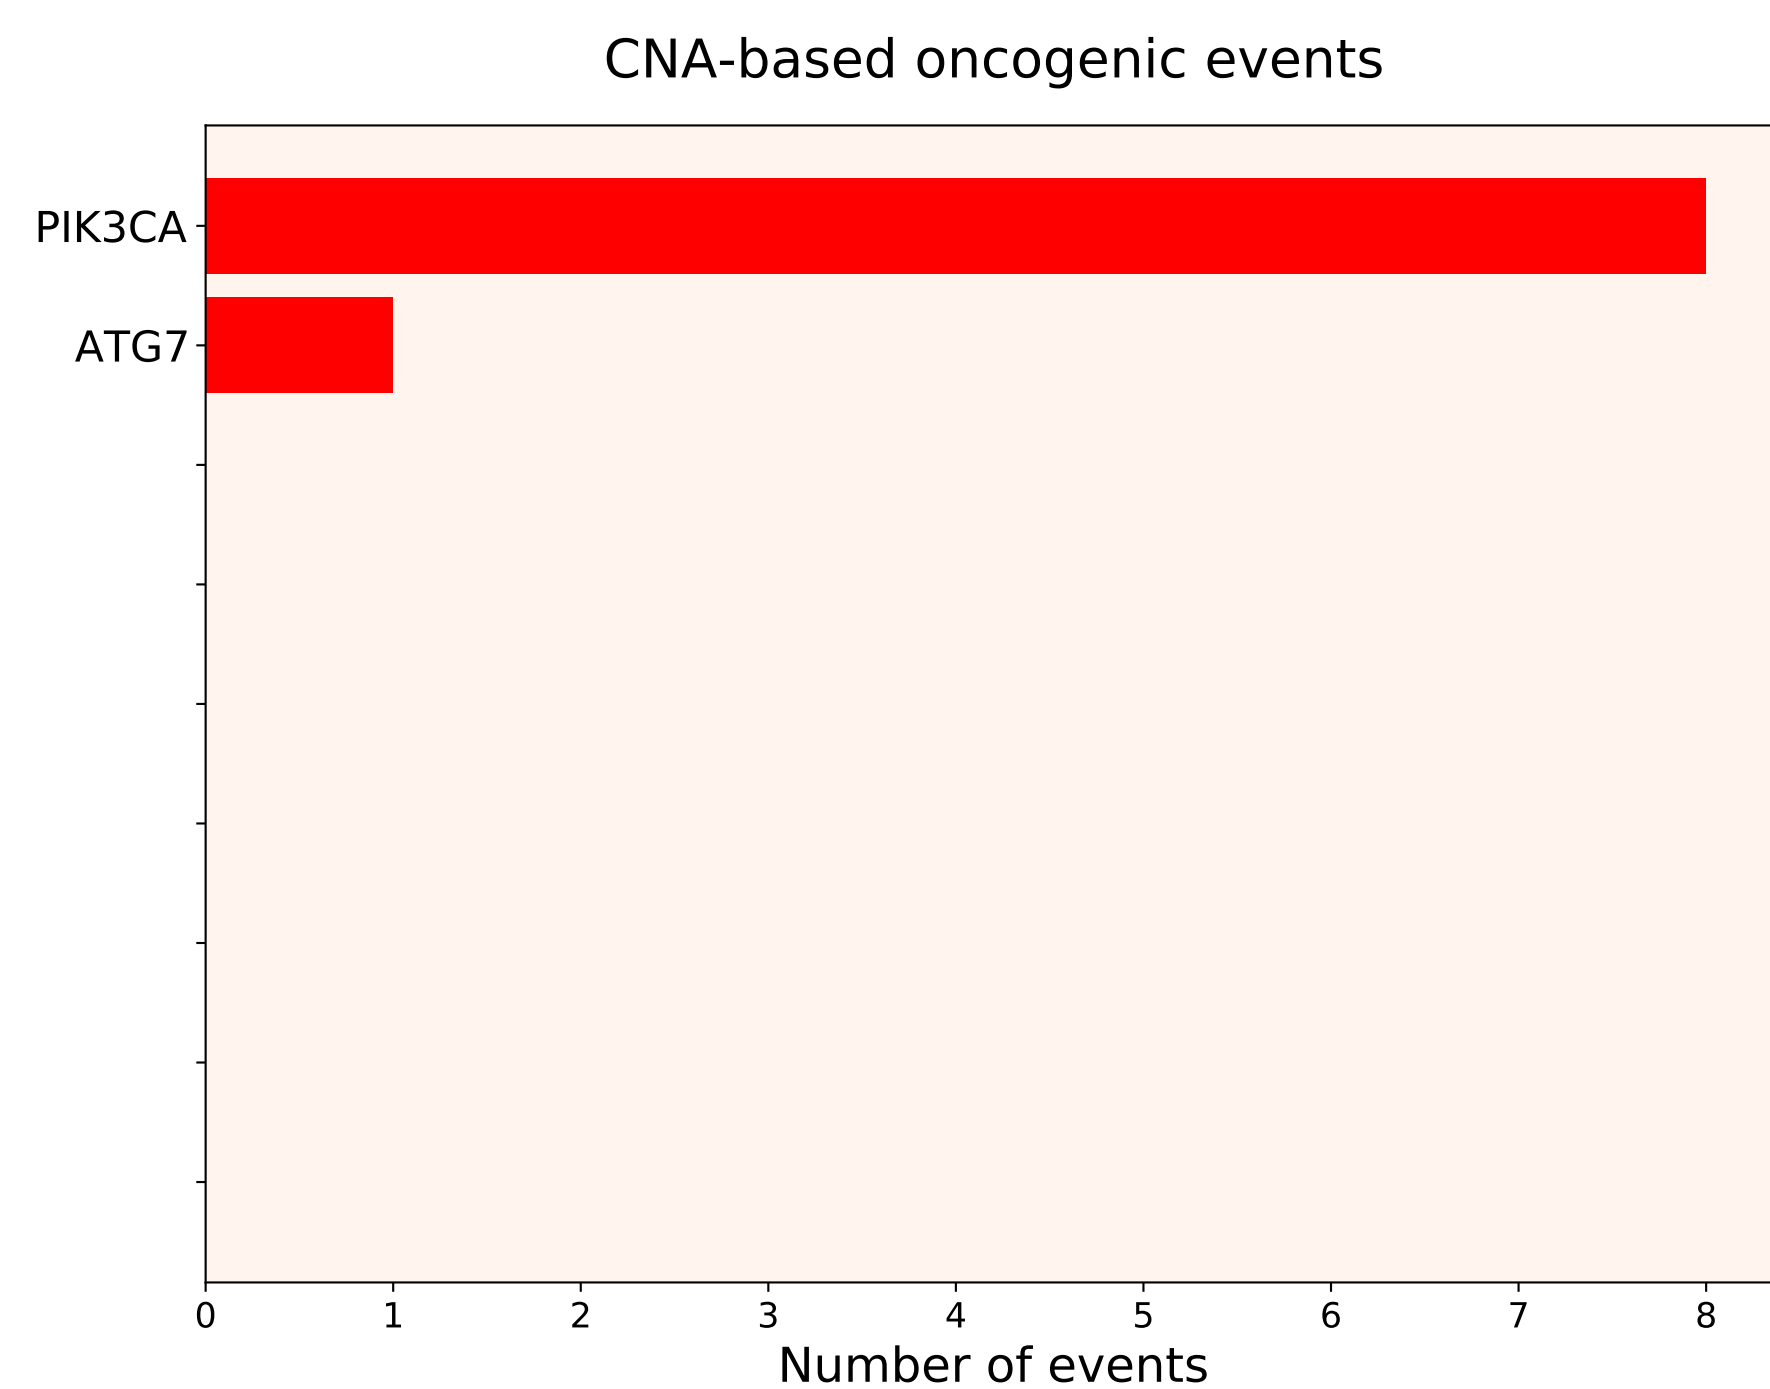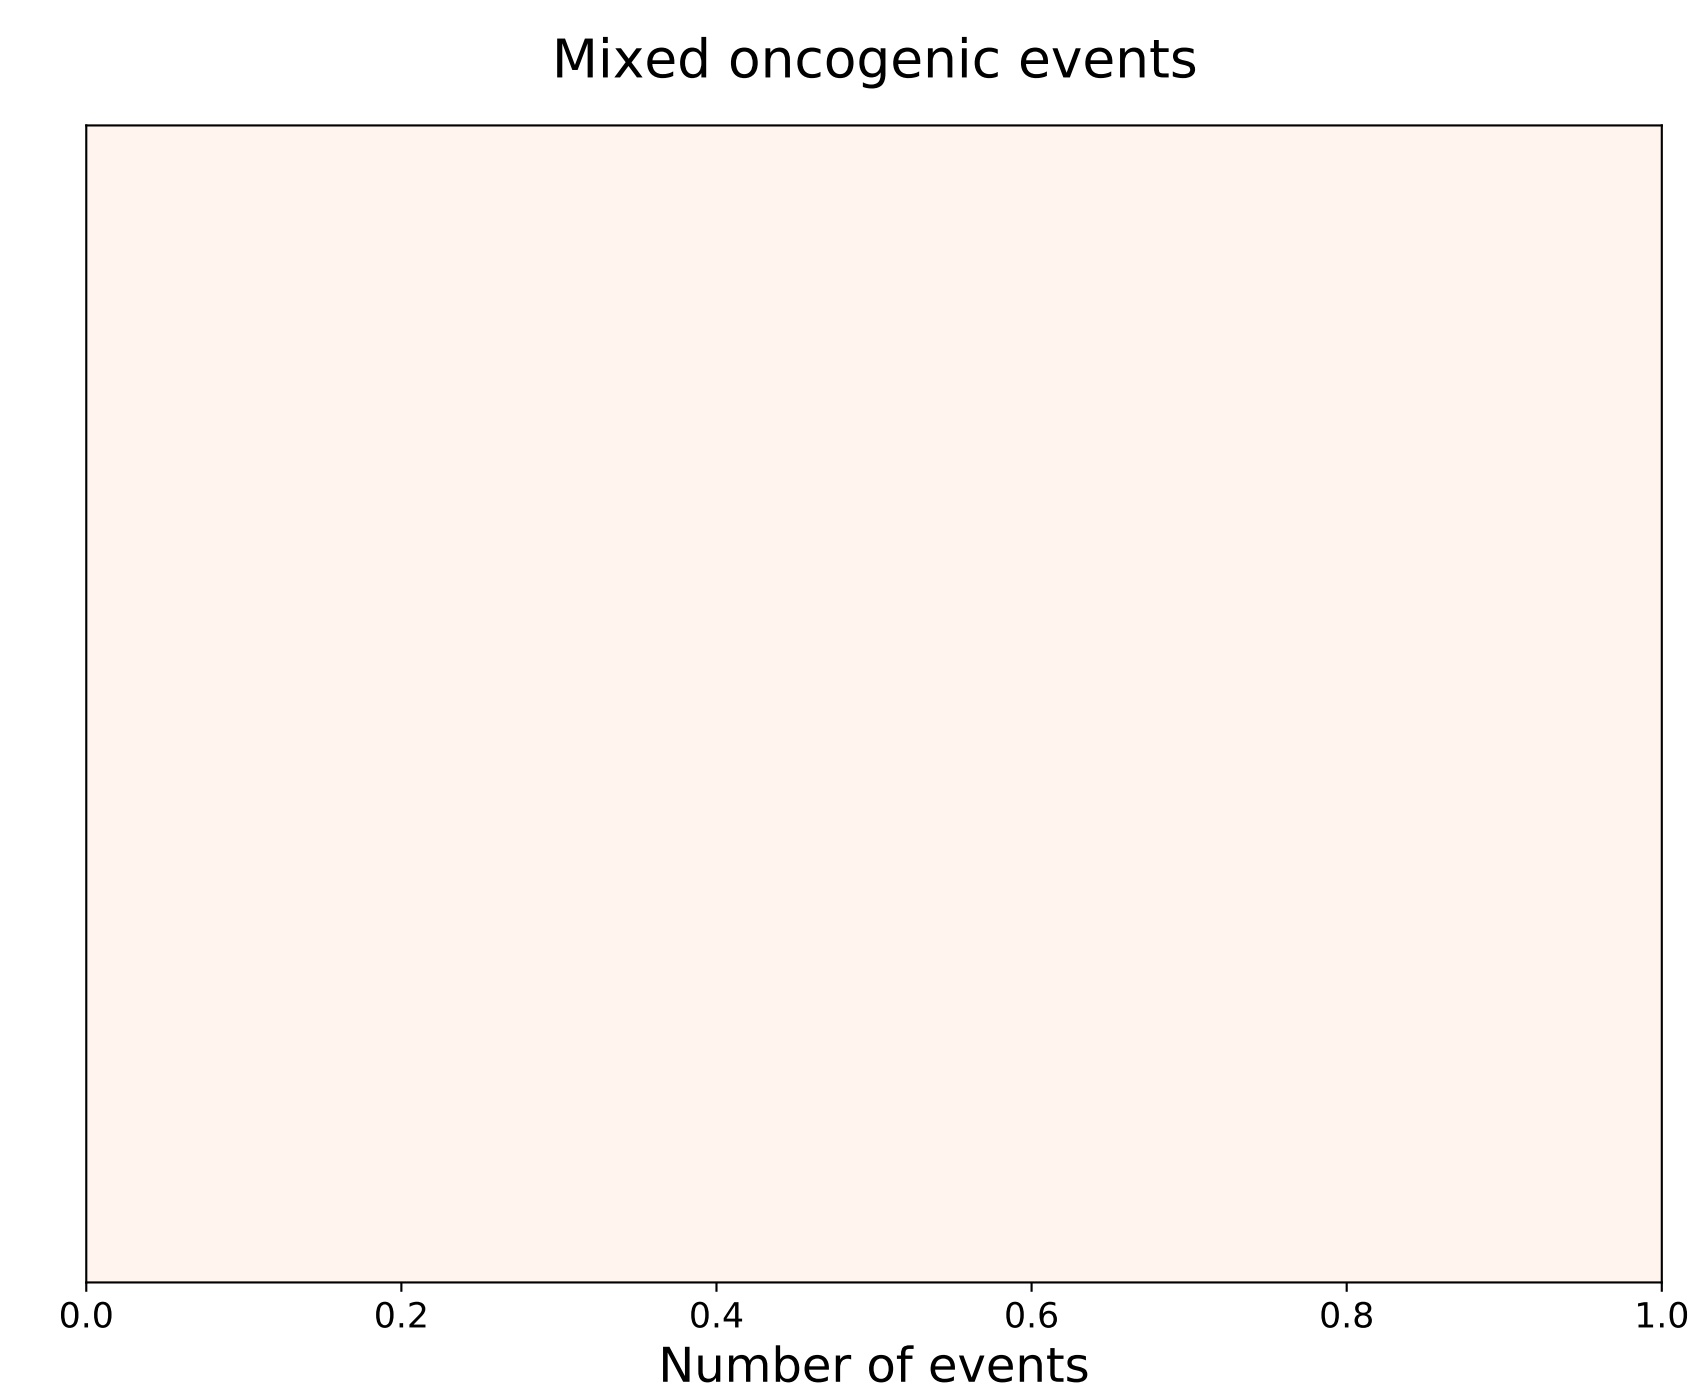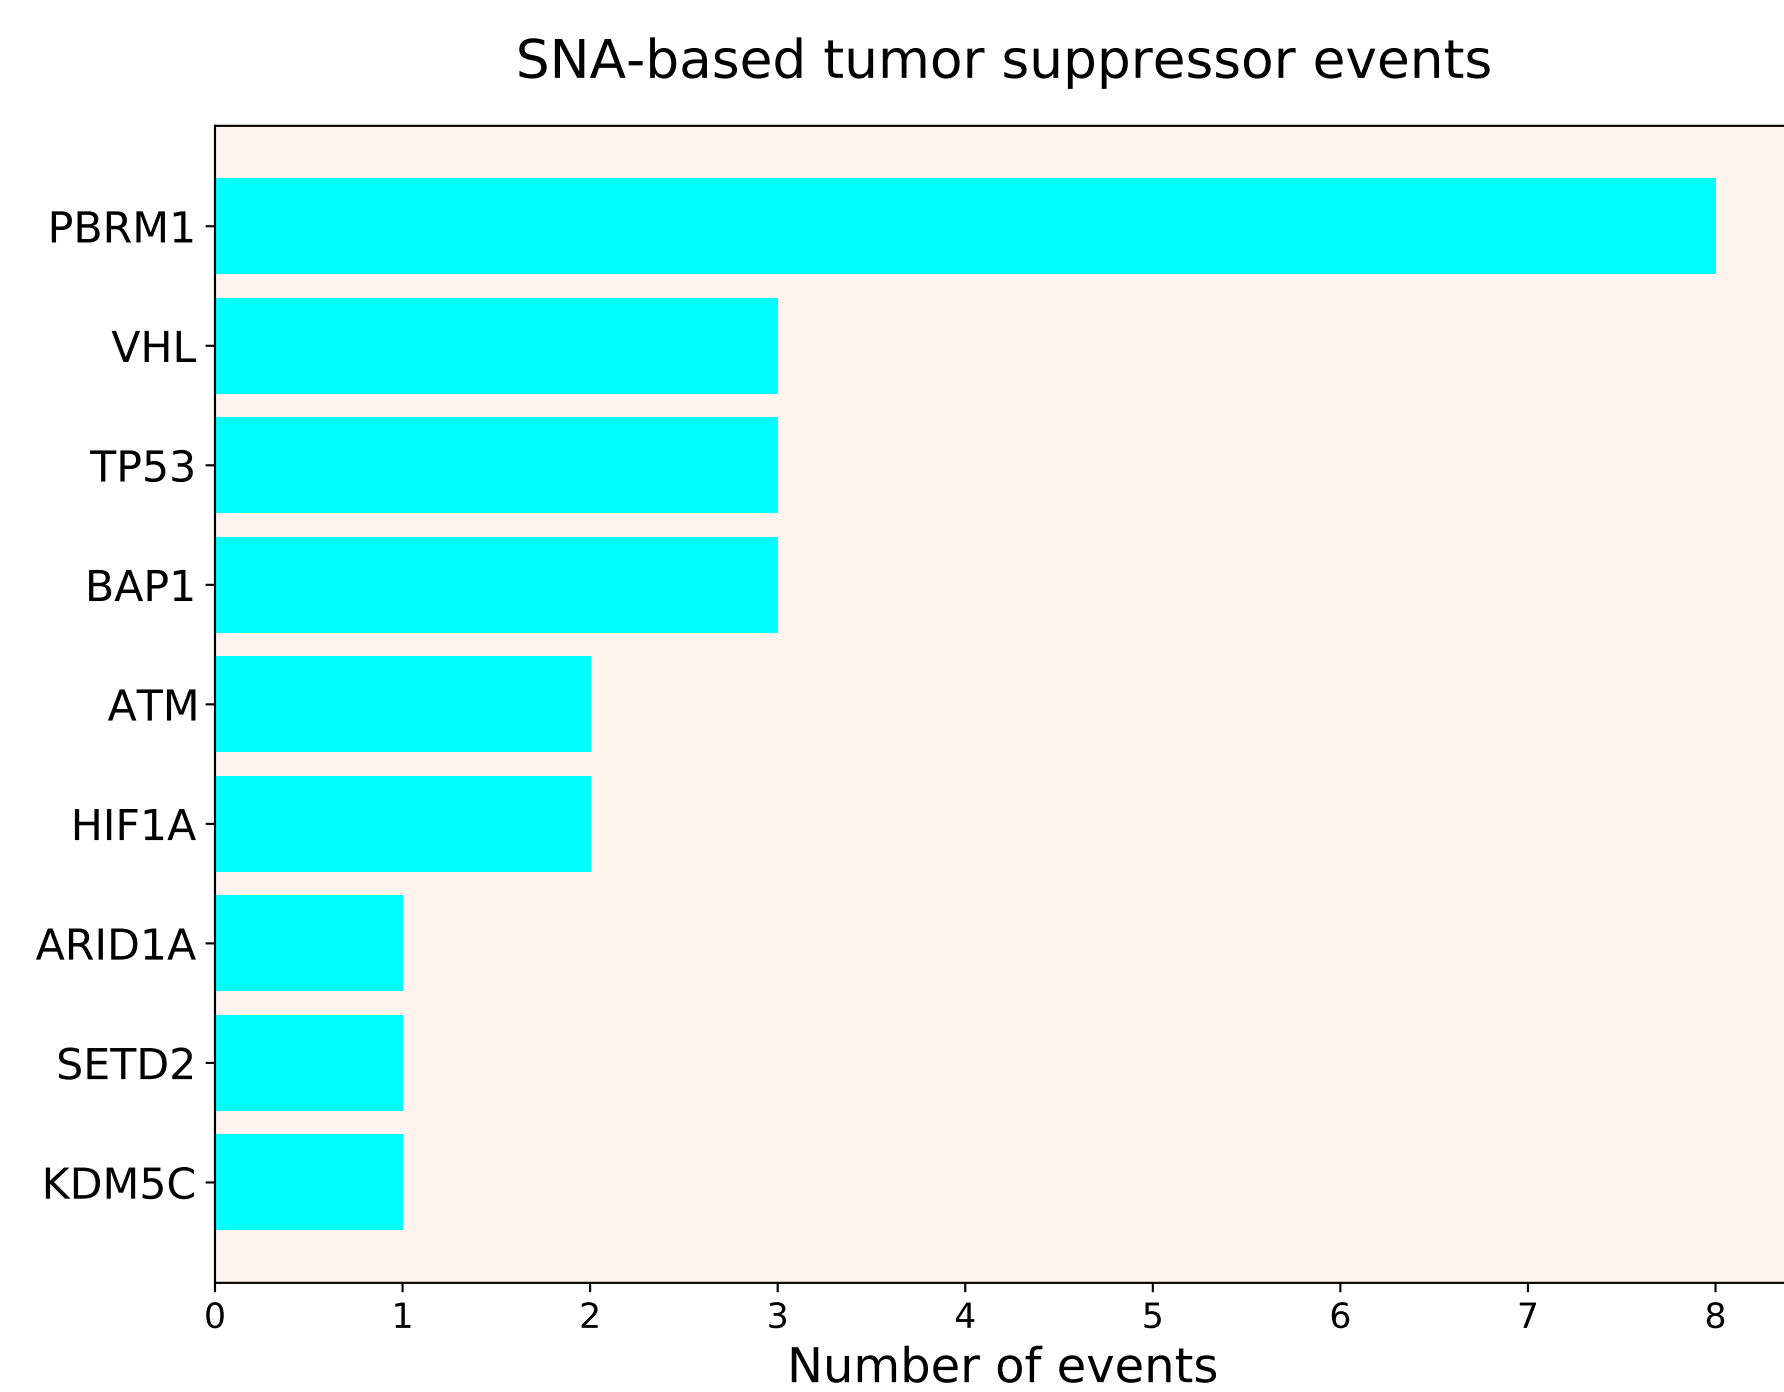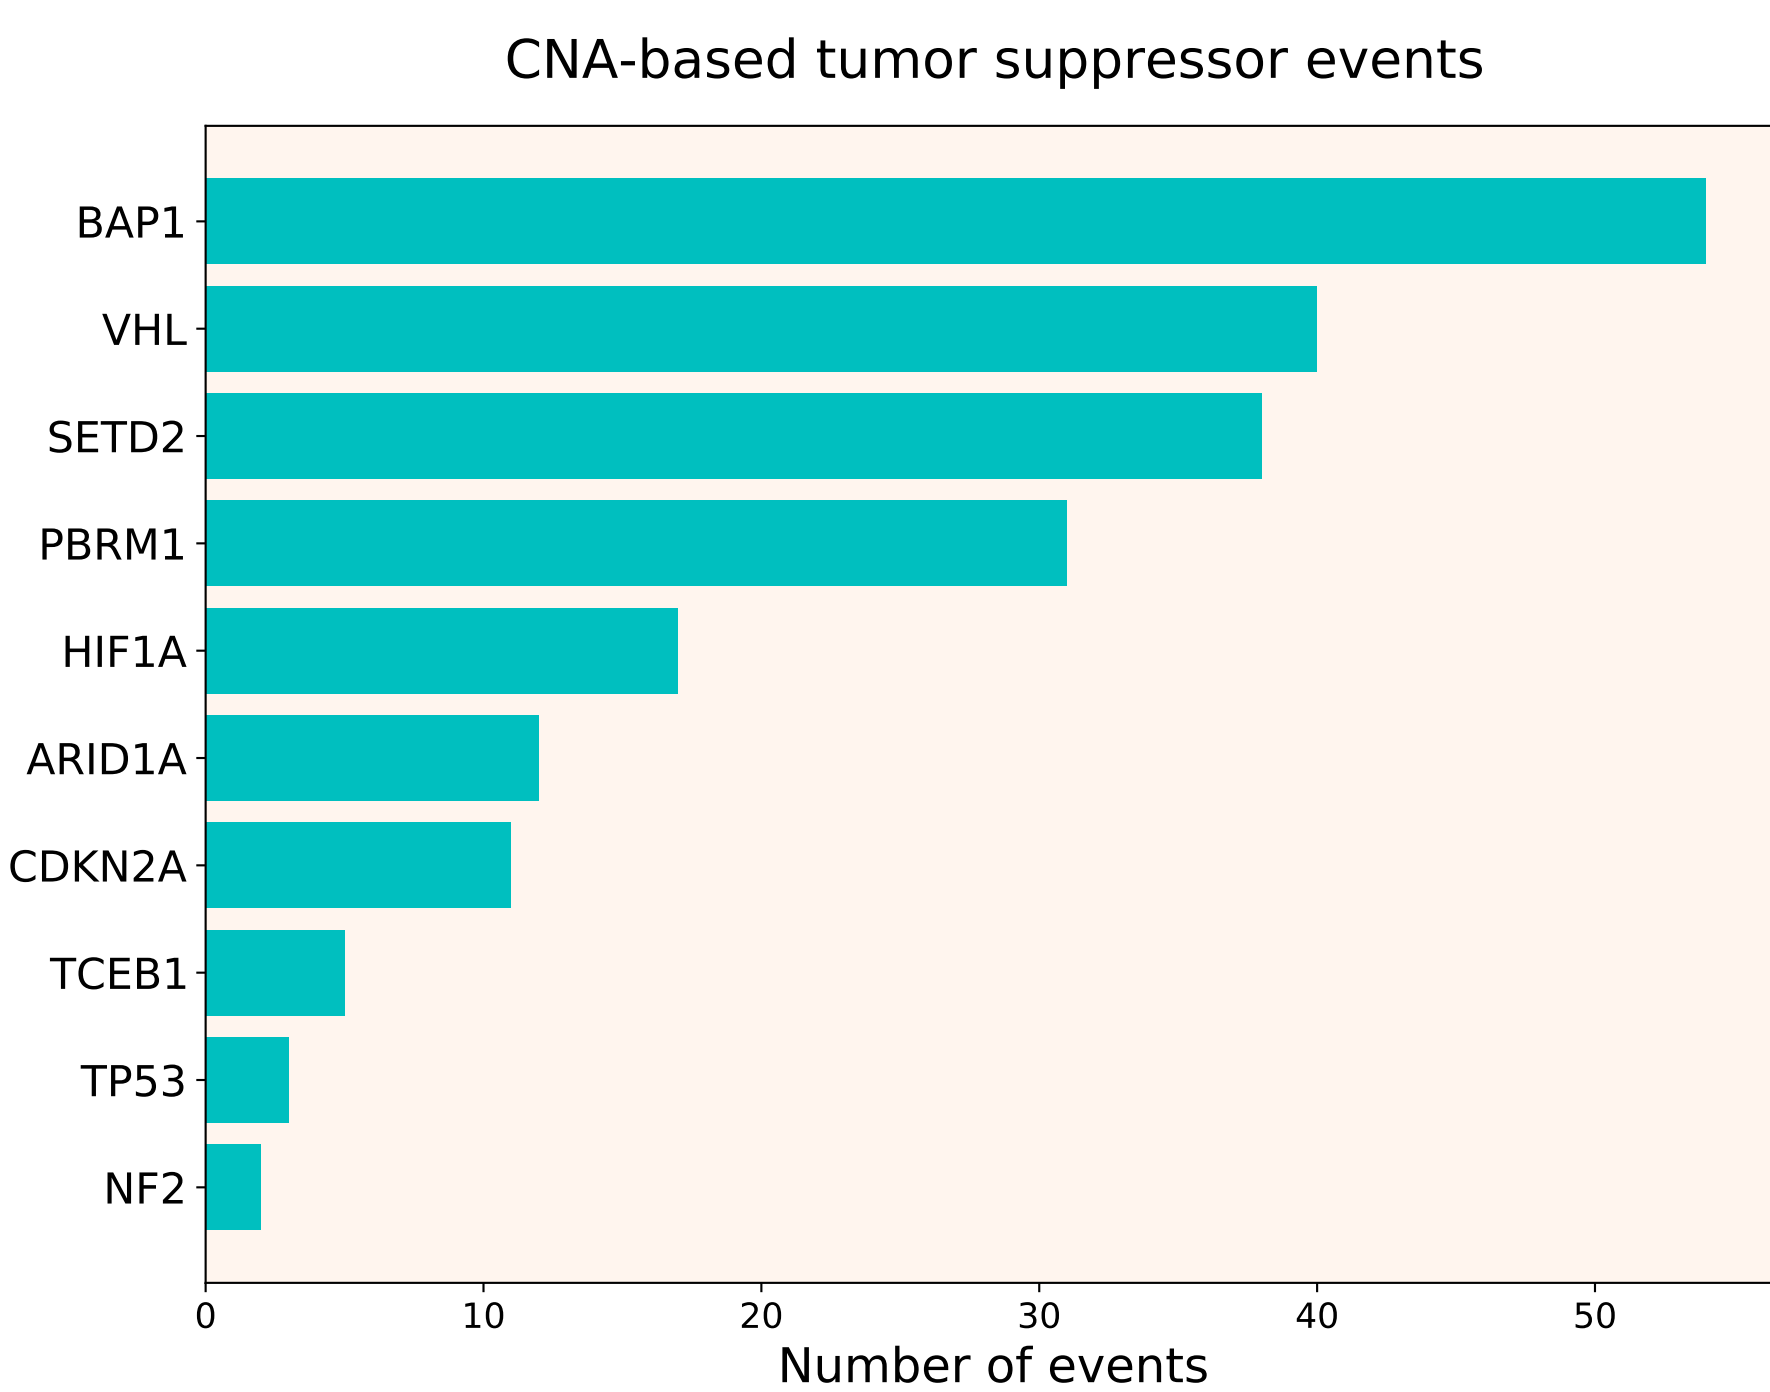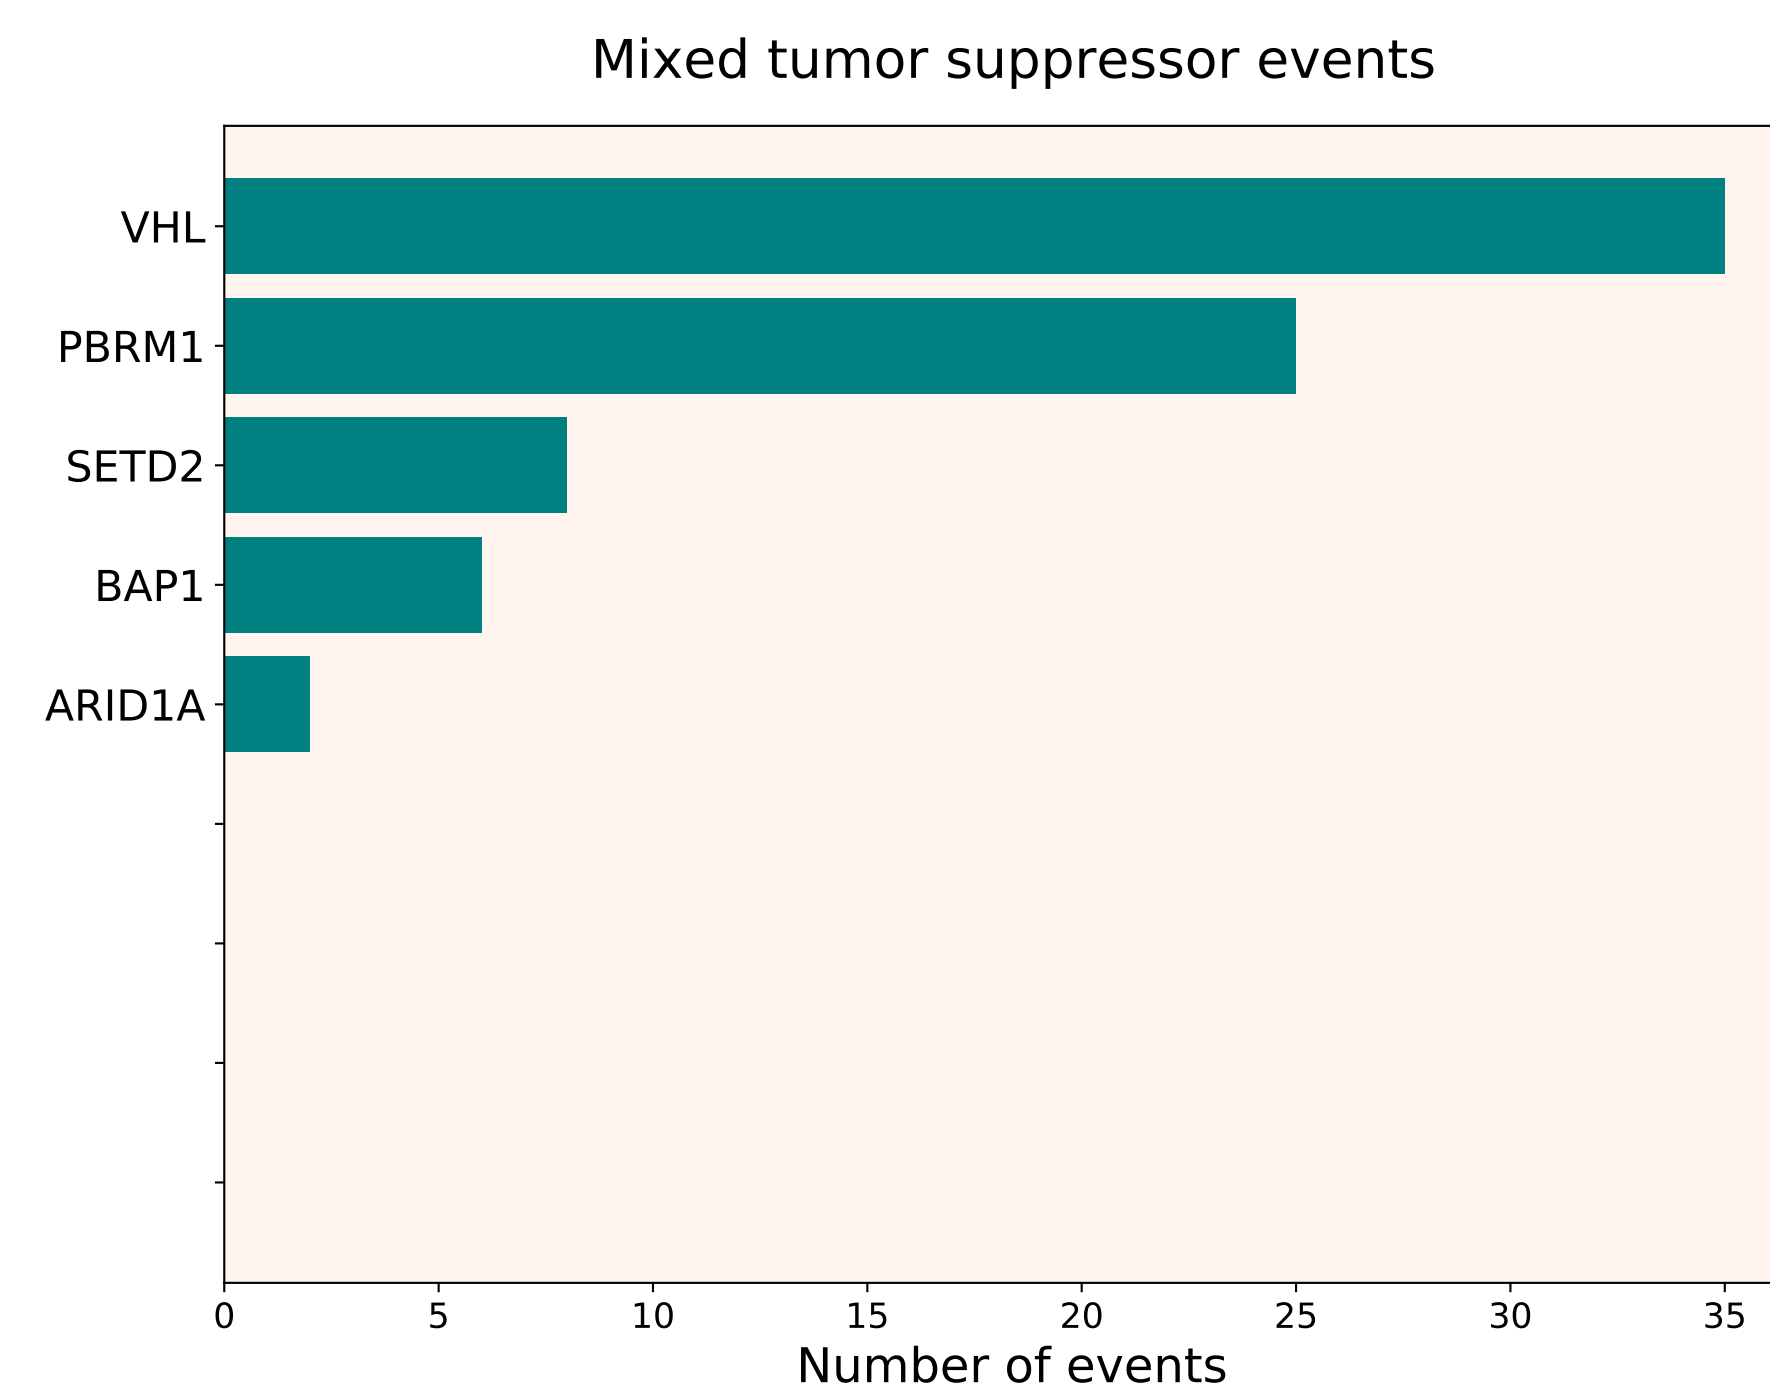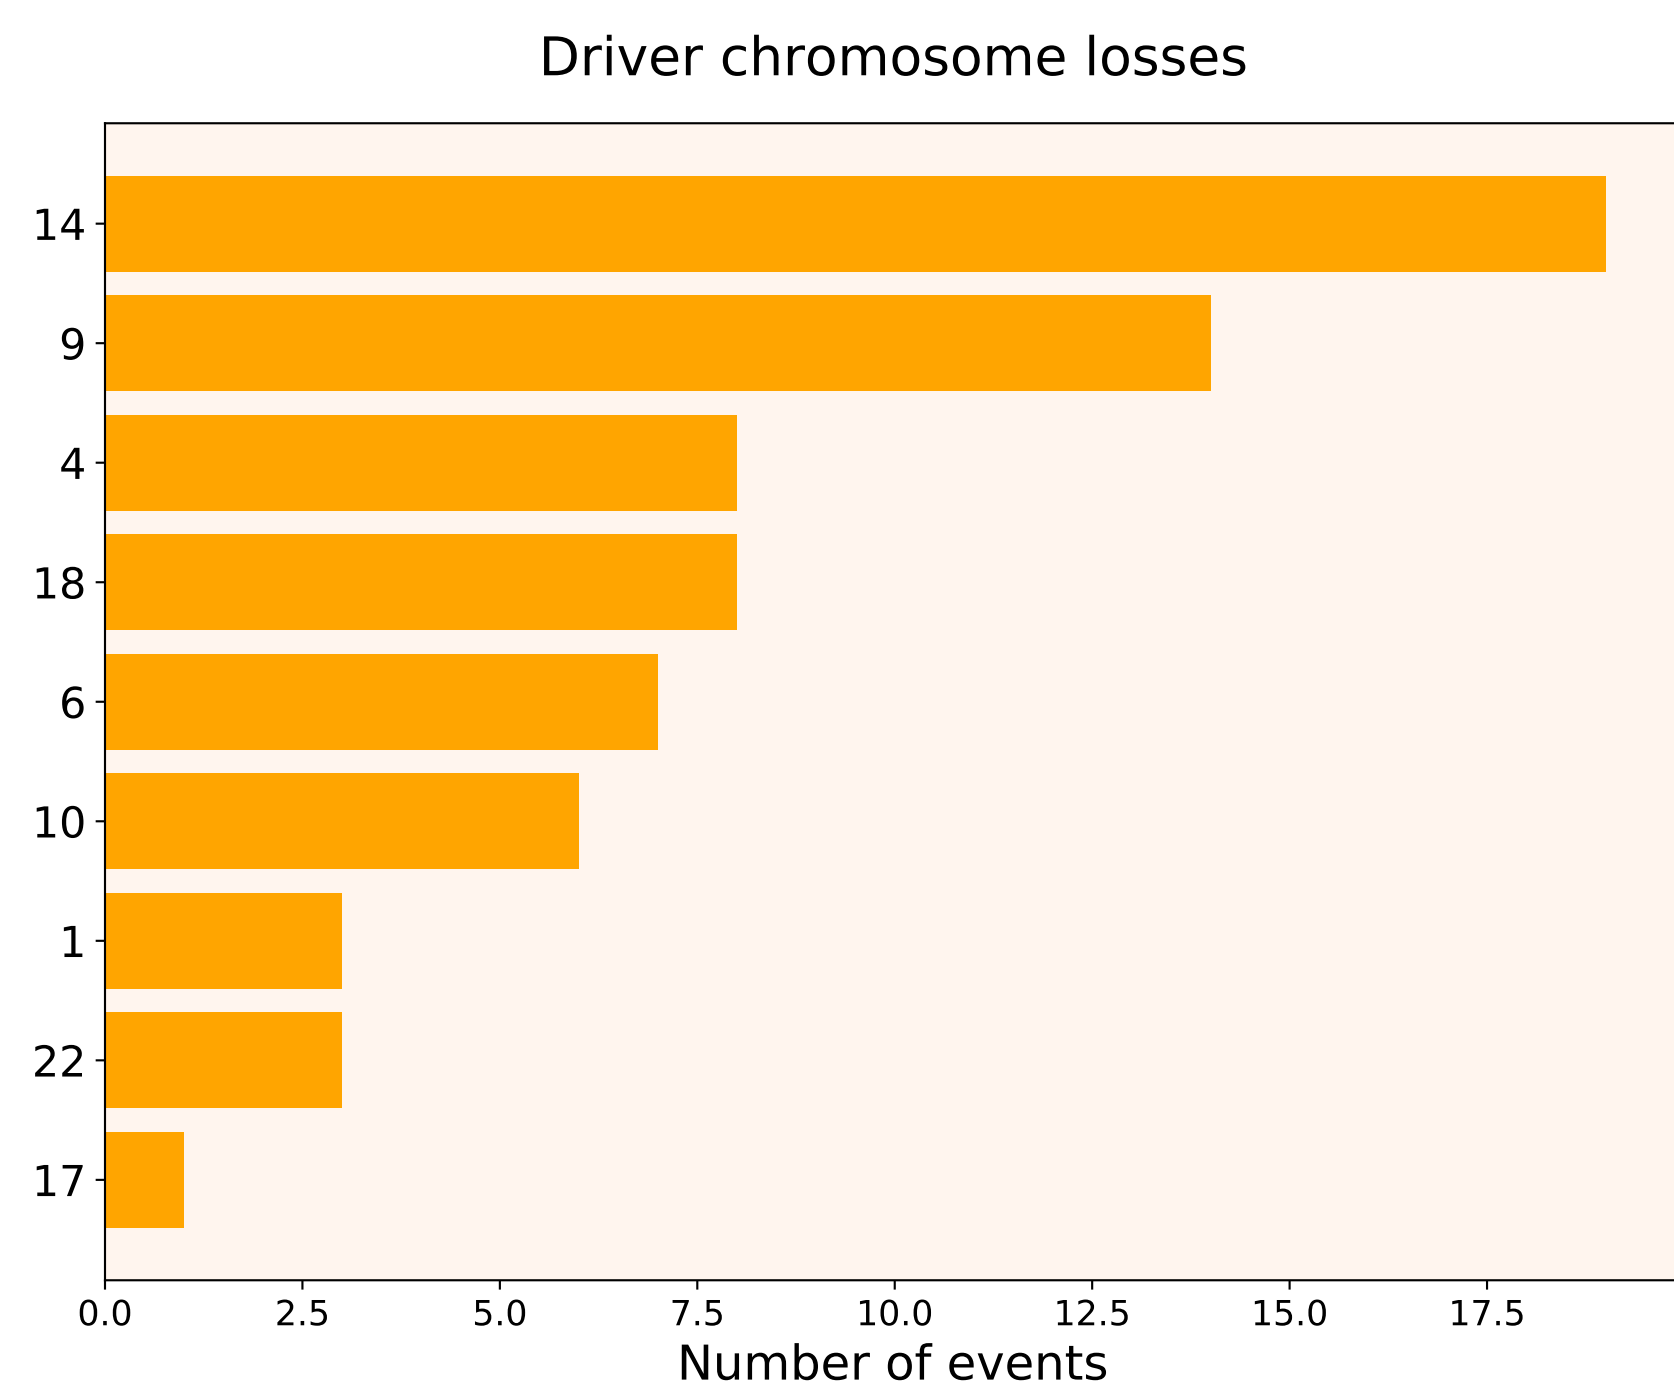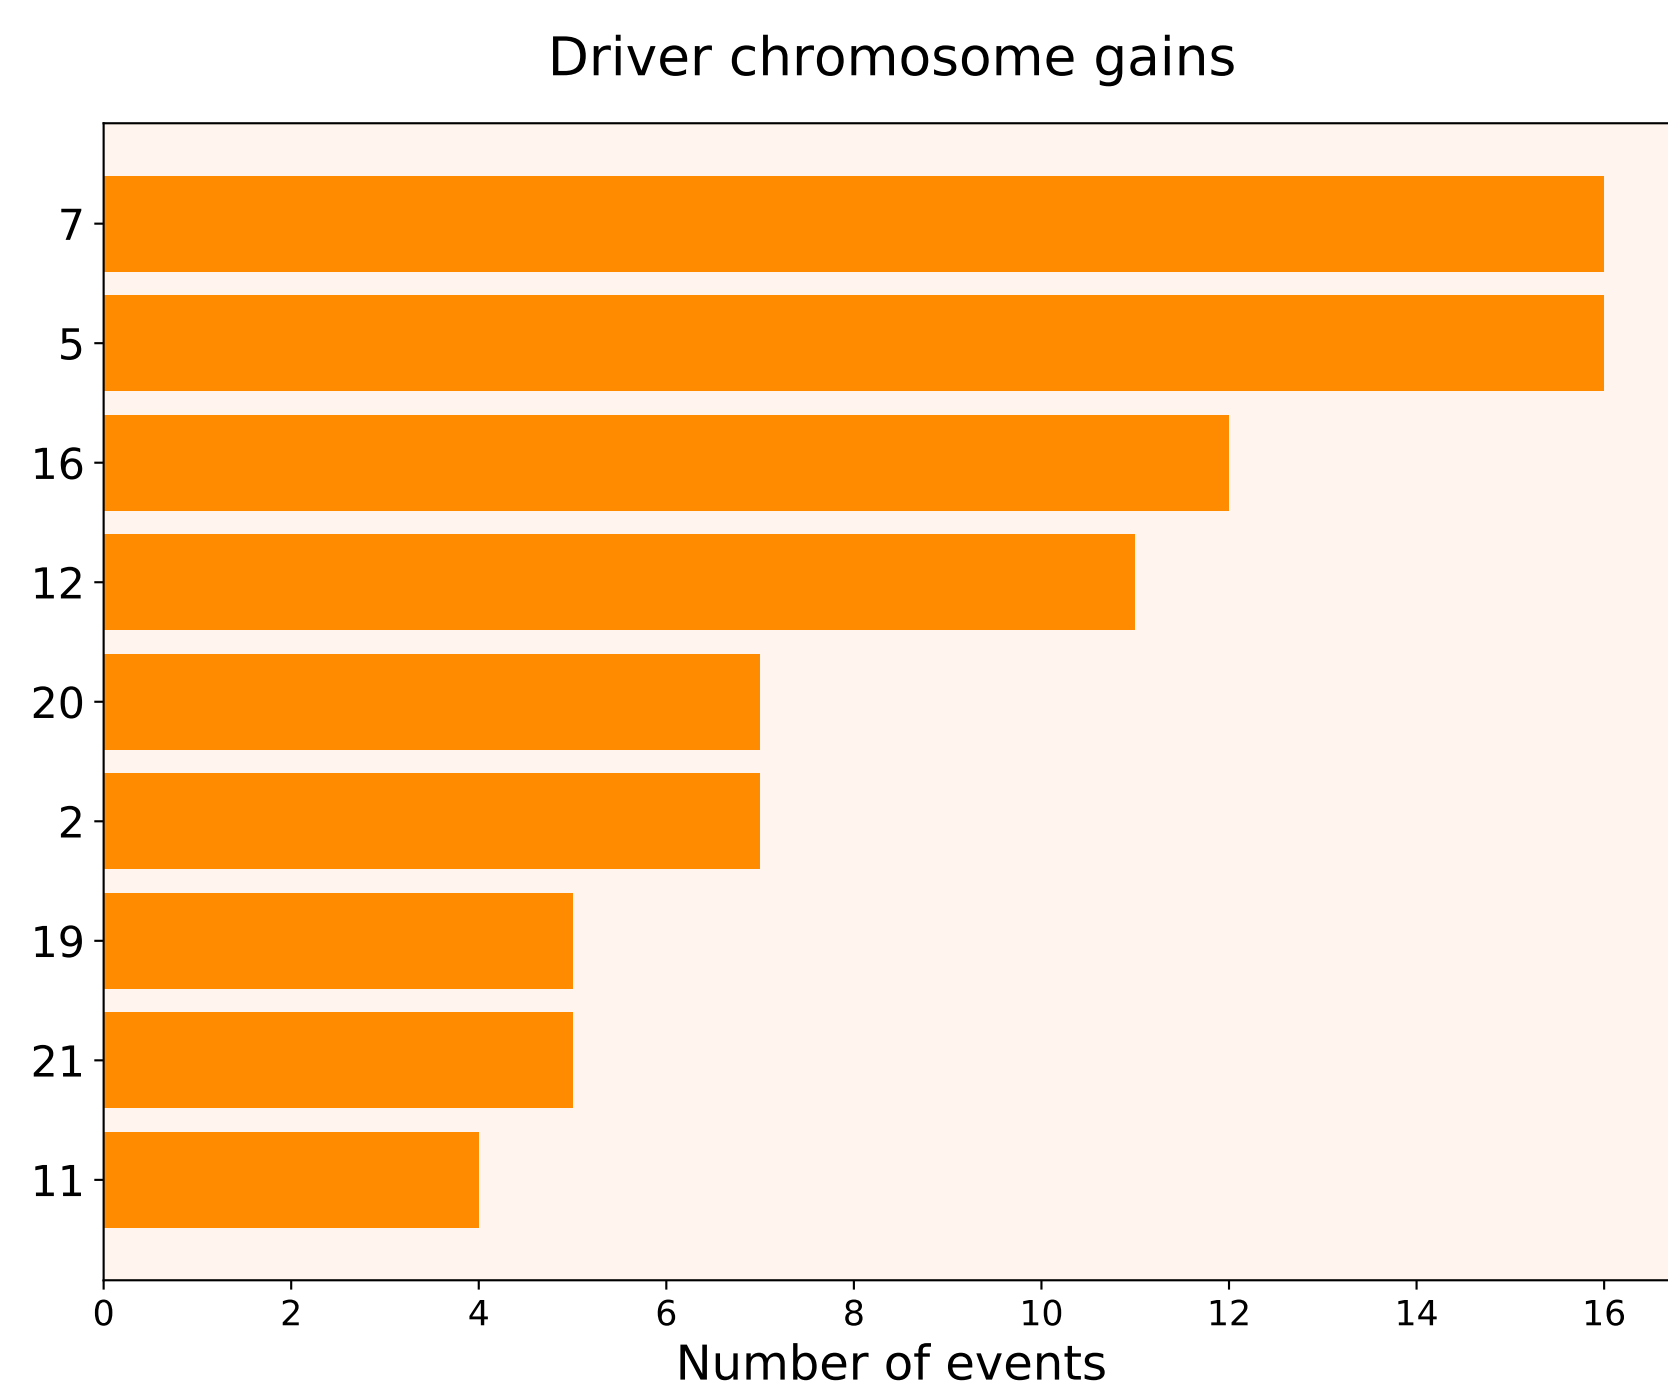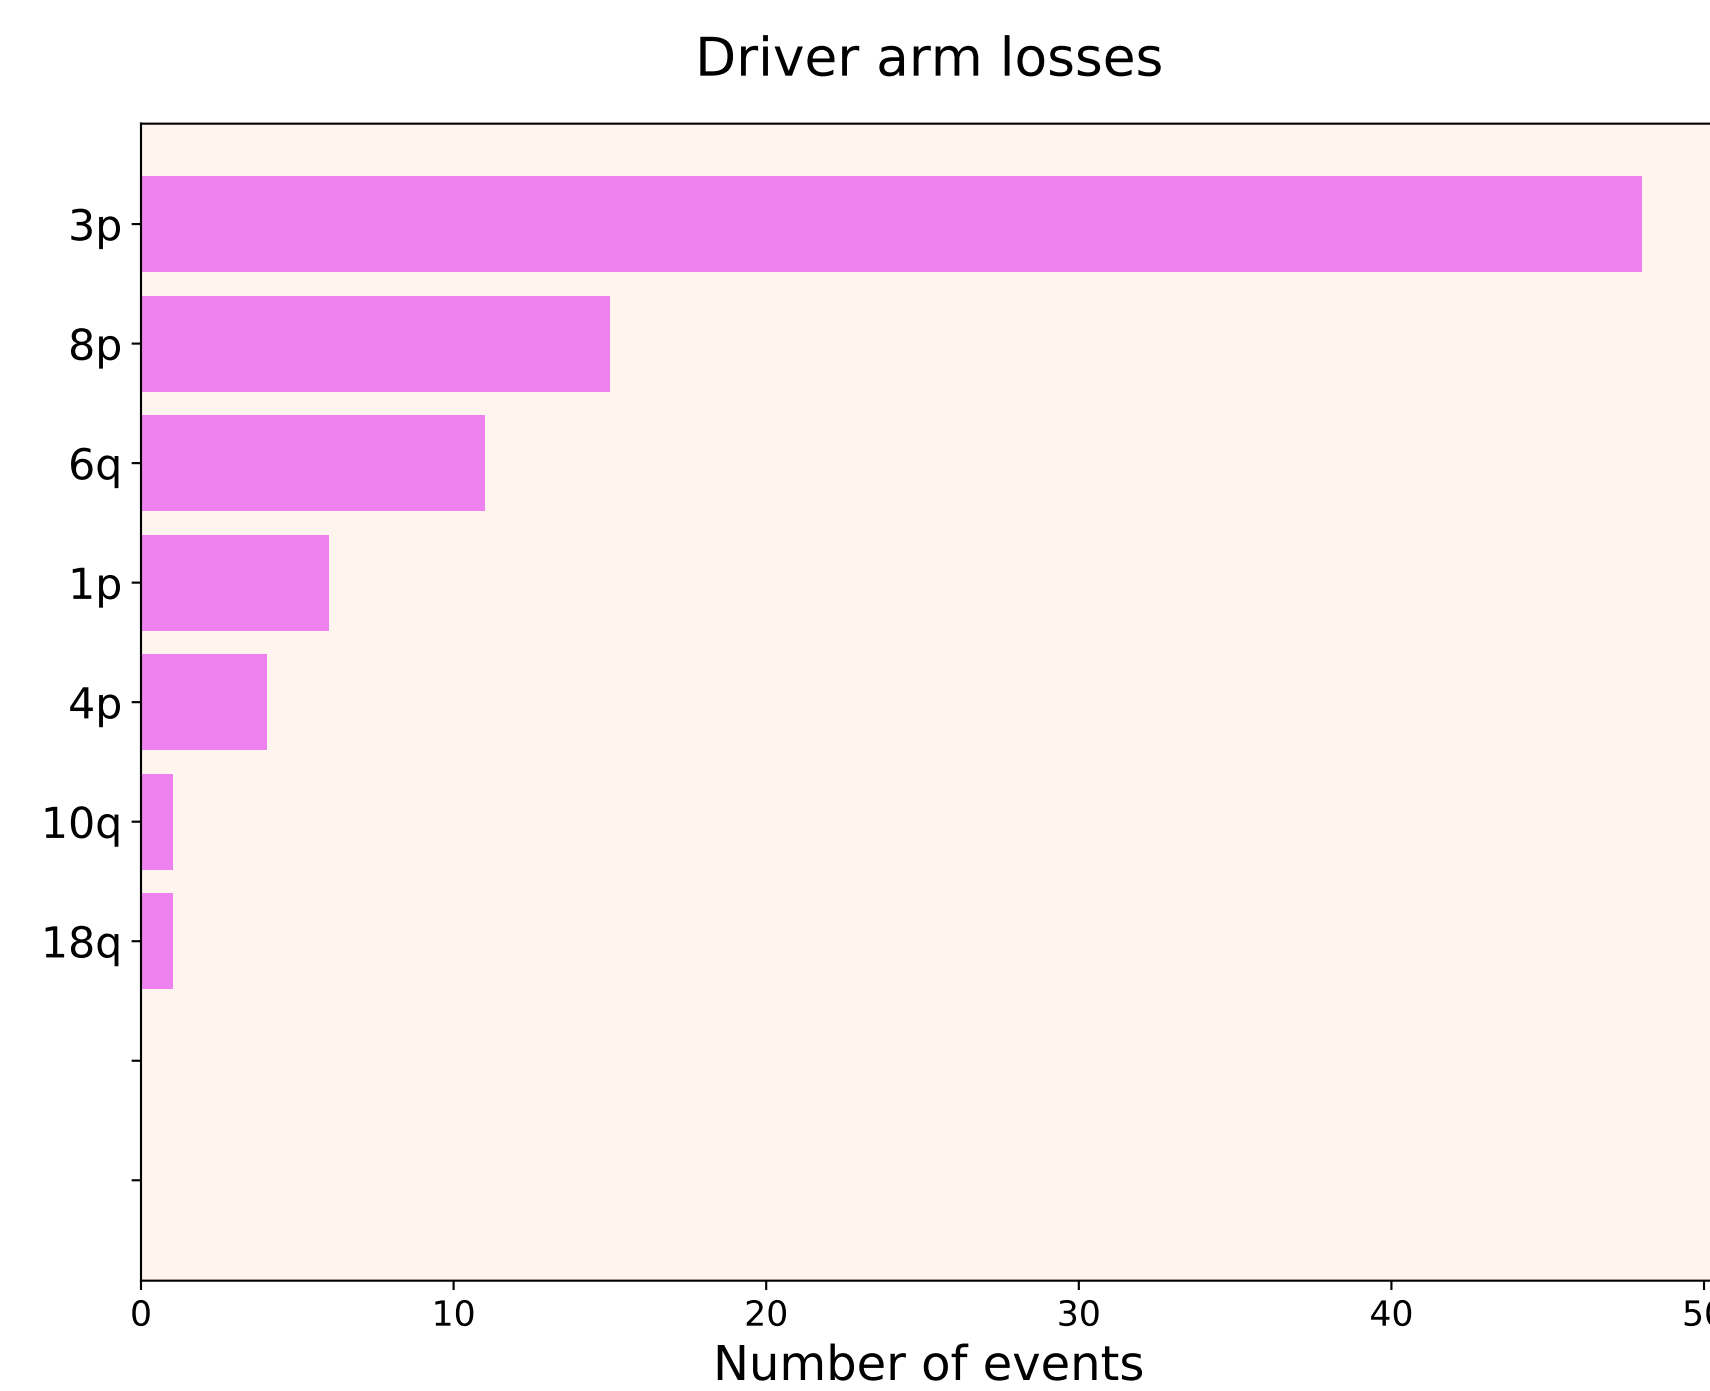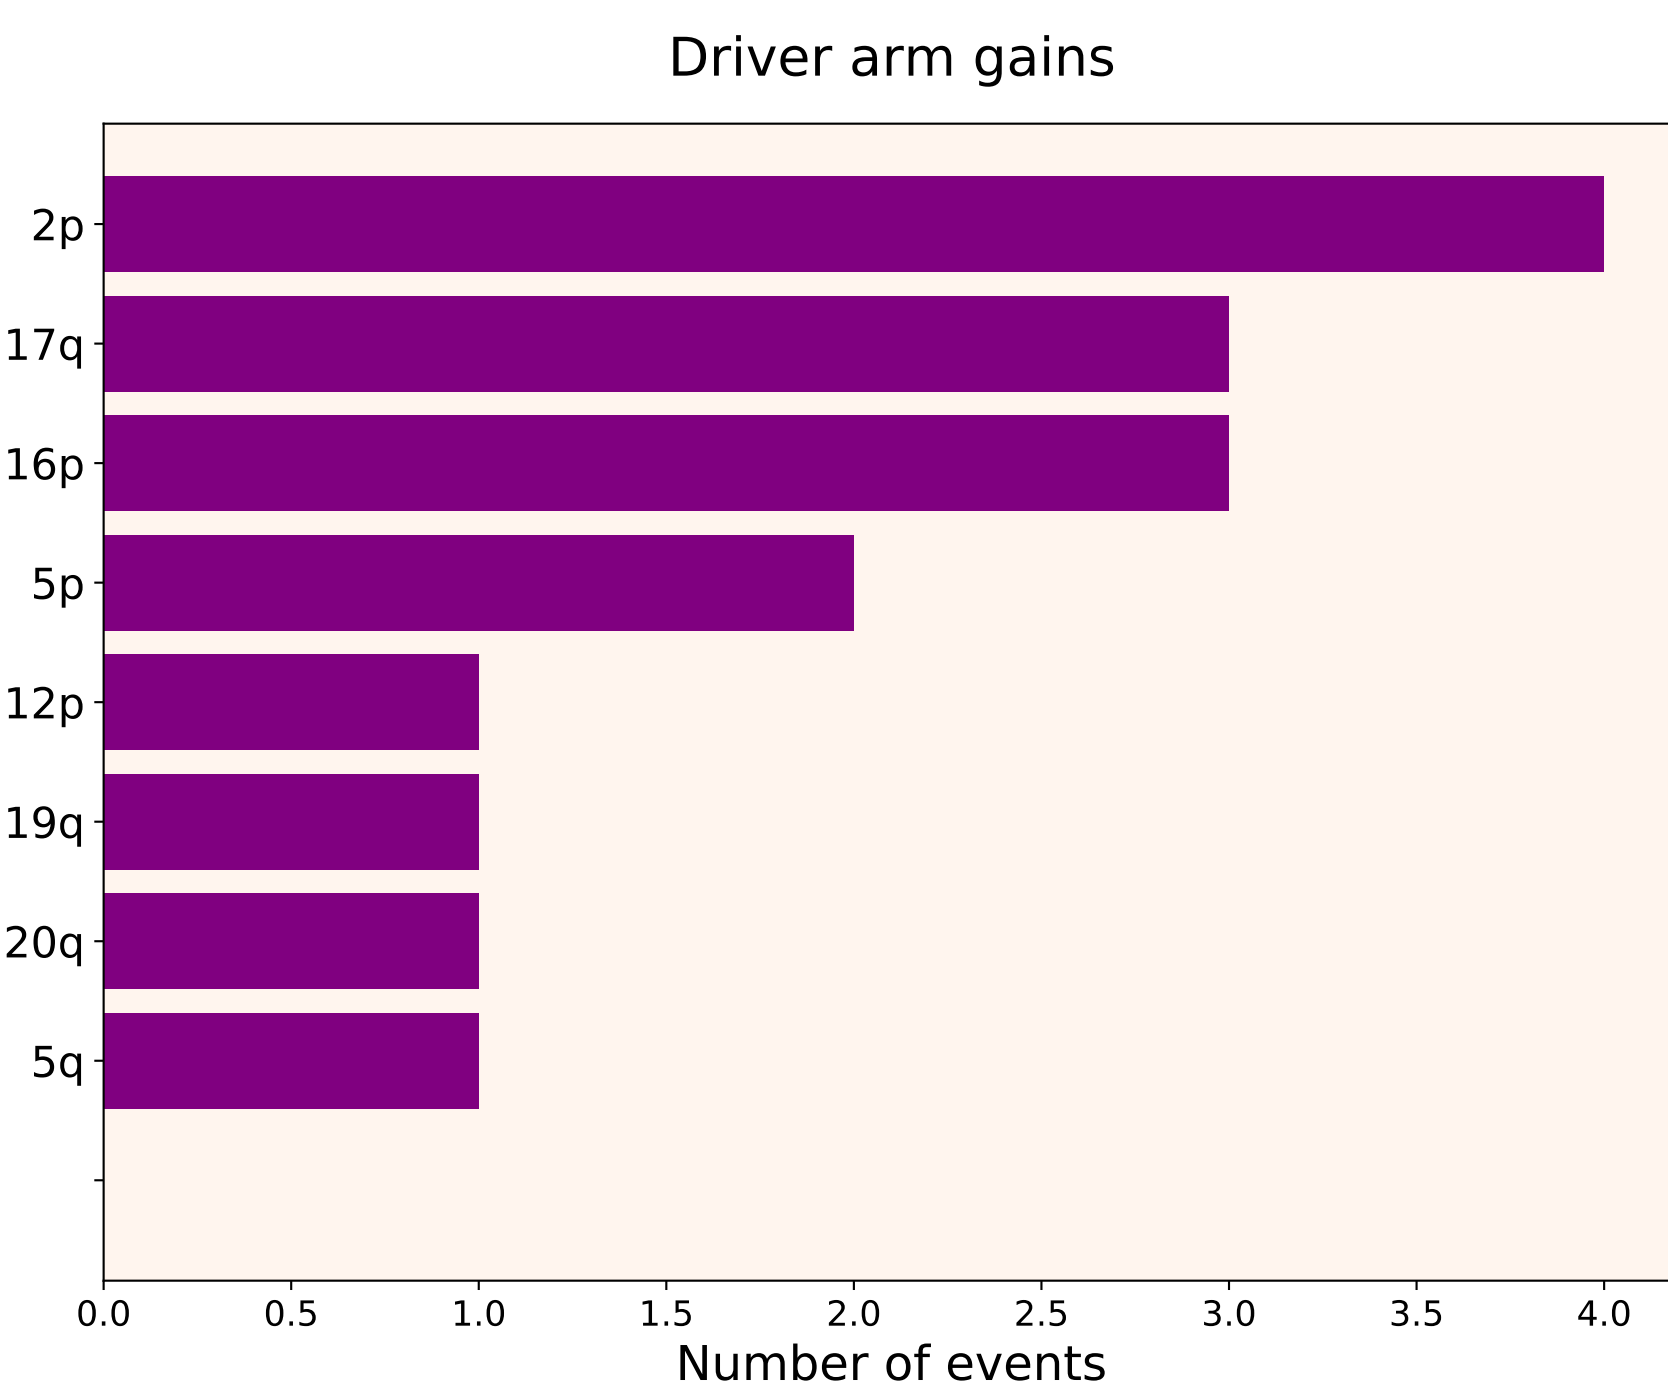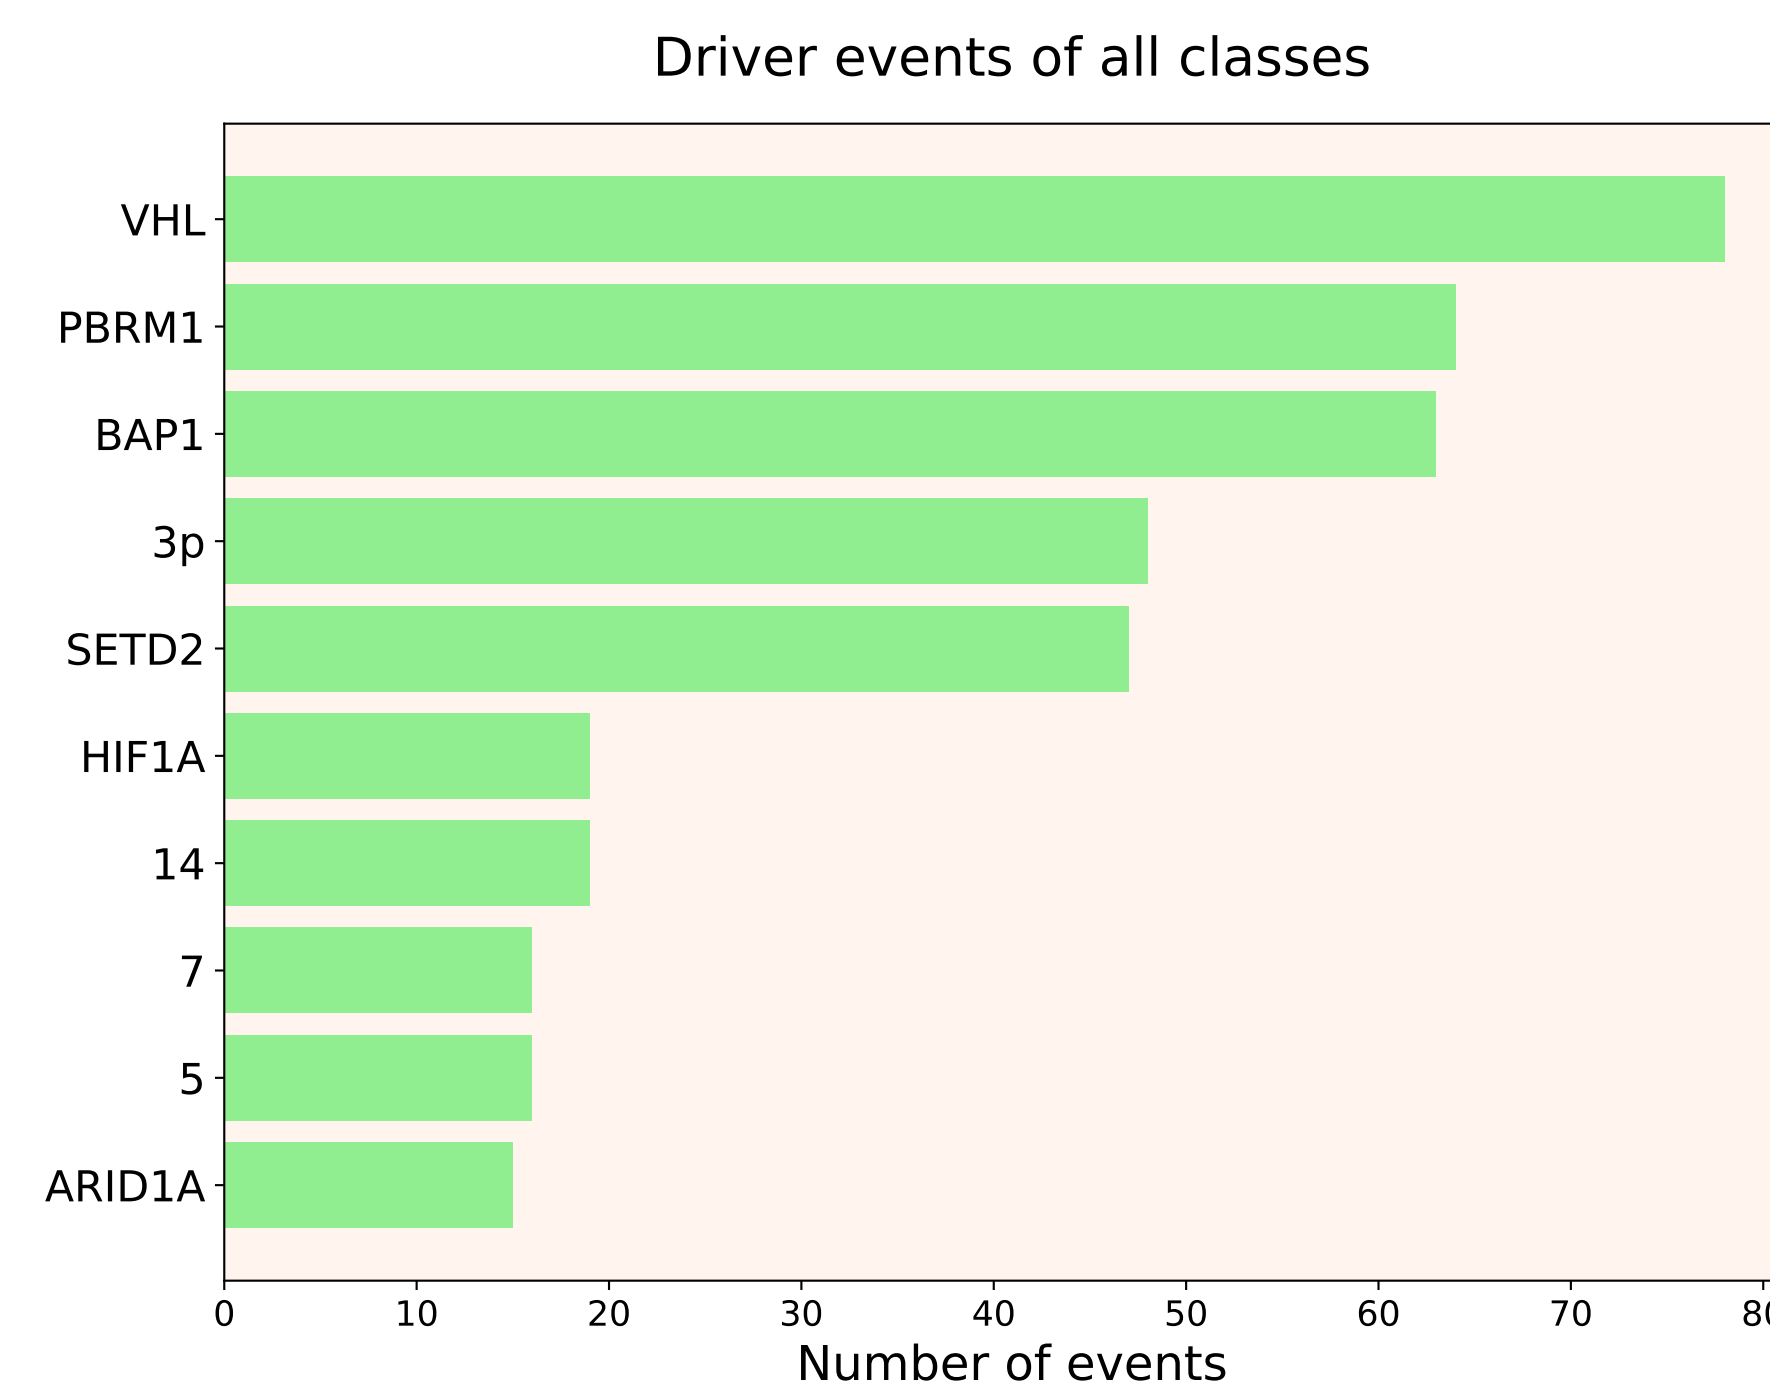

Supplement: Supplemental_Data_S1.zip [file Supplemental_Data_S1.zip]

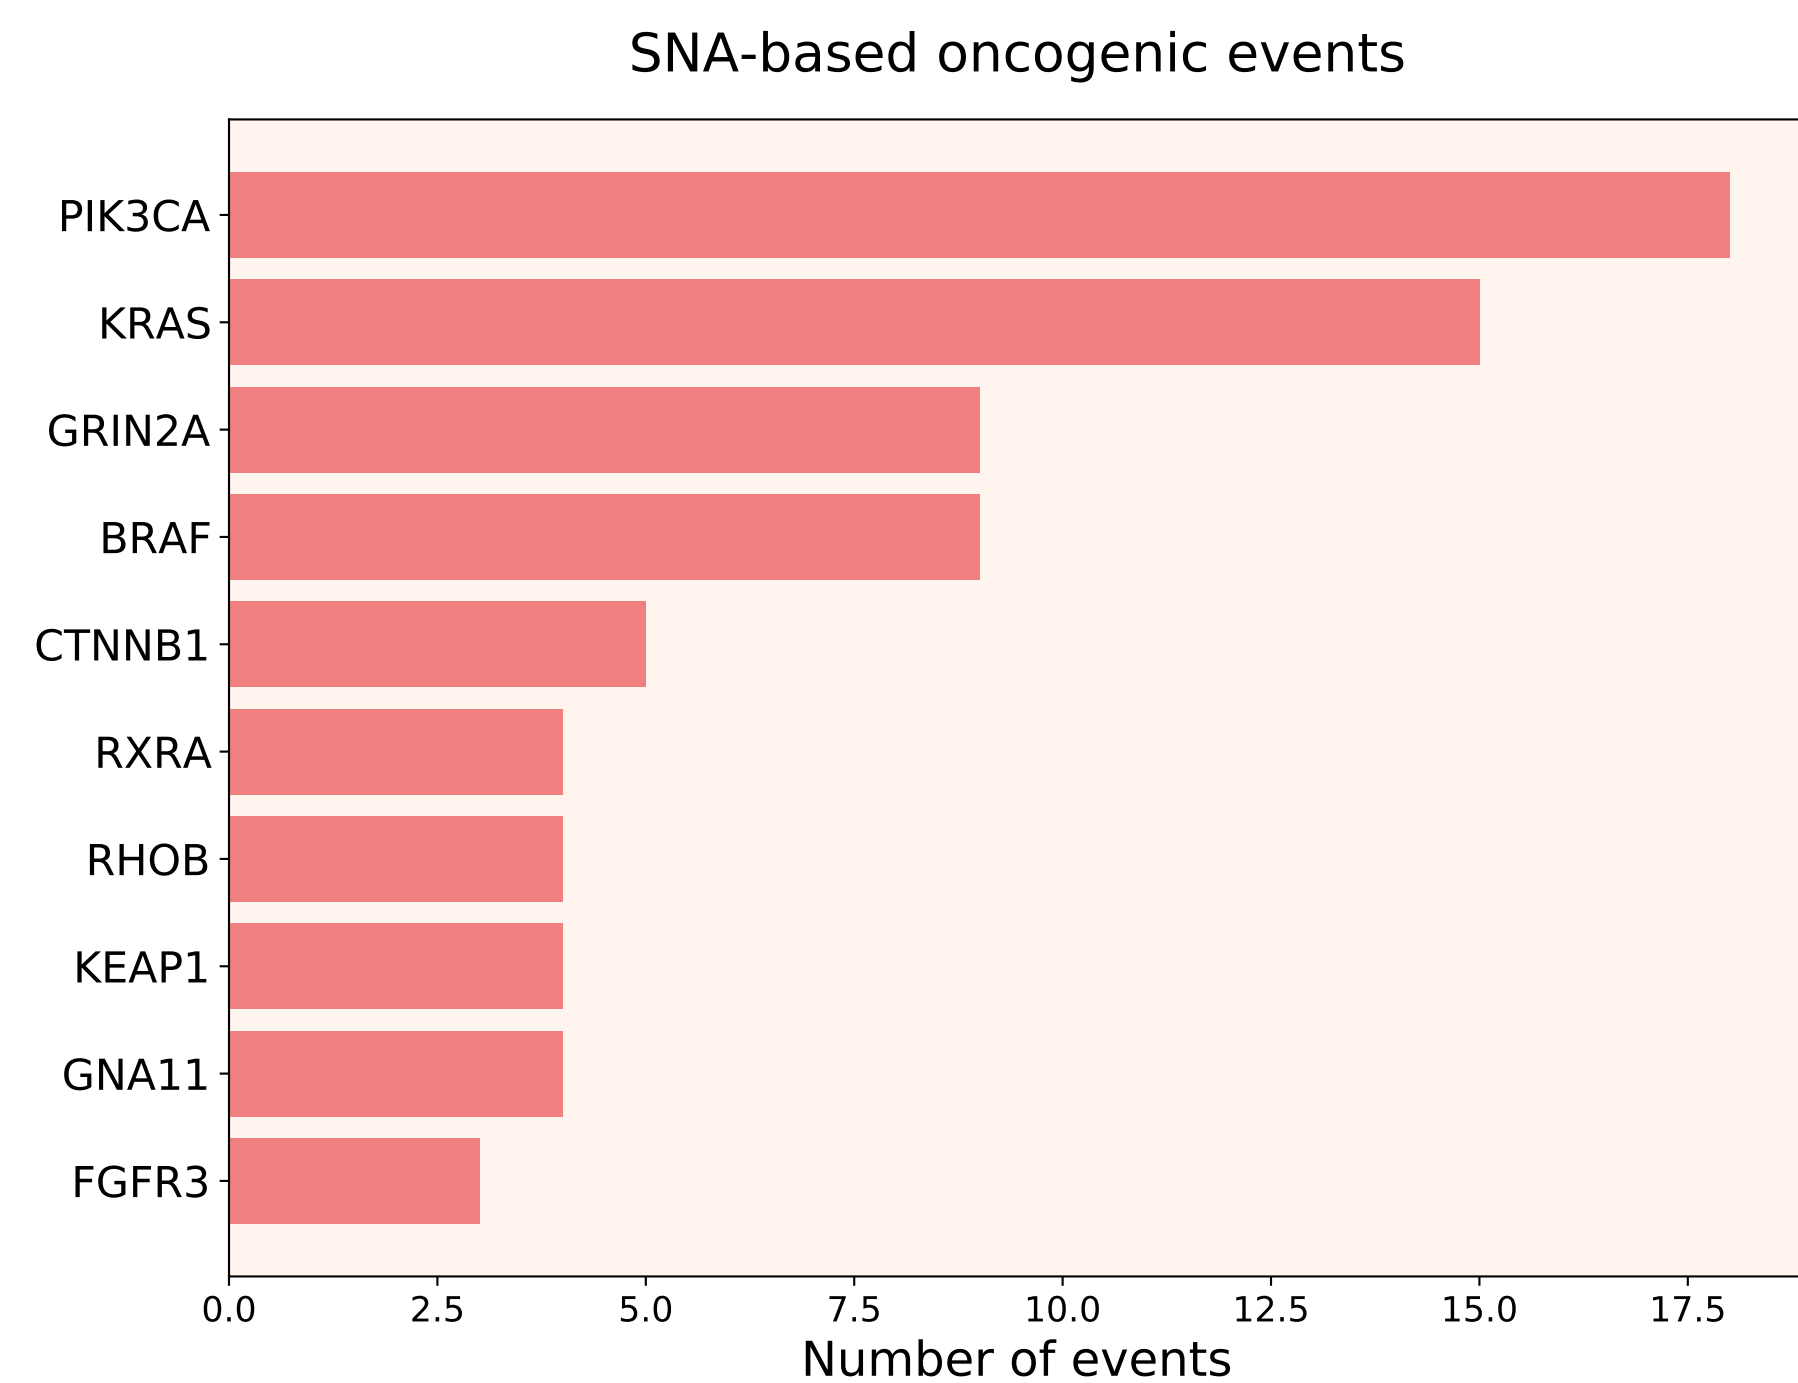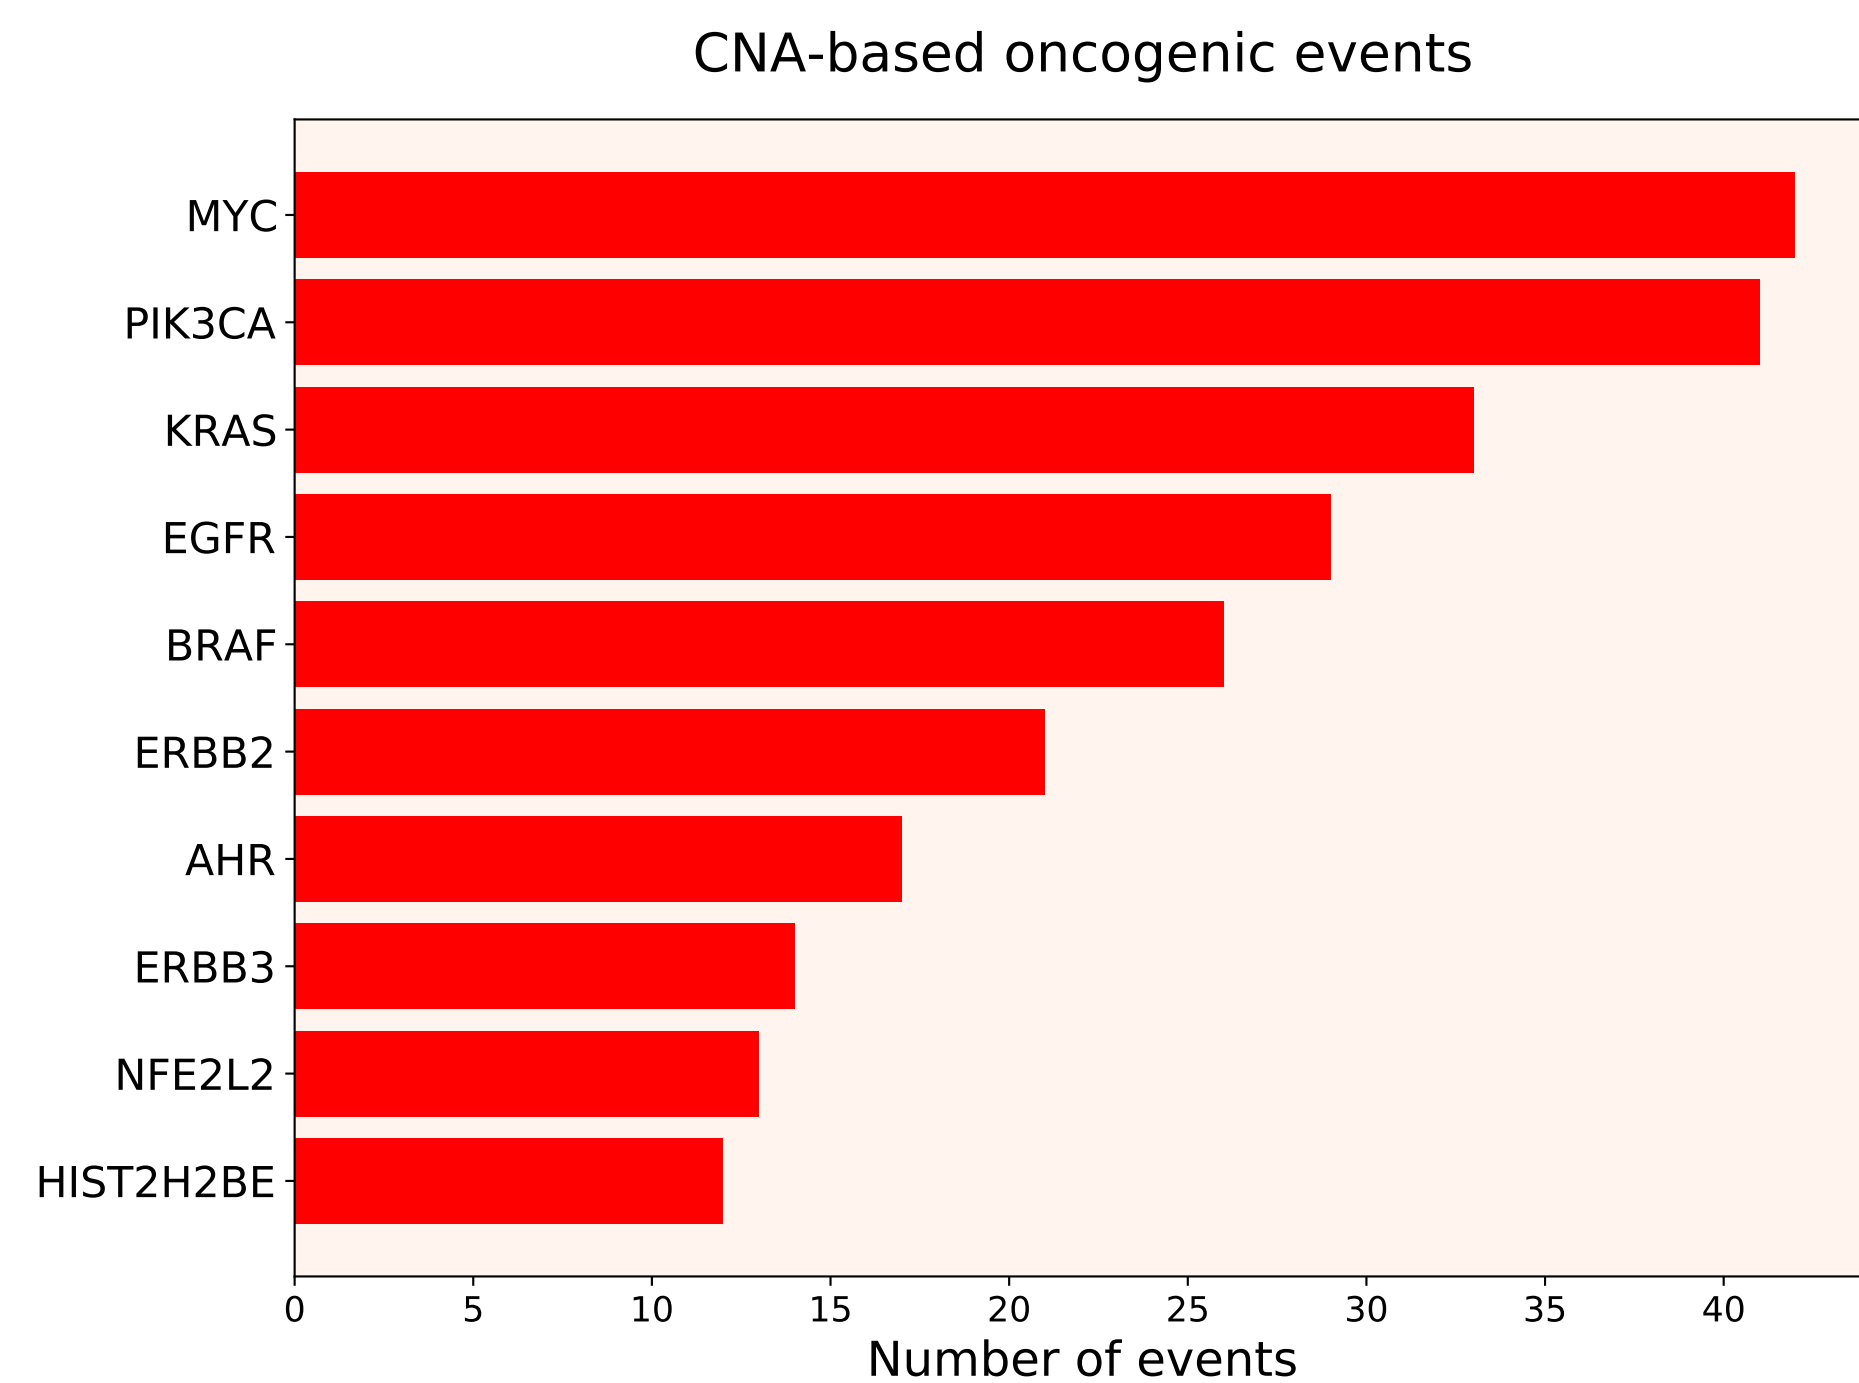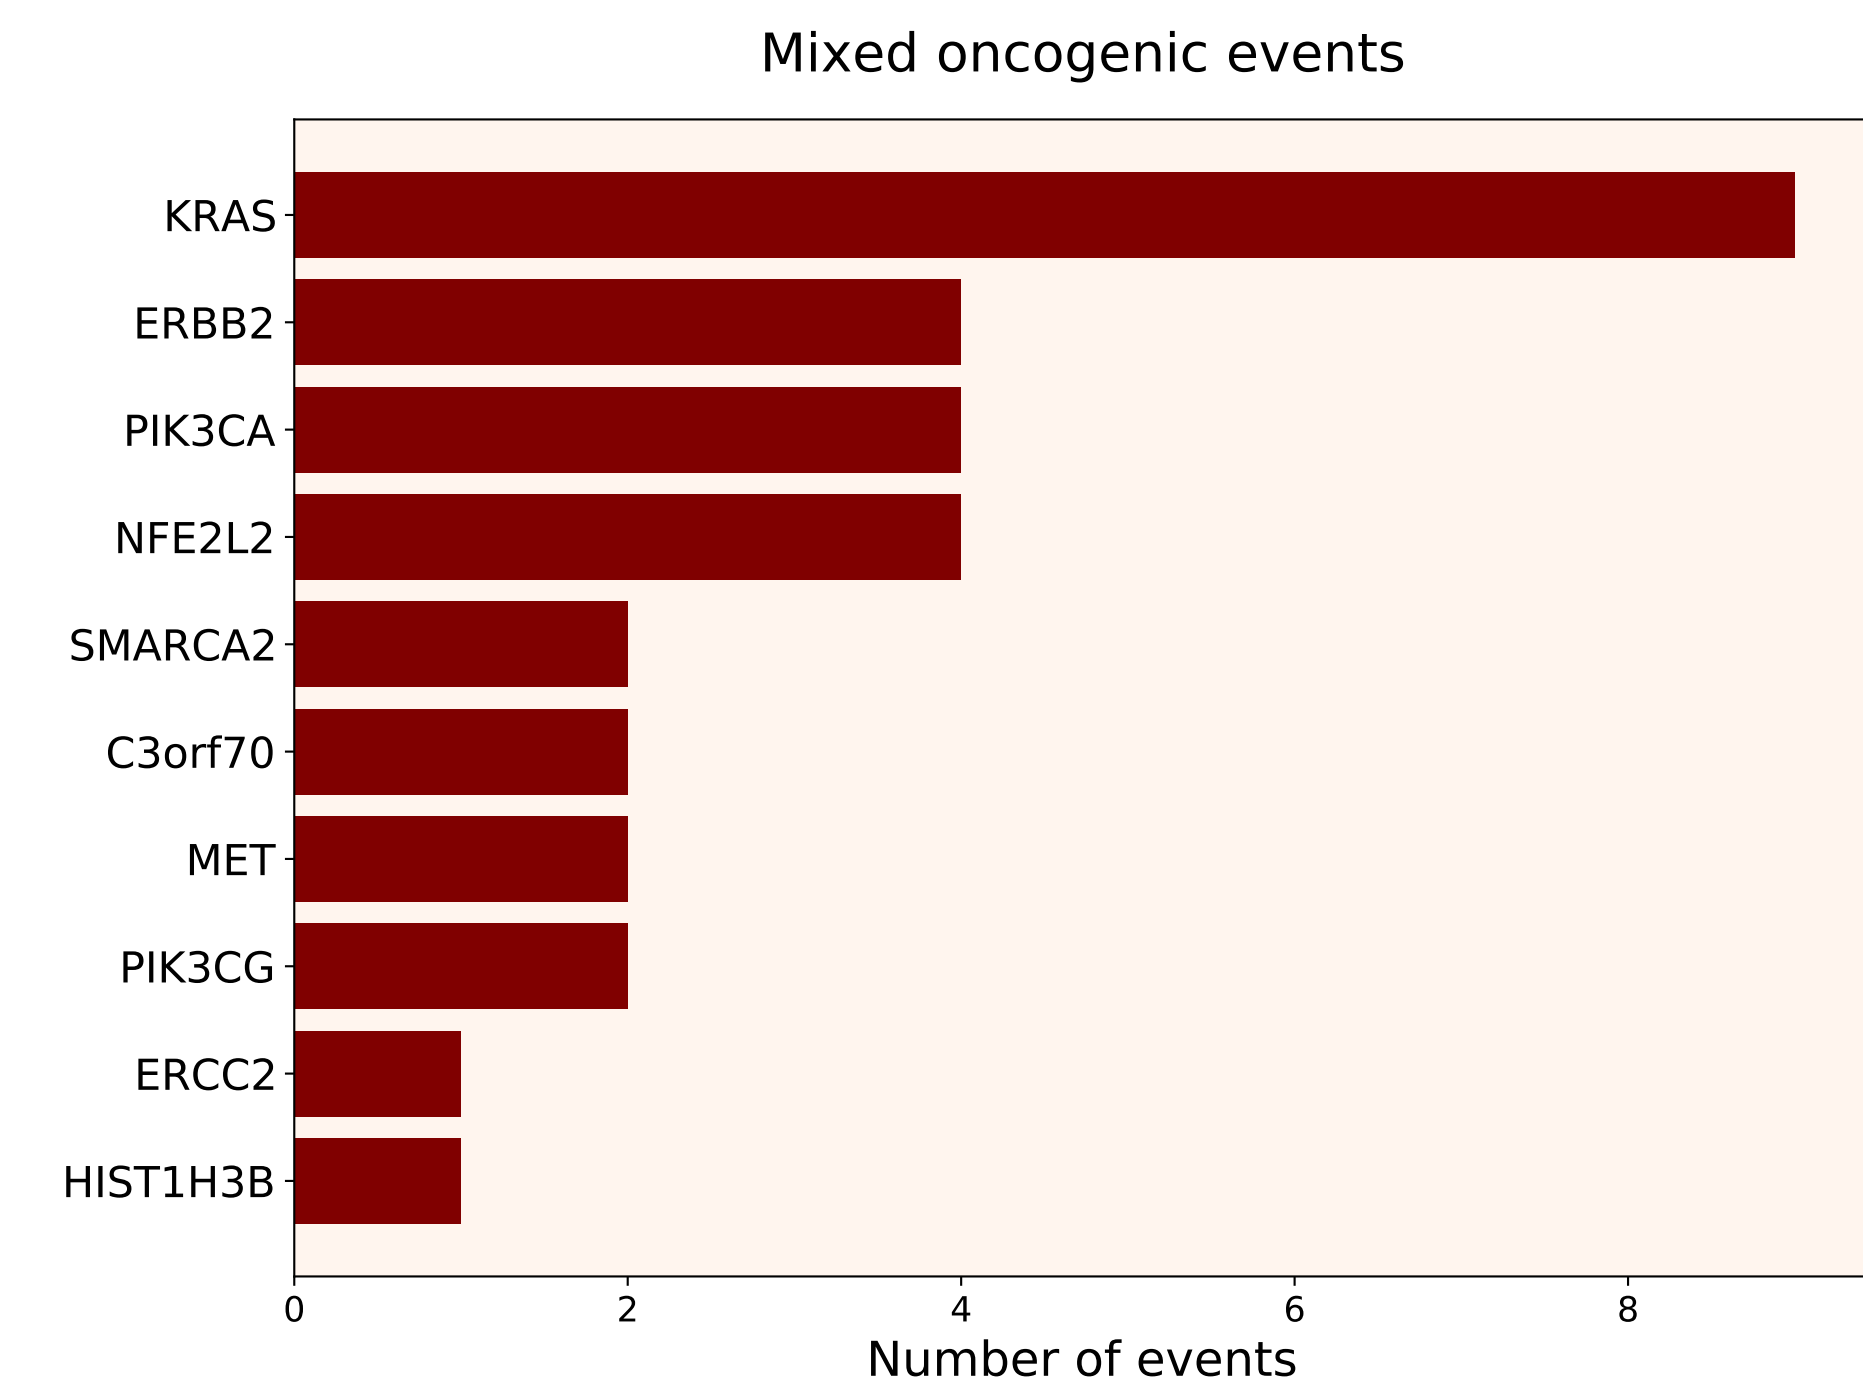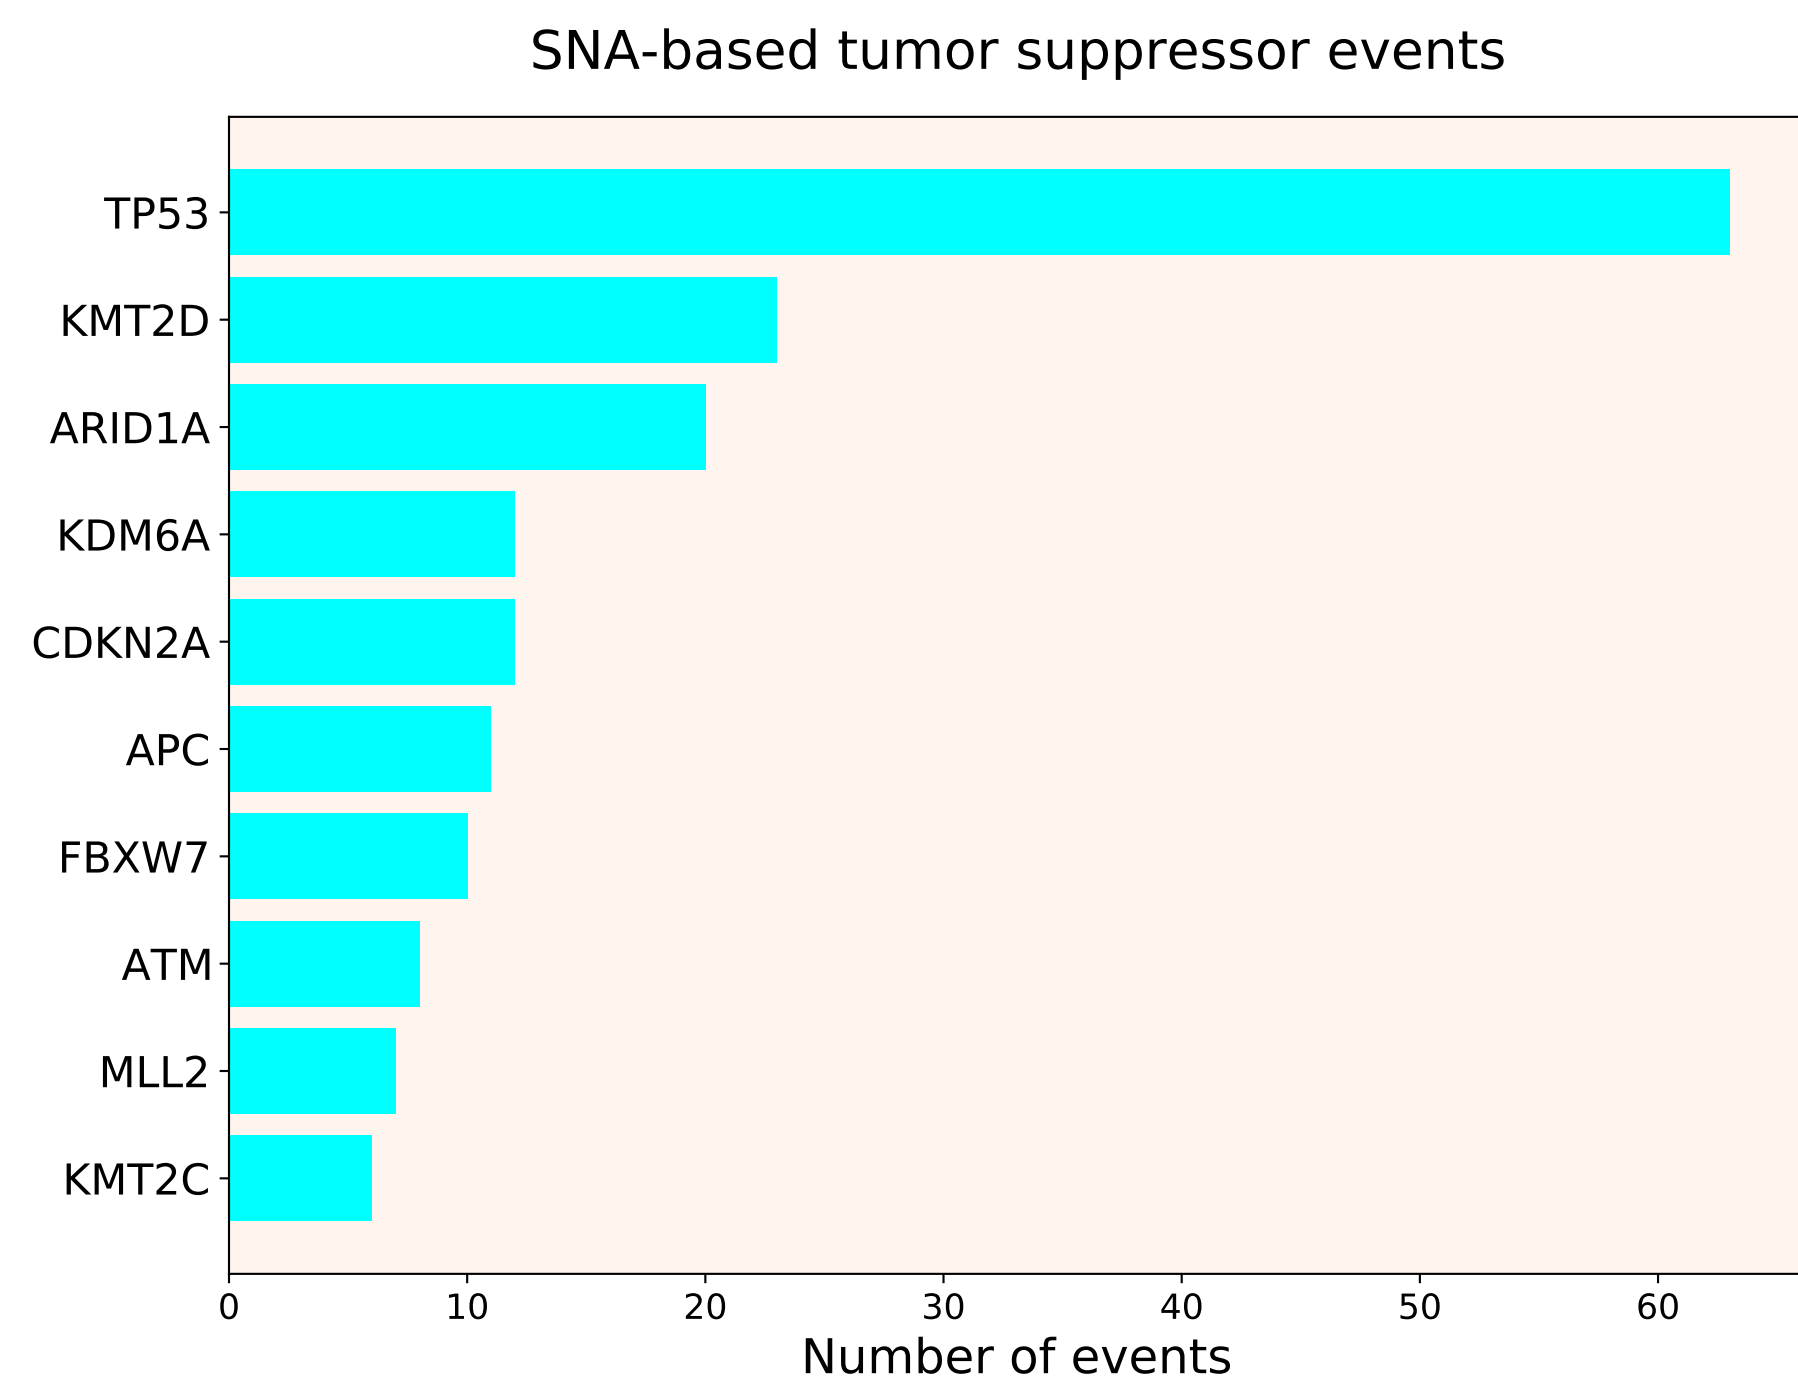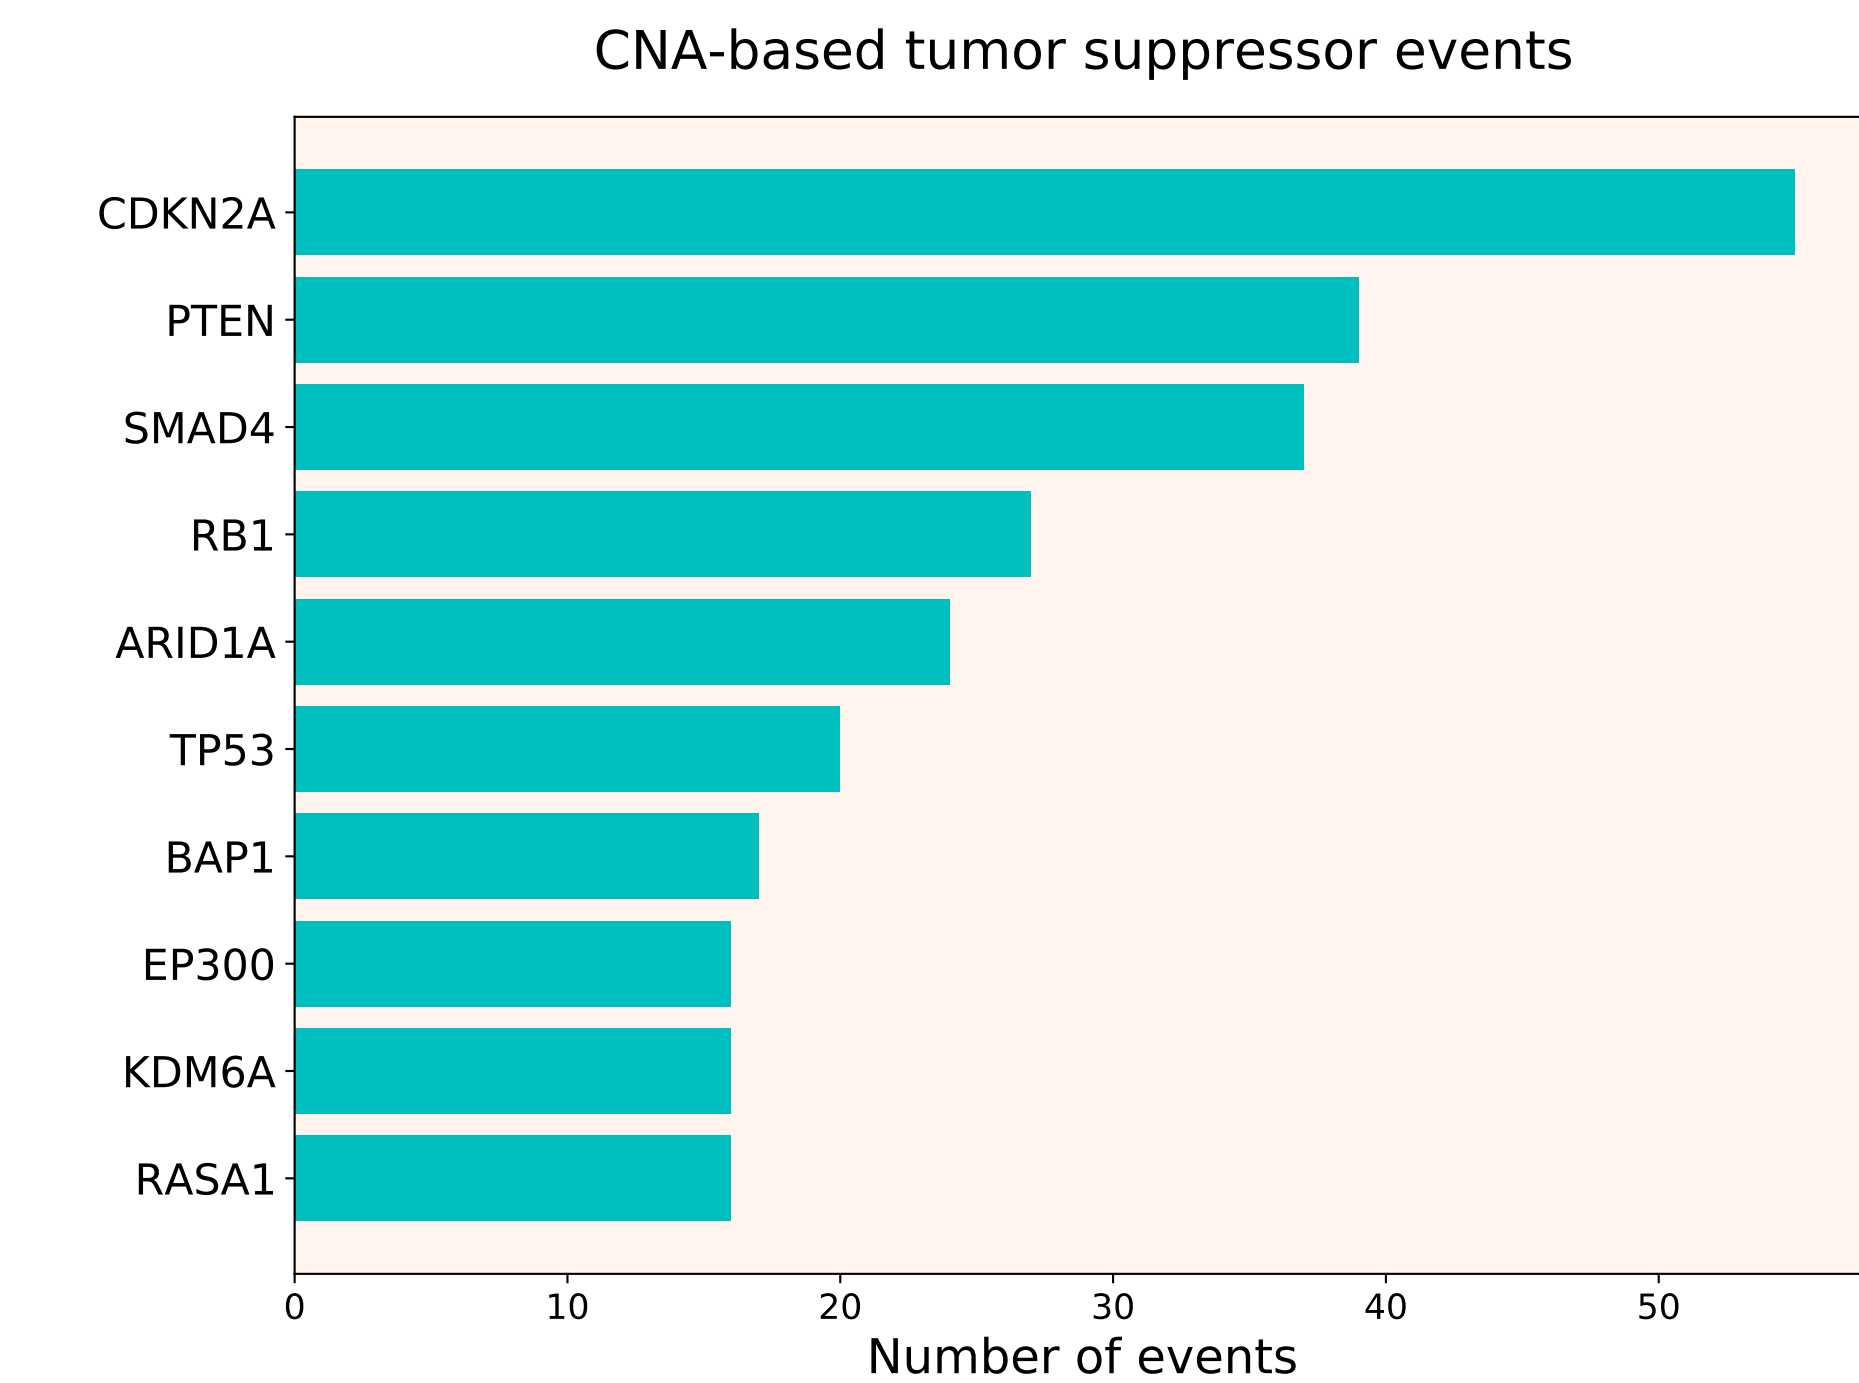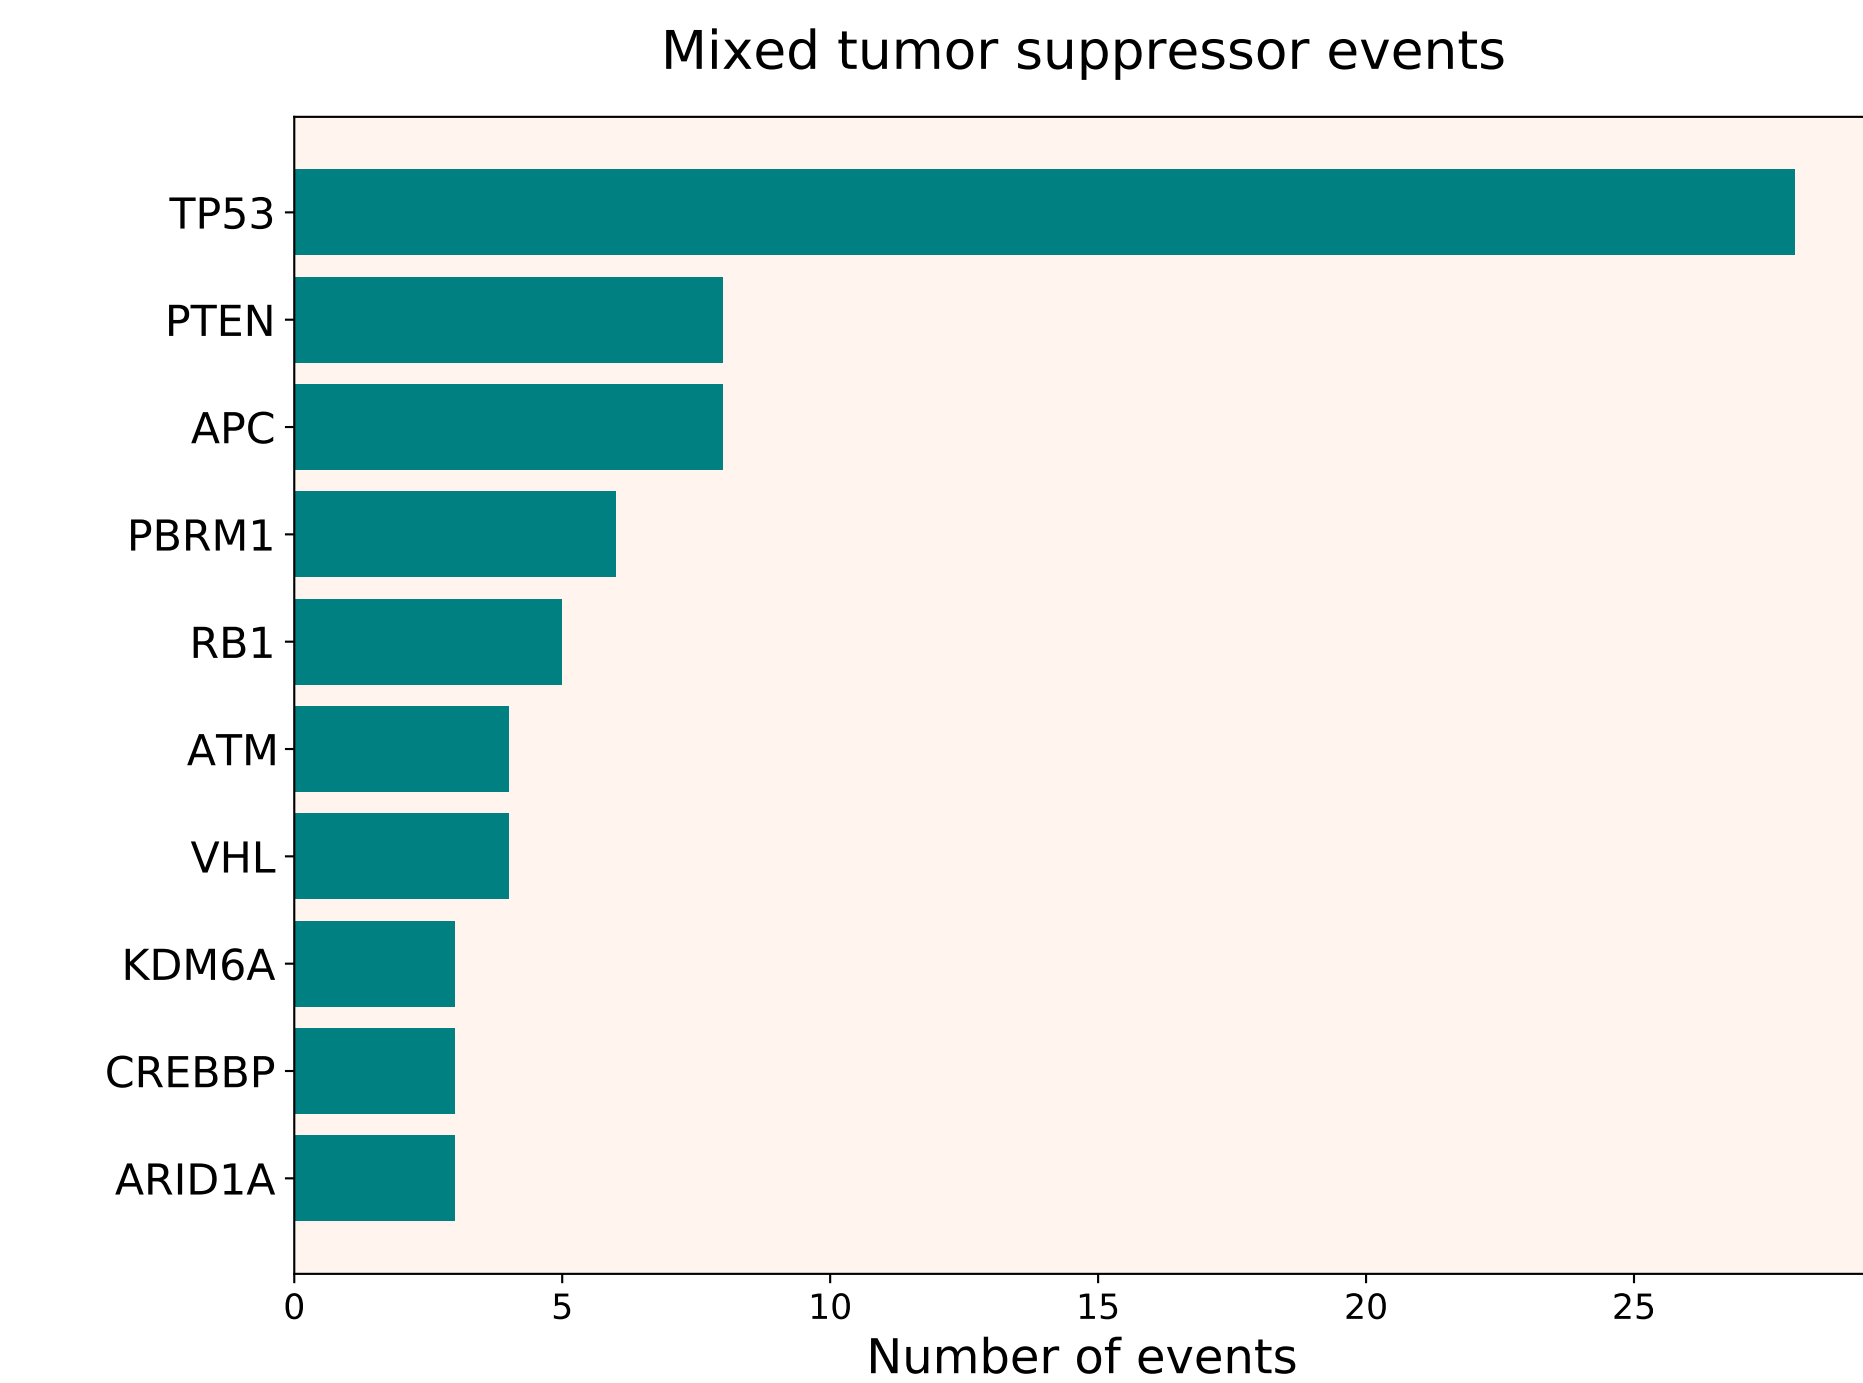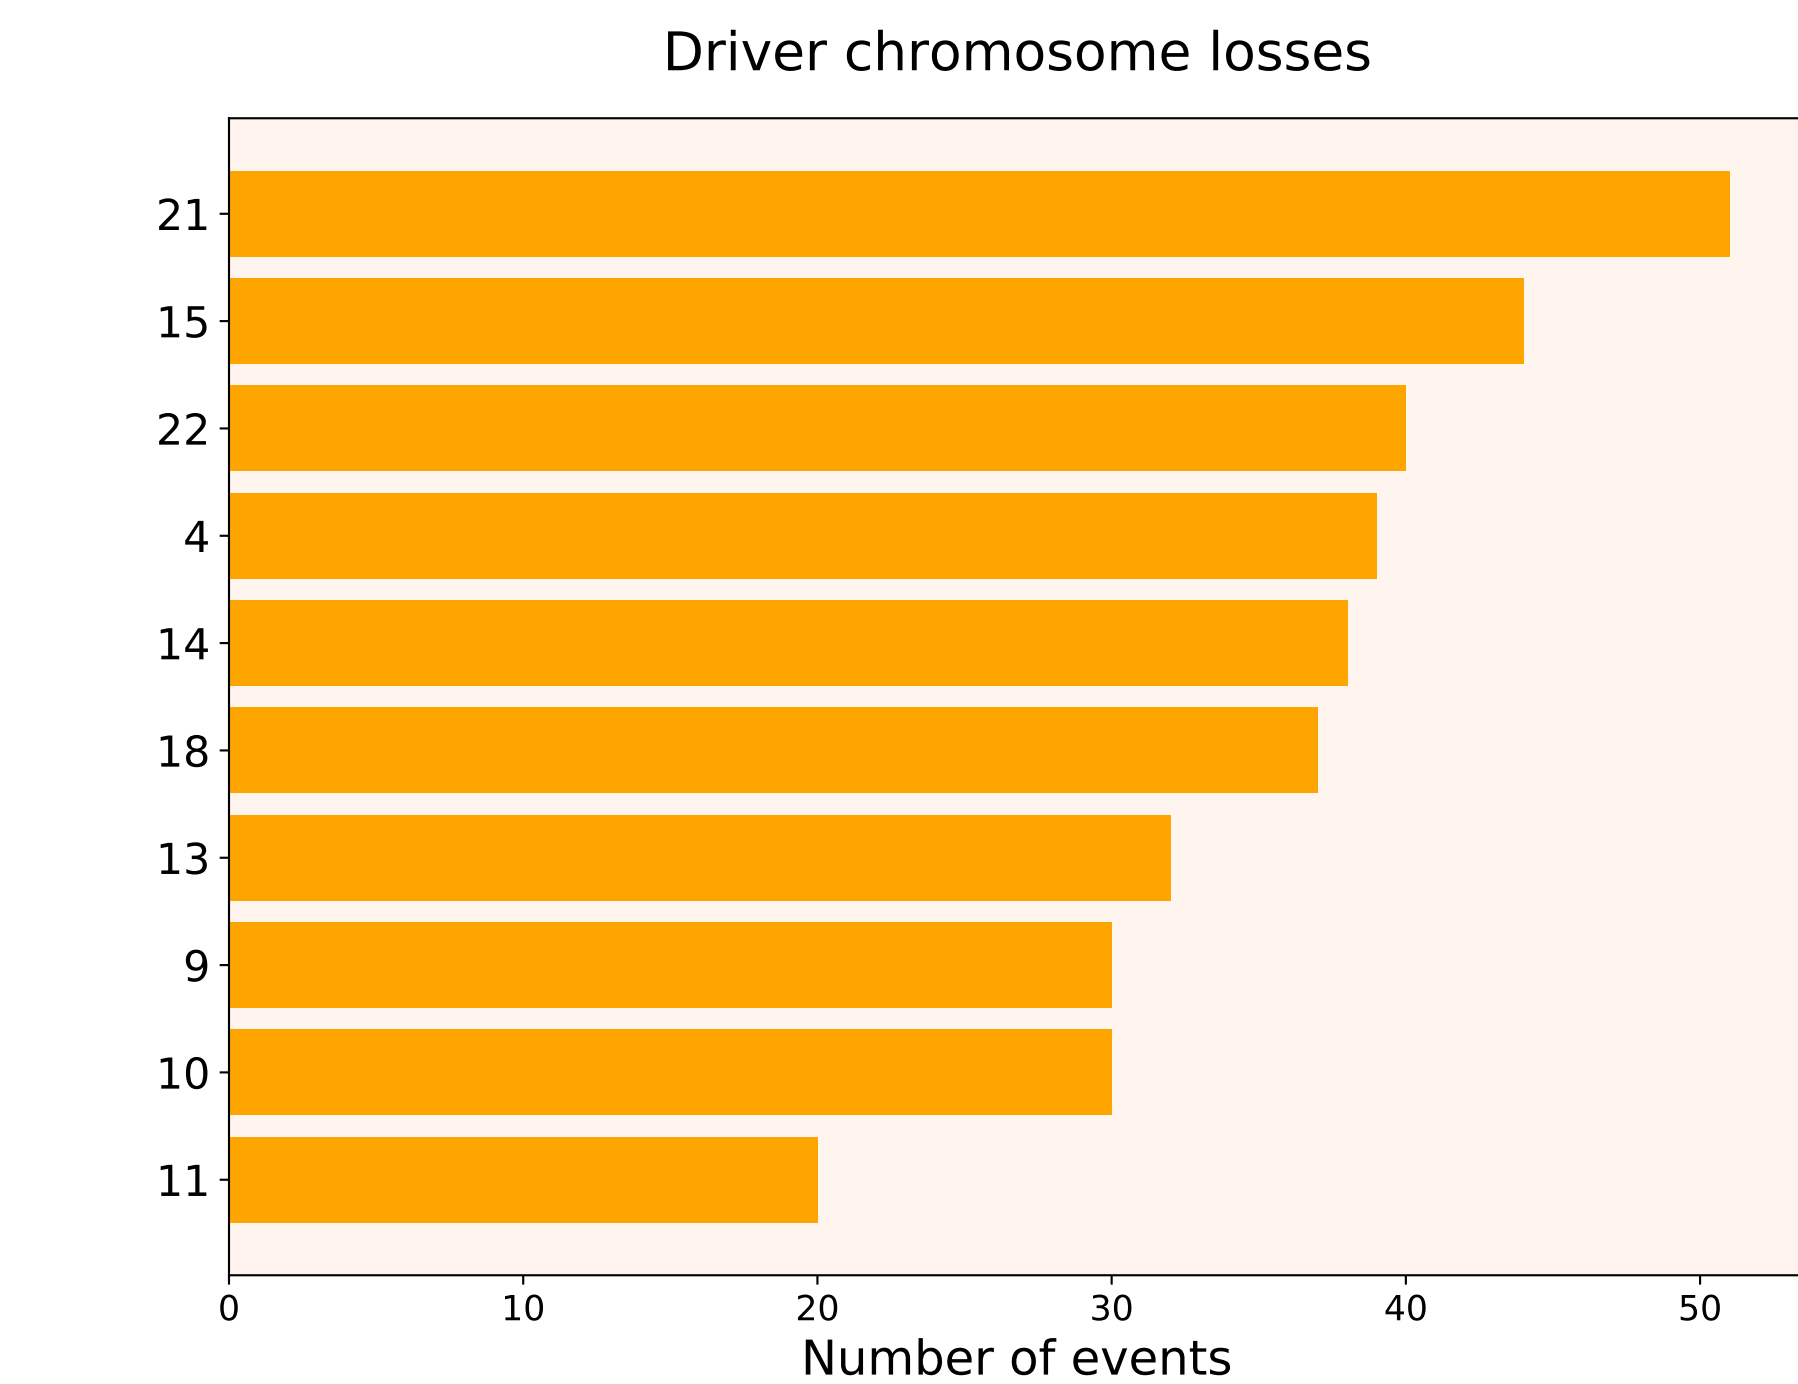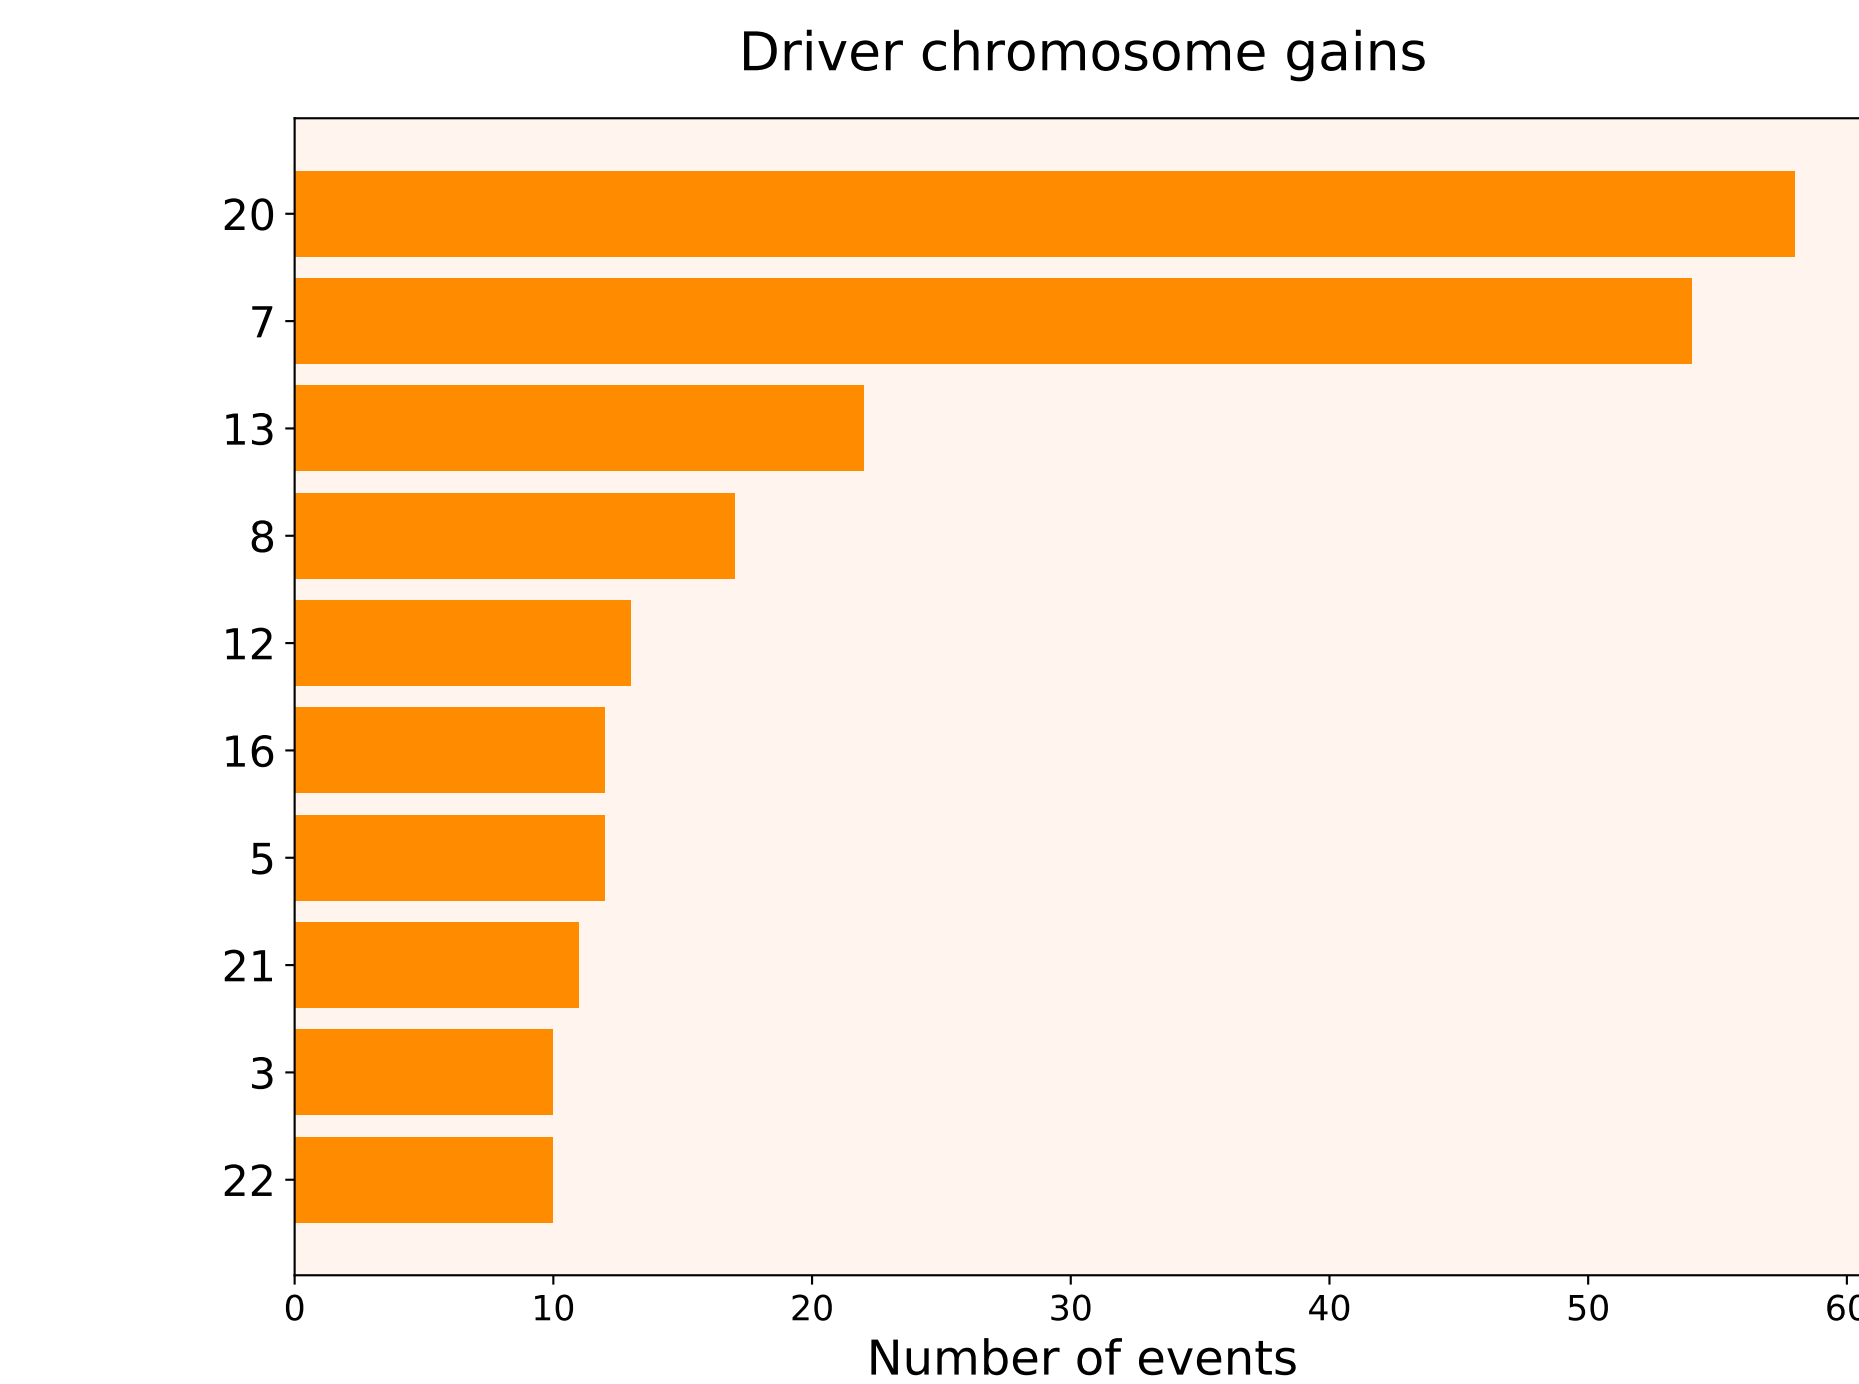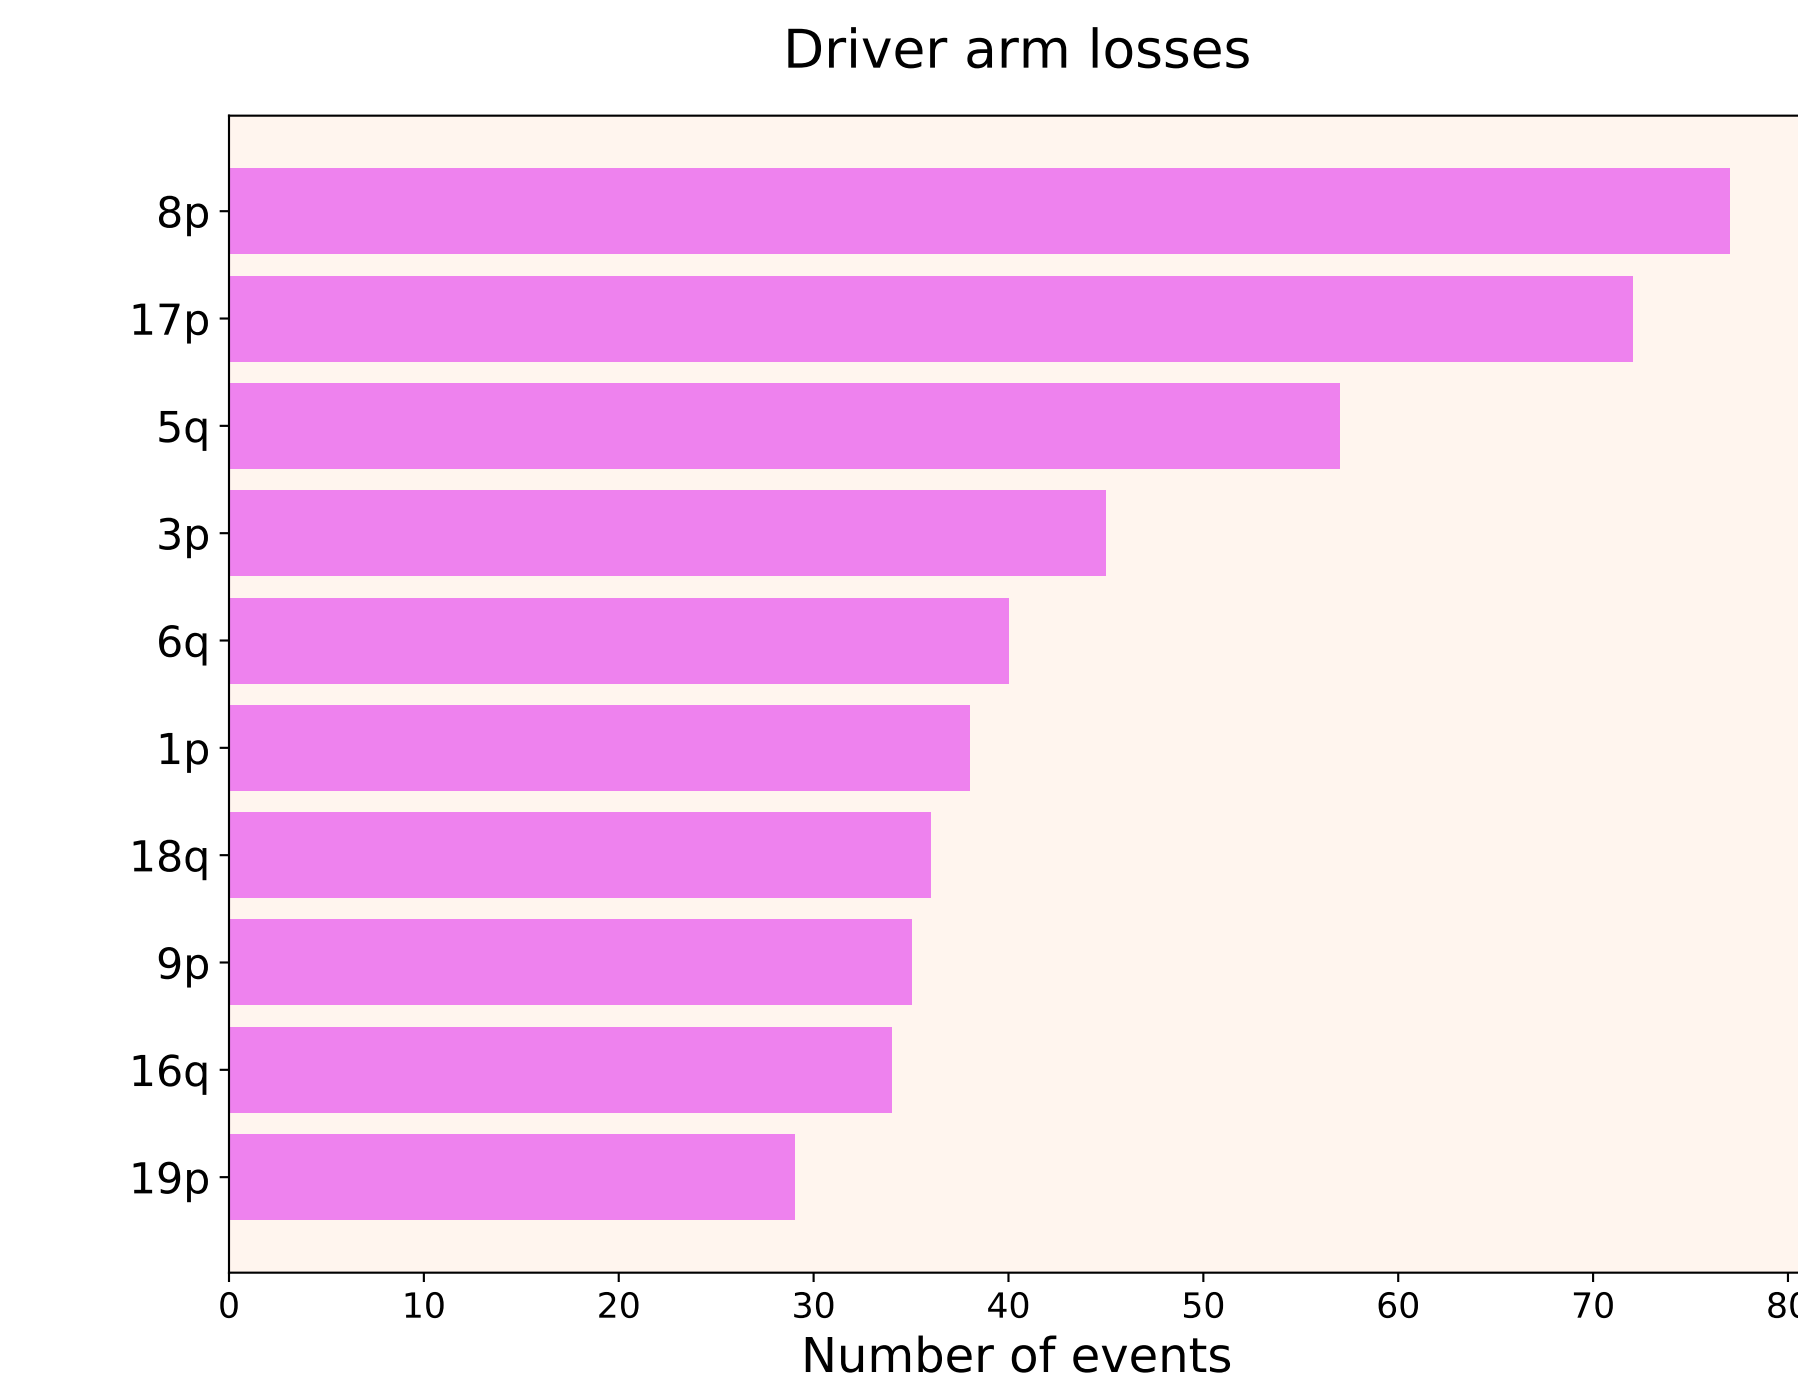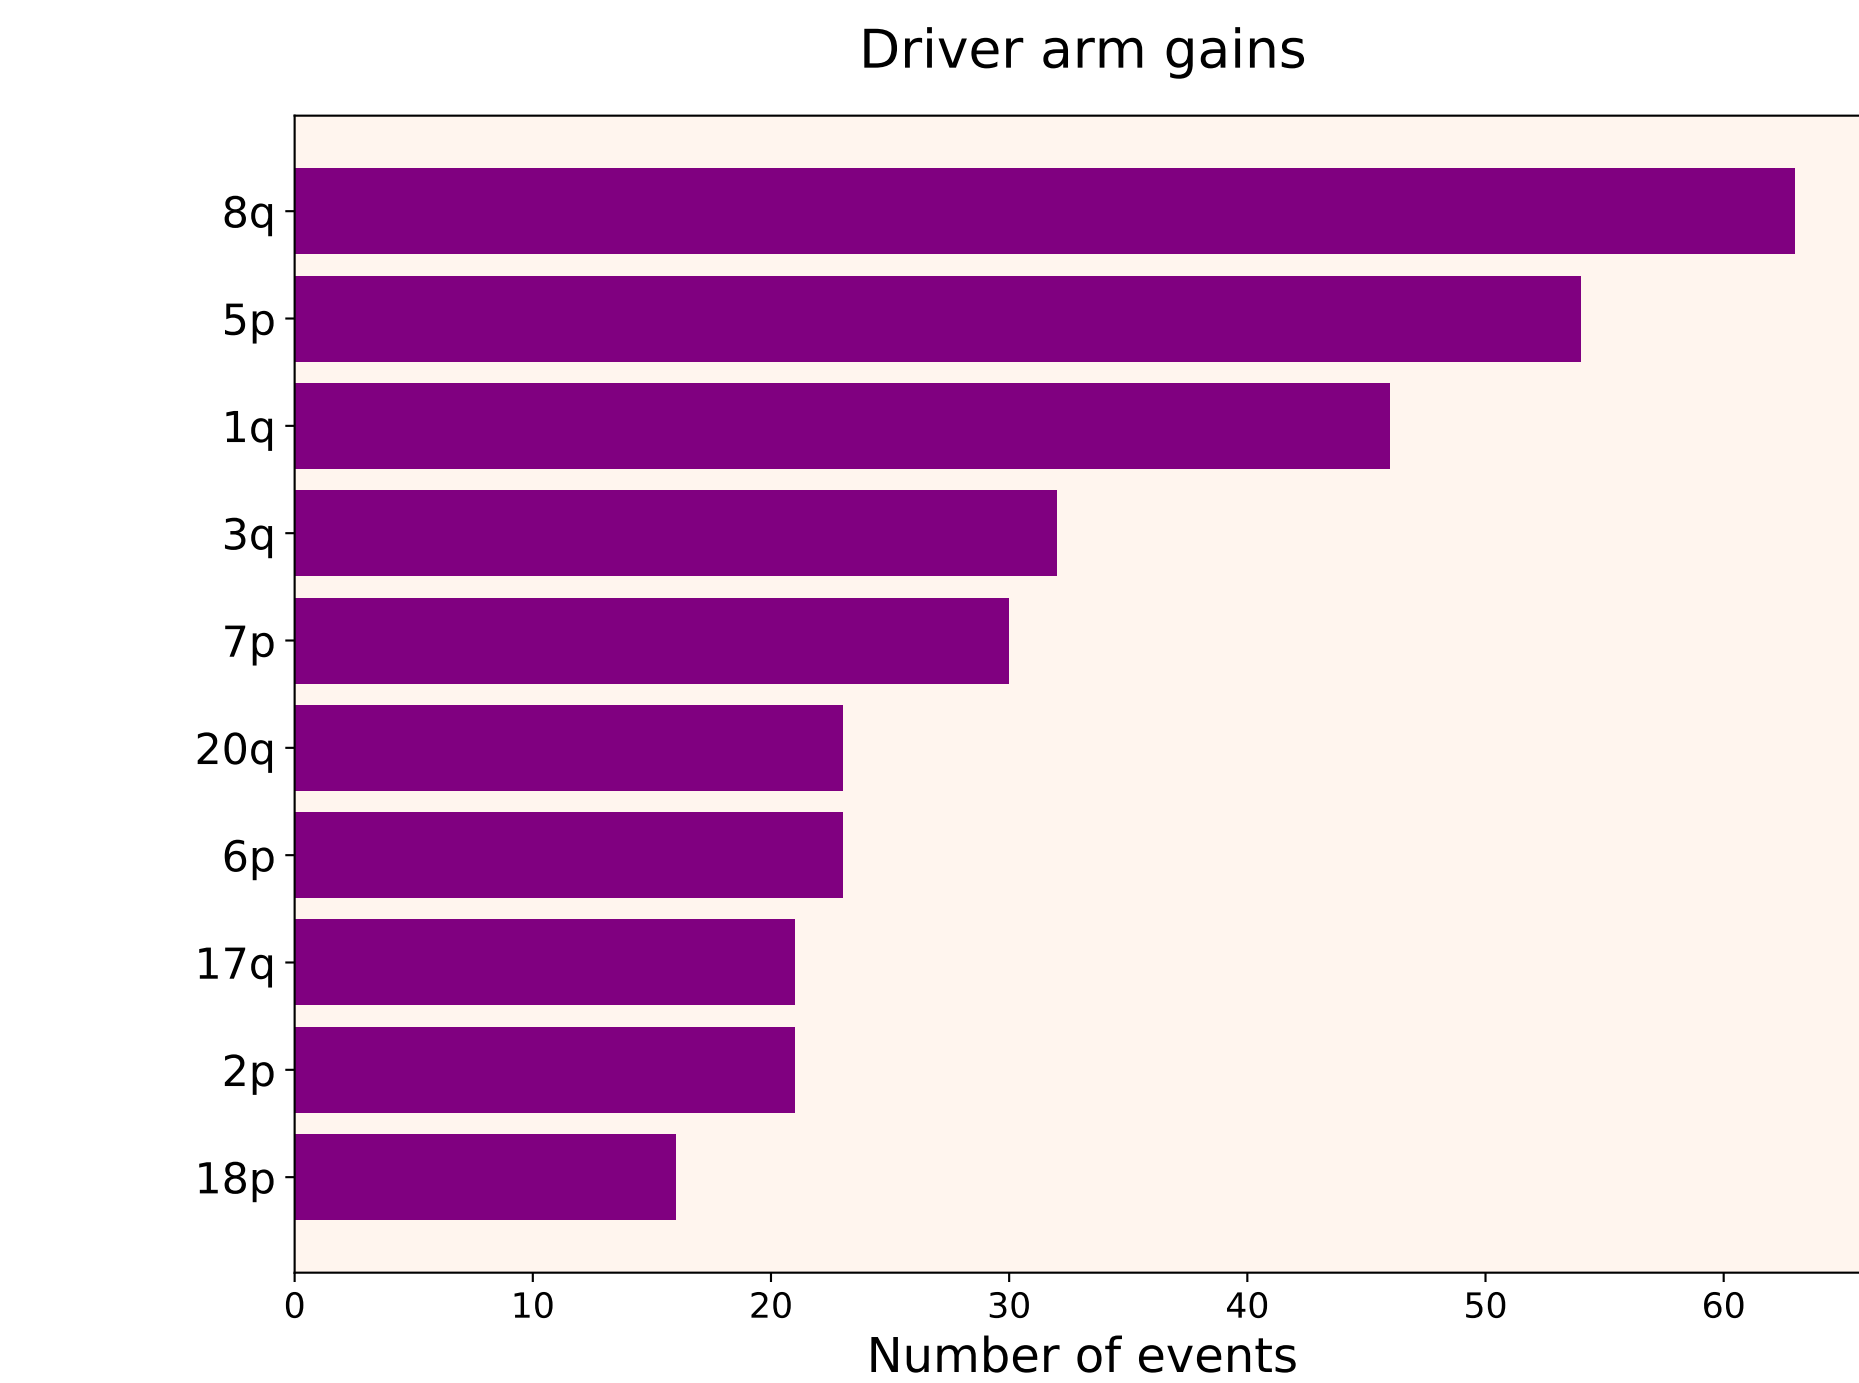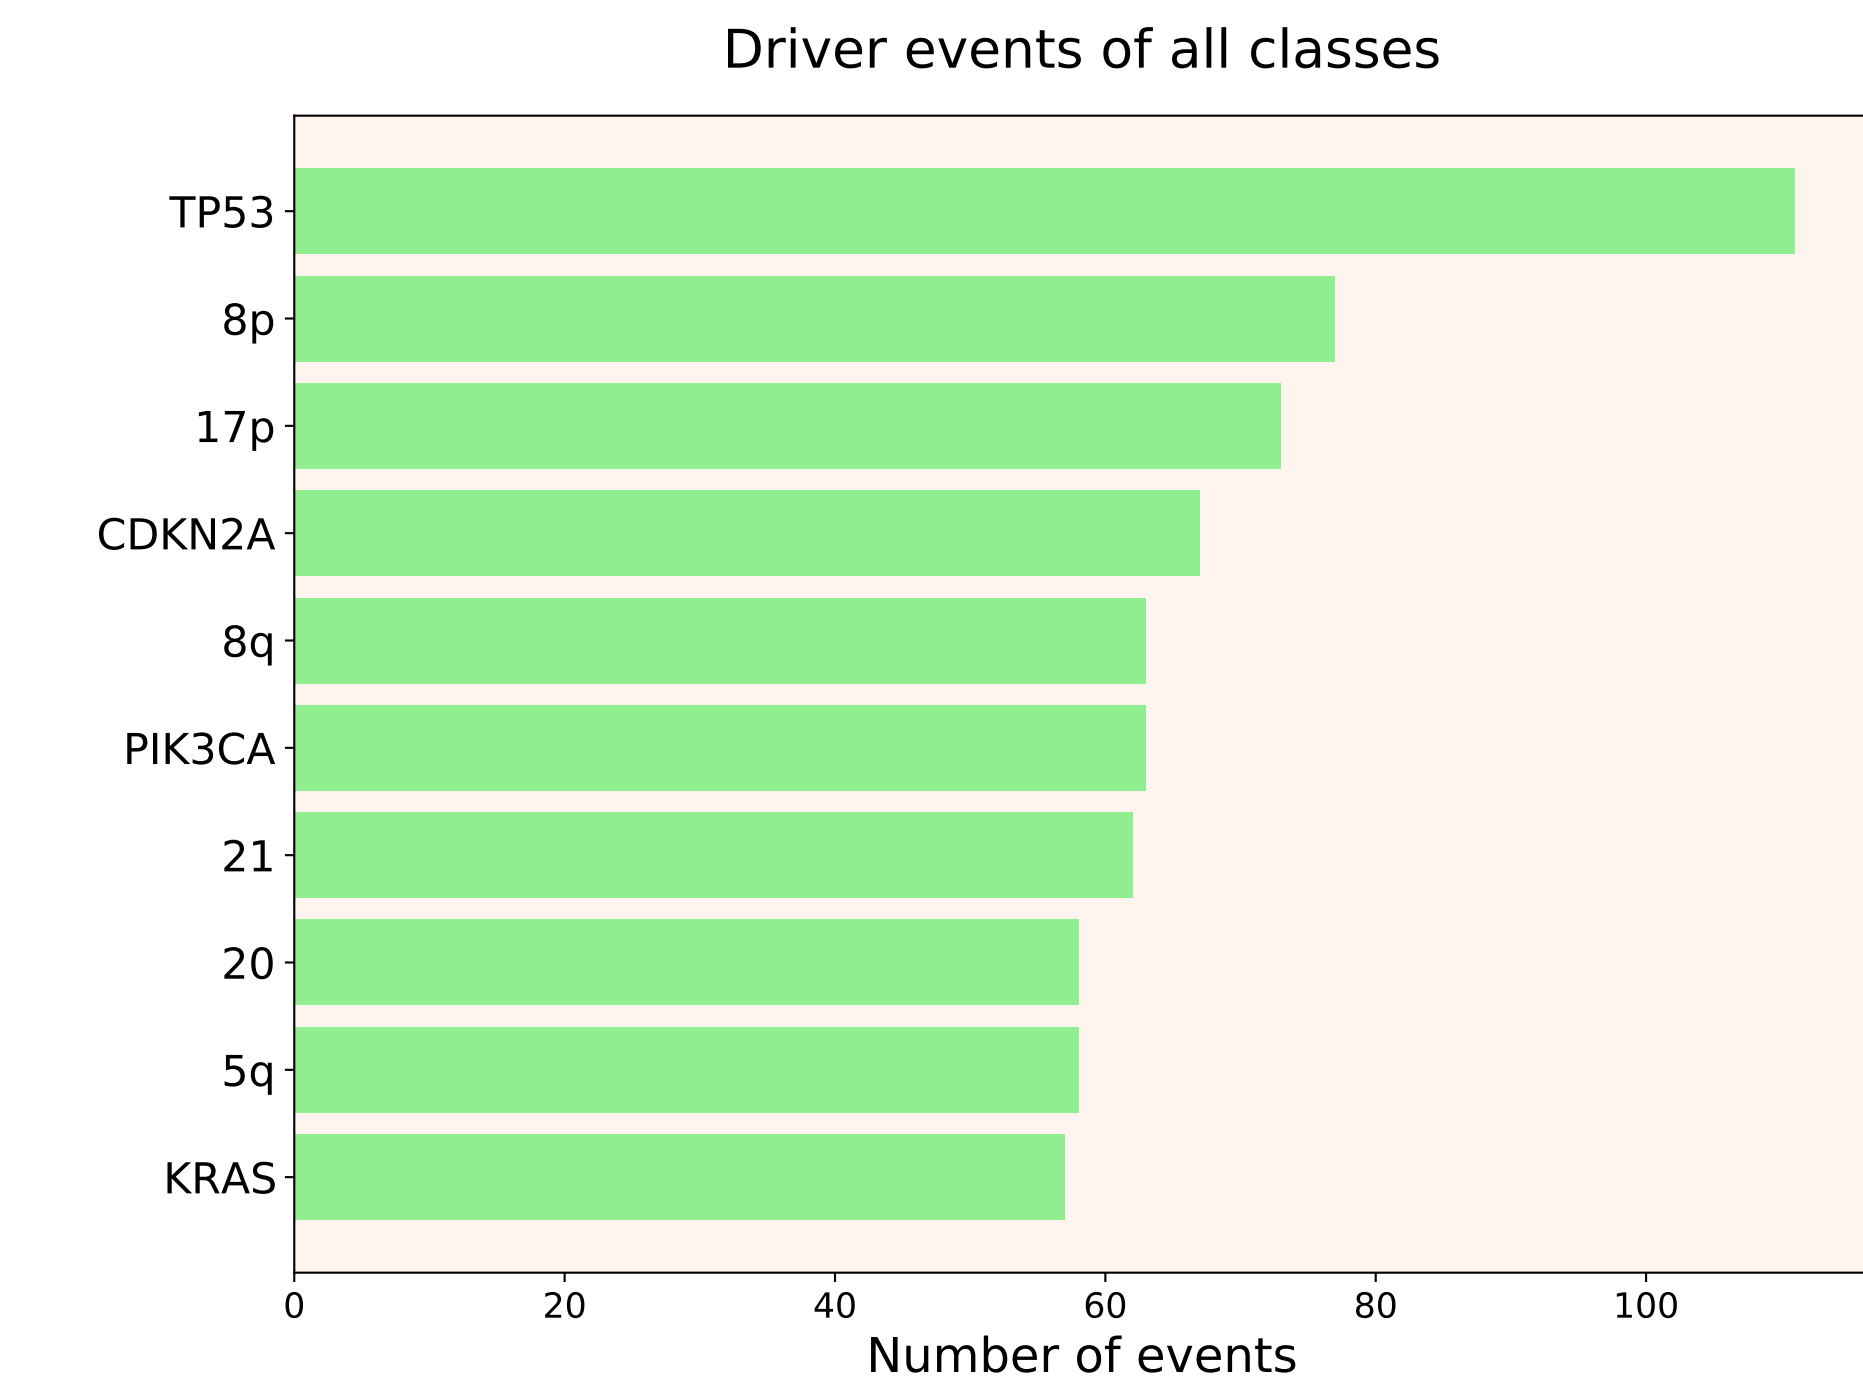

Supplement: Supplemental_Data_S1.zip [file Supplemental_Data_S1.zip]

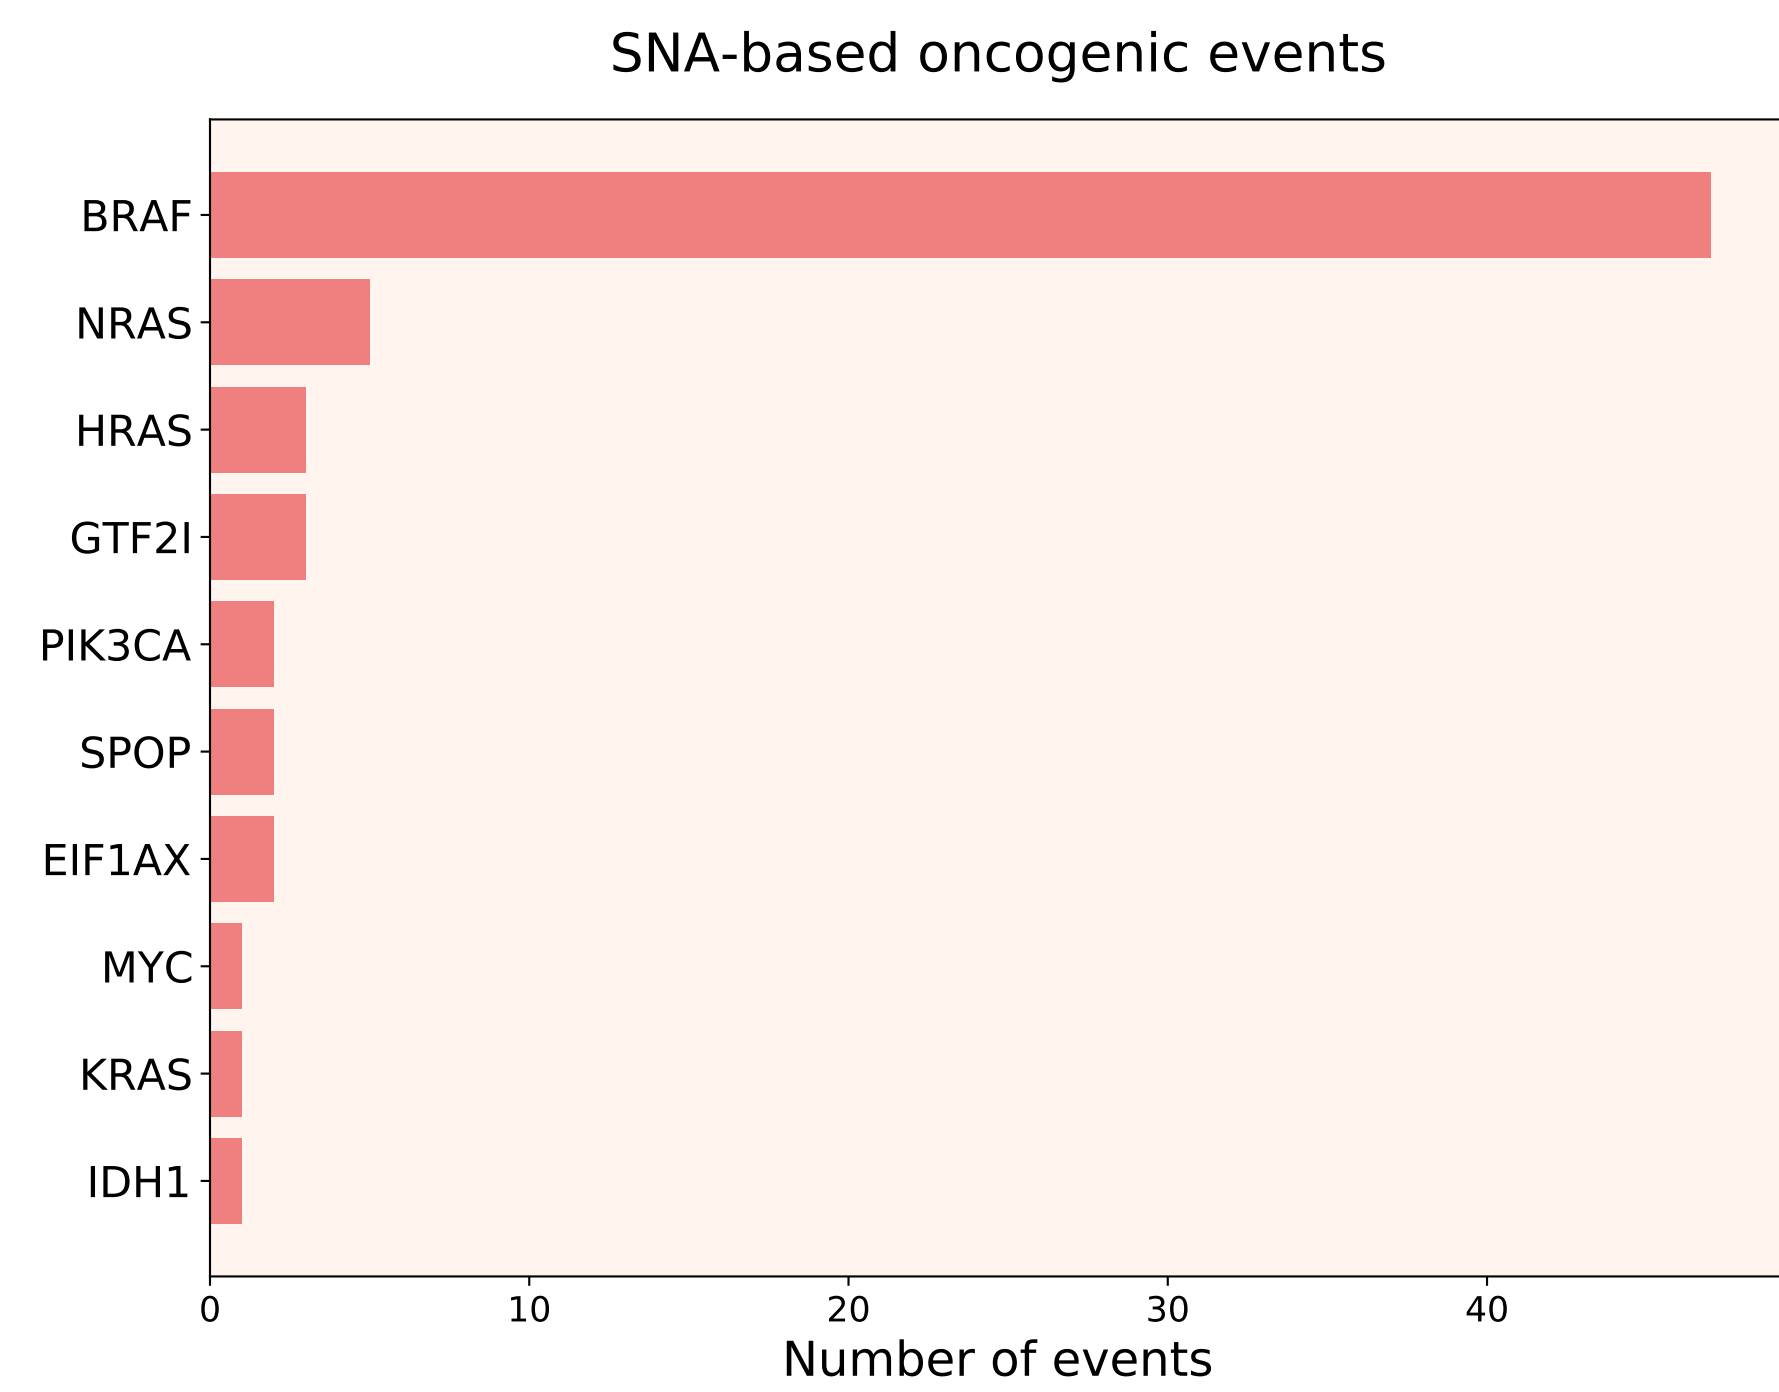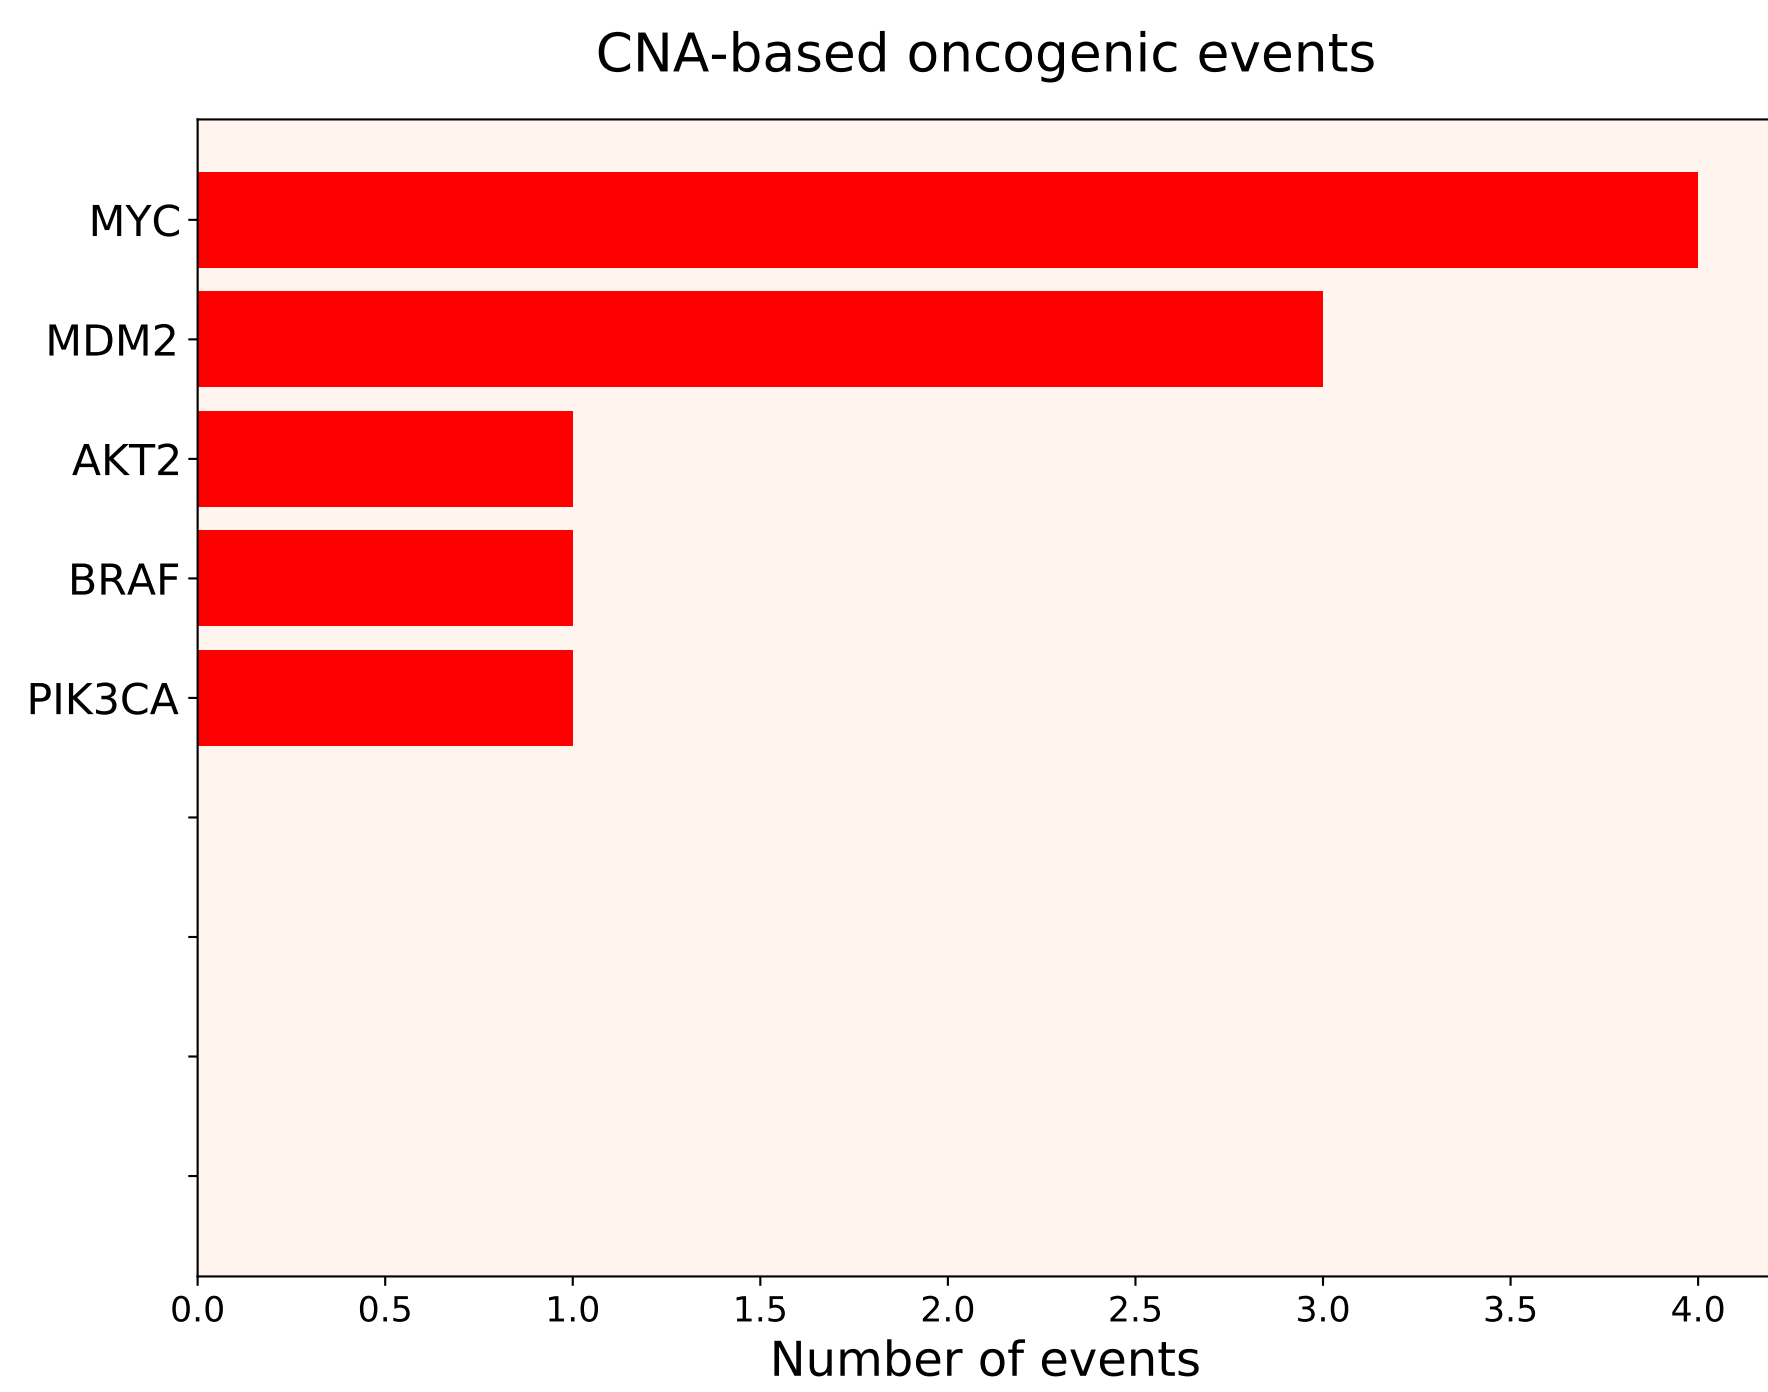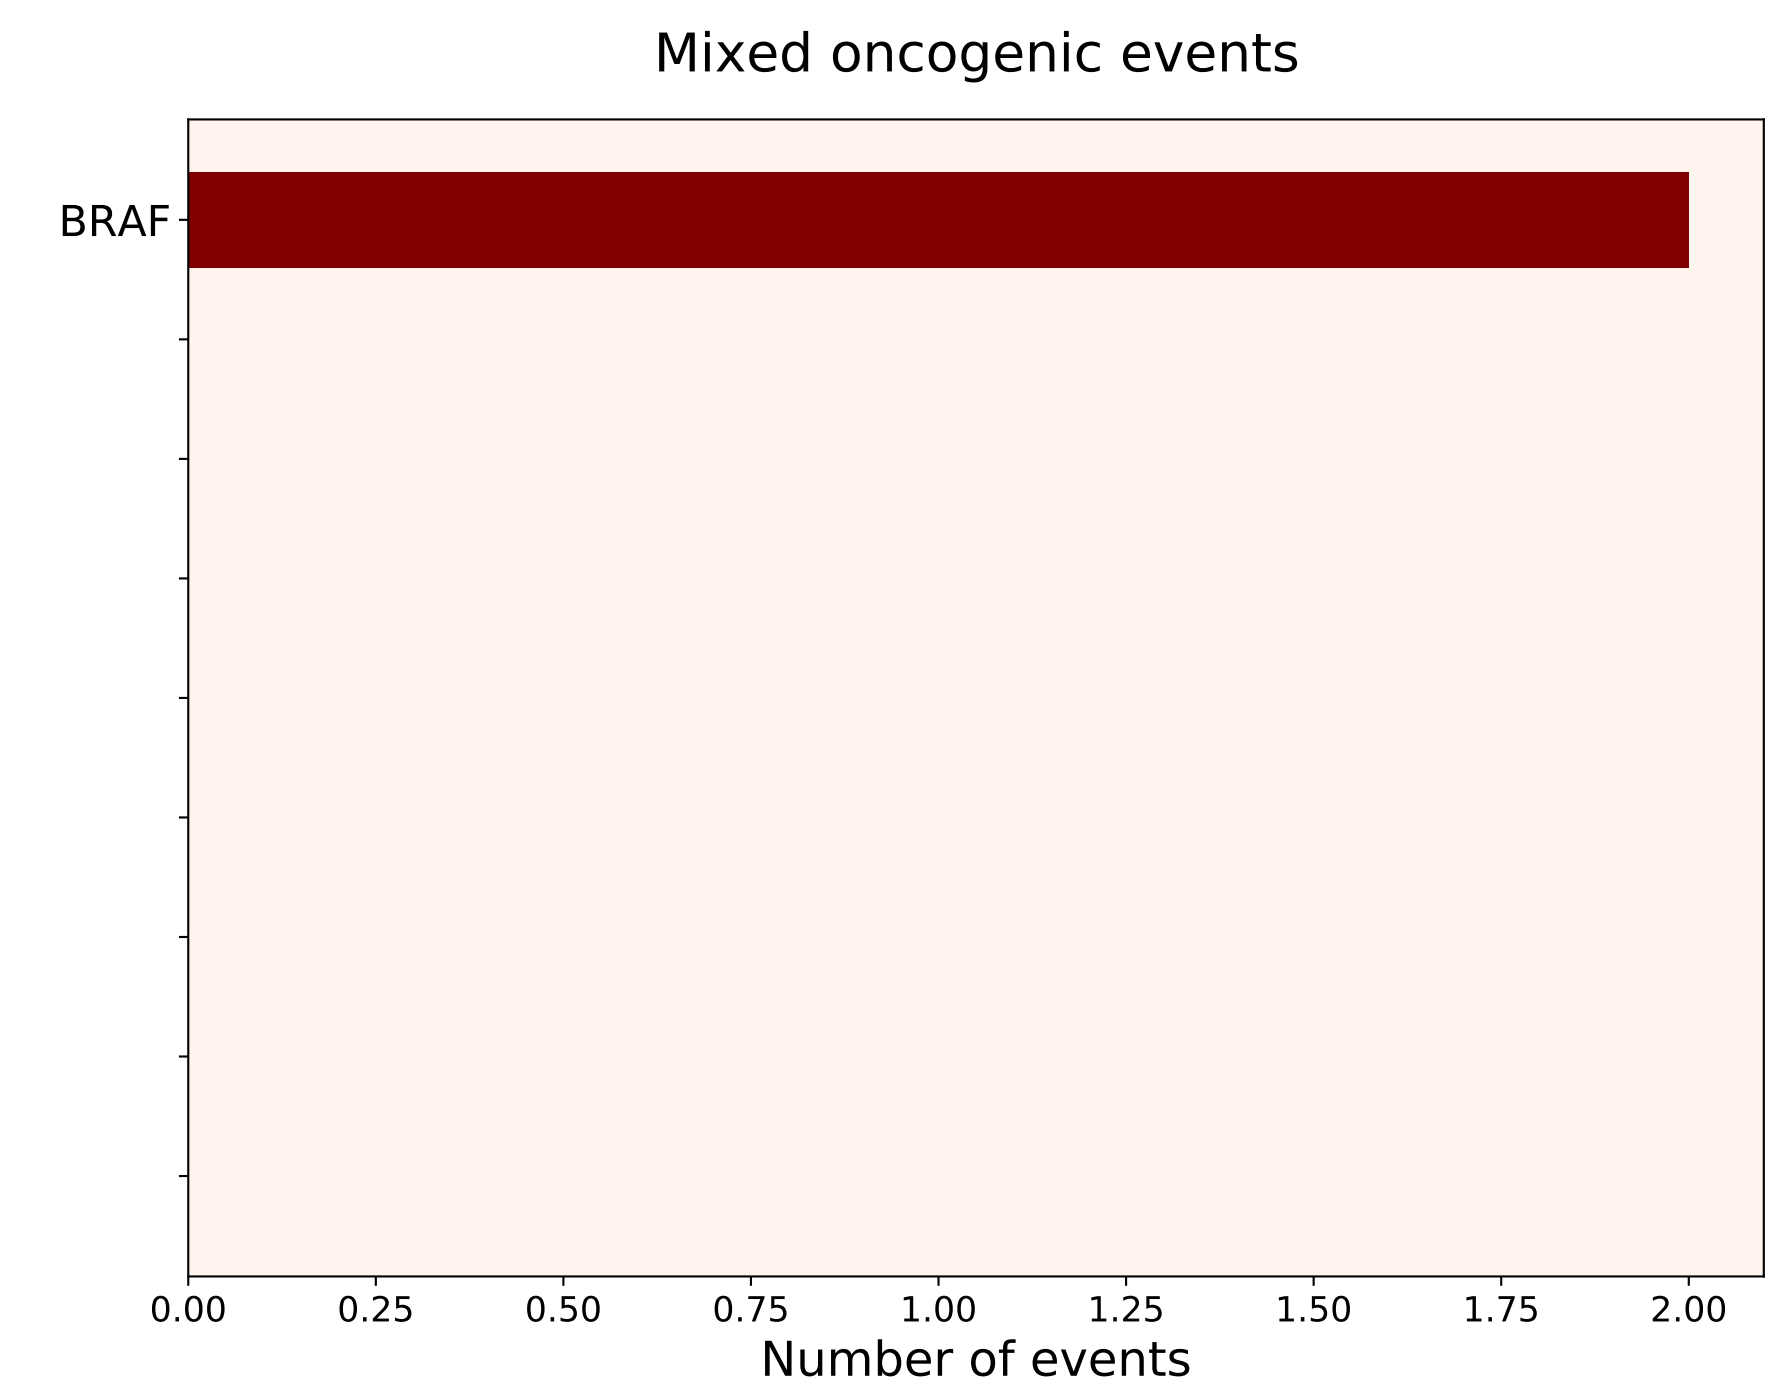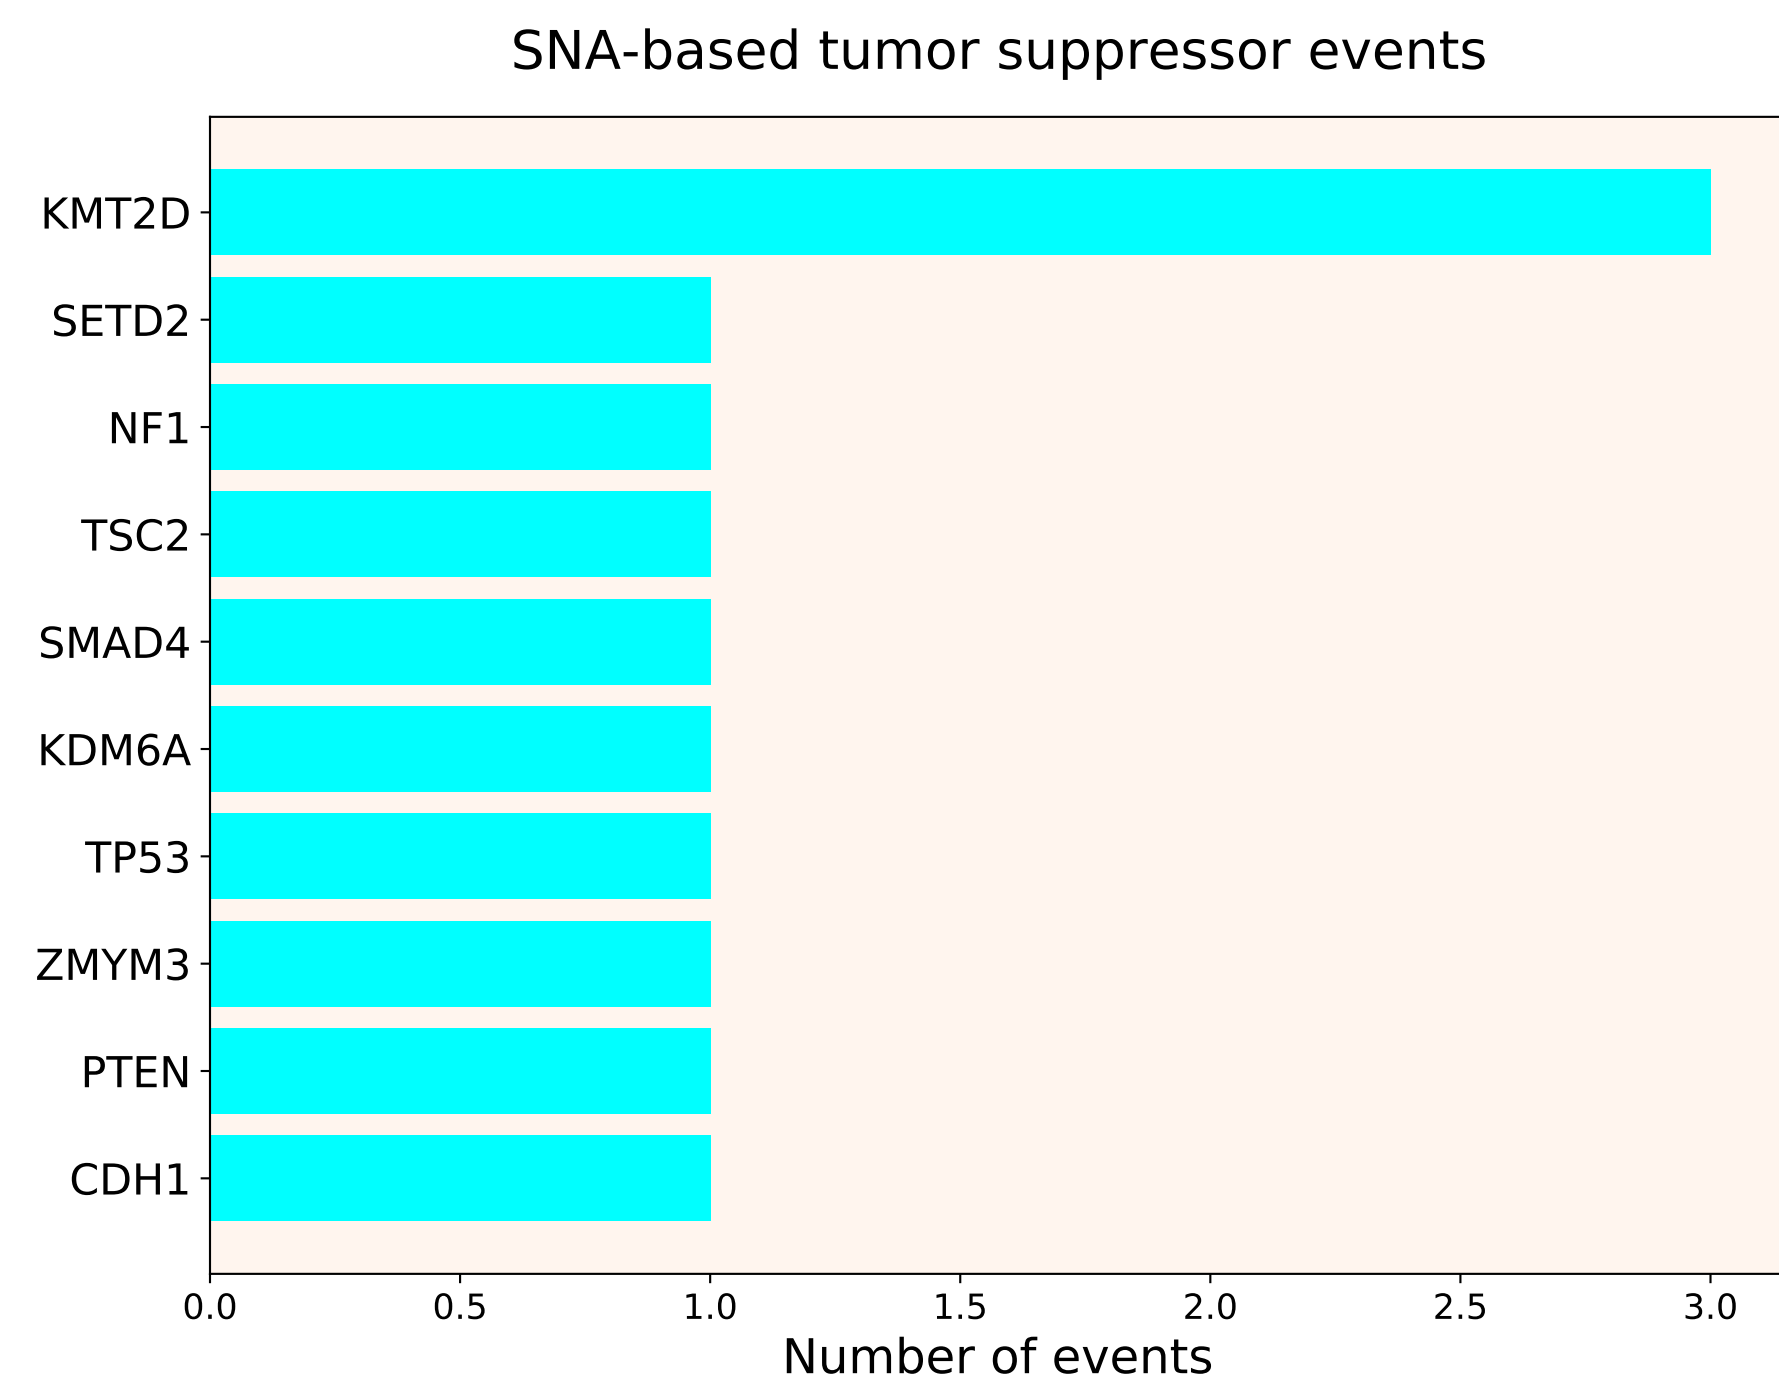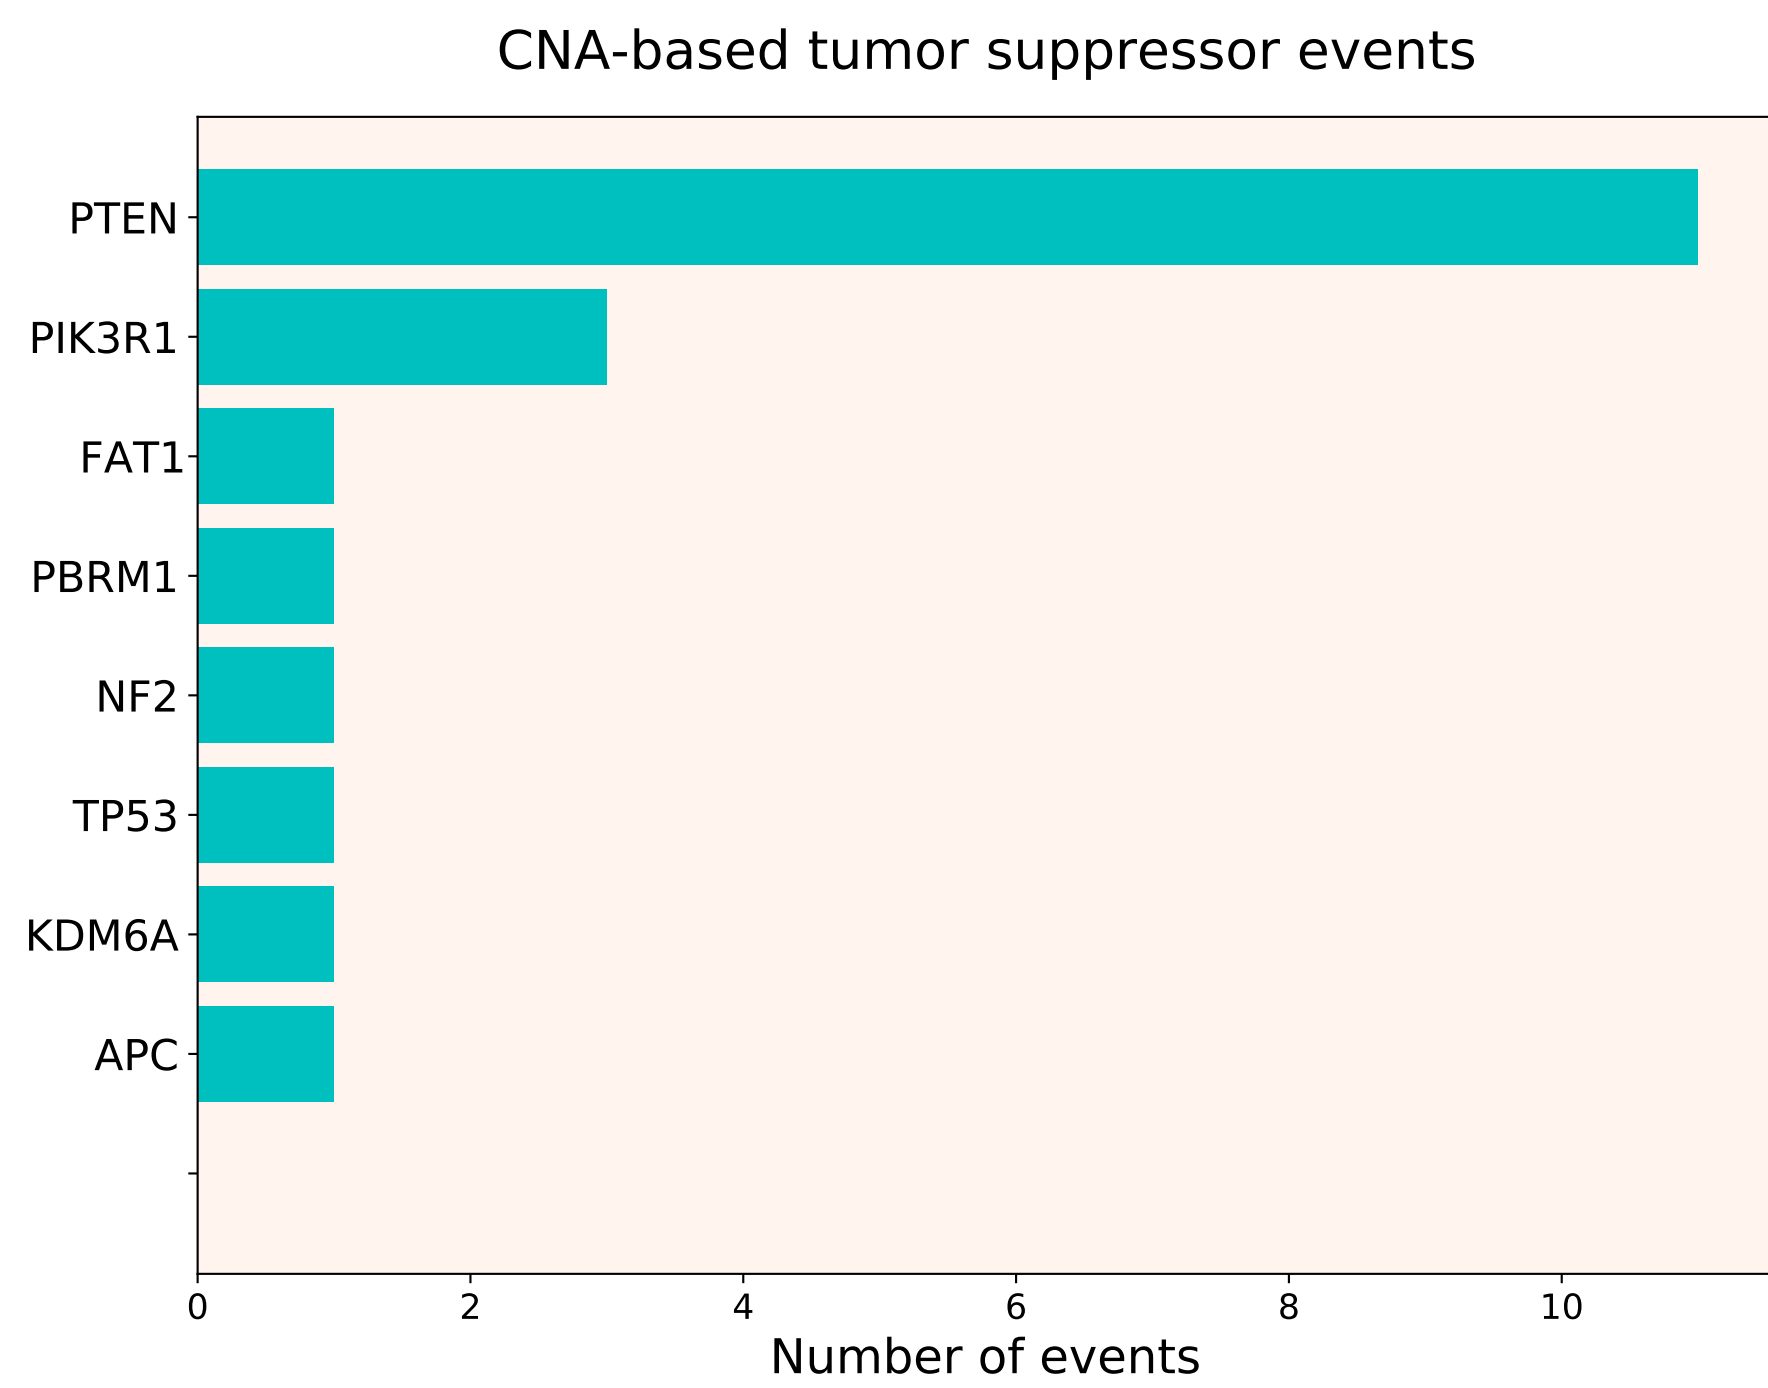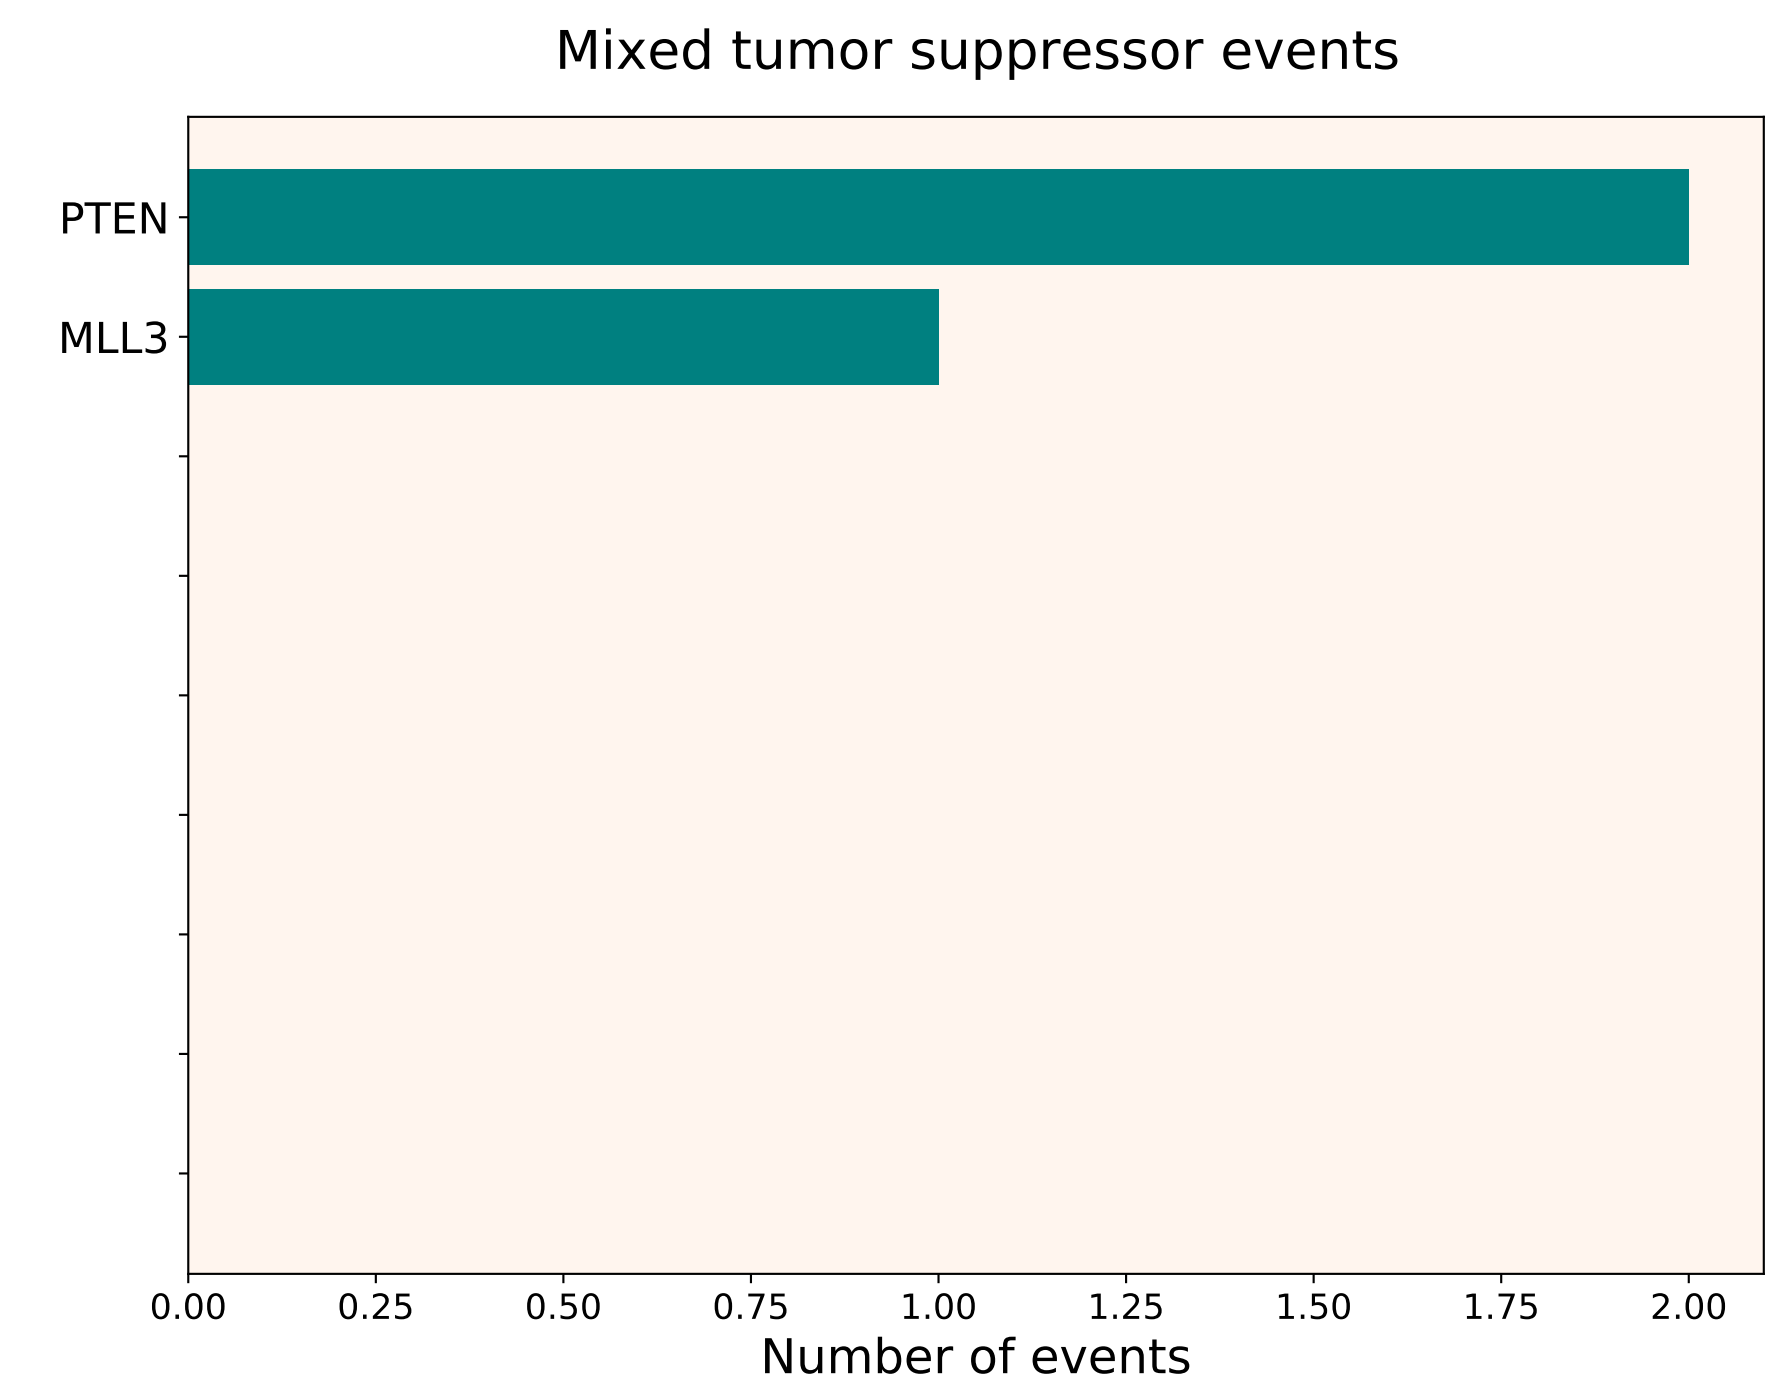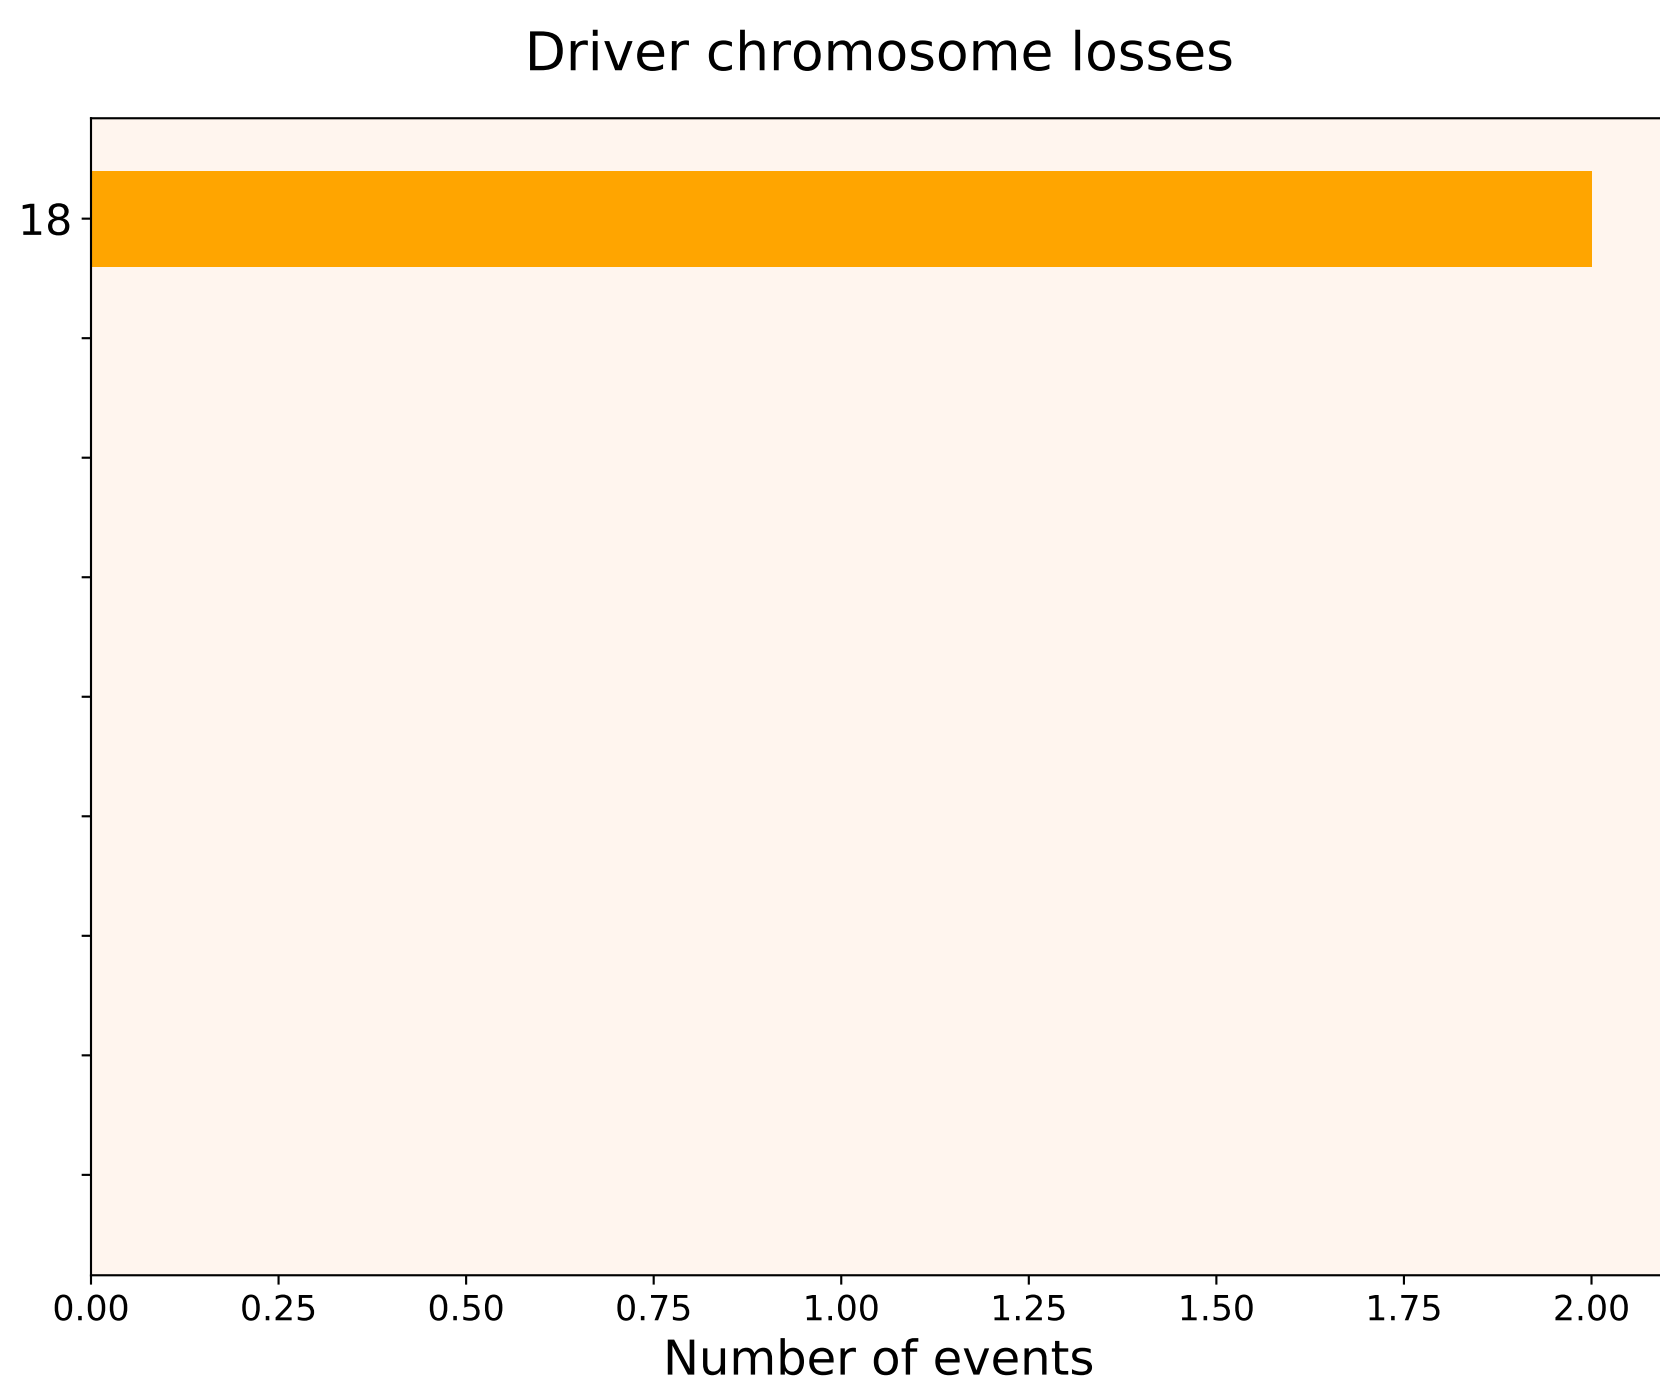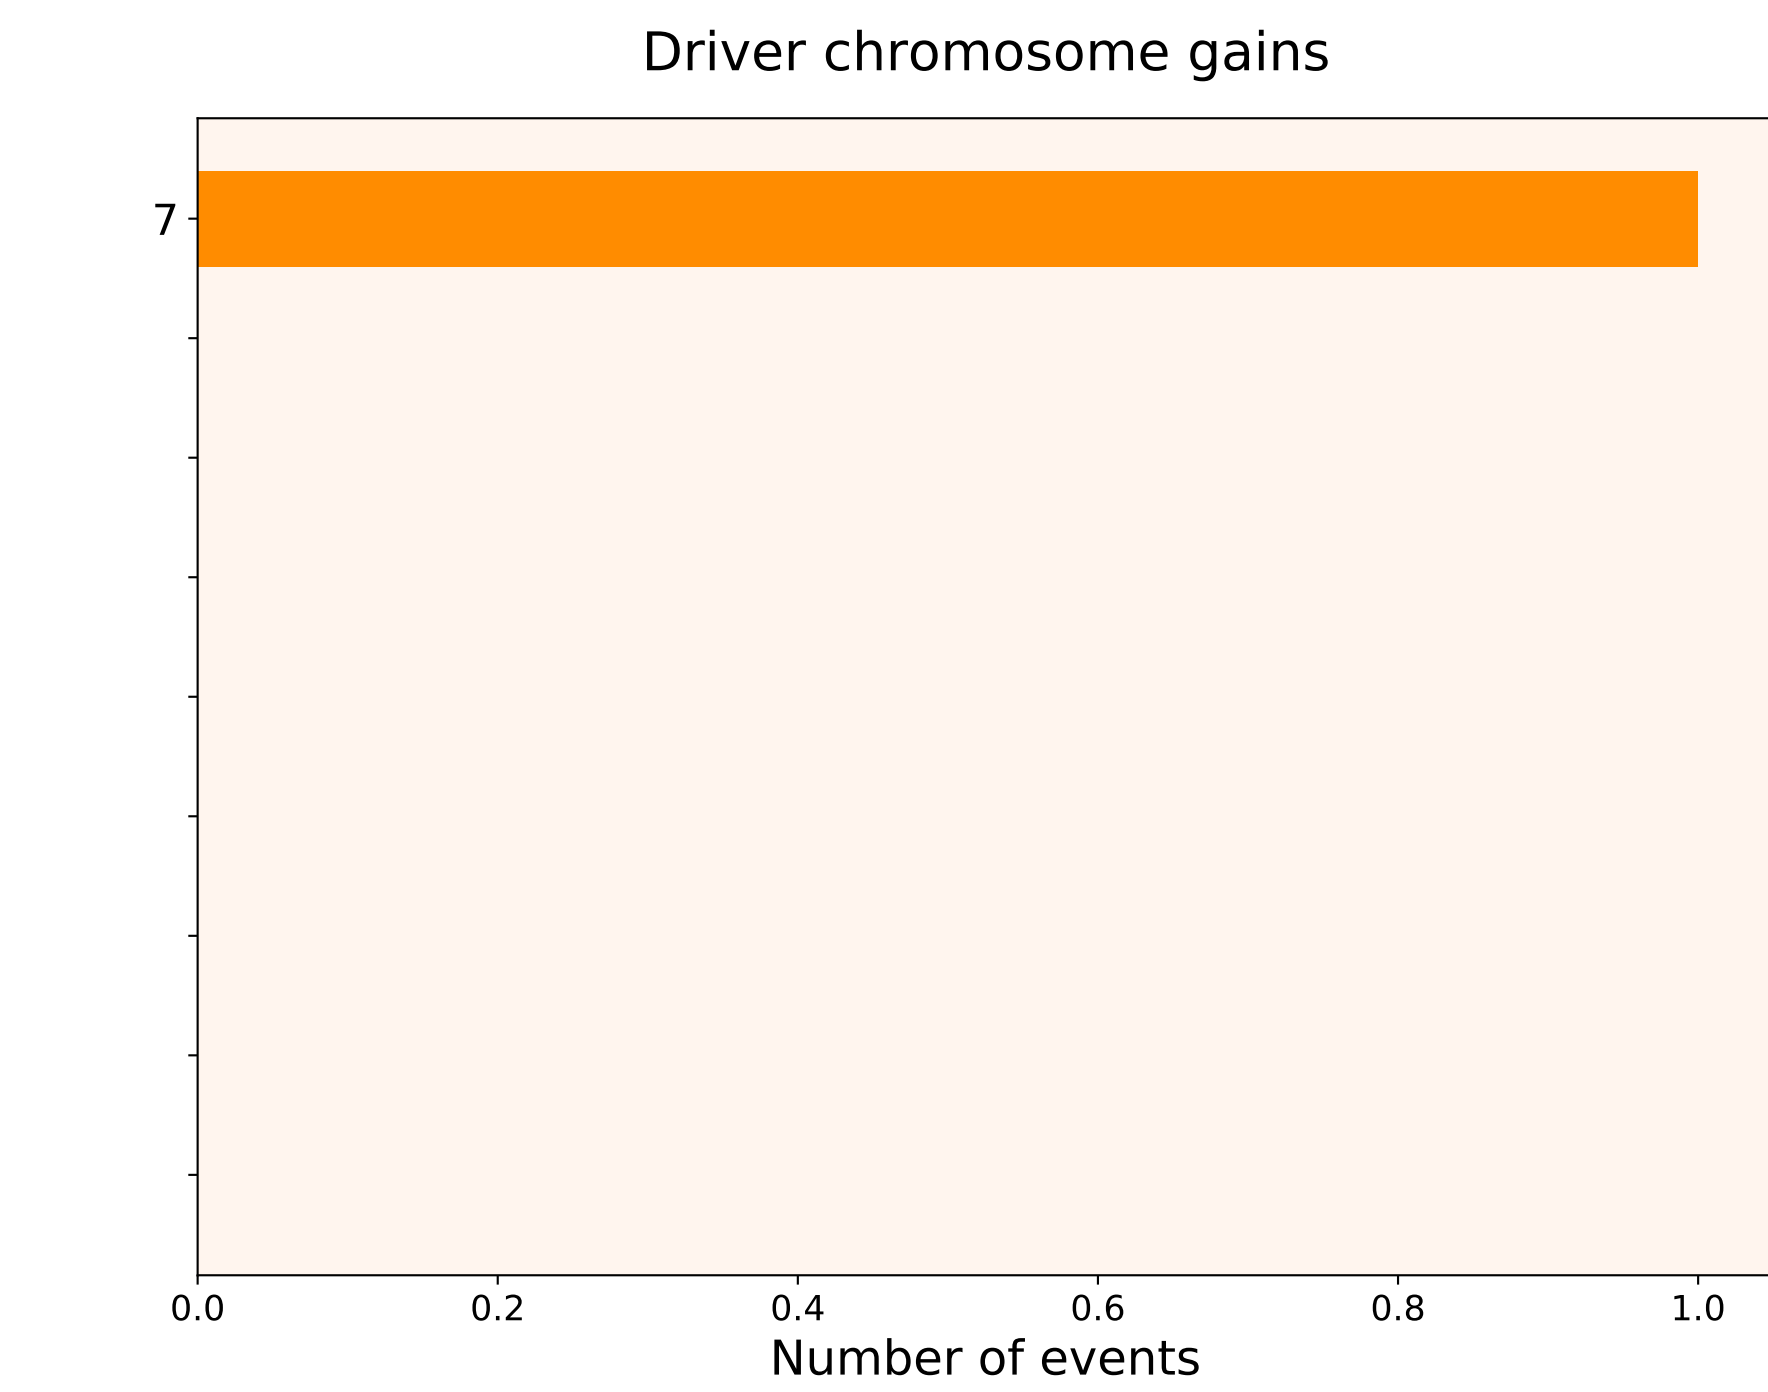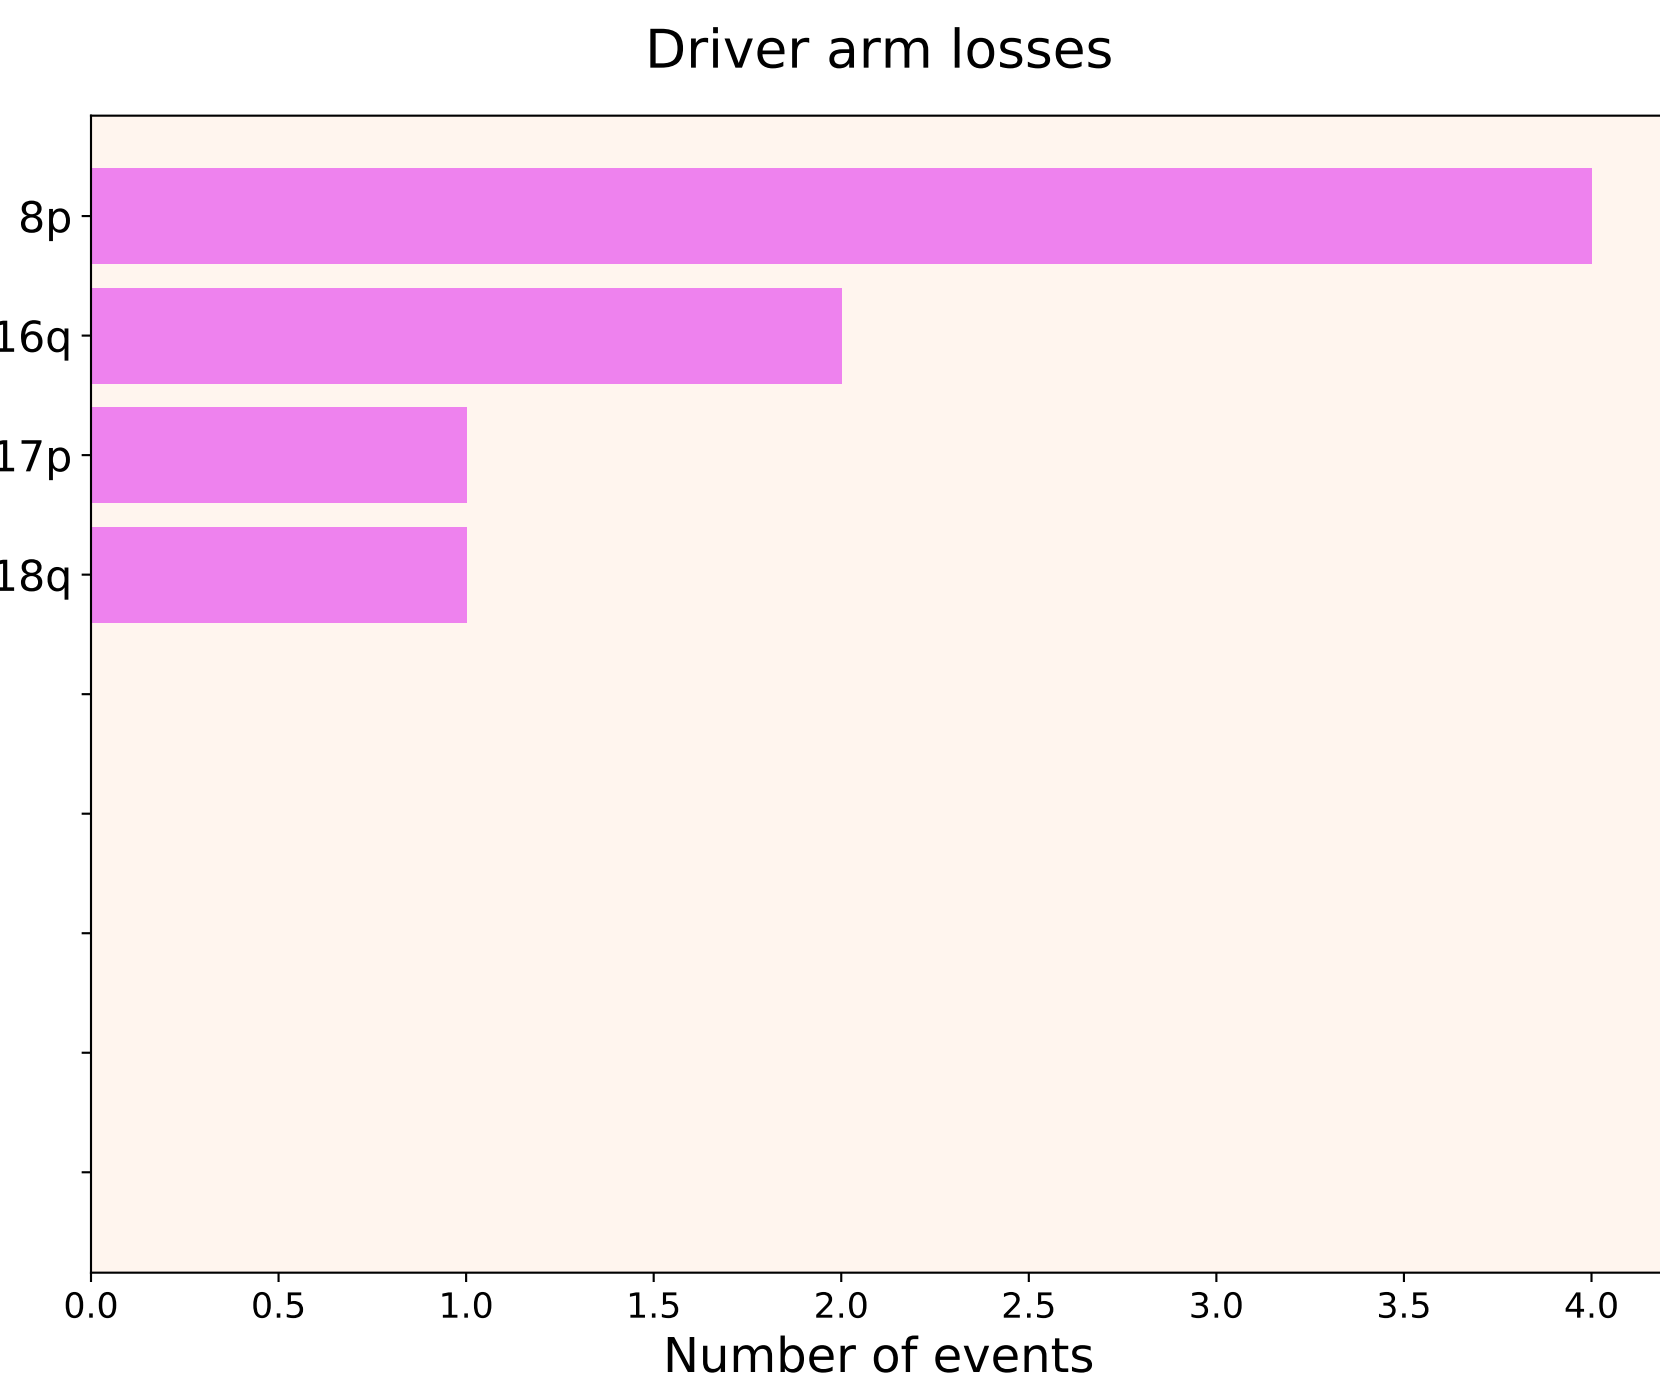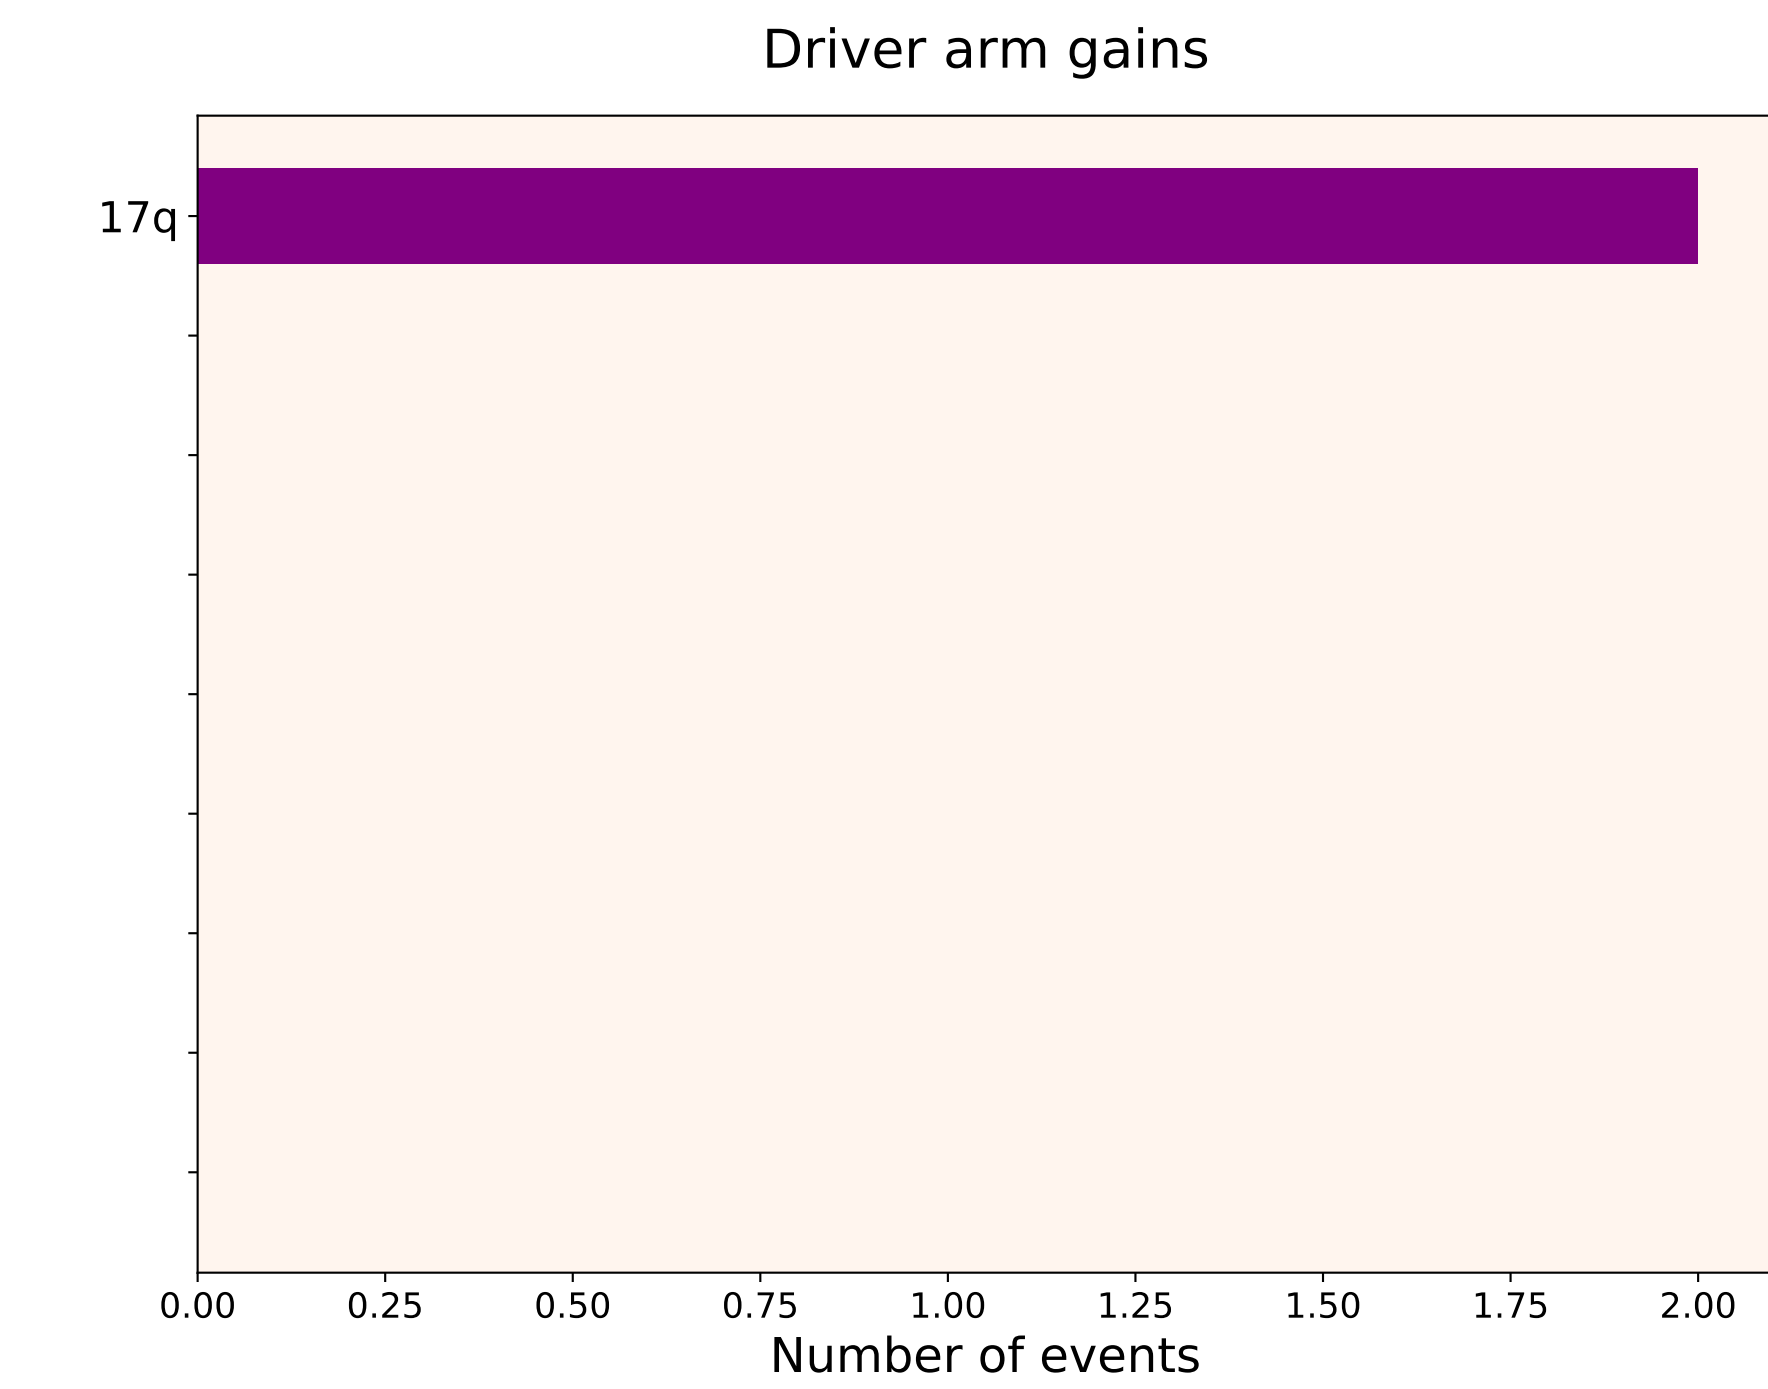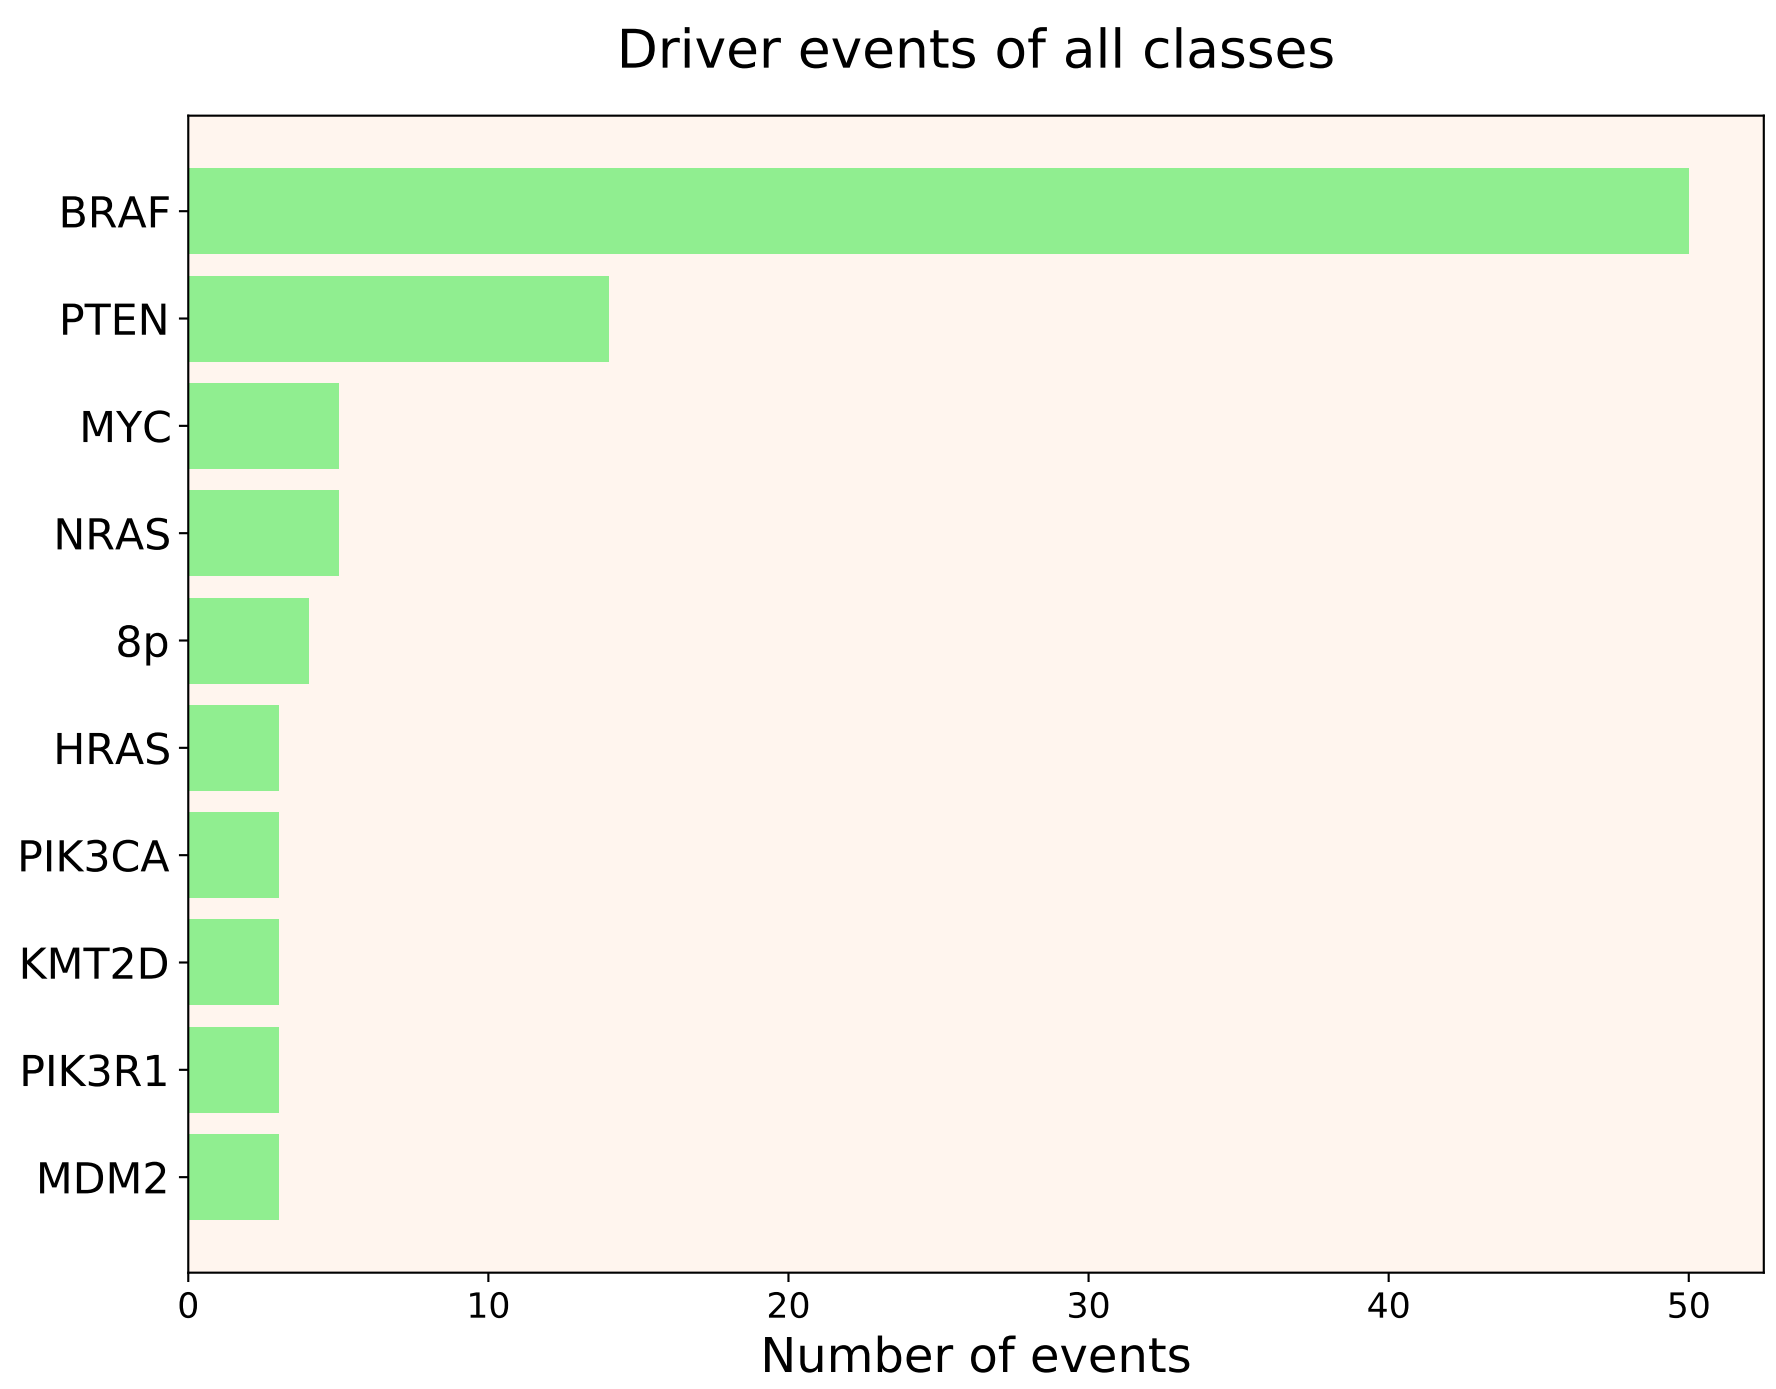

Supplement: Supplemental_Data_S1.zip [file Supplemental_Data_S1.zip]

# CHOL

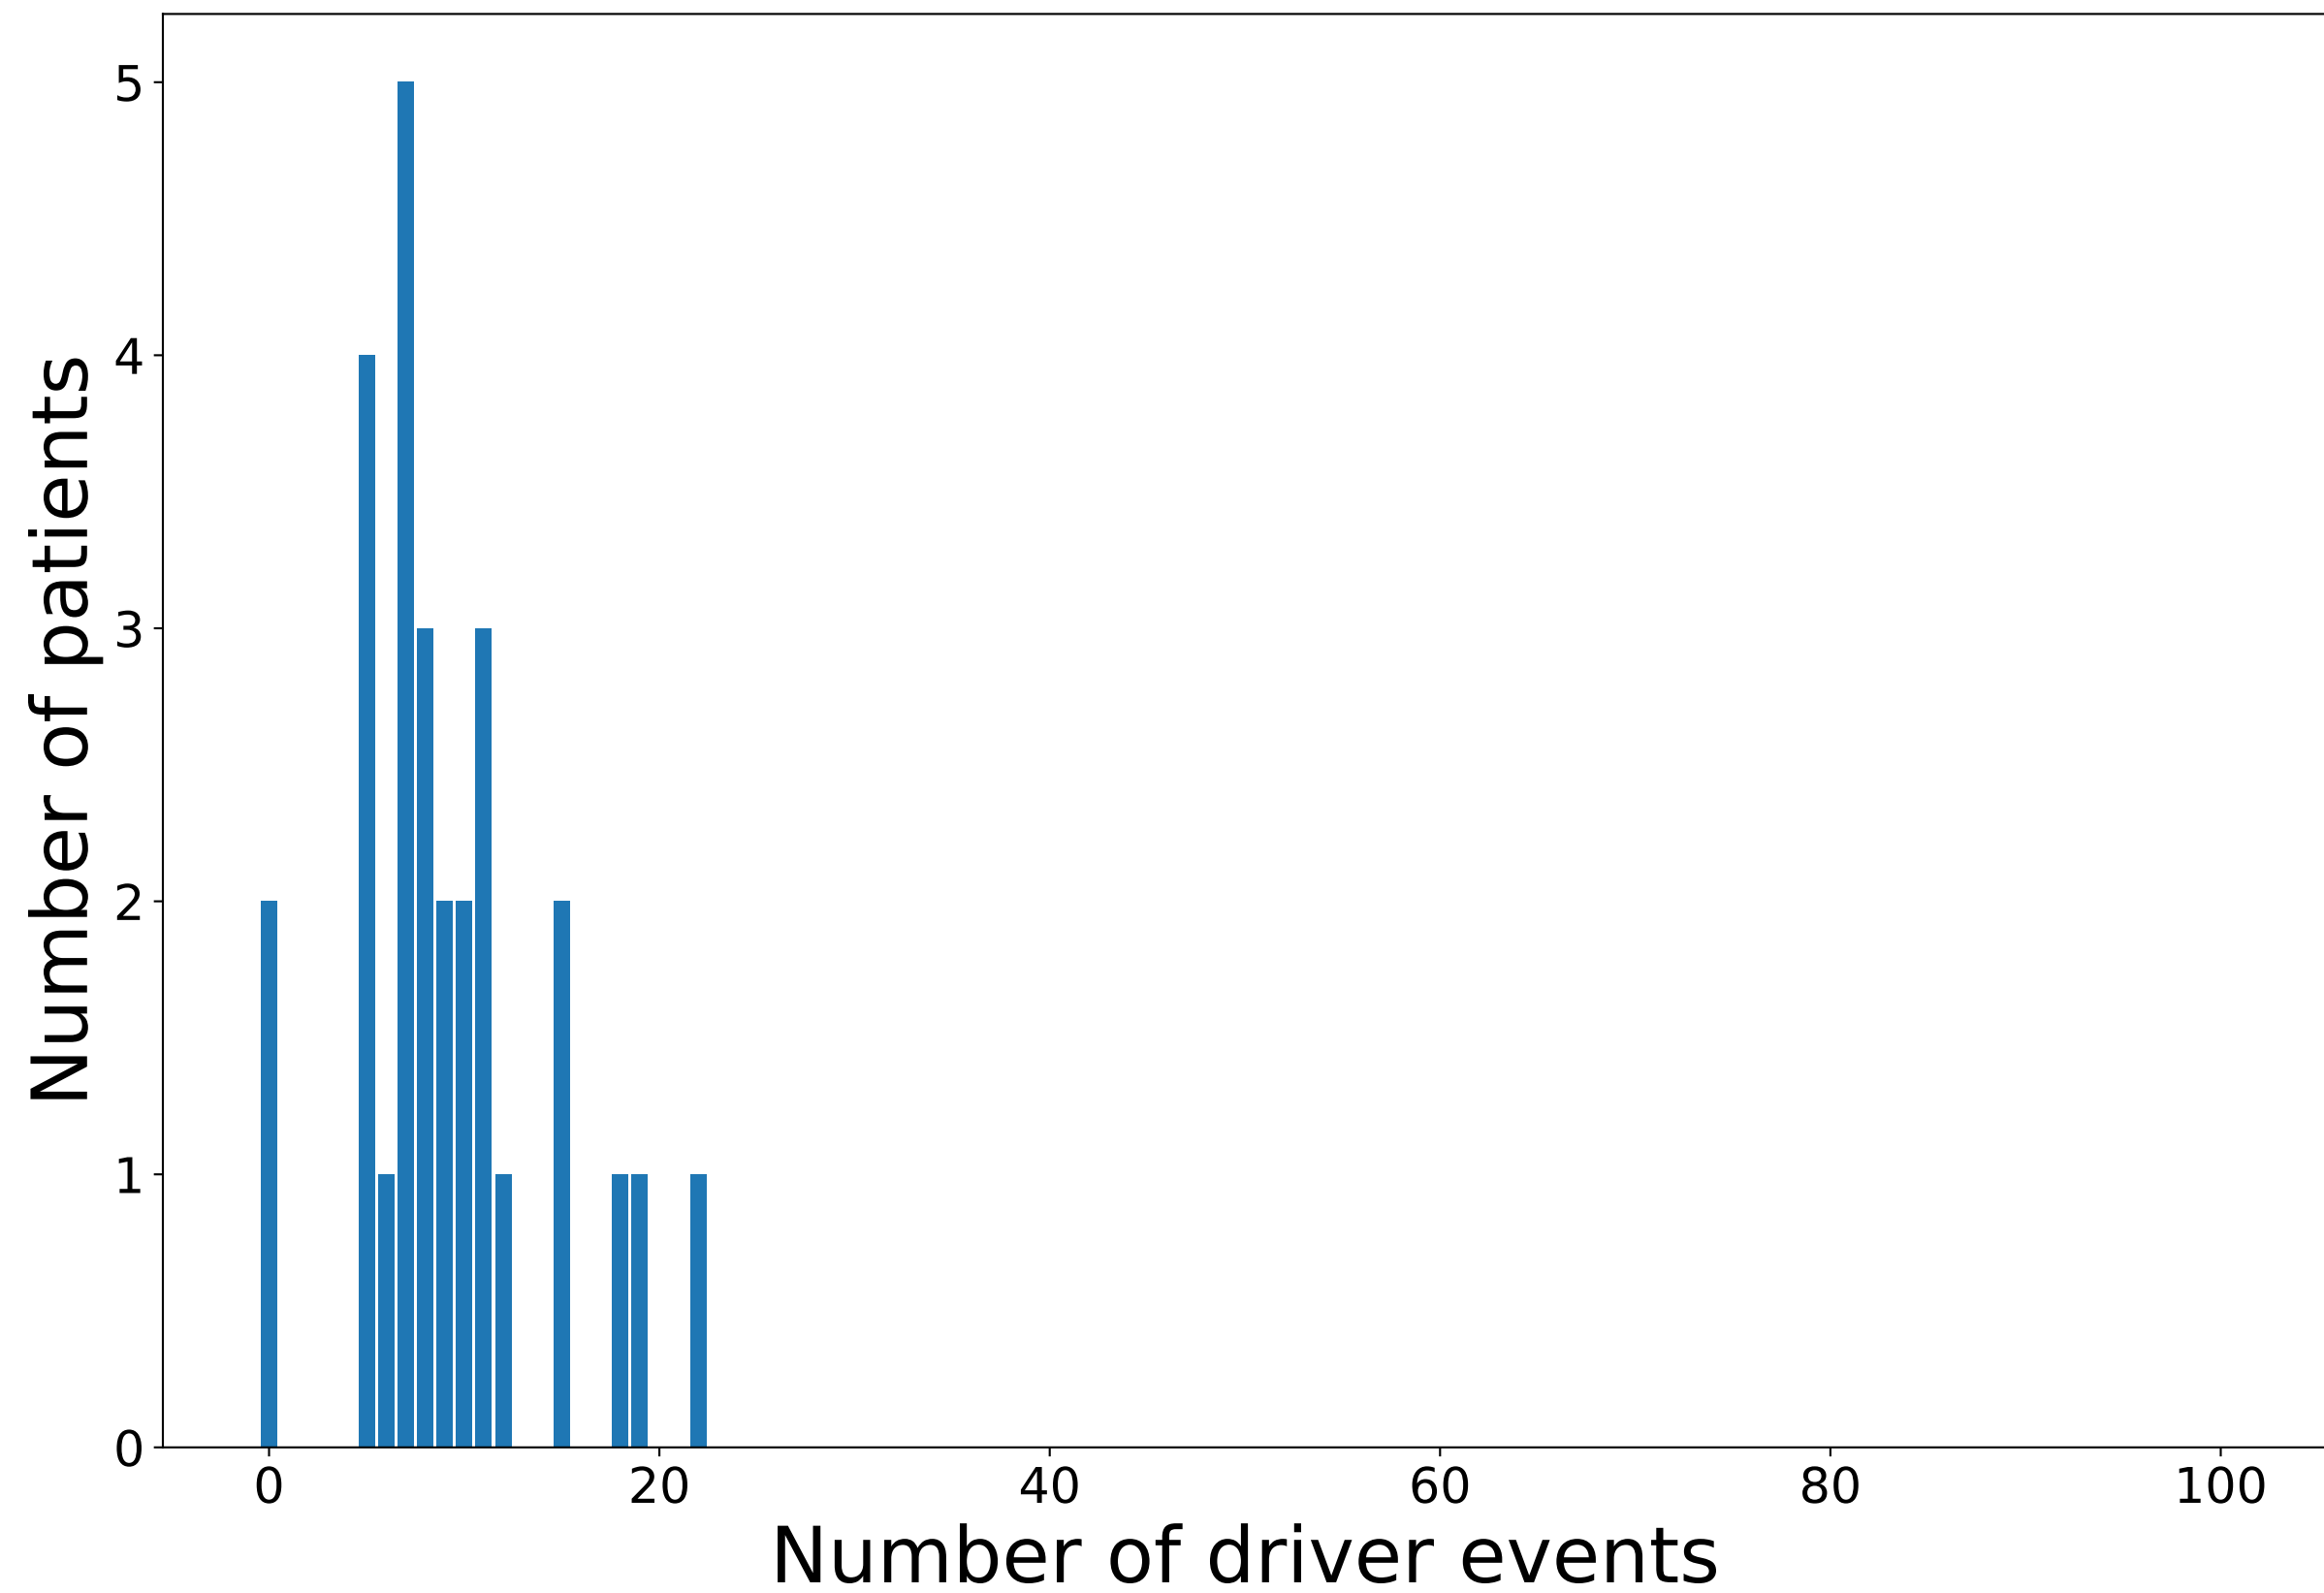

Supplement: Supplemental_Data_S1.zip [file Supplemental_Data_S1.zip]

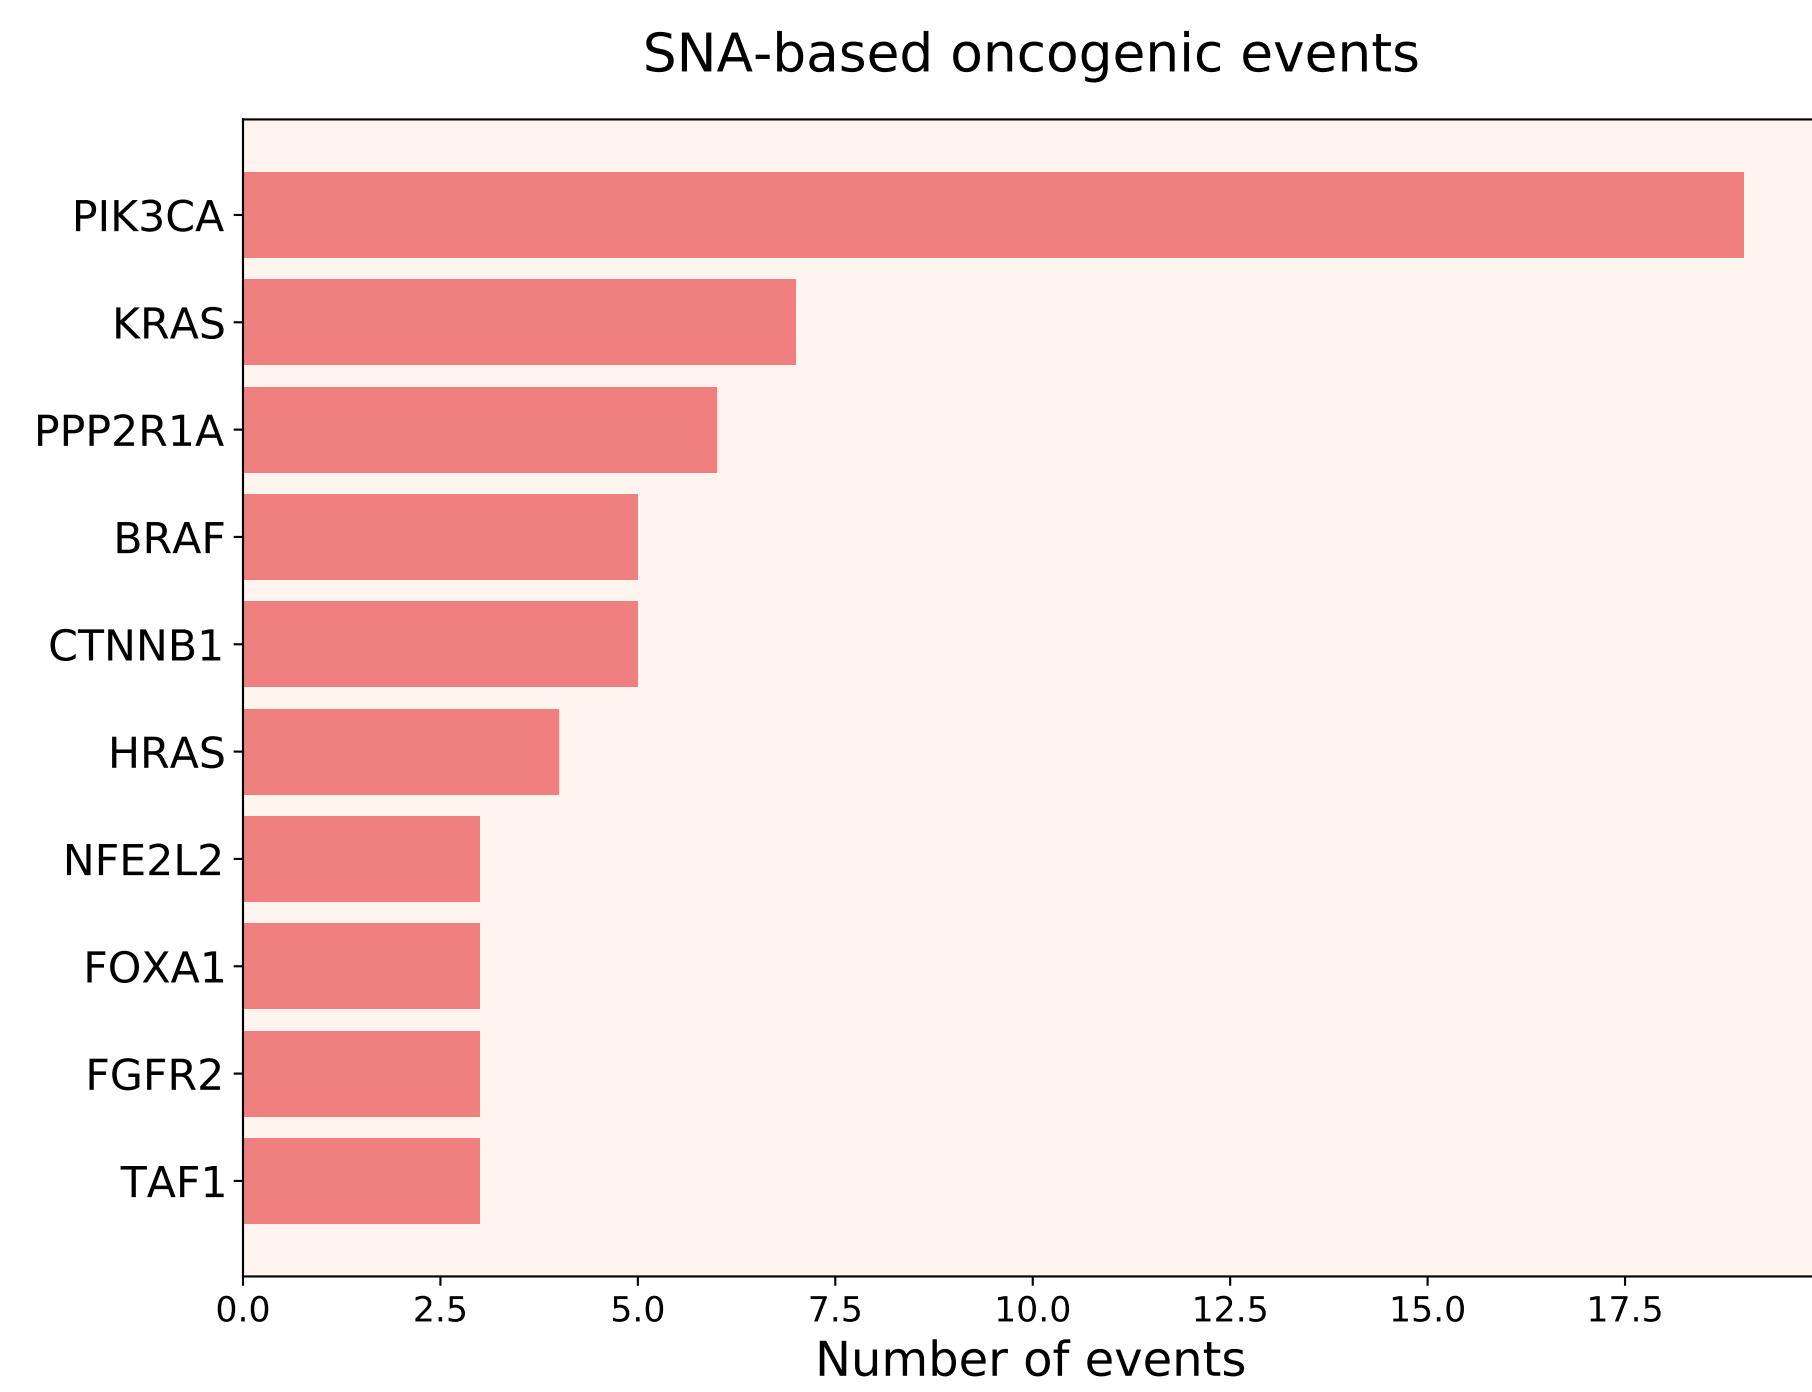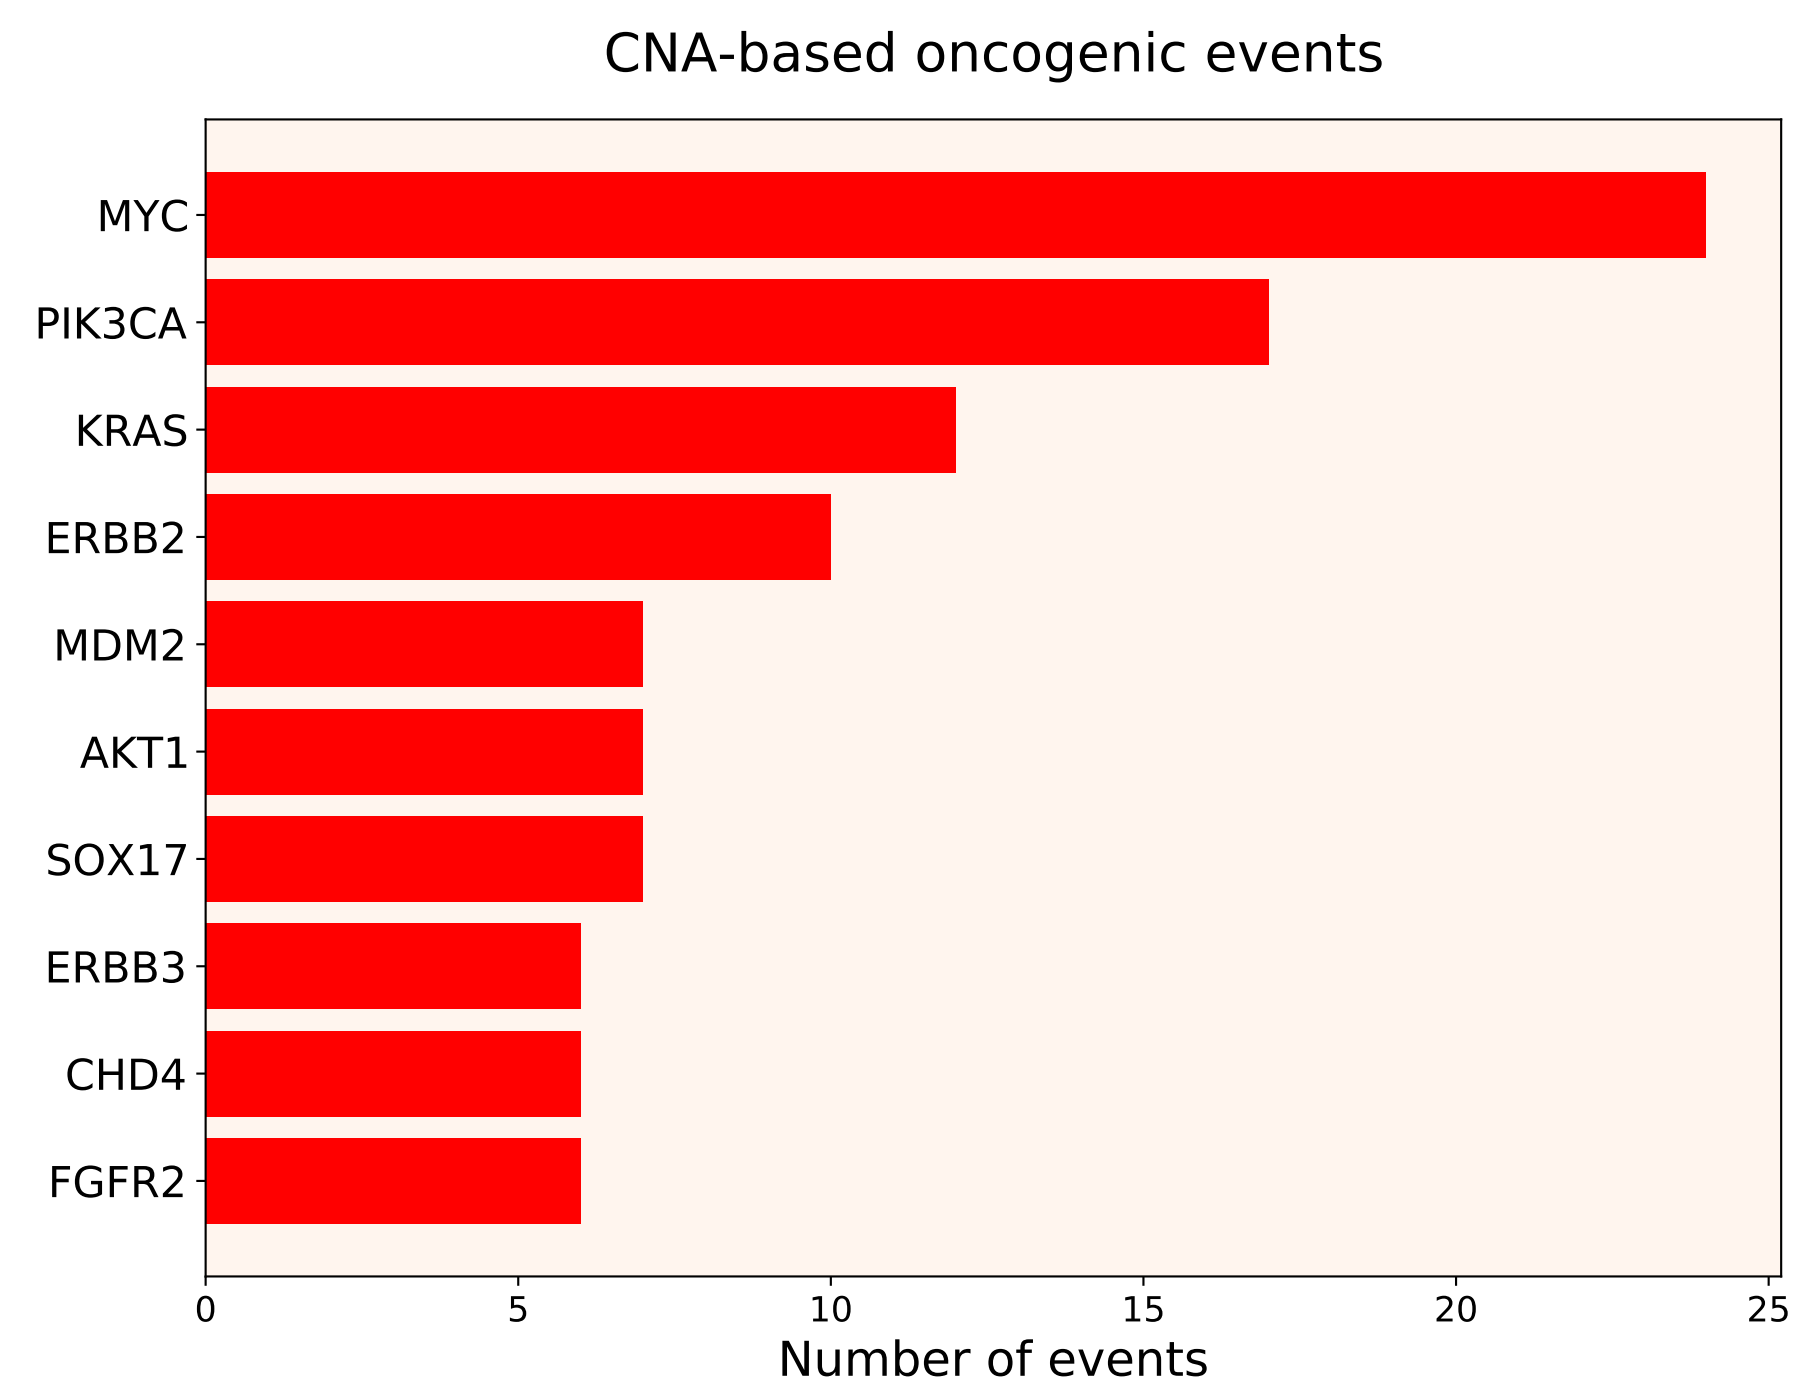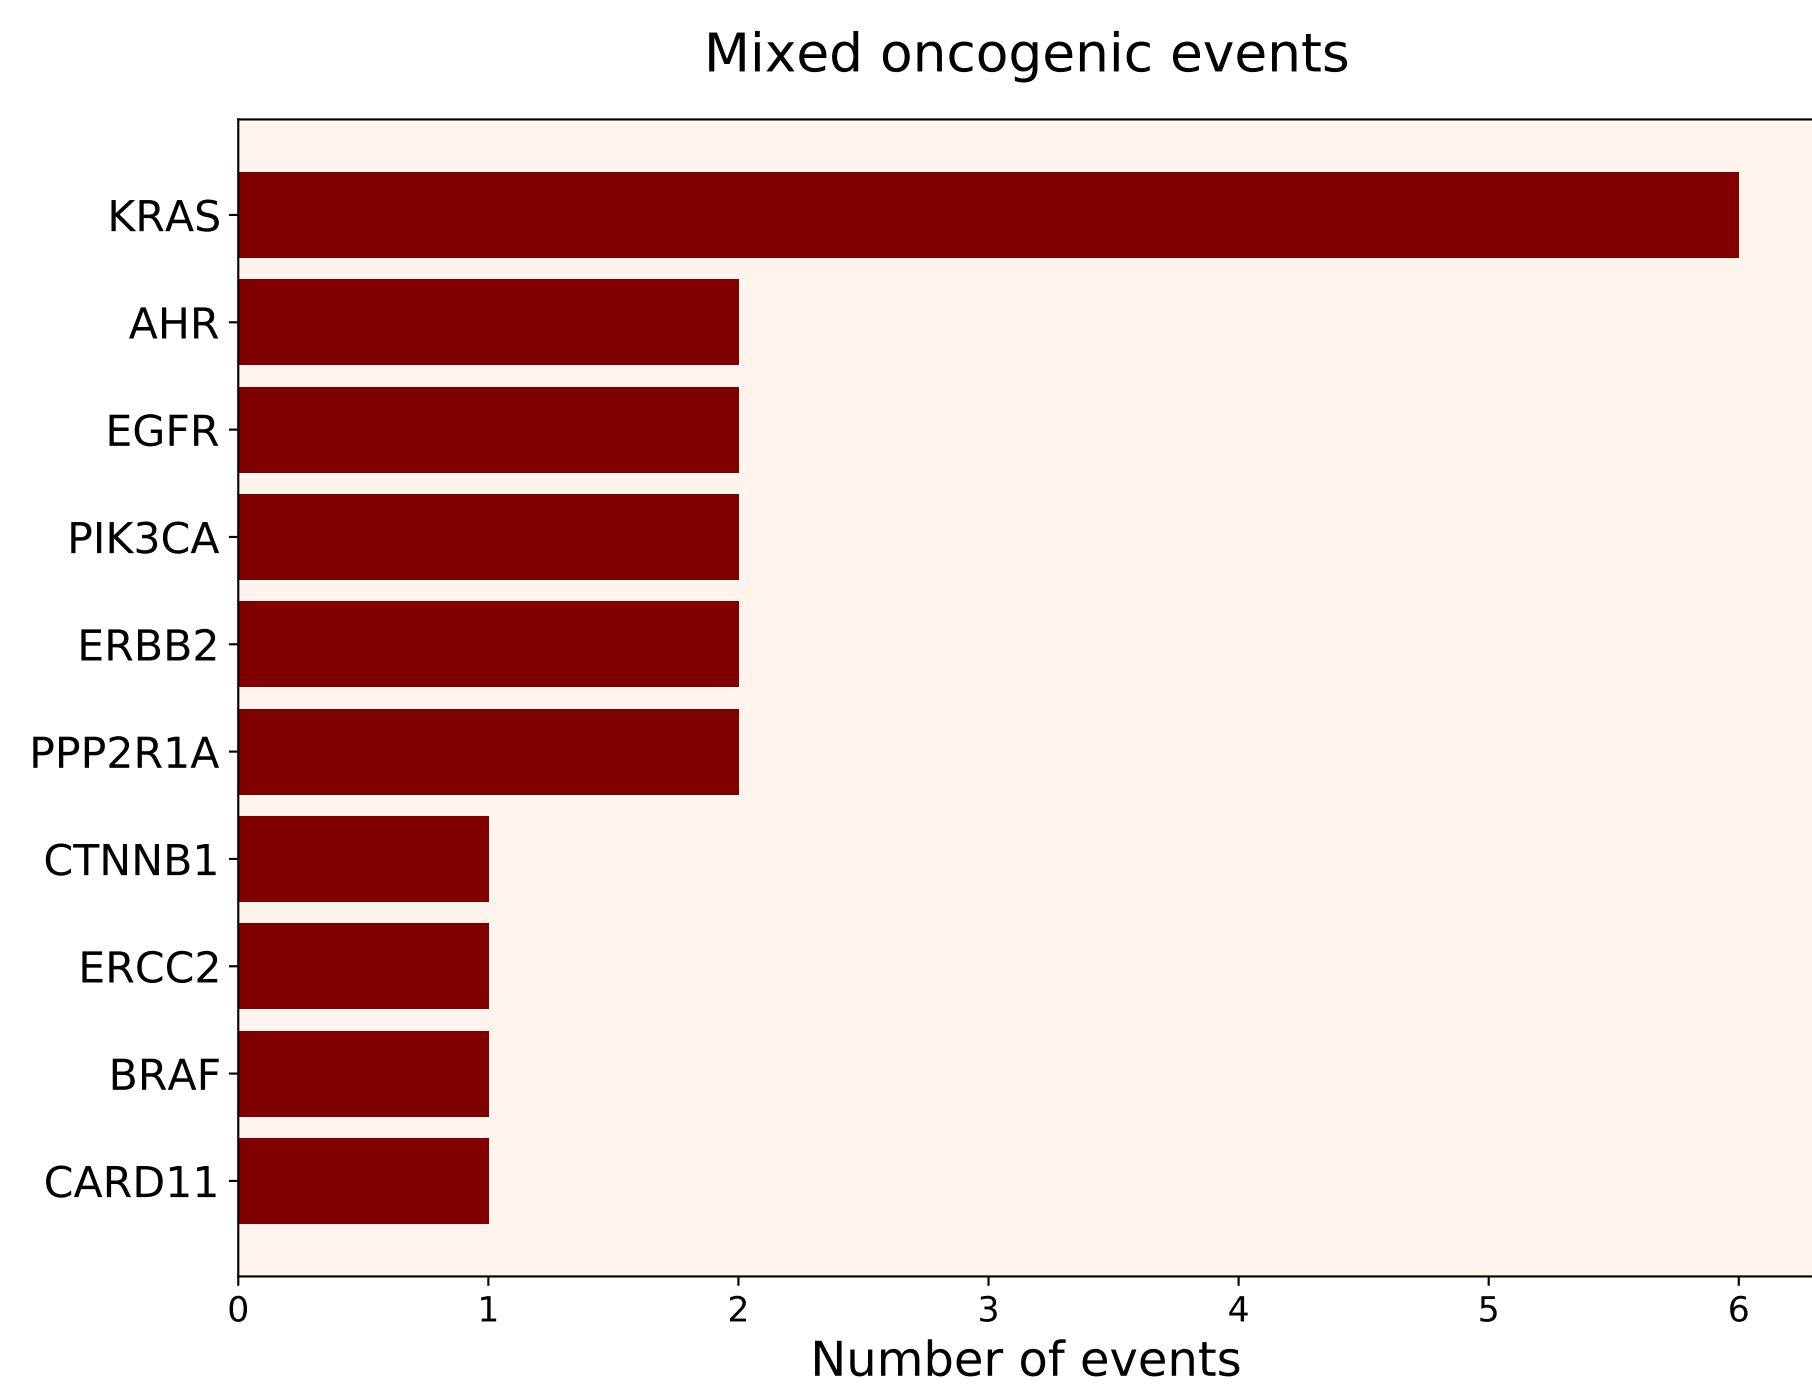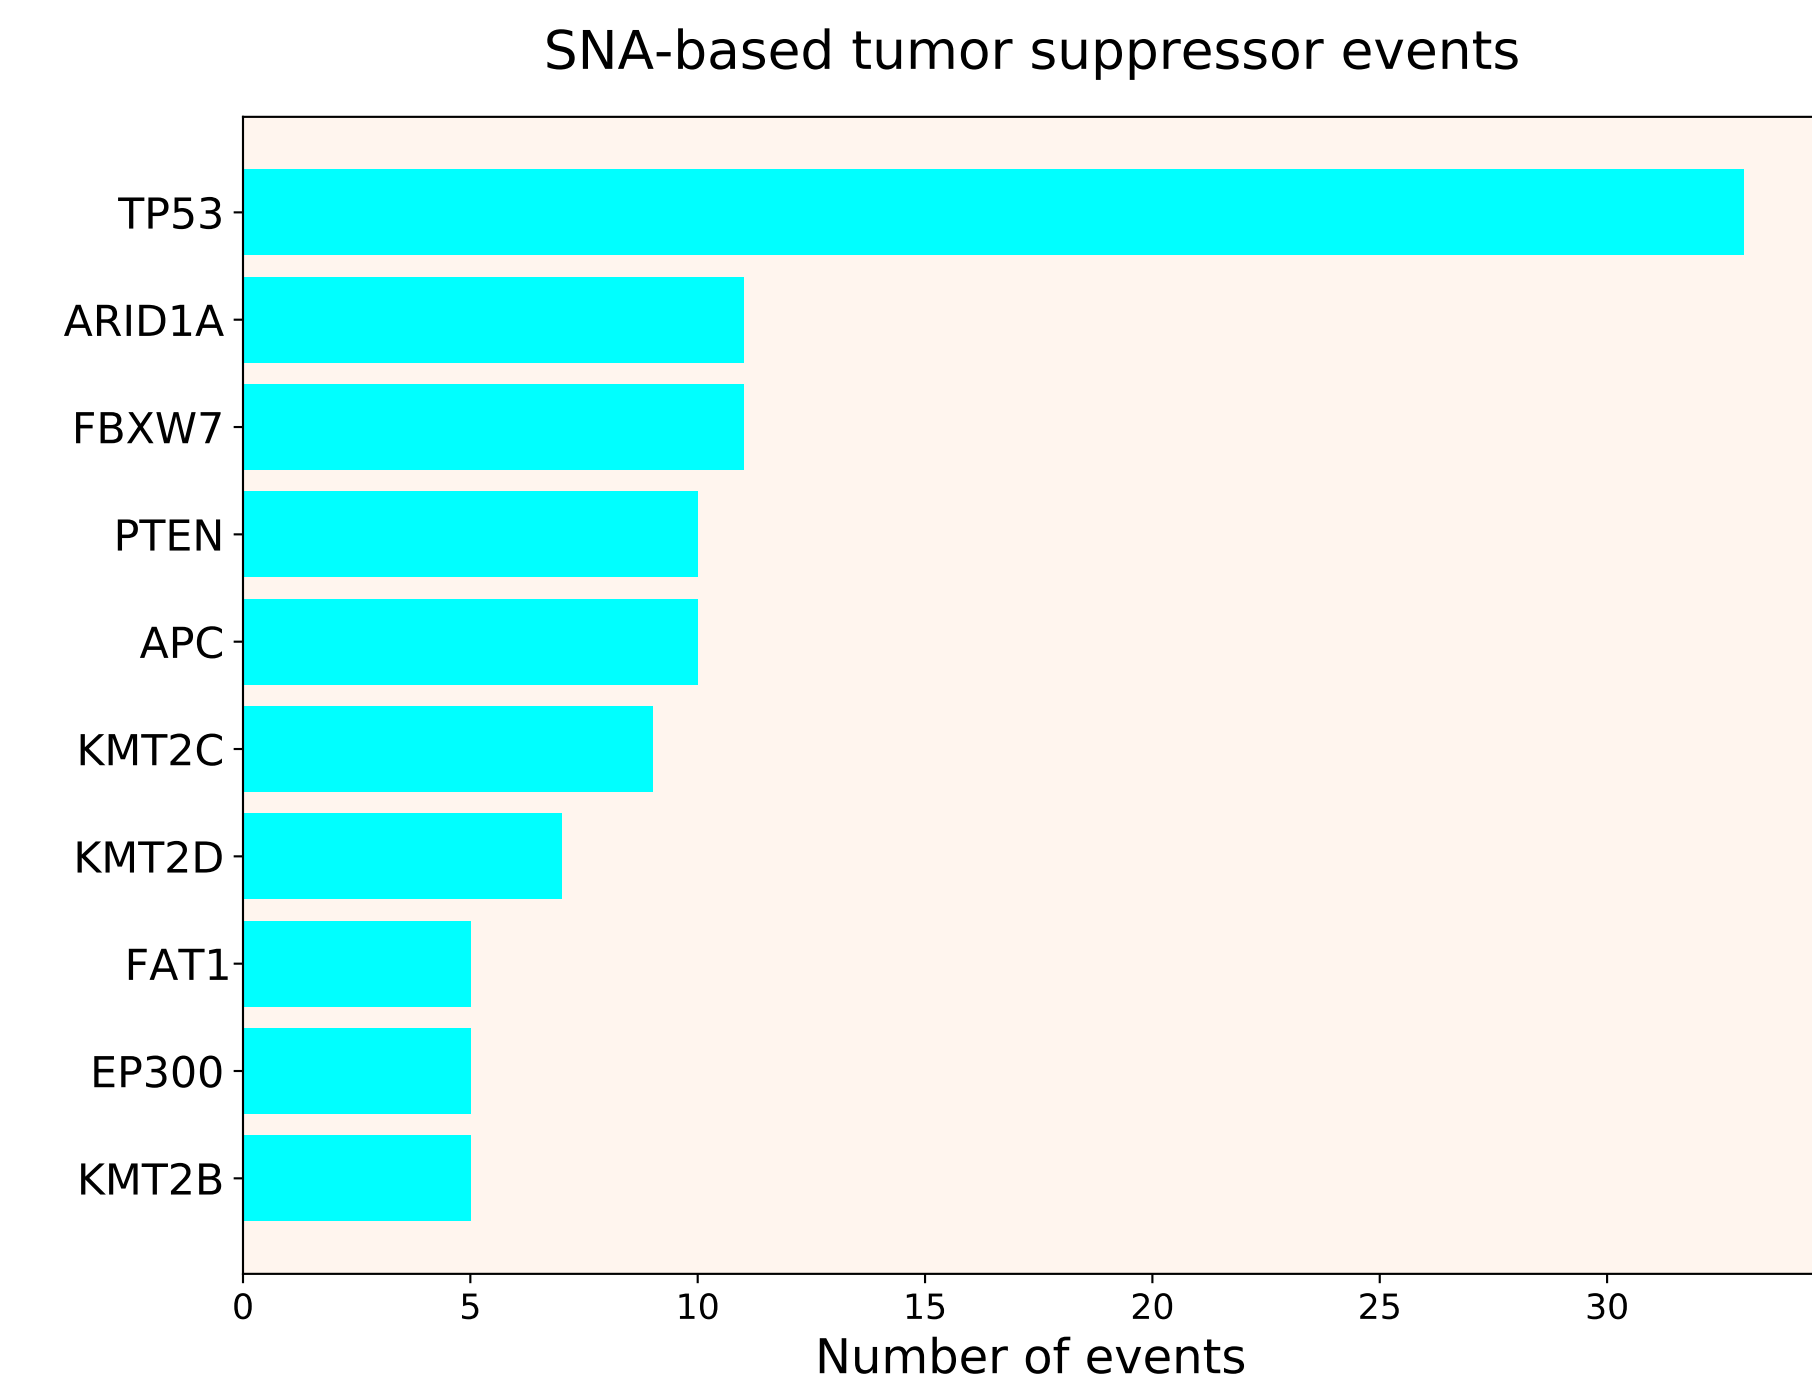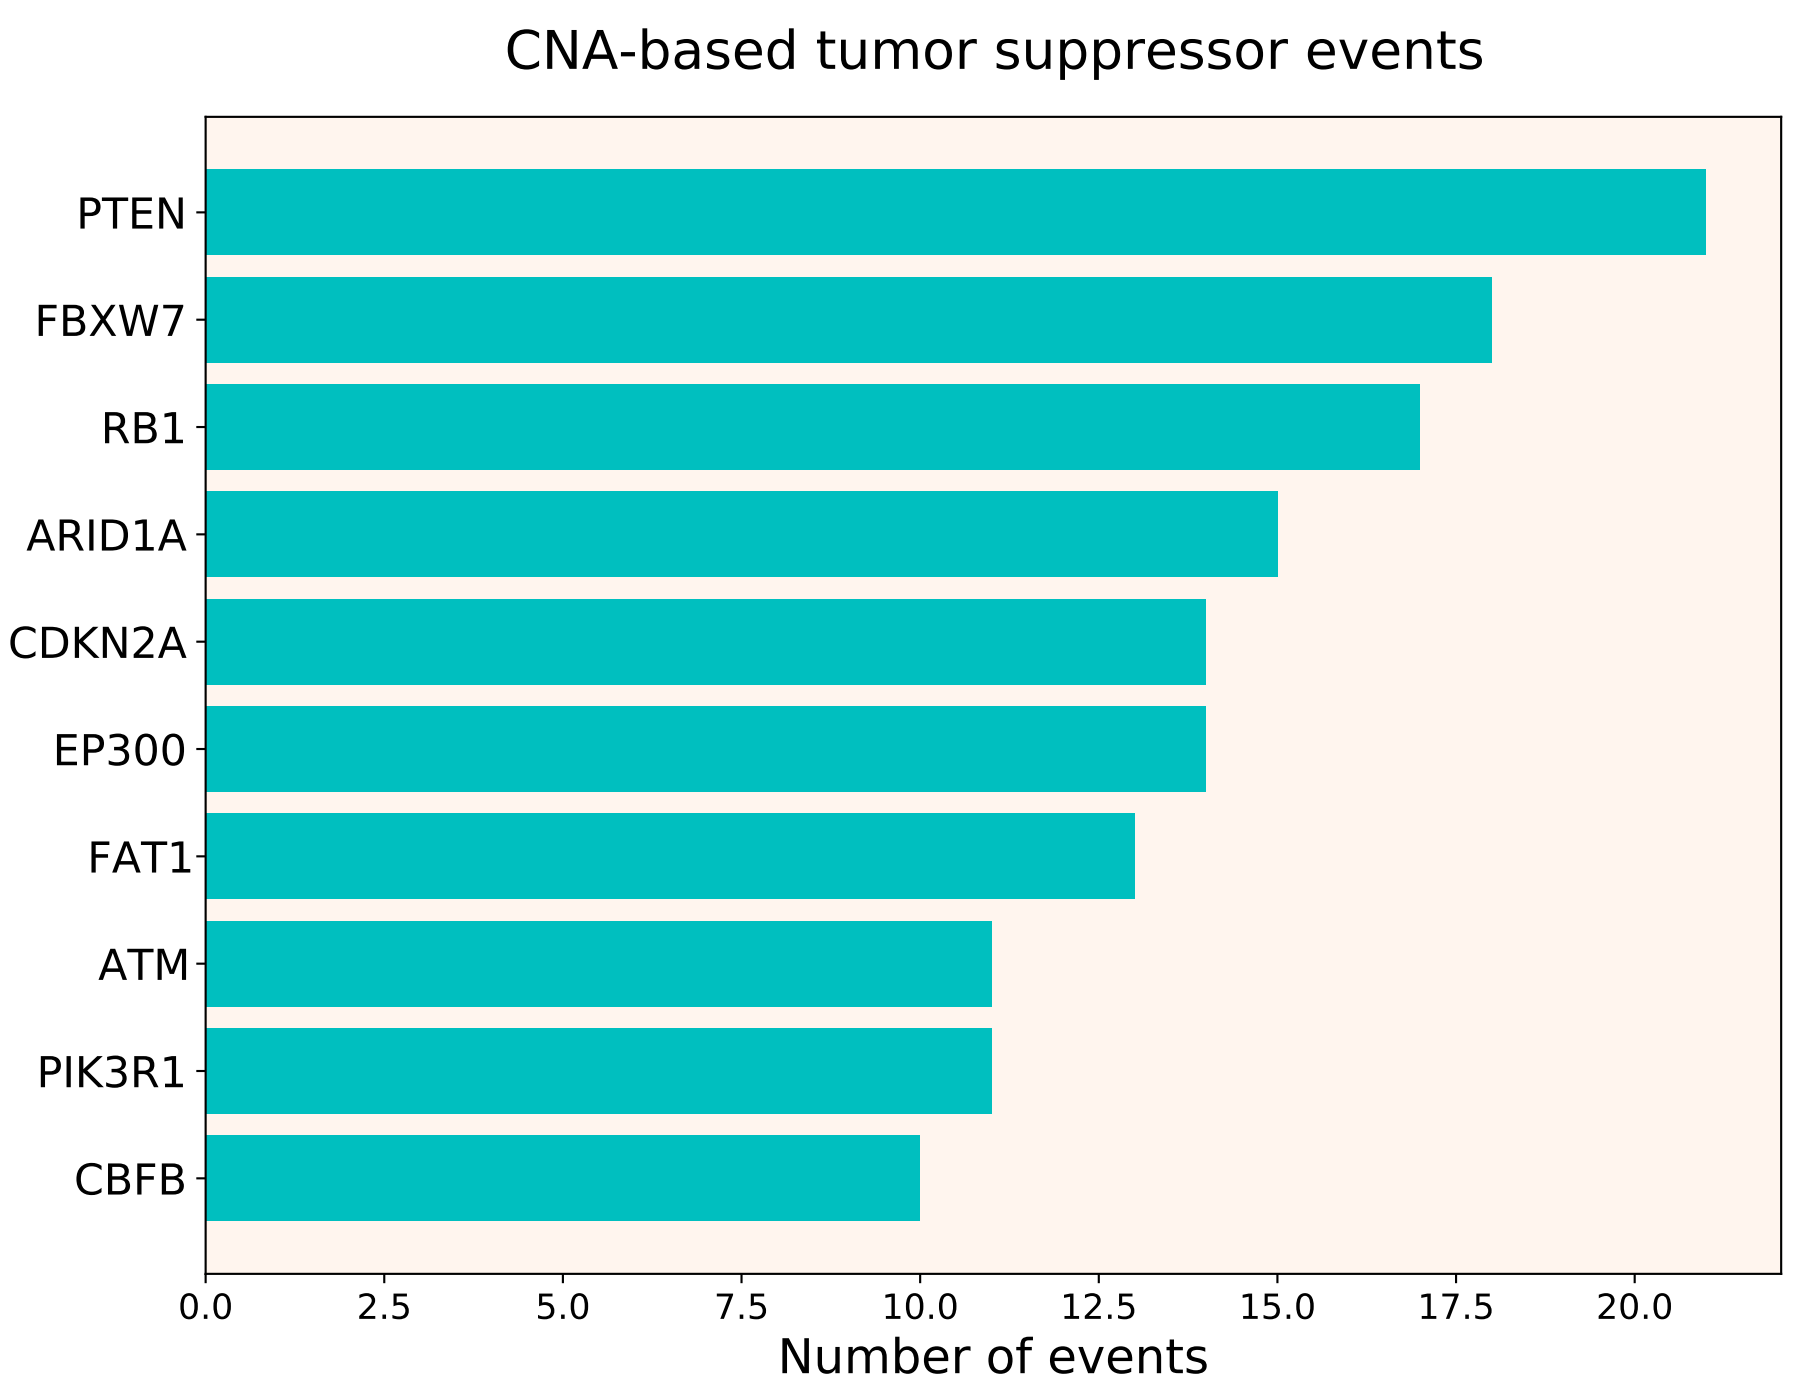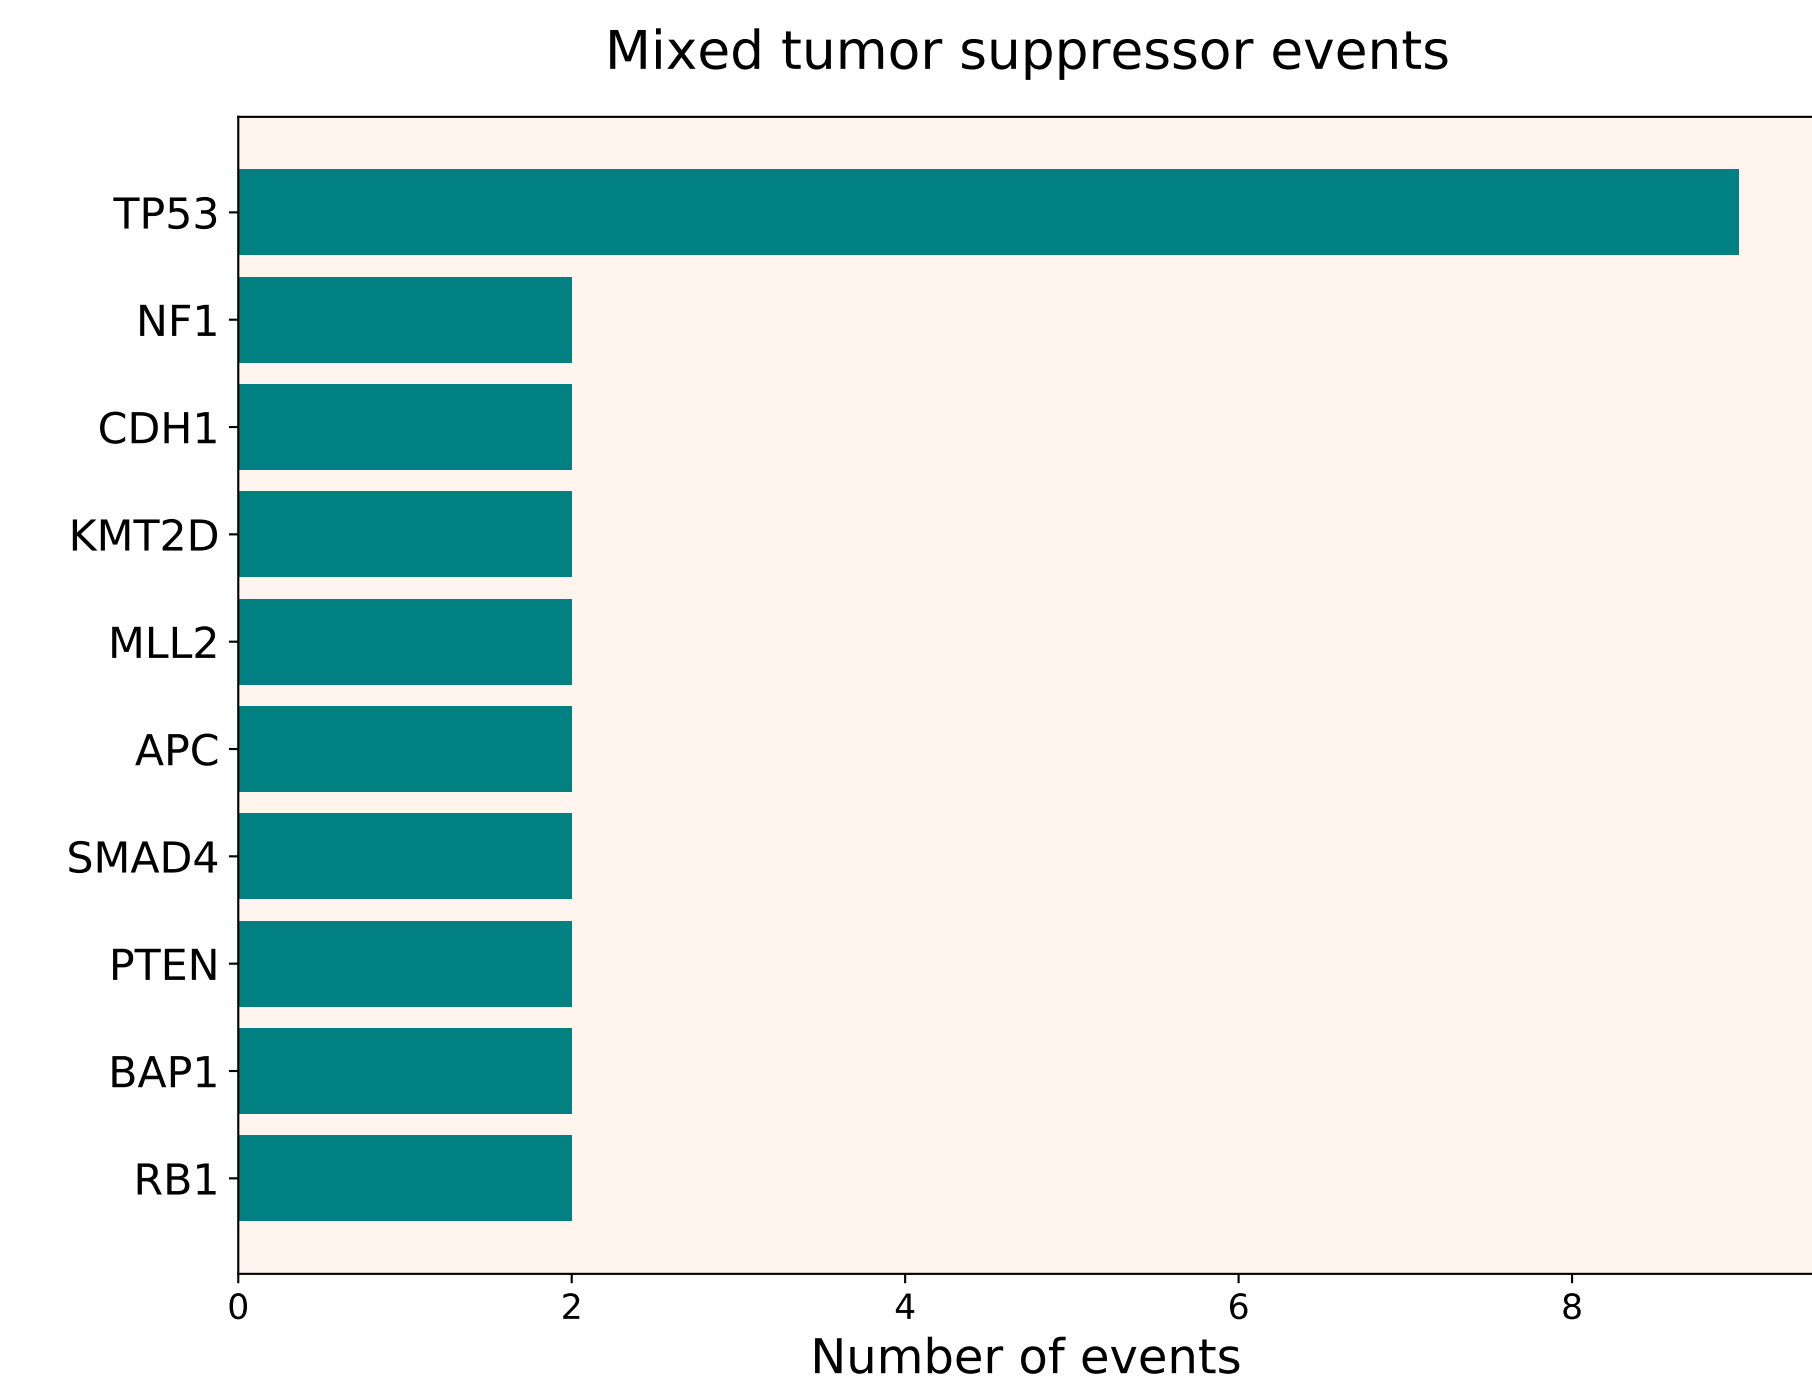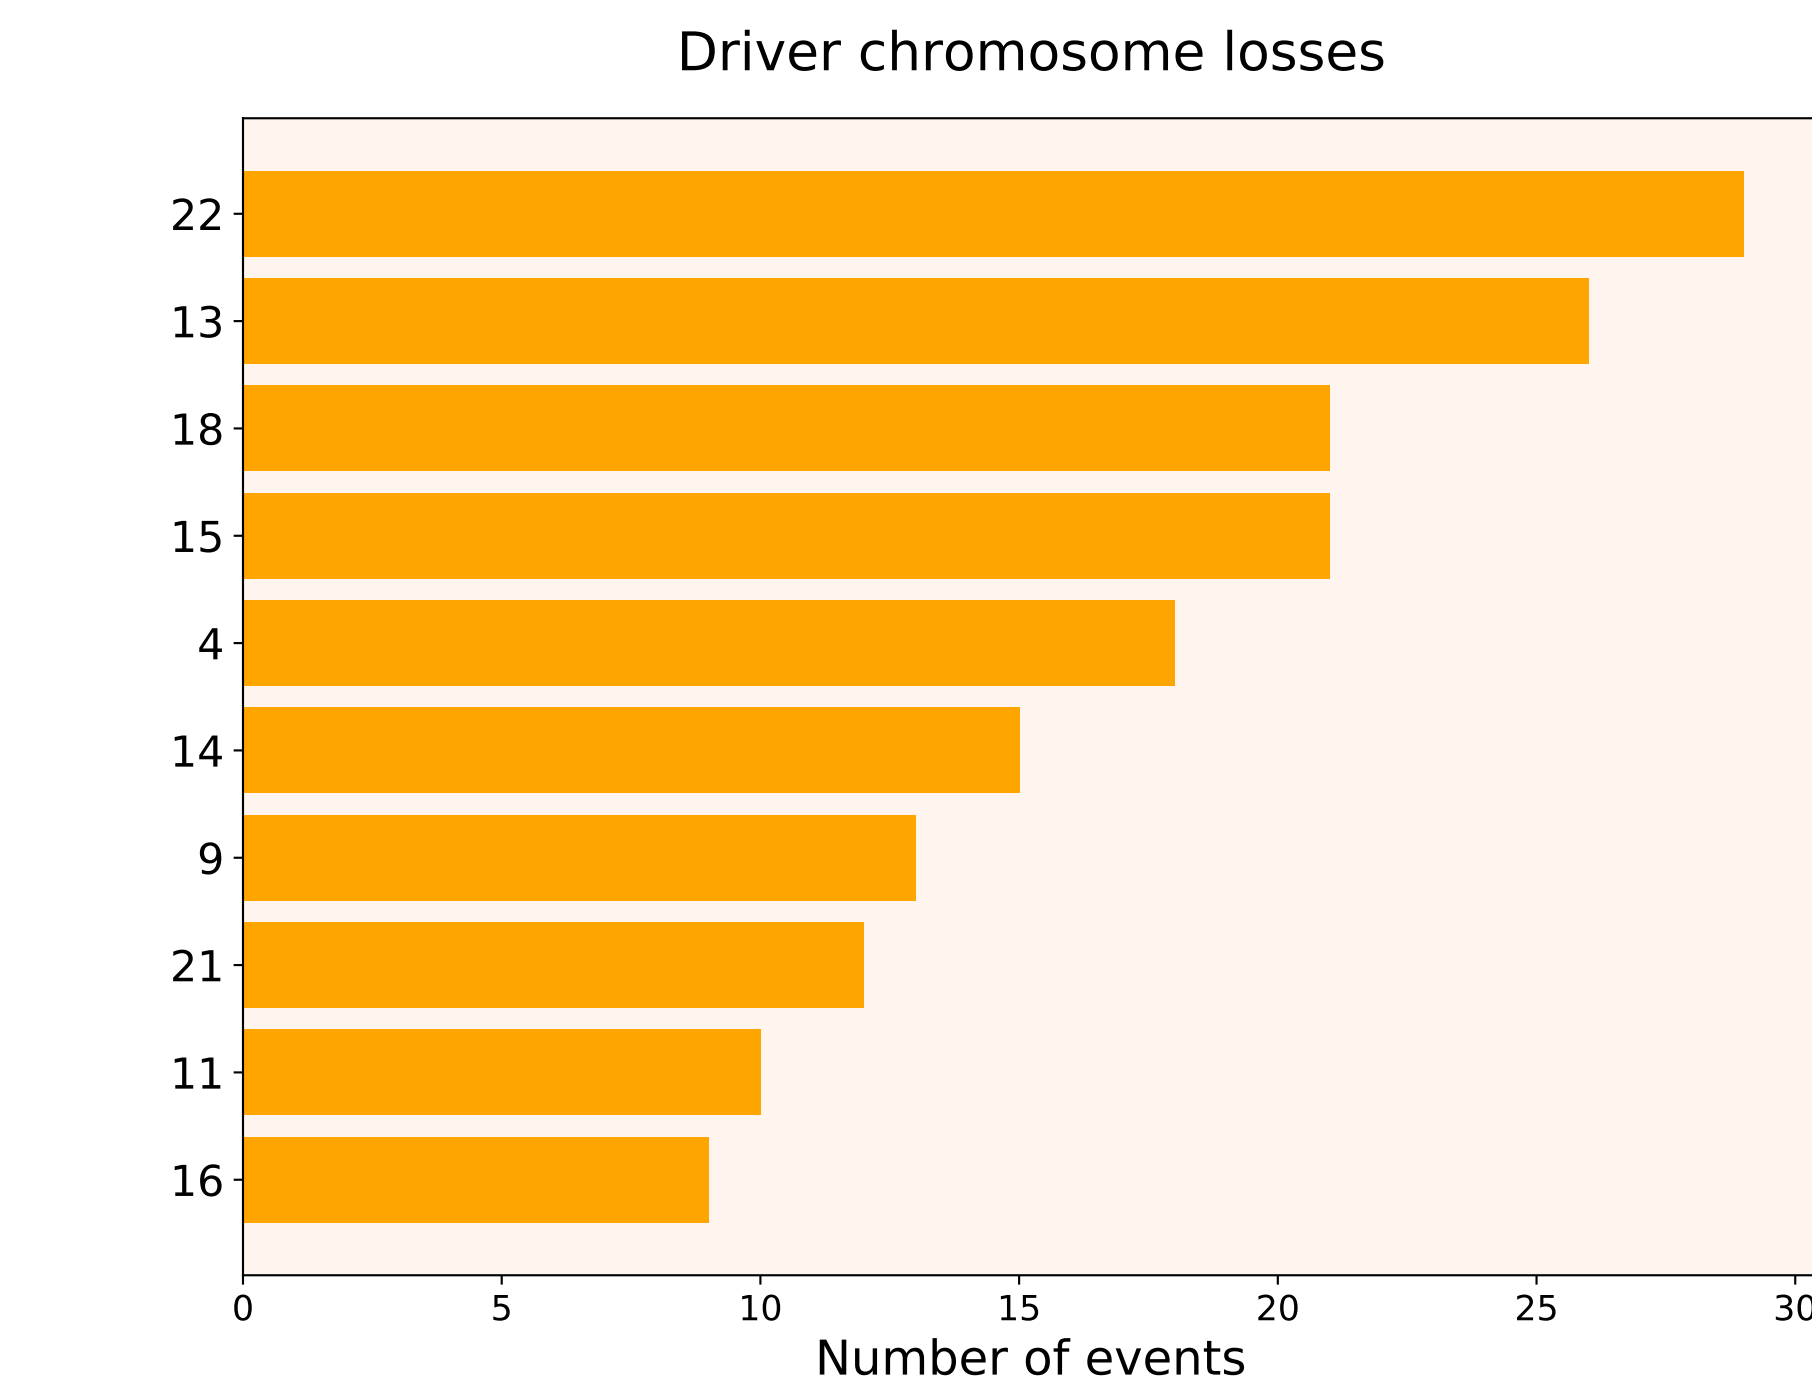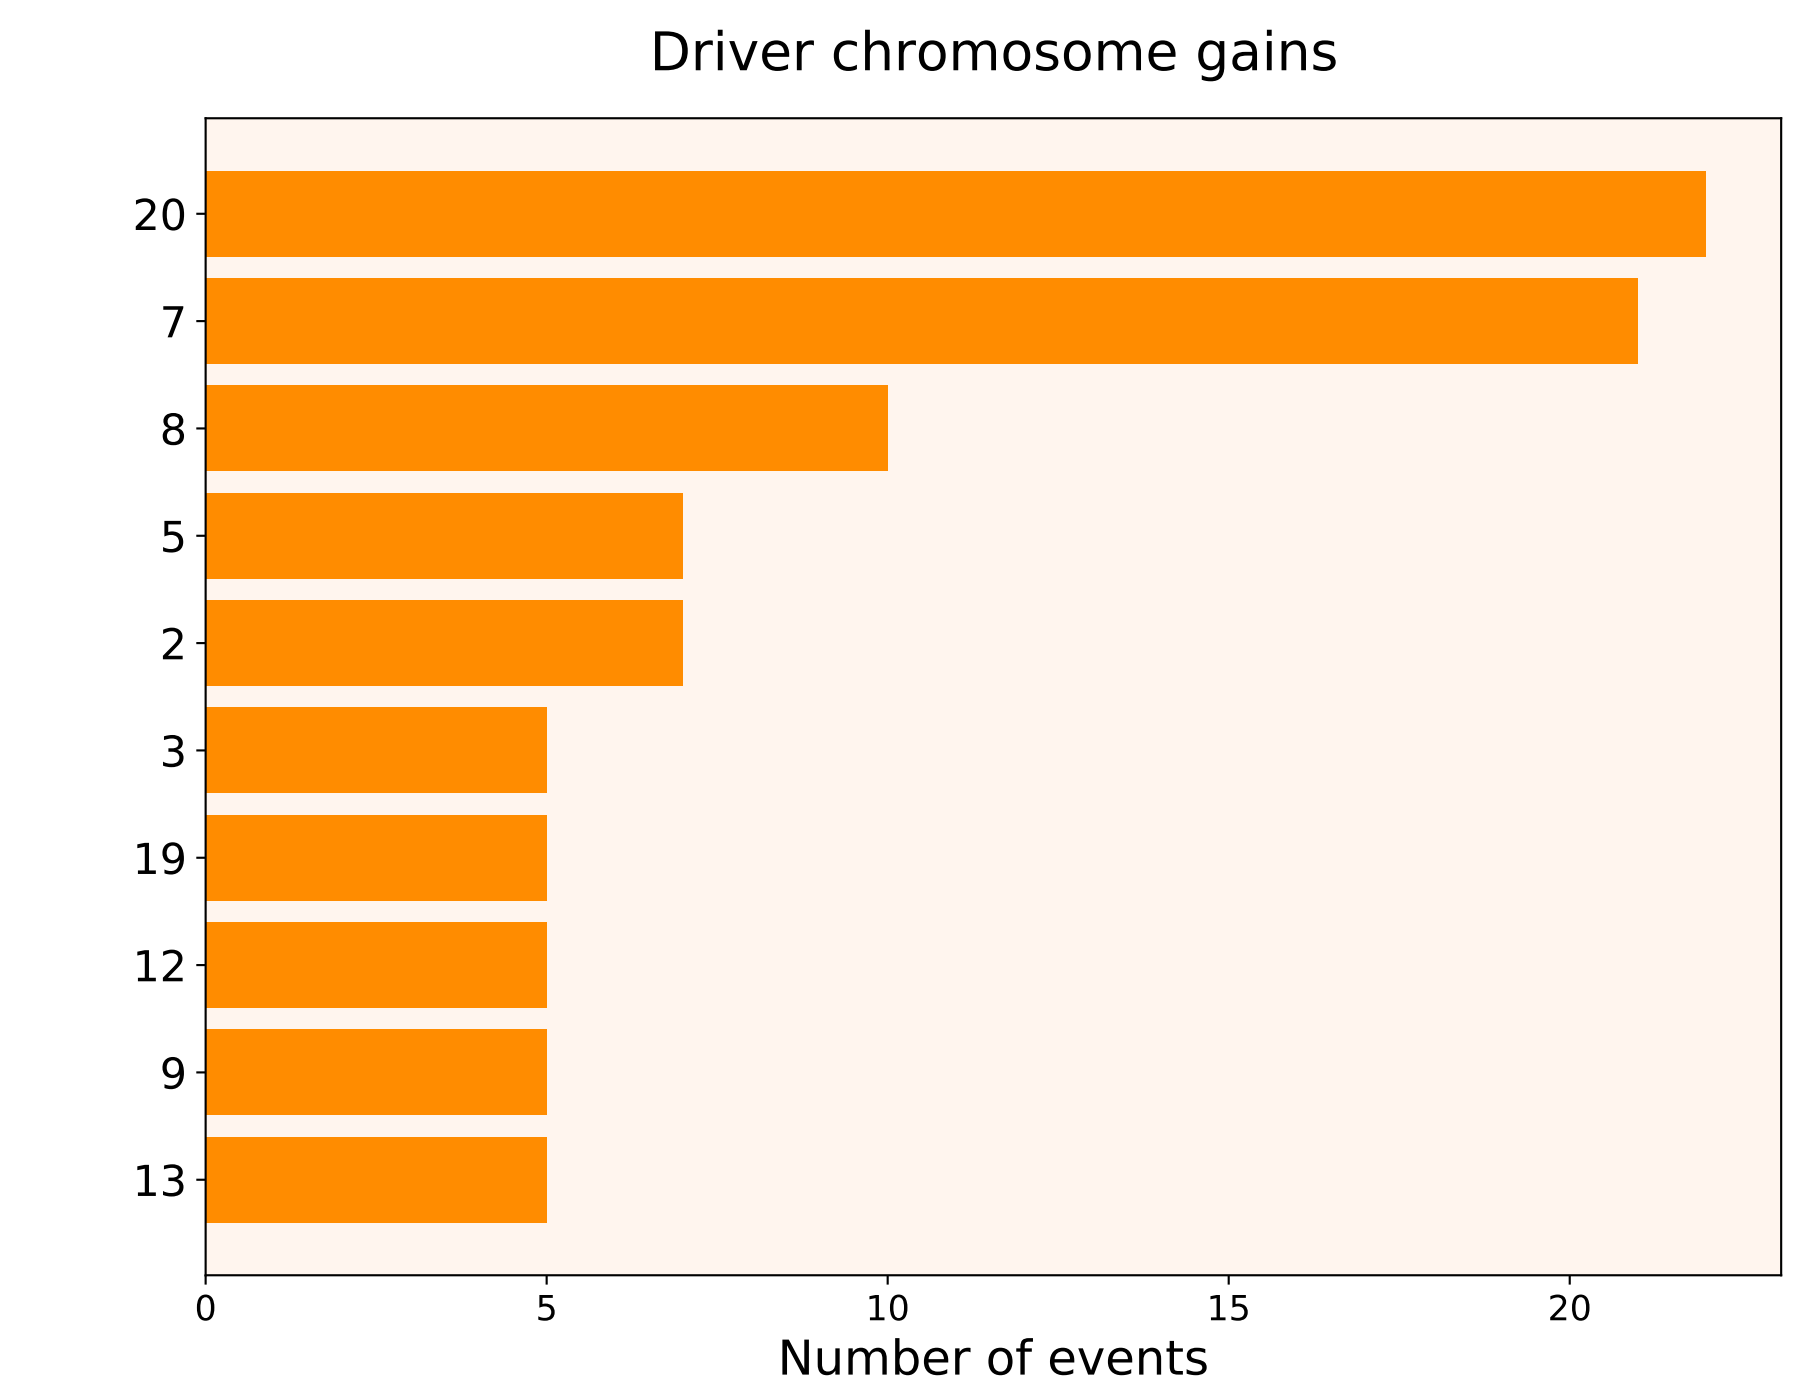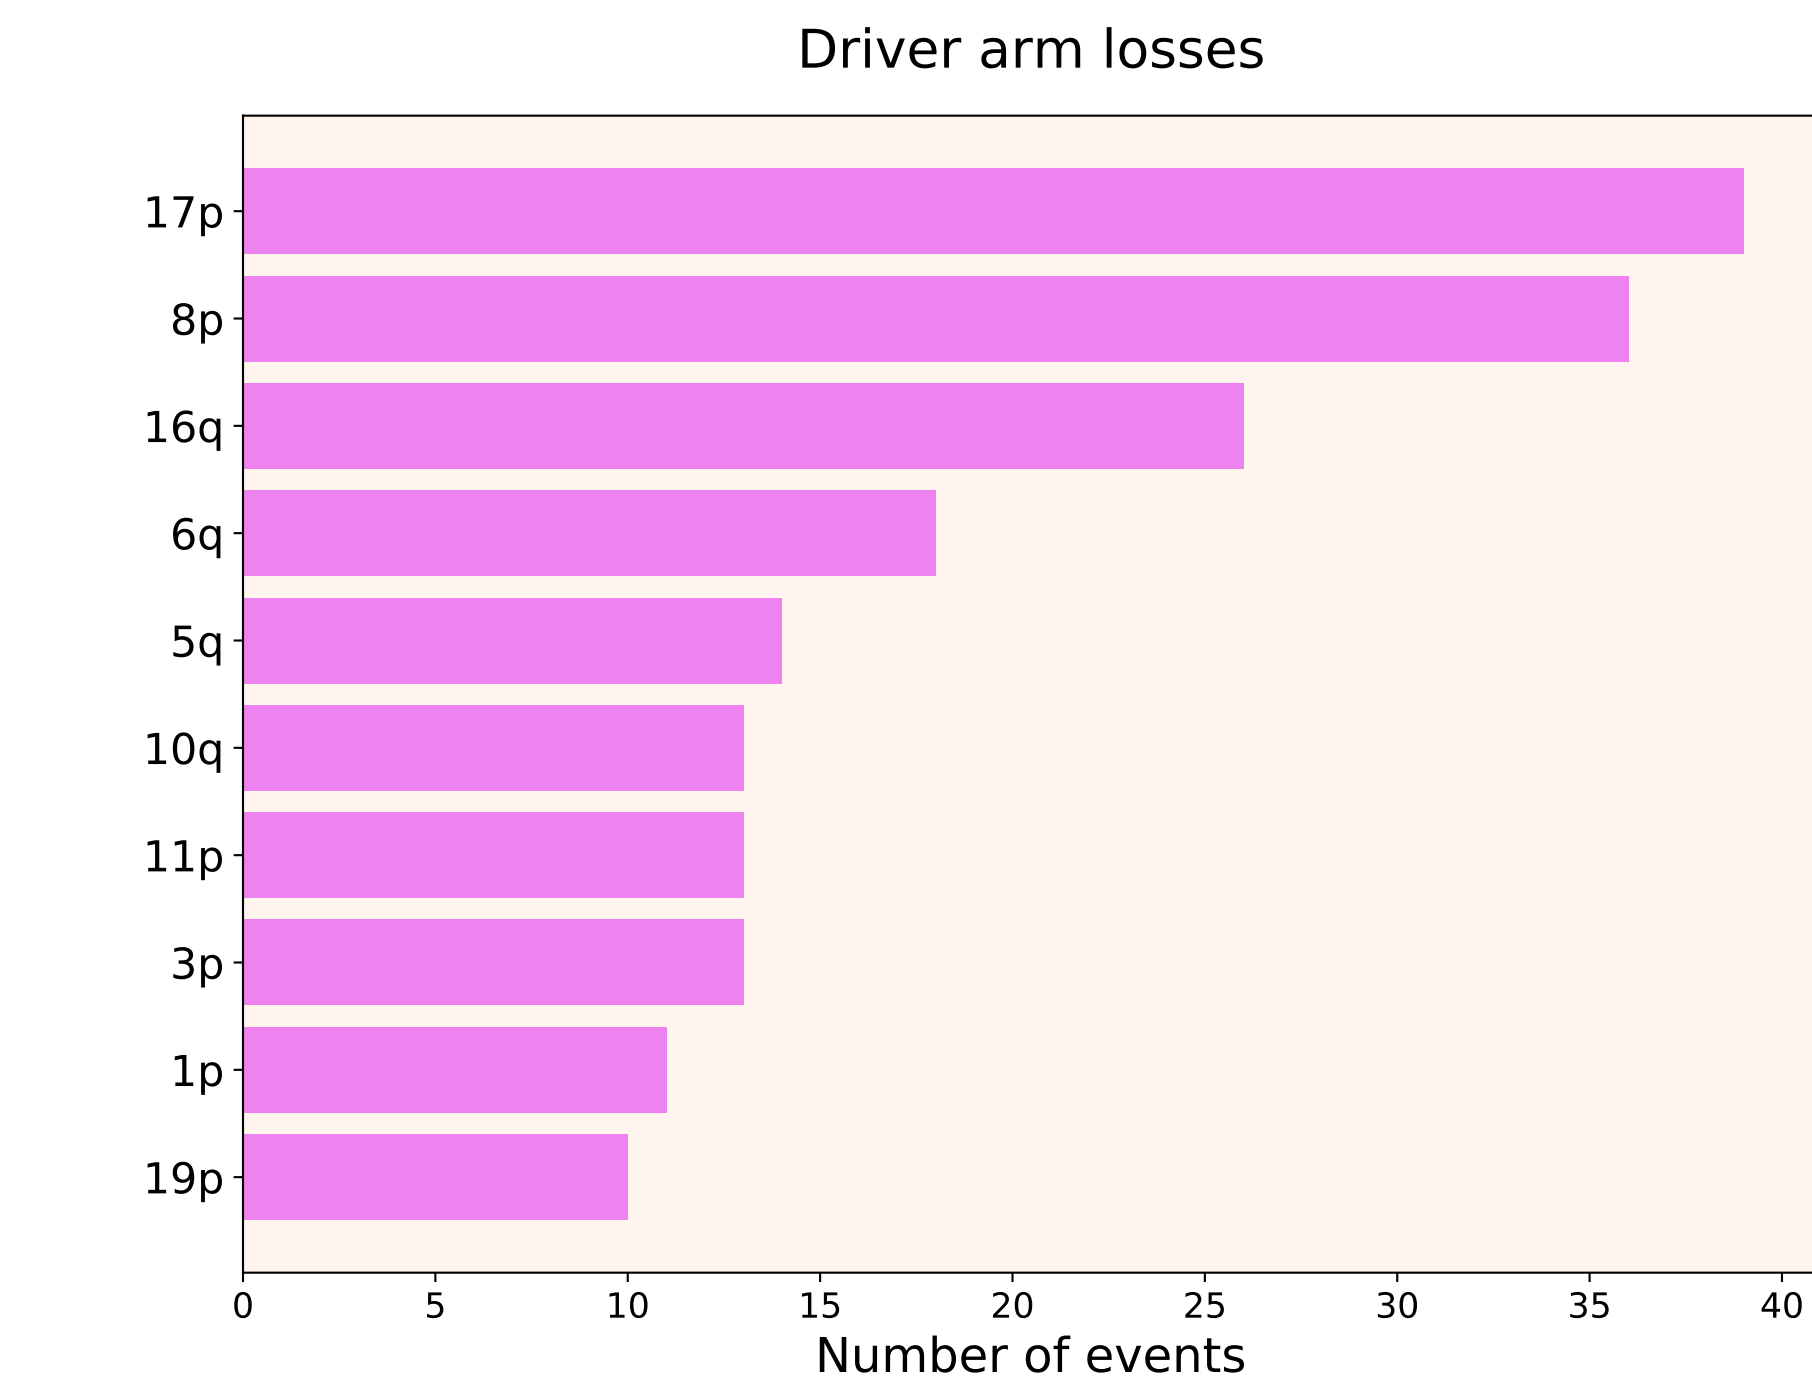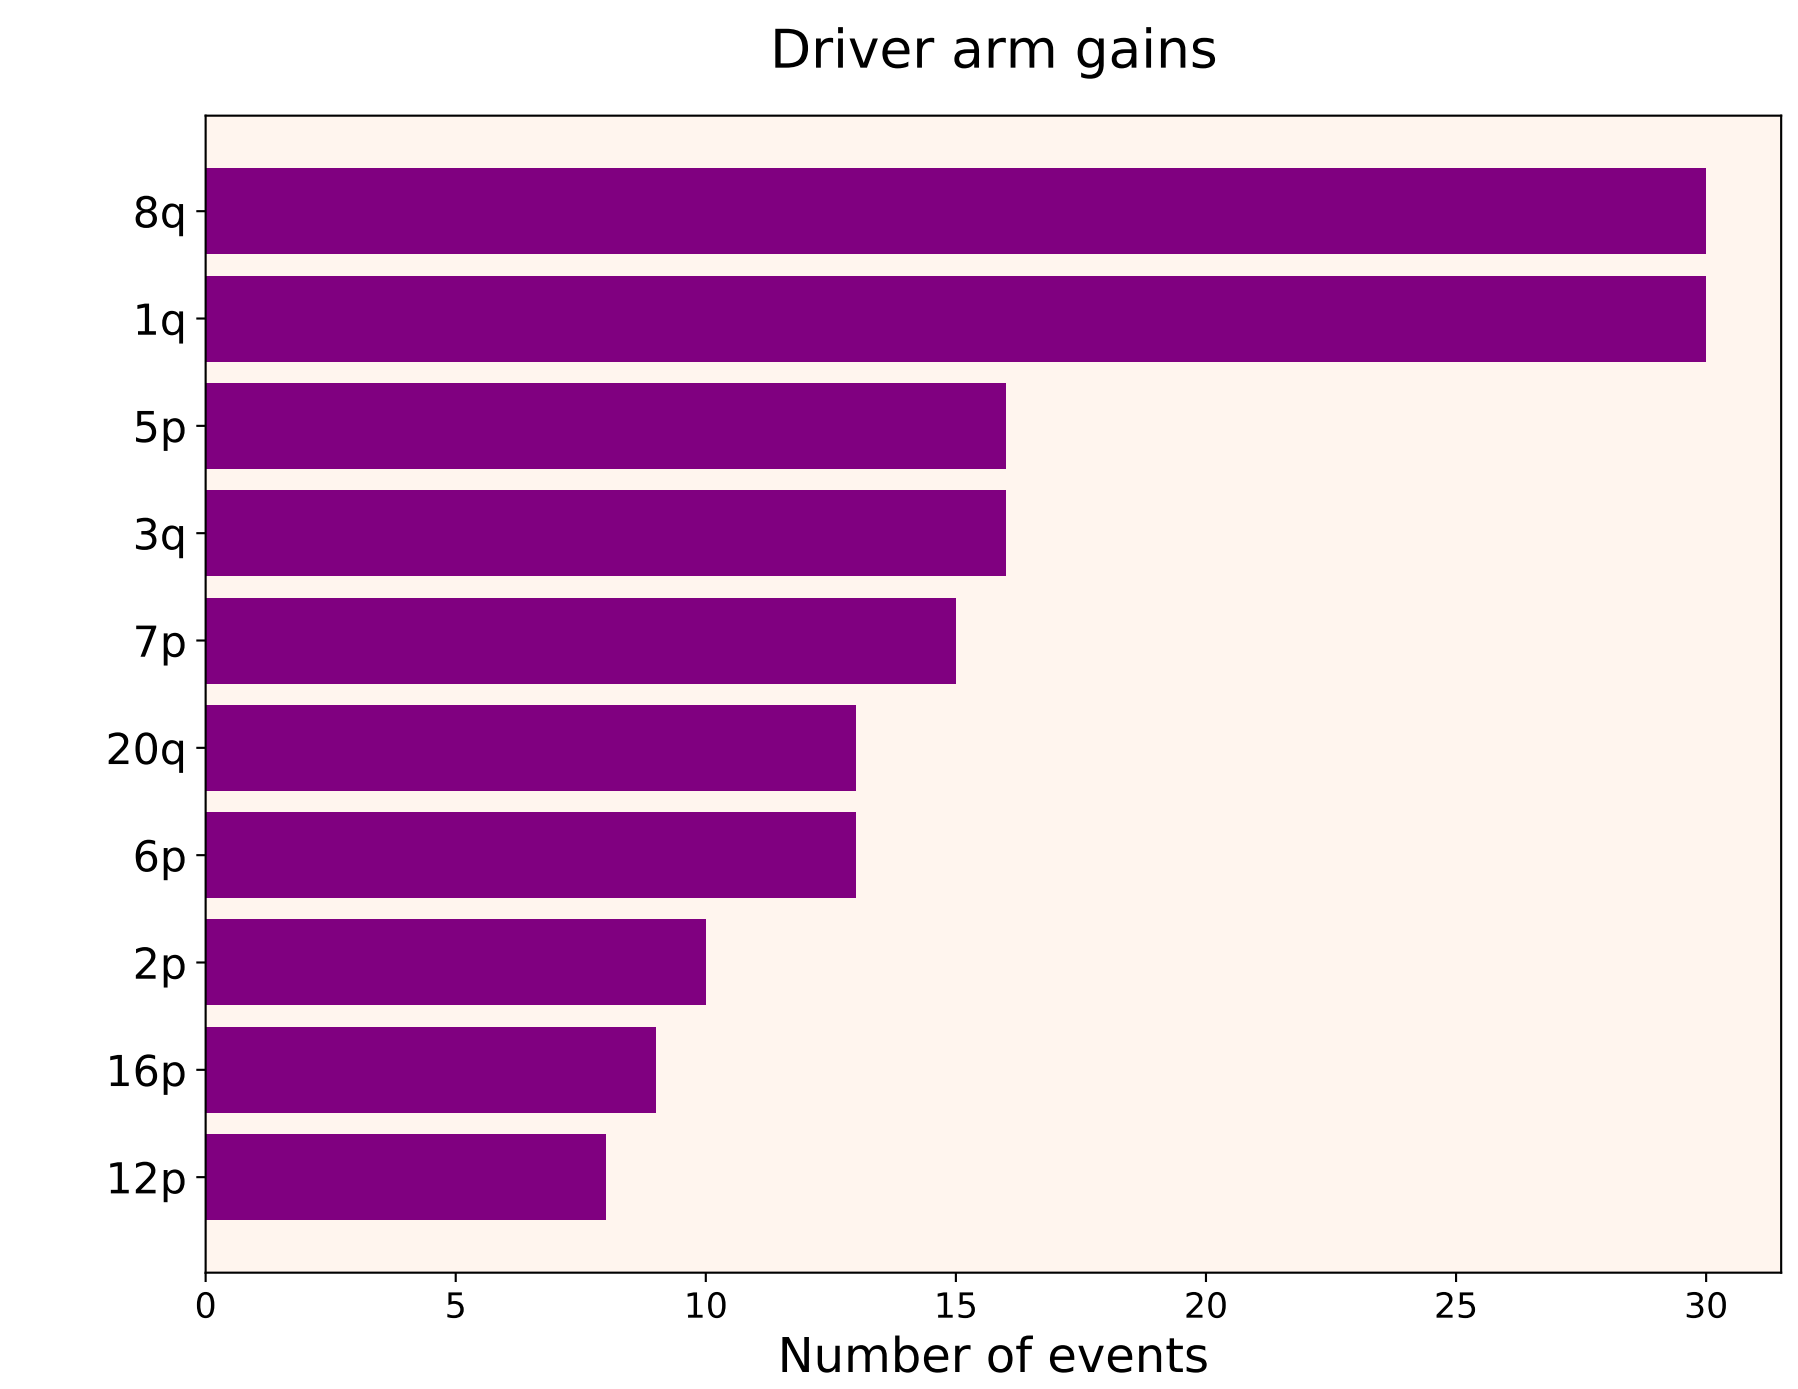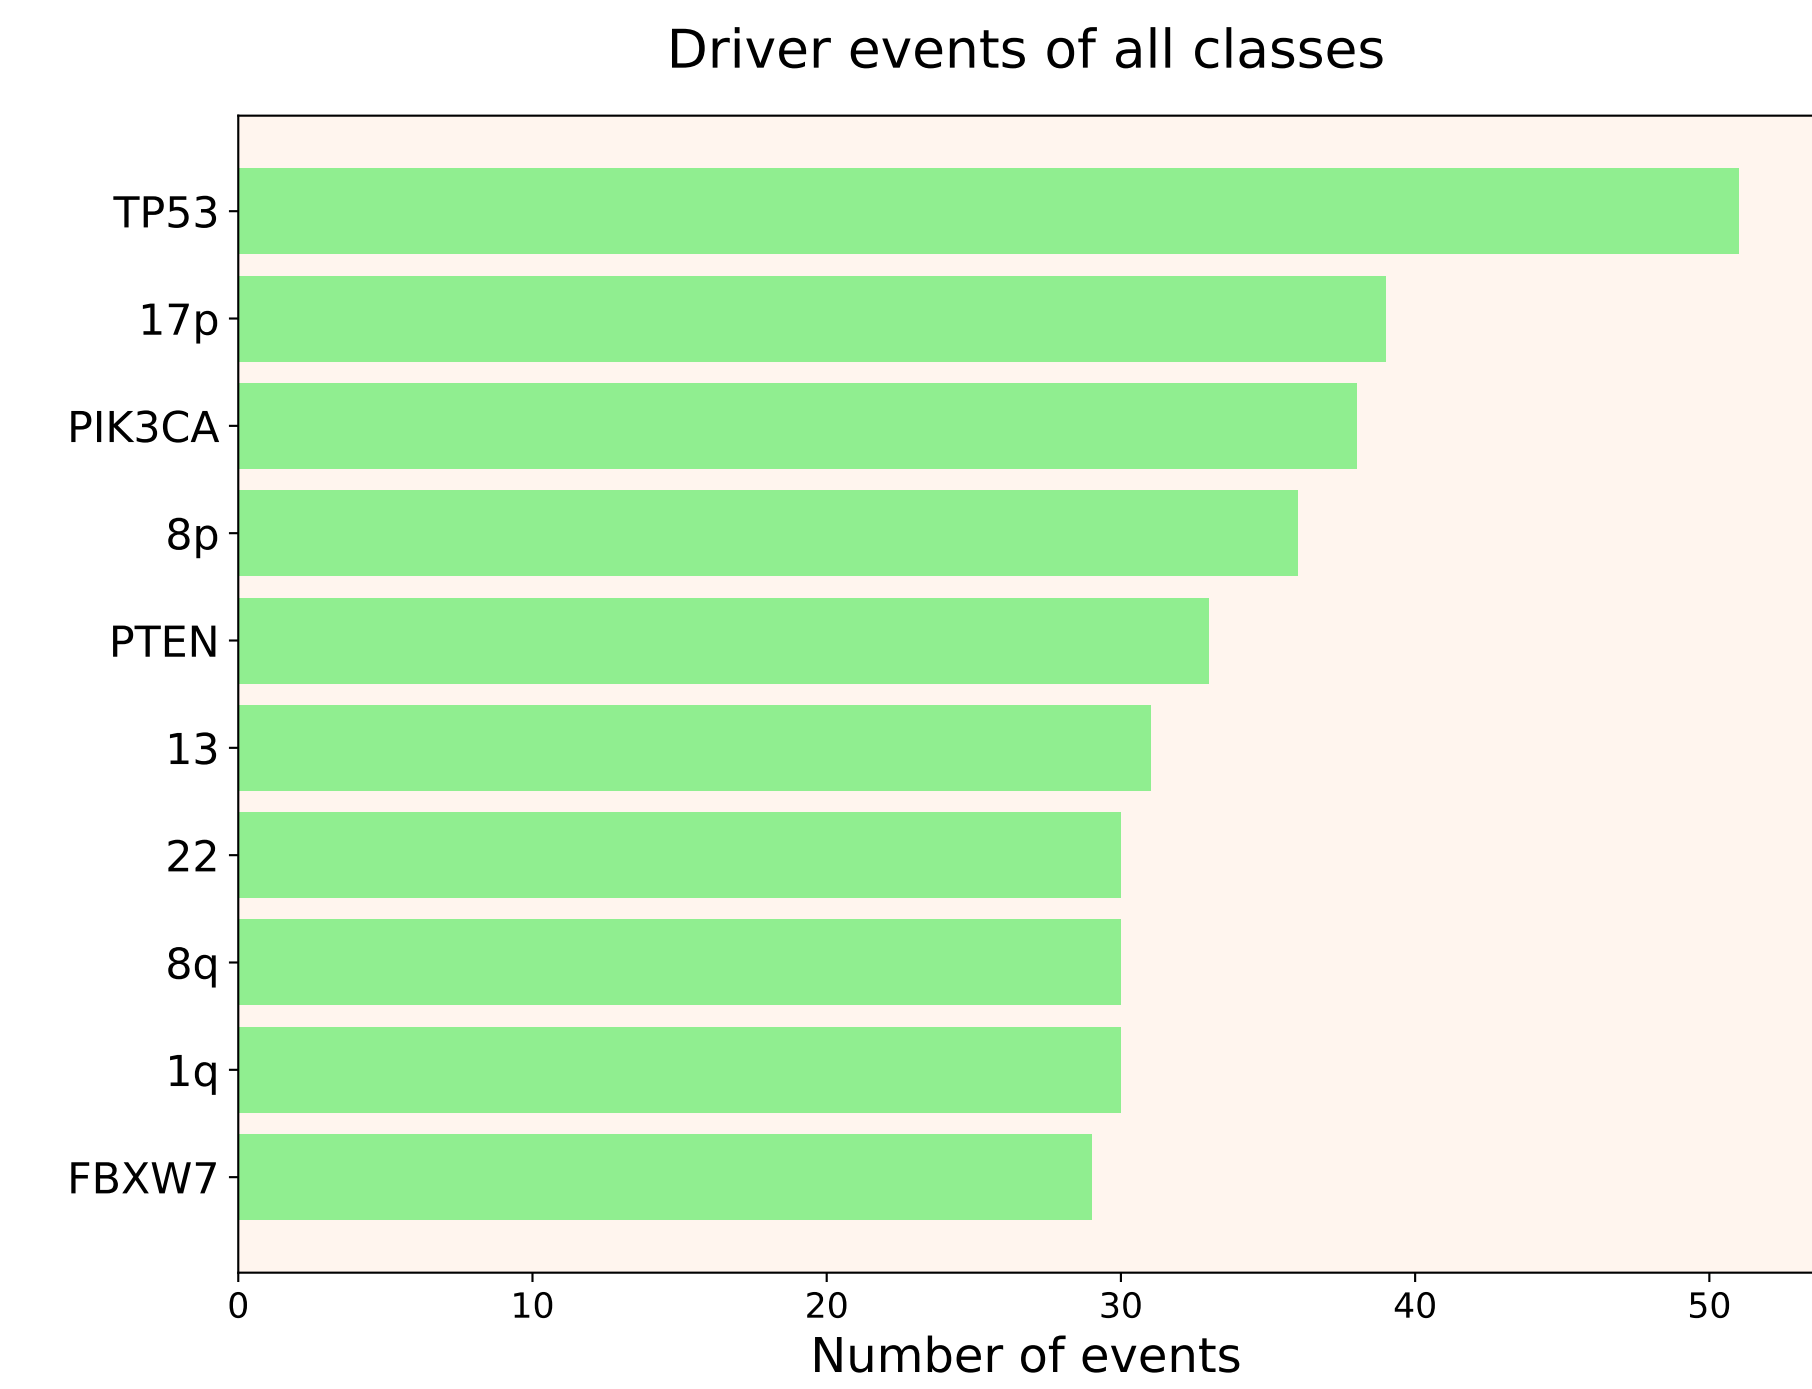

Supplement: Supplemental_Data_S1.zip [file Supplemental_Data_S1.zip]

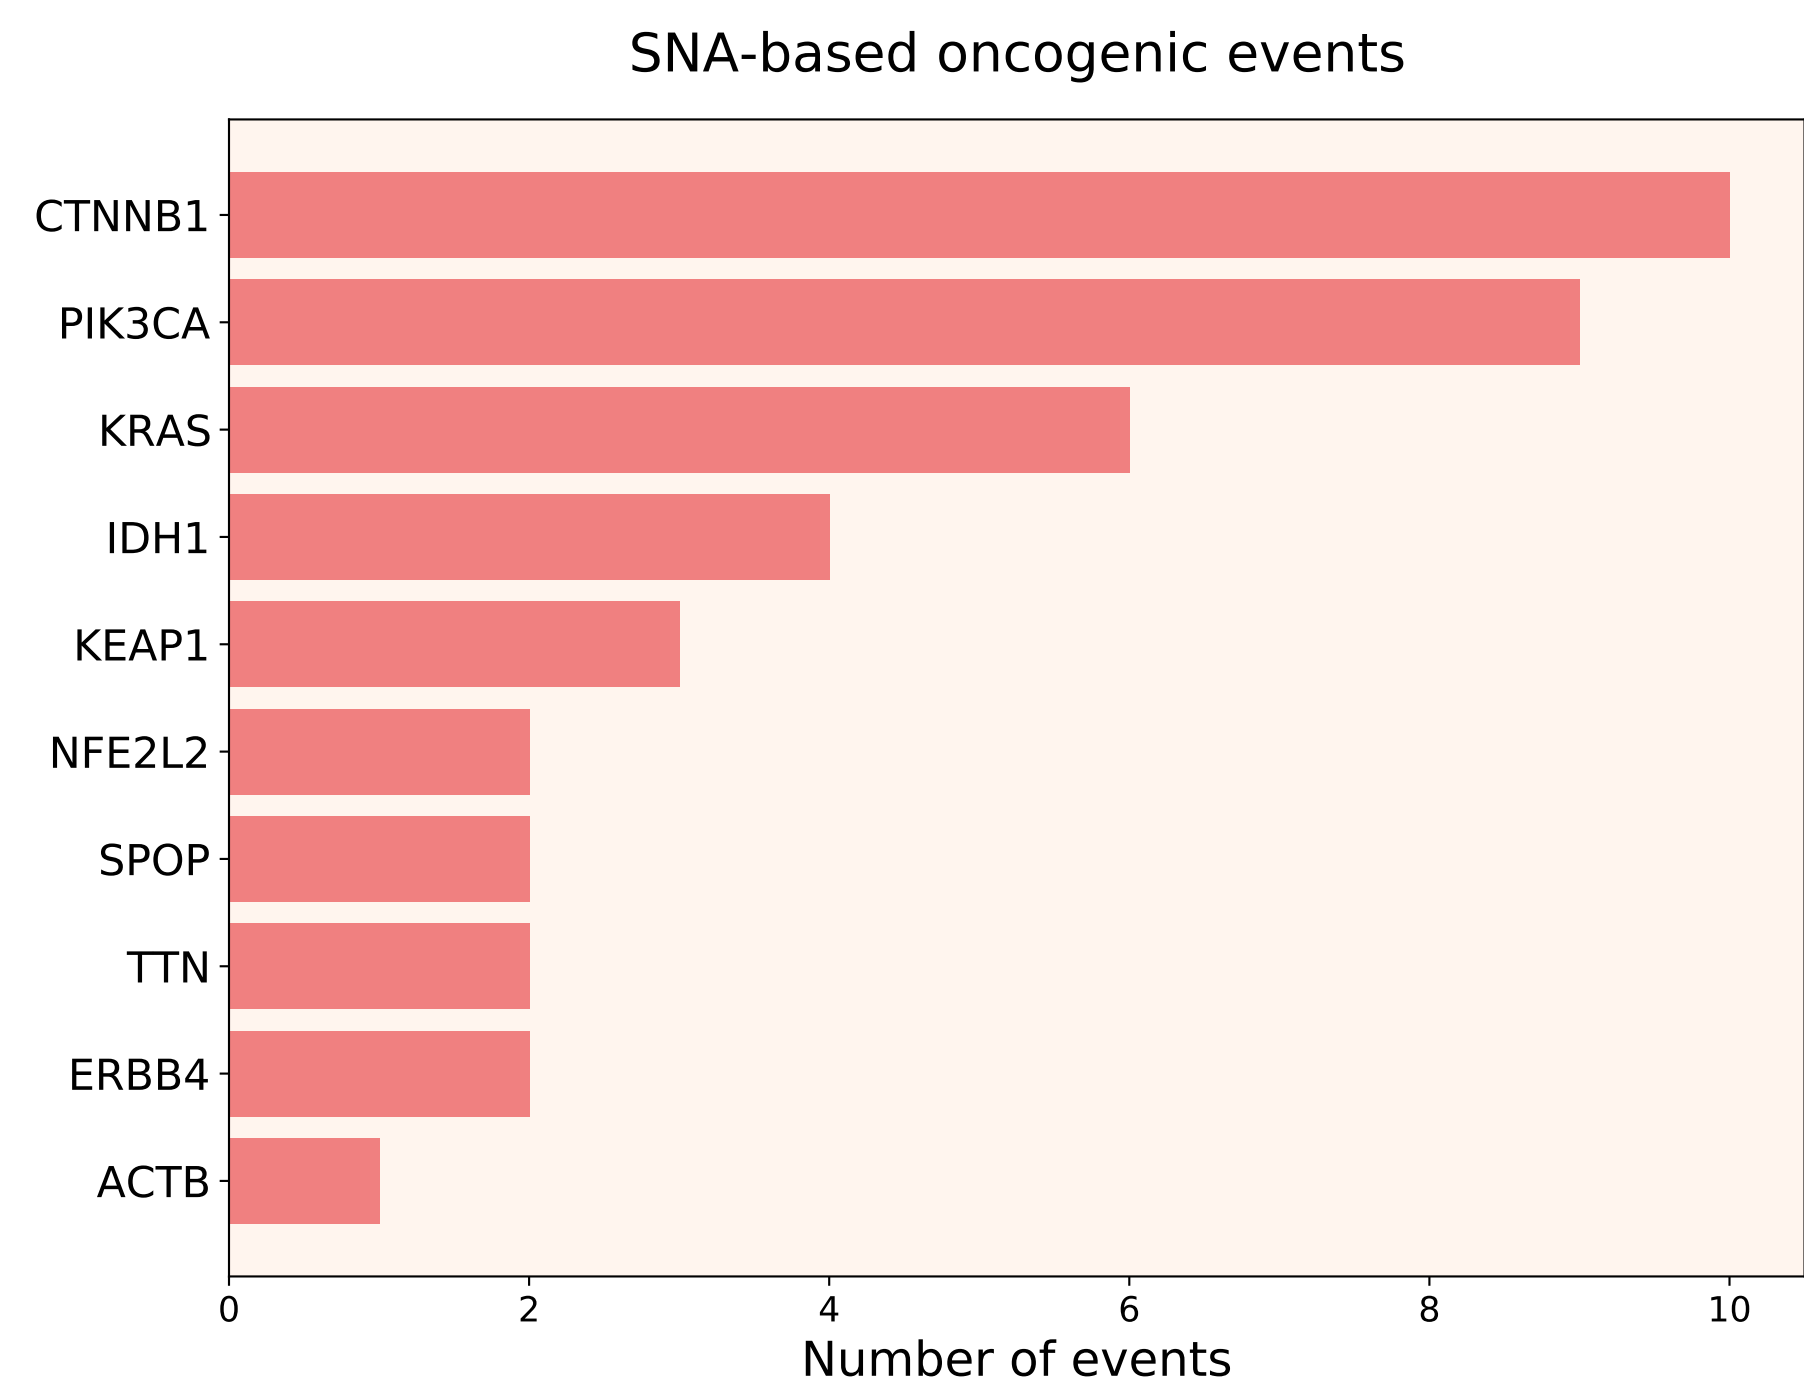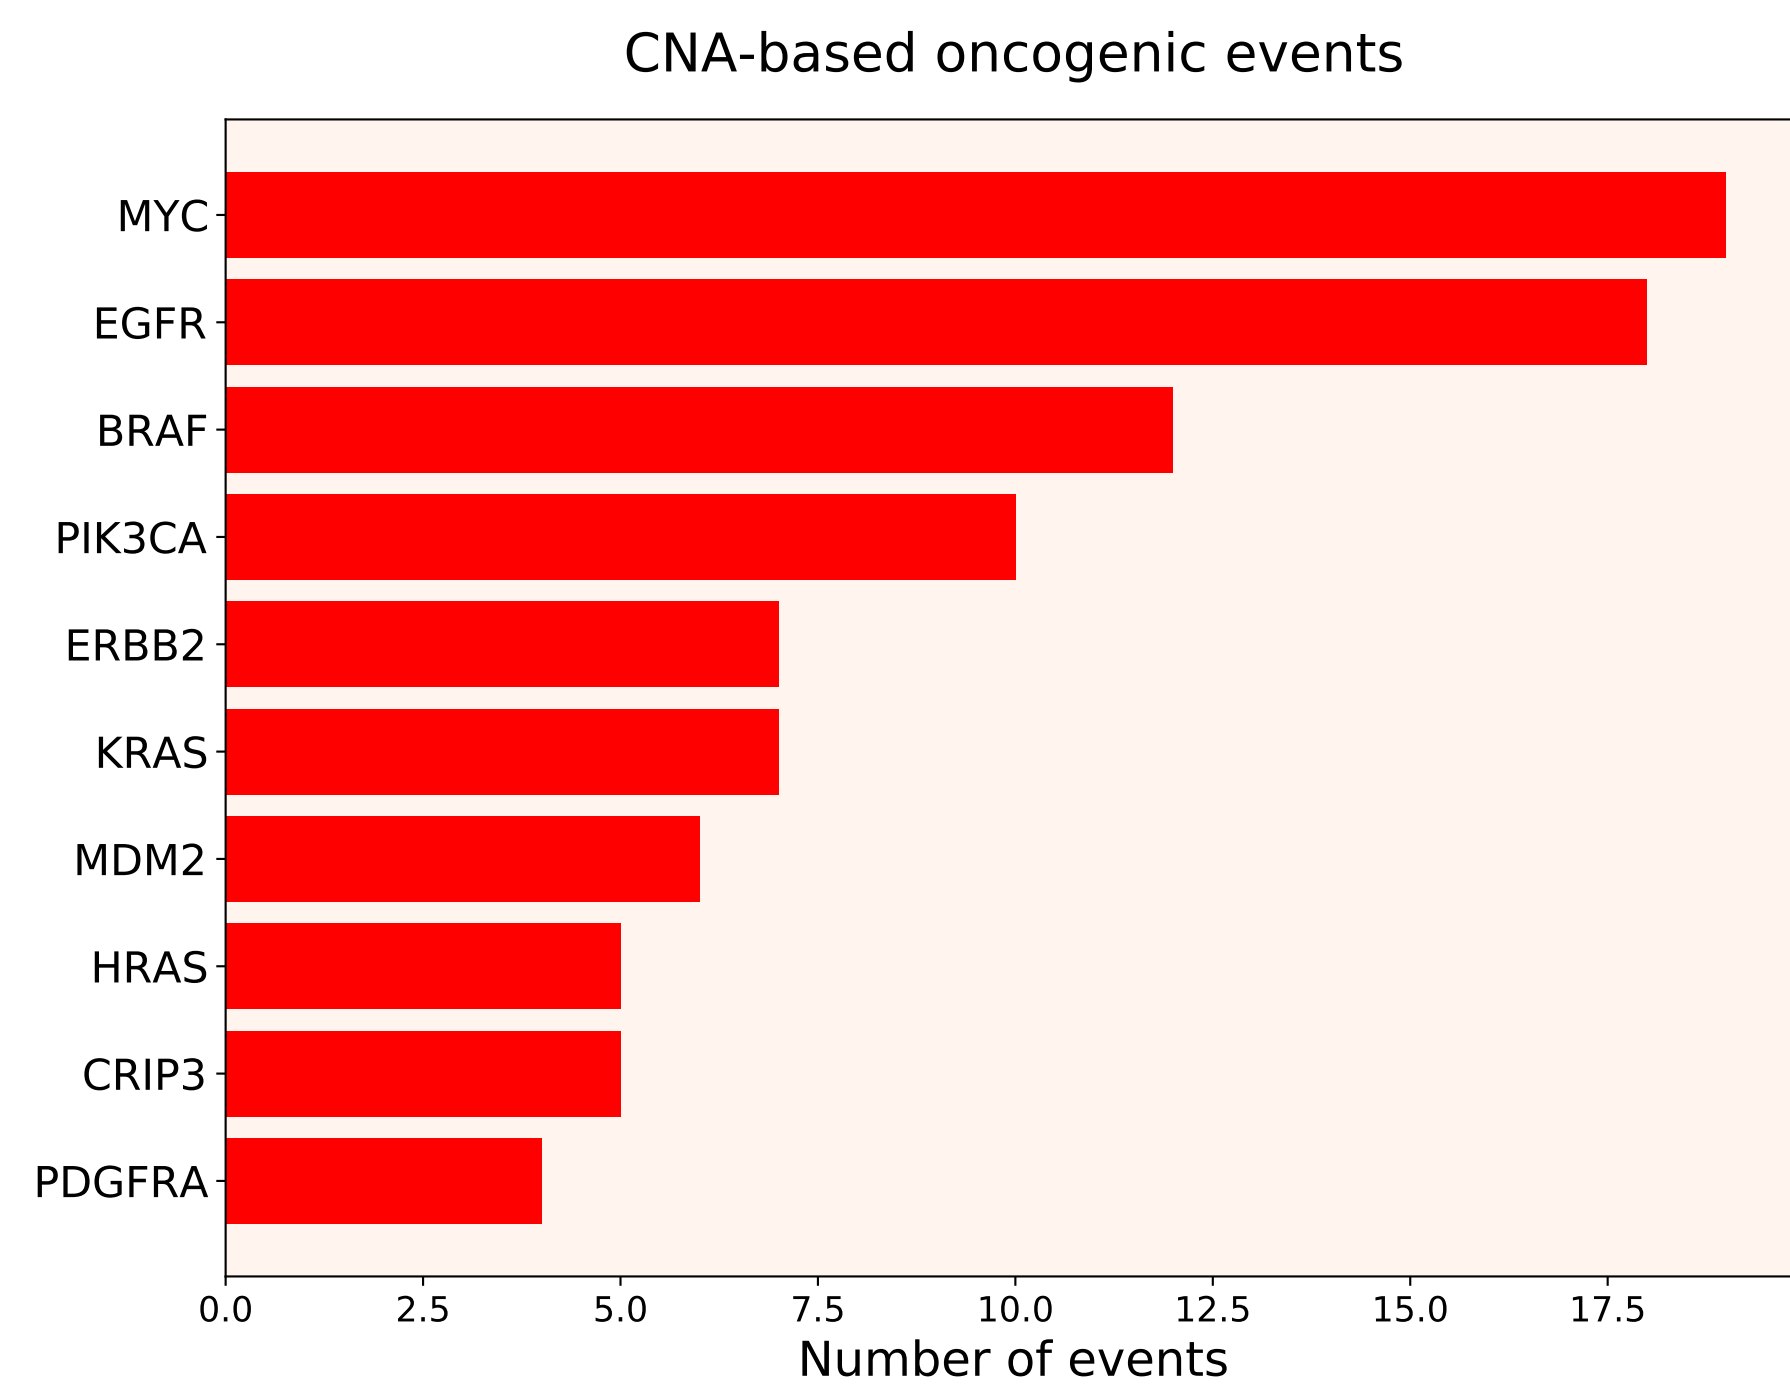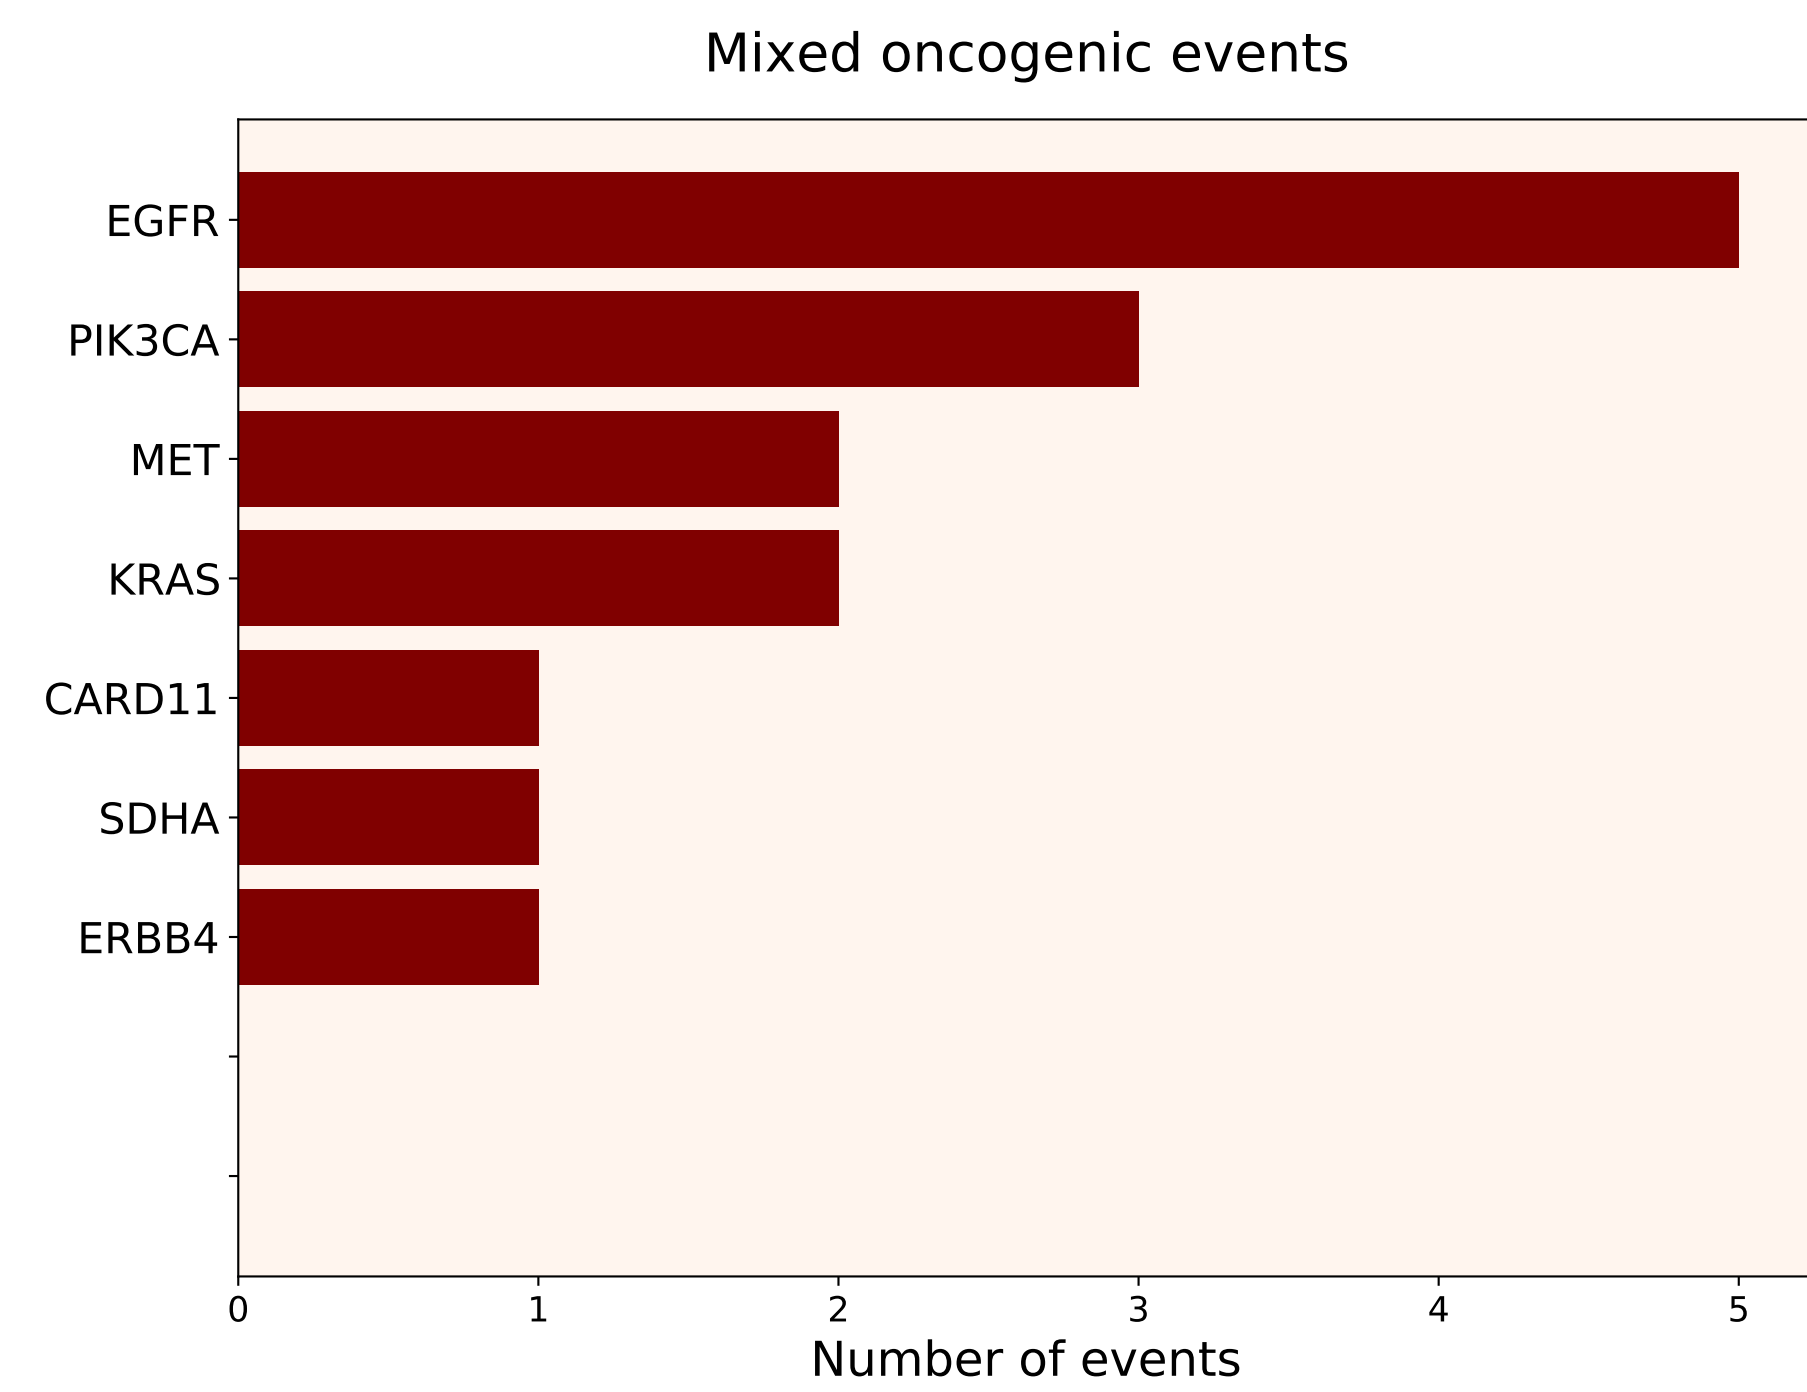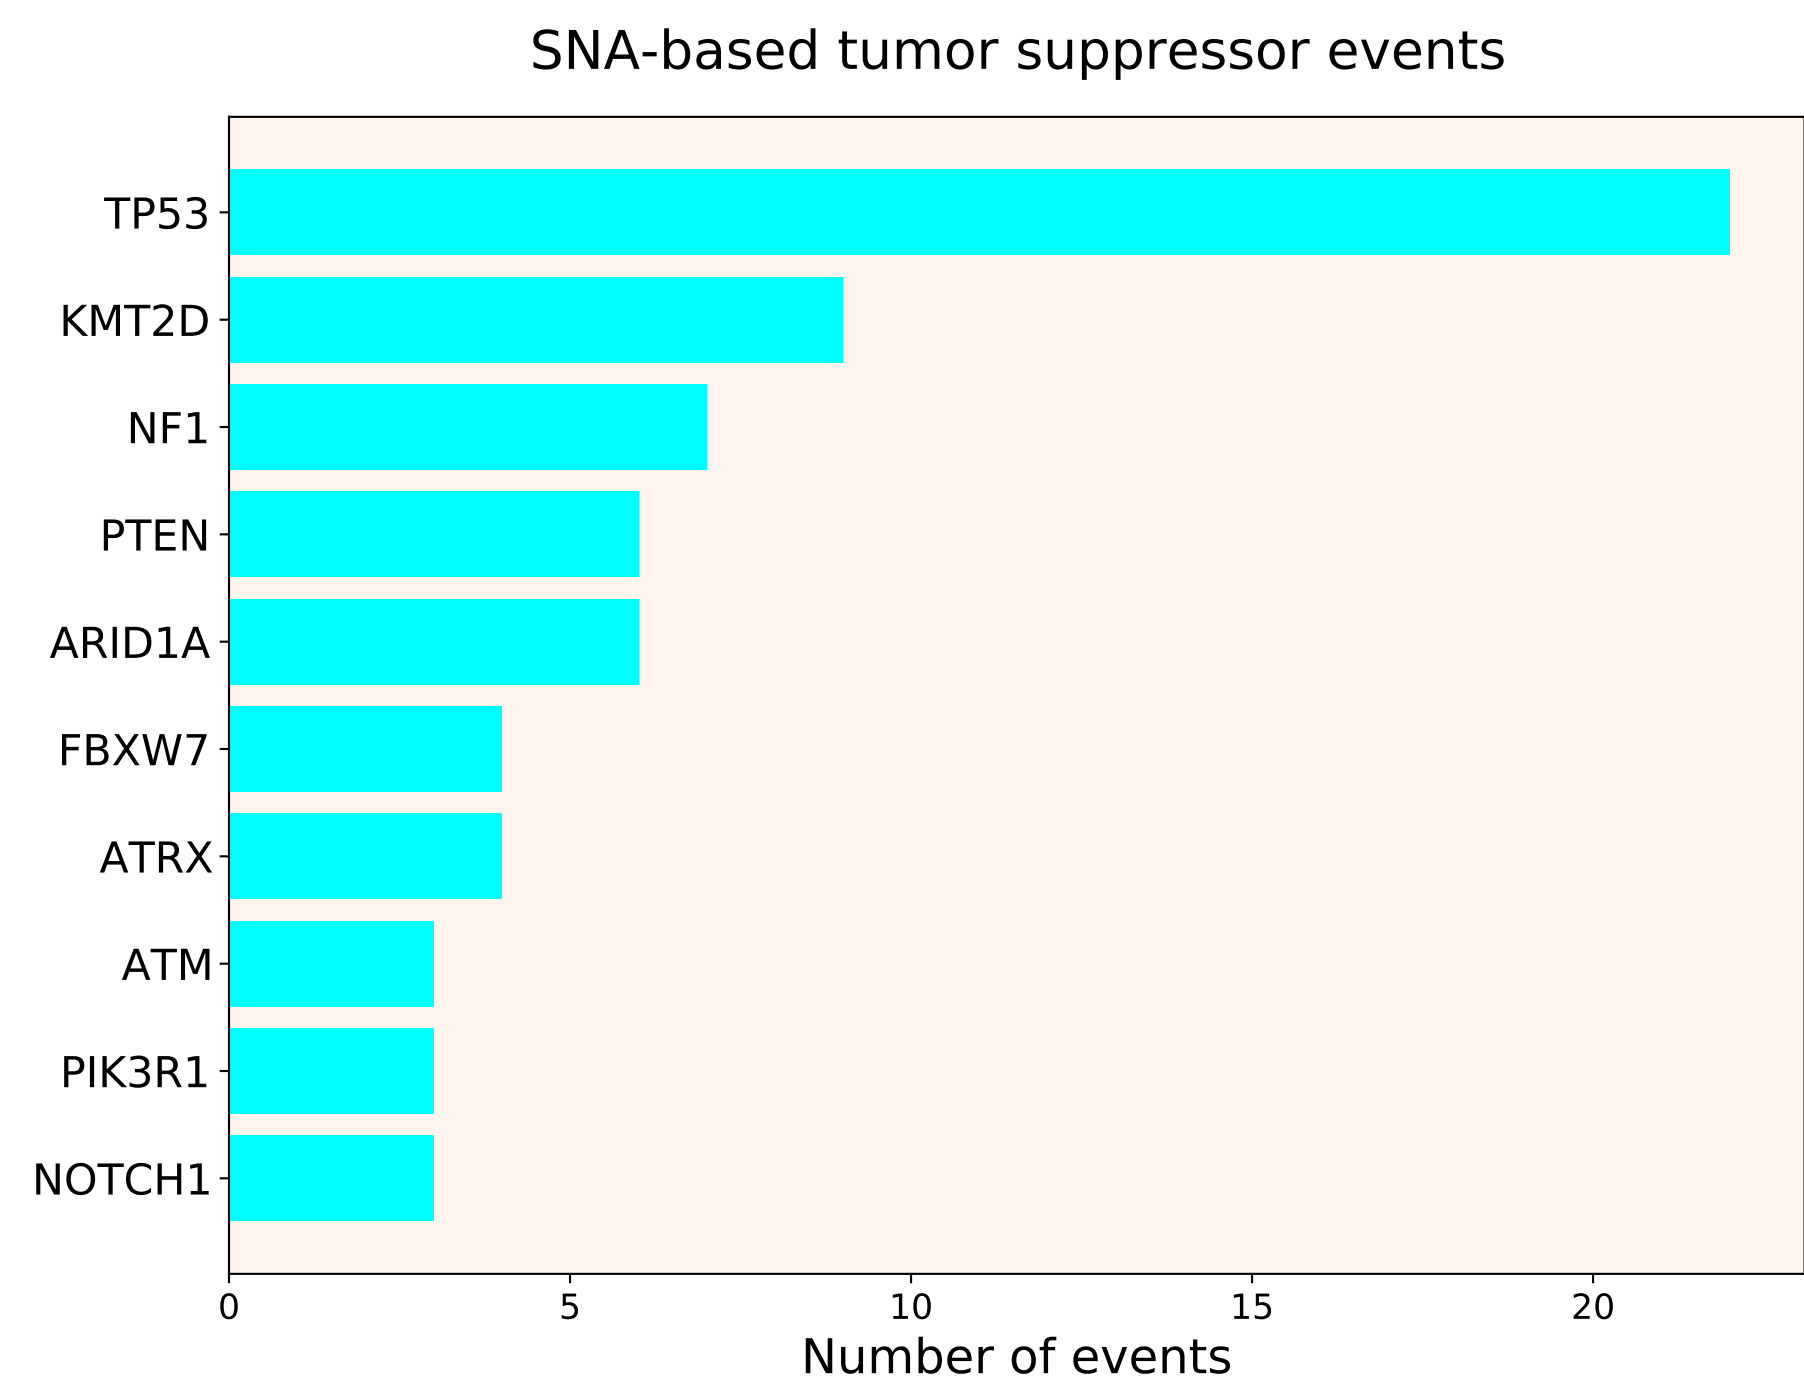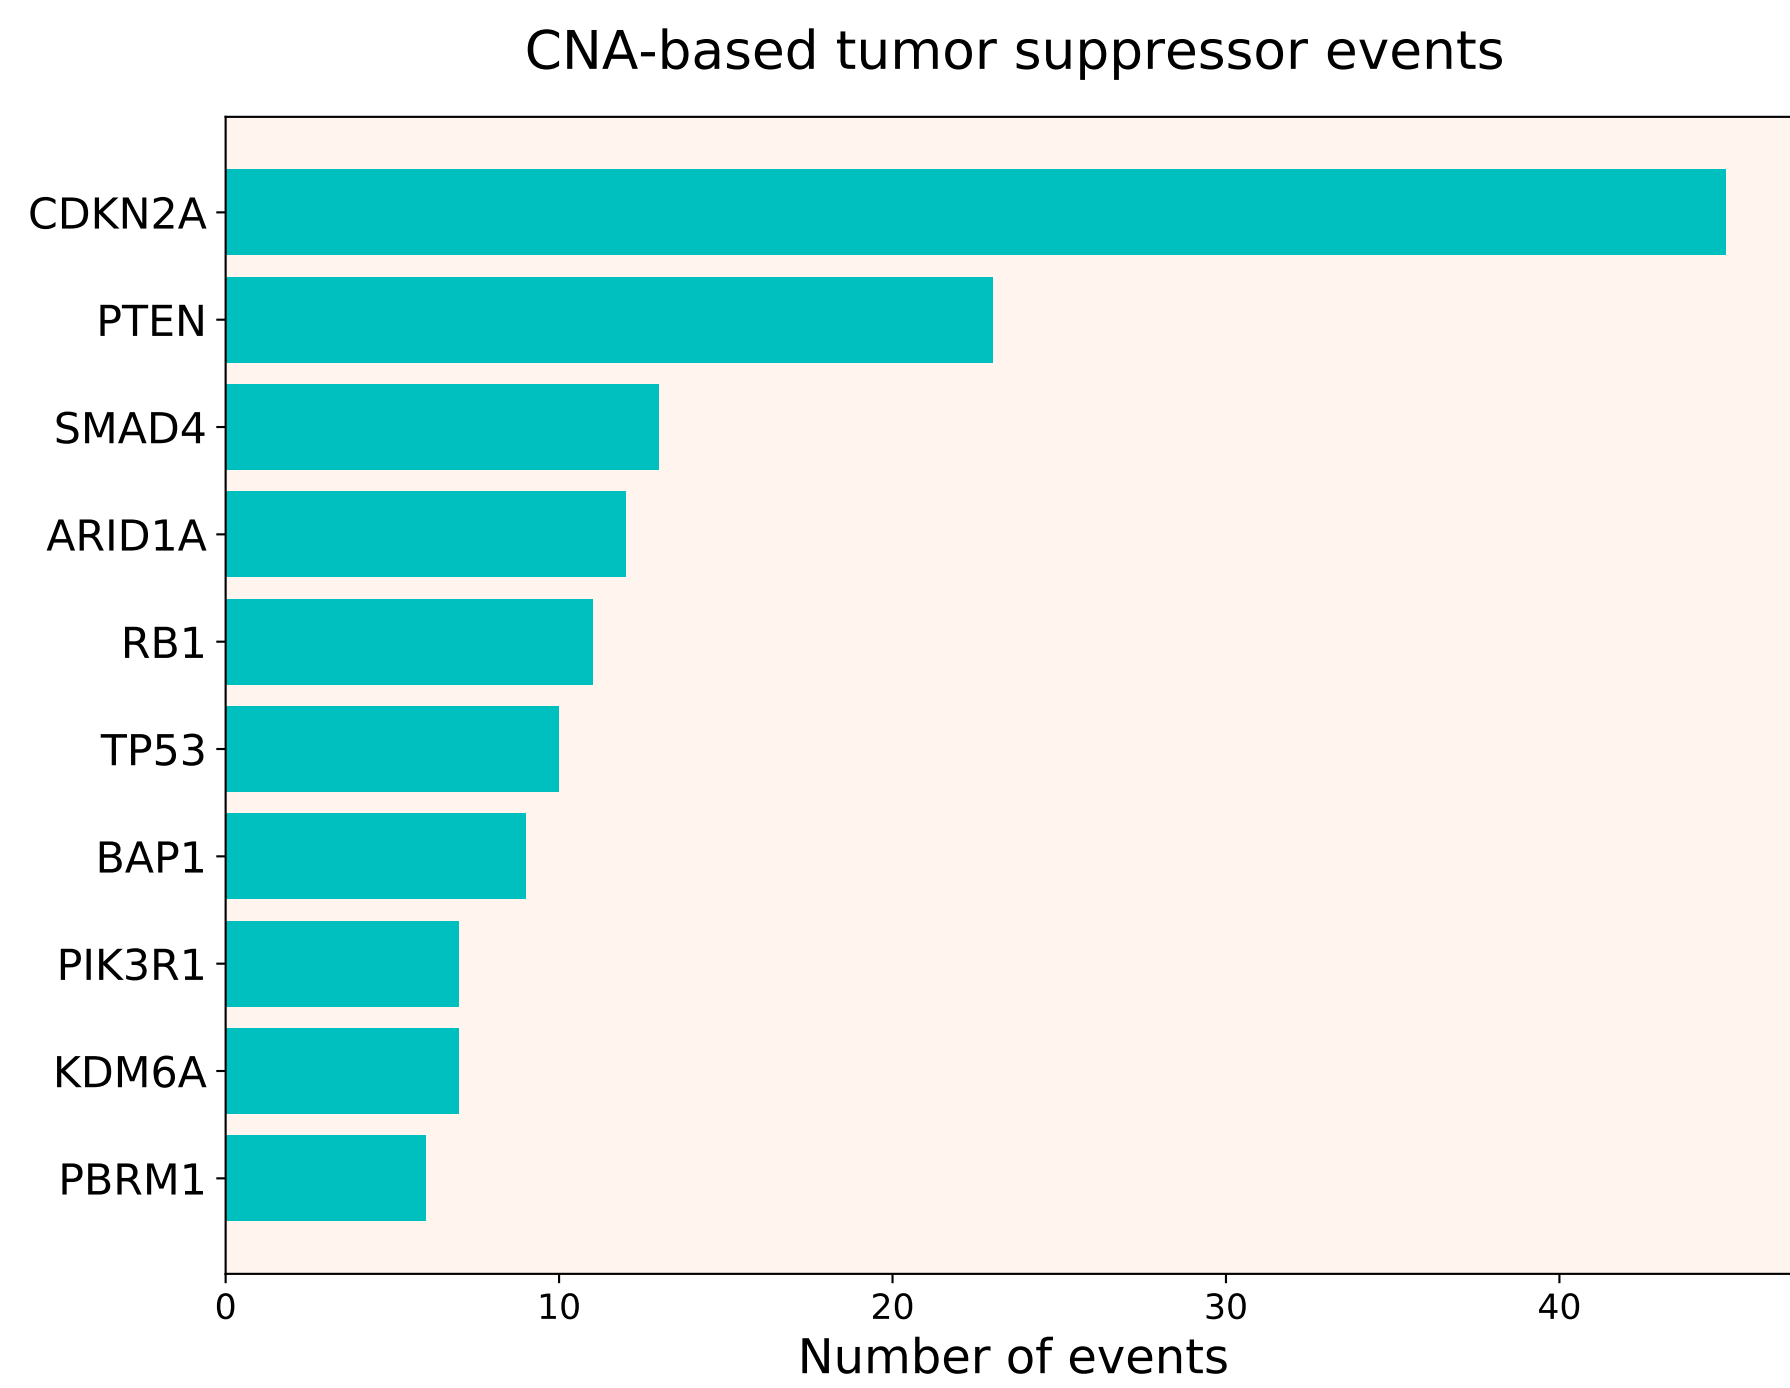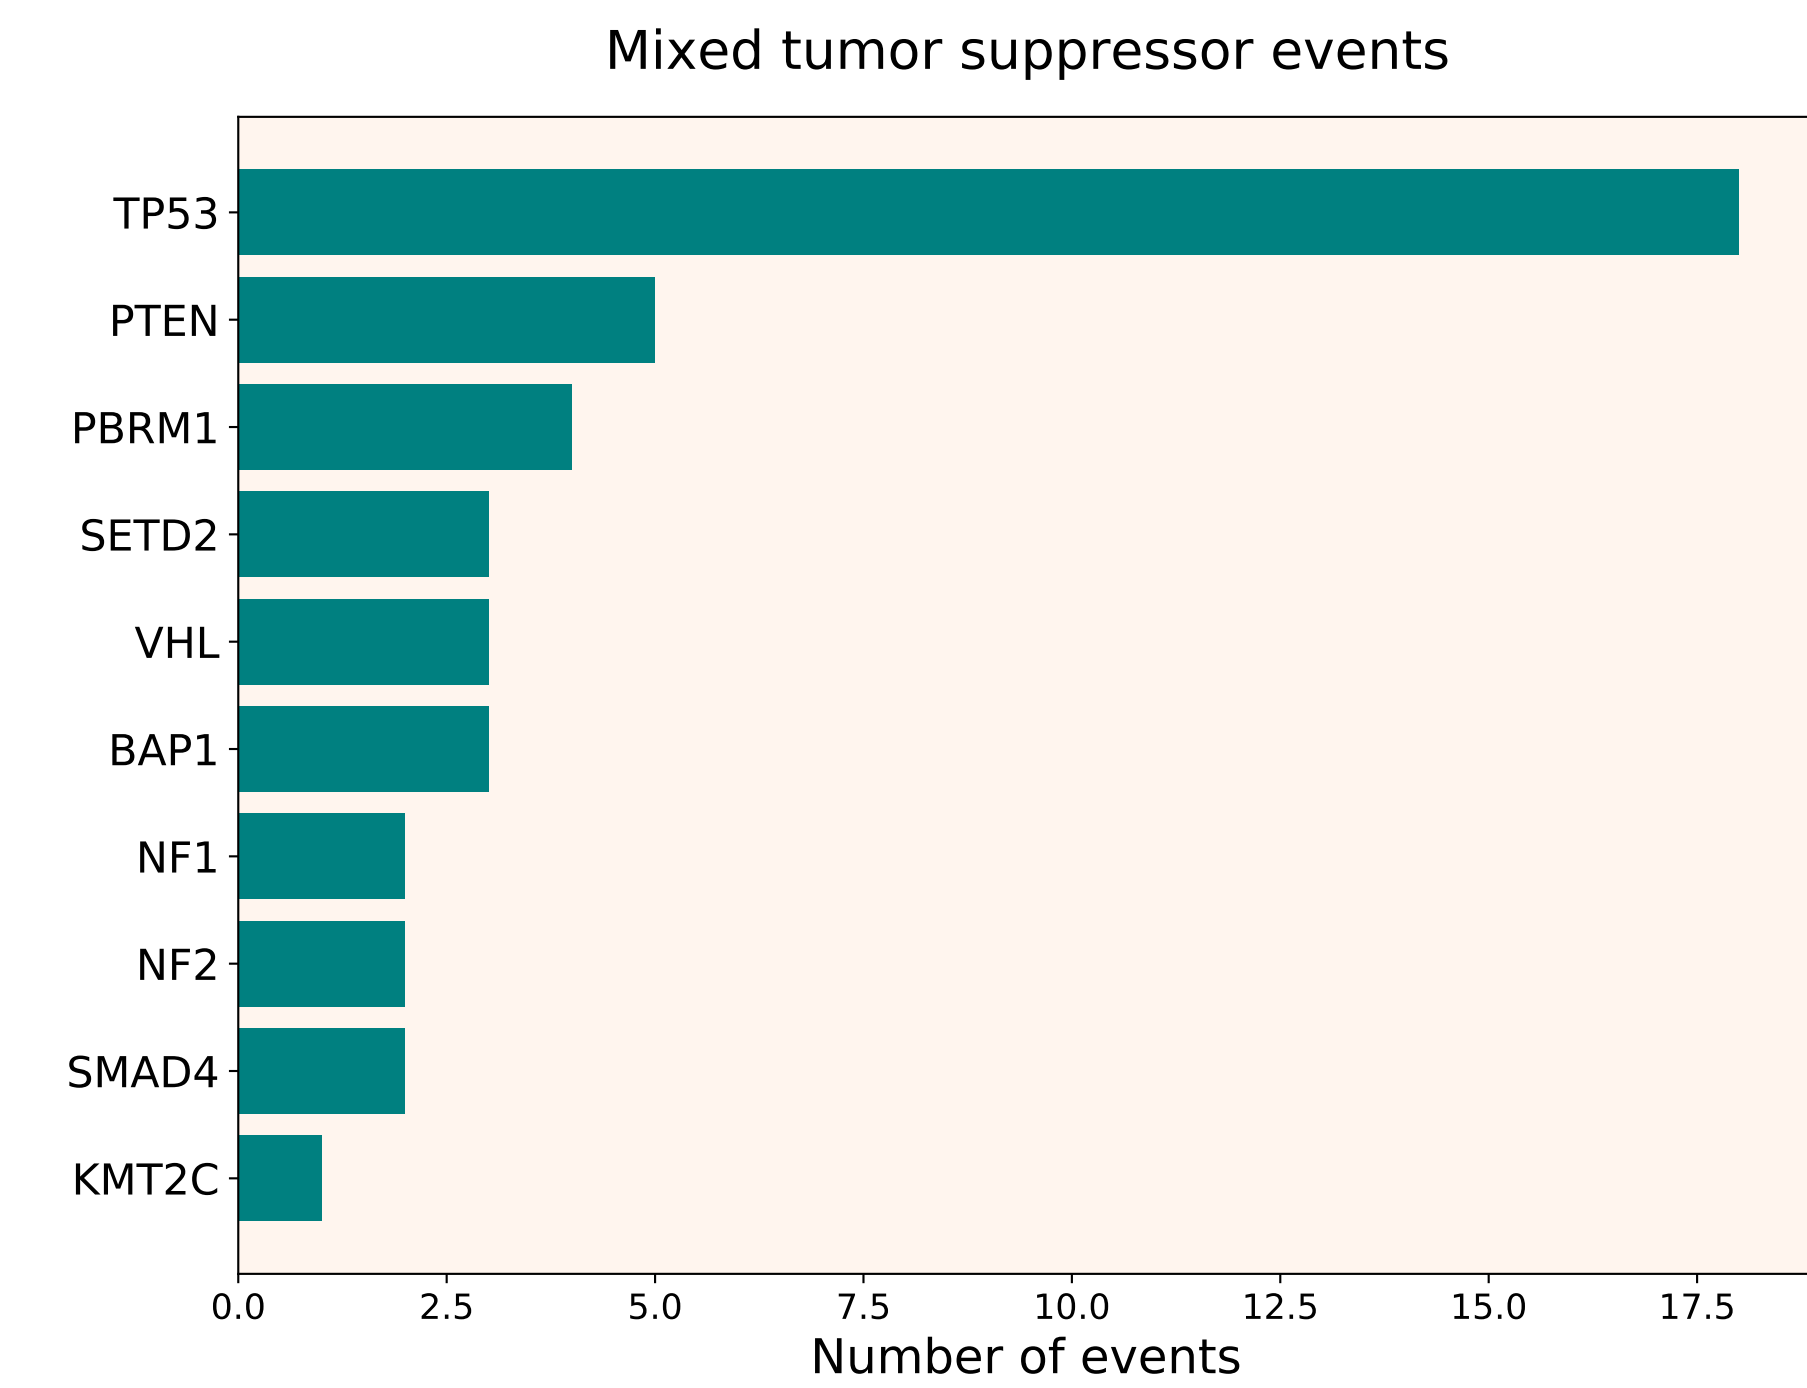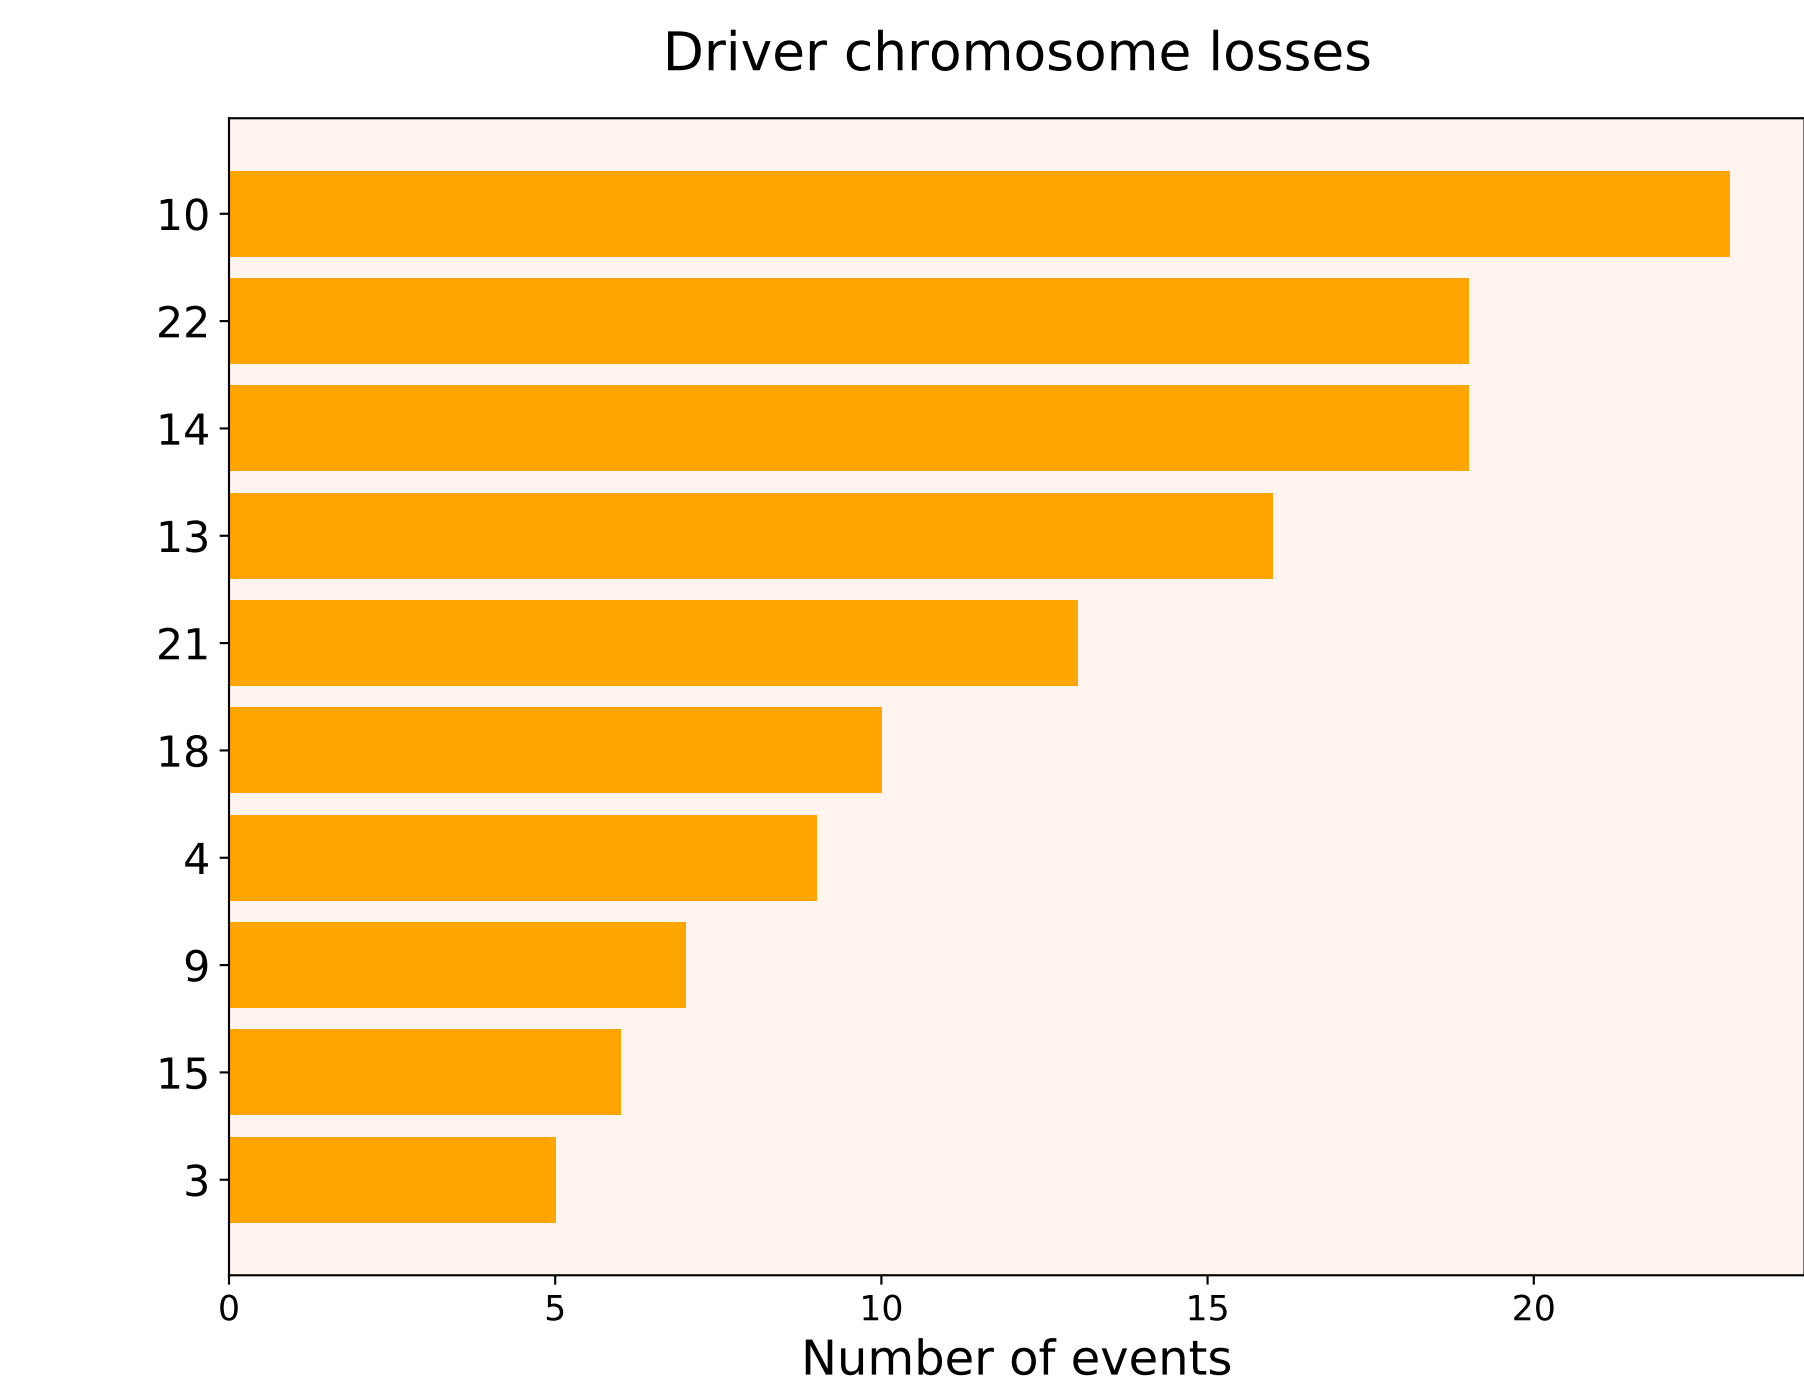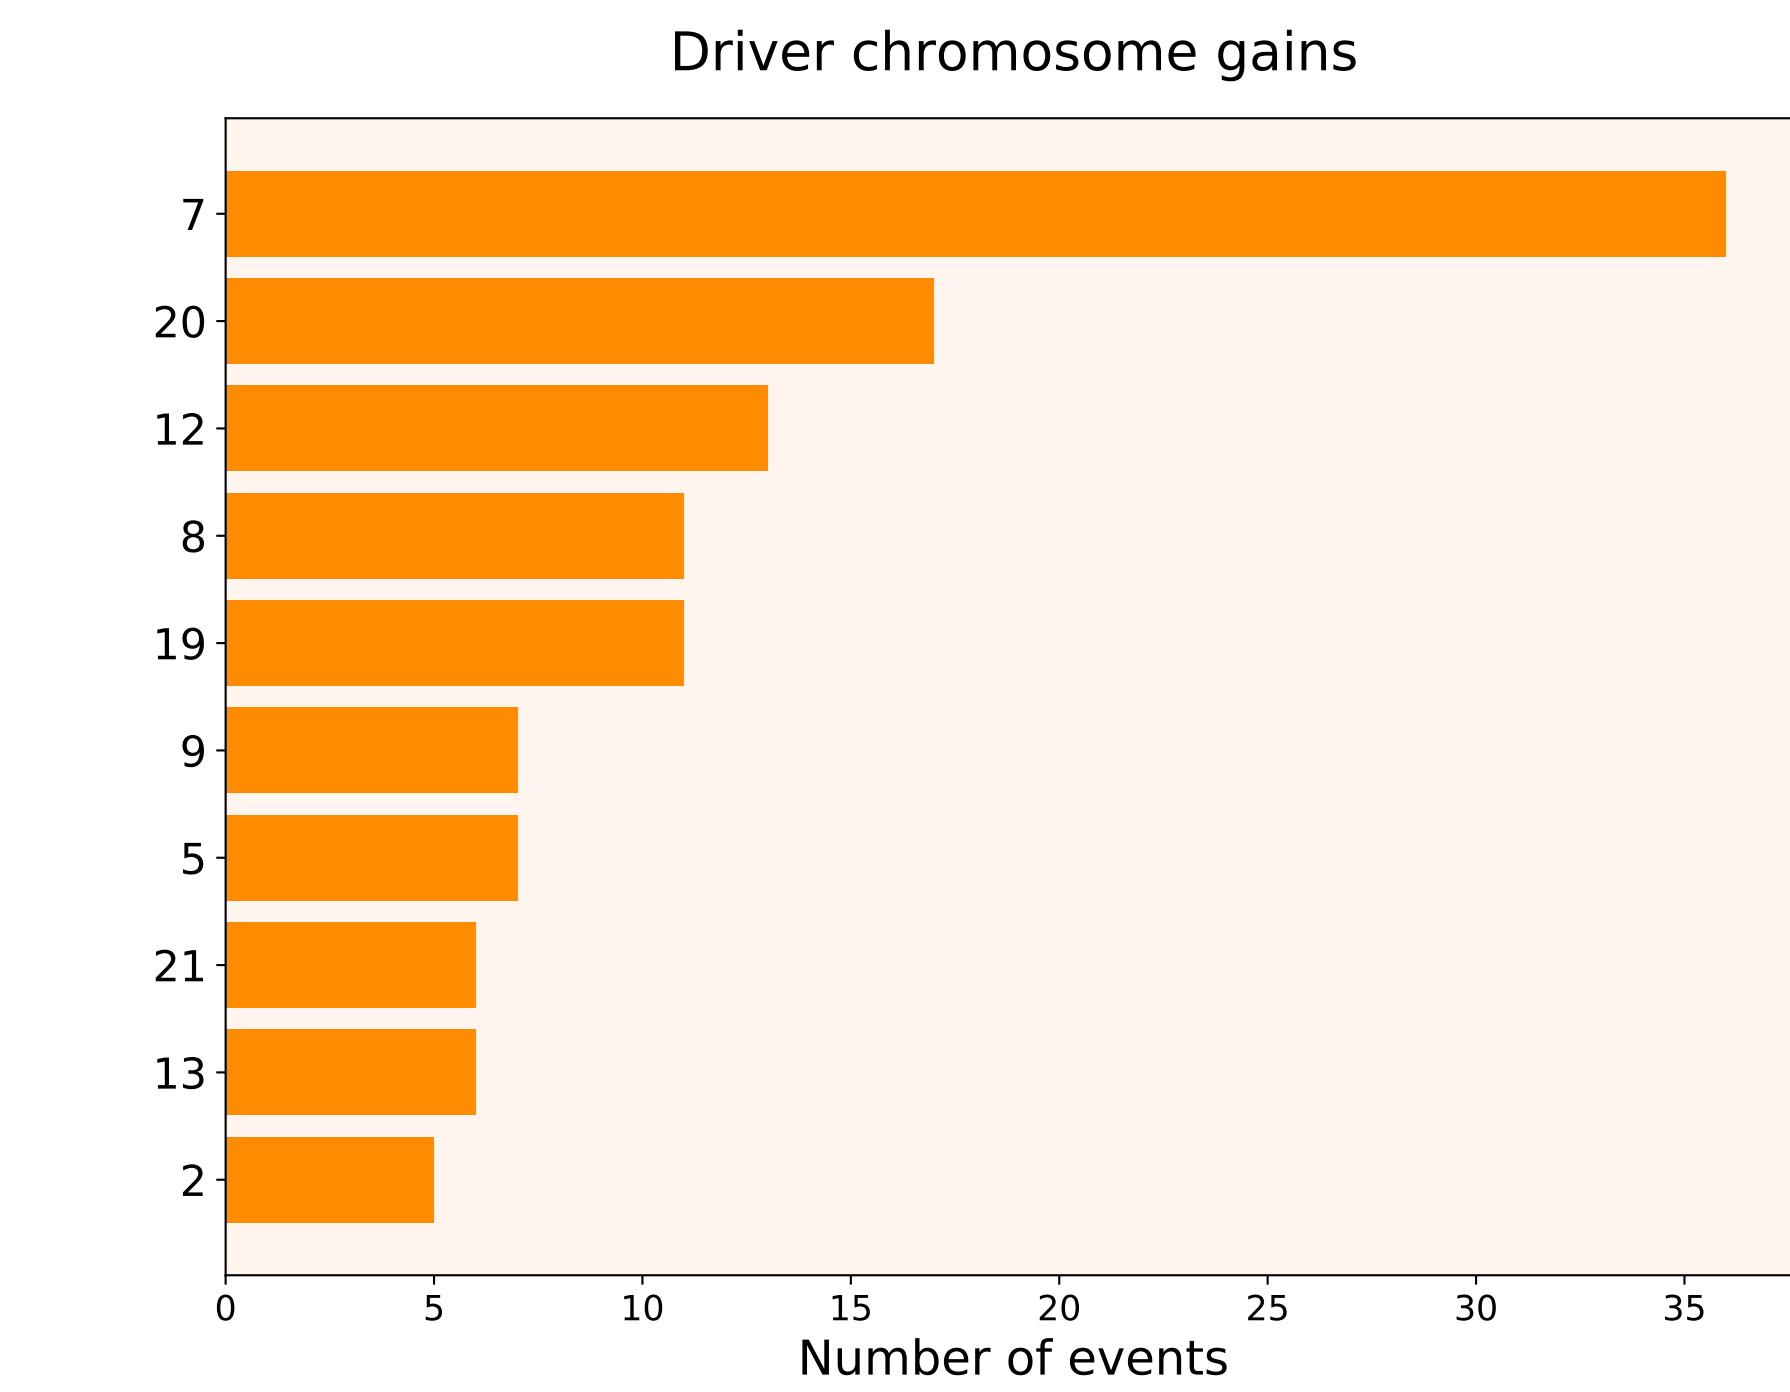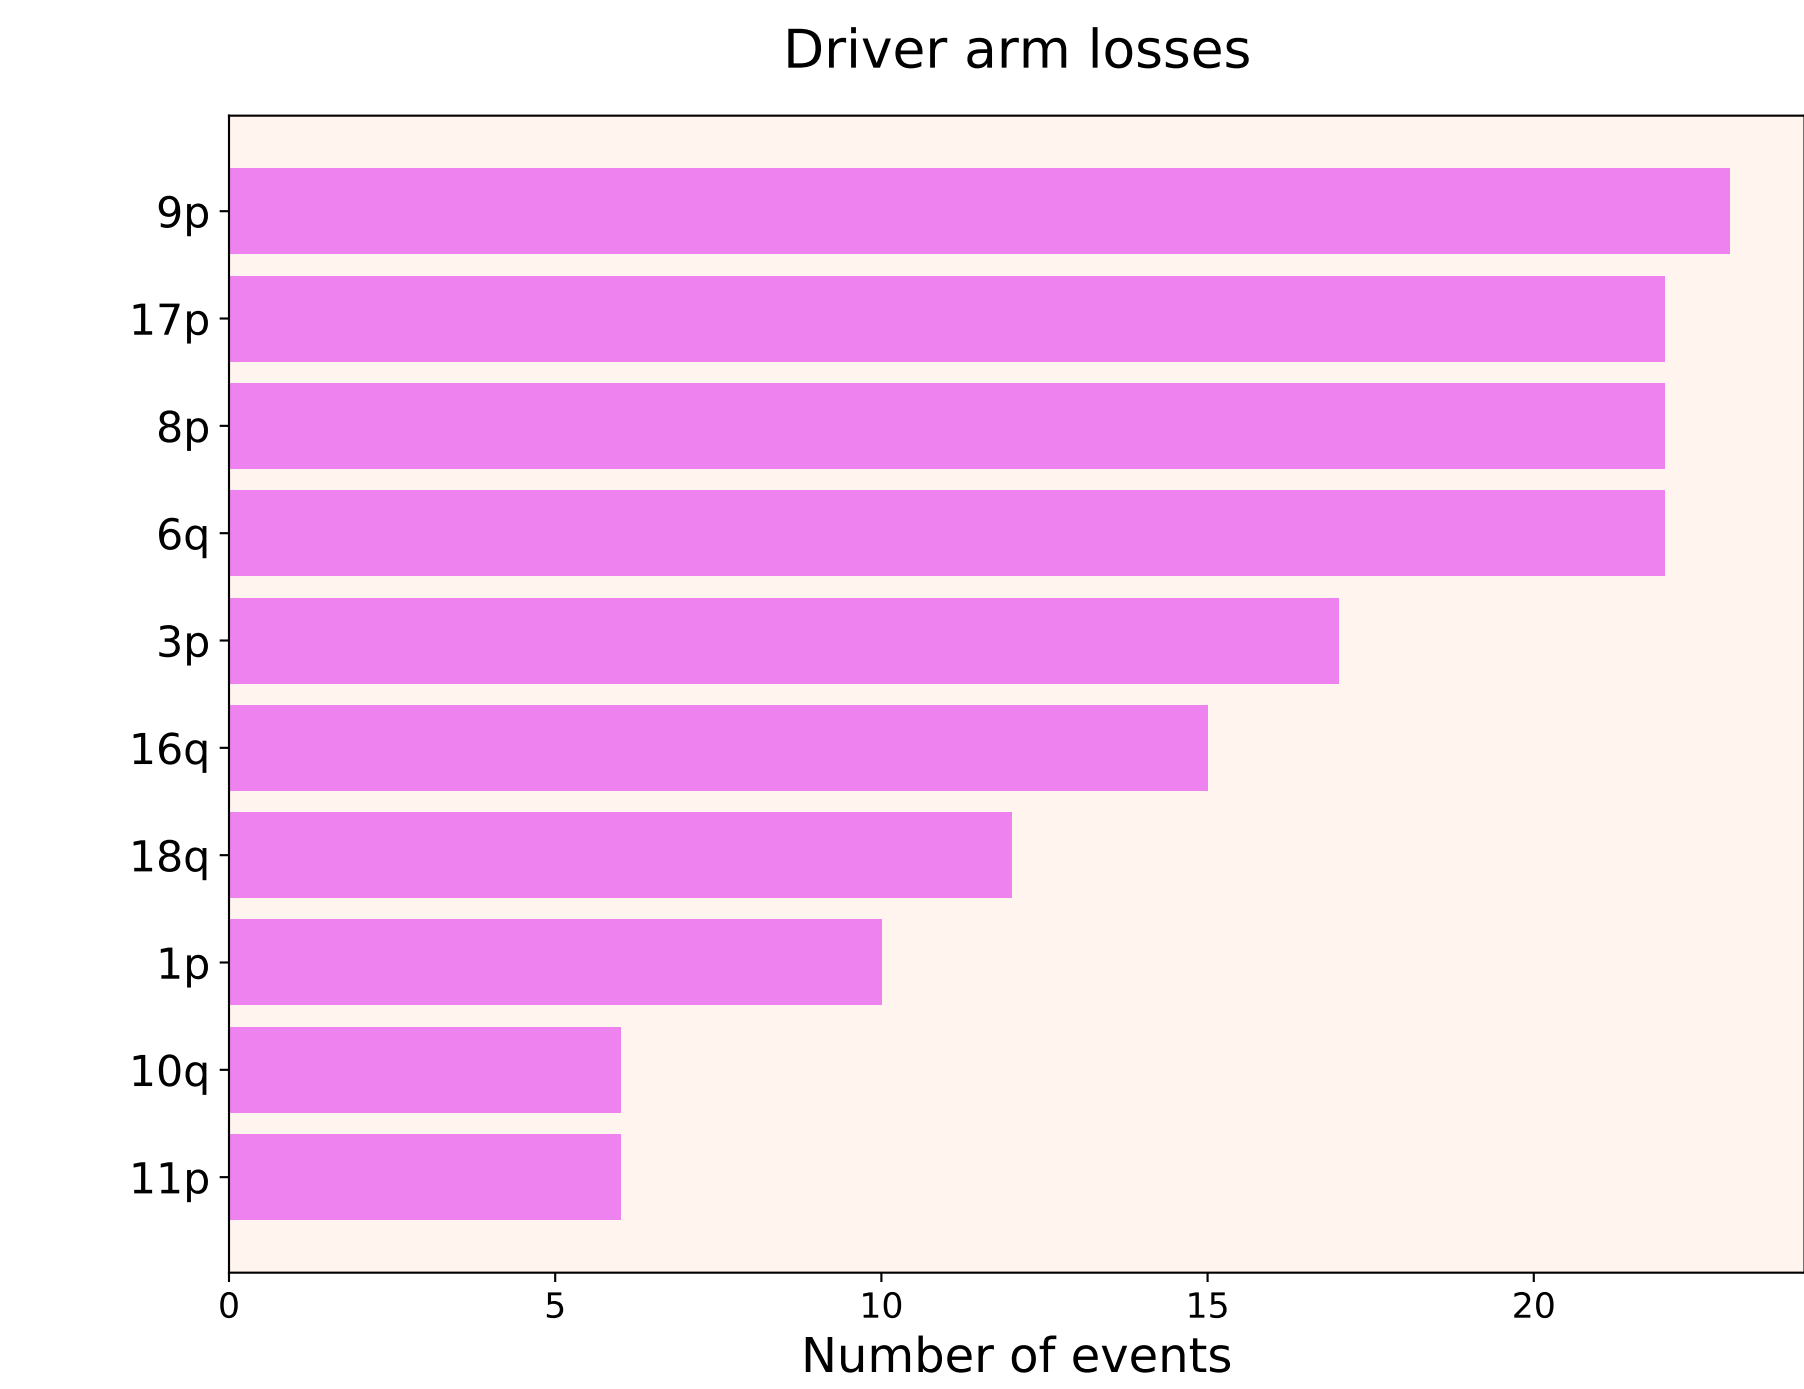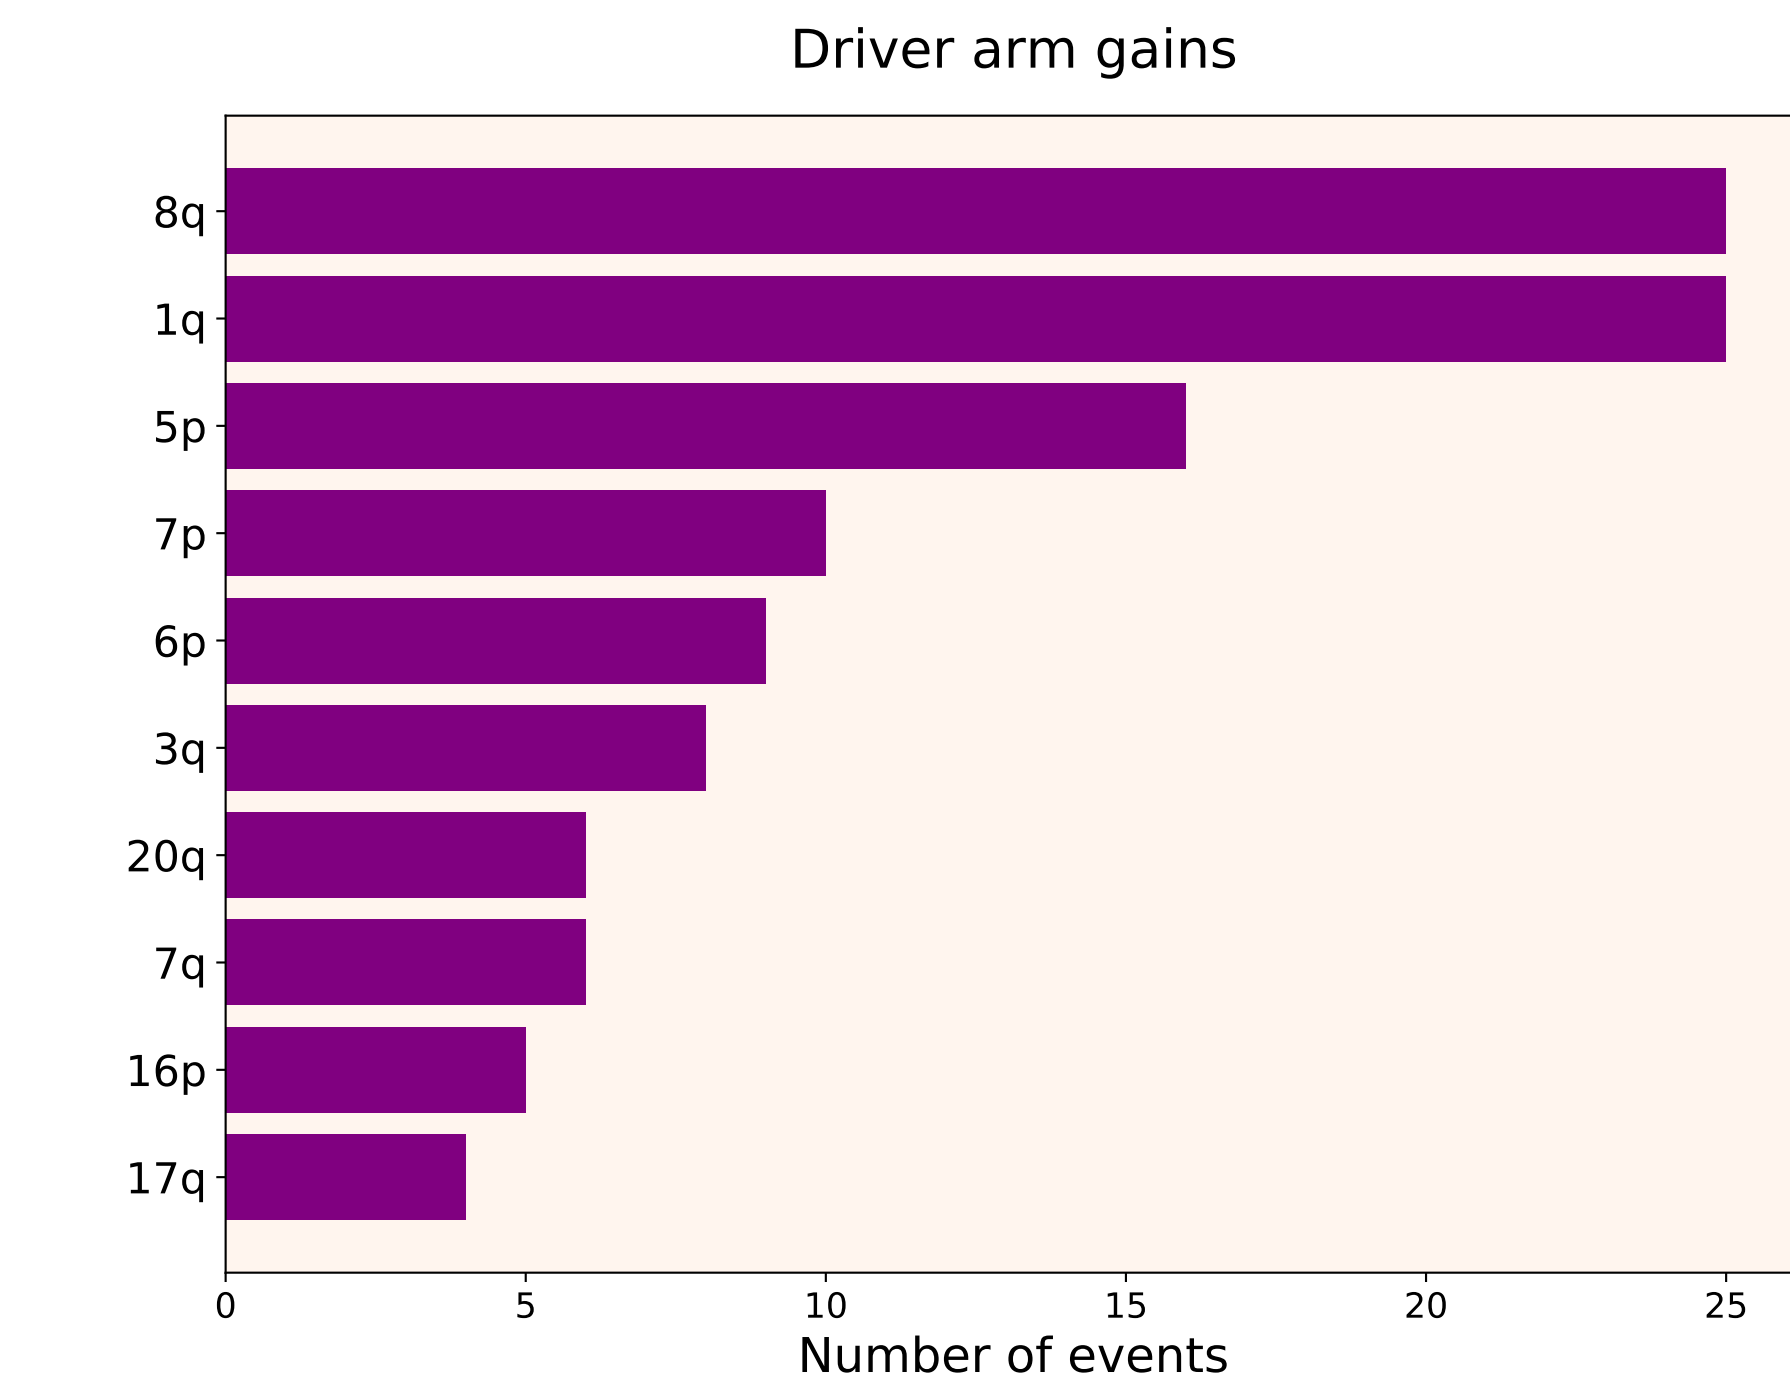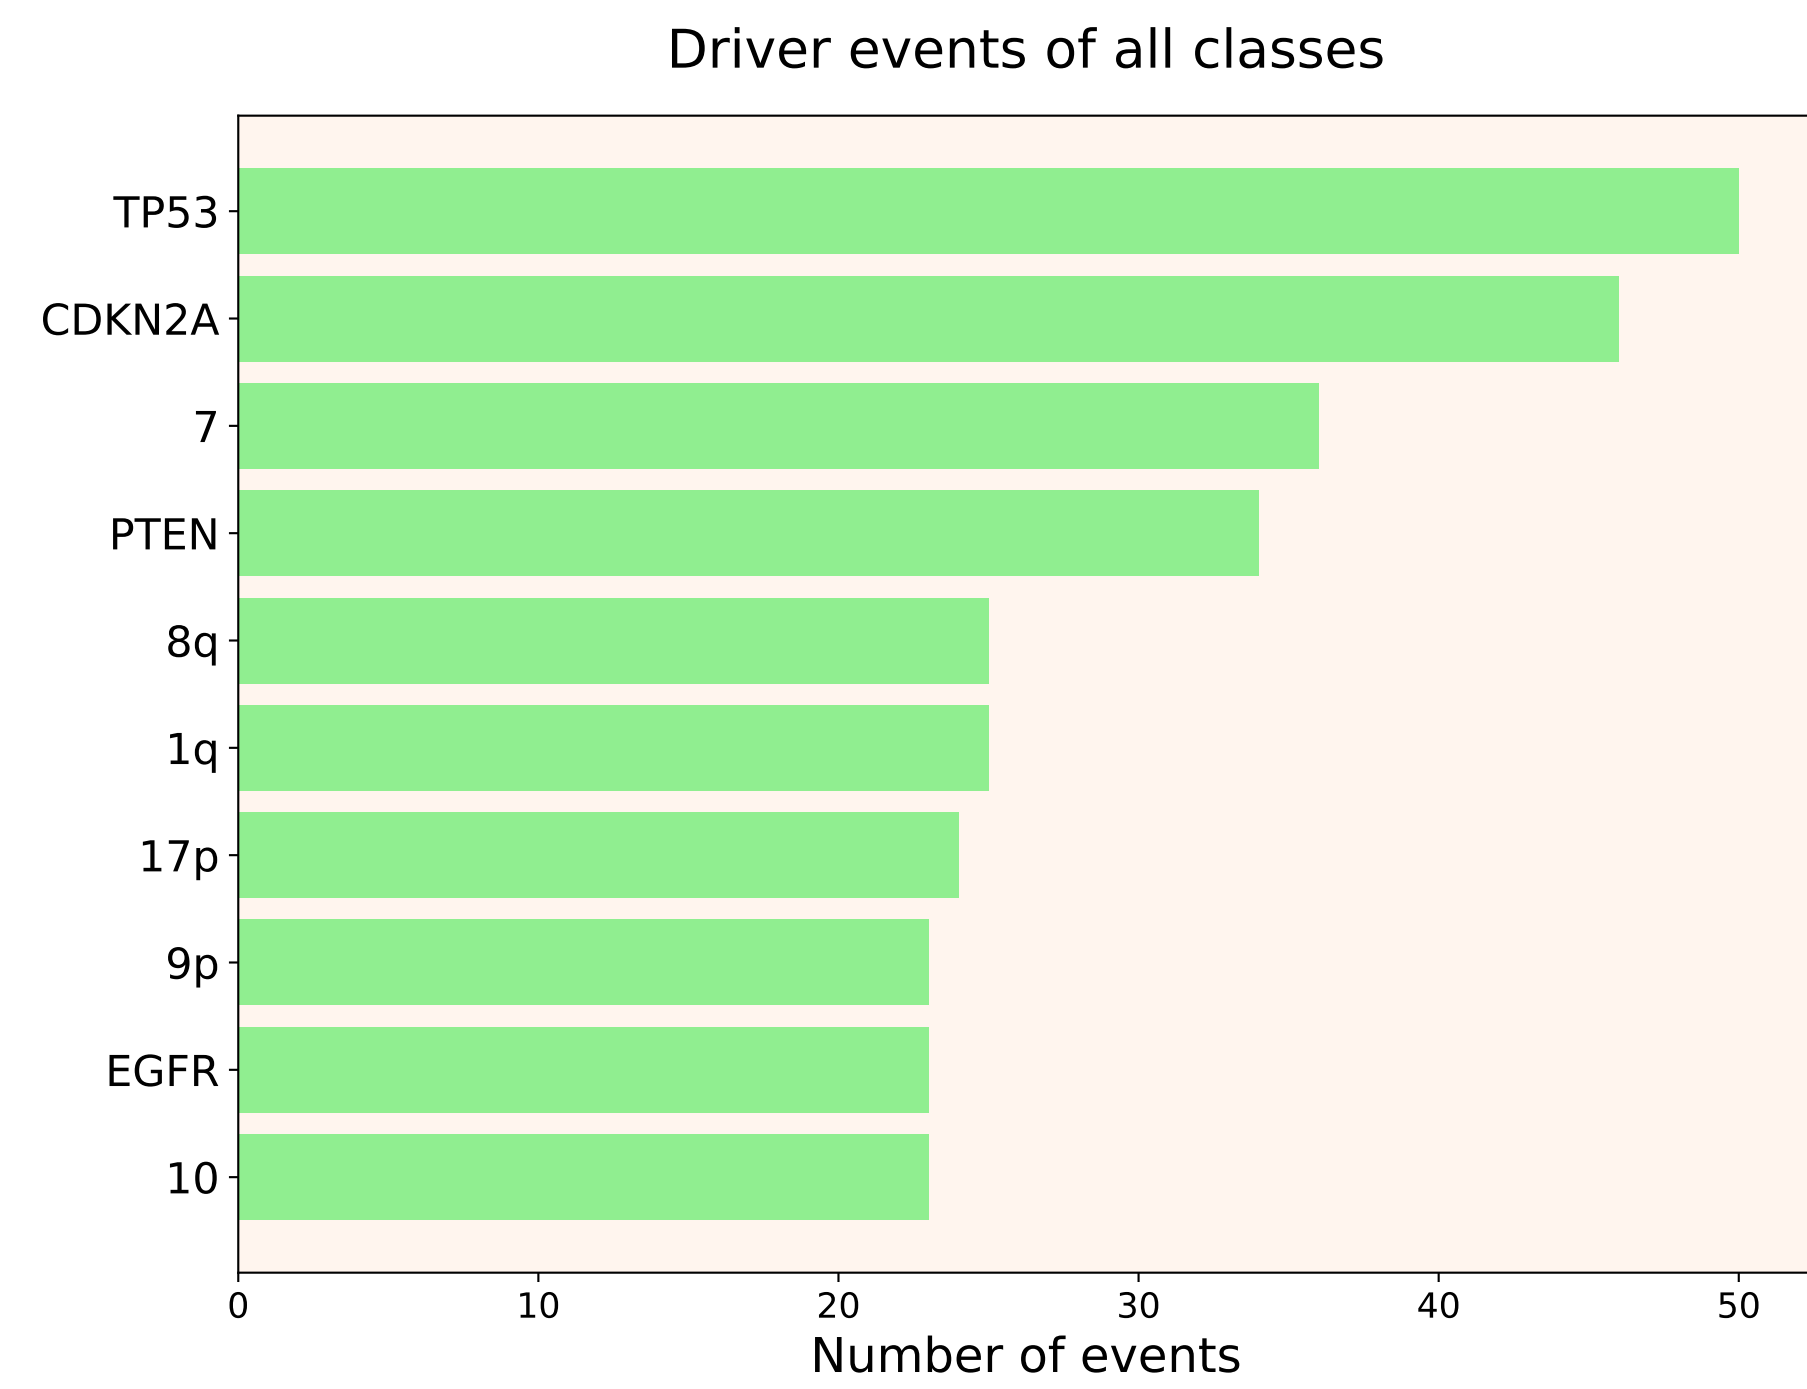

Supplement: Supplemental_Data_S1.zip [file Supplemental_Data_S1.zip]

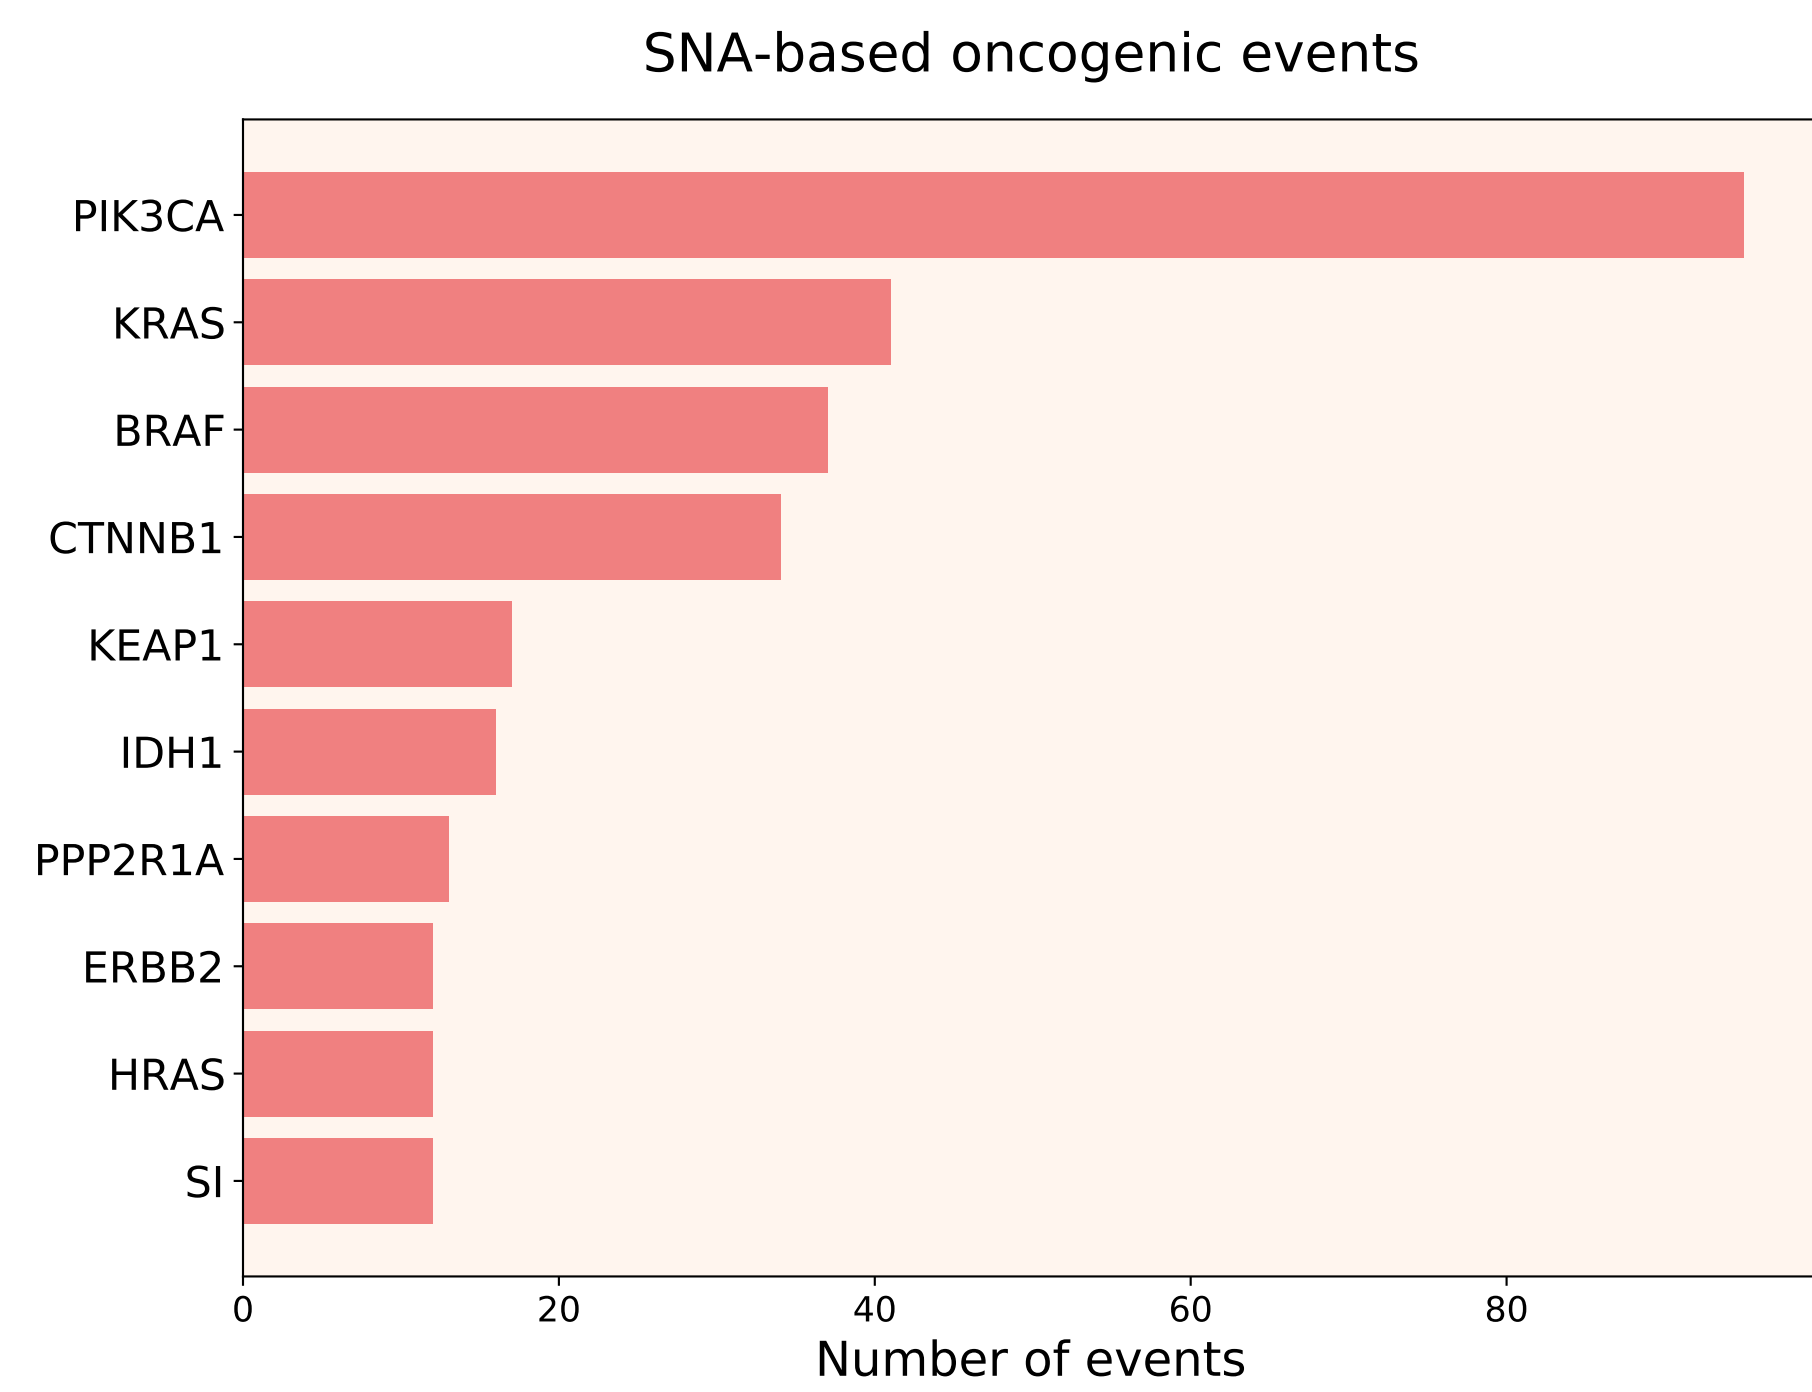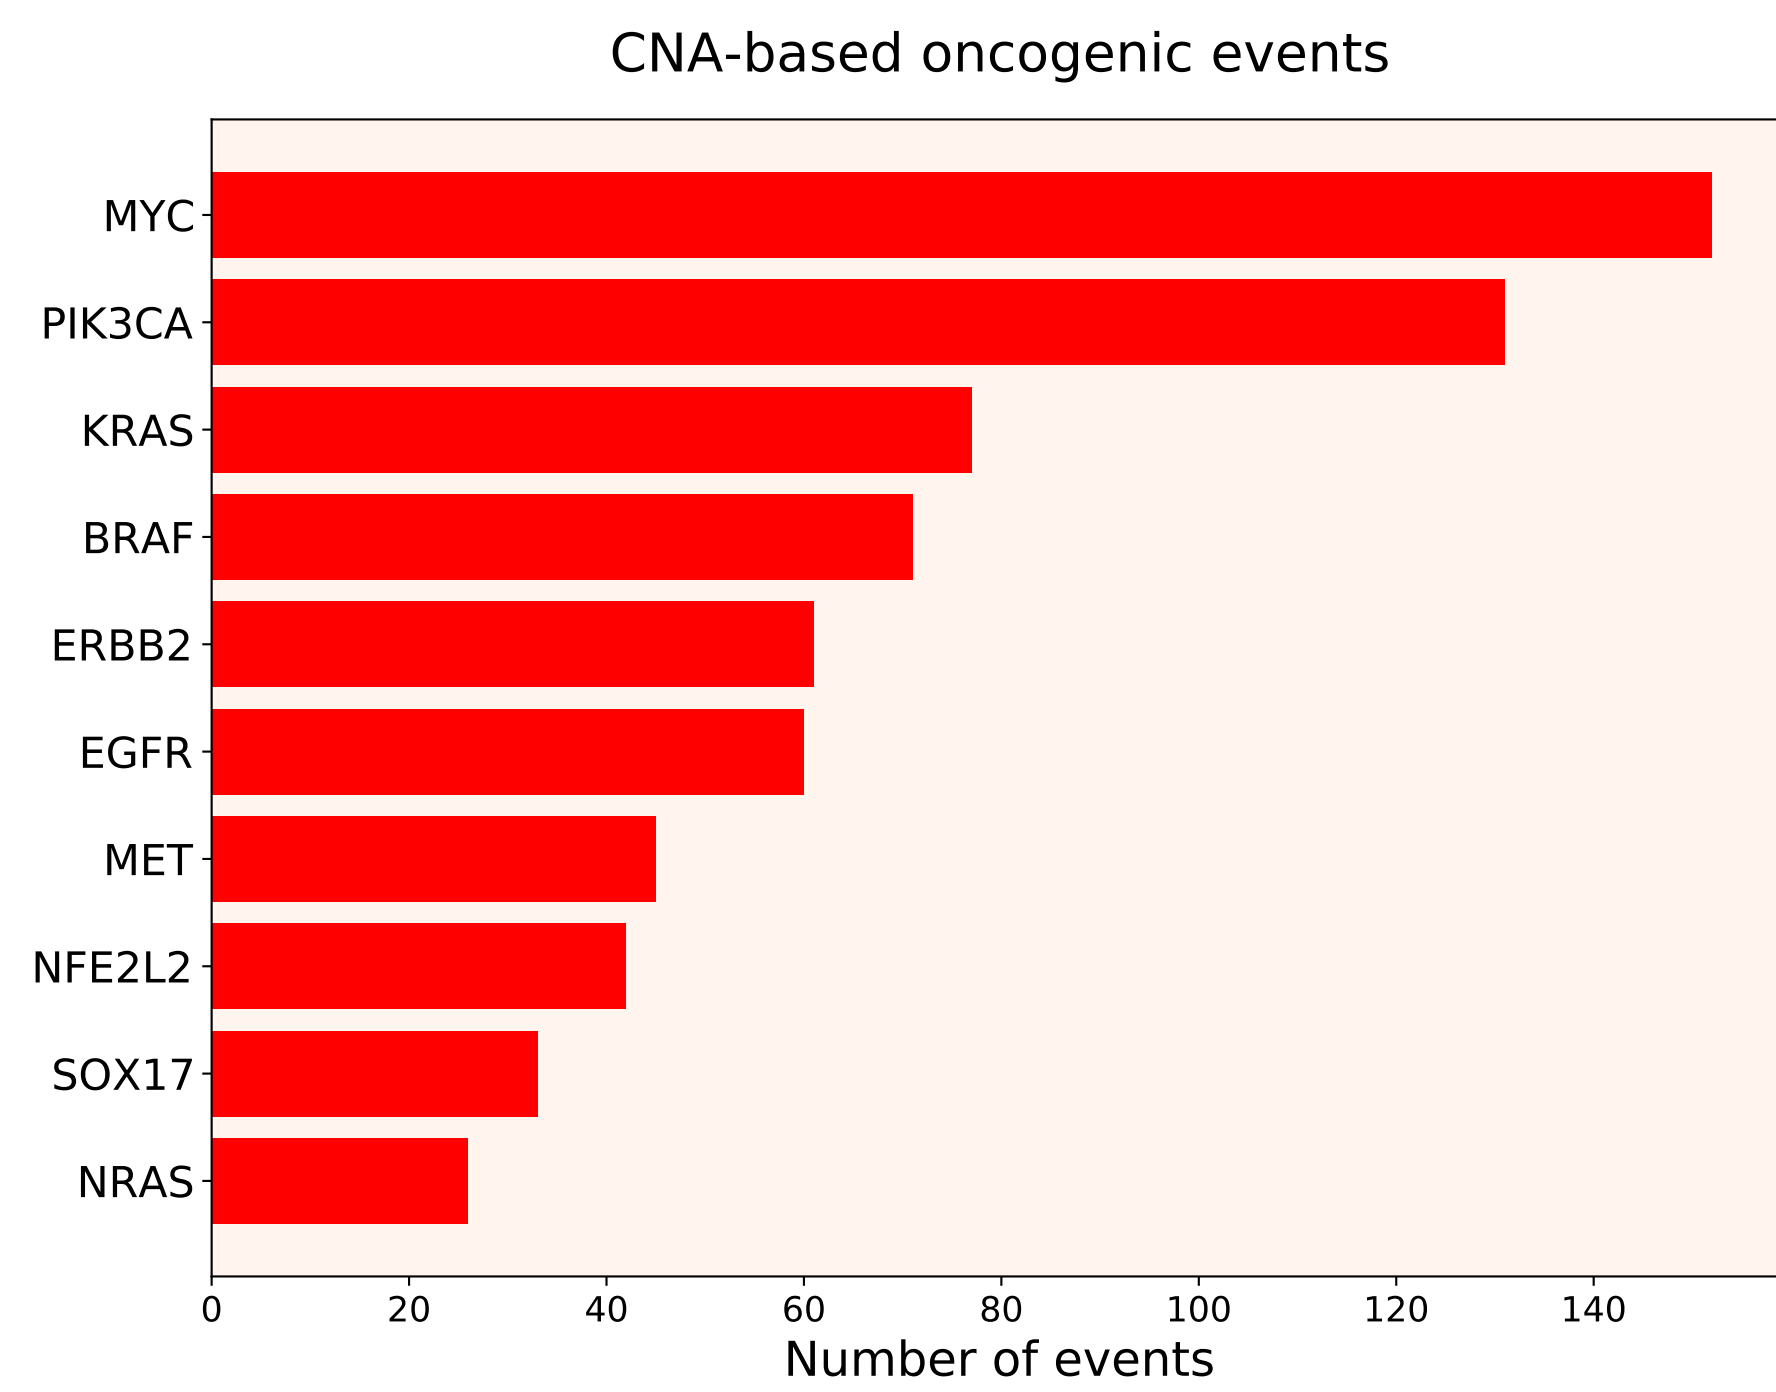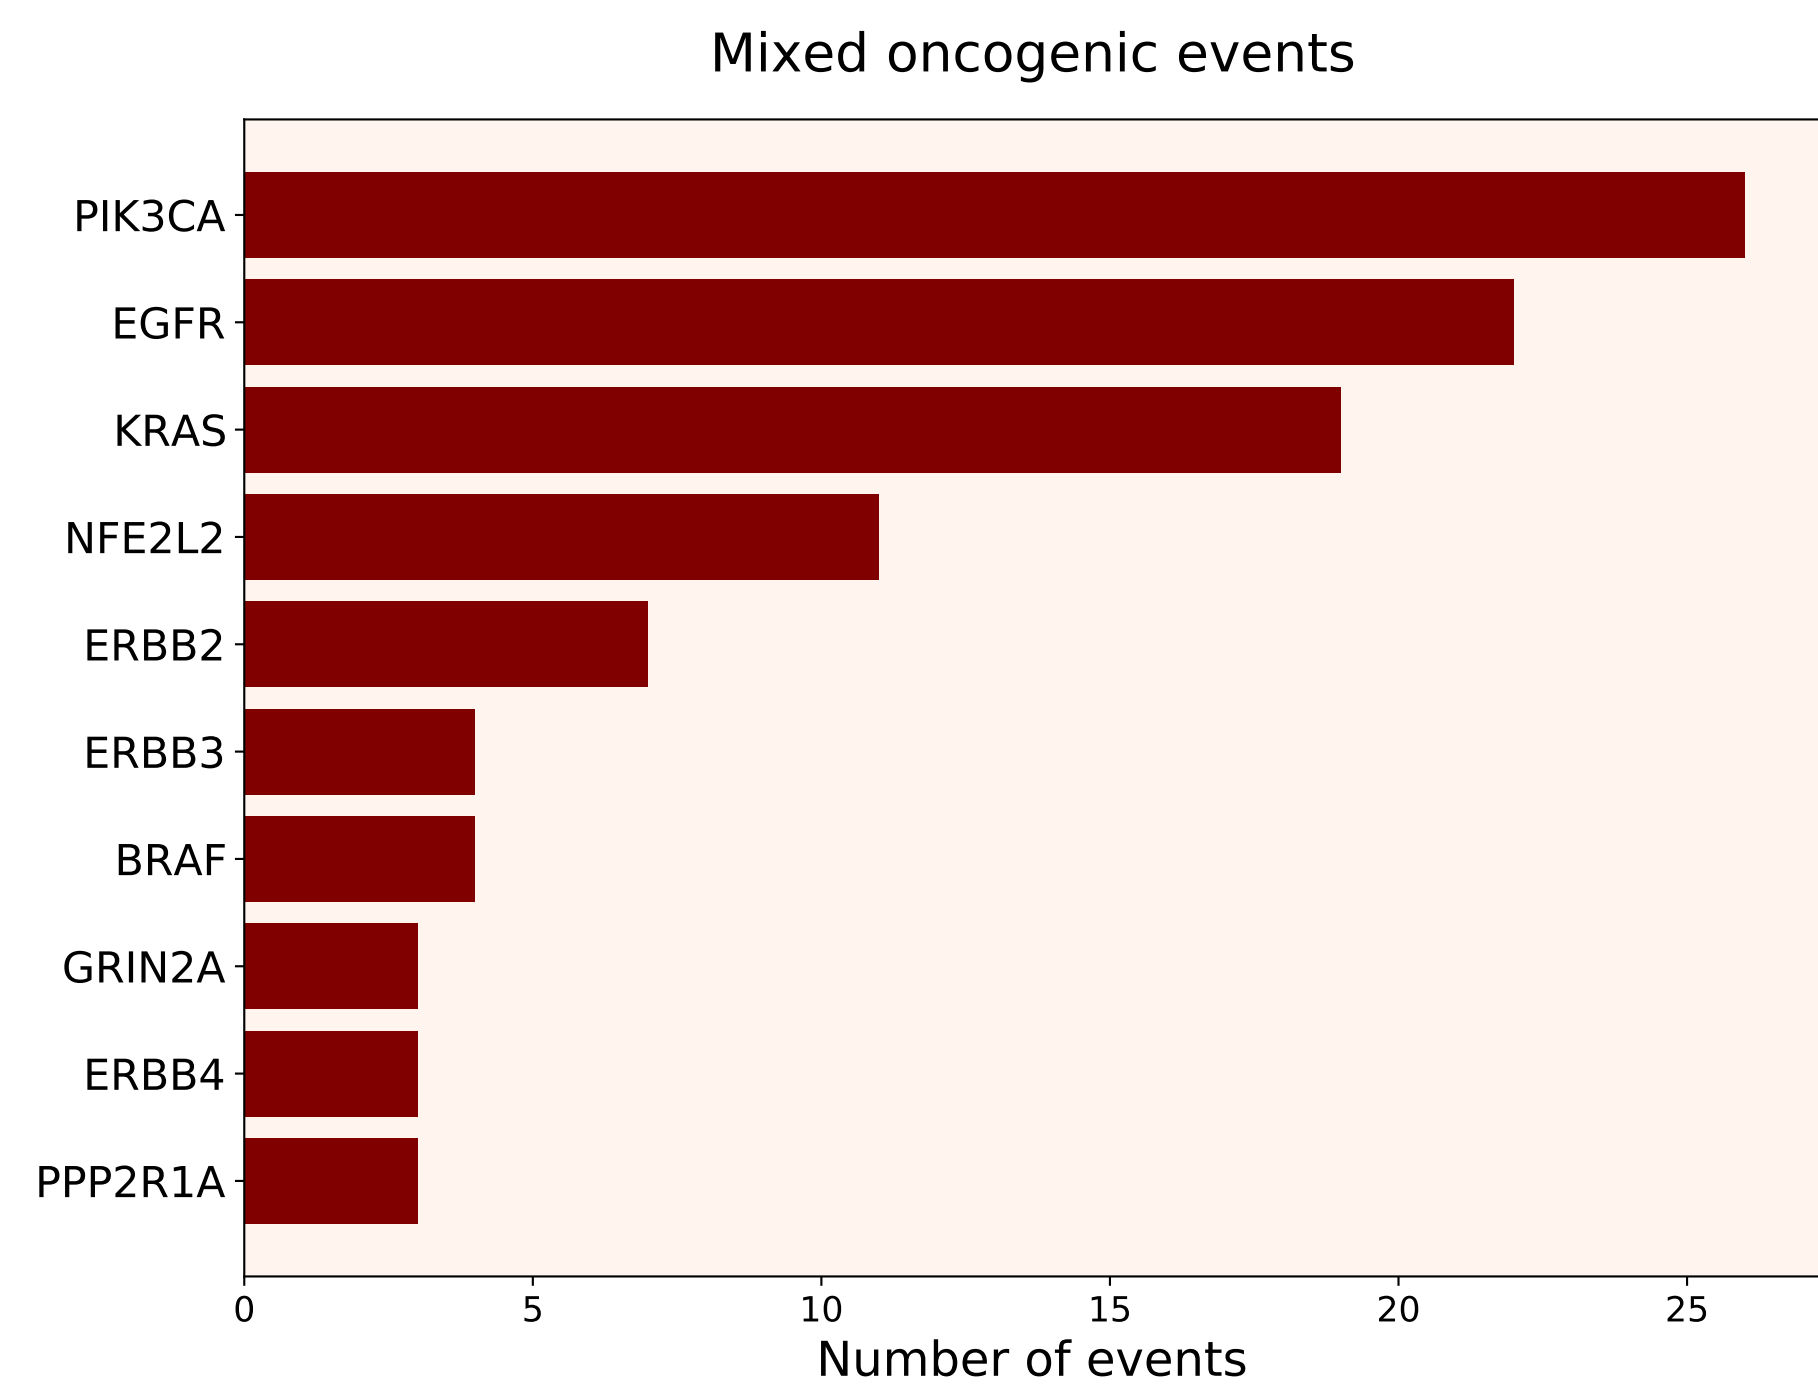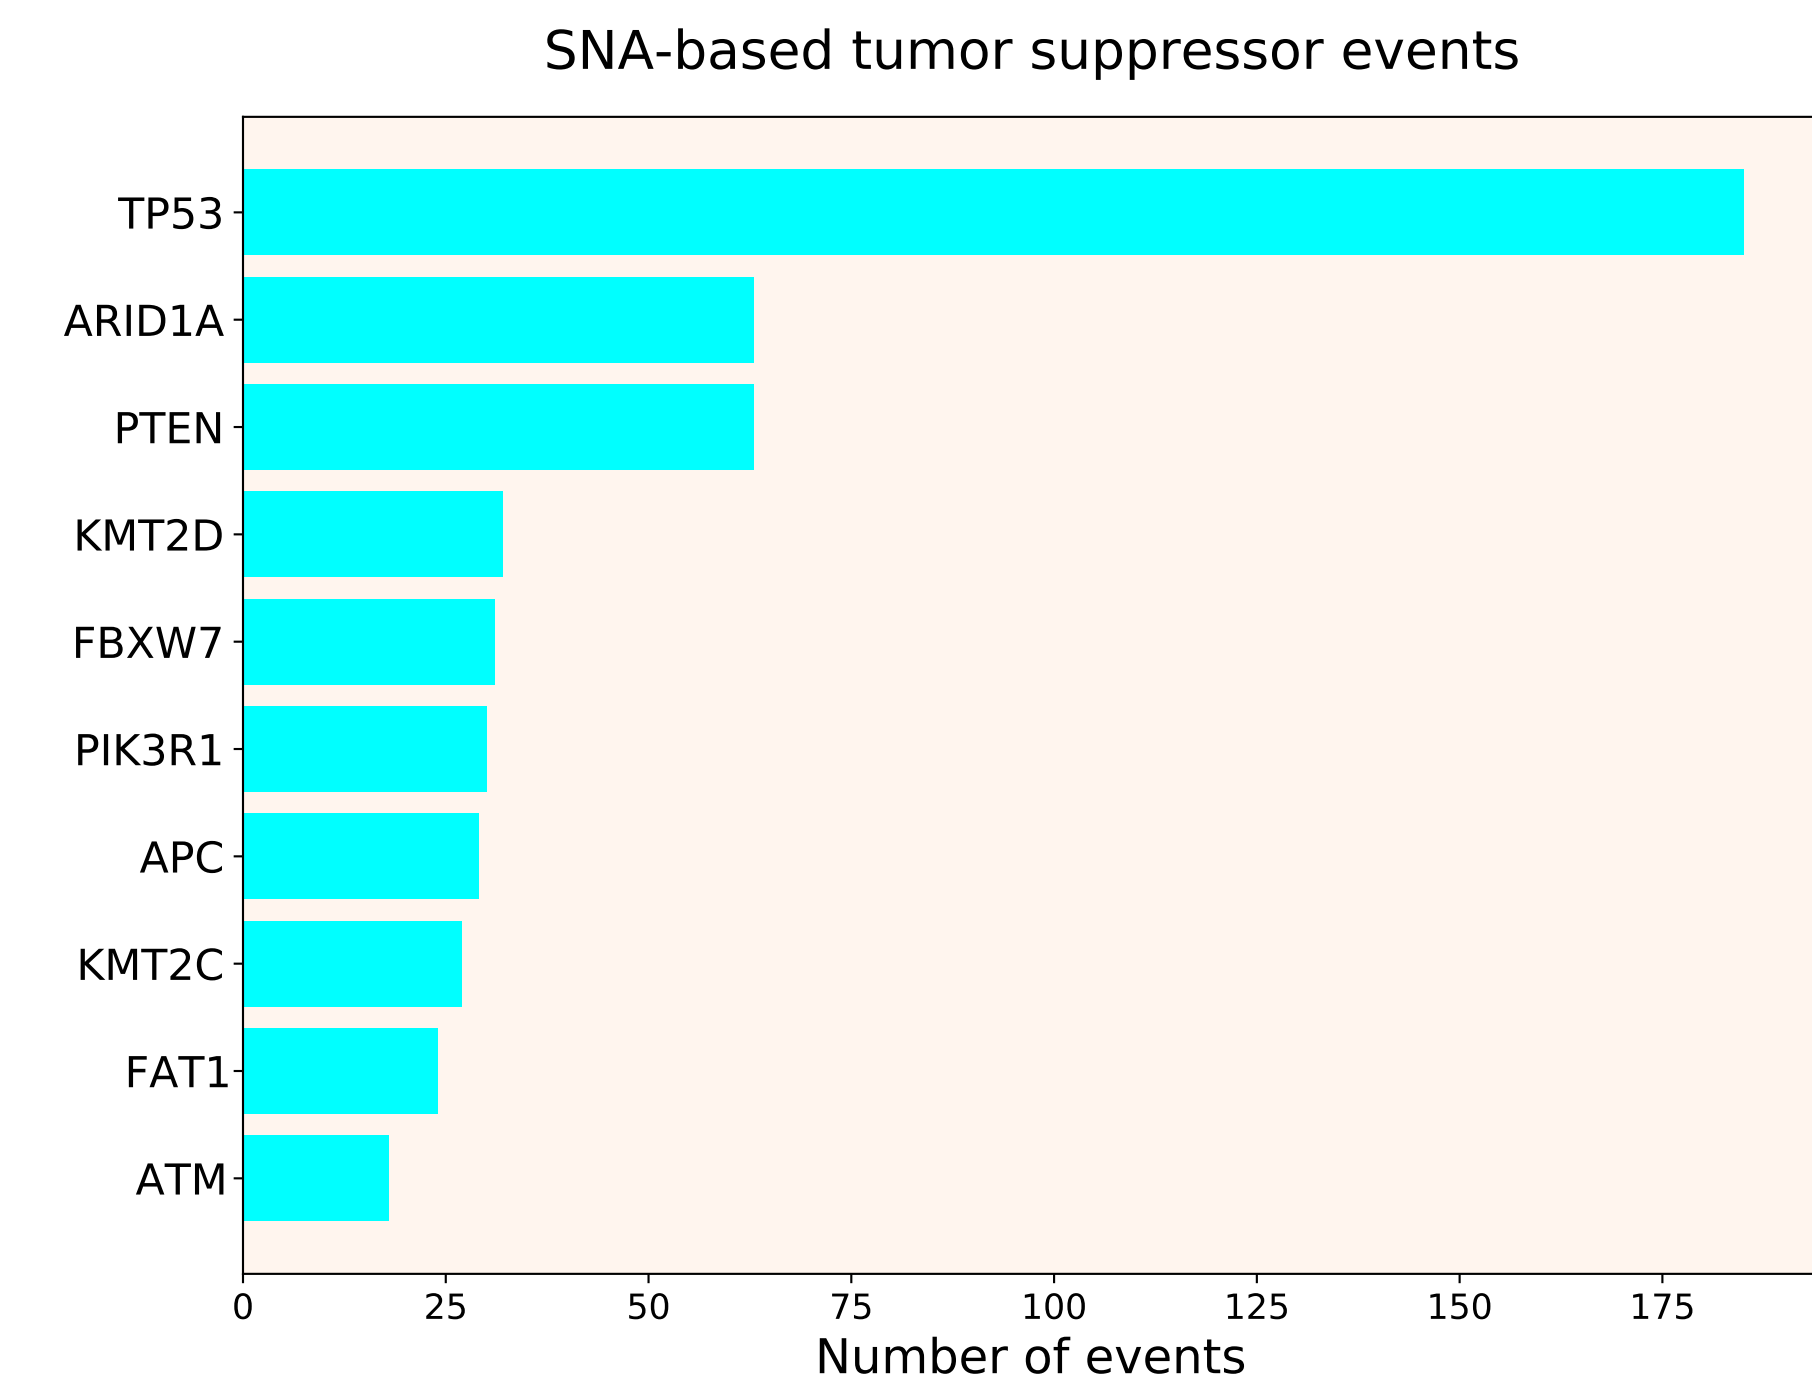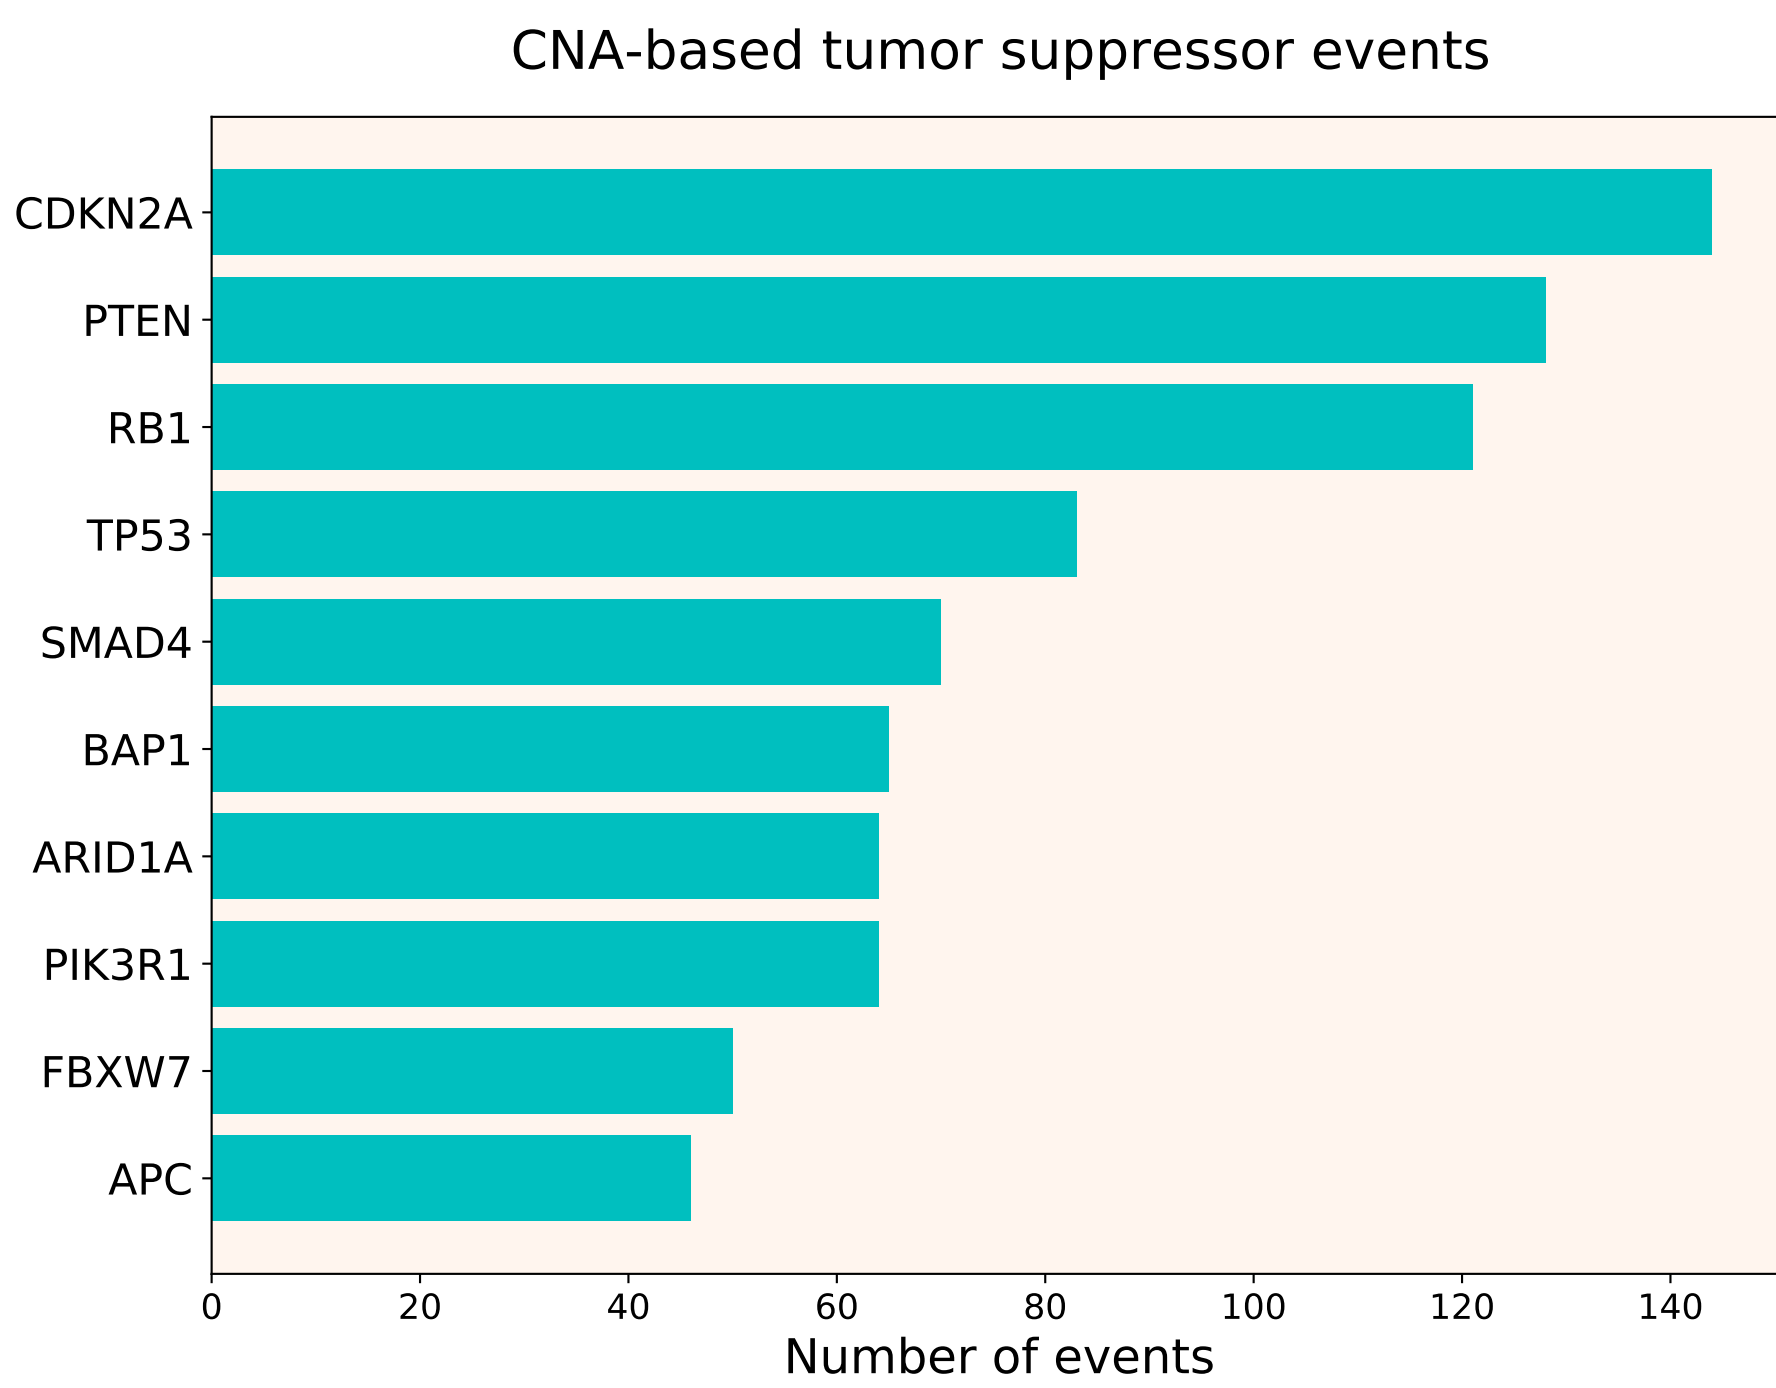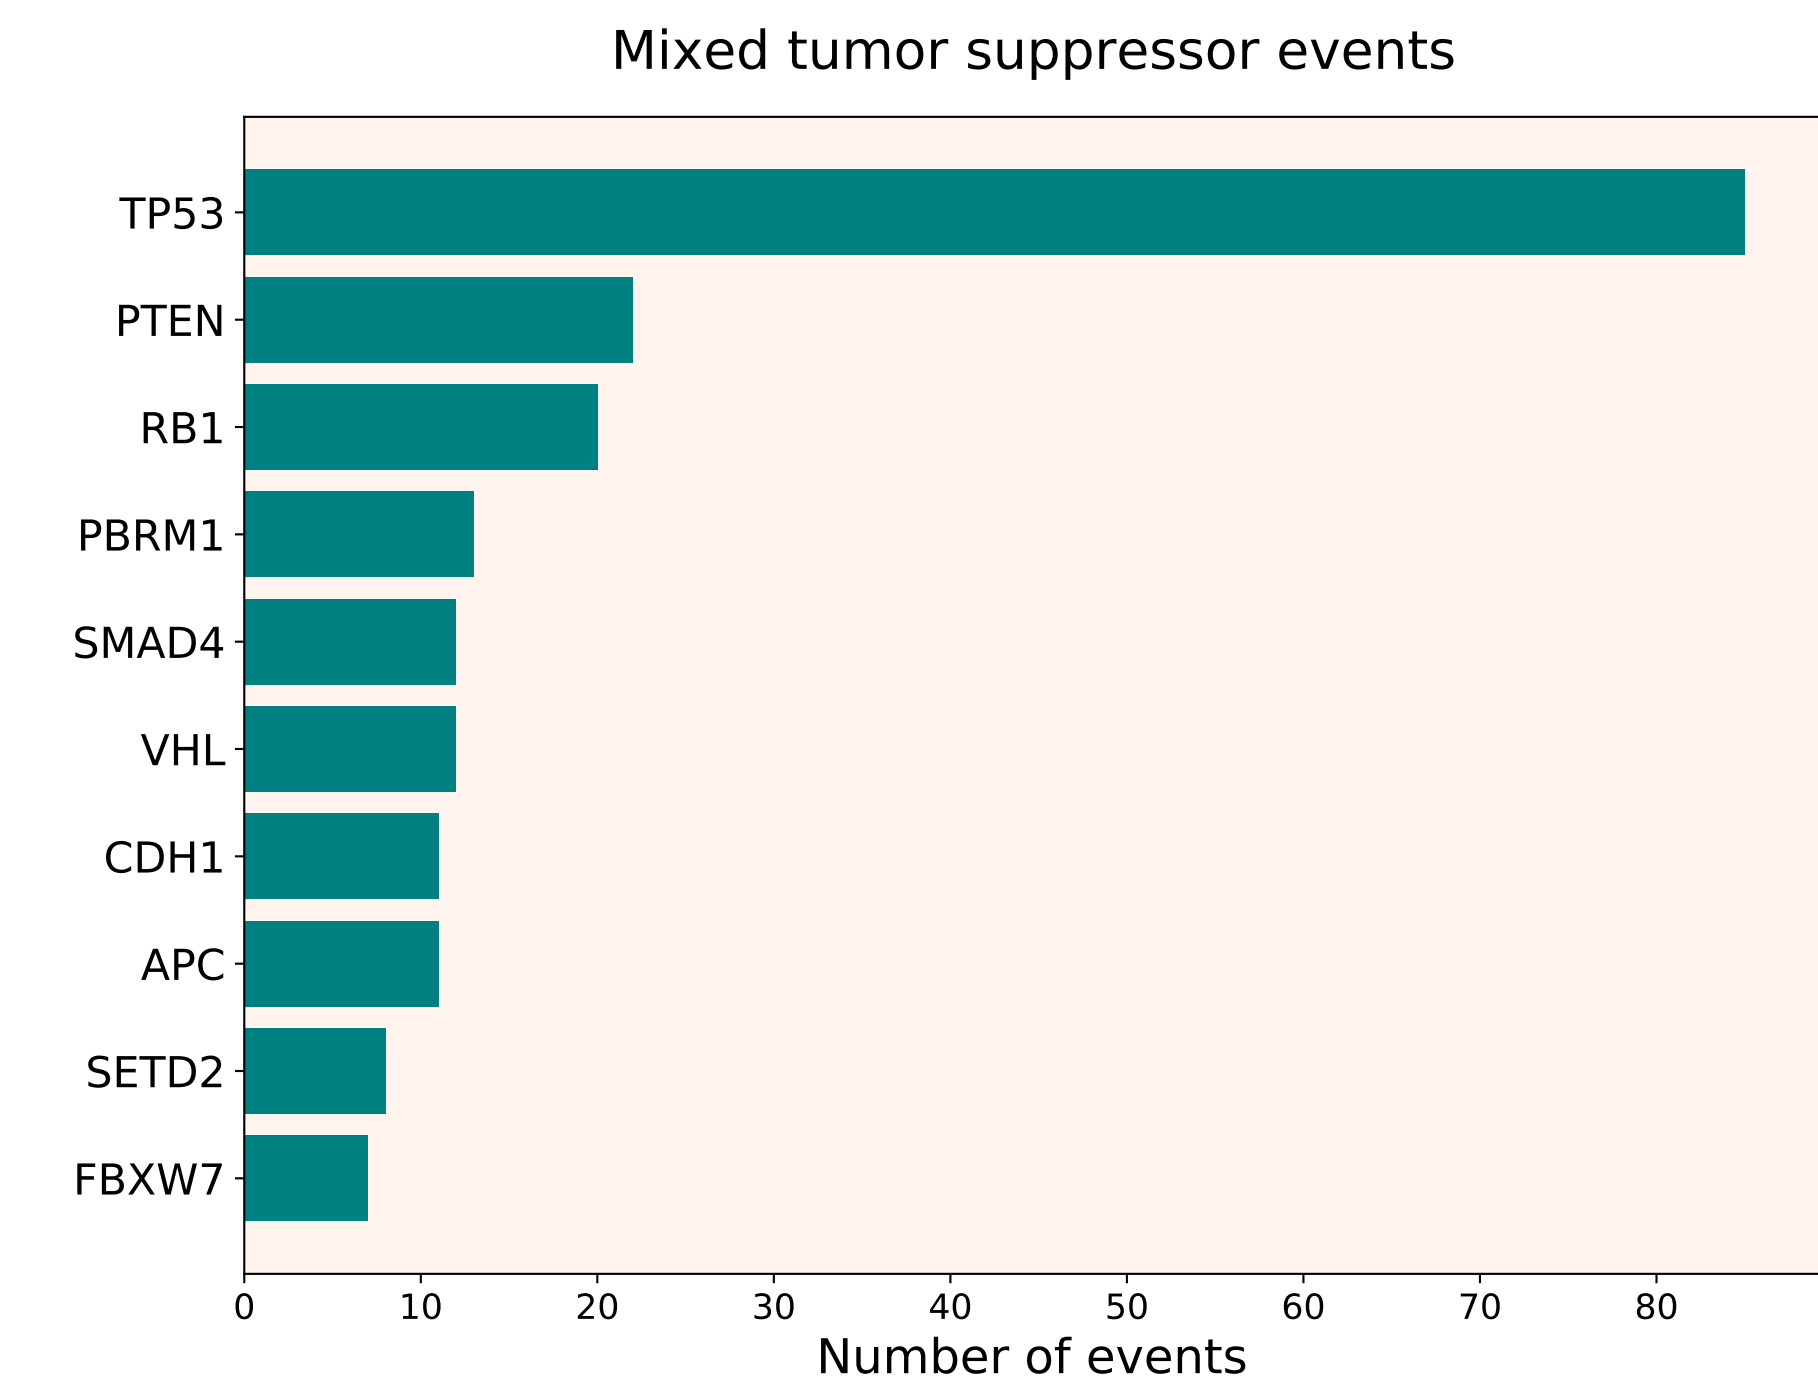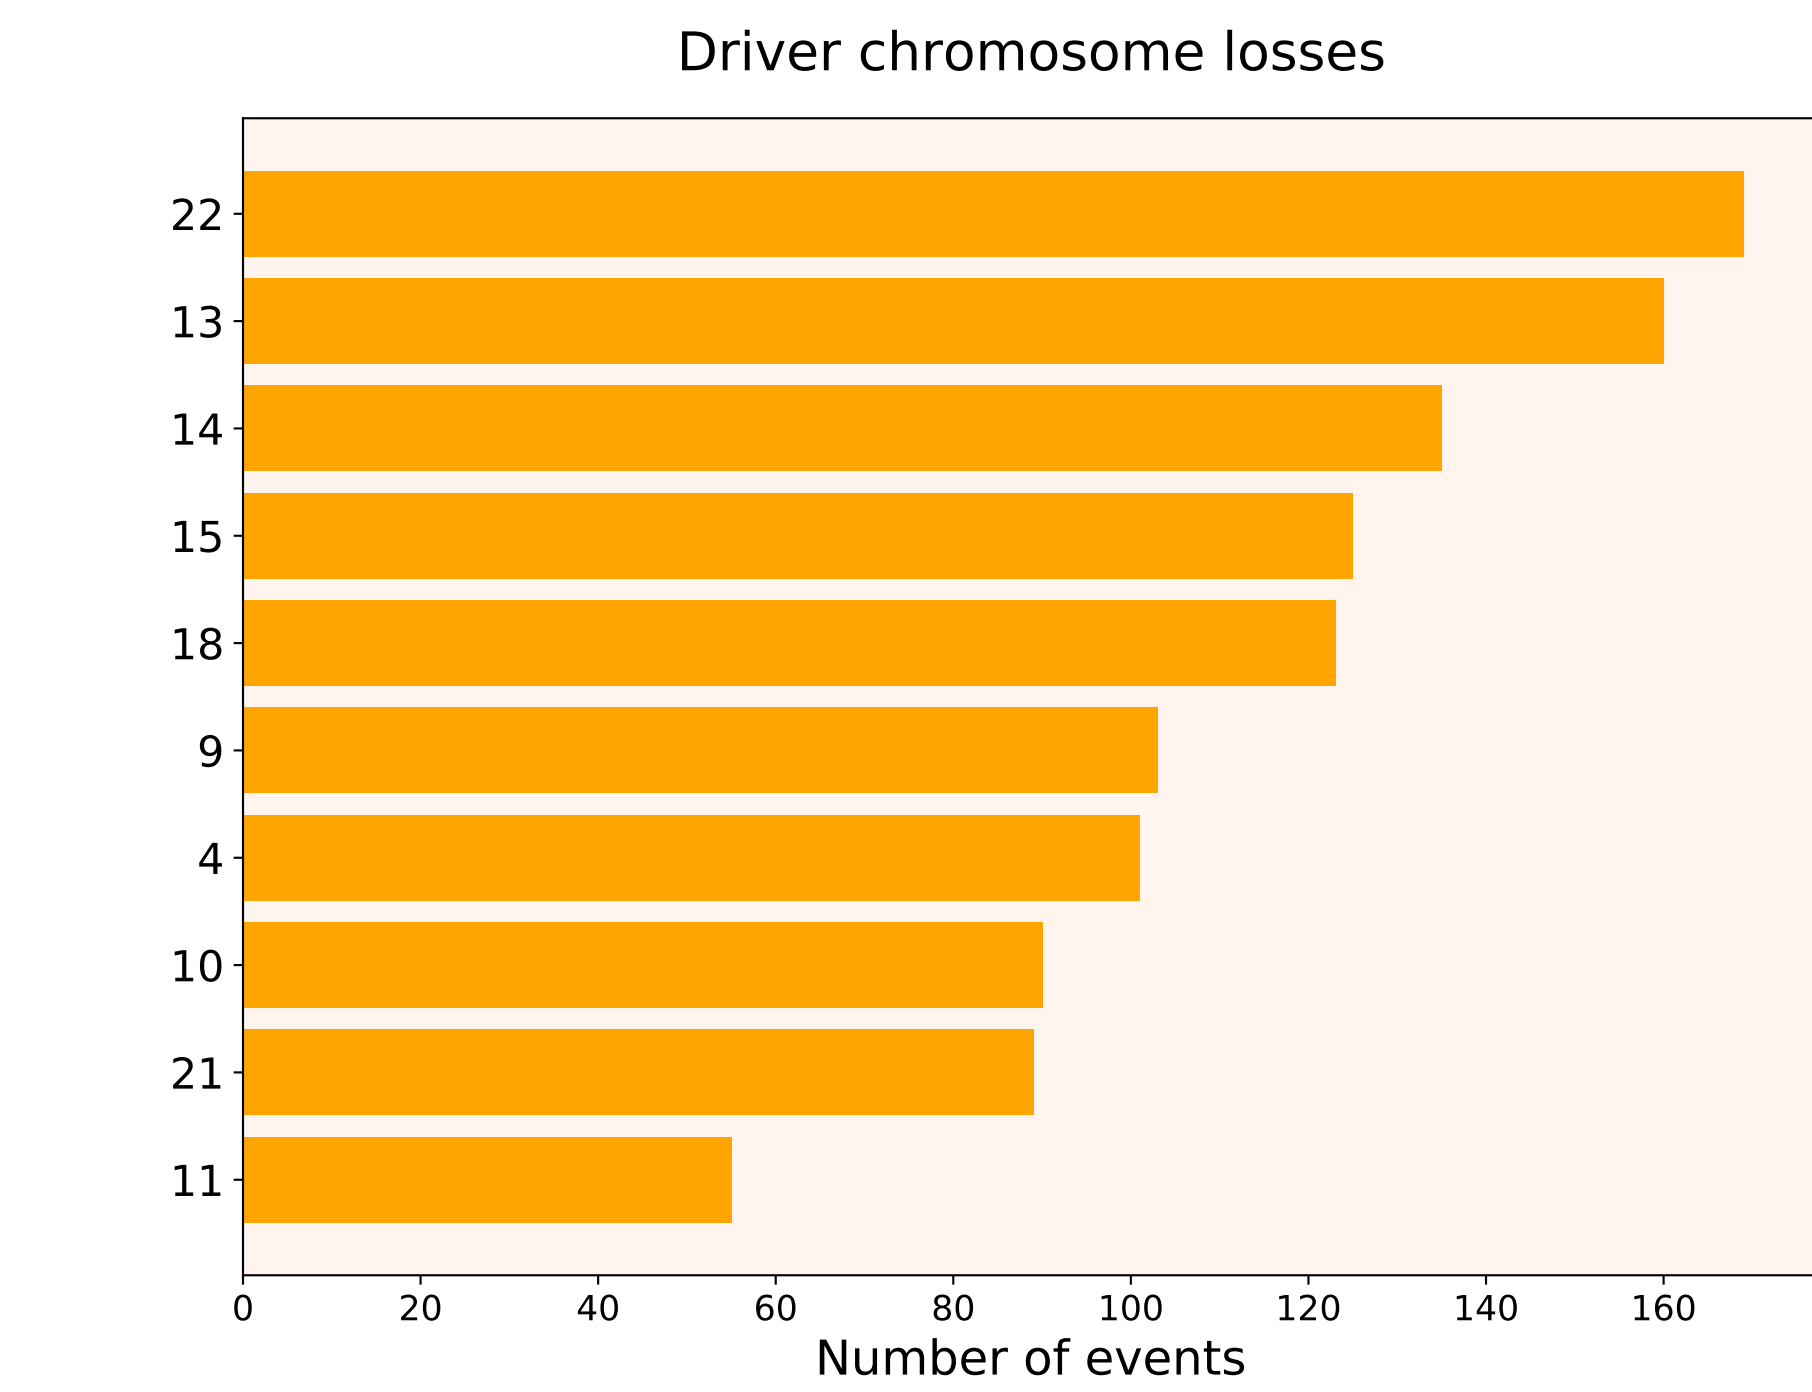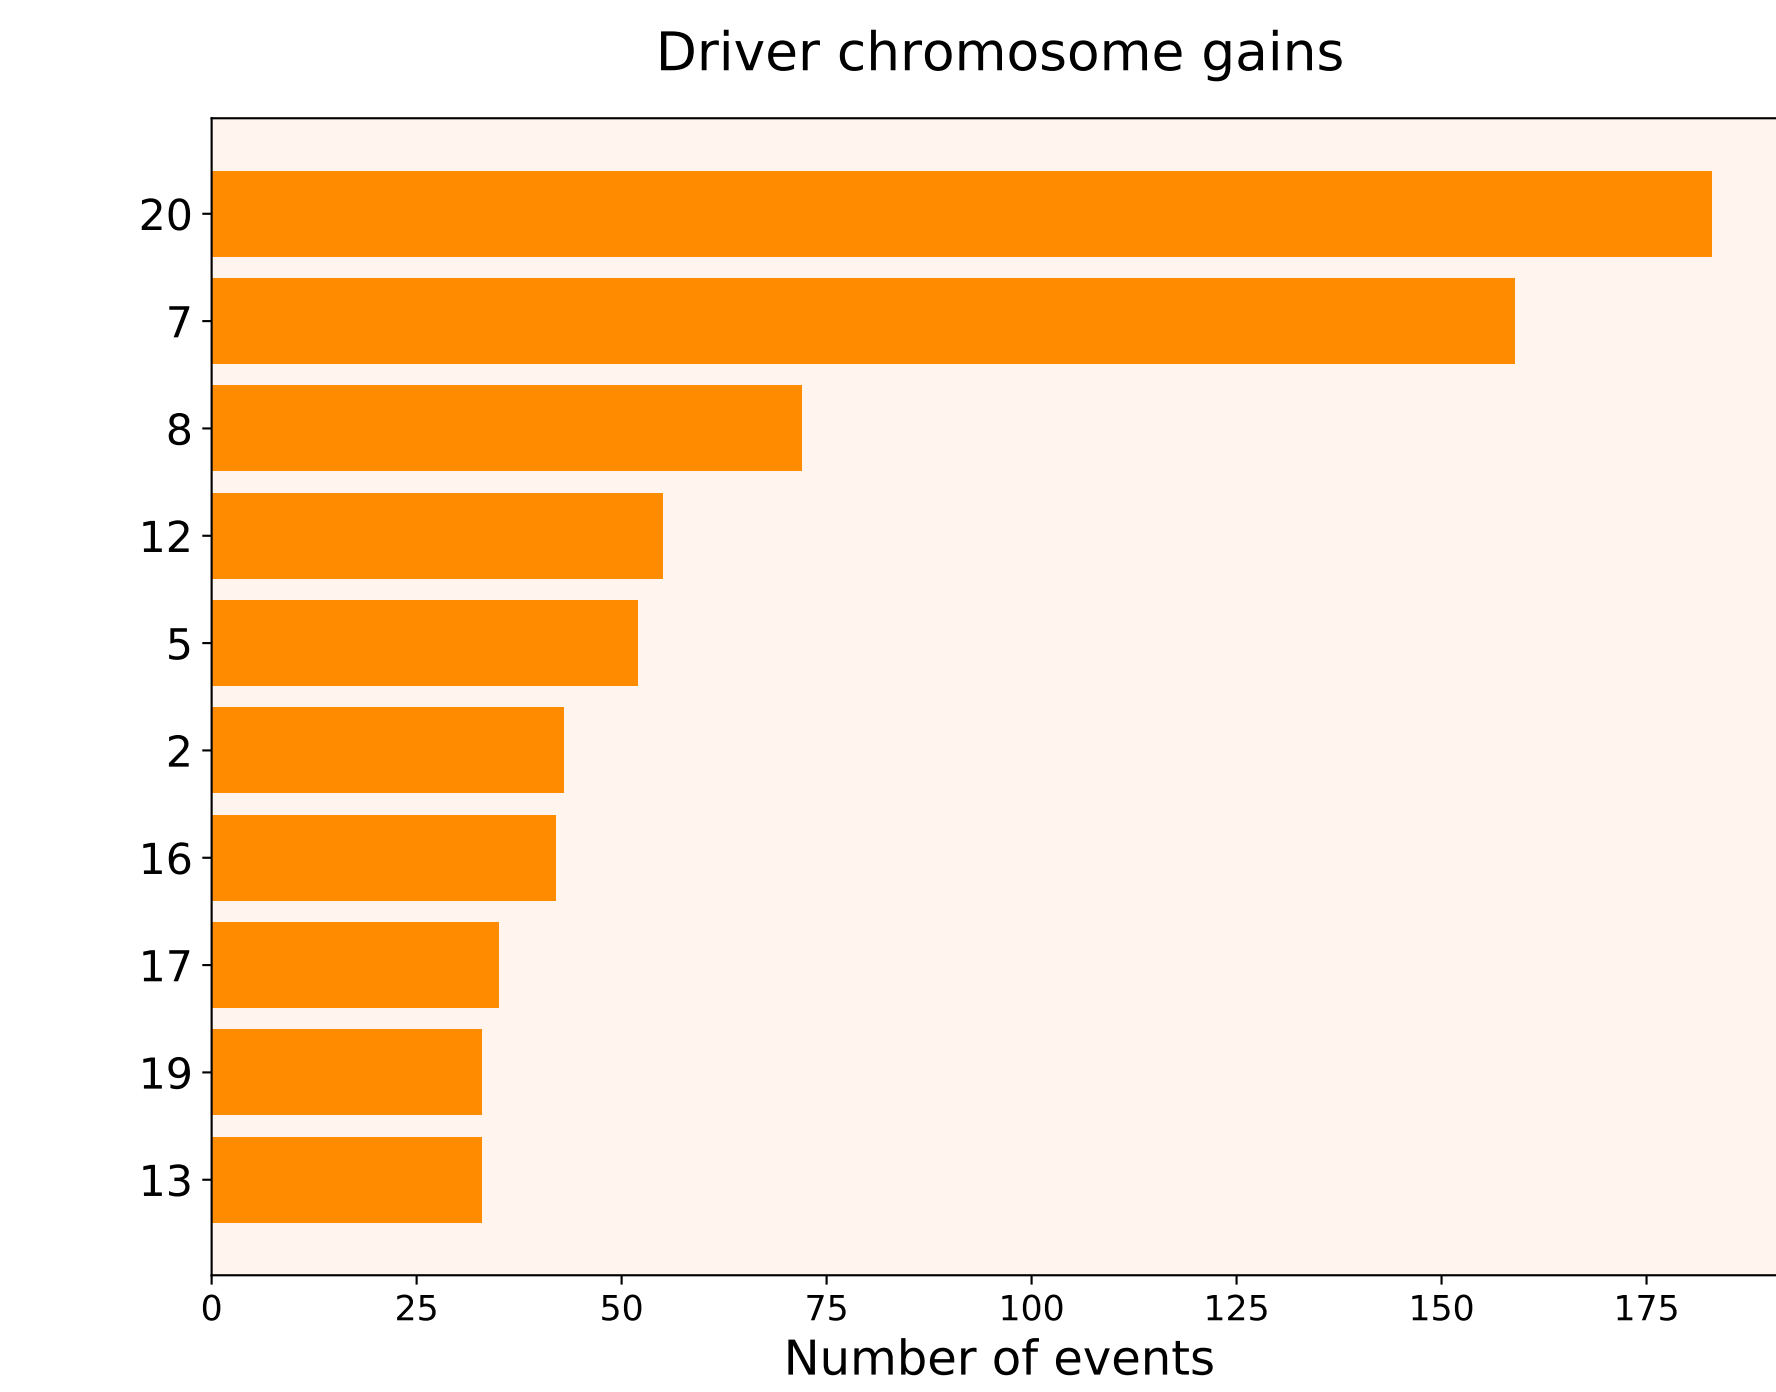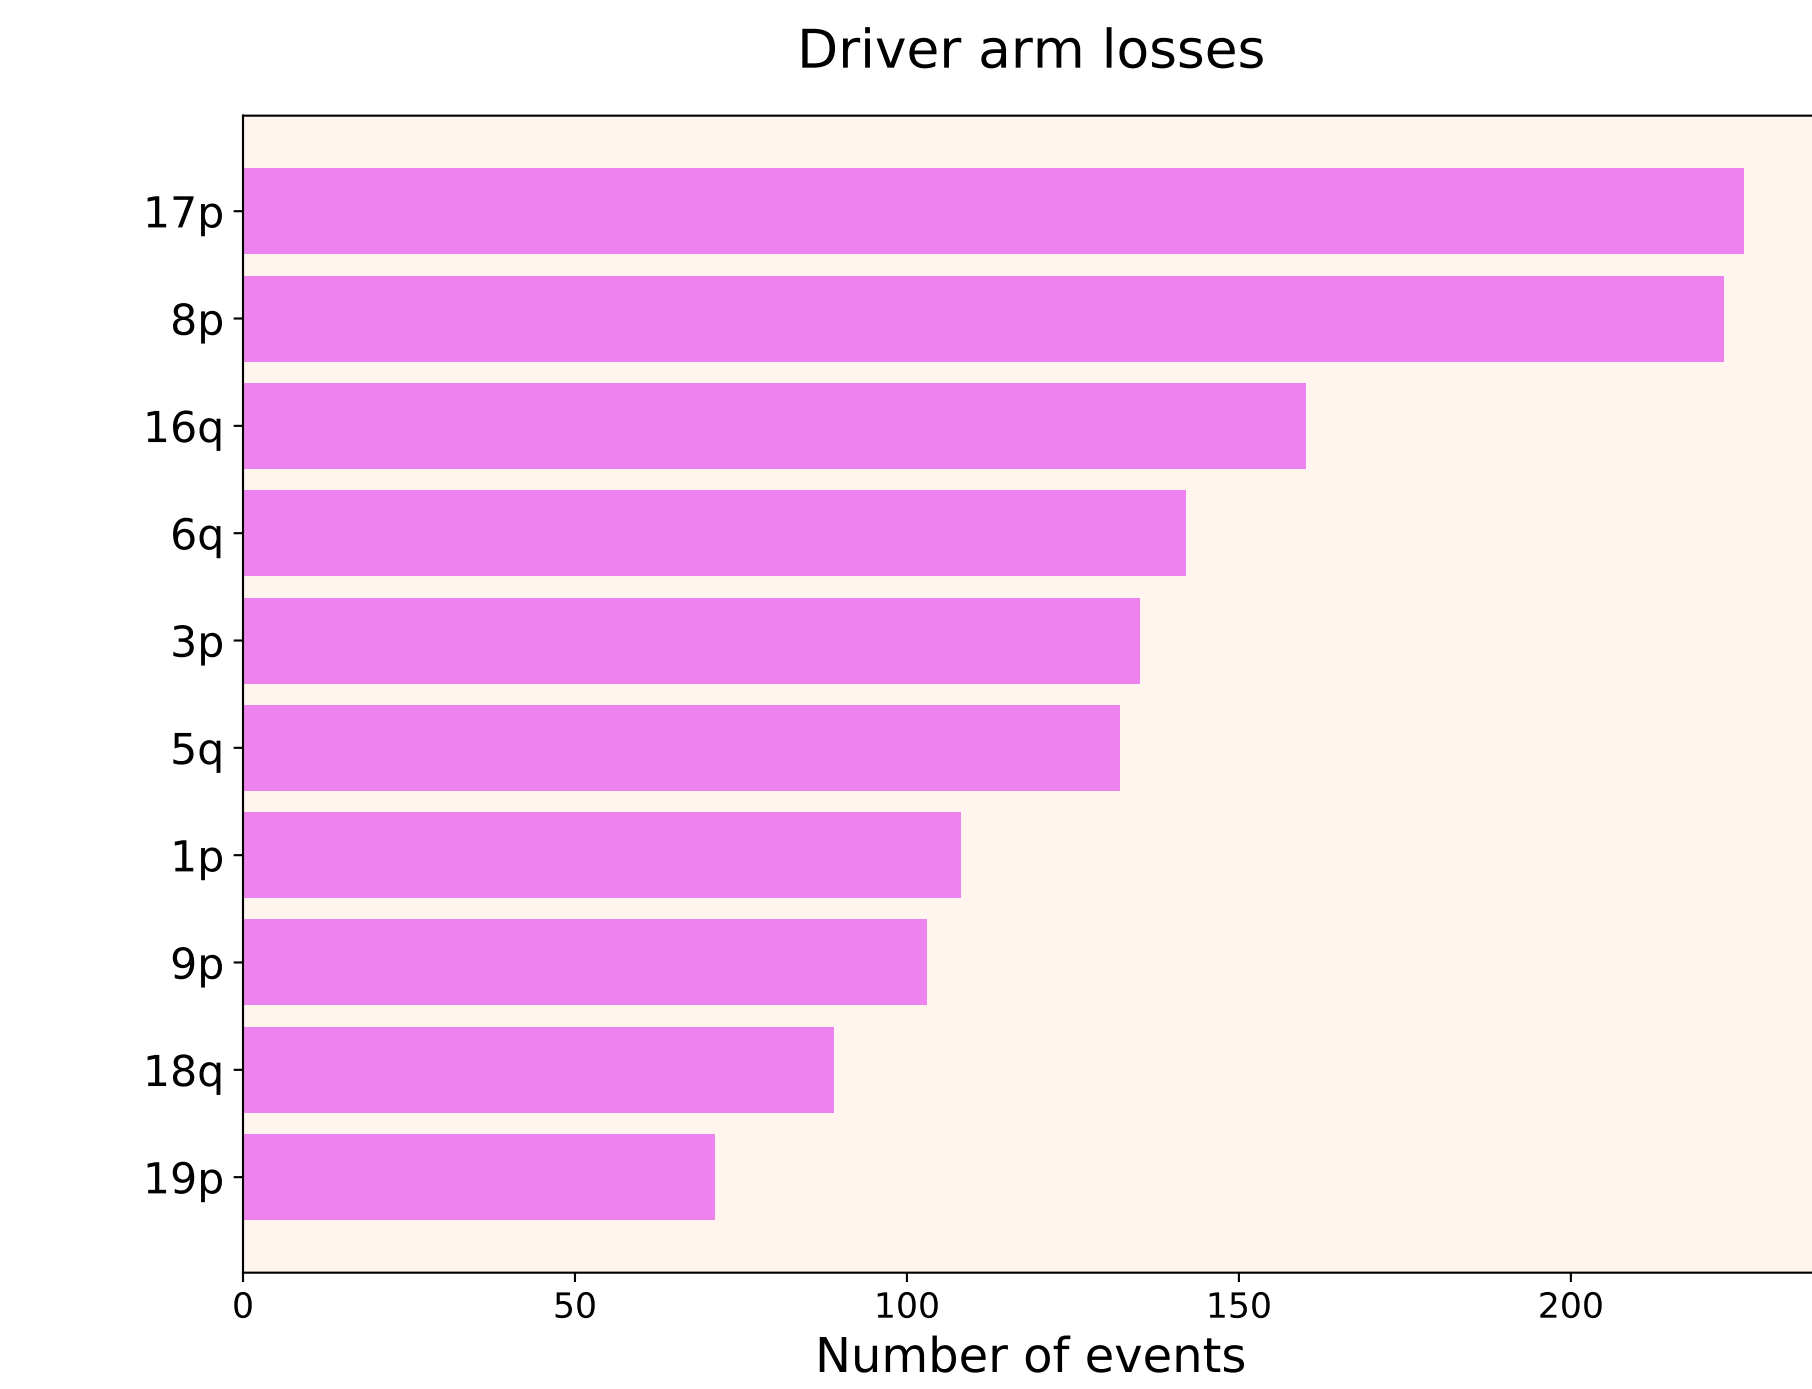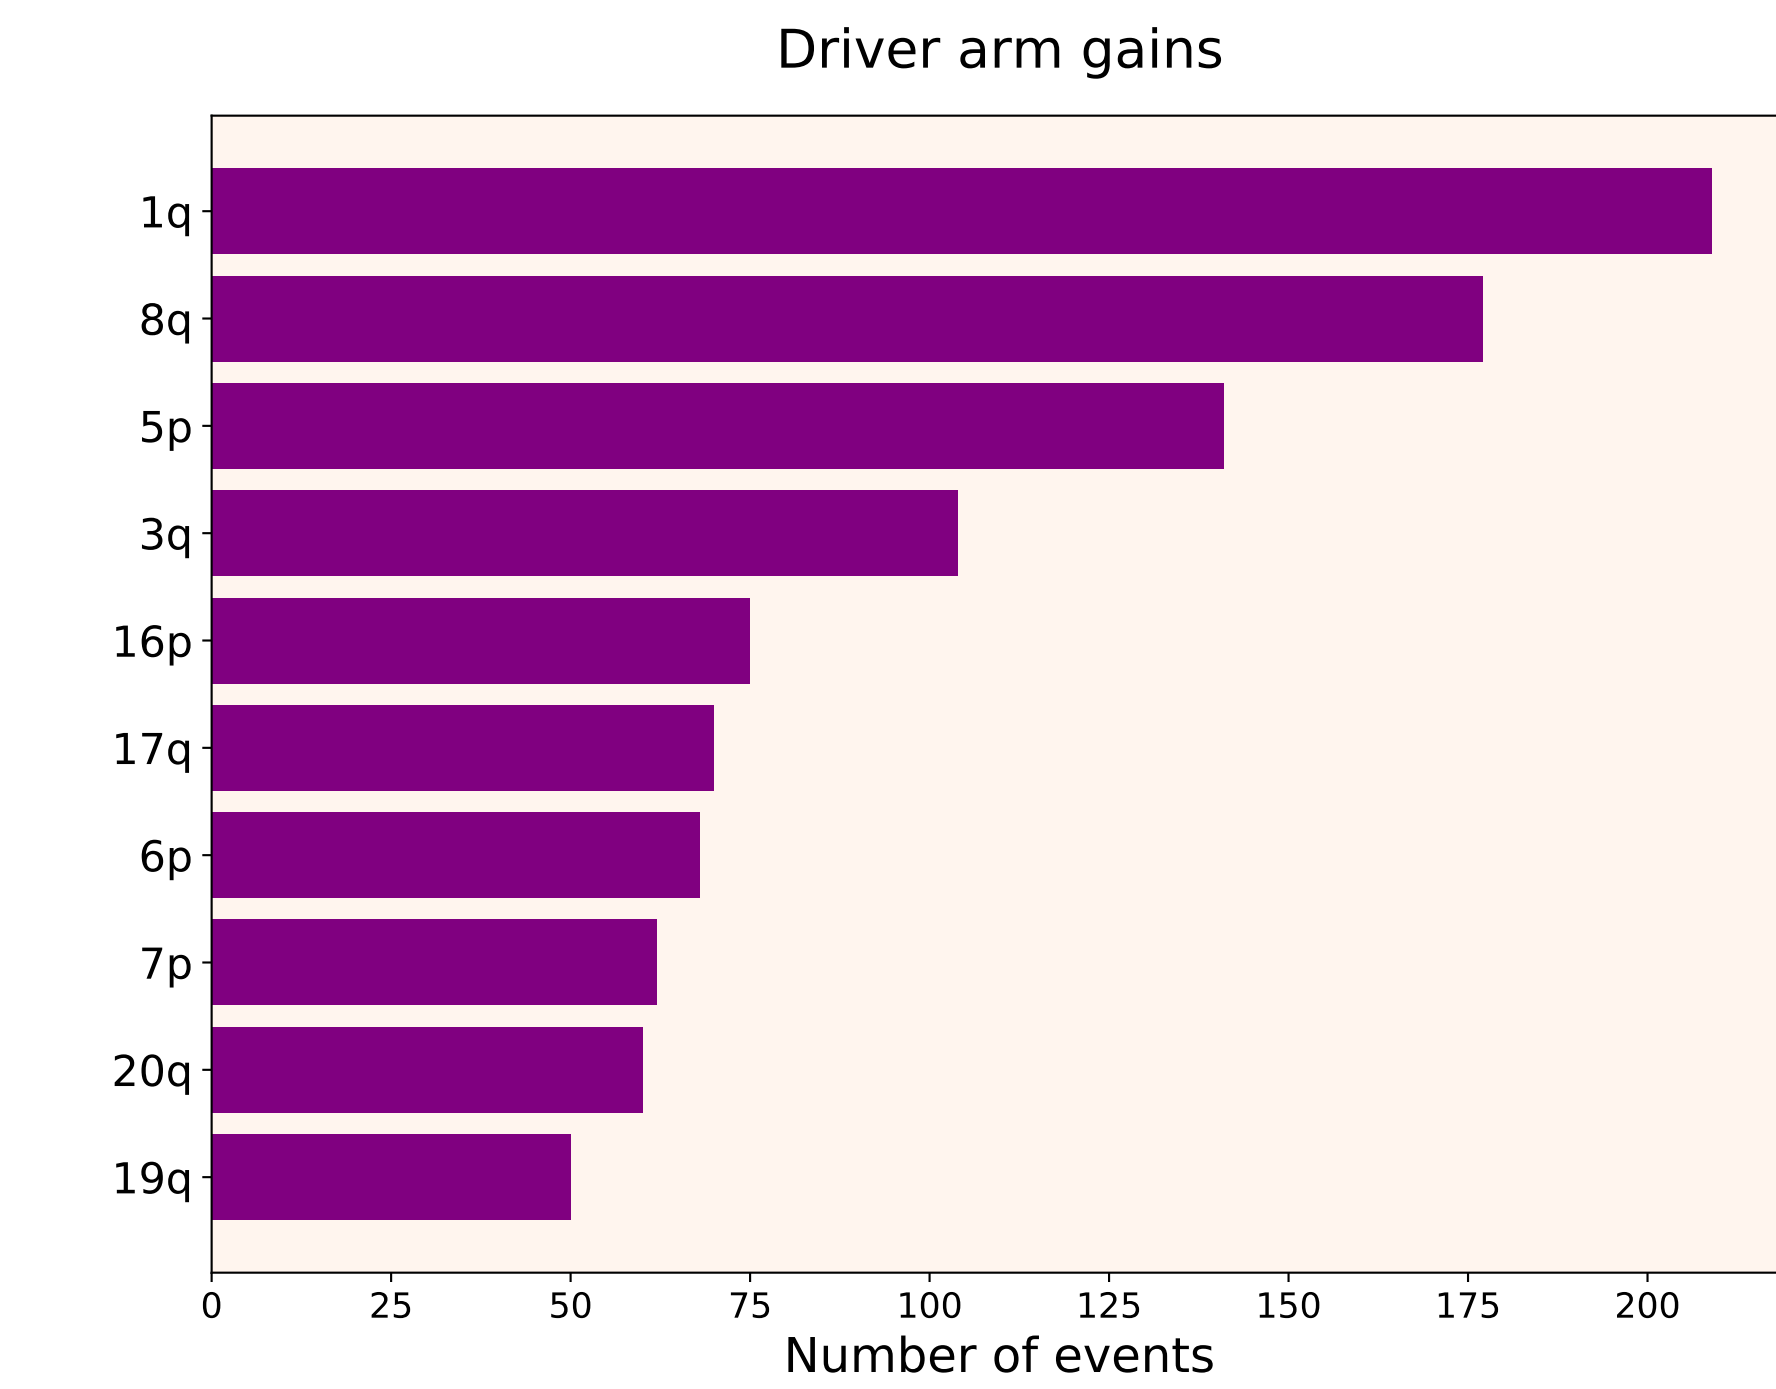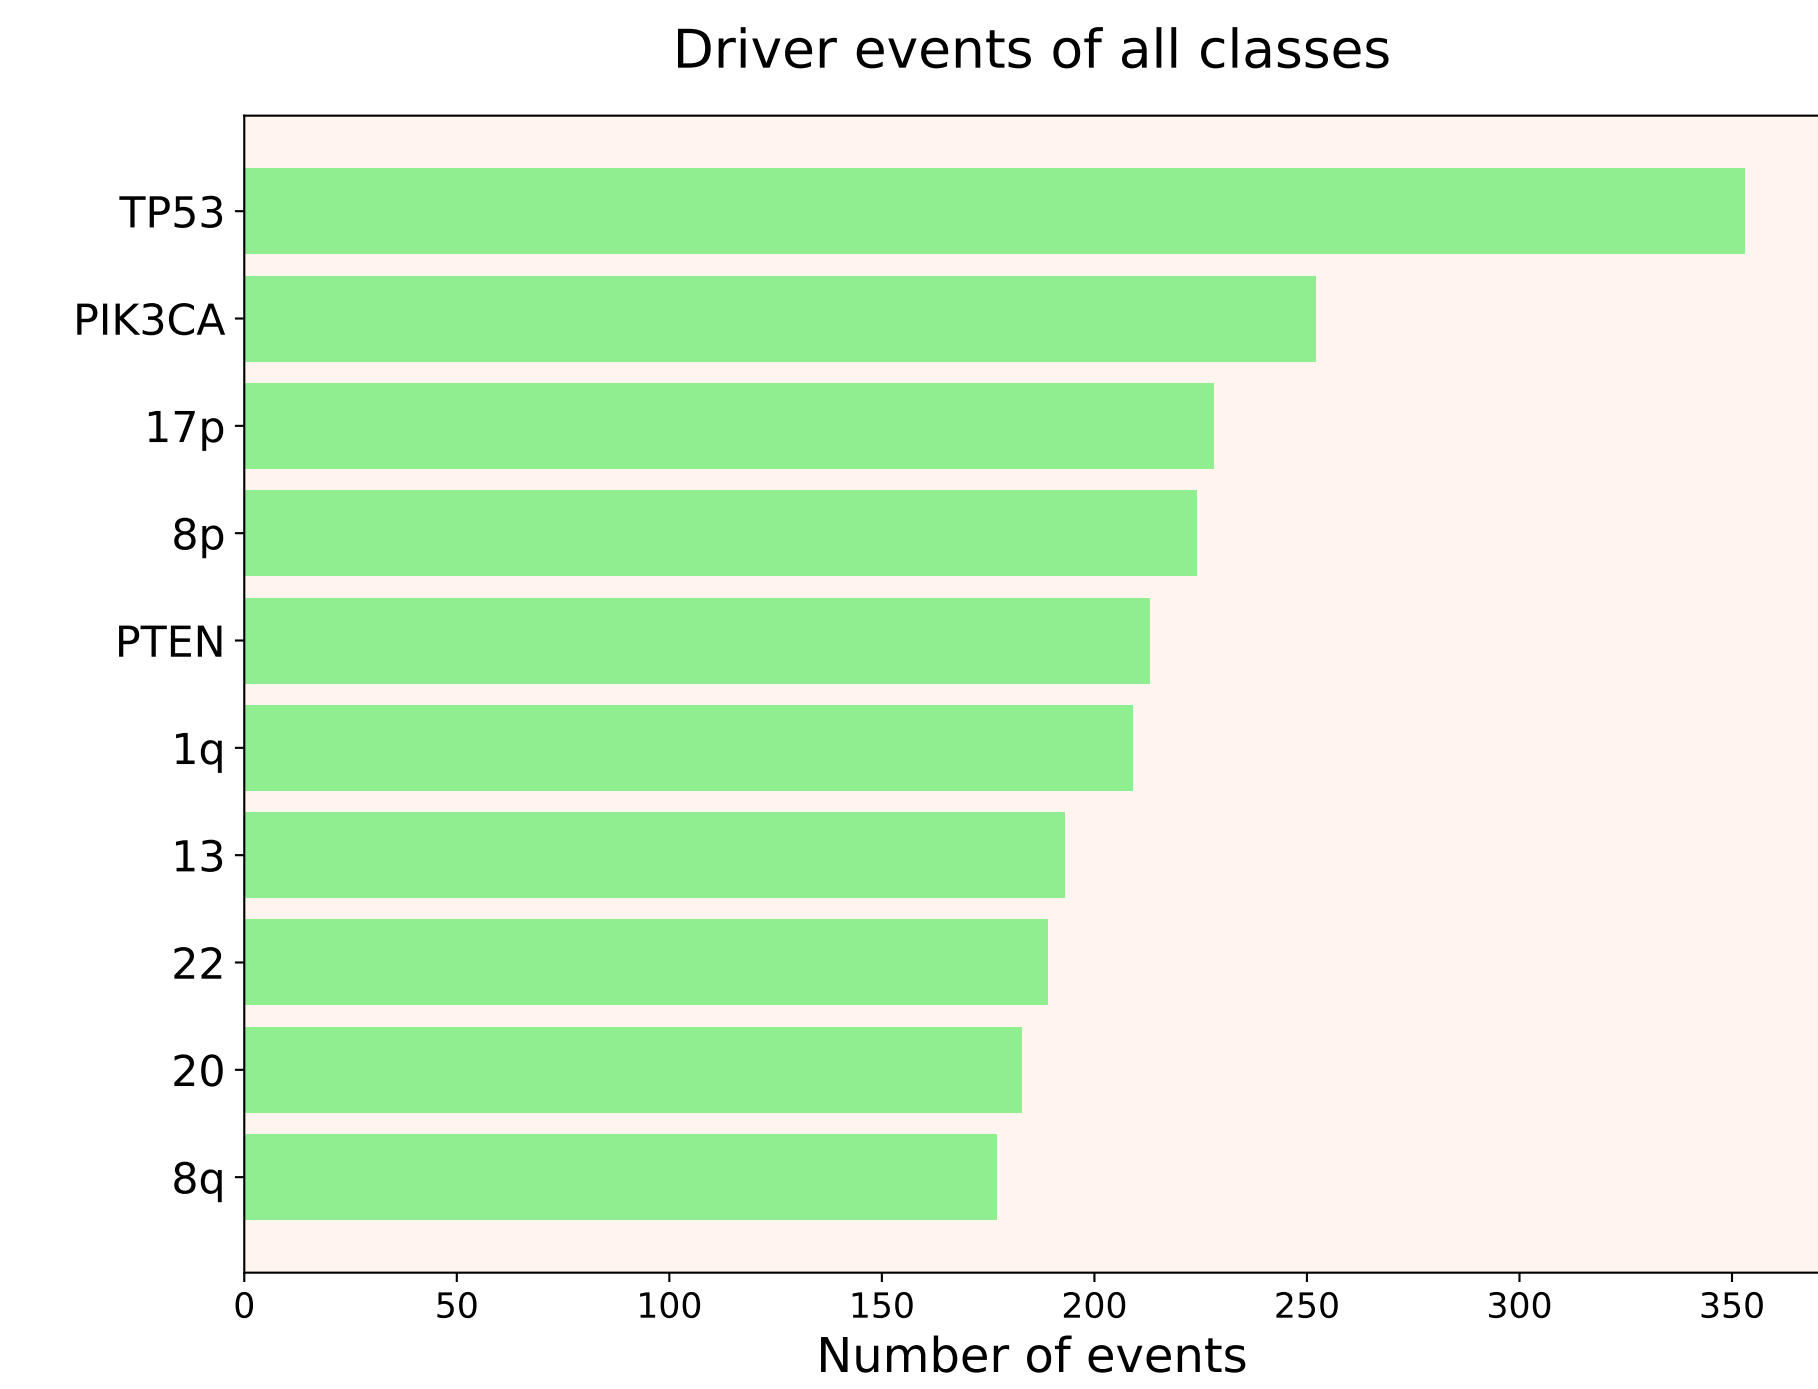

Supplement: Supplemental_Data_S1.zip [file Supplemental_Data_S1.zip]

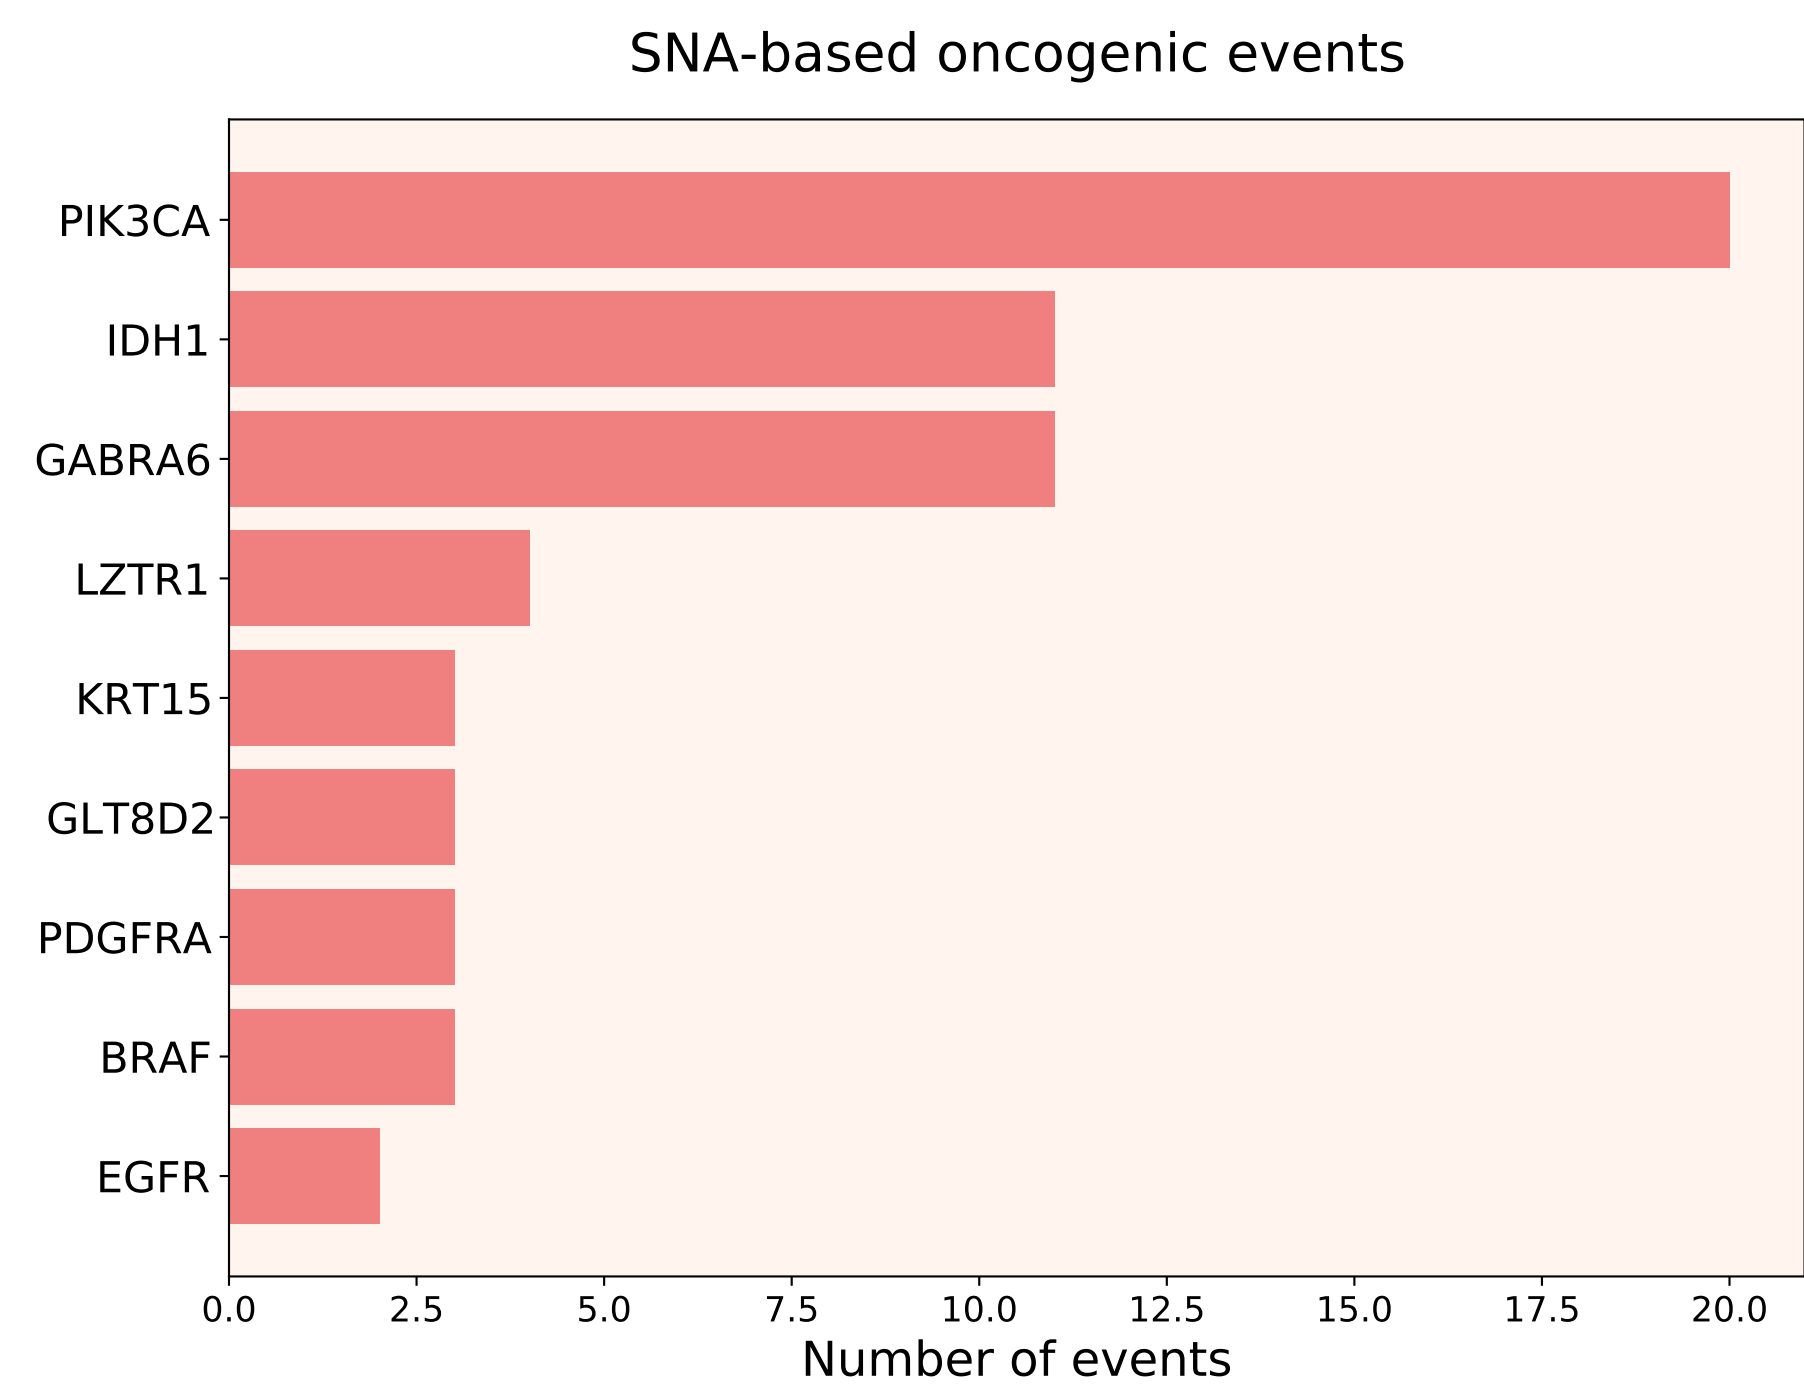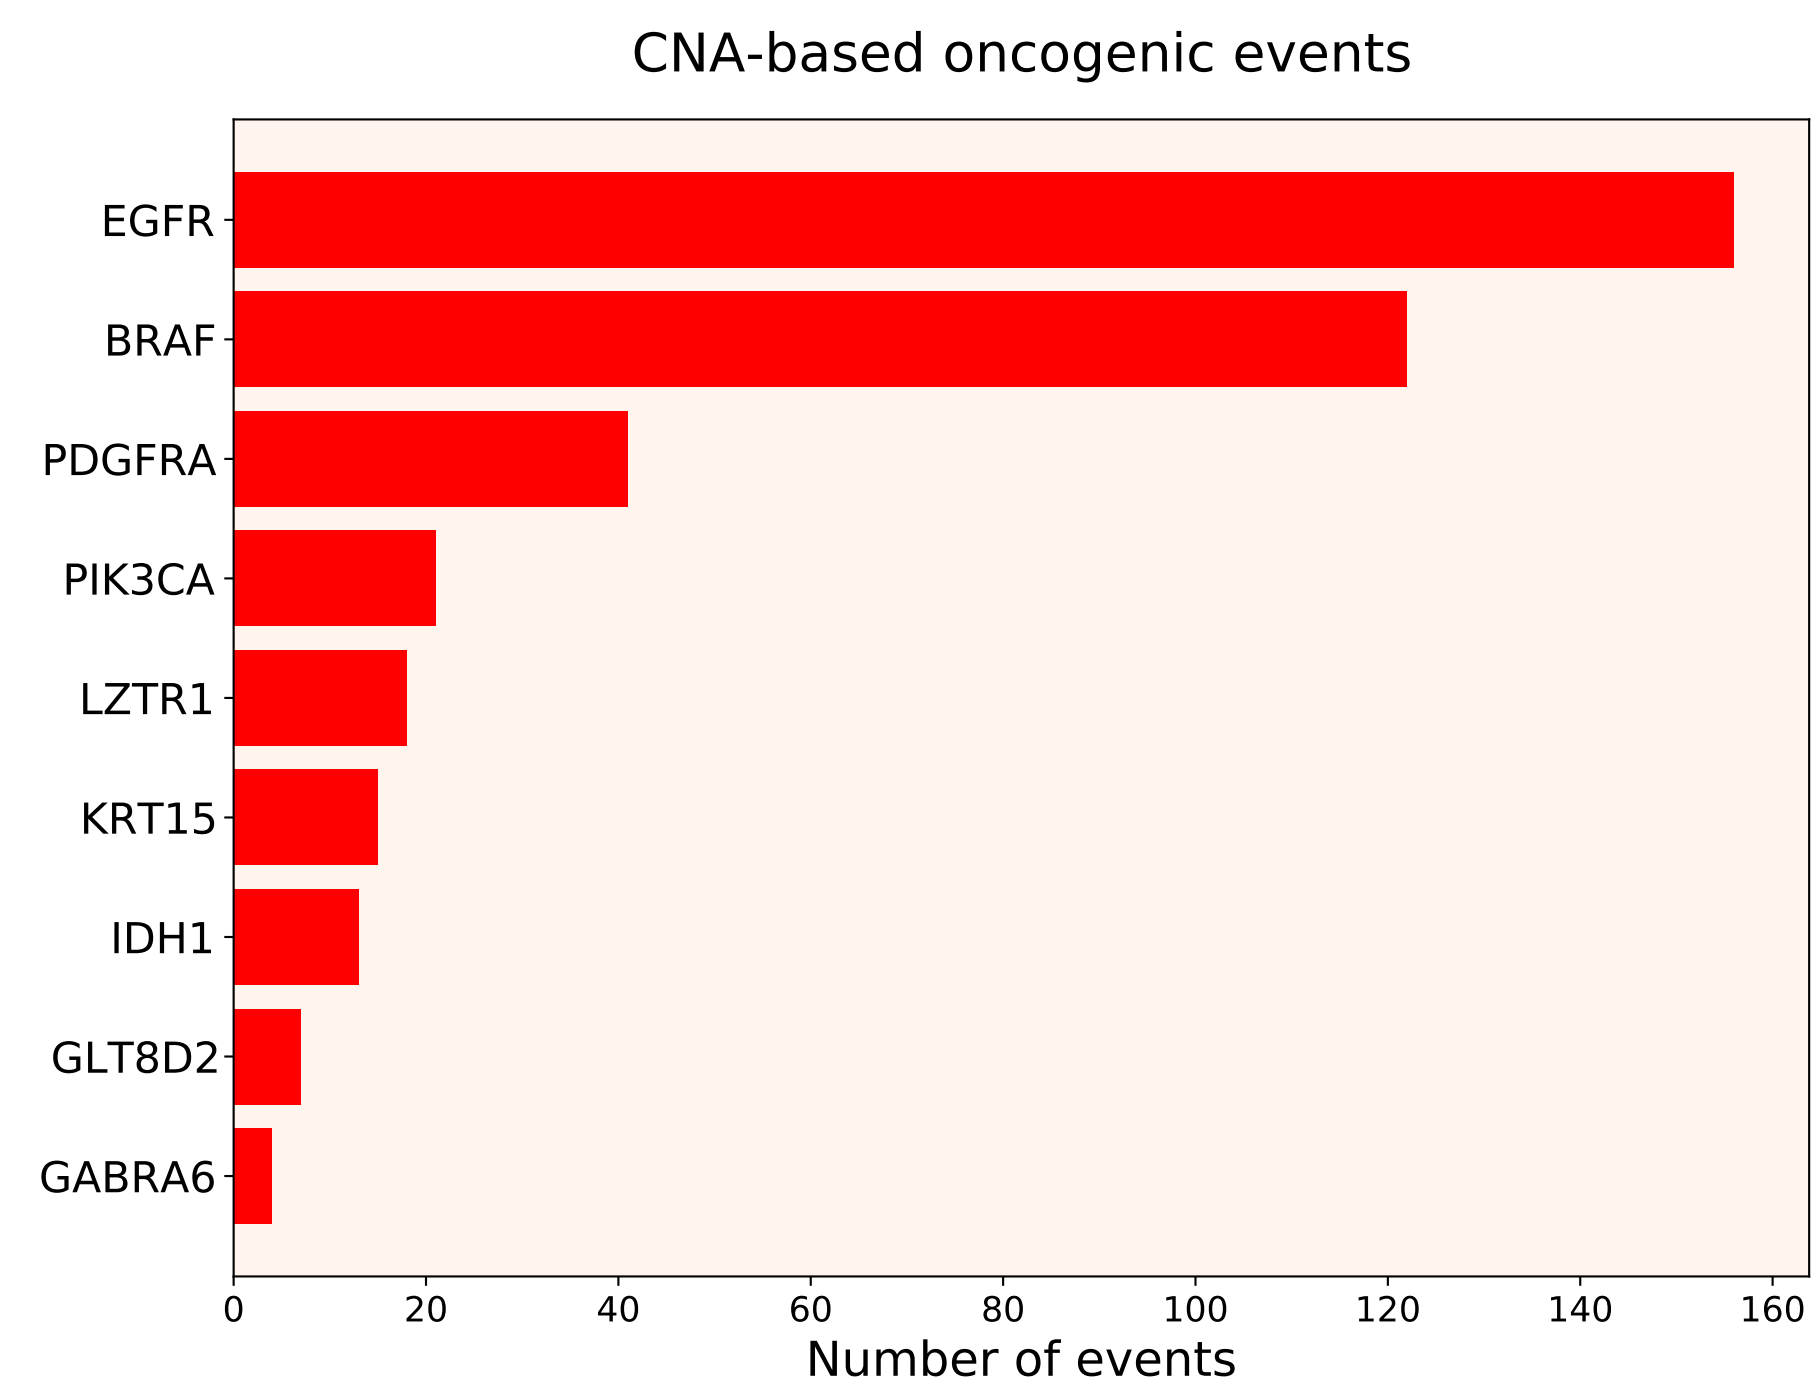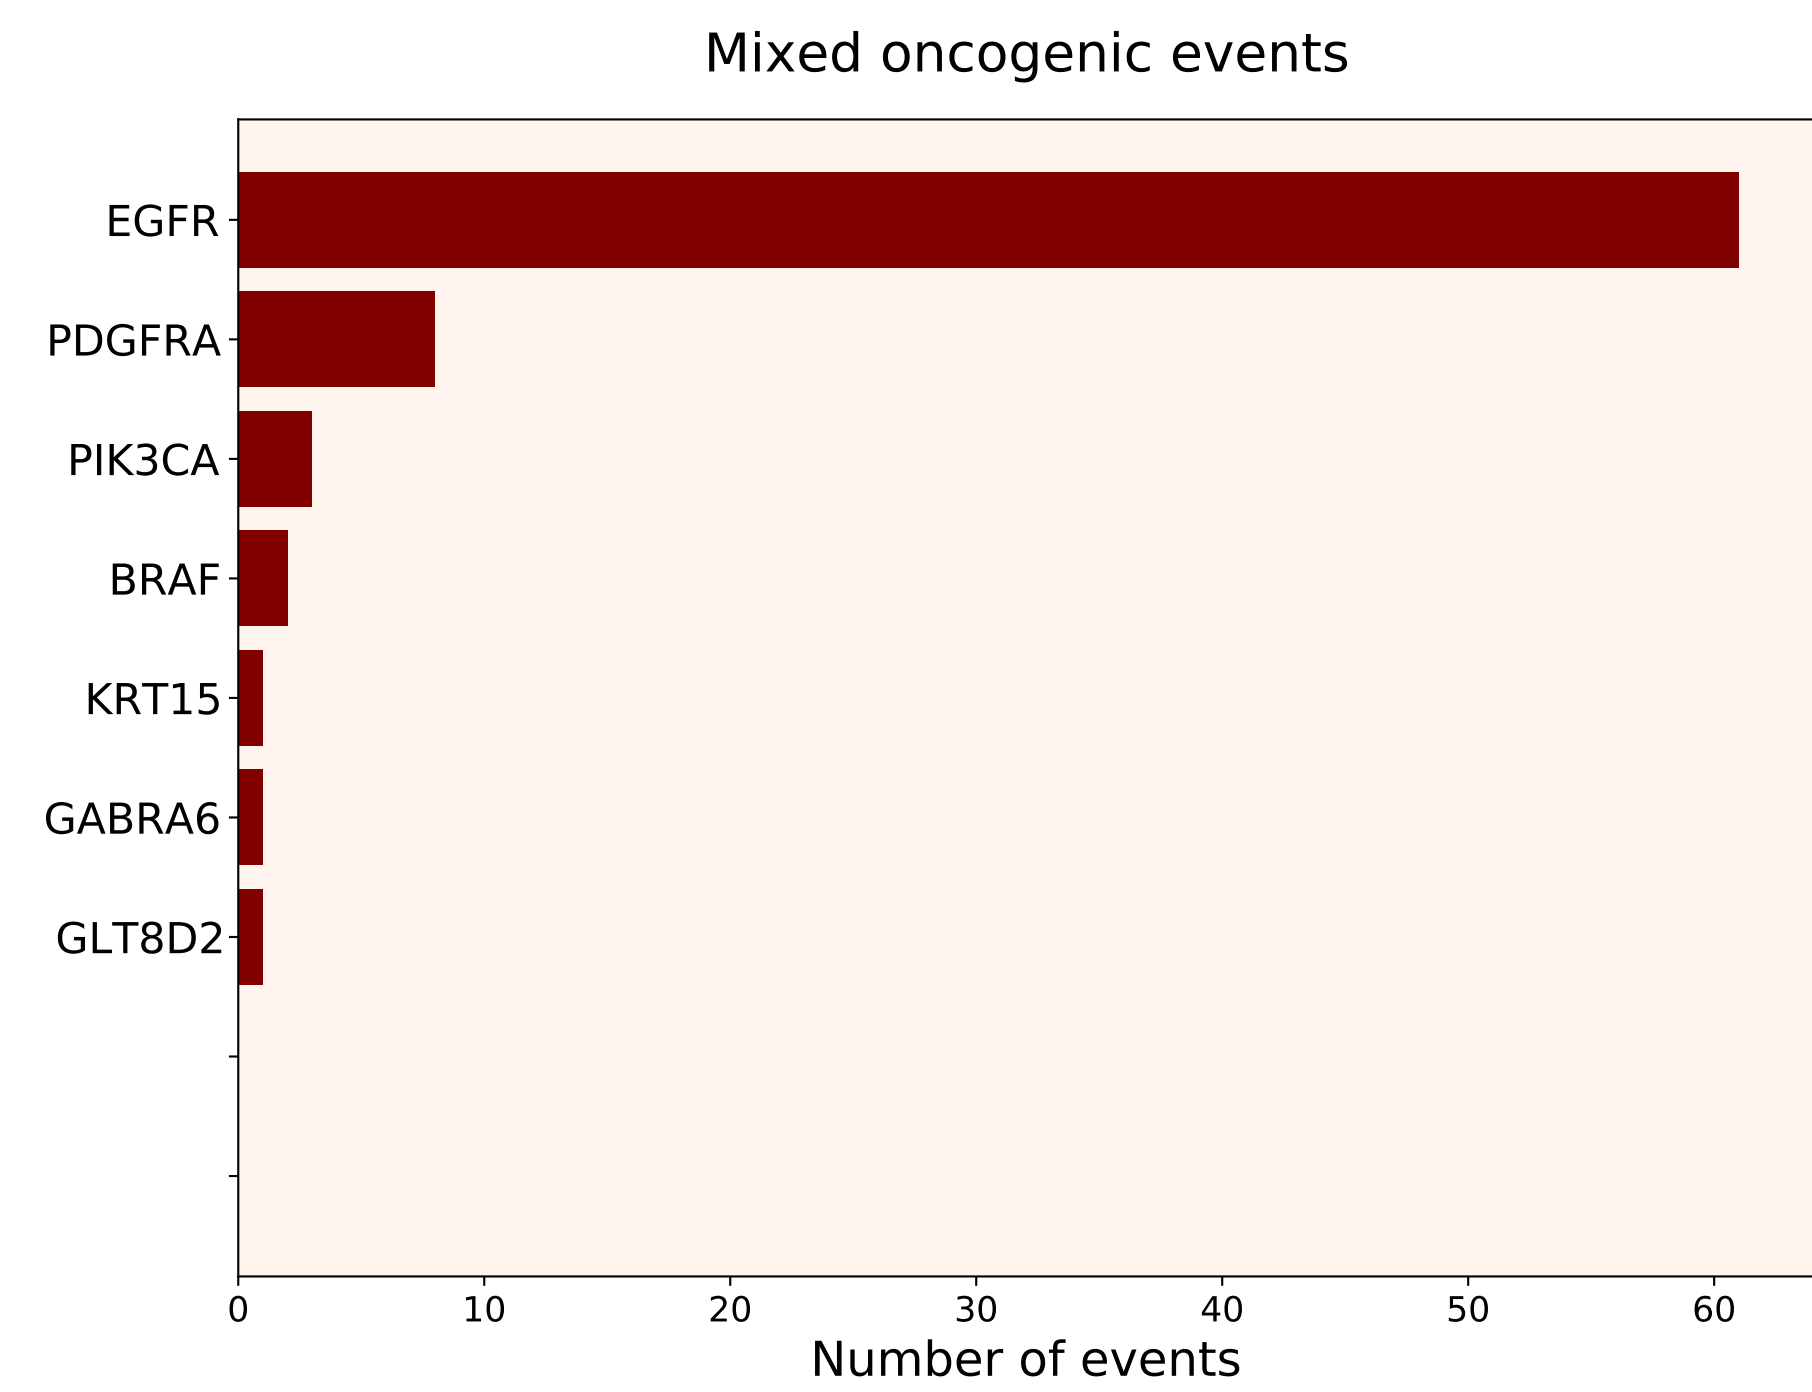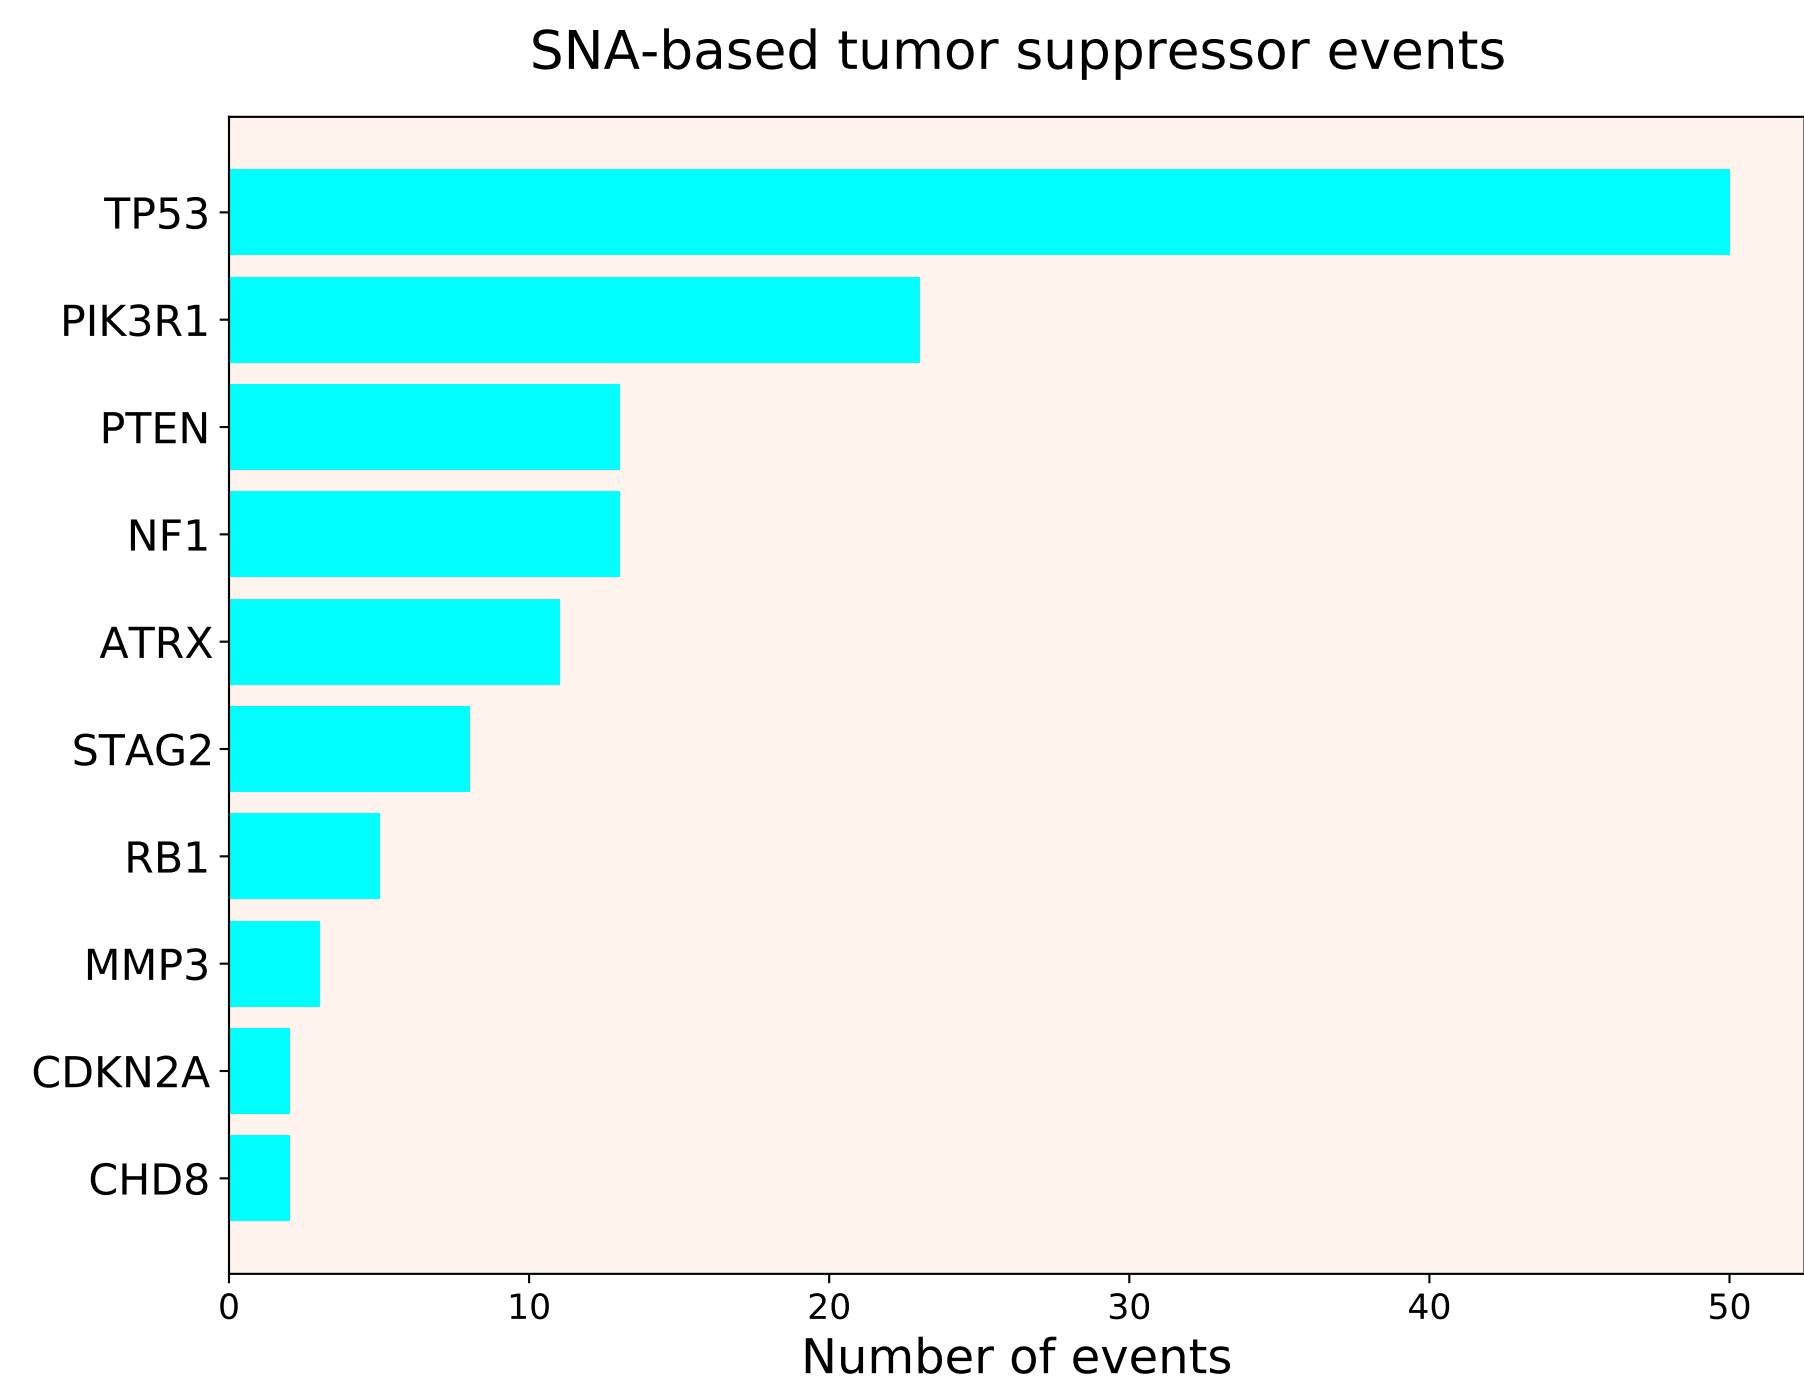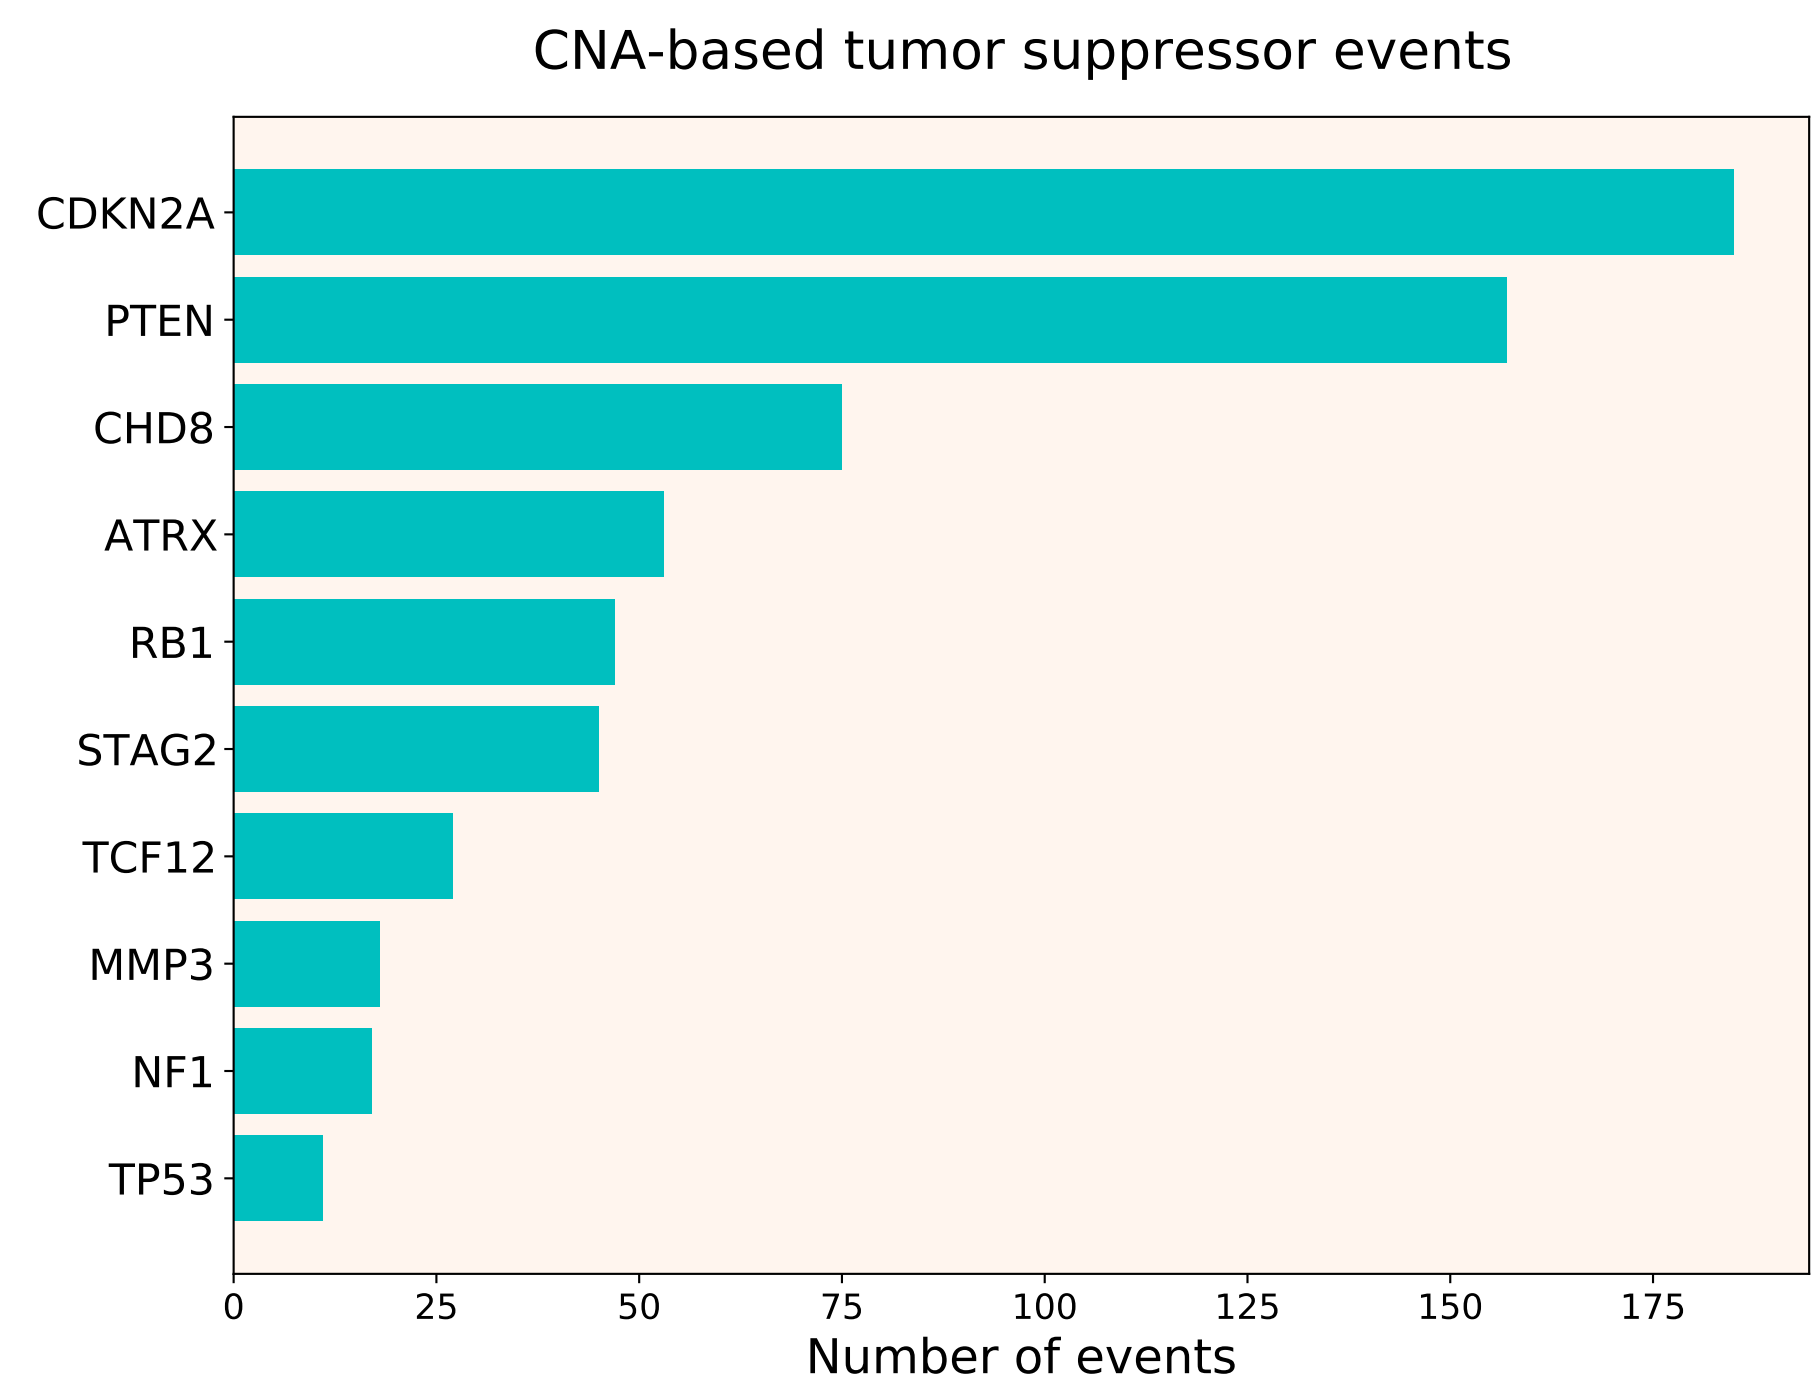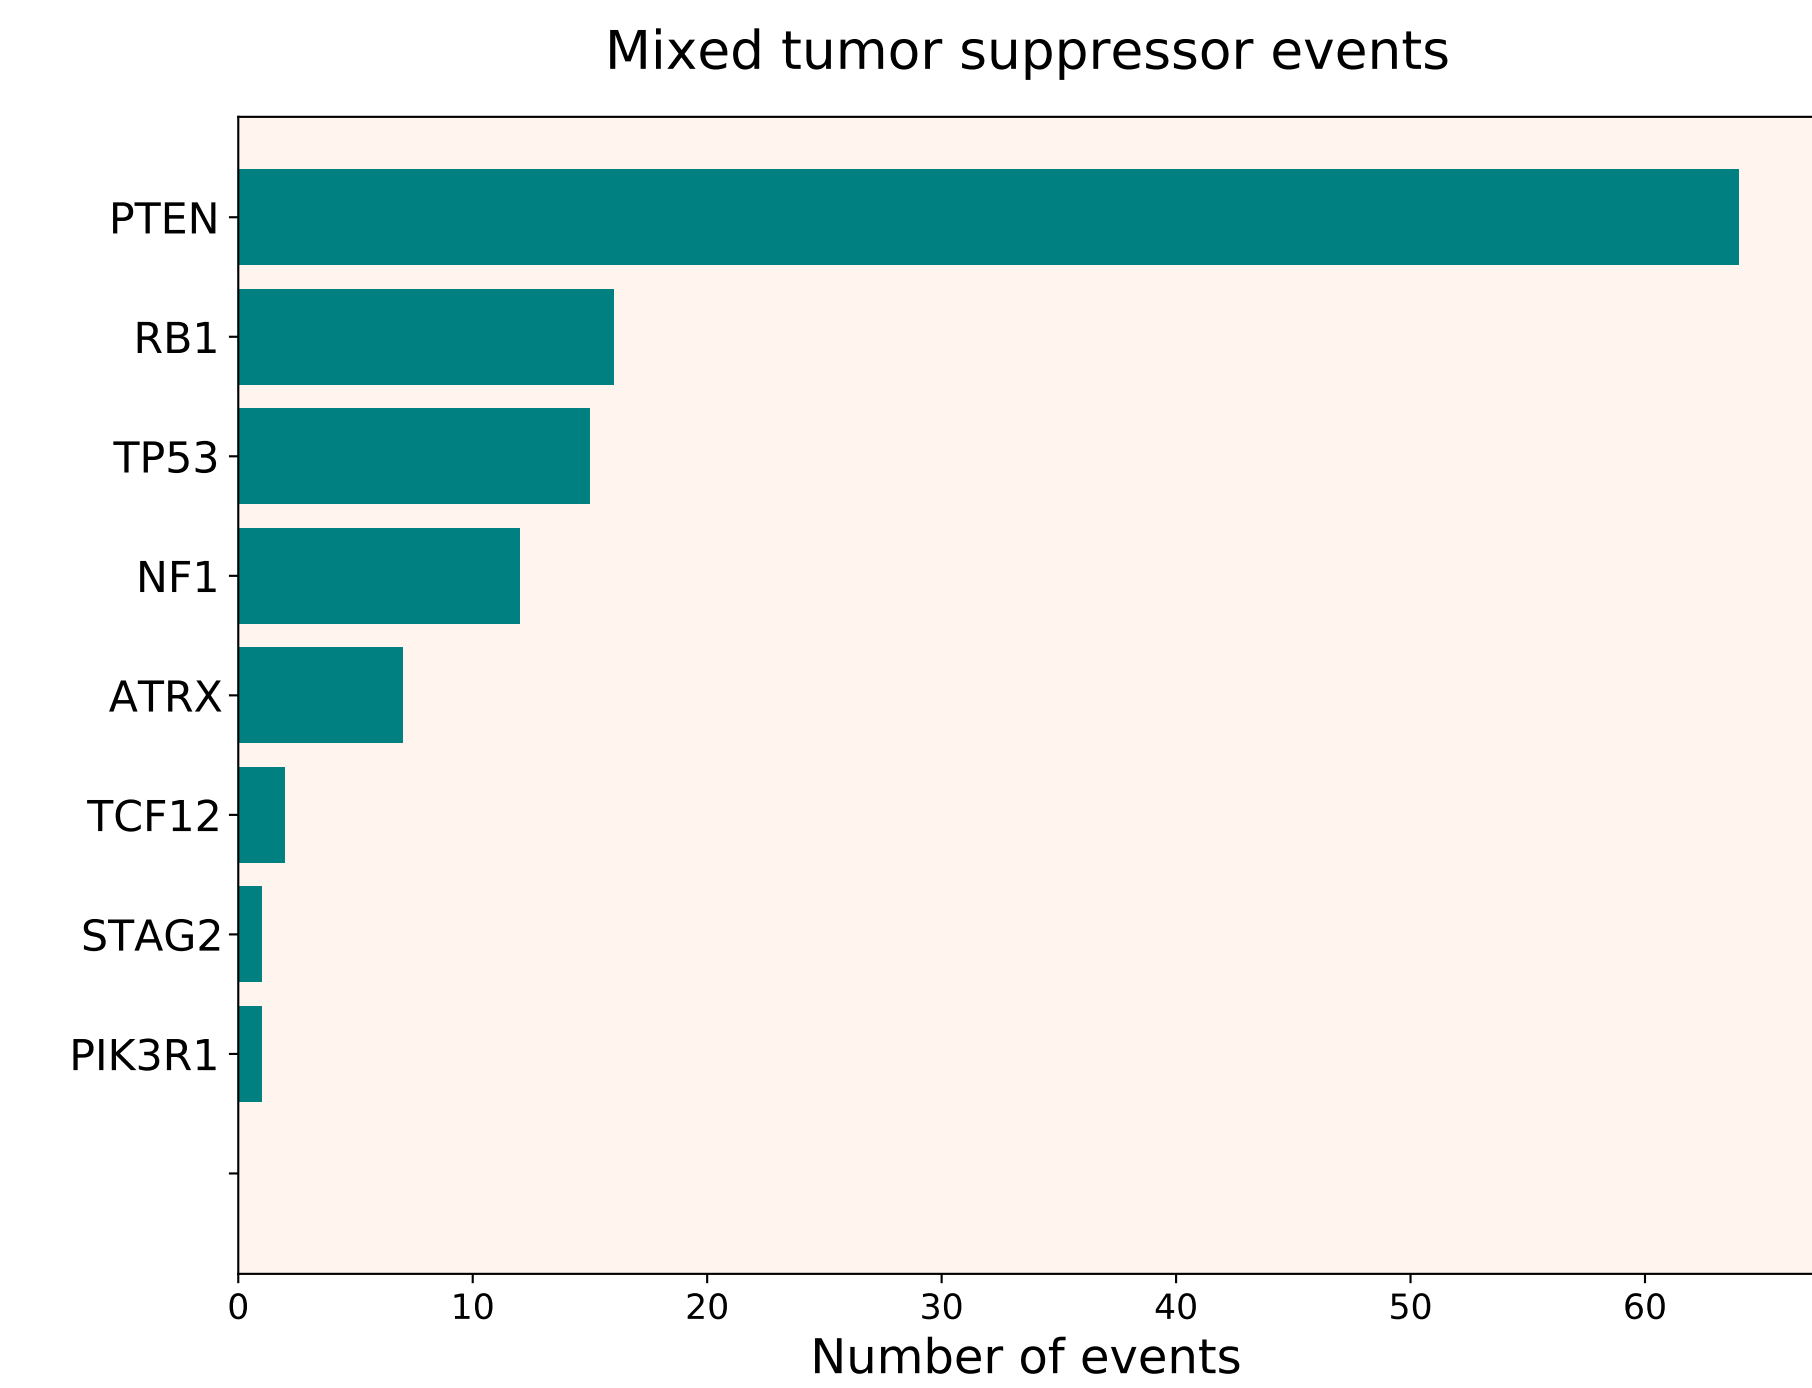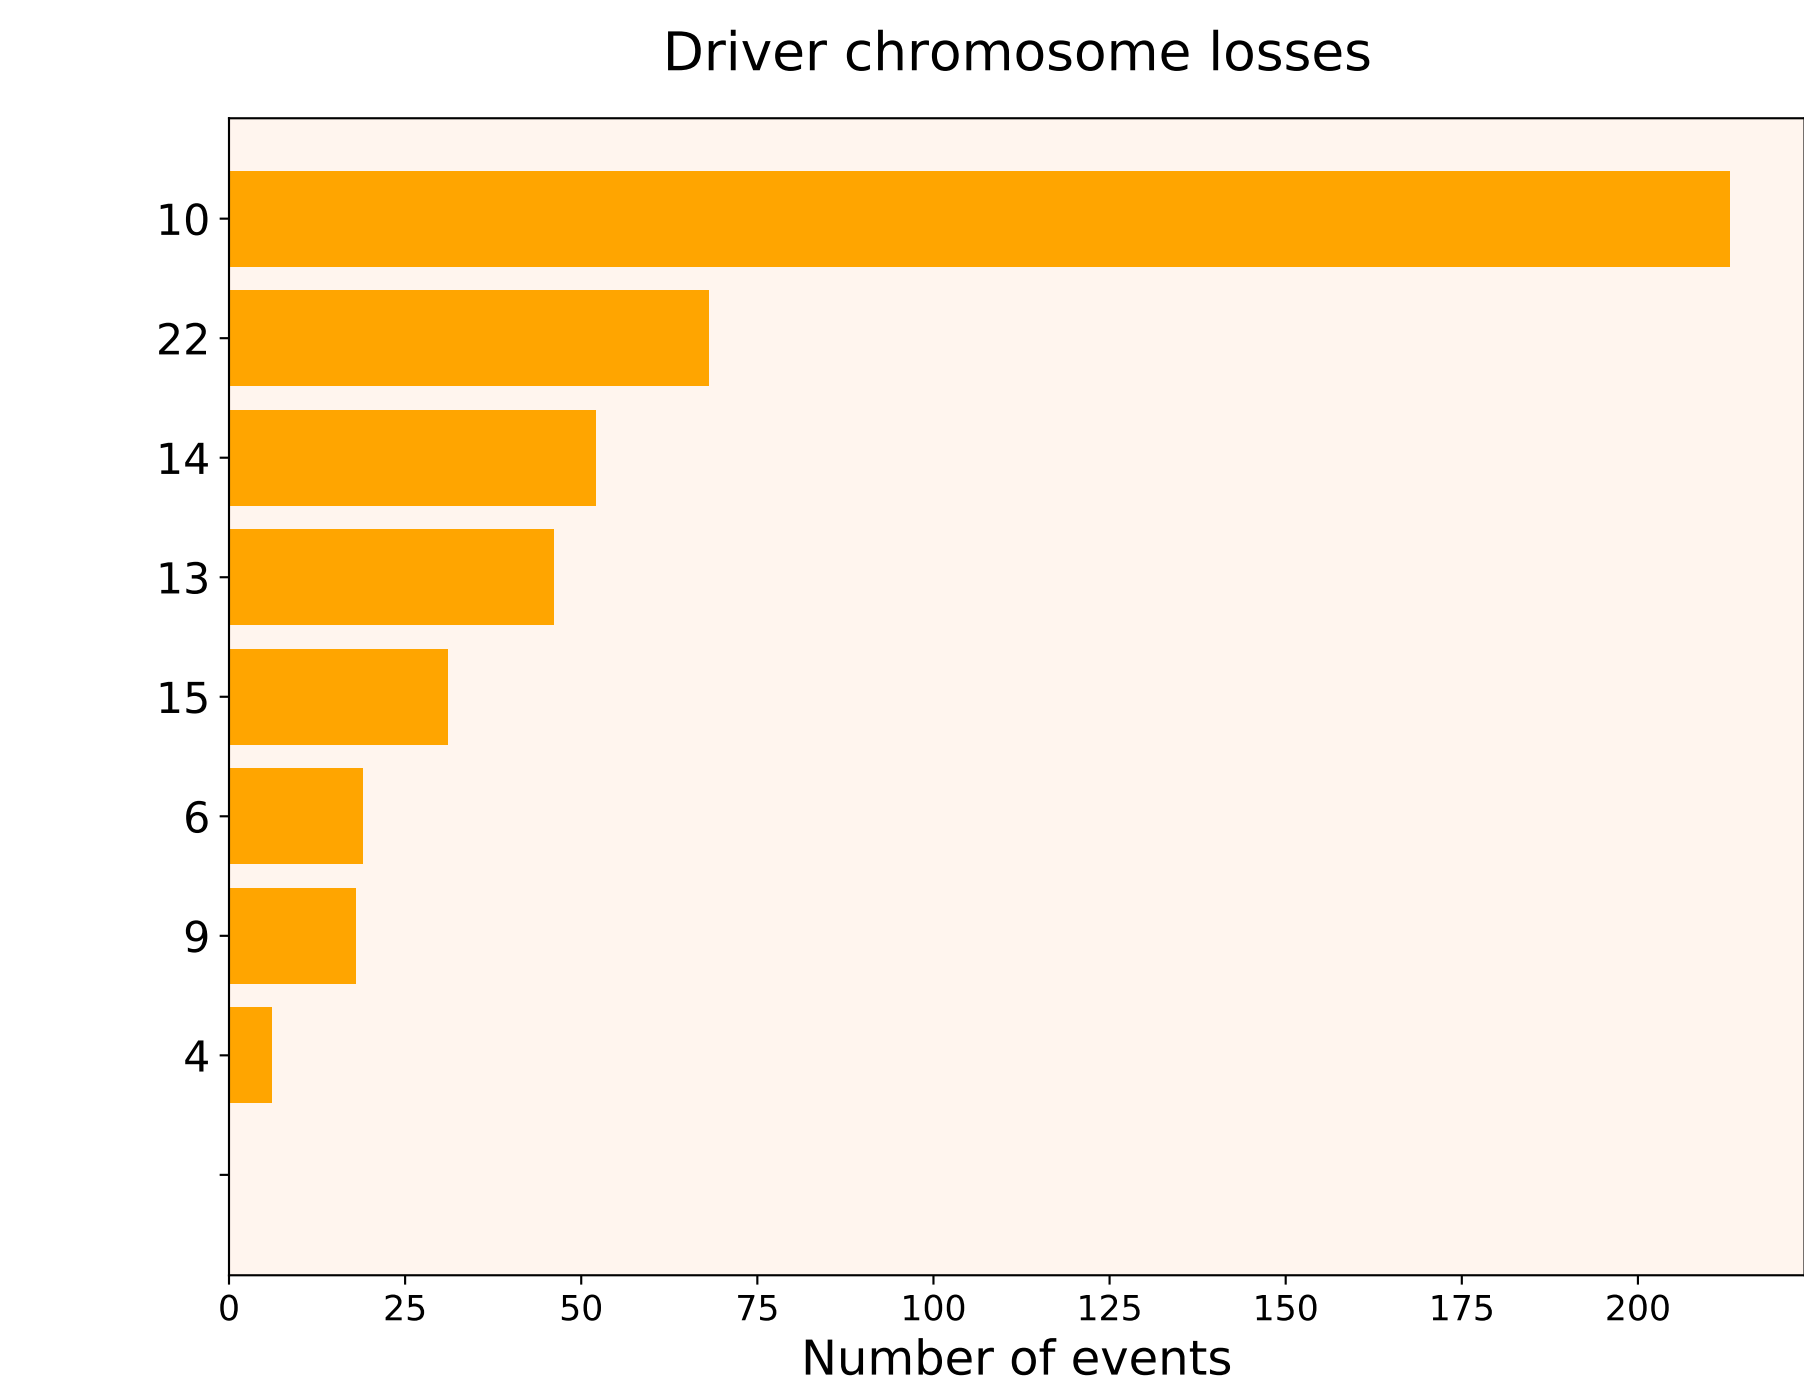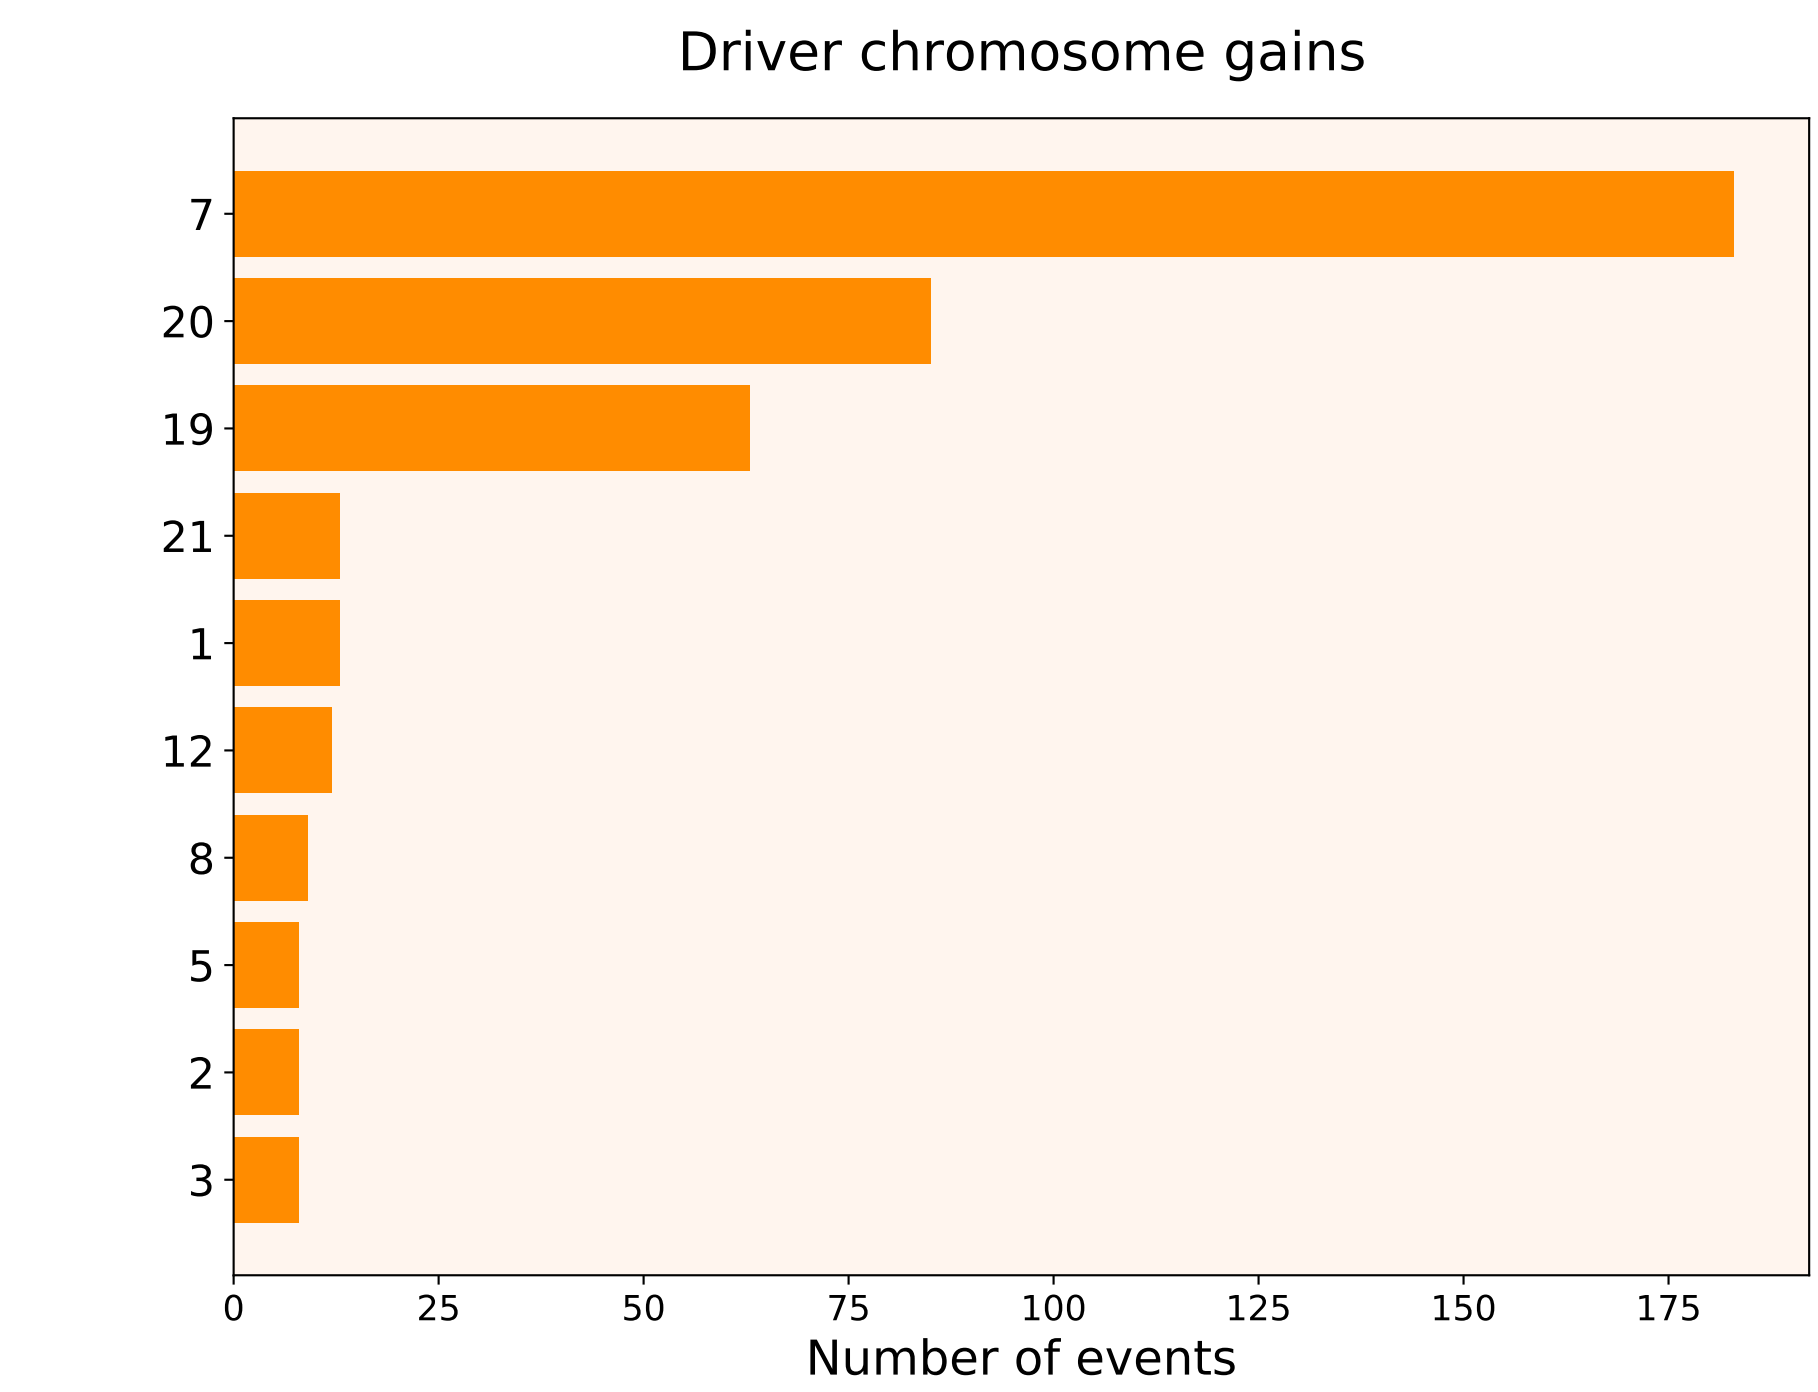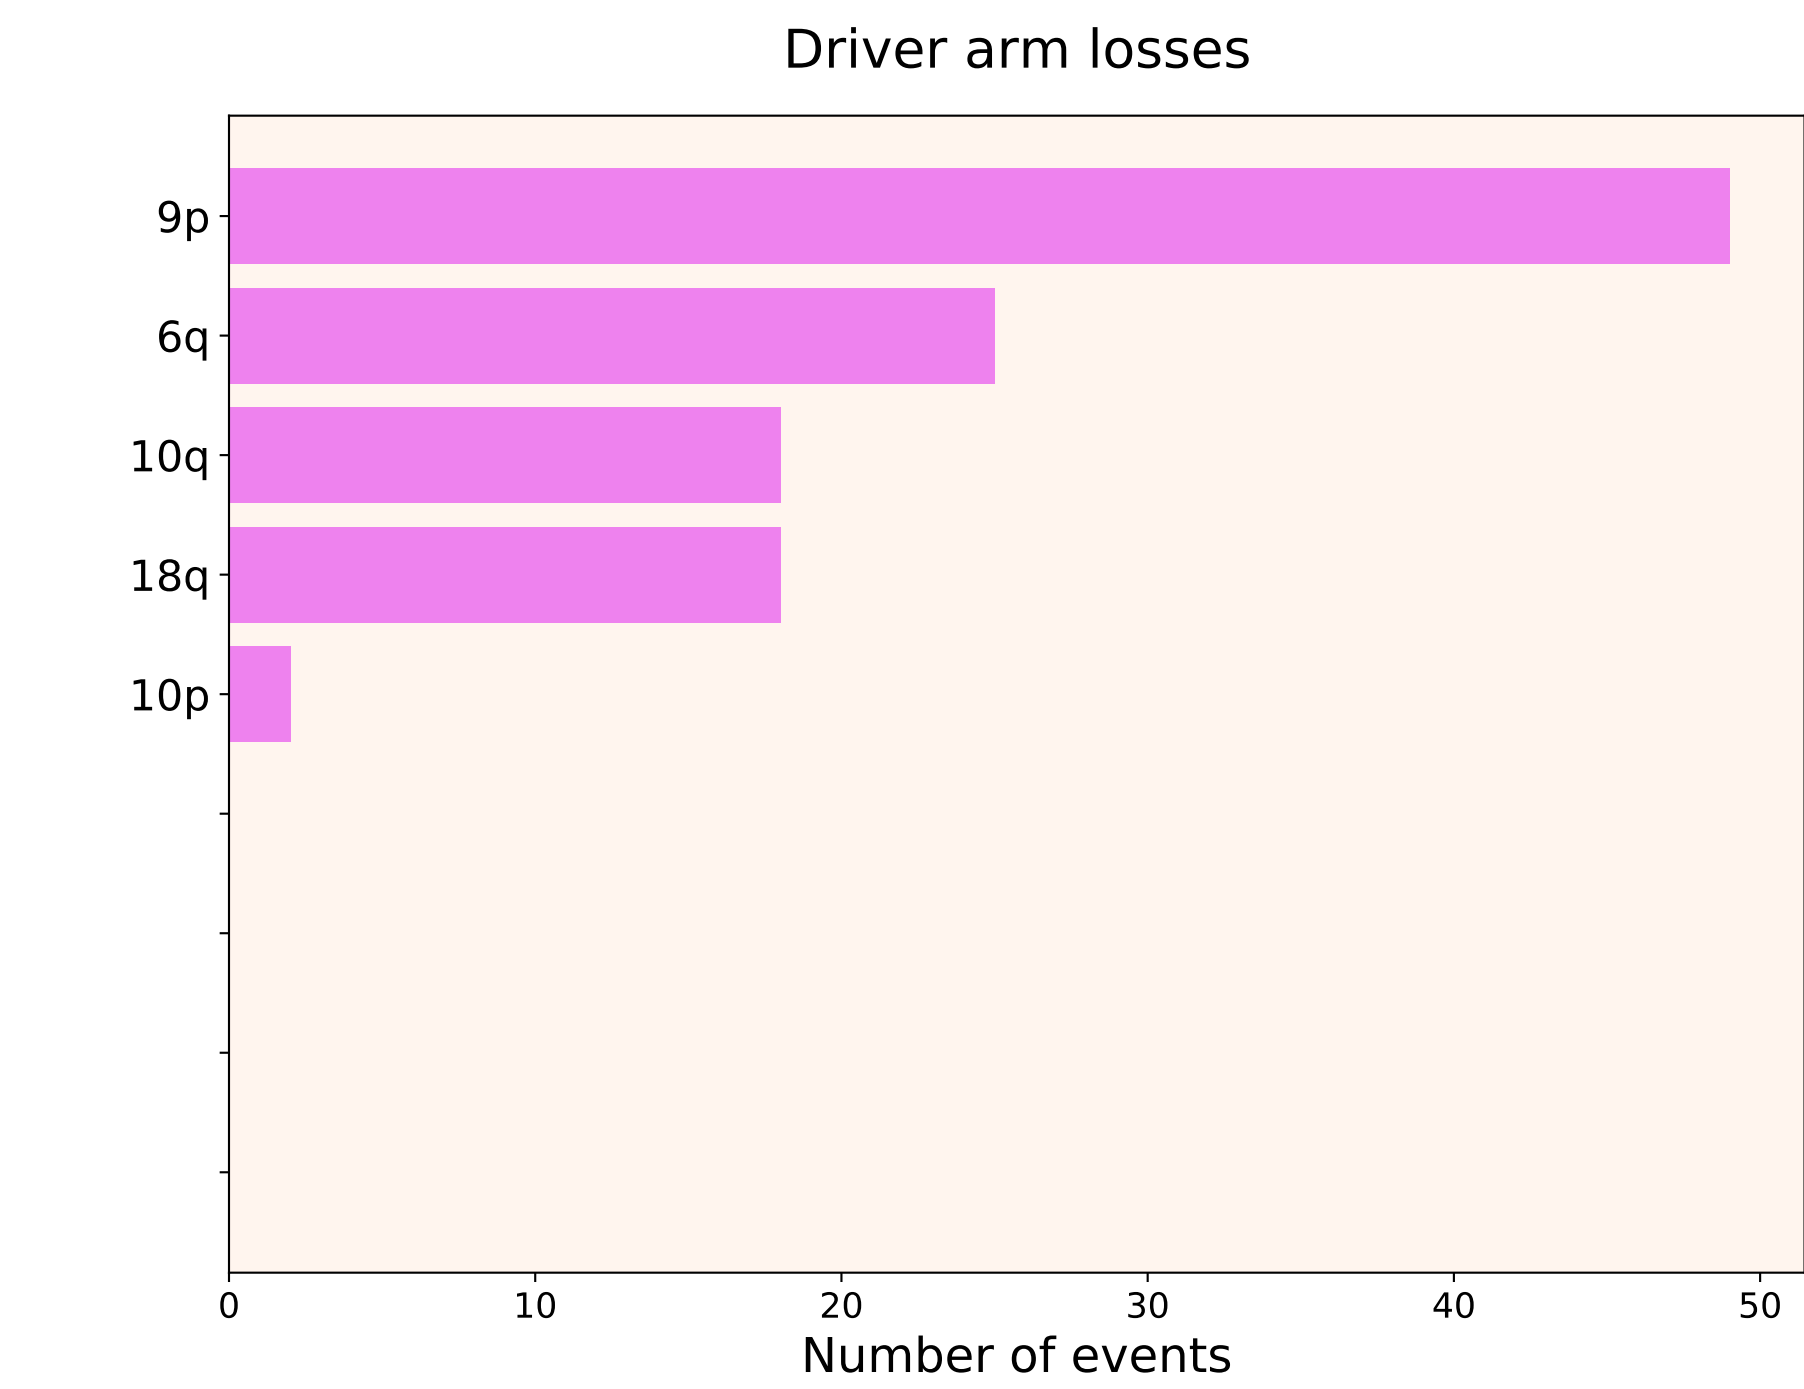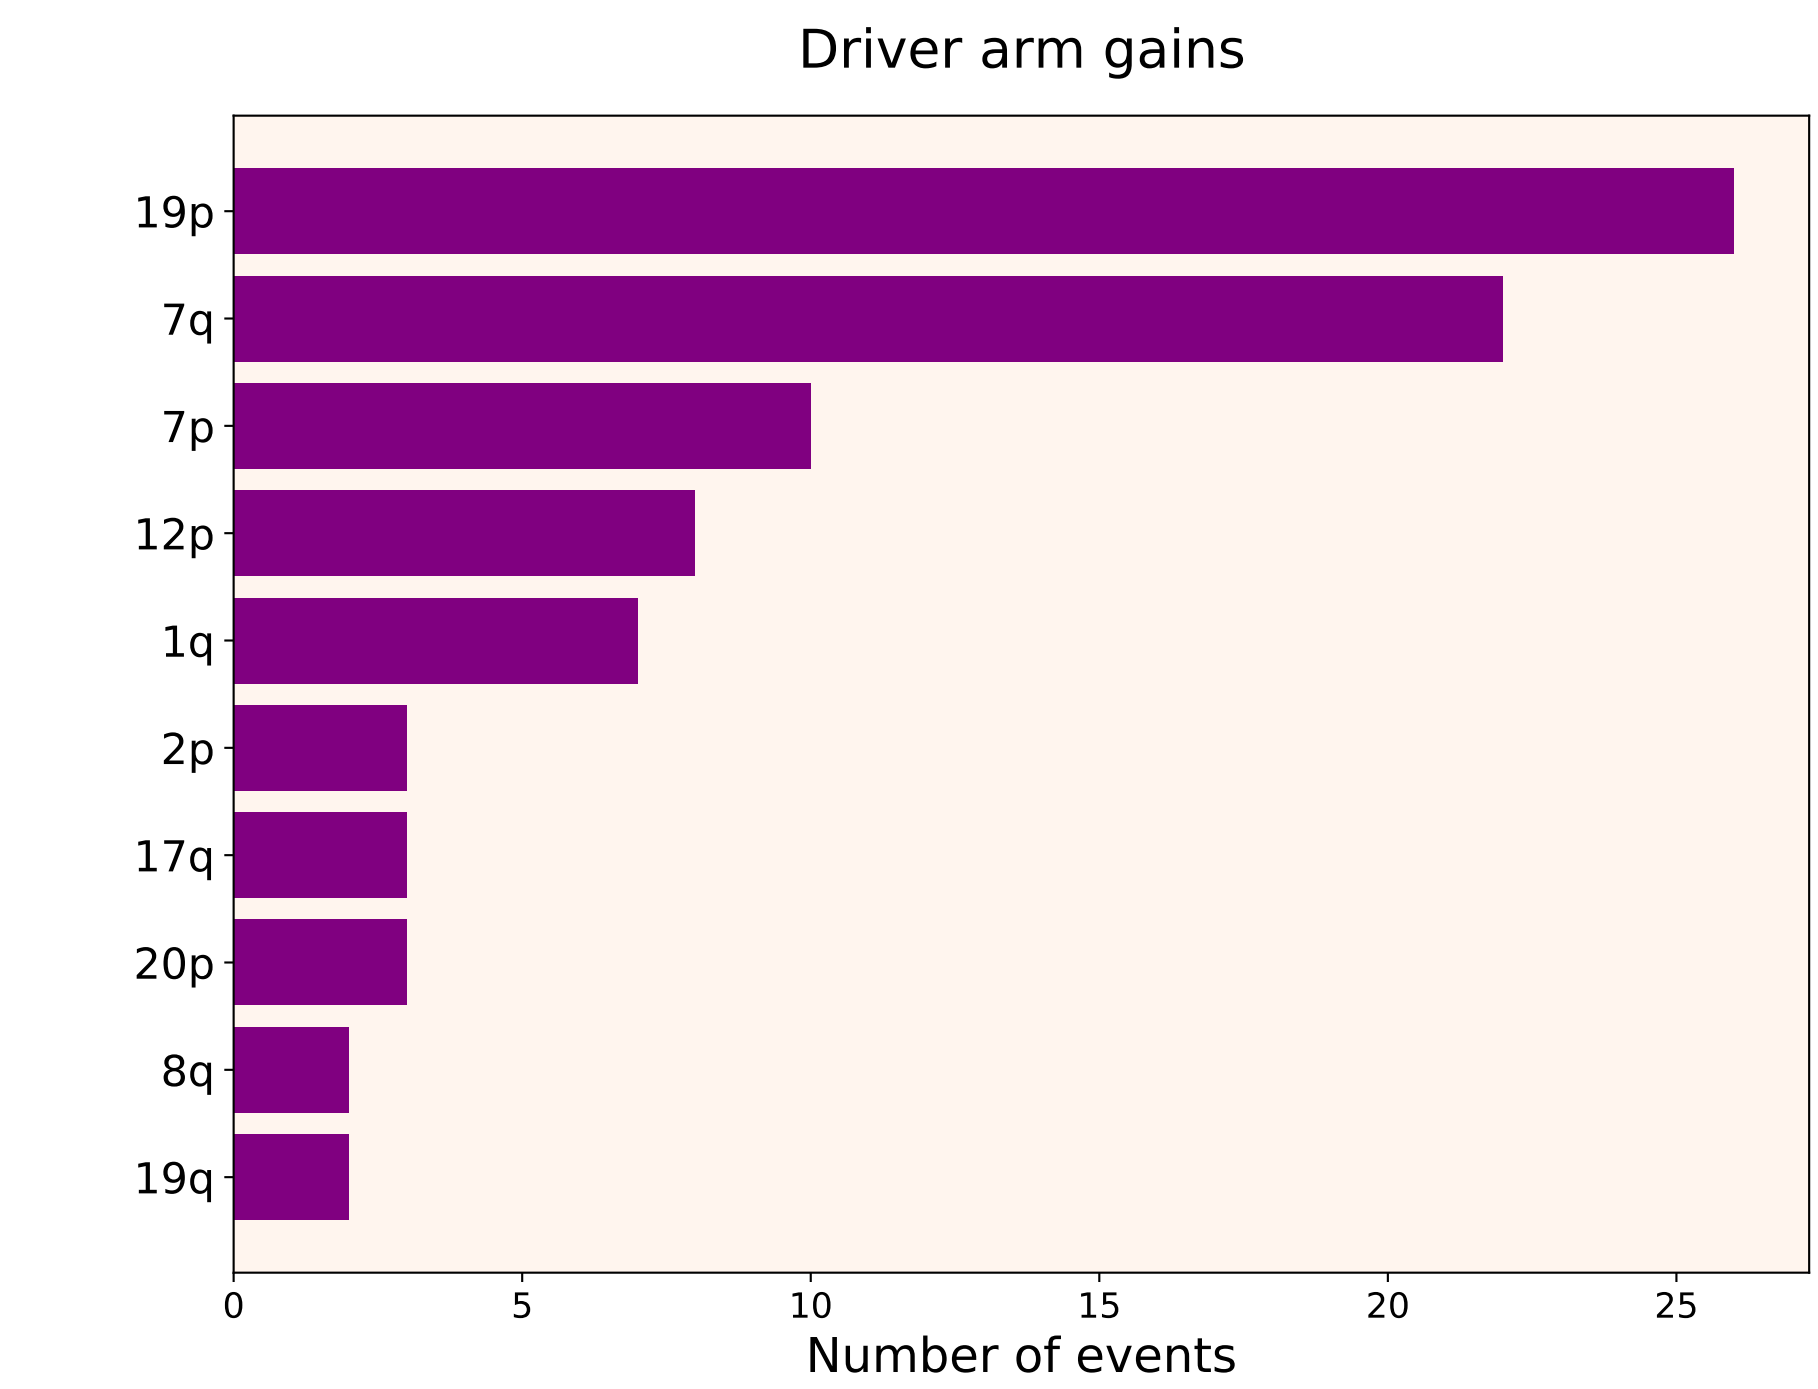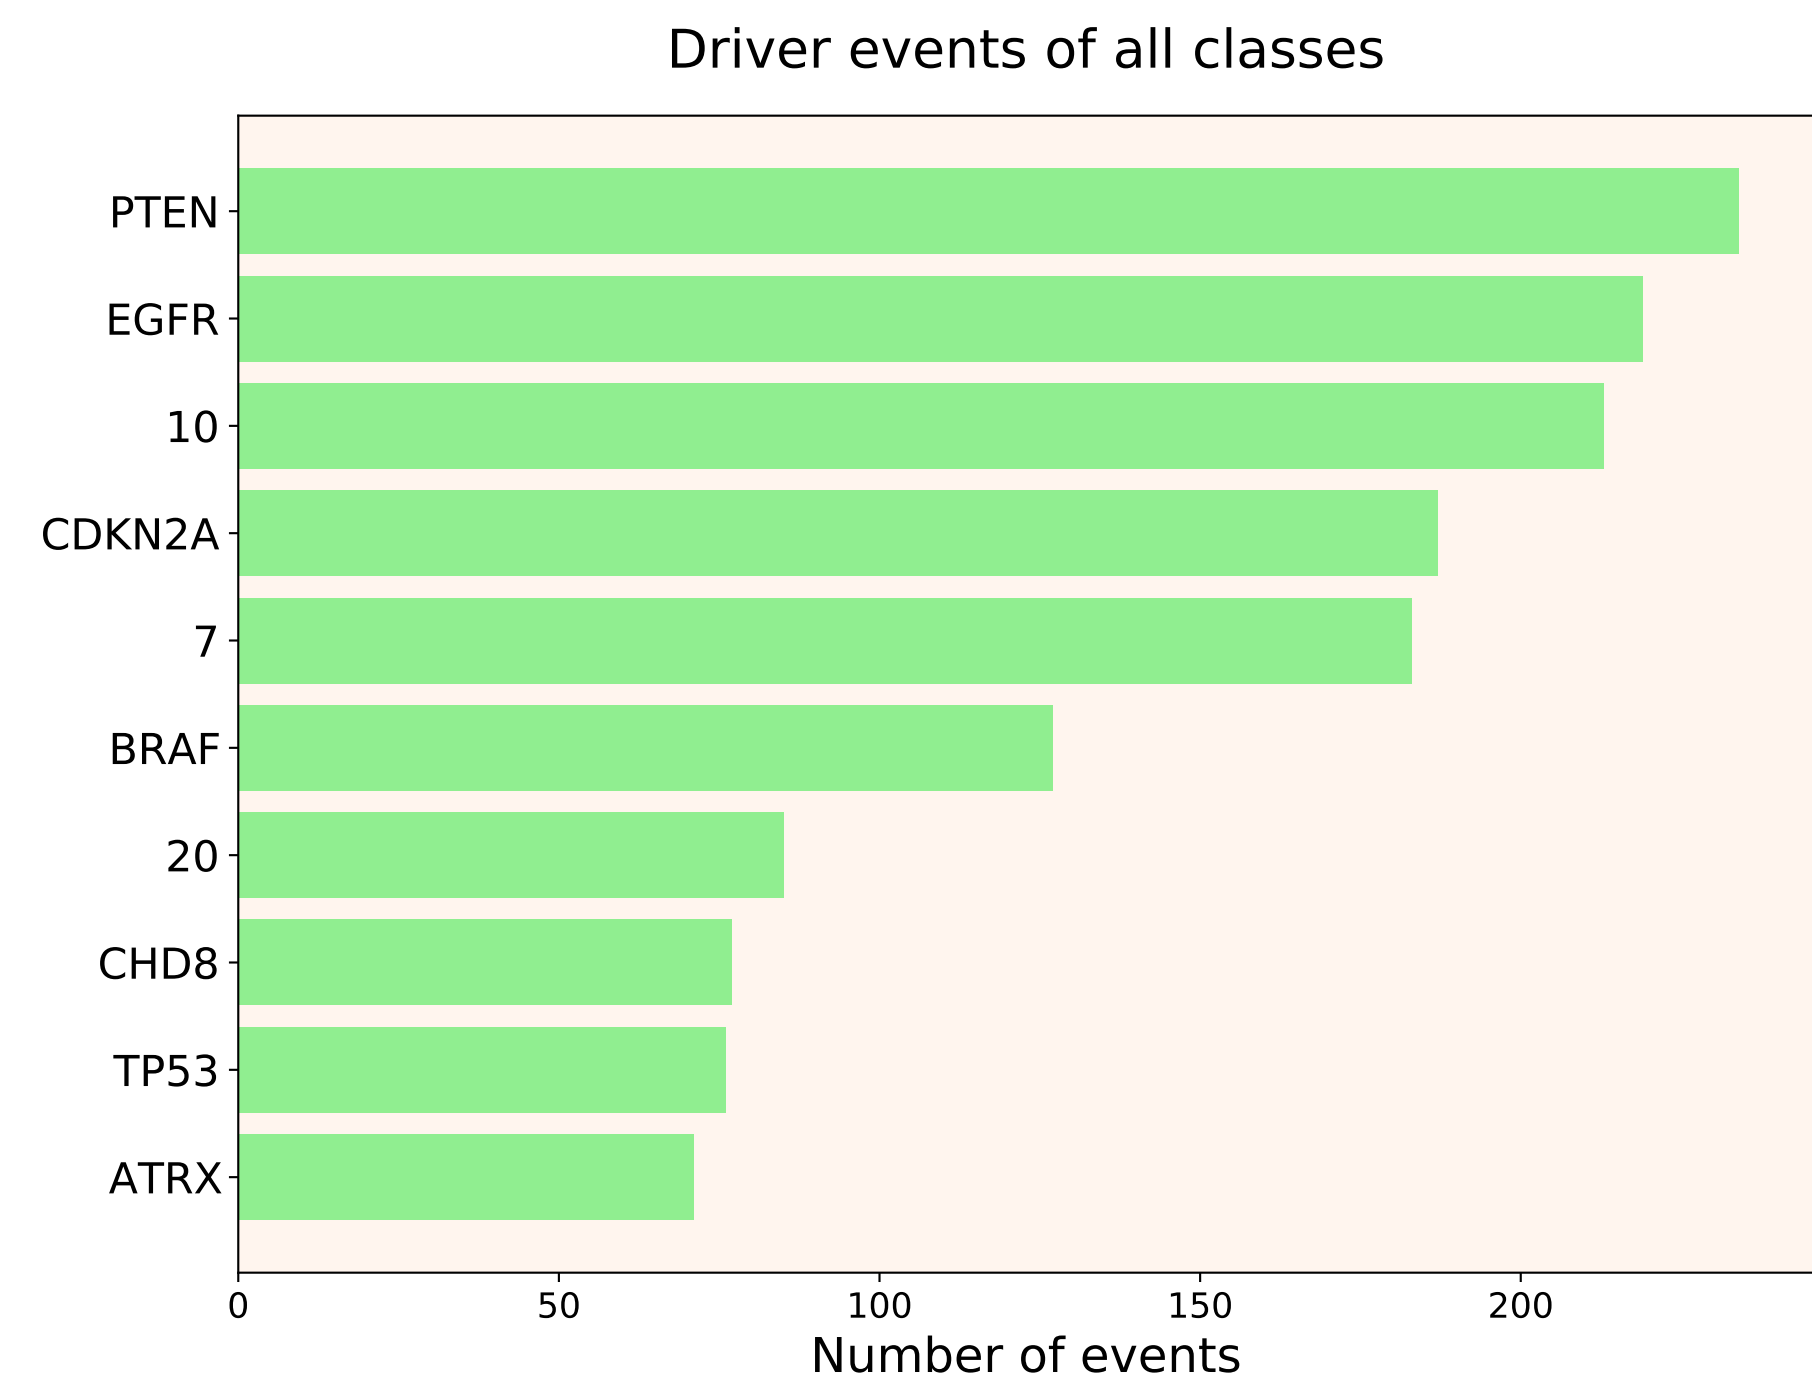

Supplement: Supplemental_Data_S1.zip [file Supplemental_Data_S1.zip]

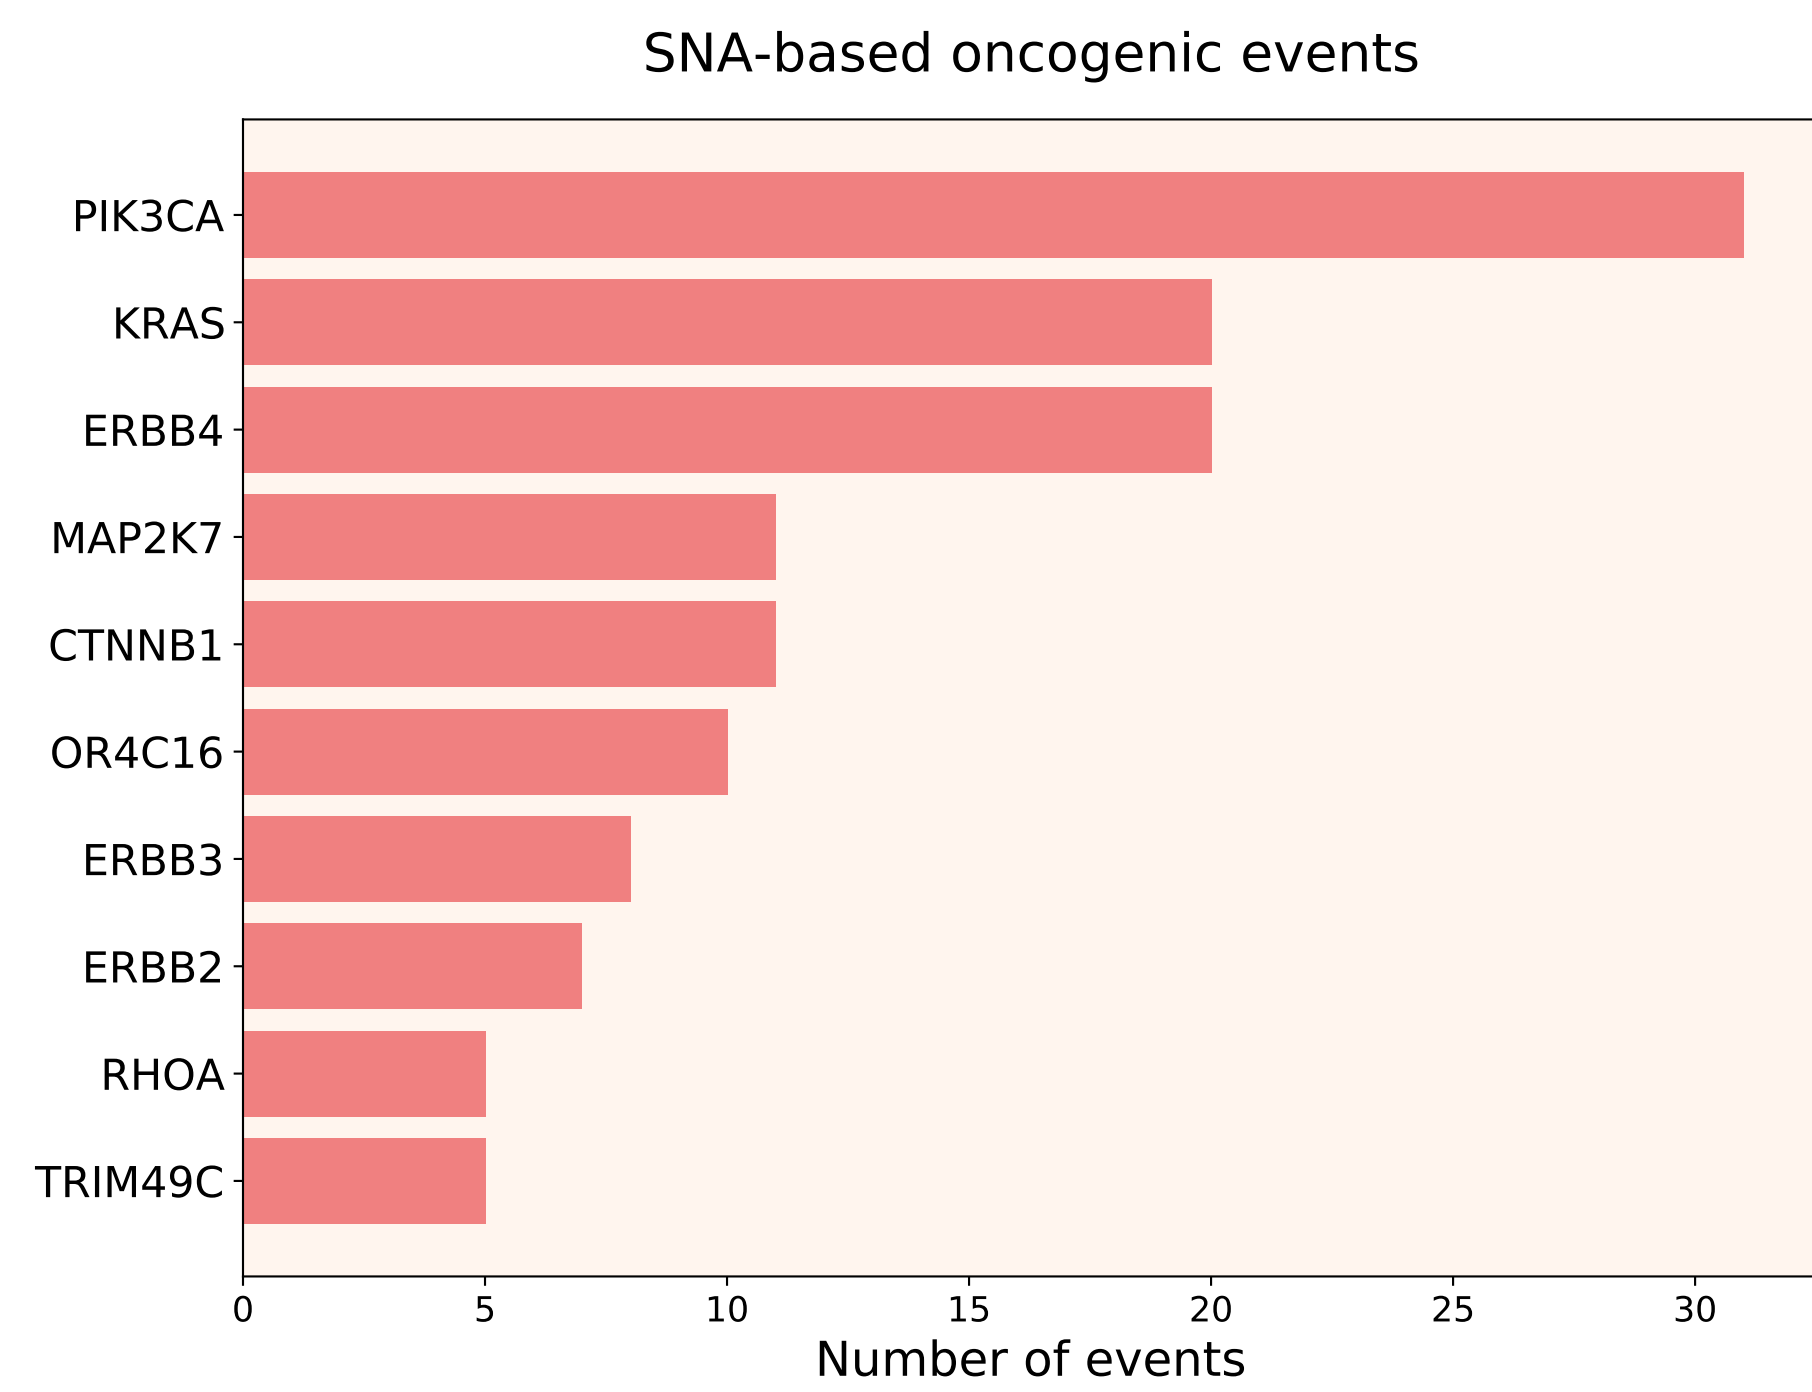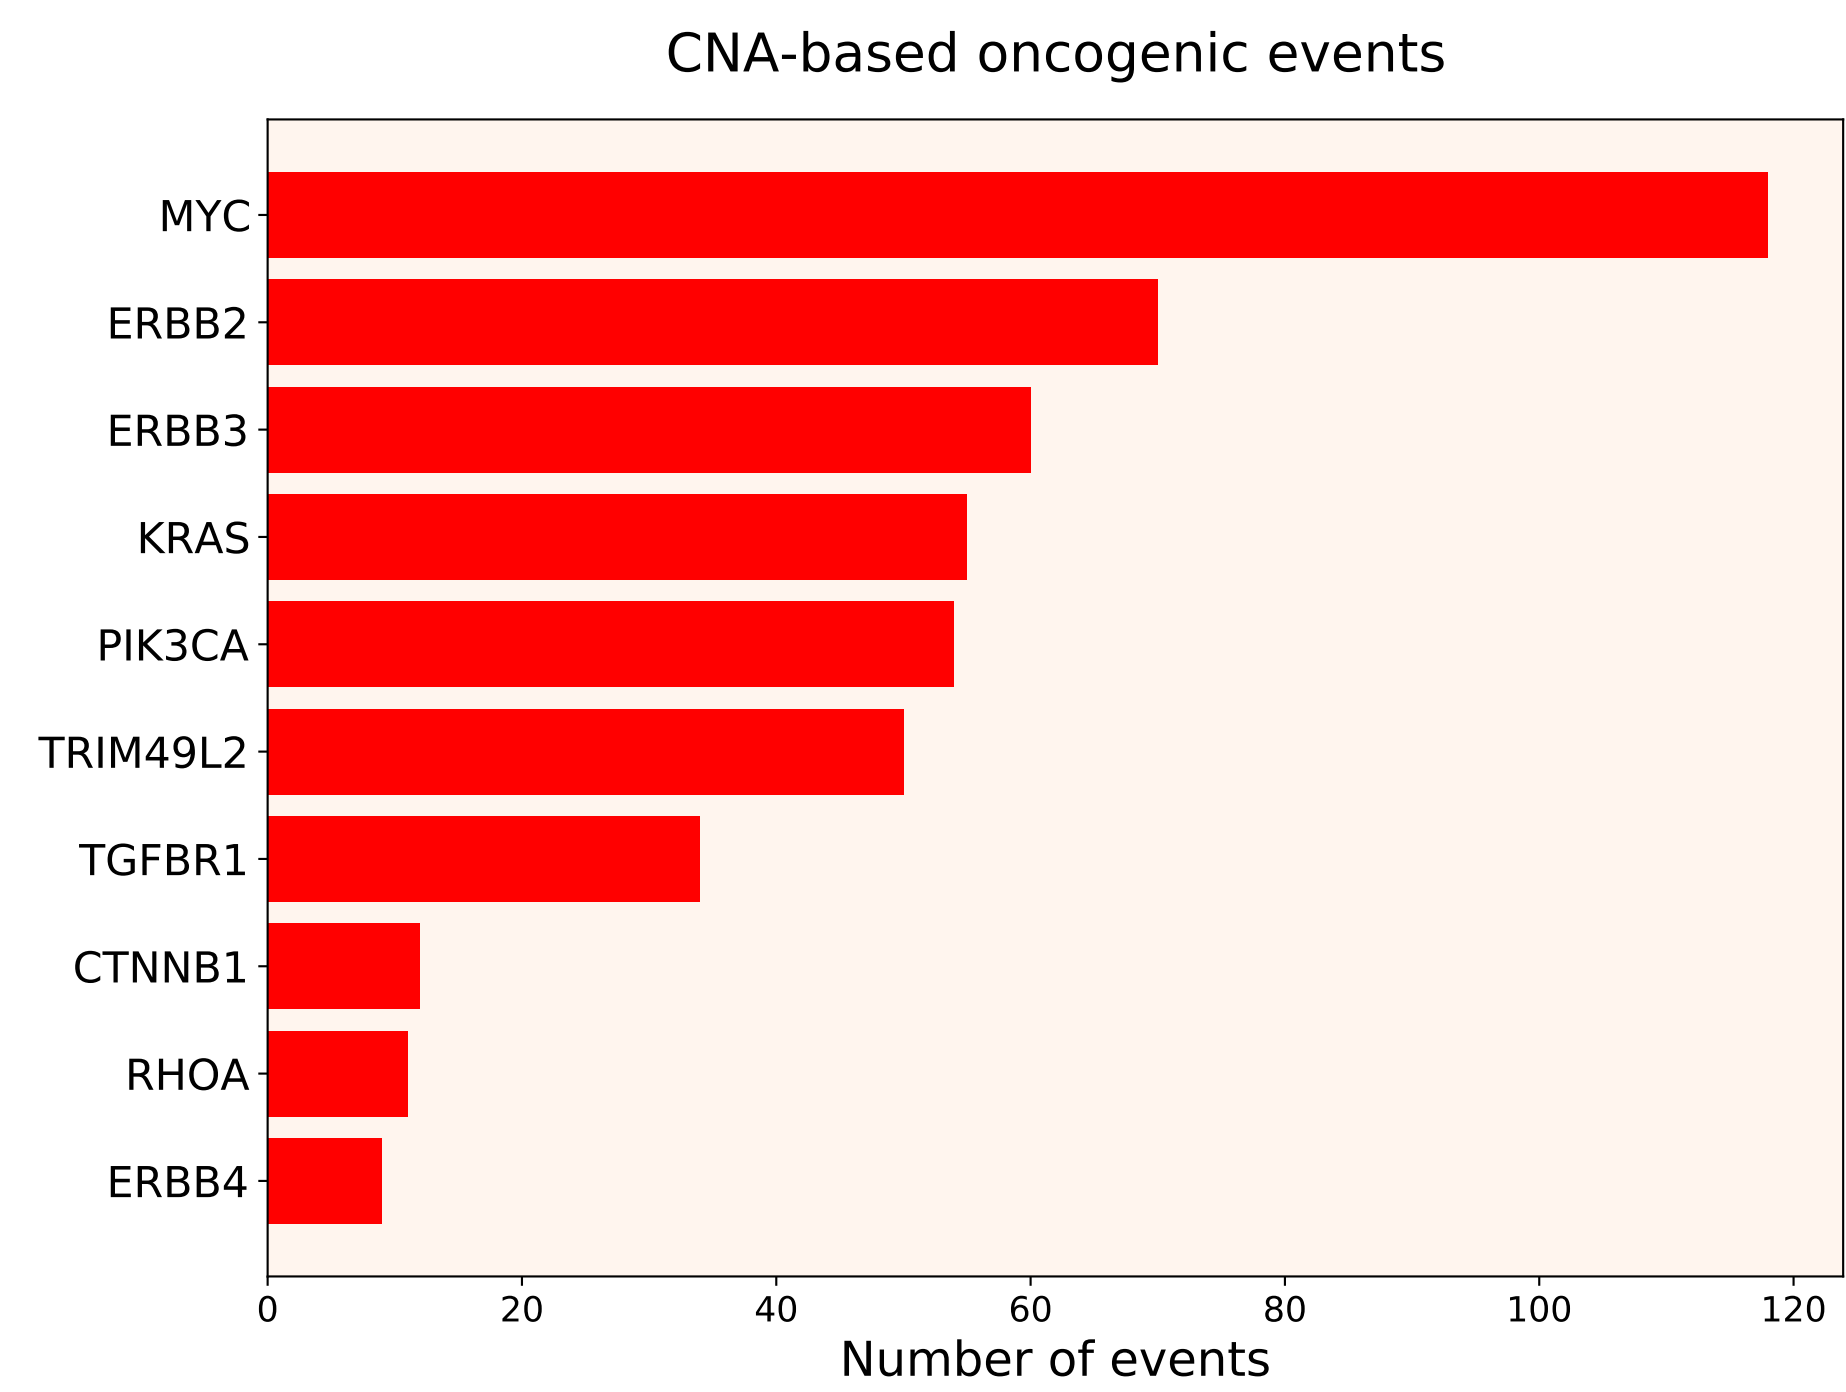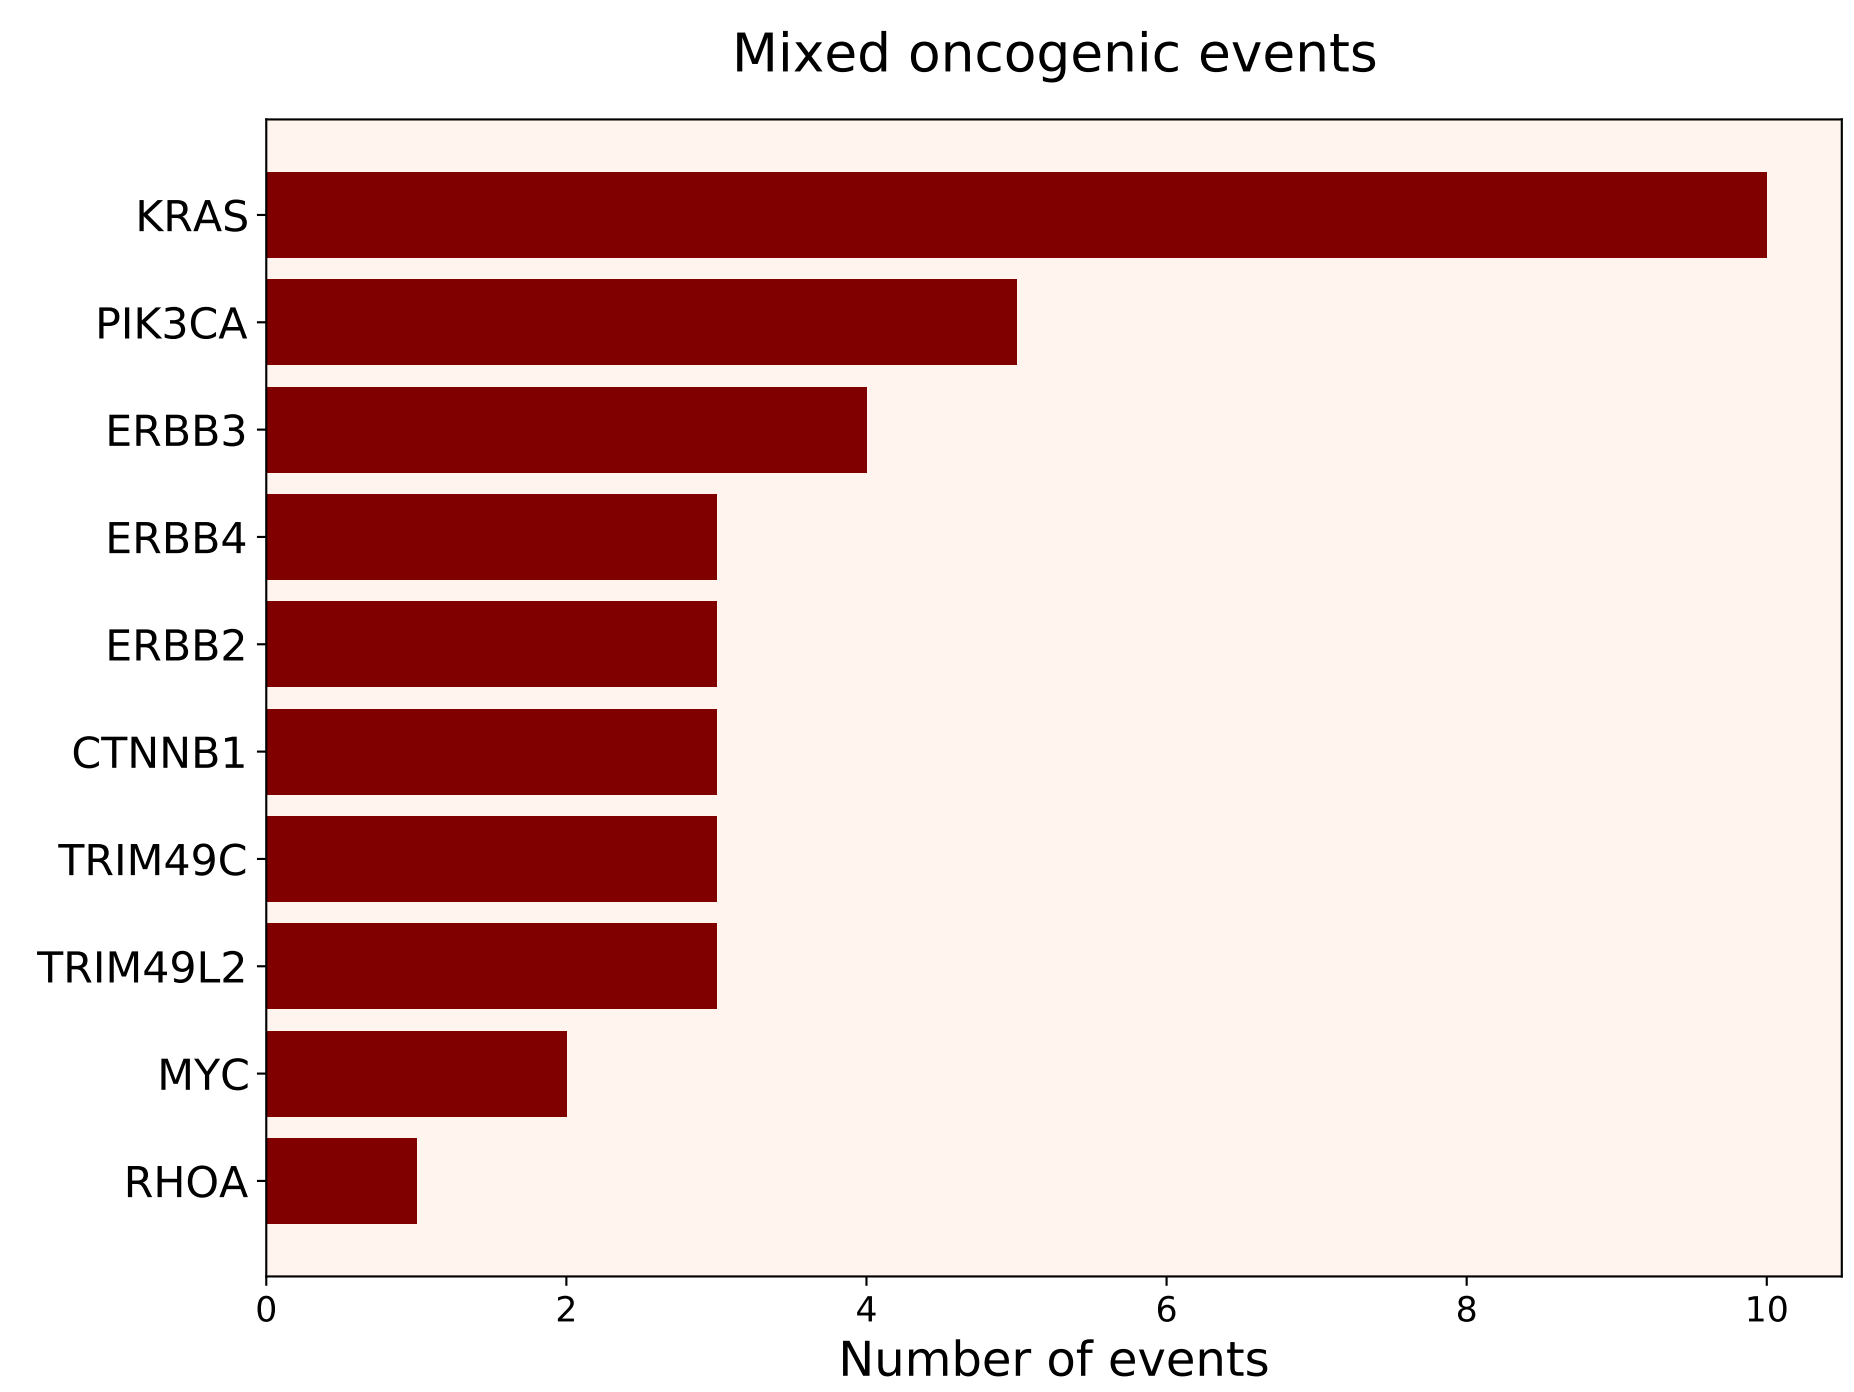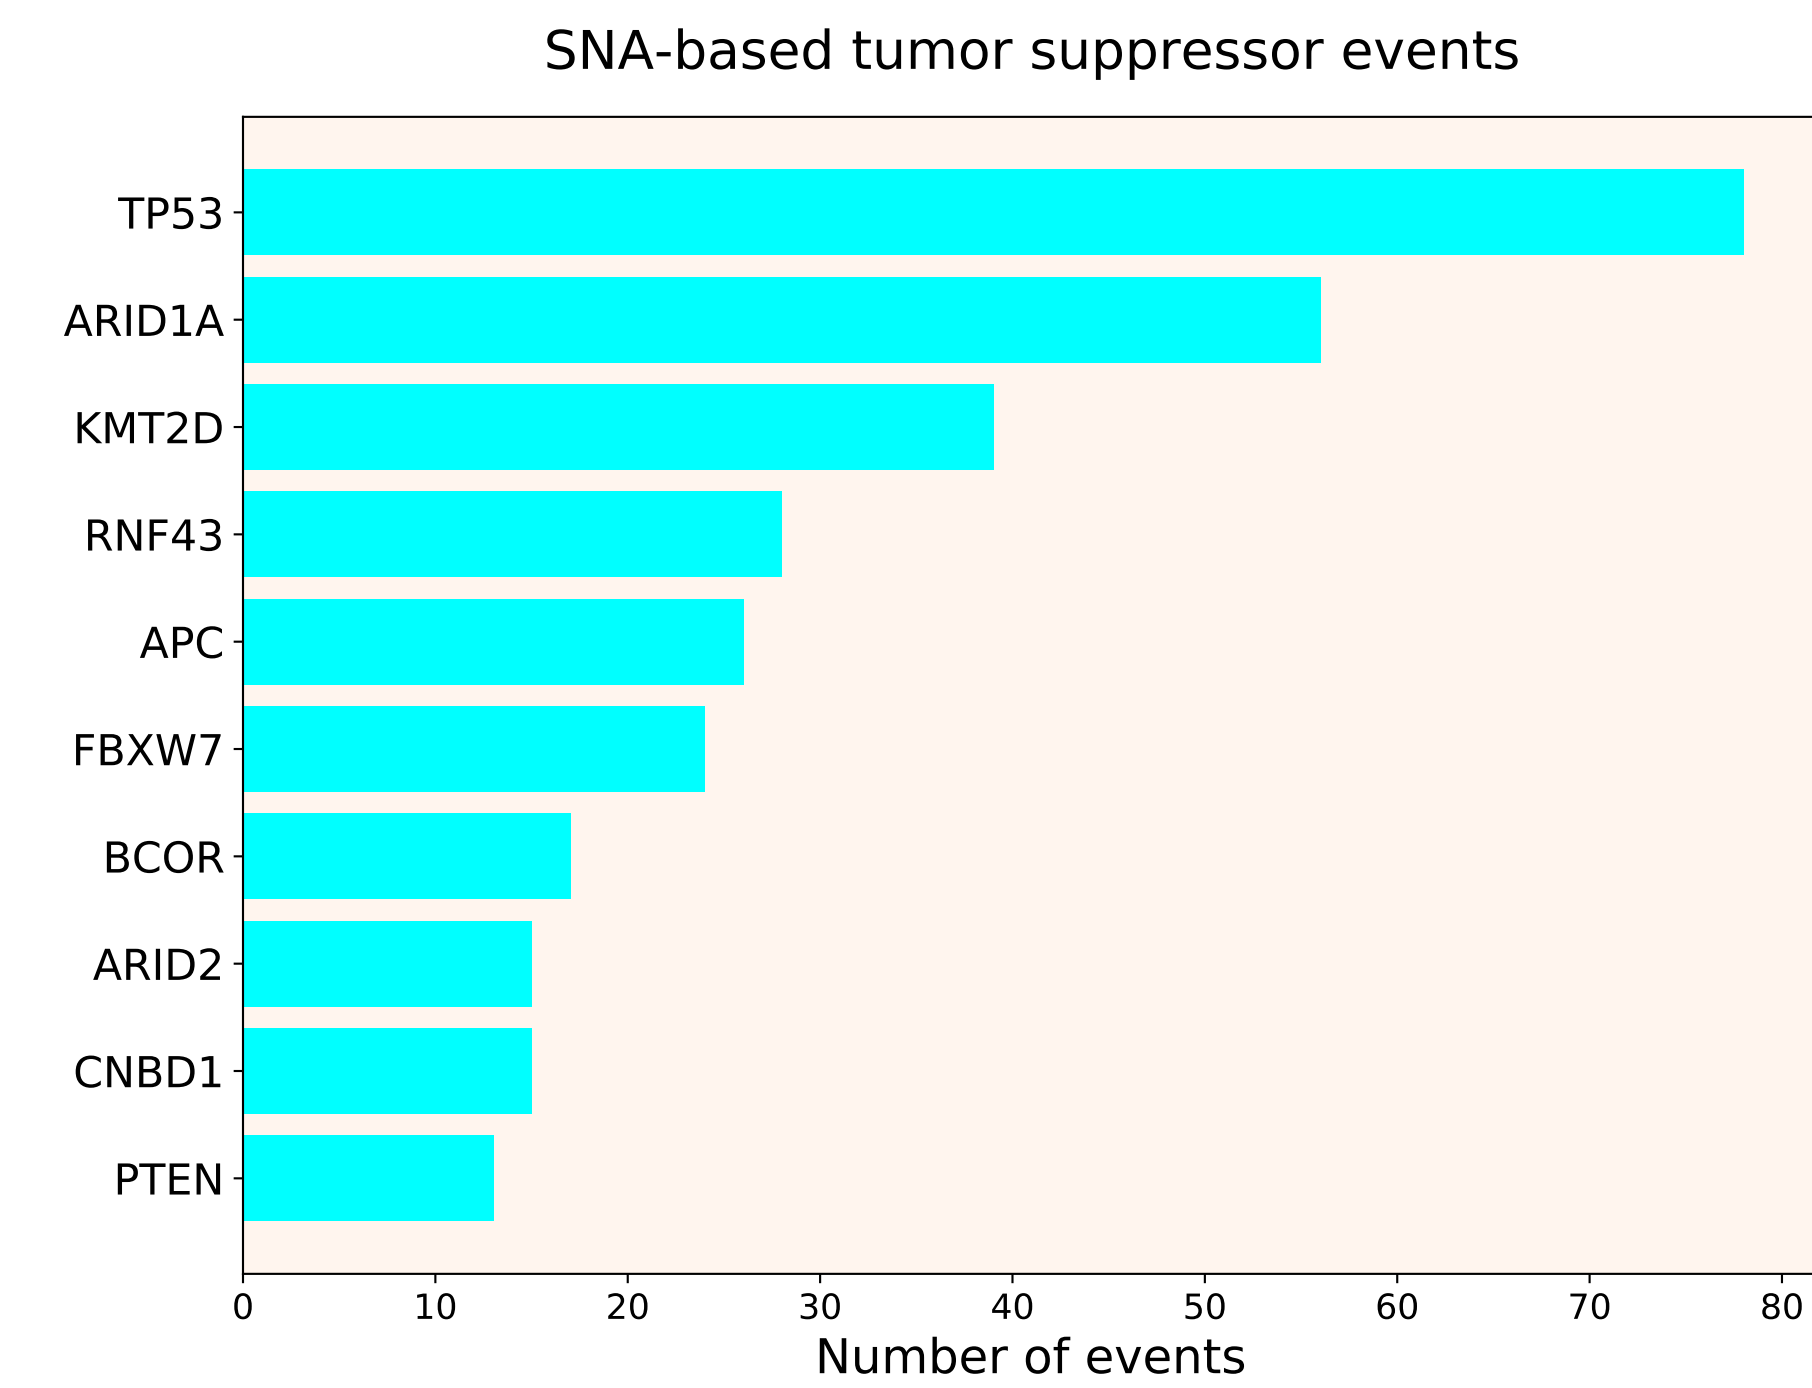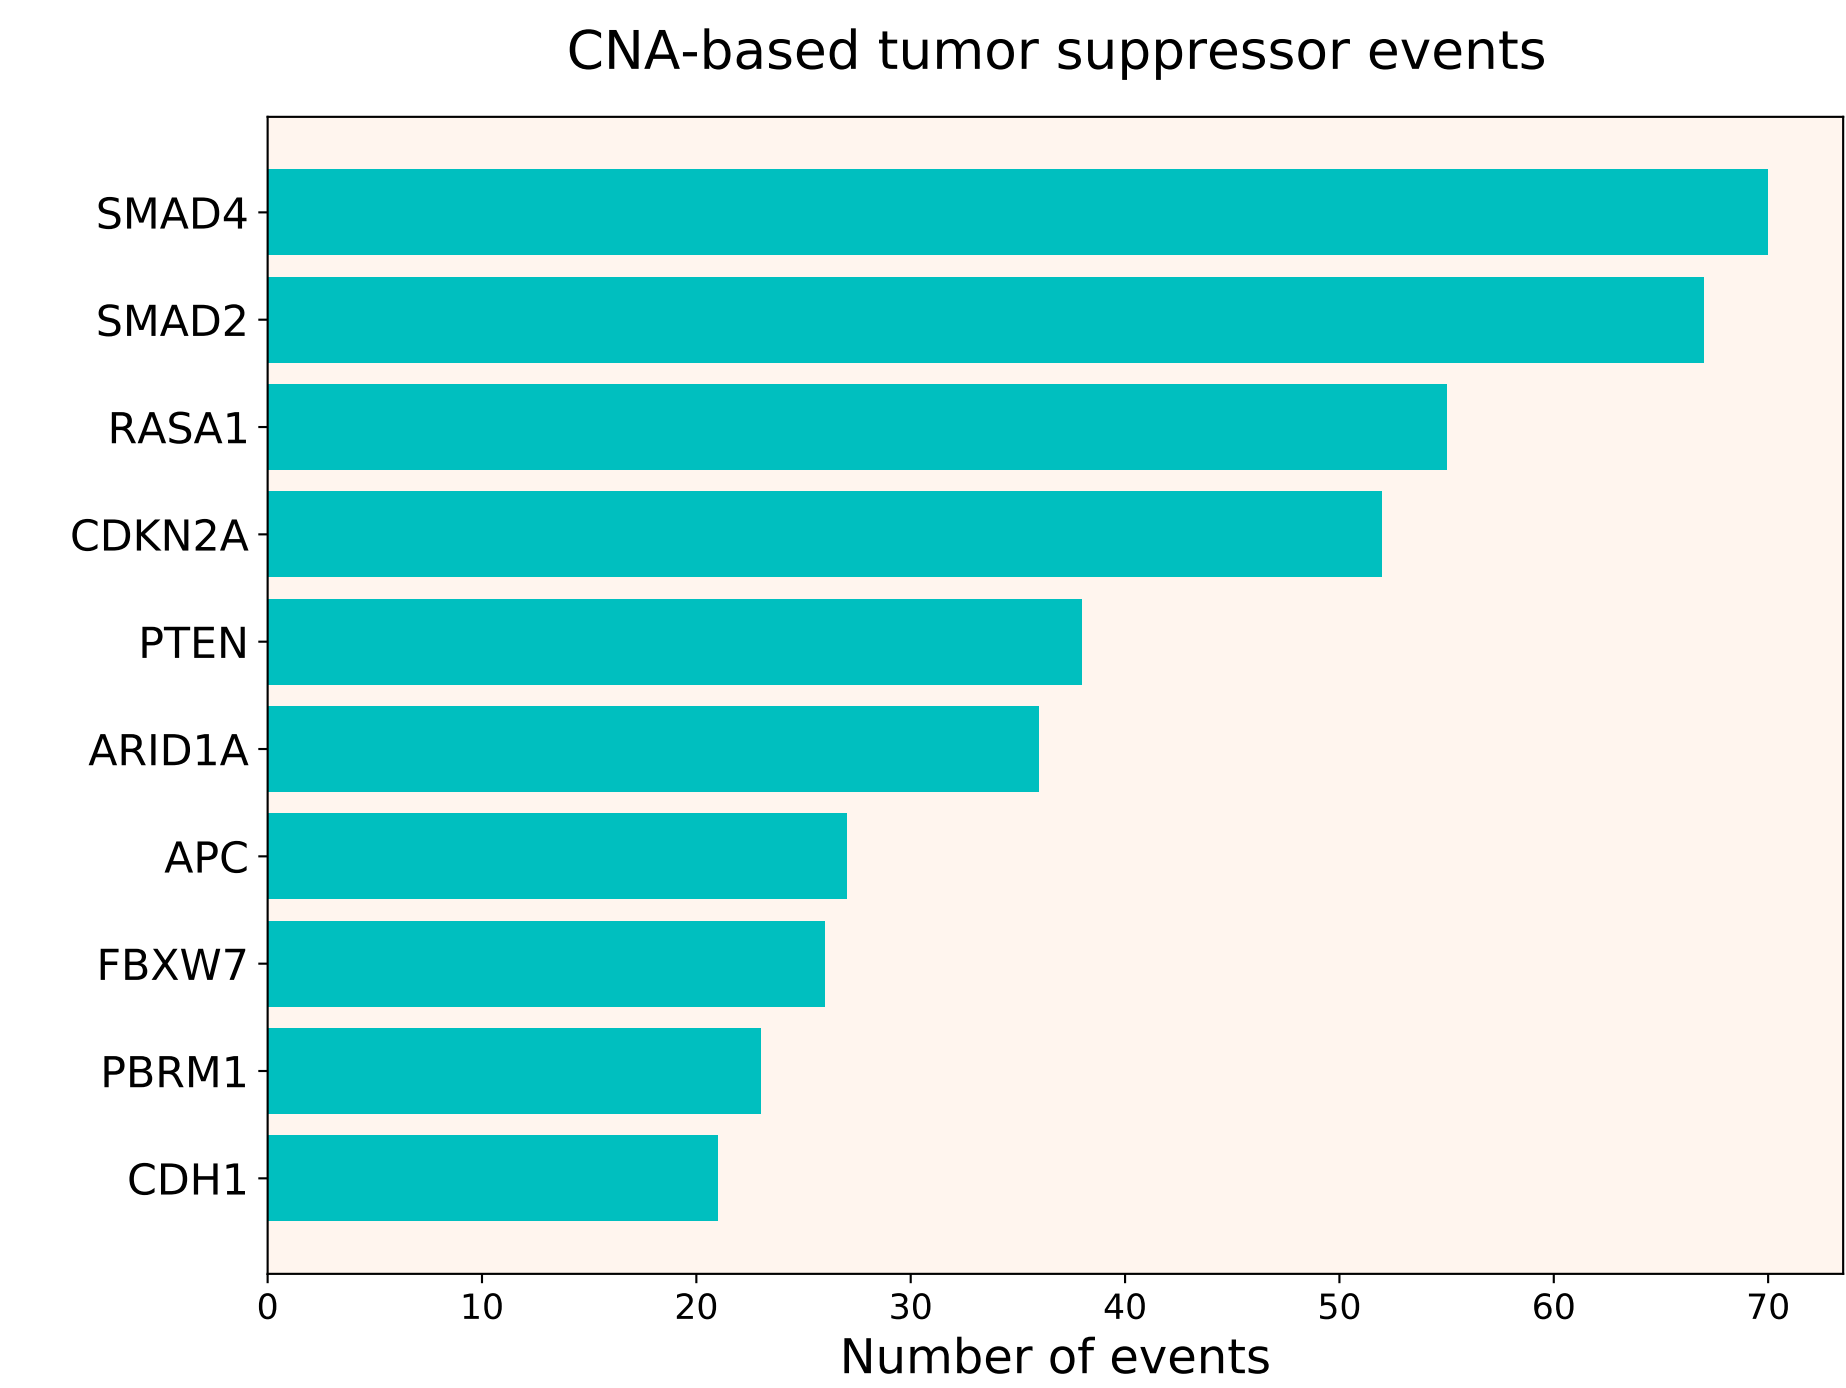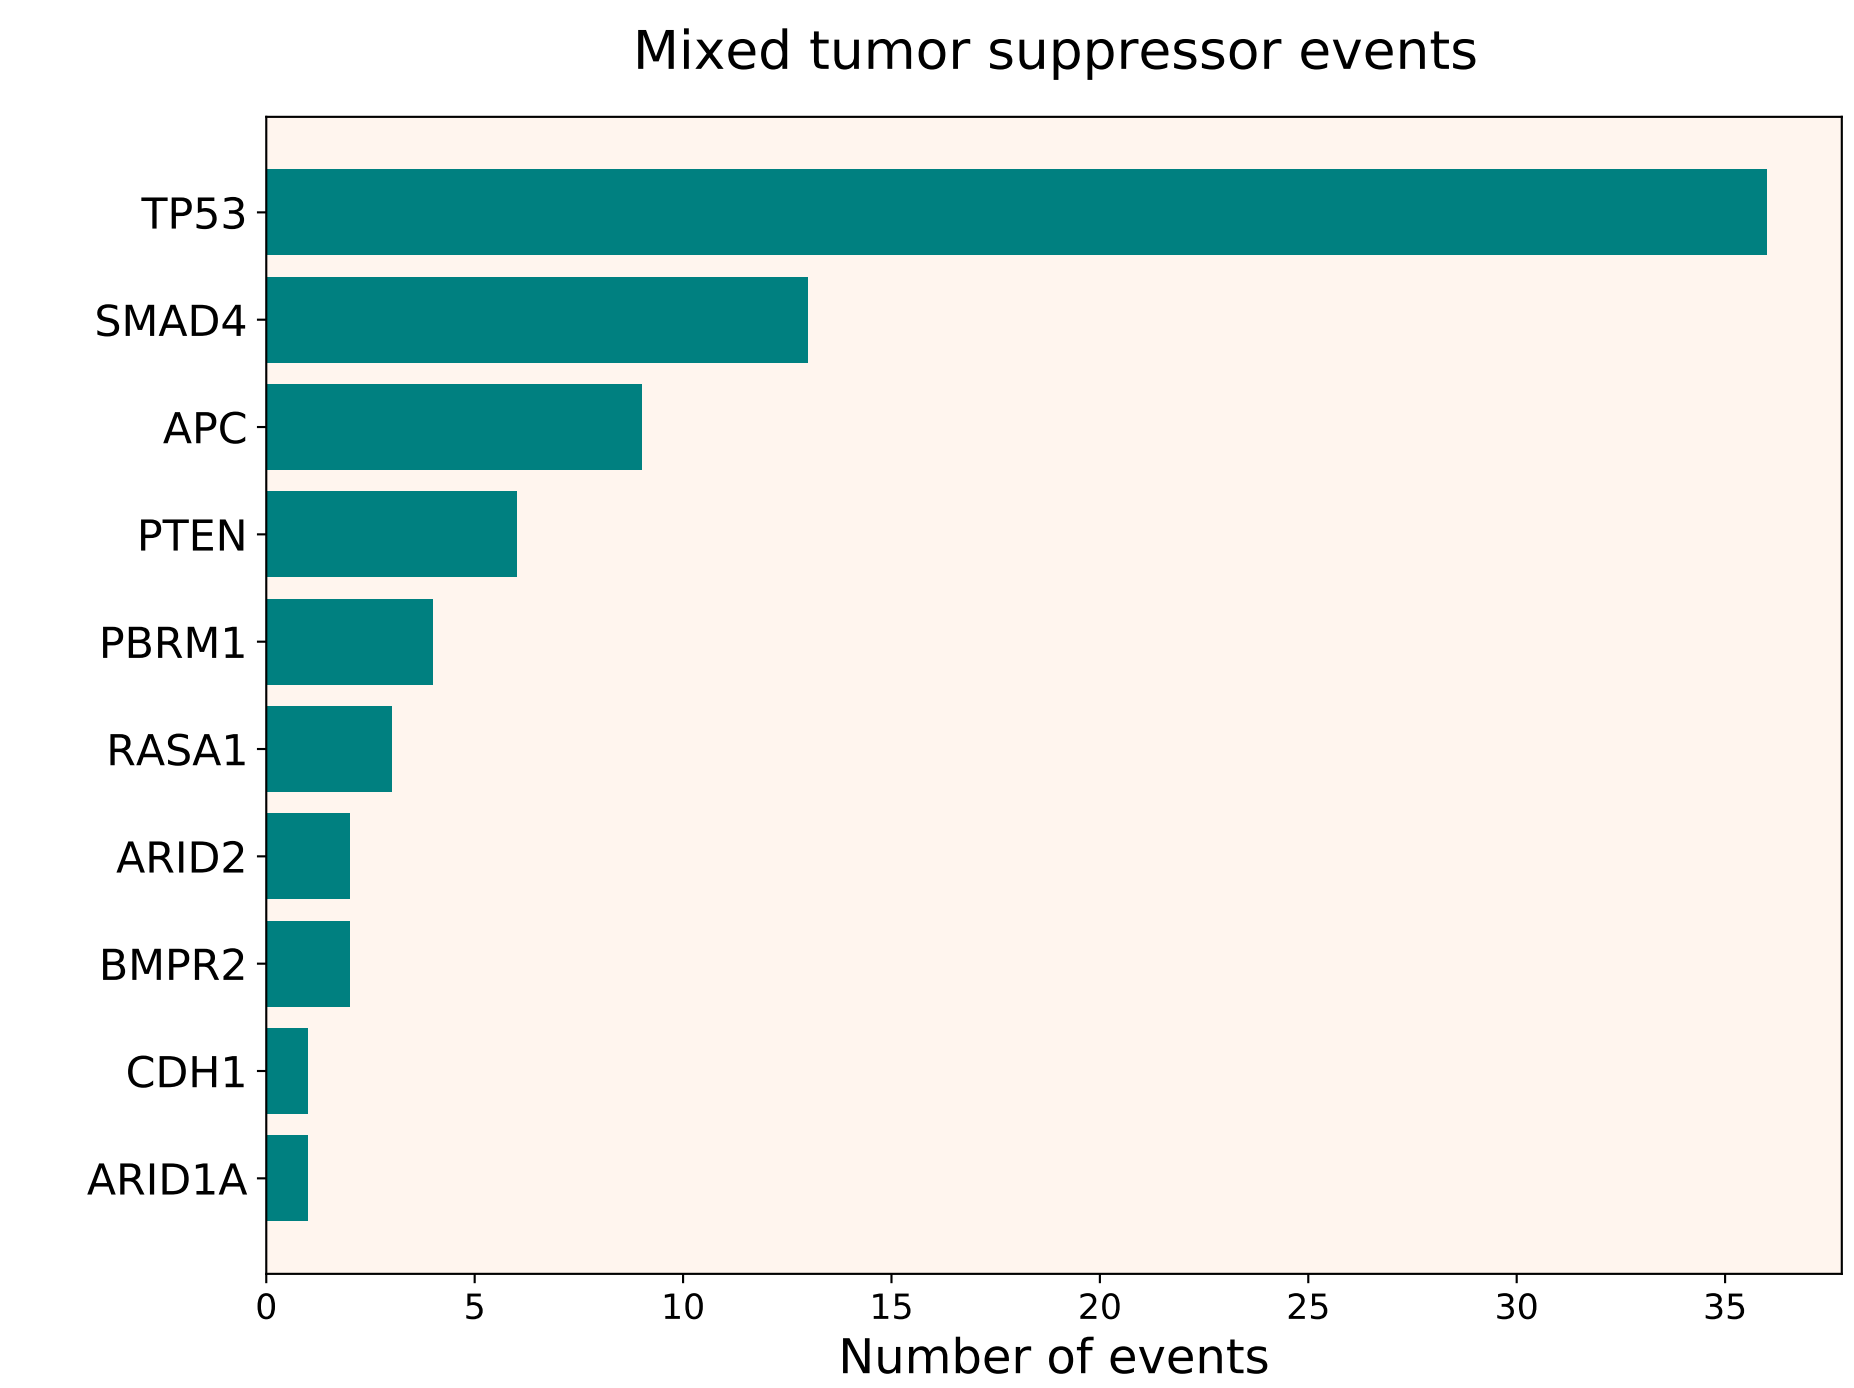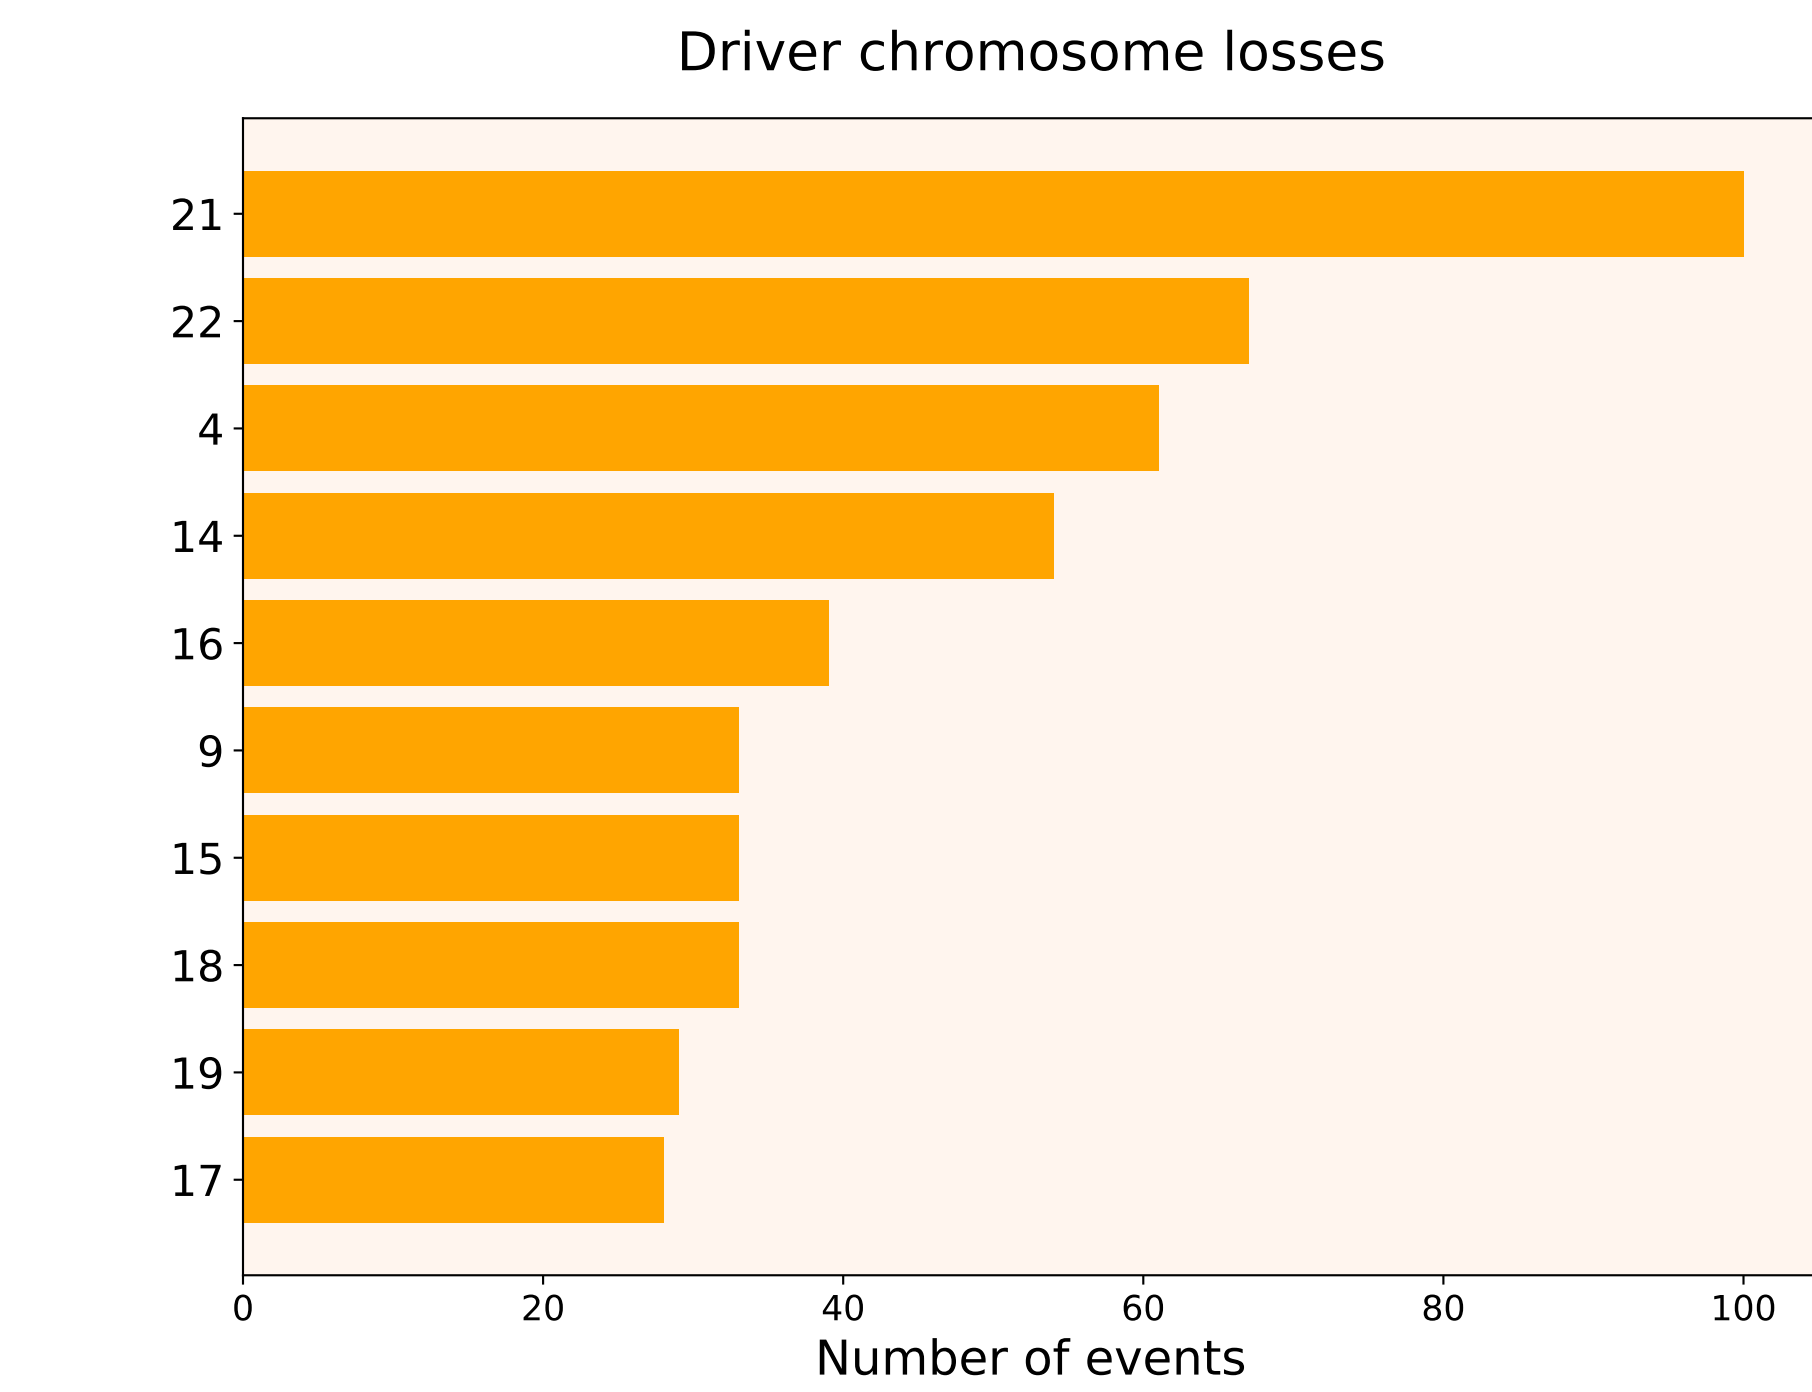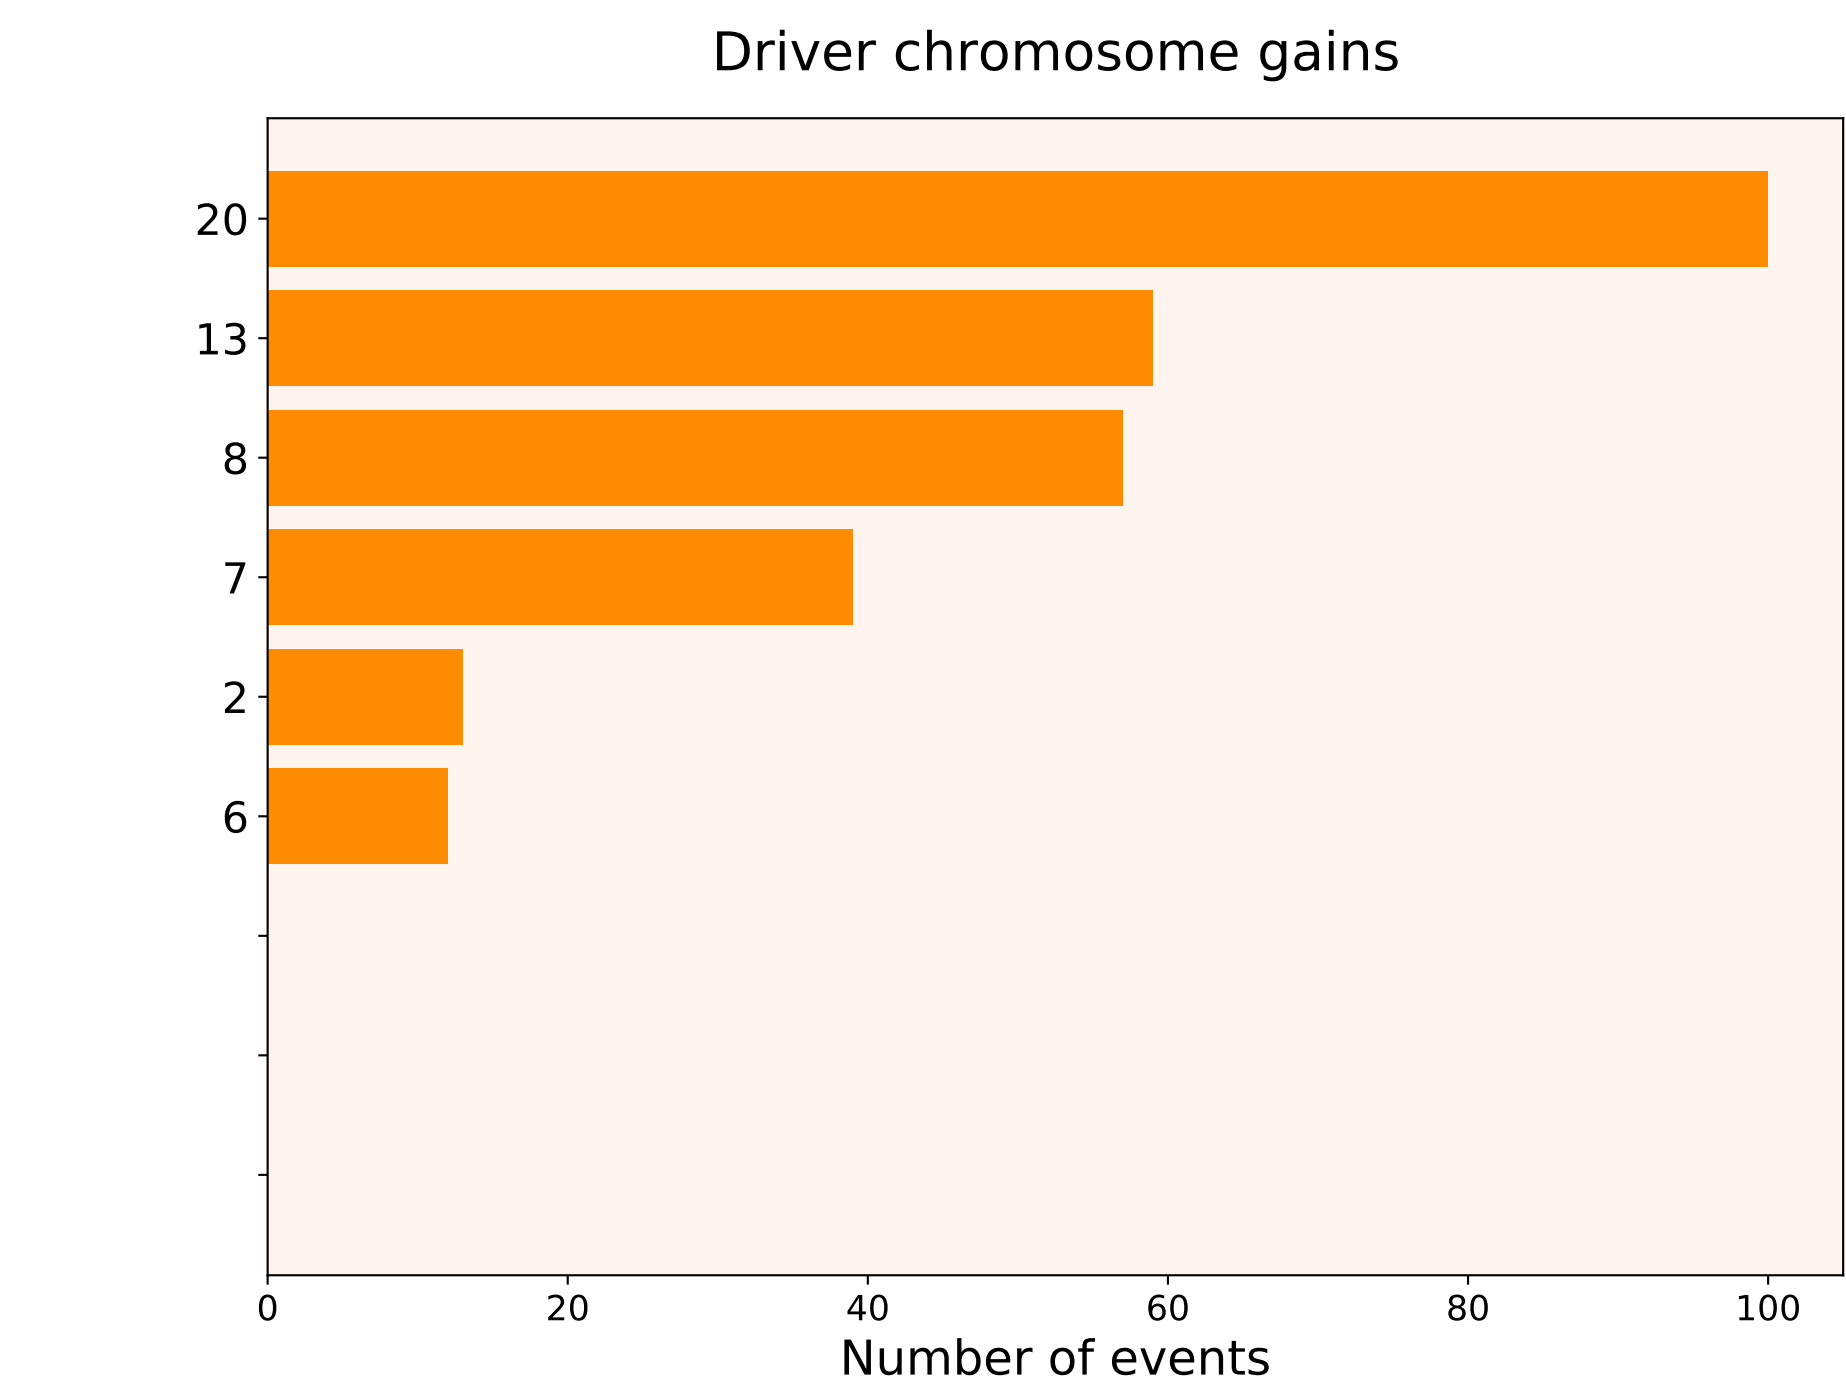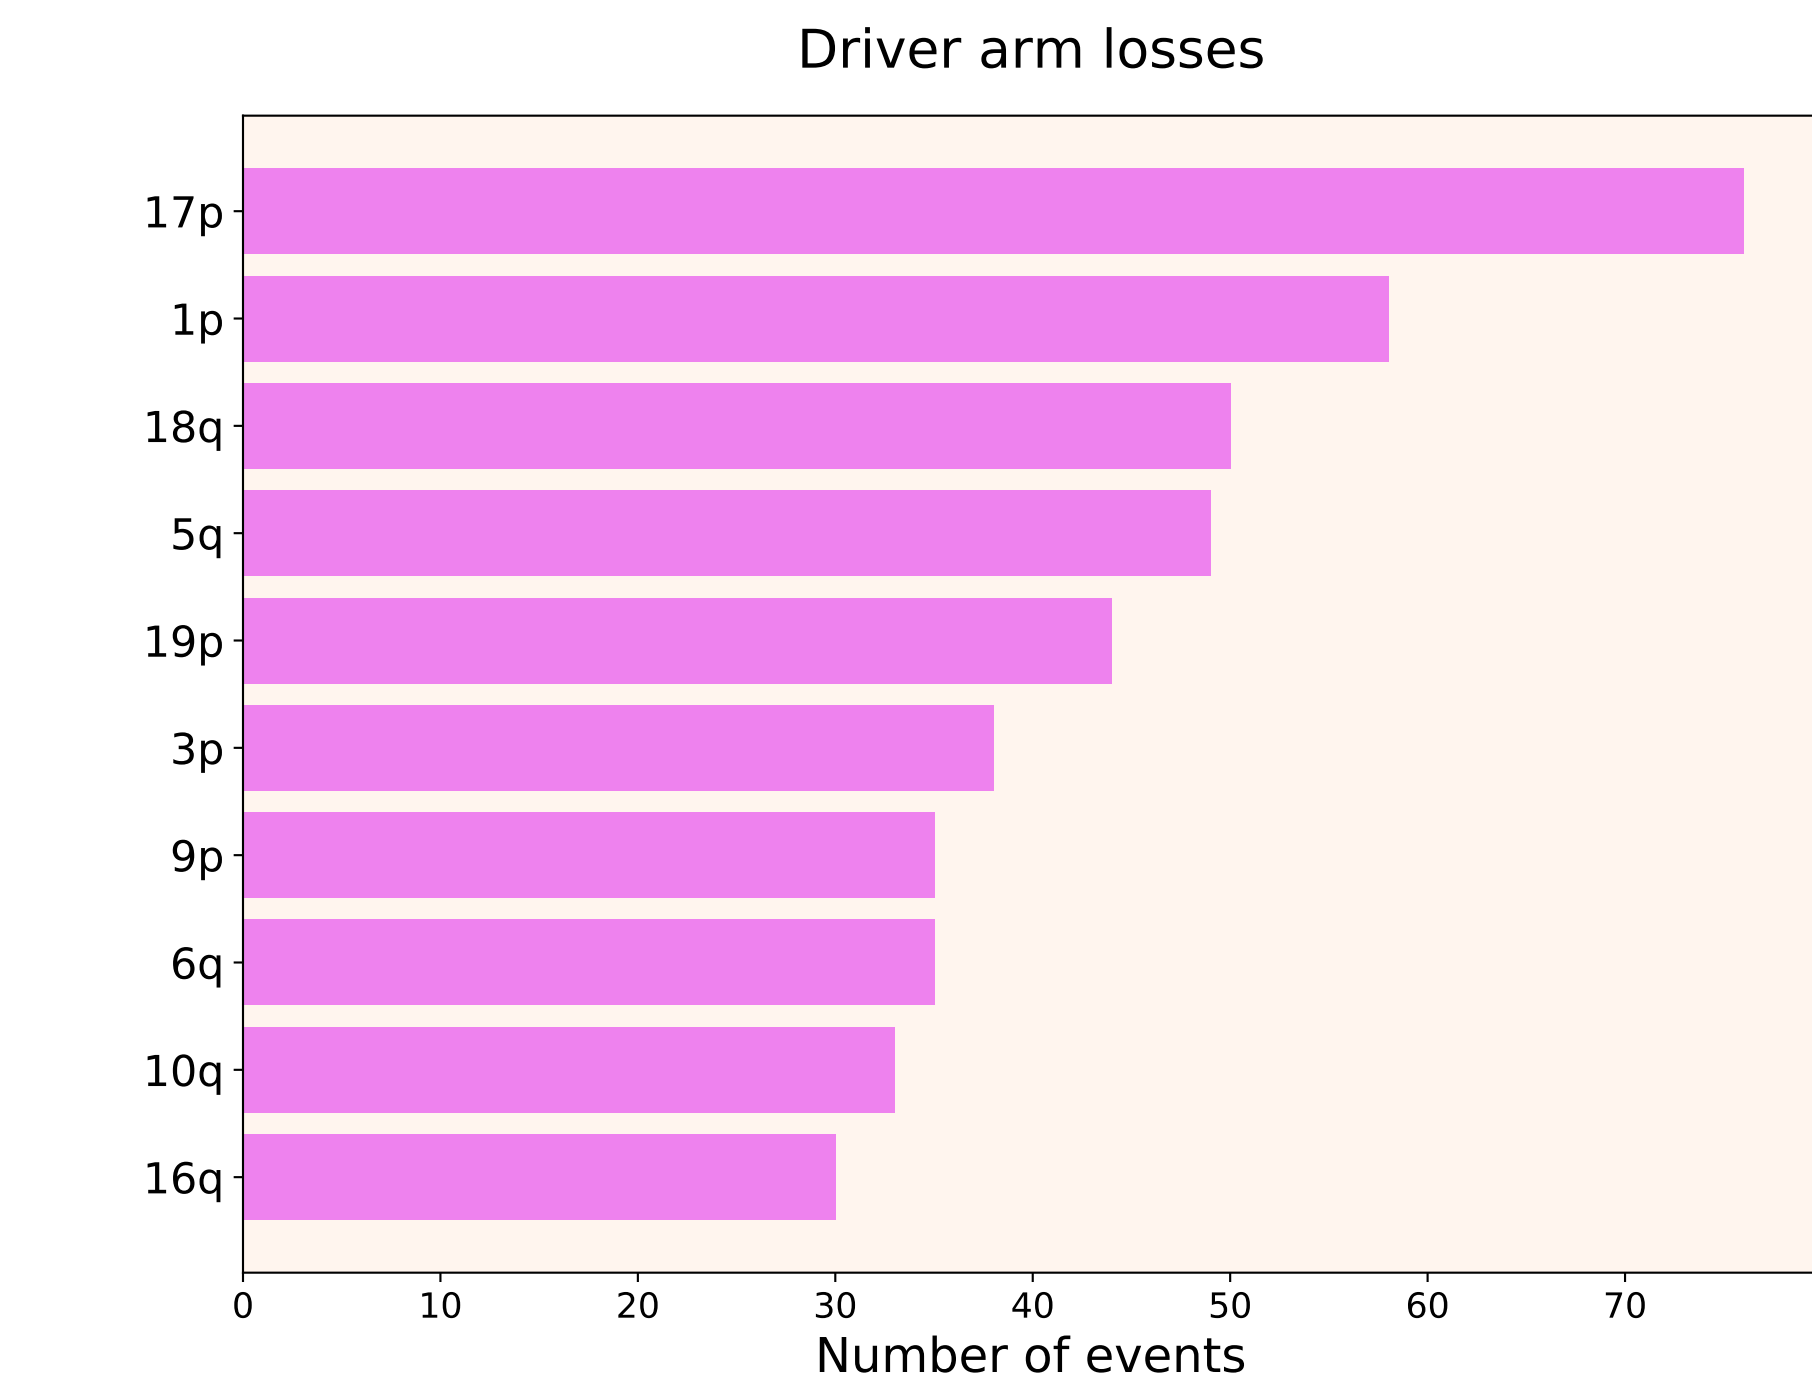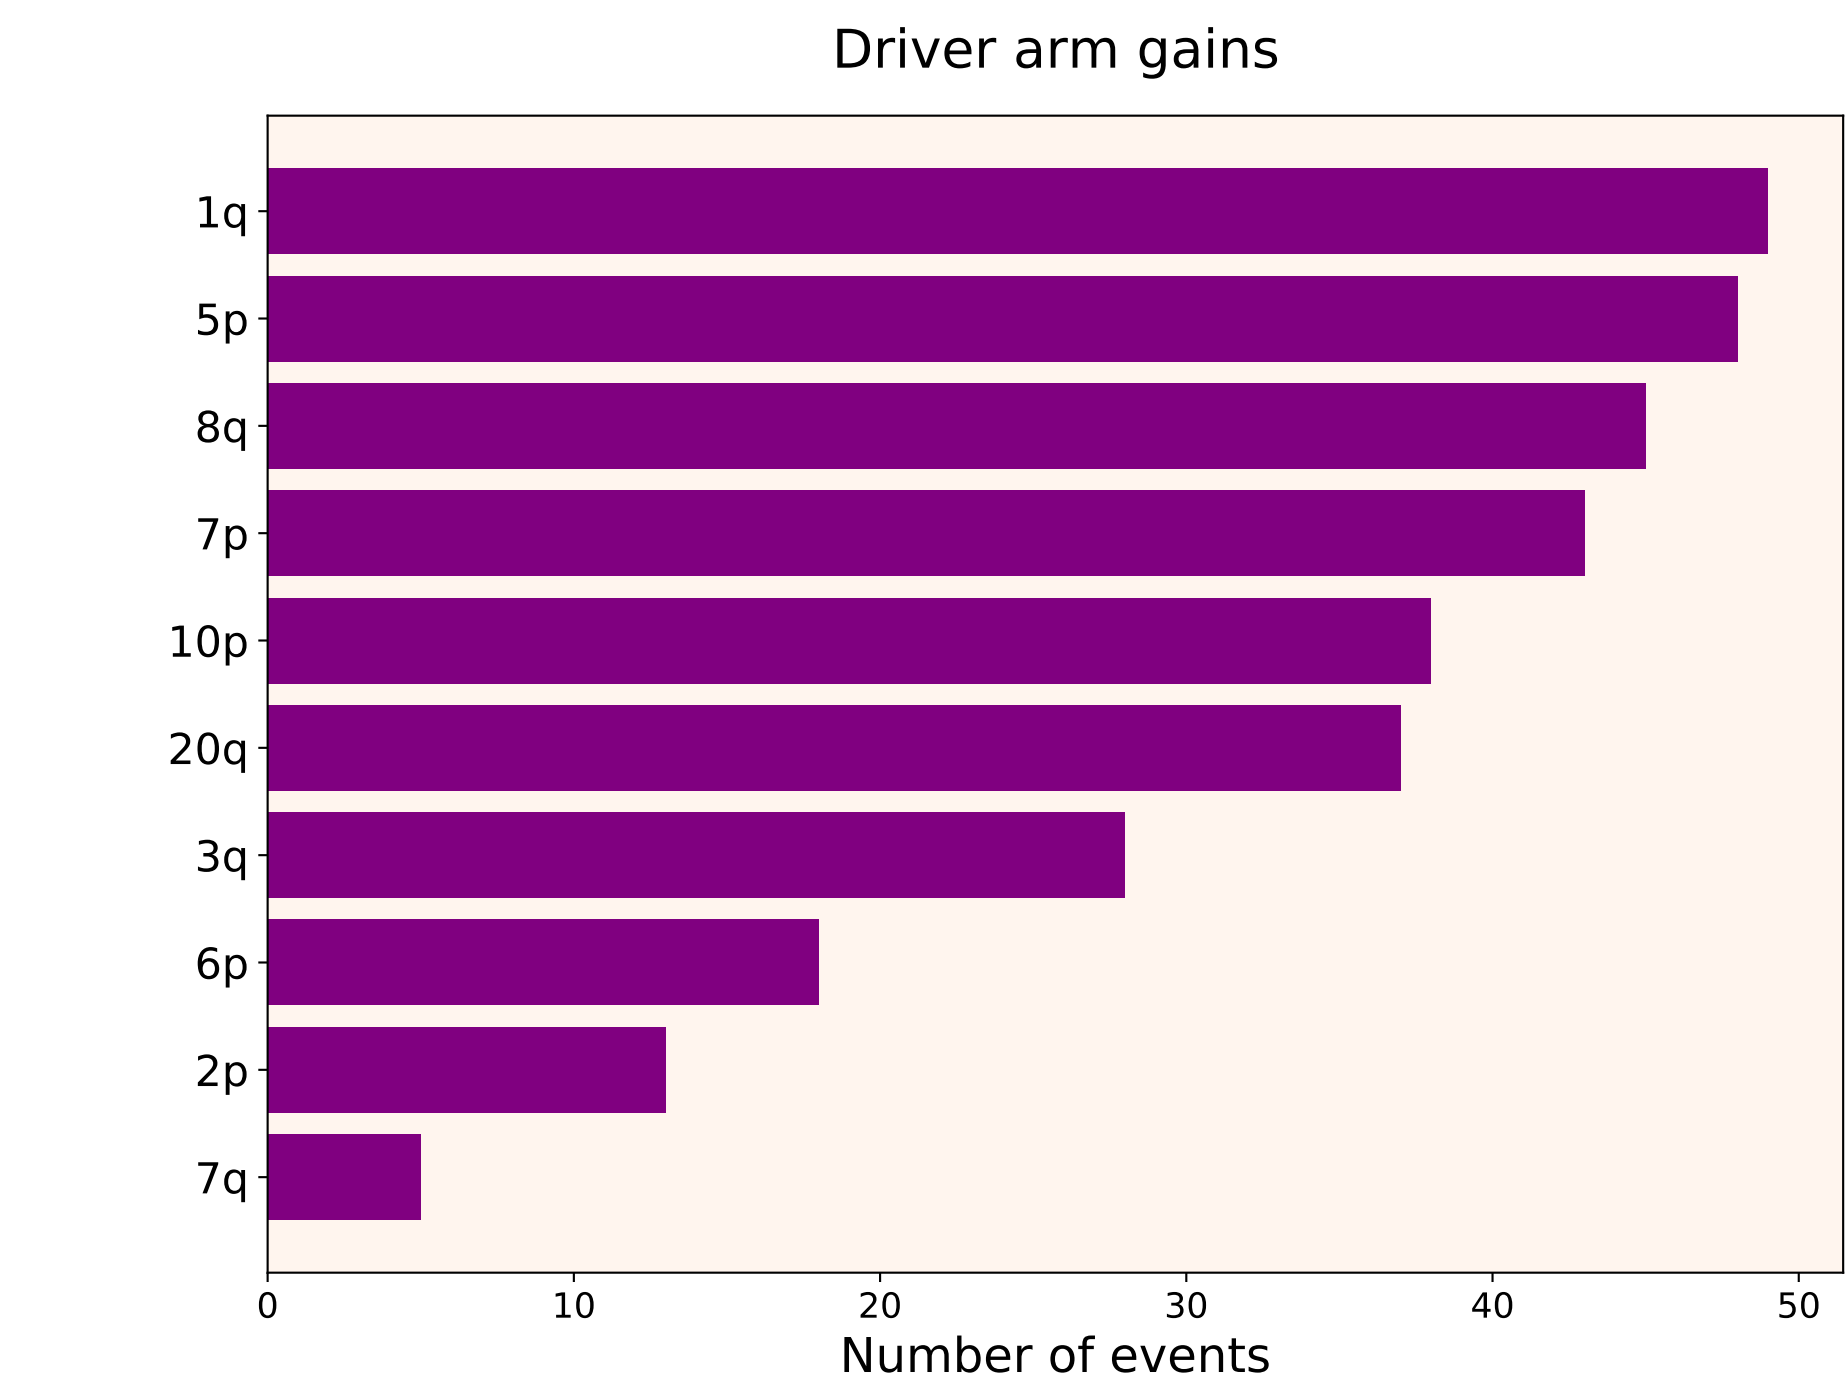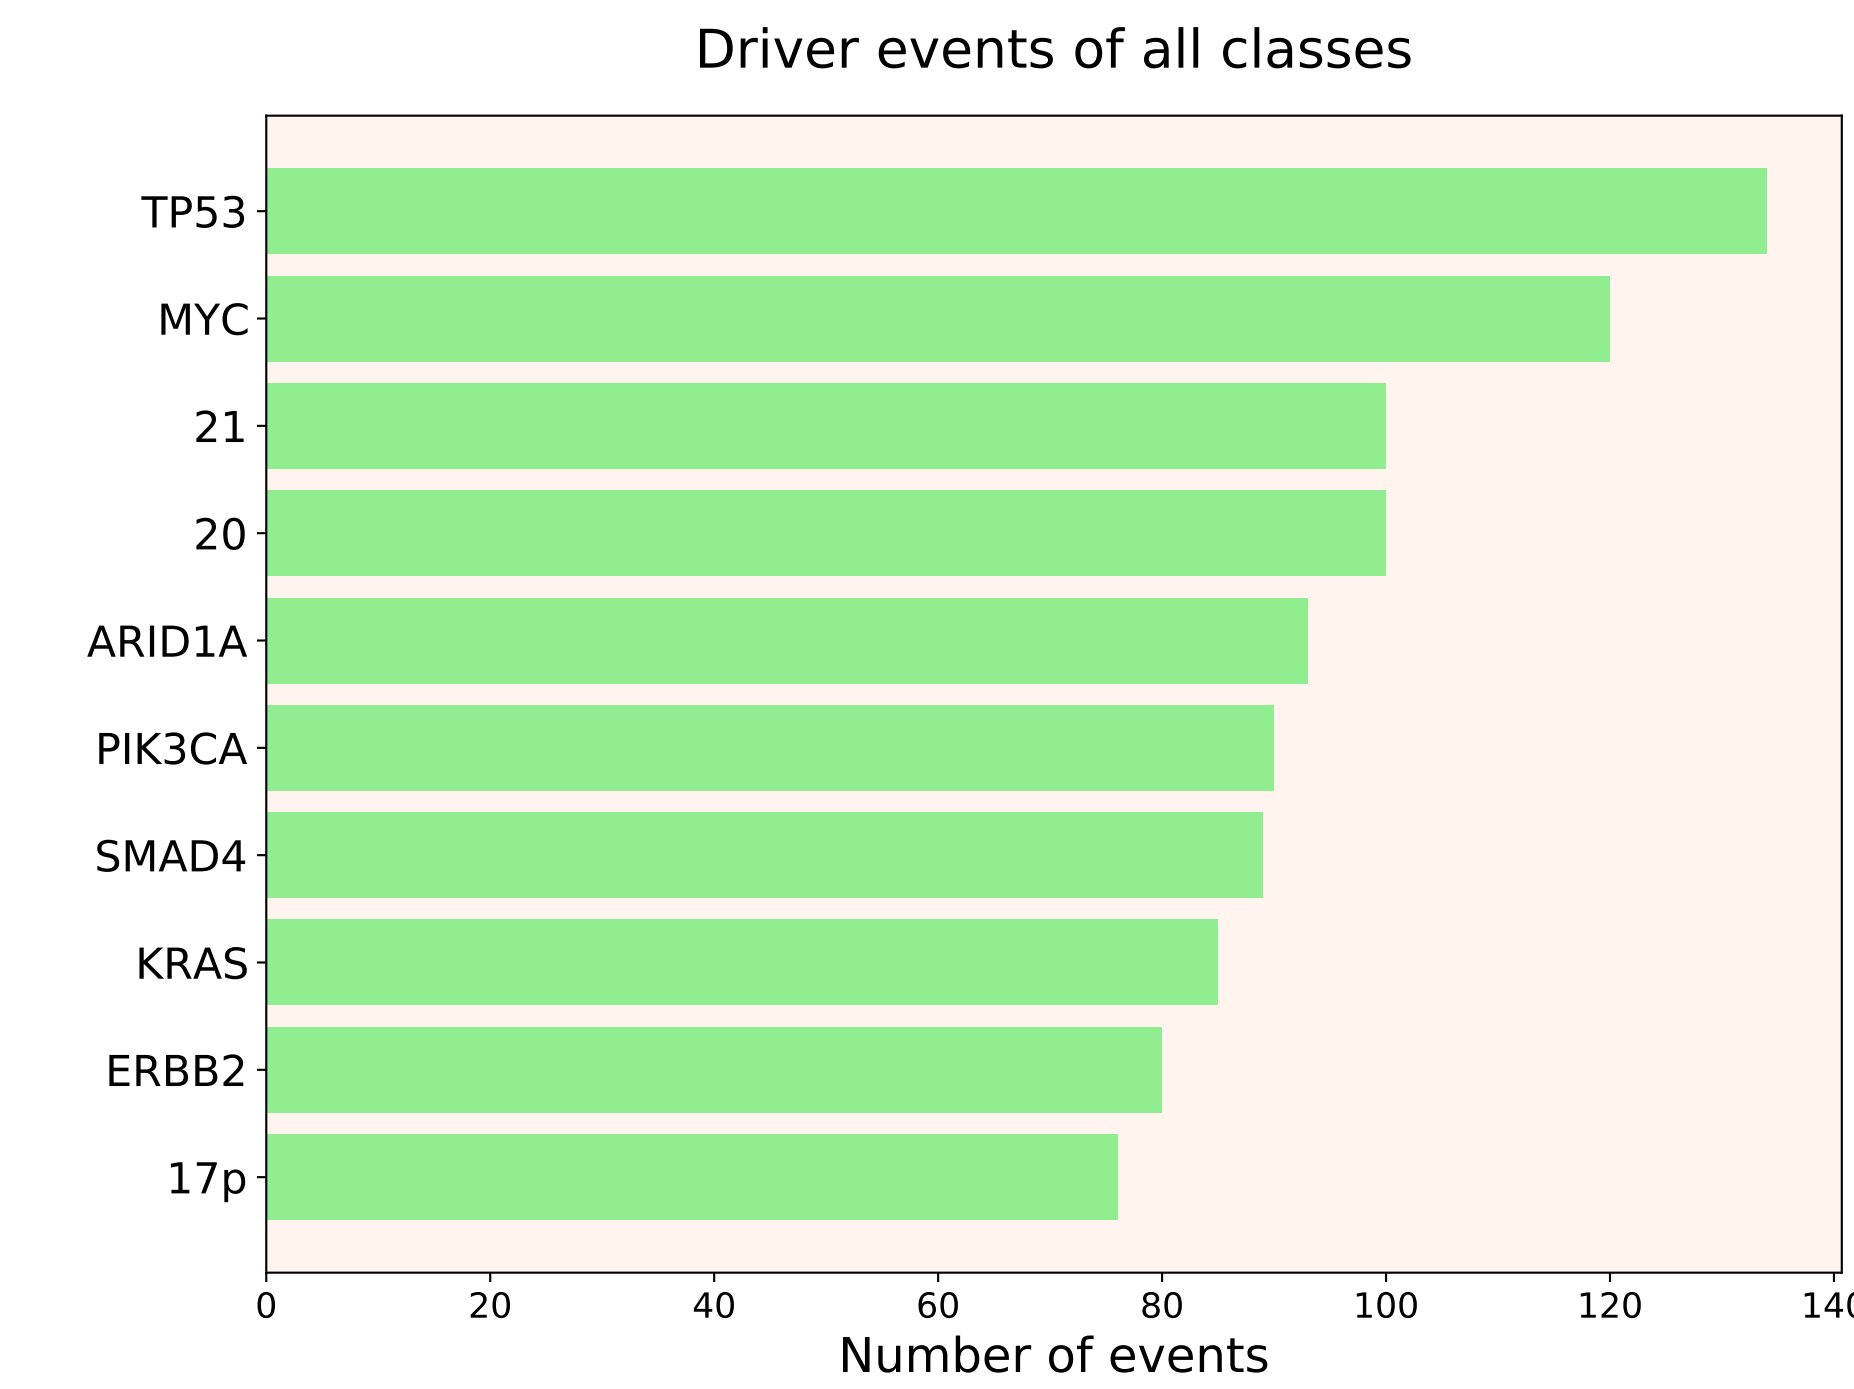

Supplement: Supplemental_Data_S1.zip [file Supplemental_Data_S1.zip]

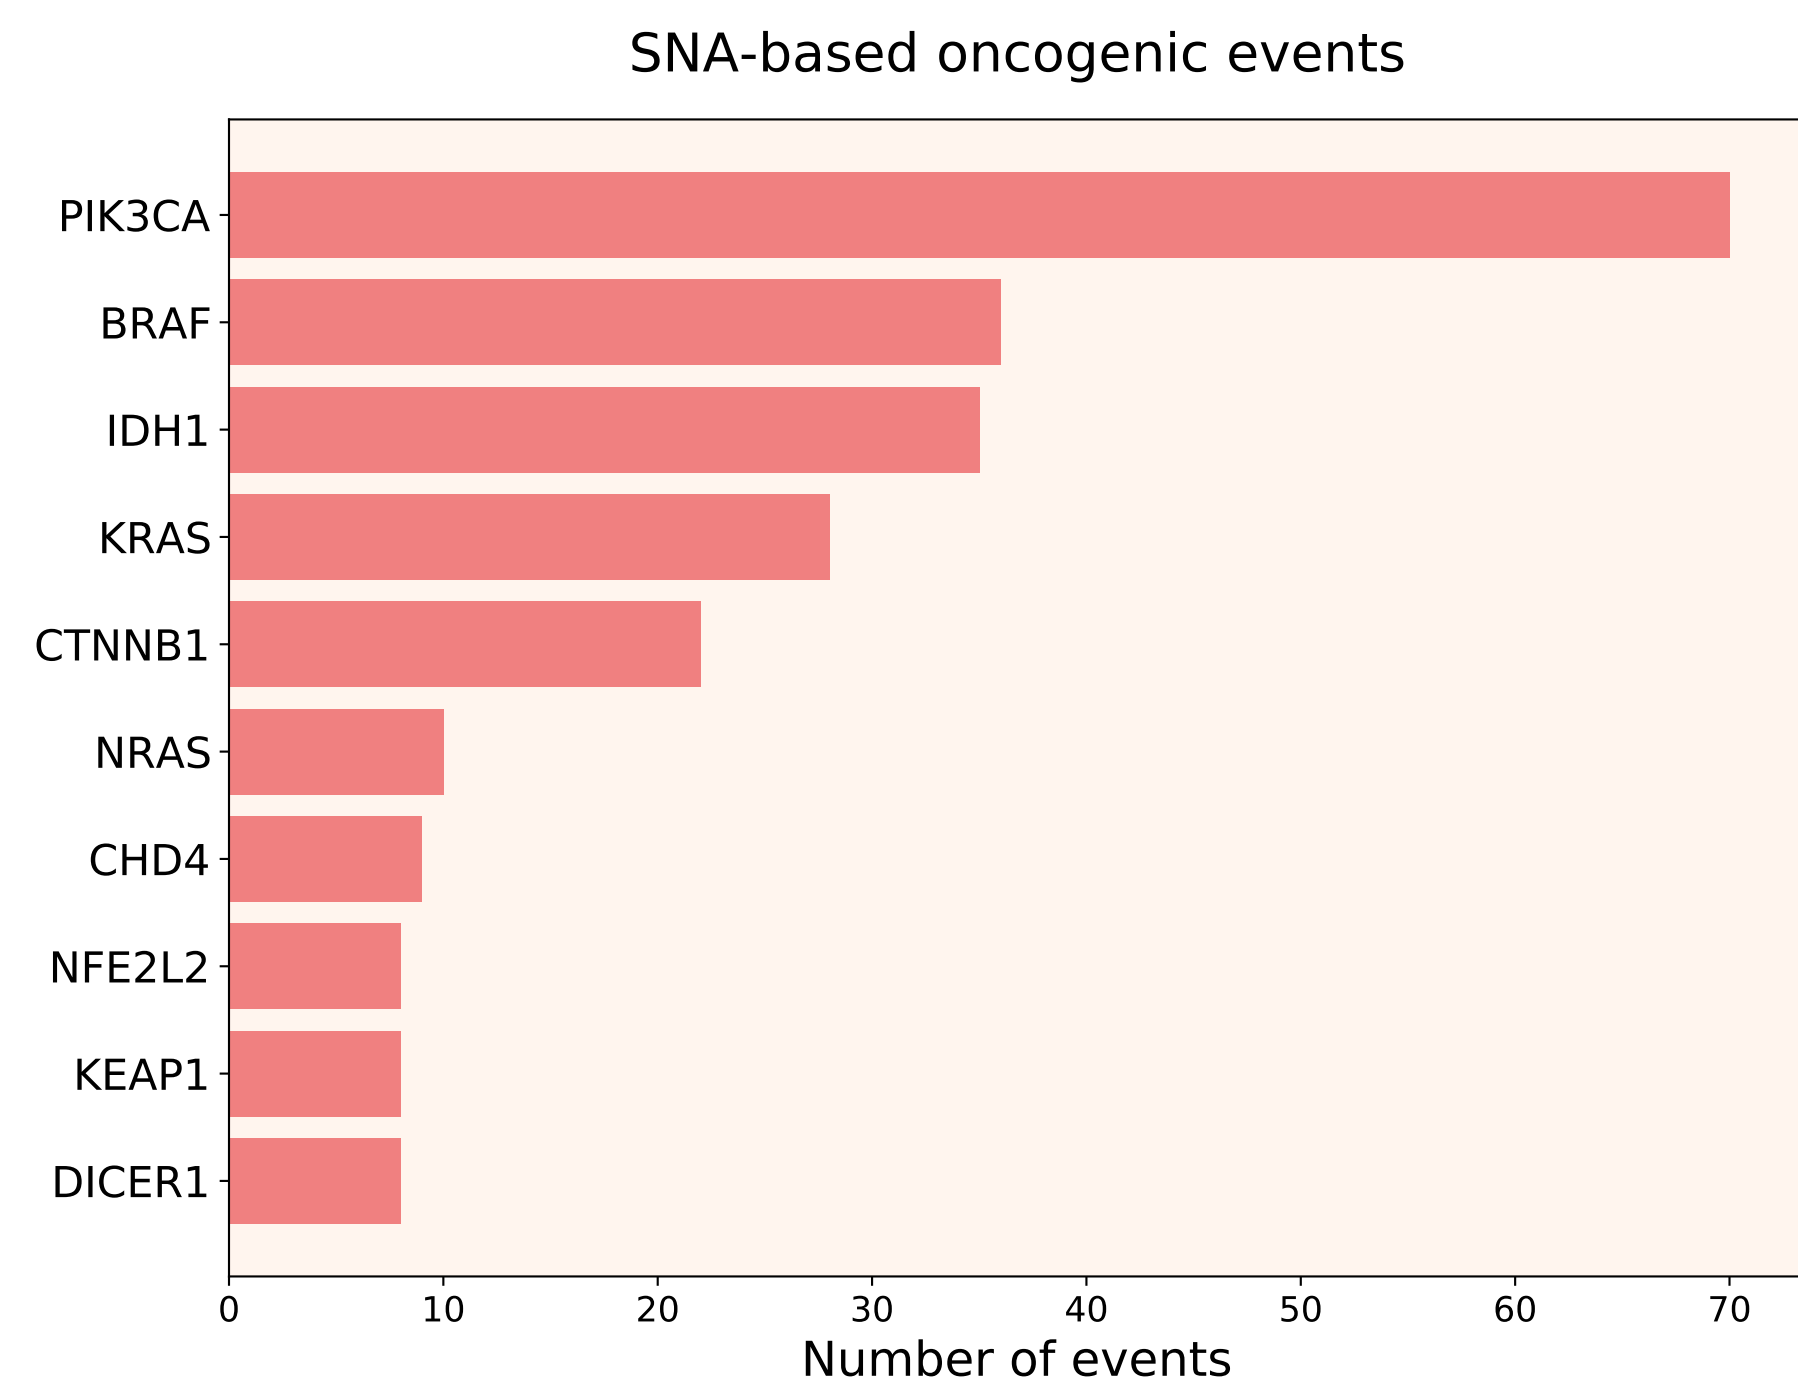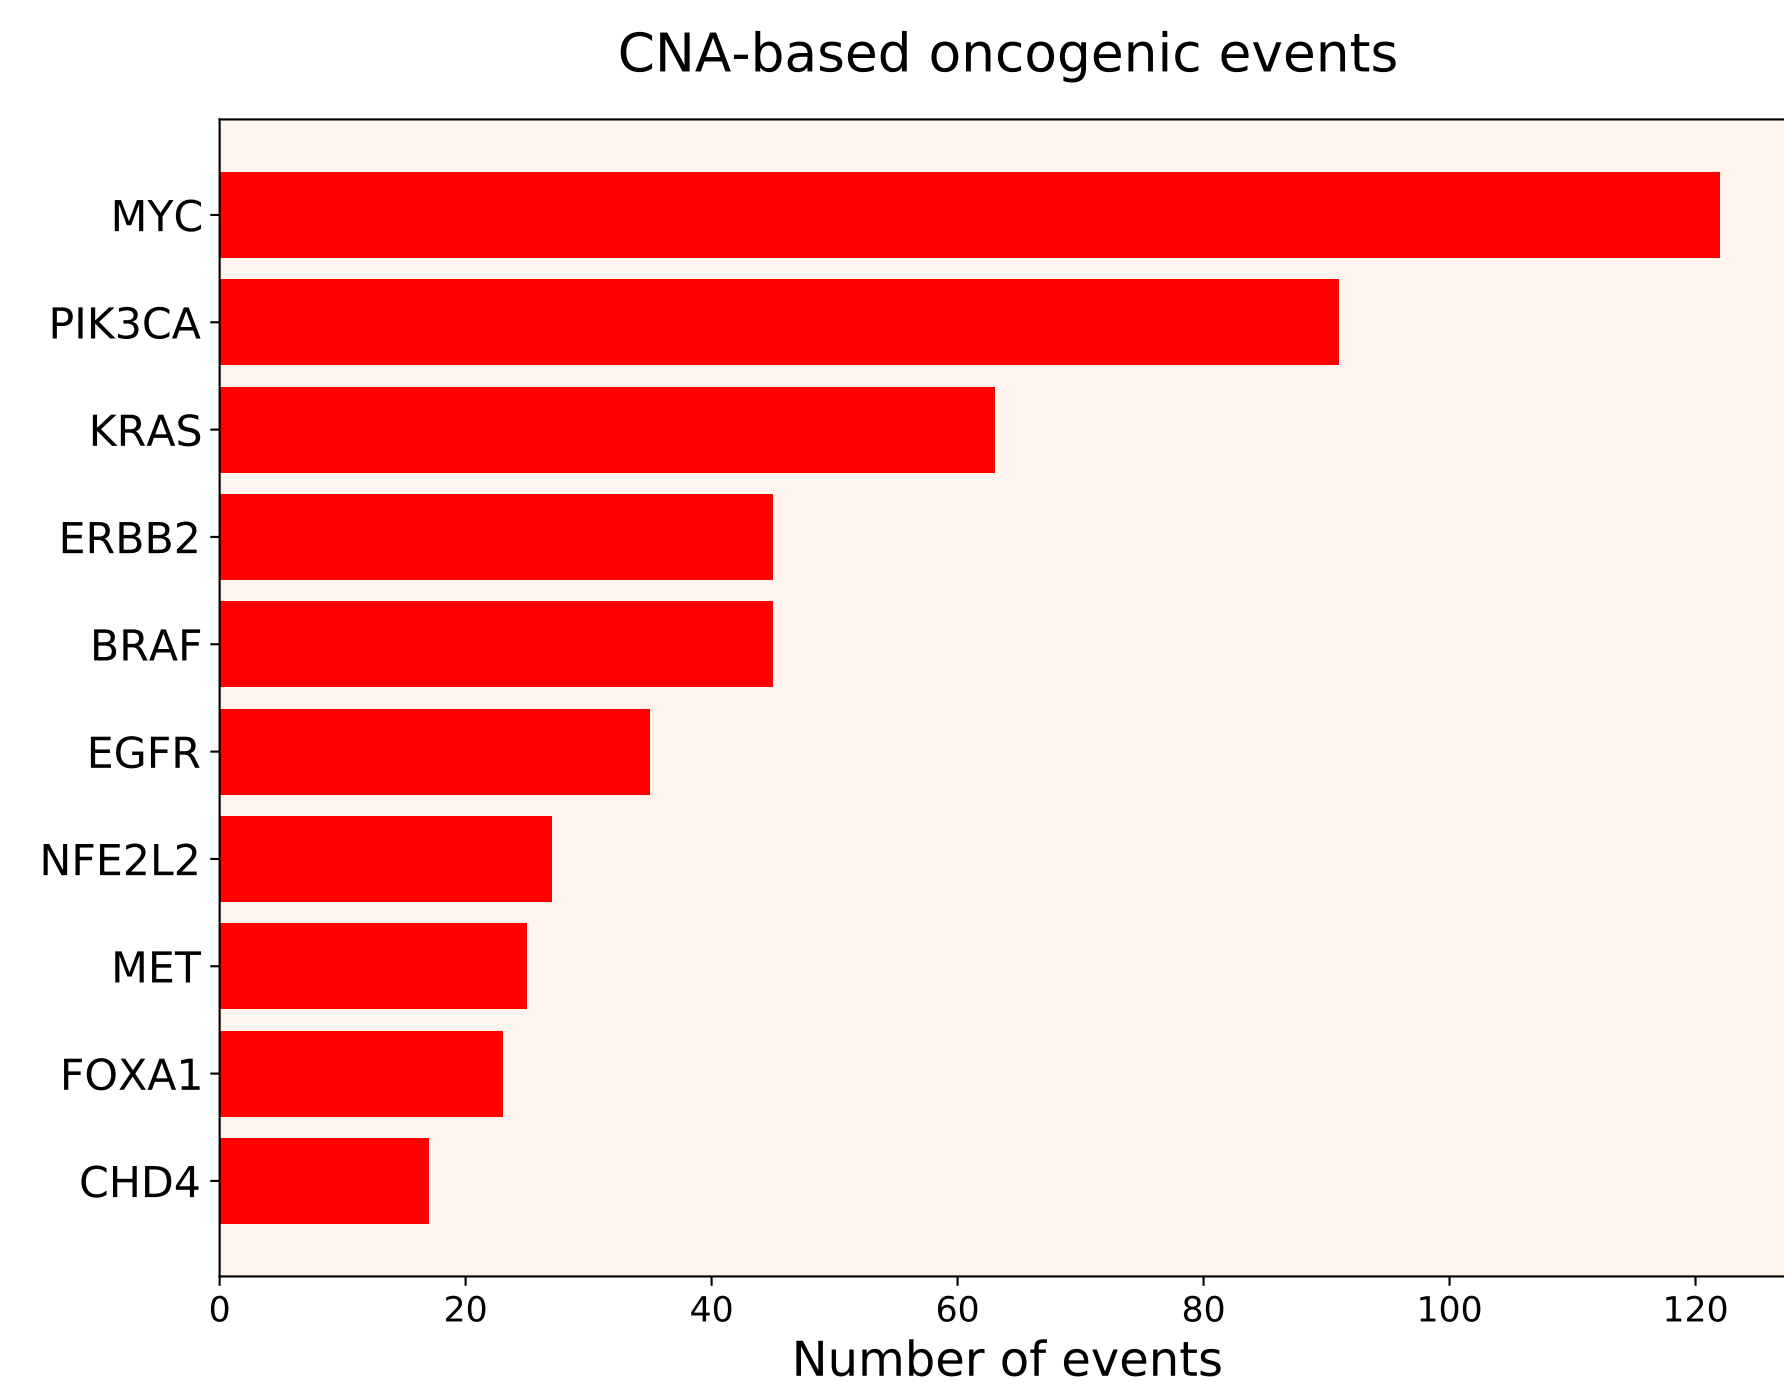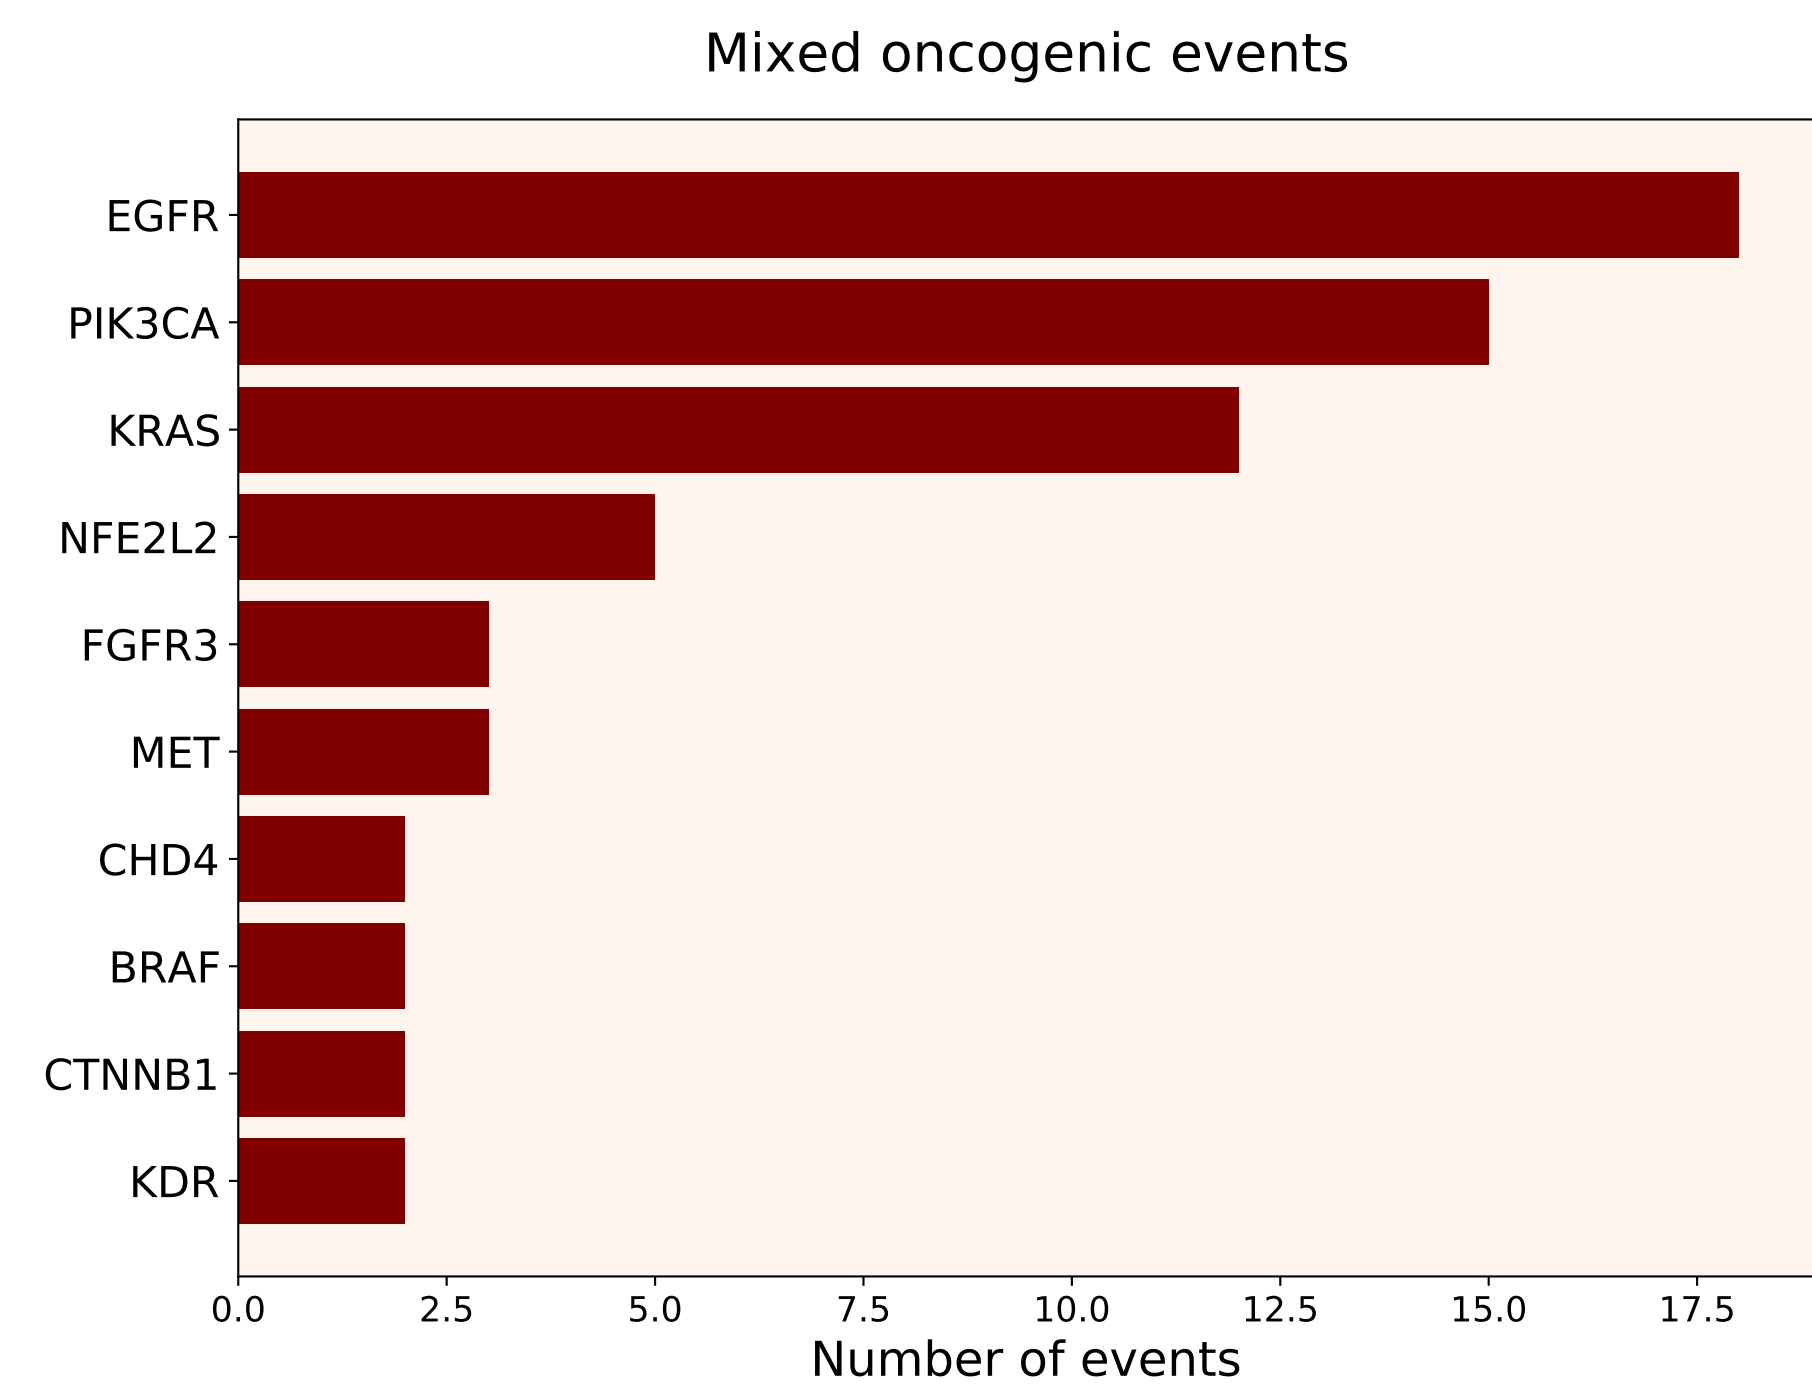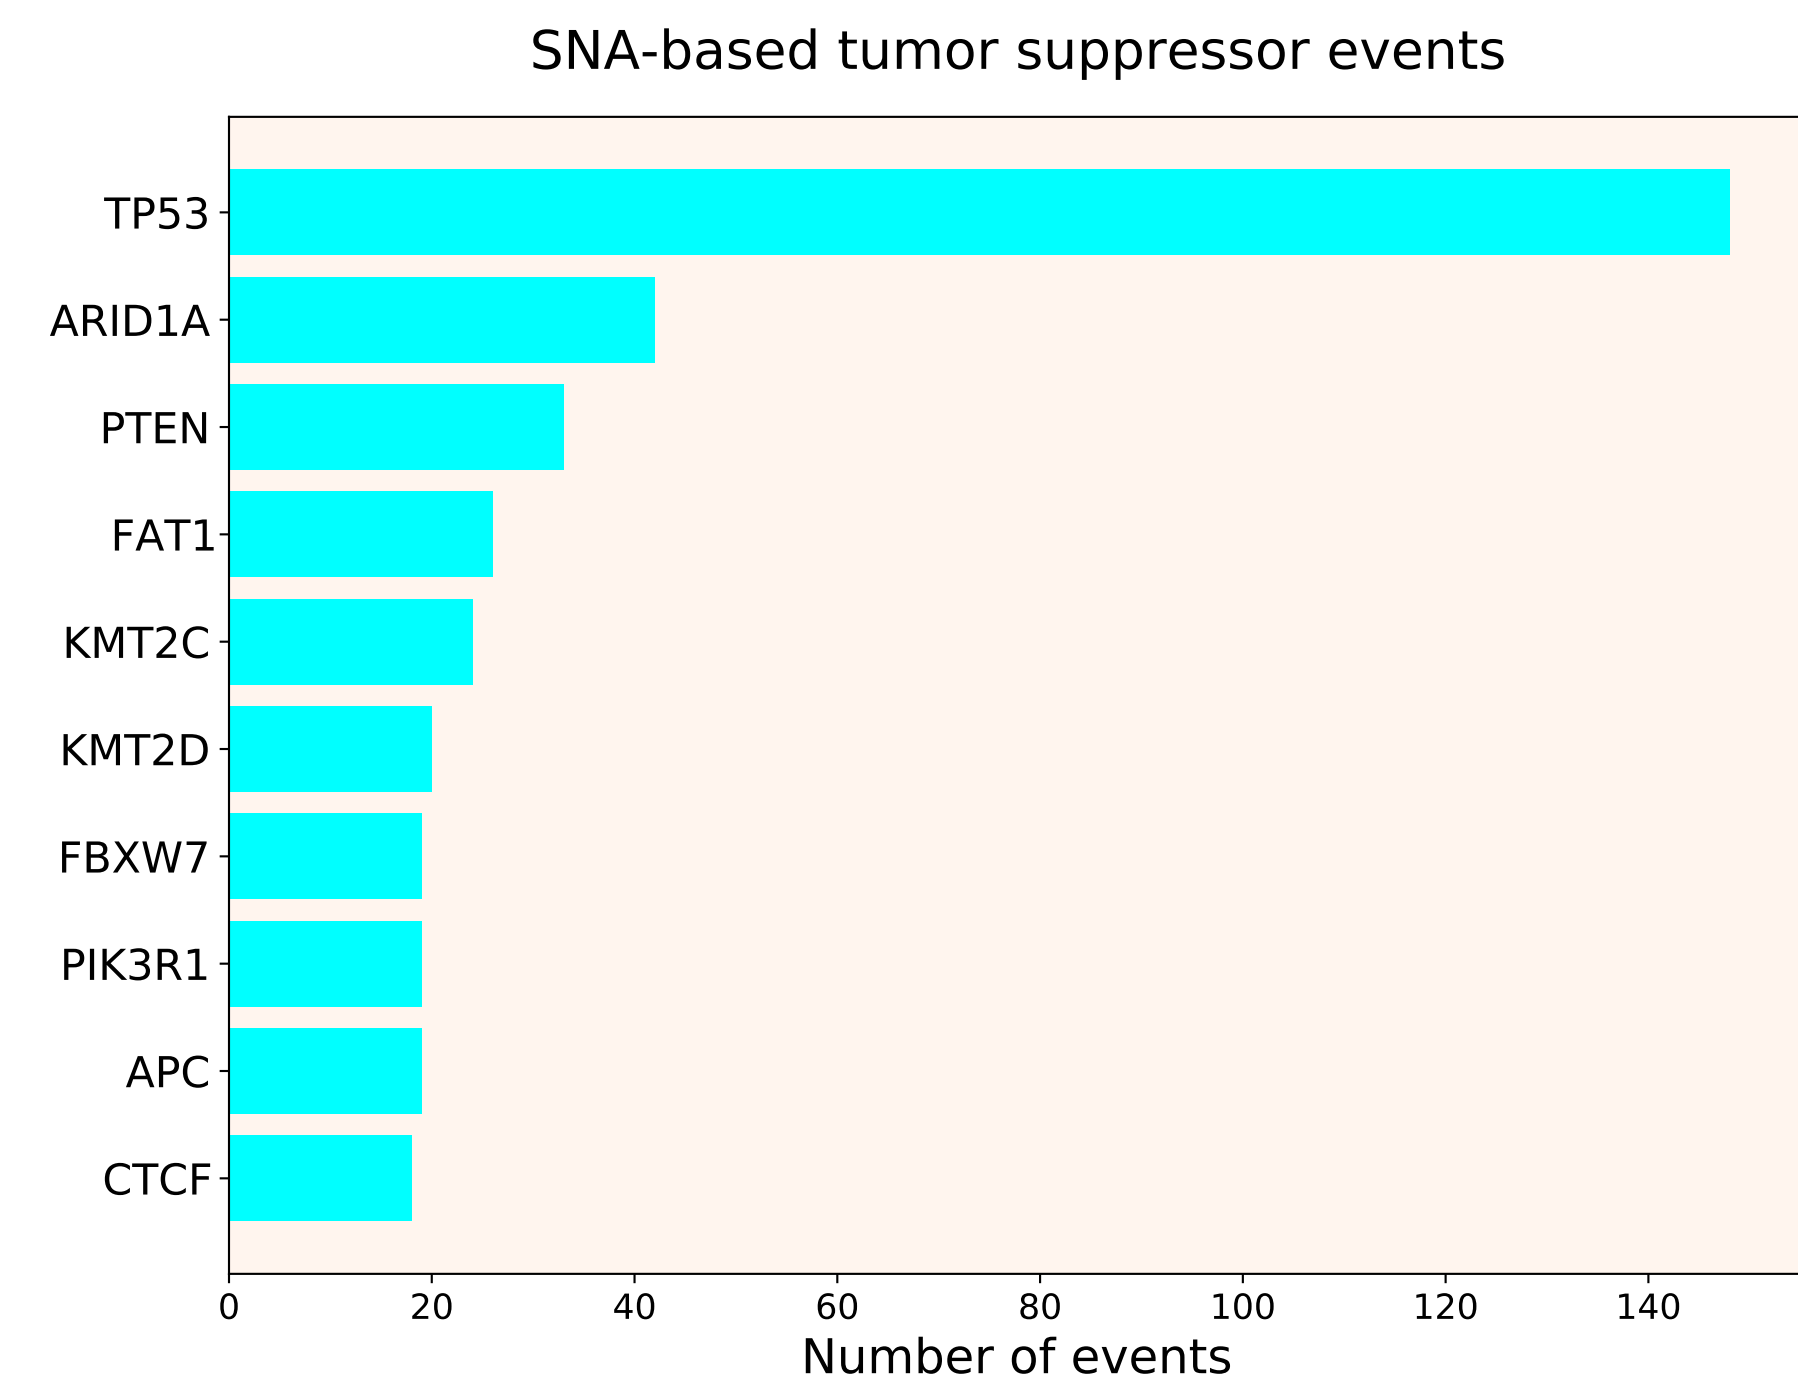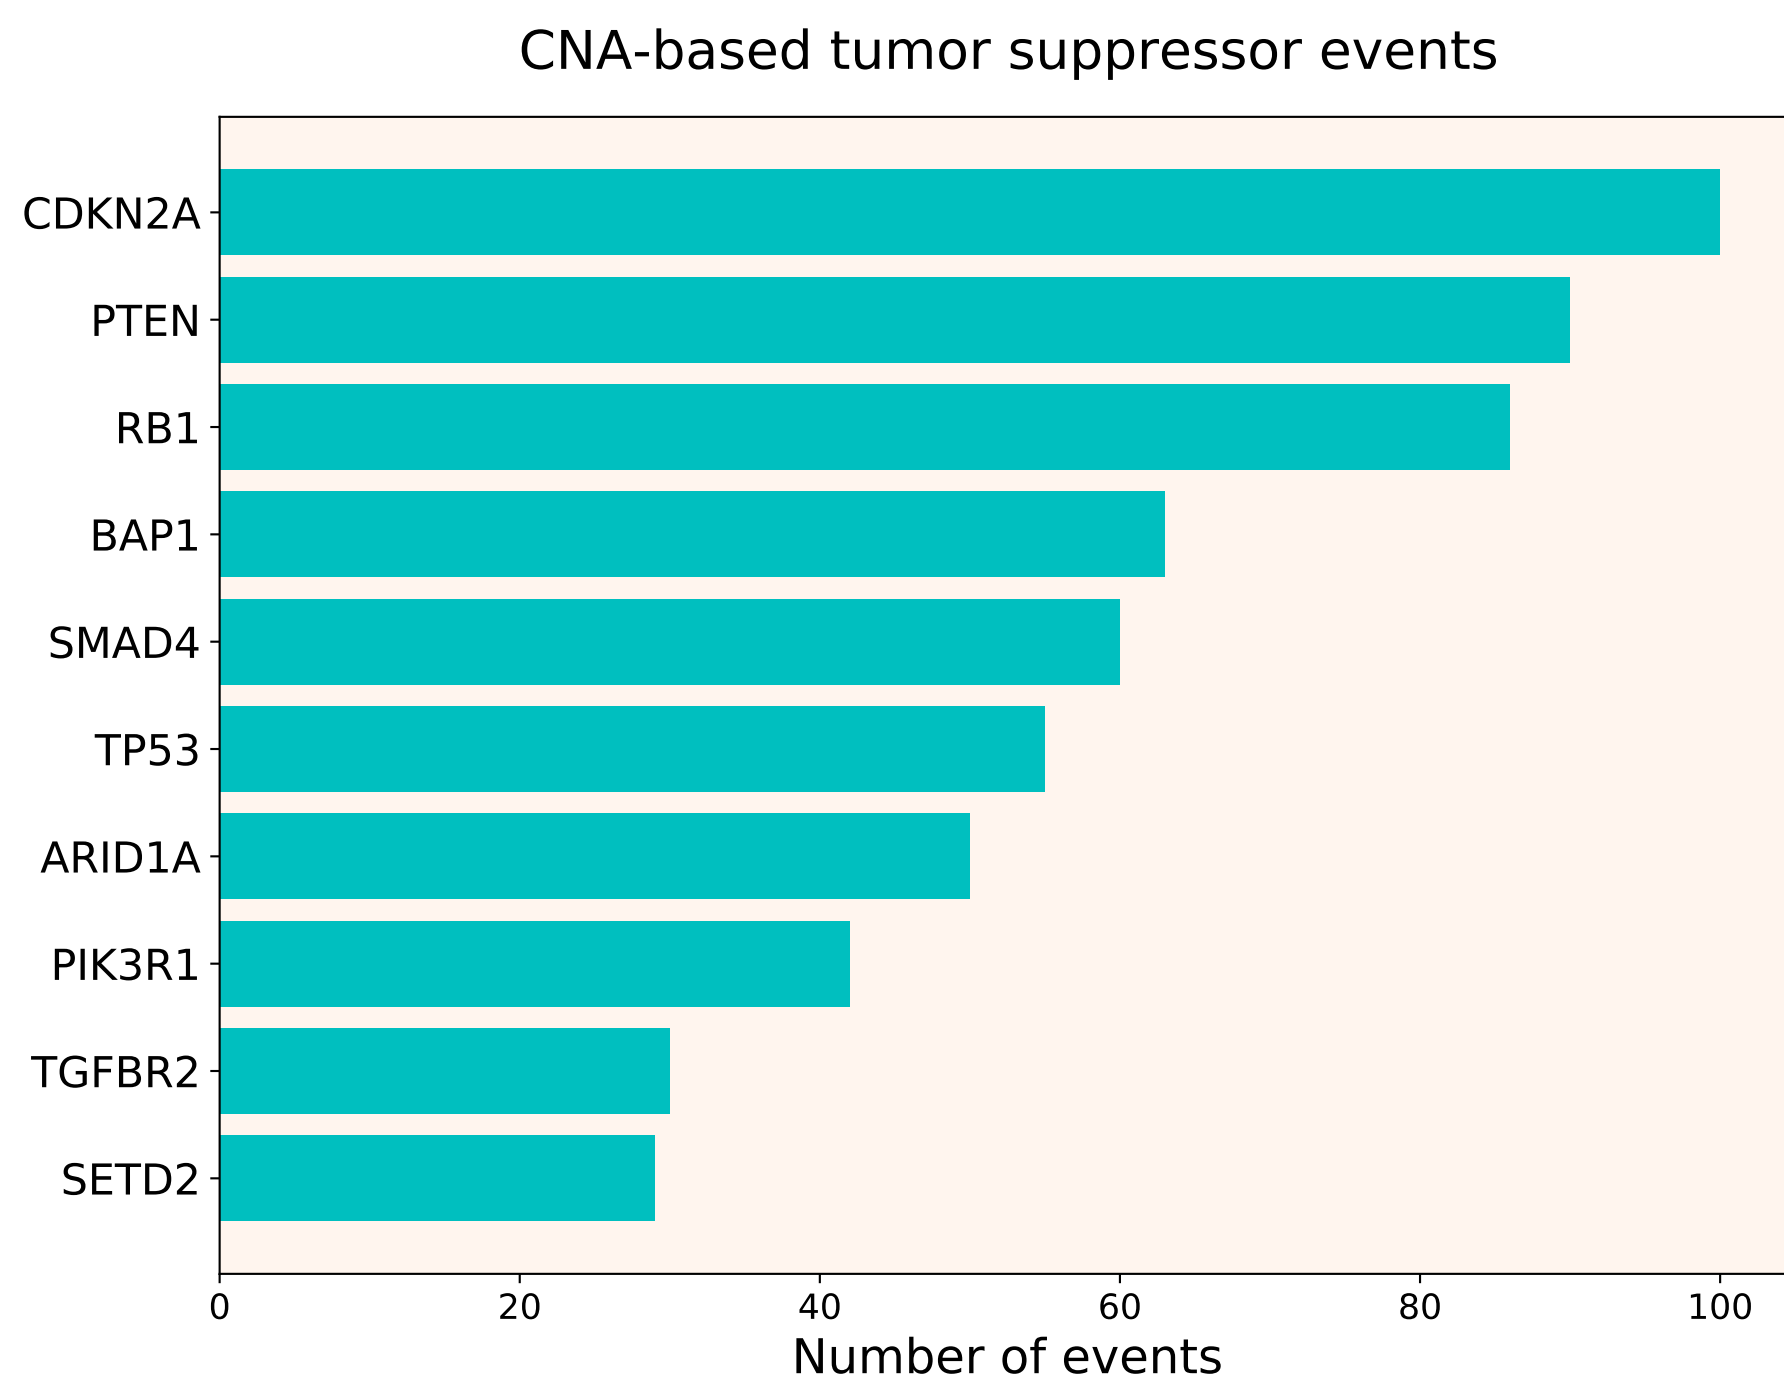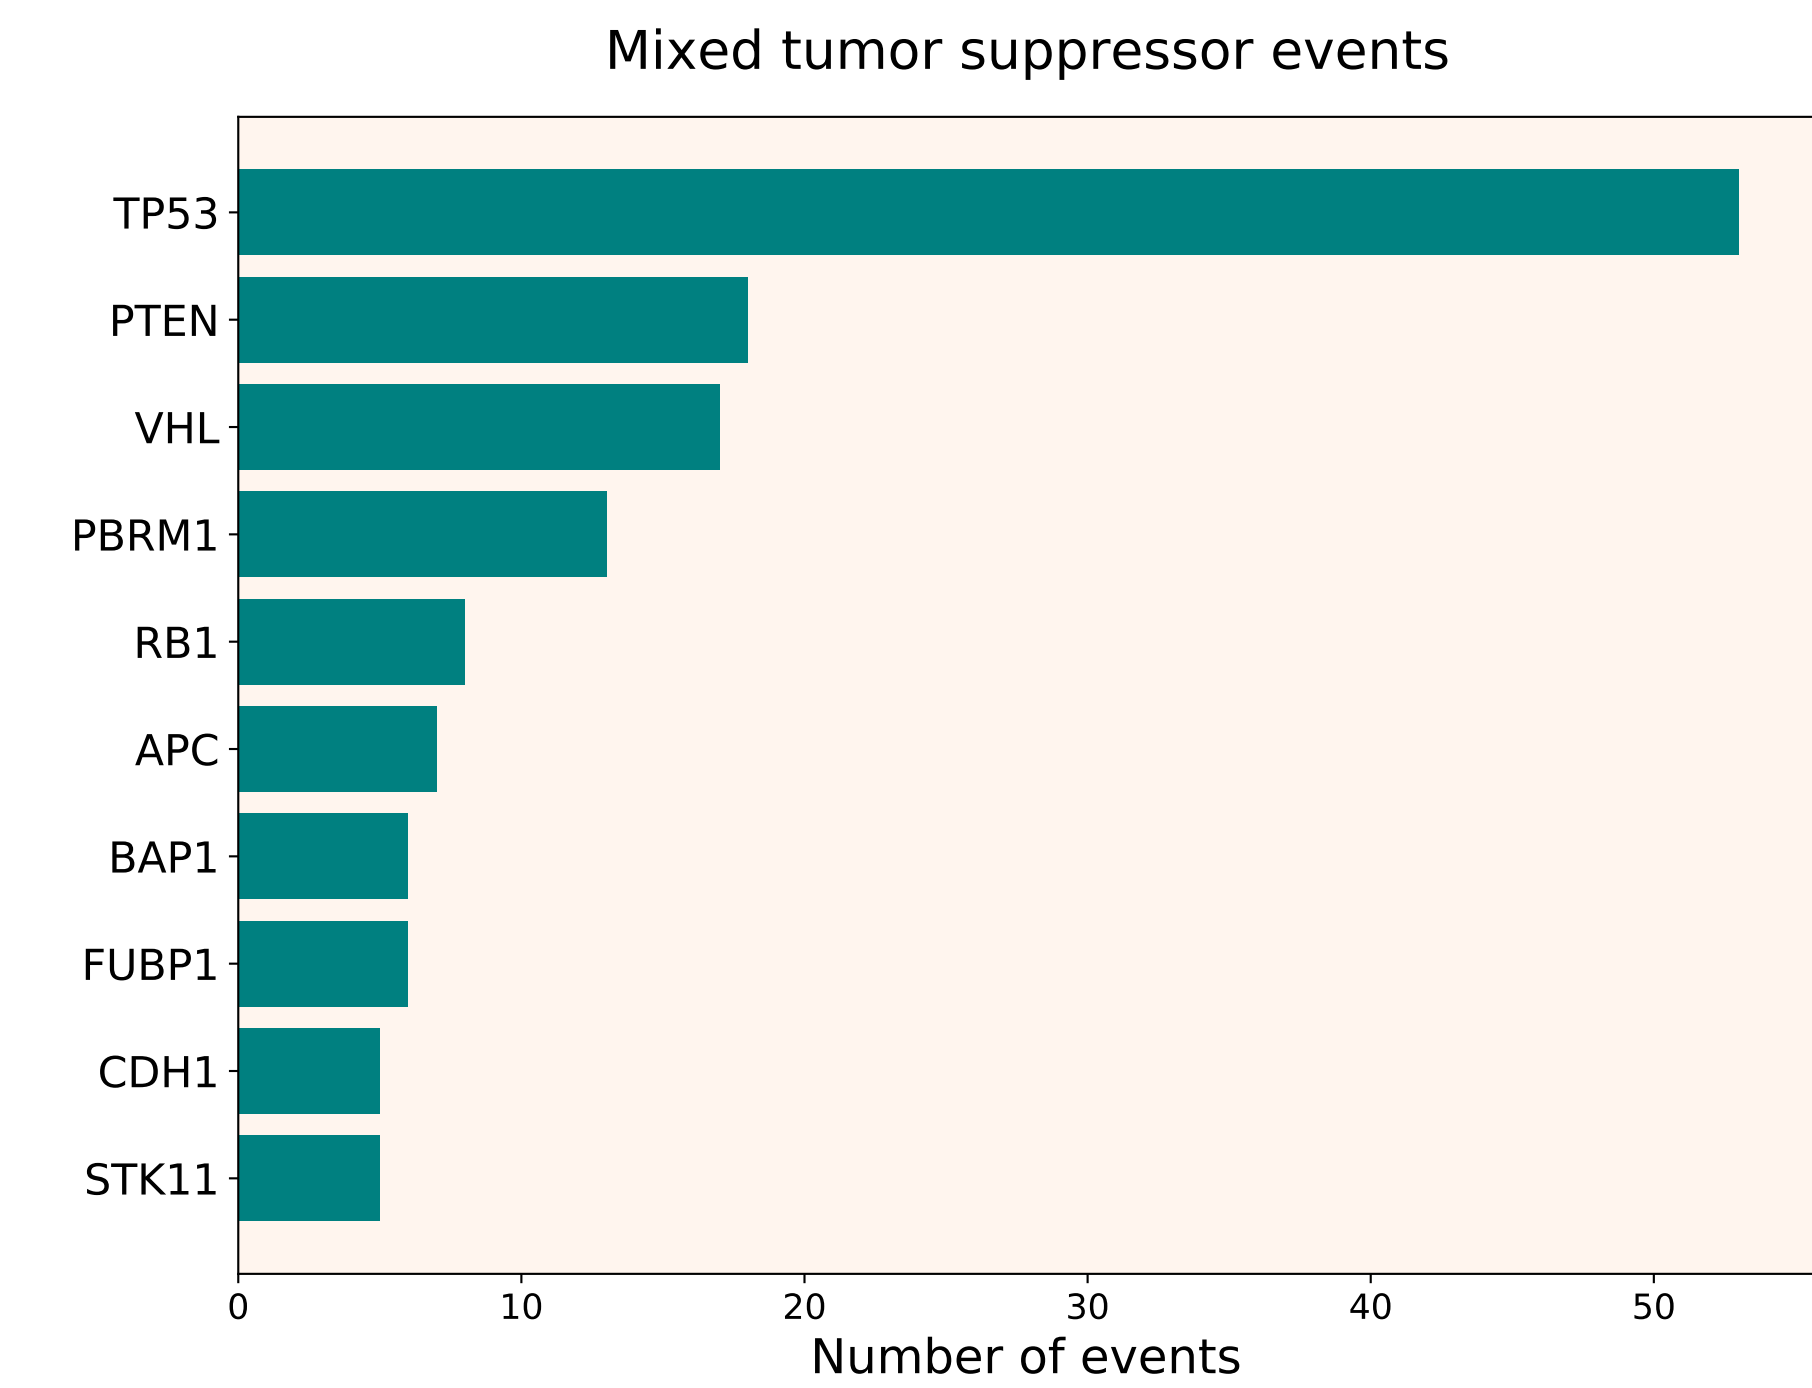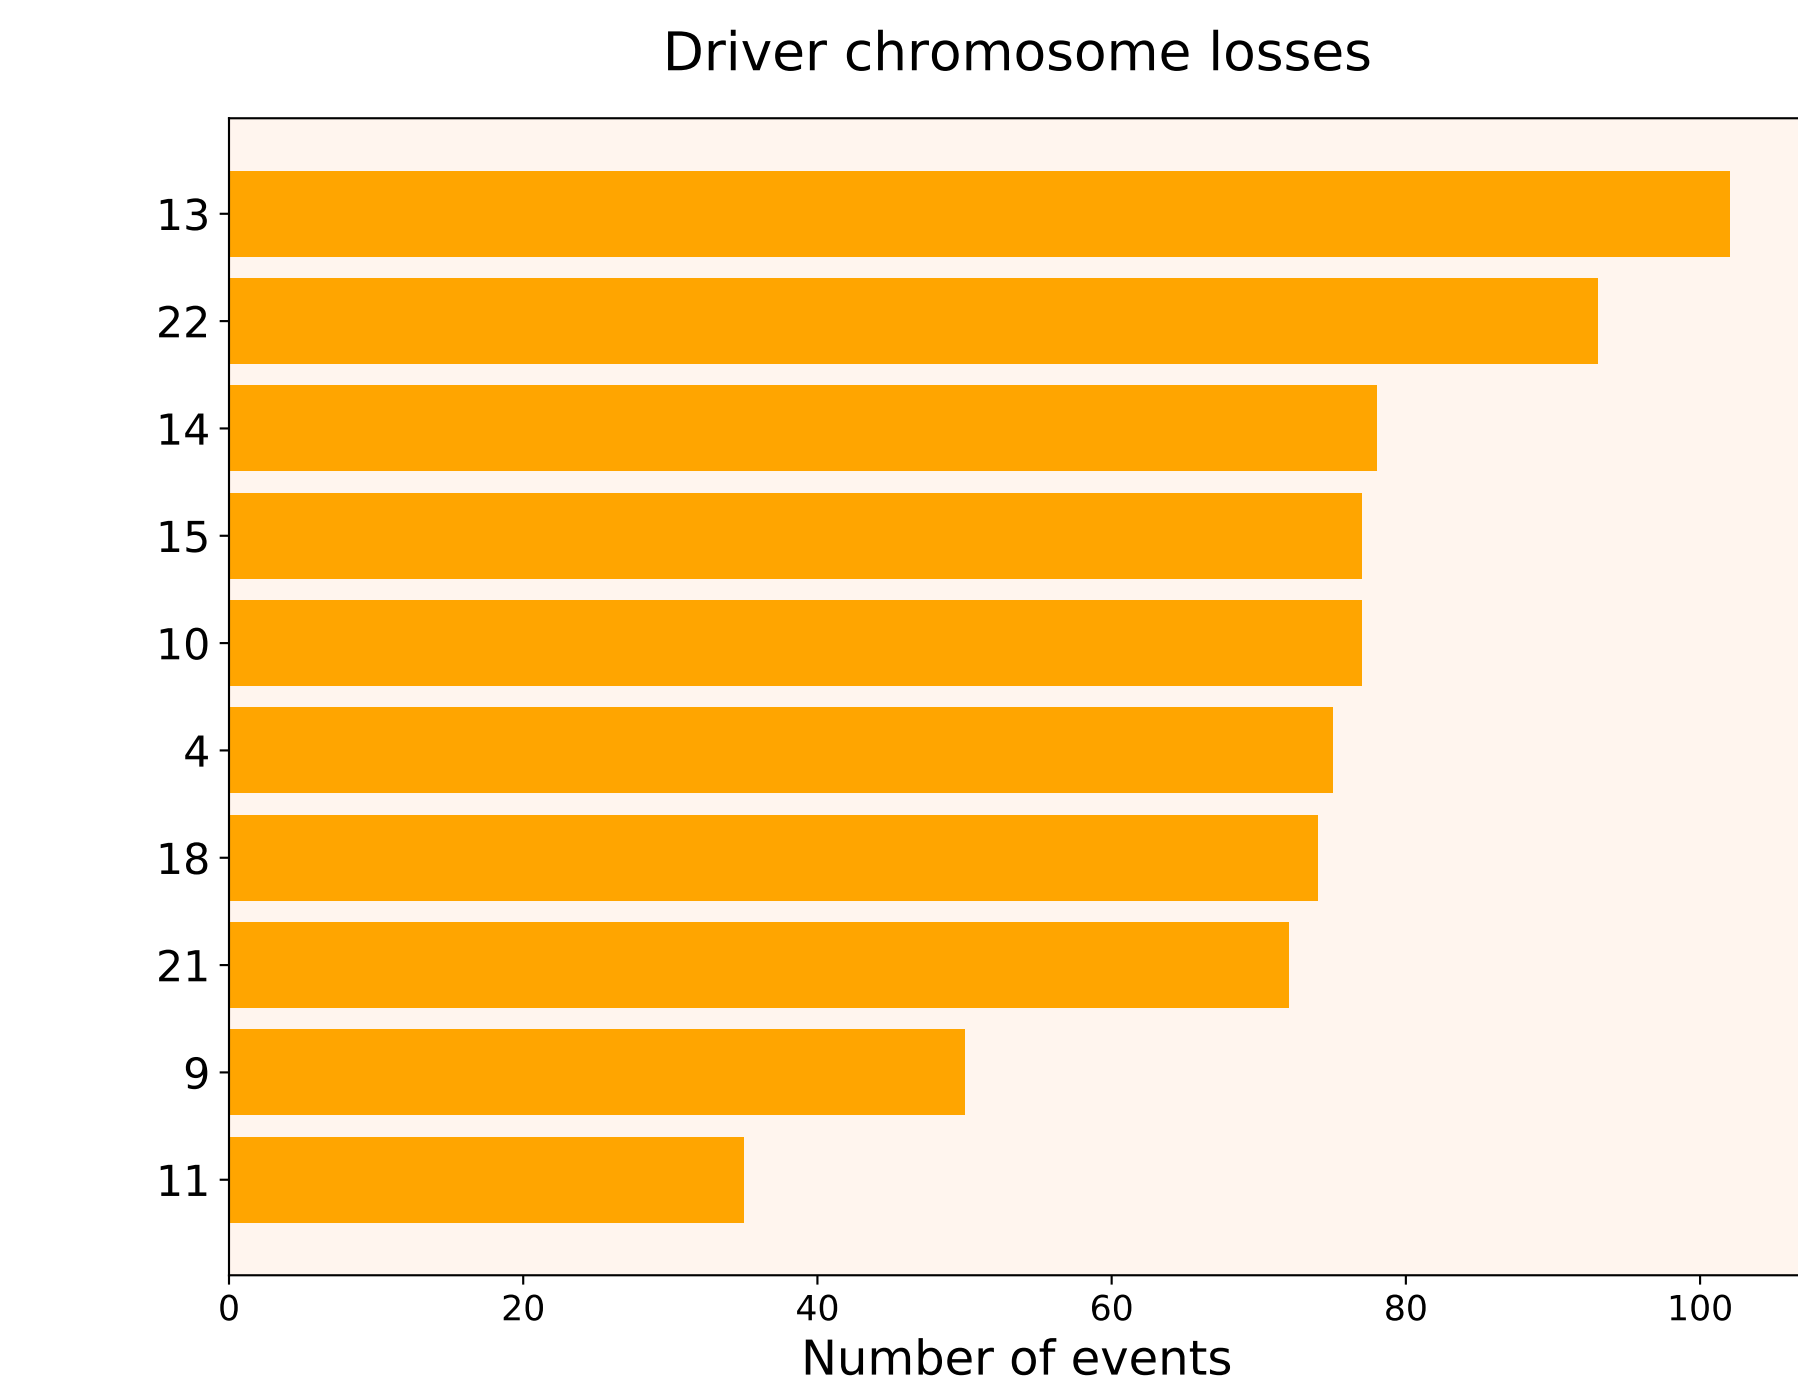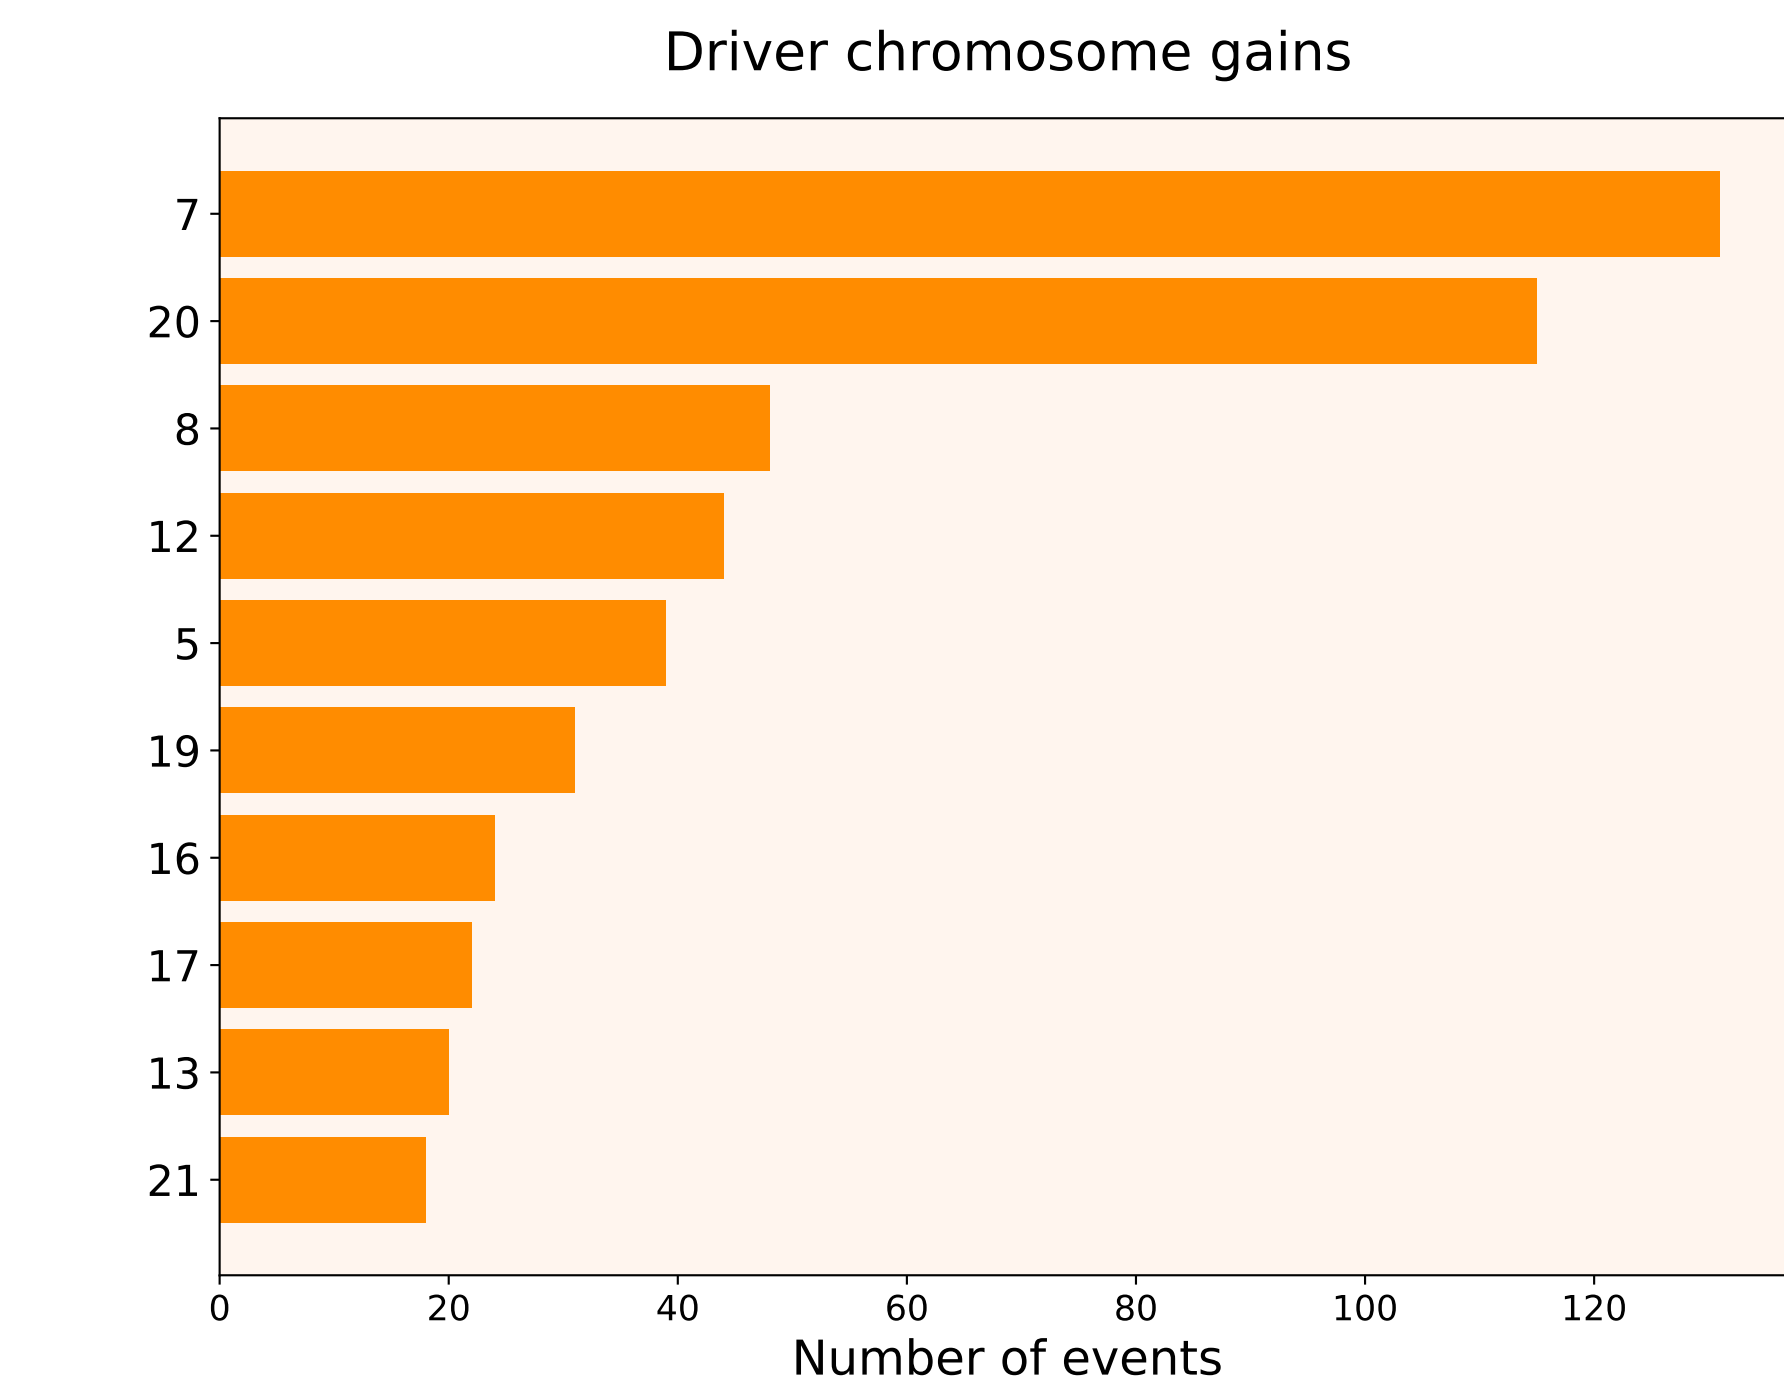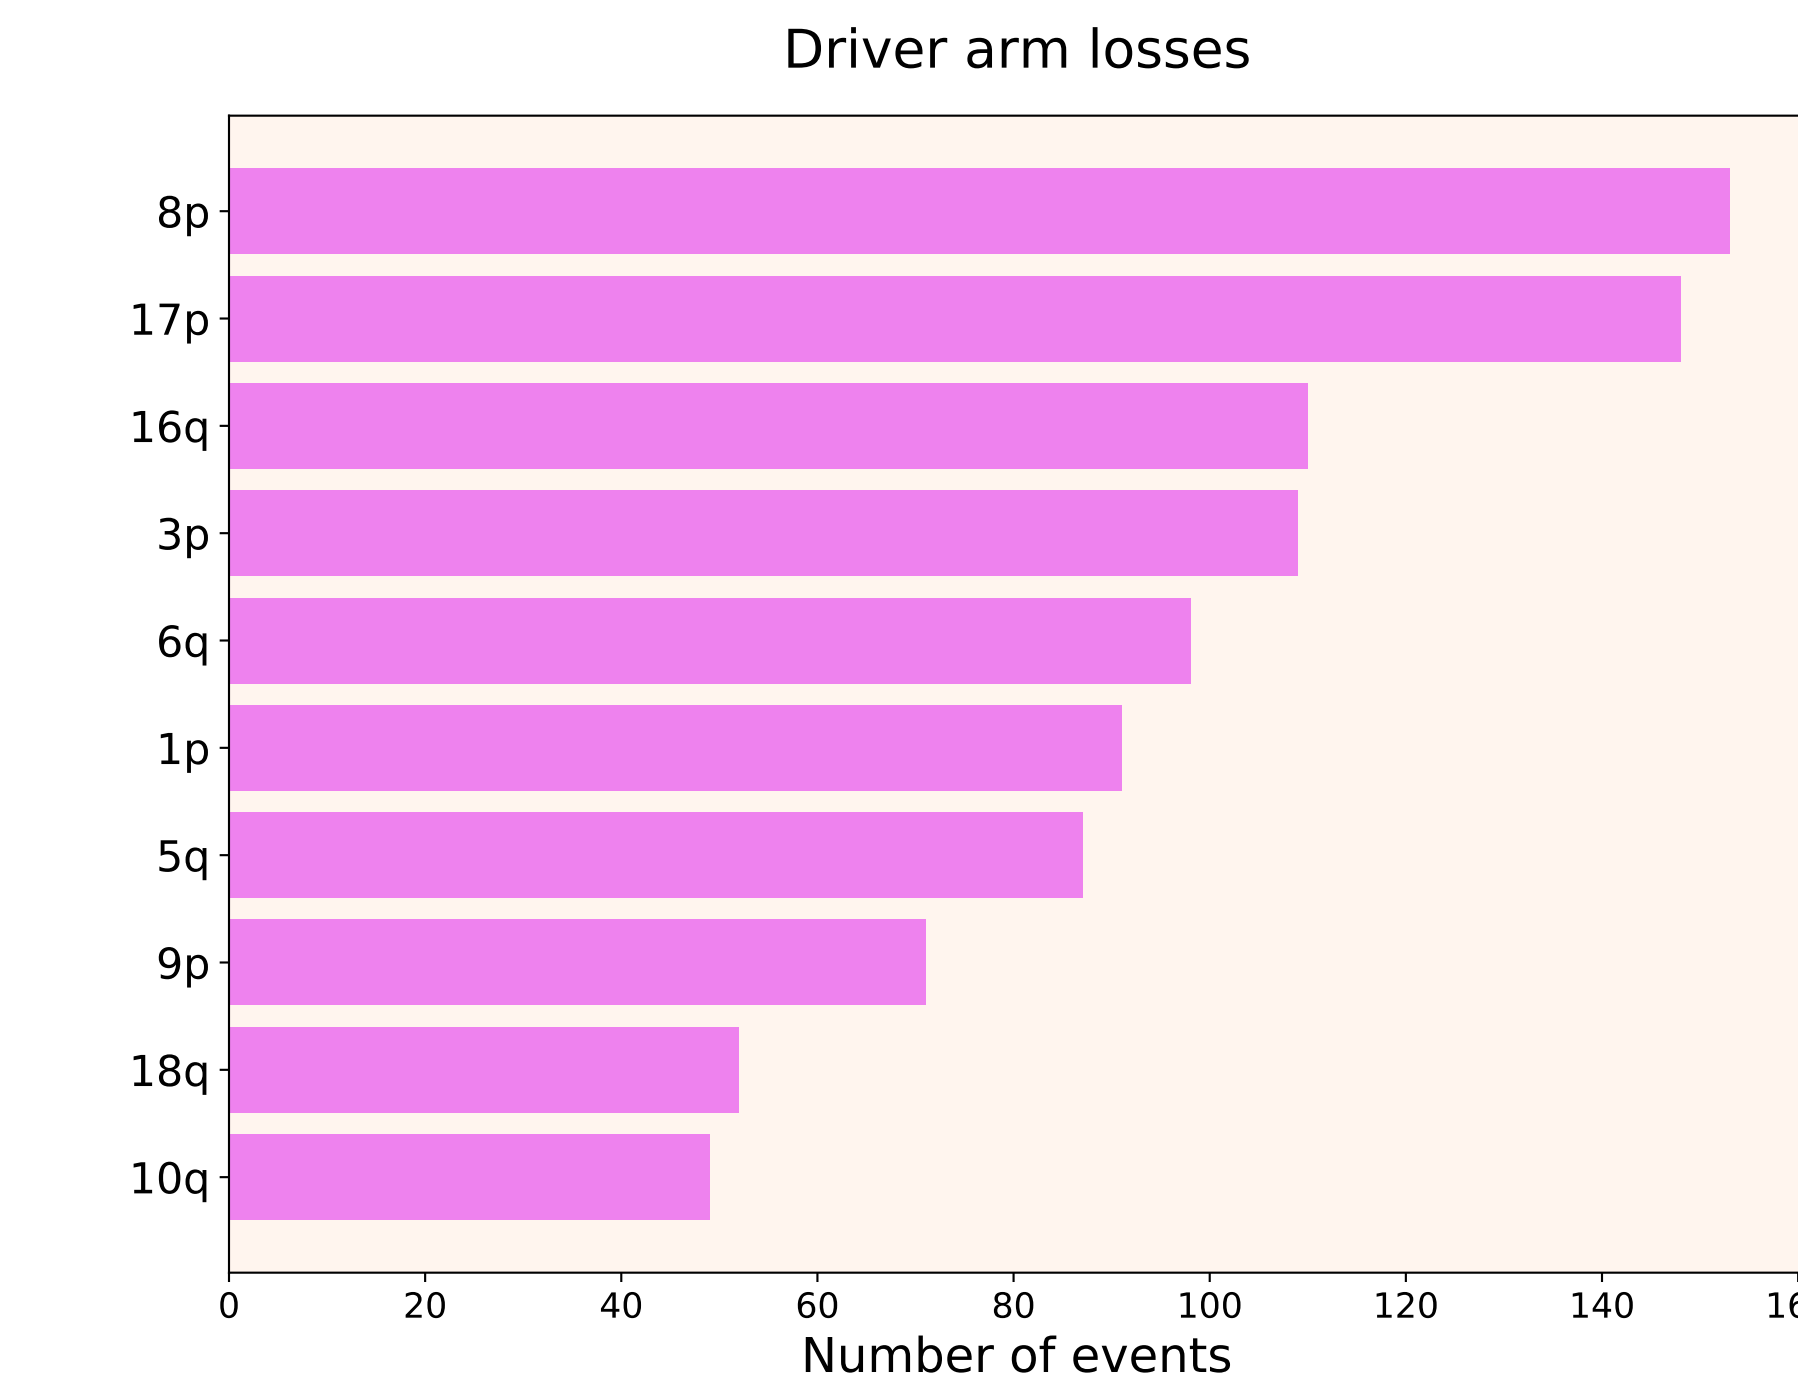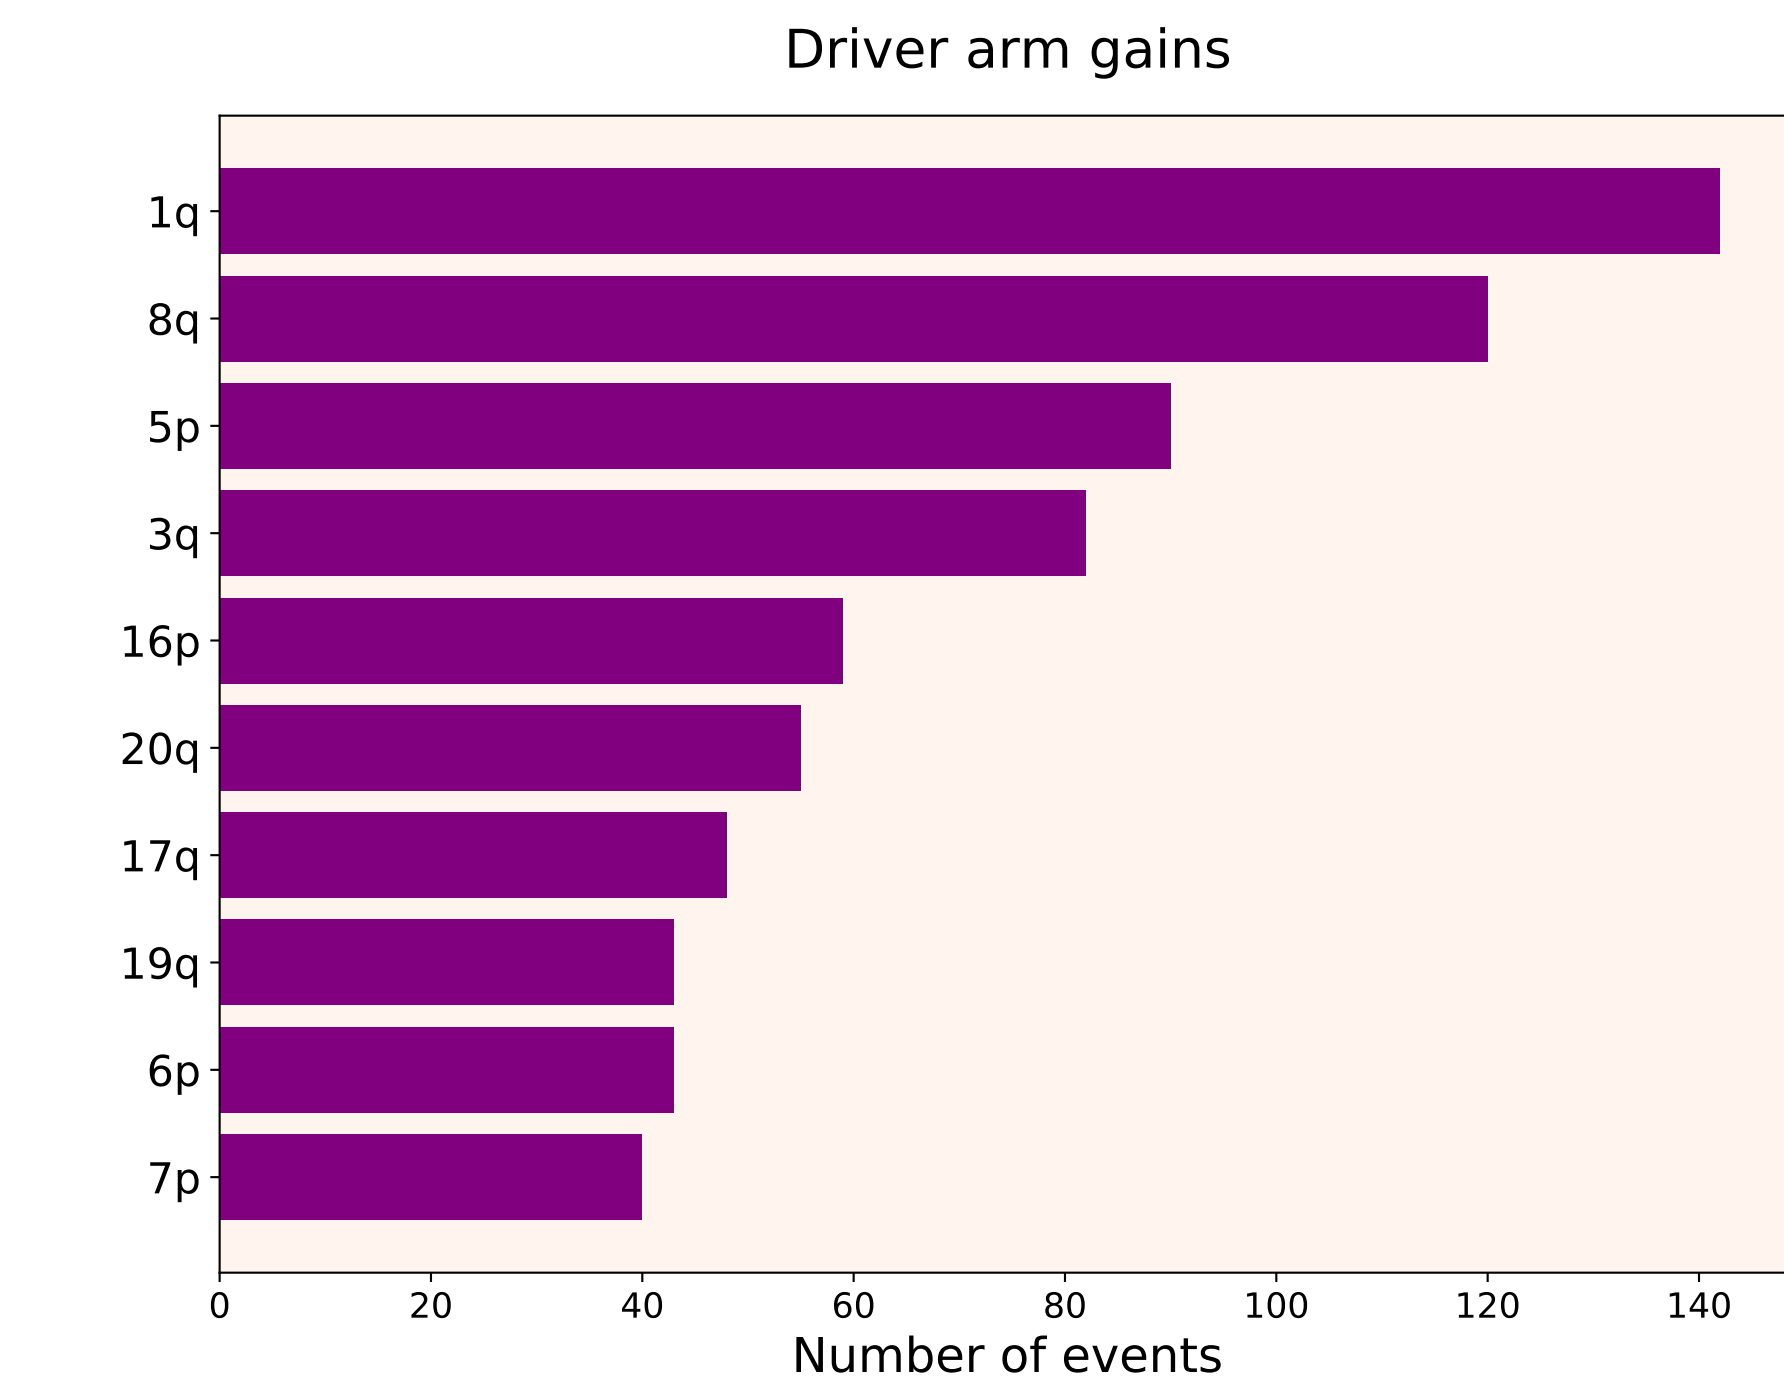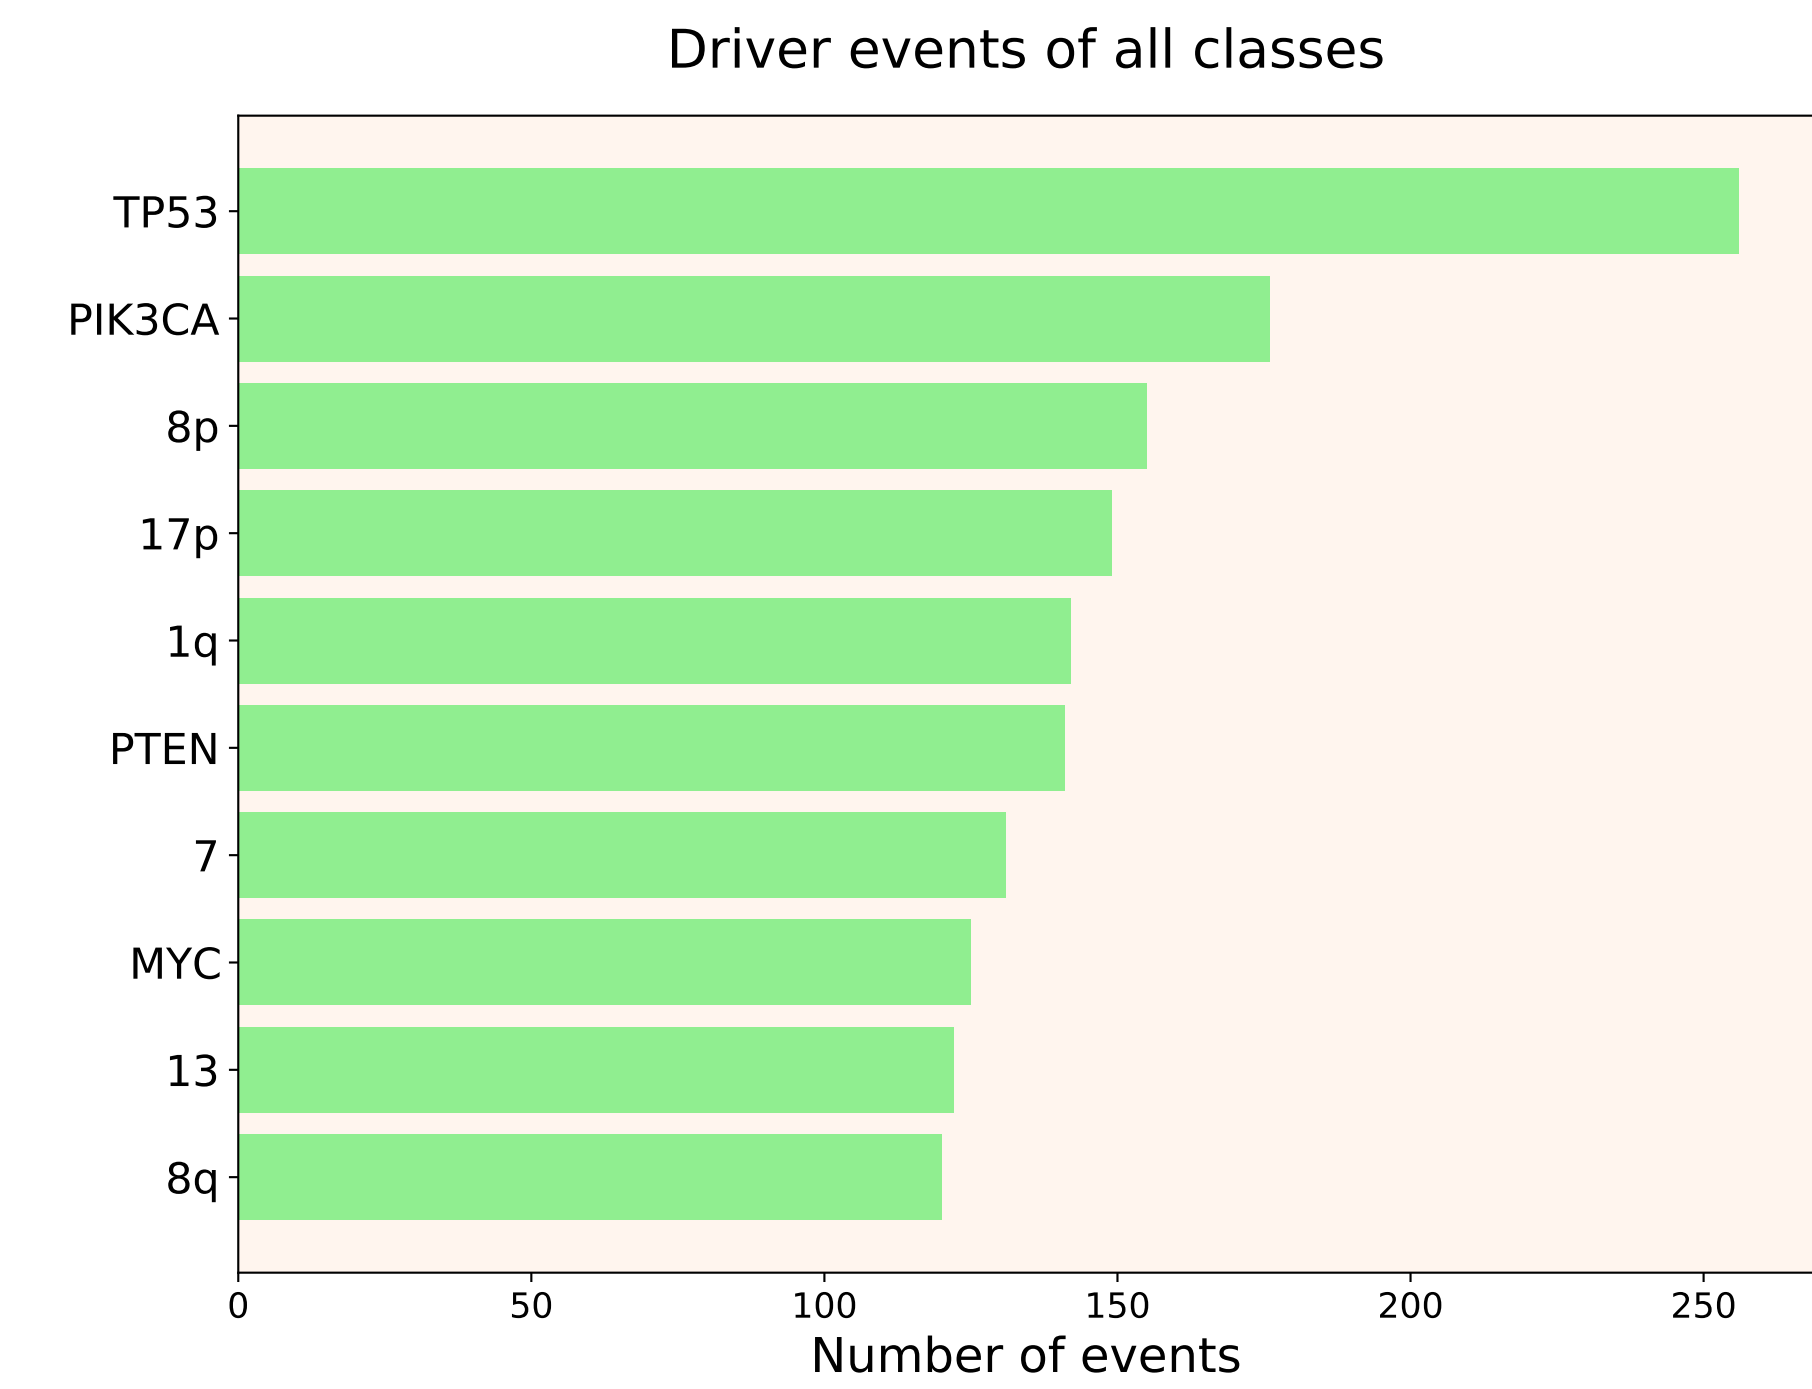

Supplement: Supplemental_Data_S1.zip [file Supplemental_Data_S1.zip]

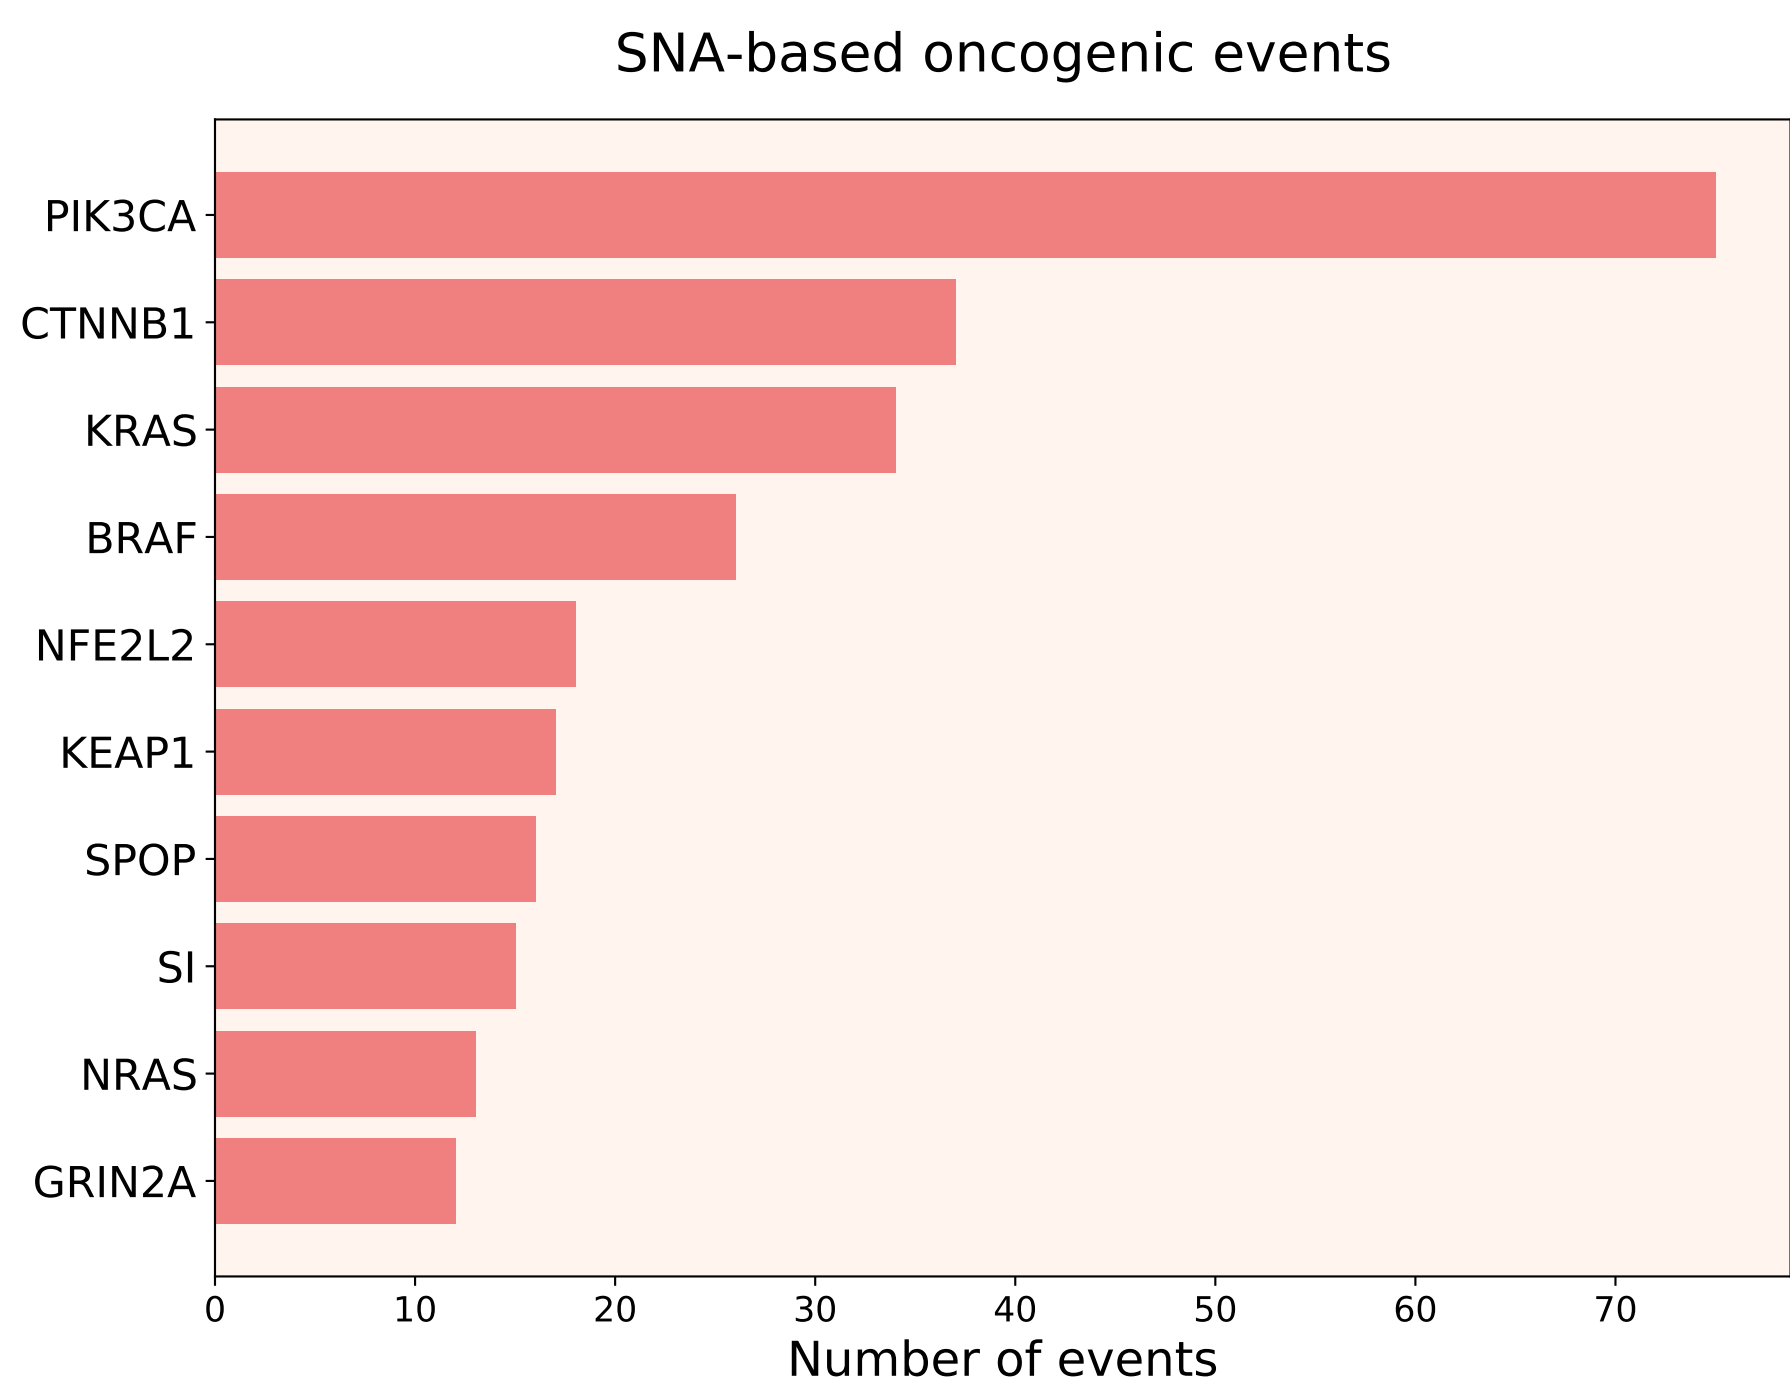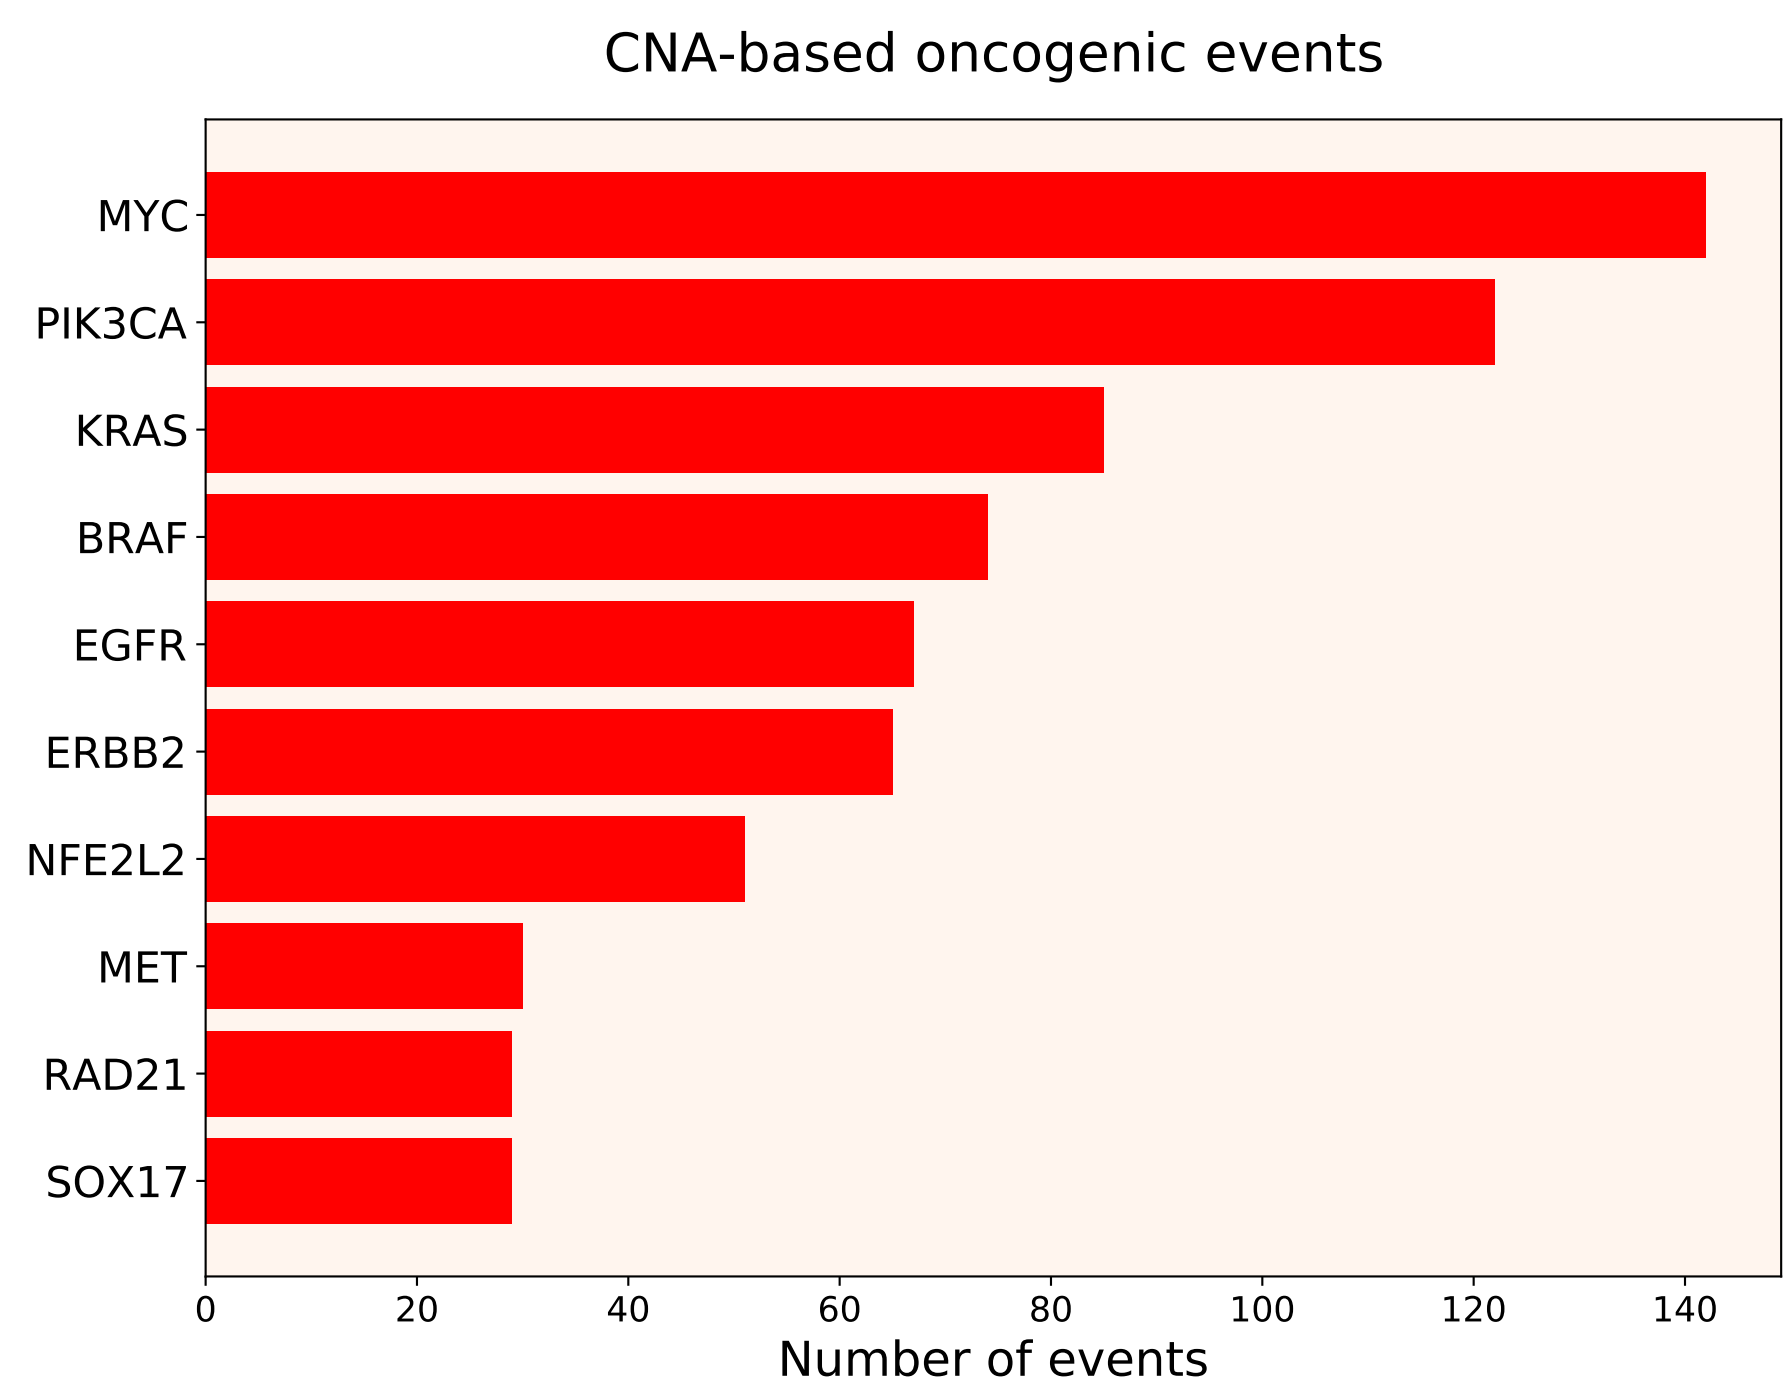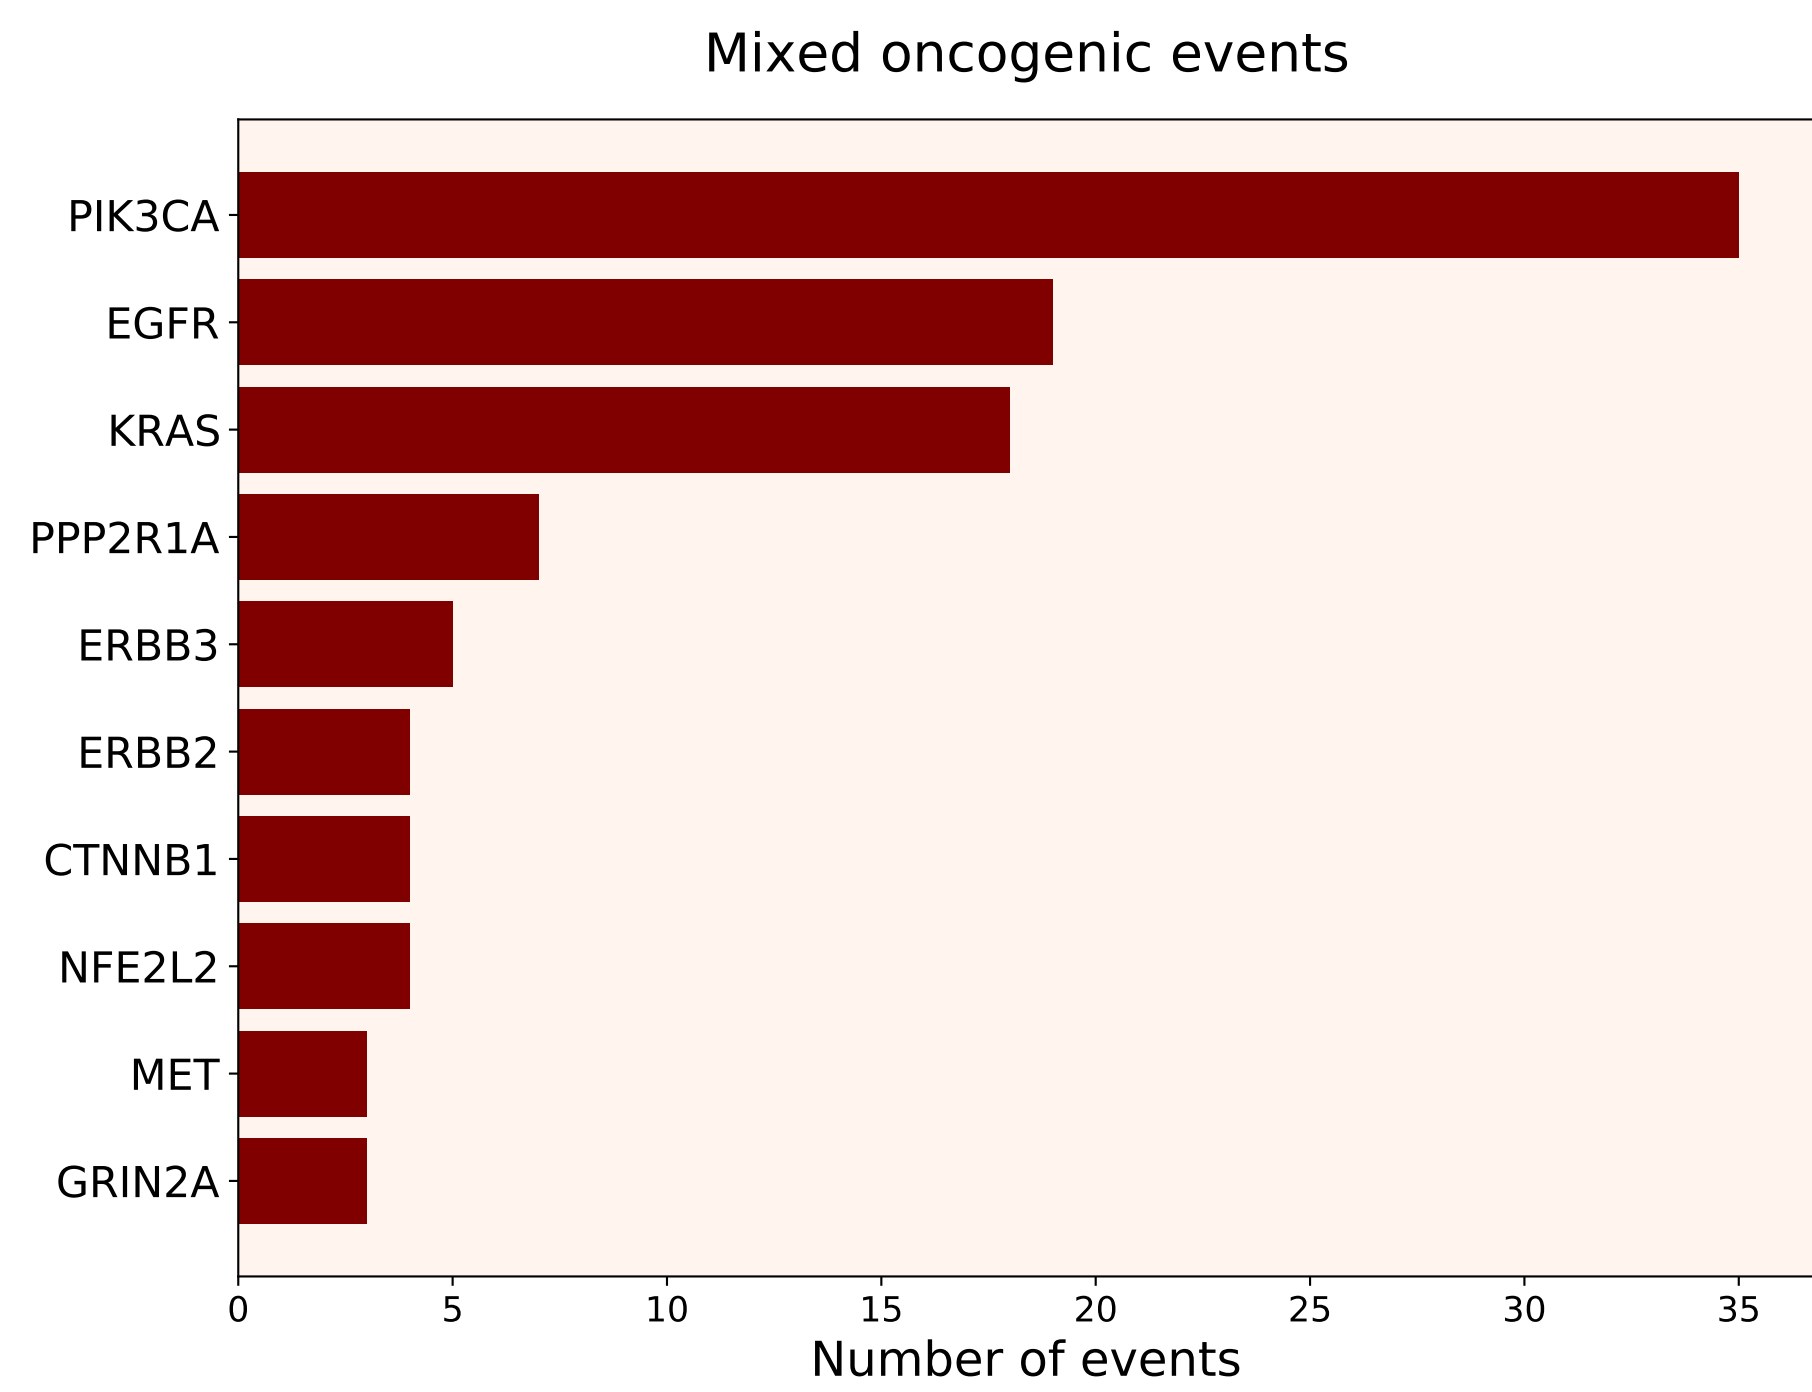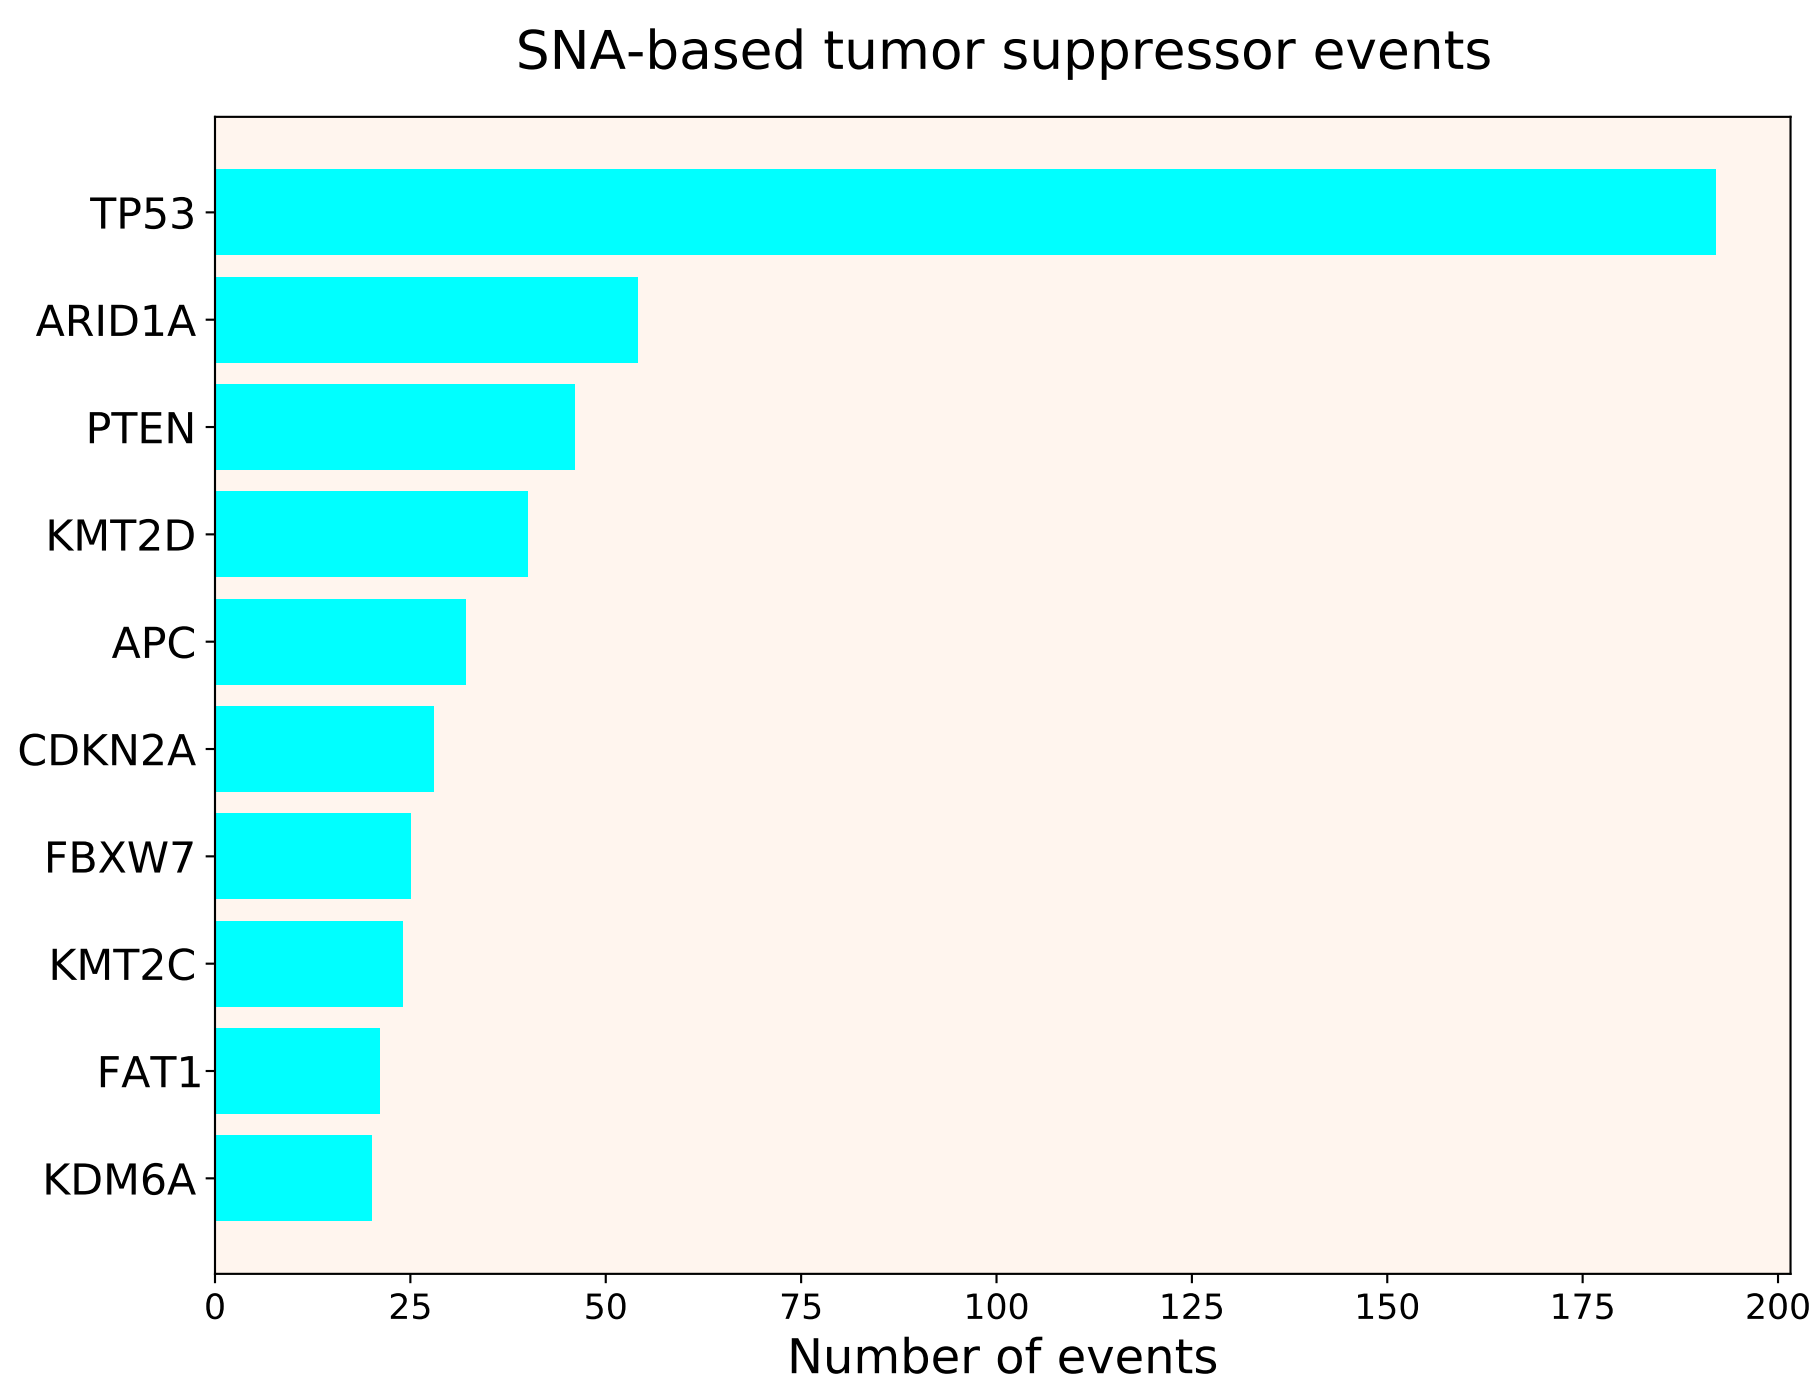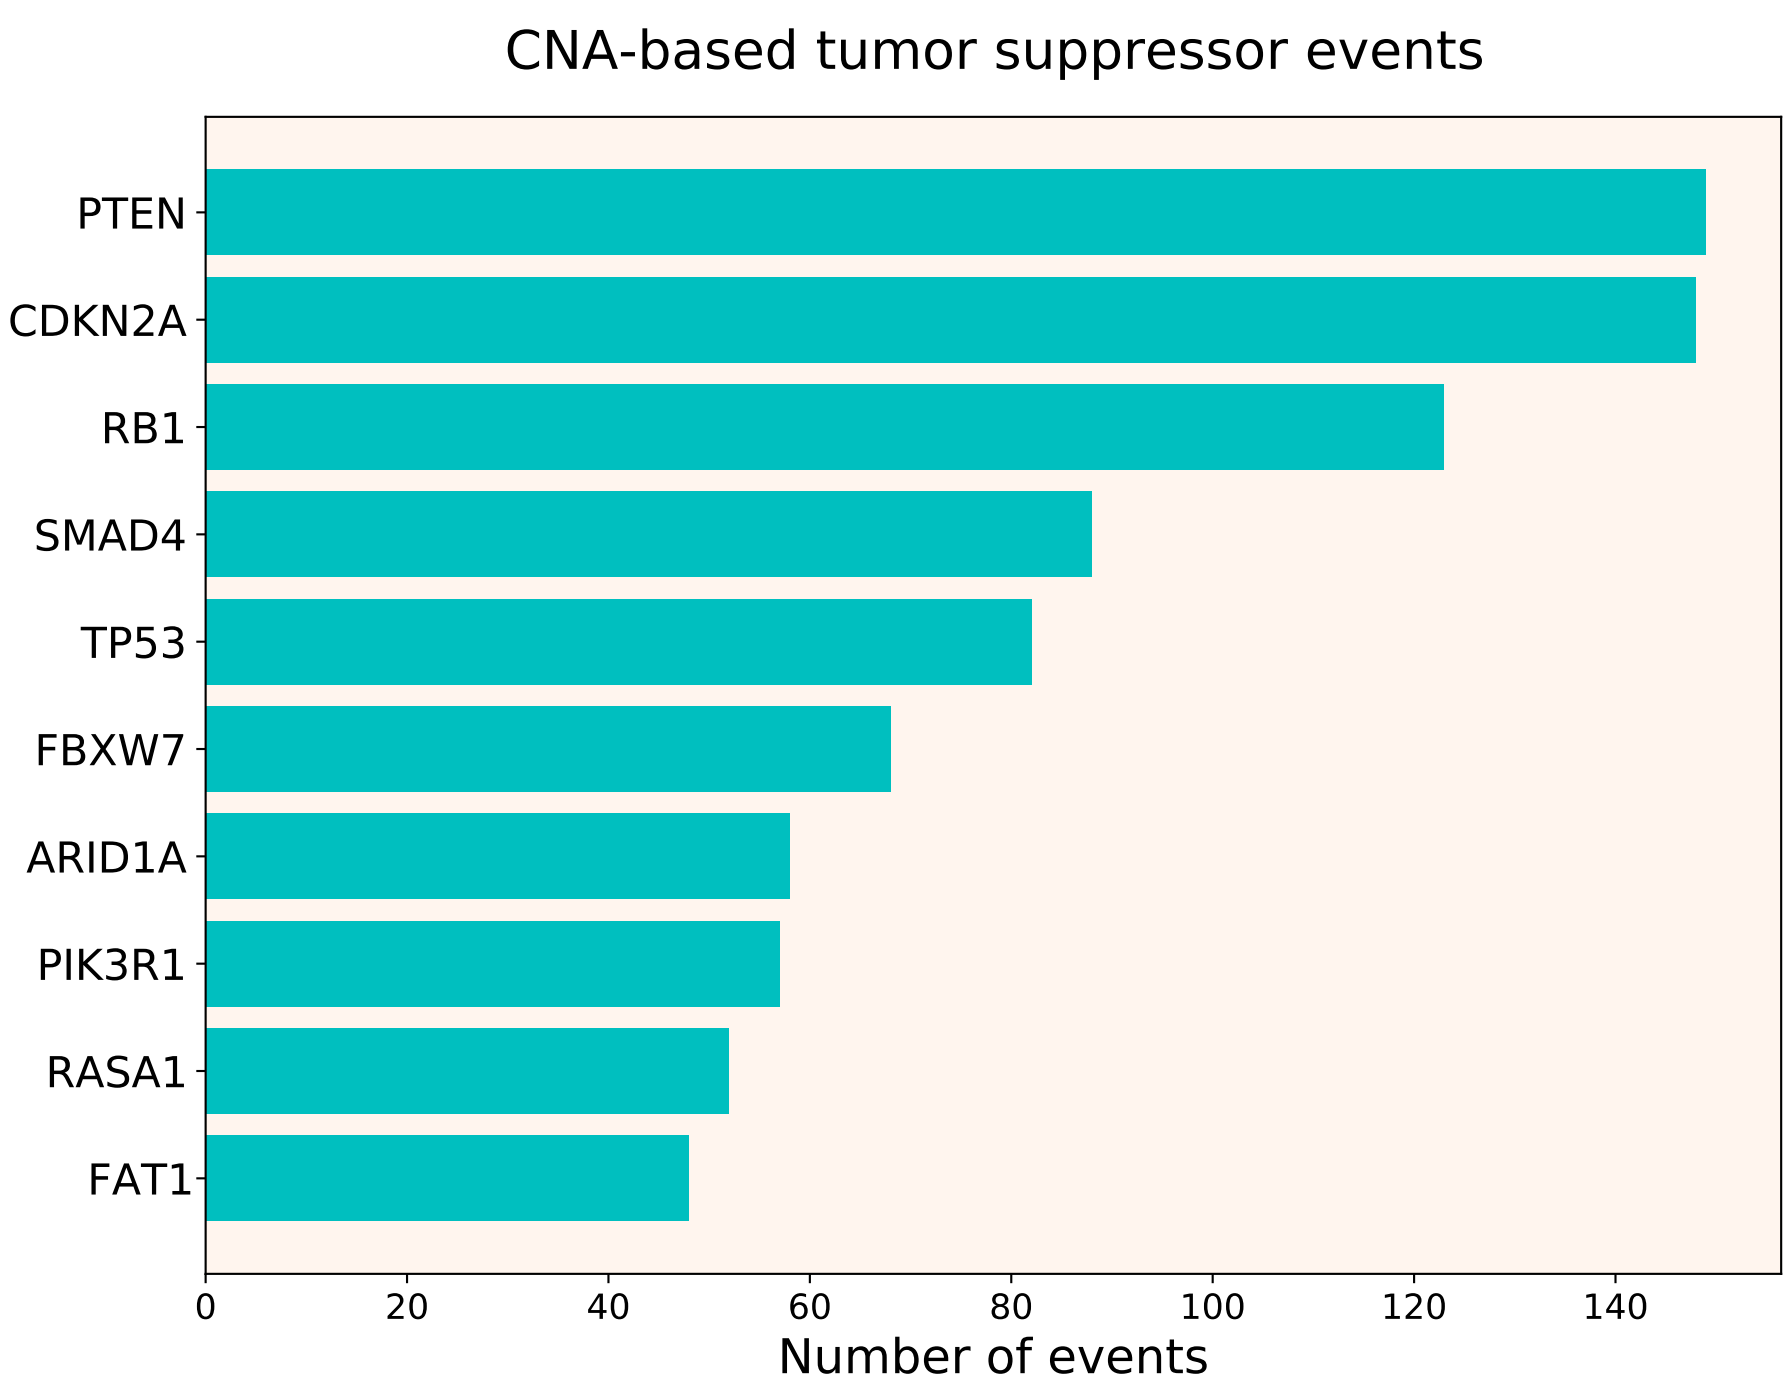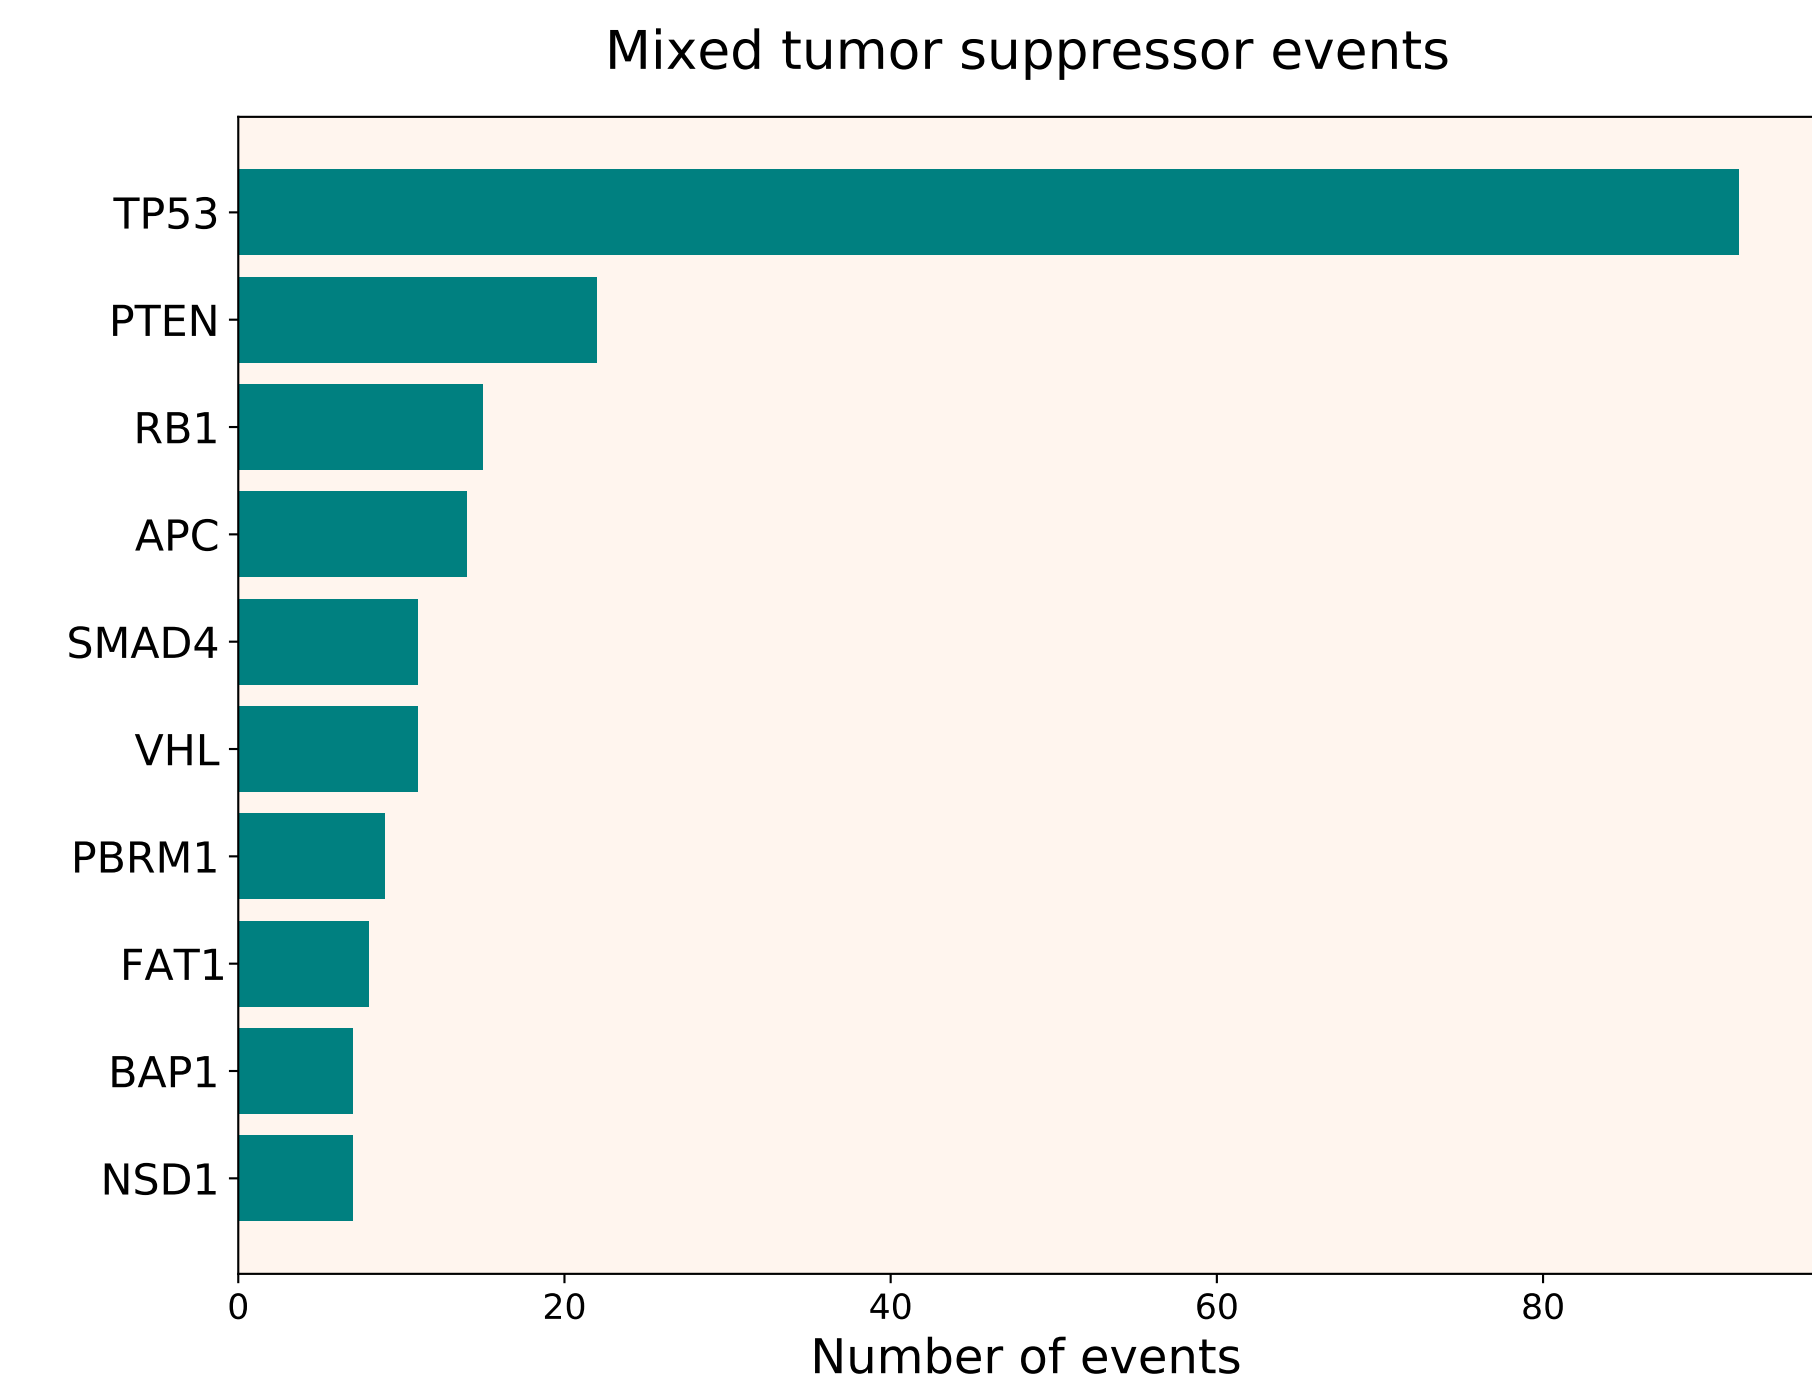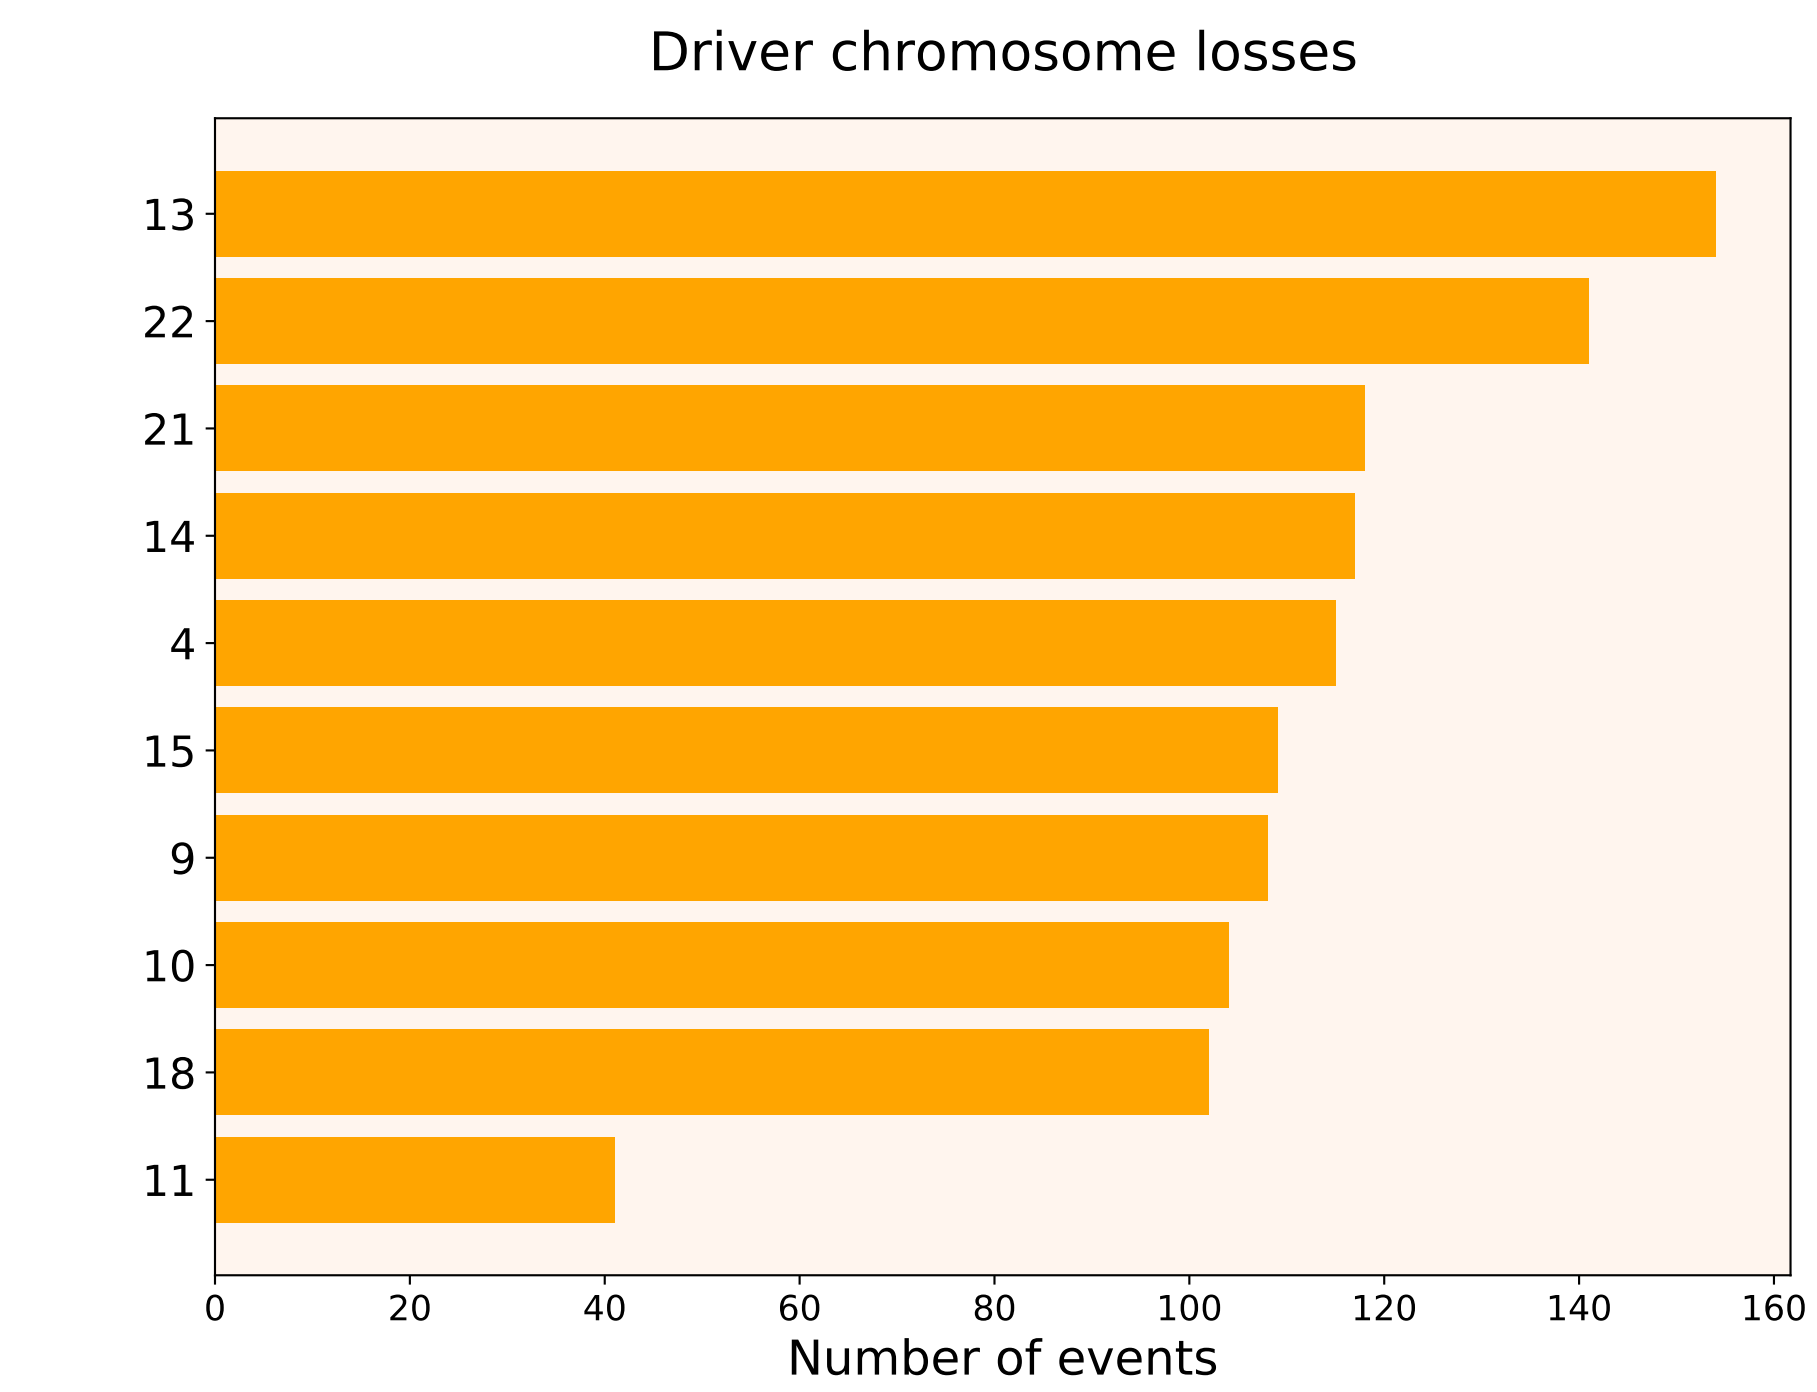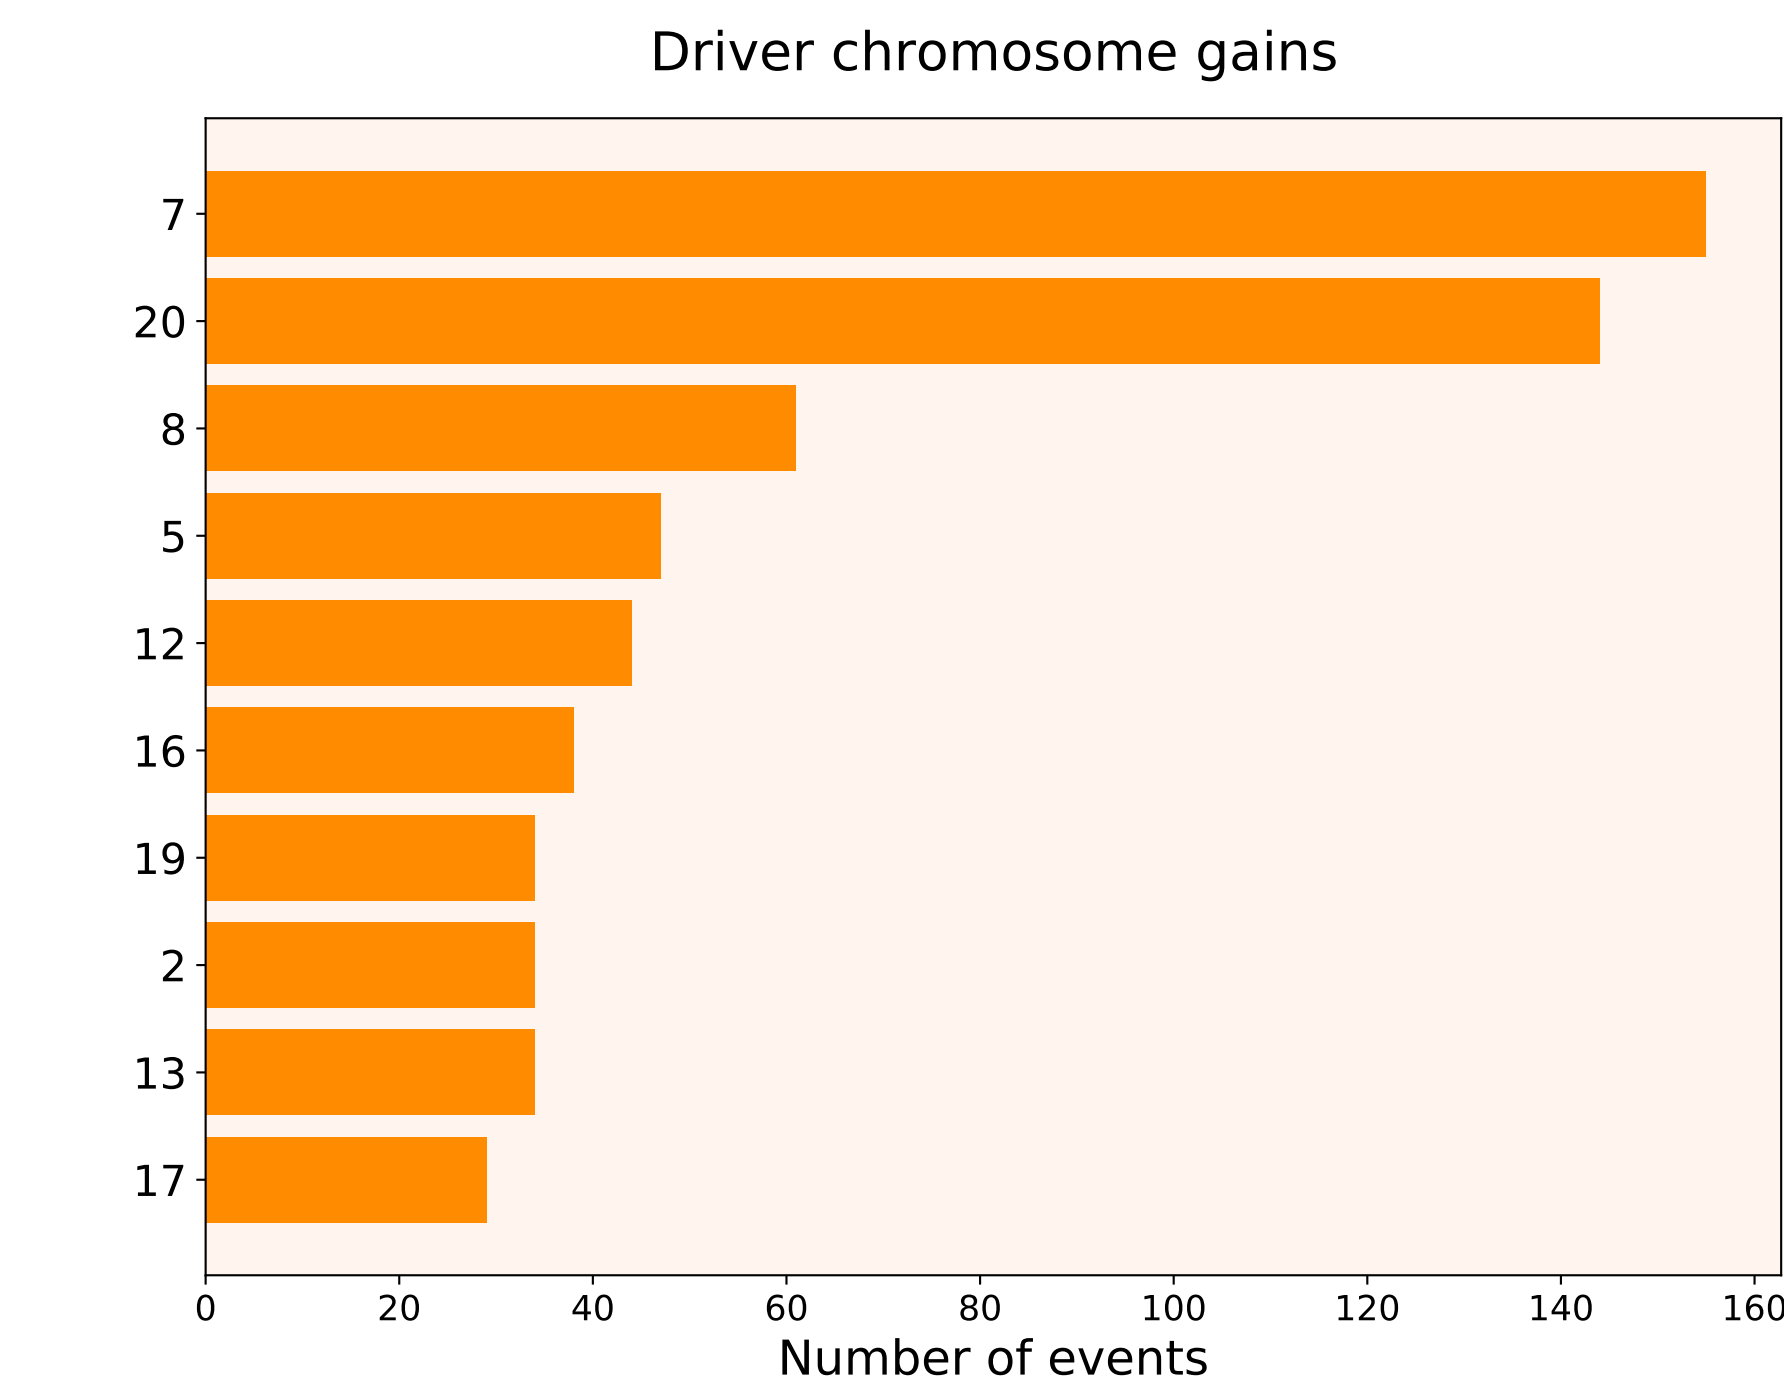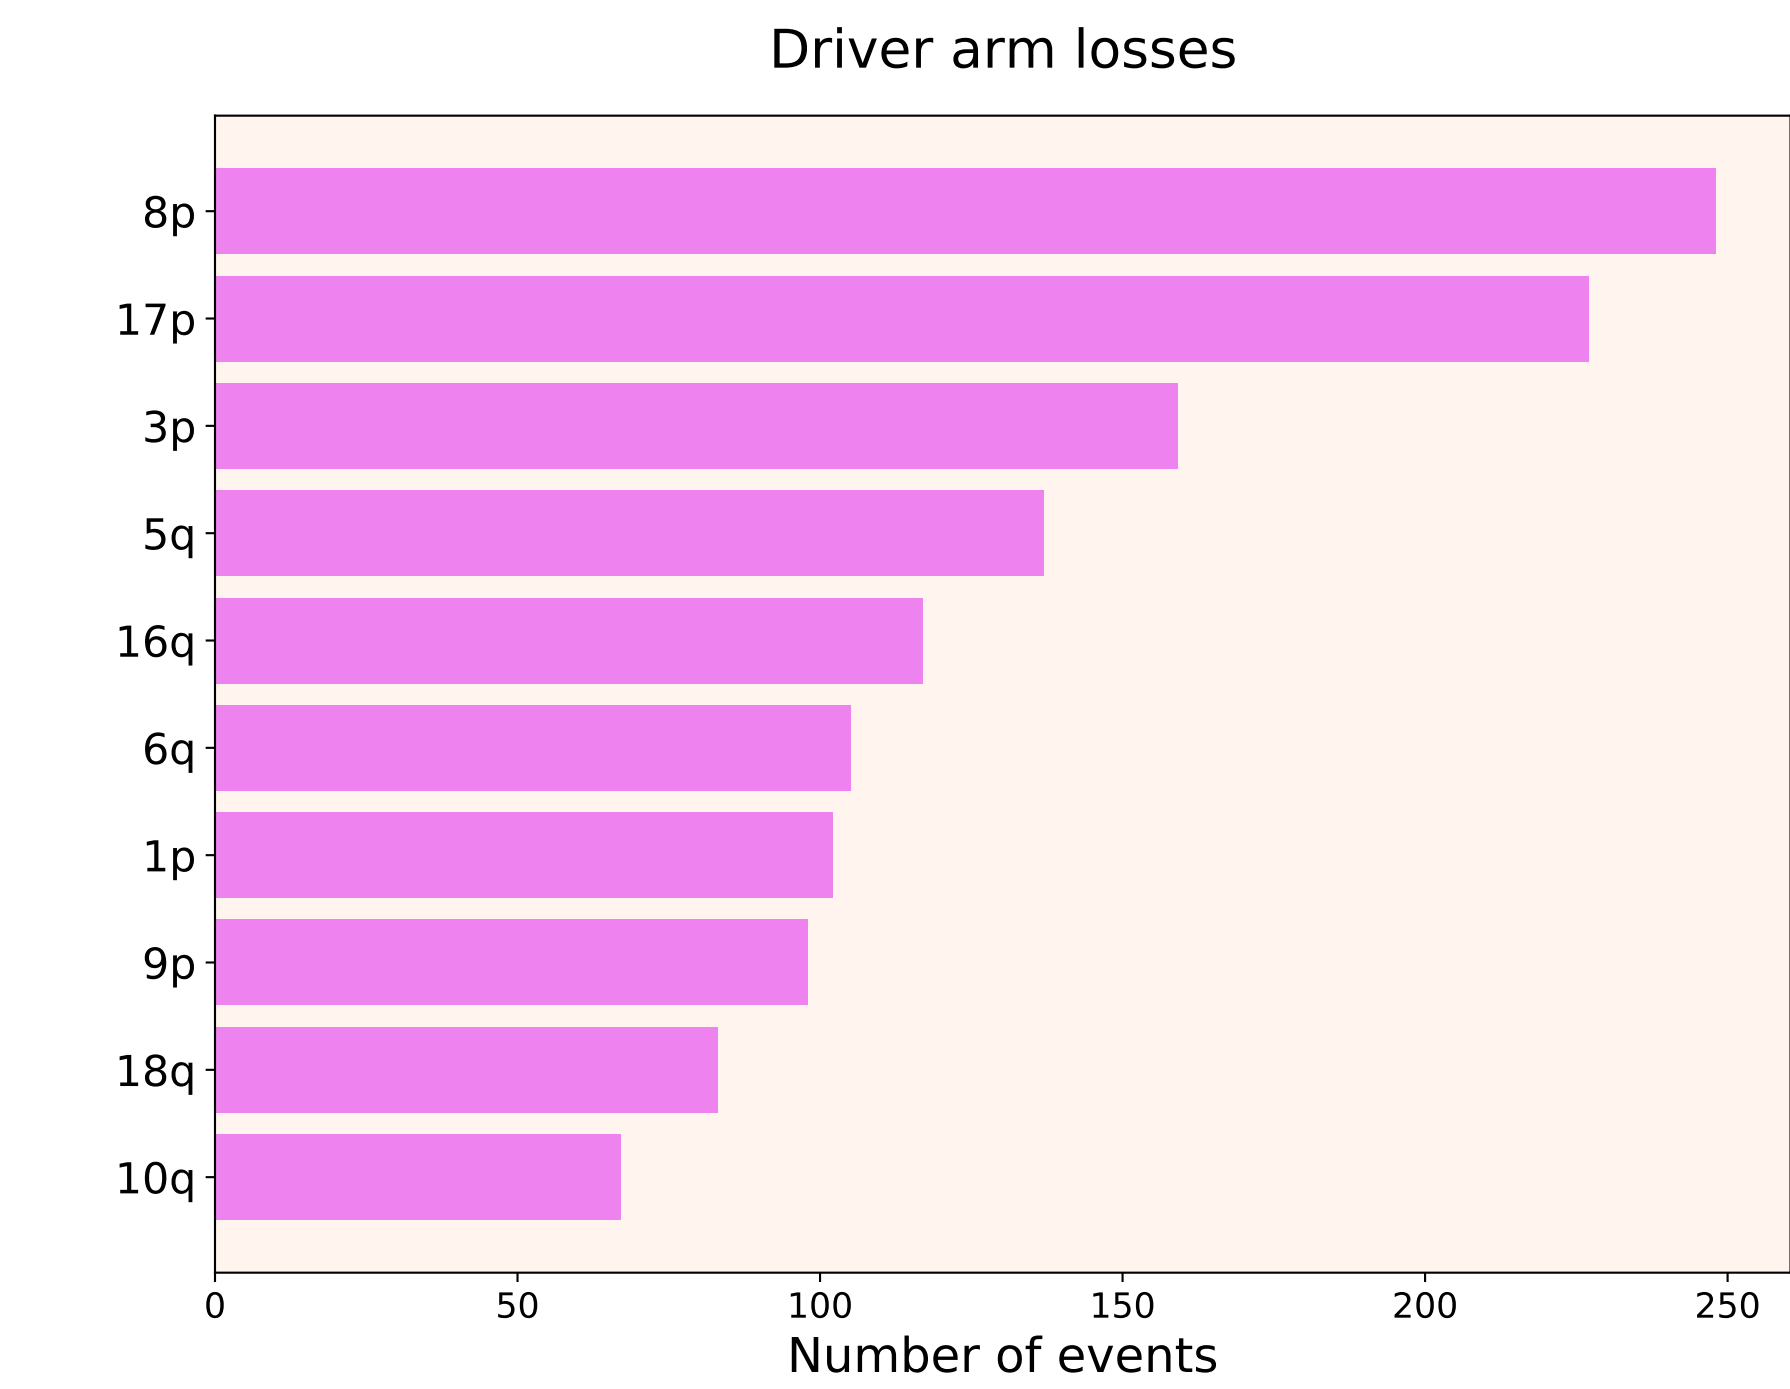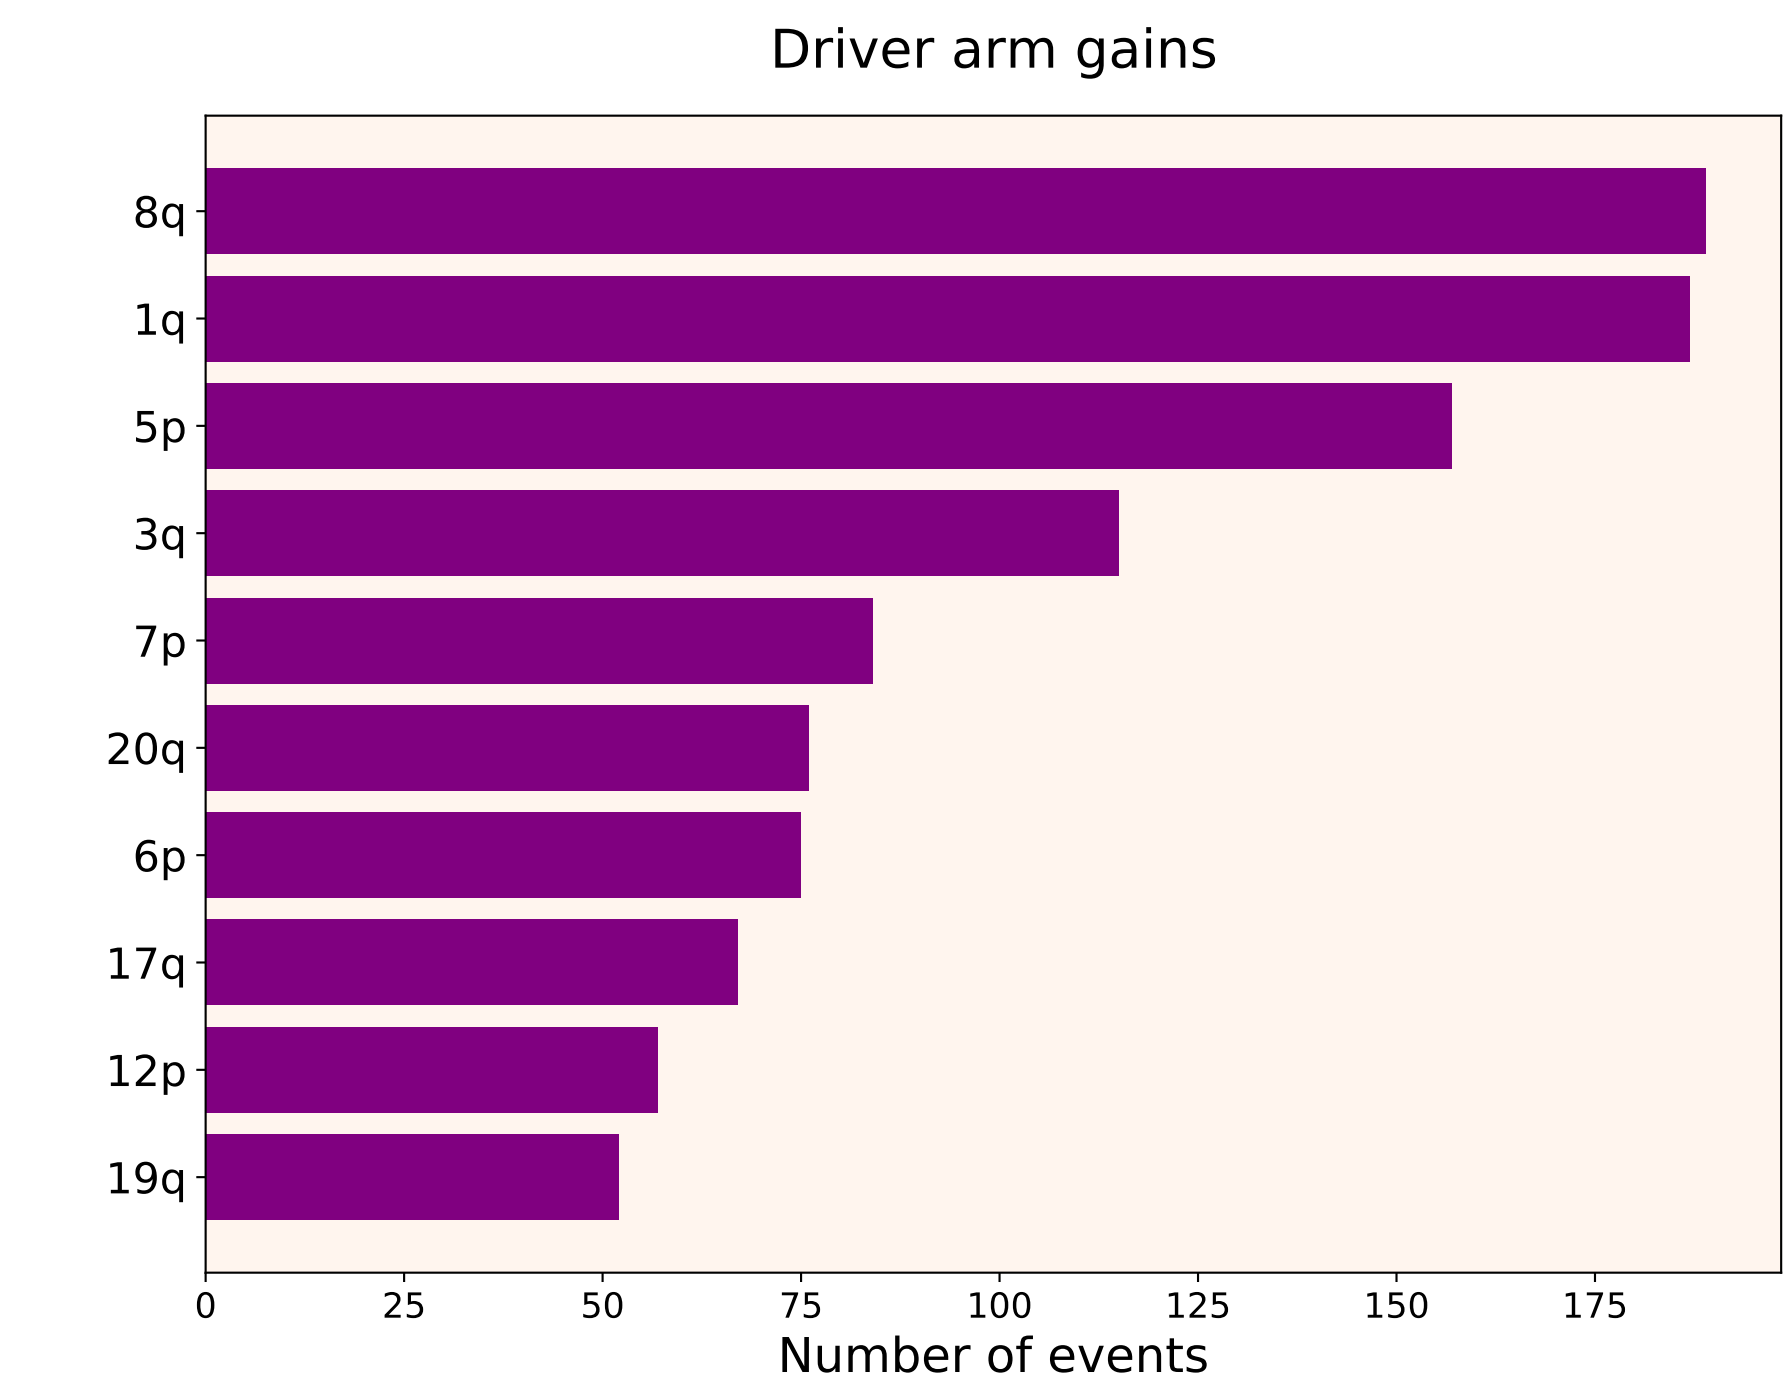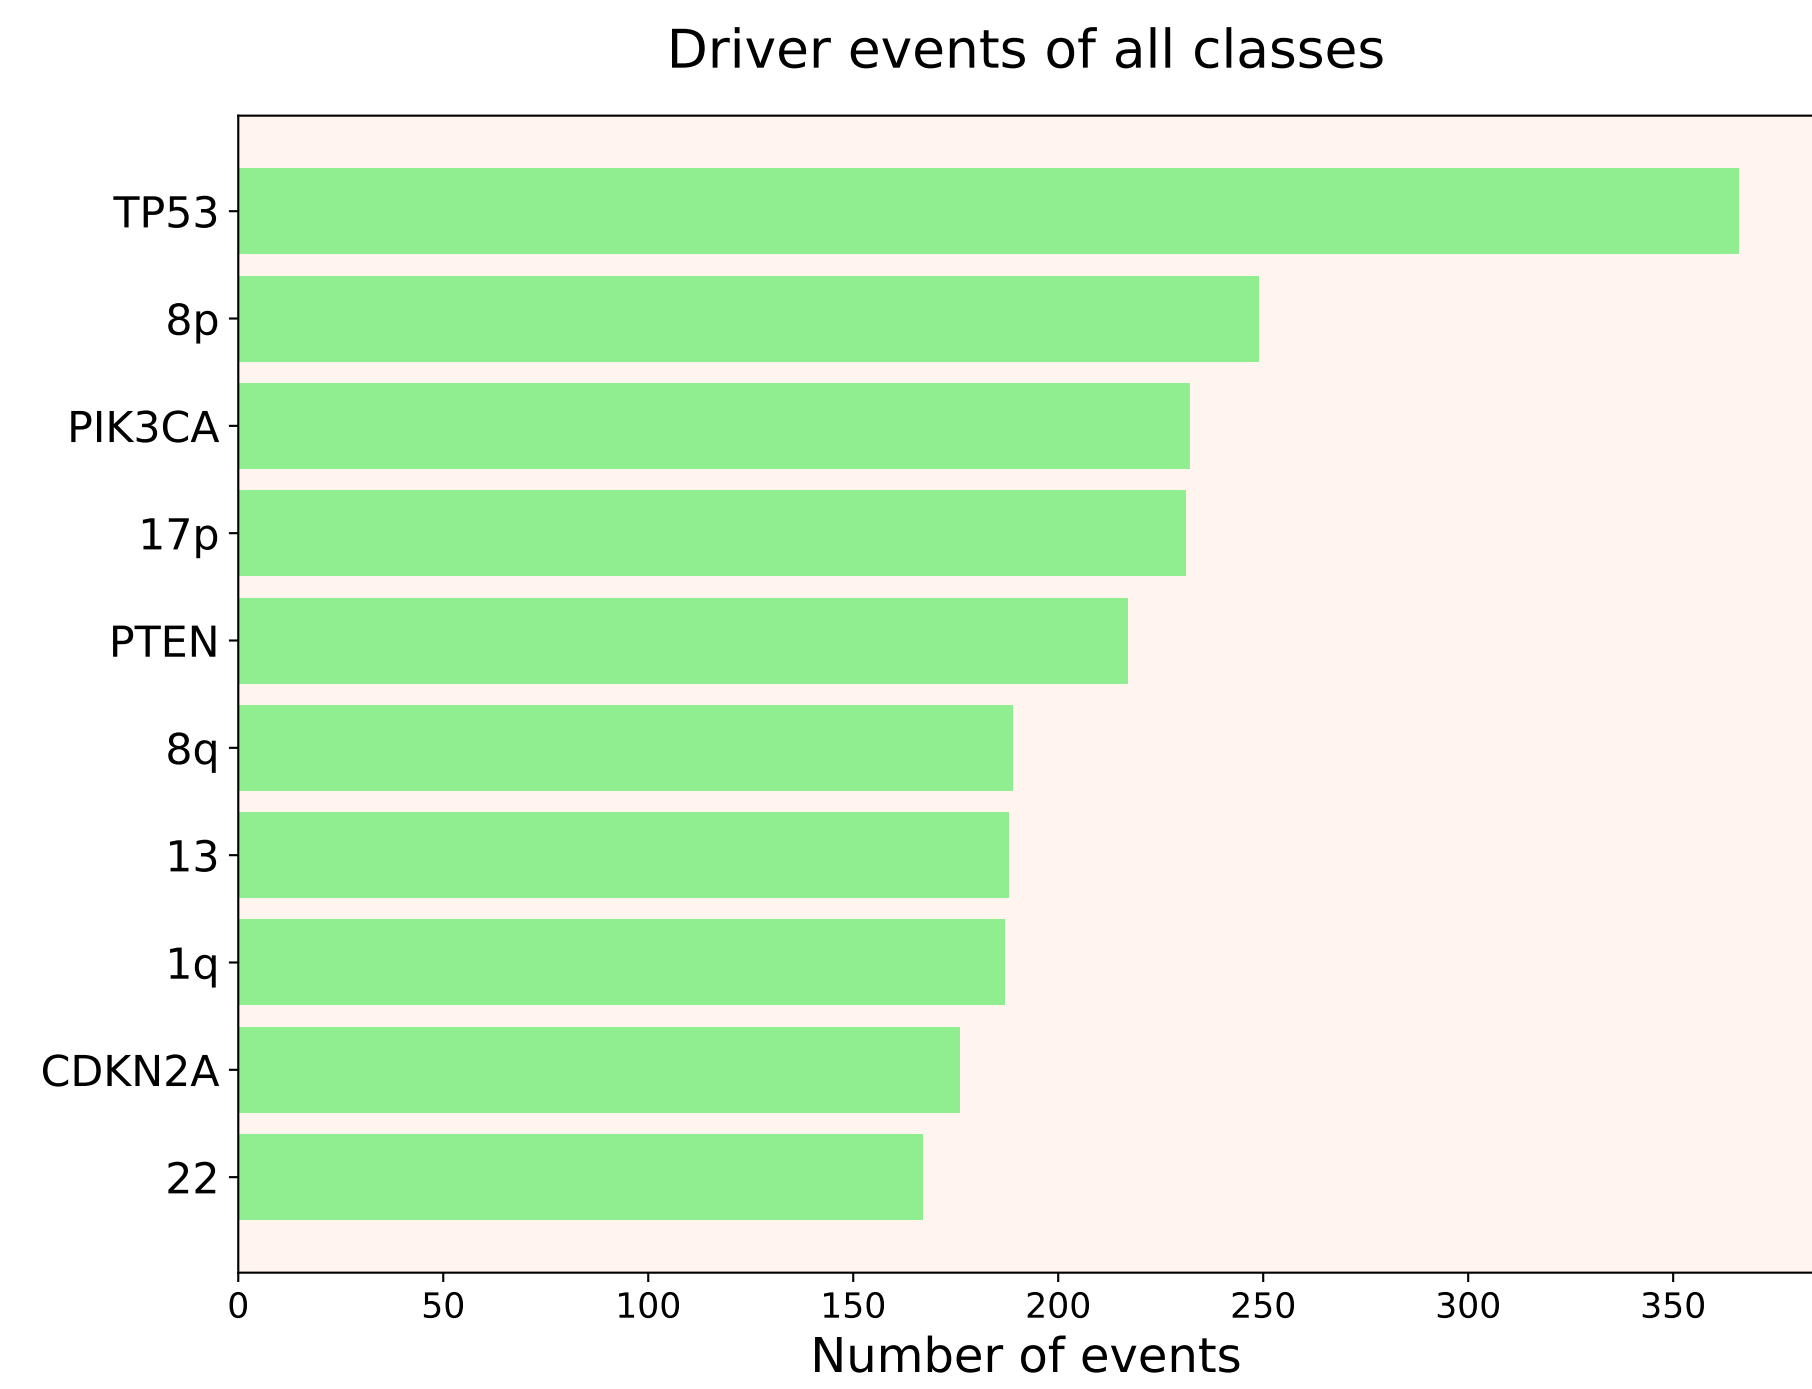

Supplement: Supplemental_Data_S1.zip [file Supplemental_Data_S1.zip]

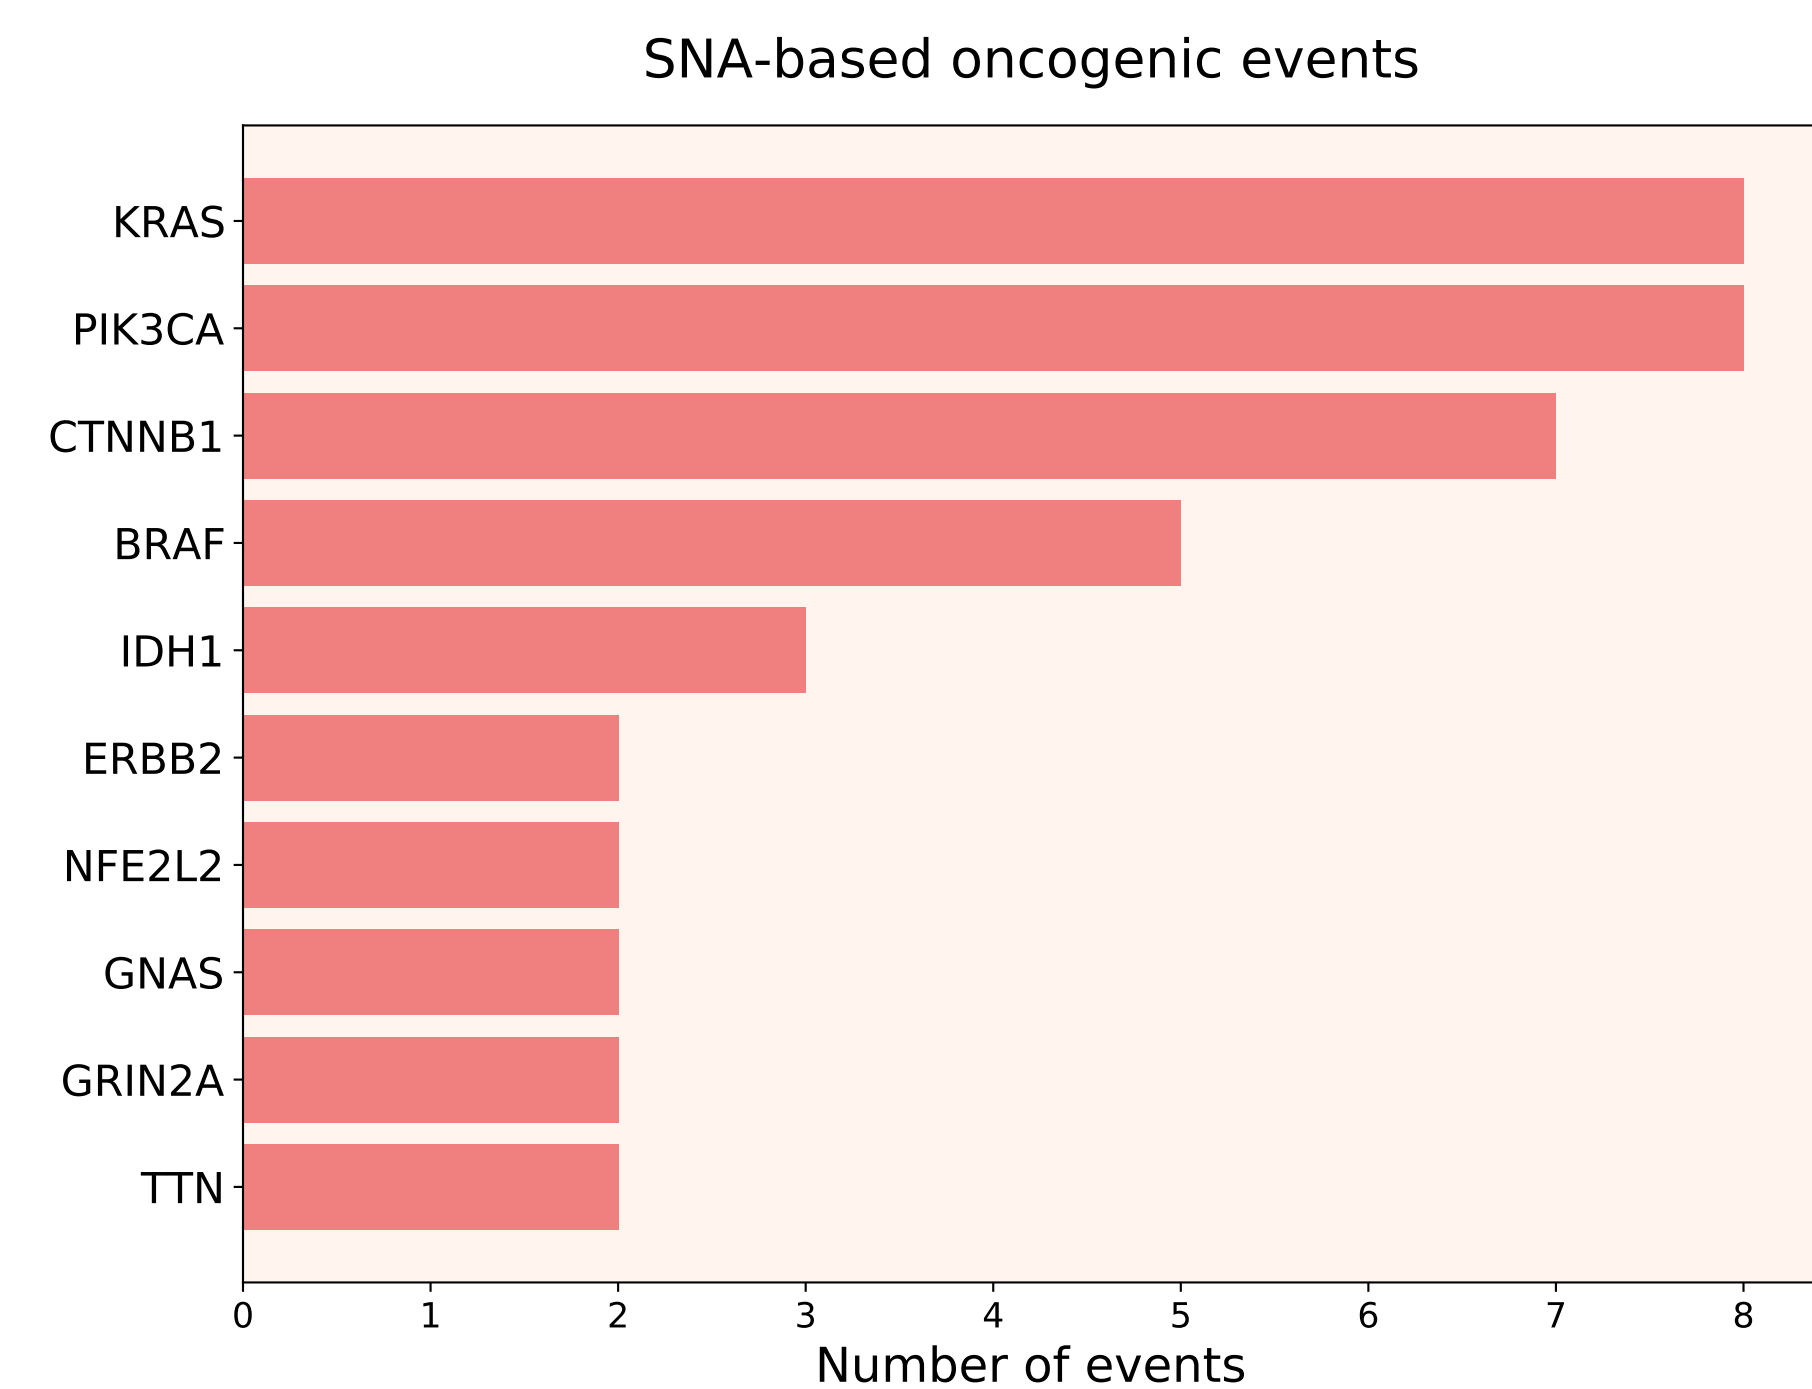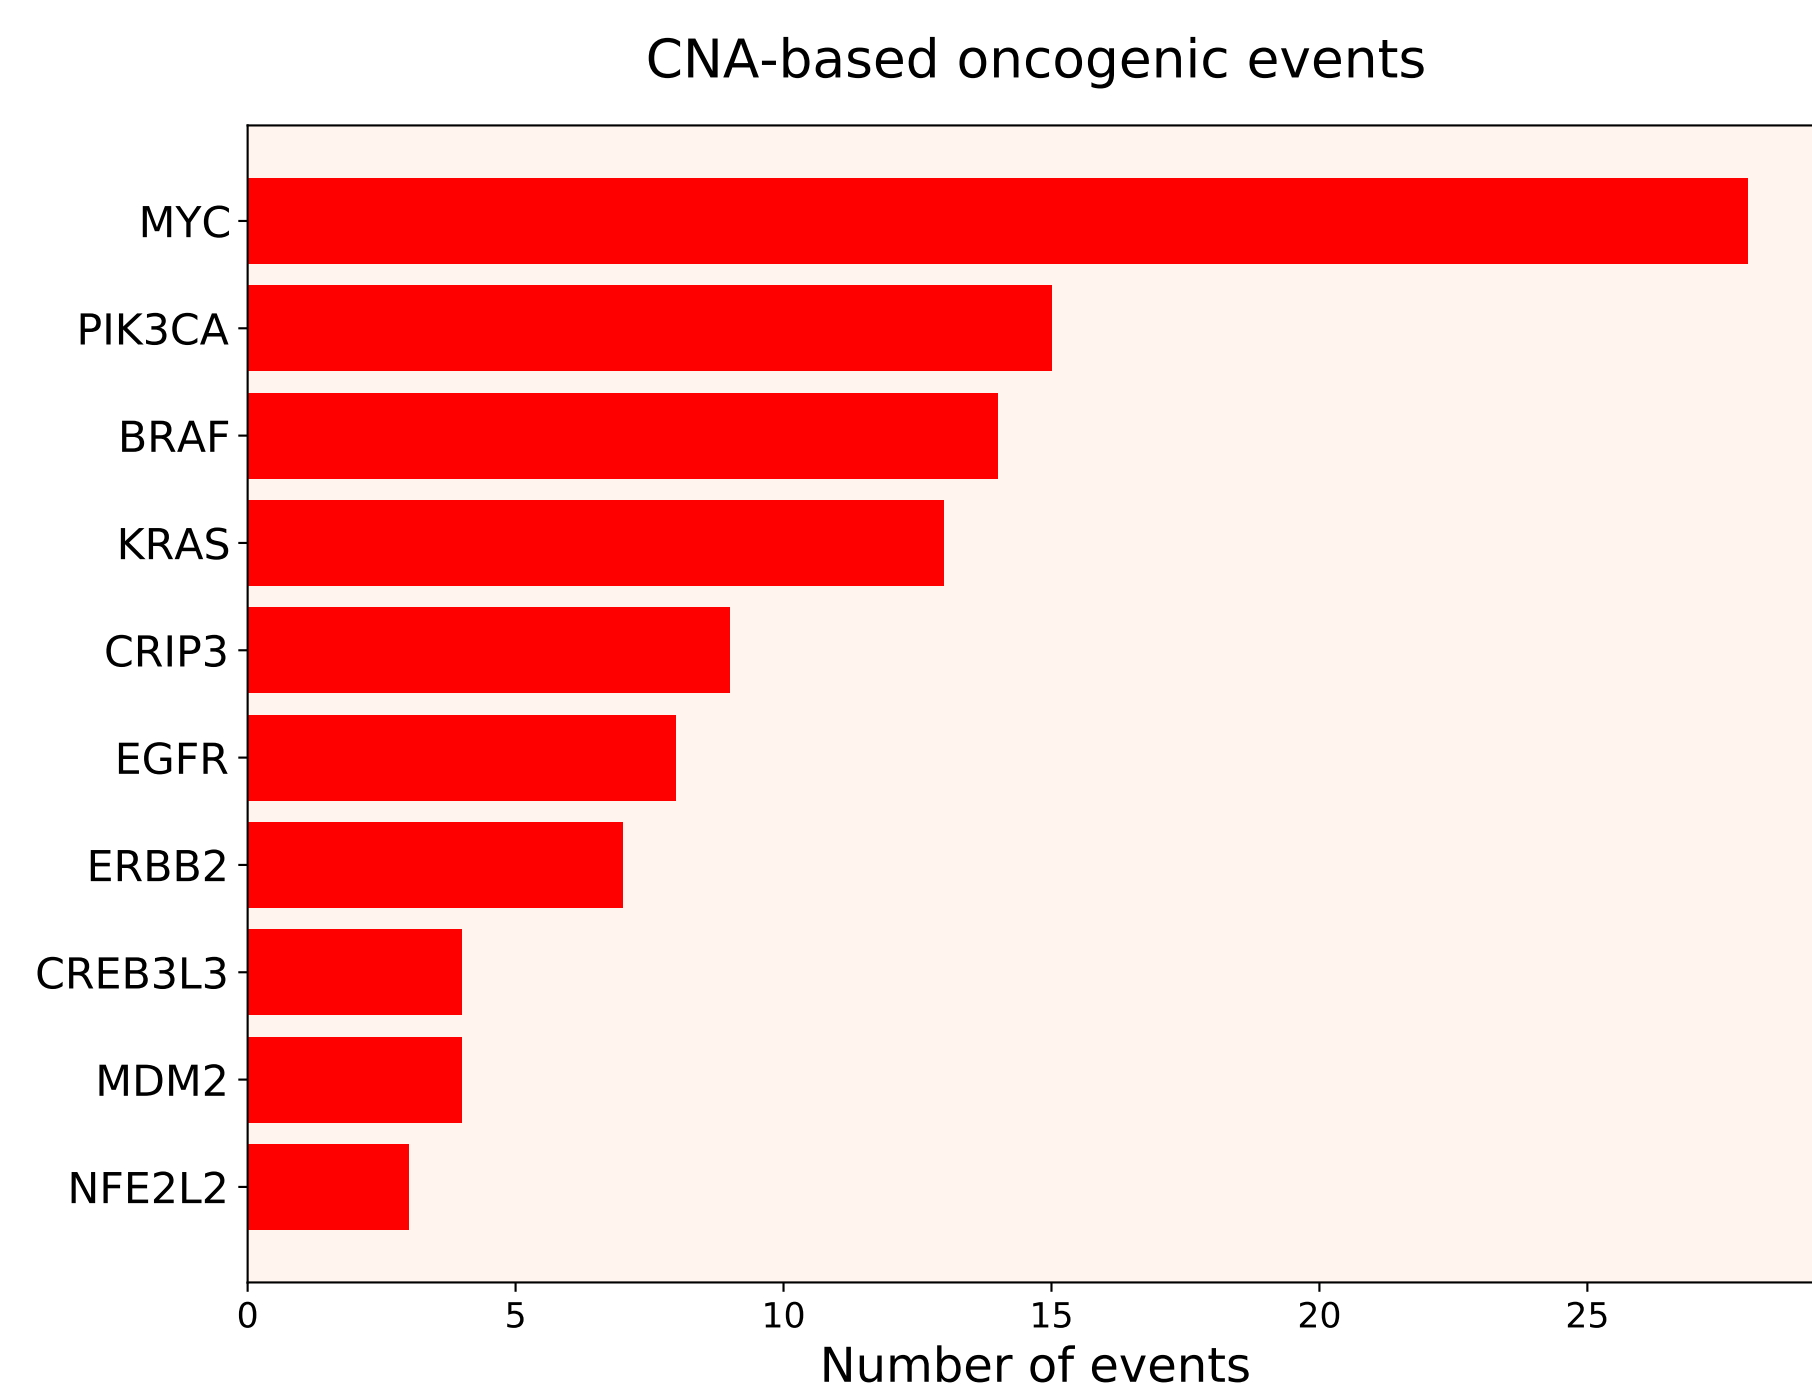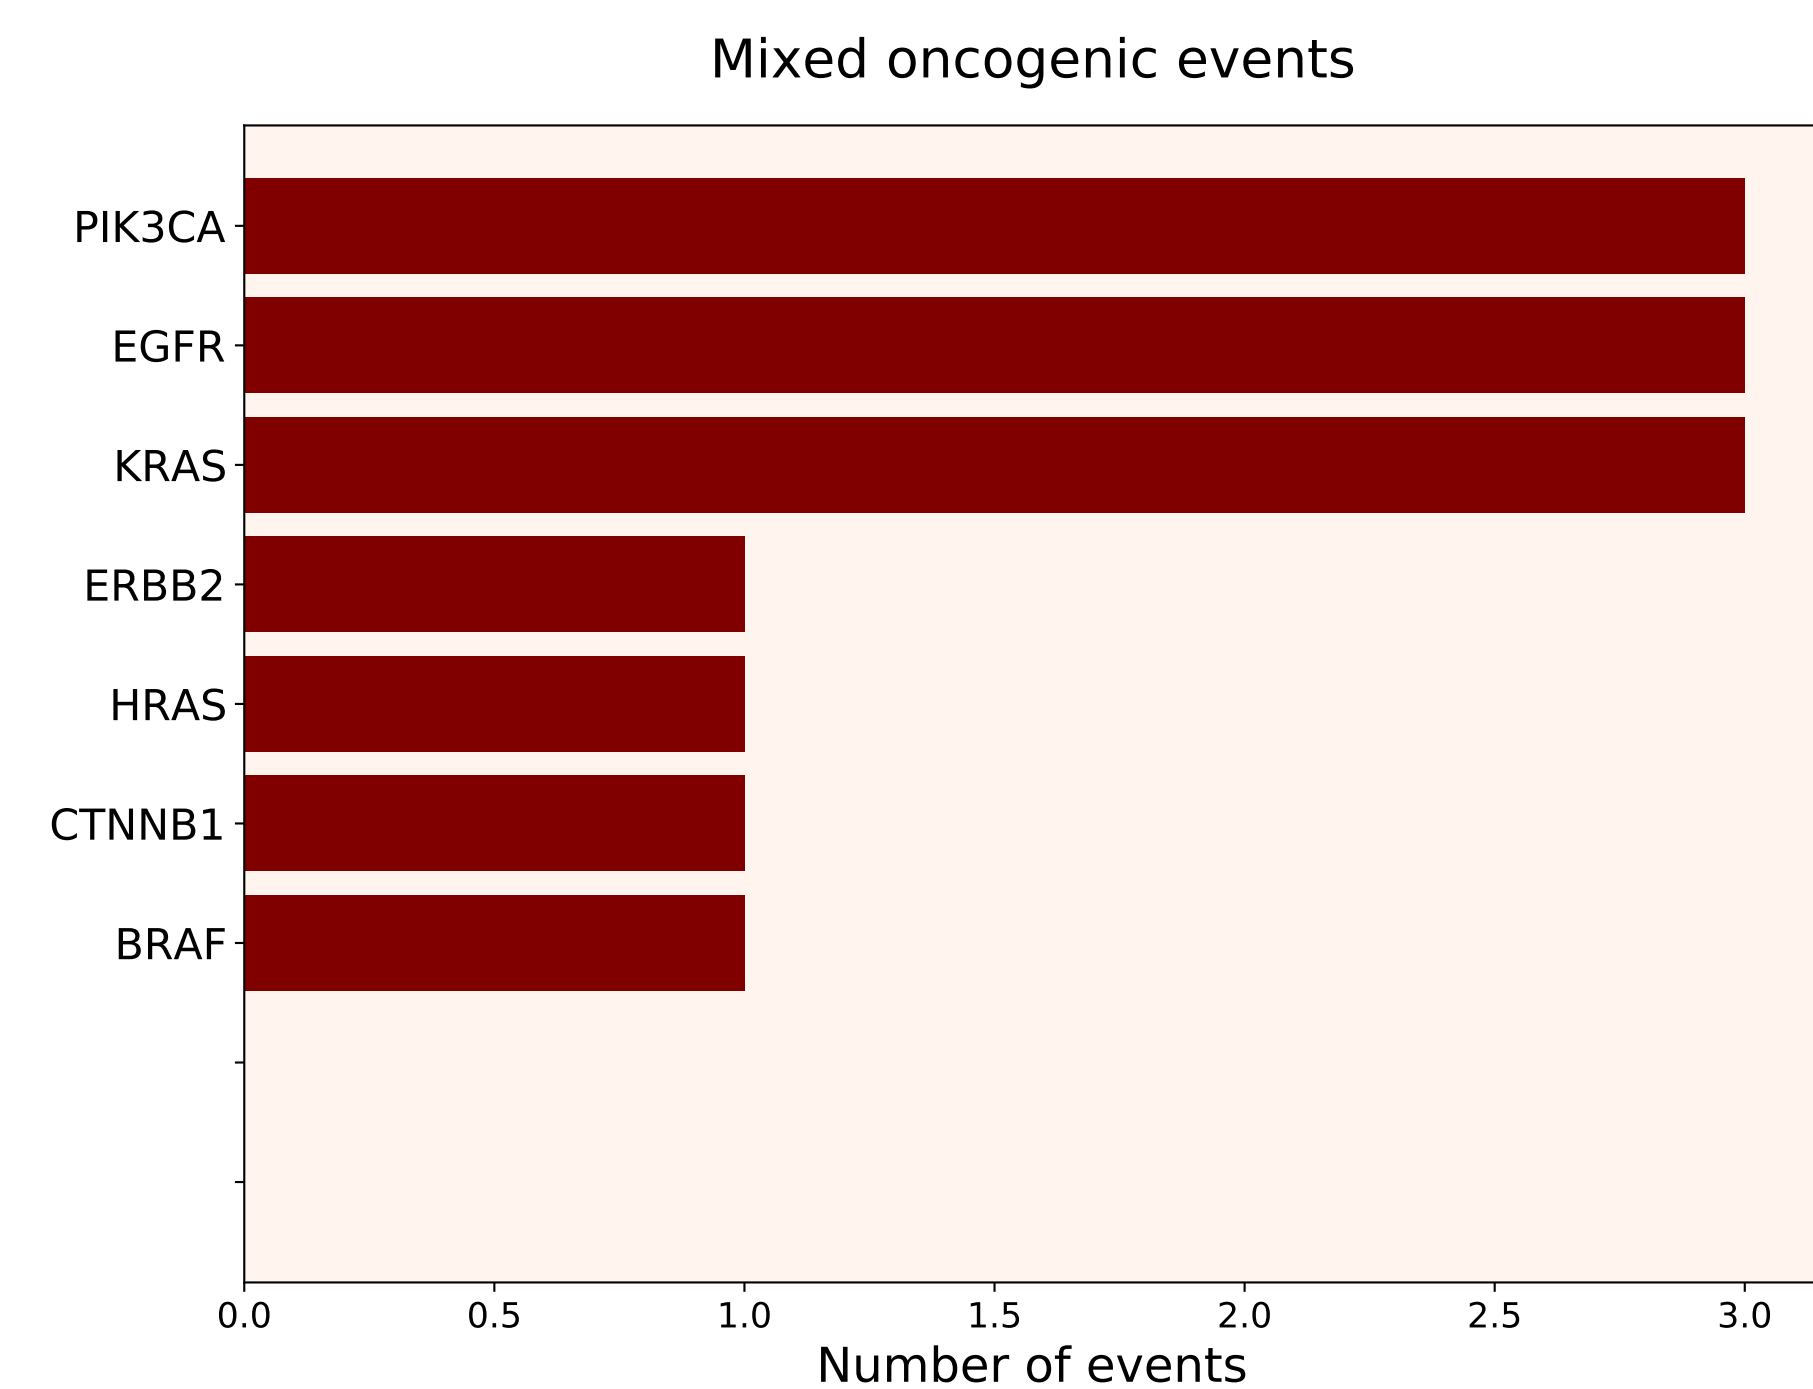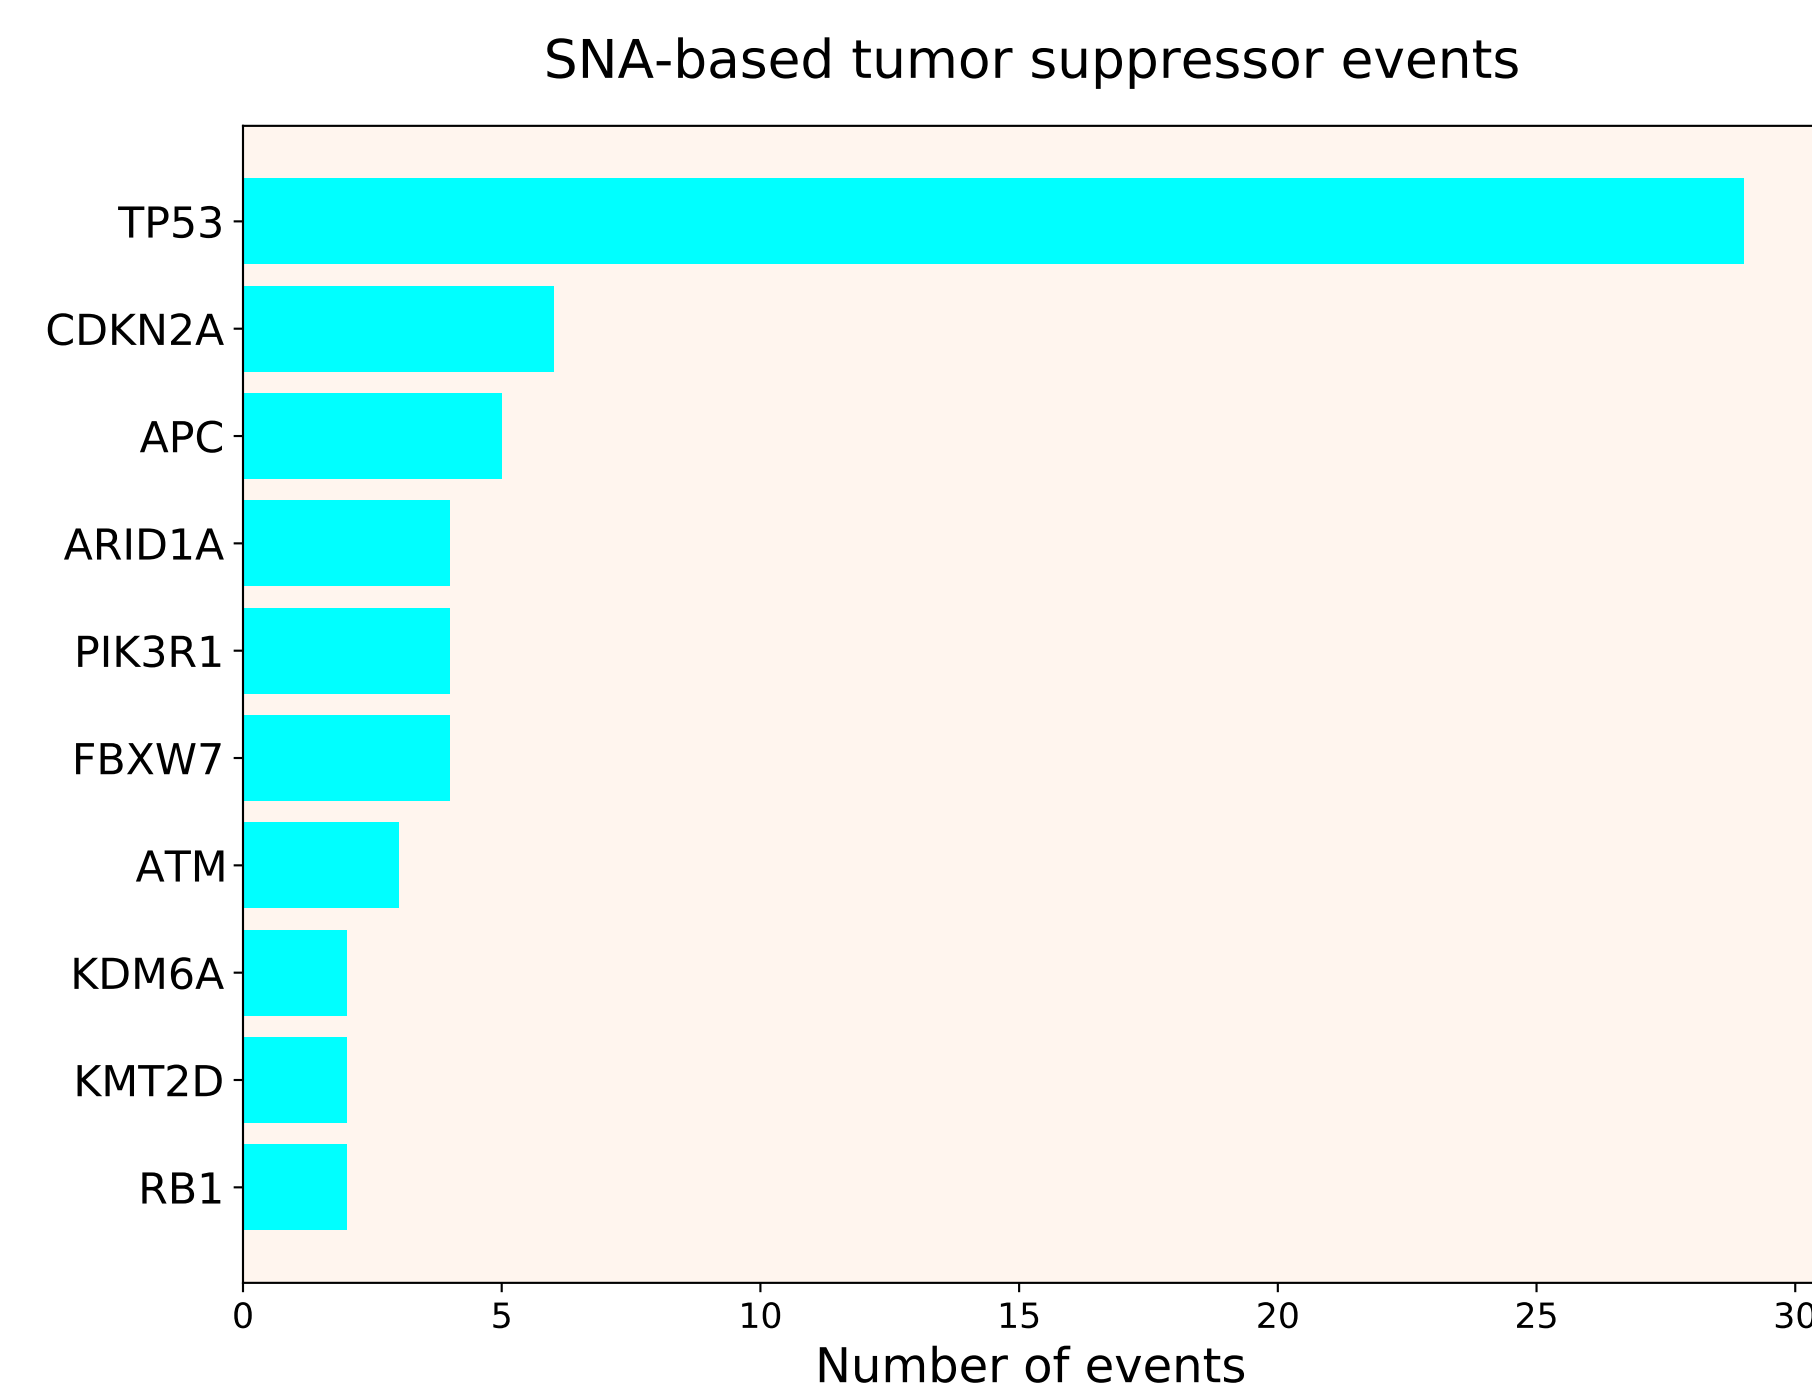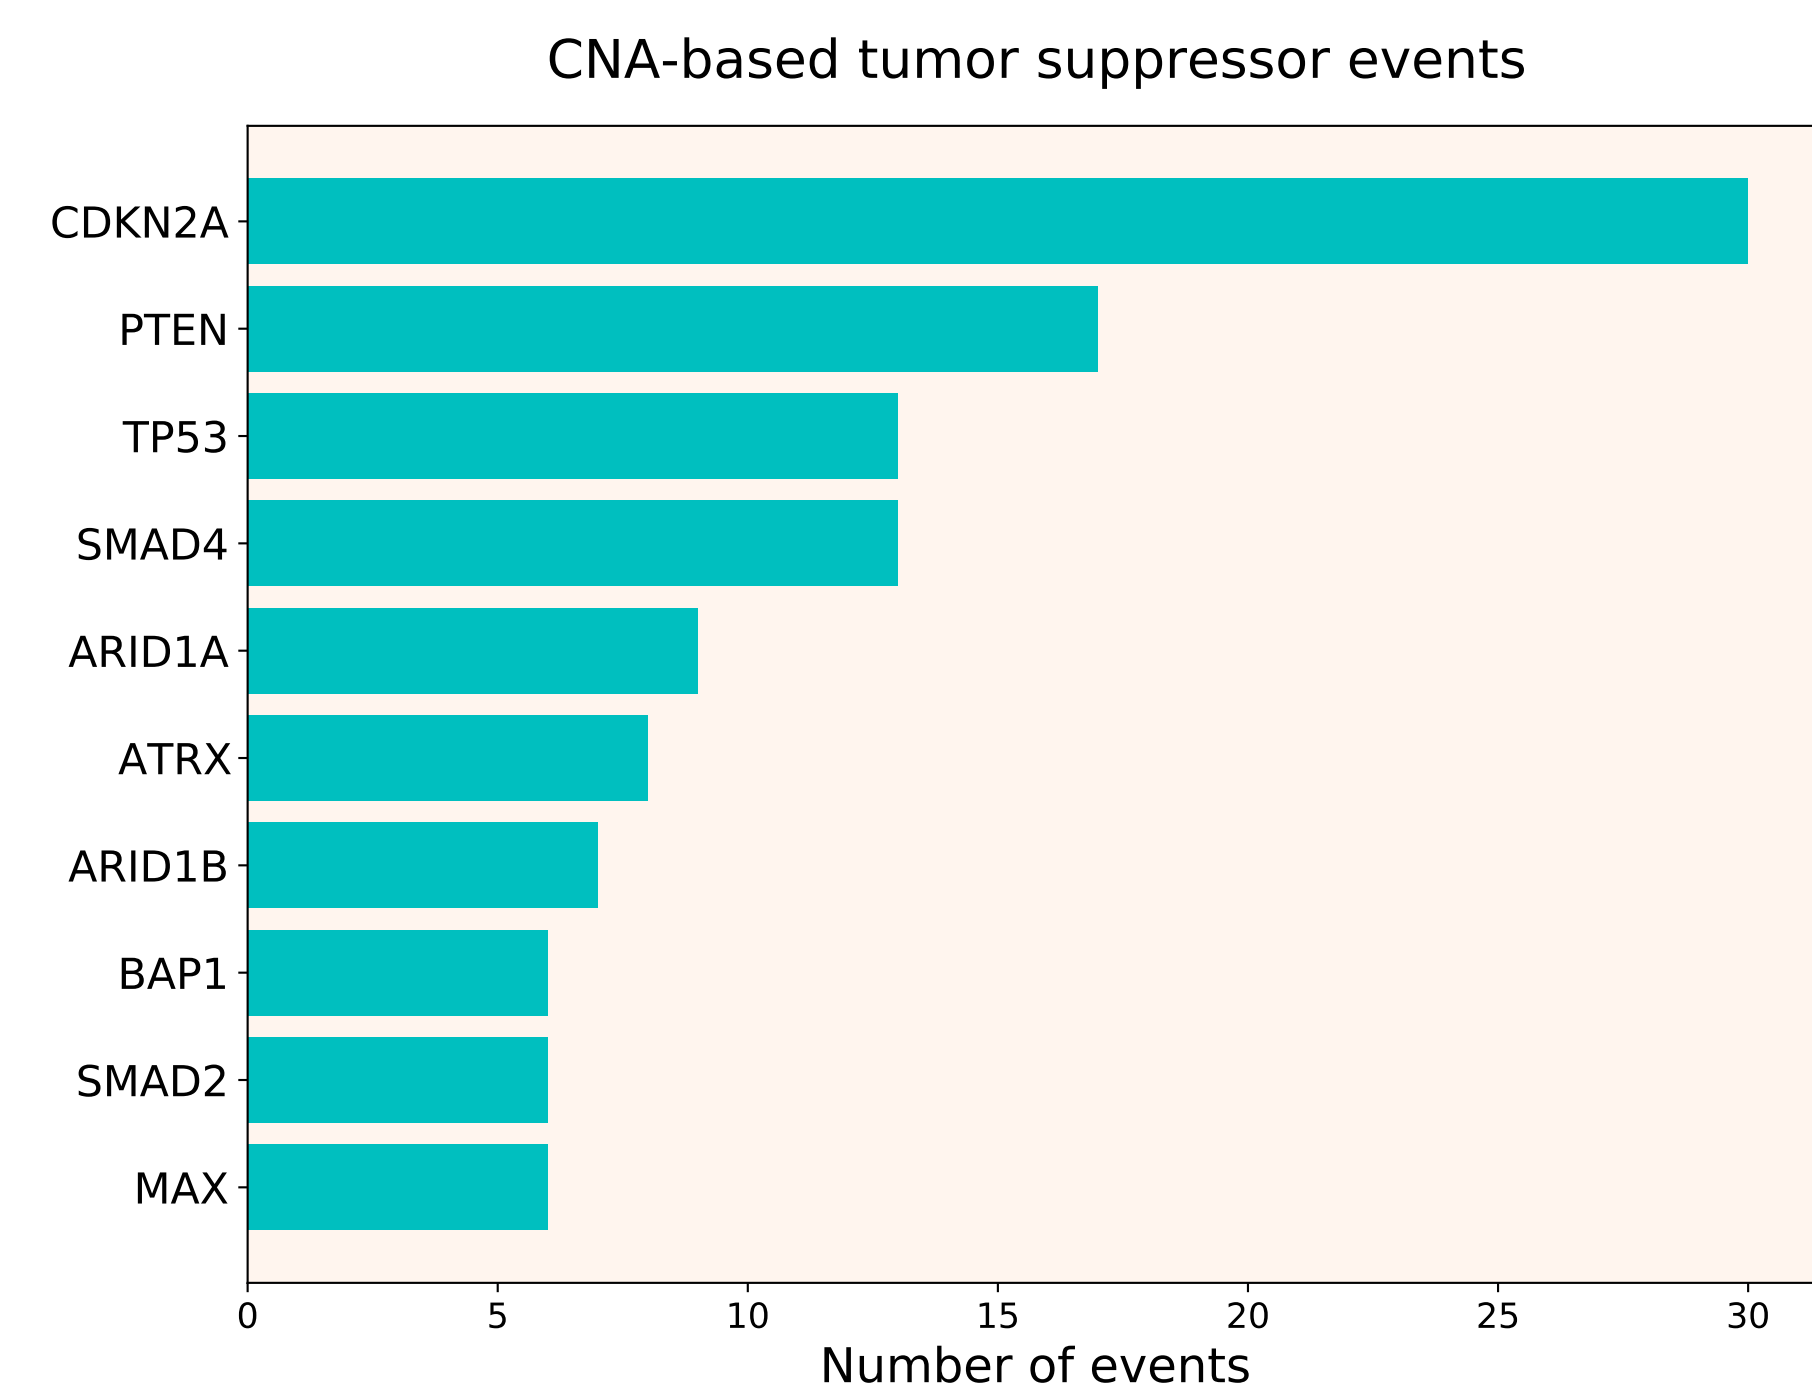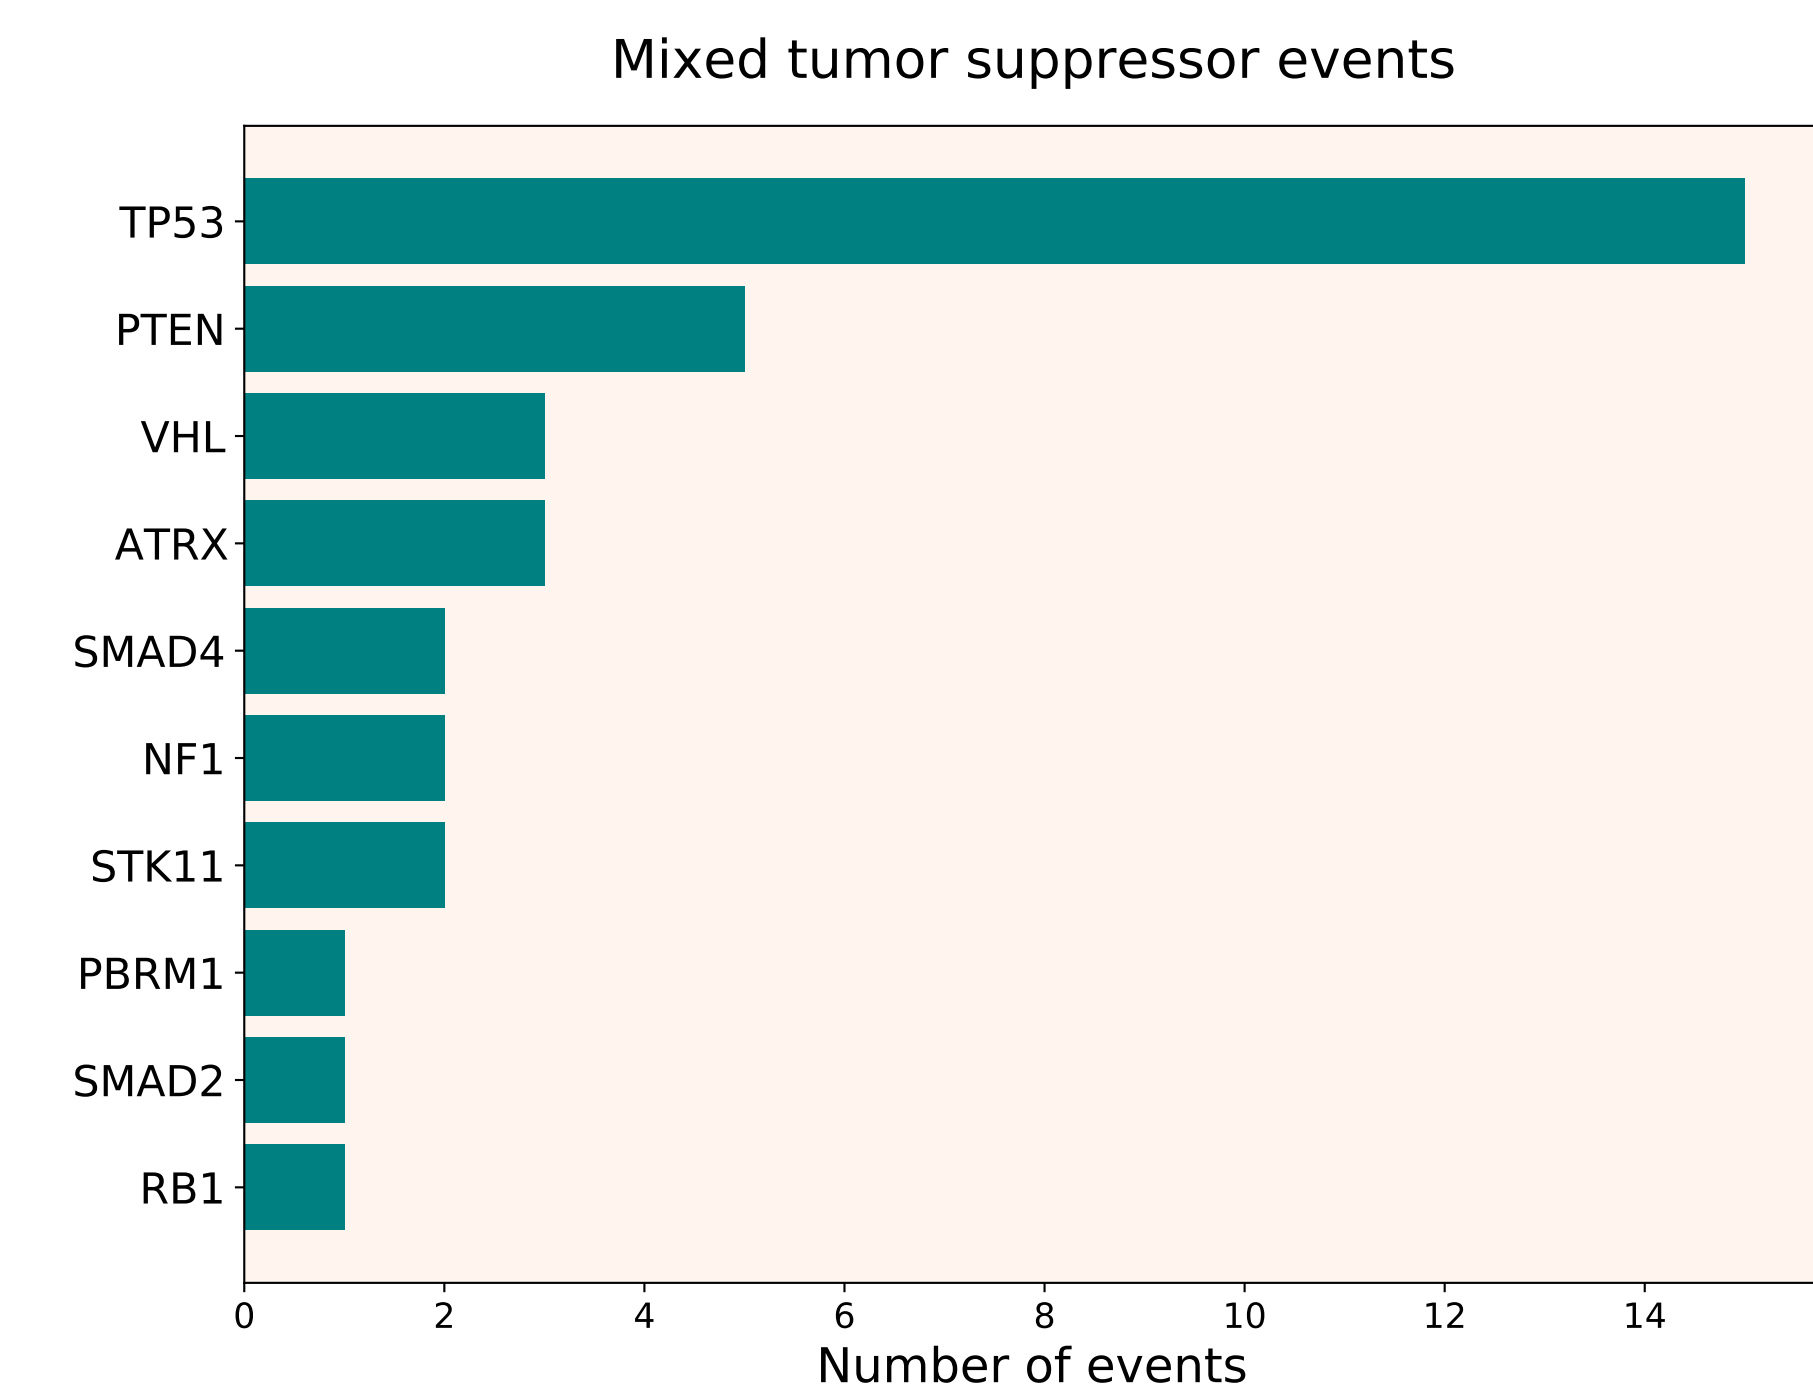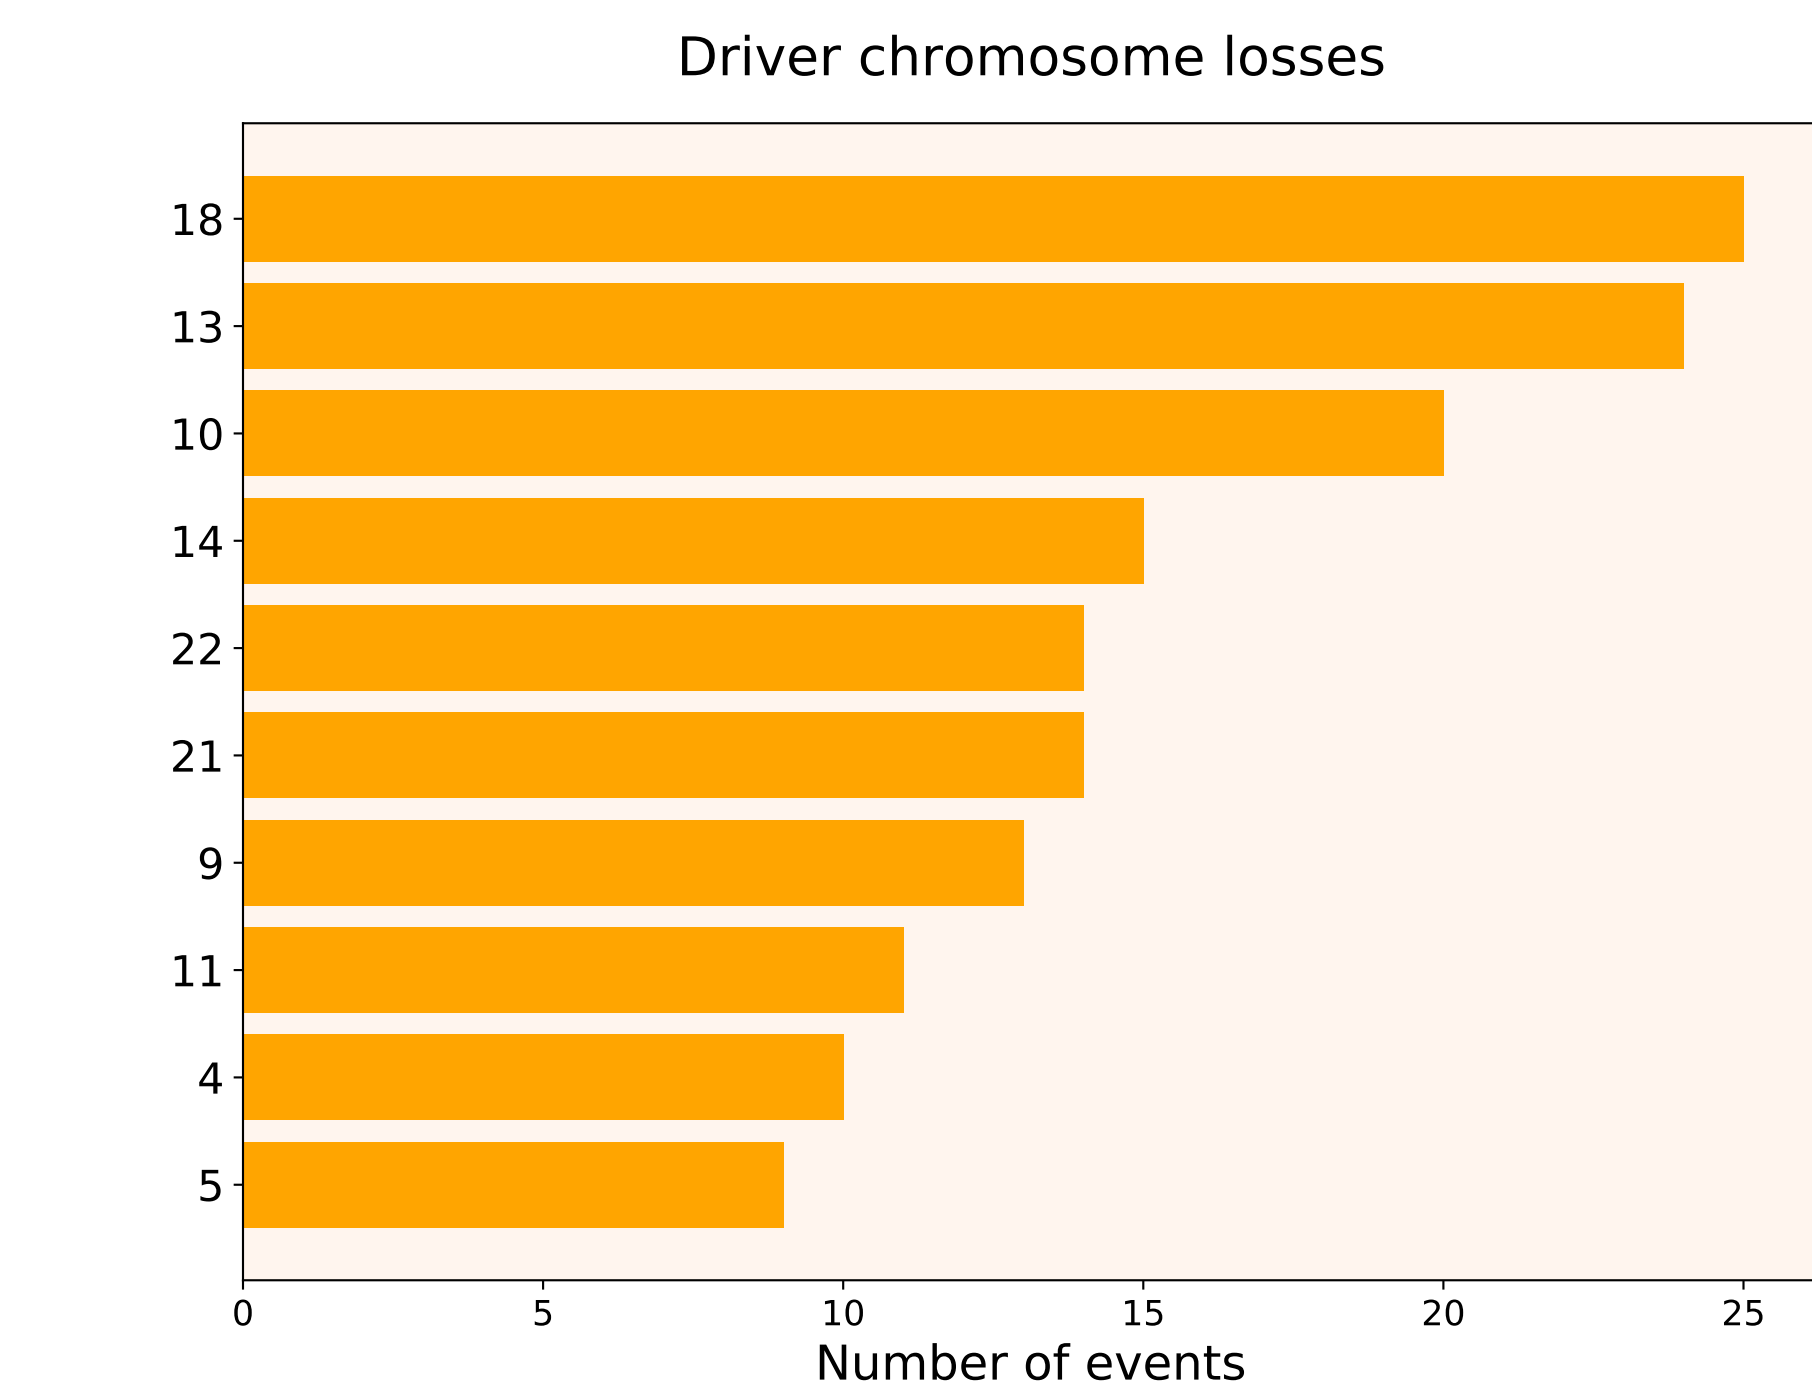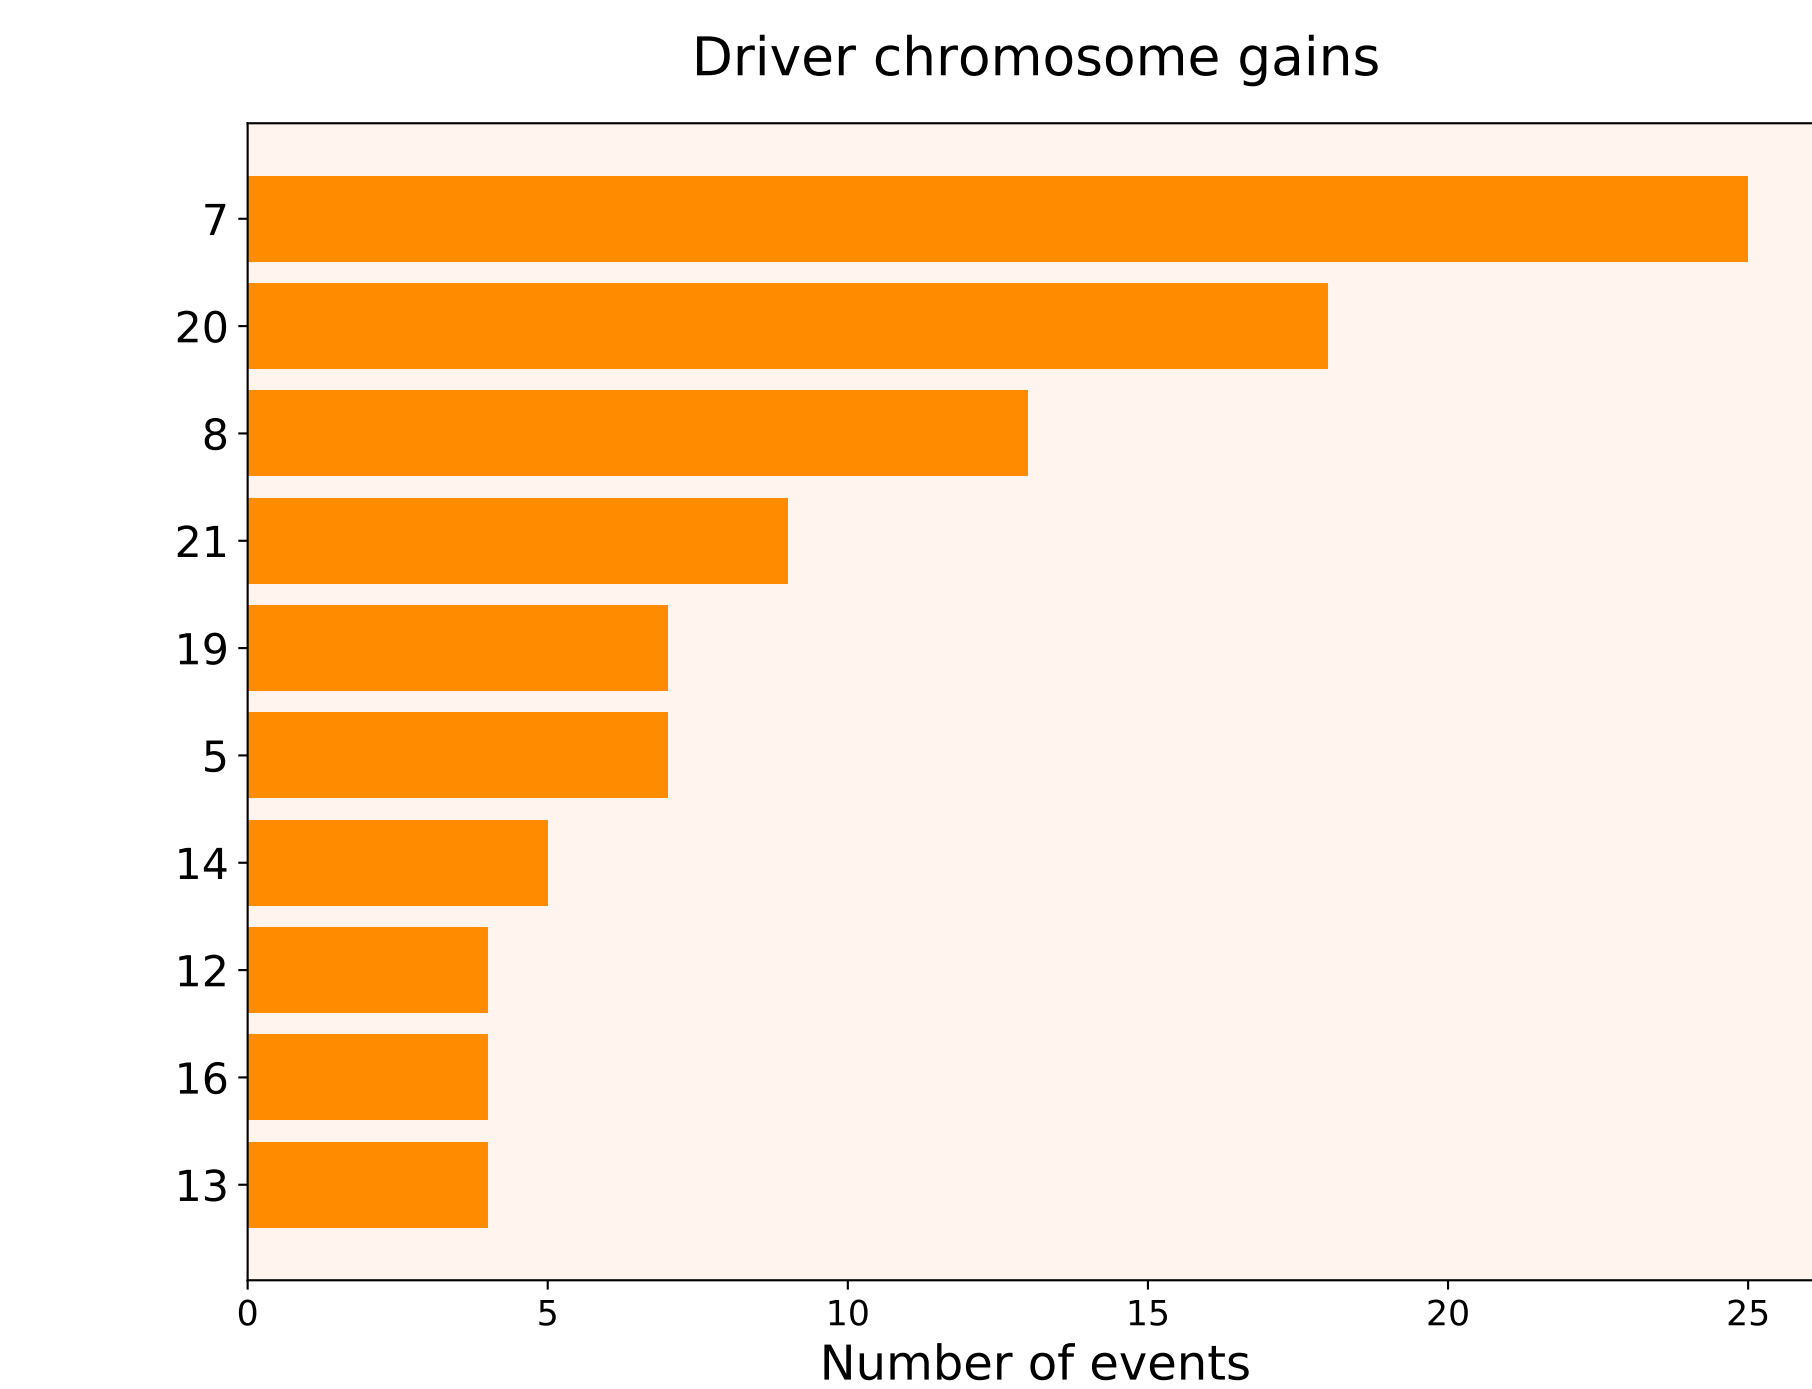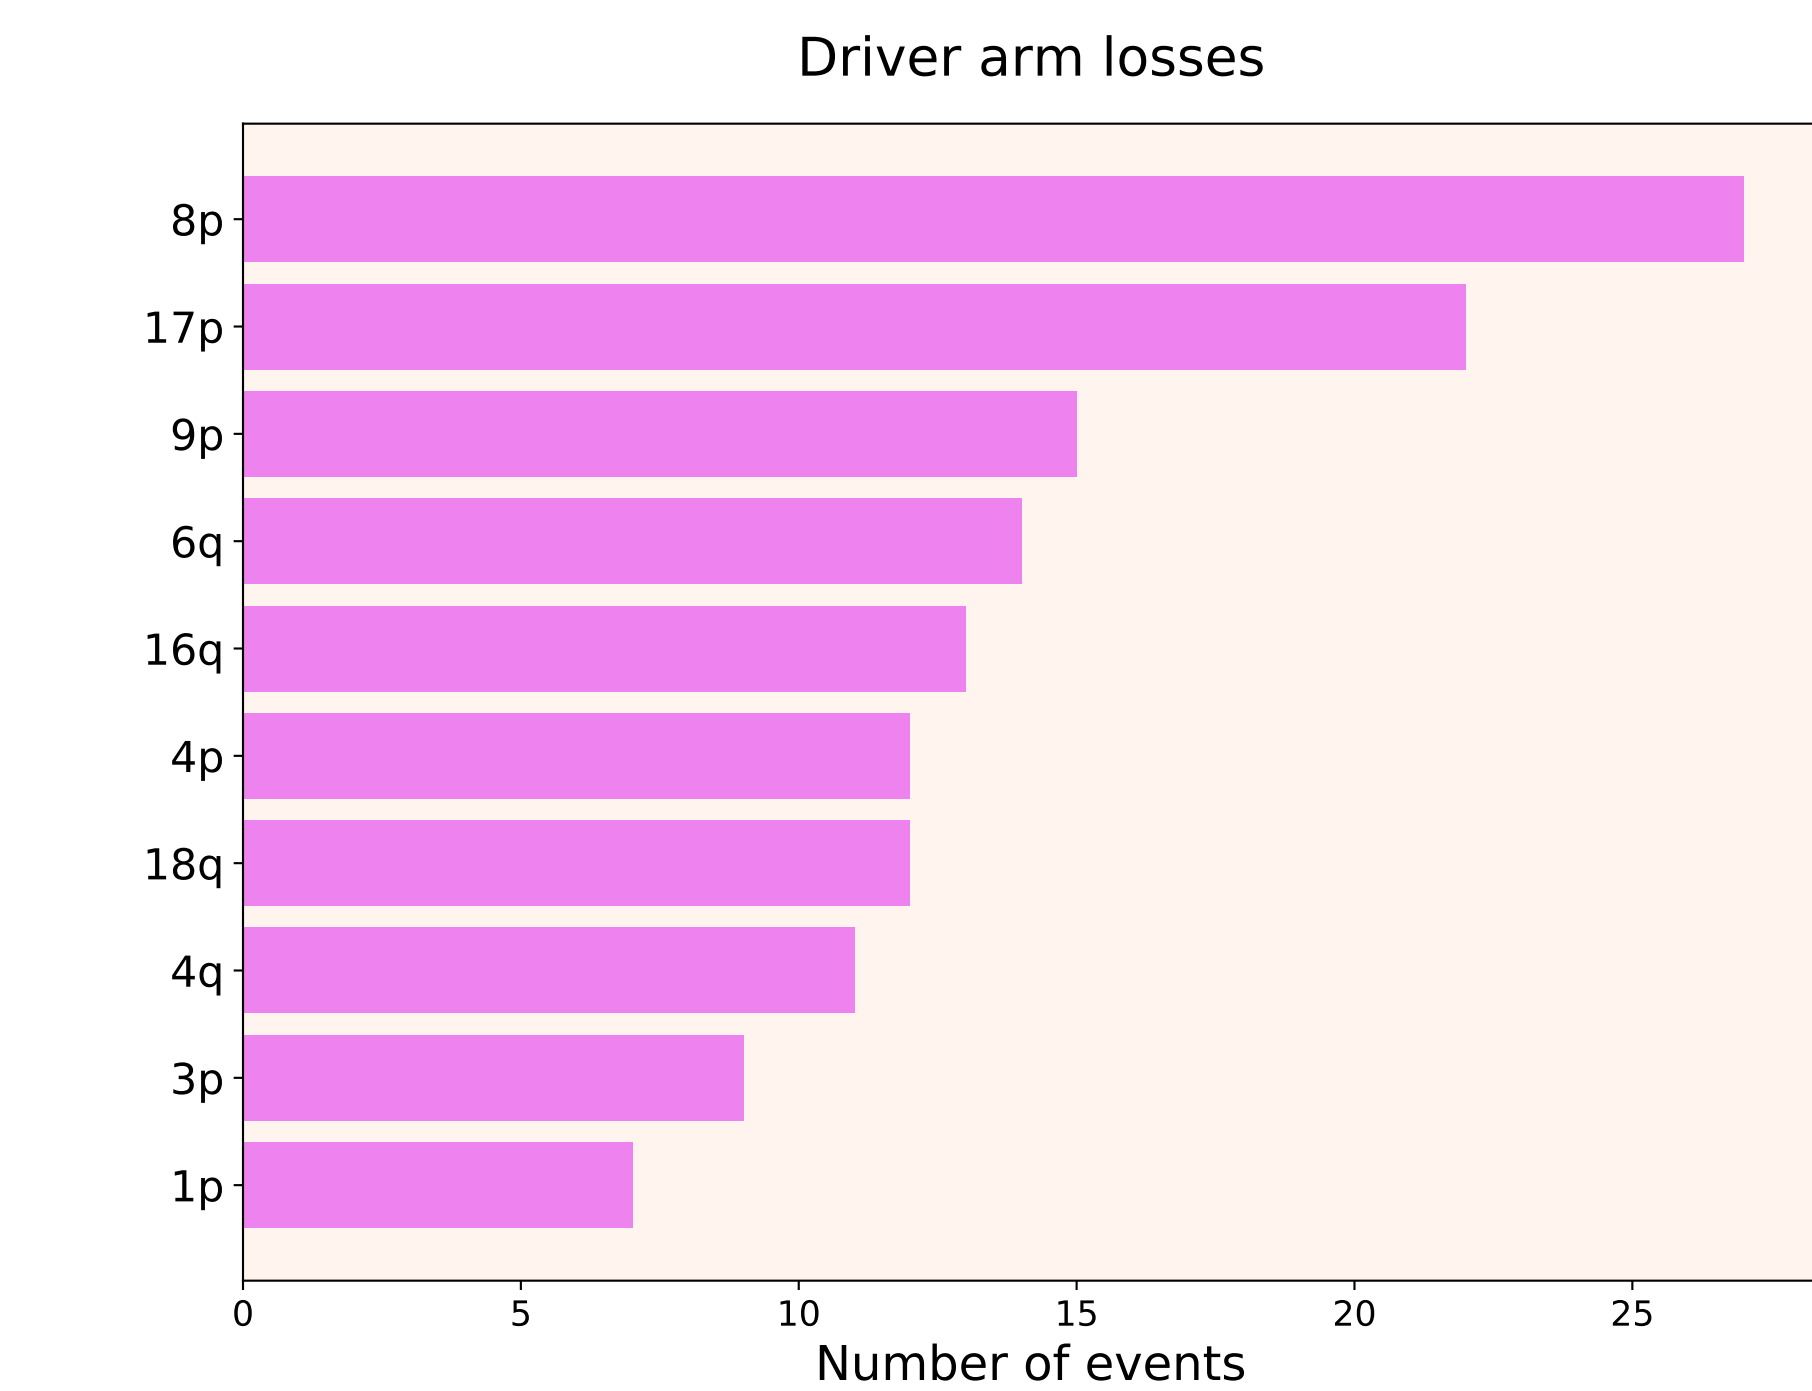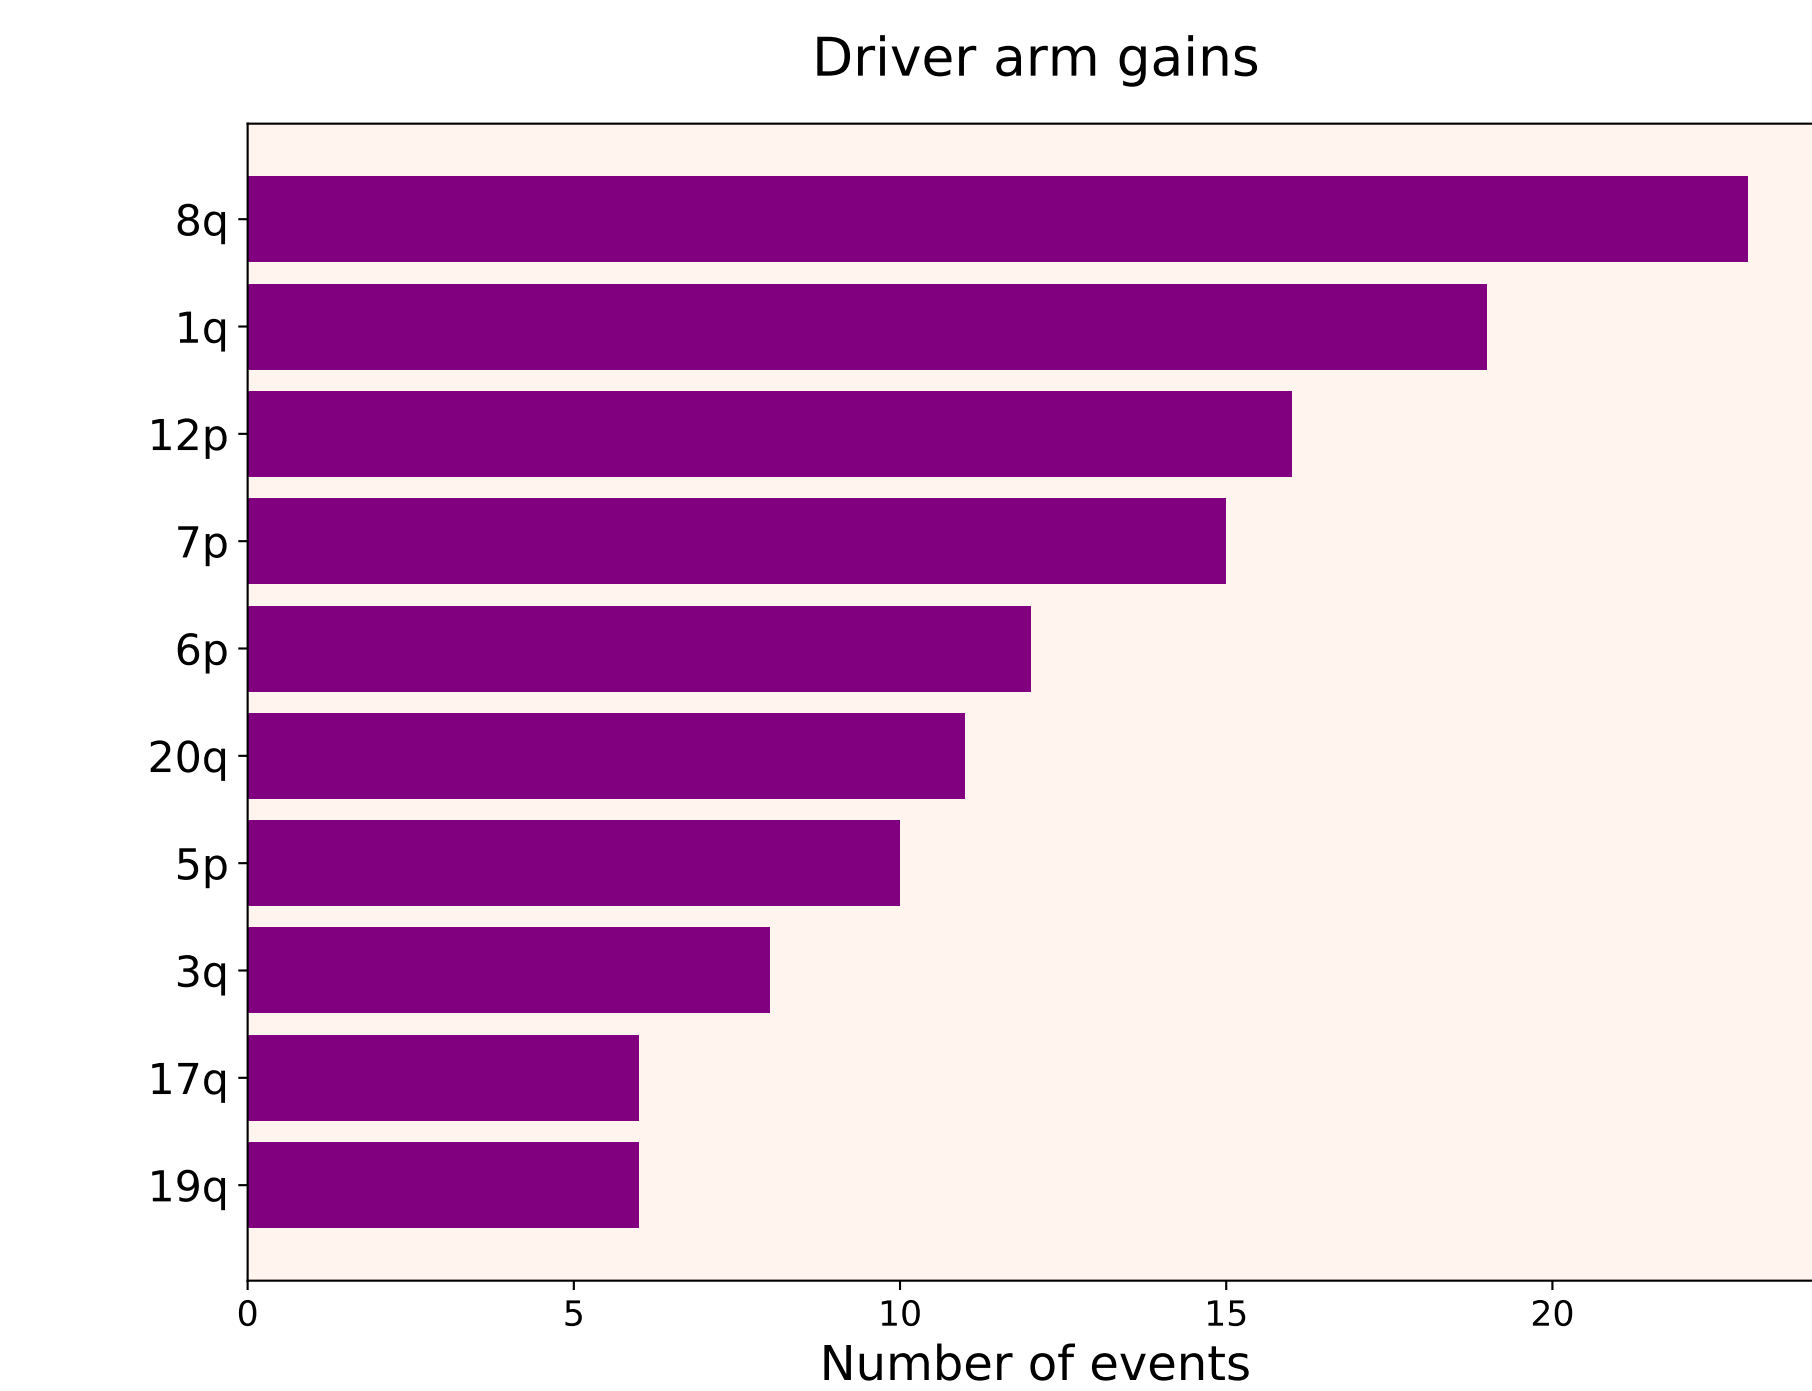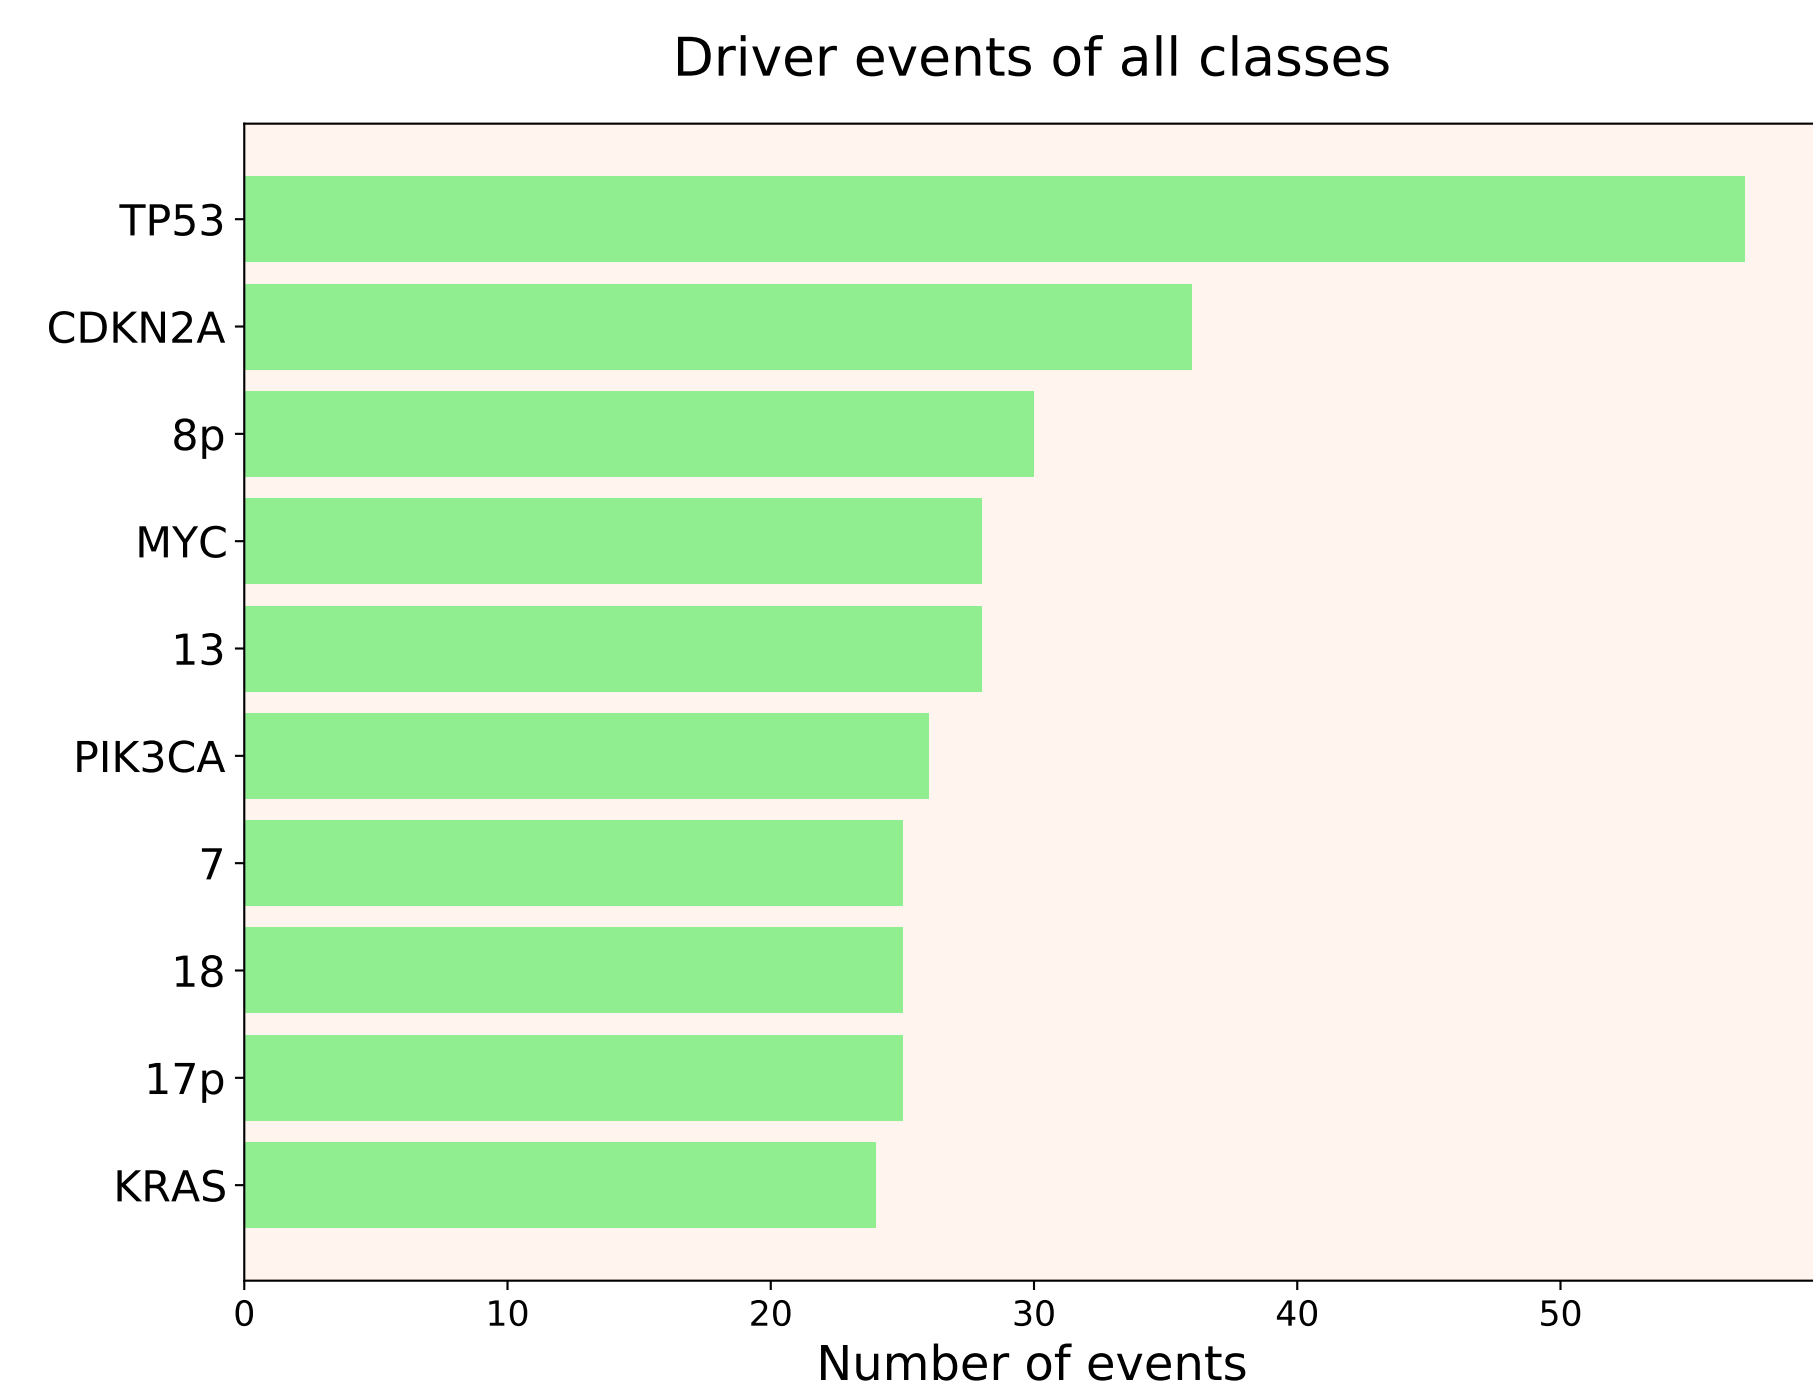

Supplement: Supplemental_Data_S1.zip [file Supplemental_Data_S1.zip]

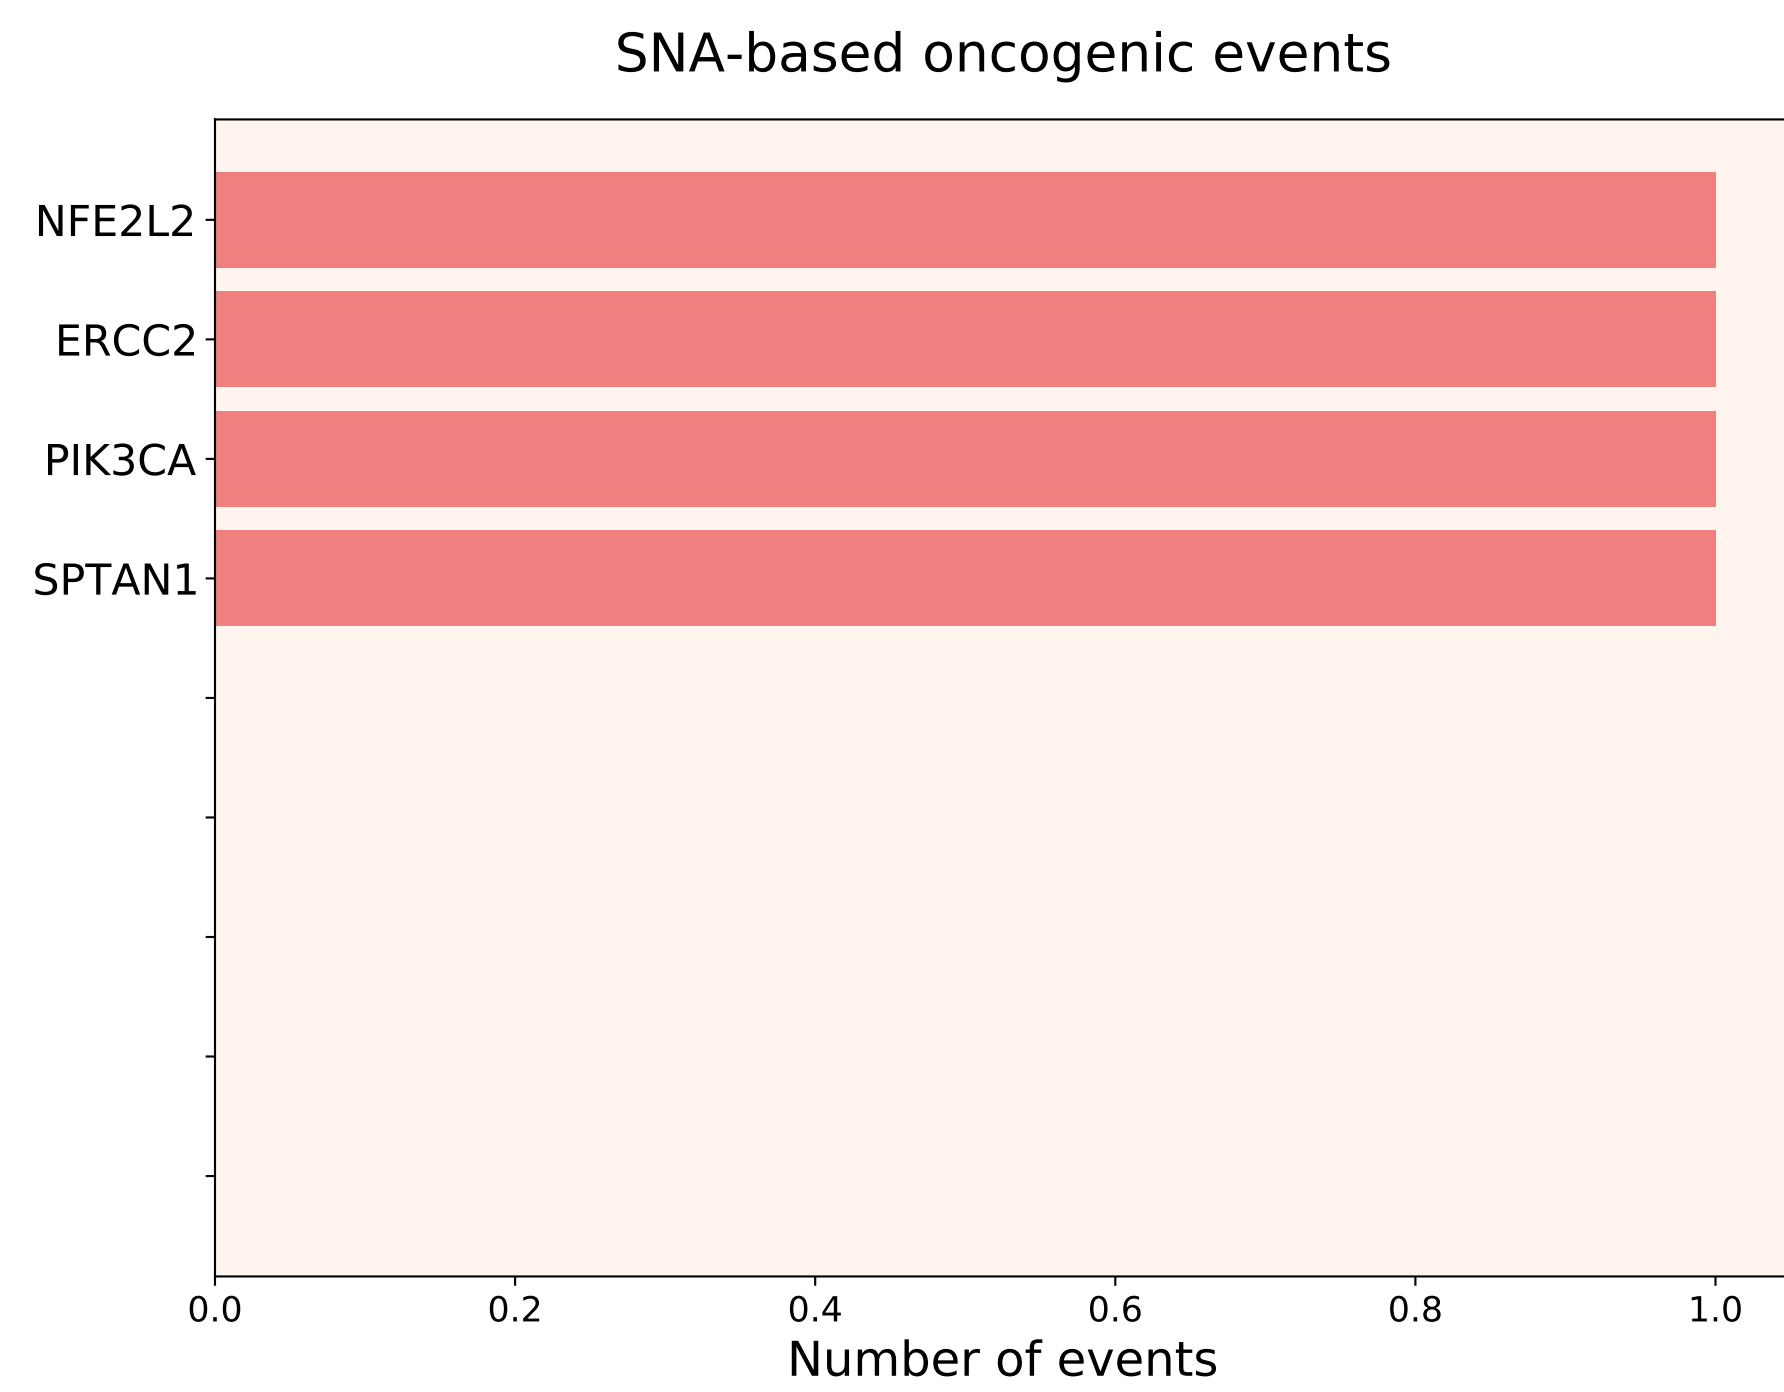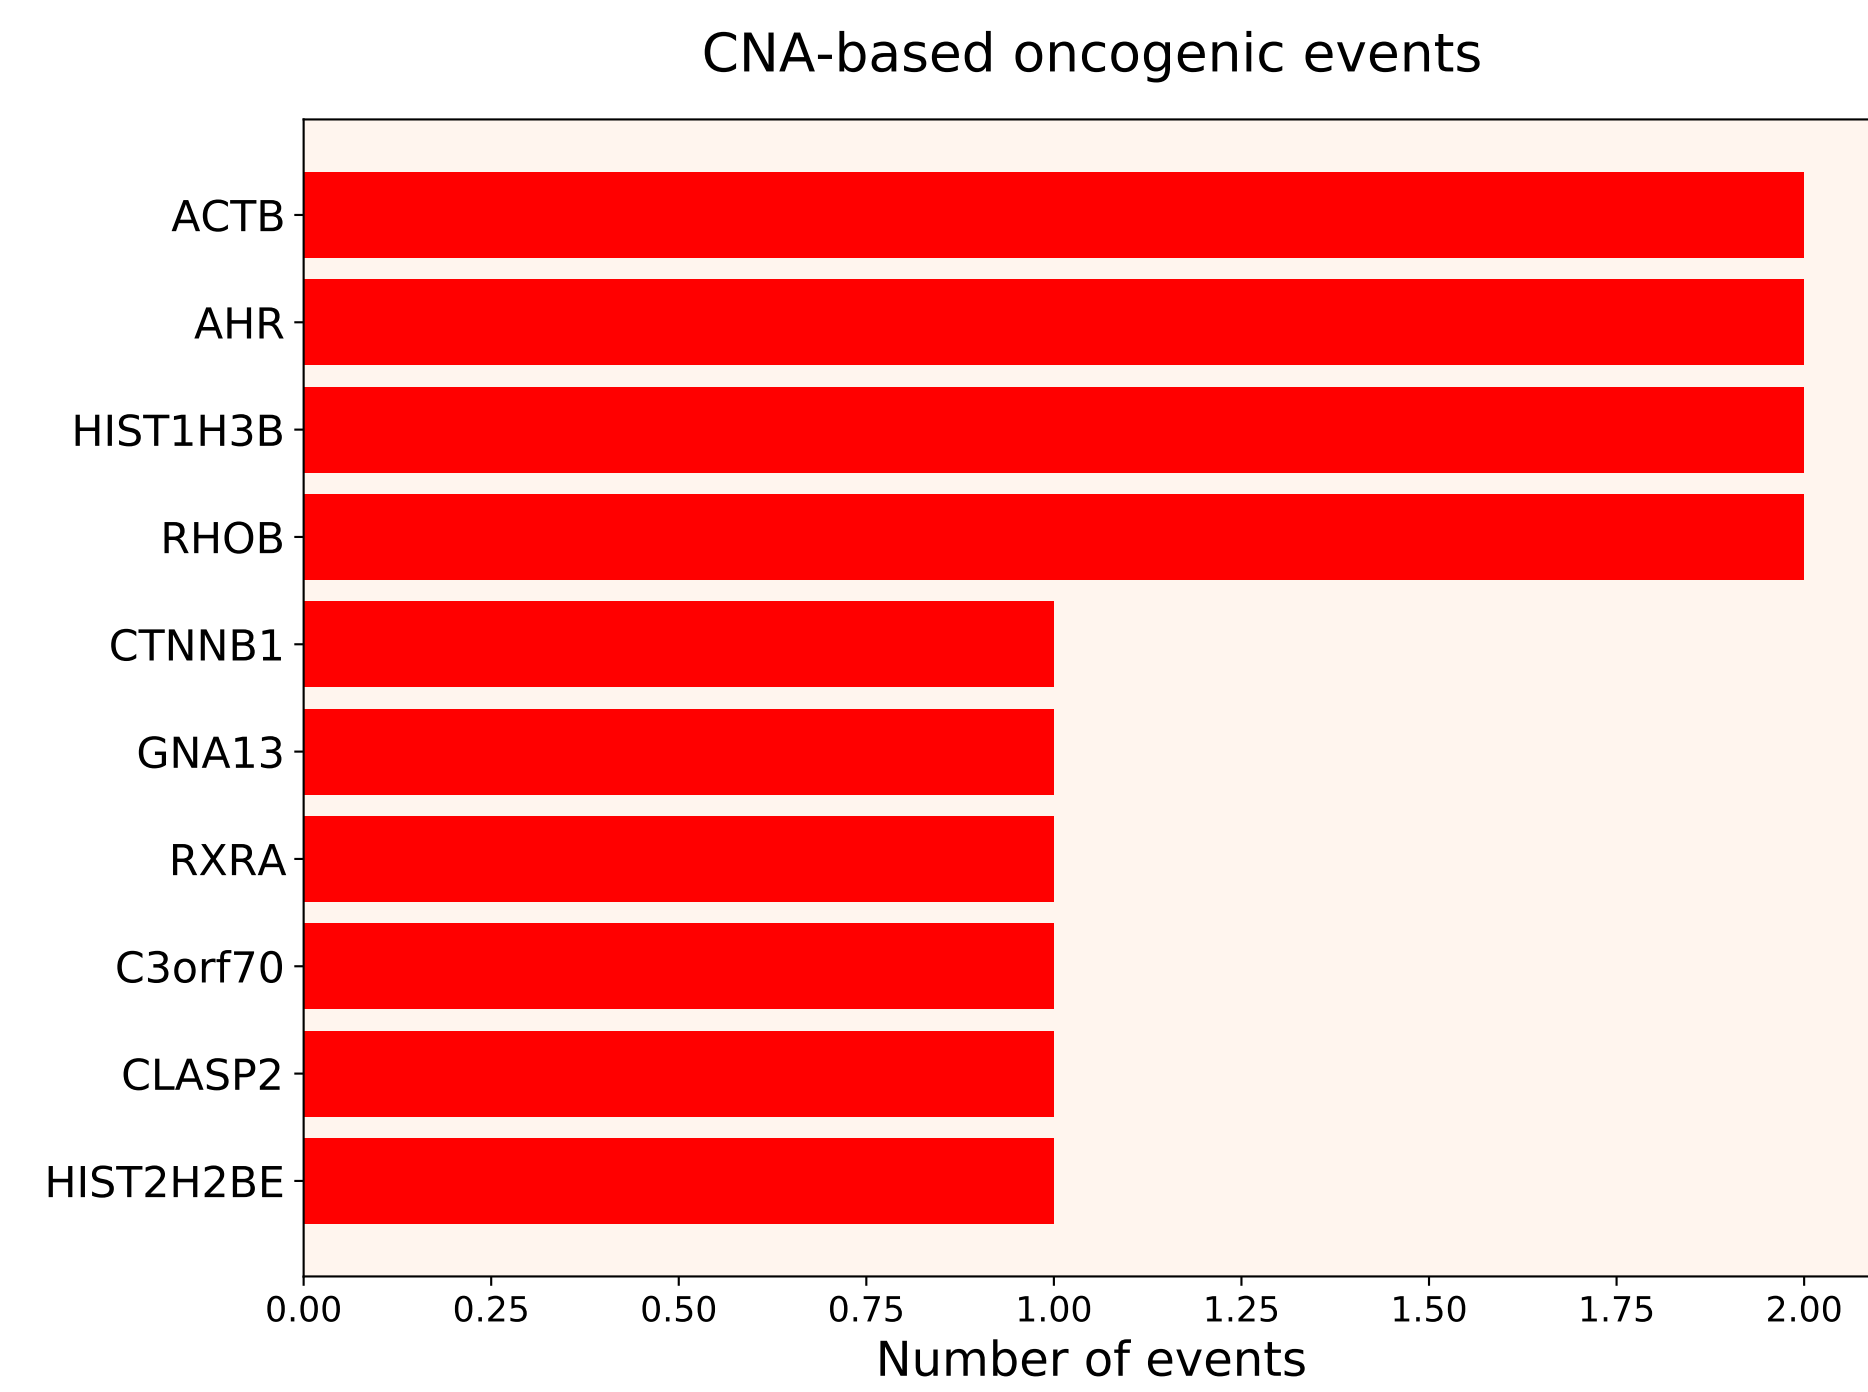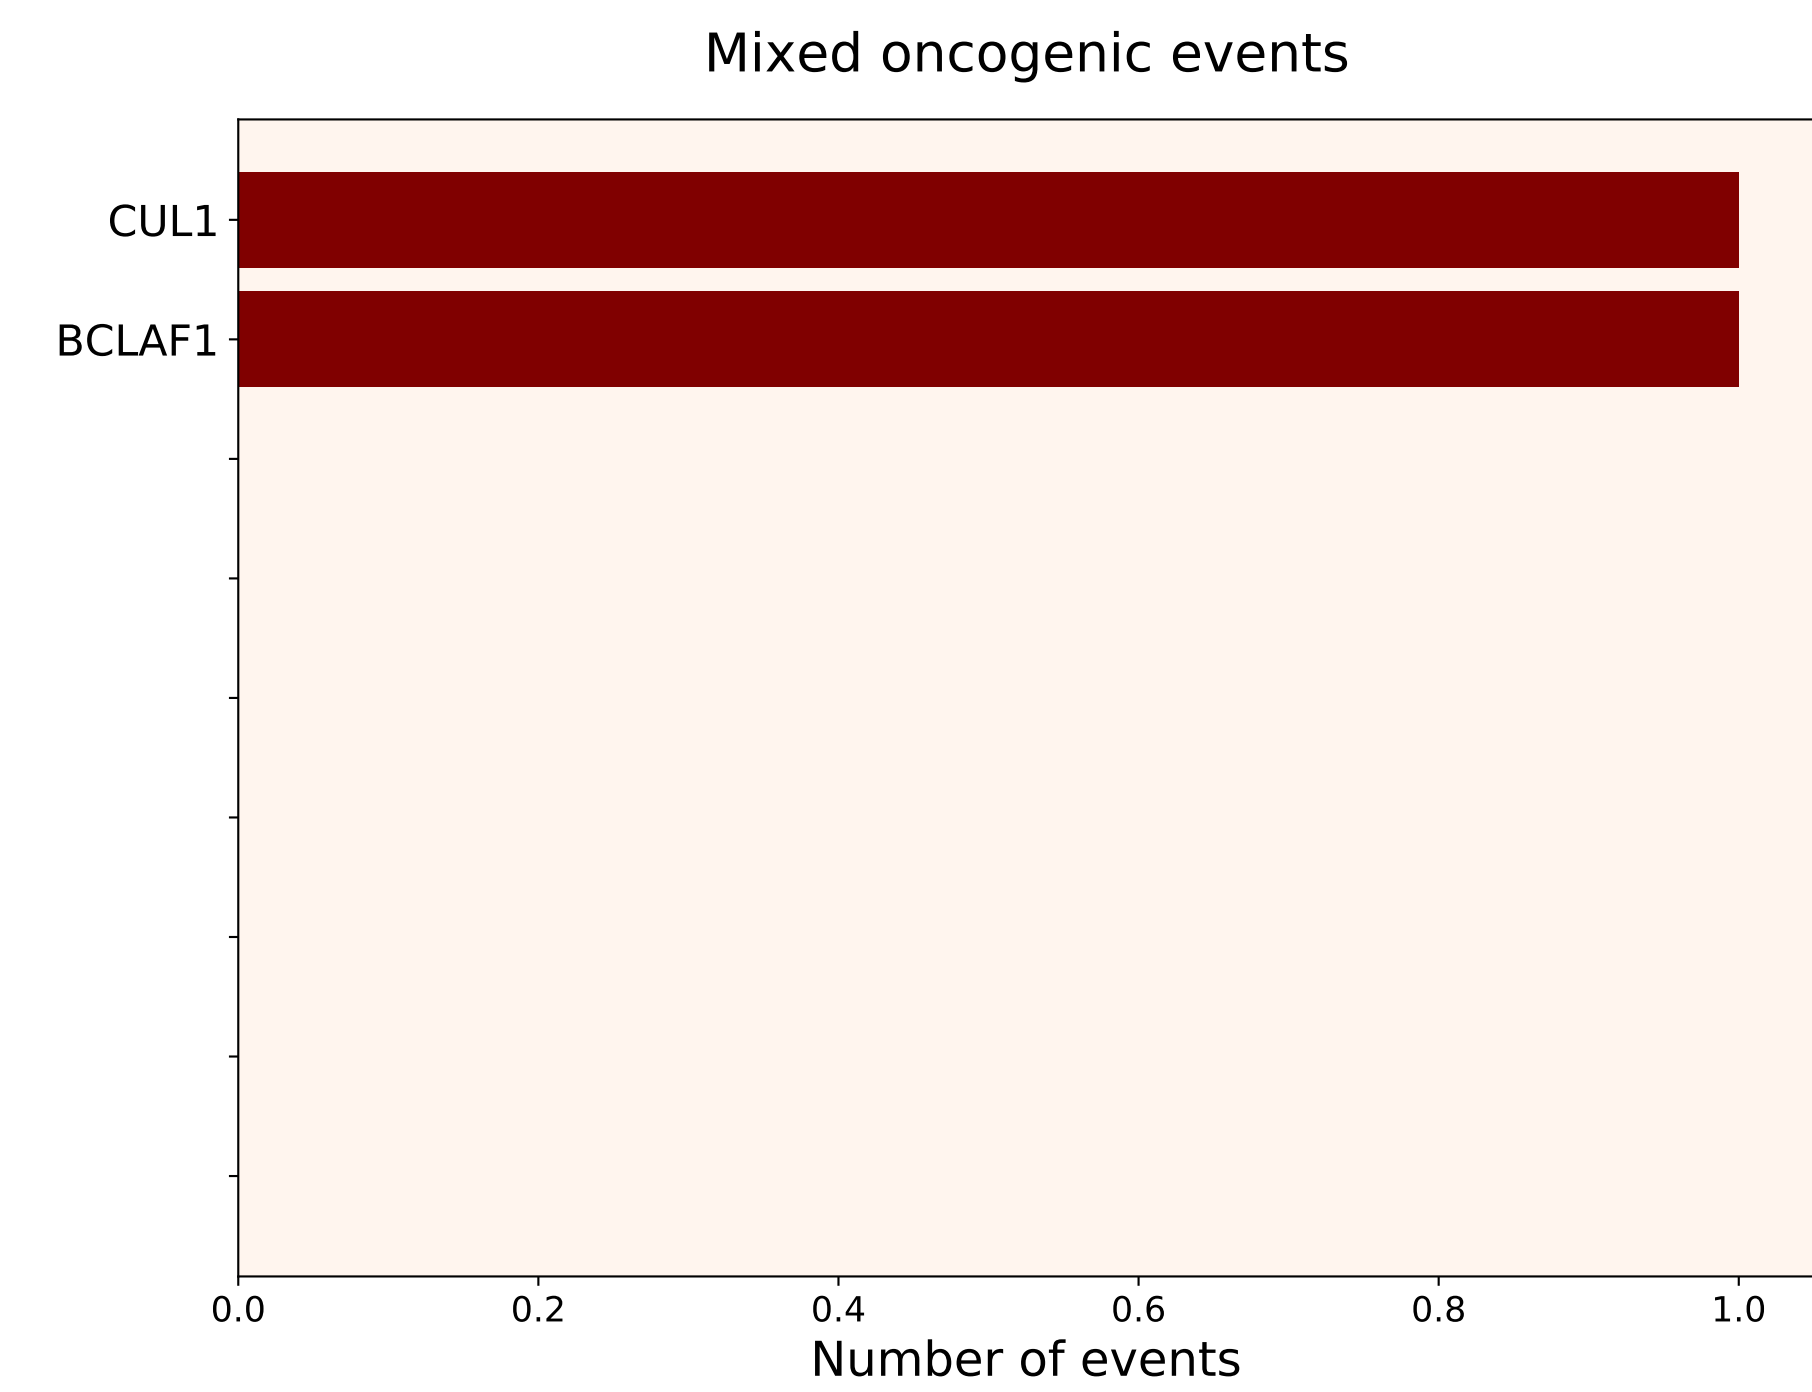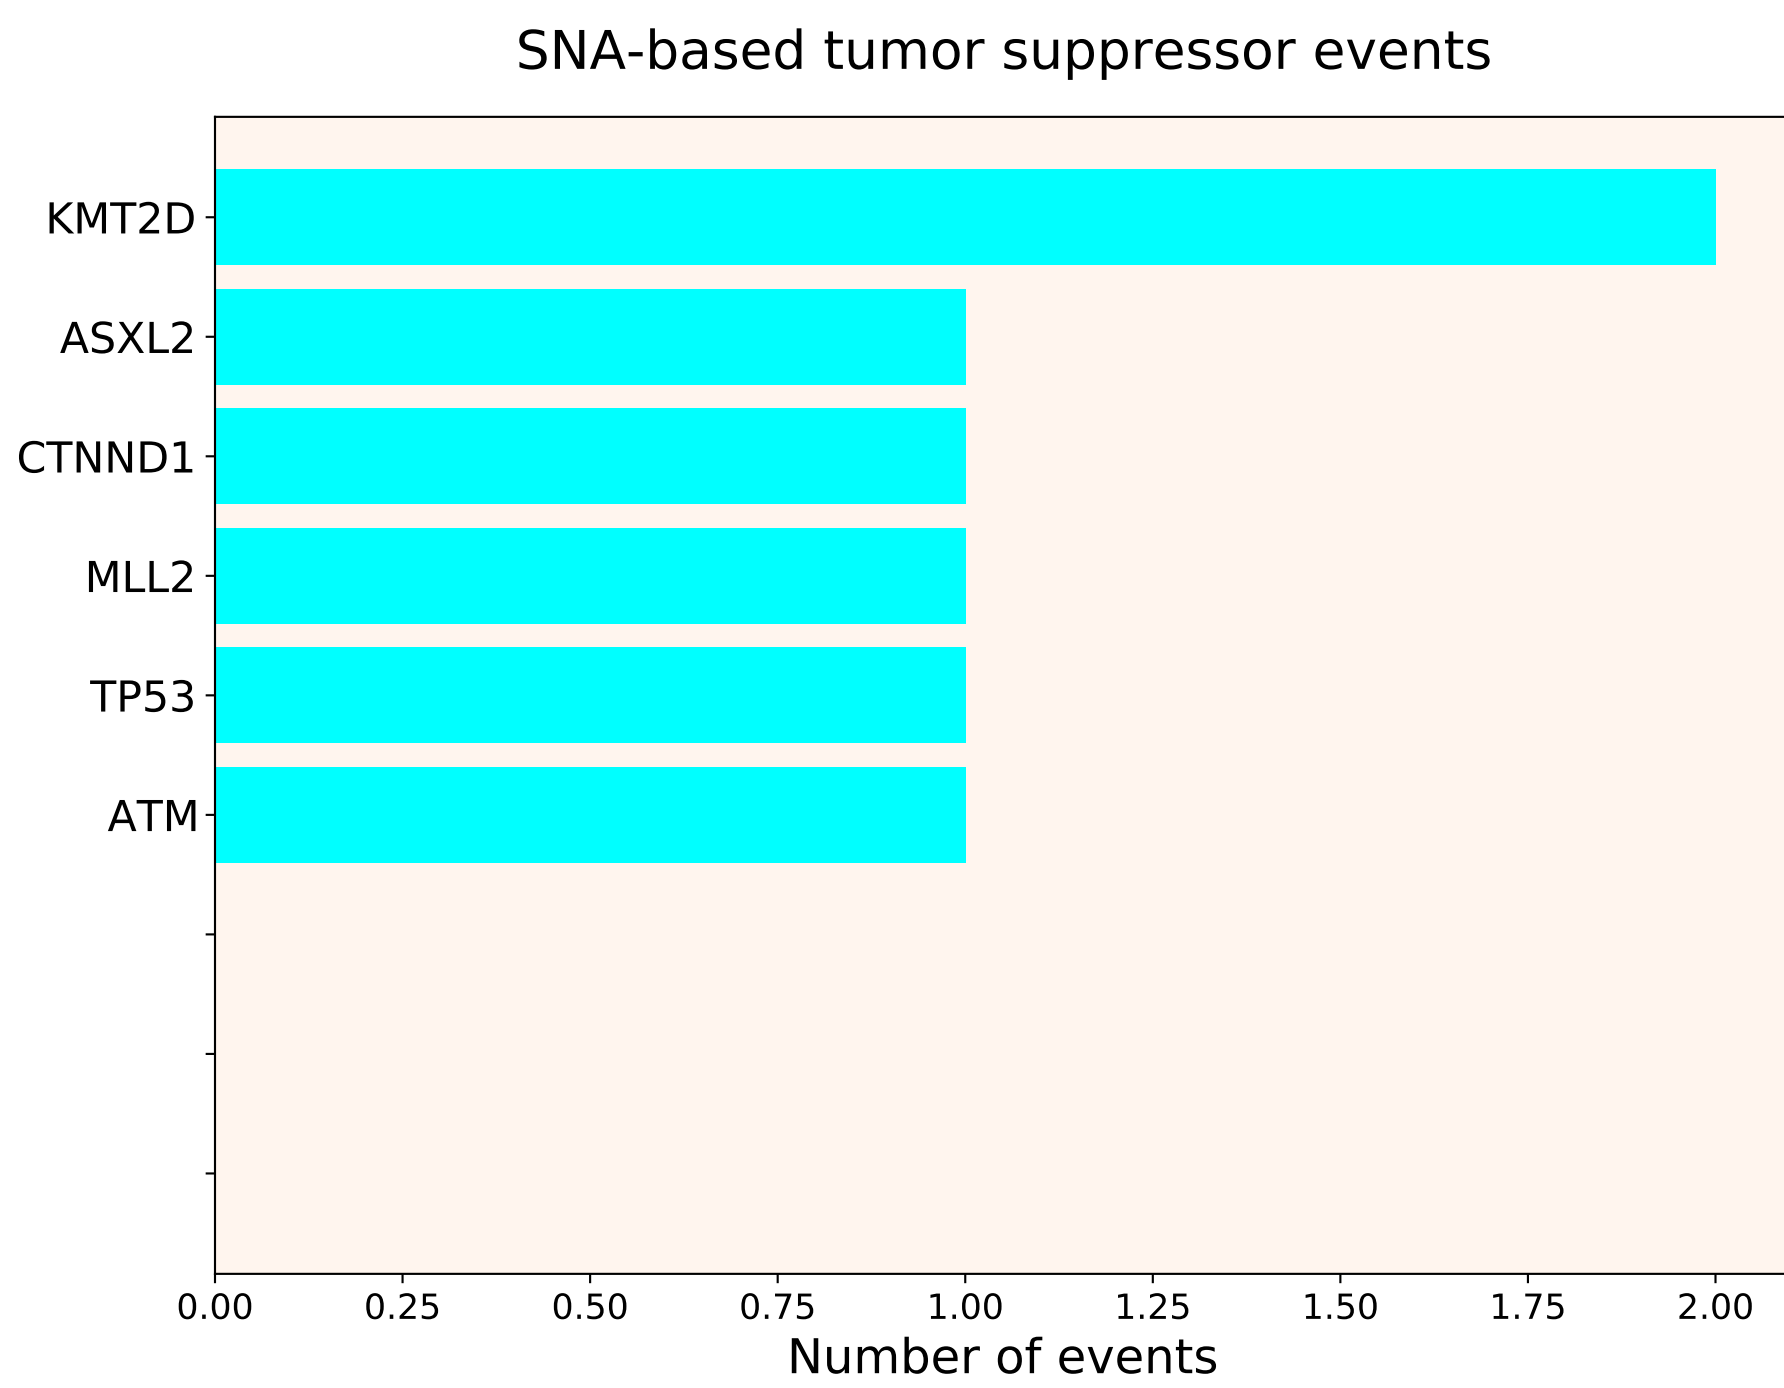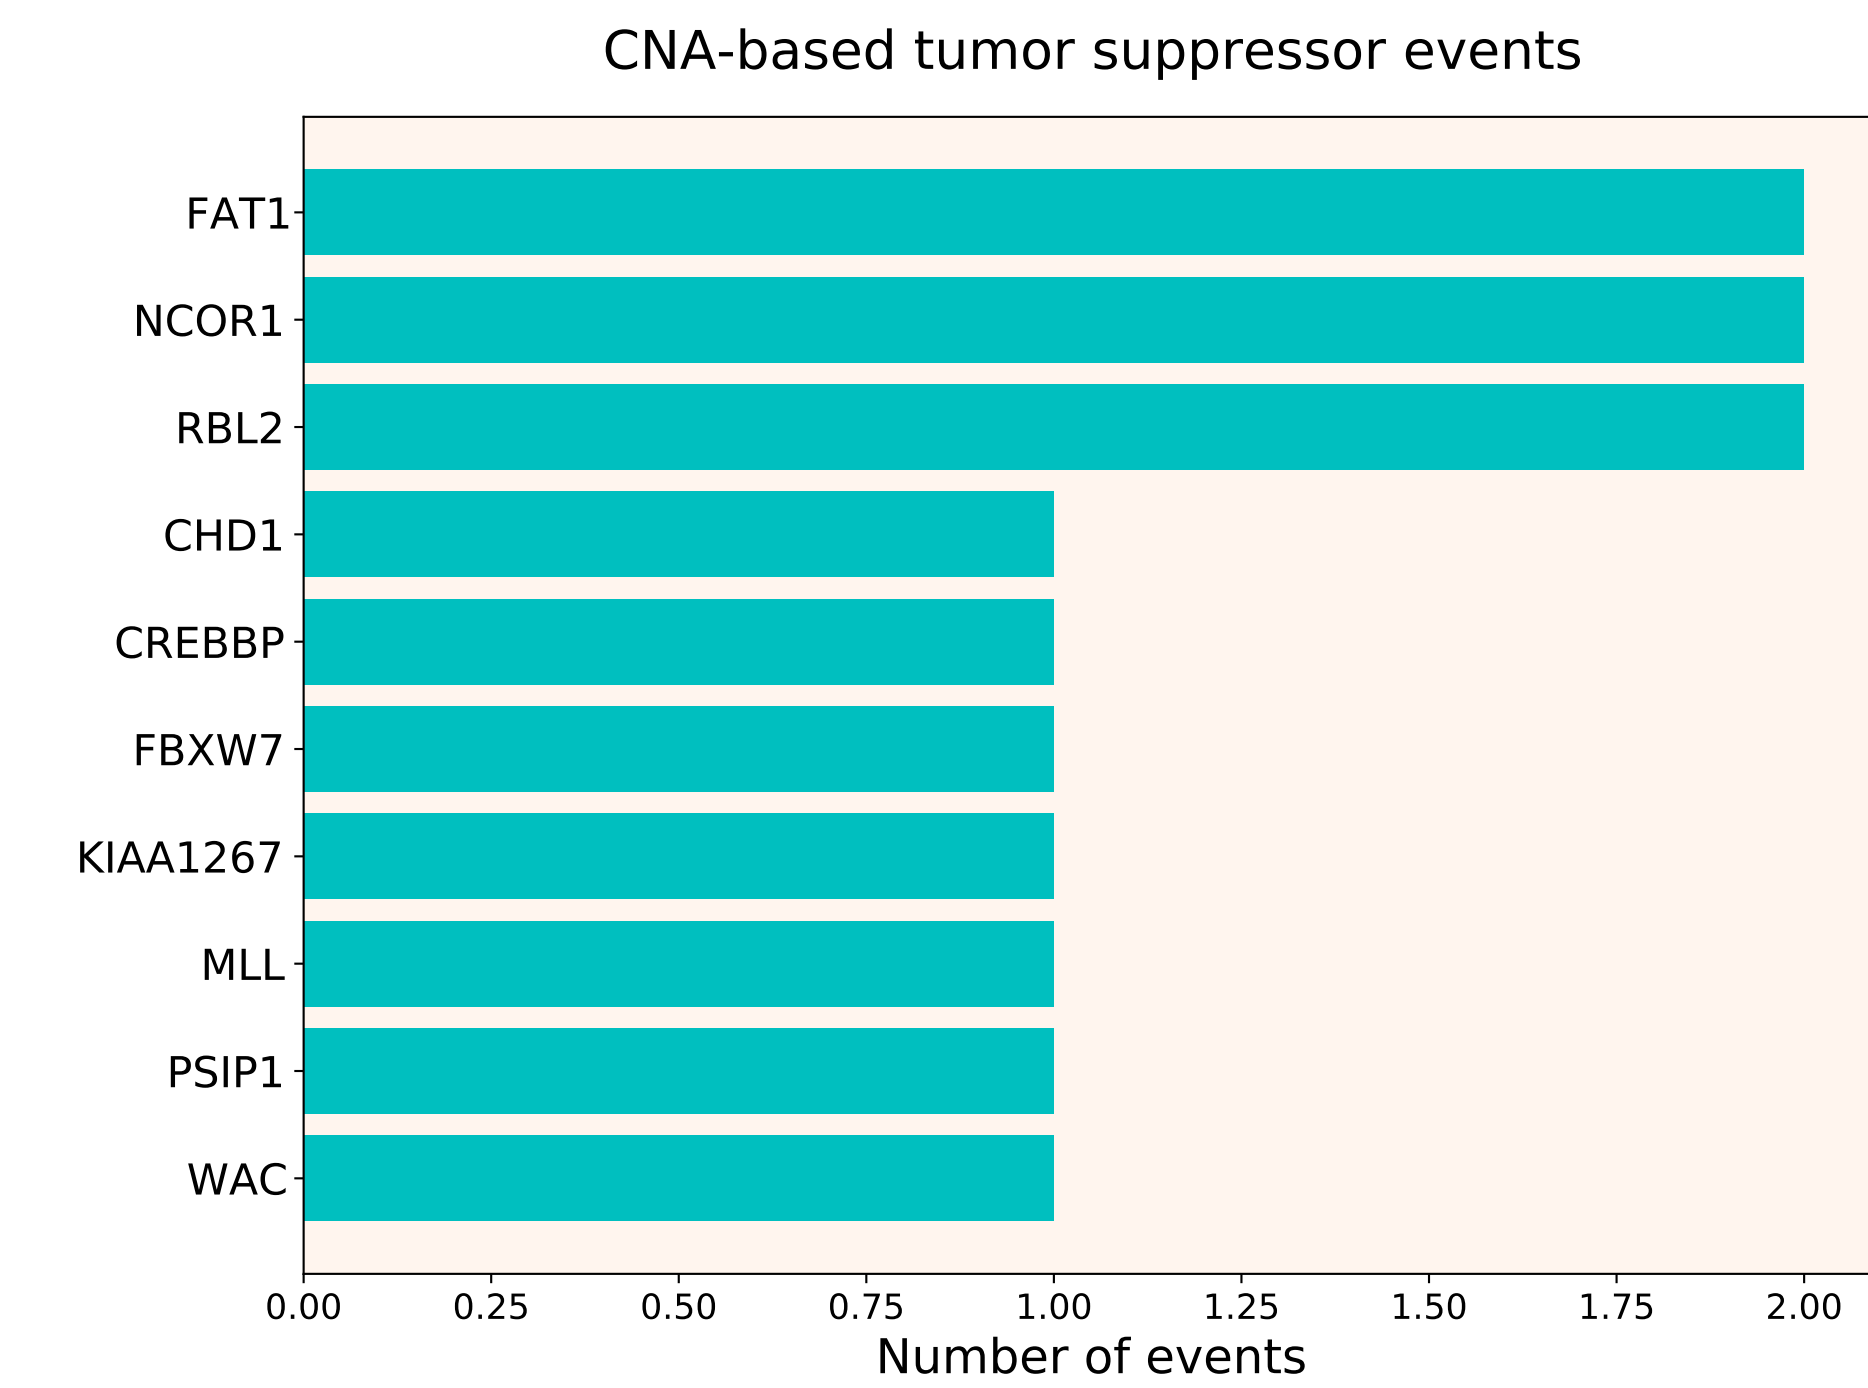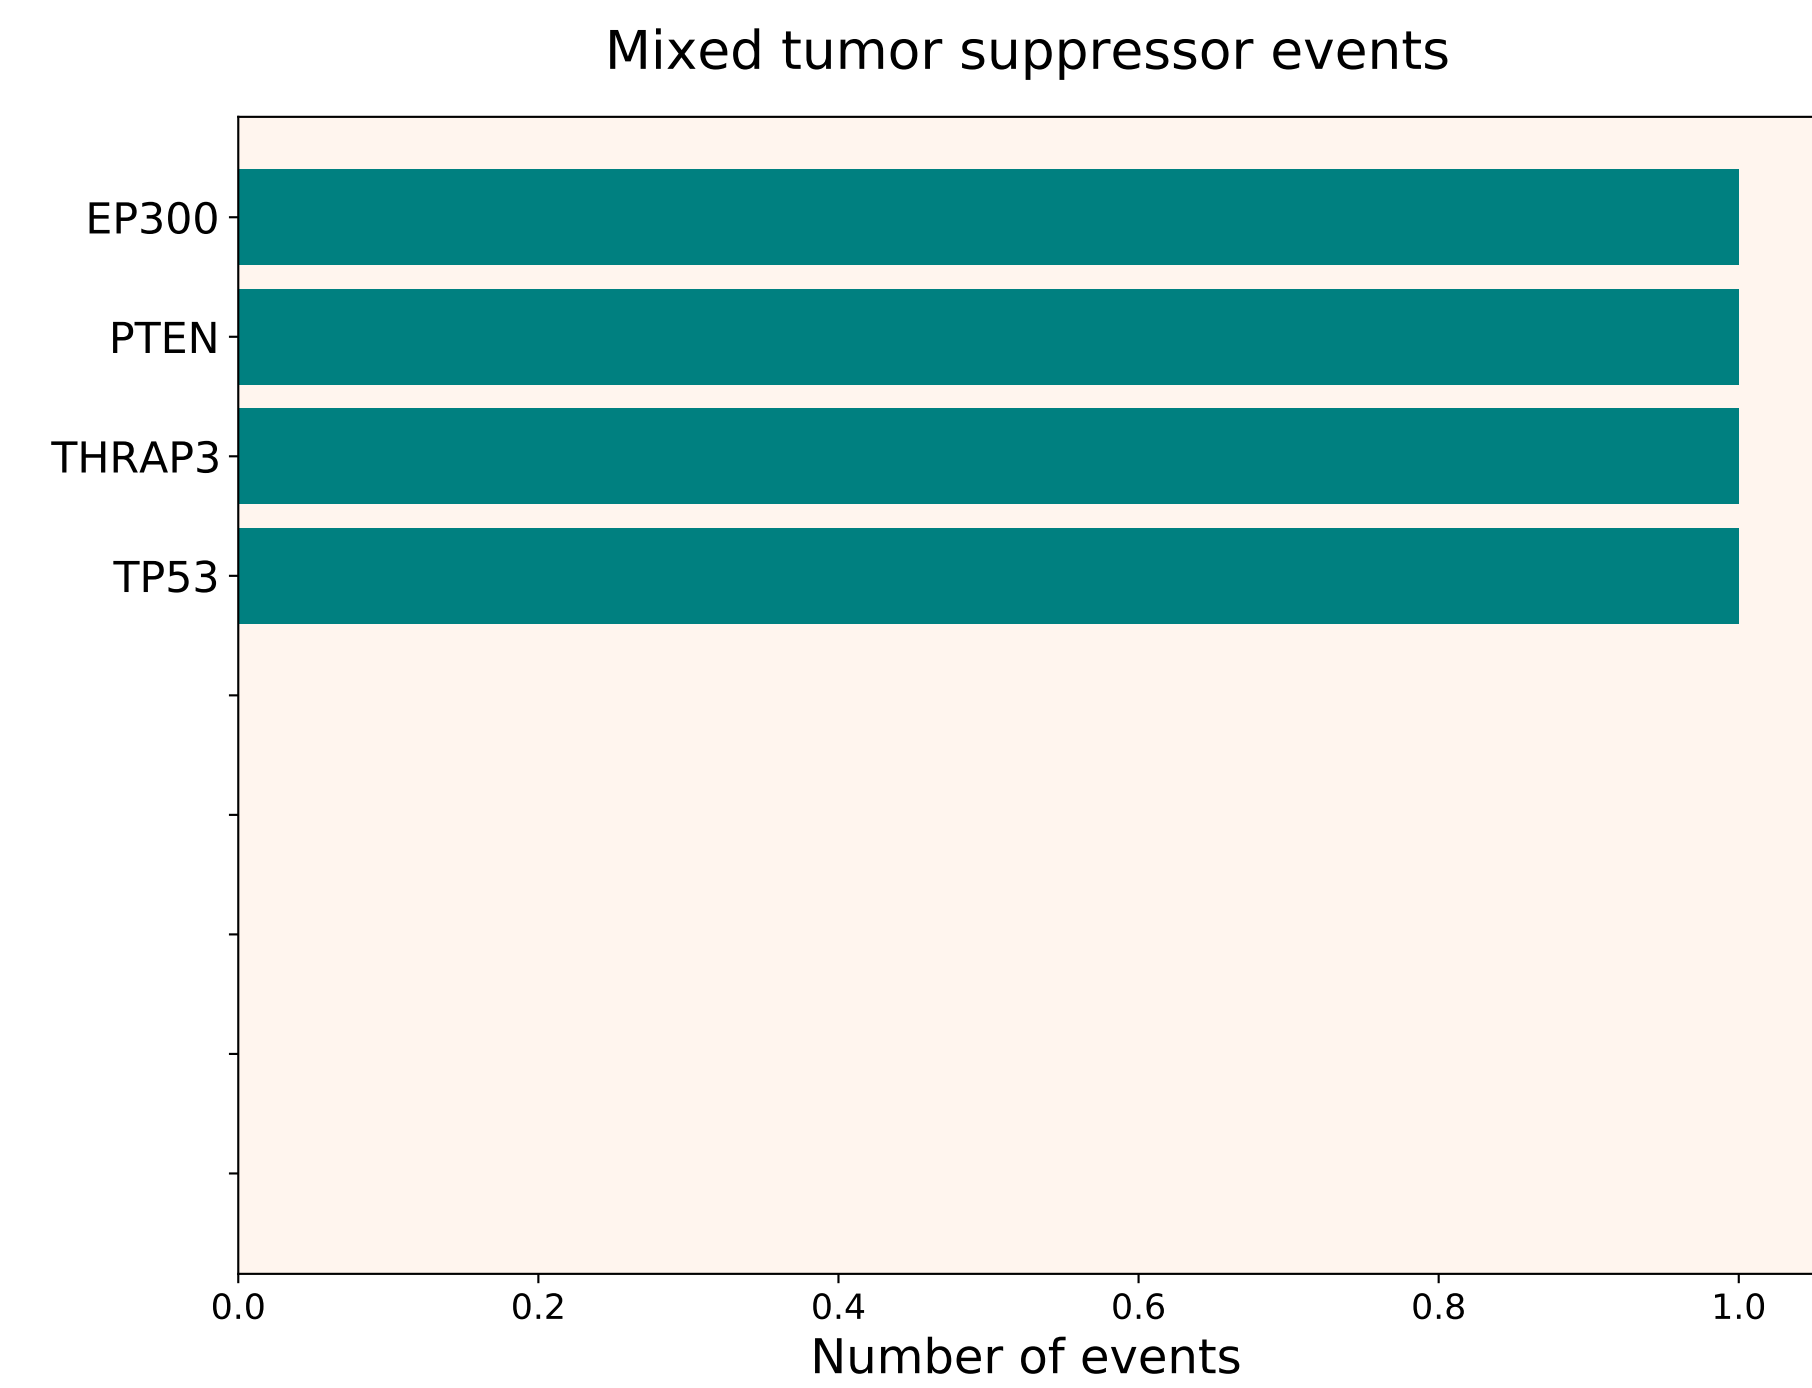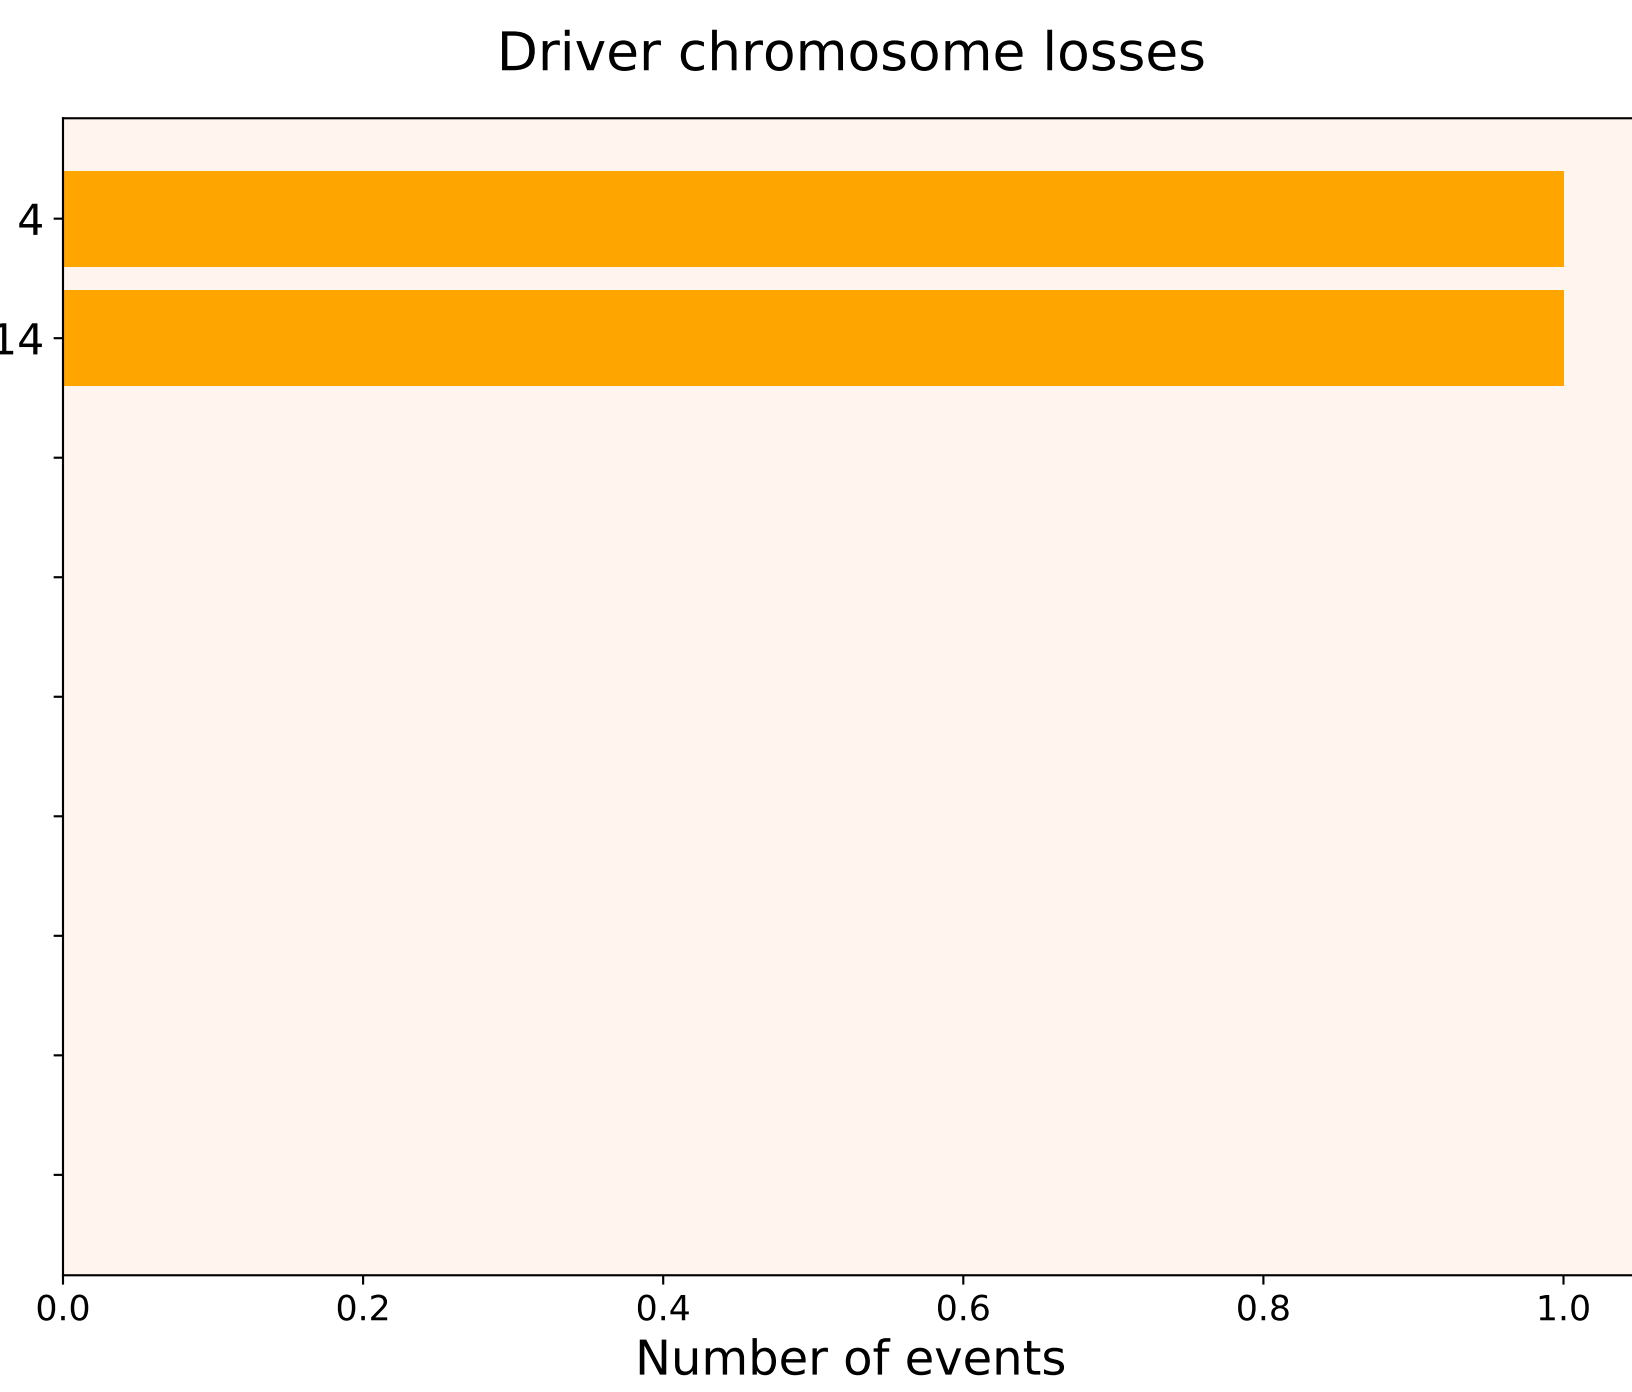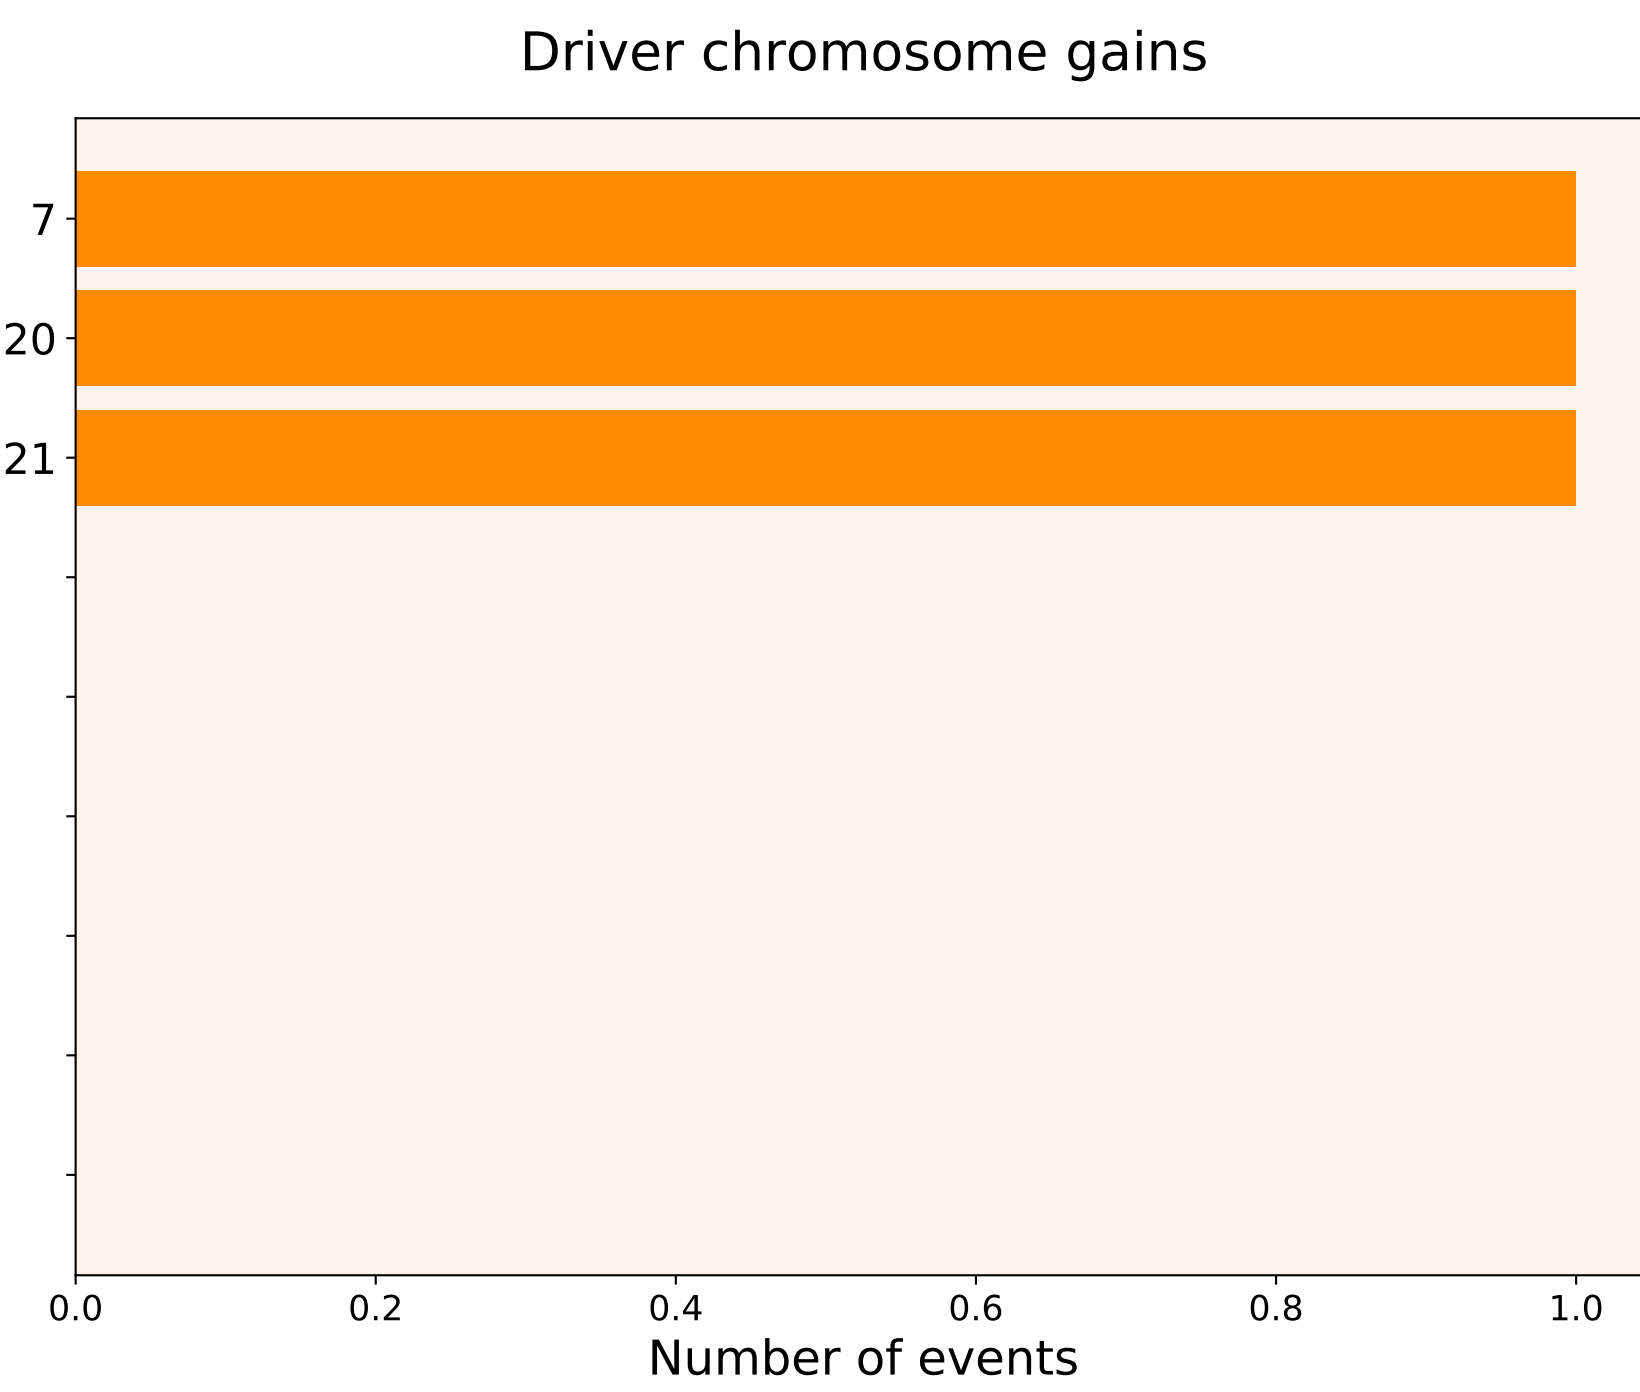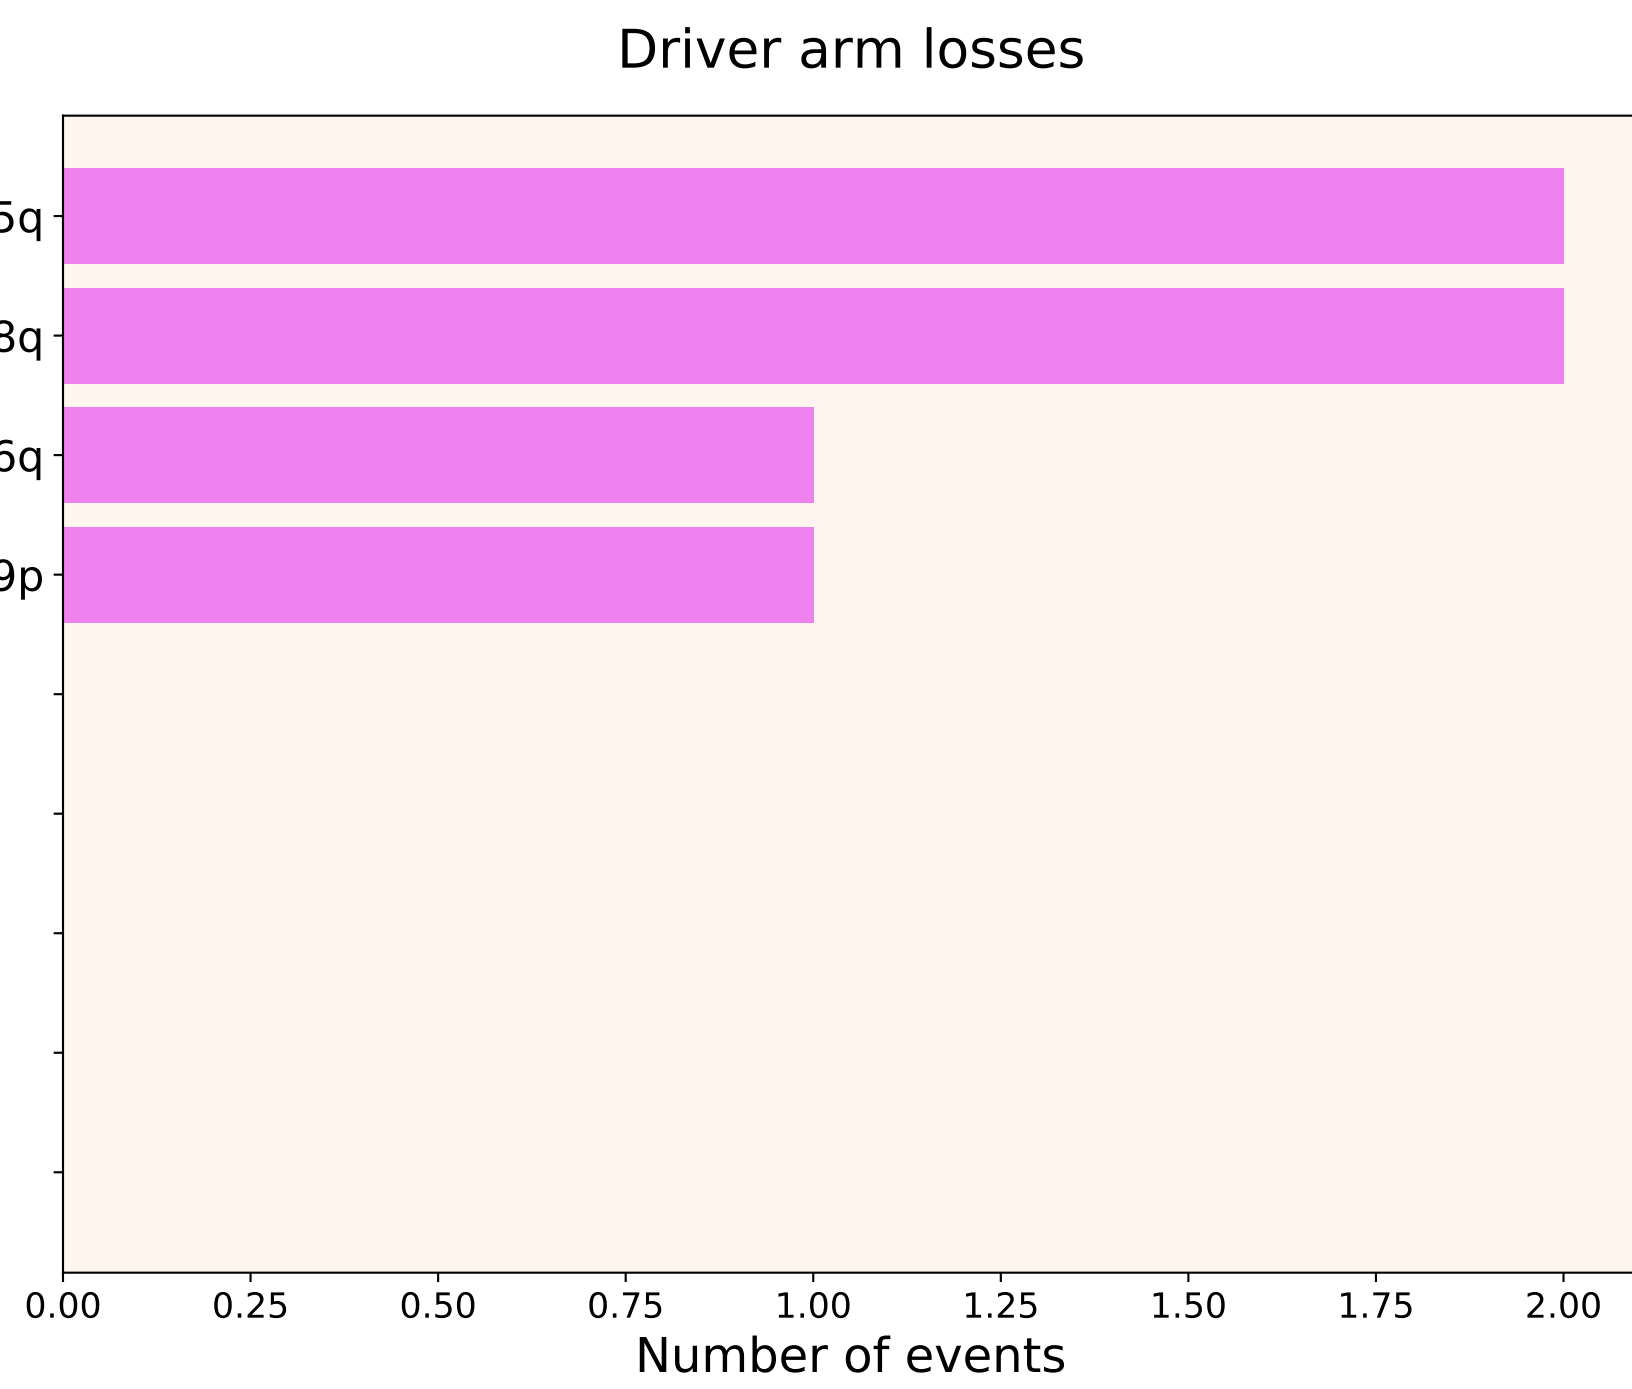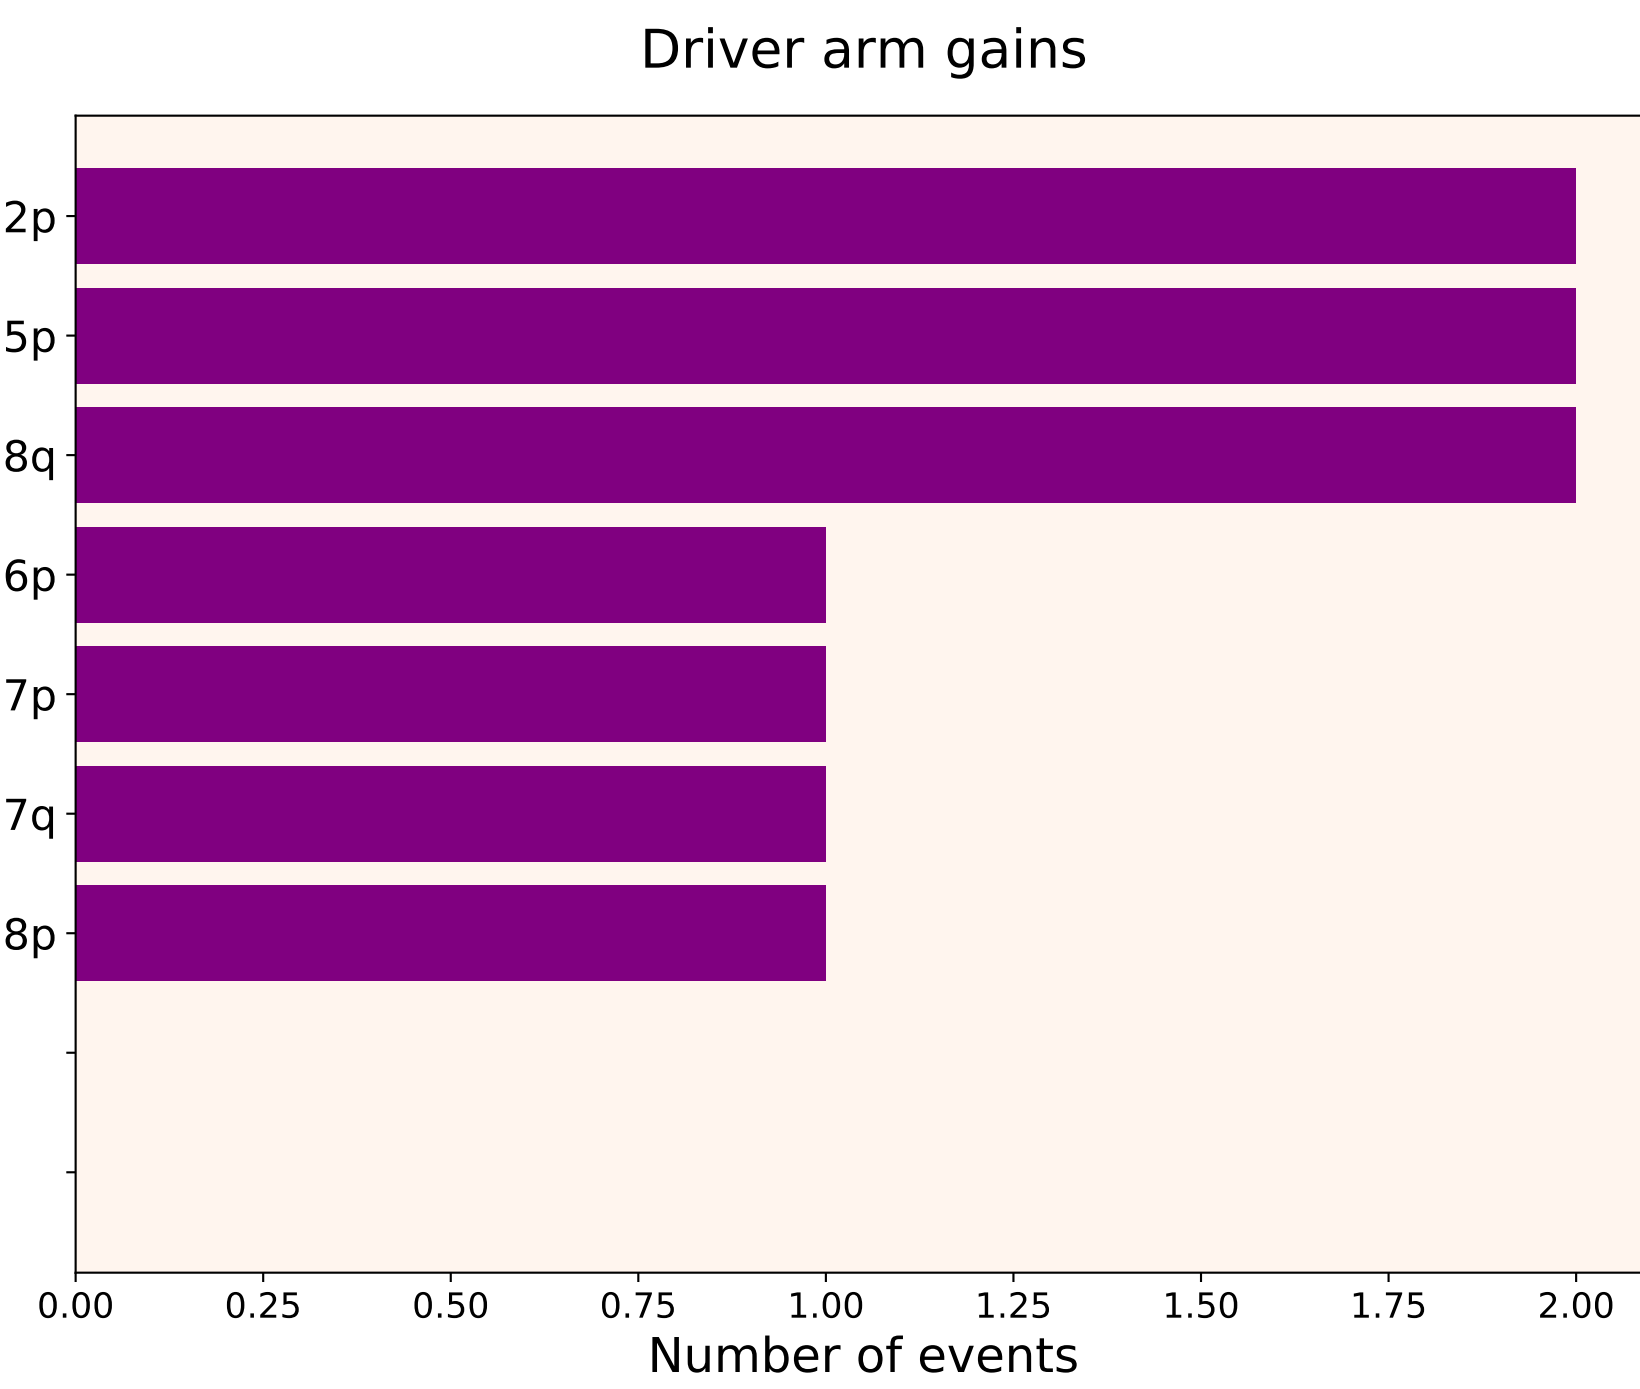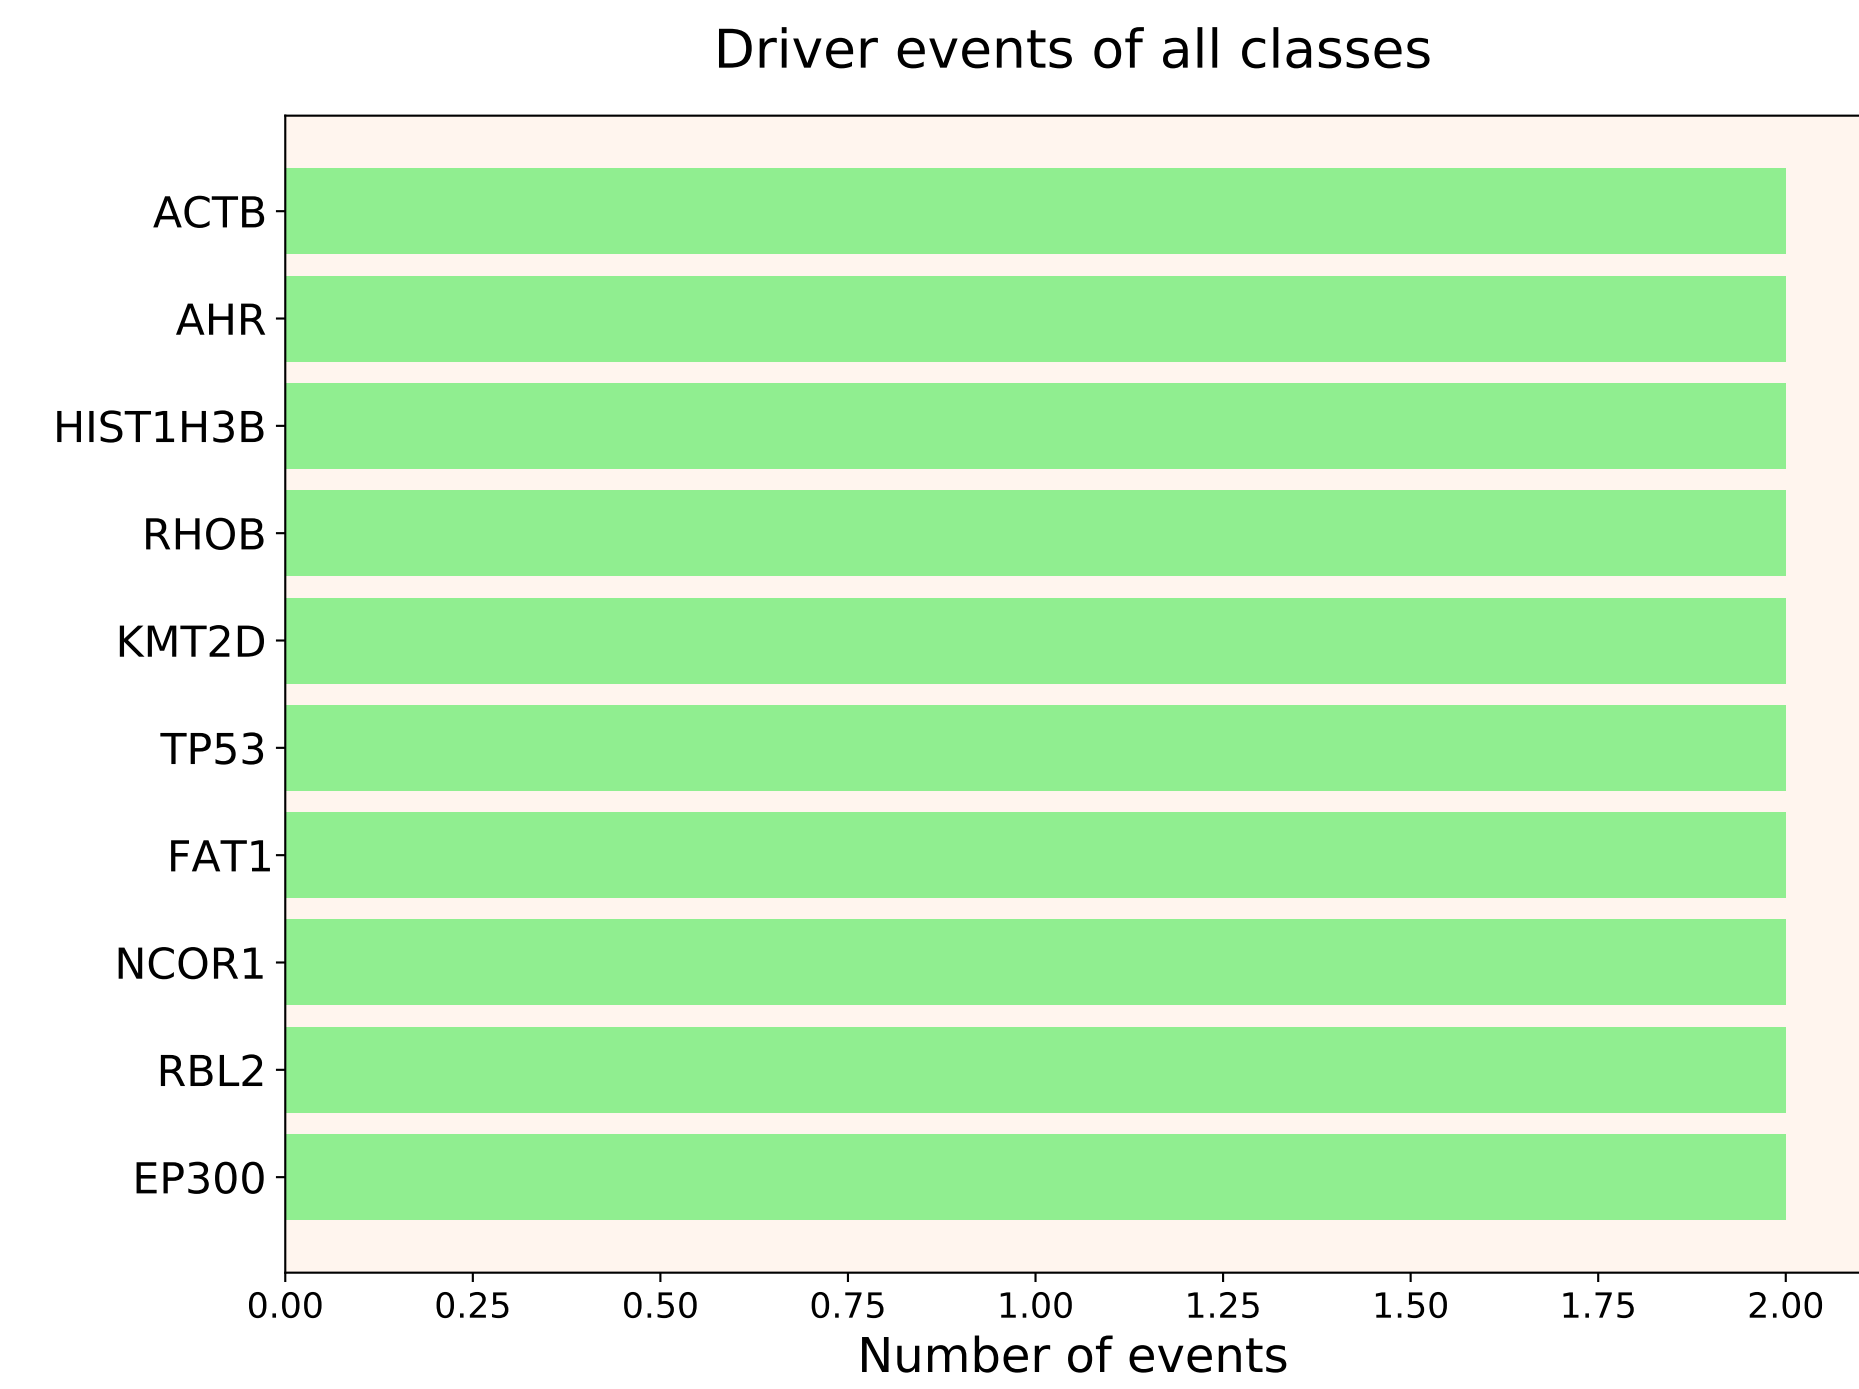

Supplement: Supplemental_Data_S1.zip [file Supplemental_Data_S1.zip]

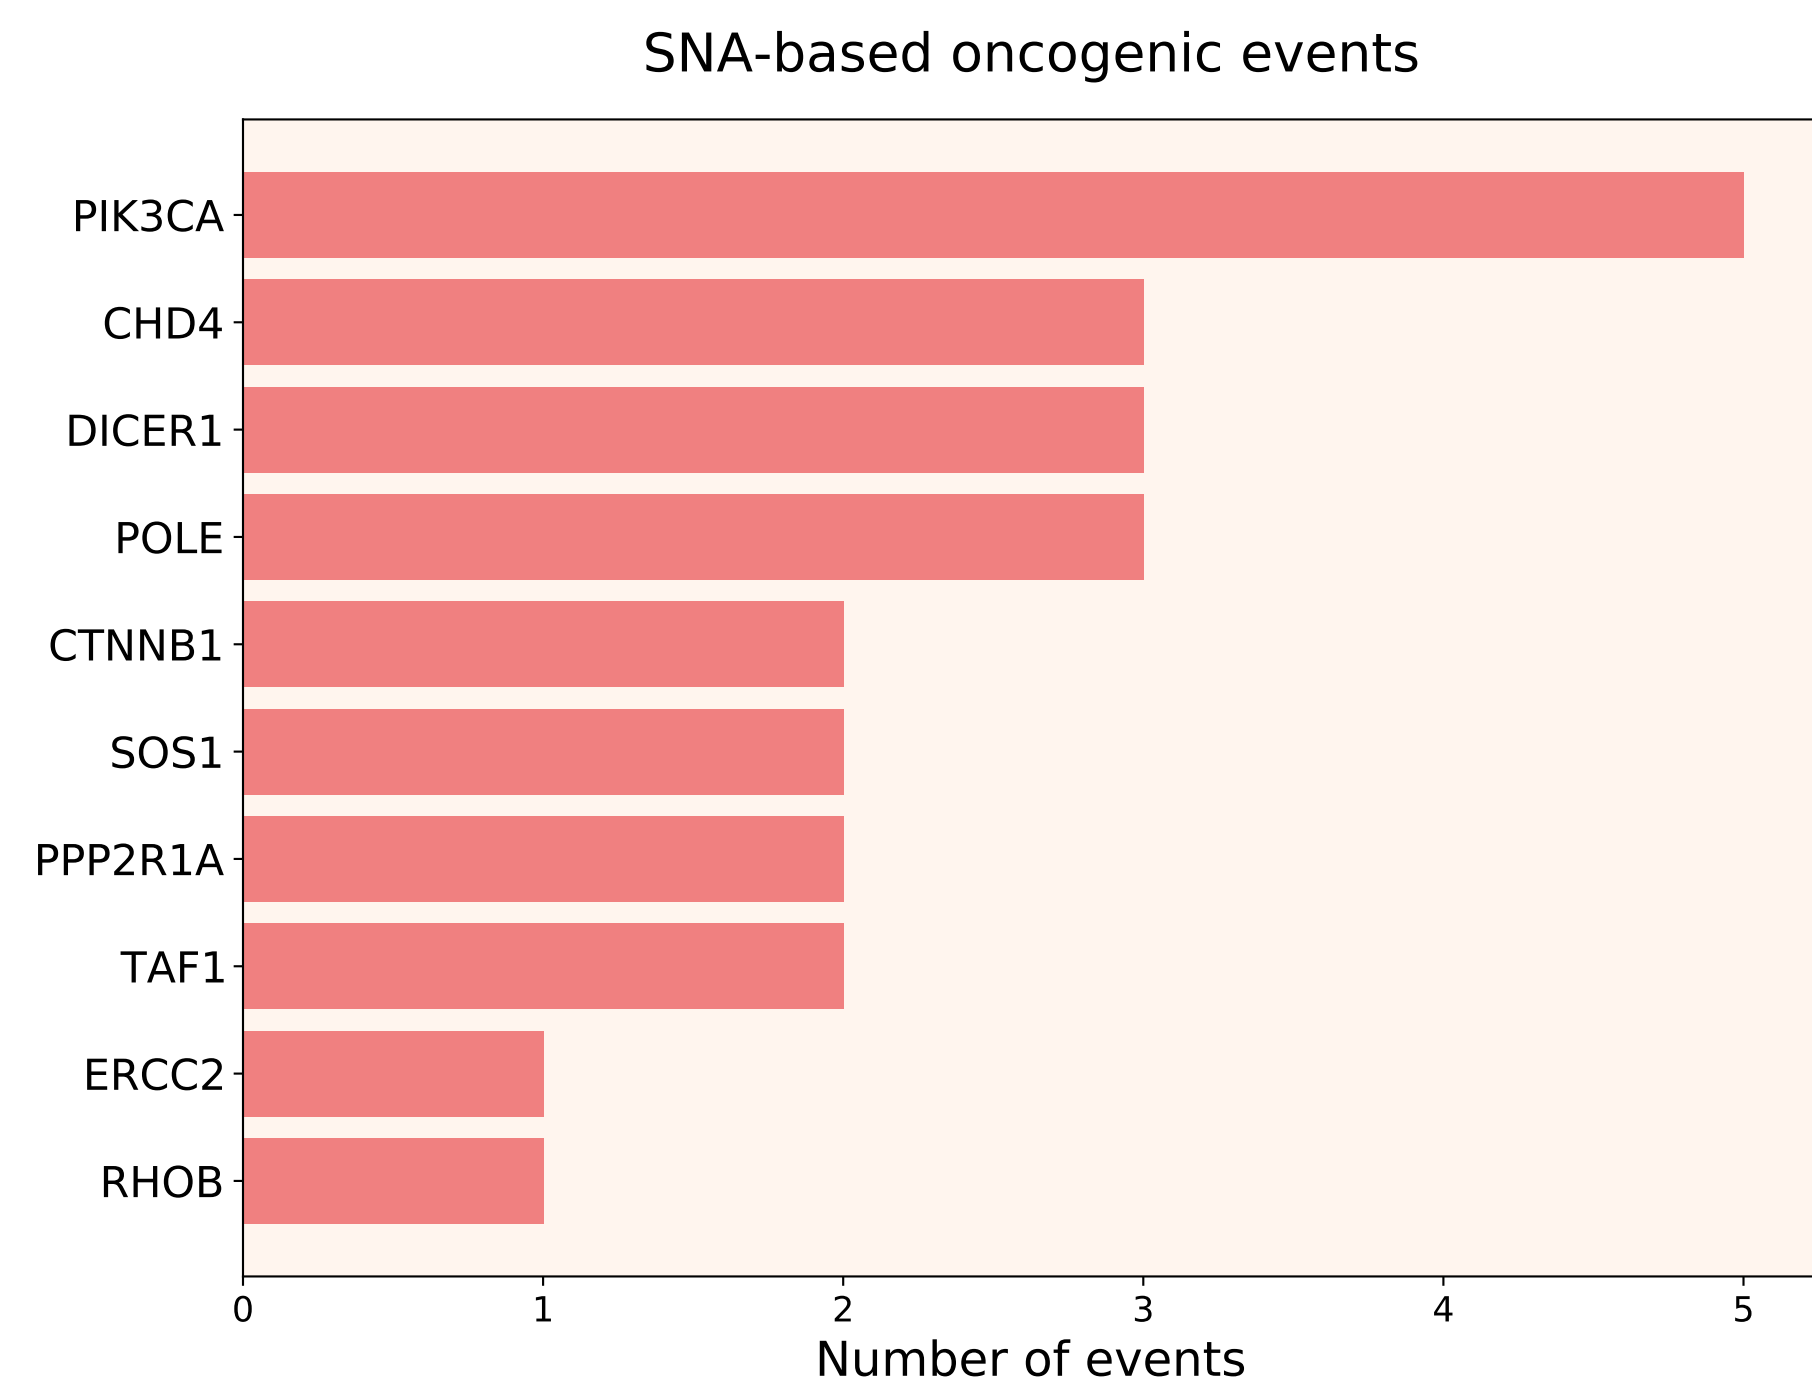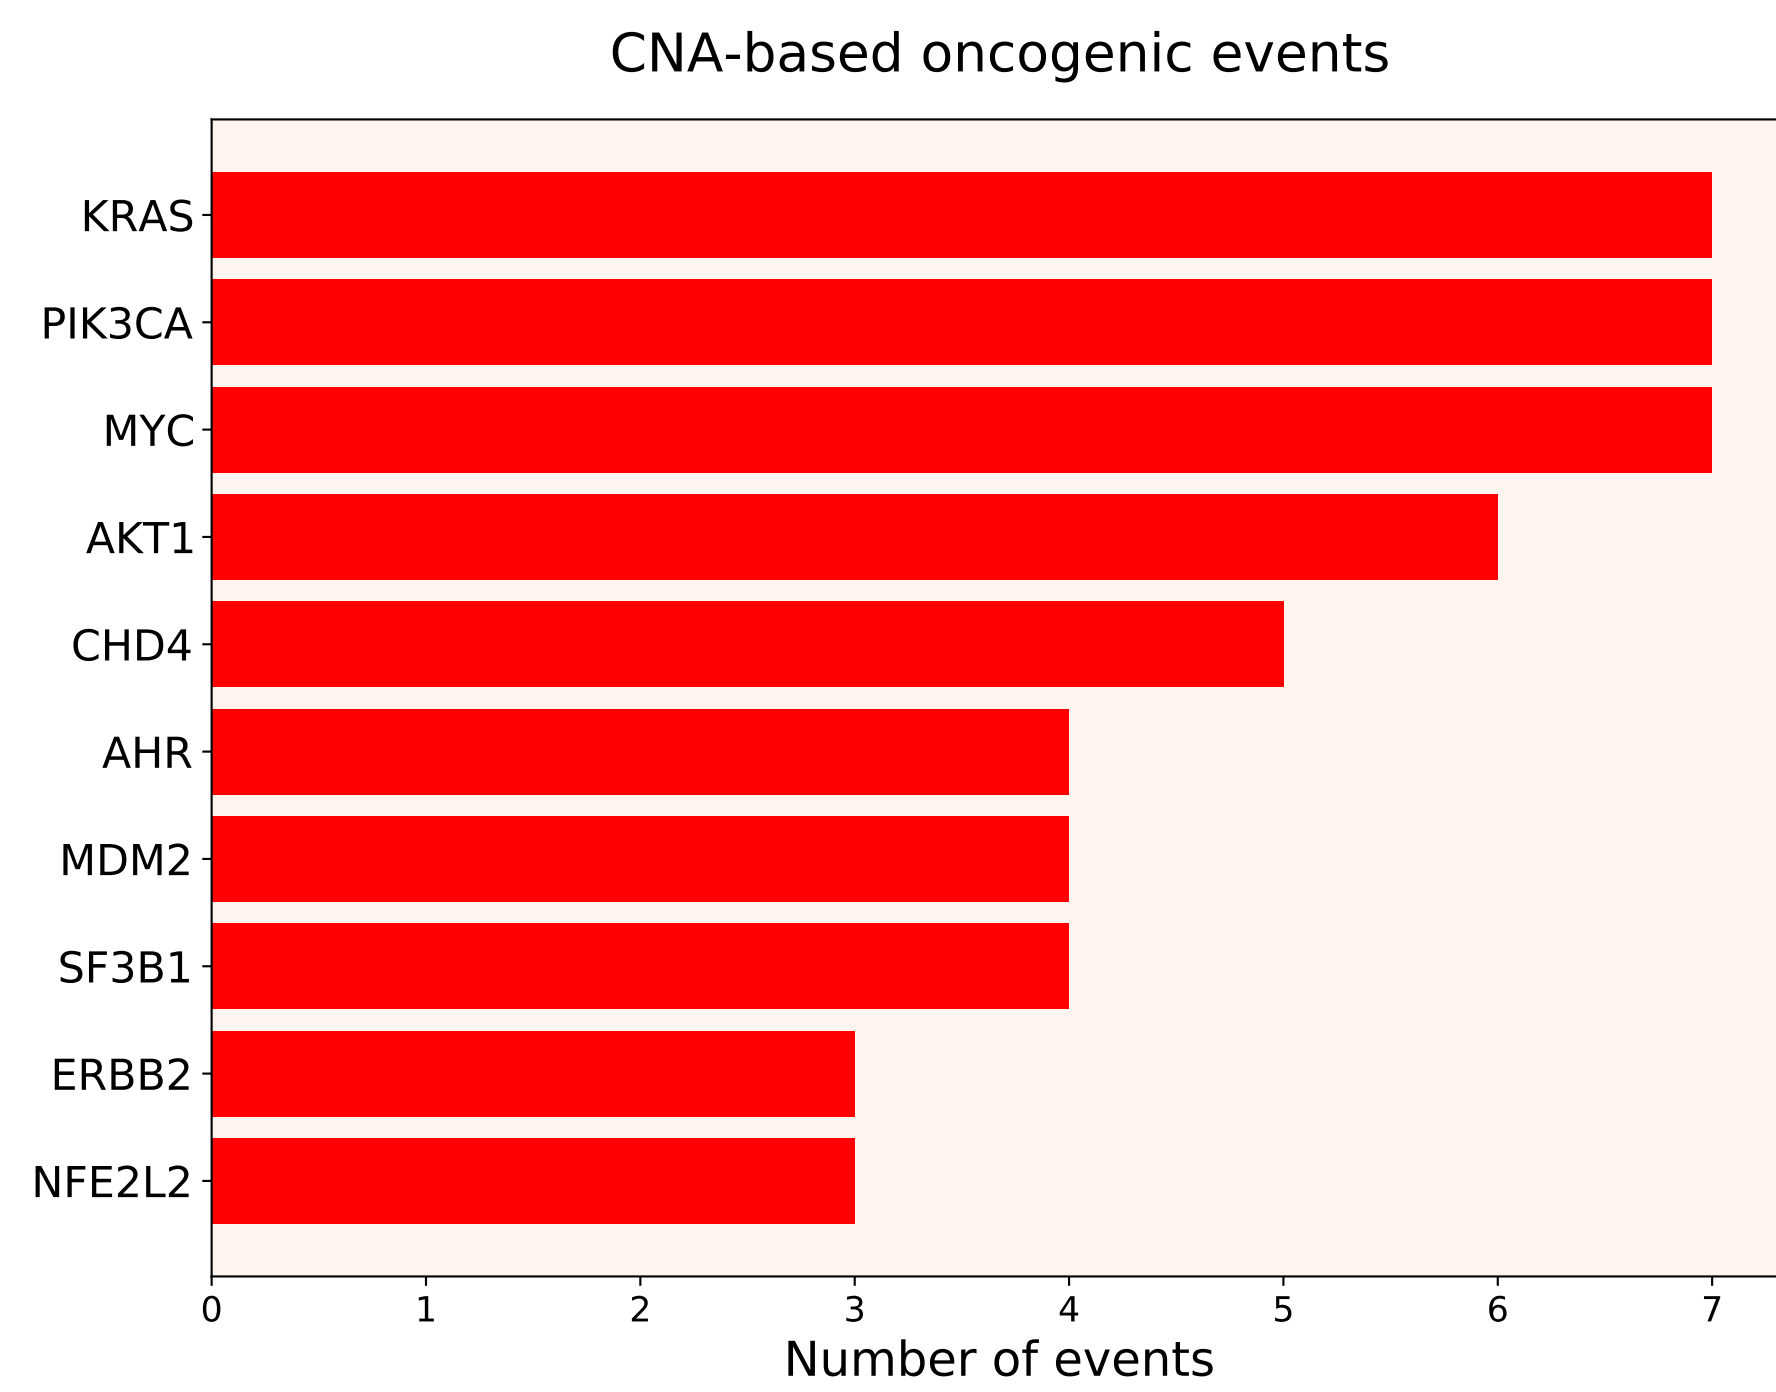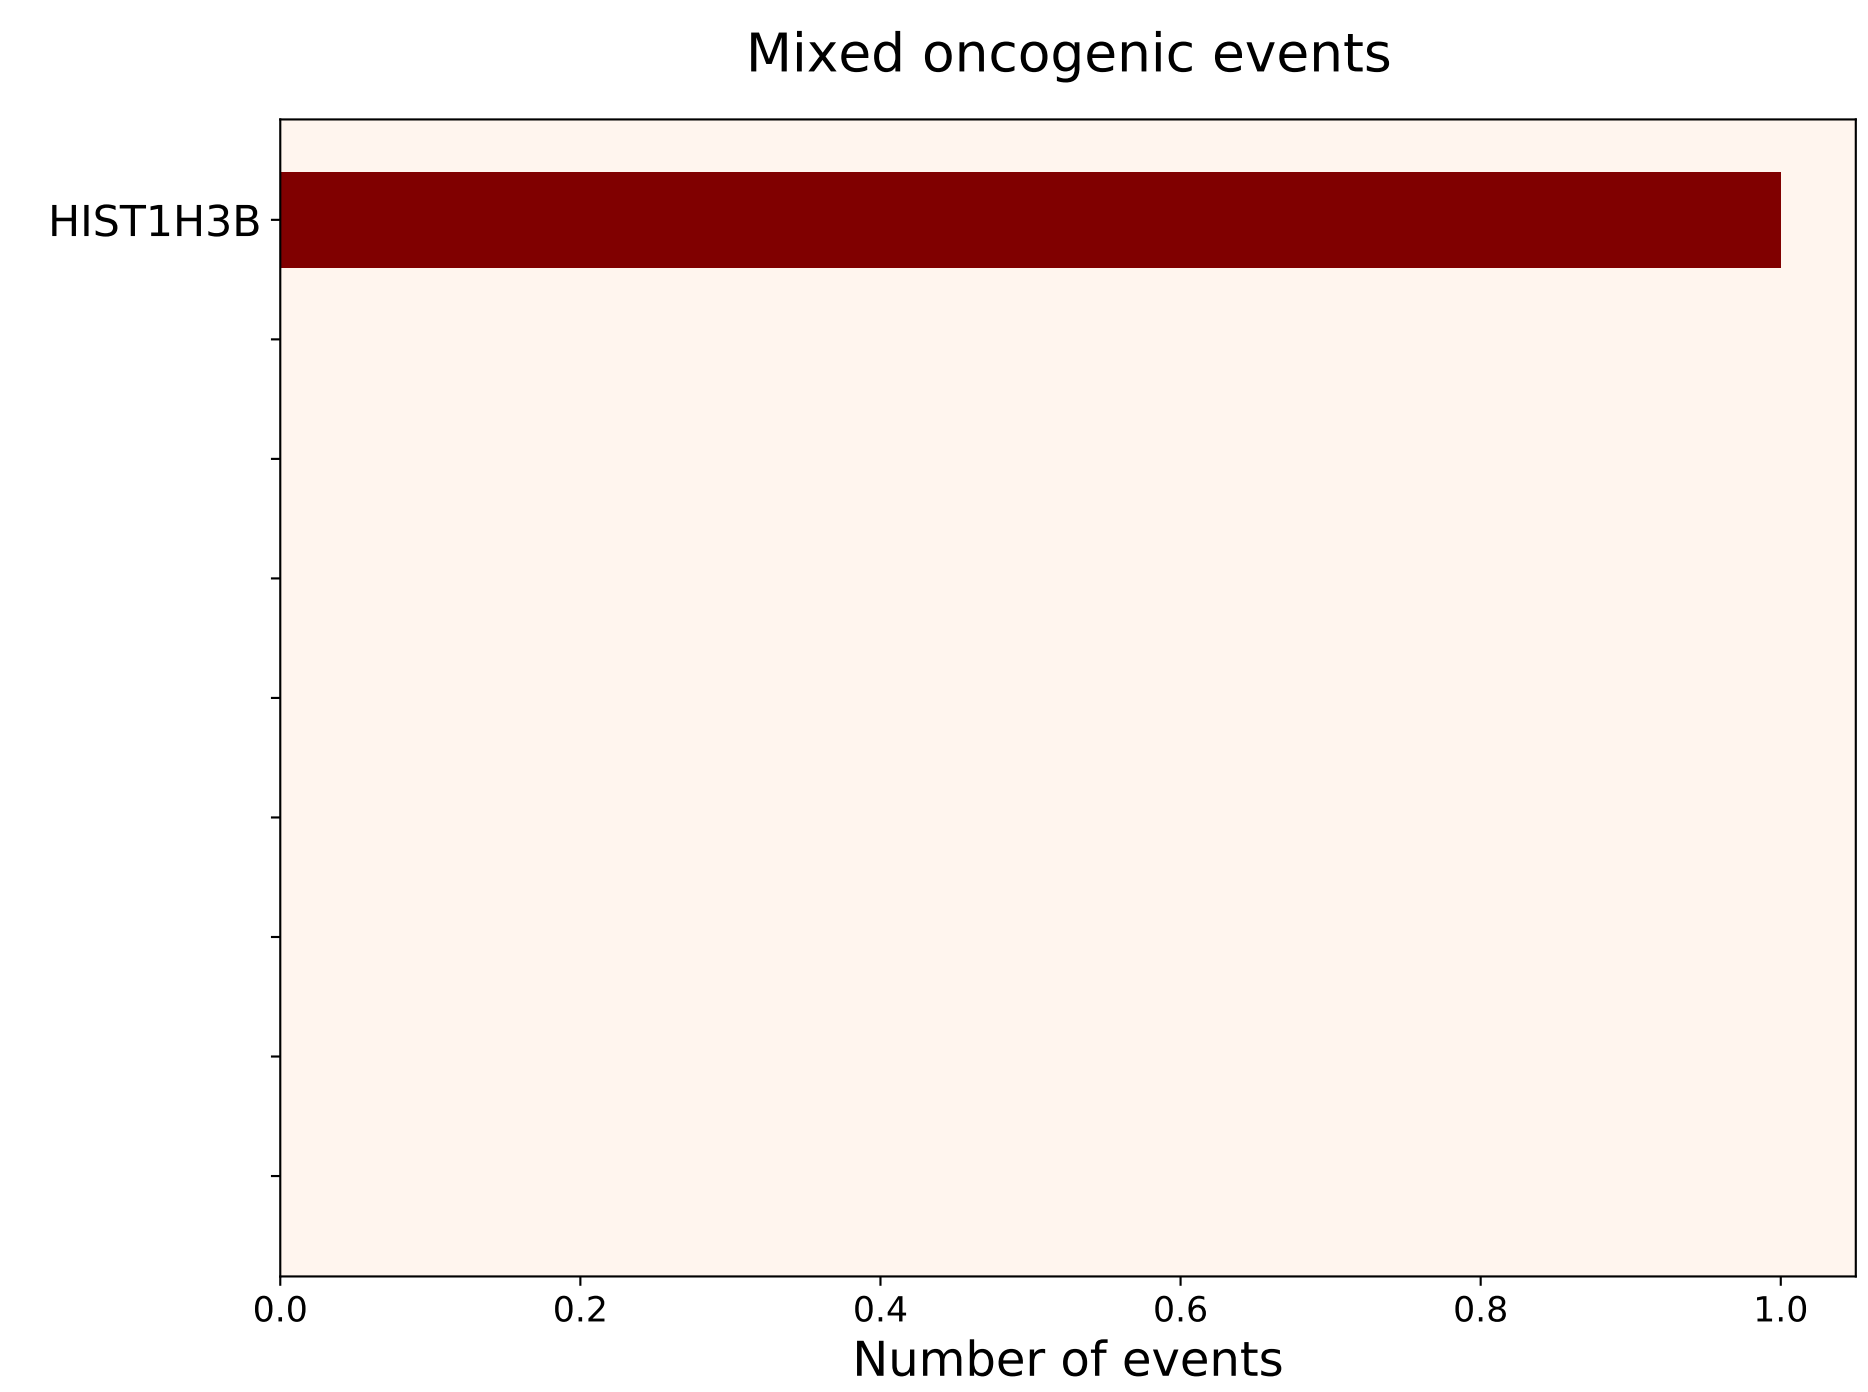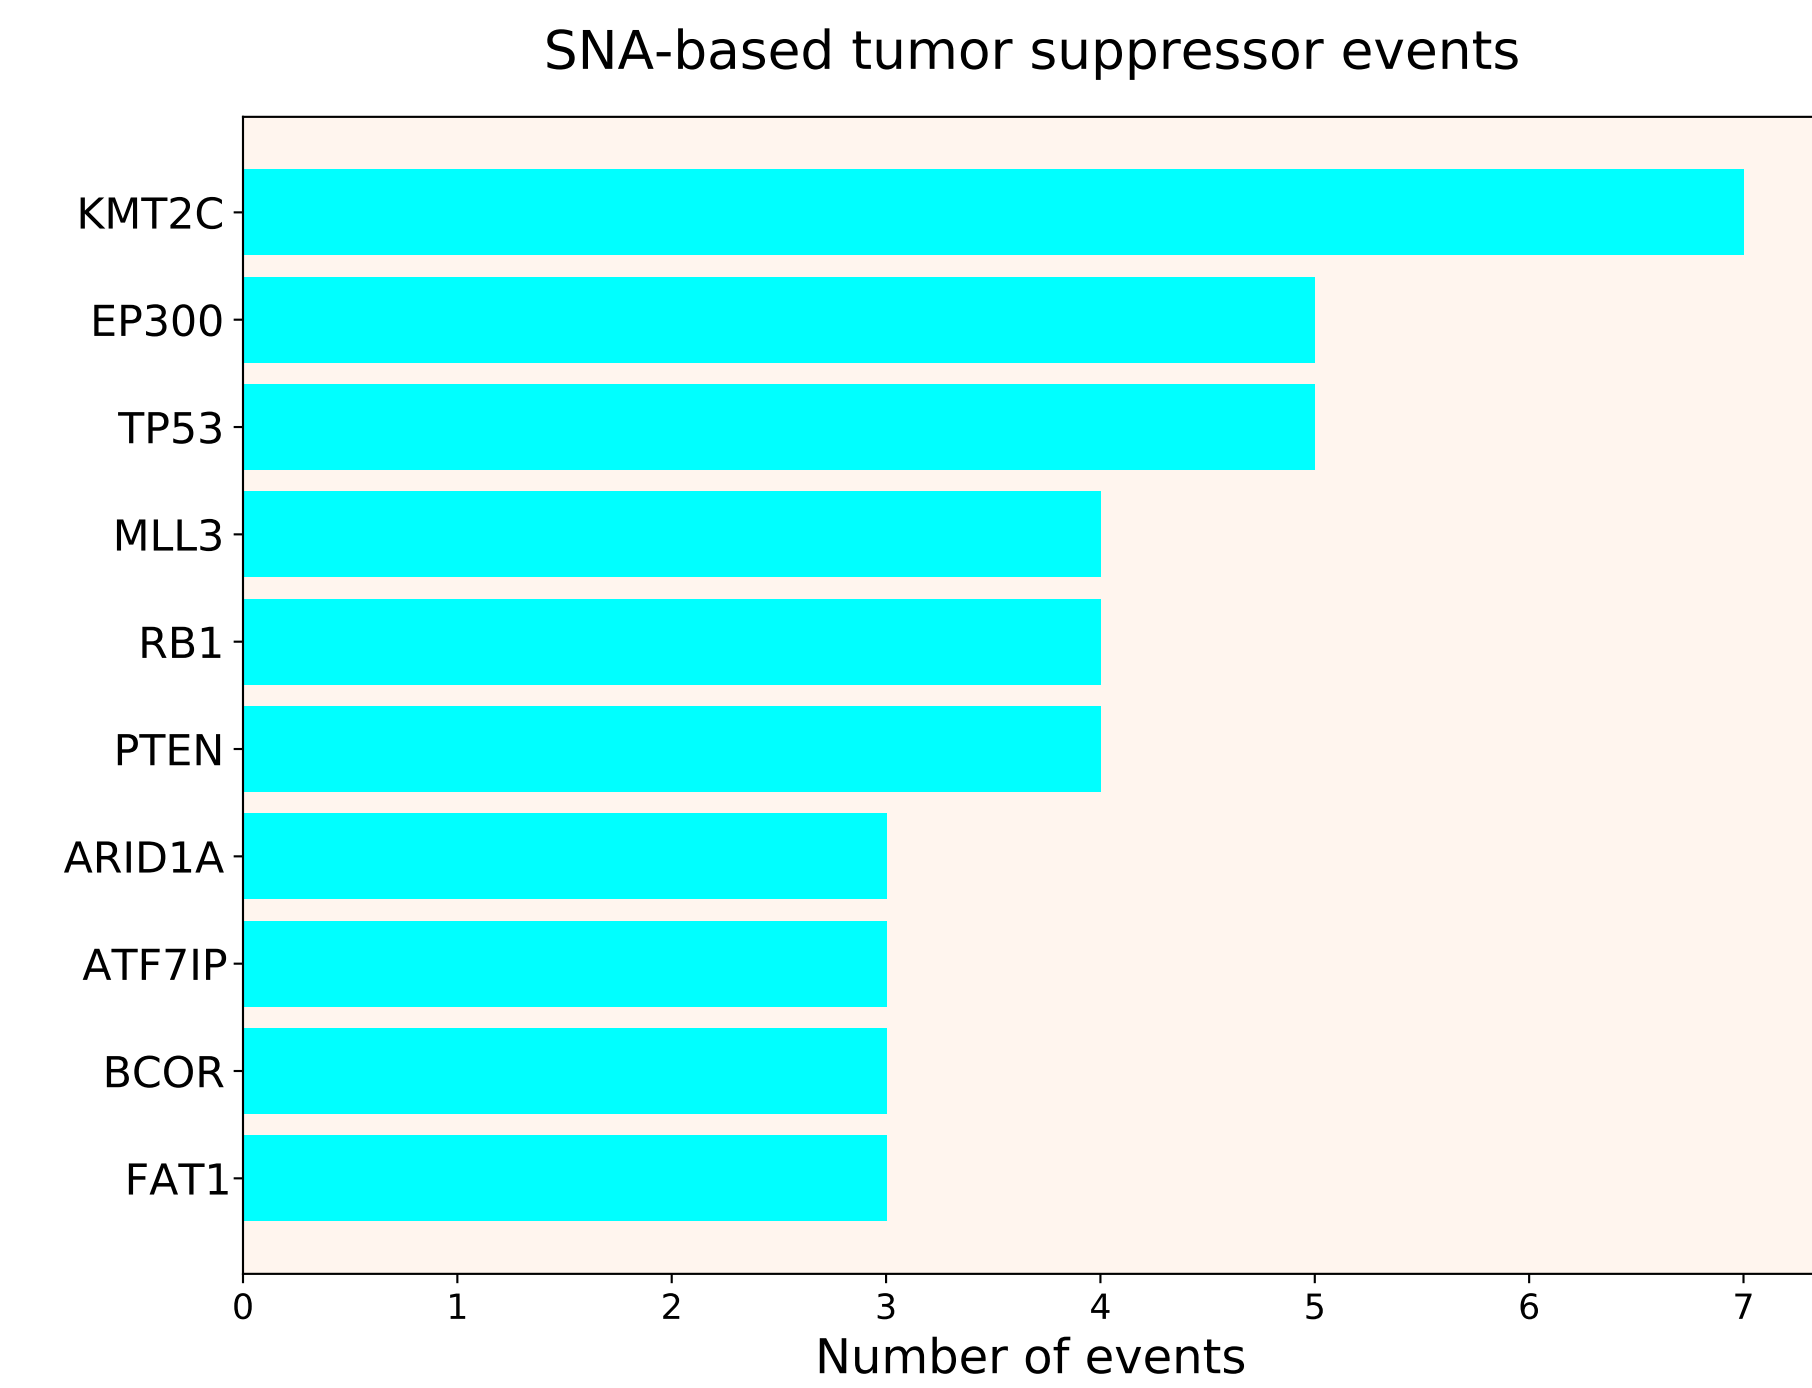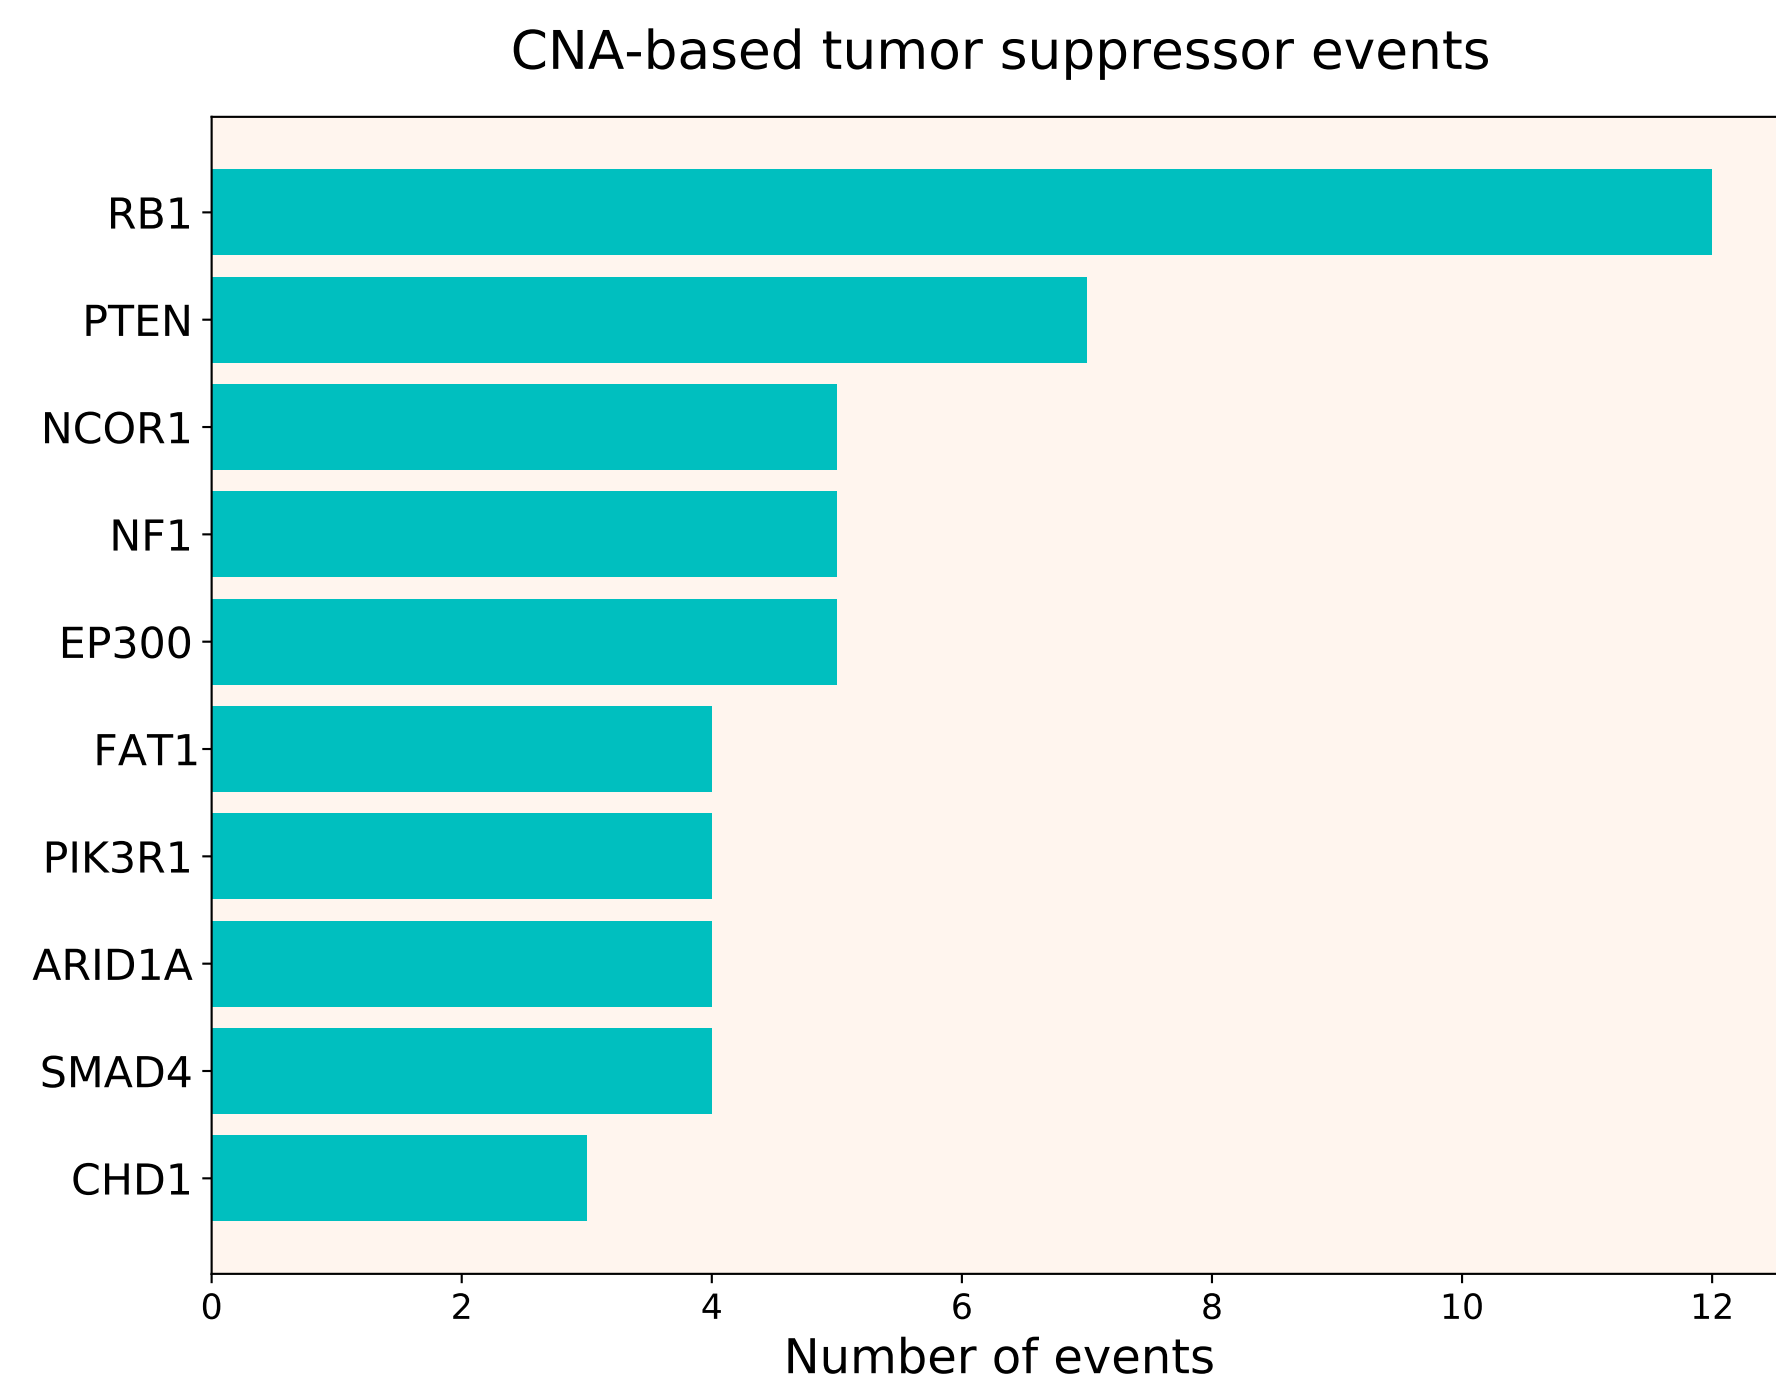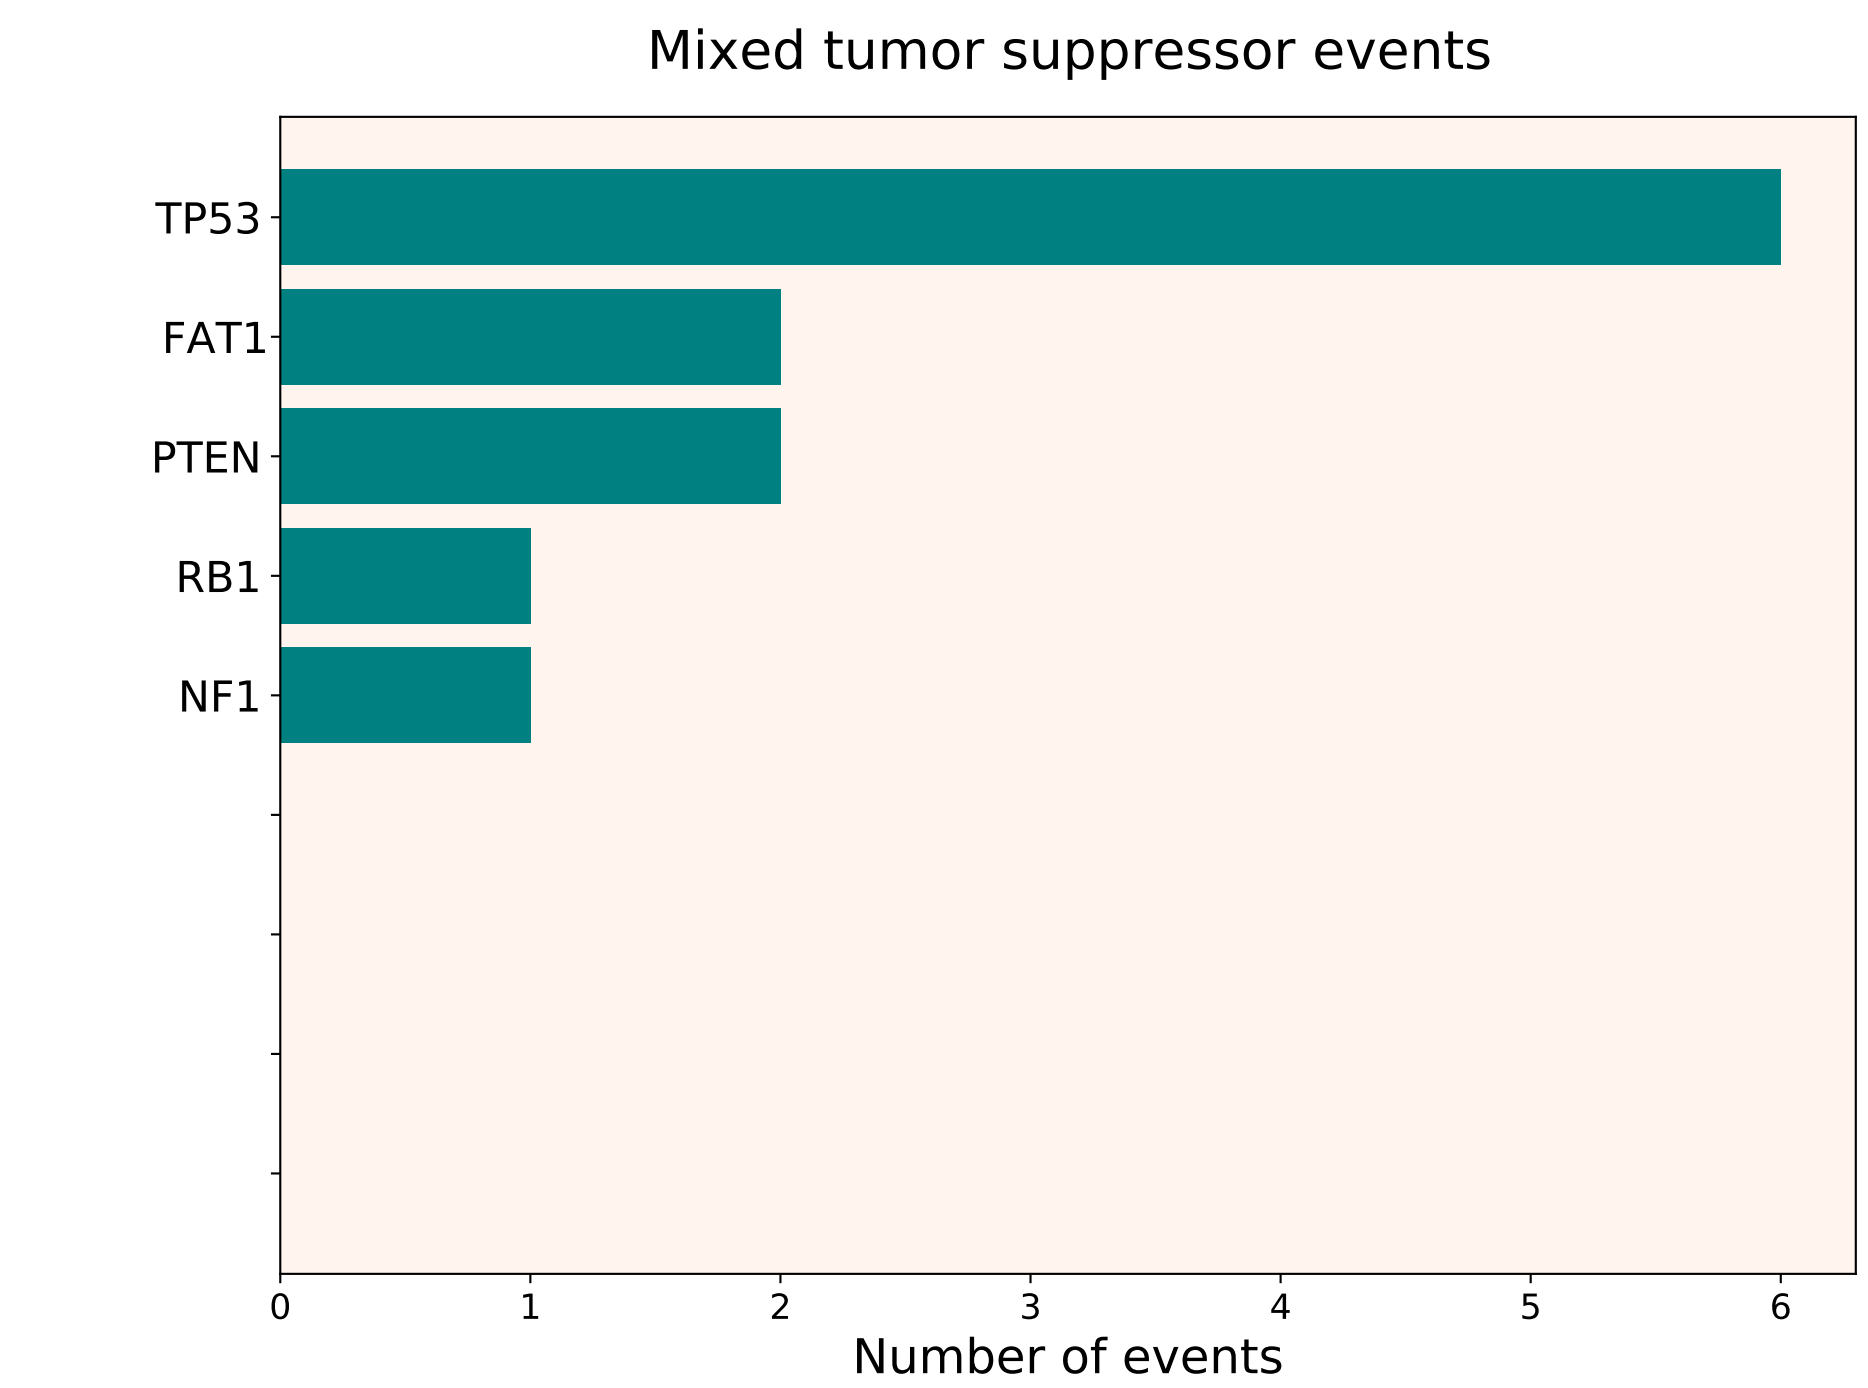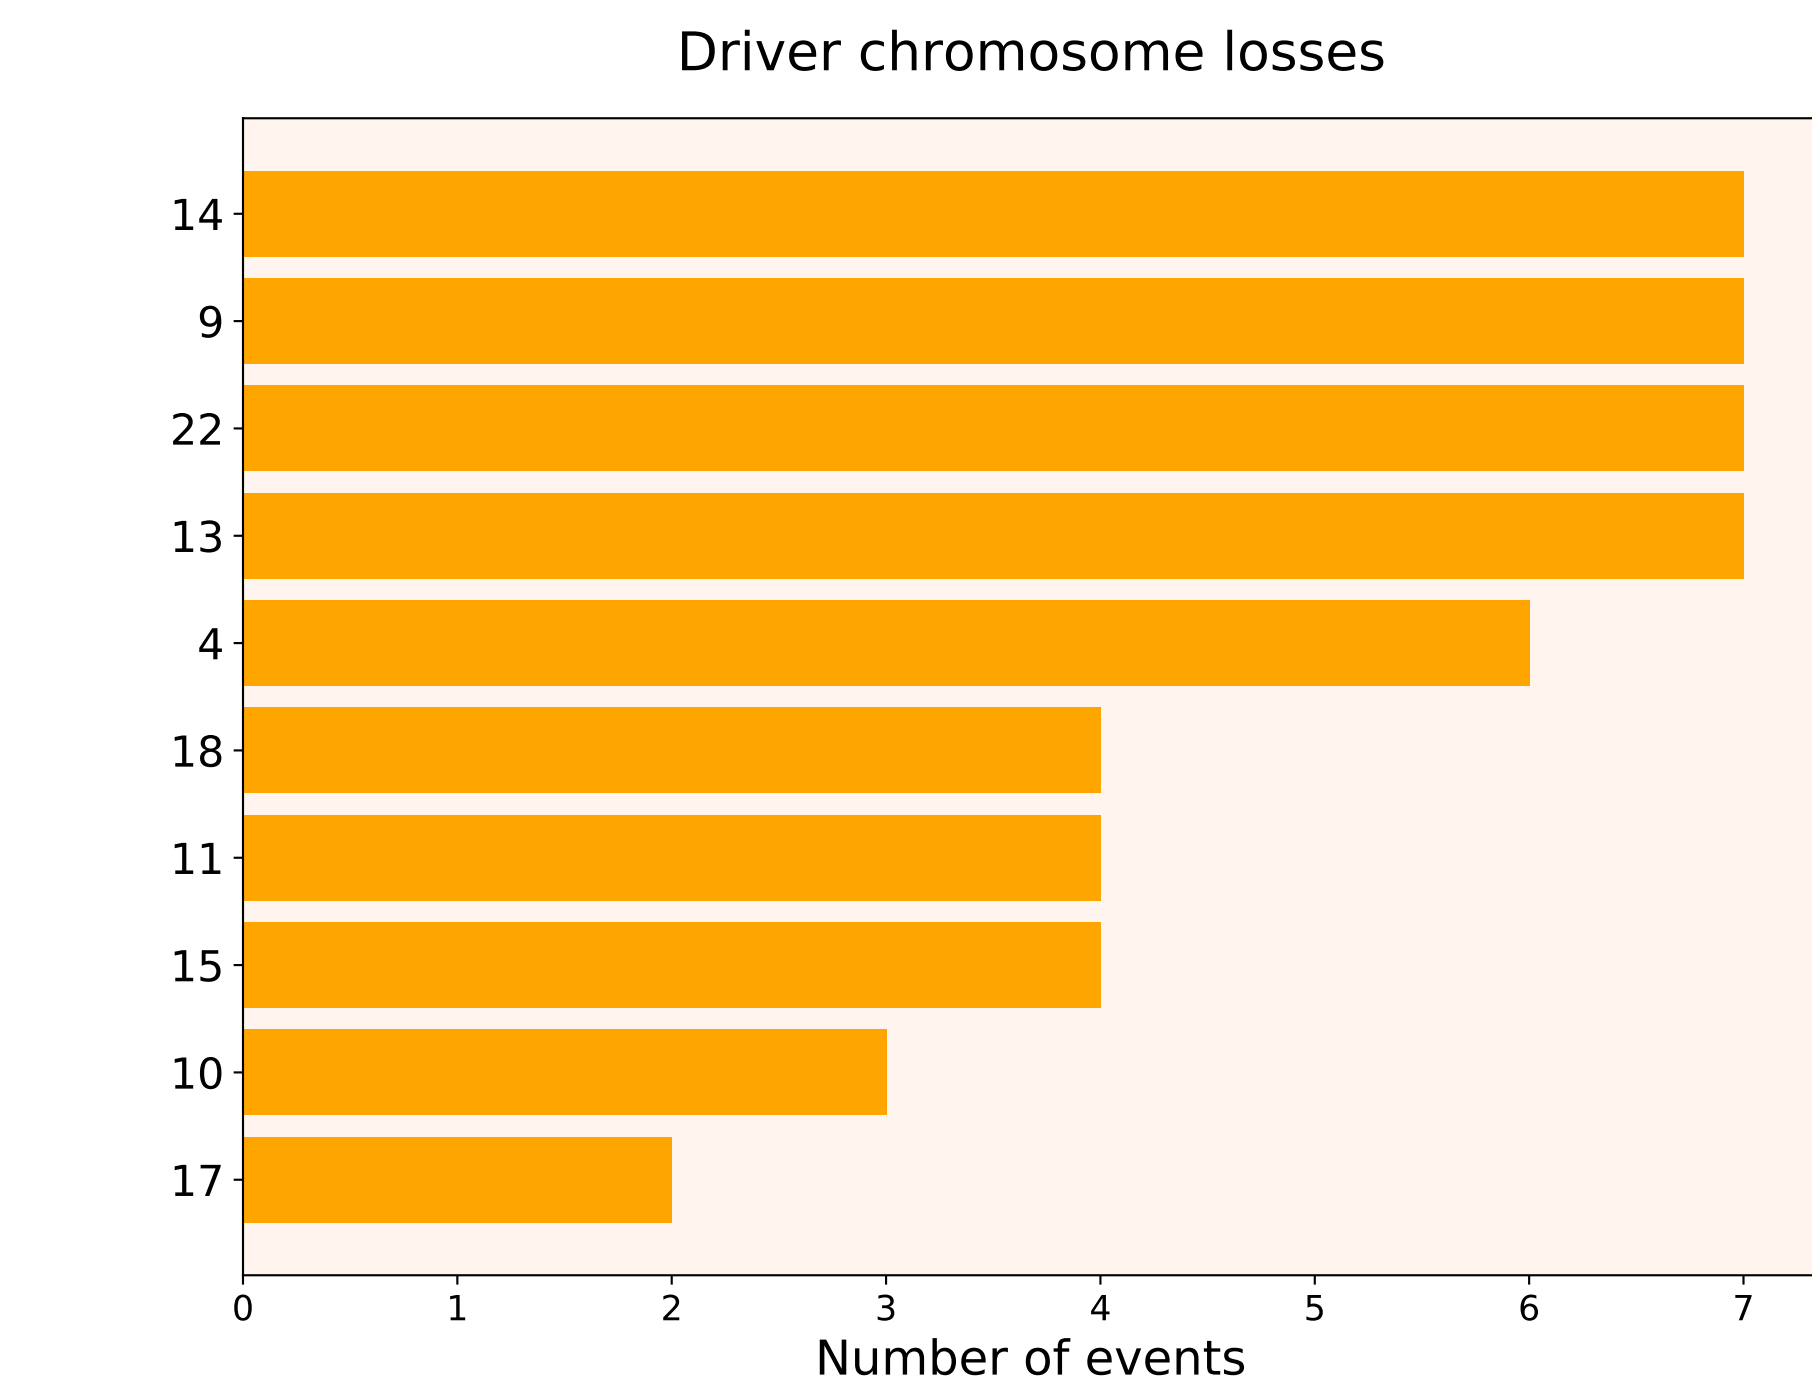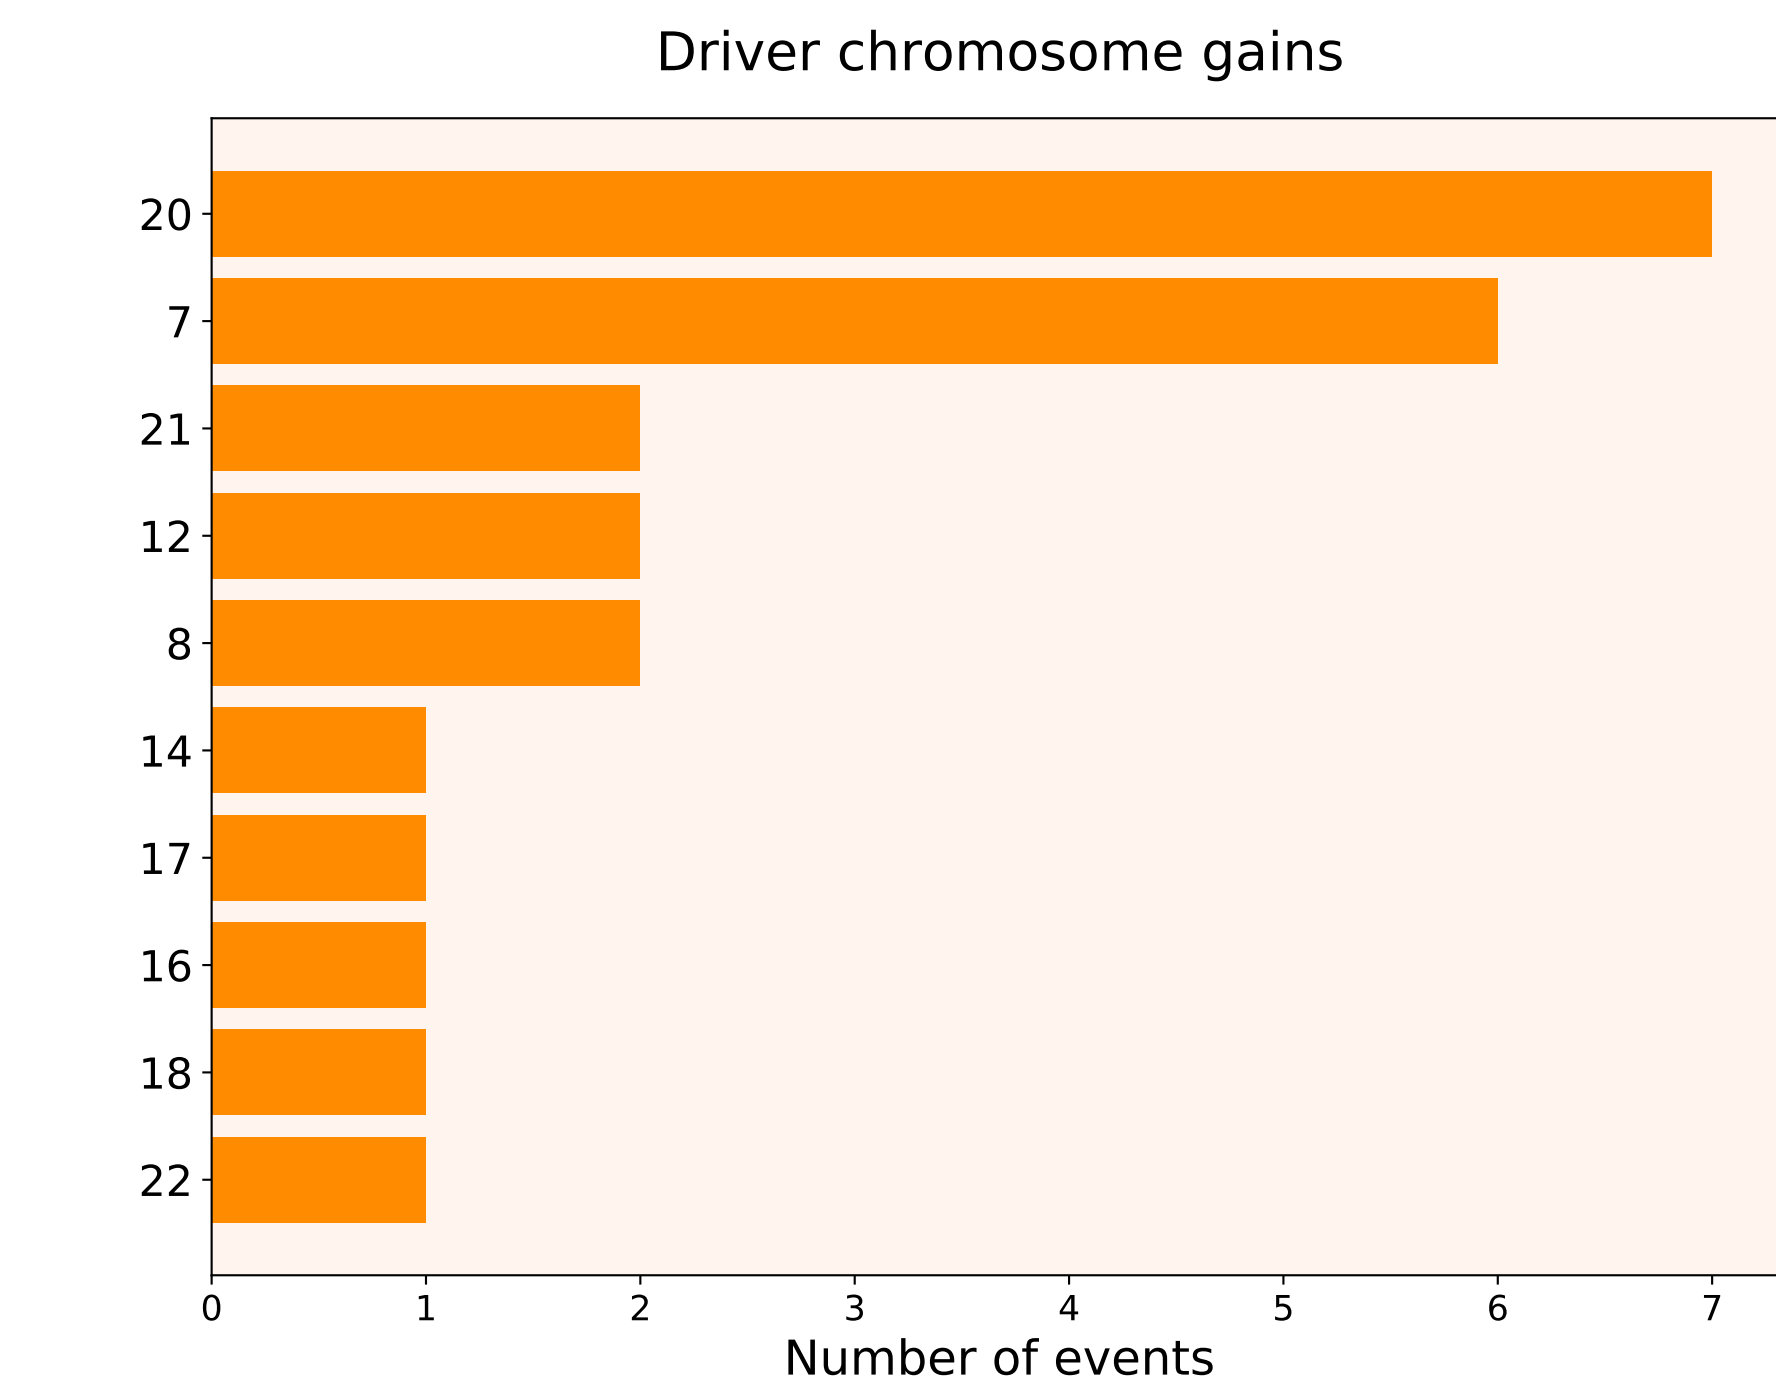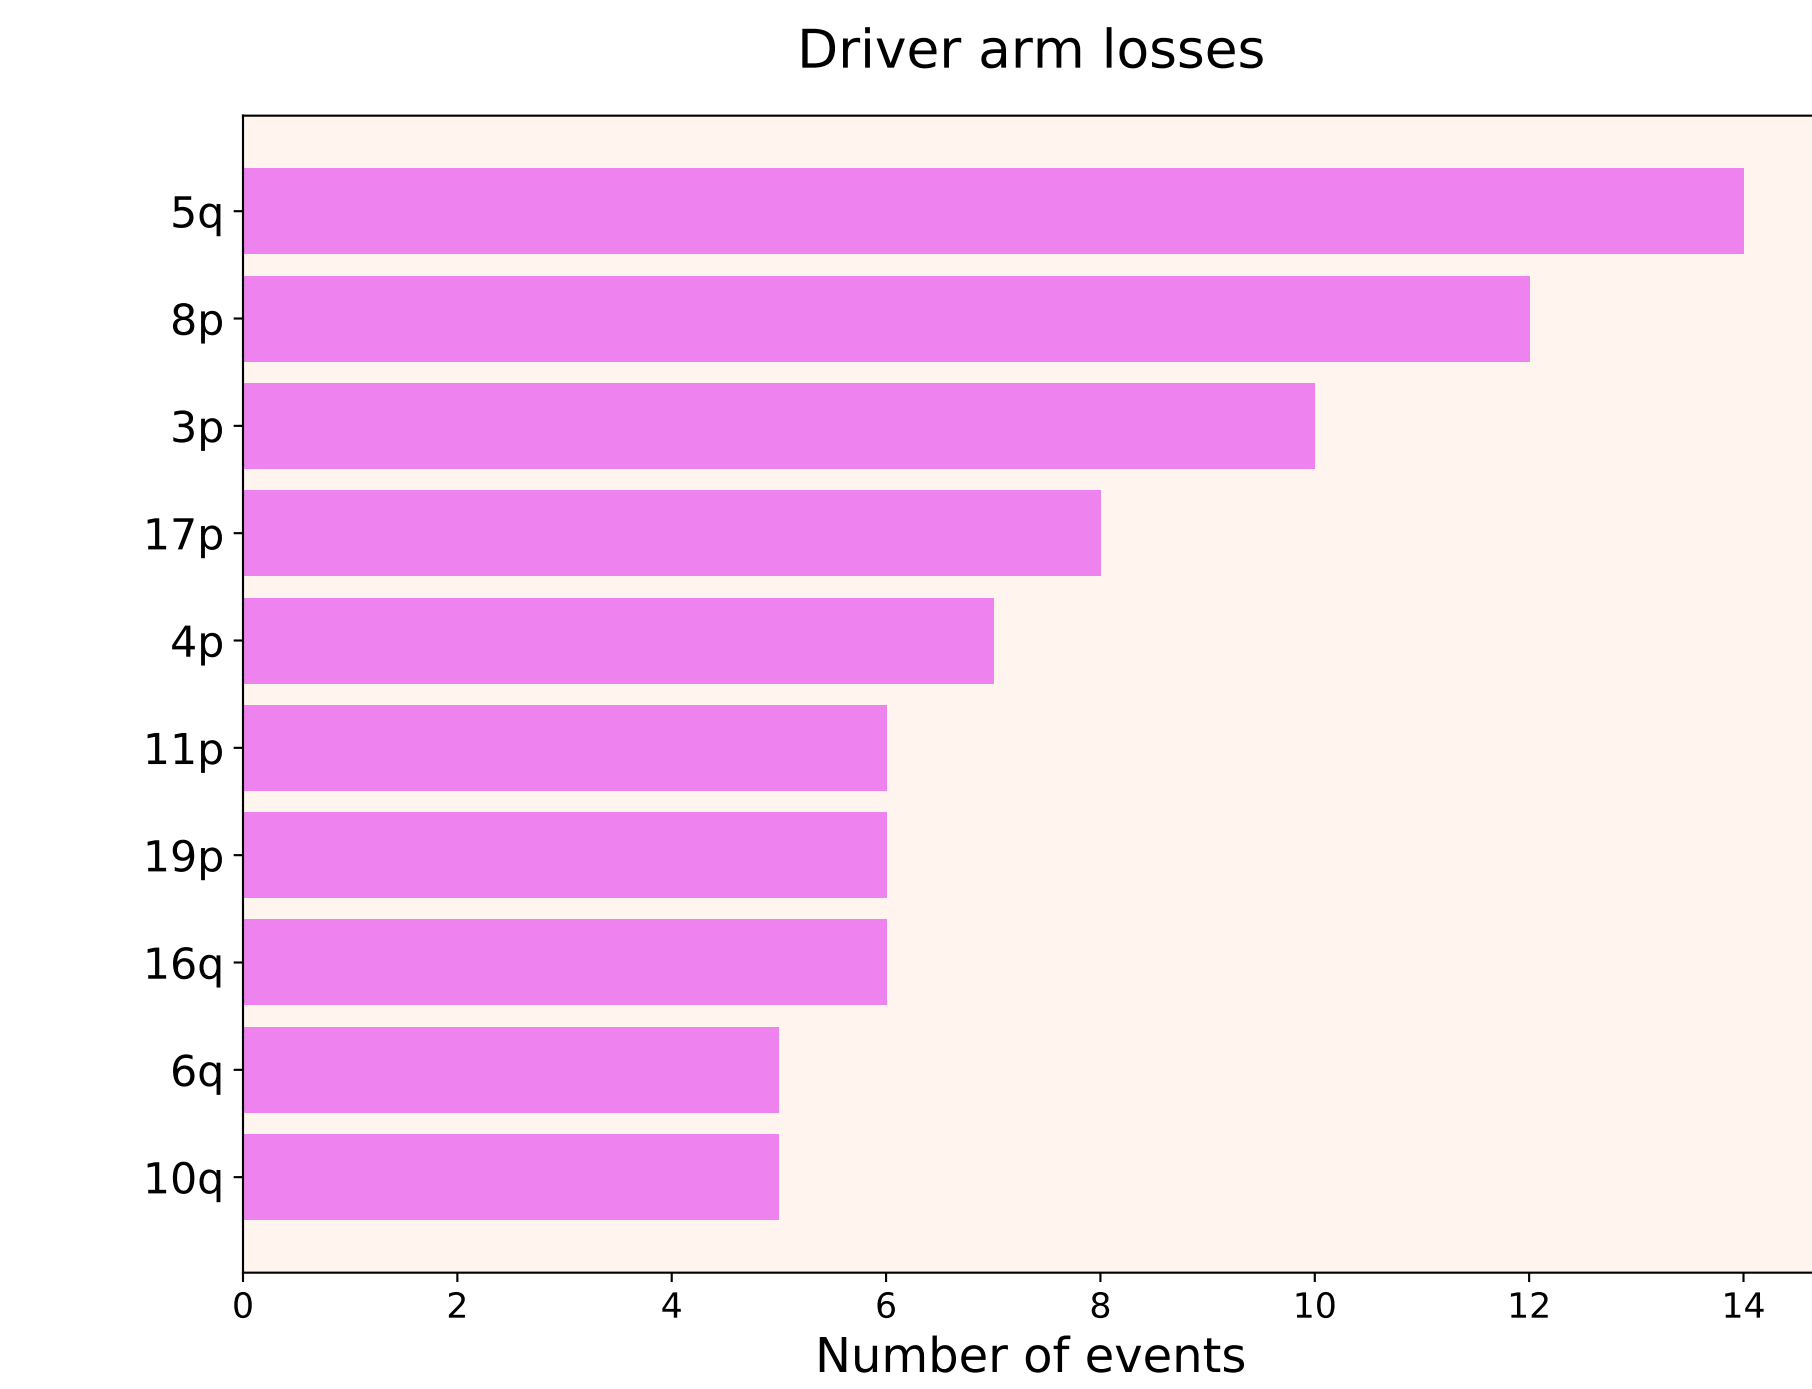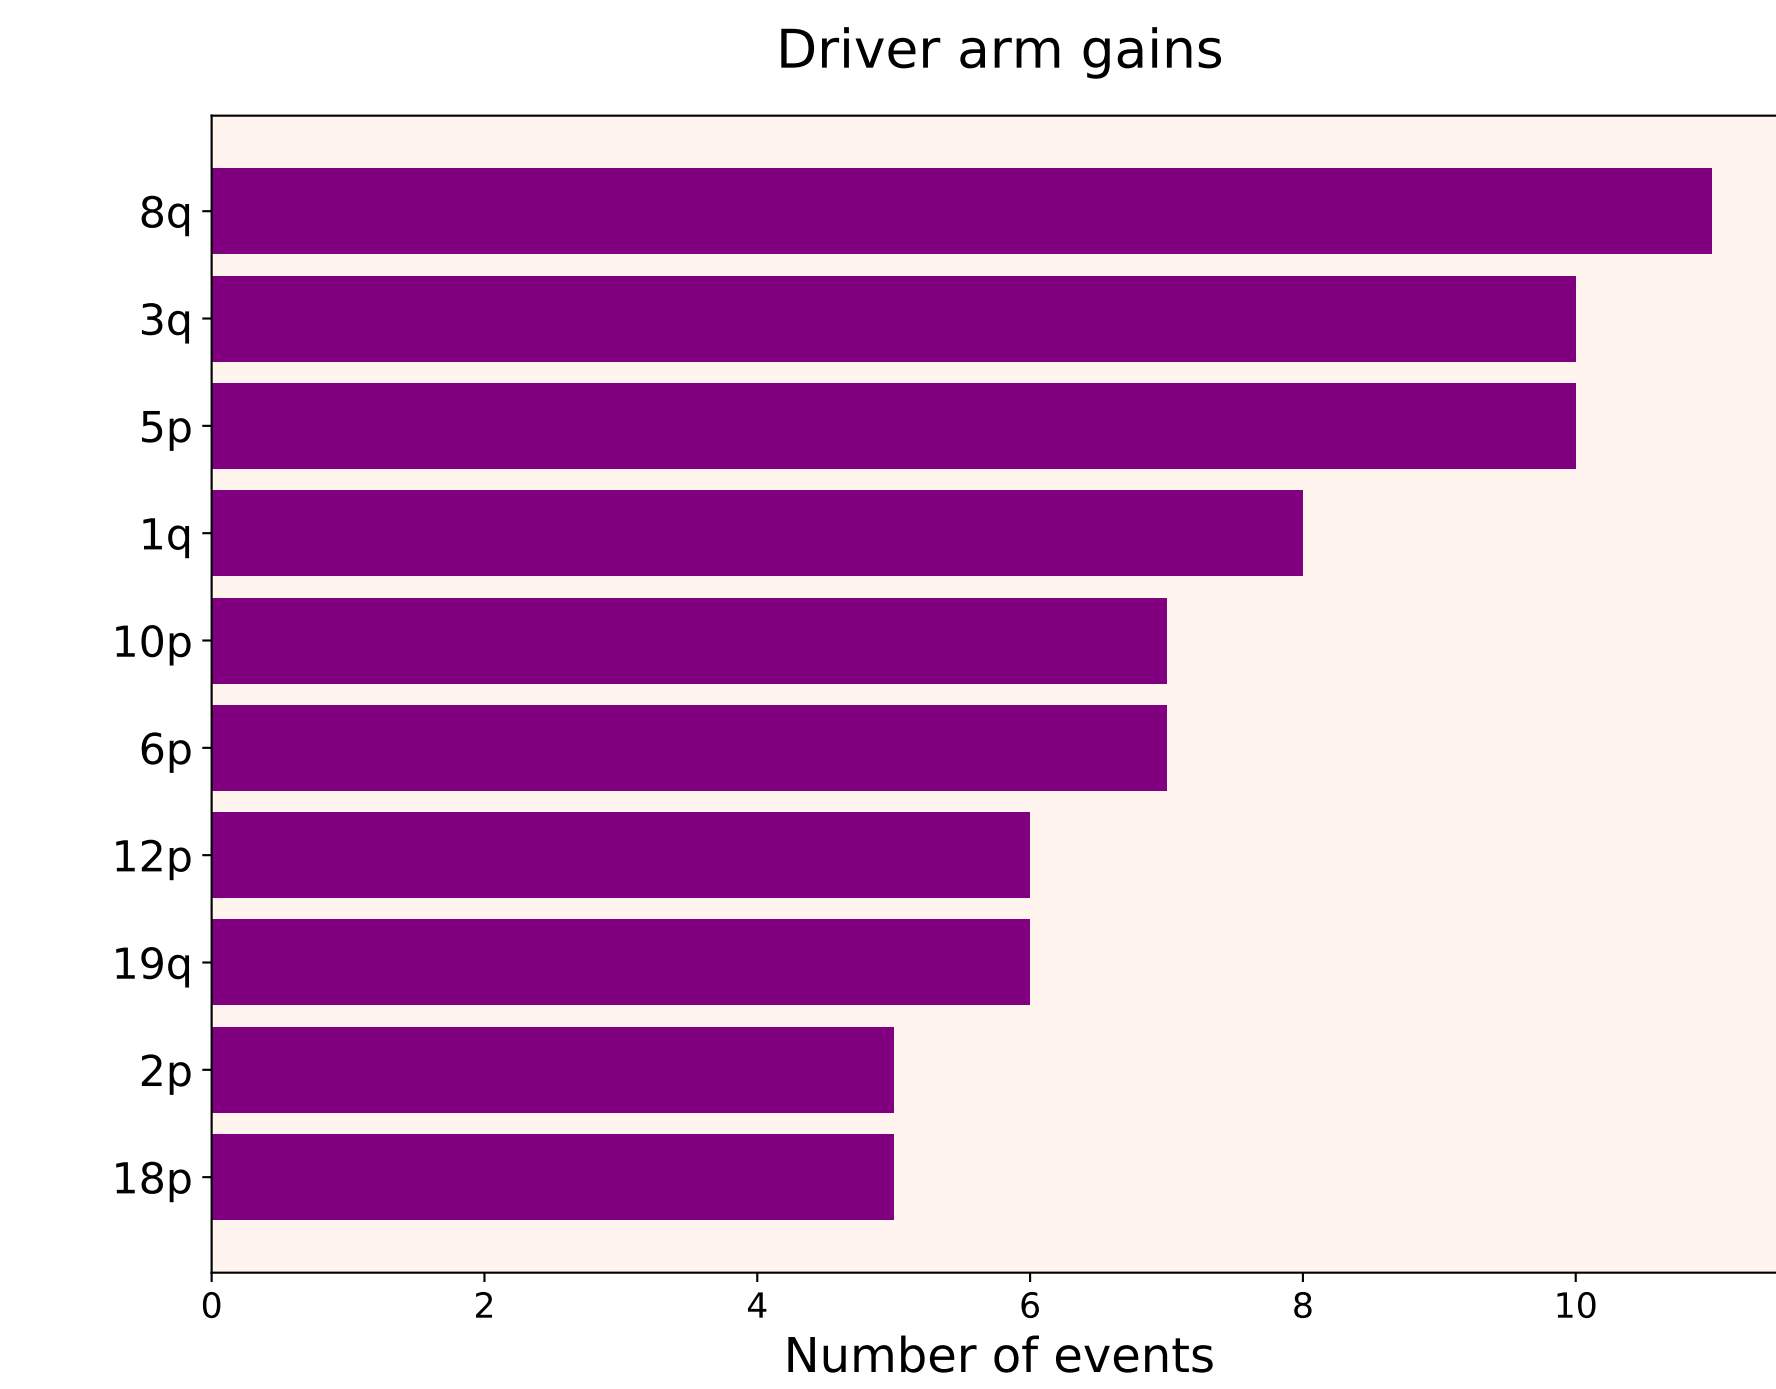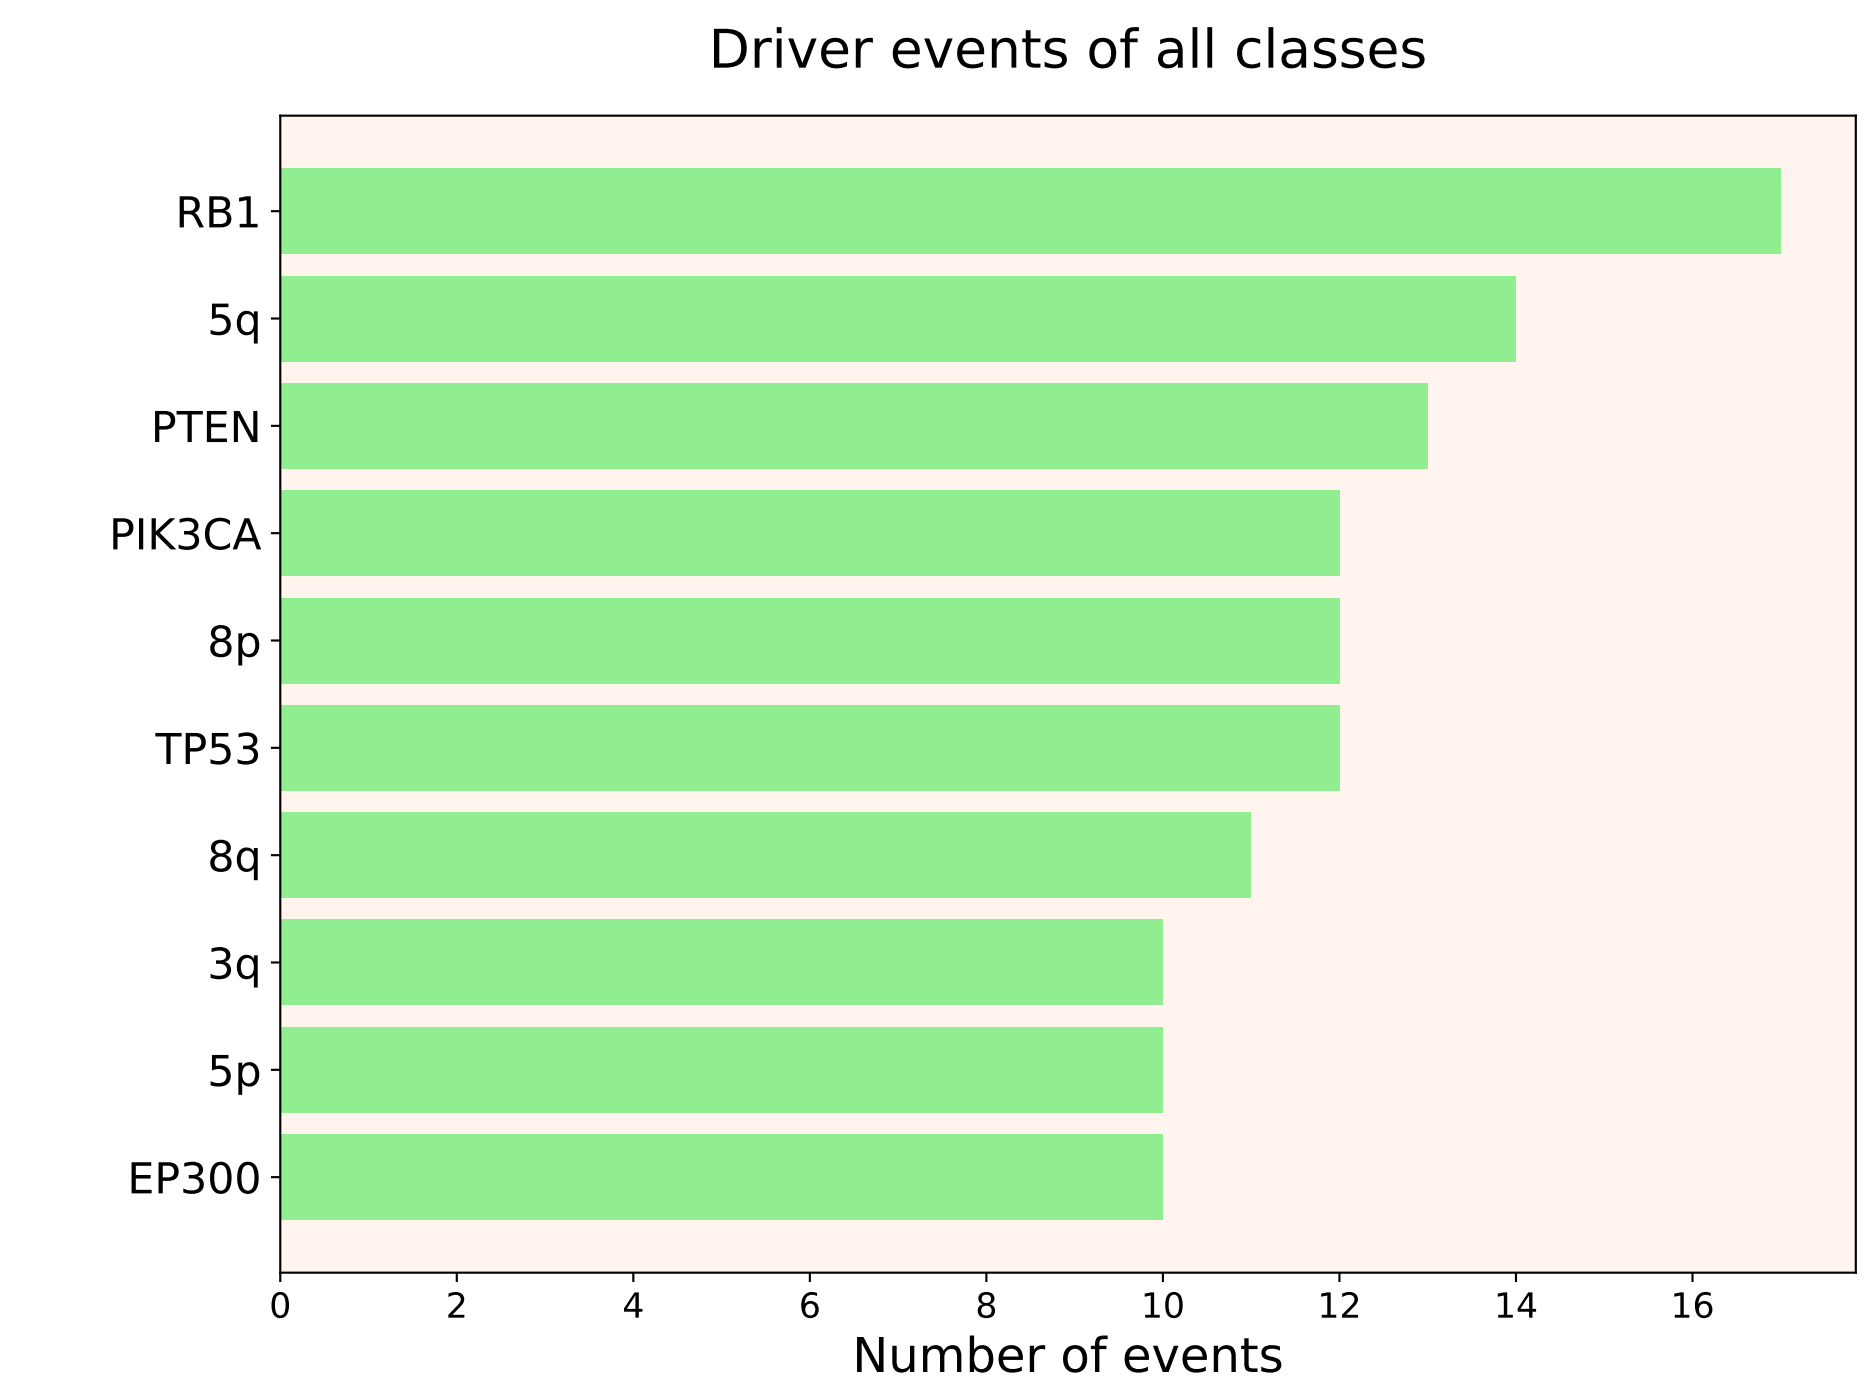

Supplement: Supplemental_Data_S1.zip [file Supplemental_Data_S1.zip]

# KIRC\_MALE

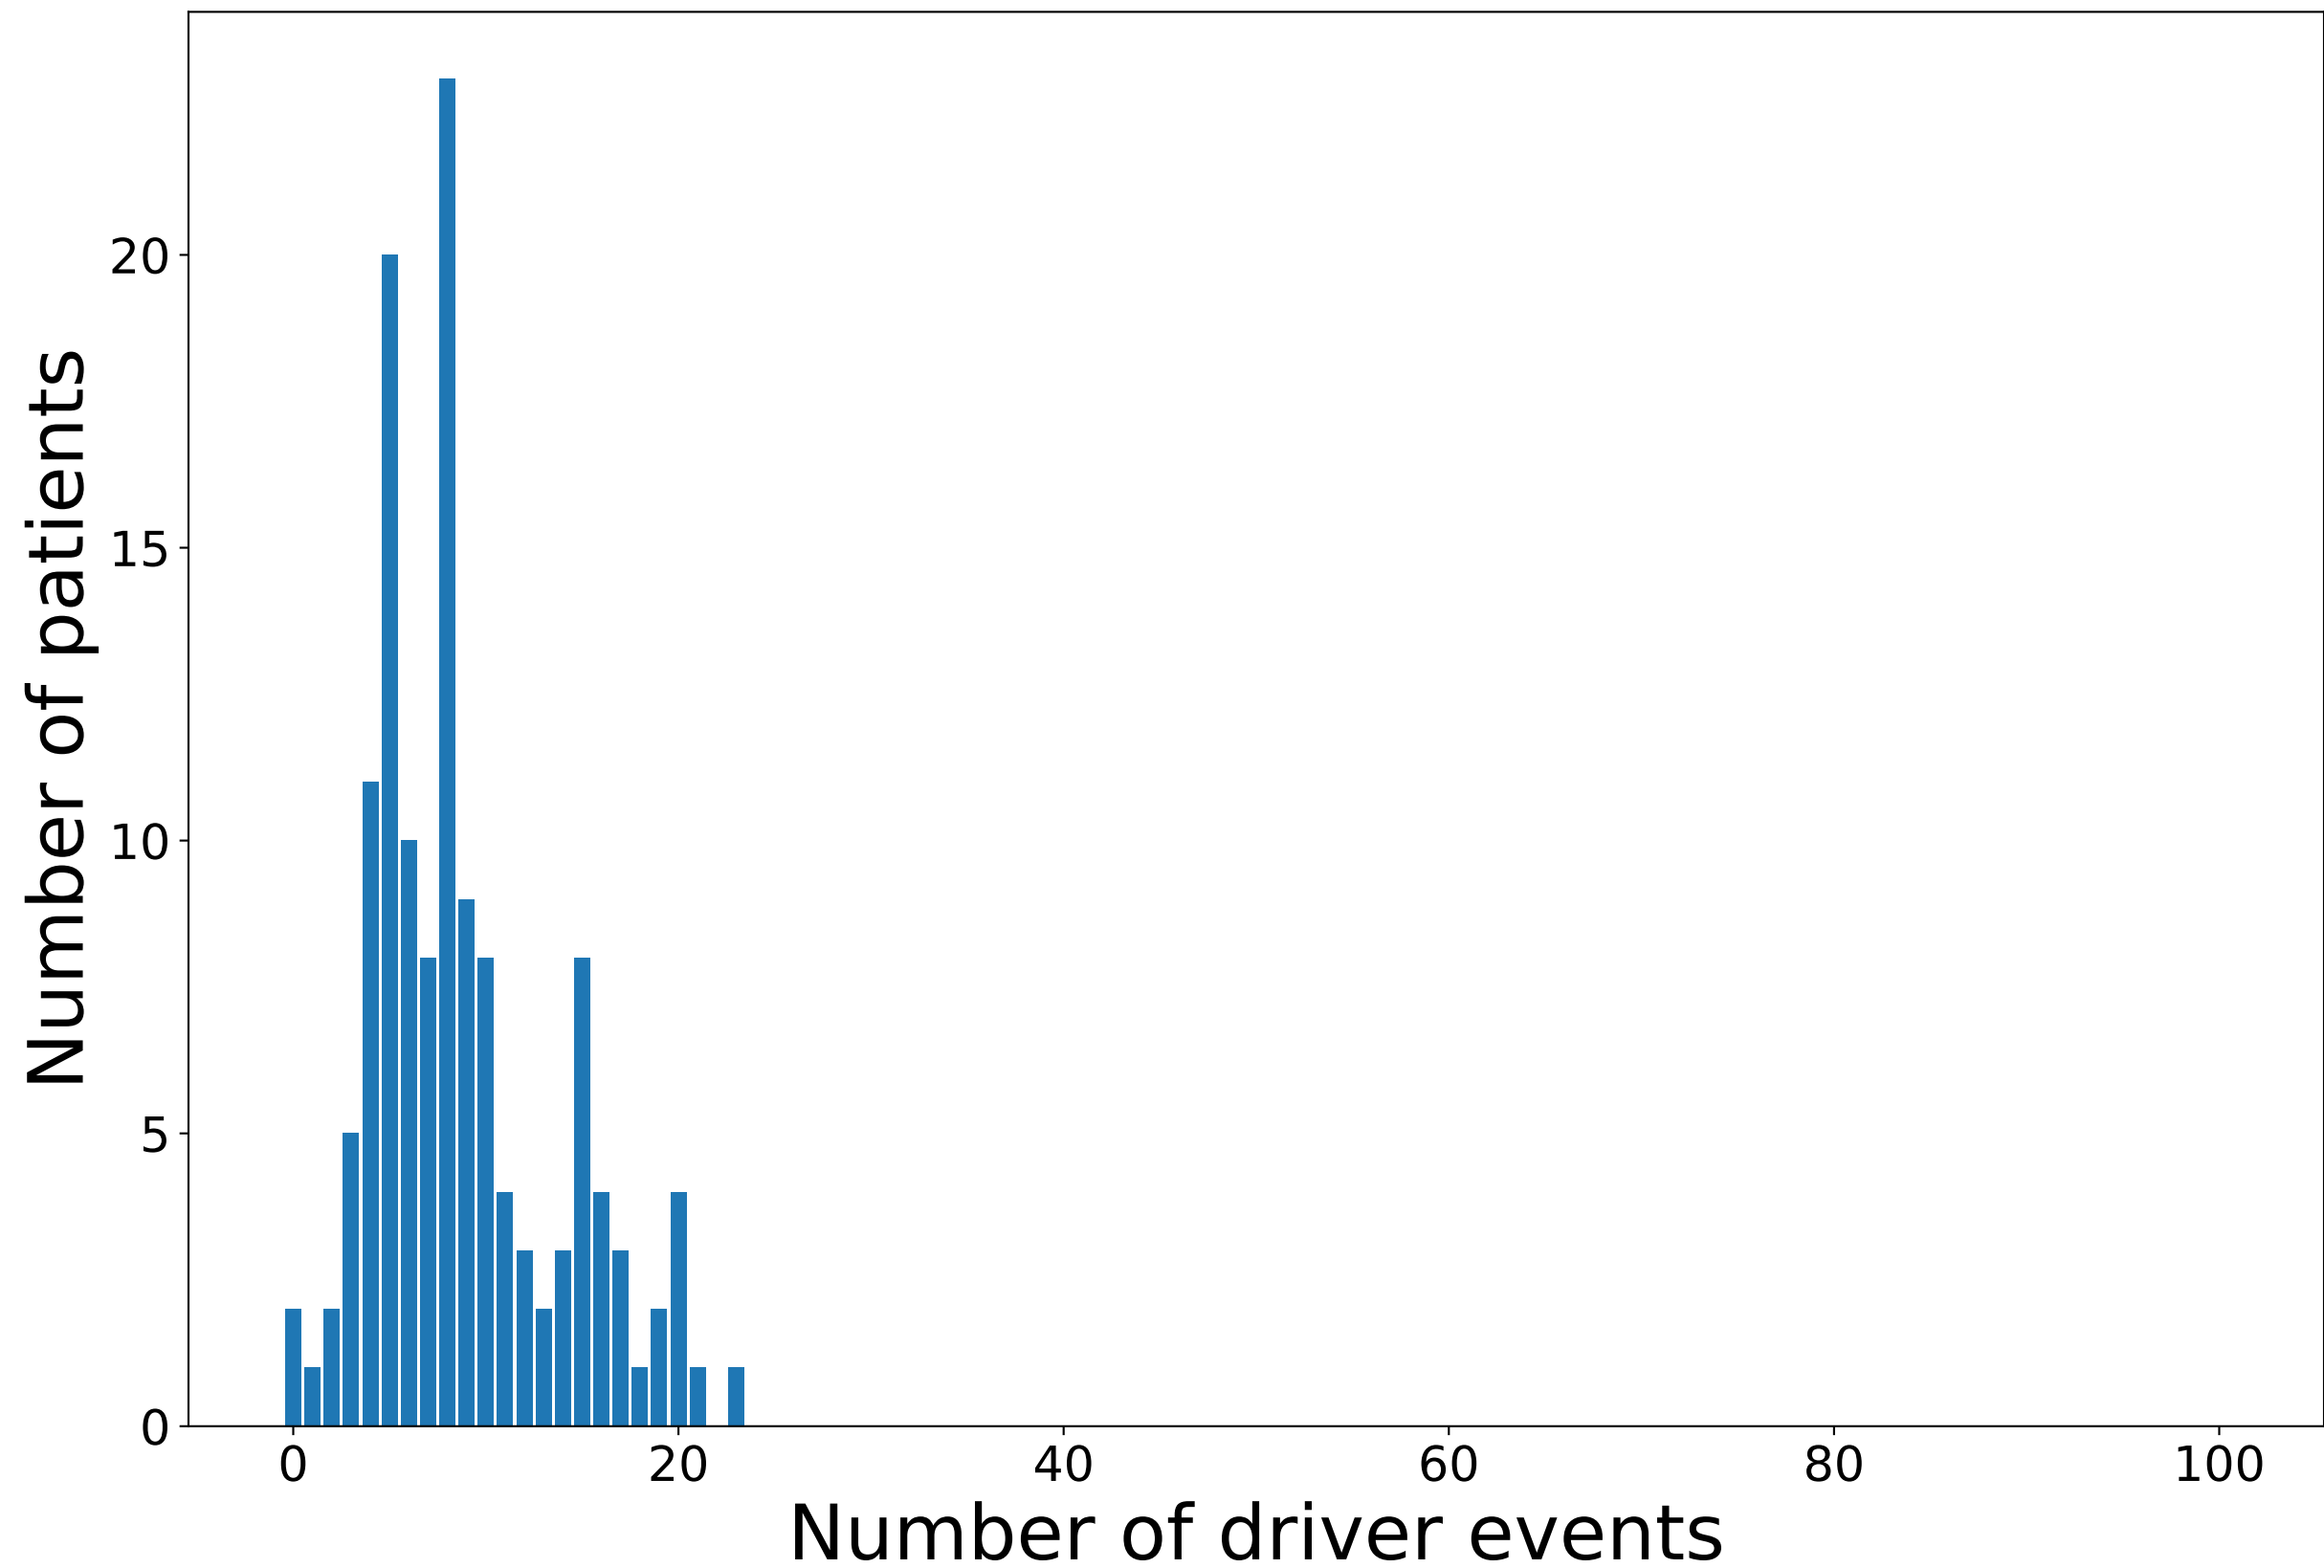

Supplement: Supplemental_Data_S1.zip [file Supplemental_Data_S1.zip]

# CHOL\_FEMALE

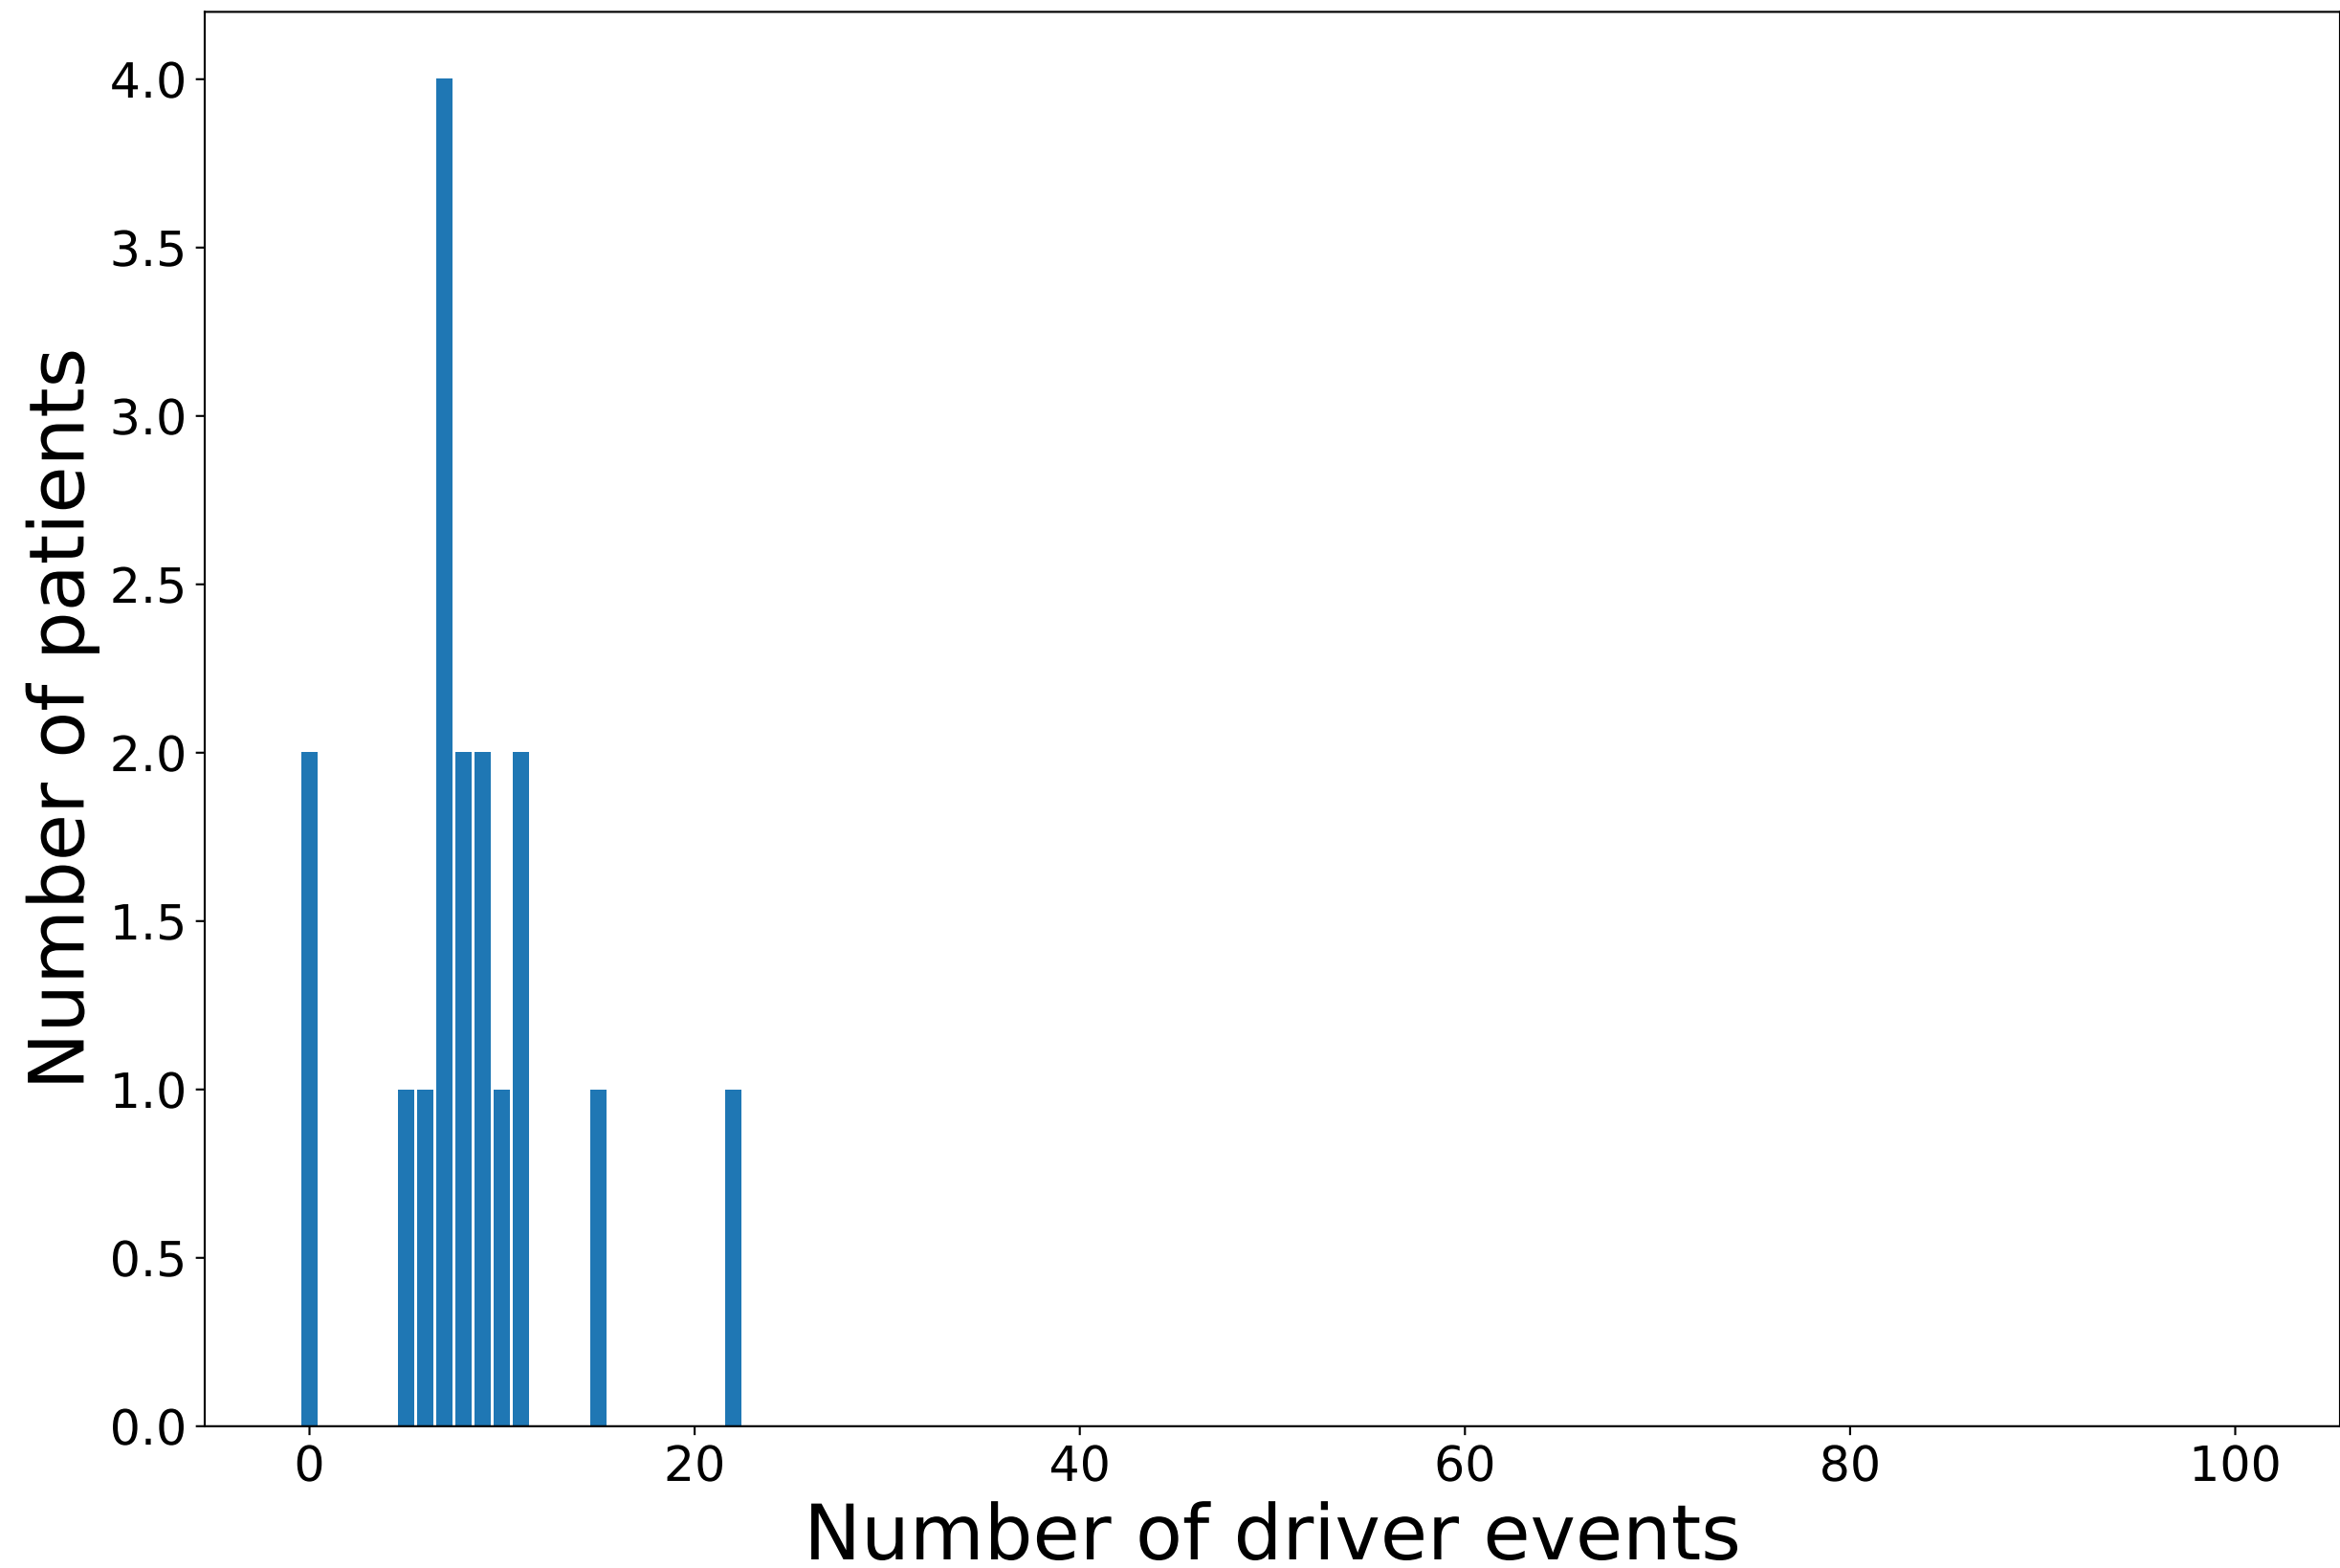

Supplement: Supplemental_Data_S1.zip [file Supplemental_Data_S1.zip]

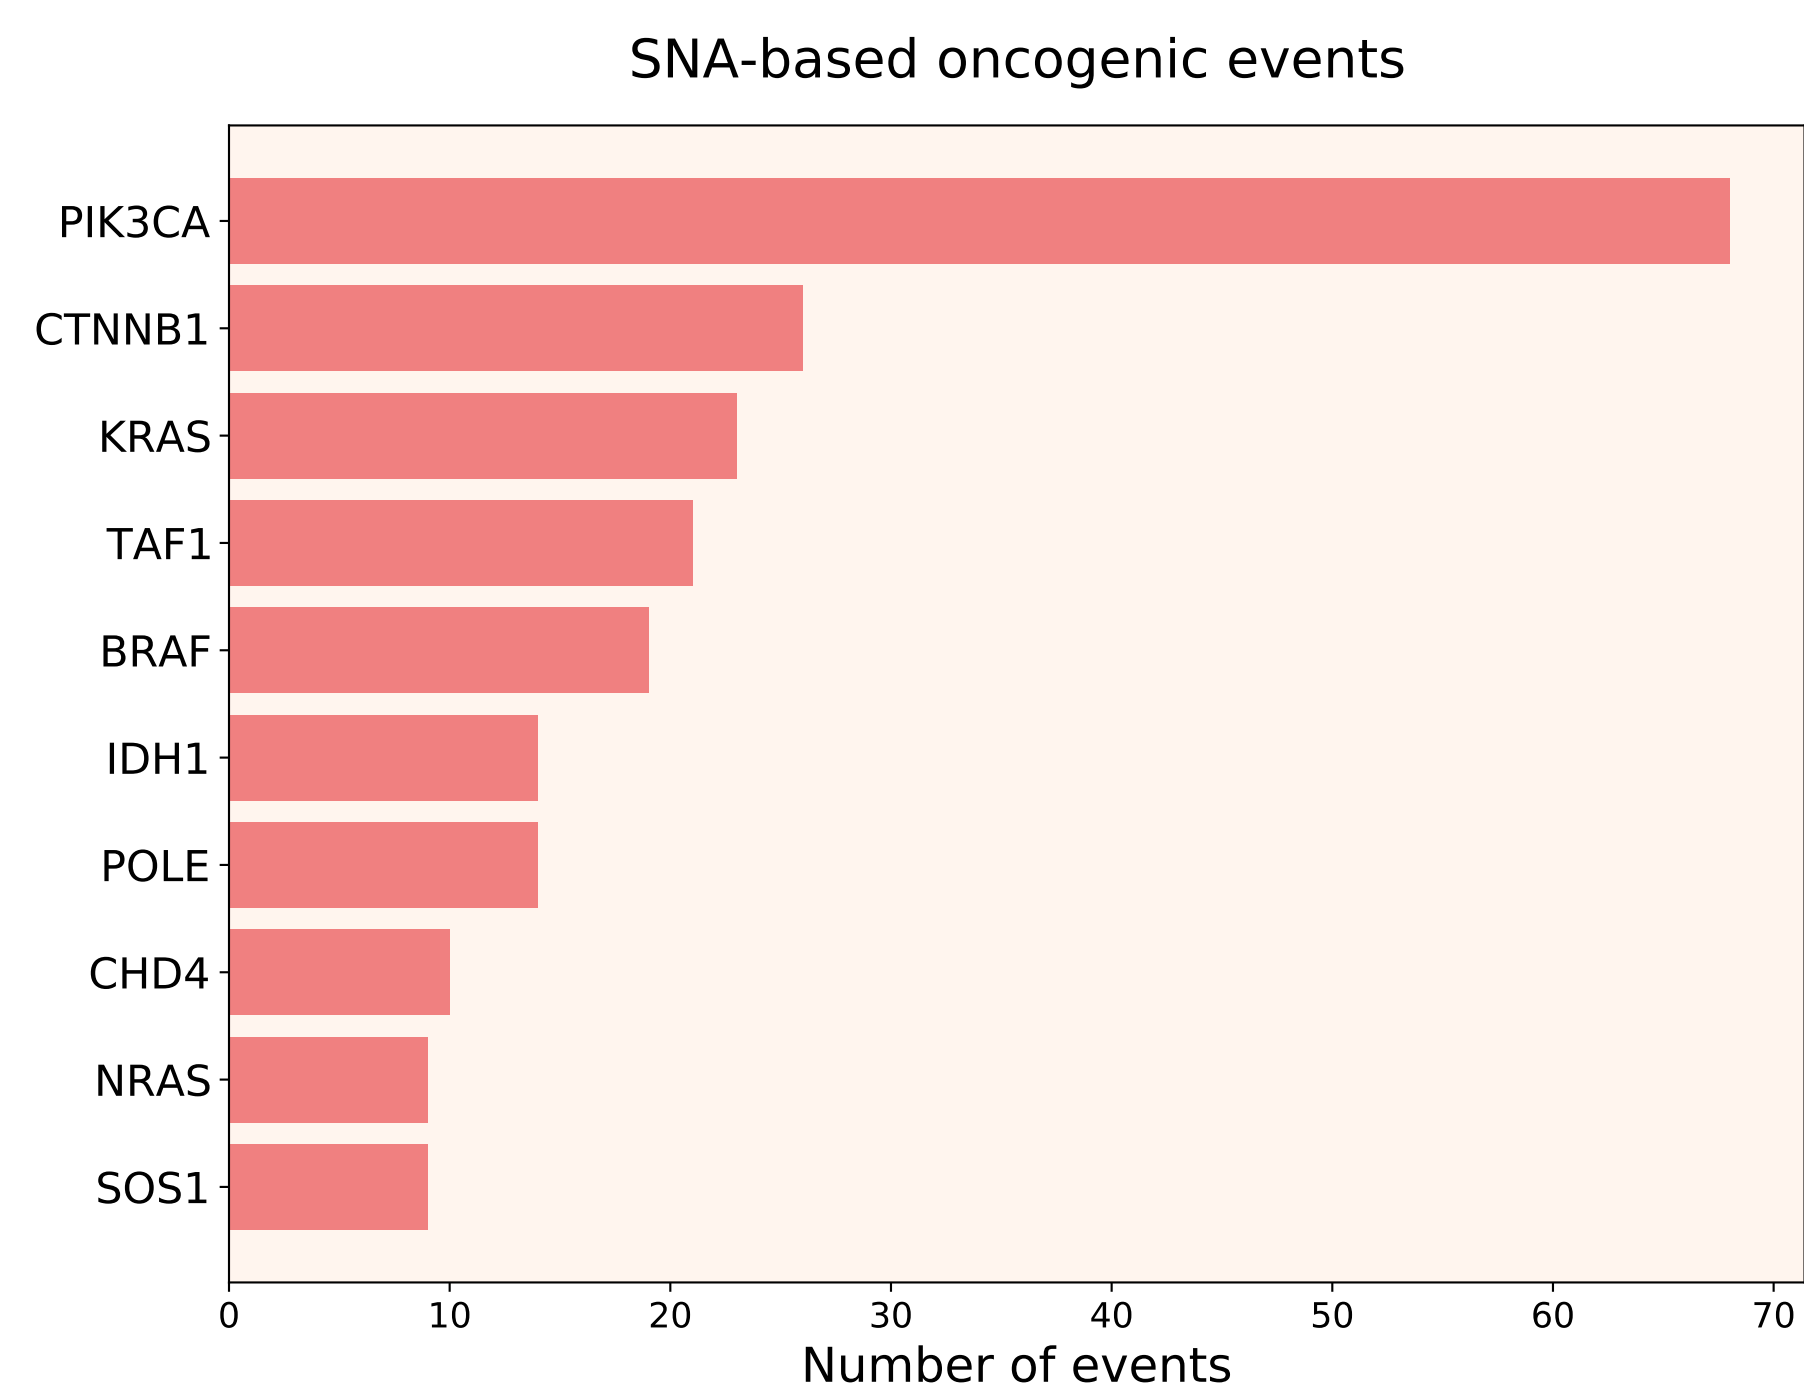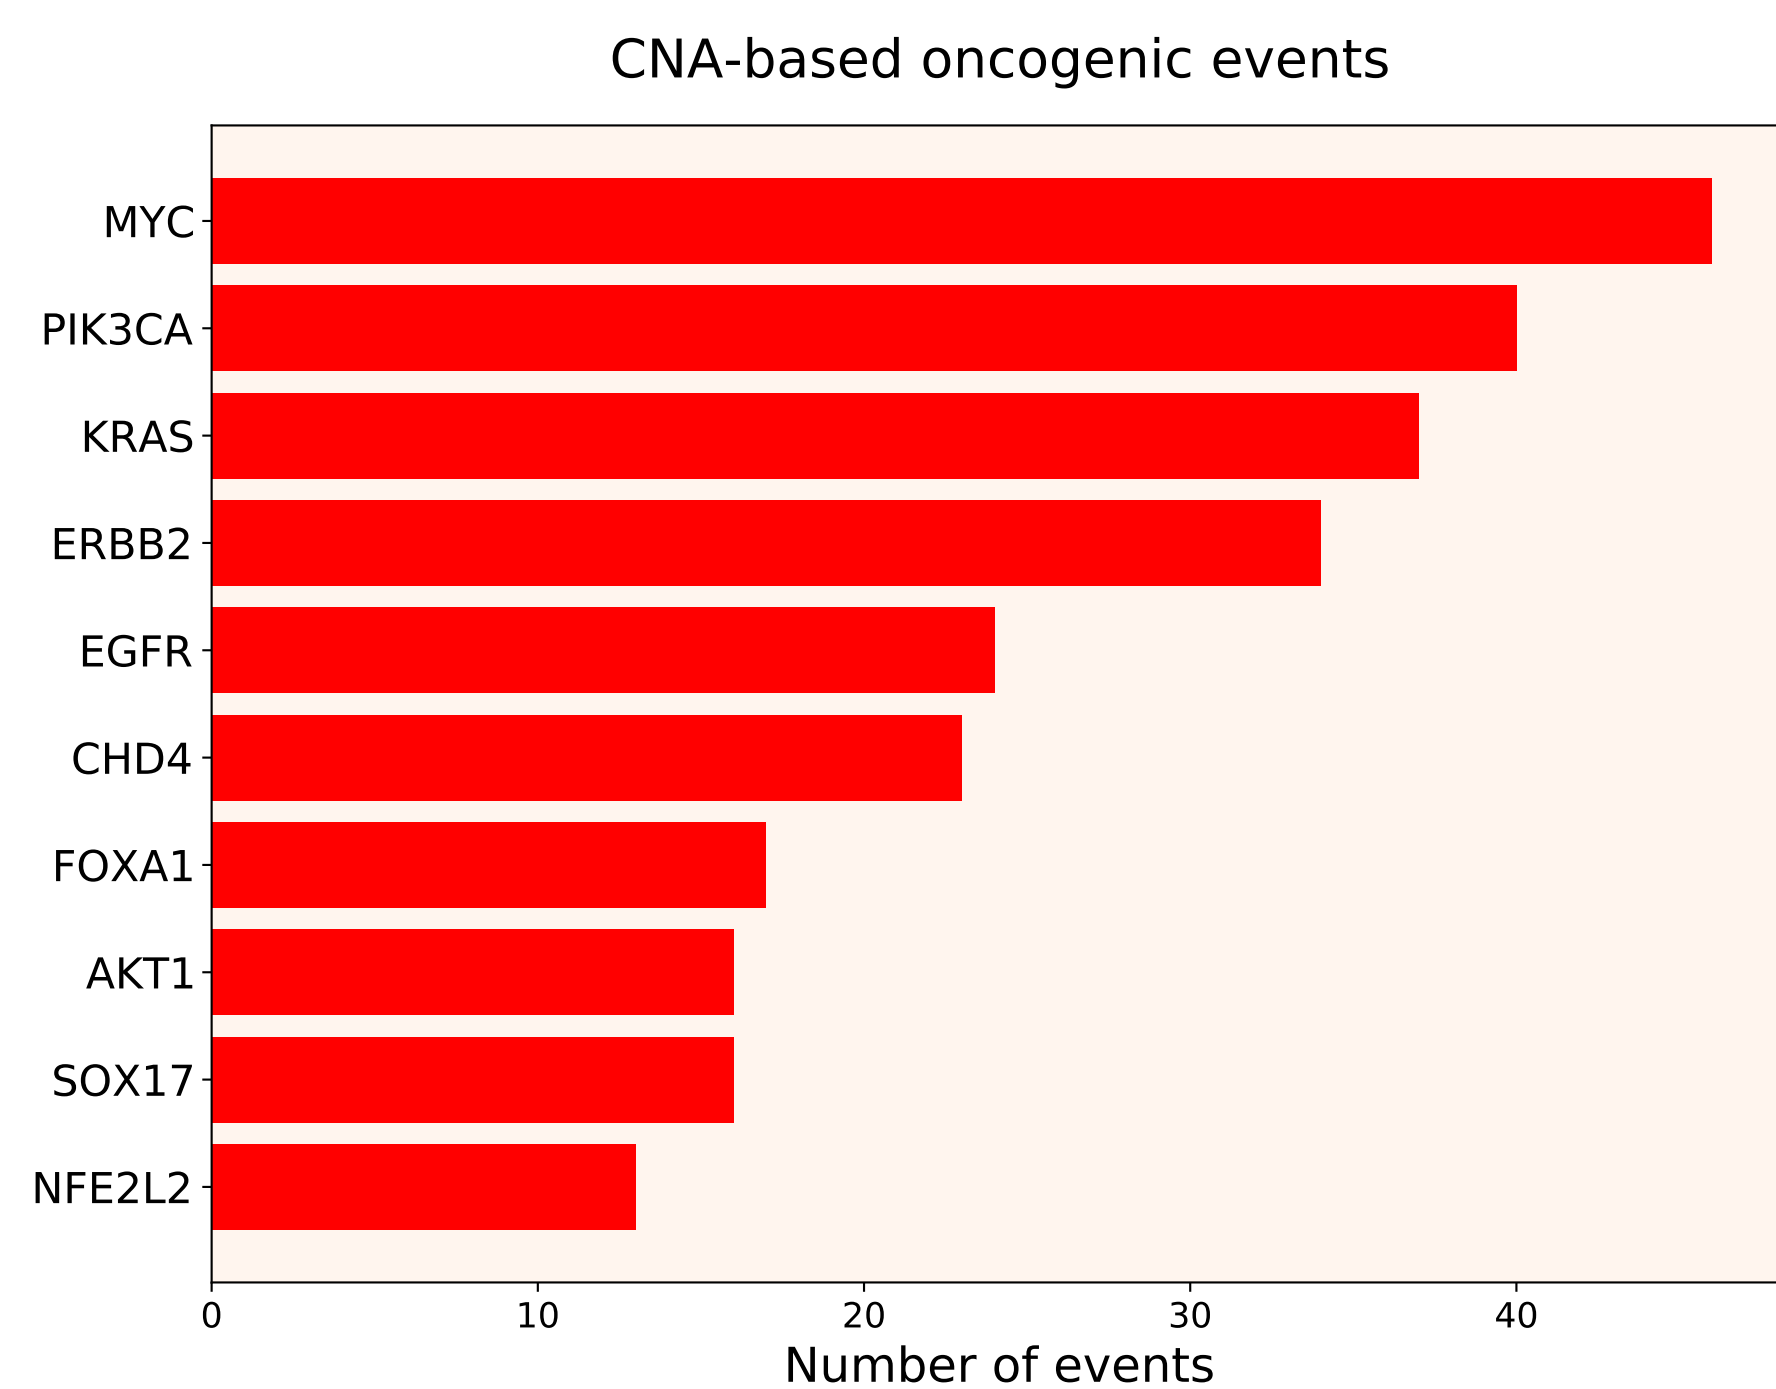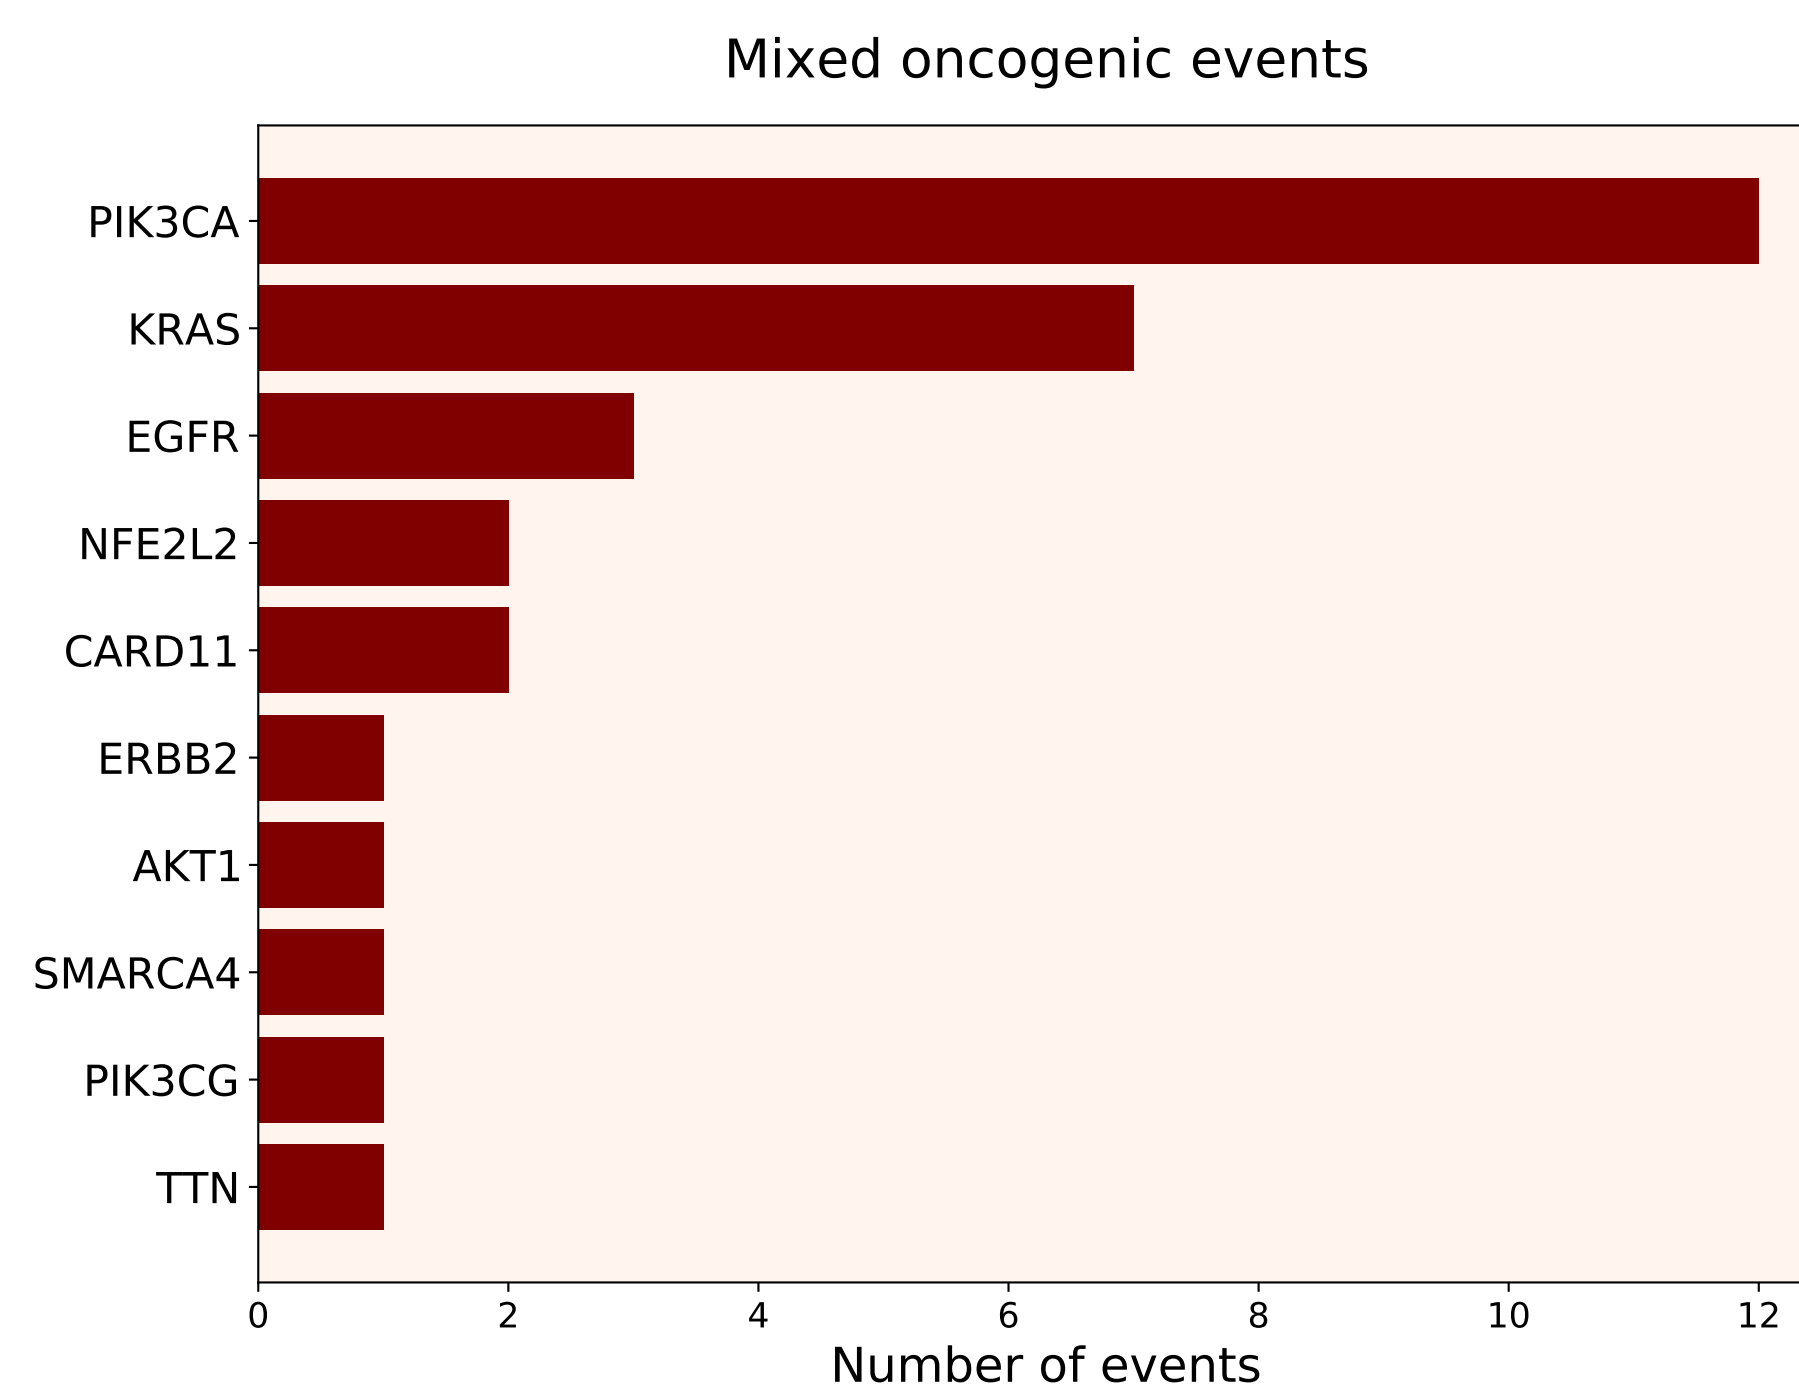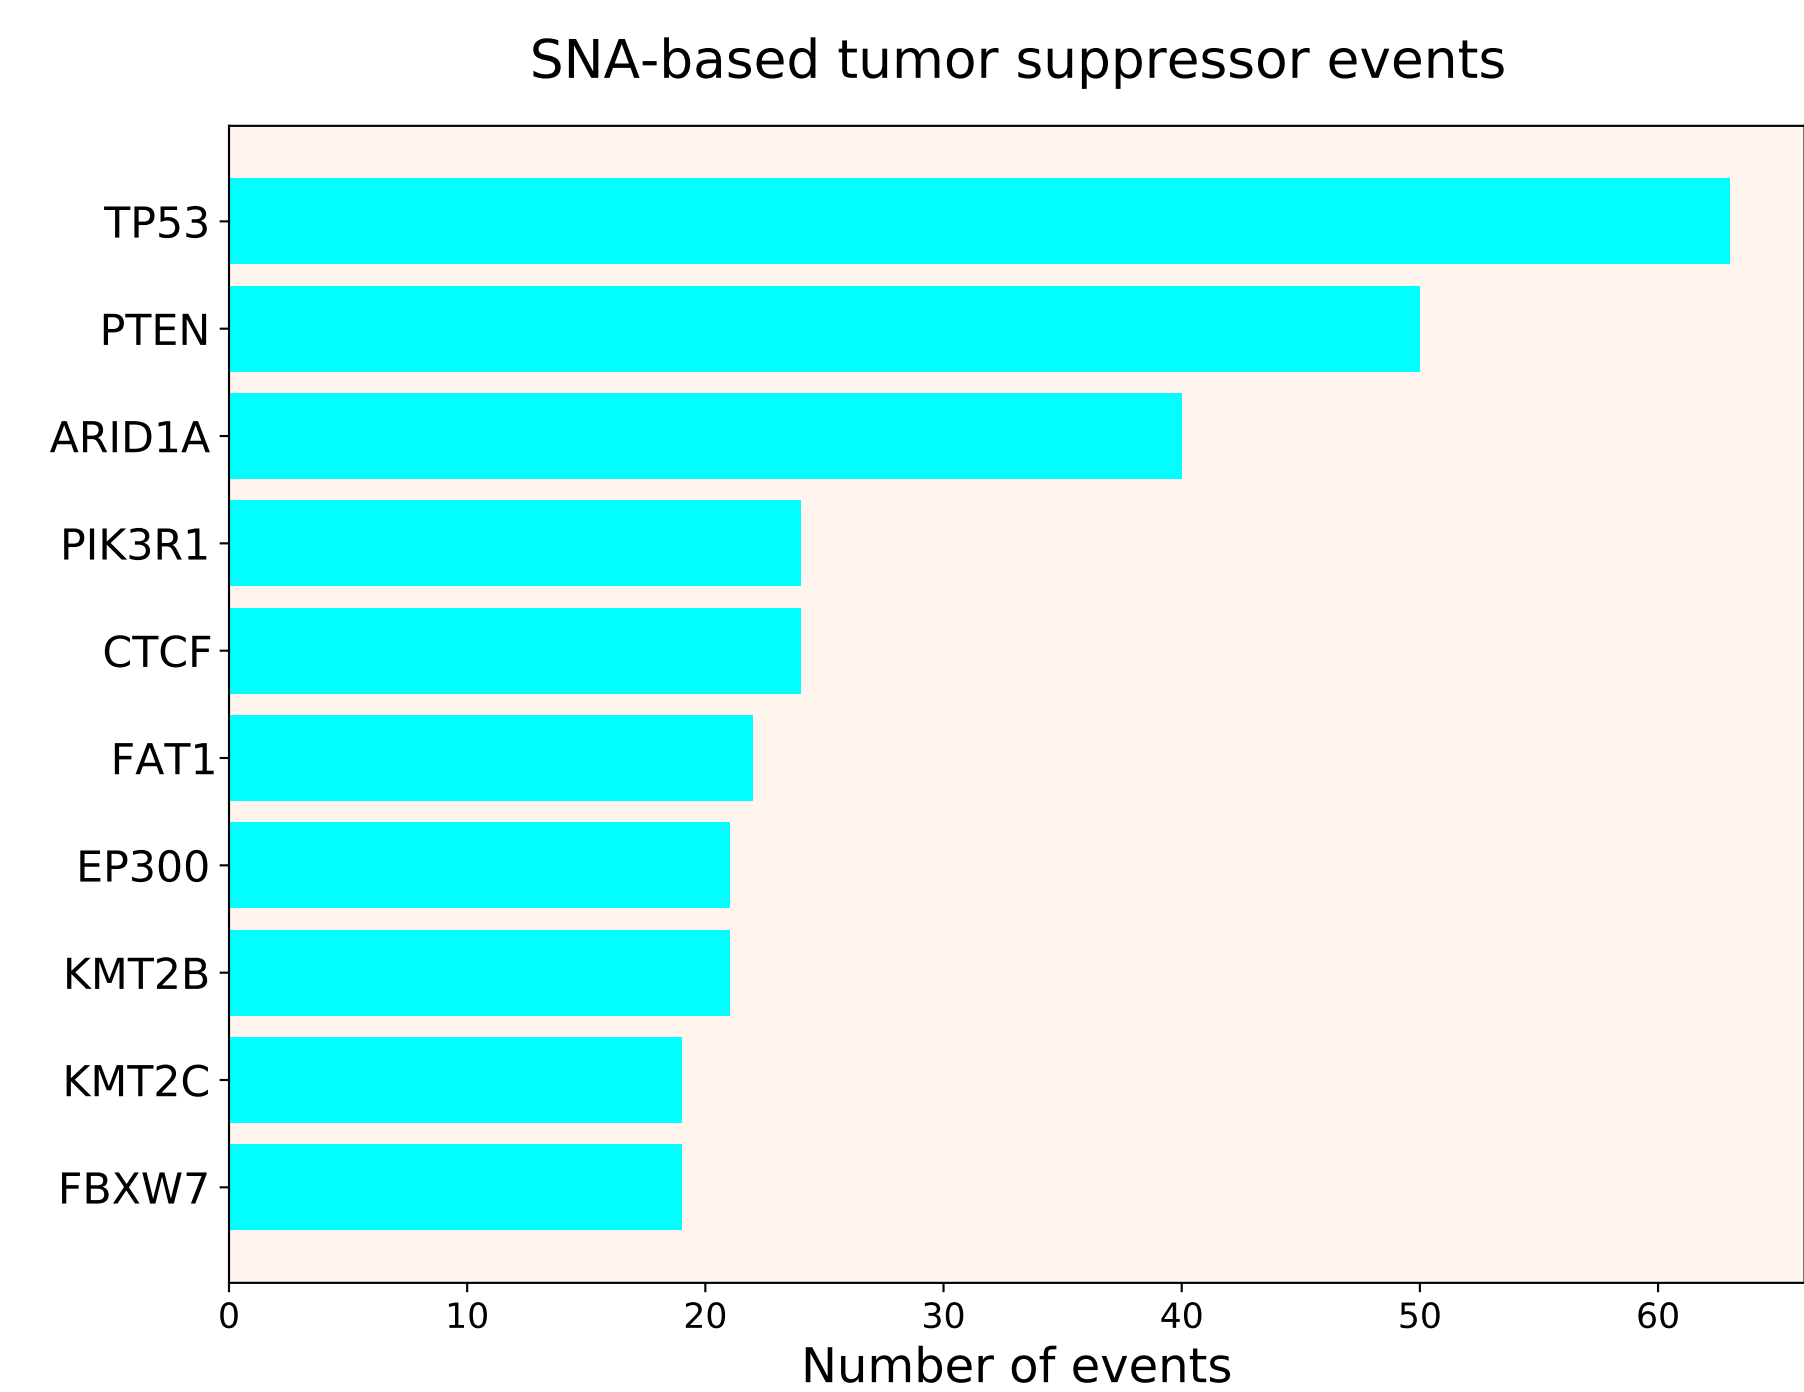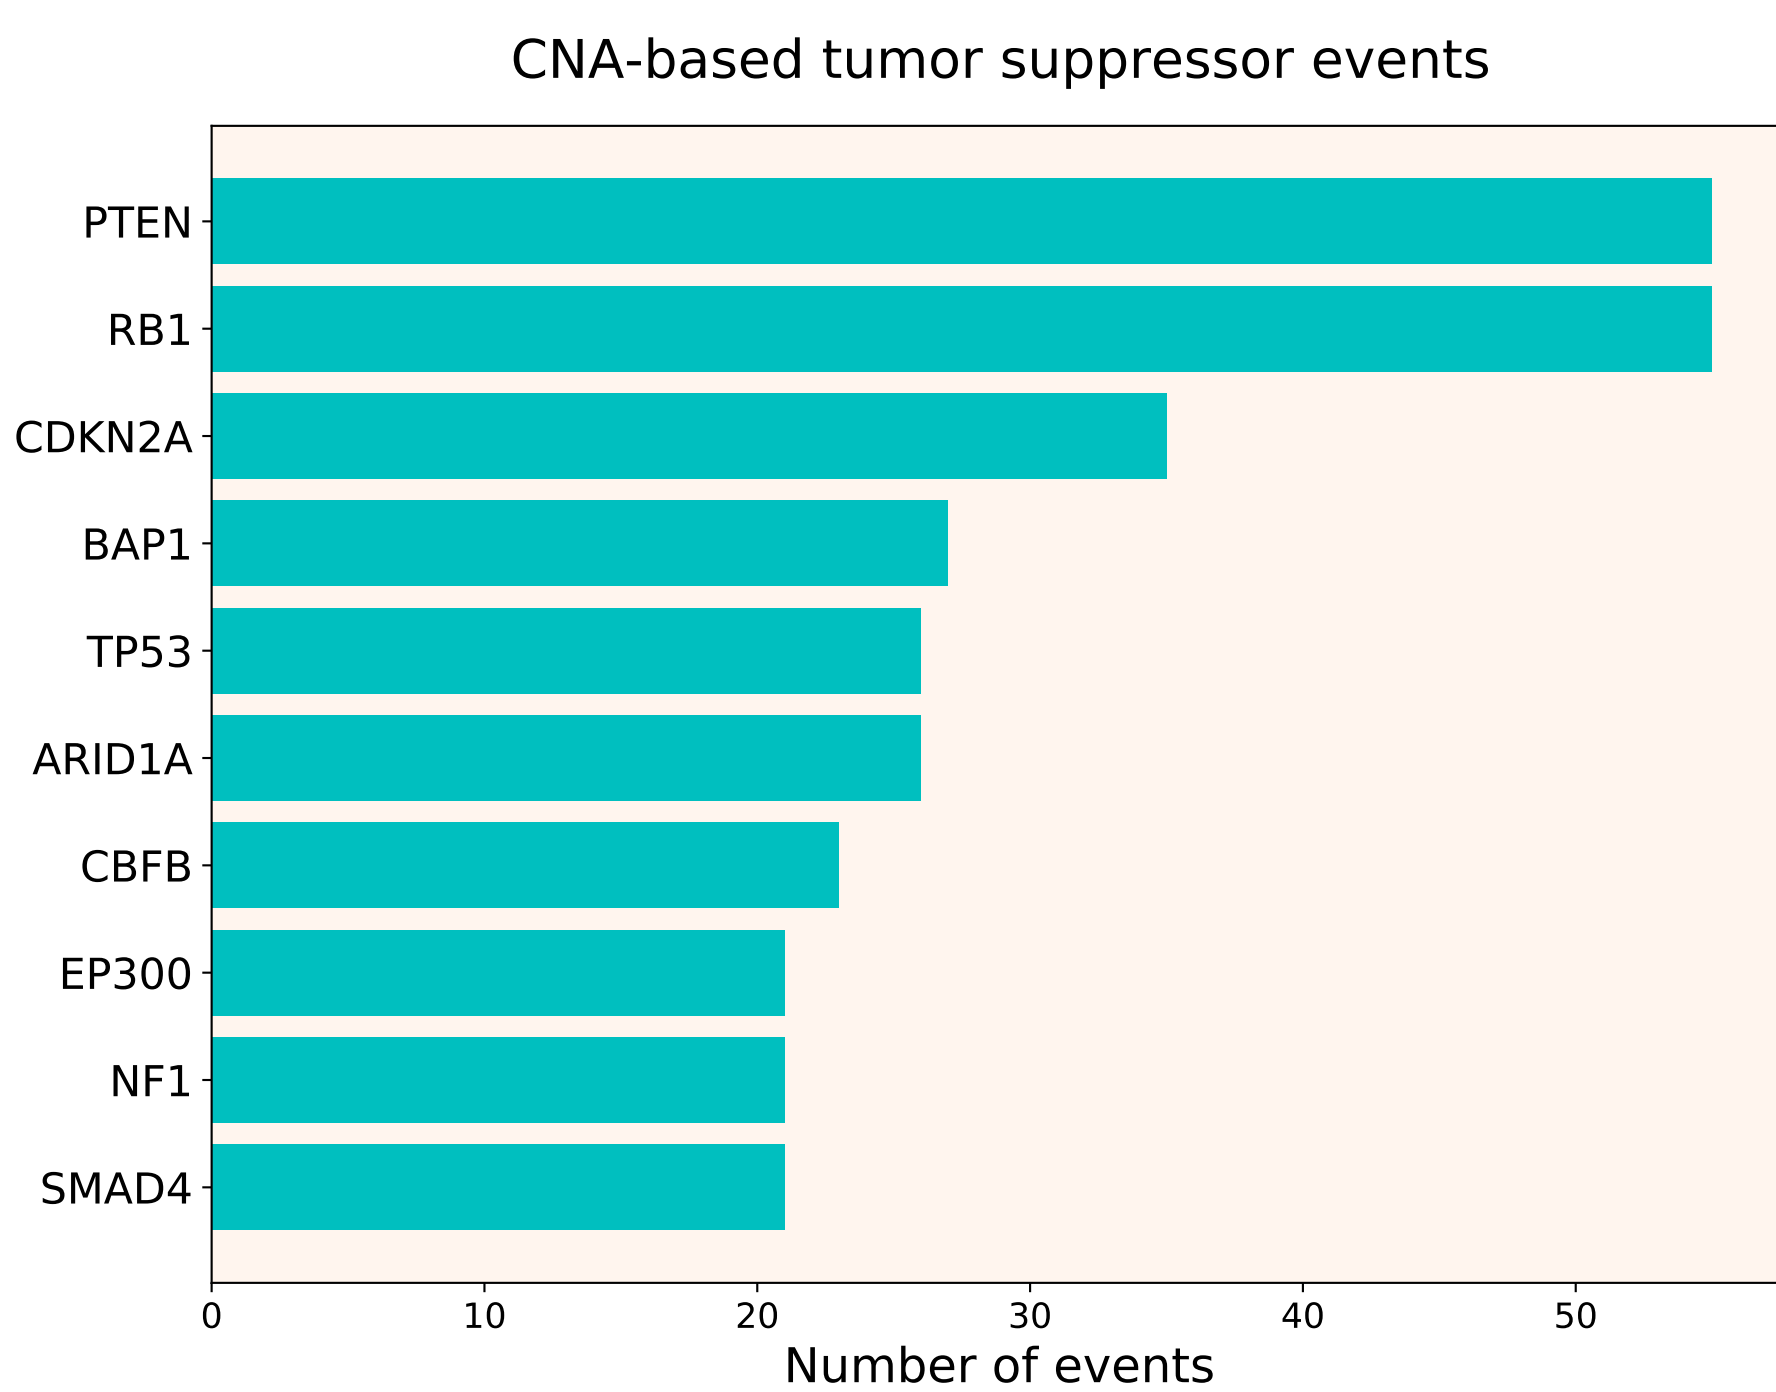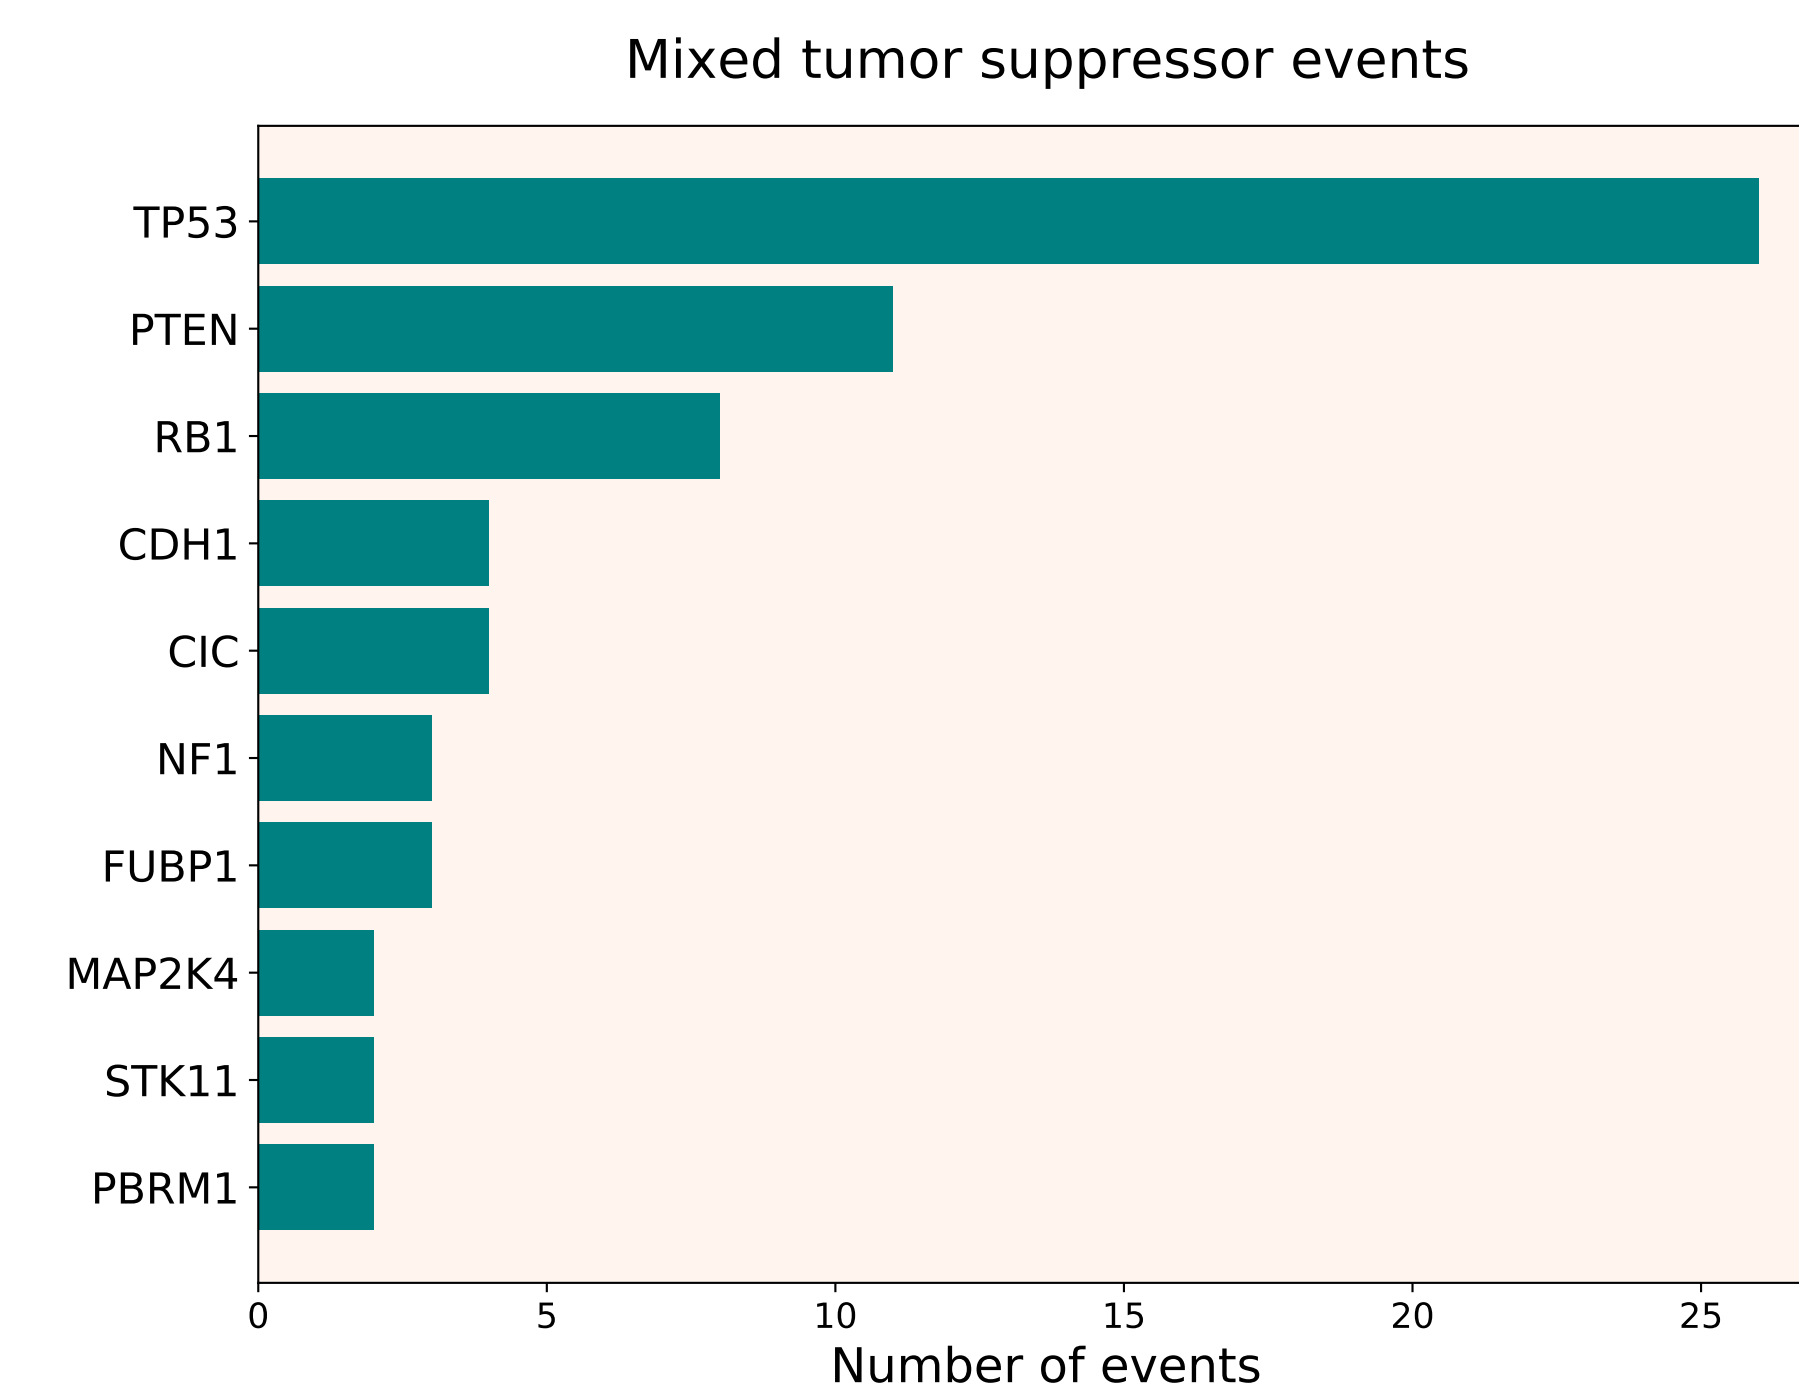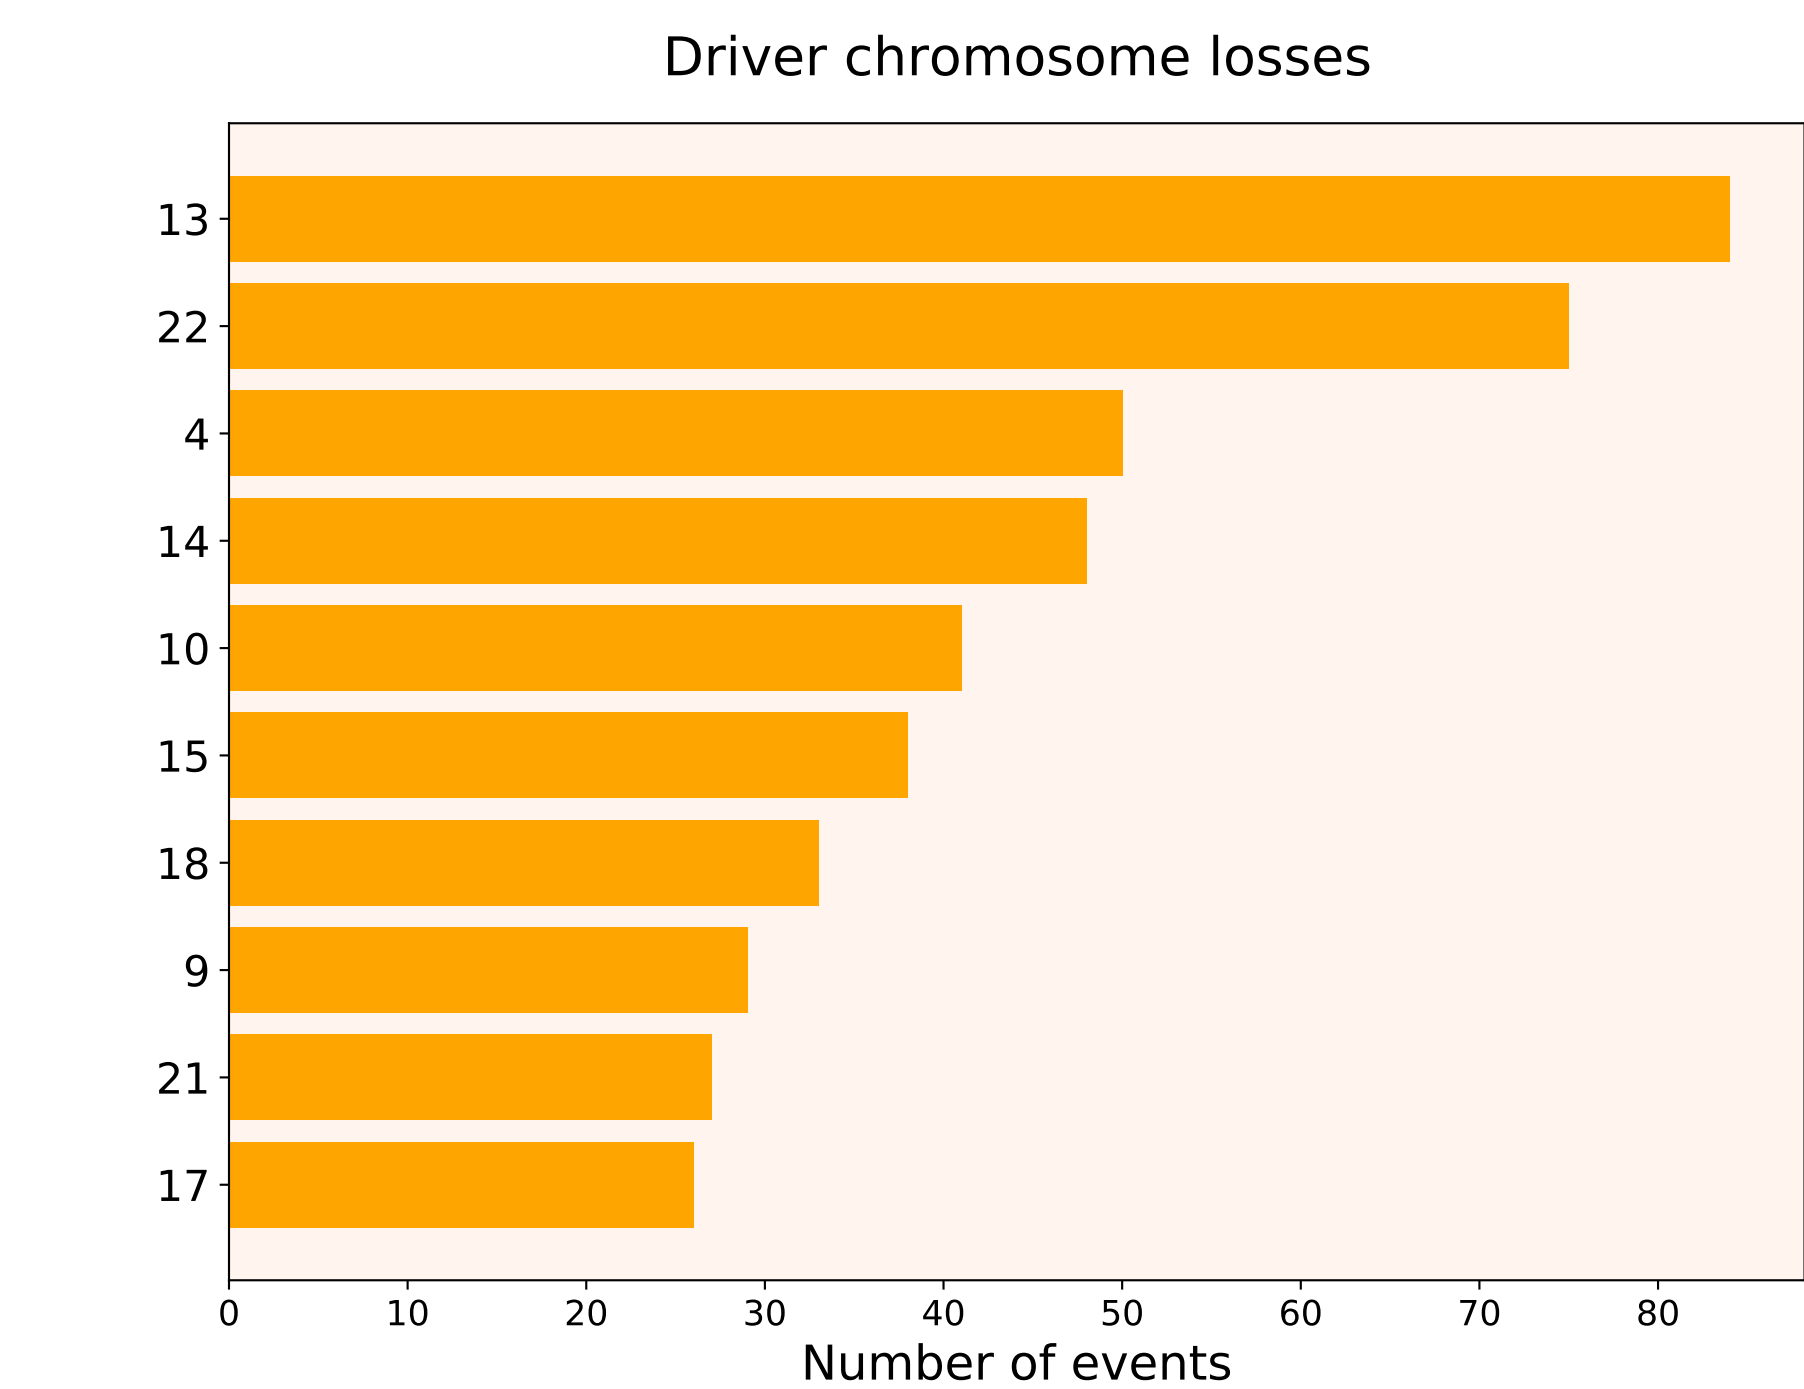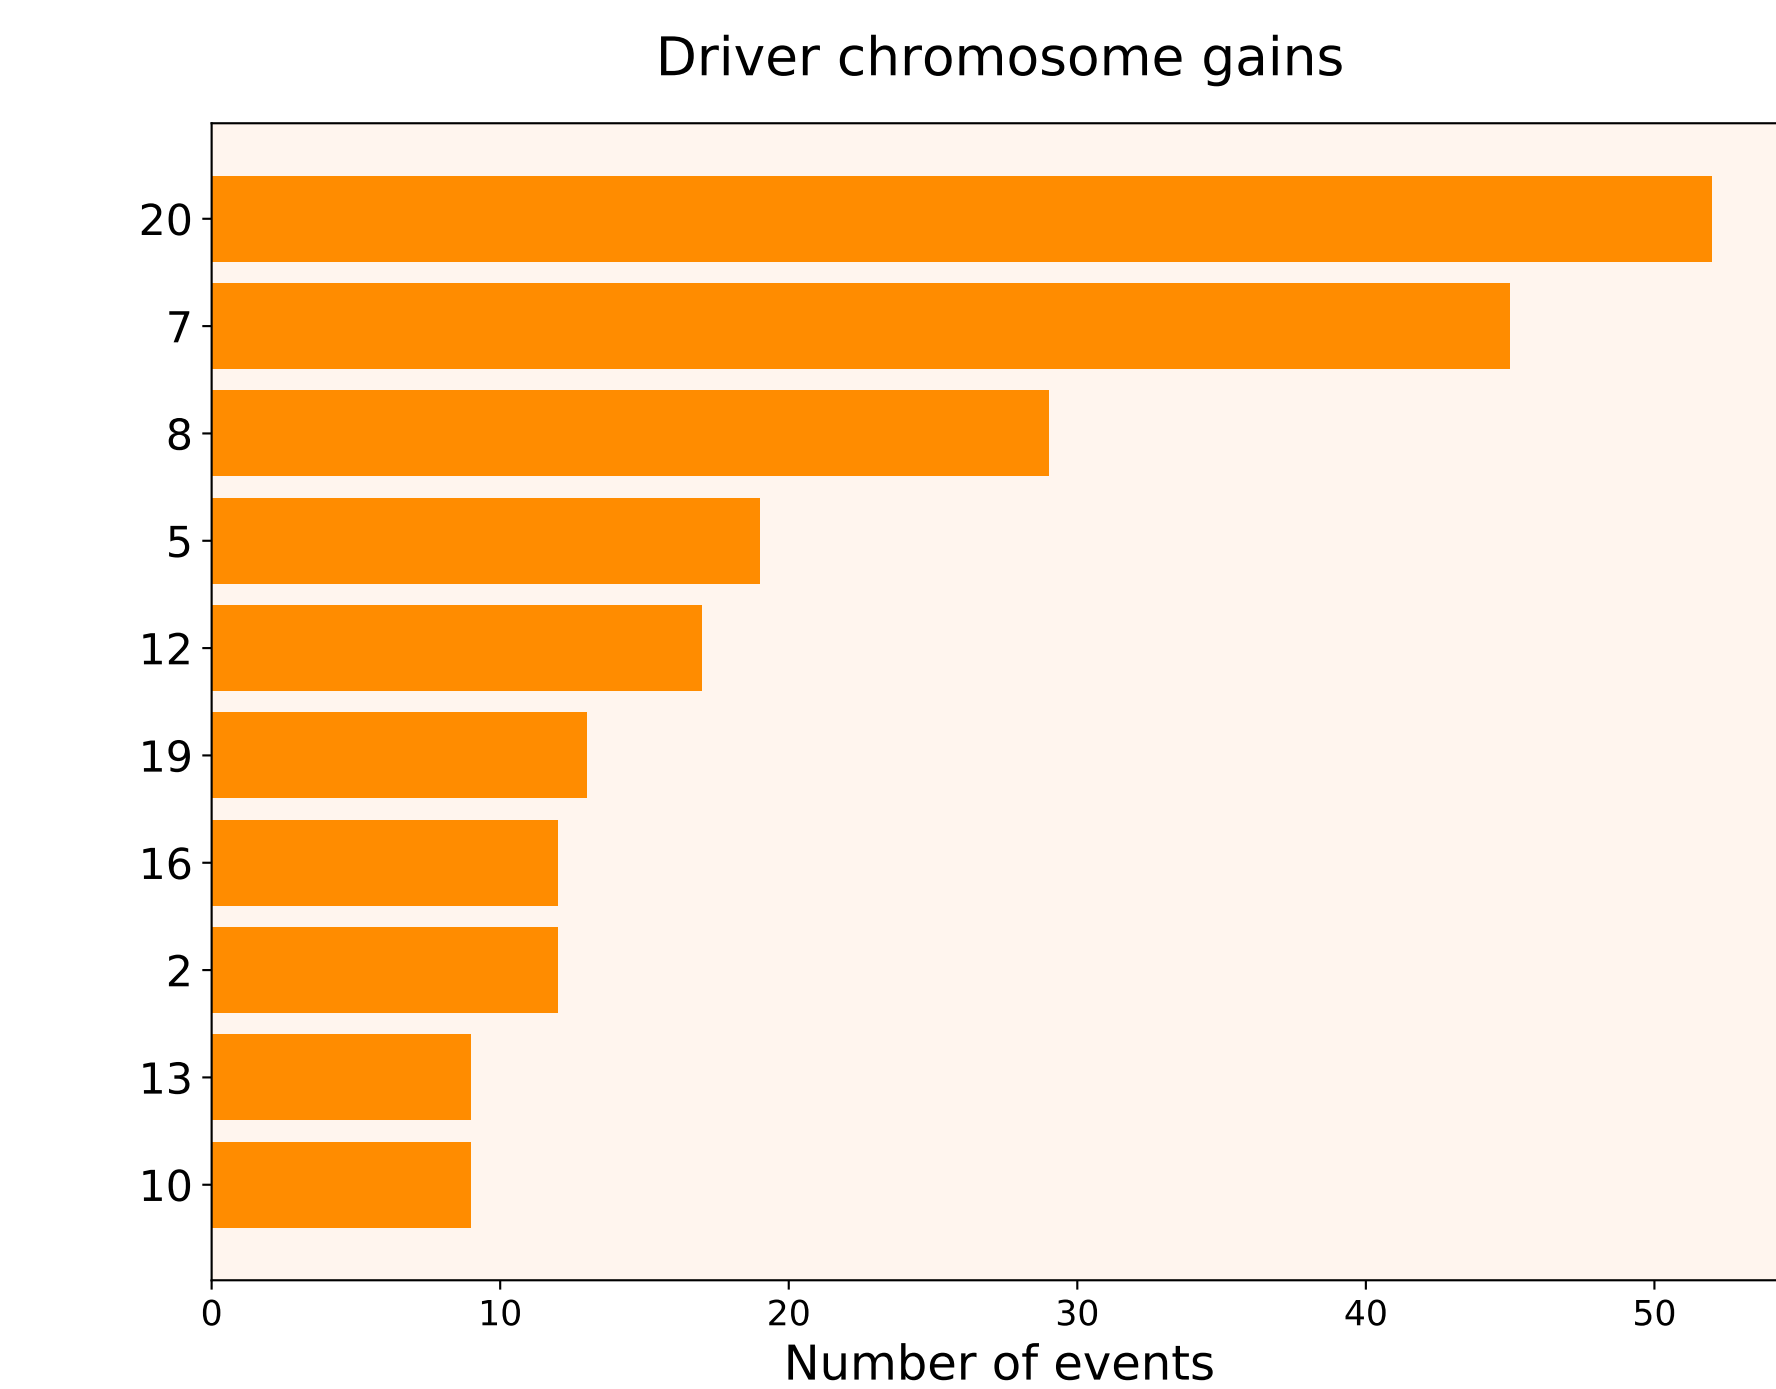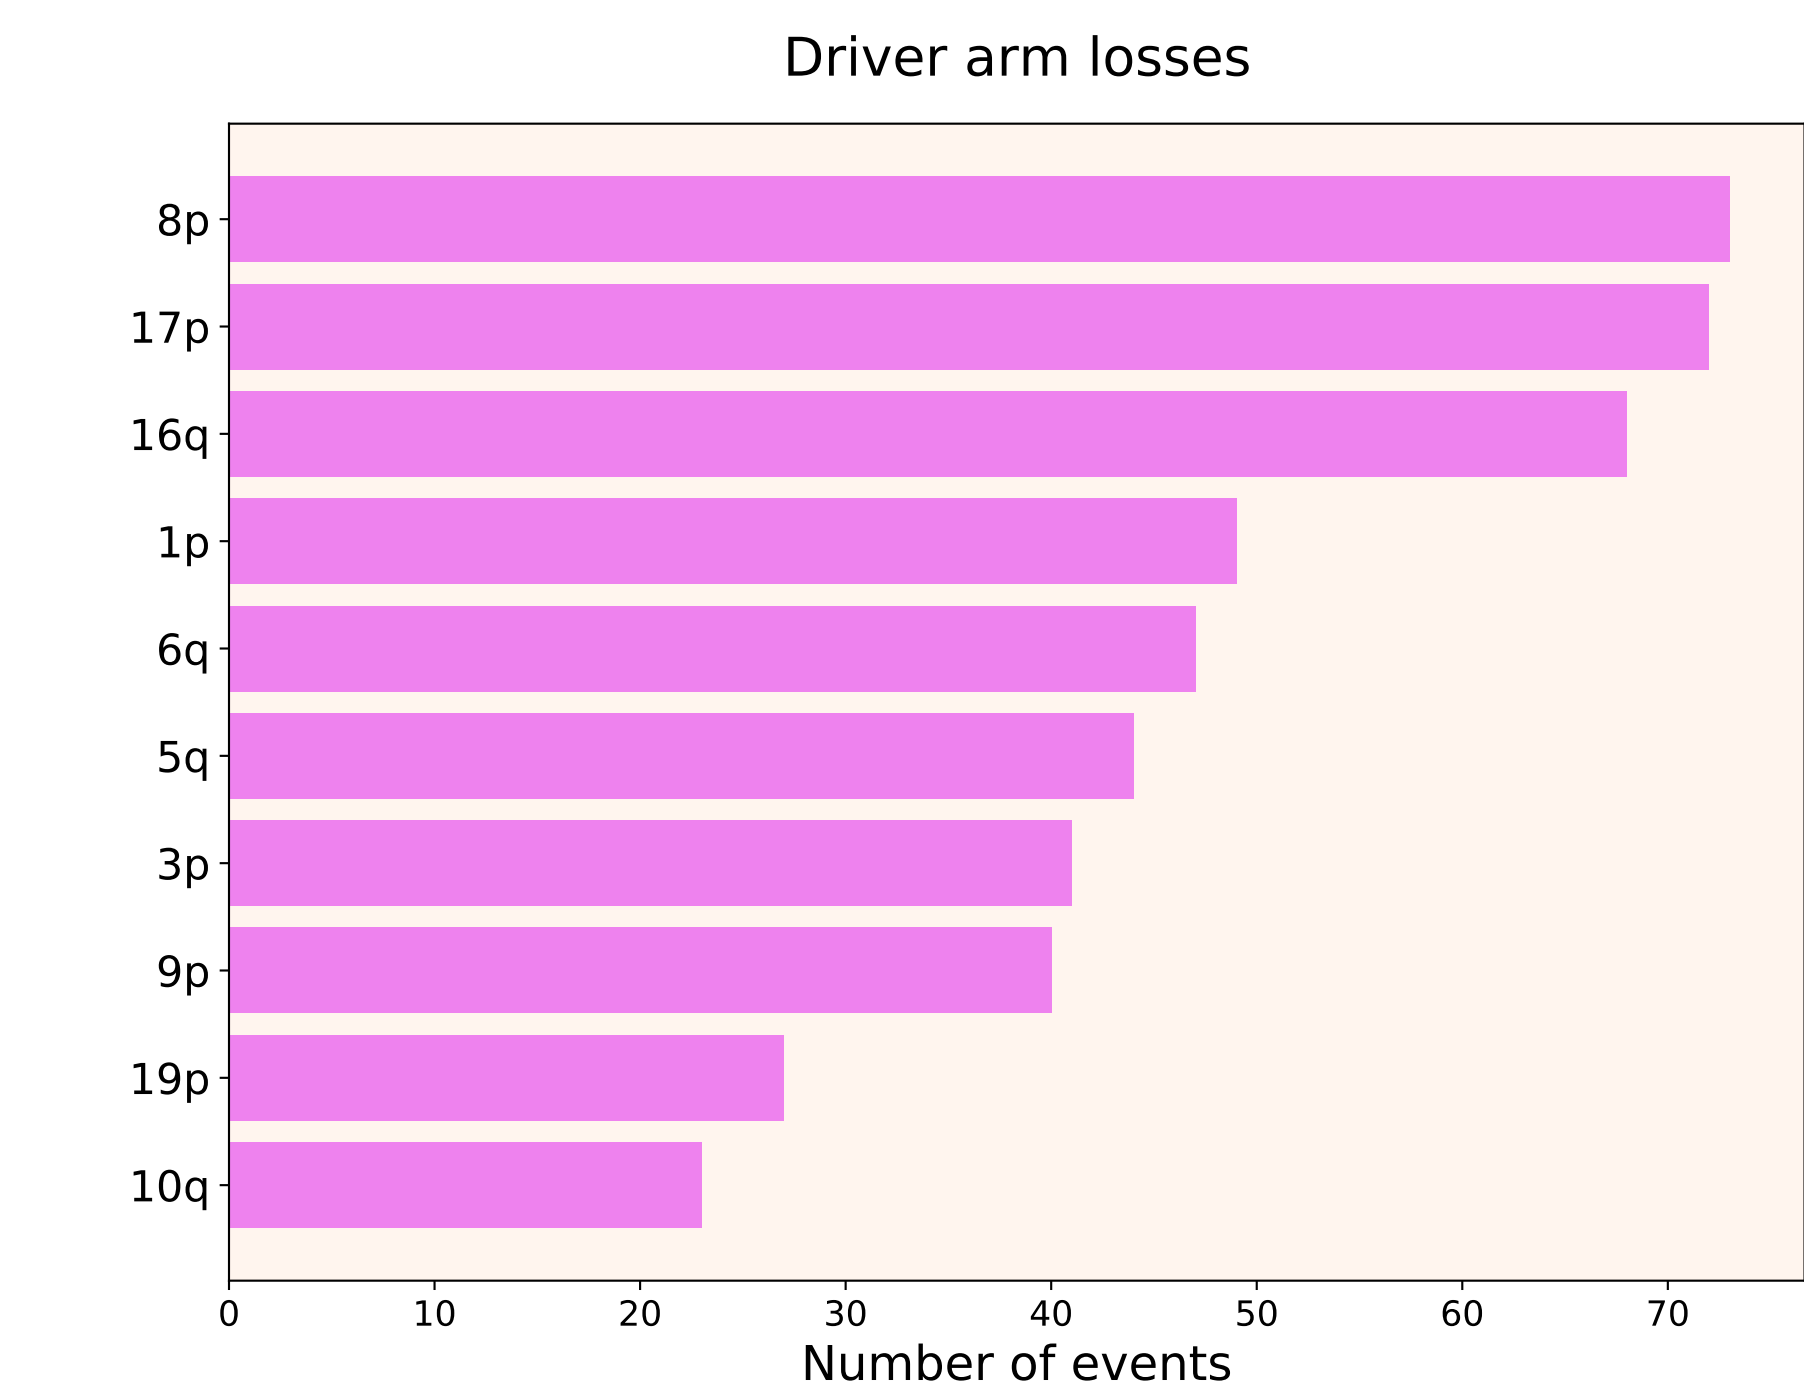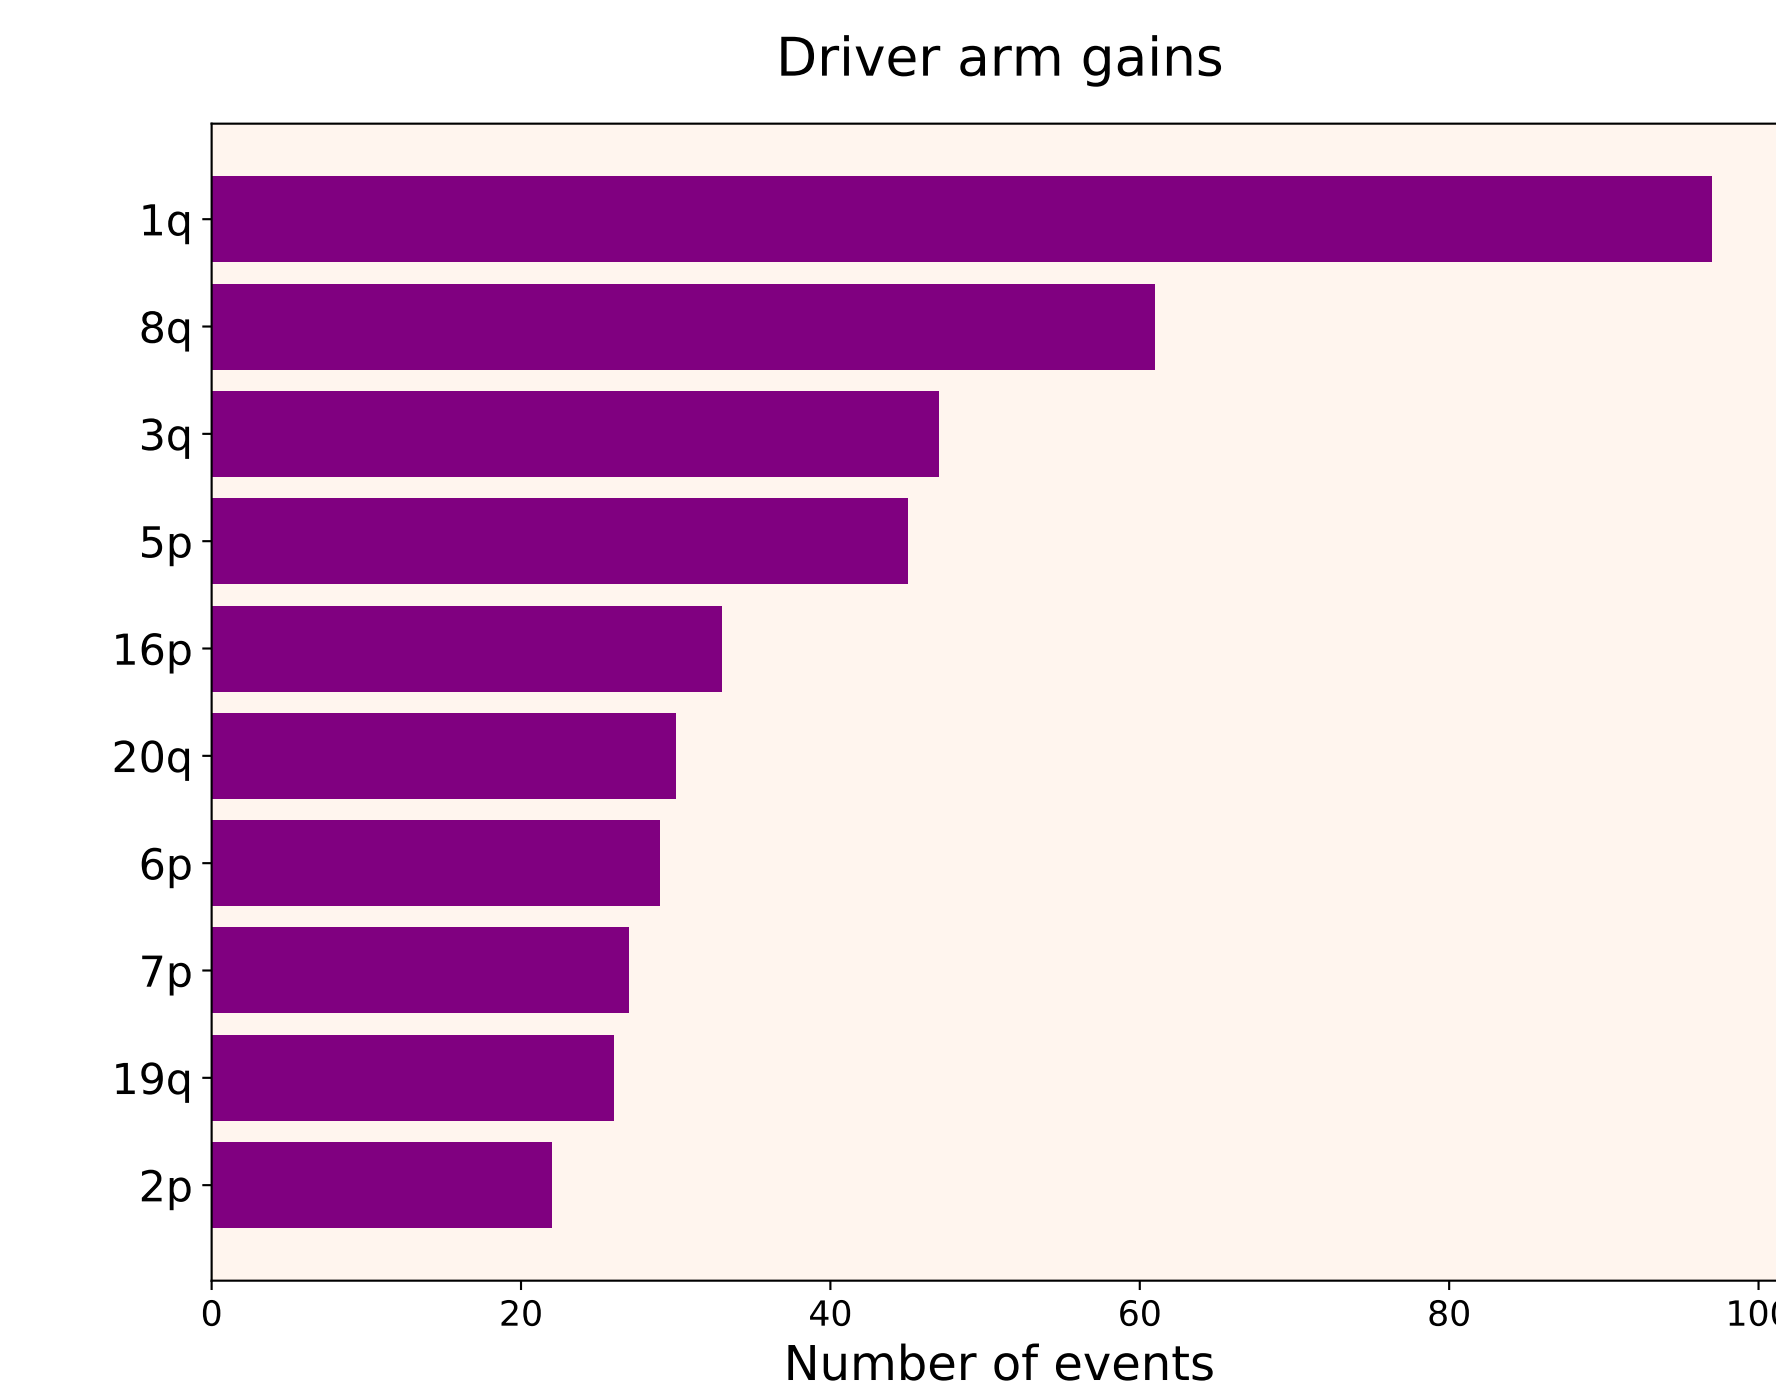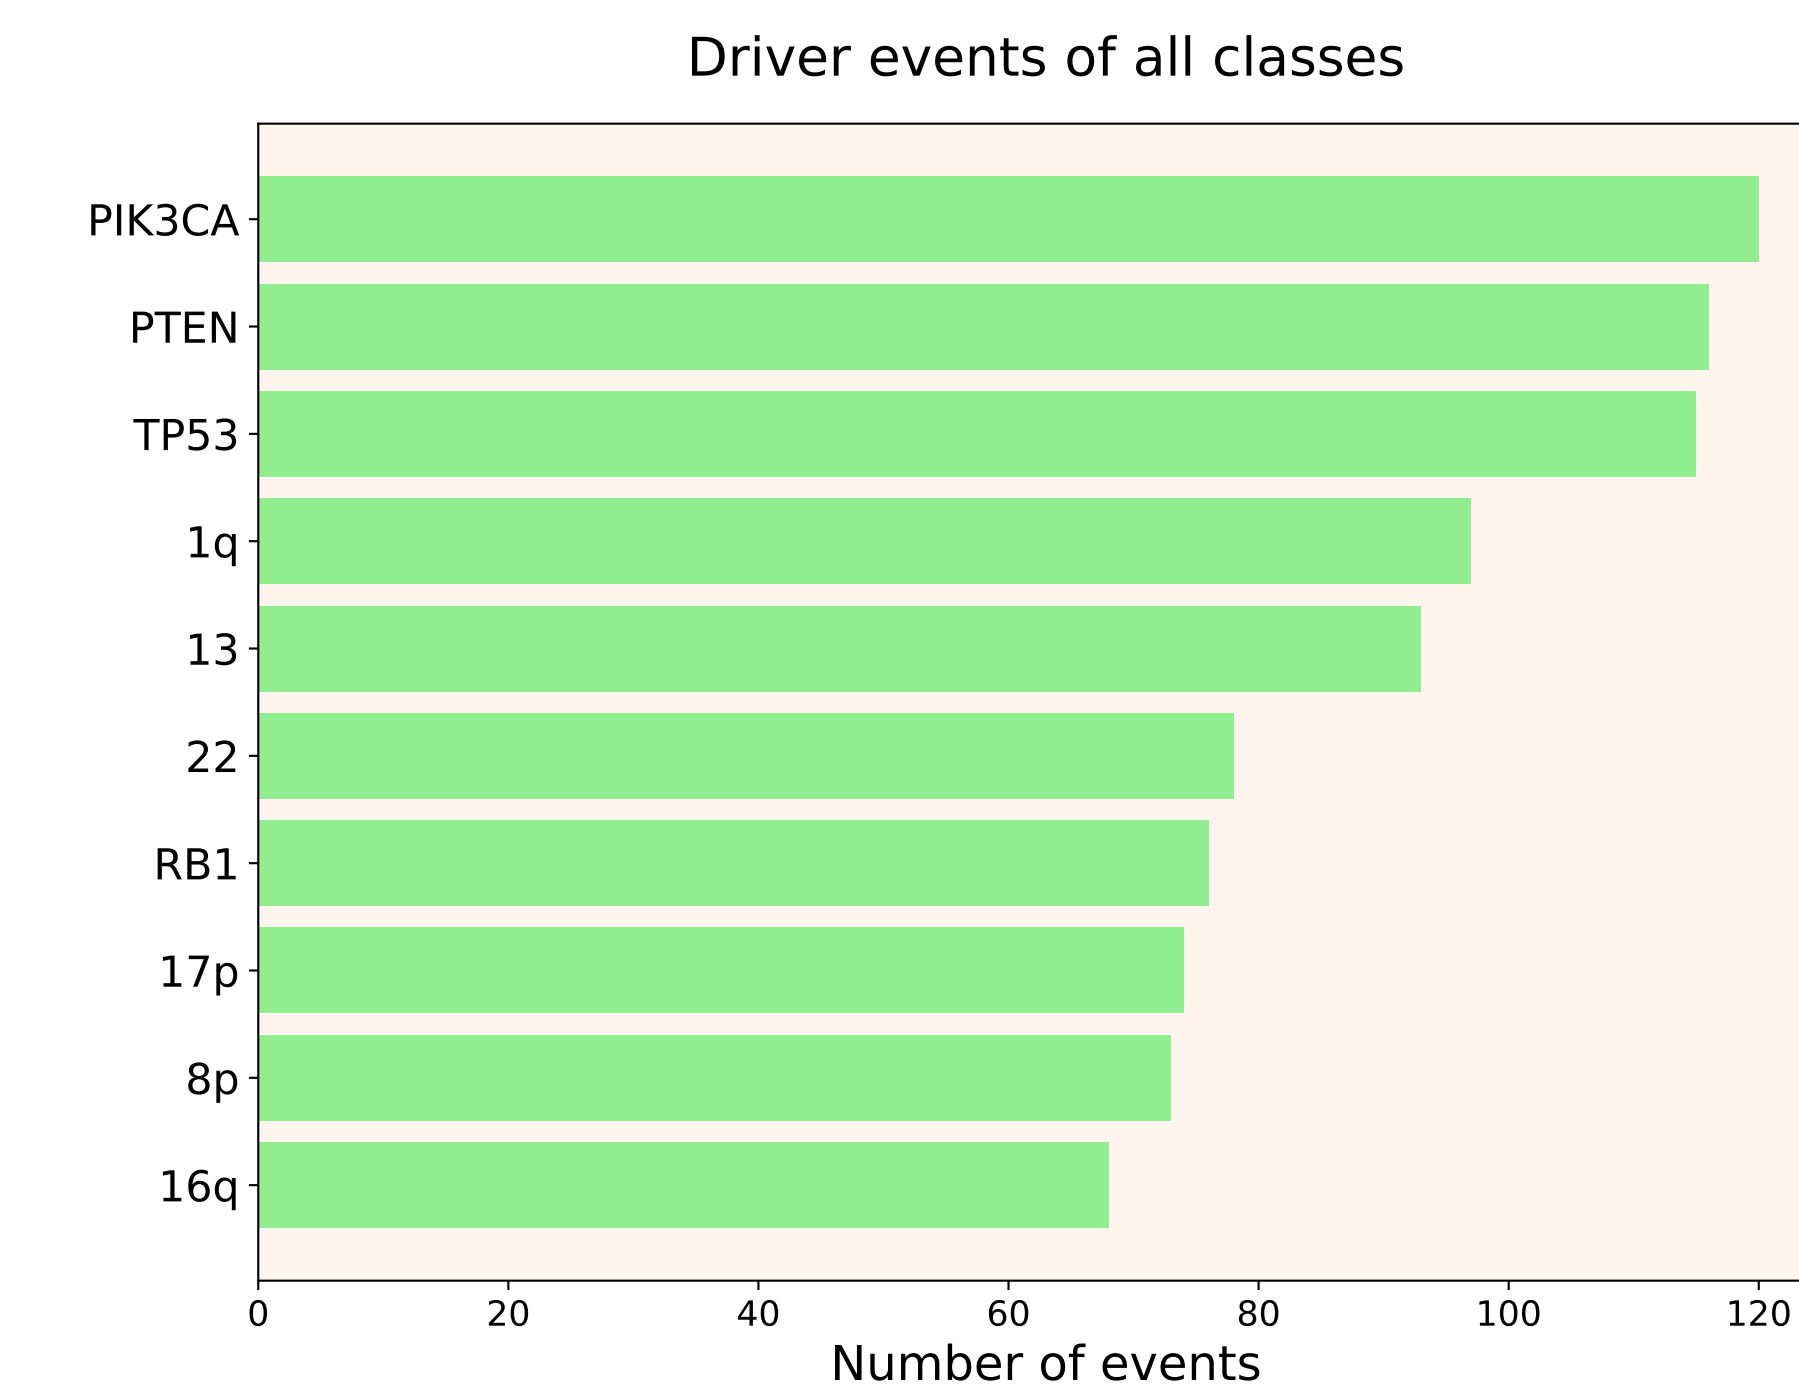

Supplement: Supplemental_Data_S1.zip [file Supplemental_Data_S1.zip]

# SKCM

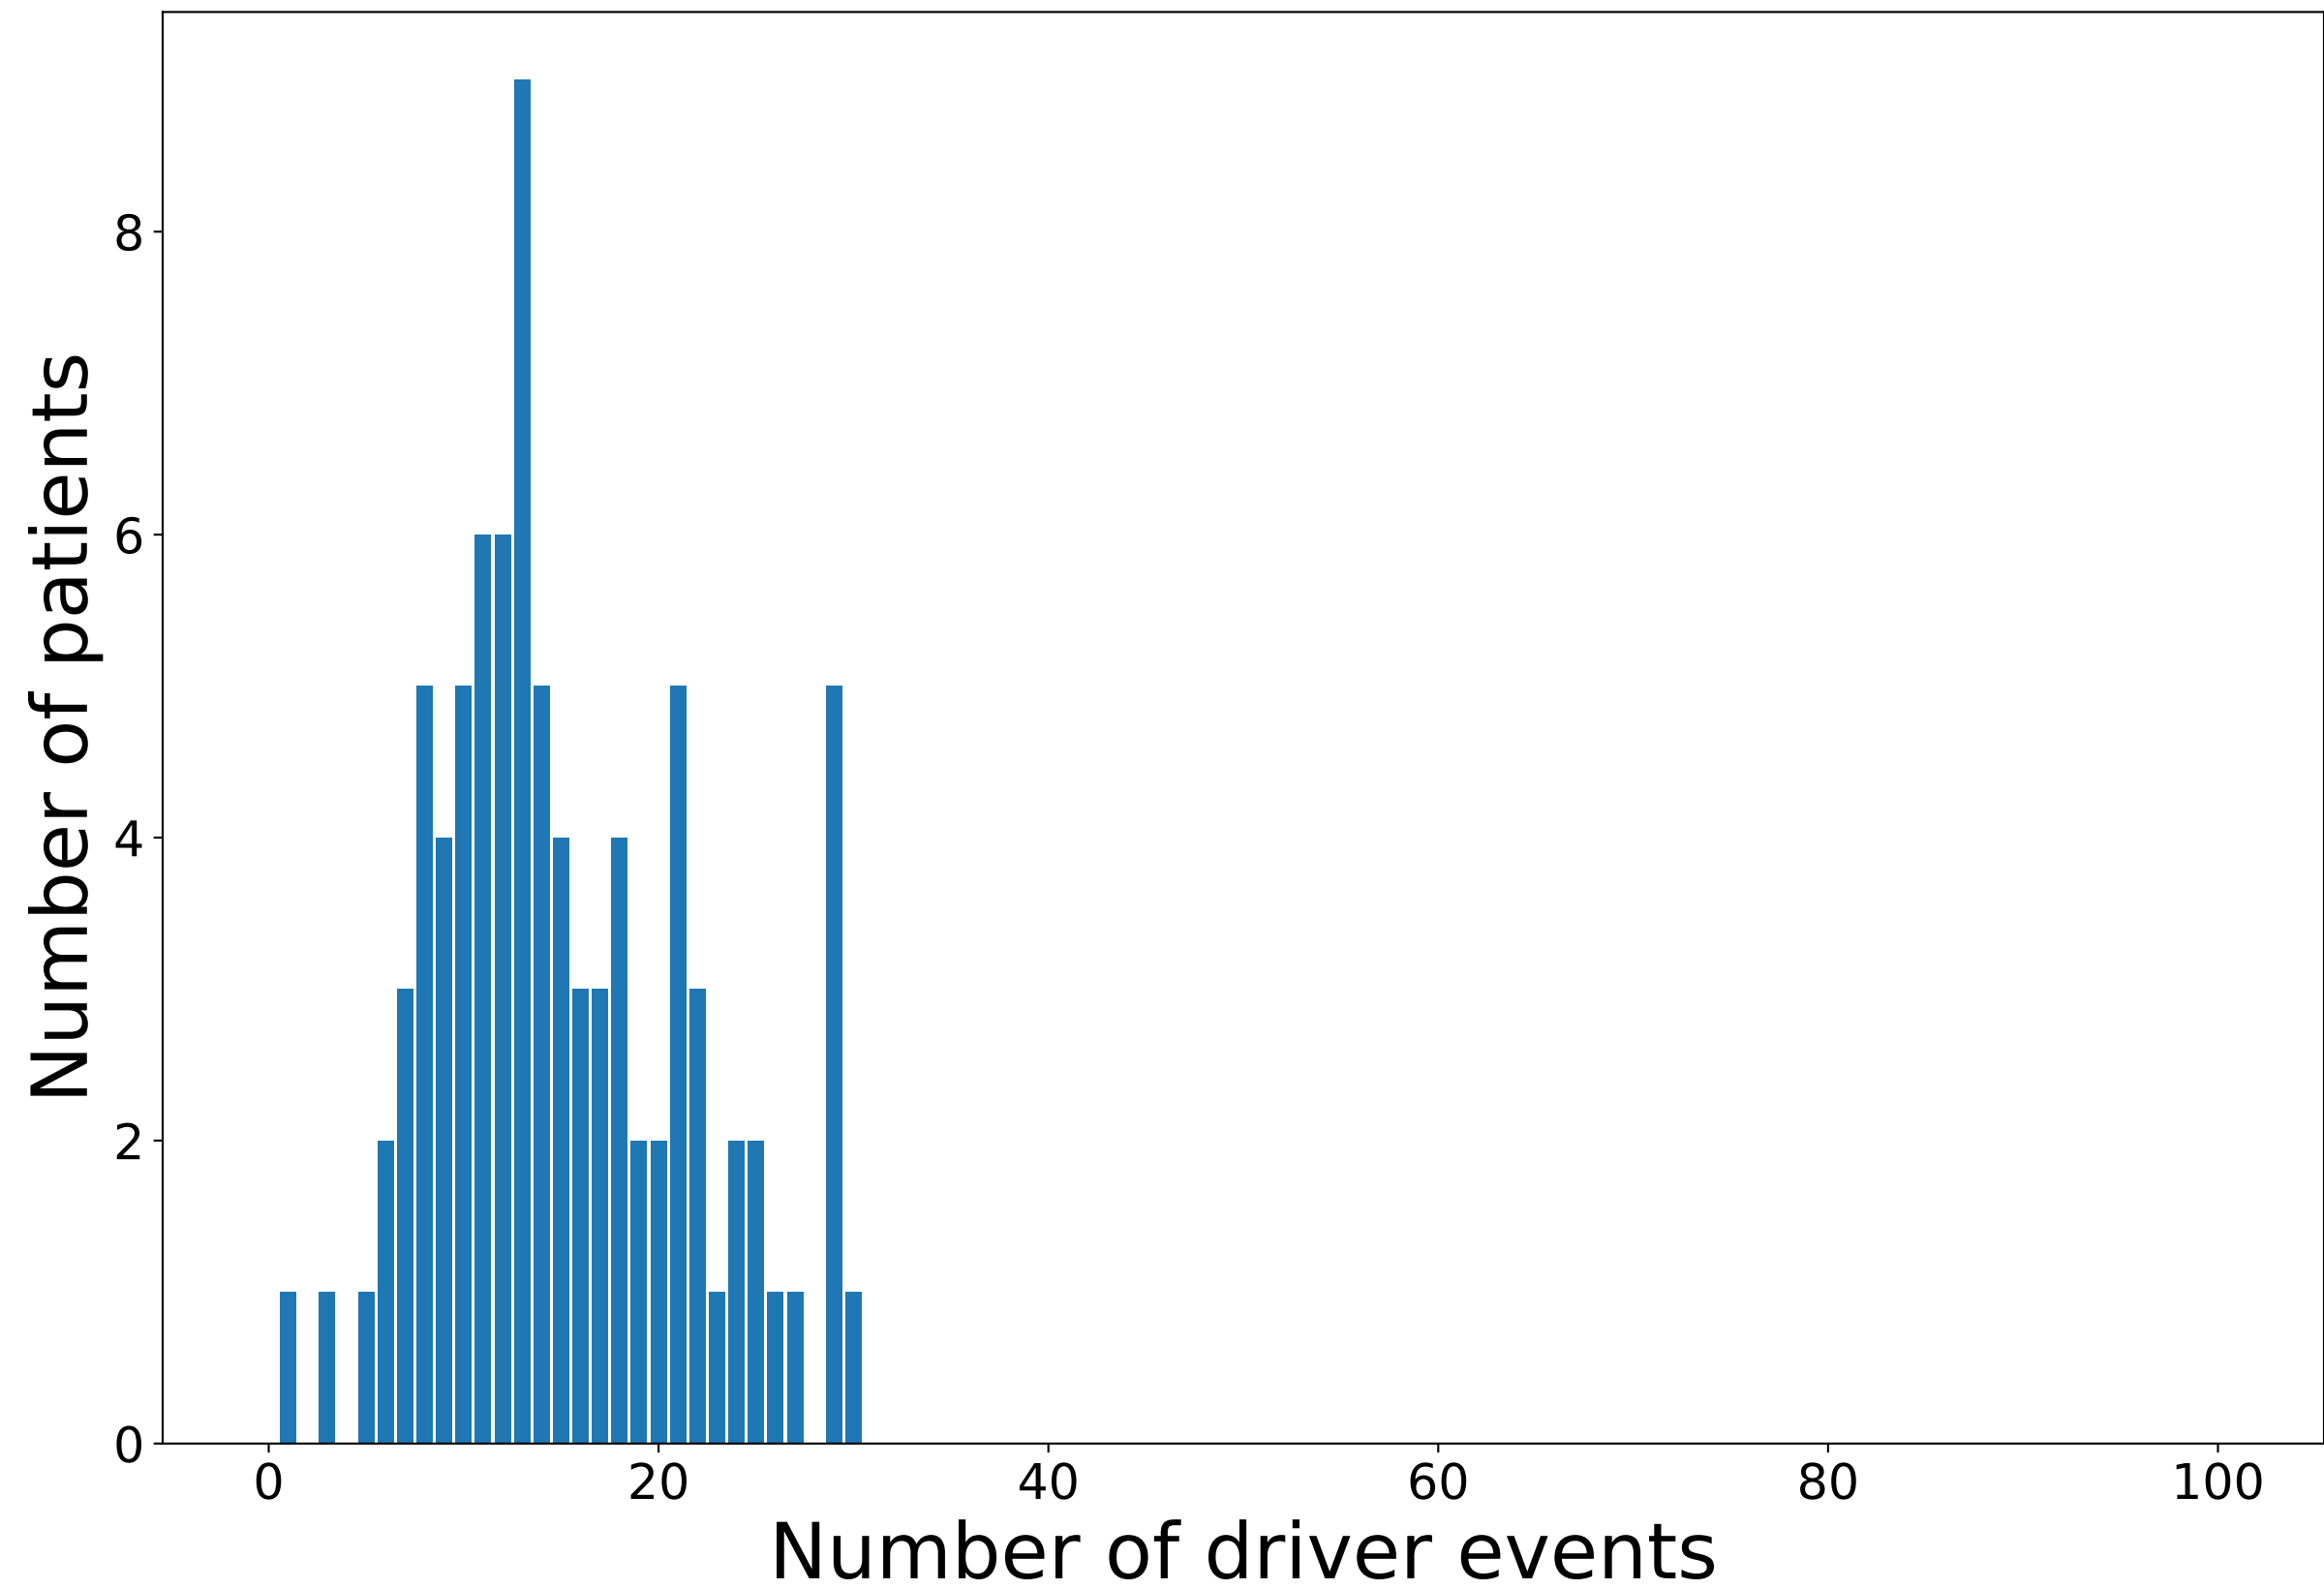

Supplement: Supplemental_Data_S1.zip [file Supplemental_Data_S1.zip]

# GBM

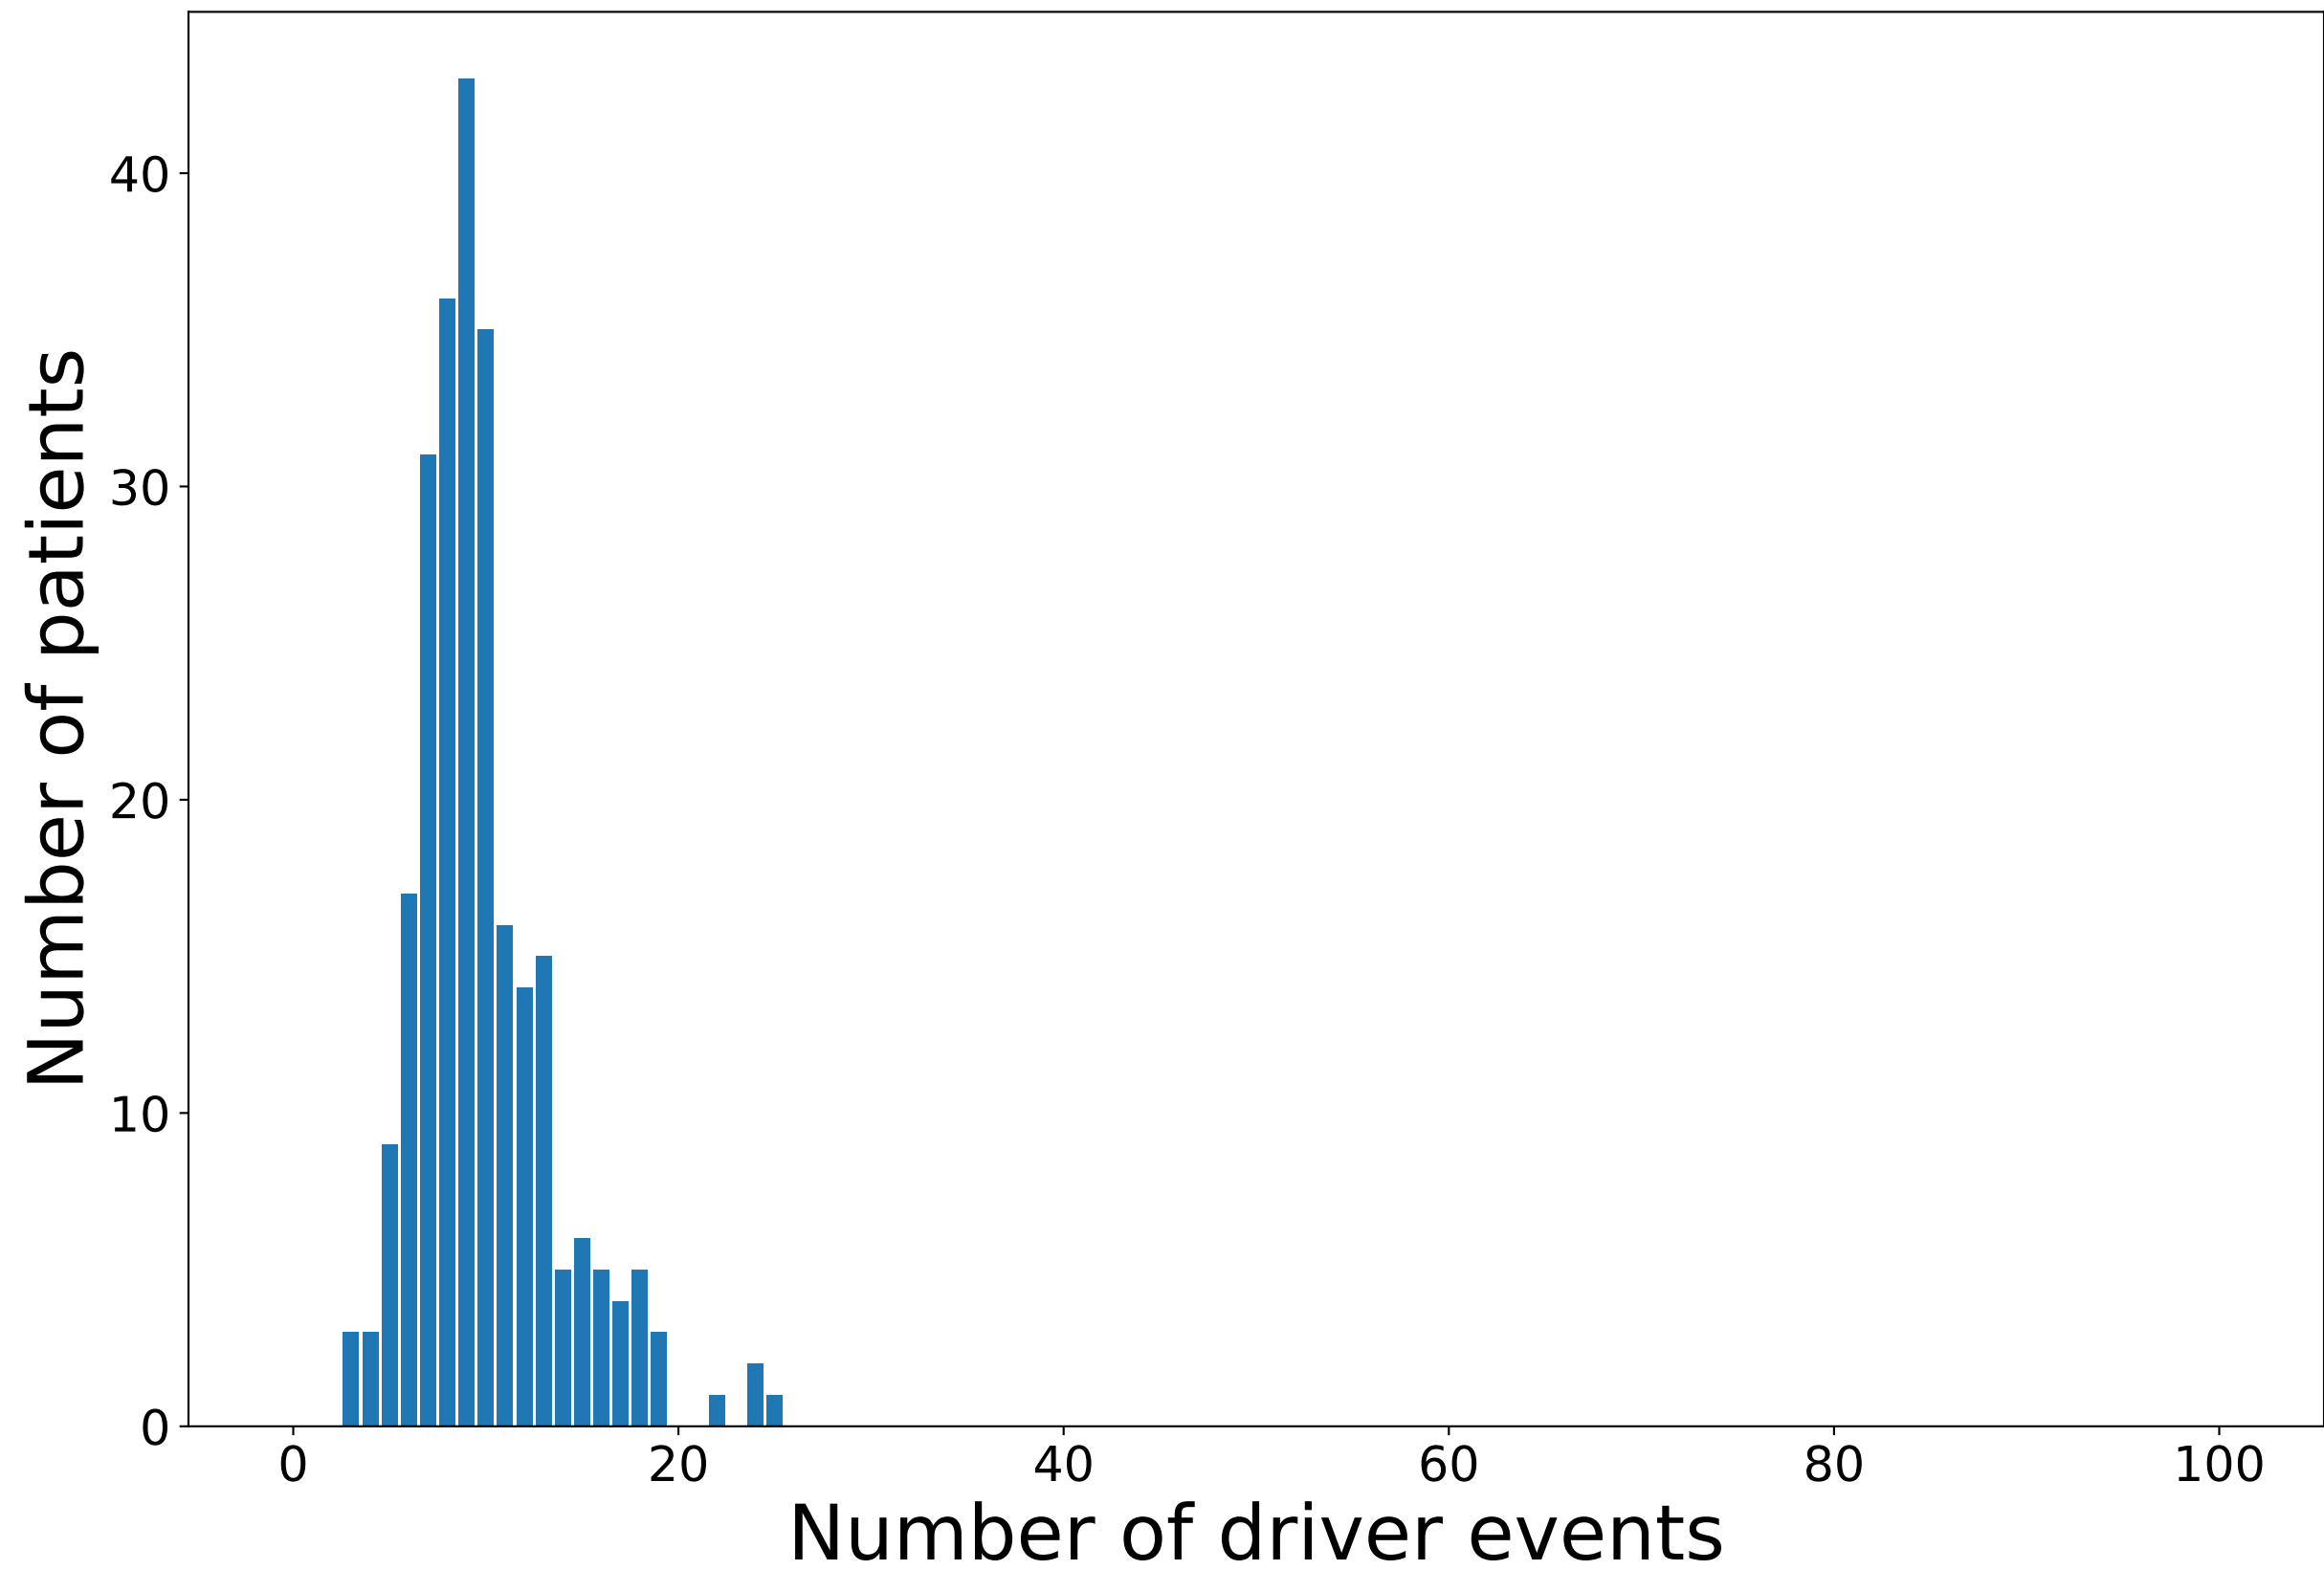

Supplement: Supplemental_Data_S1.zip [file Supplemental_Data_S1.zip]

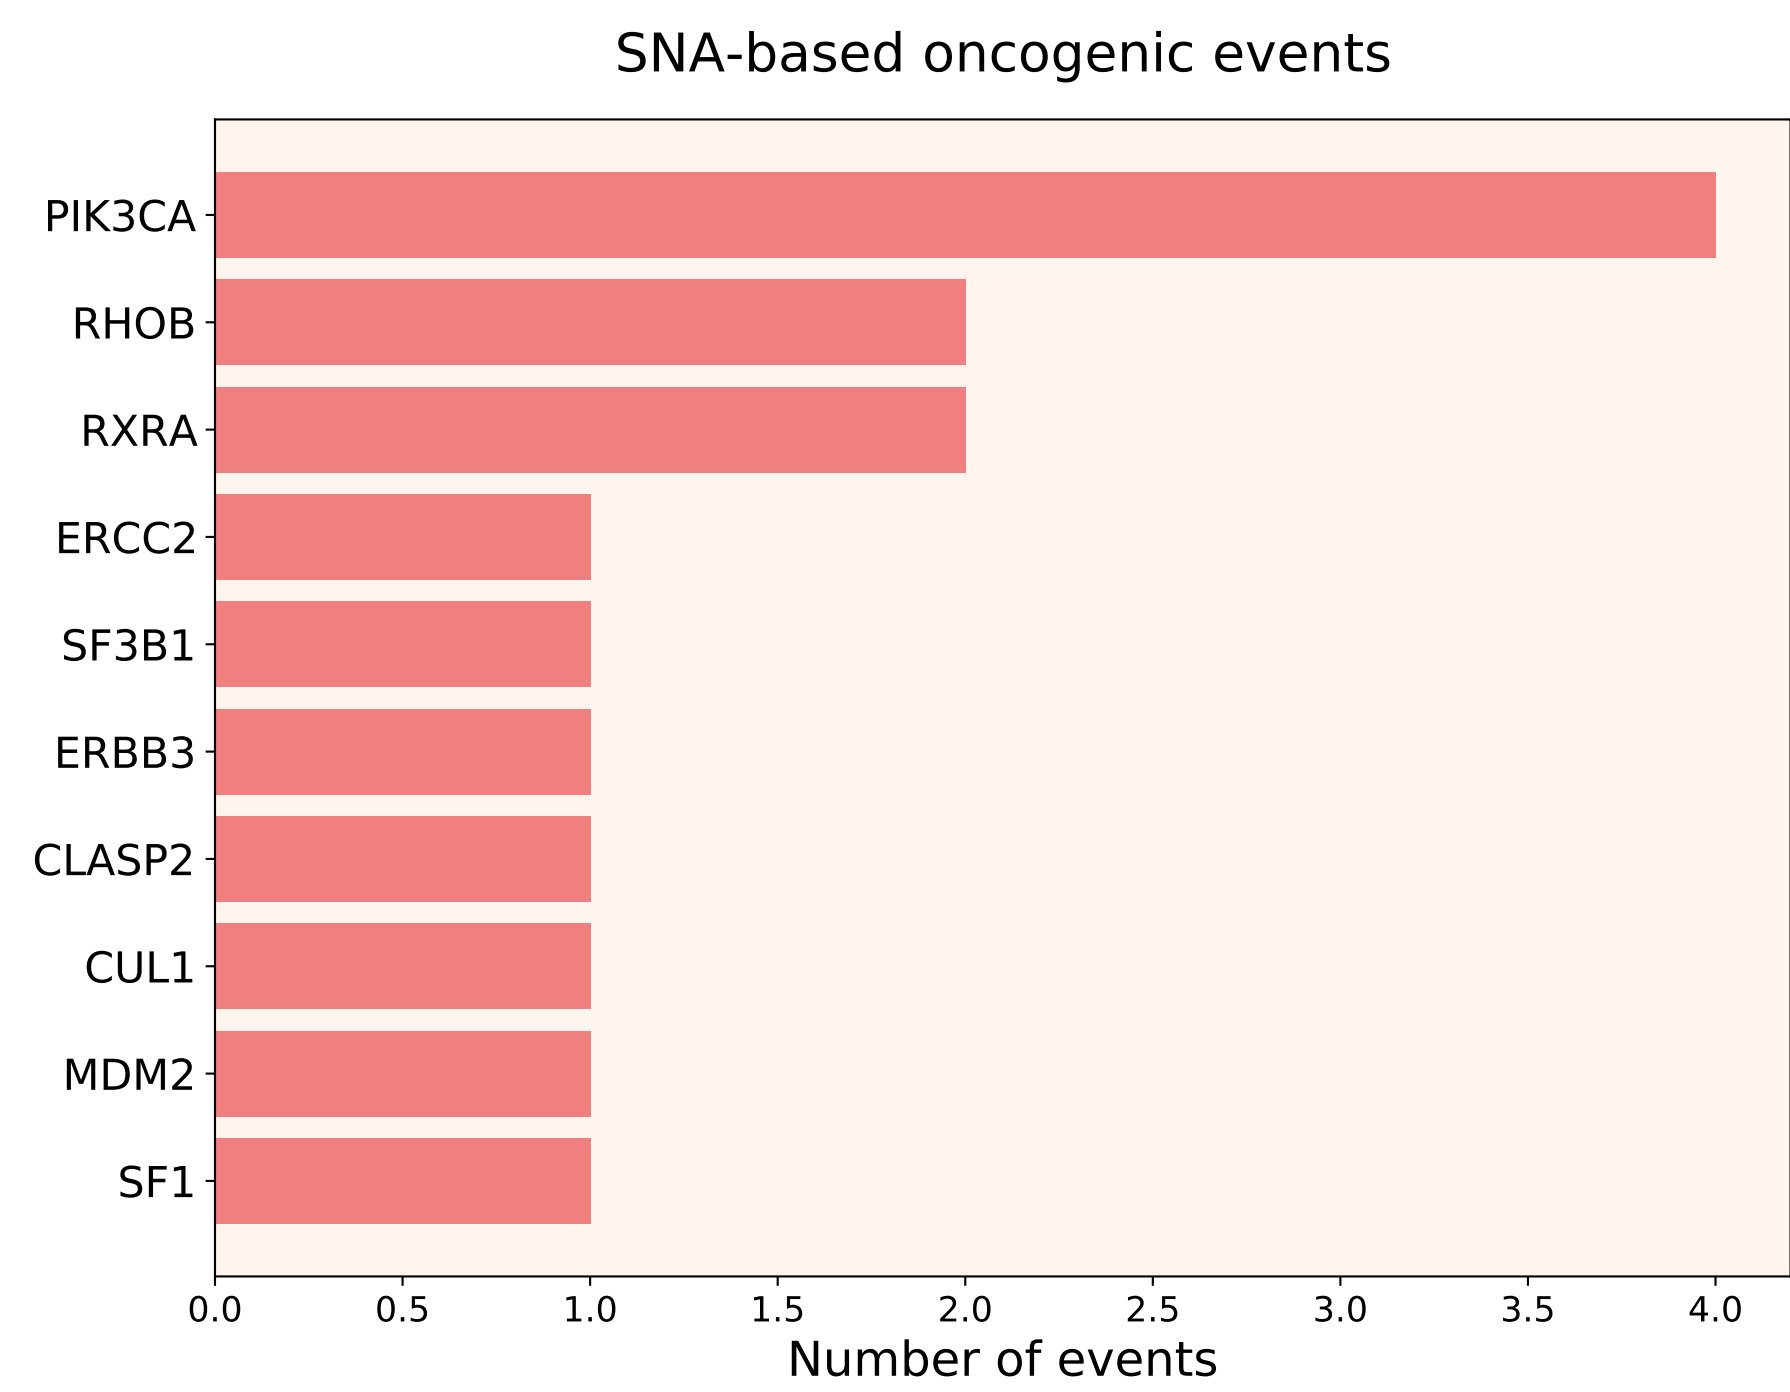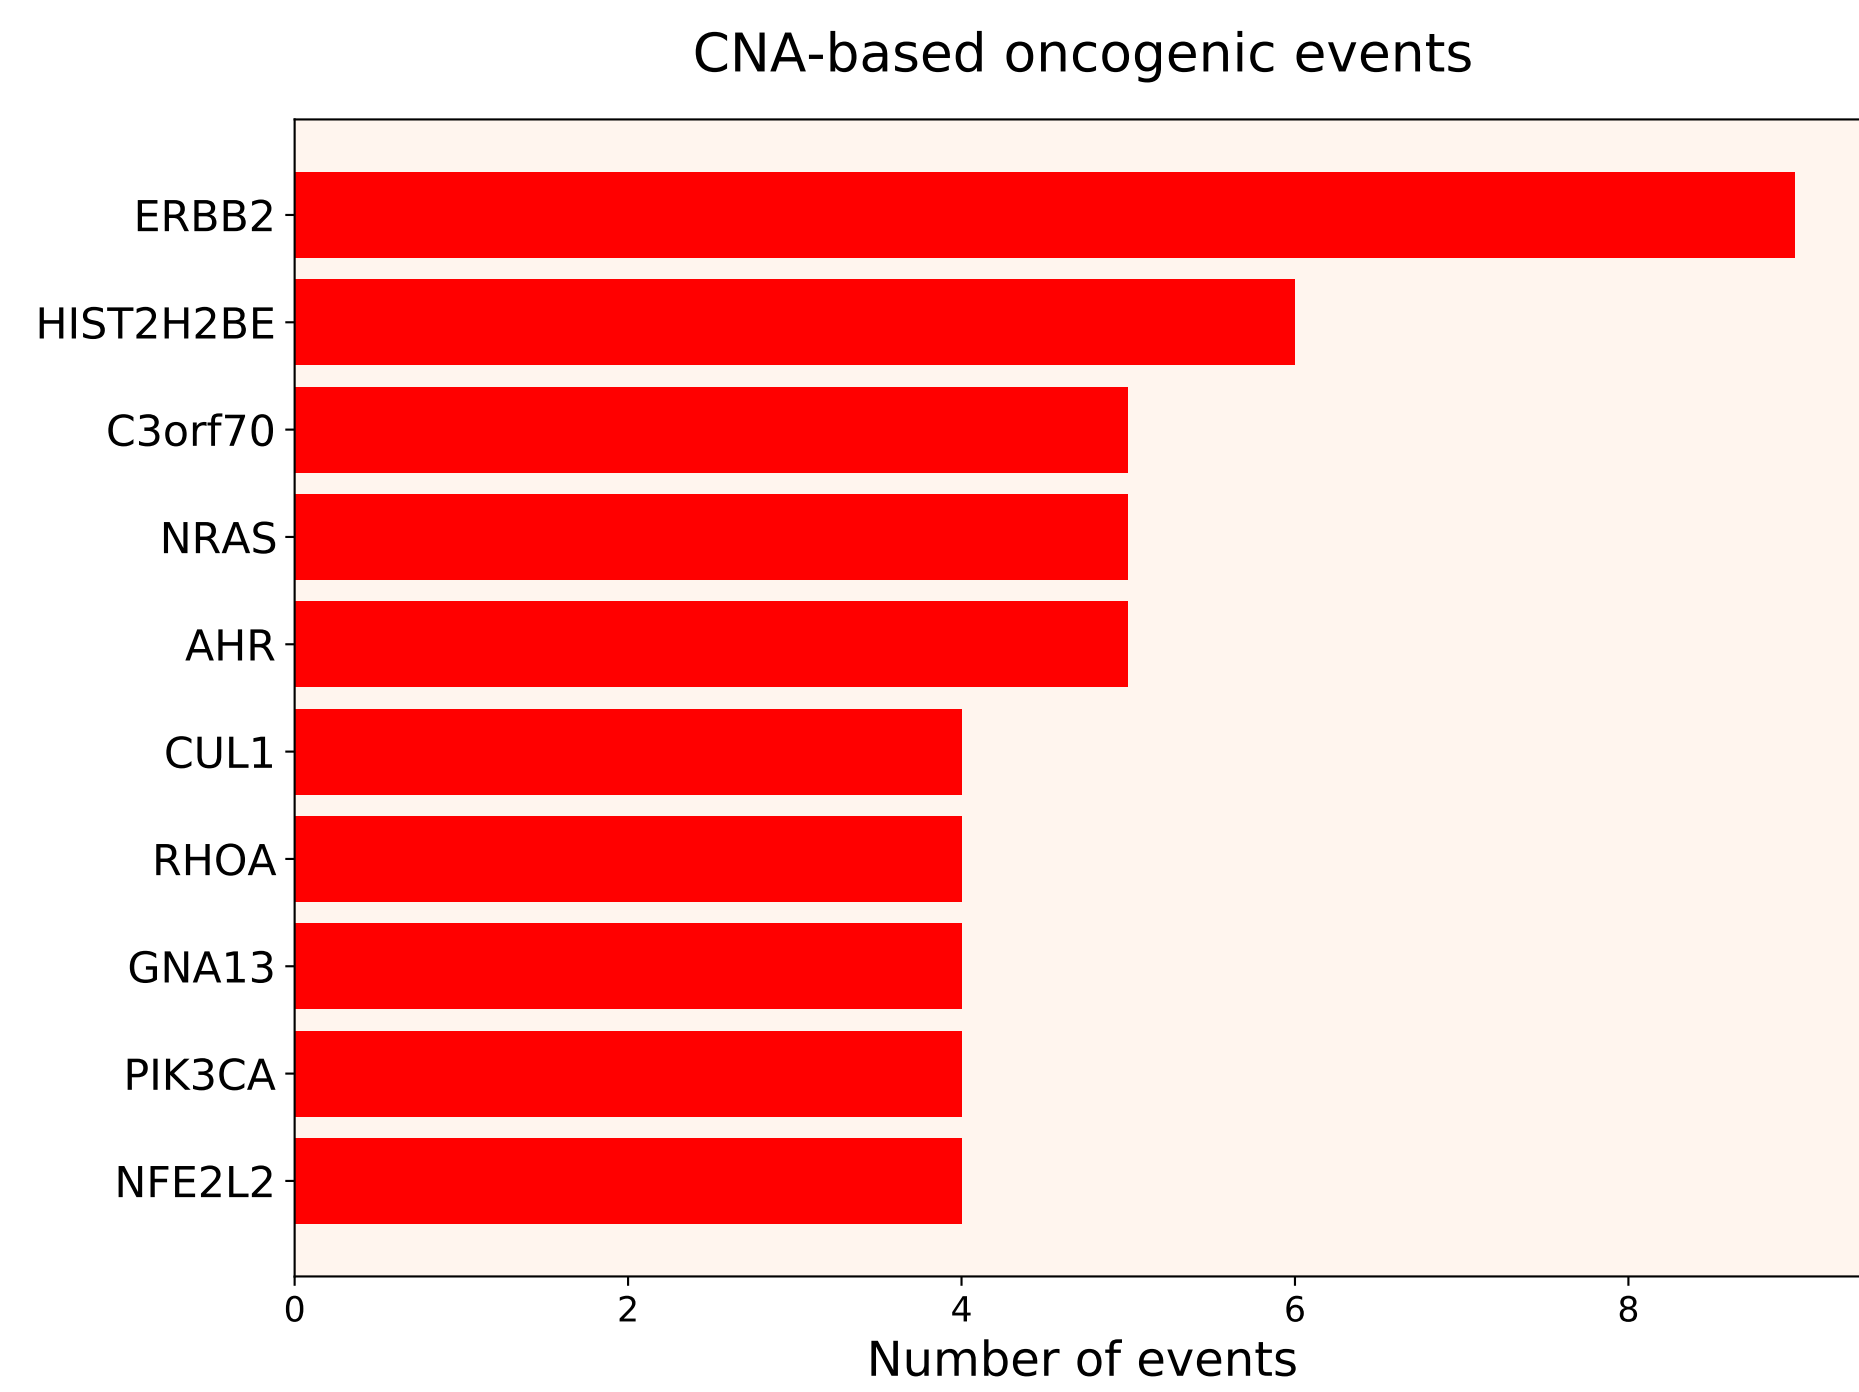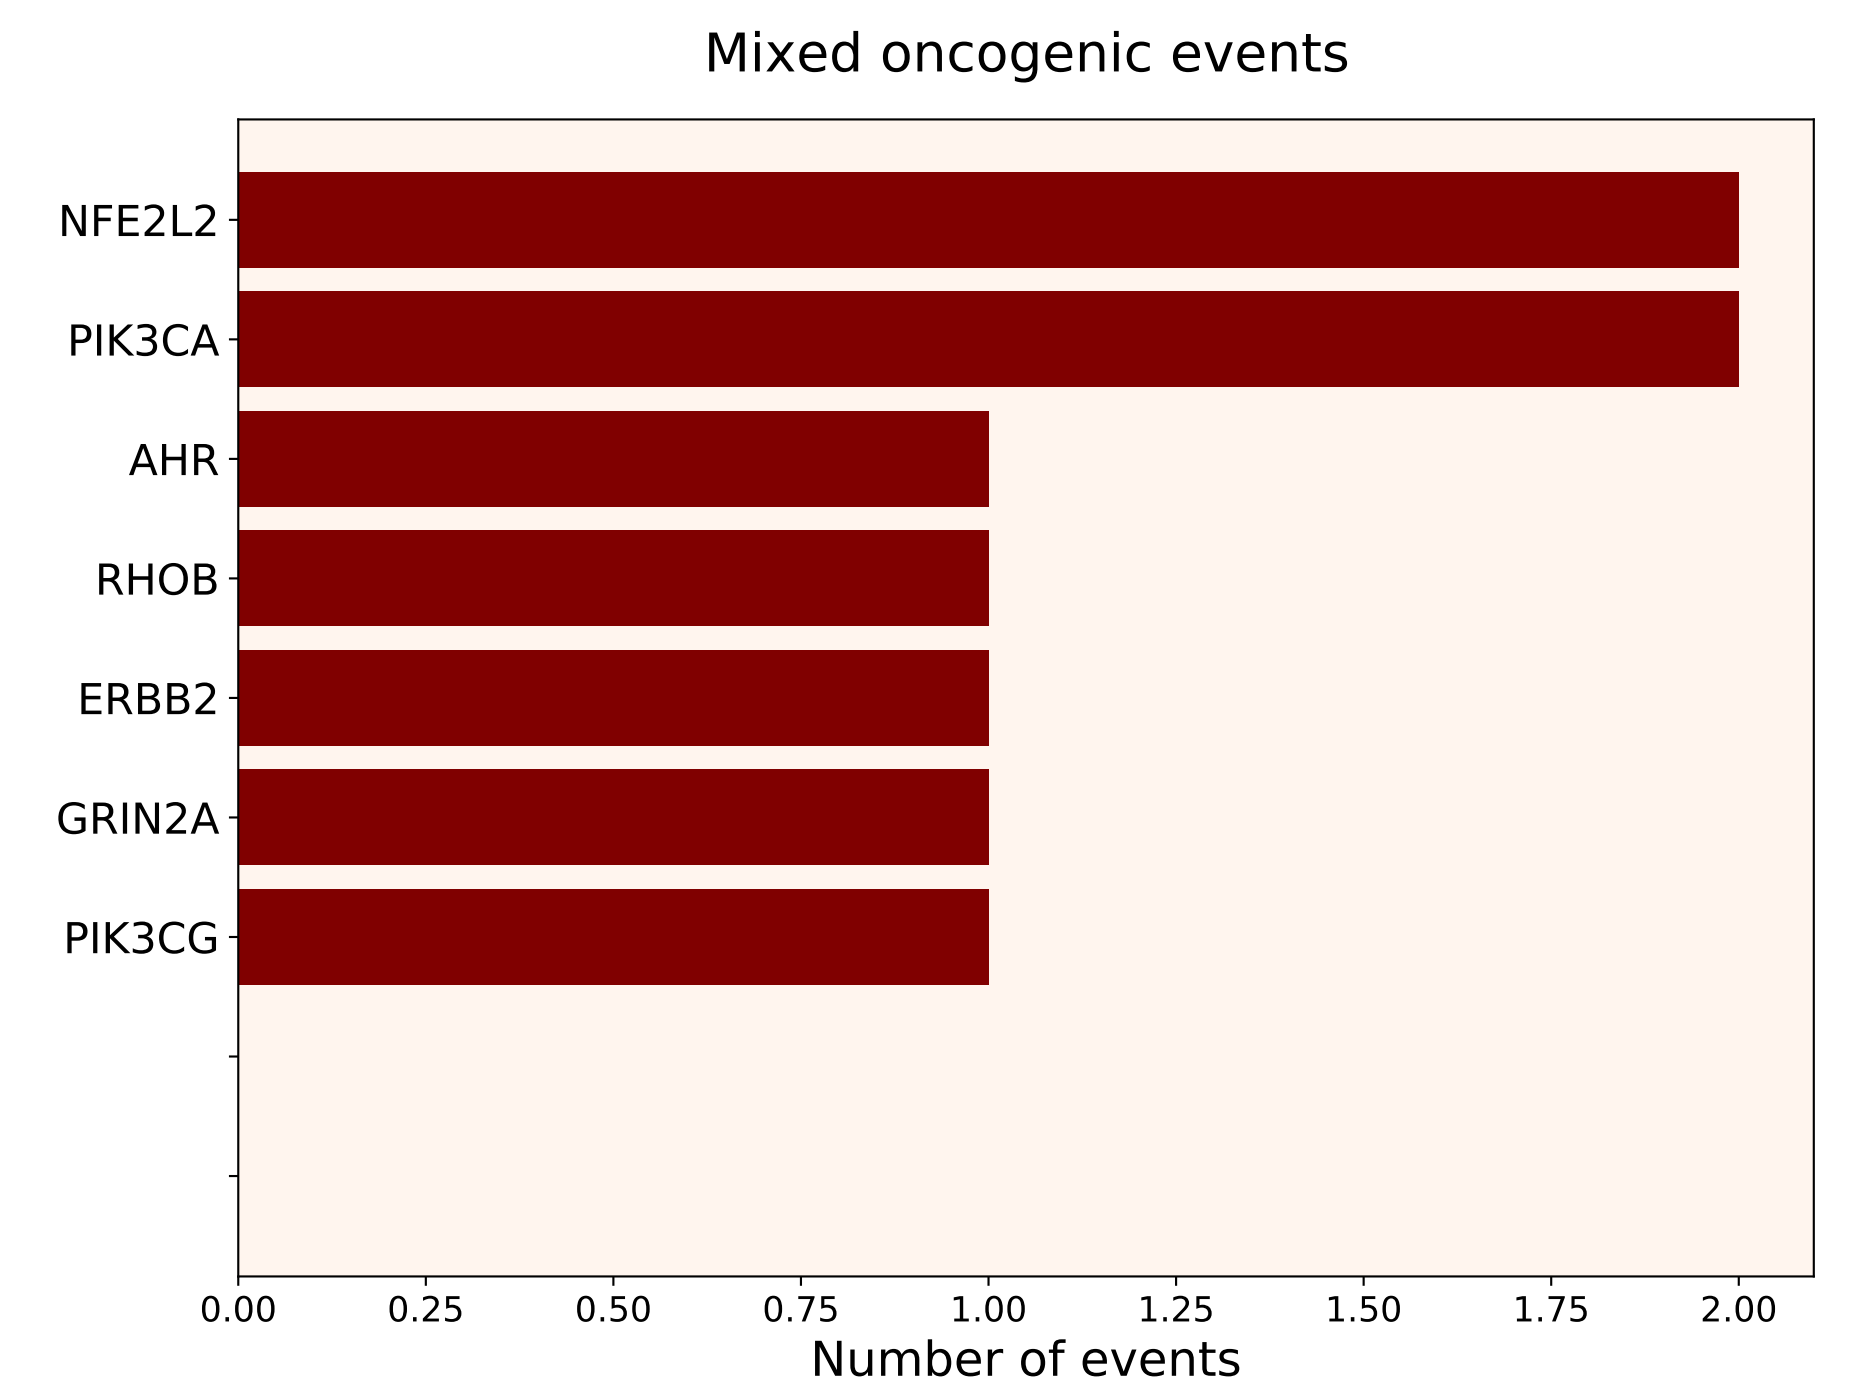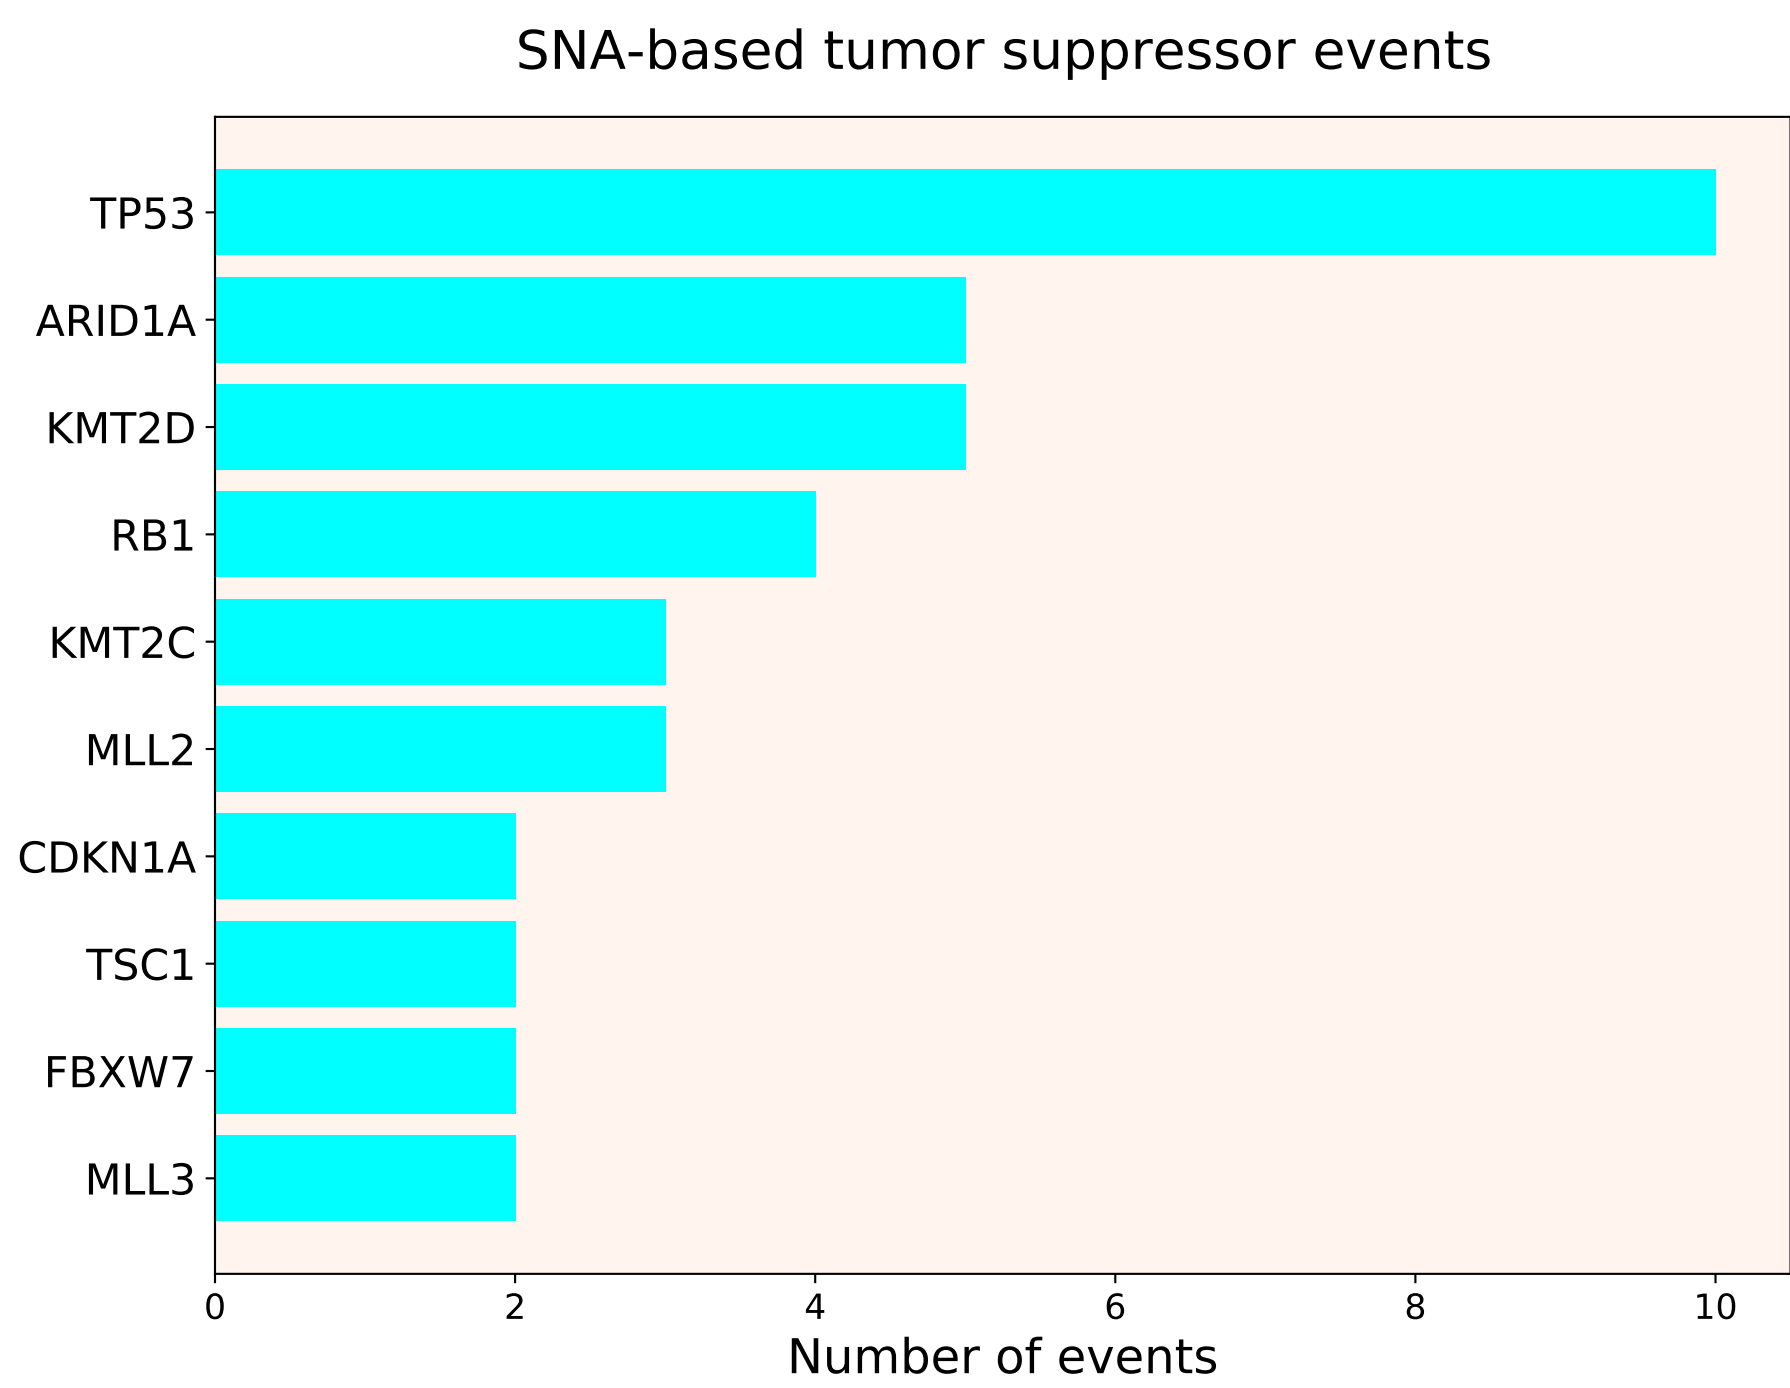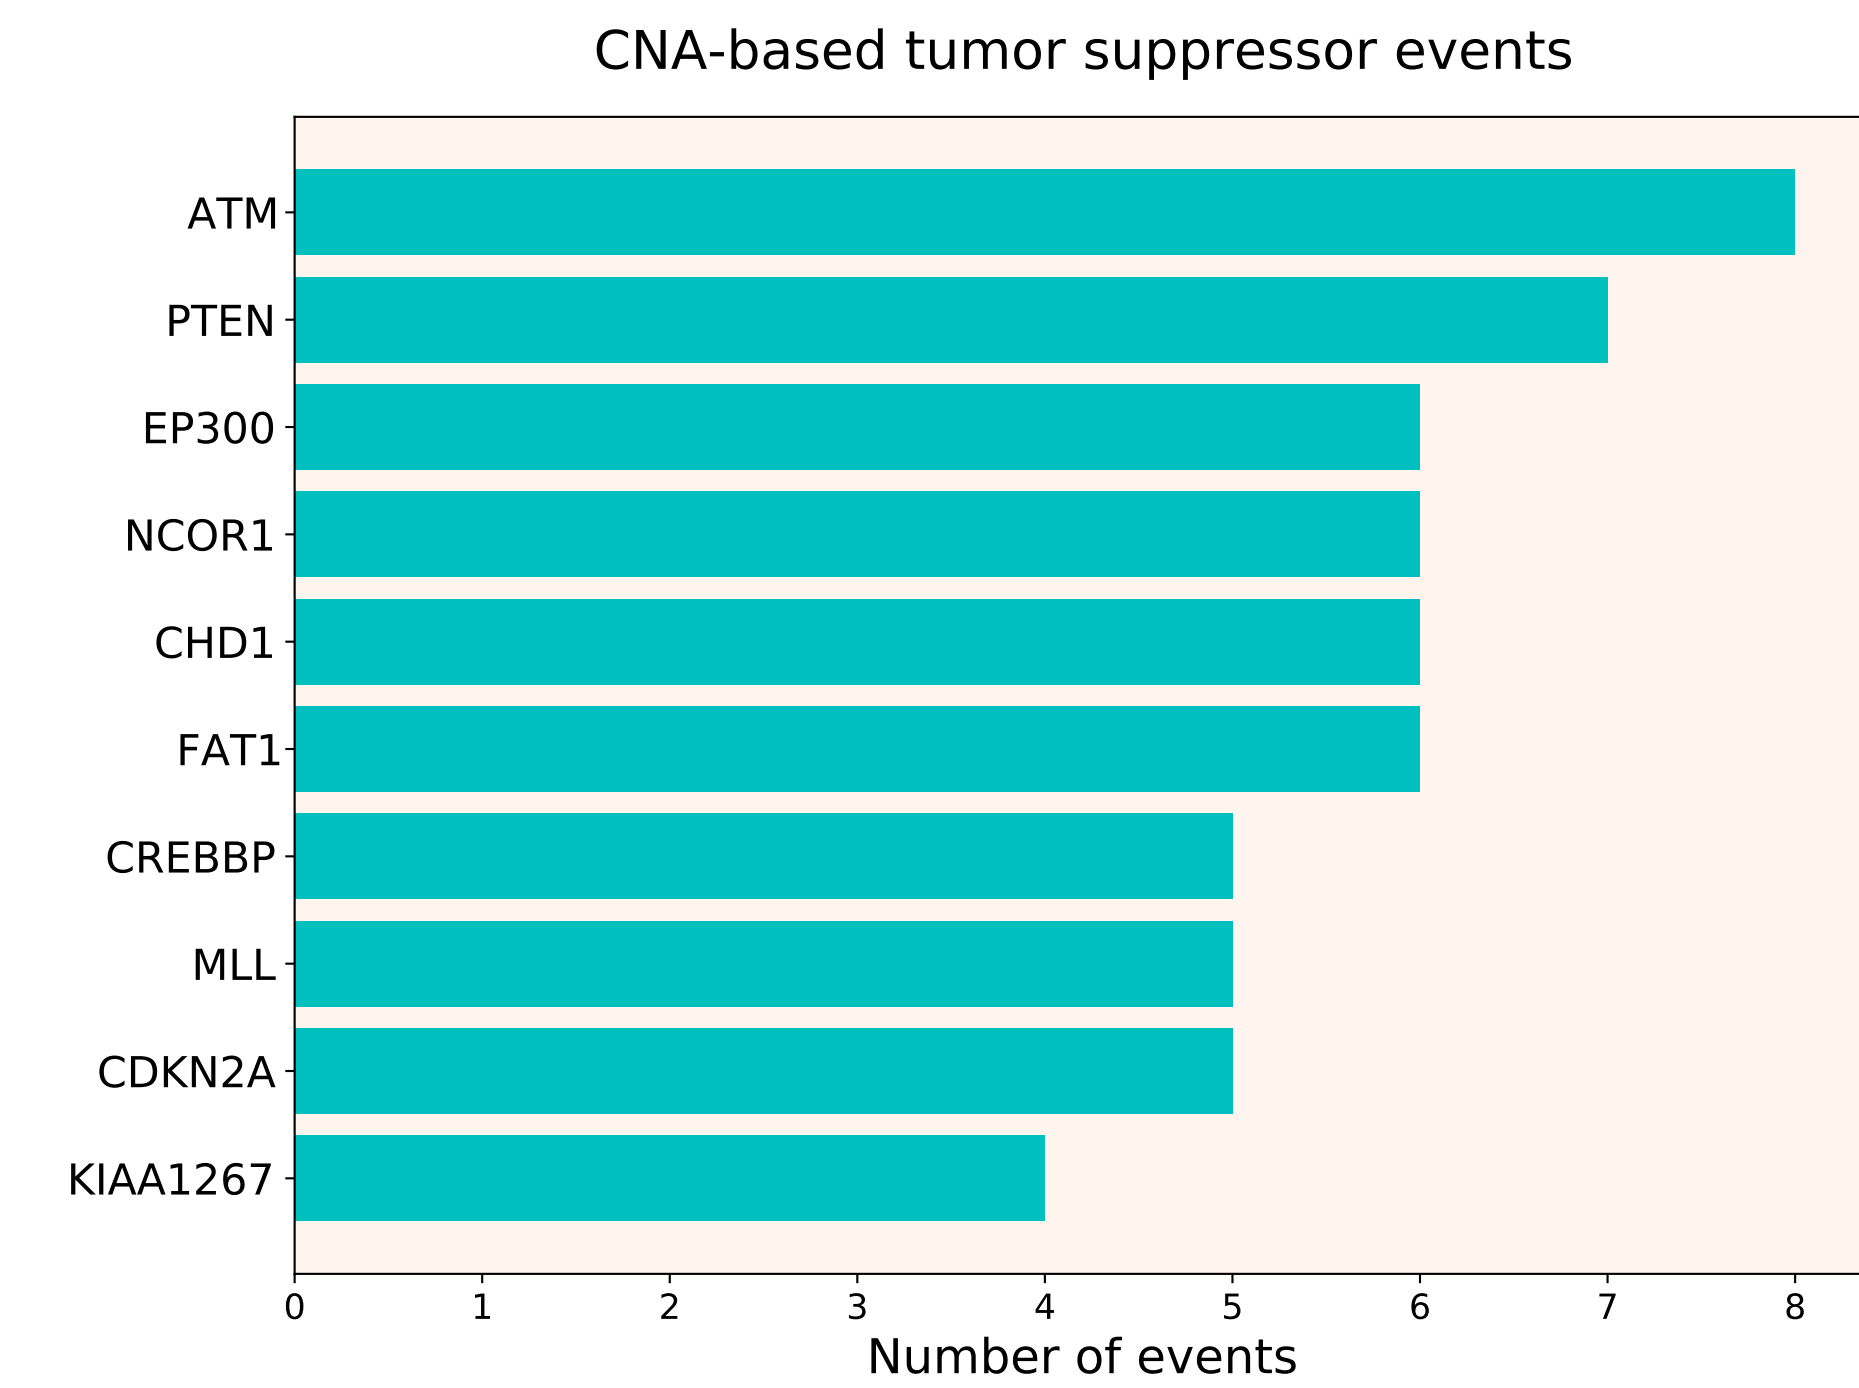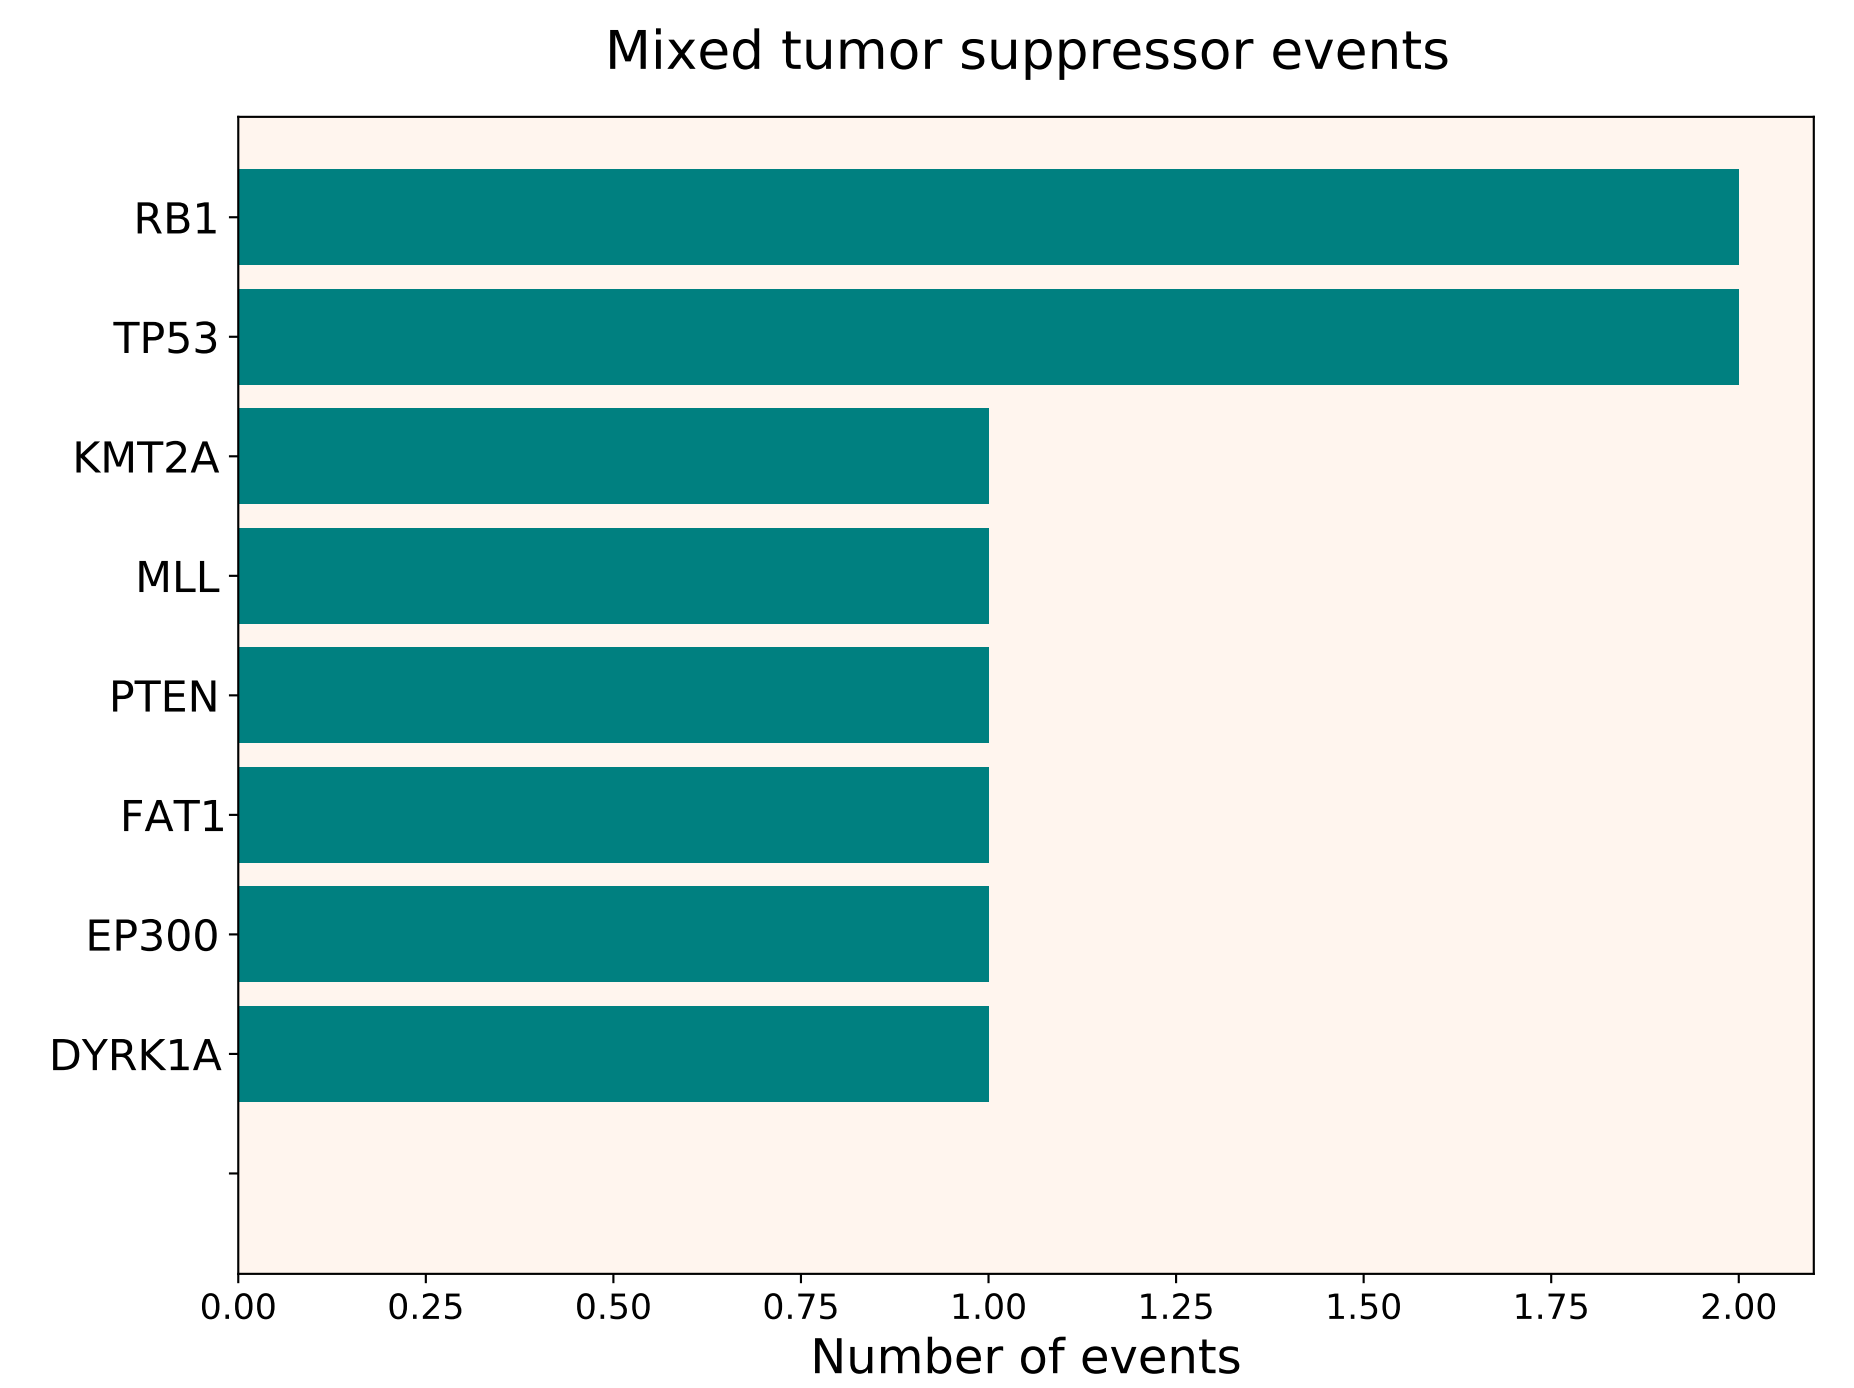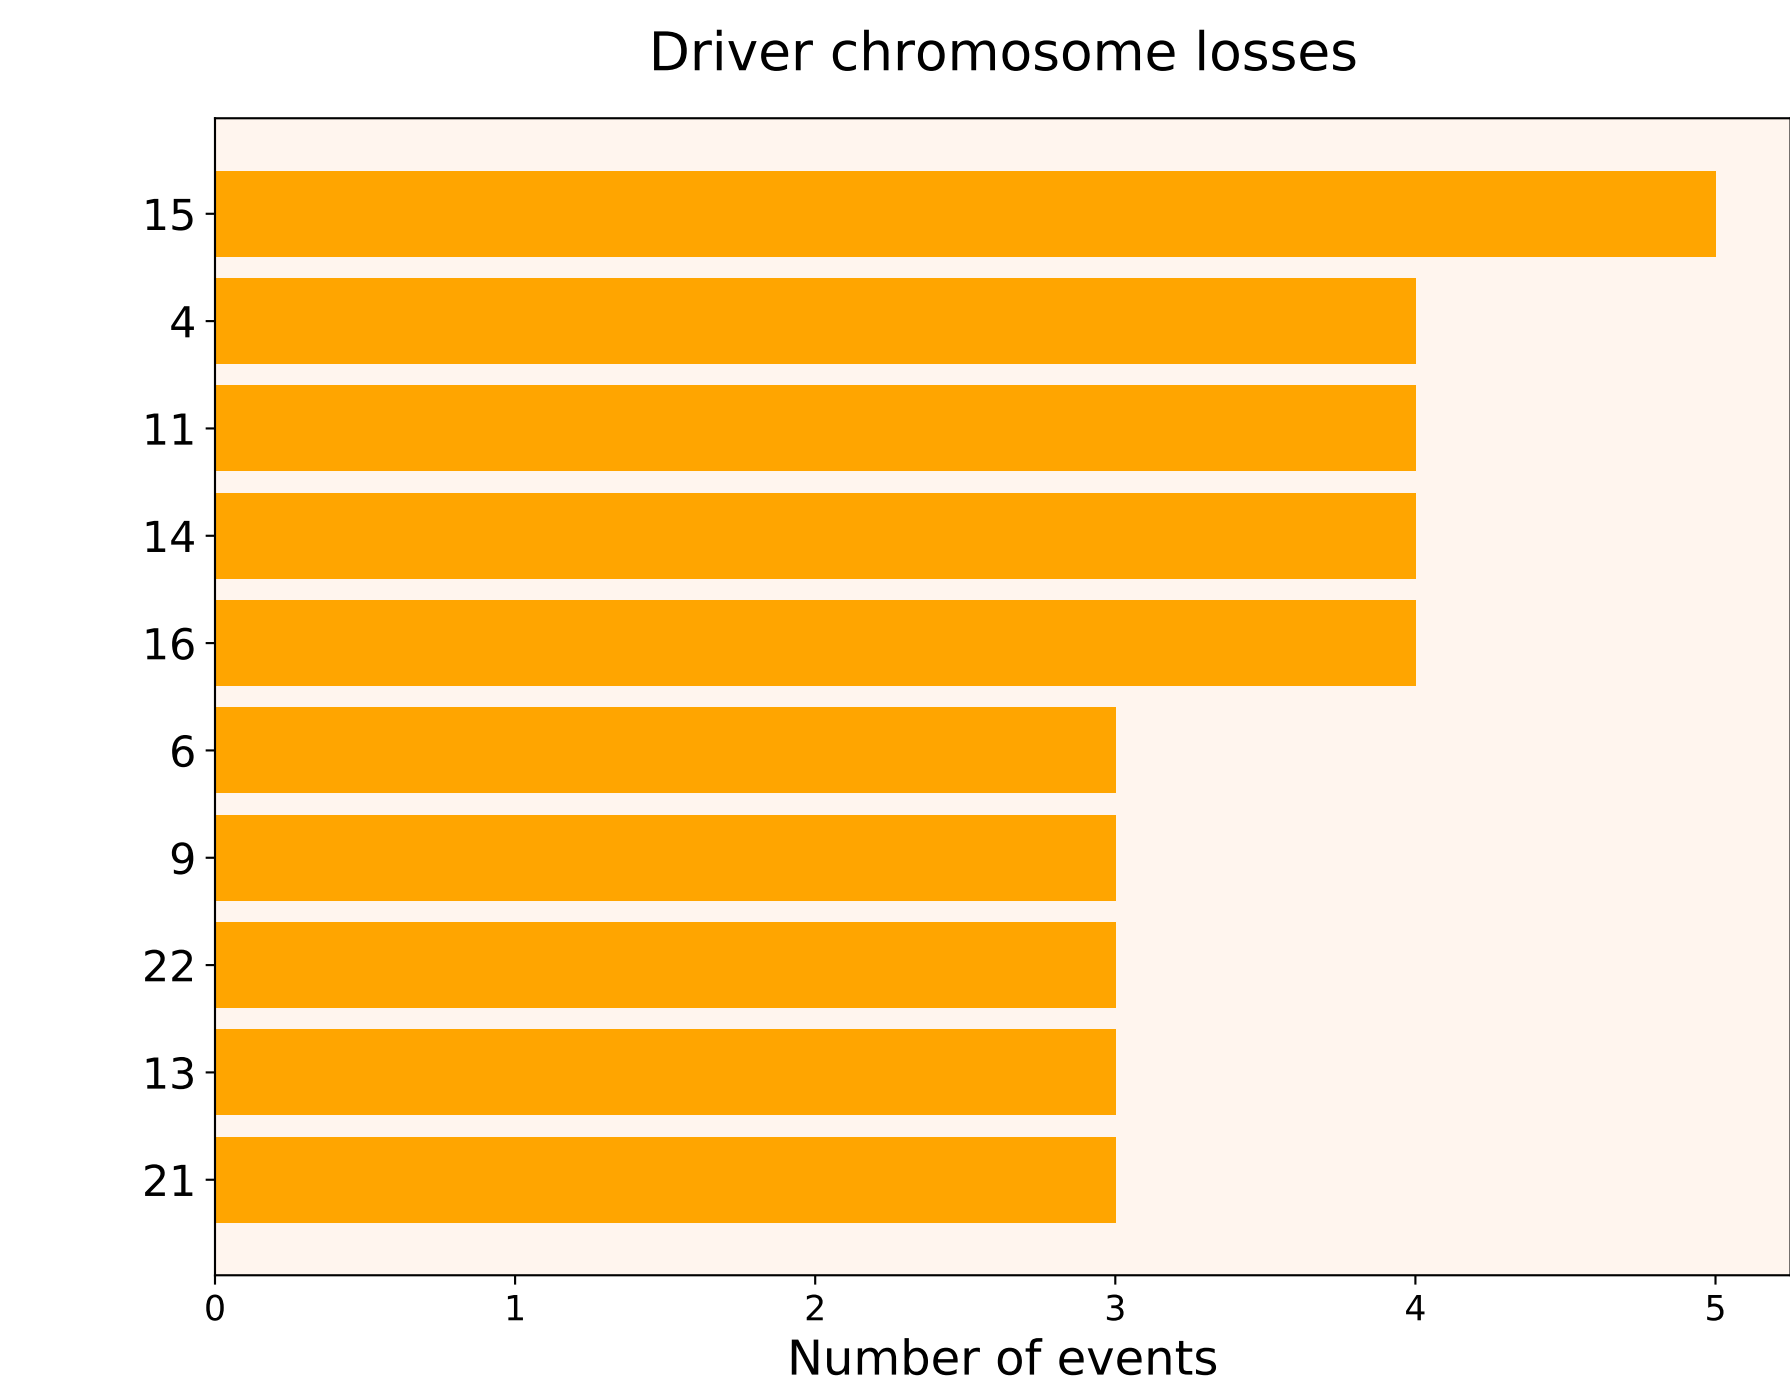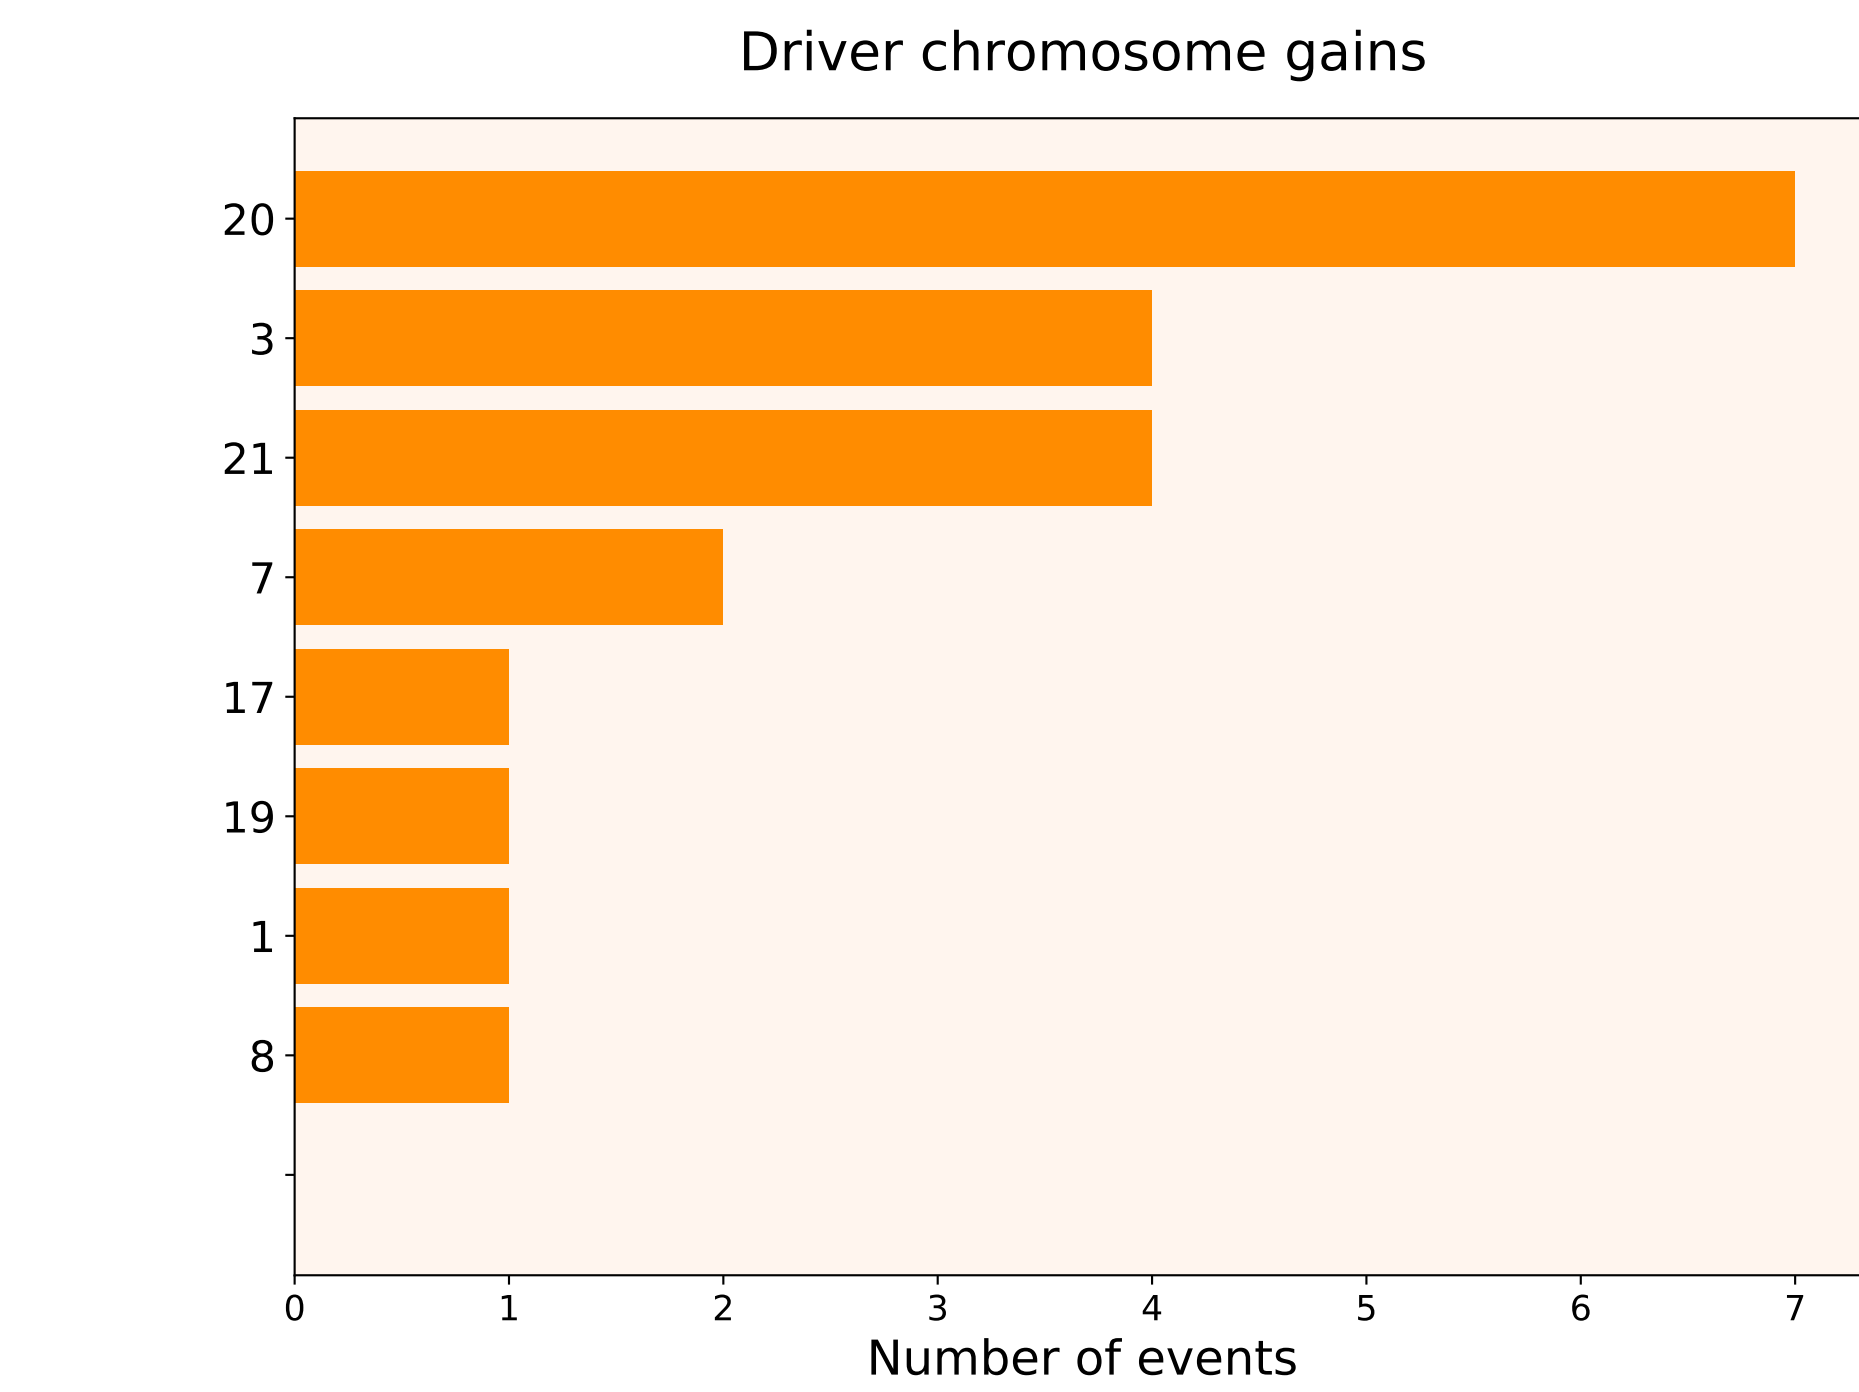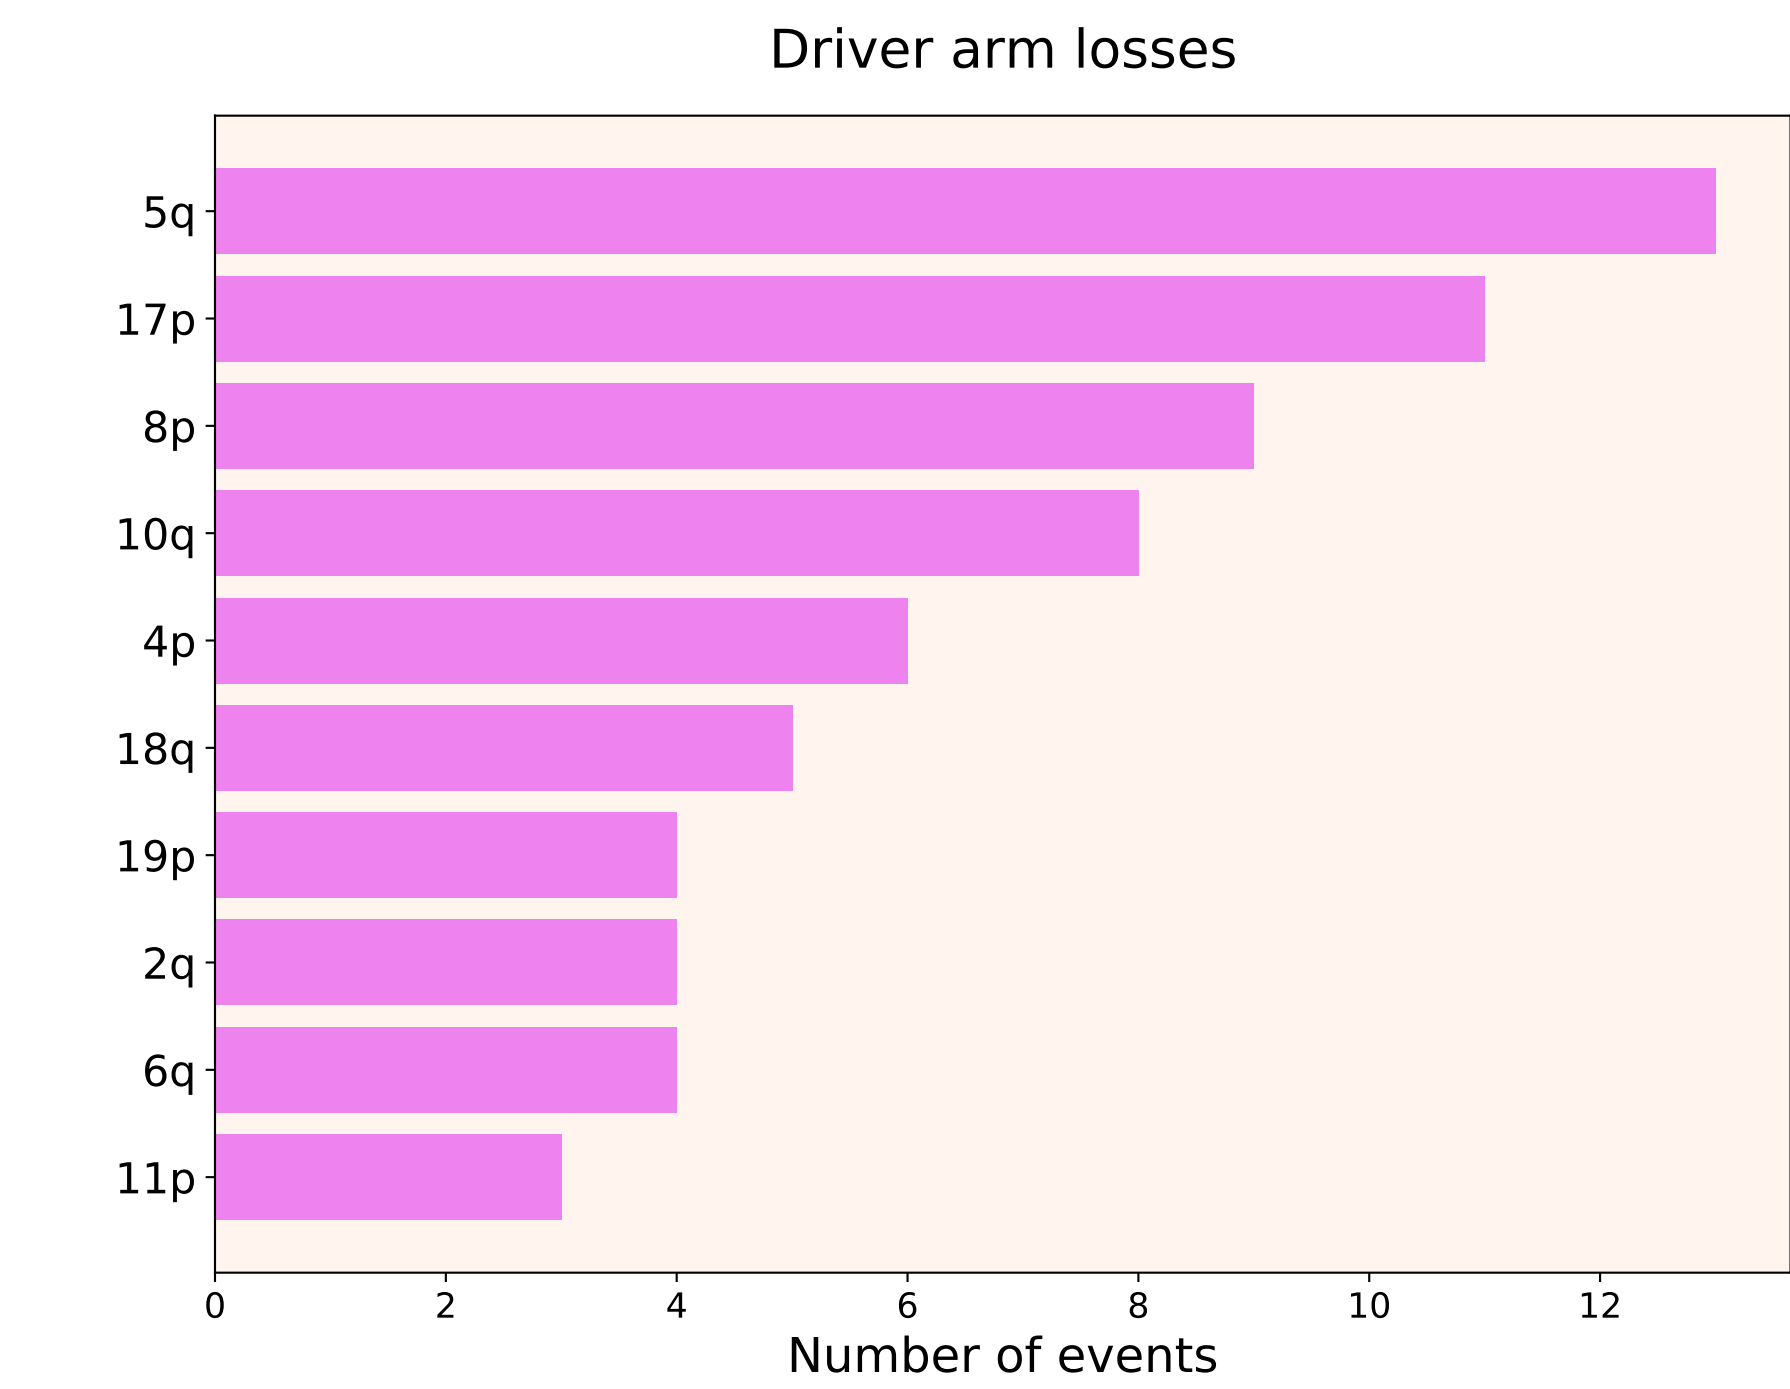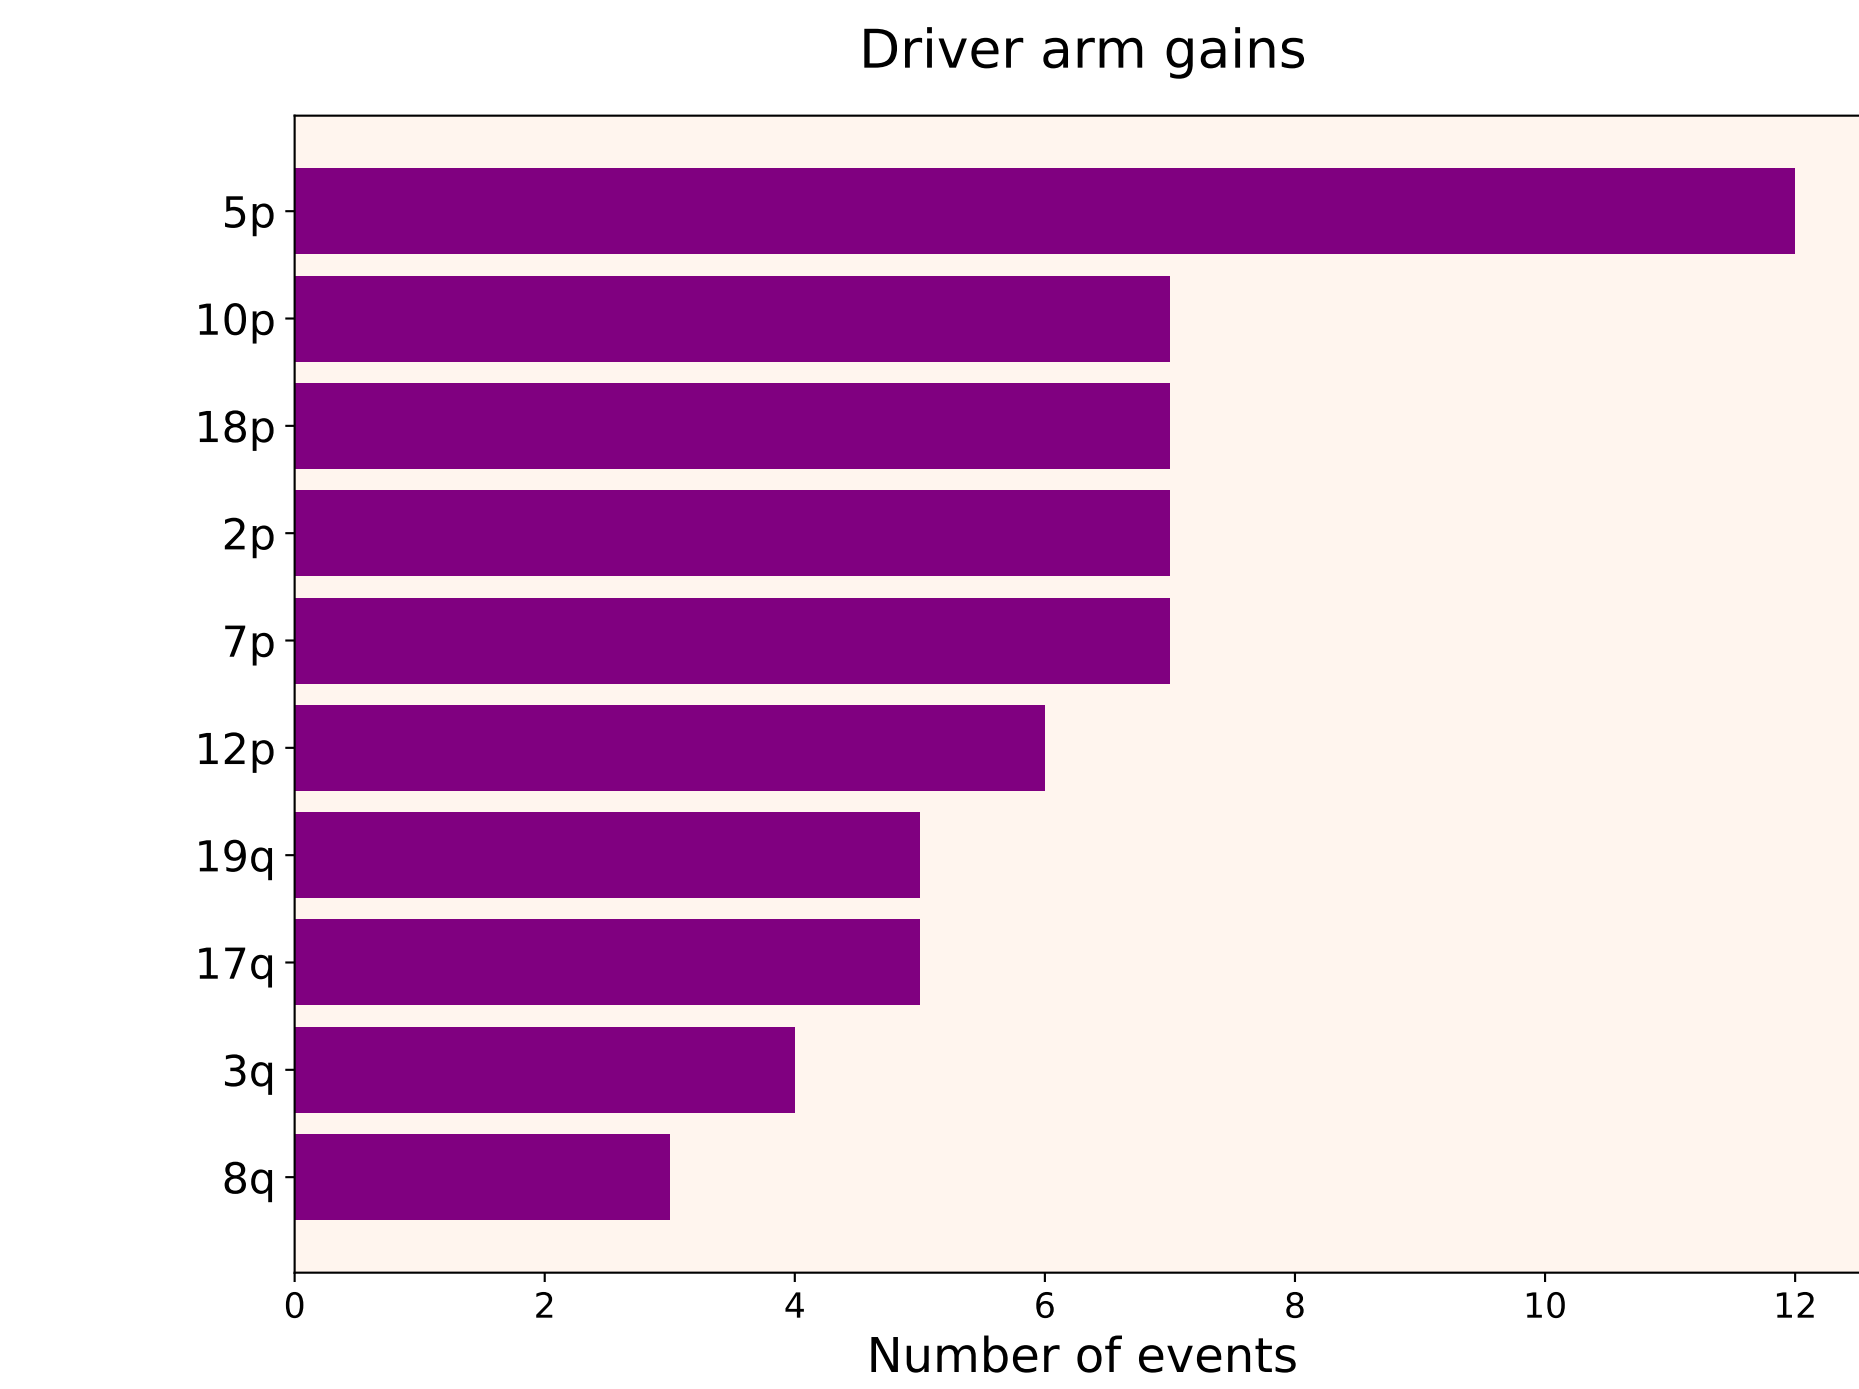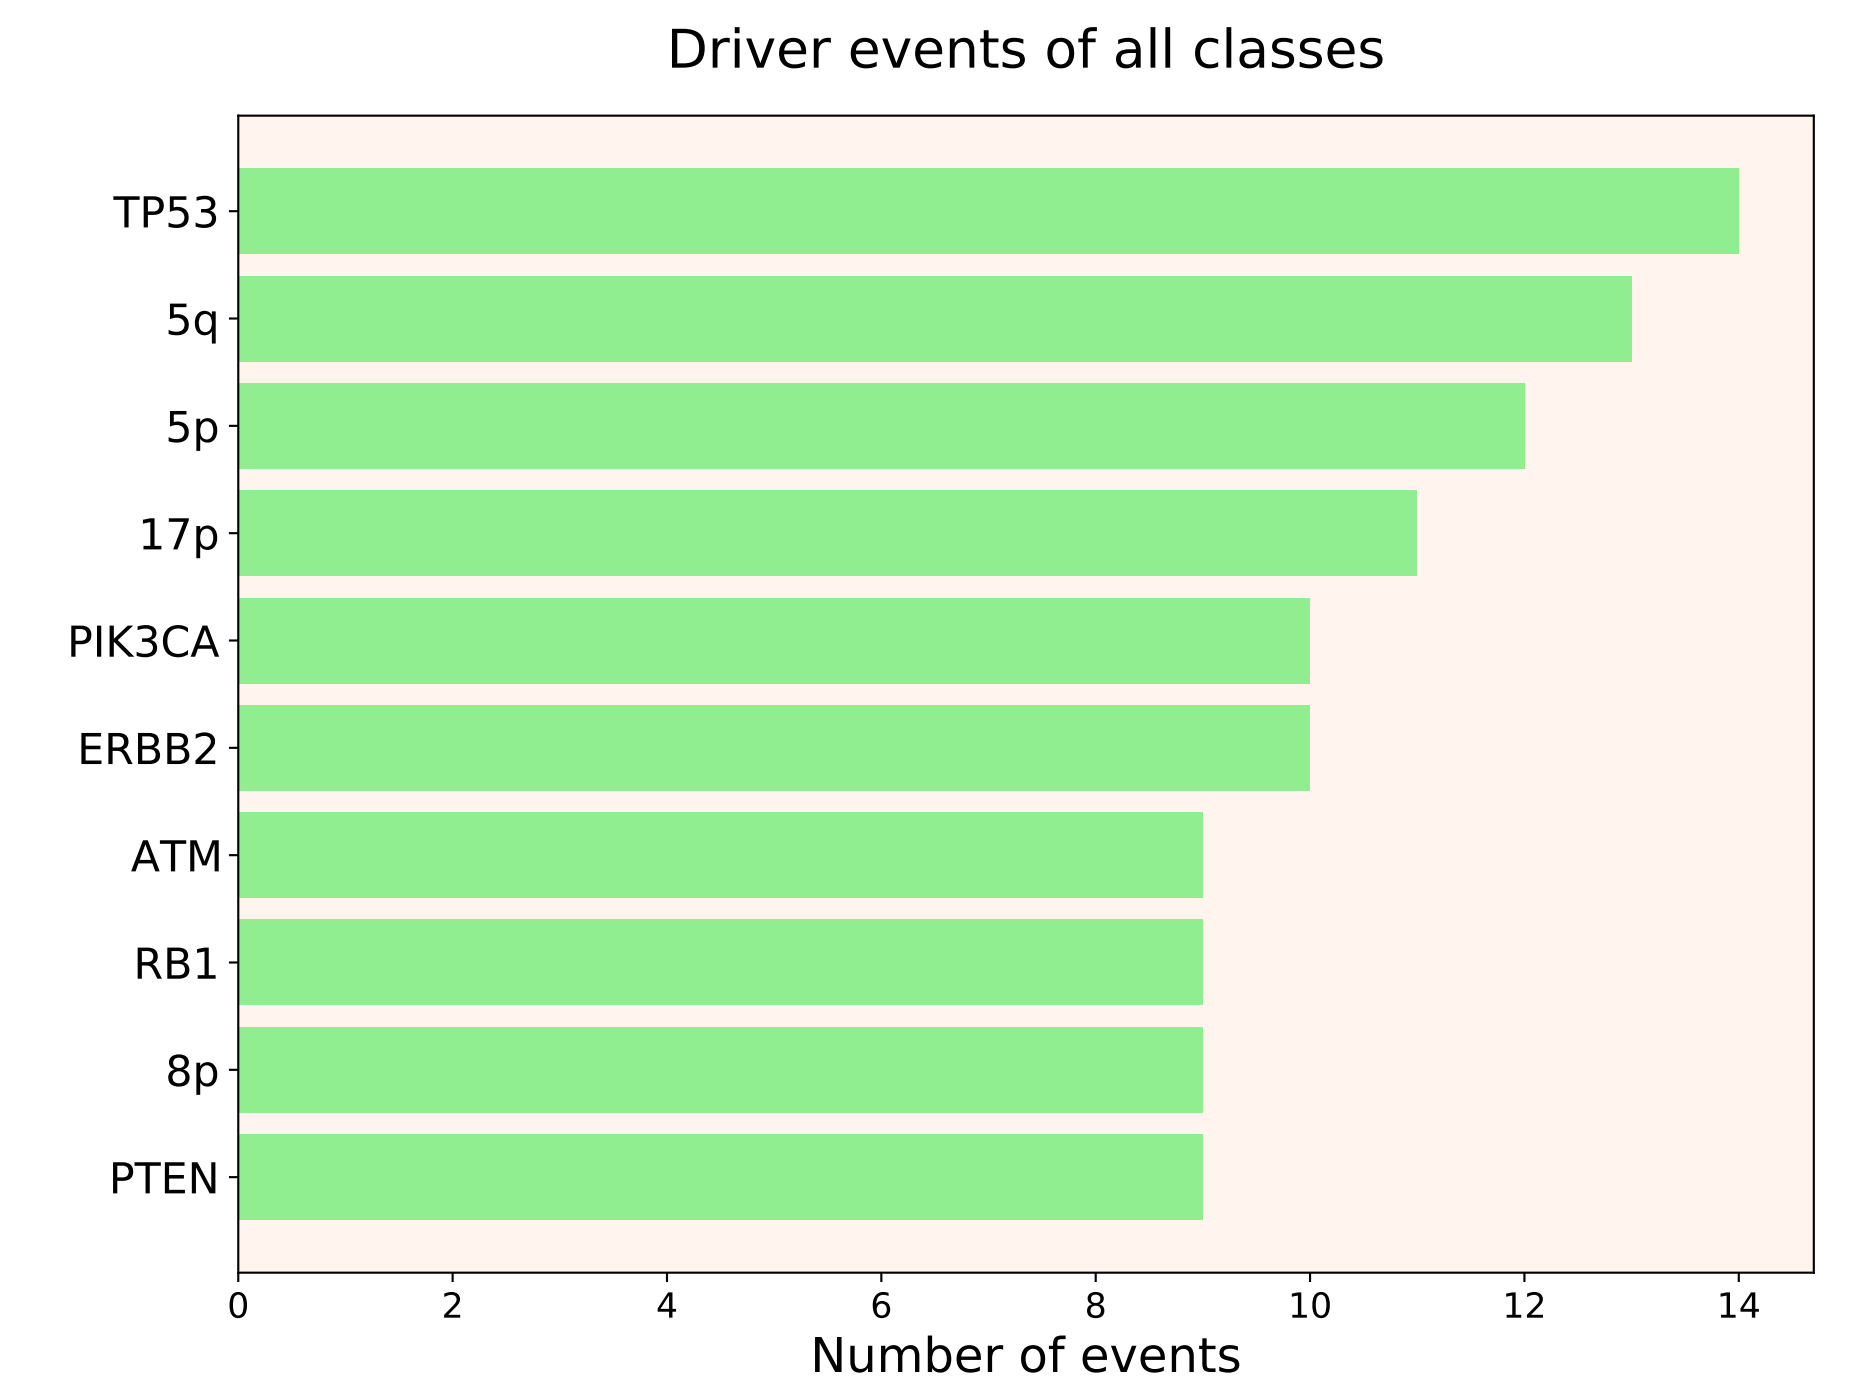

Supplement: Supplemental_Data_S1.zip [file Supplemental_Data_S1.zip]

# COAD\_MALE

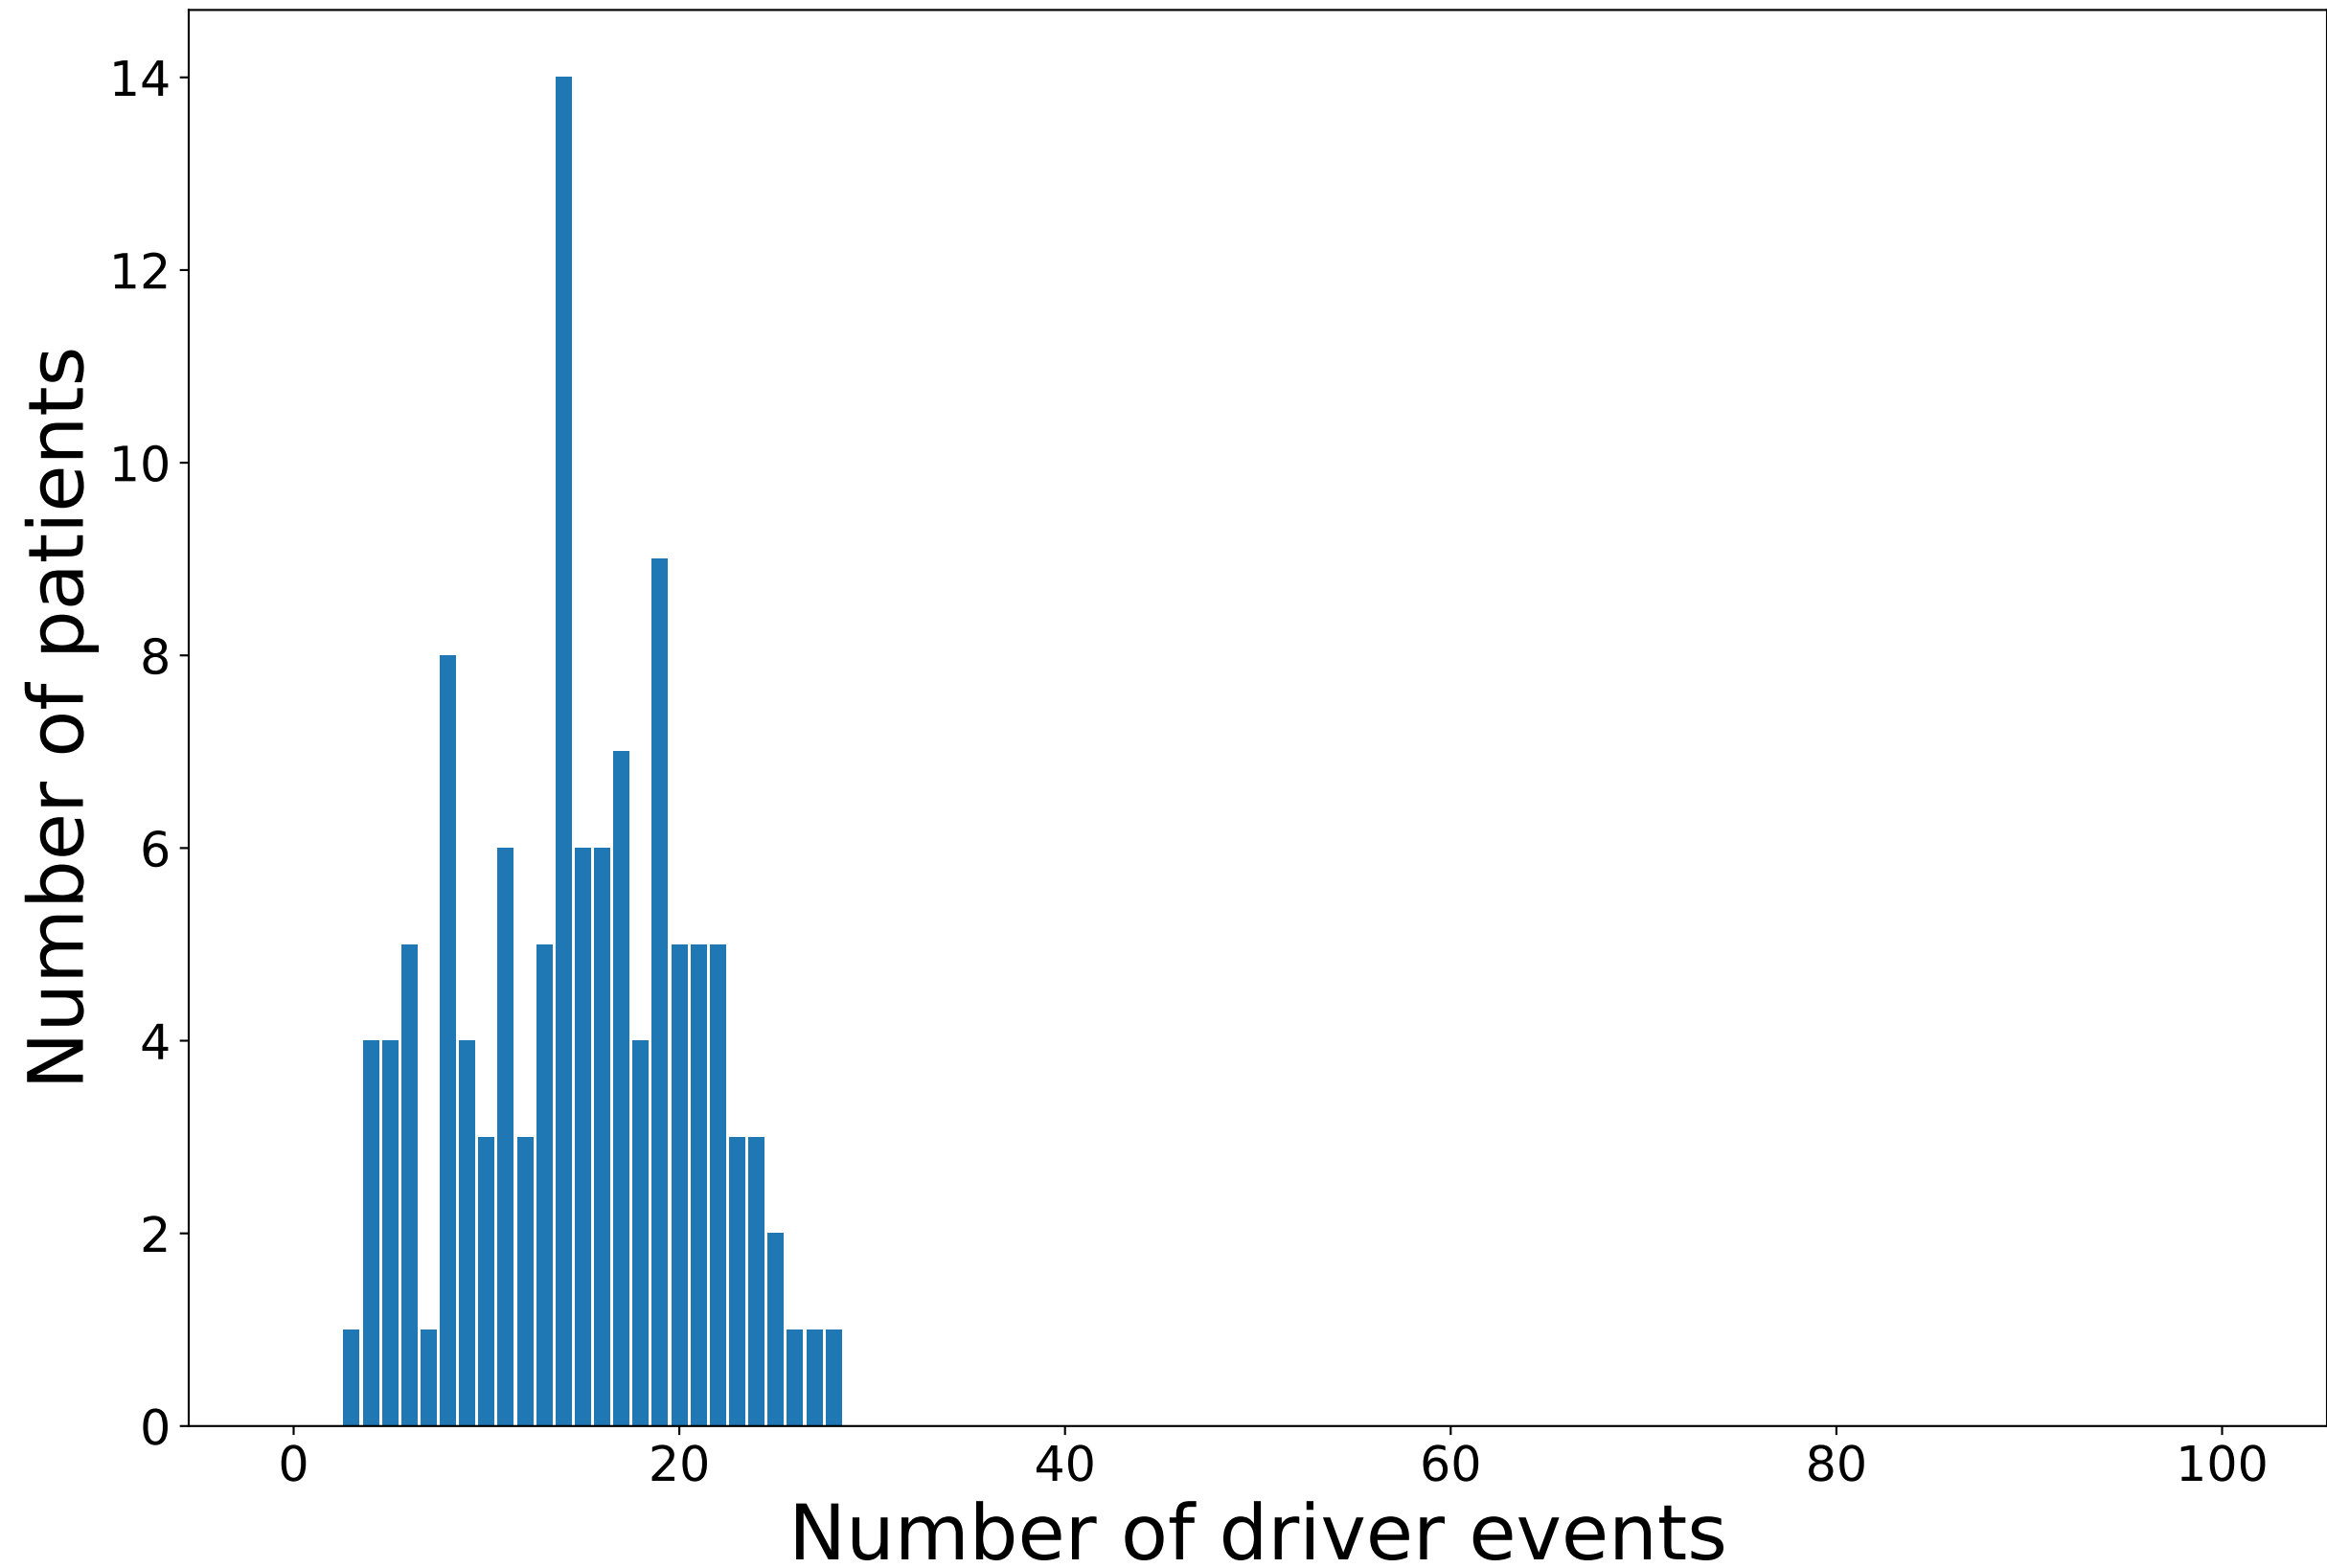

Supplement: Supplemental_Data_S1.zip [file Supplemental_Data_S1.zip]

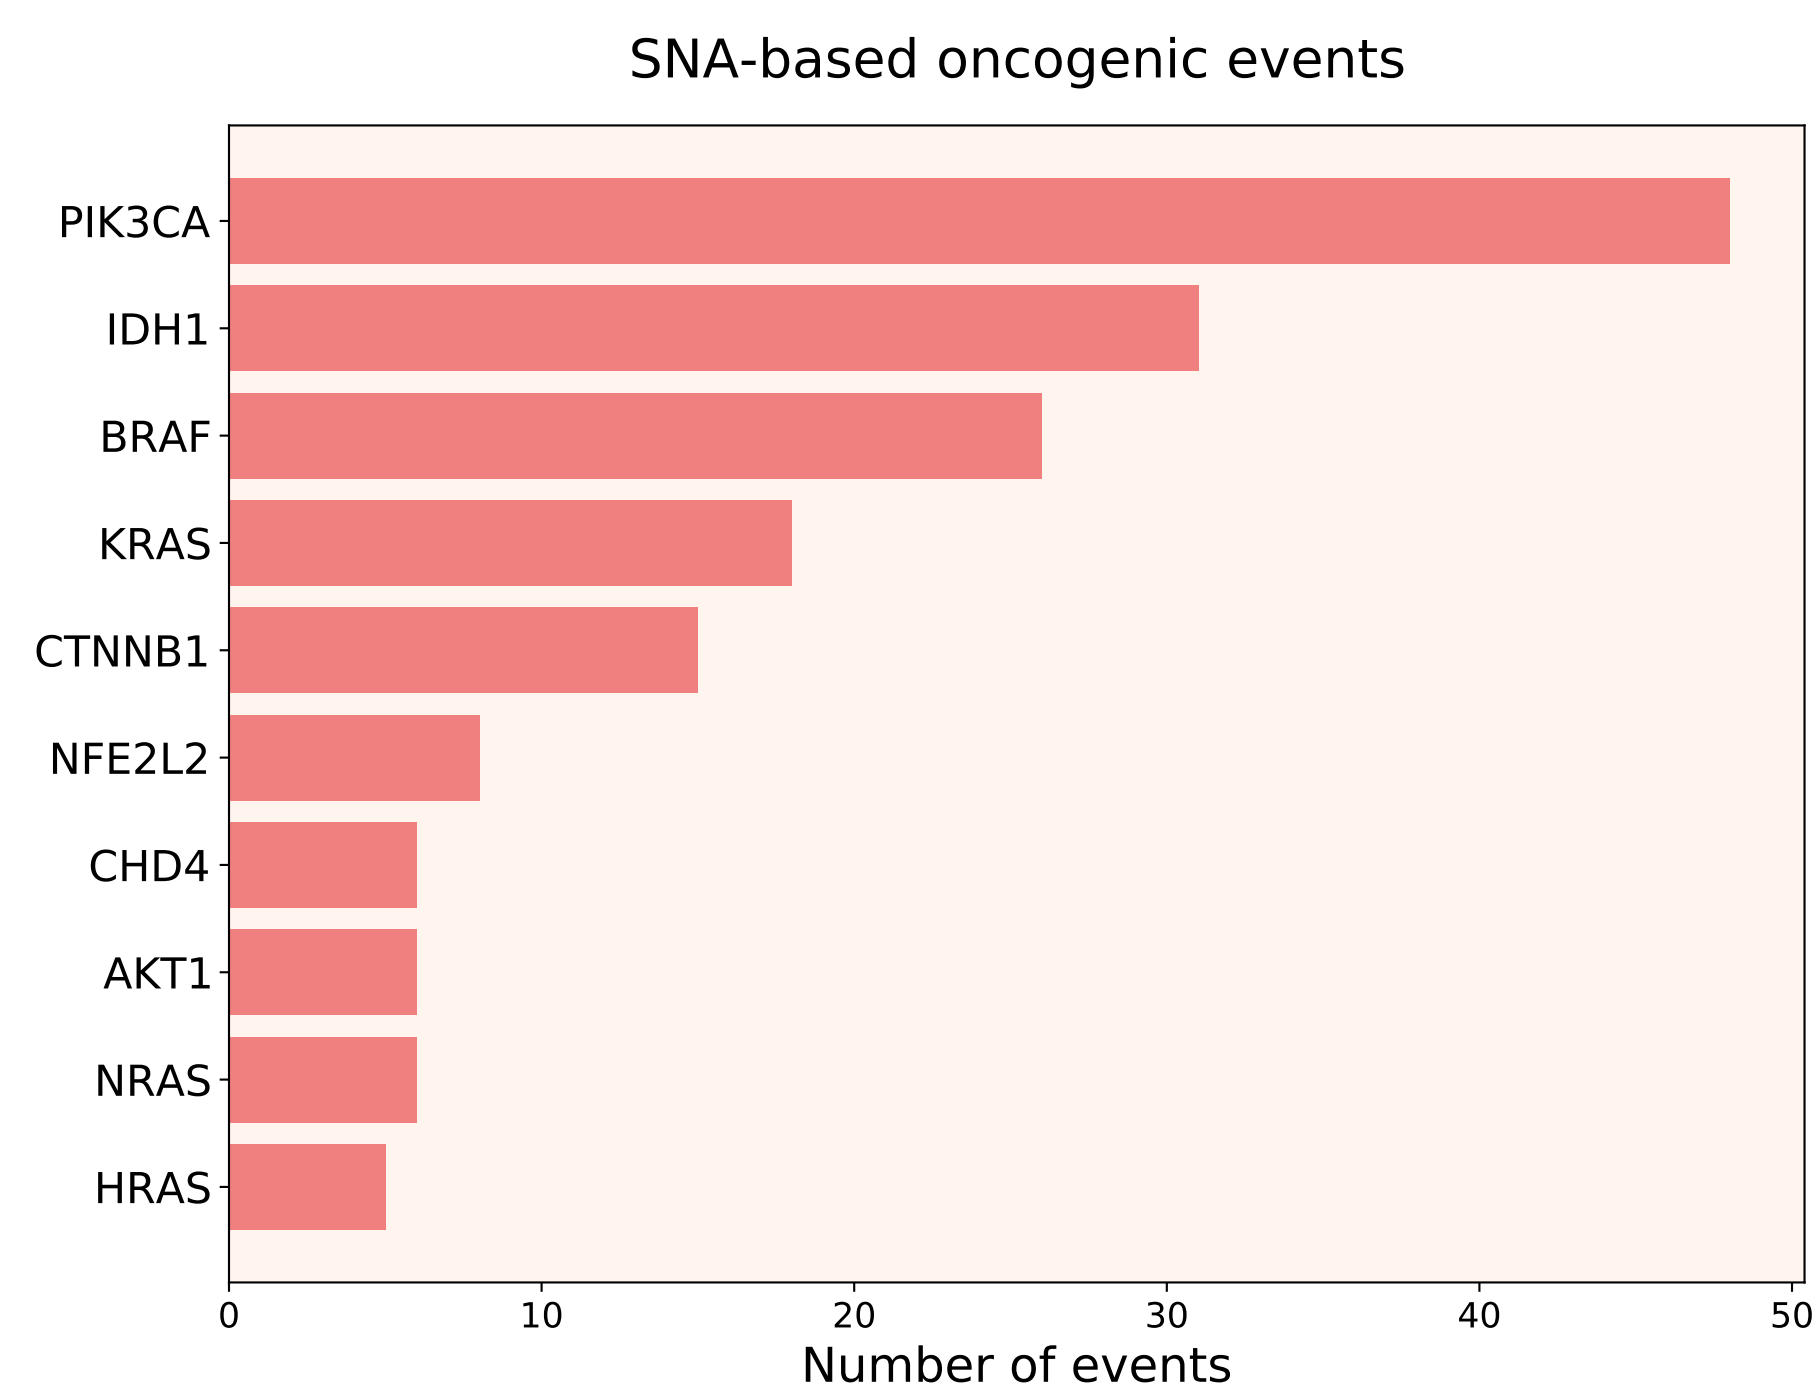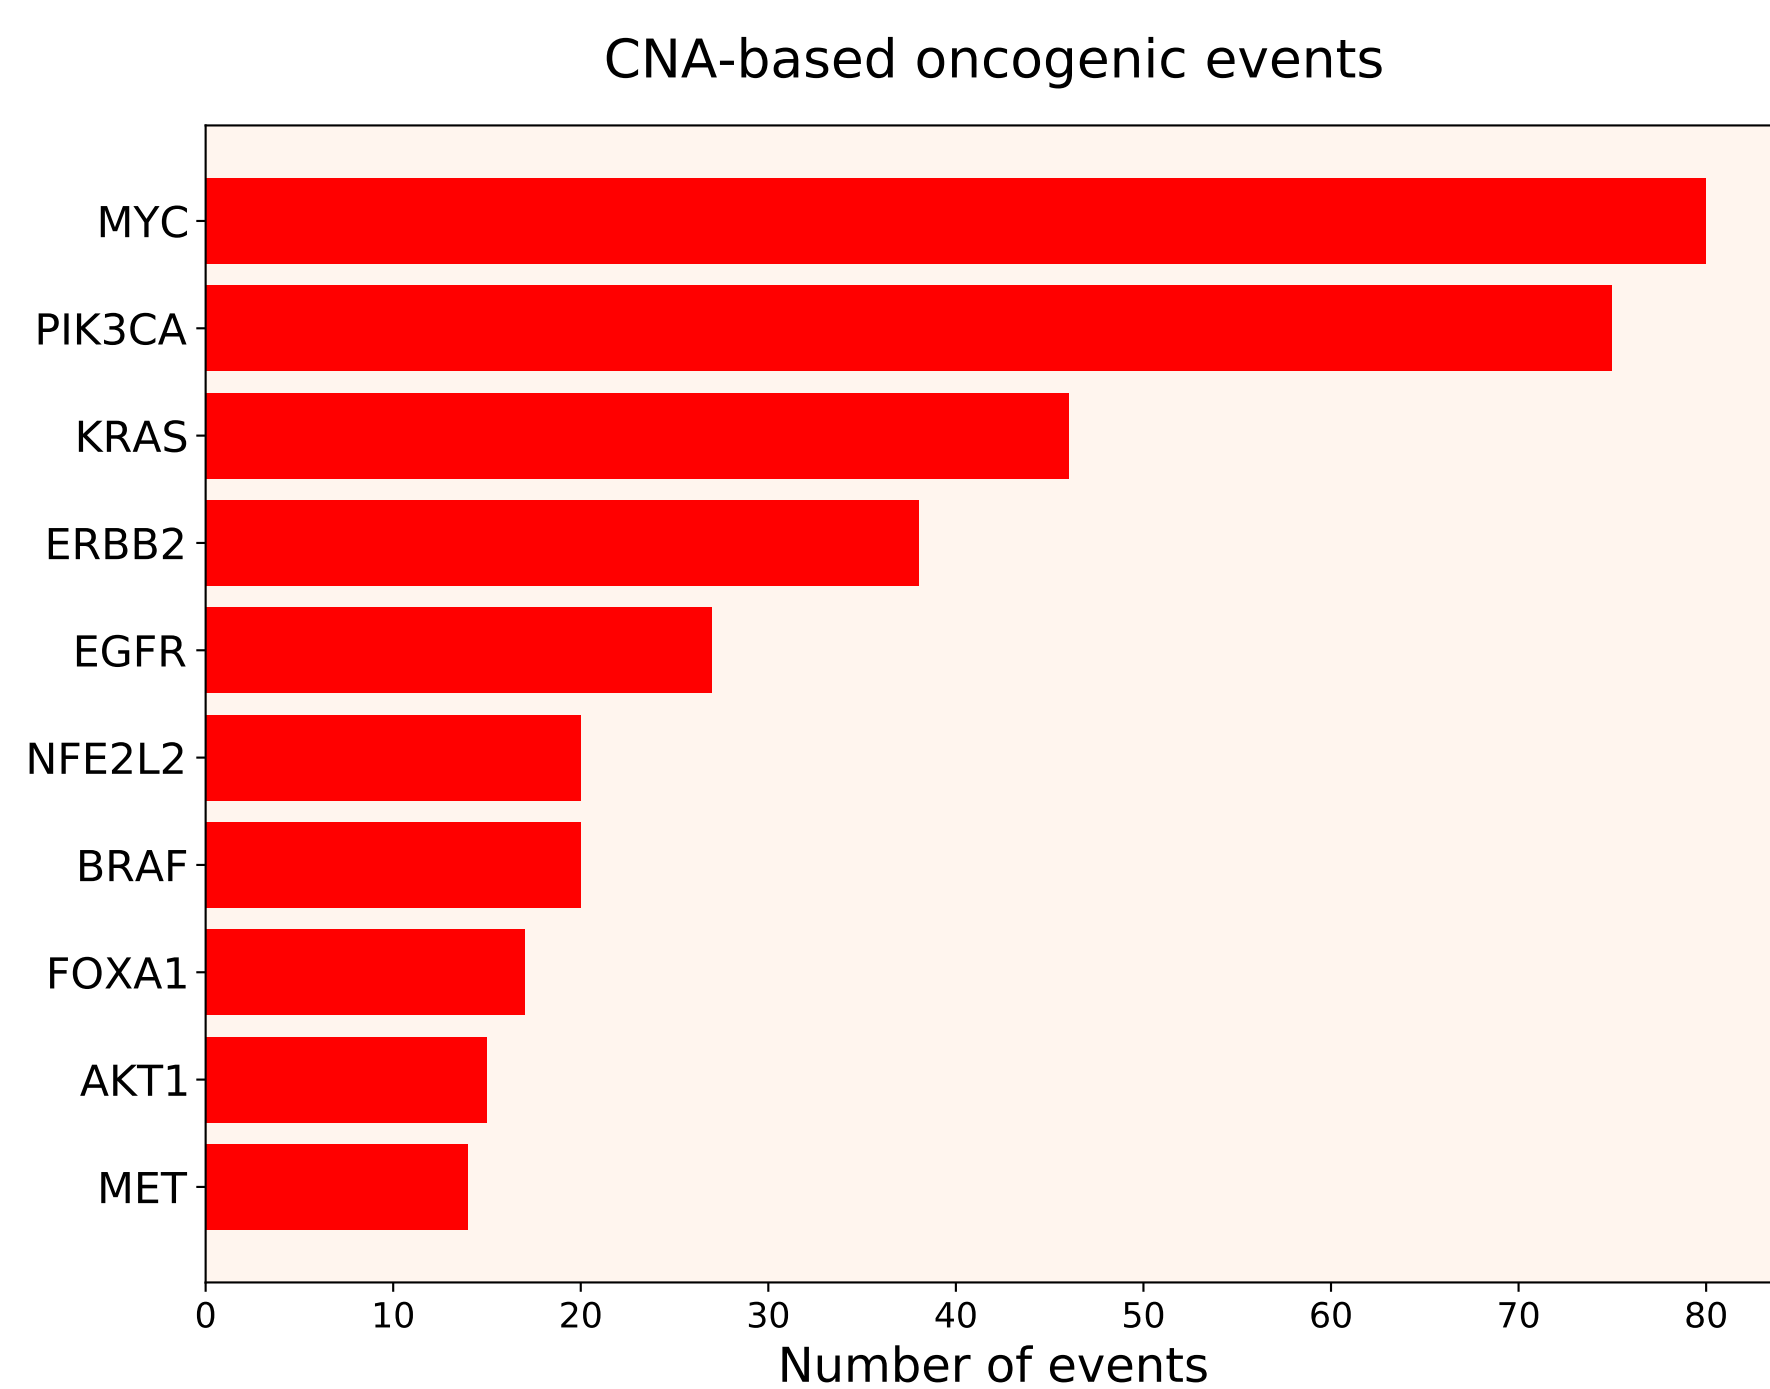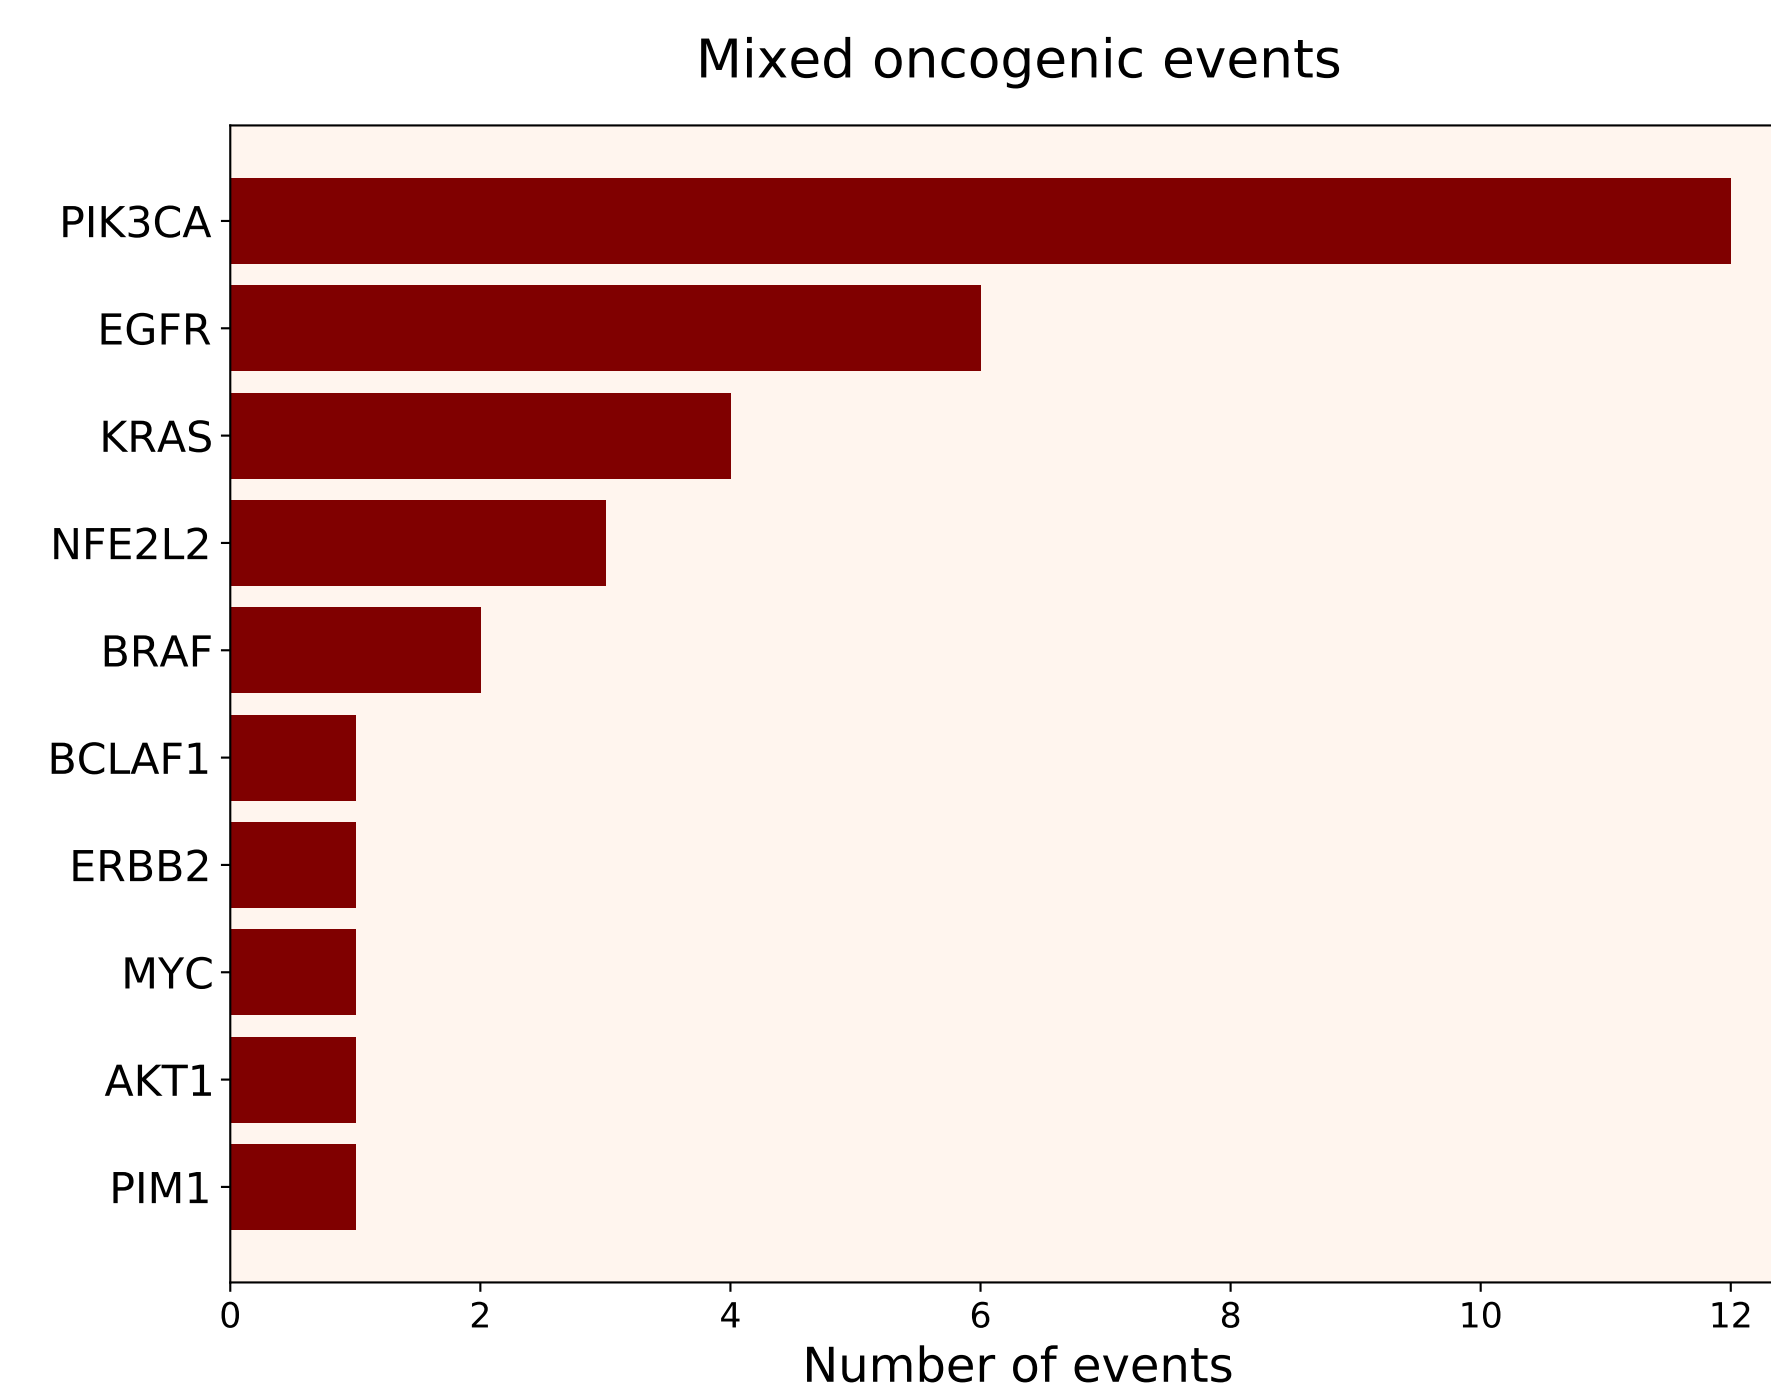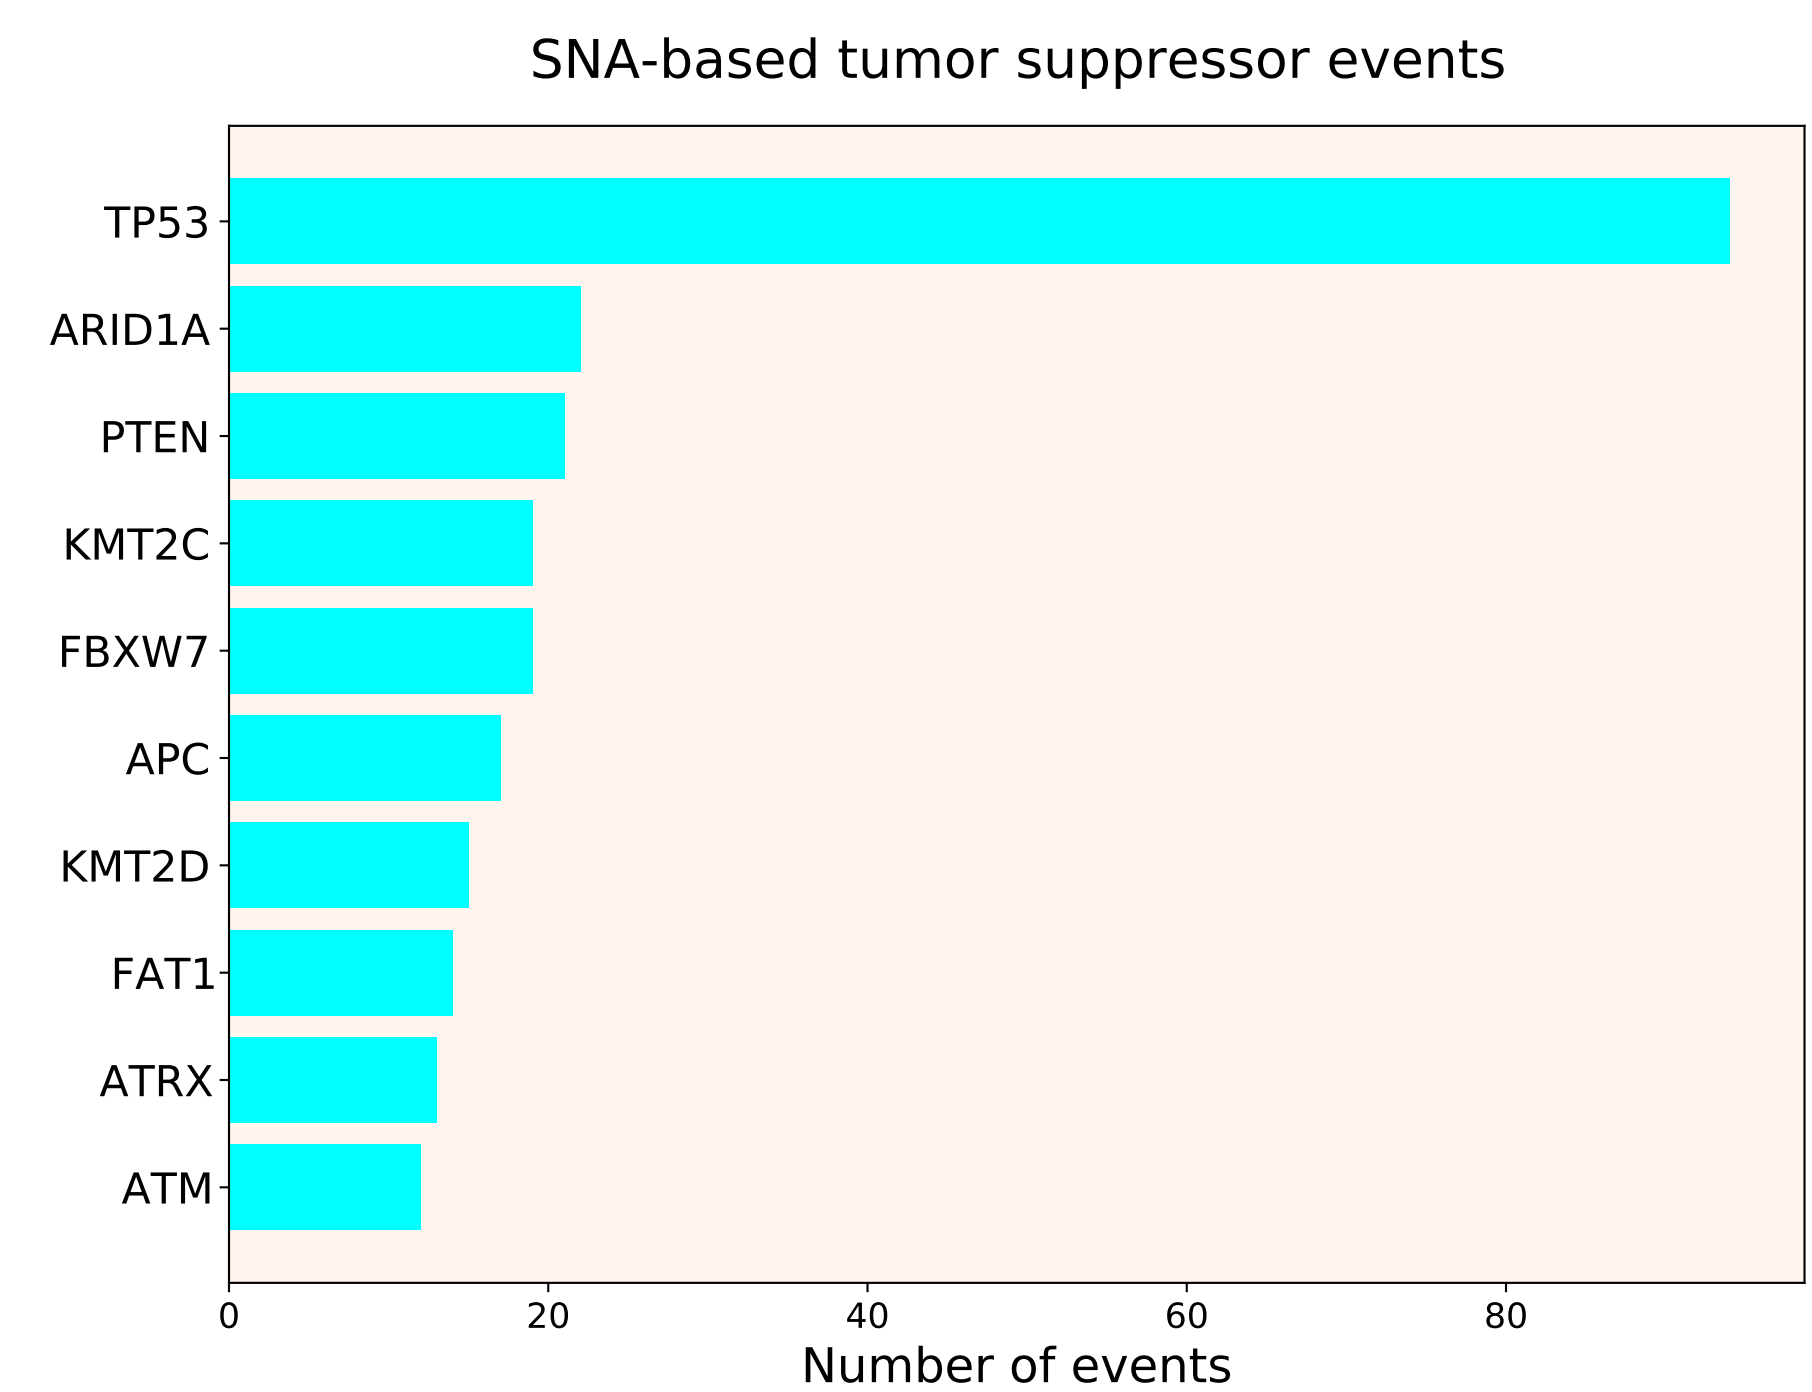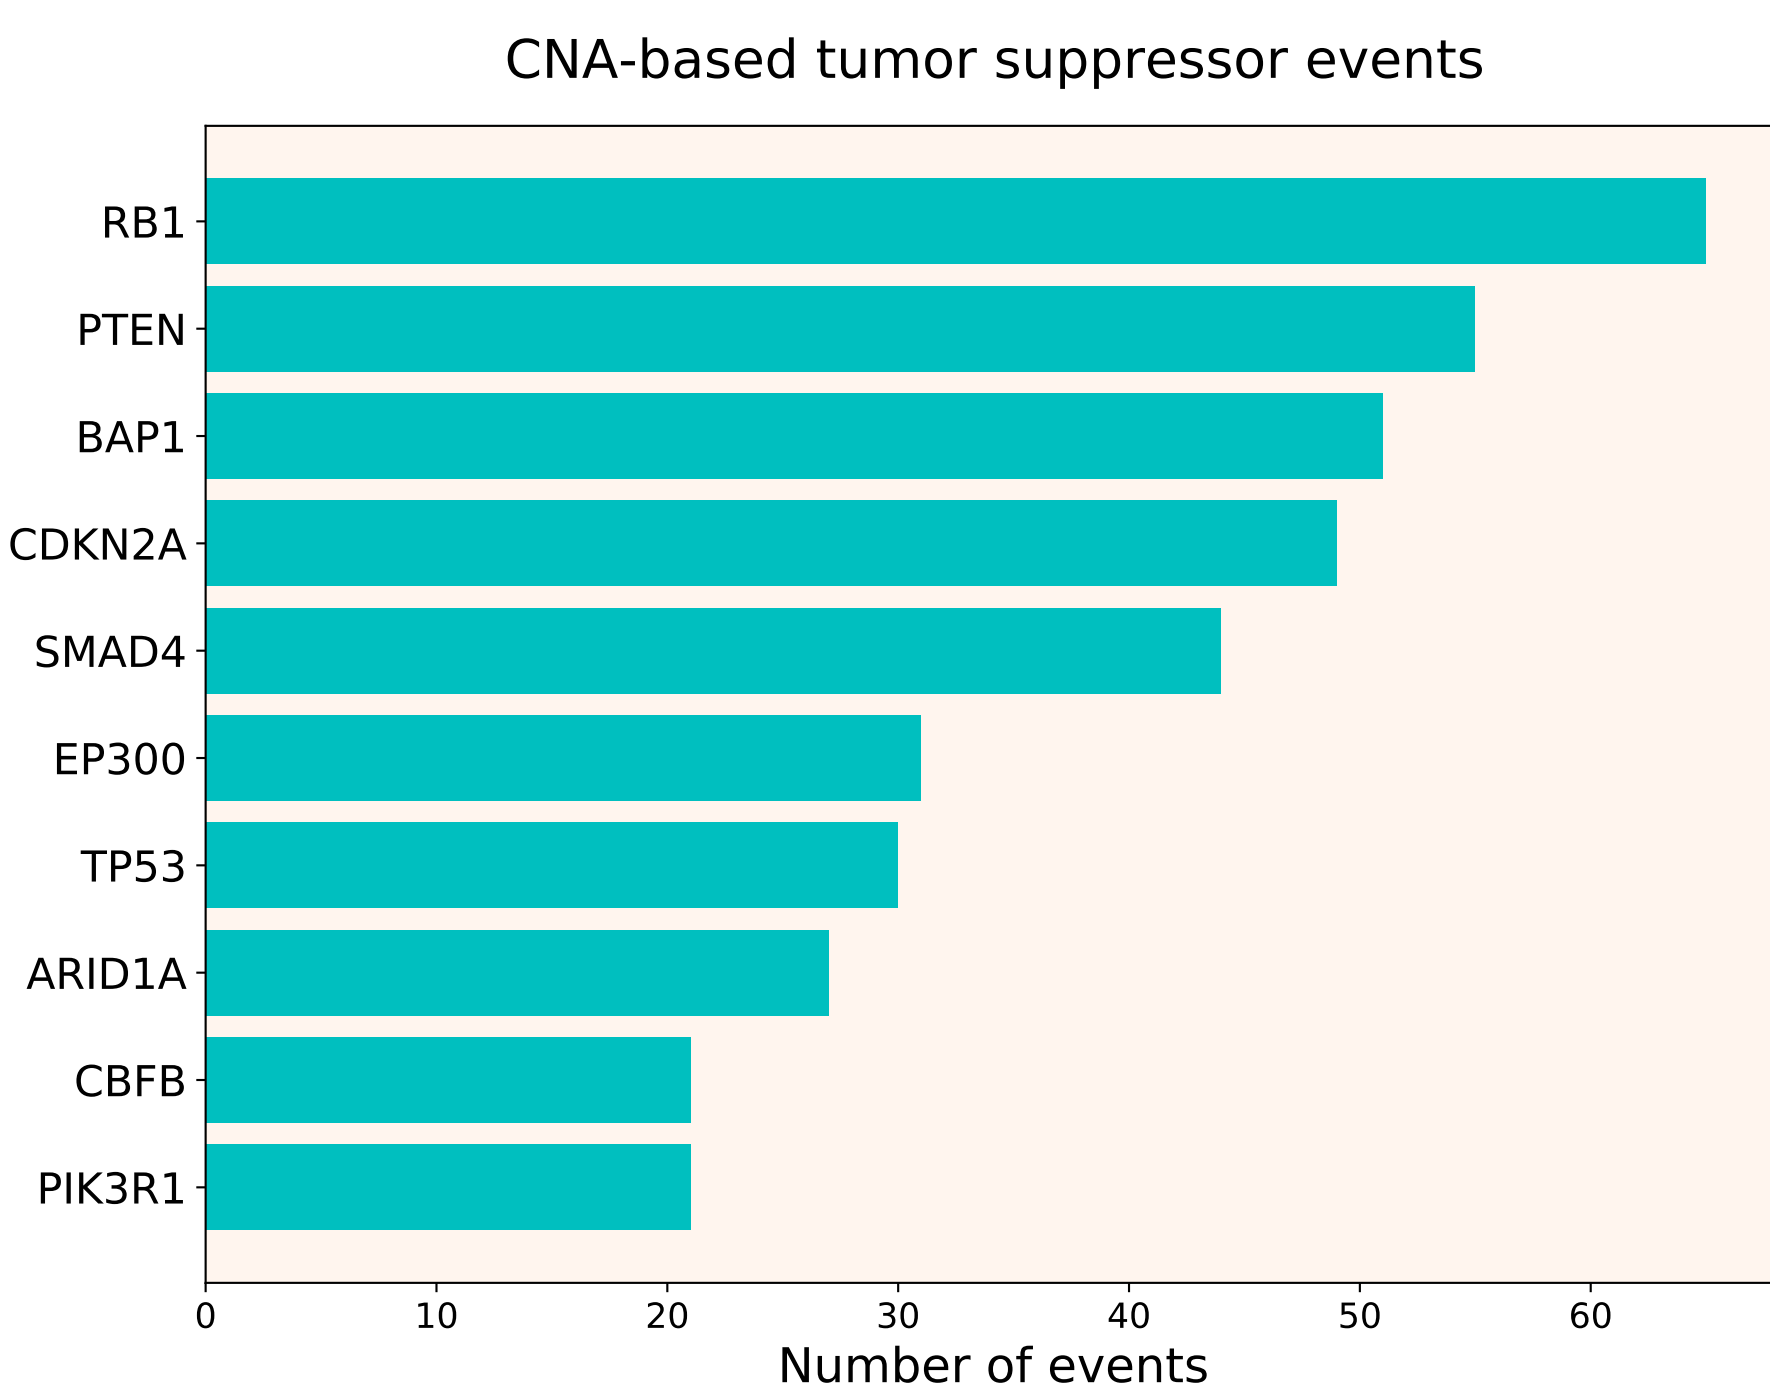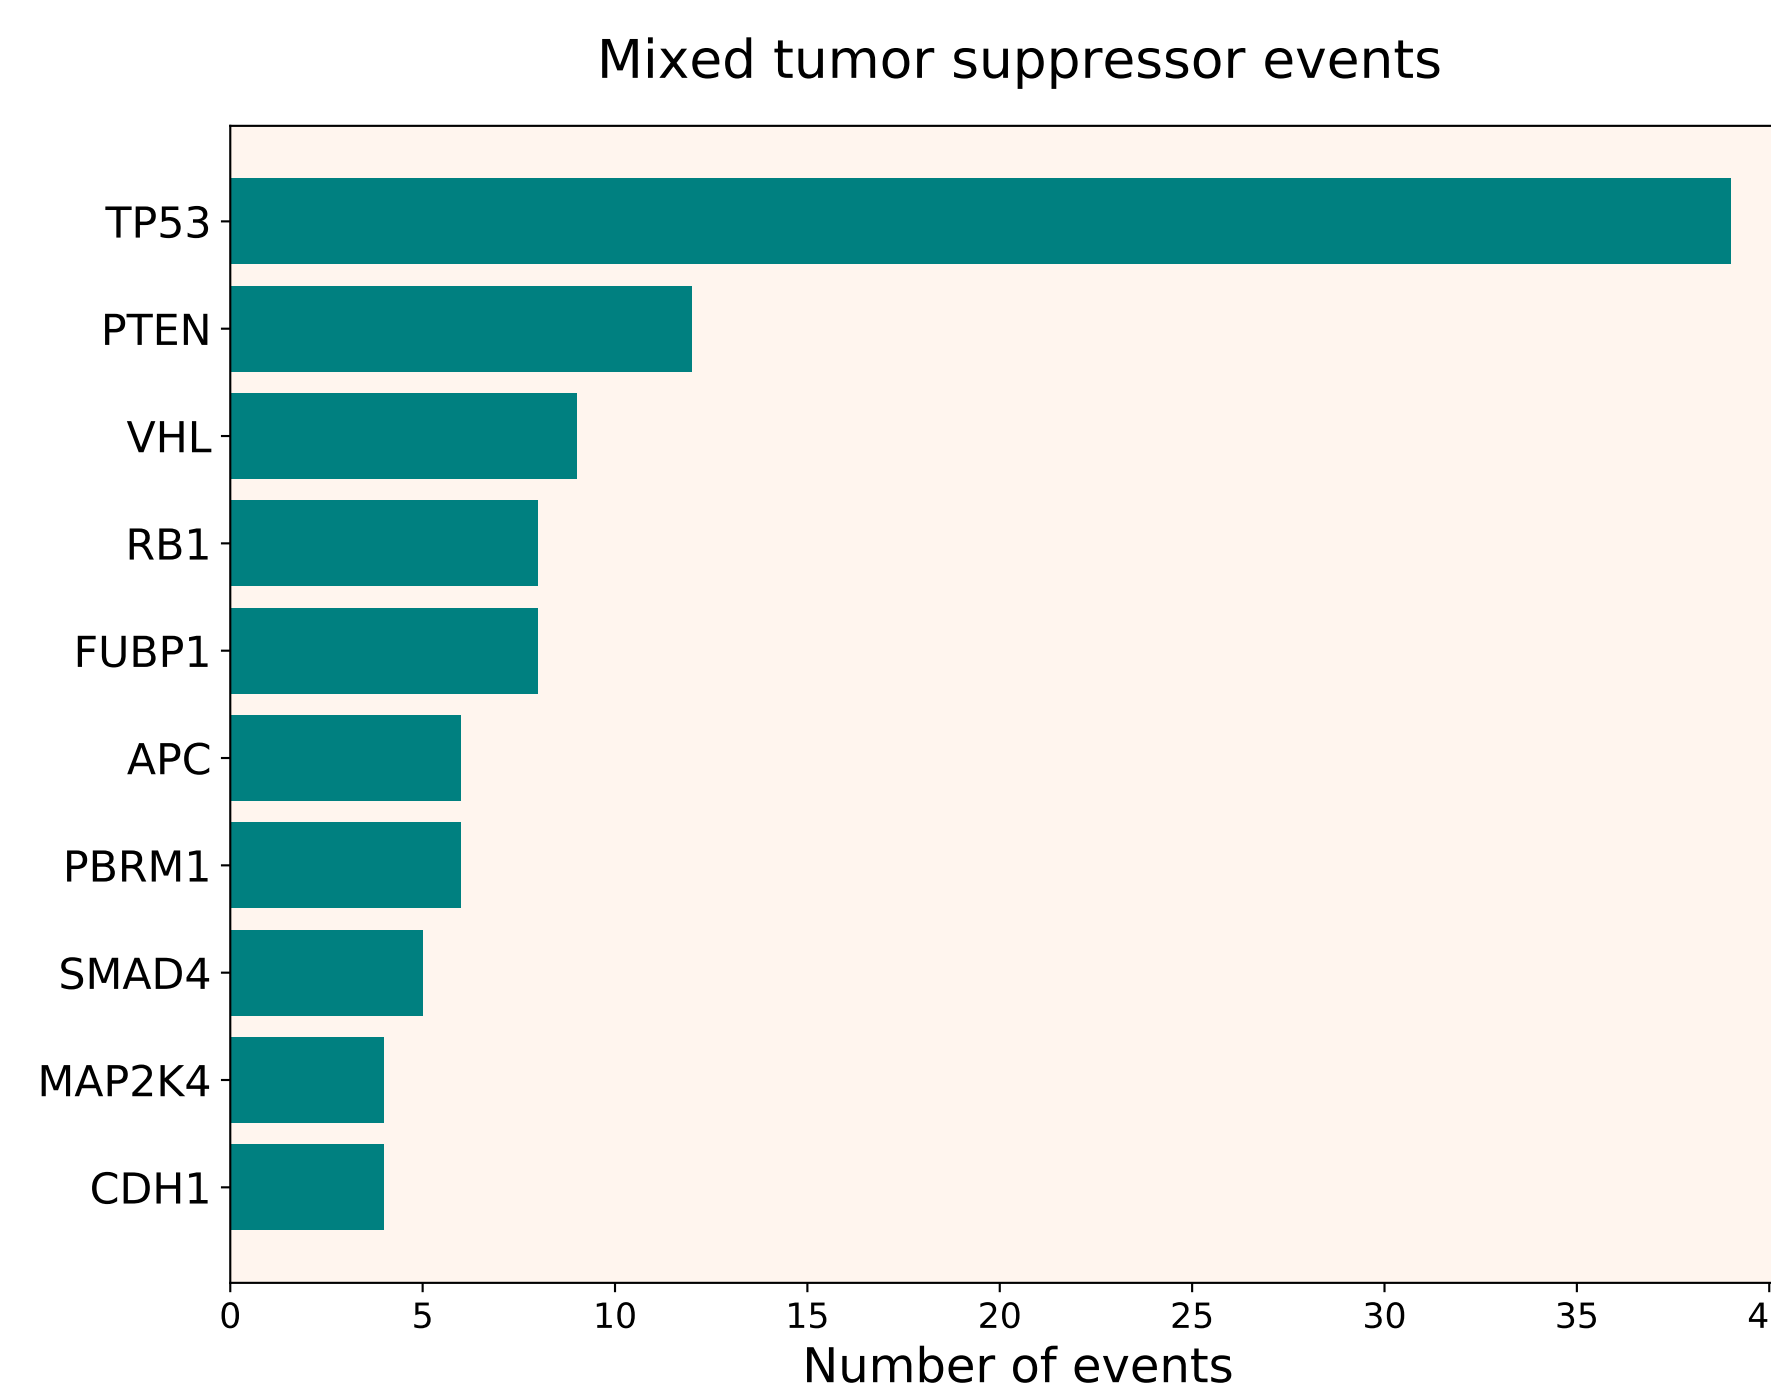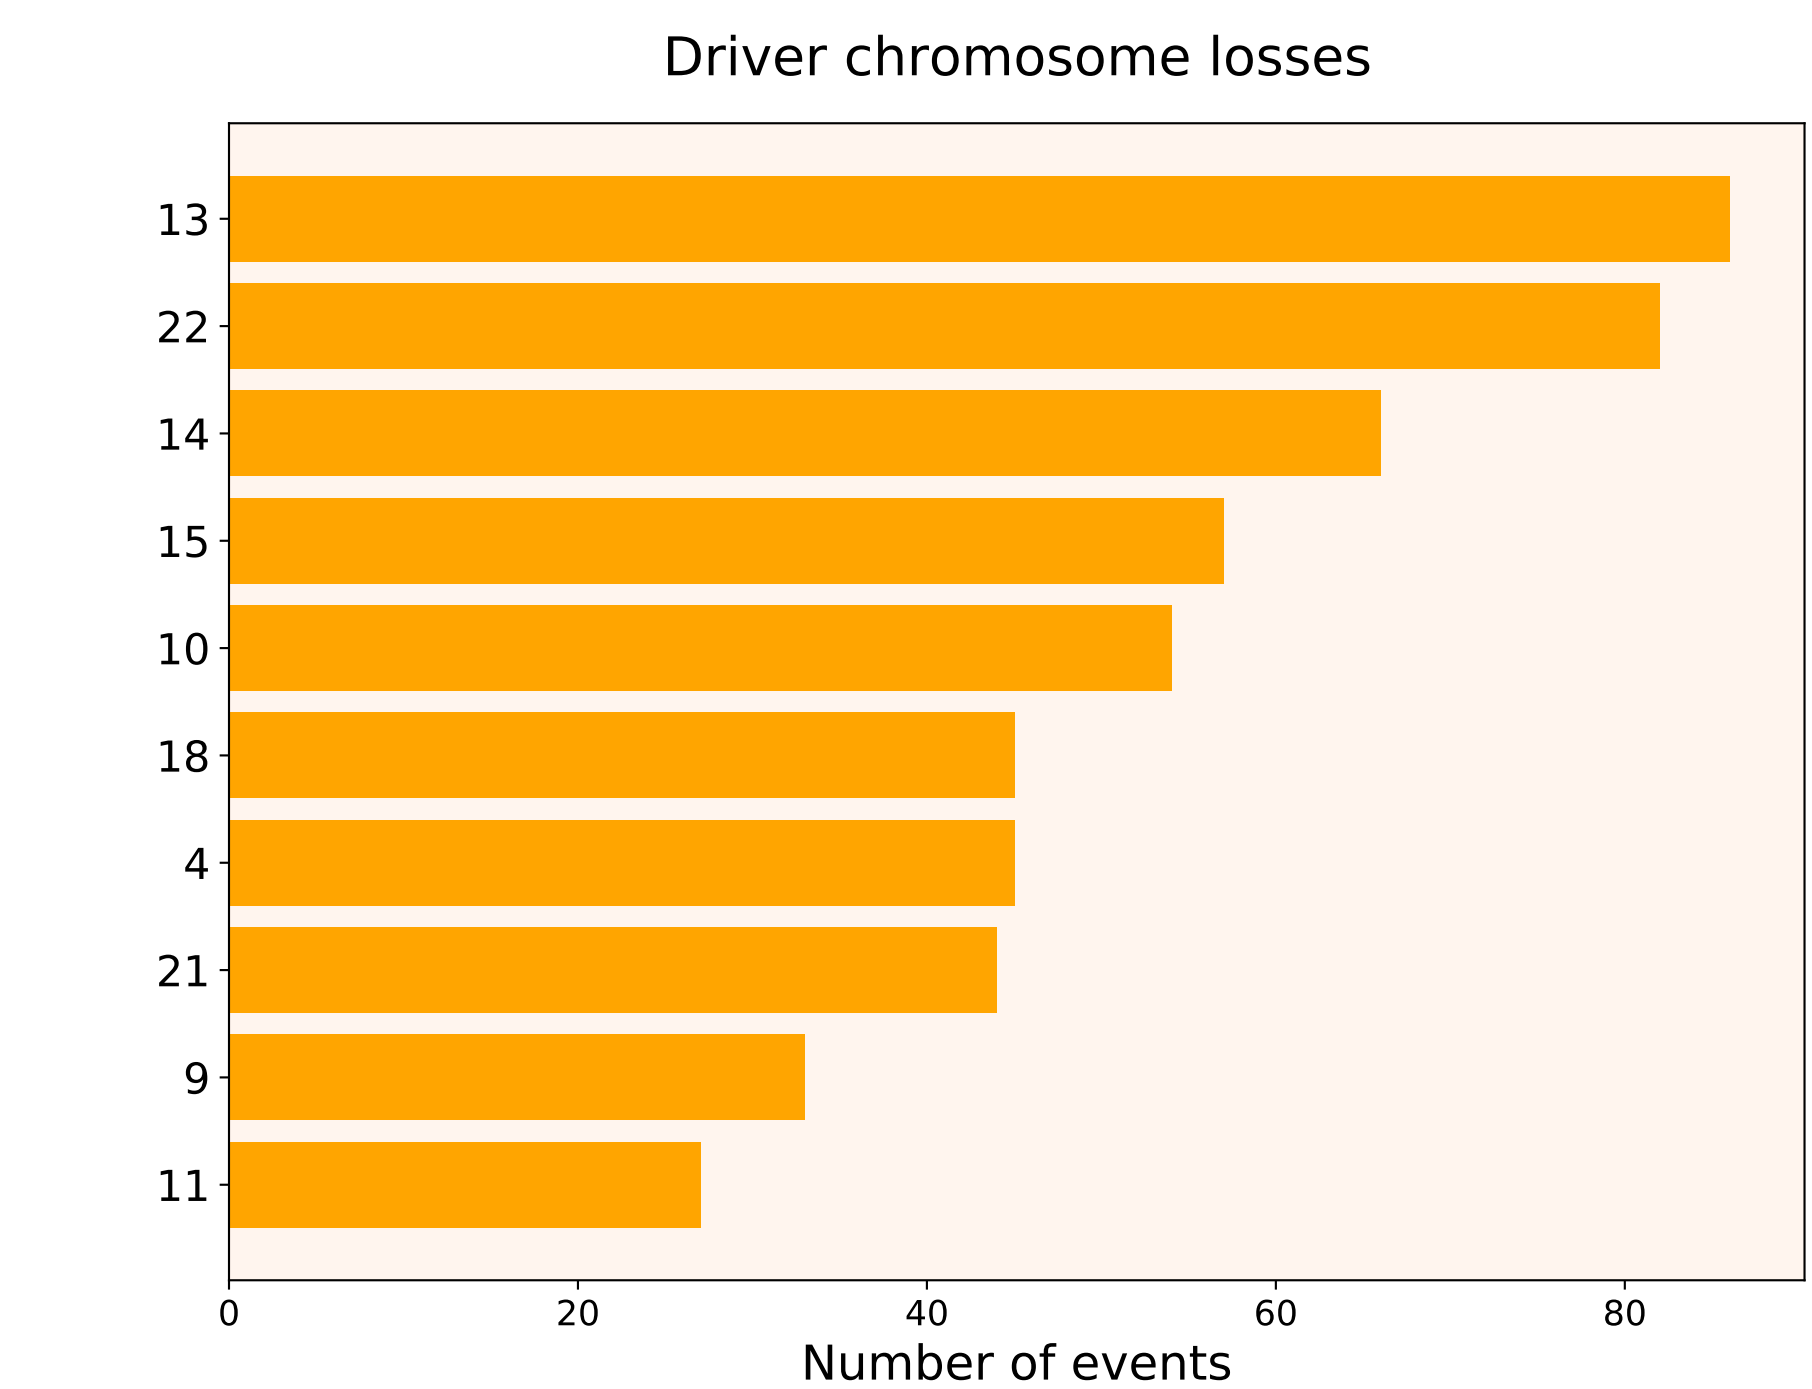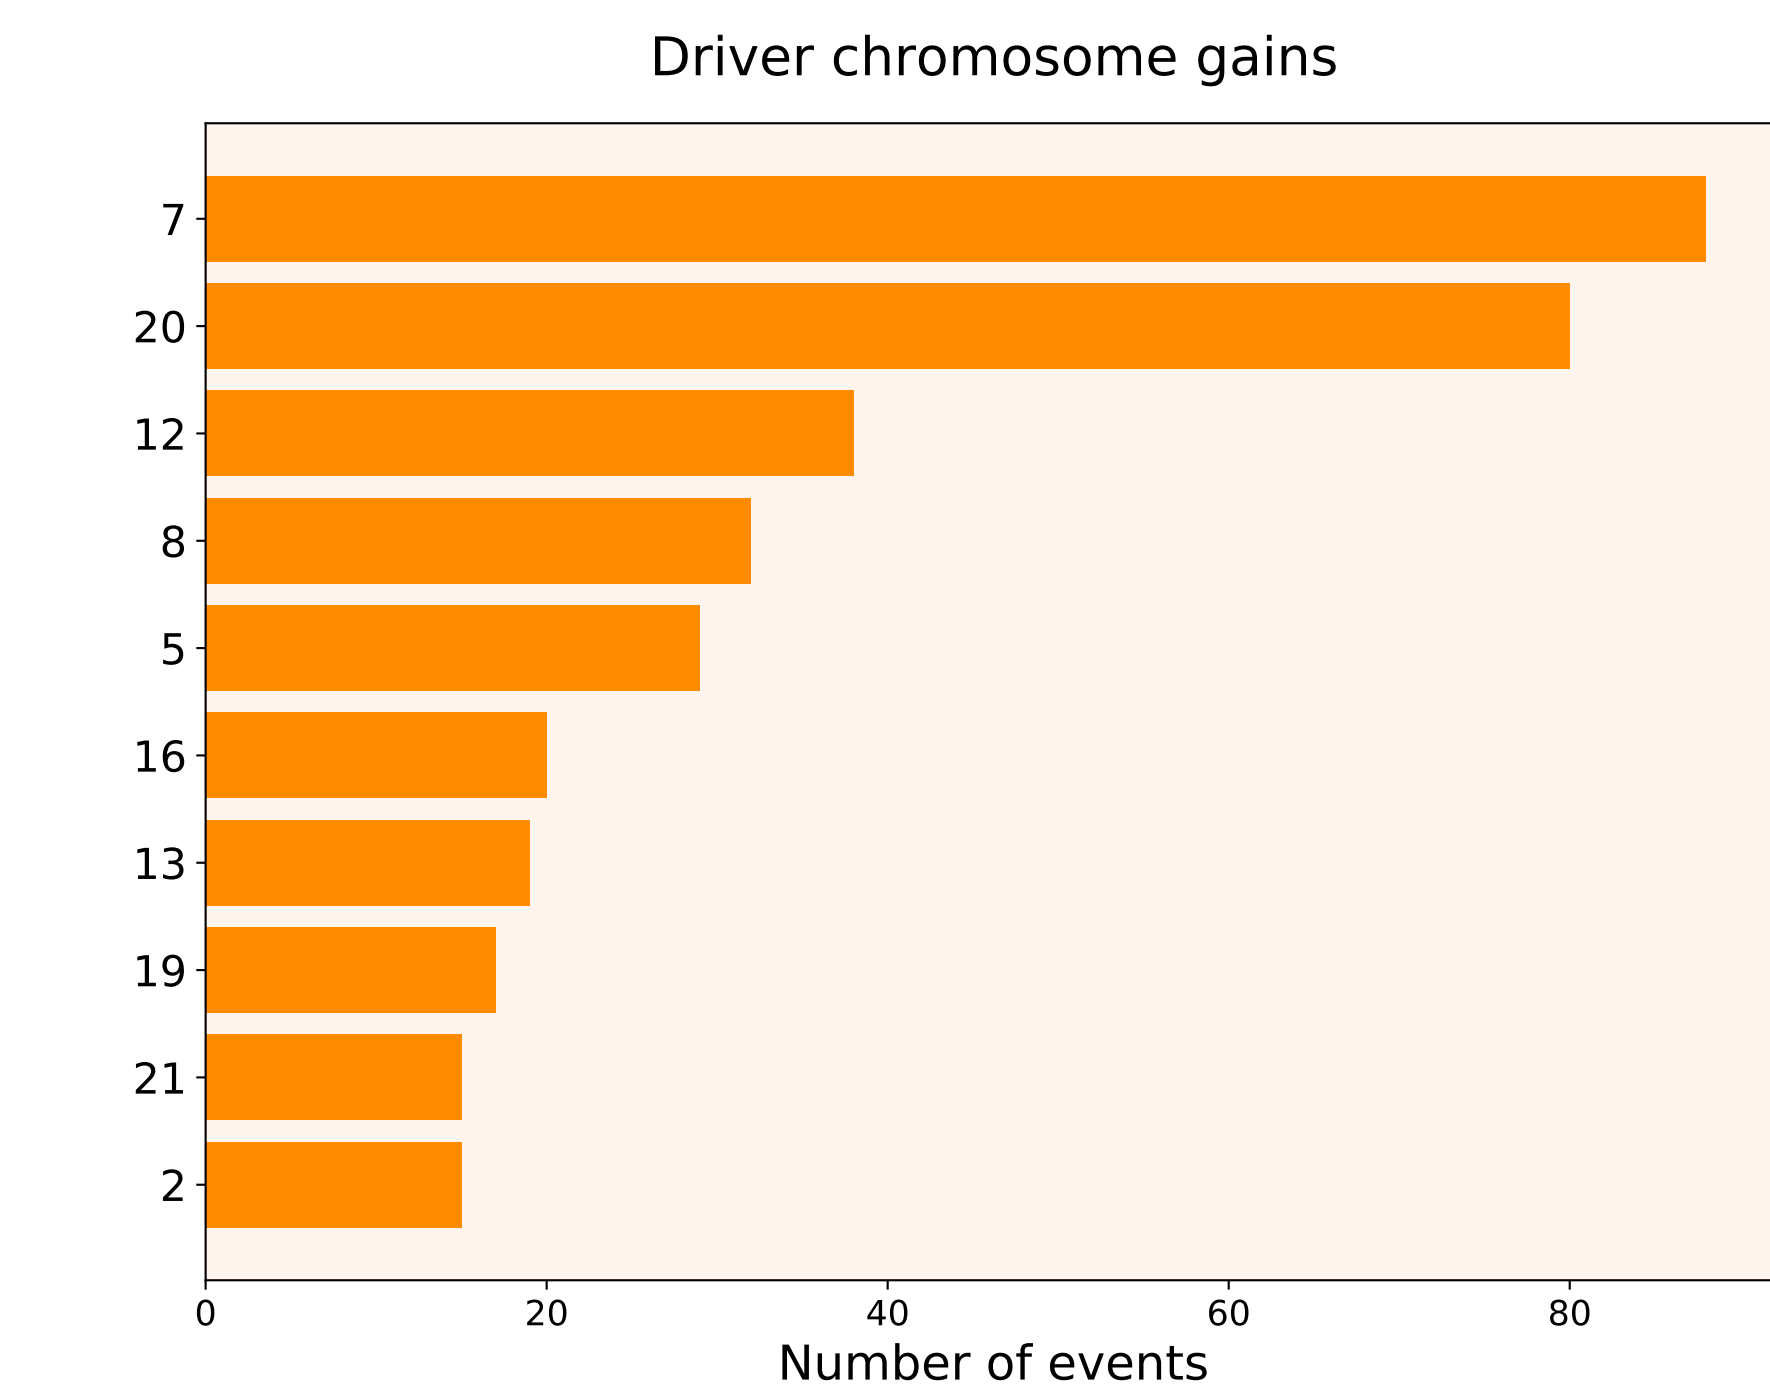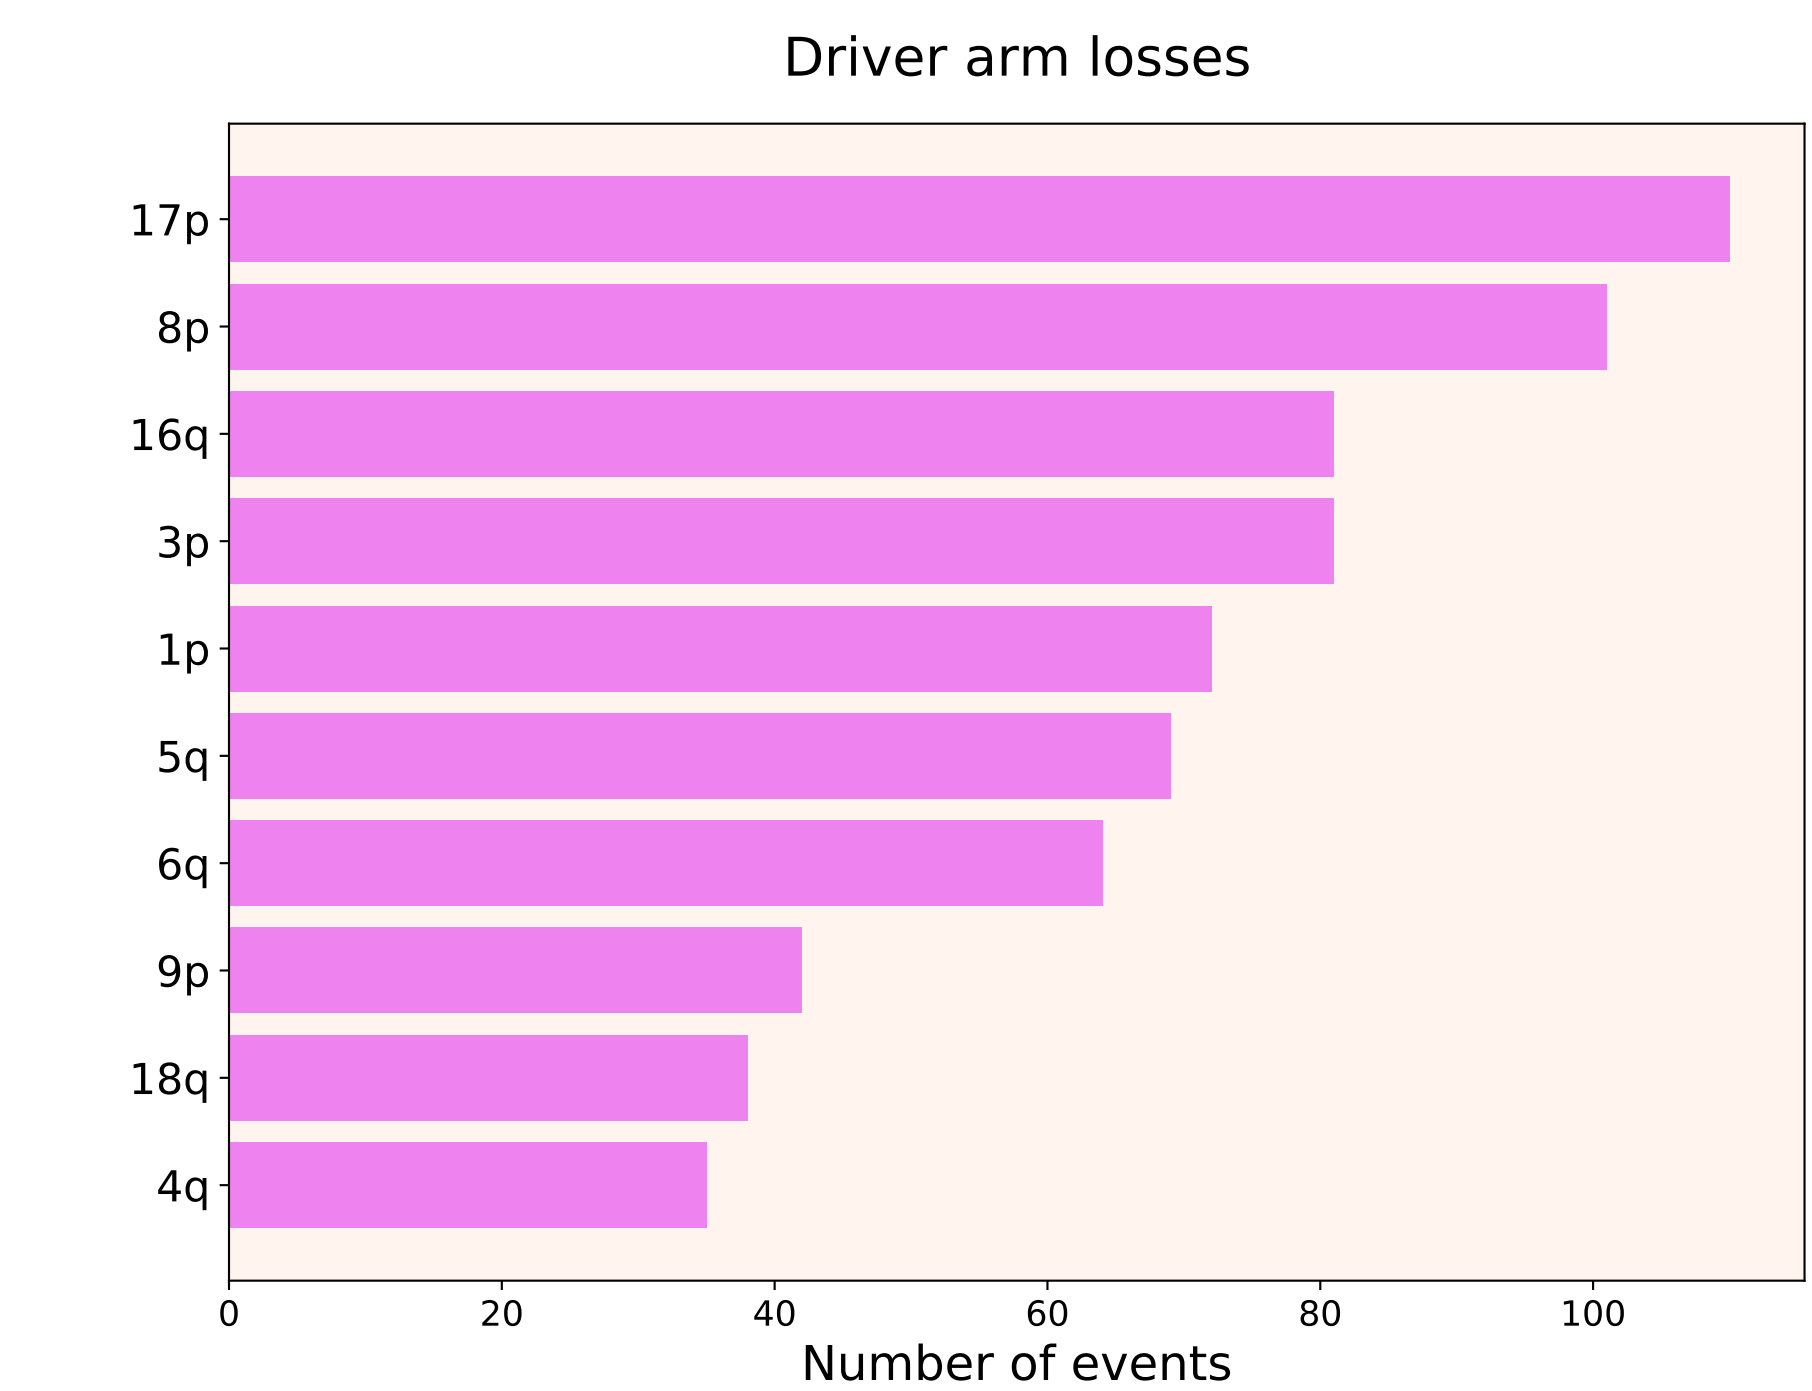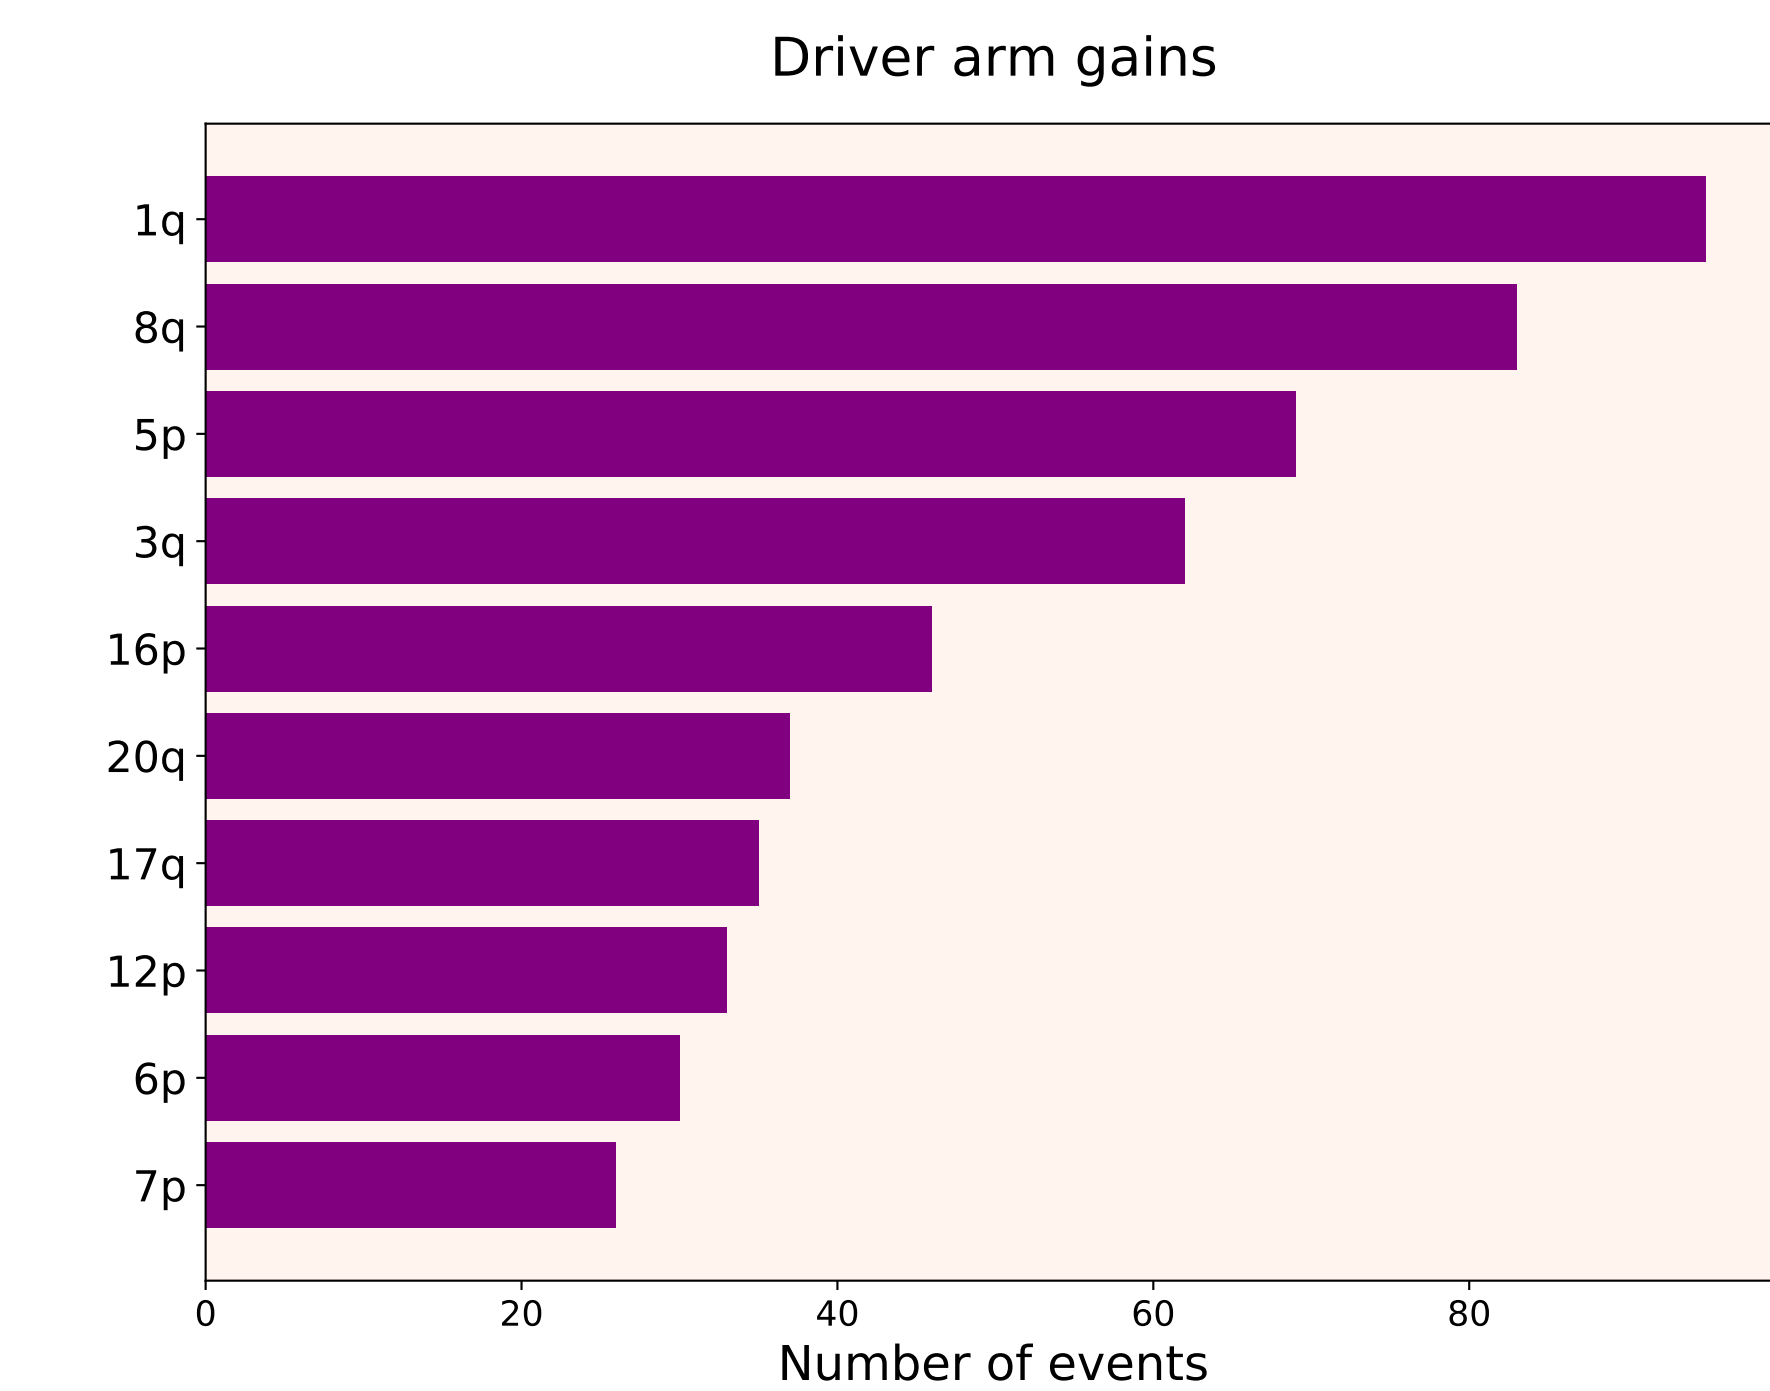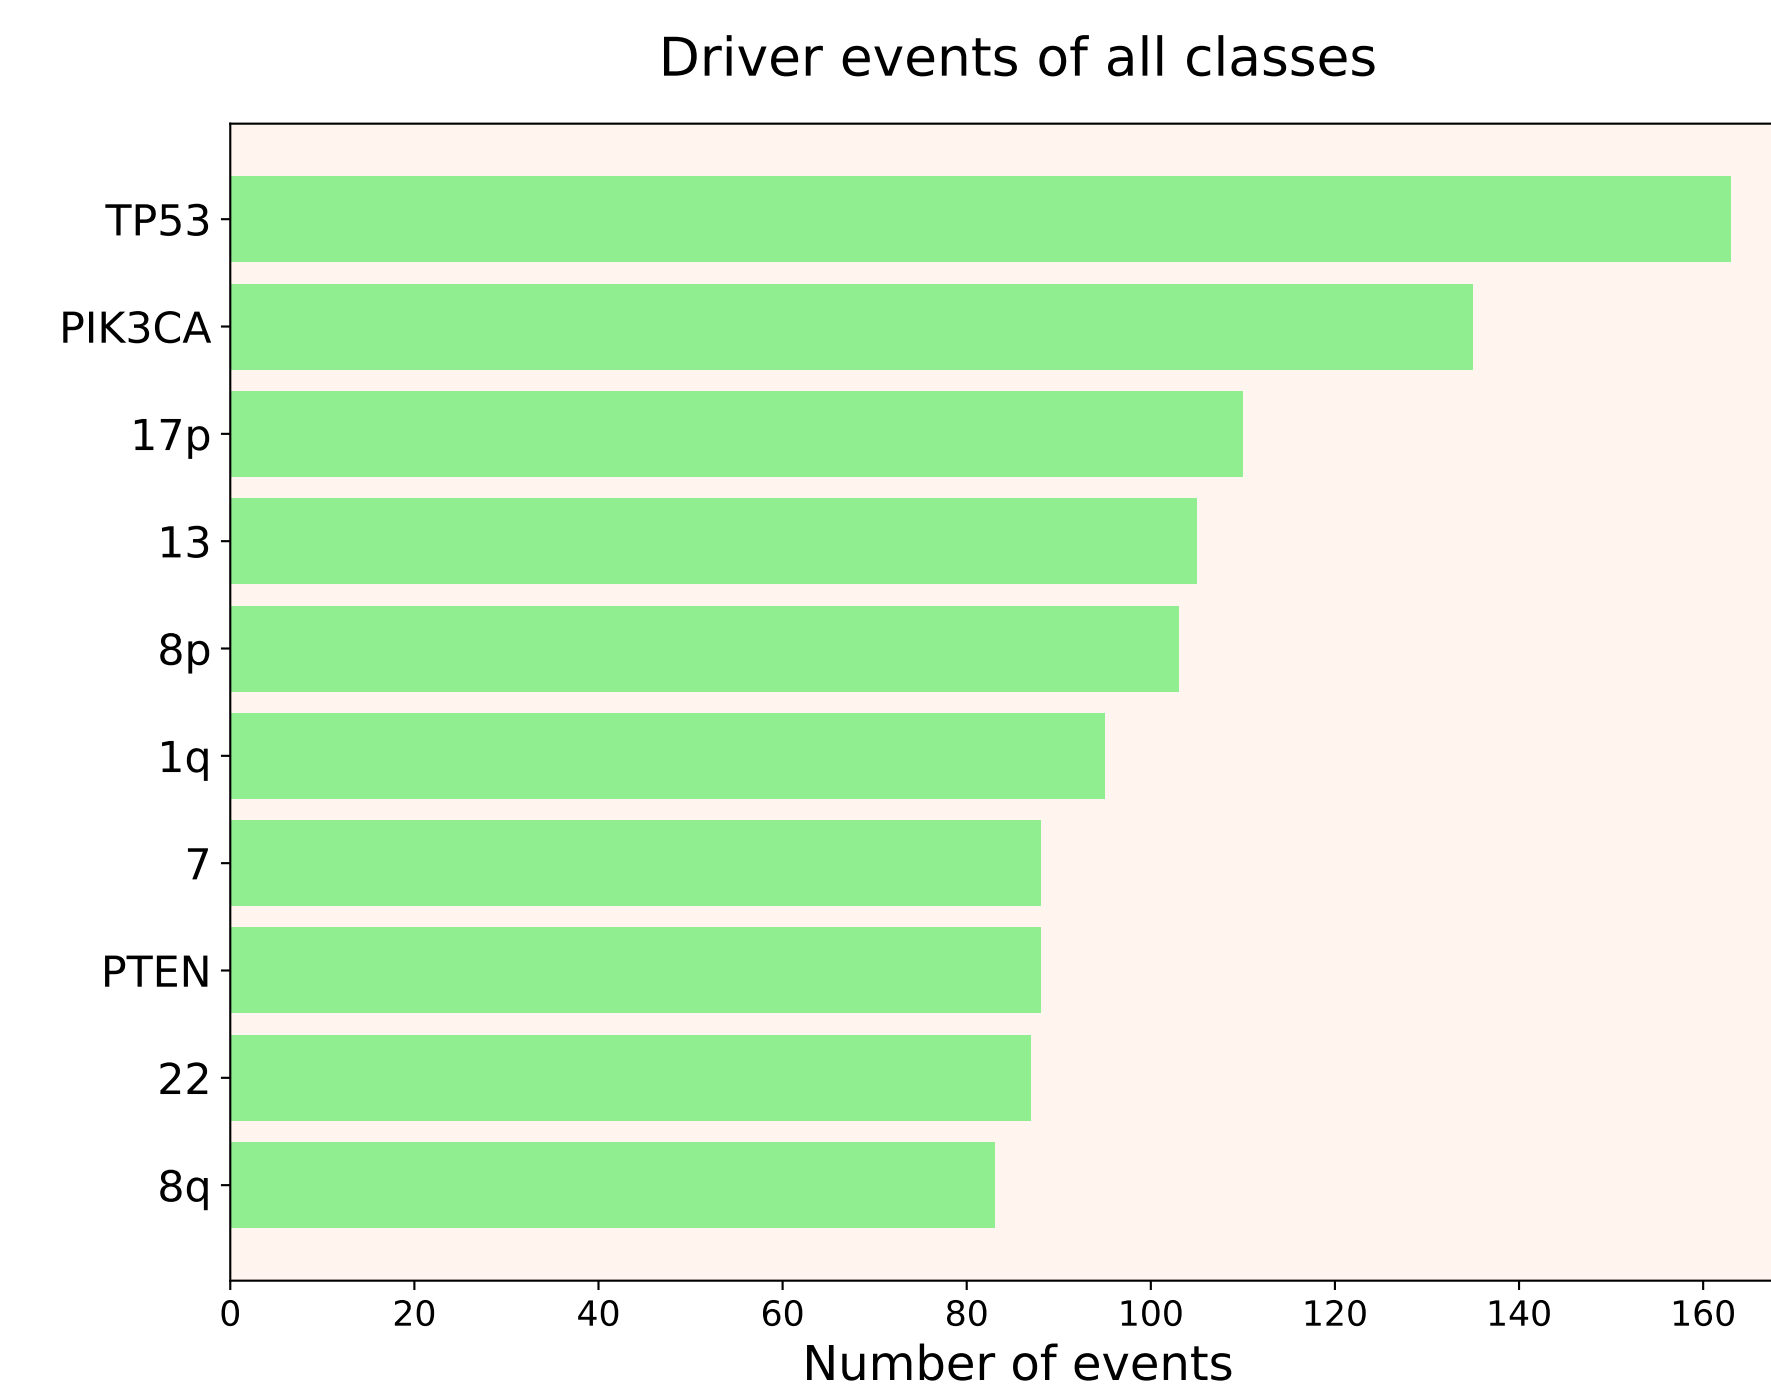

Supplement: Supplemental_Data_S1.zip [file Supplemental_Data_S1.zip]

# THCA\_MALE

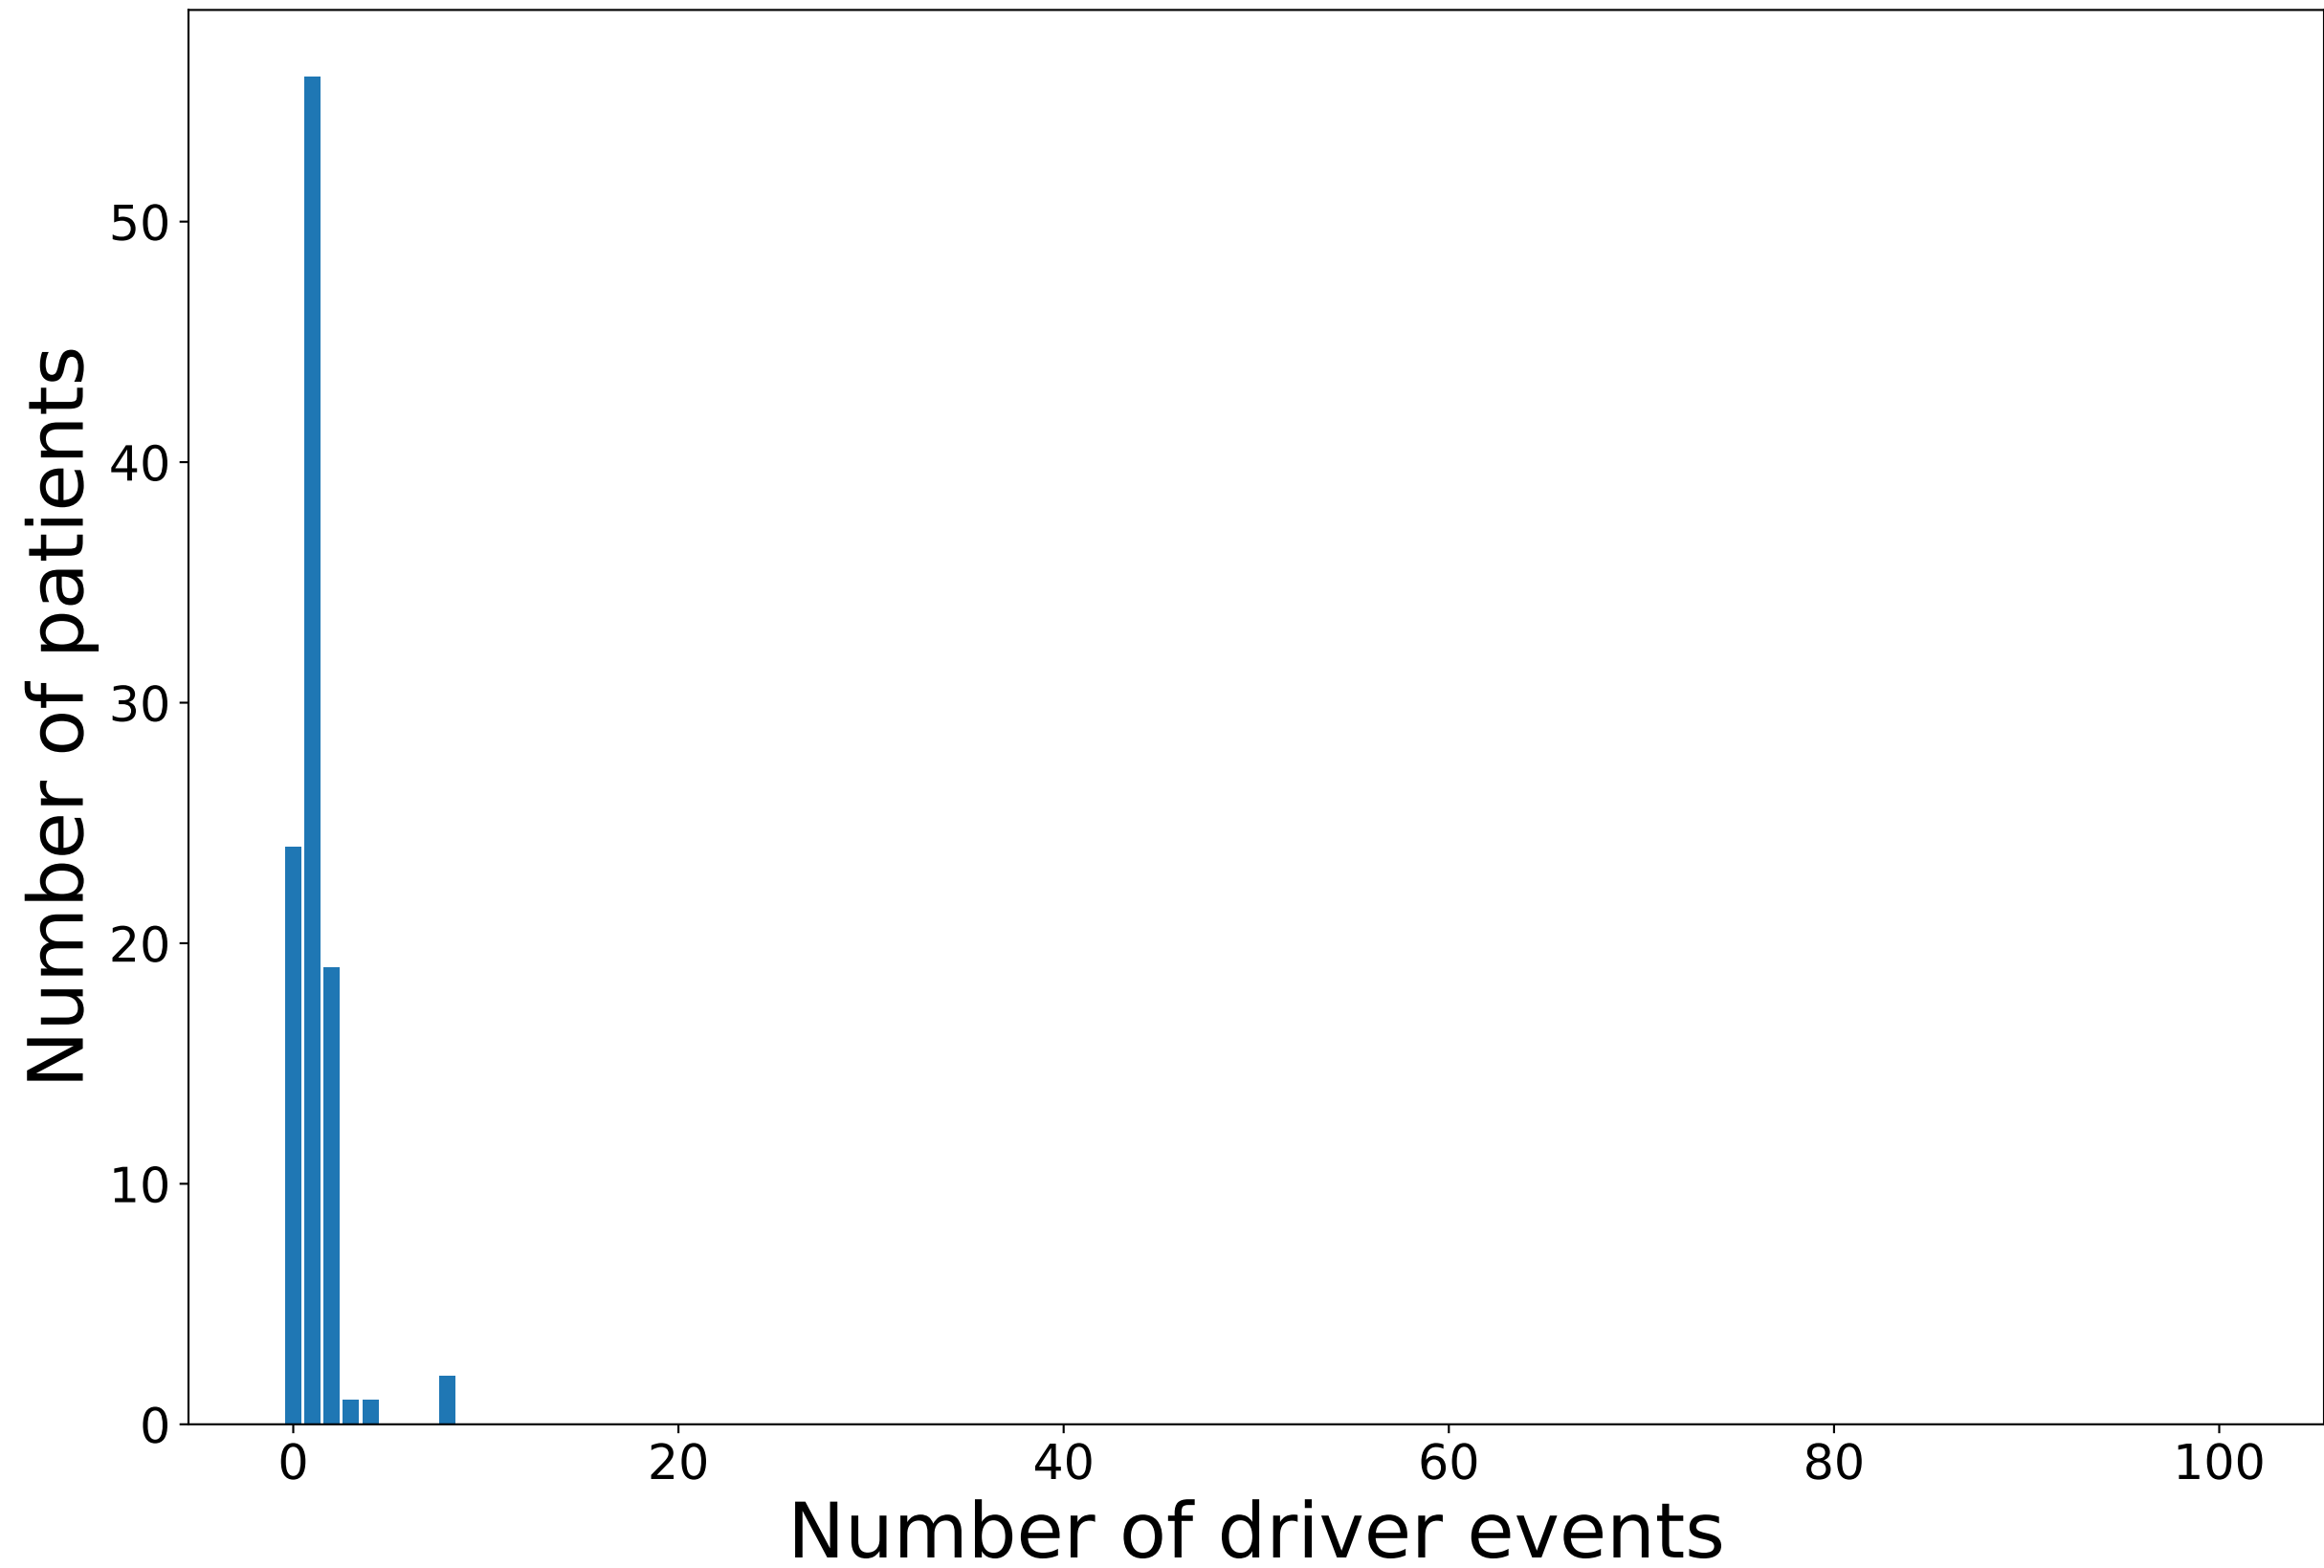

Supplement: Supplemental_Data_S1.zip [file Supplemental_Data_S1.zip]

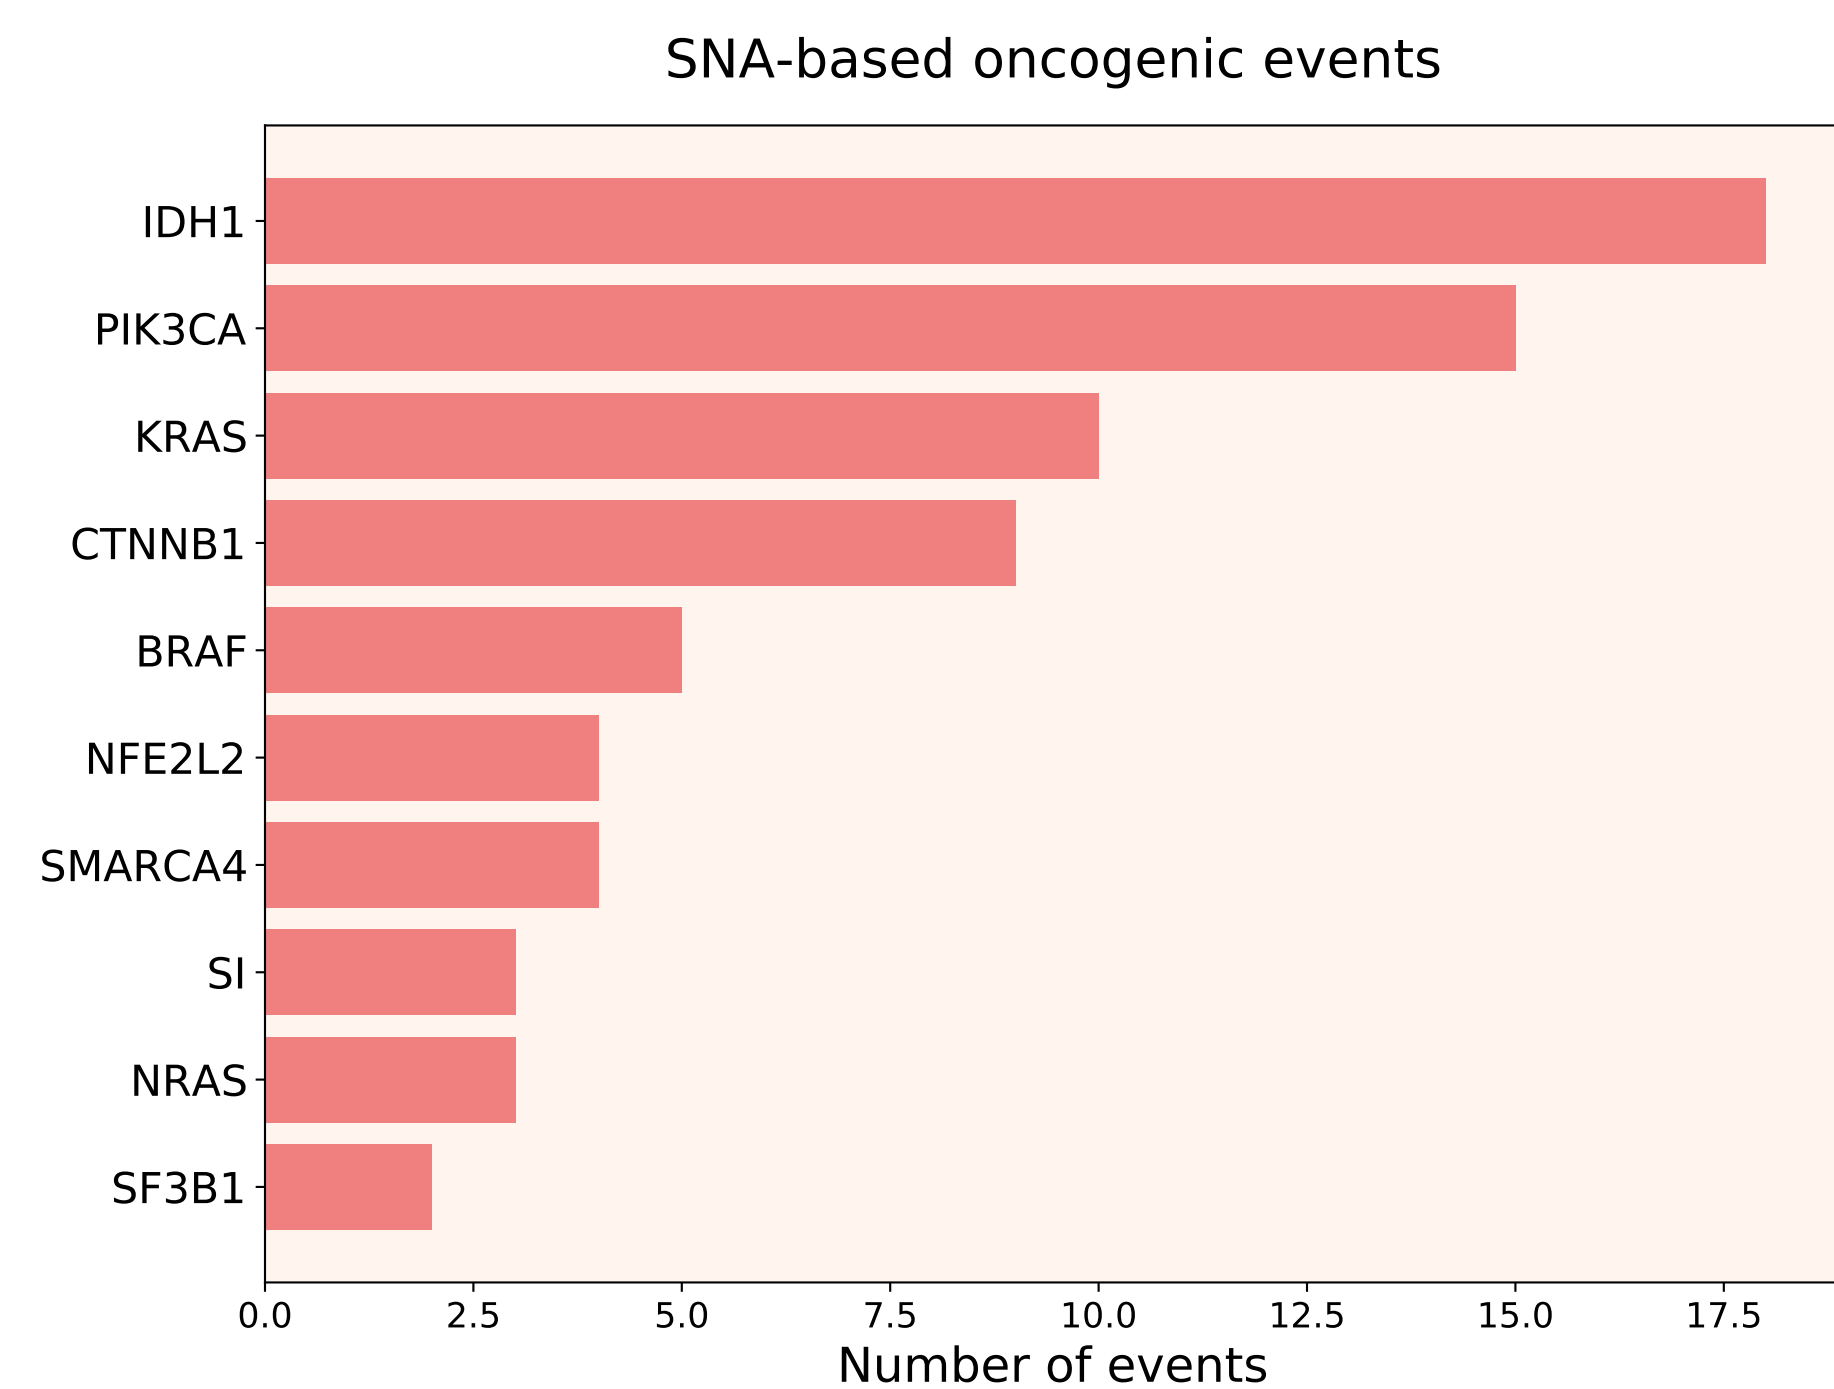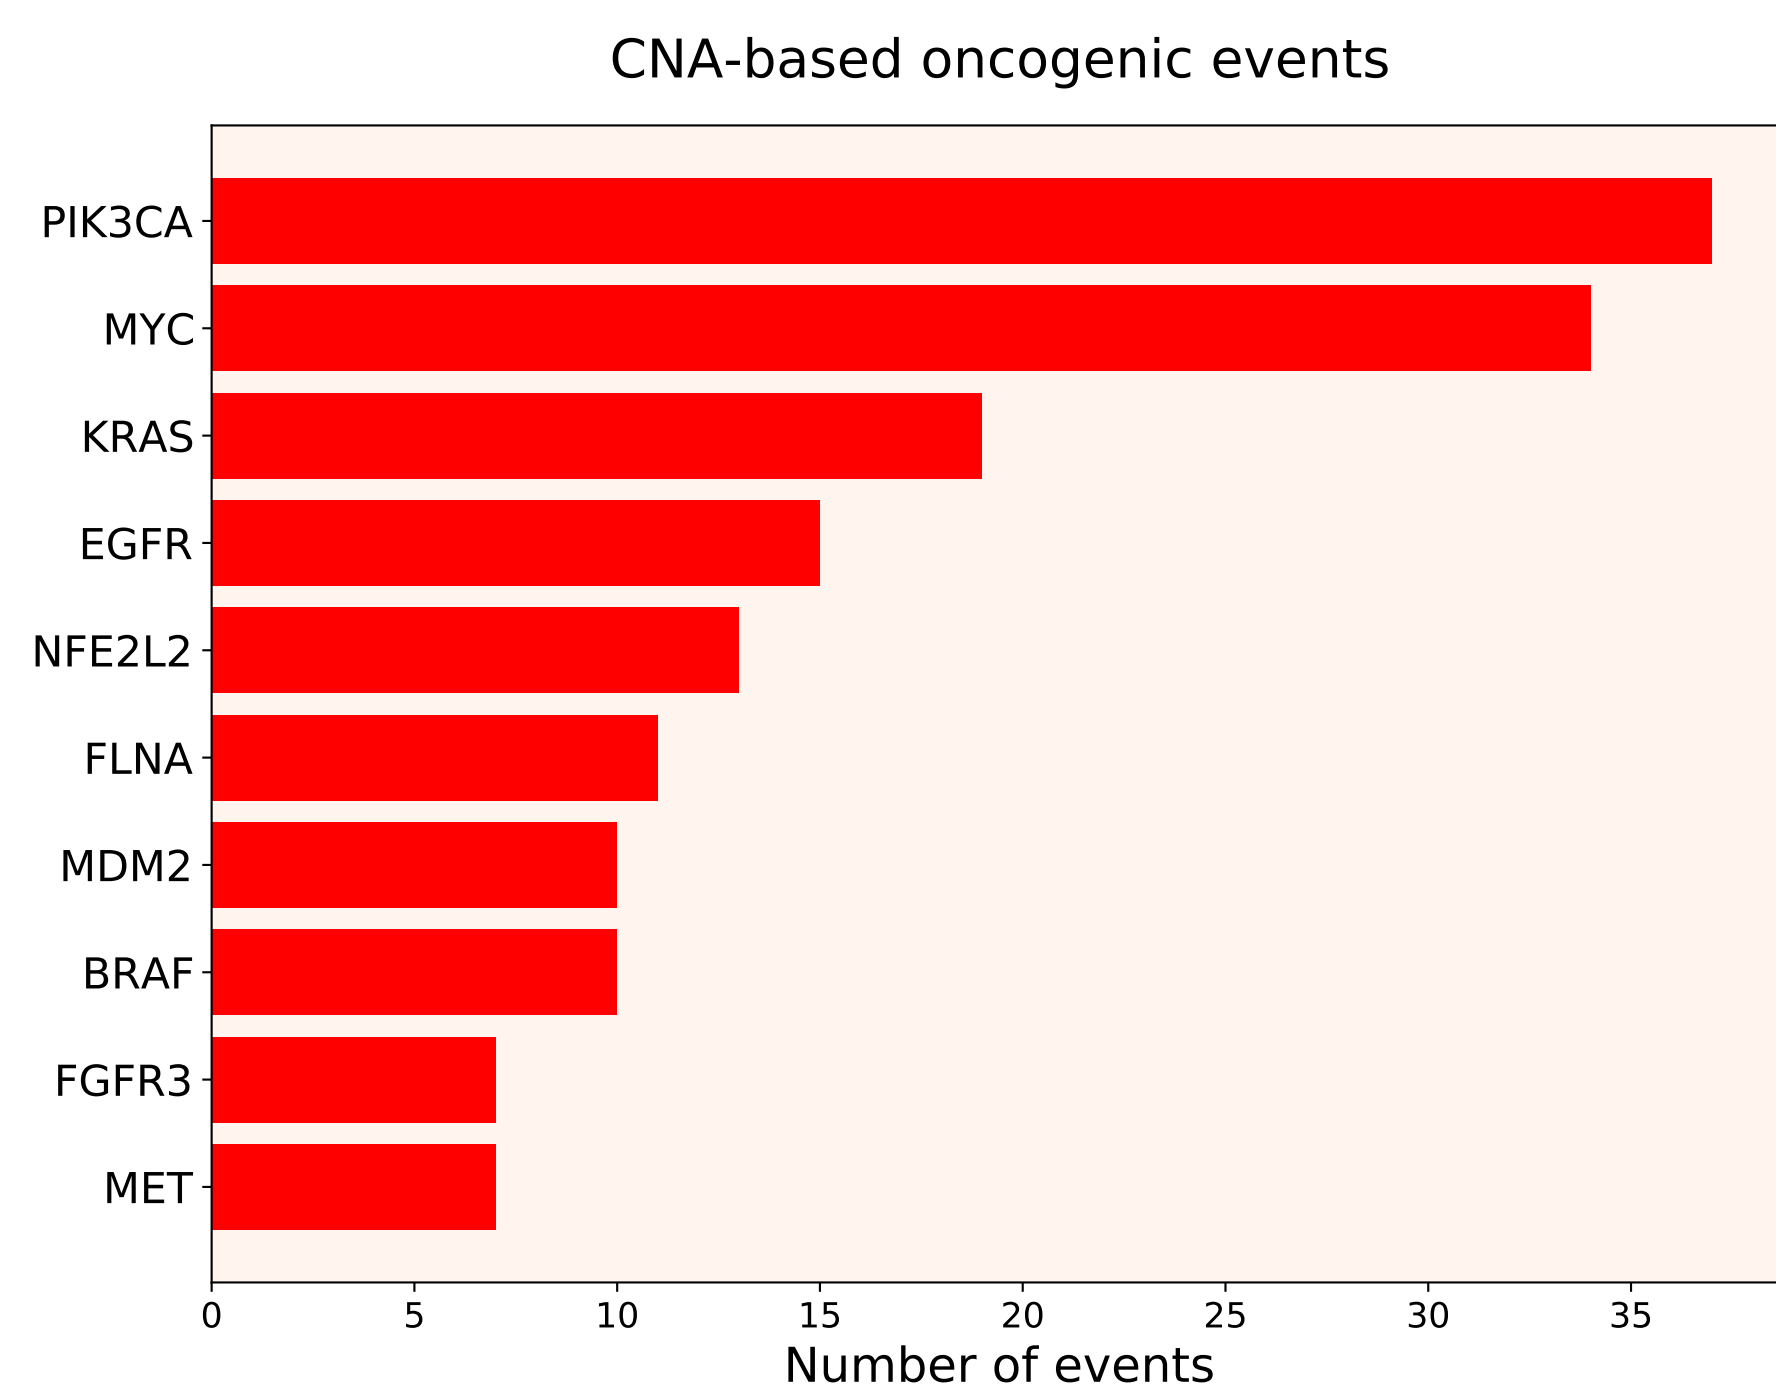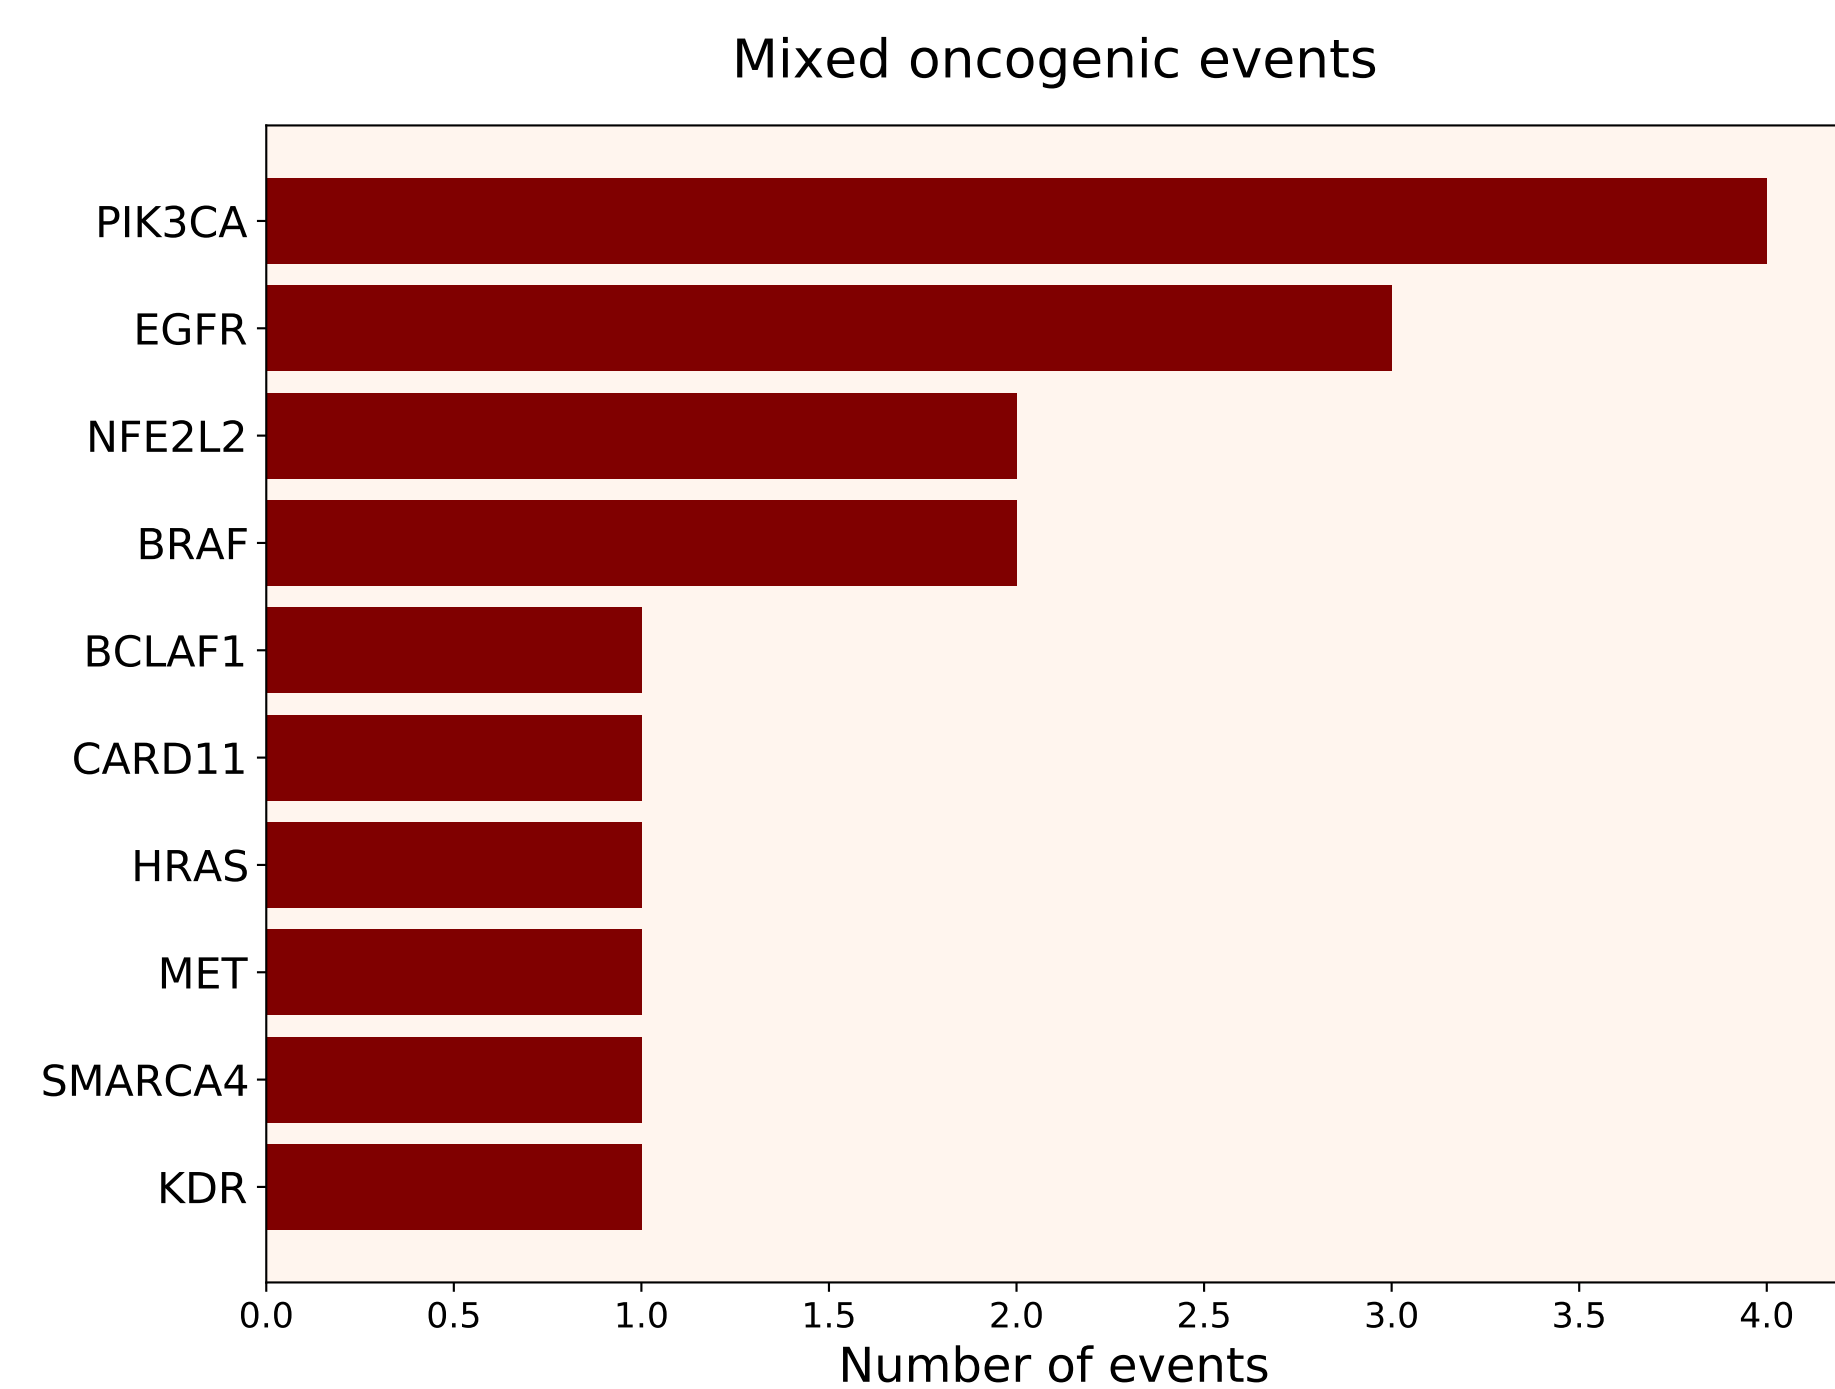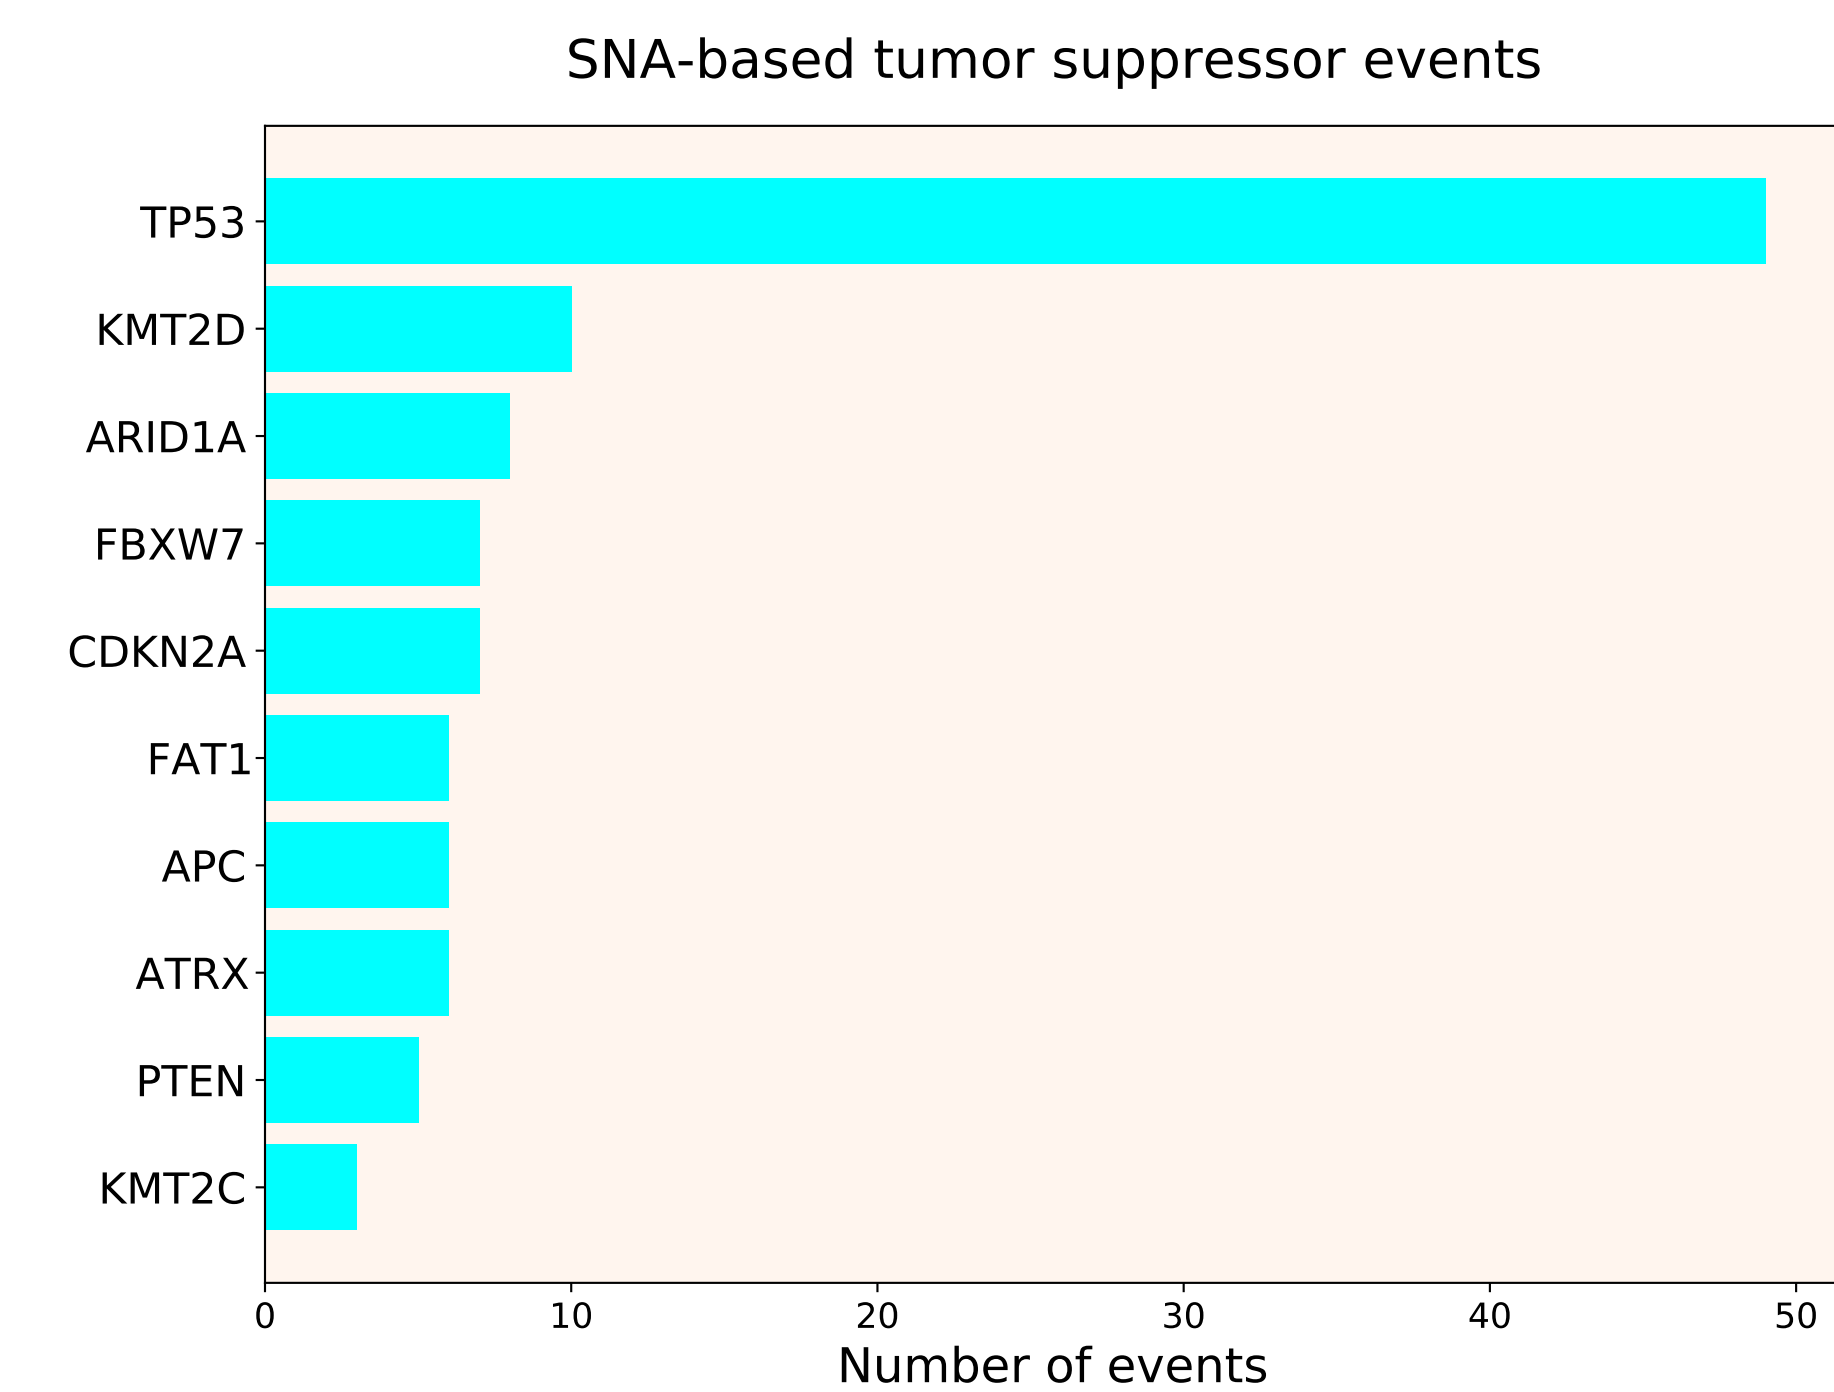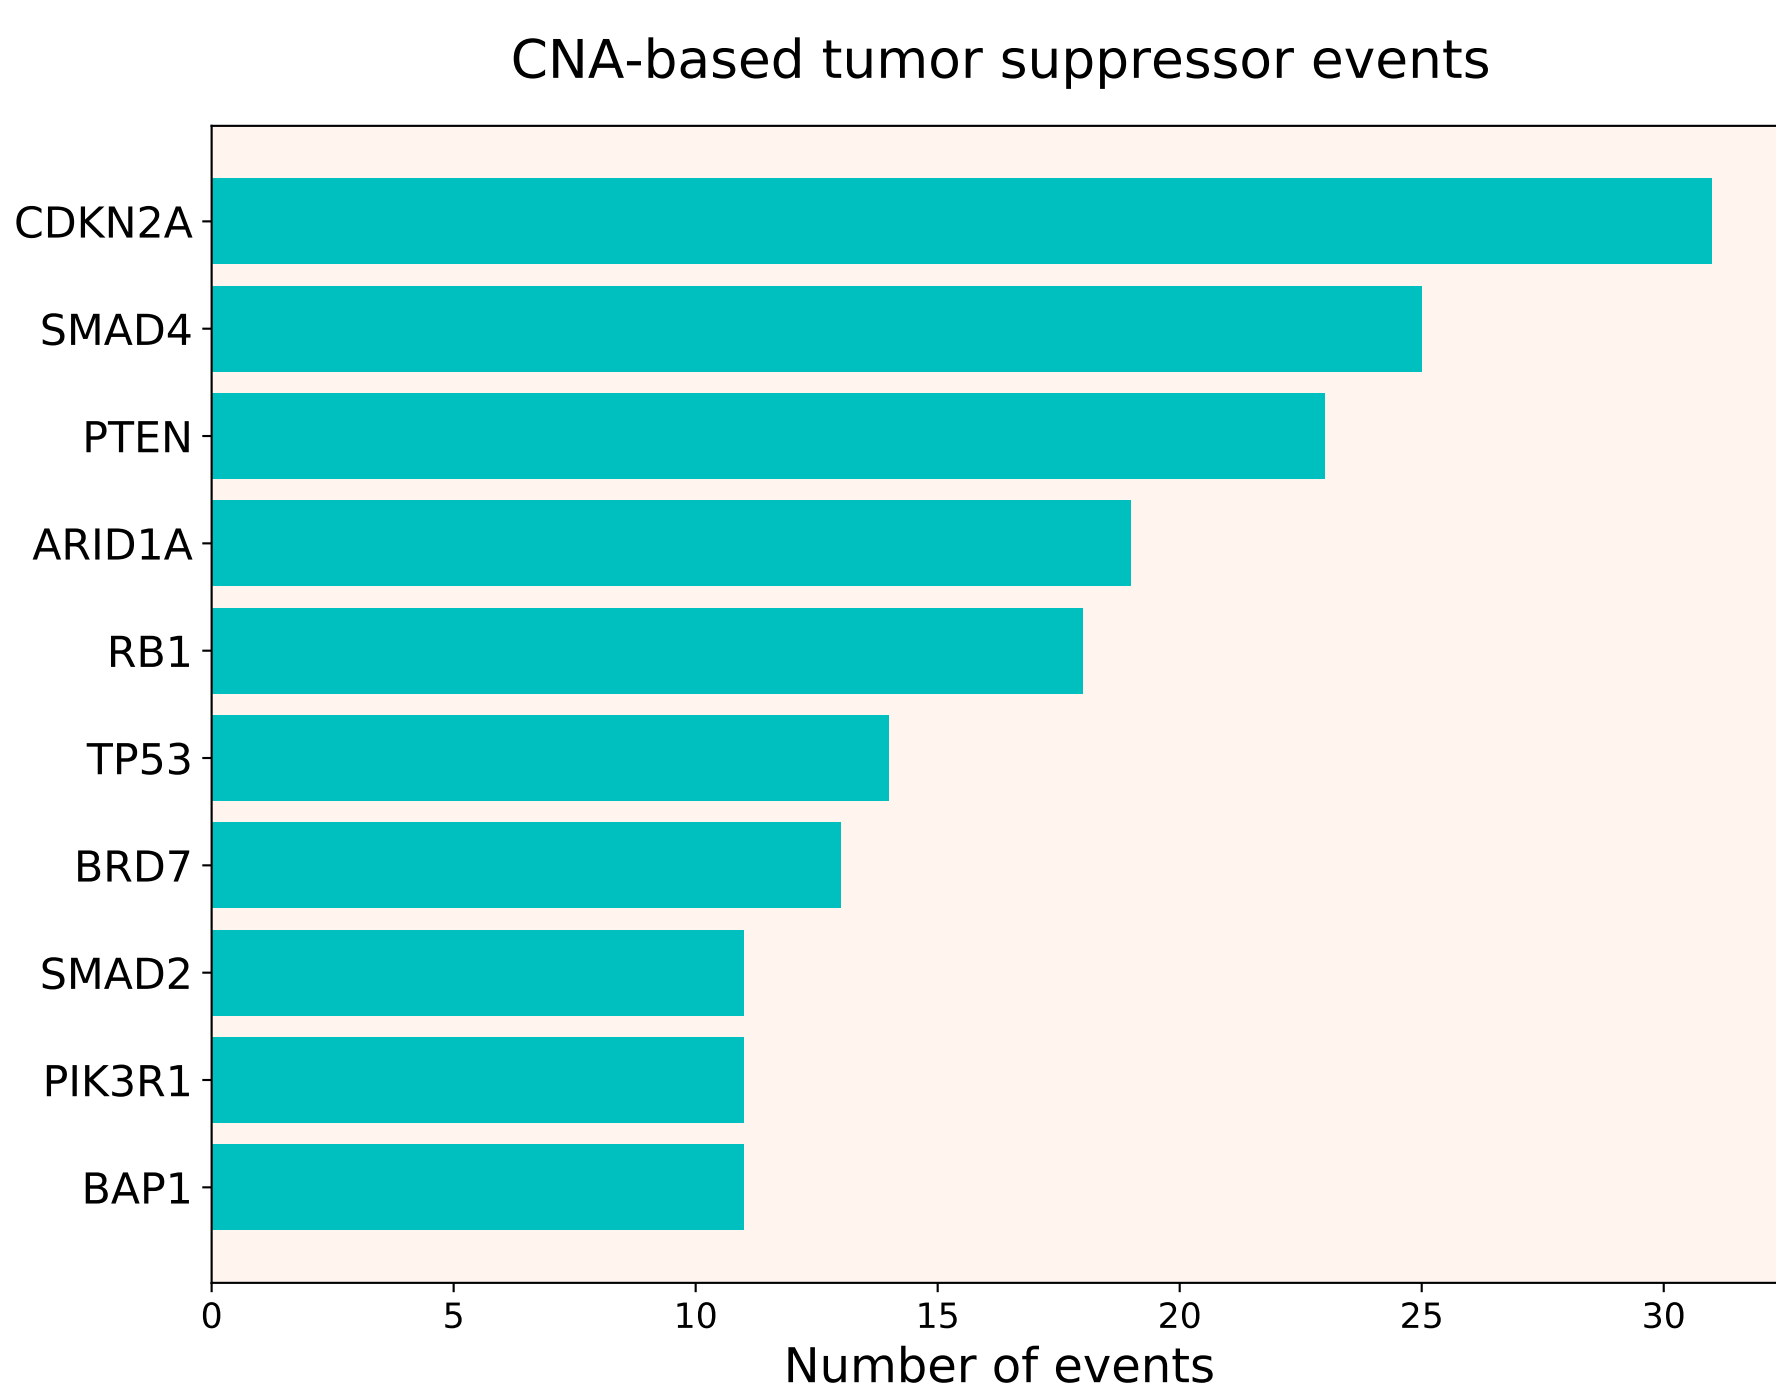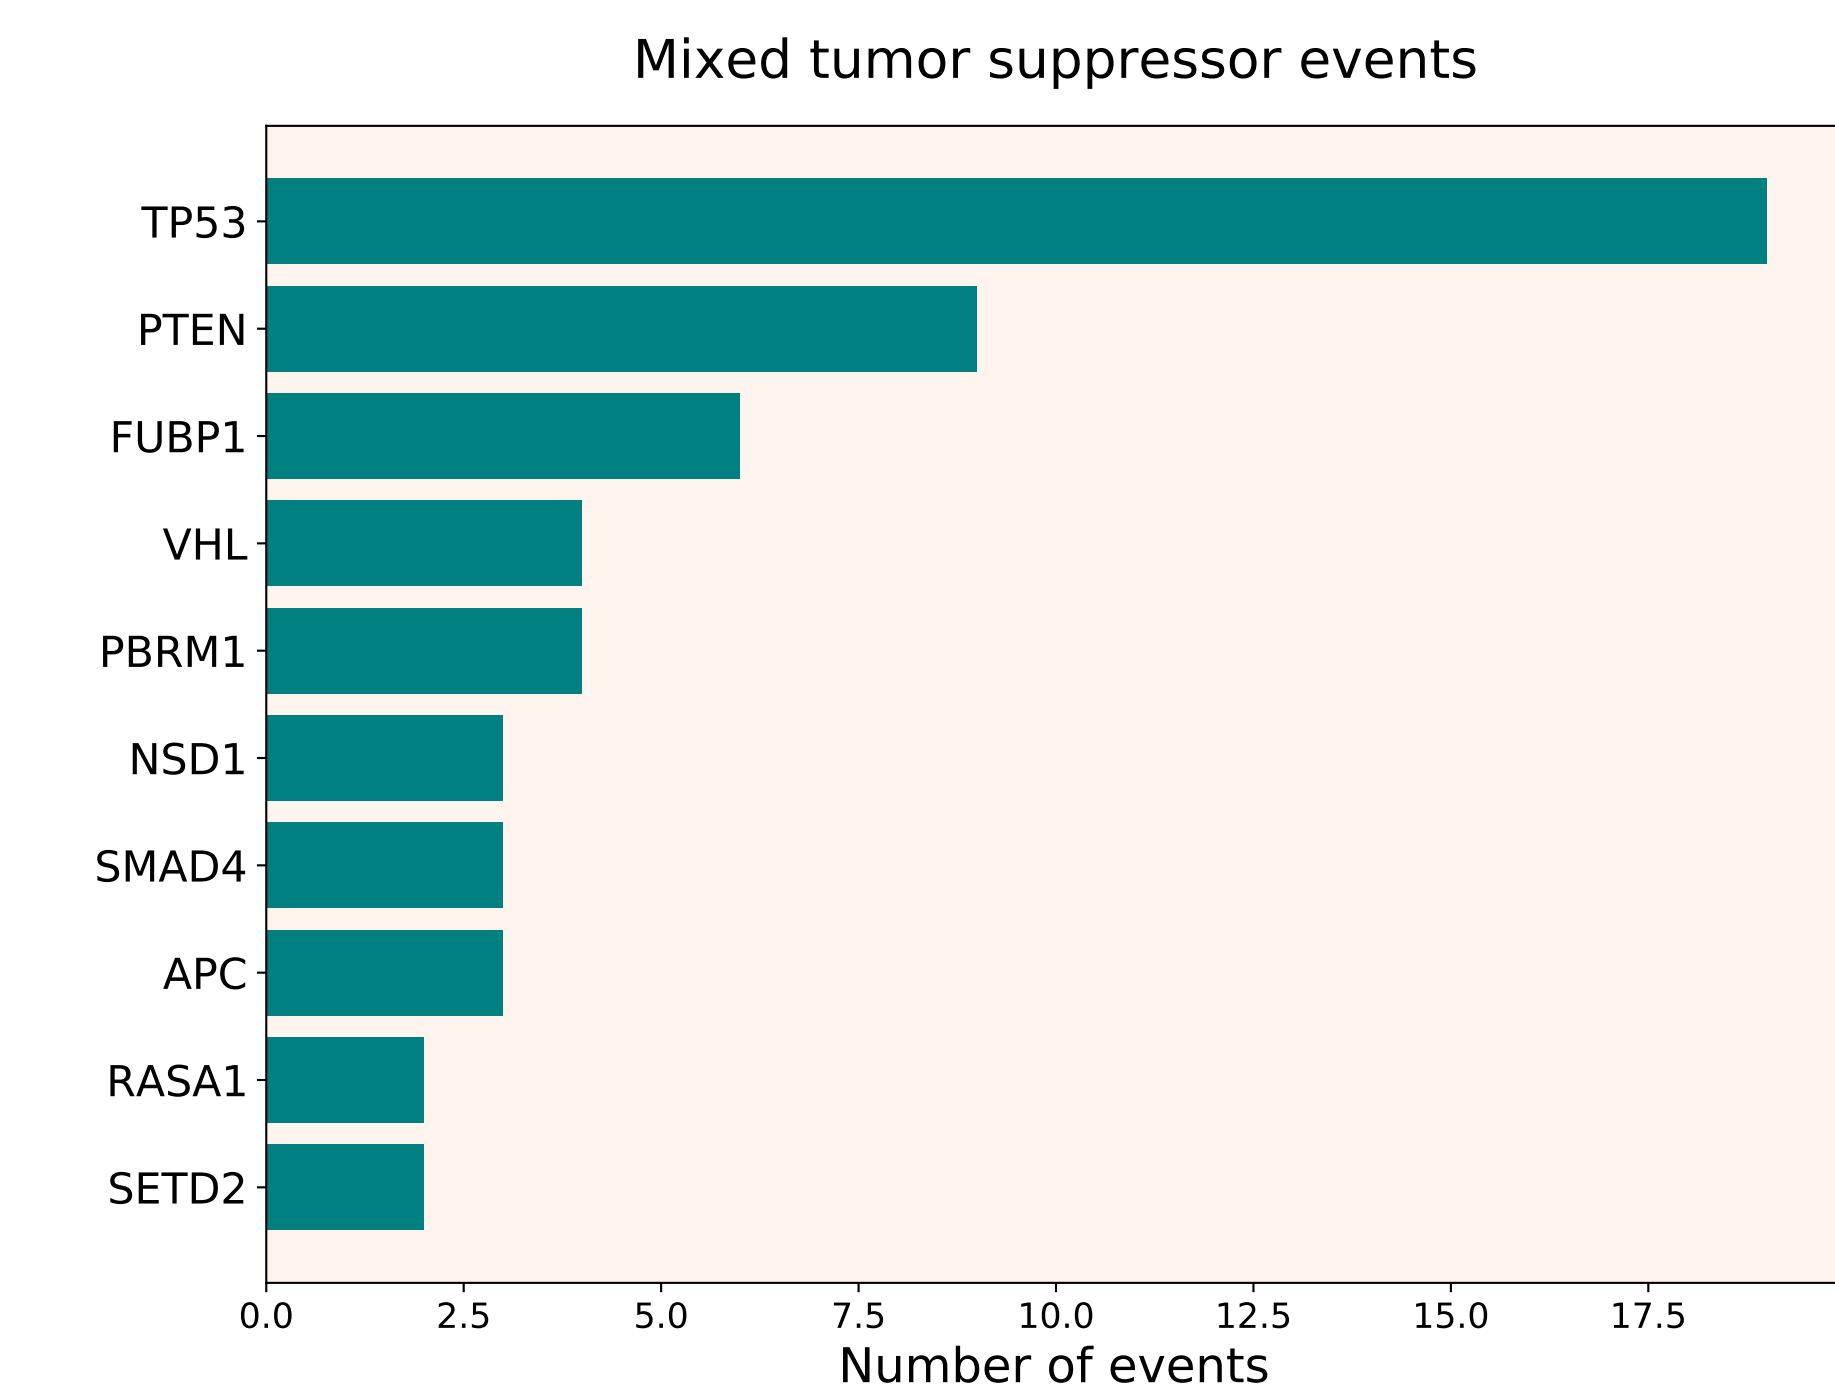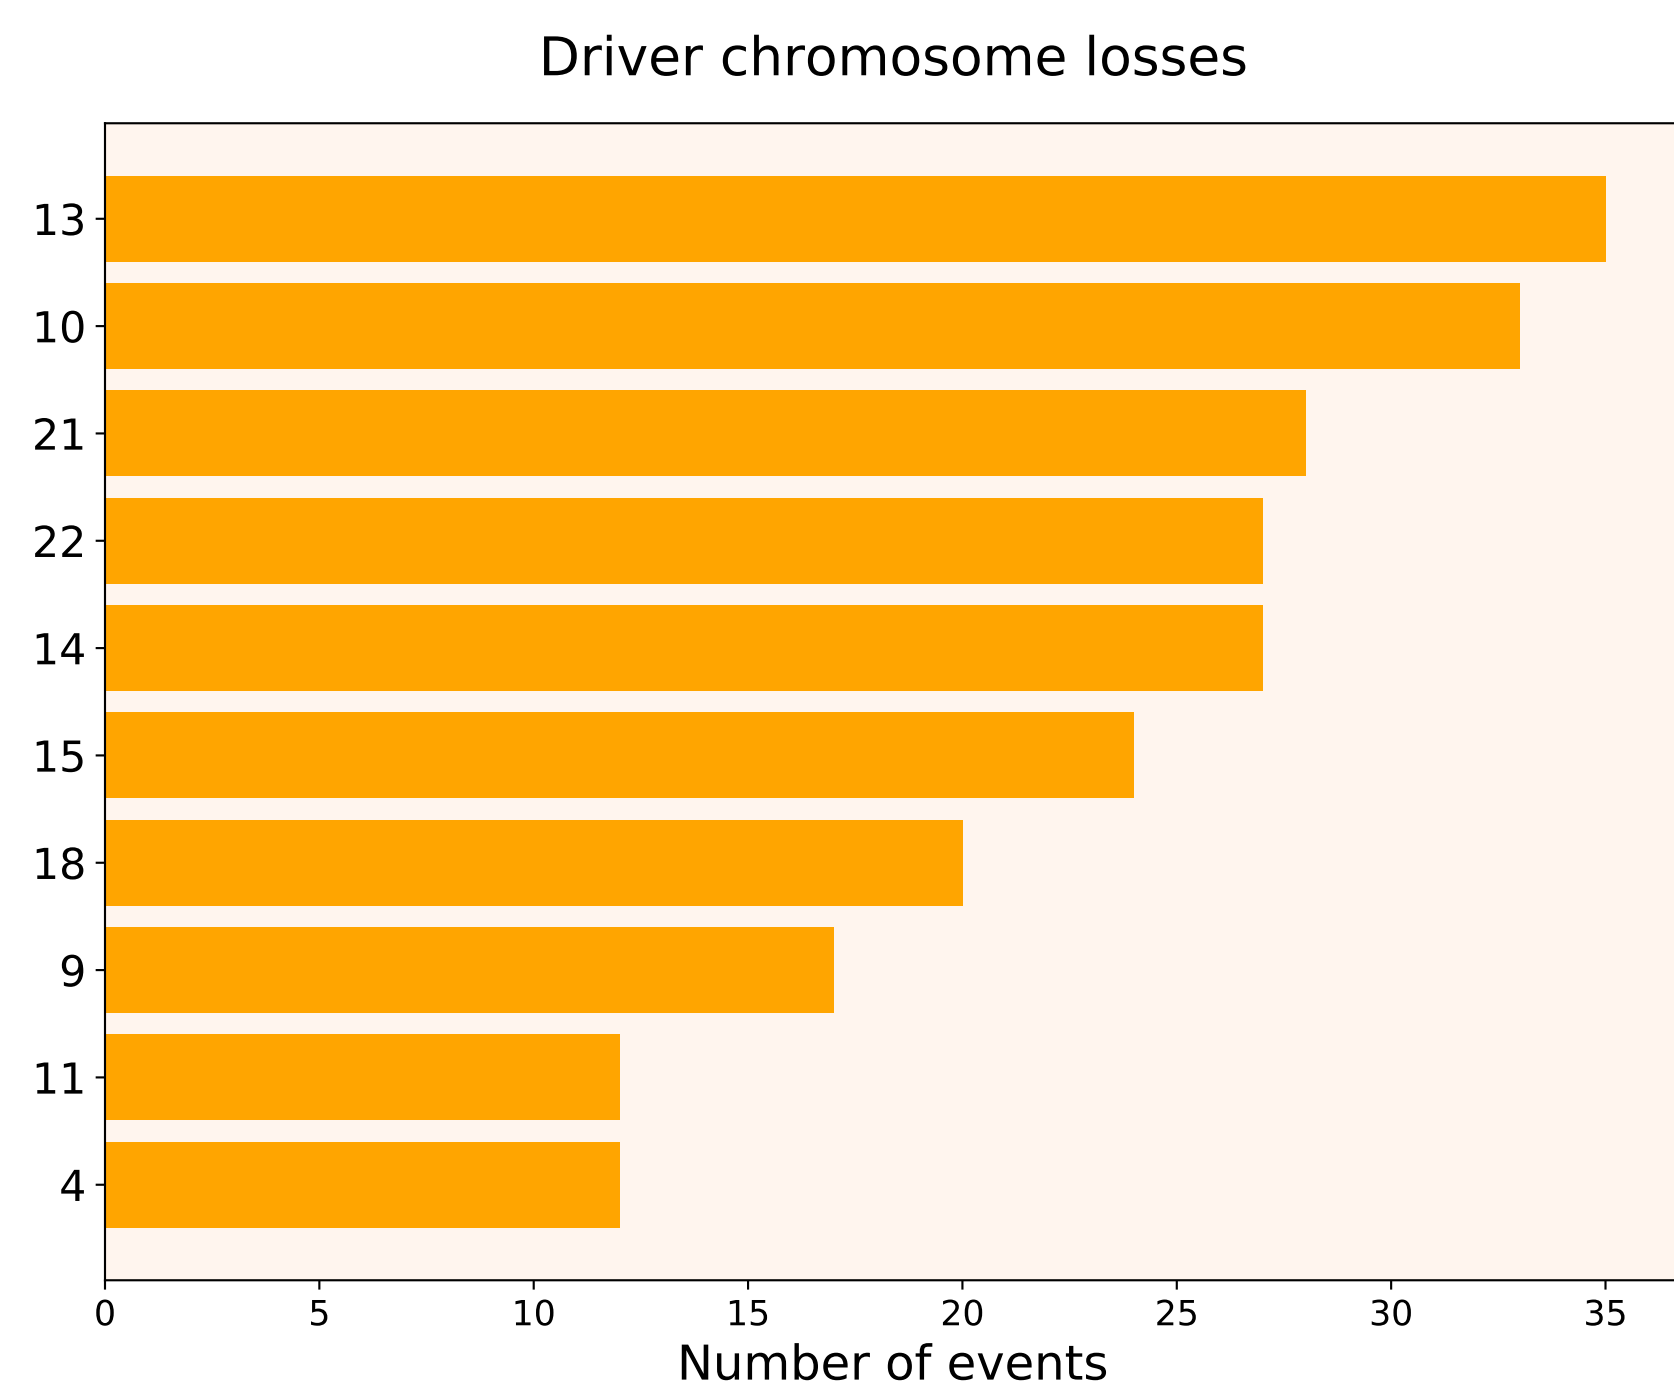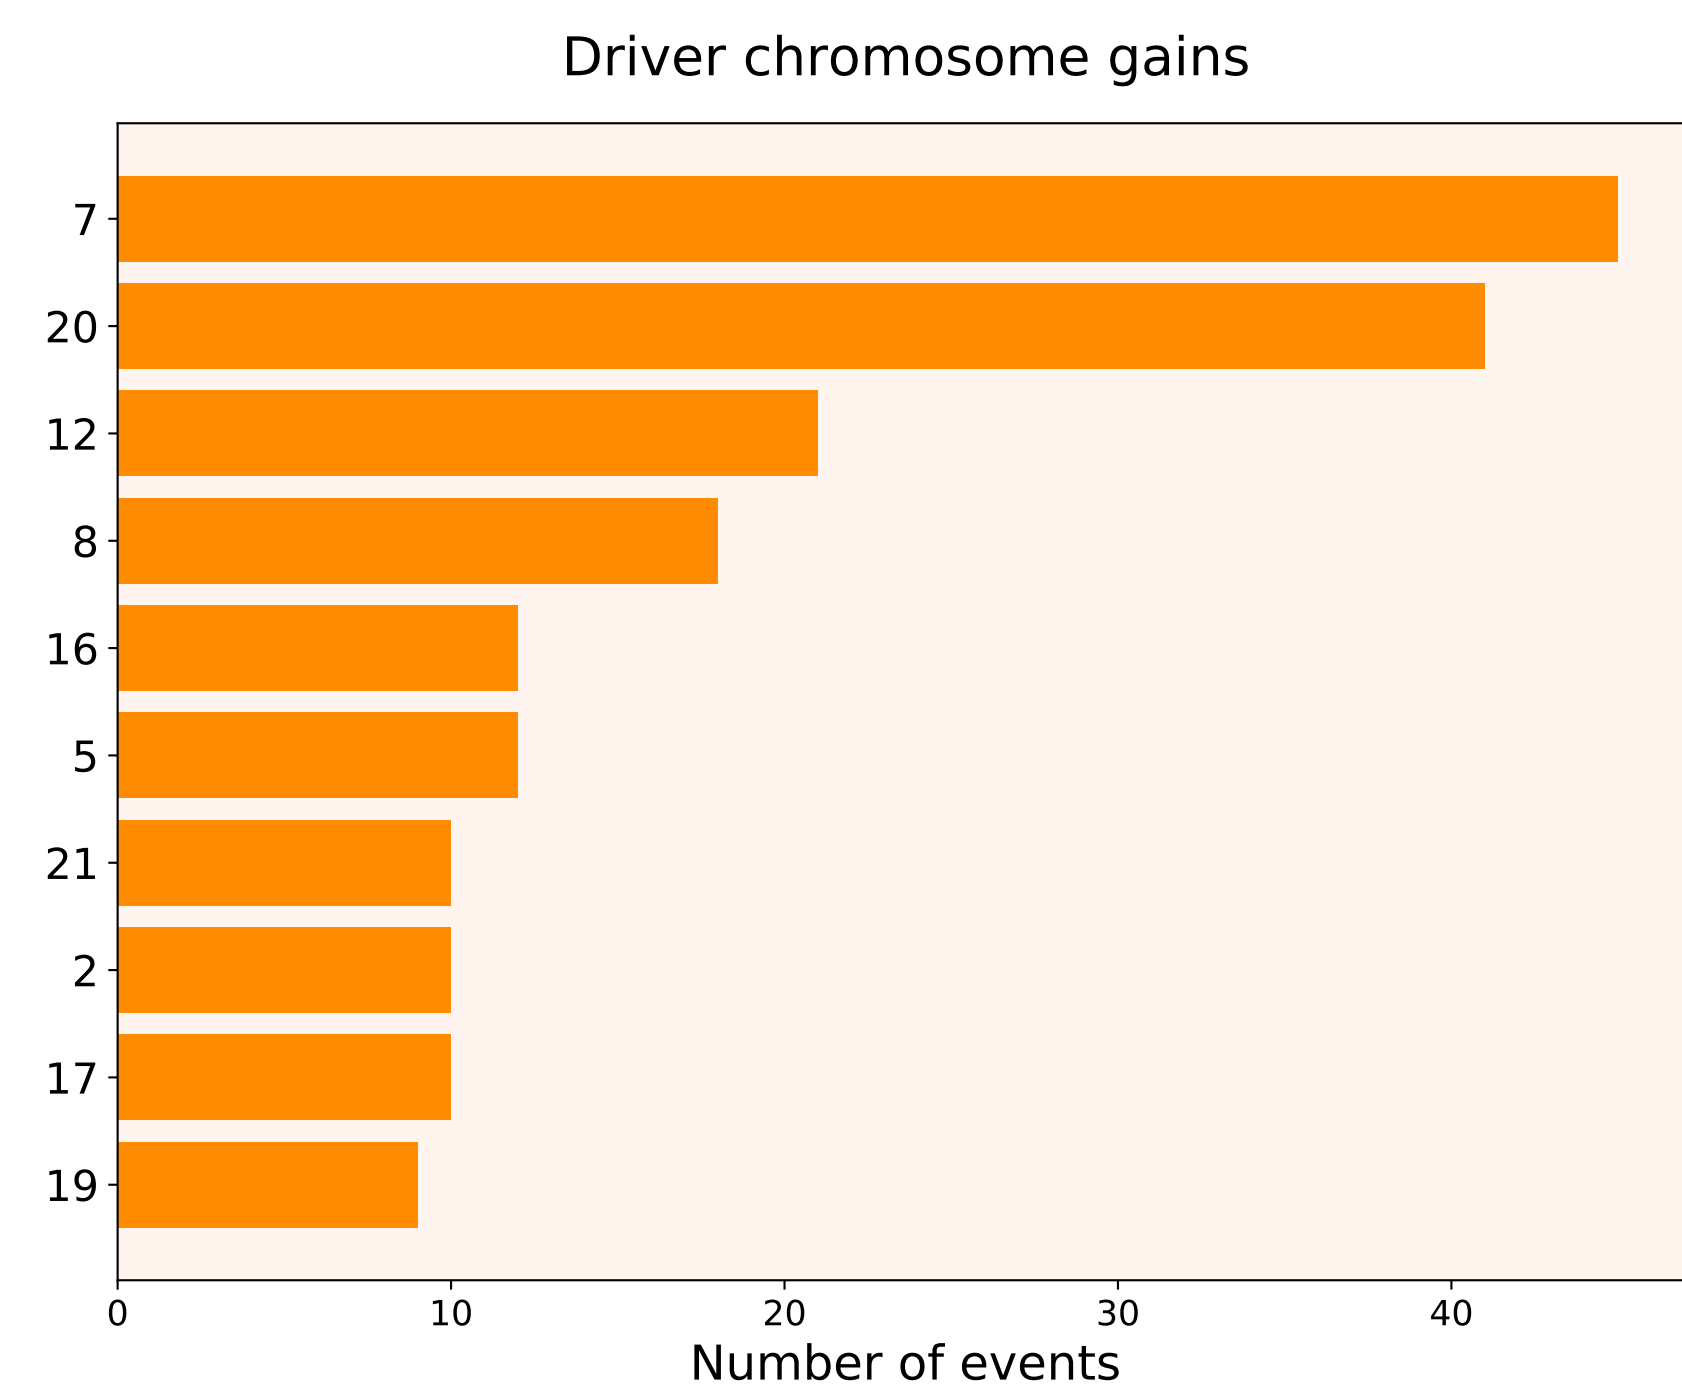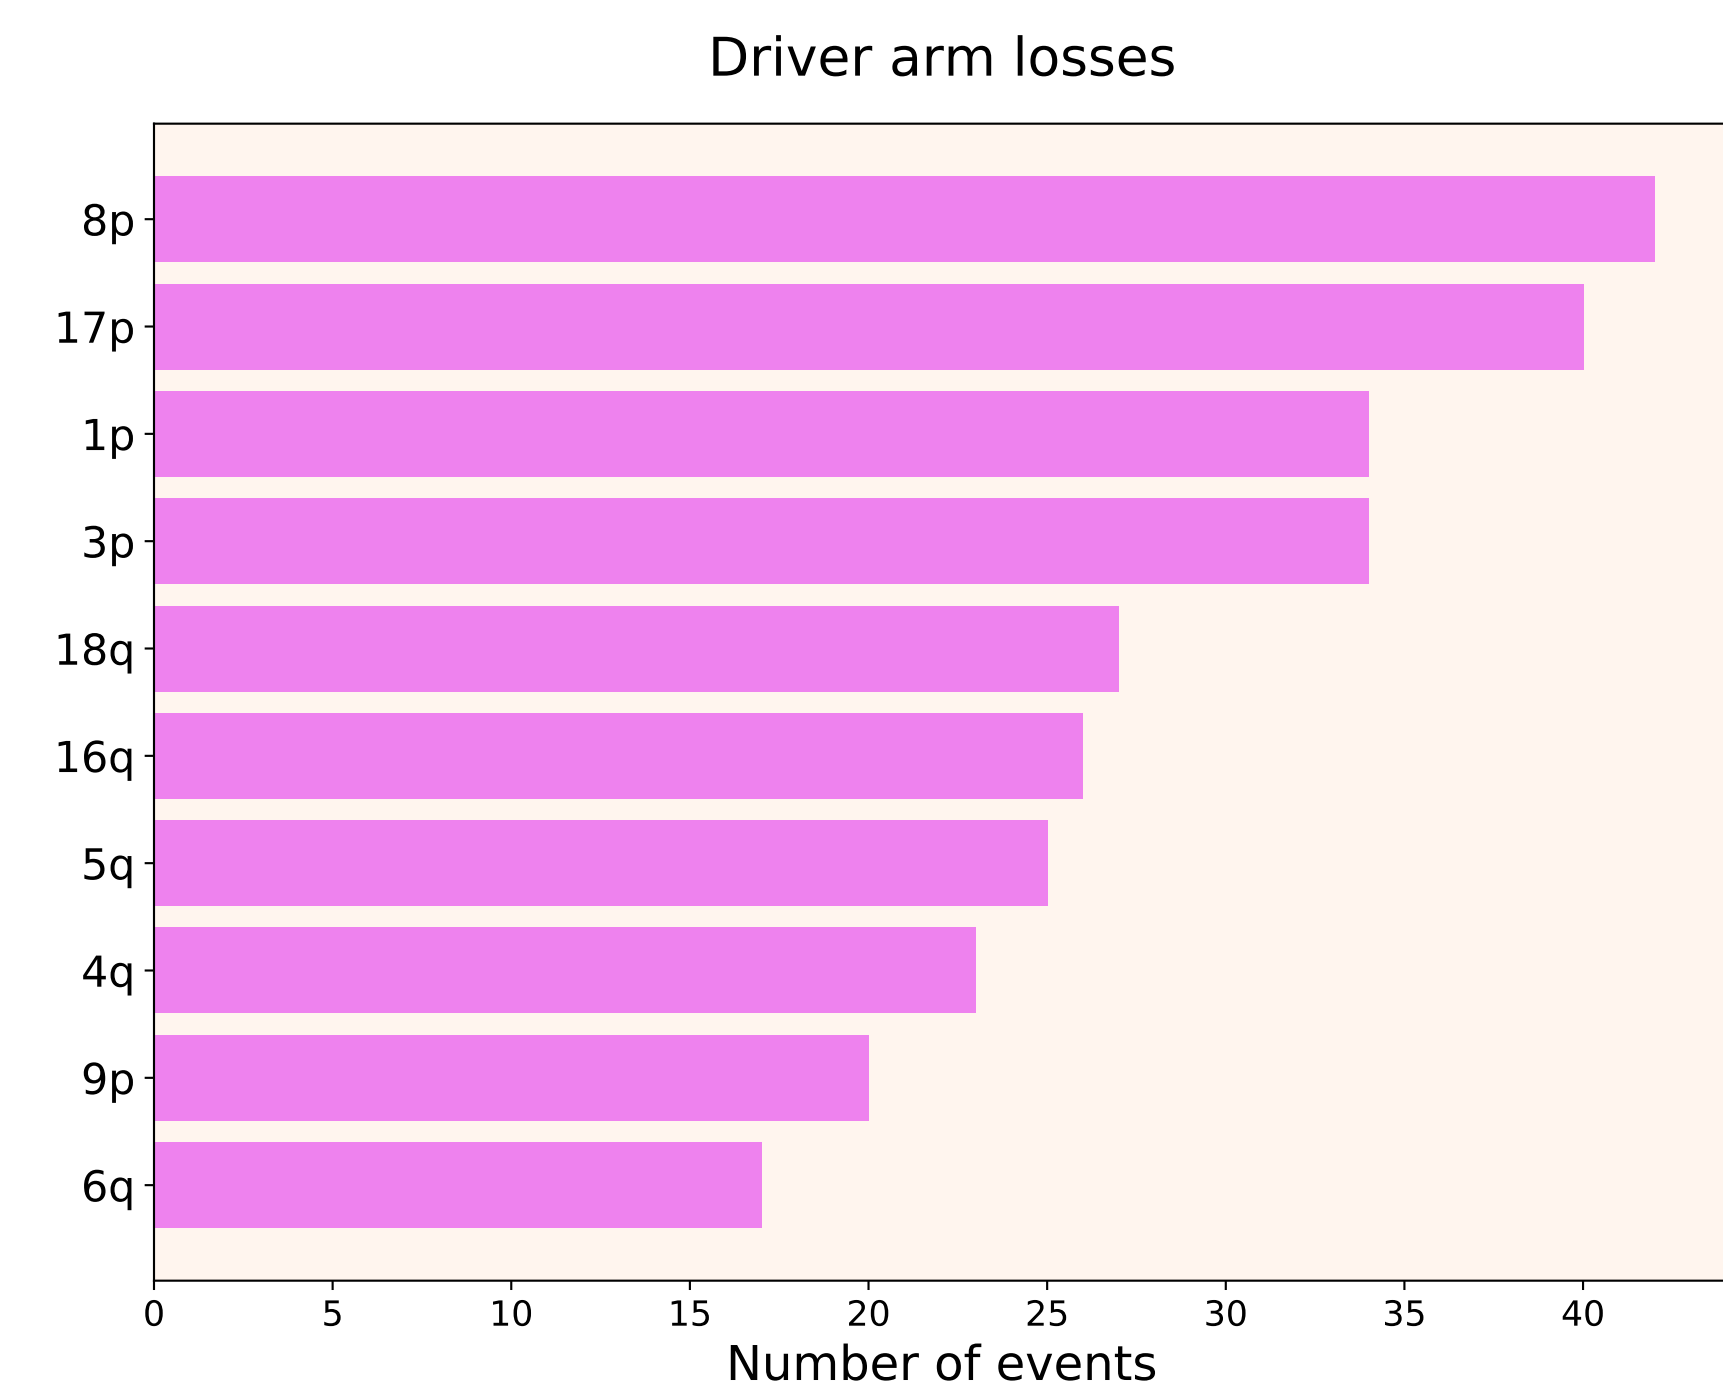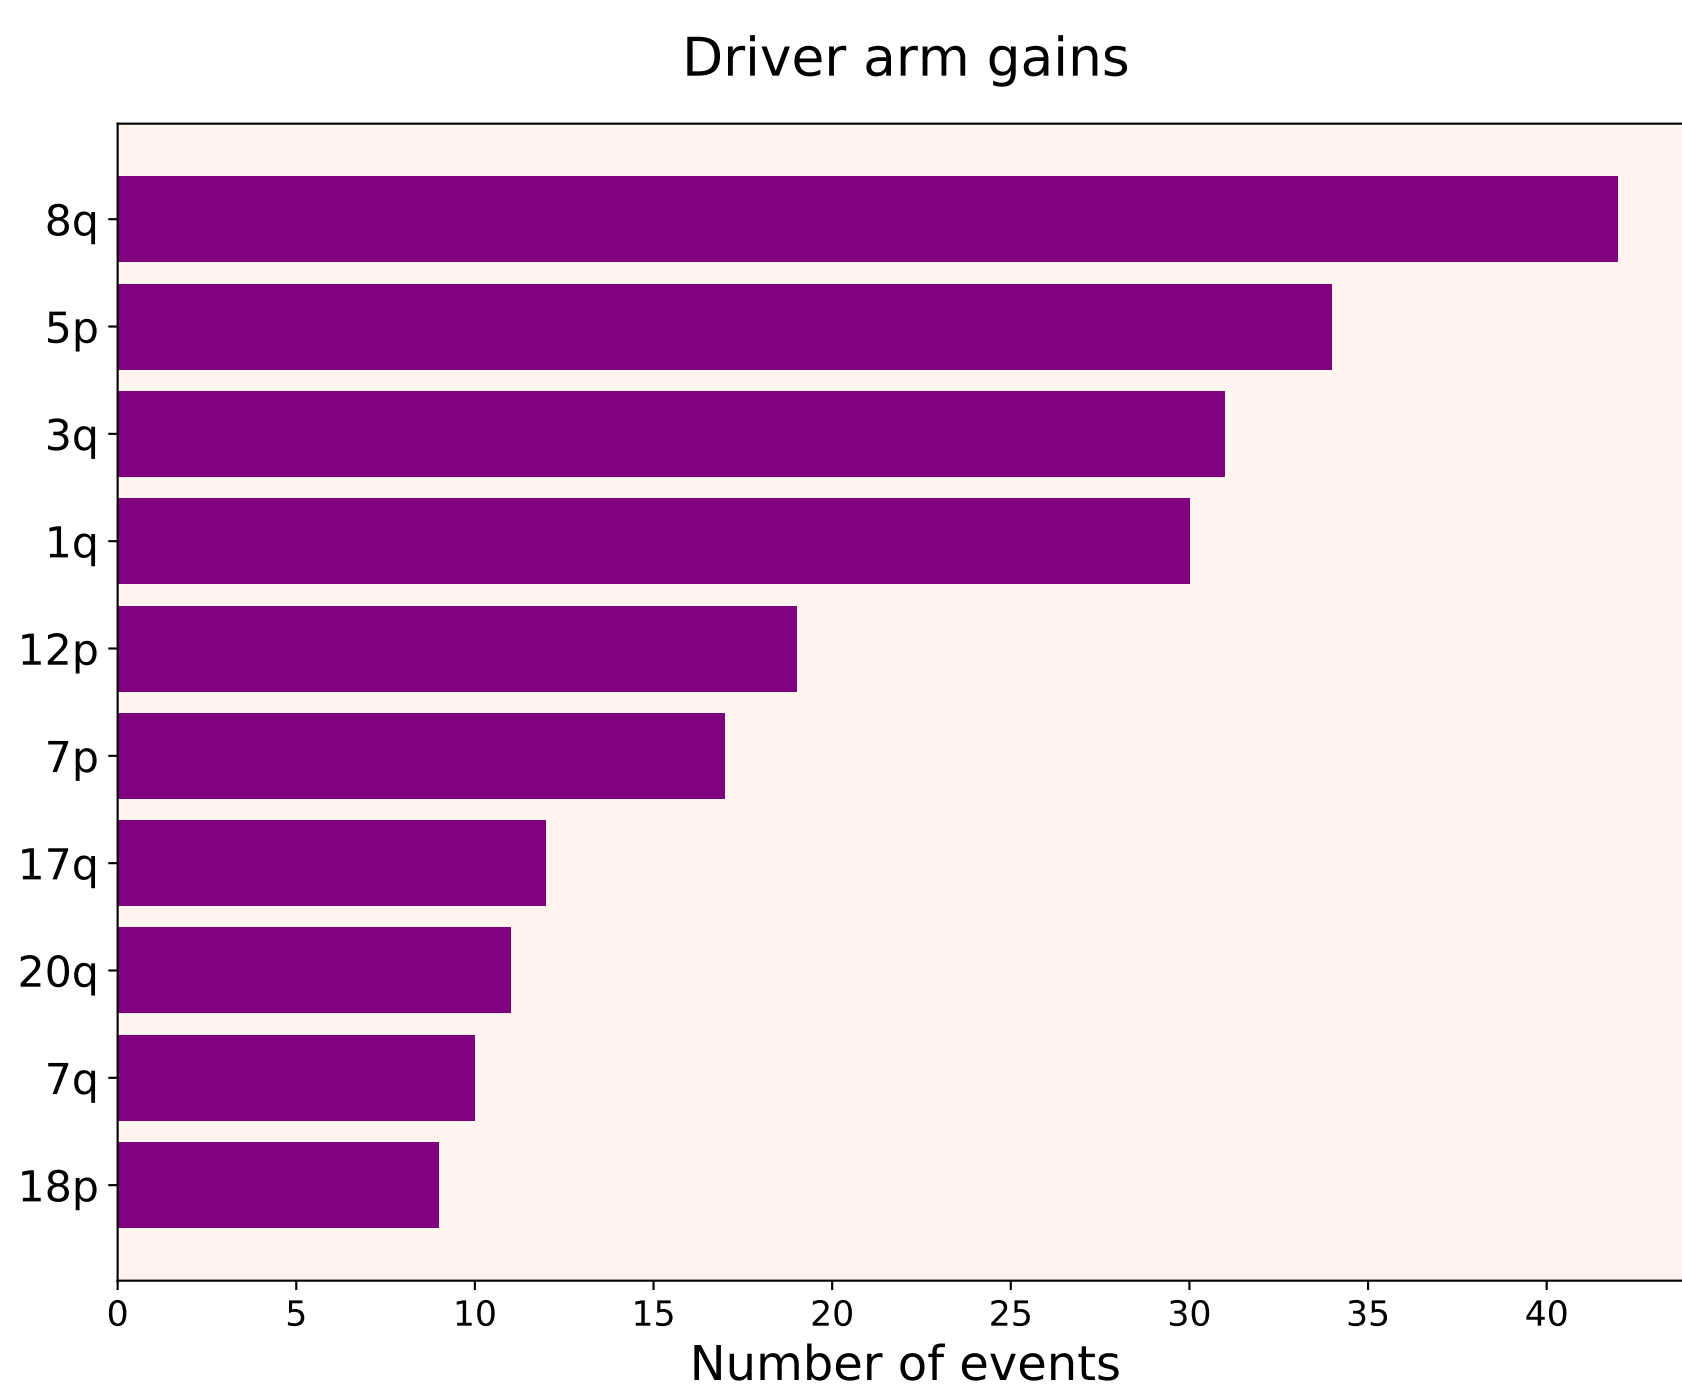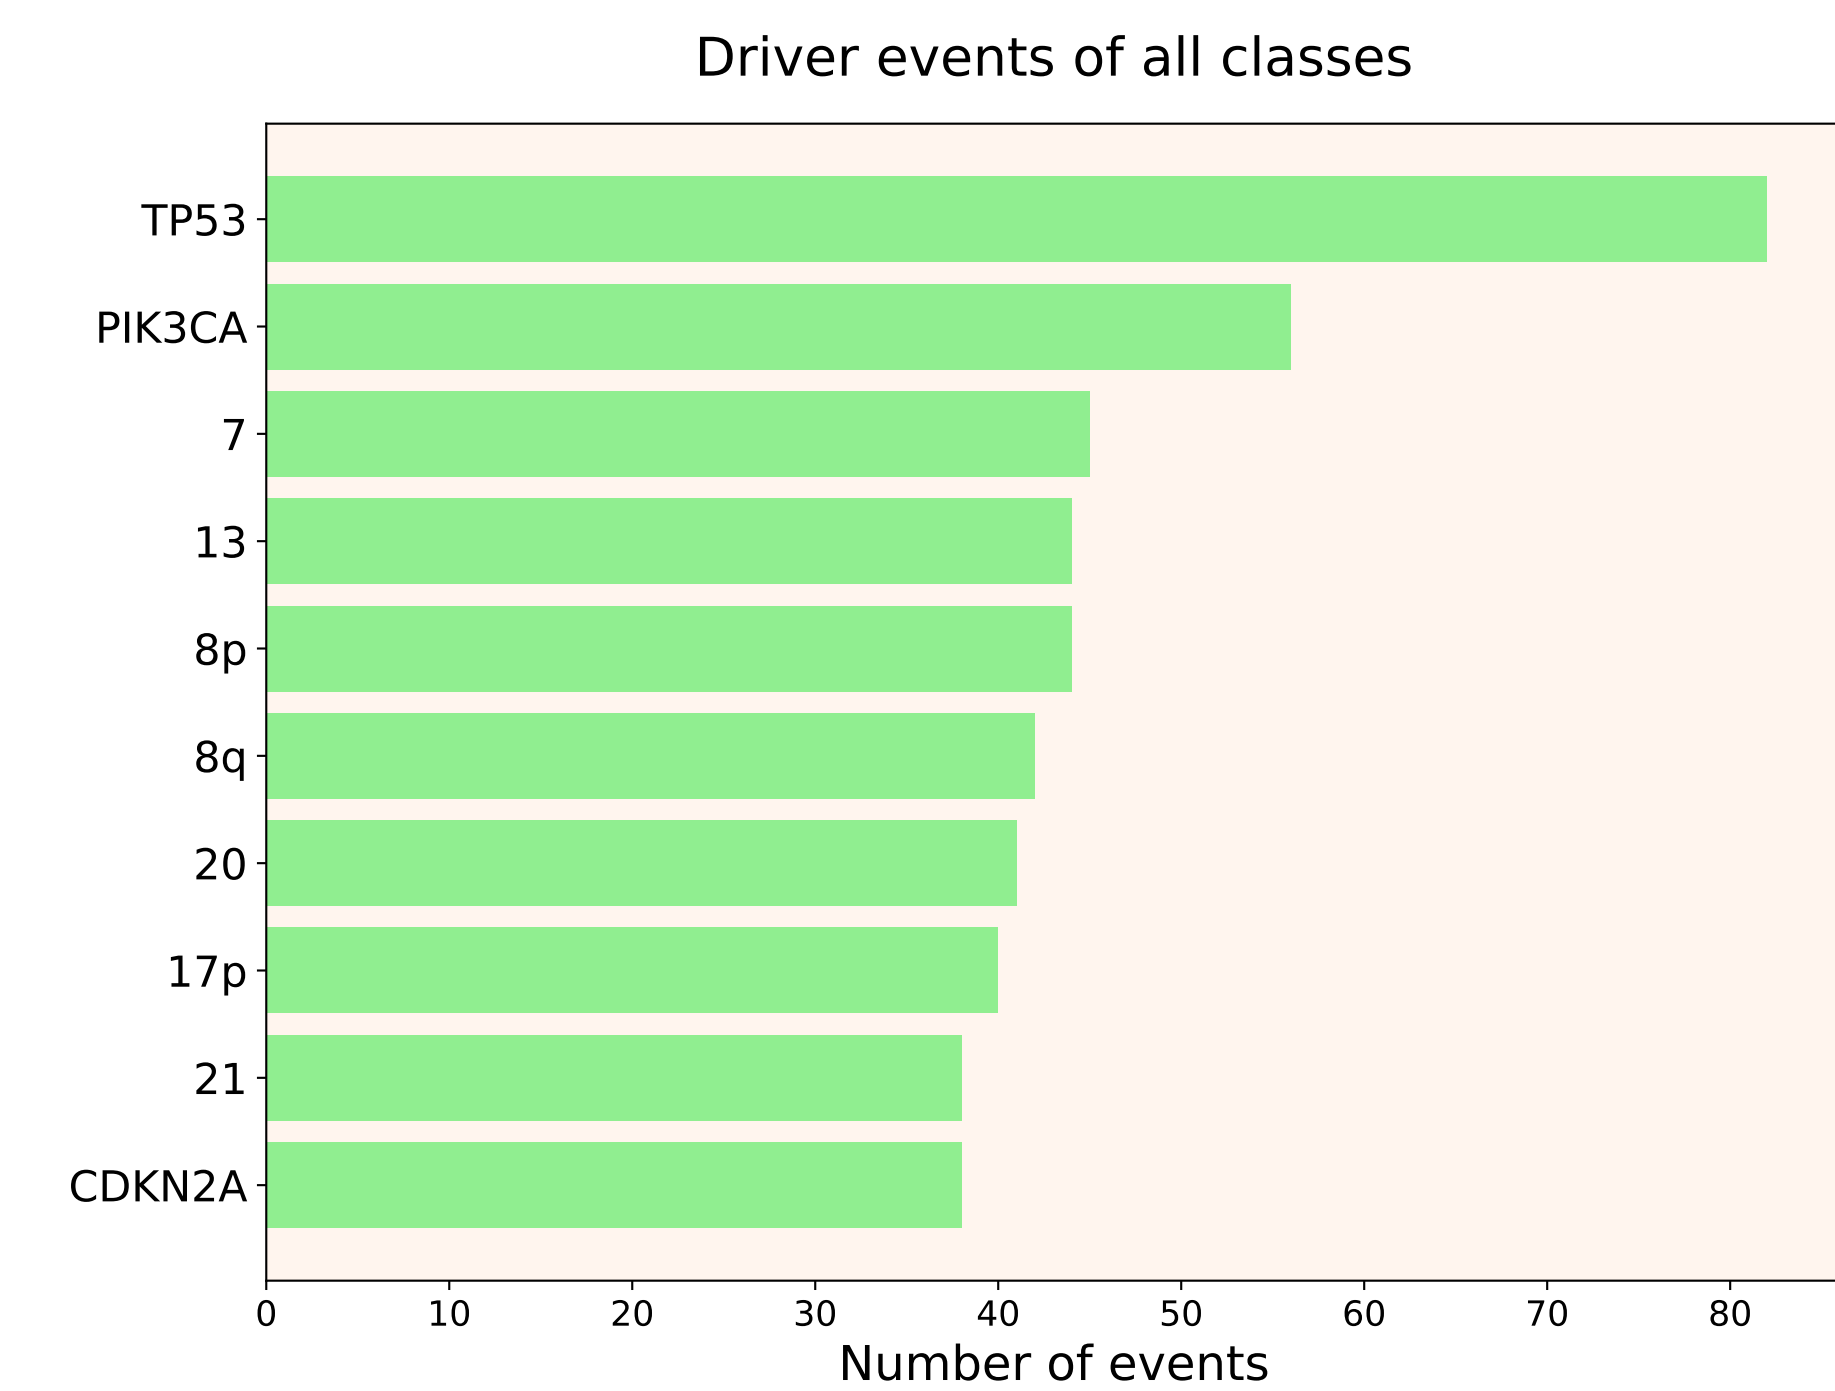

Supplement: Supplemental_Data_S1.zip [file Supplemental_Data_S1.zip]

# SARC\_MALE

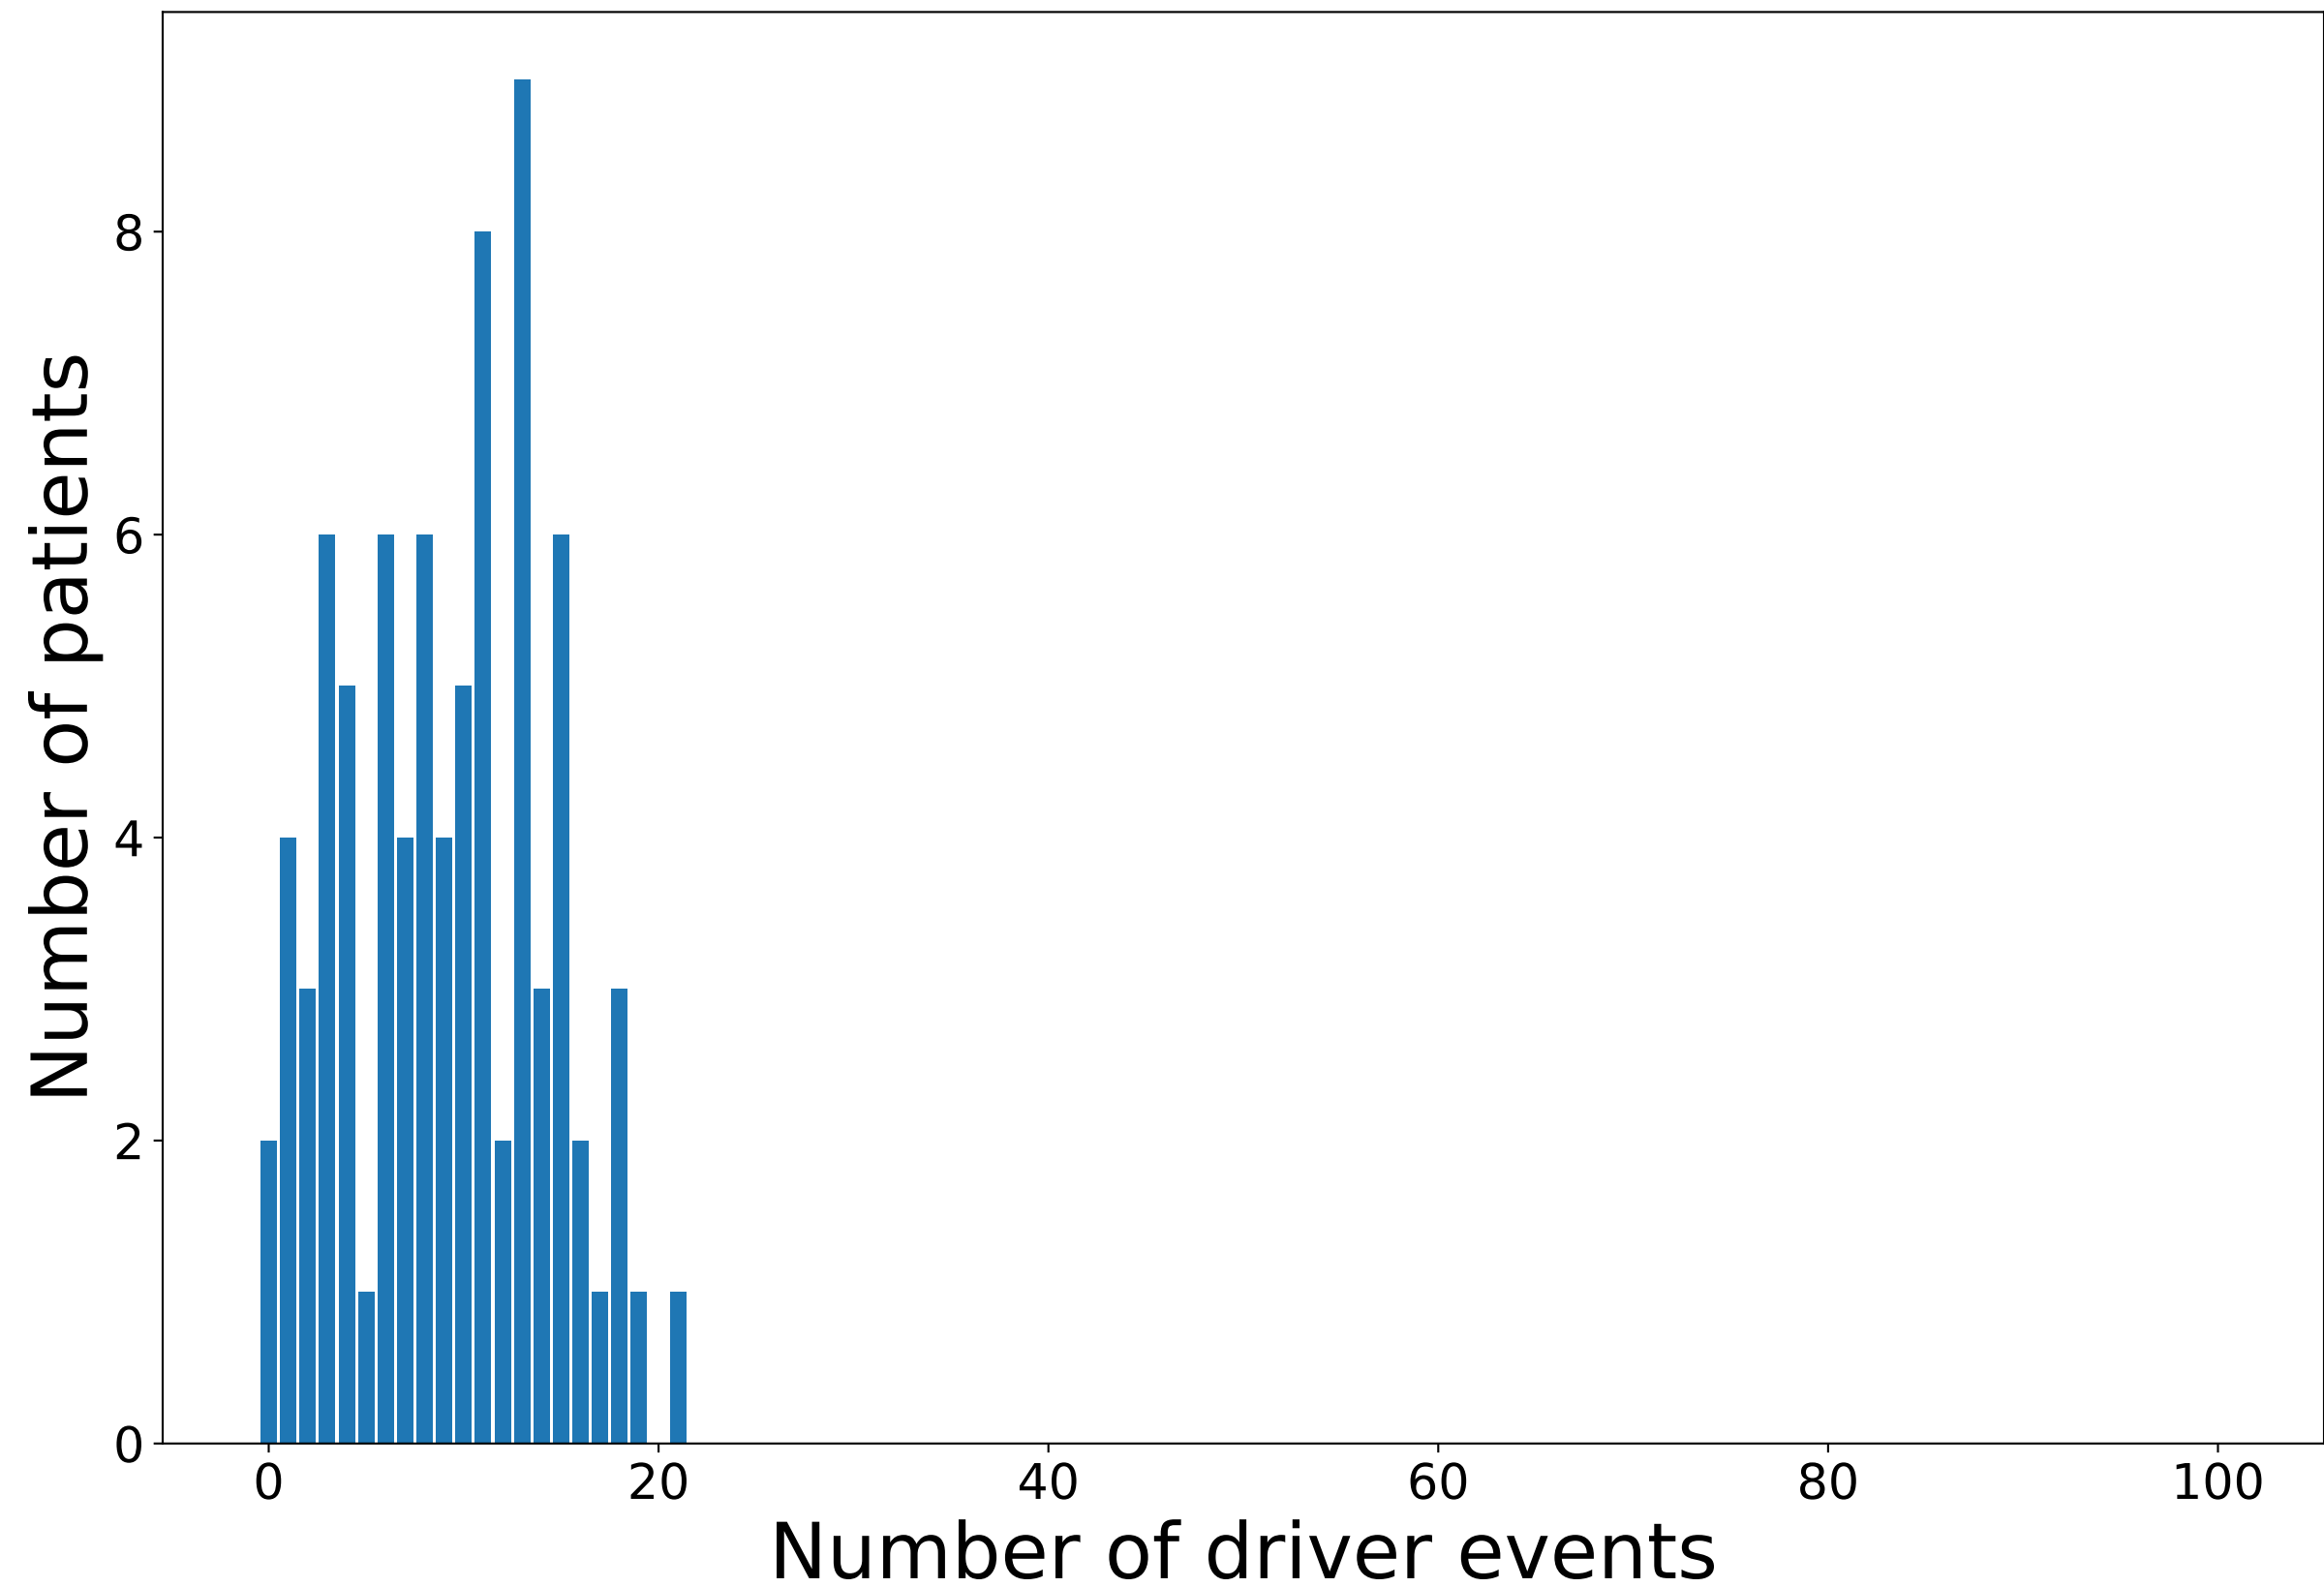

Supplement: Supplemental_Data_S1.zip [file Supplemental_Data_S1.zip]

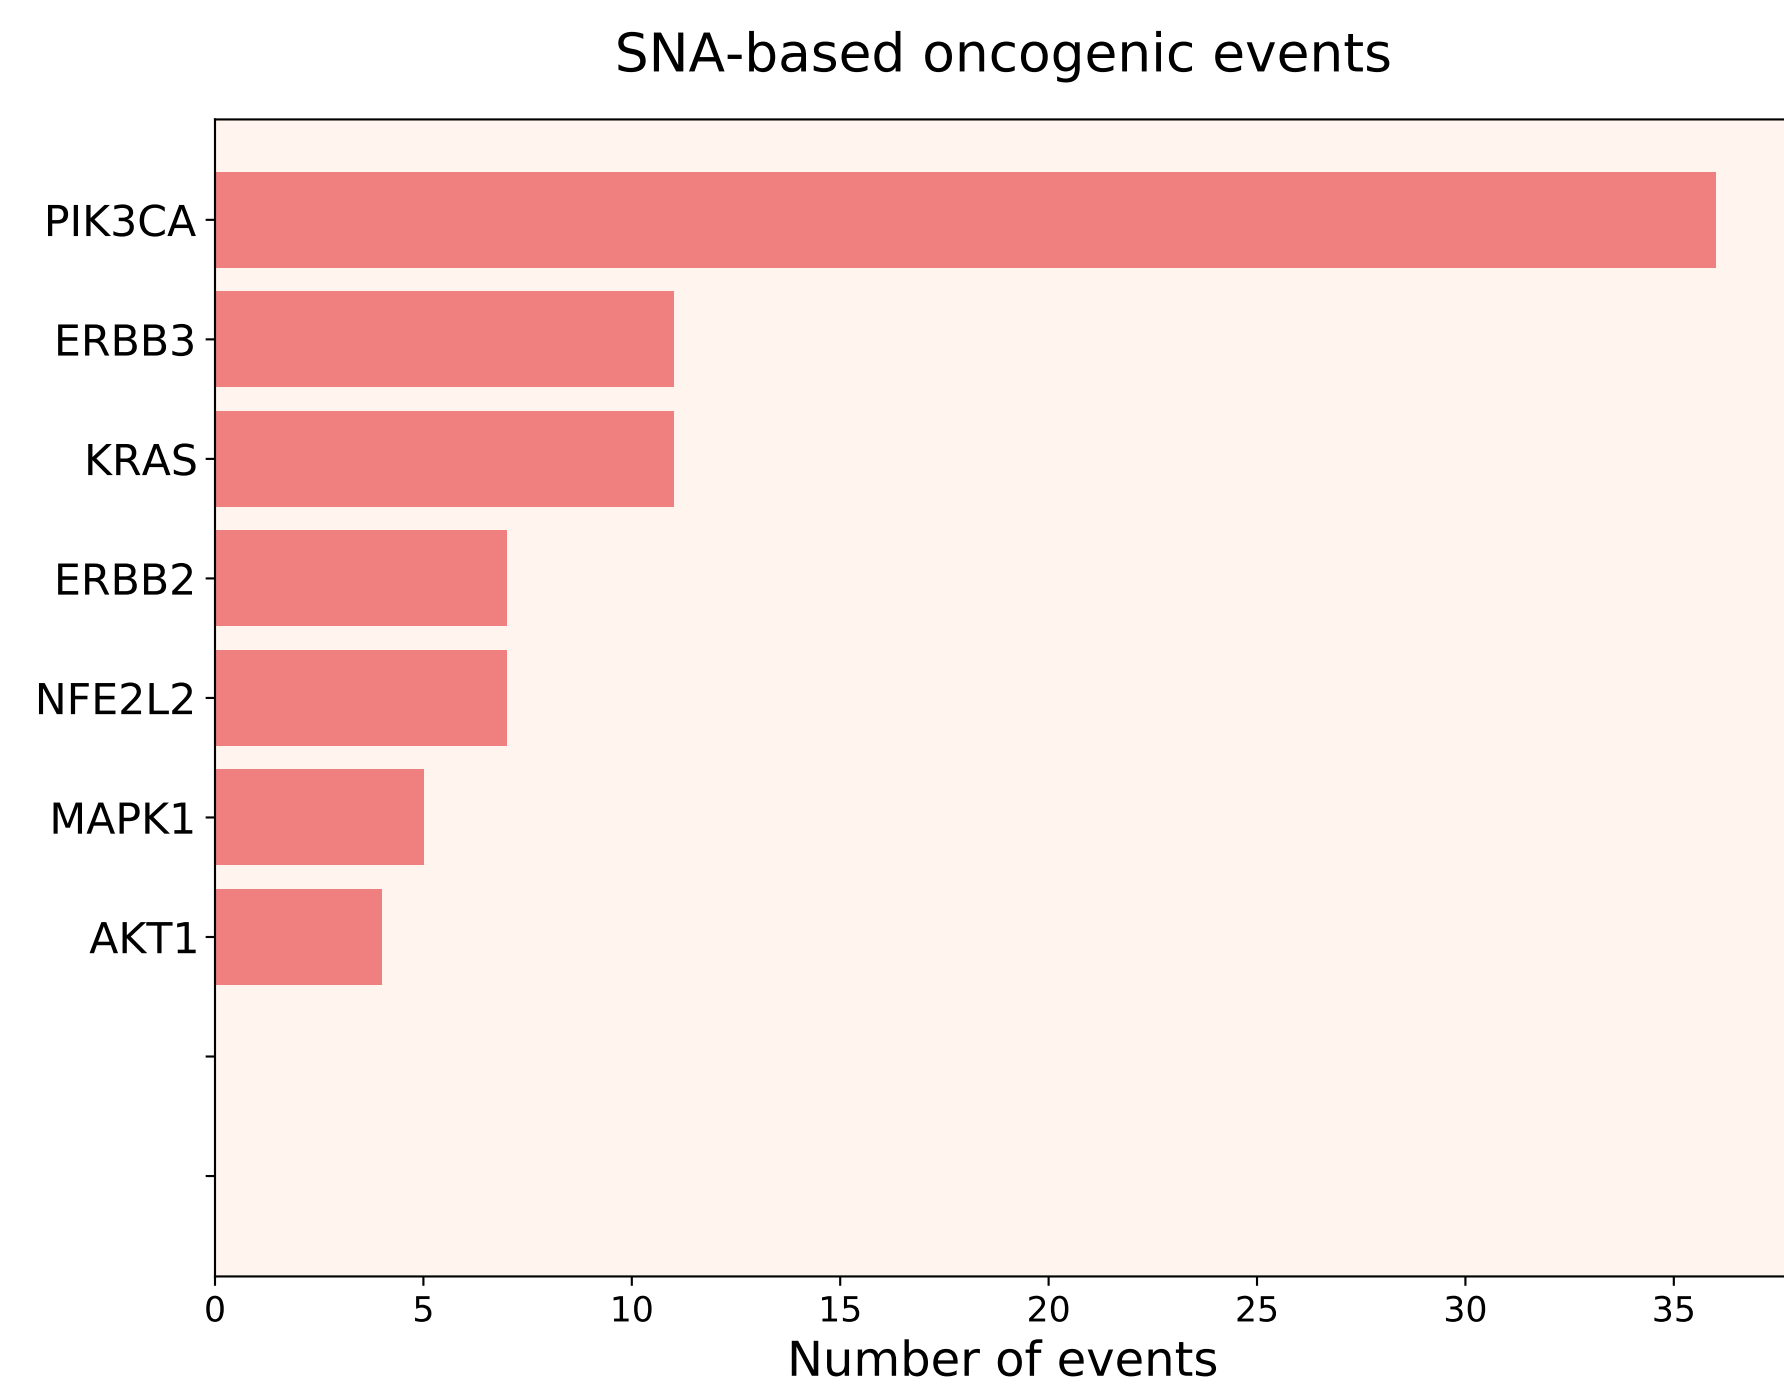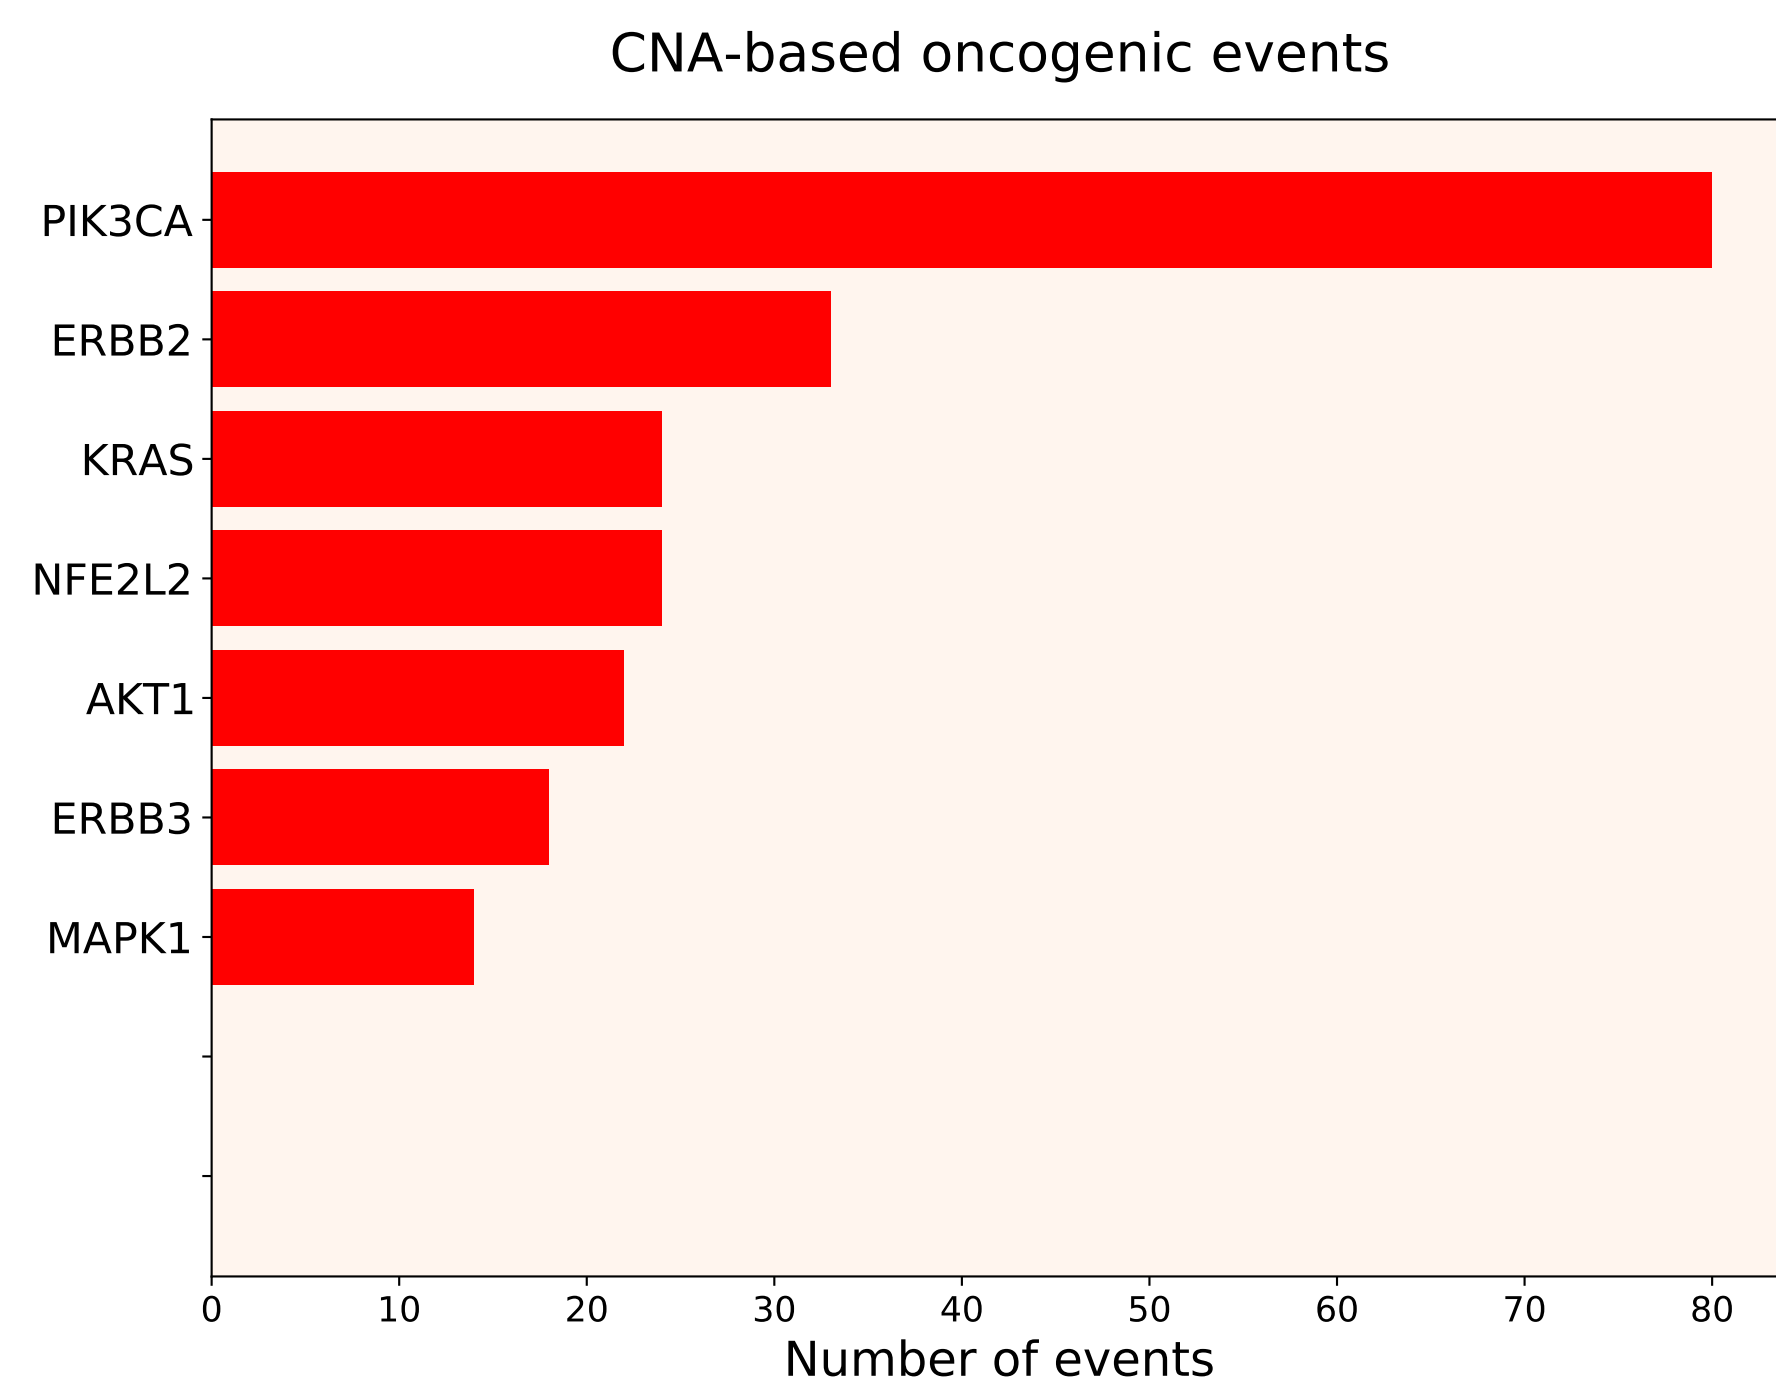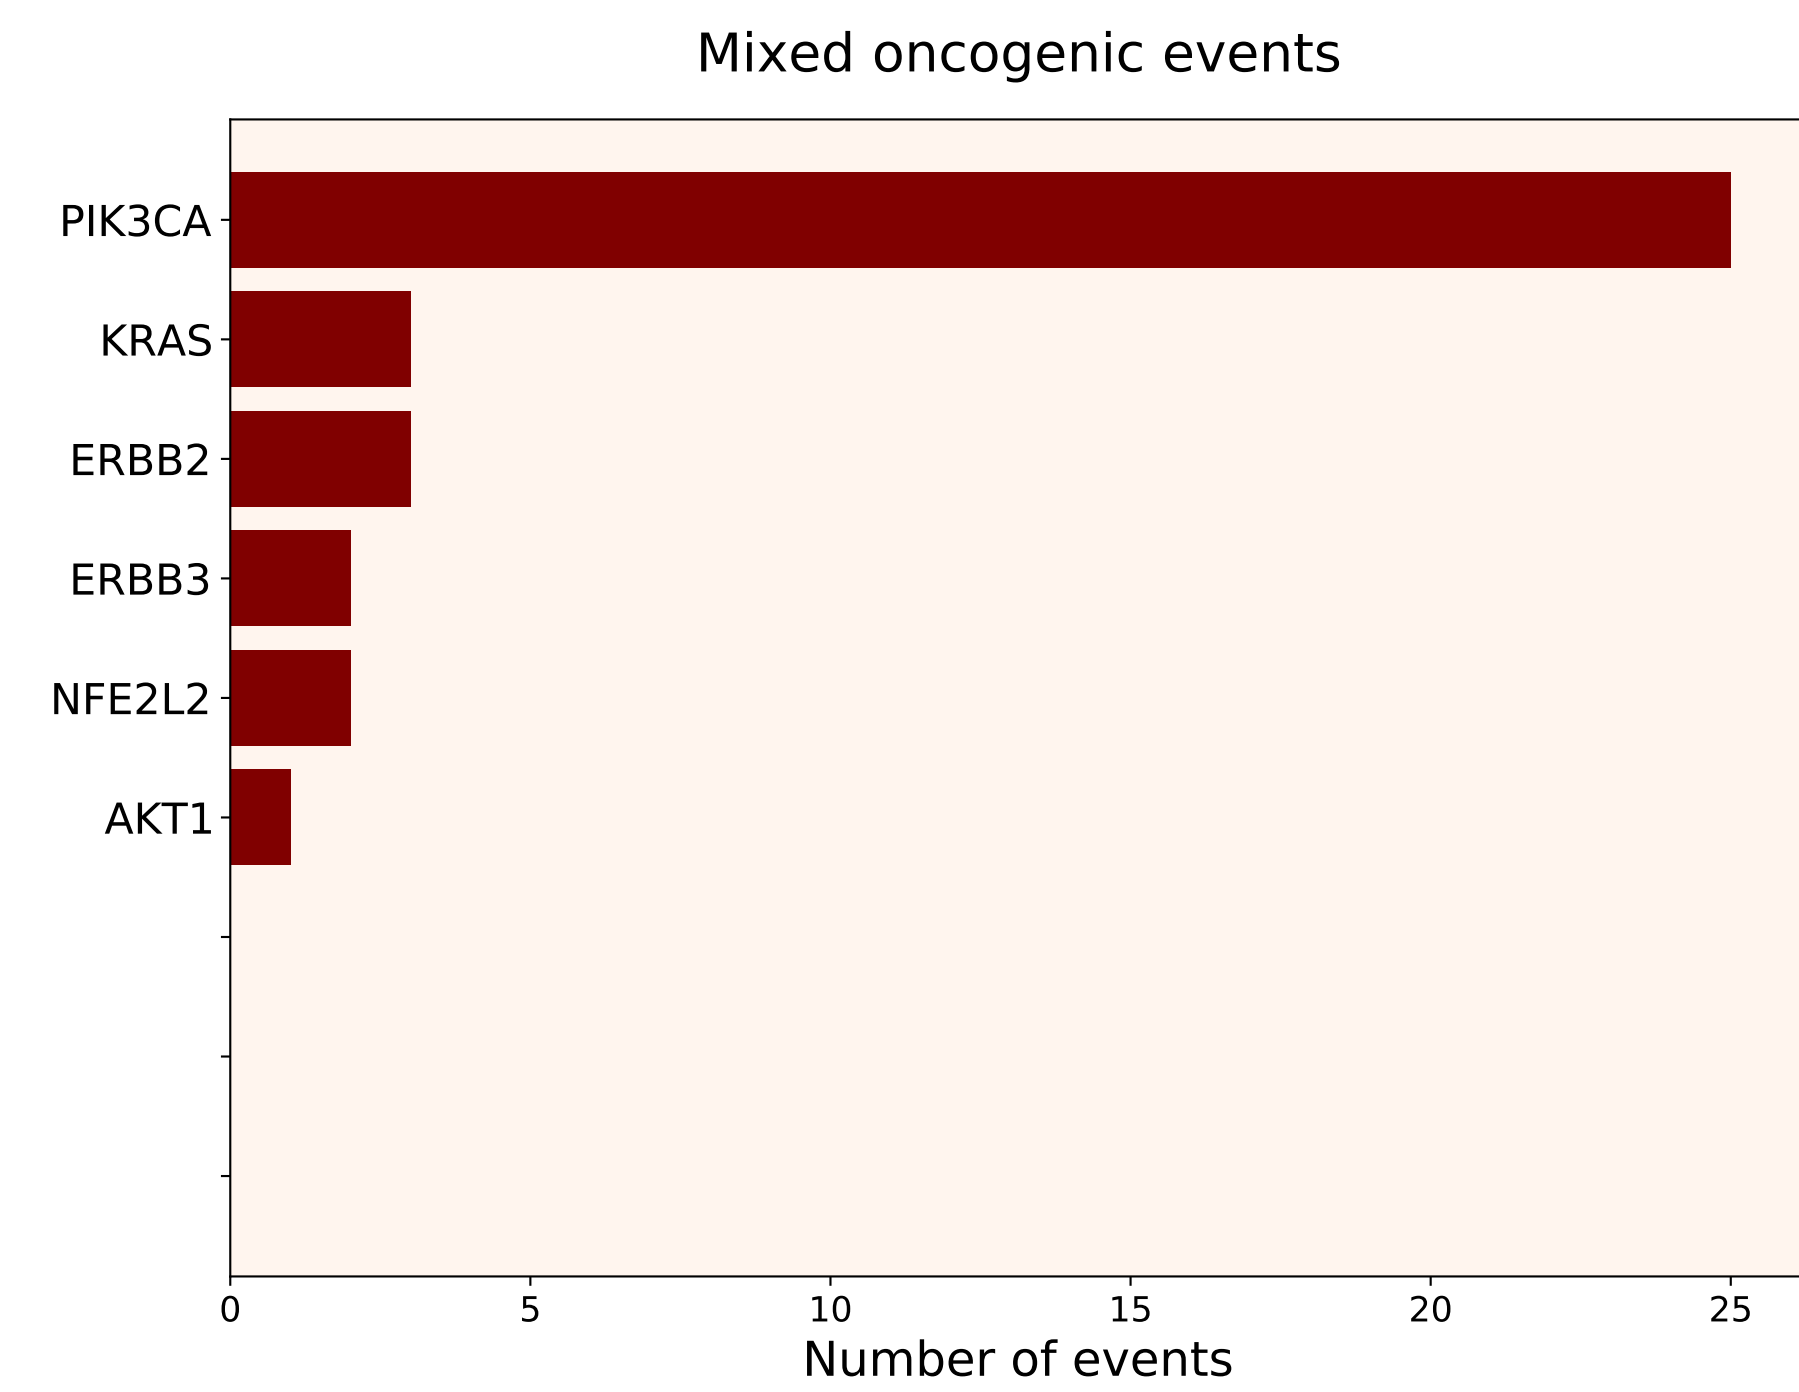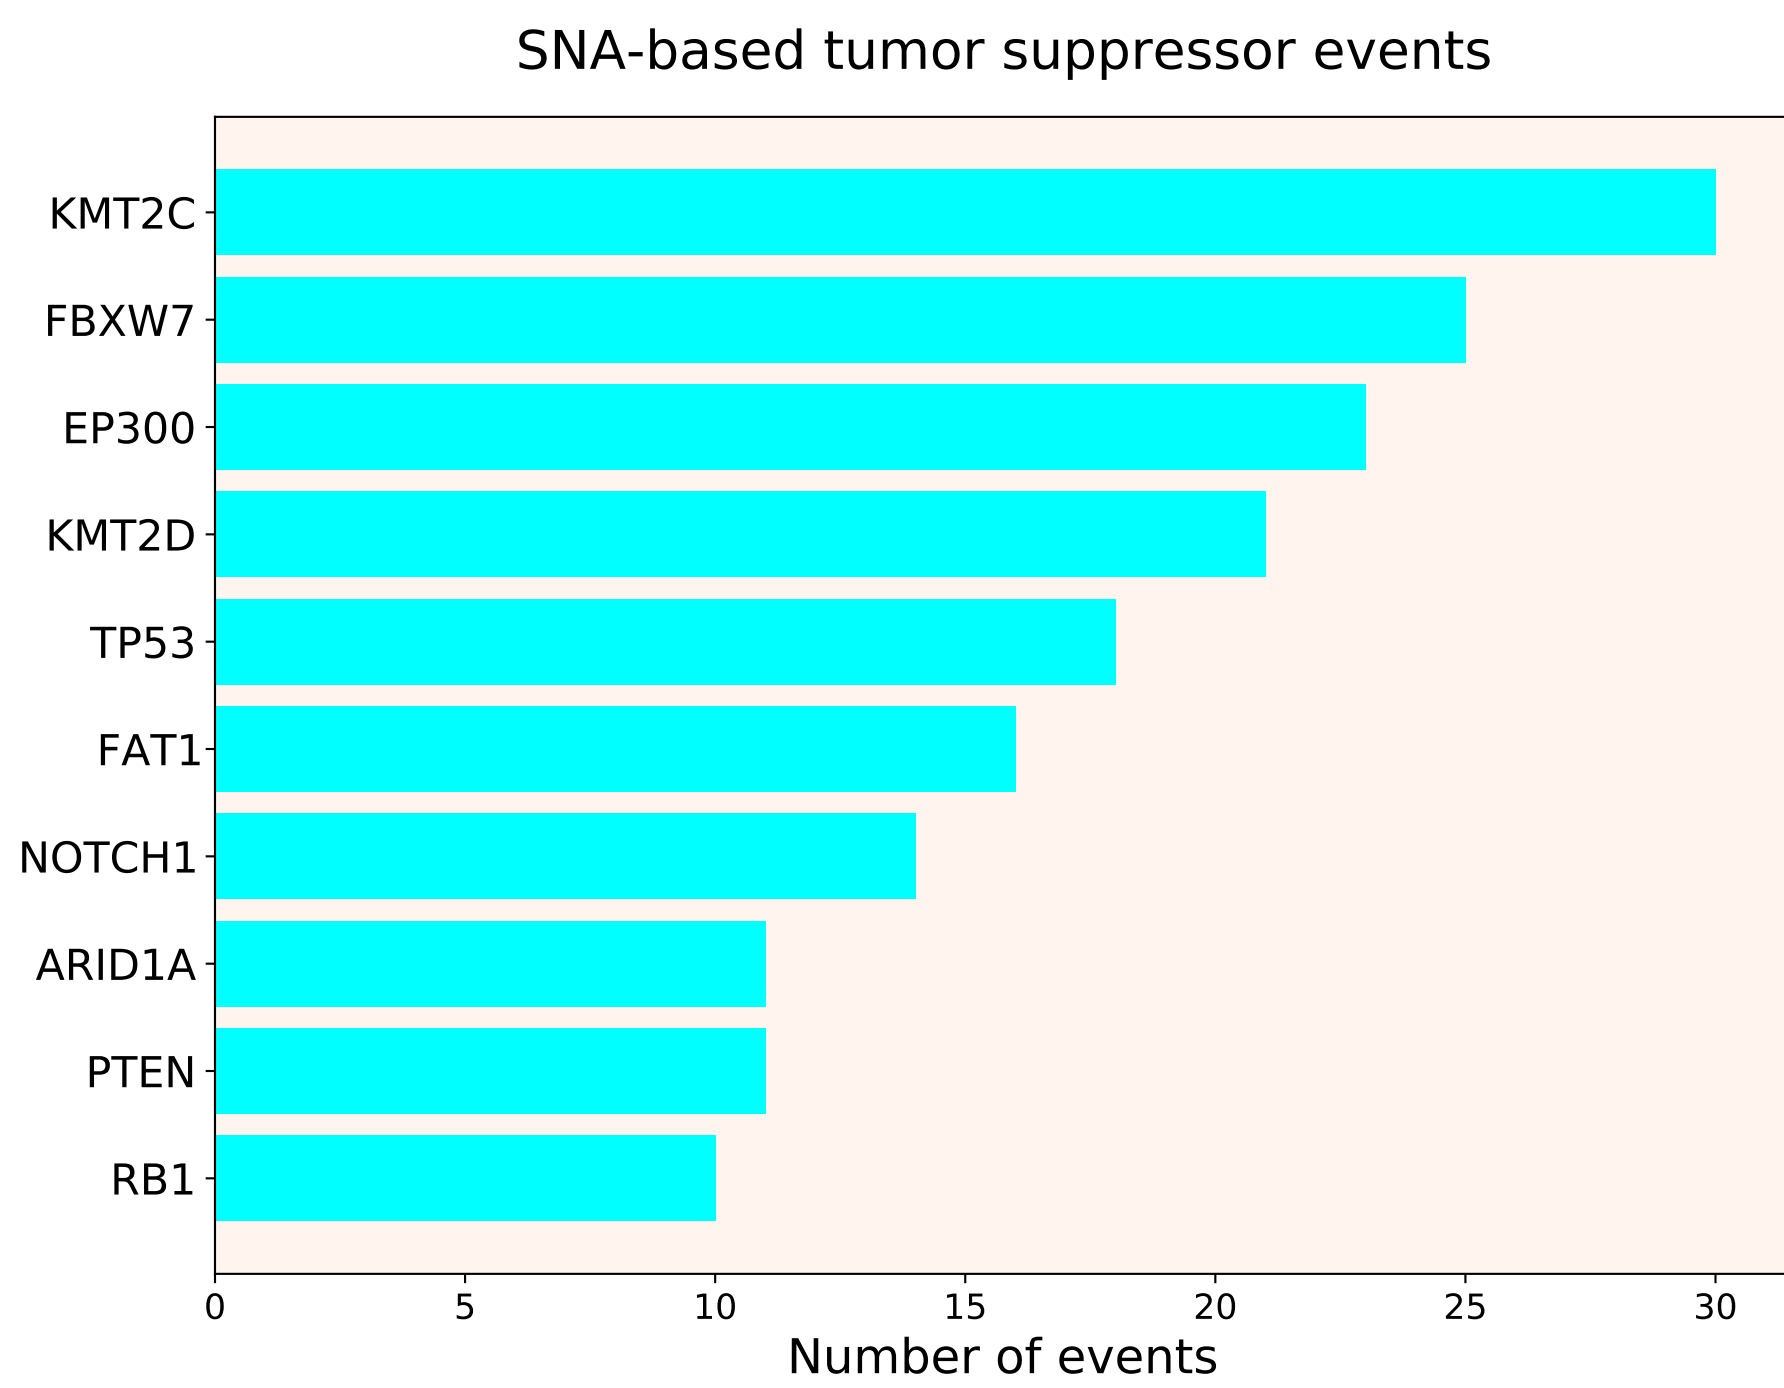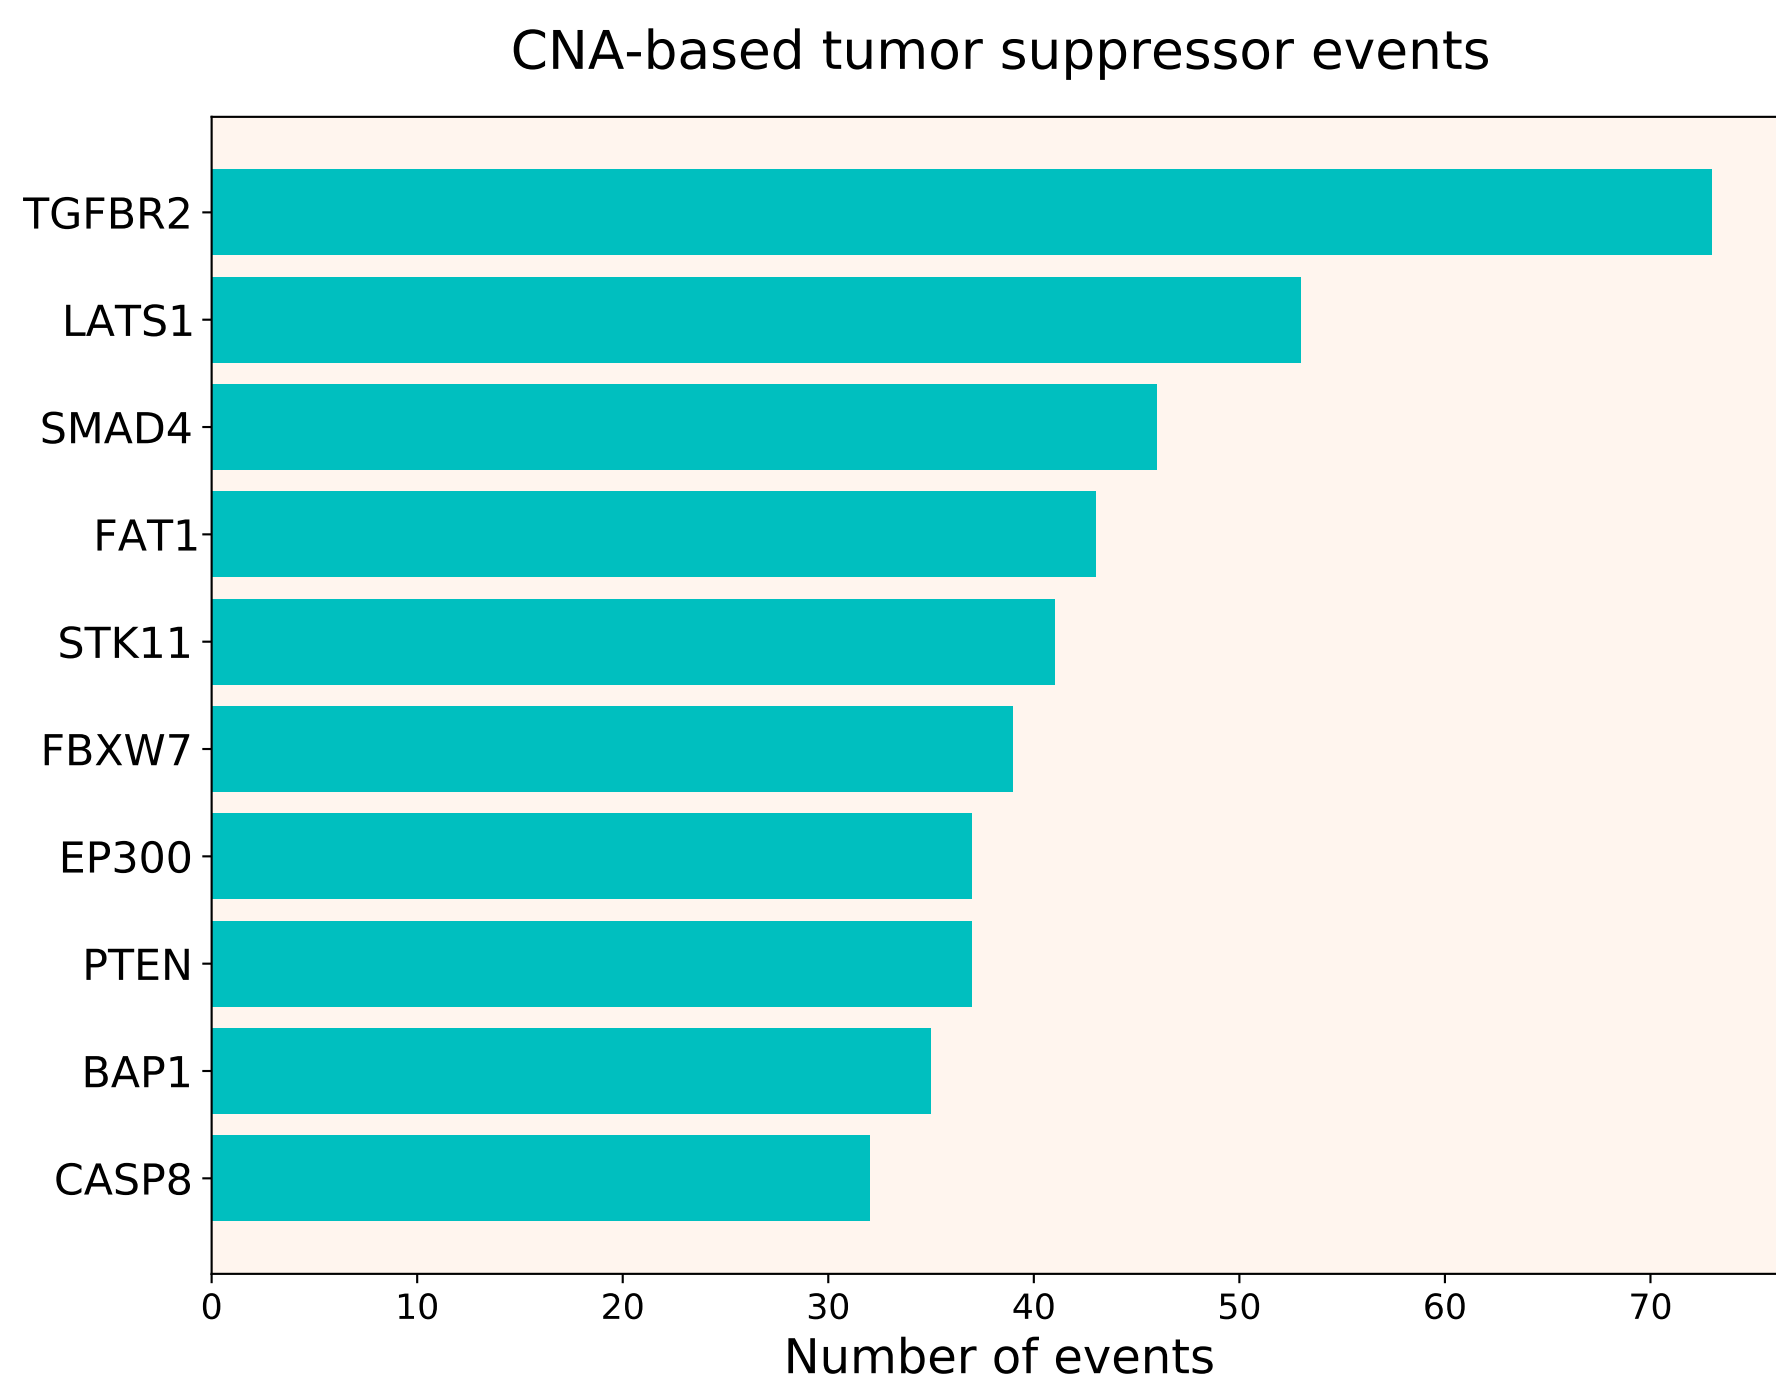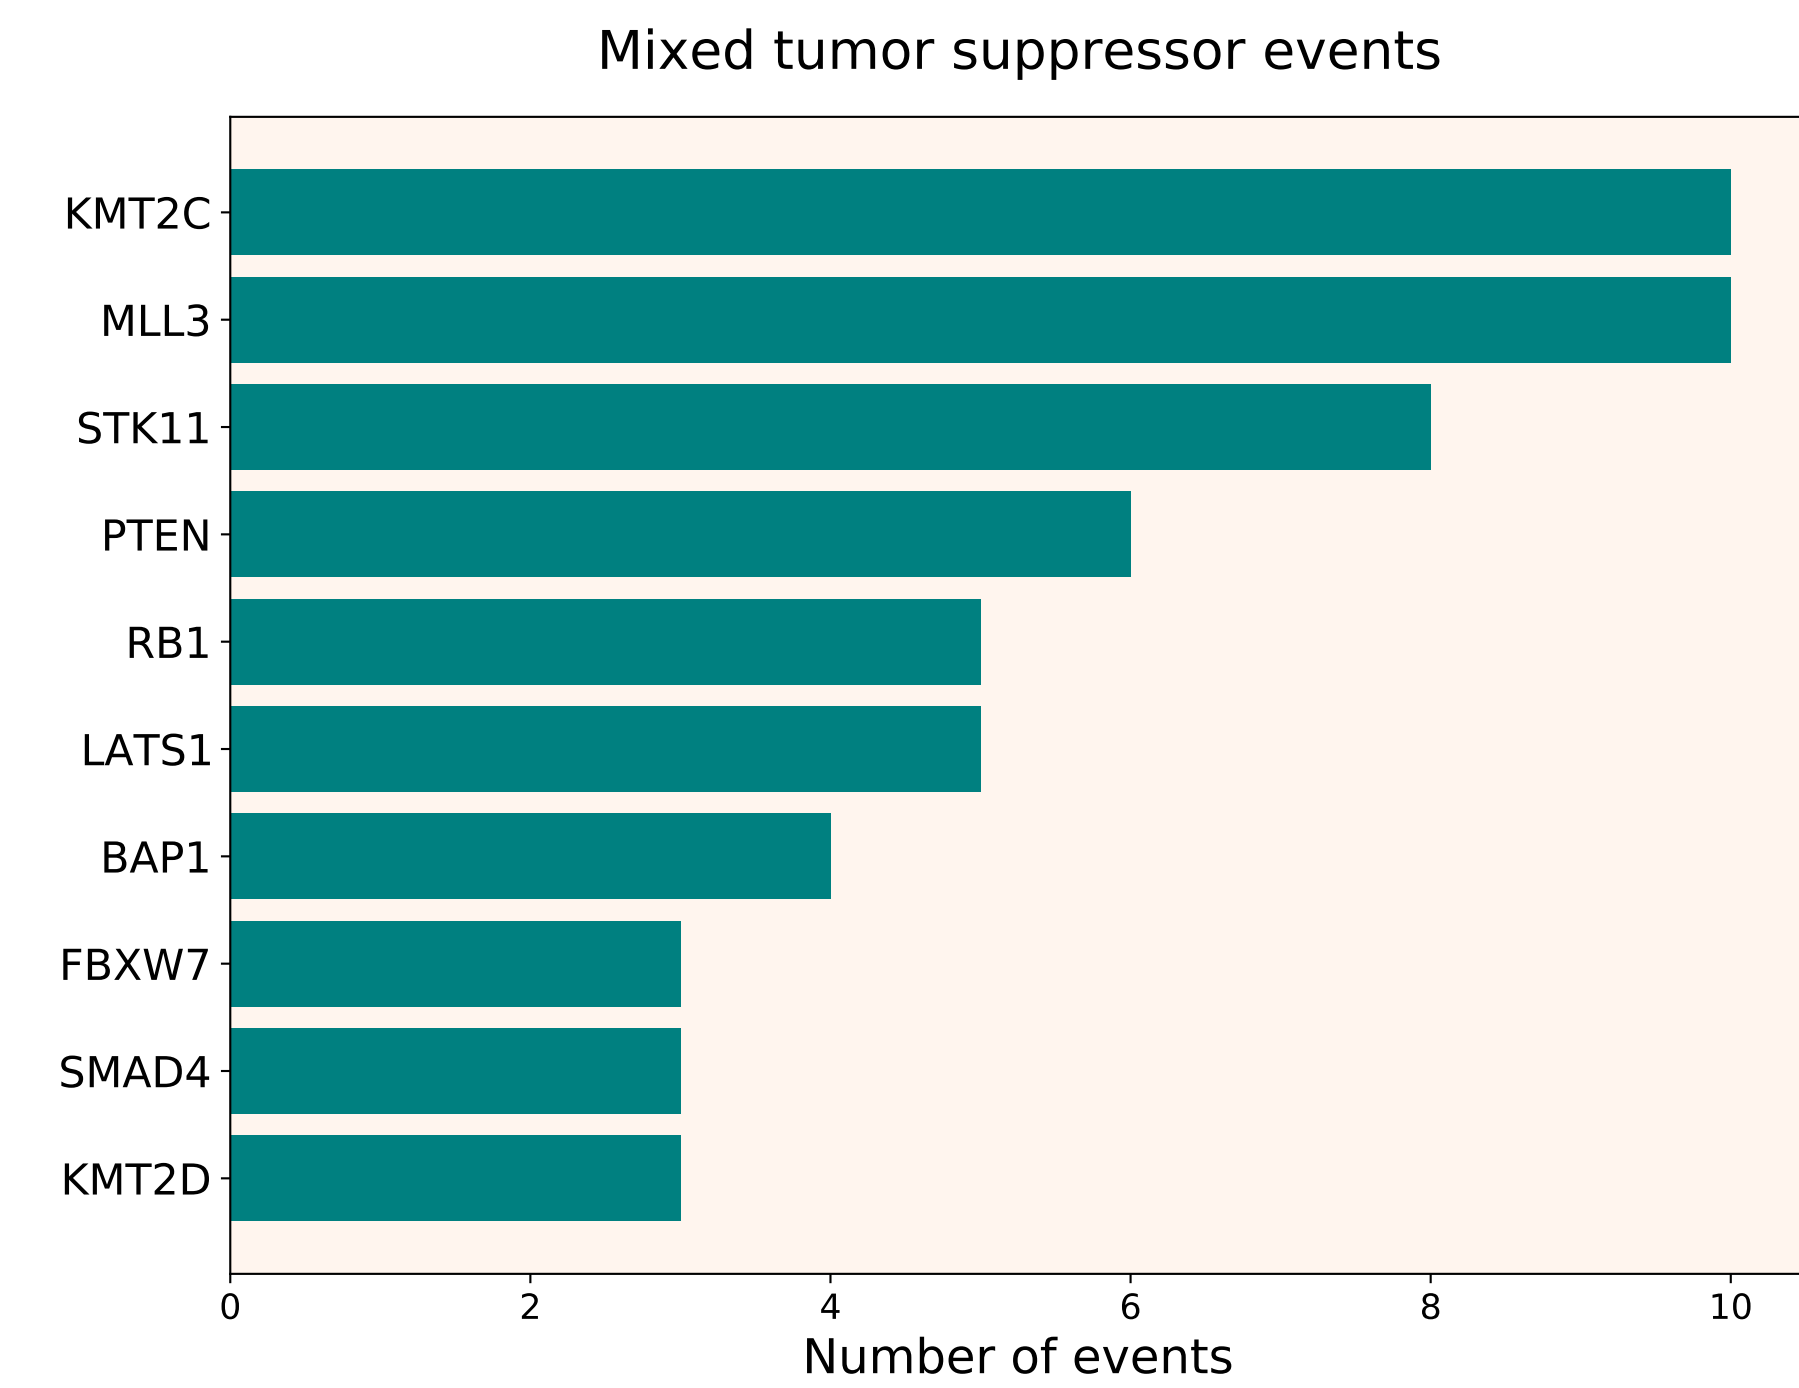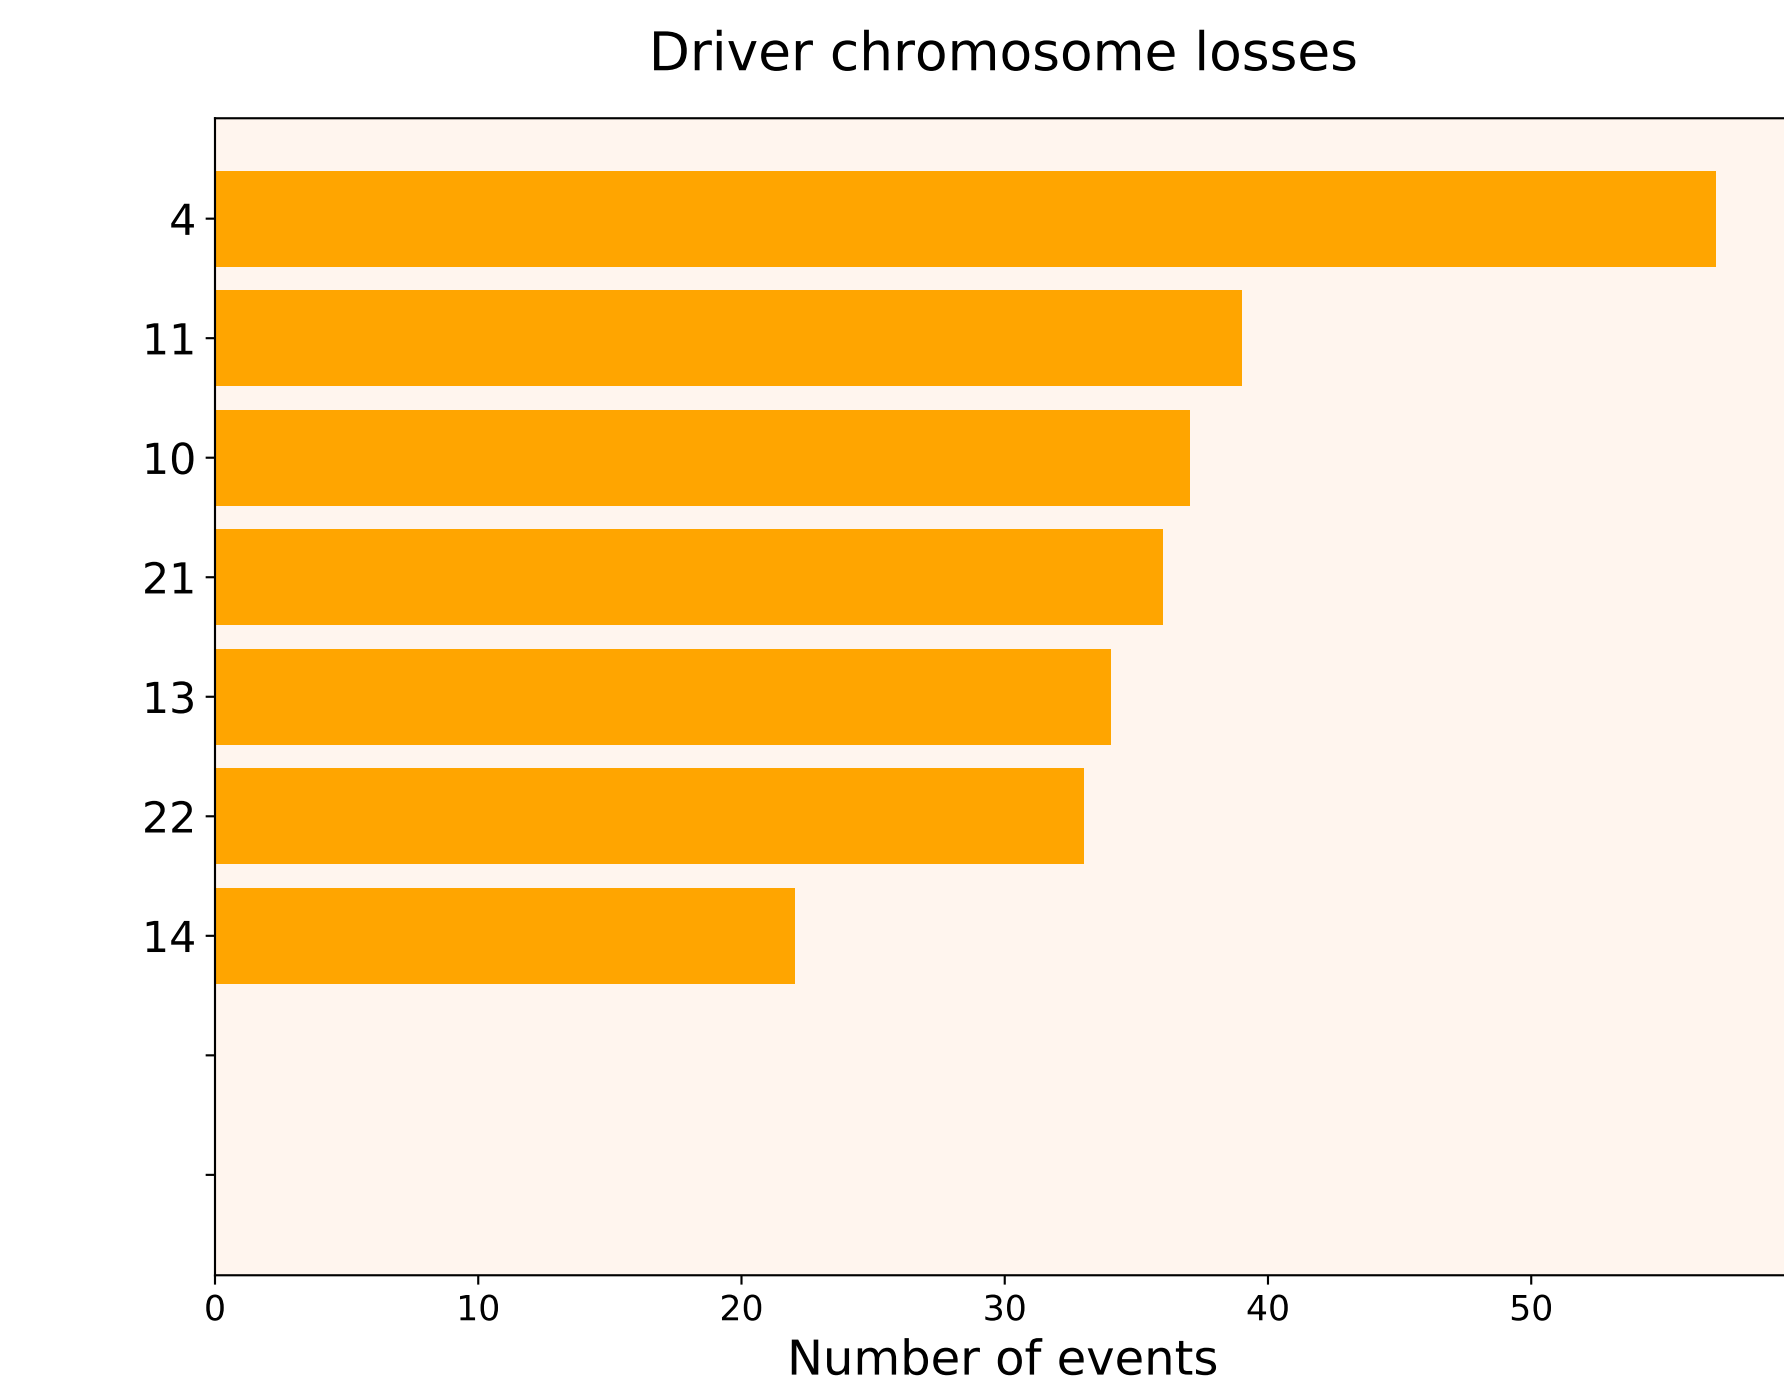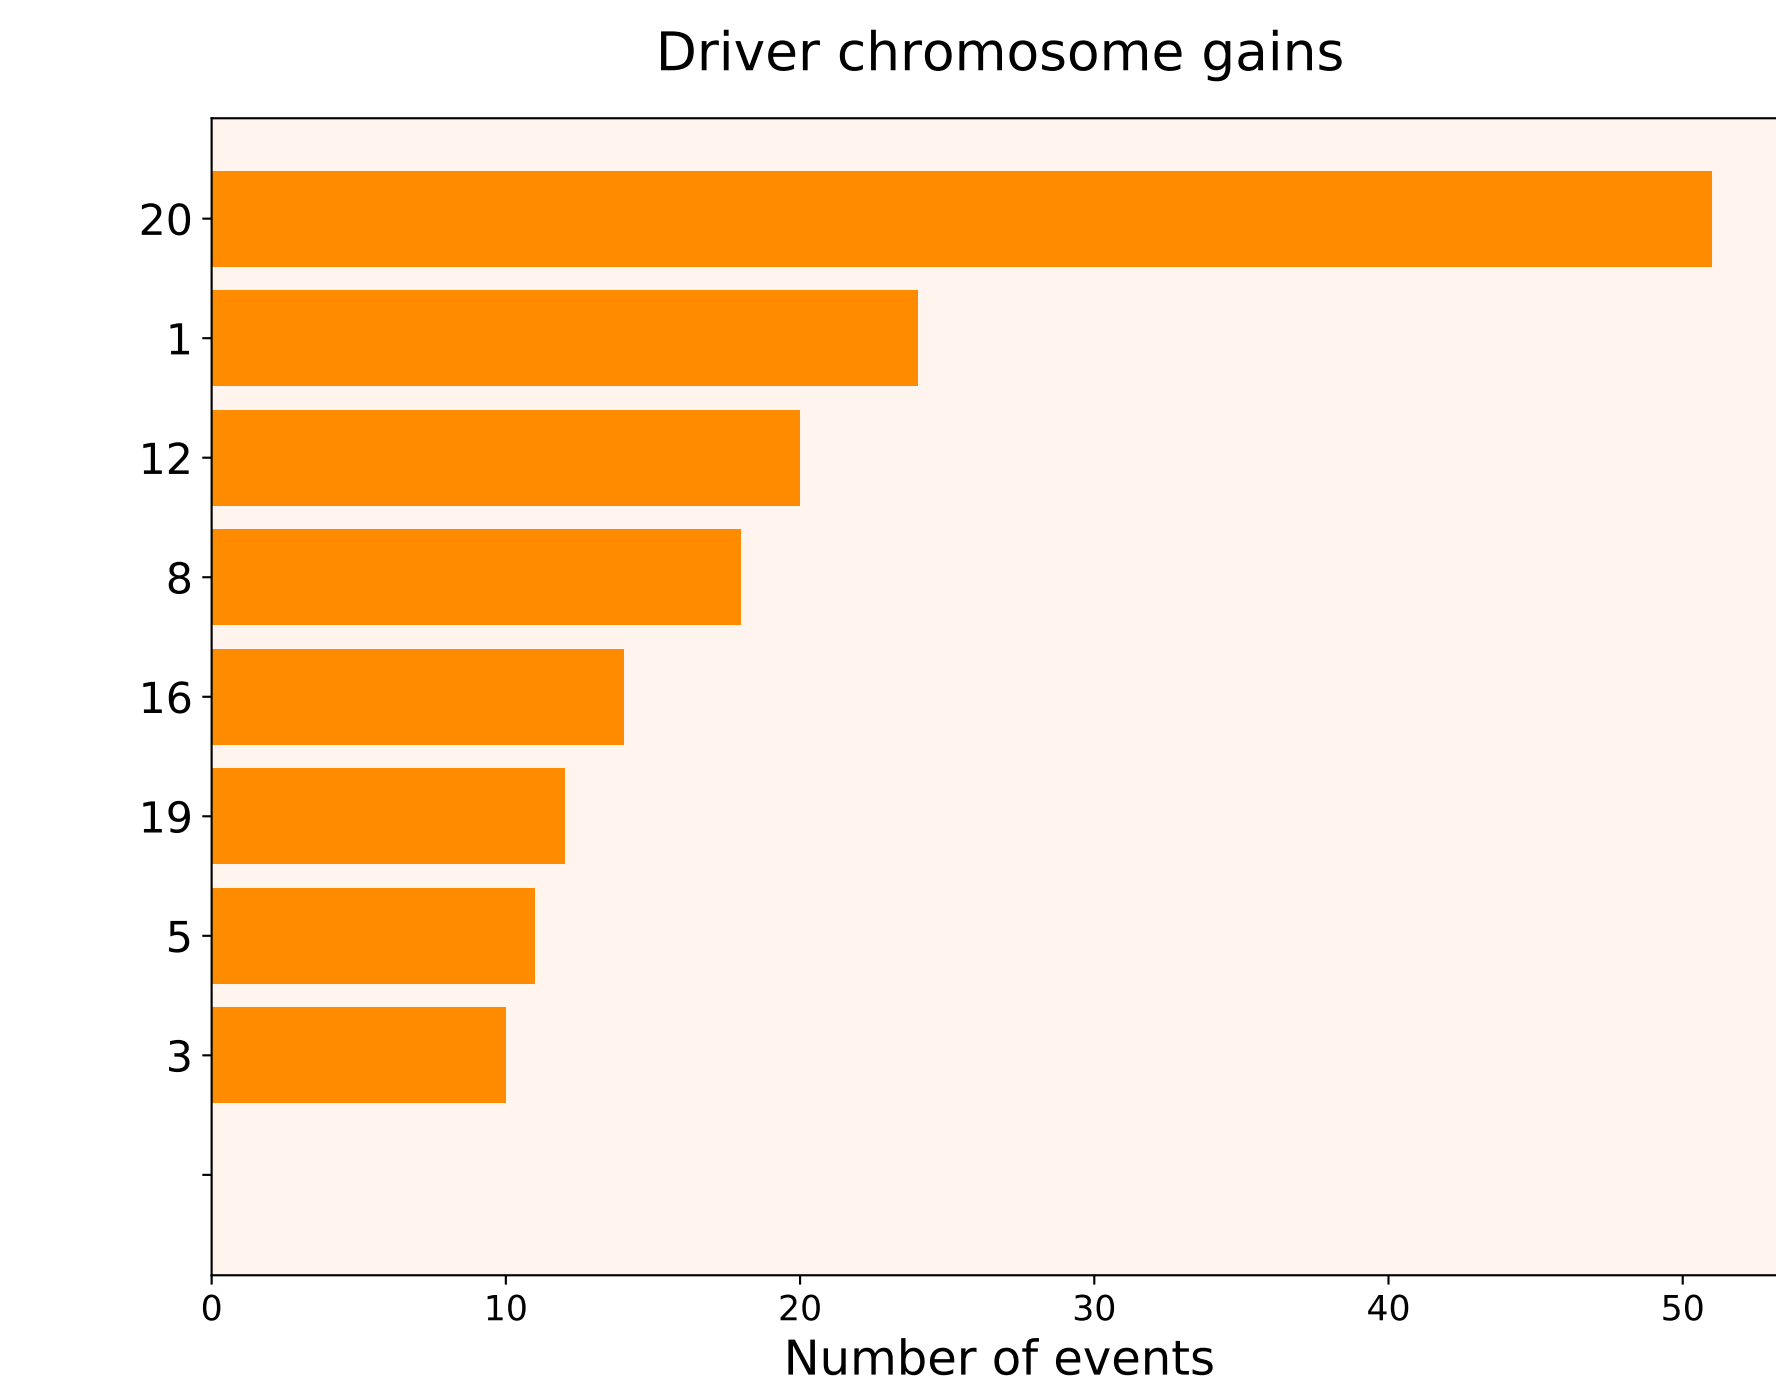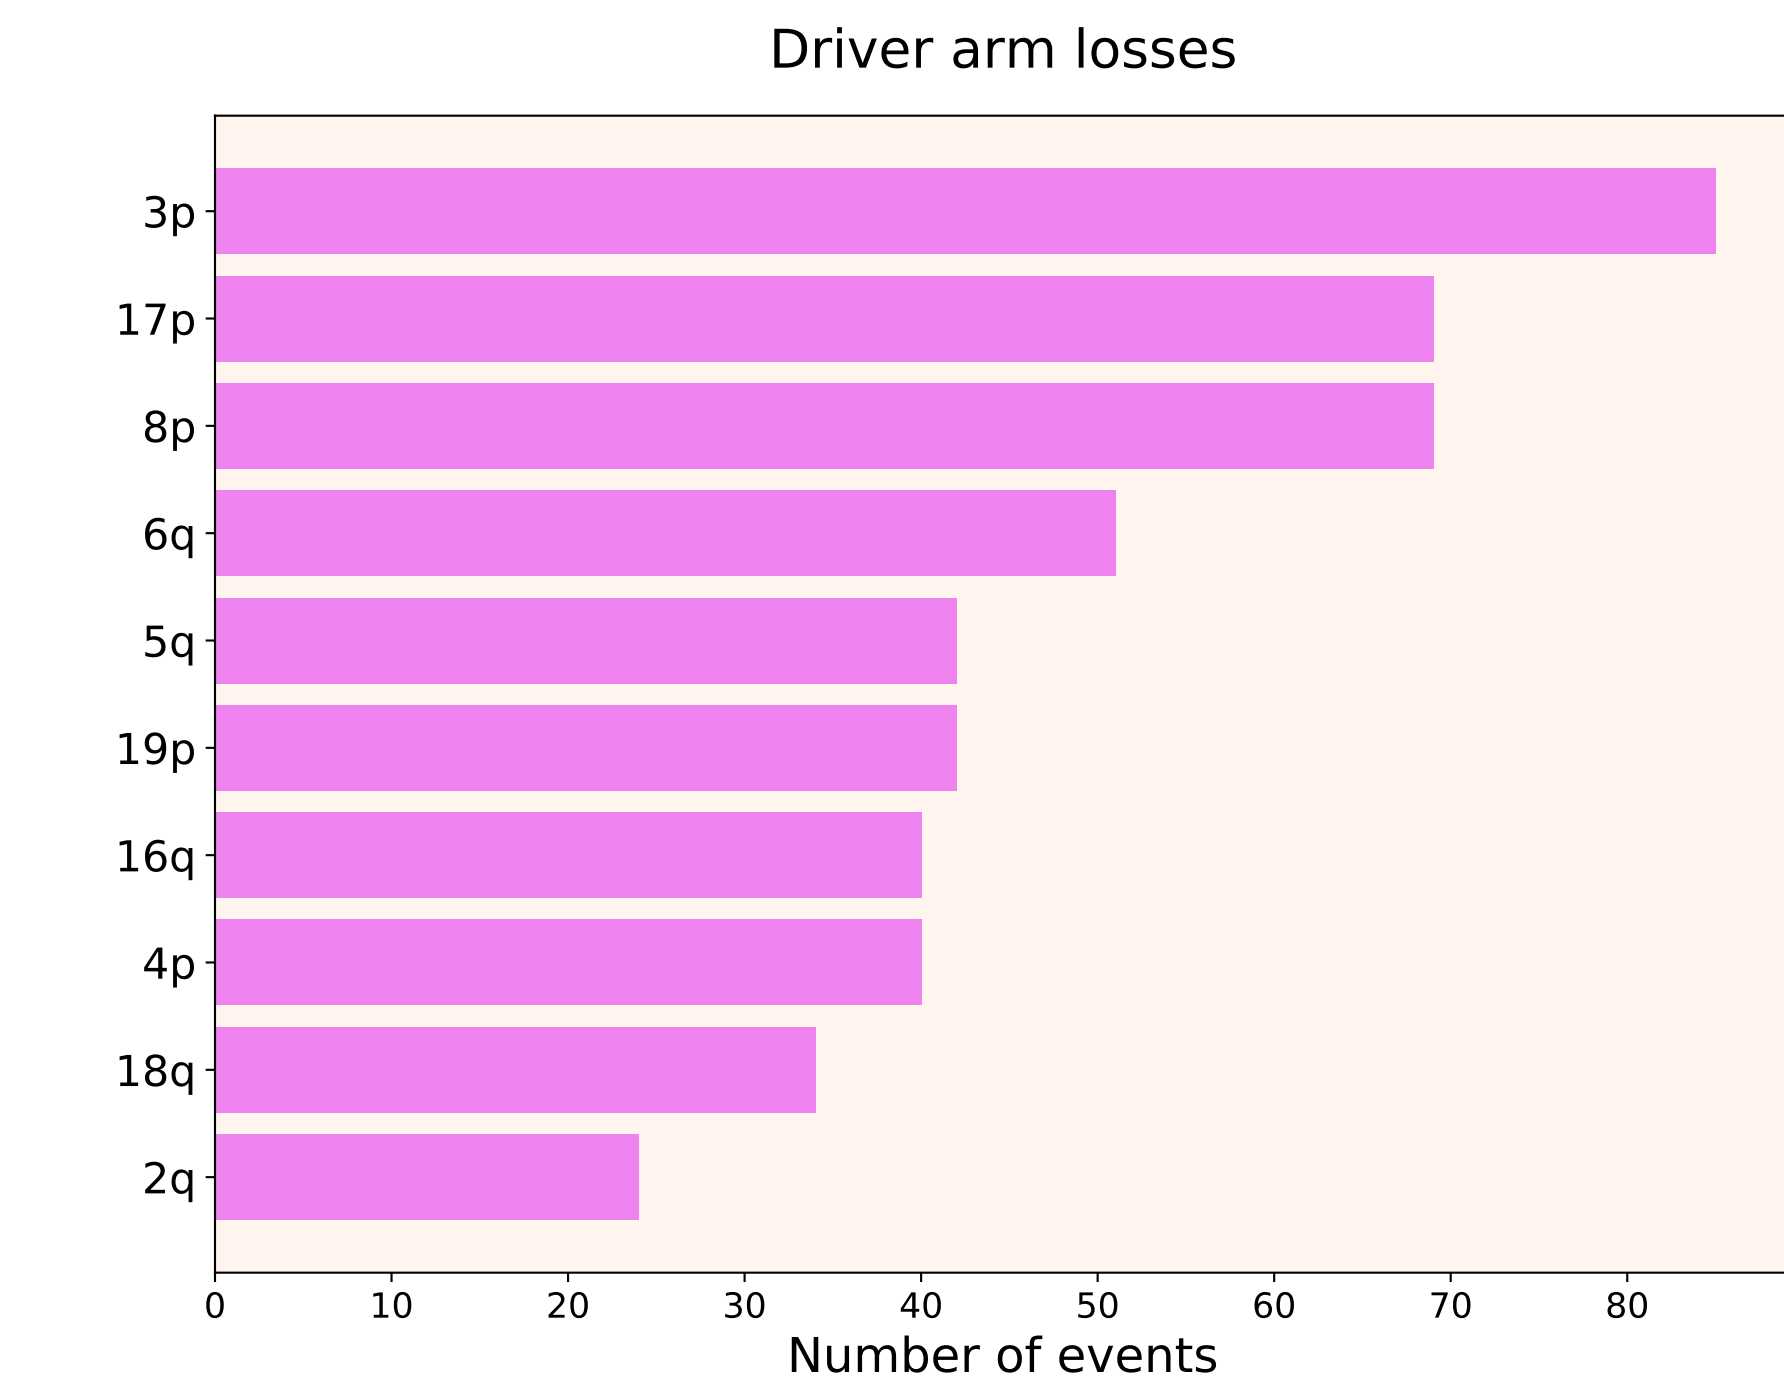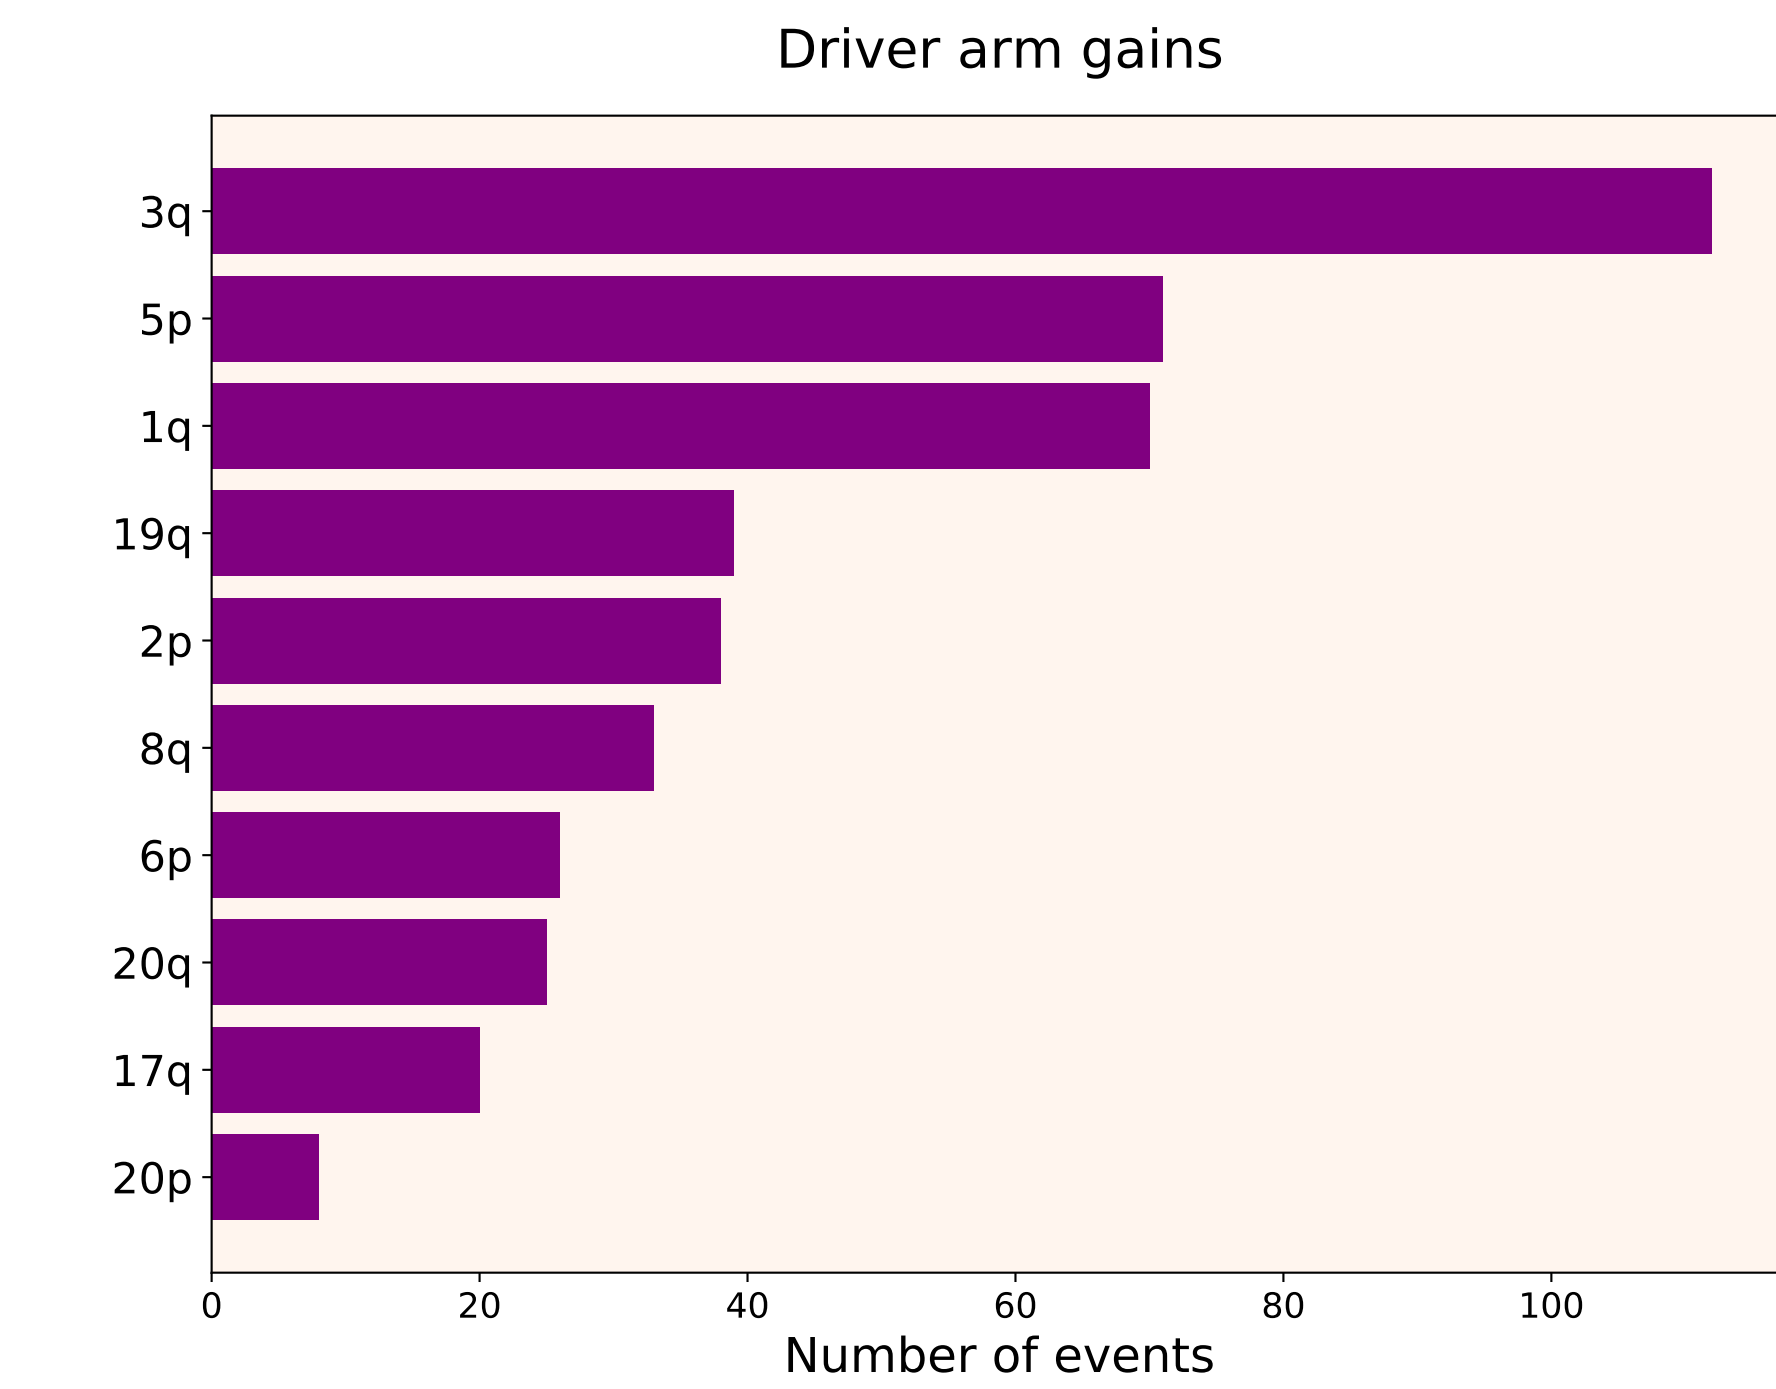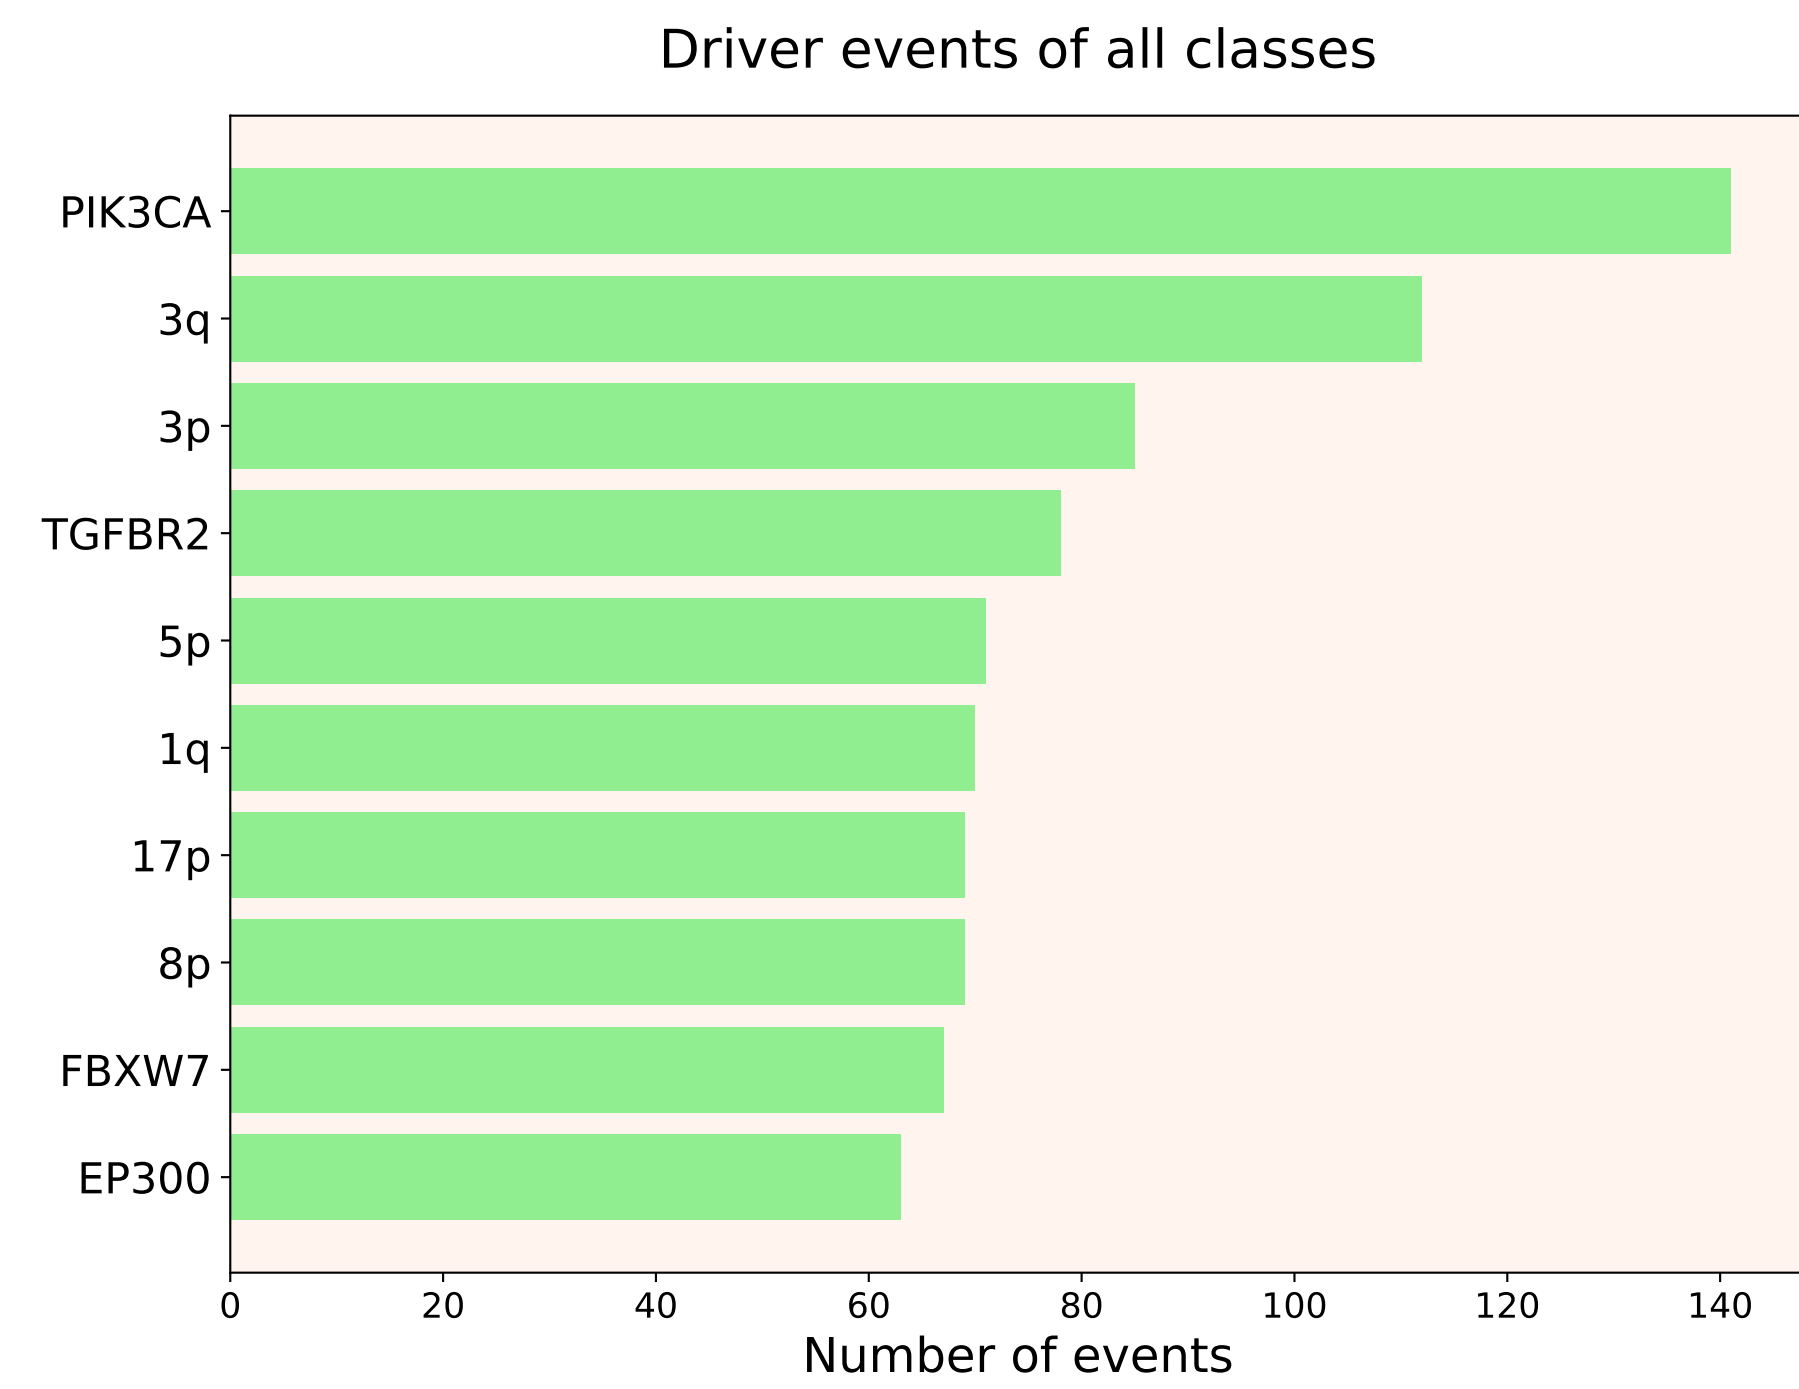

Supplement: Supplemental_Data_S1.zip [file Supplemental_Data_S1.zip]

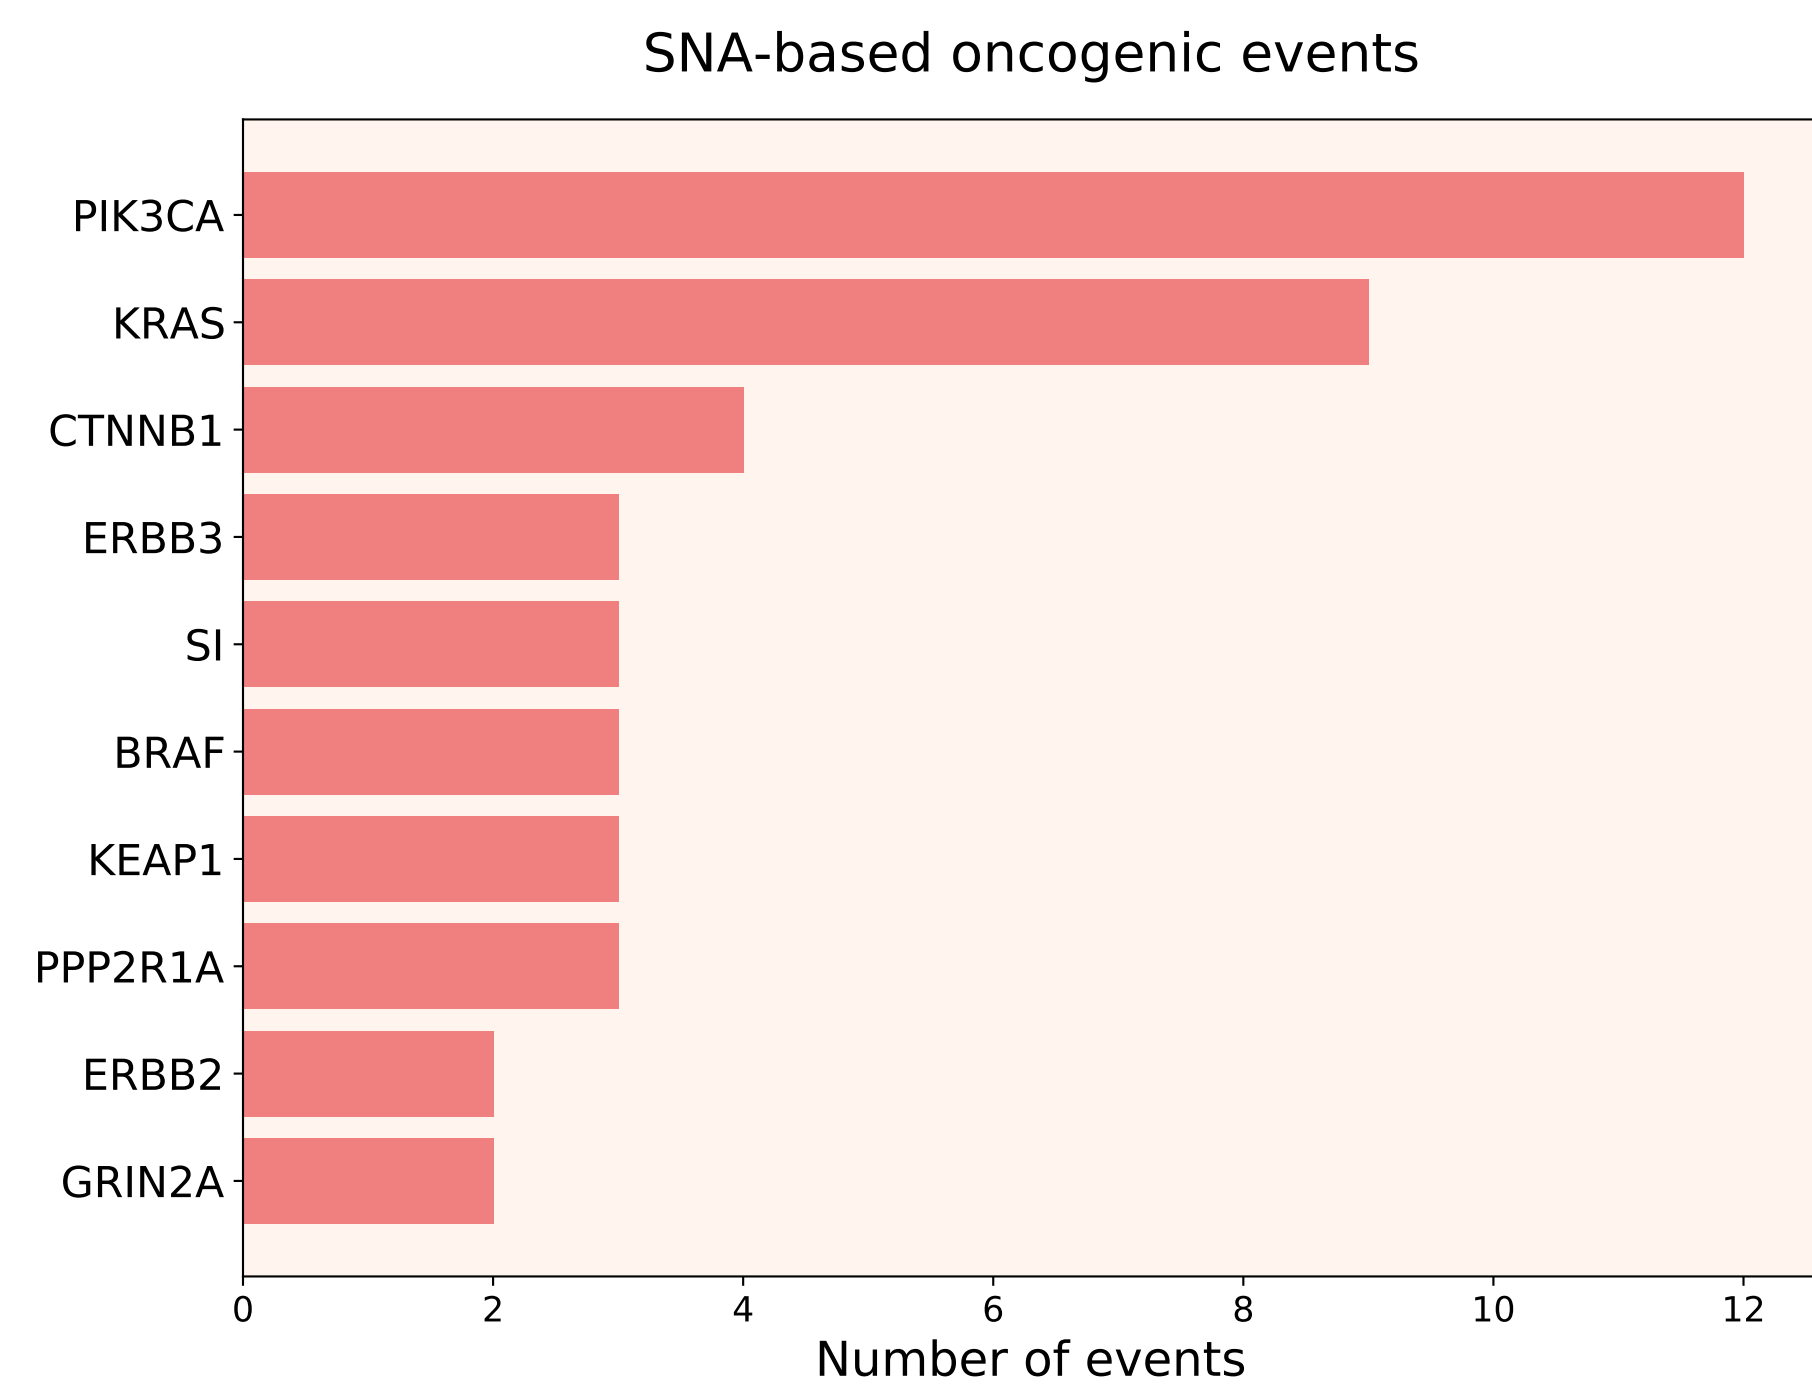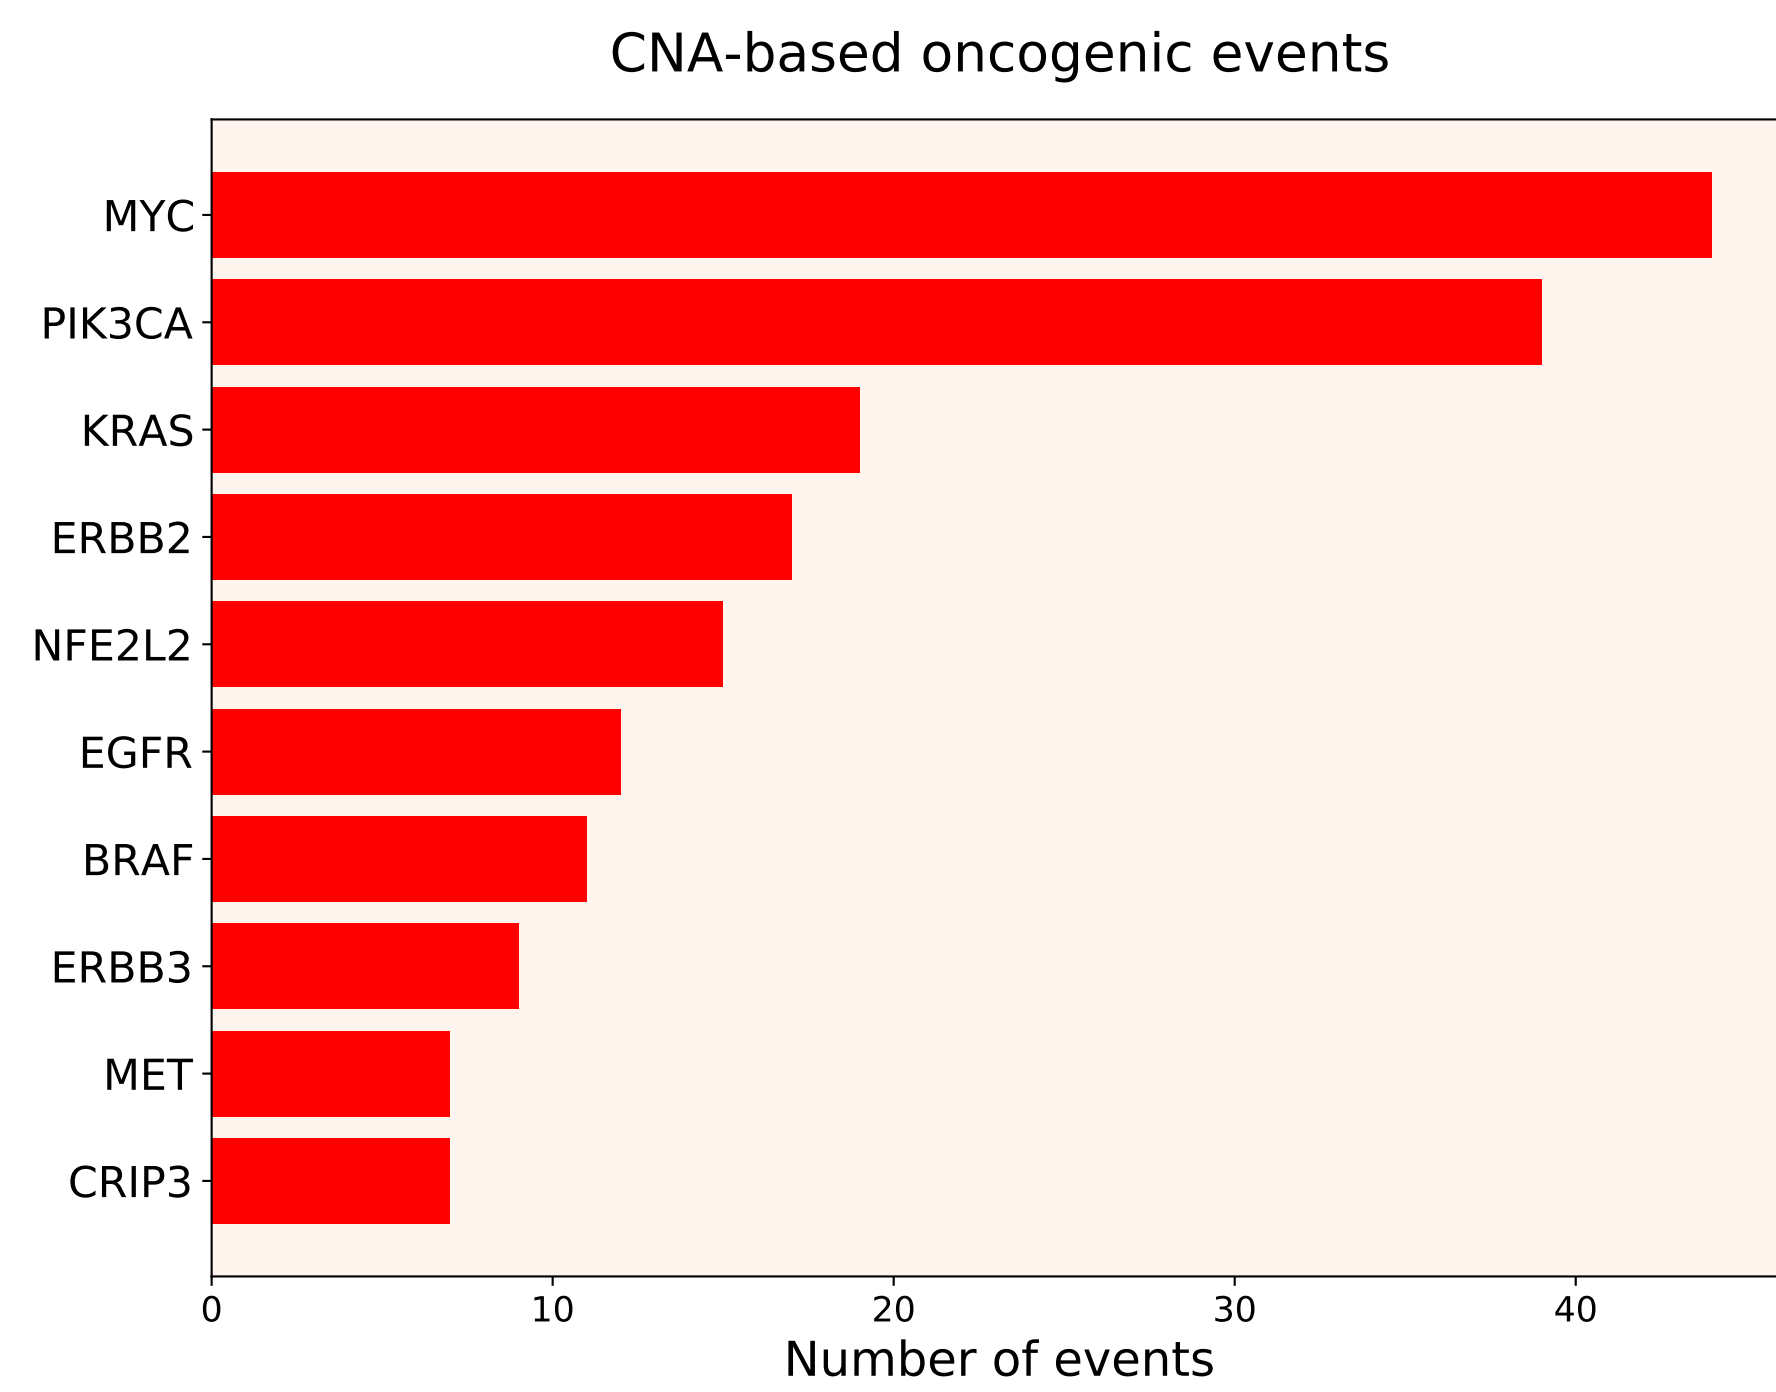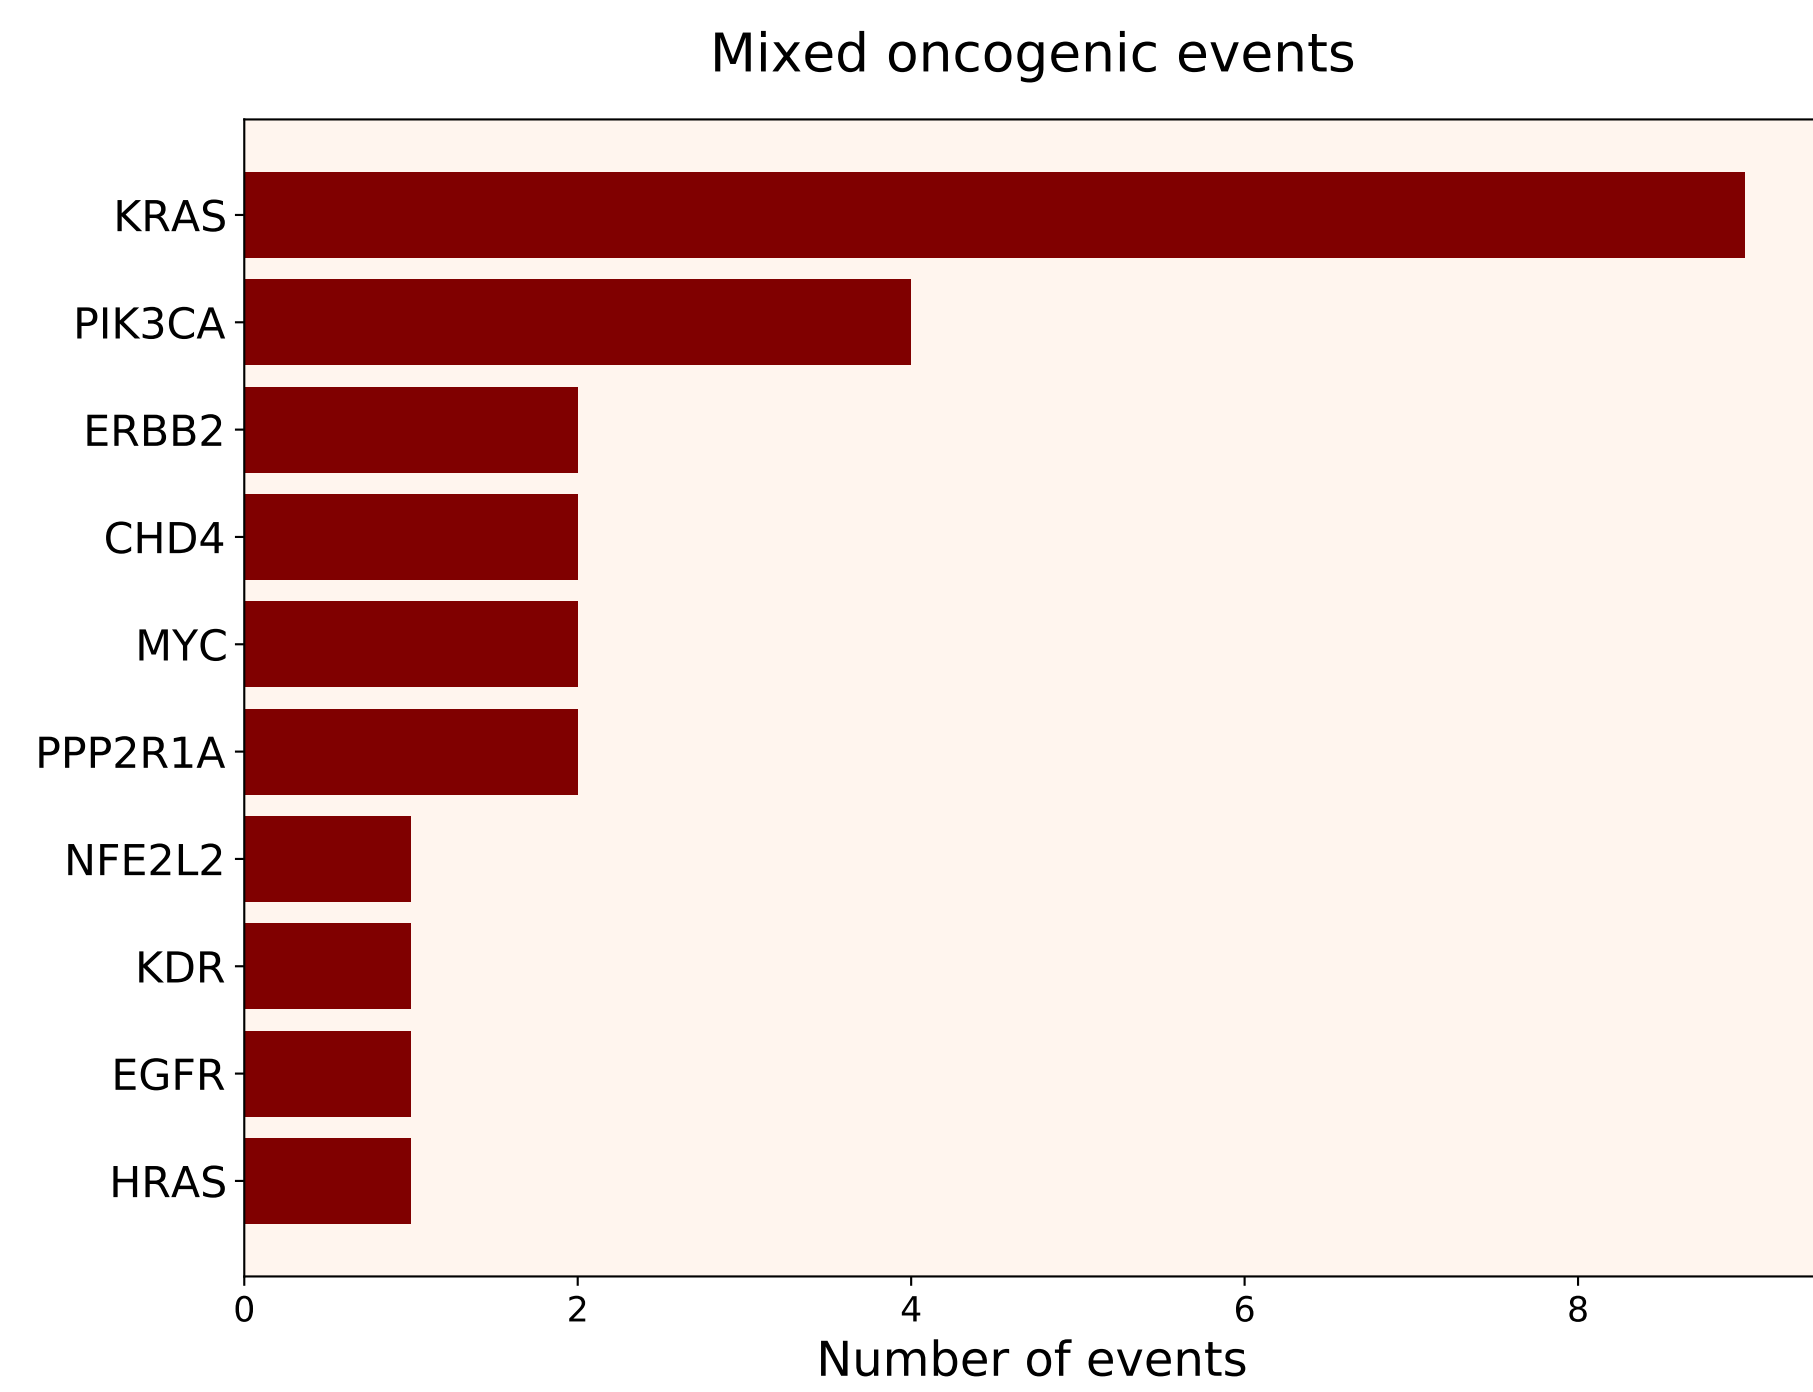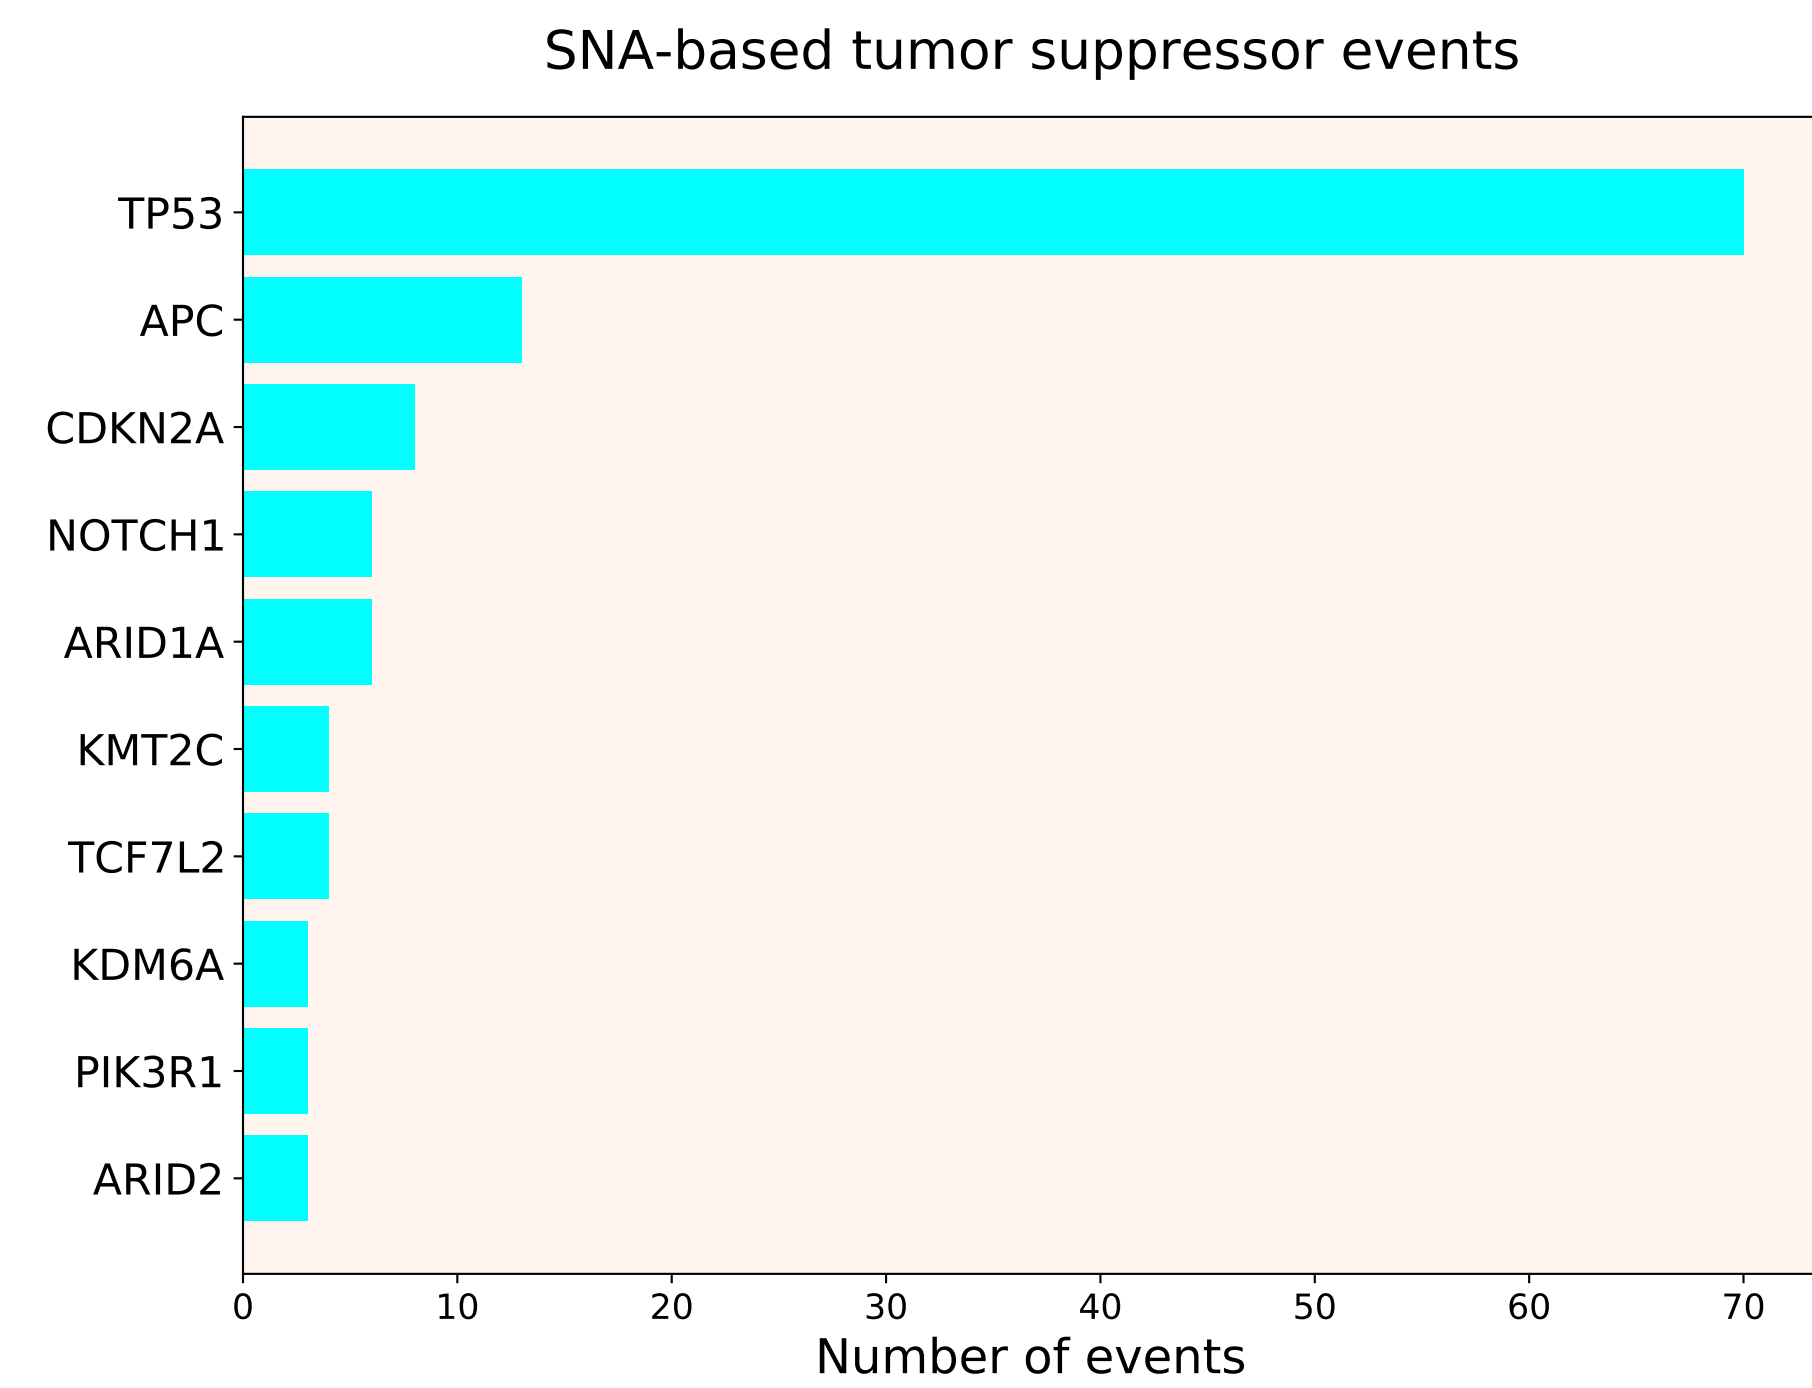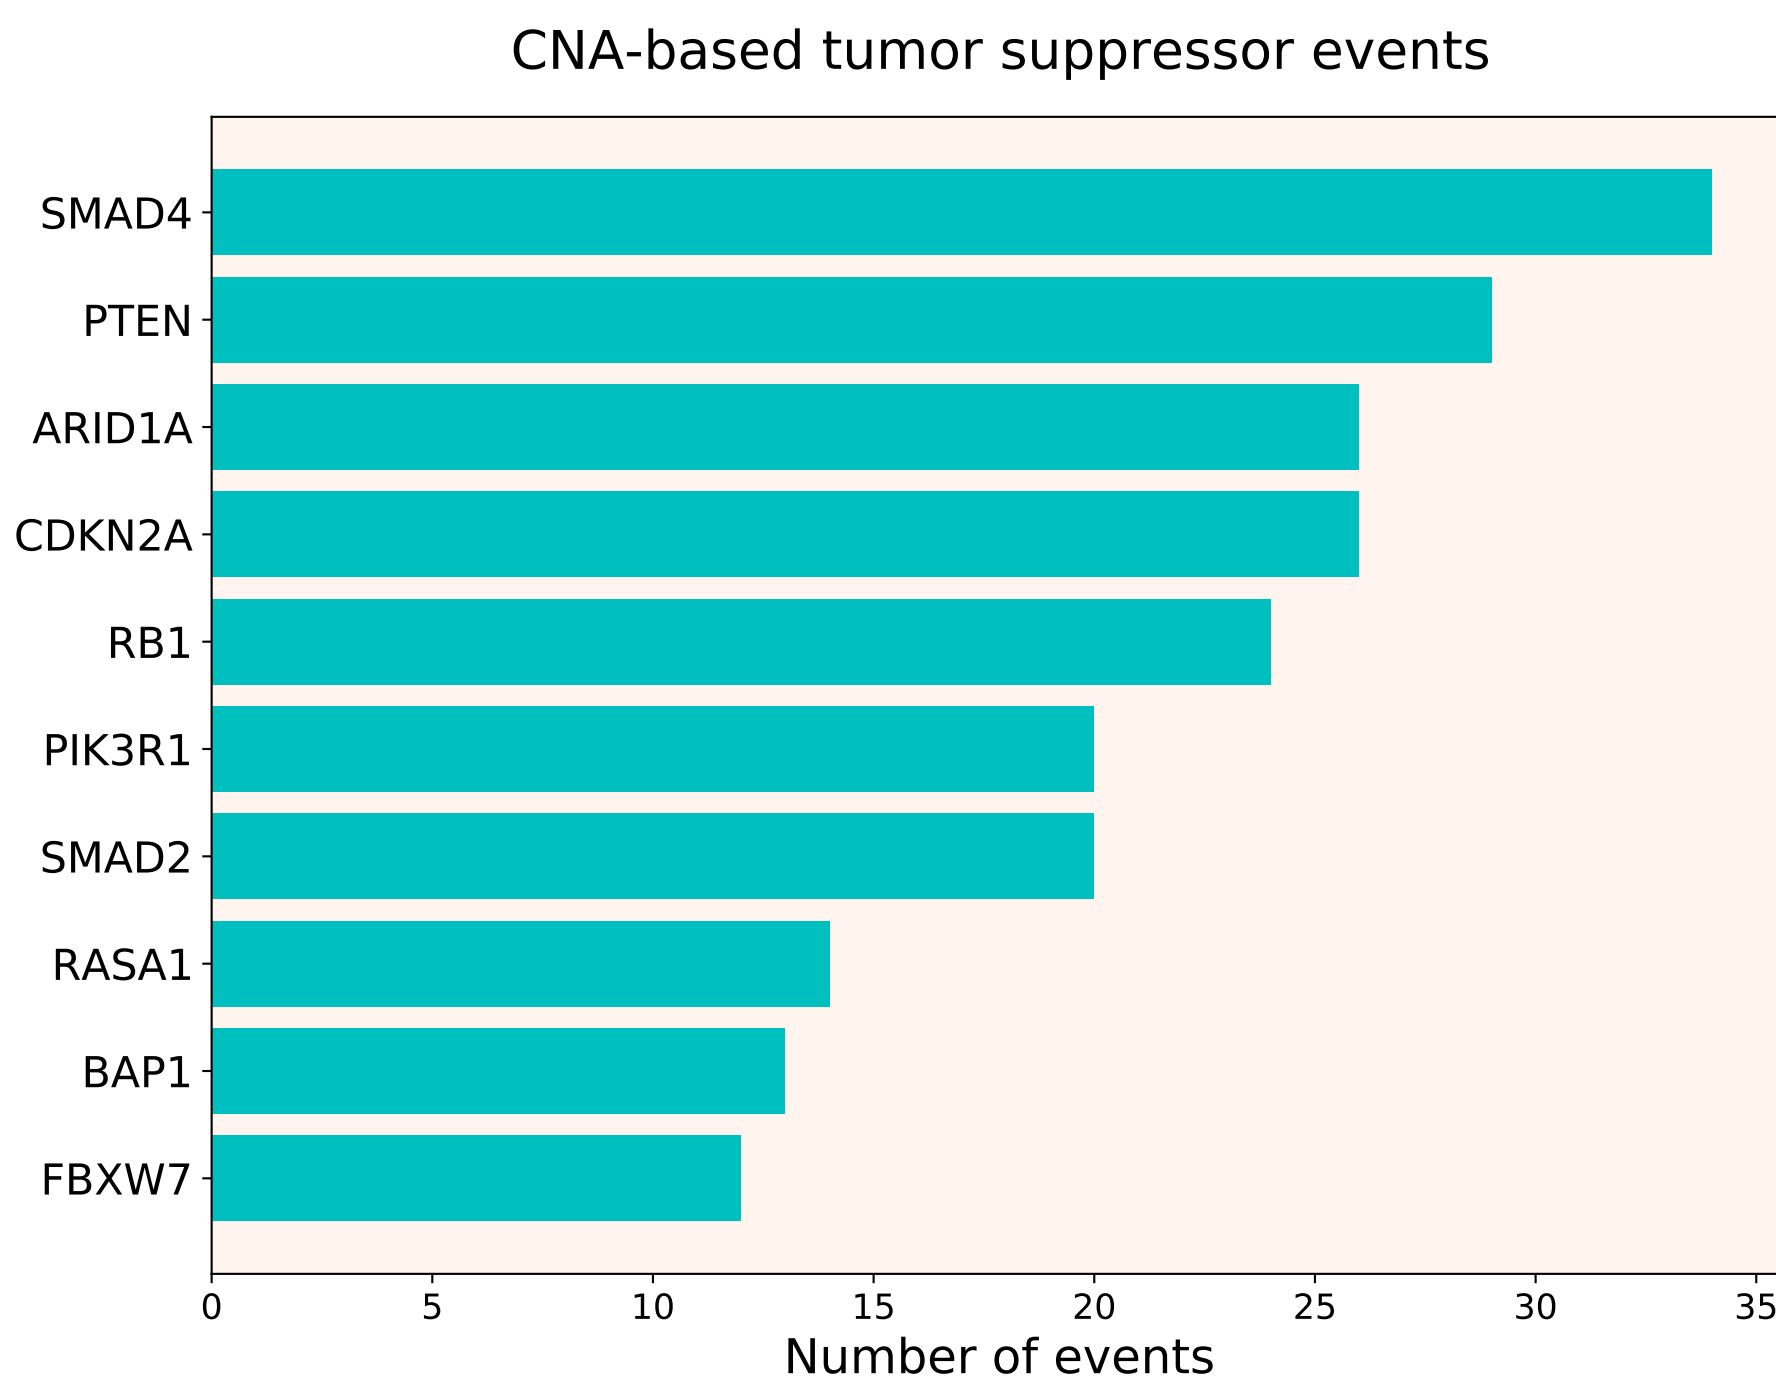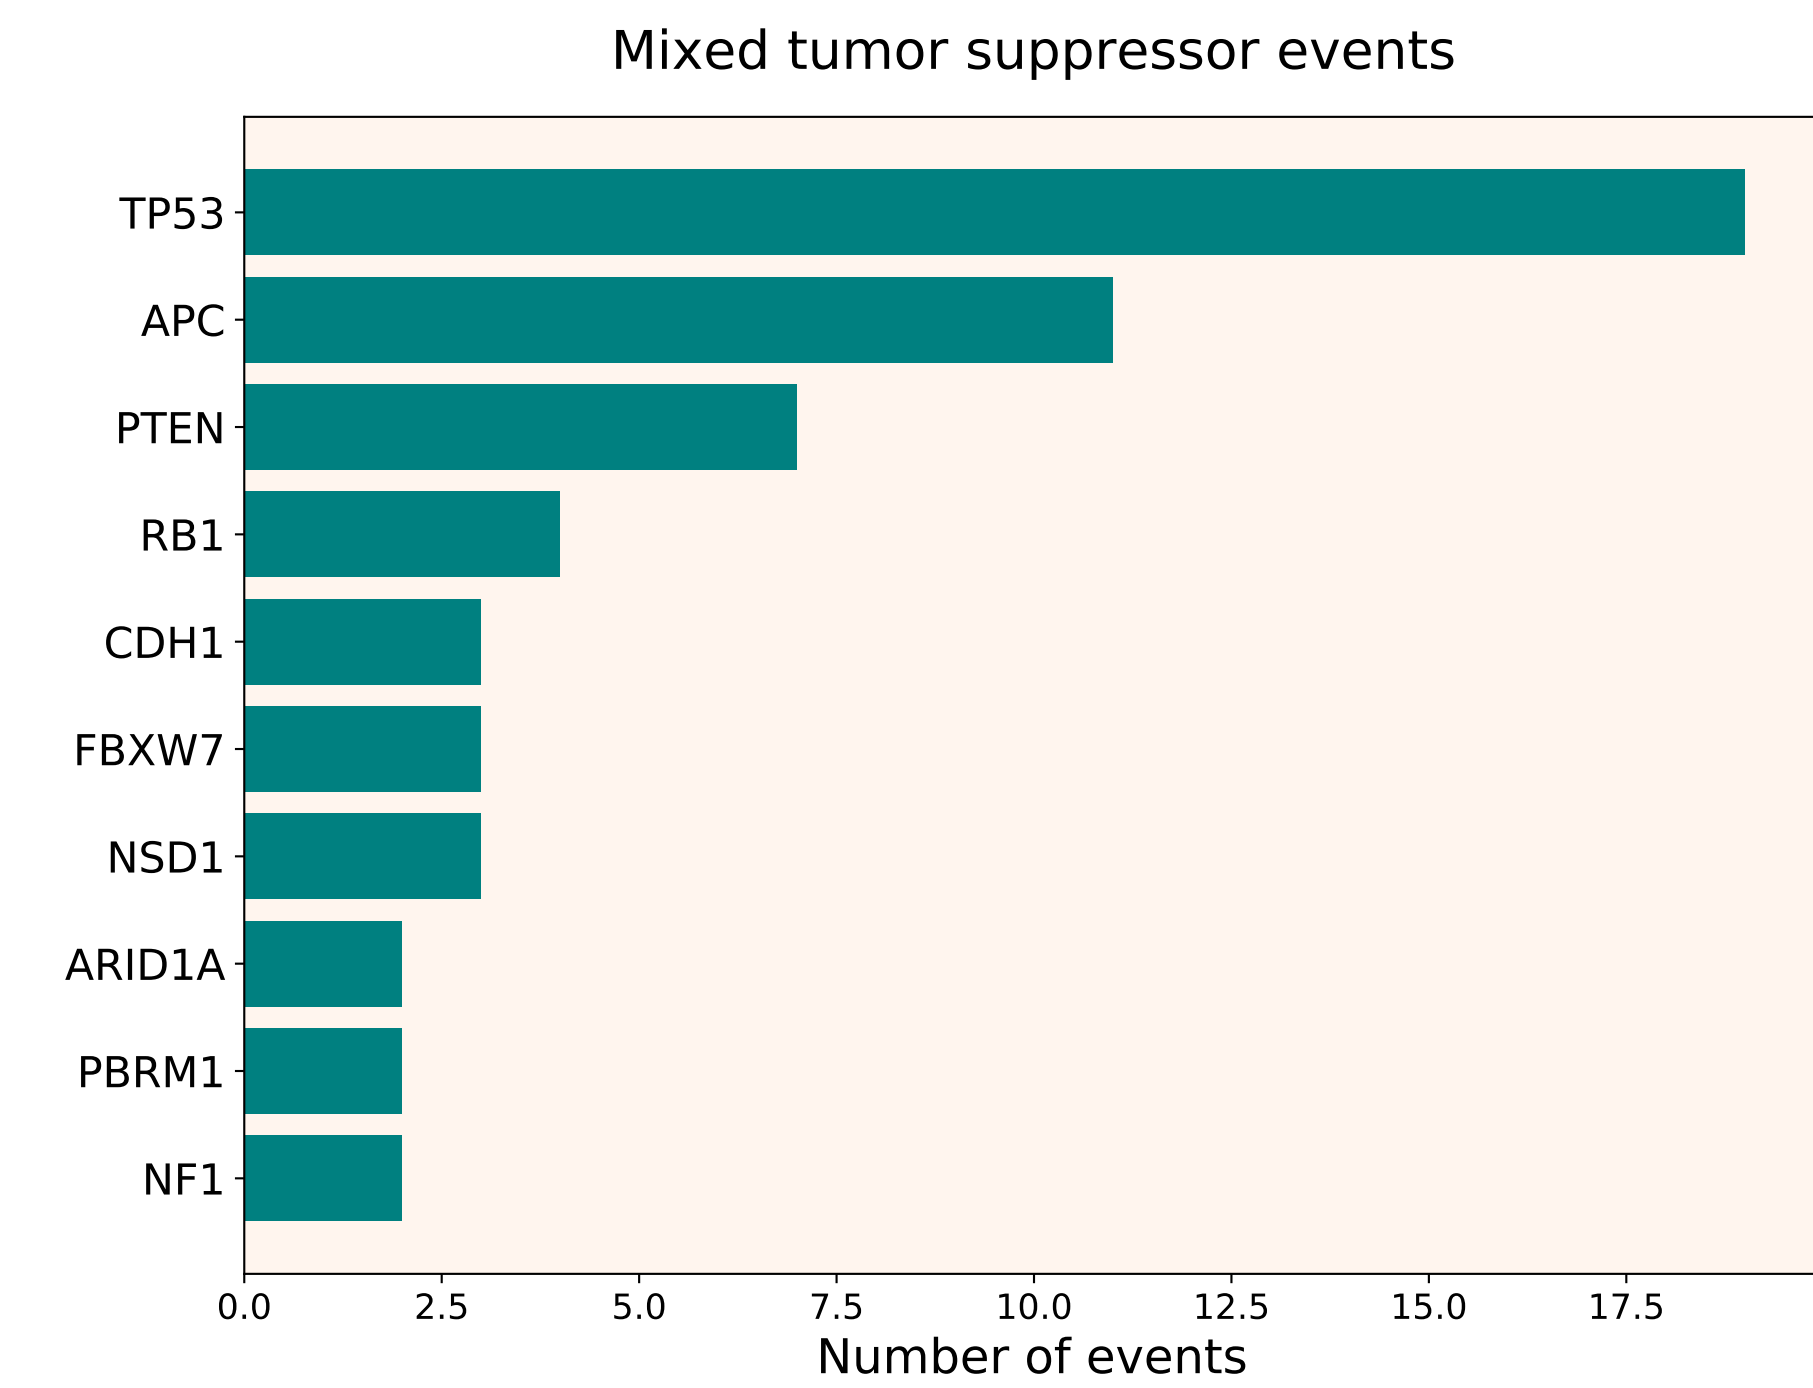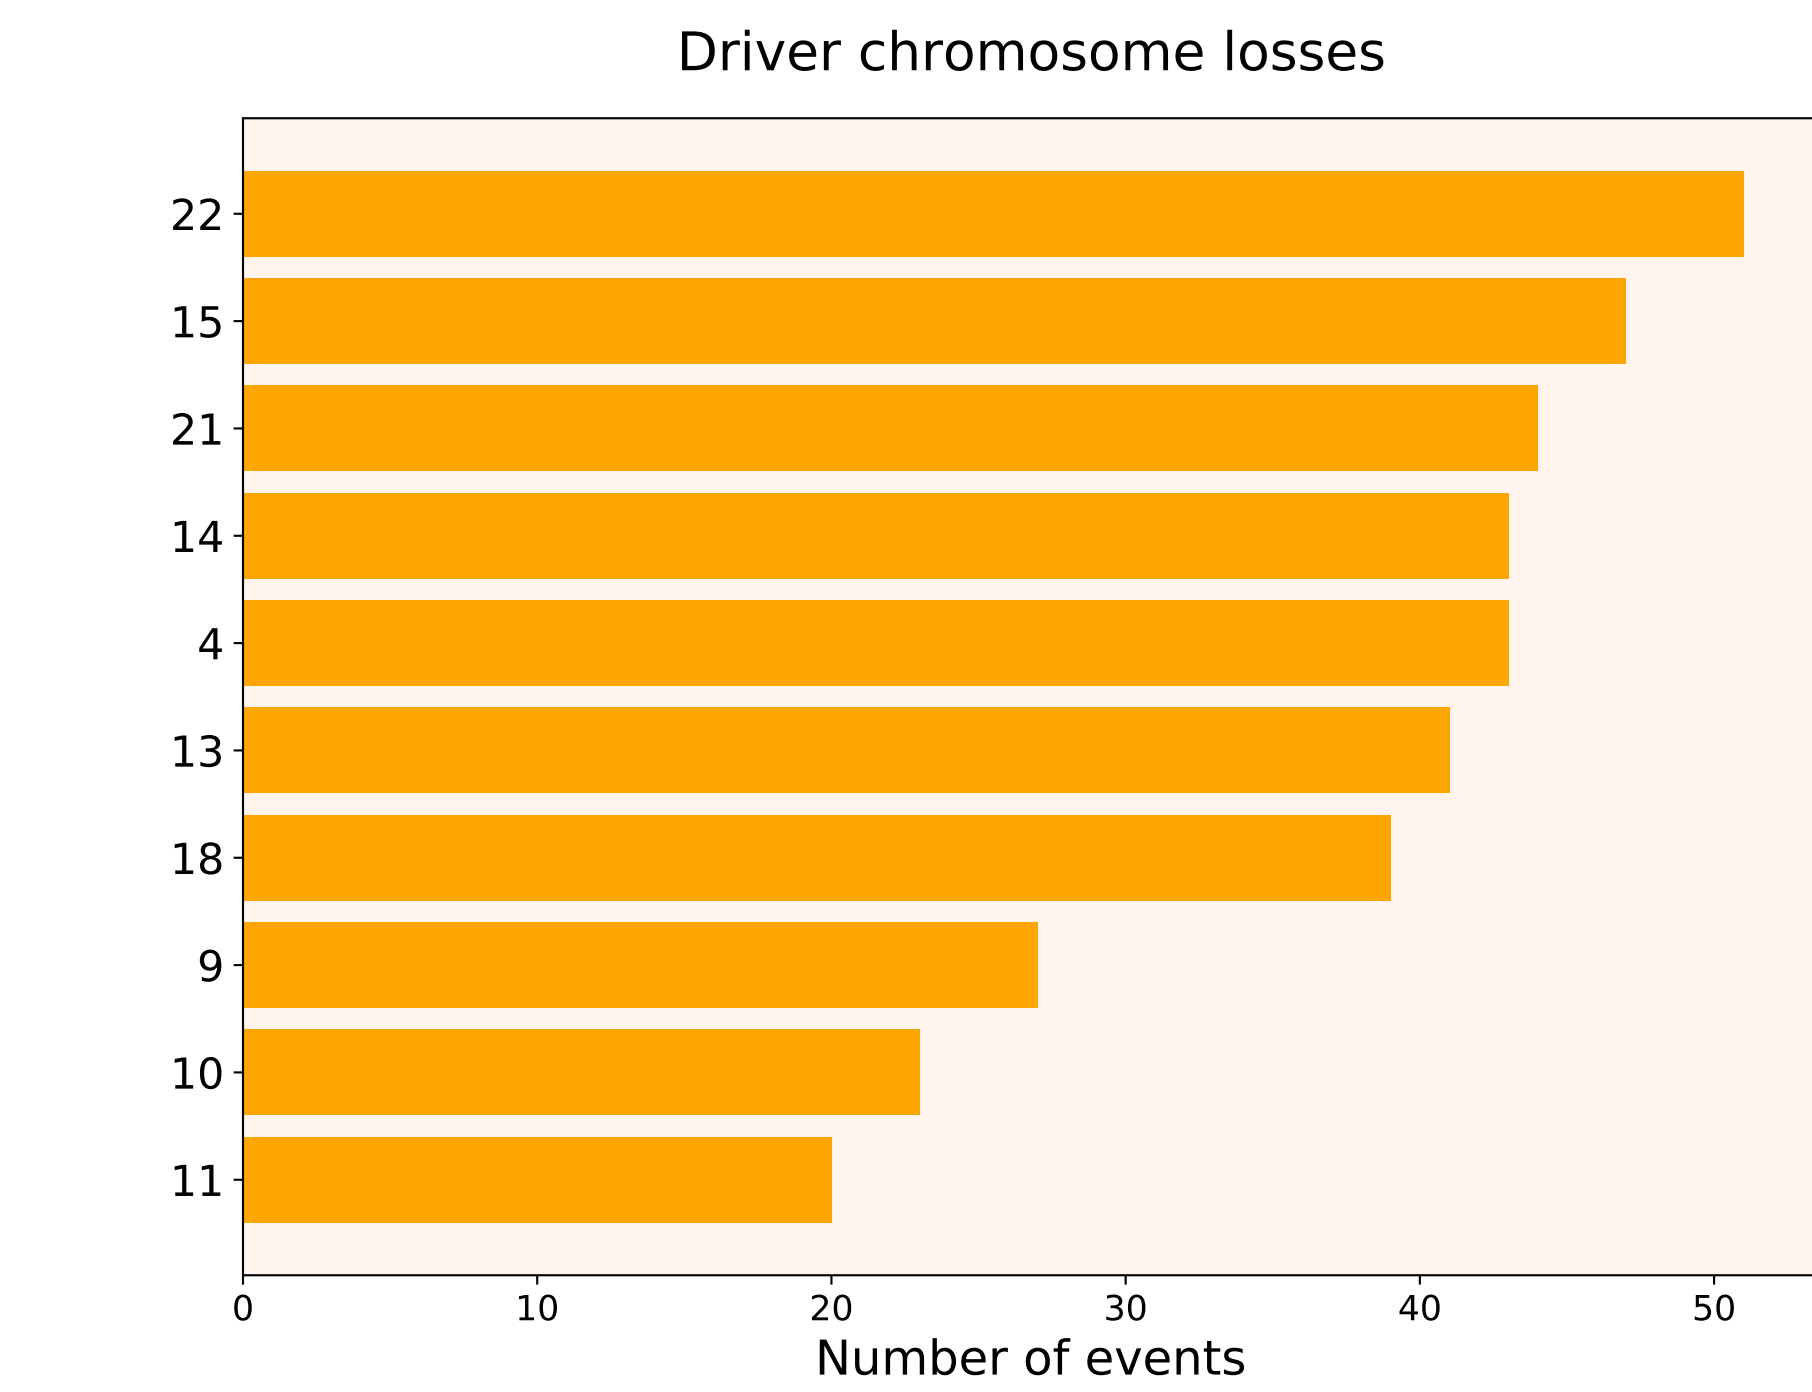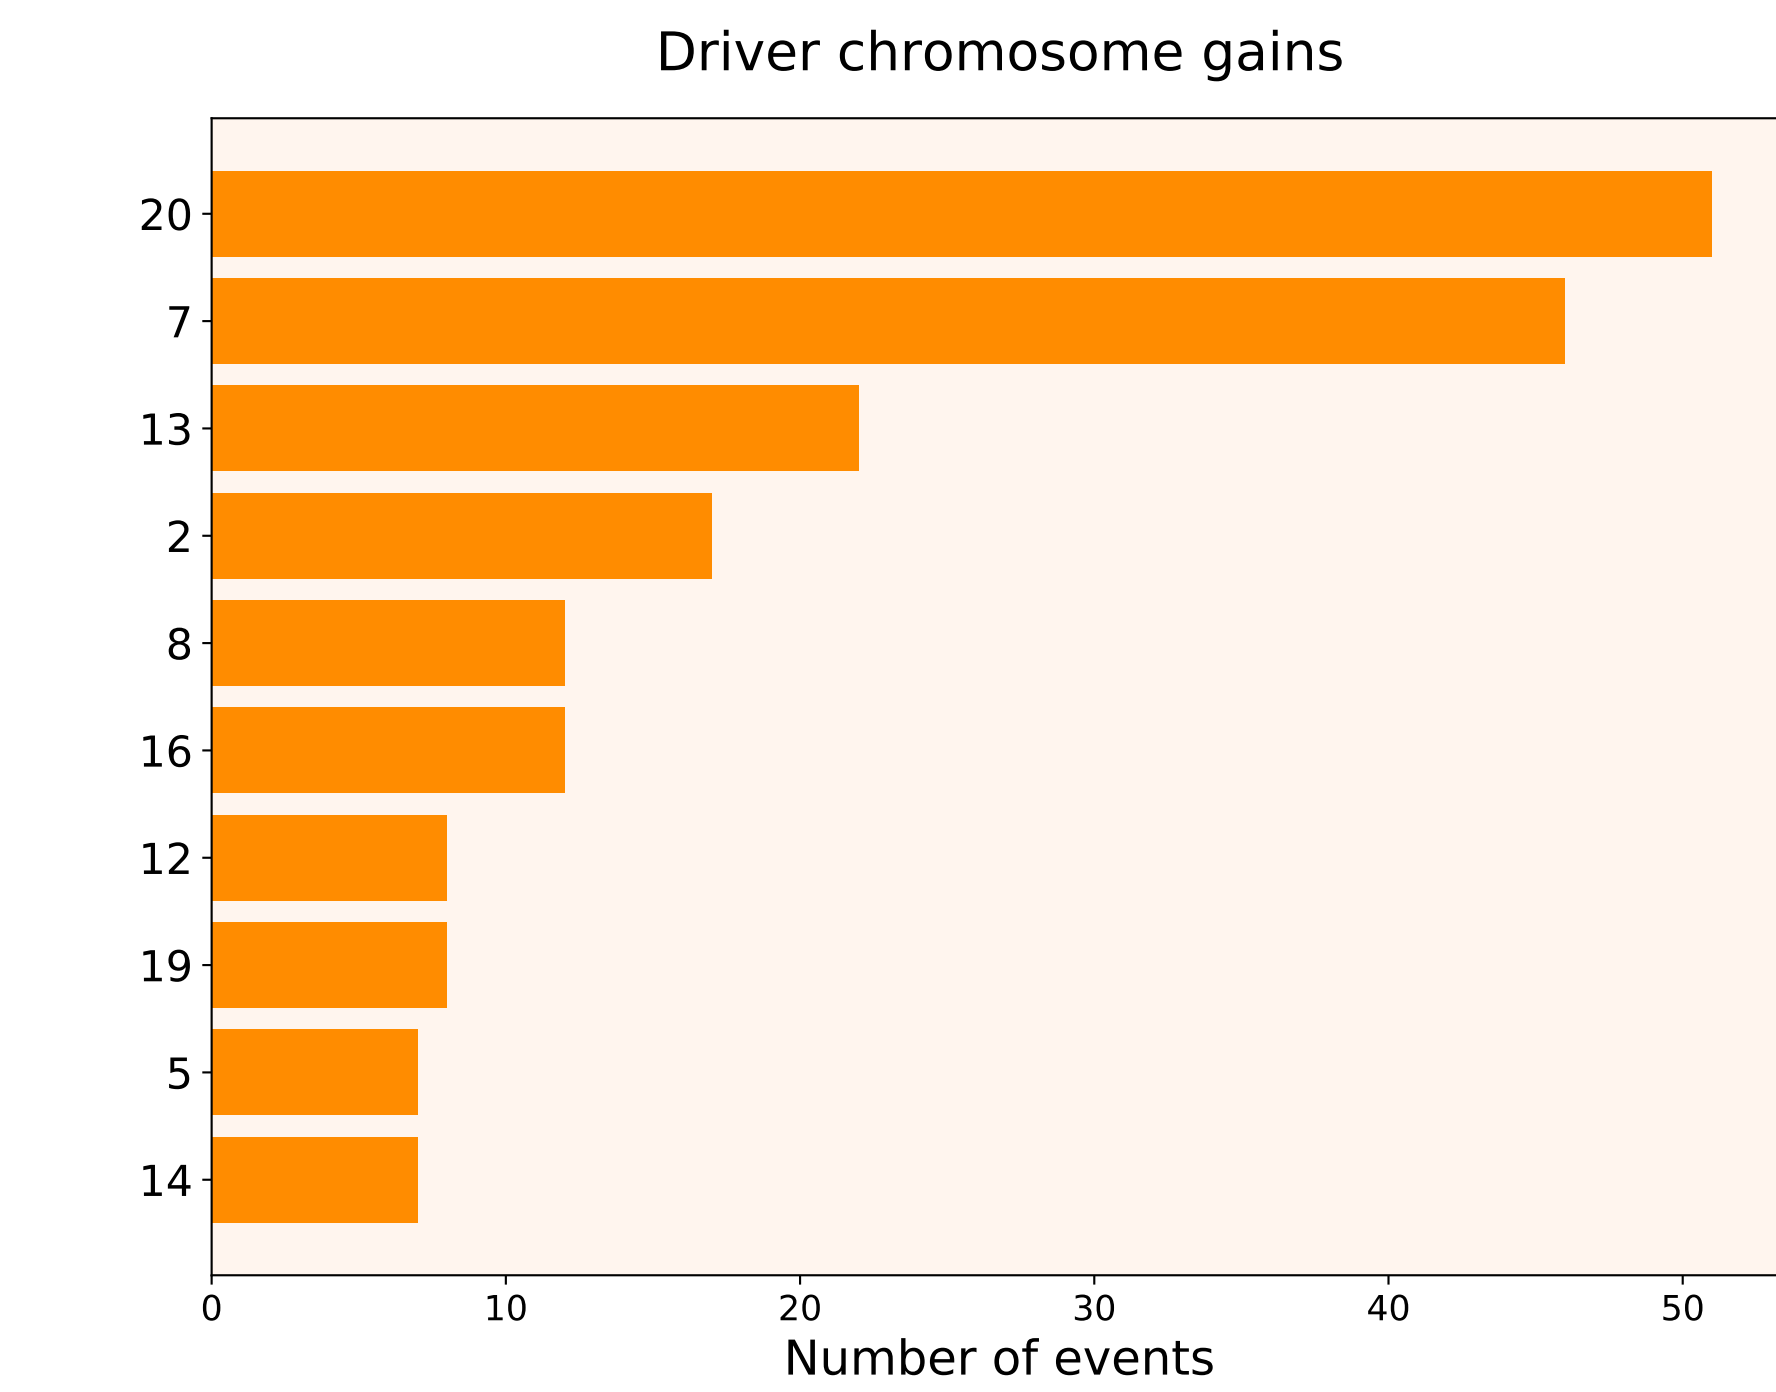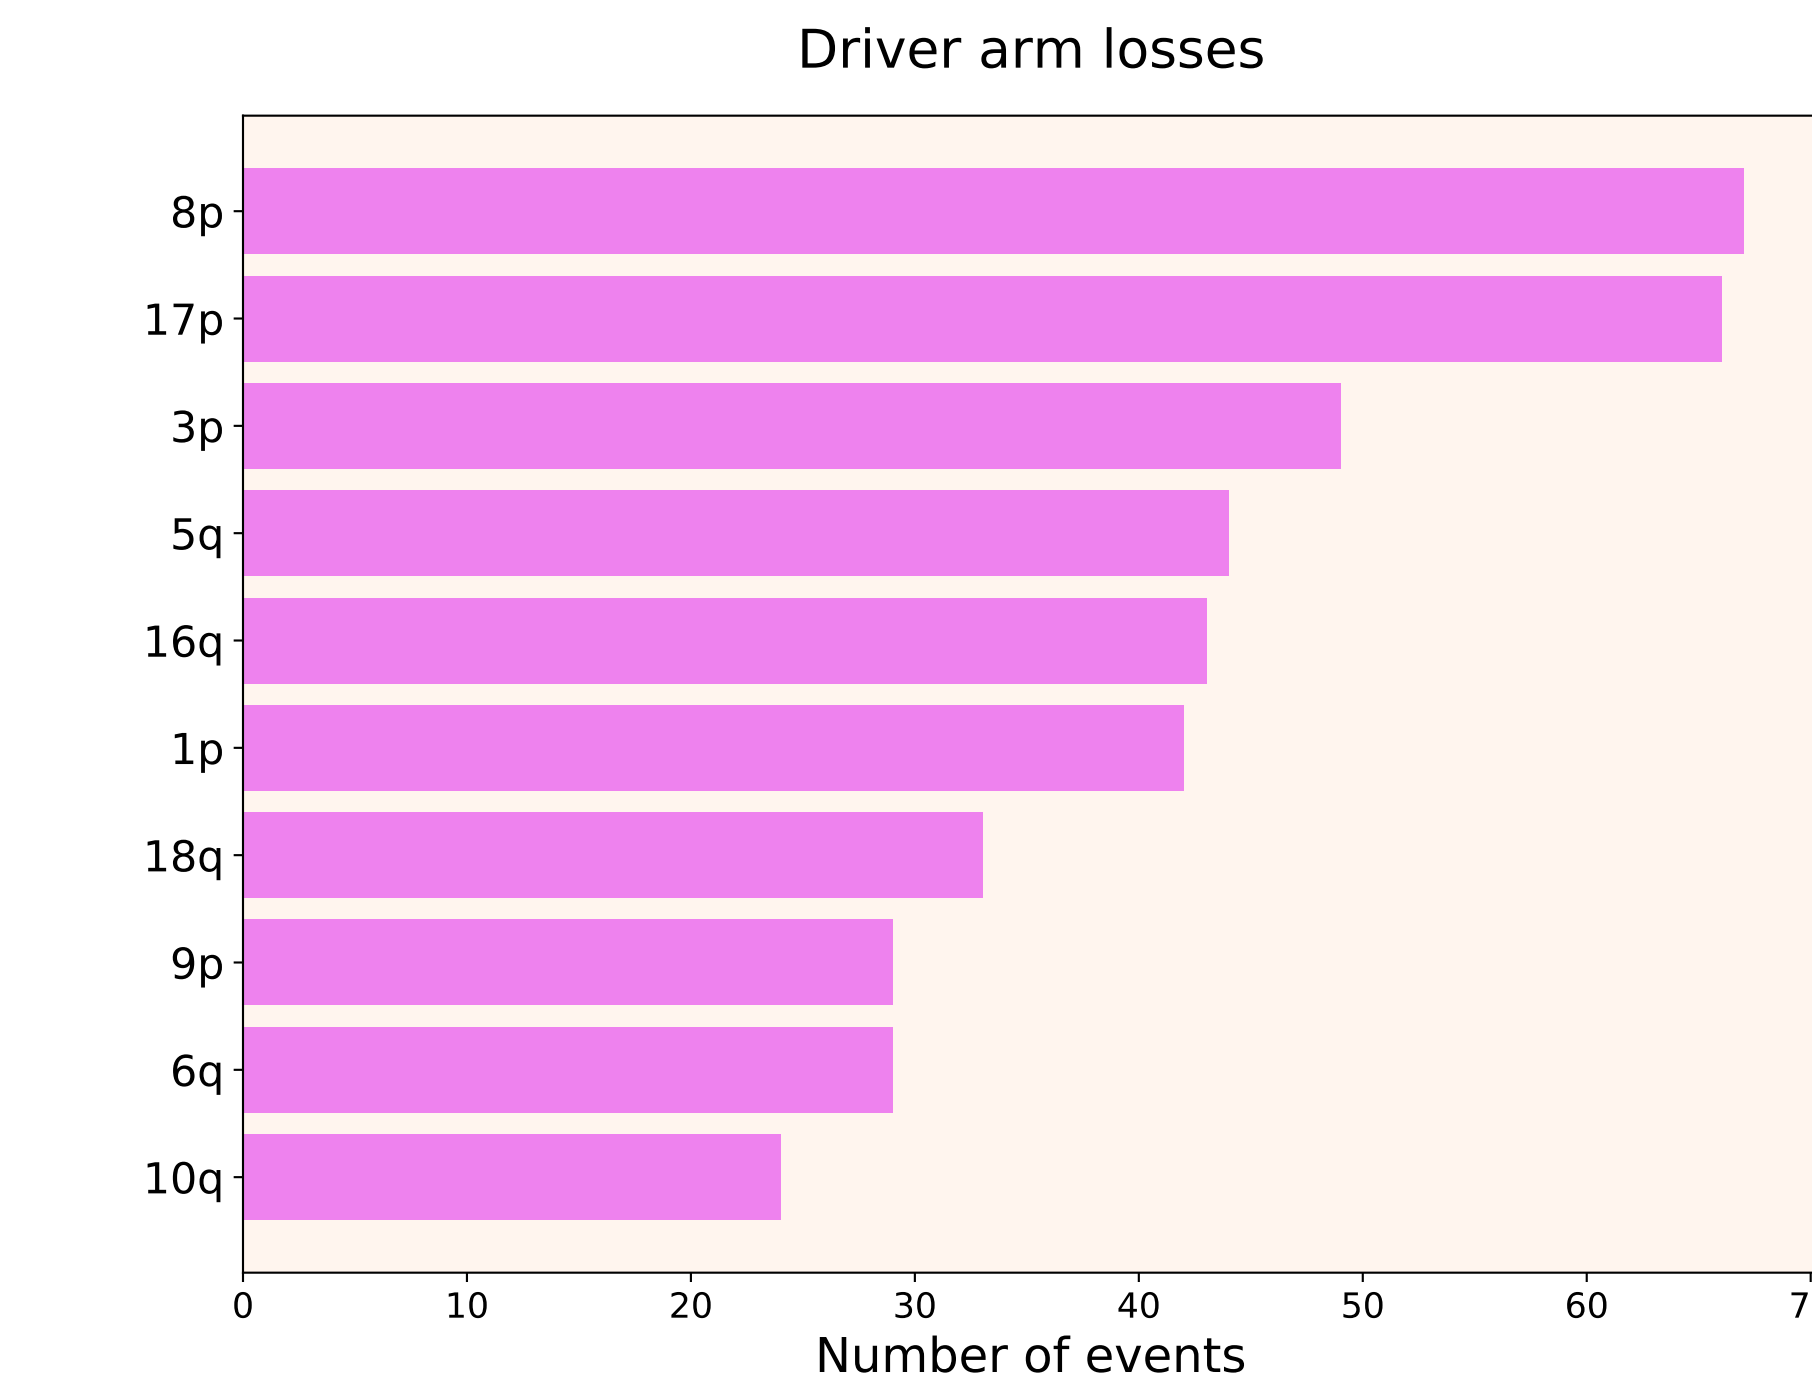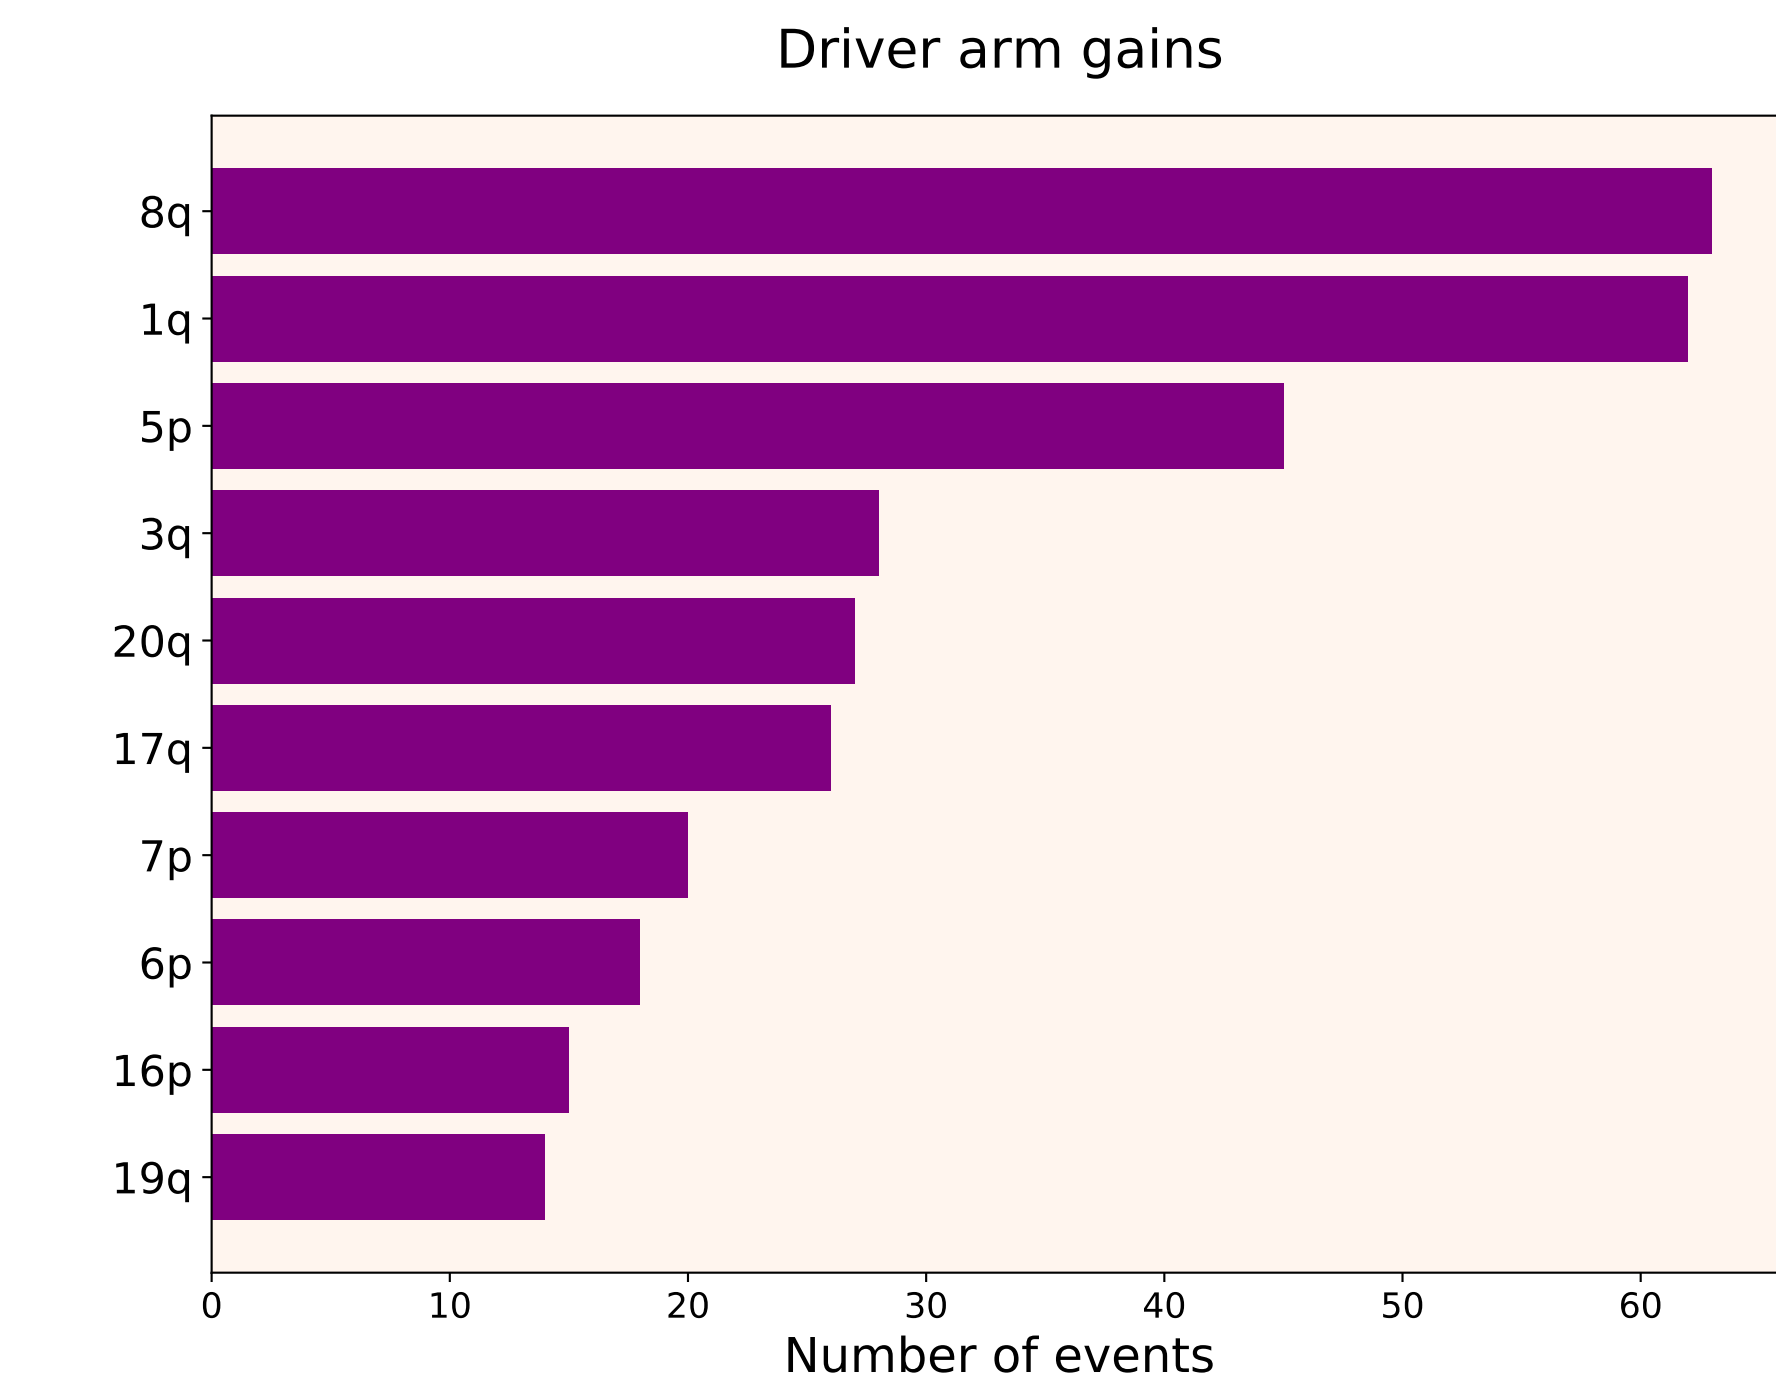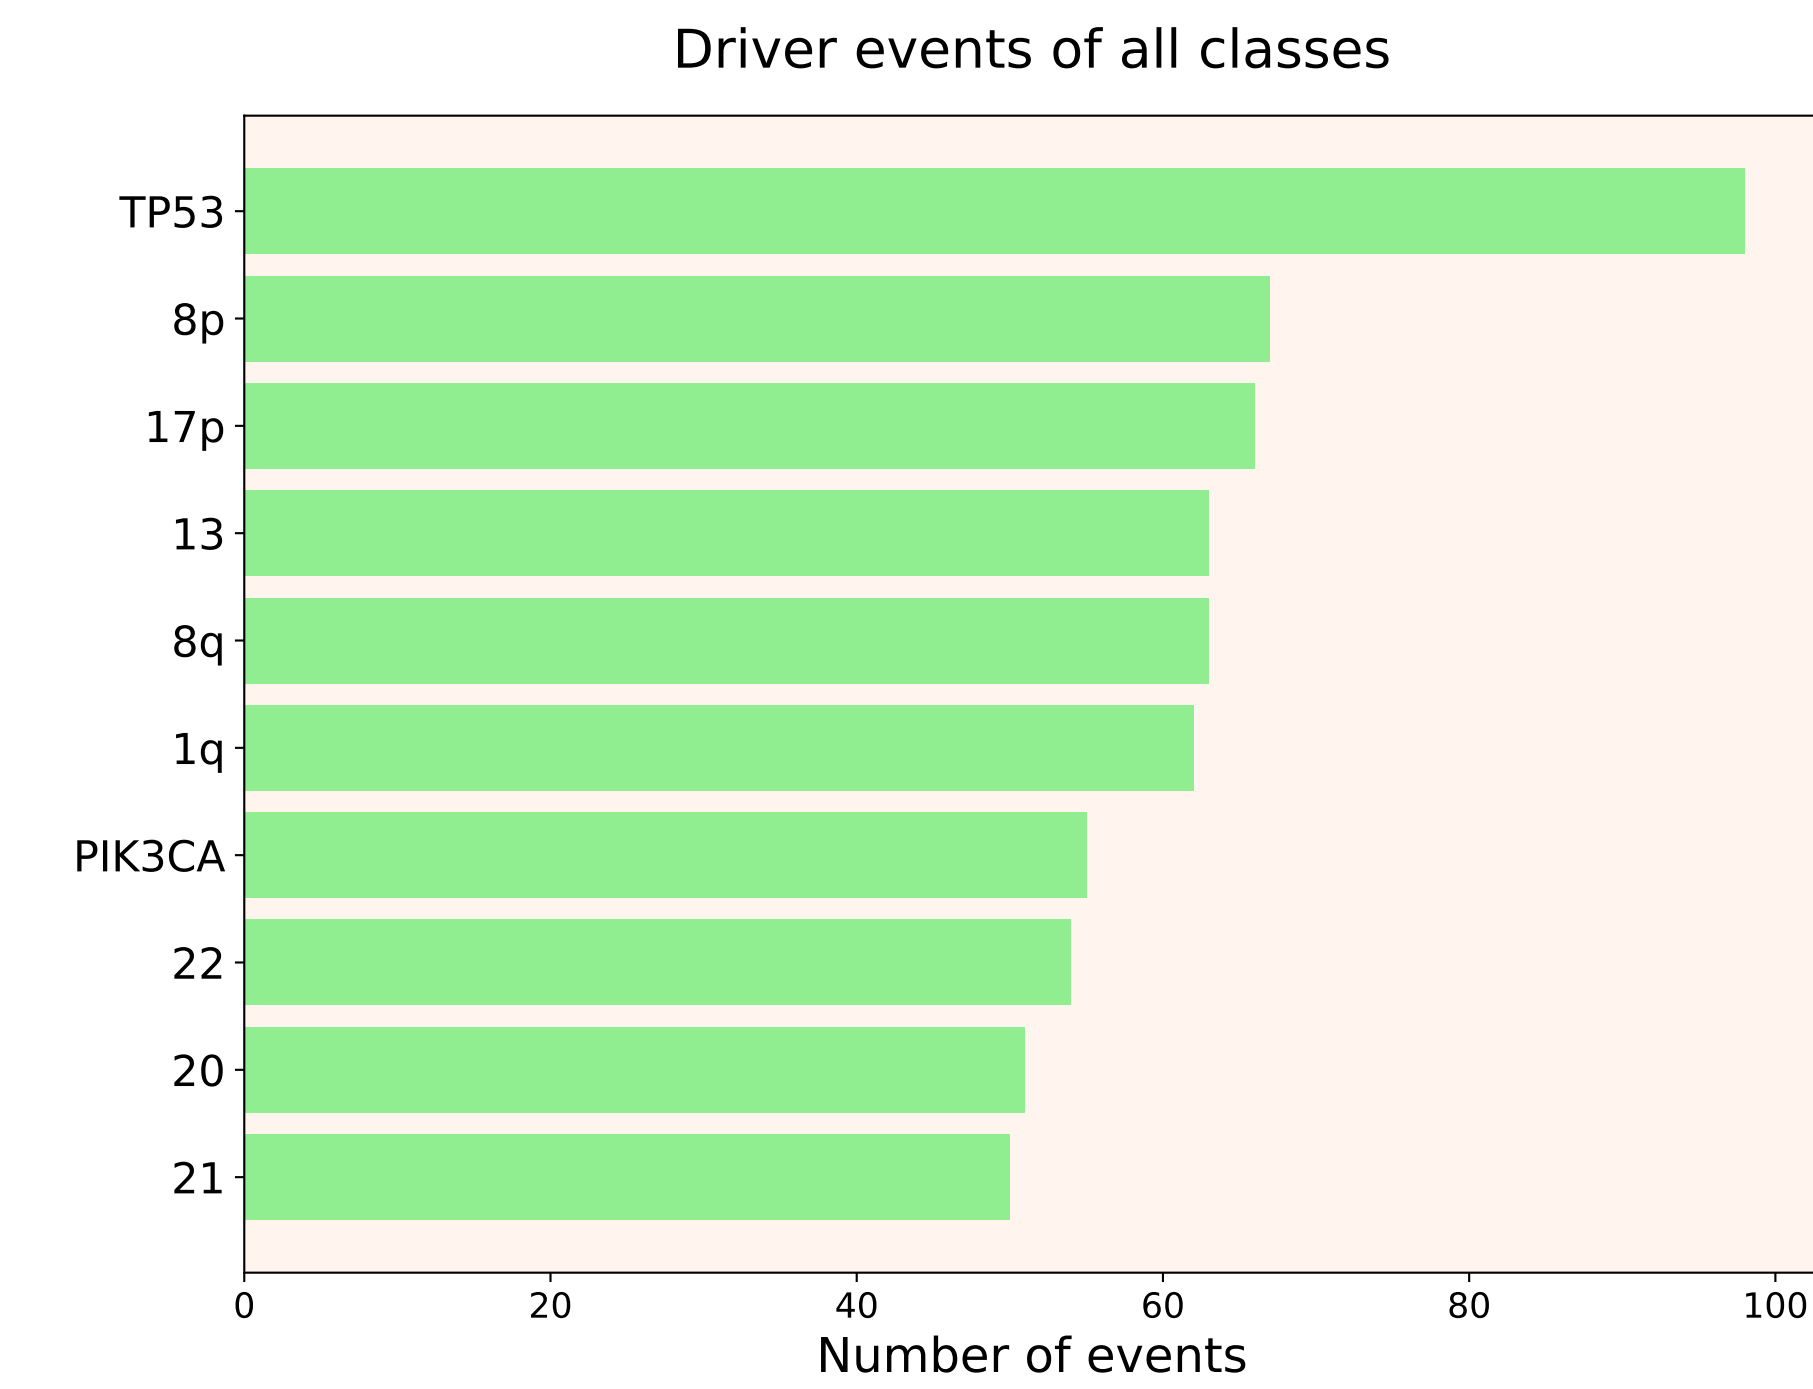

Supplement: Supplemental_Data_S1.zip [file Supplemental_Data_S1.zip]

Driver event distribution by age in females

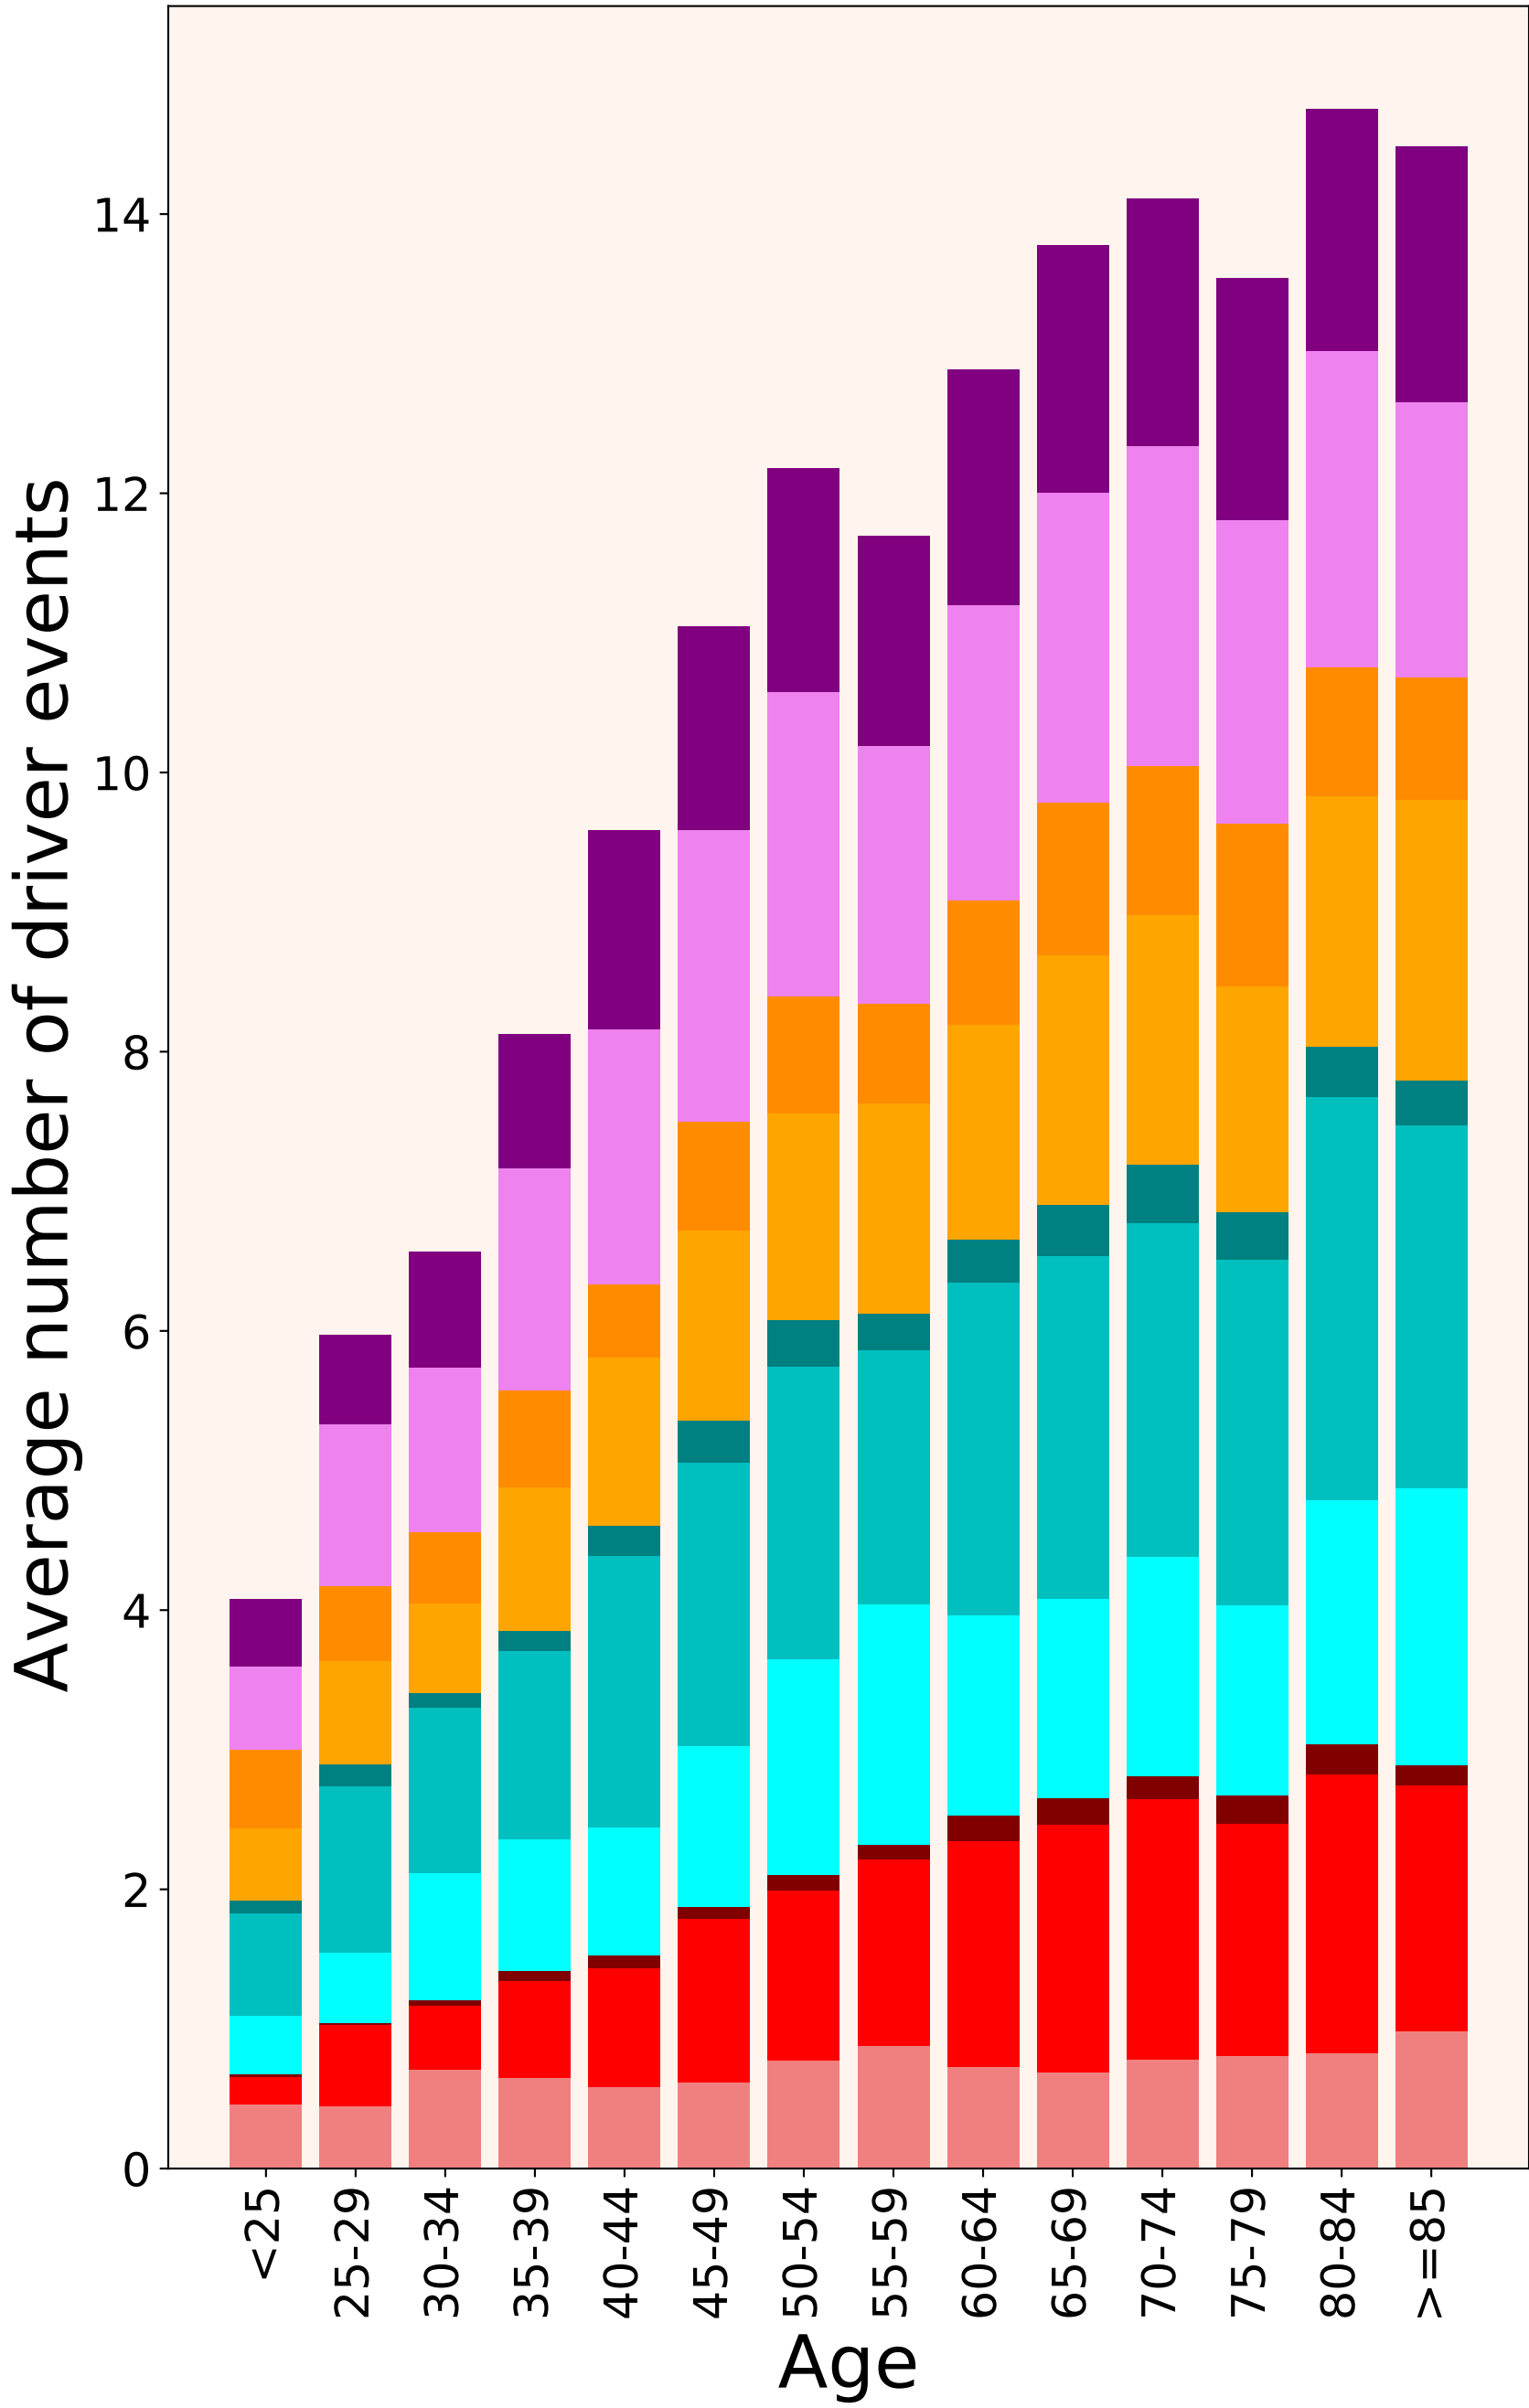

Supplement: Supplemental_Data_S1.zip [file Supplemental_Data_S1.zip]

# GBM\_MALE

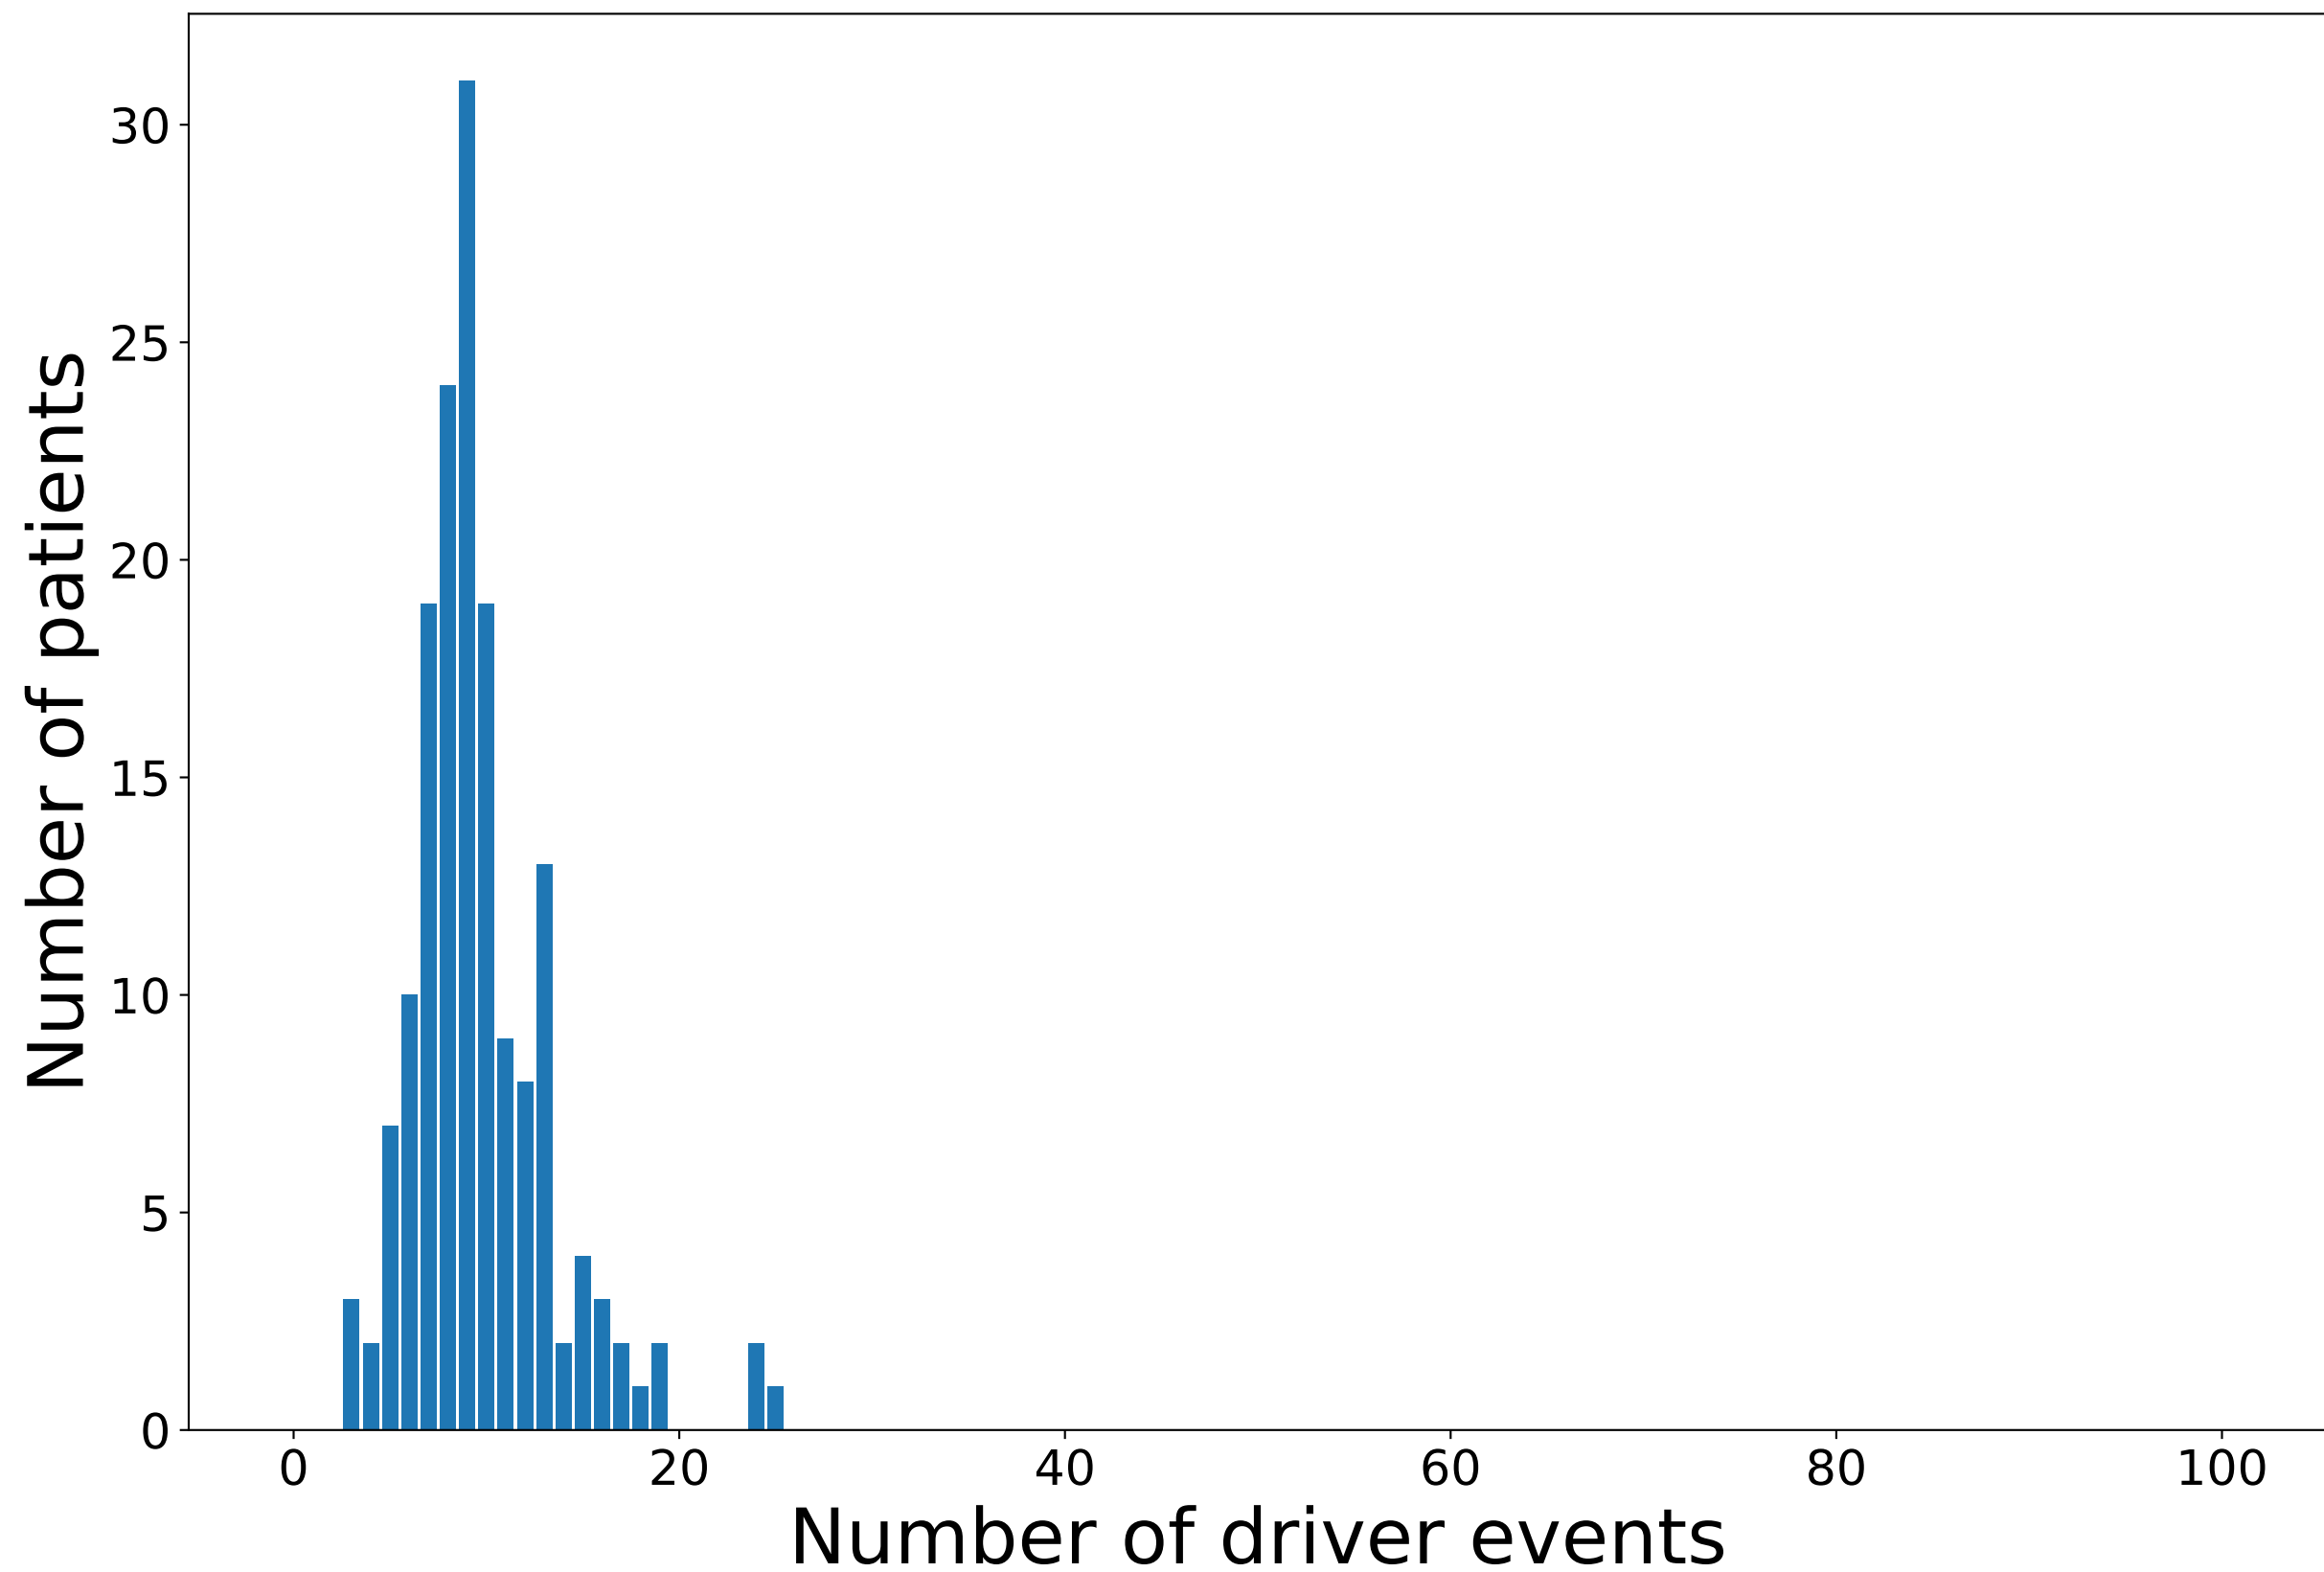

Supplement: Supplemental_Data_S1.zip [file Supplemental_Data_S1.zip]

Driver event distribution by total number of driver events per patient

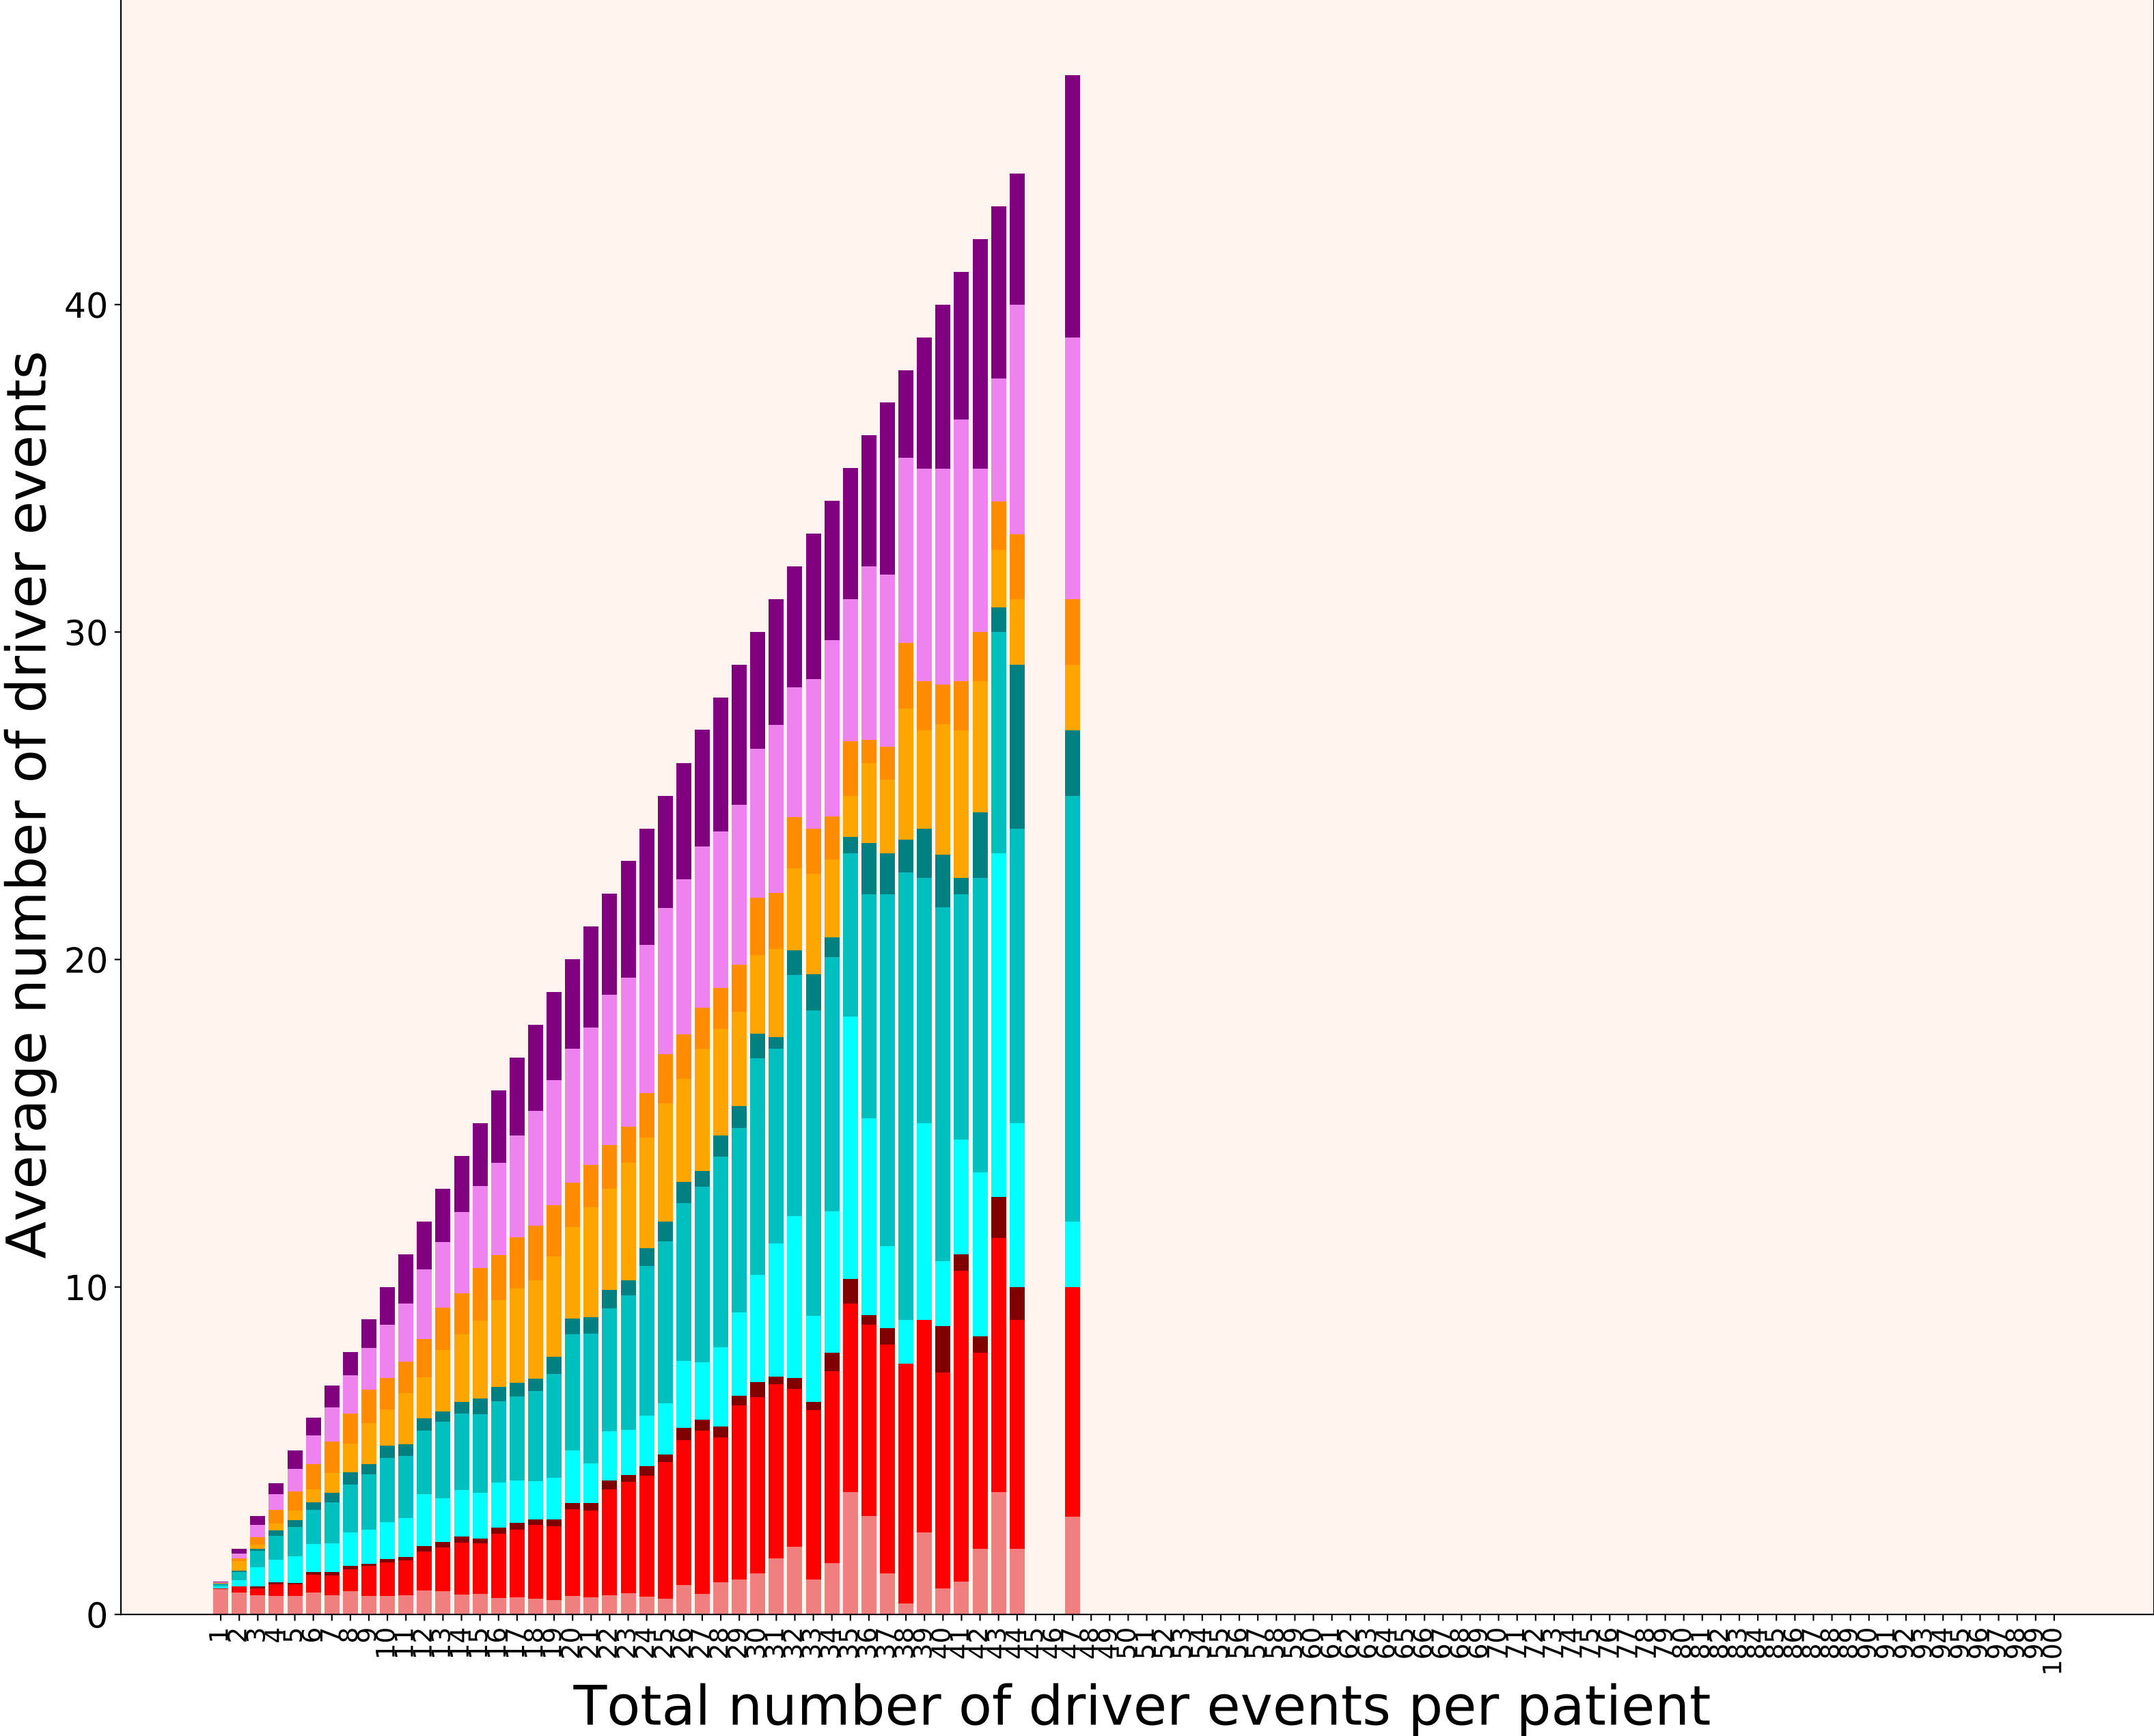

Supplement: Supplemental_Data_S1.zip [file Supplemental_Data_S1.zip]

# STAD

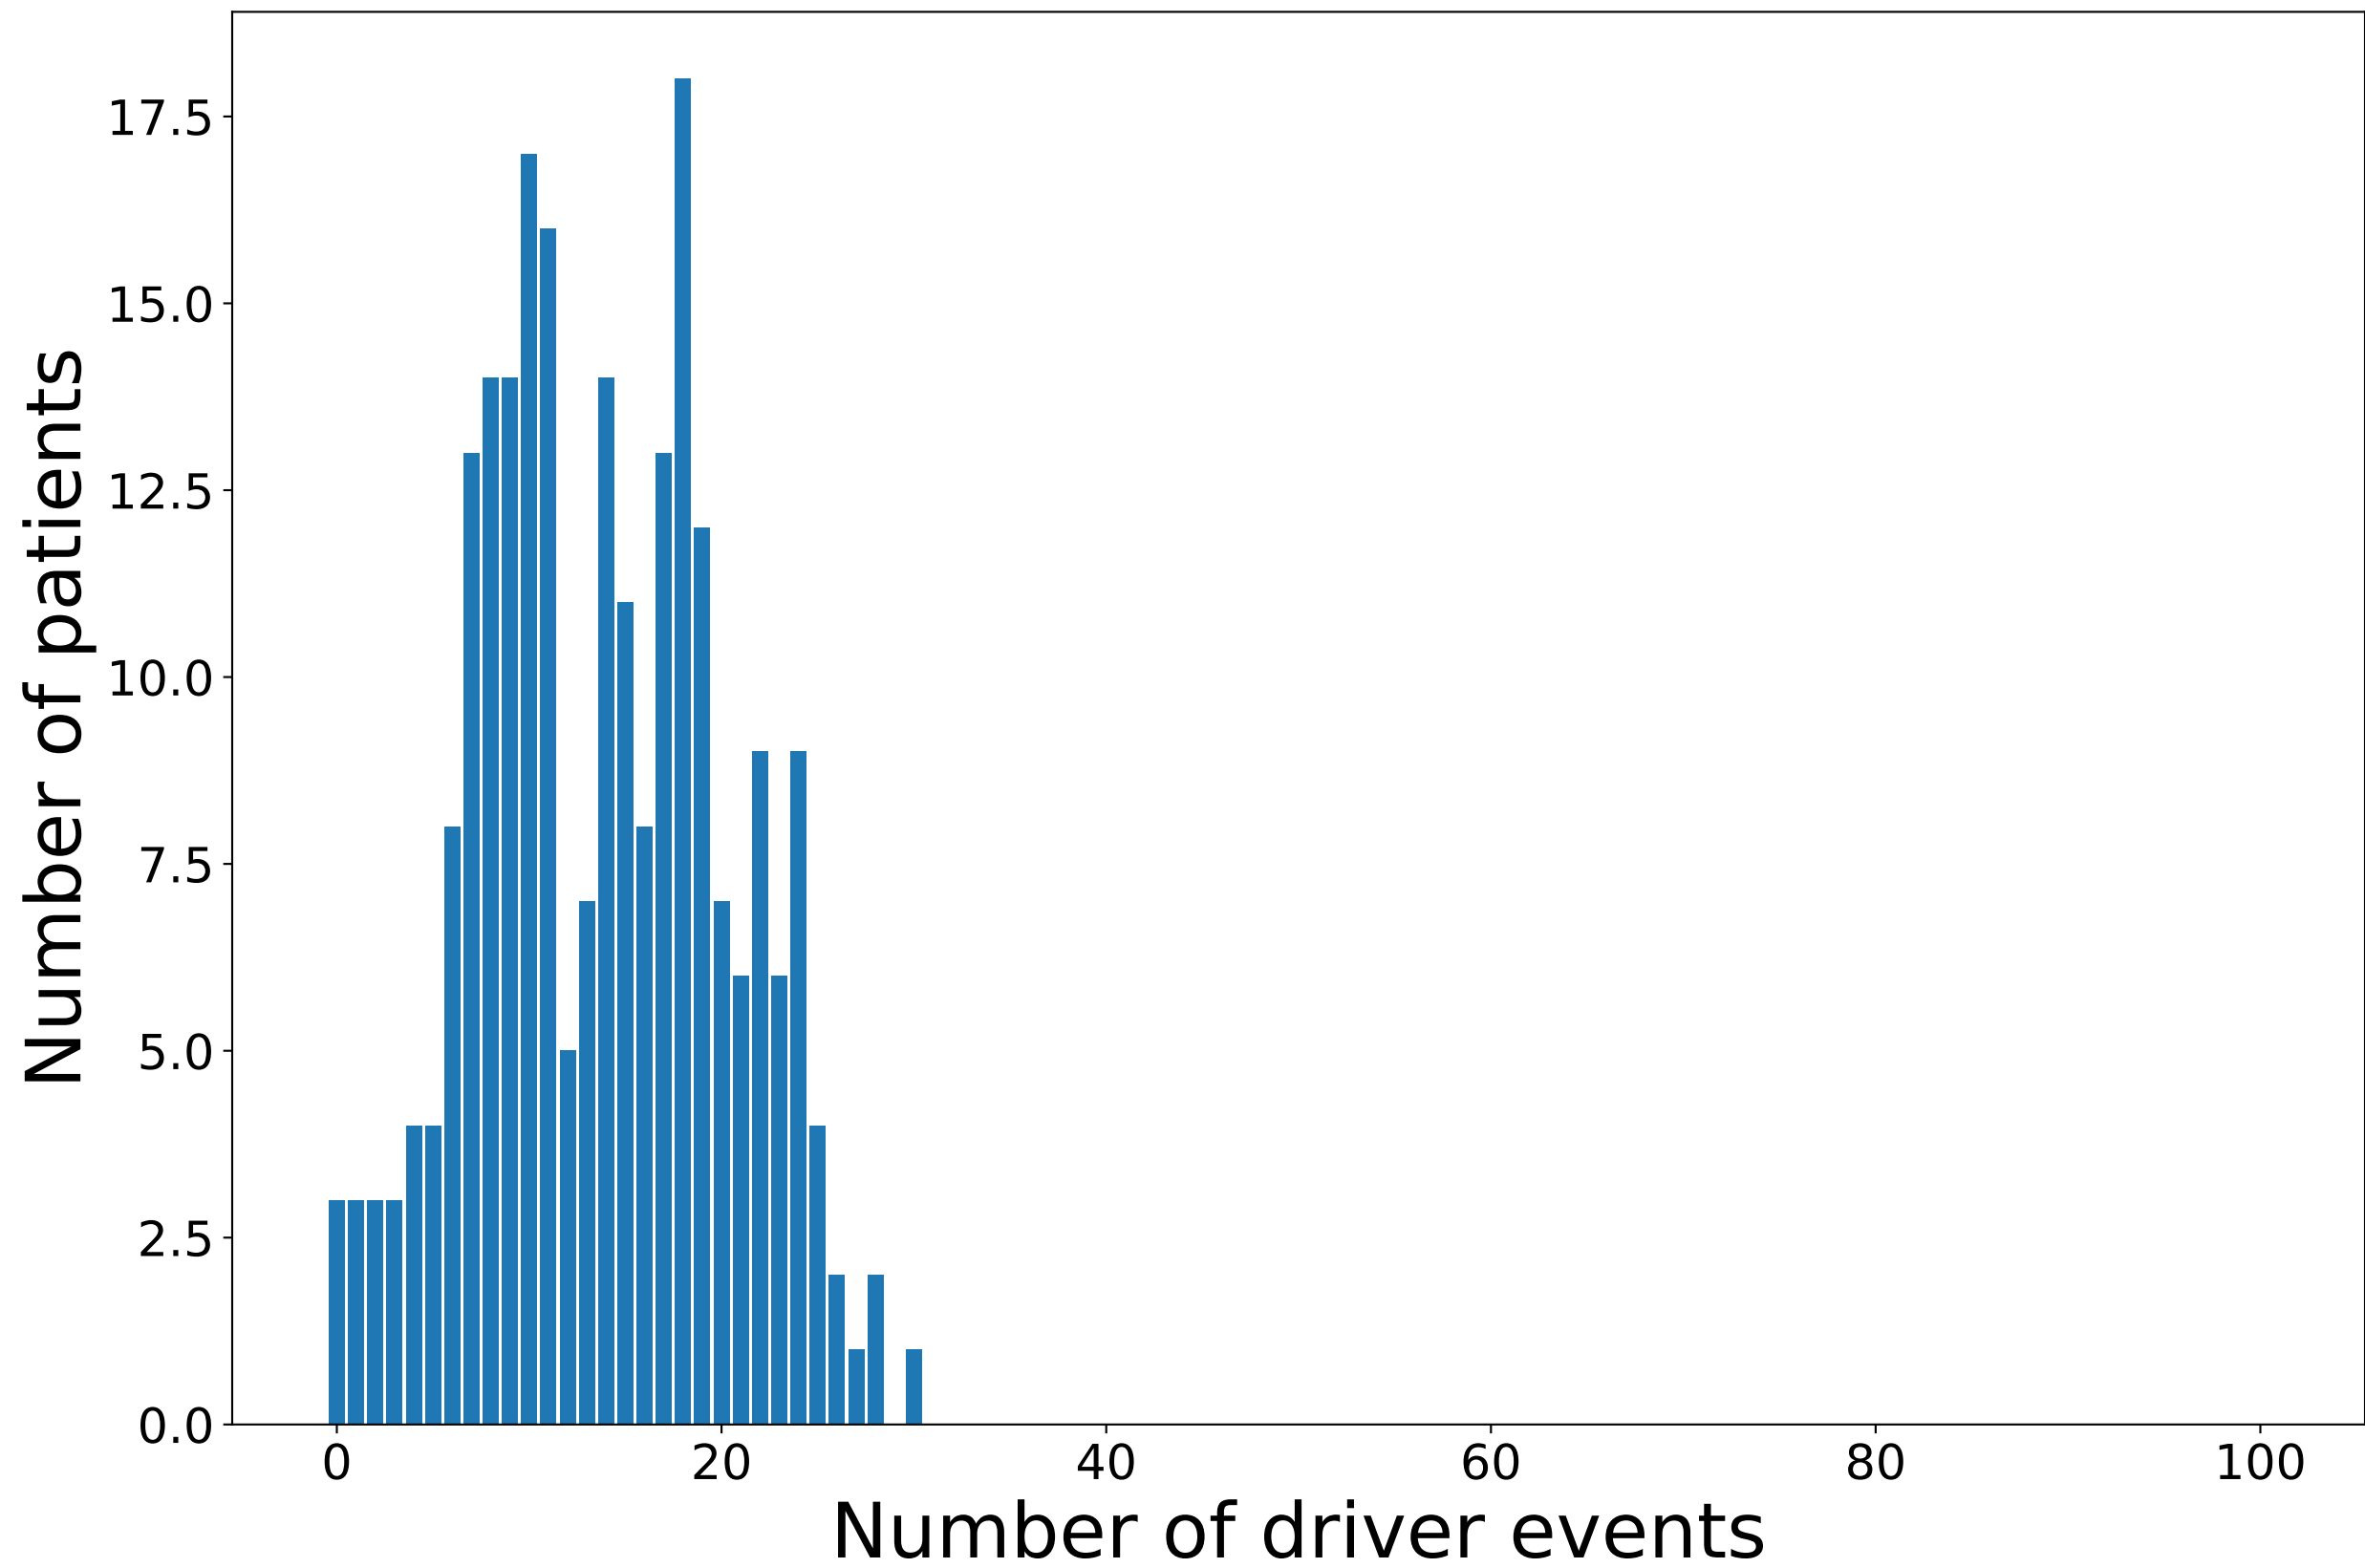

Supplement: Supplemental_Data_S1.zip [file Supplemental_Data_S1.zip]

Driver event distribution by age in males

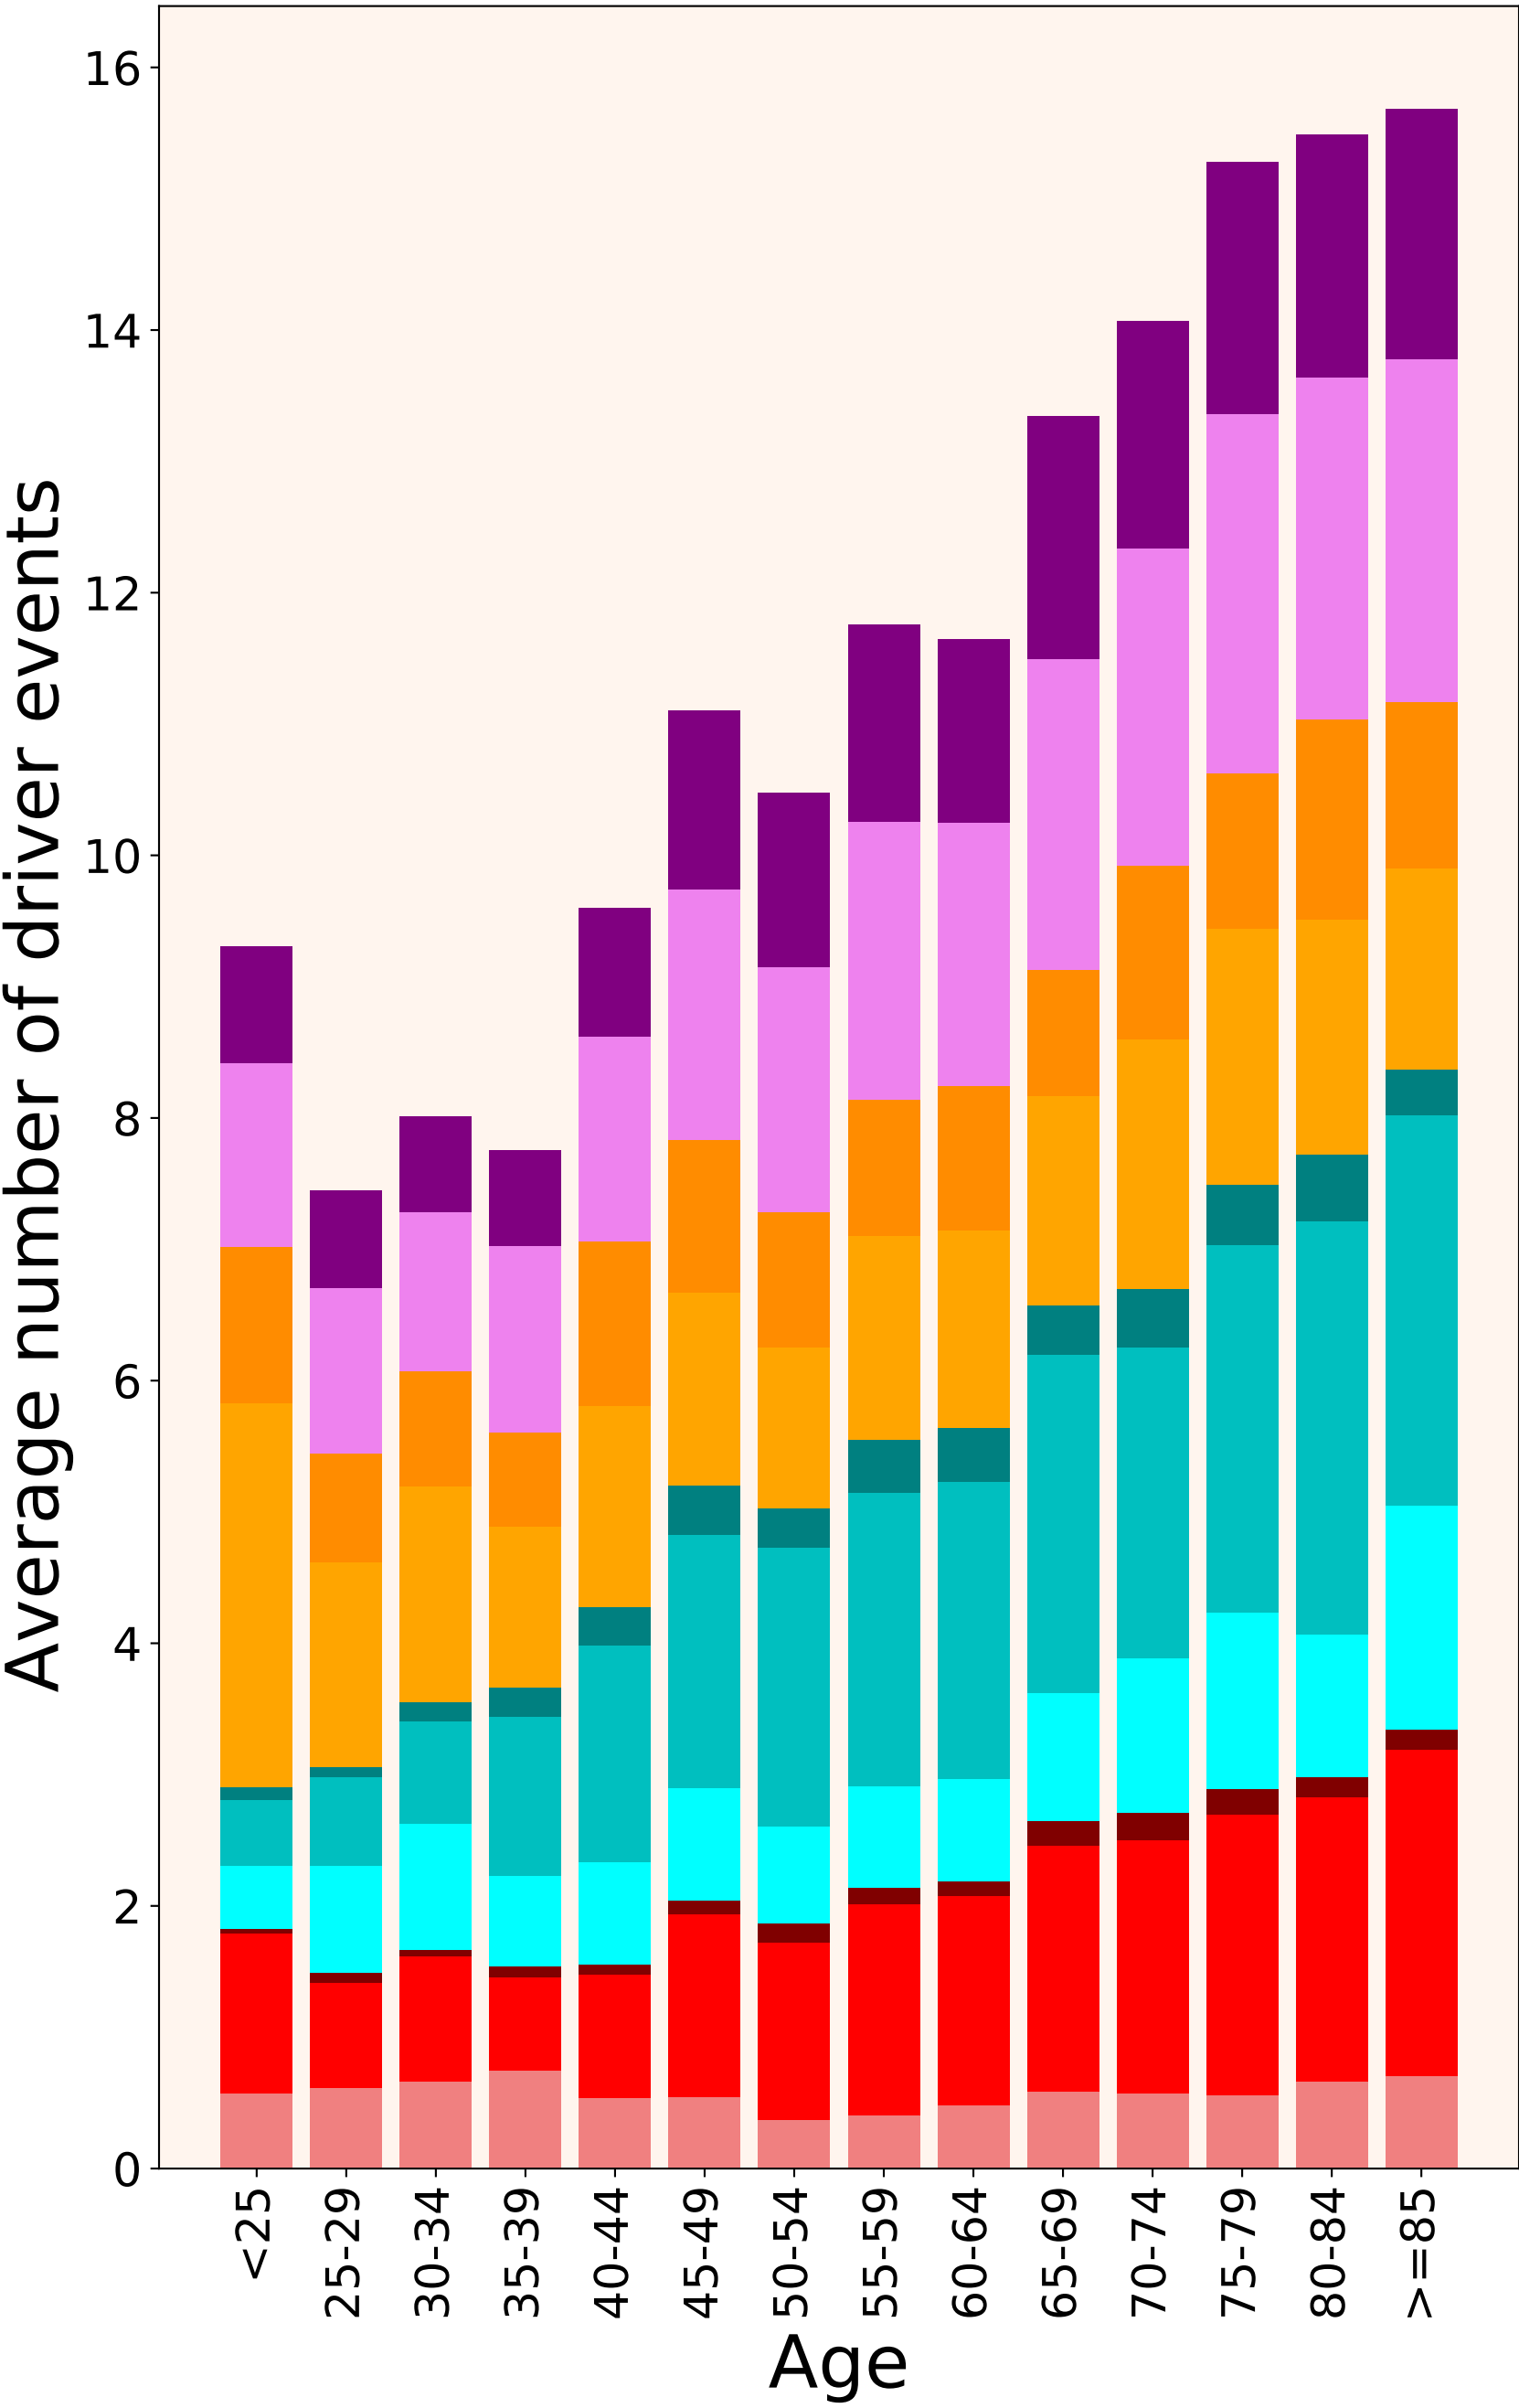

Supplement: Supplemental_Data_S1.zip [file Supplemental_Data_S1.zip]

# READ\_FEMALE

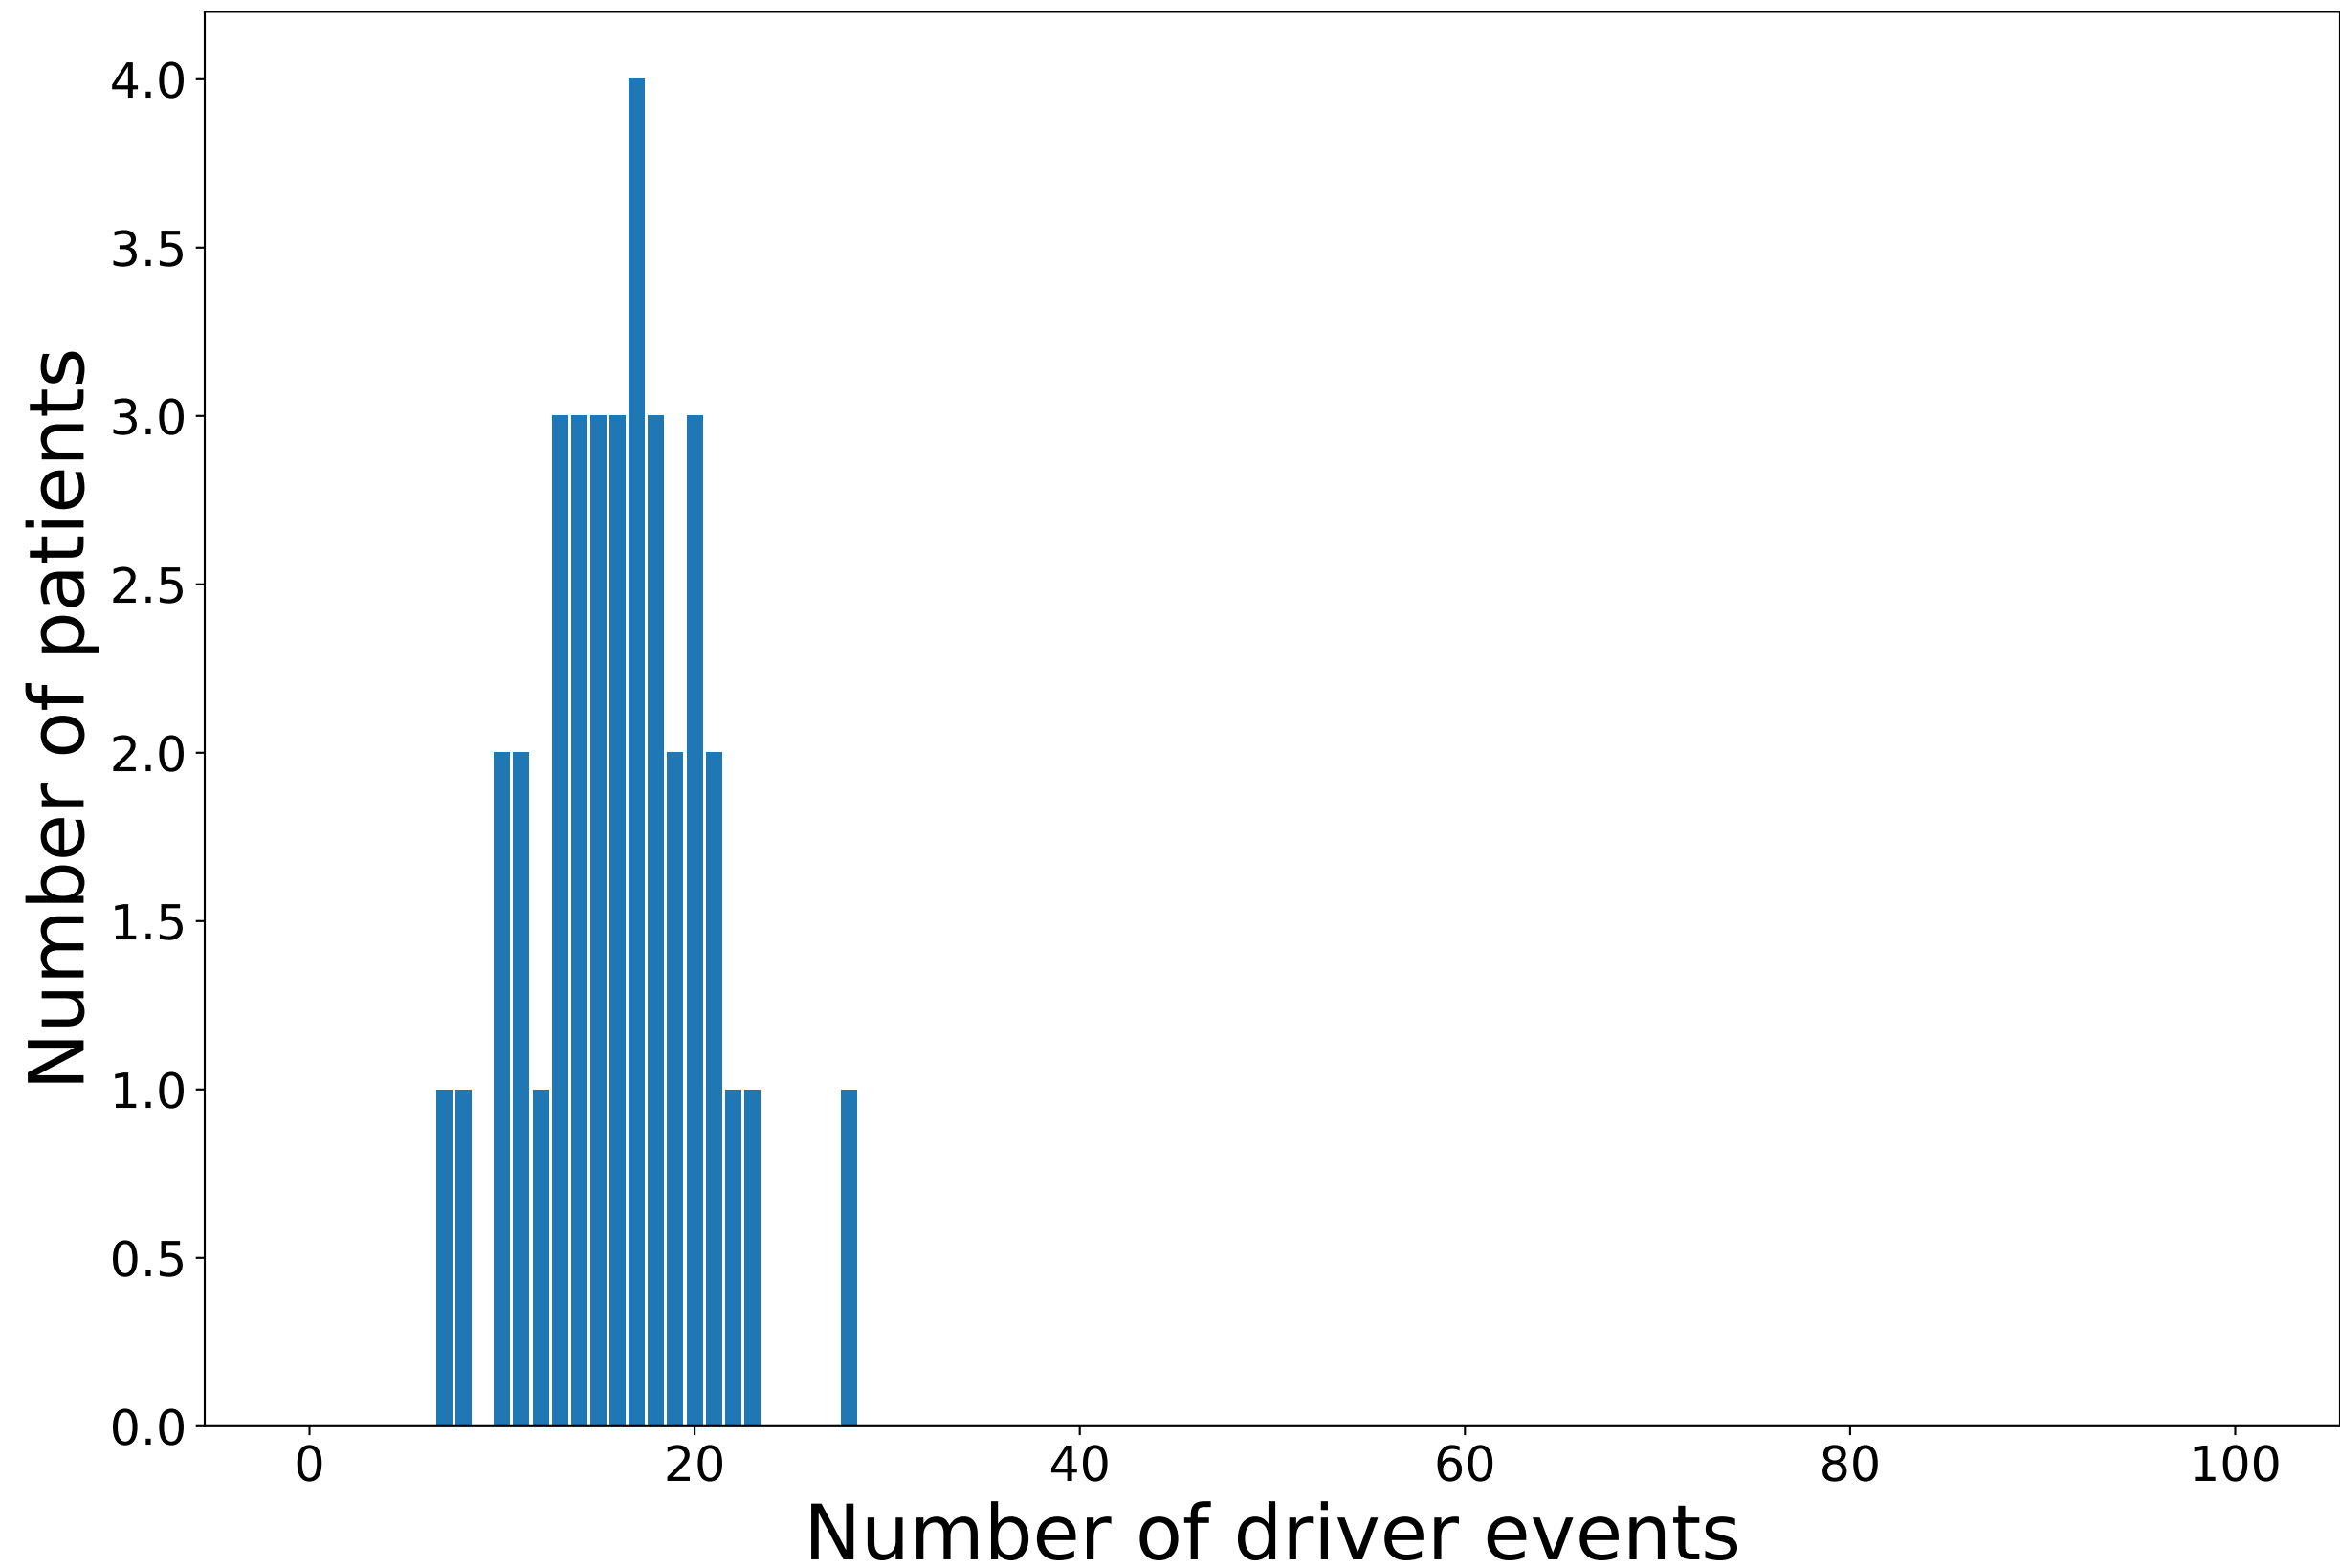

Supplement: Supplemental_Data_S1.zip [file Supplemental_Data_S1.zip]

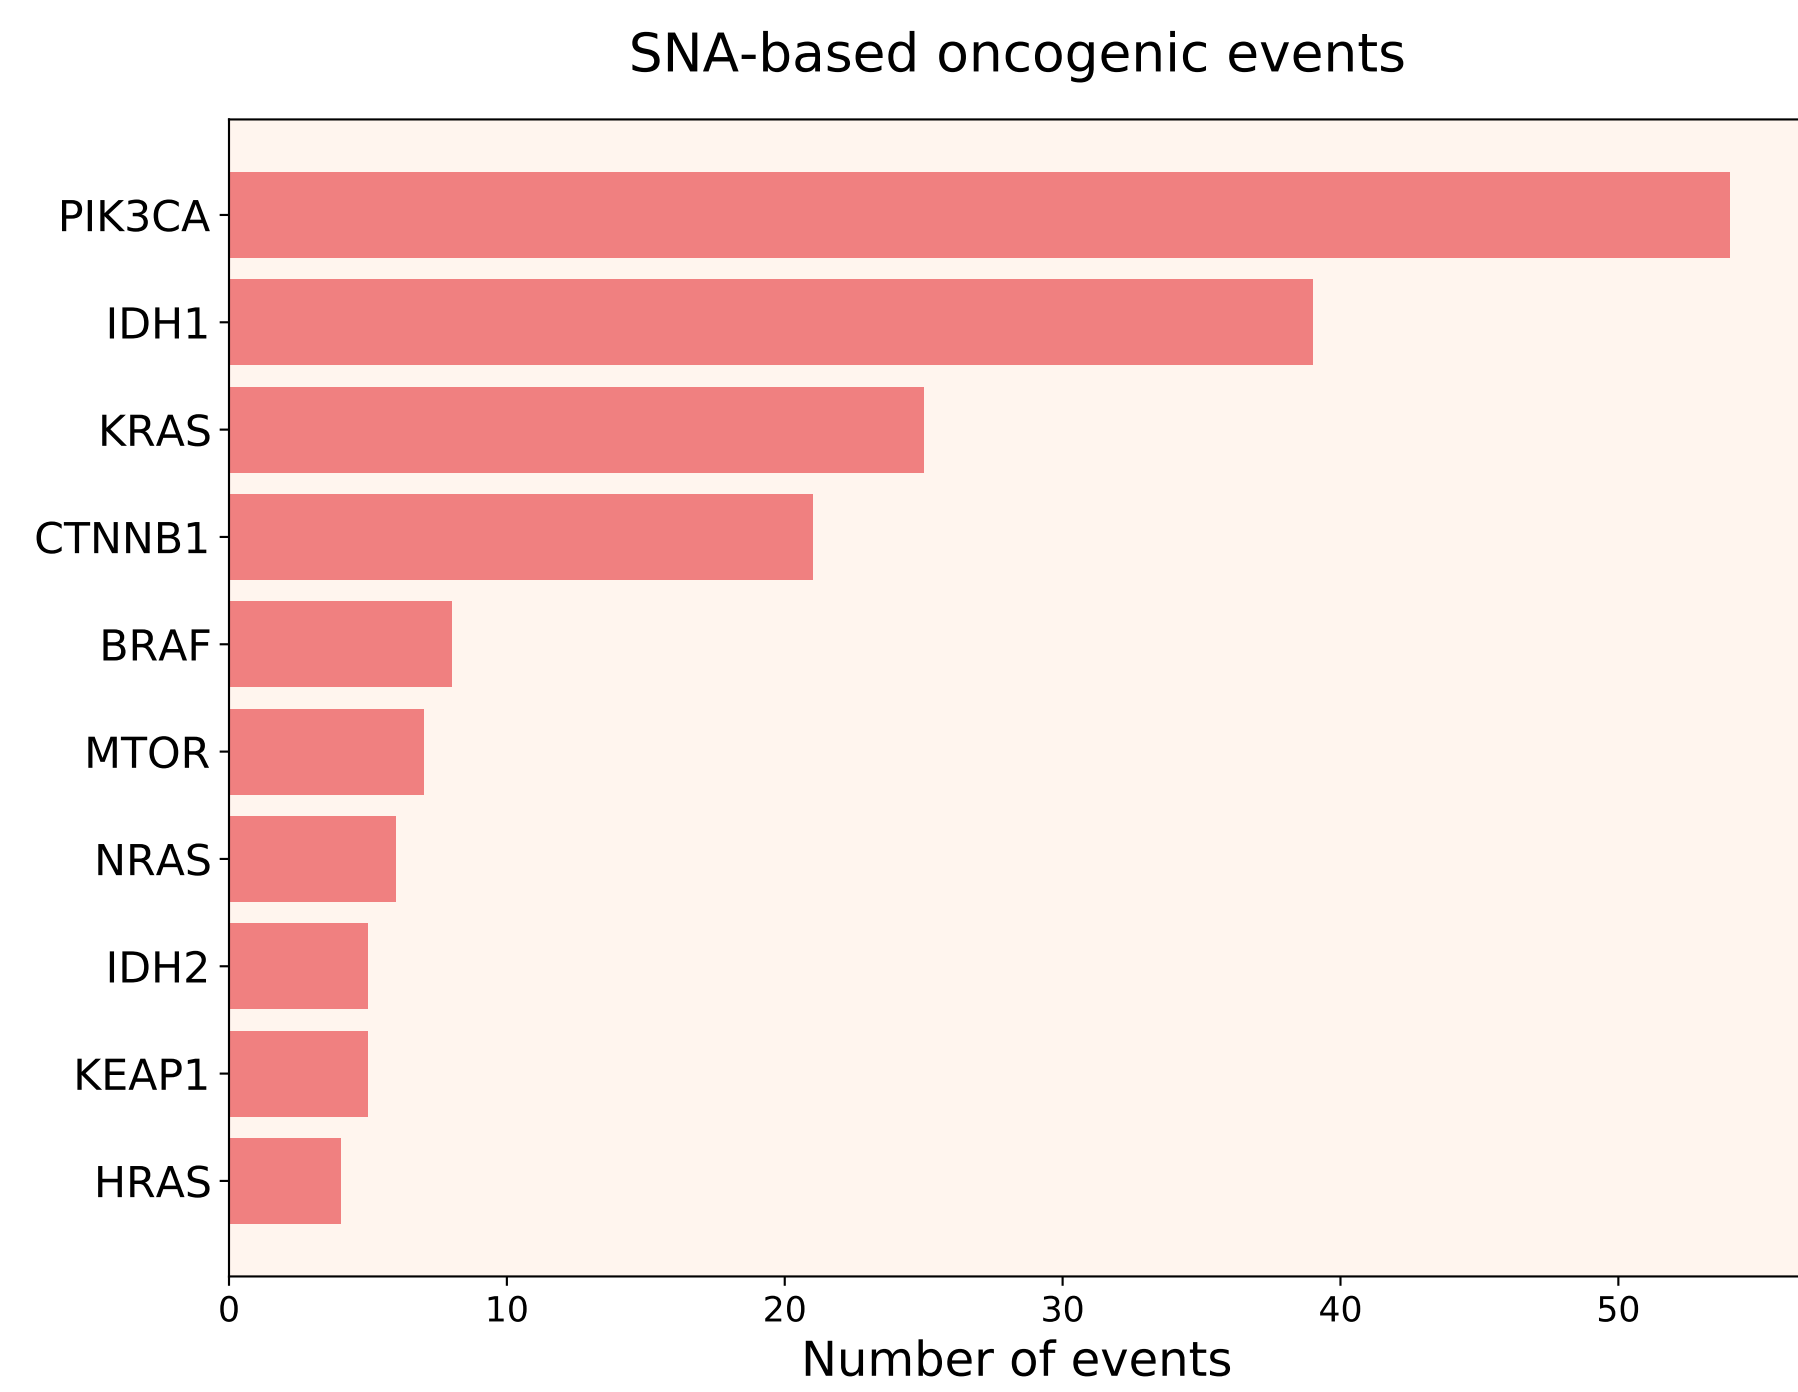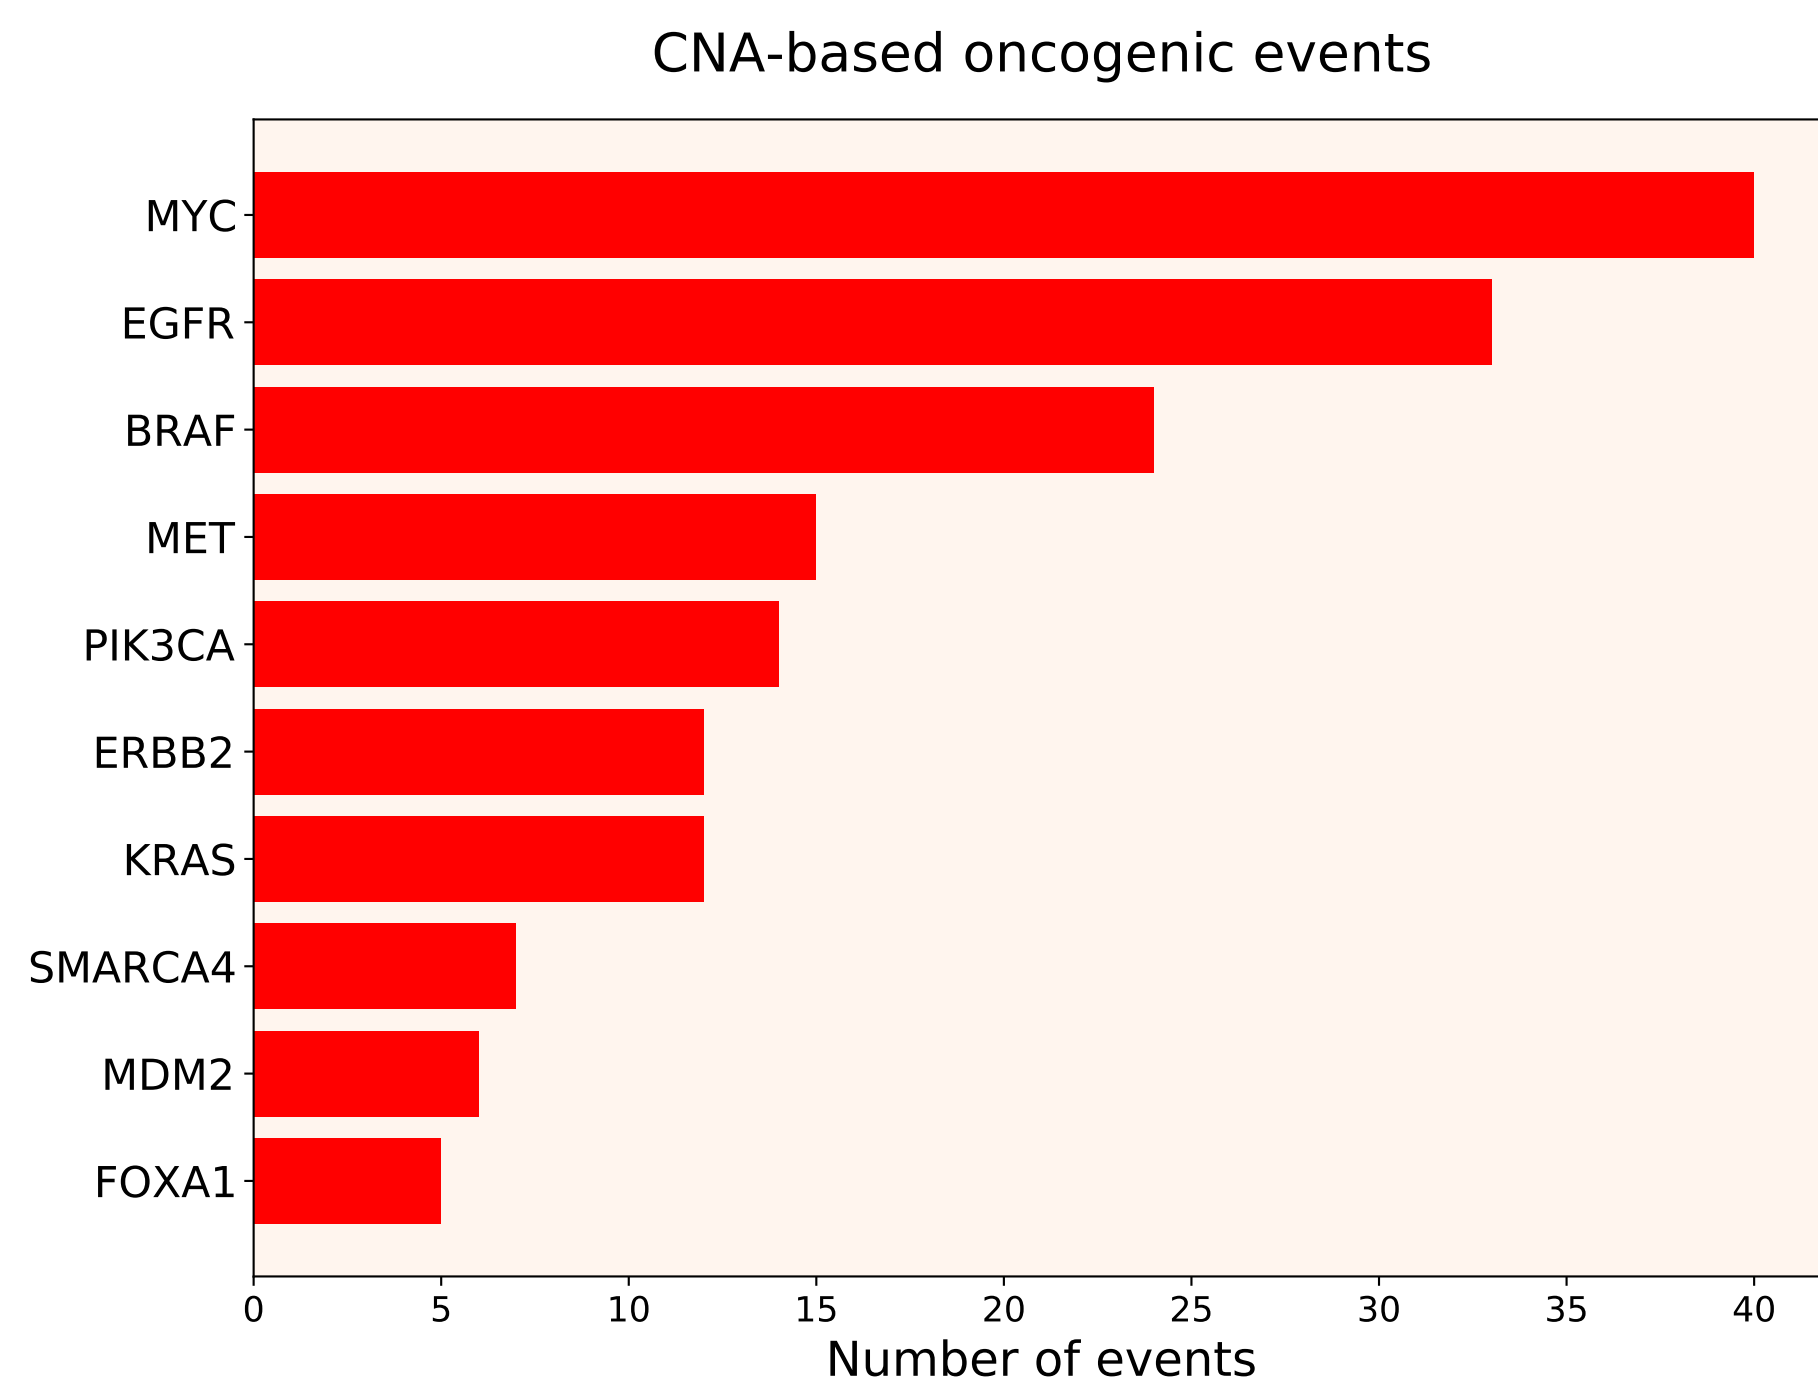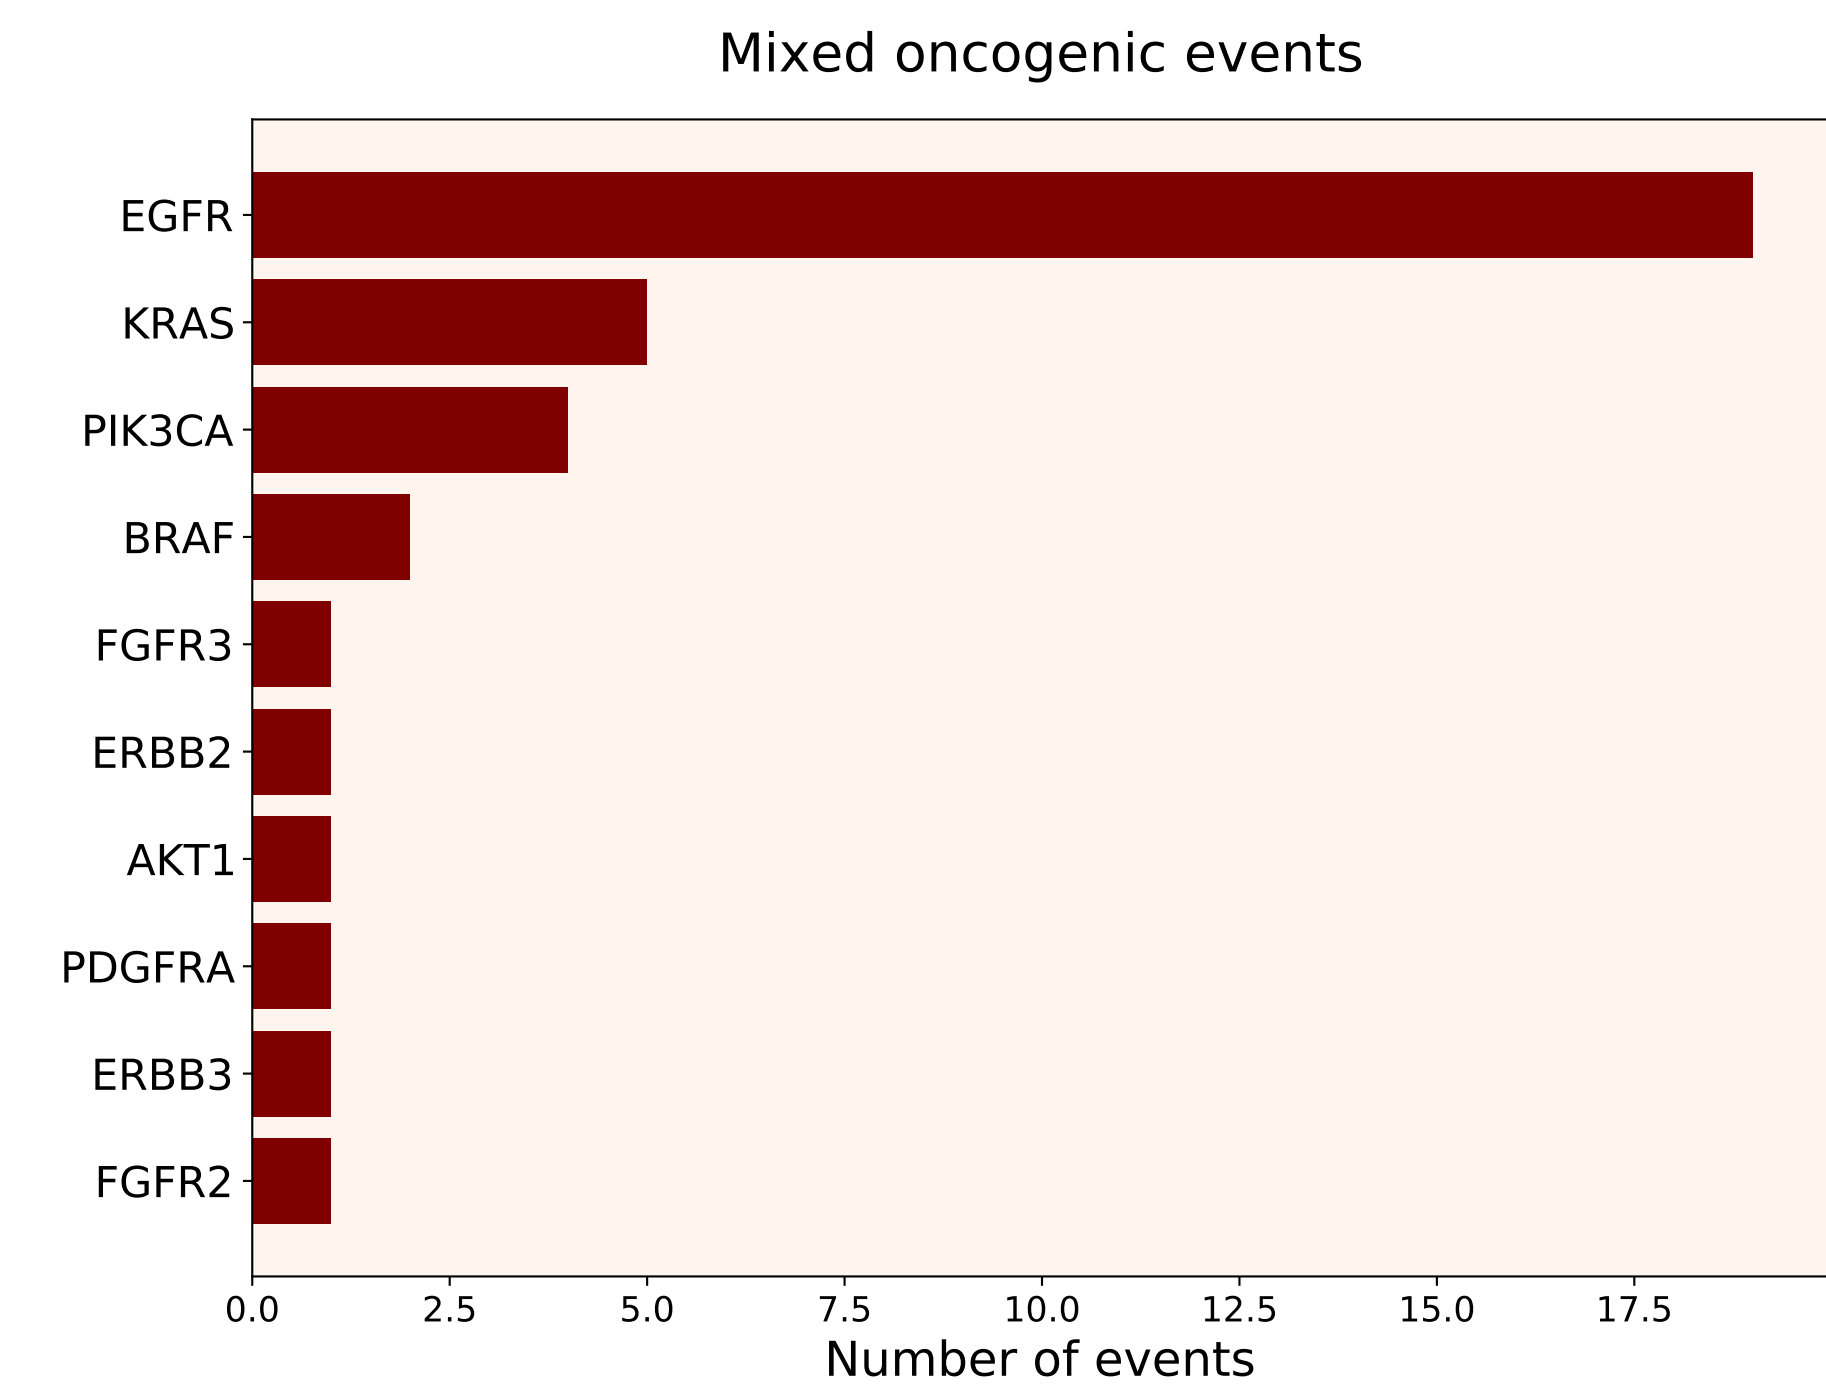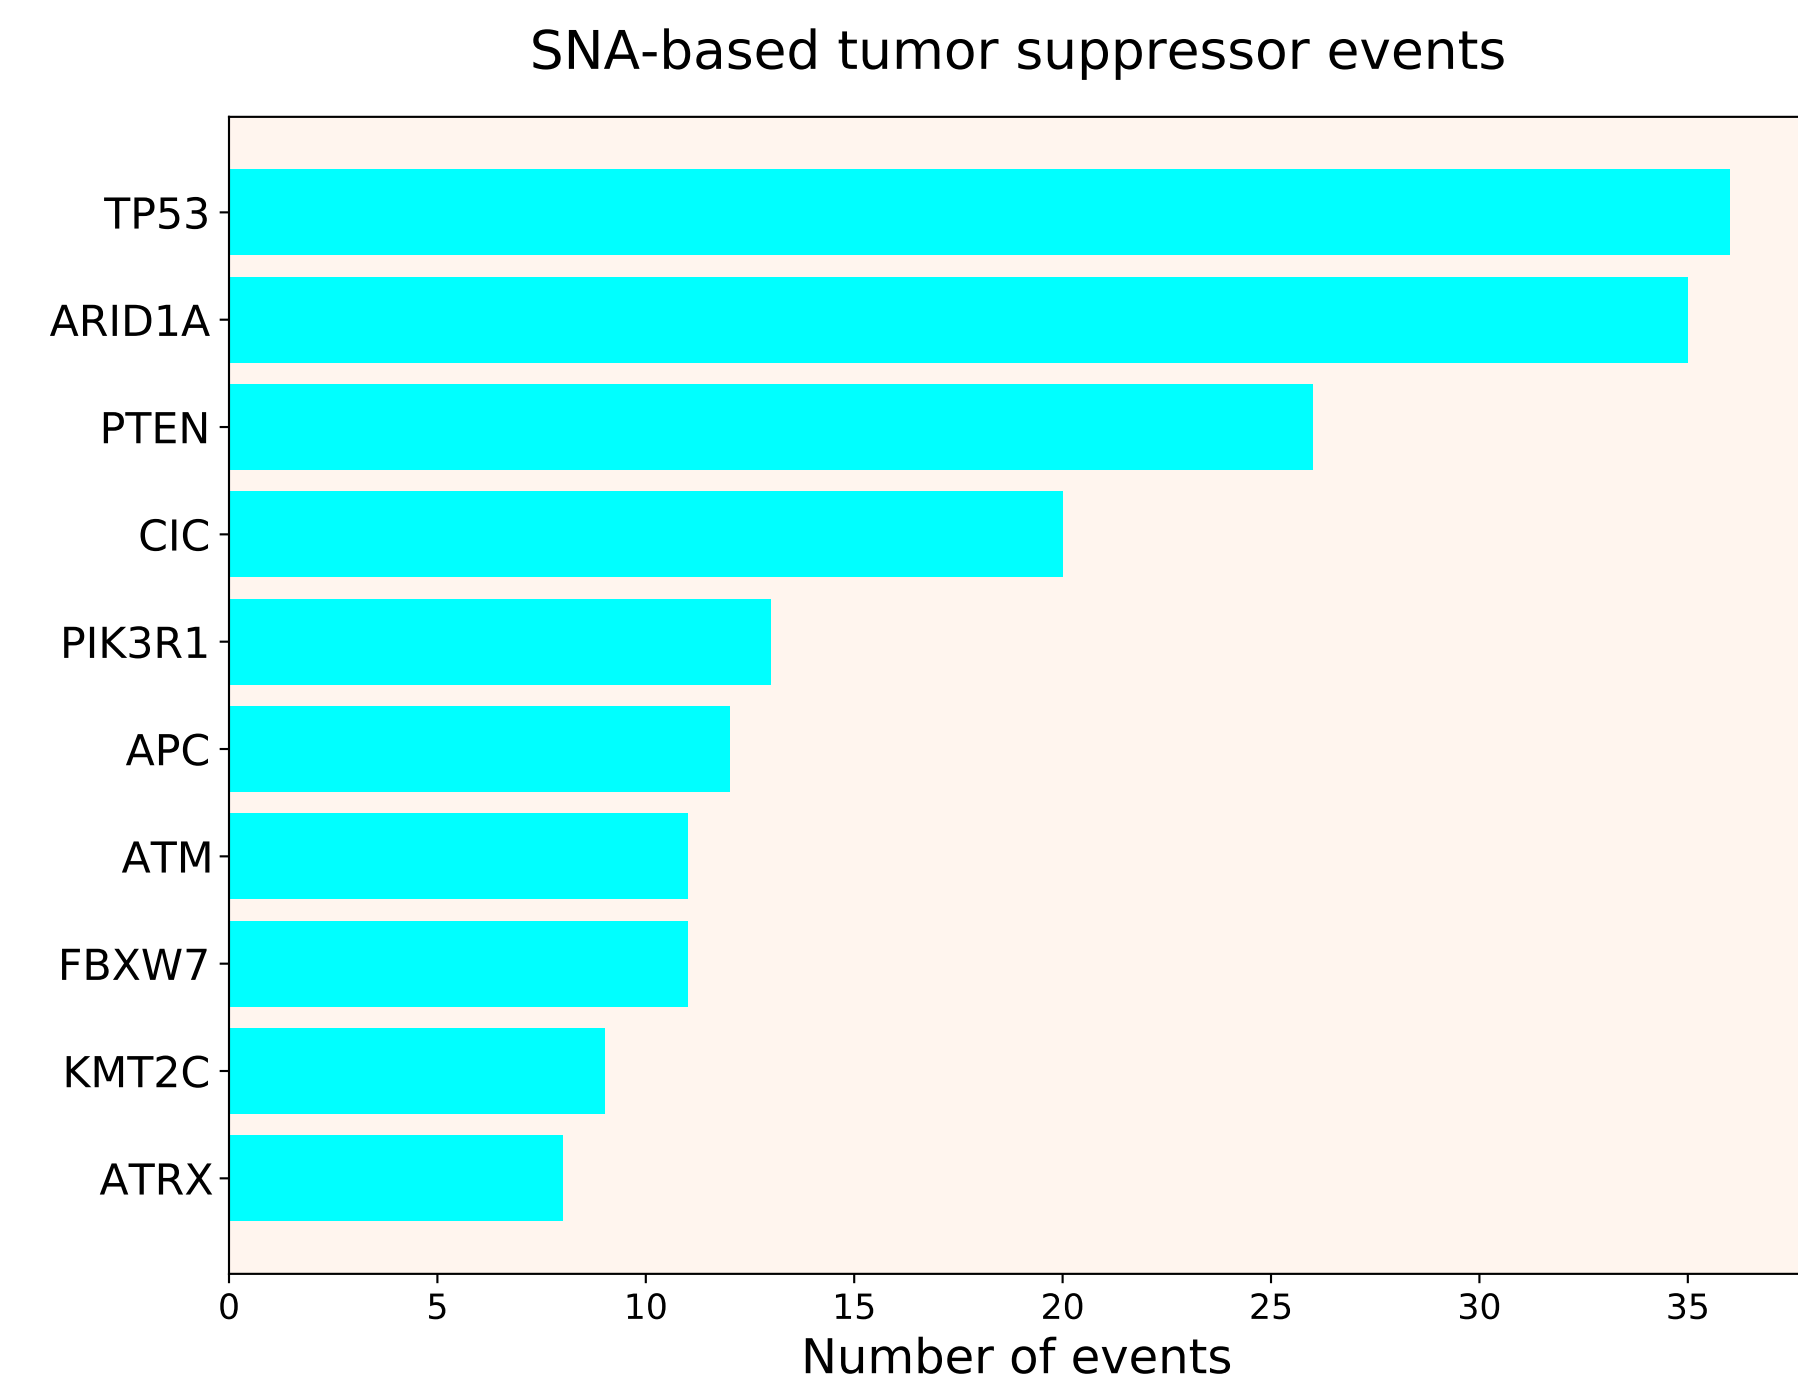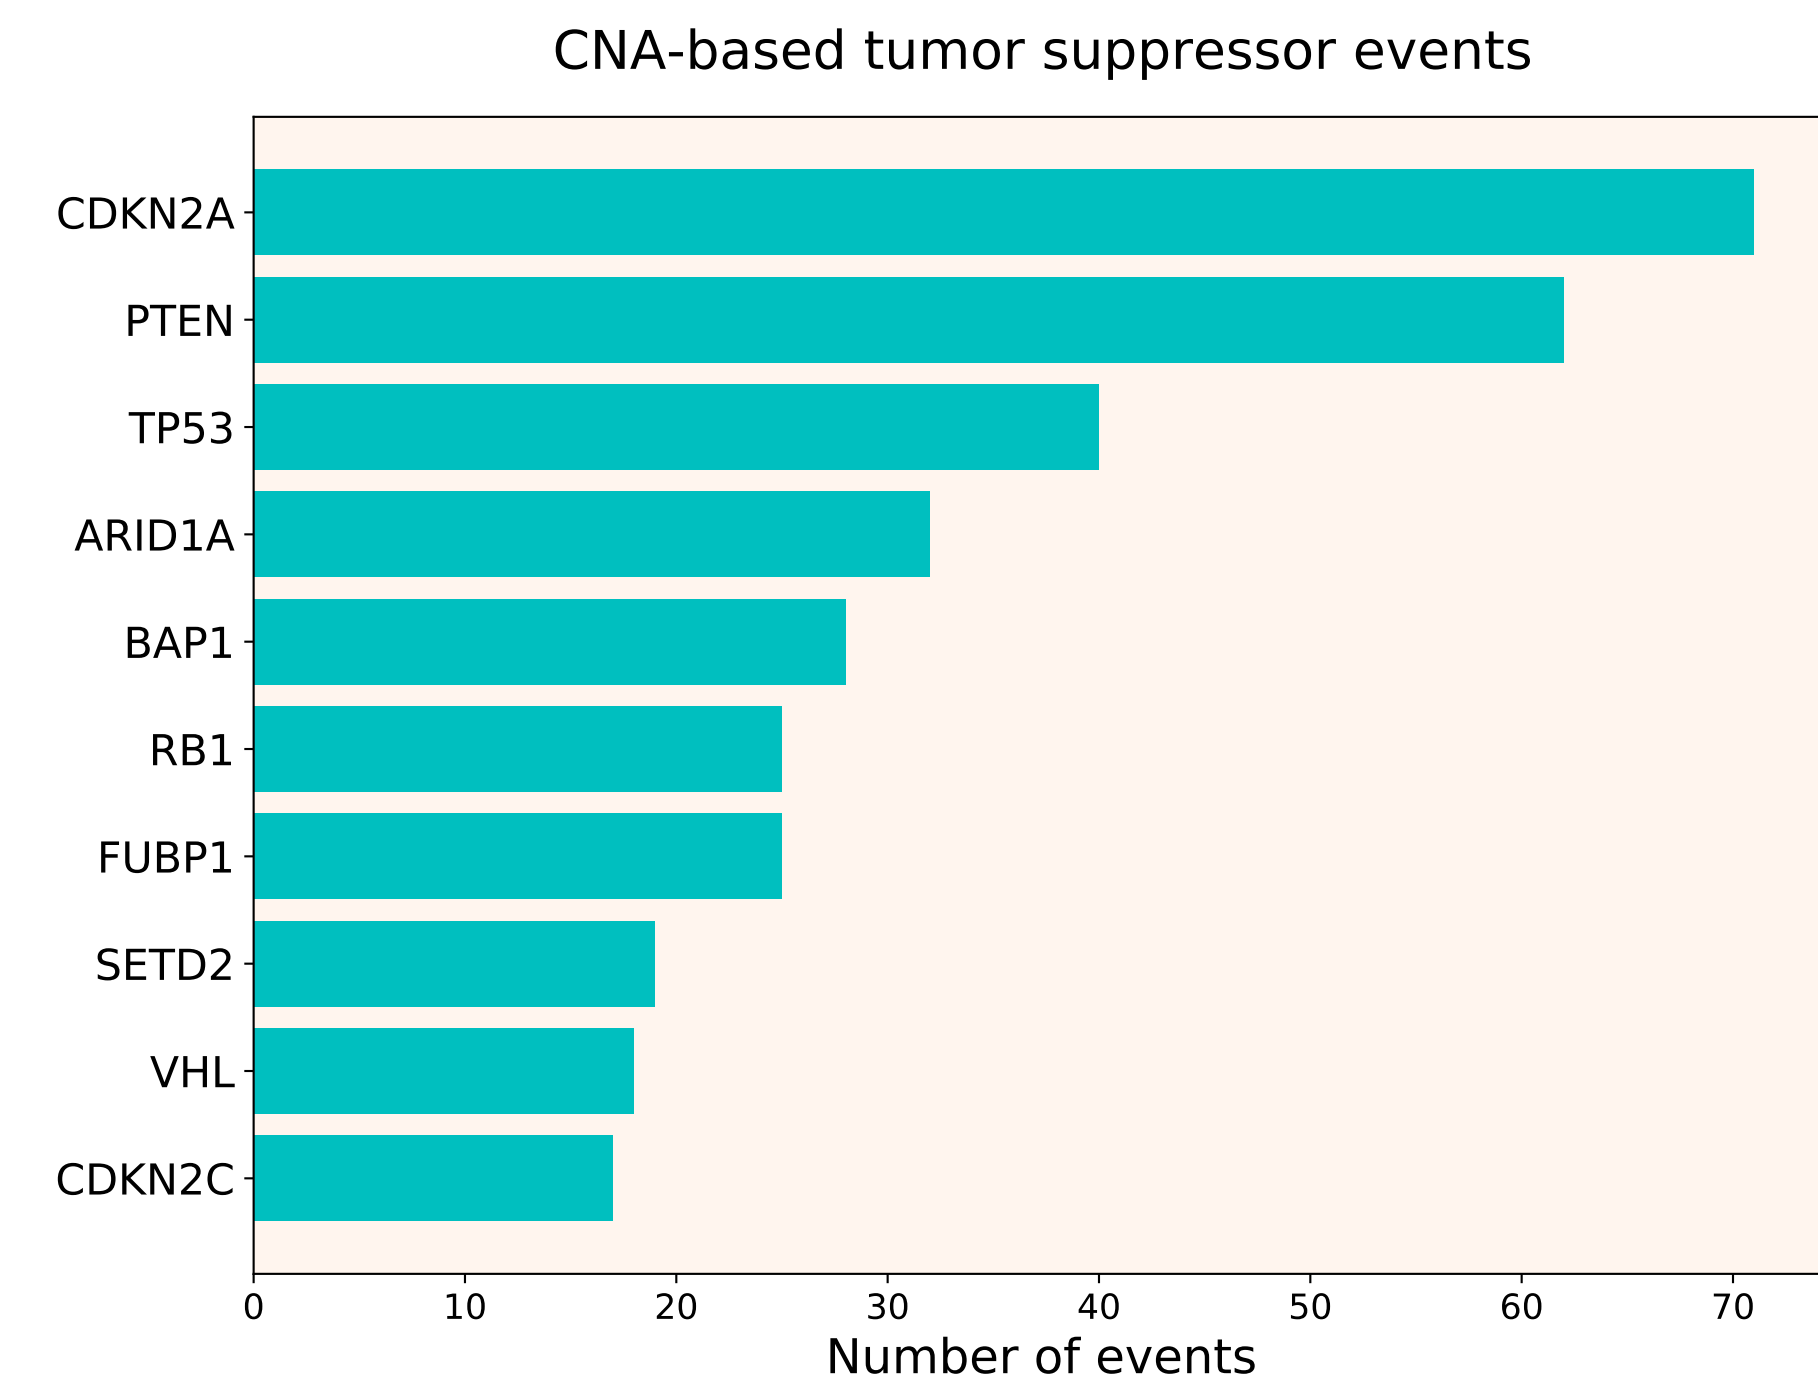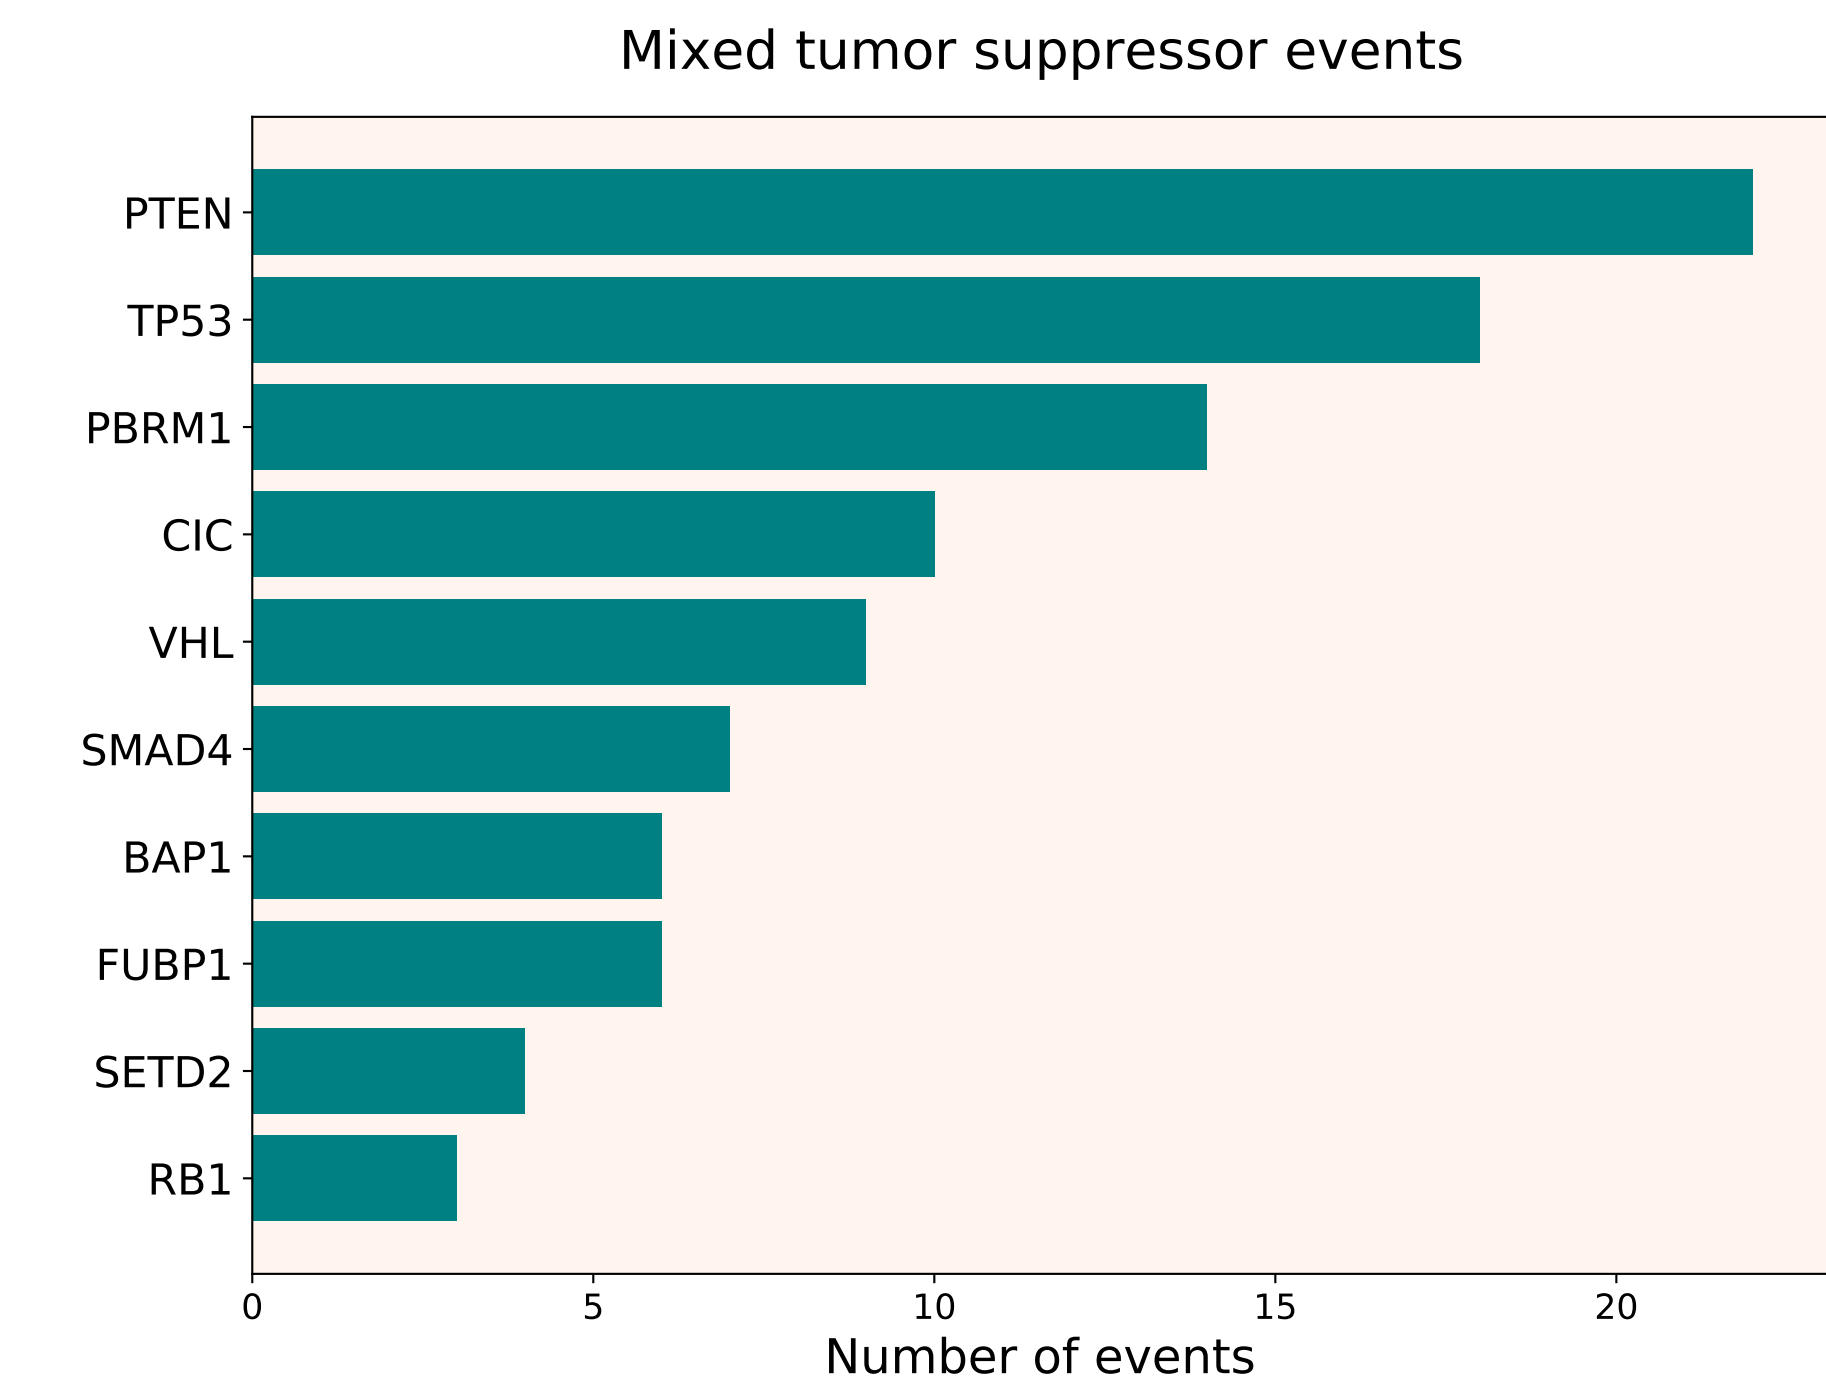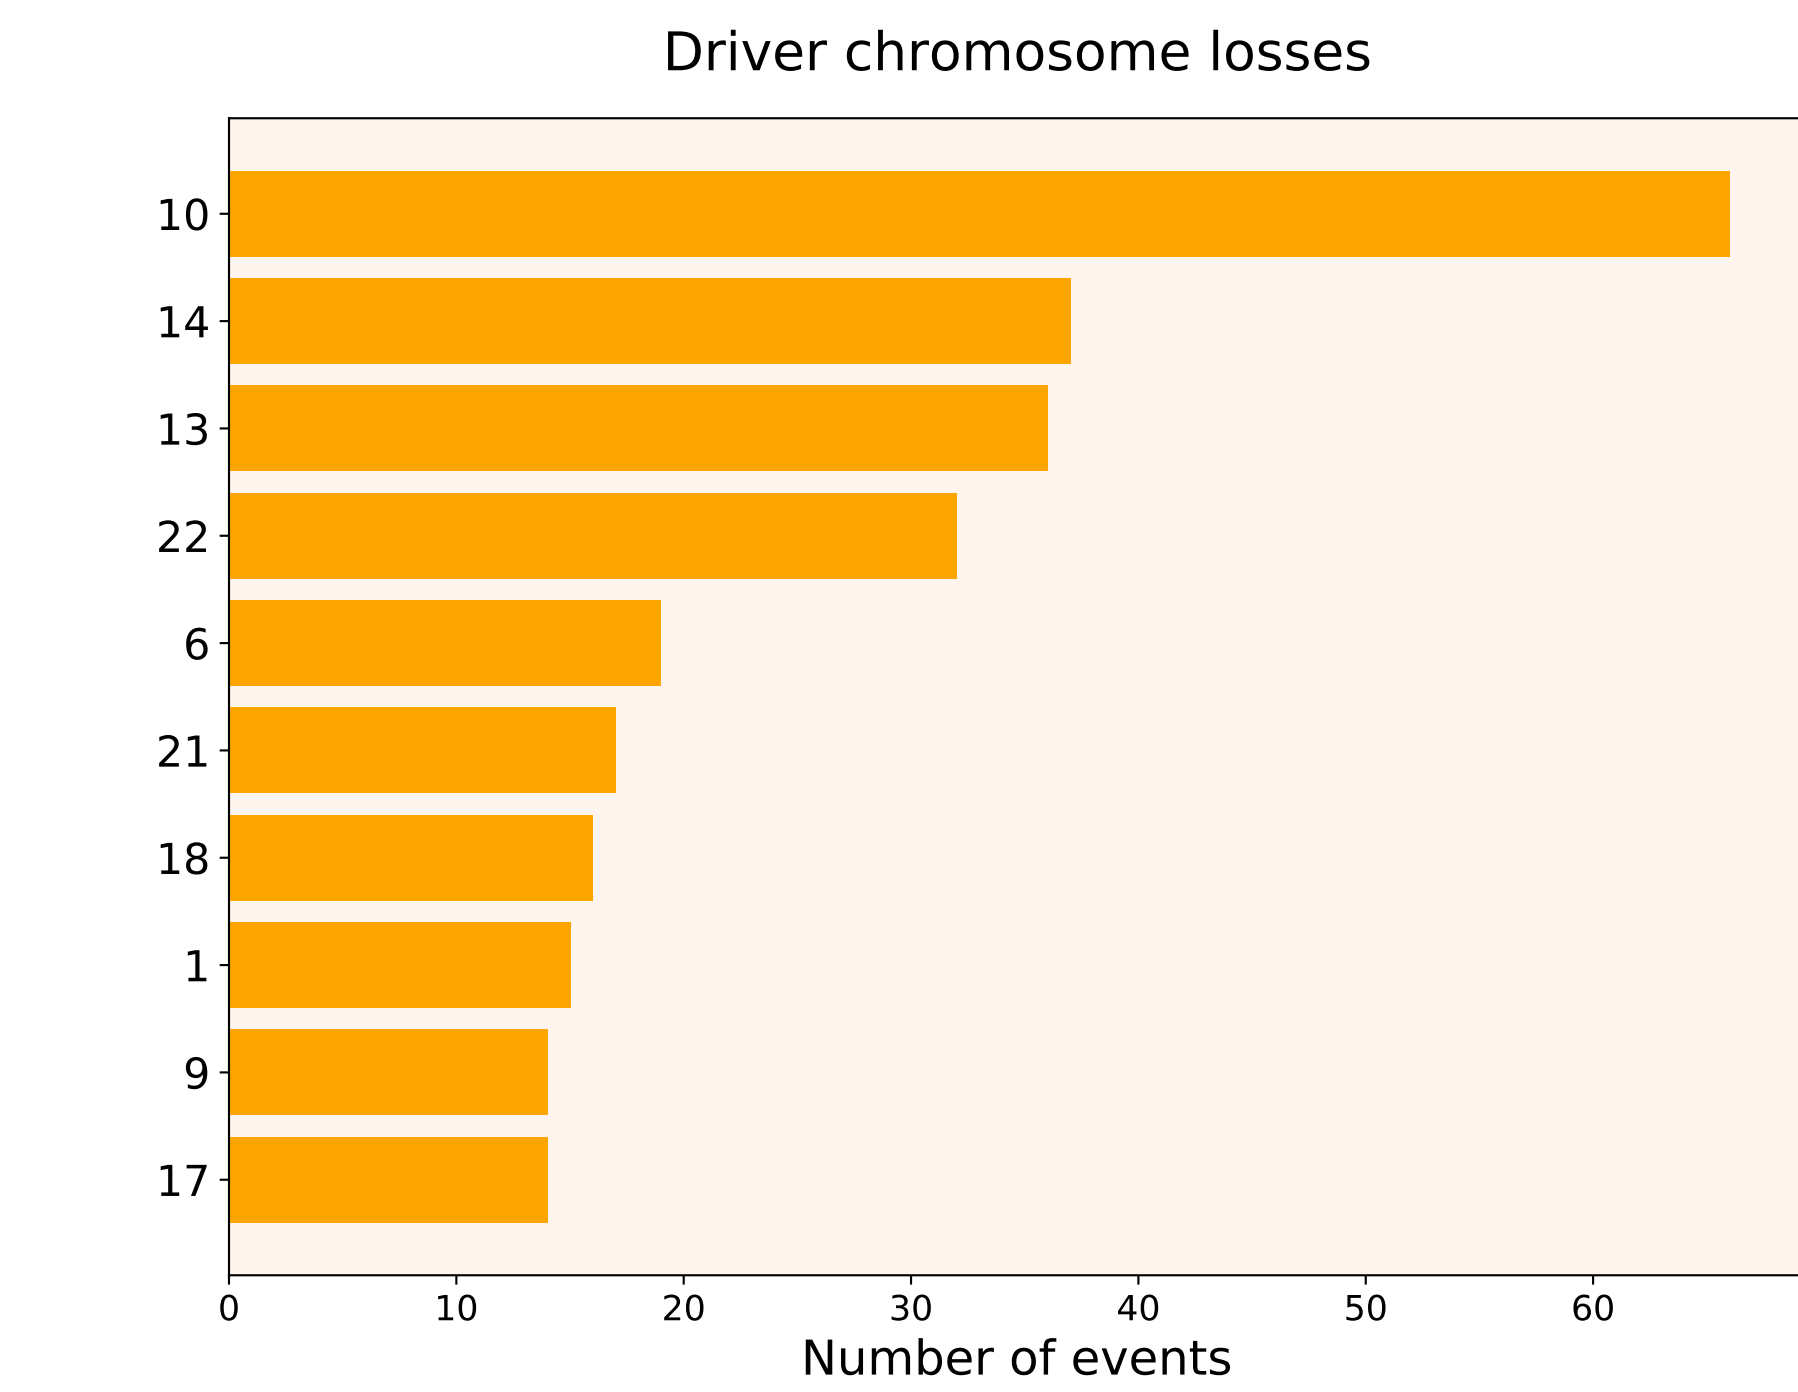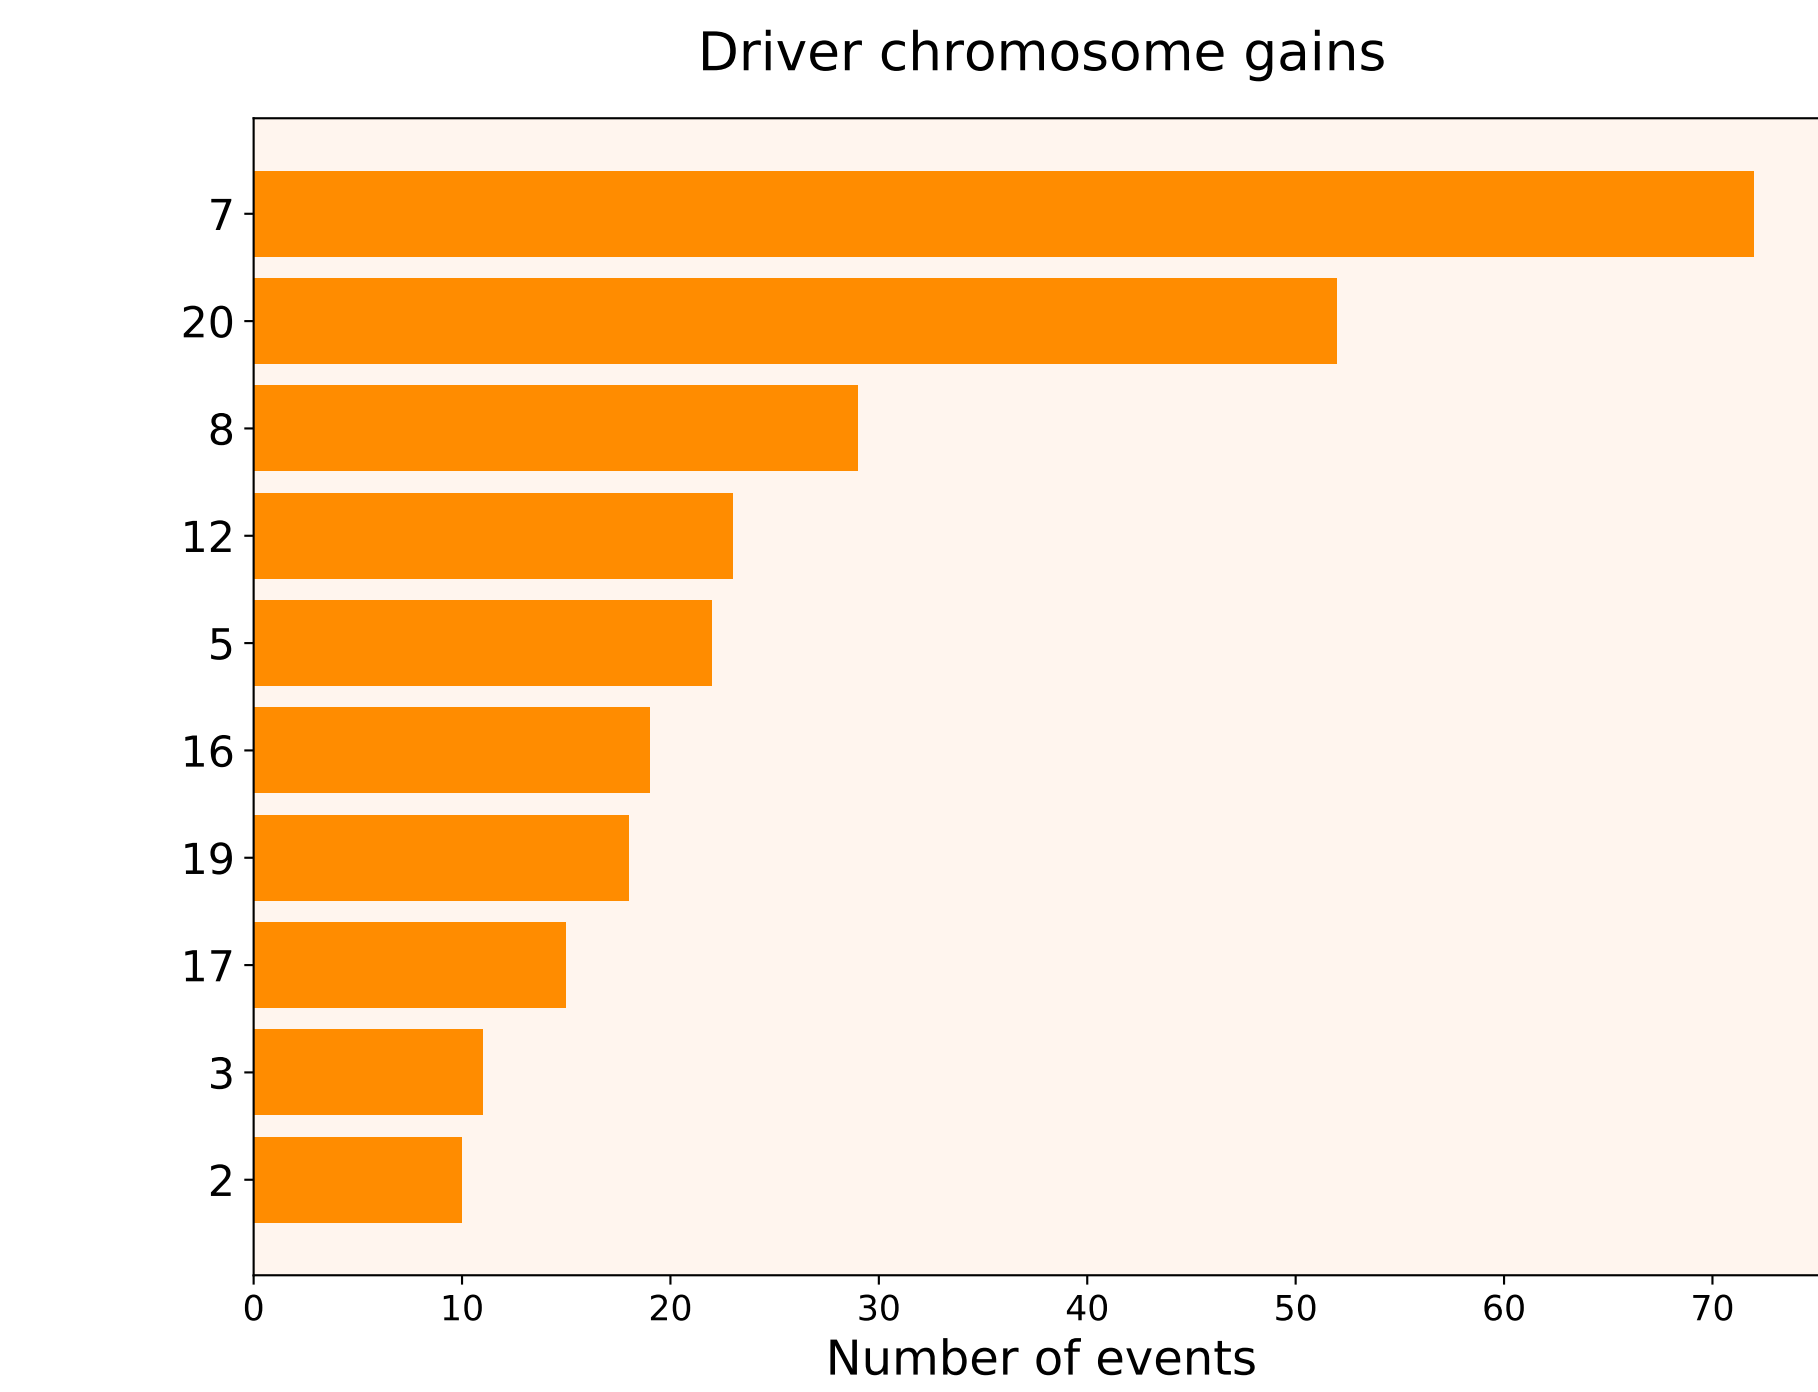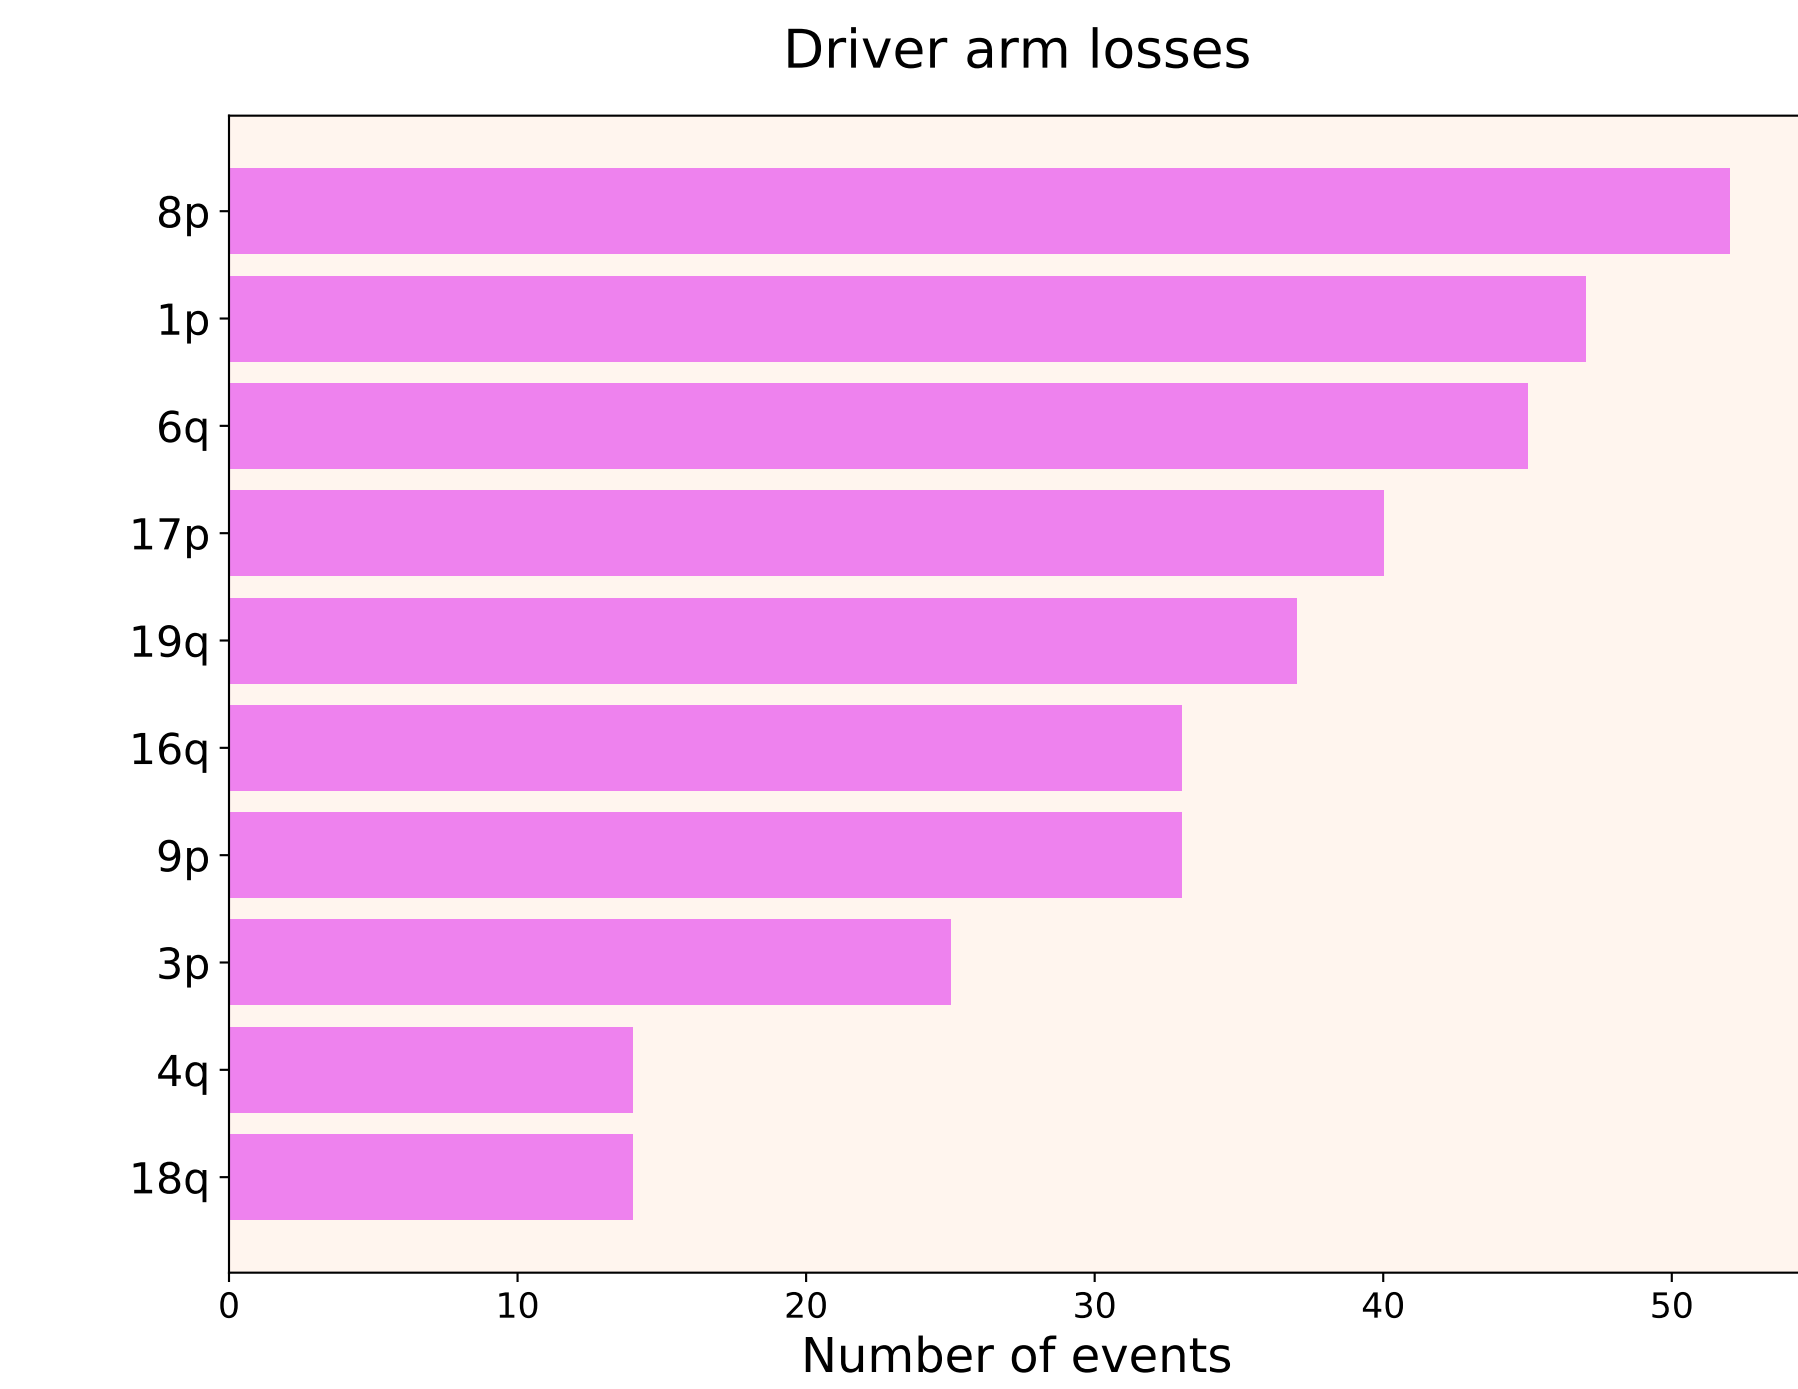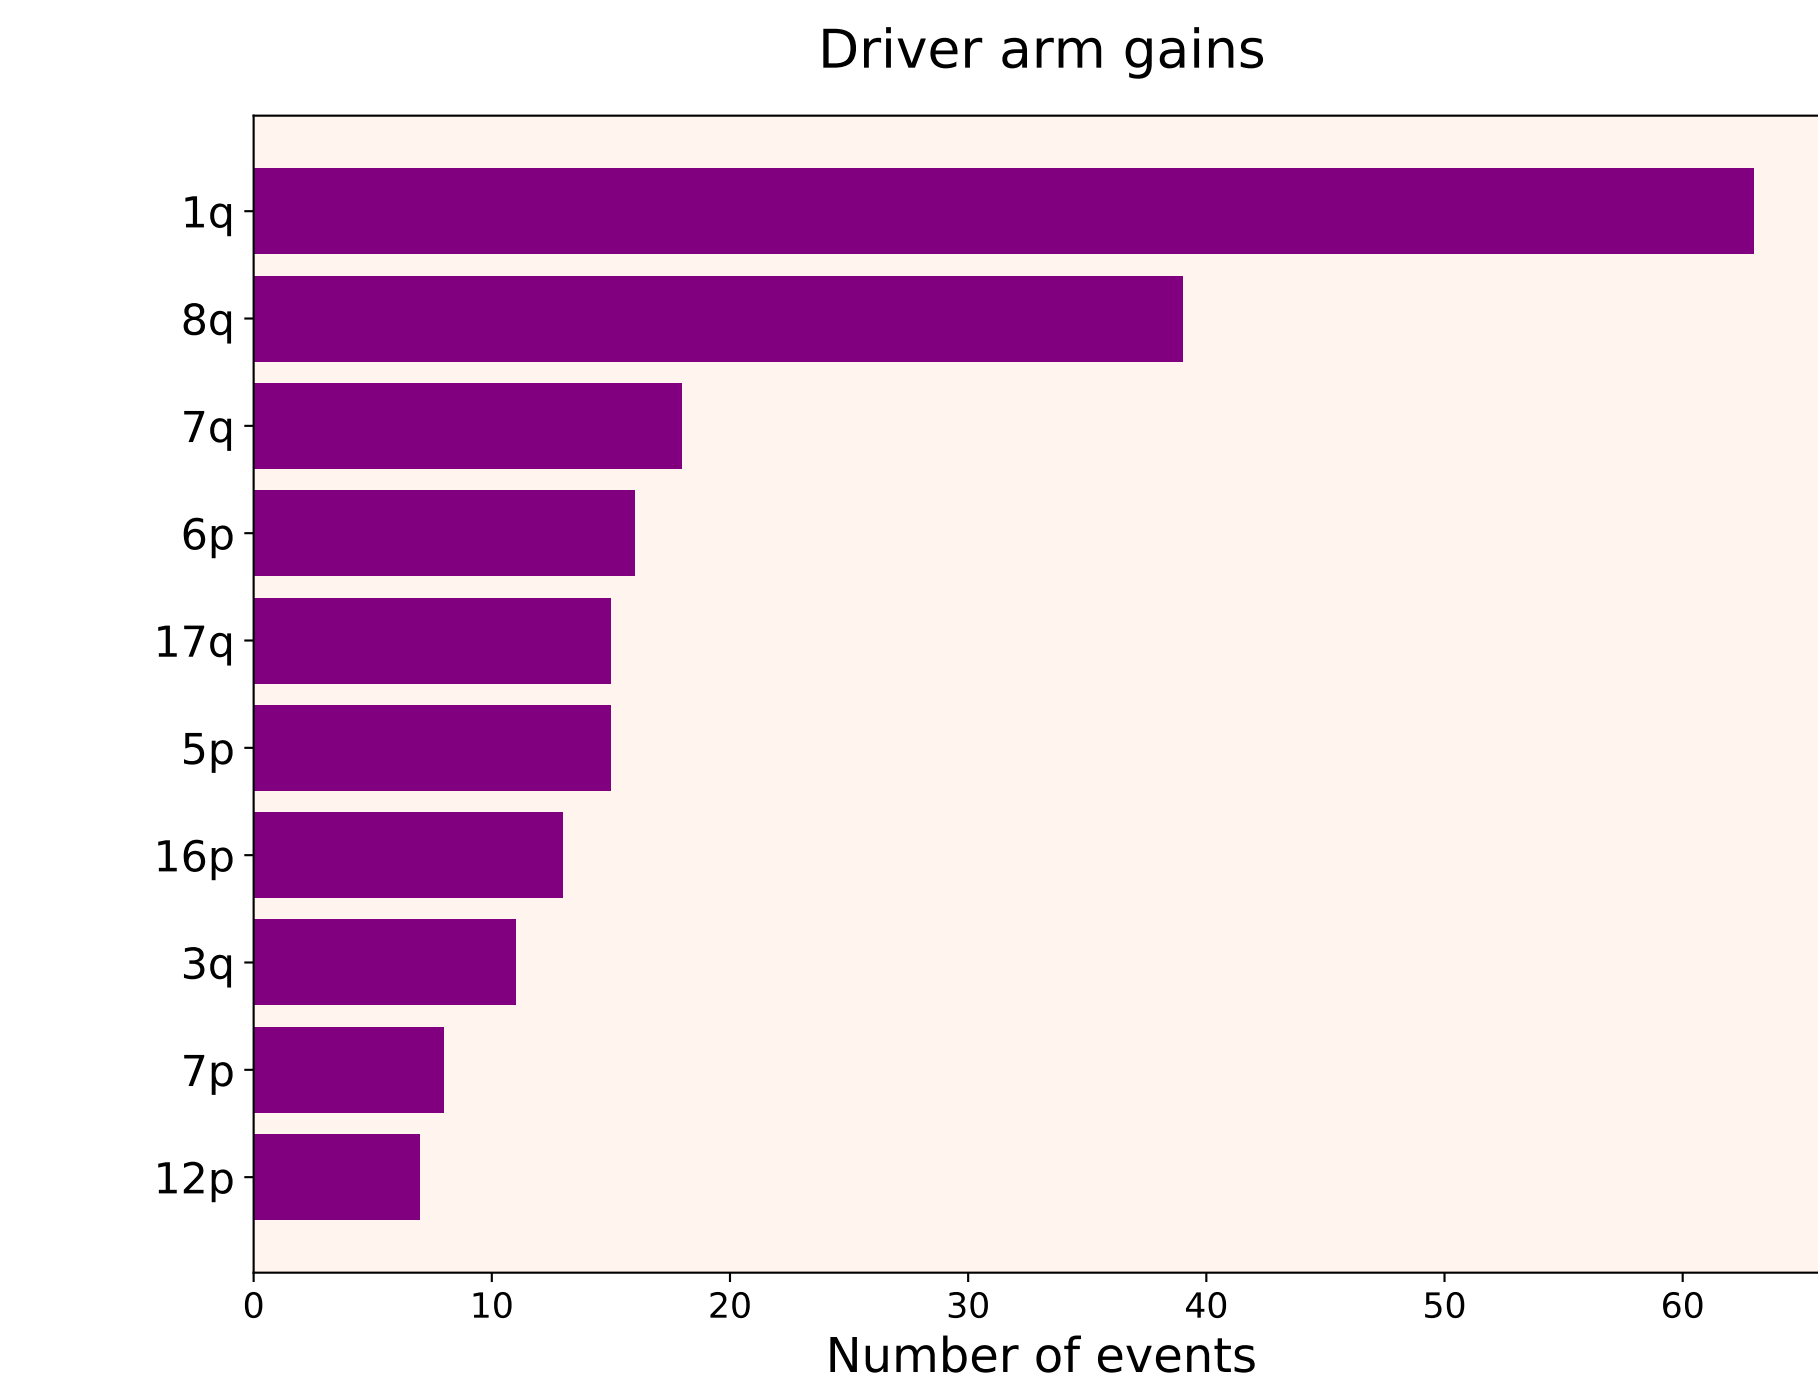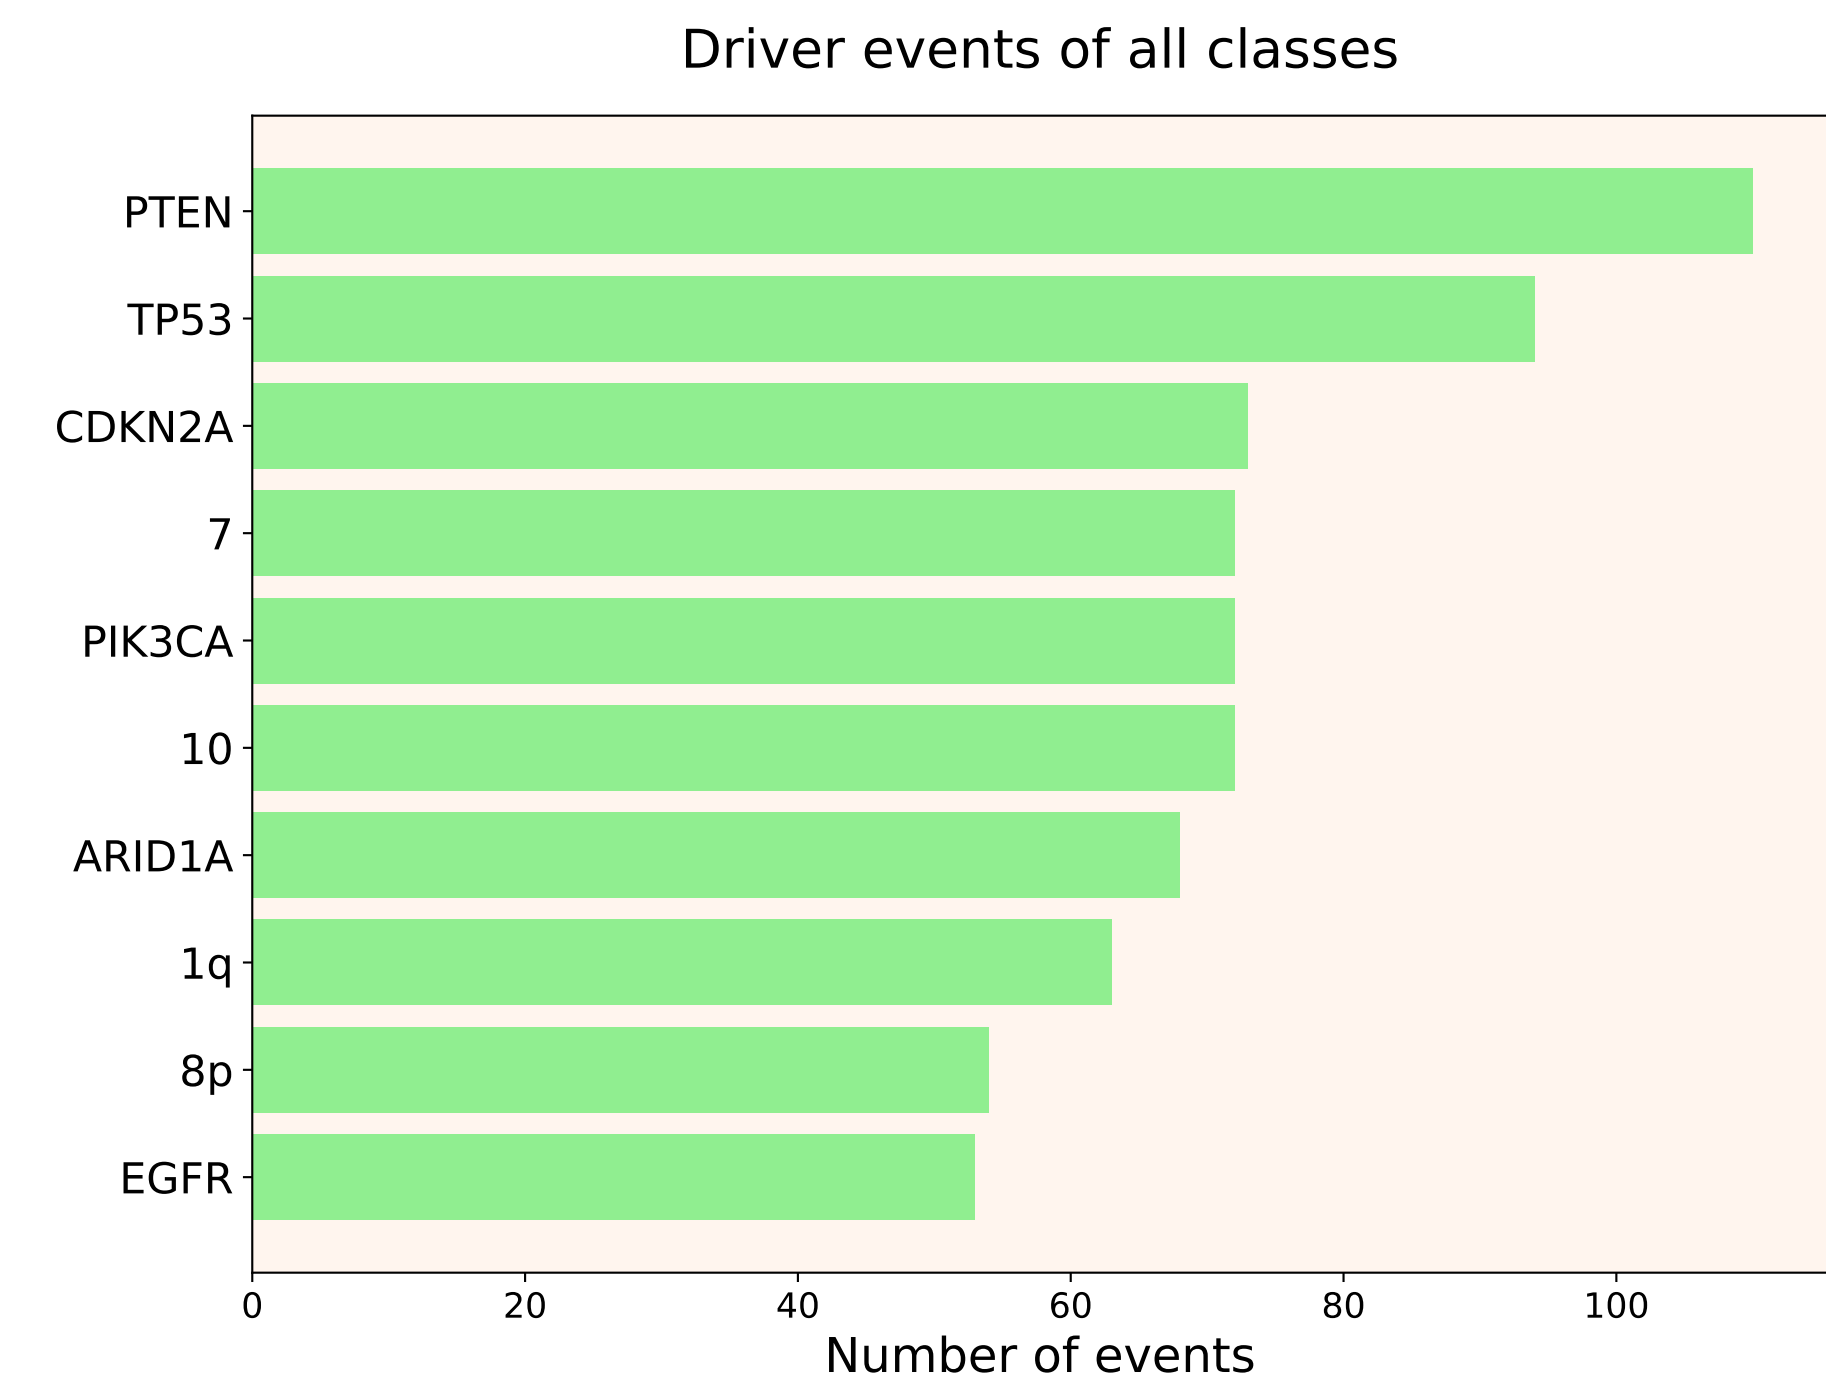

Supplement: Supplemental_Data_S1.zip [file Supplemental_Data_S1.zip]

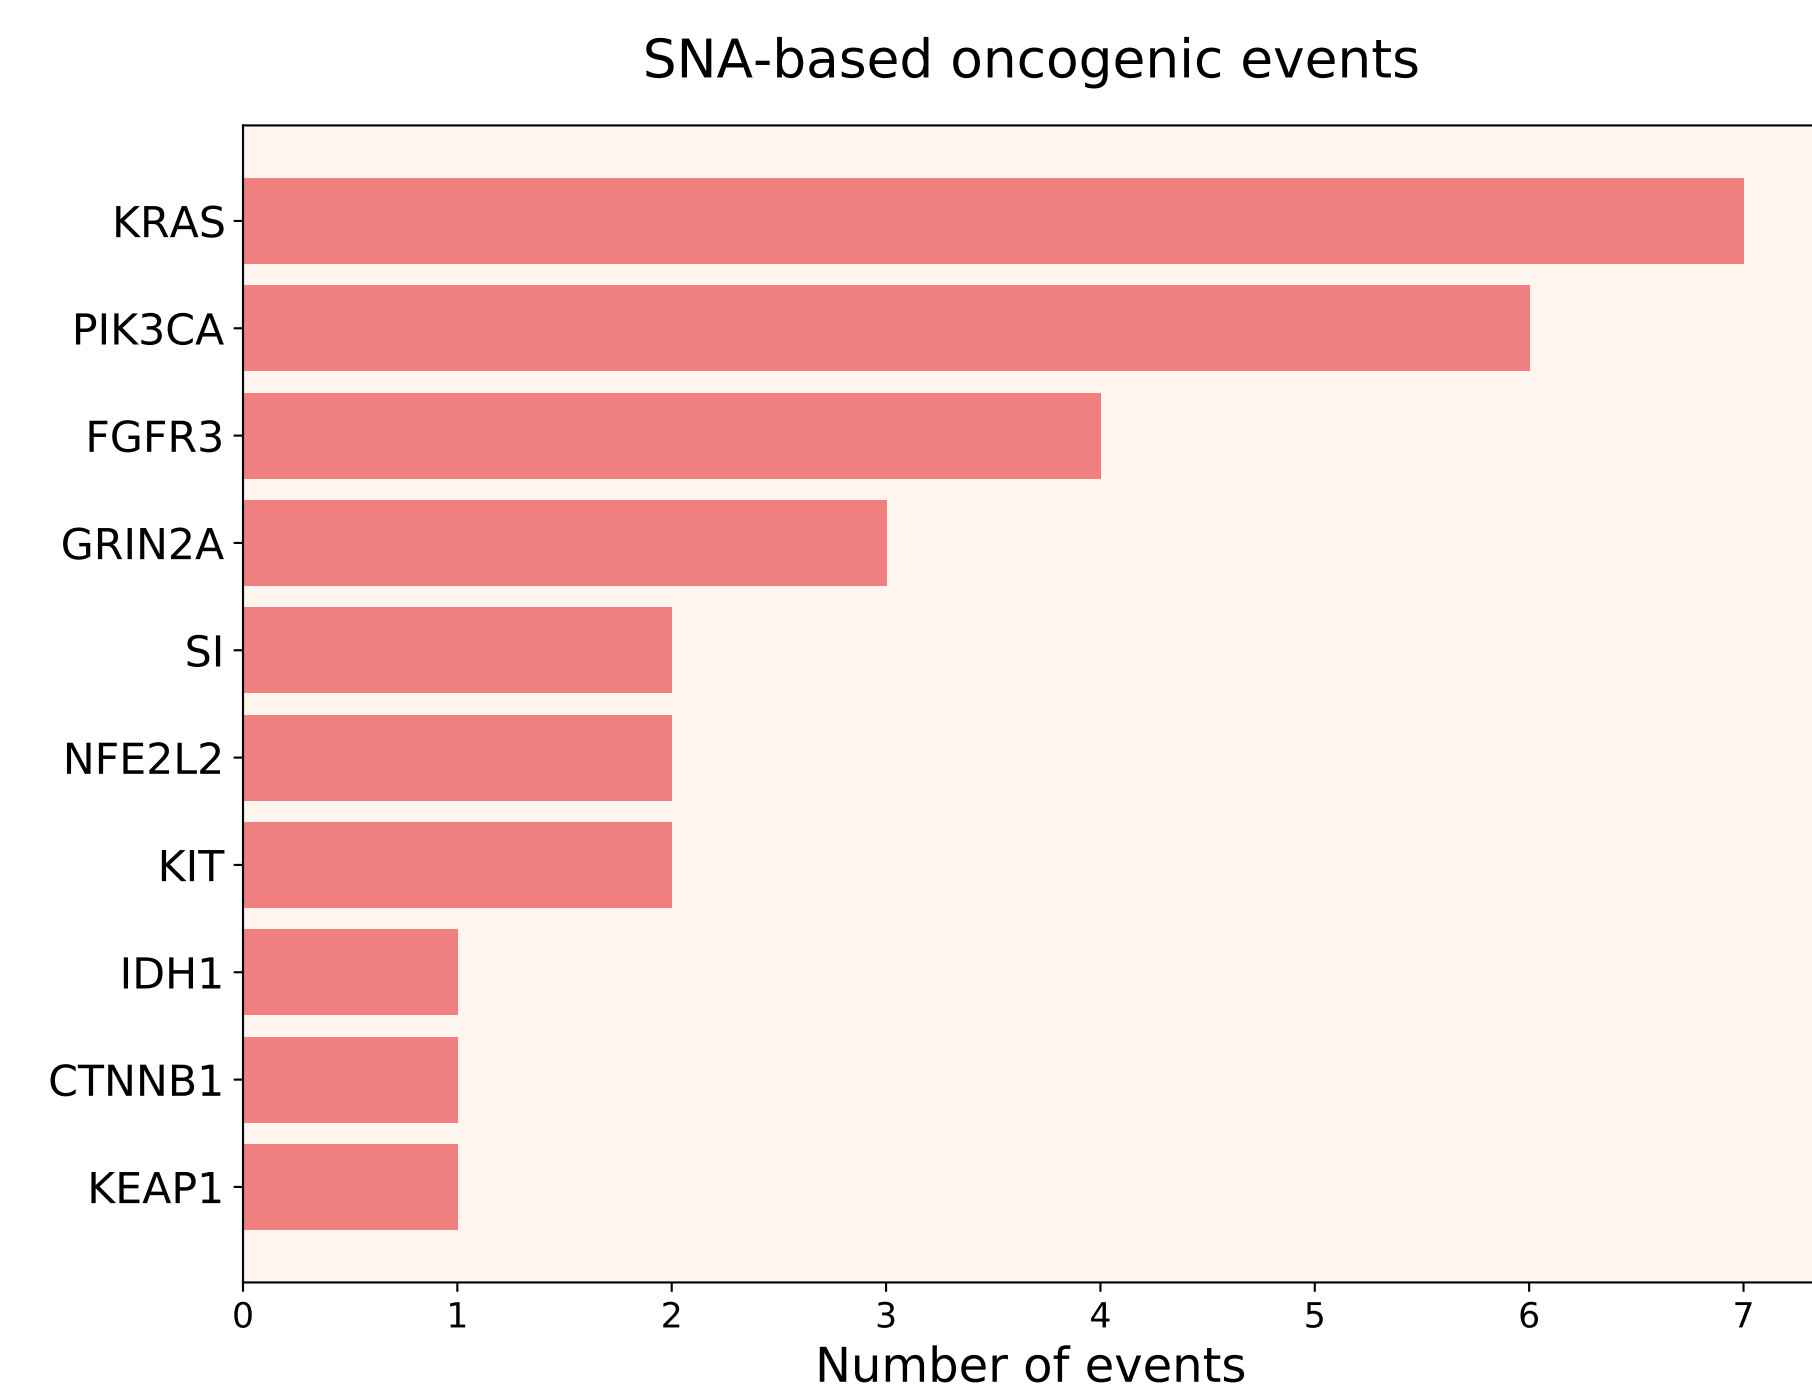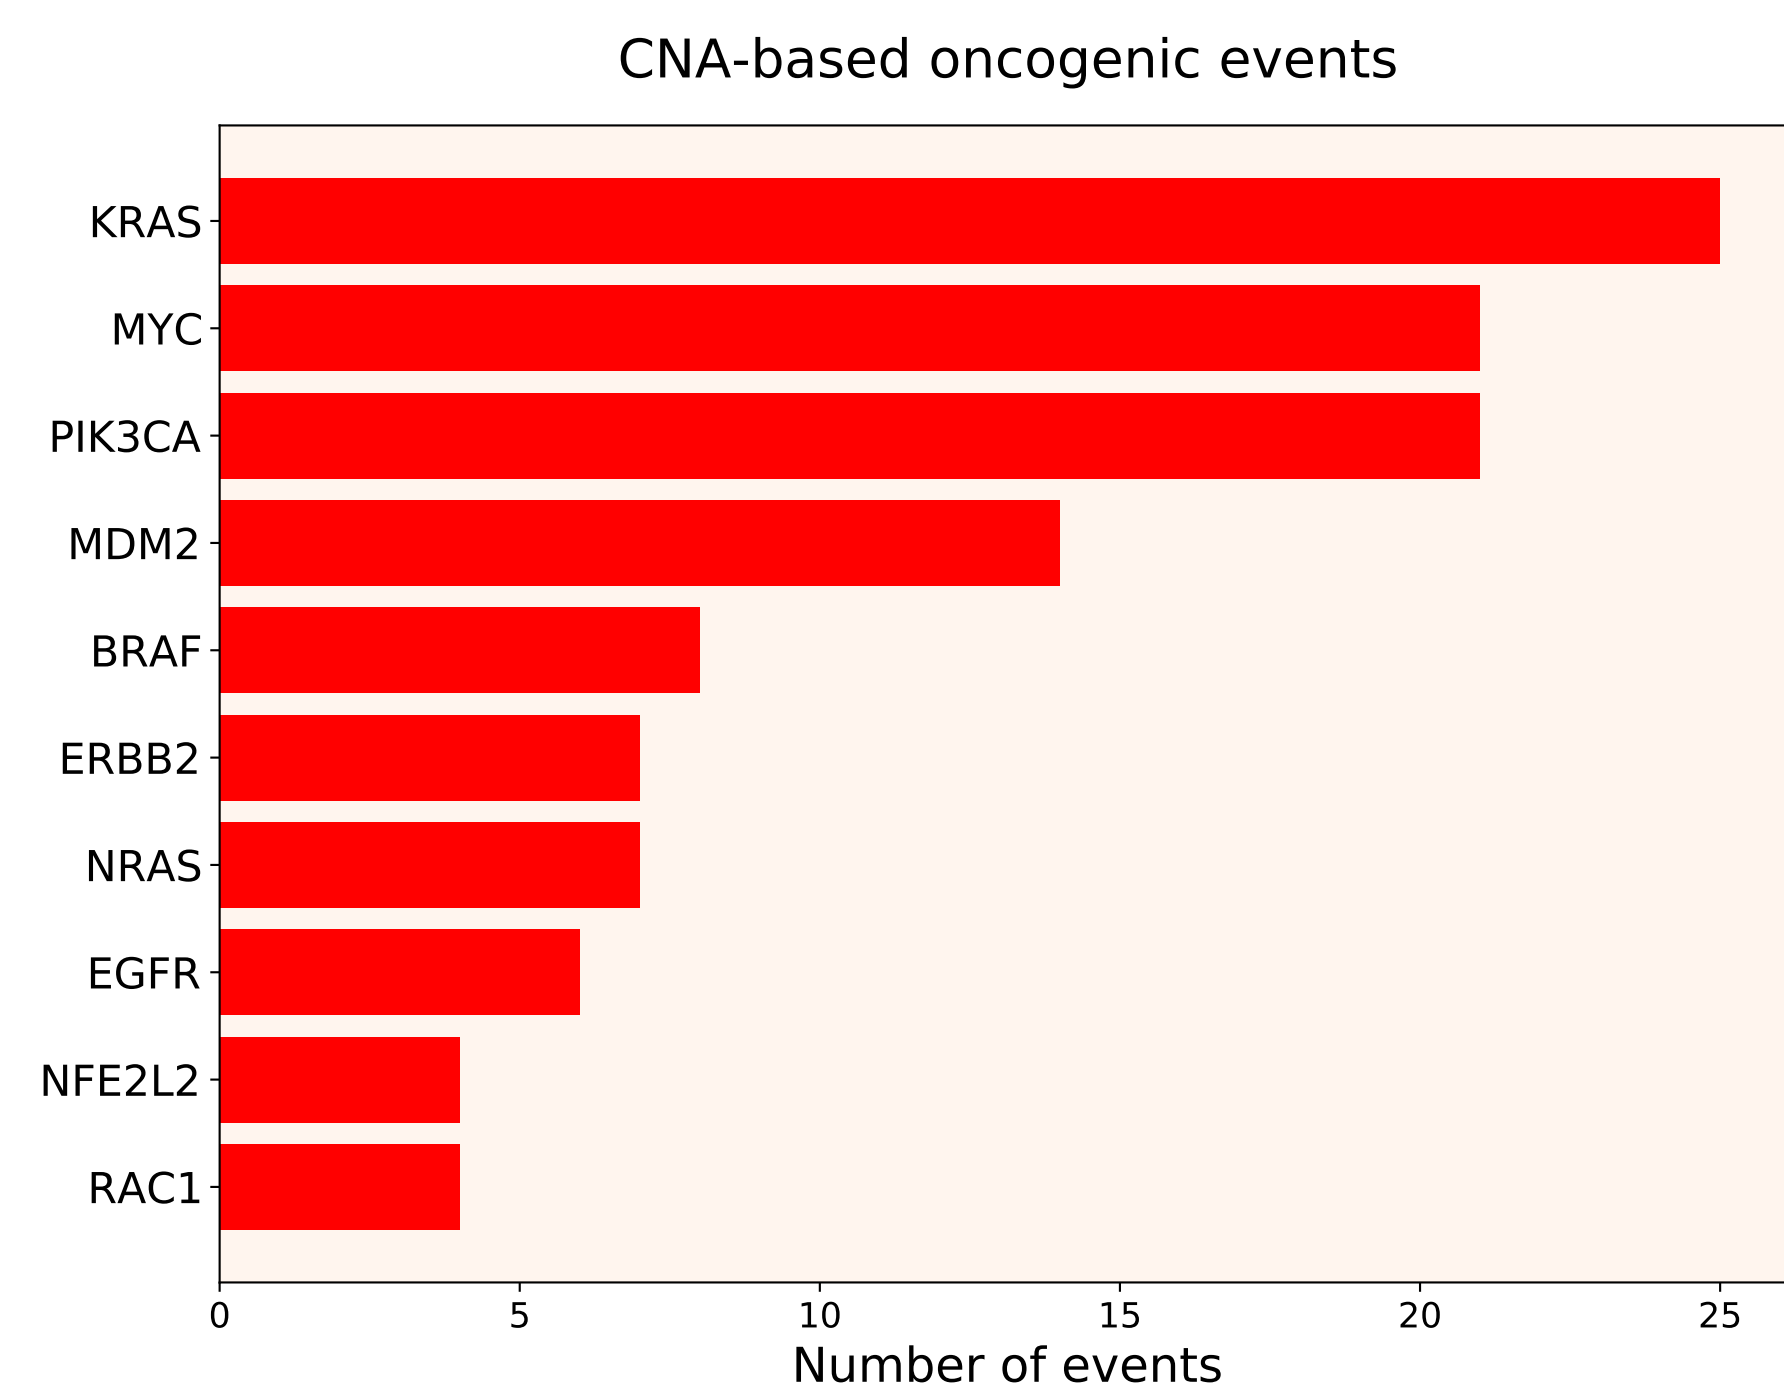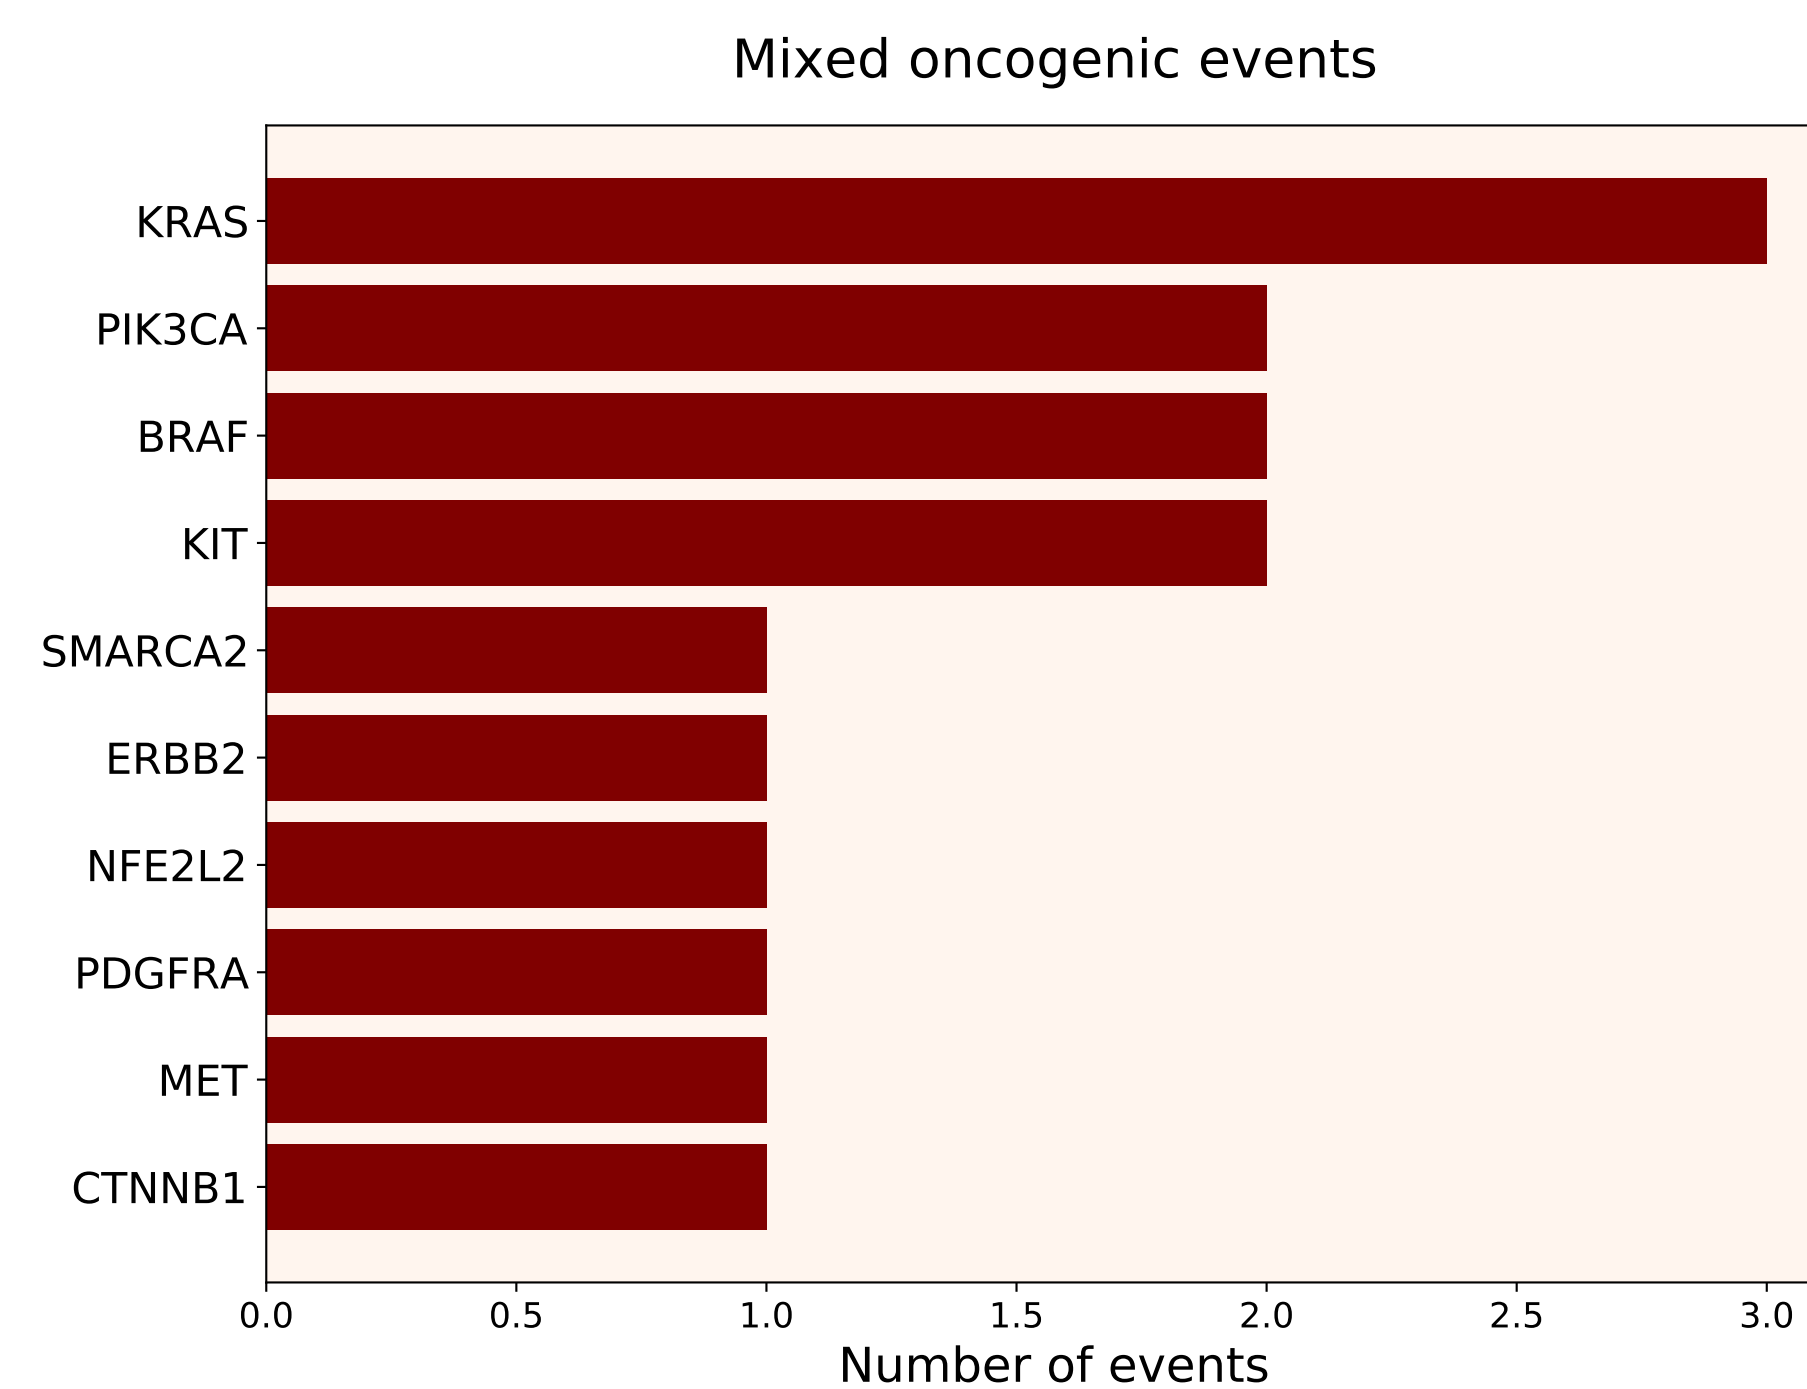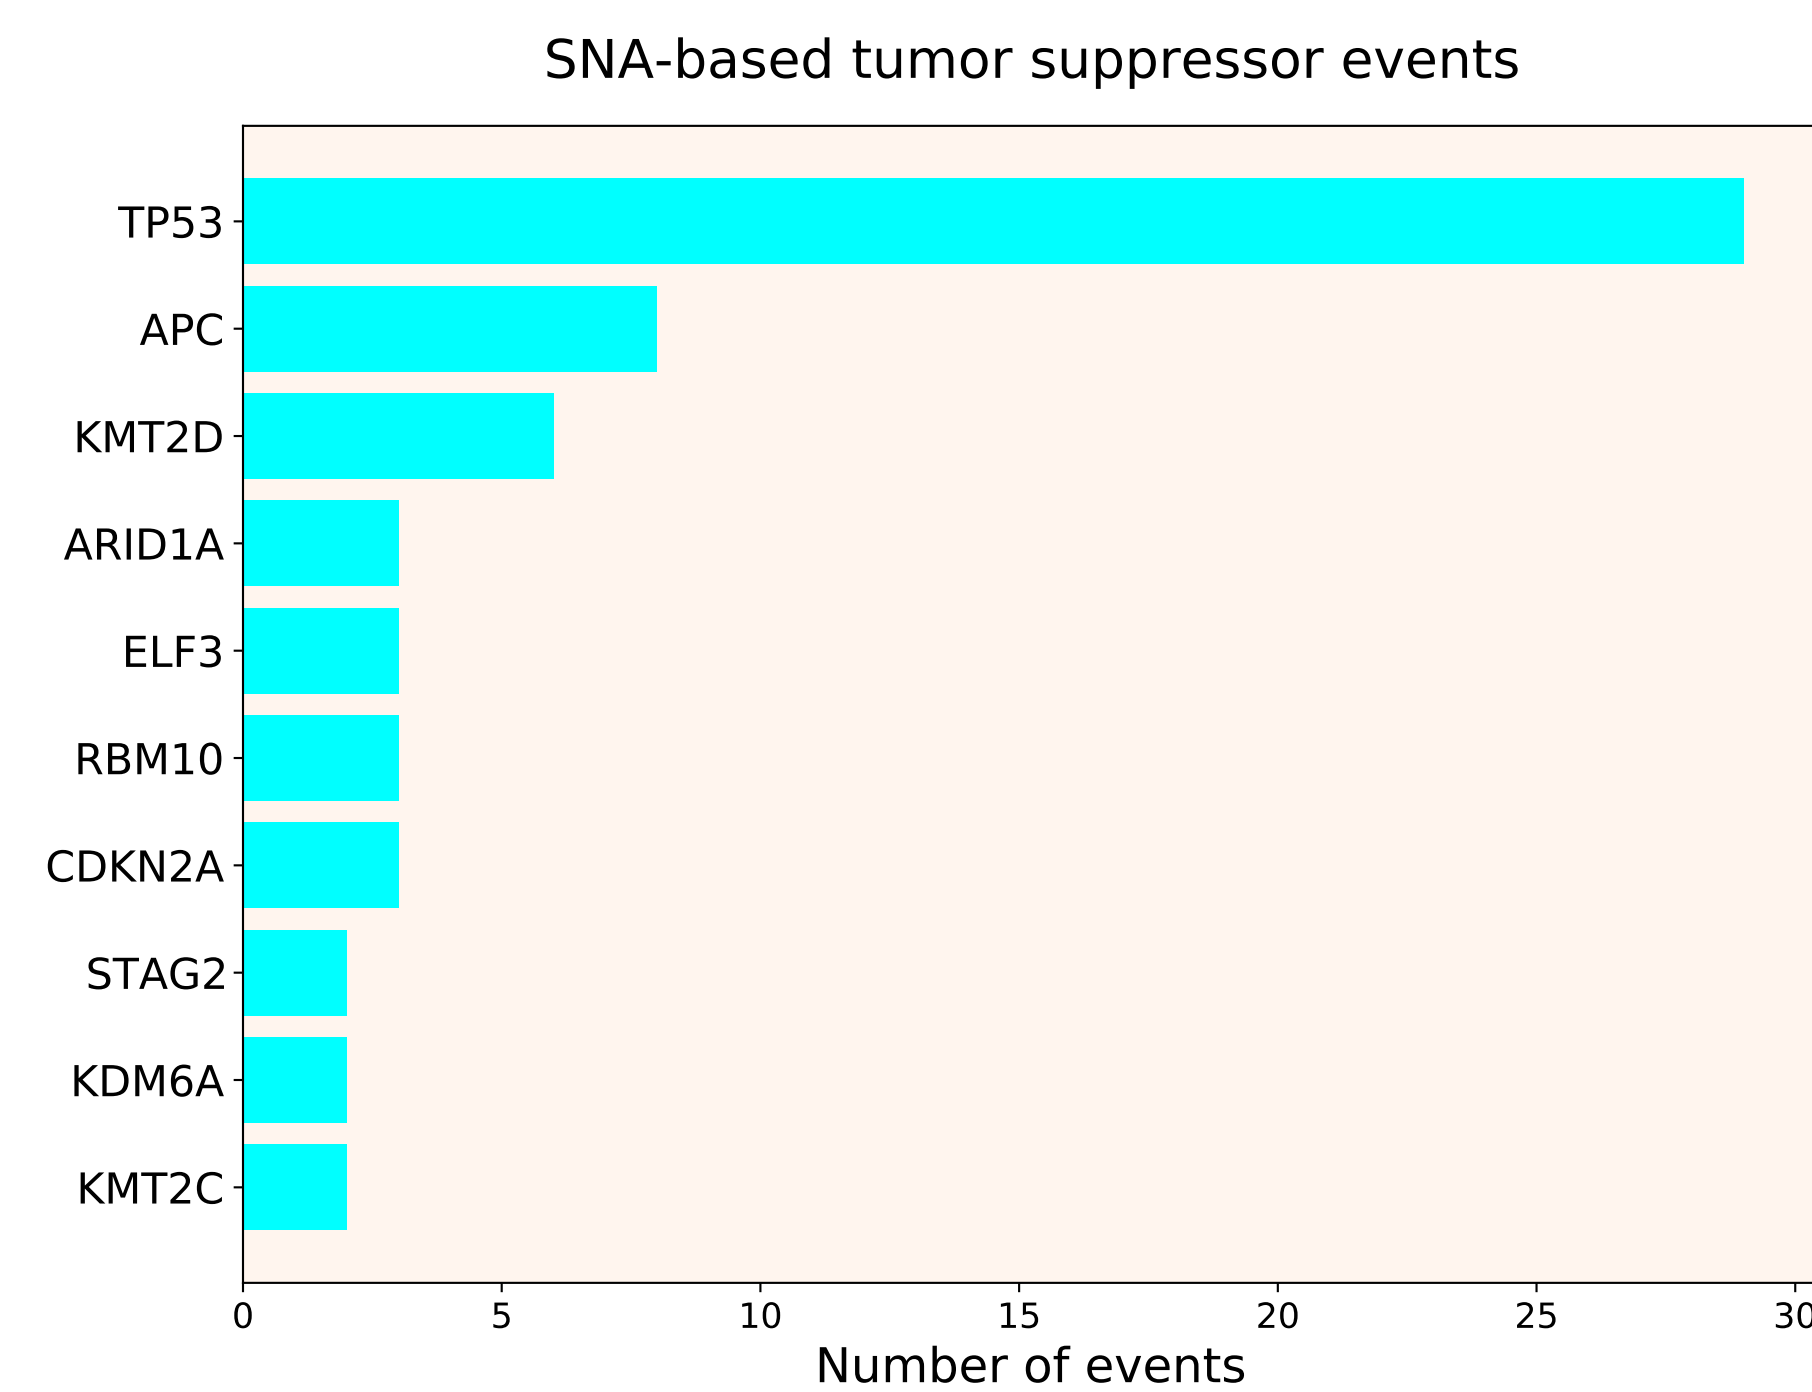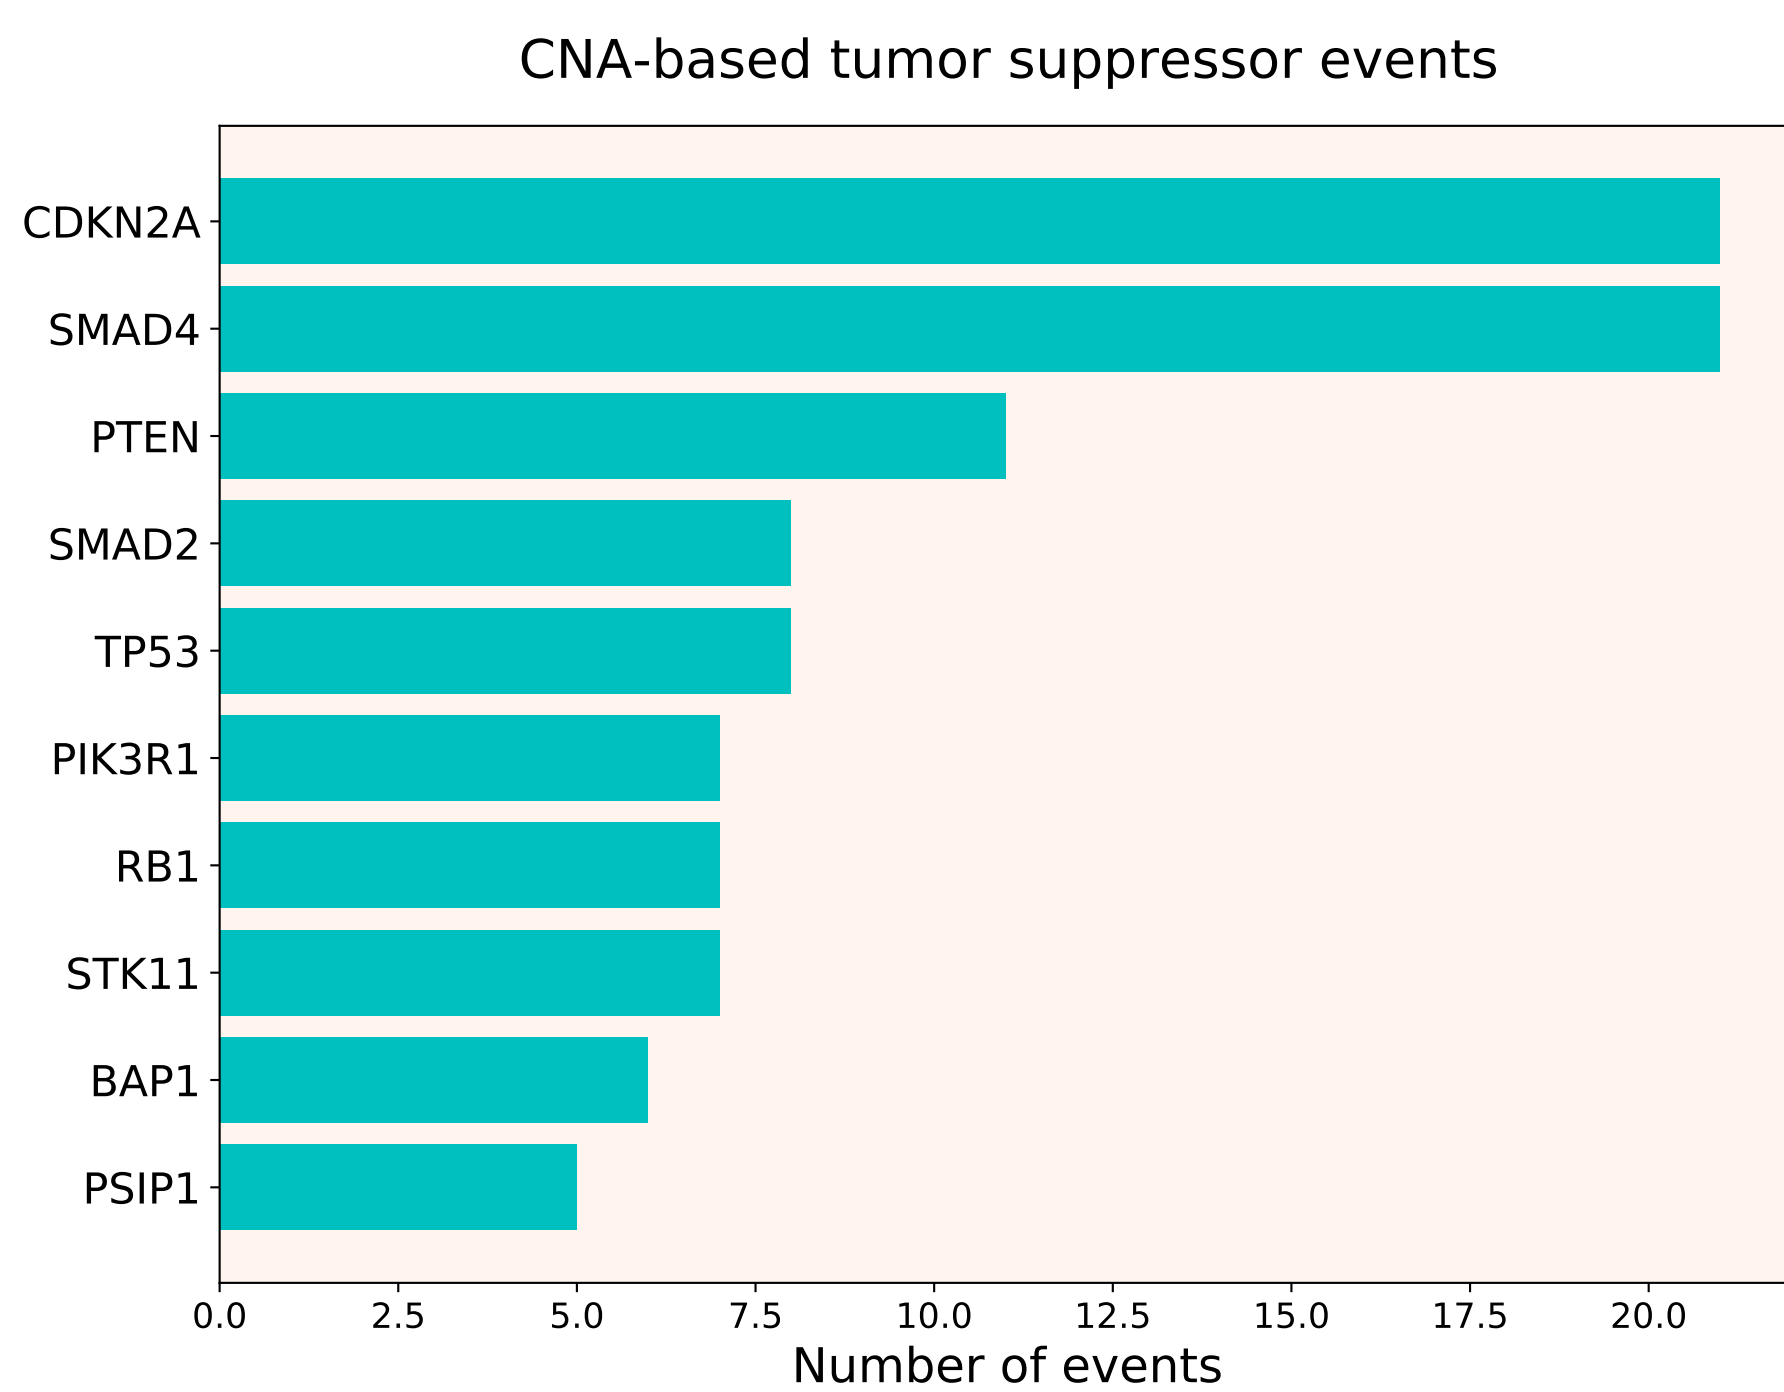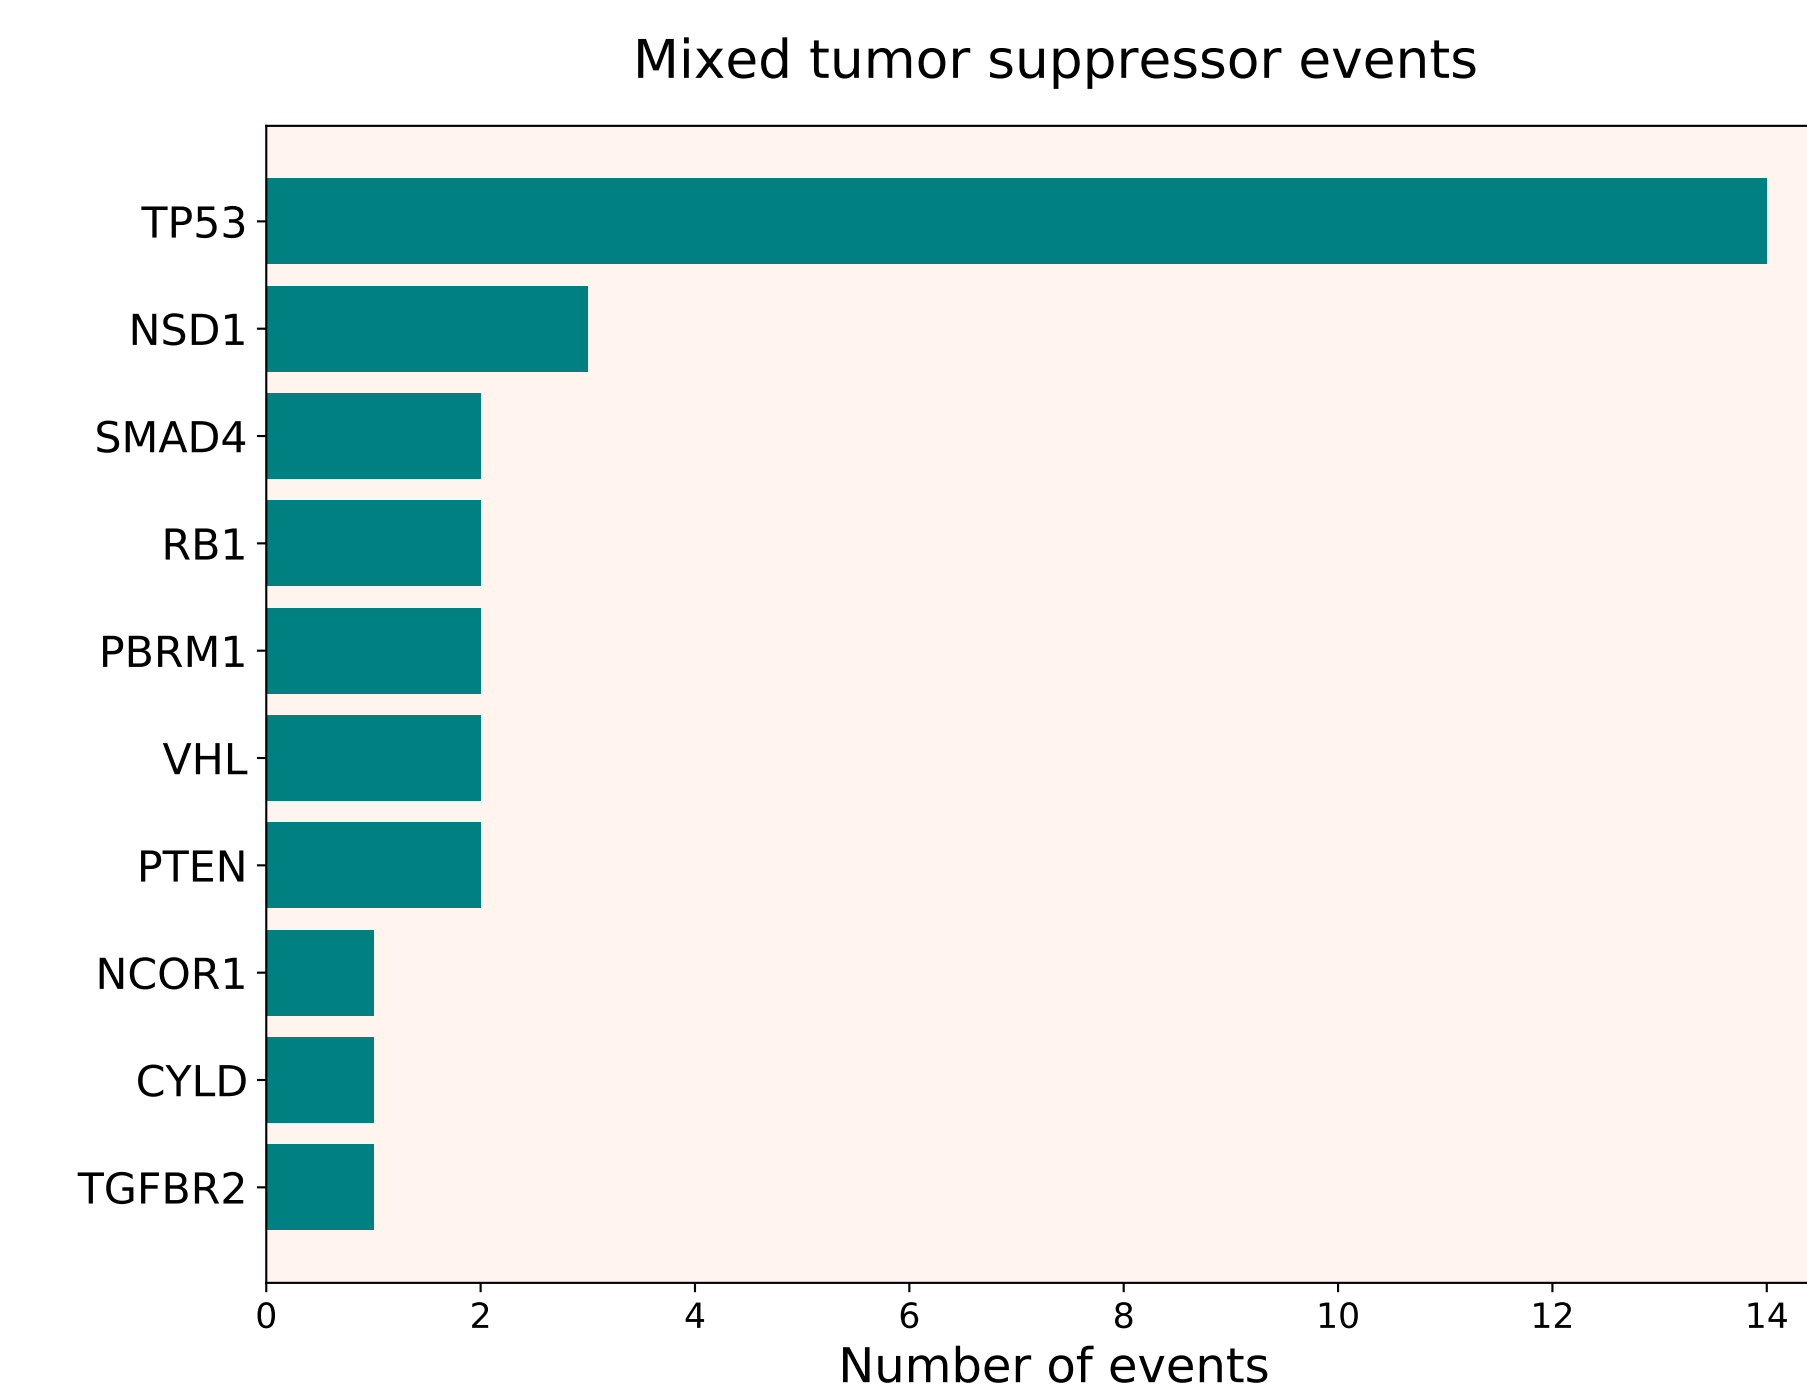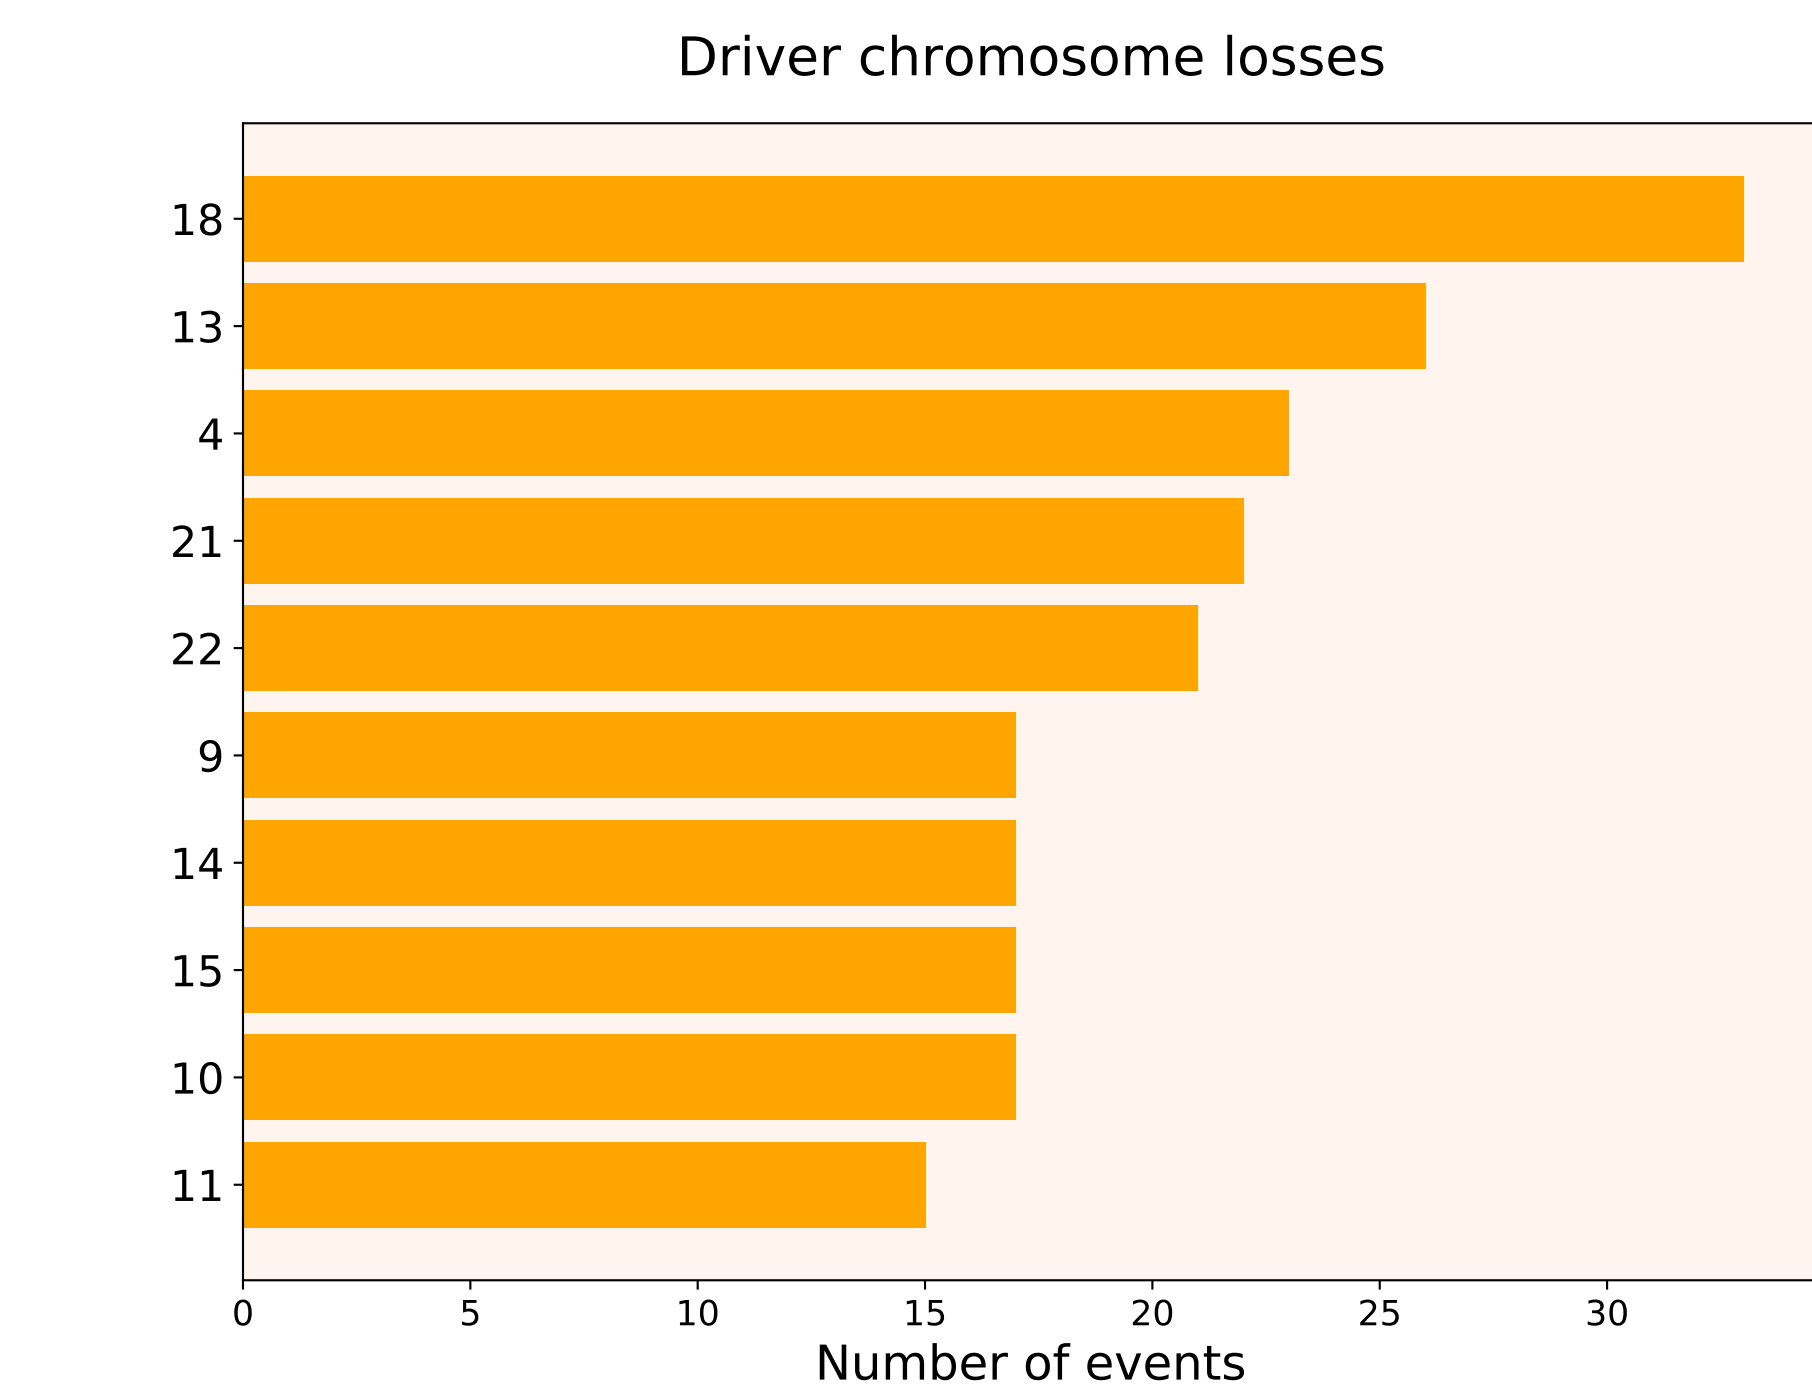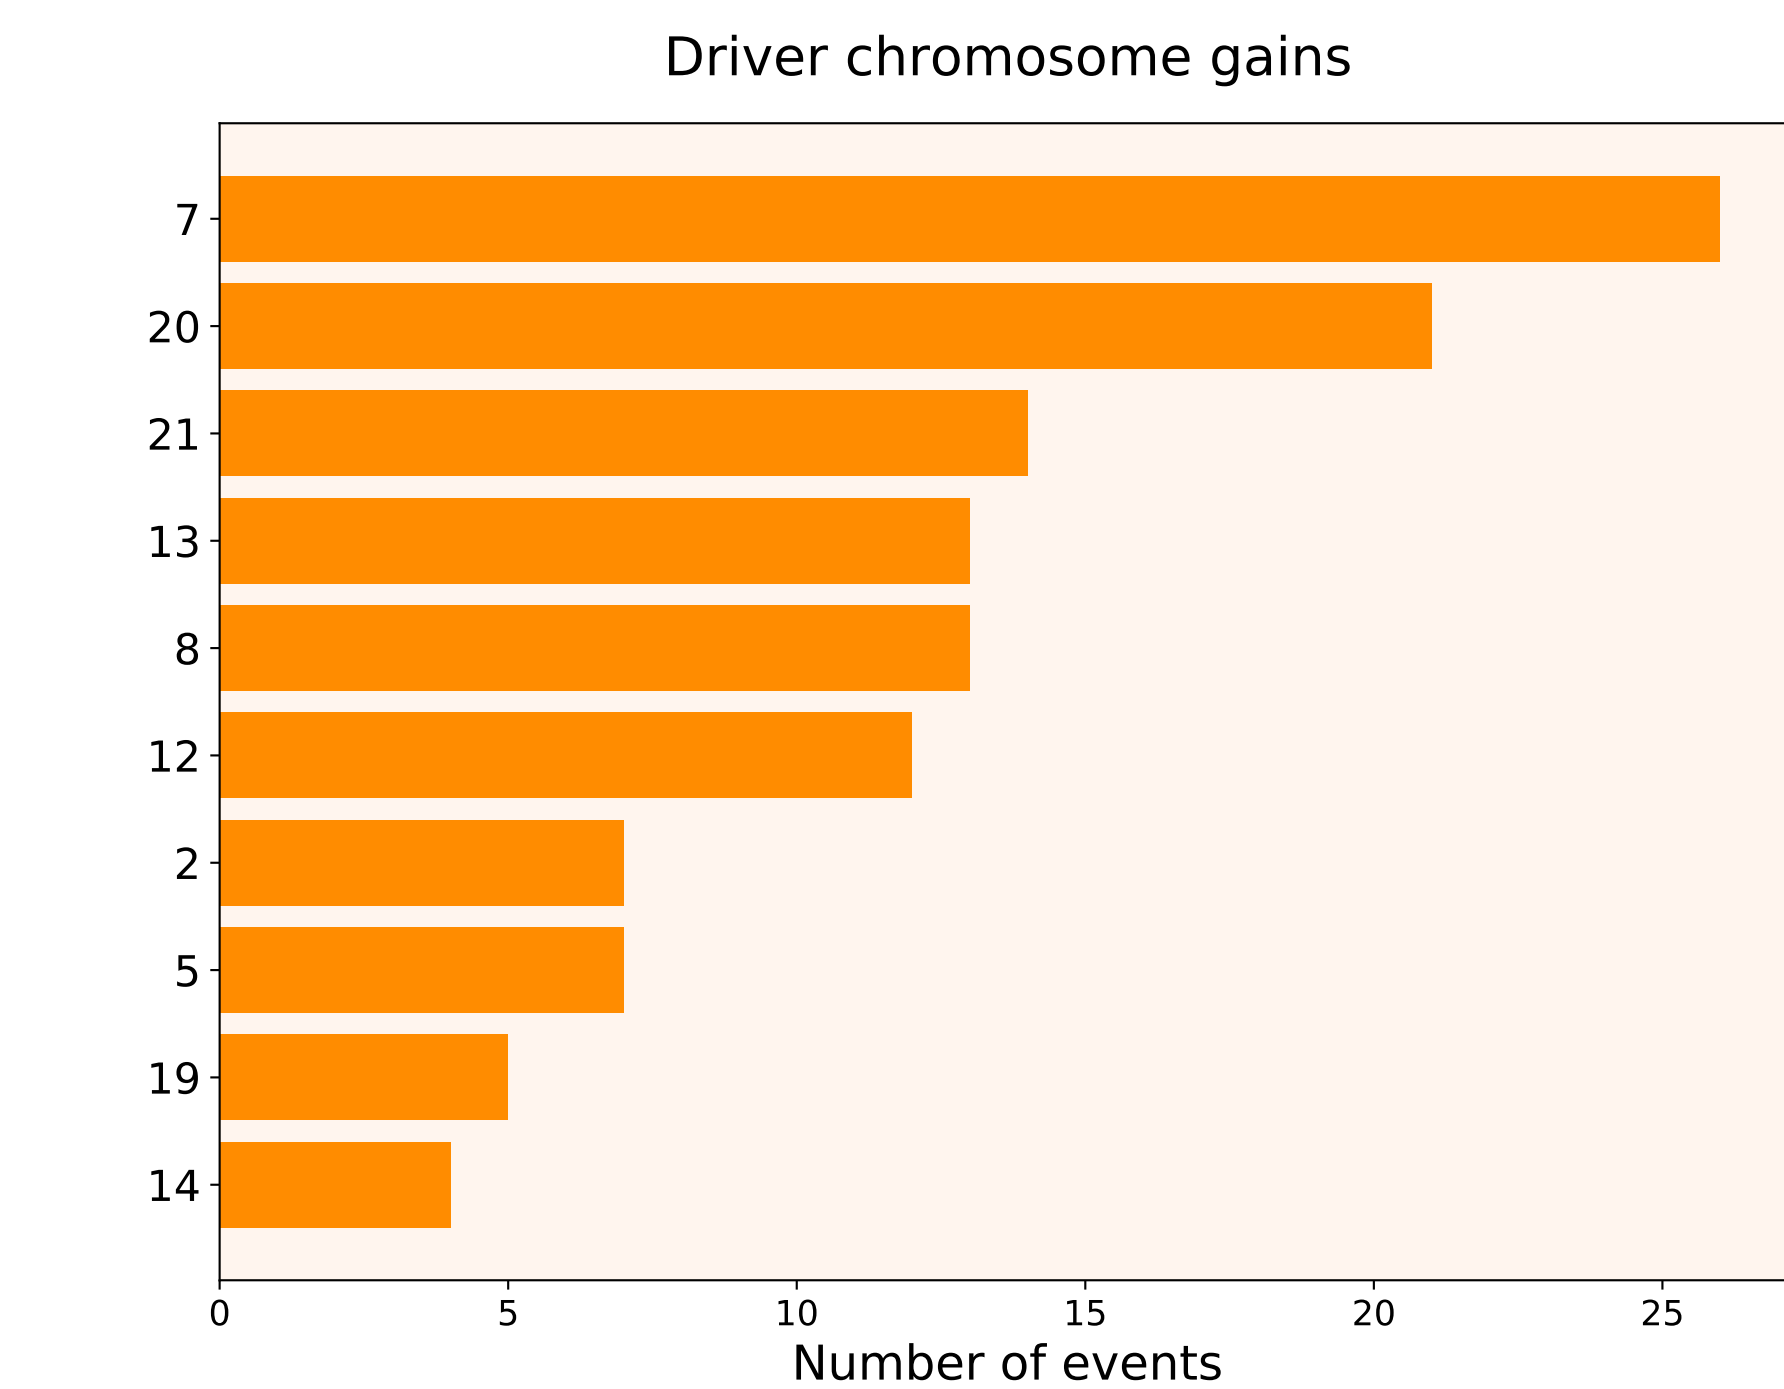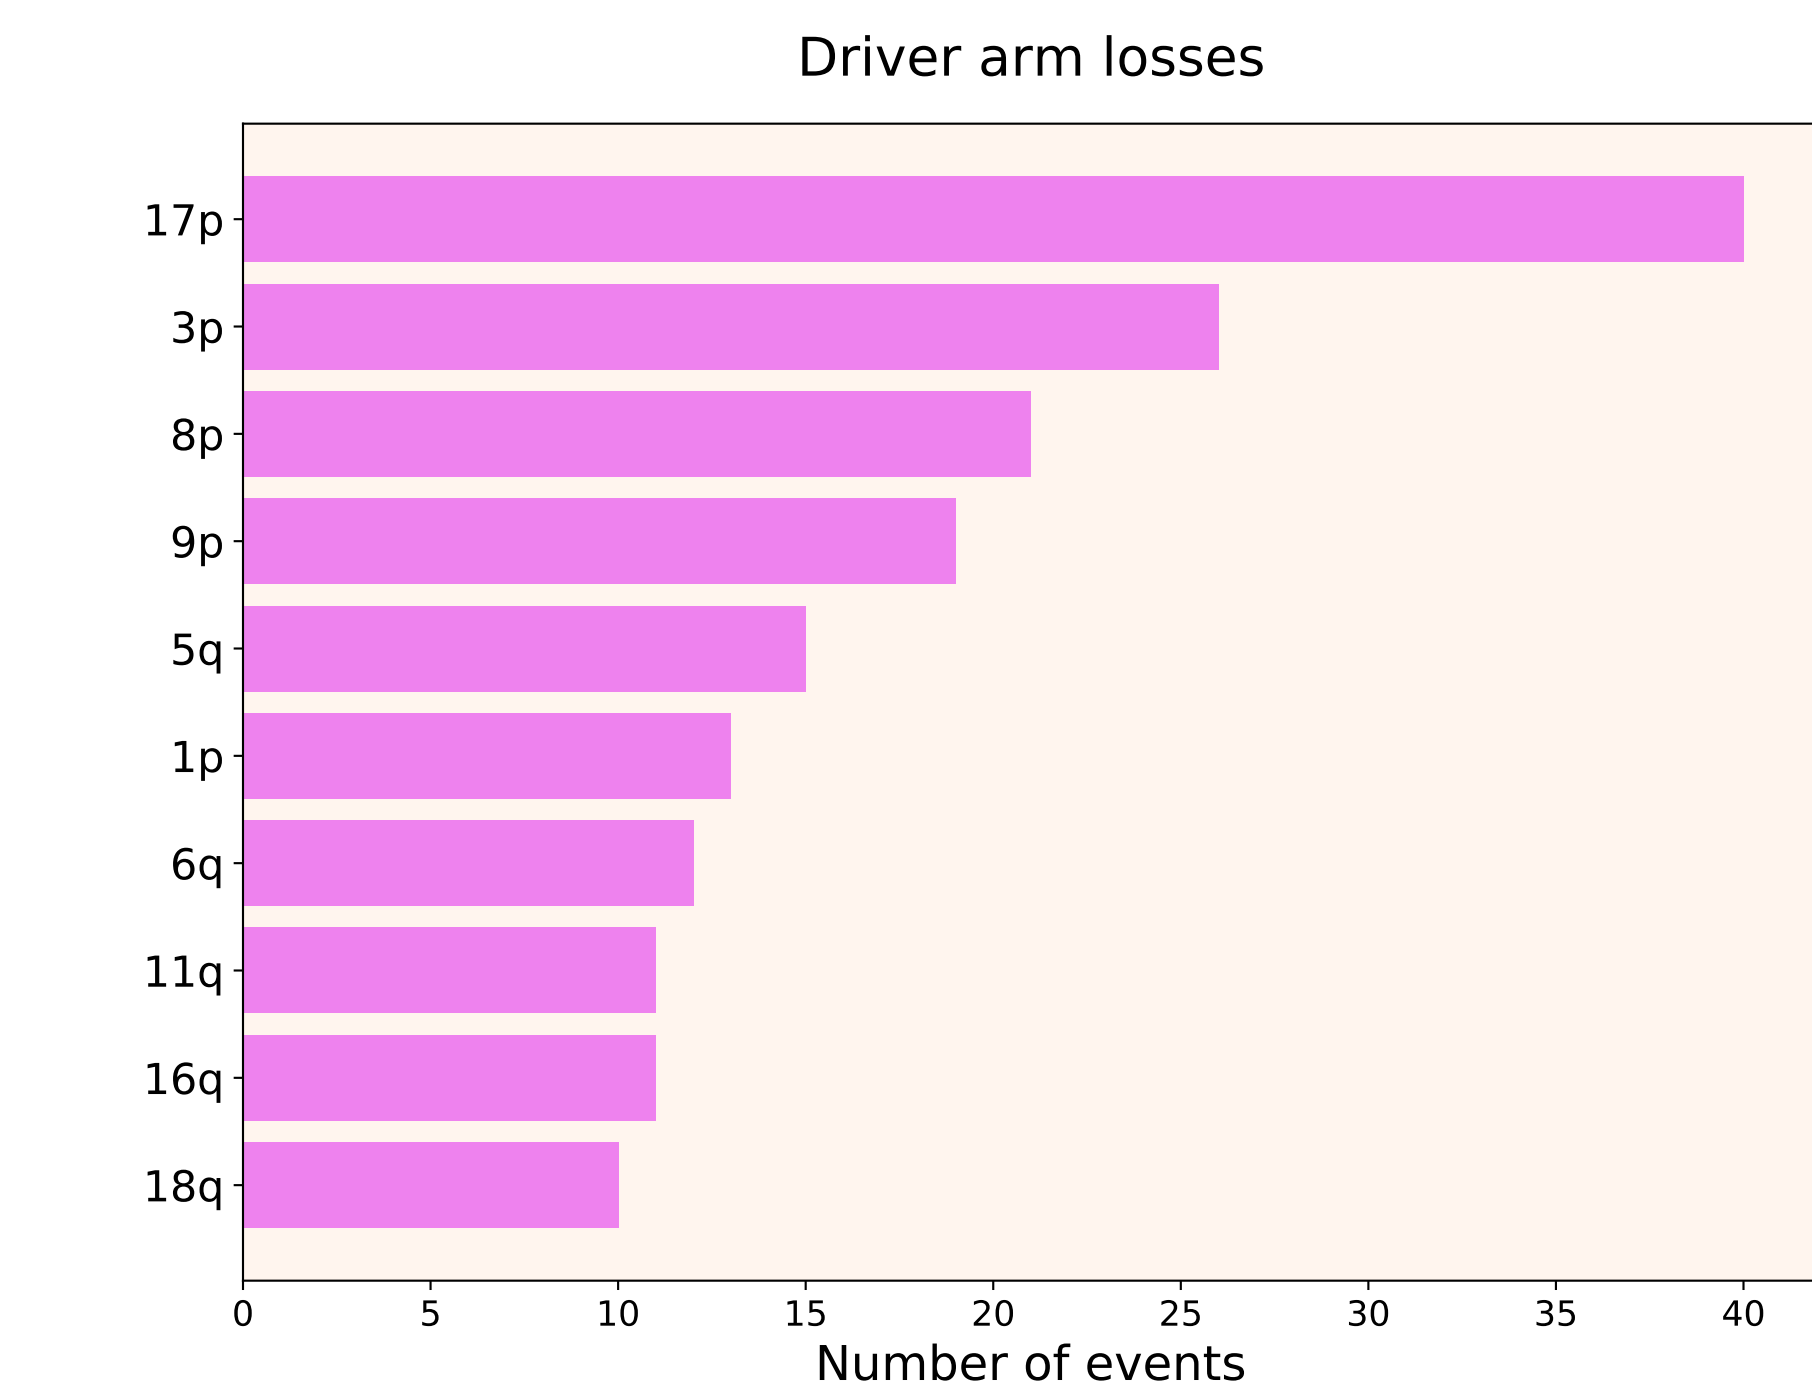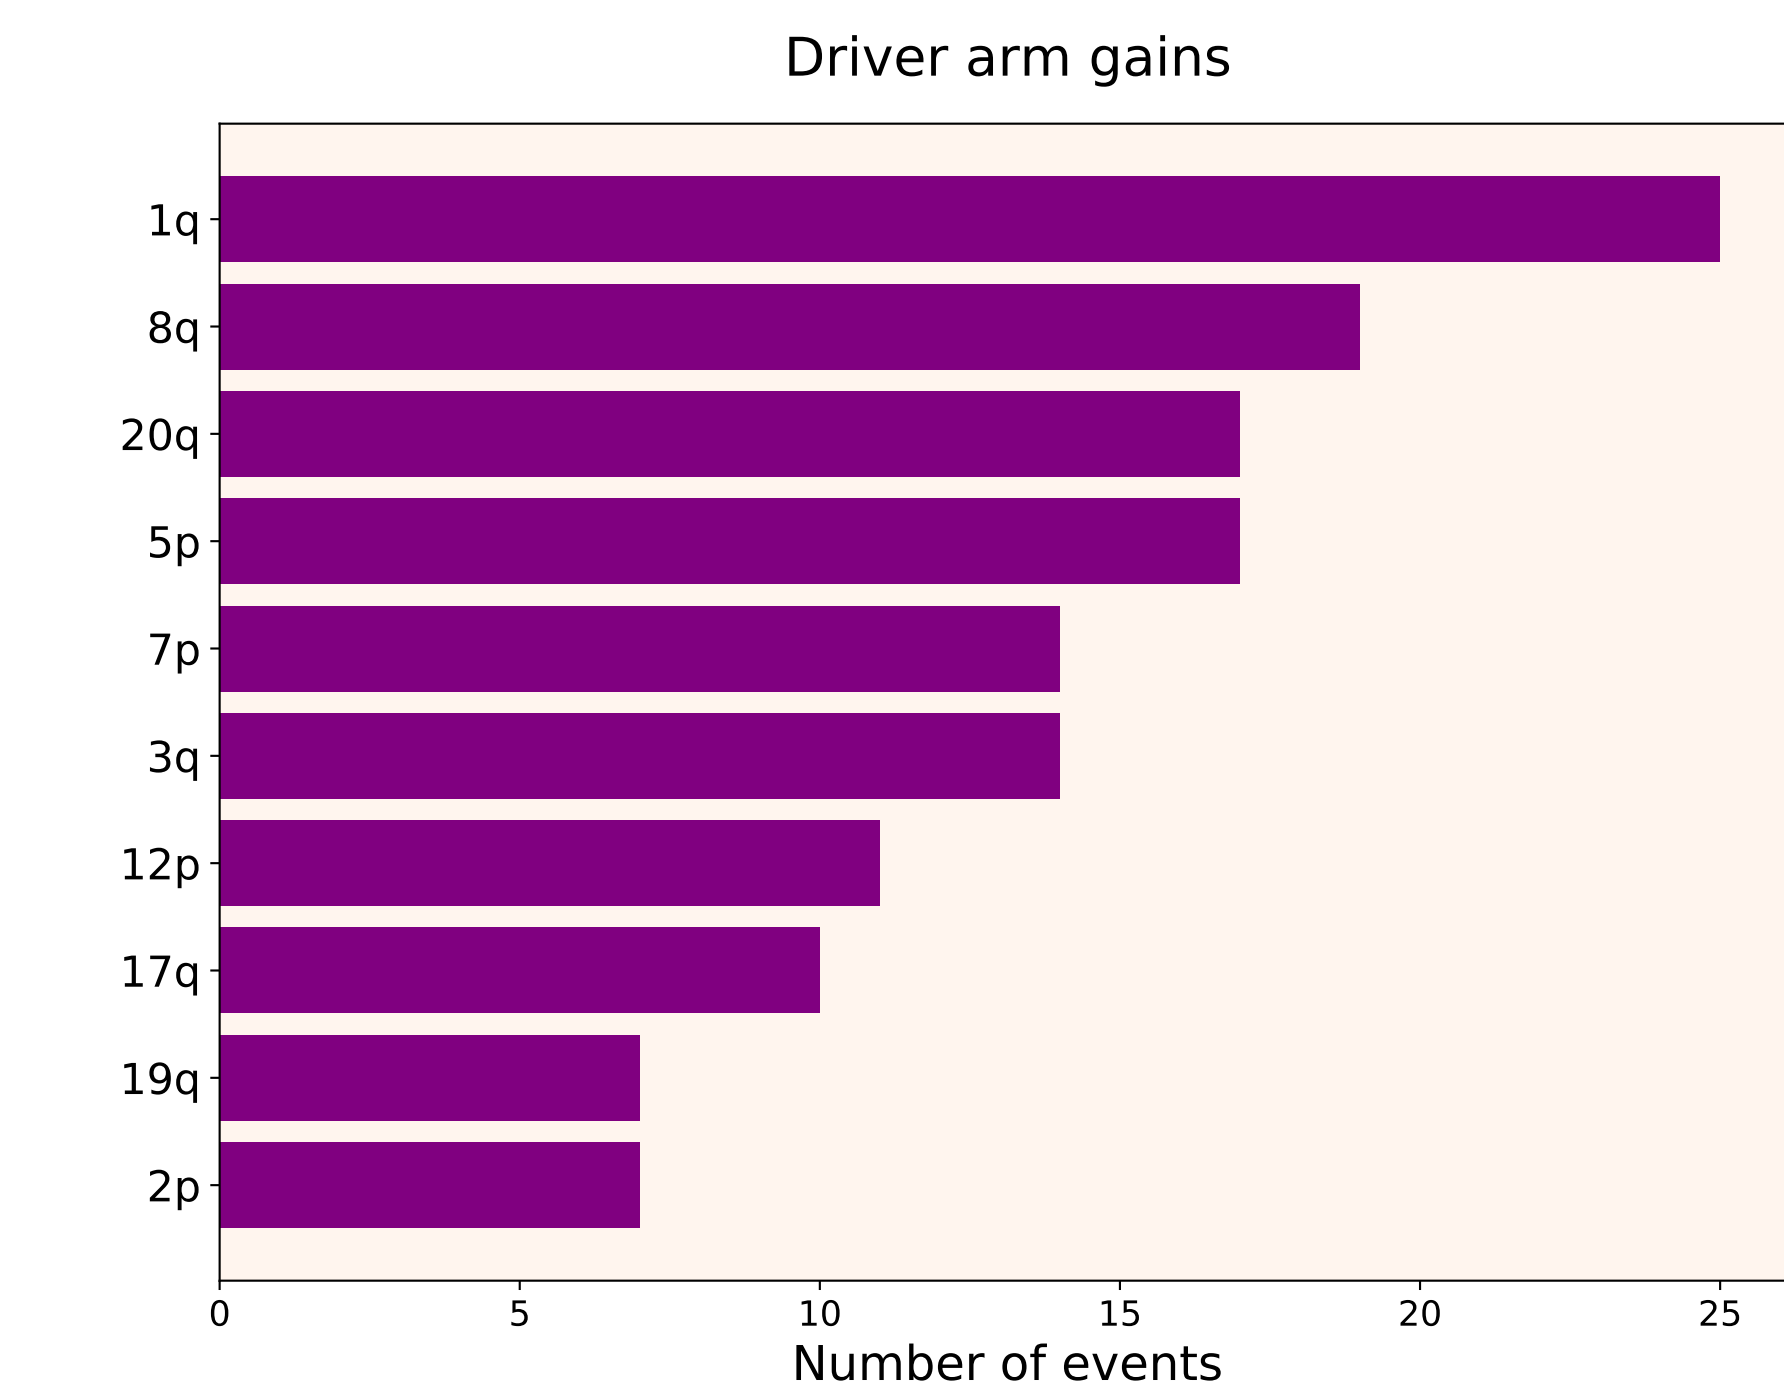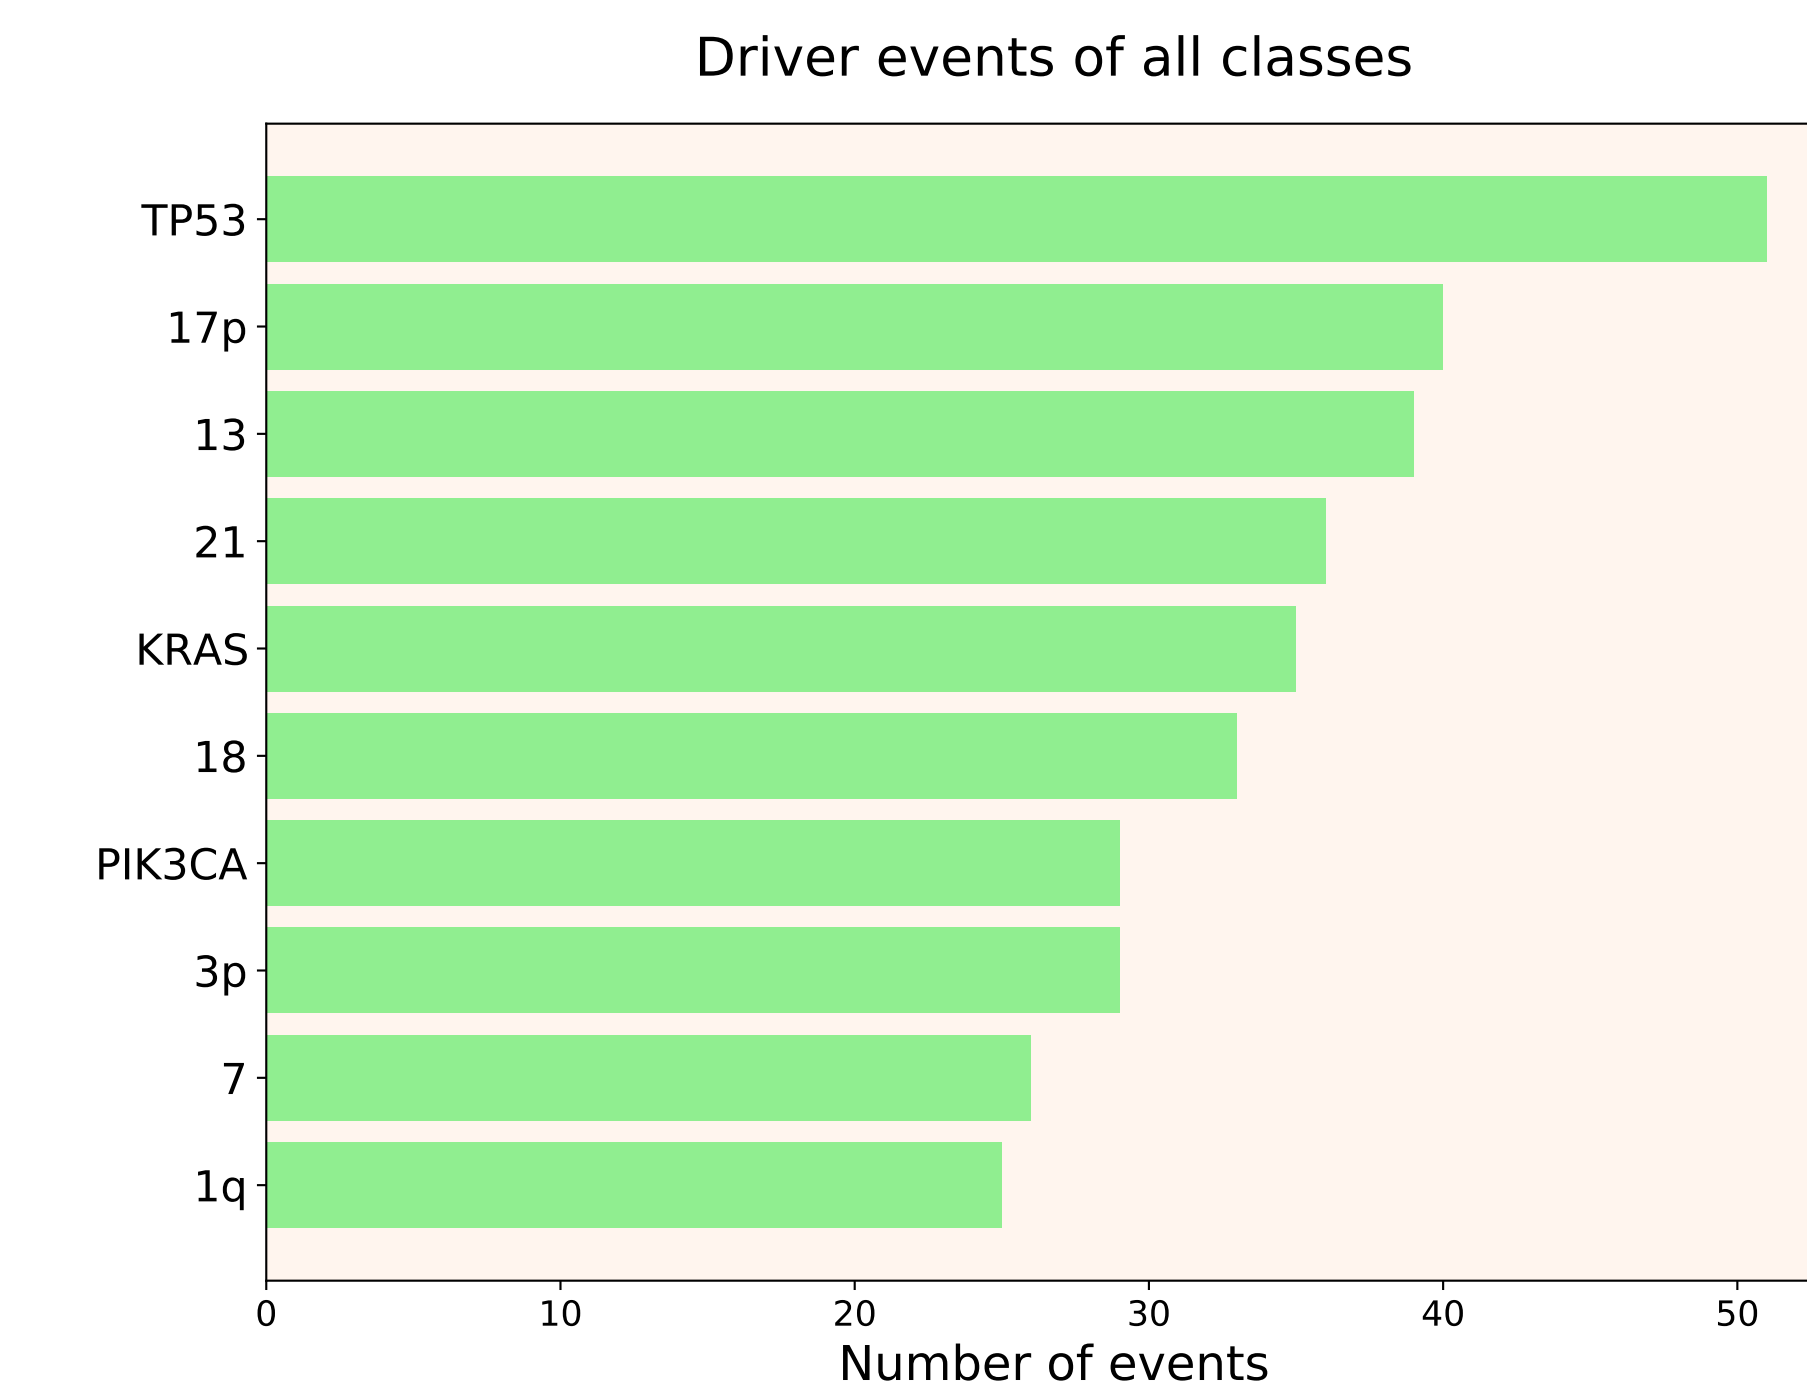

Supplement: Supplemental_Data_S1.zip [file Supplemental_Data_S1.zip]

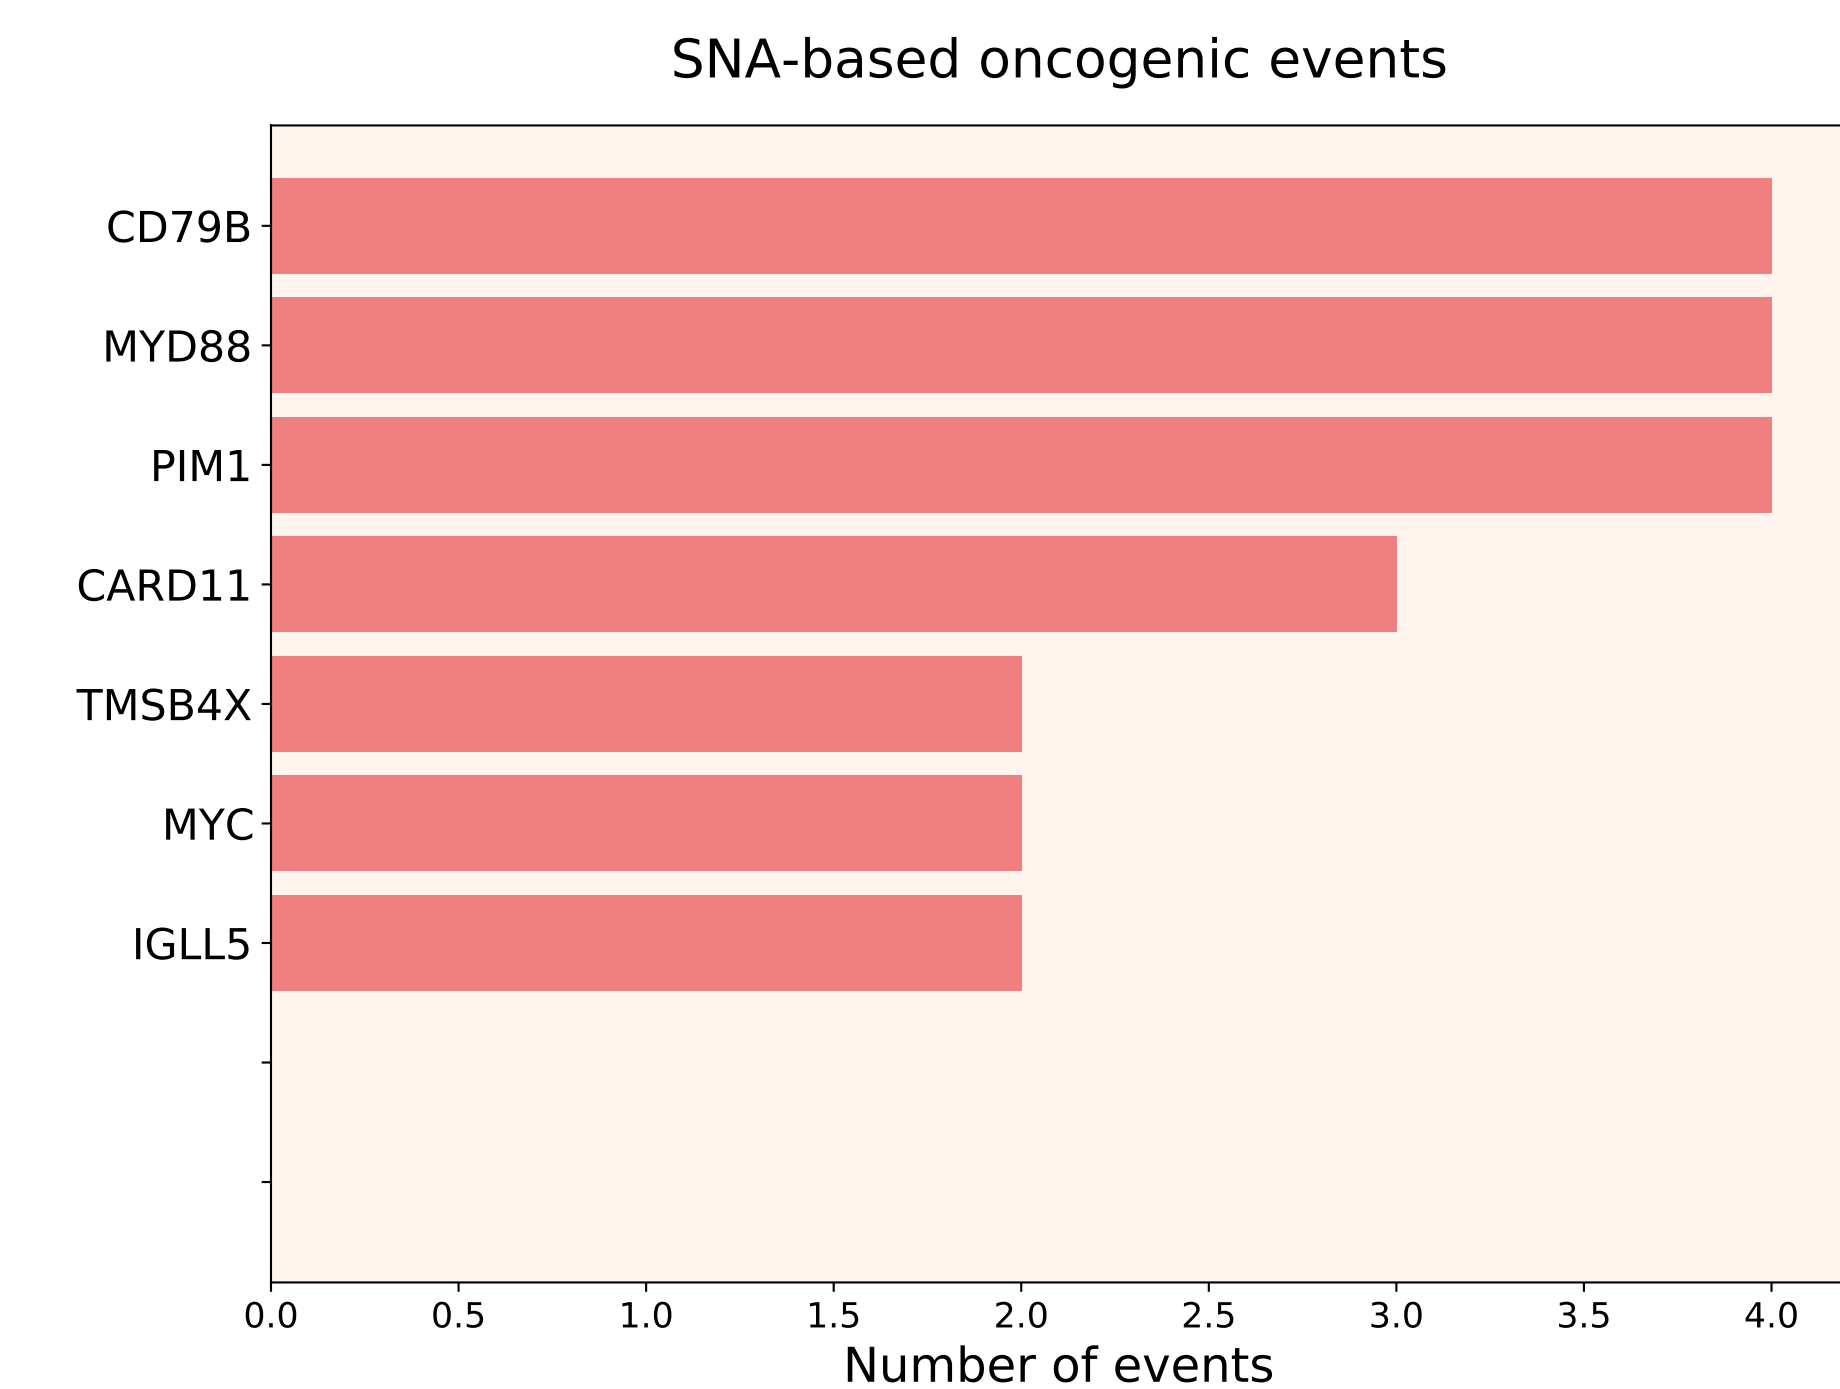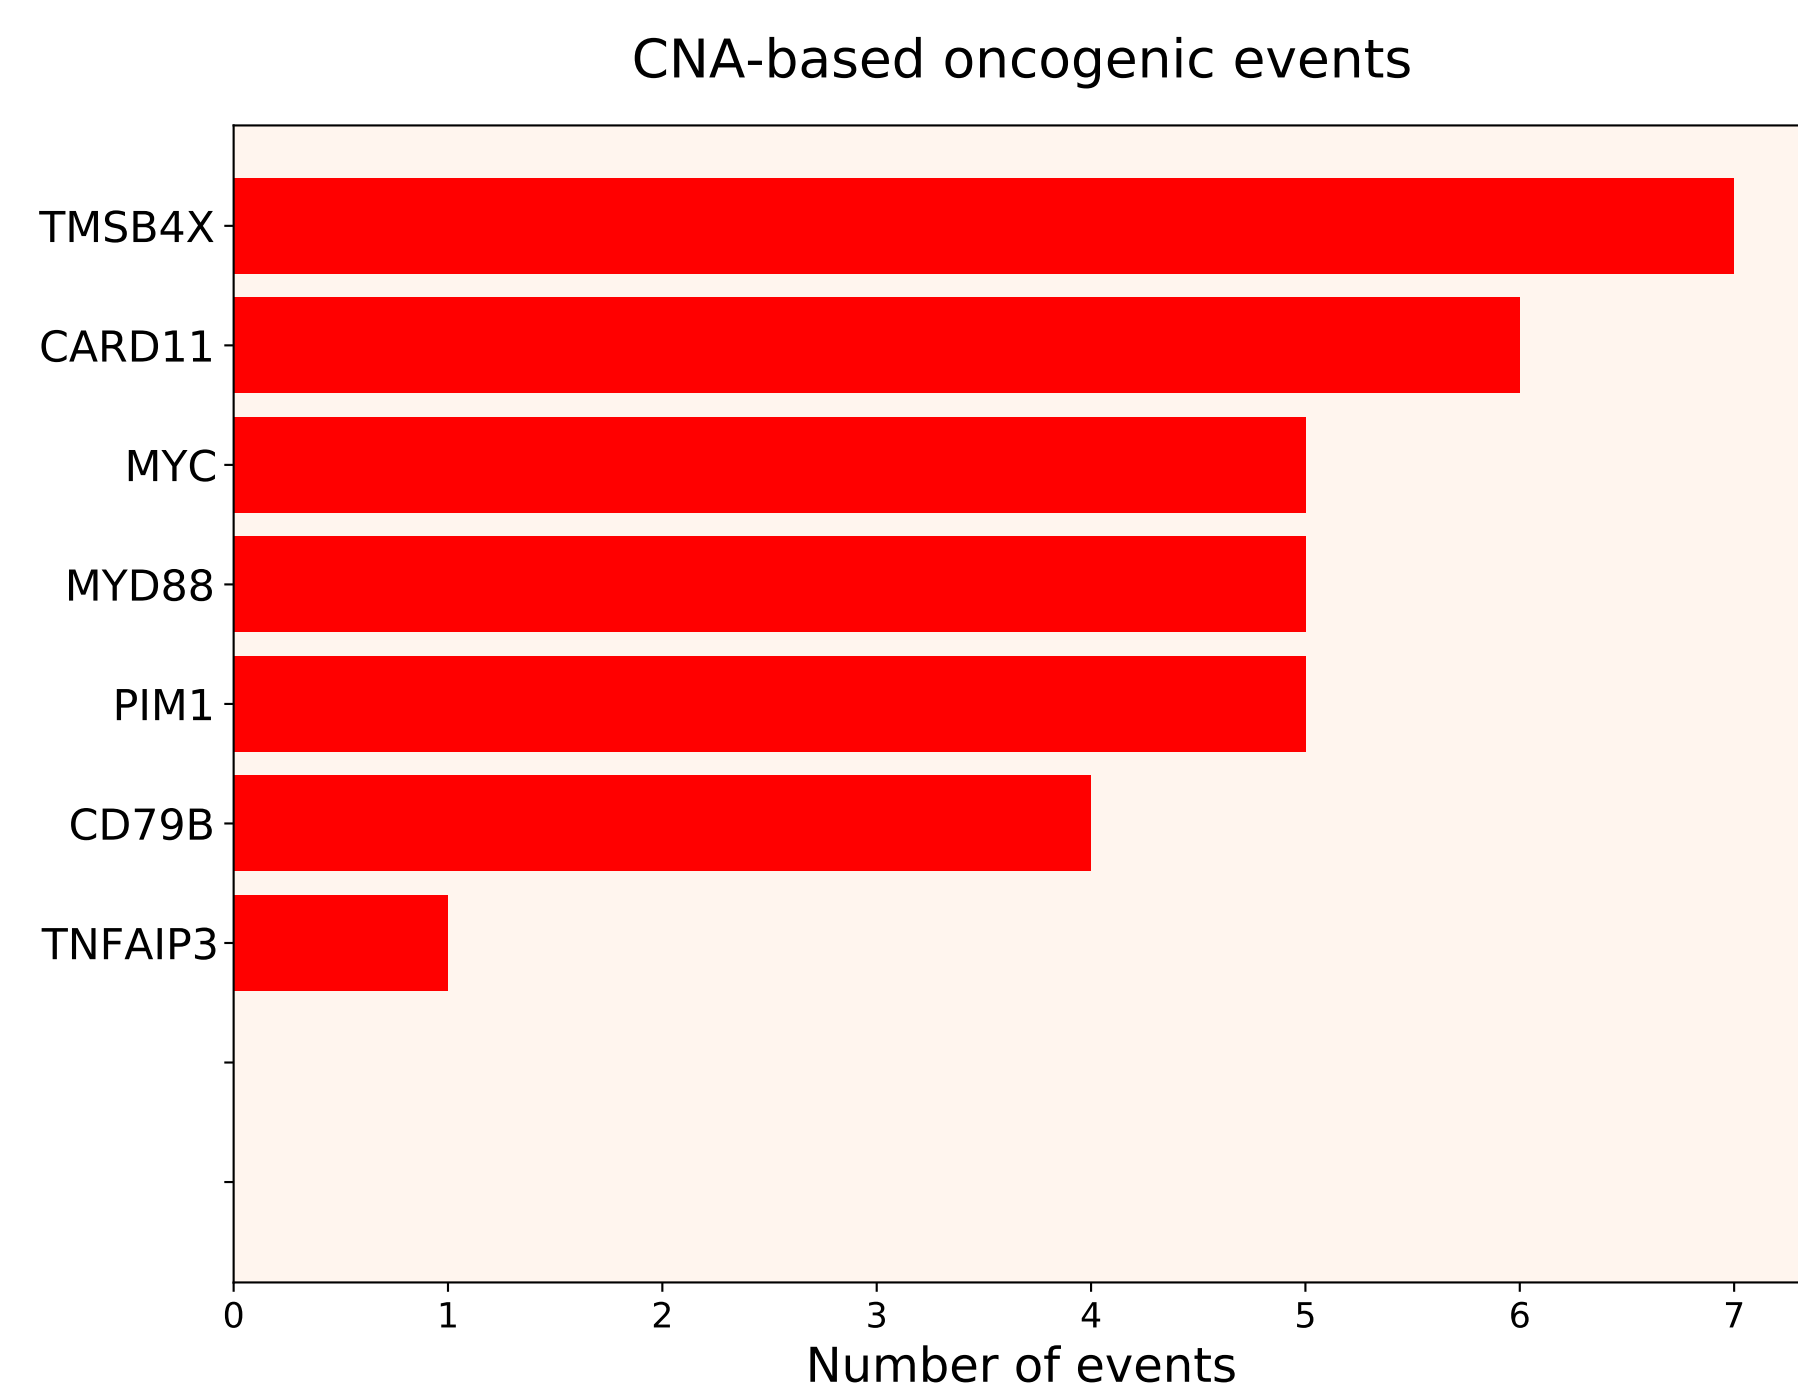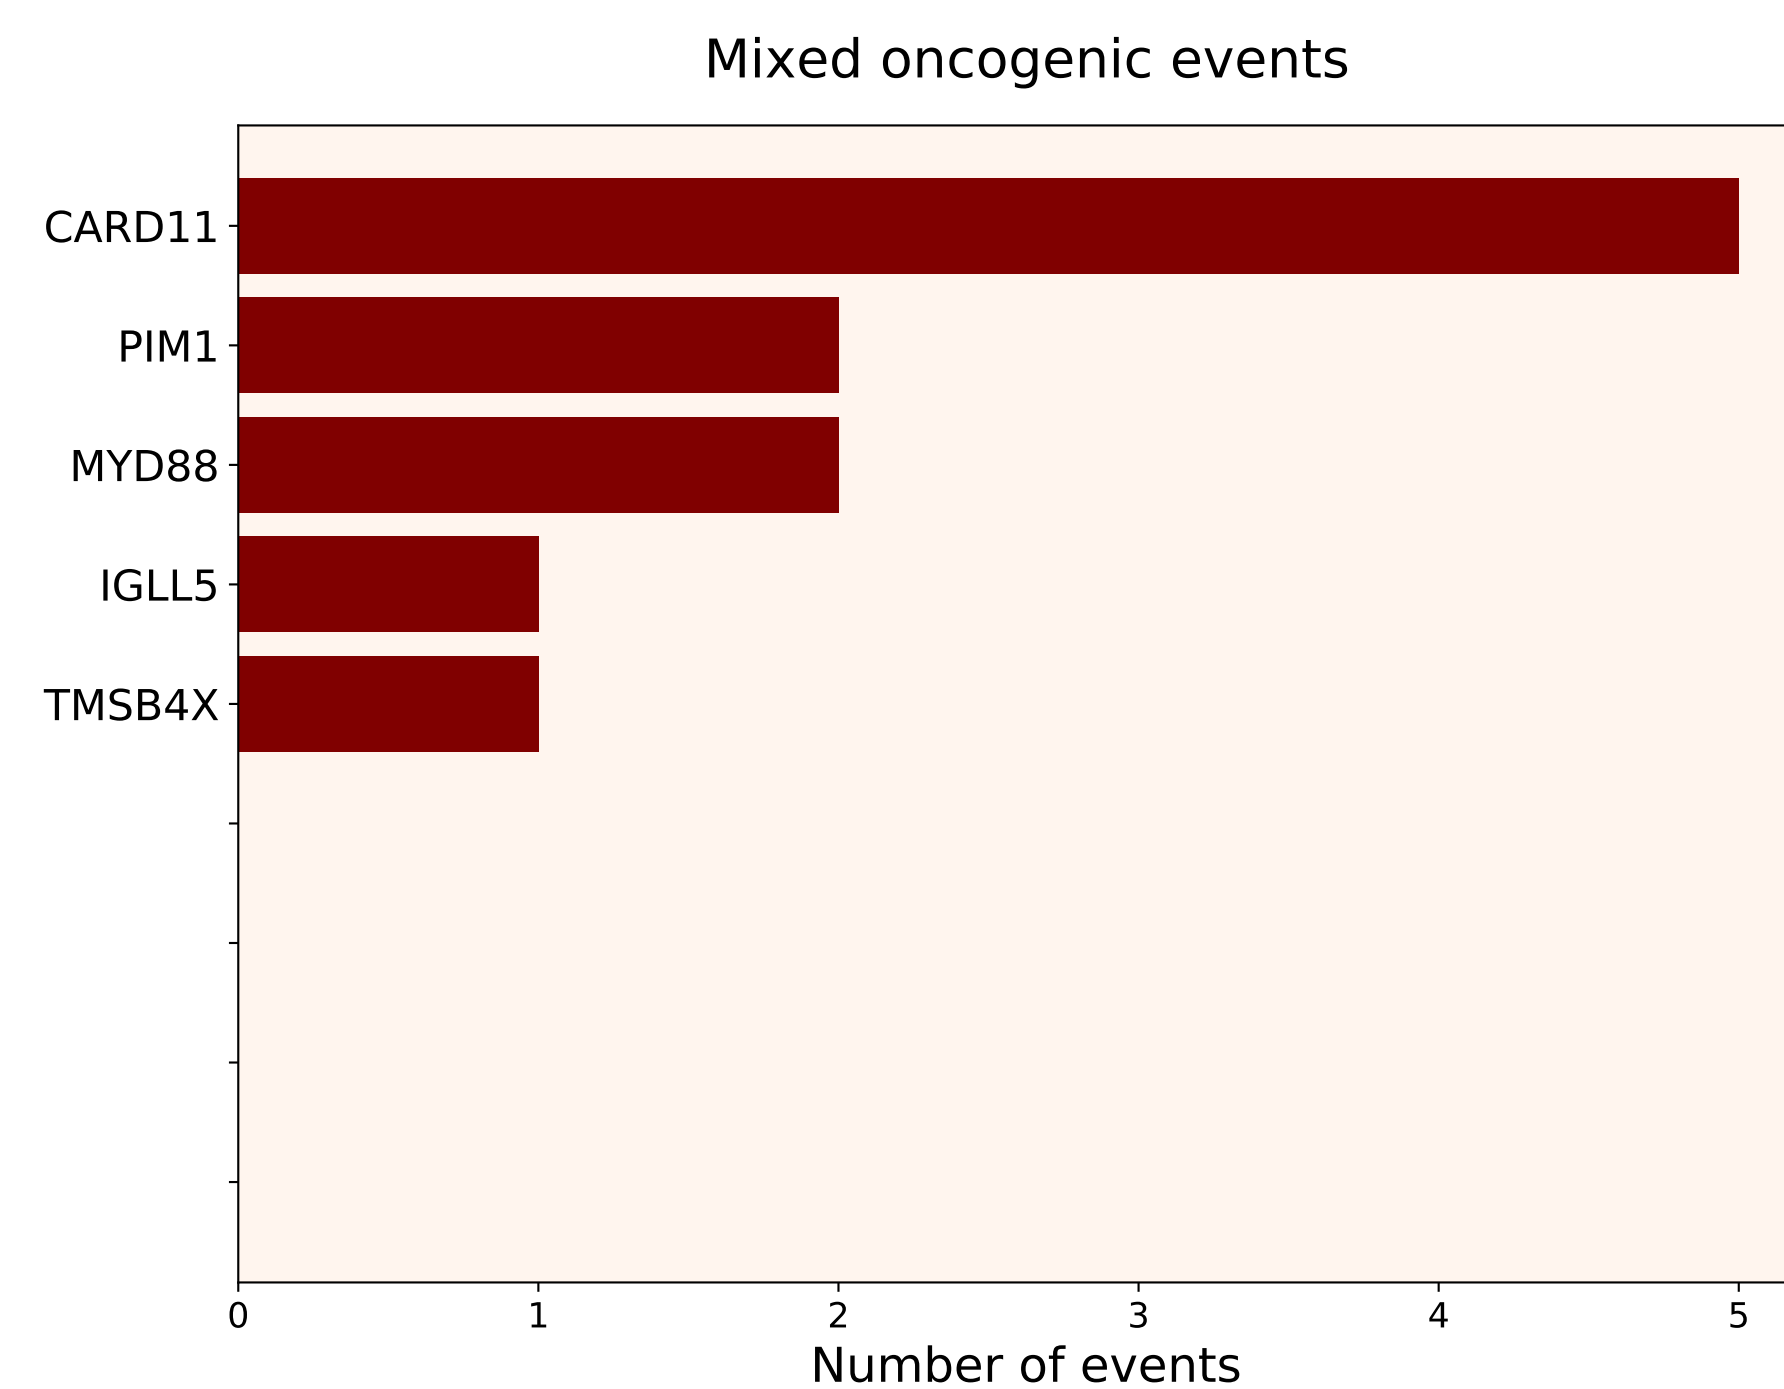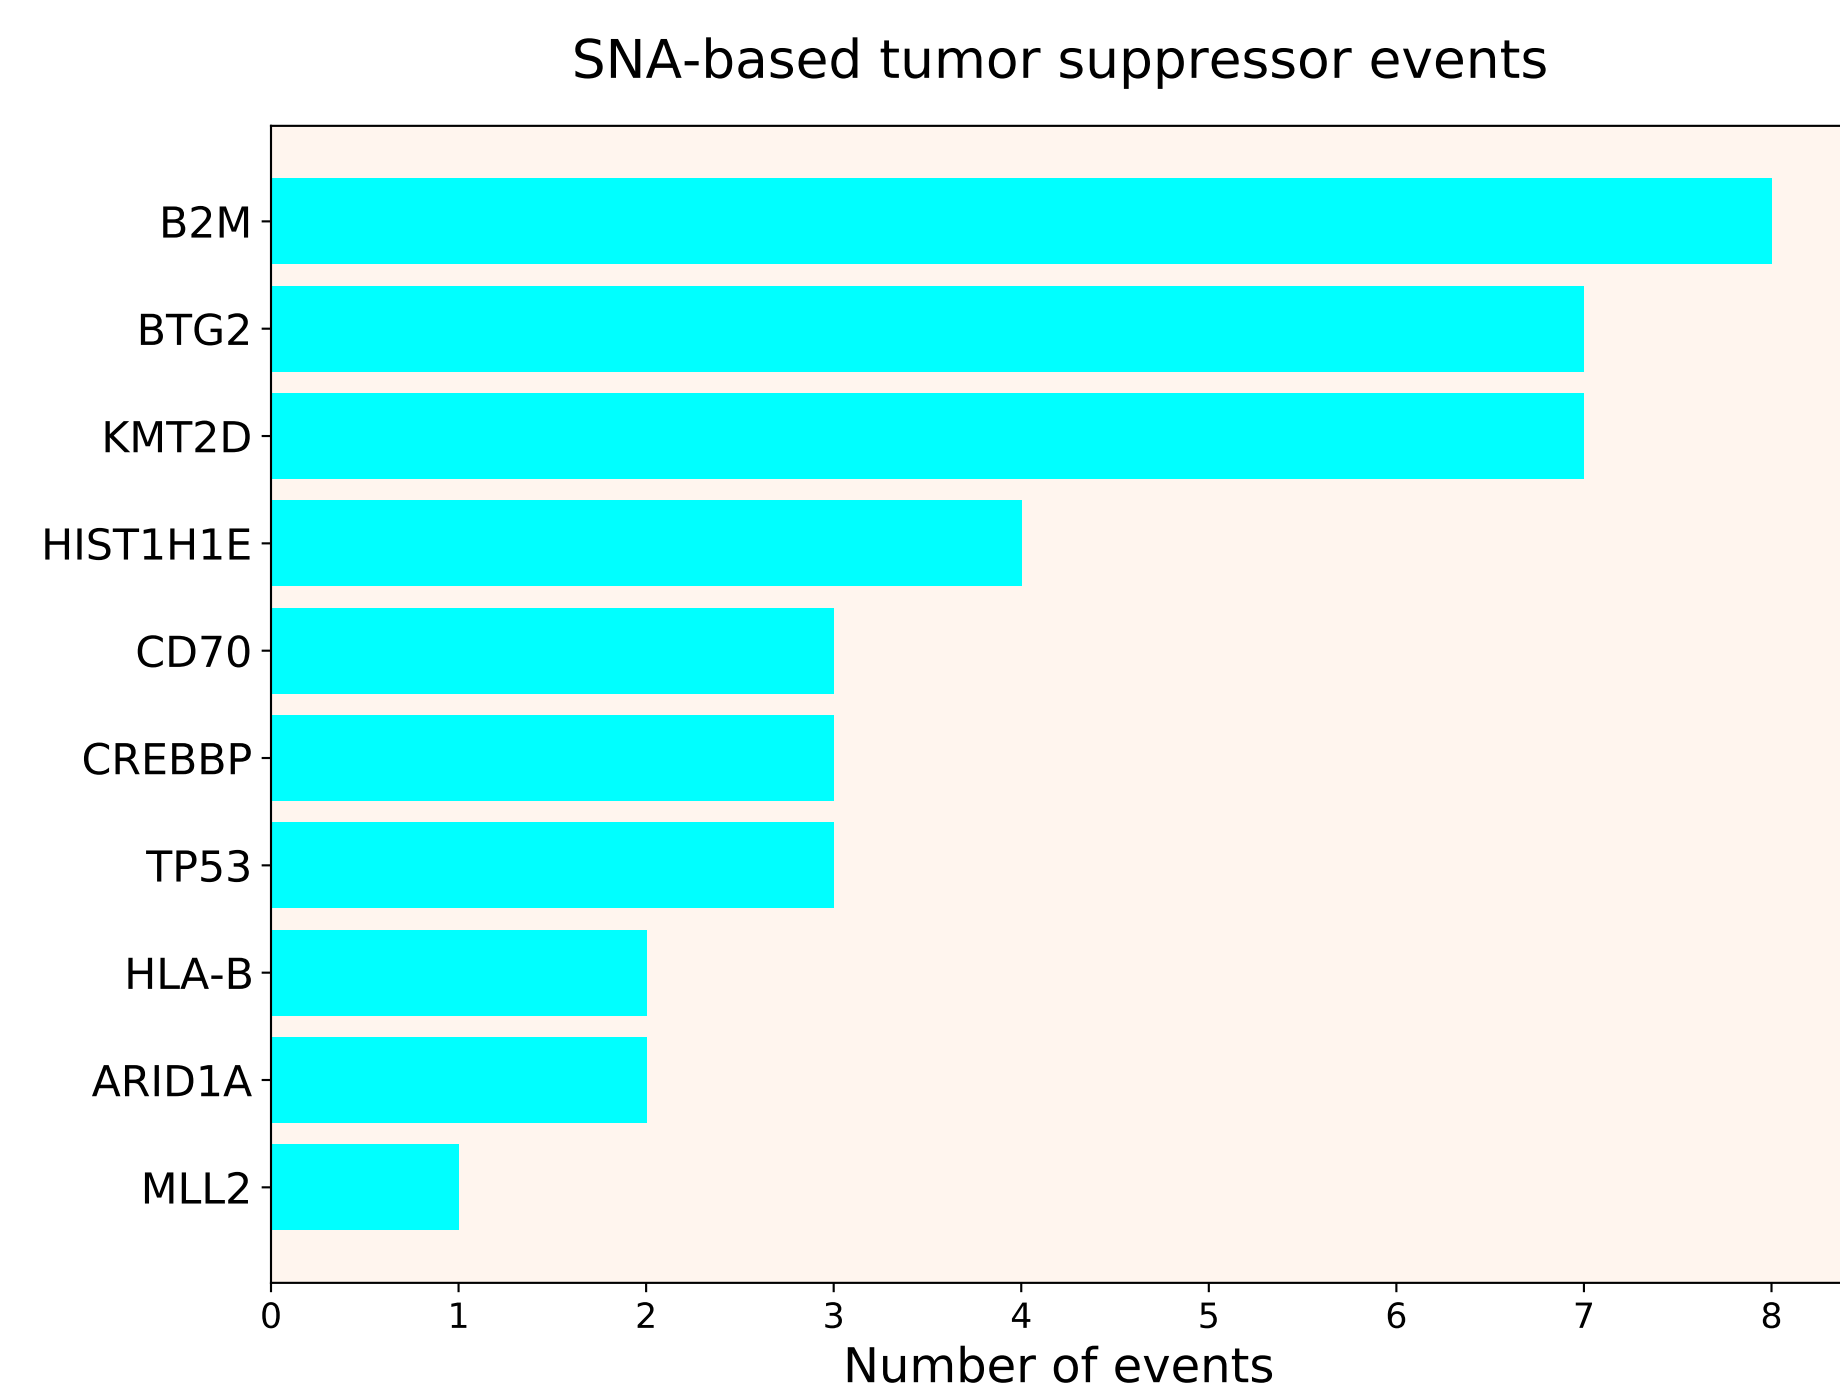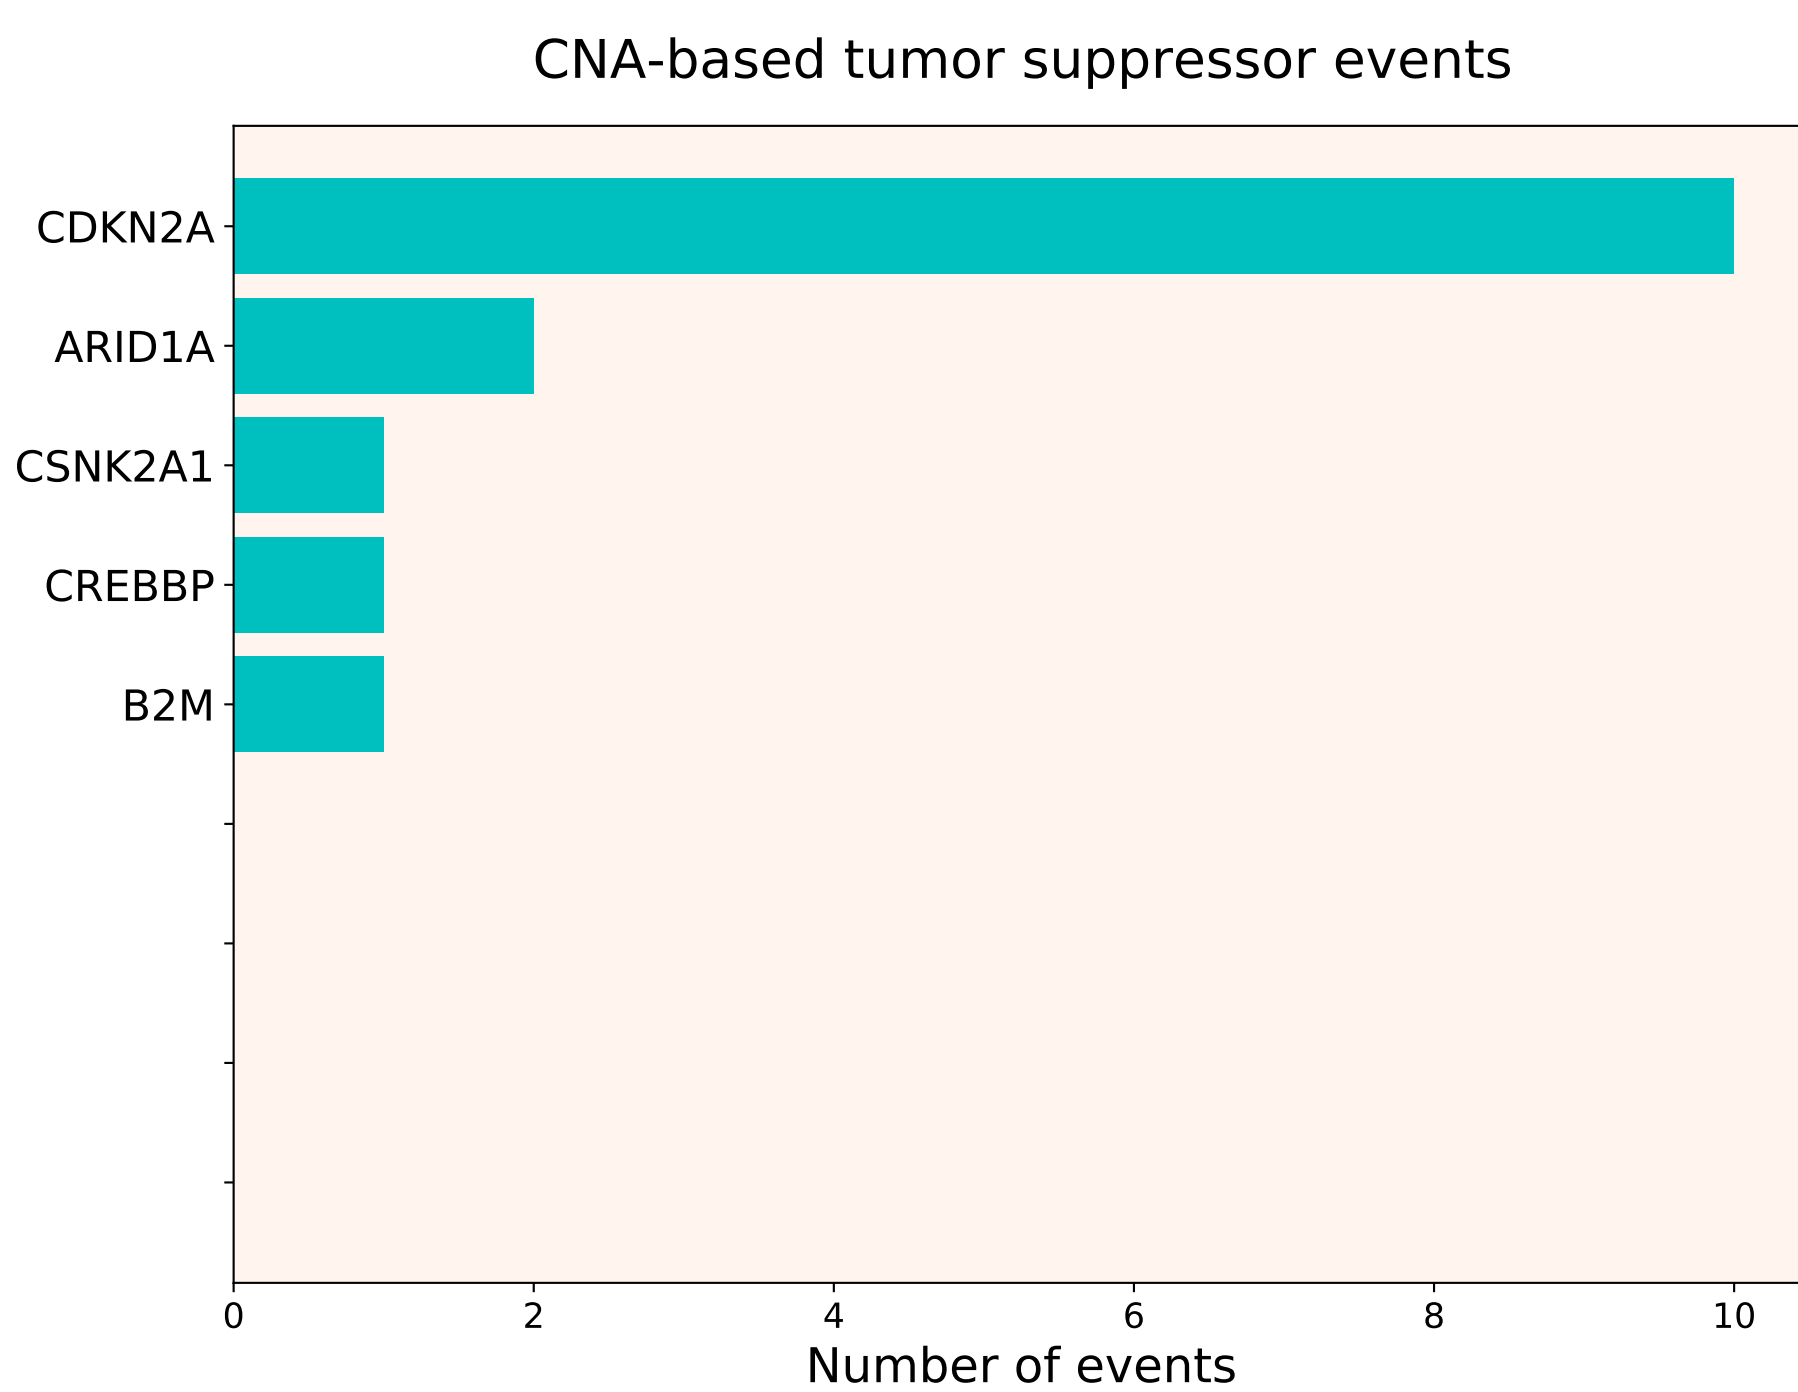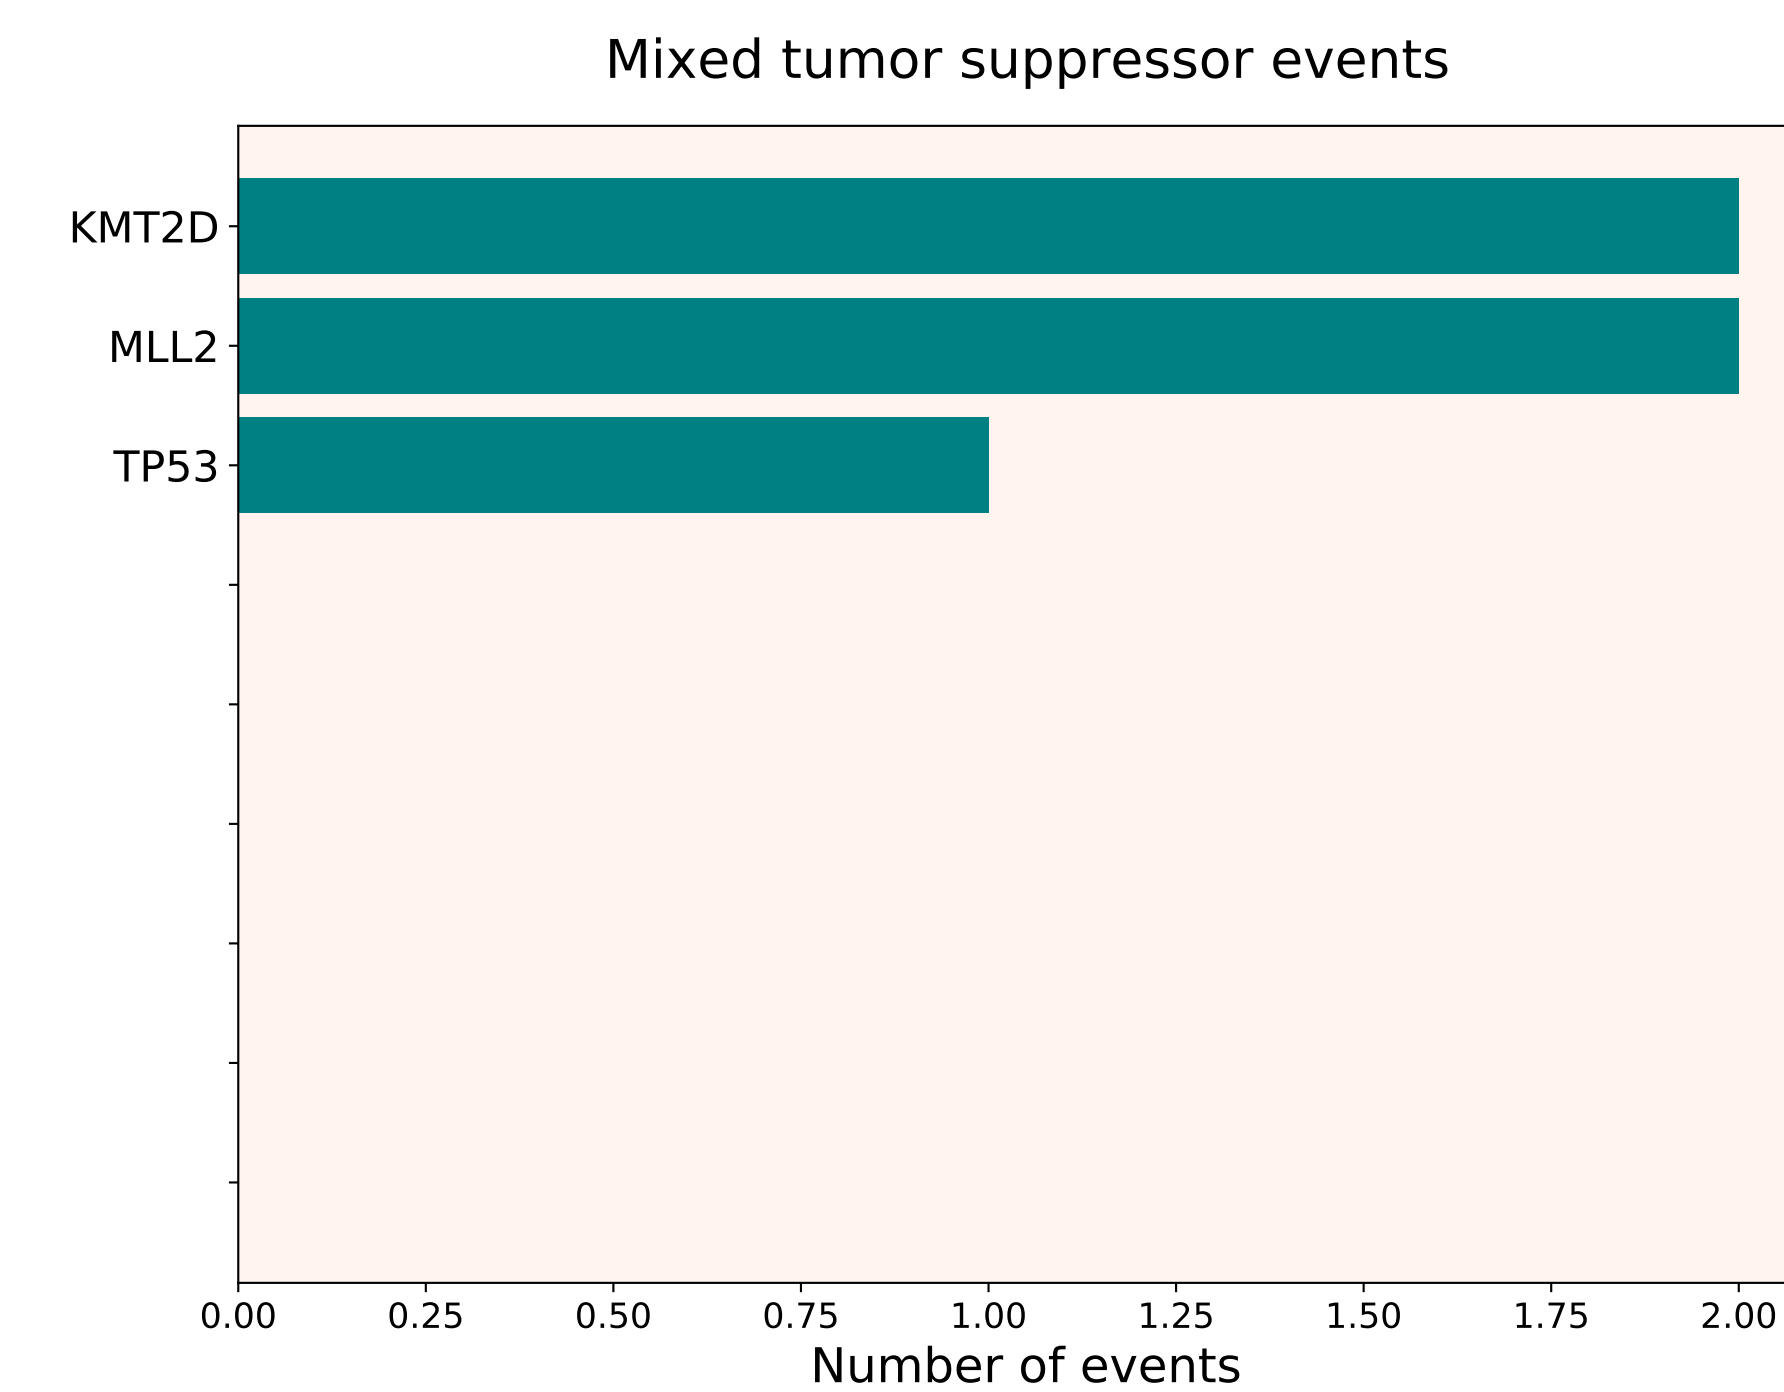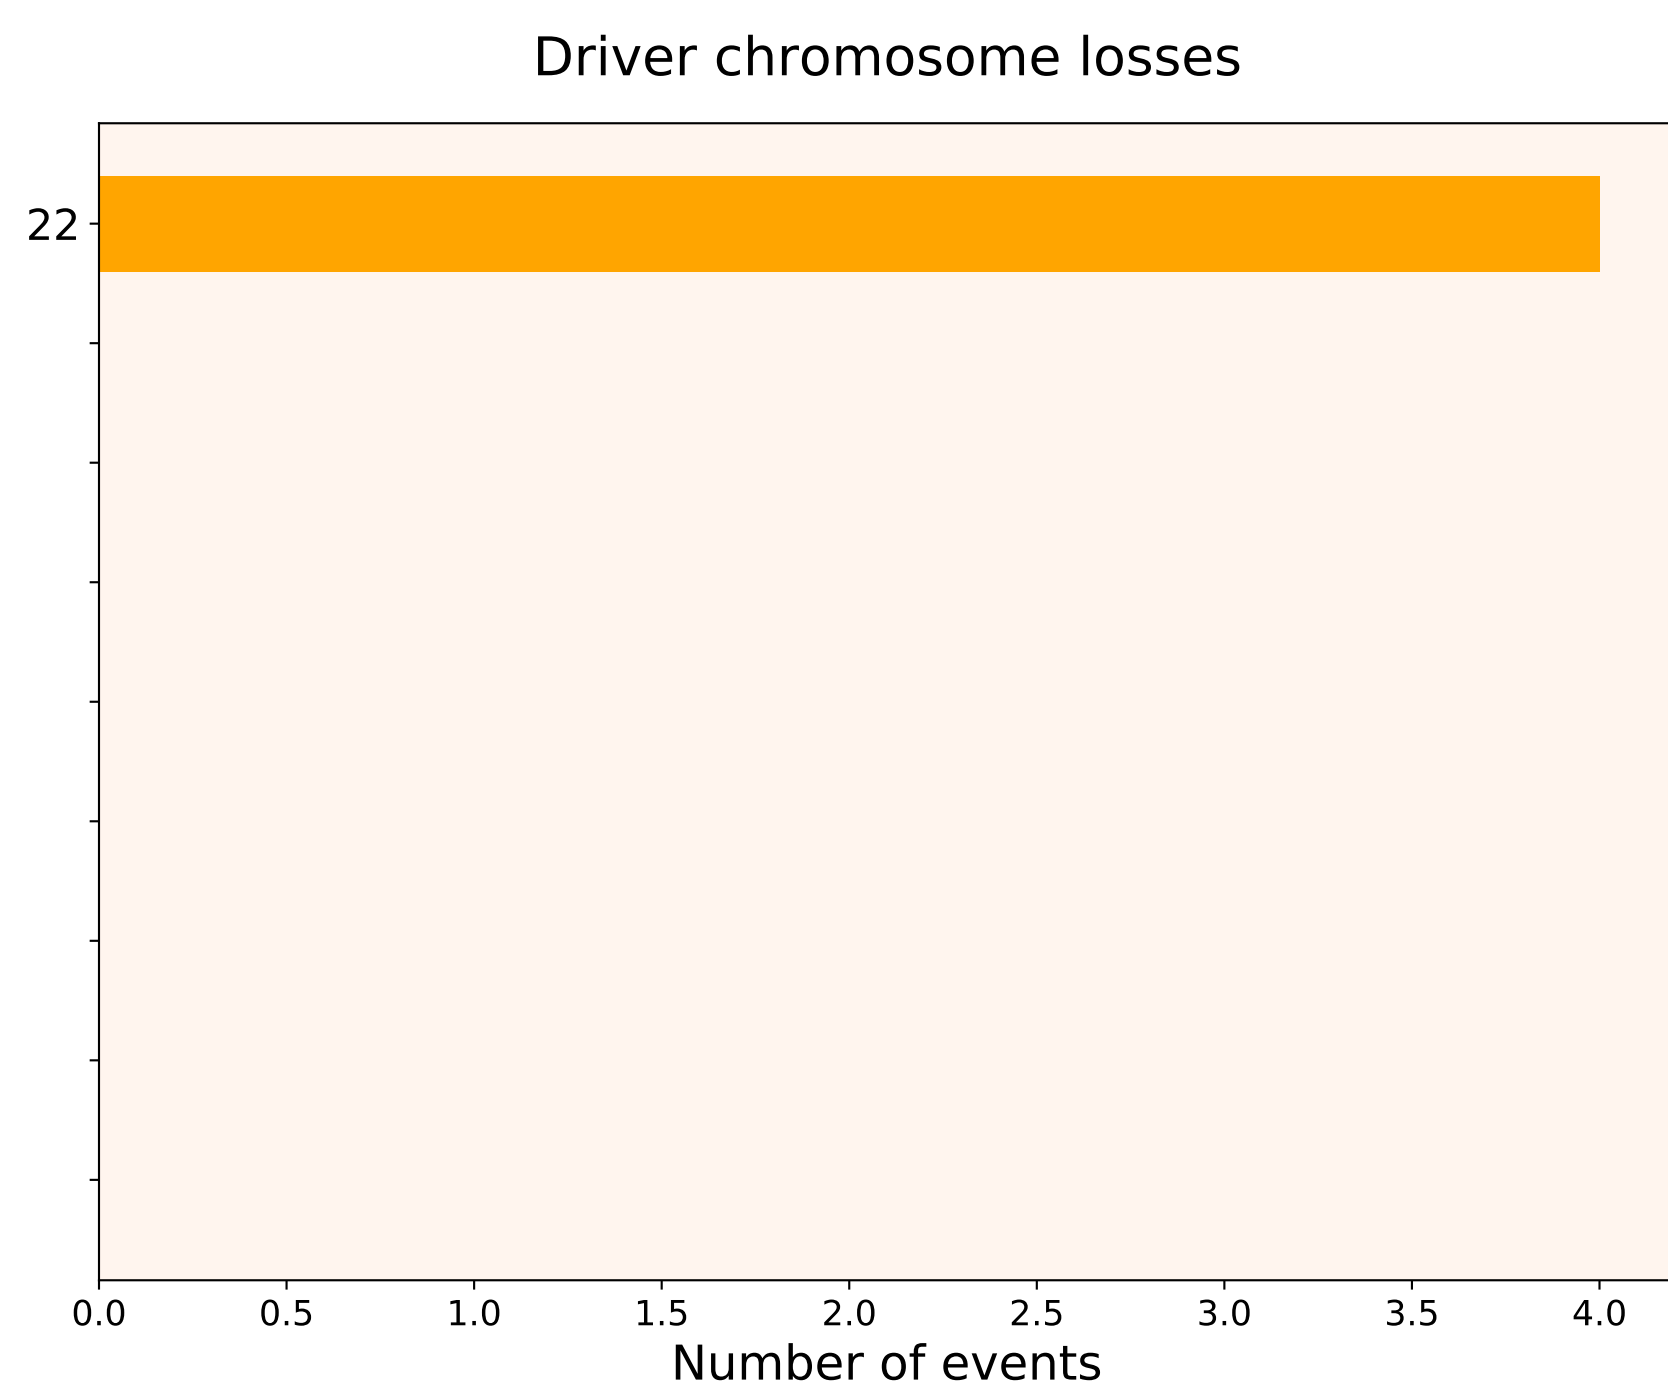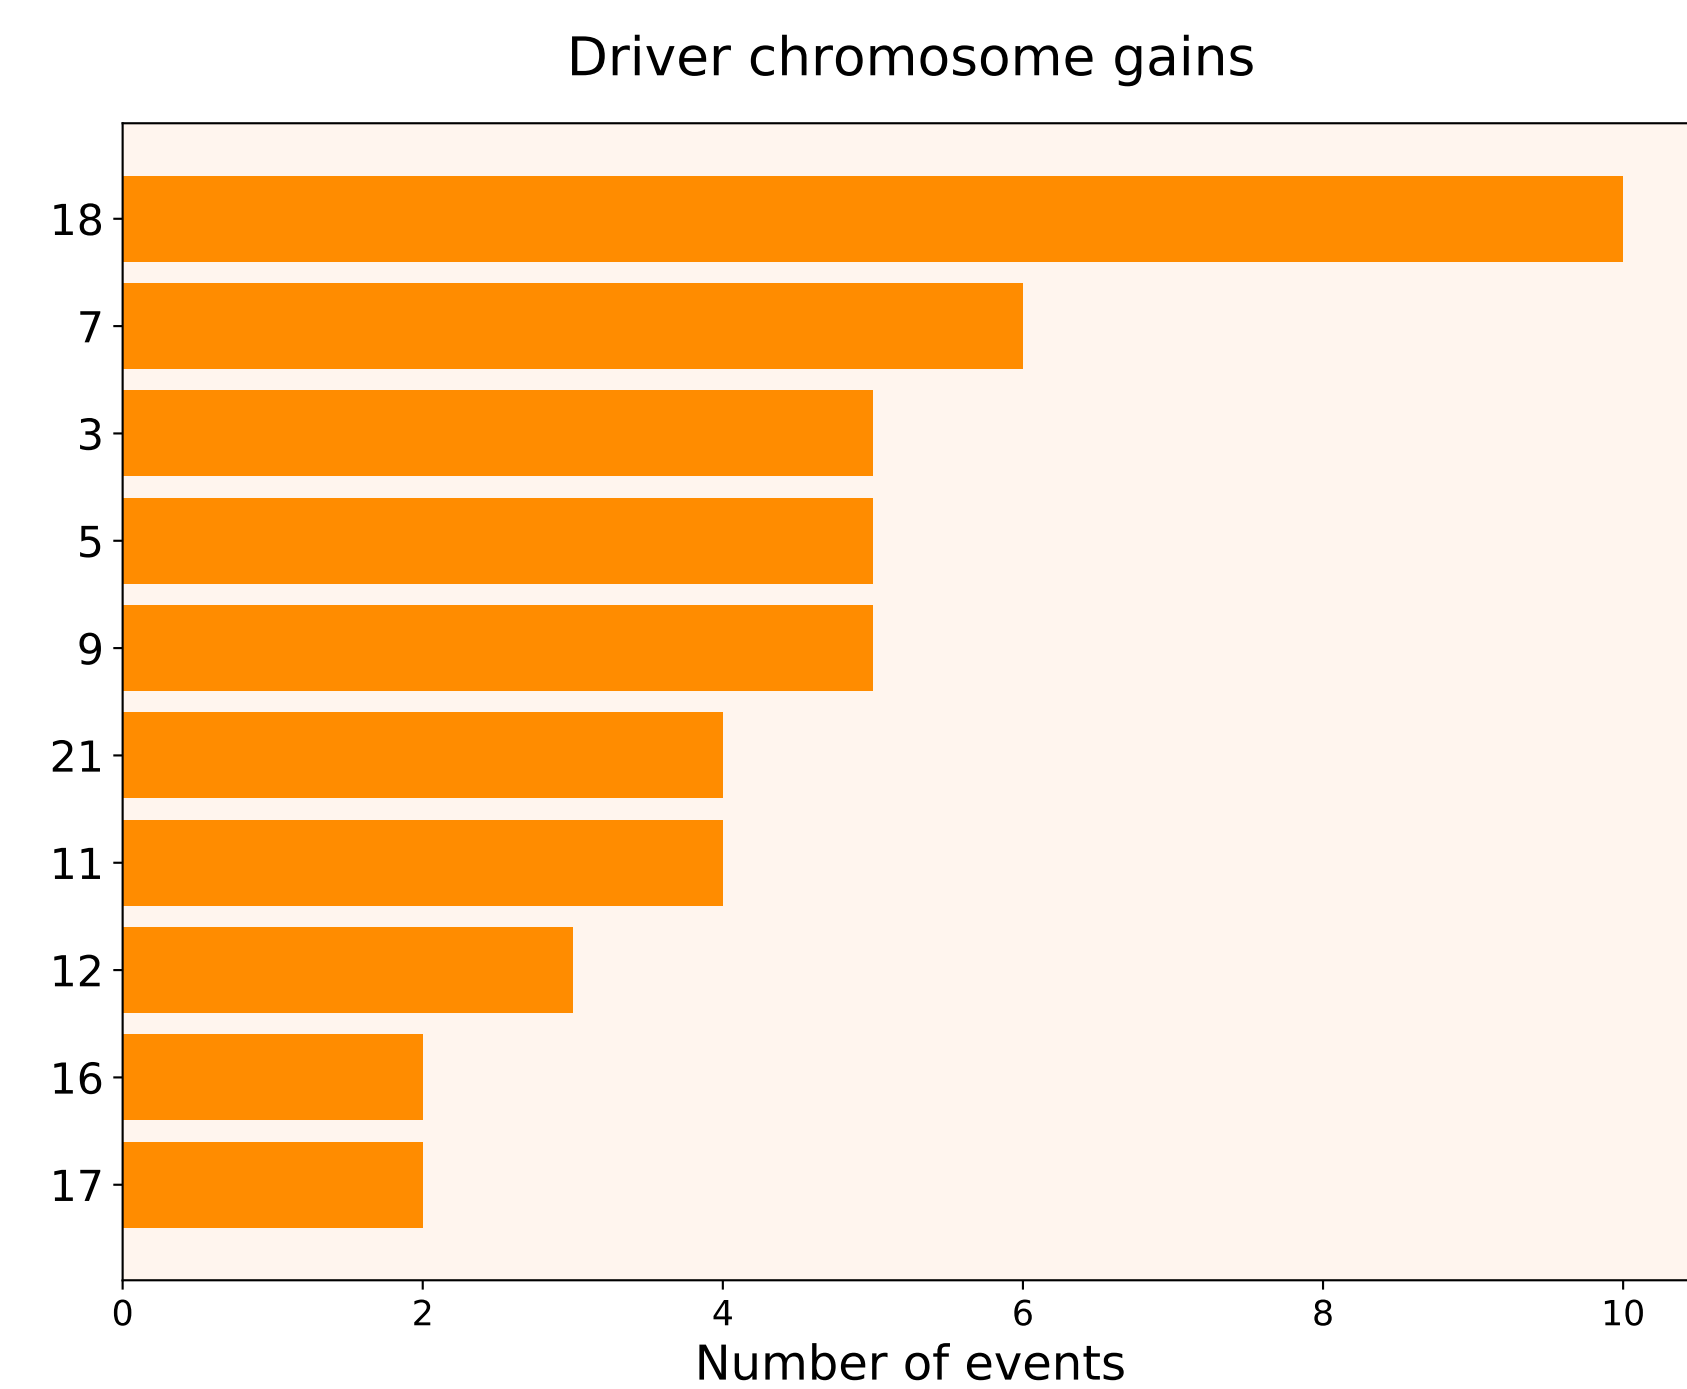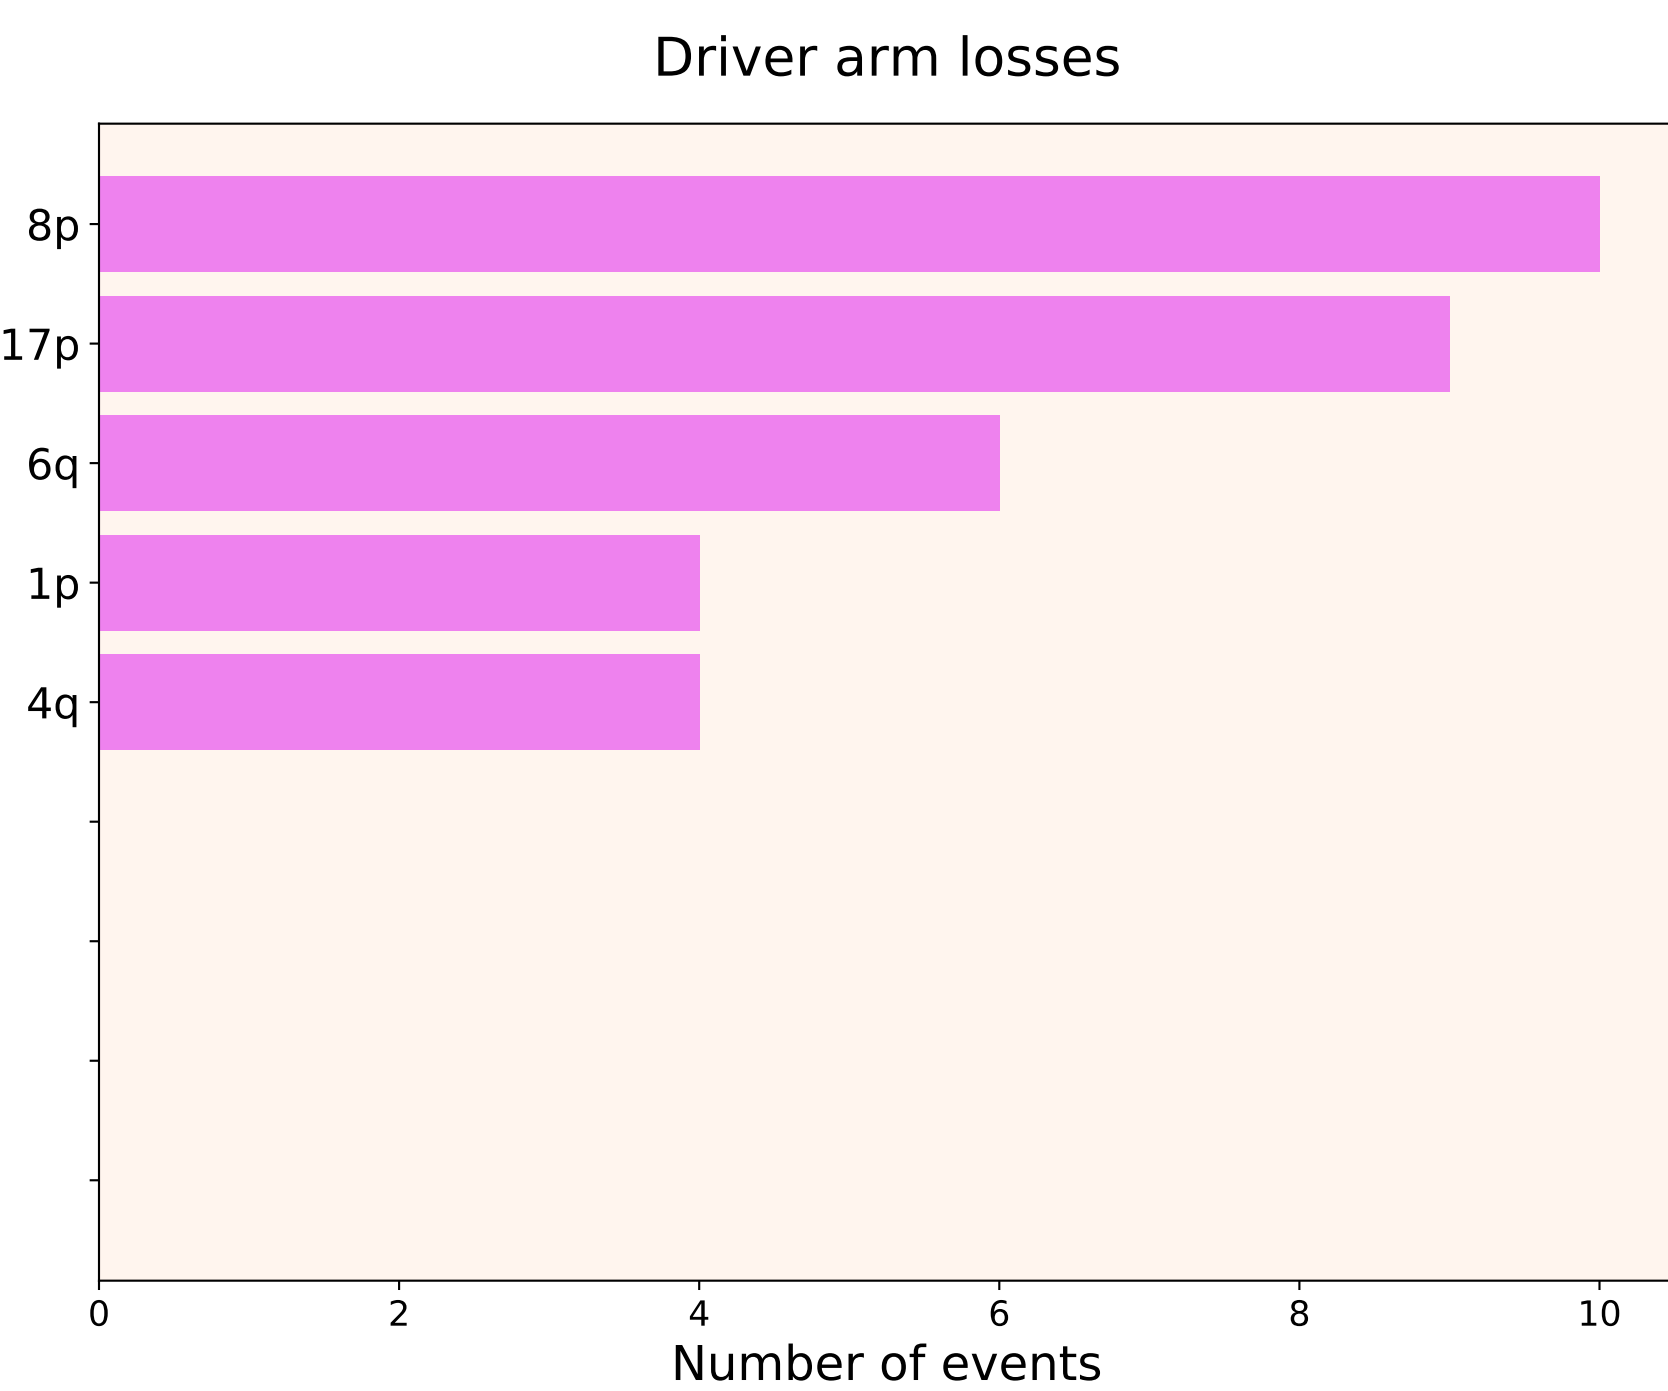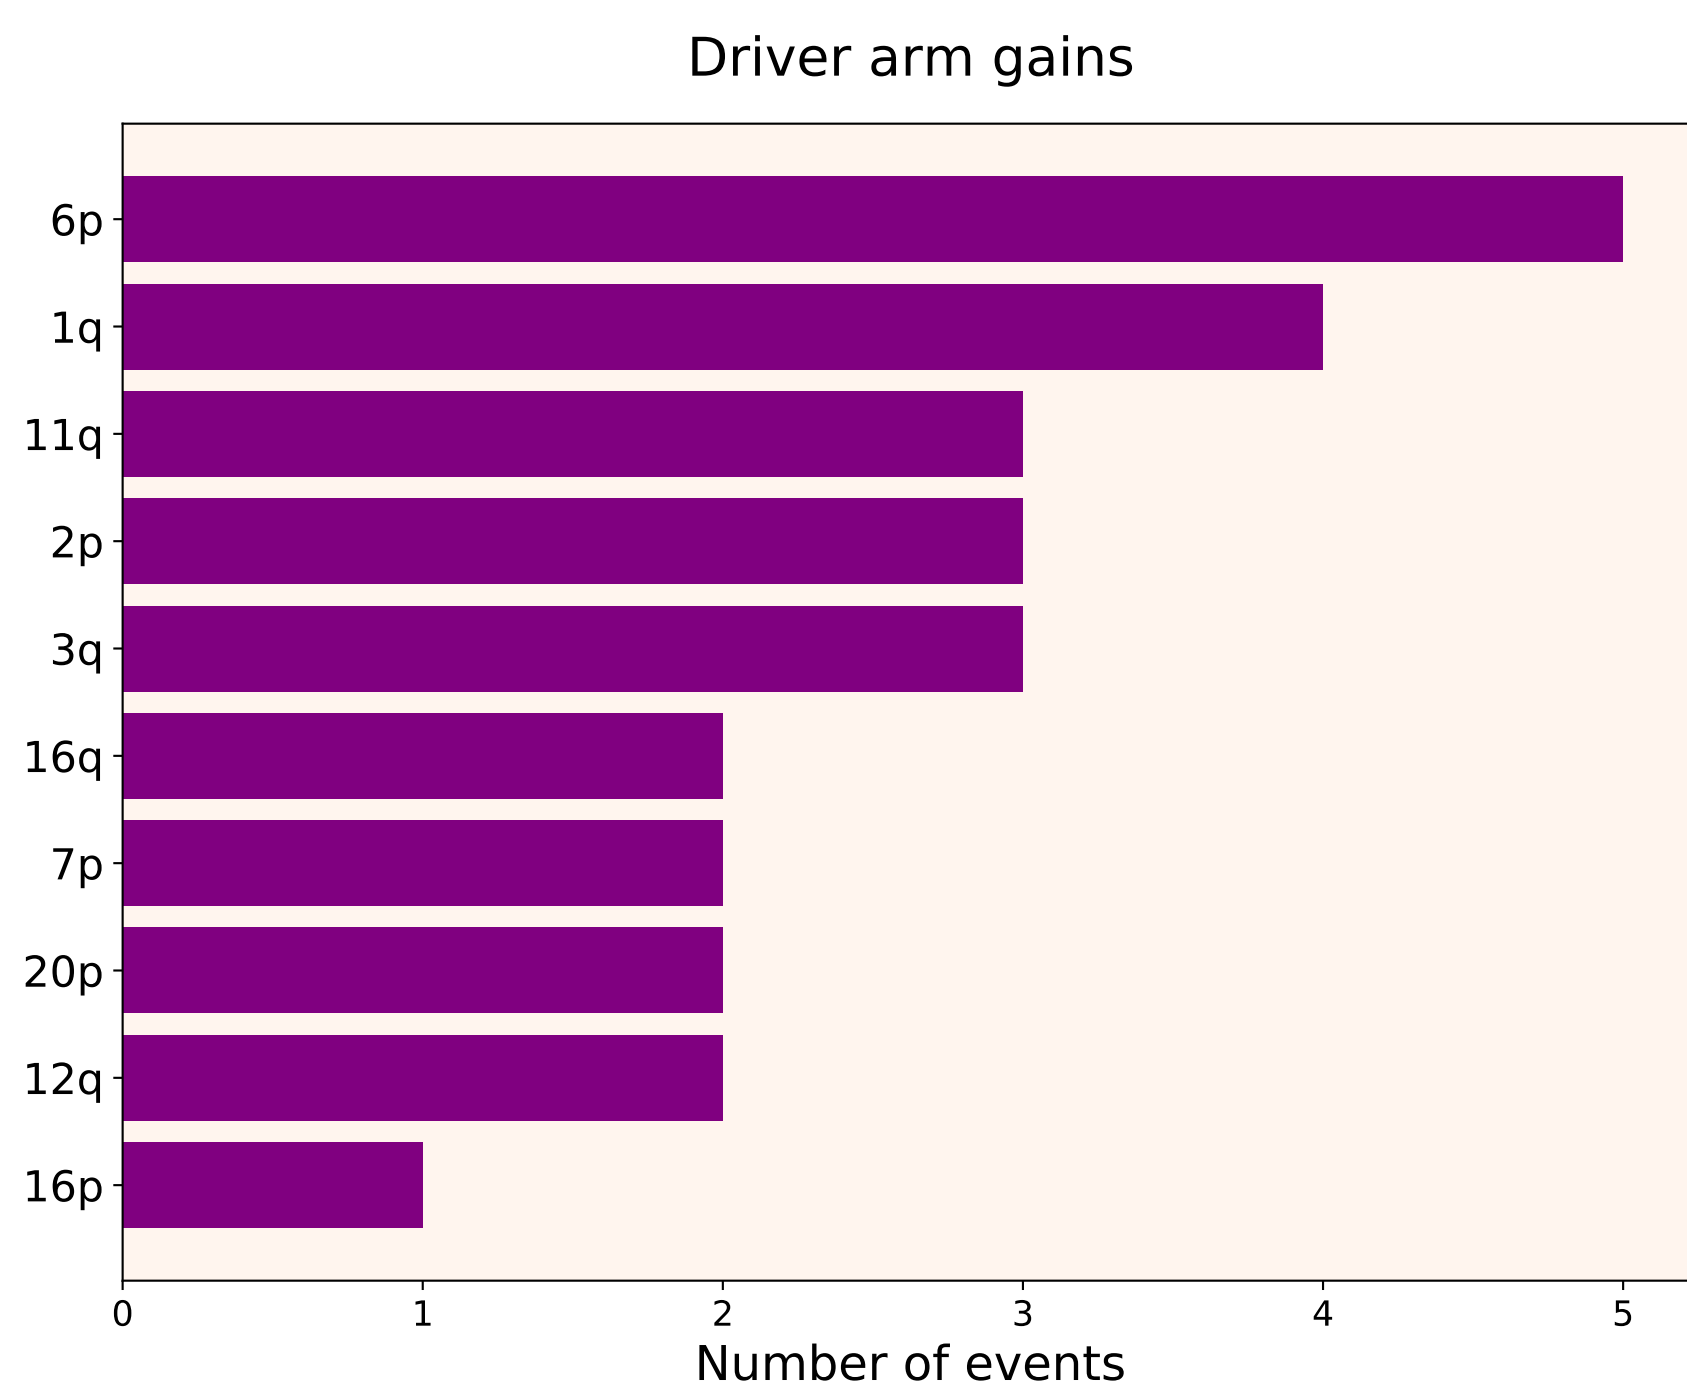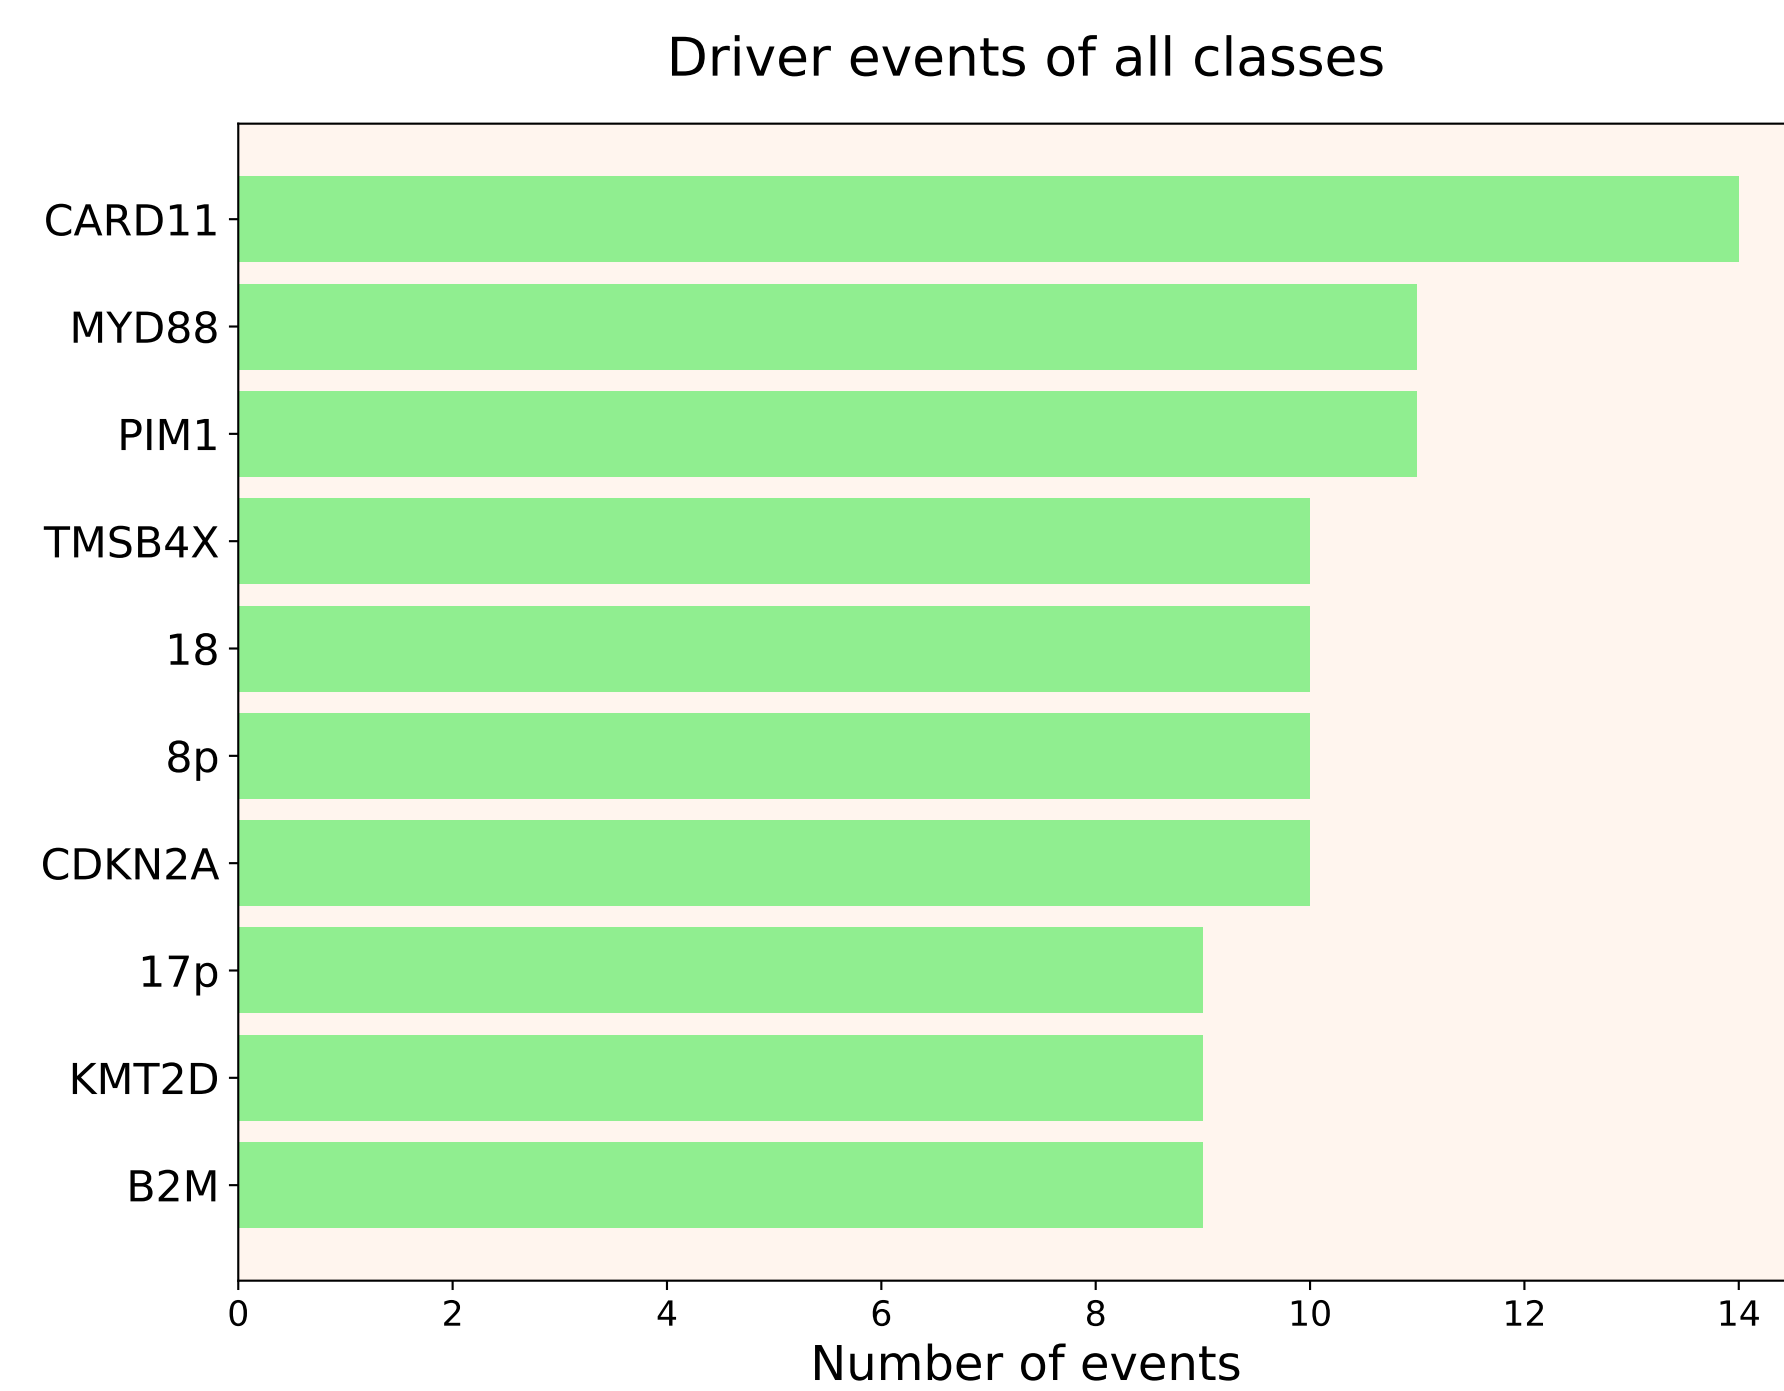

Supplement: Supplemental_Data_S1.zip [file Supplemental_Data_S1.zip]

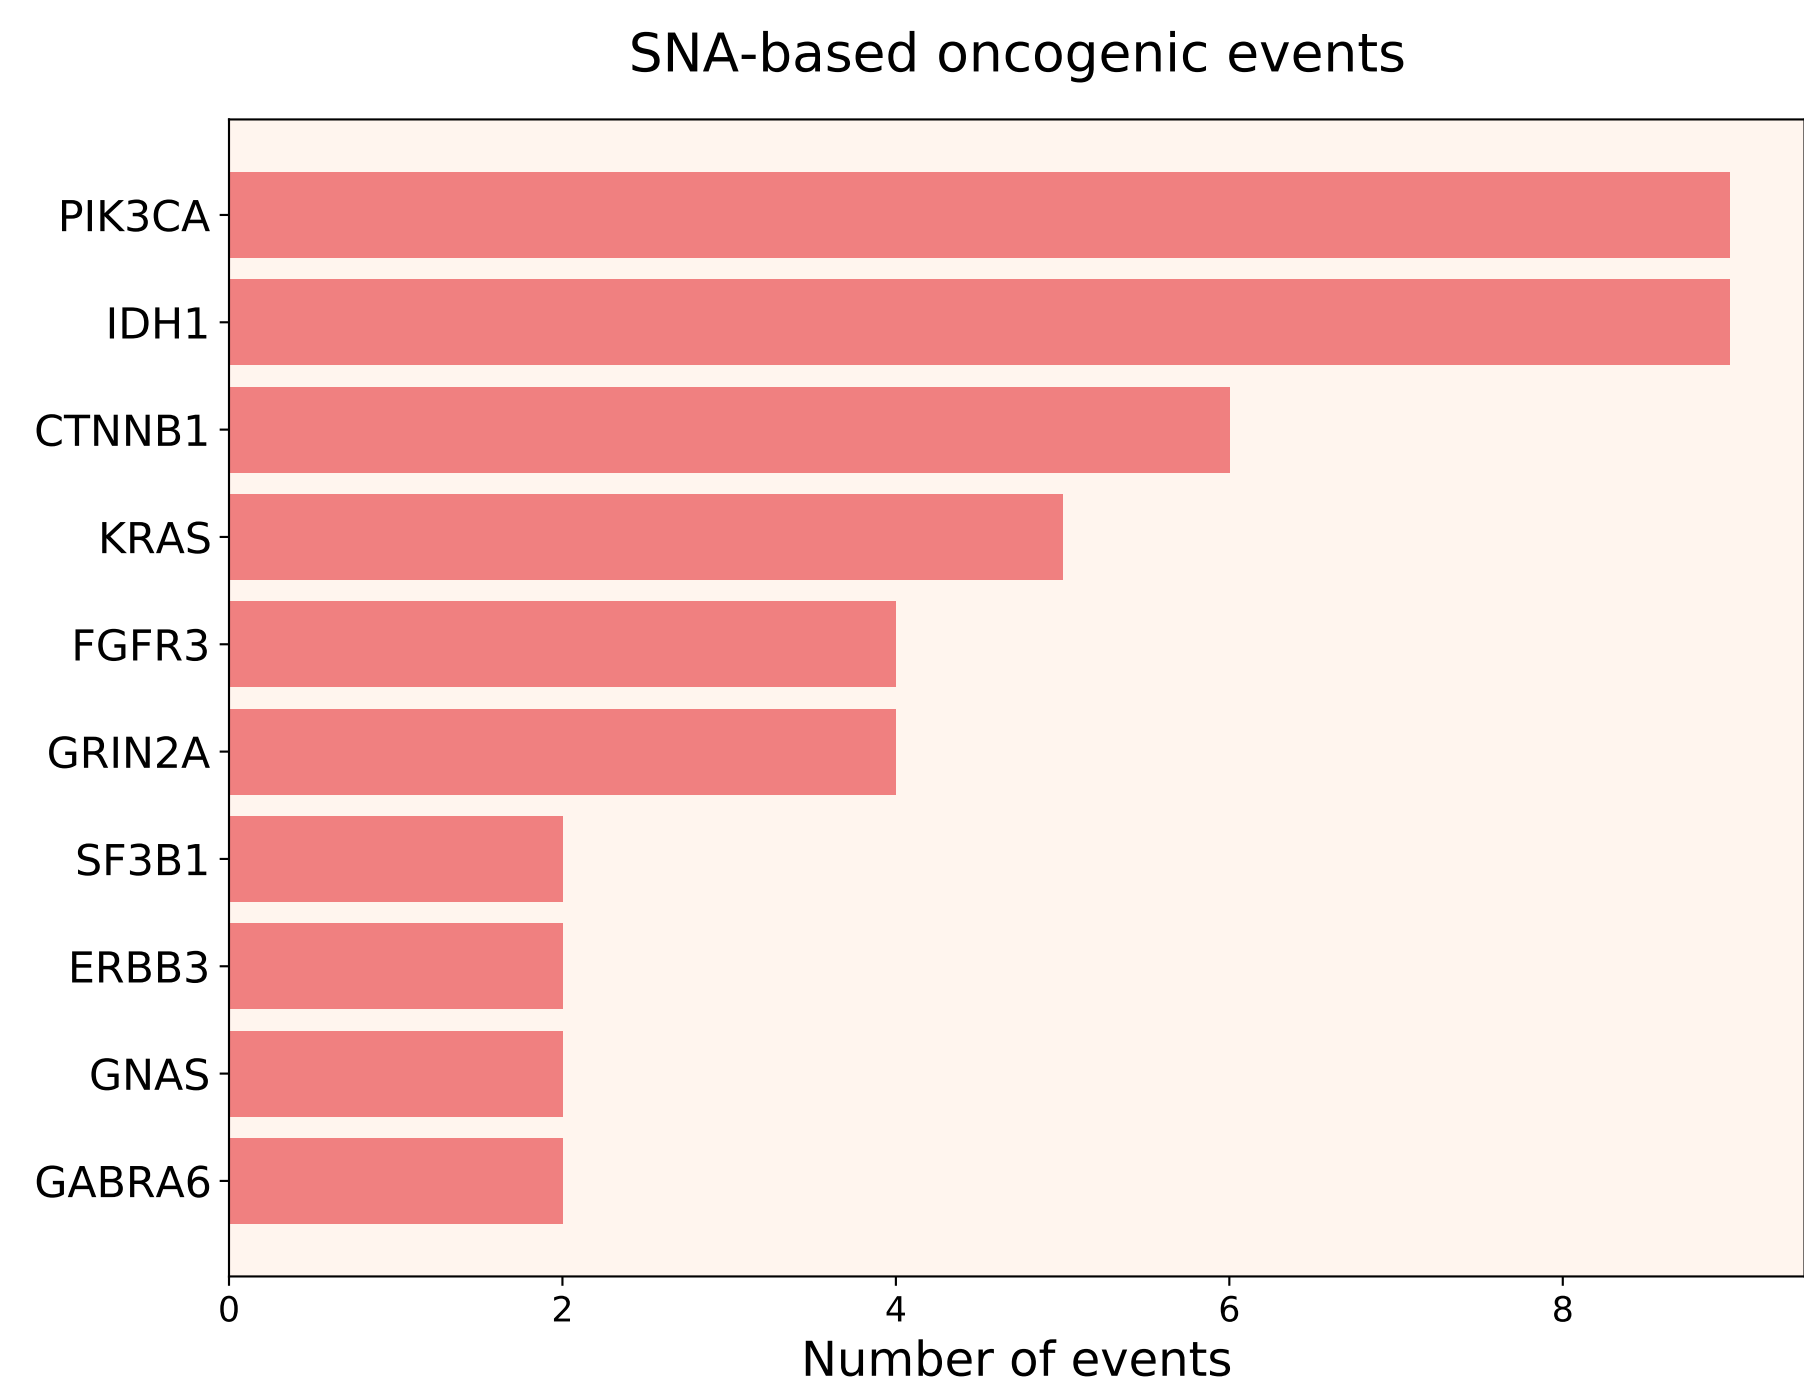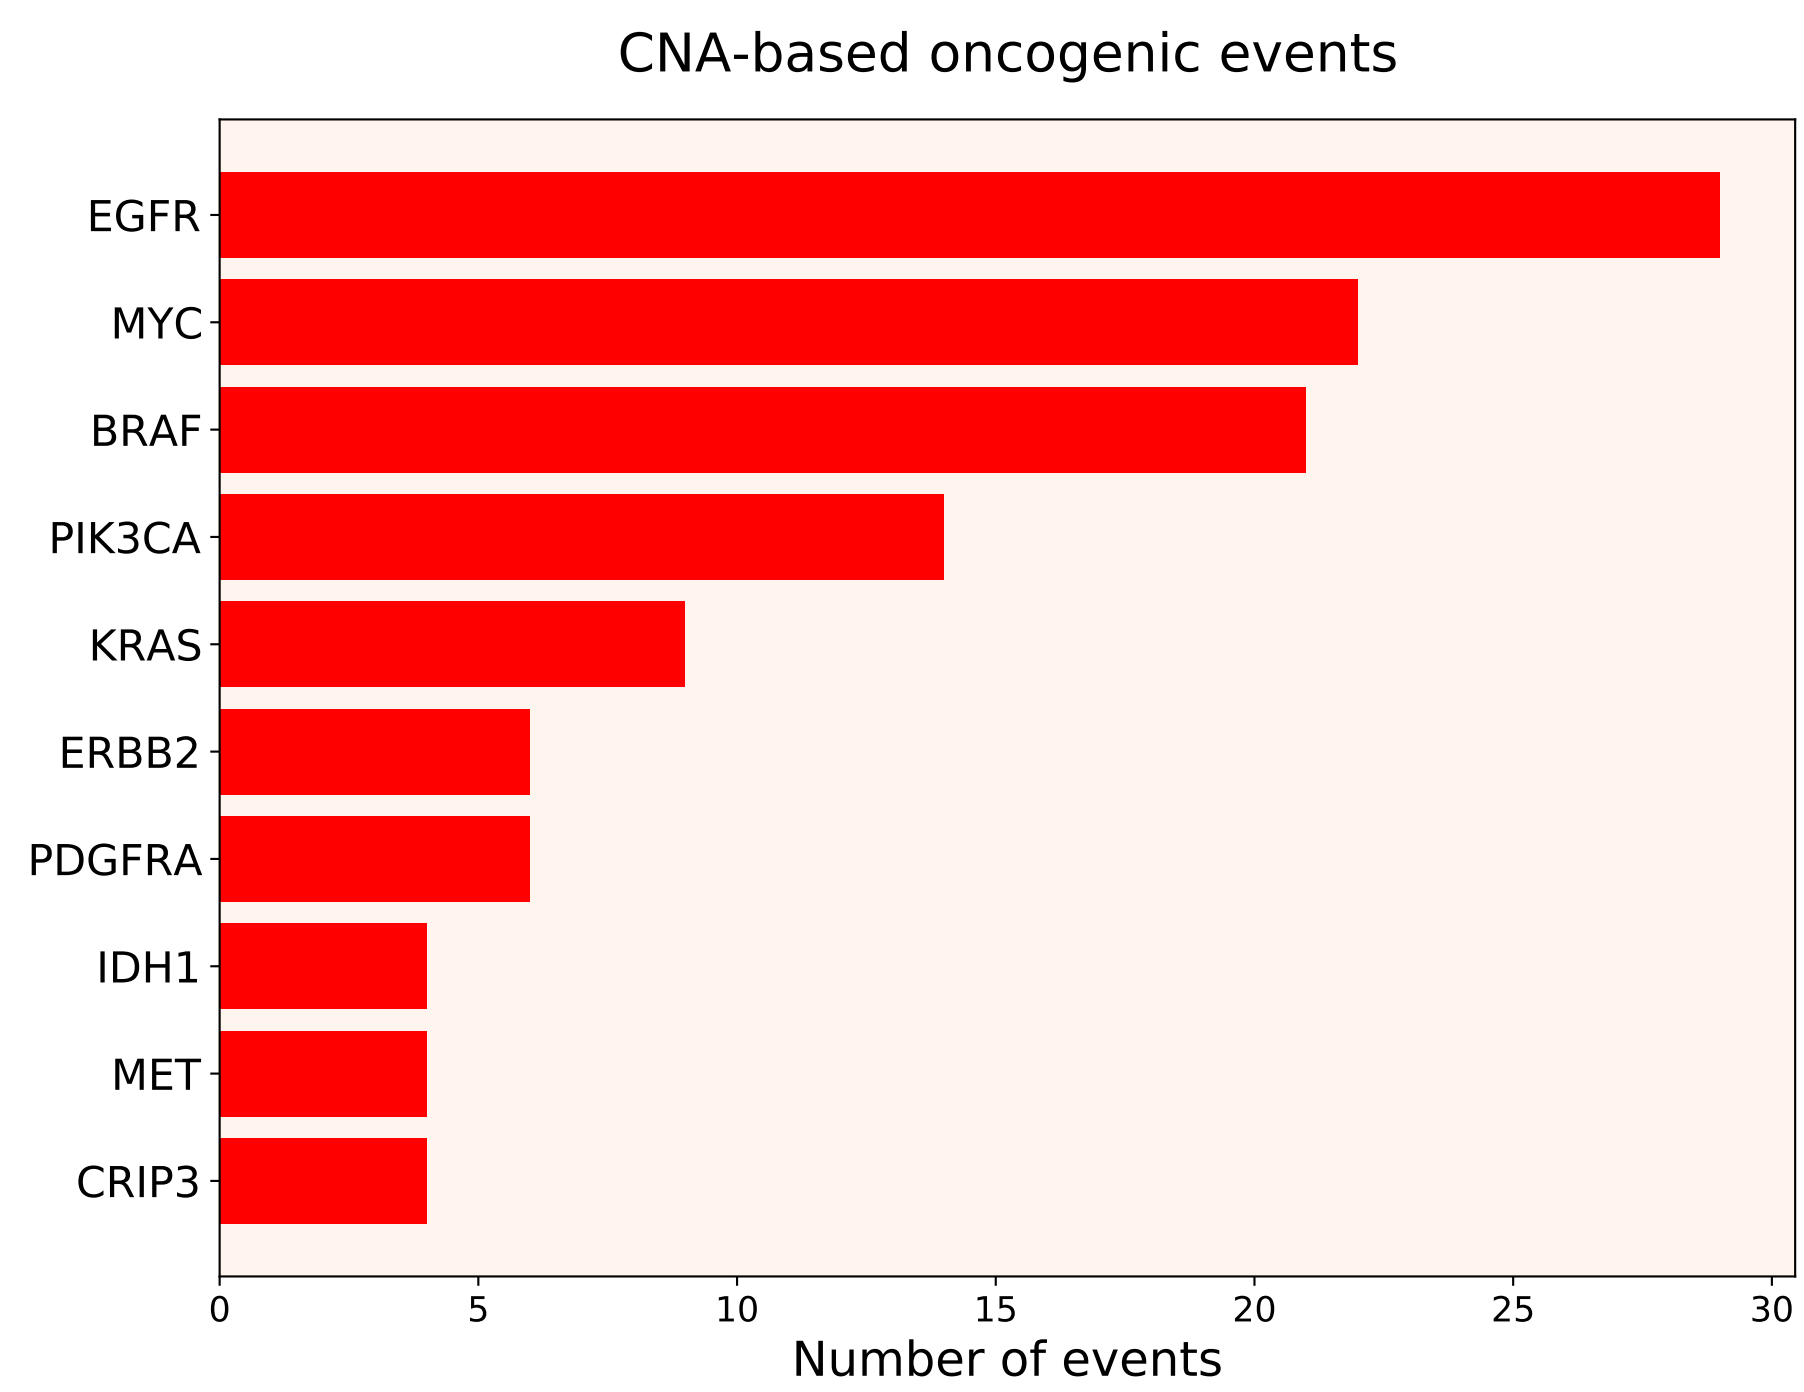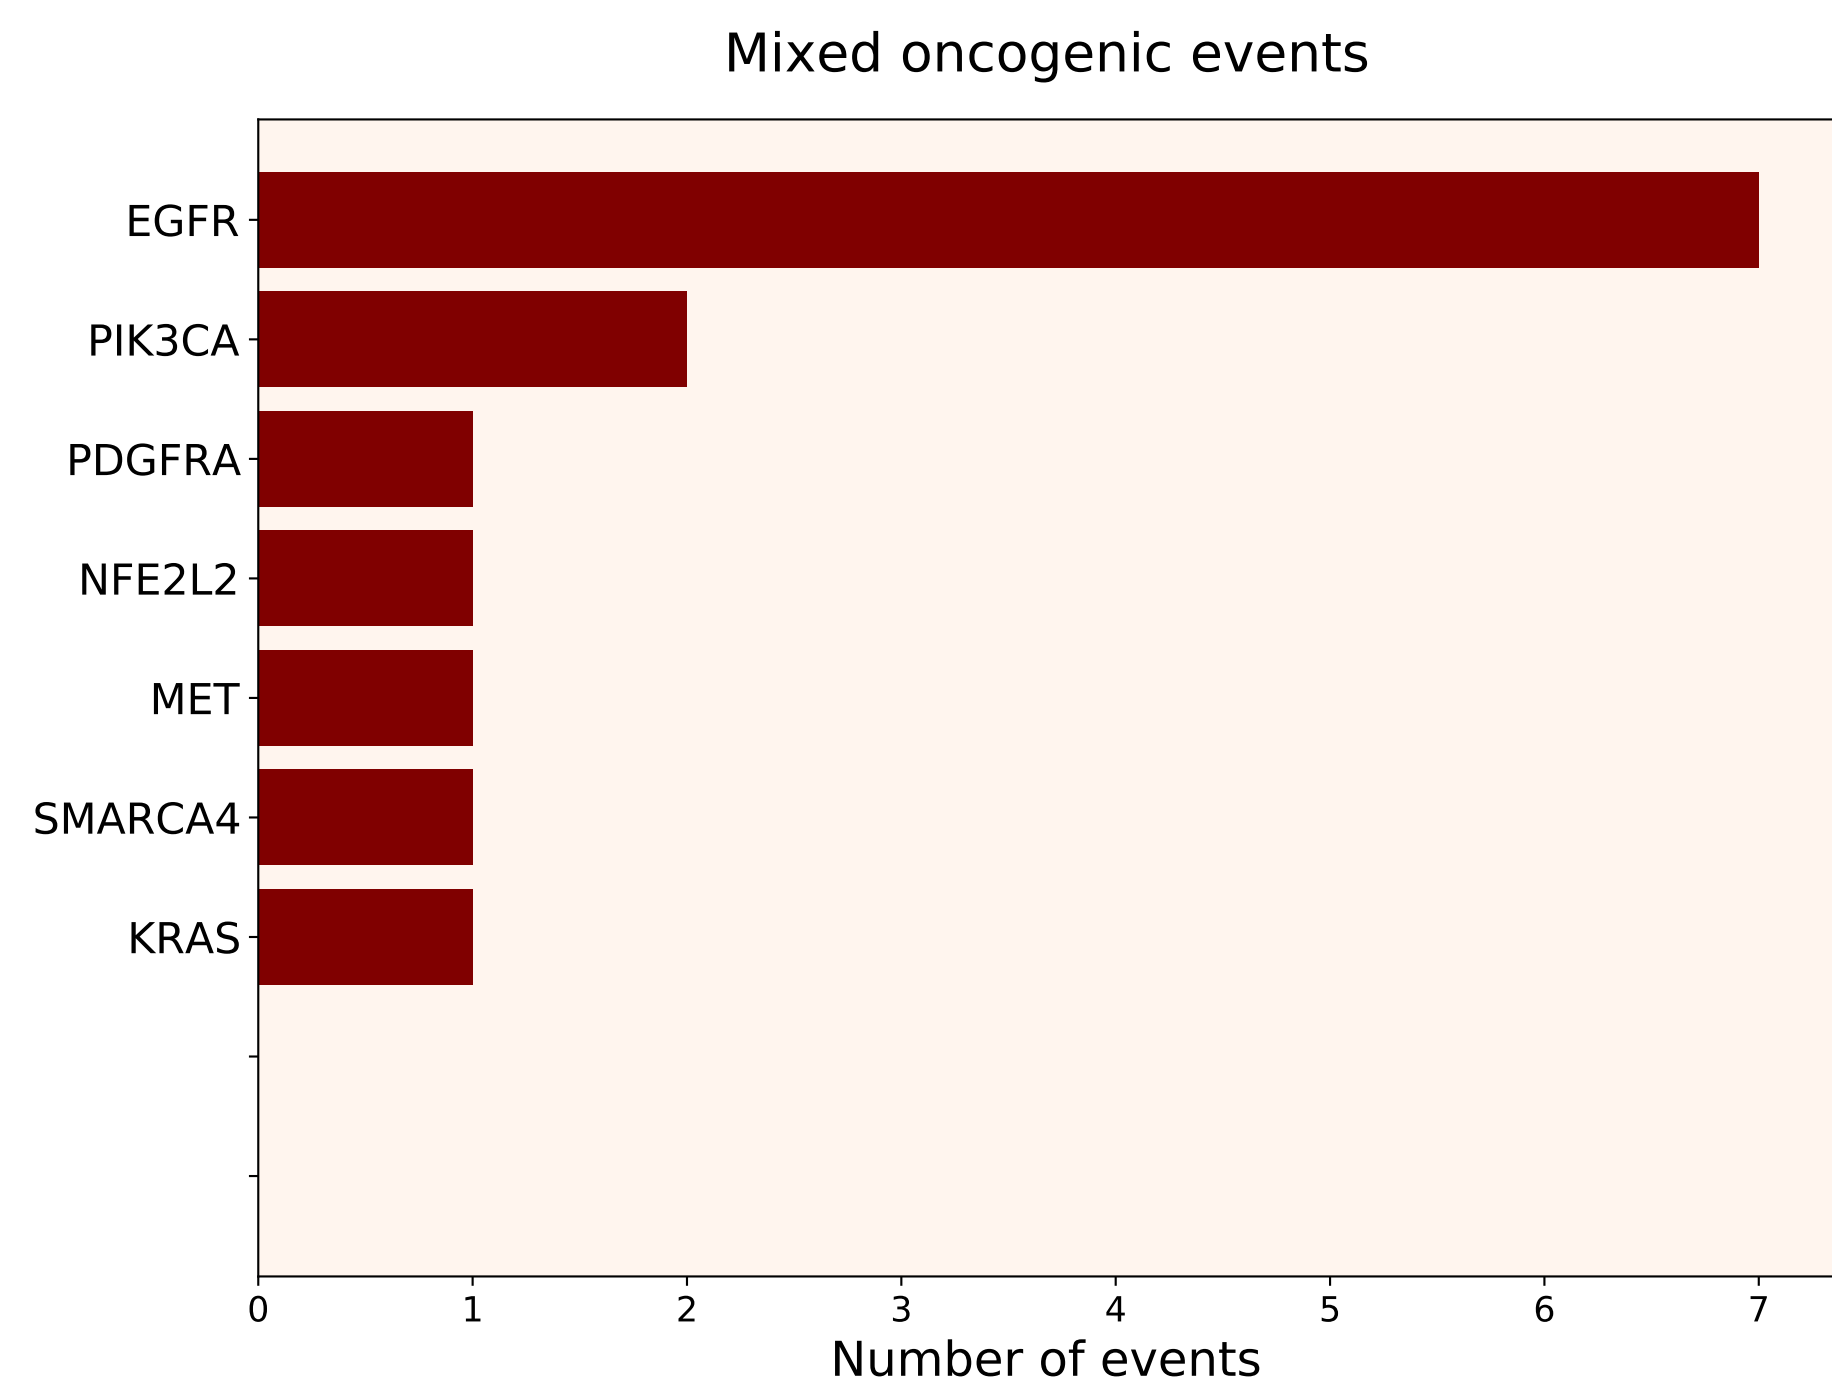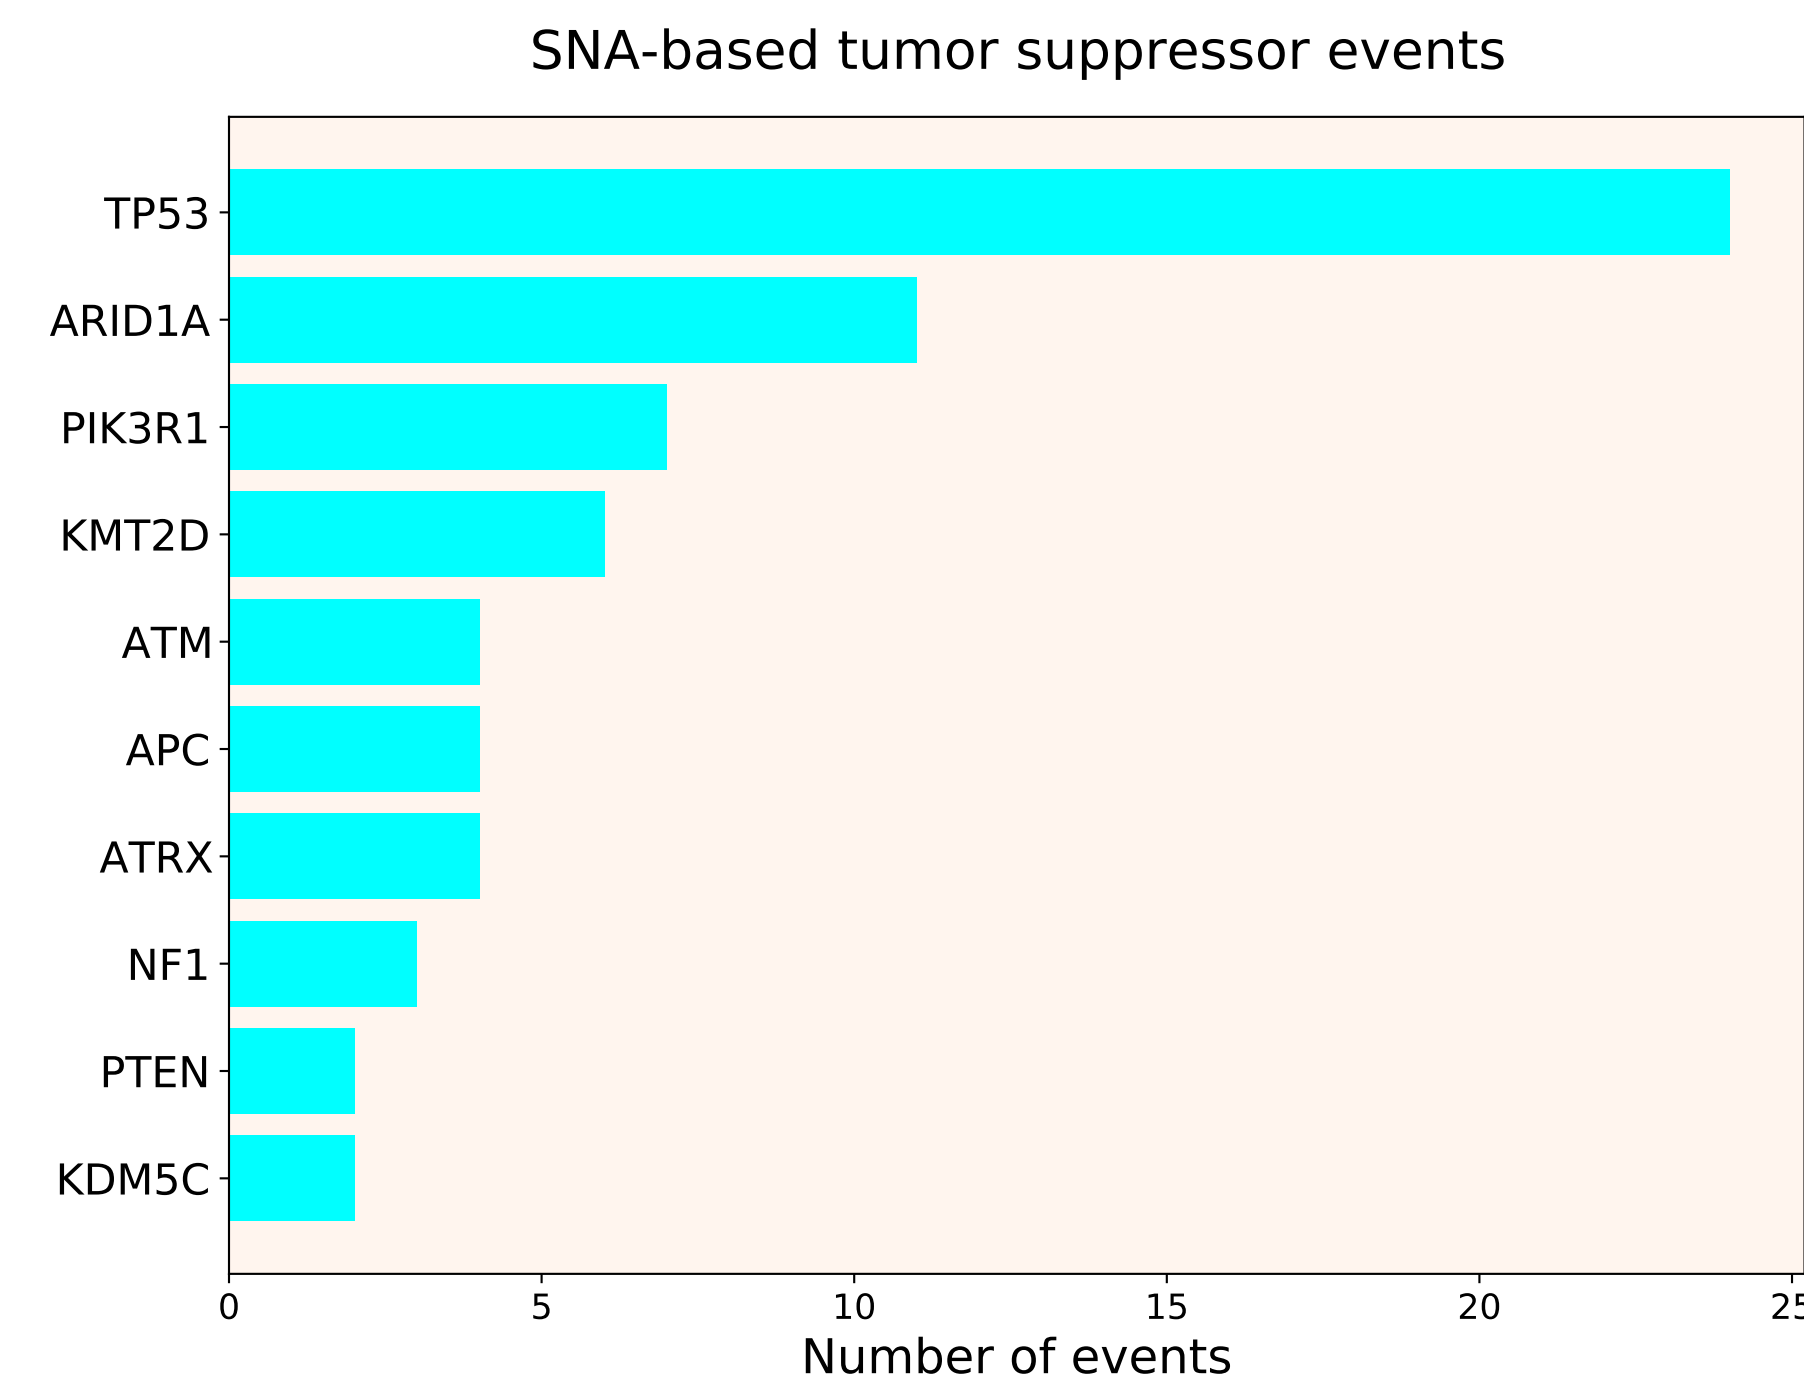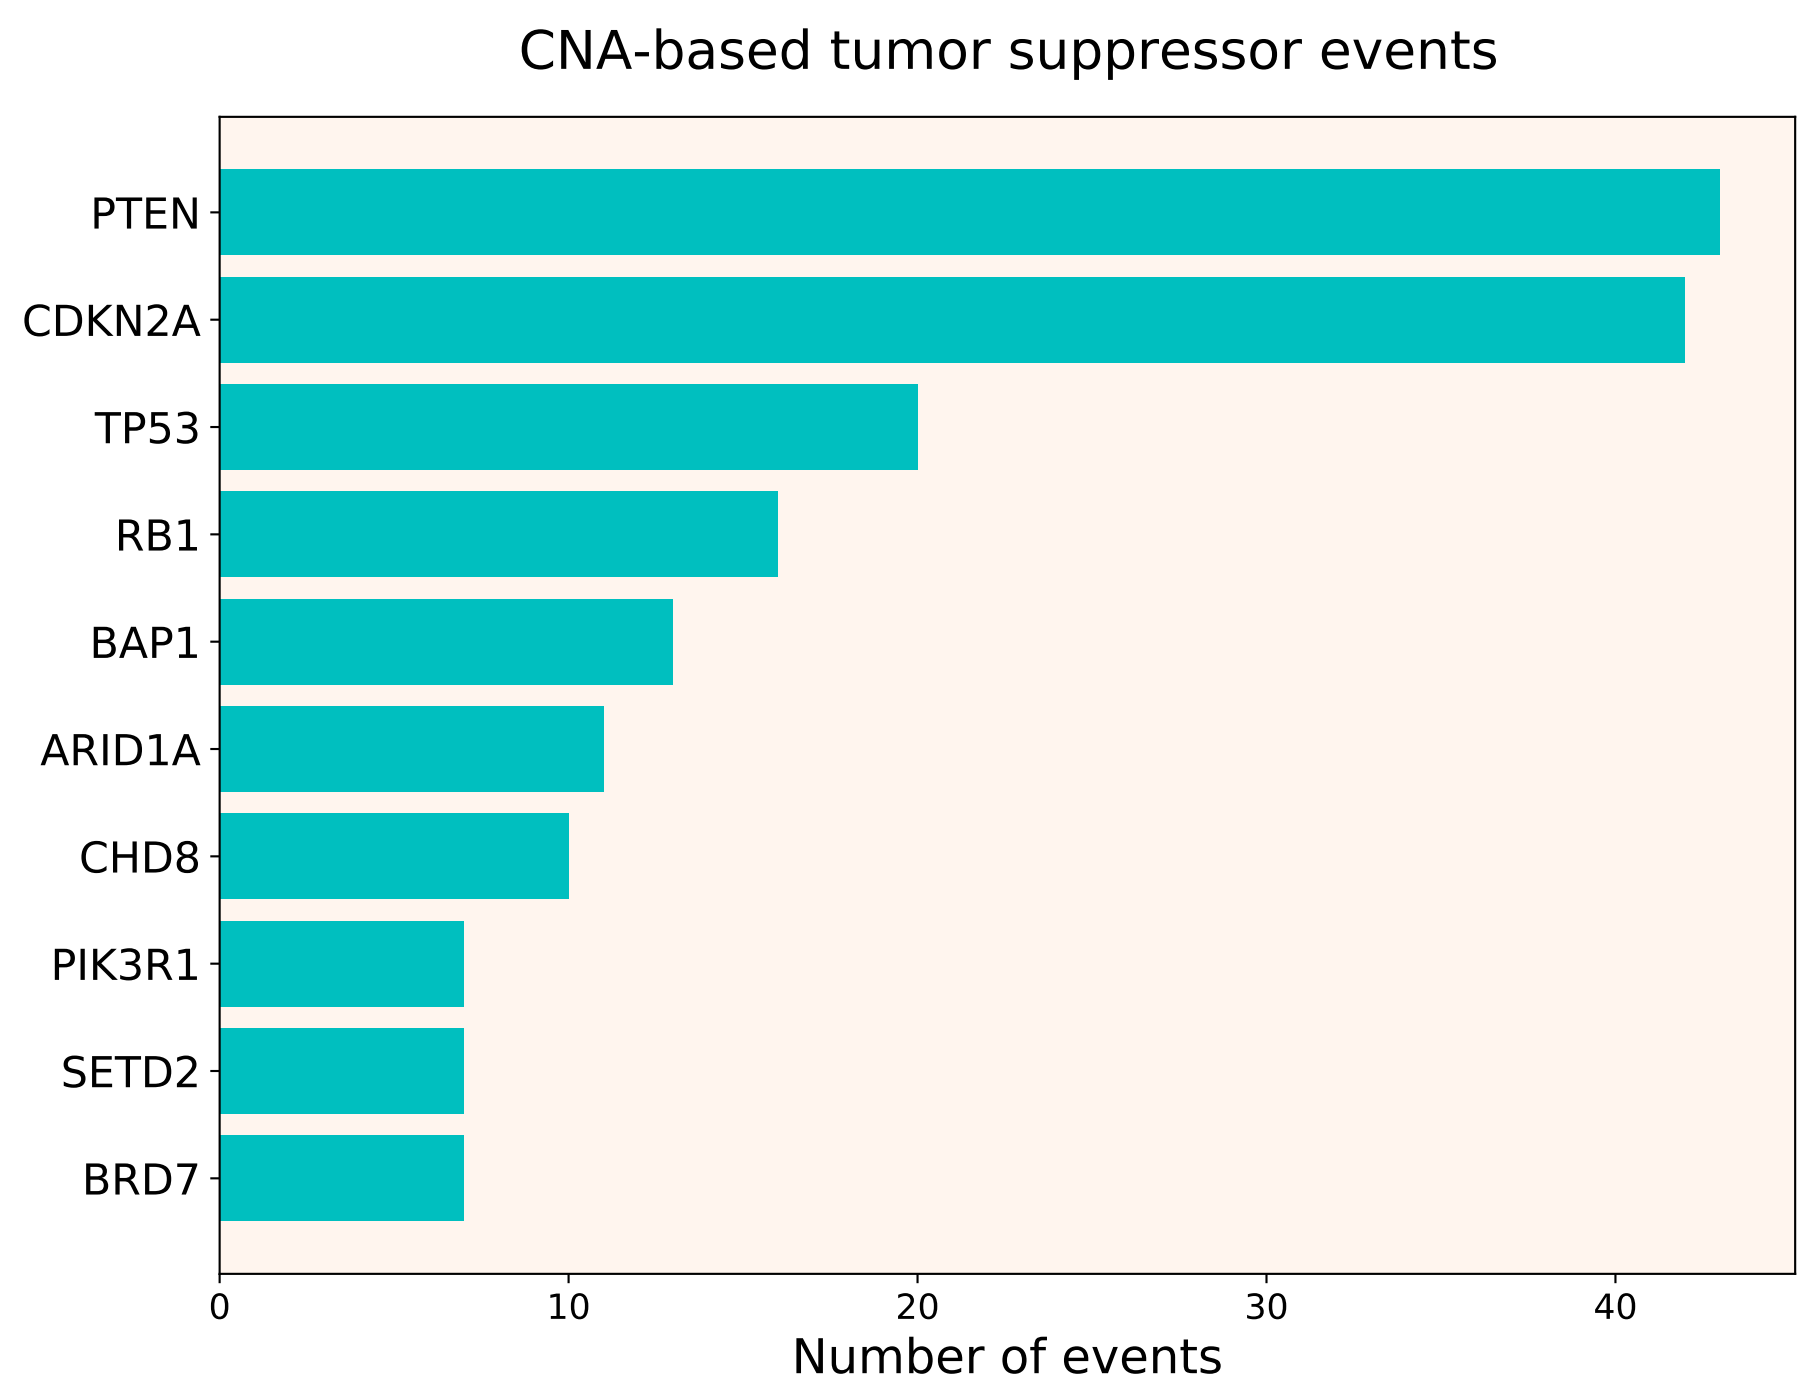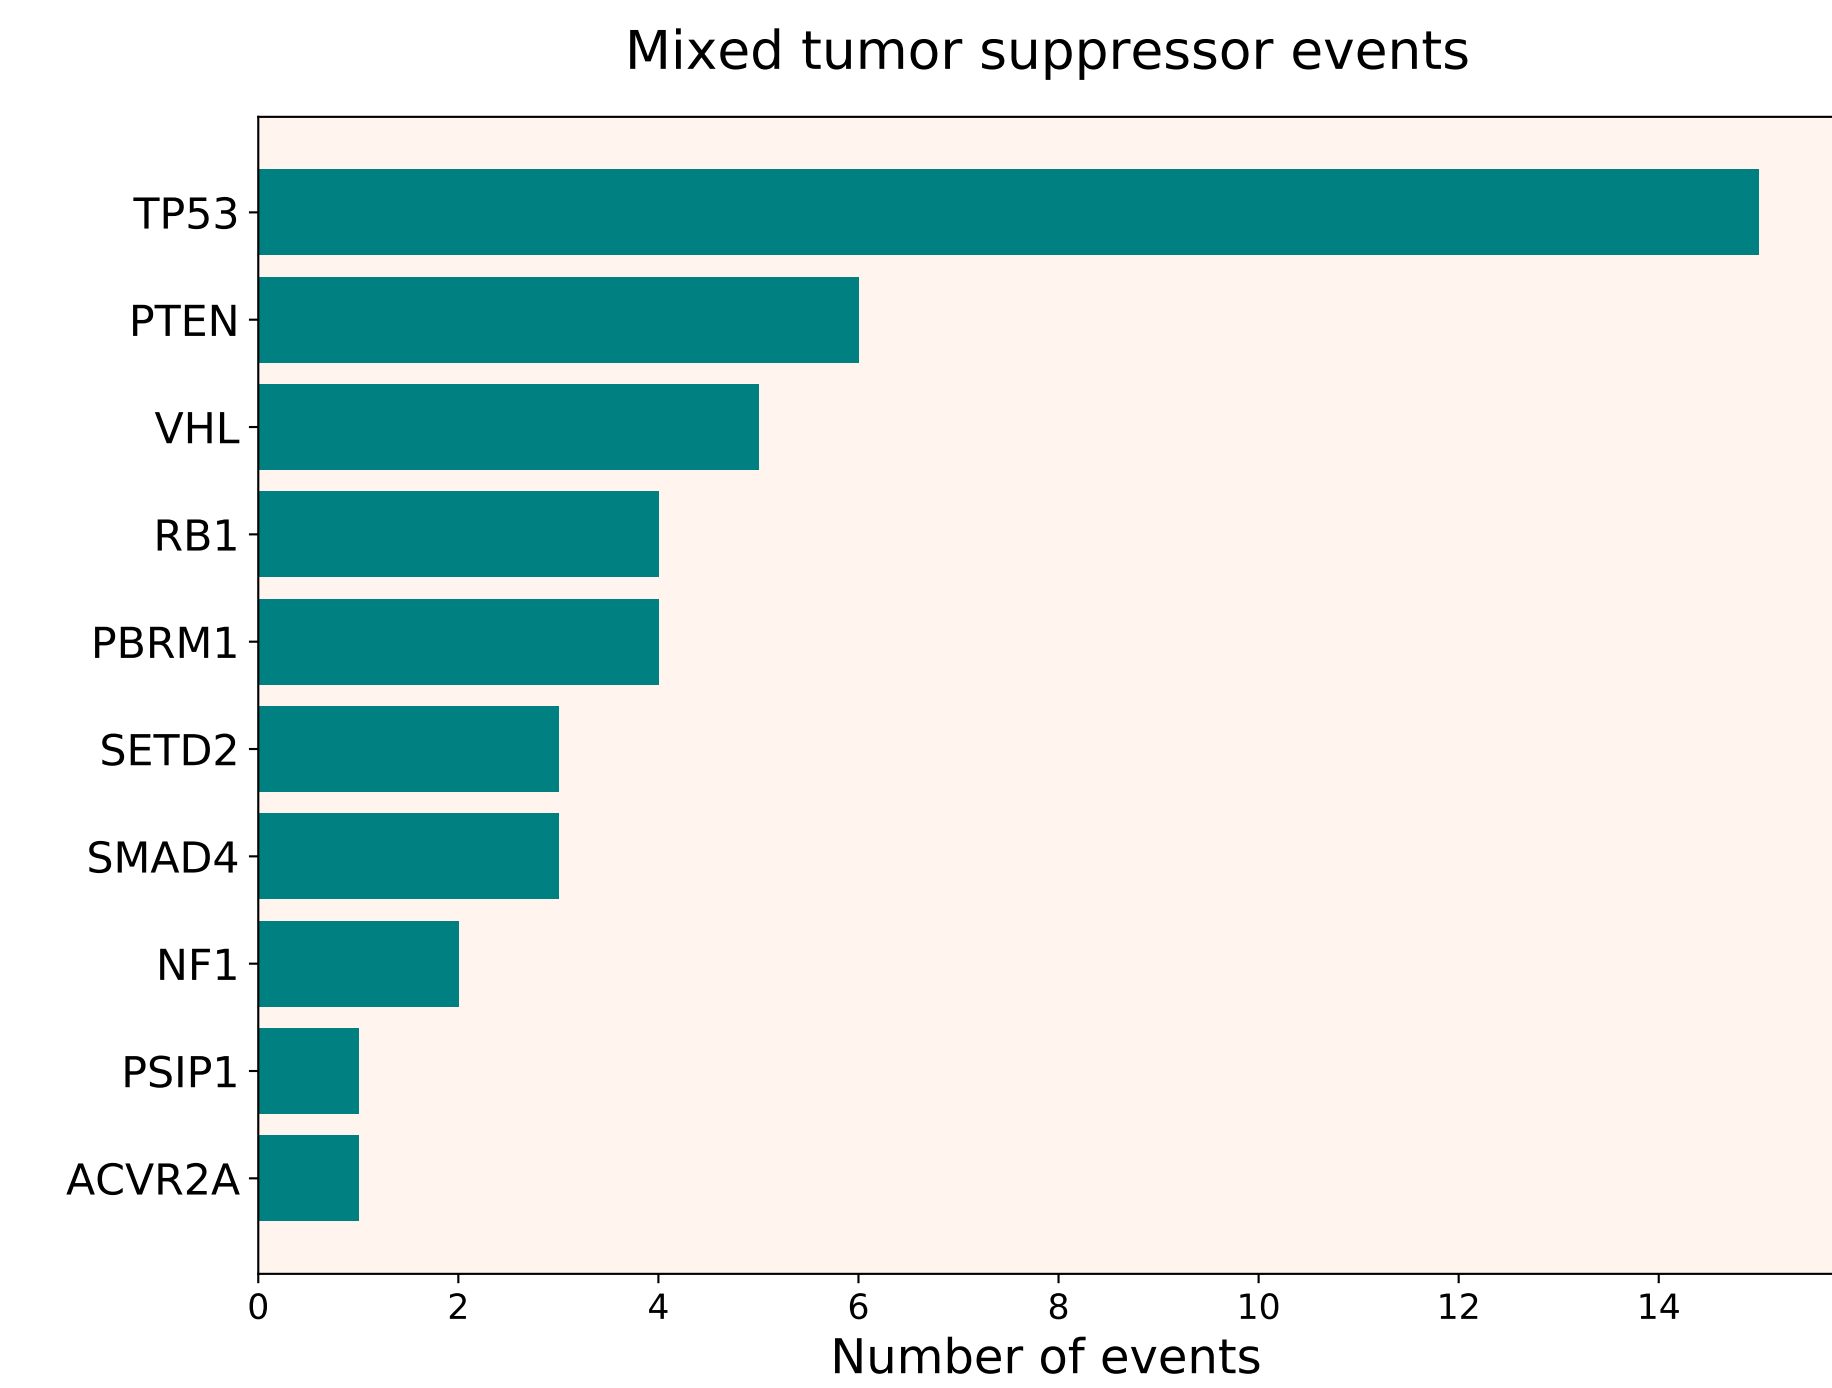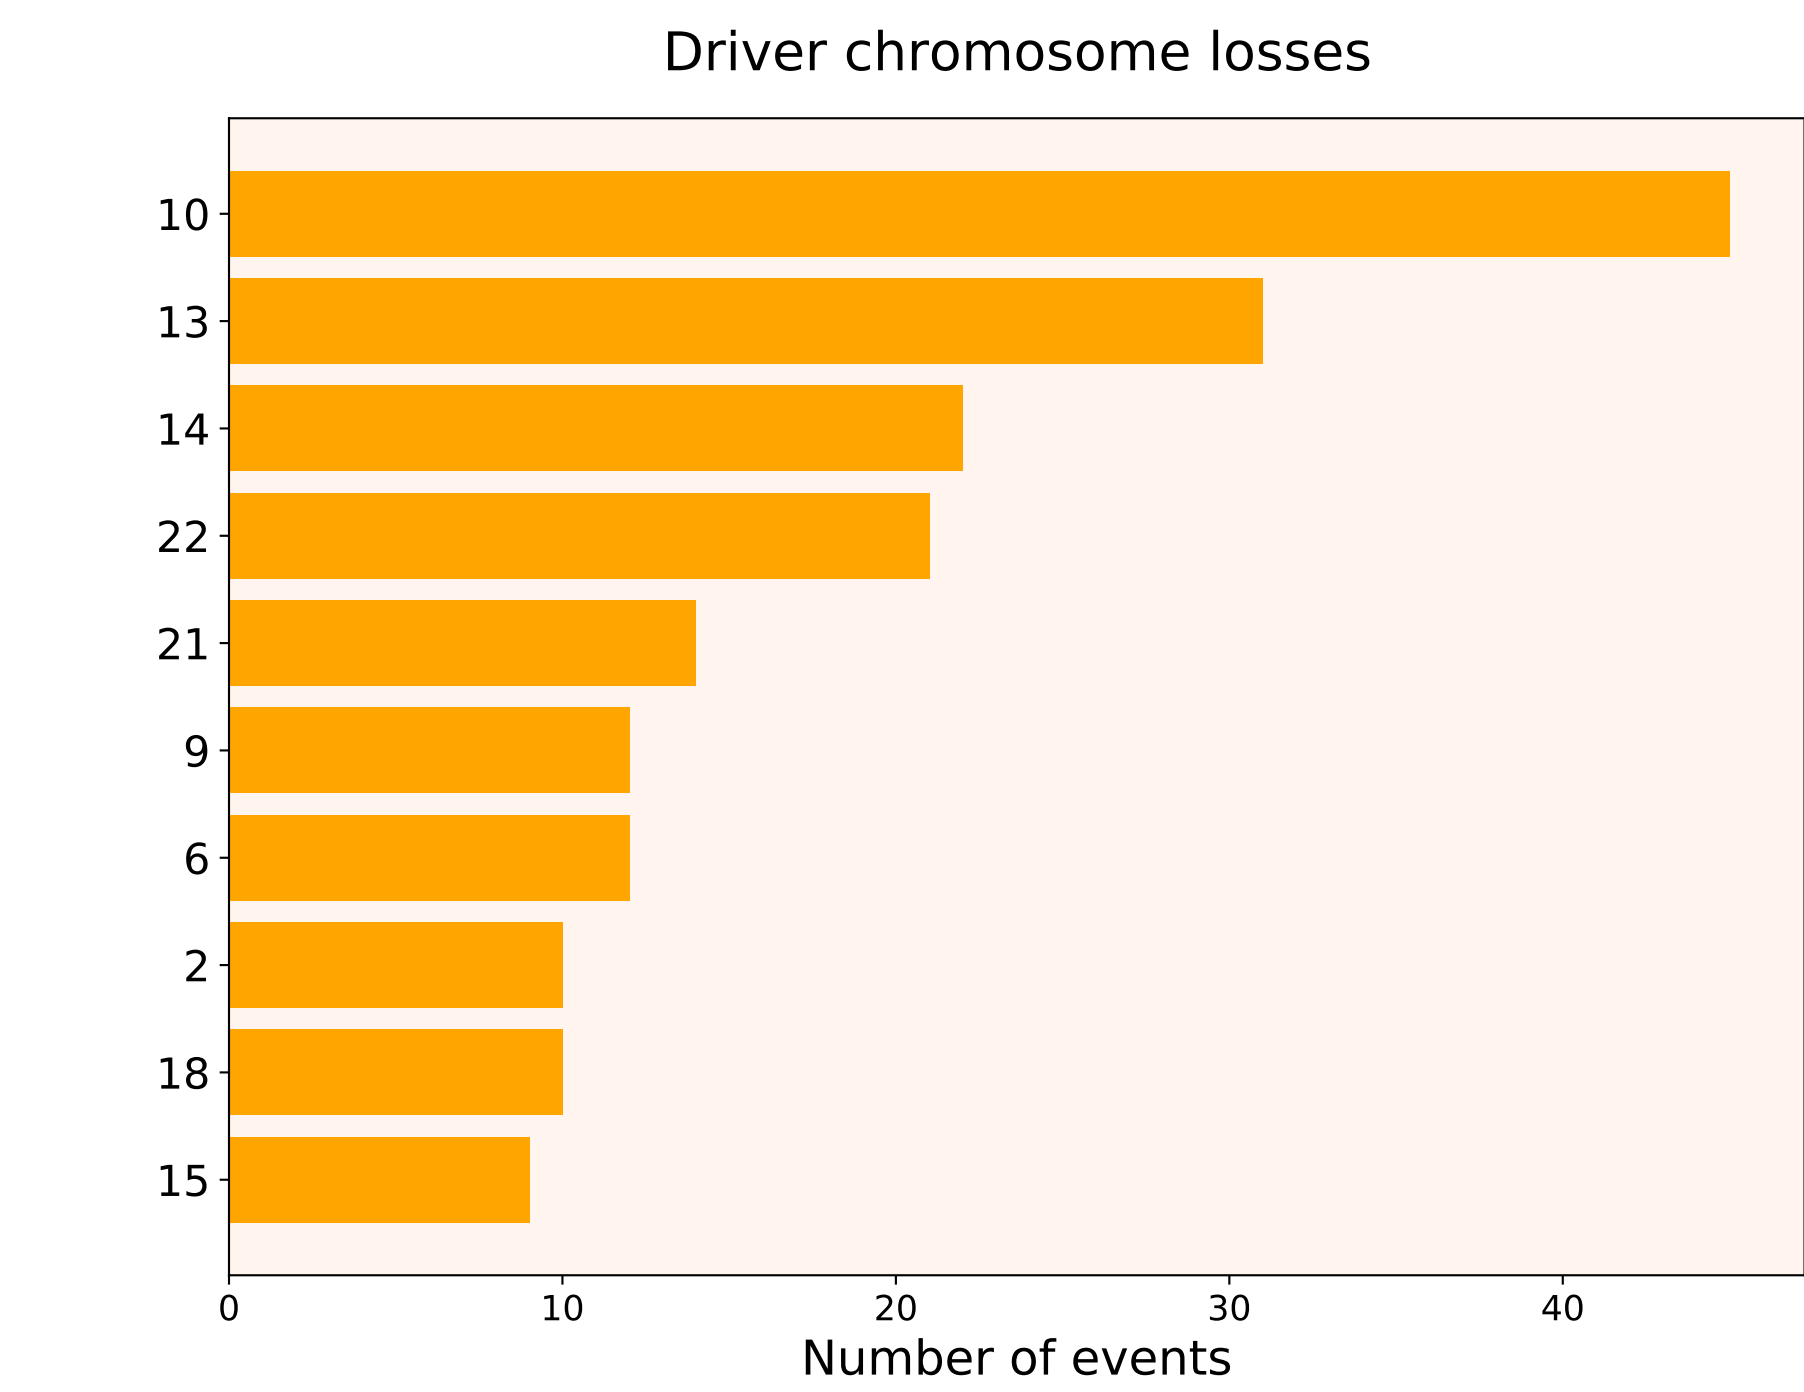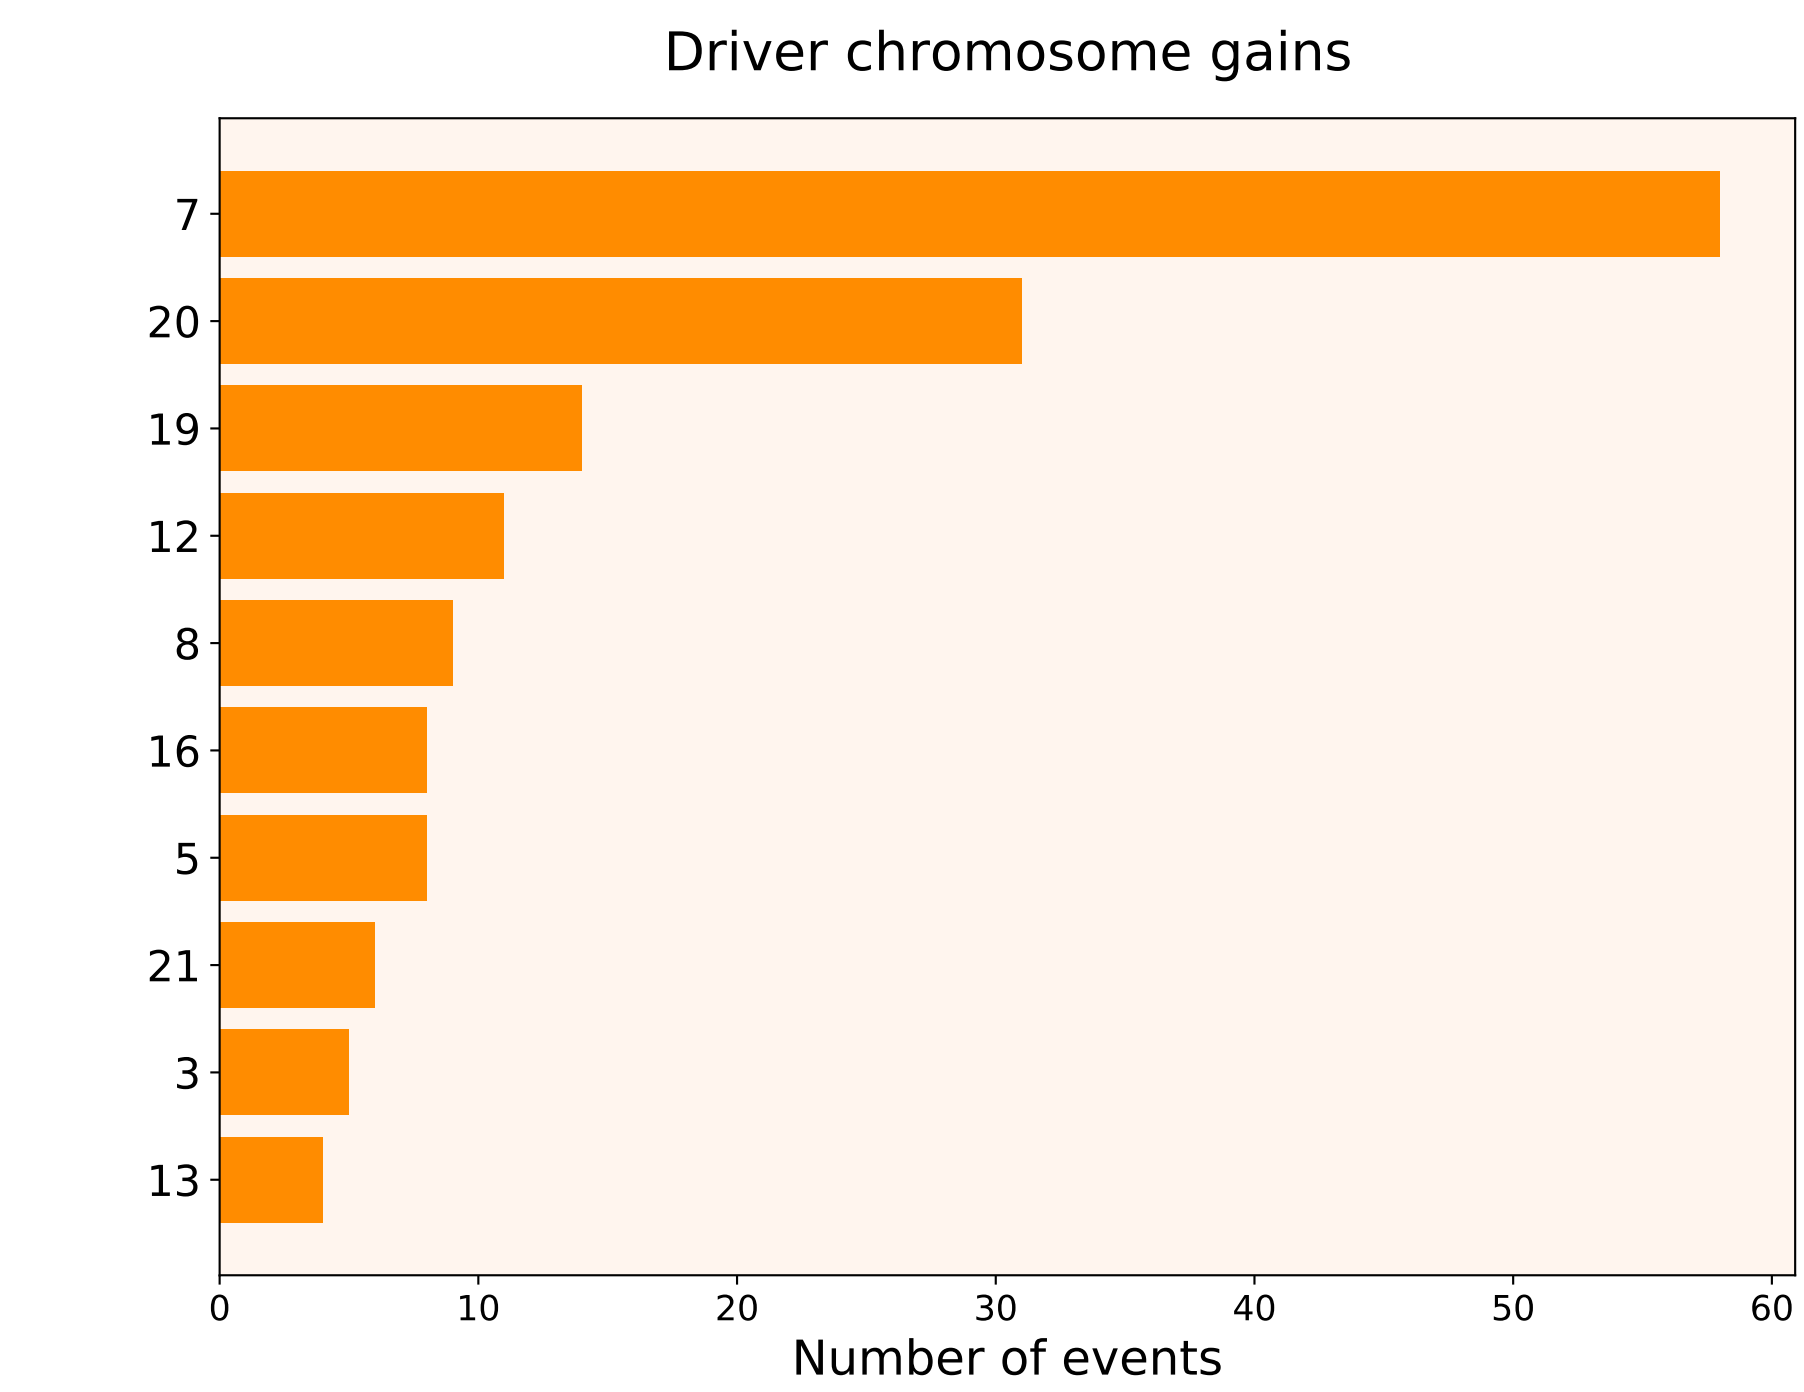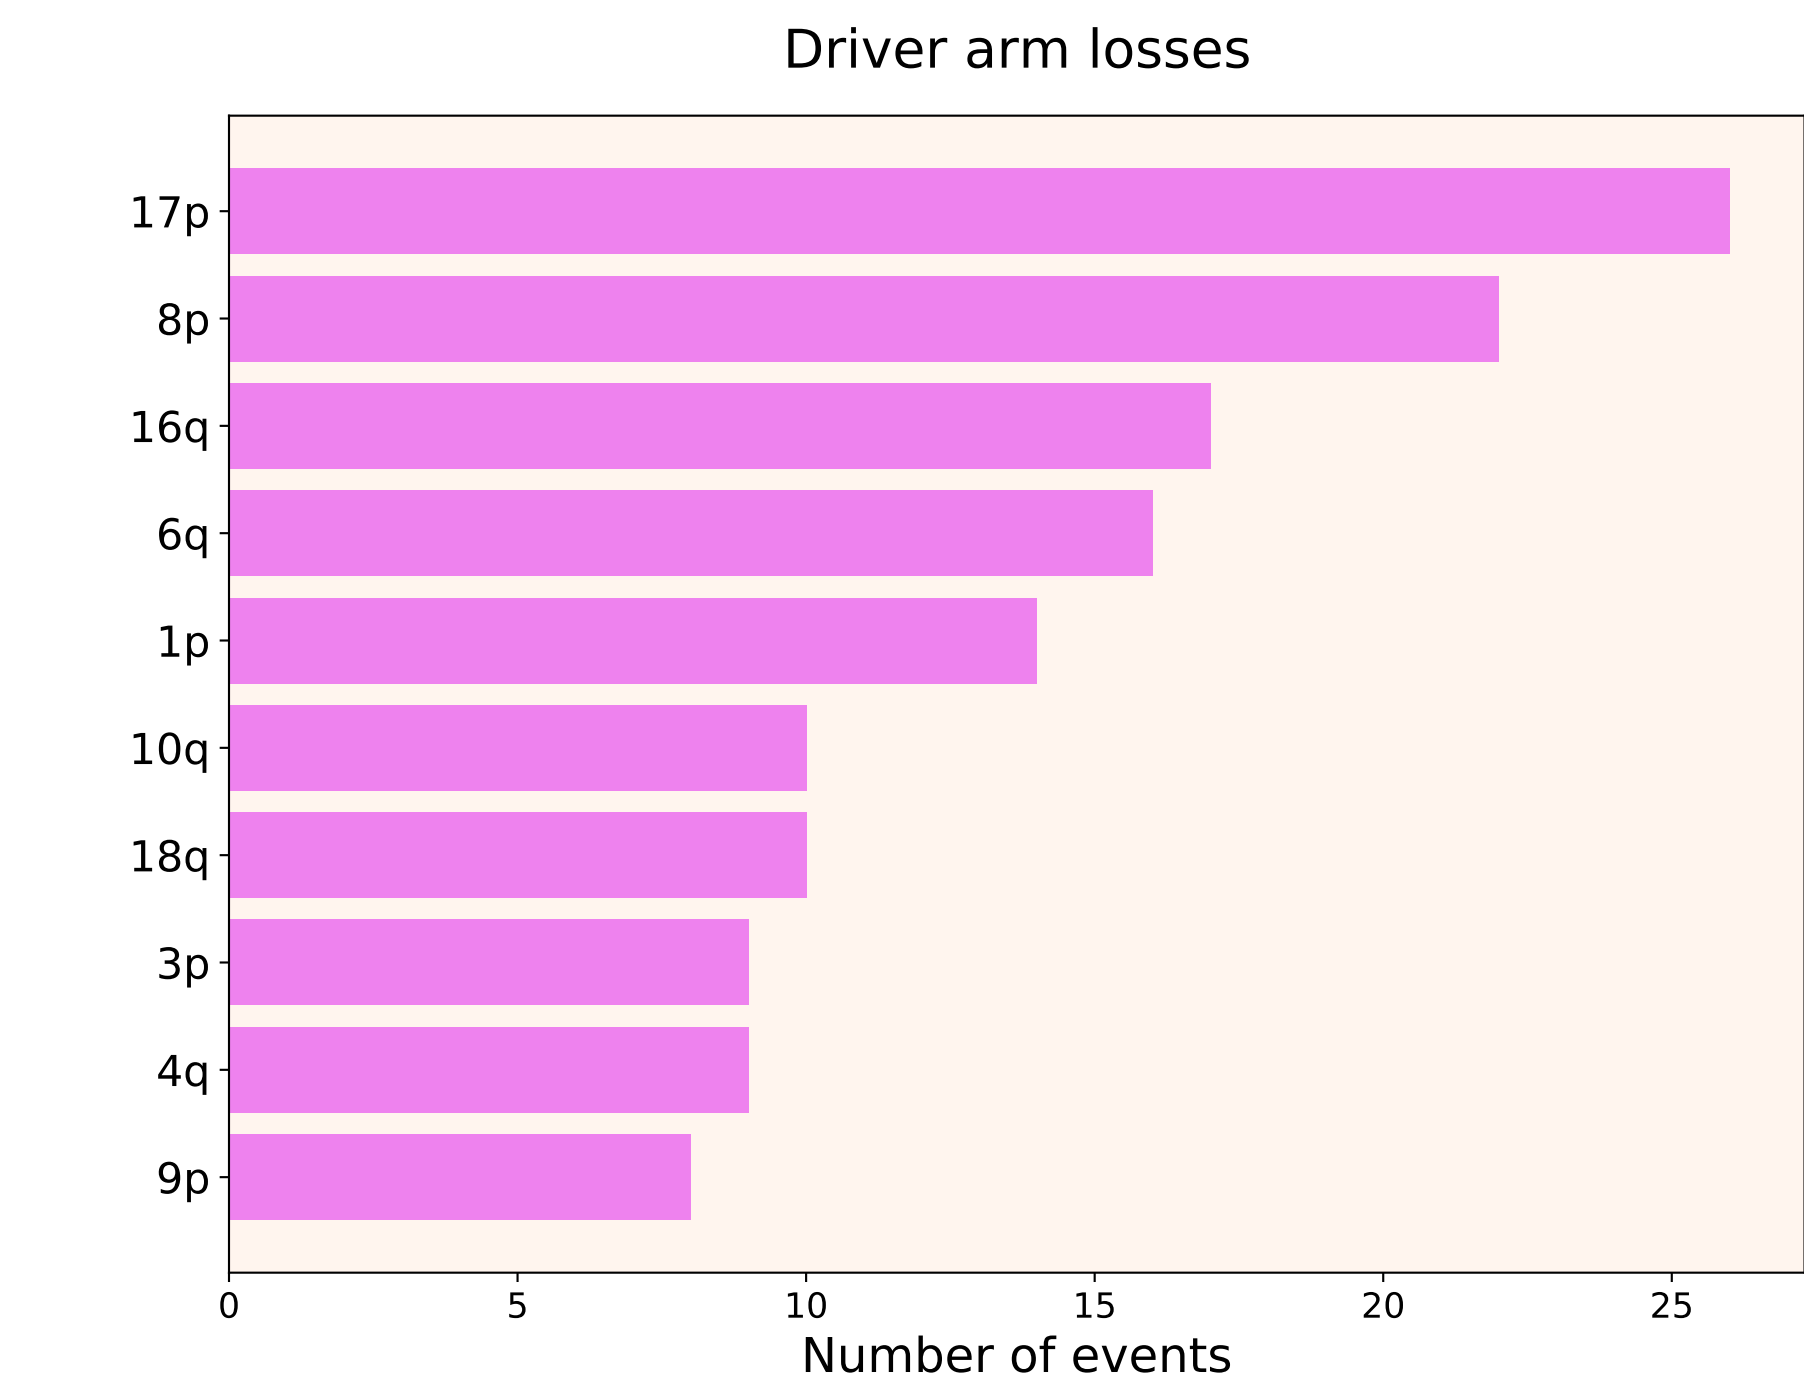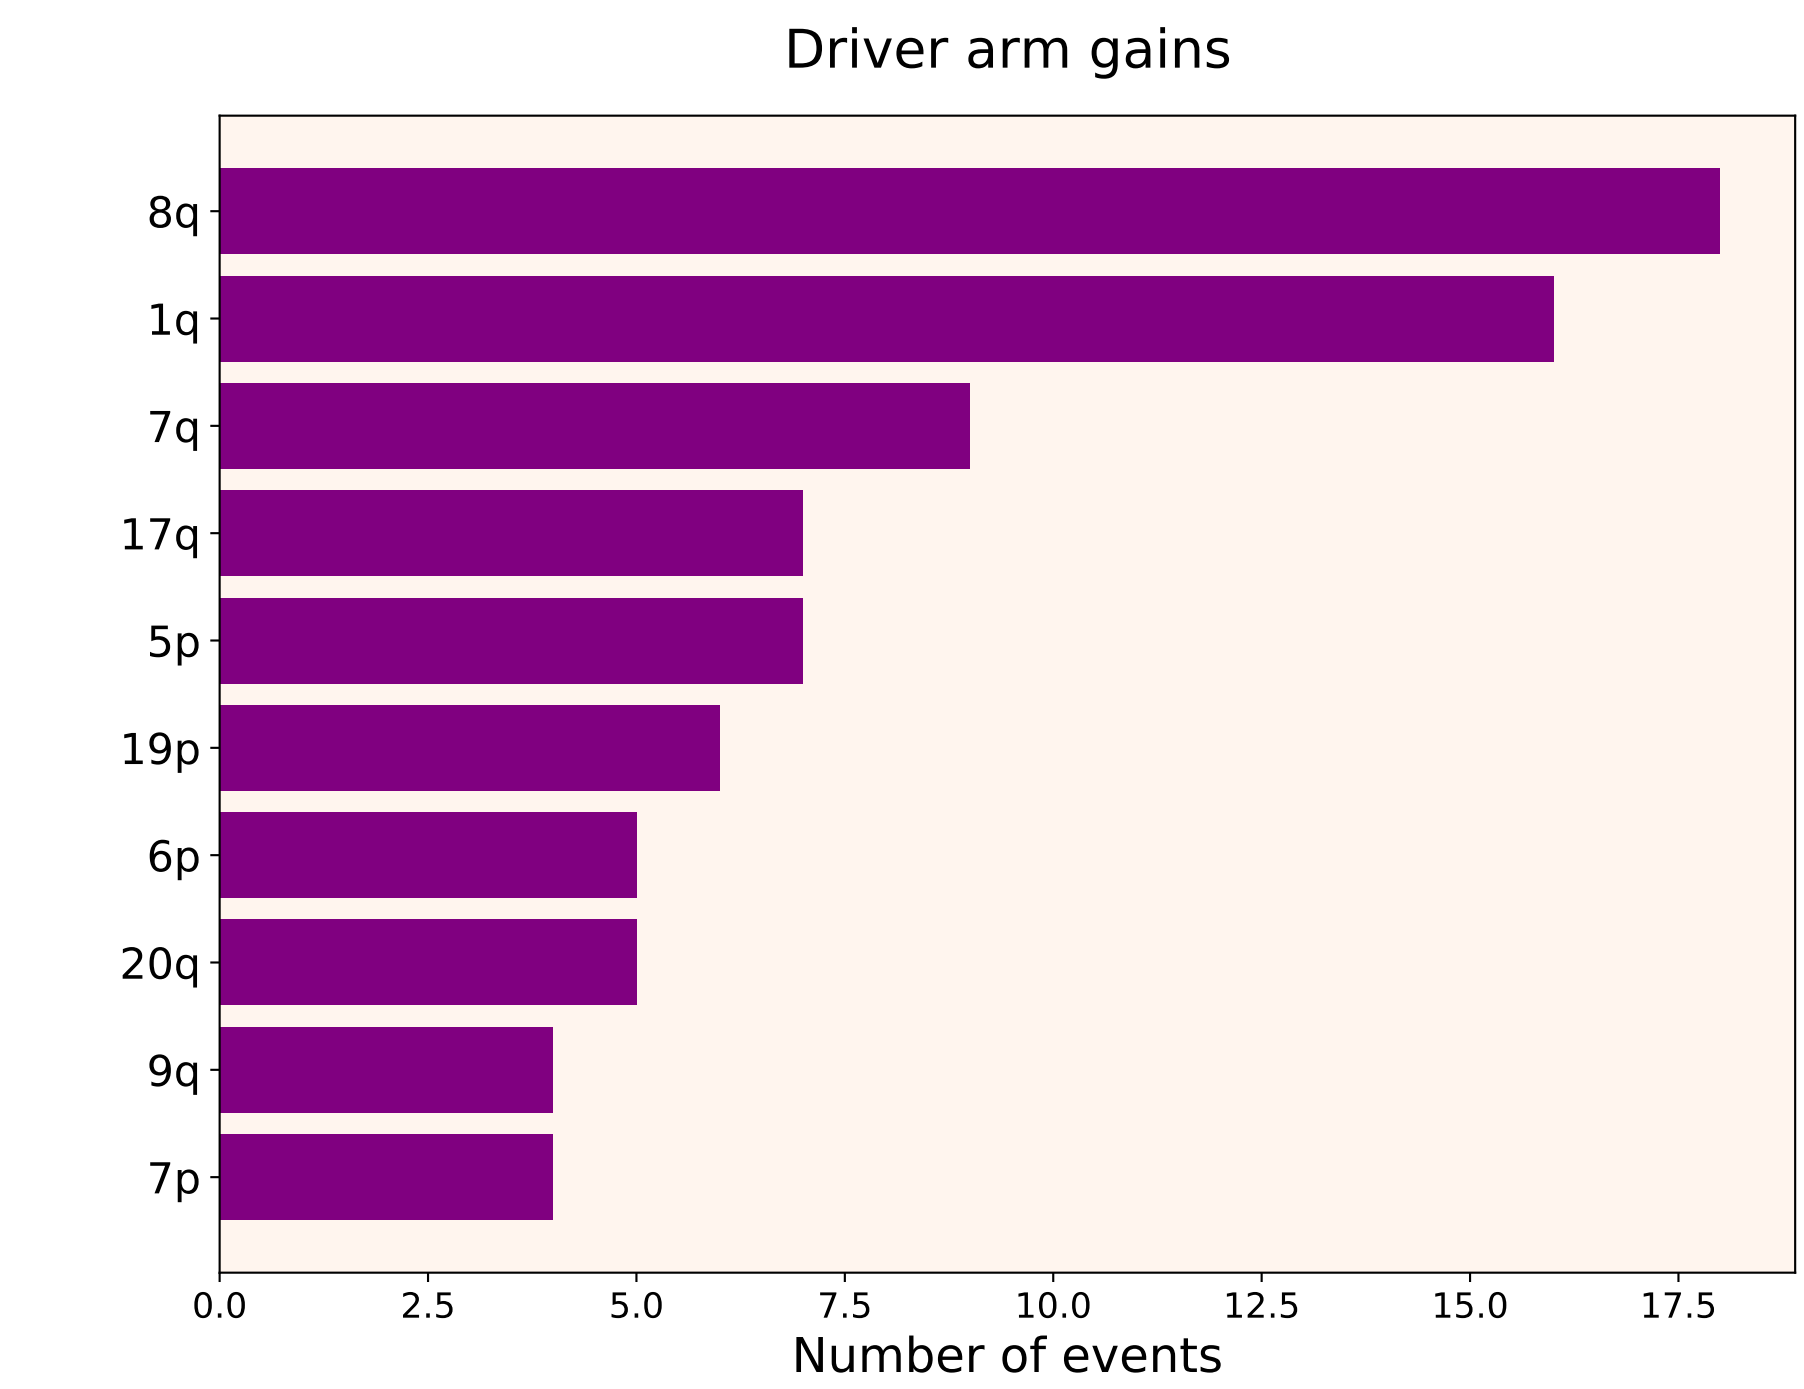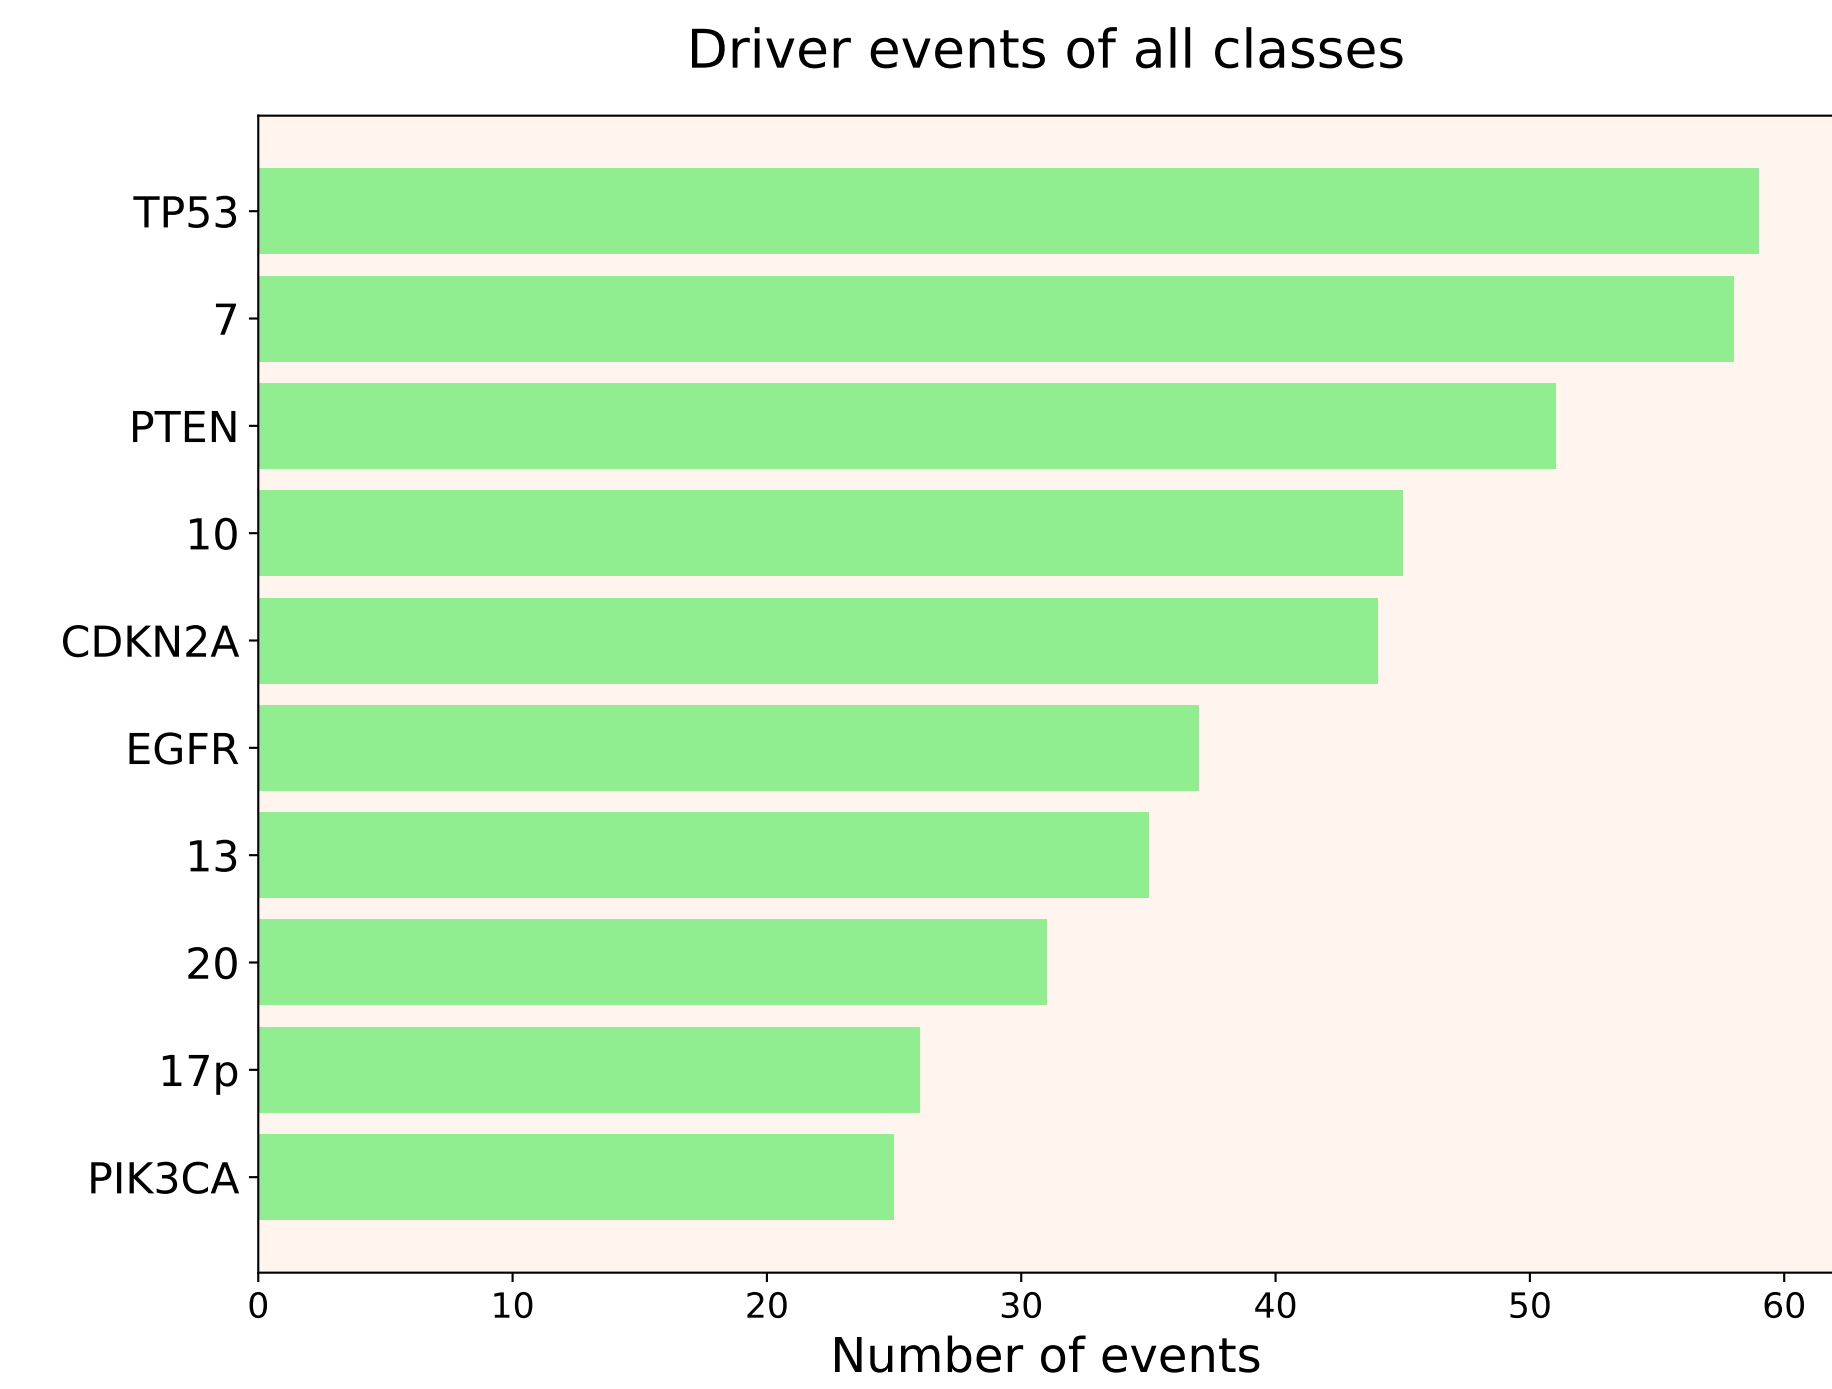

Supplement: Supplemental_Data_S1.zip [file Supplemental_Data_S1.zip]

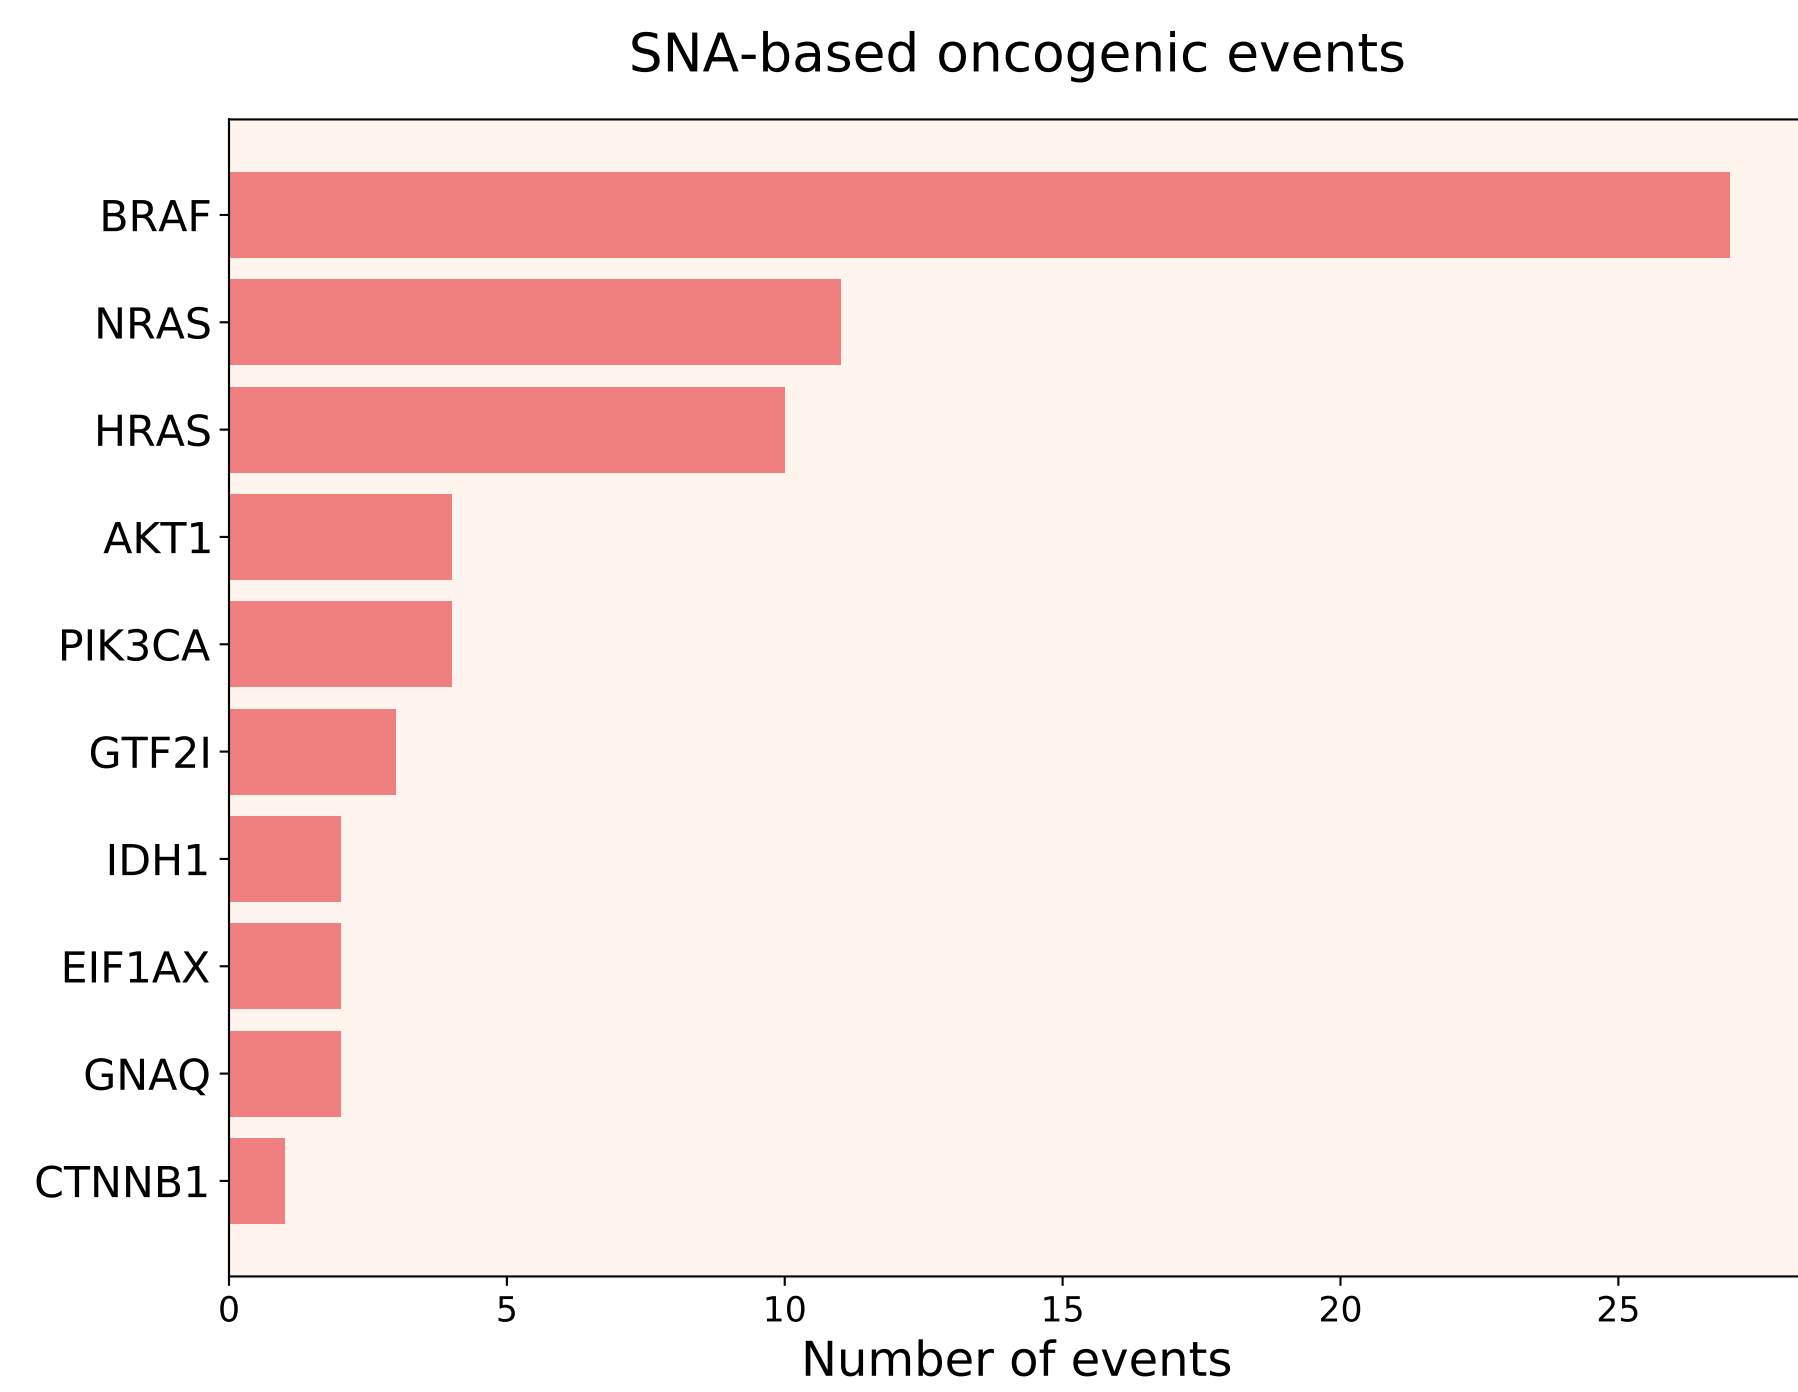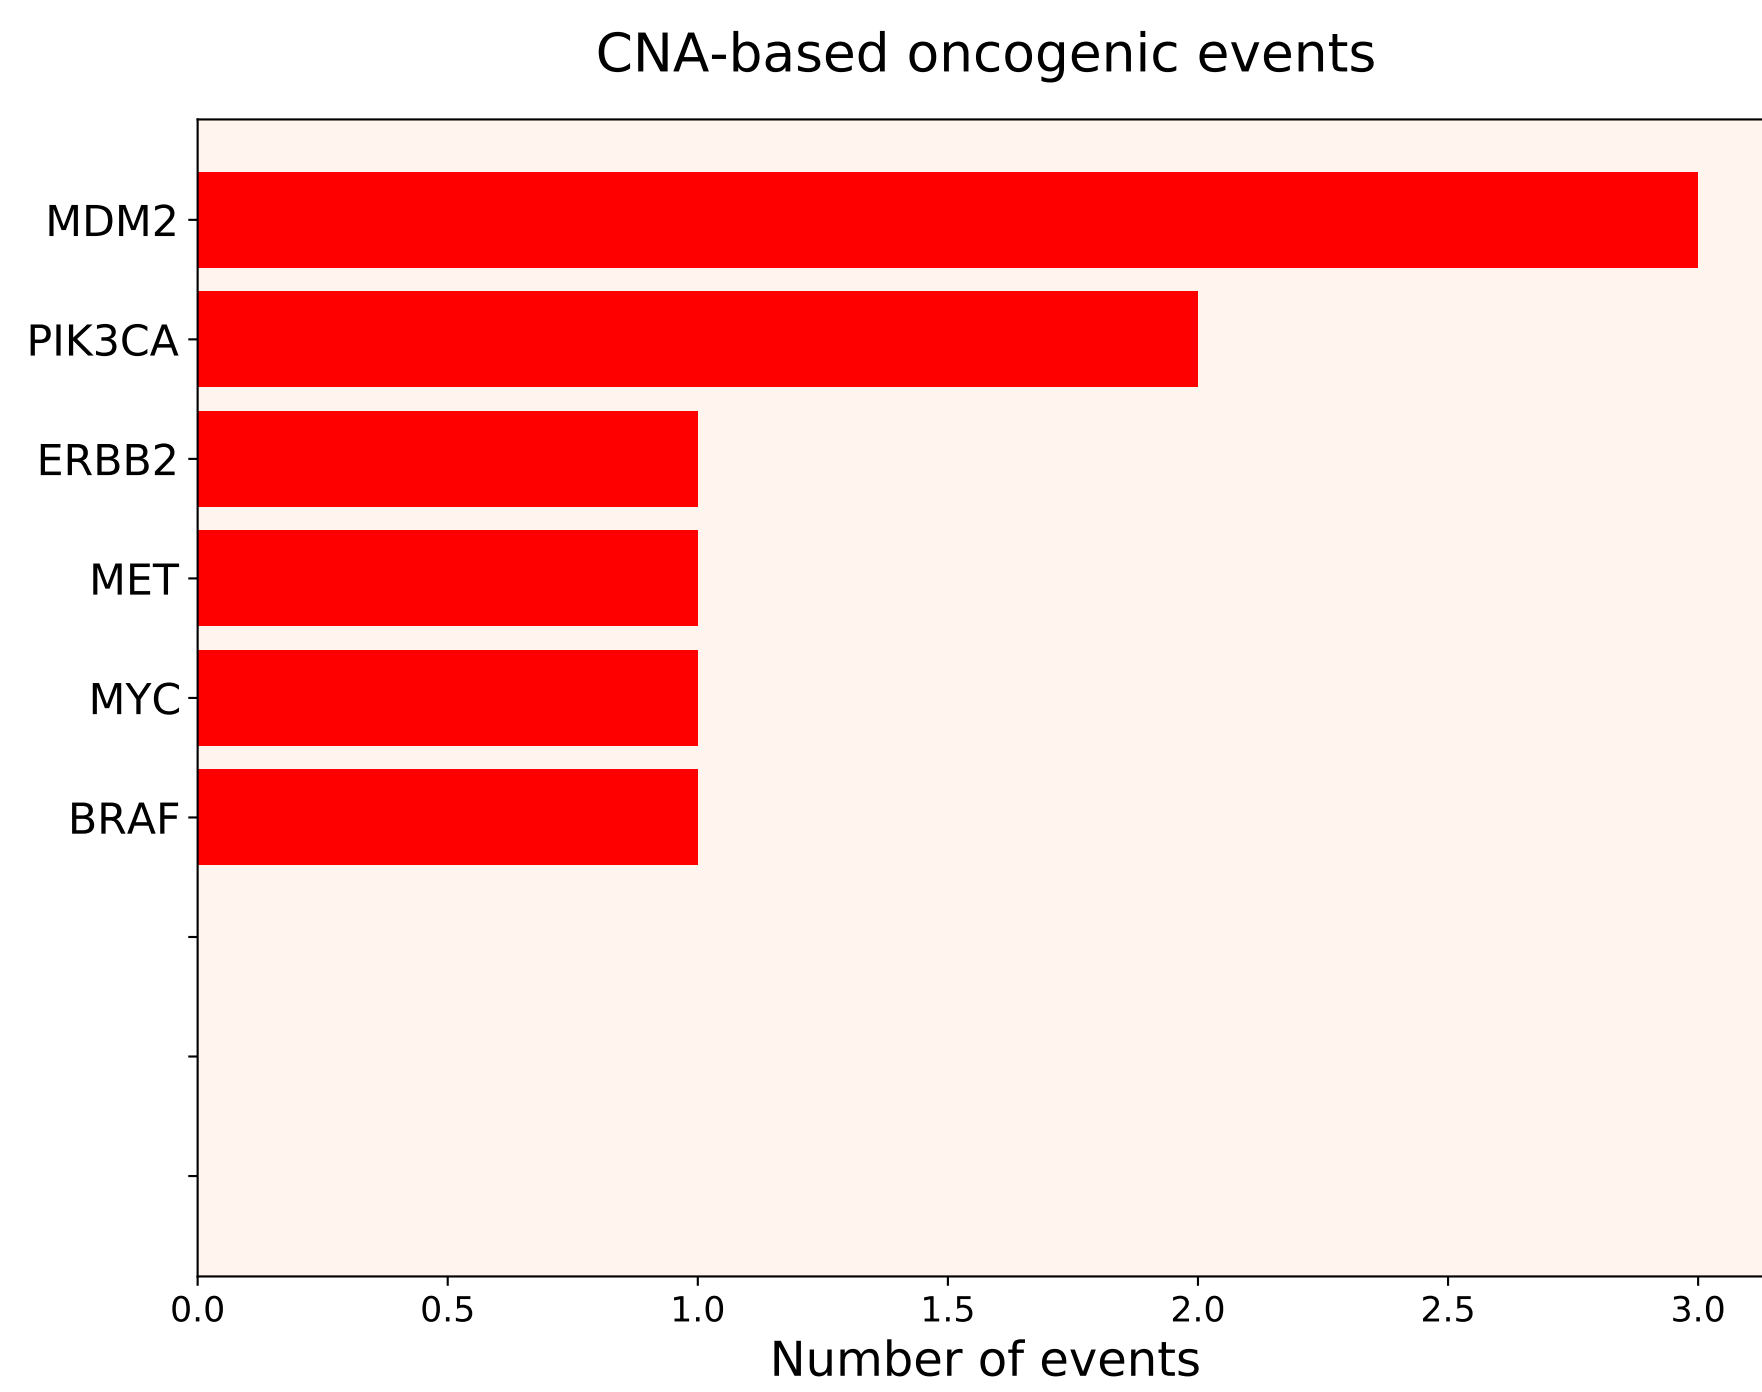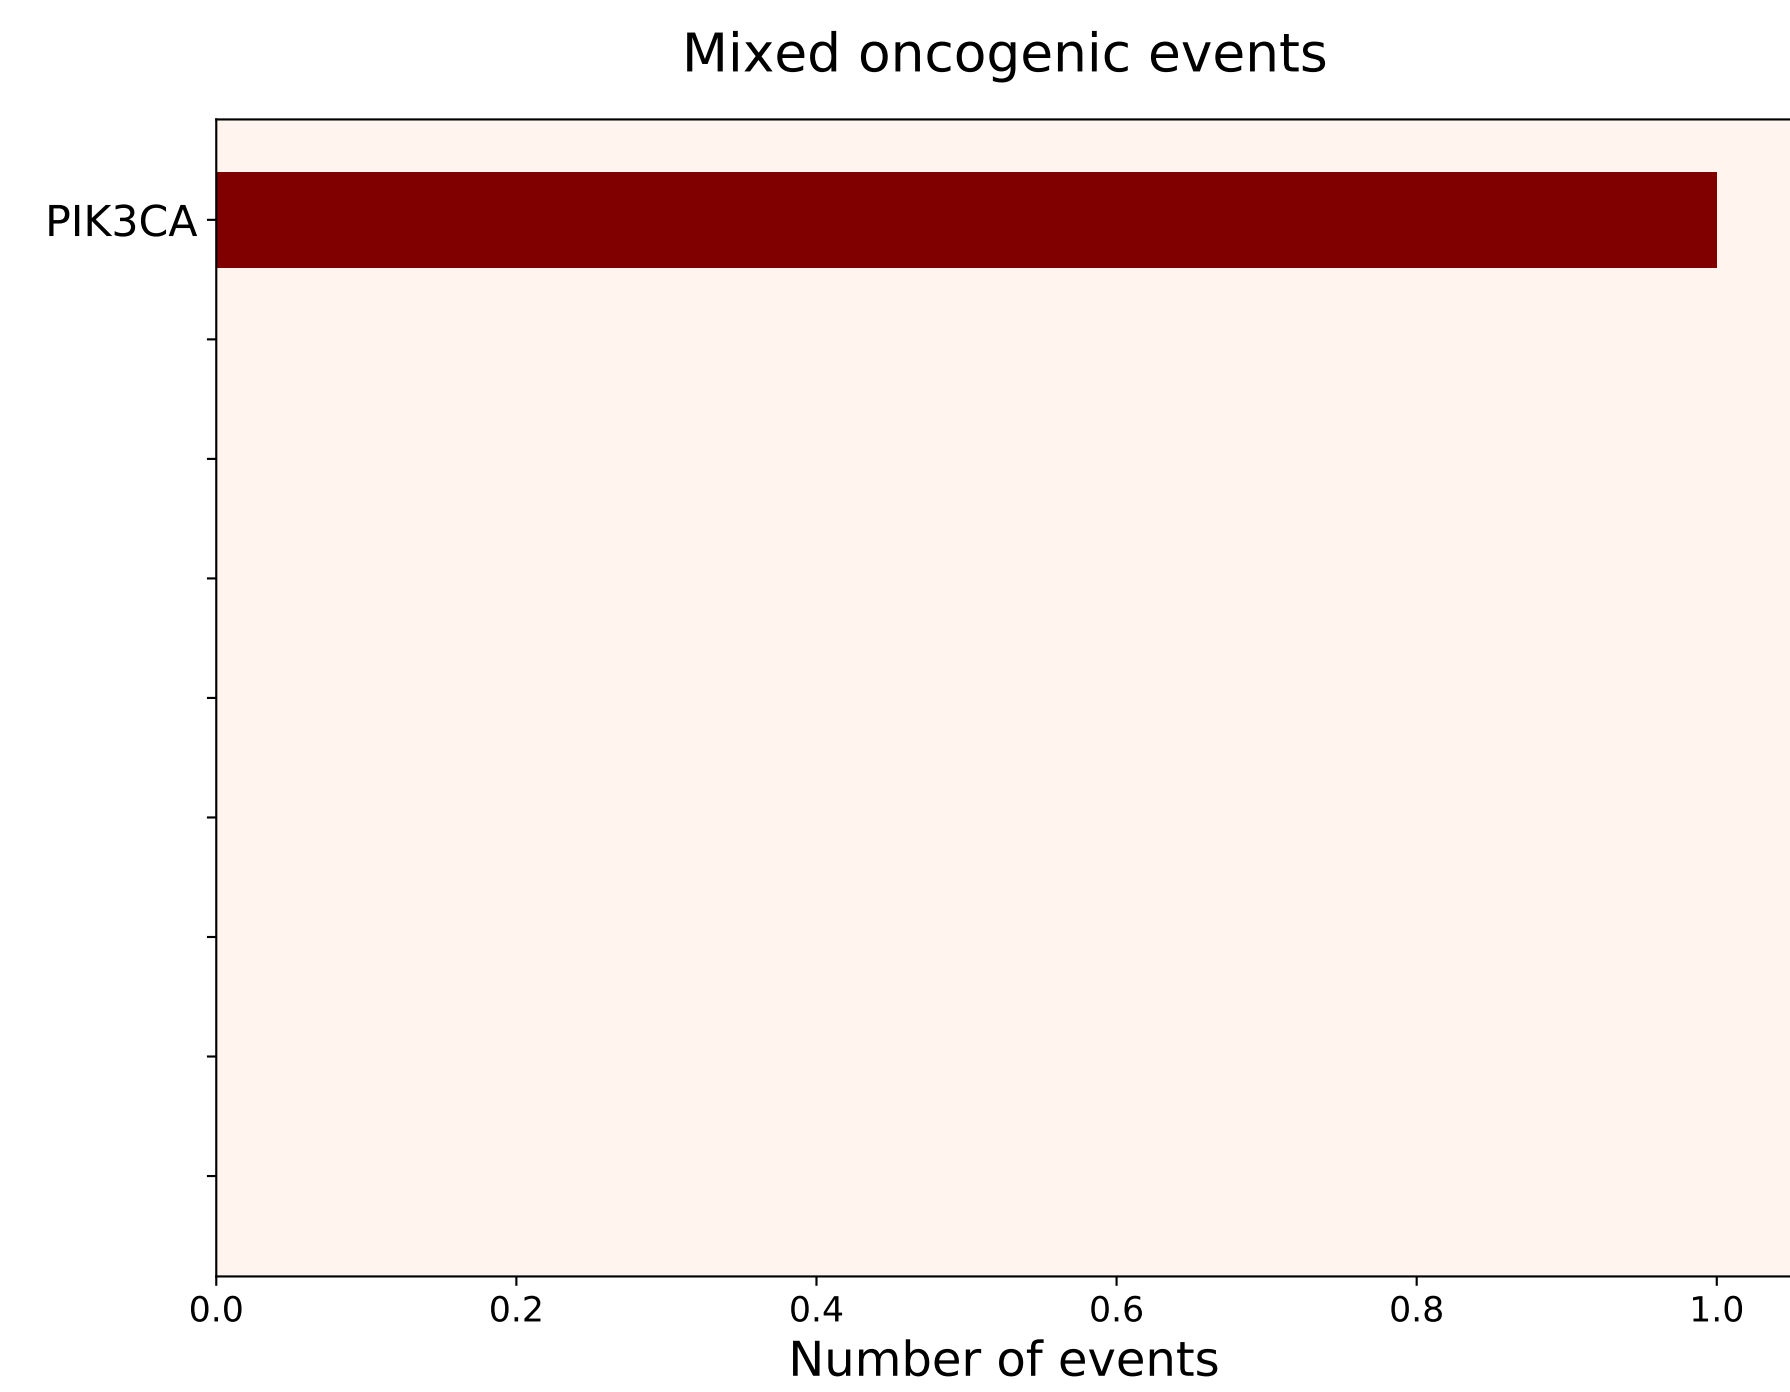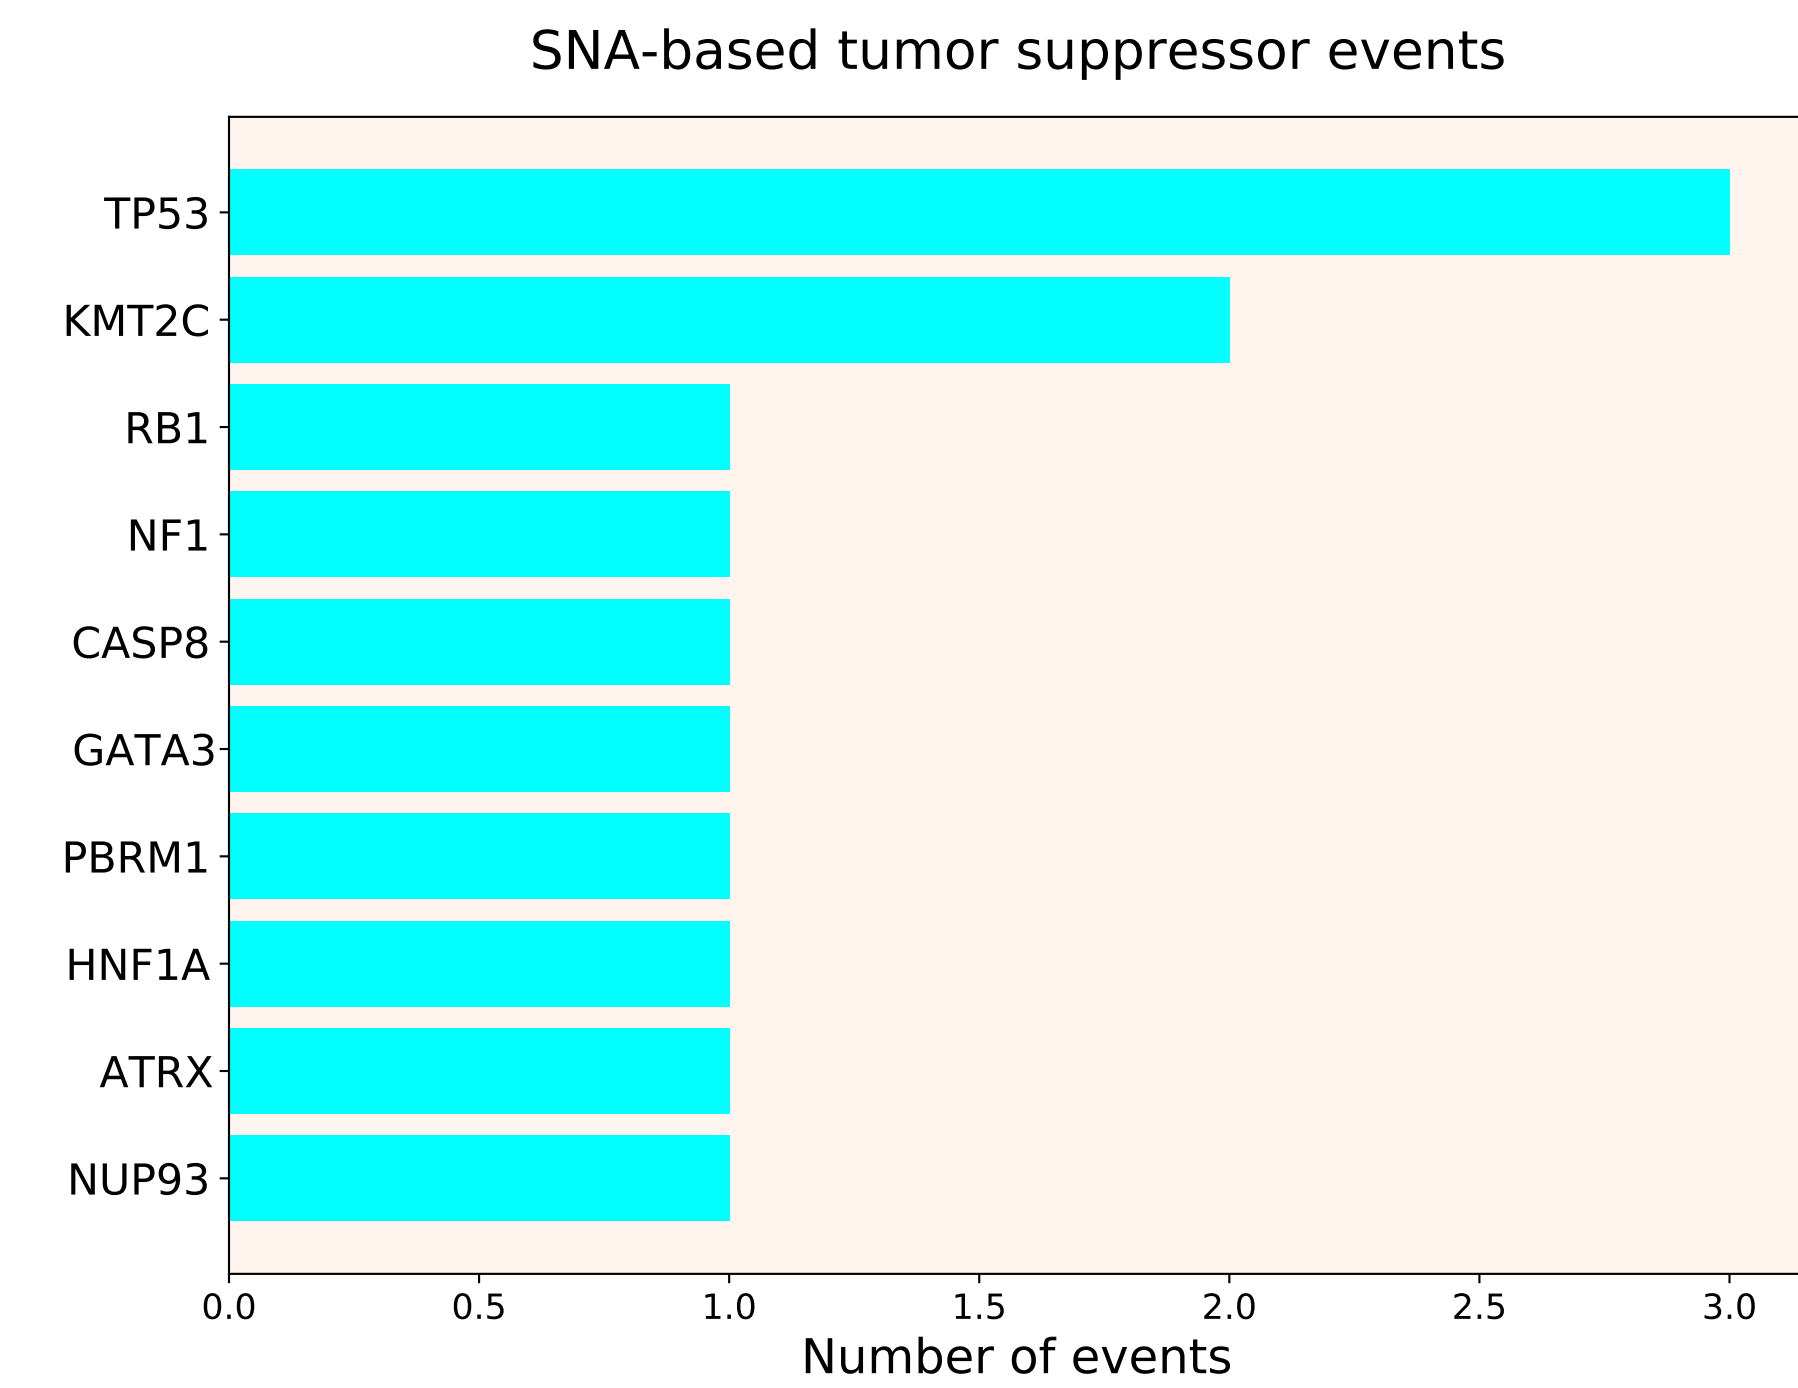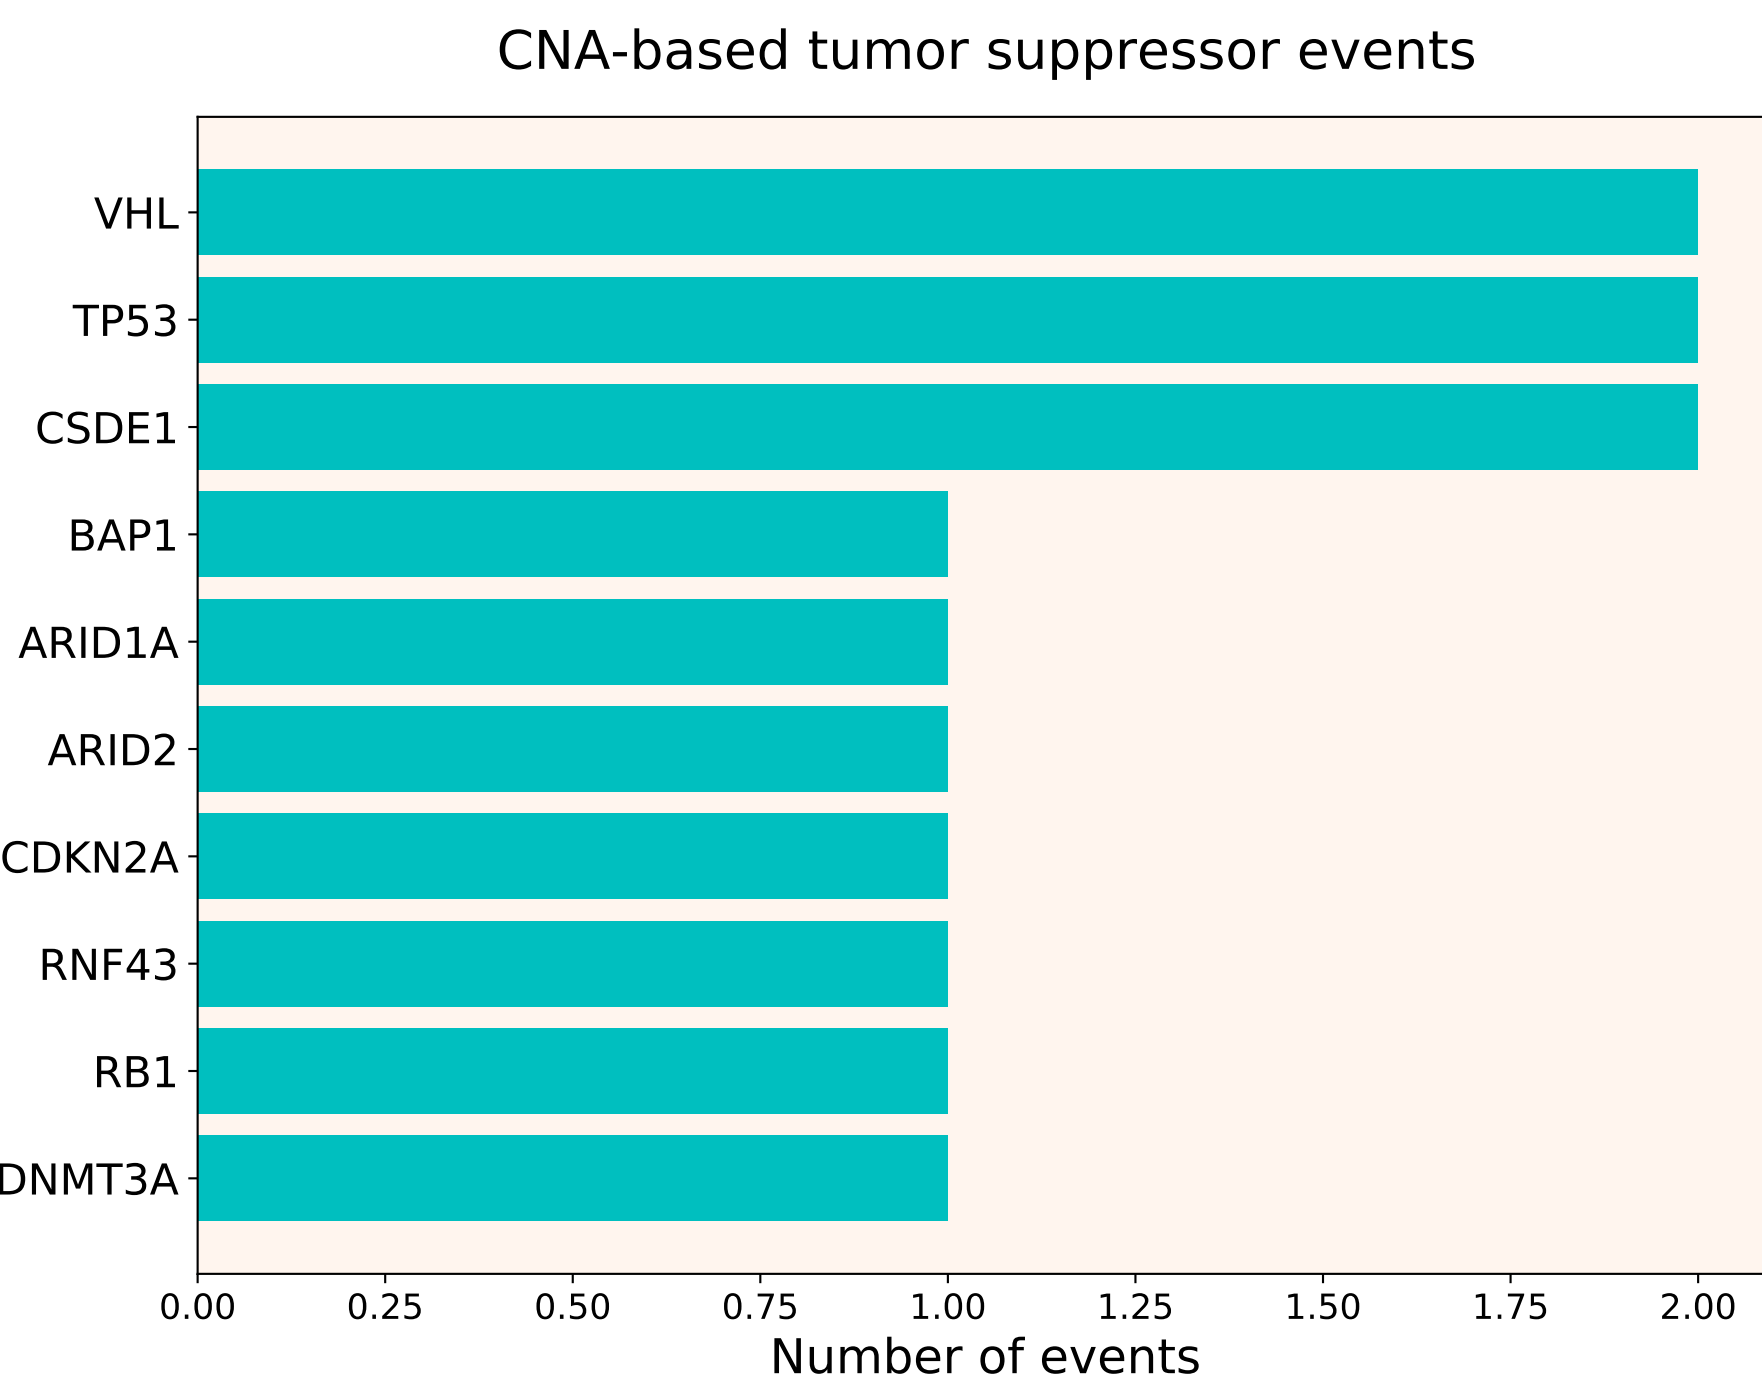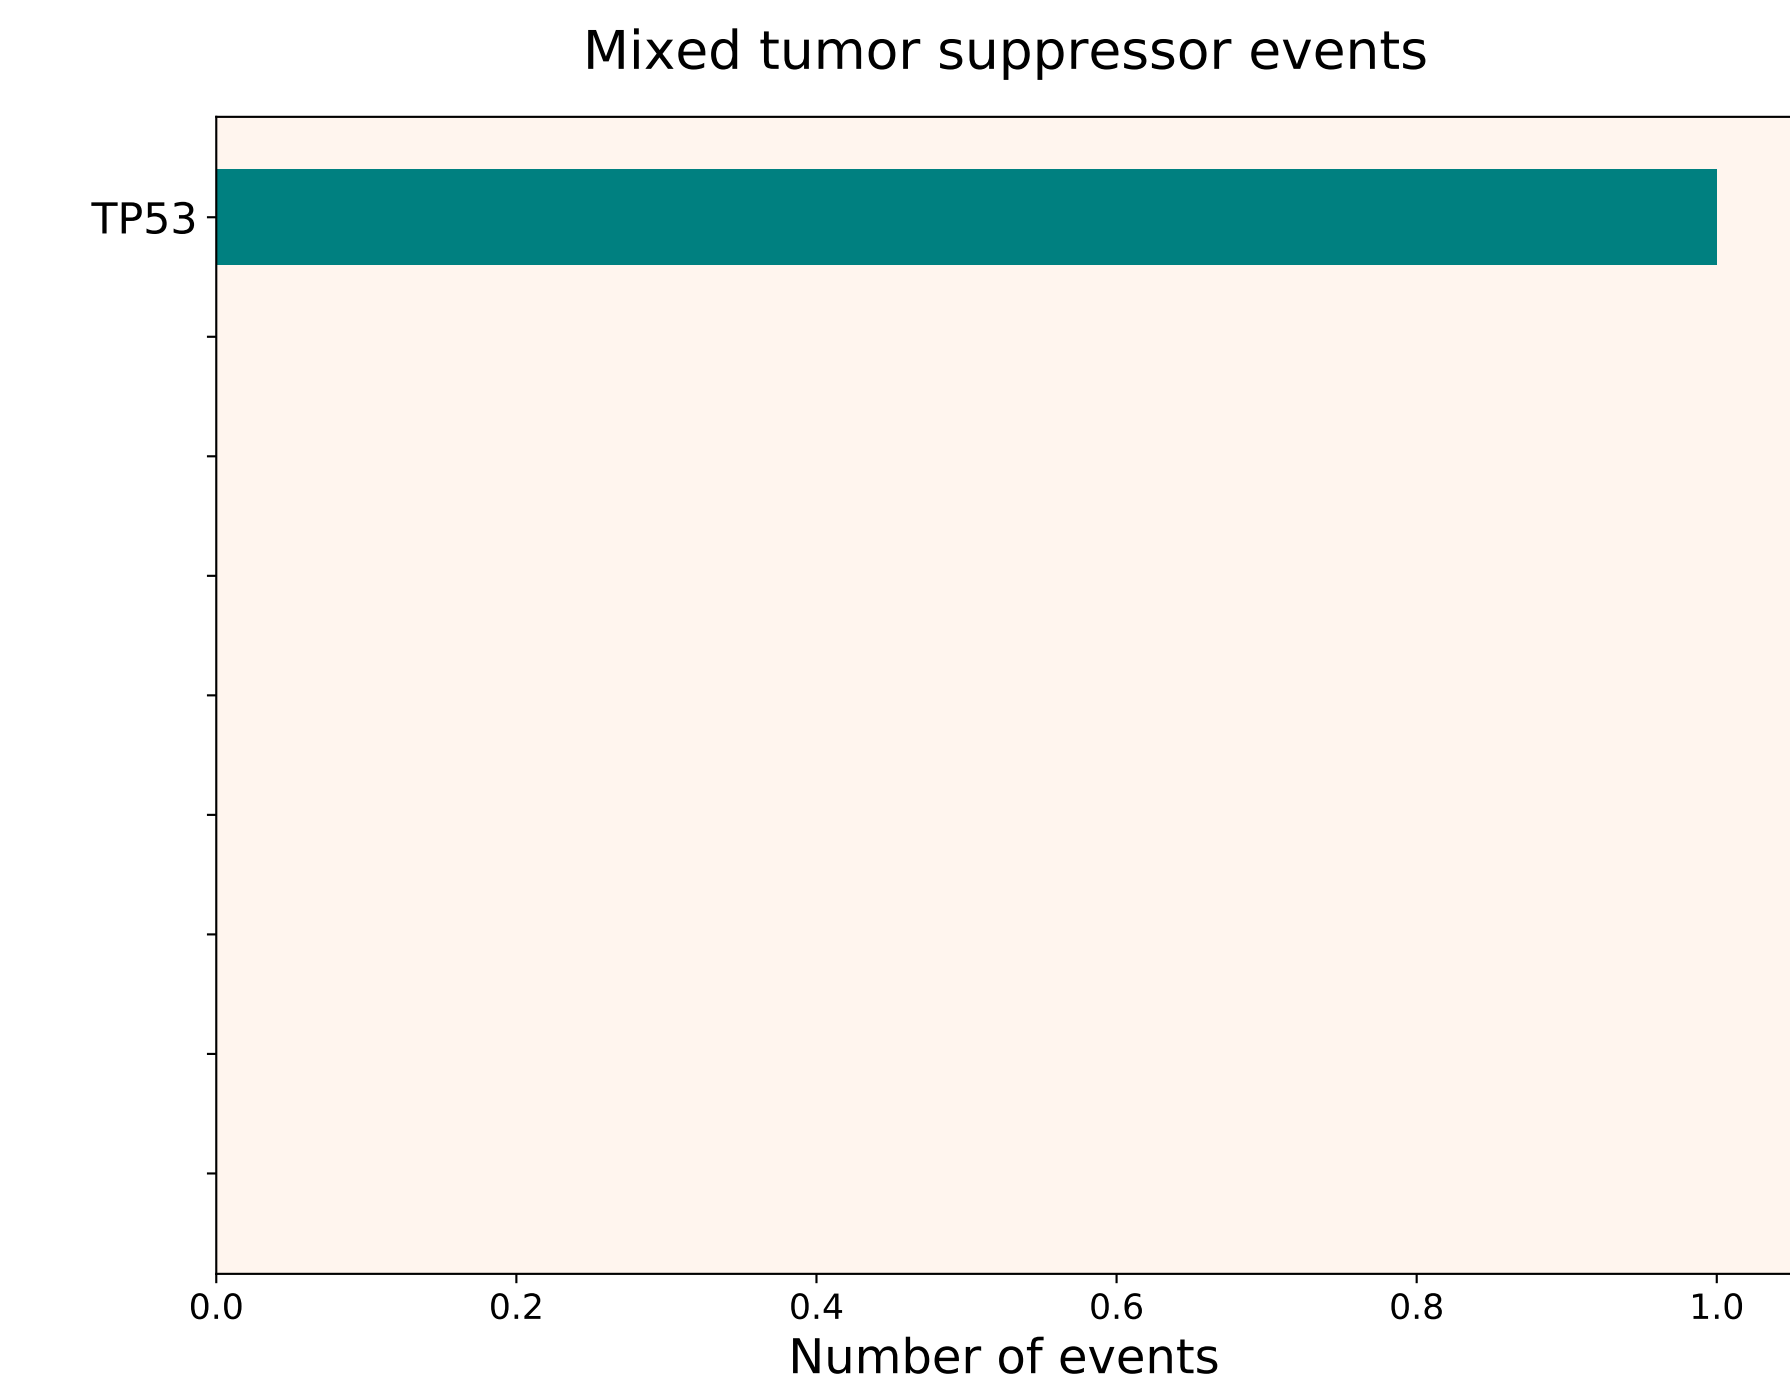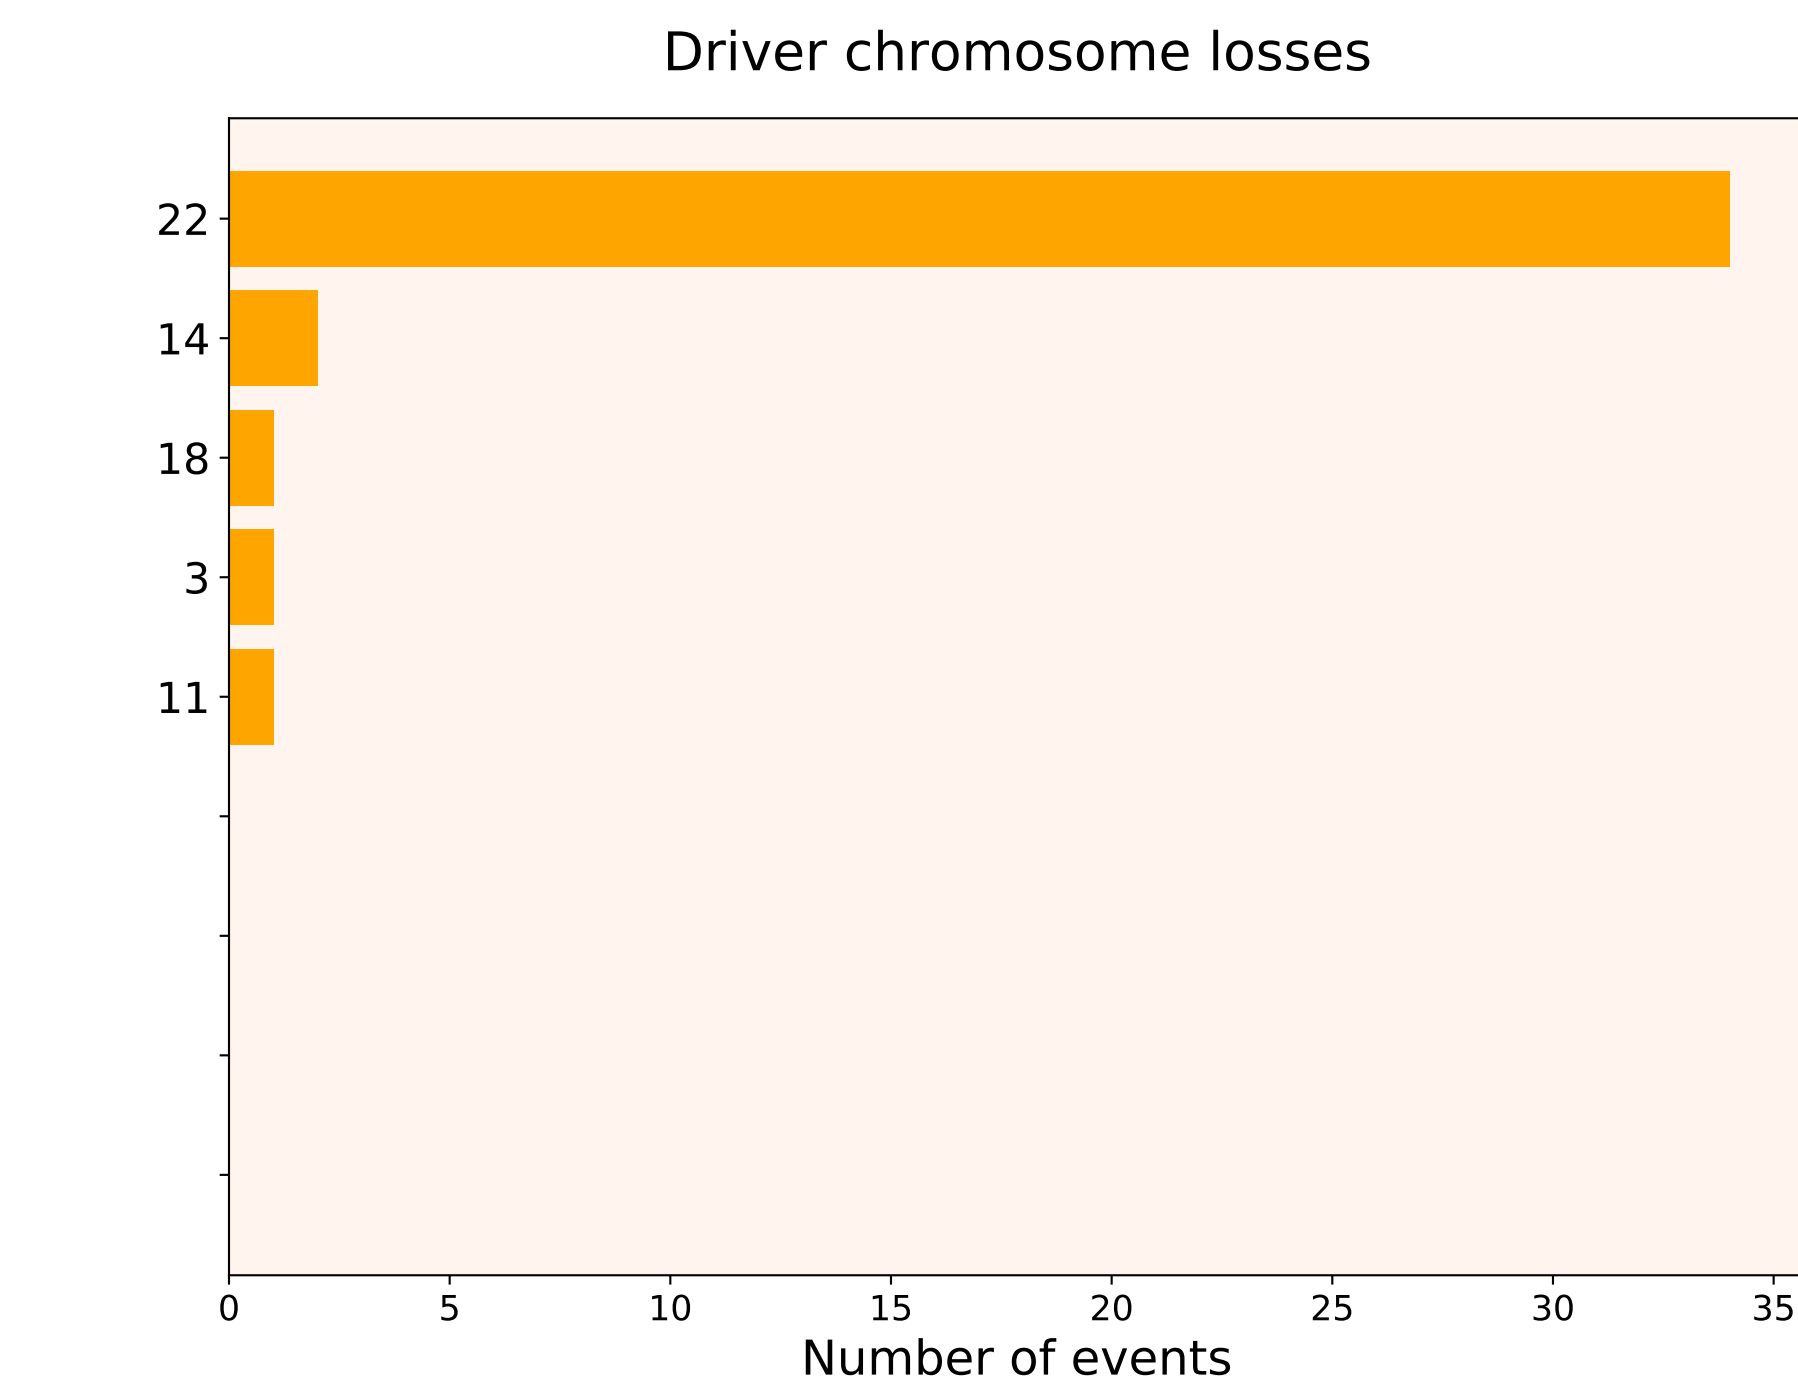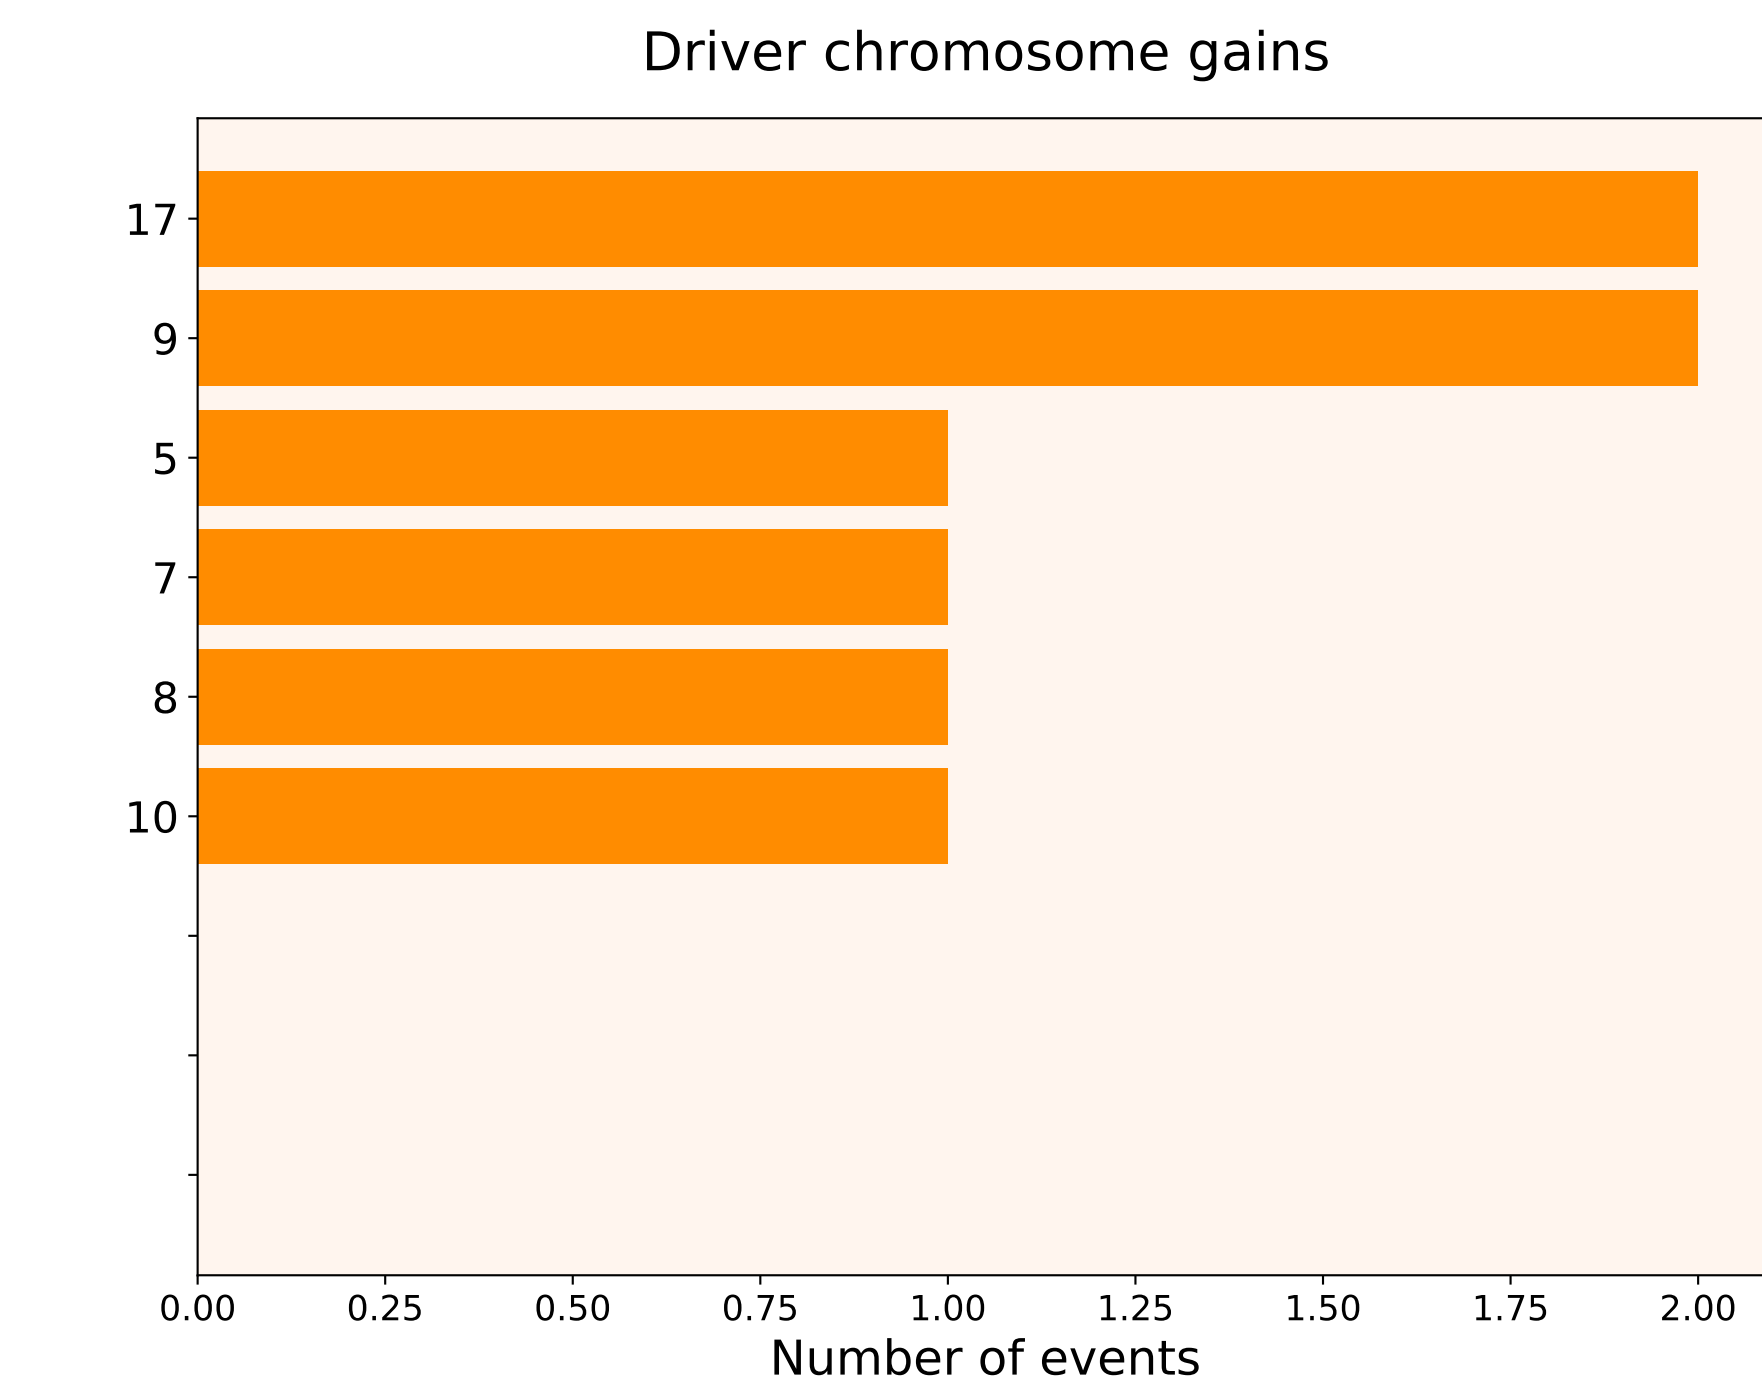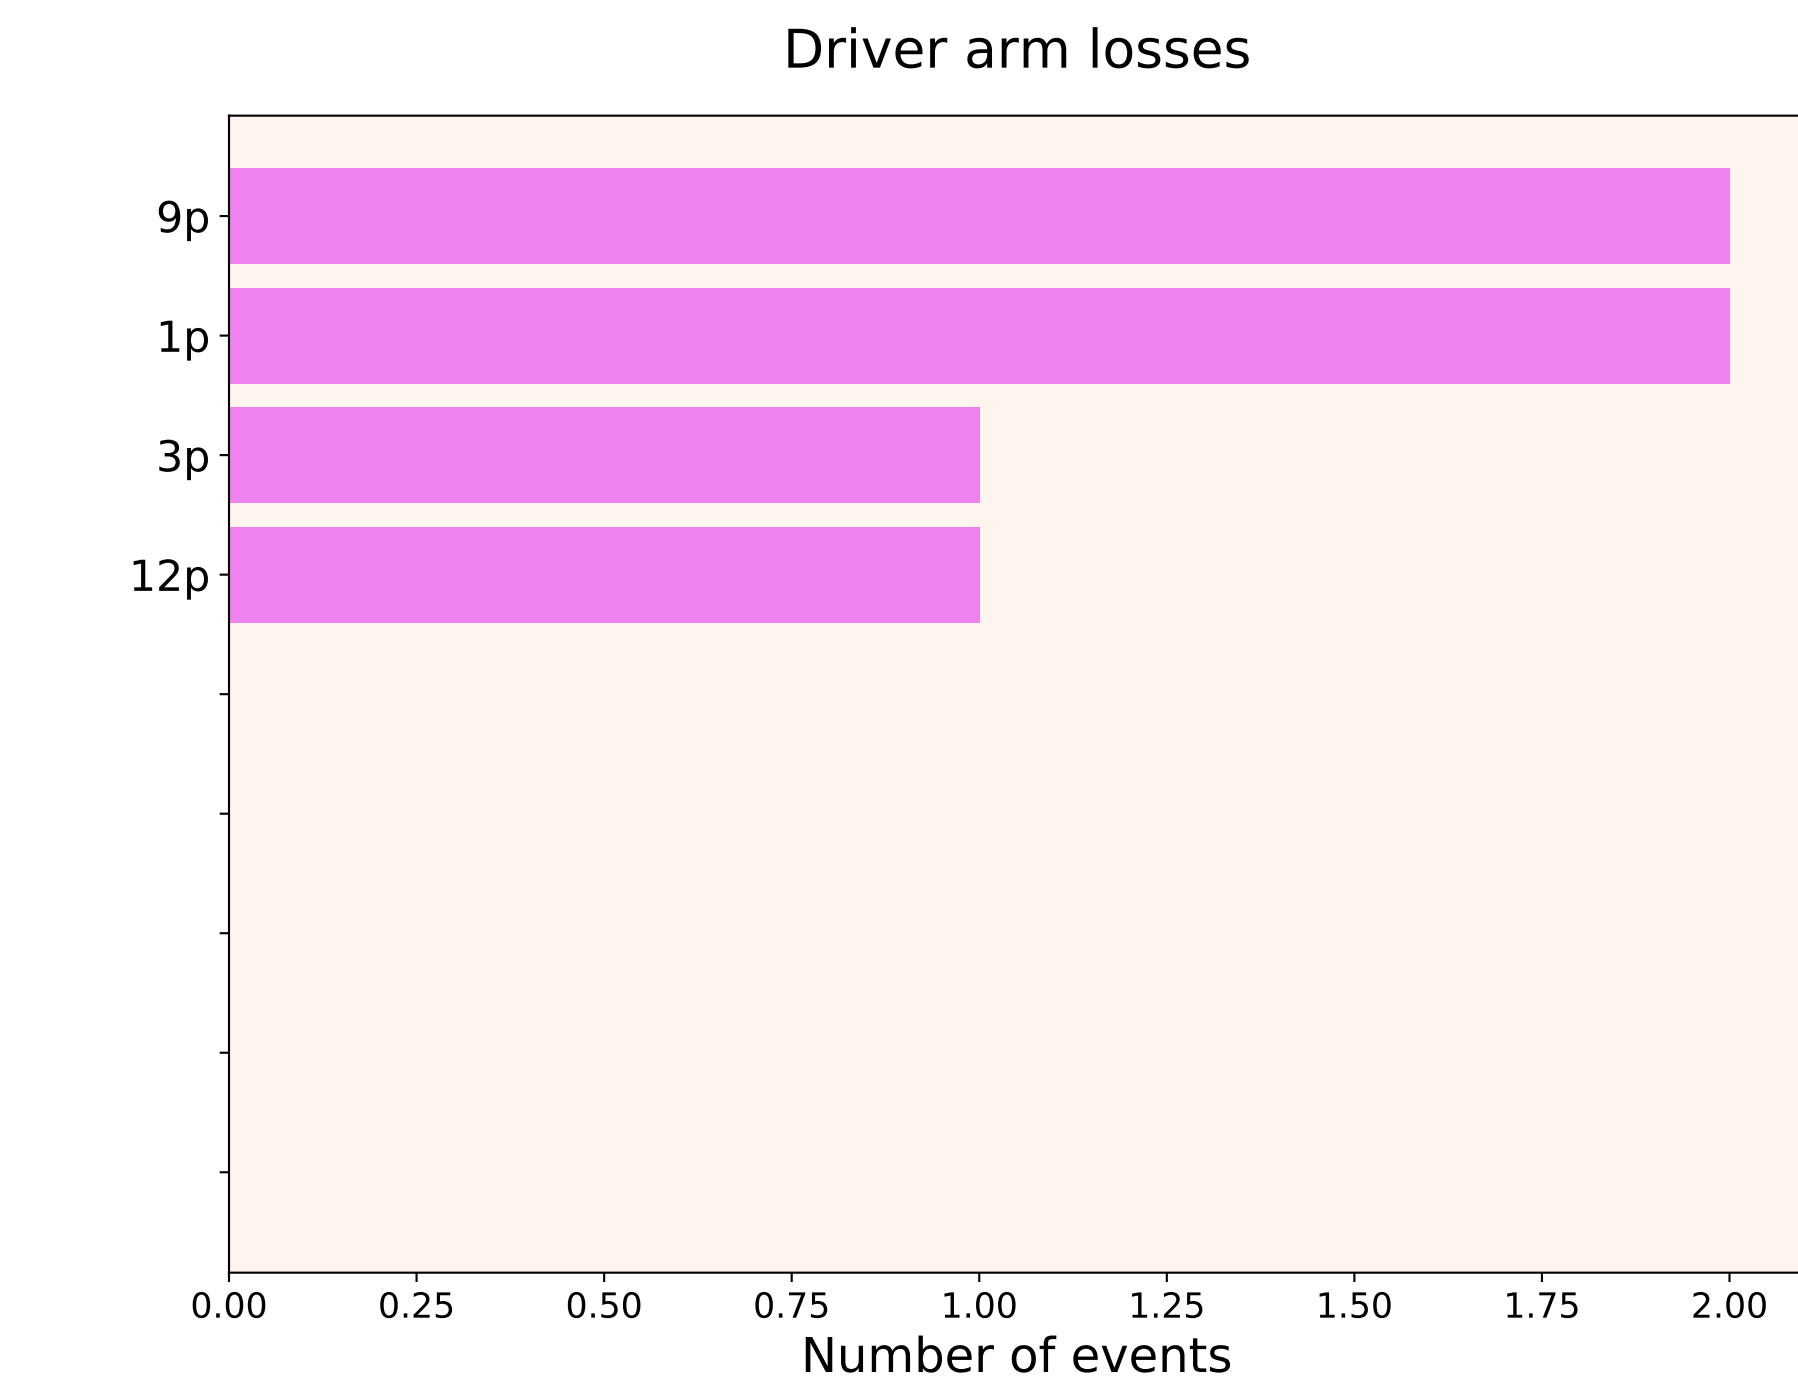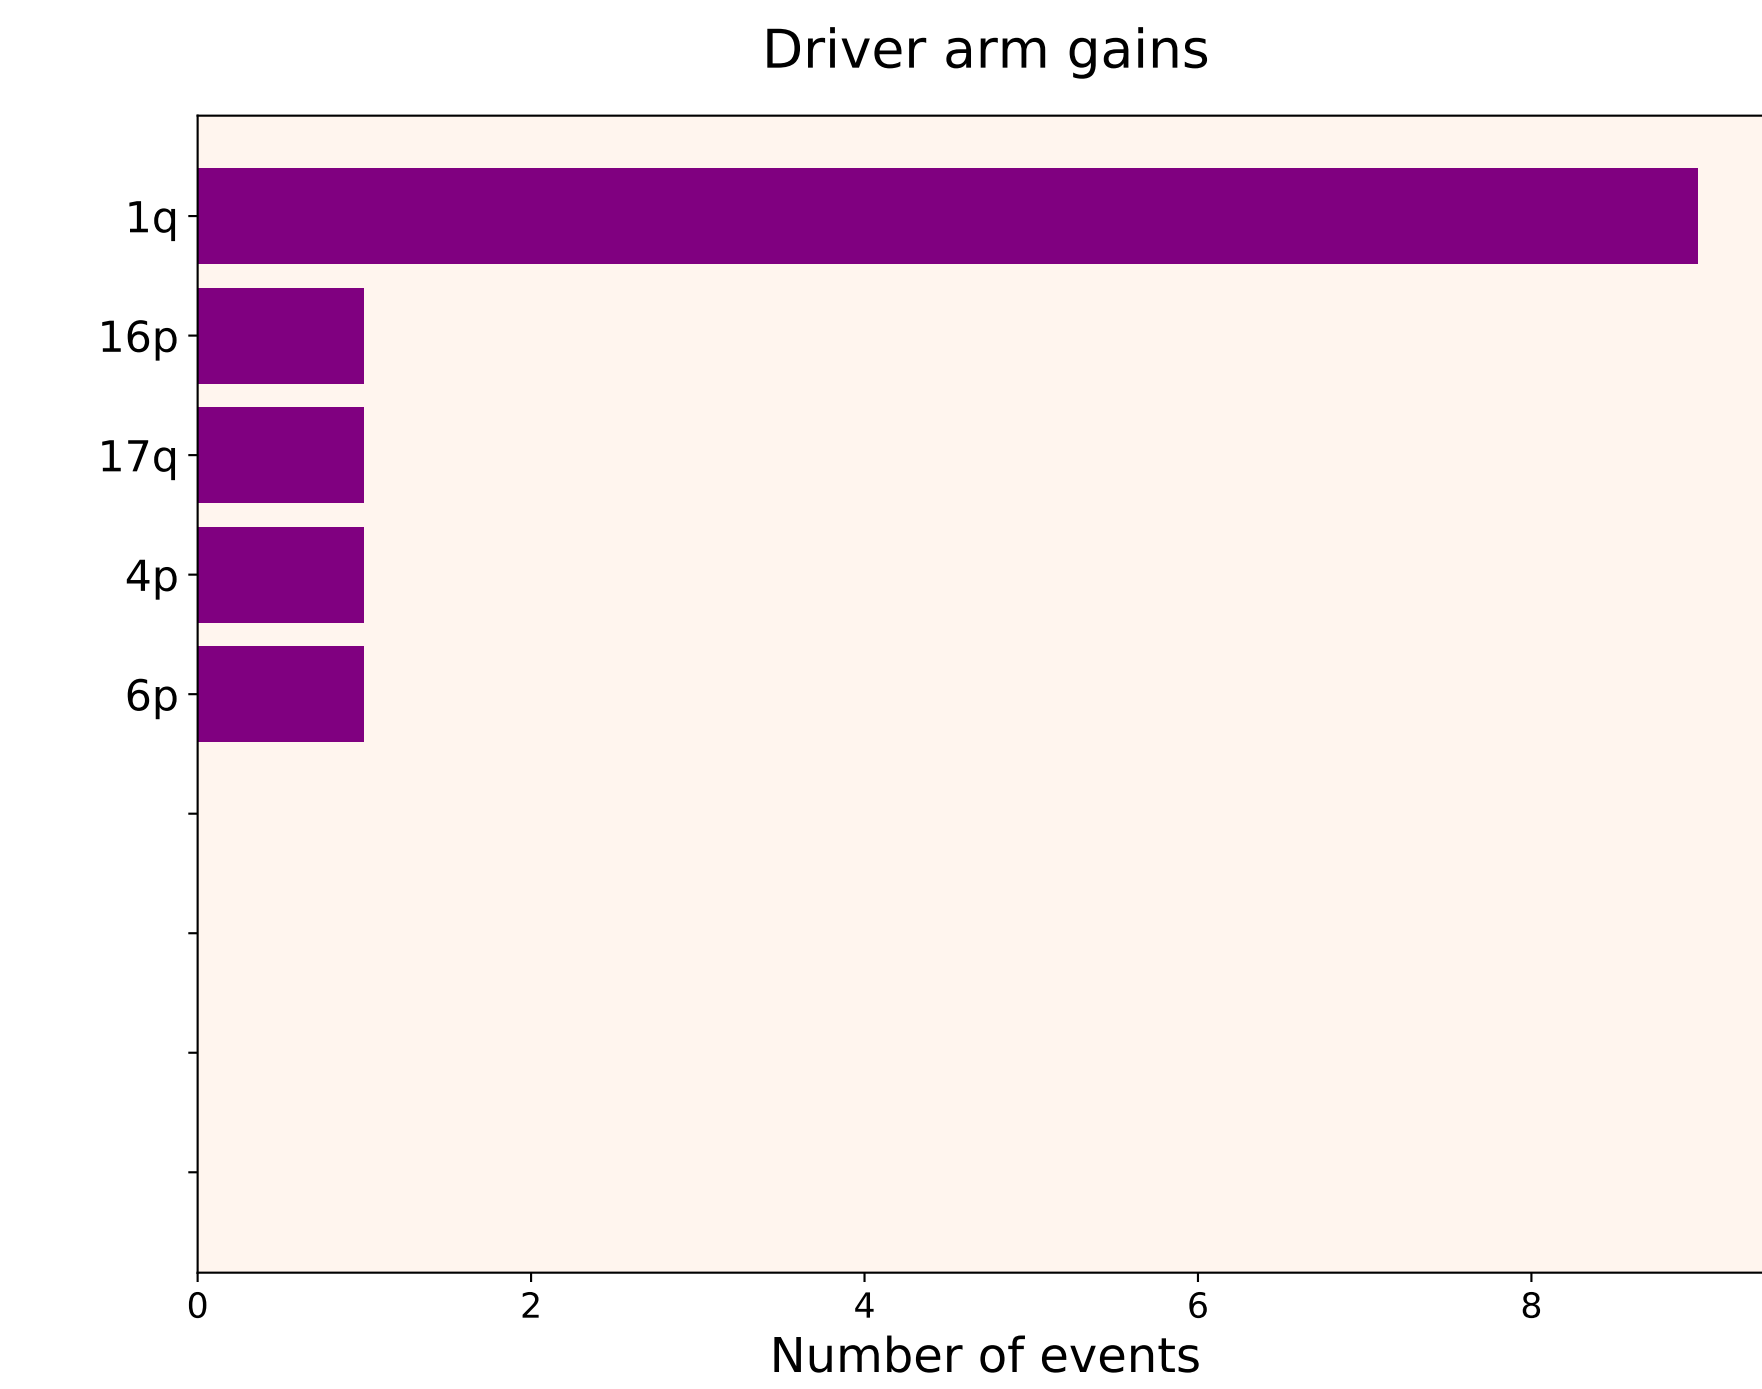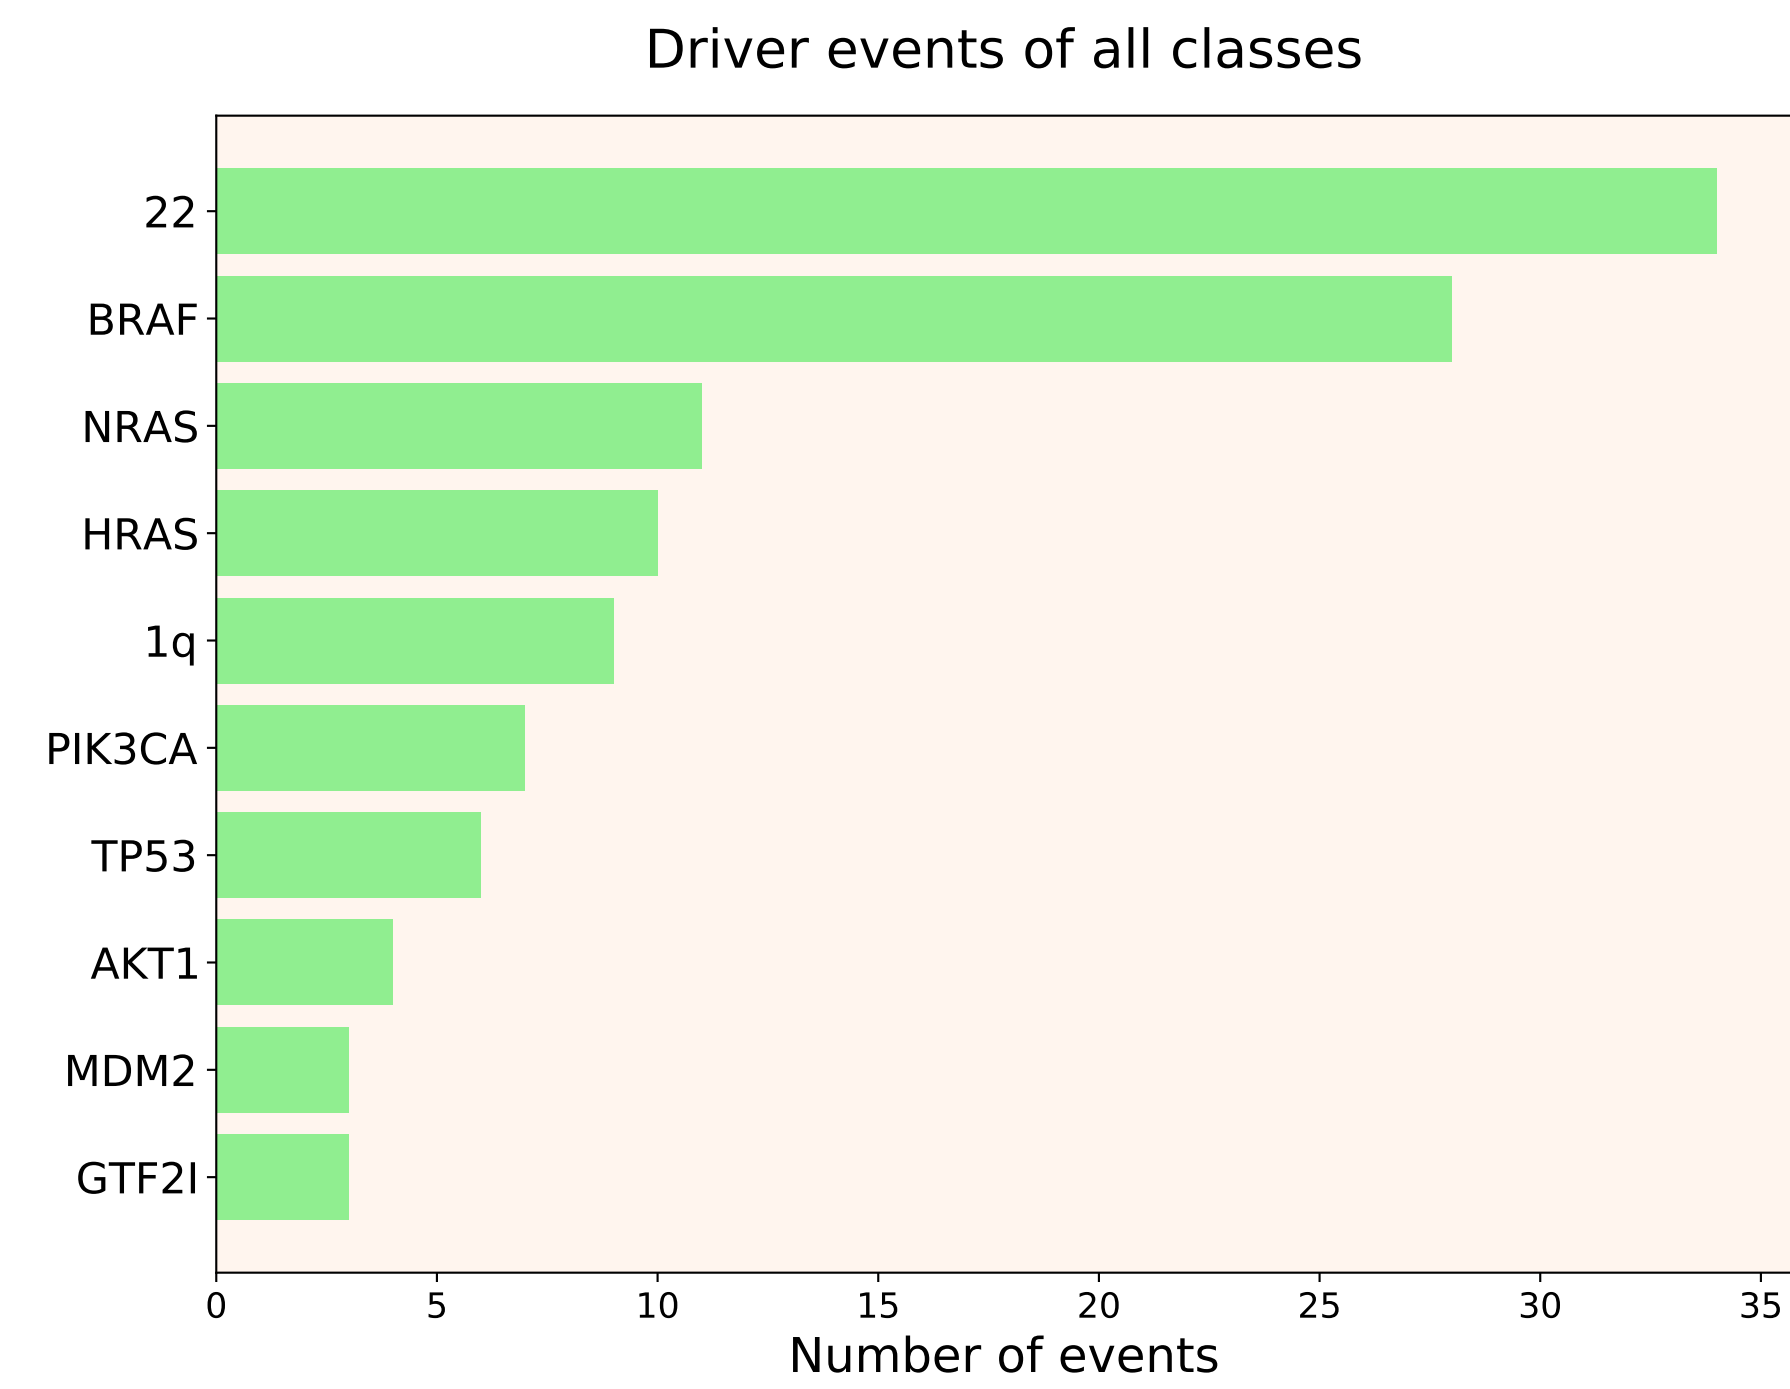

Supplement: Supplemental_Data_S1.zip [file Supplemental_Data_S1.zip]

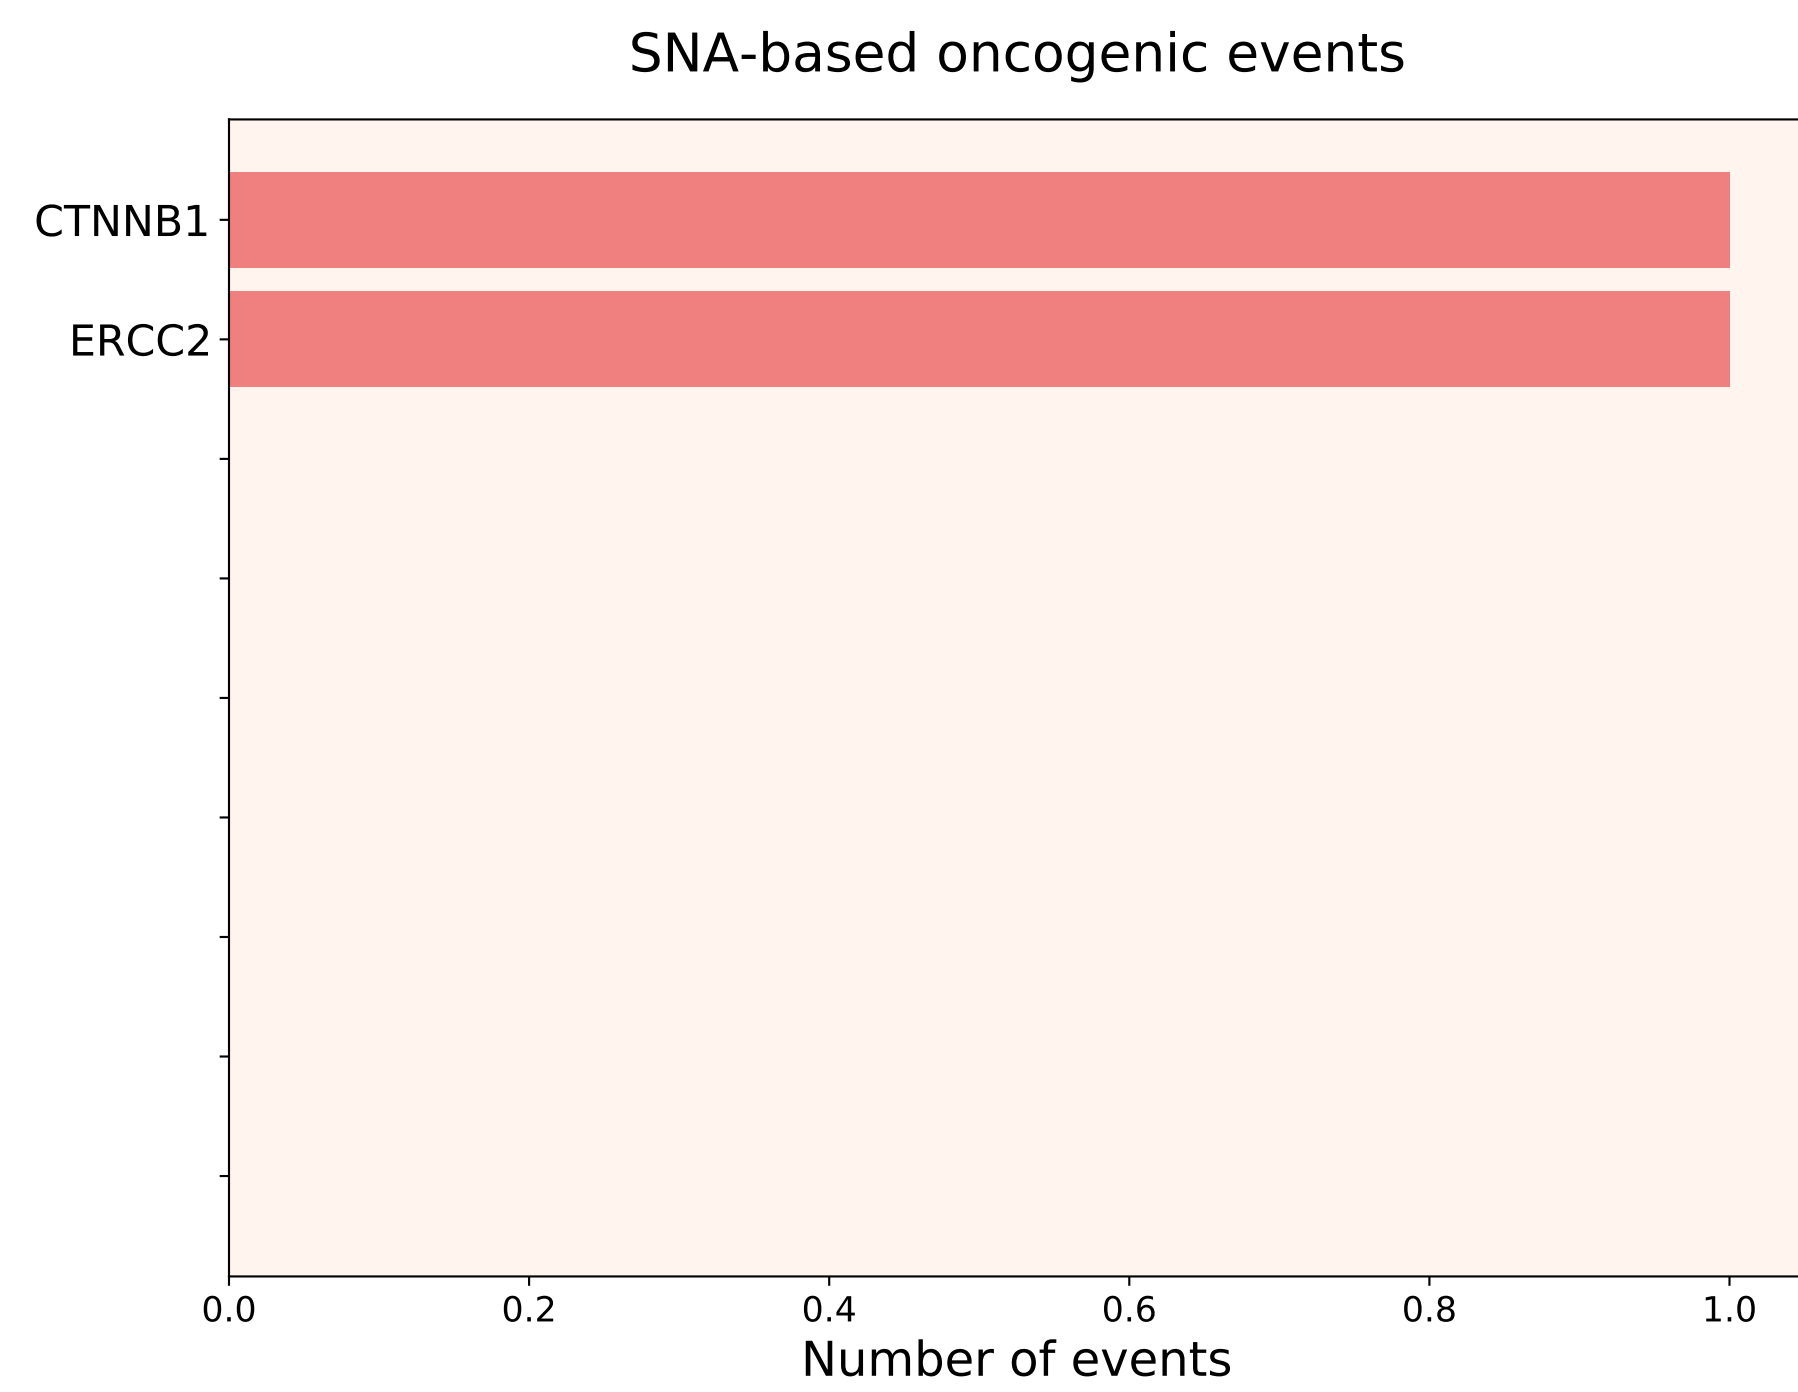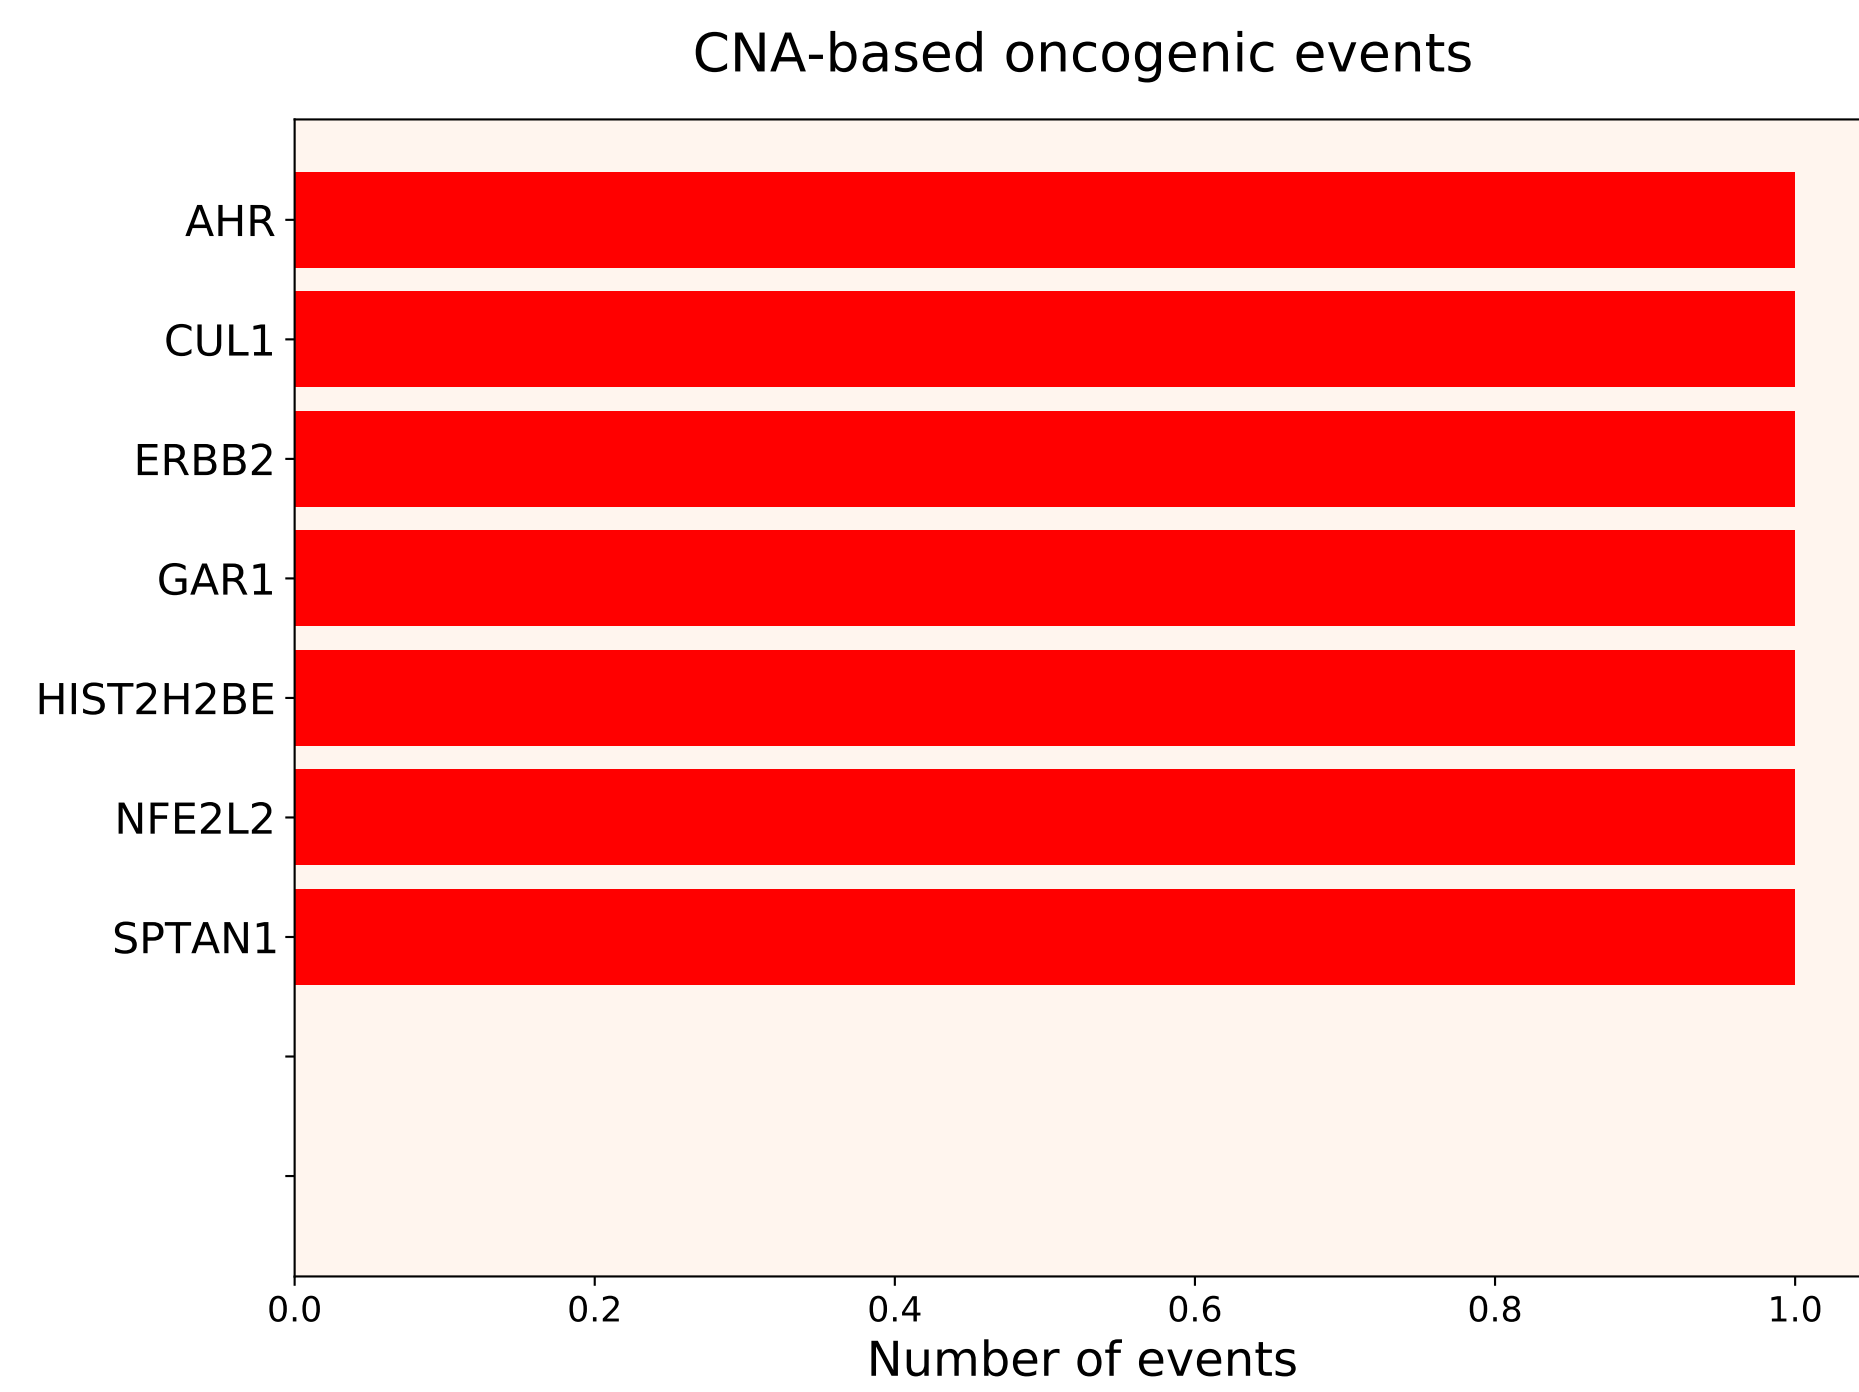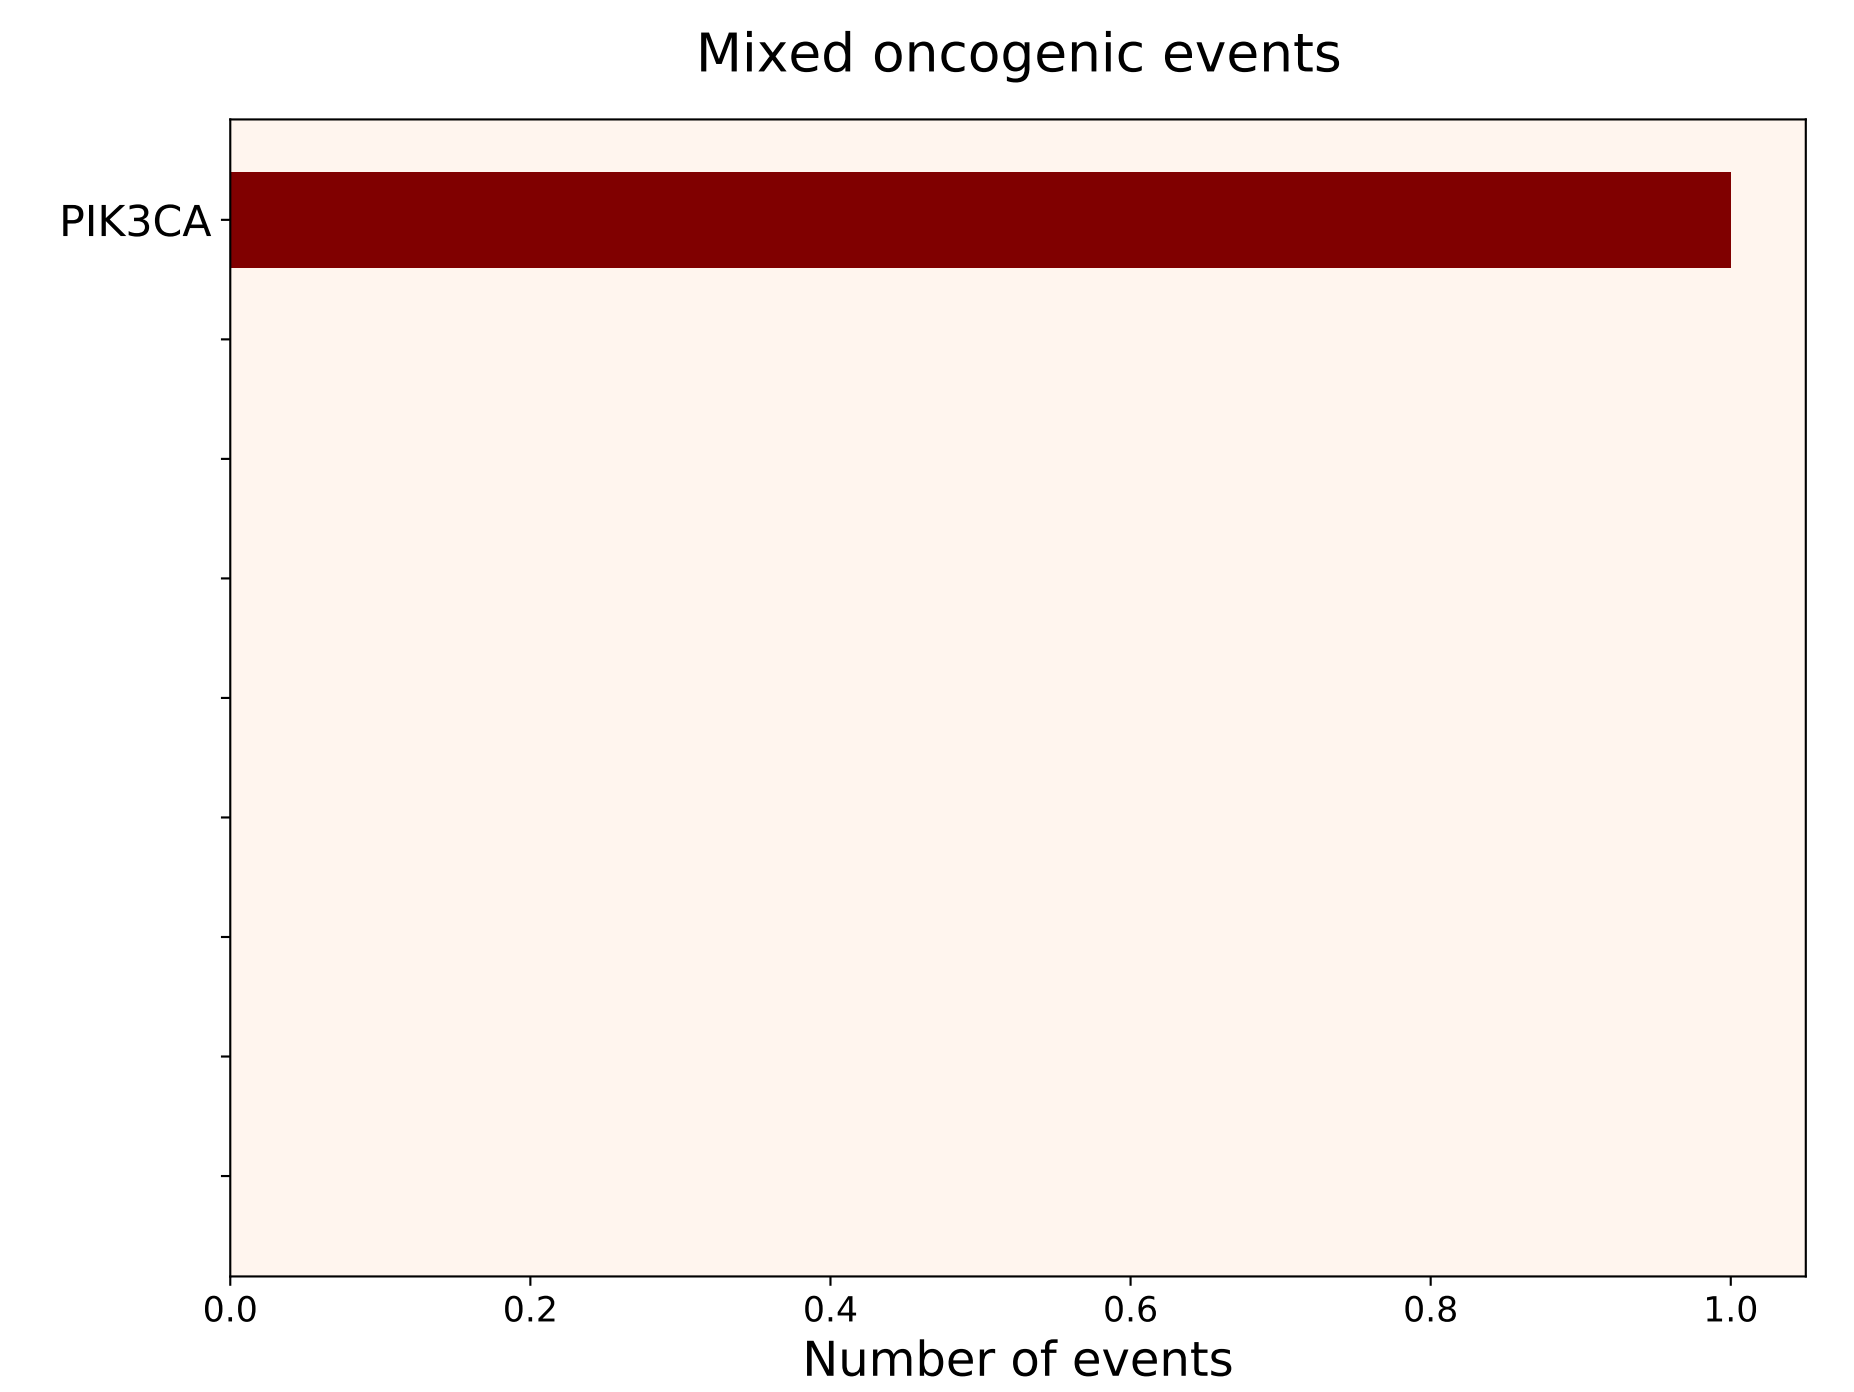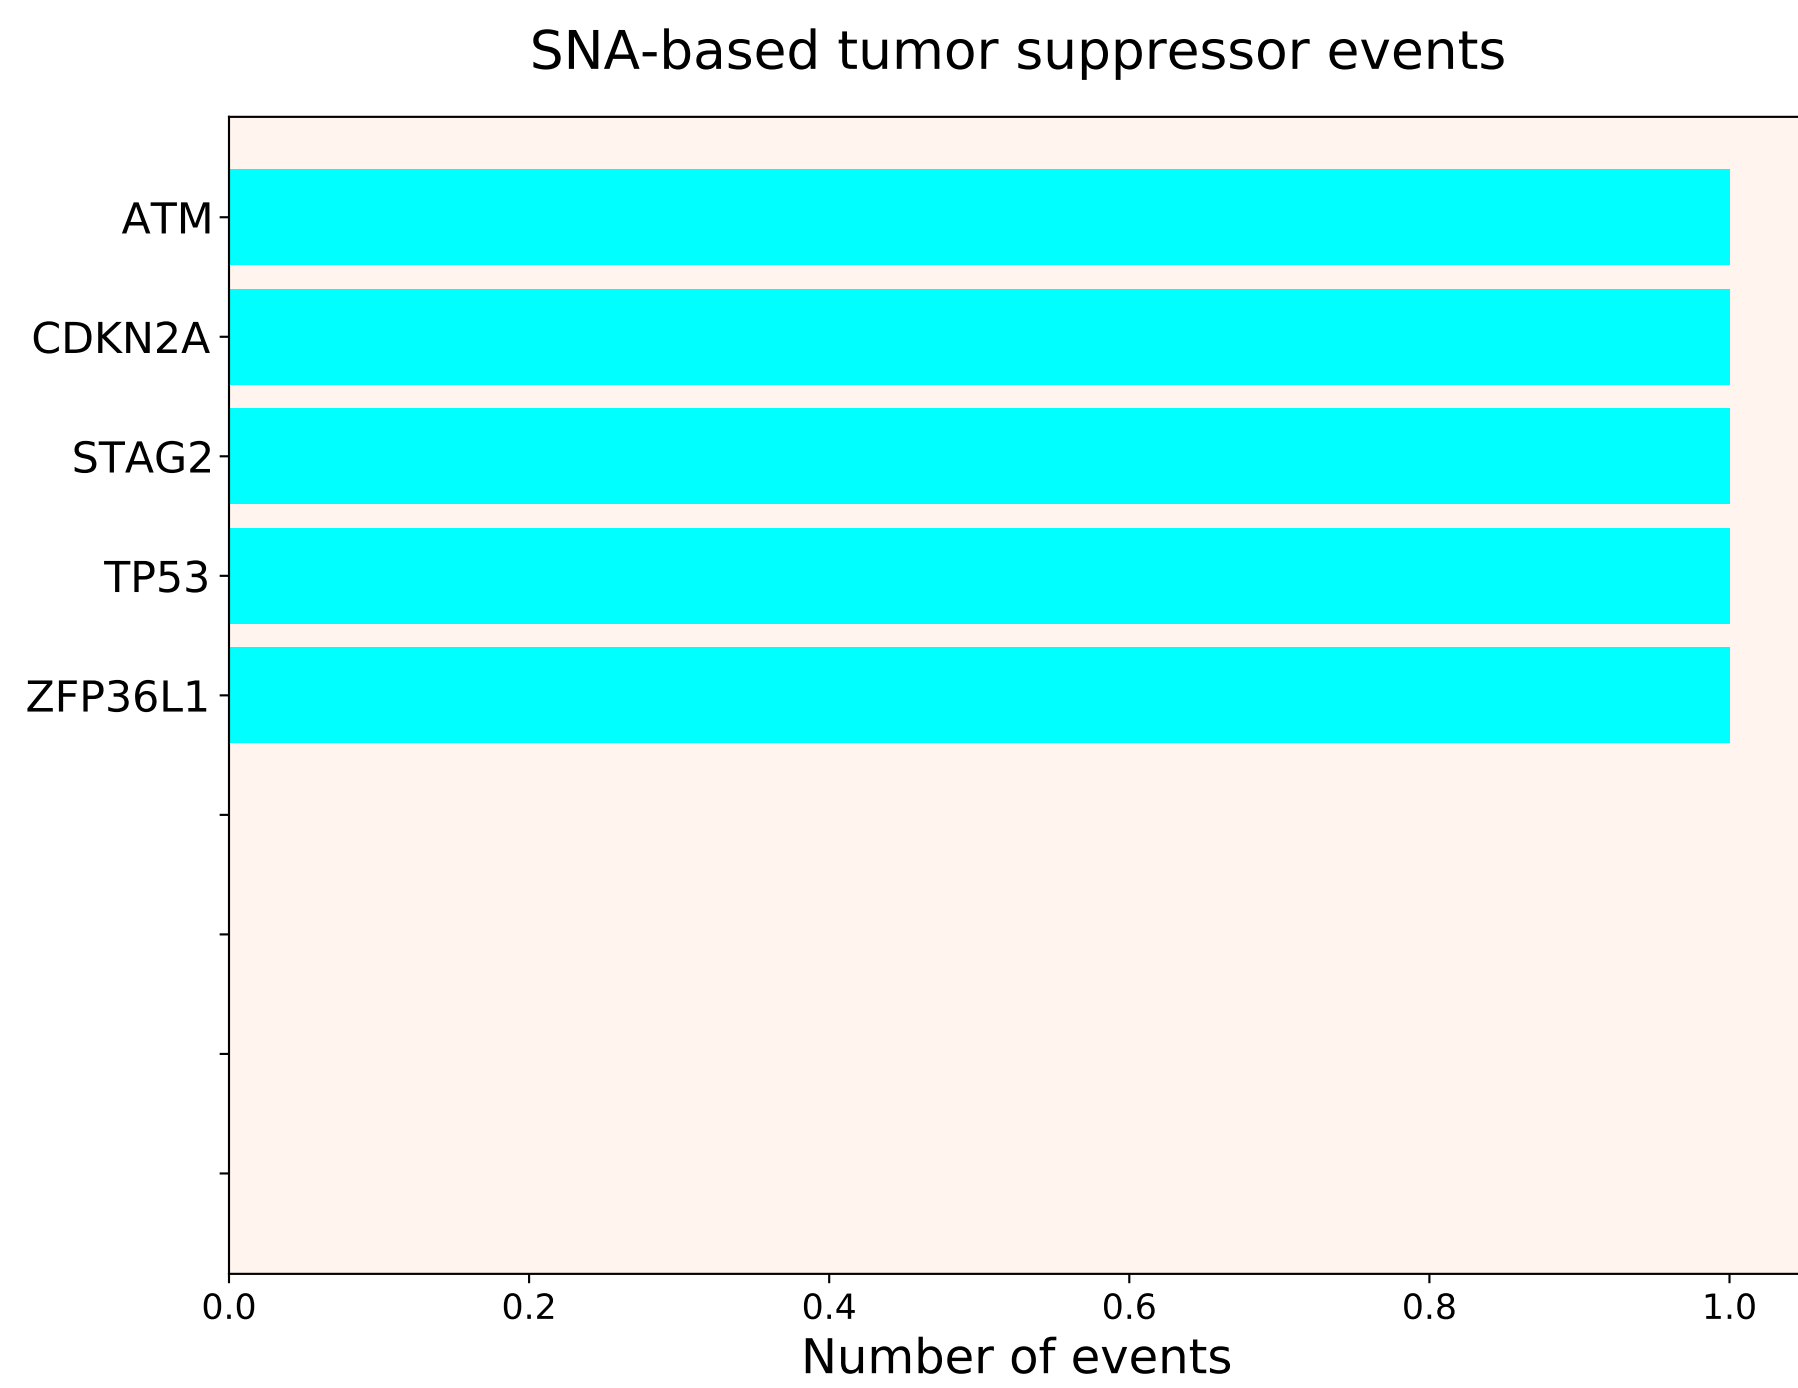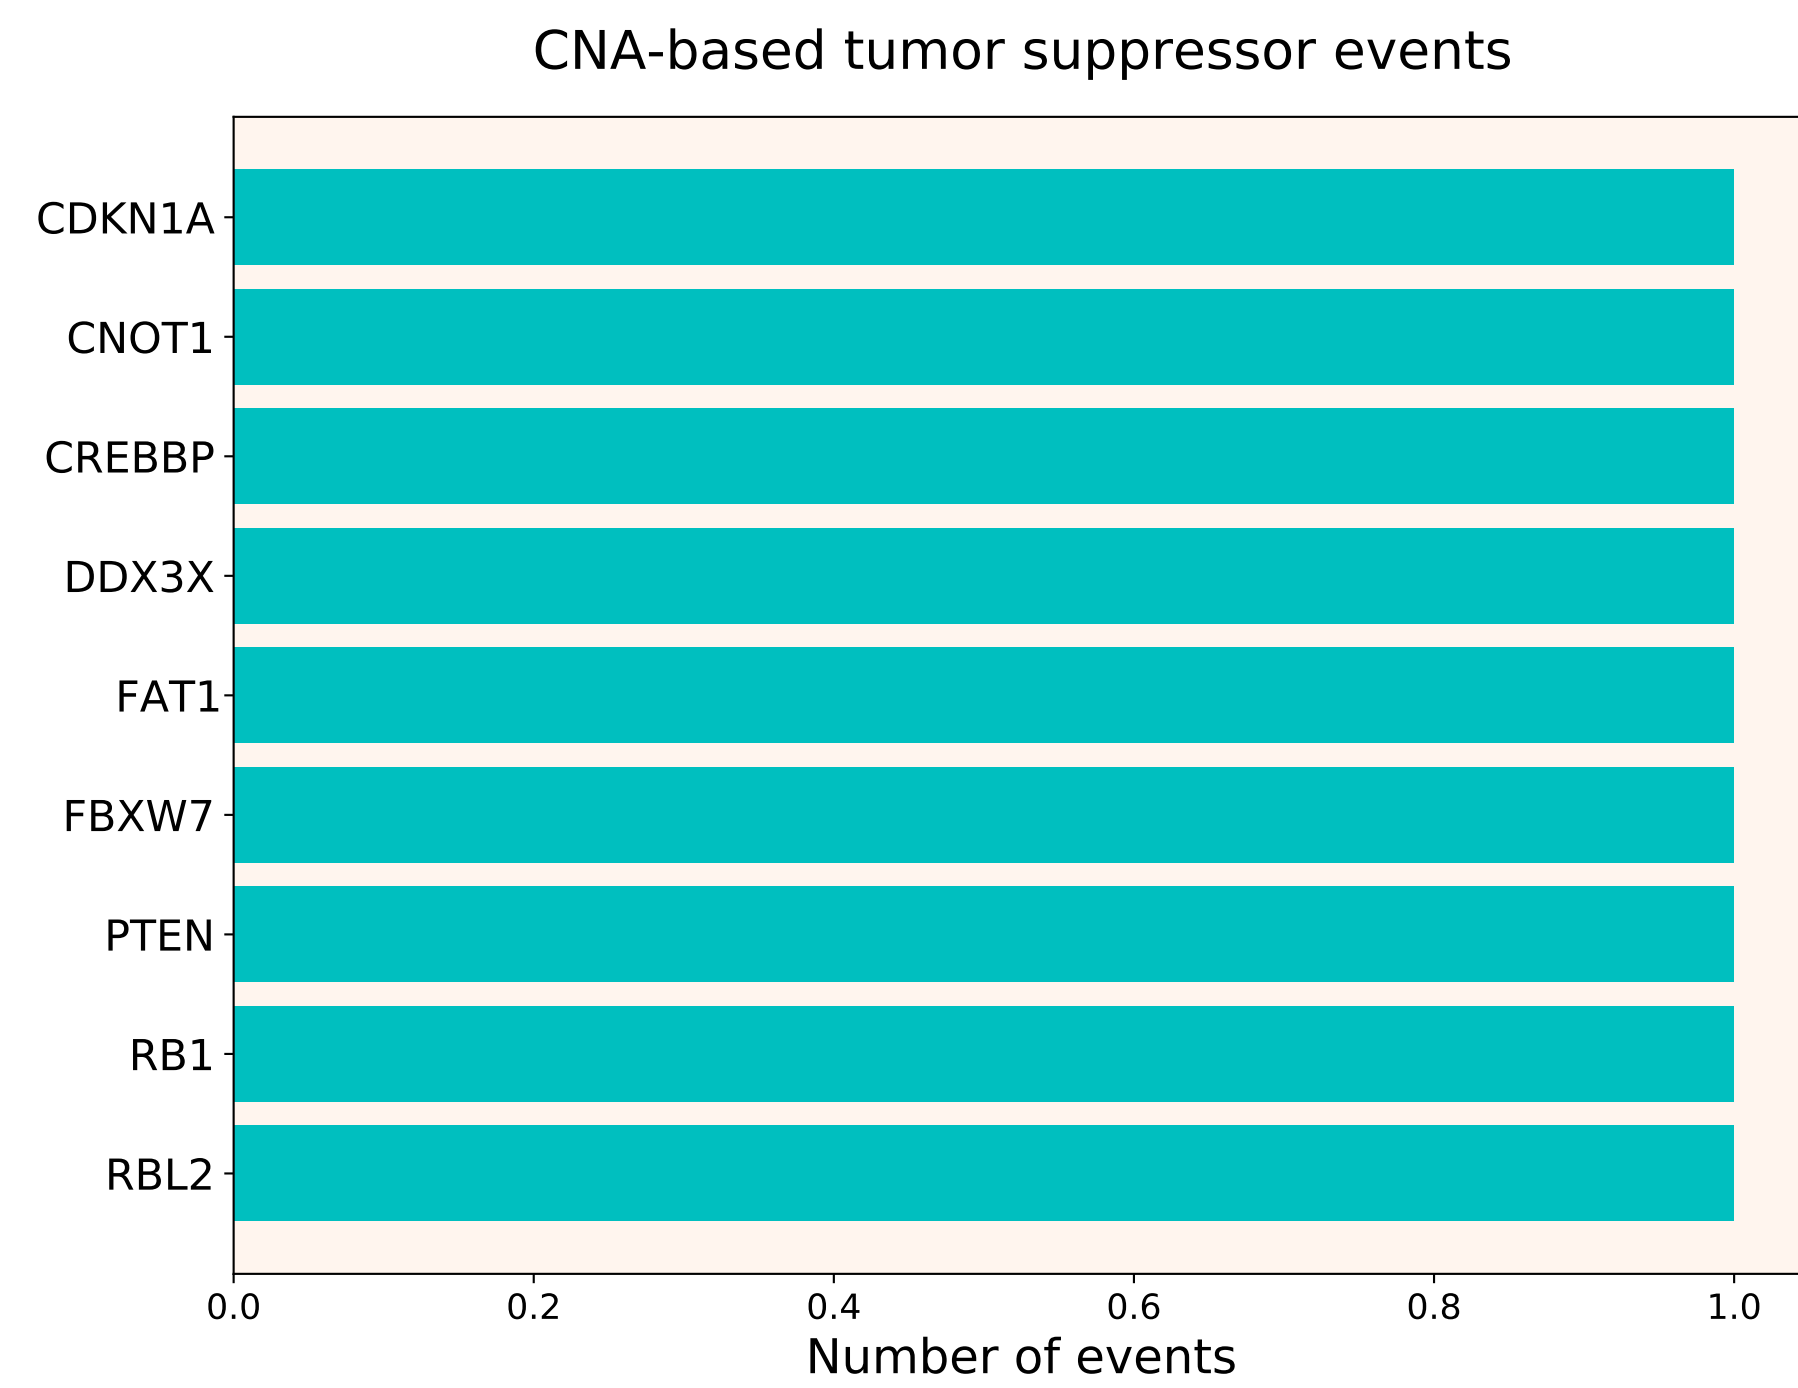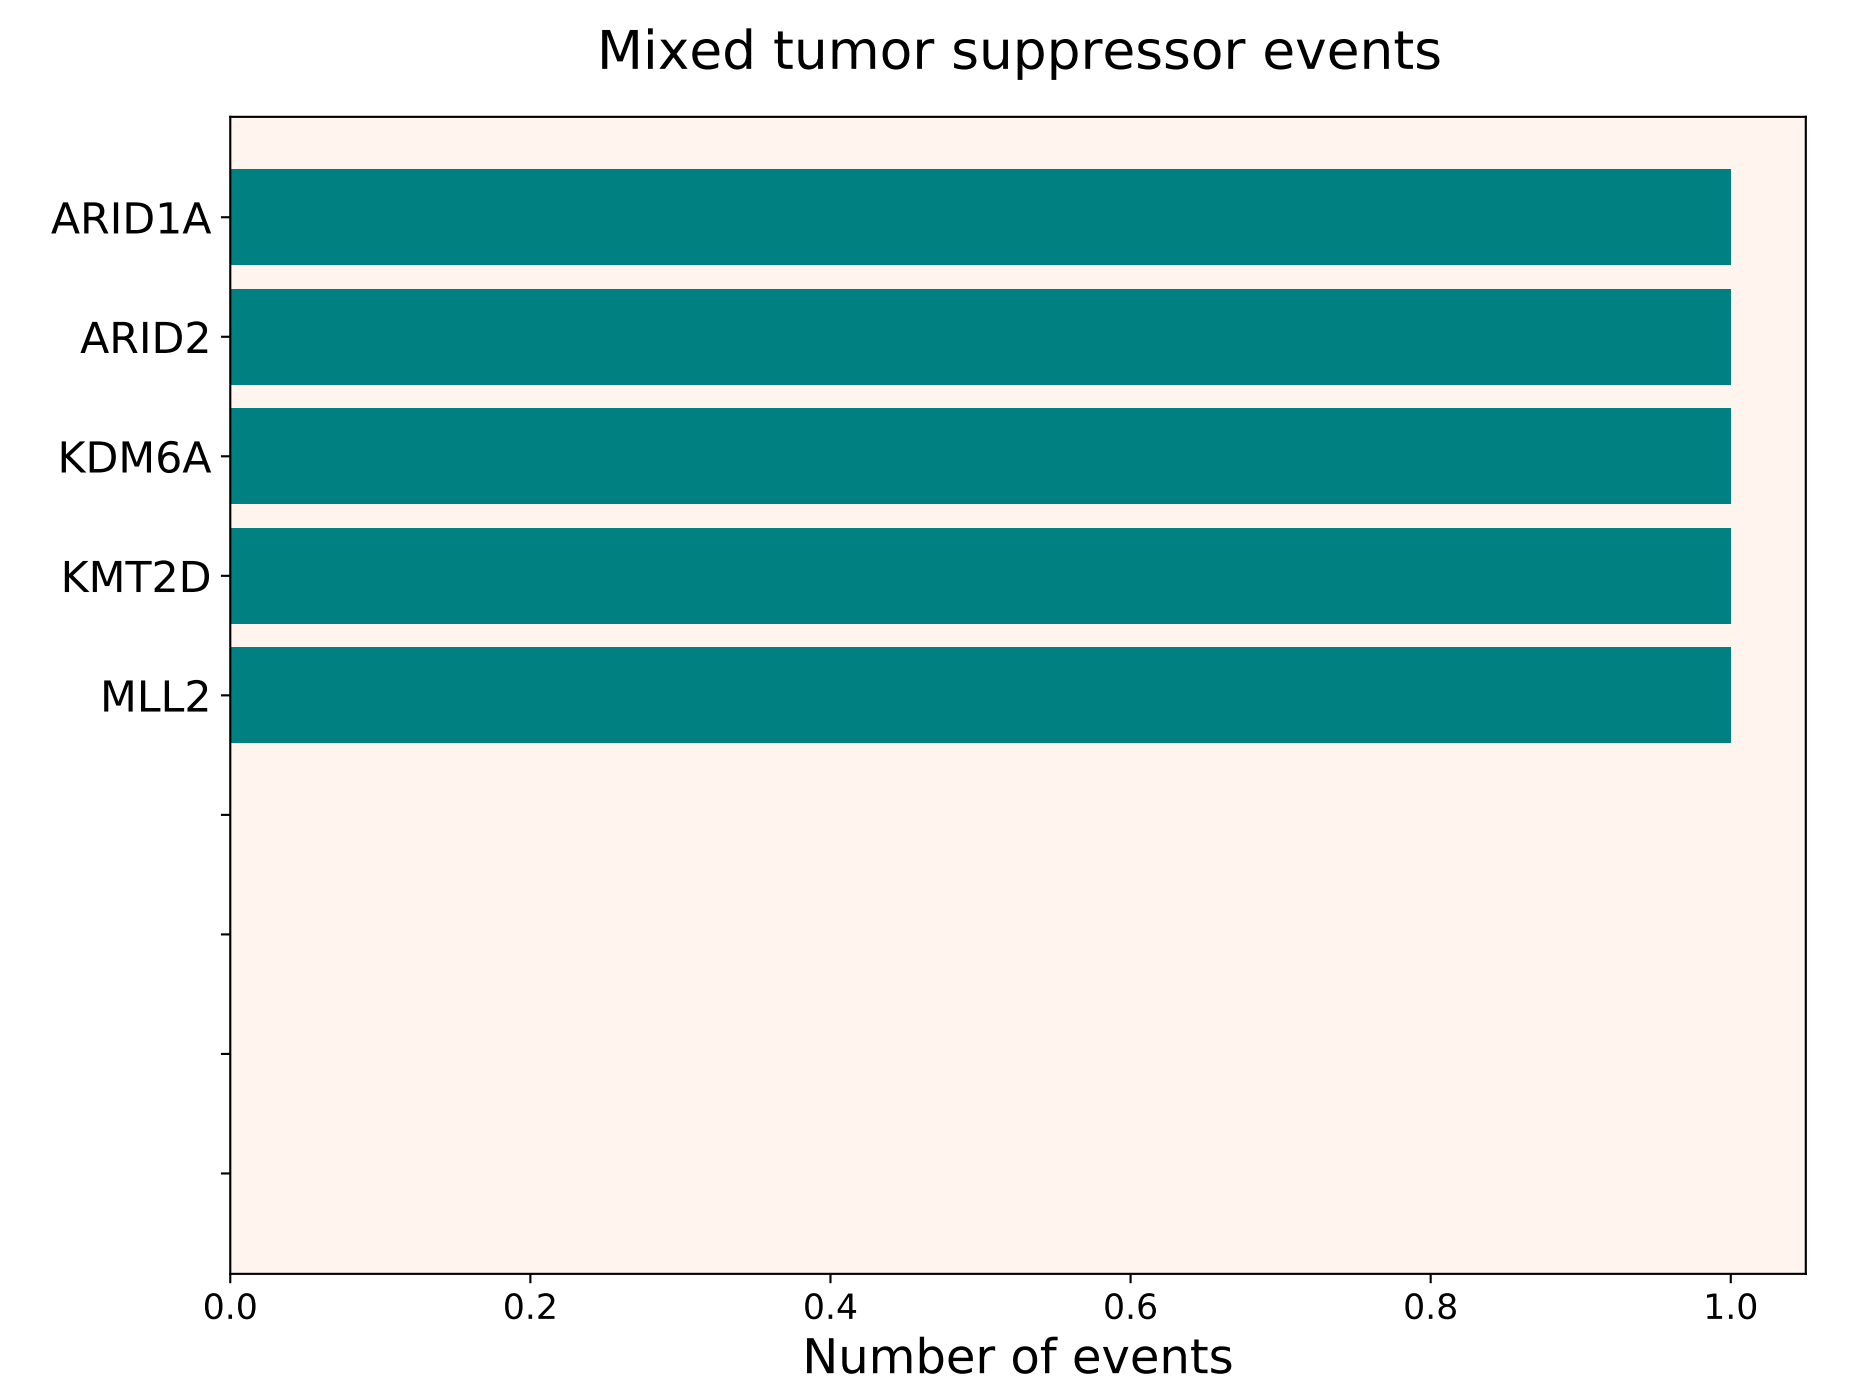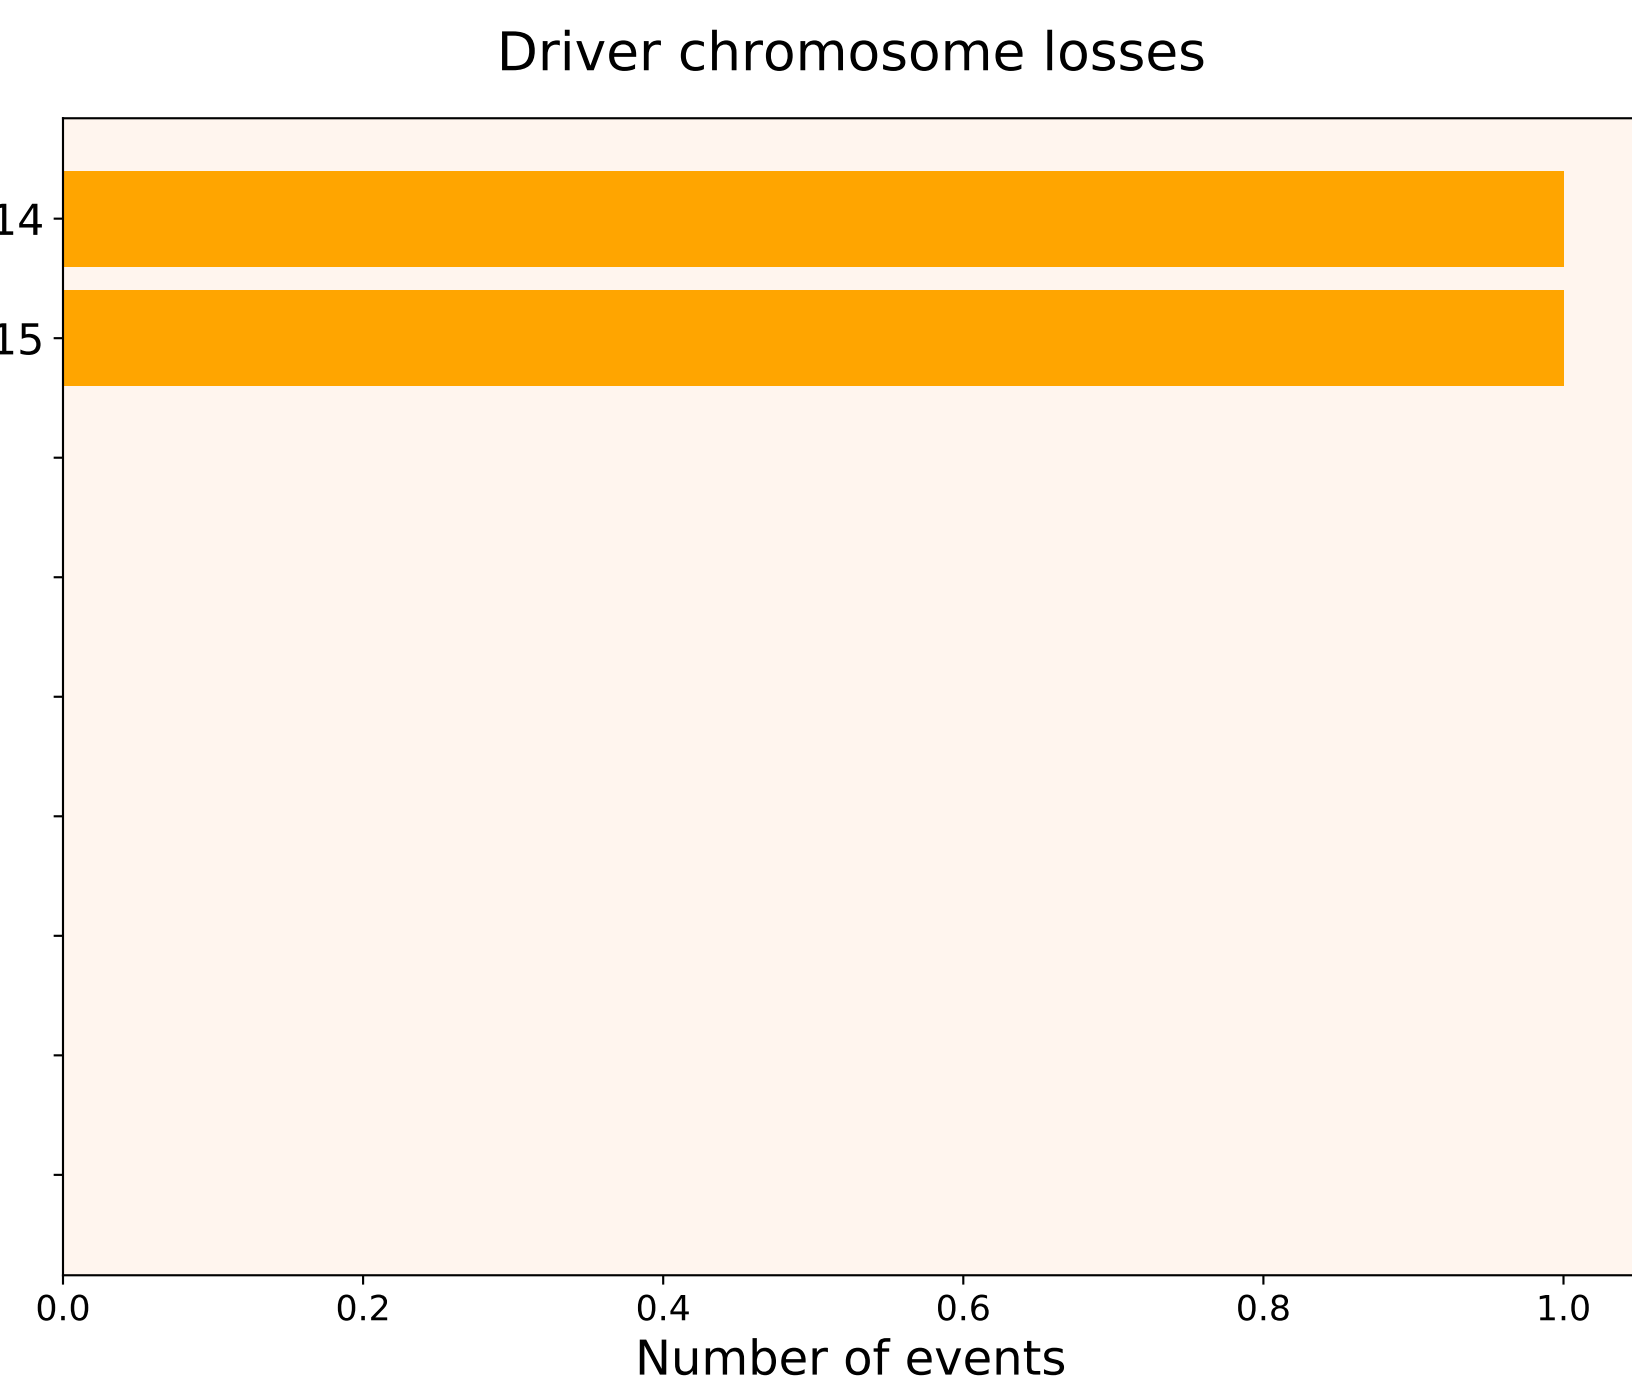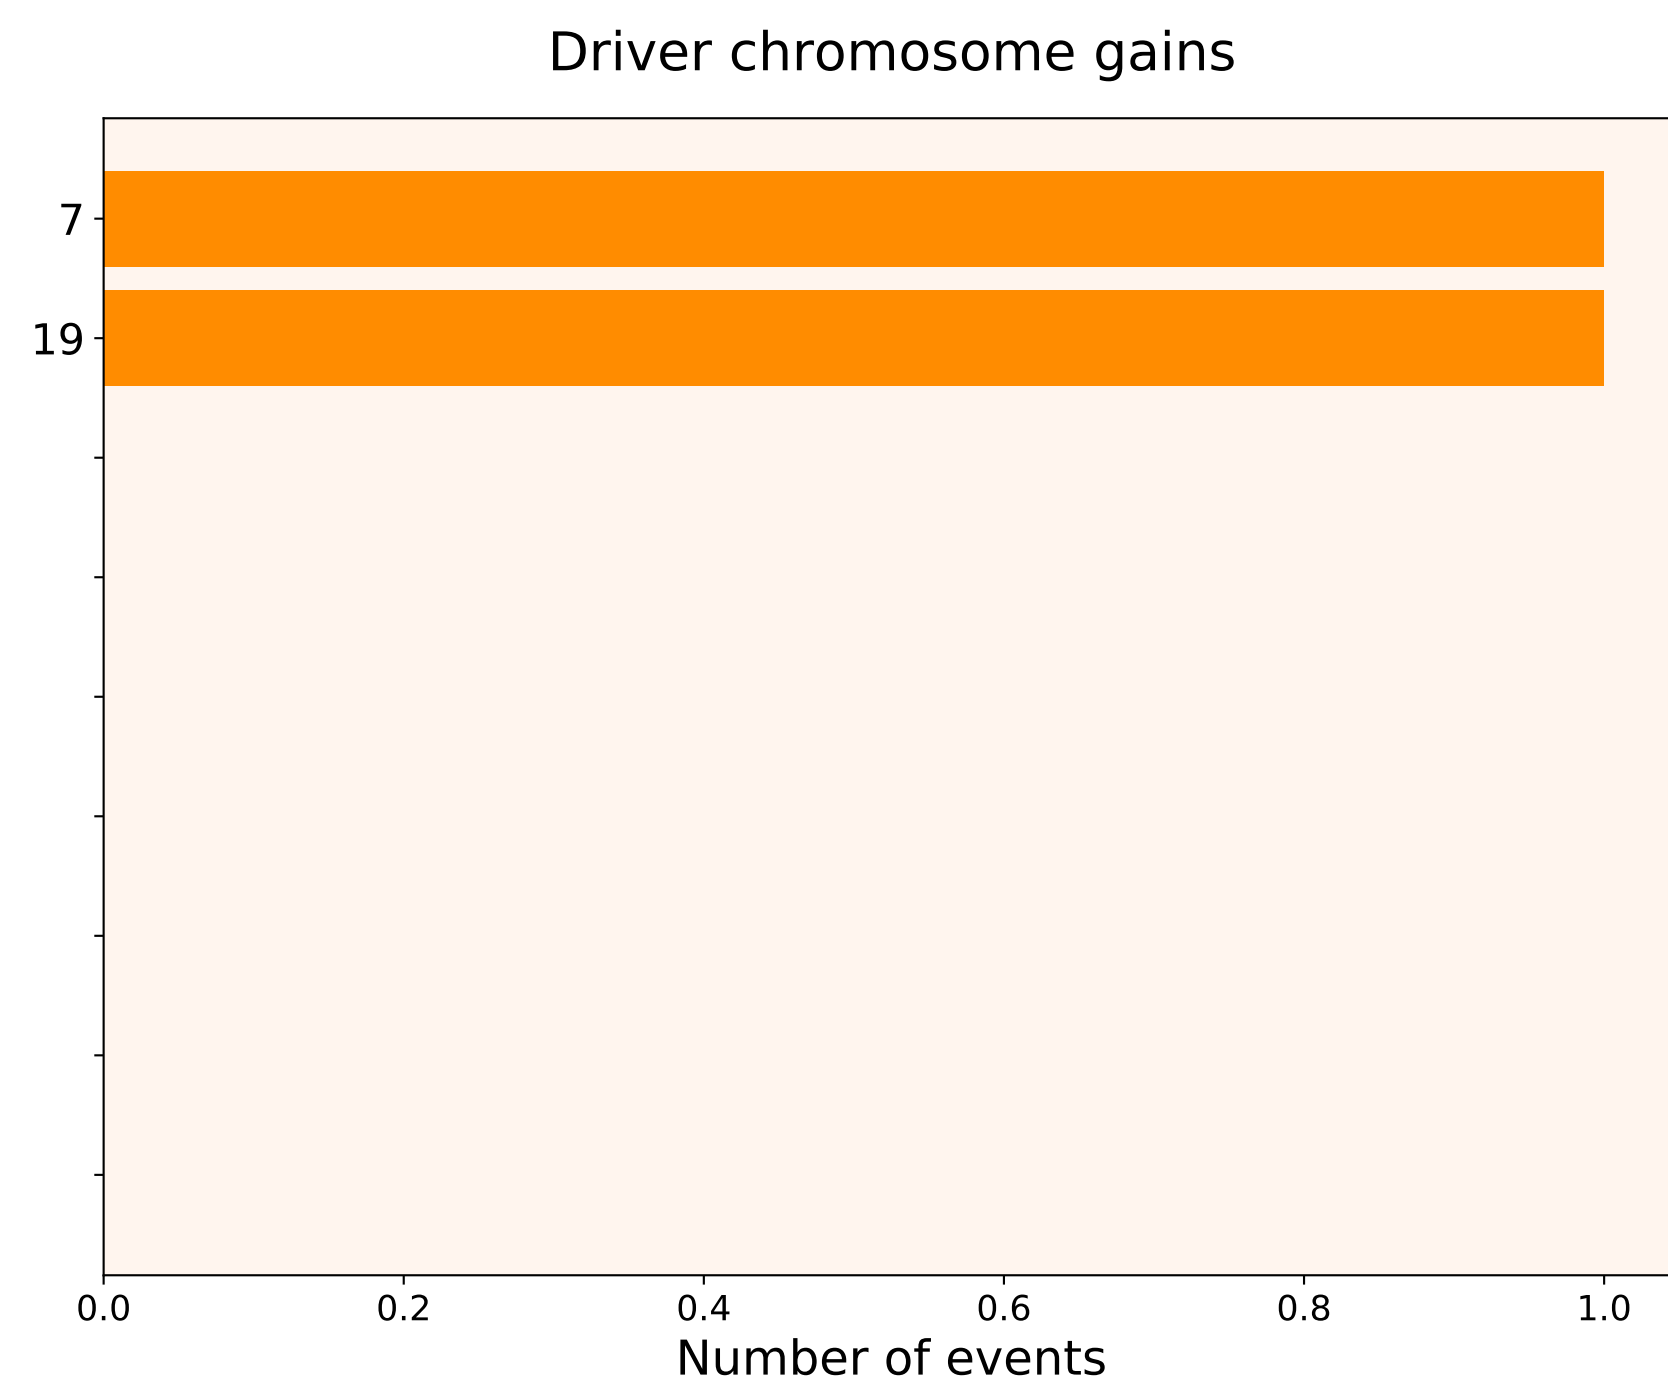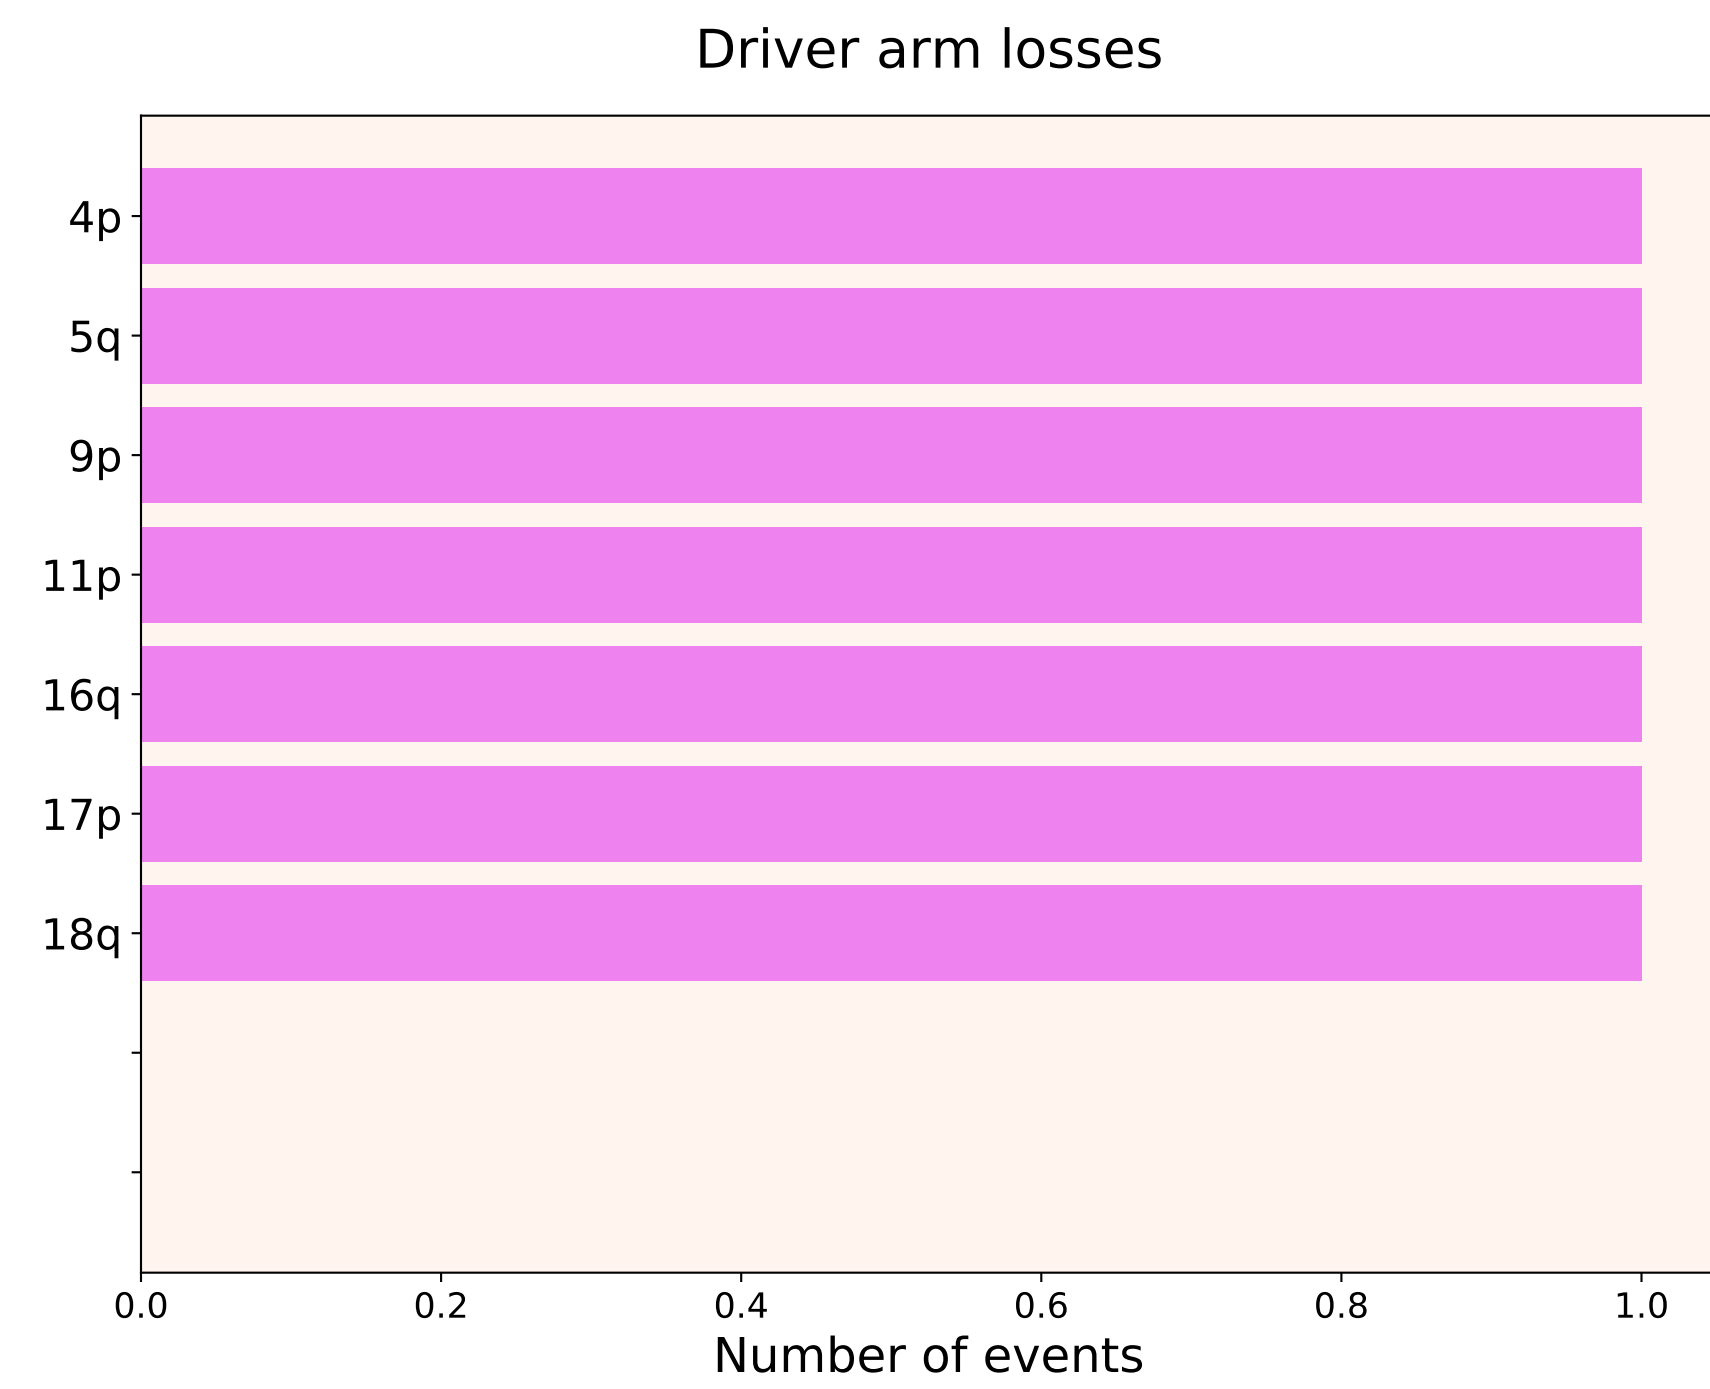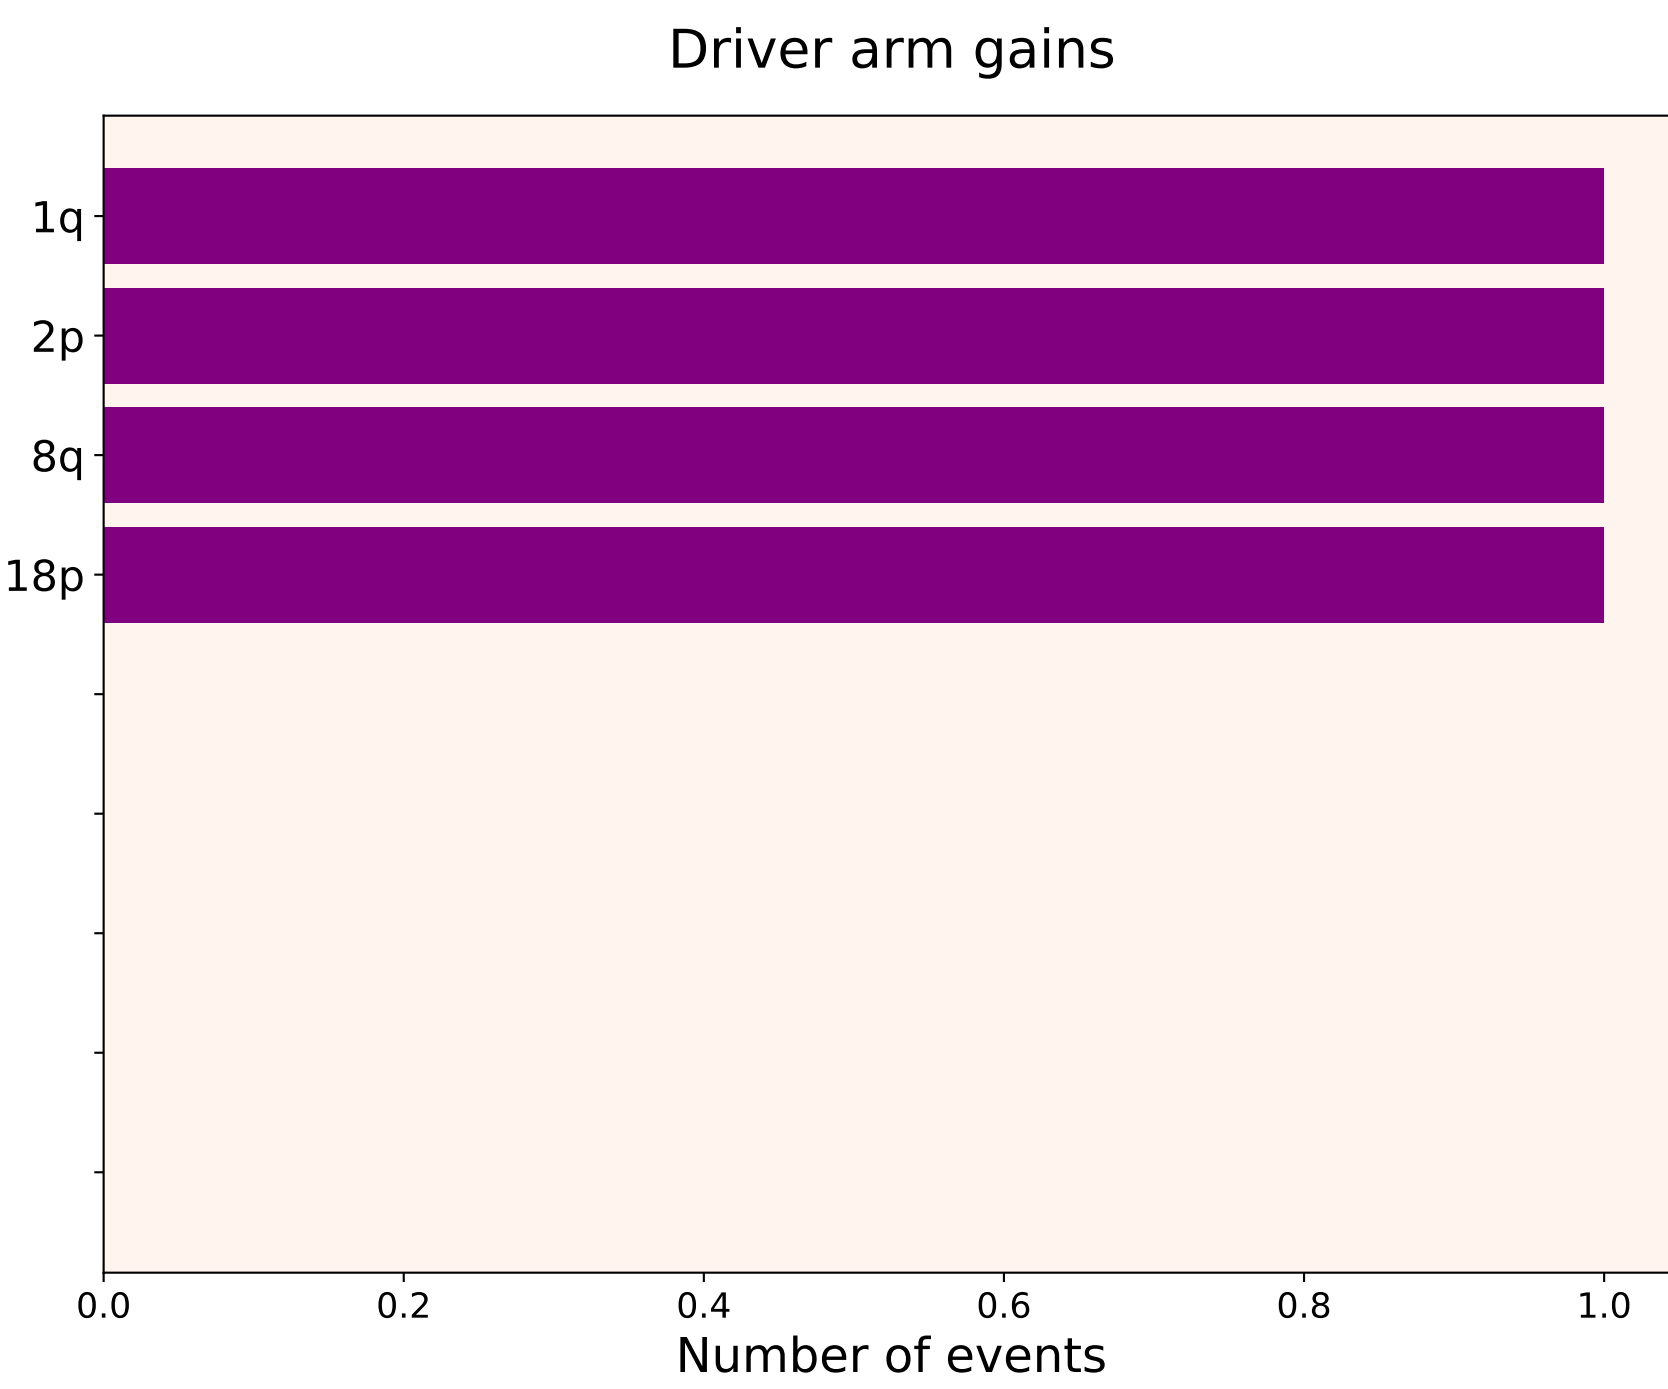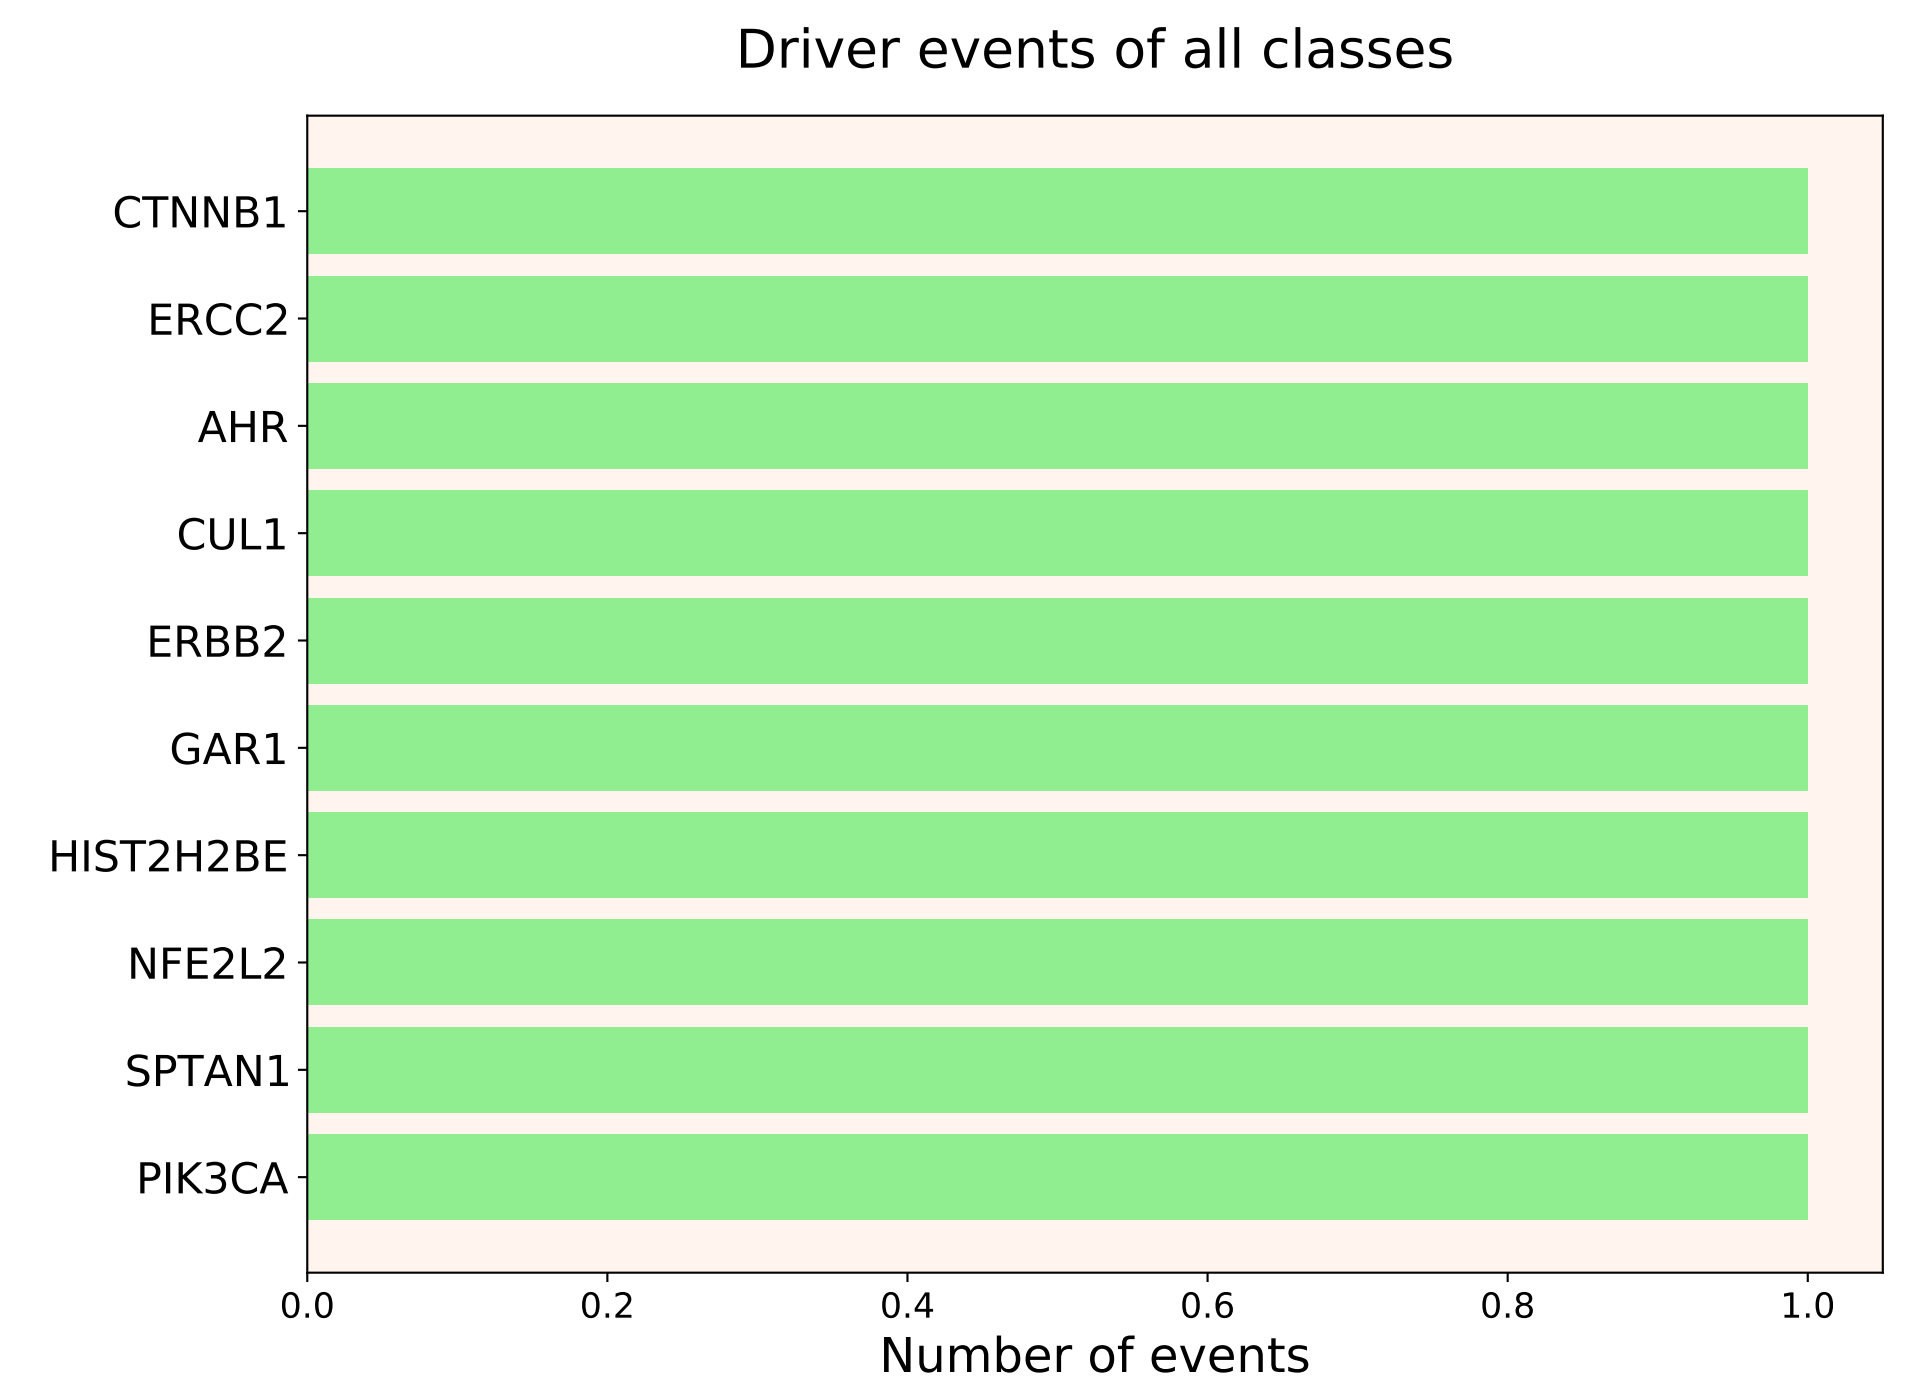

Supplement: Supplemental_Data_S1.zip [file Supplemental_Data_S1.zip]

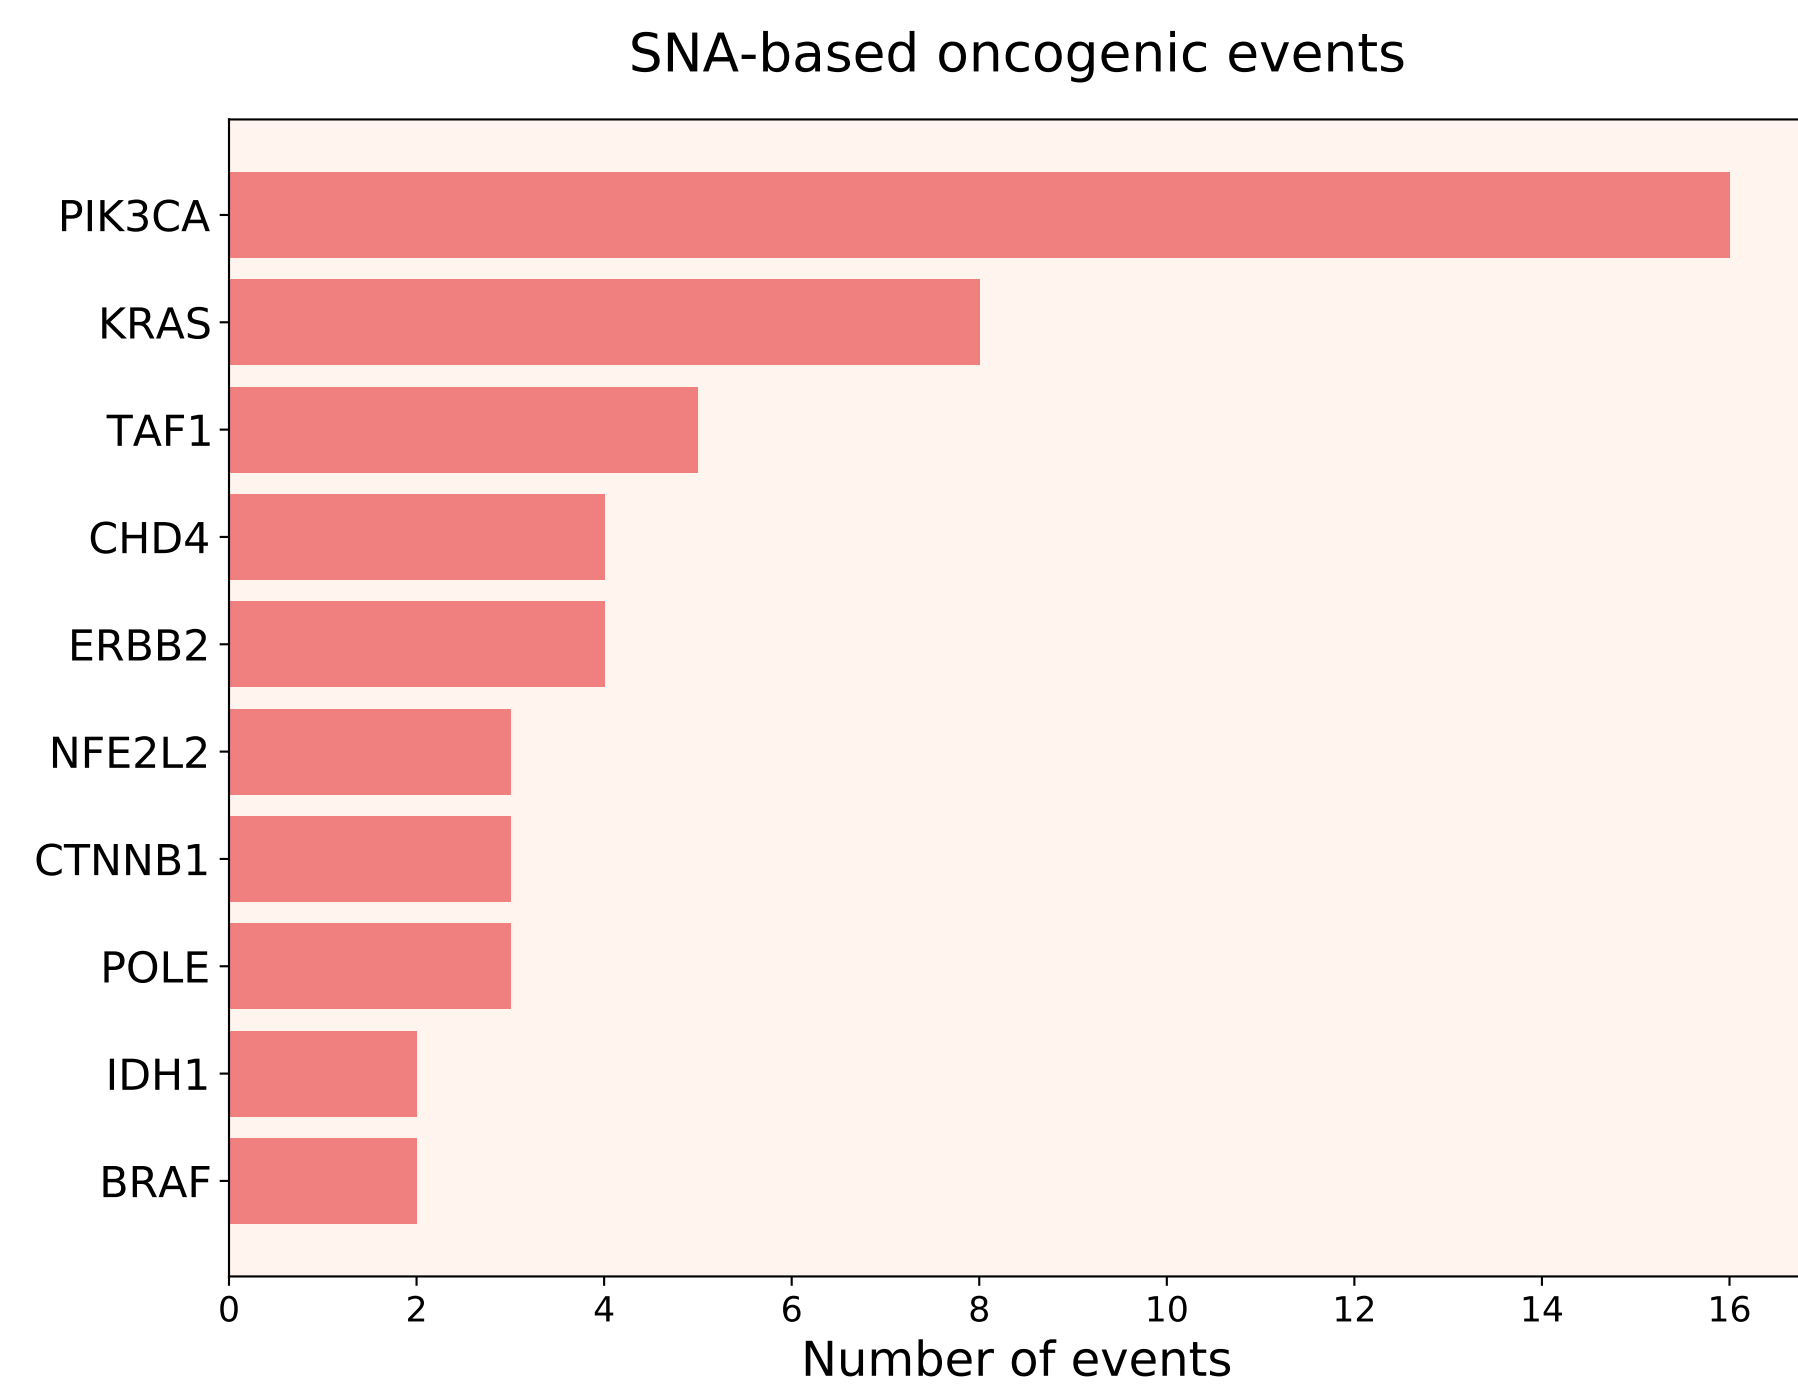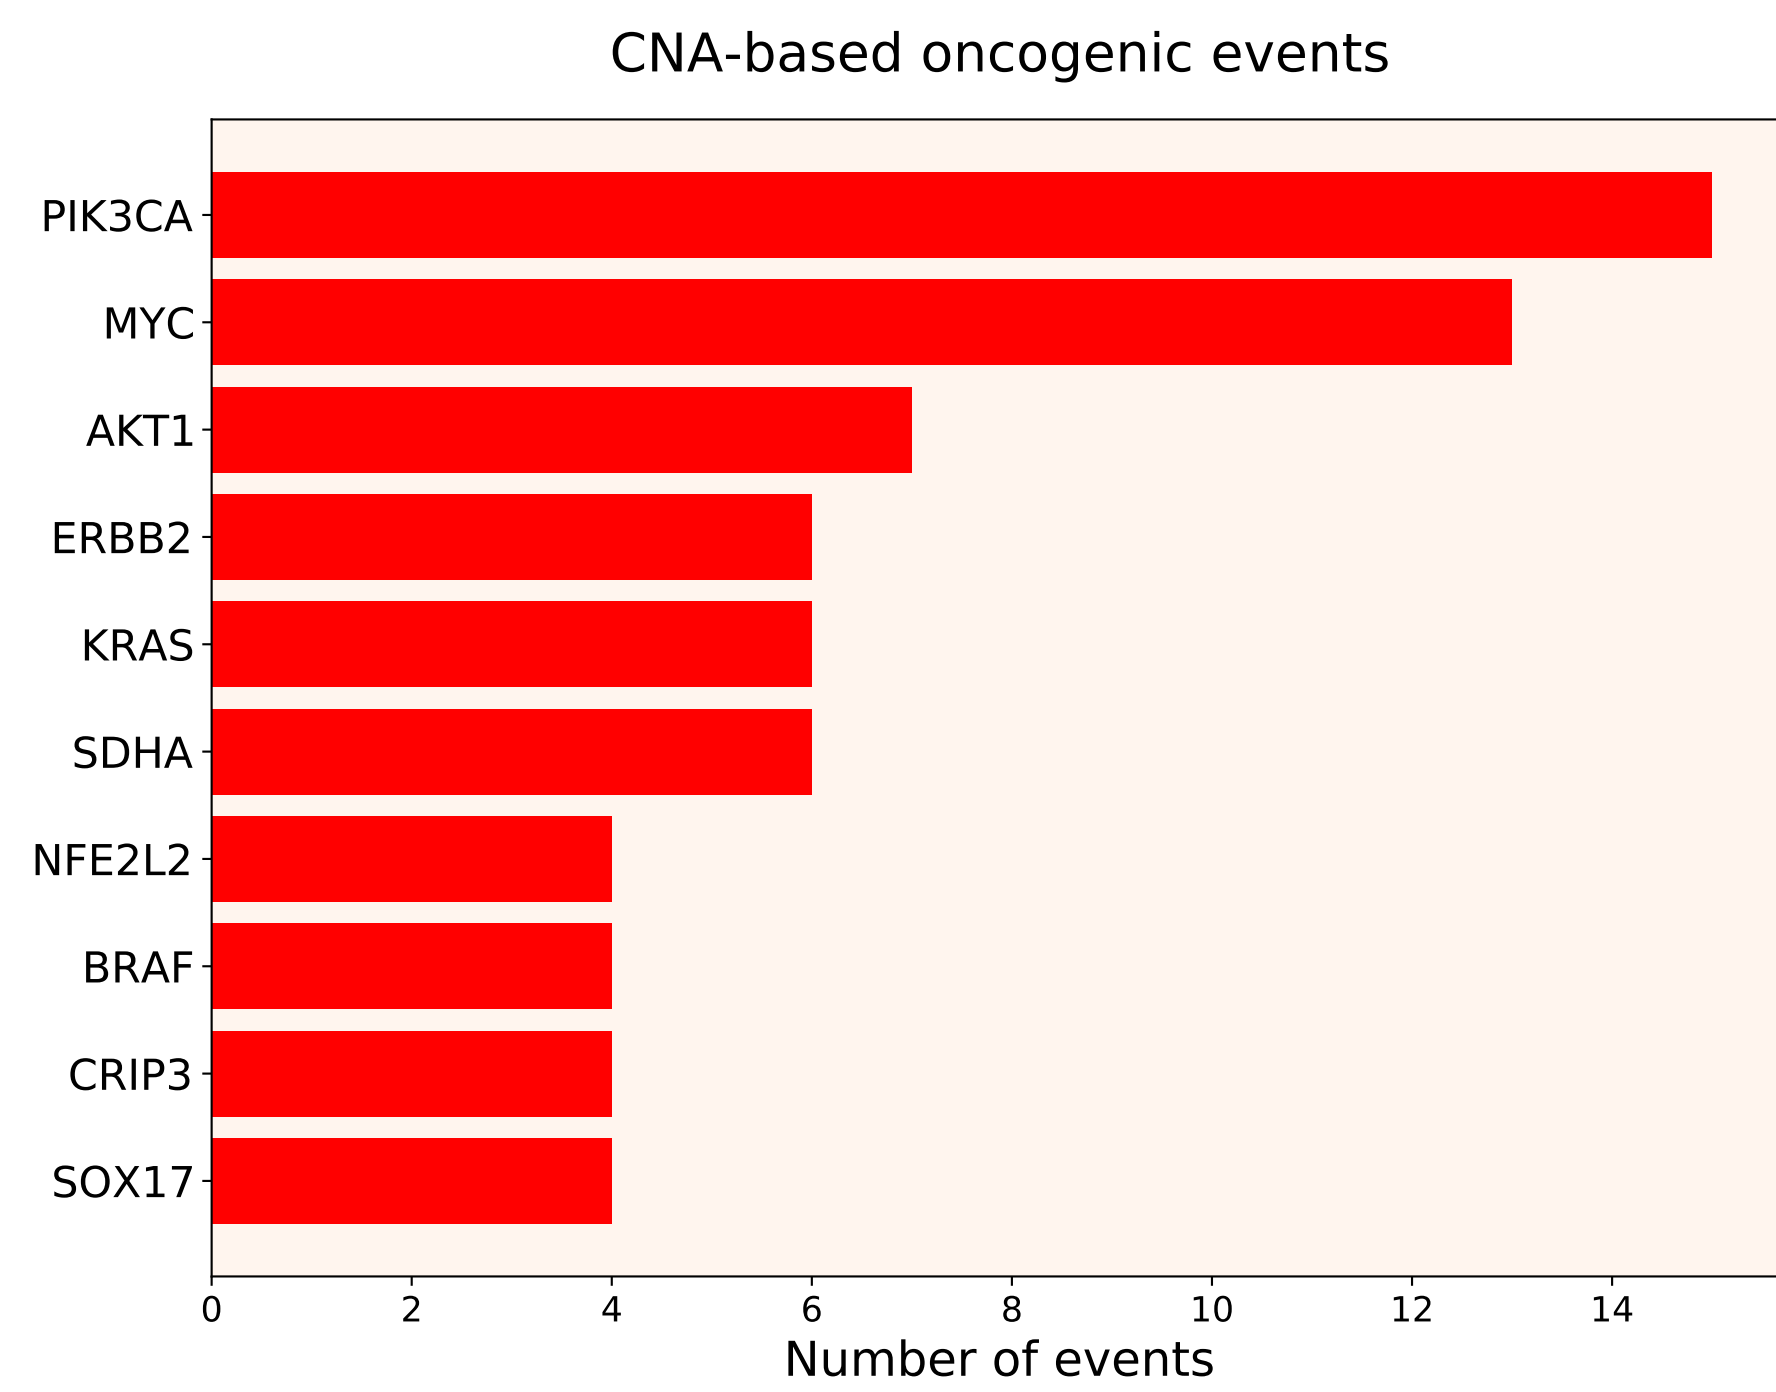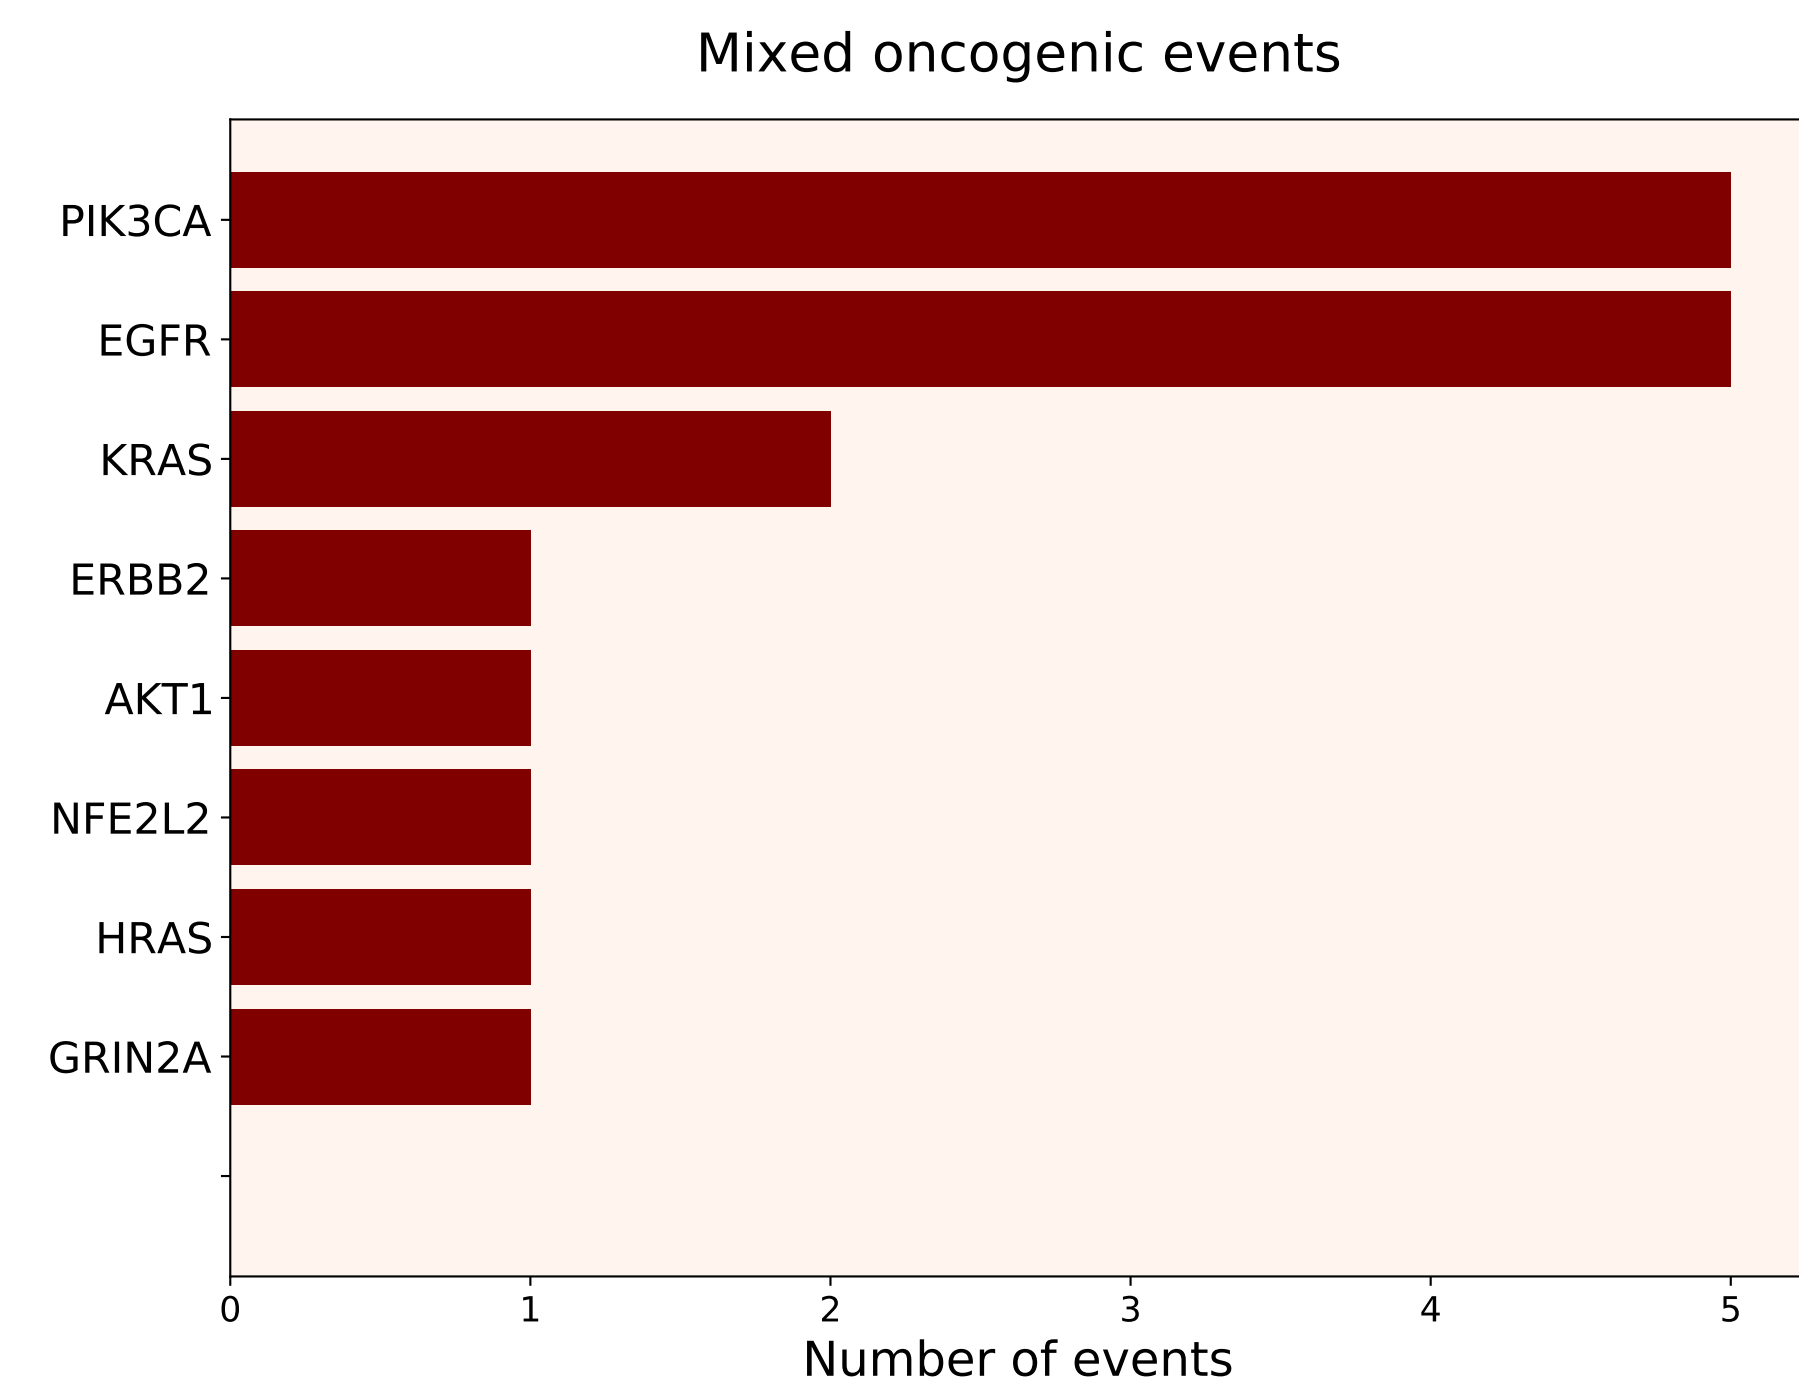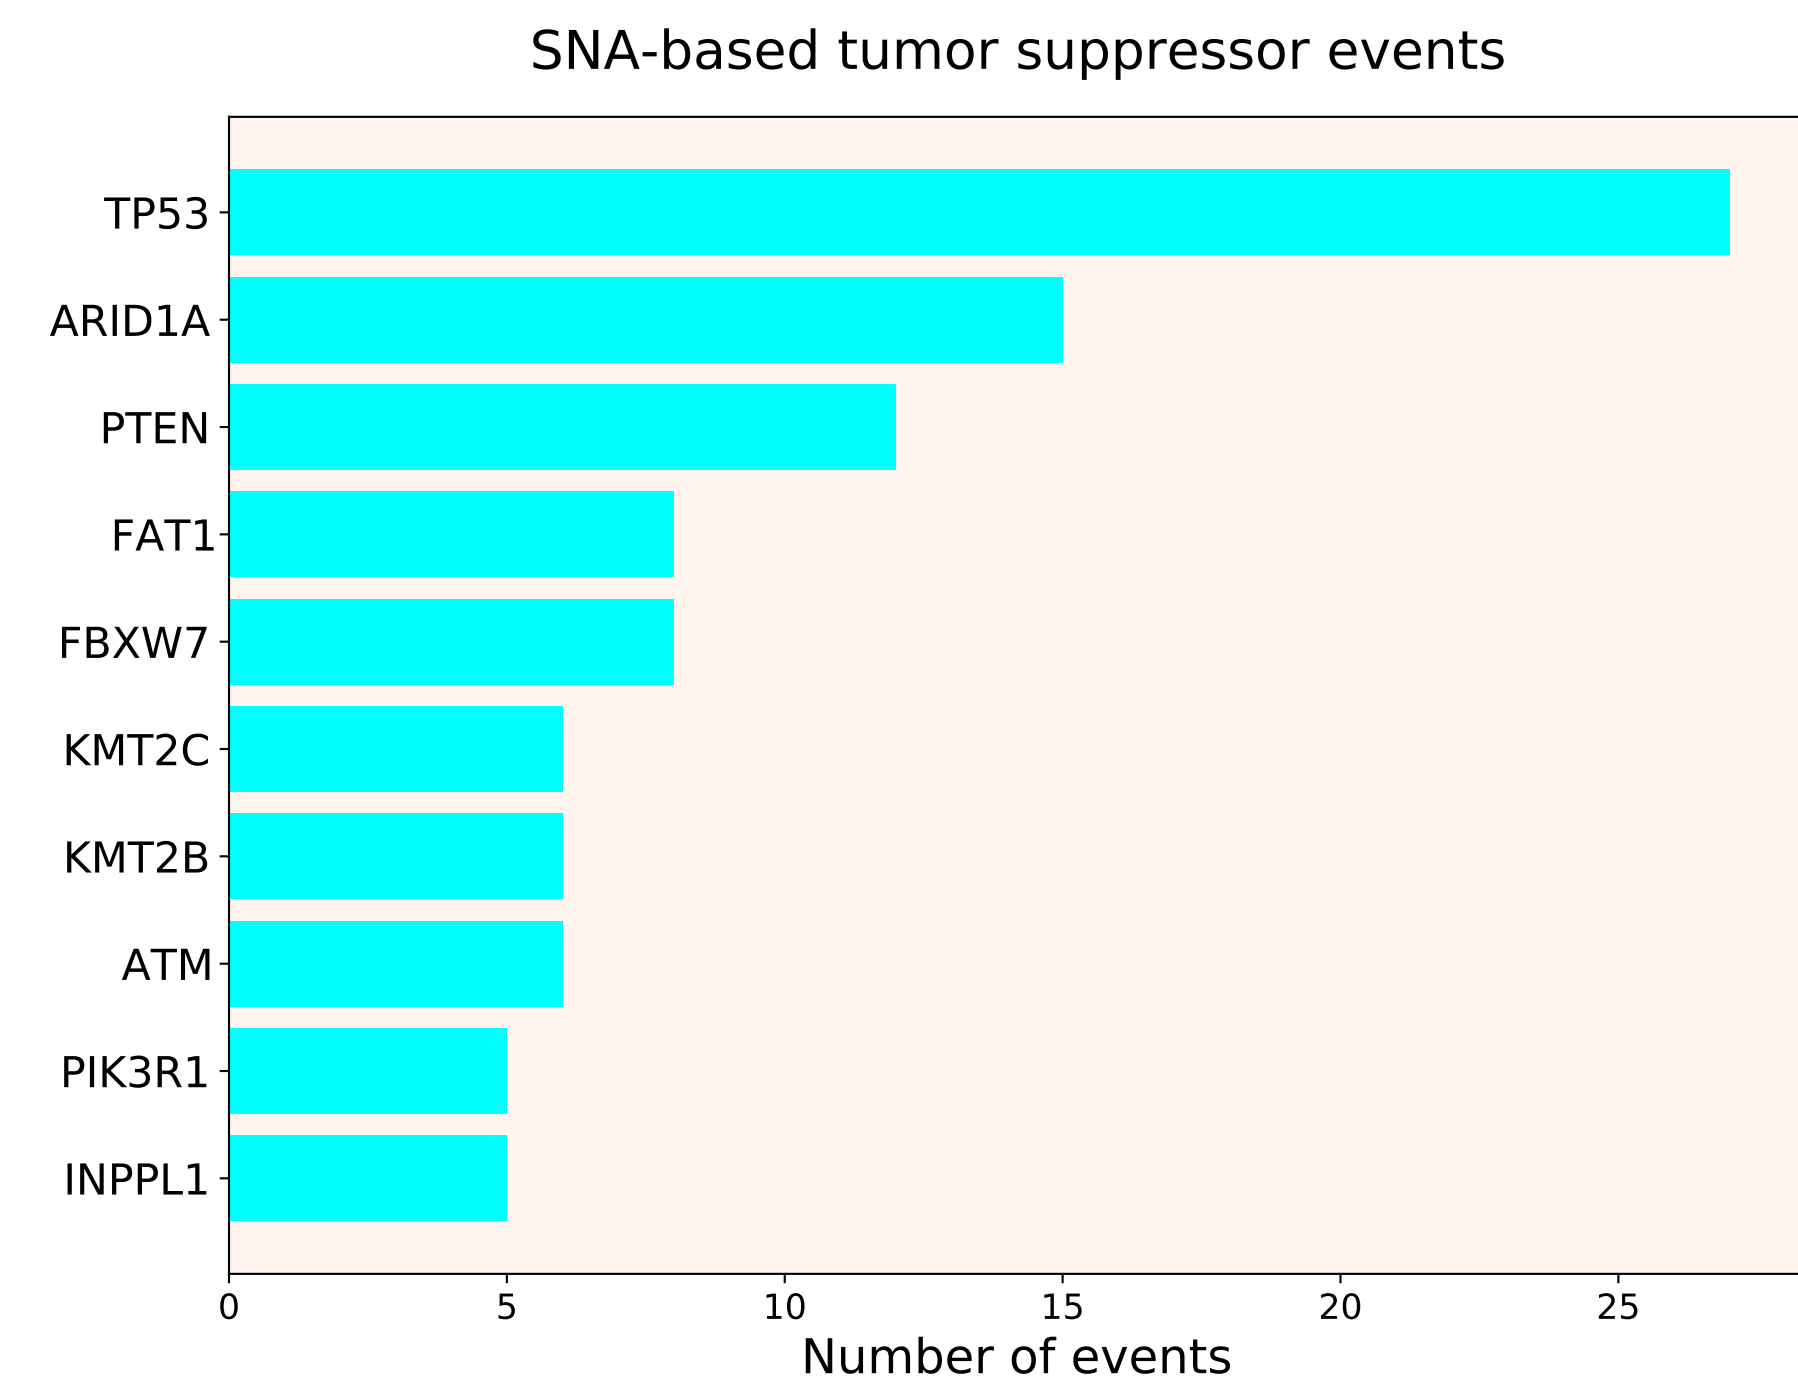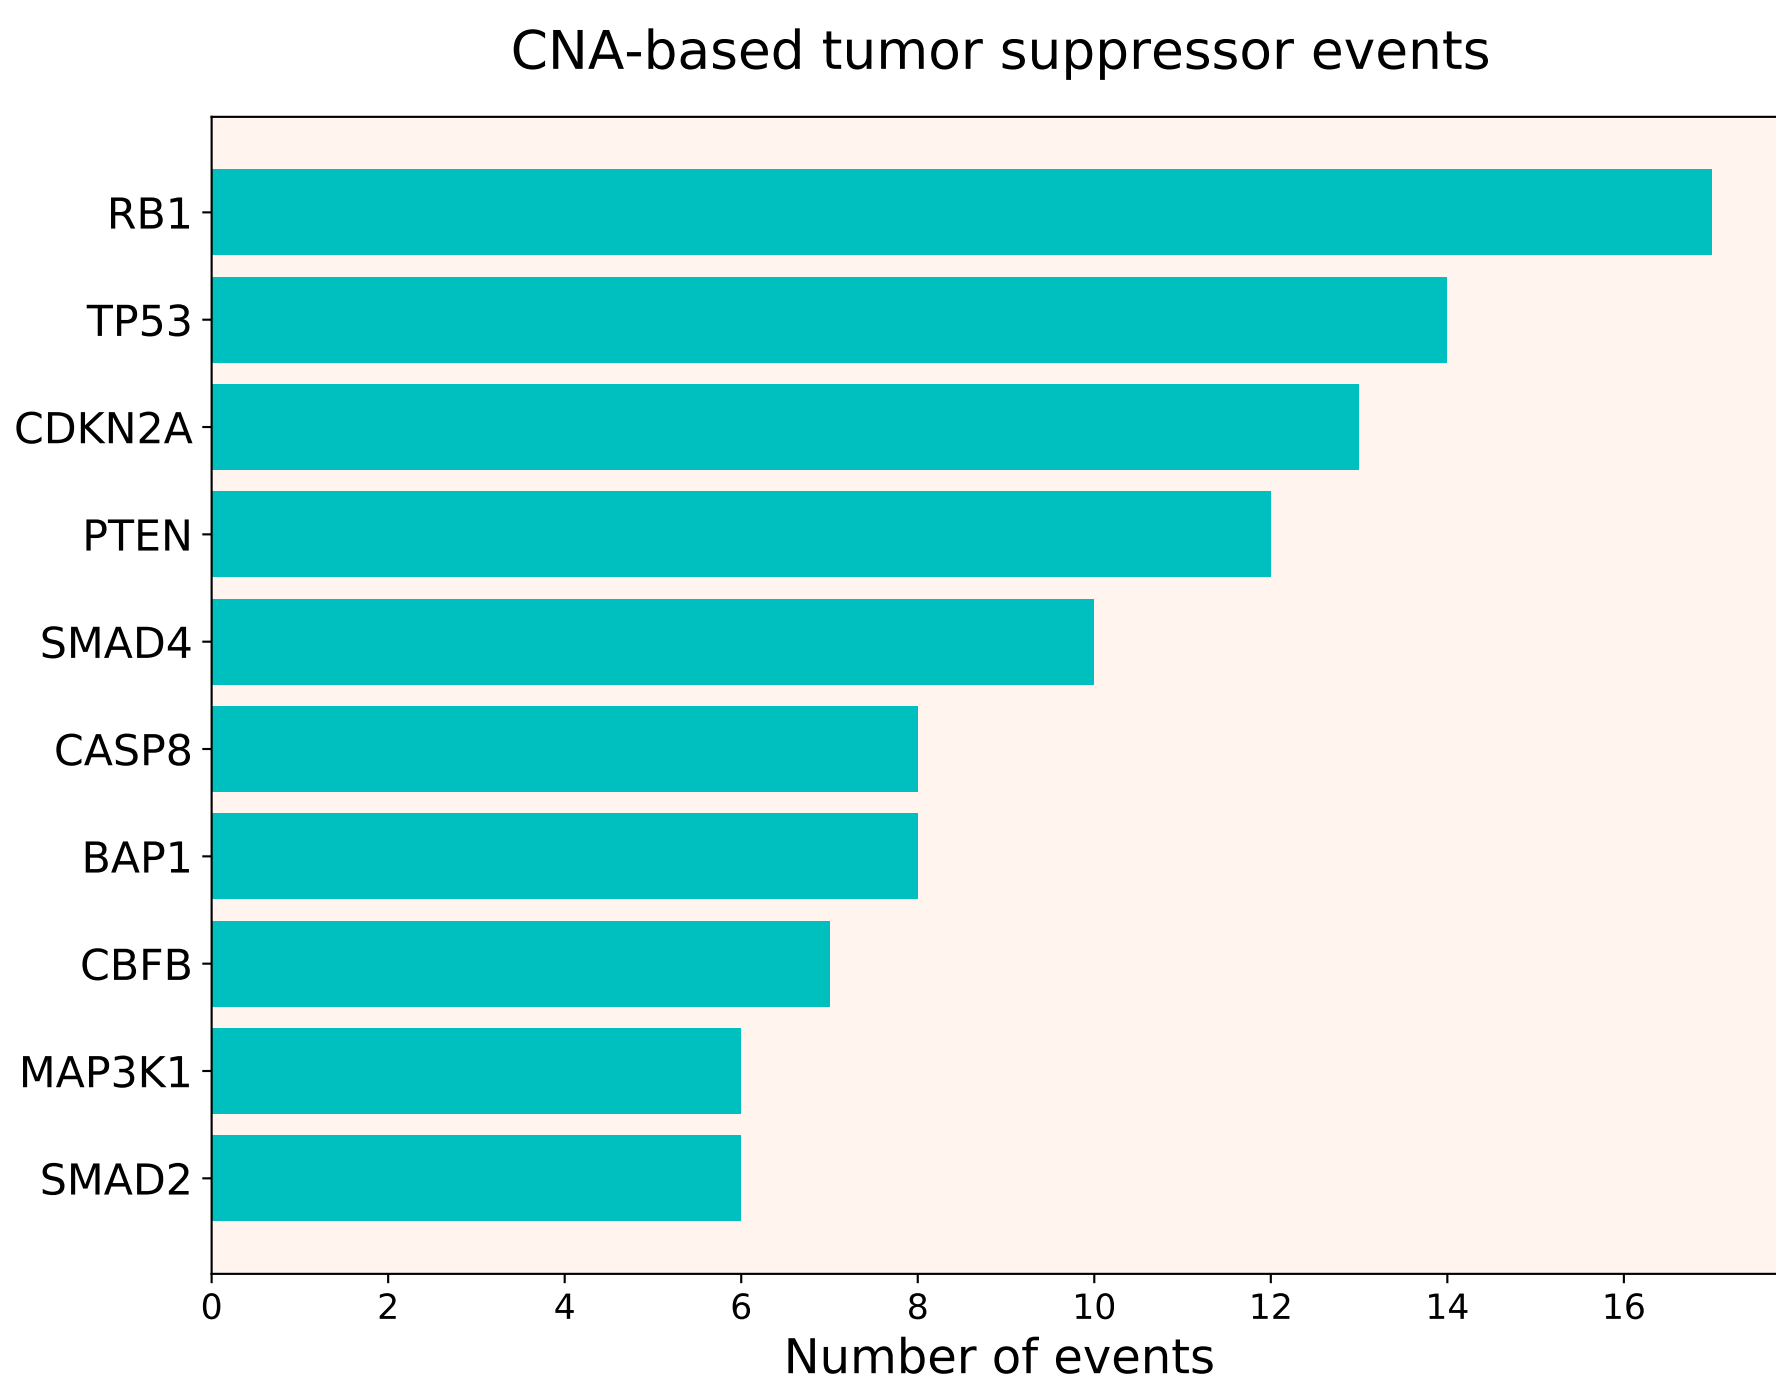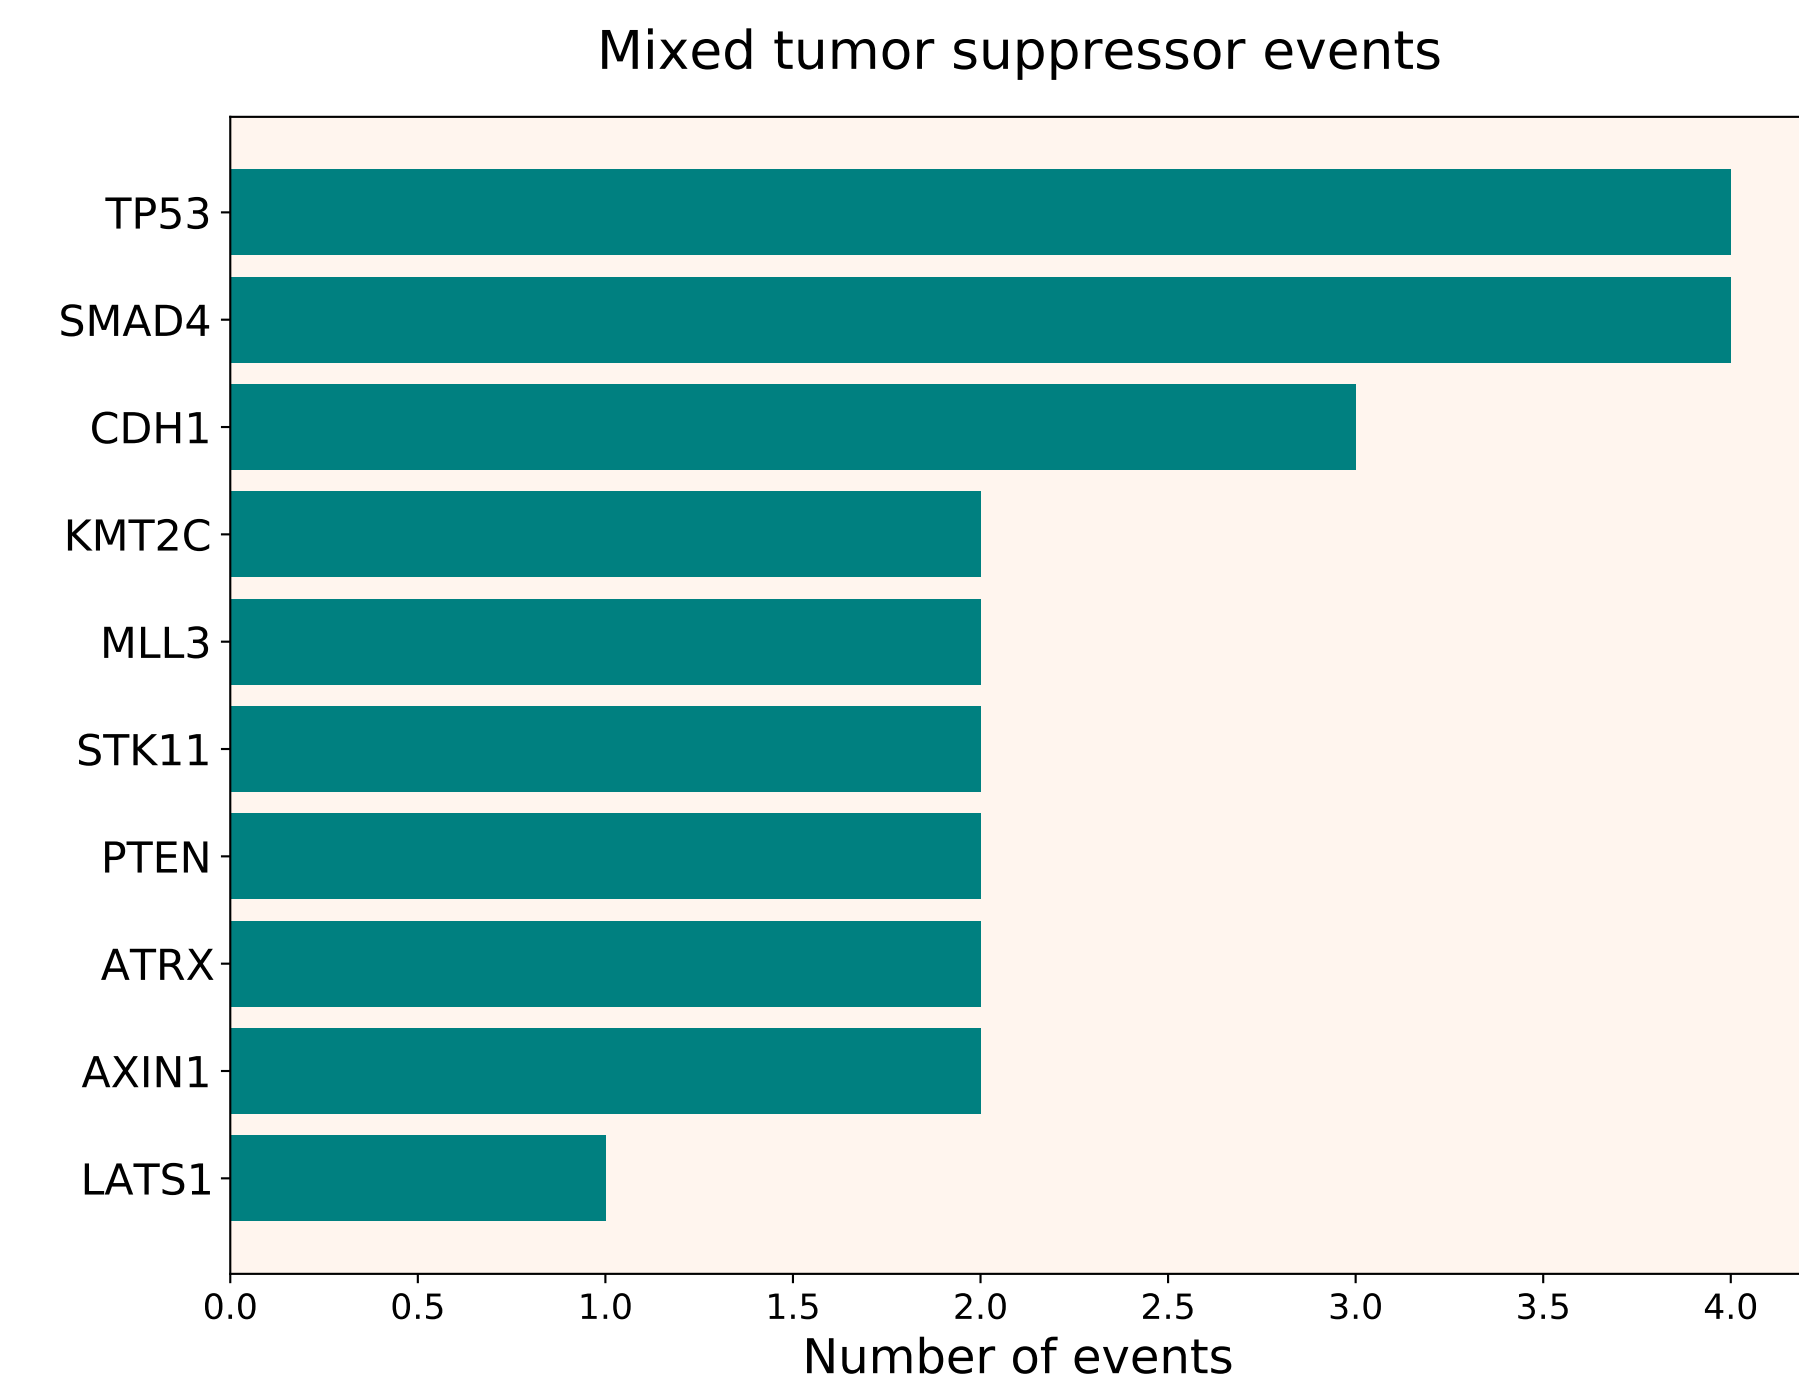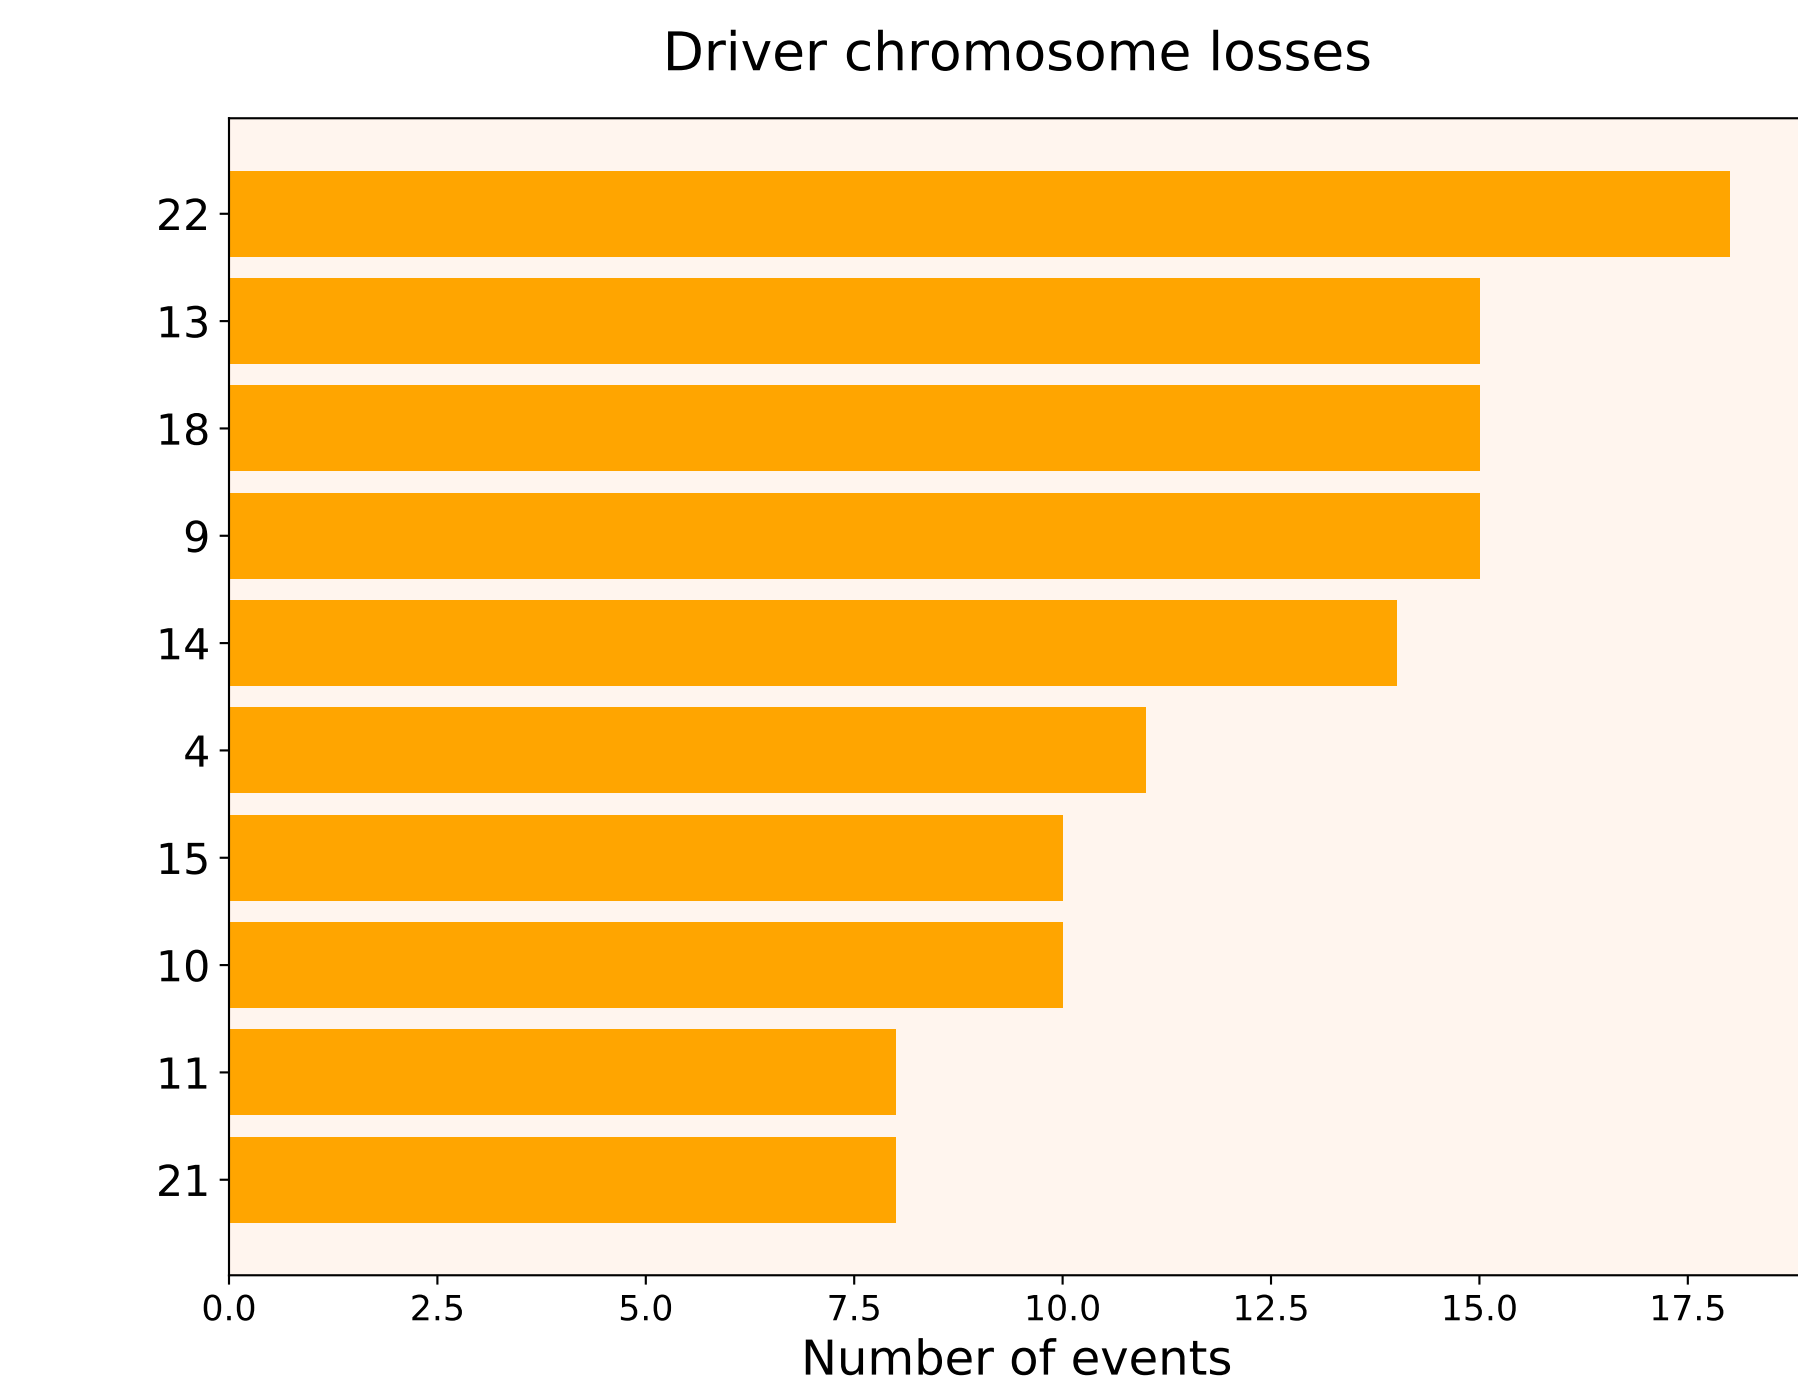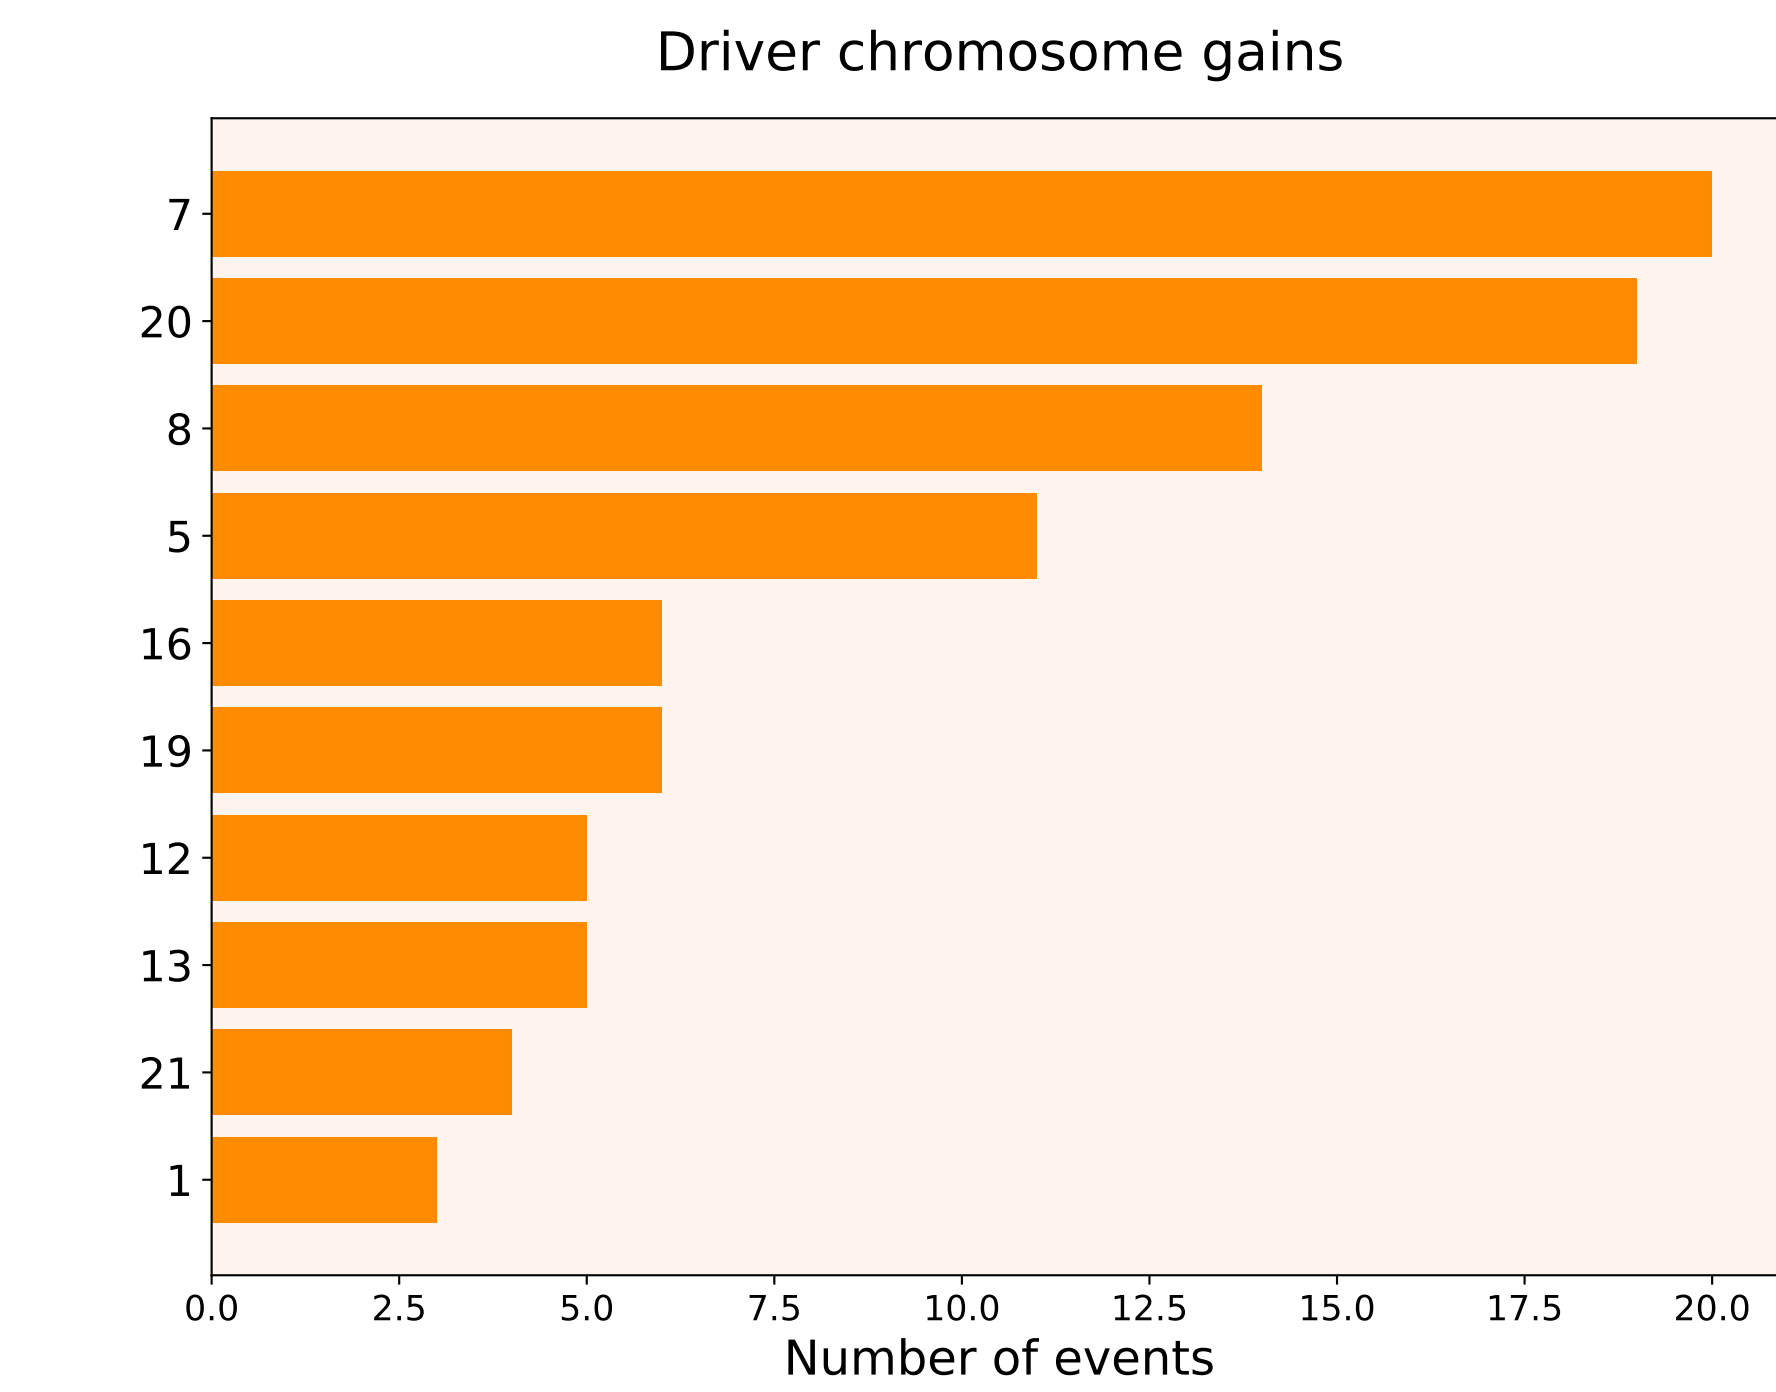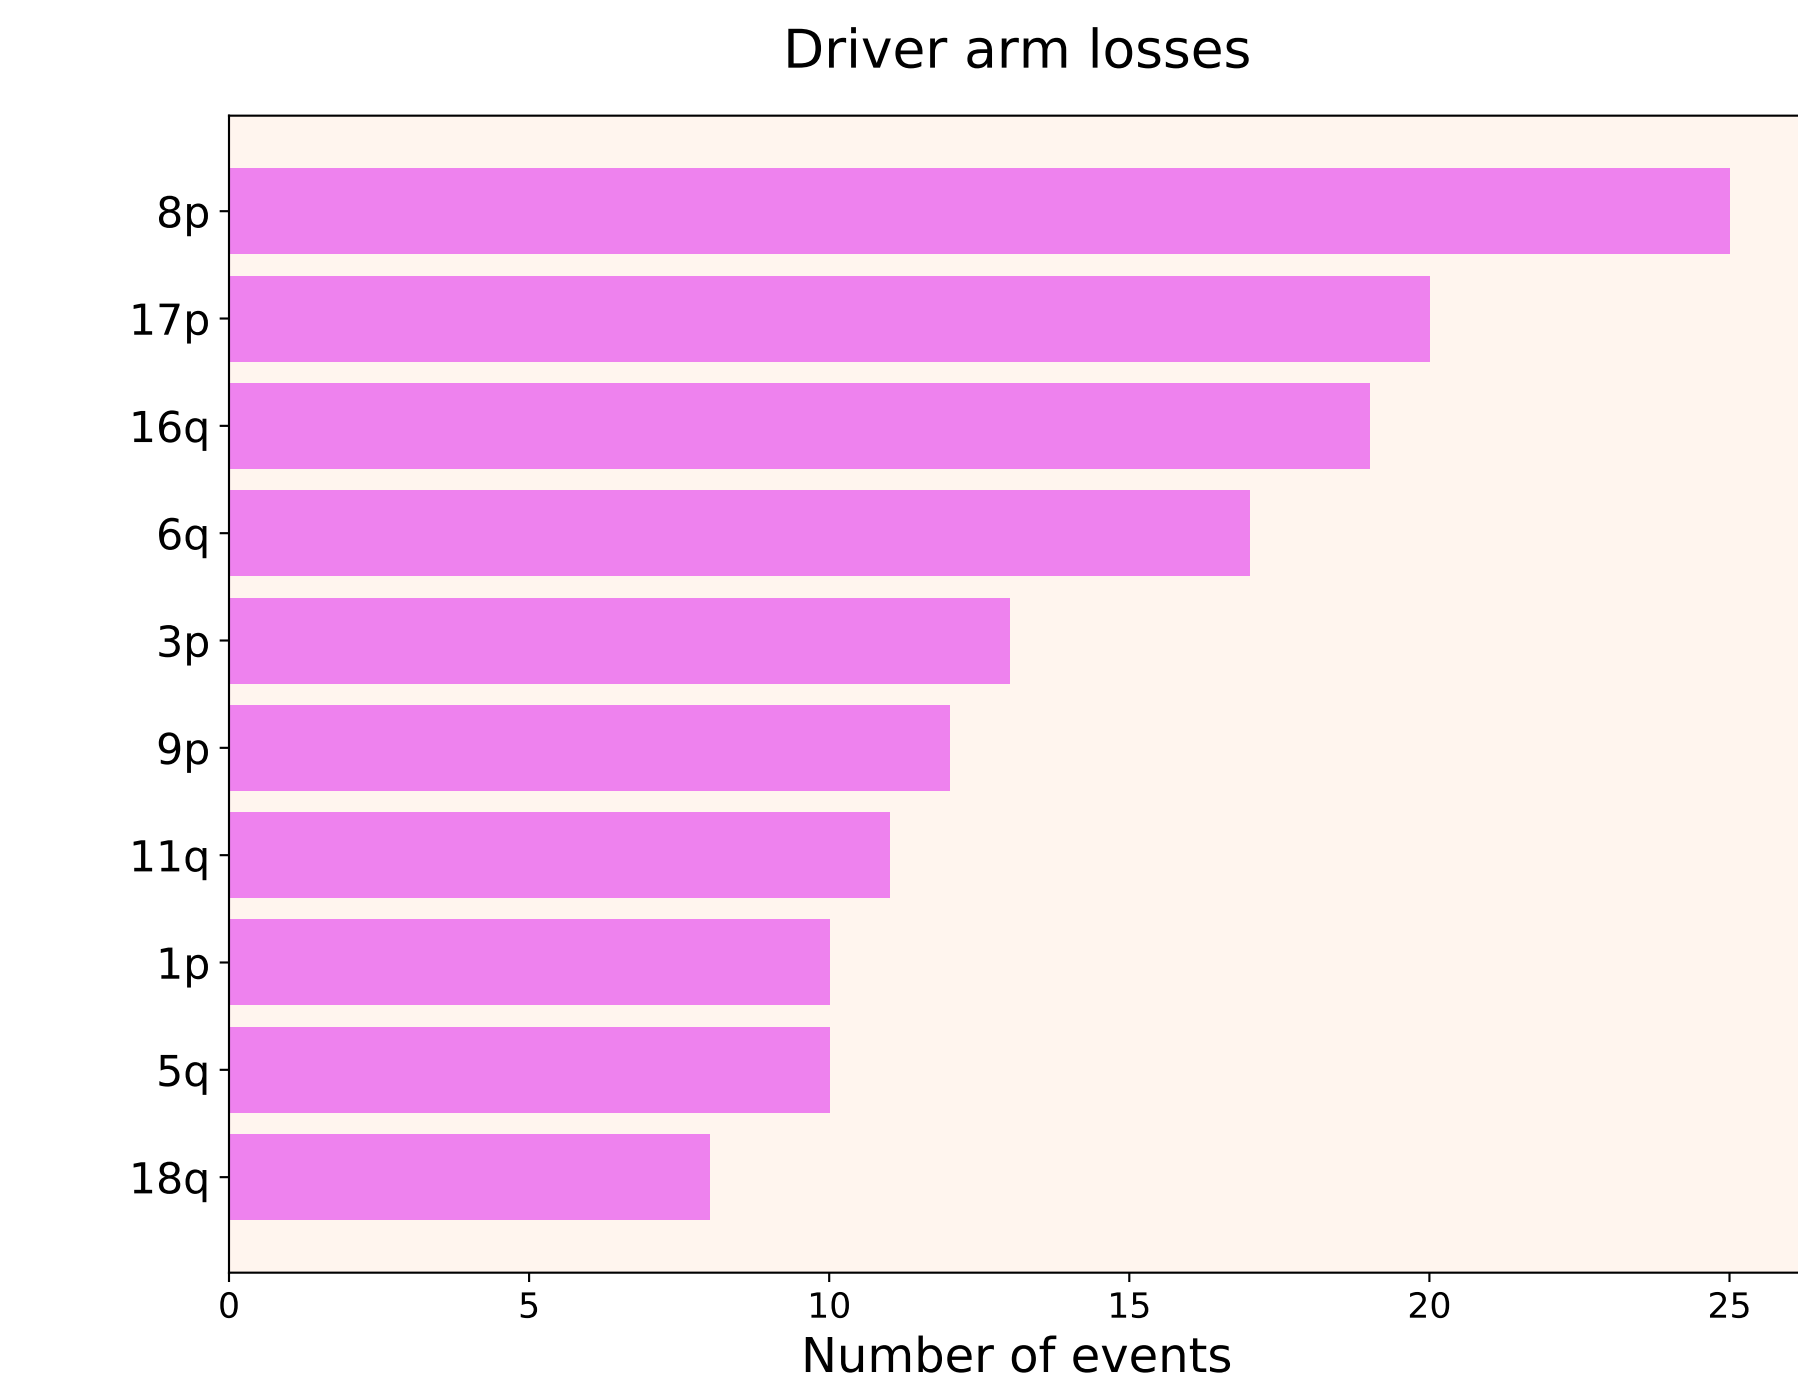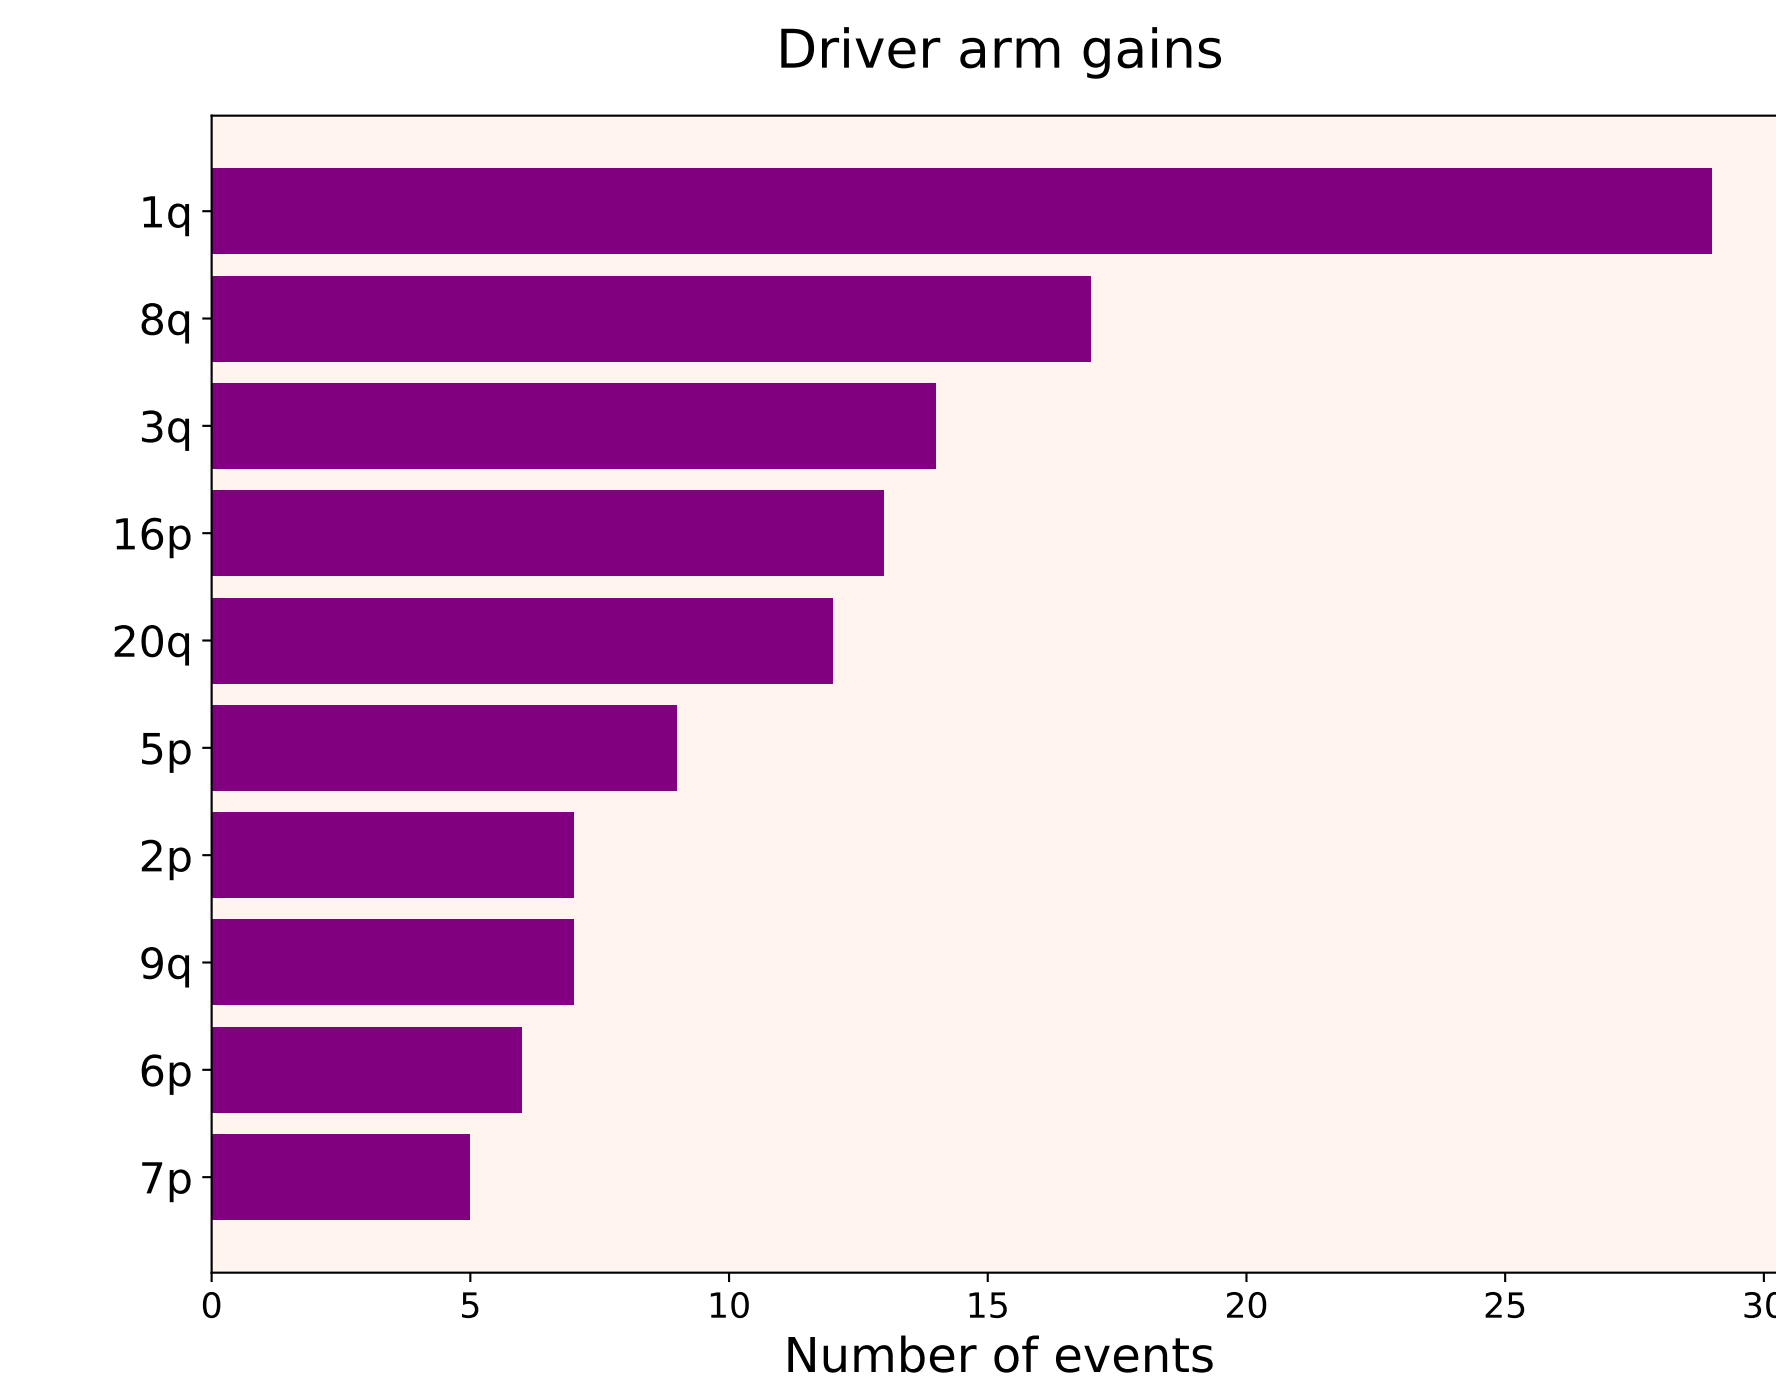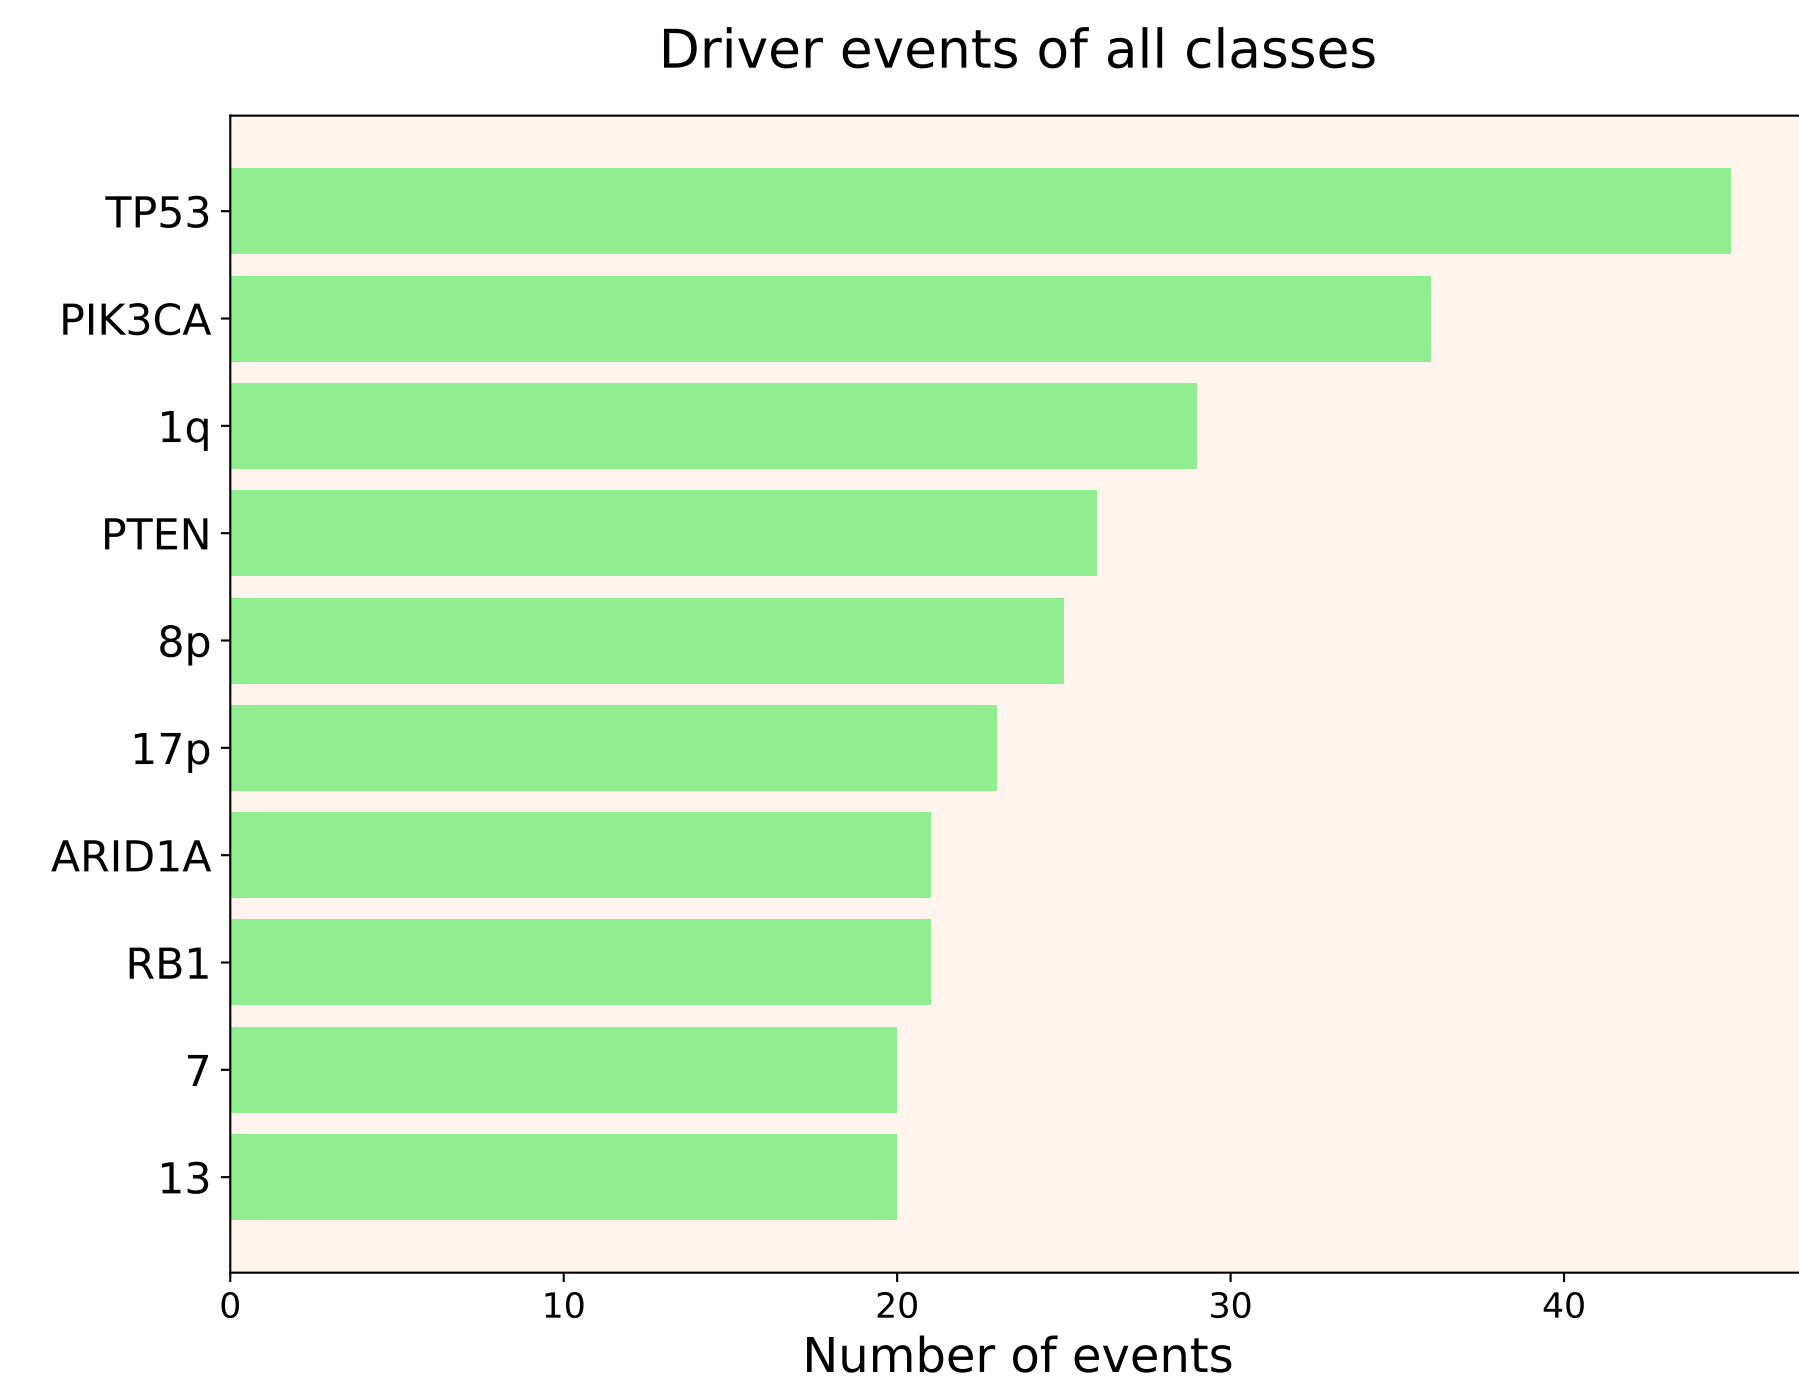

Supplement: Supplemental_Data_S1.zip [file Supplemental_Data_S1.zip]

Driver event distribution by cancer stage

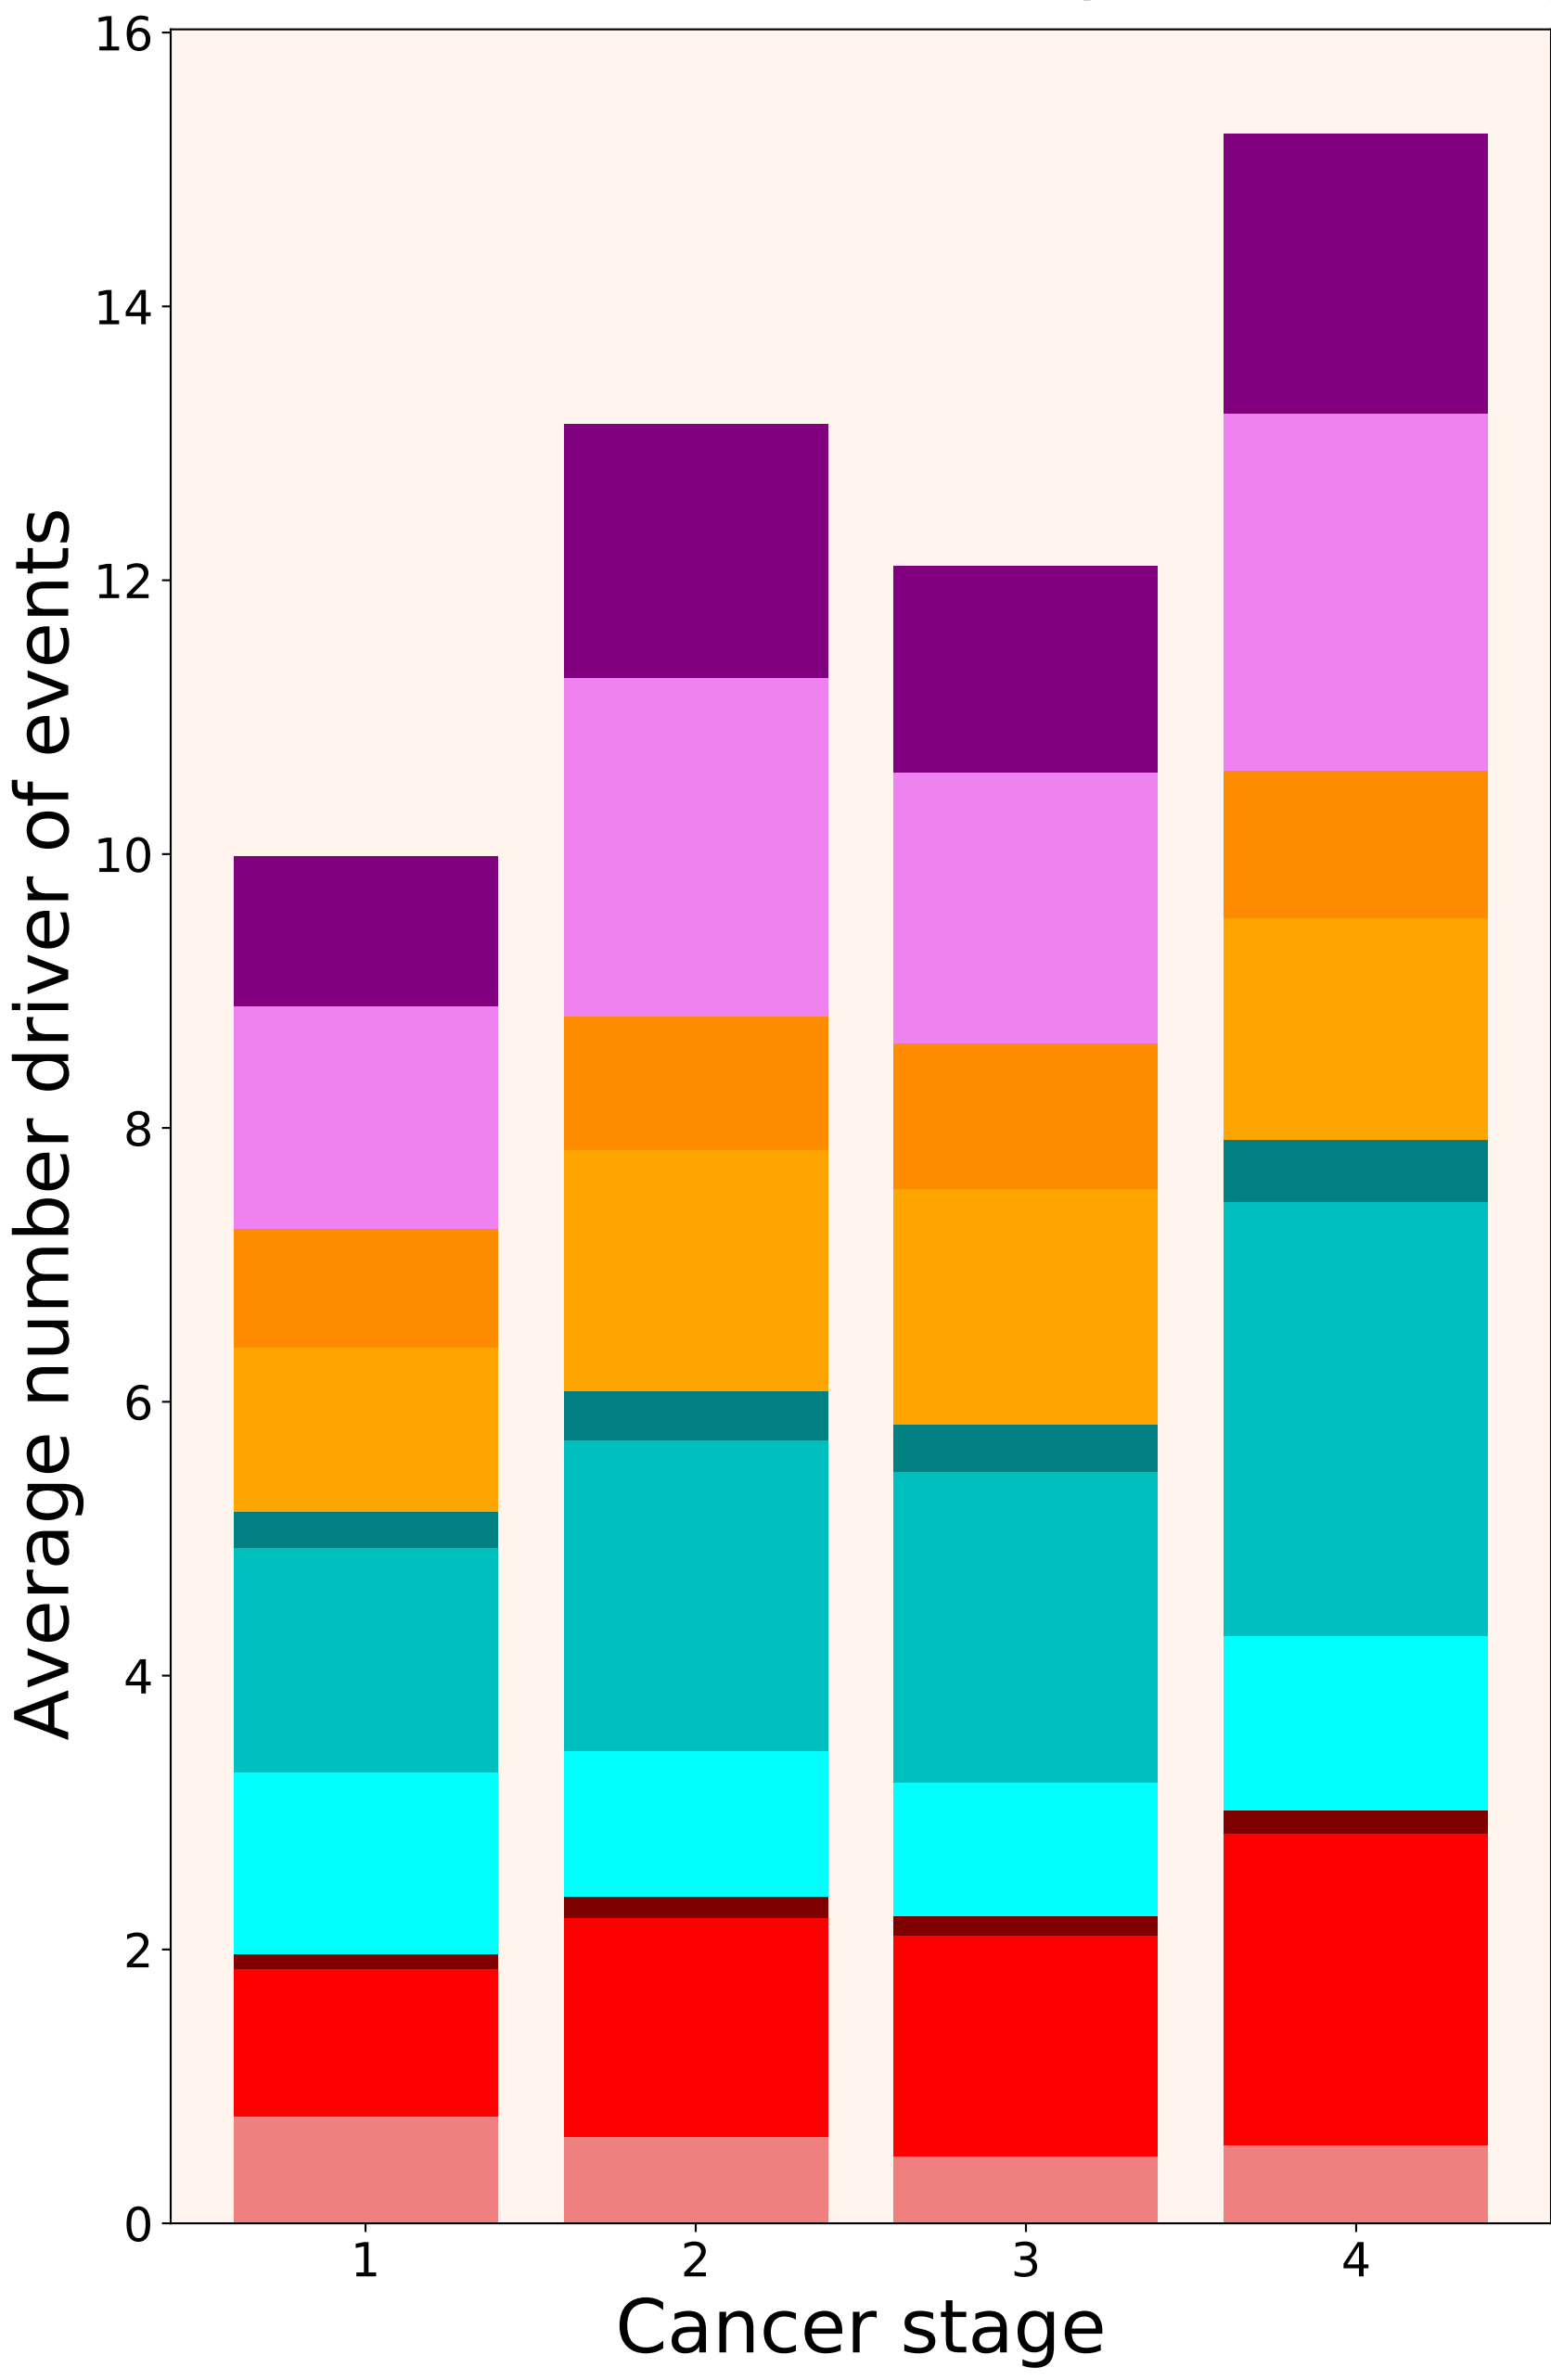

Supplement: Supplemental_Data_S1.zip [file Supplemental_Data_S1.zip]

# BLCA\_MALE

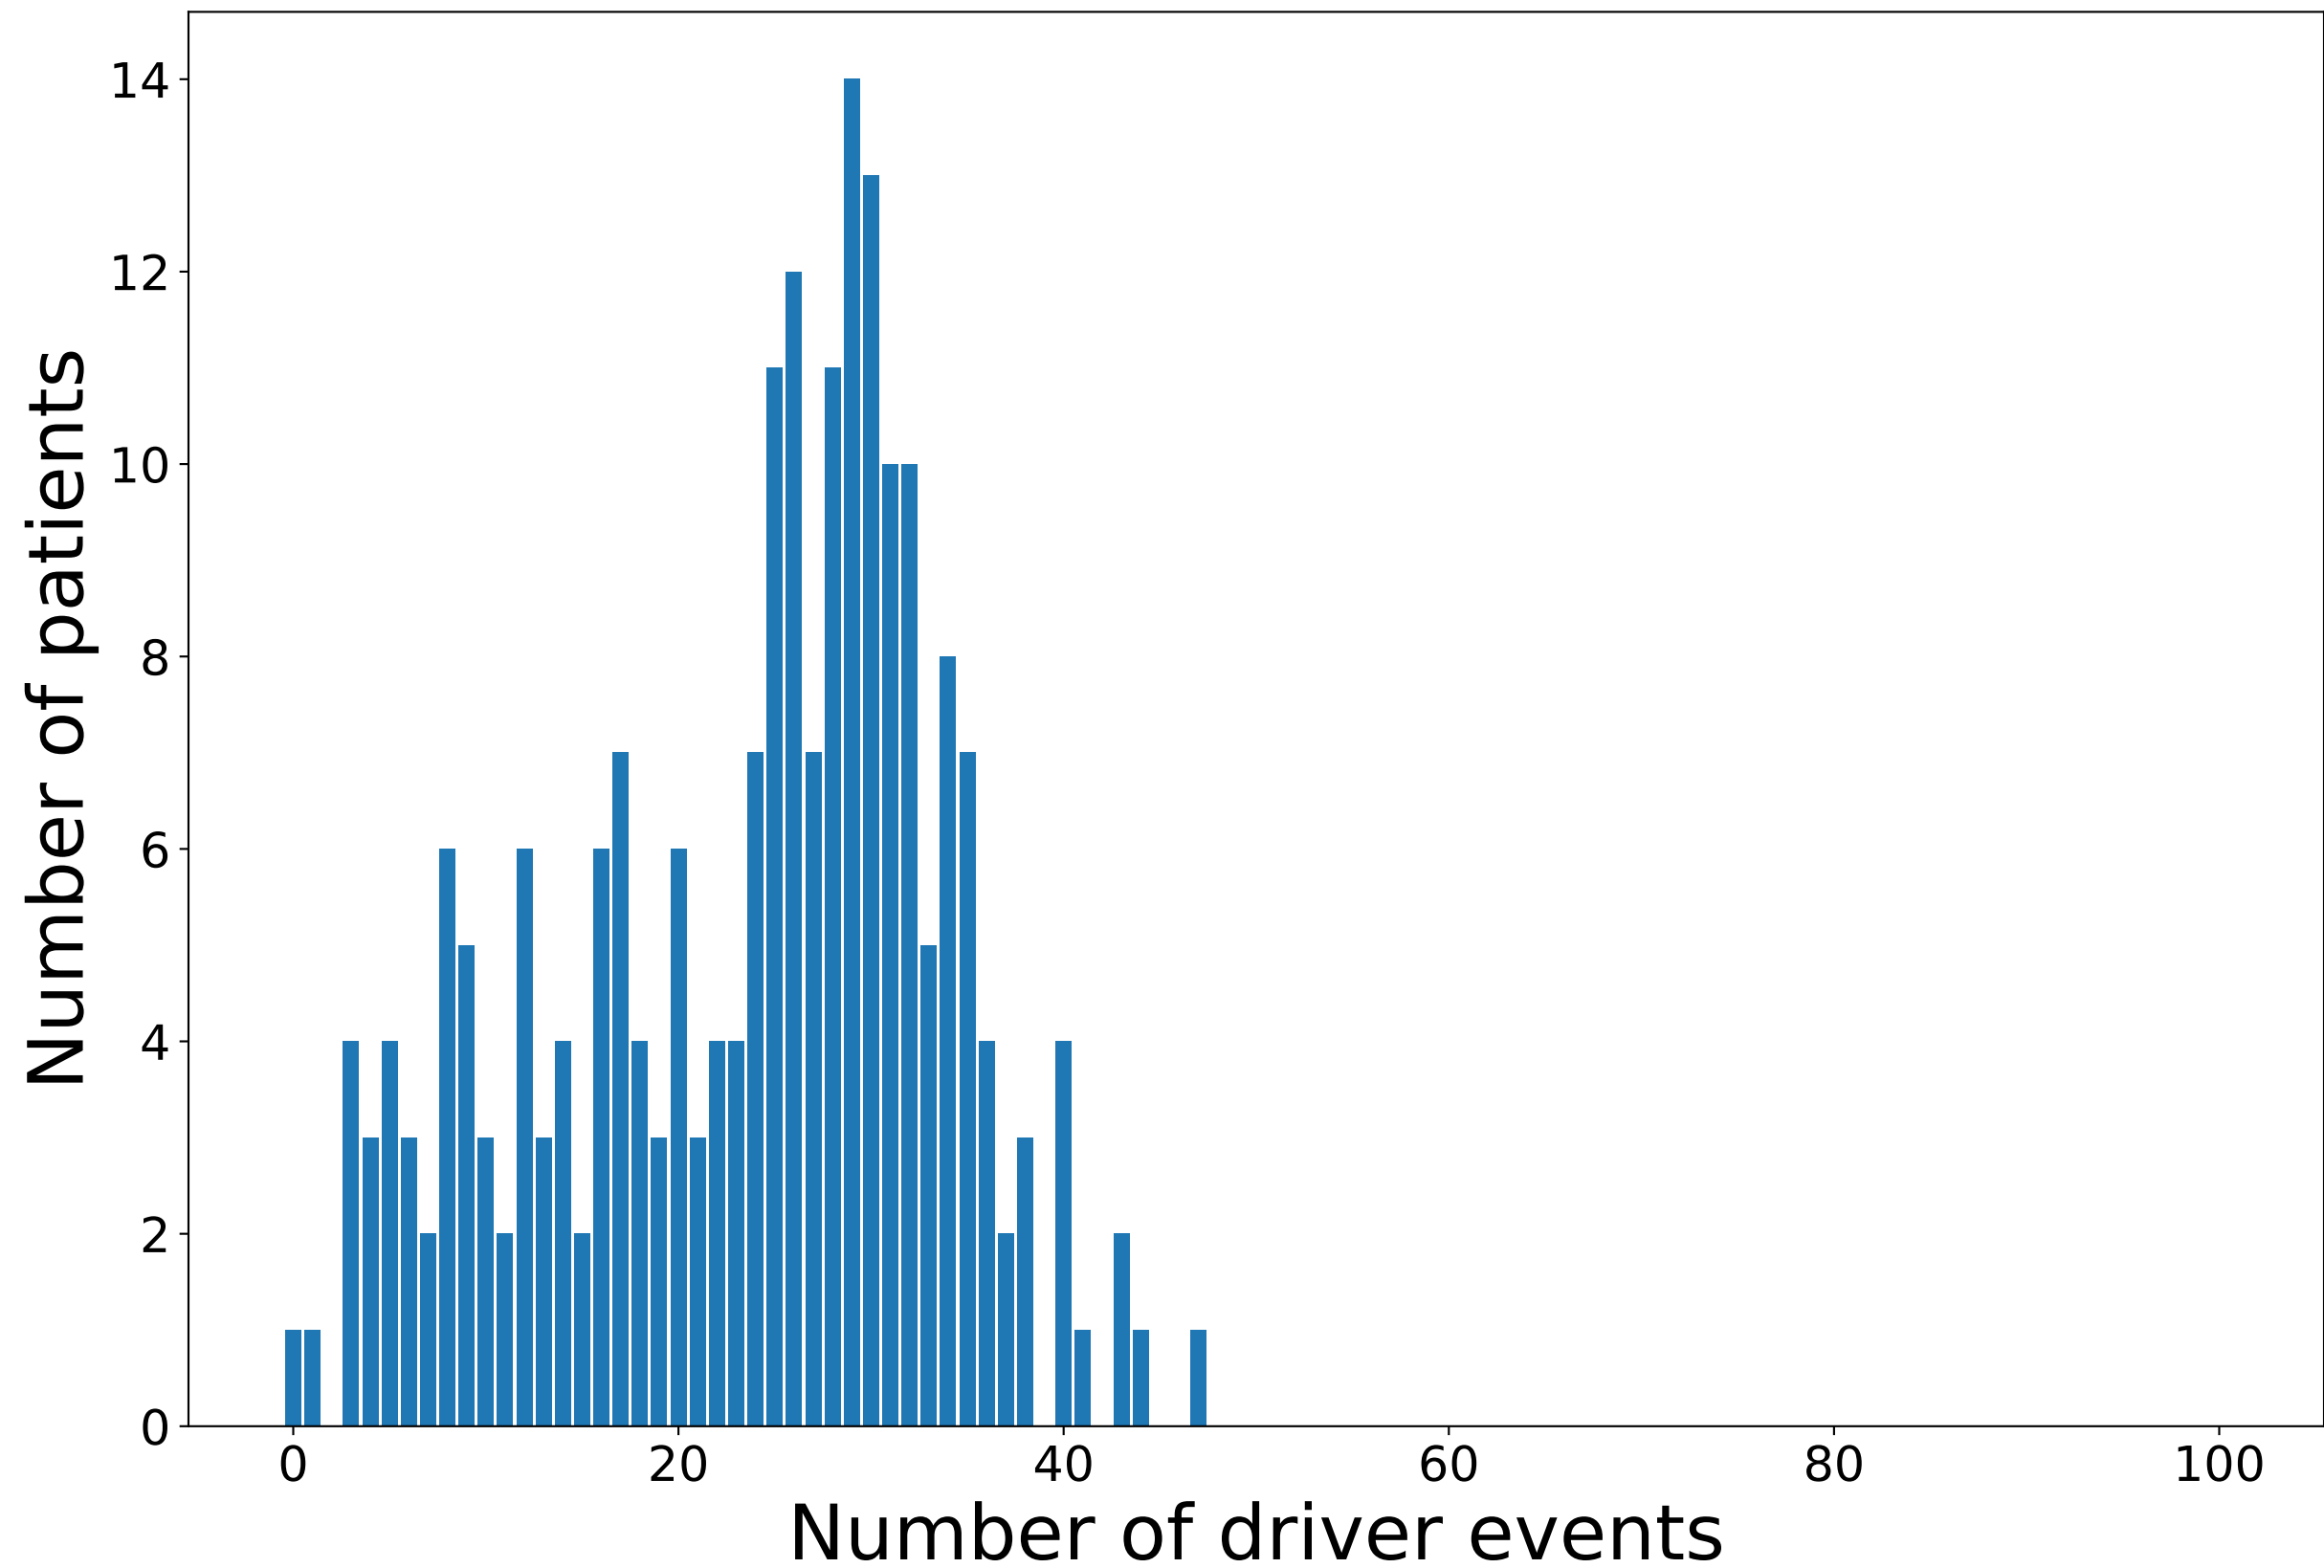

Supplement: Supplemental_Data_S1.zip [file Supplemental_Data_S1.zip]

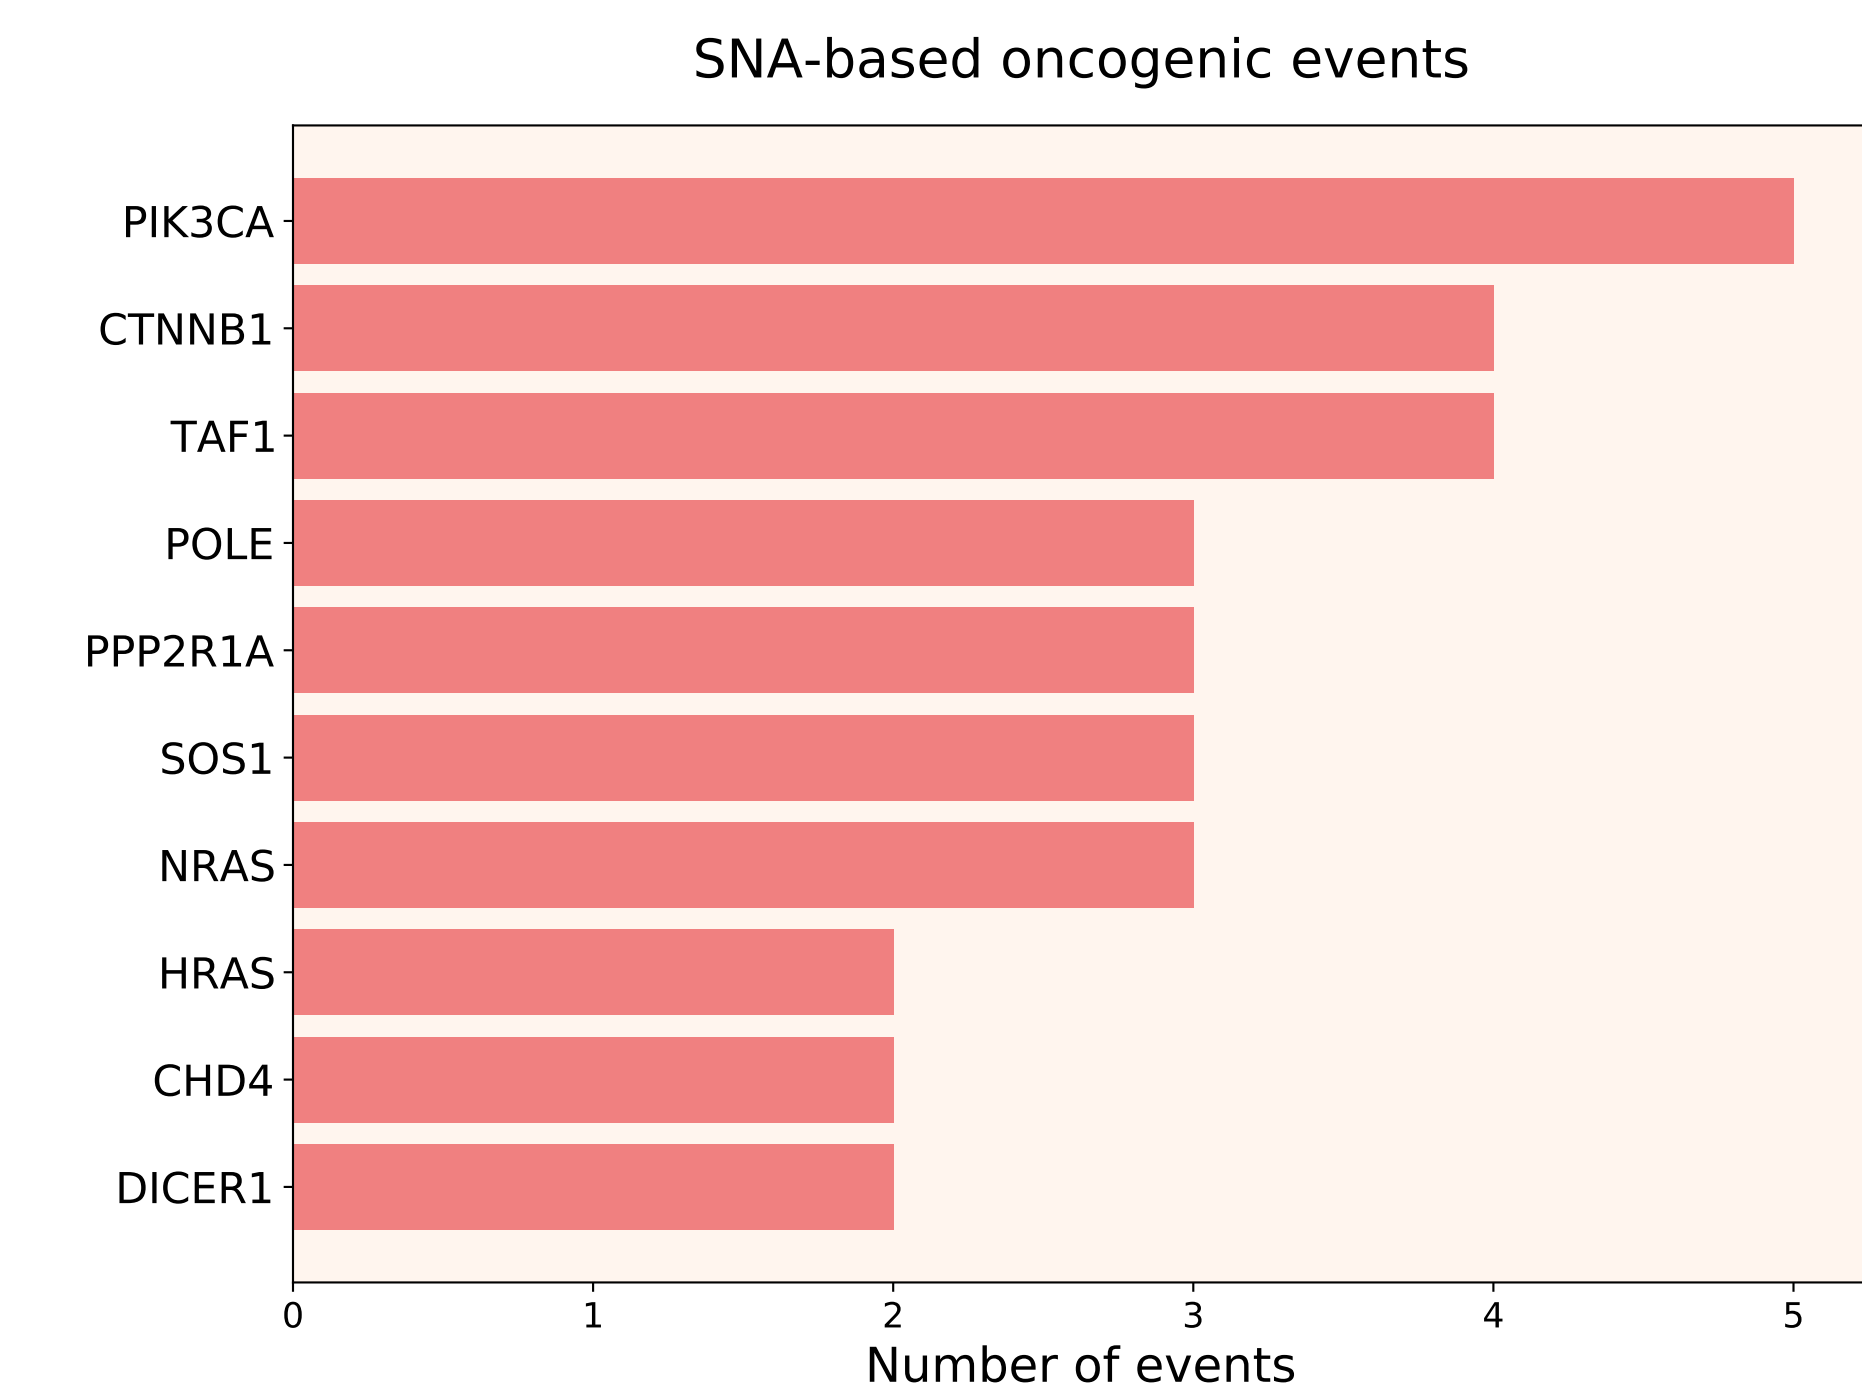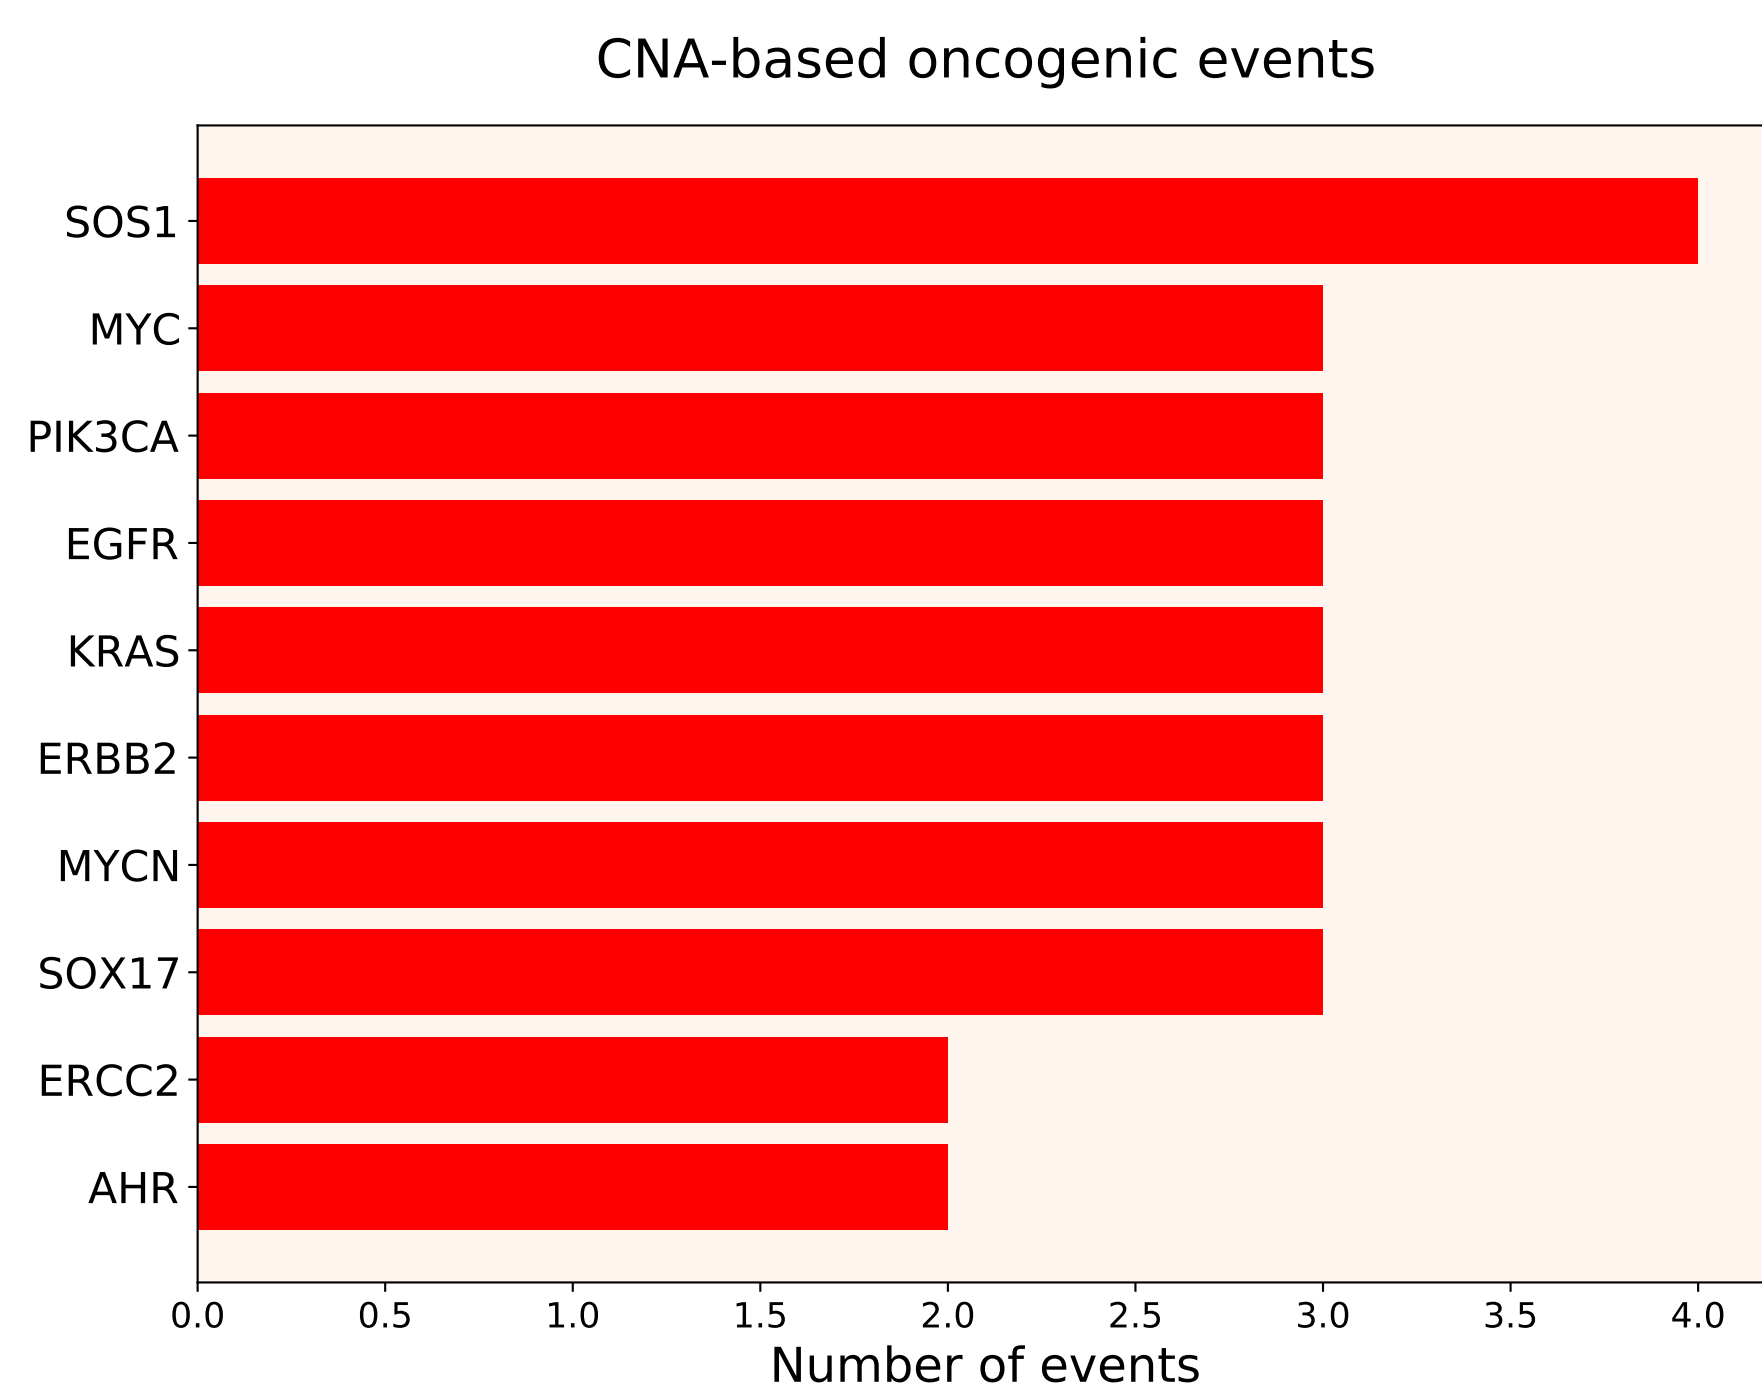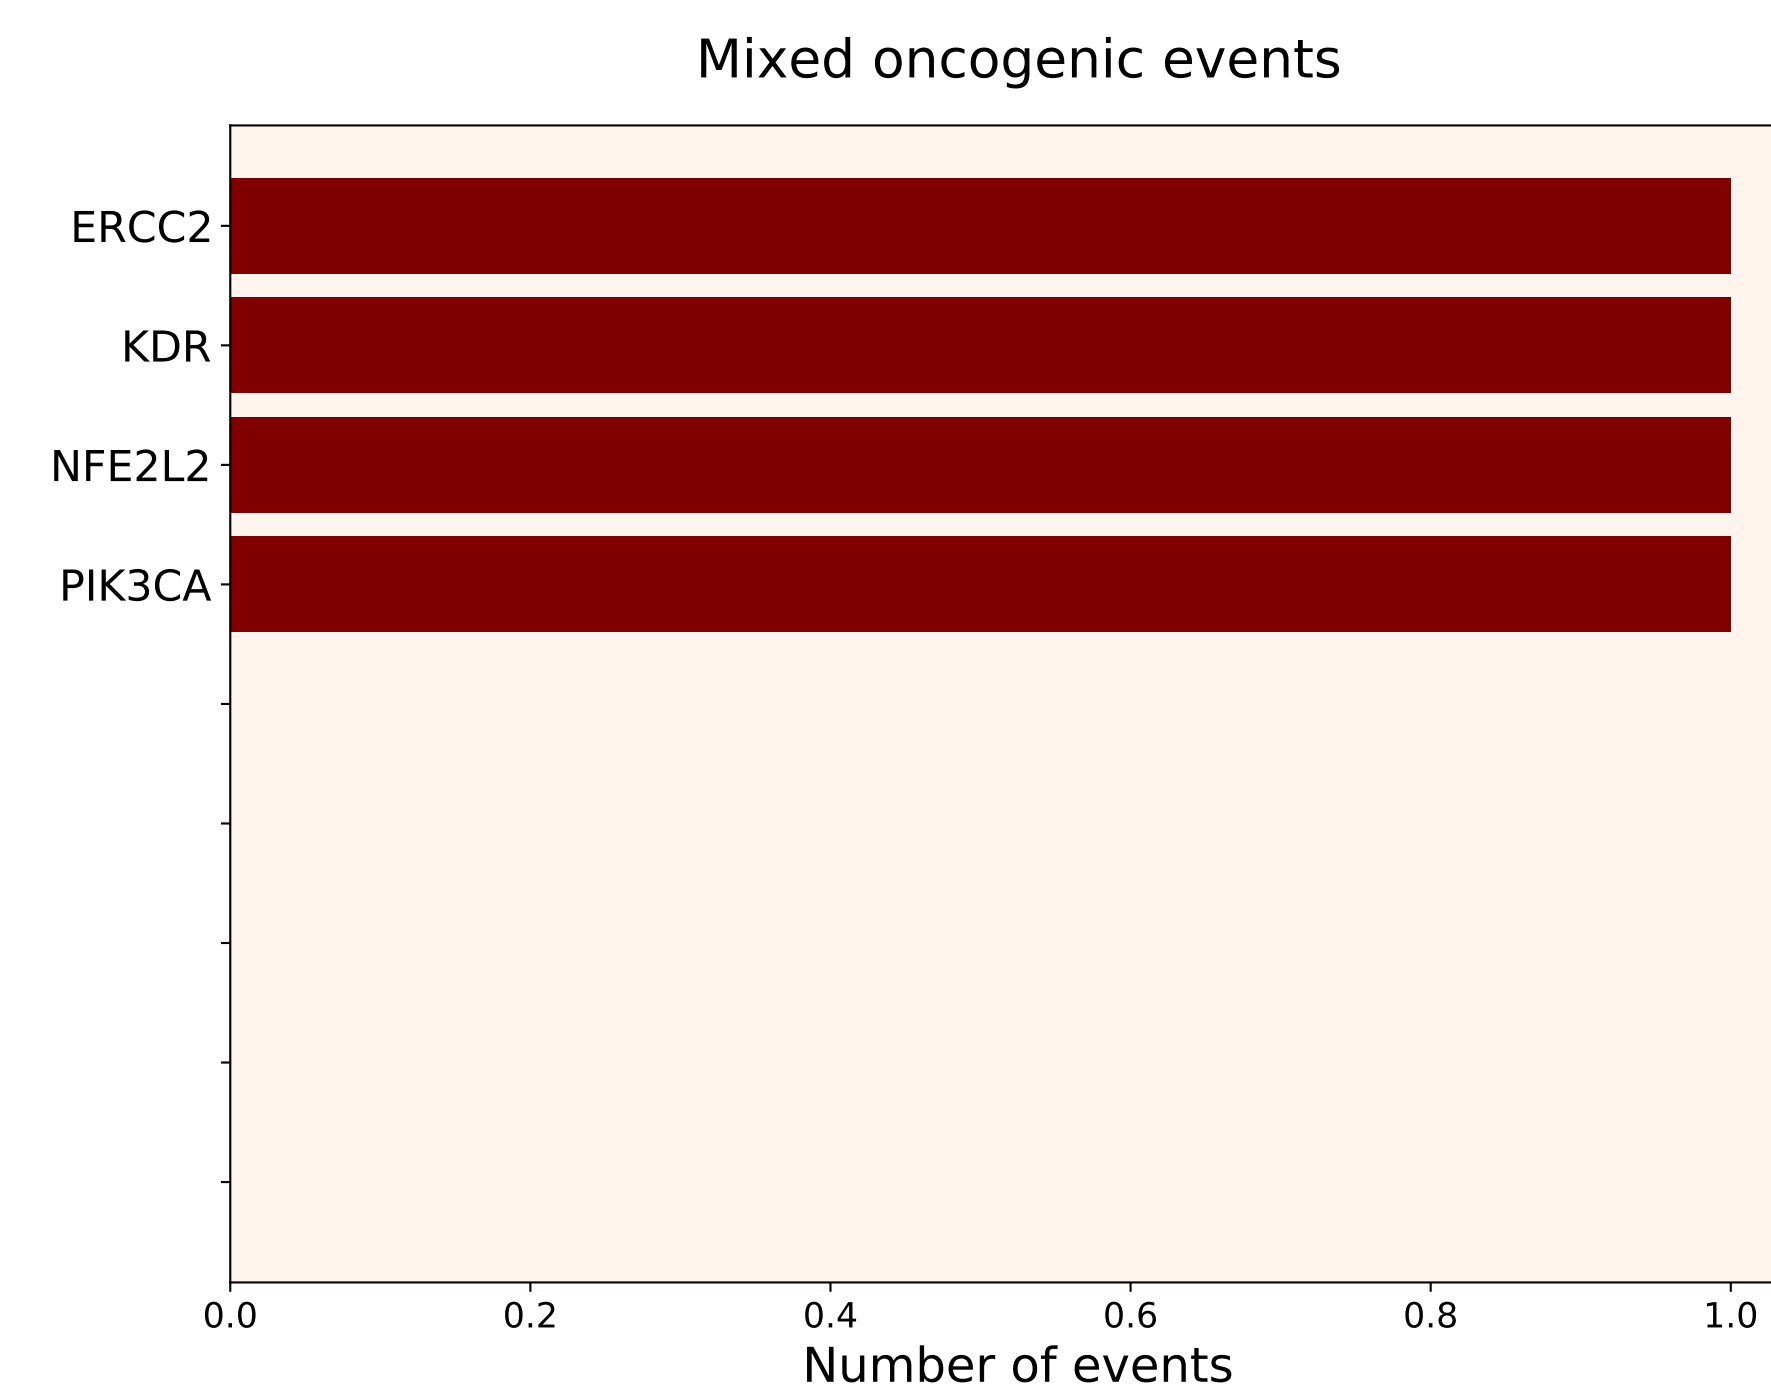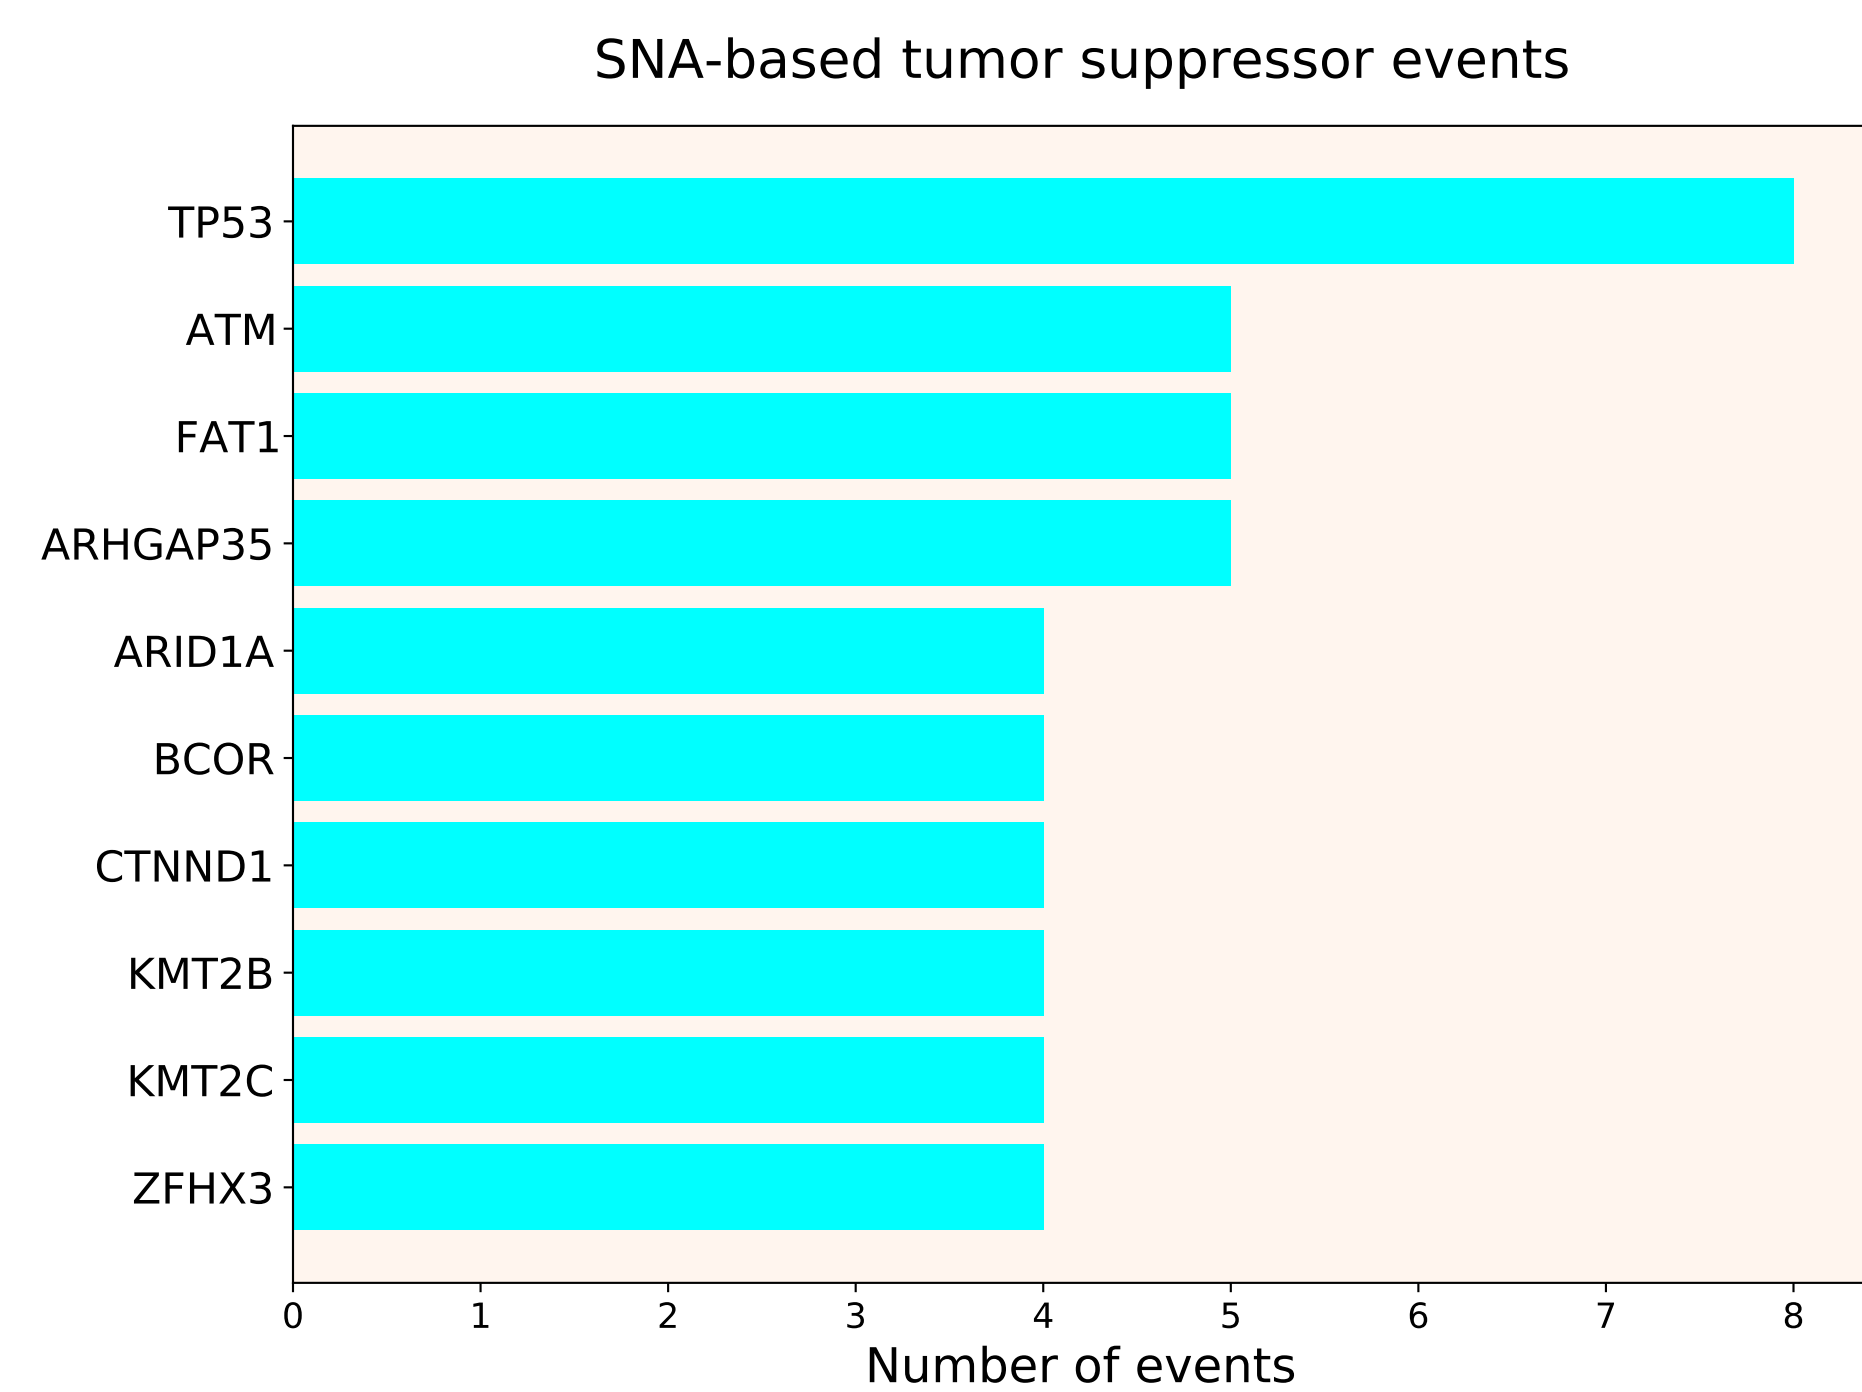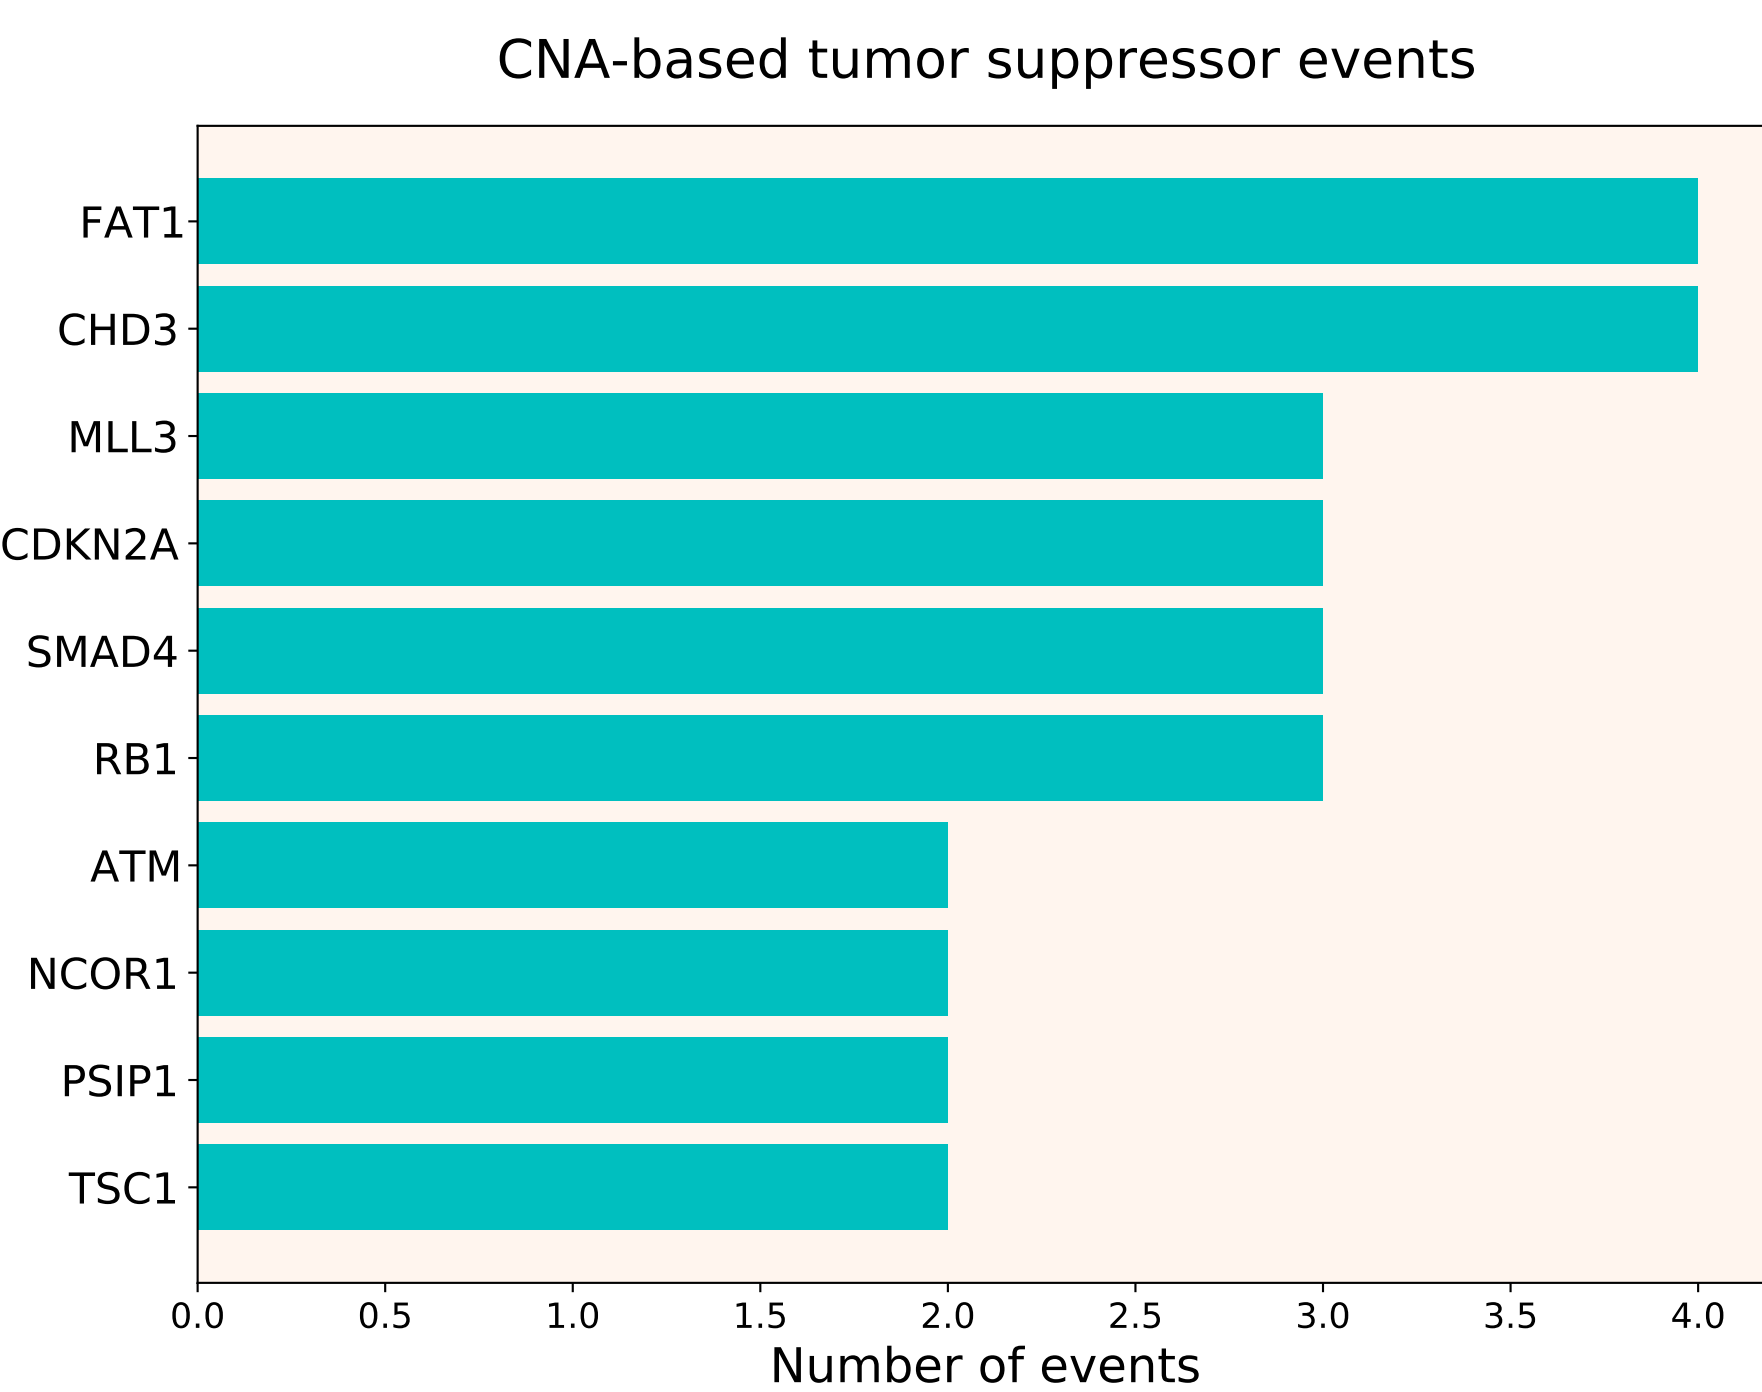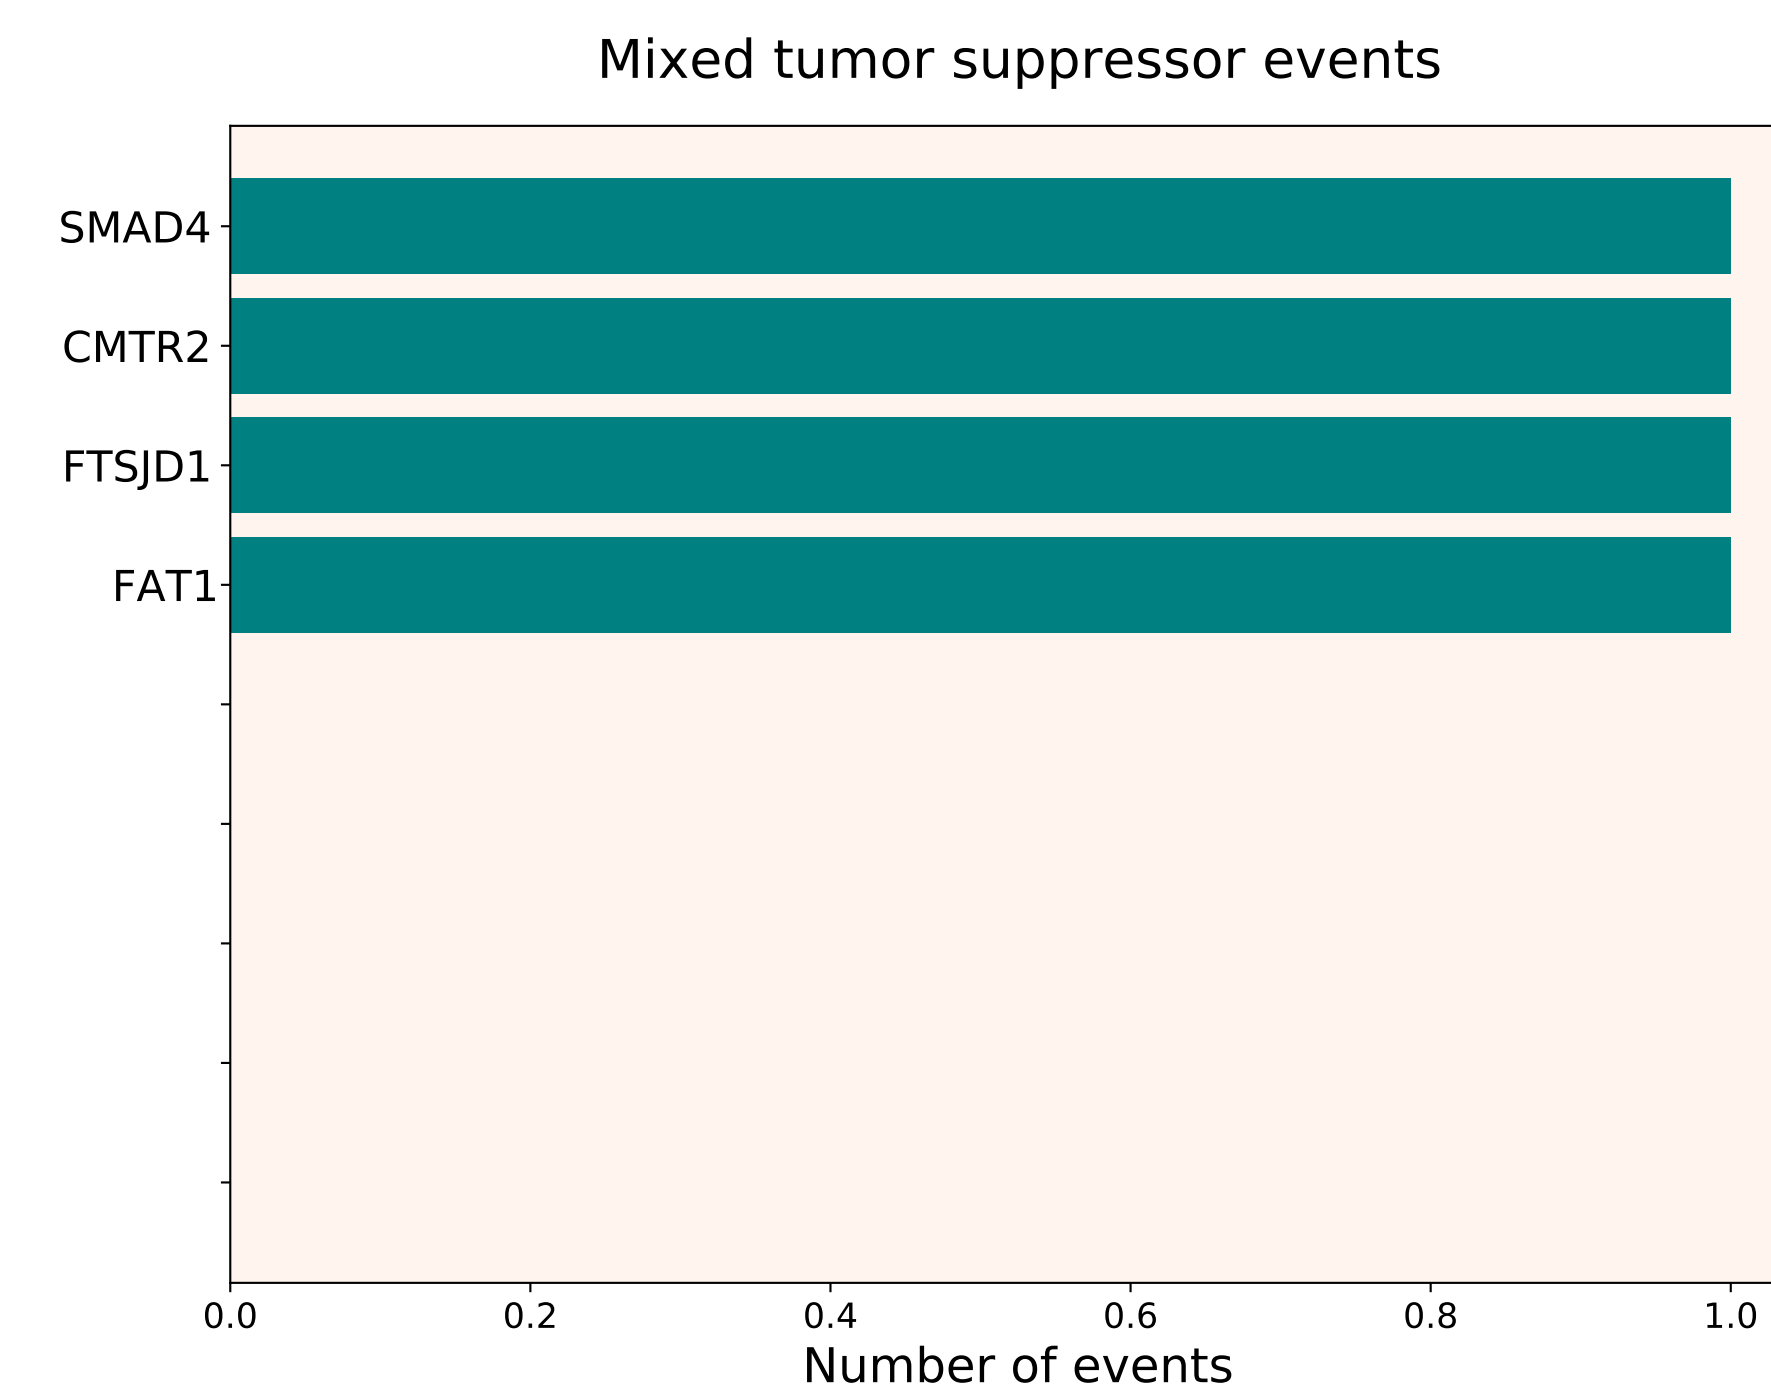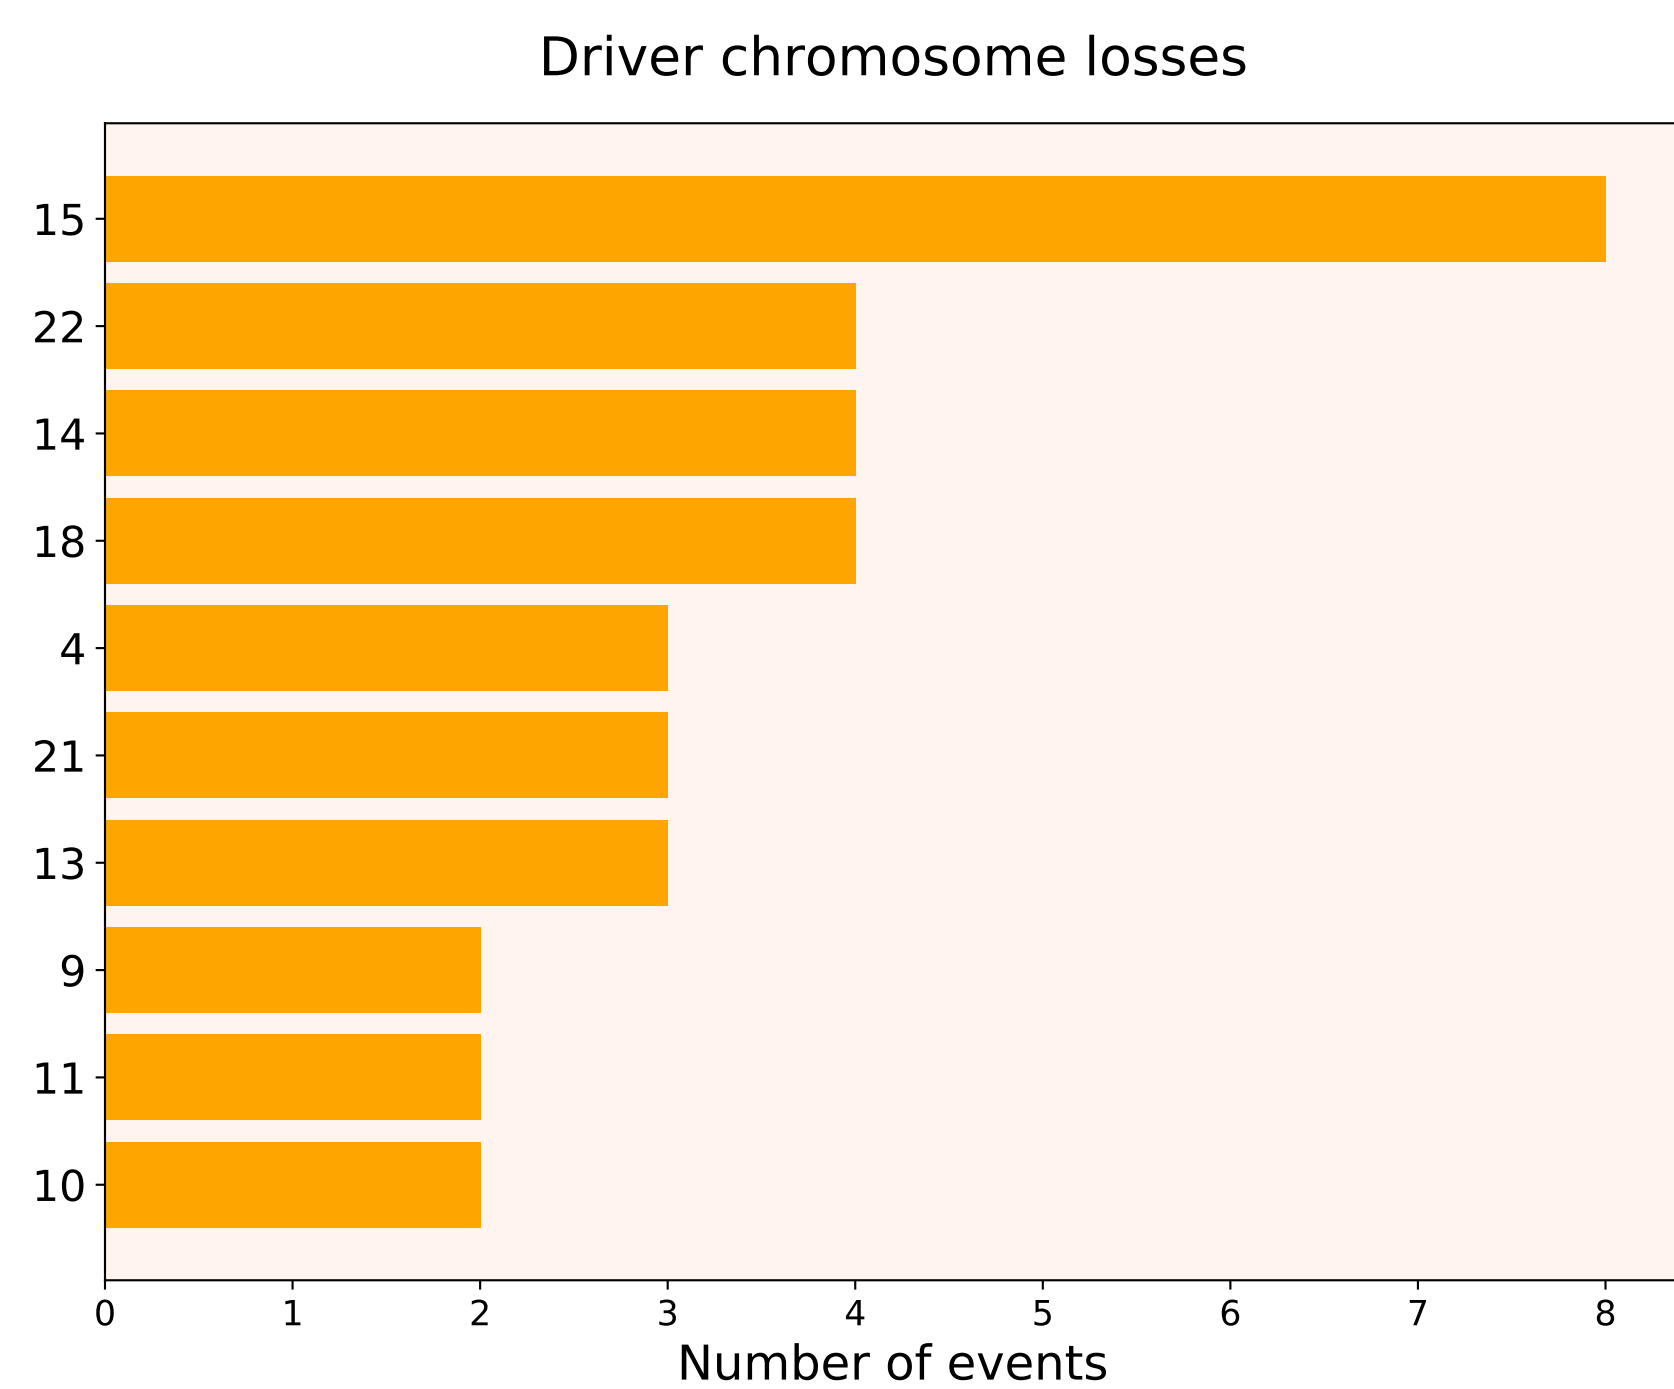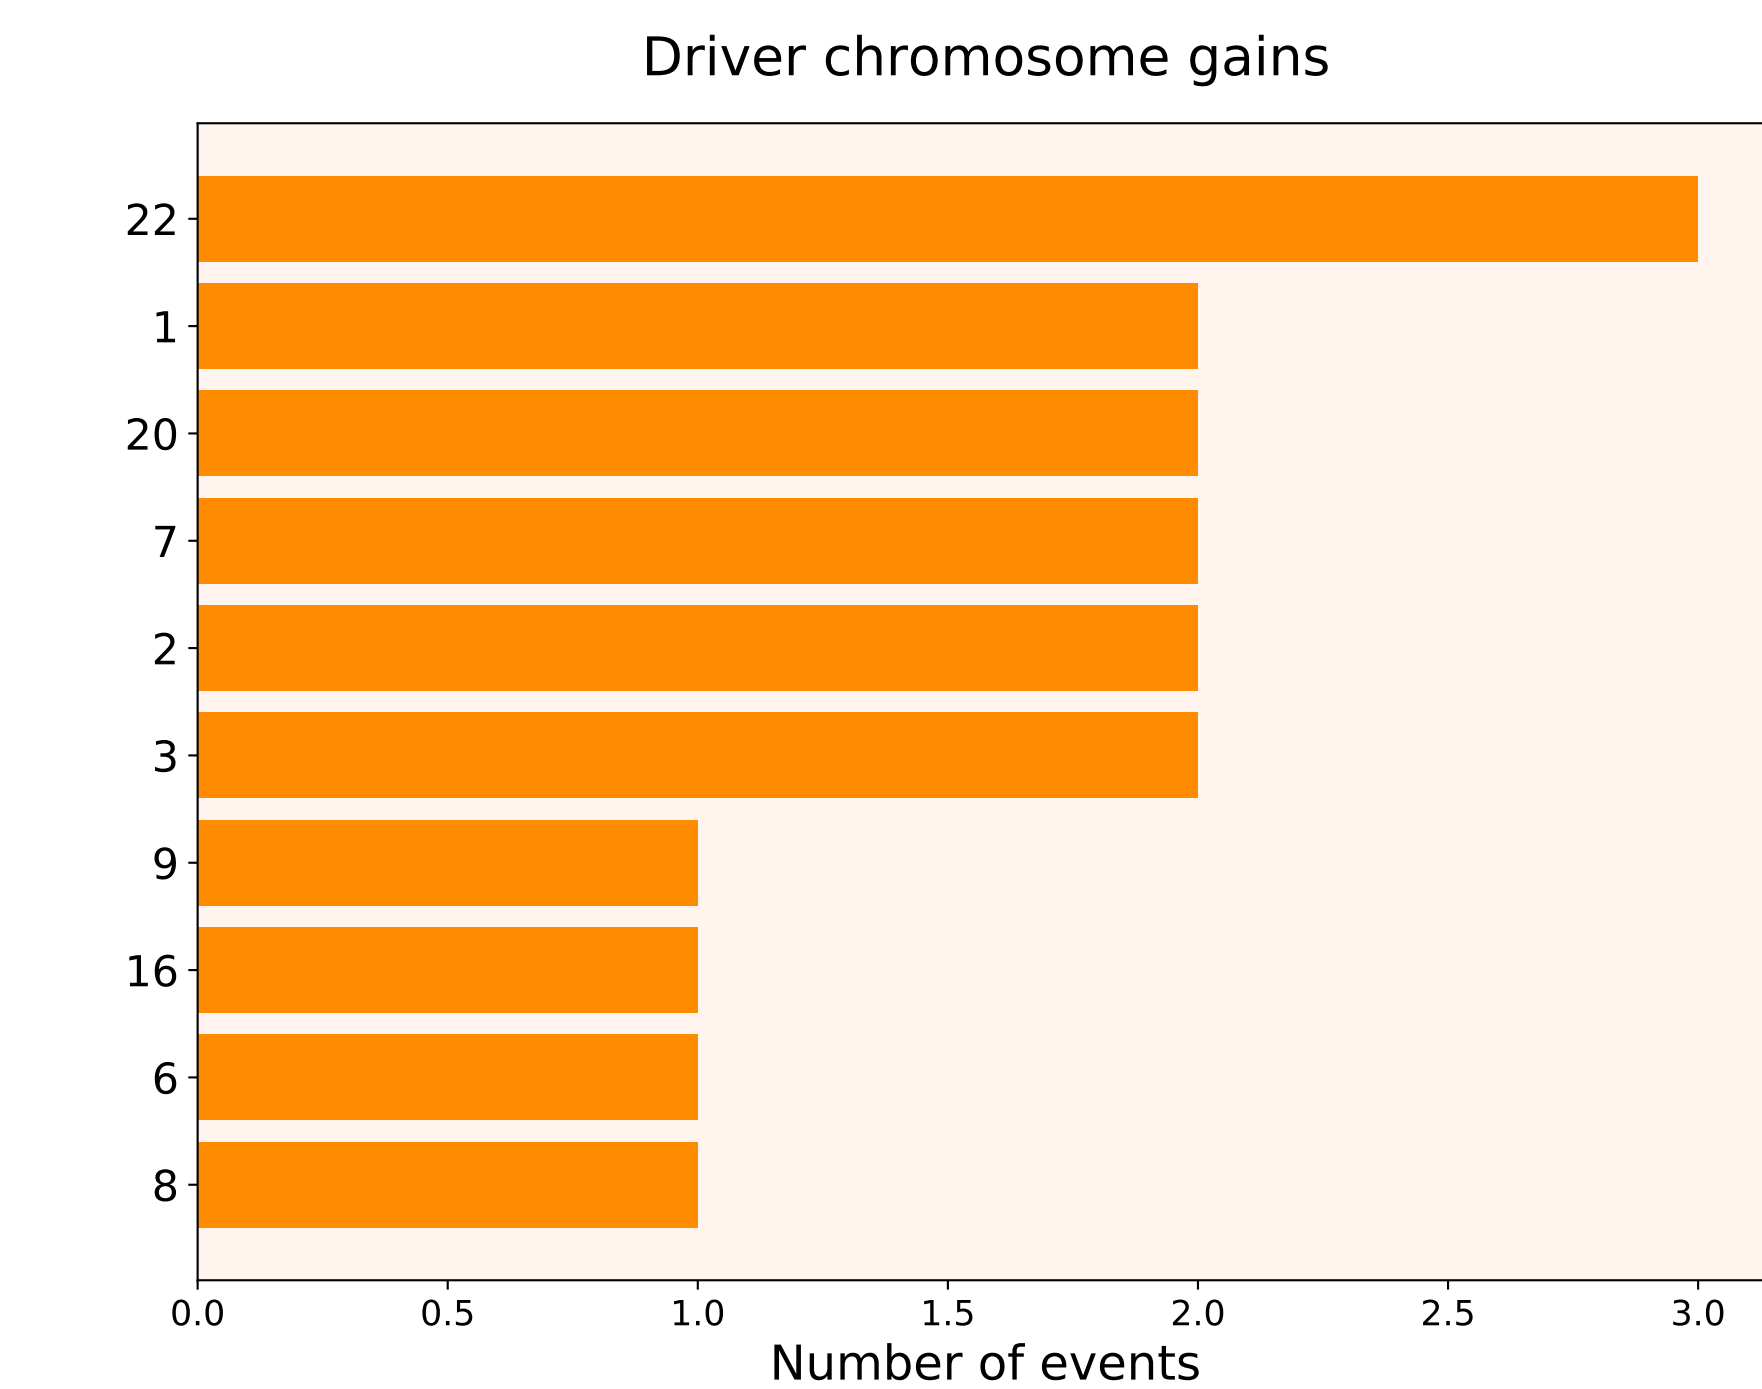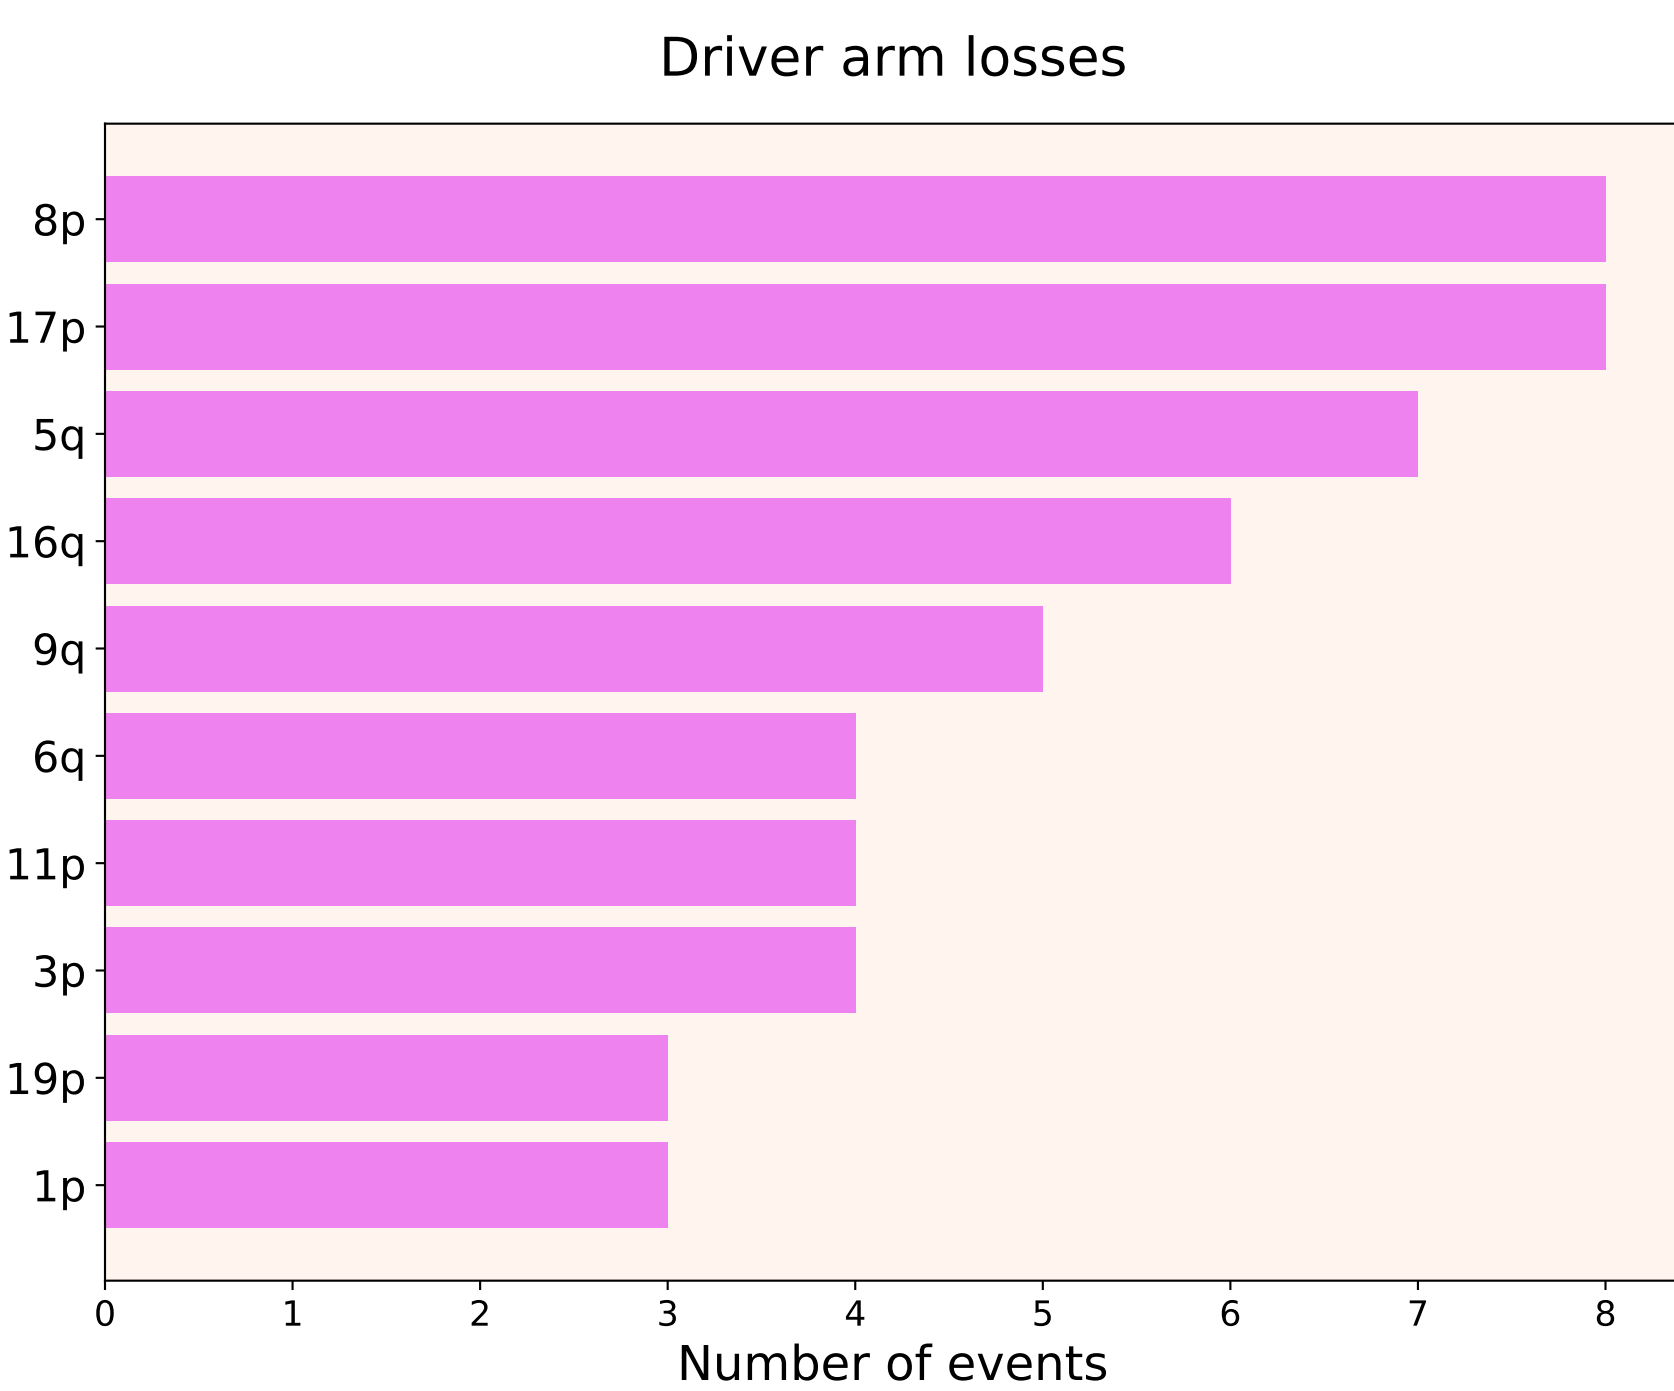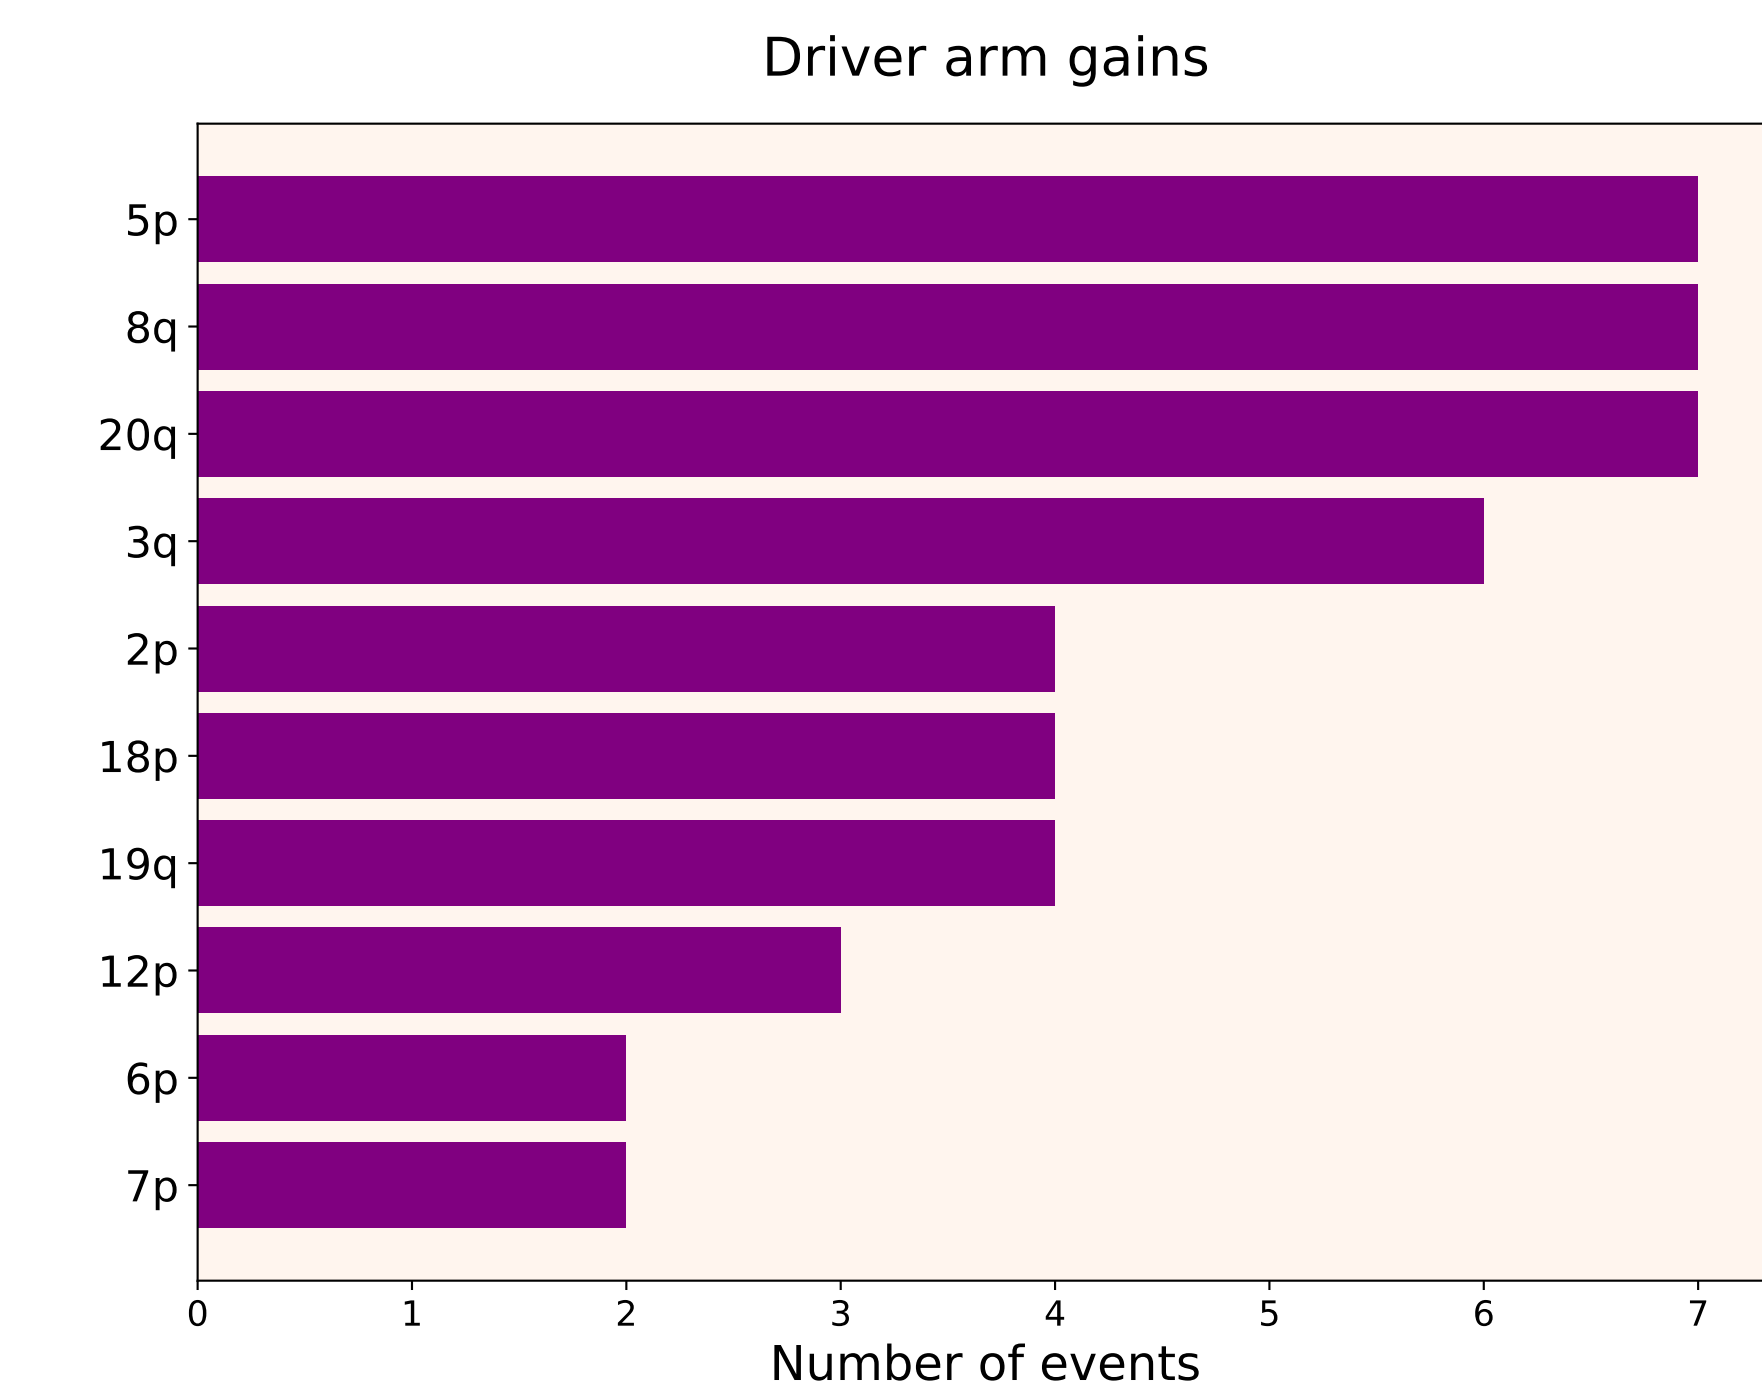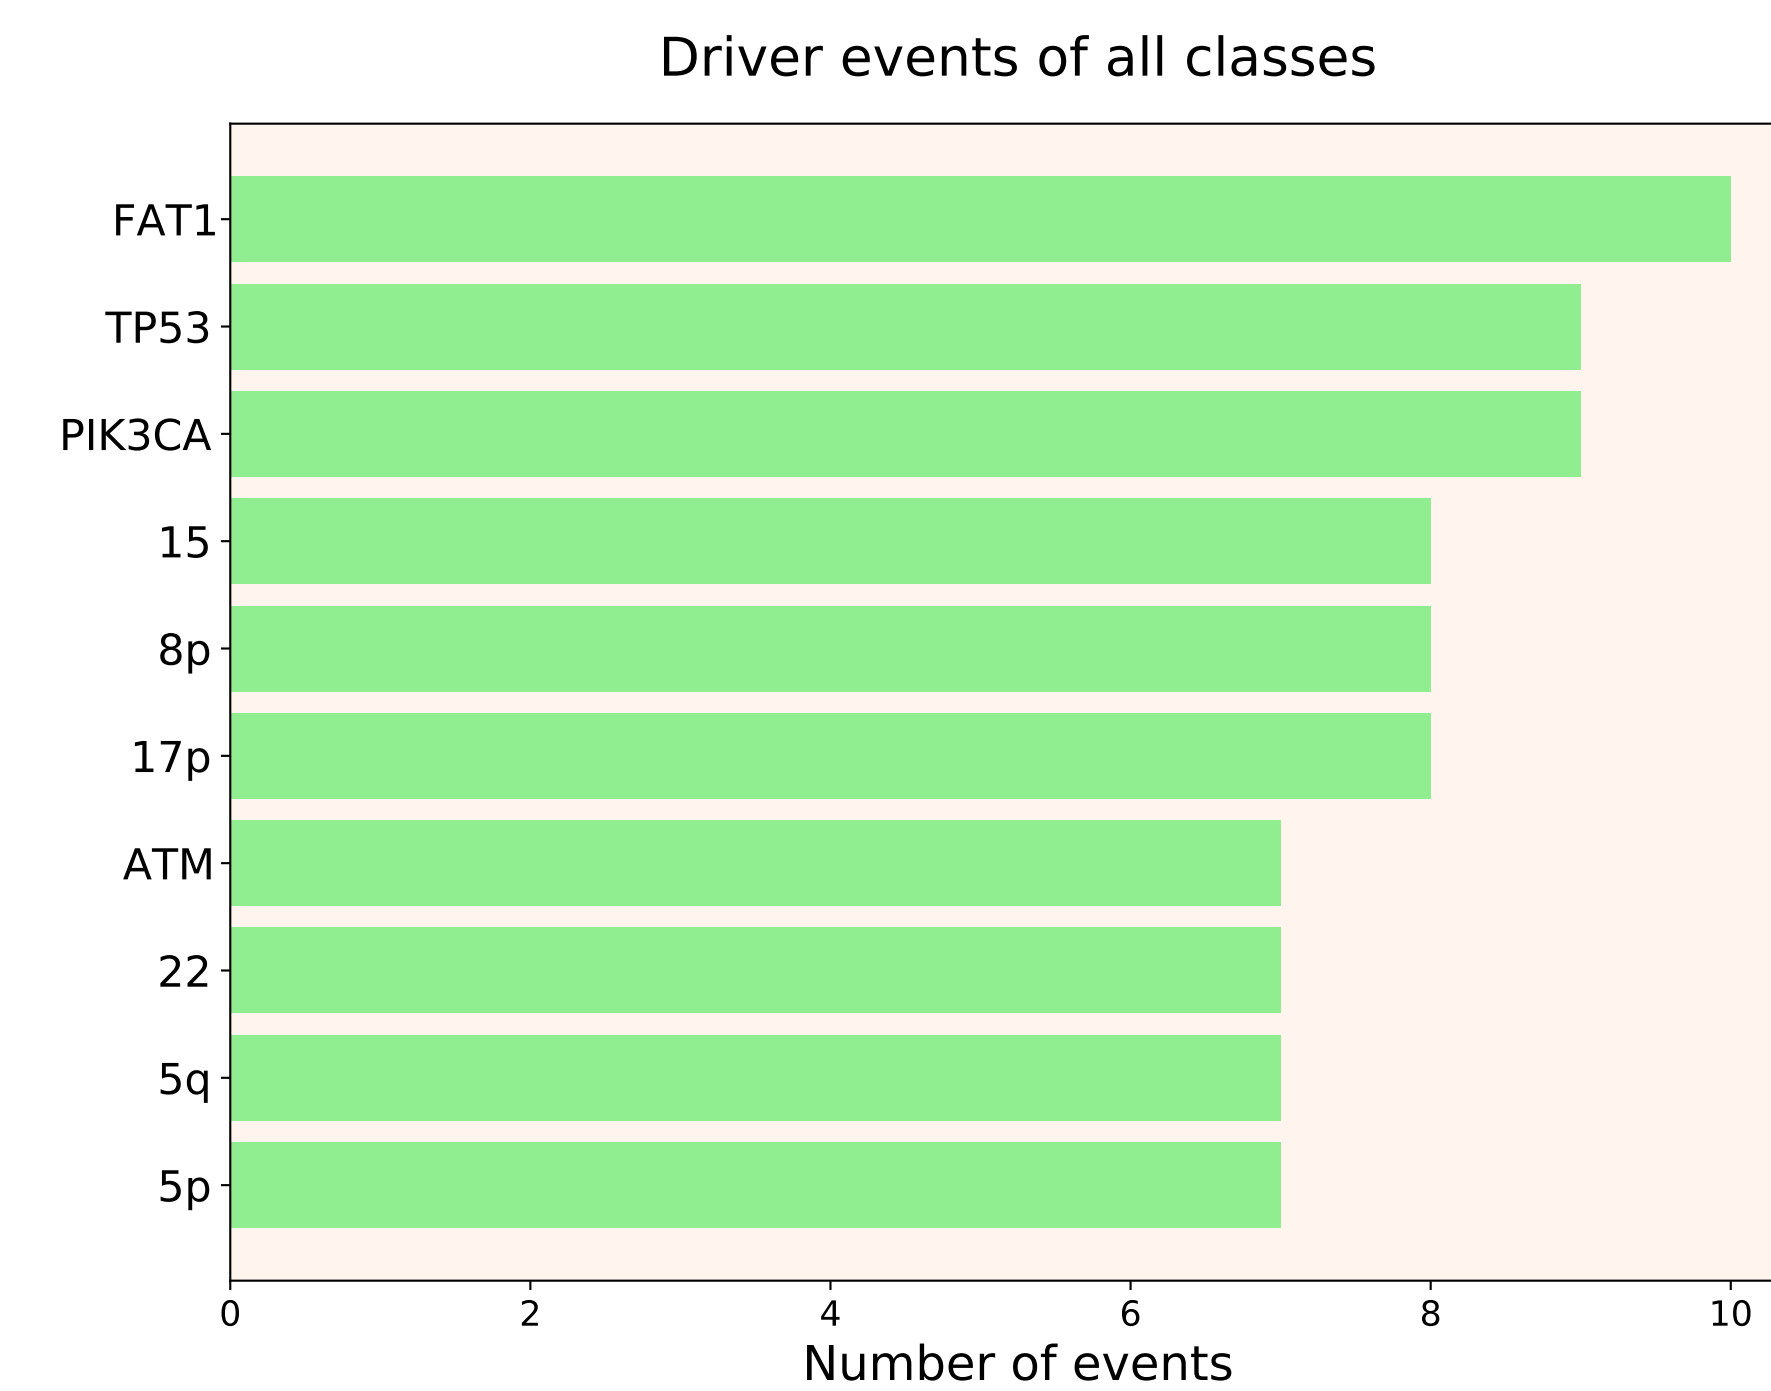

Supplement: Supplemental_Data_S1.zip [file Supplemental_Data_S1.zip]

# PAAD

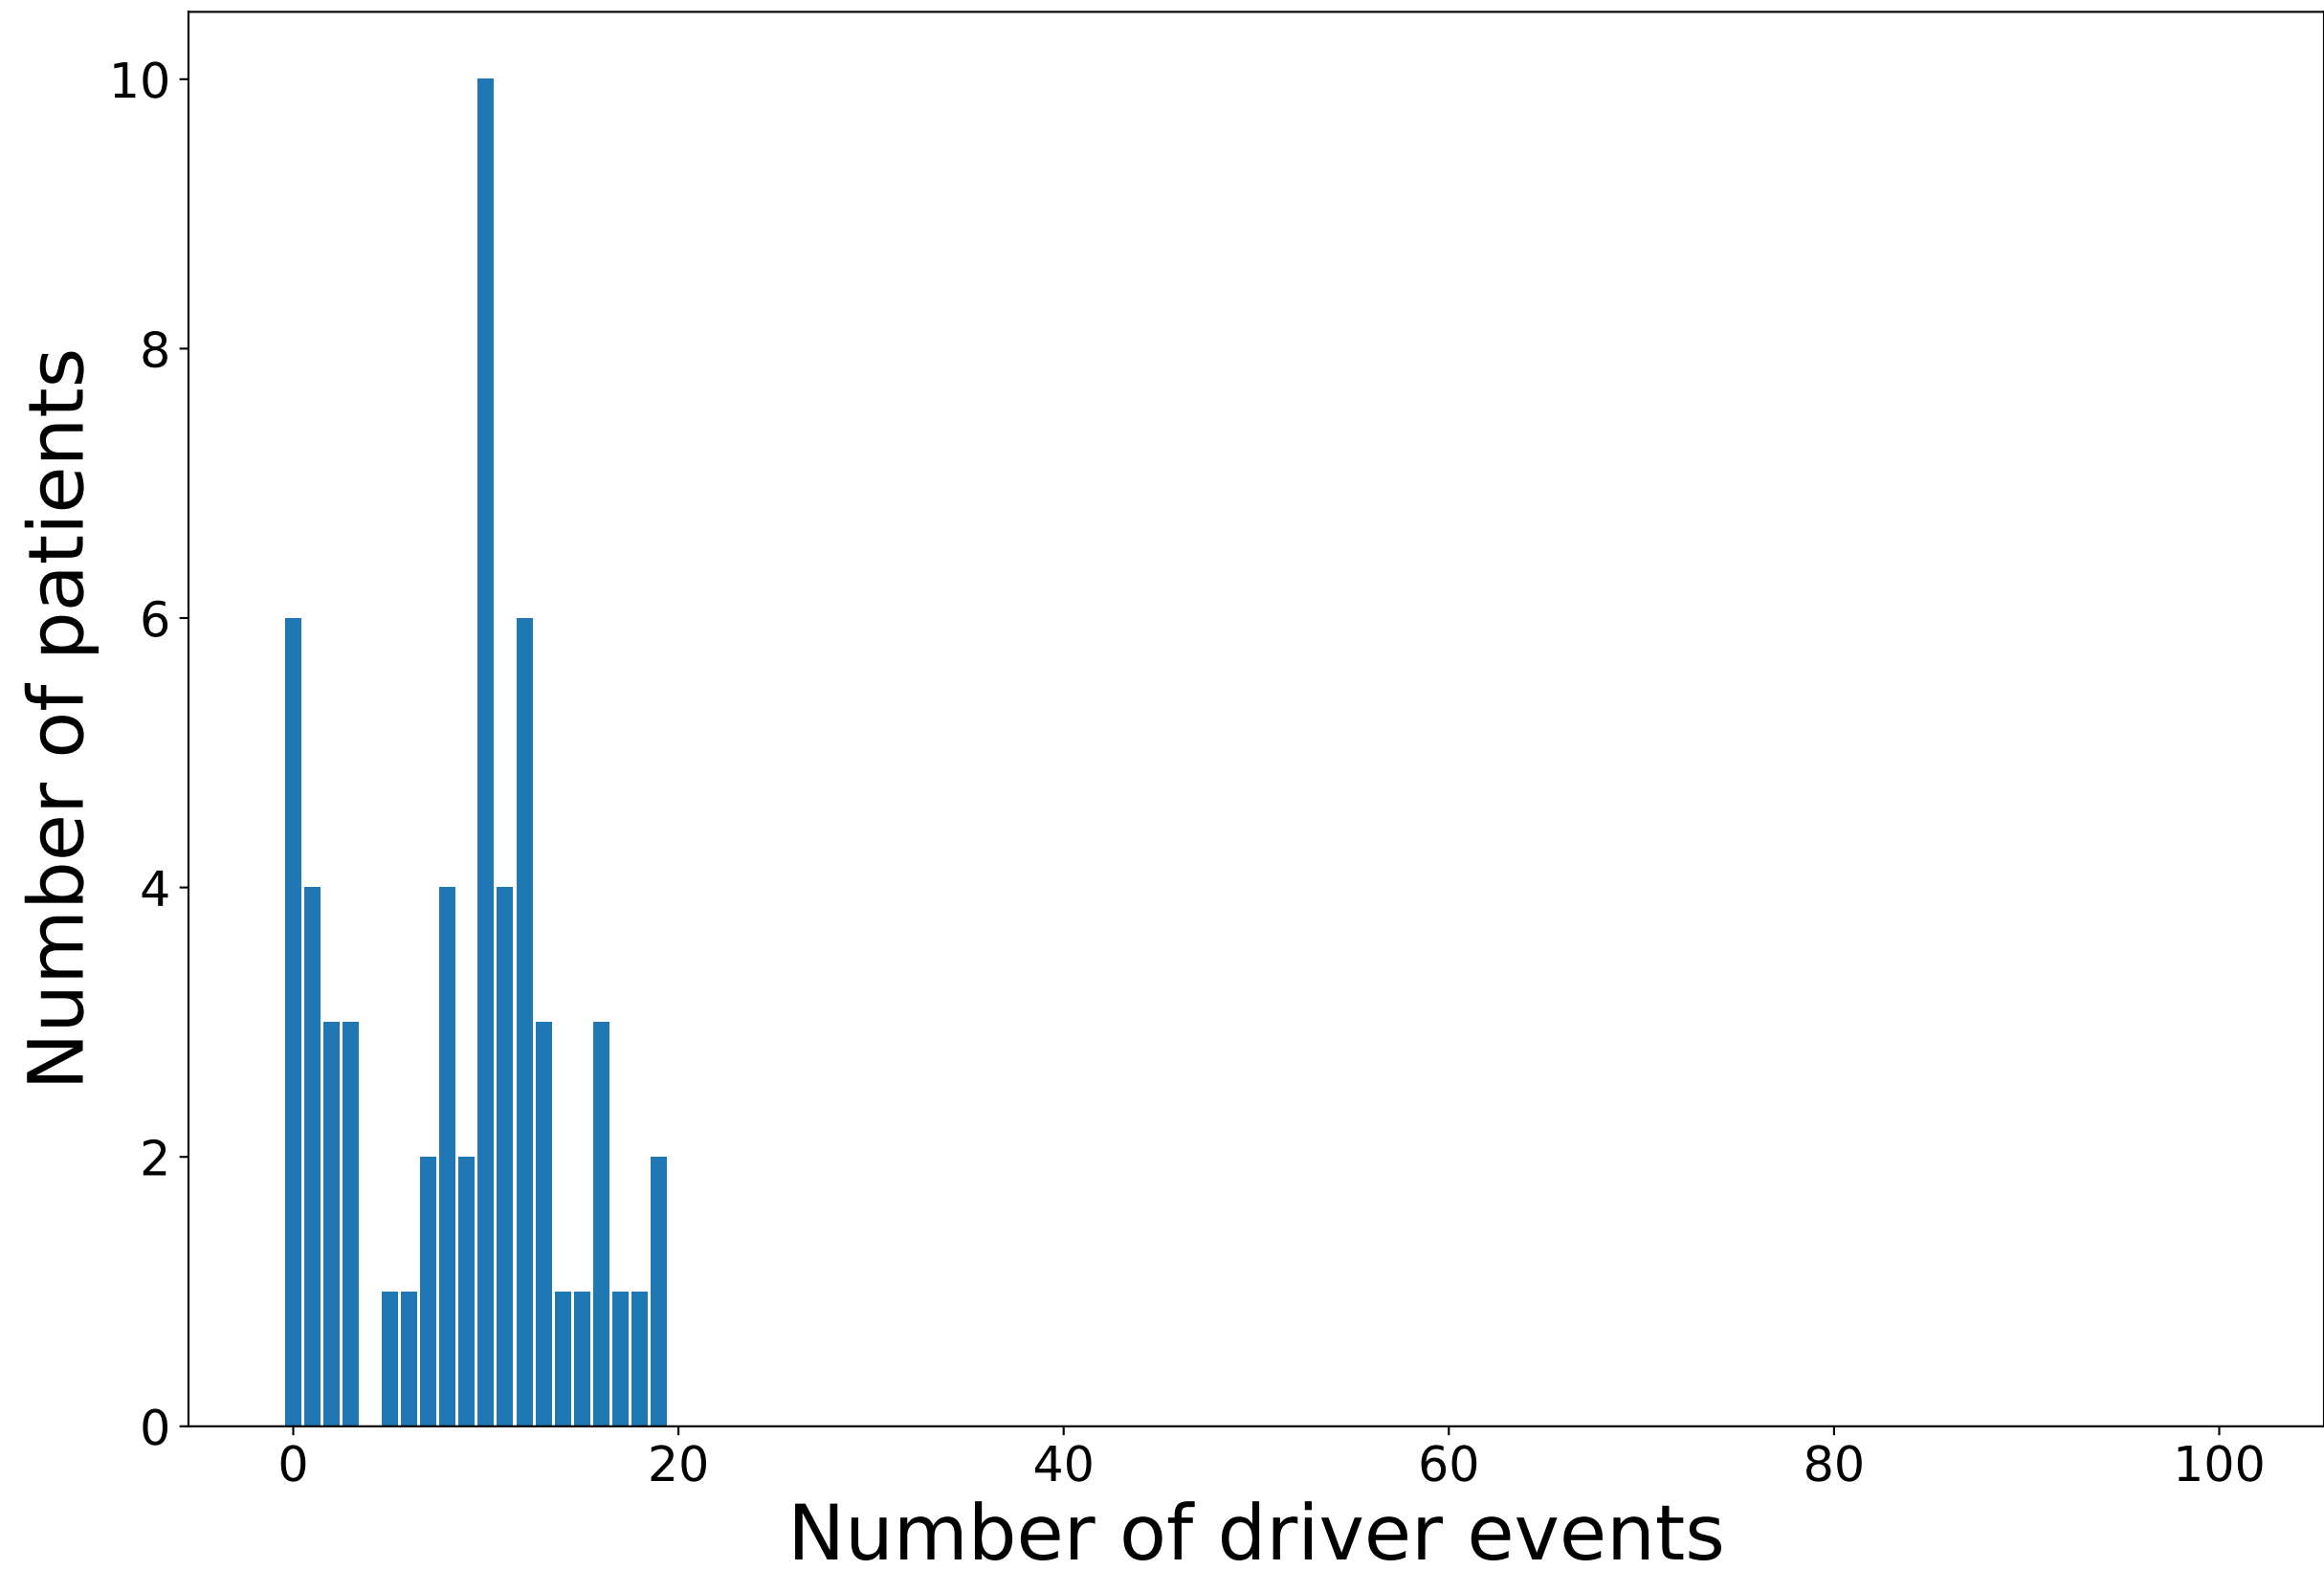

Supplement: Supplemental_Data_S1.zip [file Supplemental_Data_S1.zip]

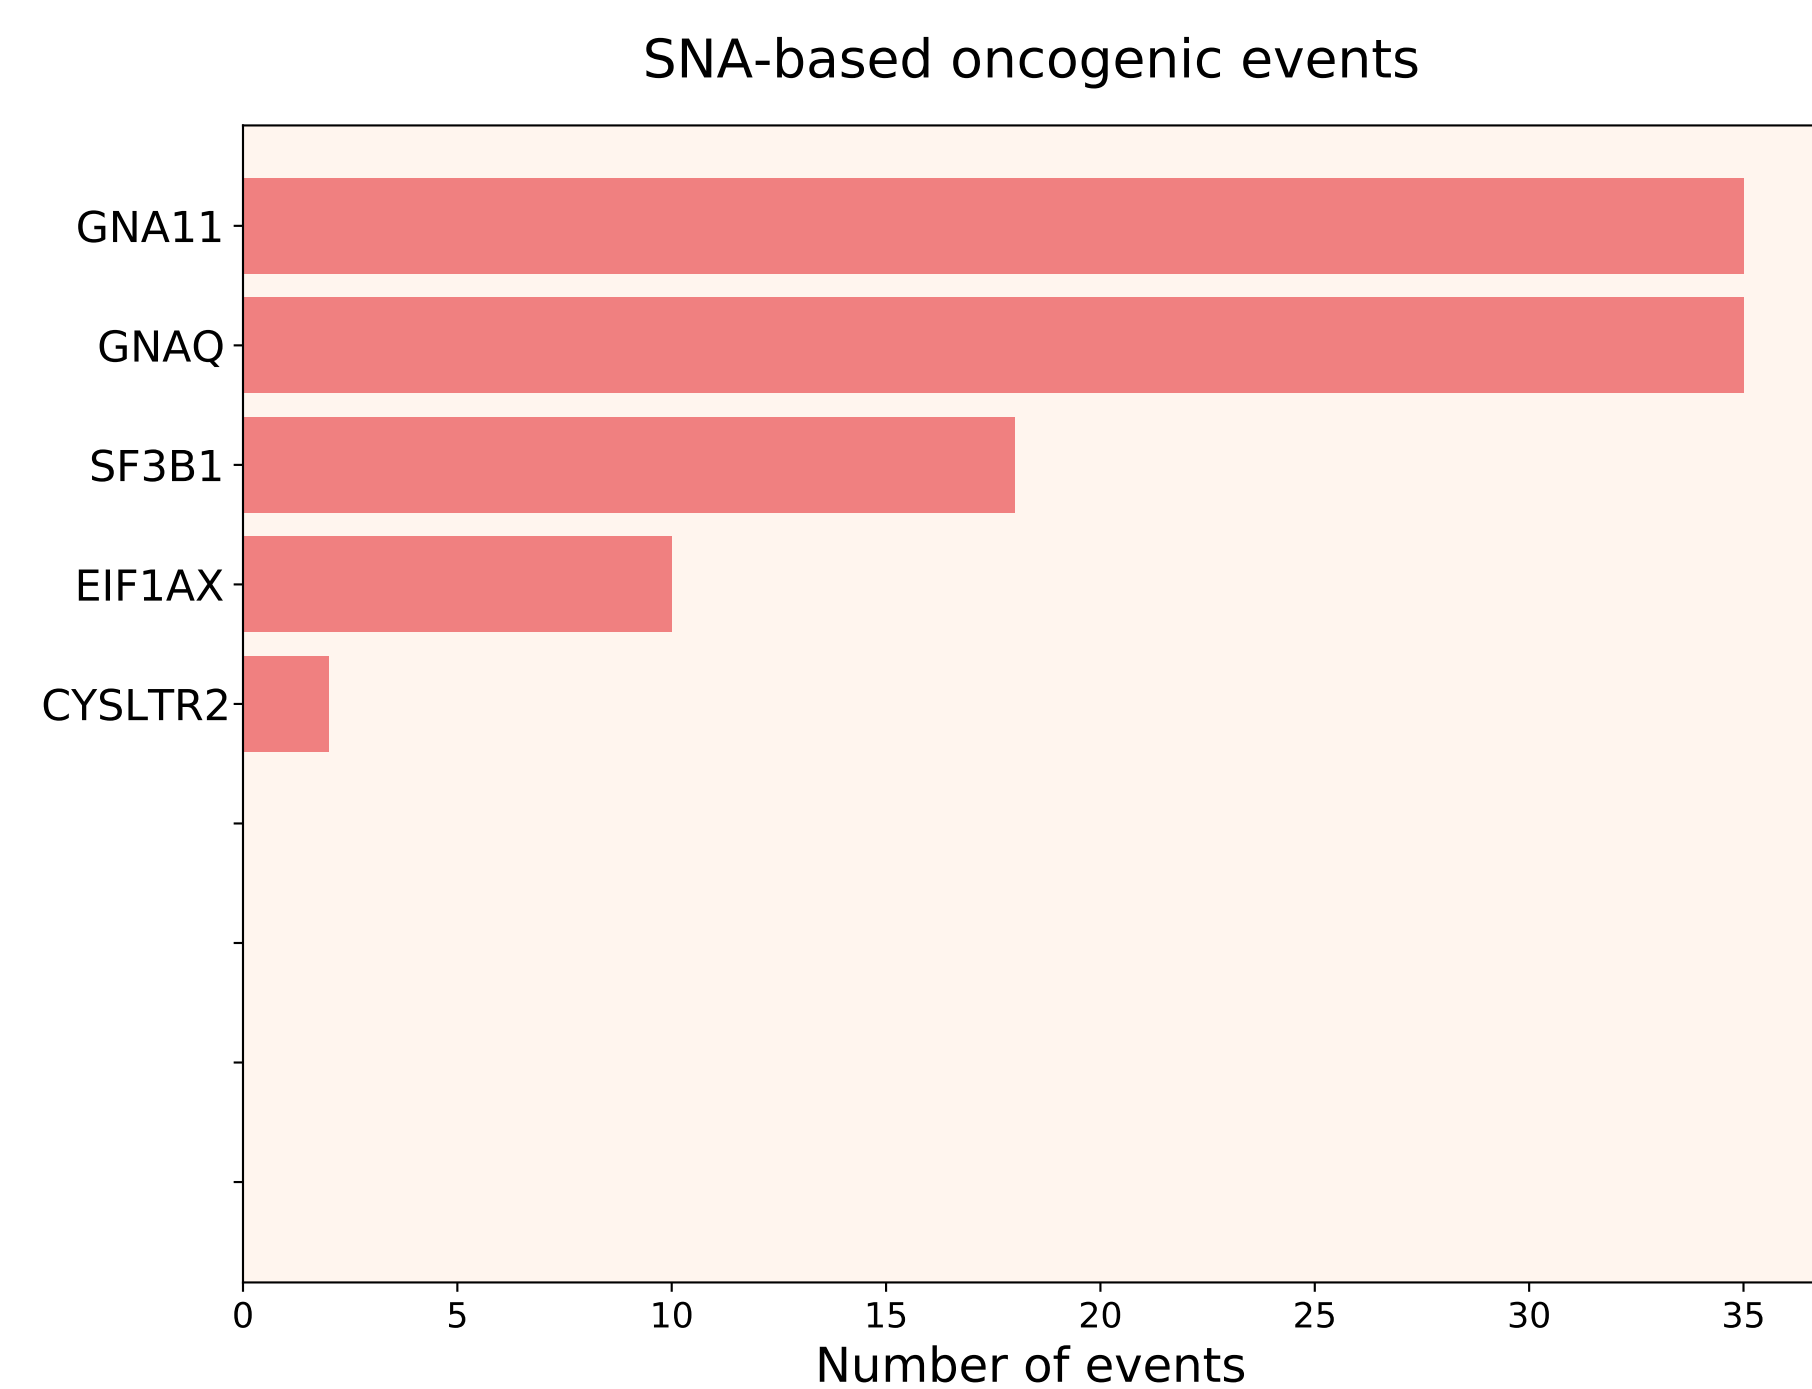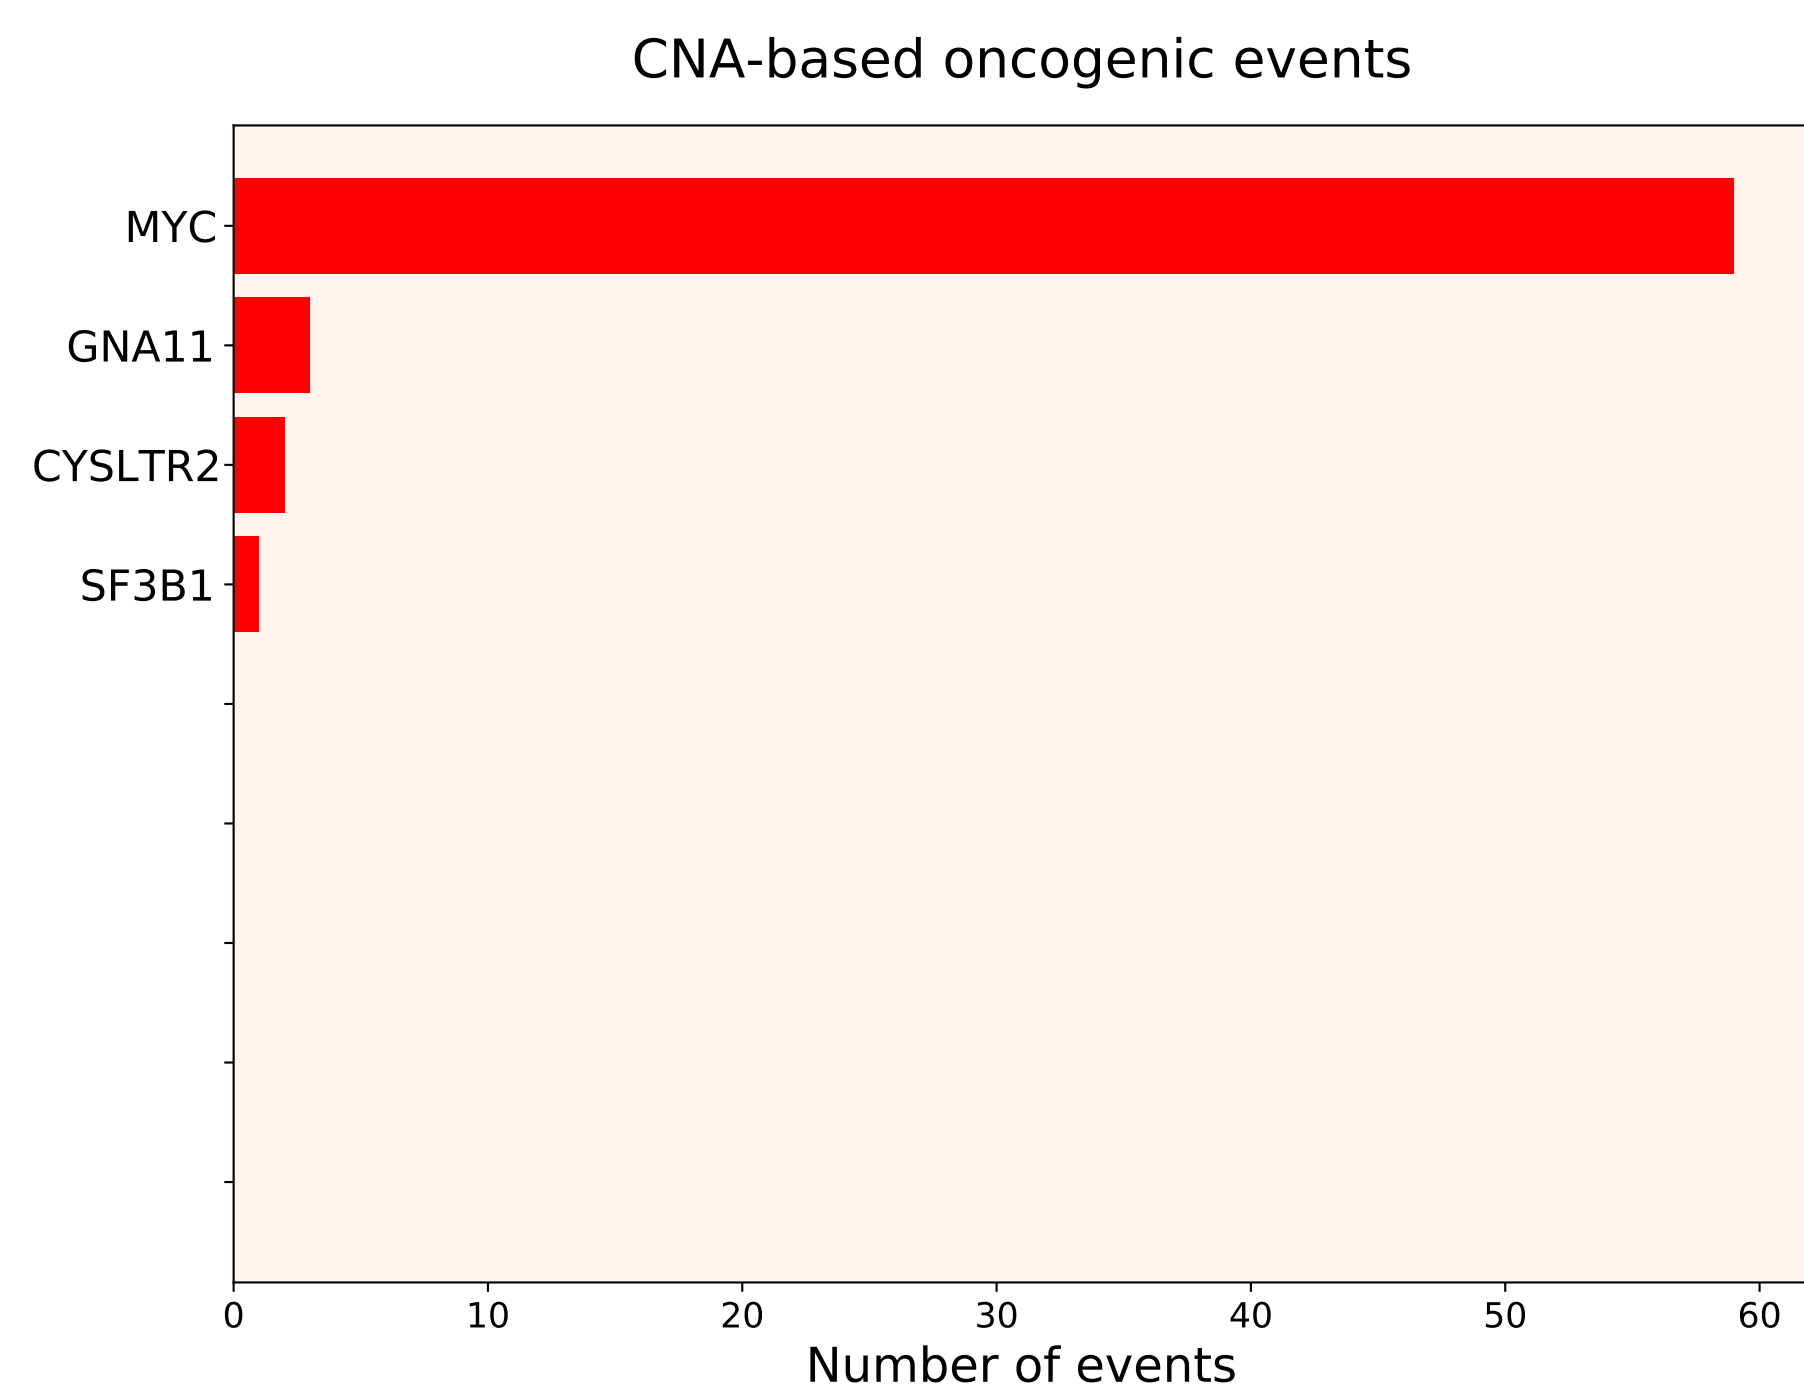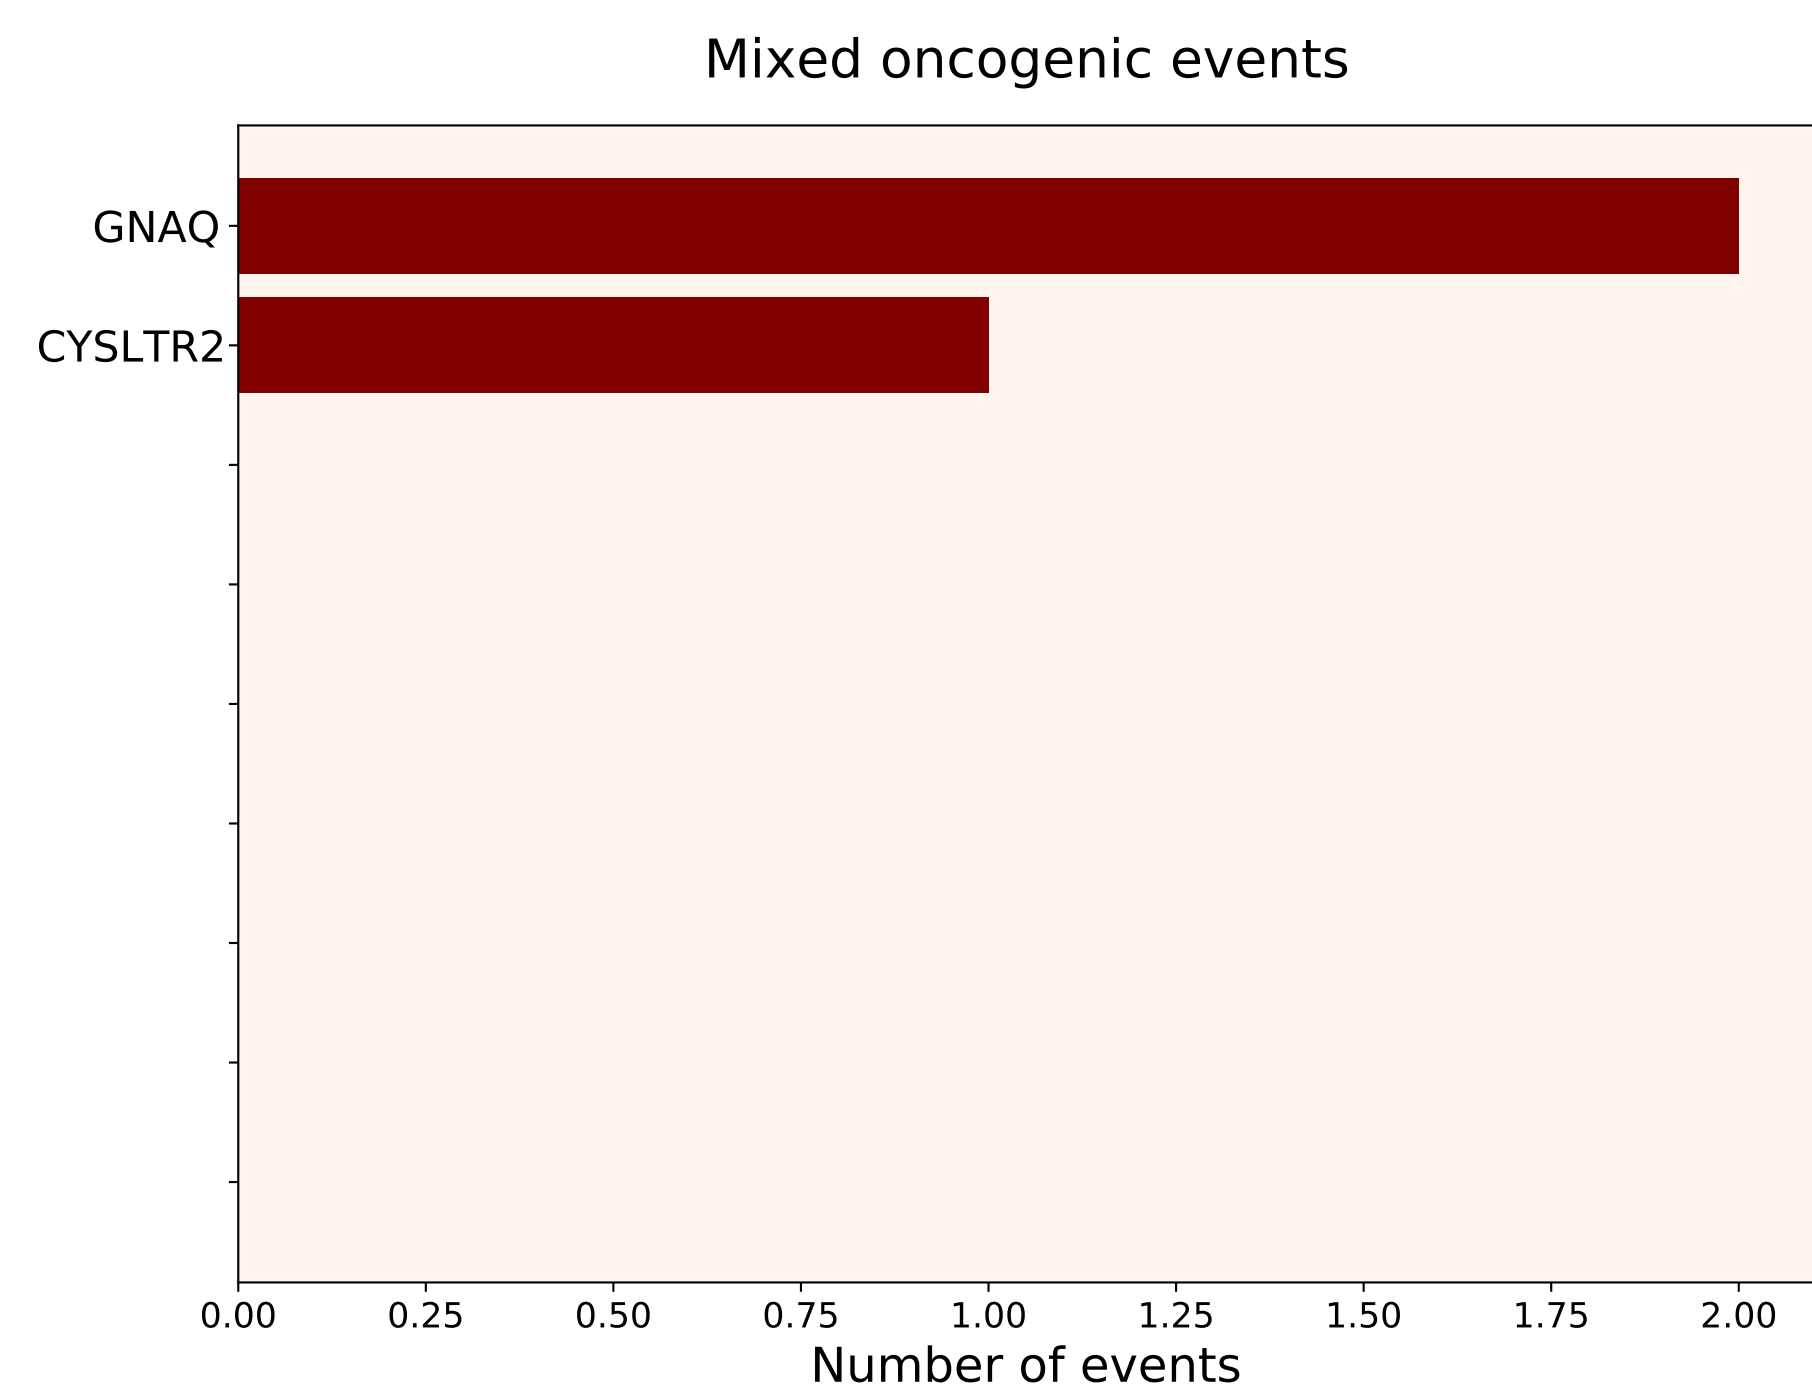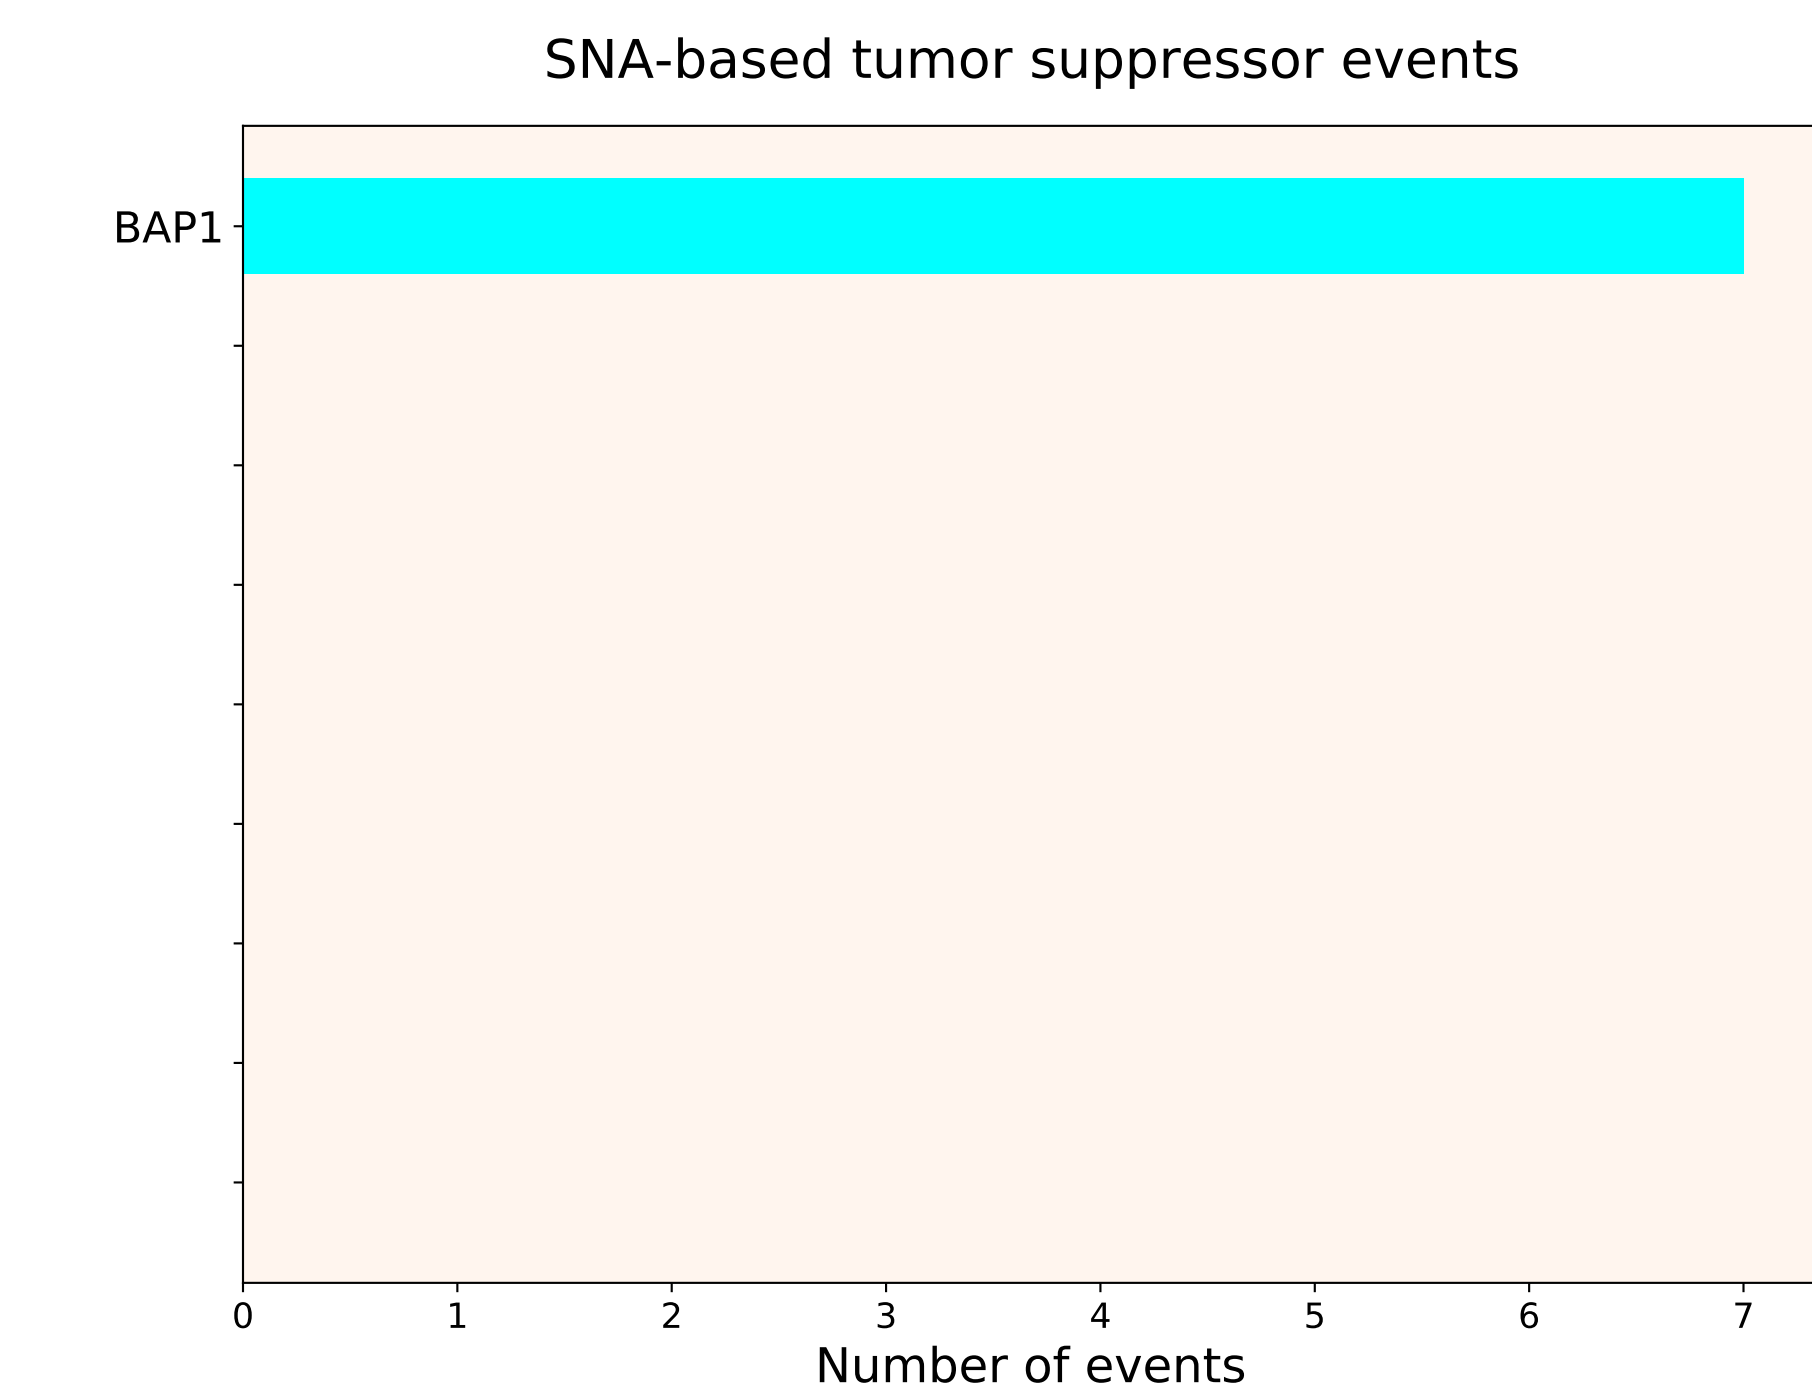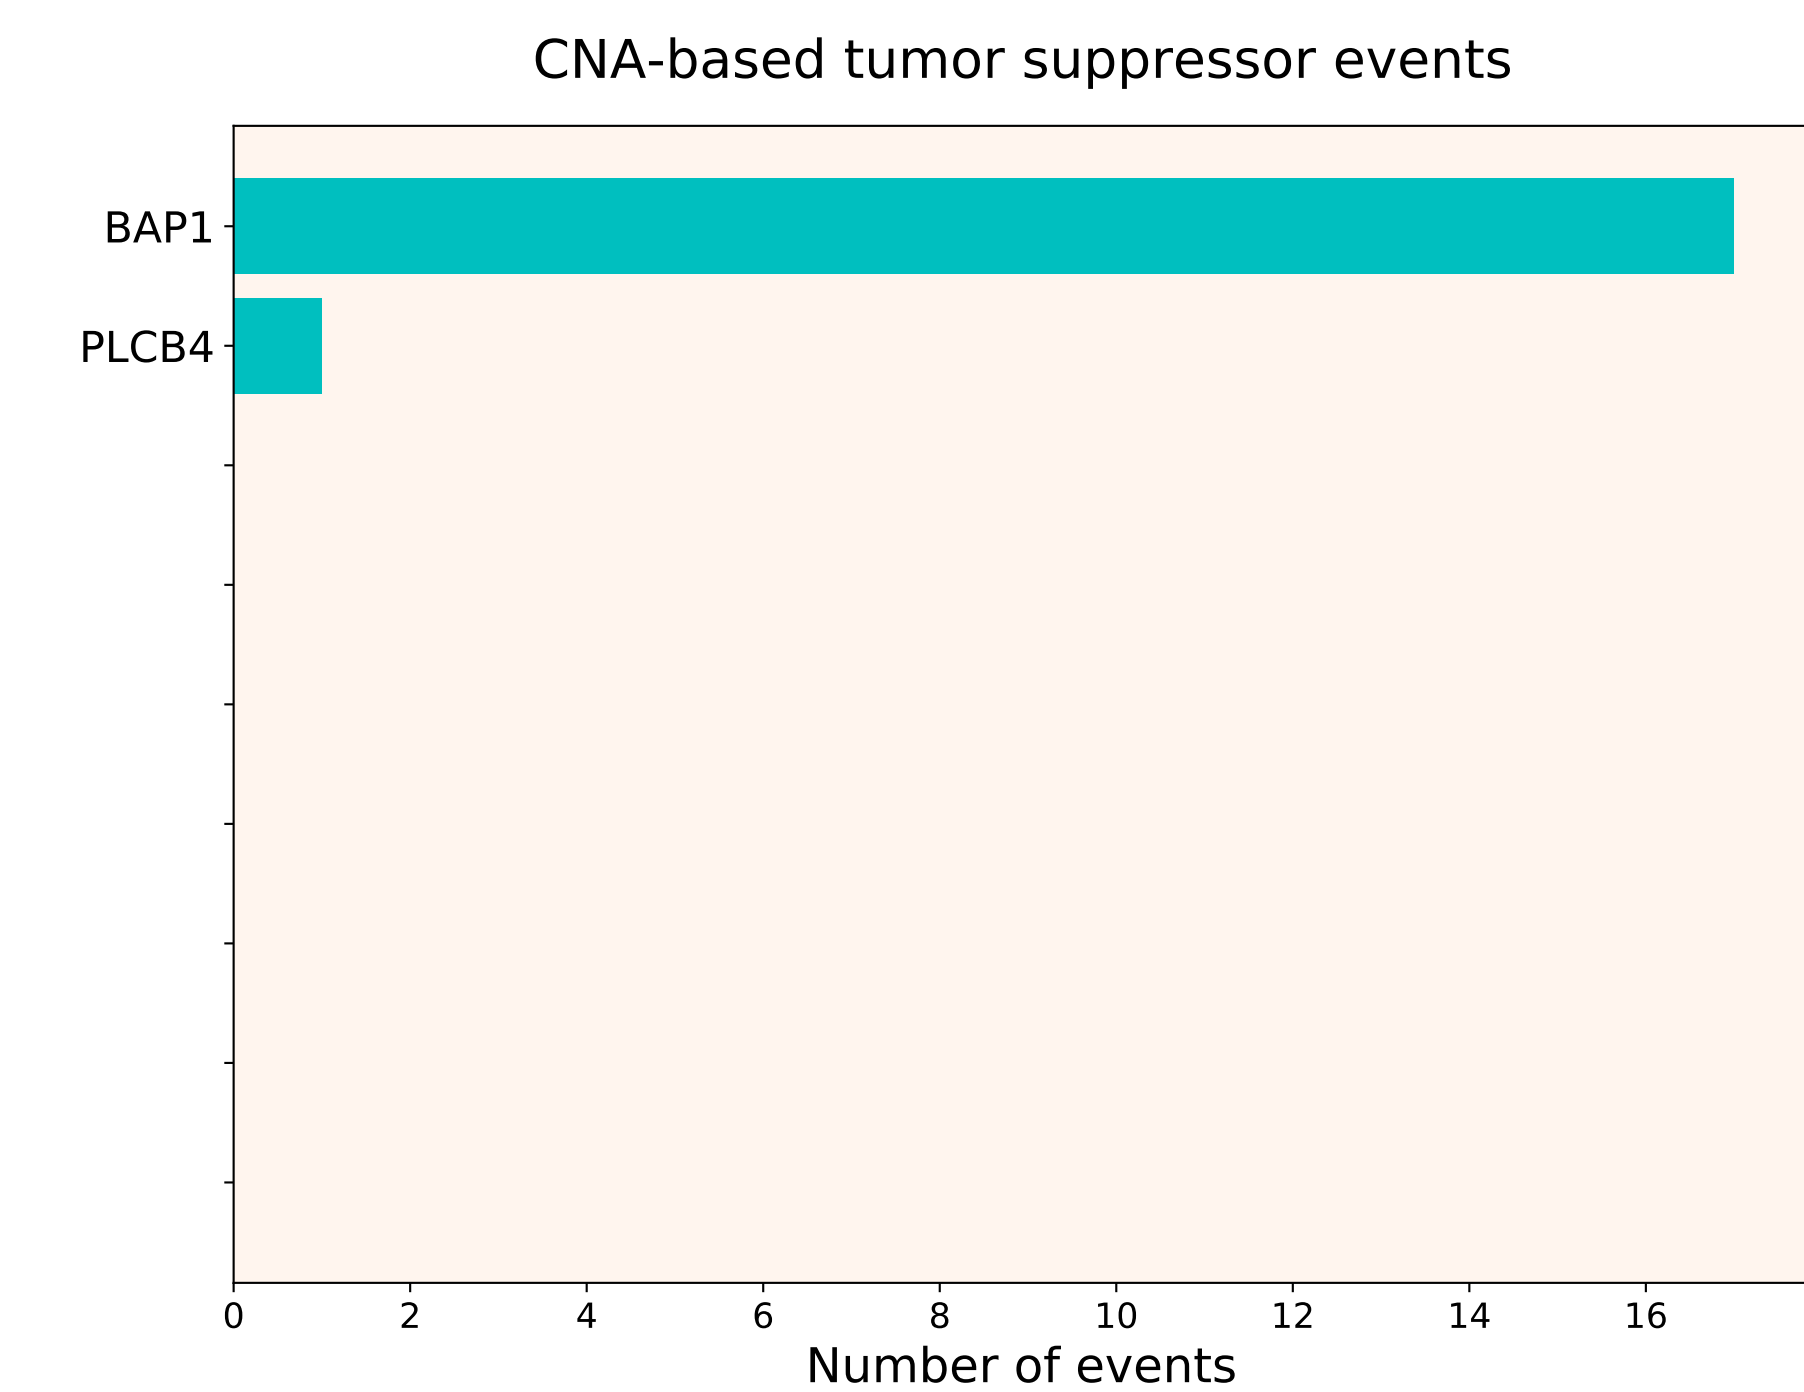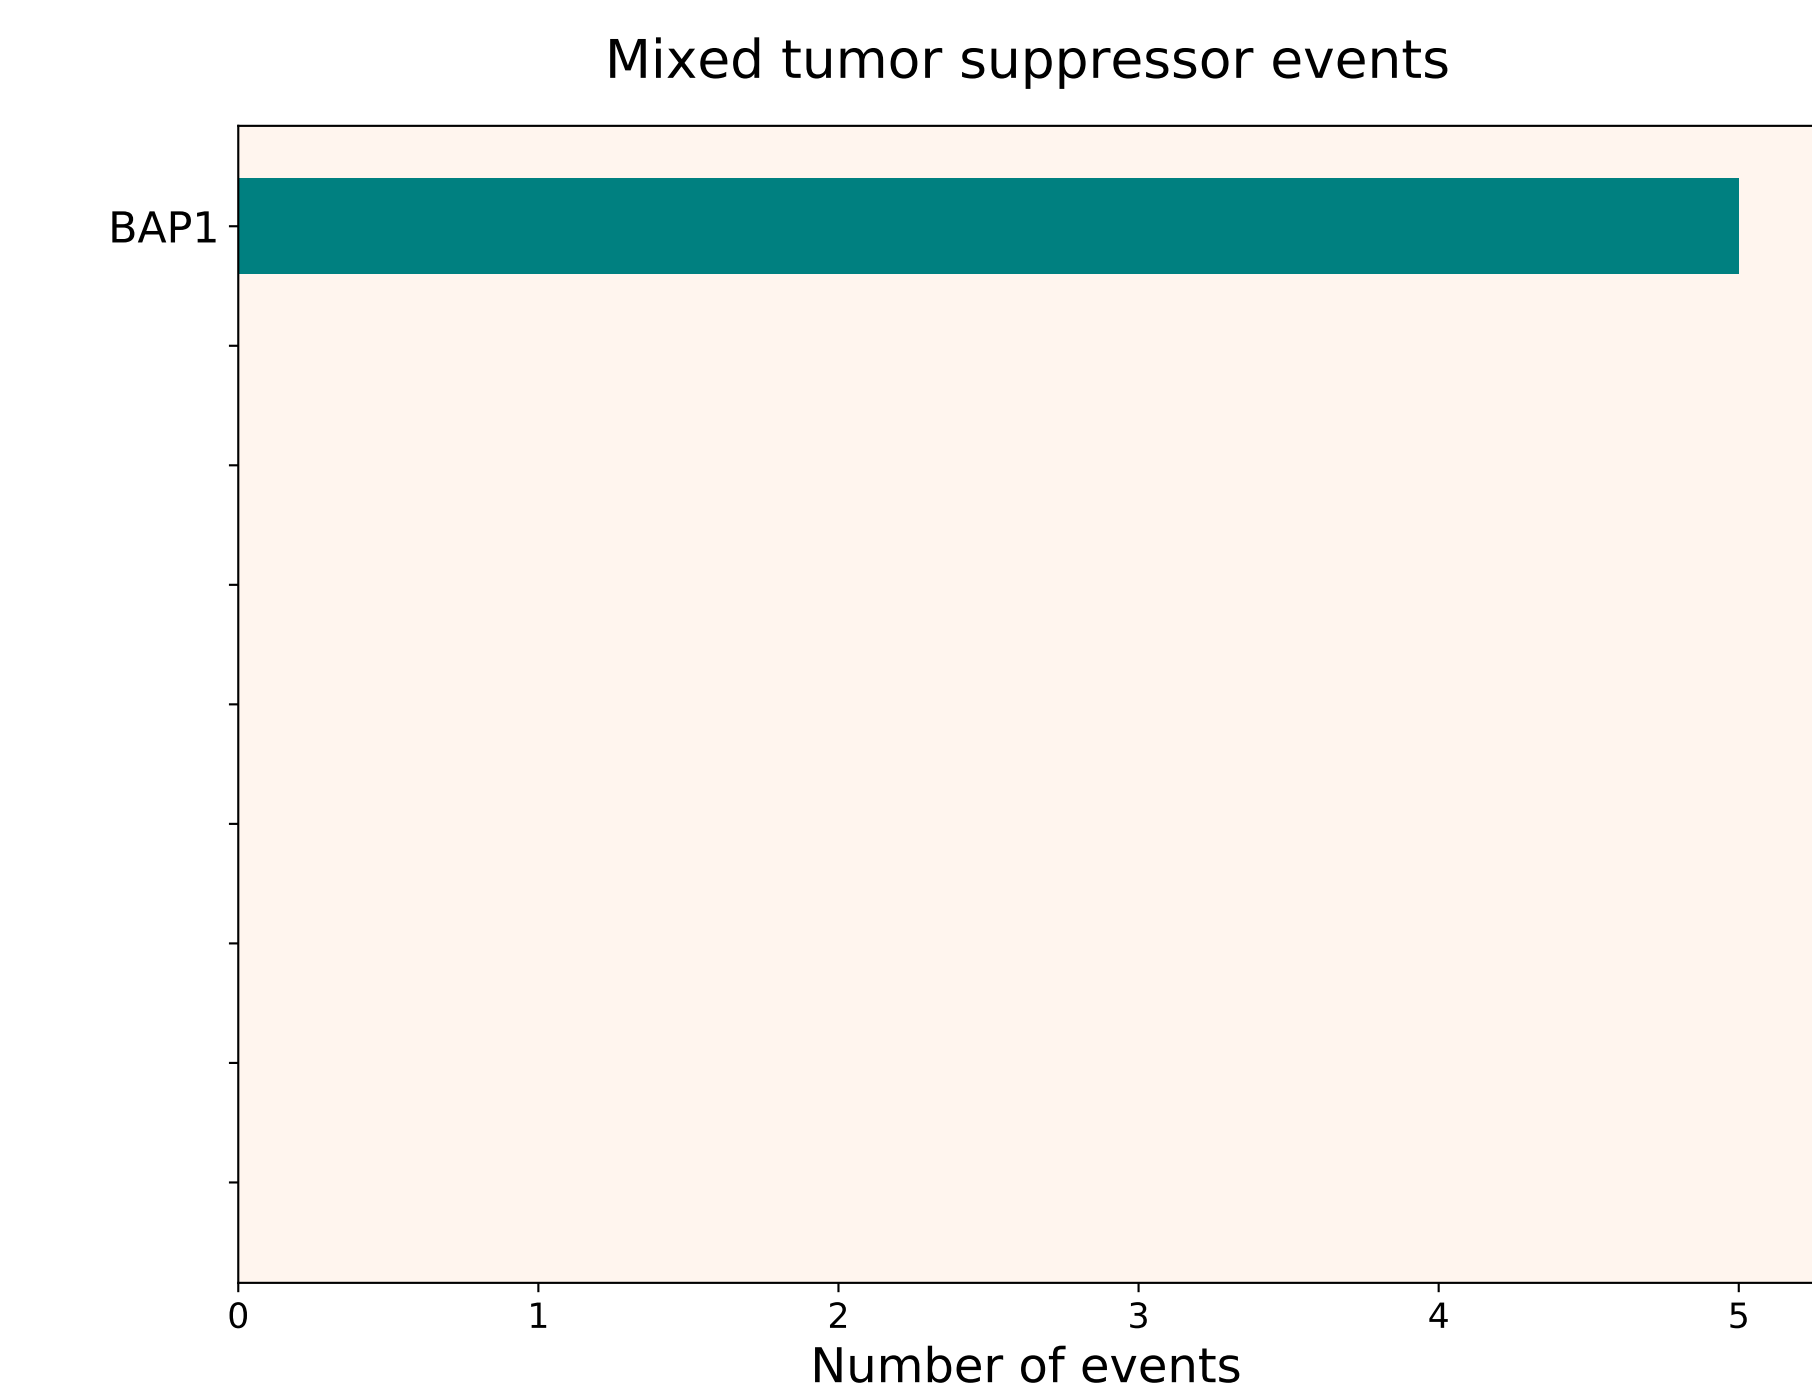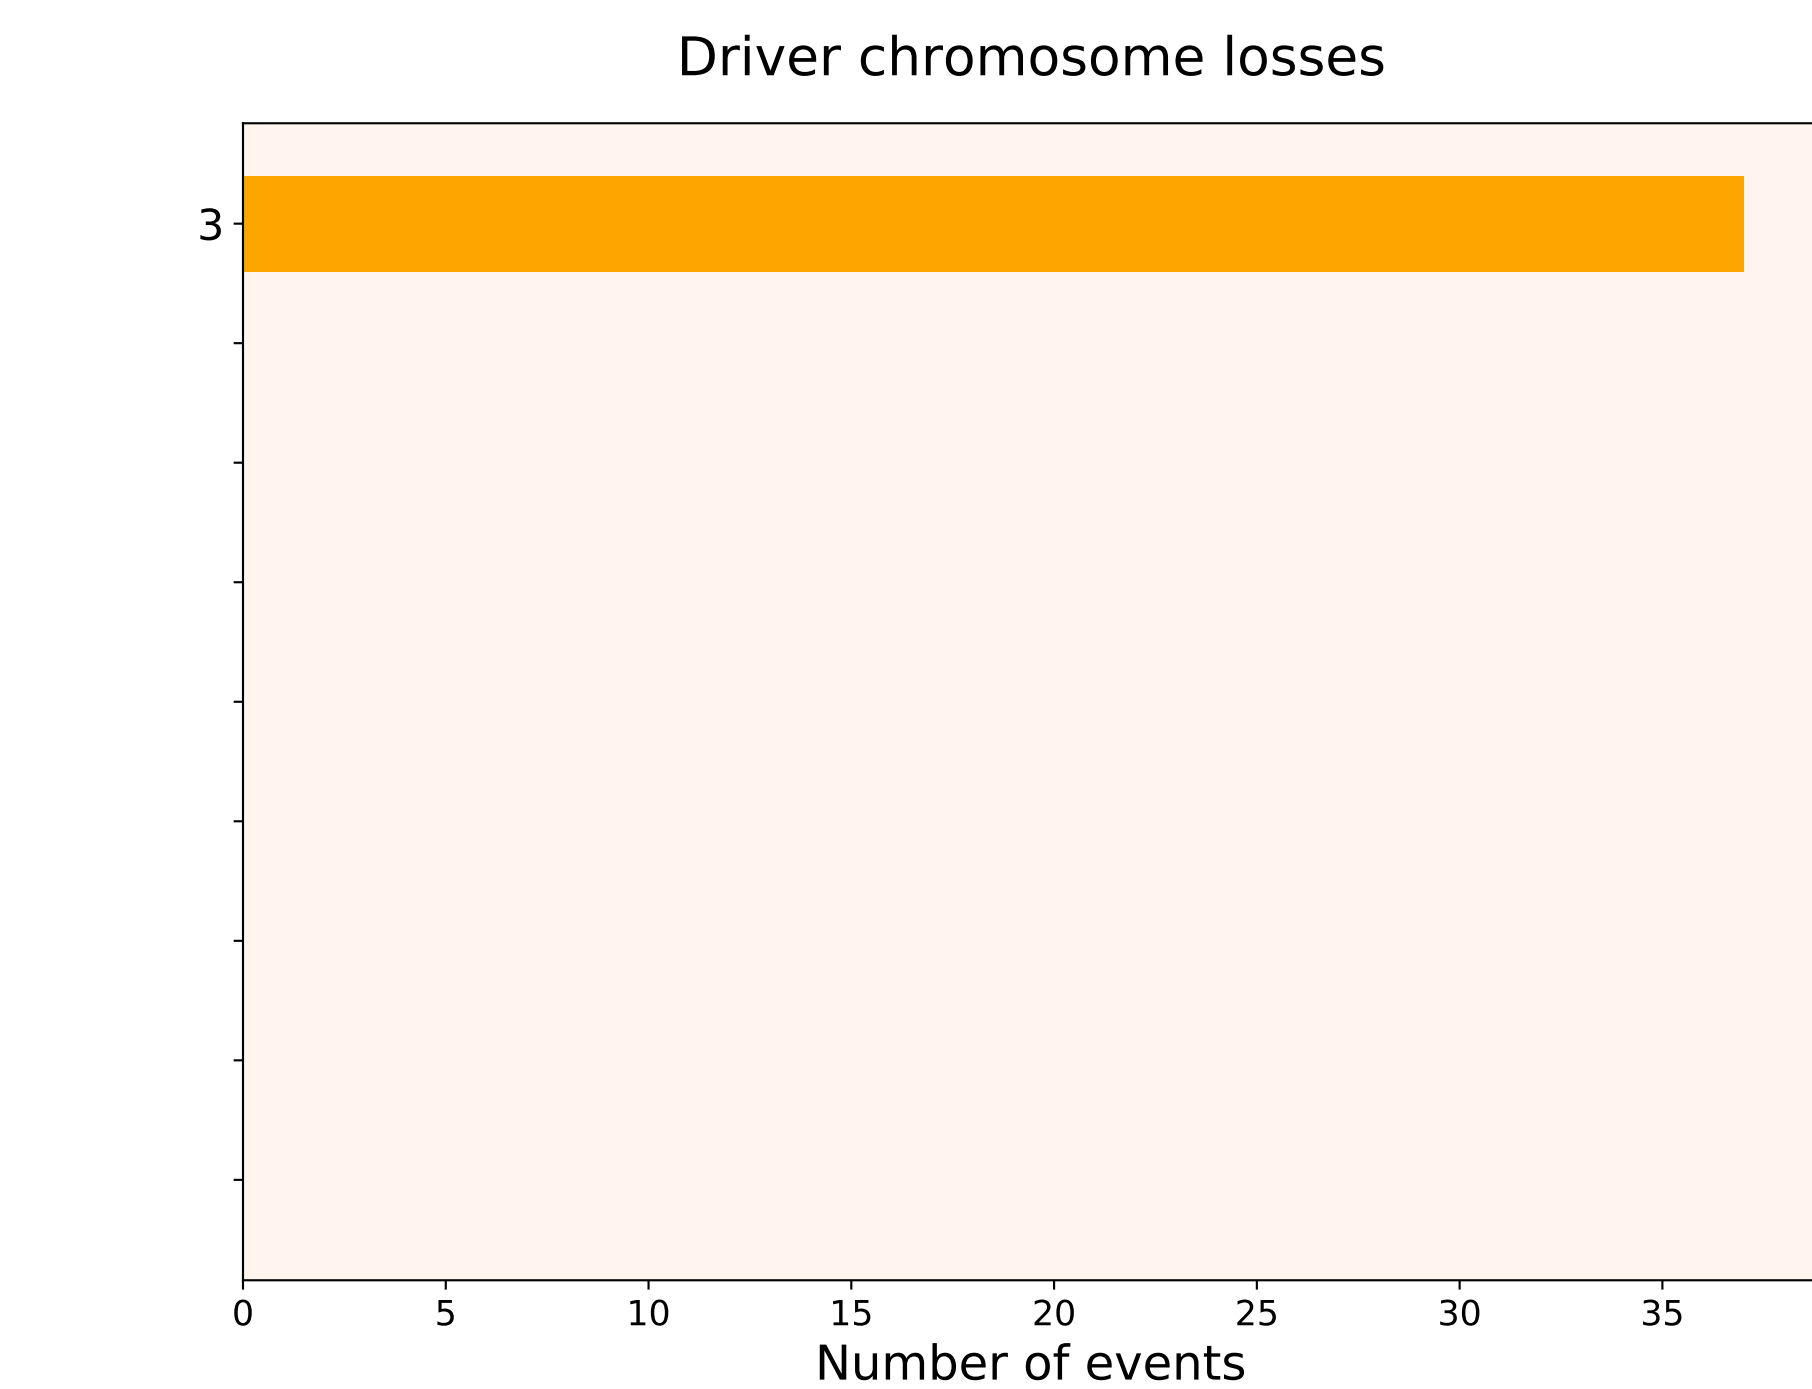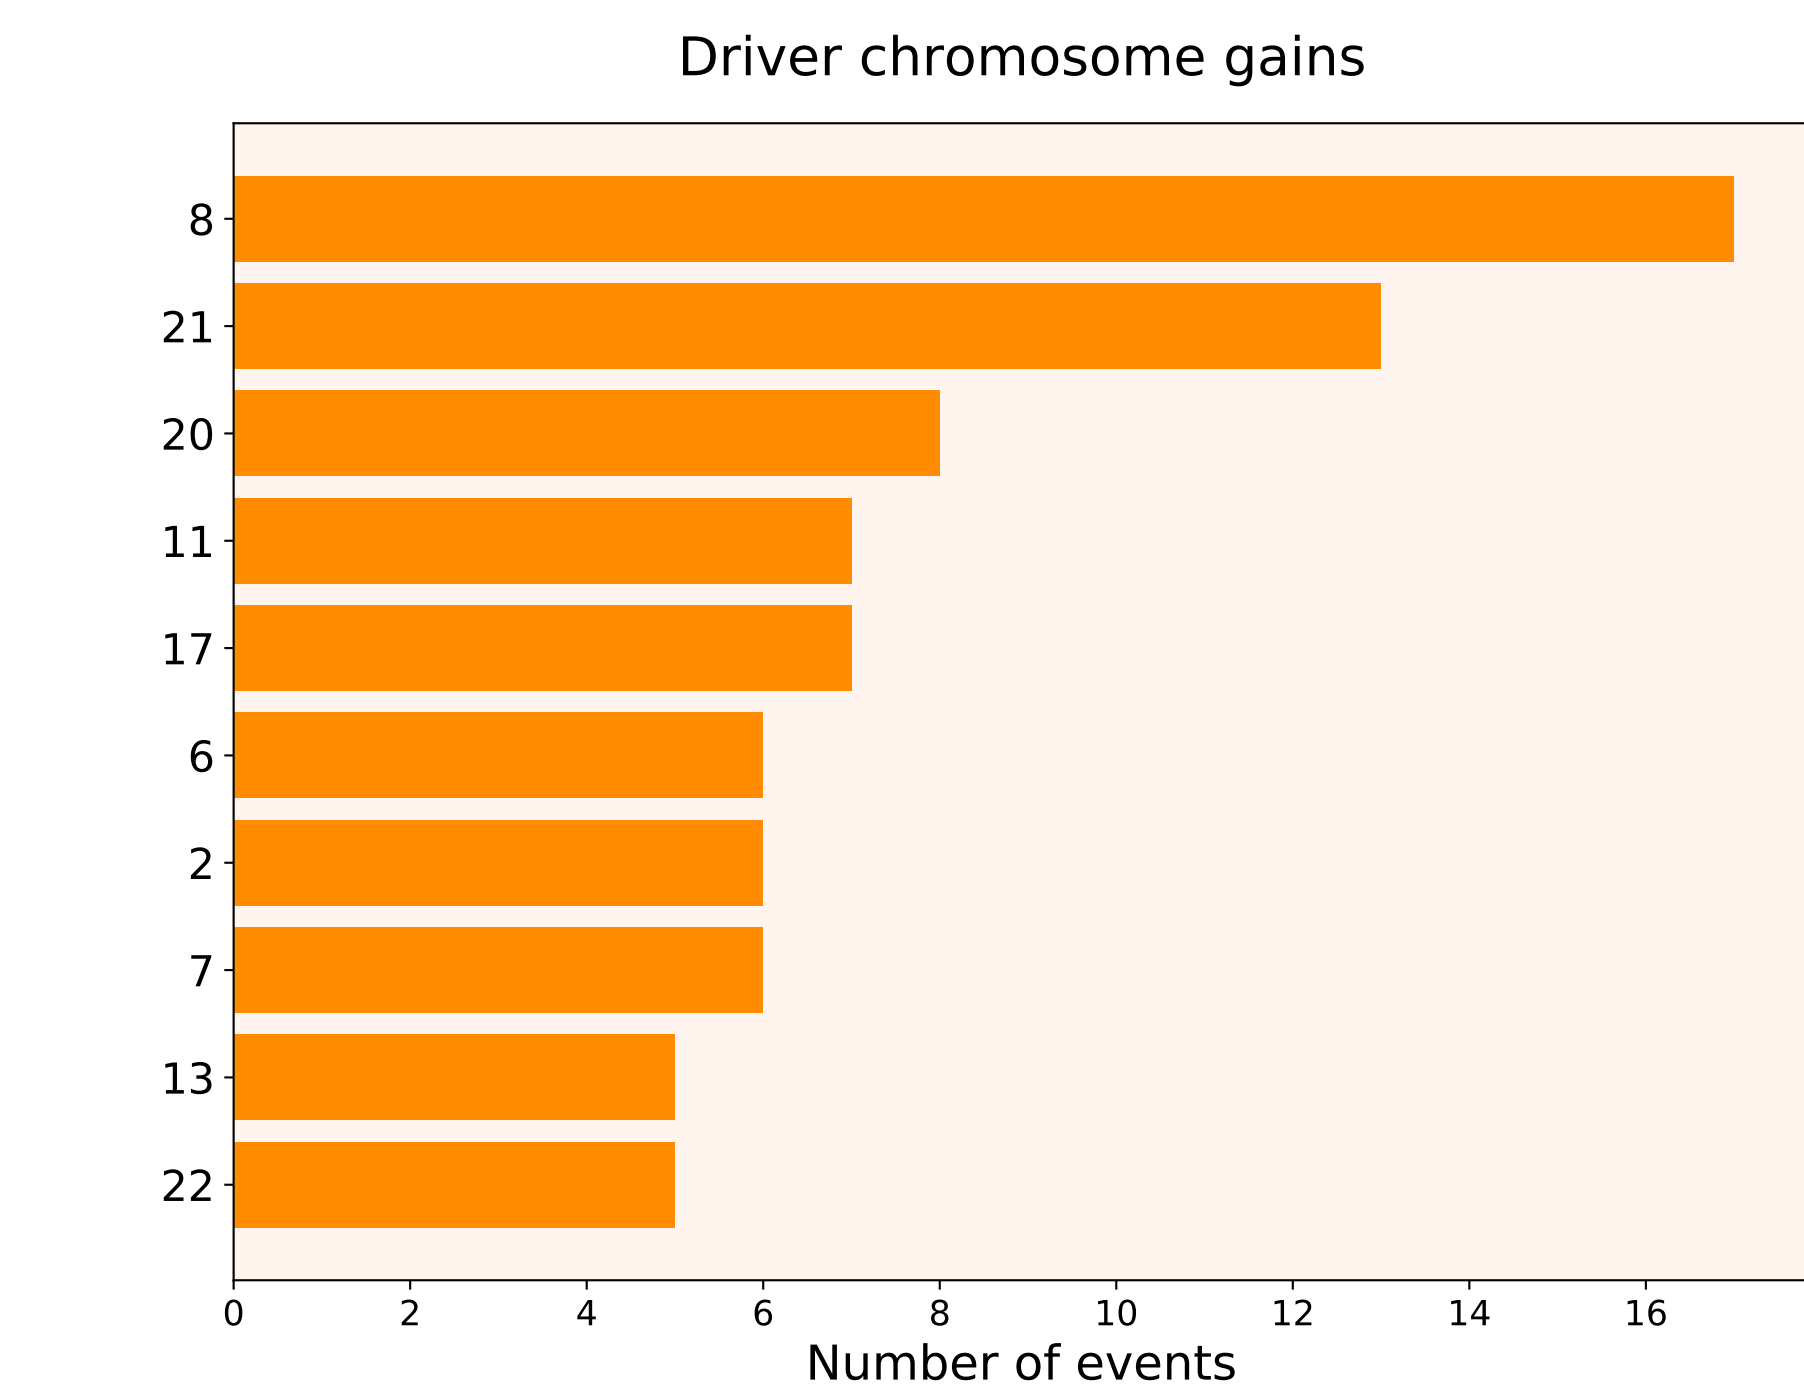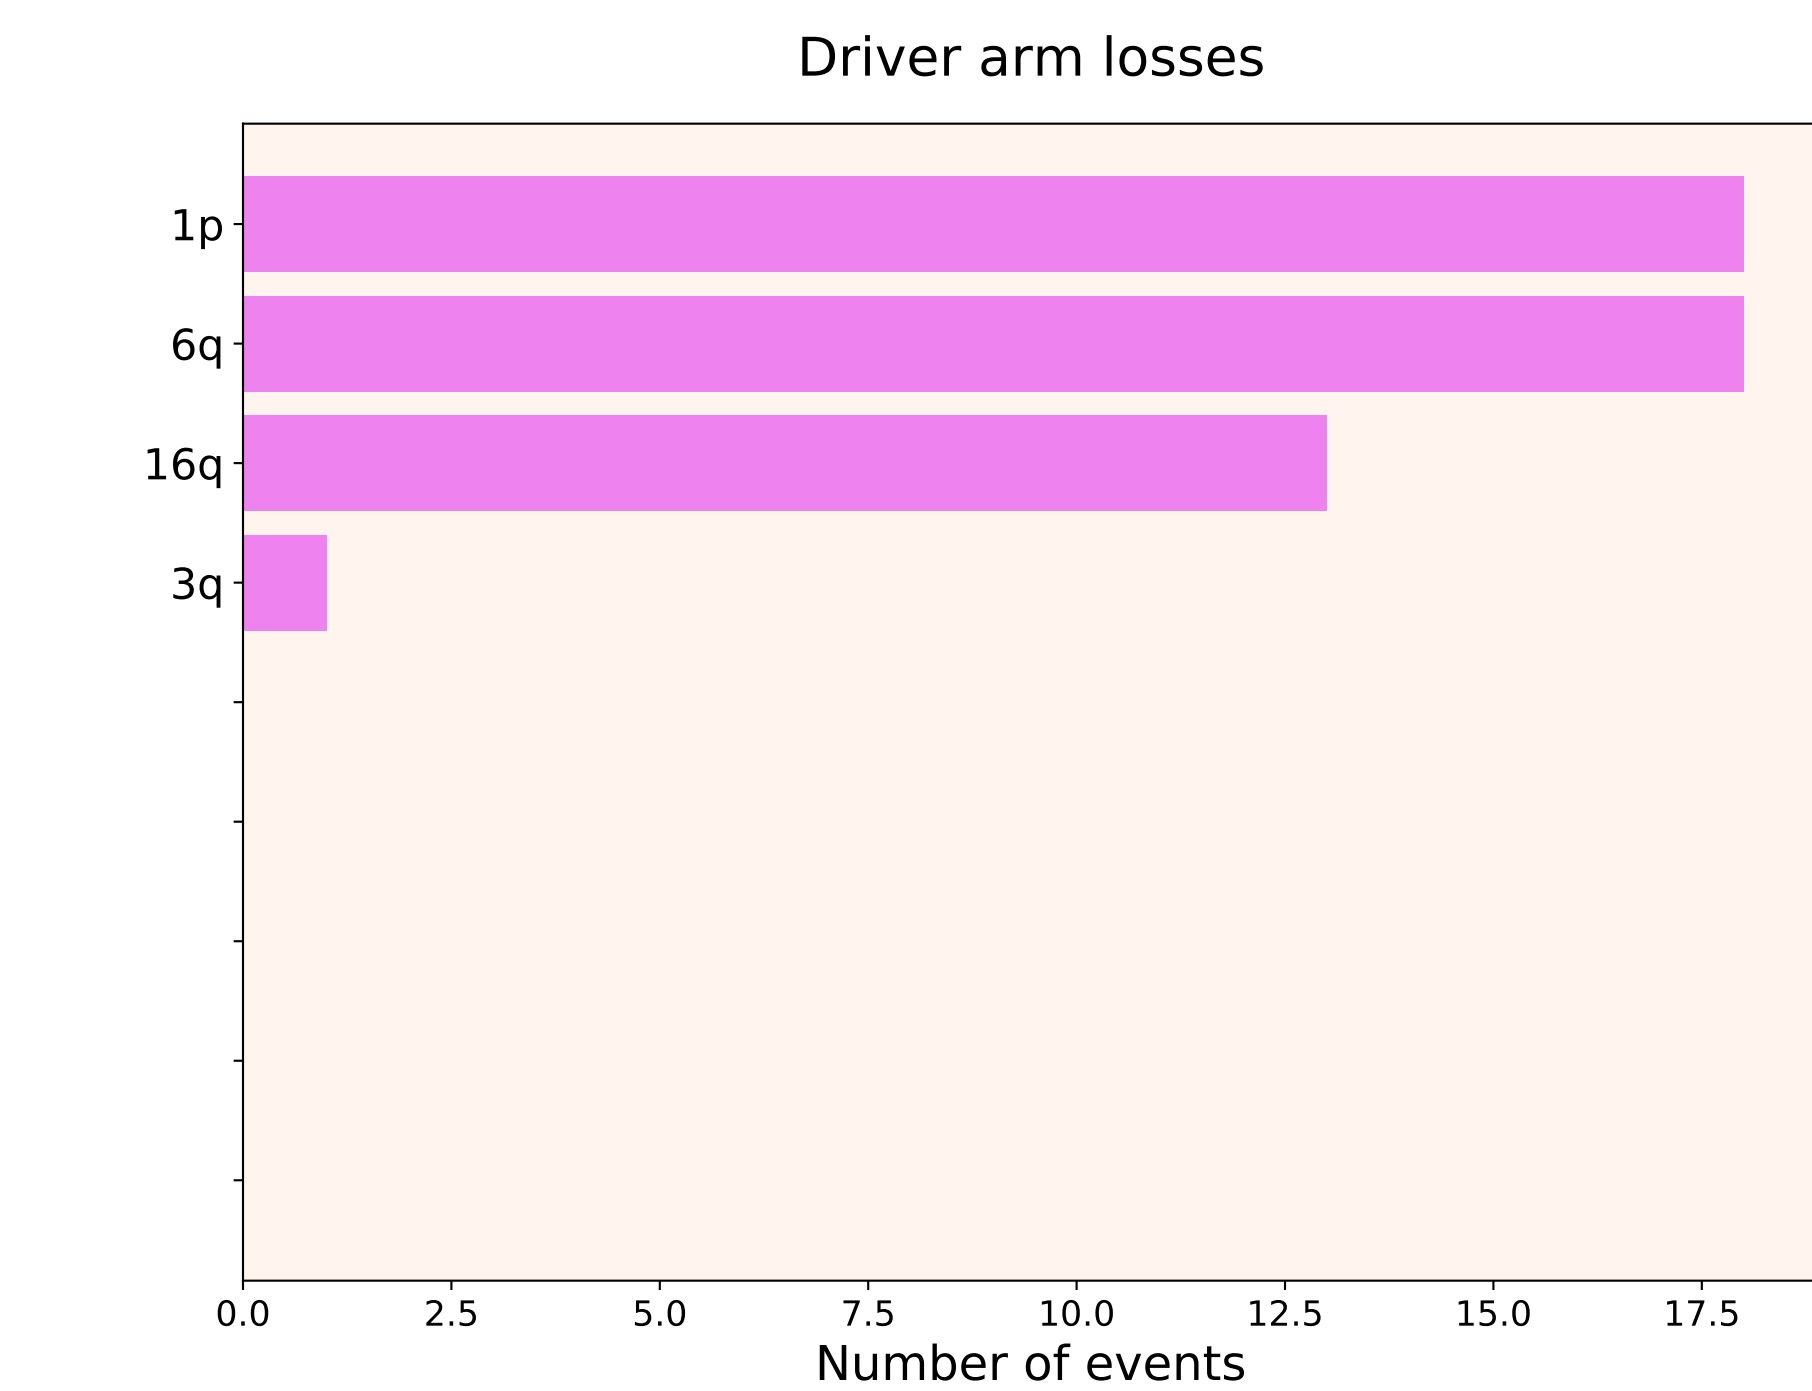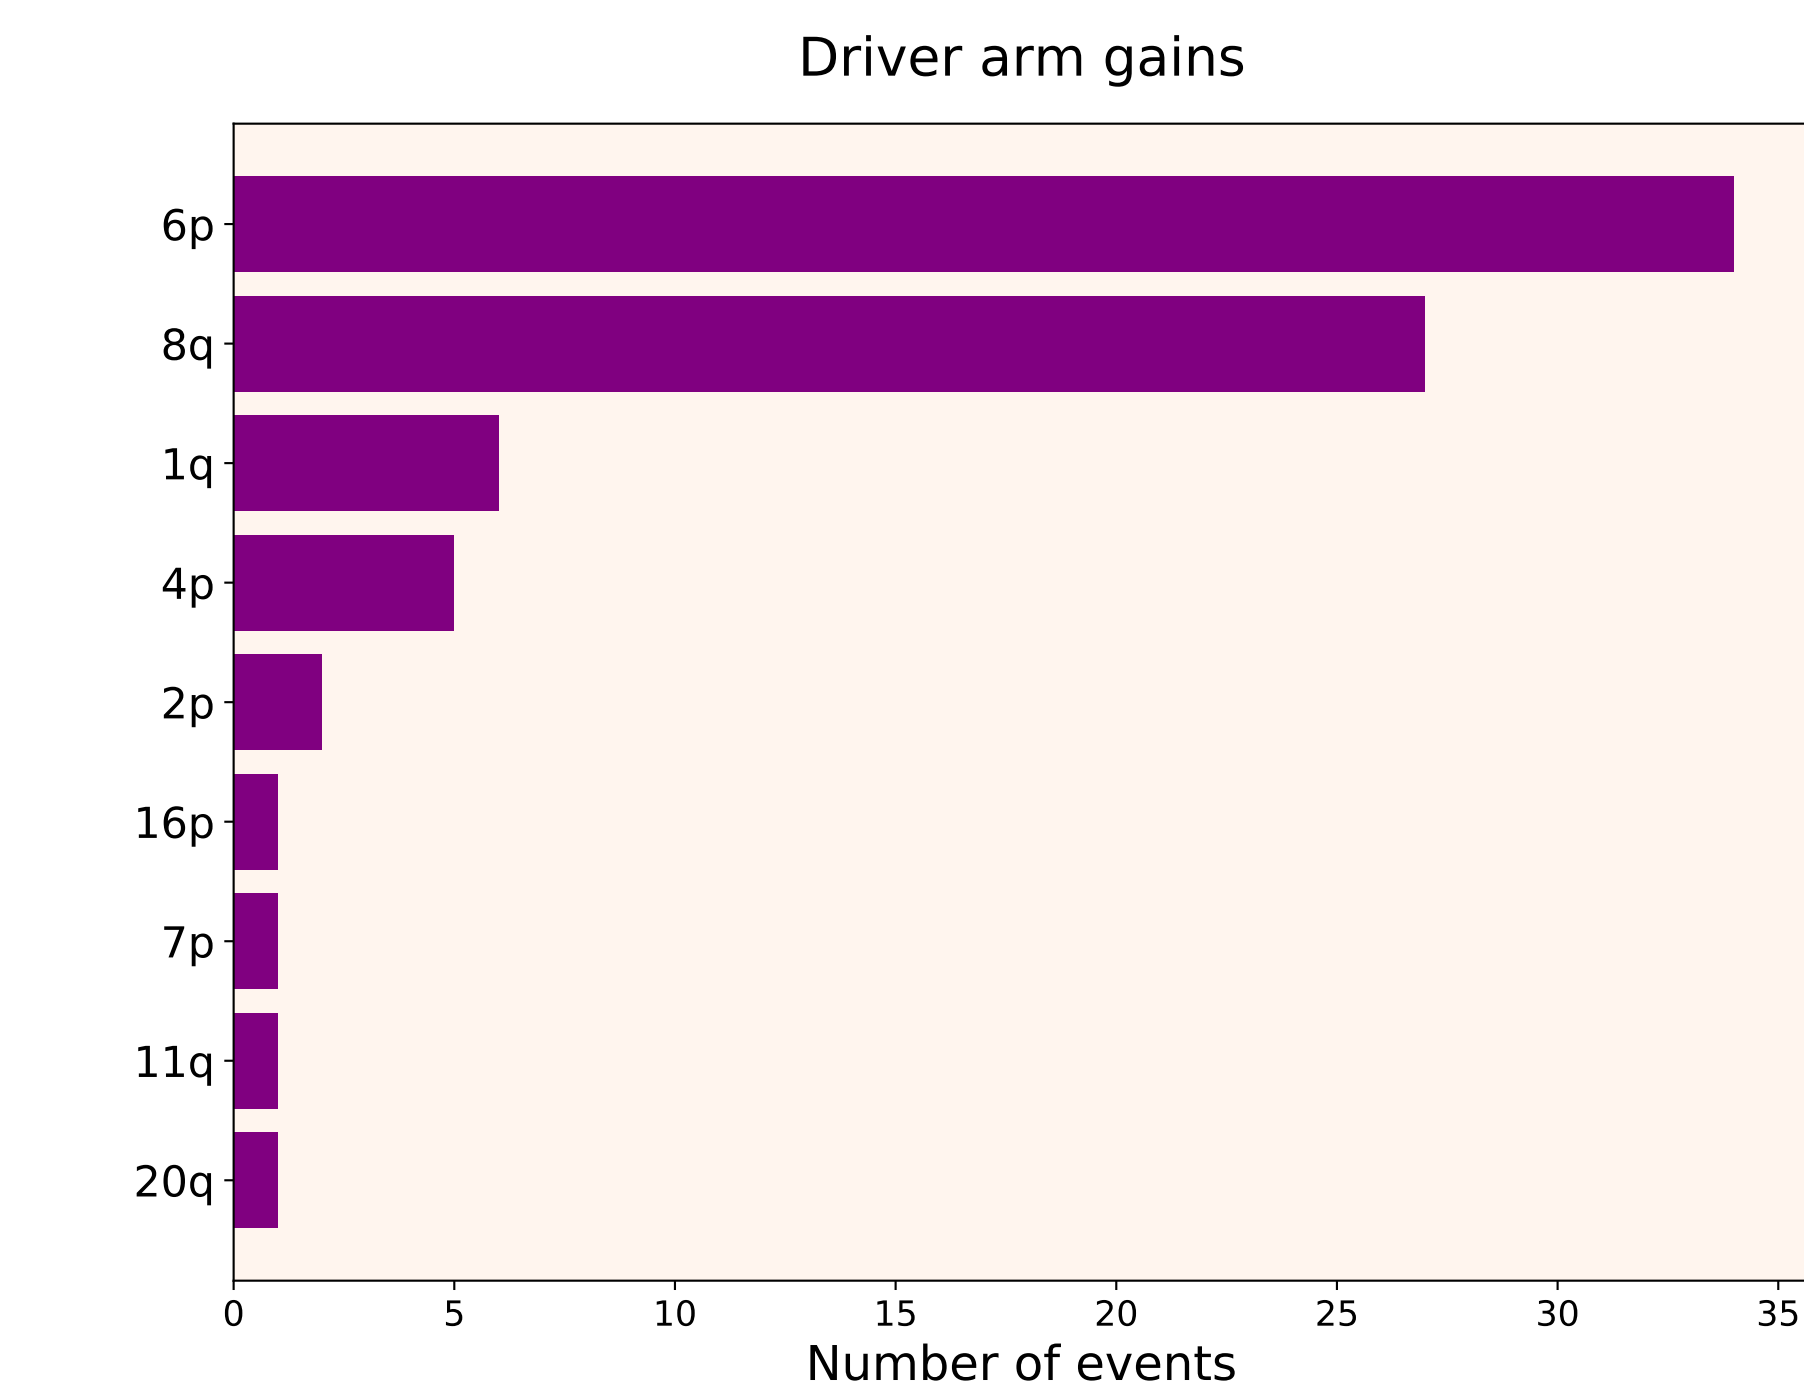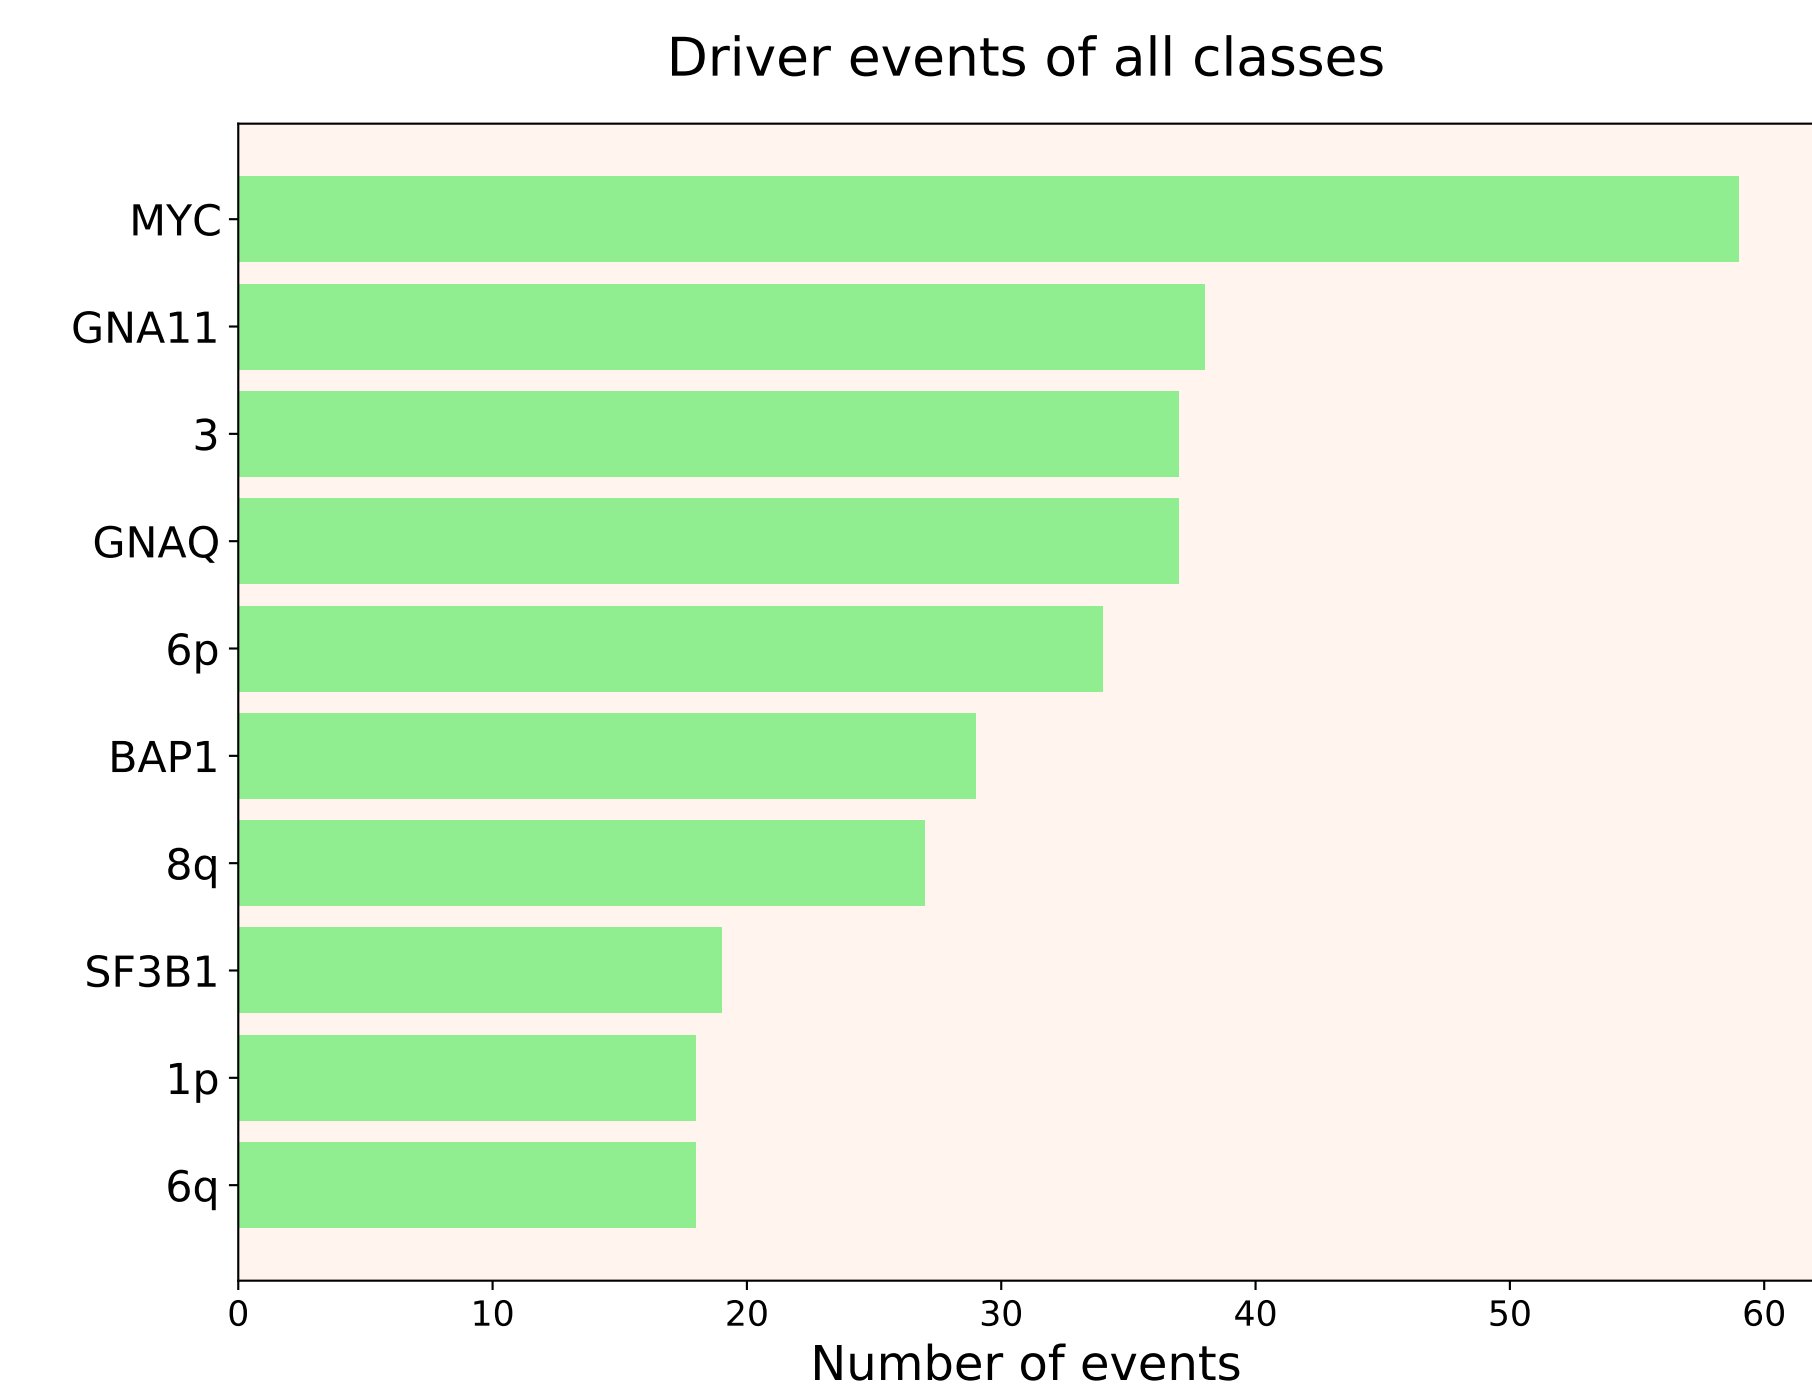

Supplement: Supplemental_Data_S1.zip [file Supplemental_Data_S1.zip]

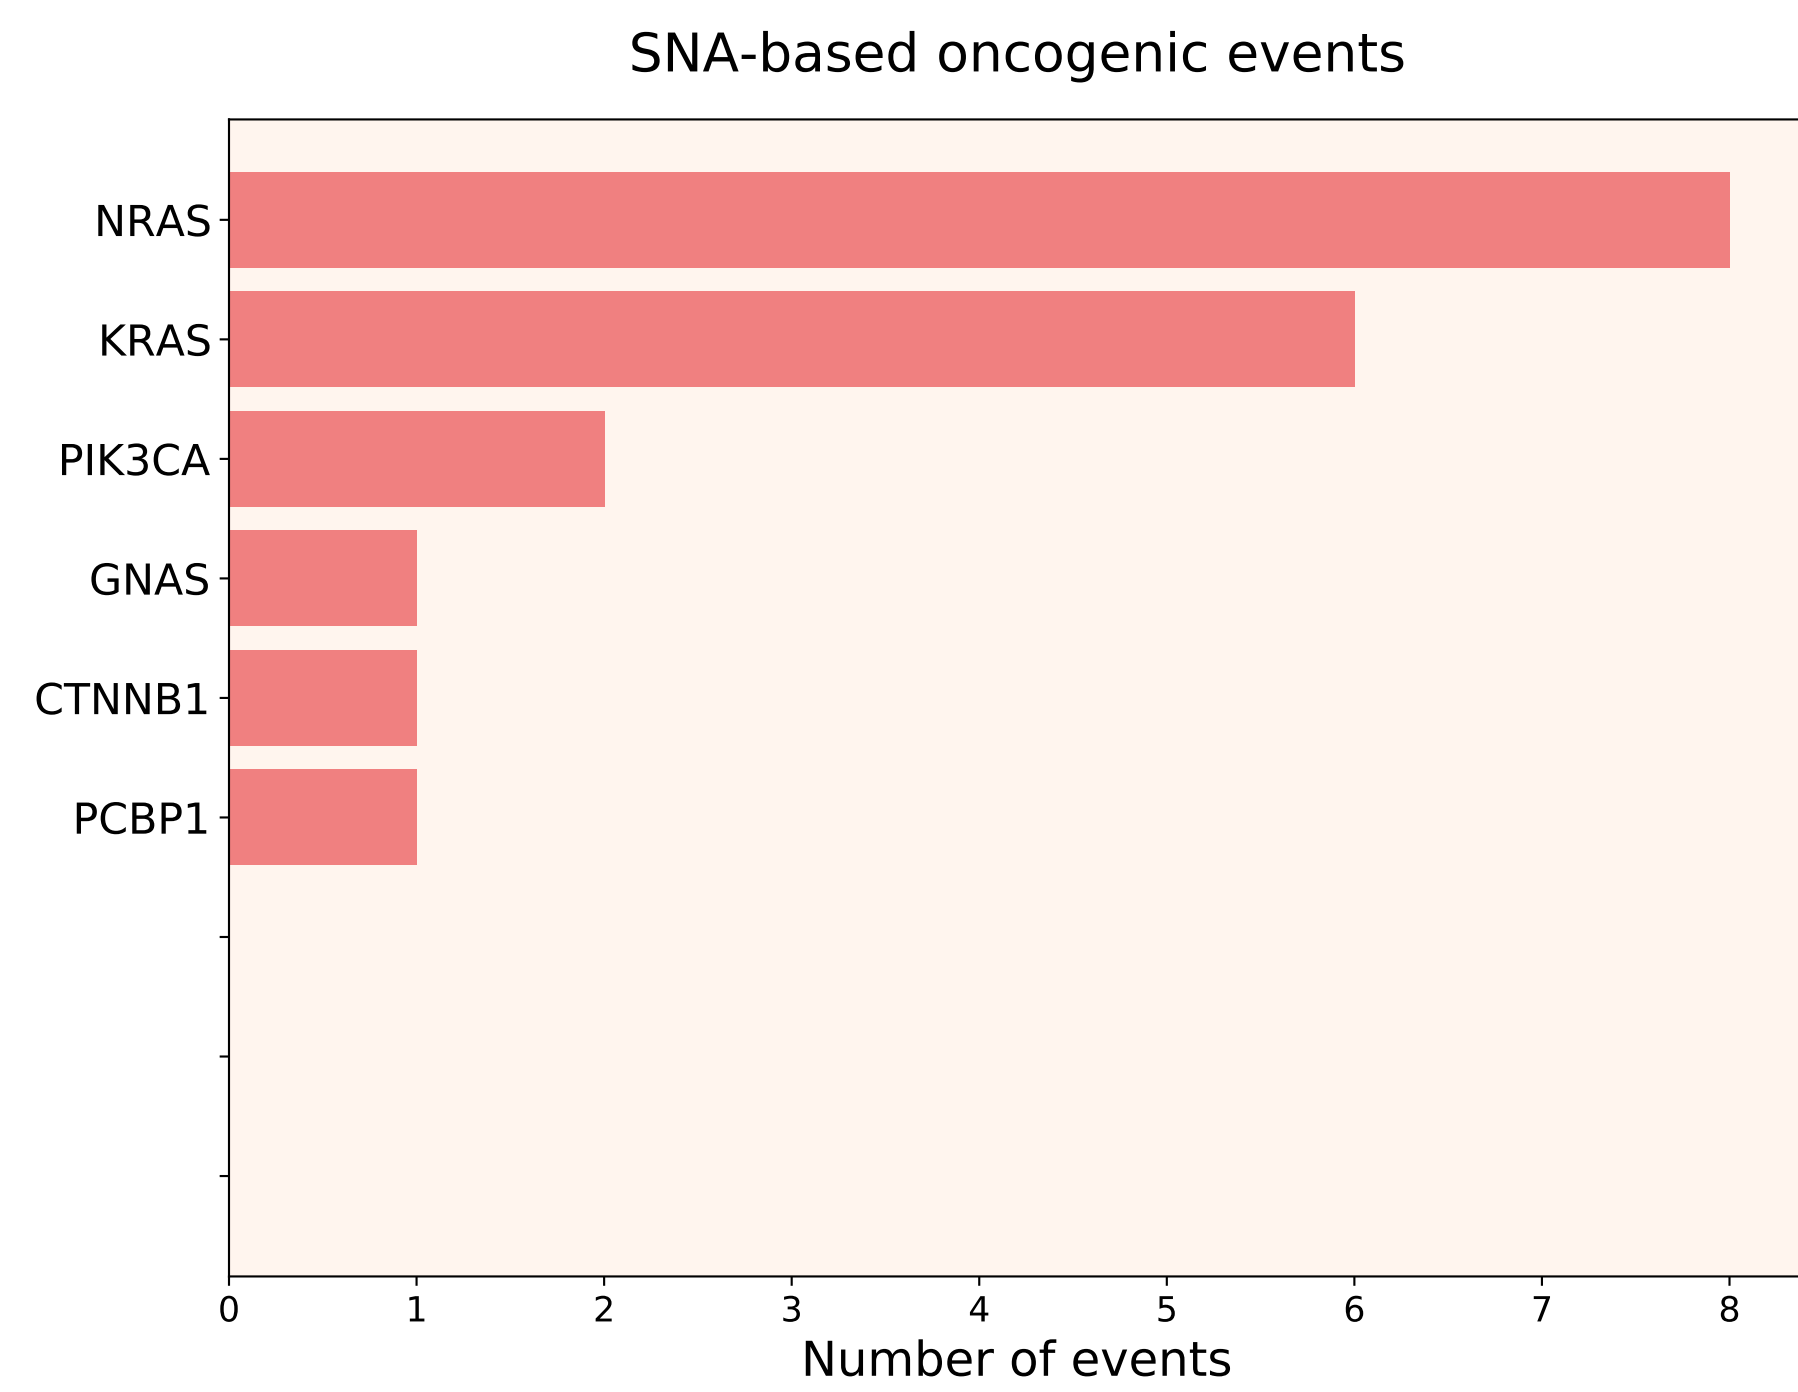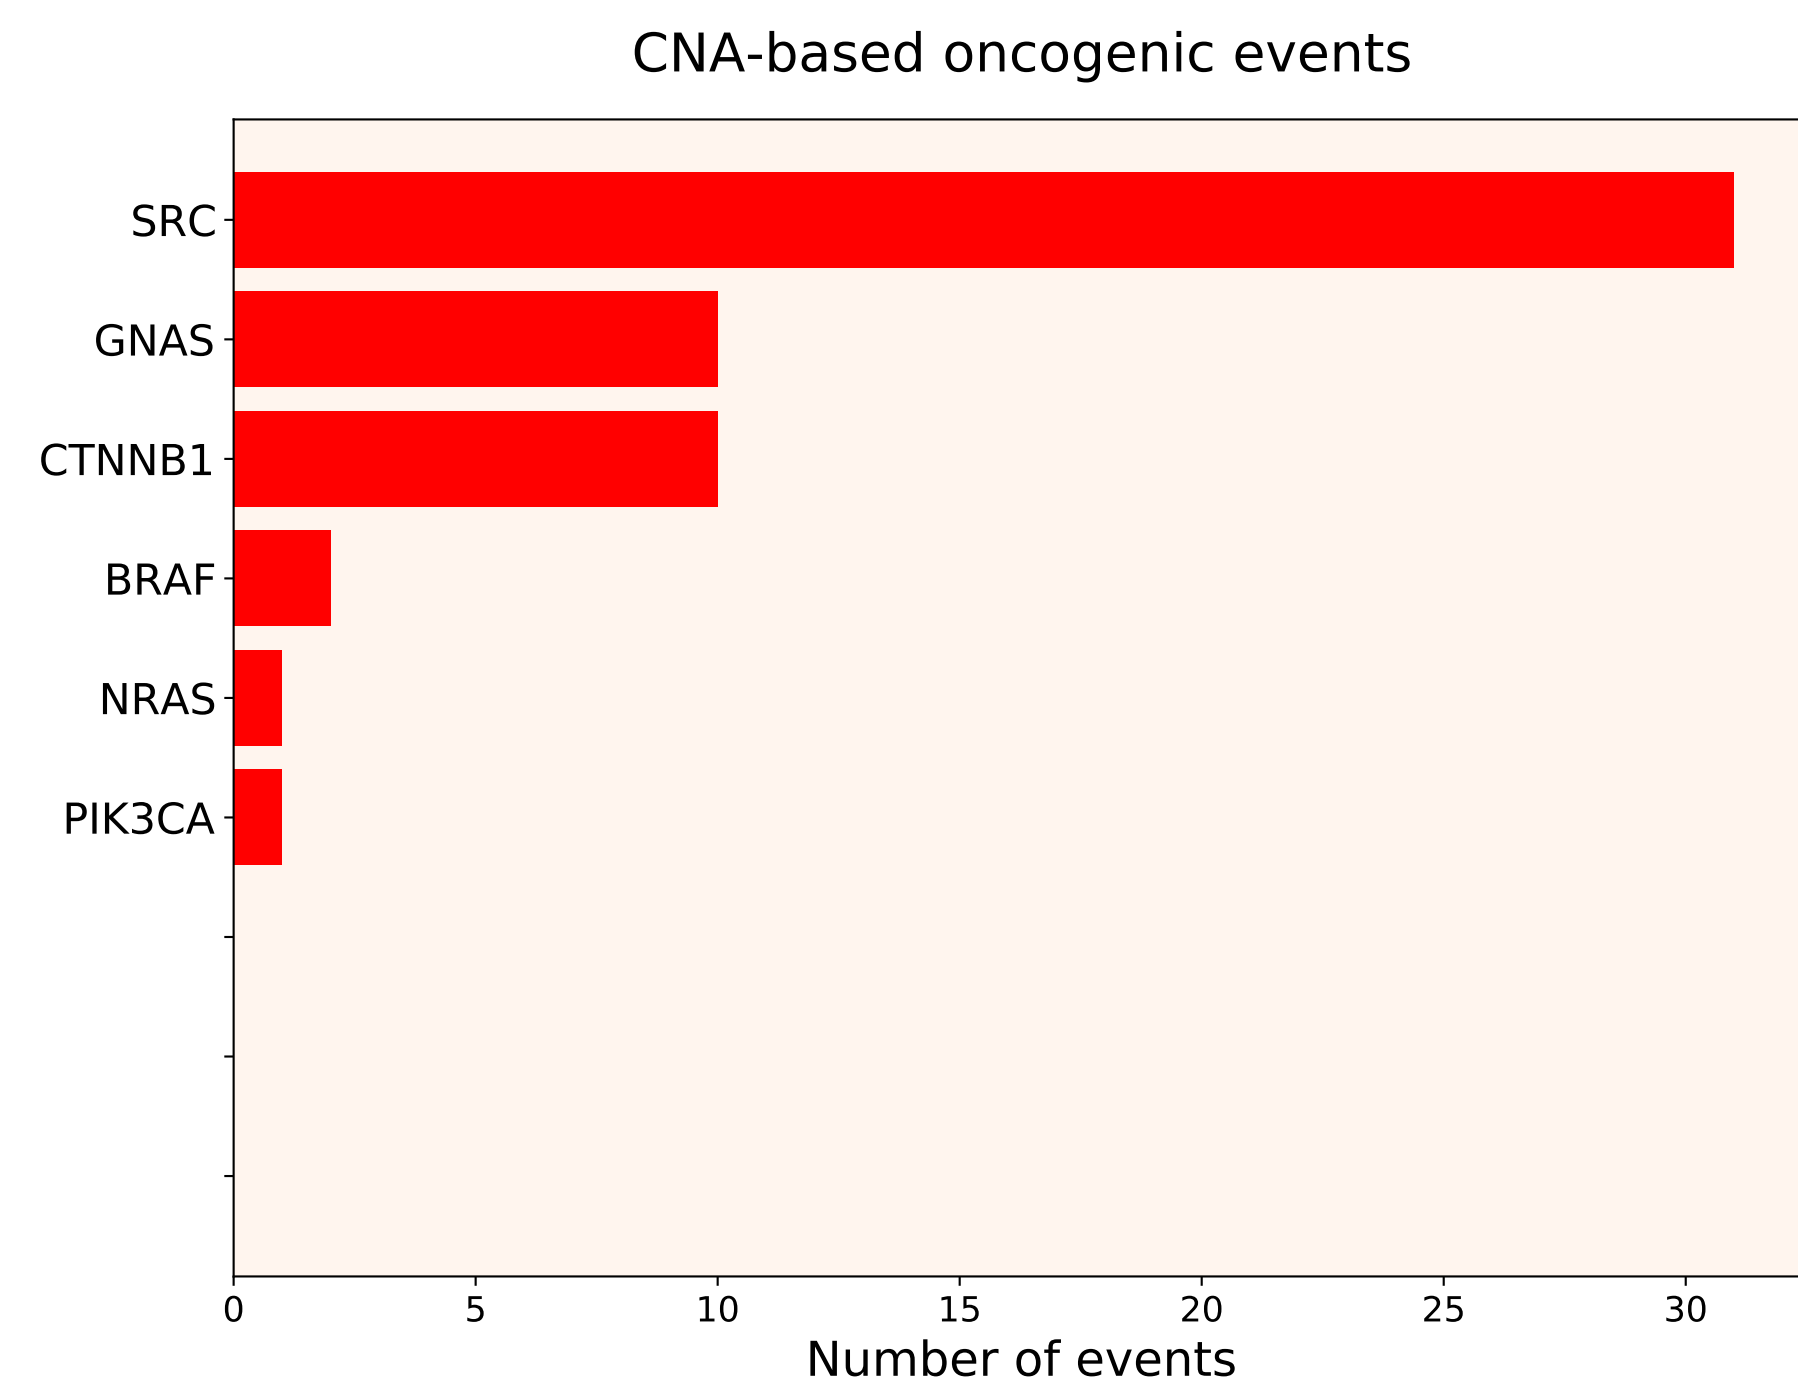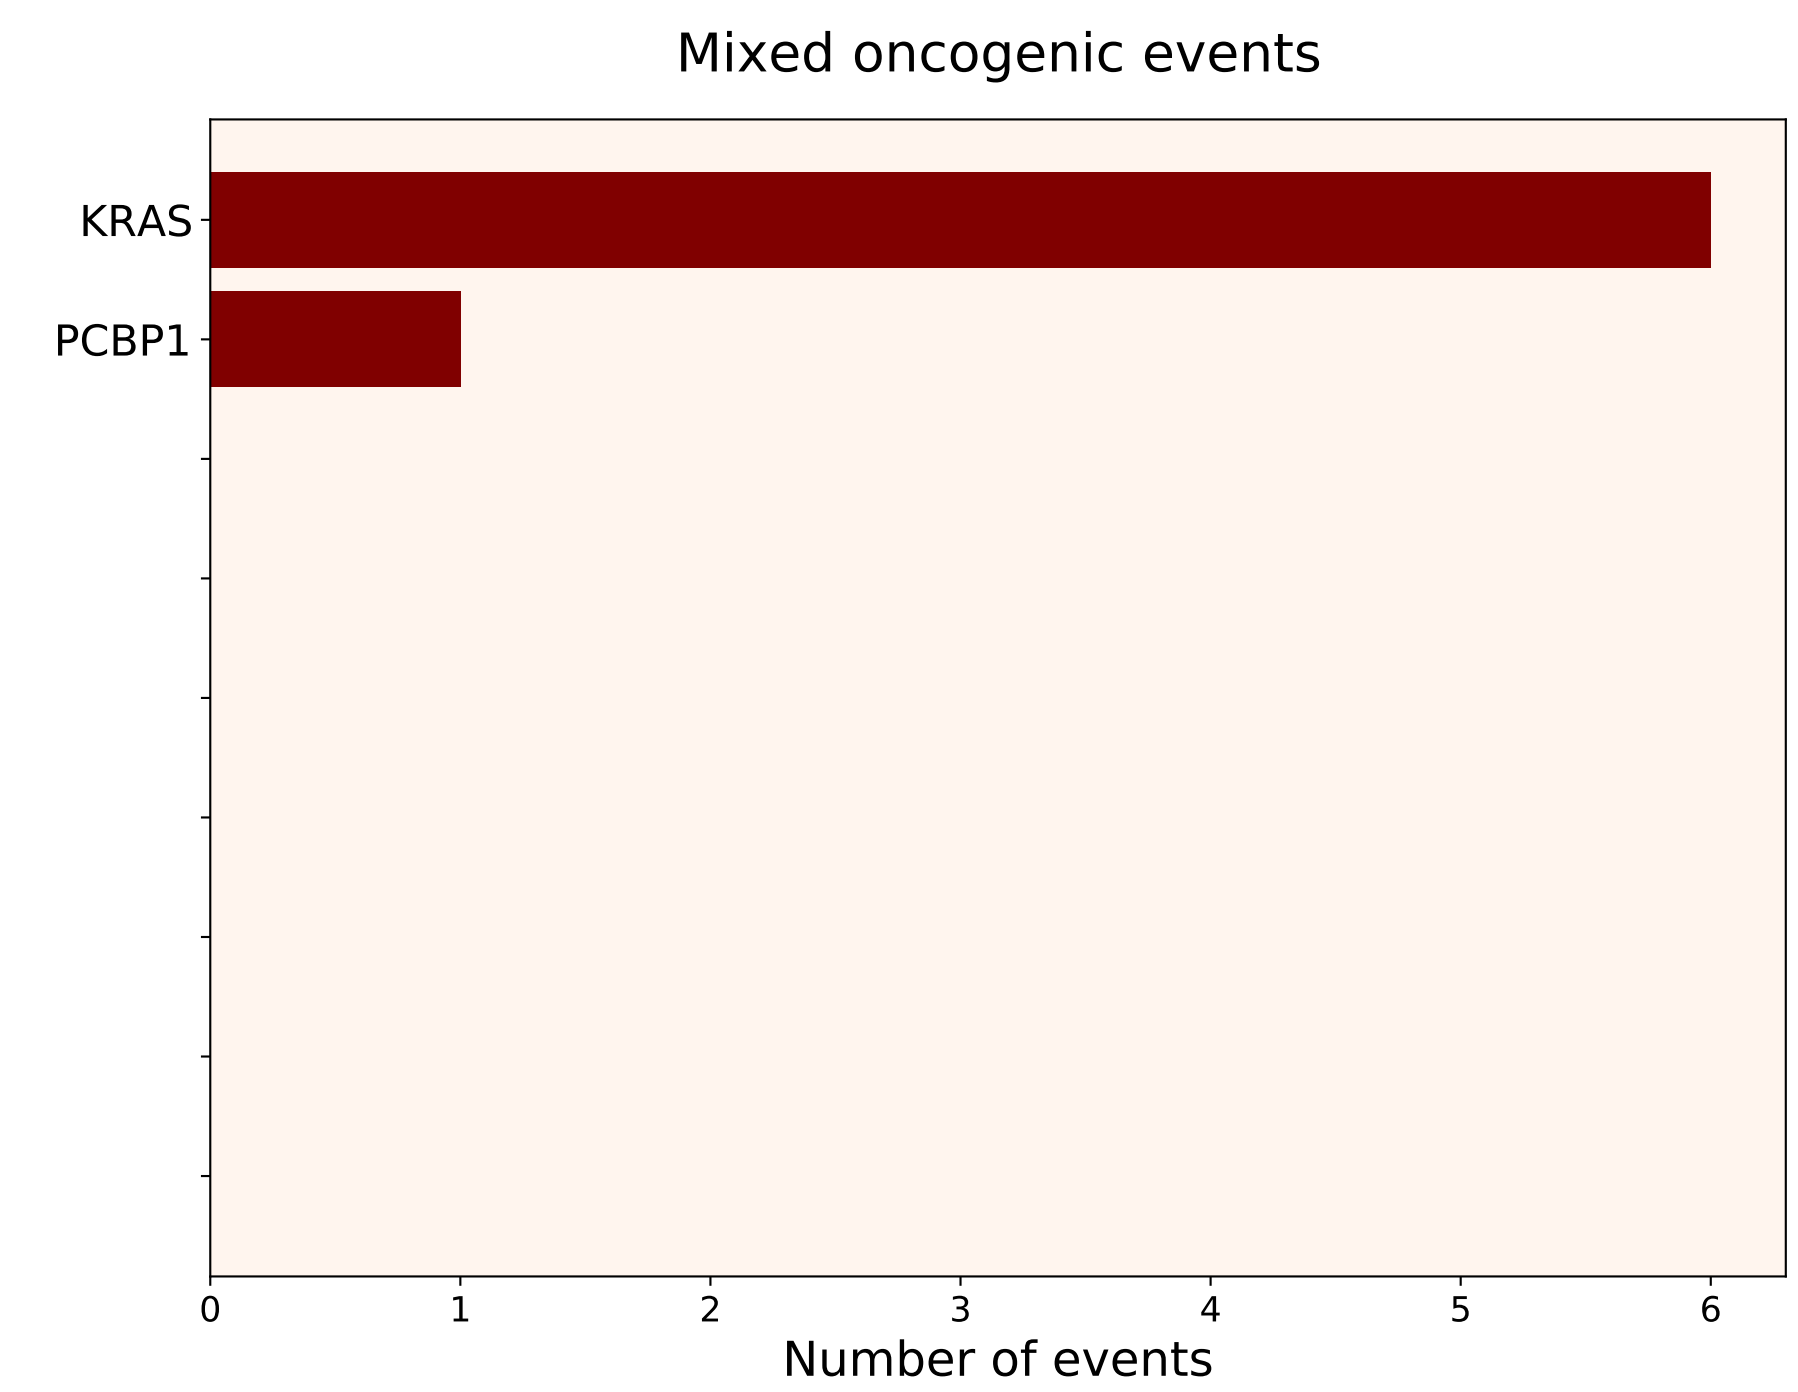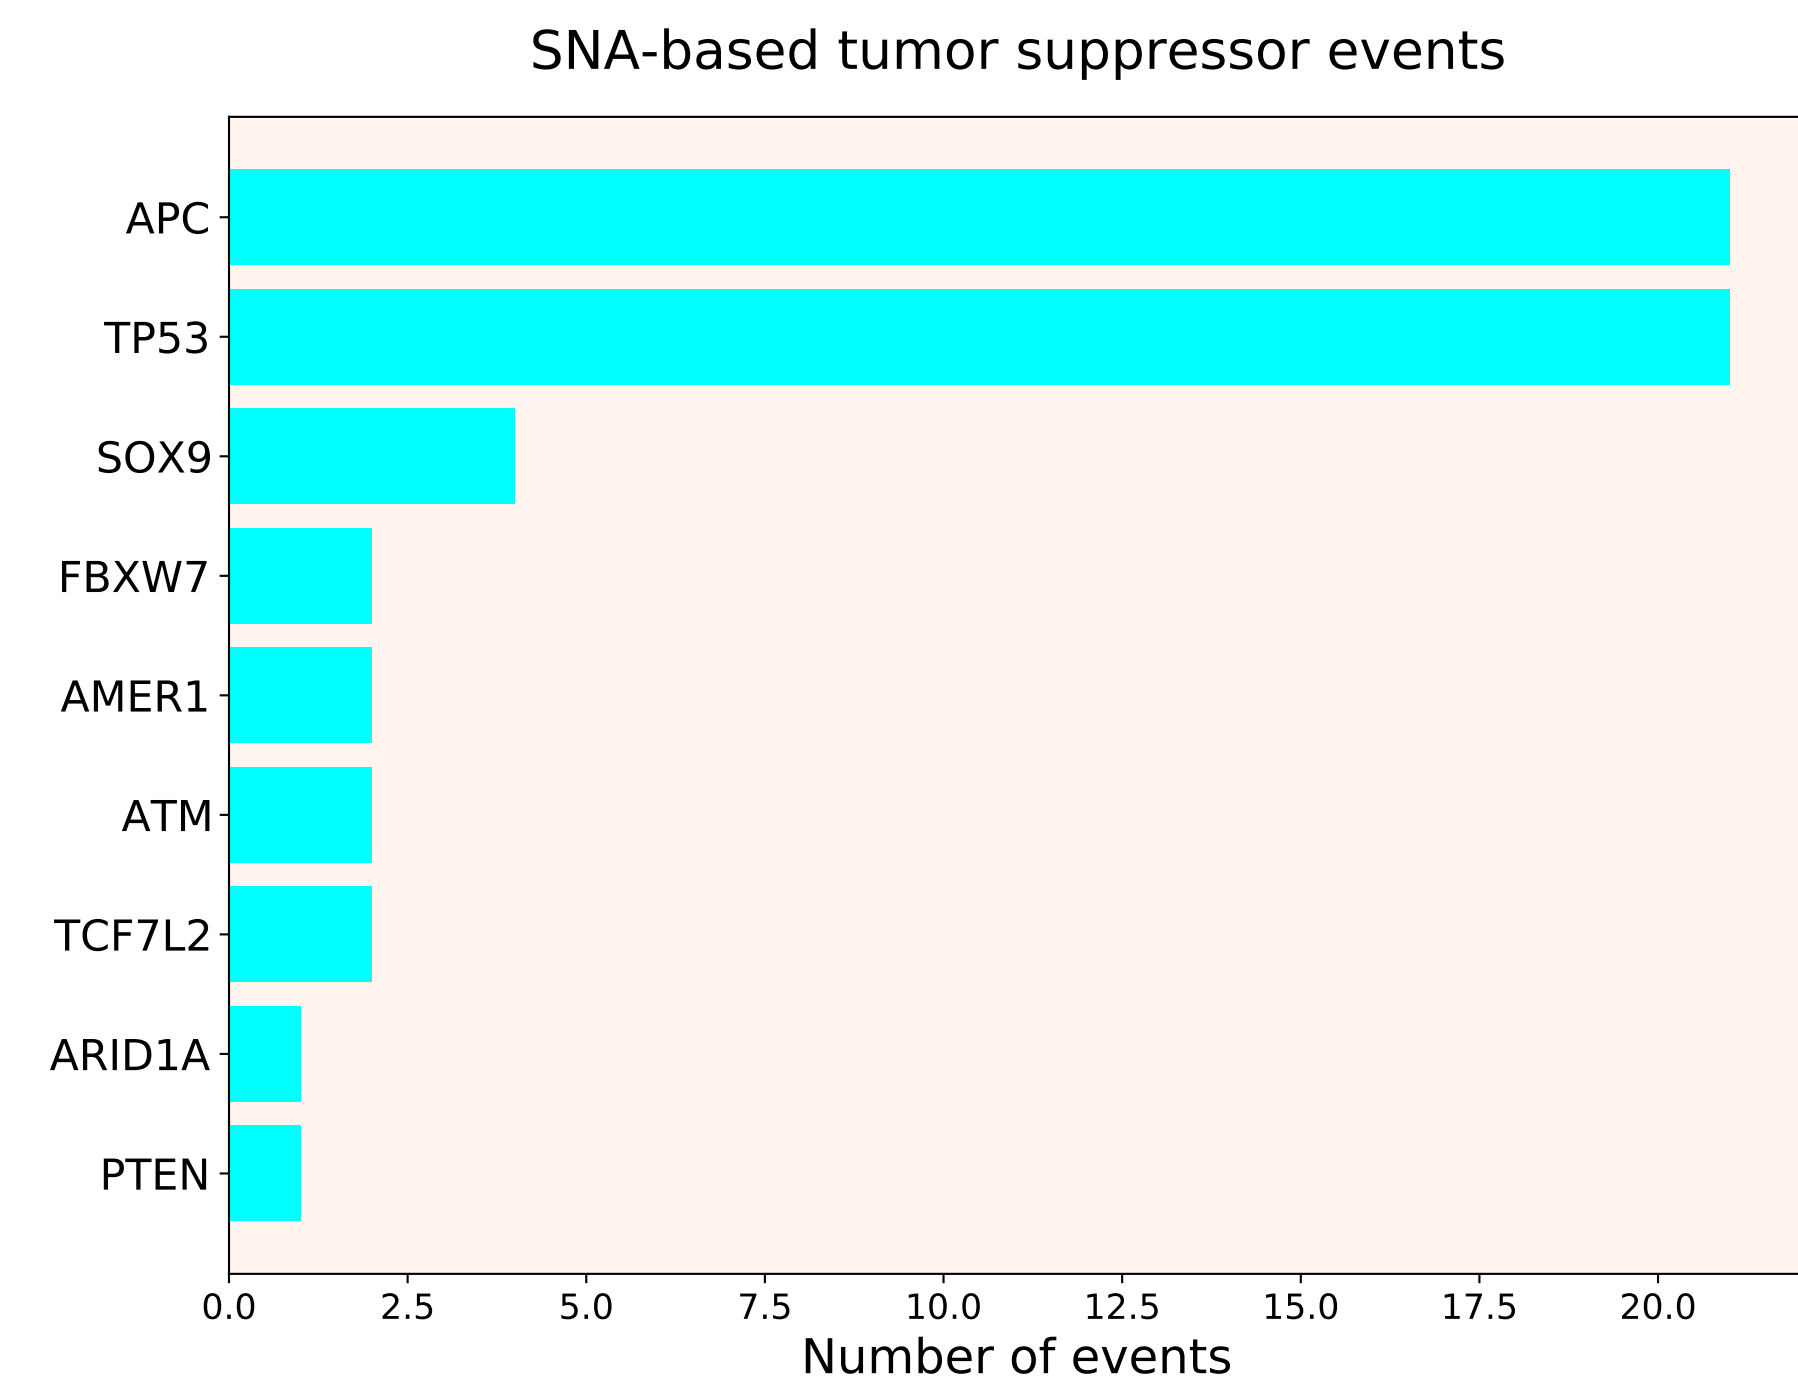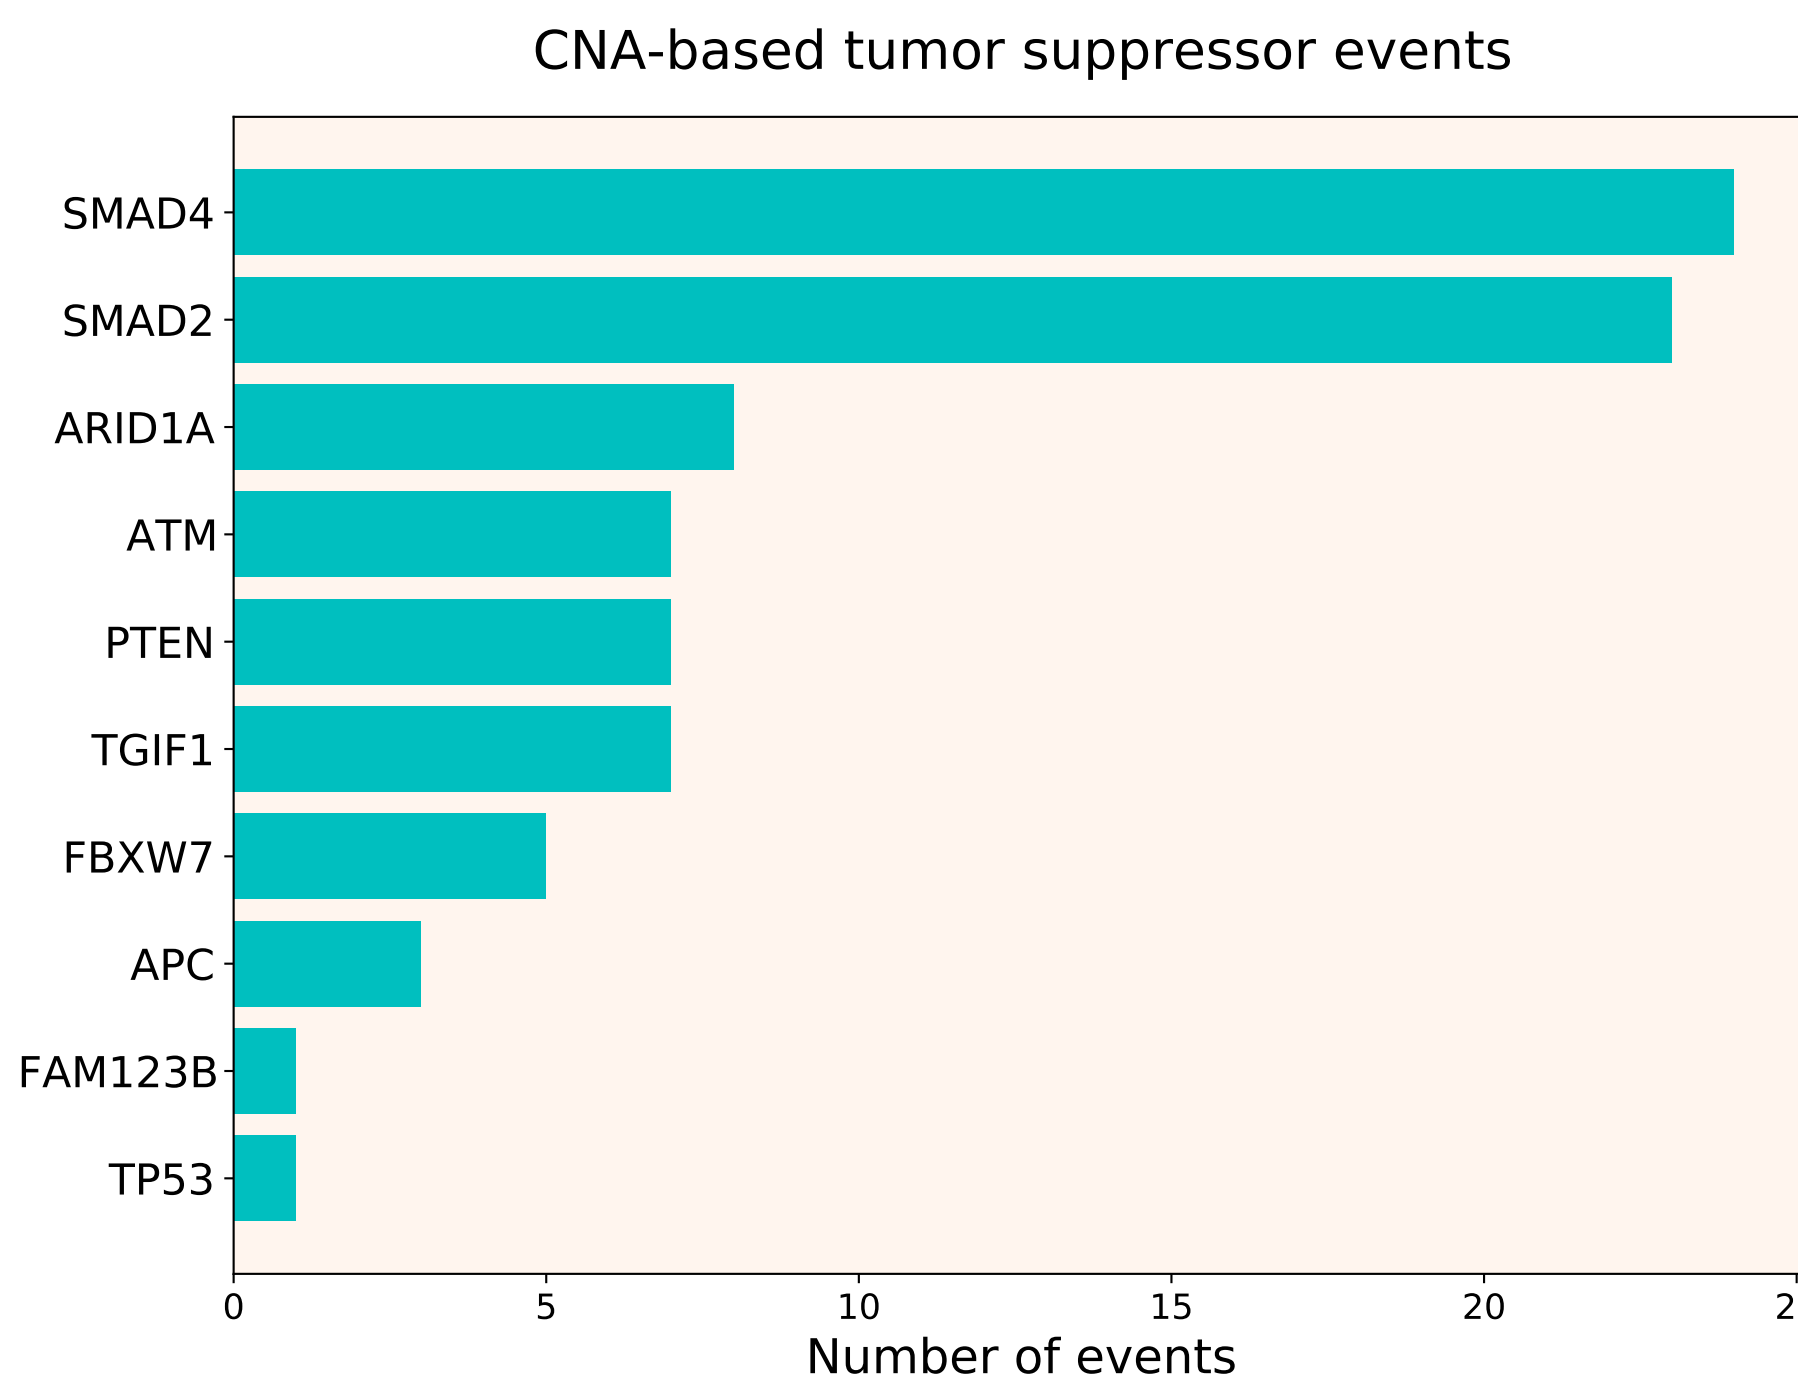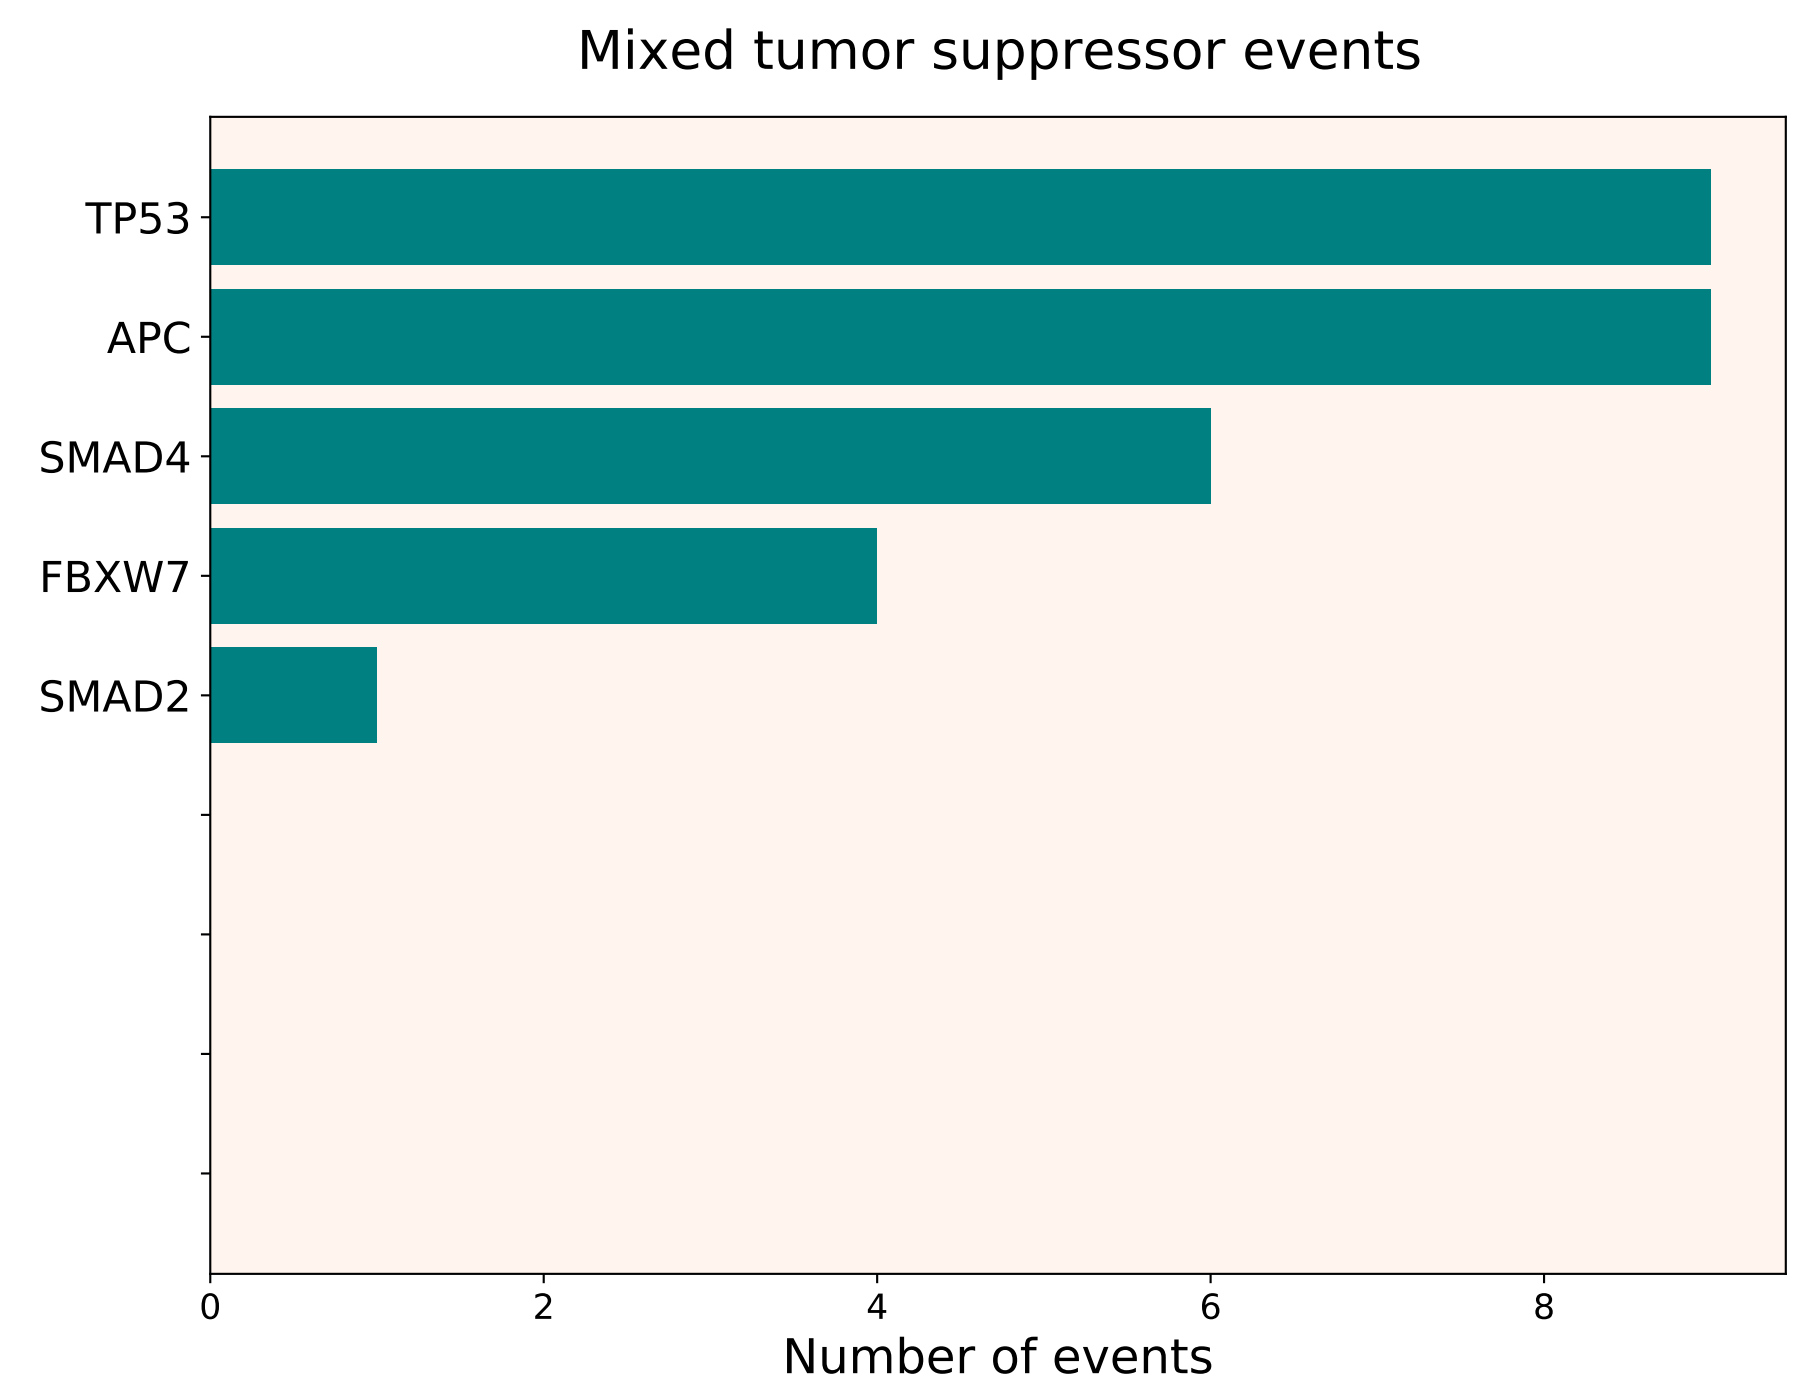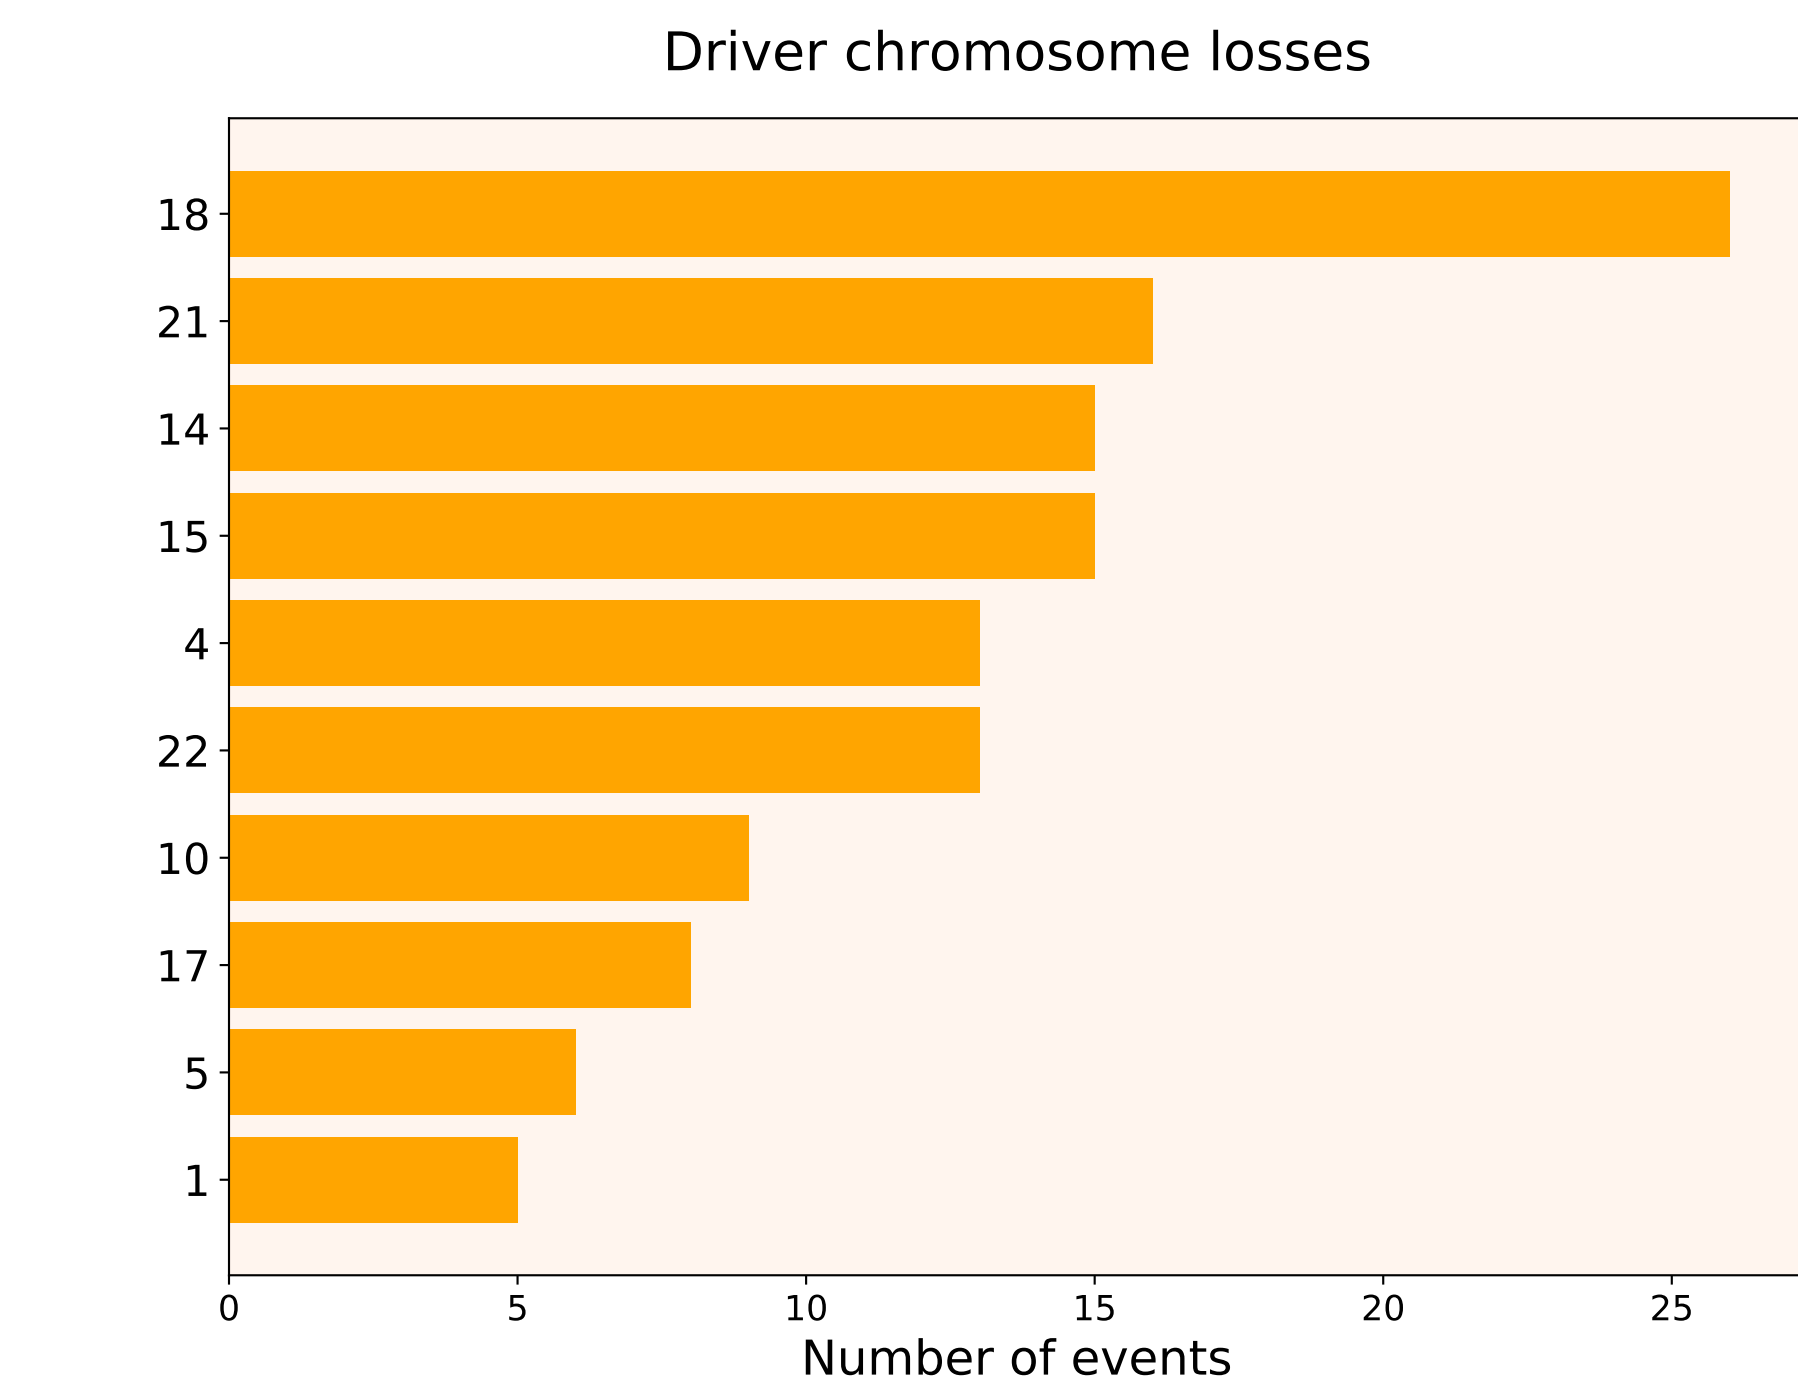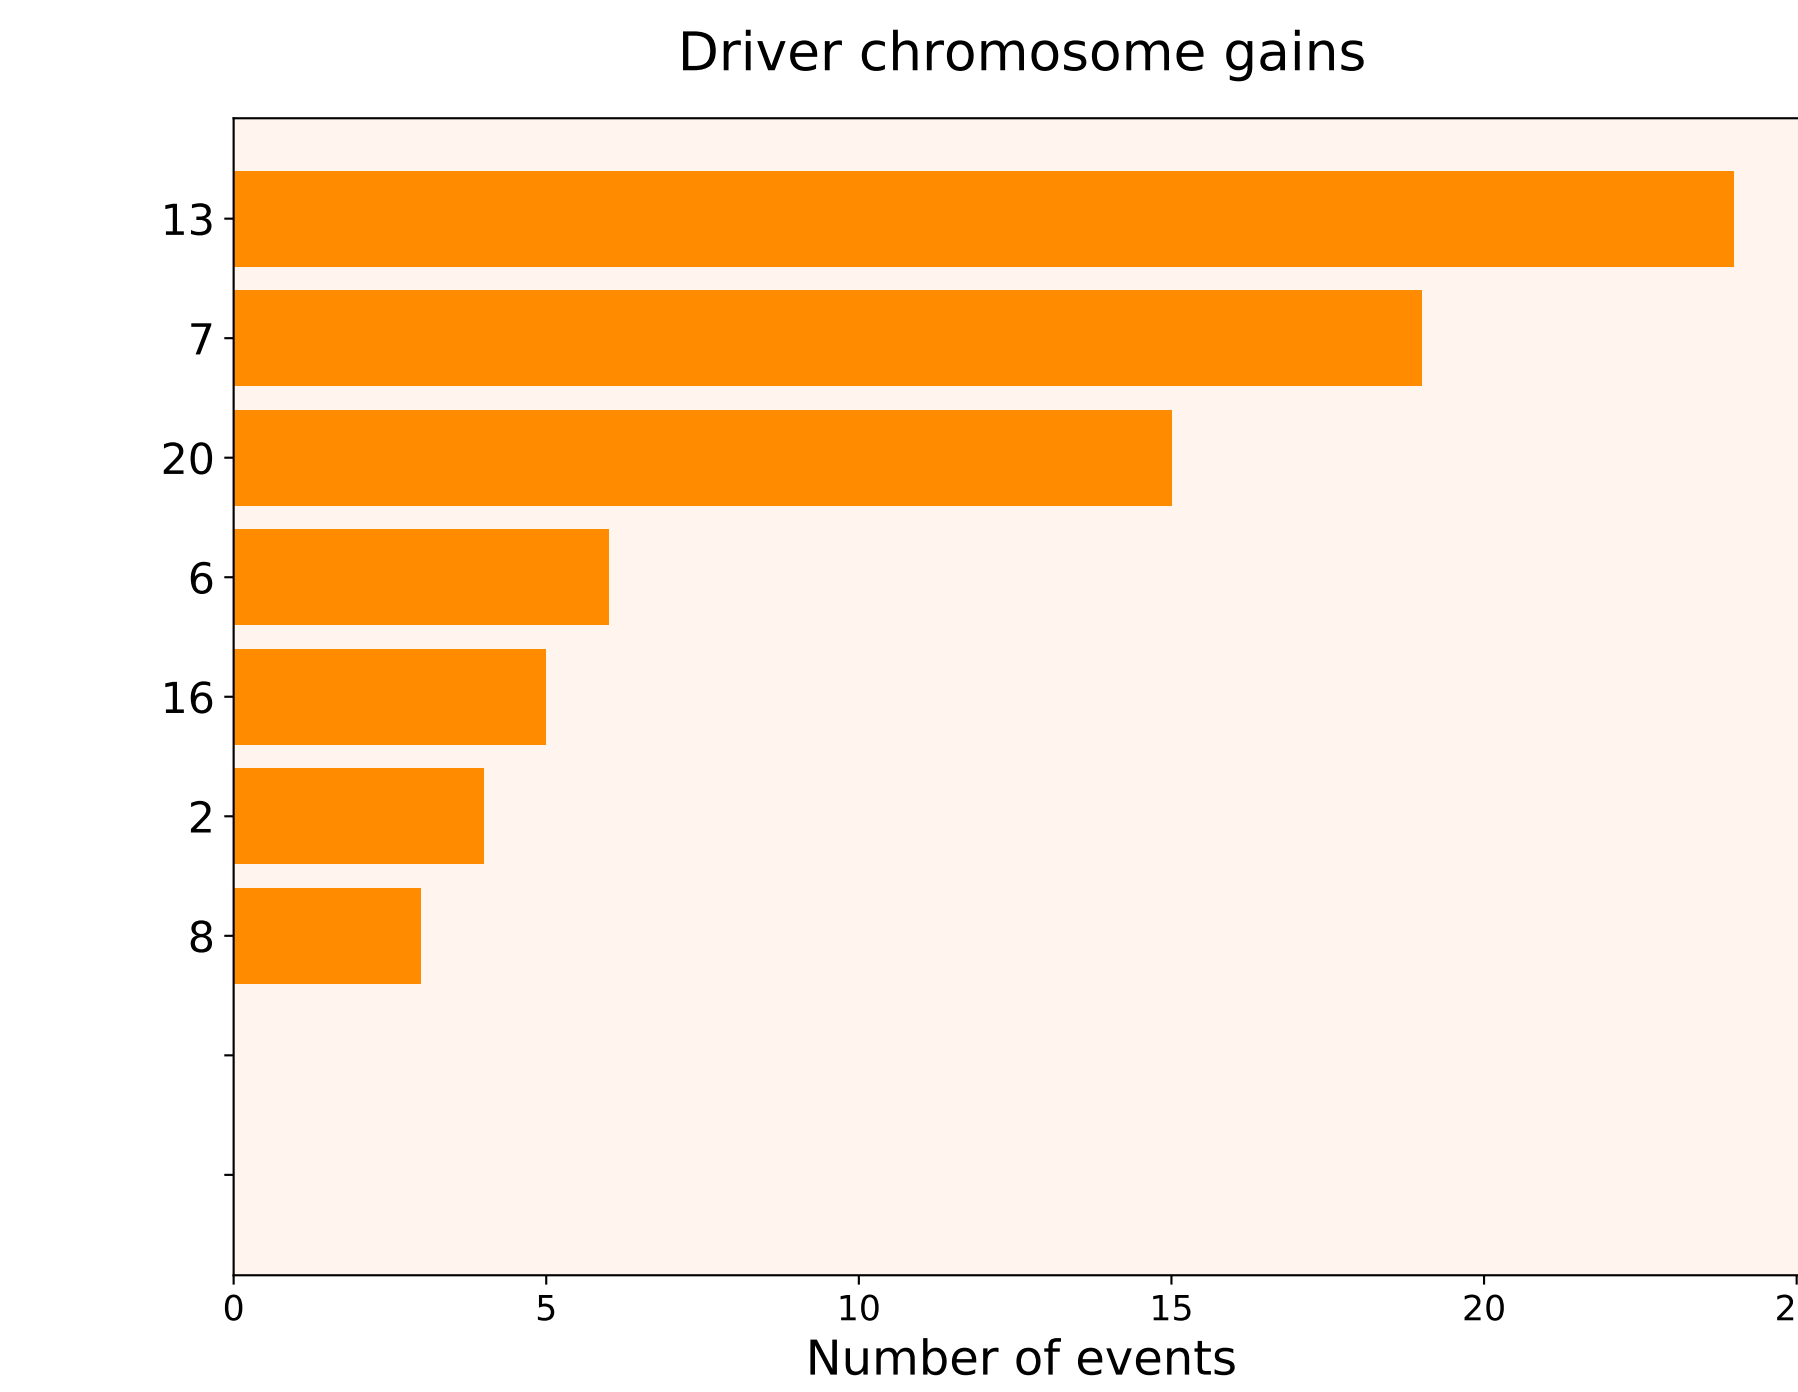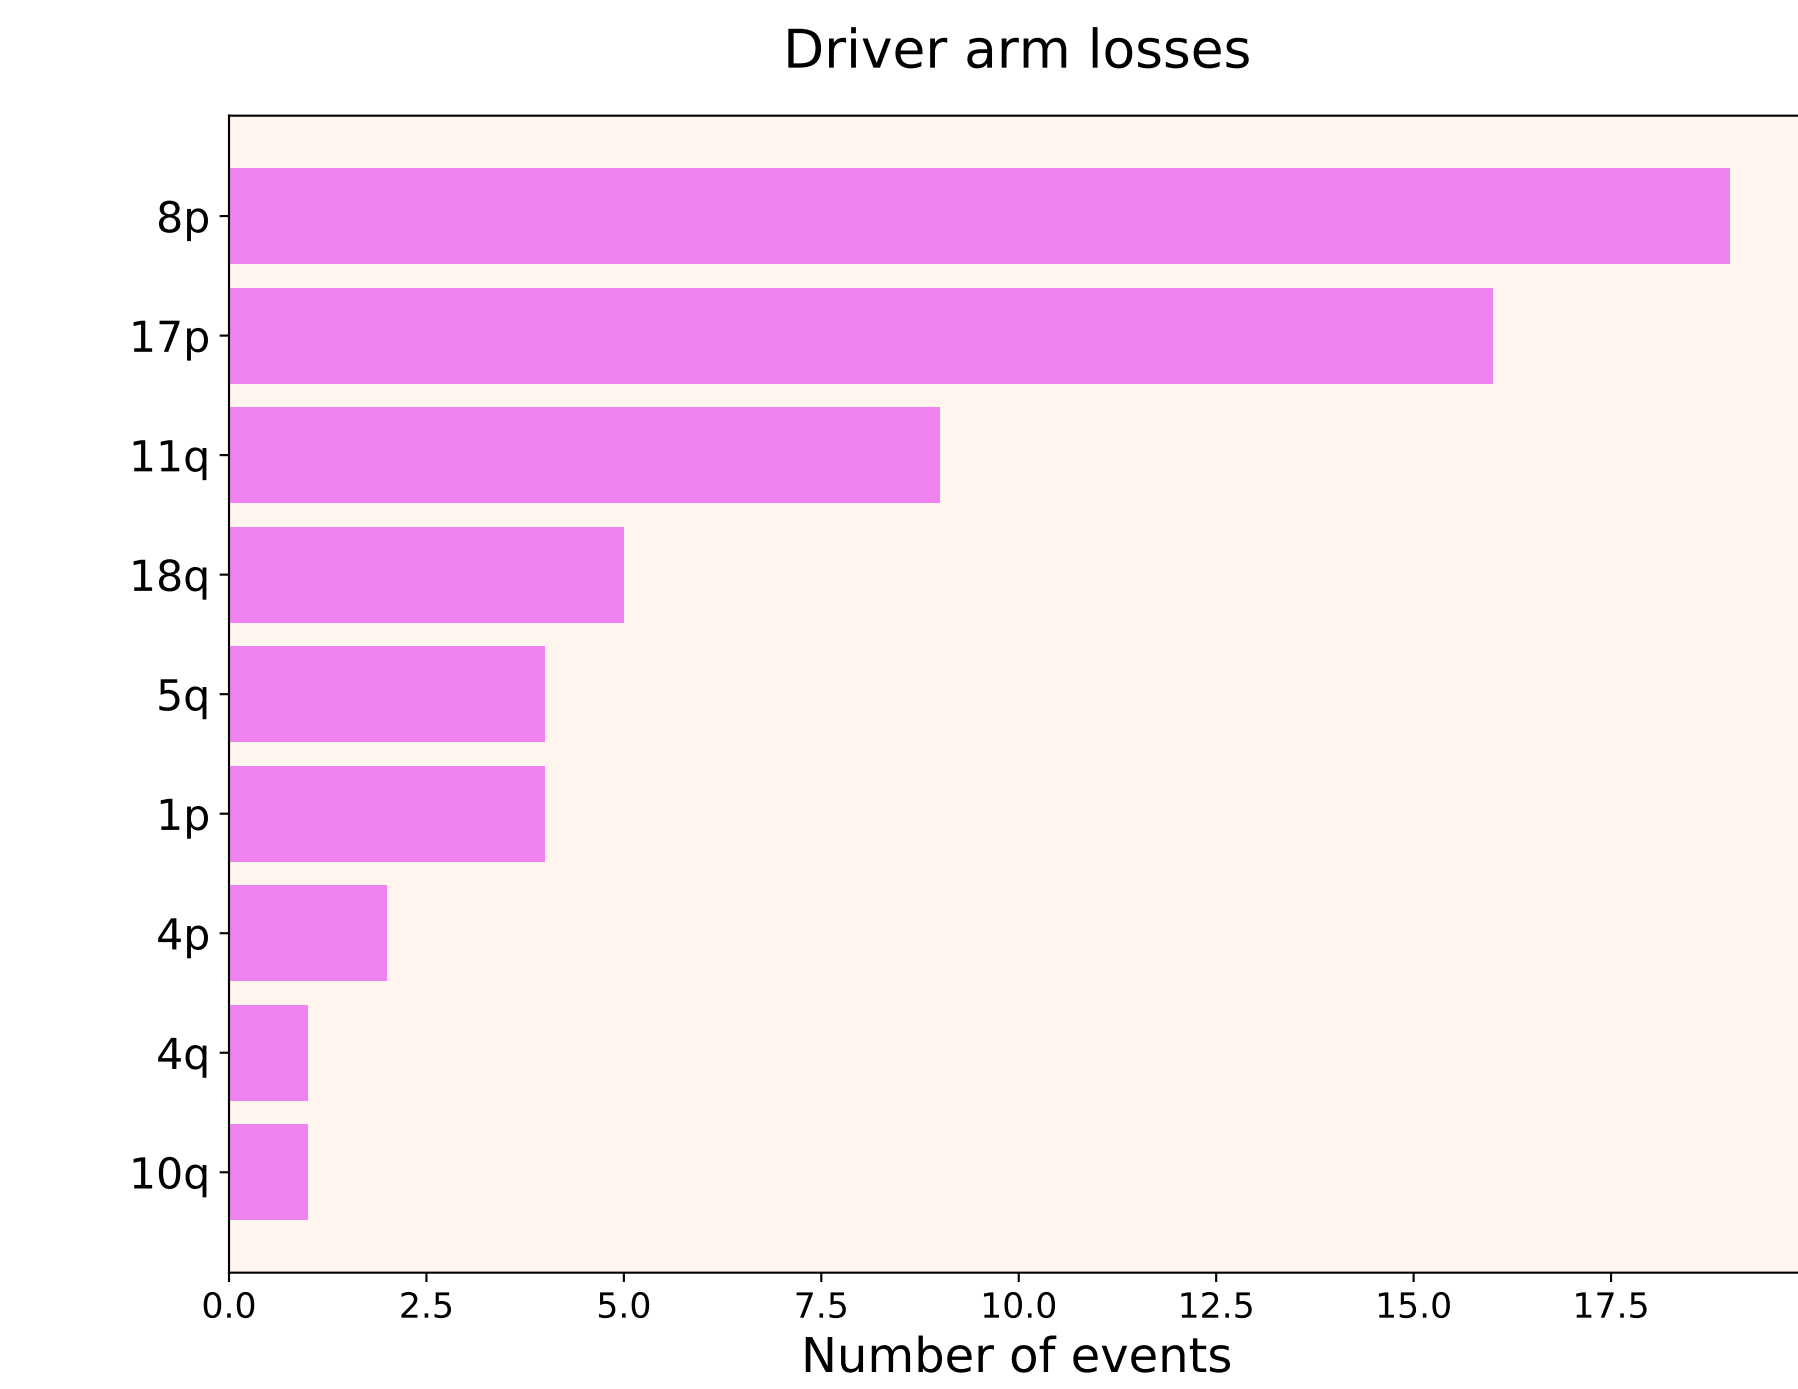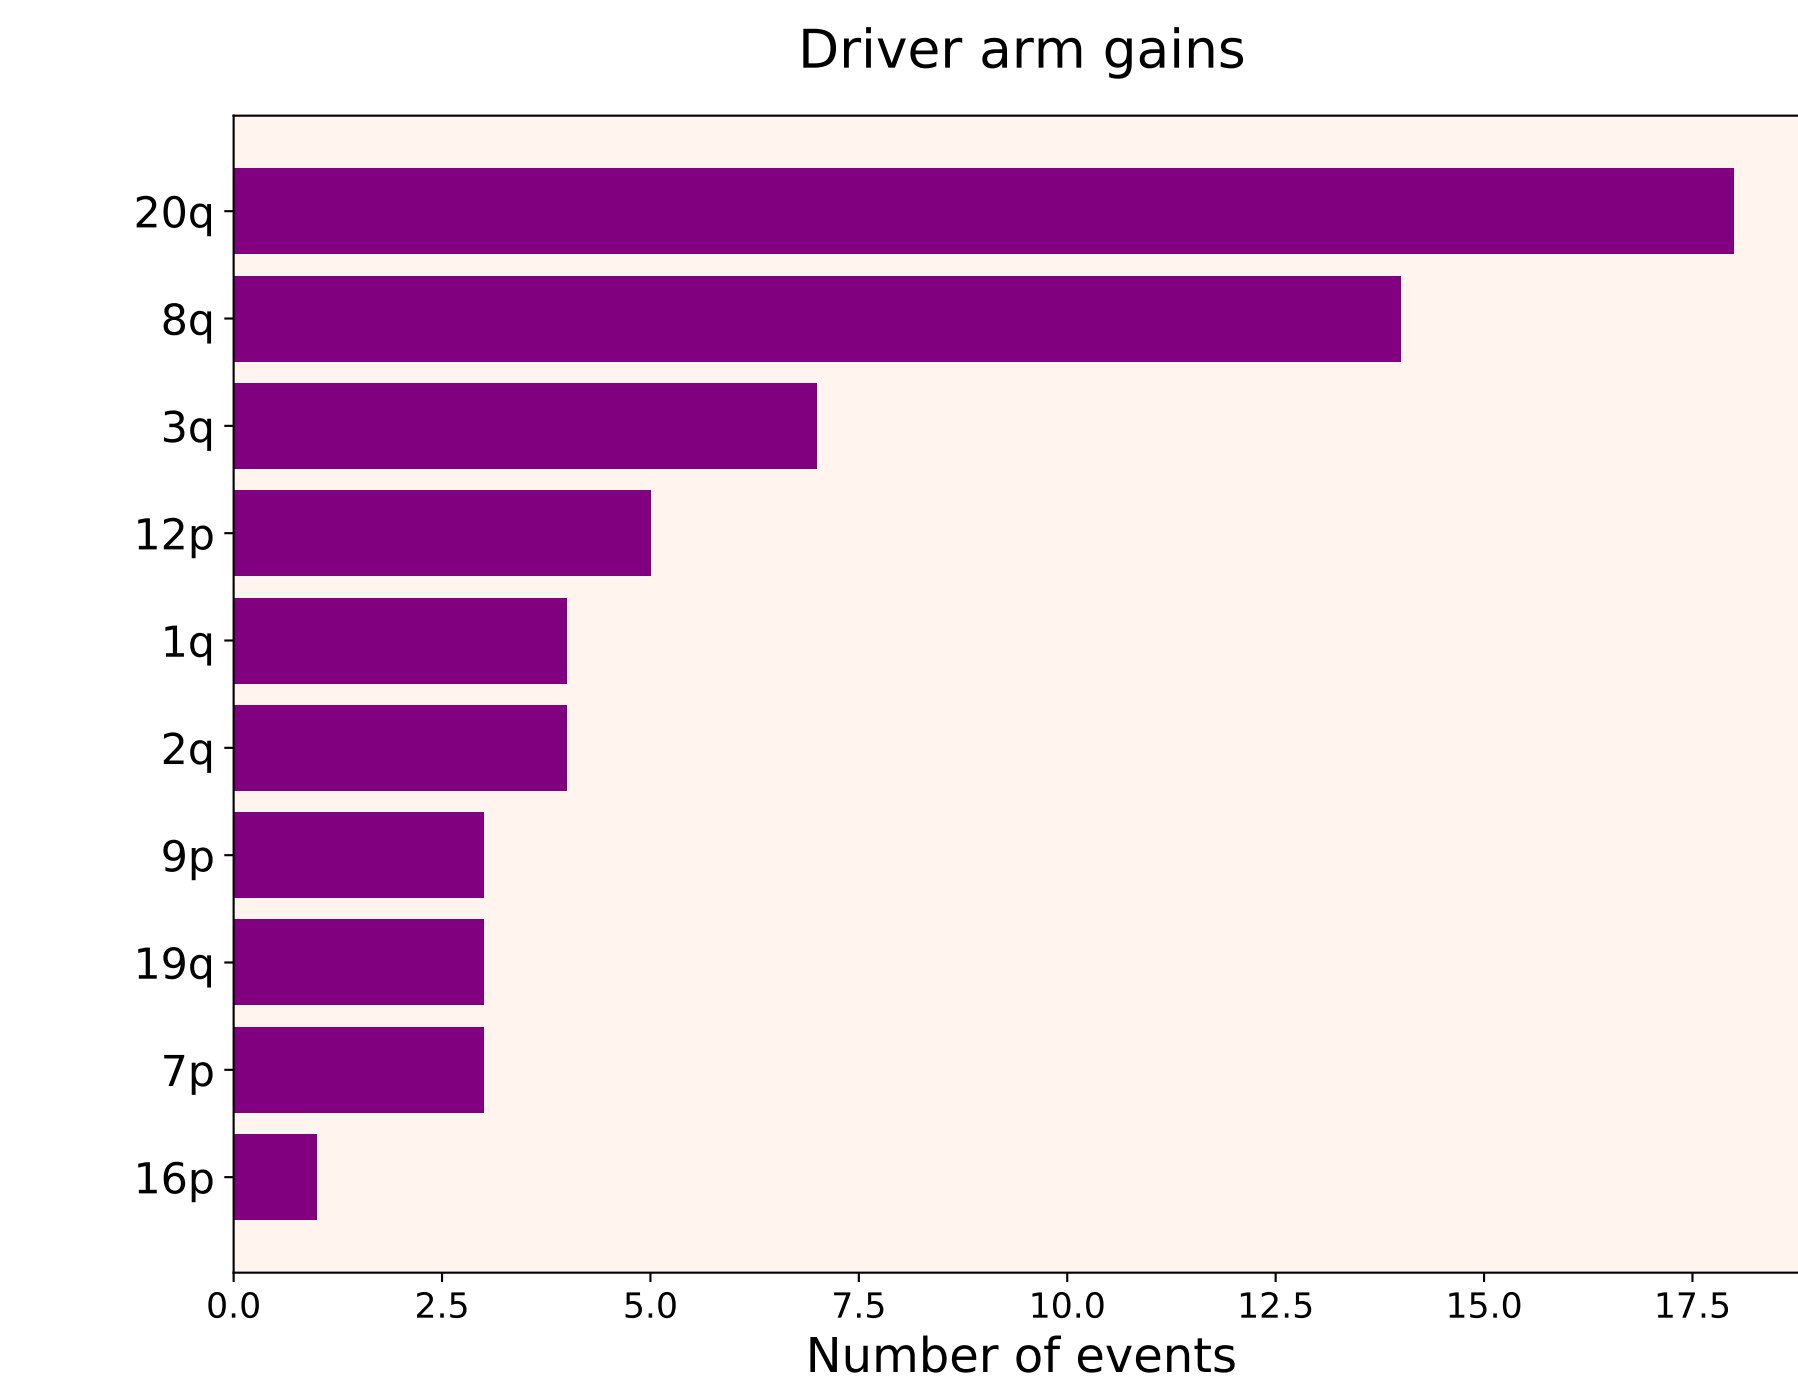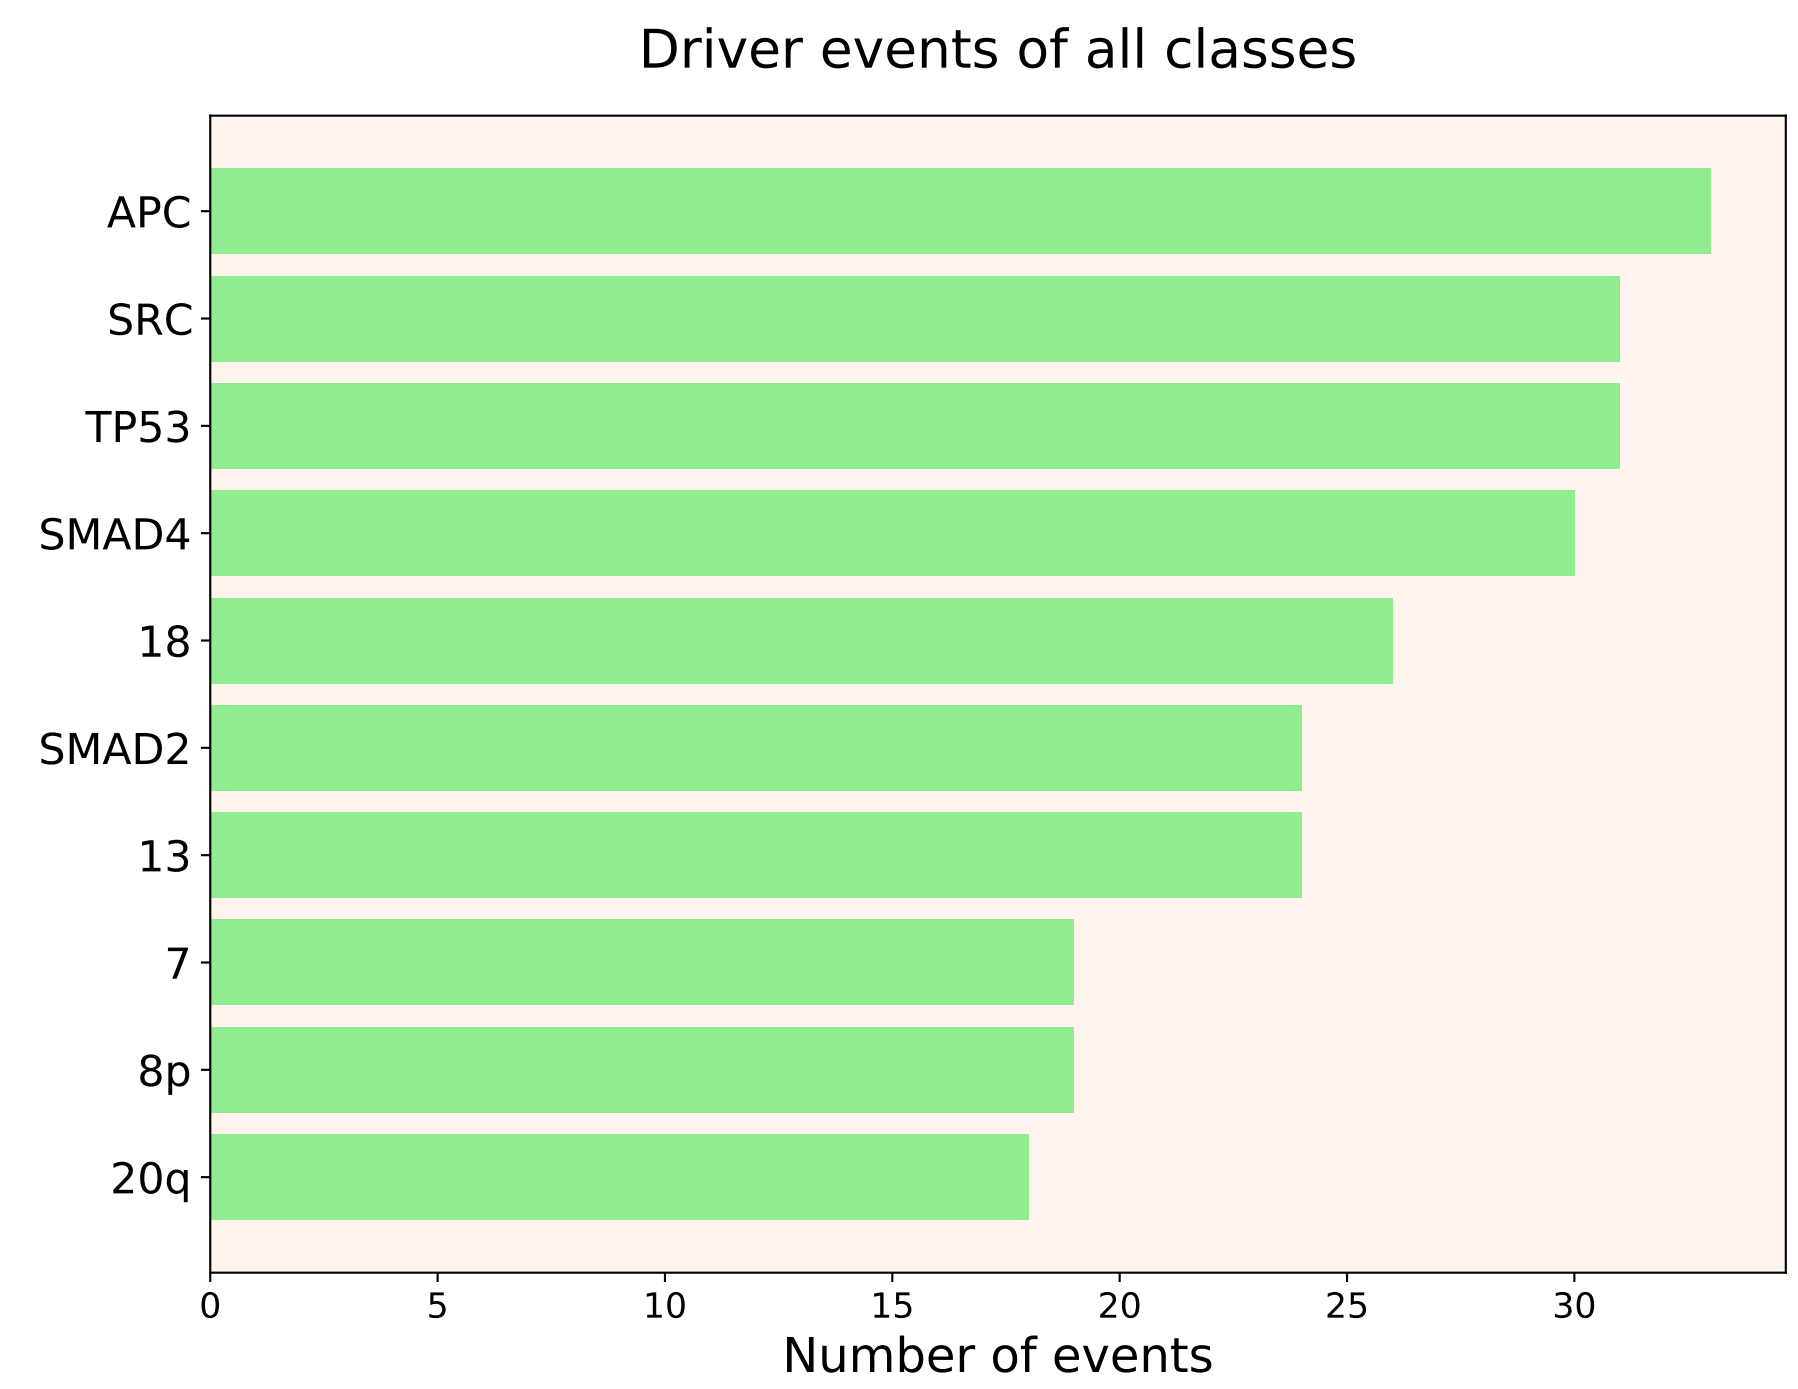

Supplement: Supplemental_Data_S1.zip [file Supplemental_Data_S1.zip]

Driver event distribution by gender

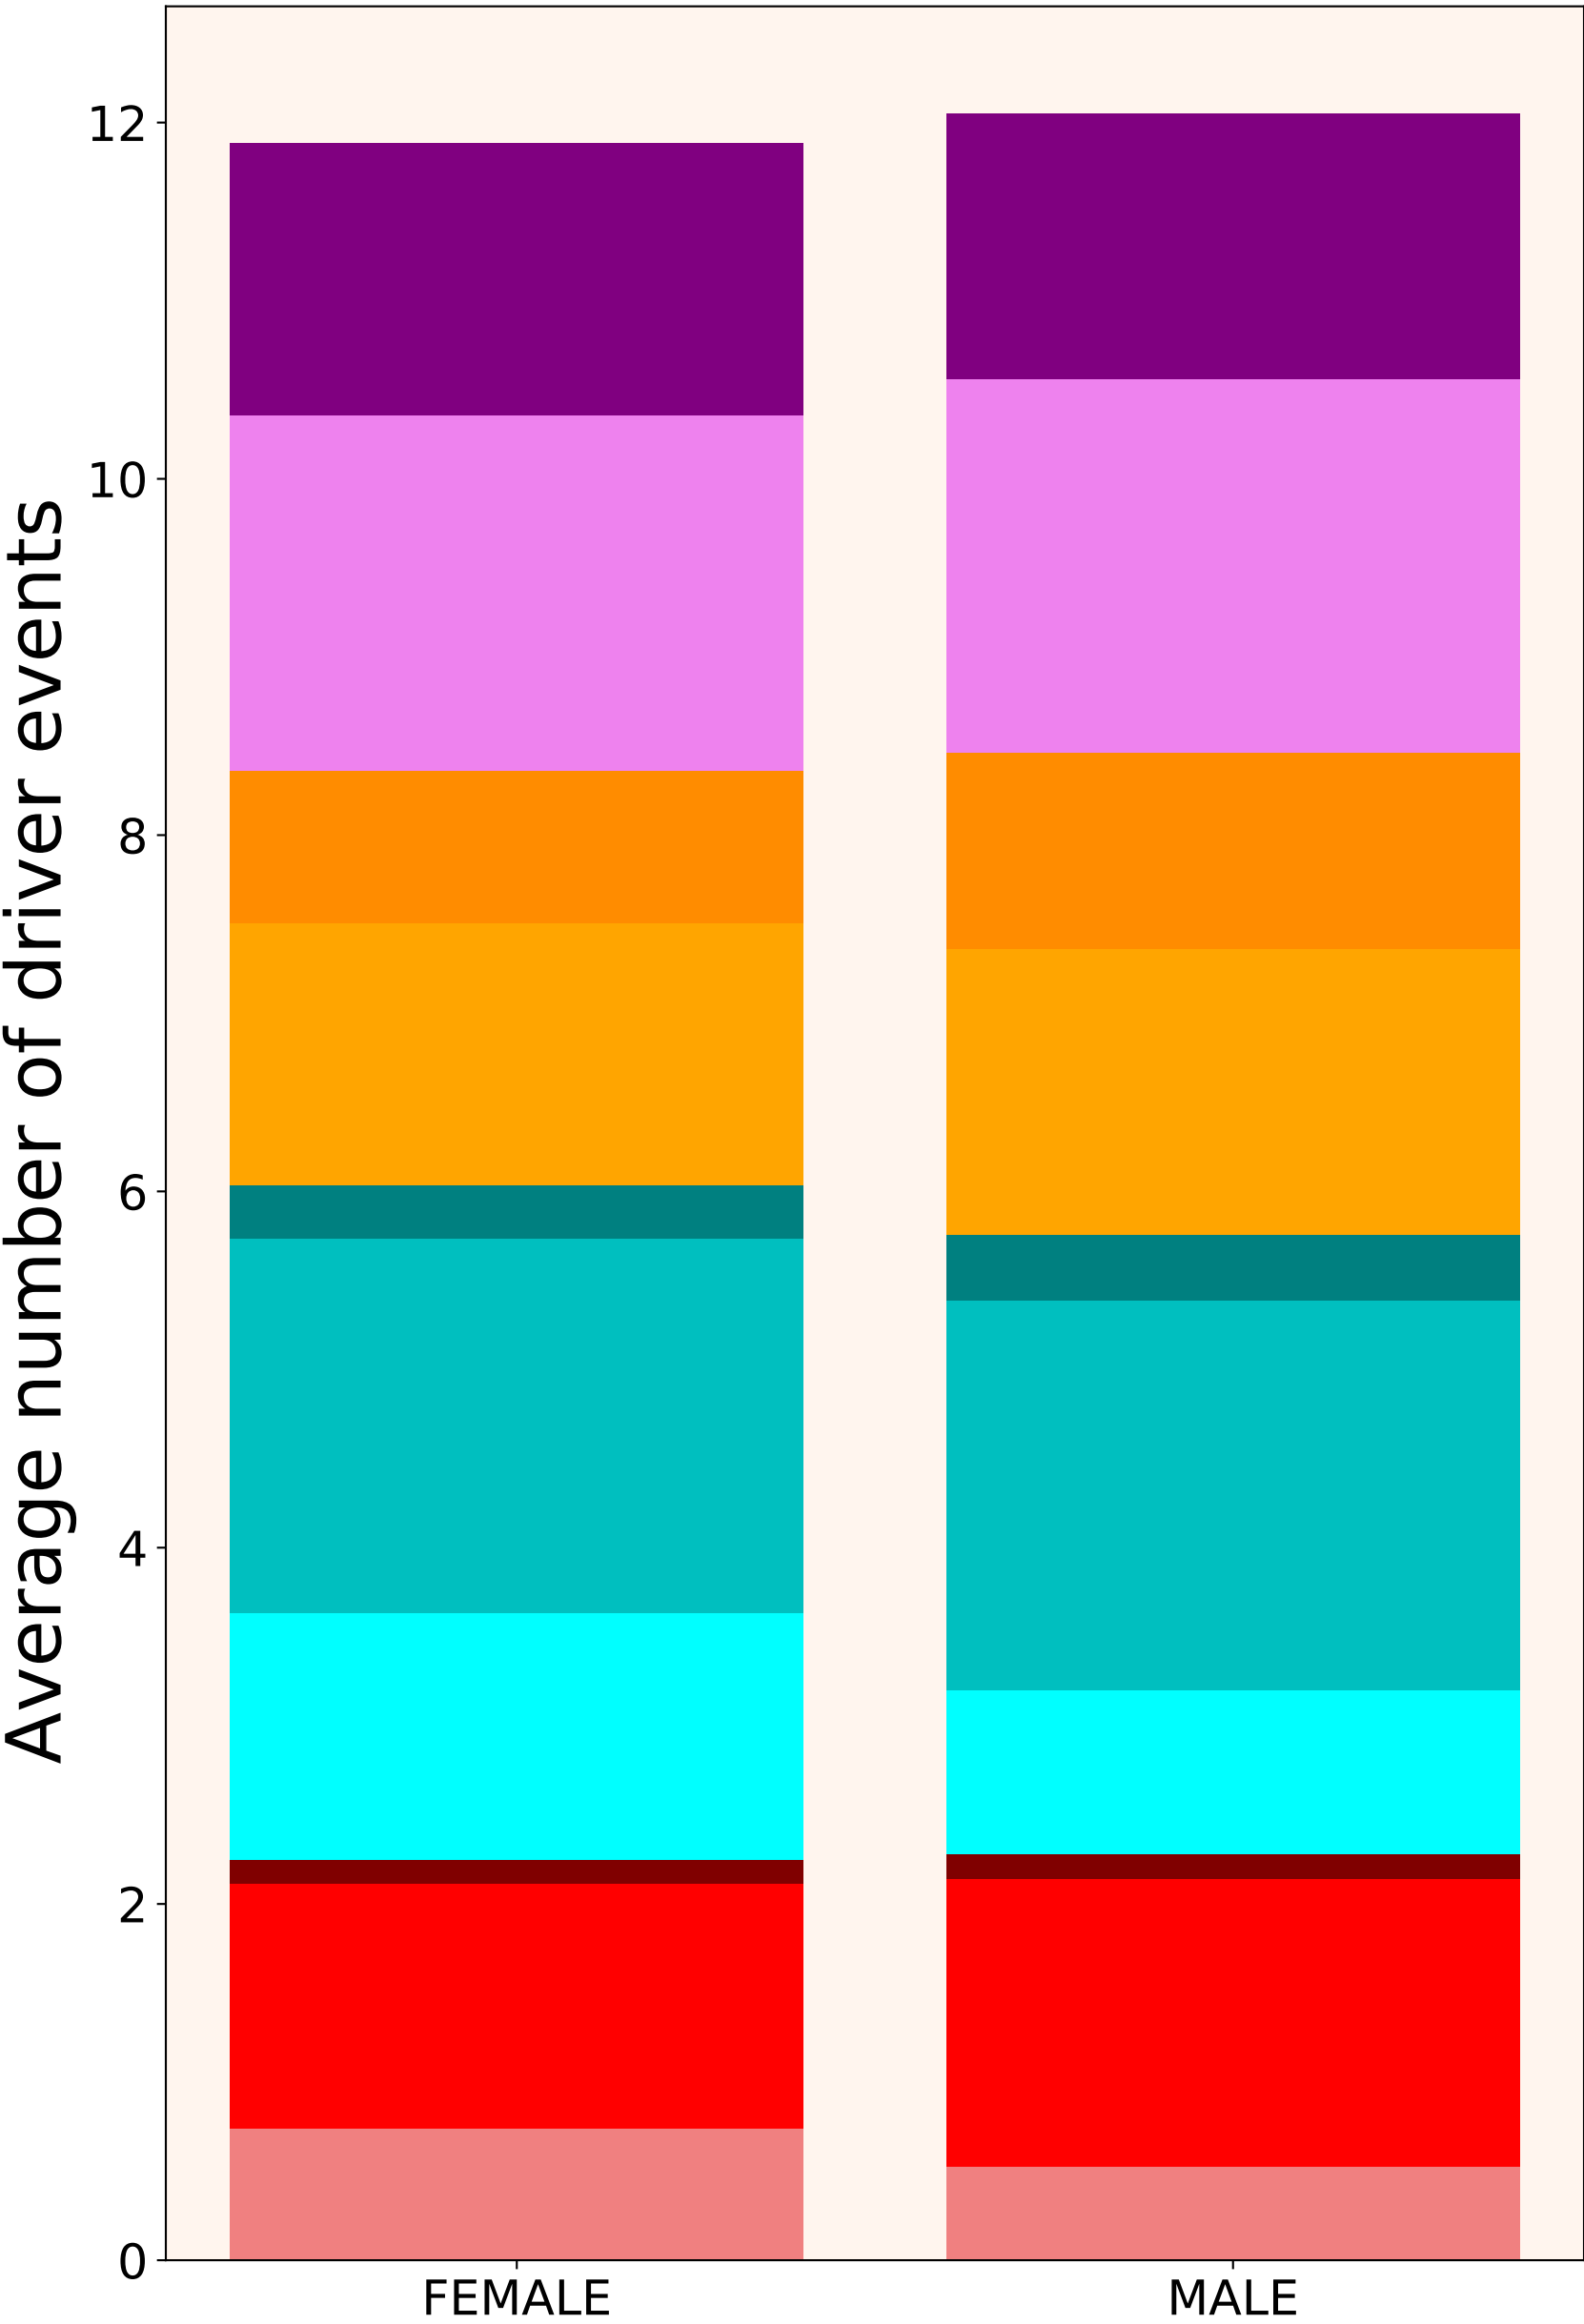

Supplement: Supplemental_Data_S1.zip [file Supplemental_Data_S1.zip]

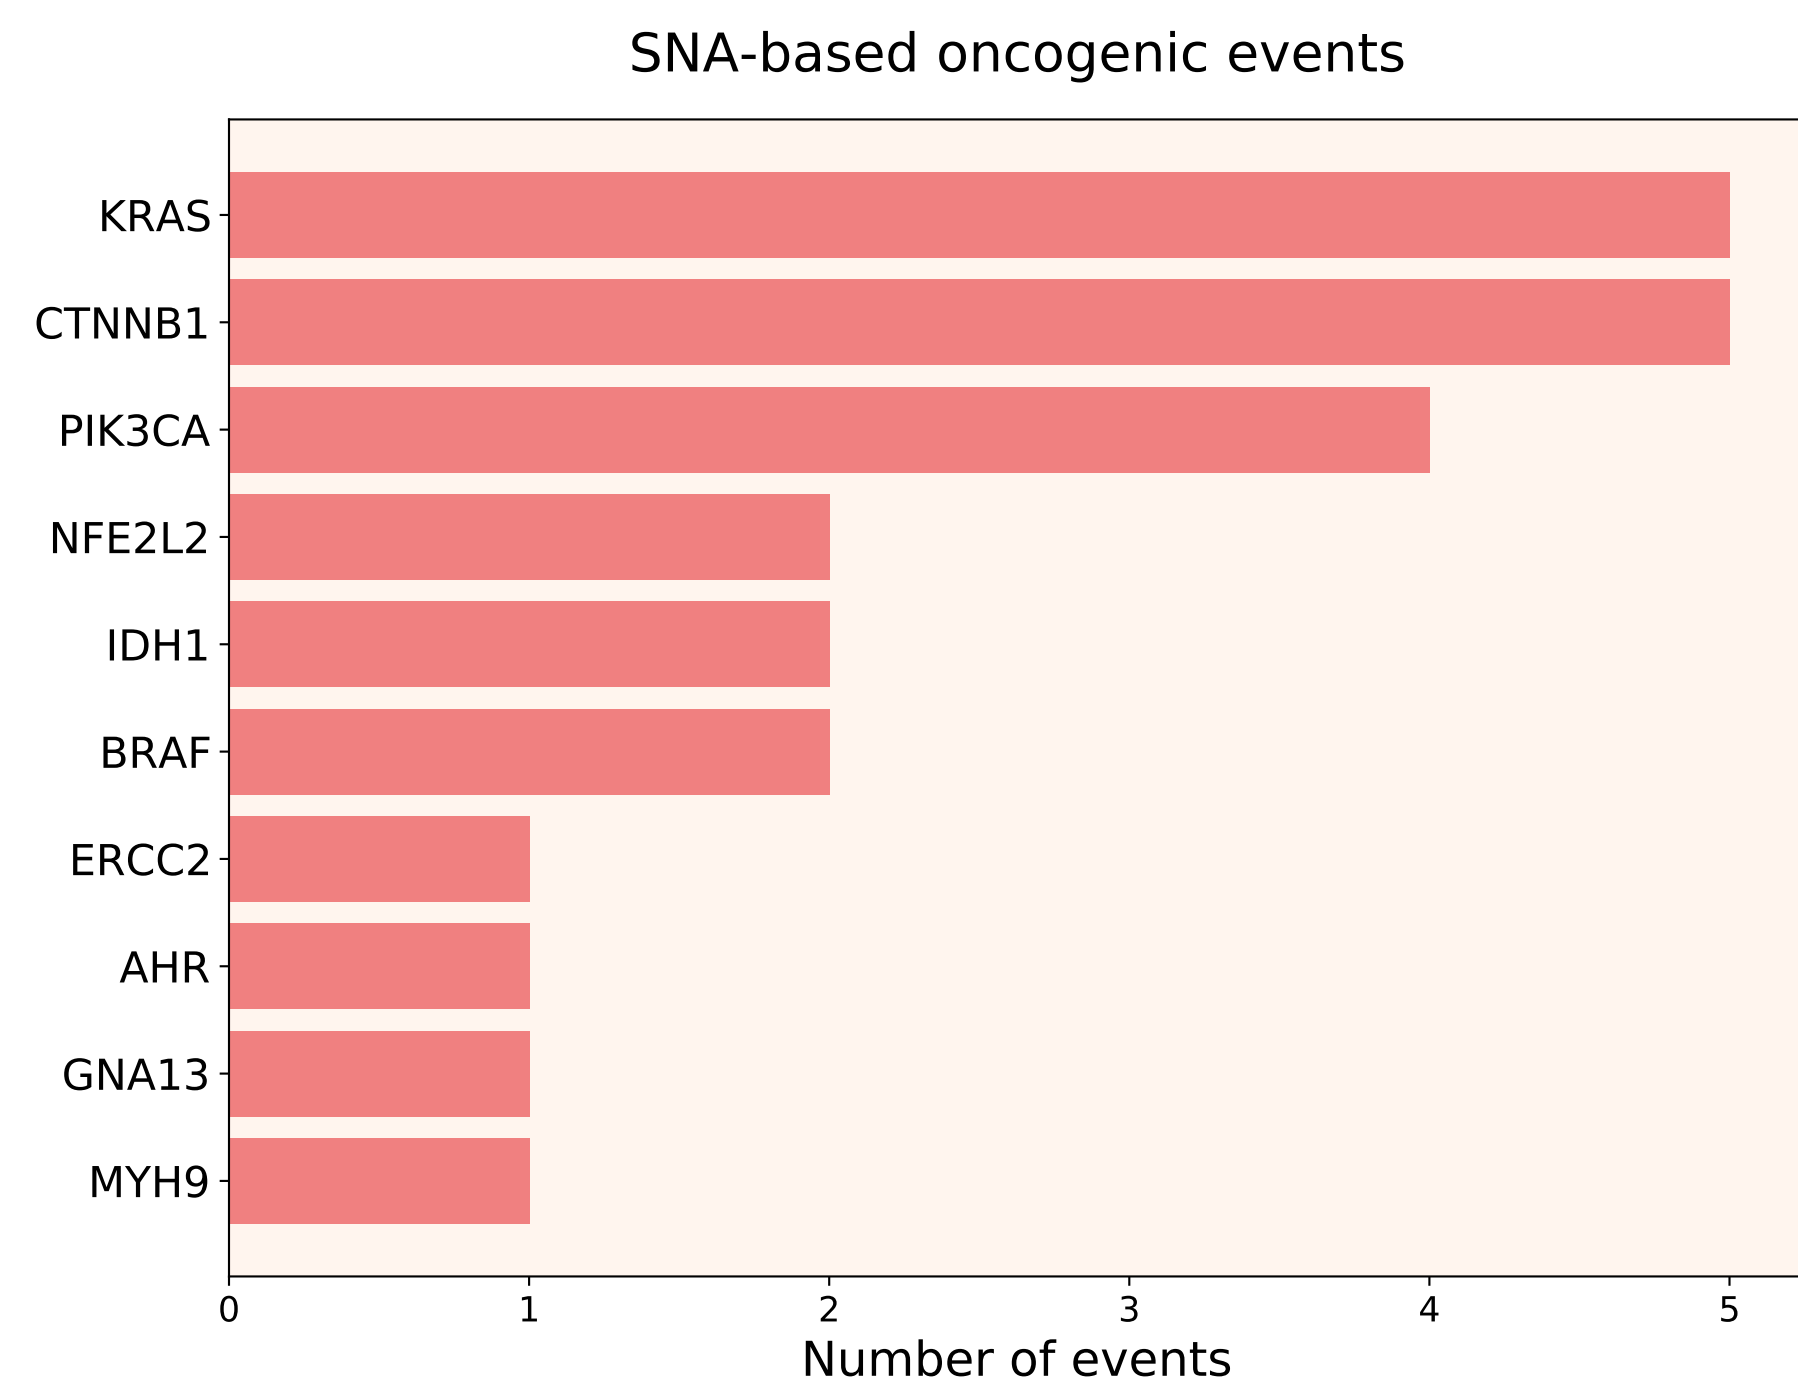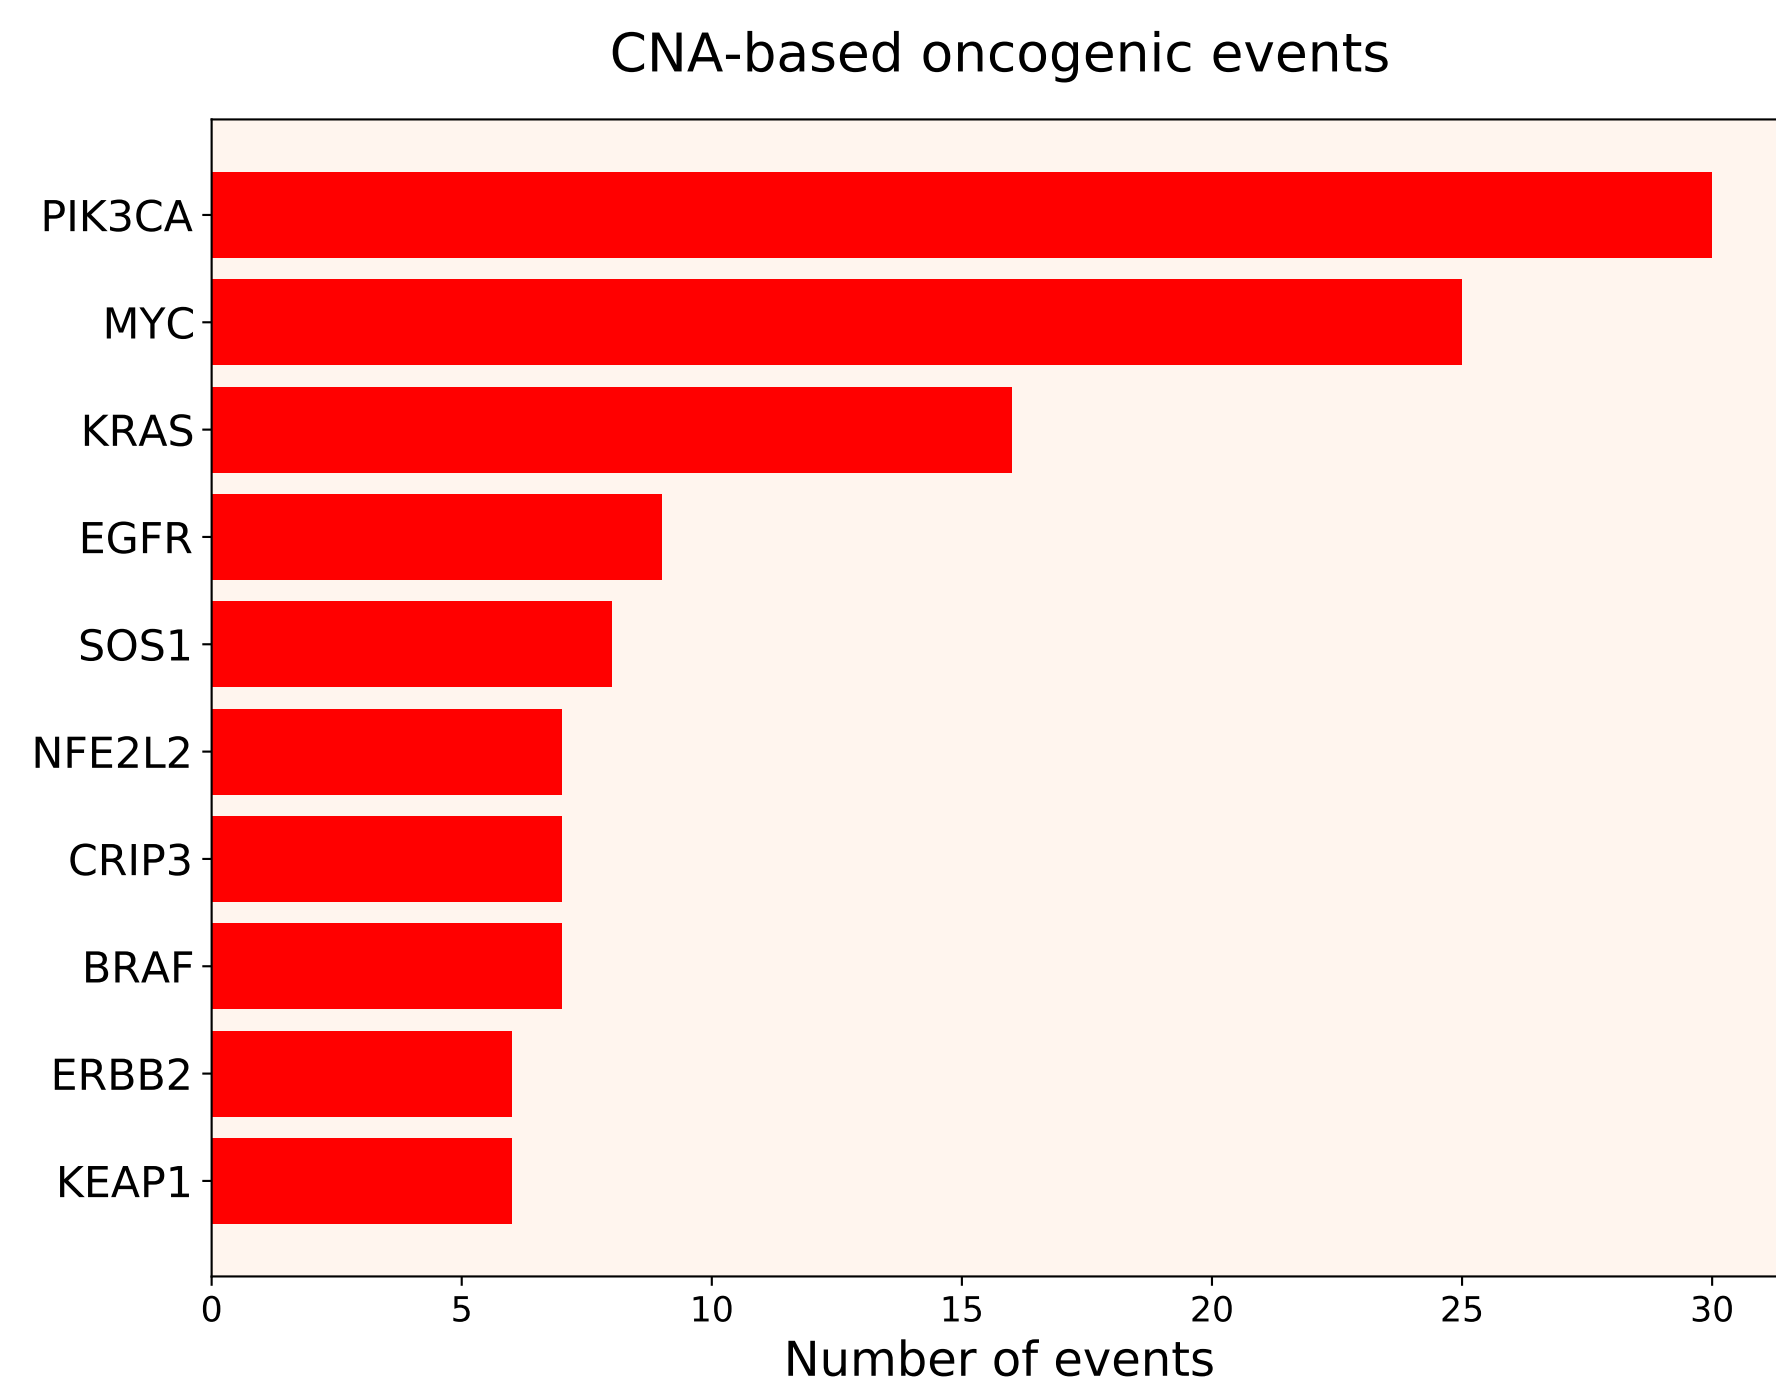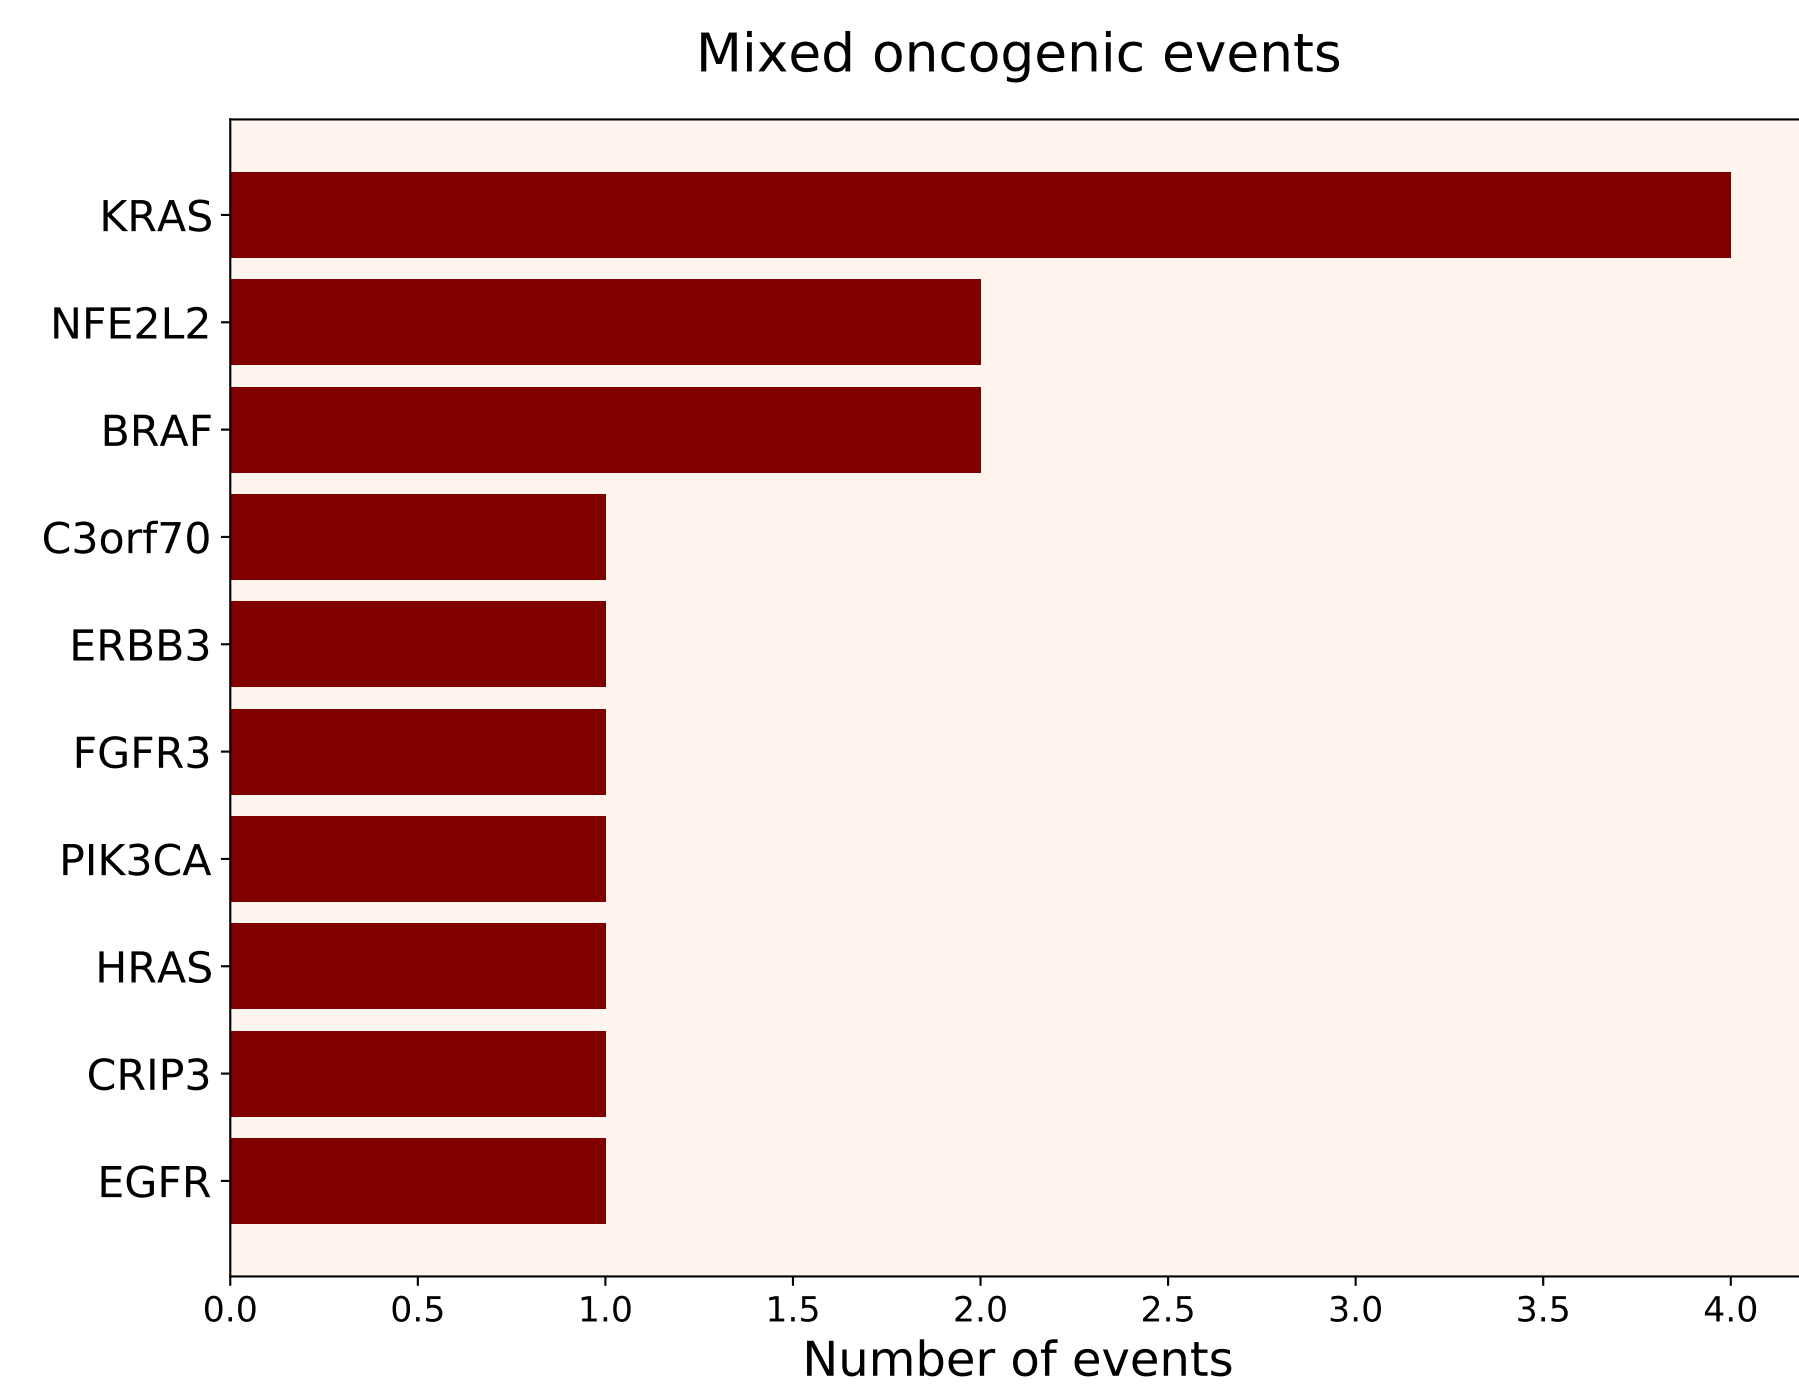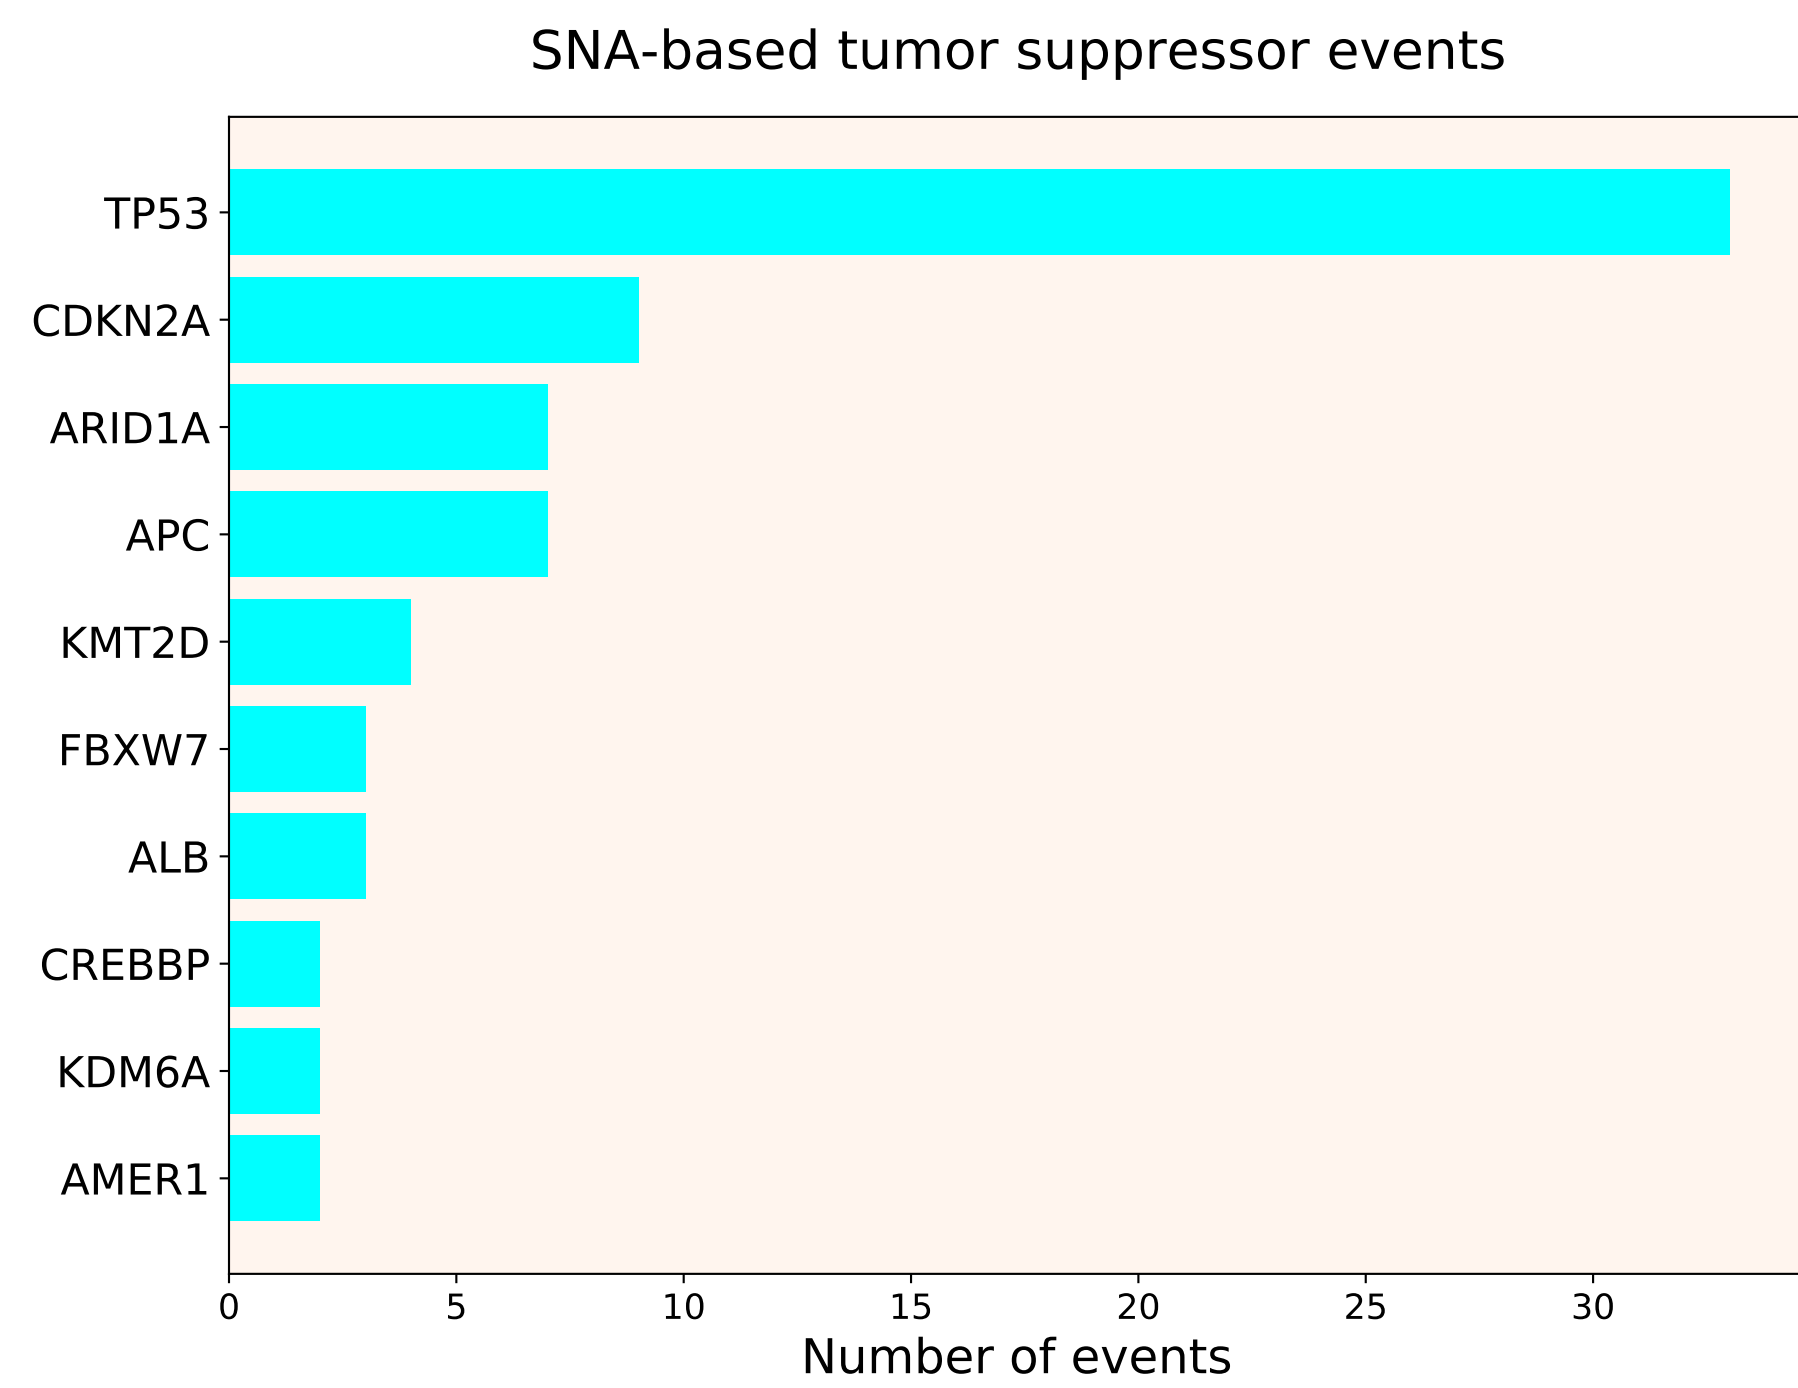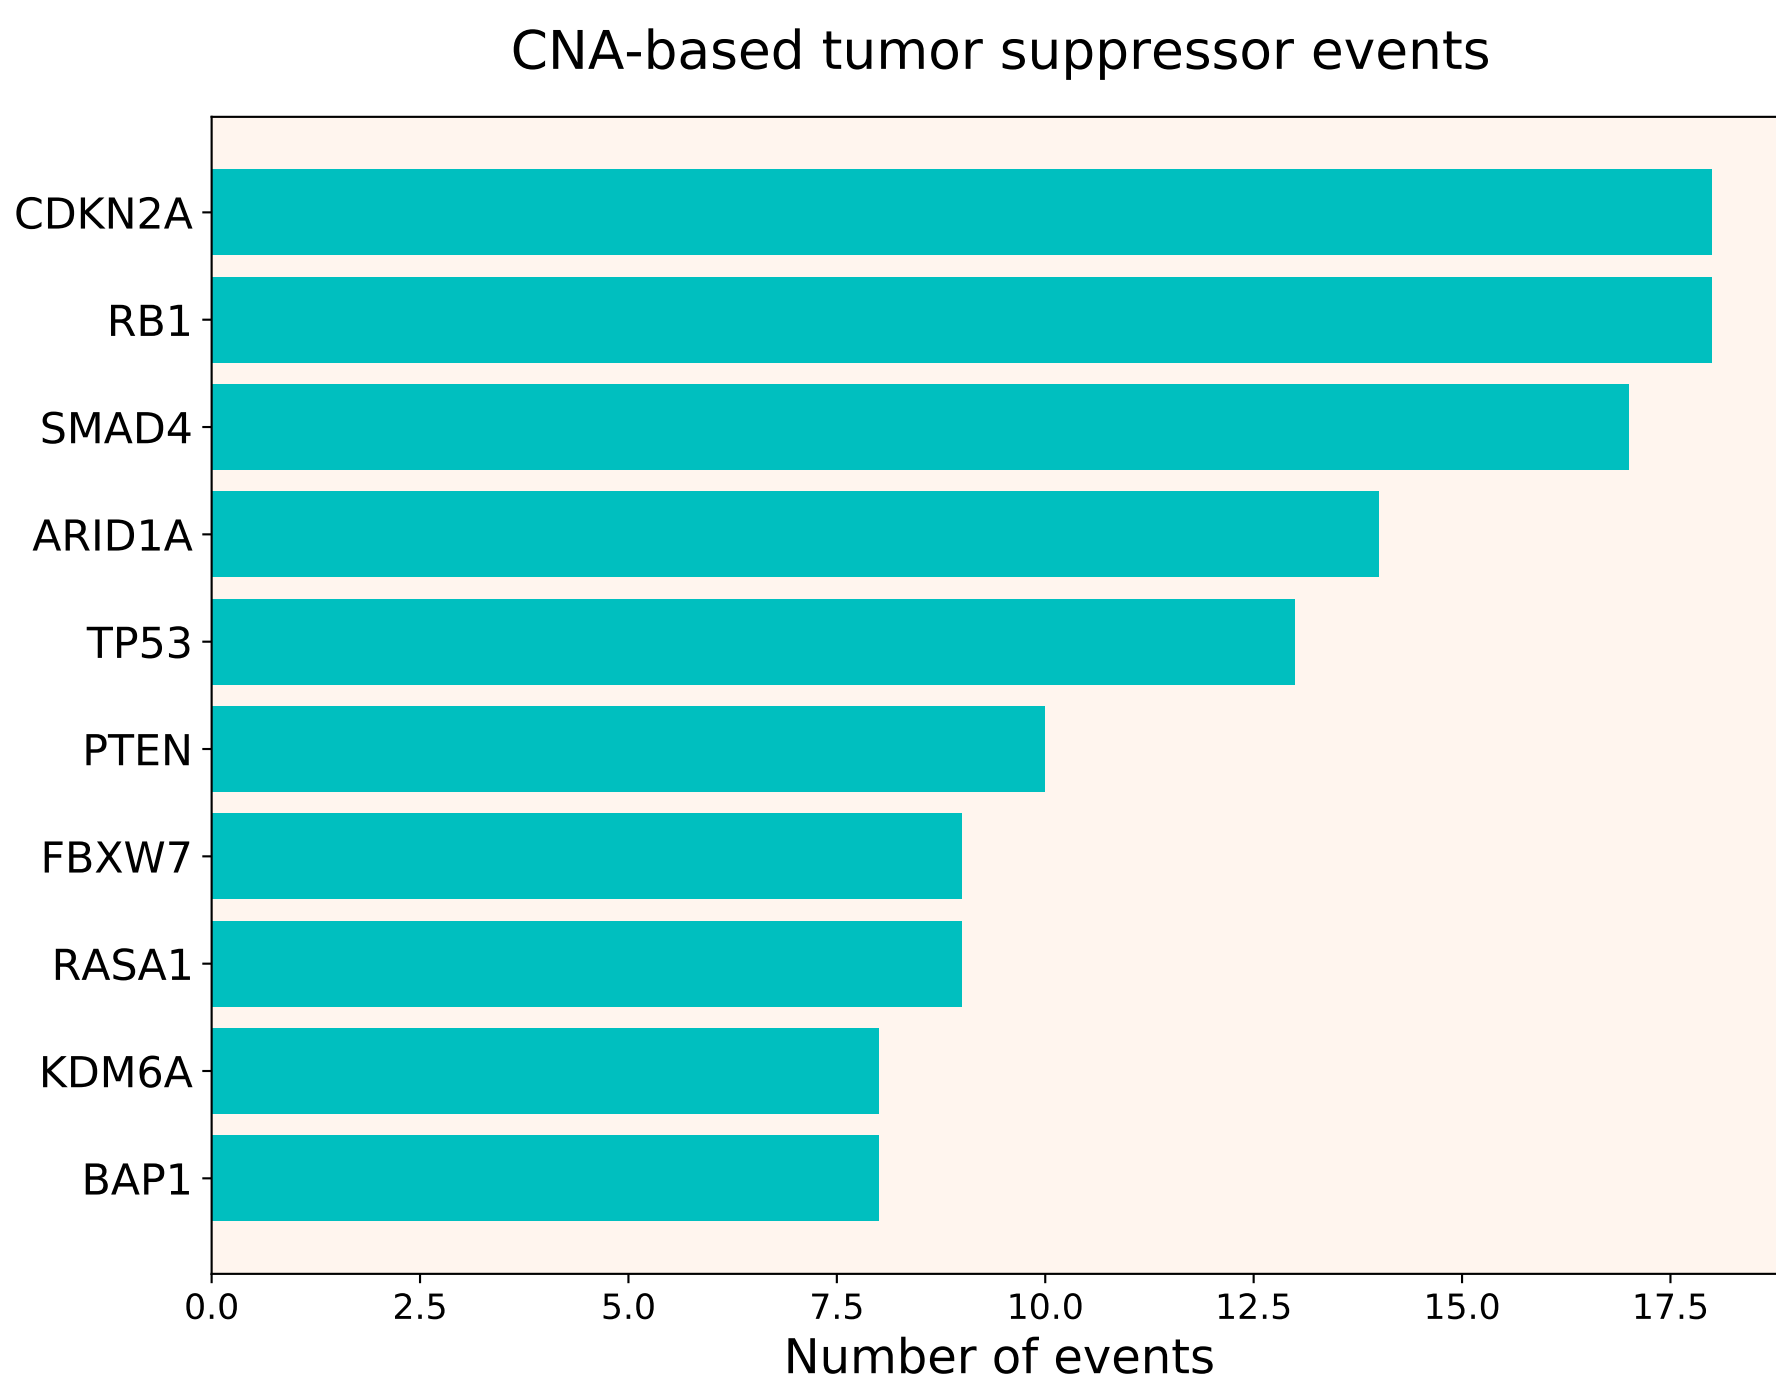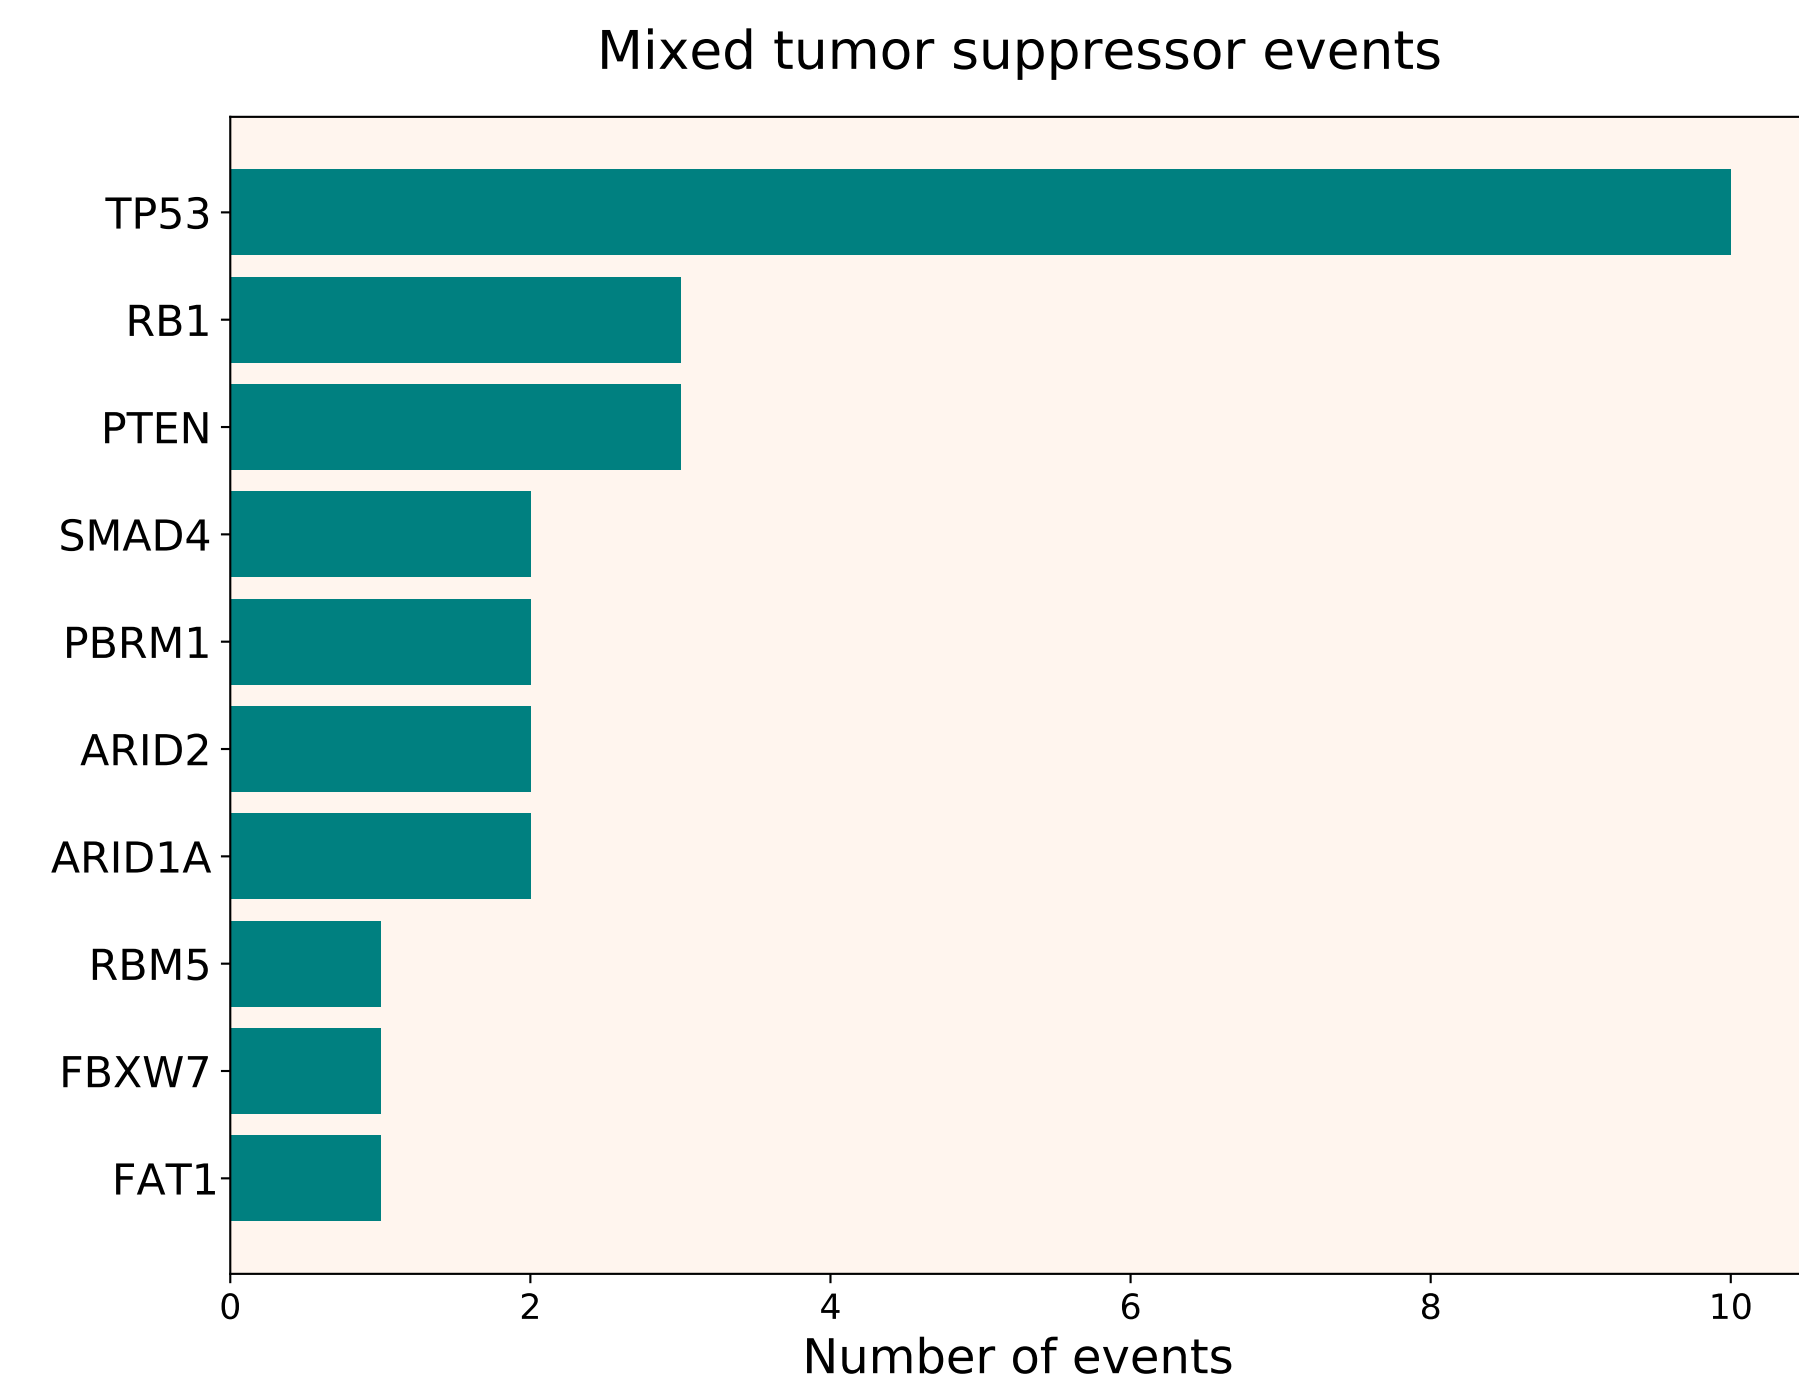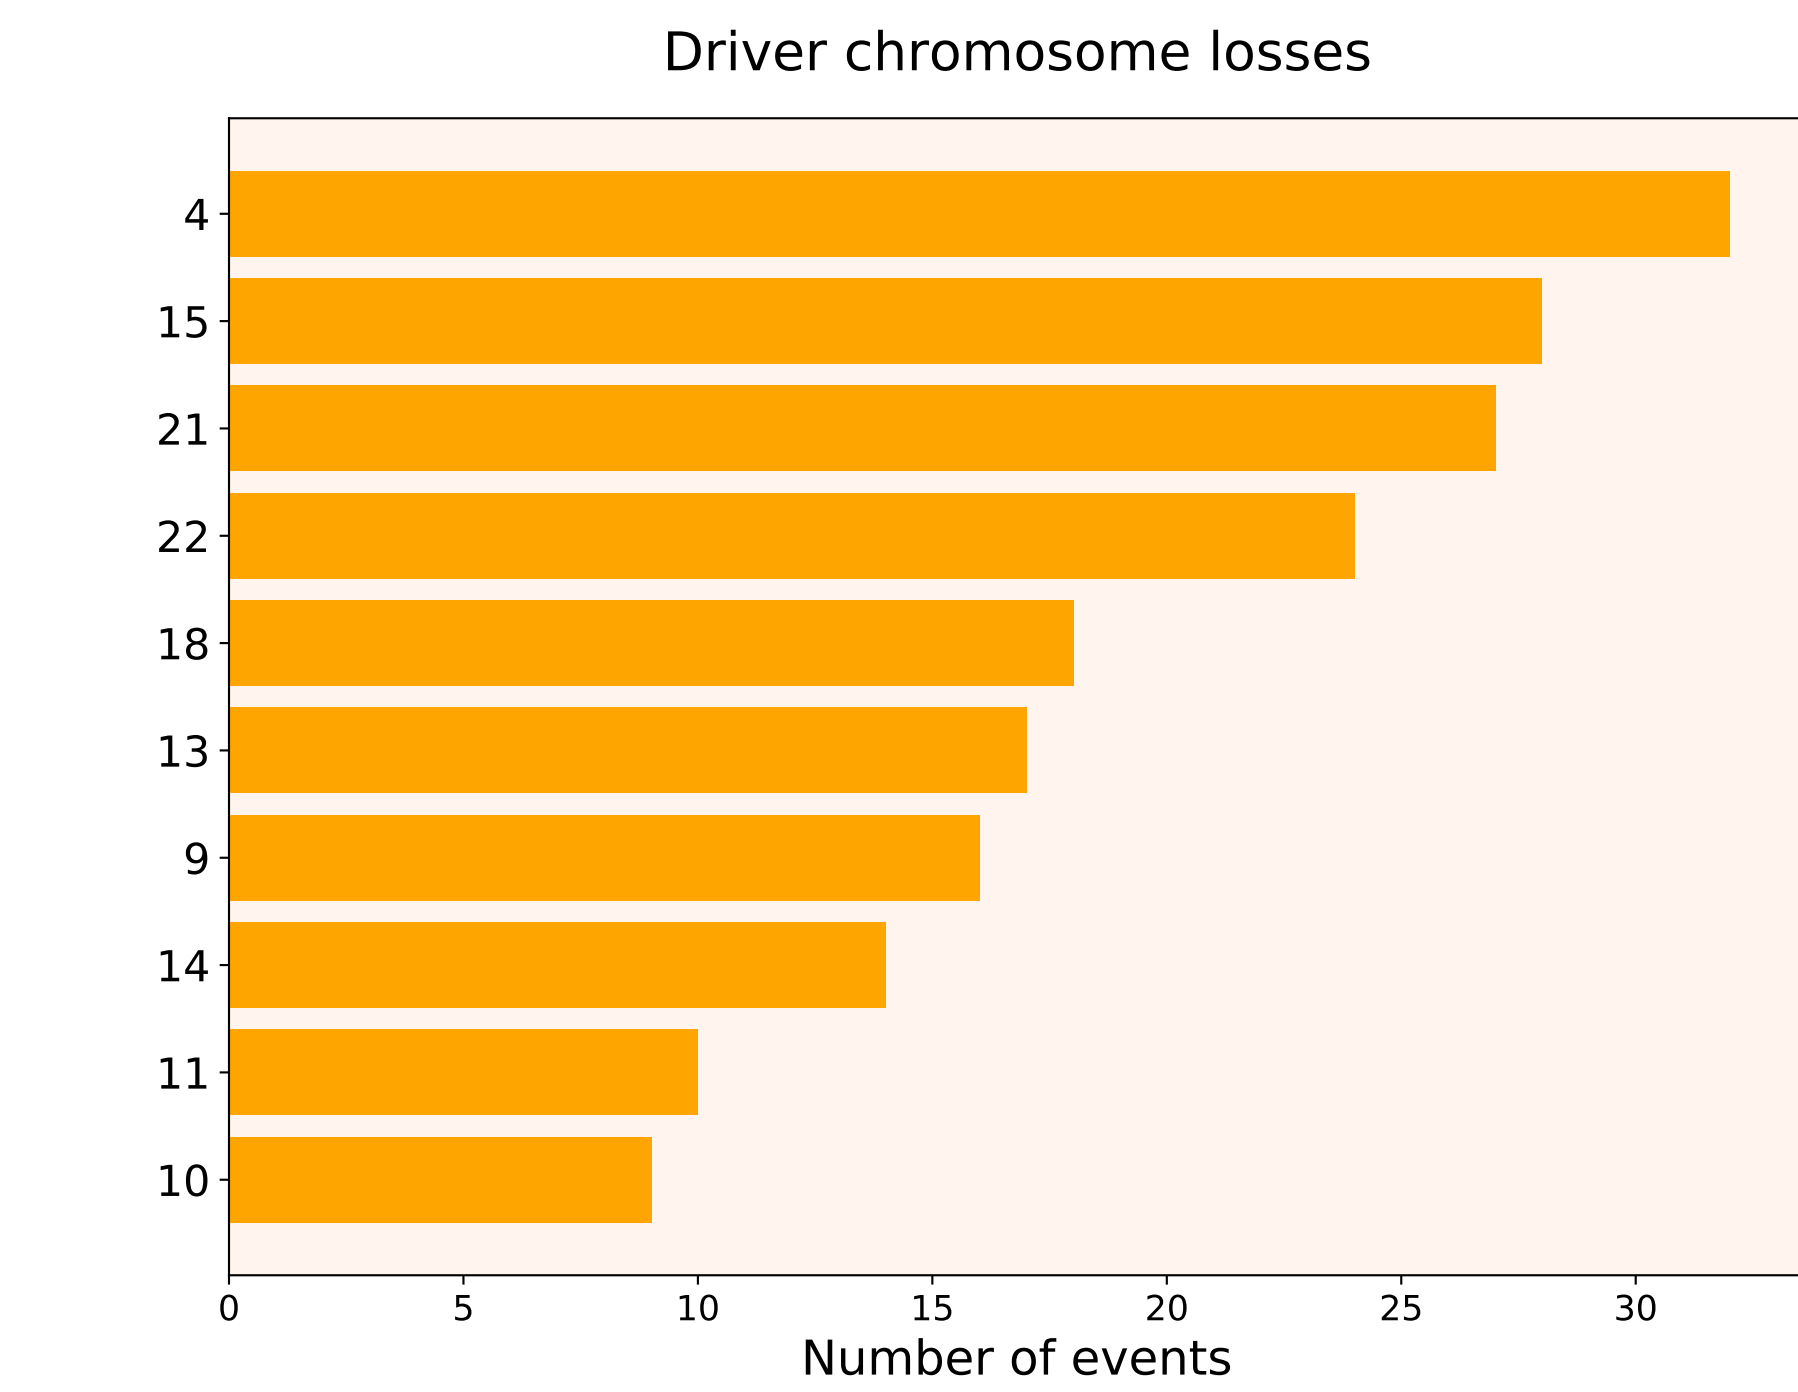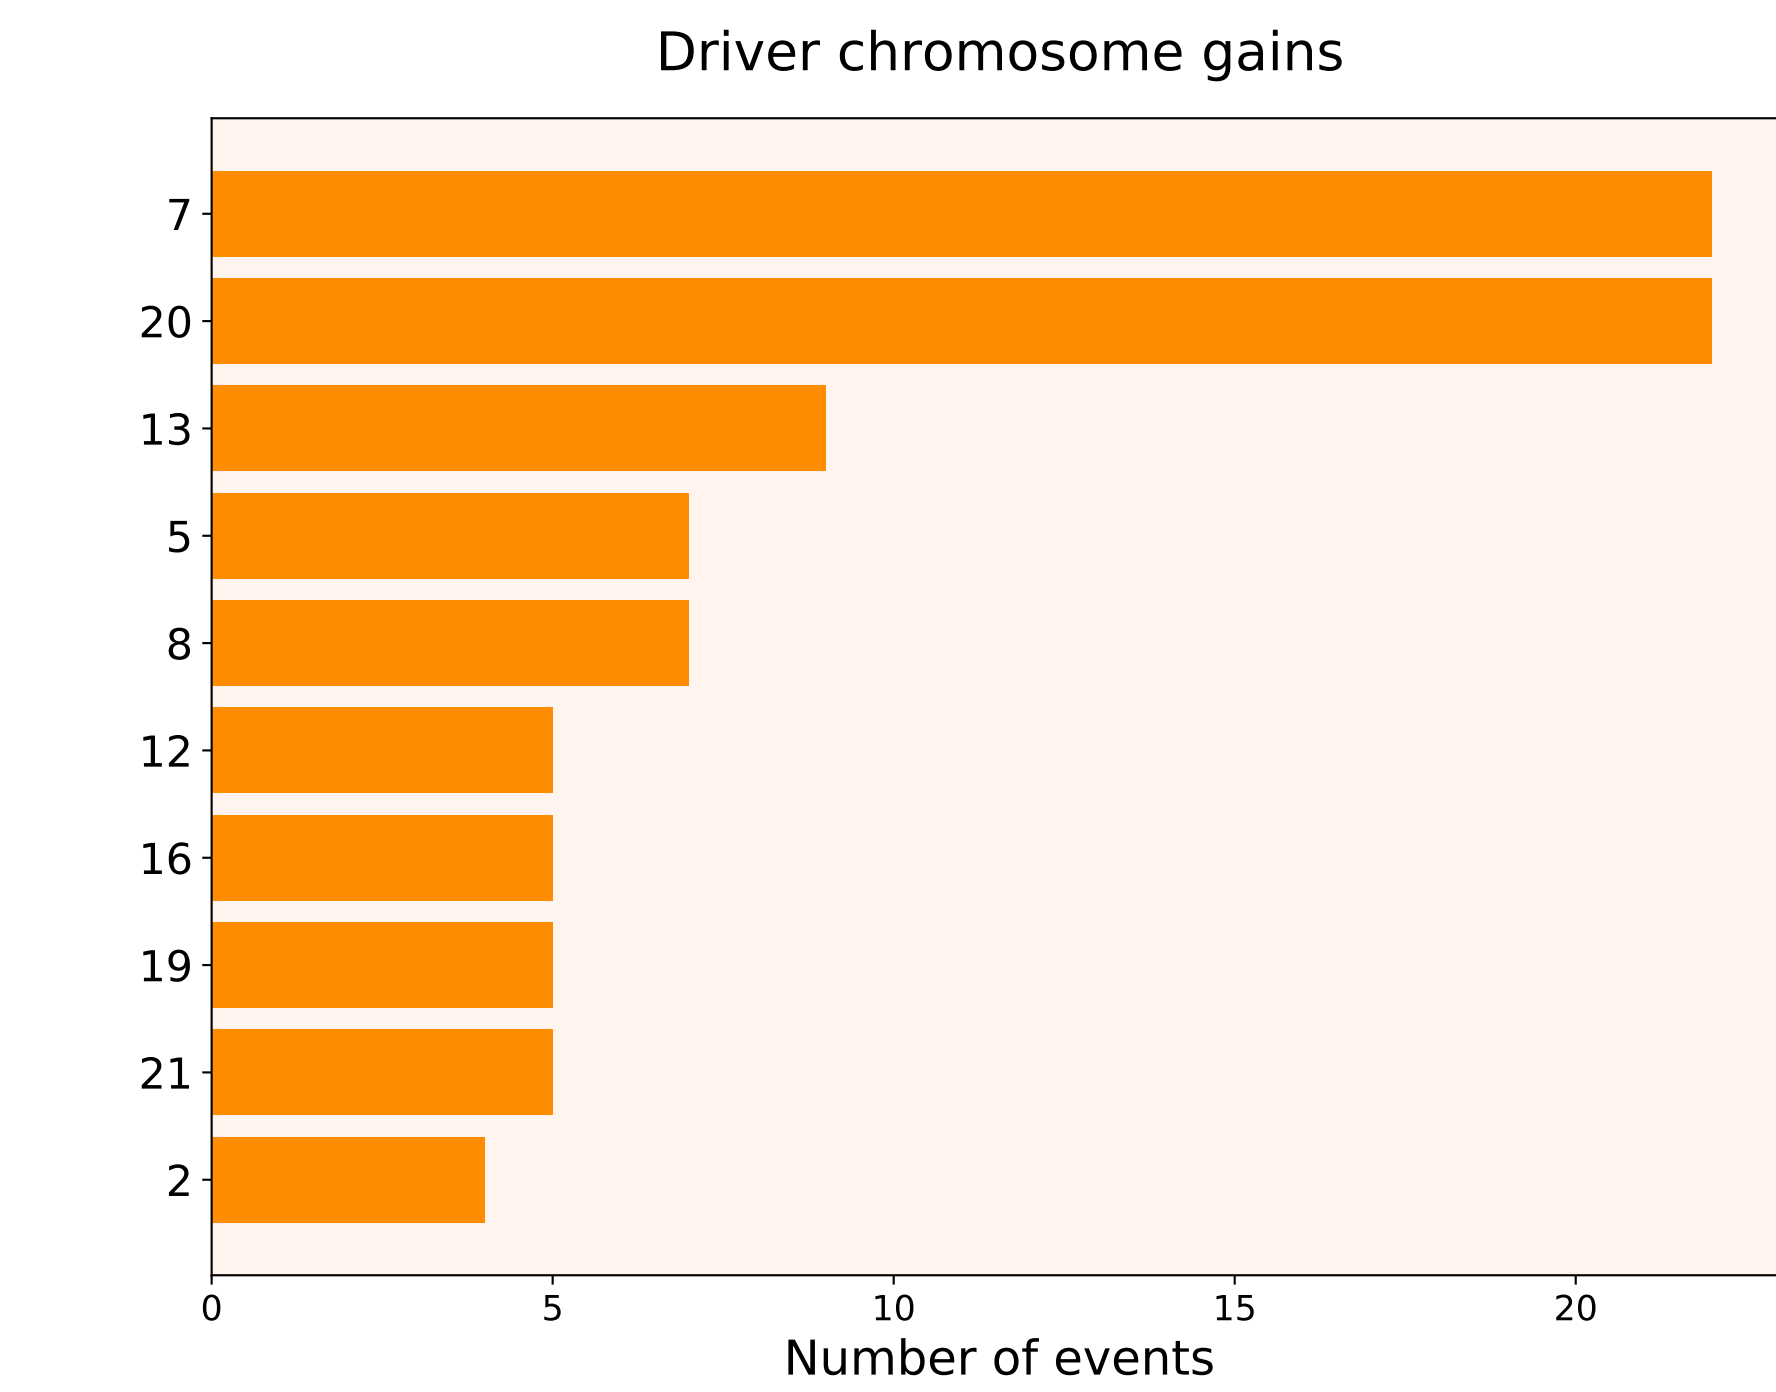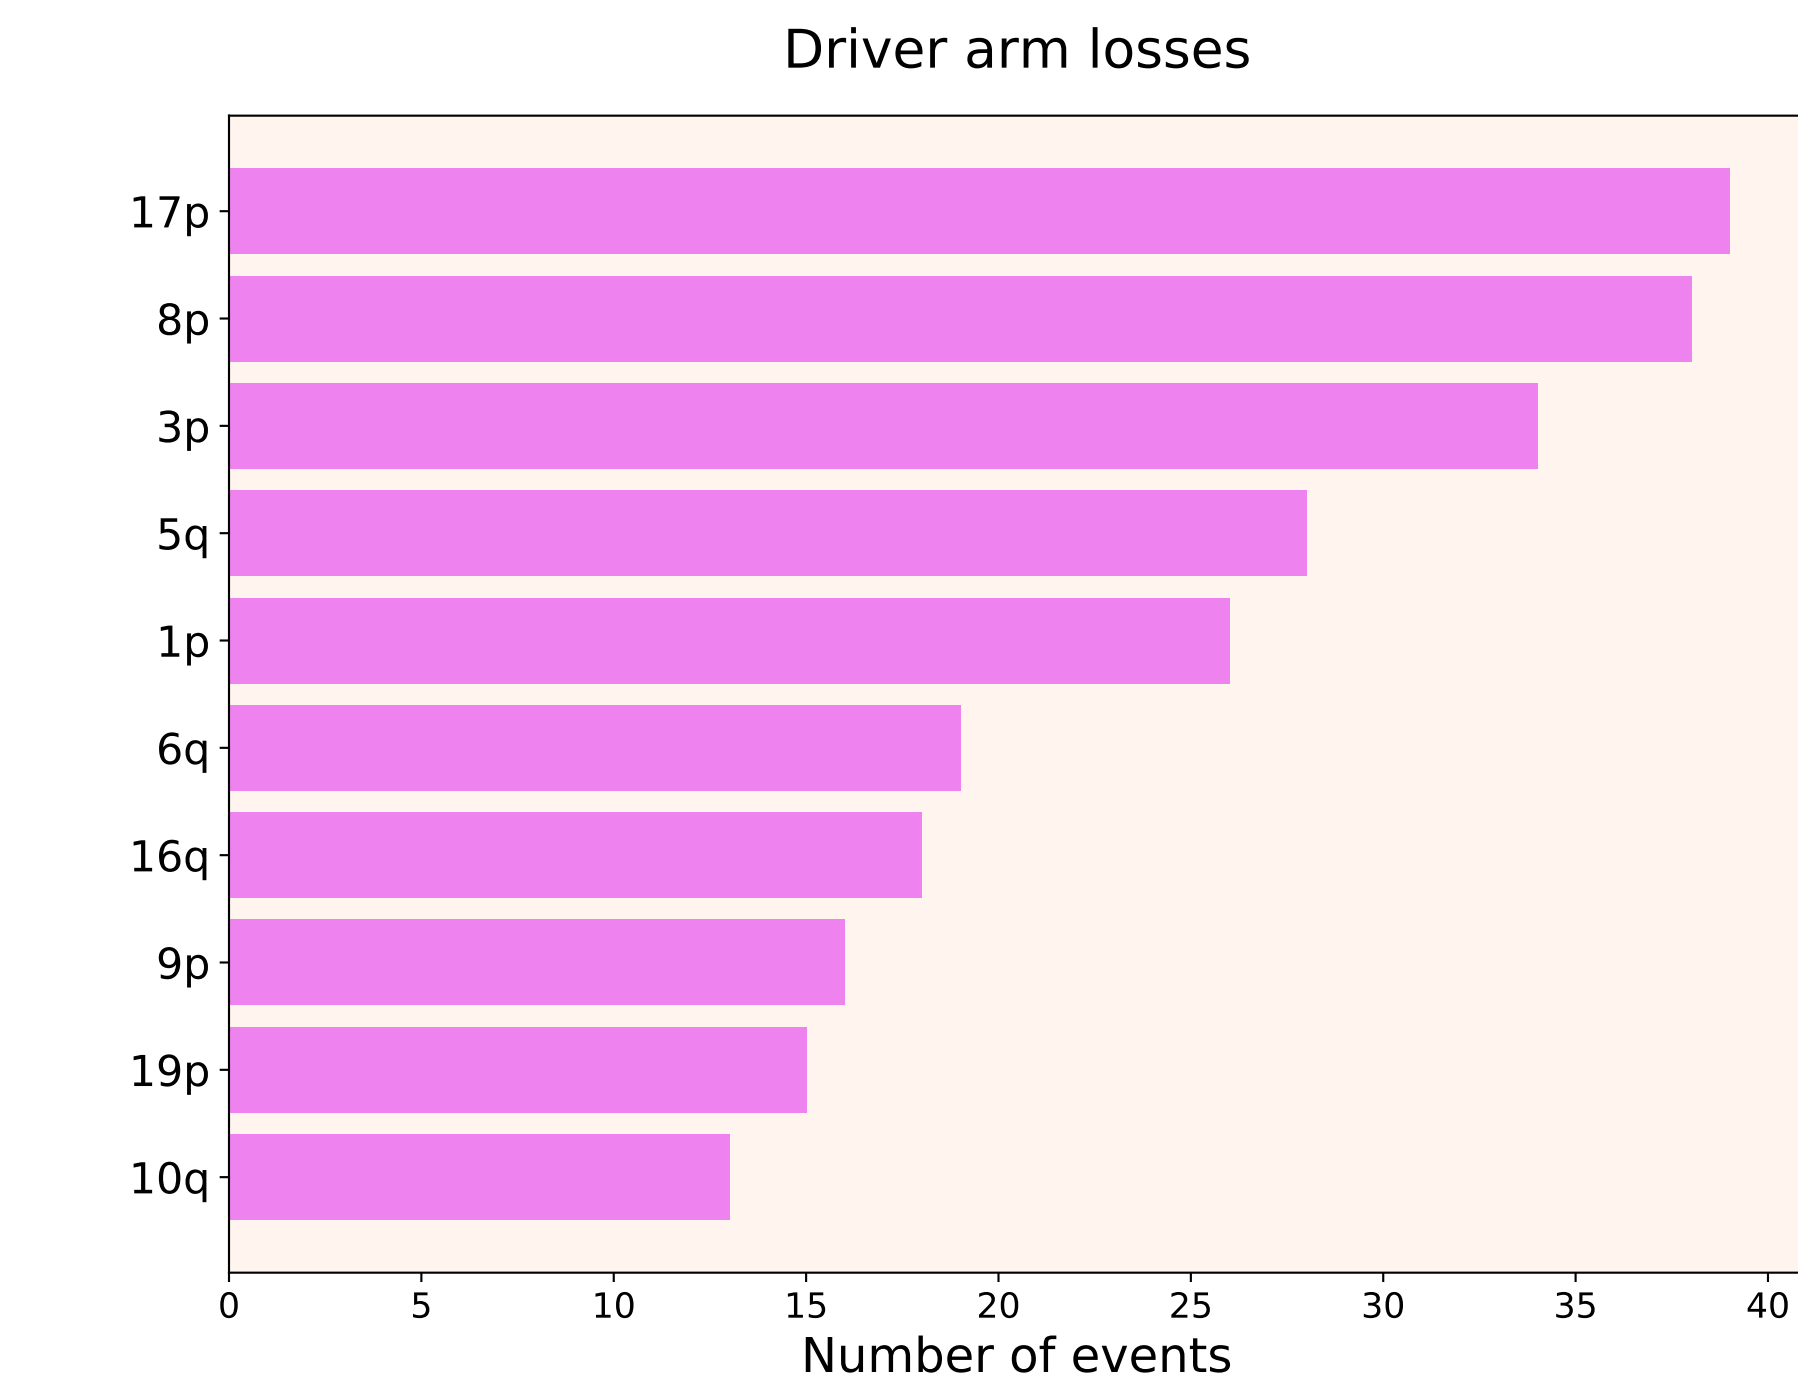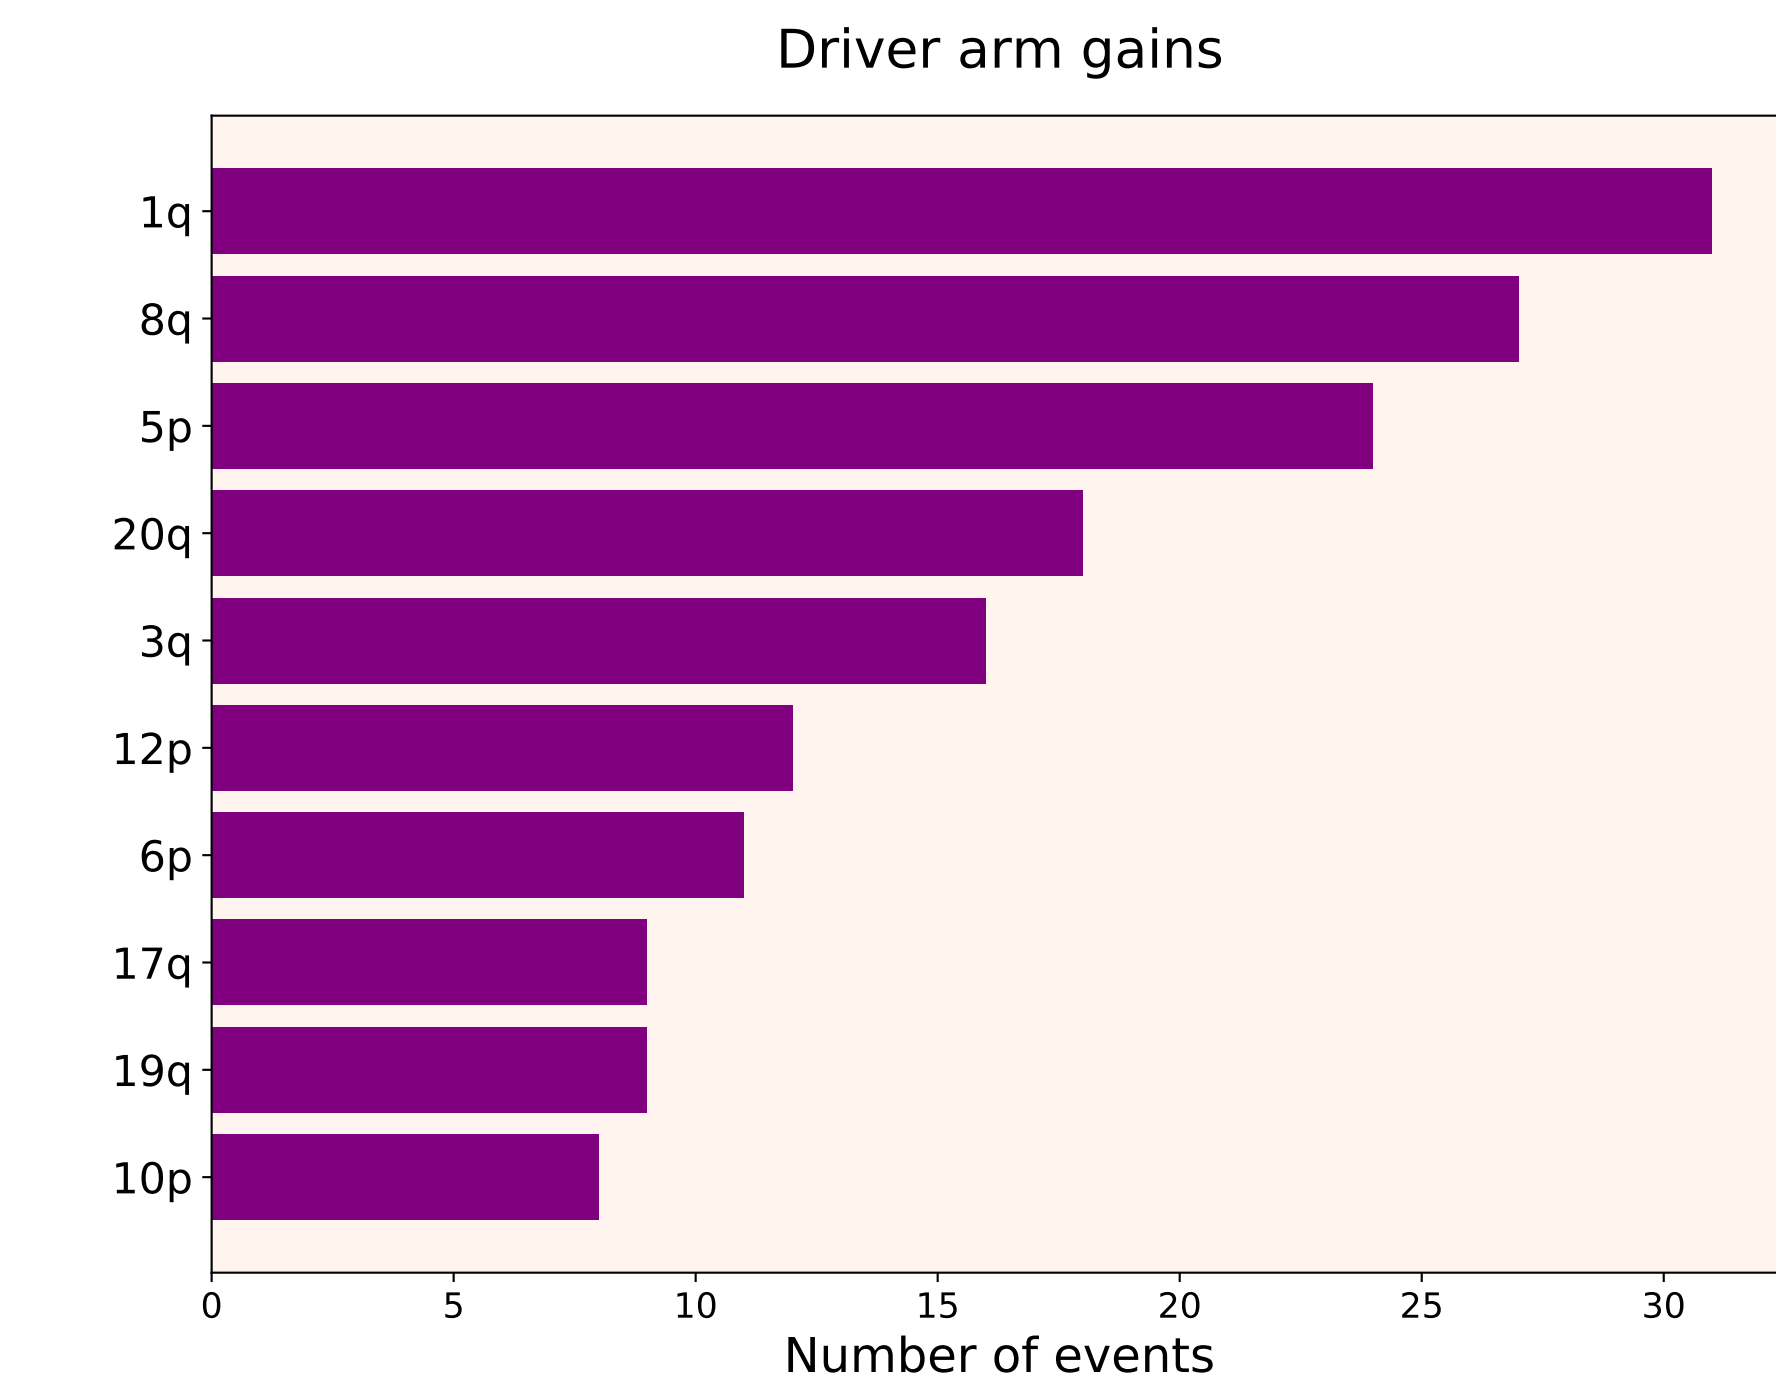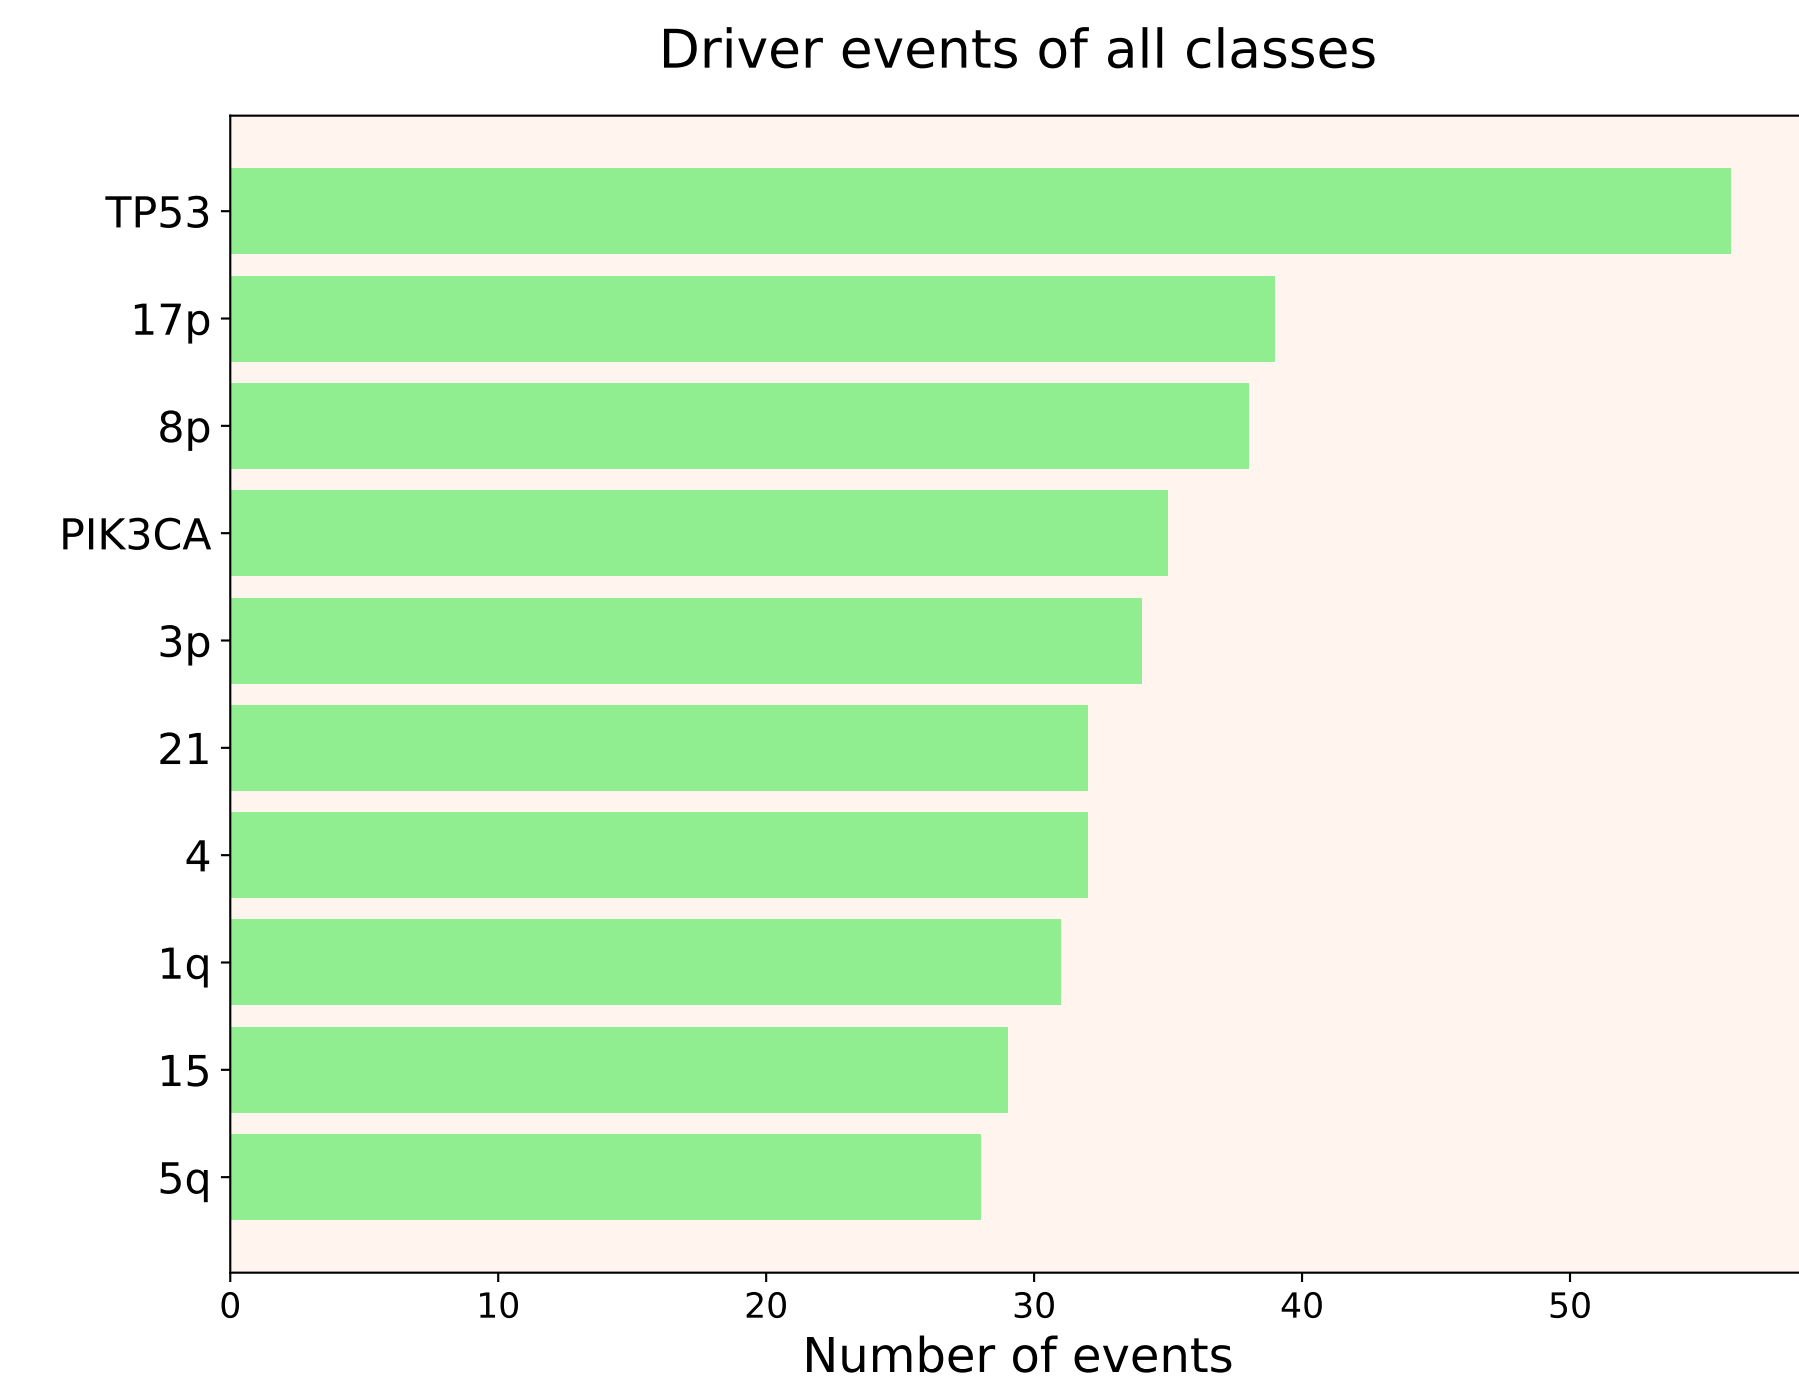

Supplement: Supplemental_Data_S1.zip [file Supplemental_Data_S1.zip]

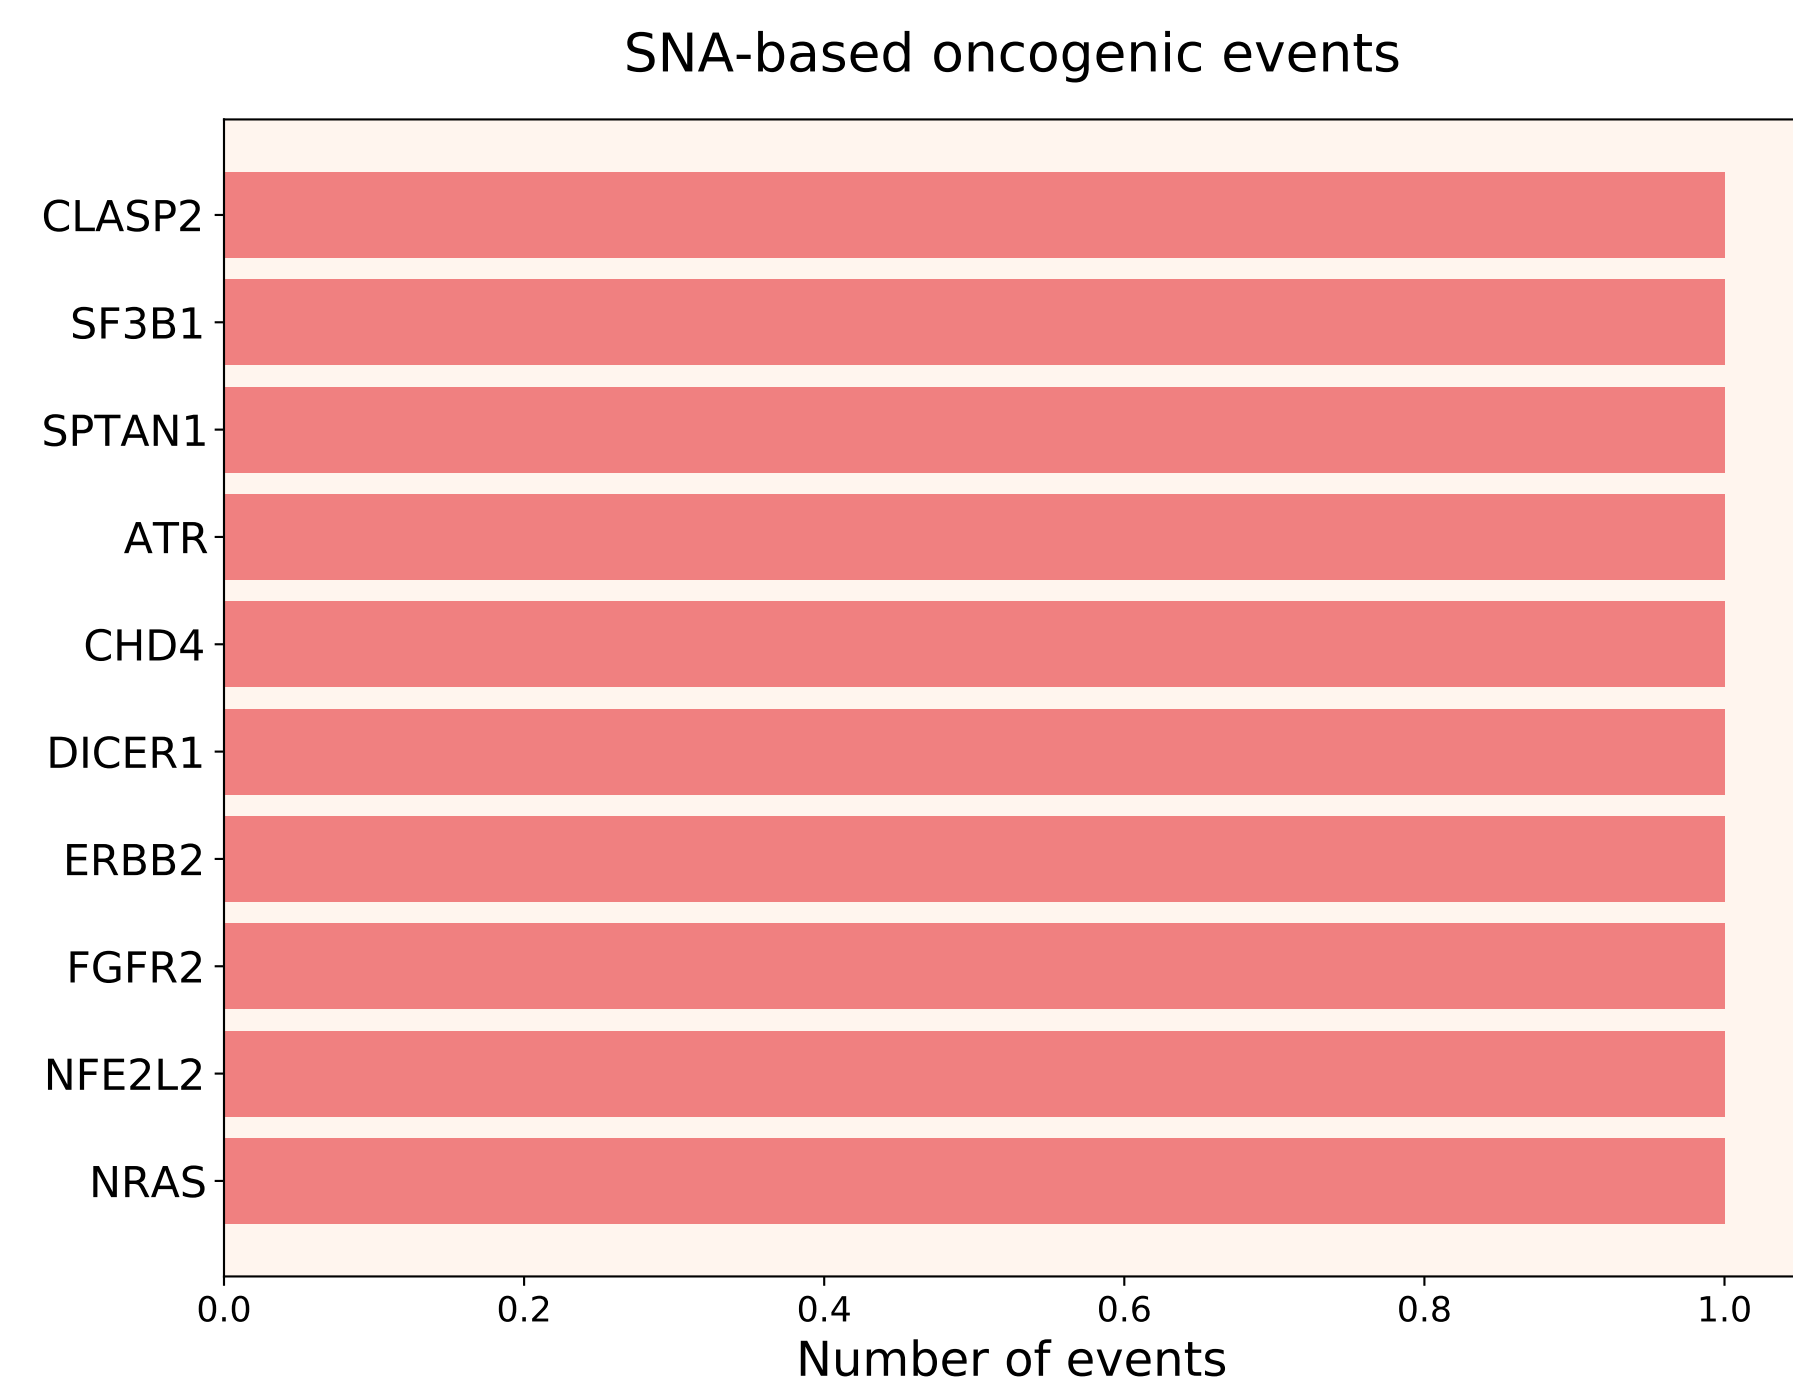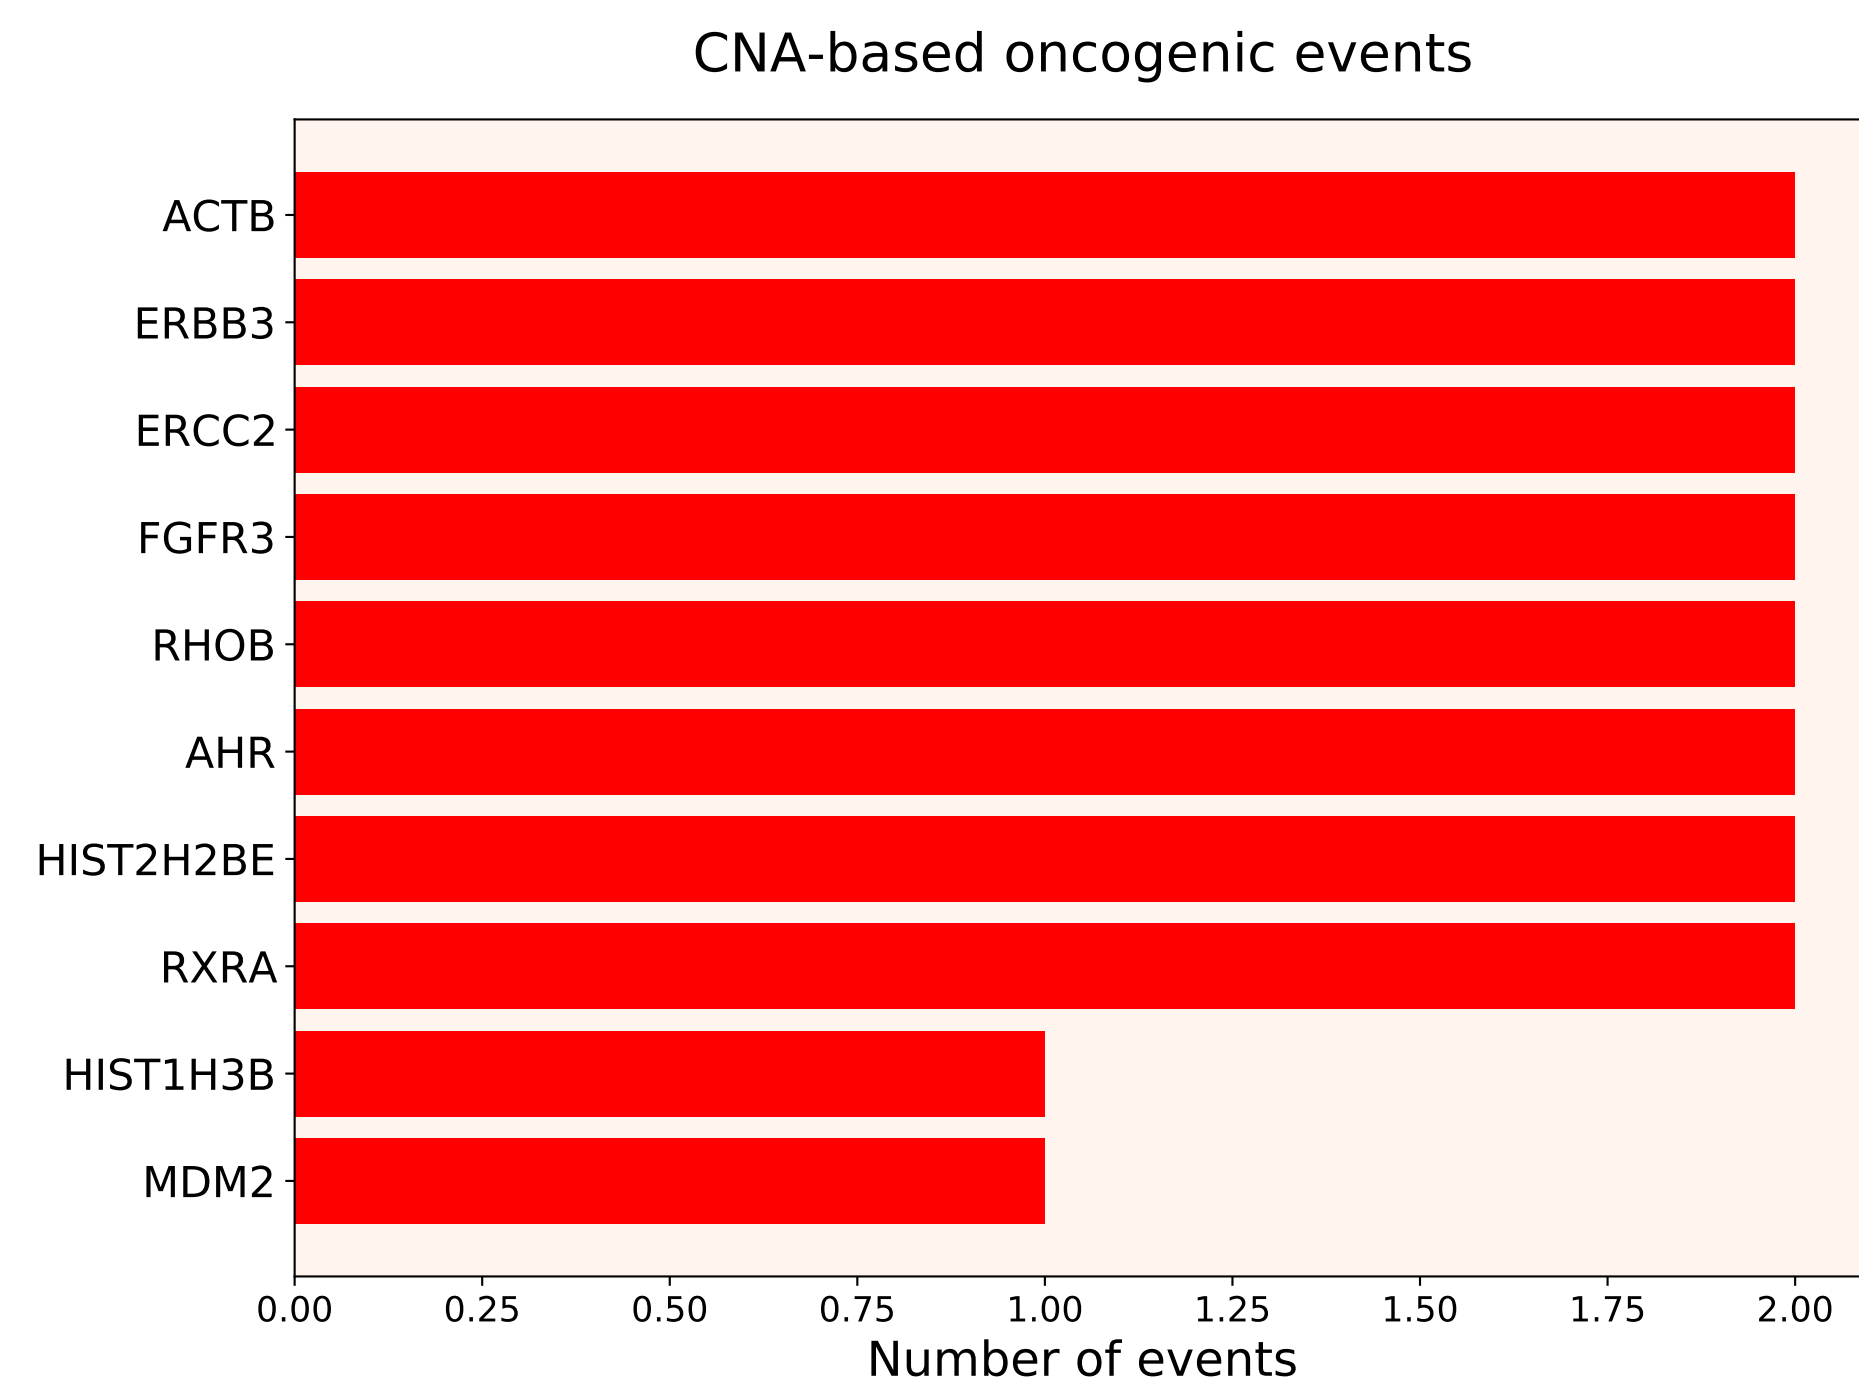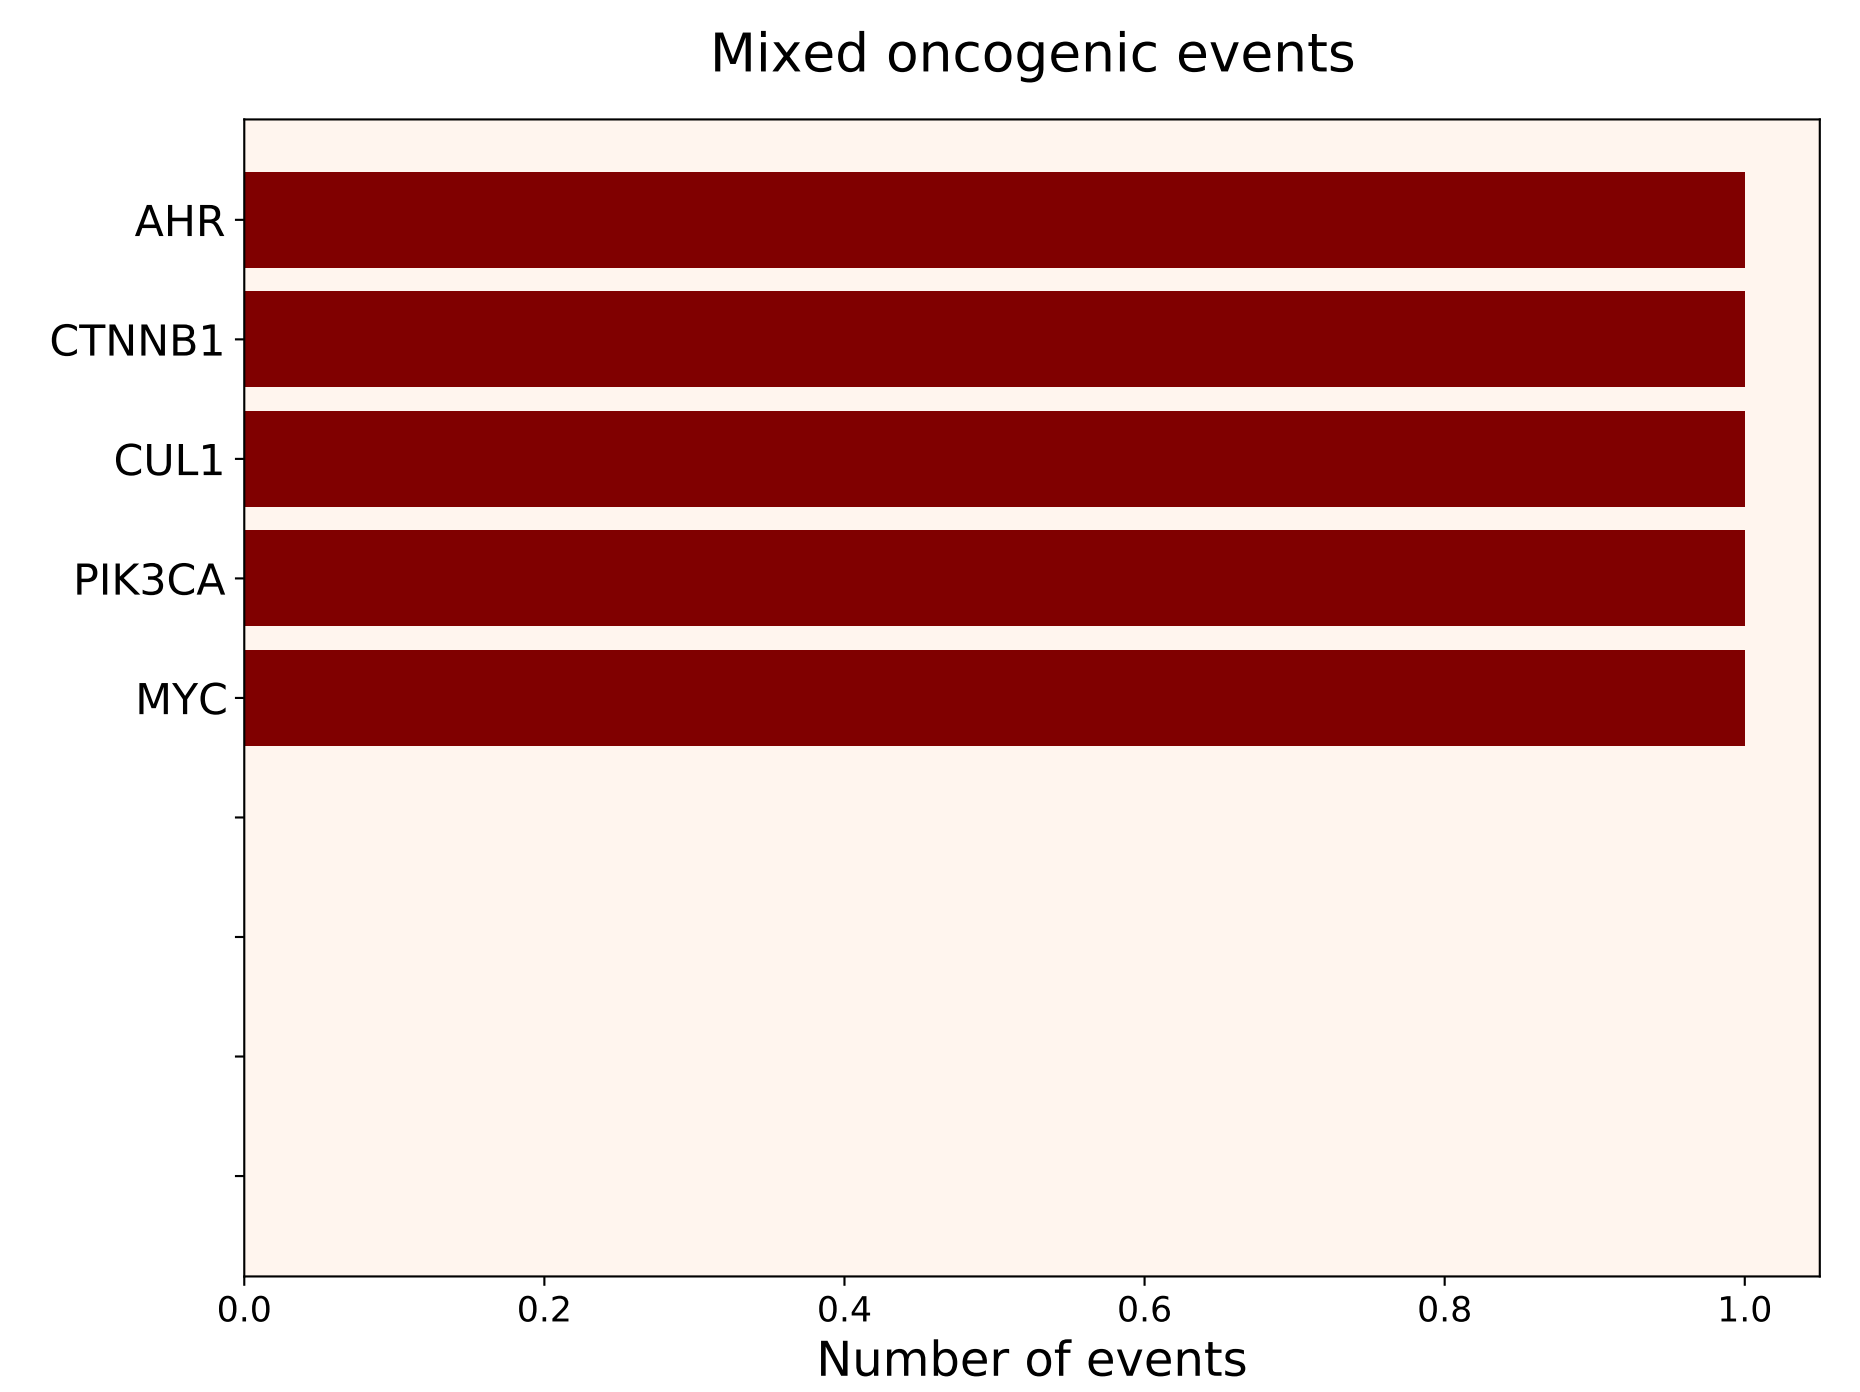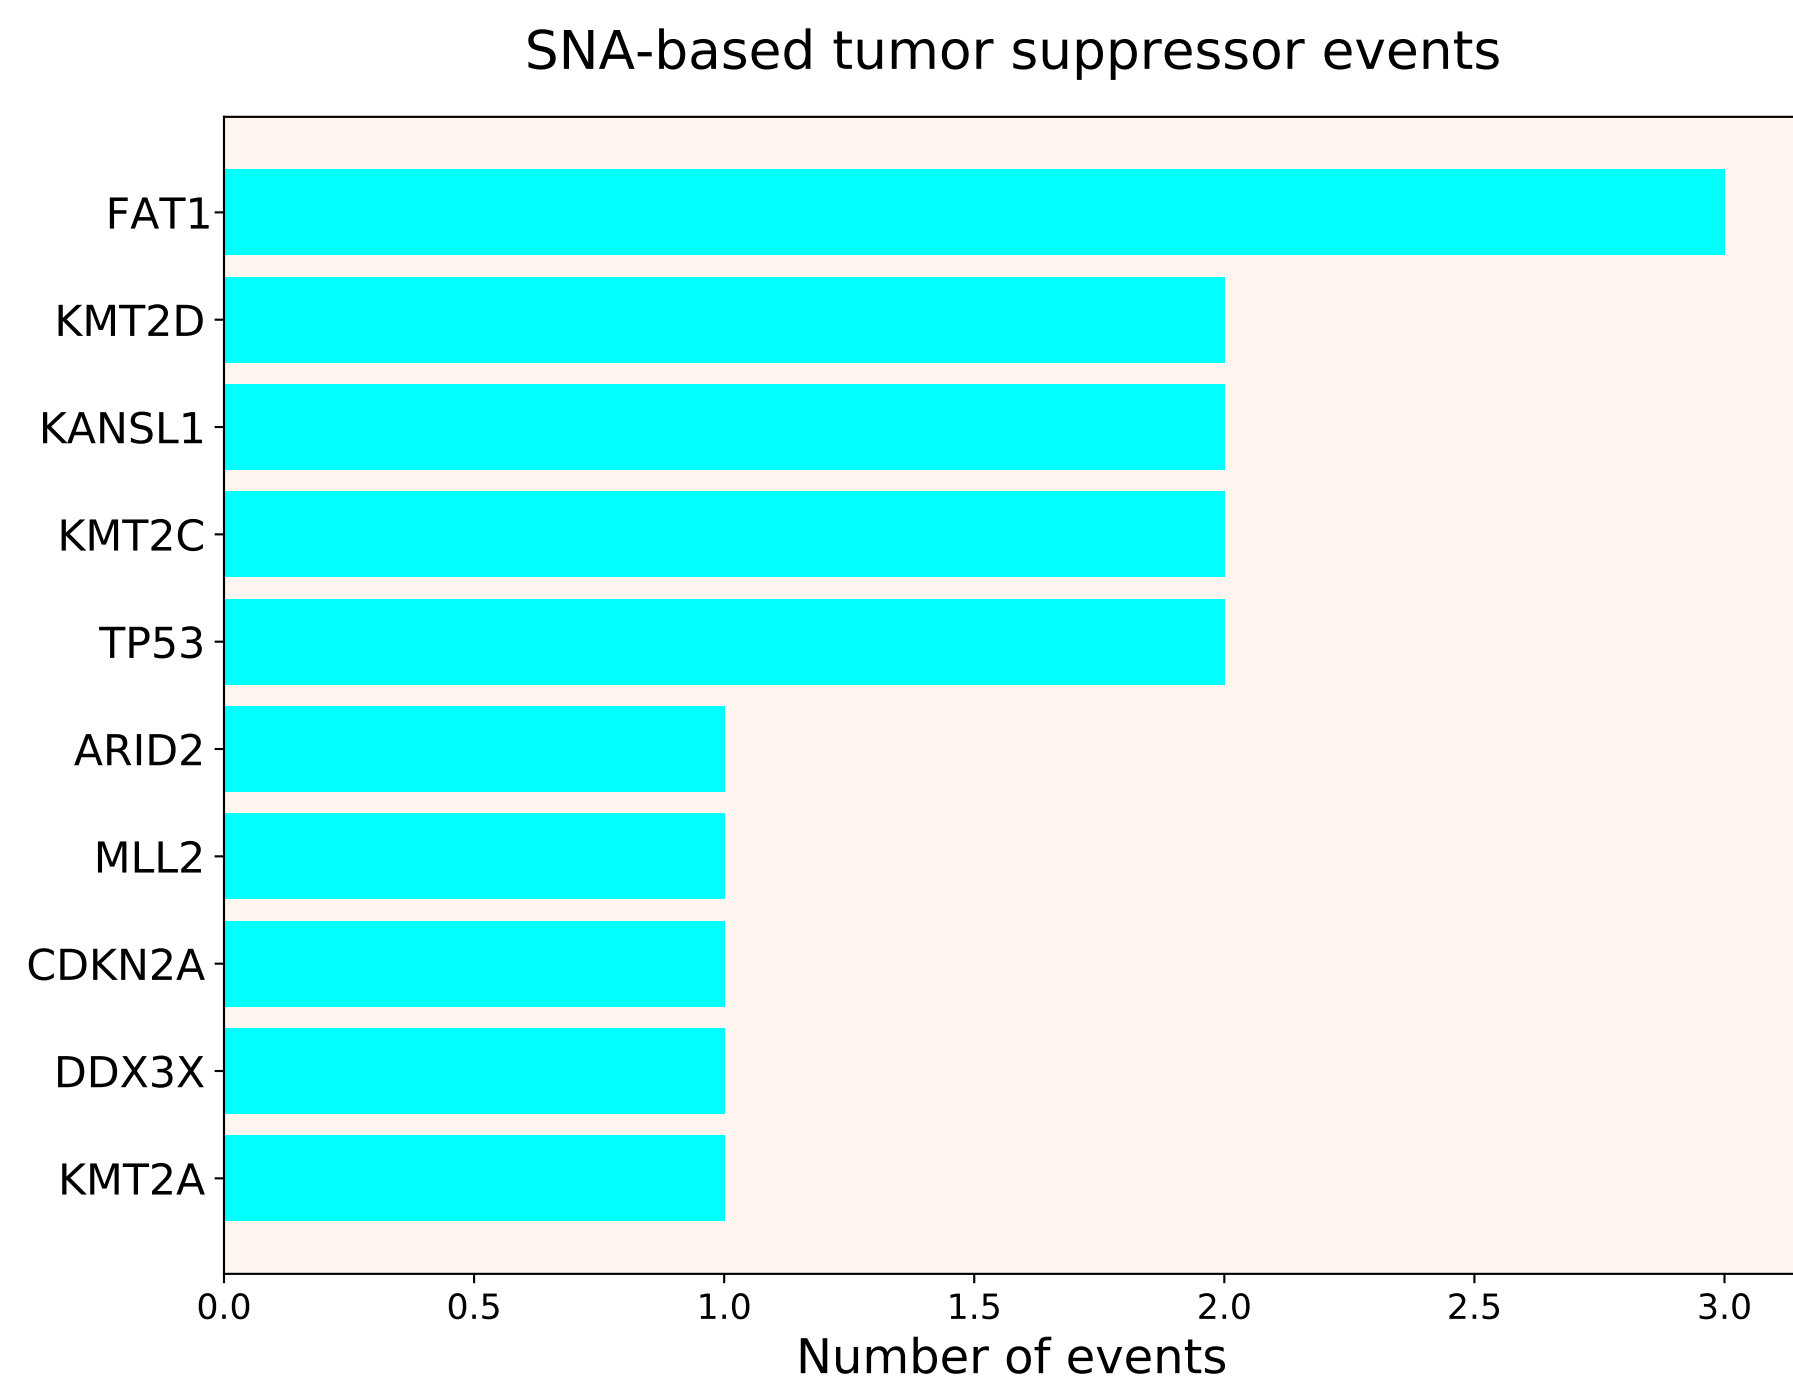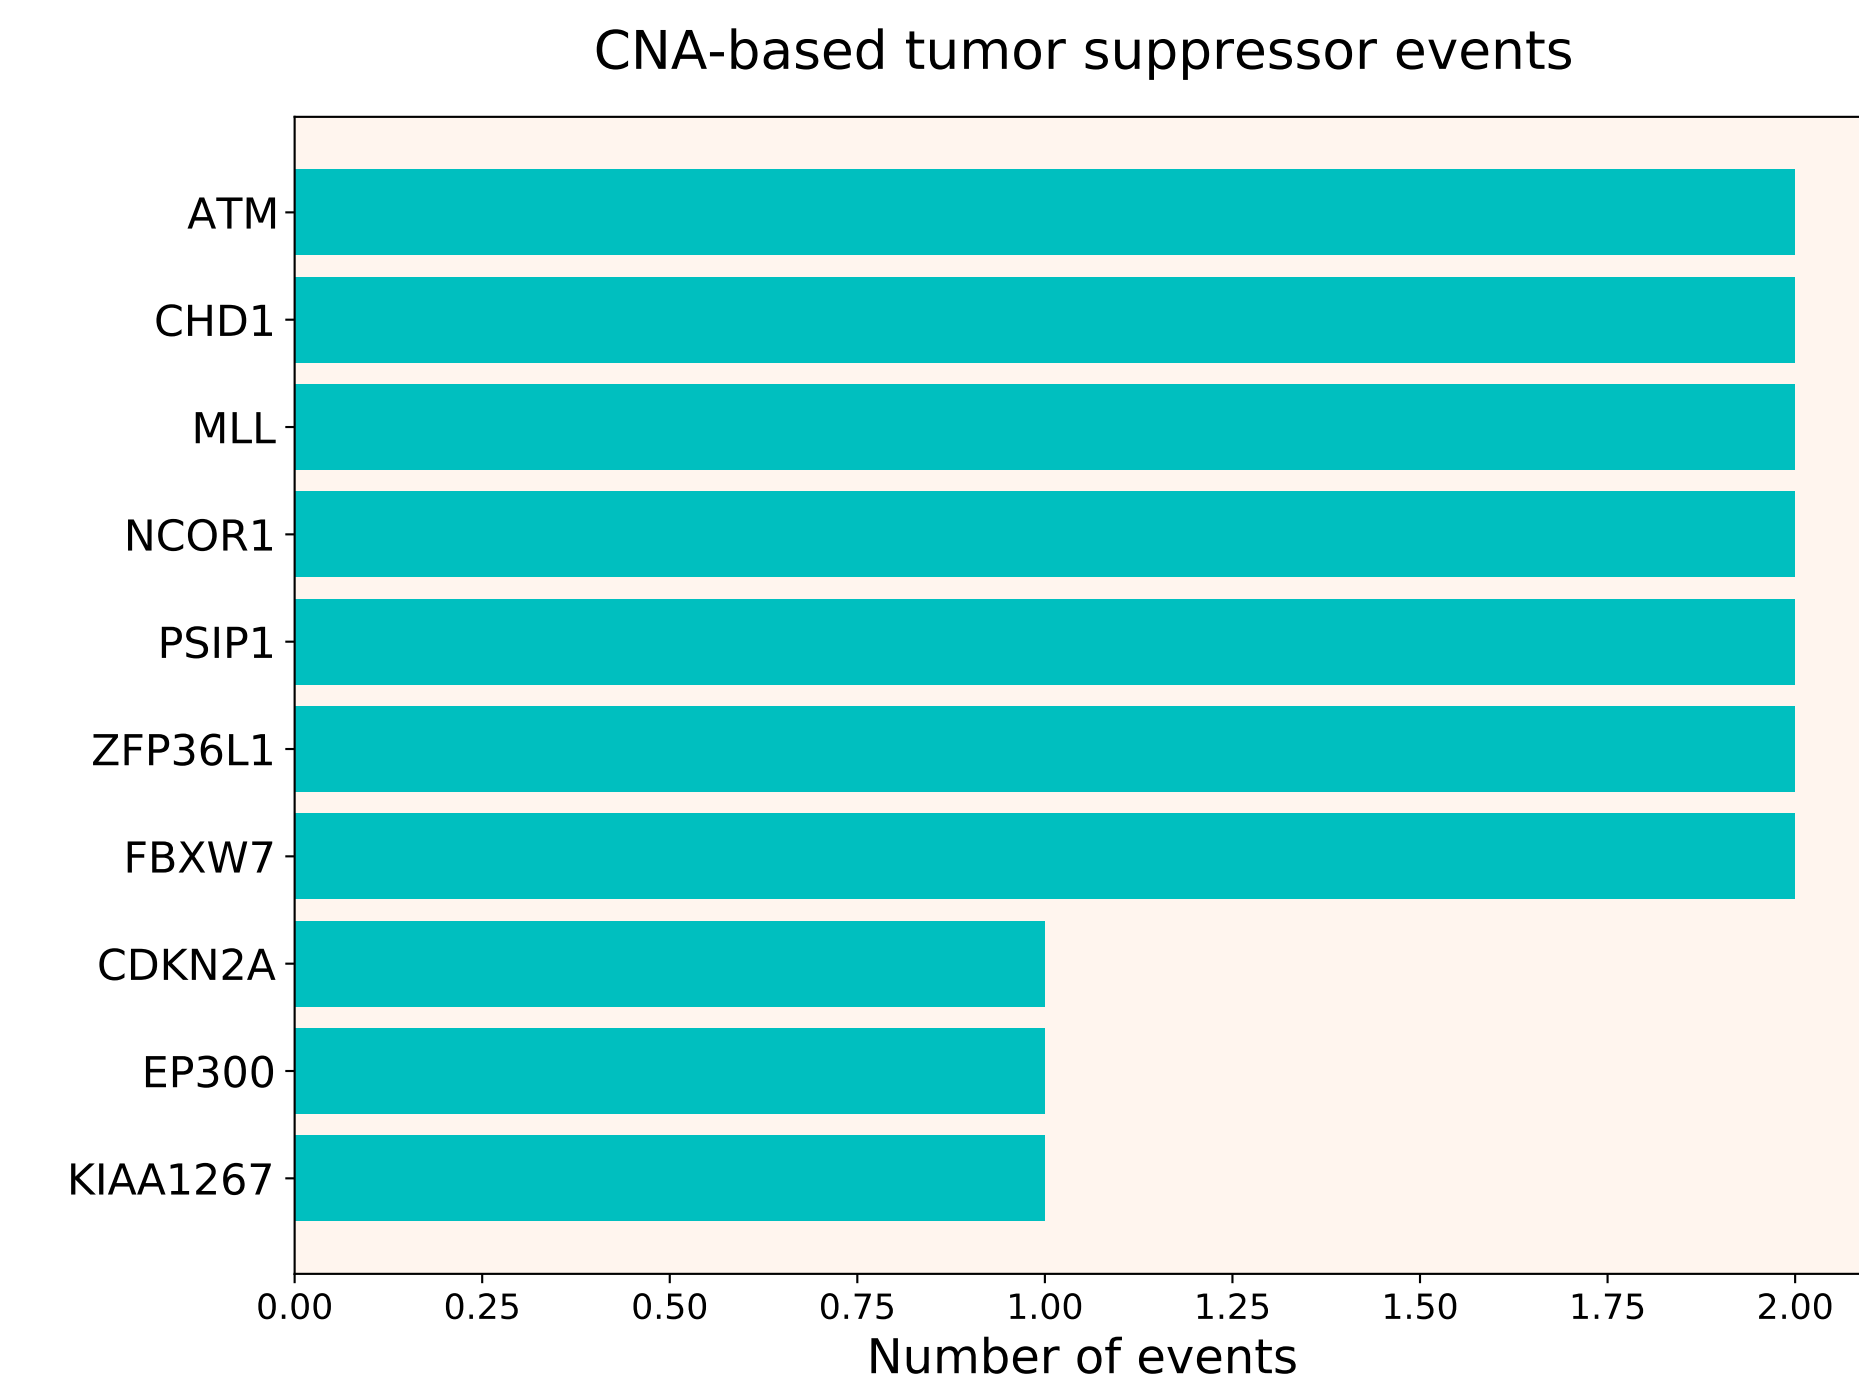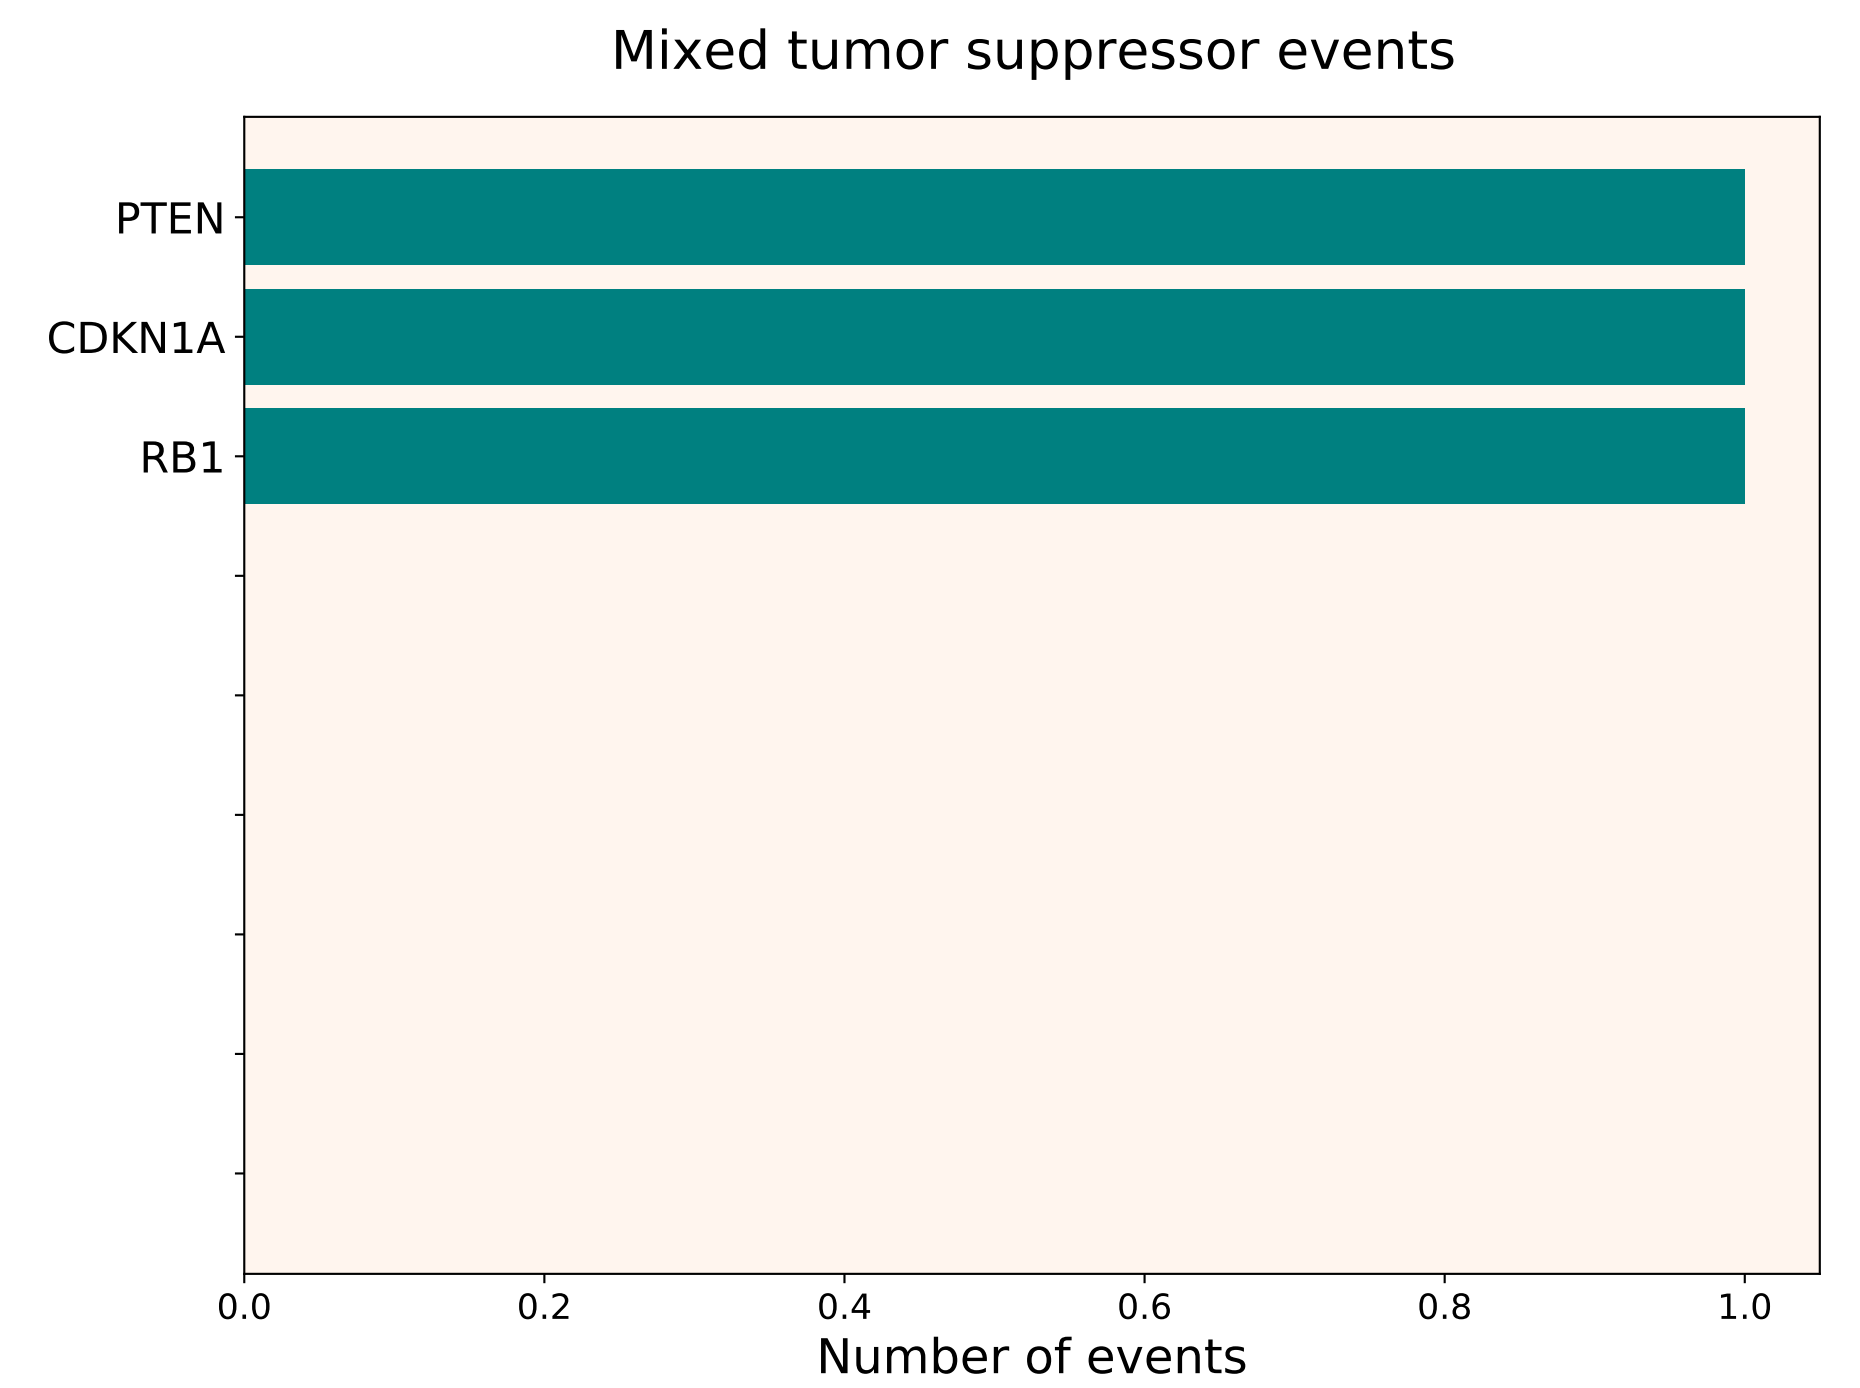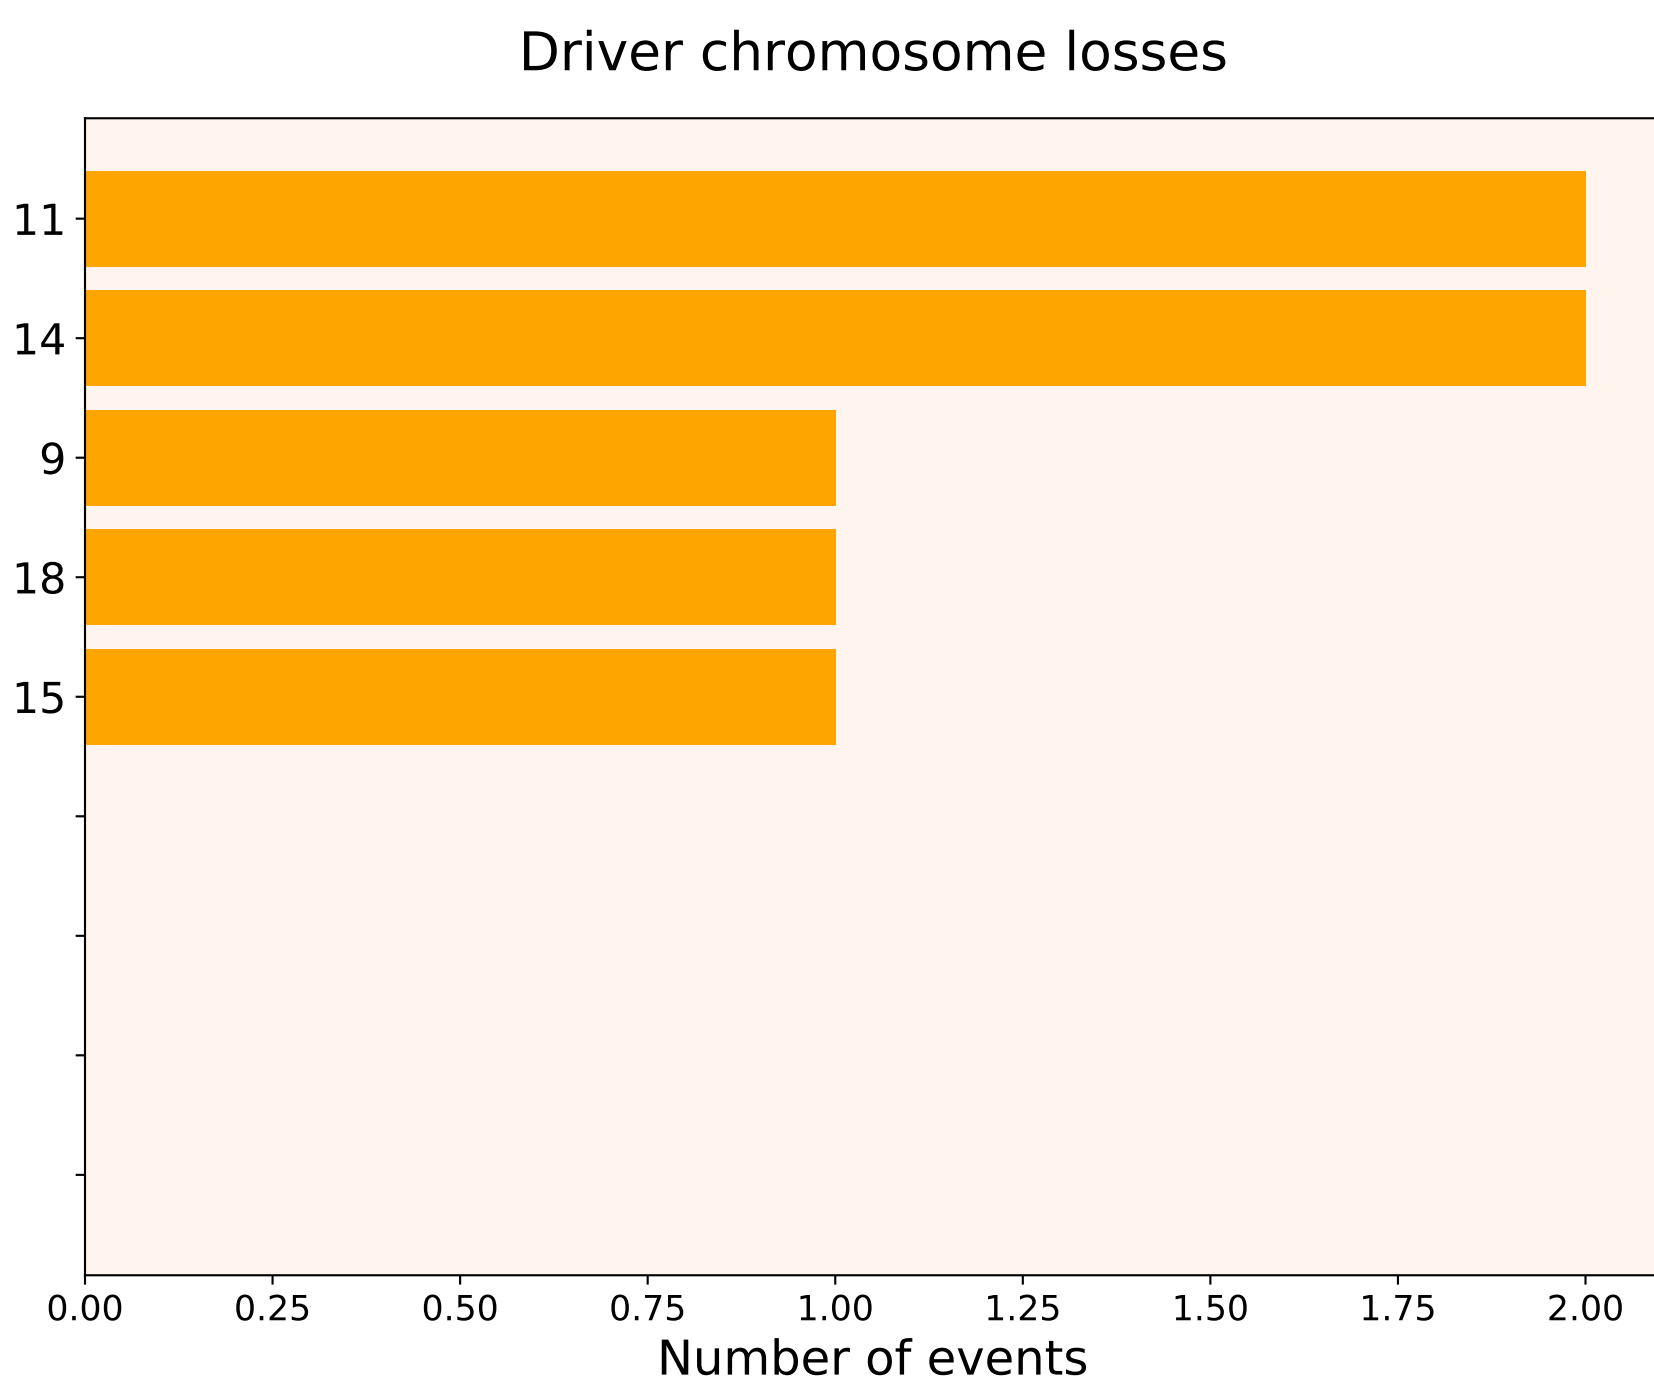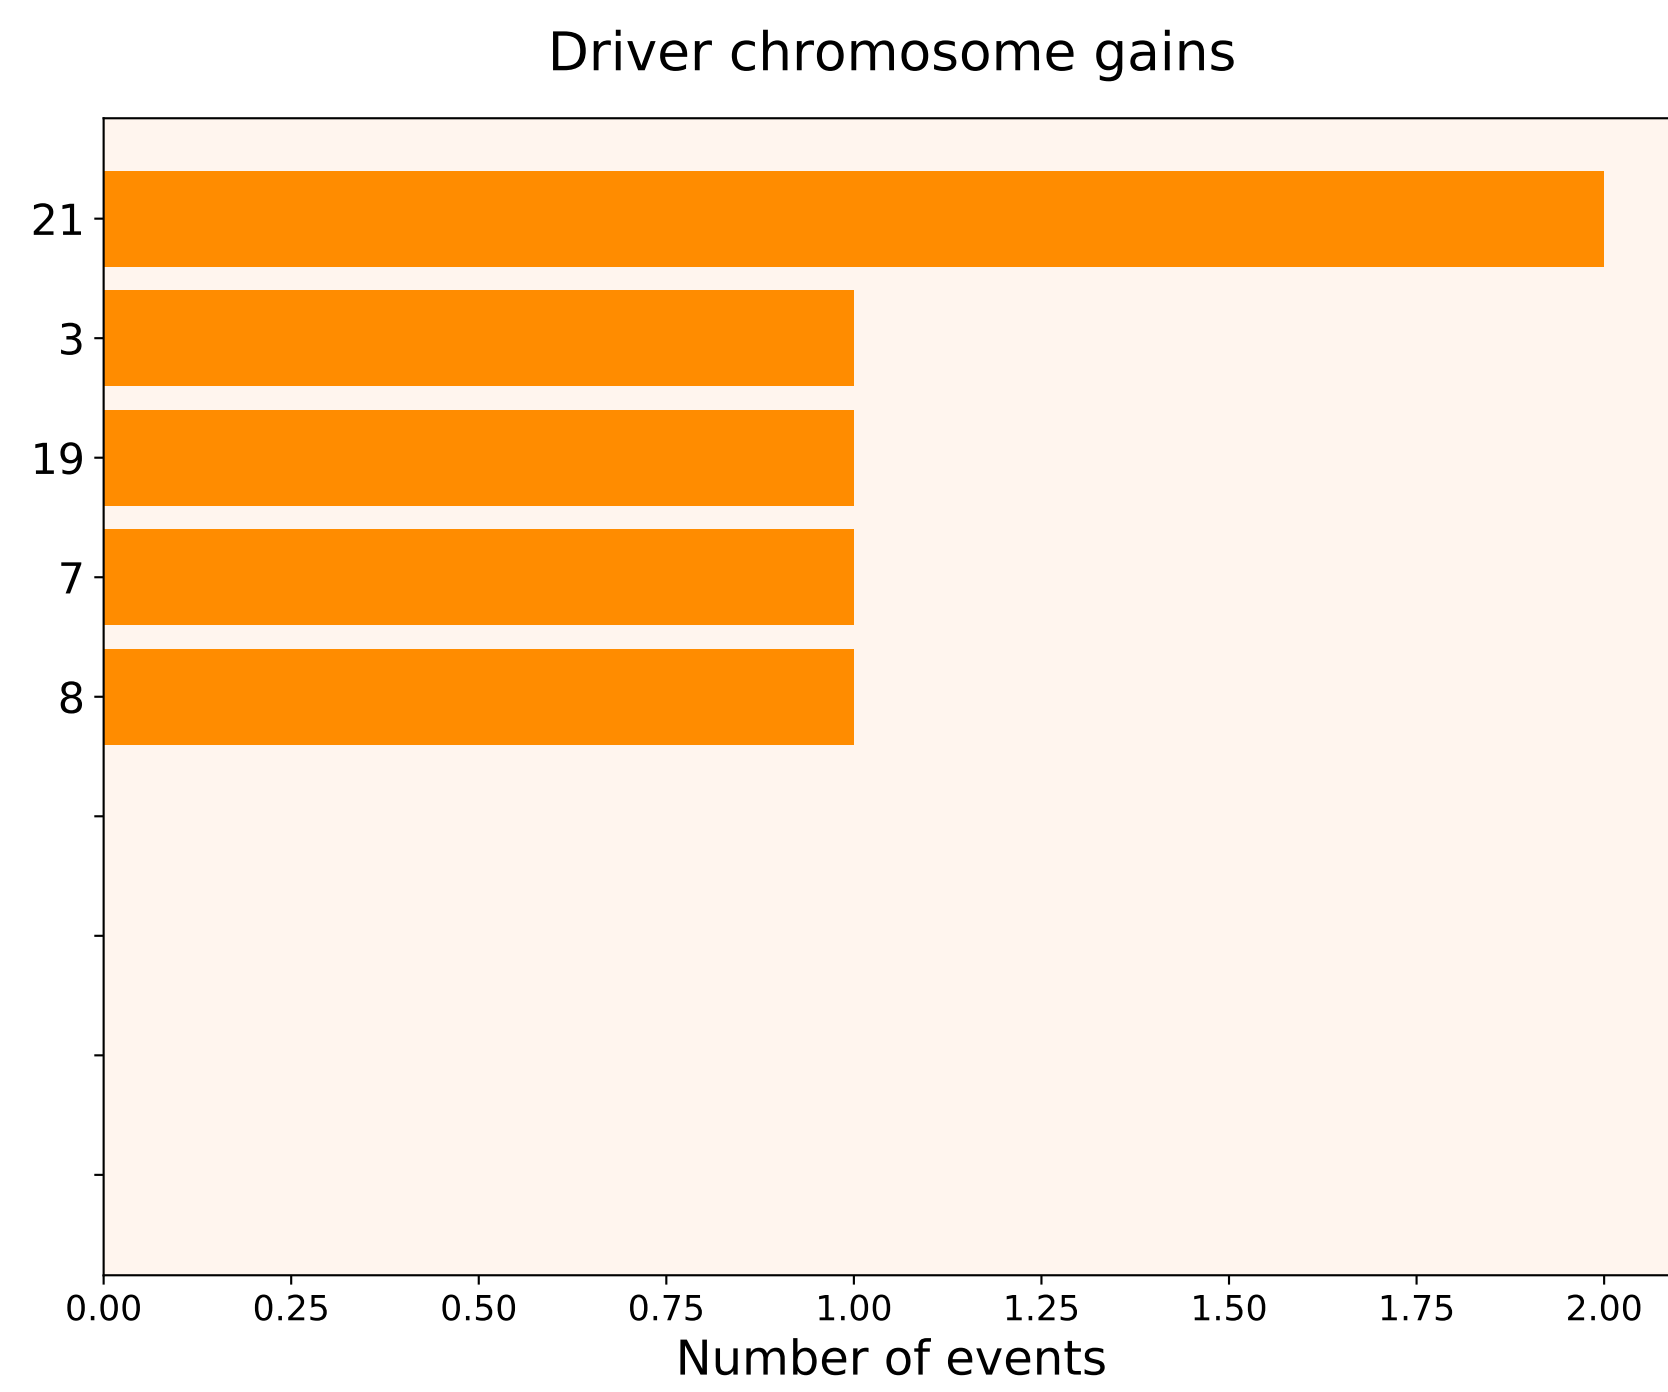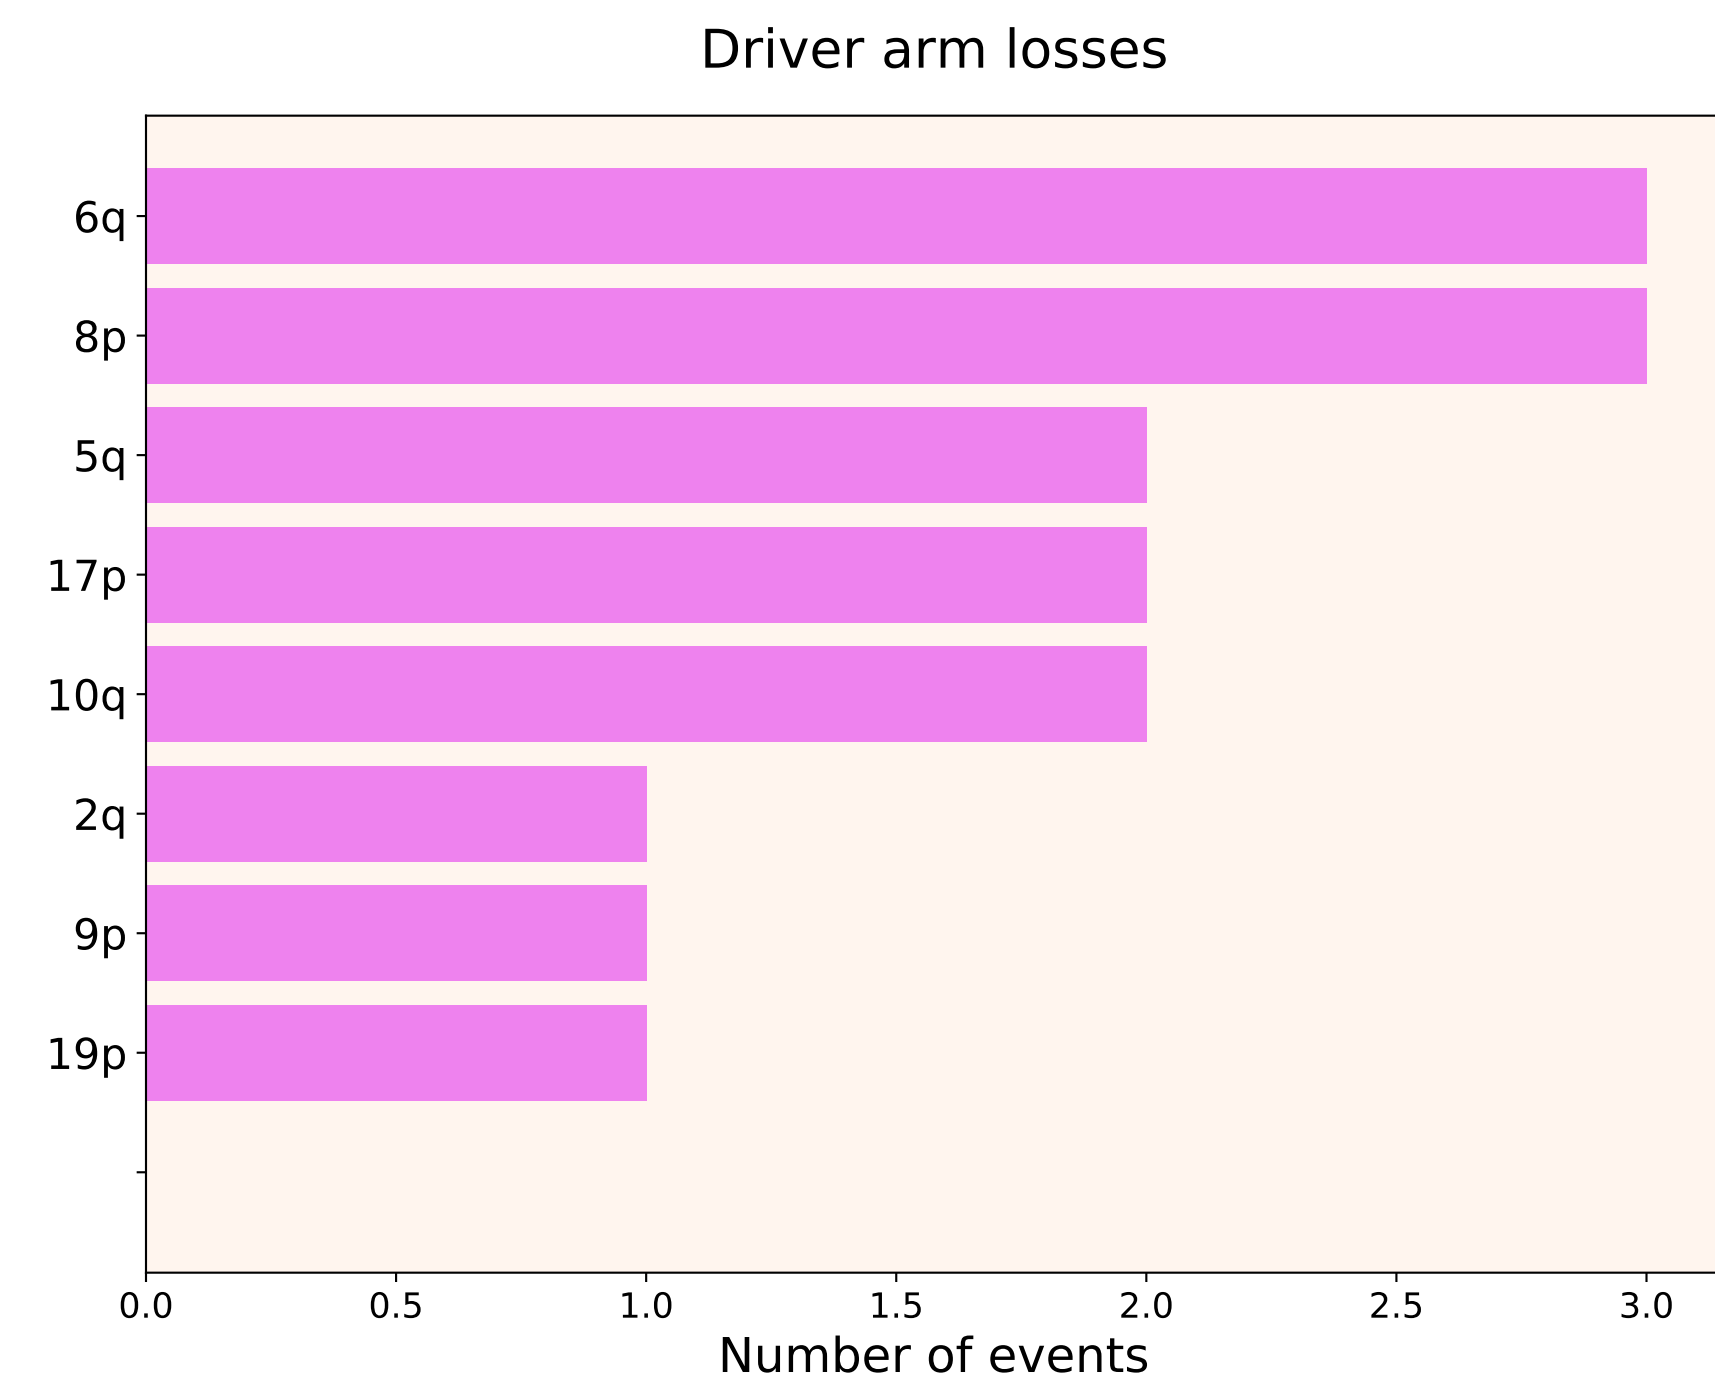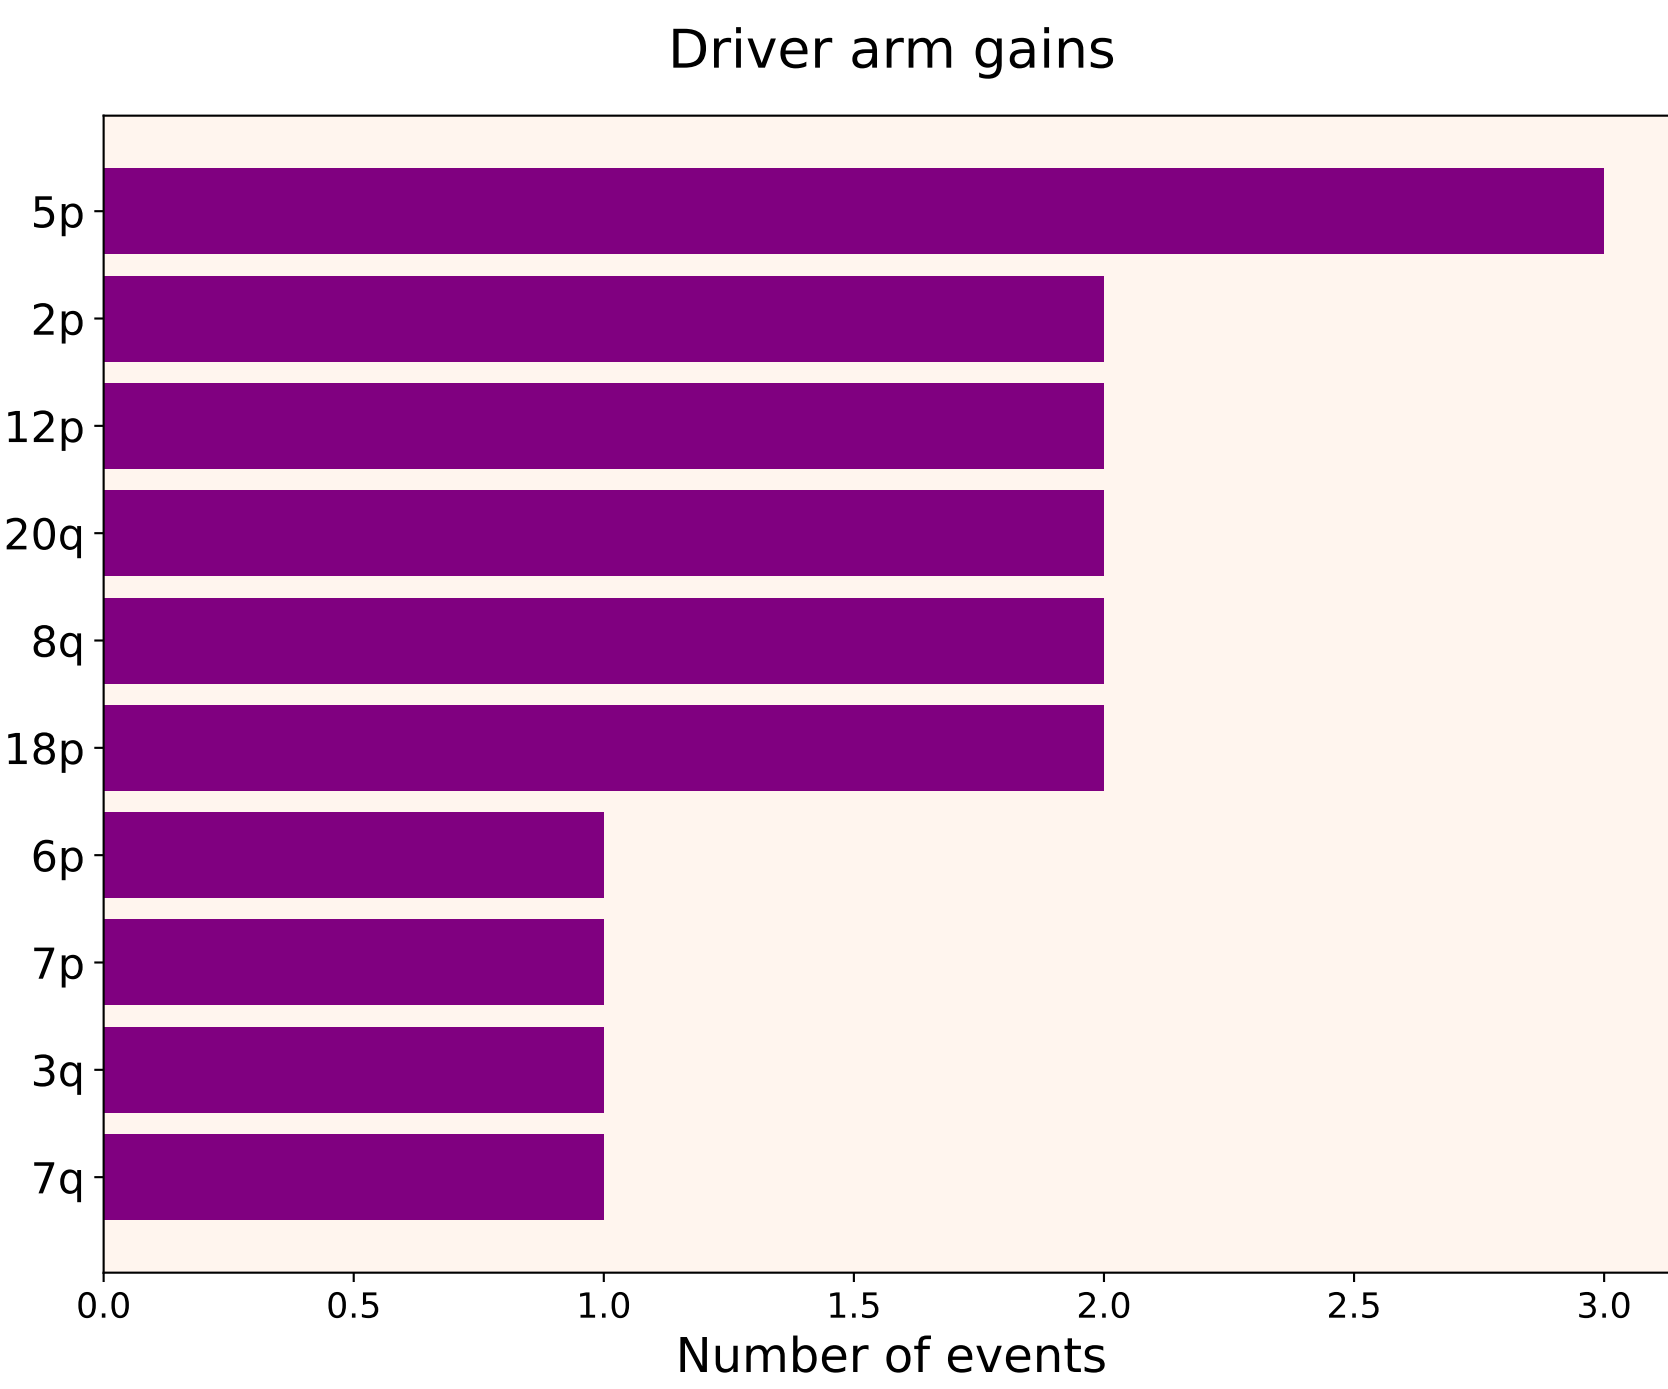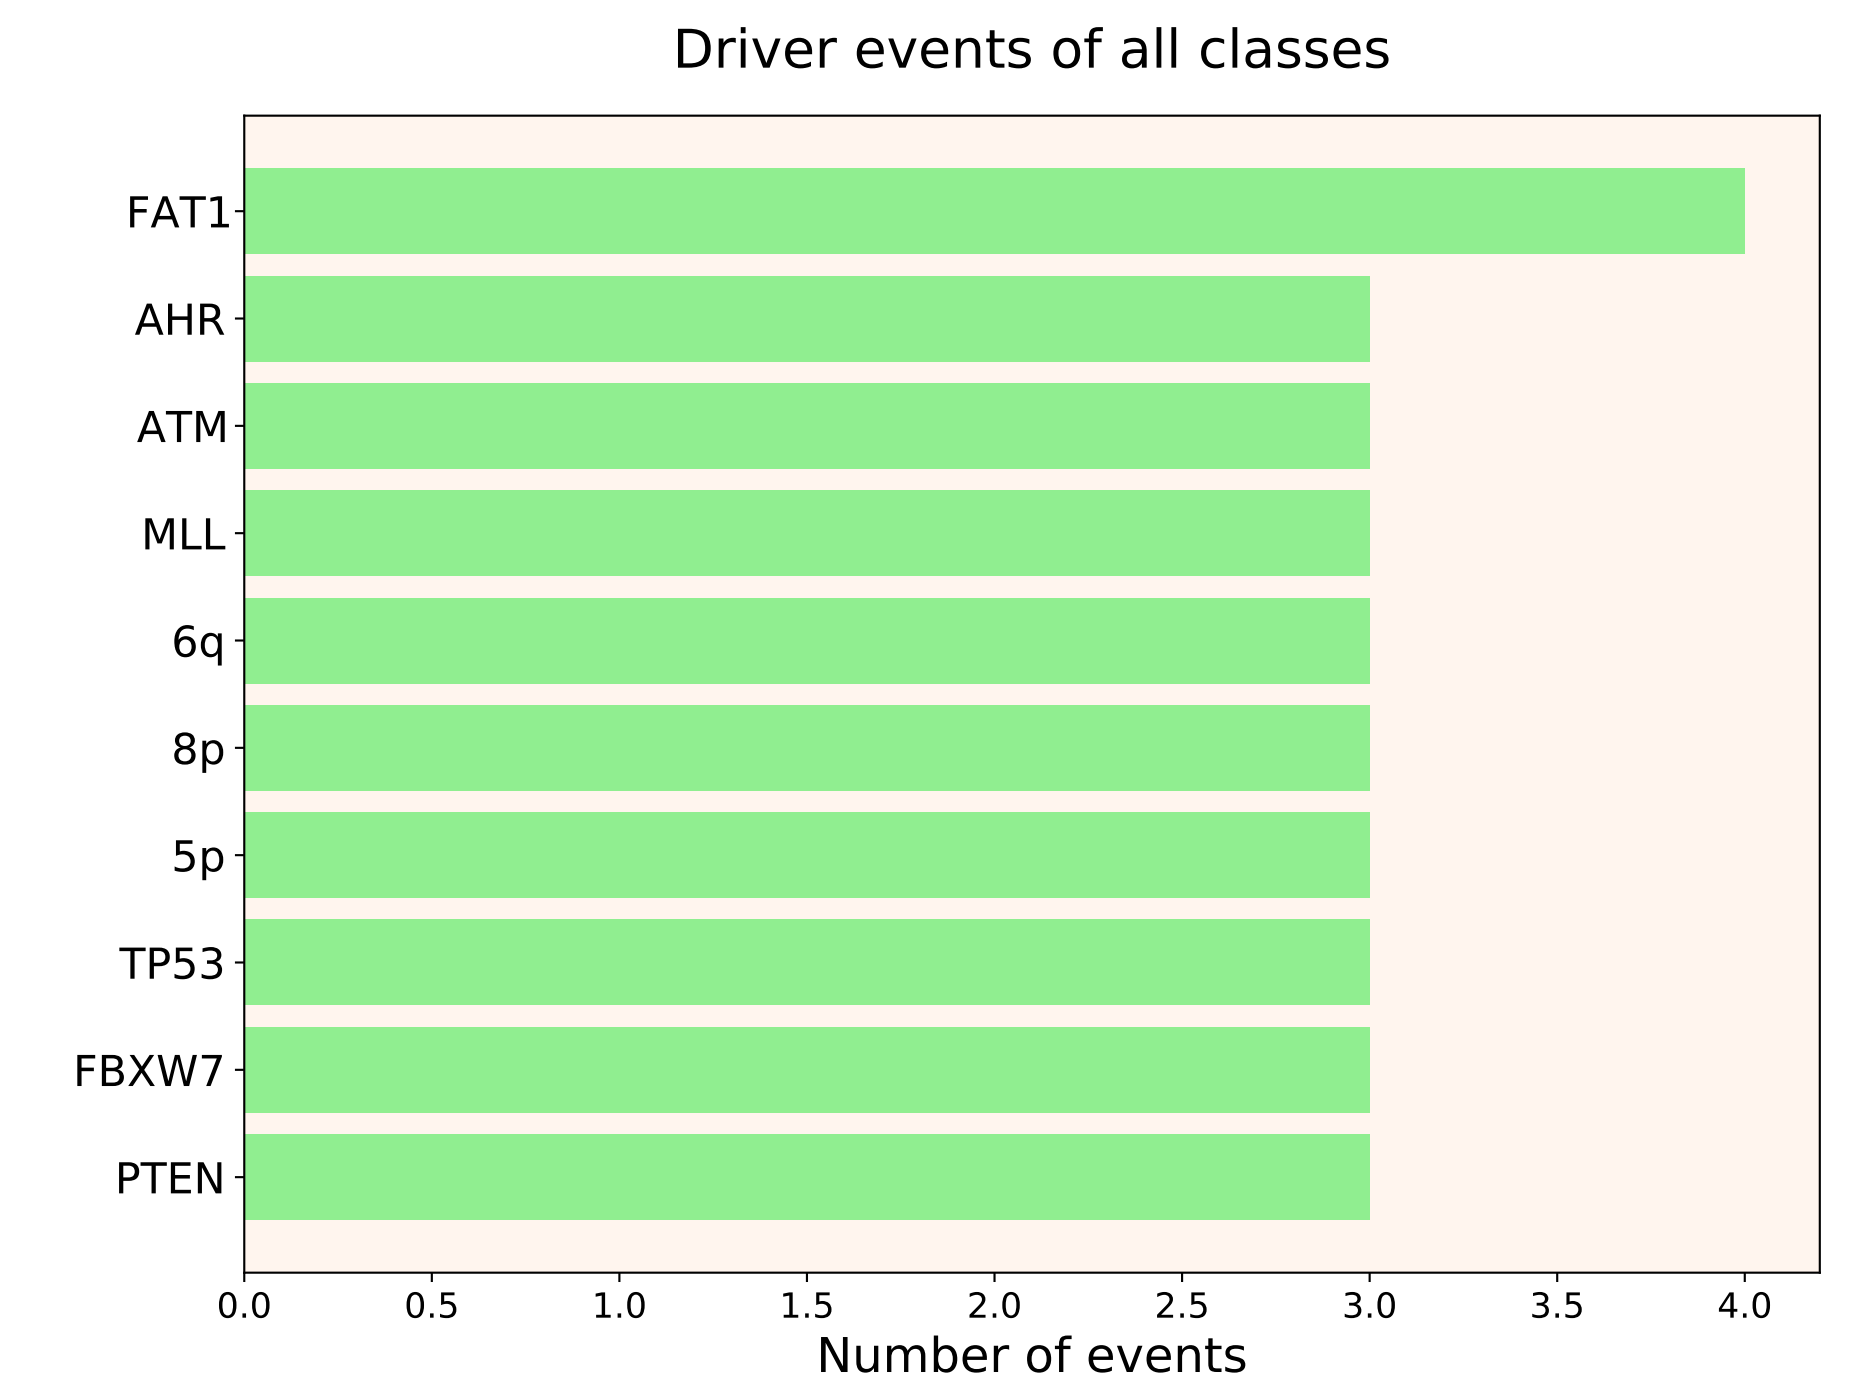

Supplement: Supplemental_Data_S1.zip [file Supplemental_Data_S1.zip]

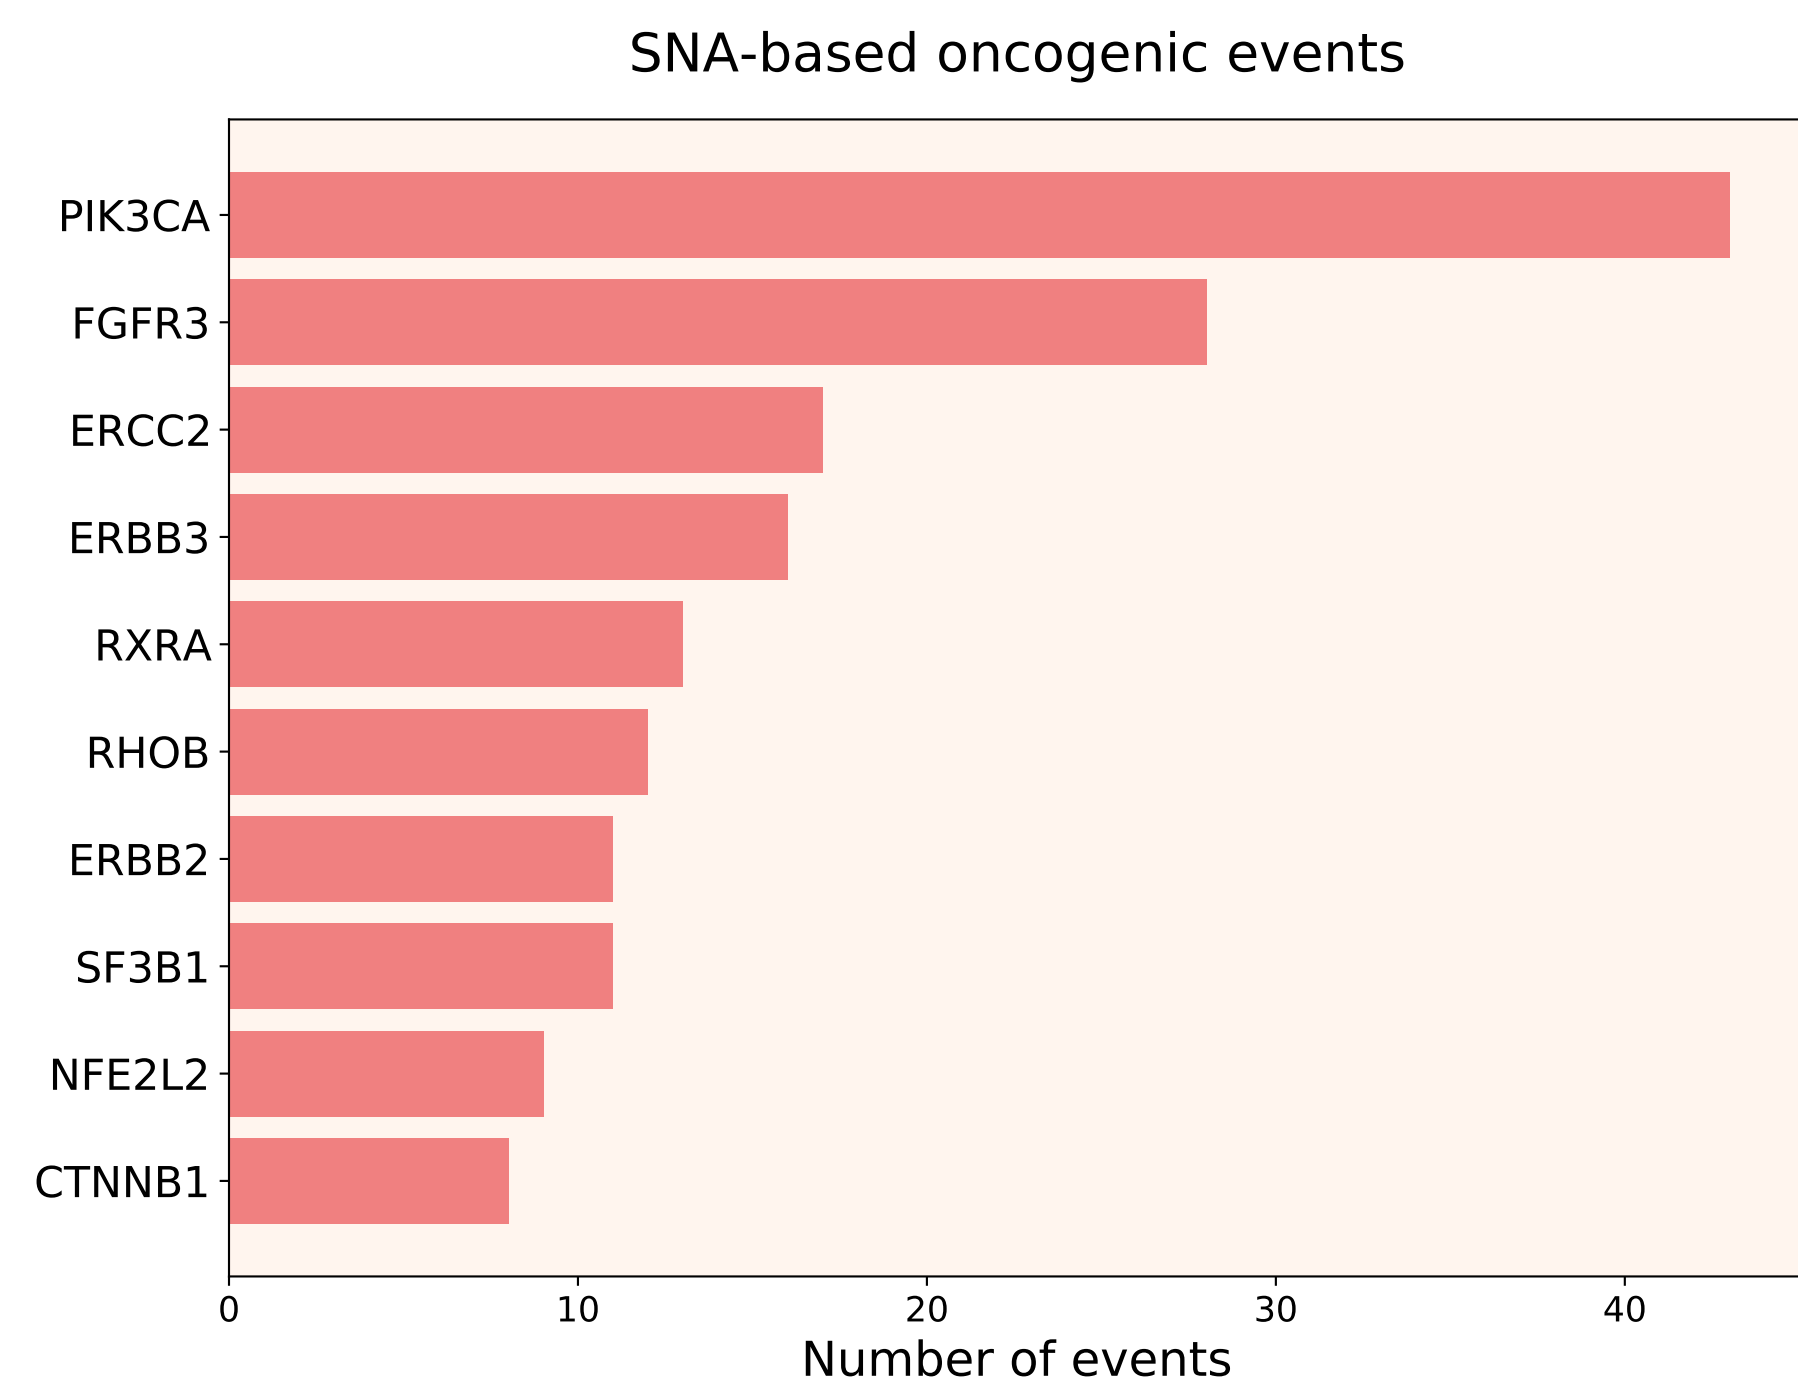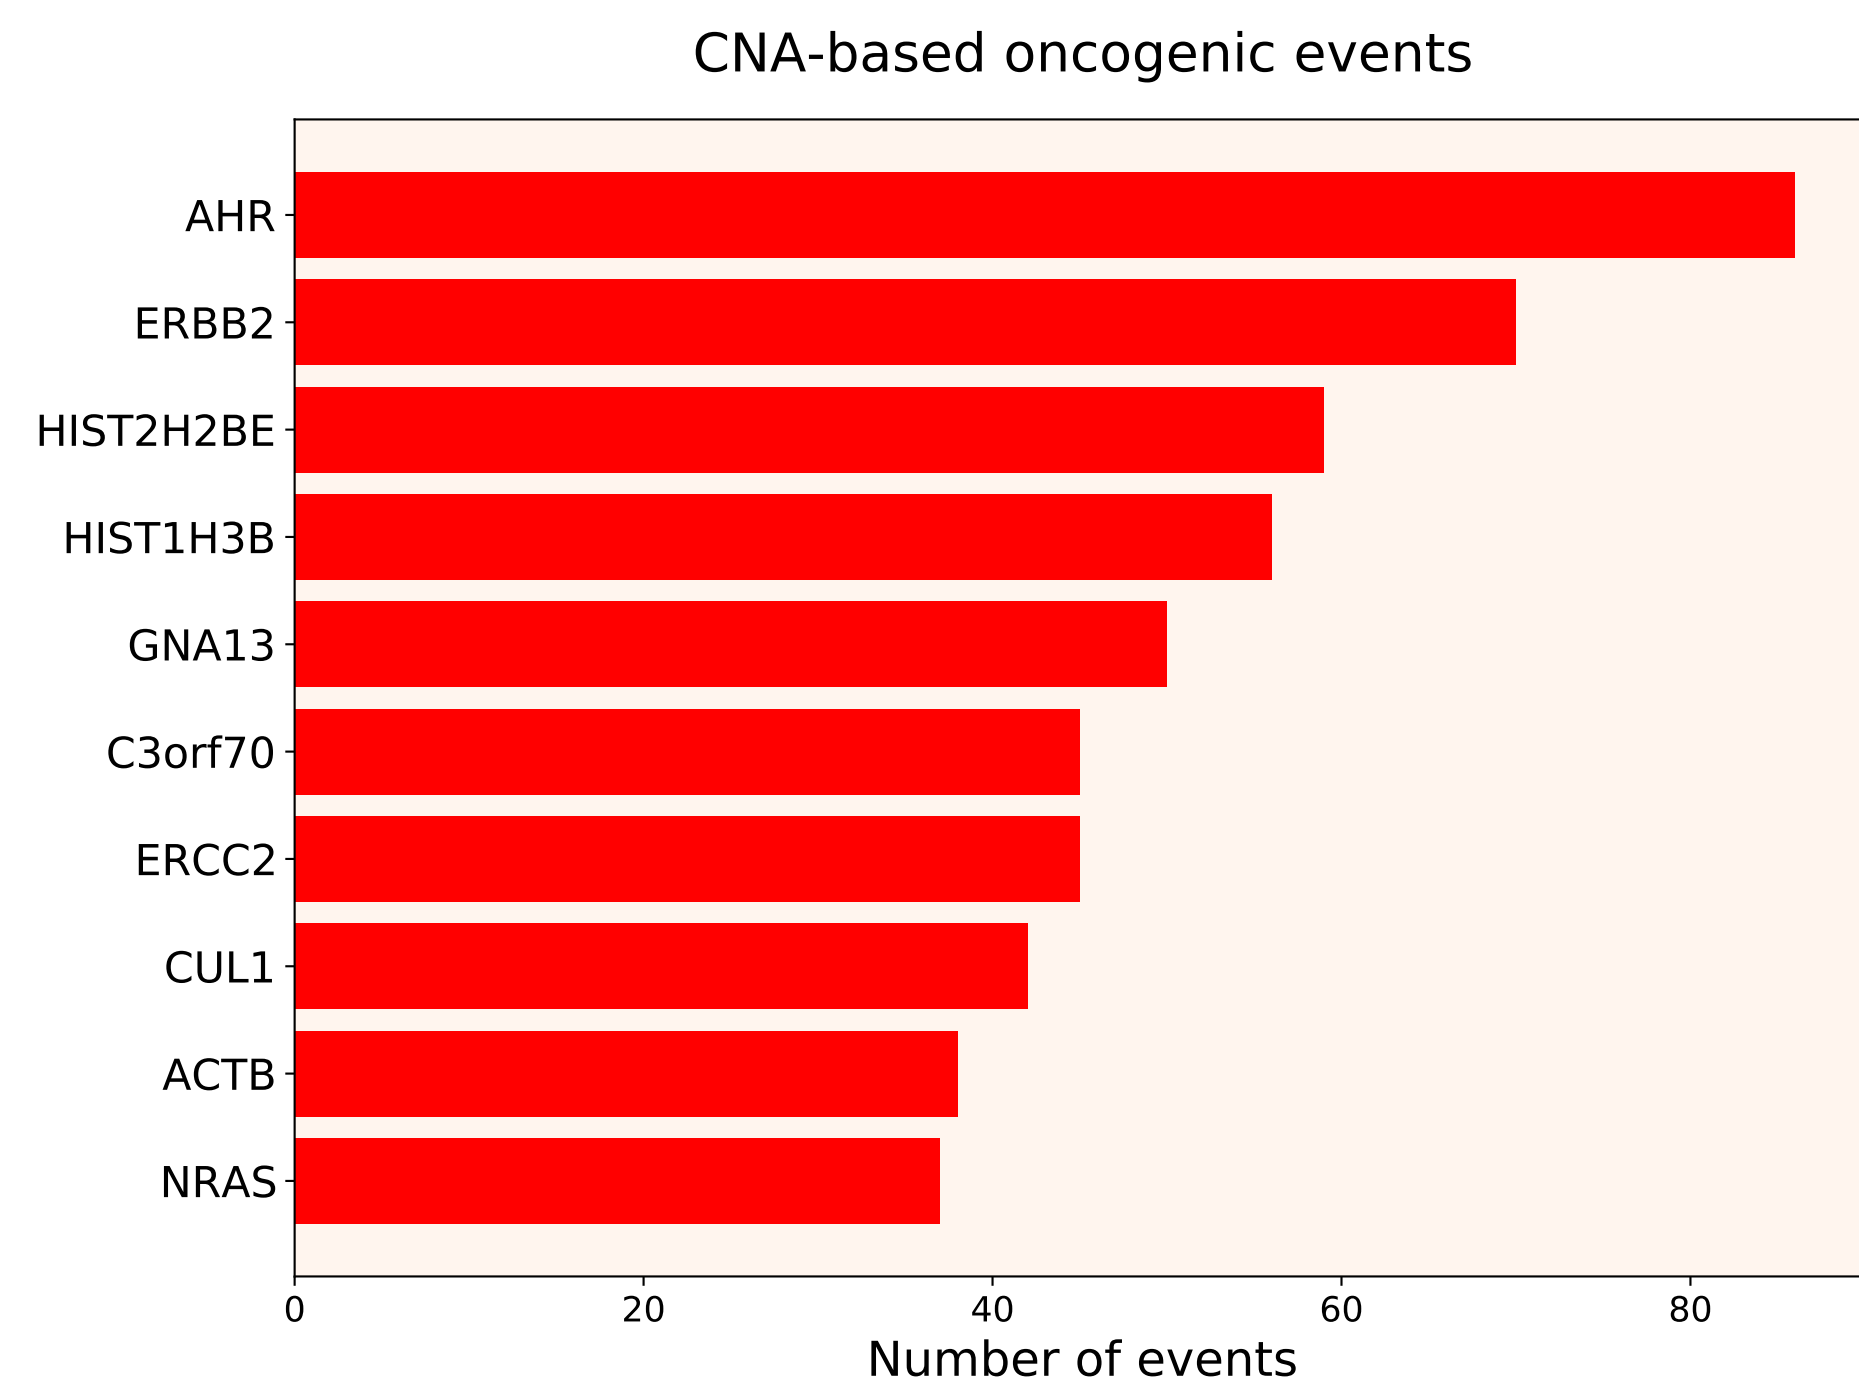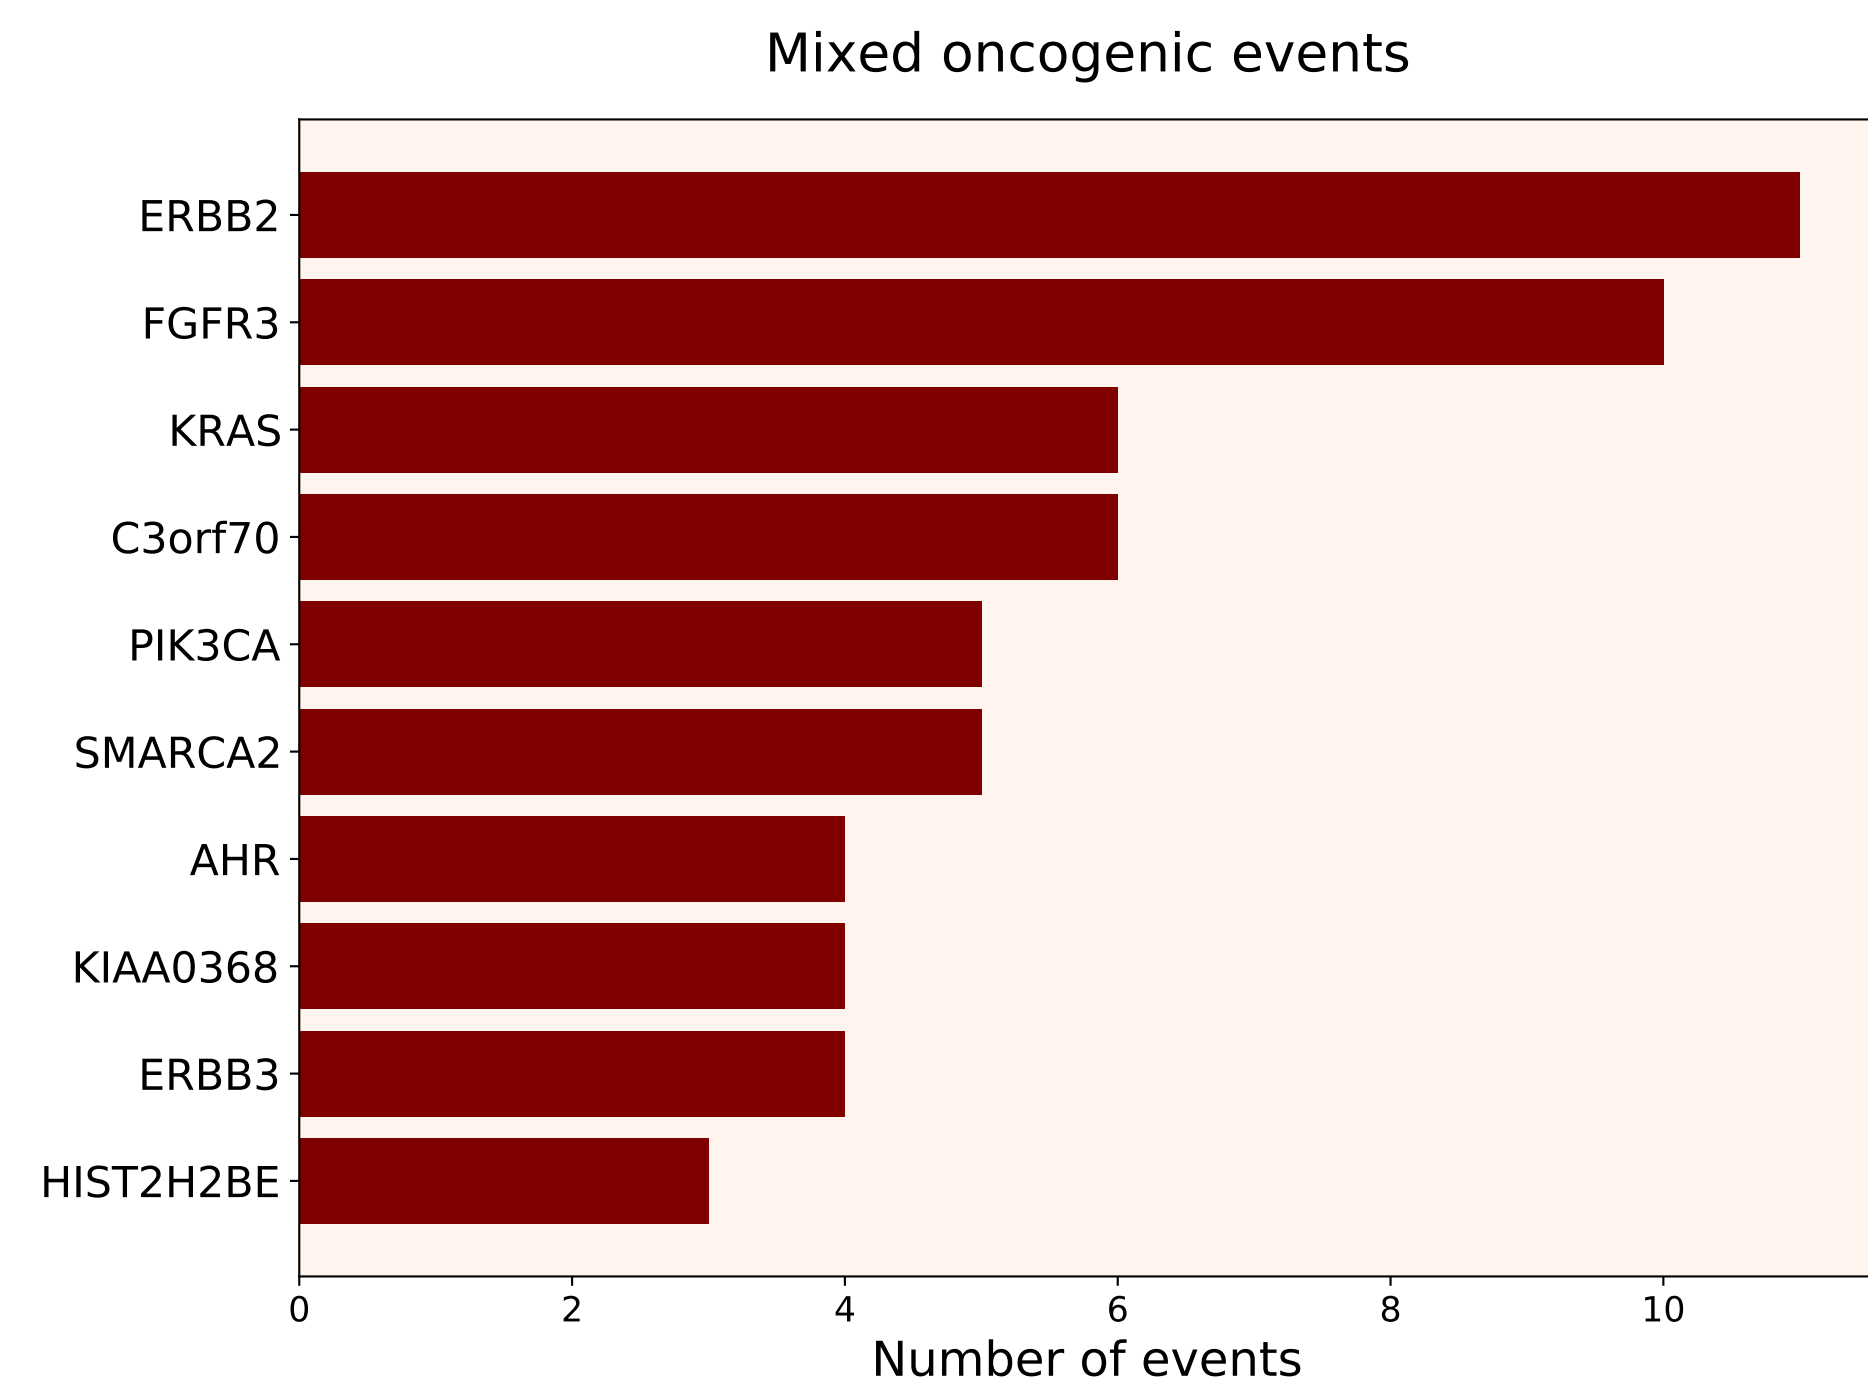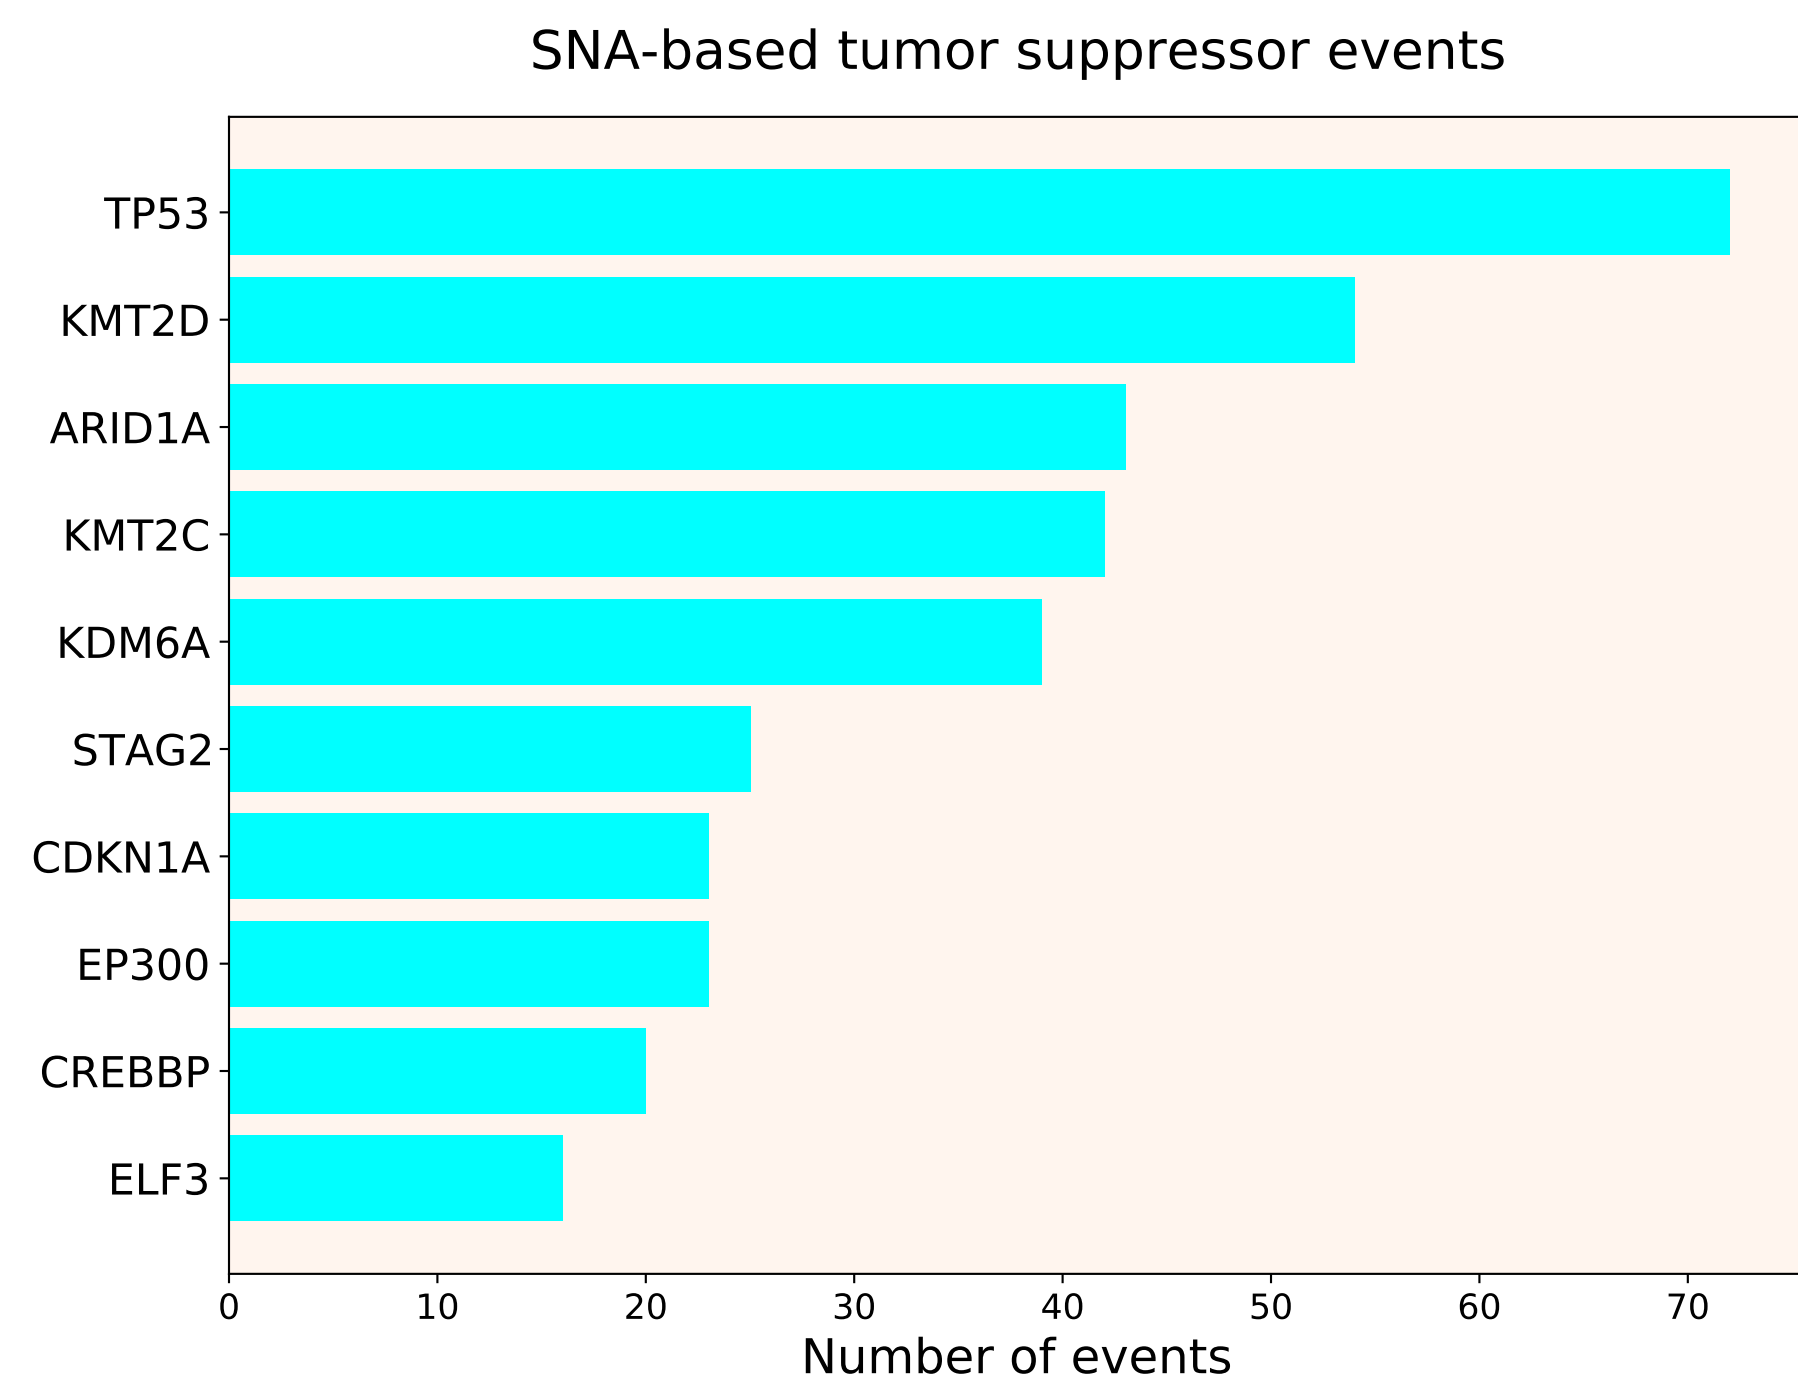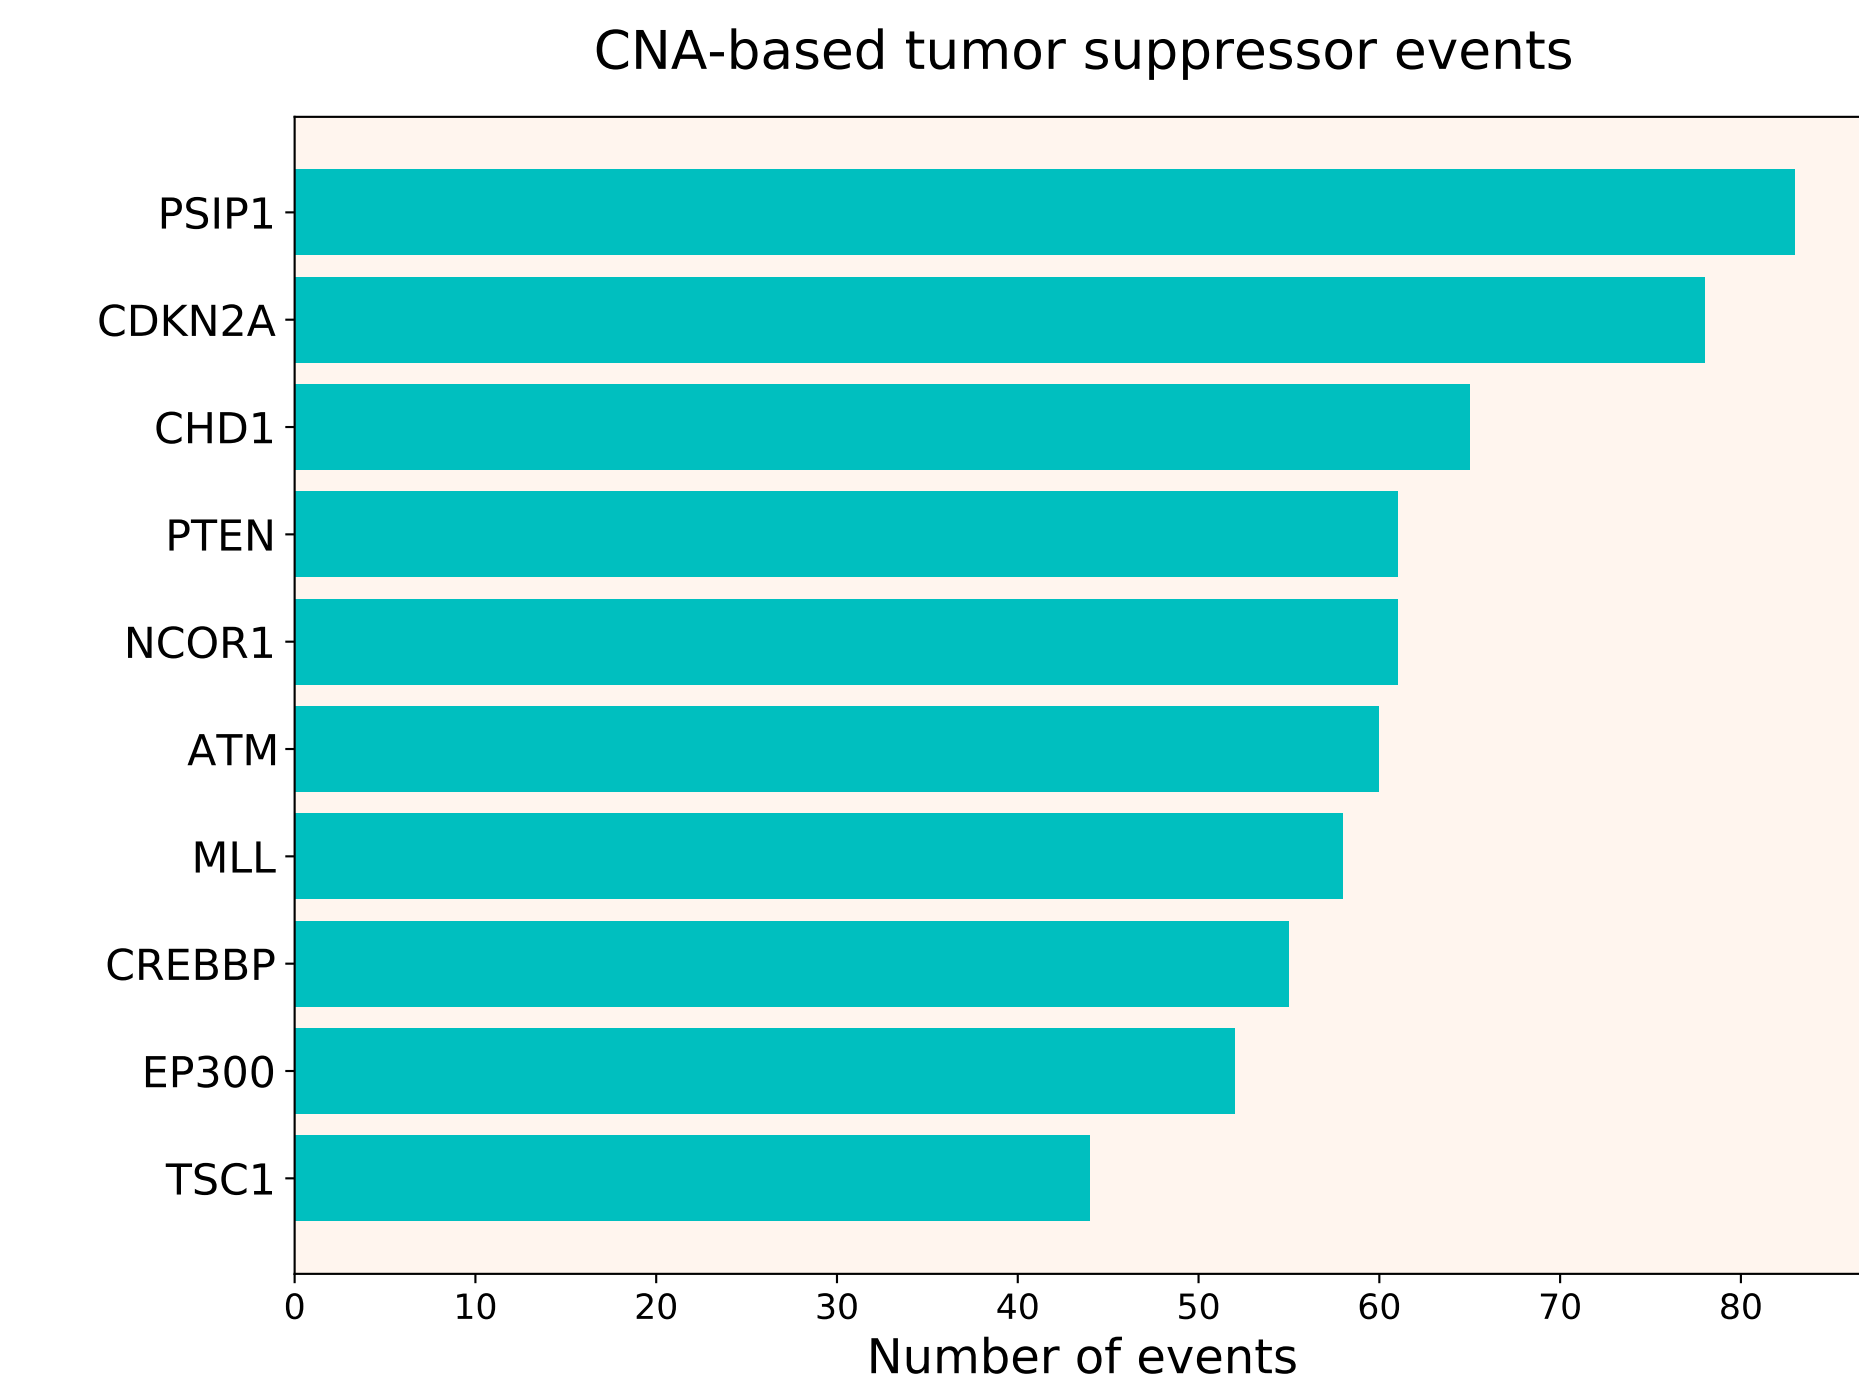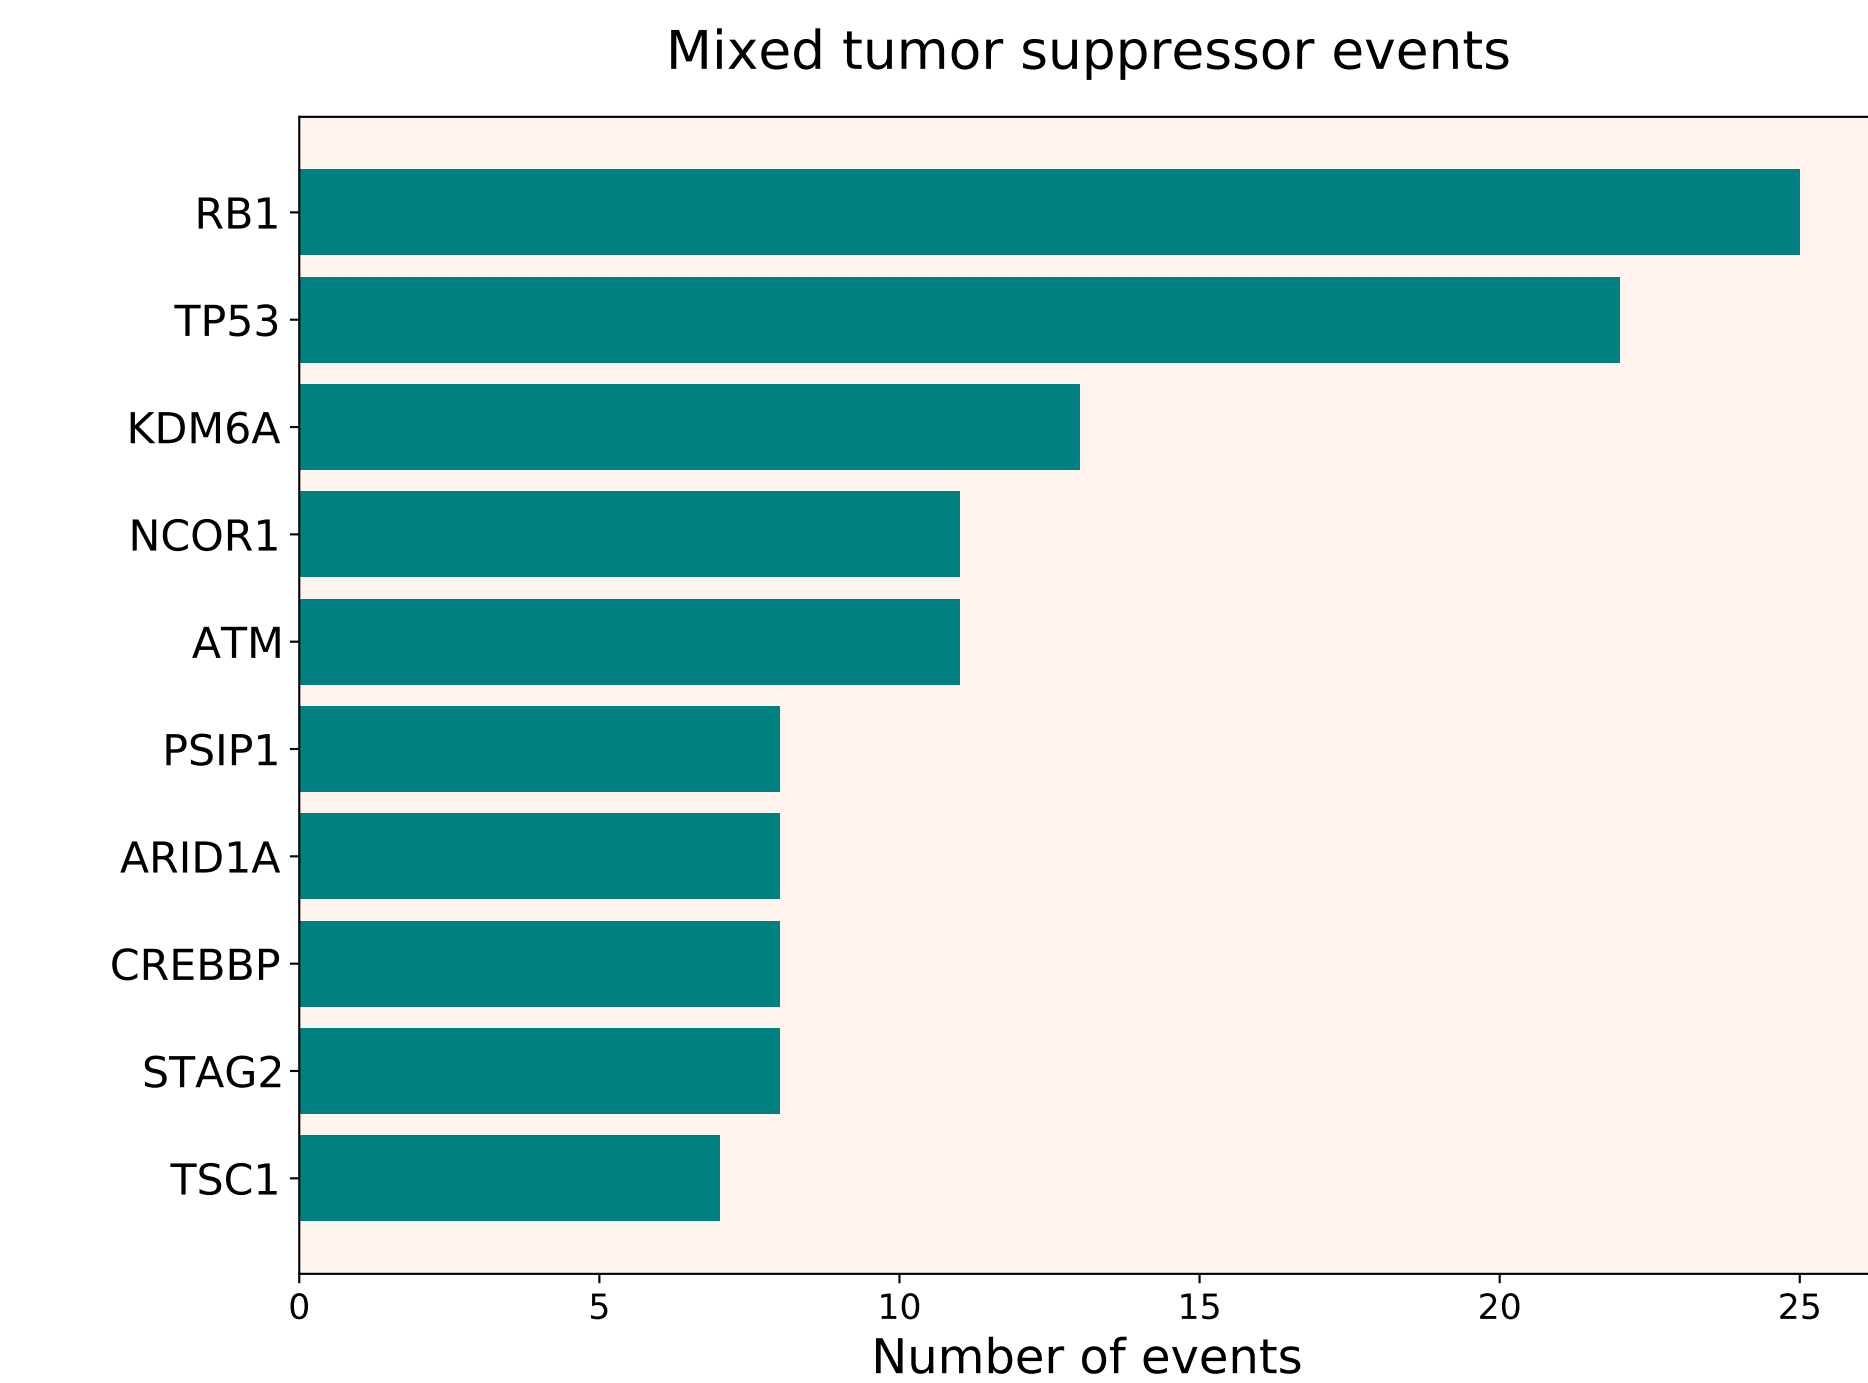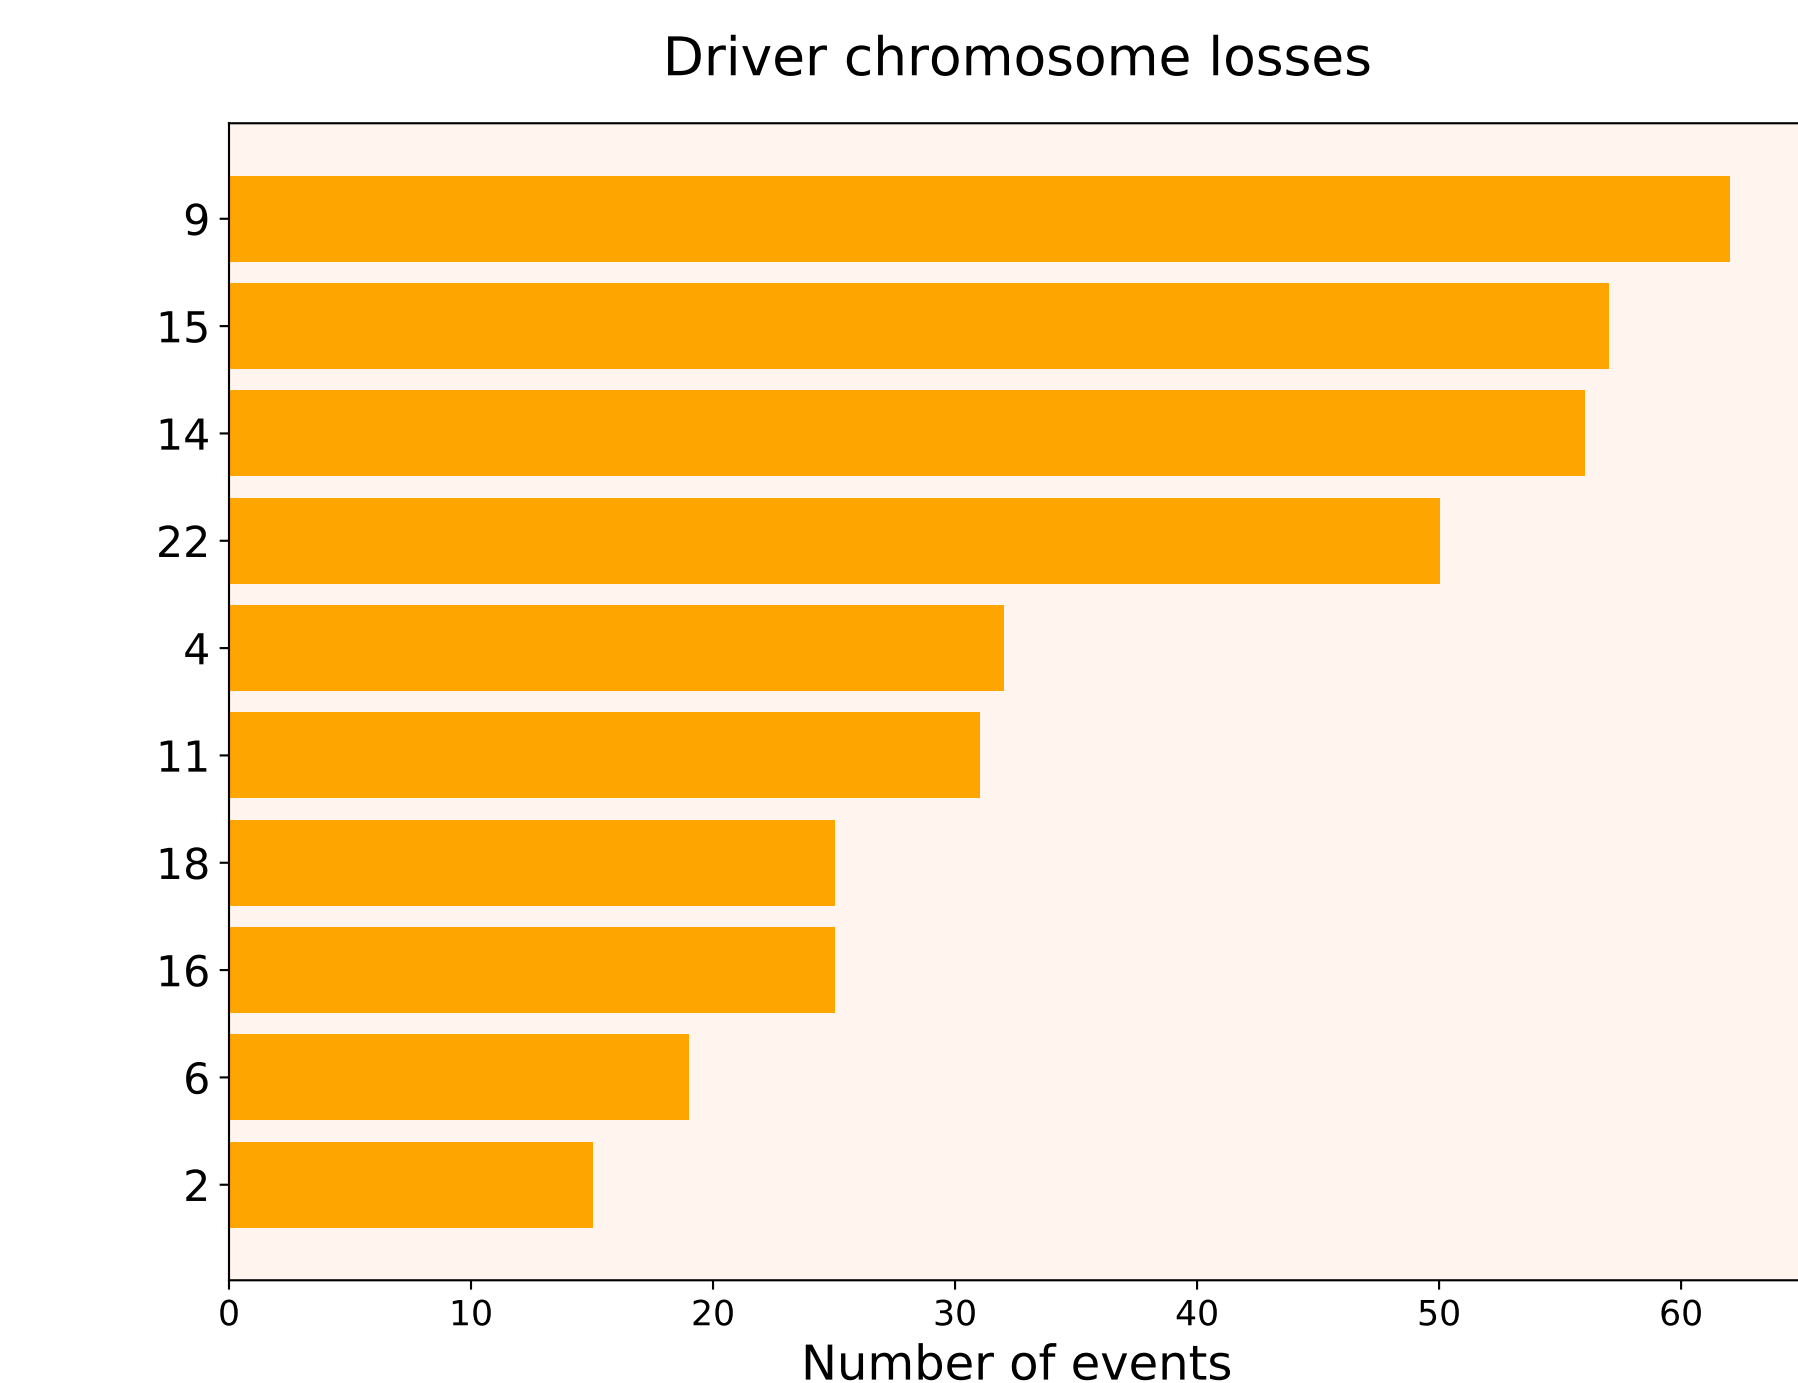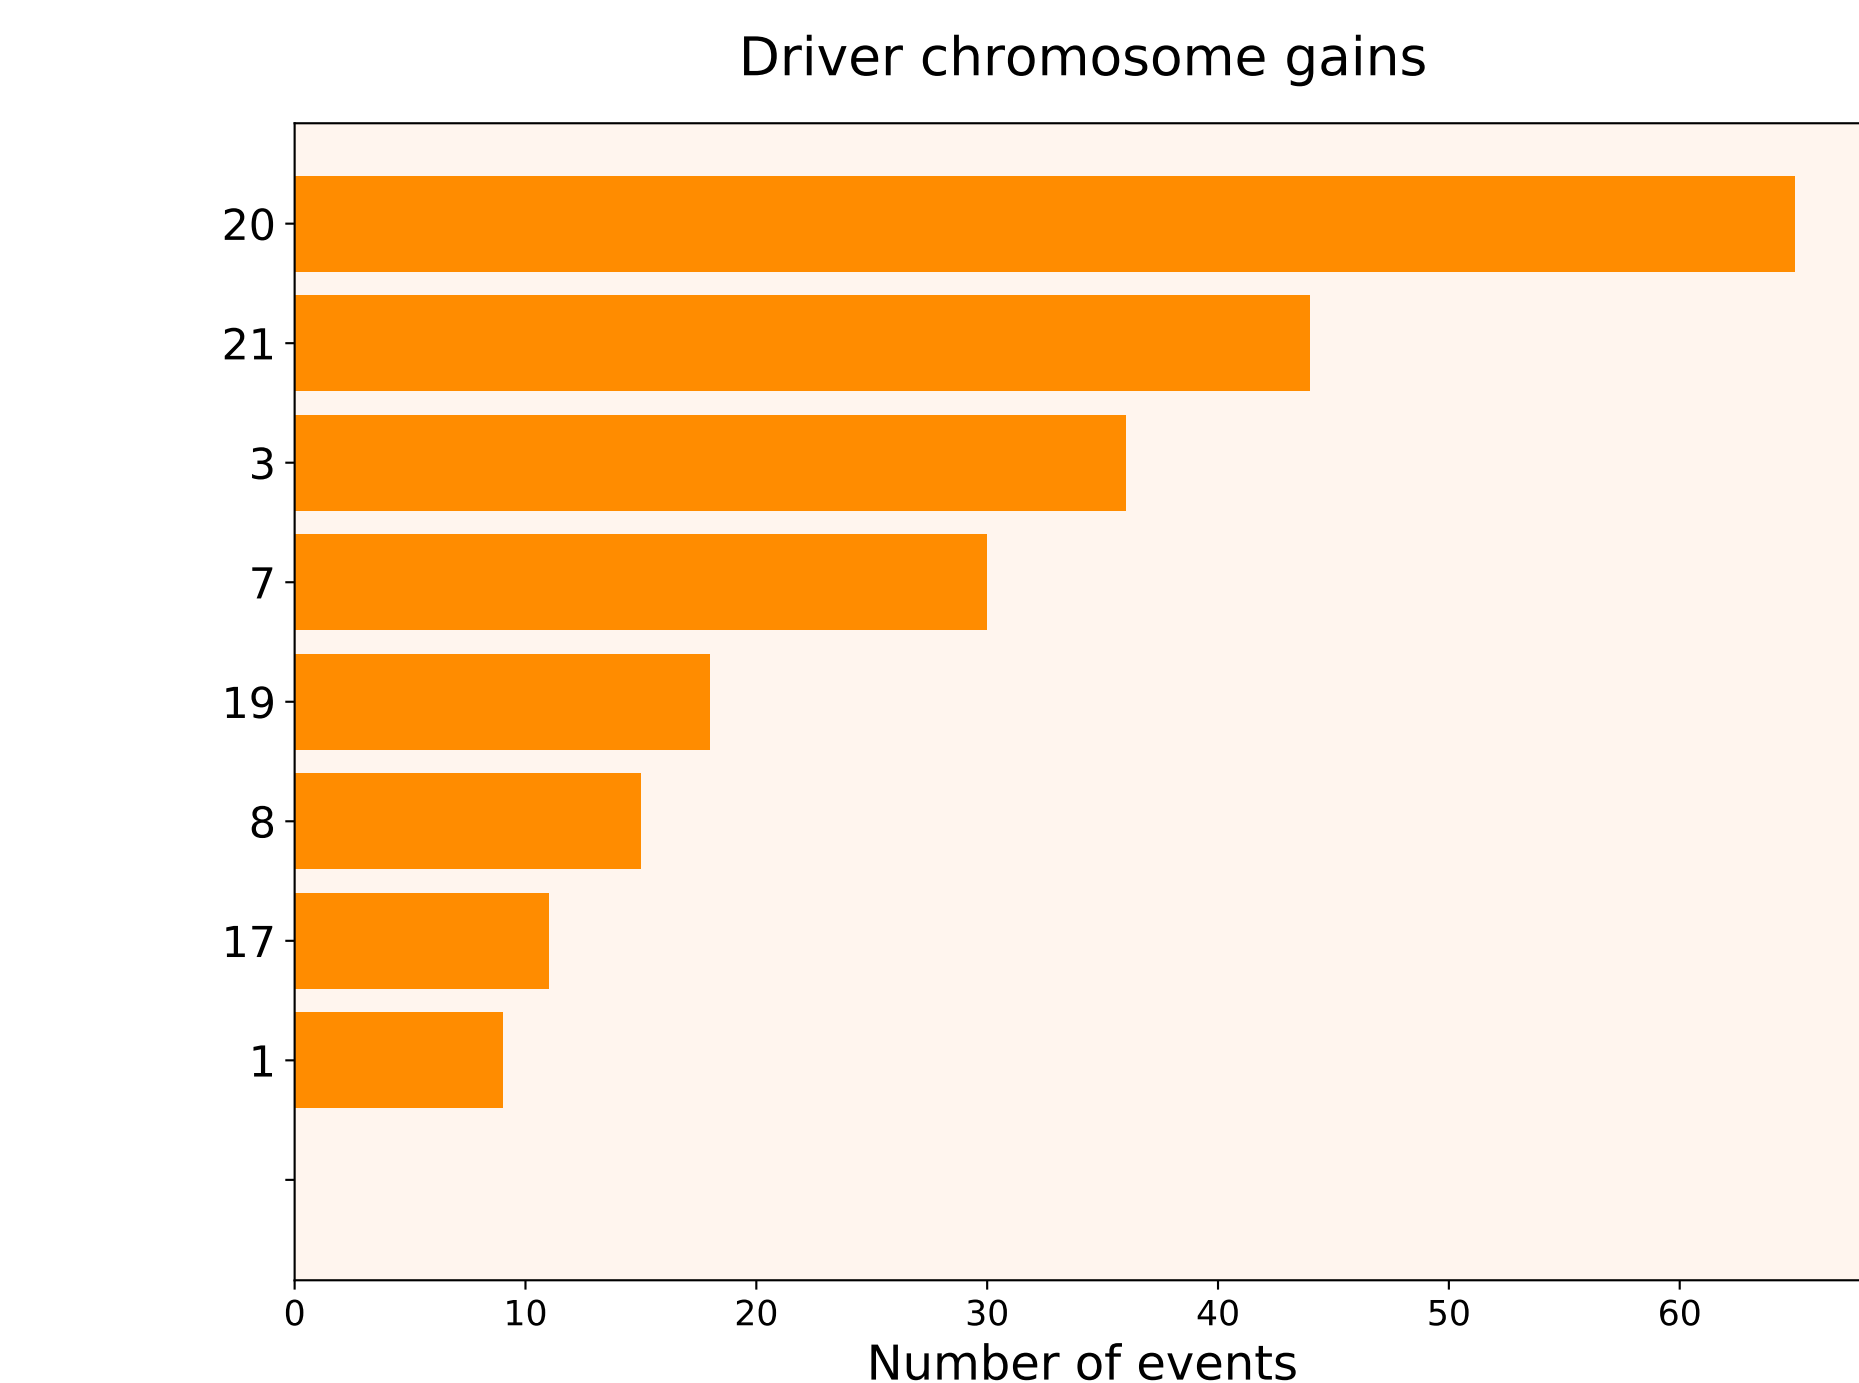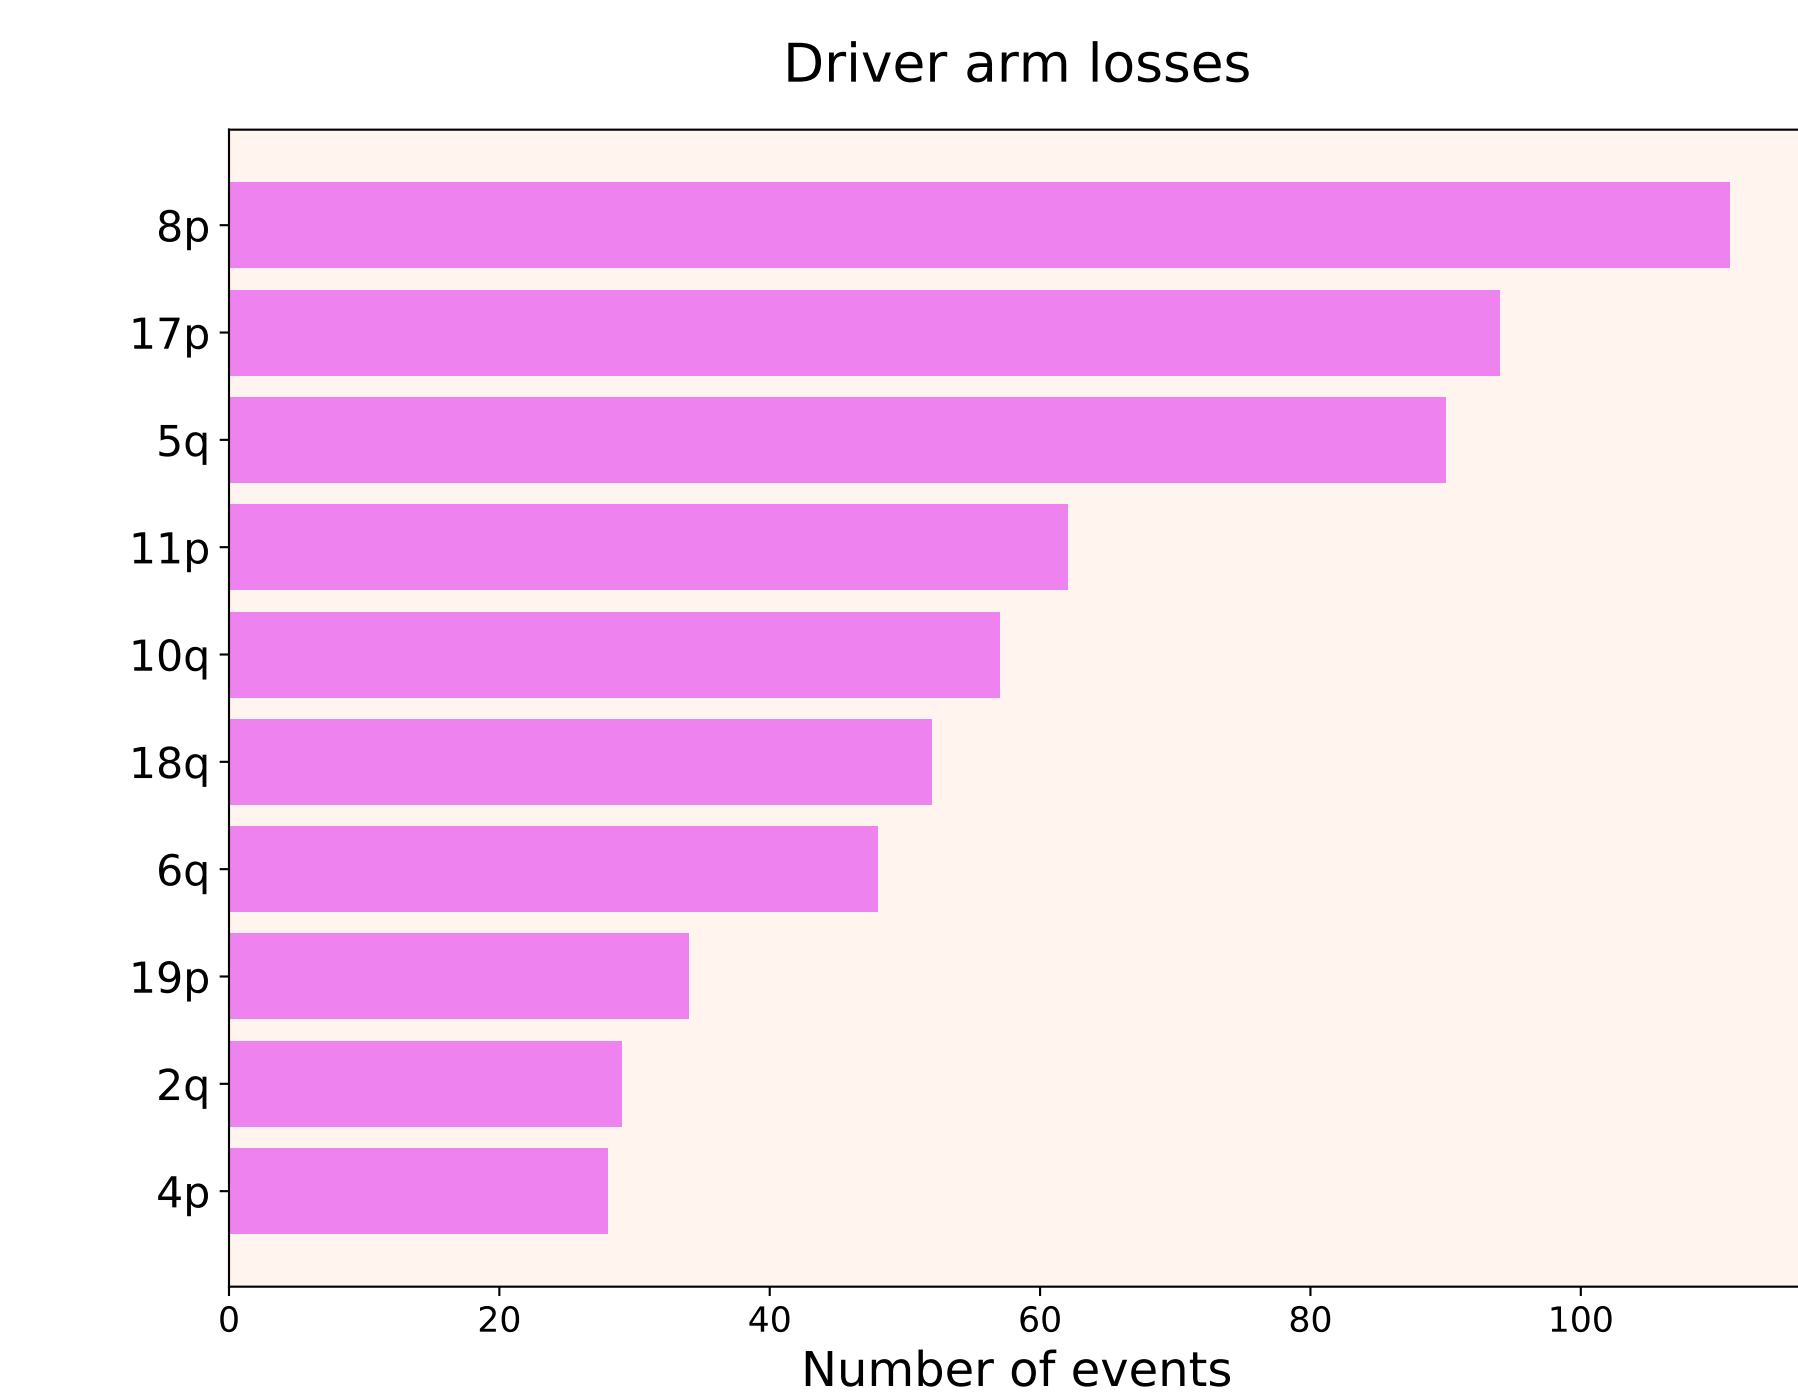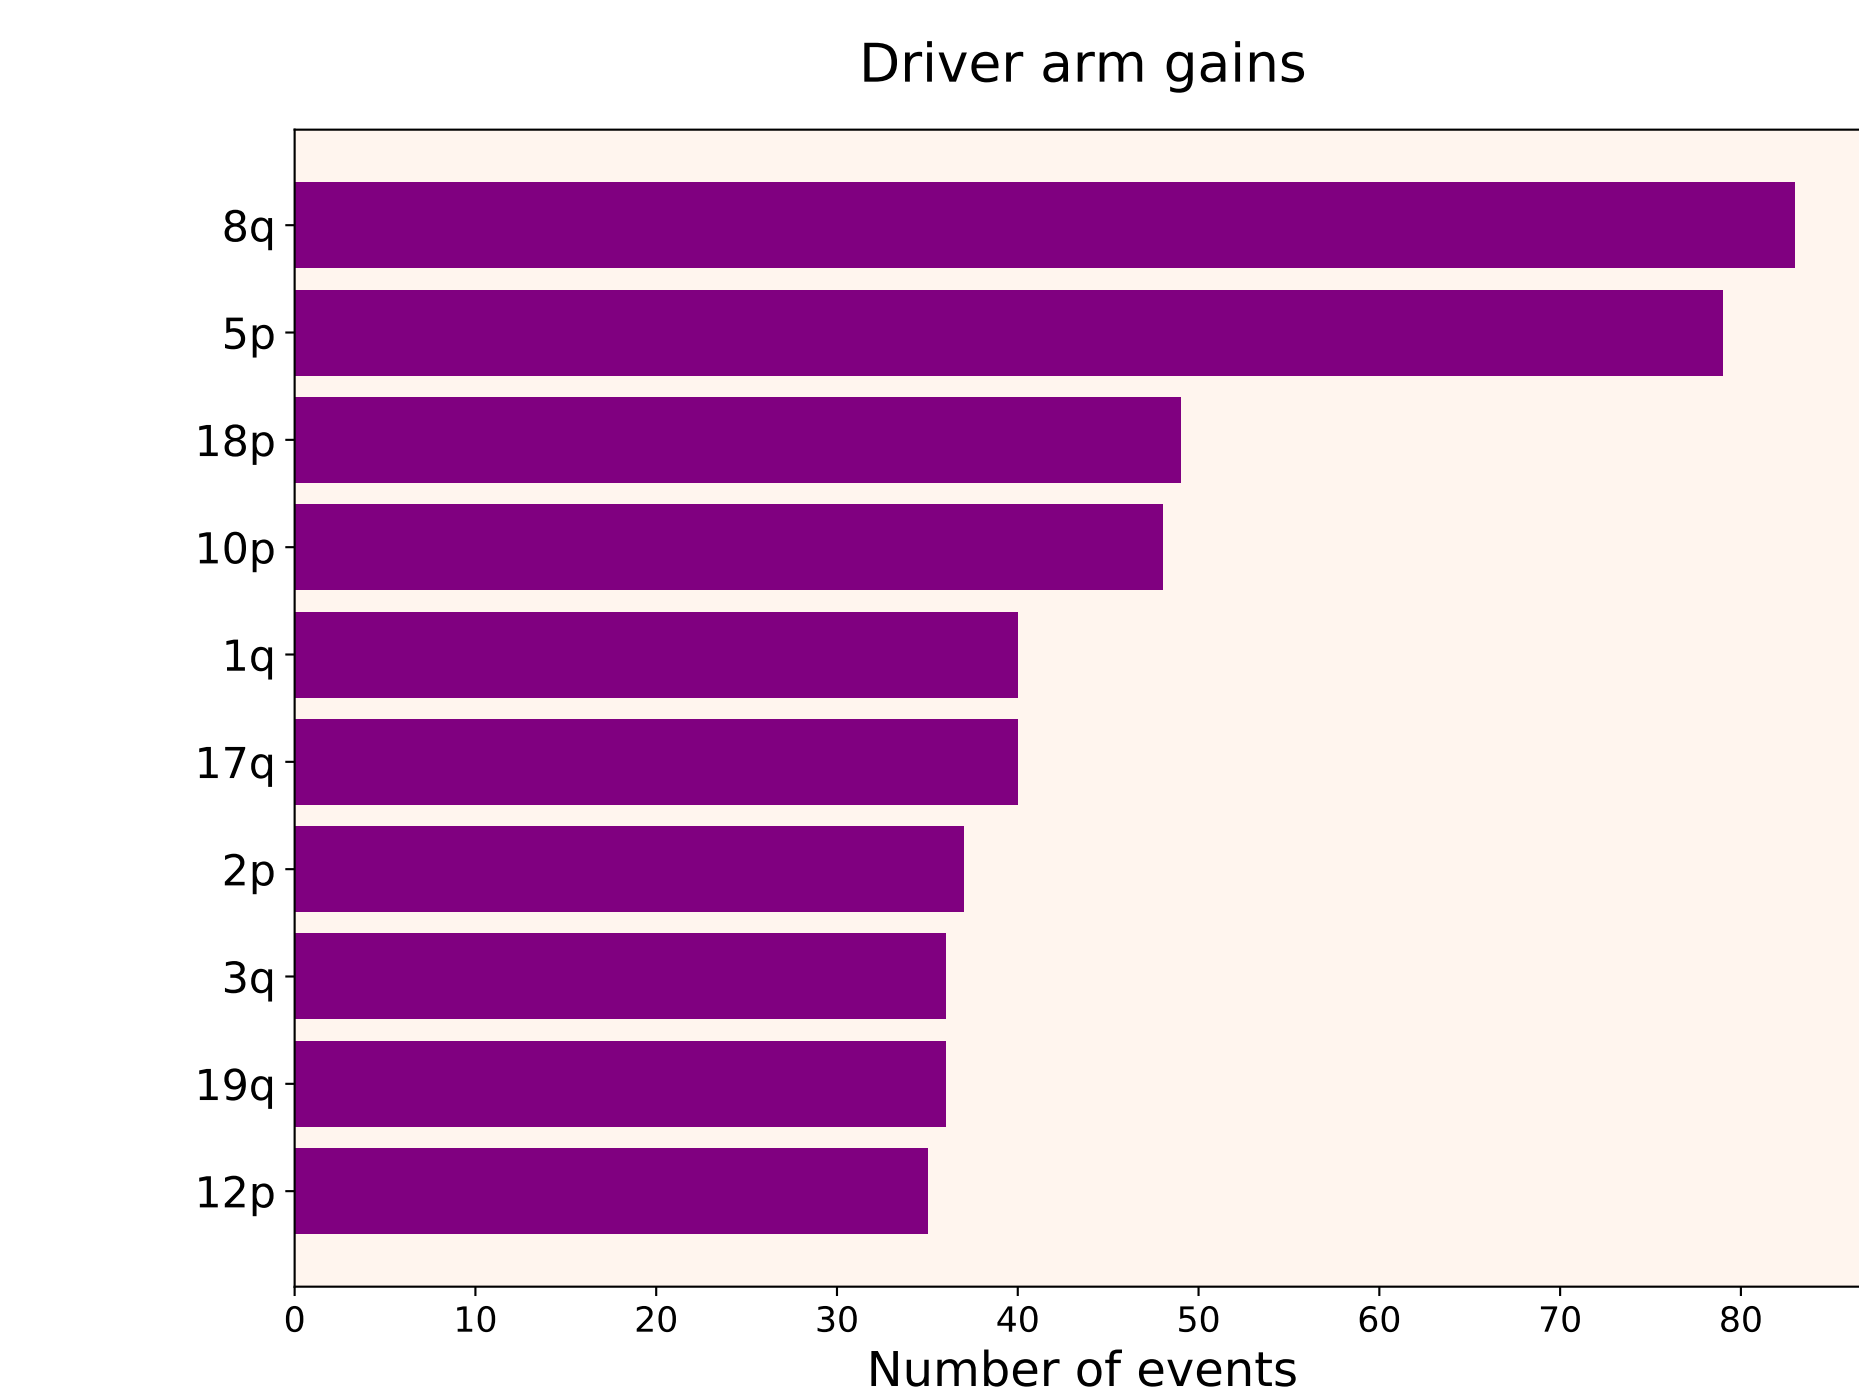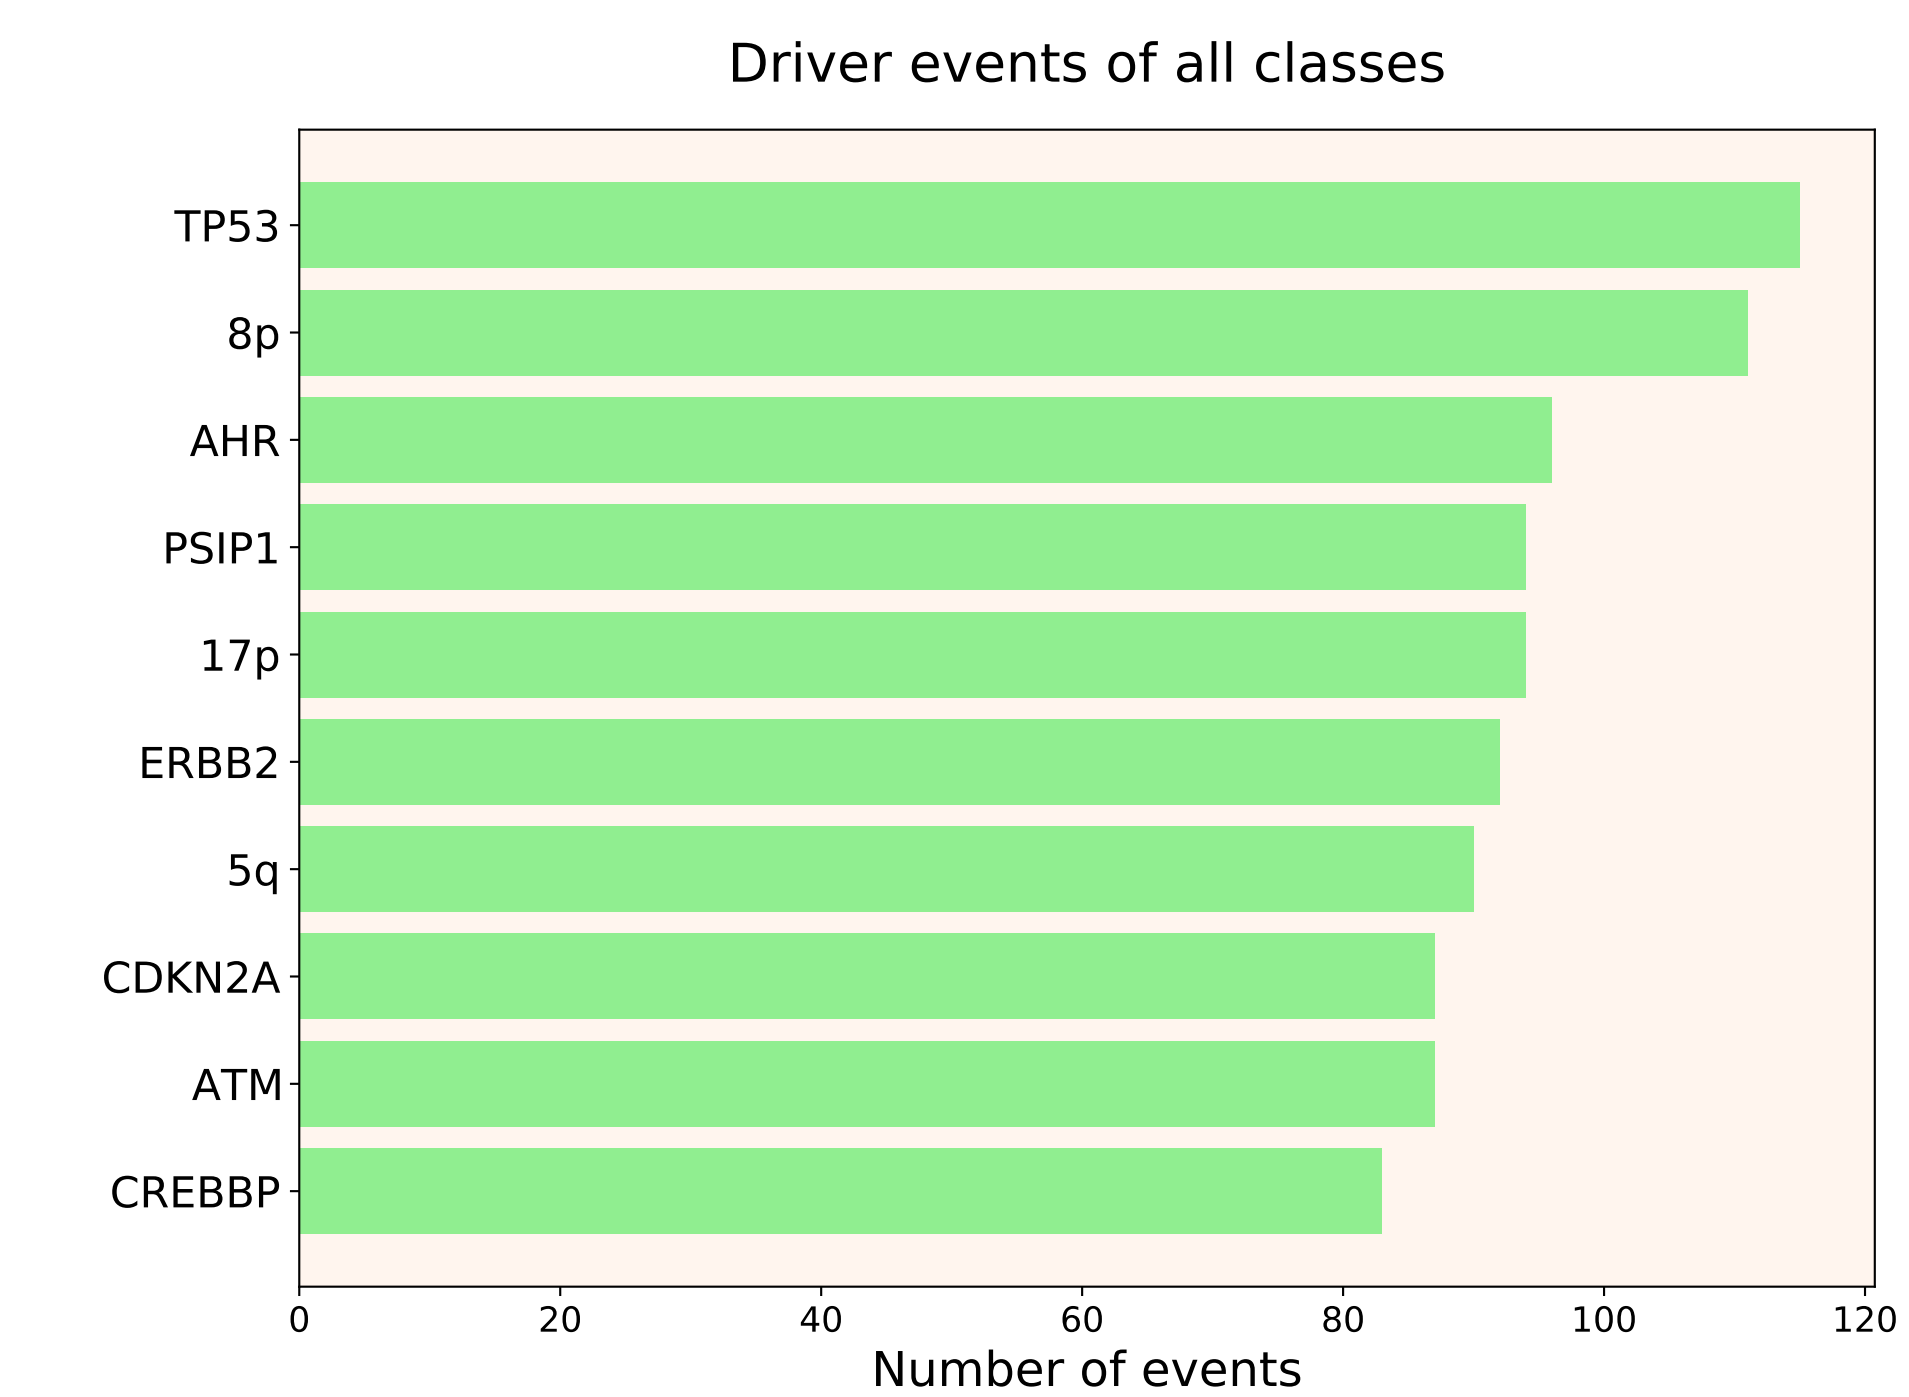

Supplement: Supplemental_Data_S1.zip [file Supplemental_Data_S1.zip]

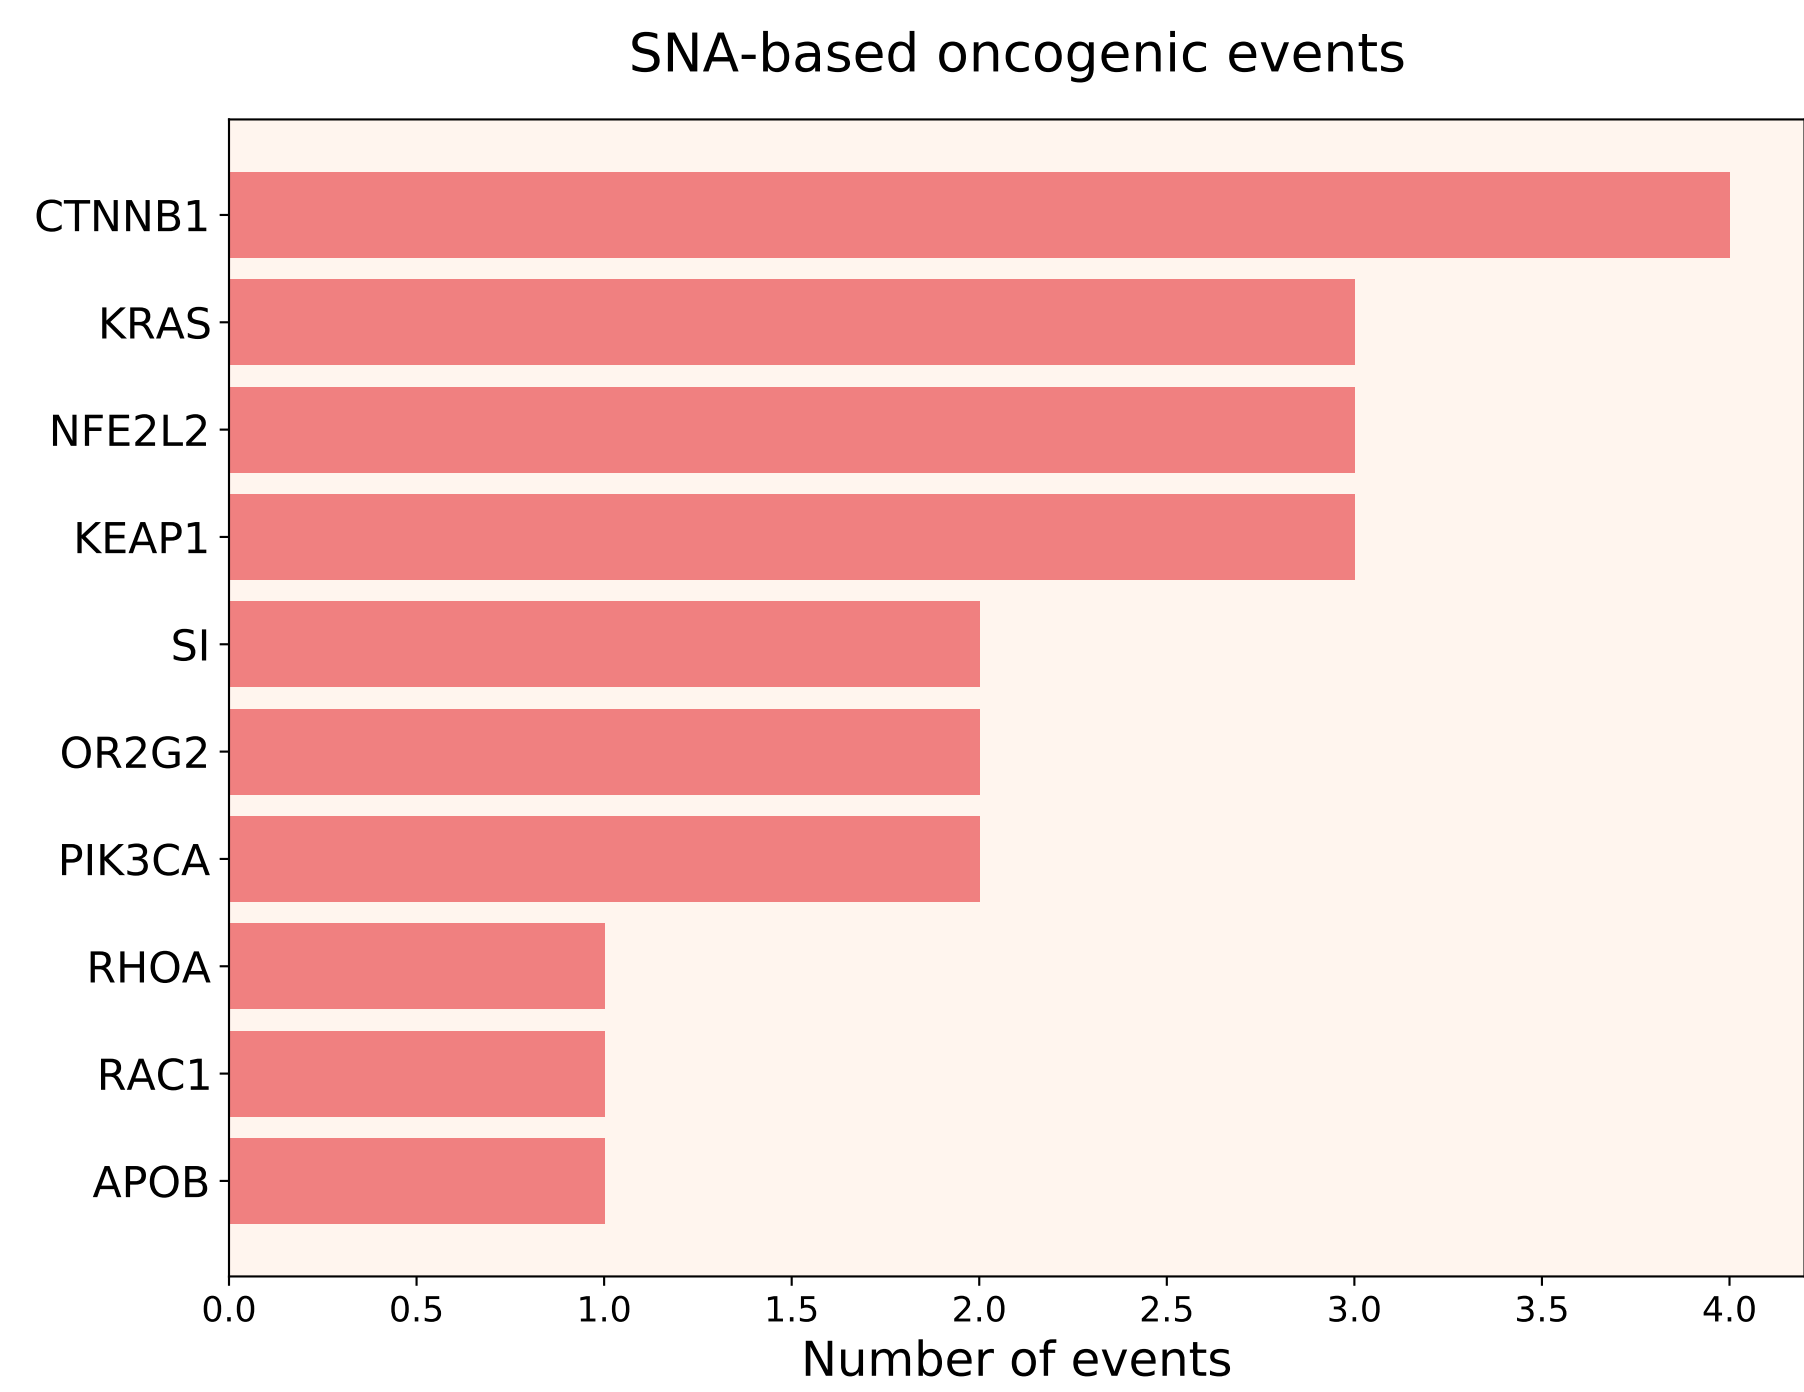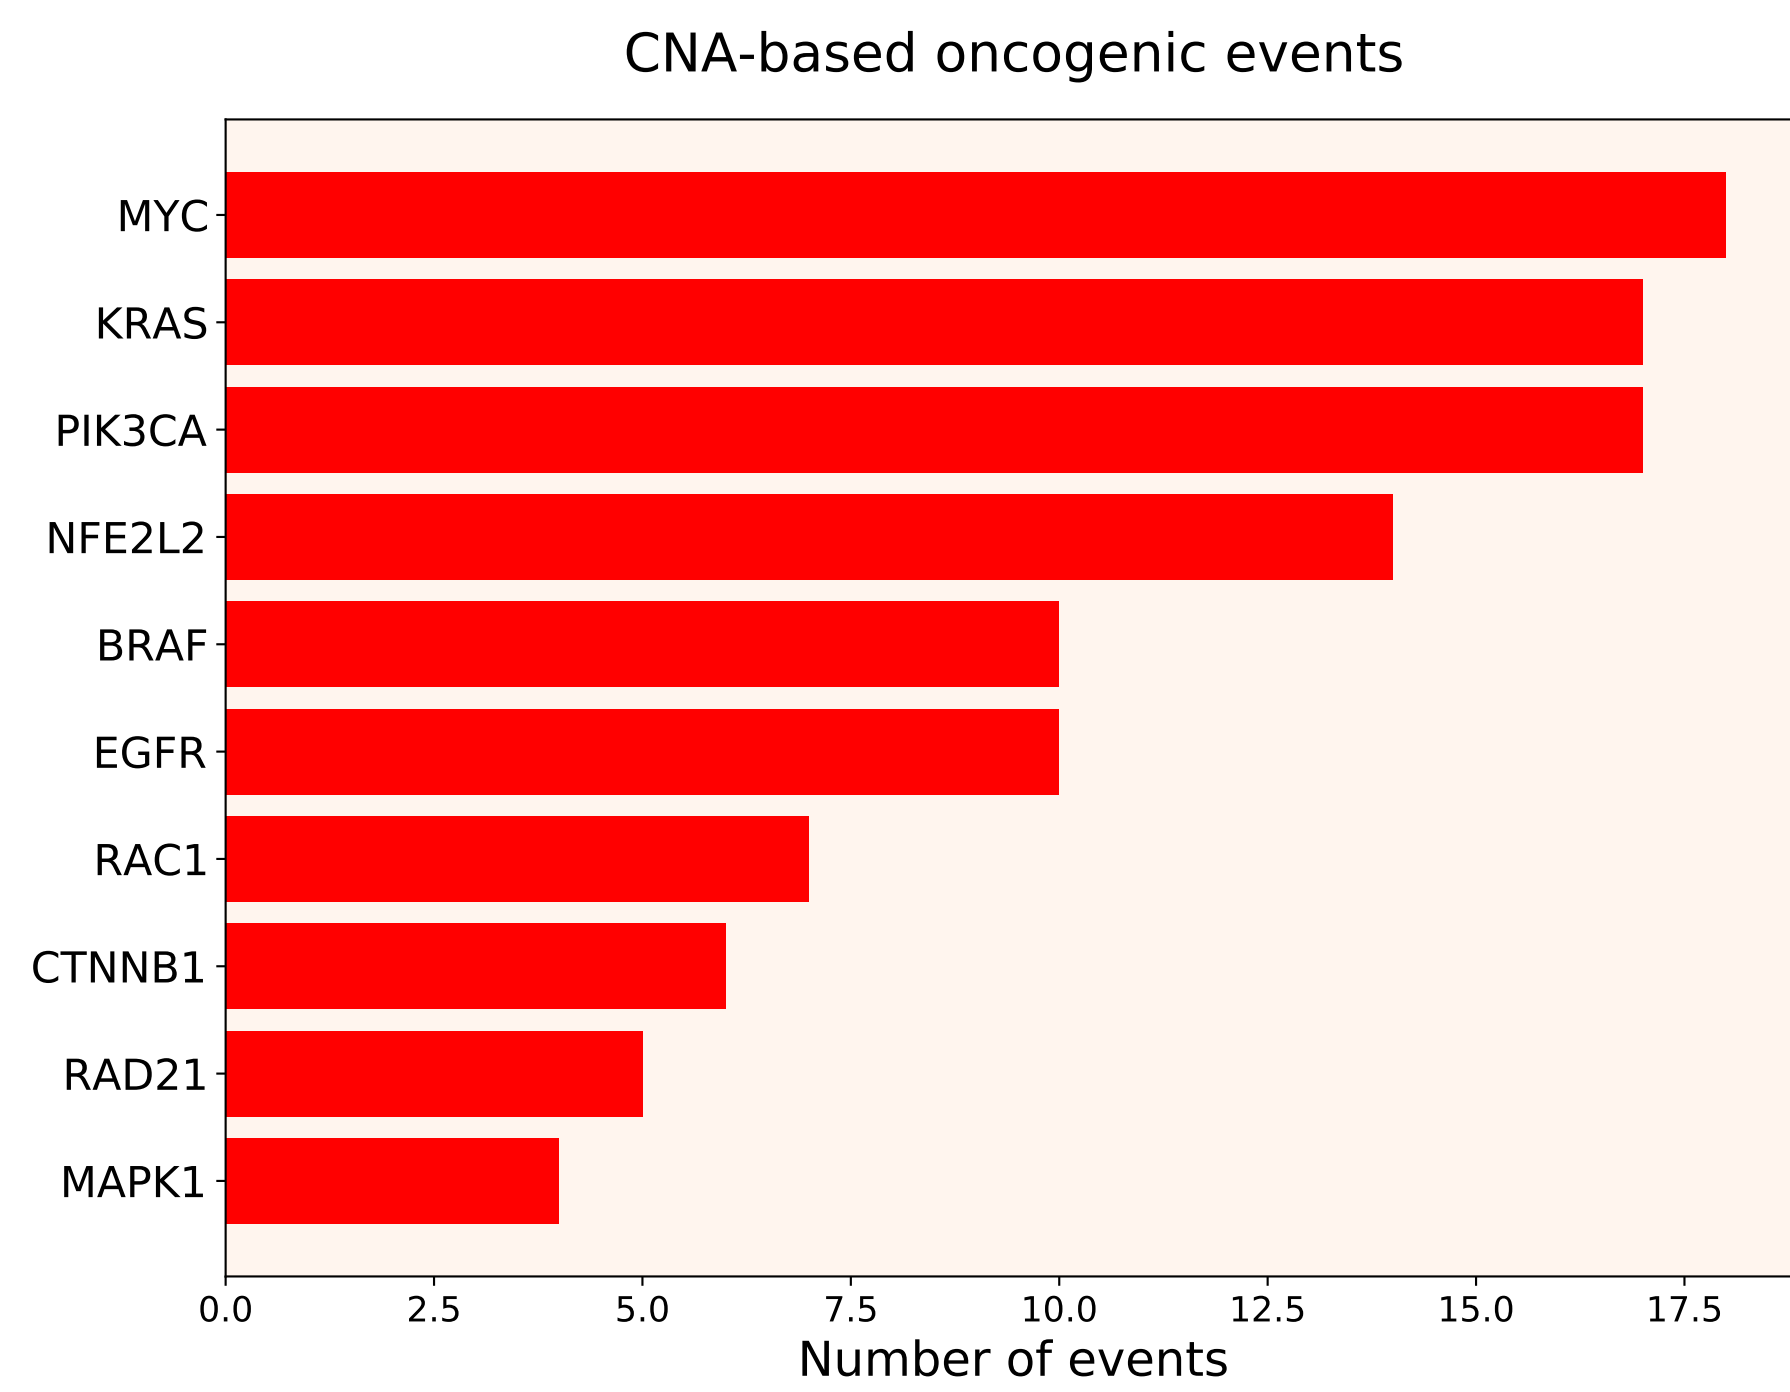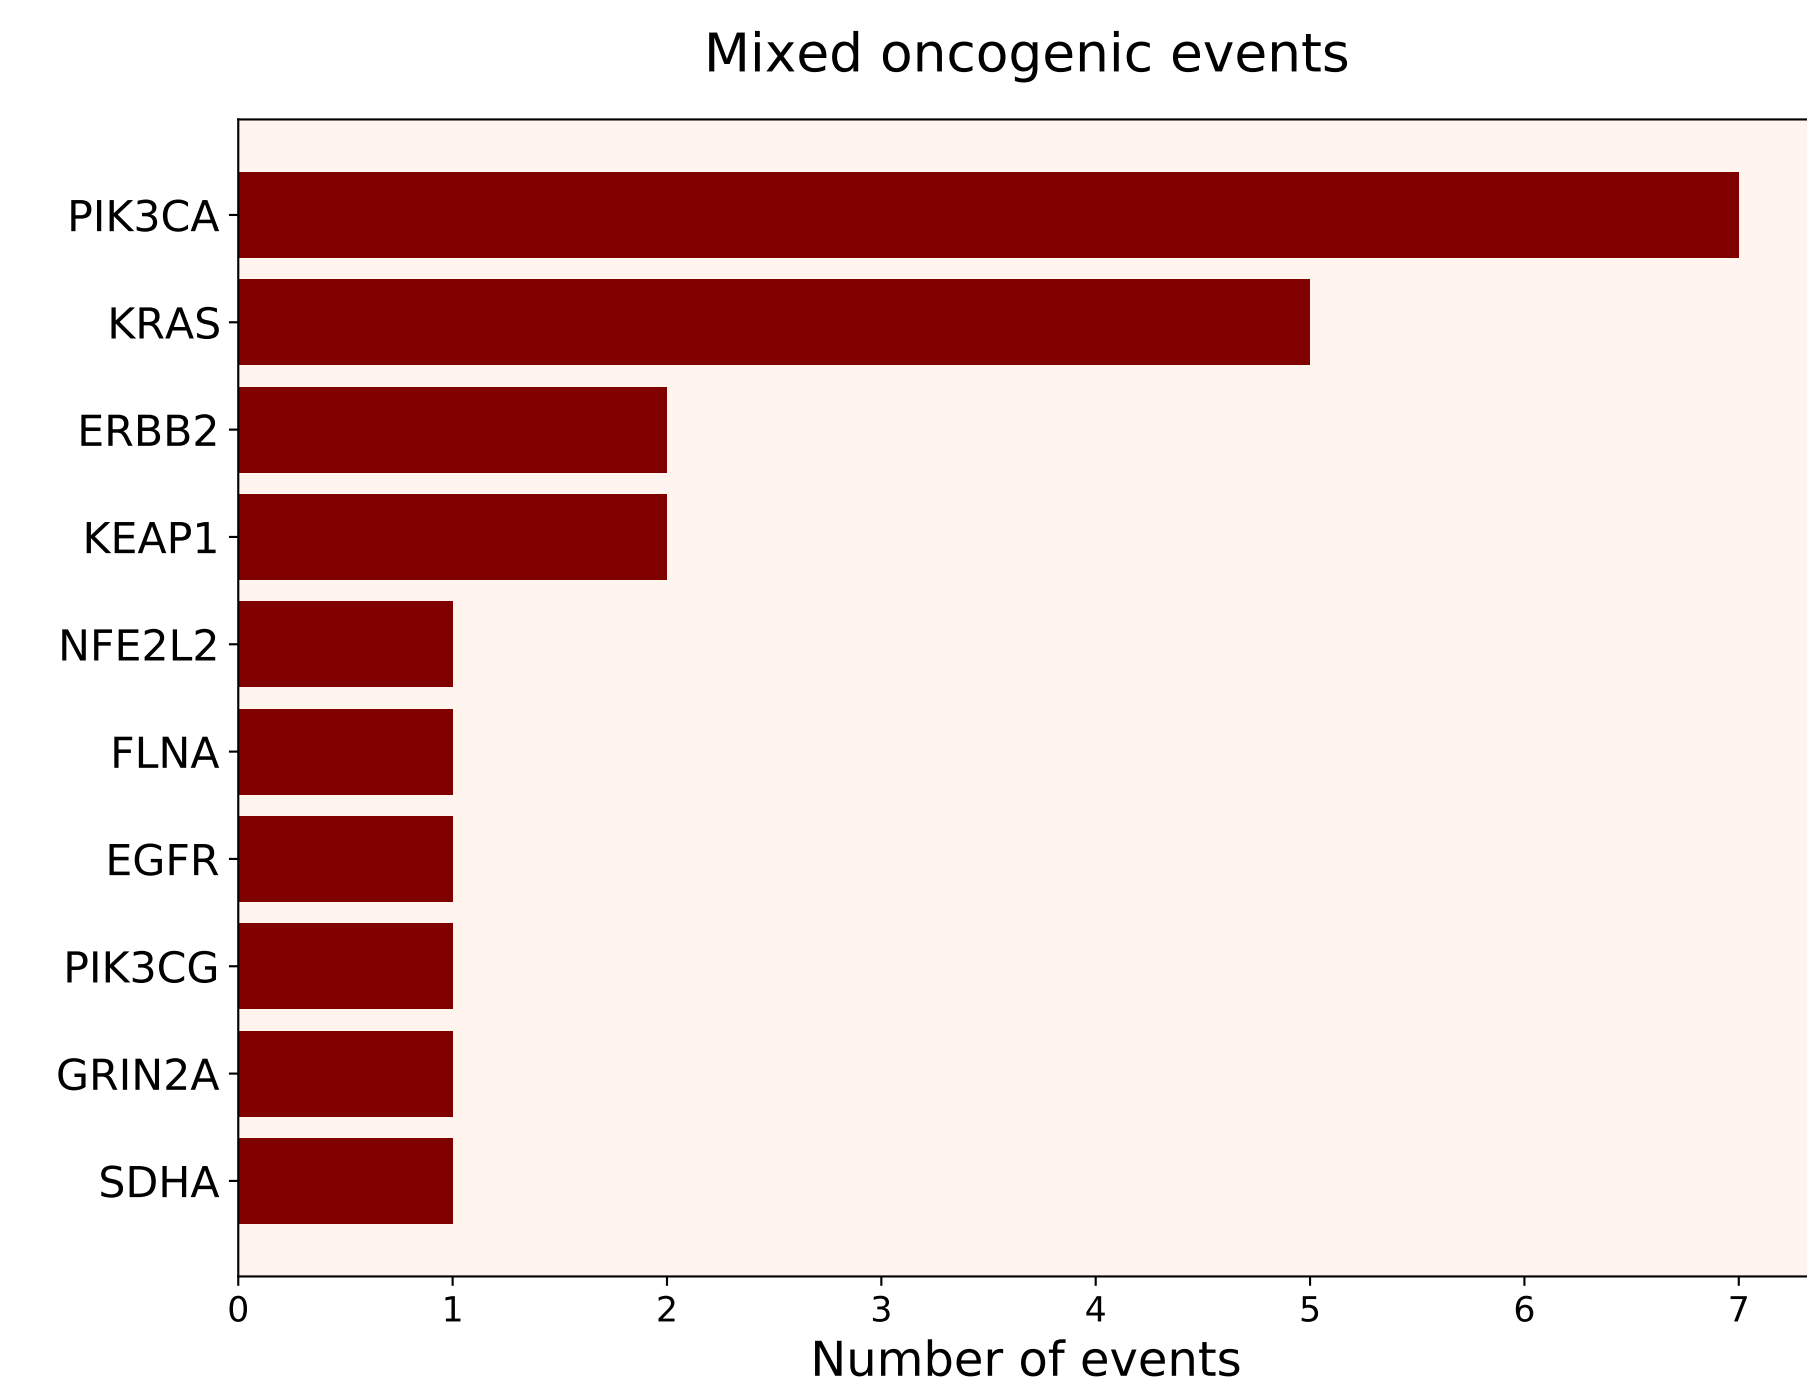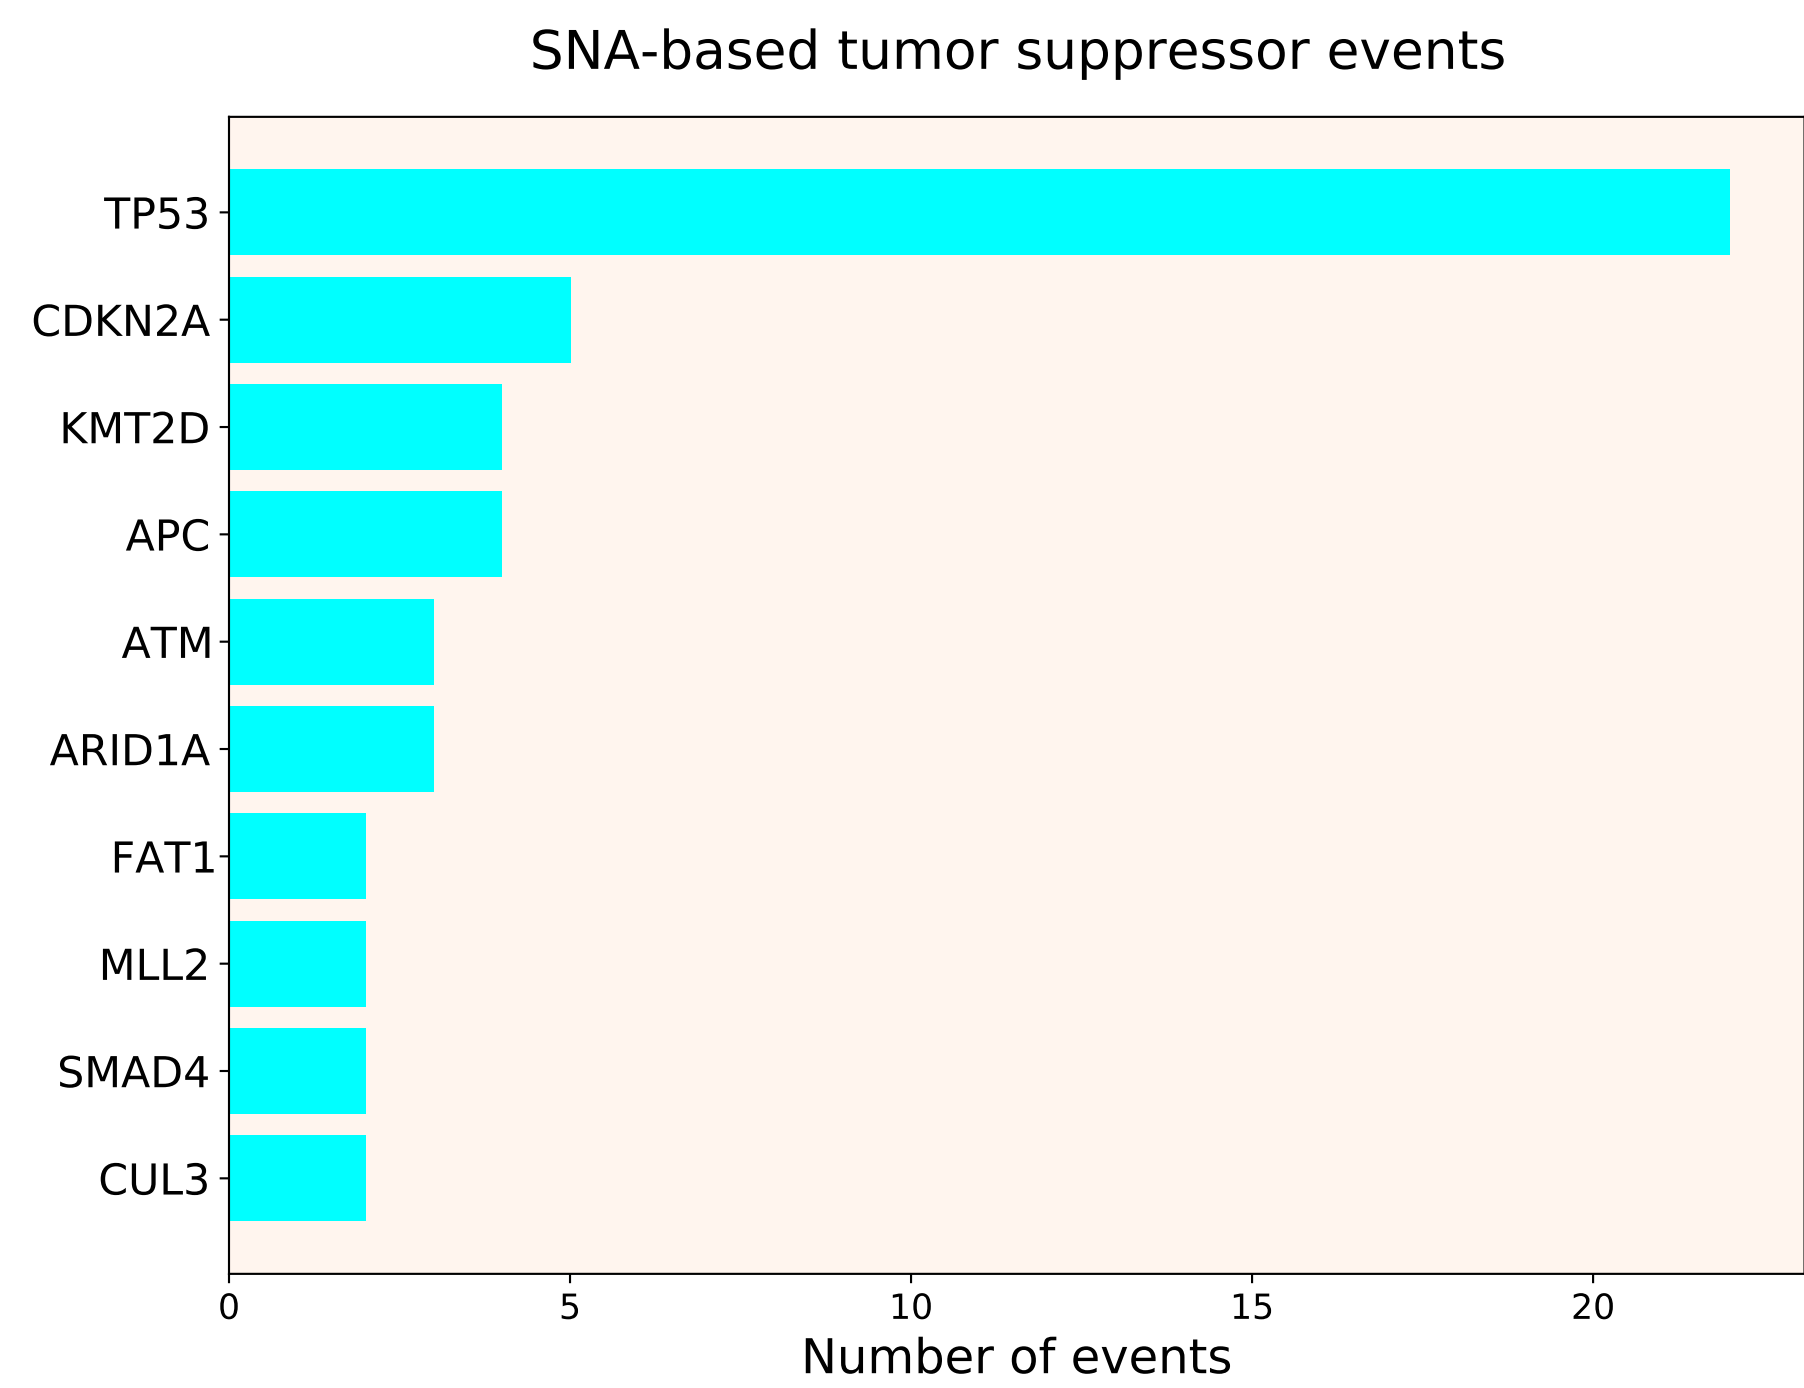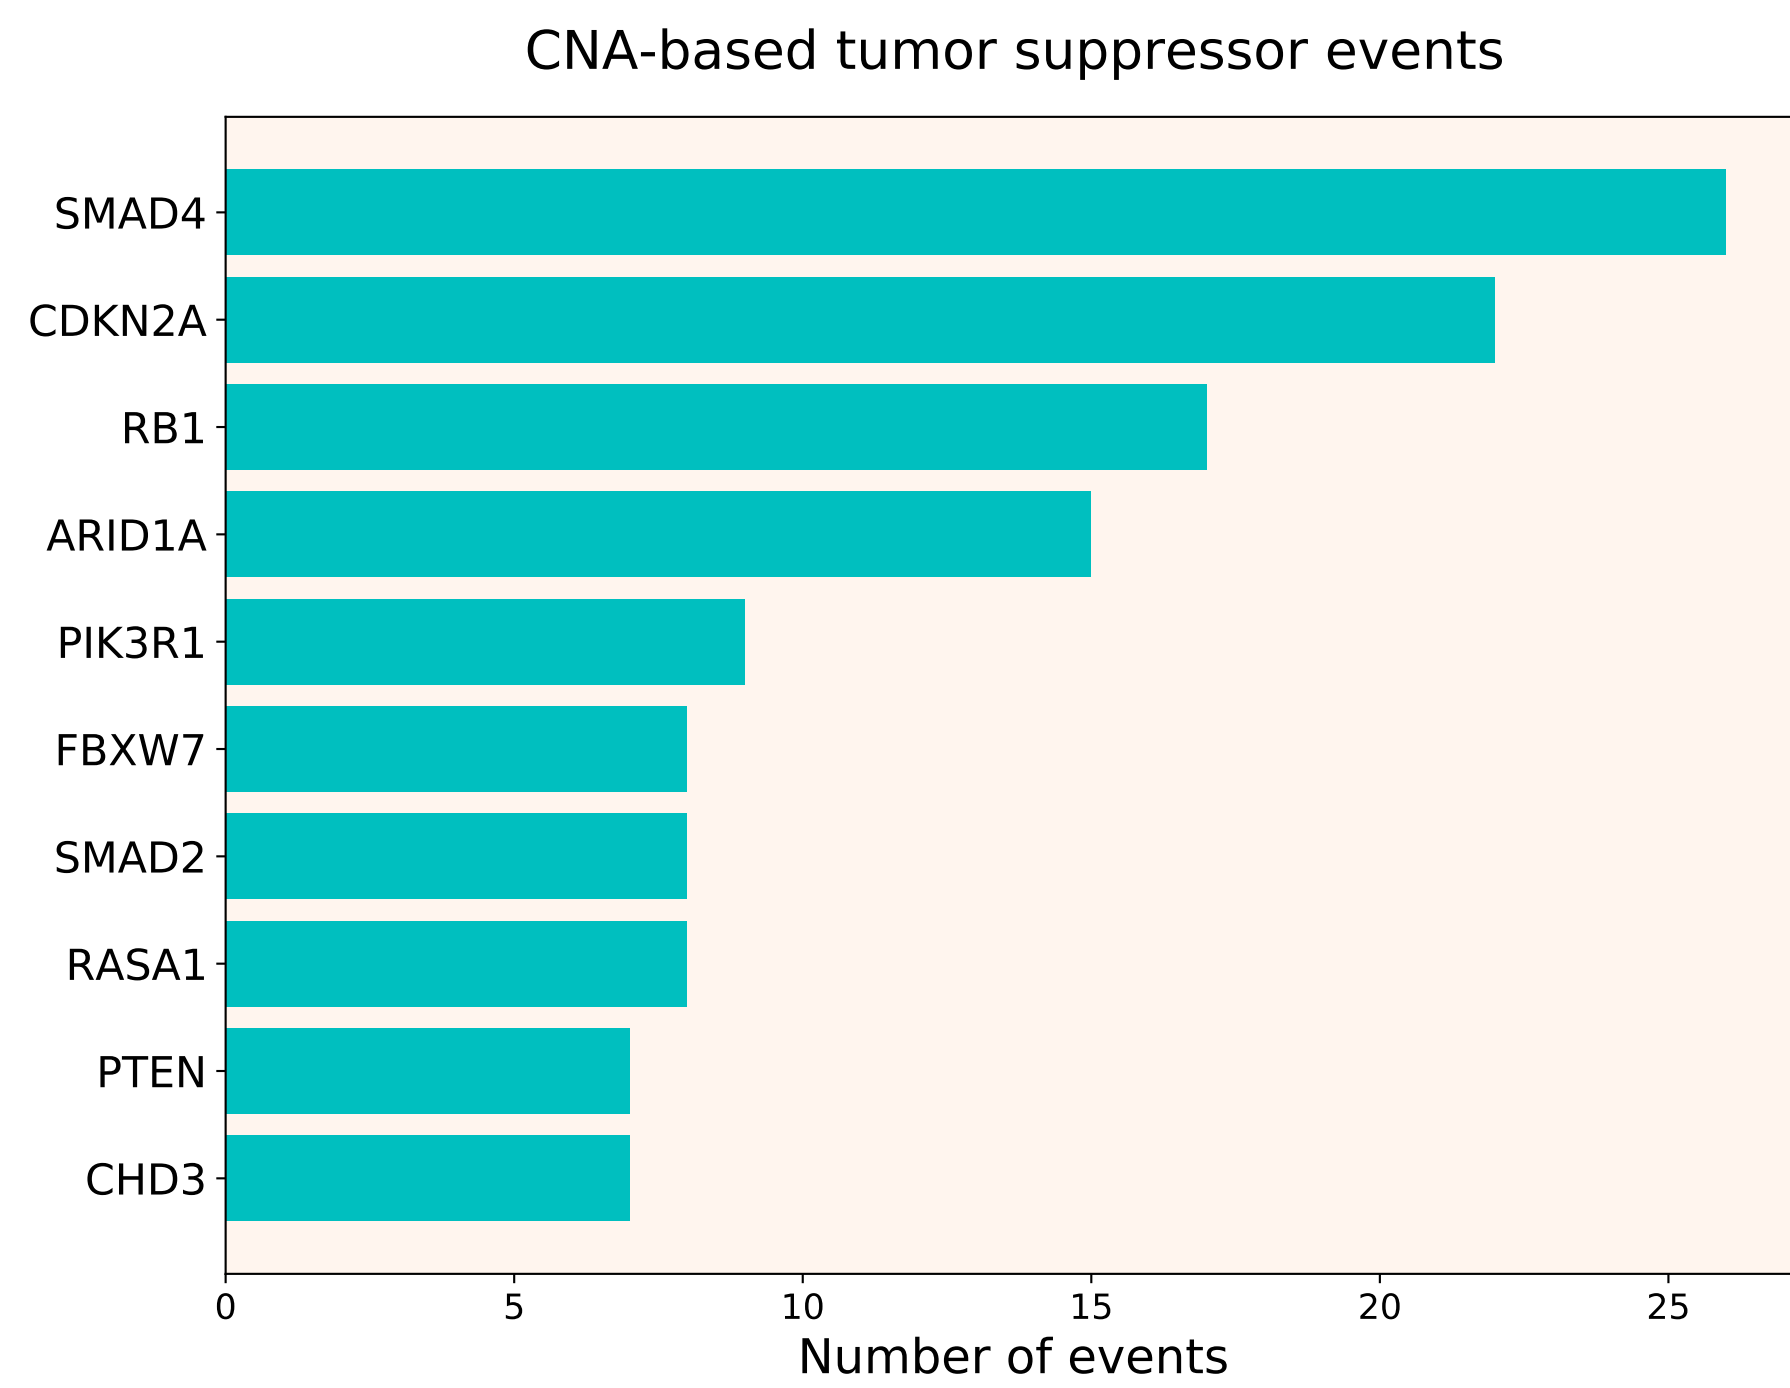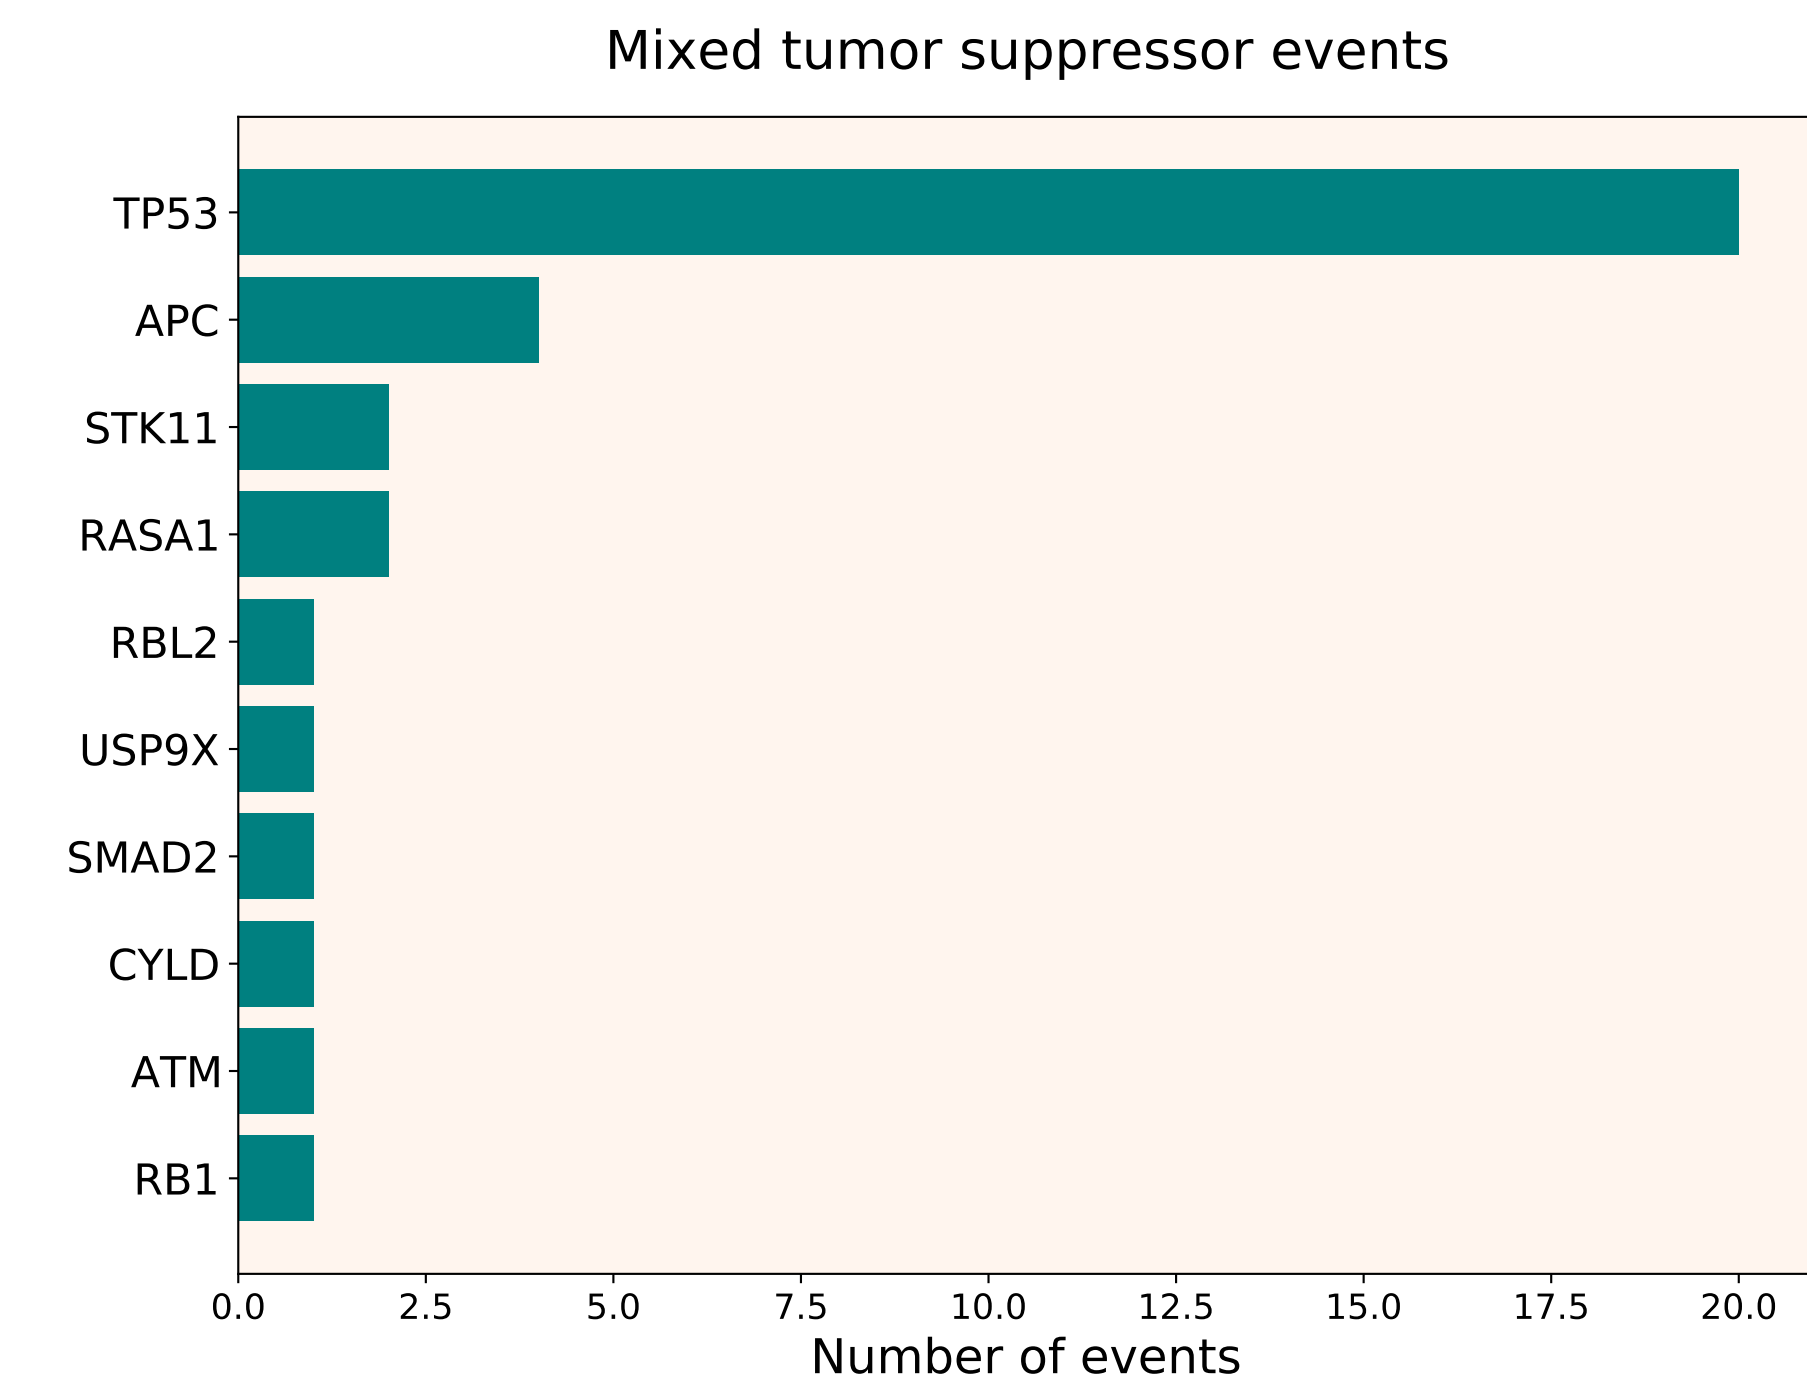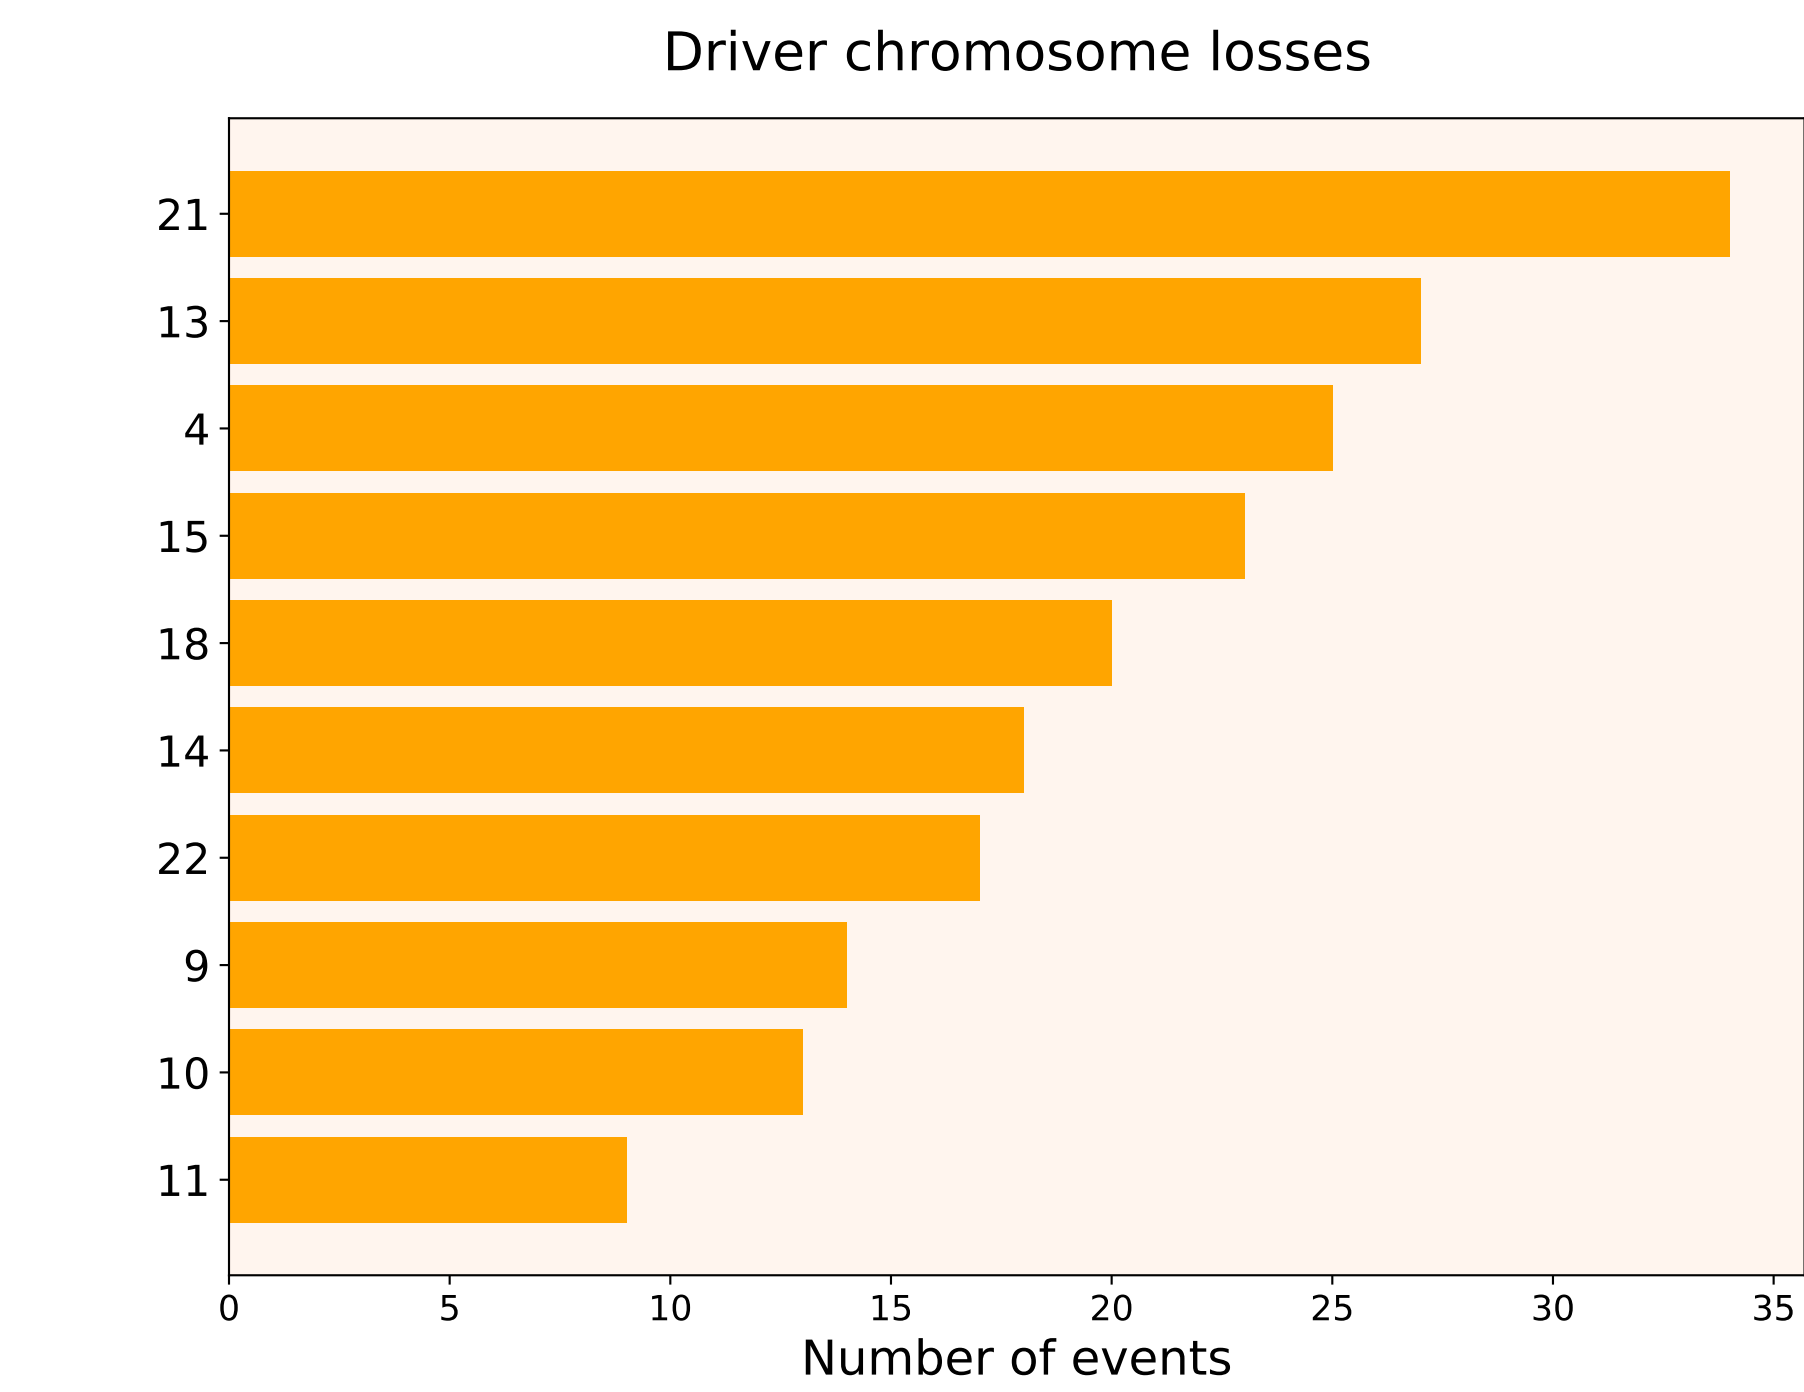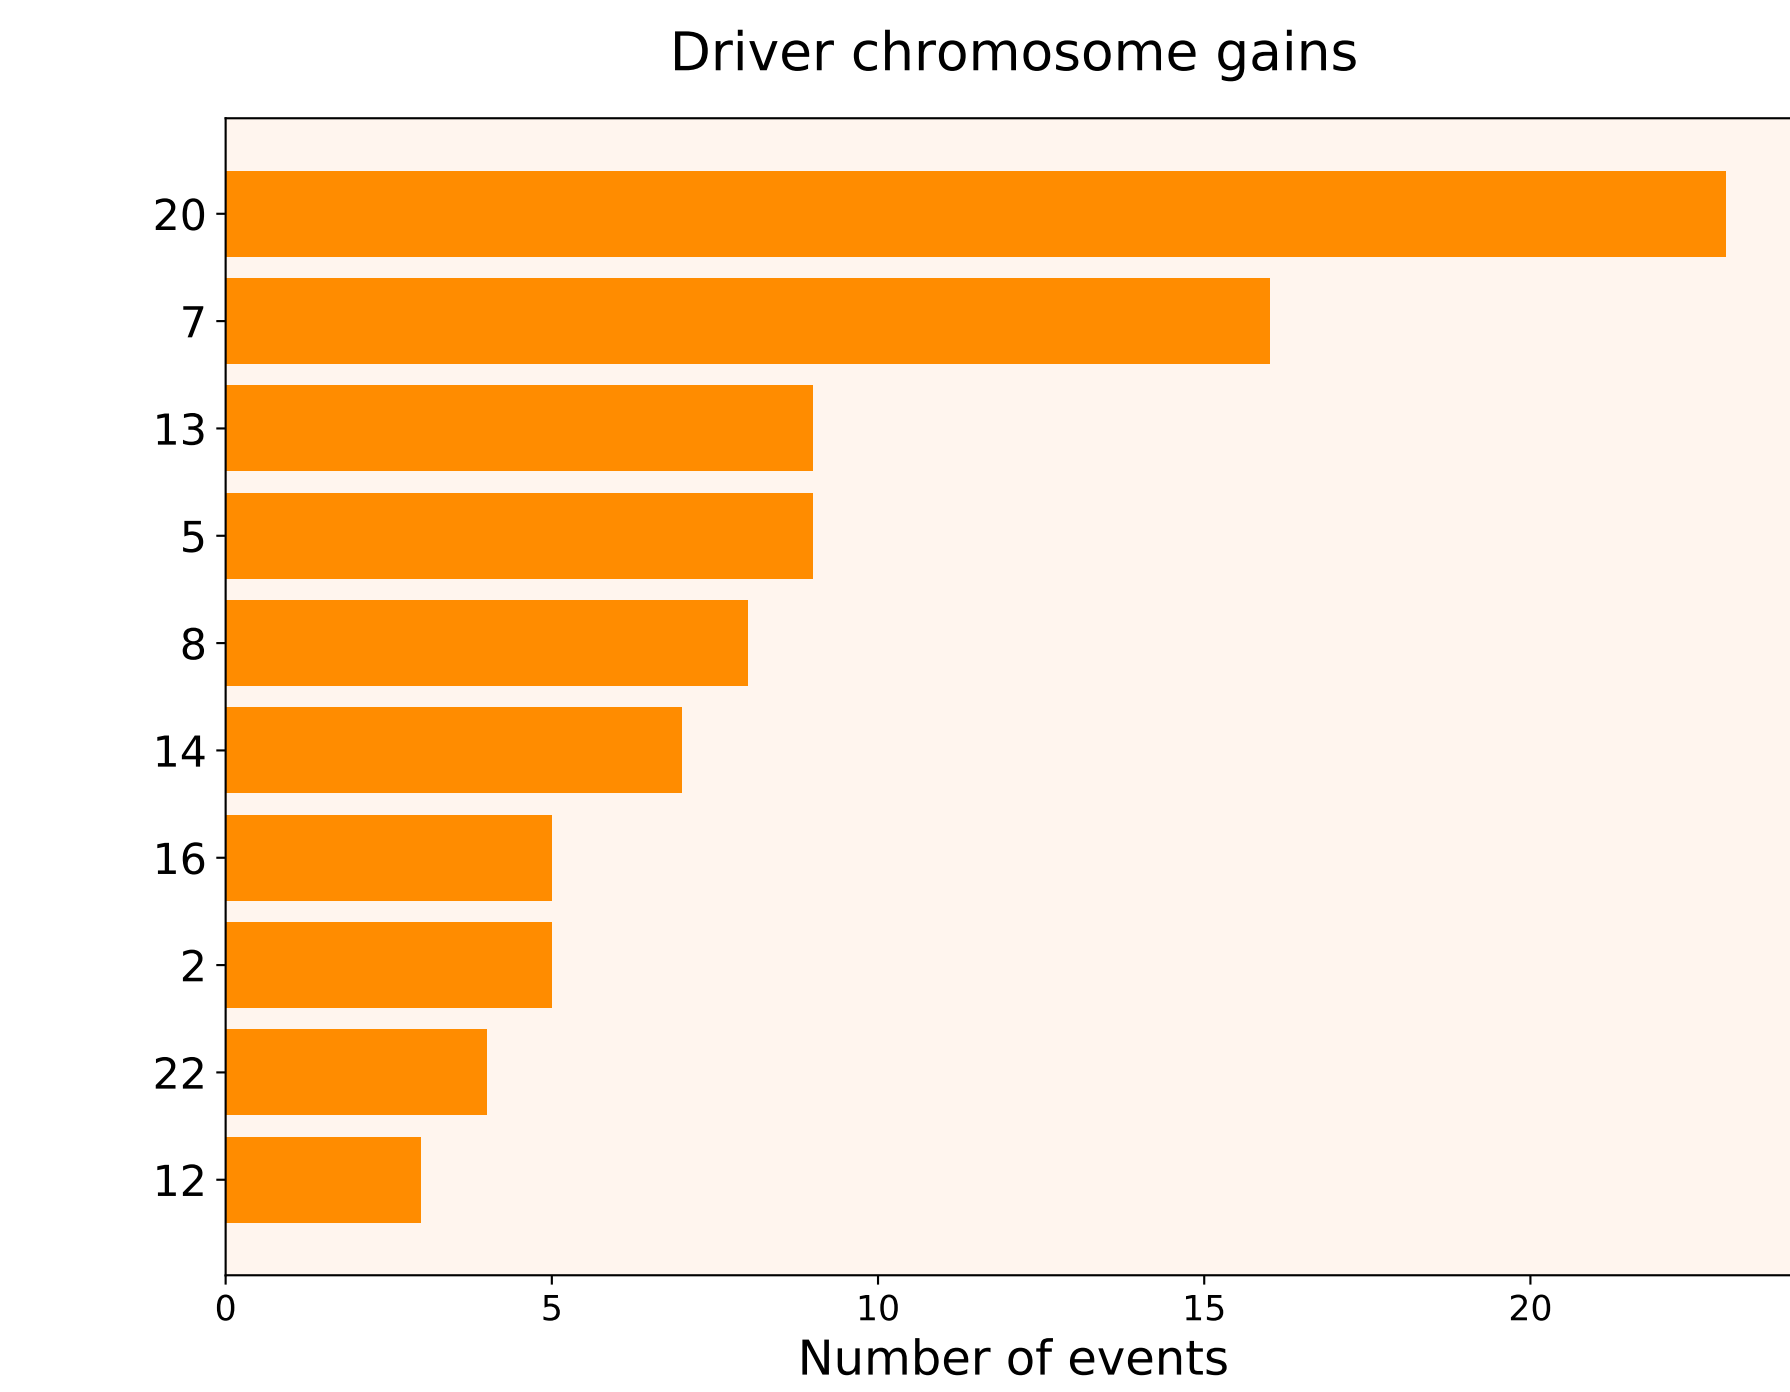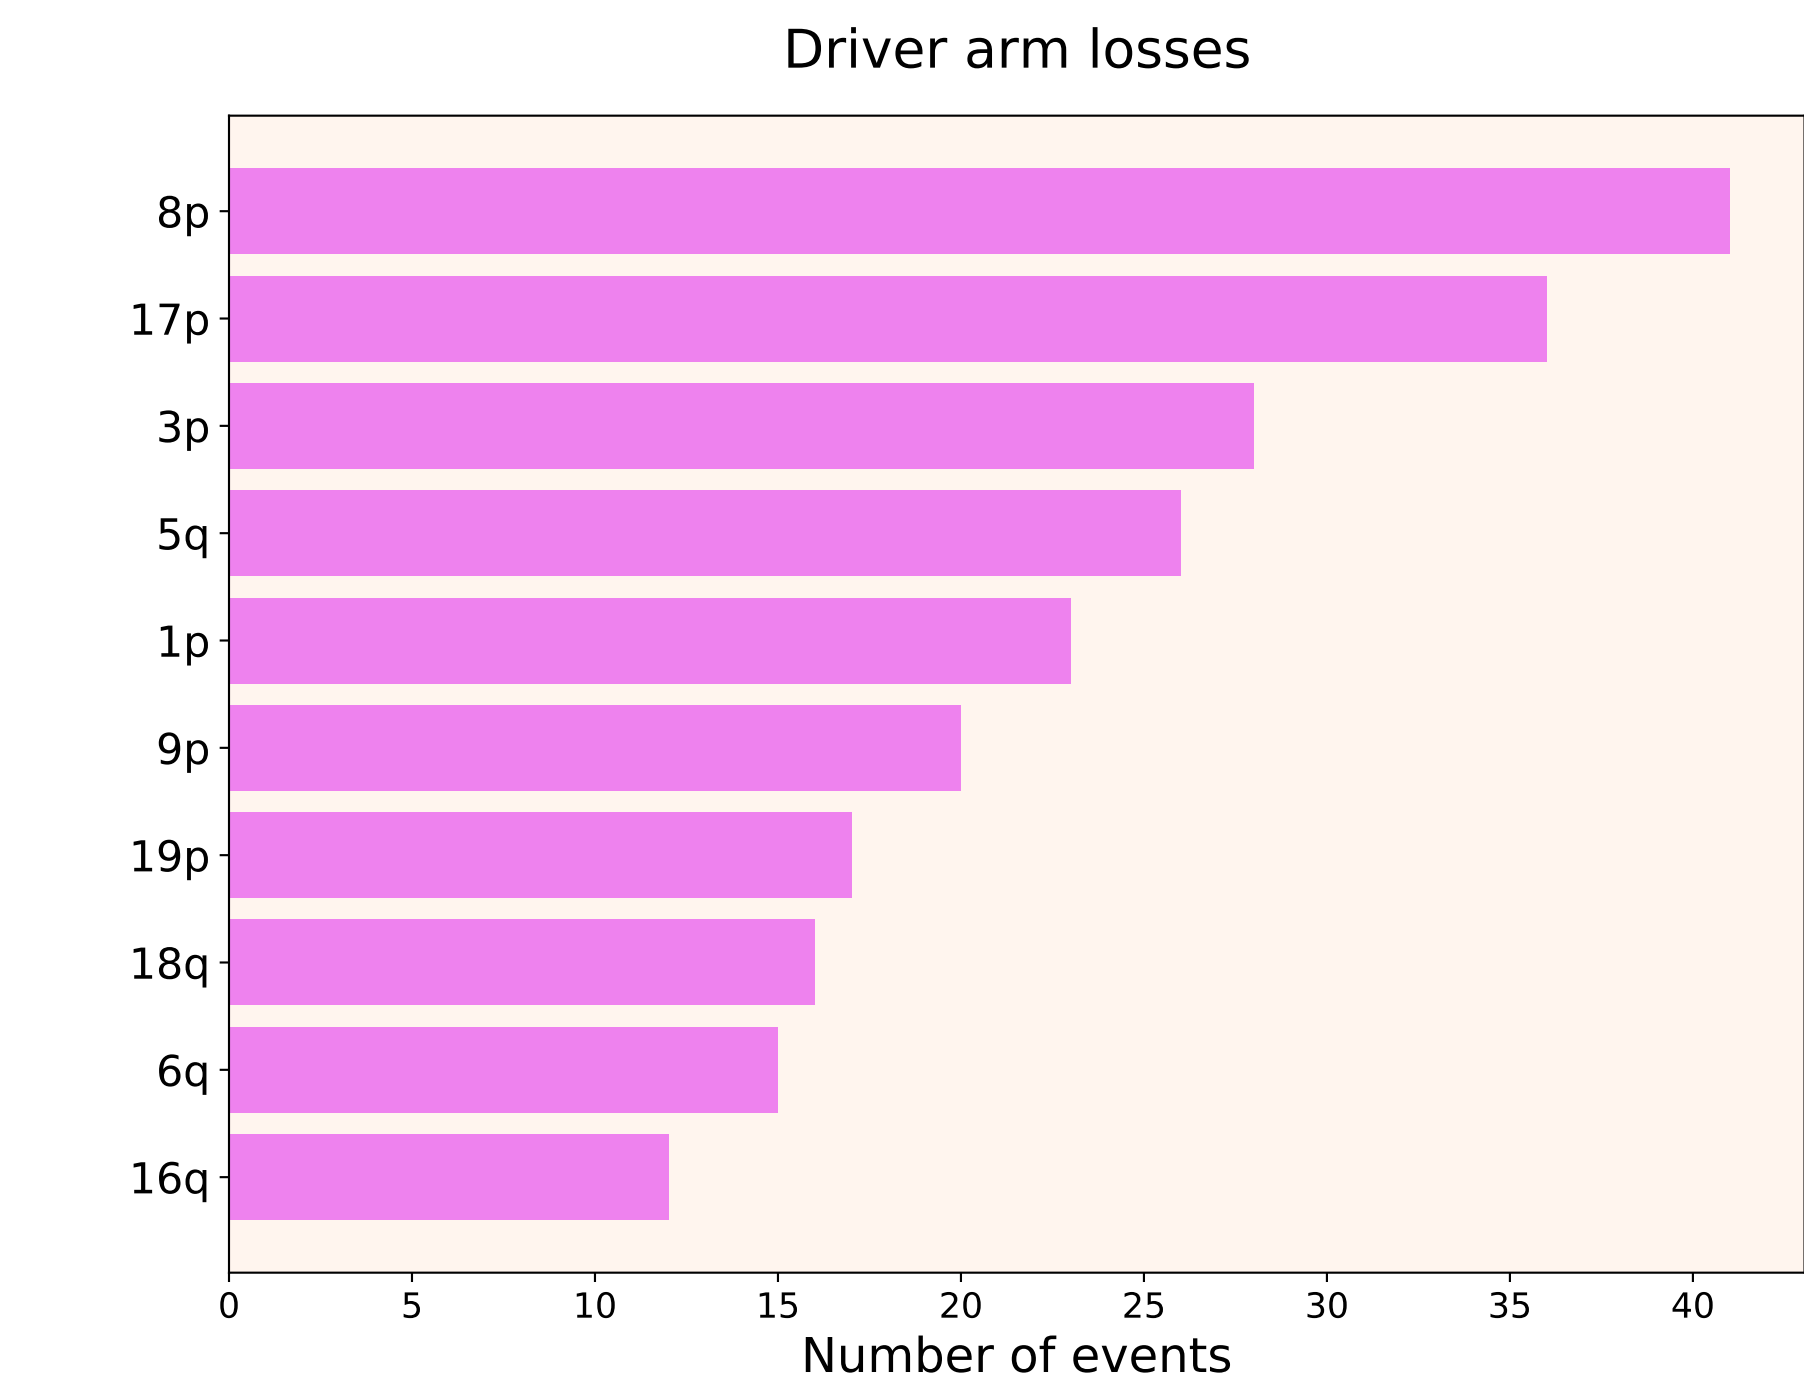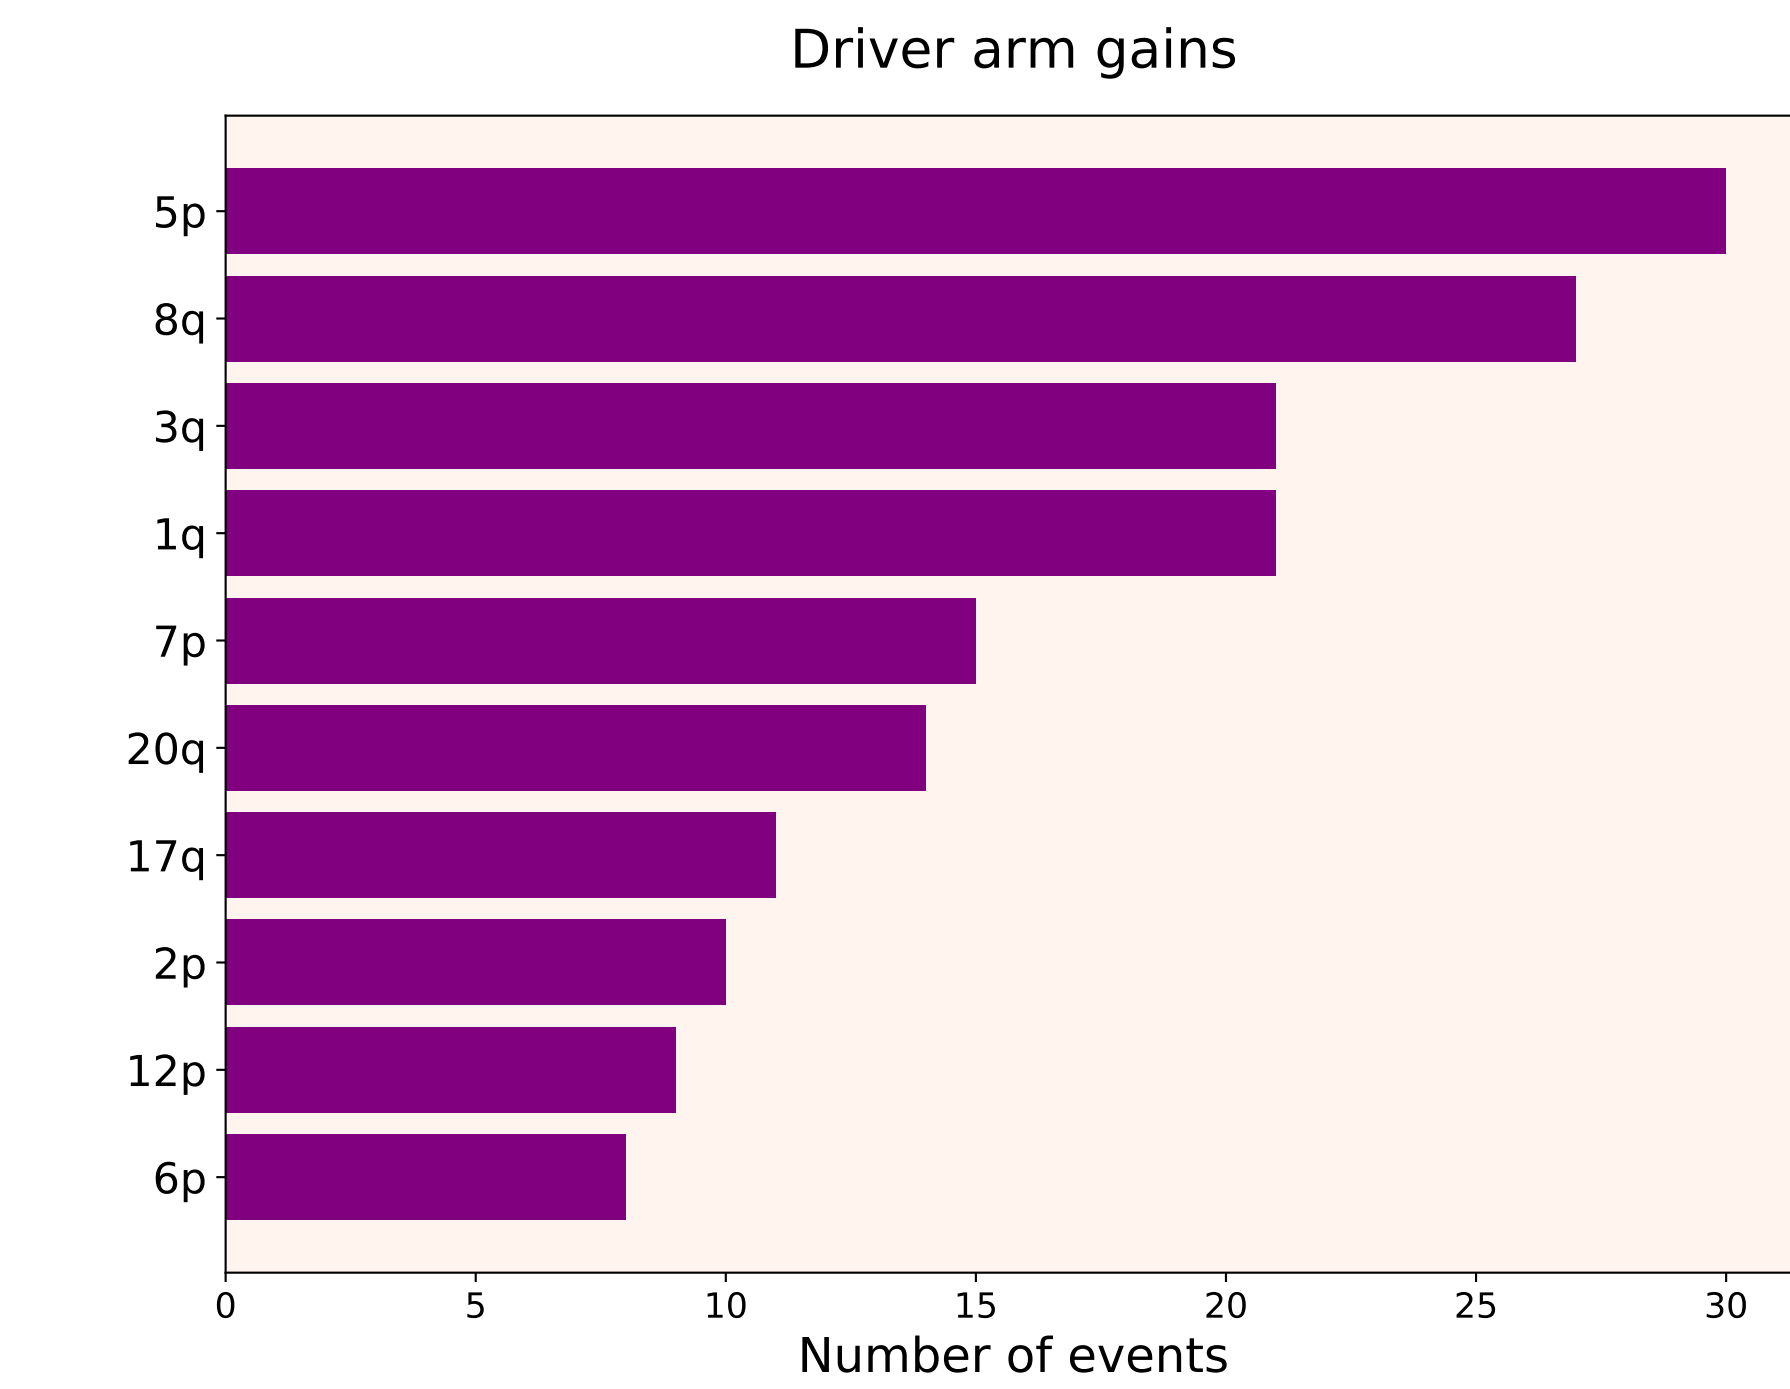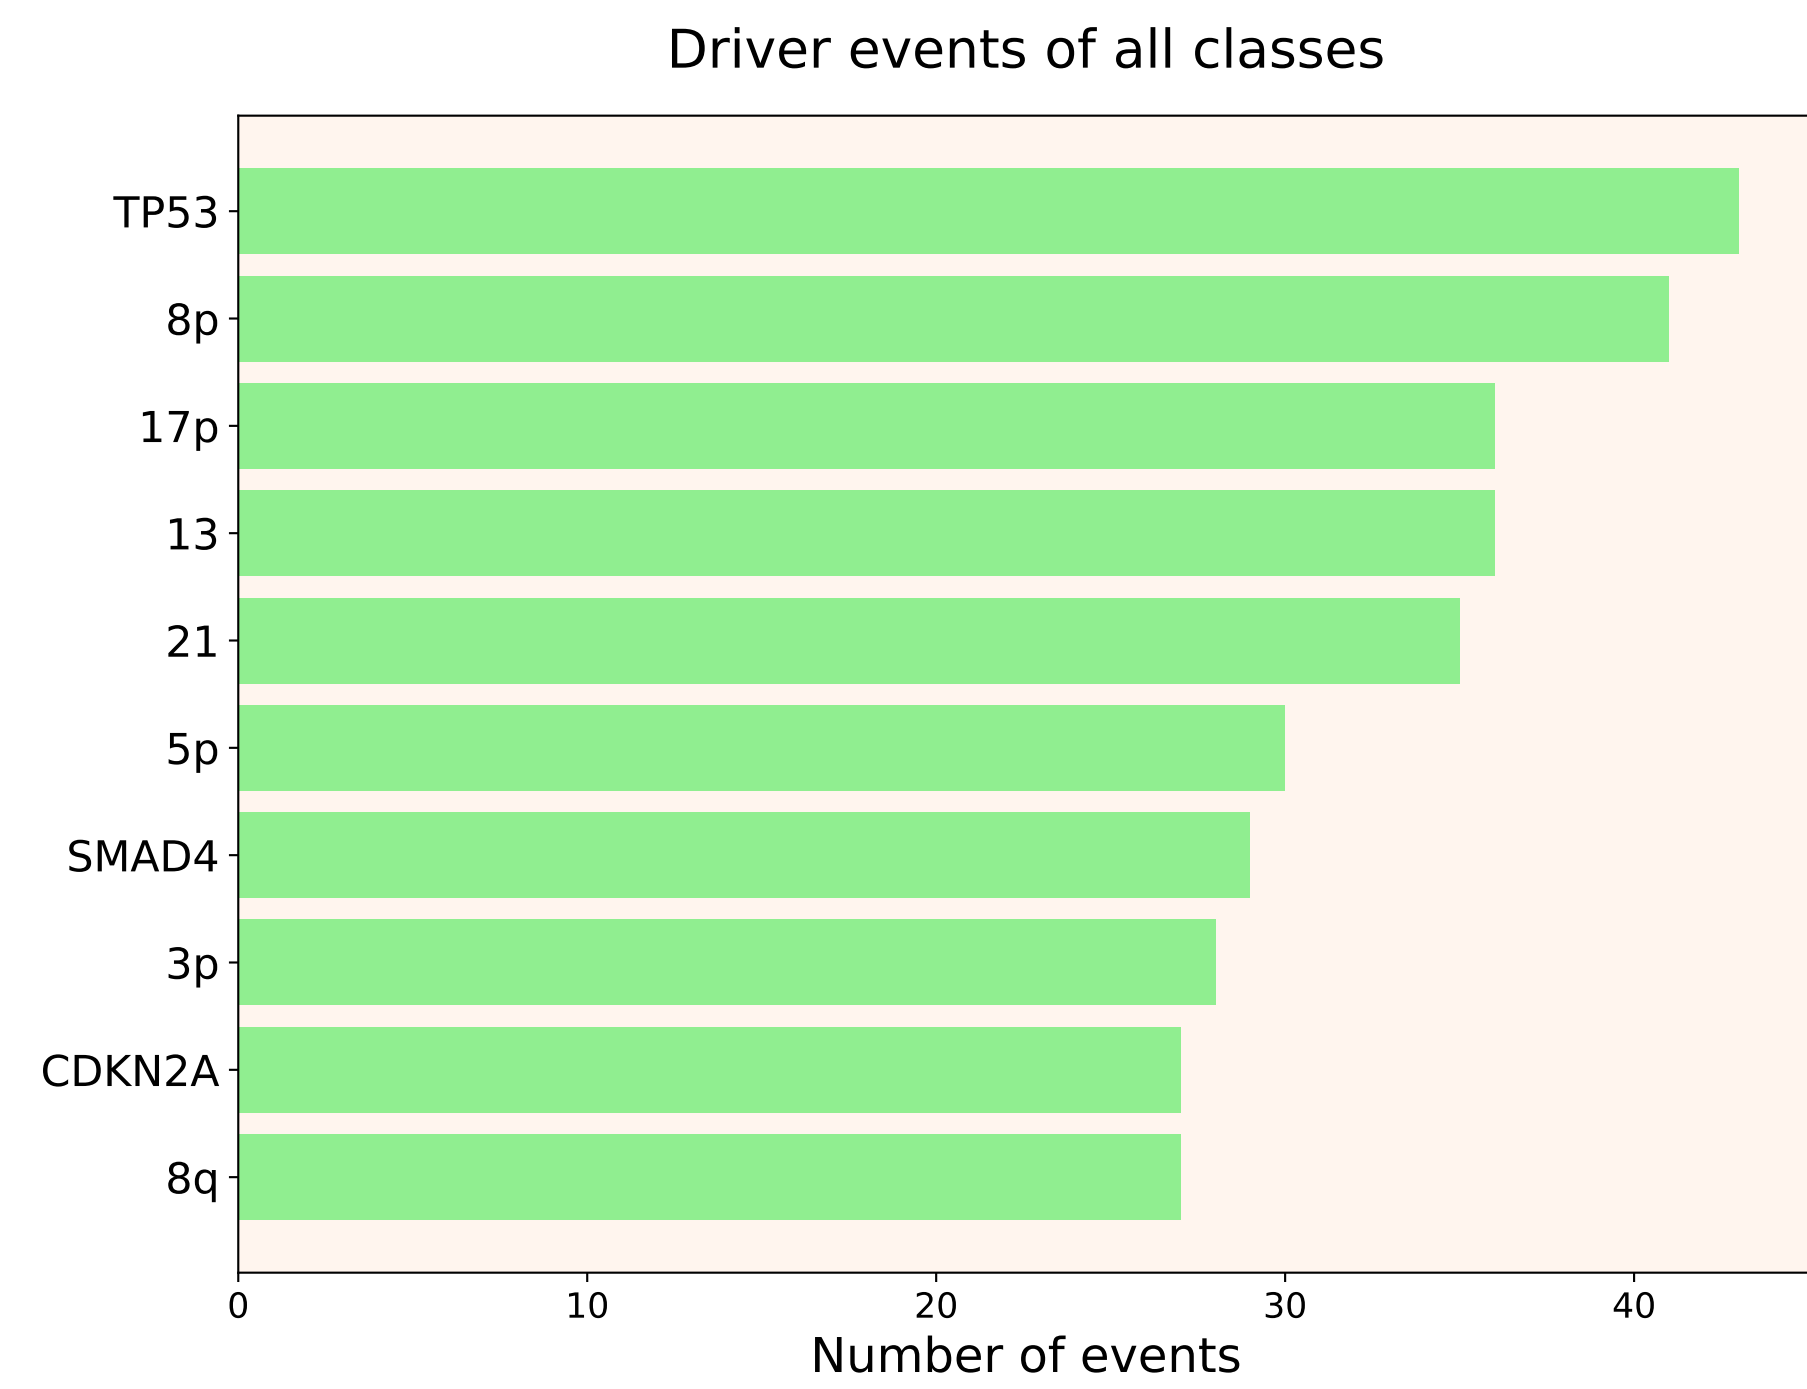

Supplement: Supplemental_Data_S1.zip [file Supplemental_Data_S1.zip]

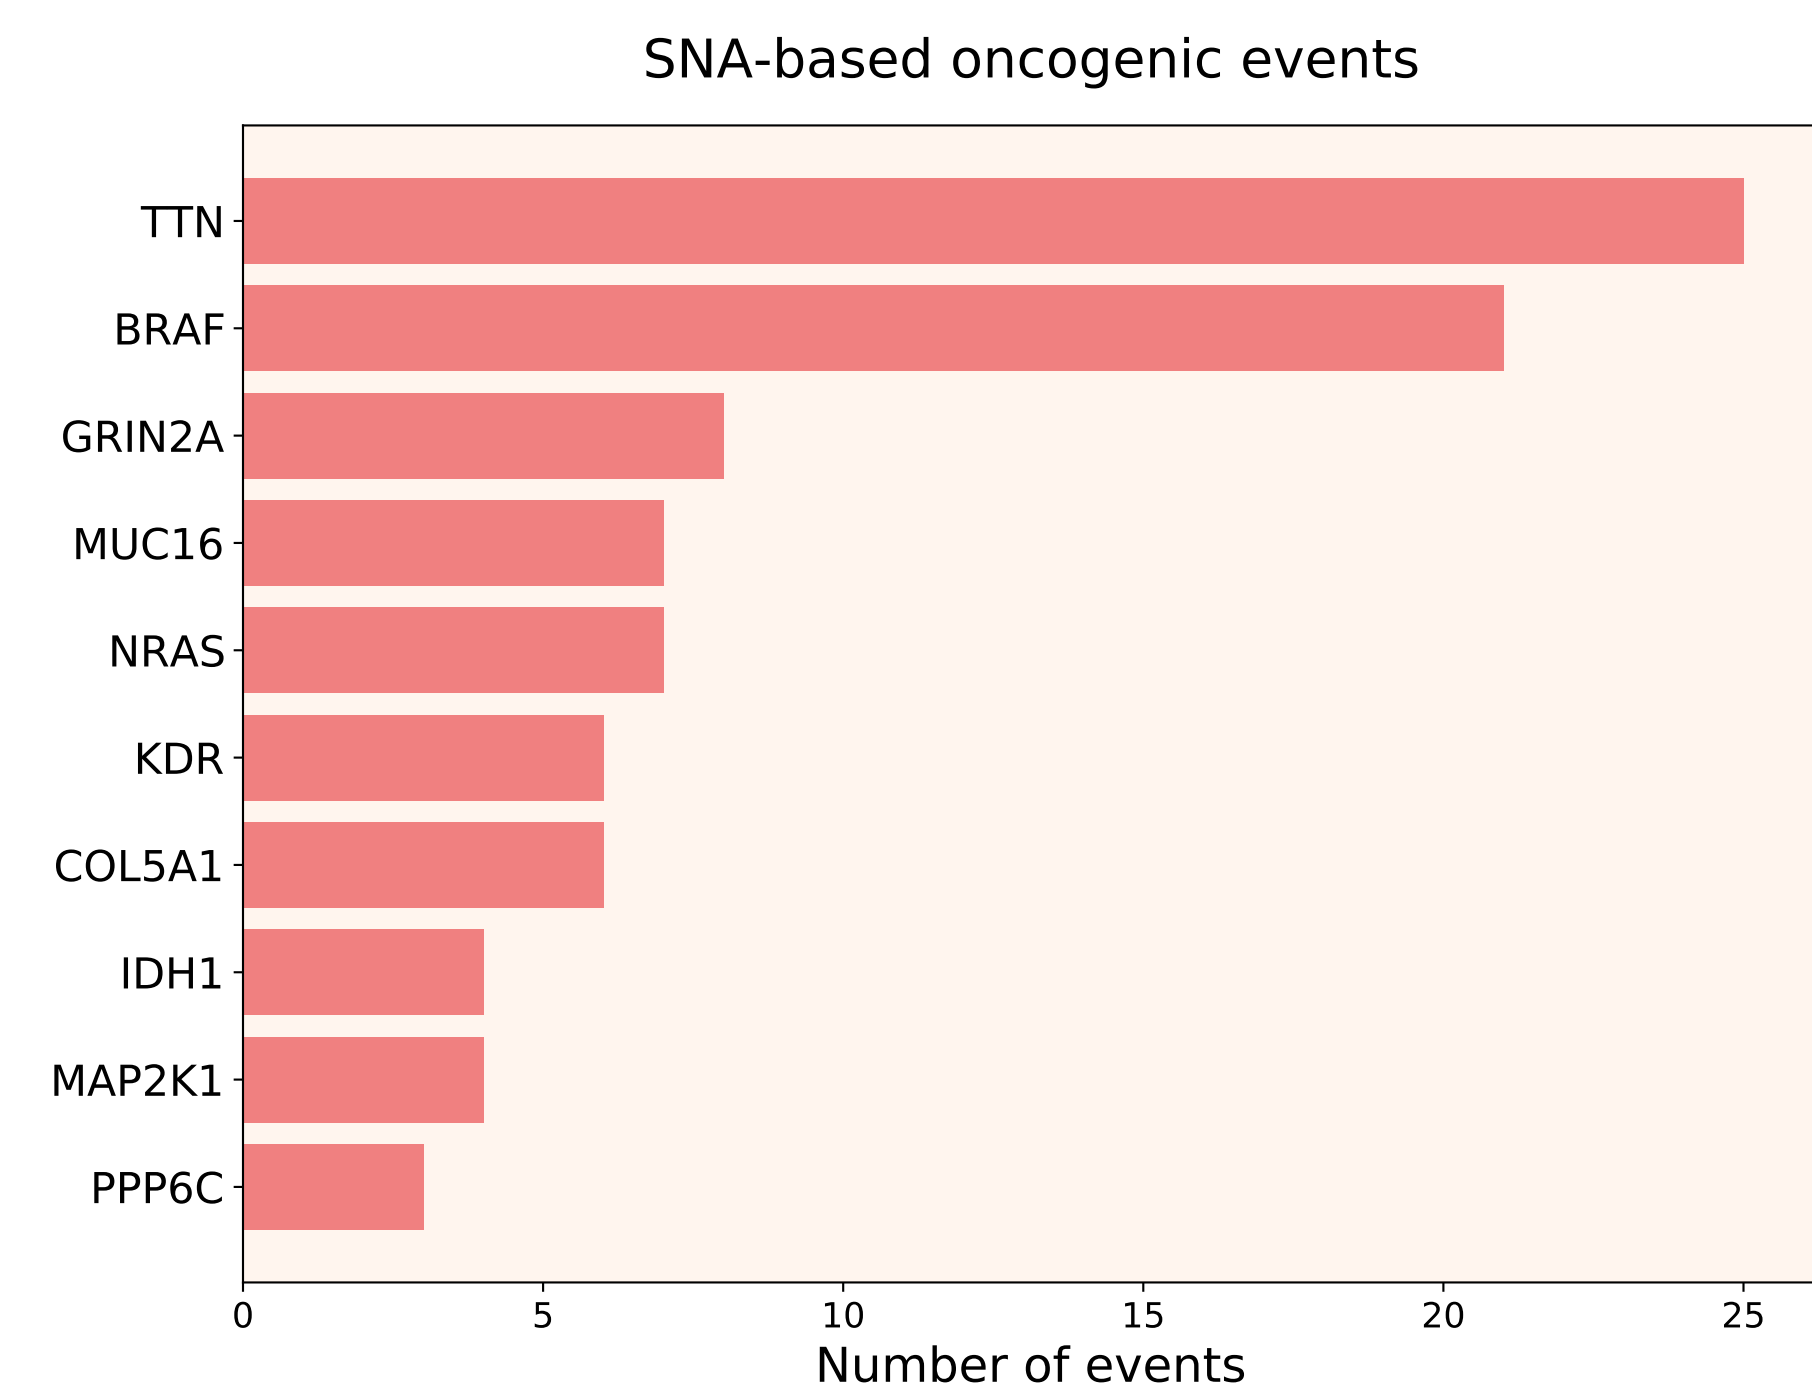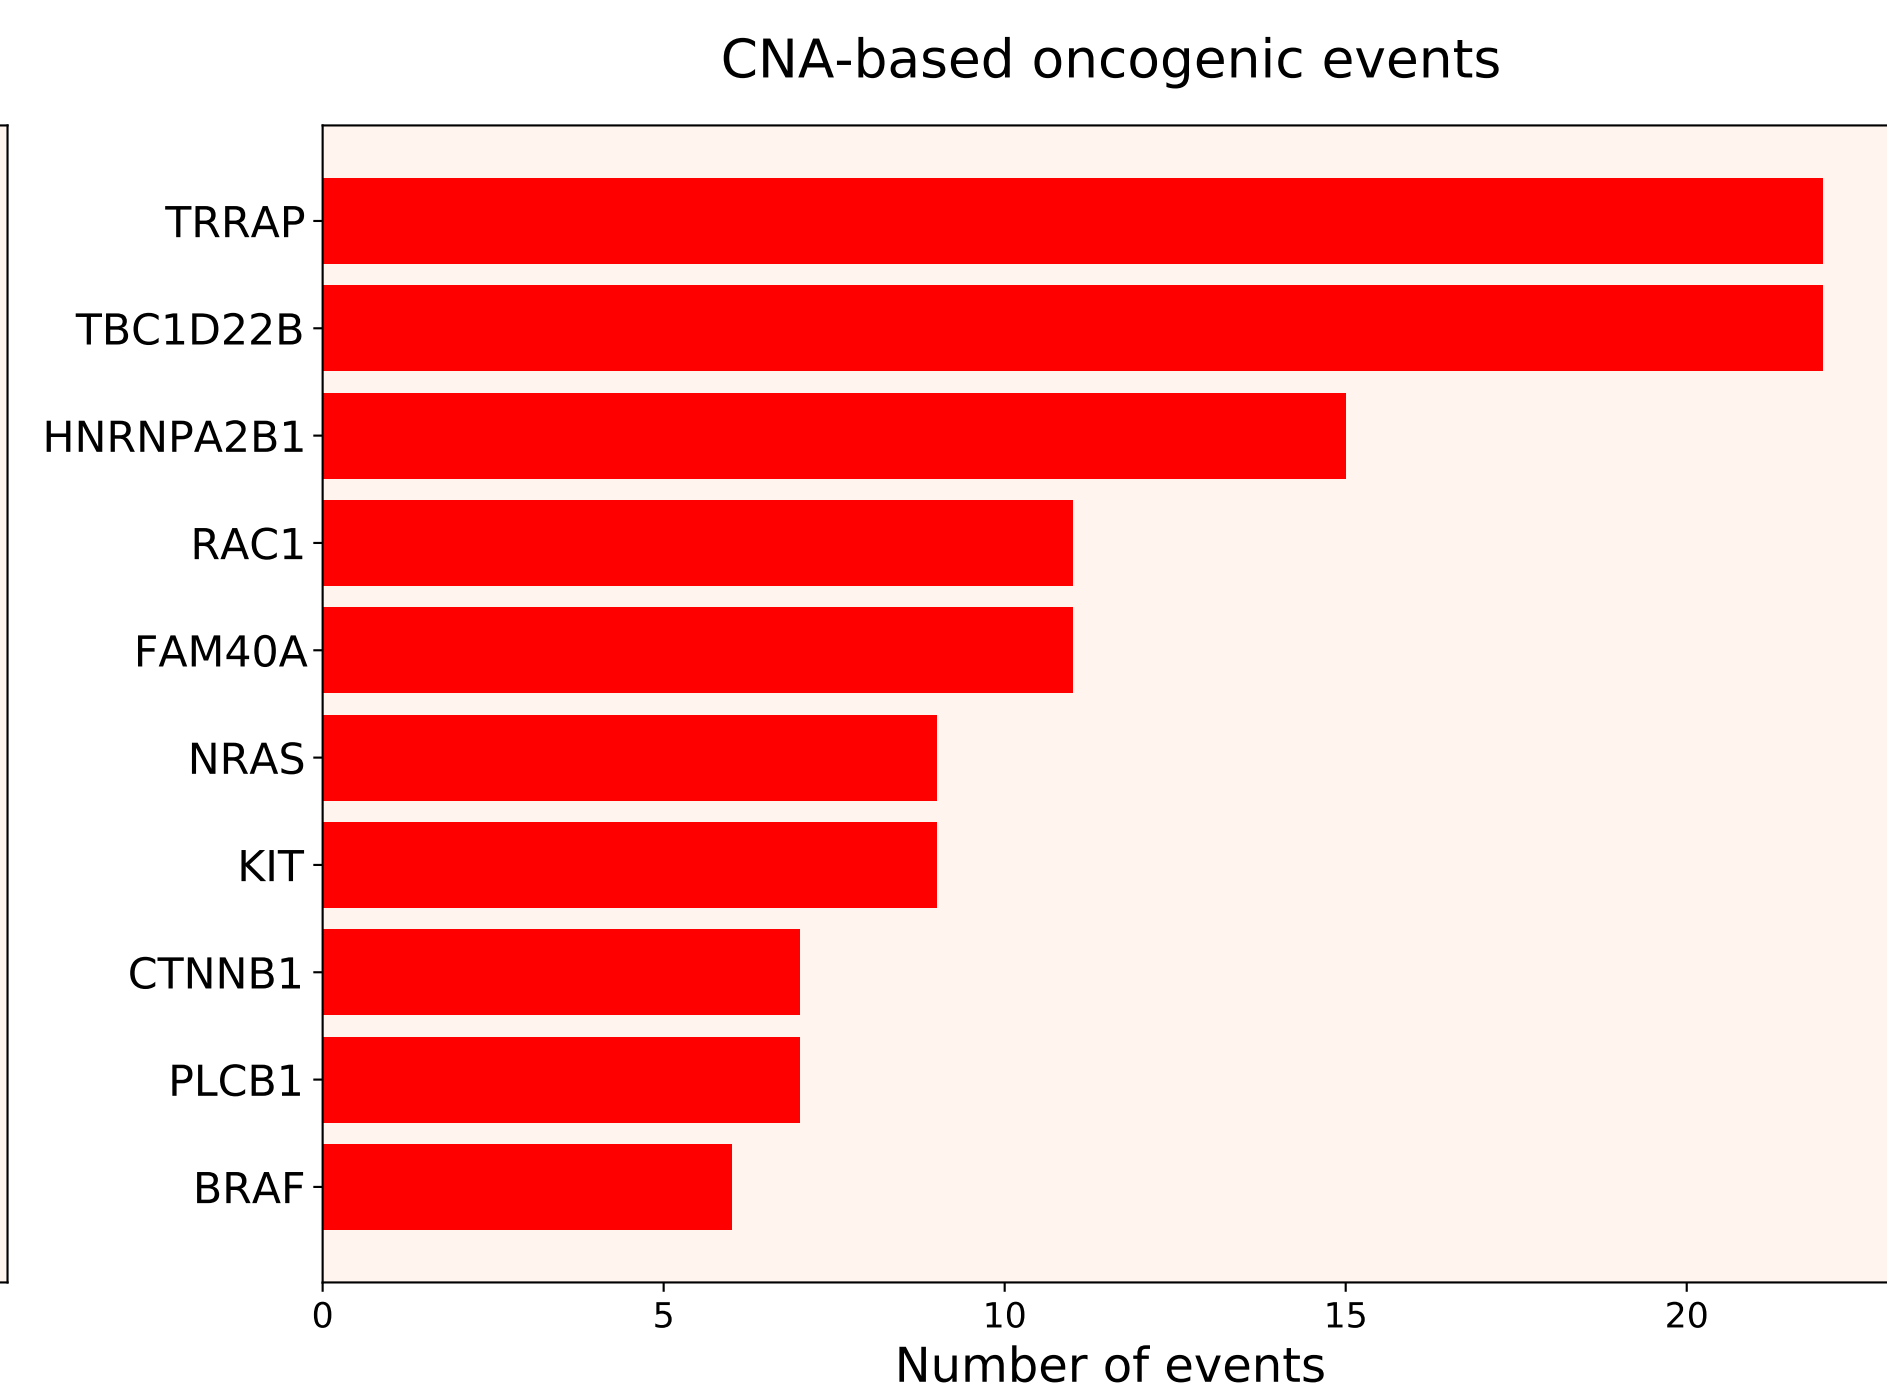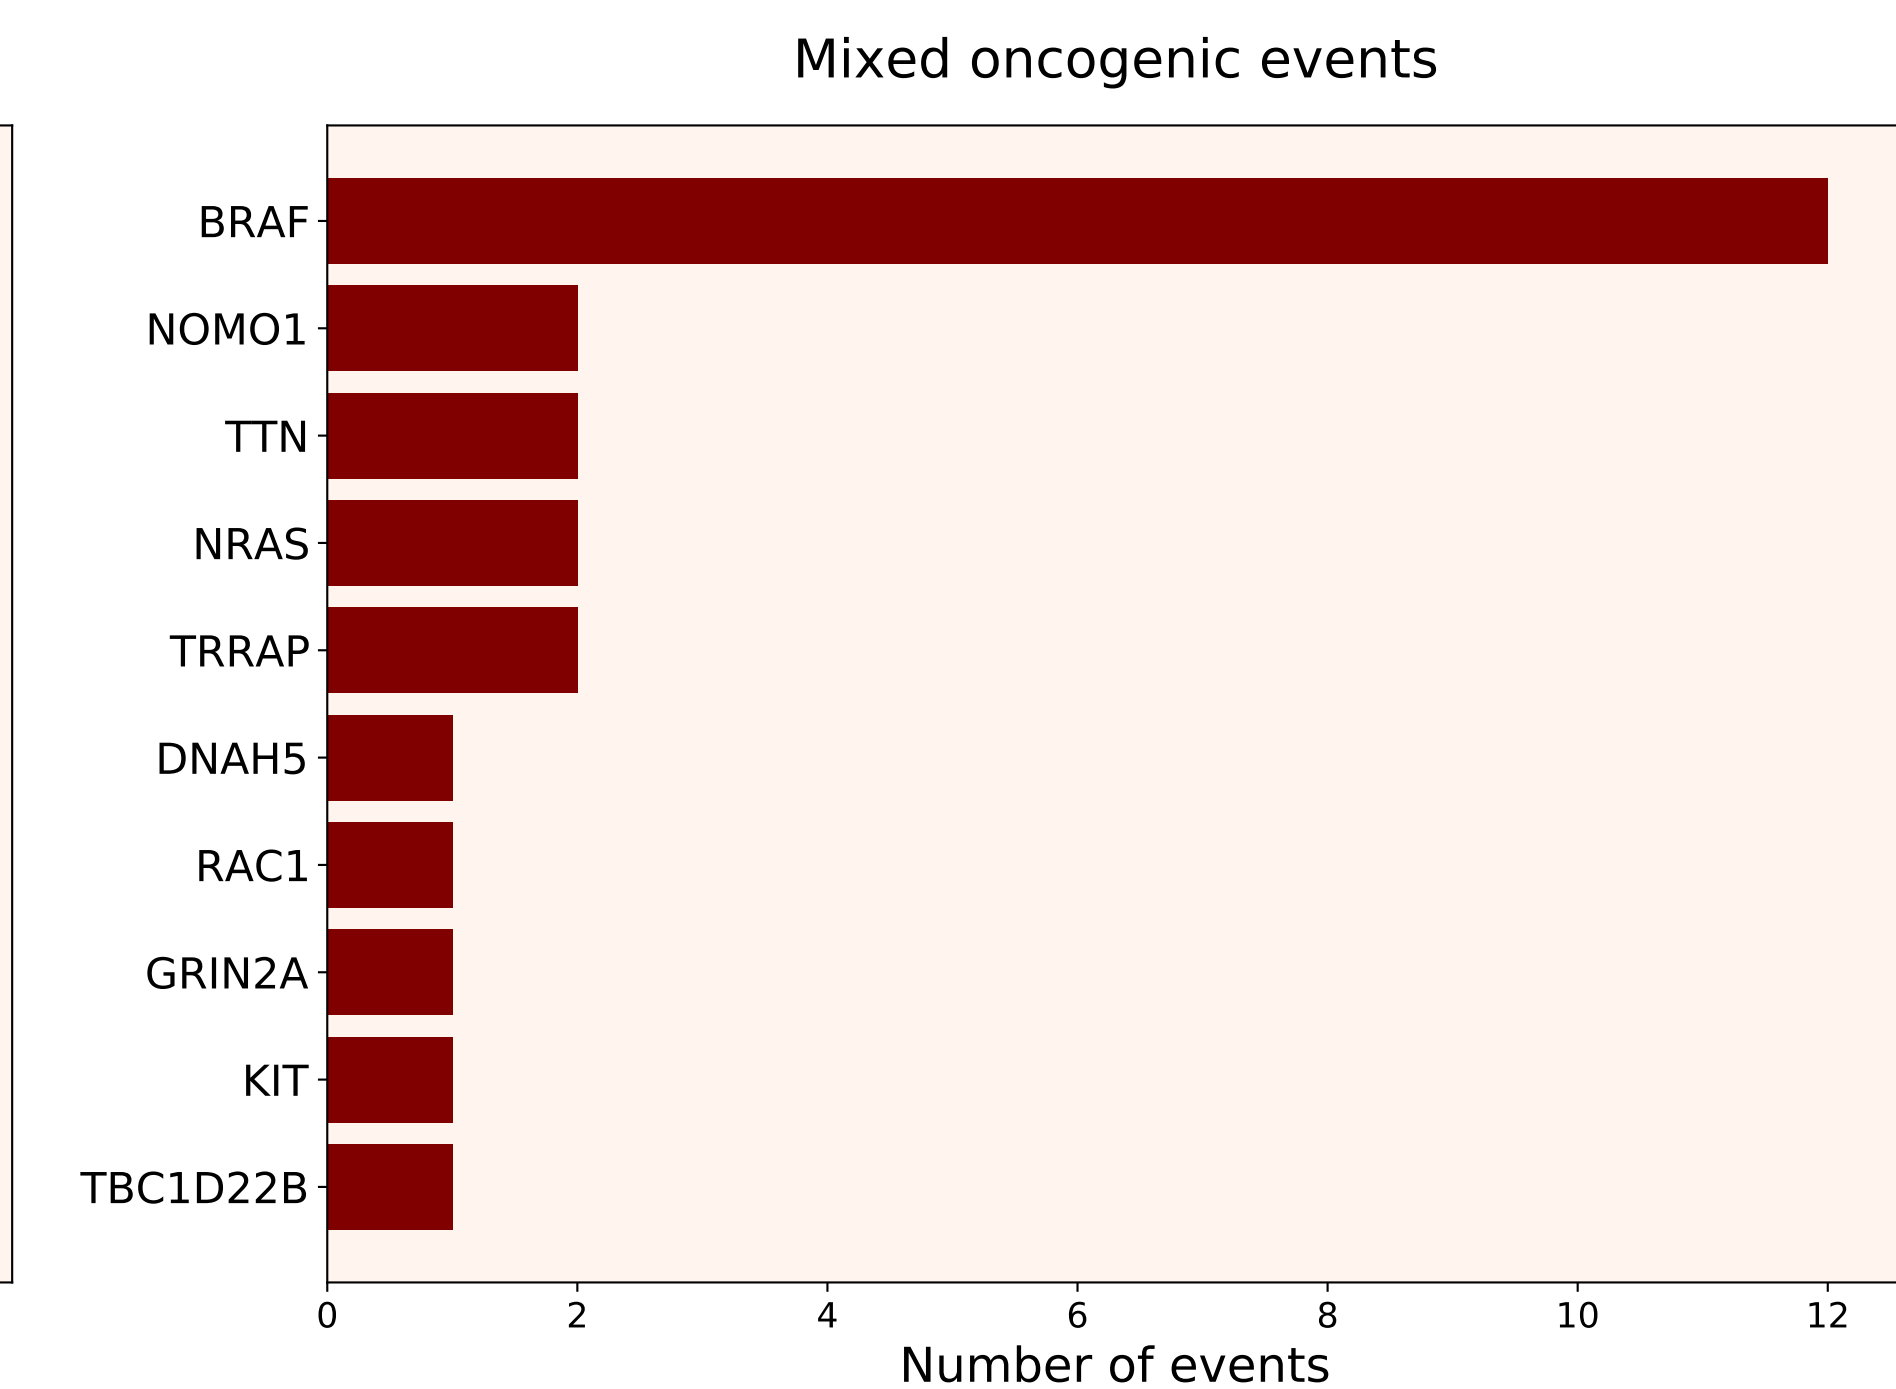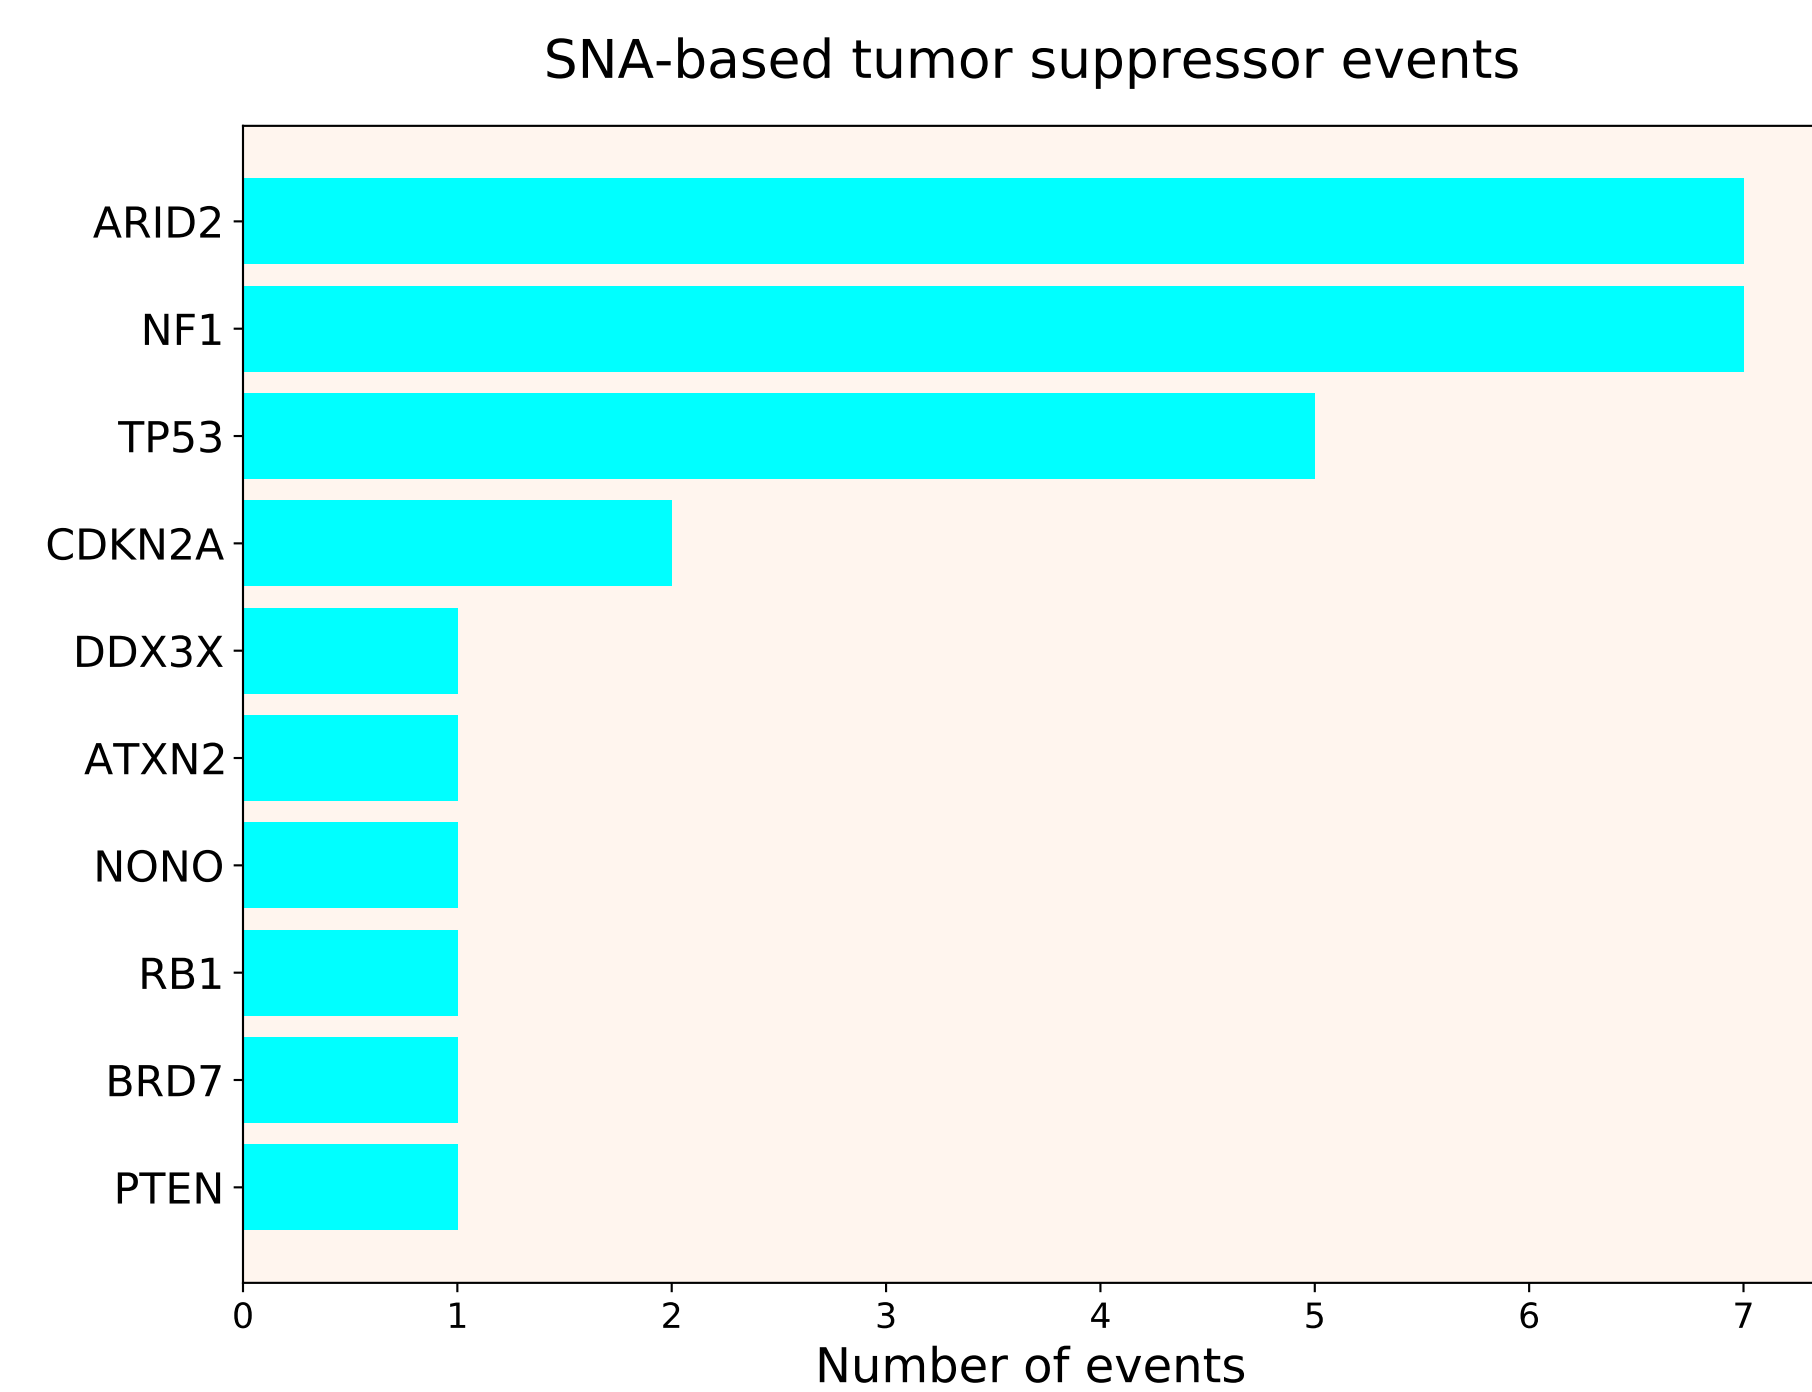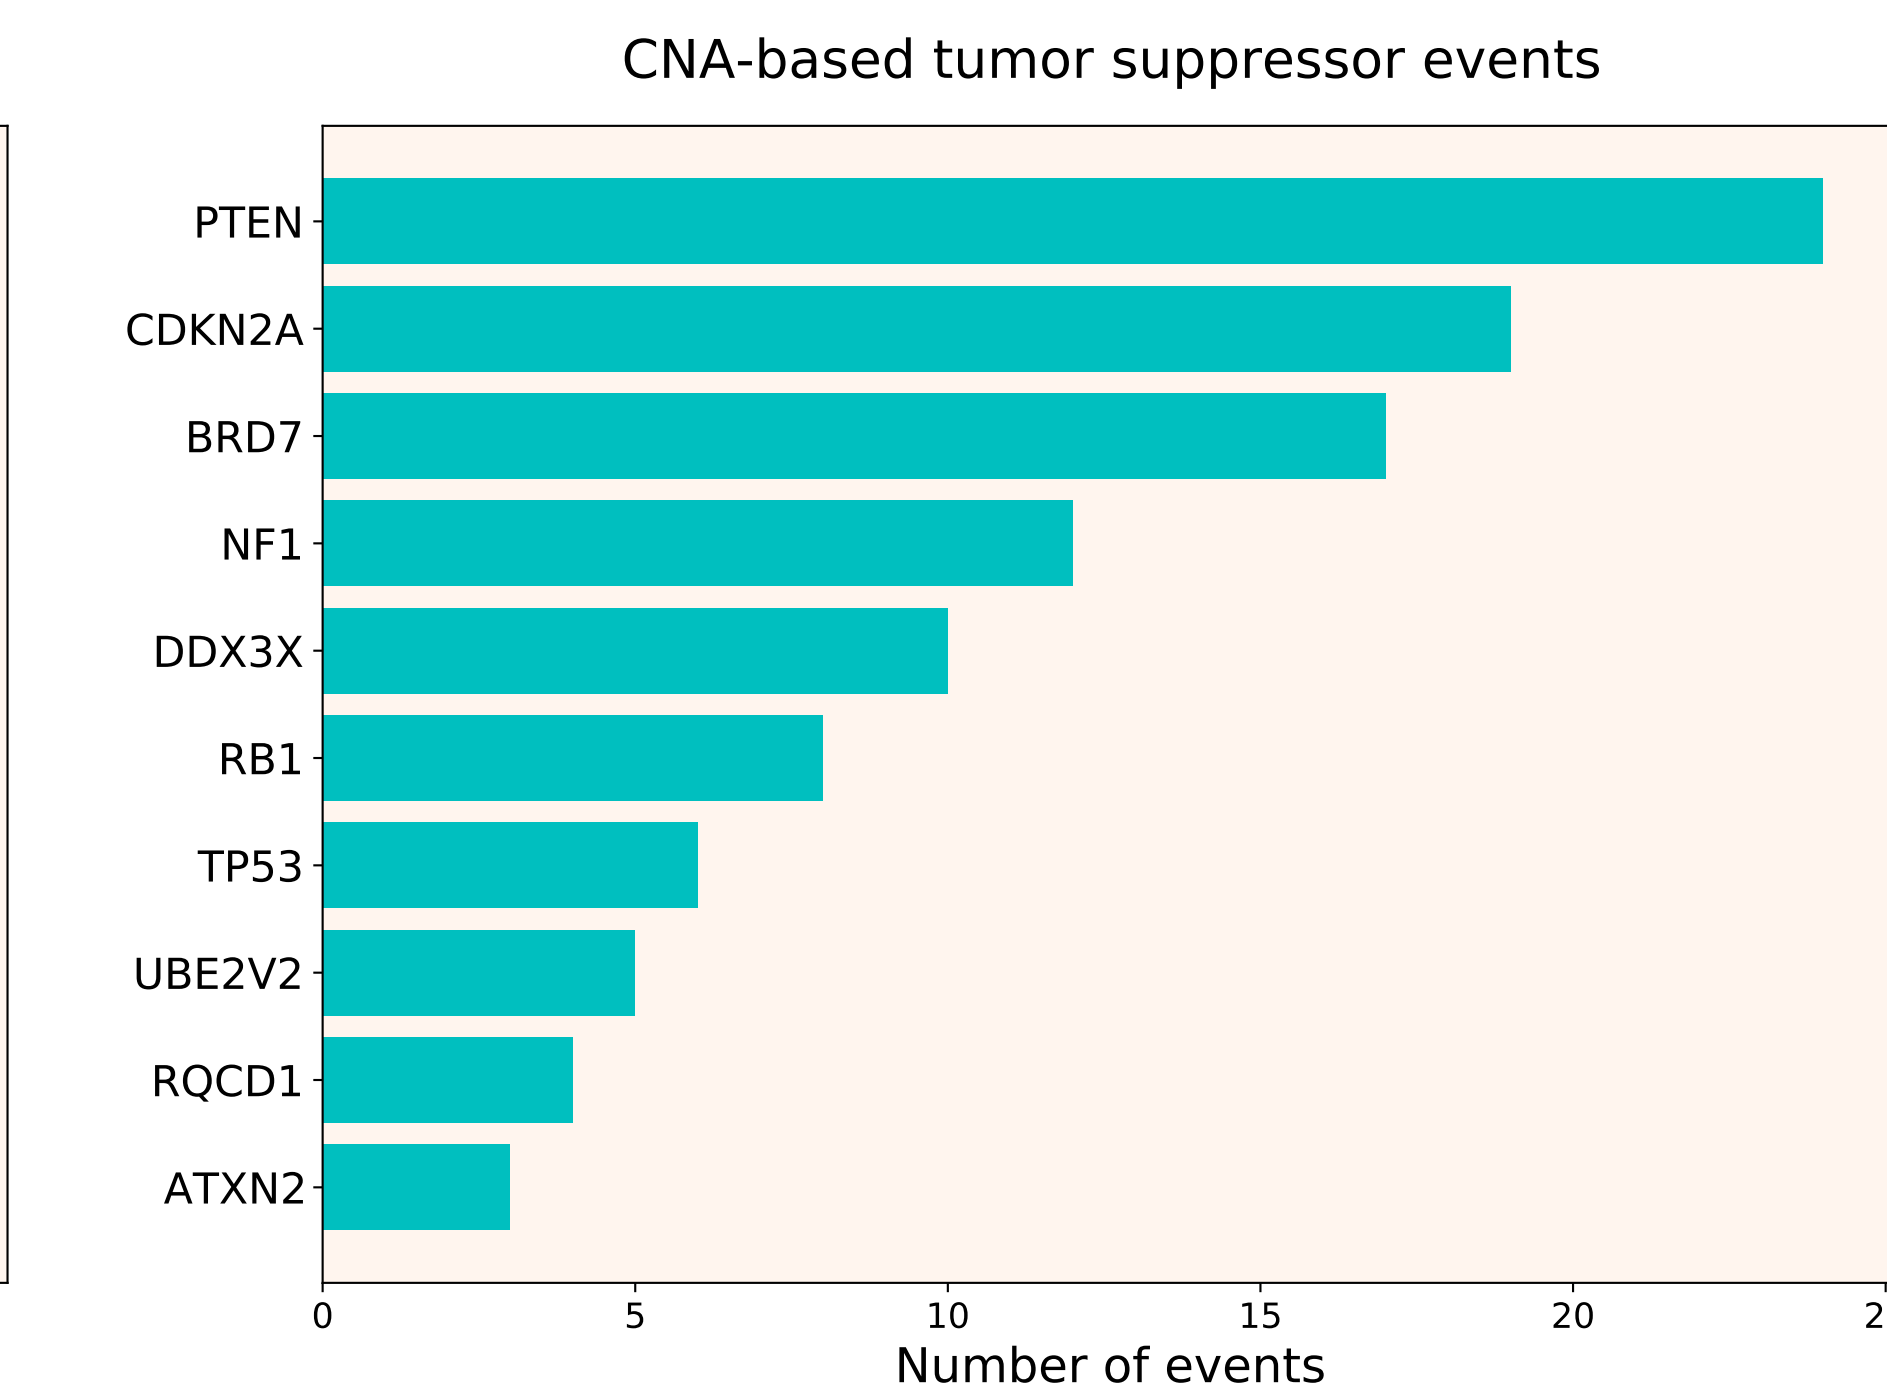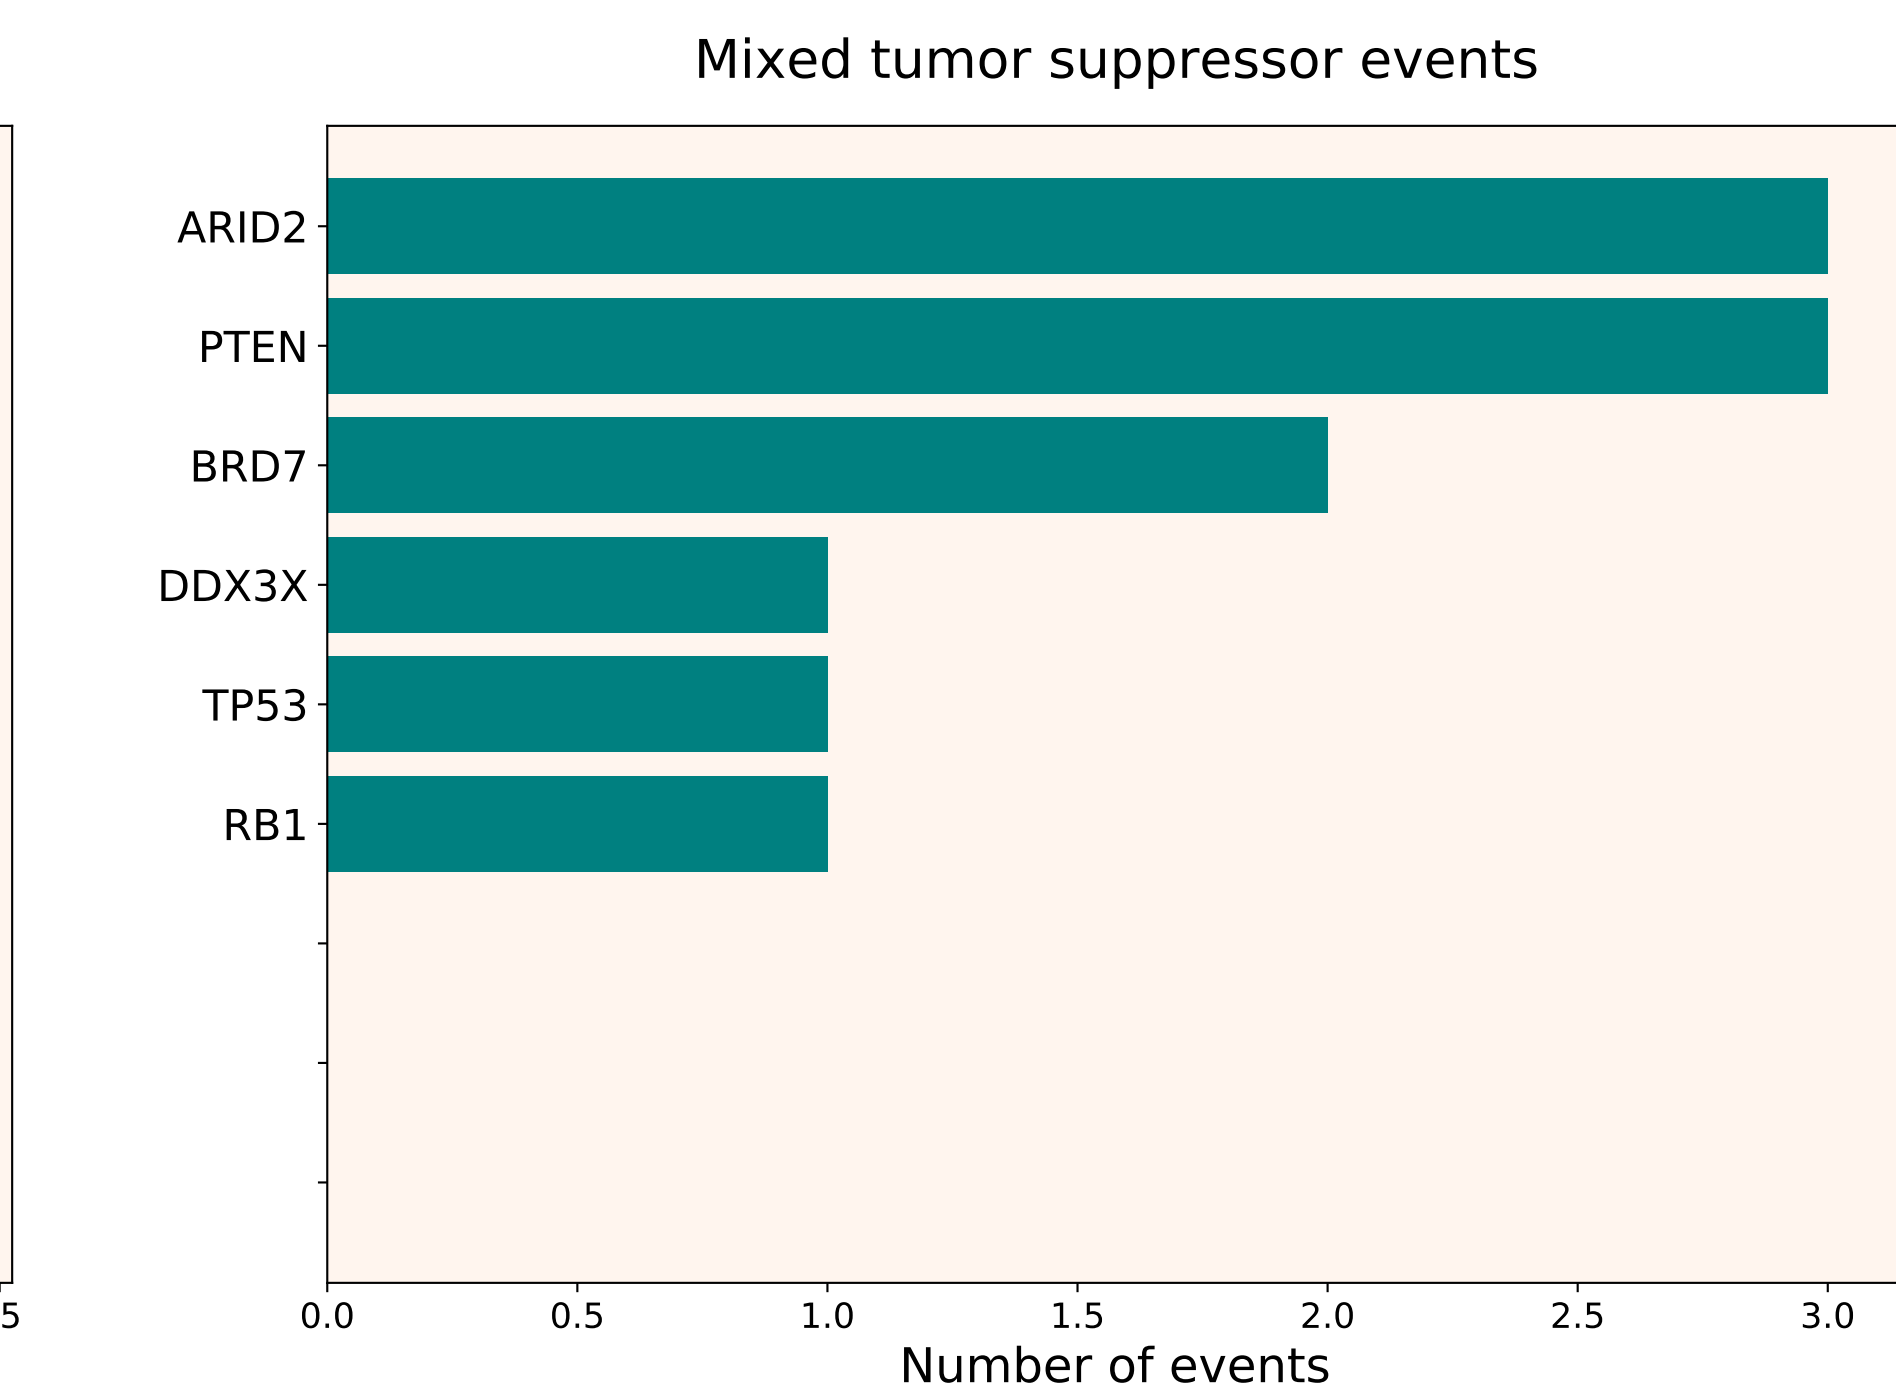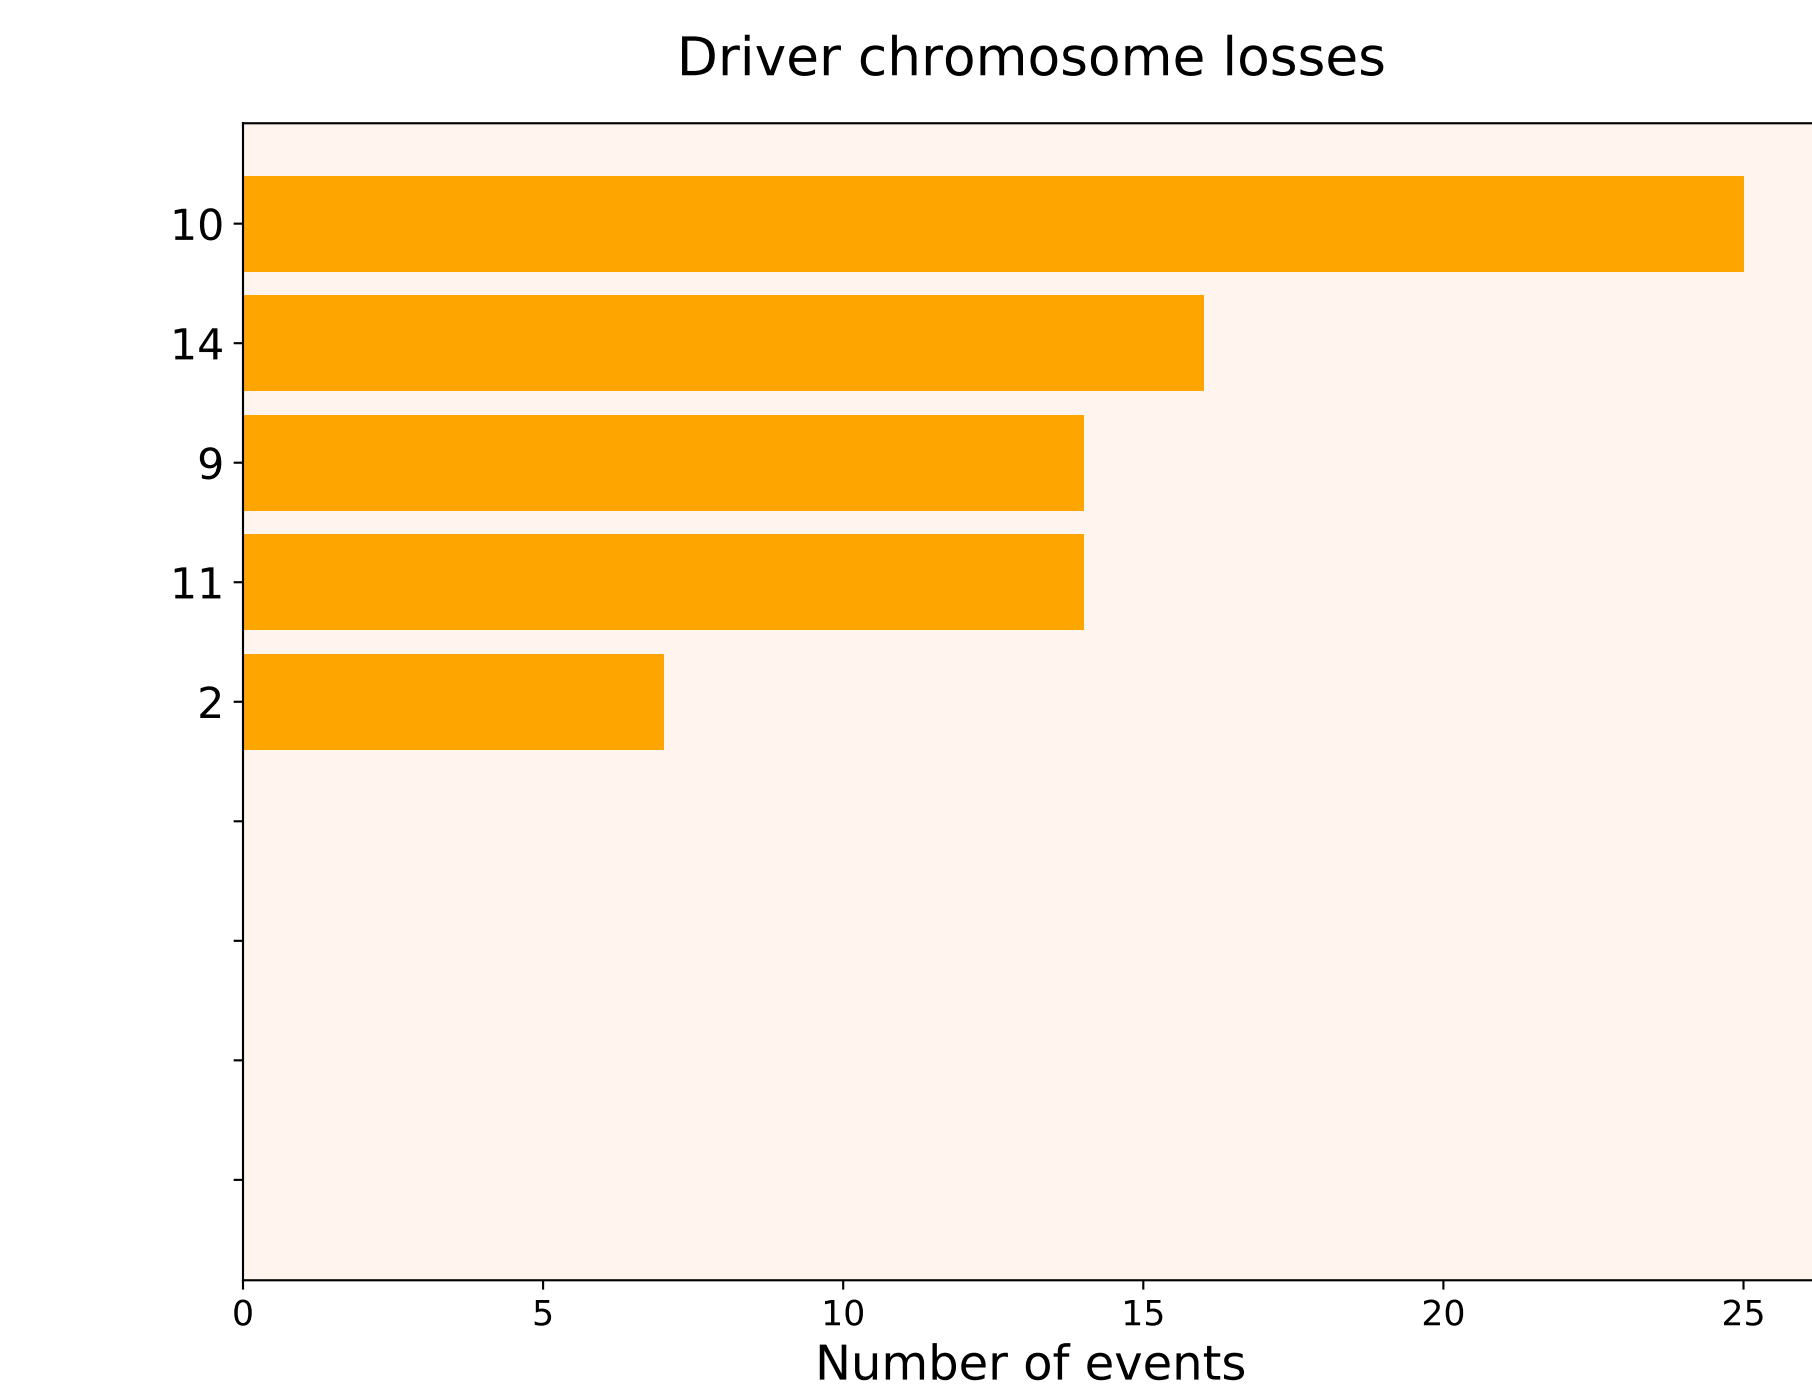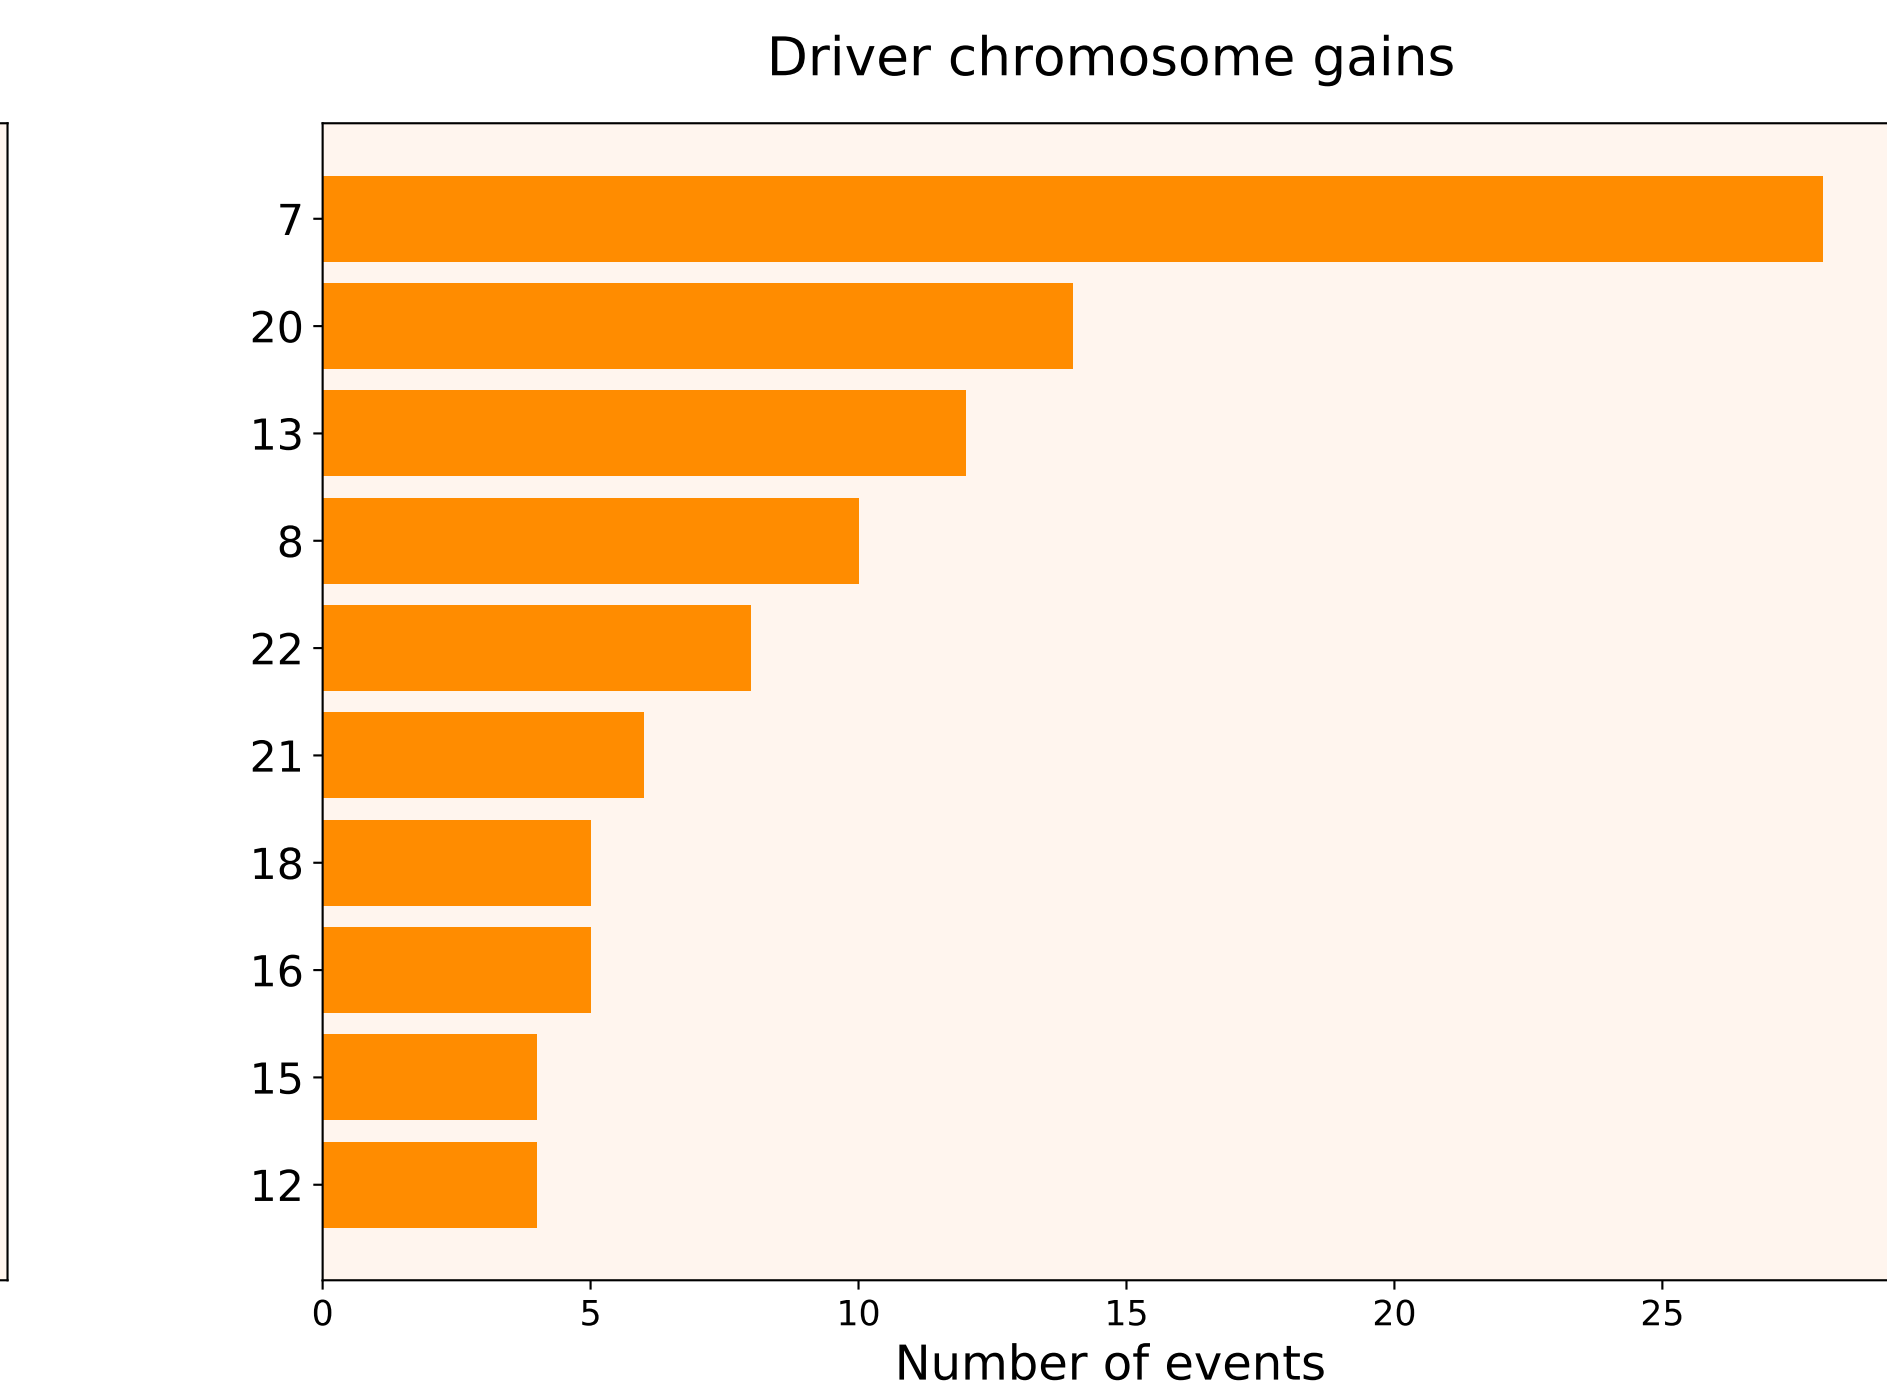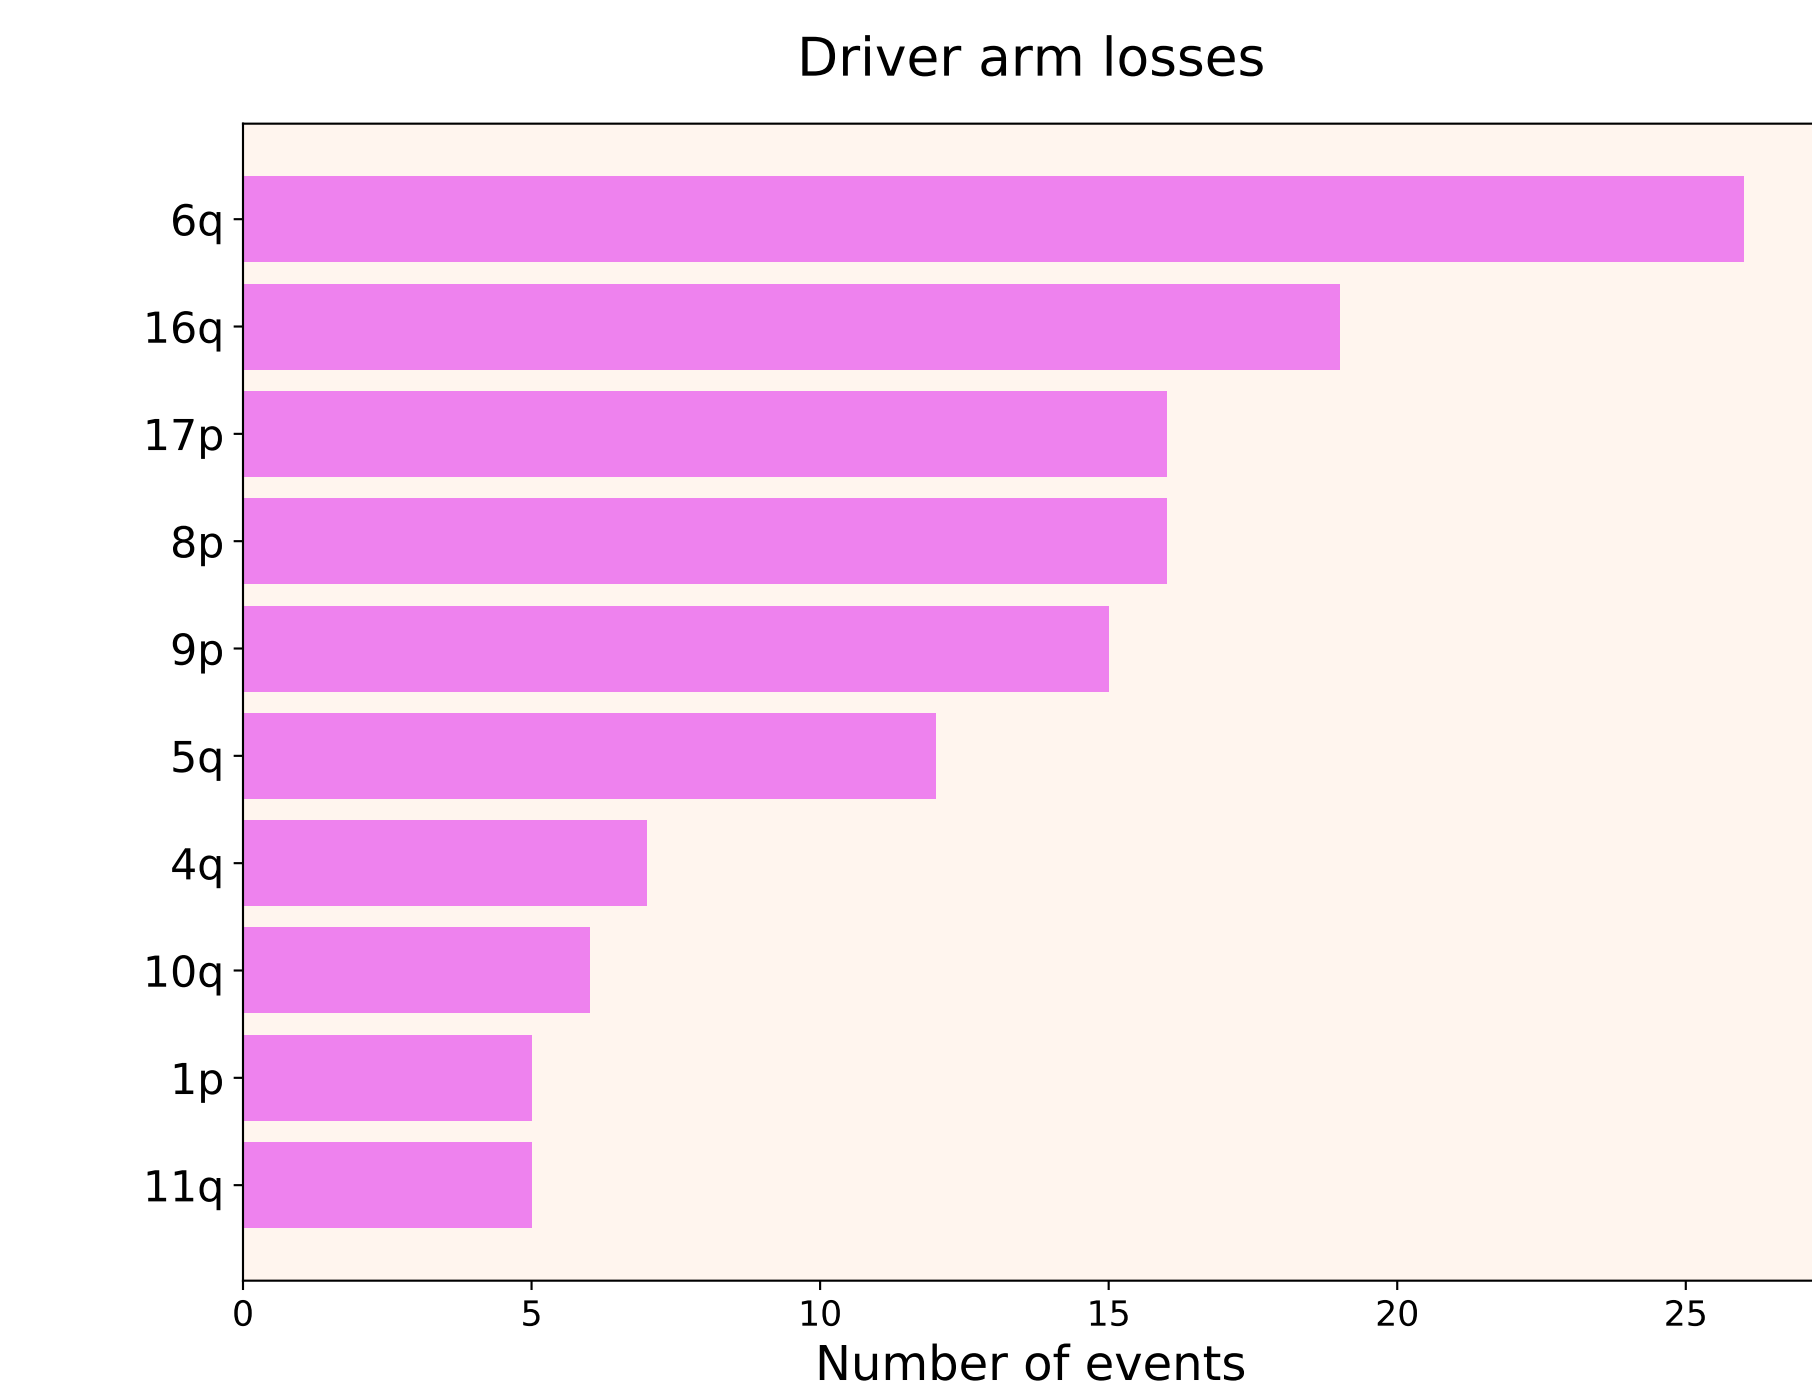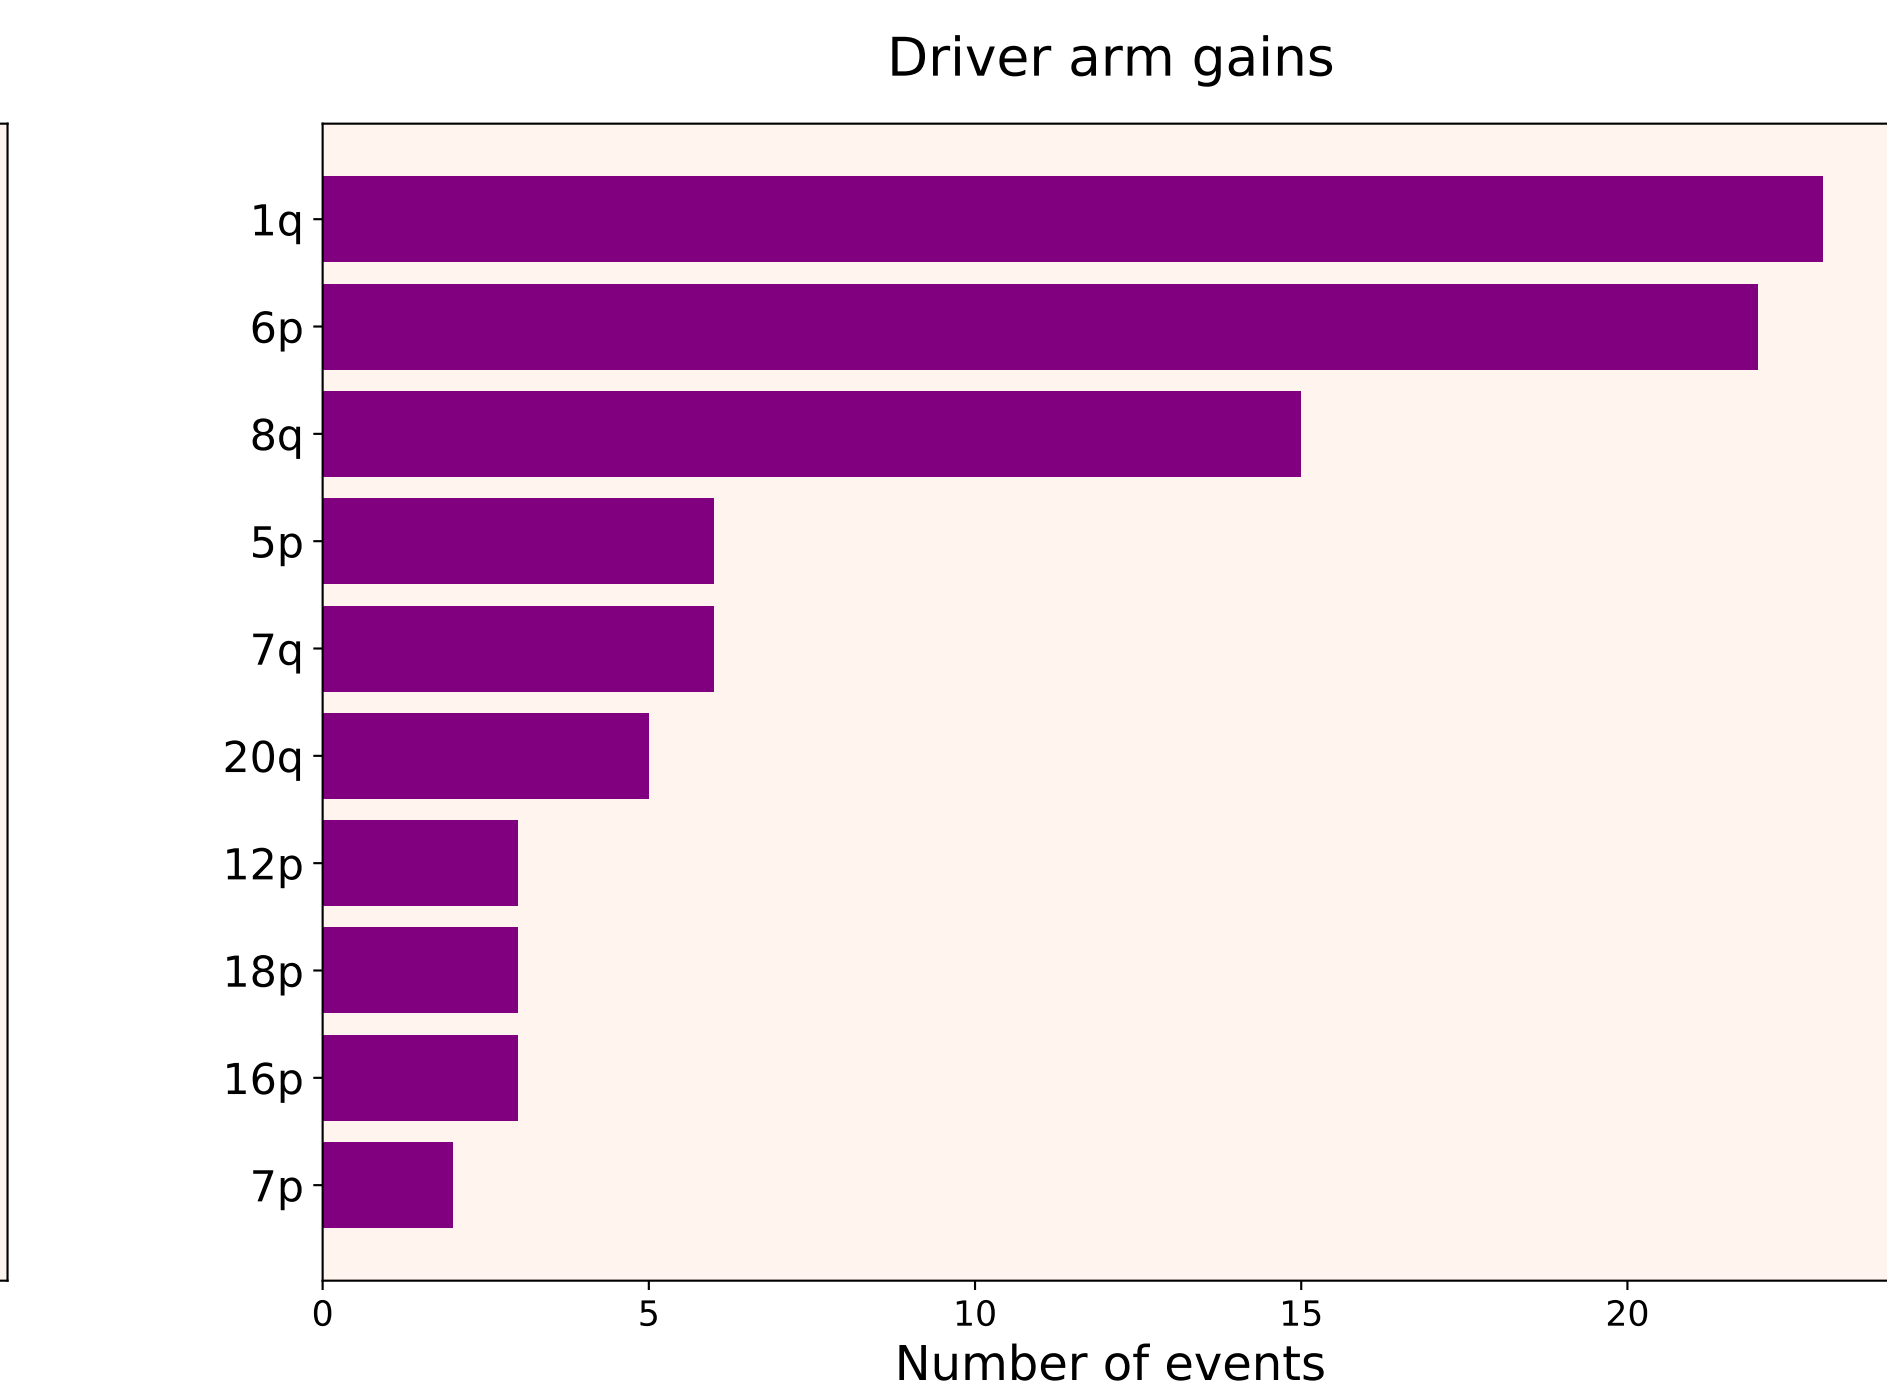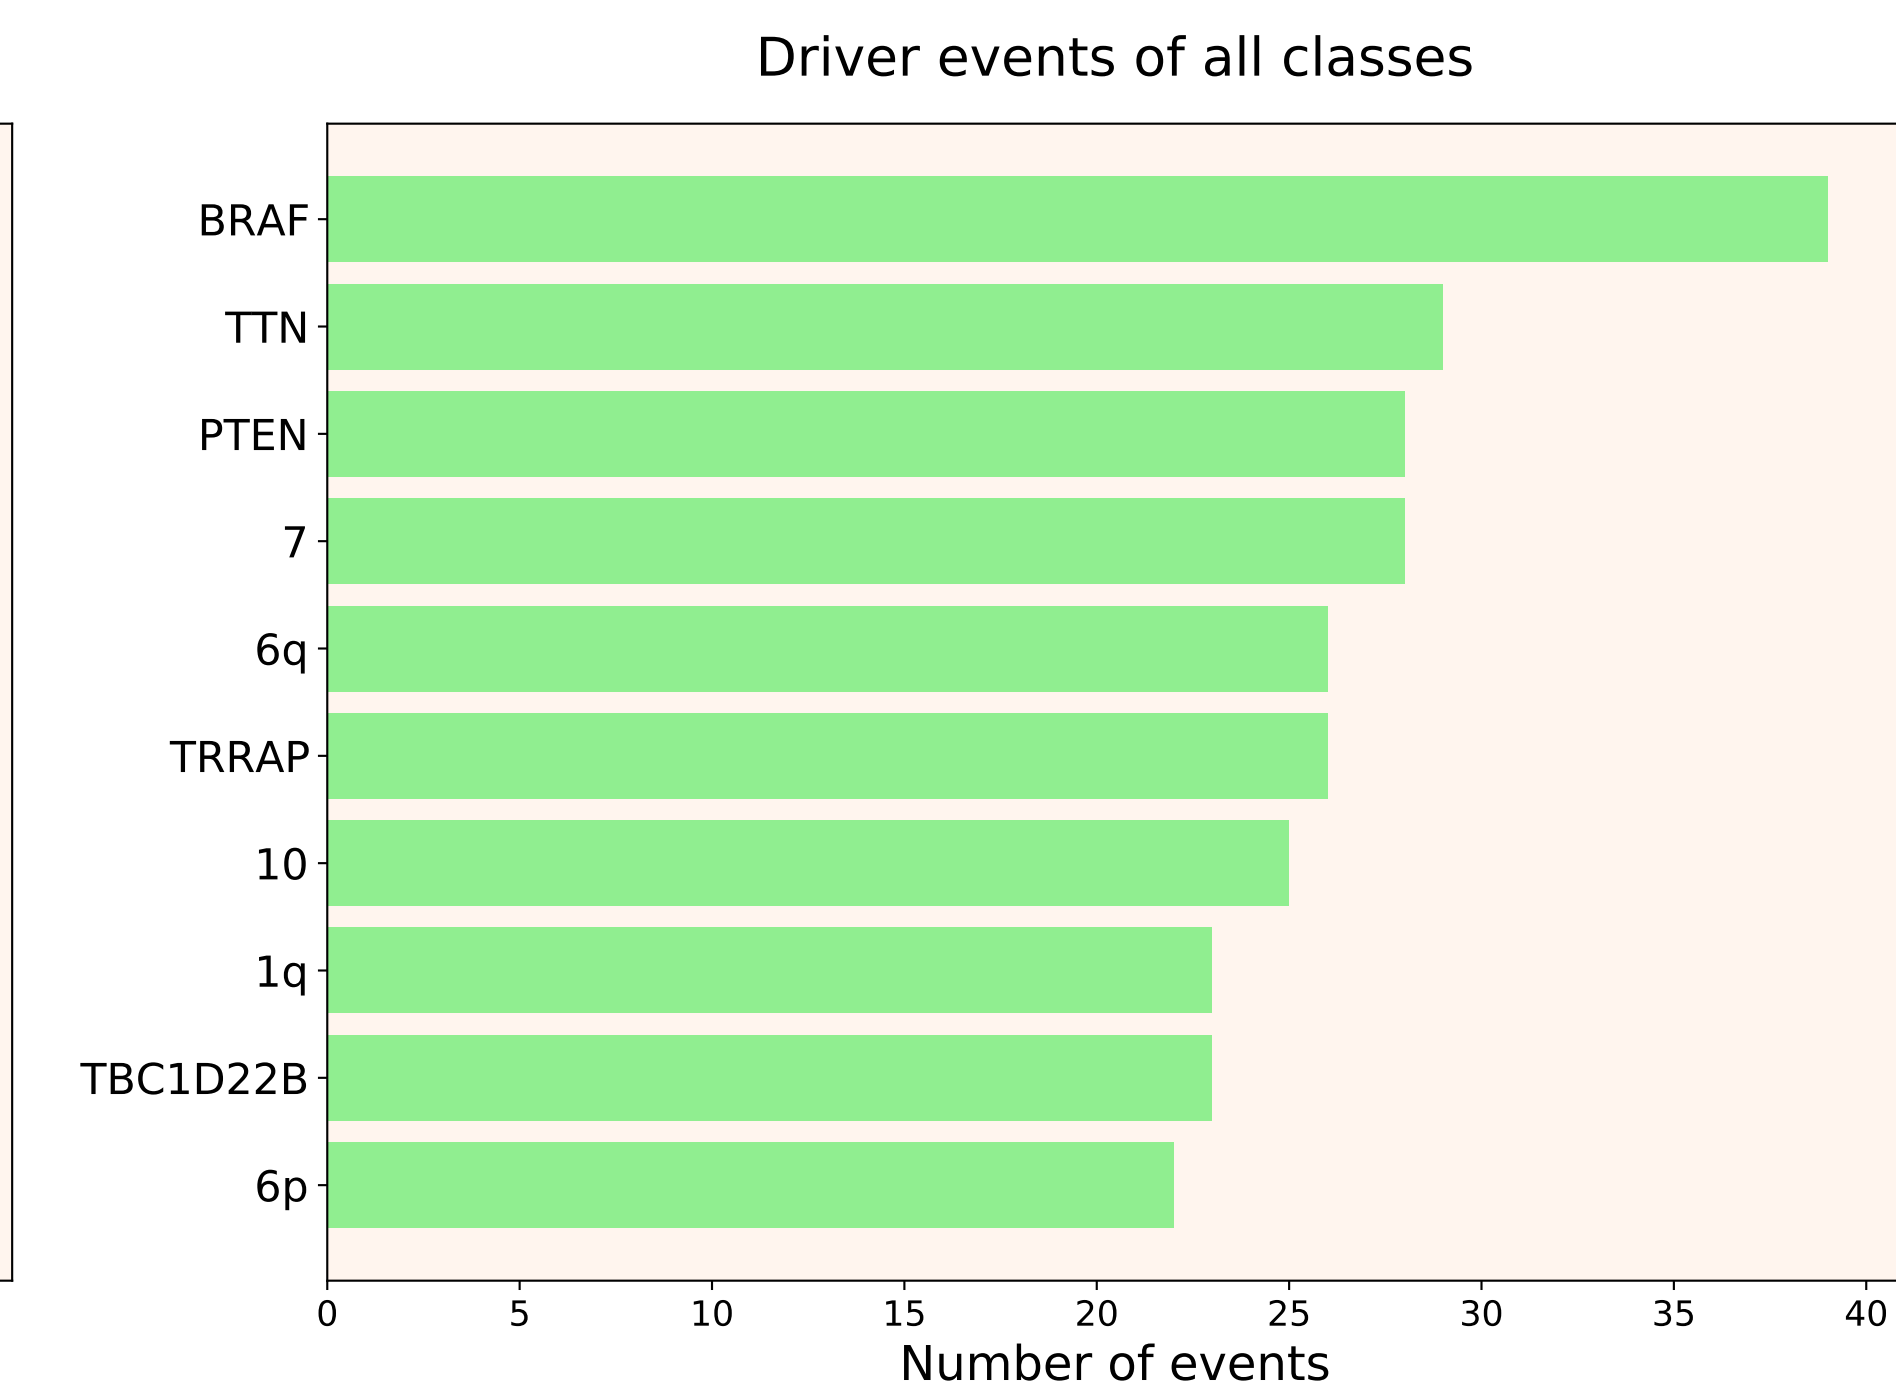

Supplement: Supplemental_Data_S1.zip [file Supplemental_Data_S1.zip]

# PAAD\_FEMALE

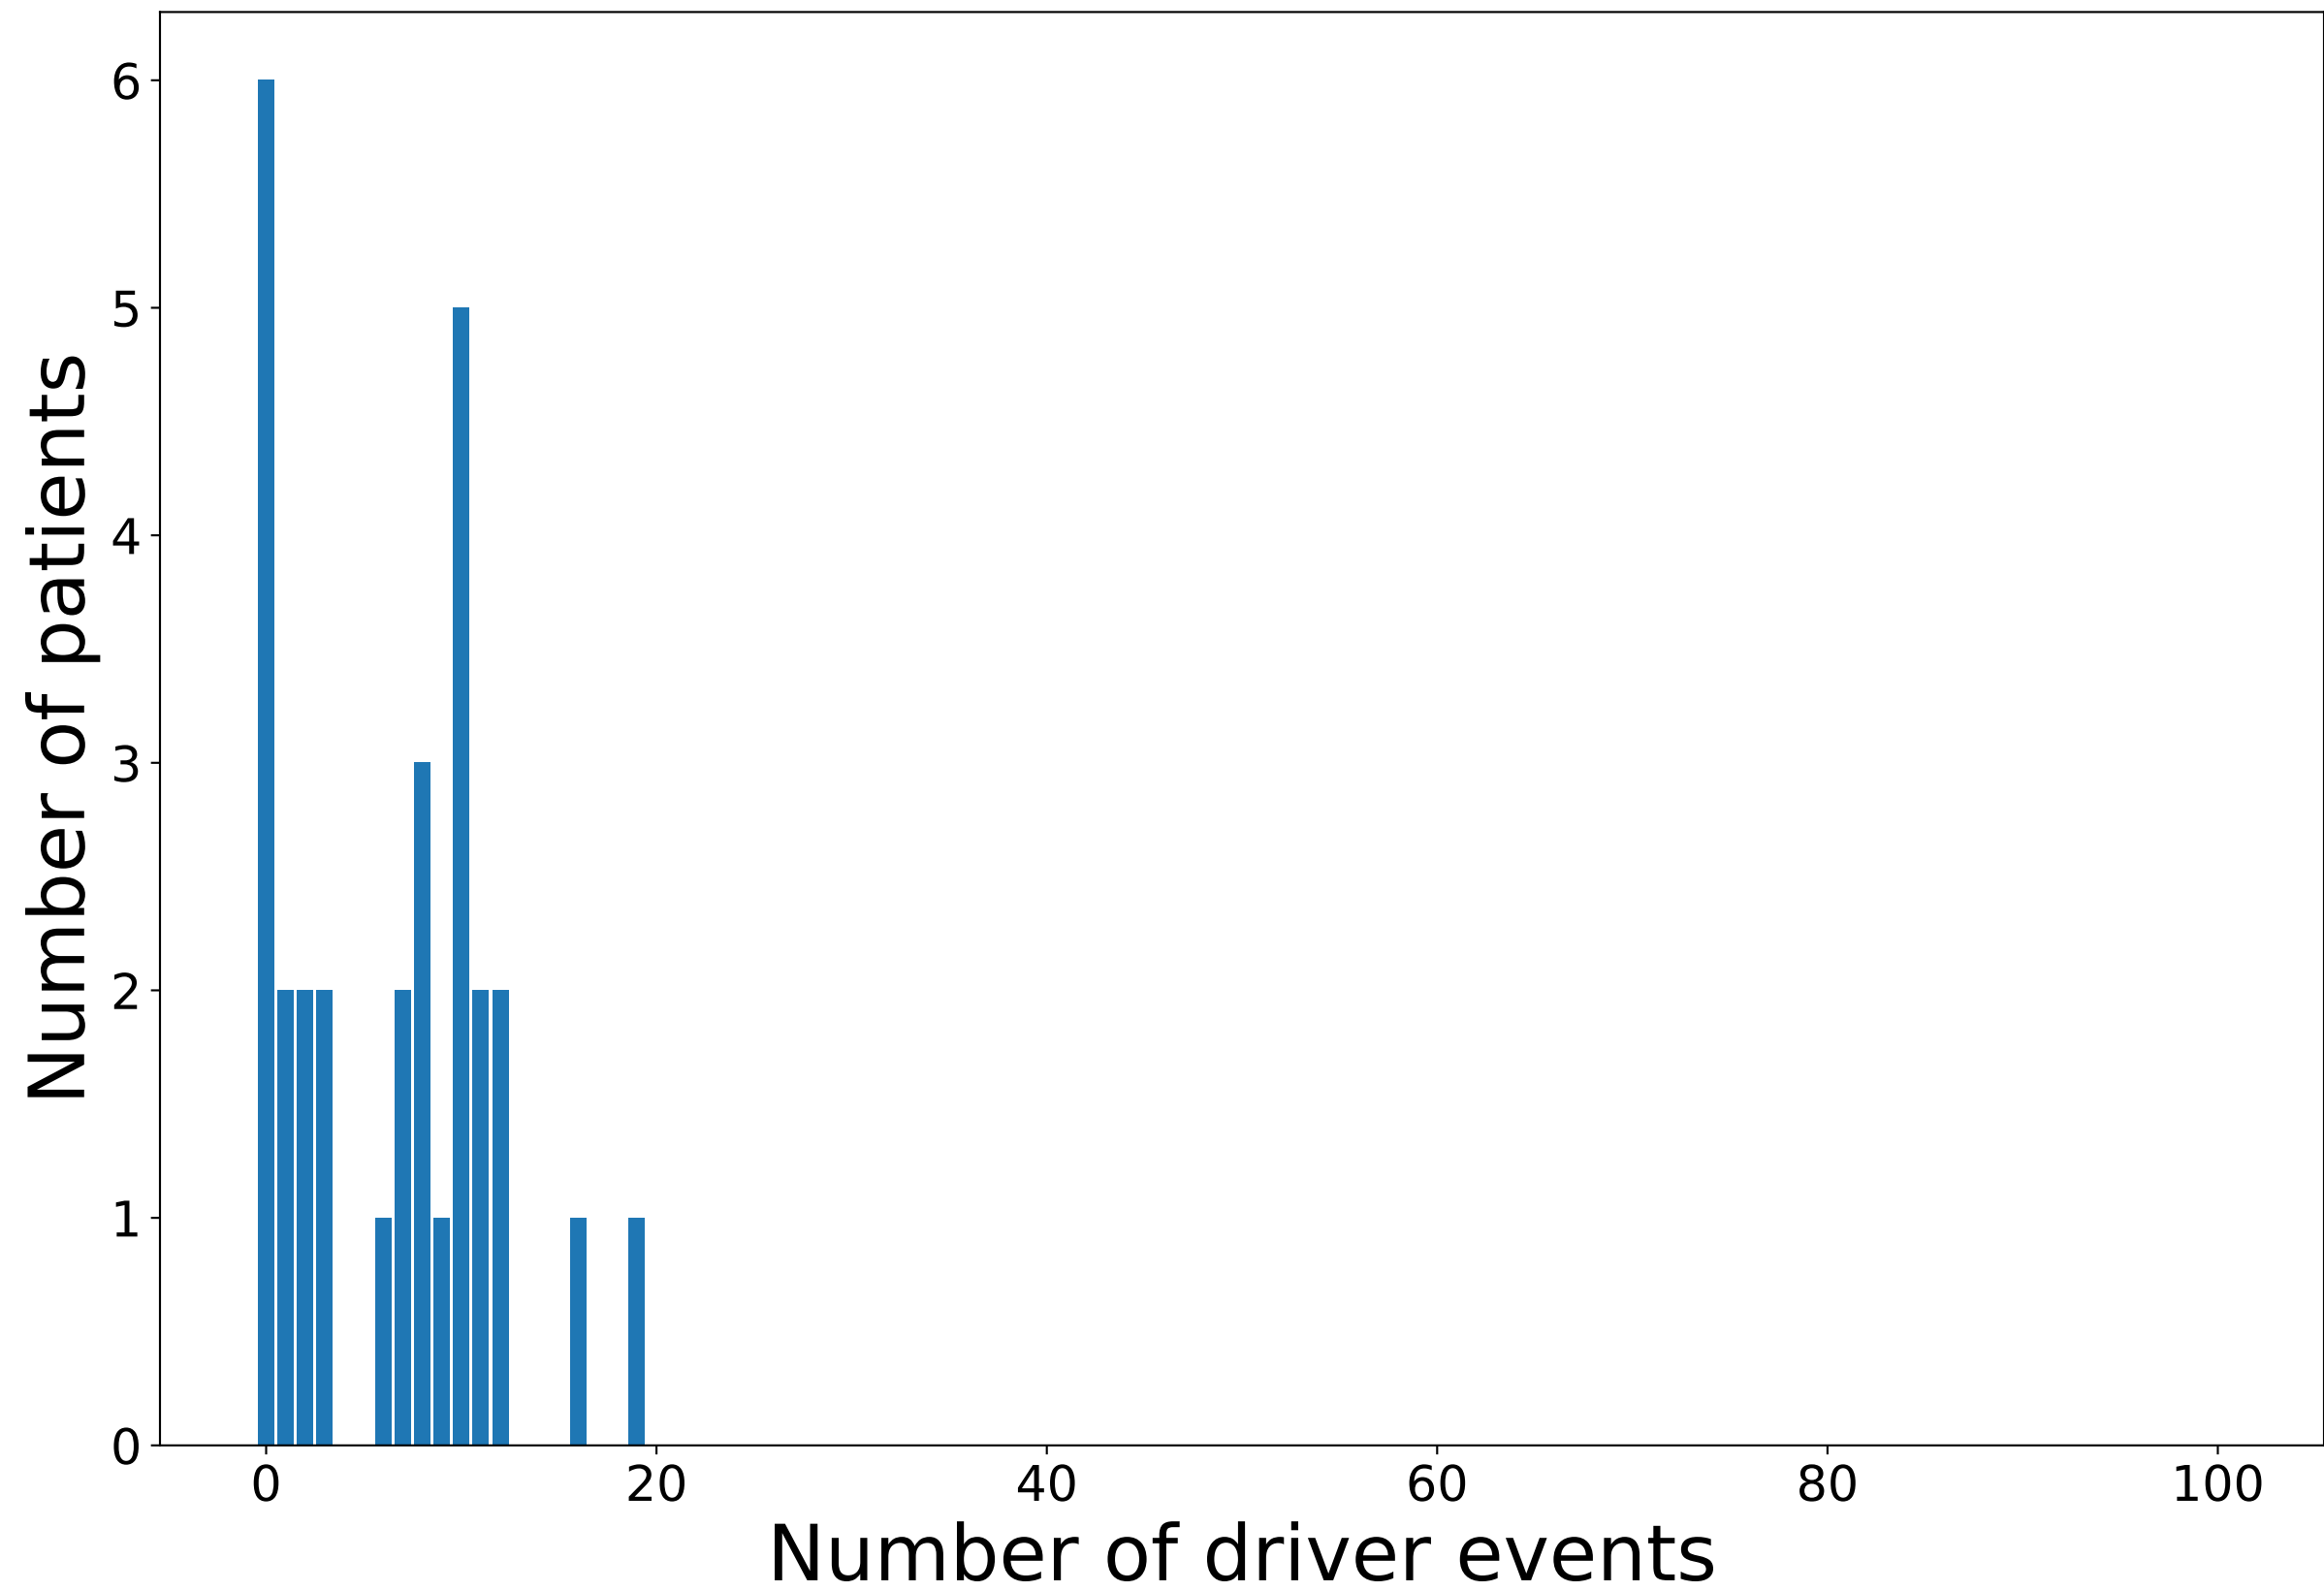

Supplement: Supplemental_Data_S1.zip [file Supplemental_Data_S1.zip]

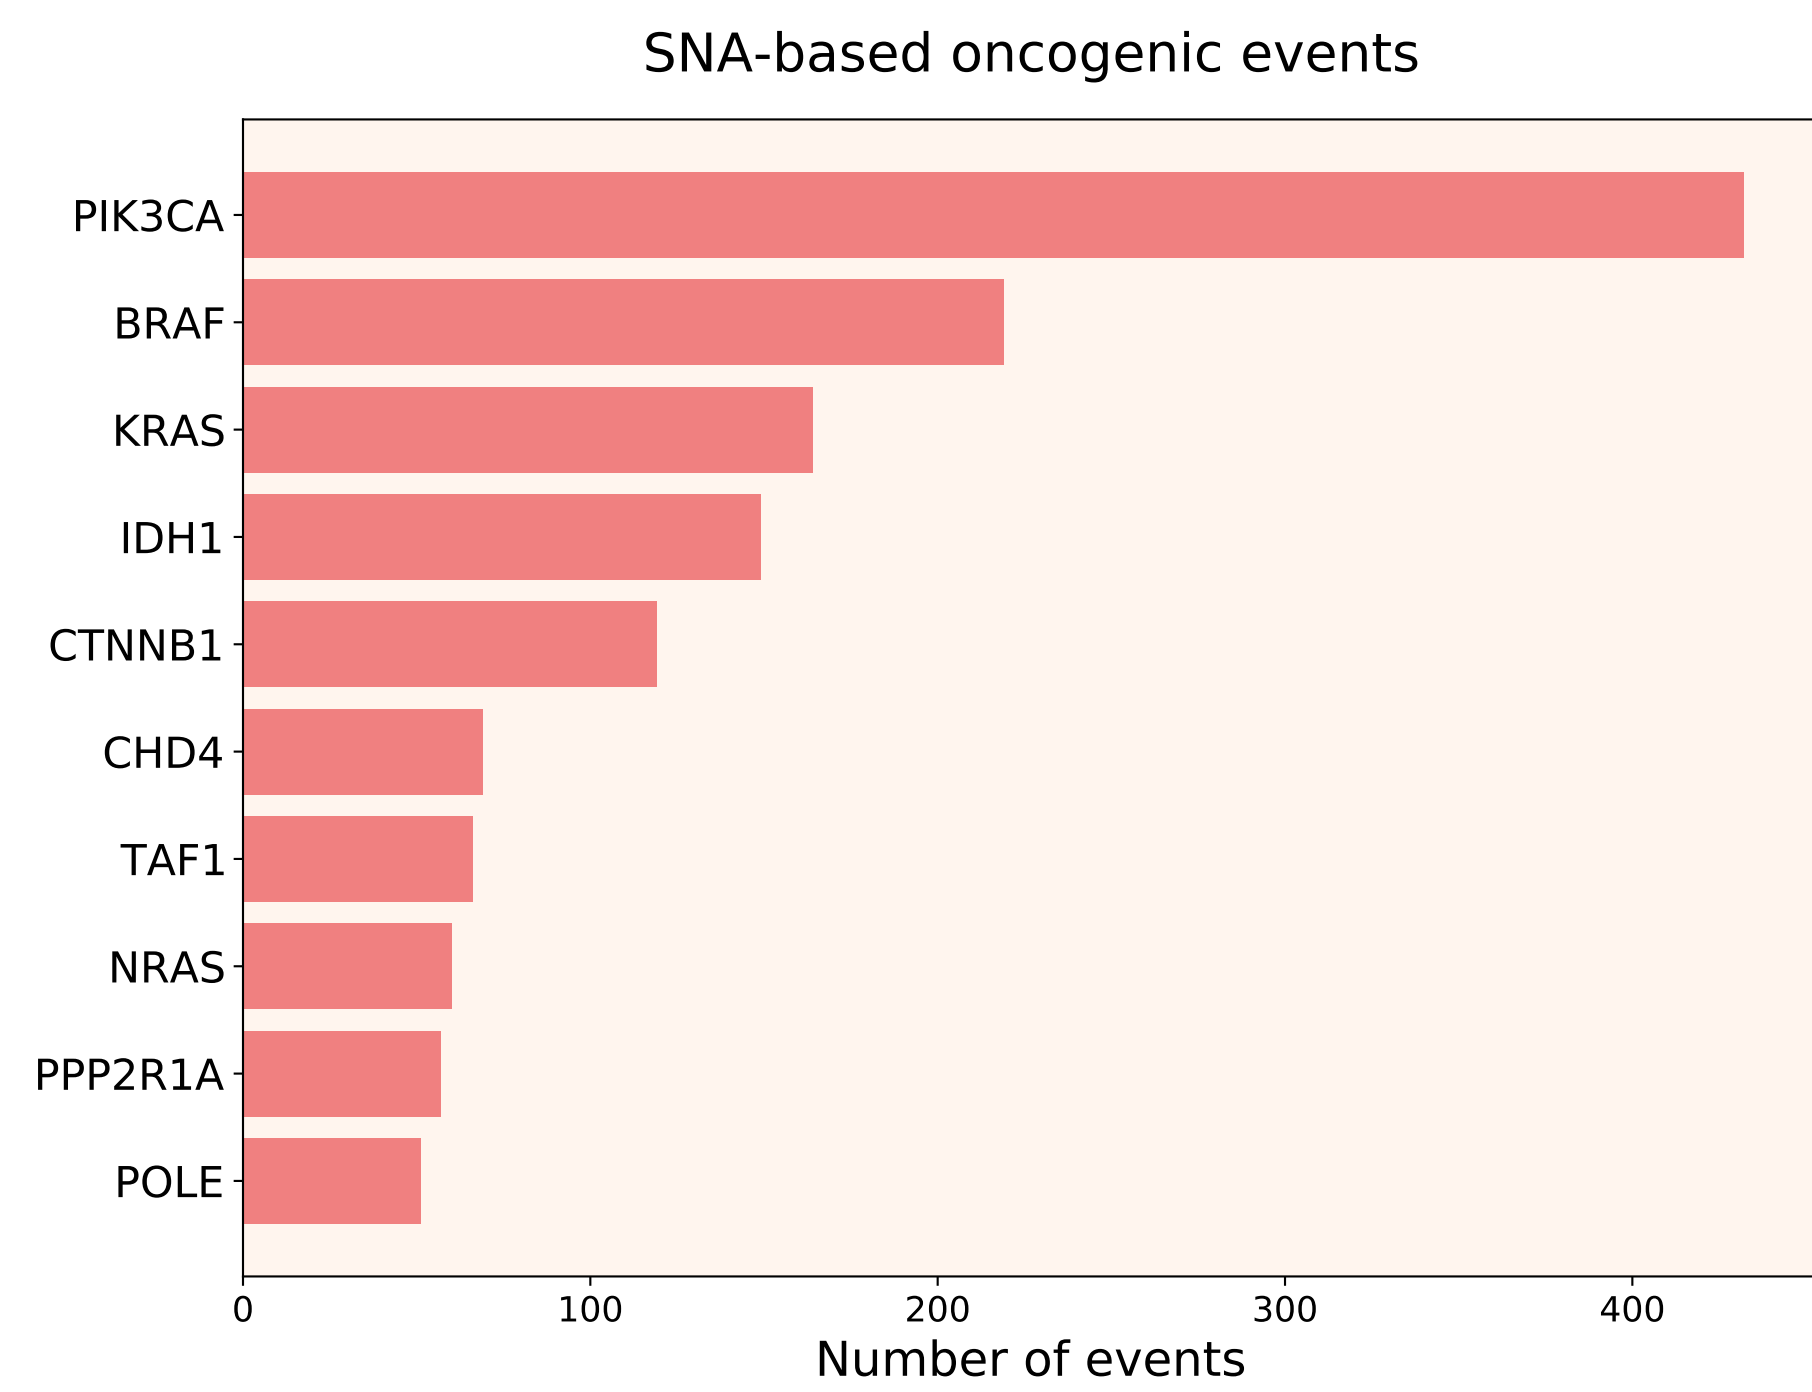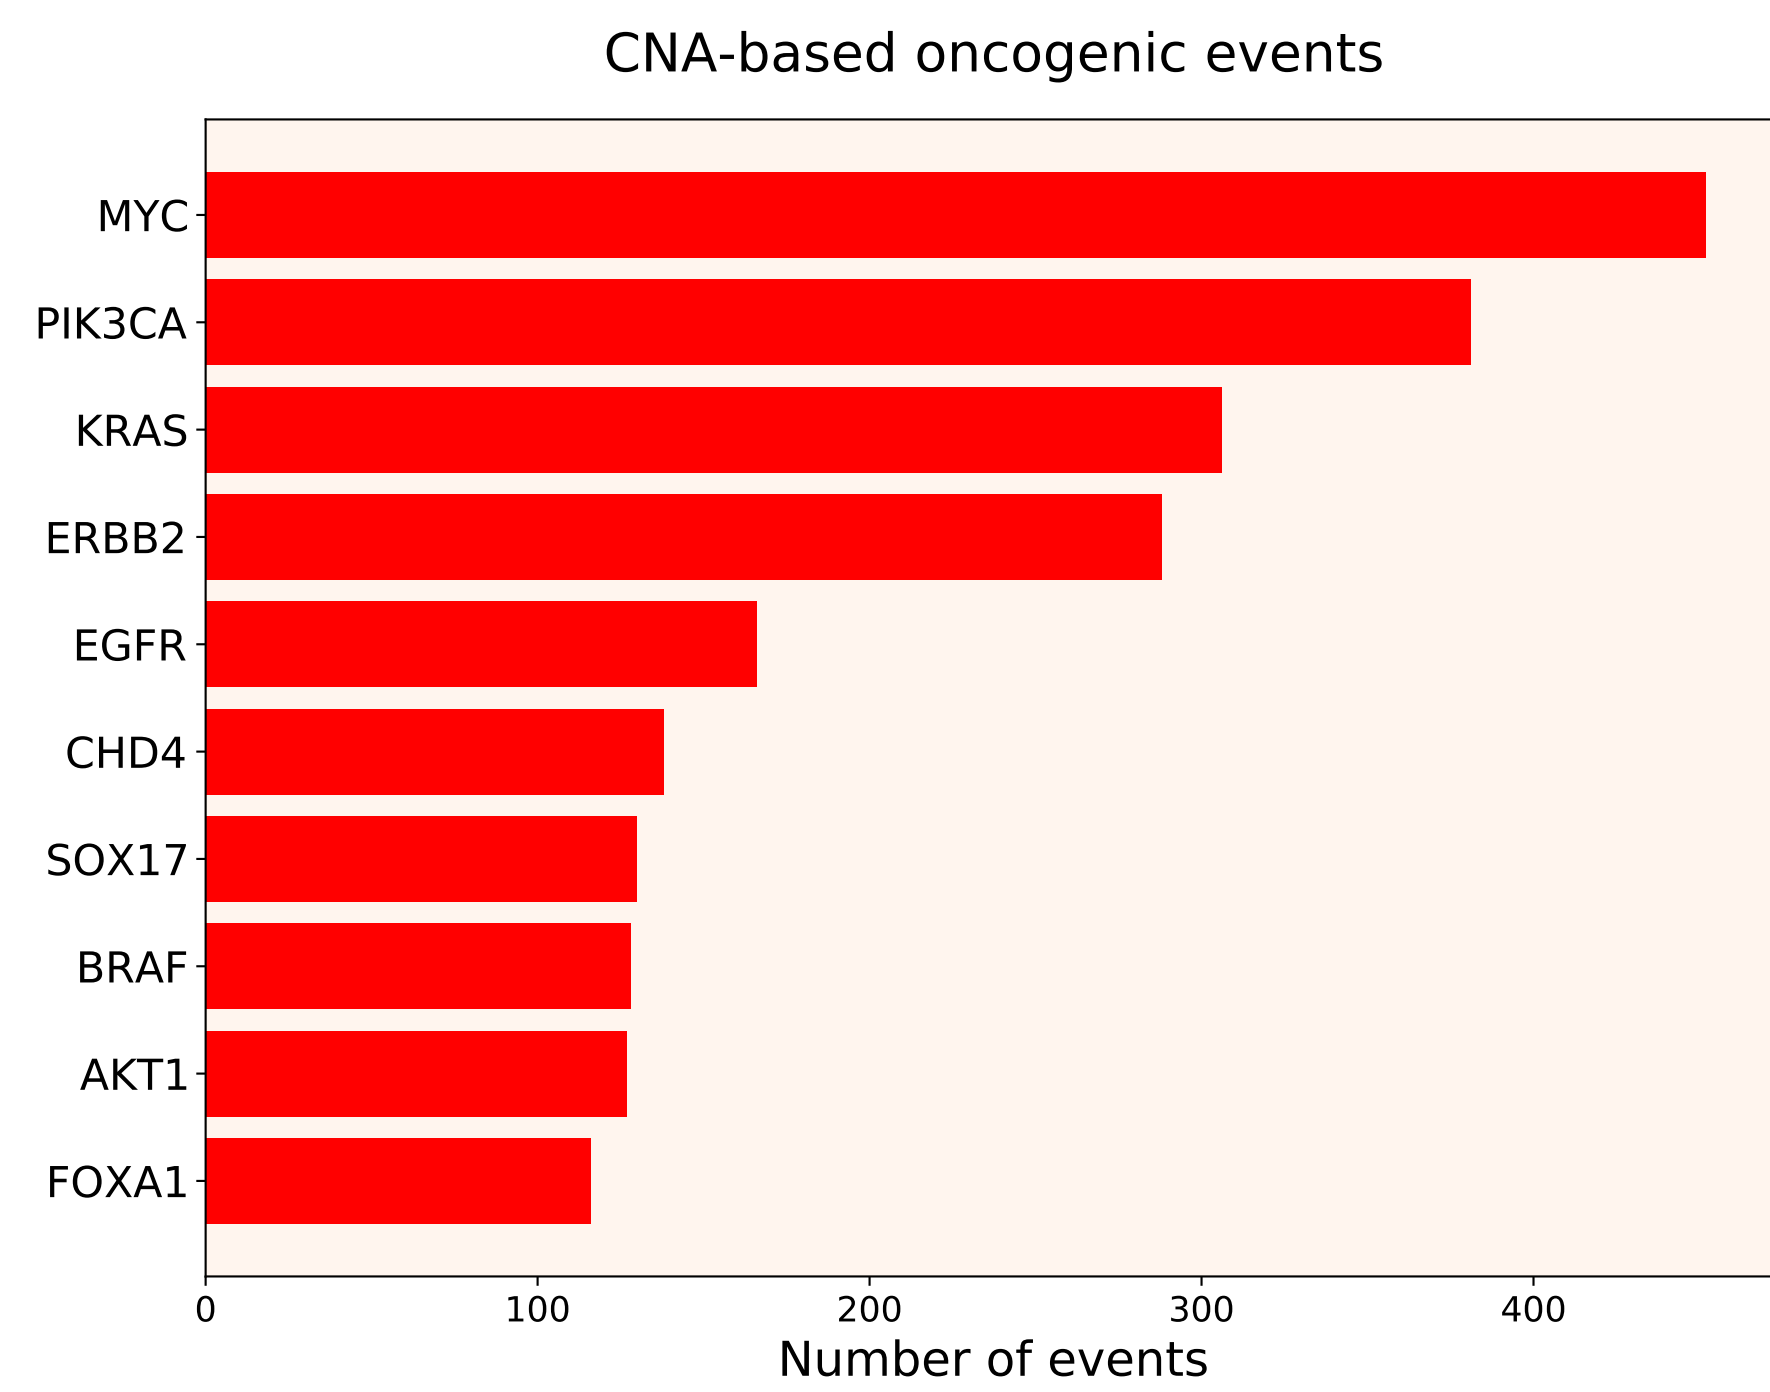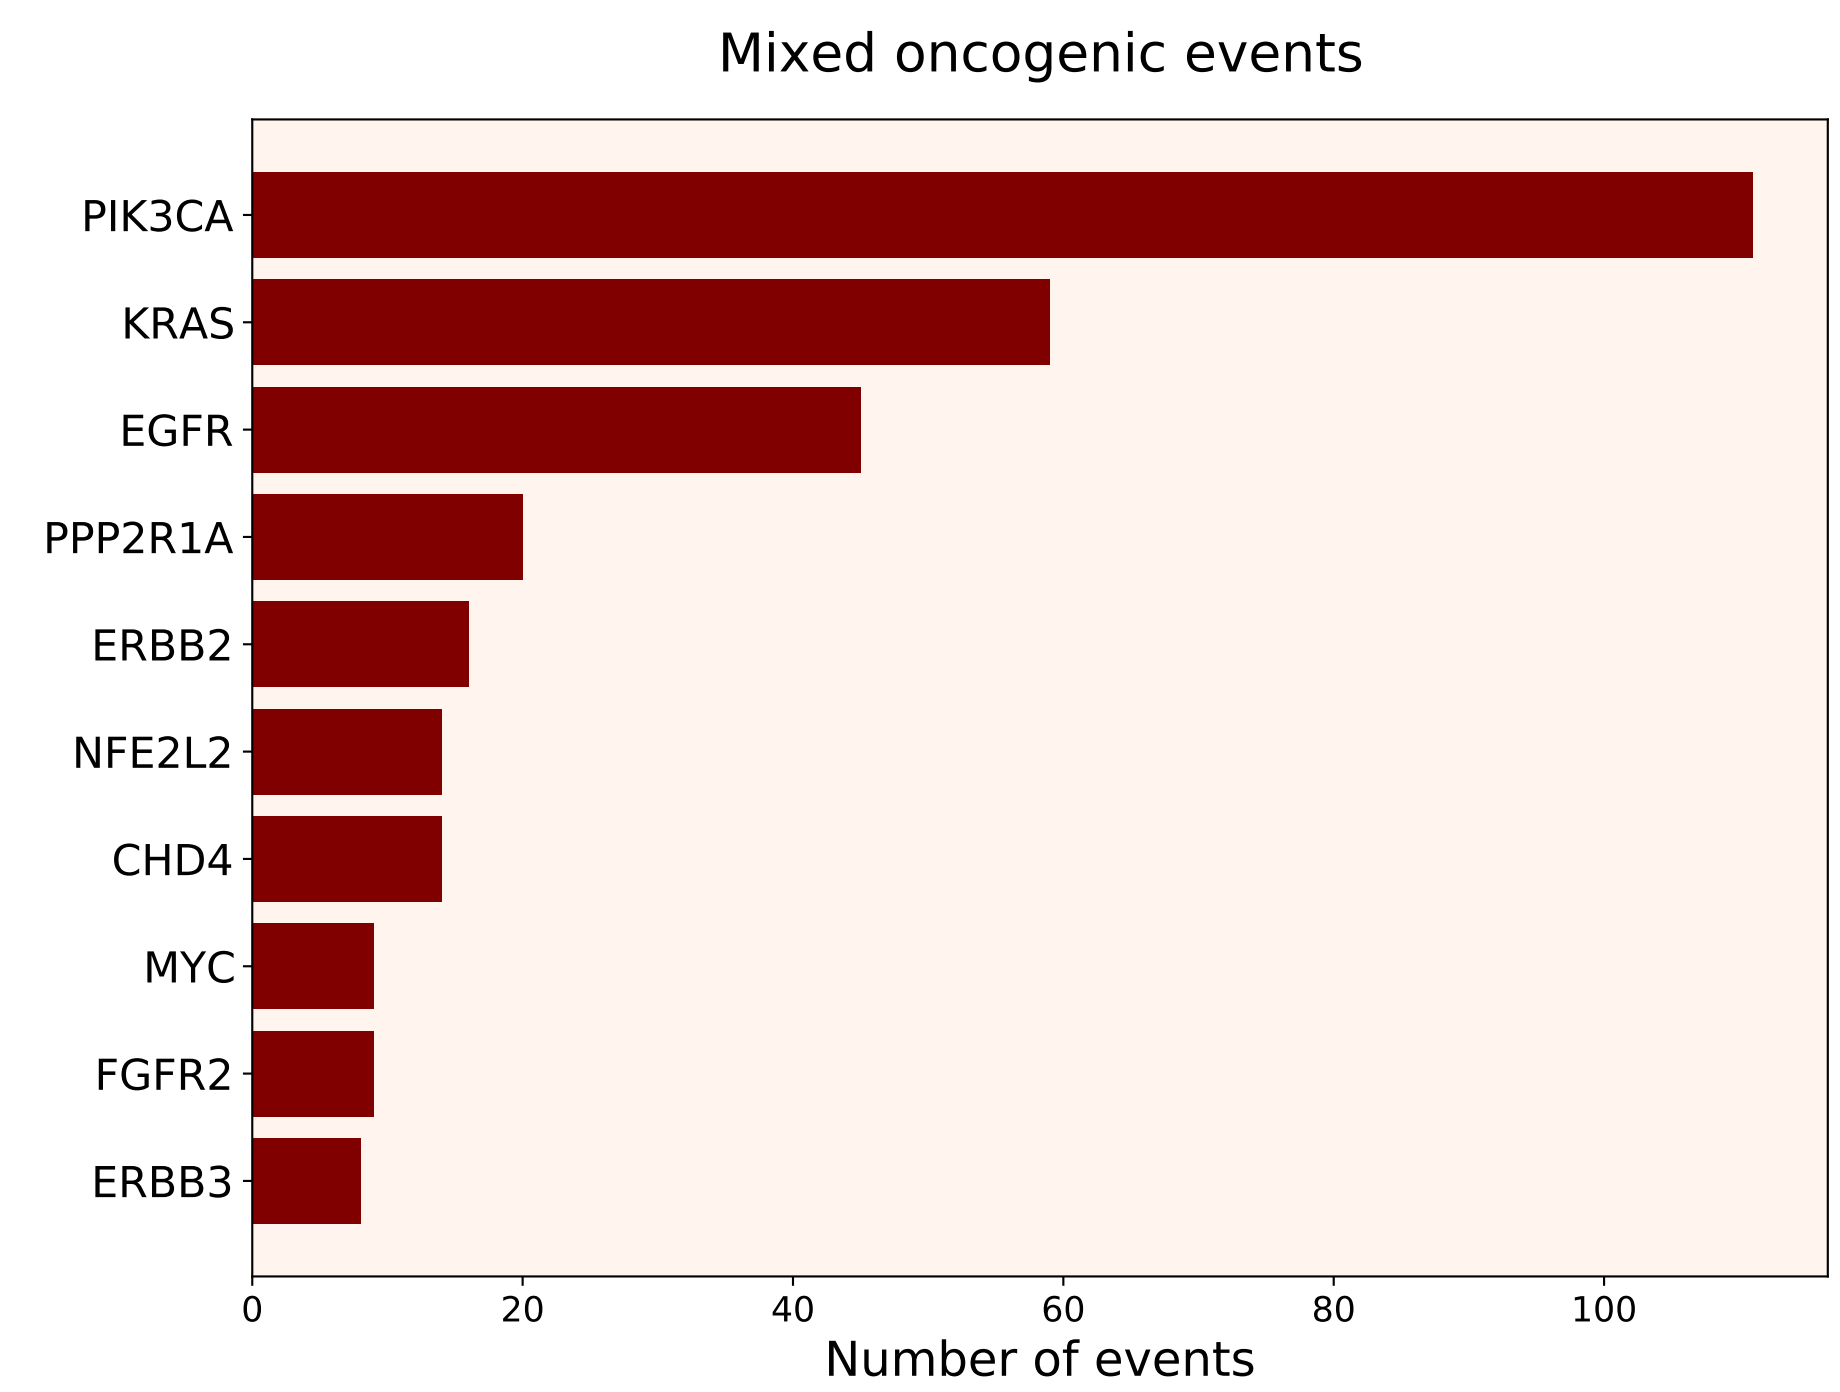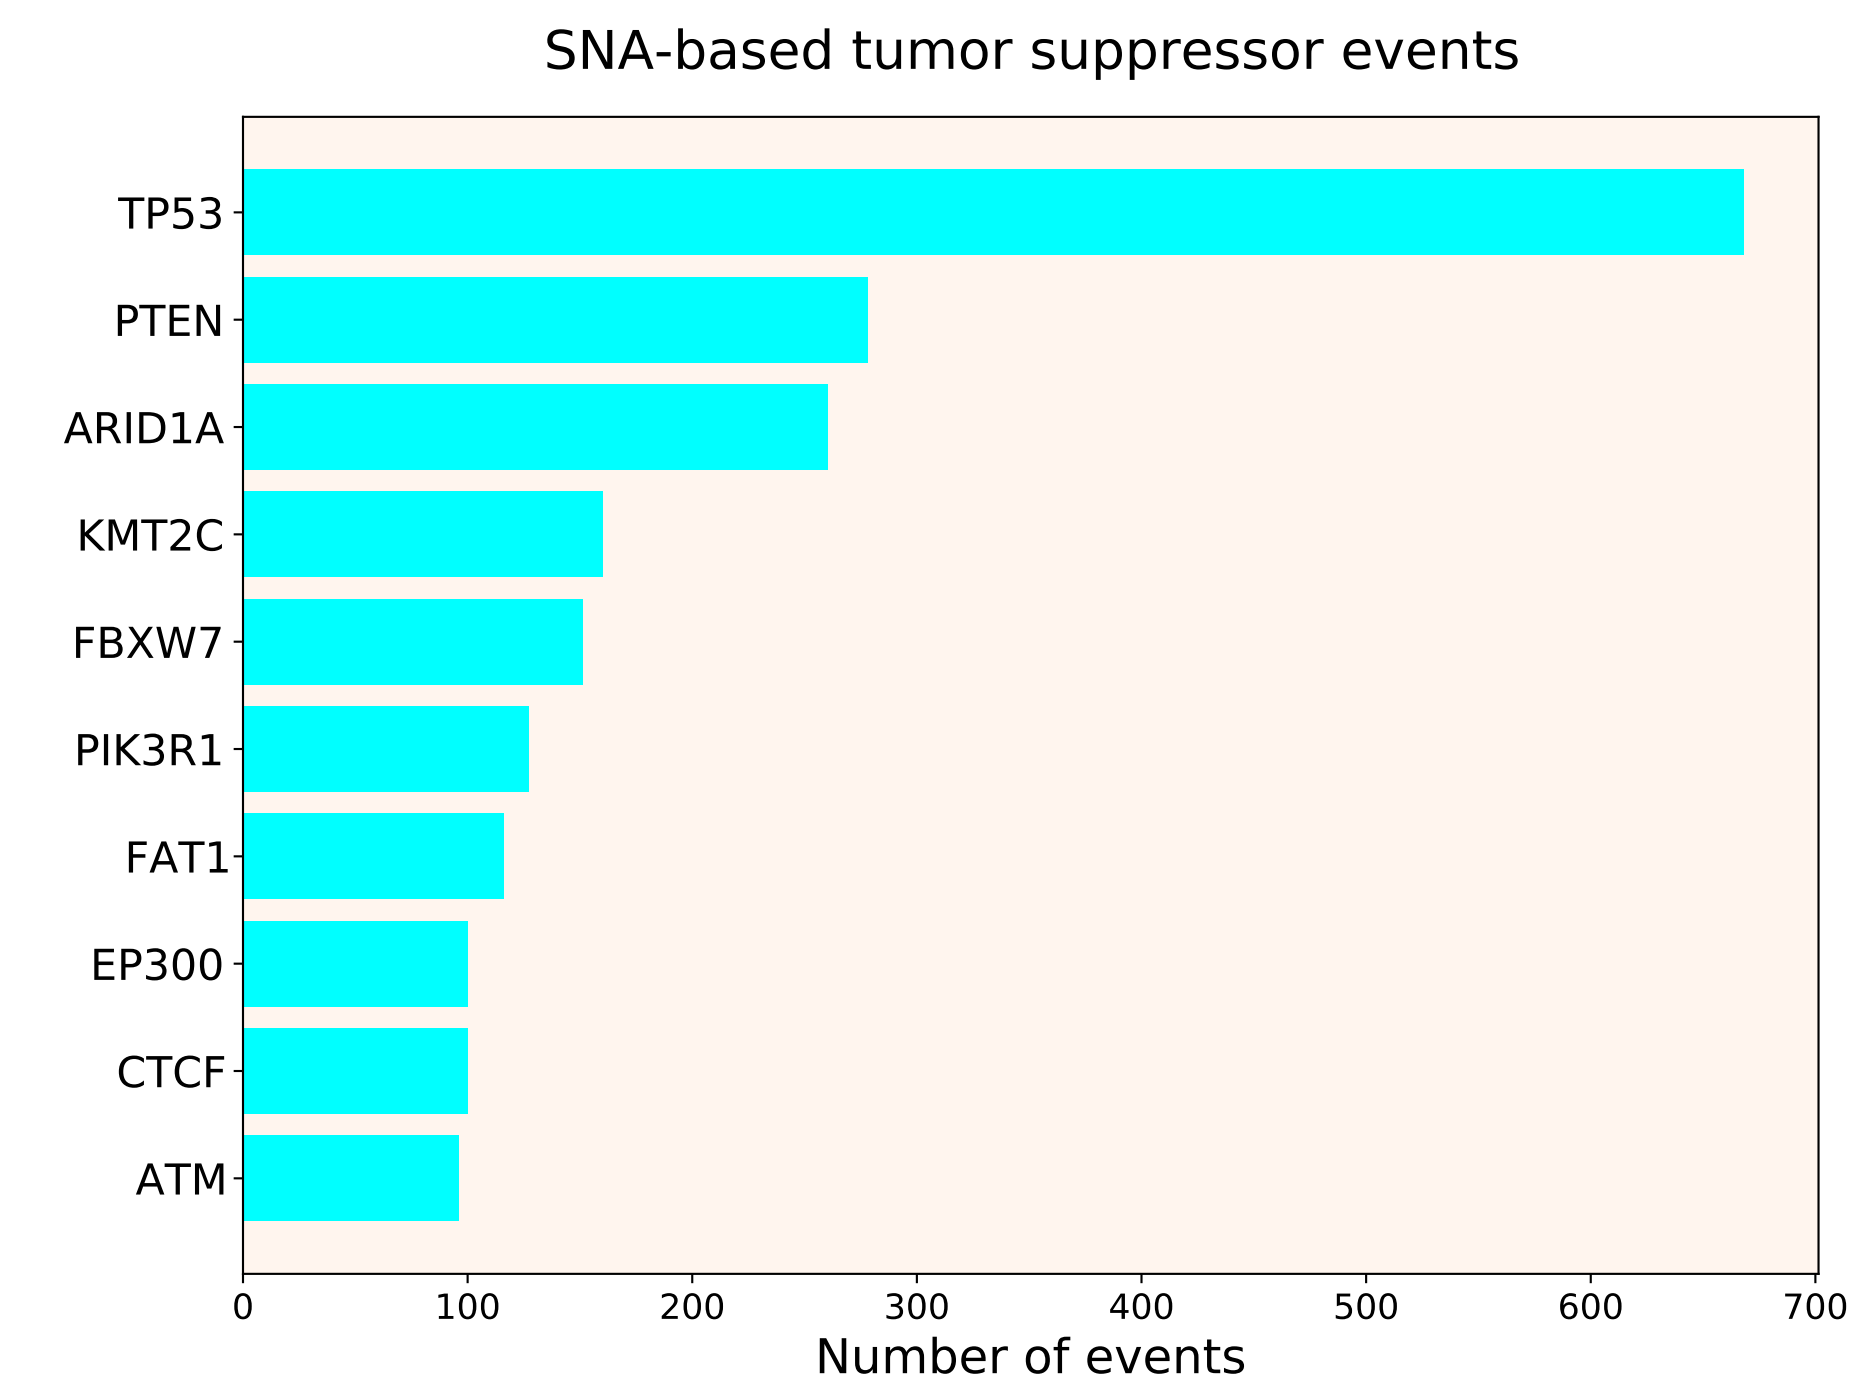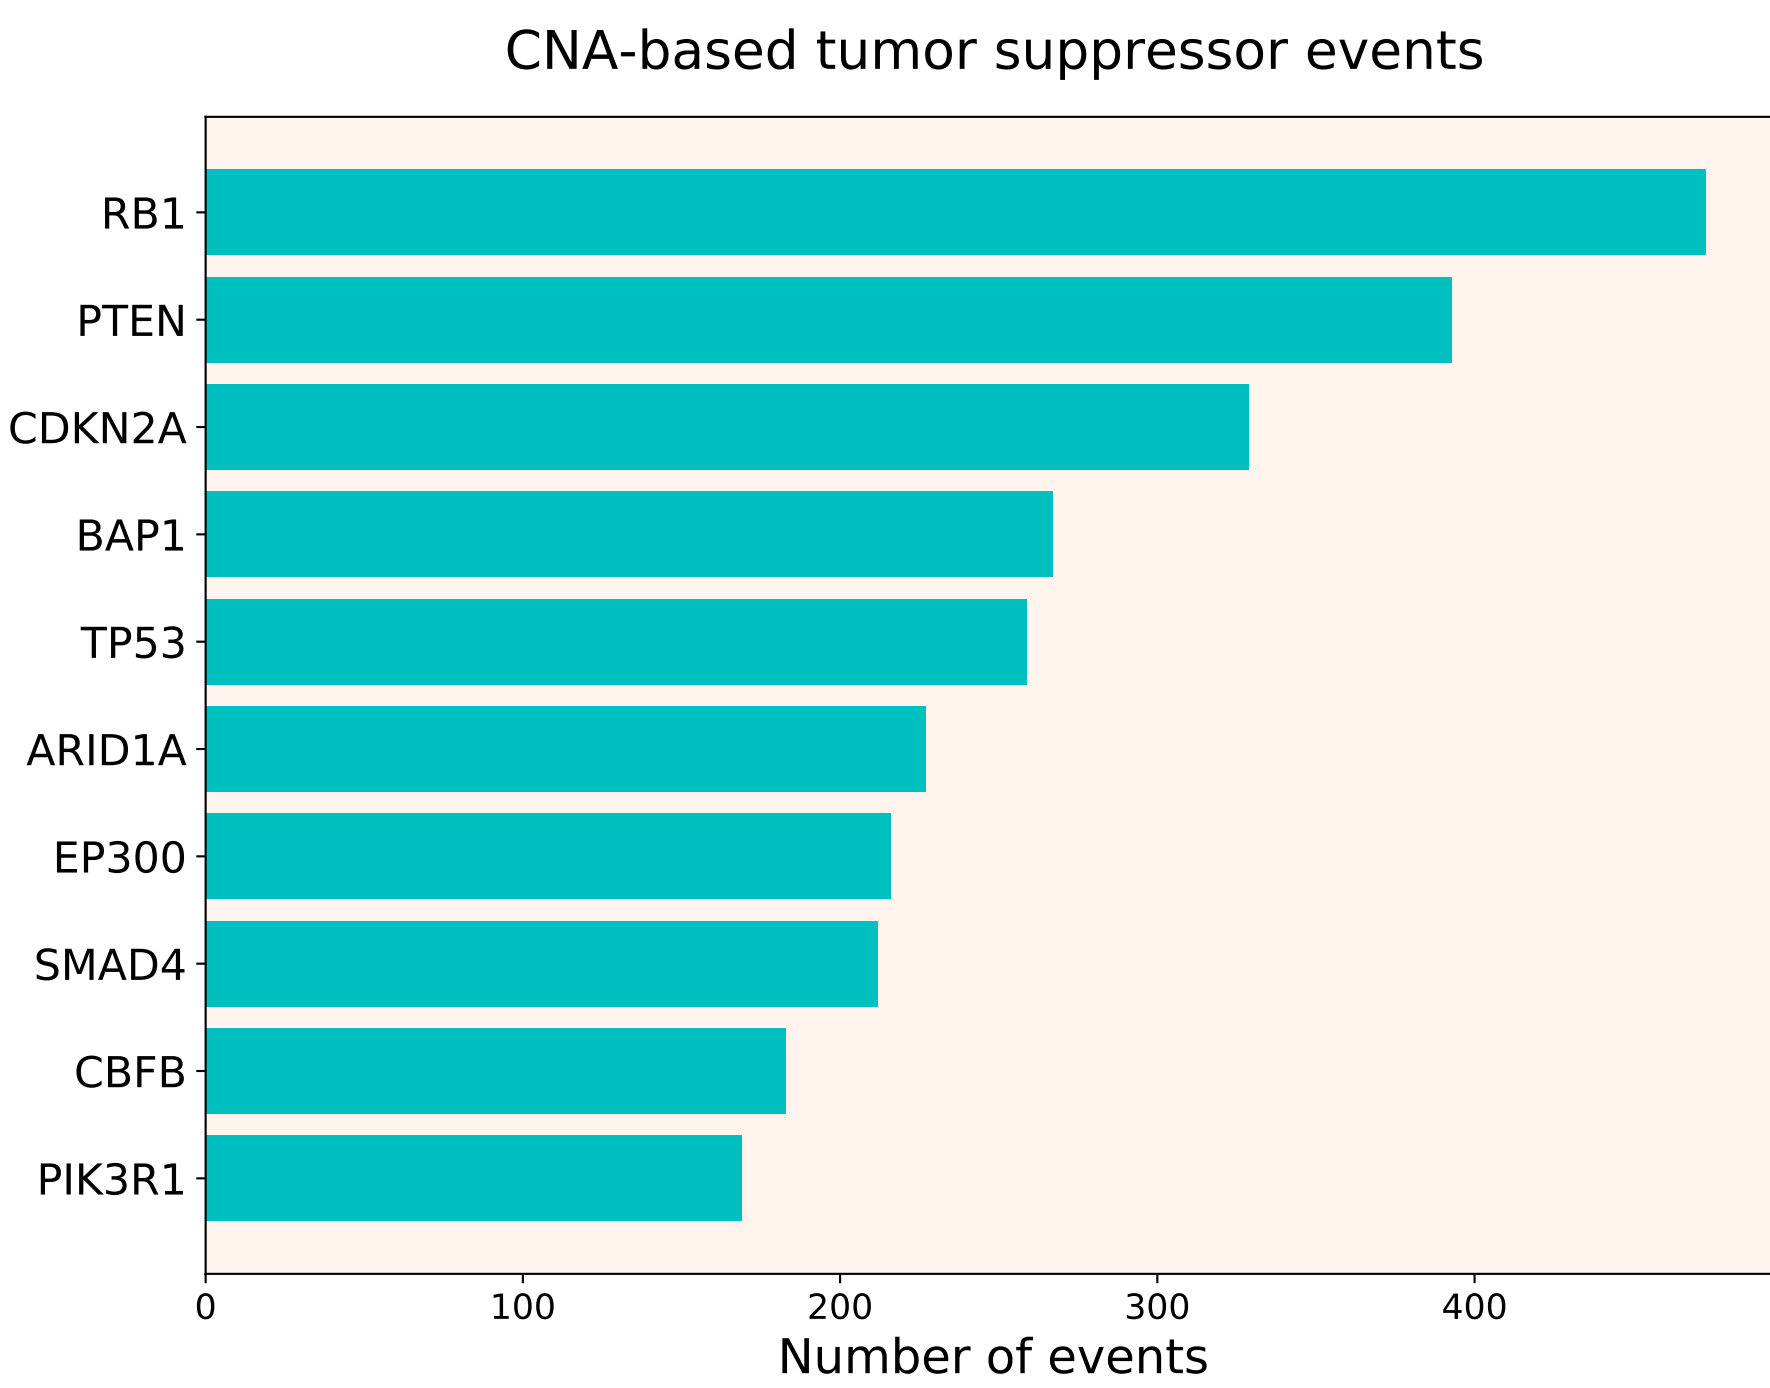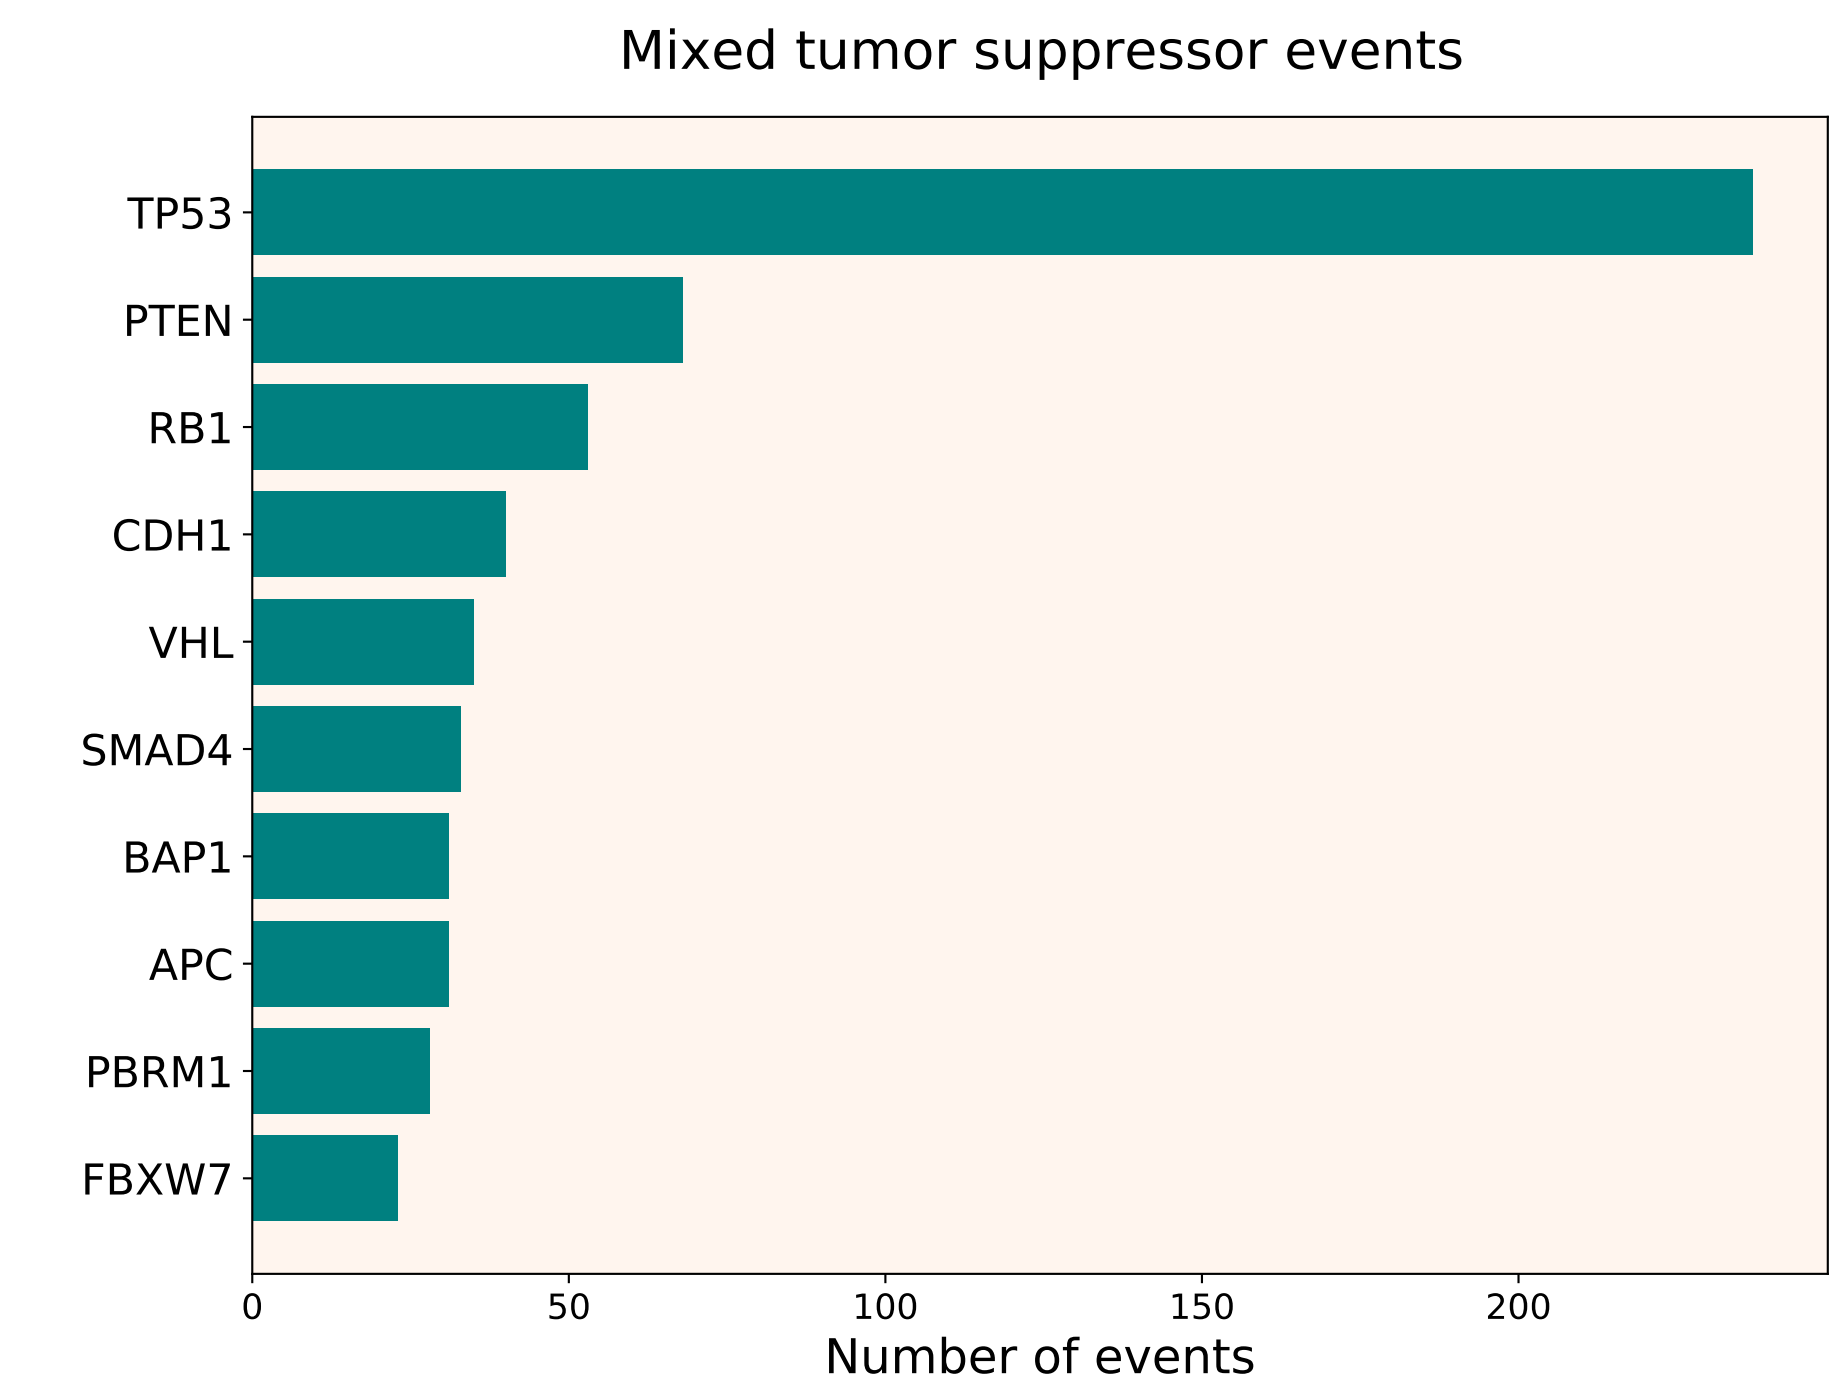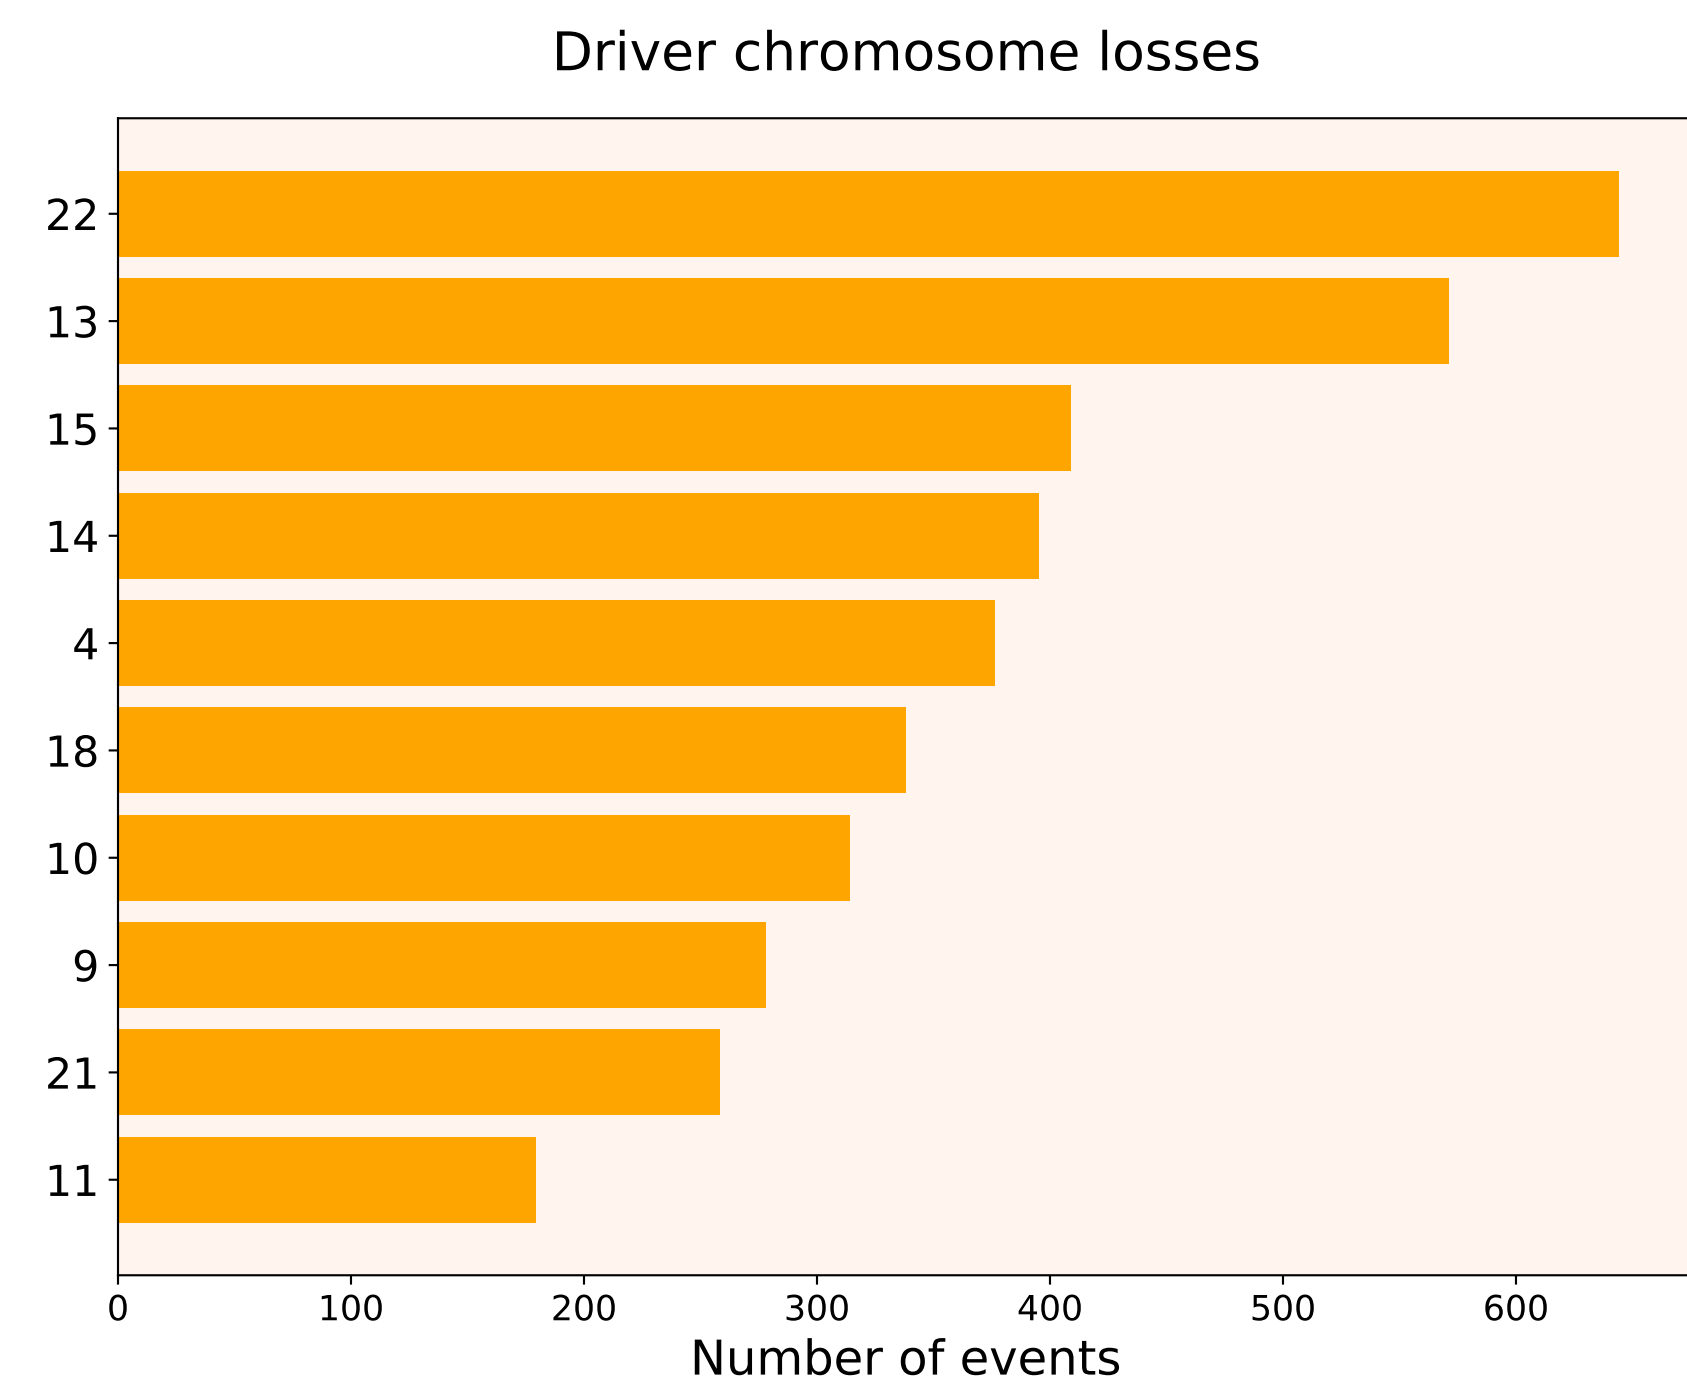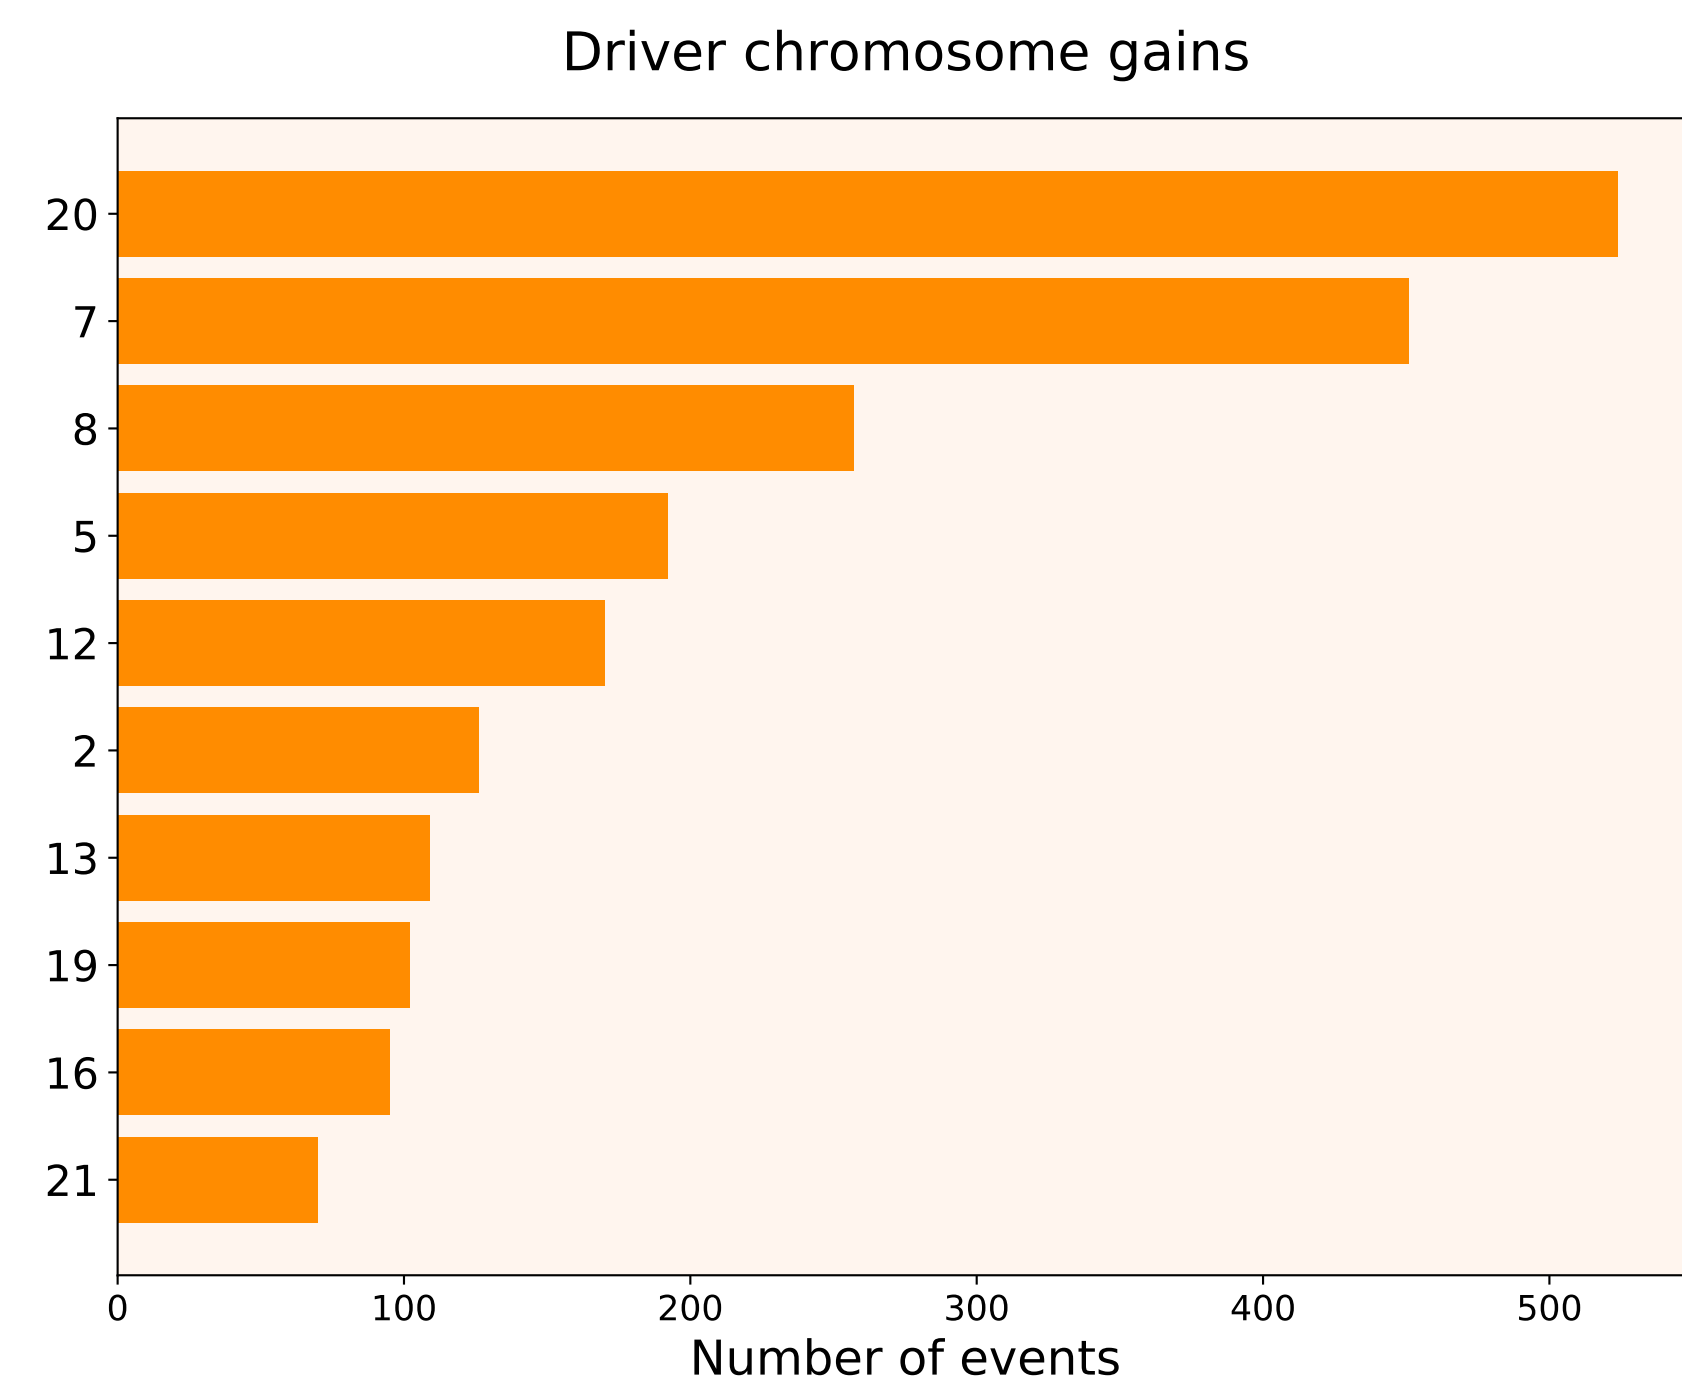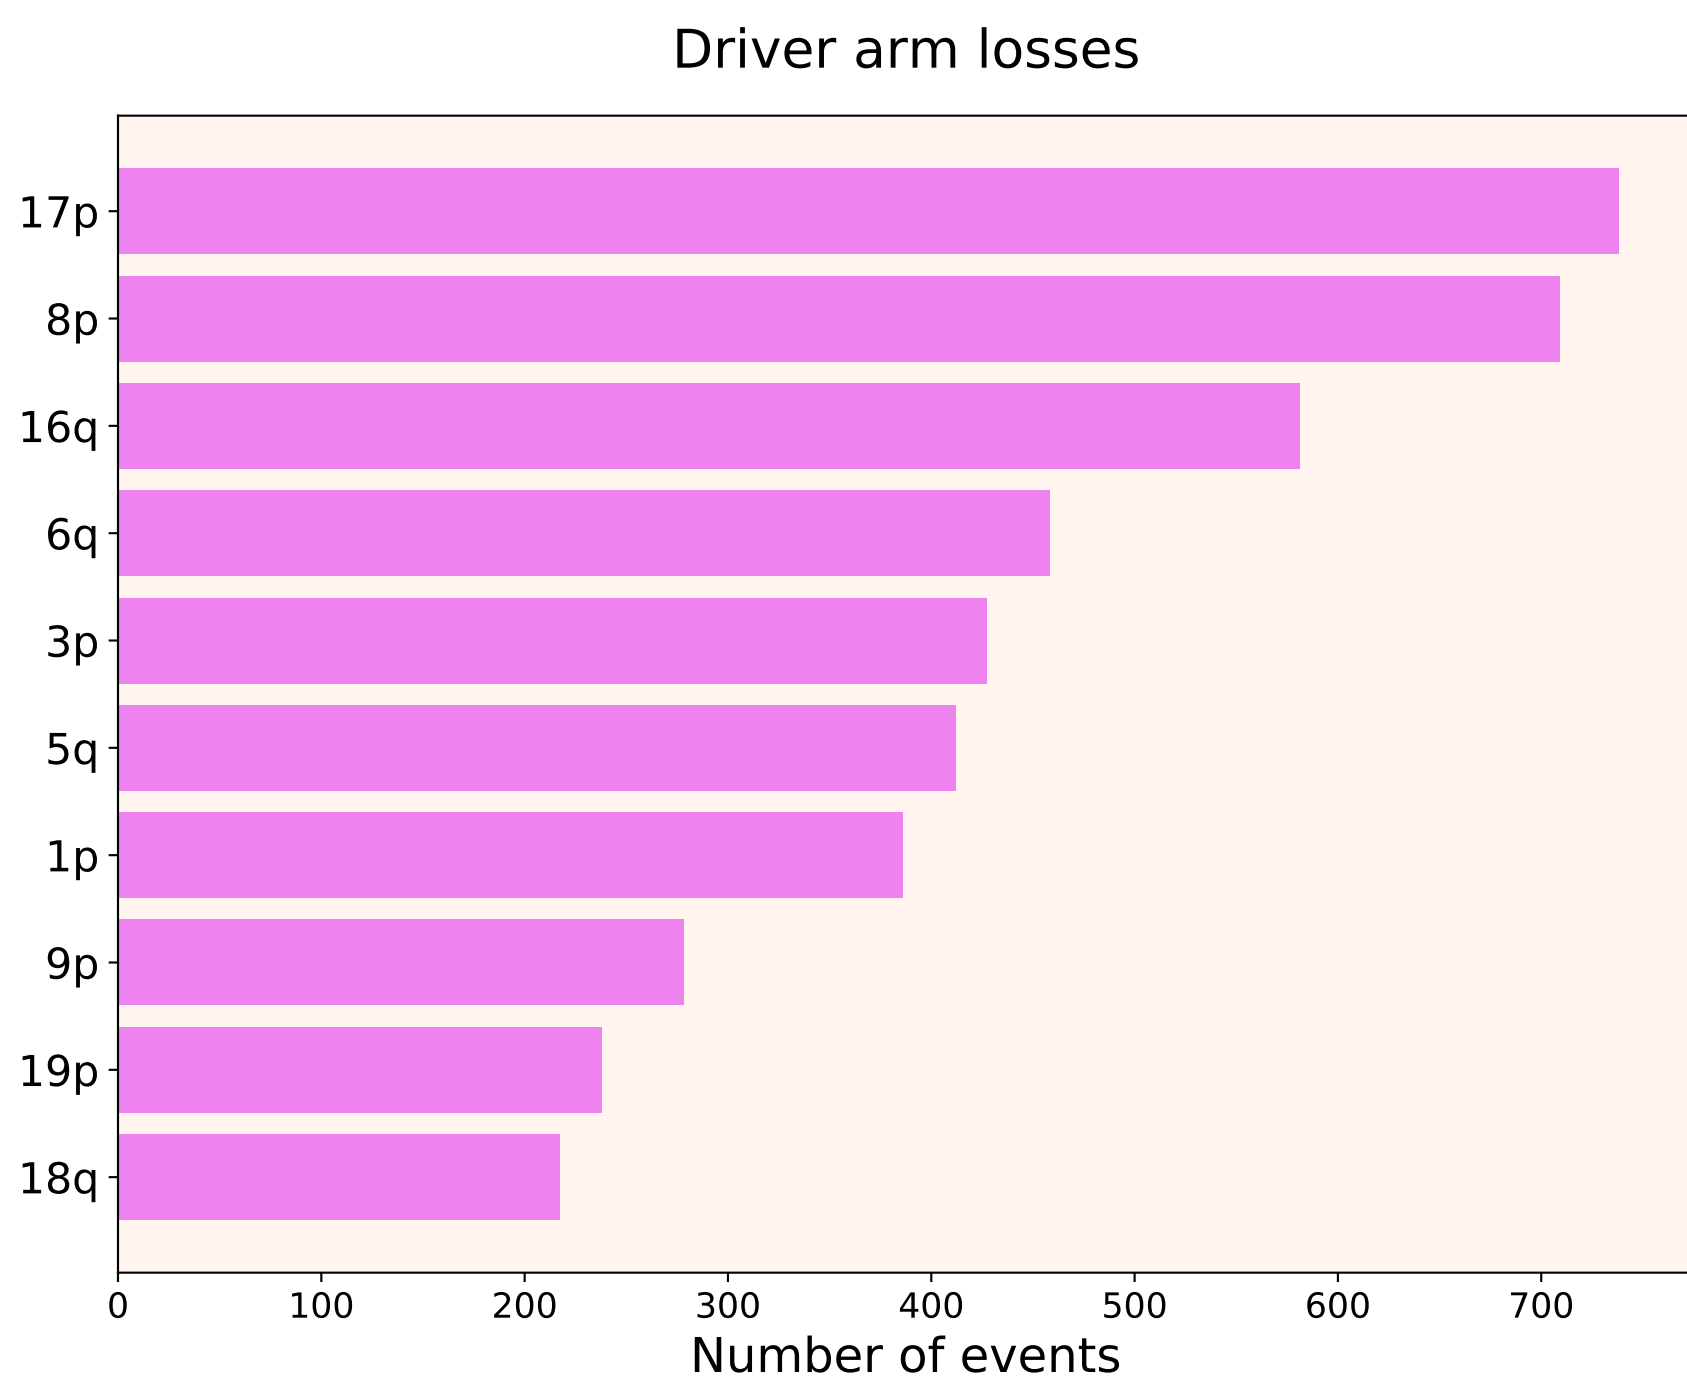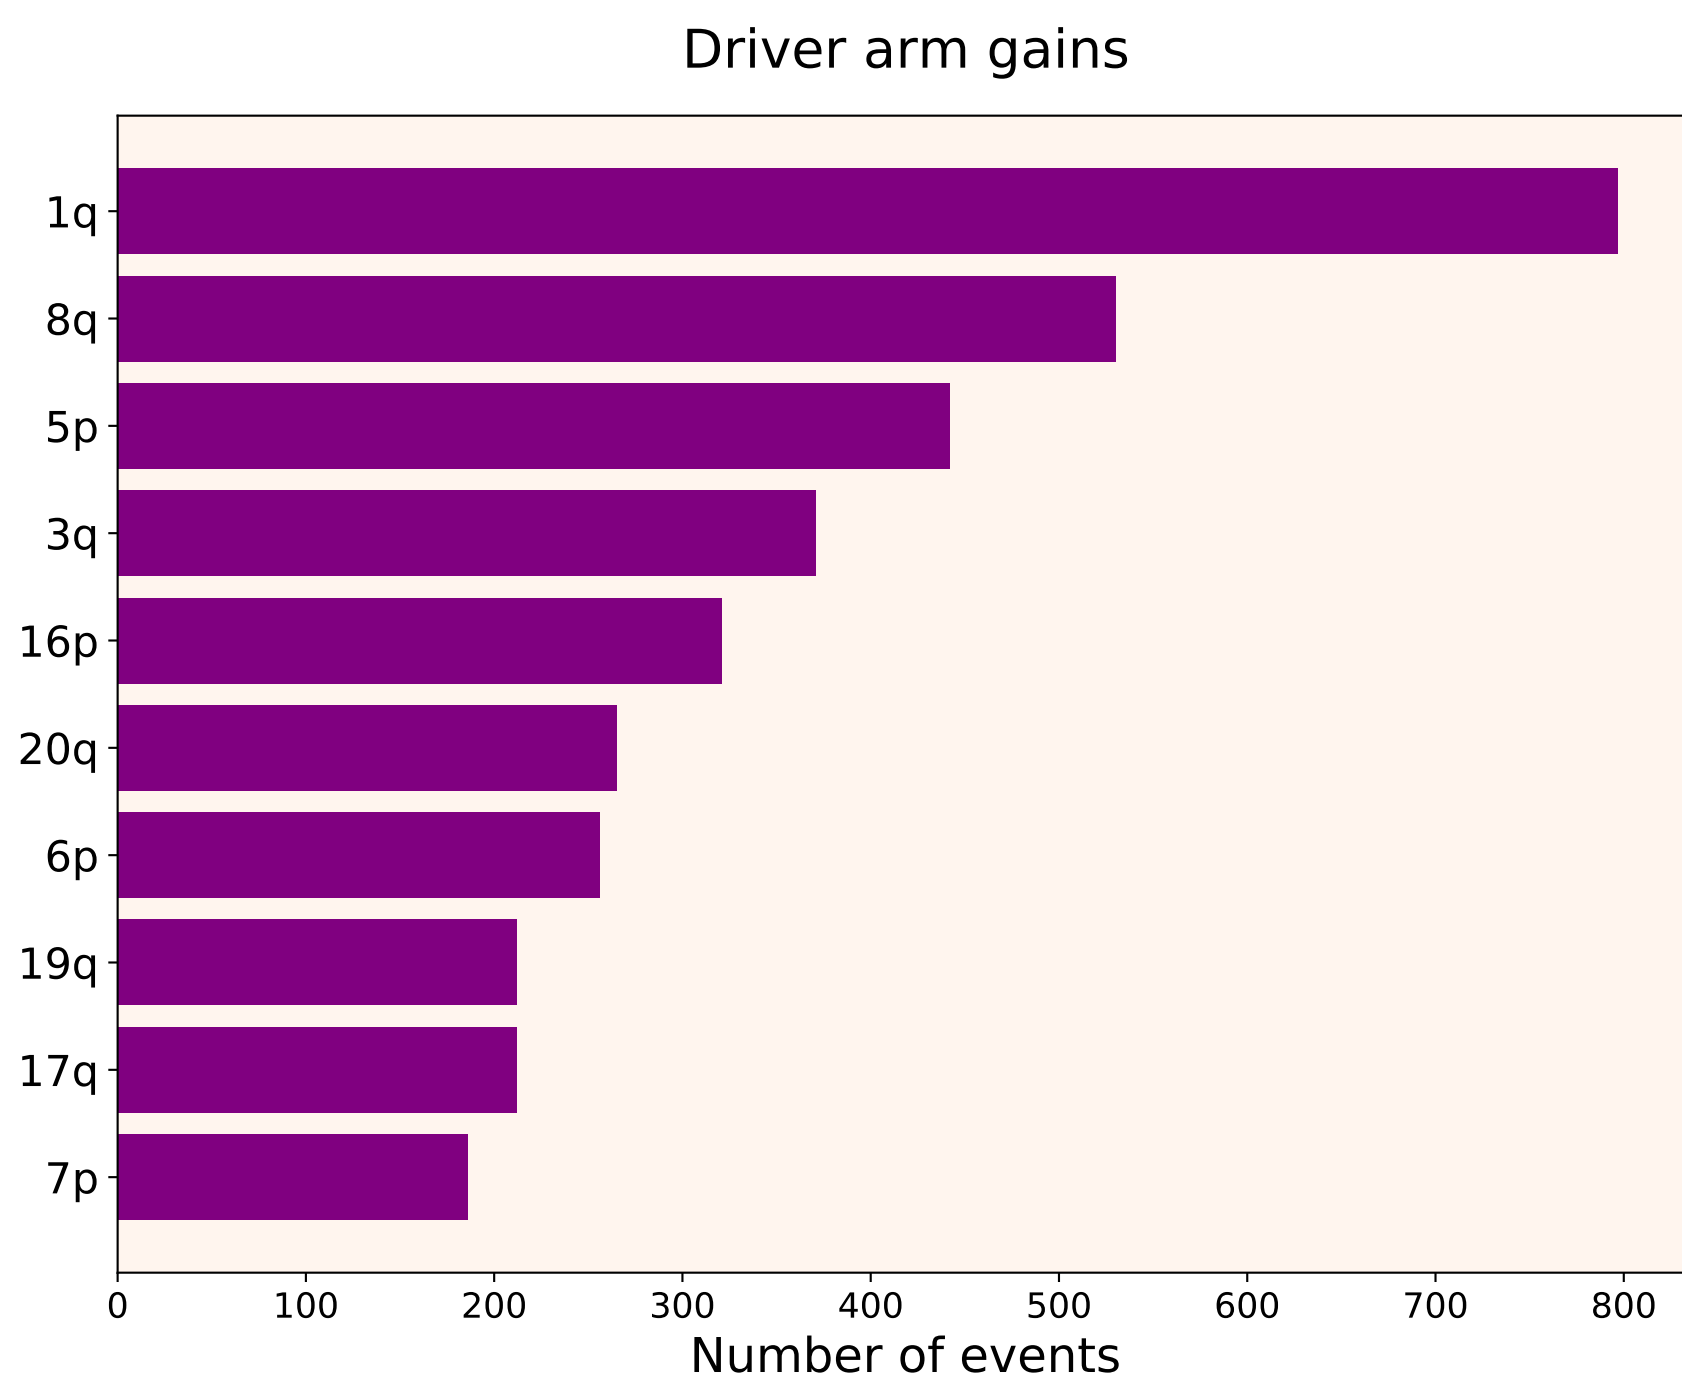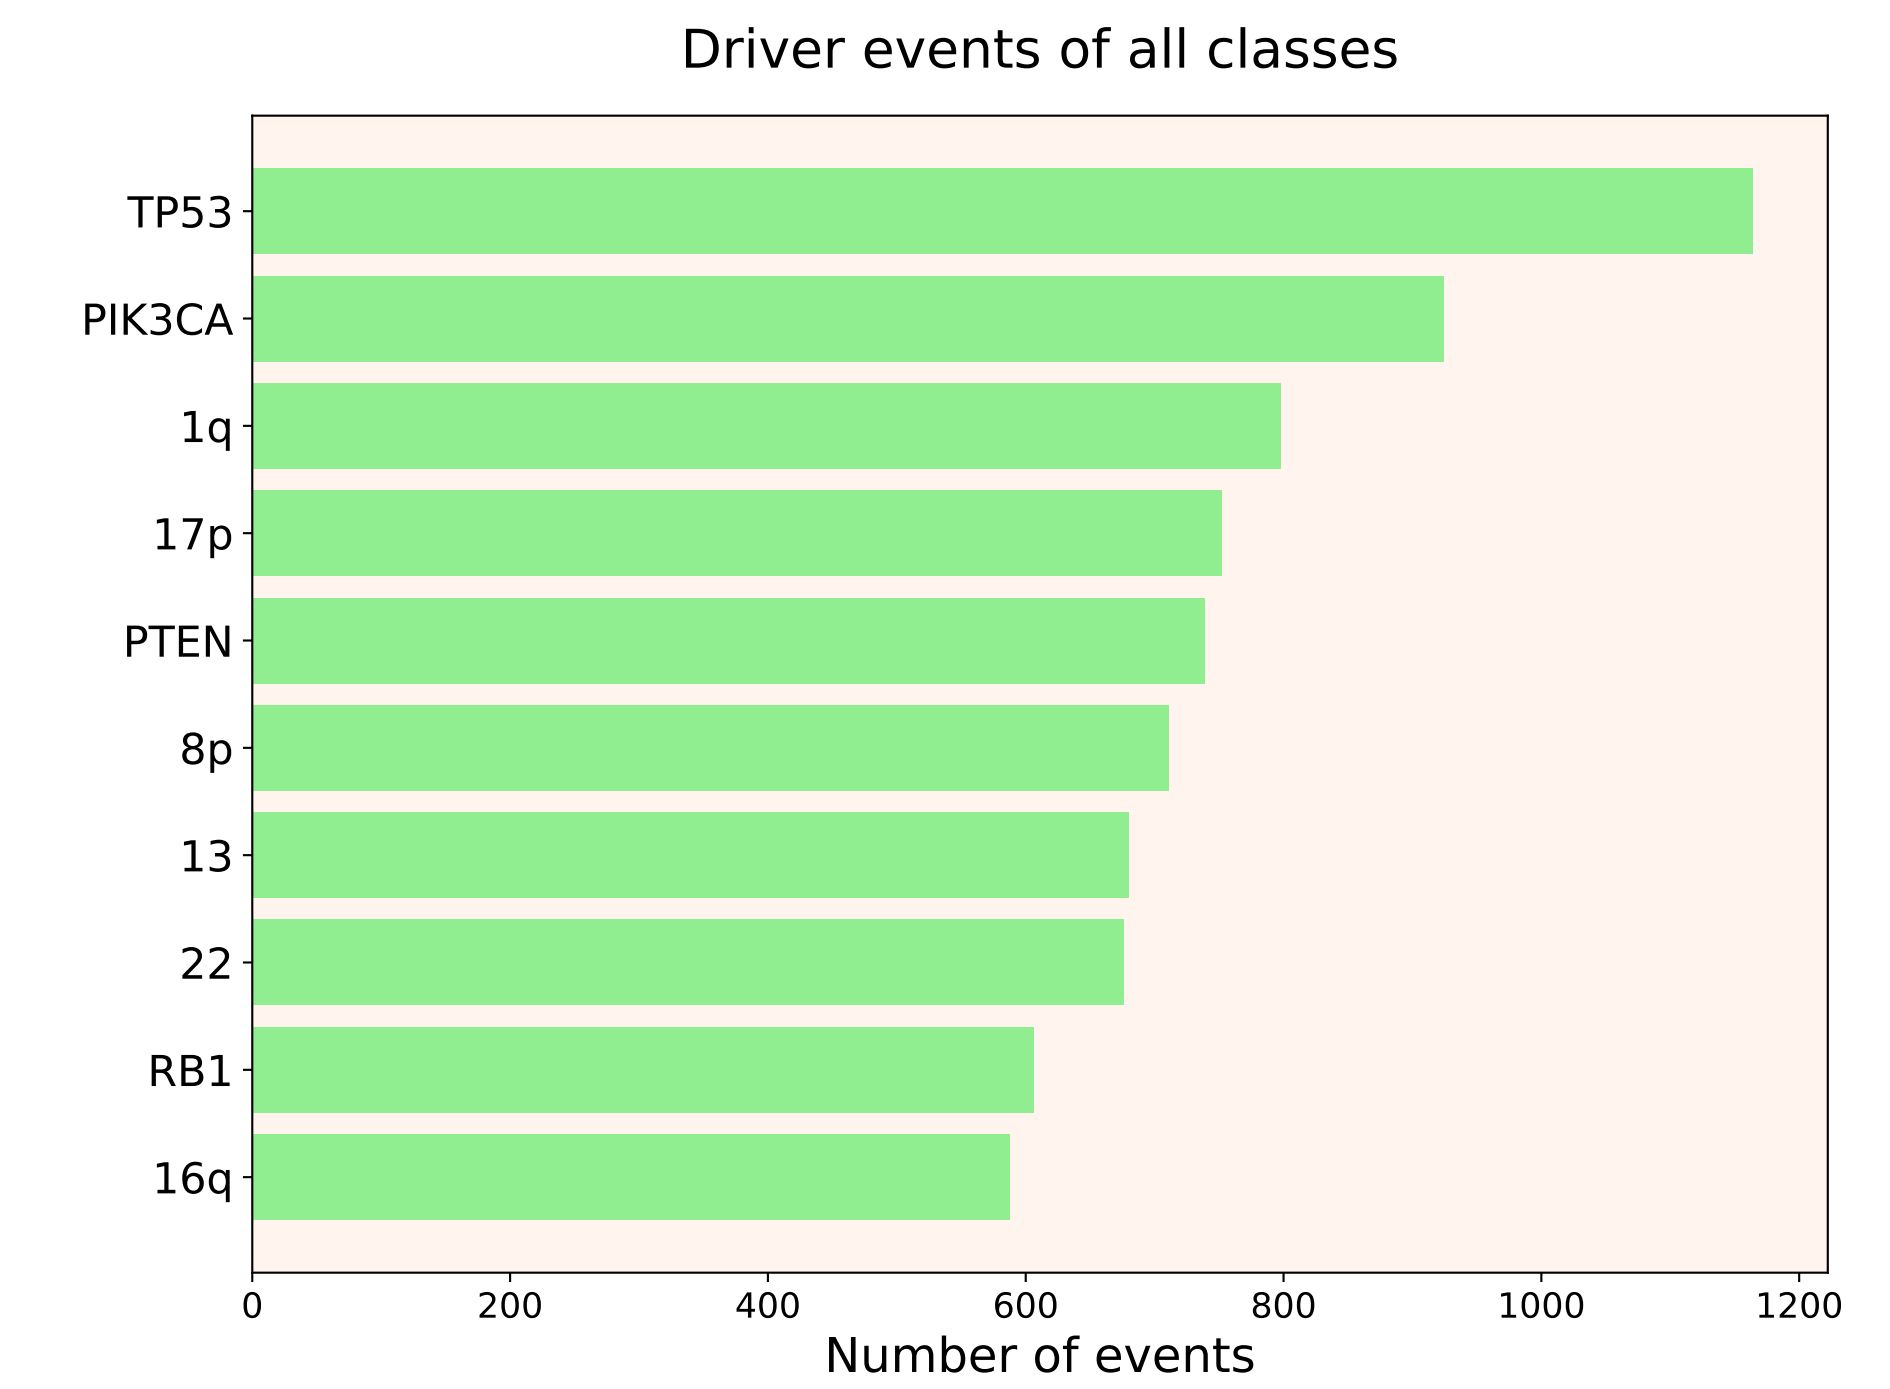

Supplement: Supplemental_Data_S1.zip [file Supplemental_Data_S1.zip]

Driver event distribution by cancer type

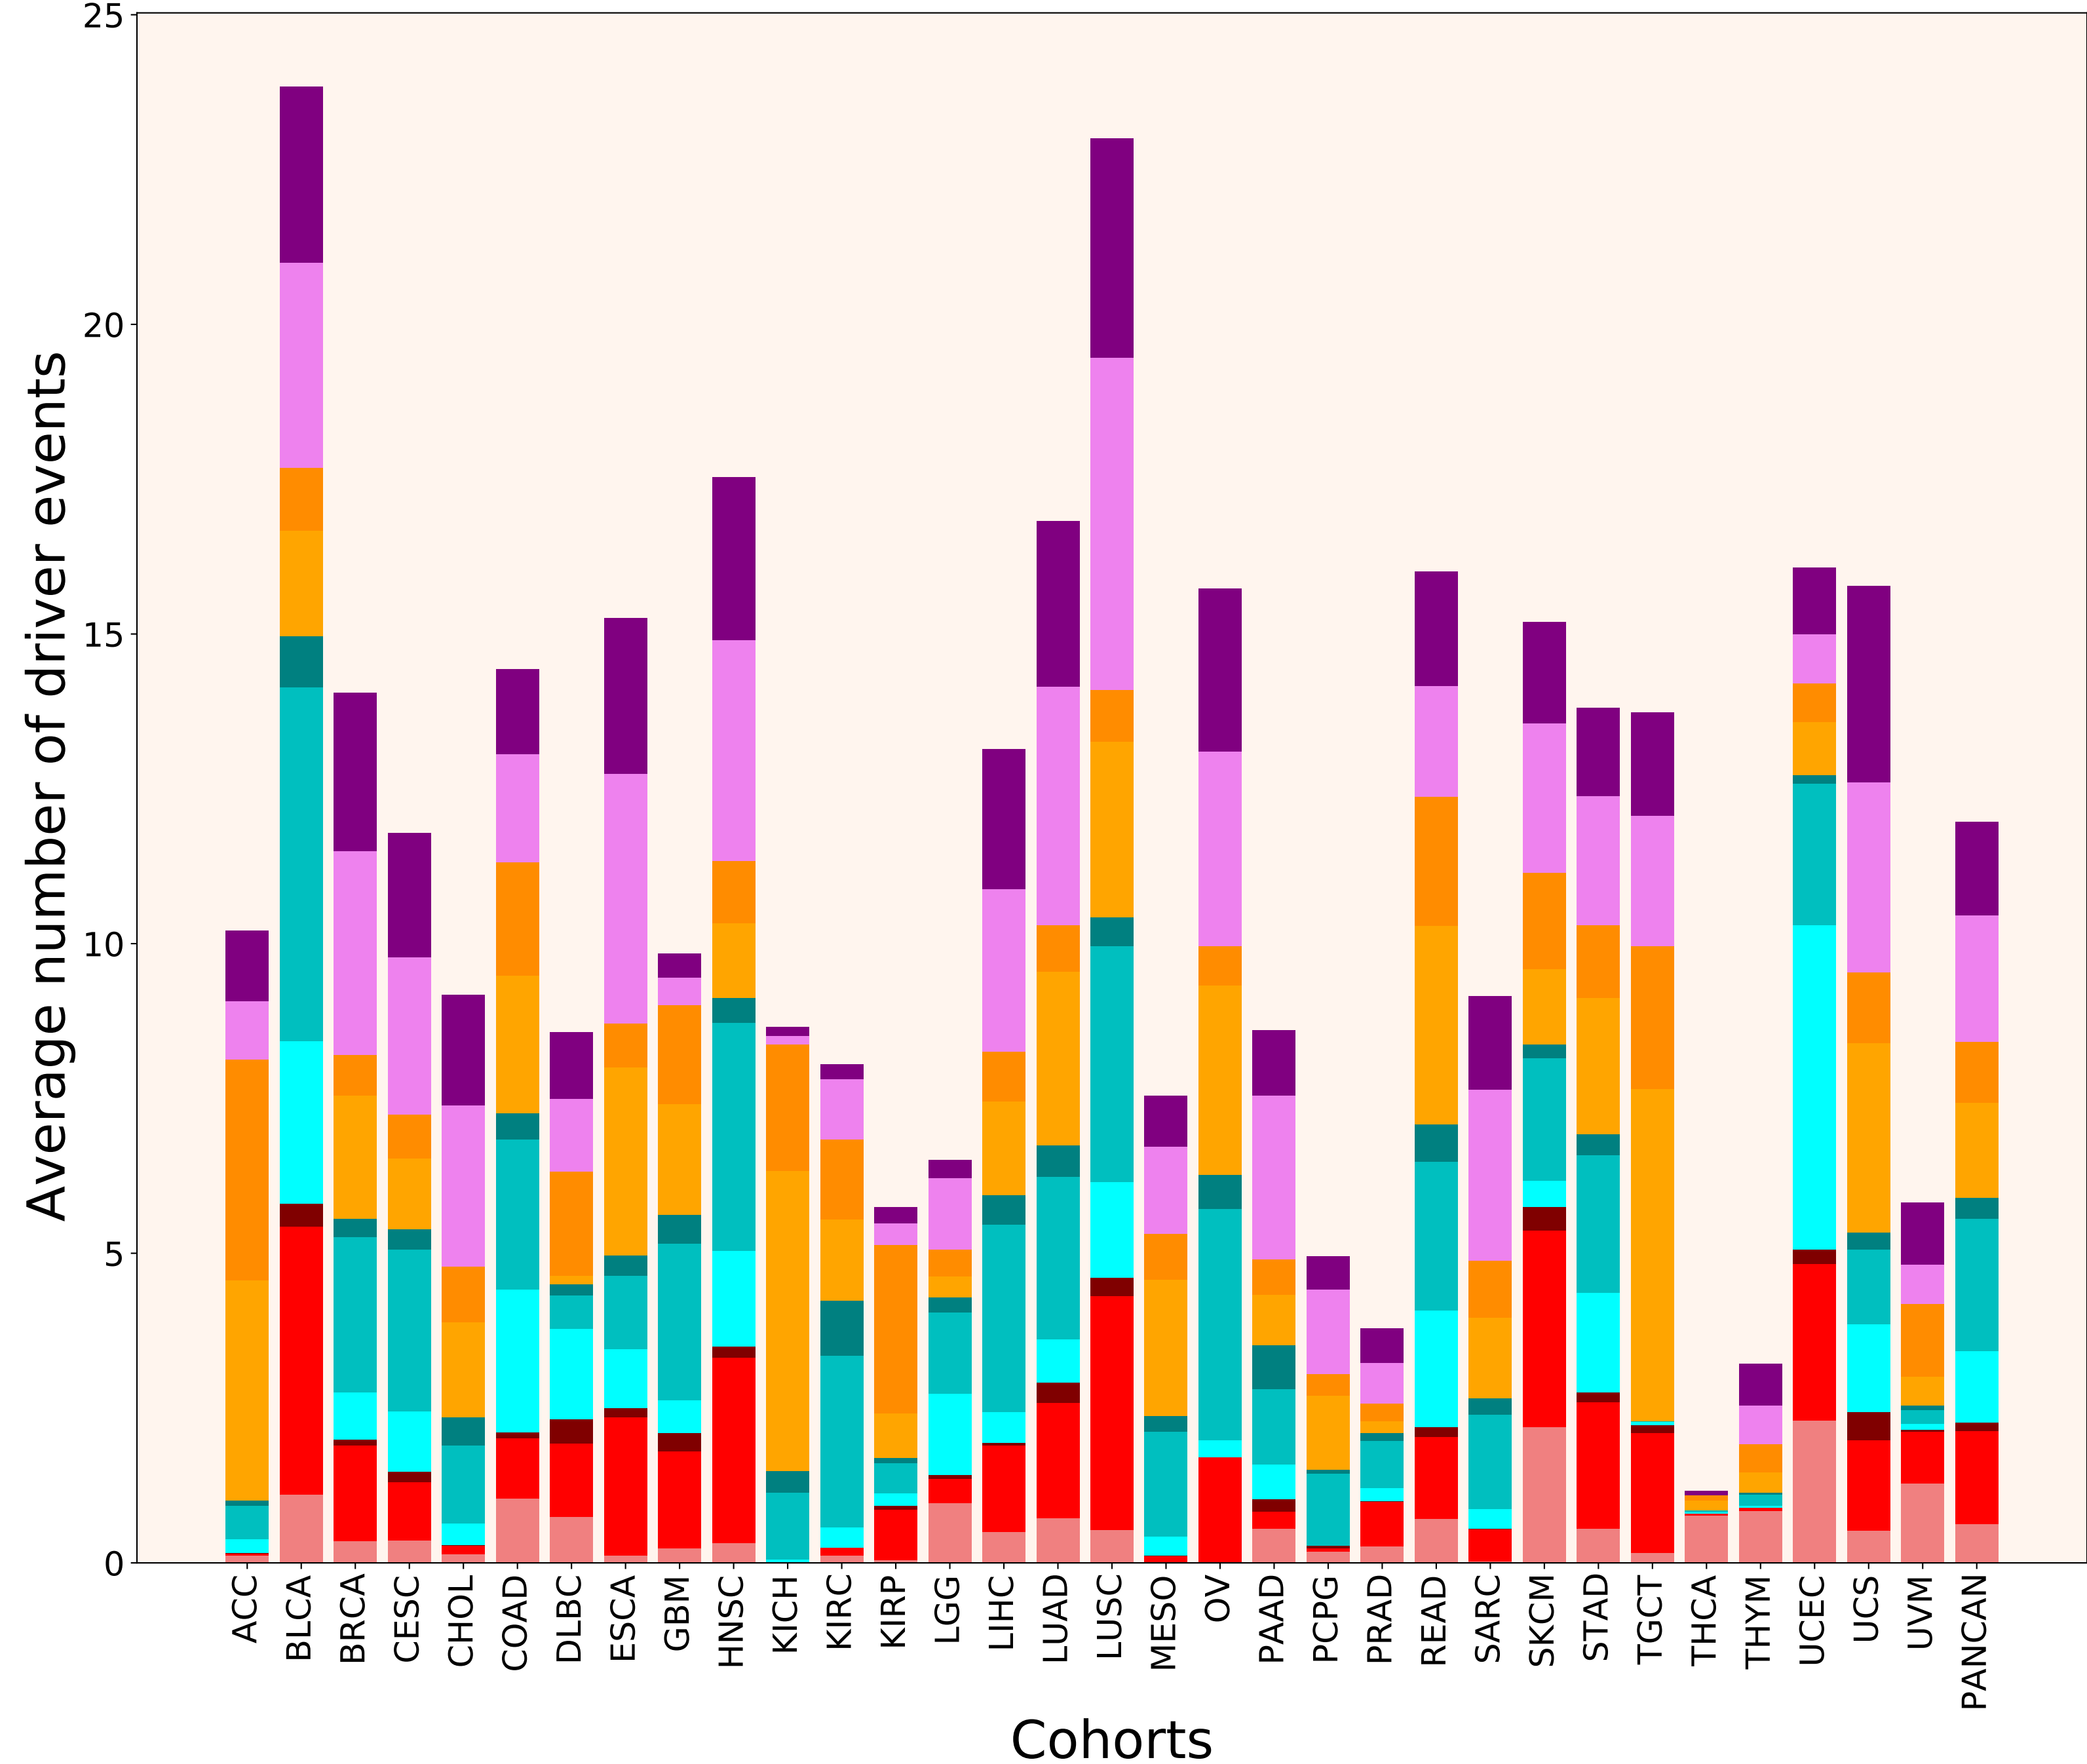

Supplement: Supplemental_Data_S1.zip [file Supplemental_Data_S1.zip]

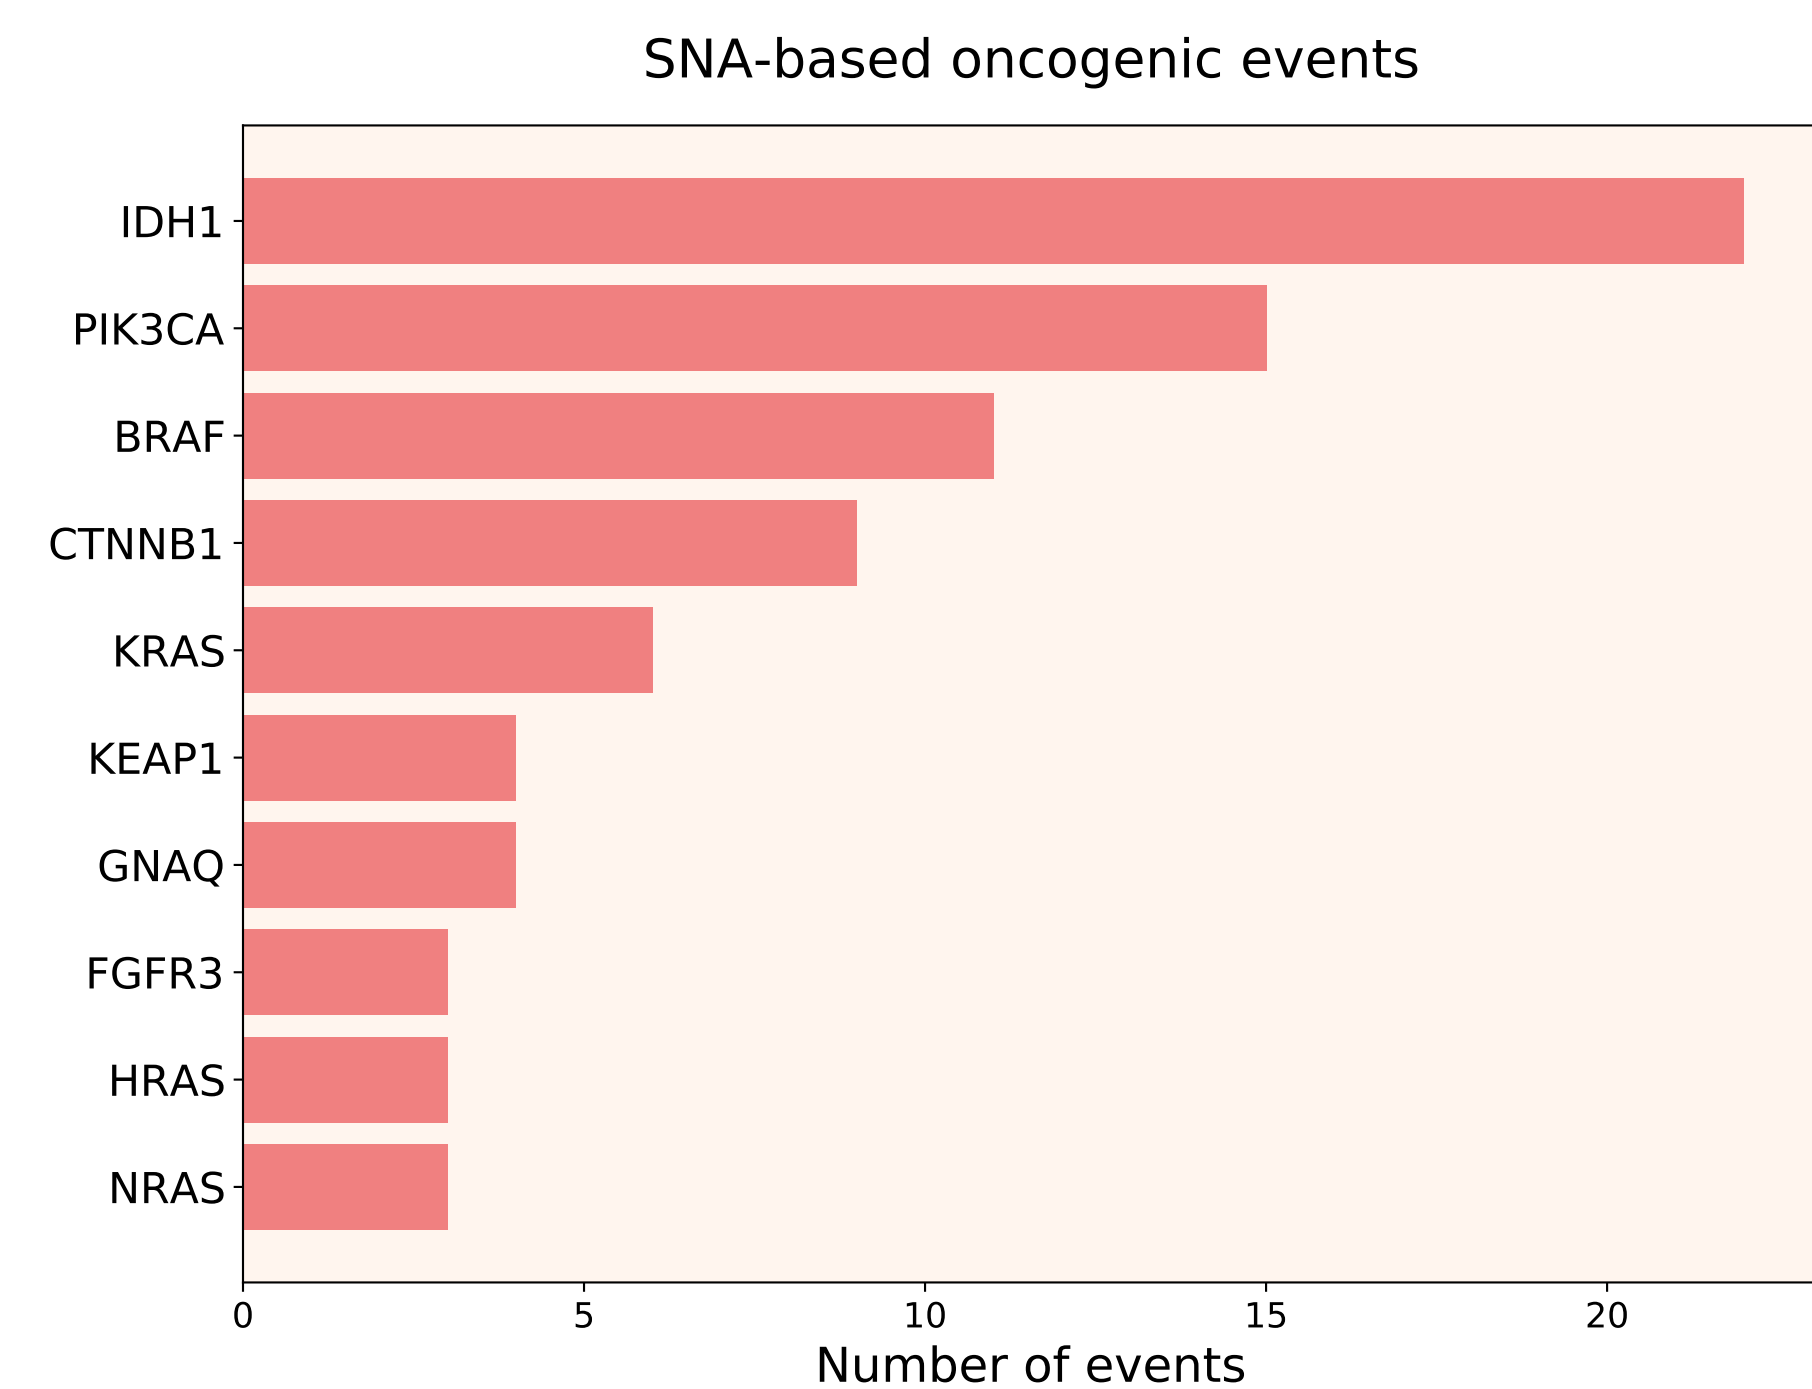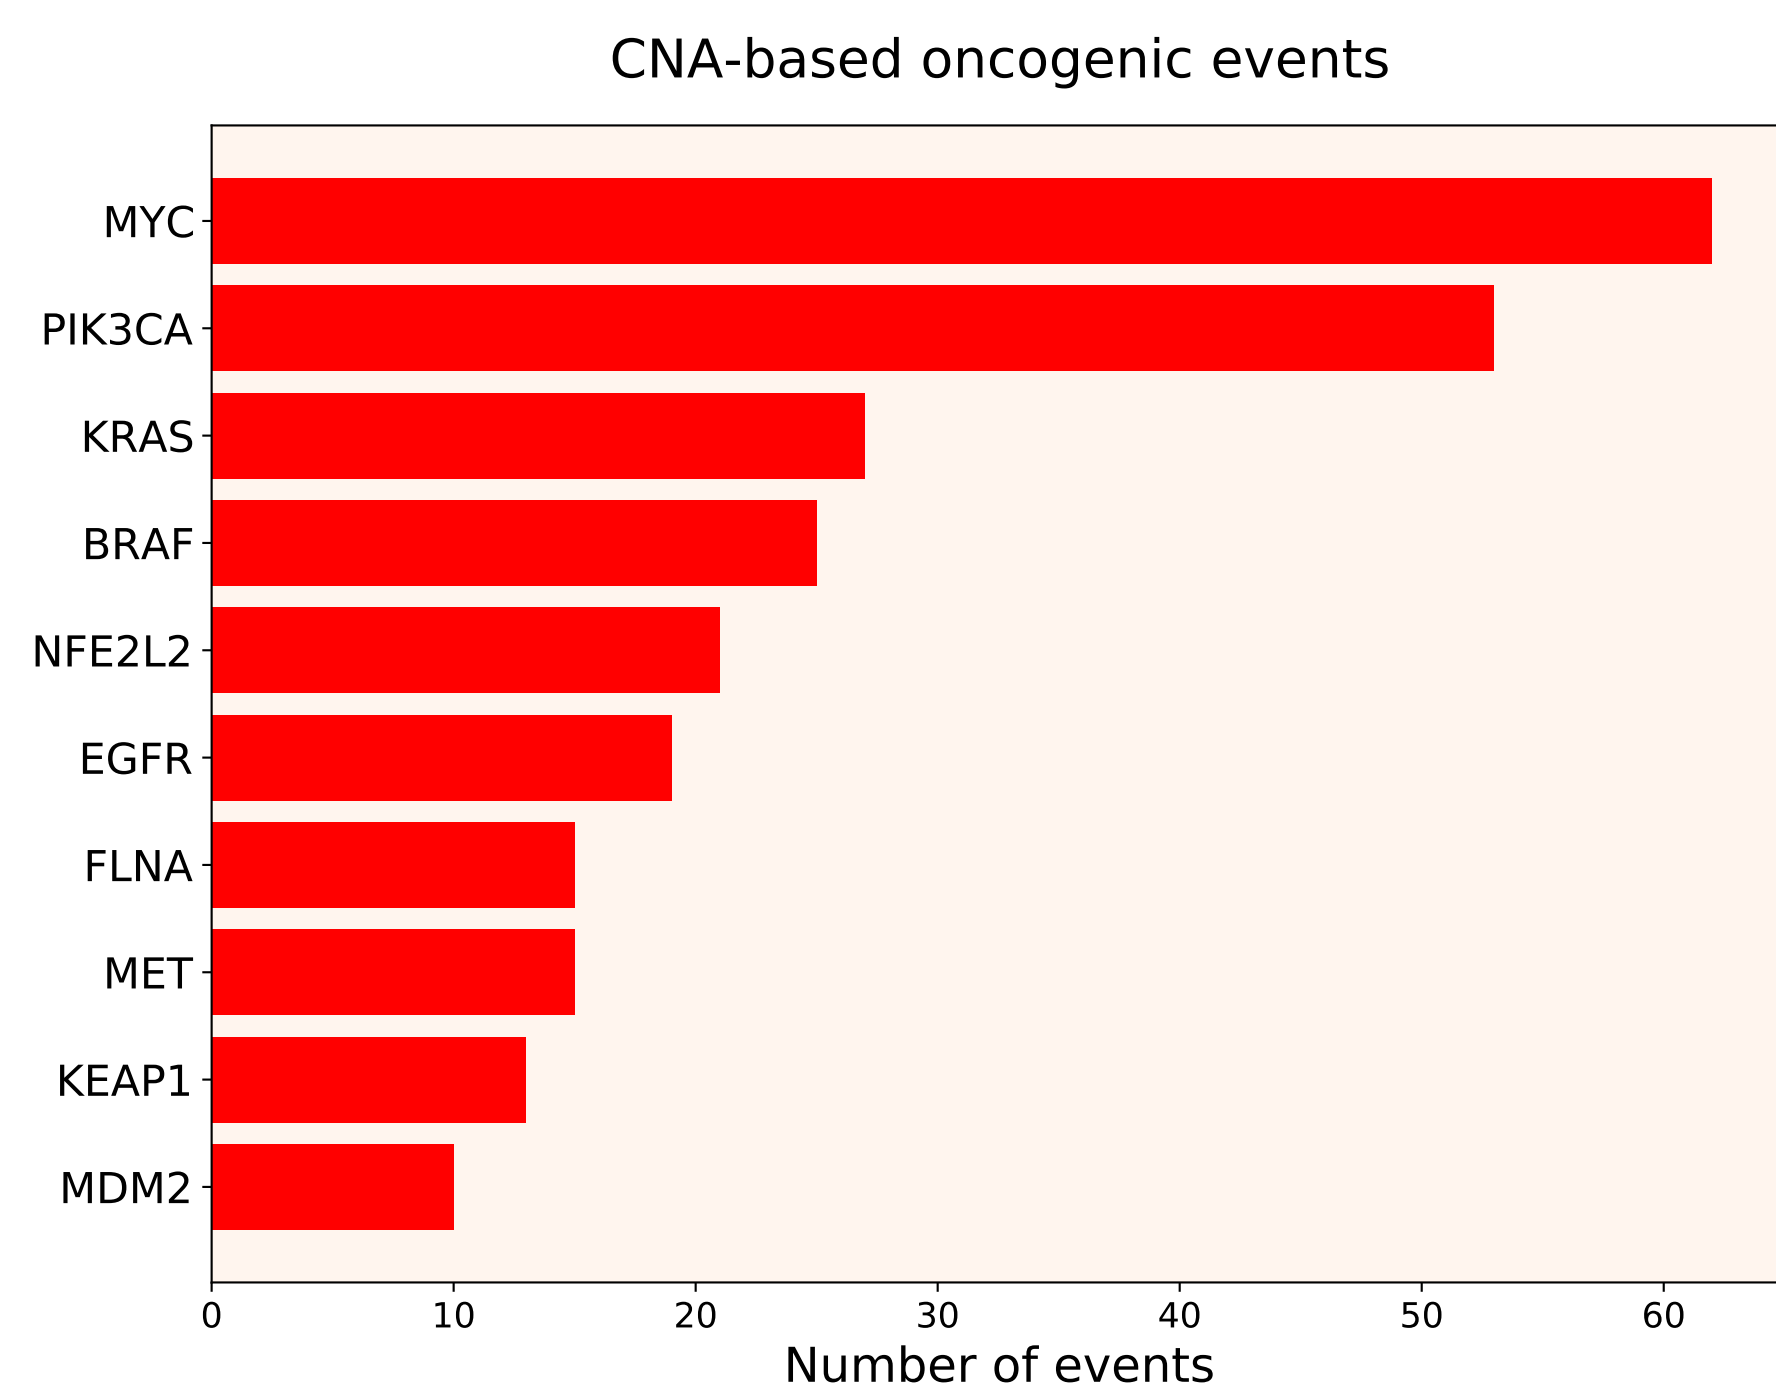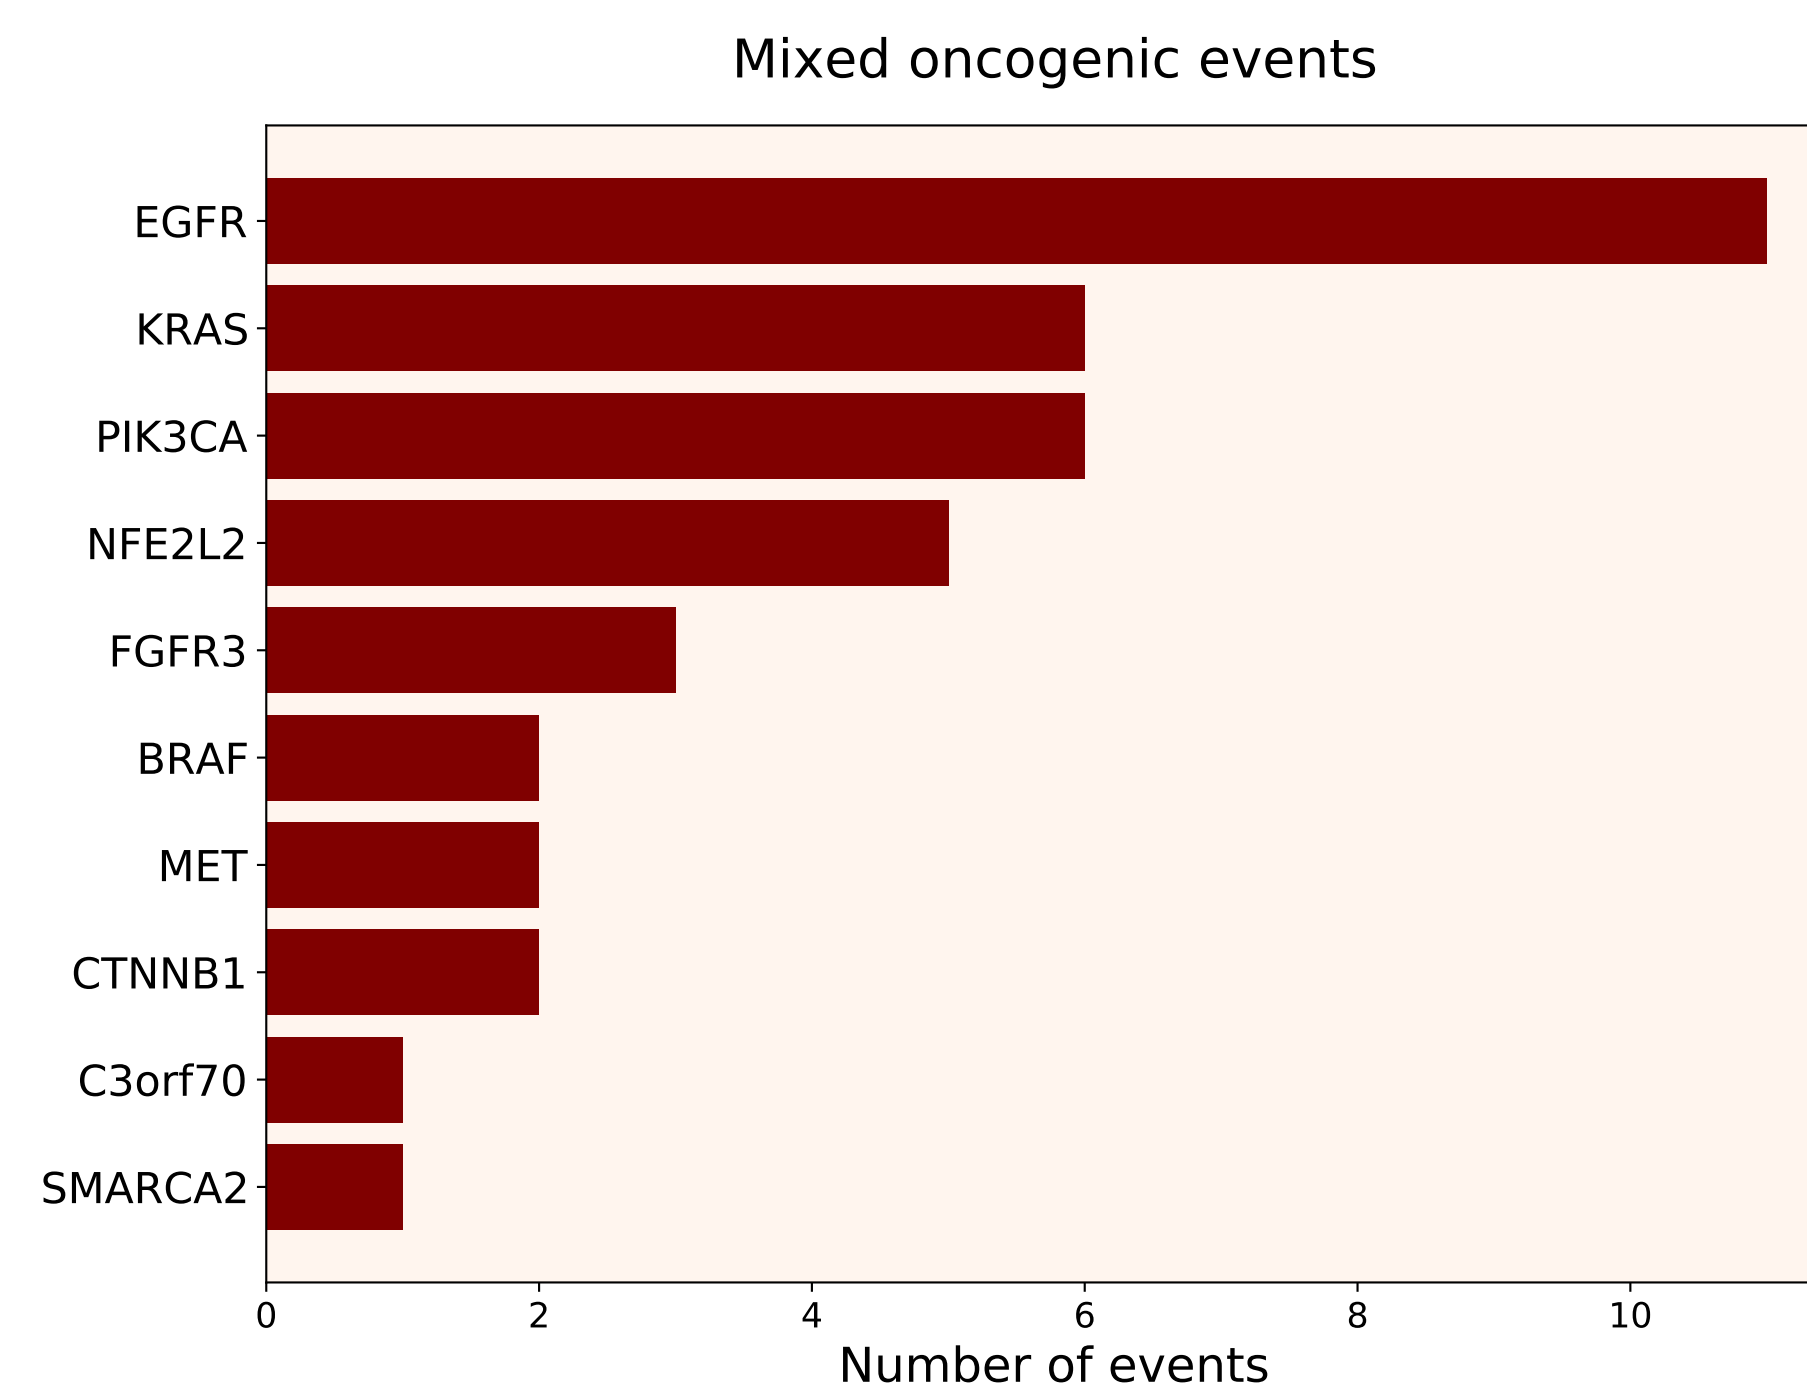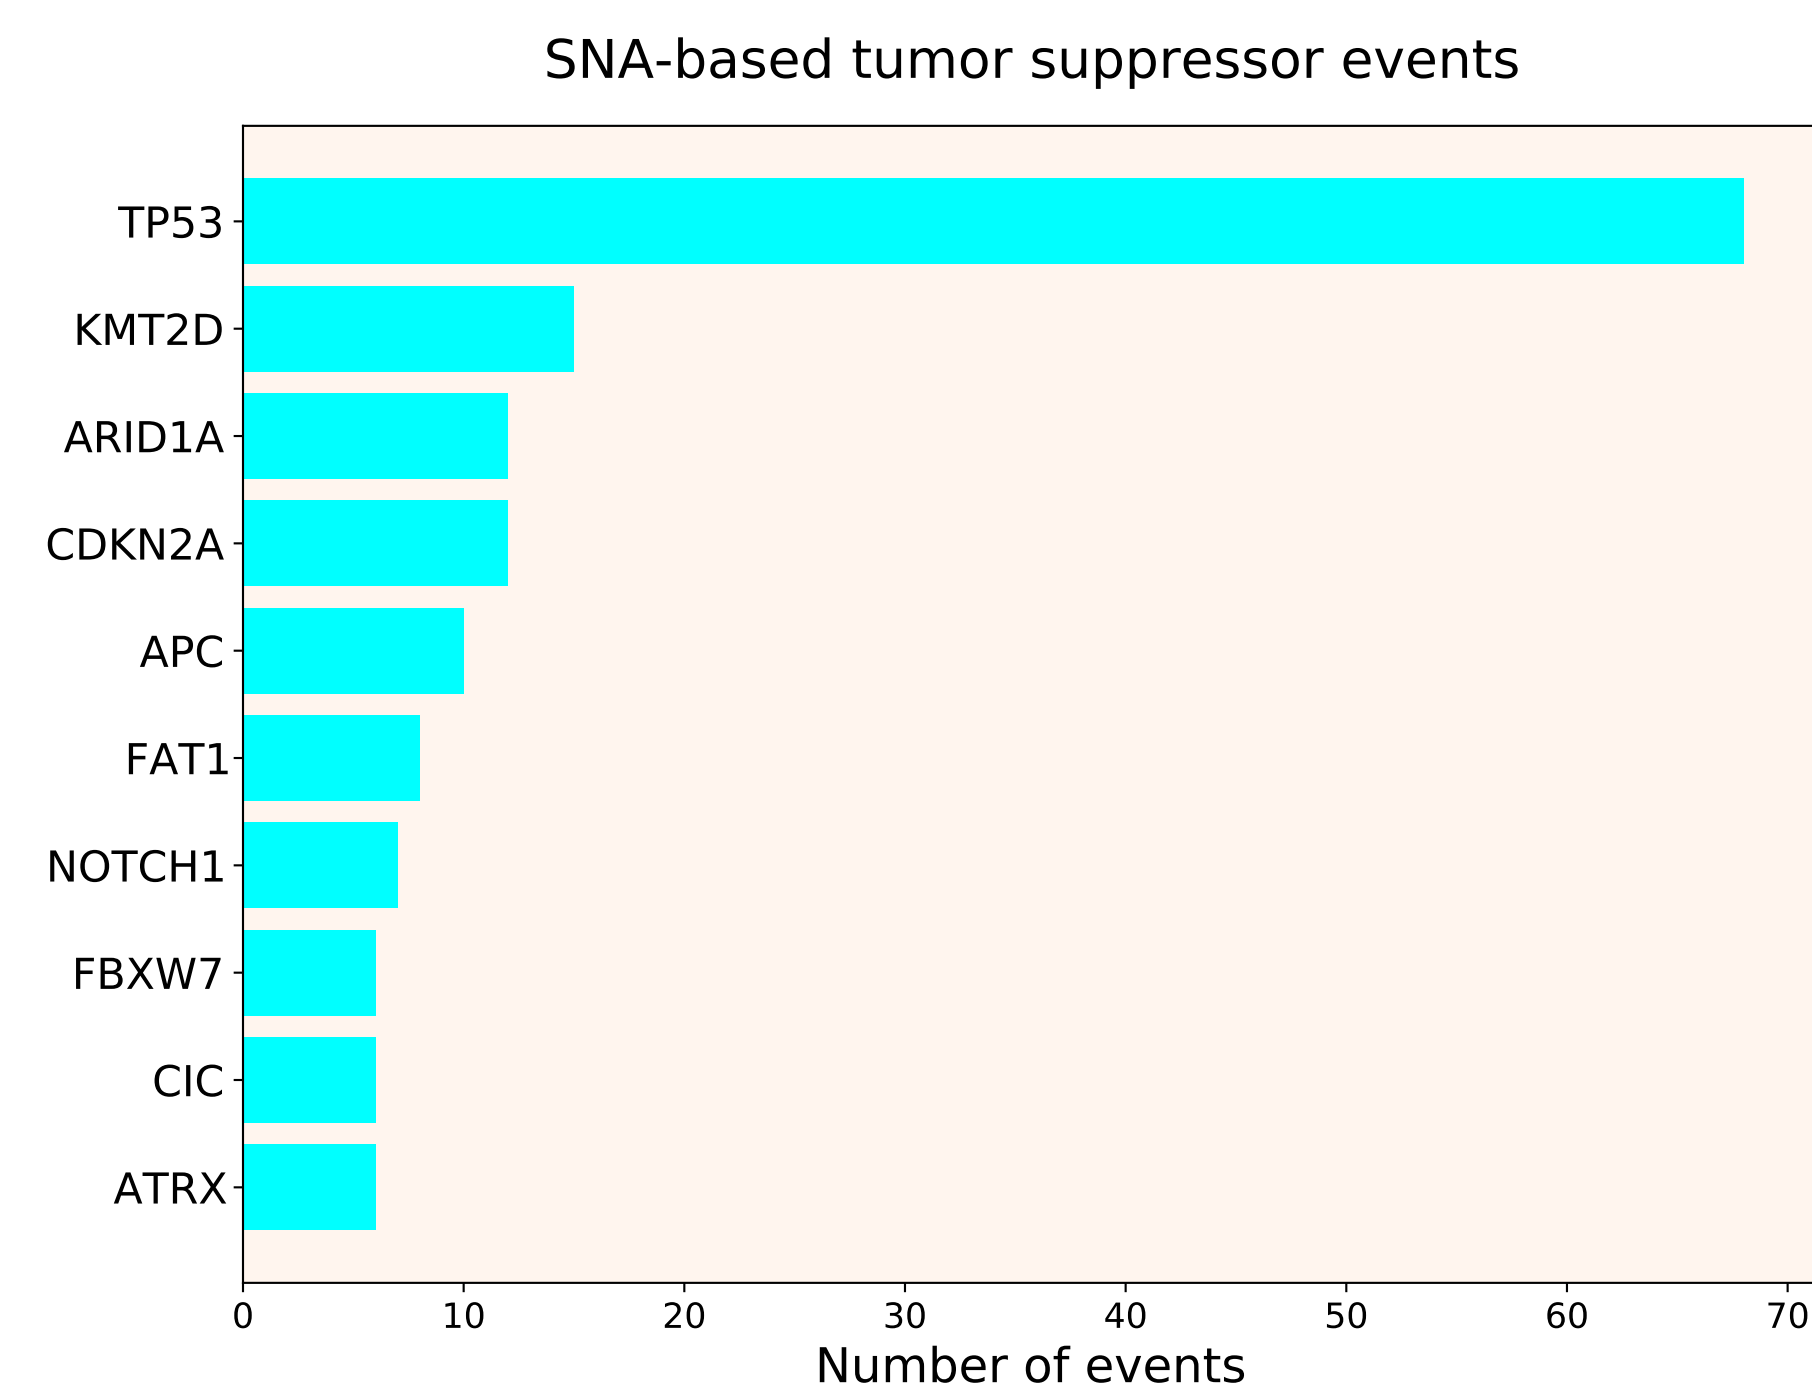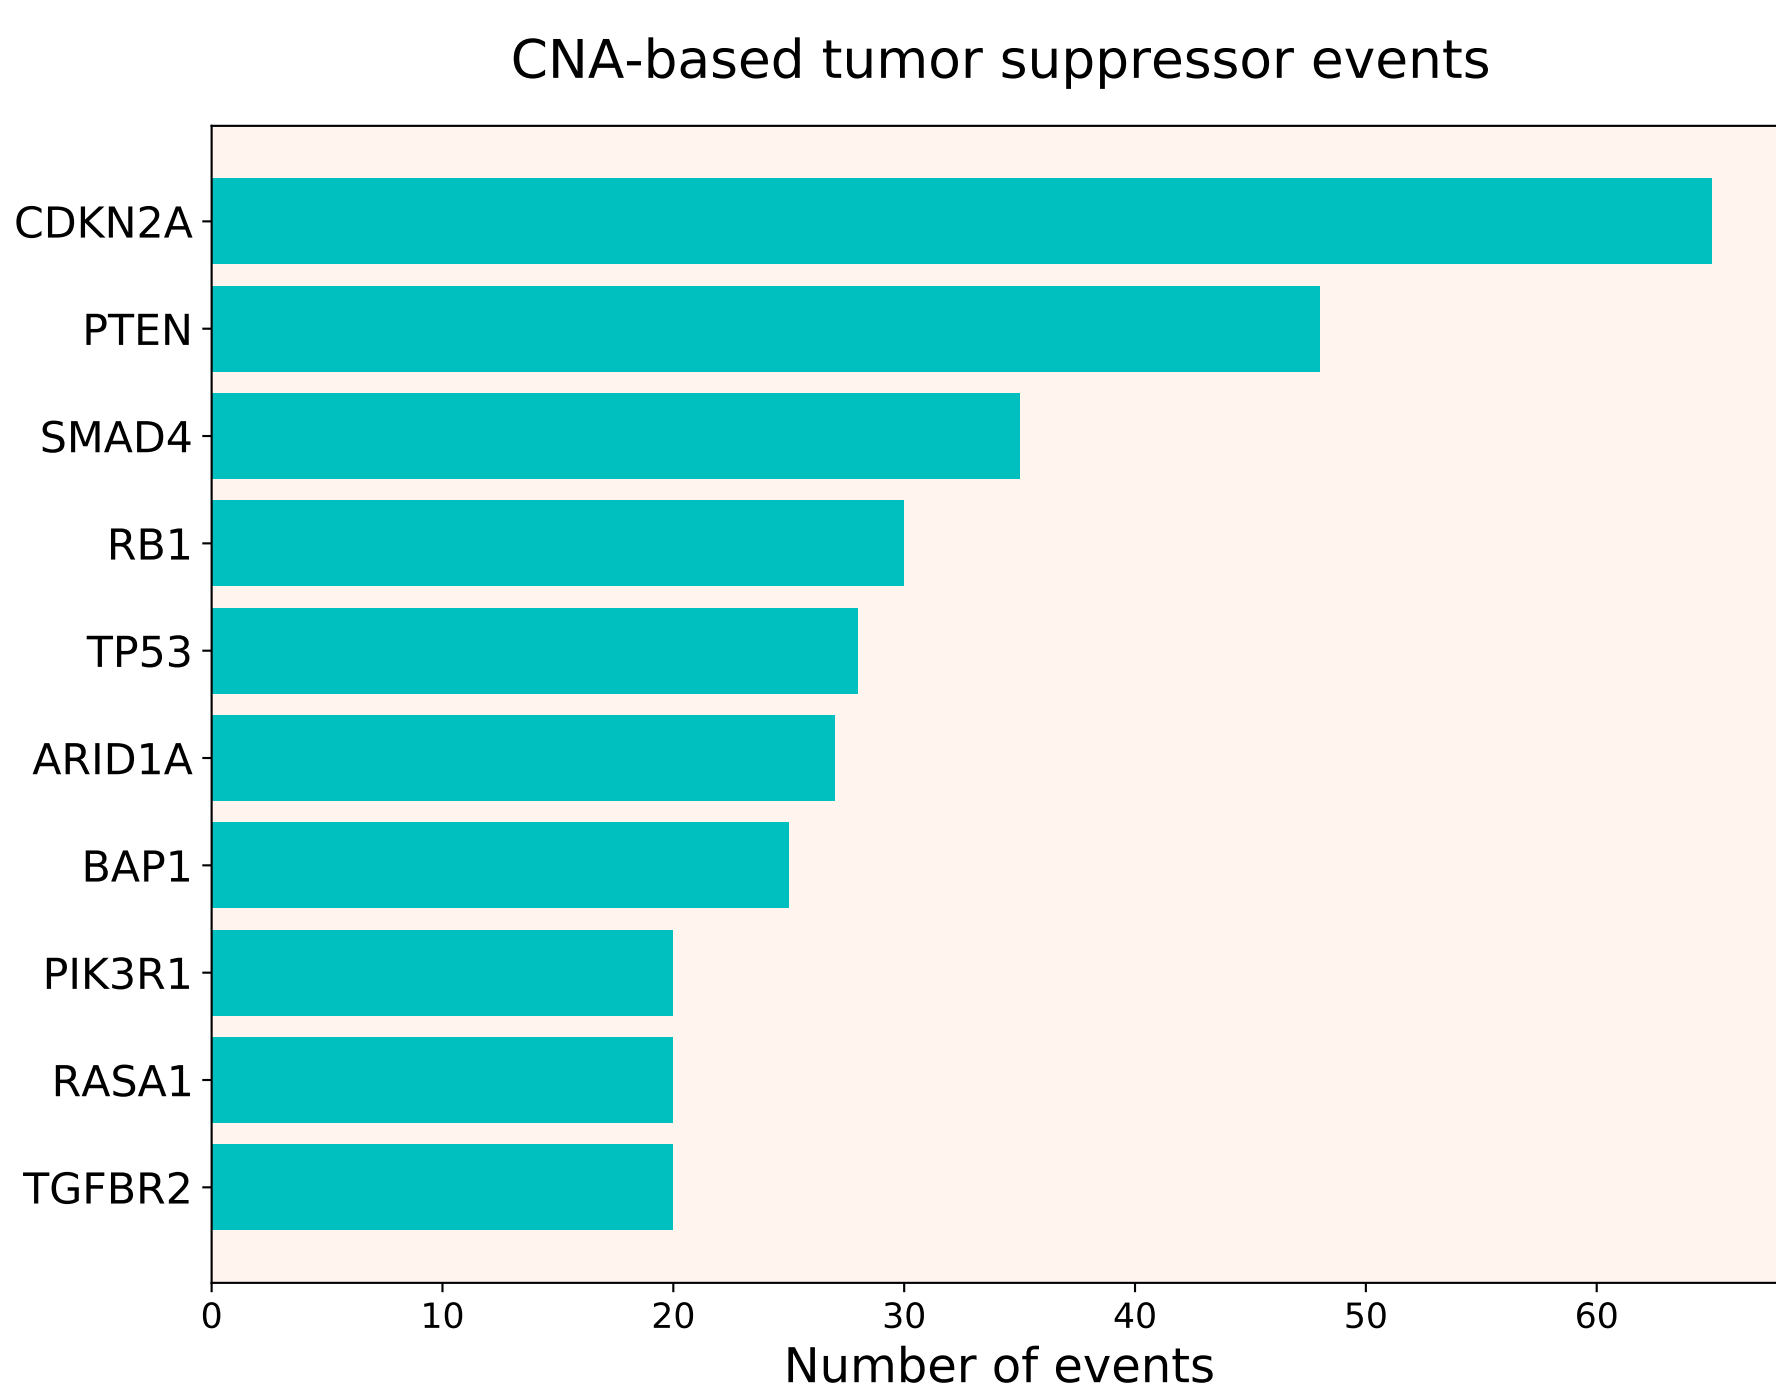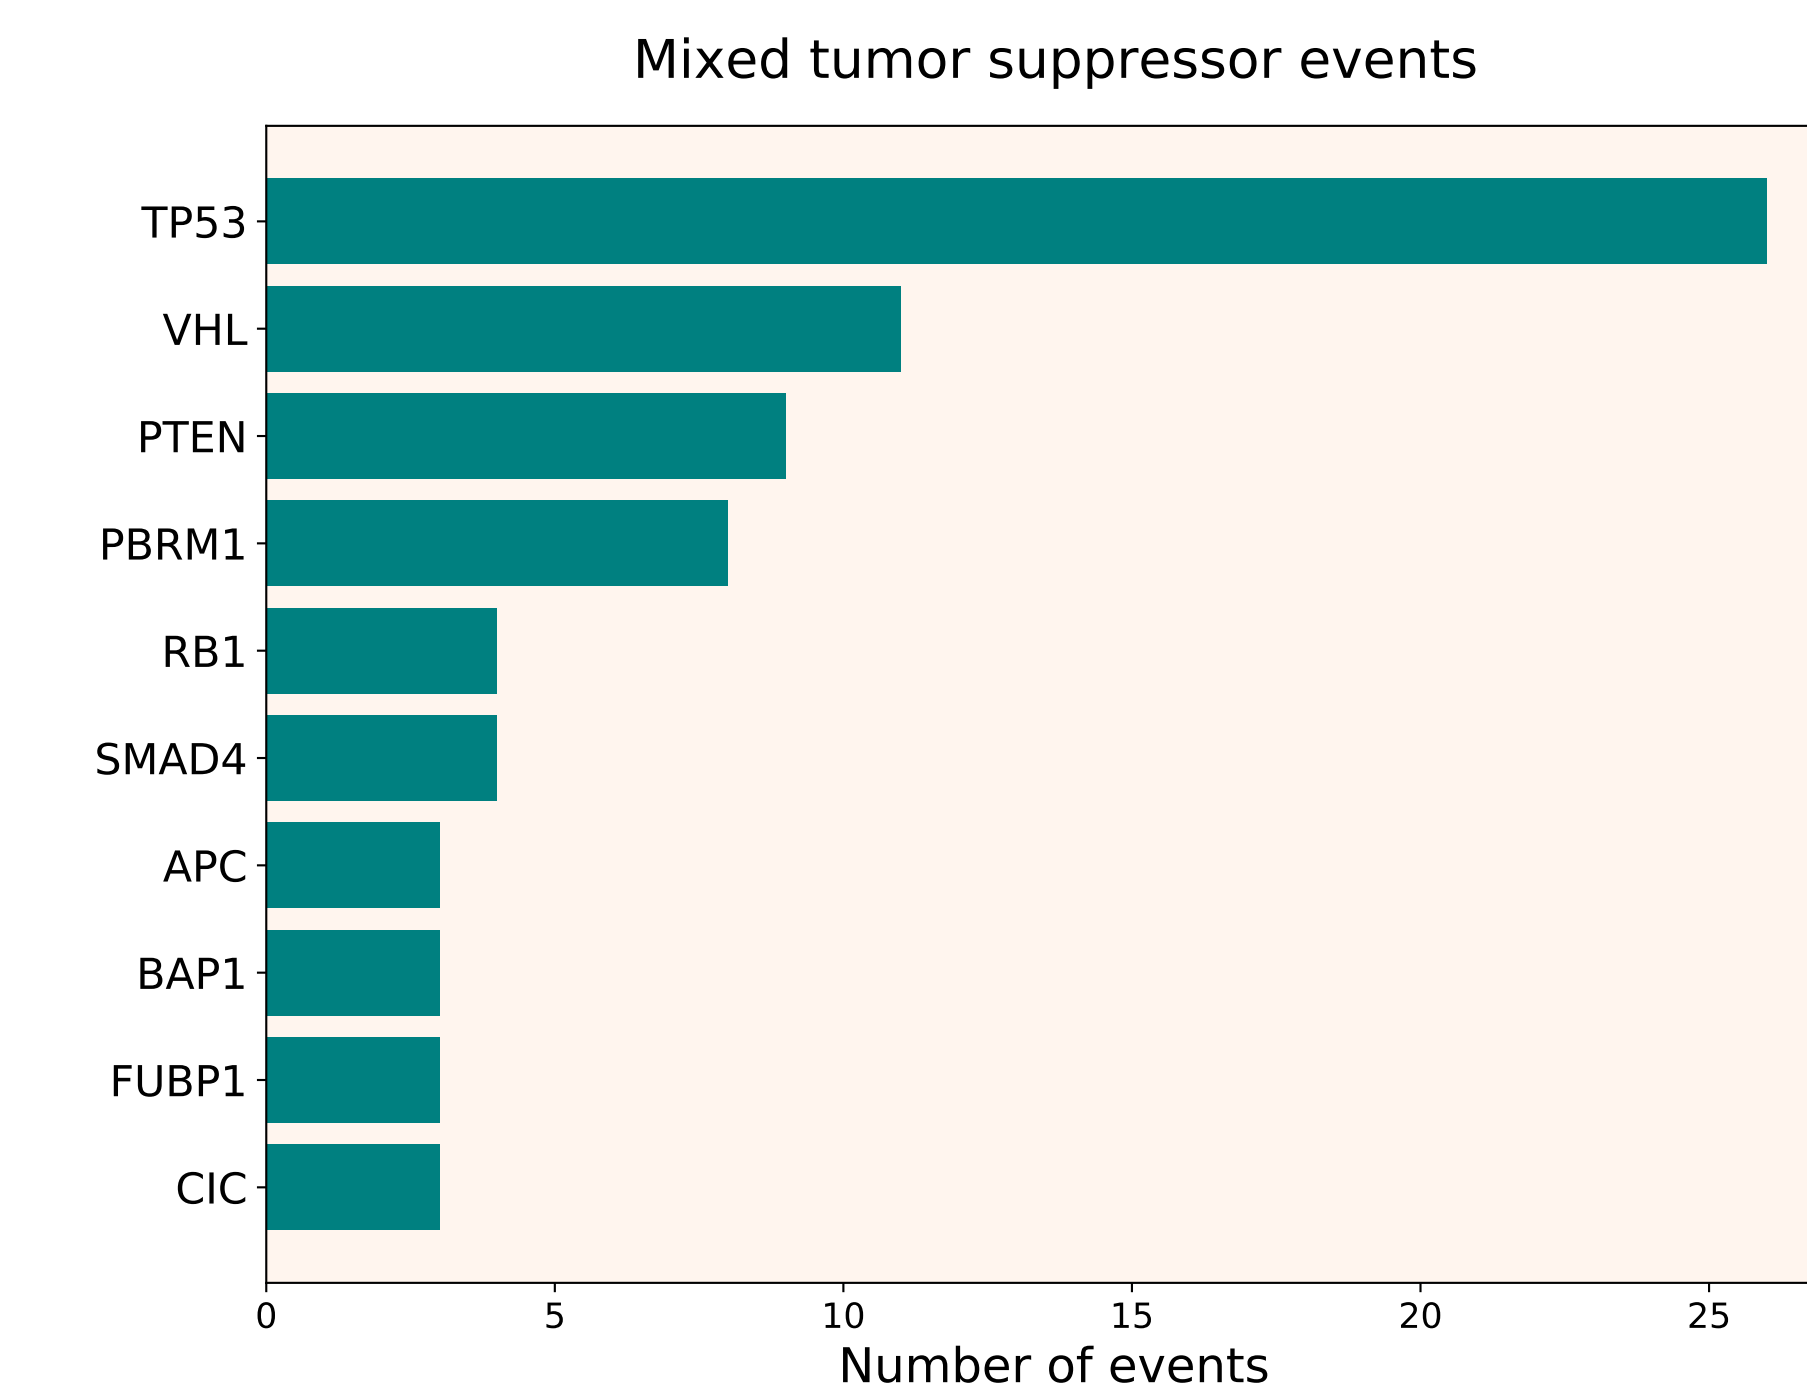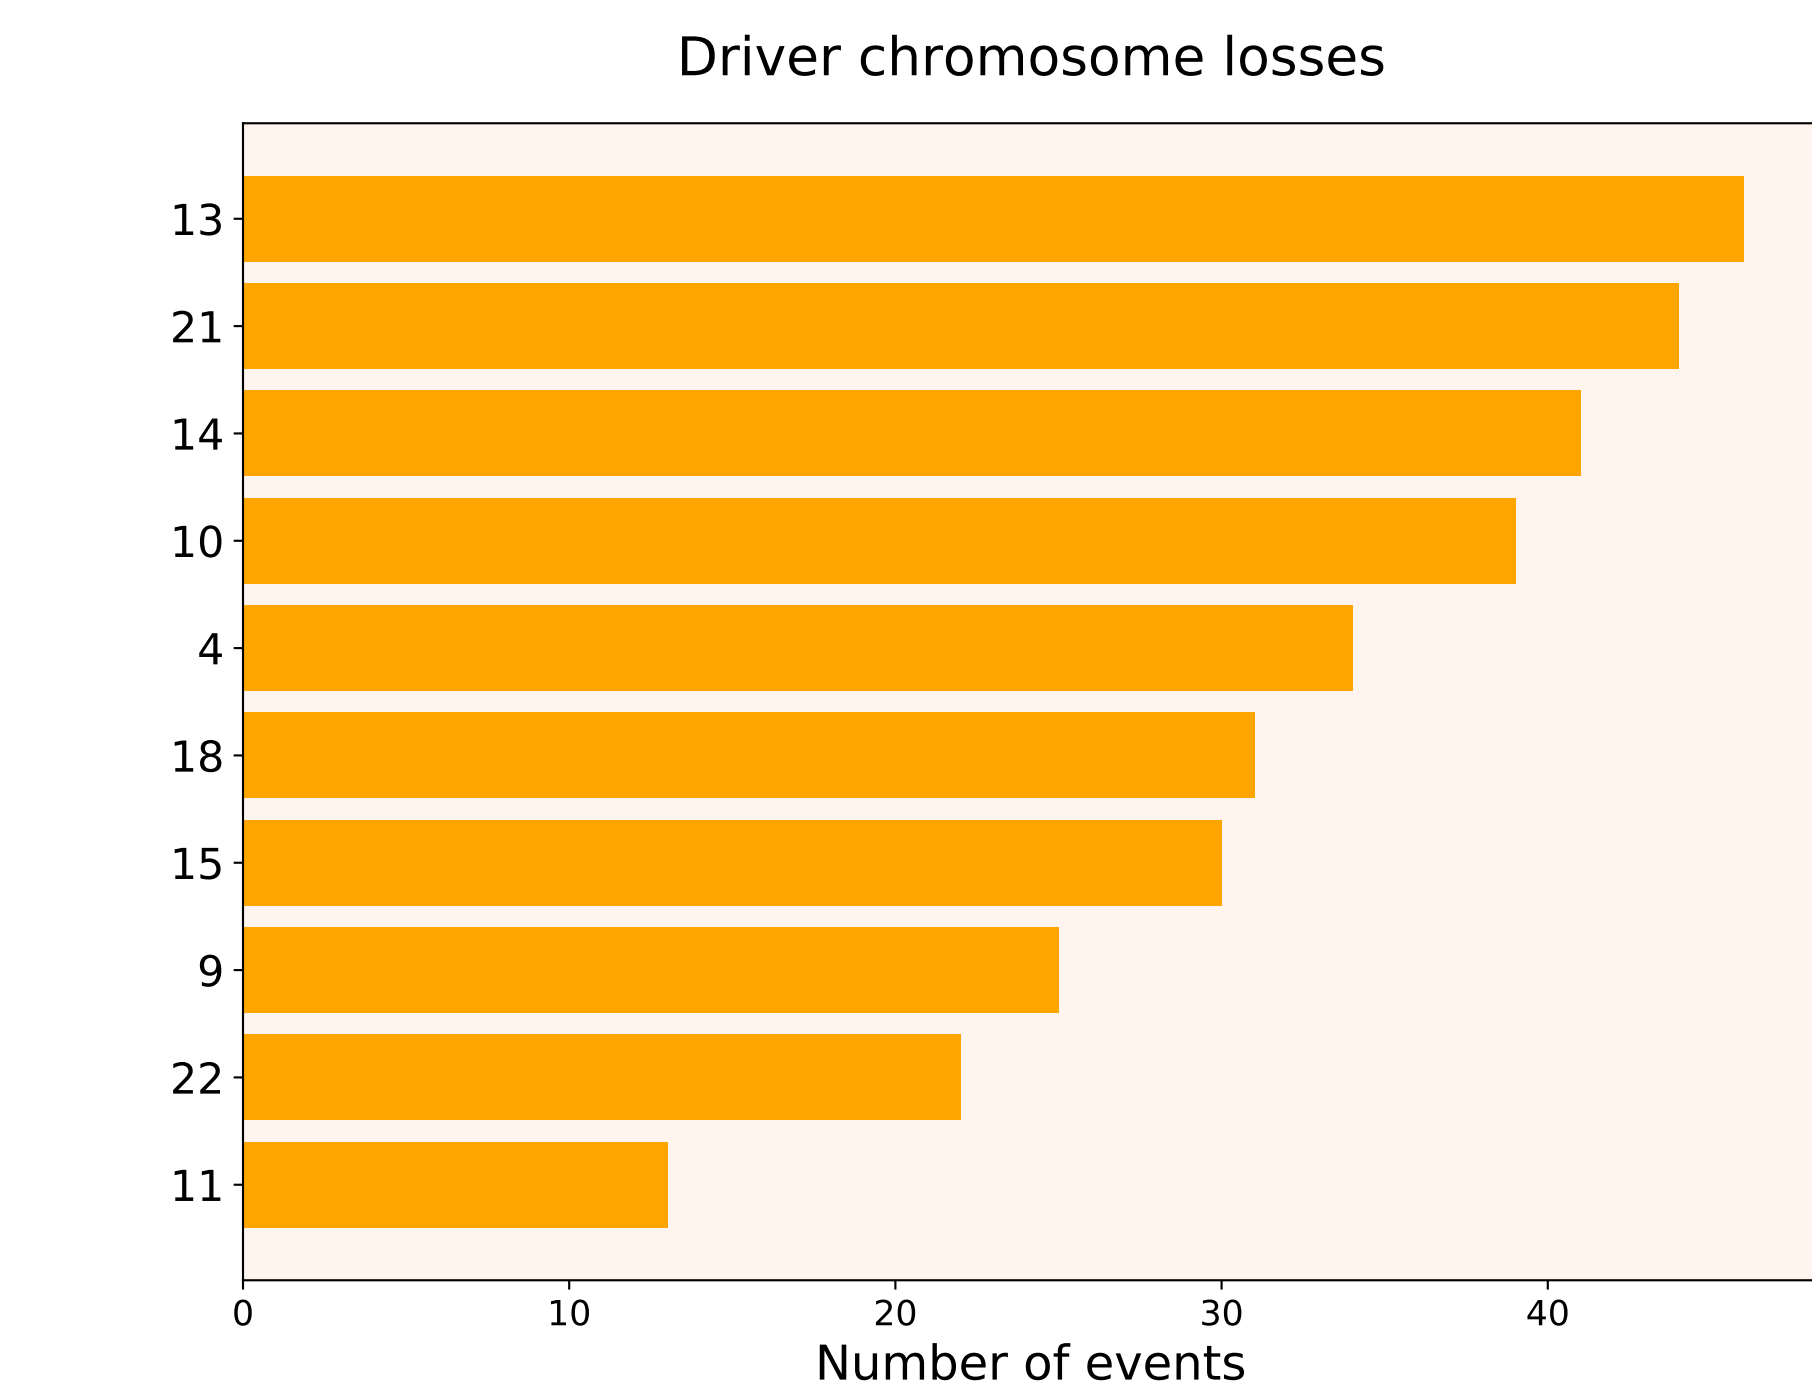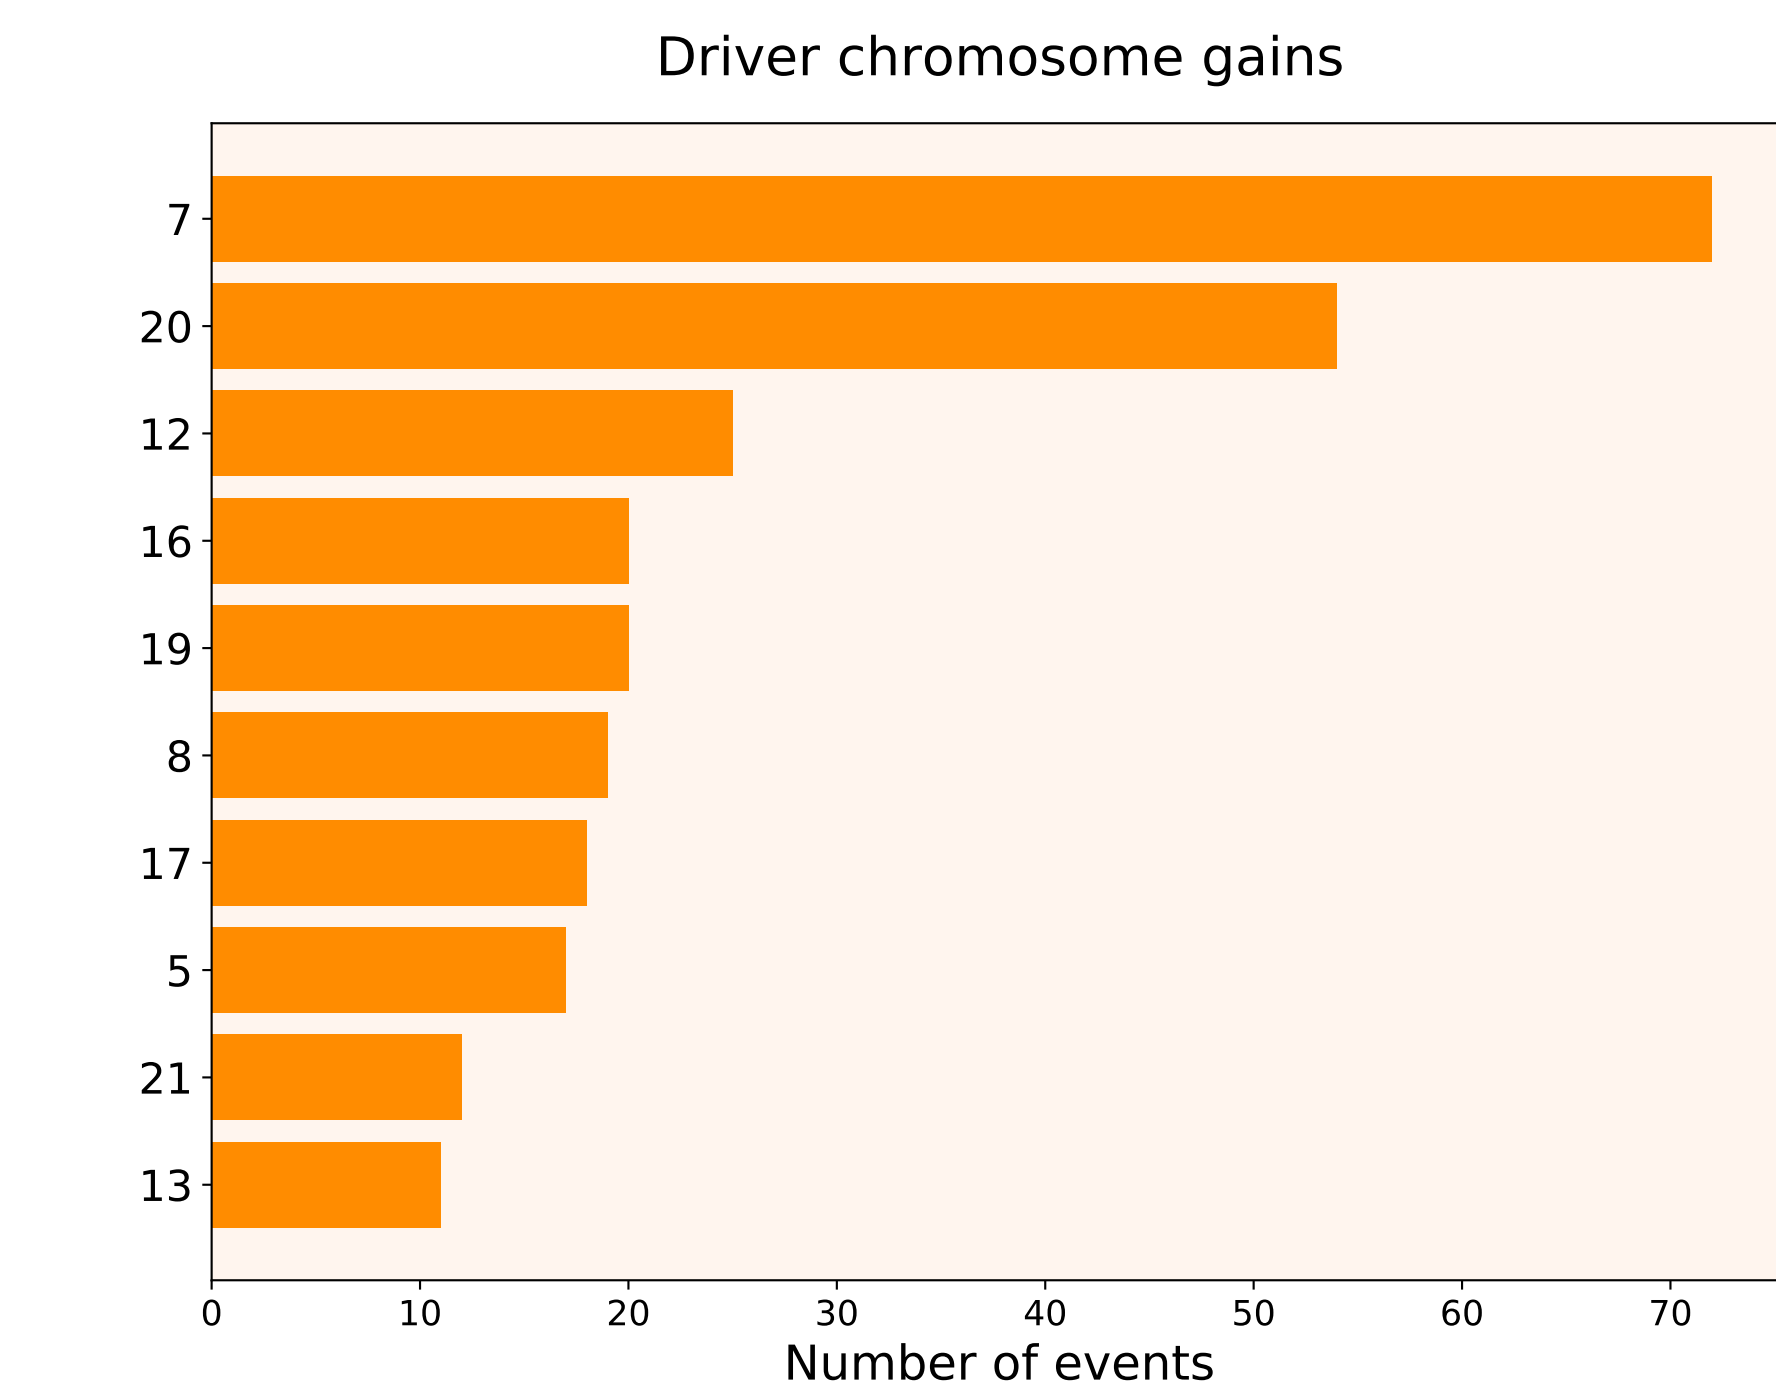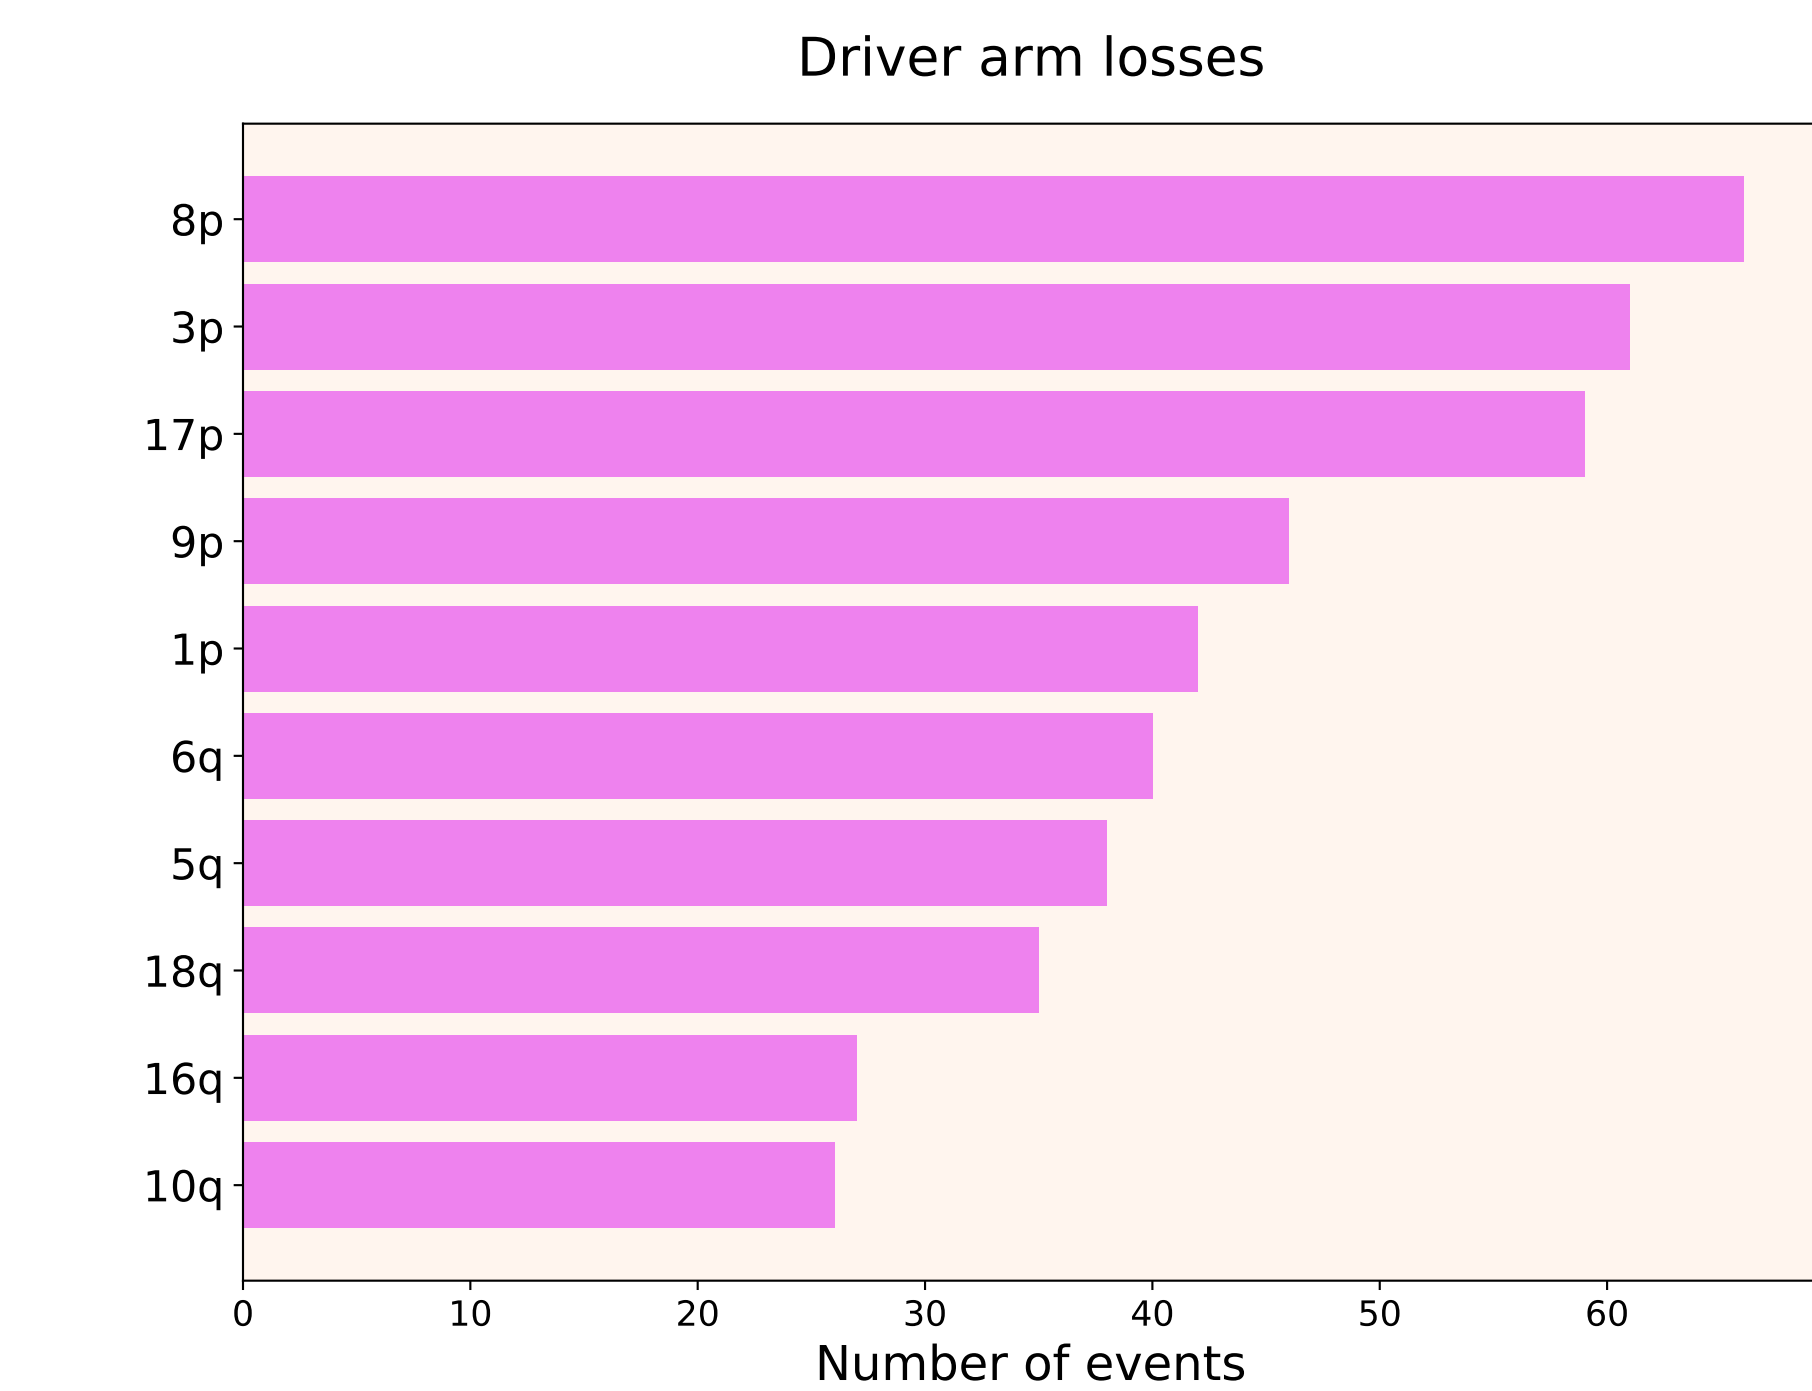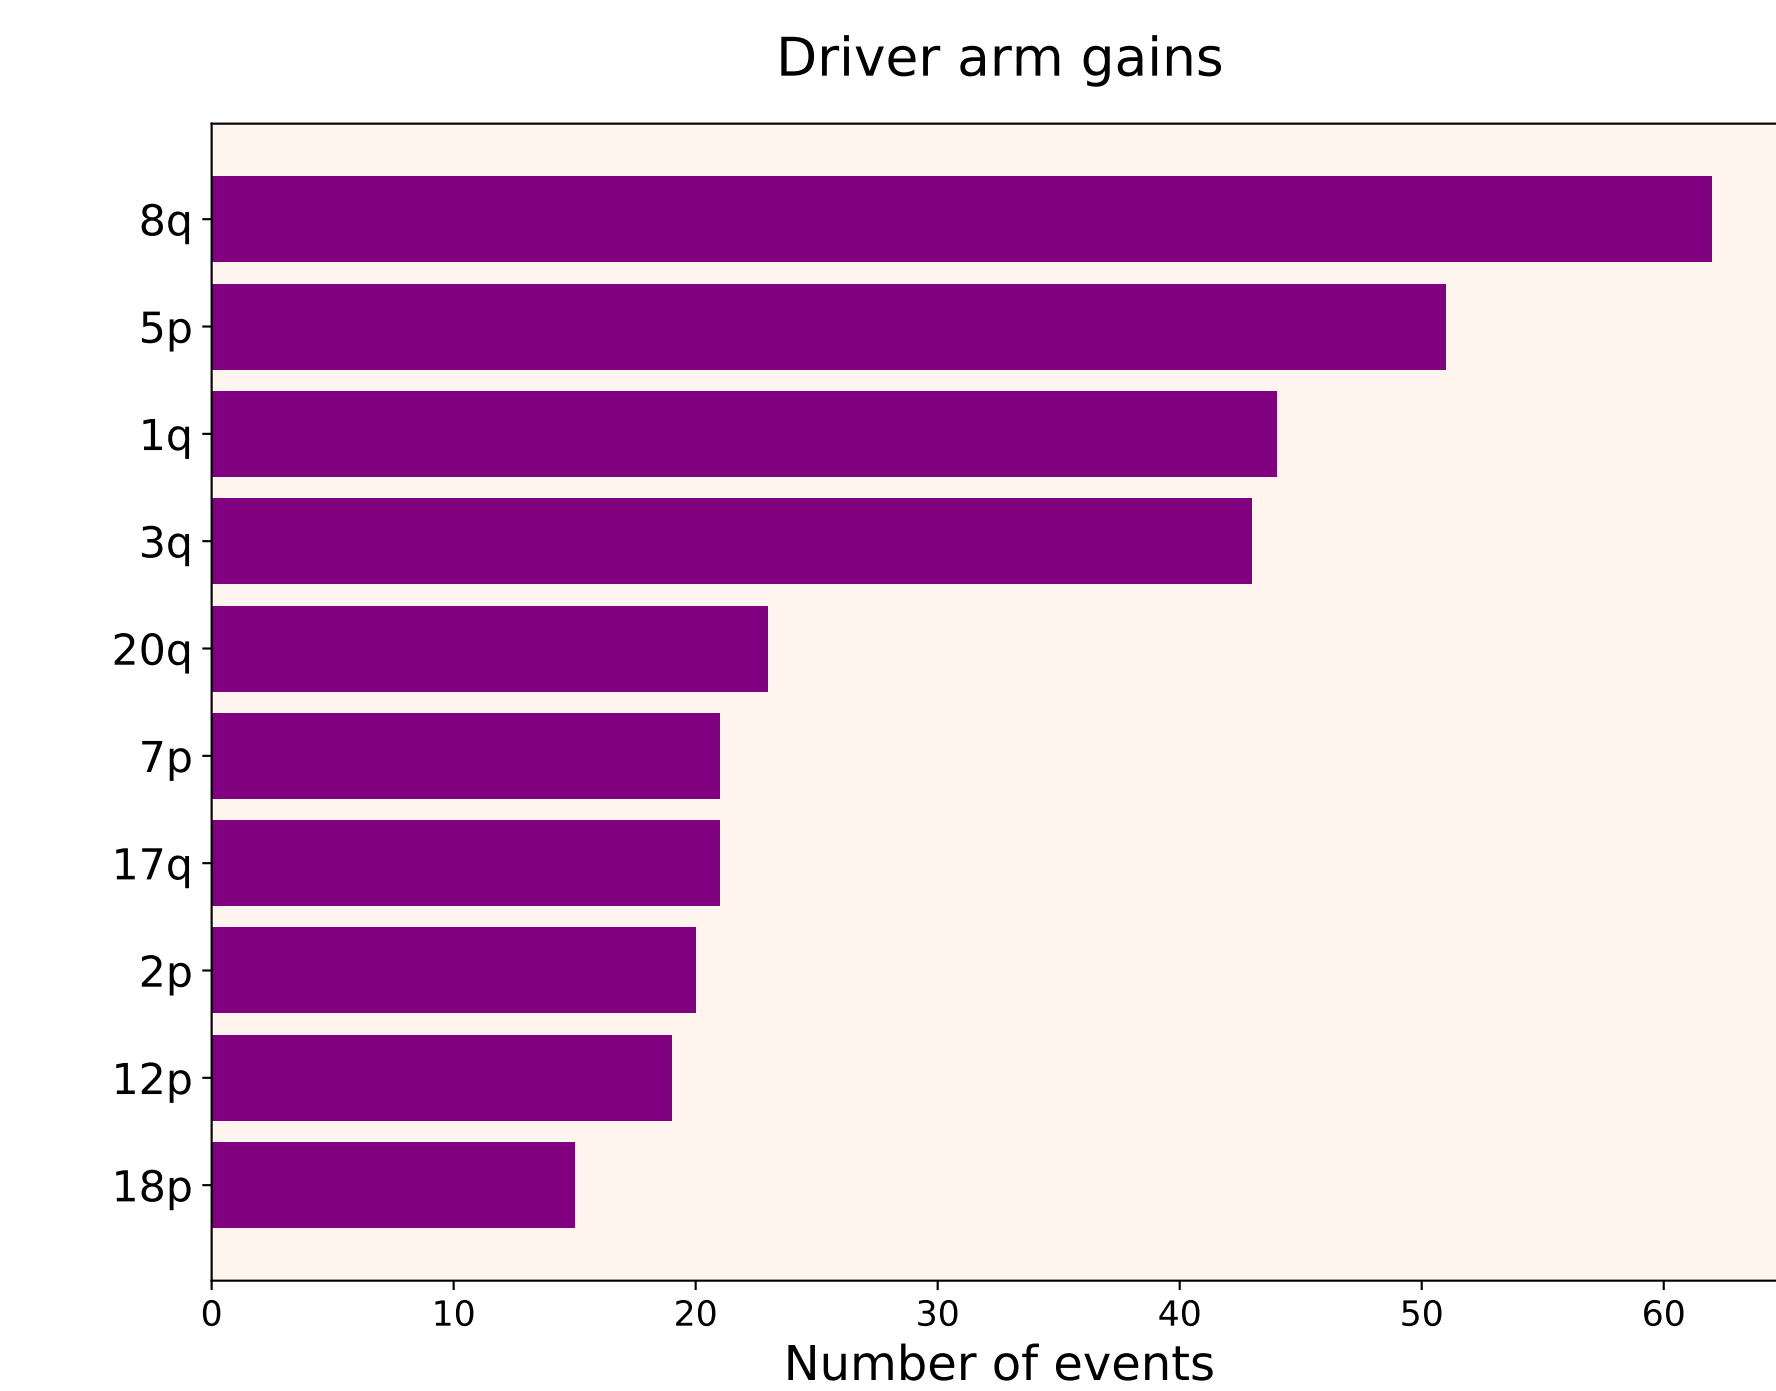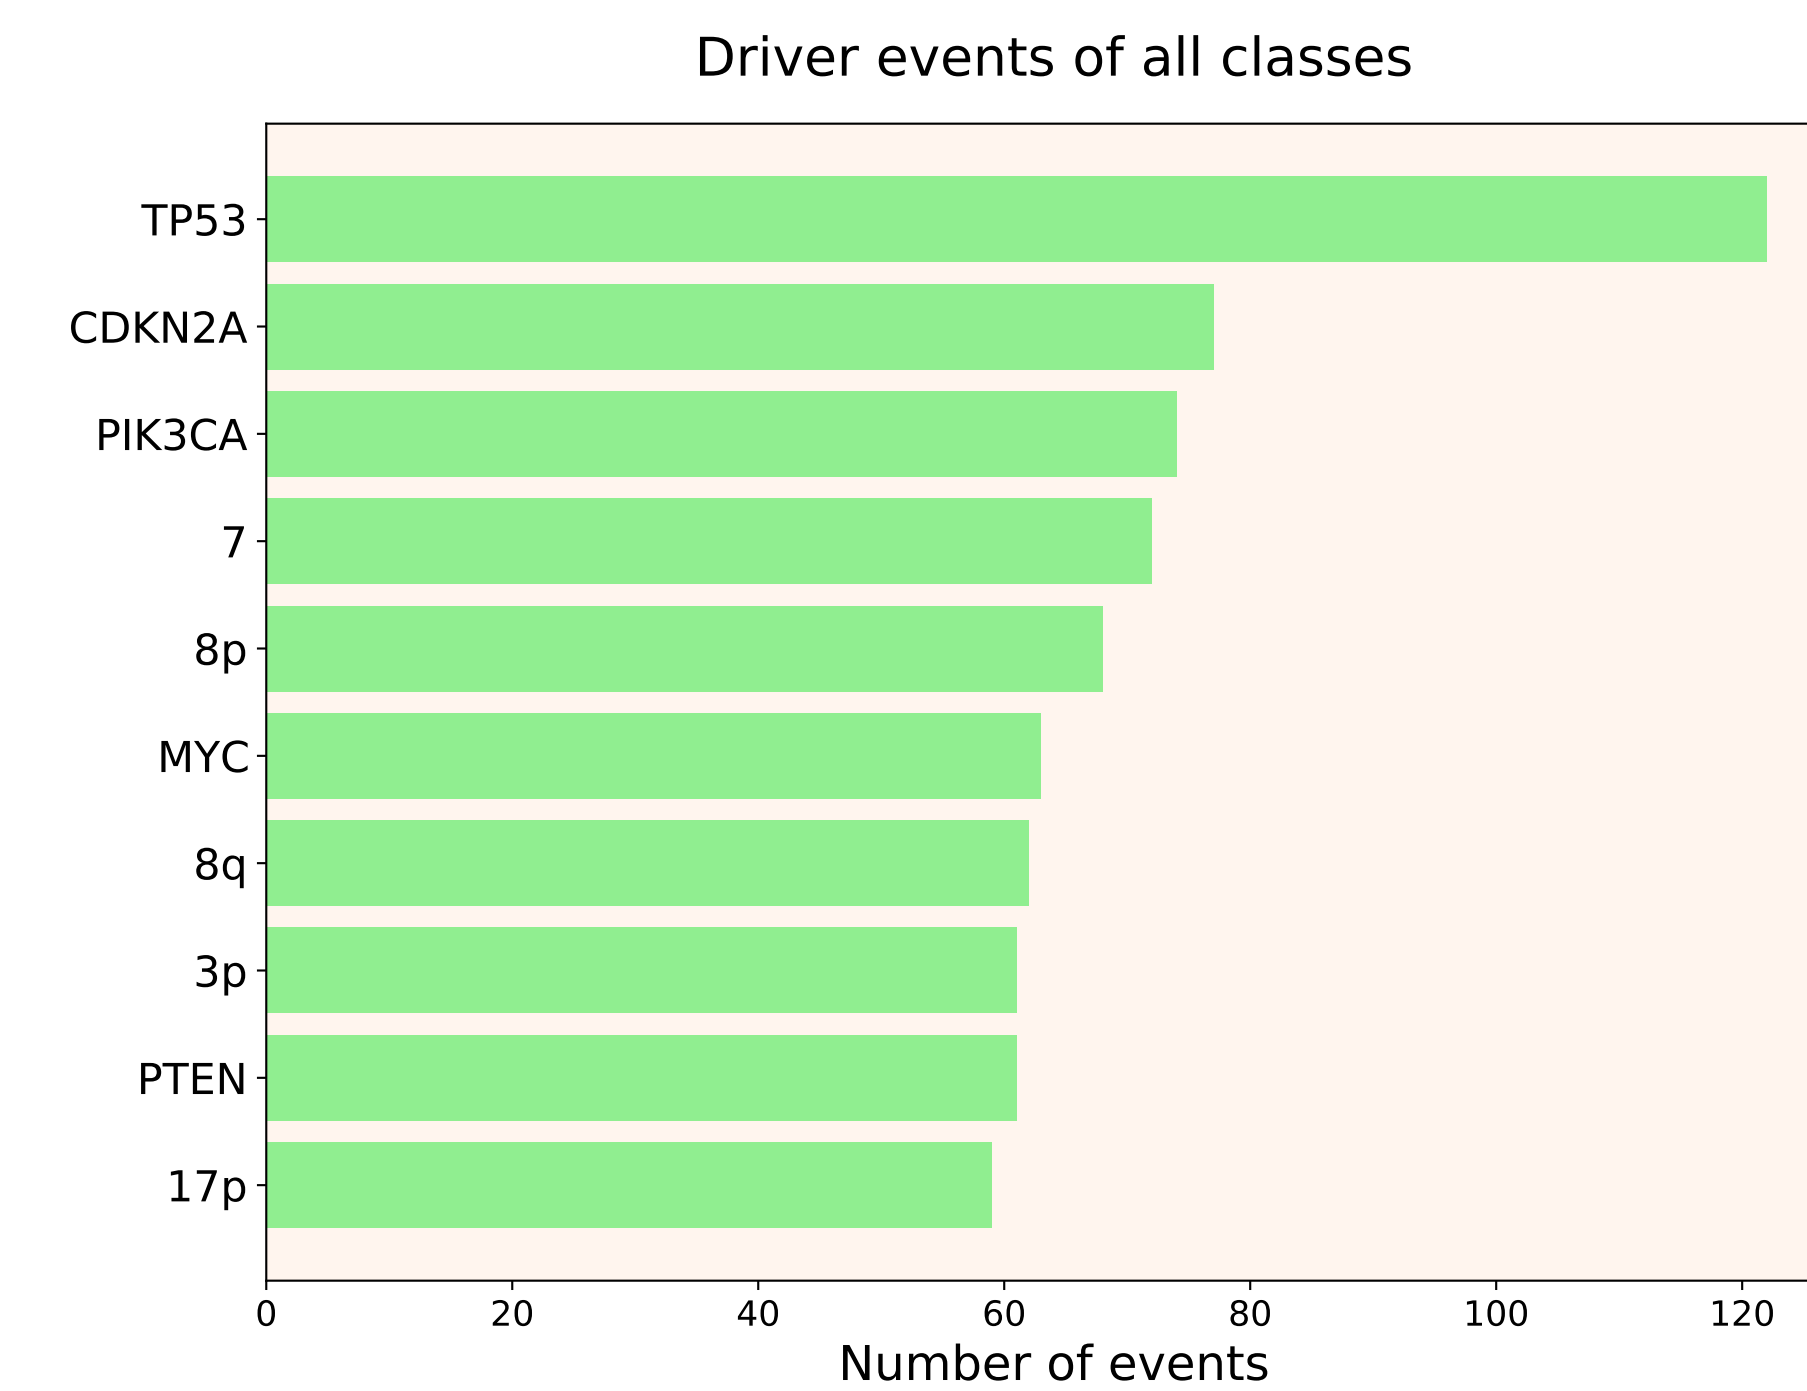

Supplement: Supplemental_Data_S1.zip [file Supplemental_Data_S1.zip]

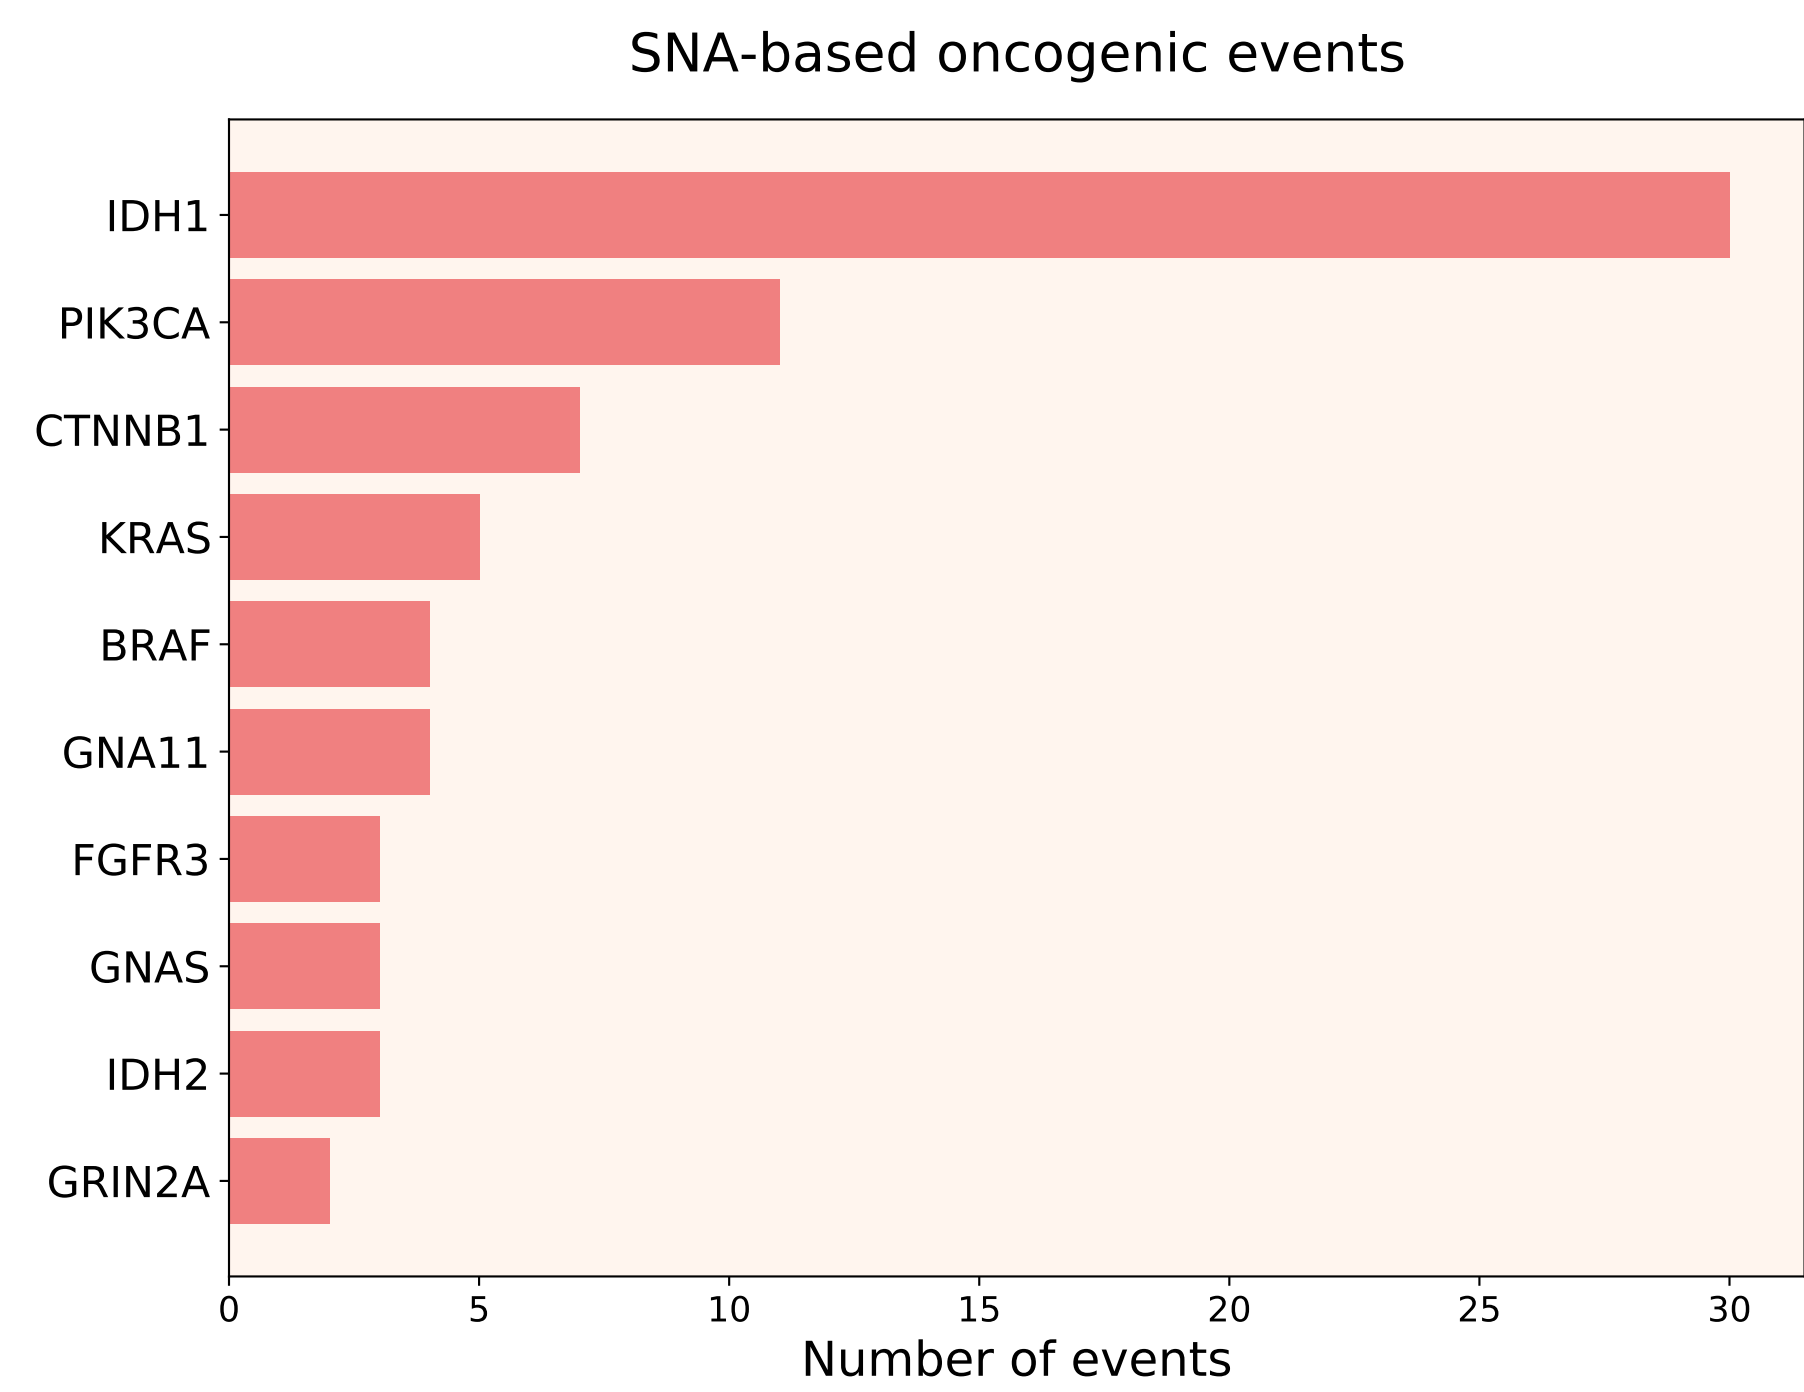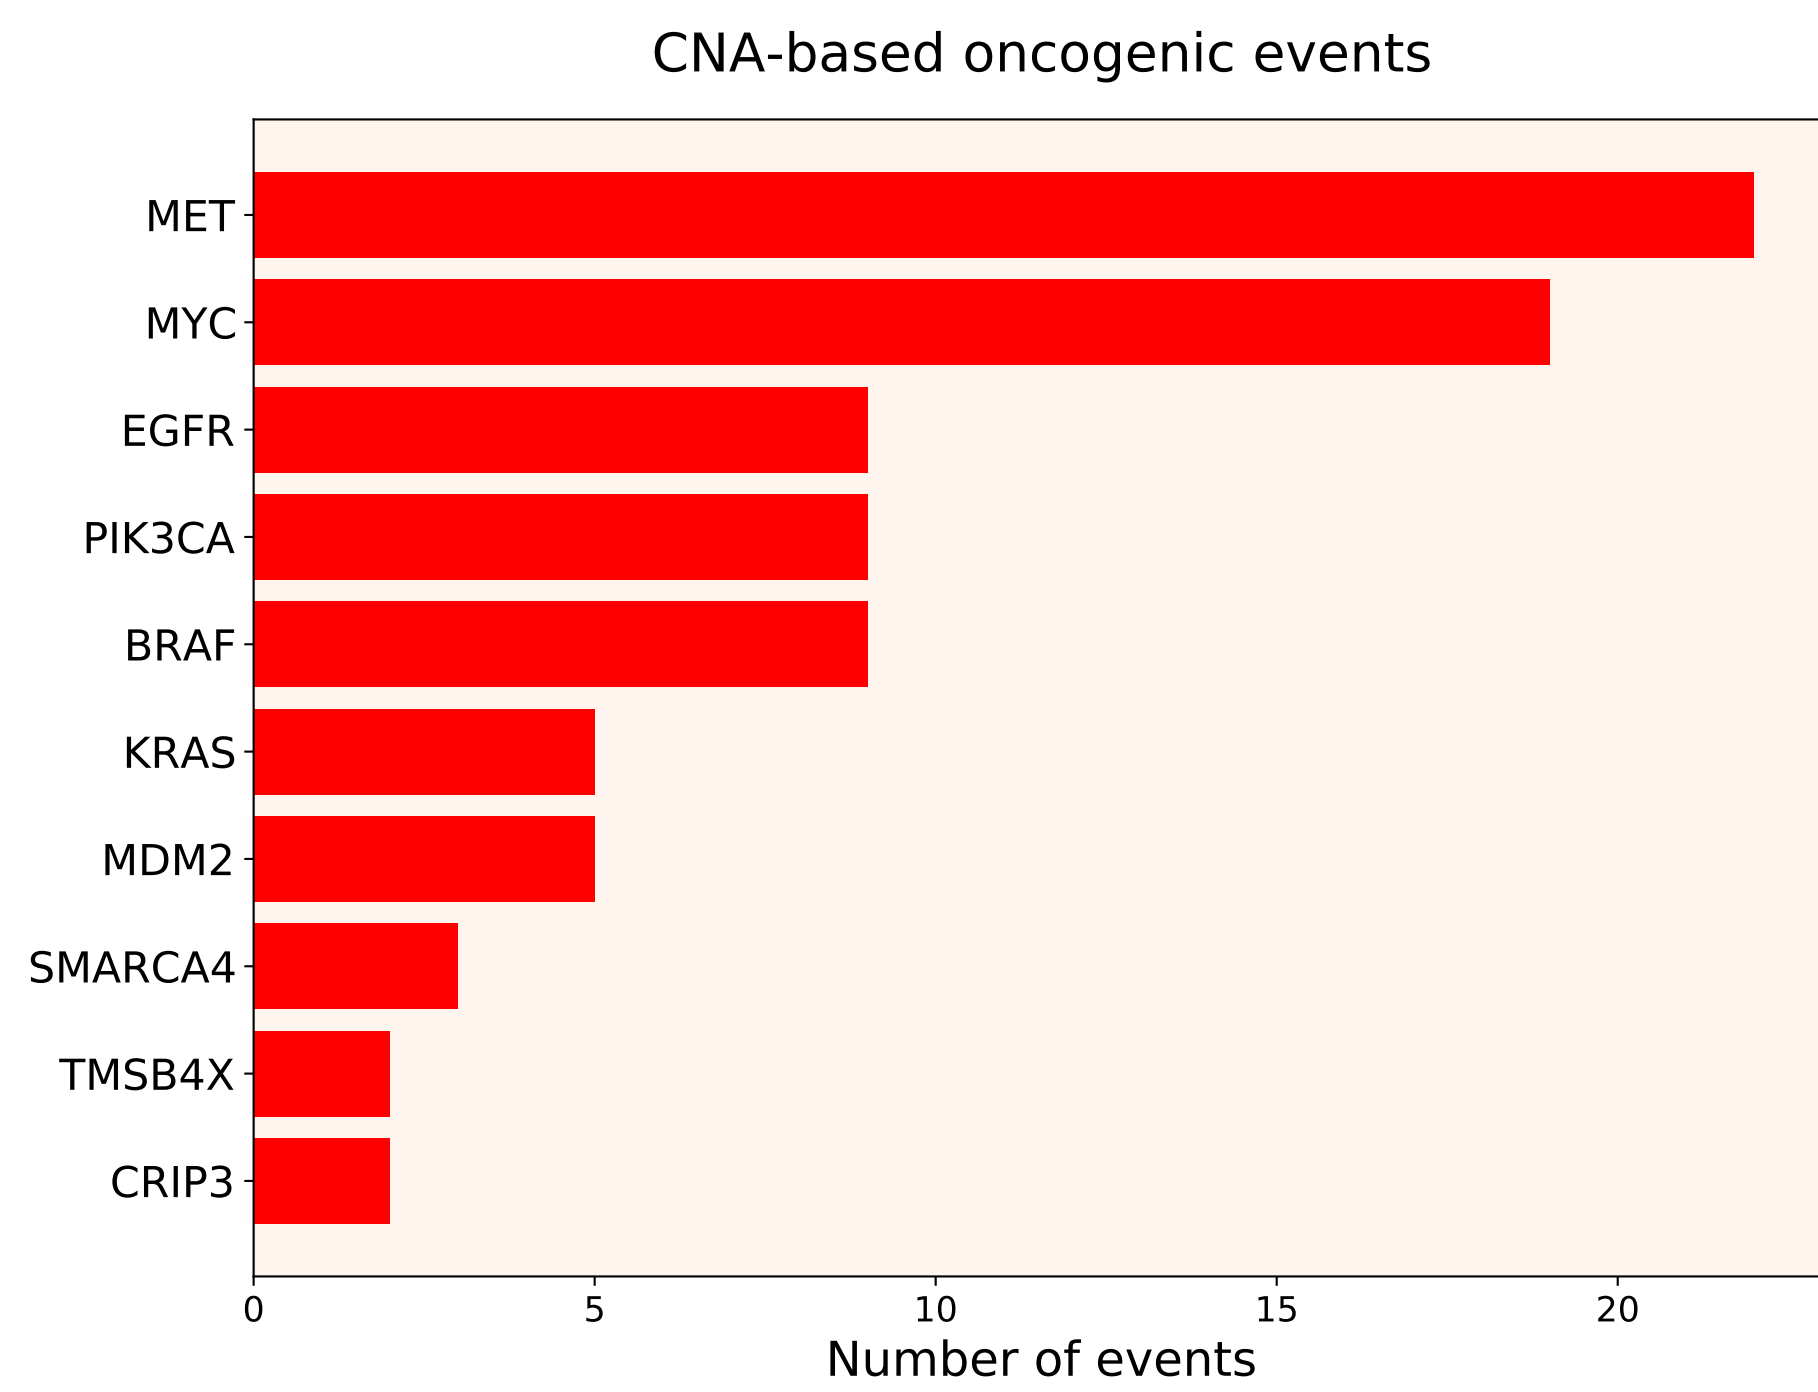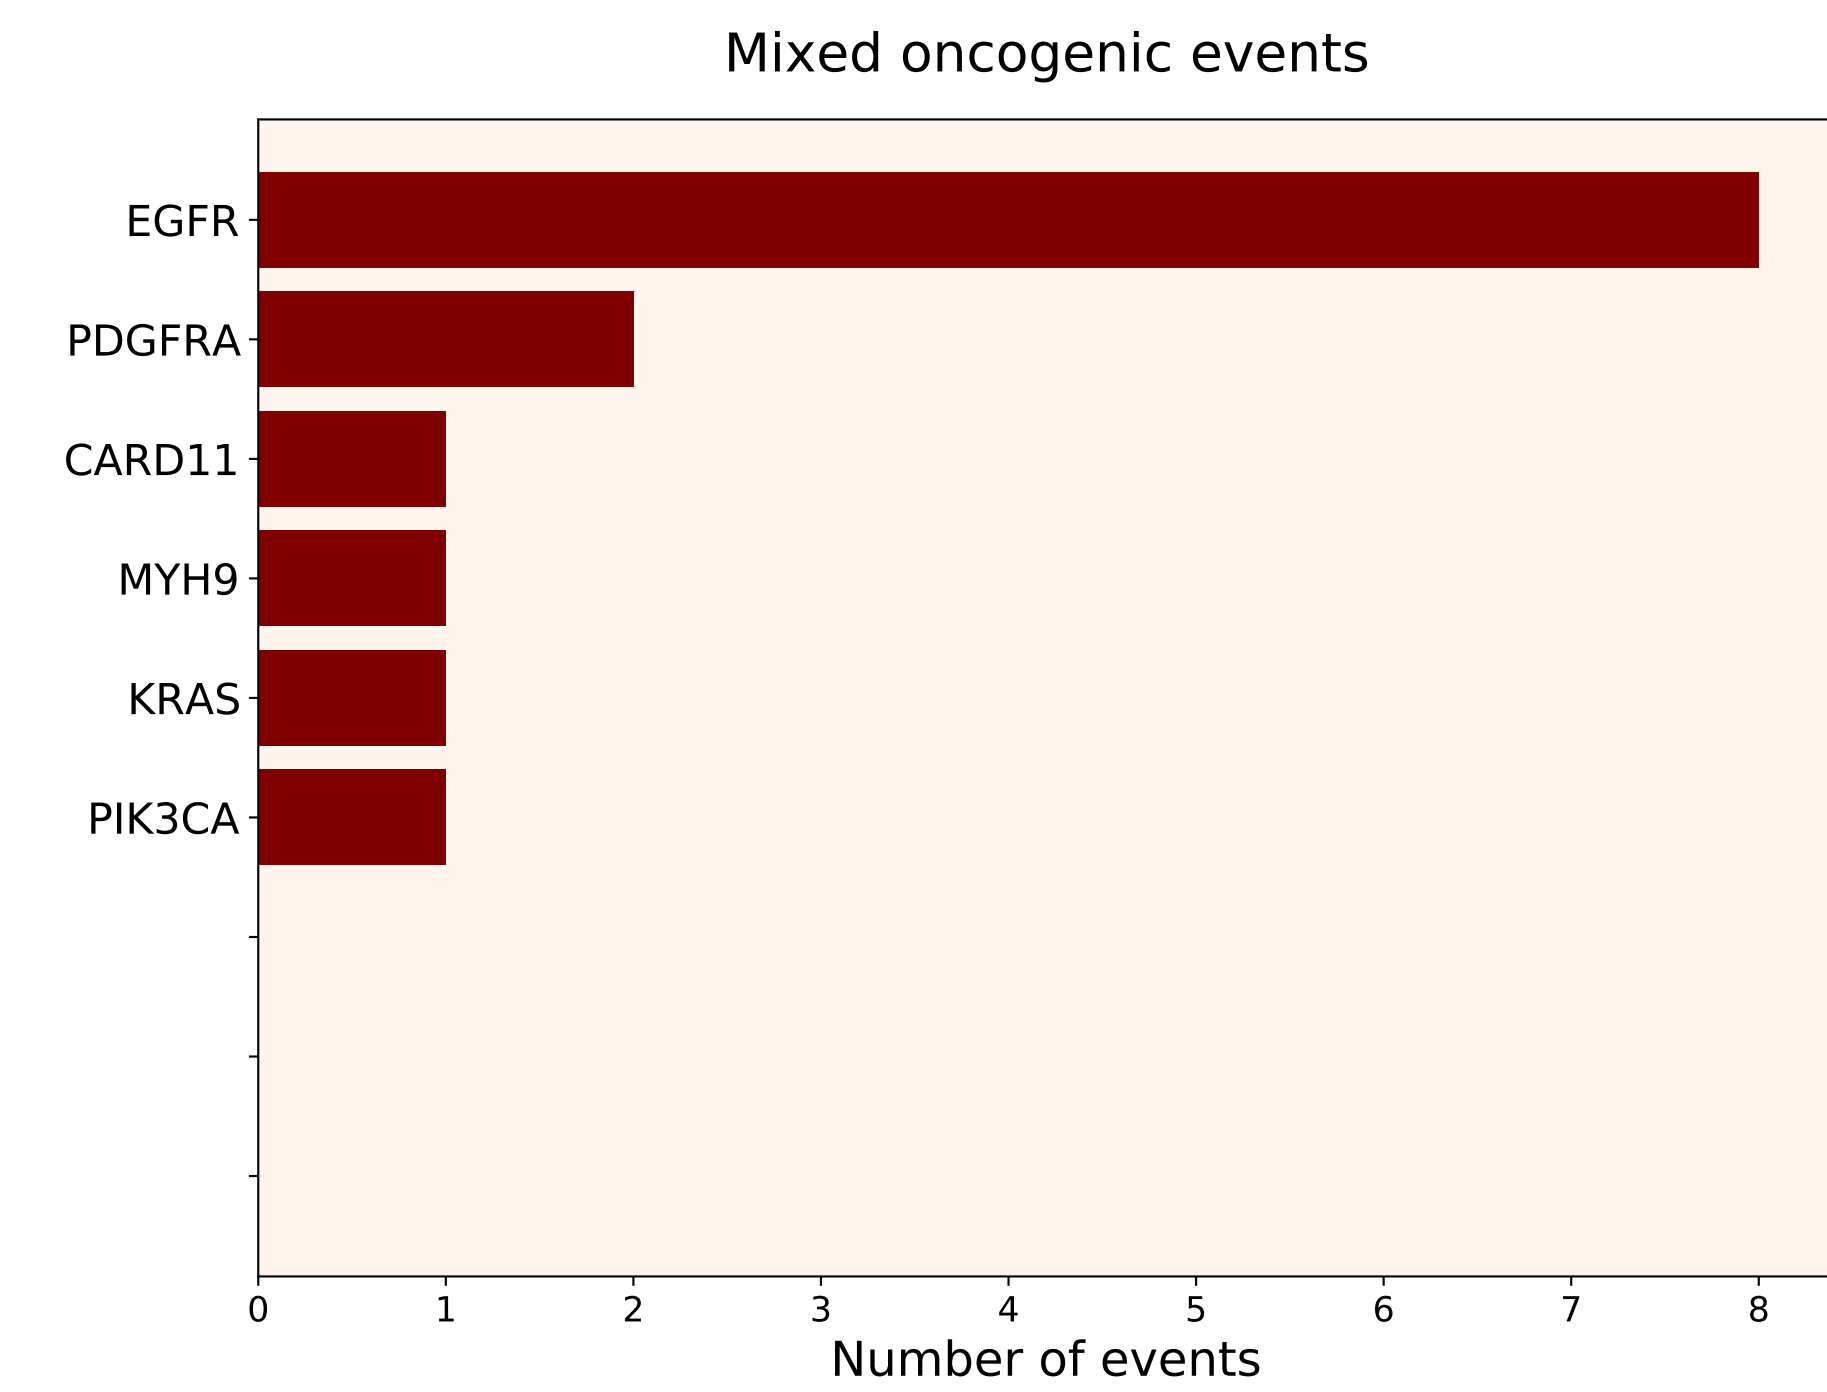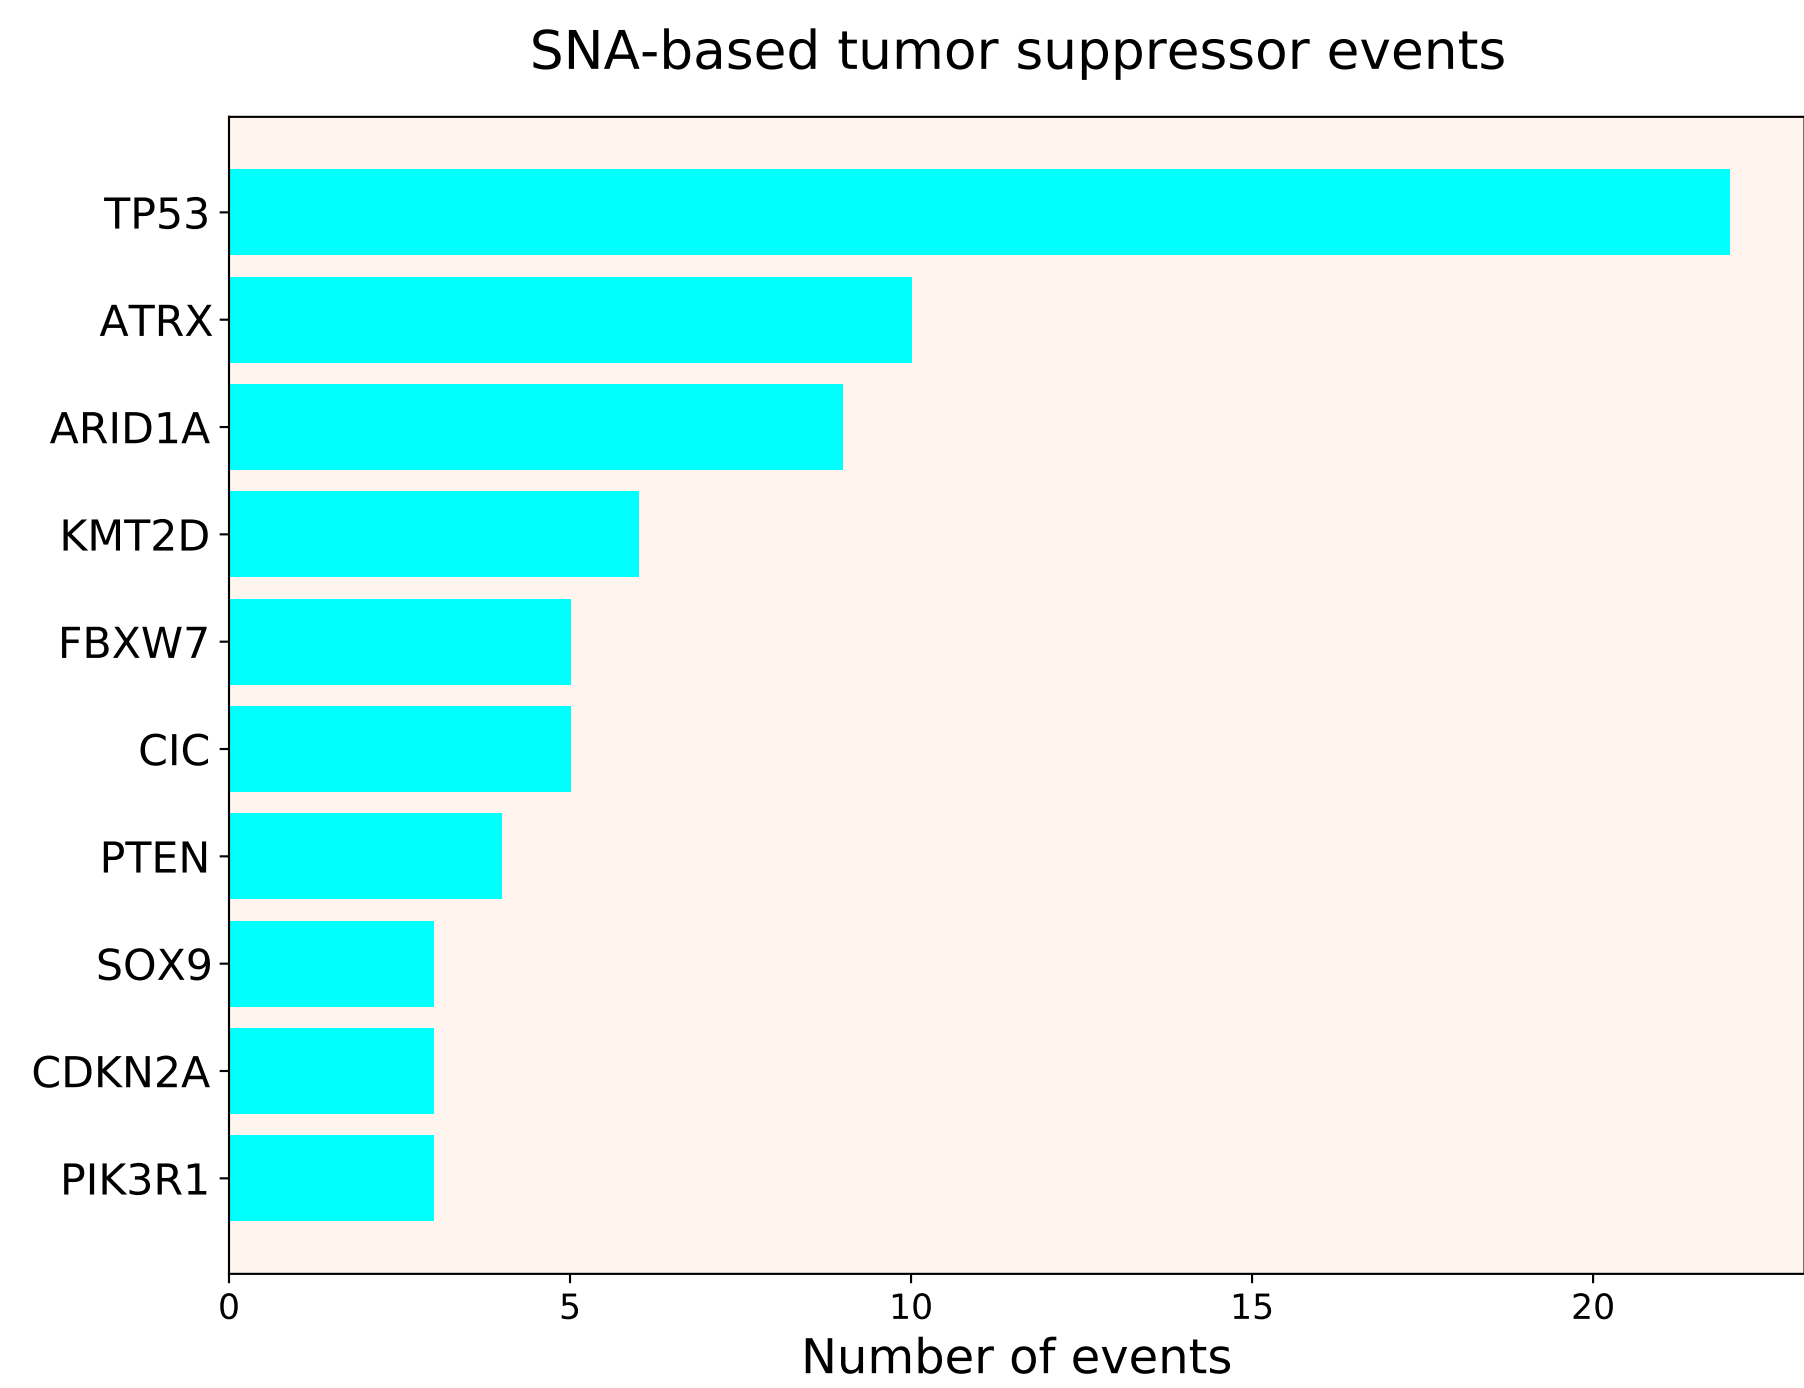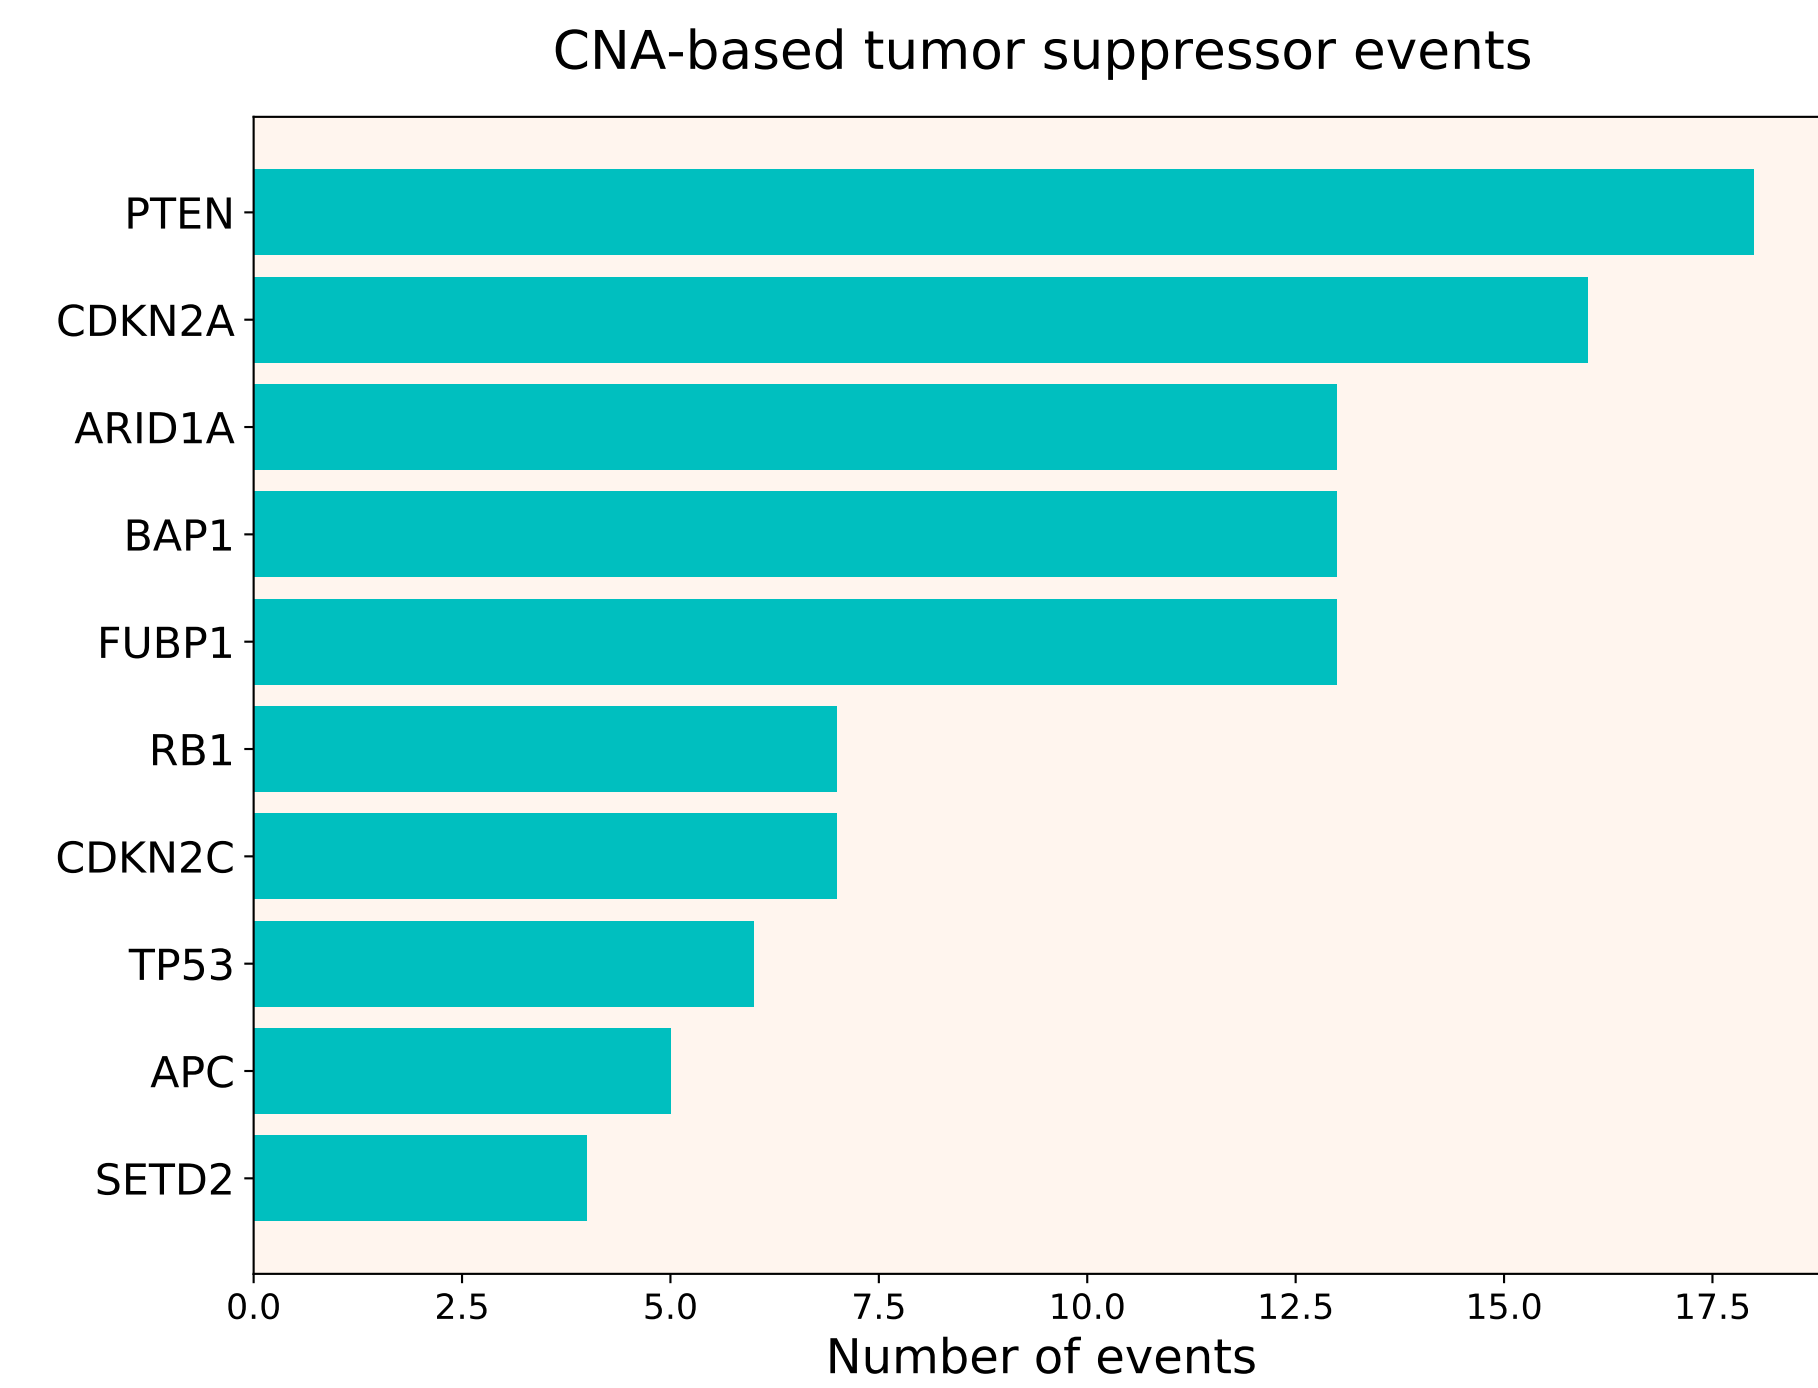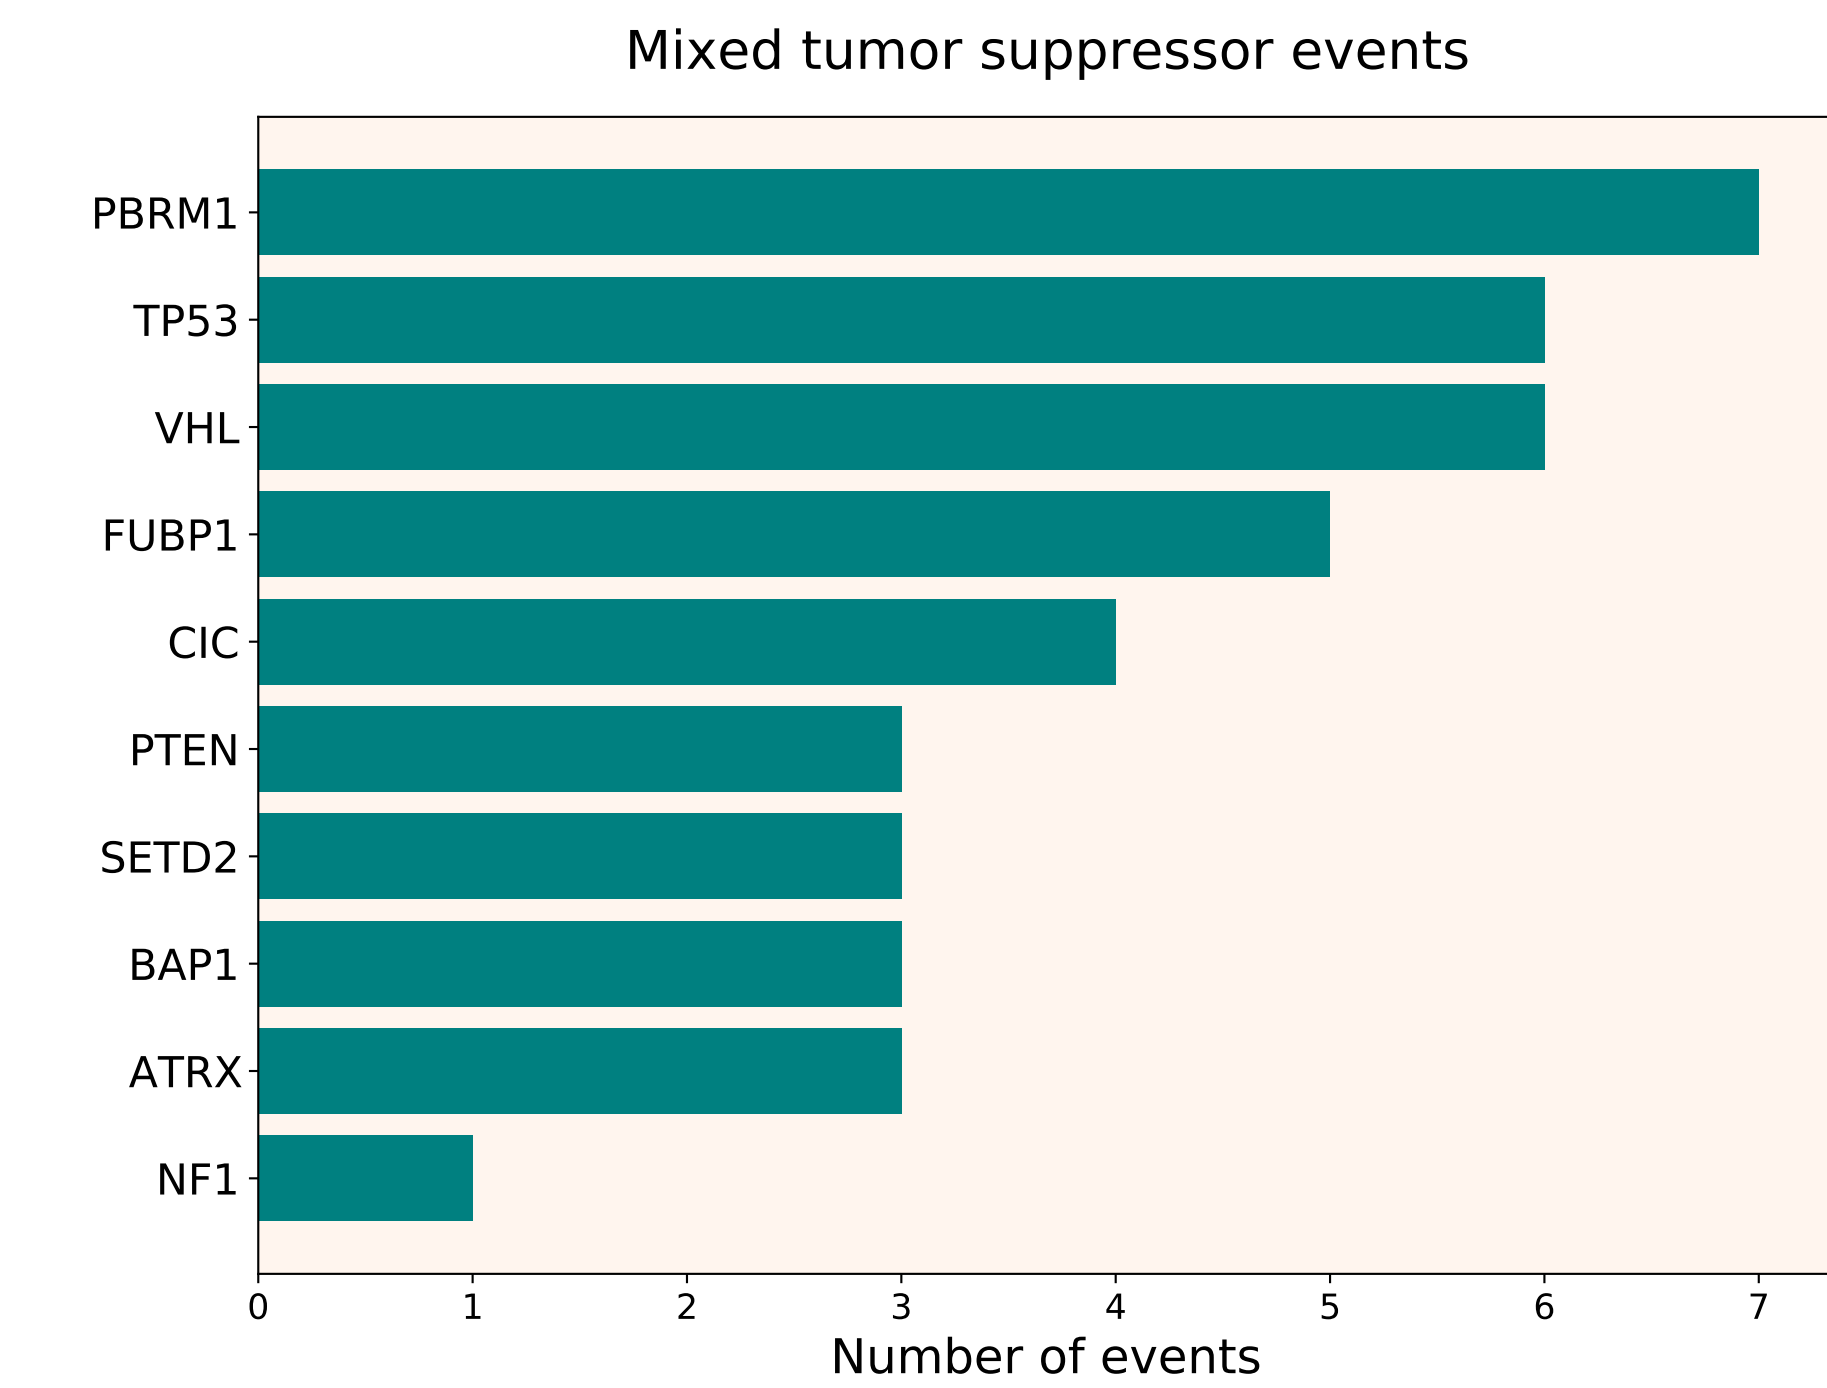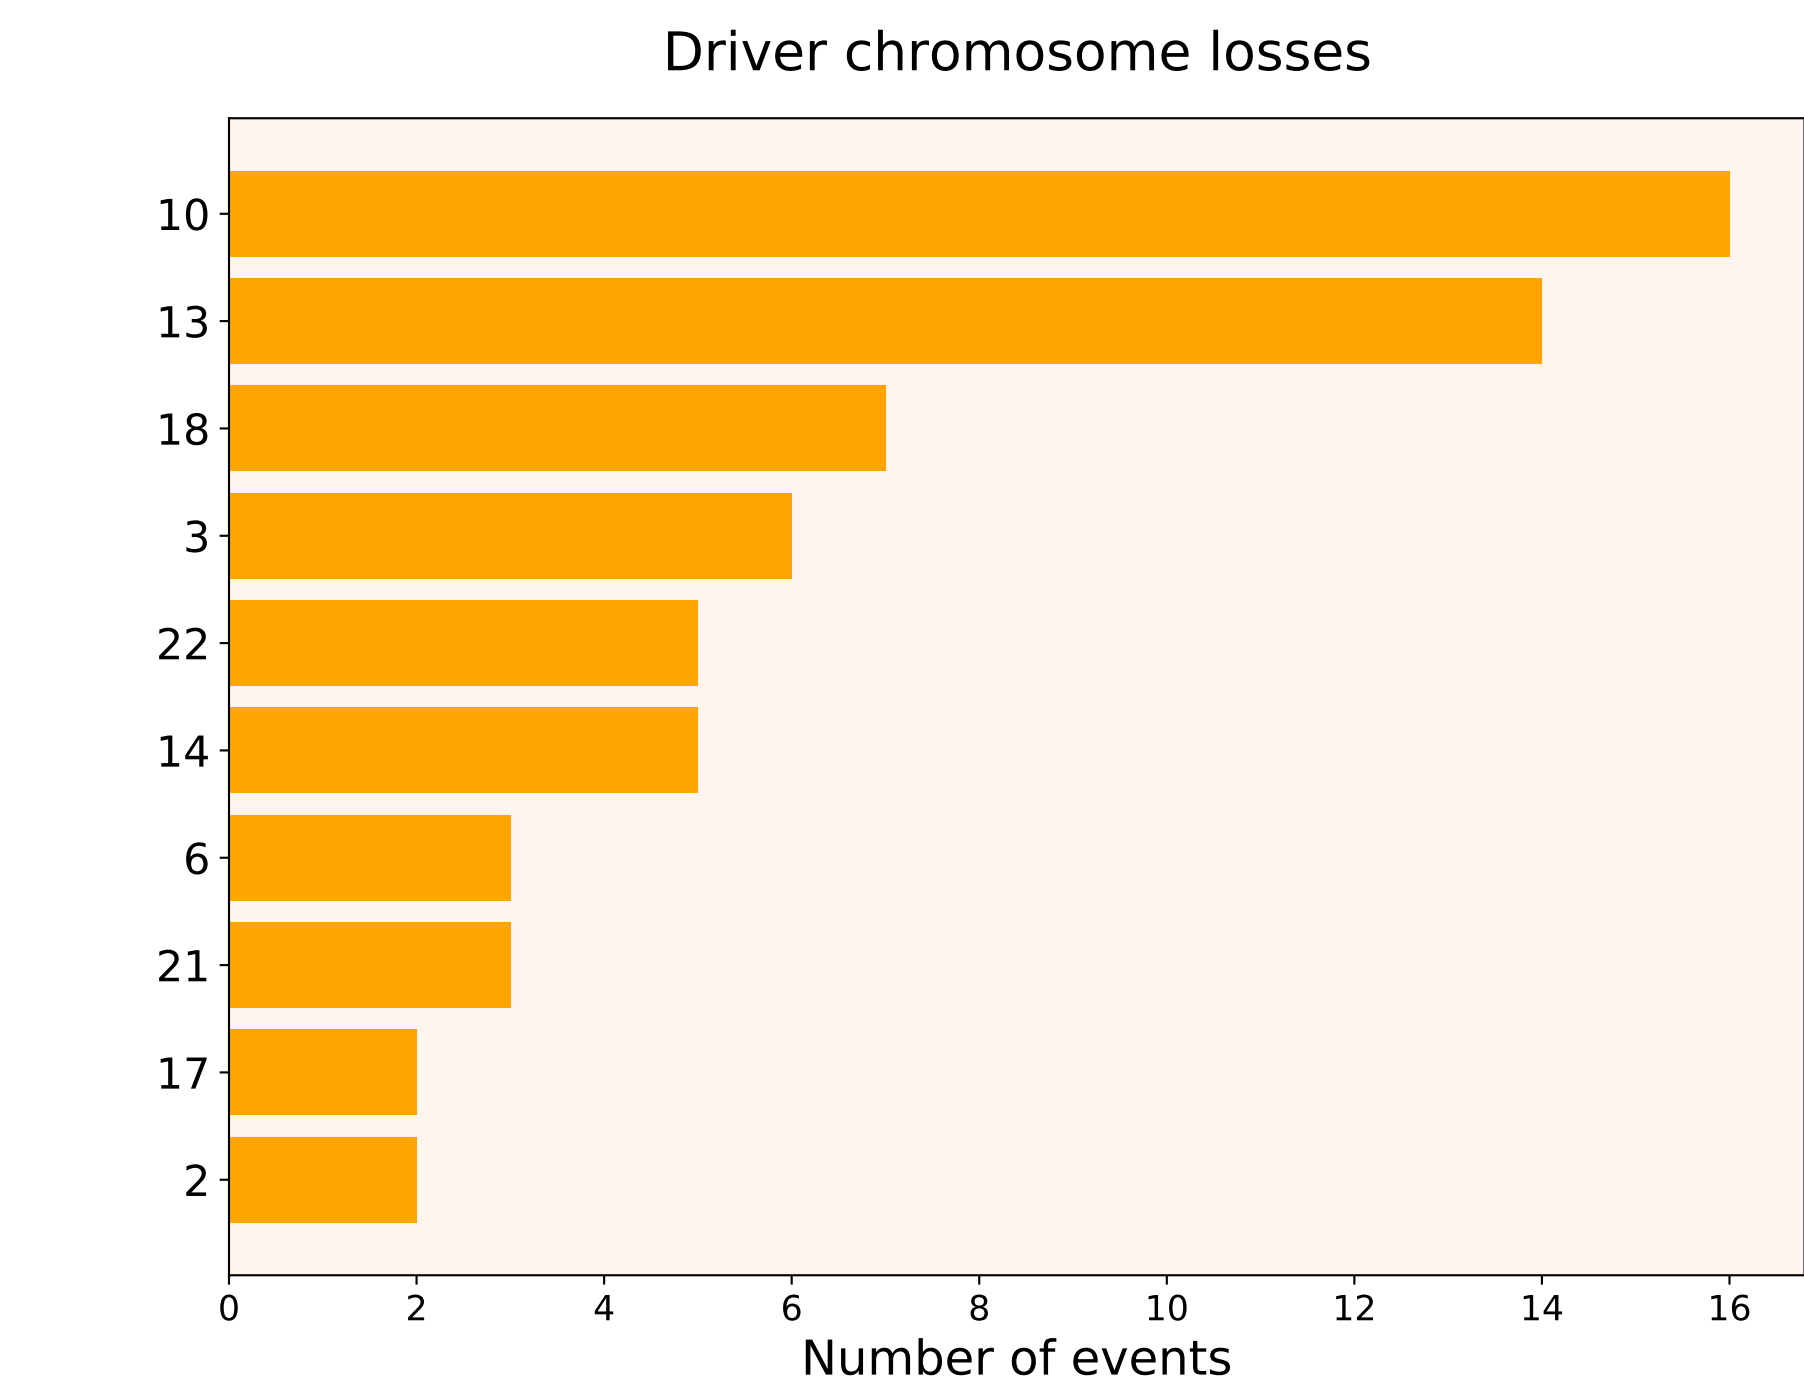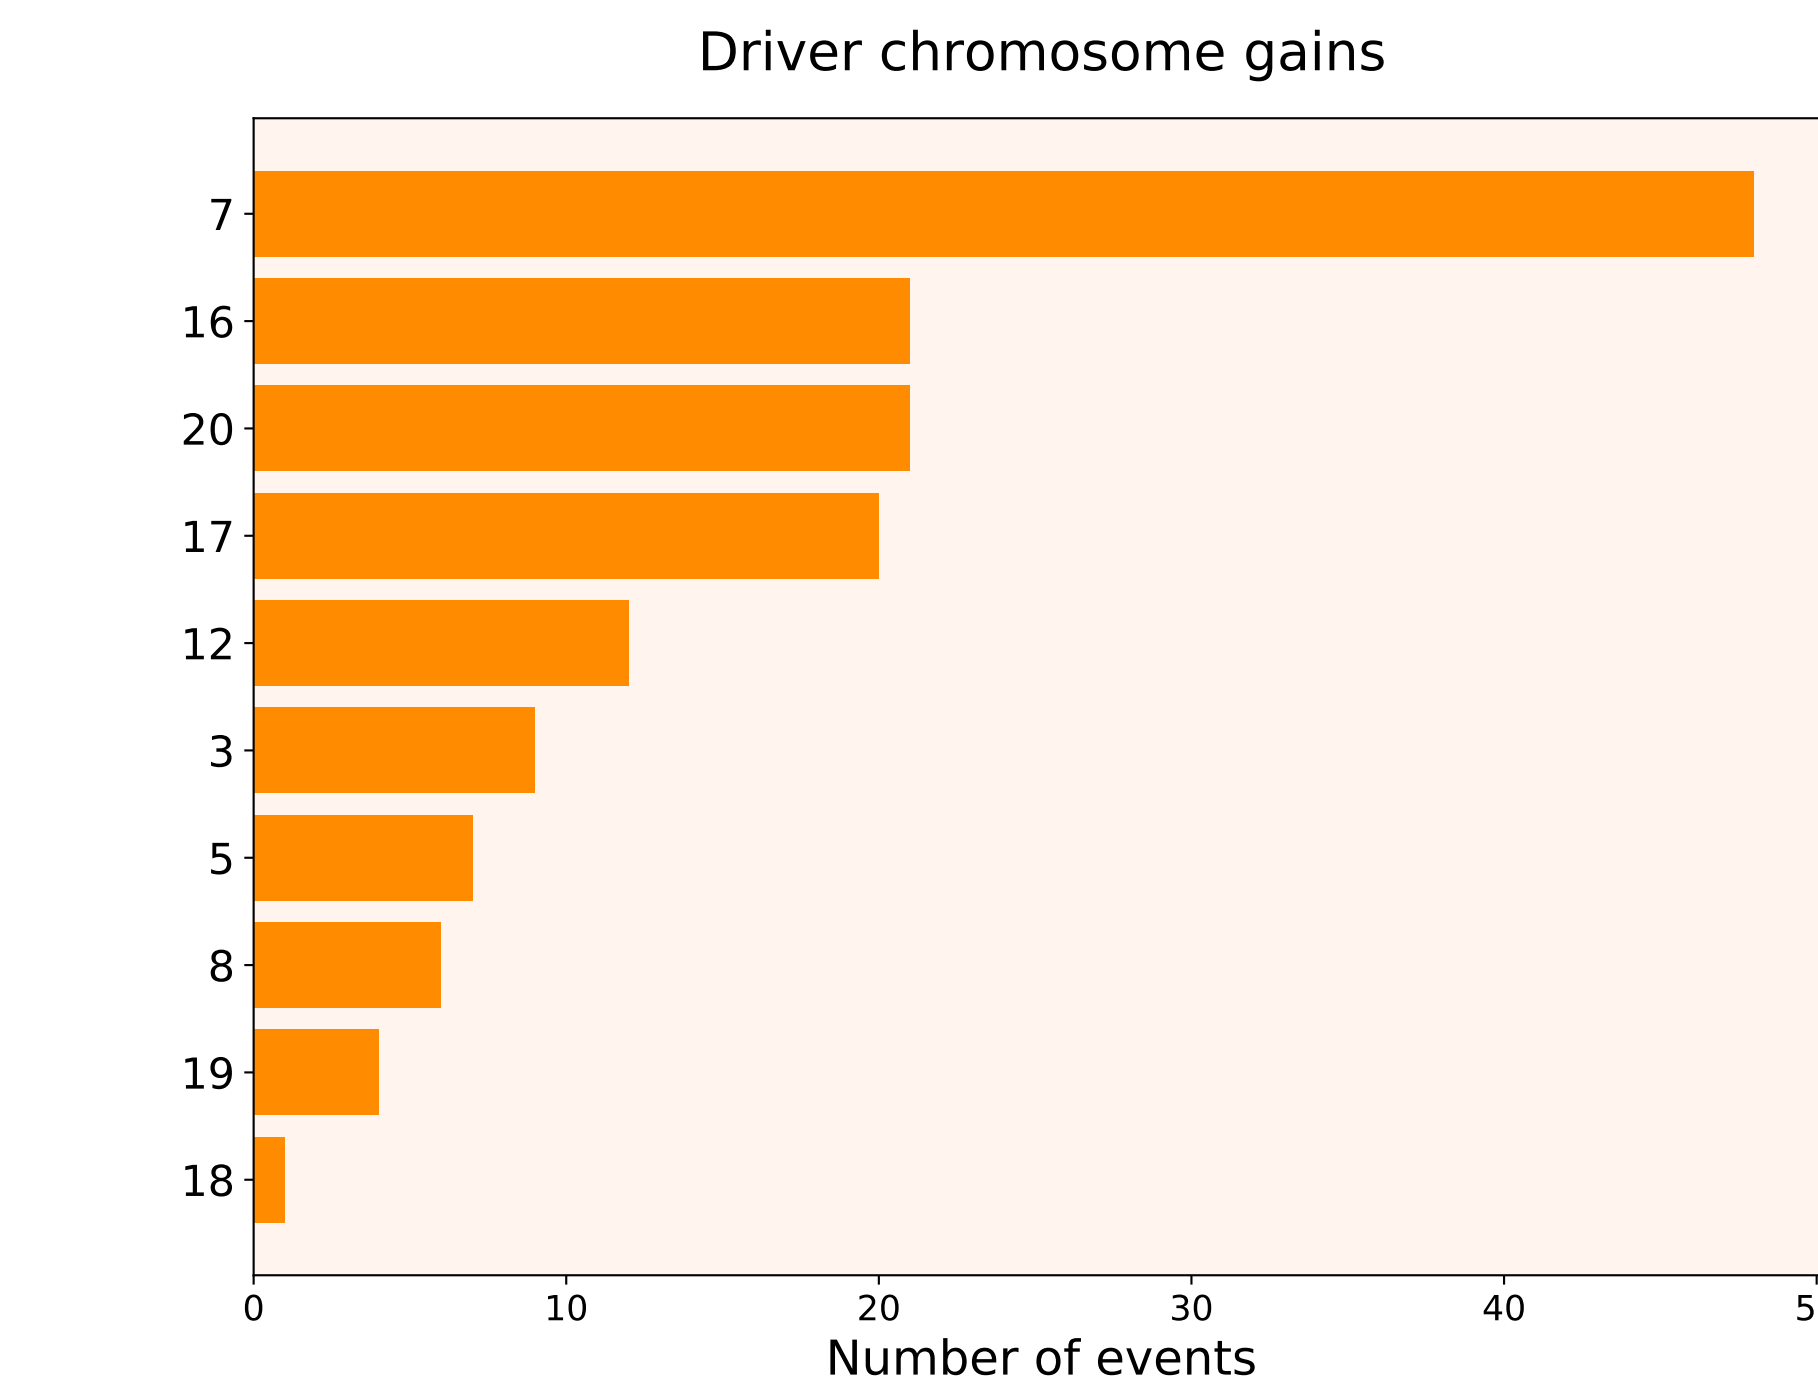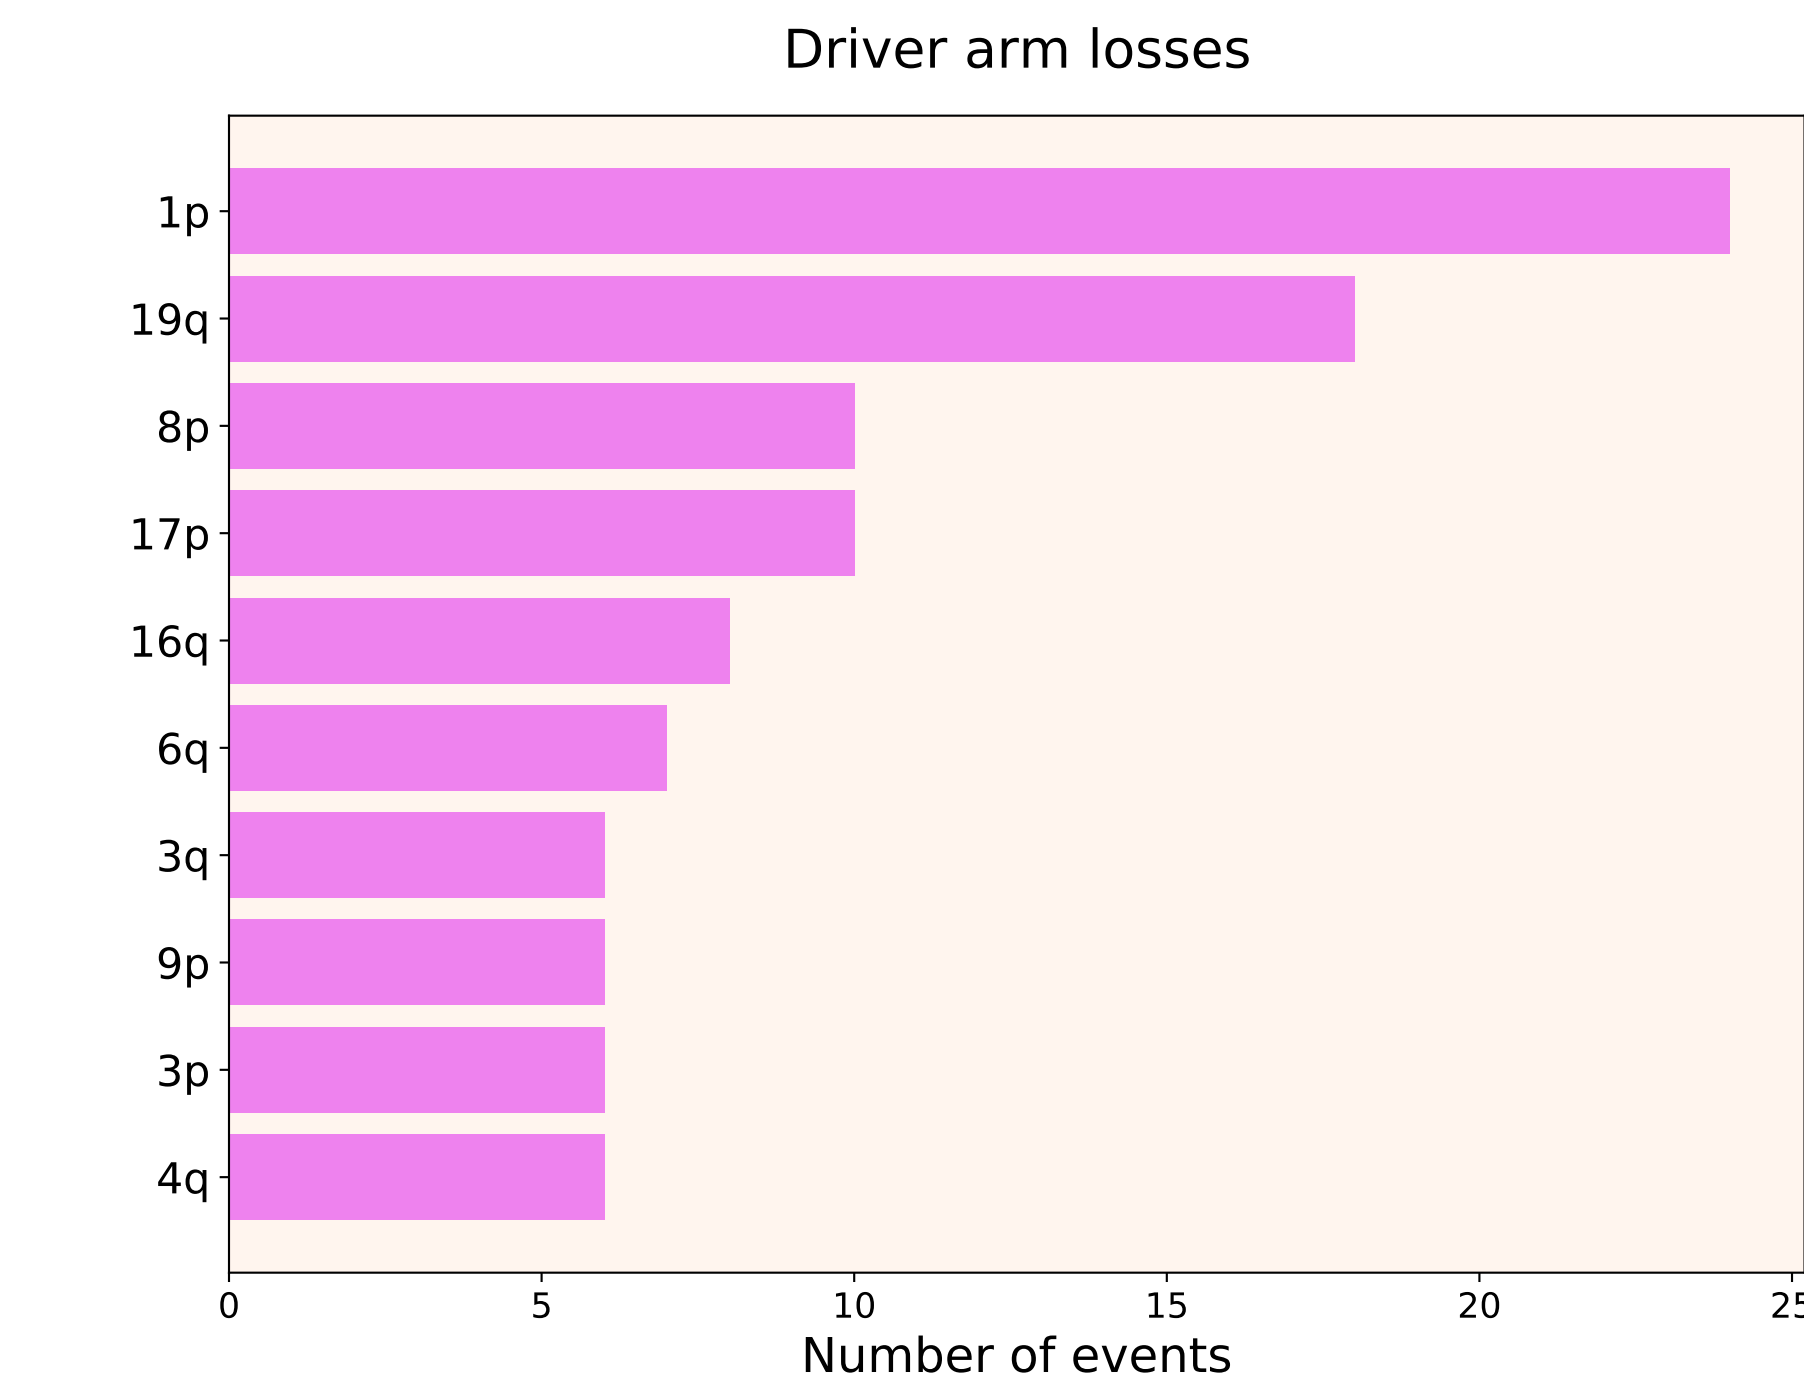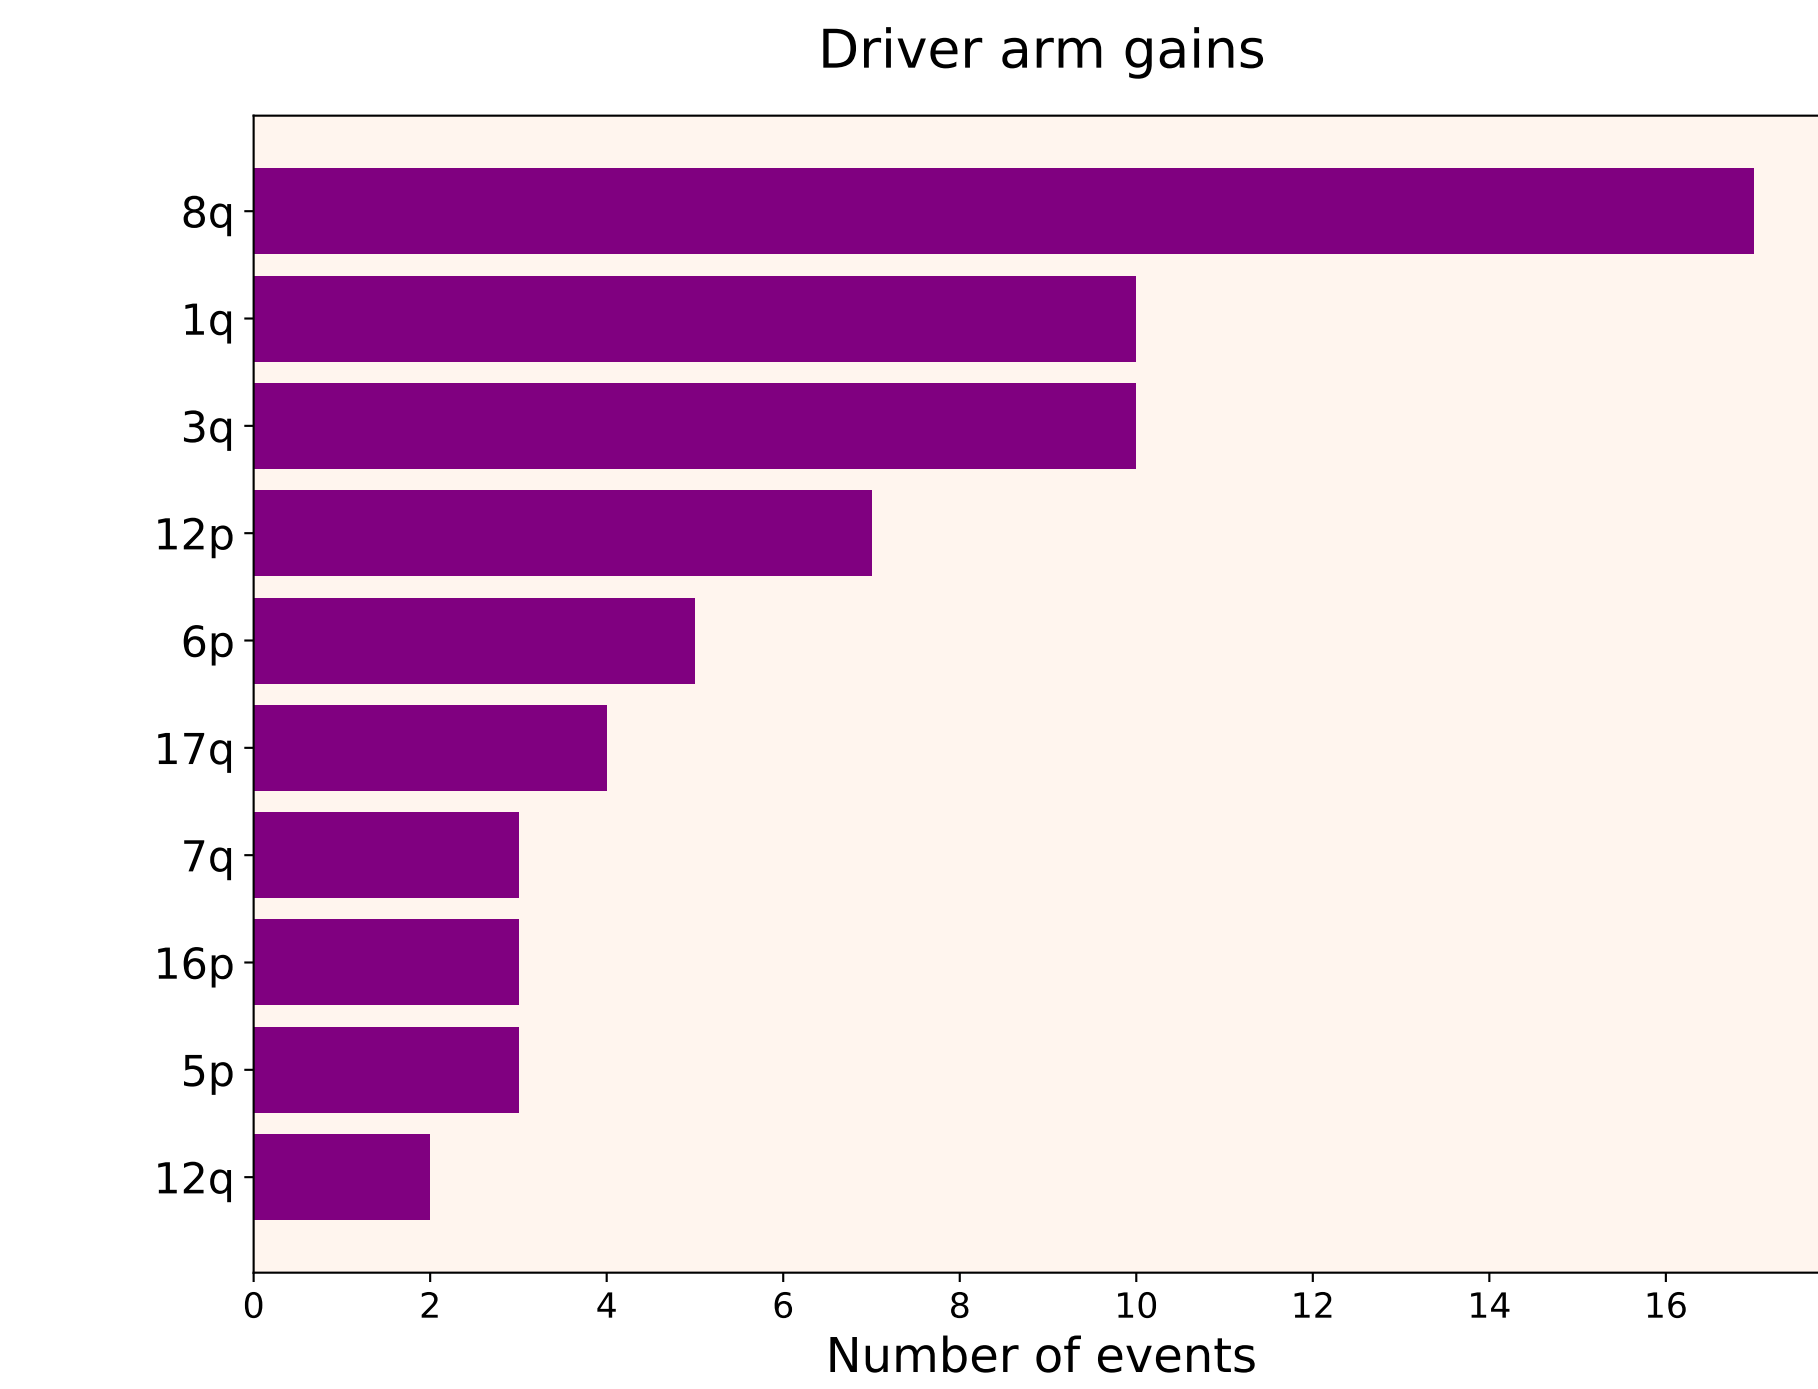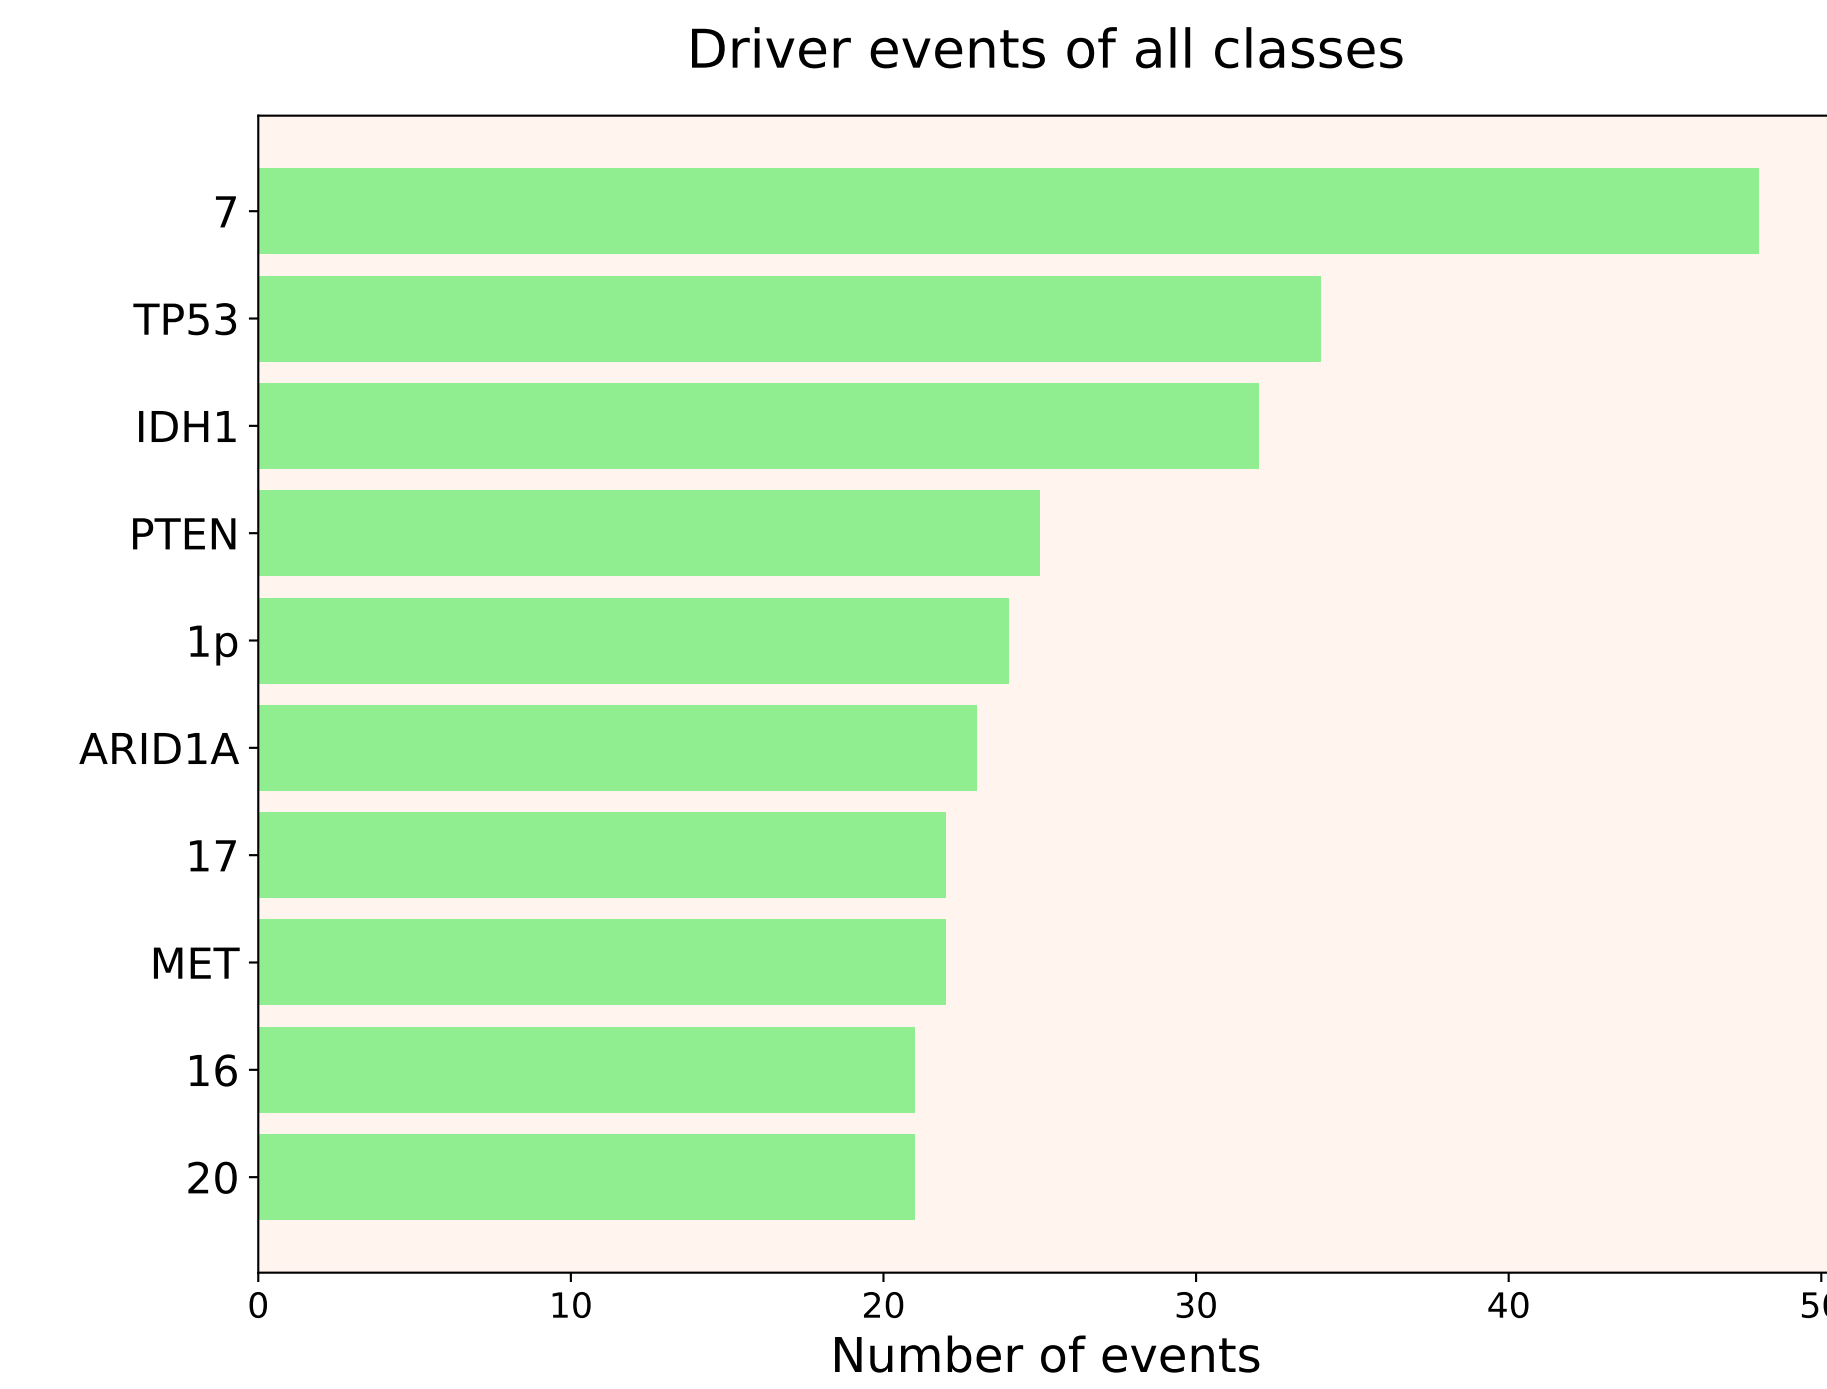

Supplement: Supplemental_Data_S1.zip [file Supplemental_Data_S1.zip]

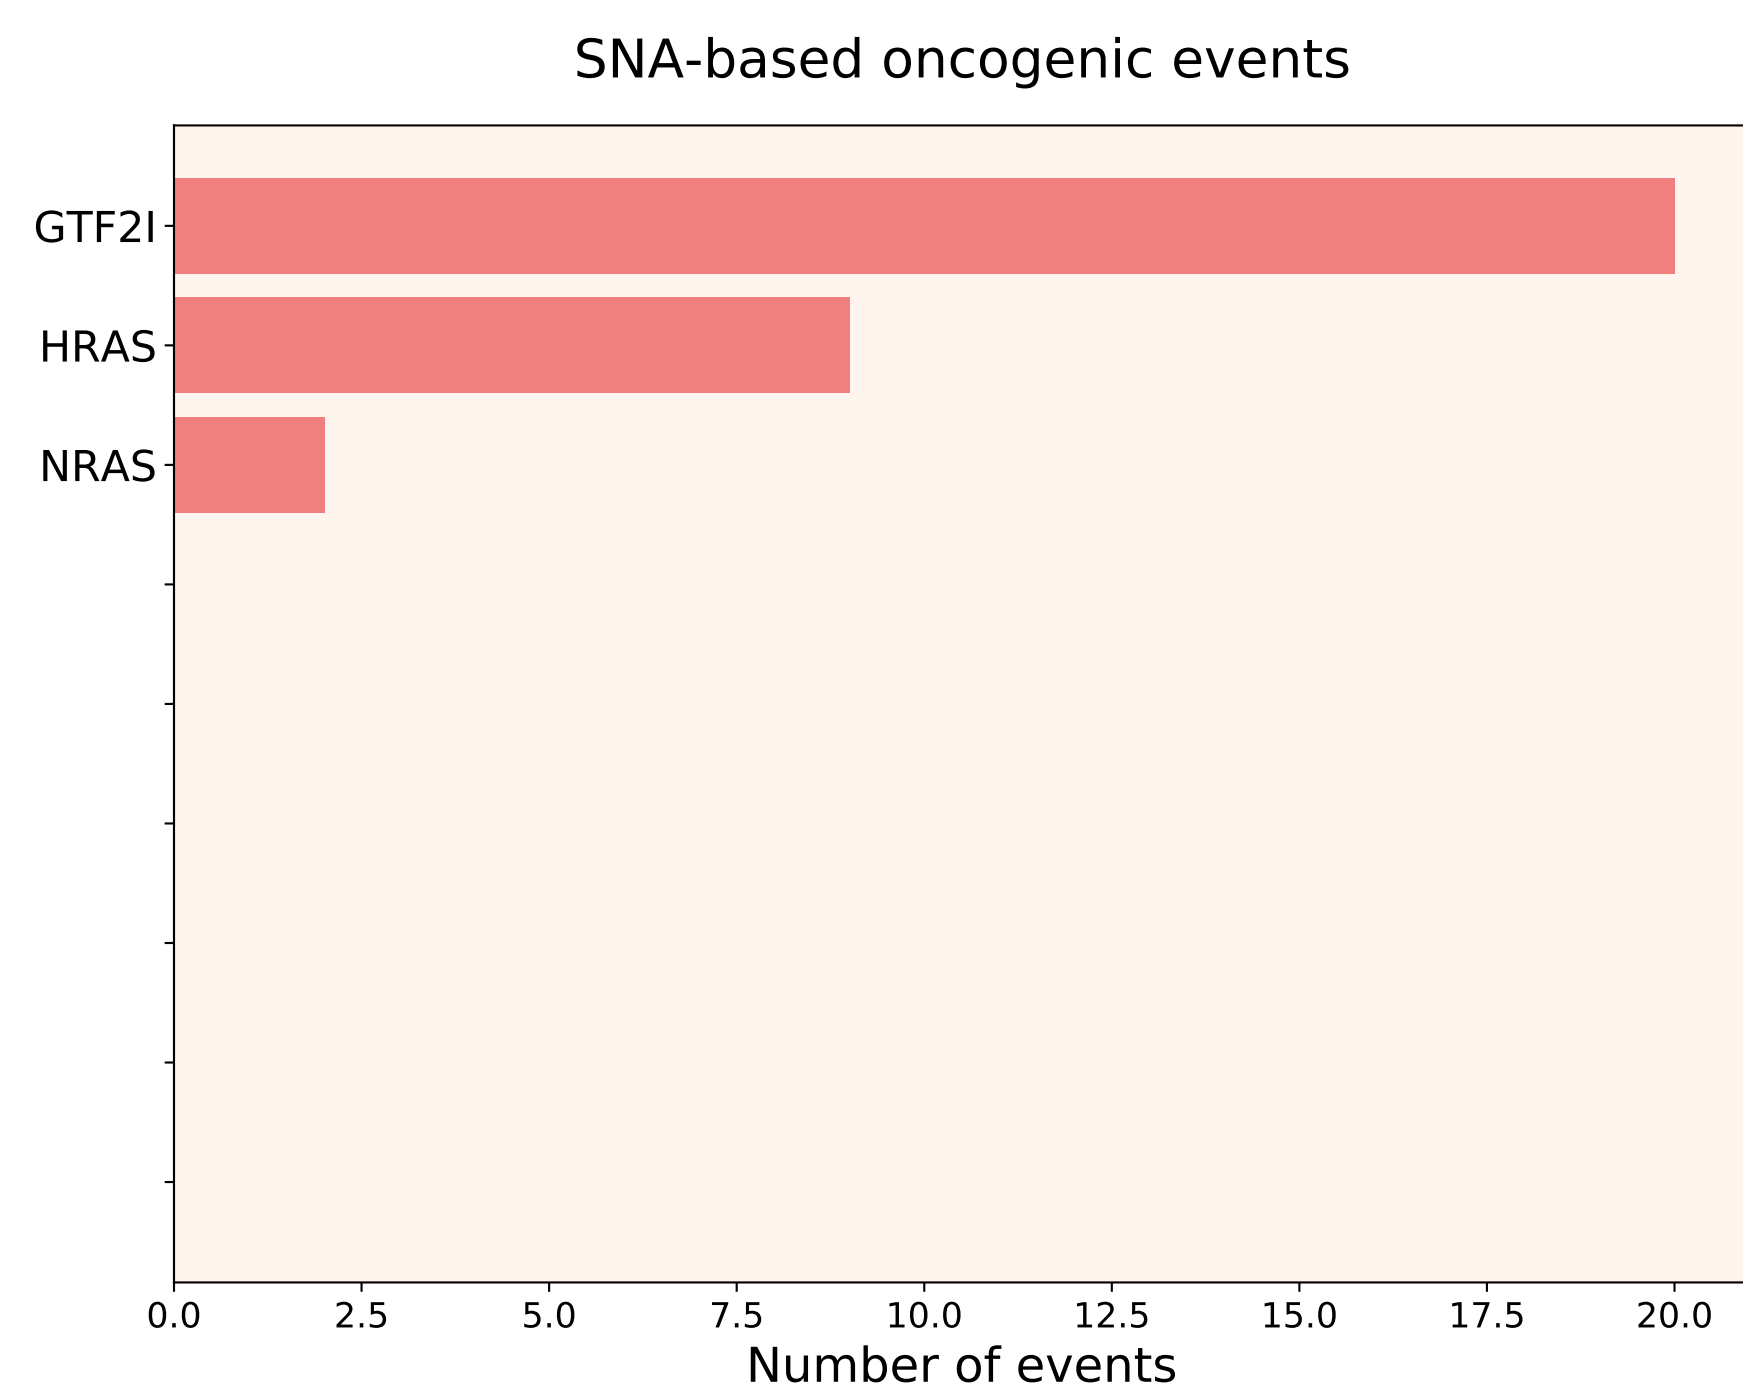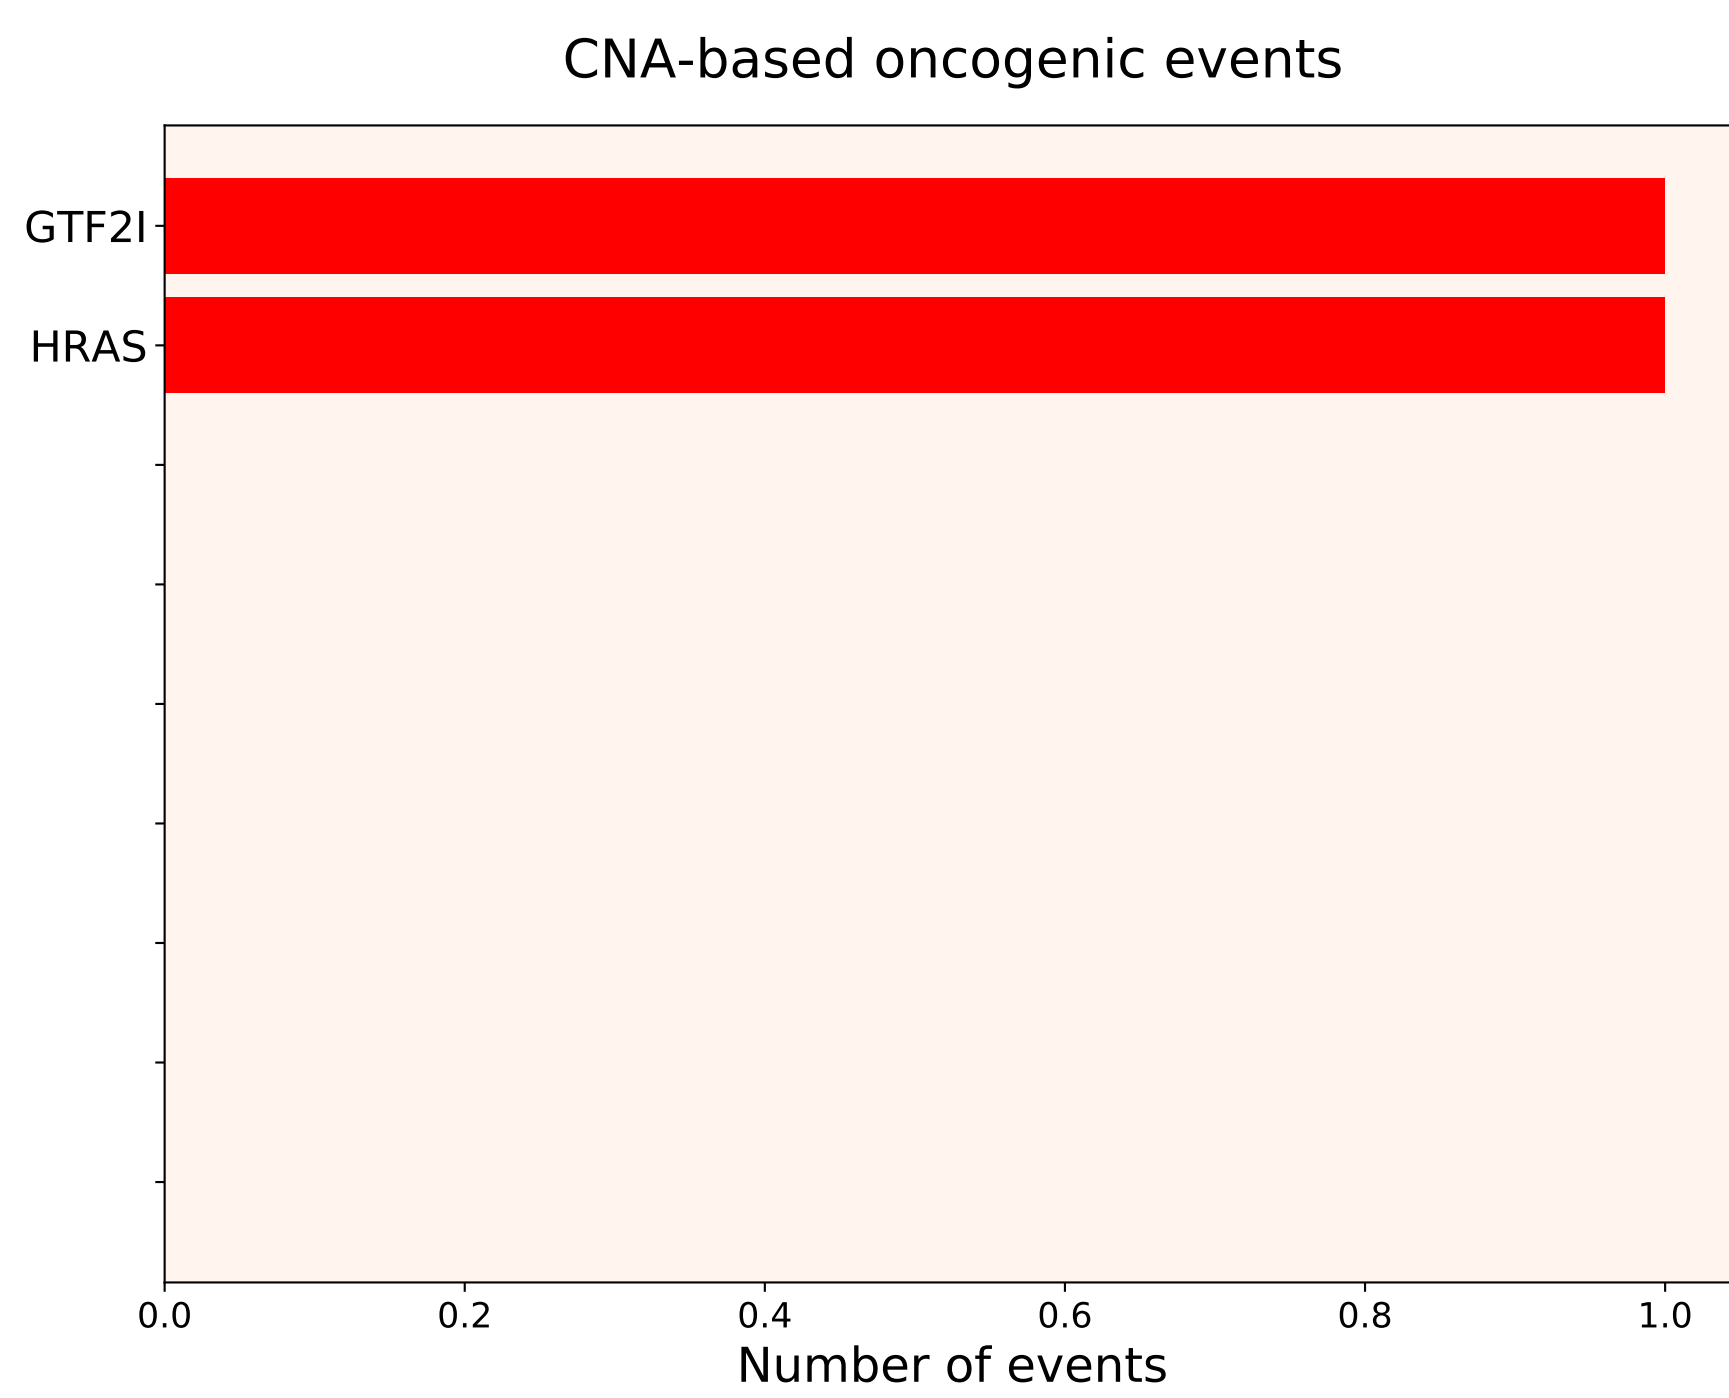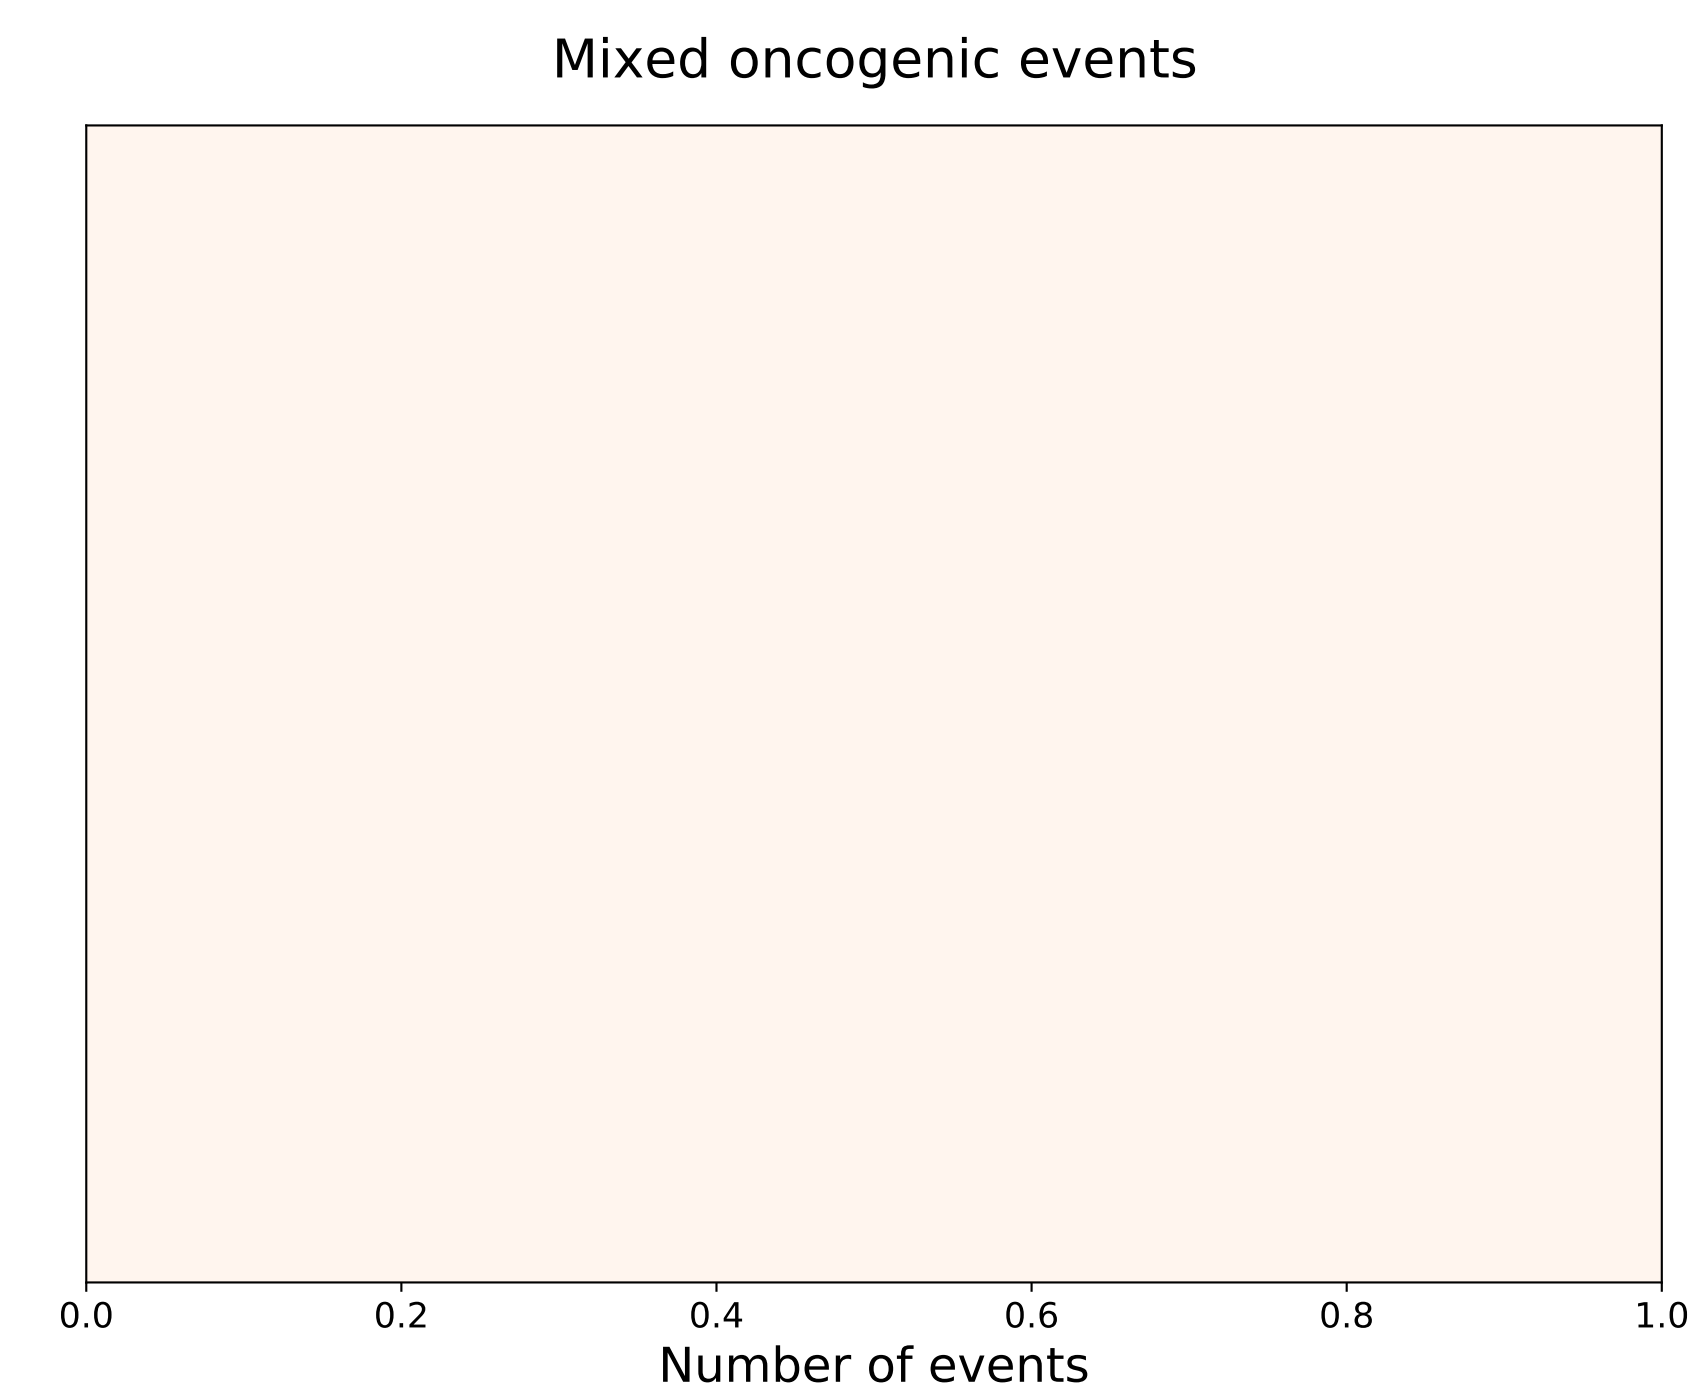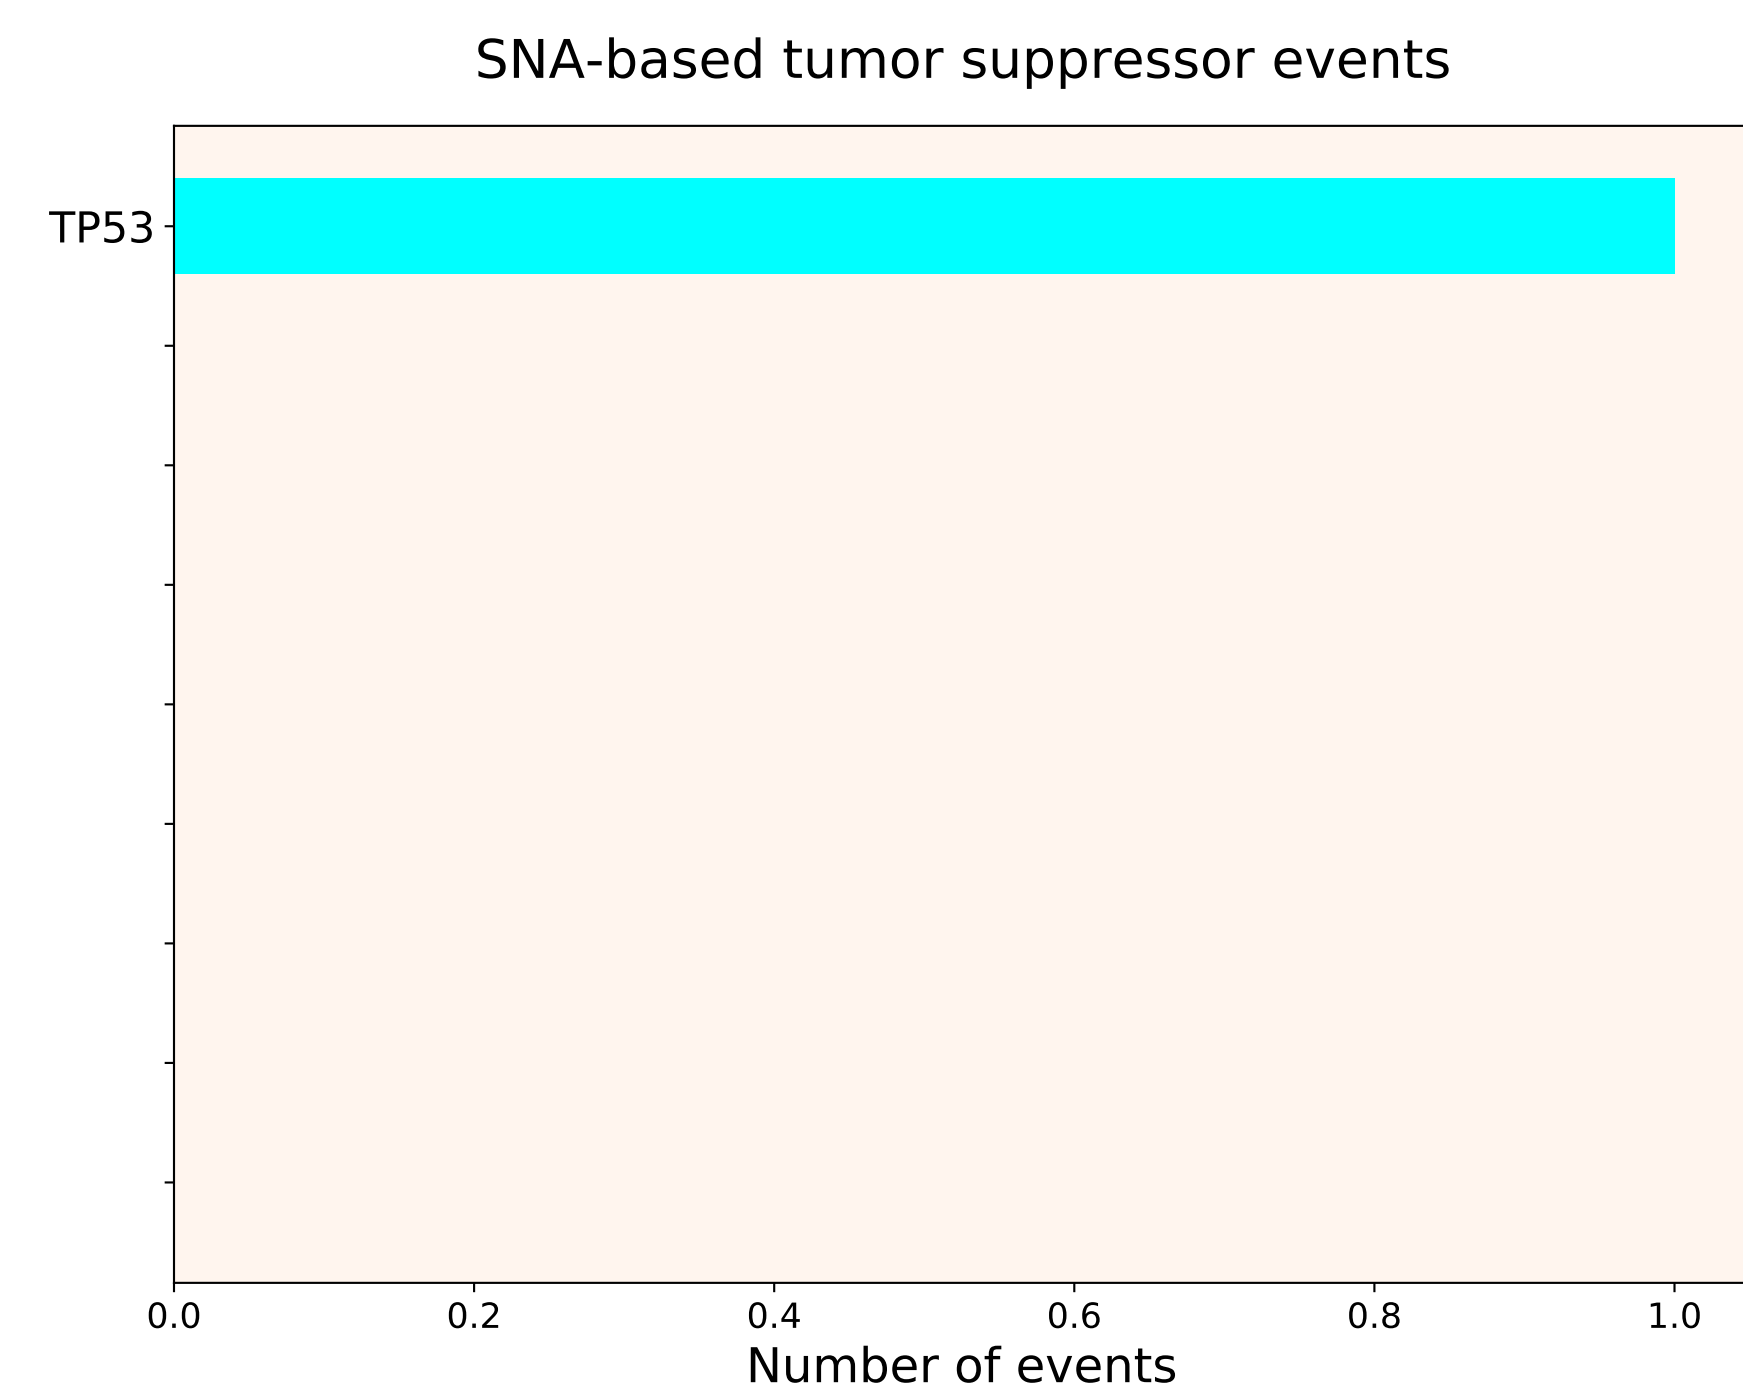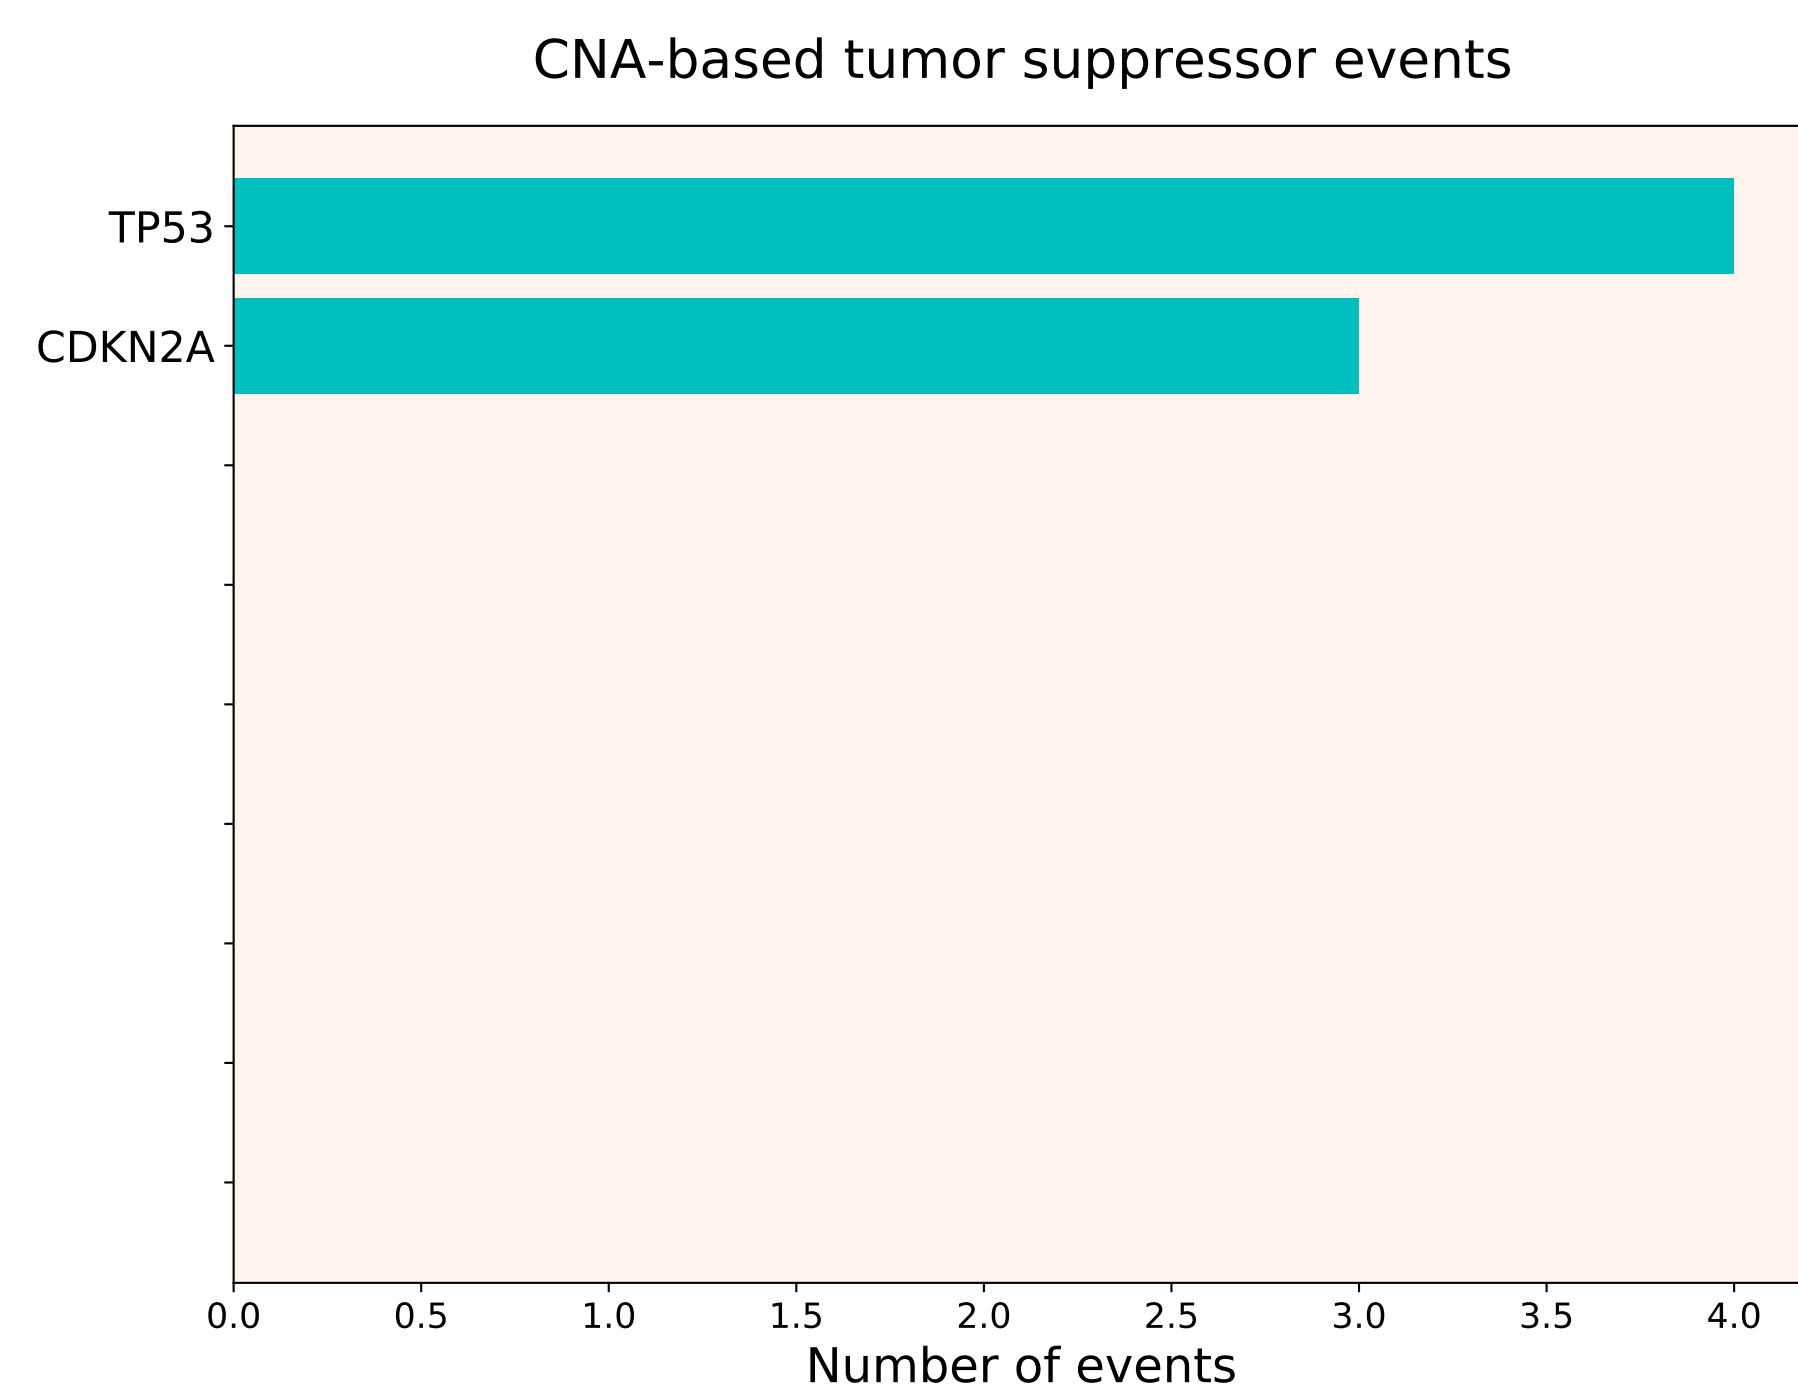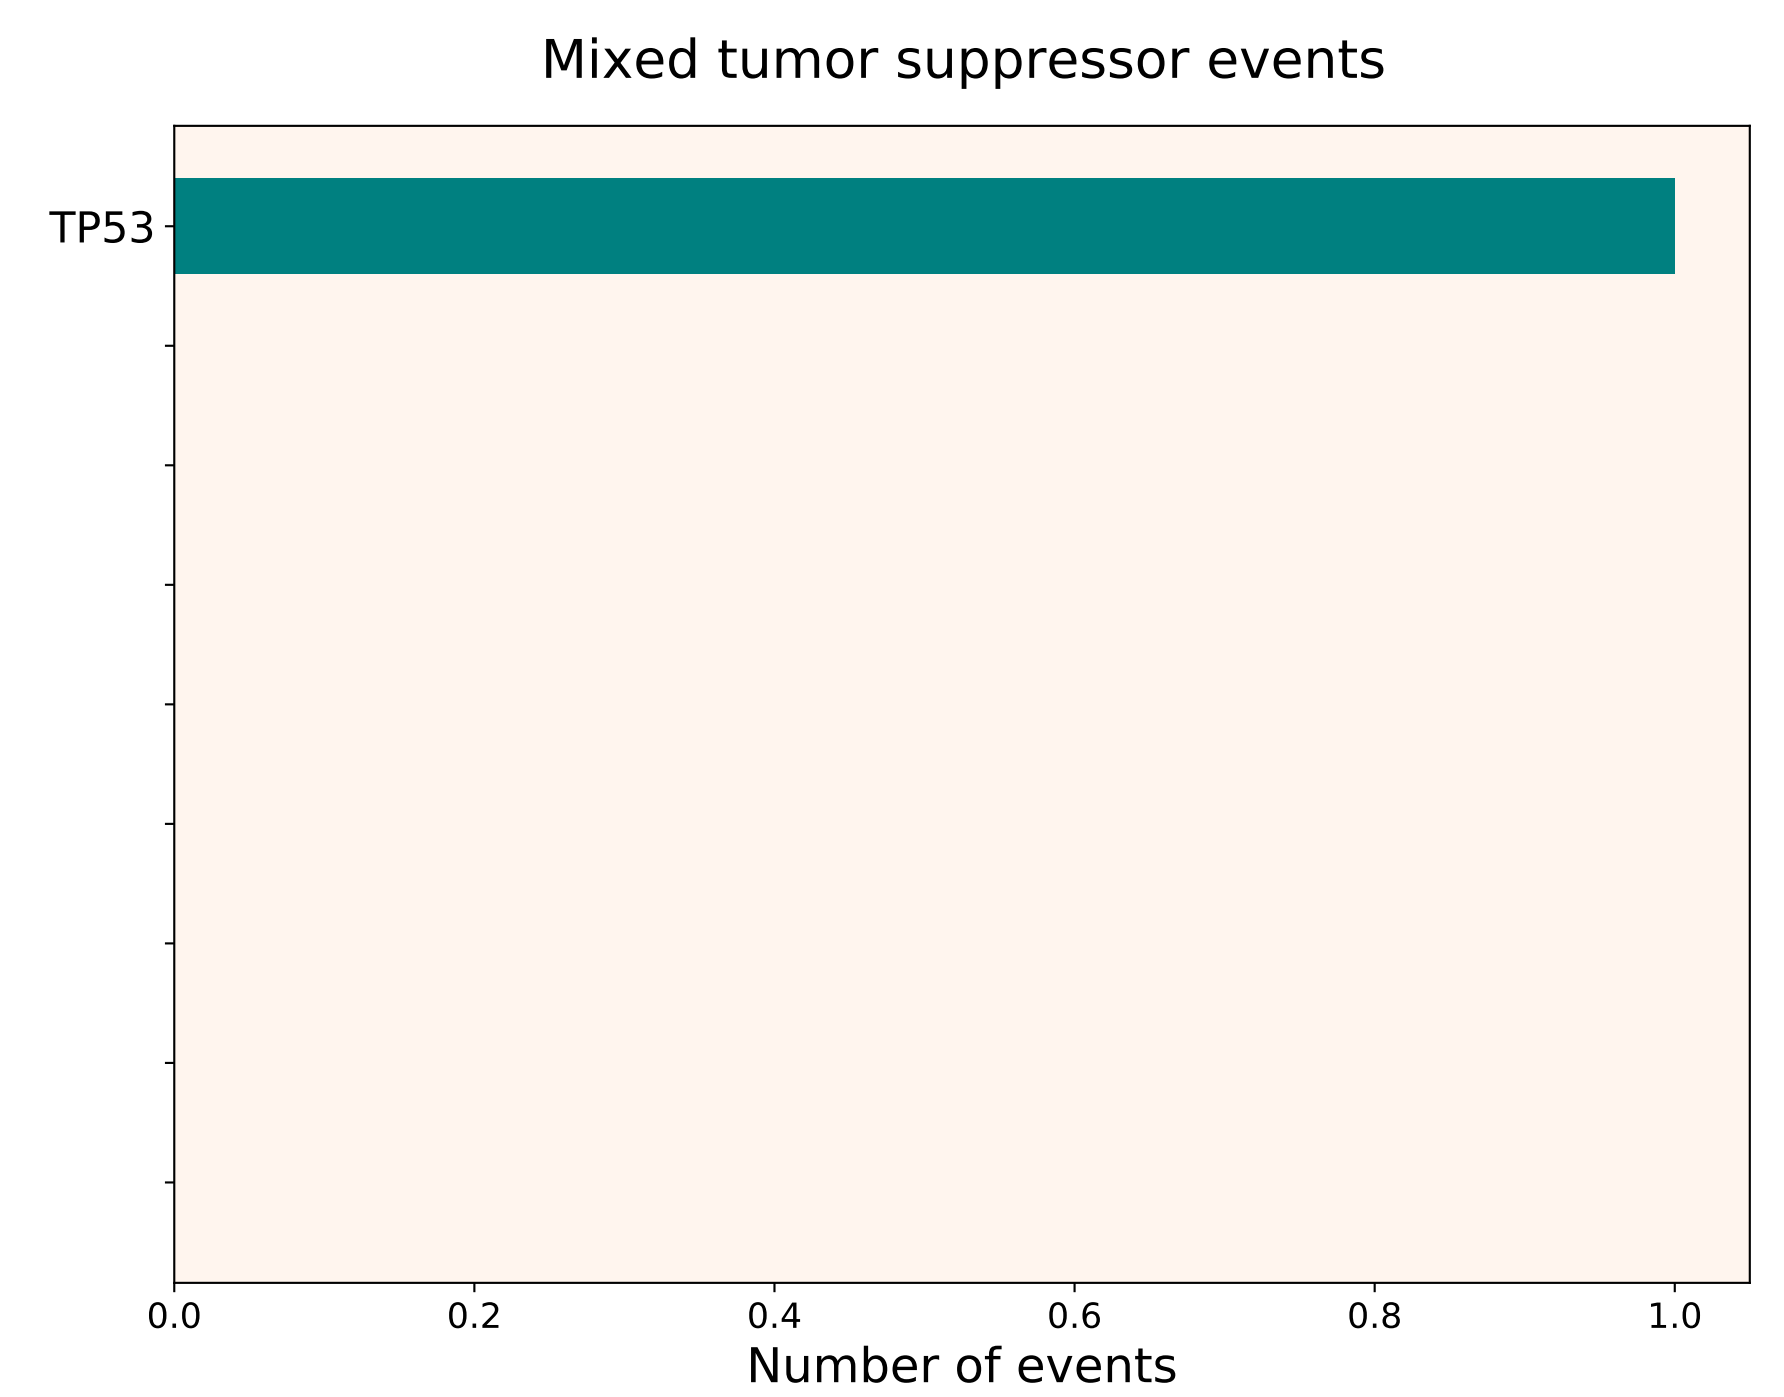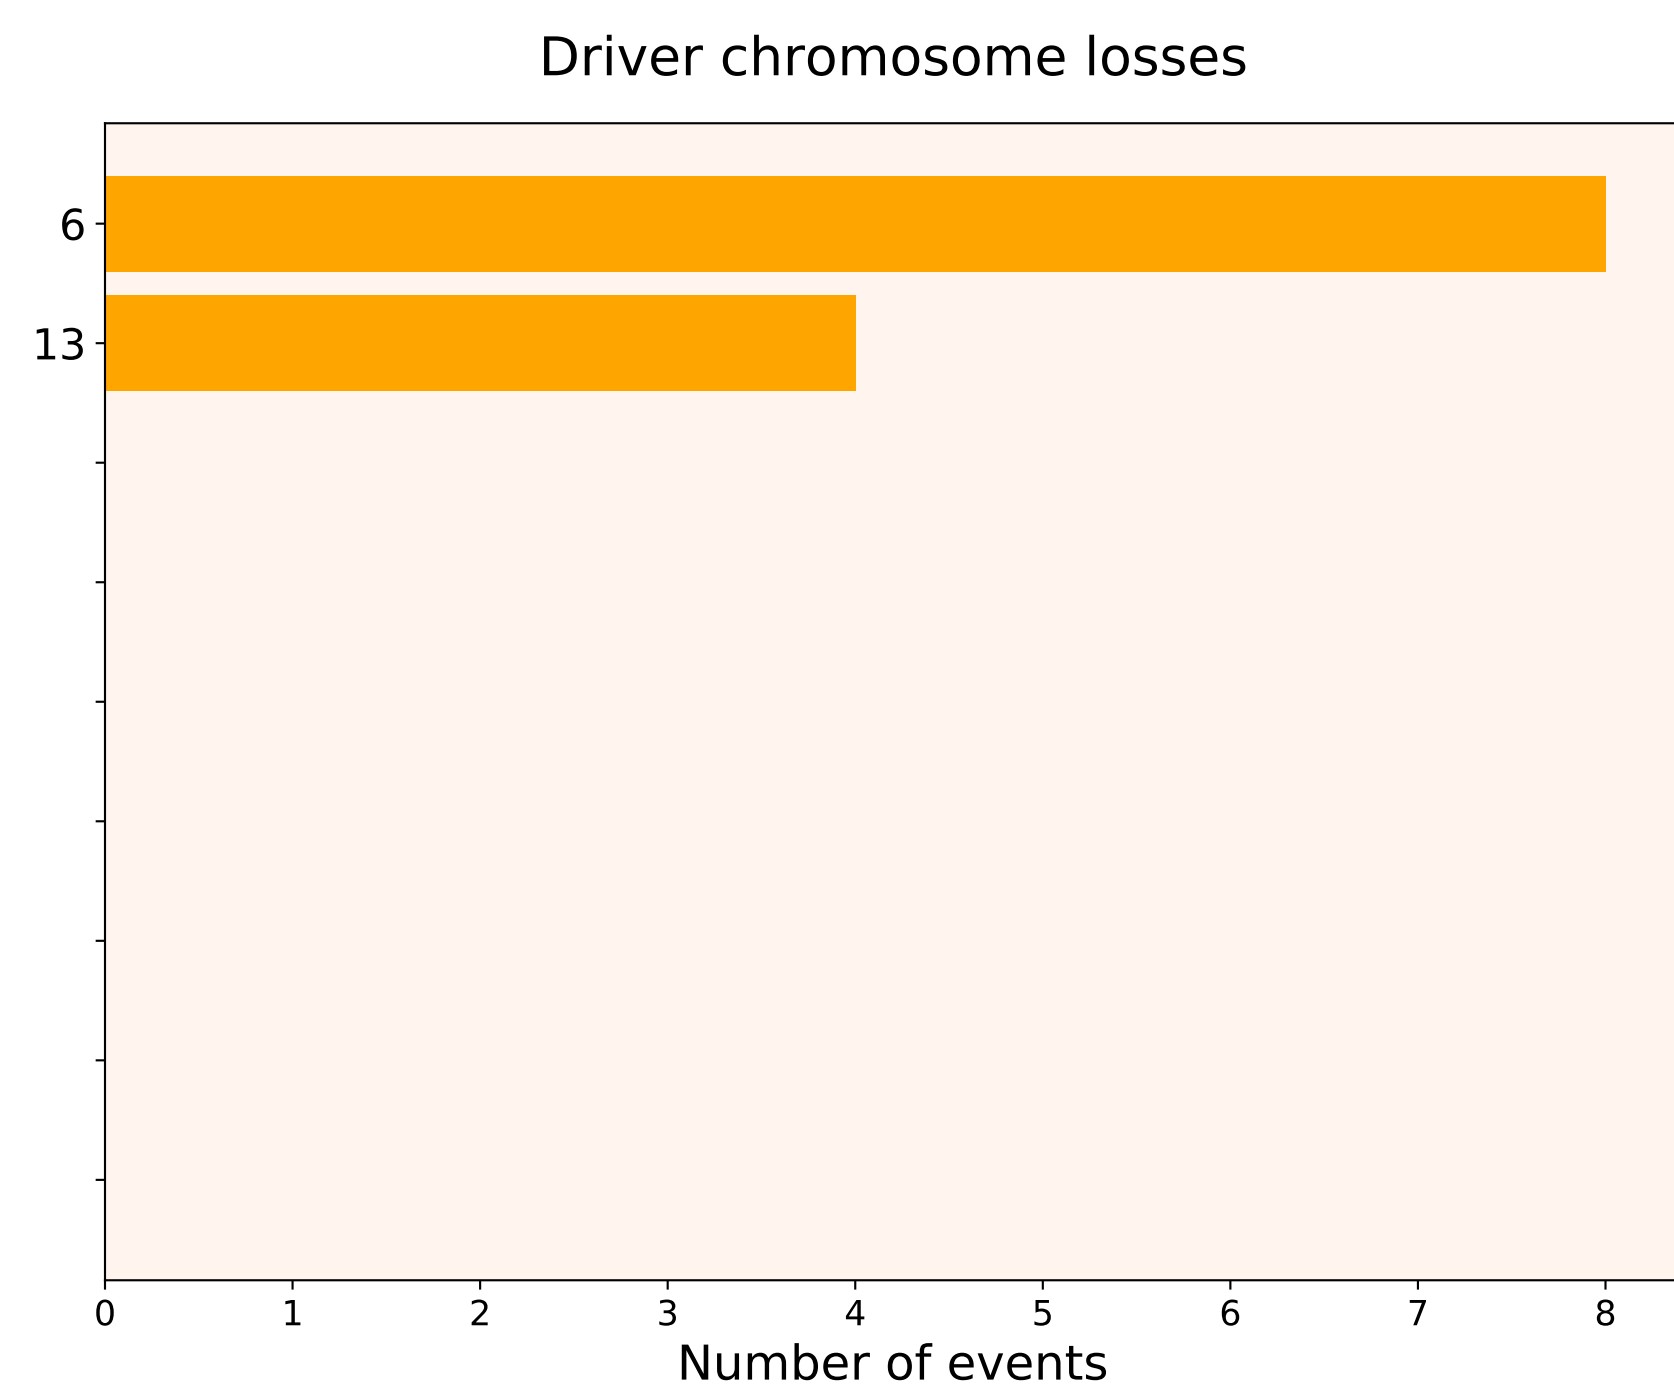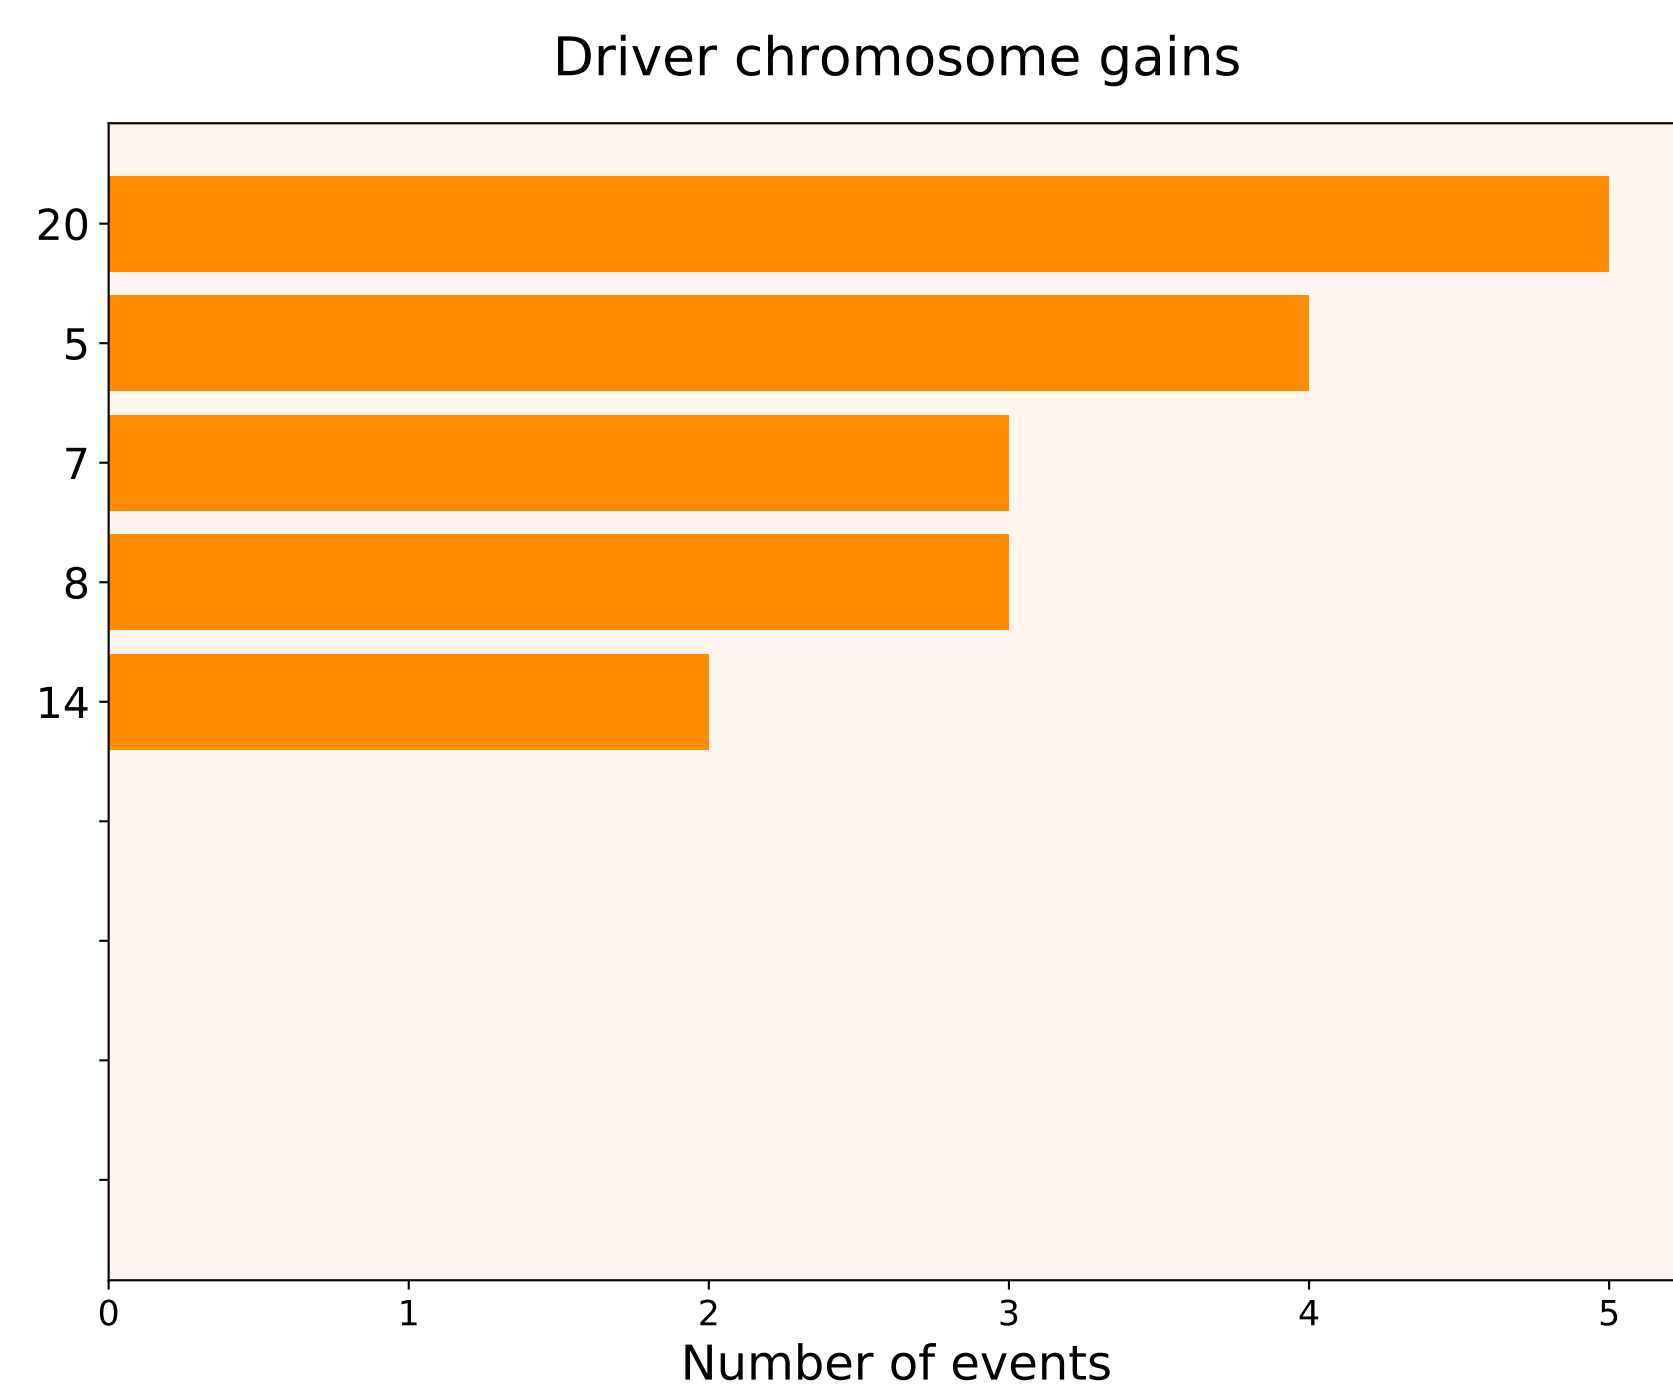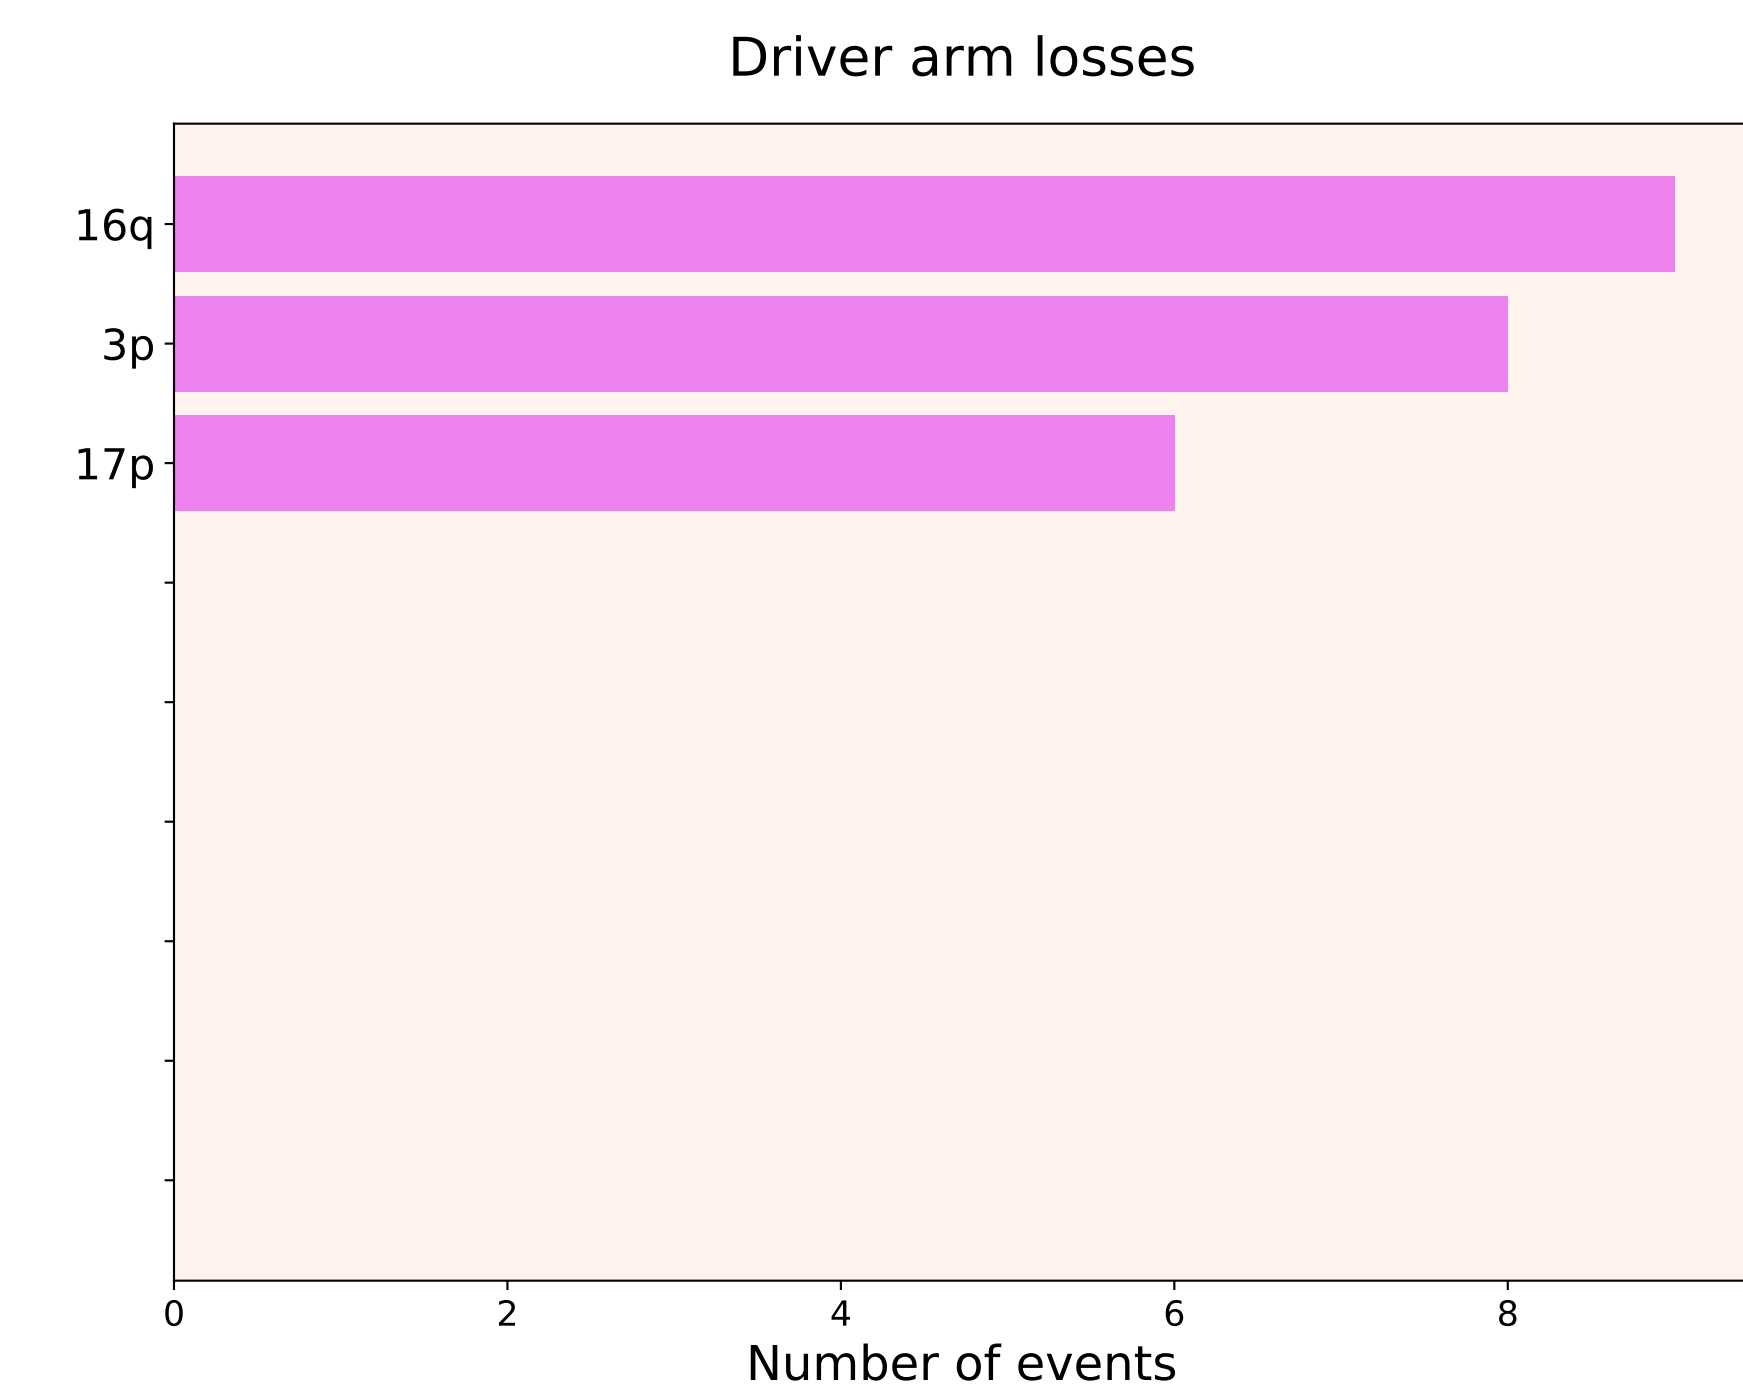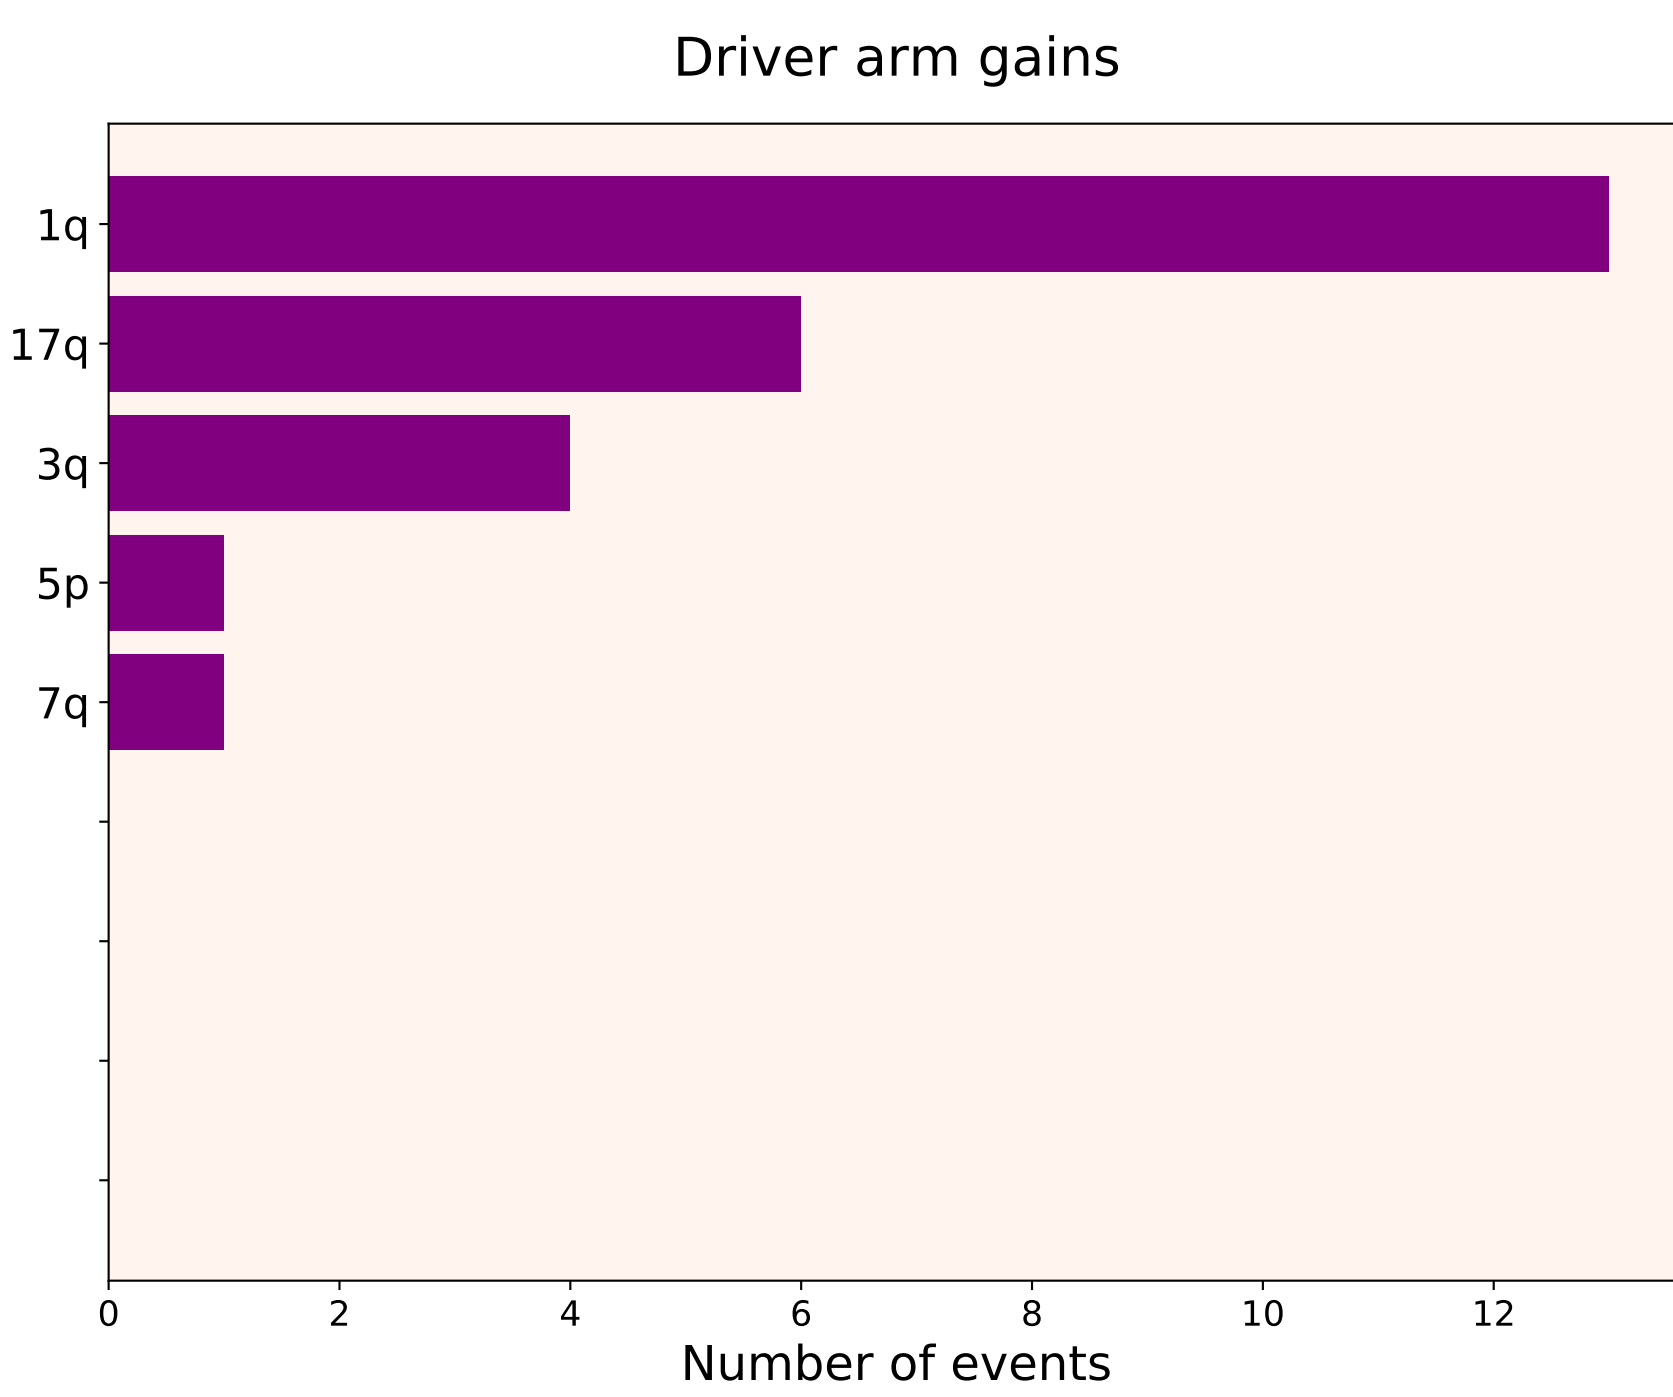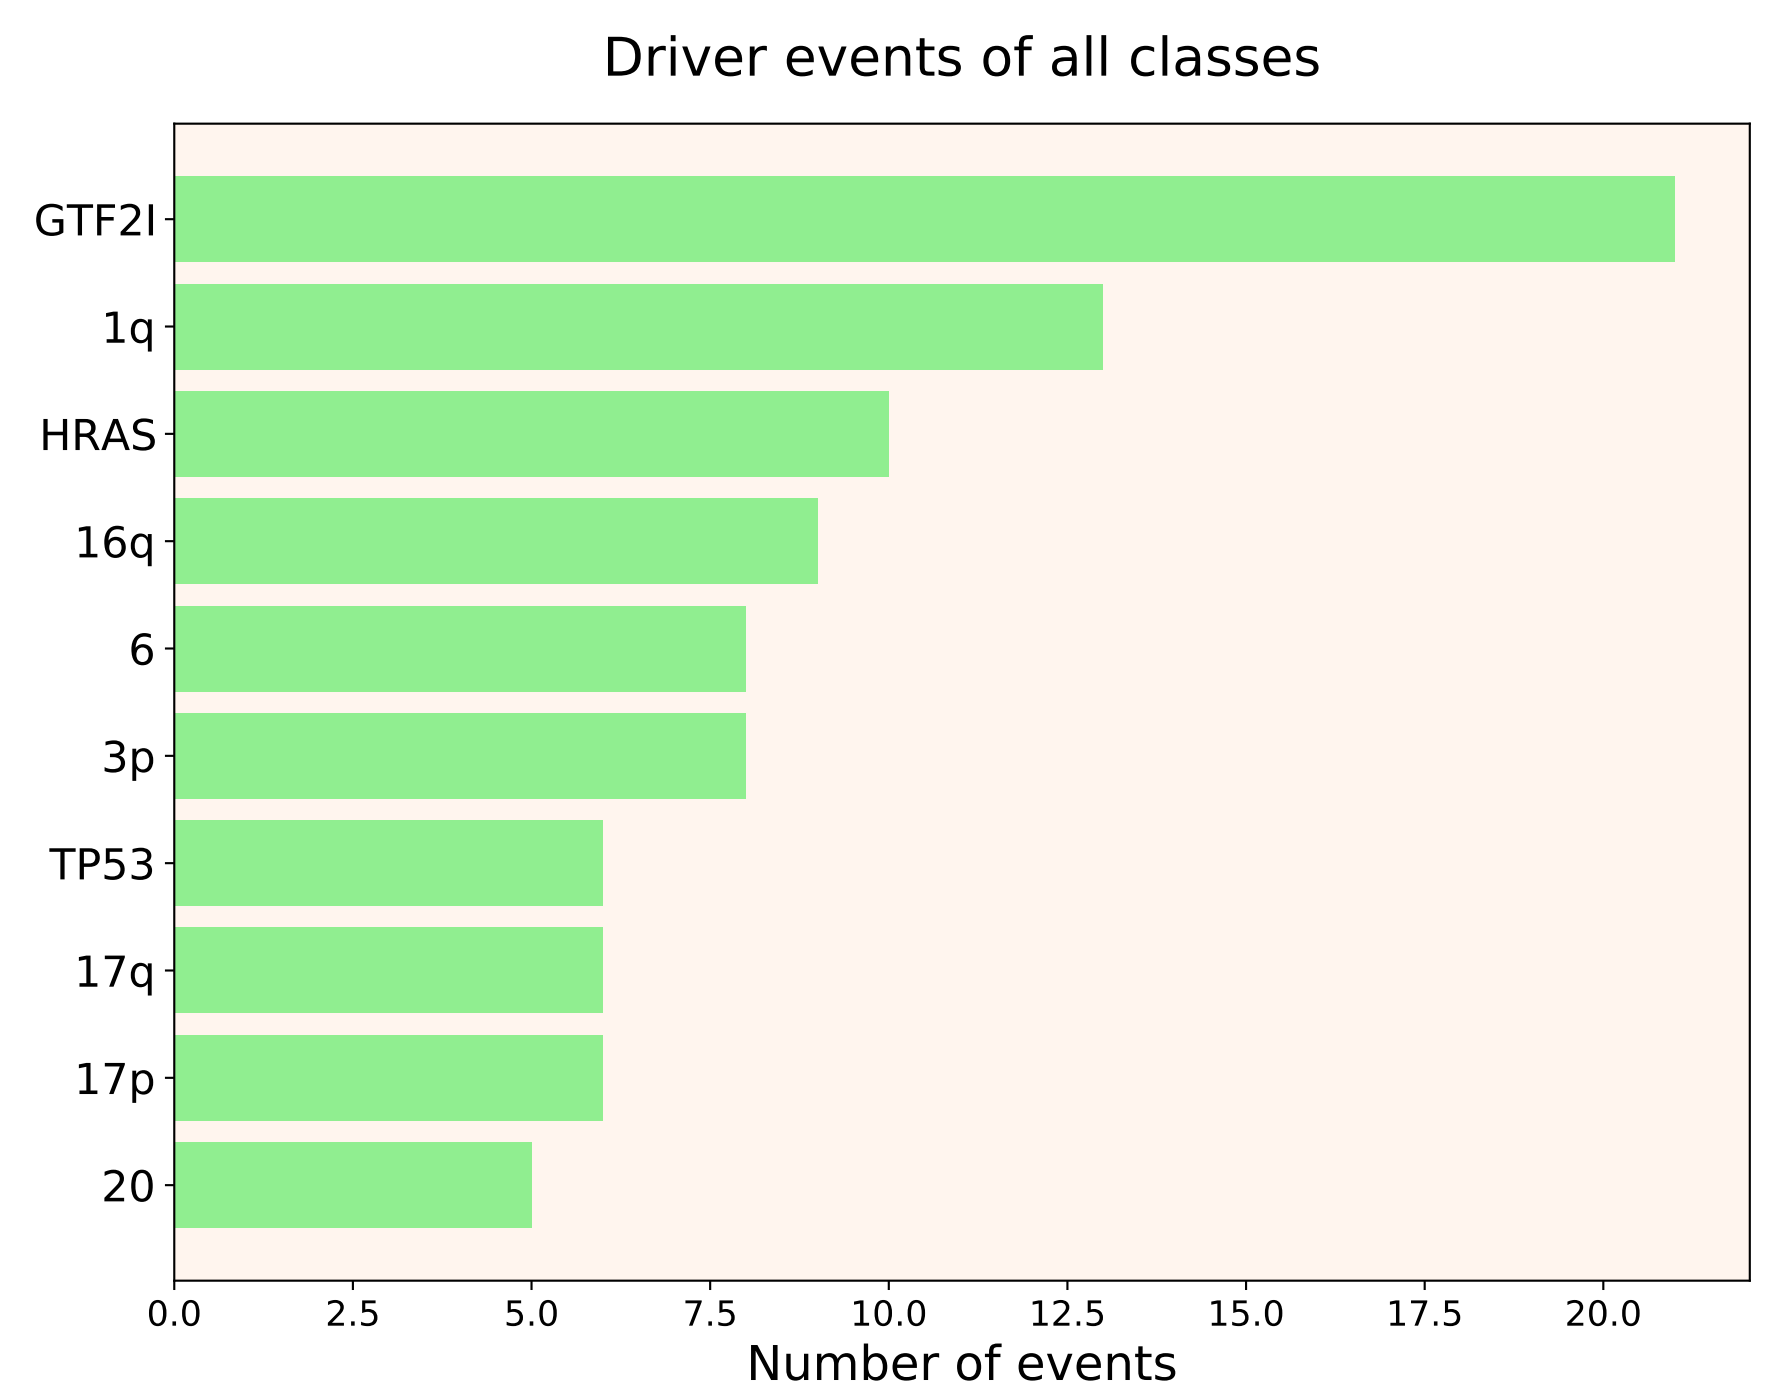

Supplement: Supplemental_Data_S1.zip [file Supplemental_Data_S1.zip]

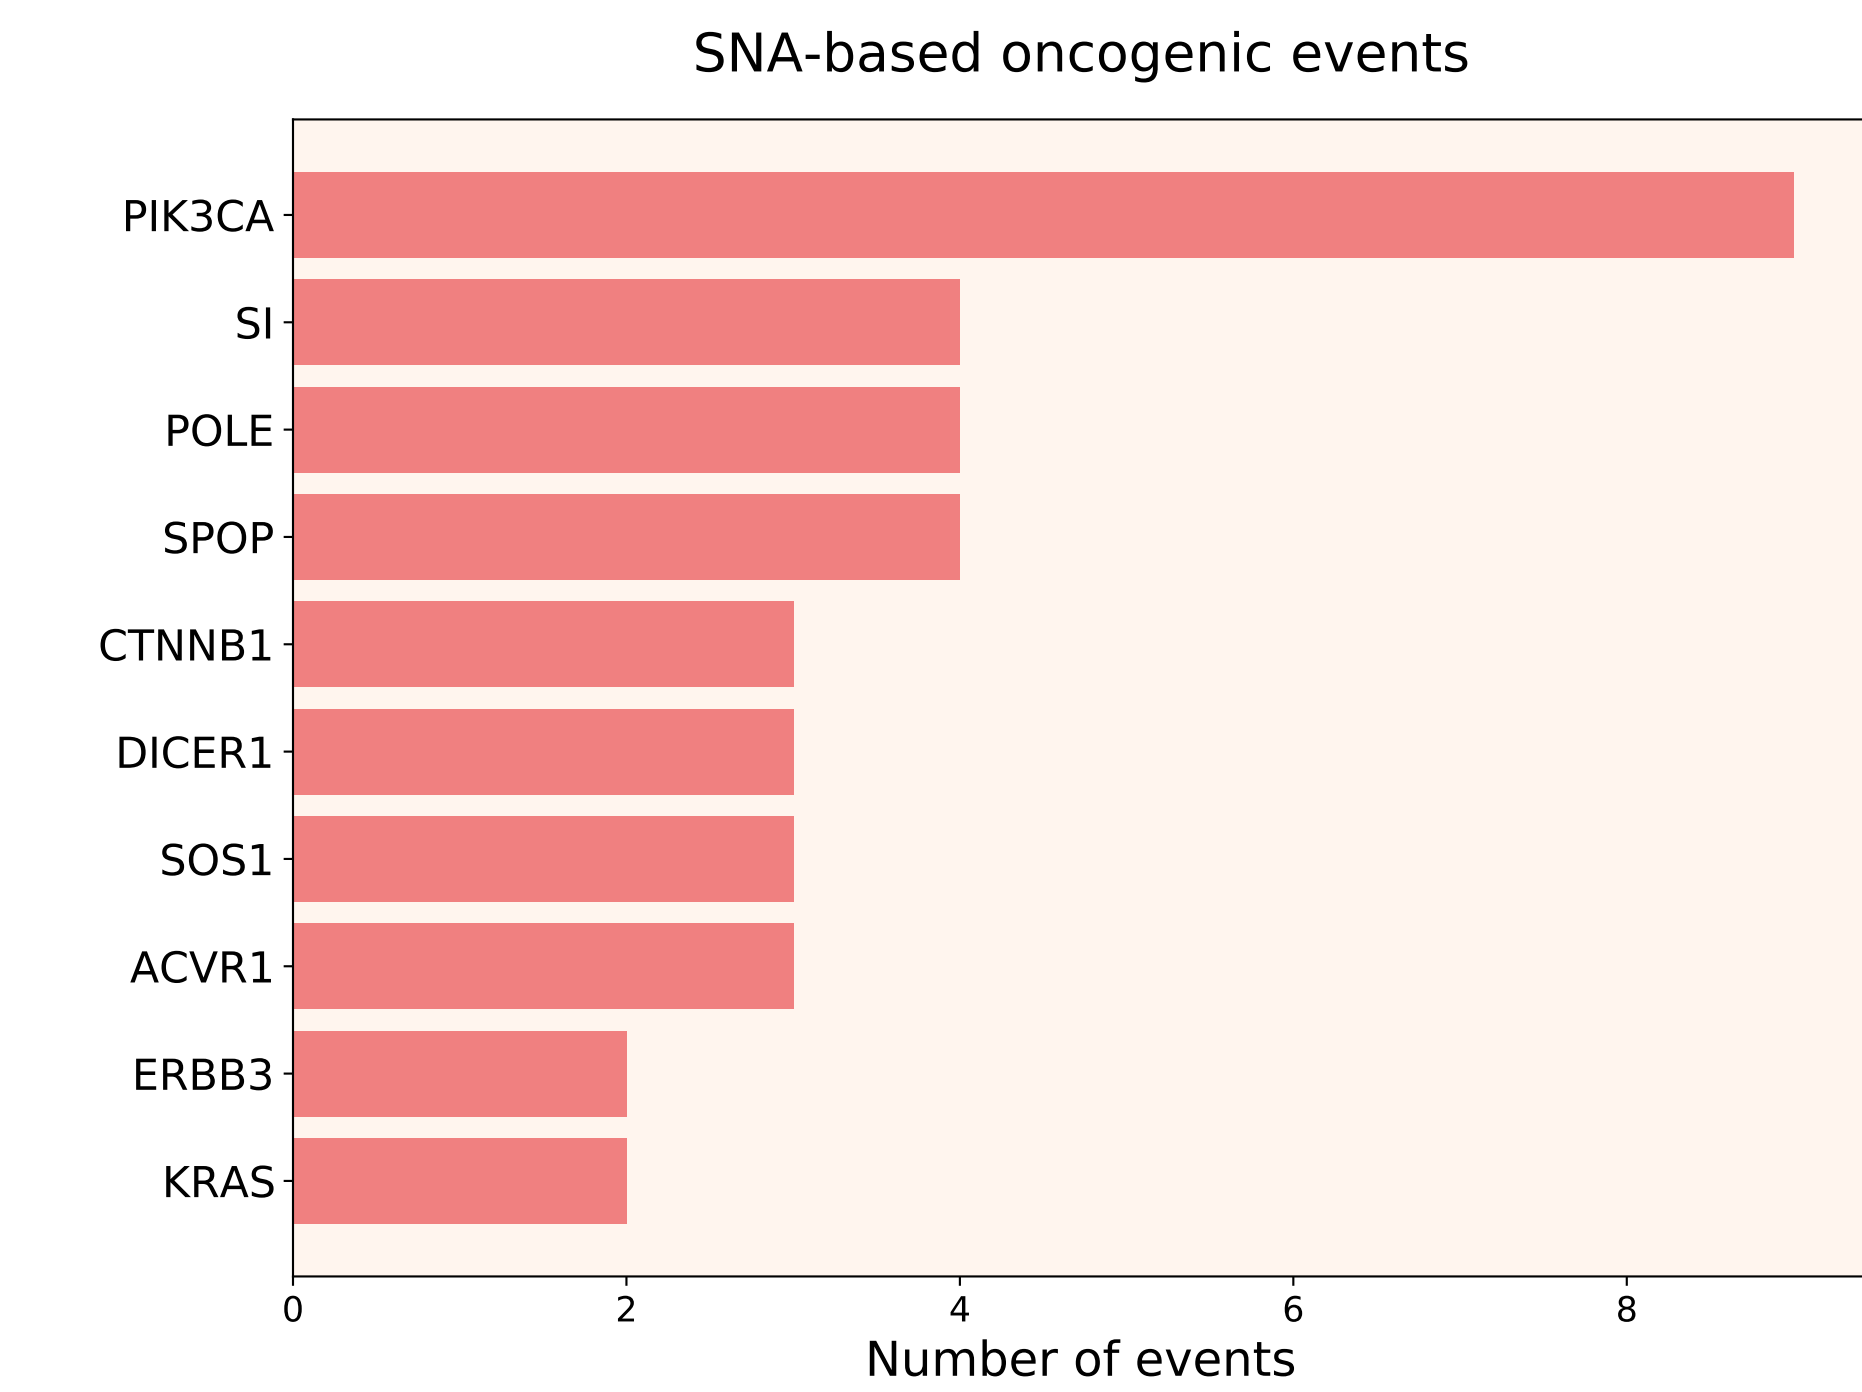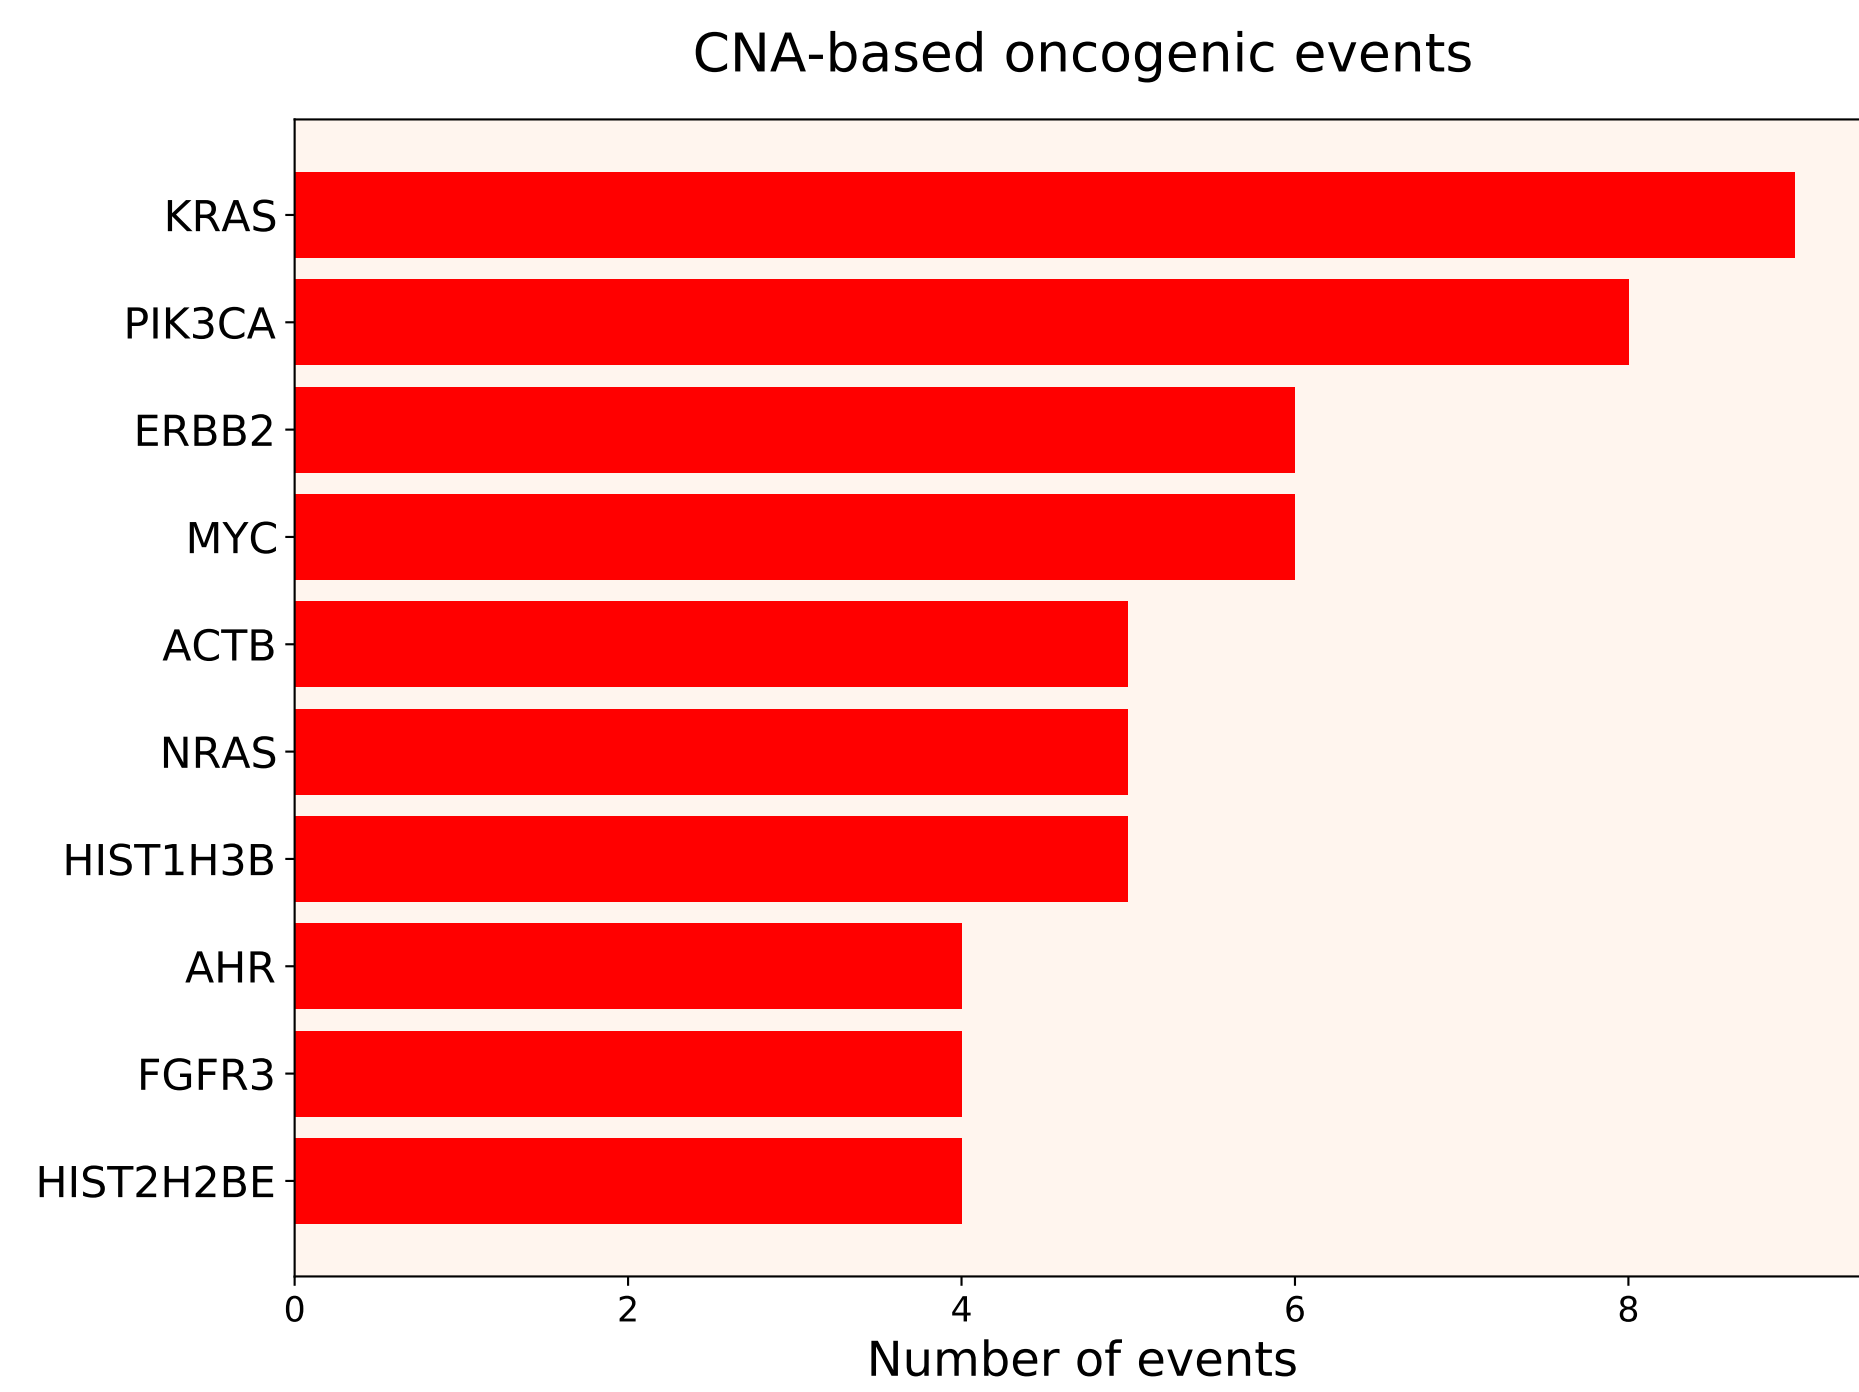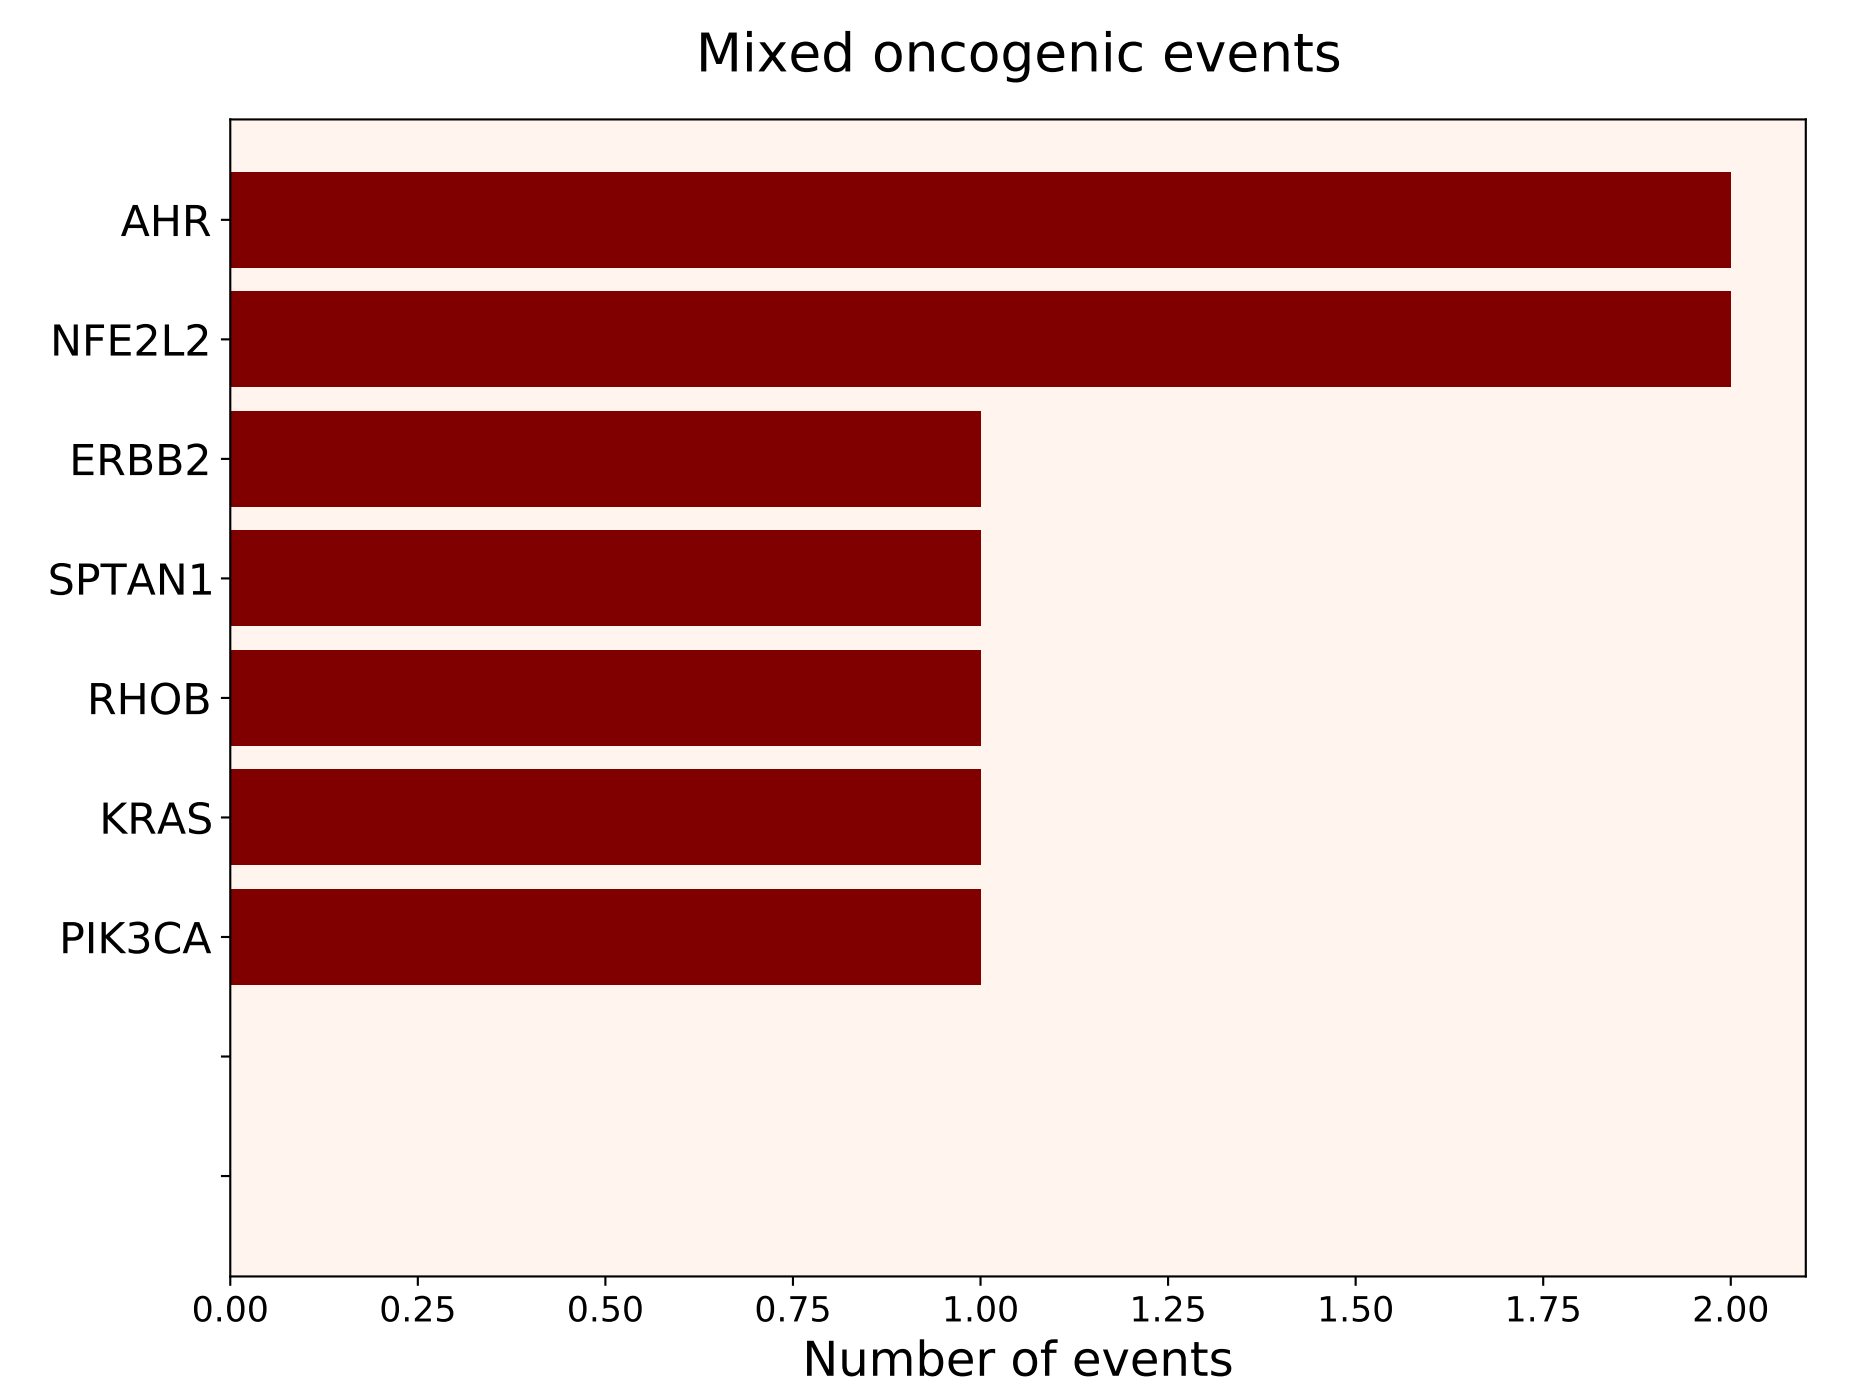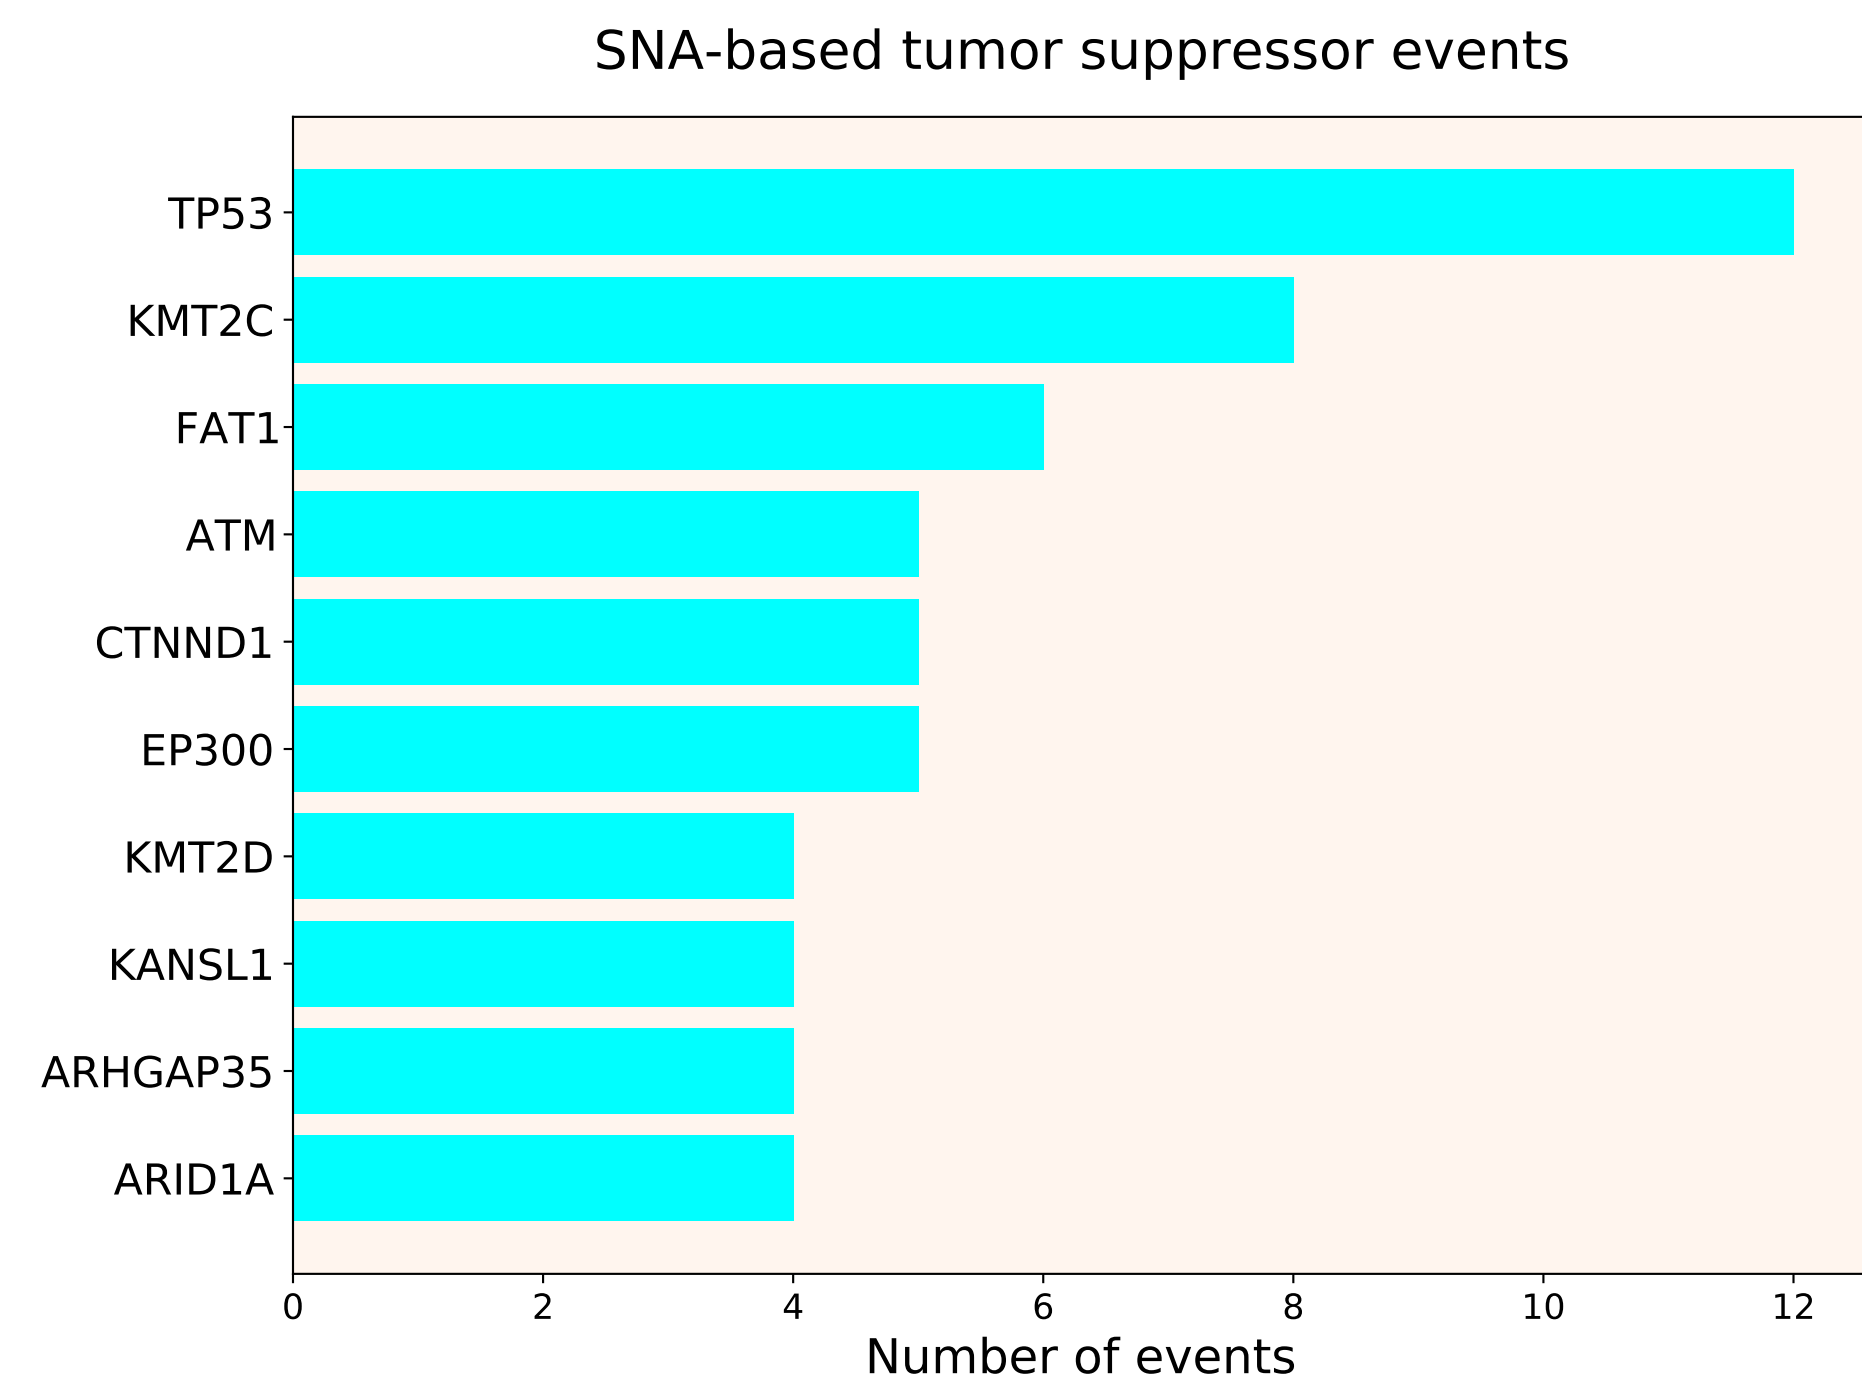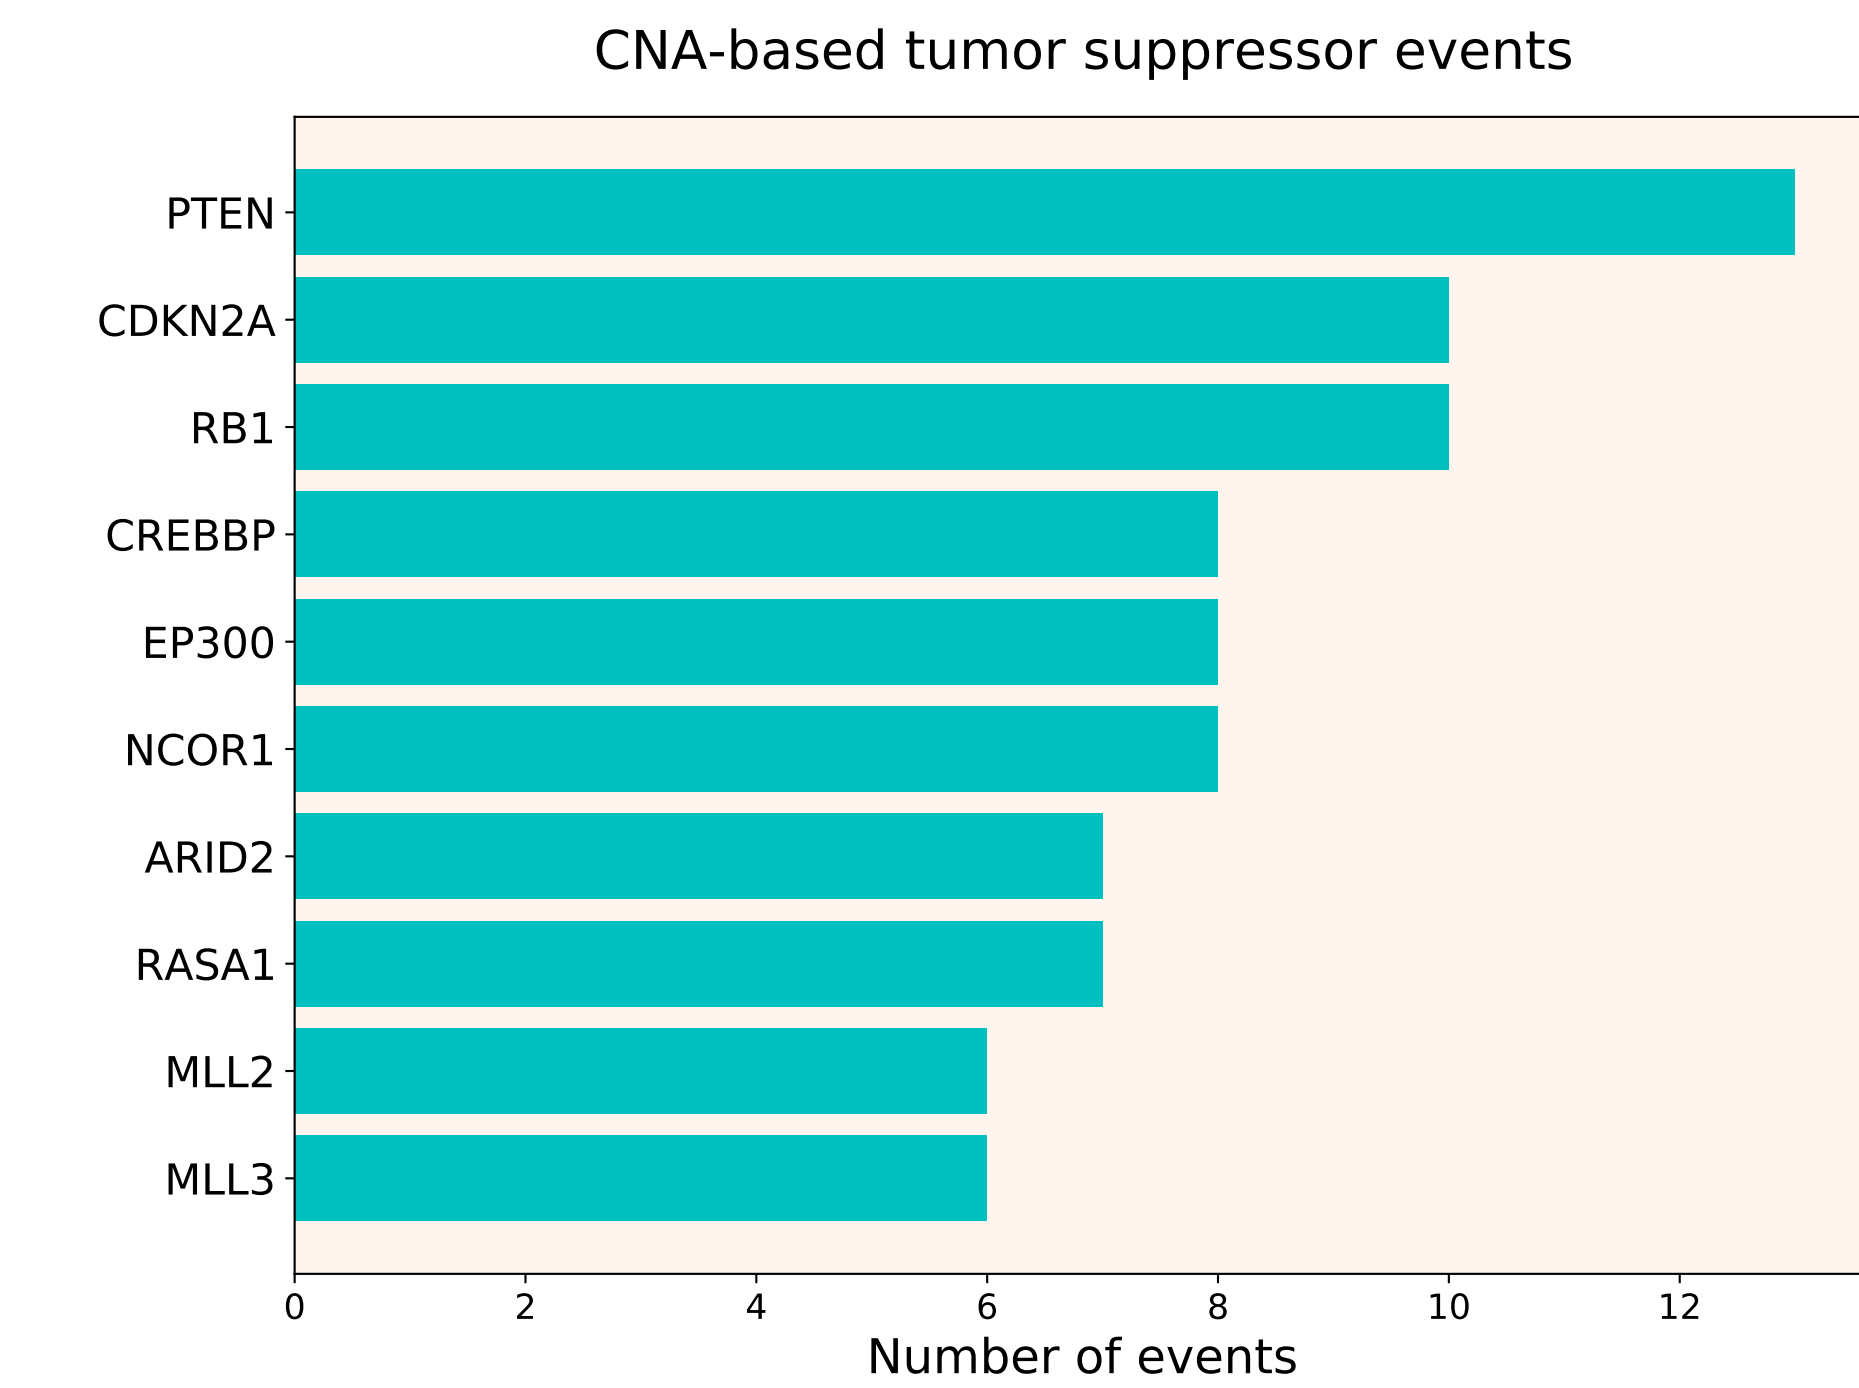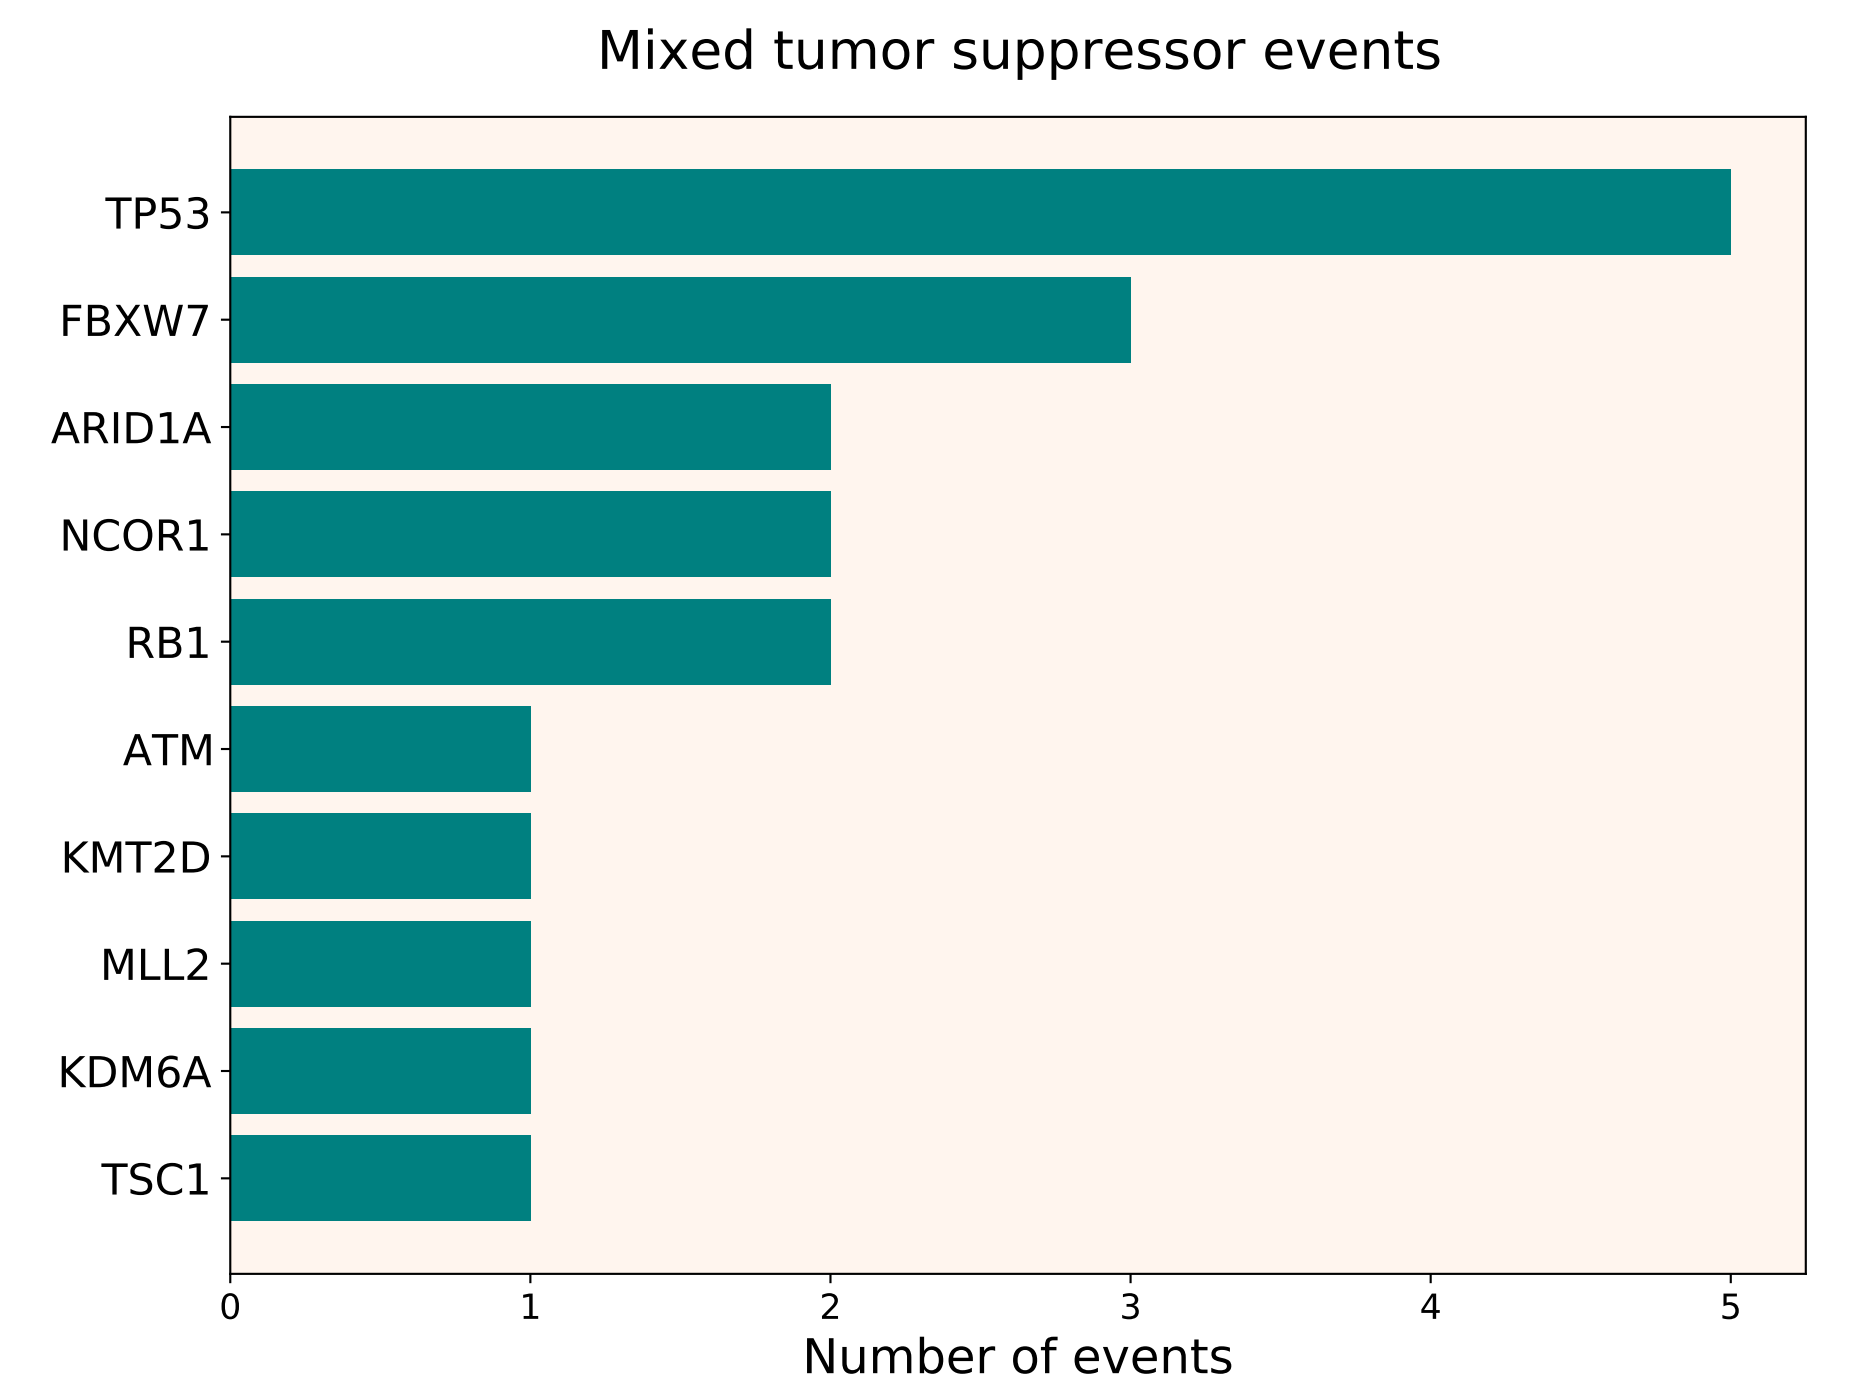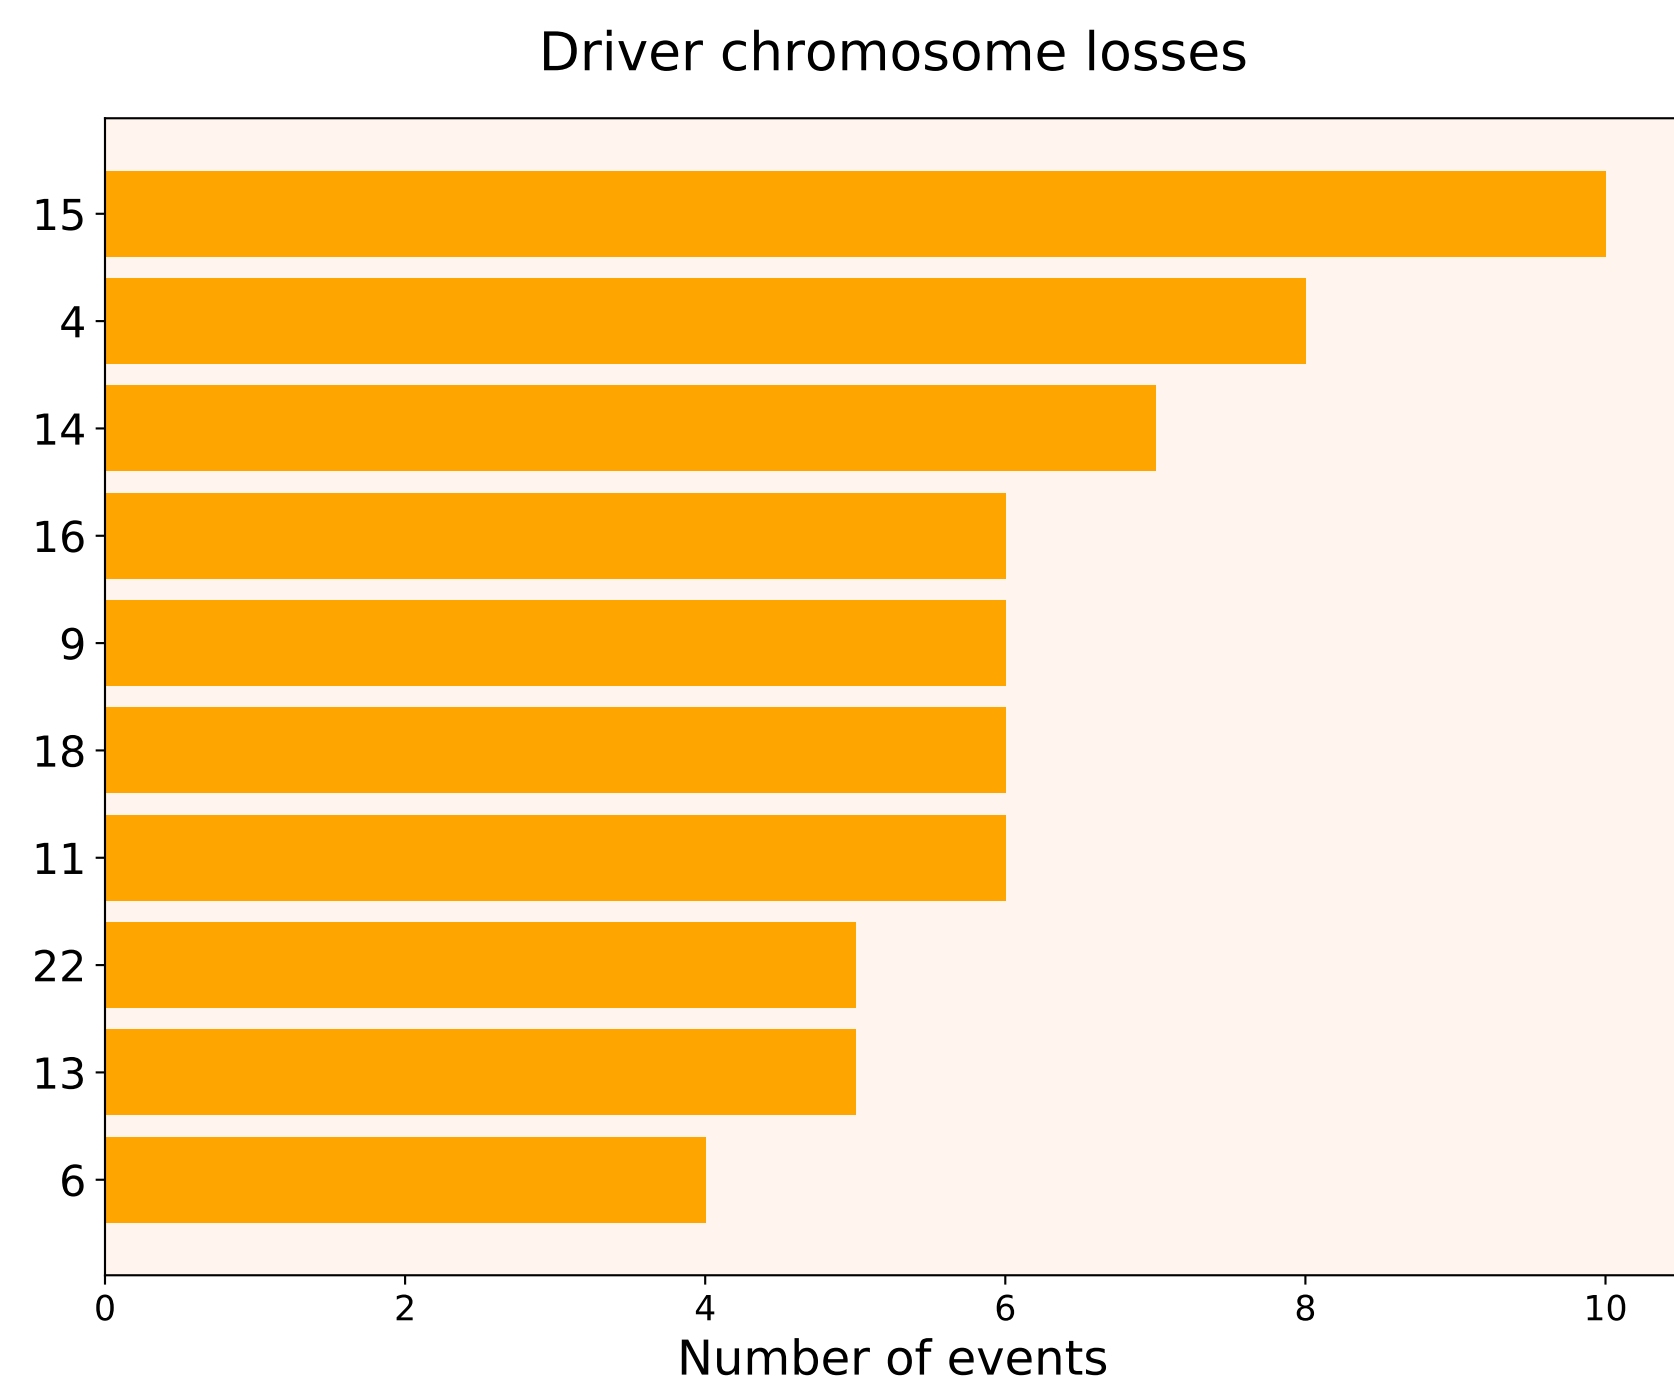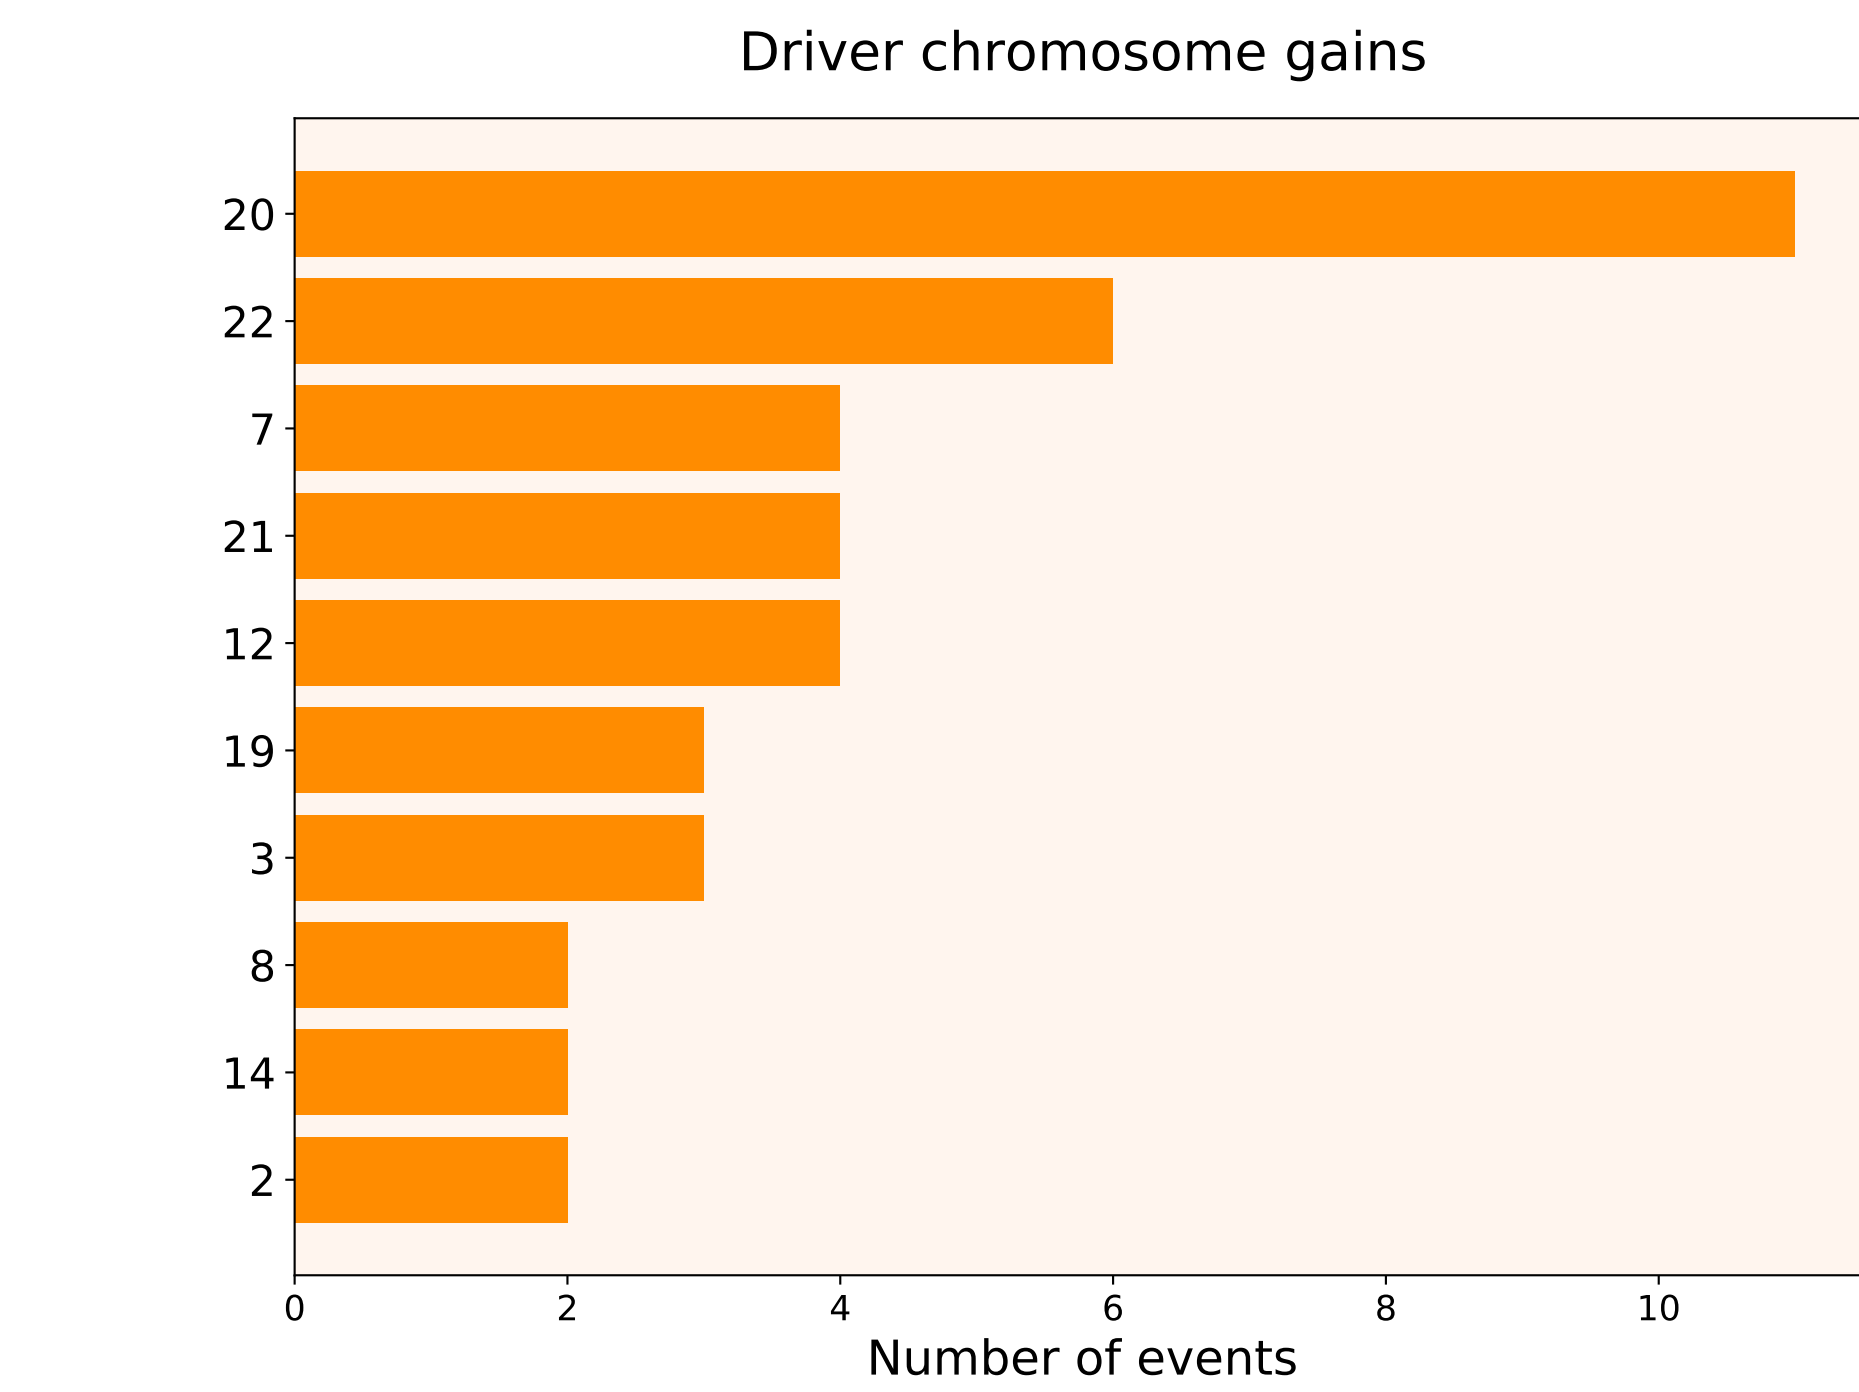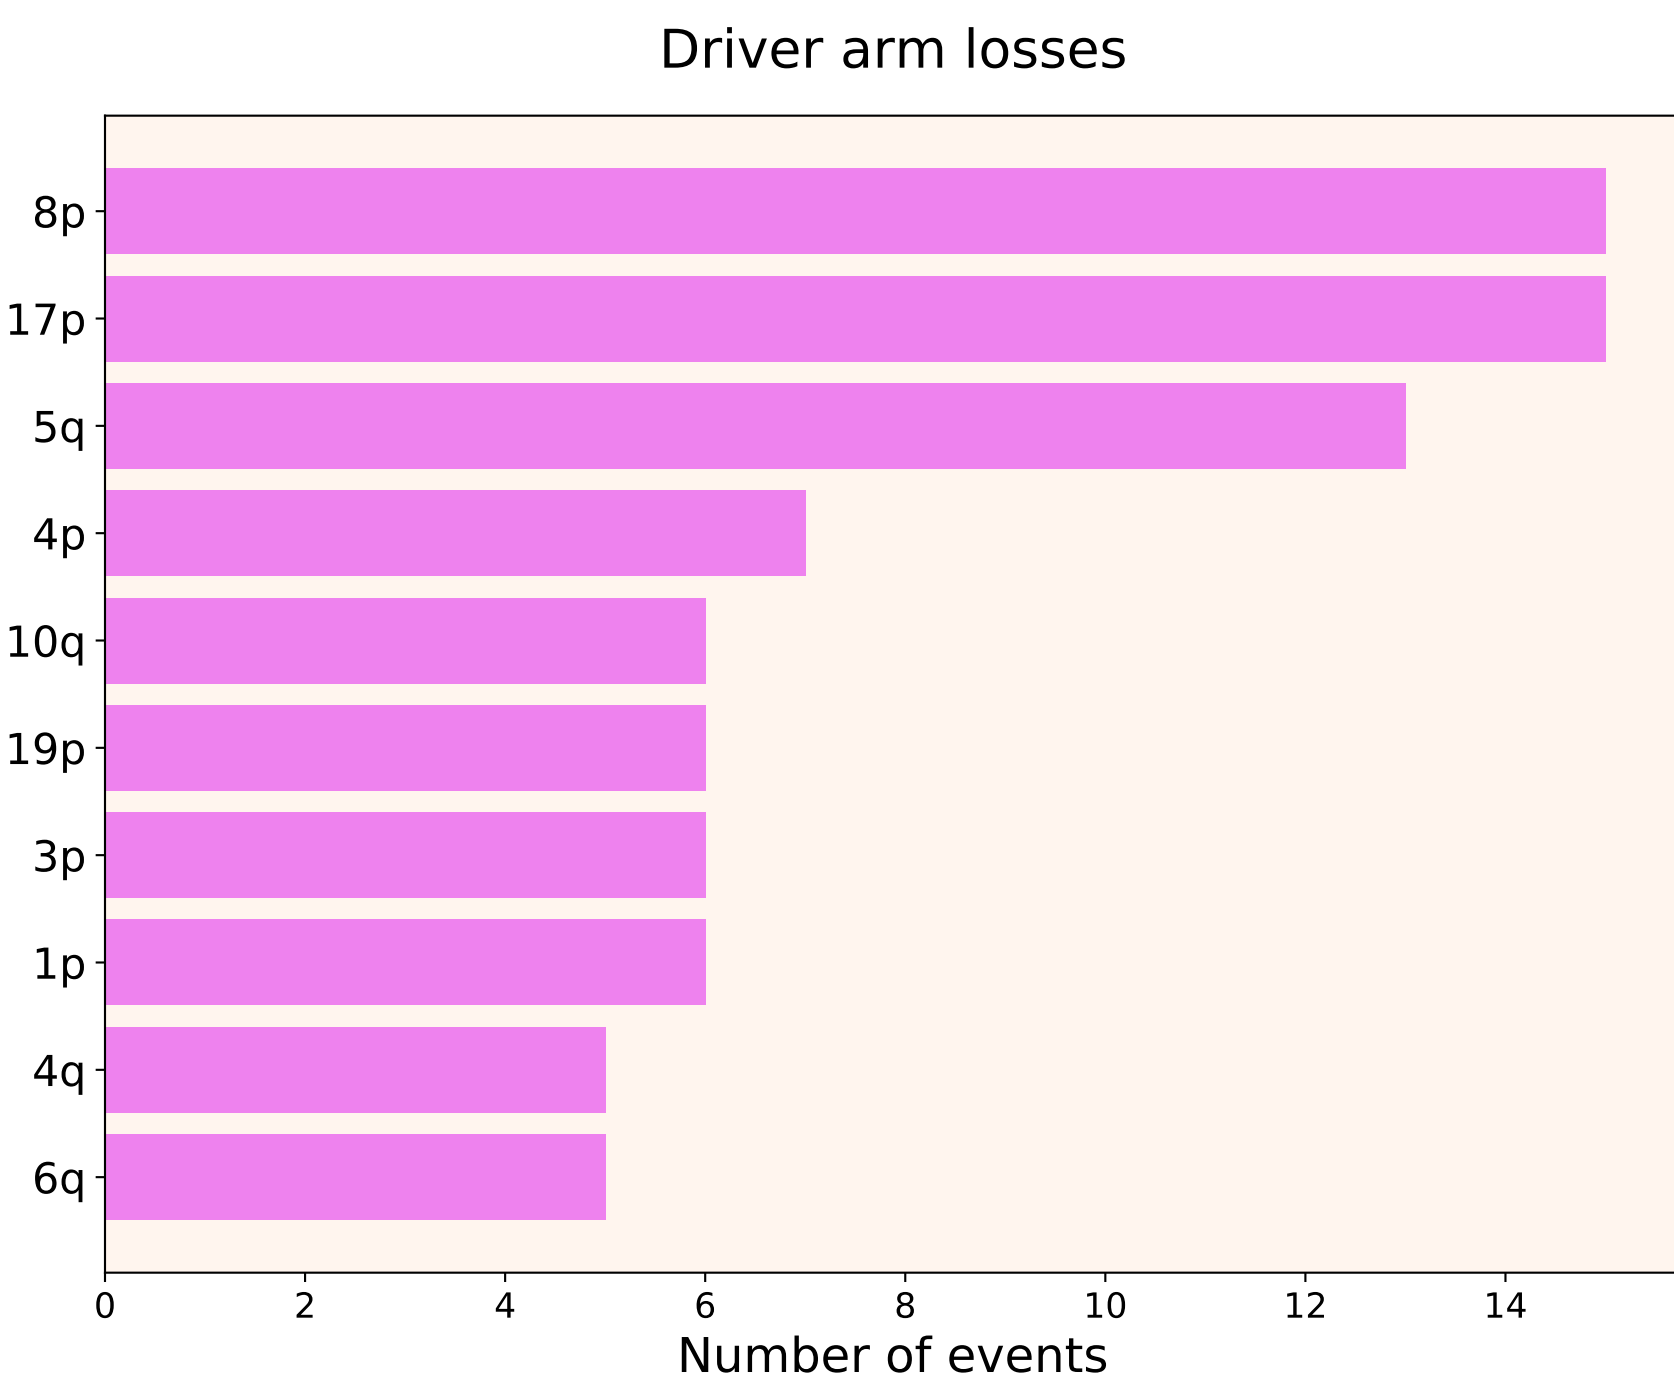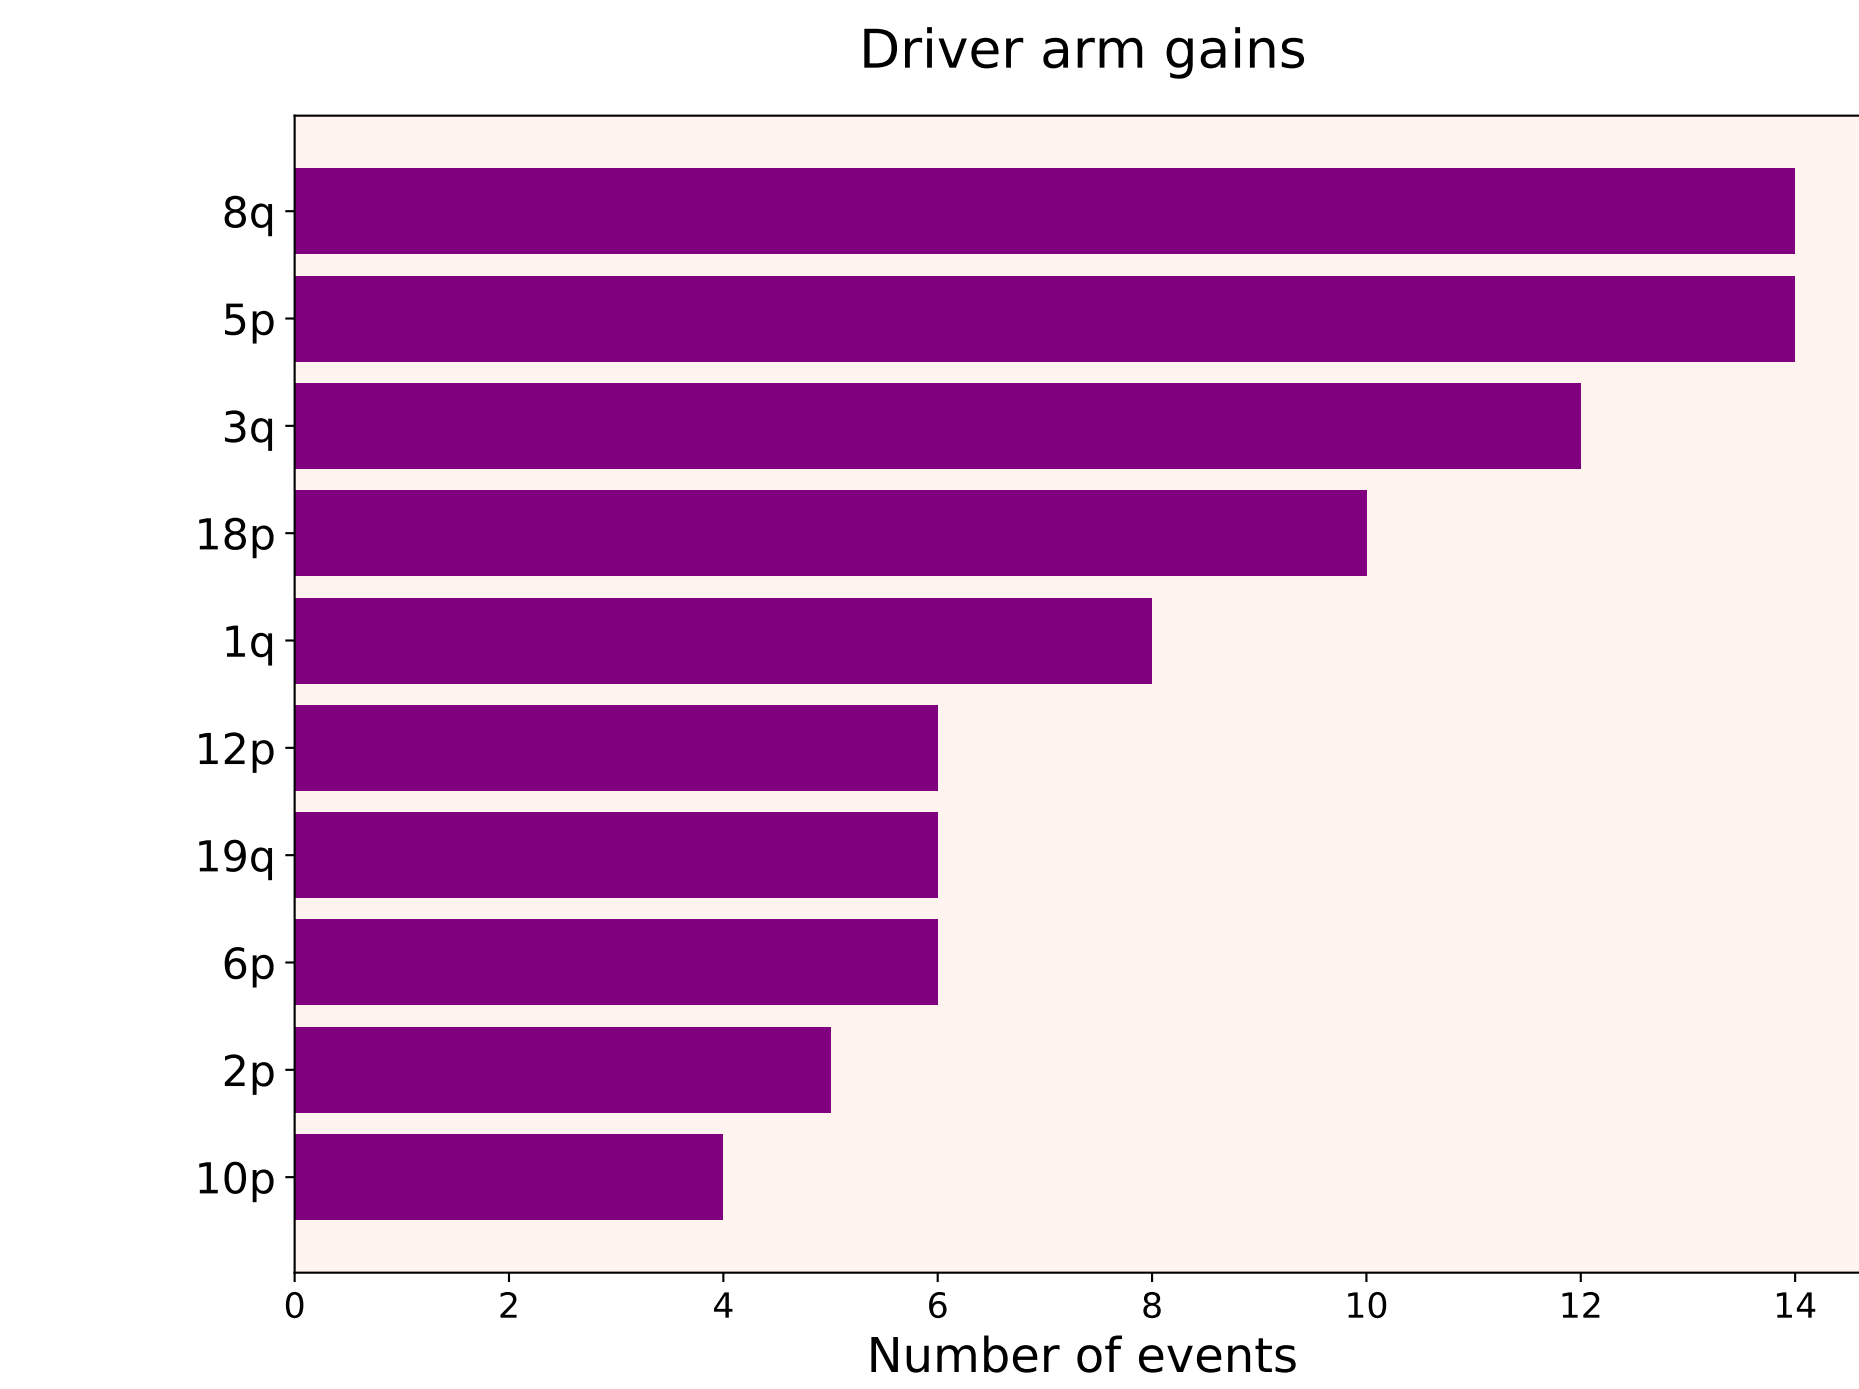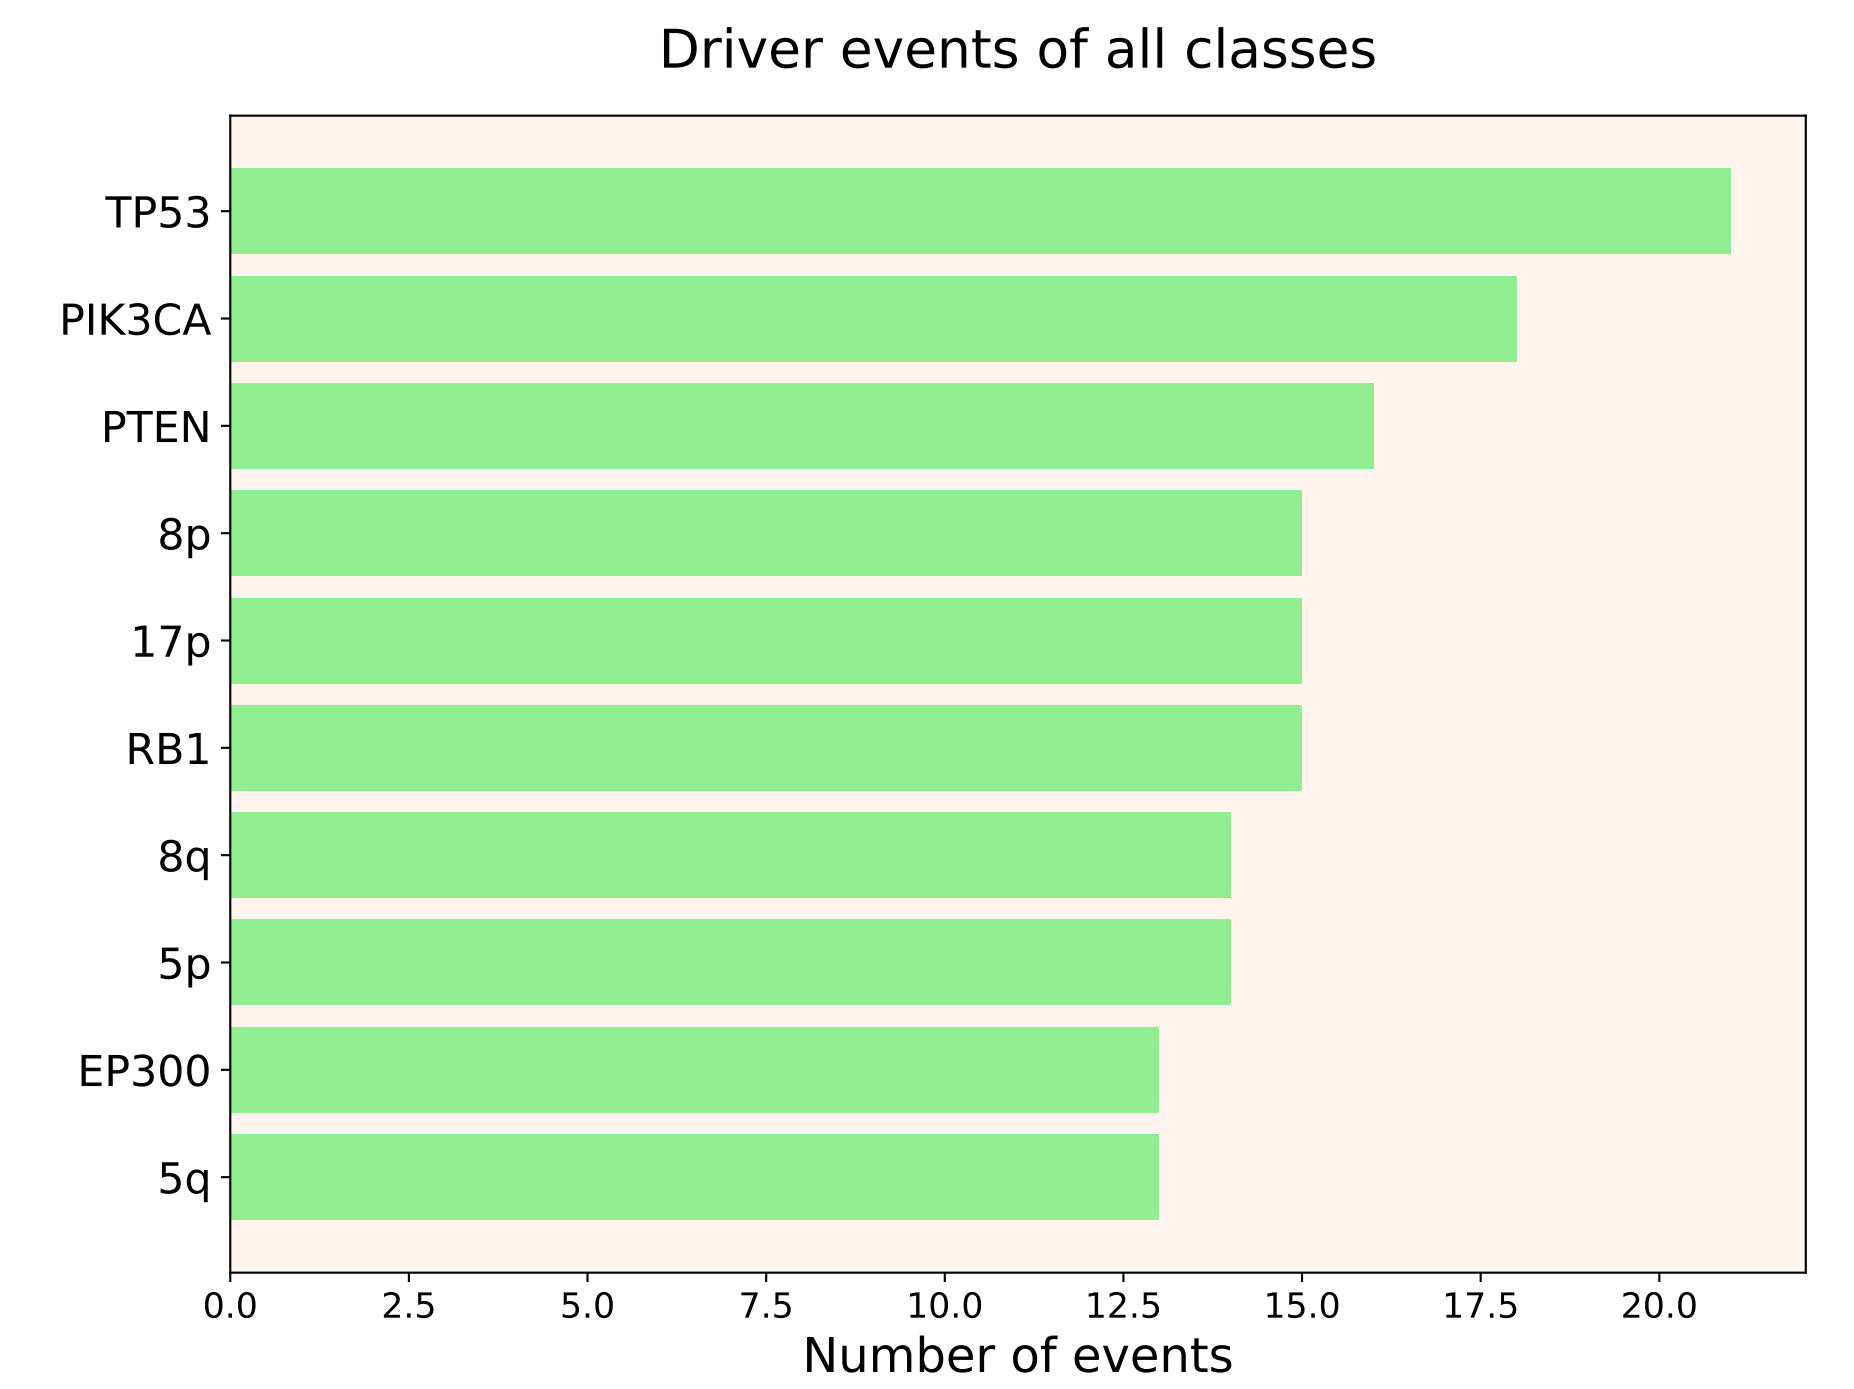

Supplement: Supplemental_Data_S1.zip [file Supplemental_Data_S1.zip]

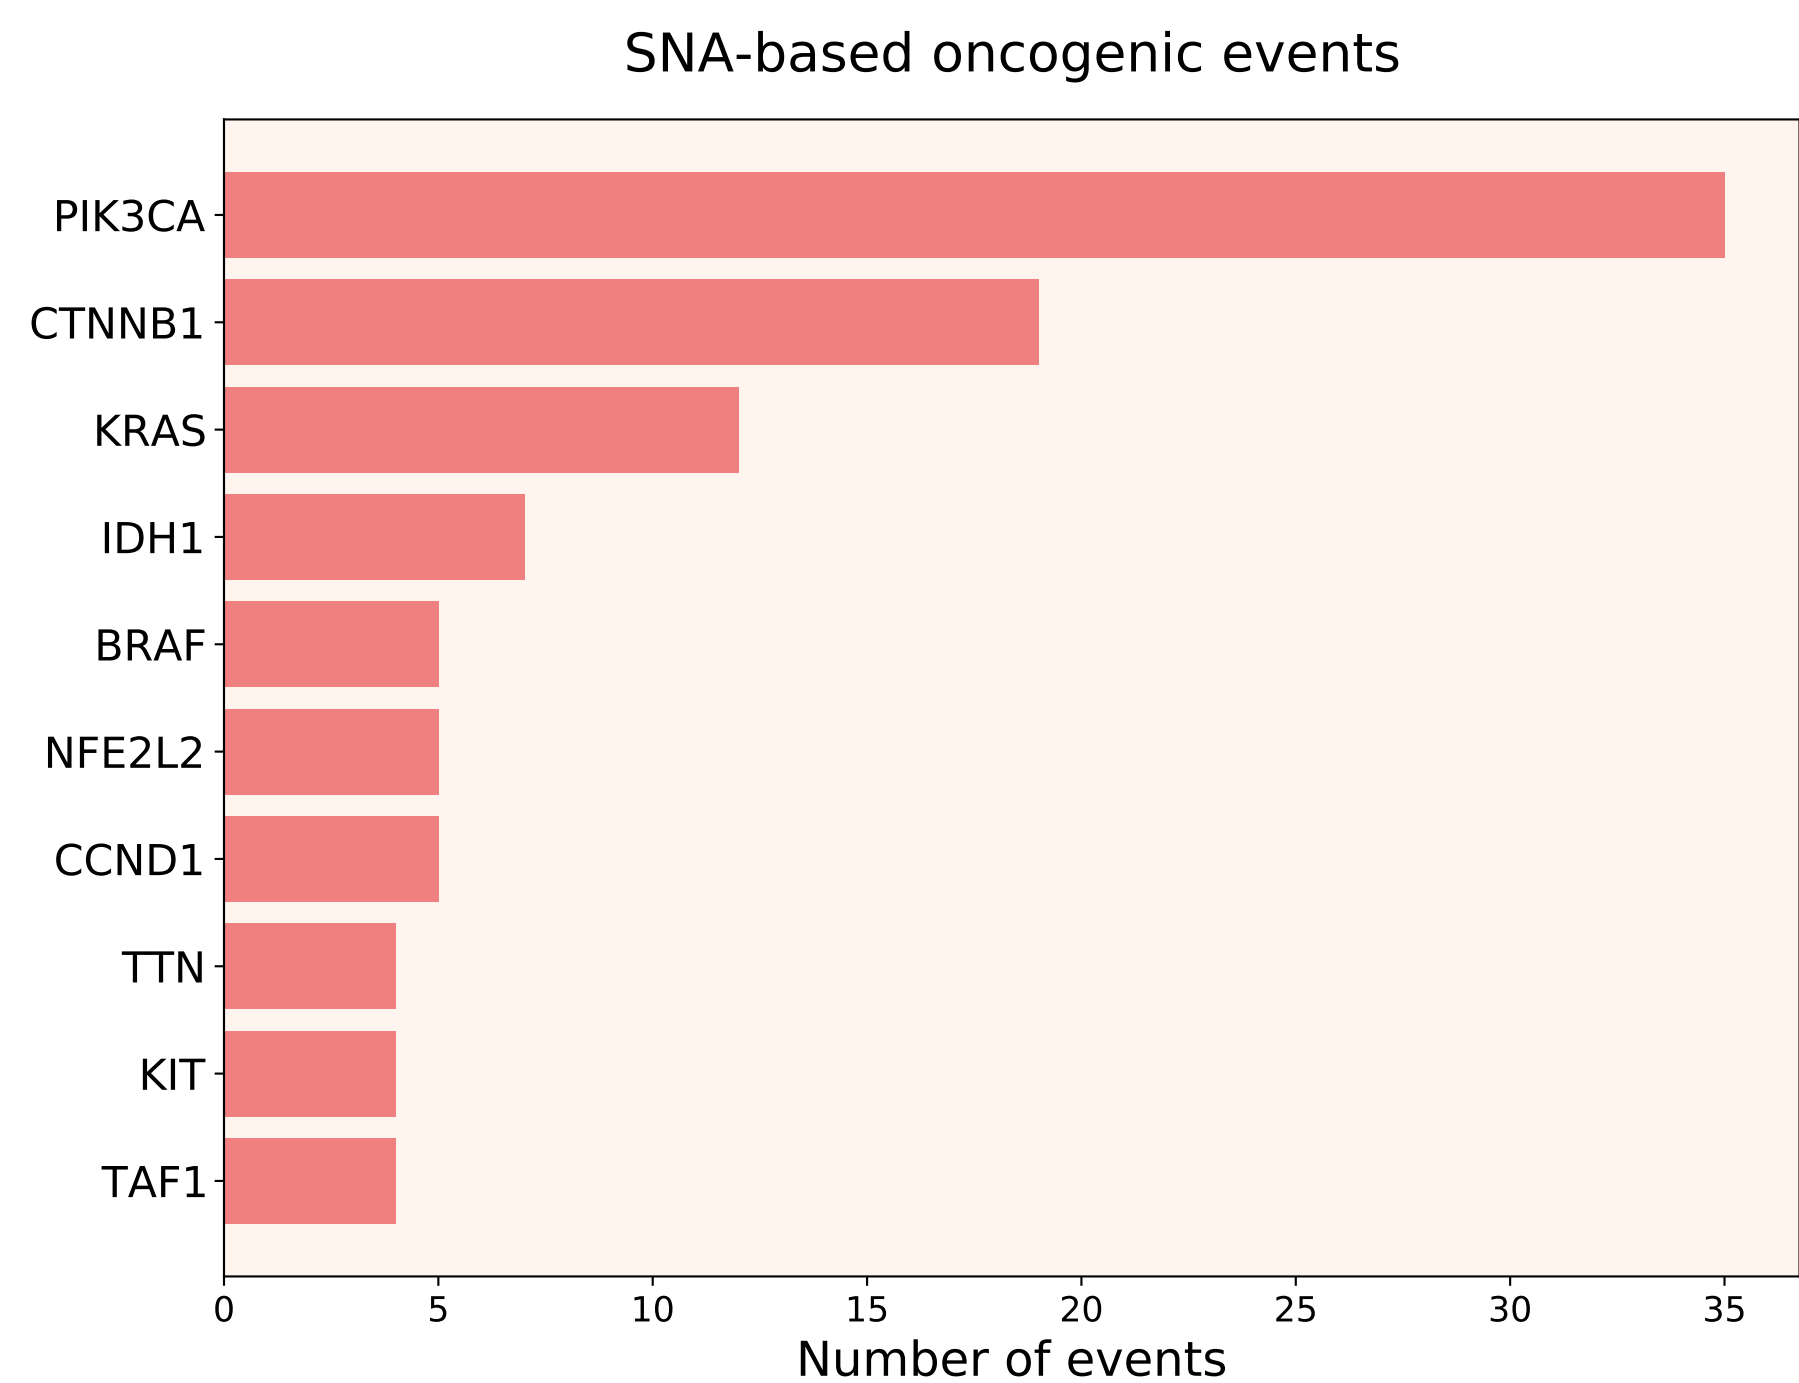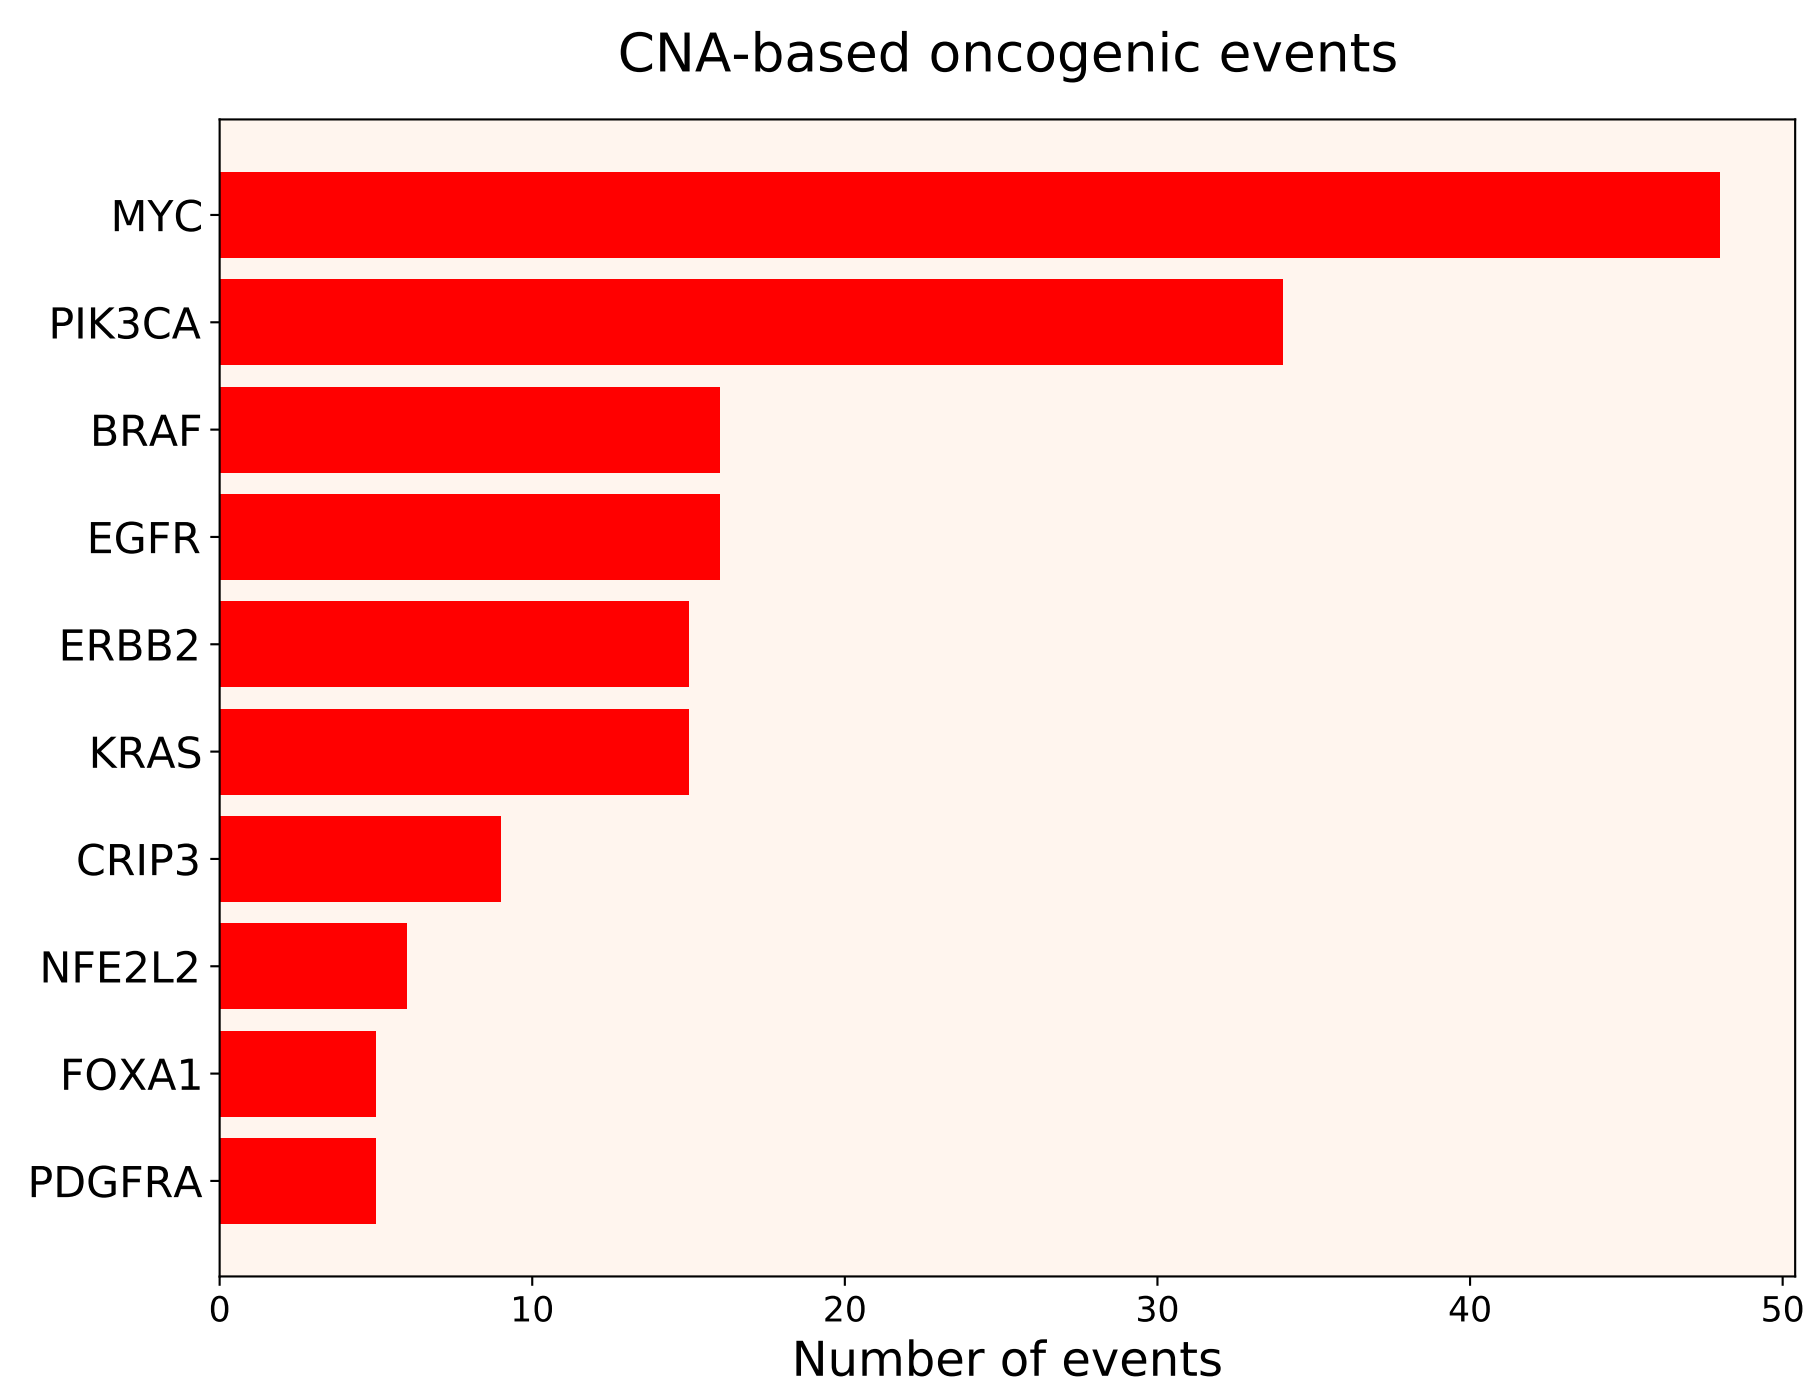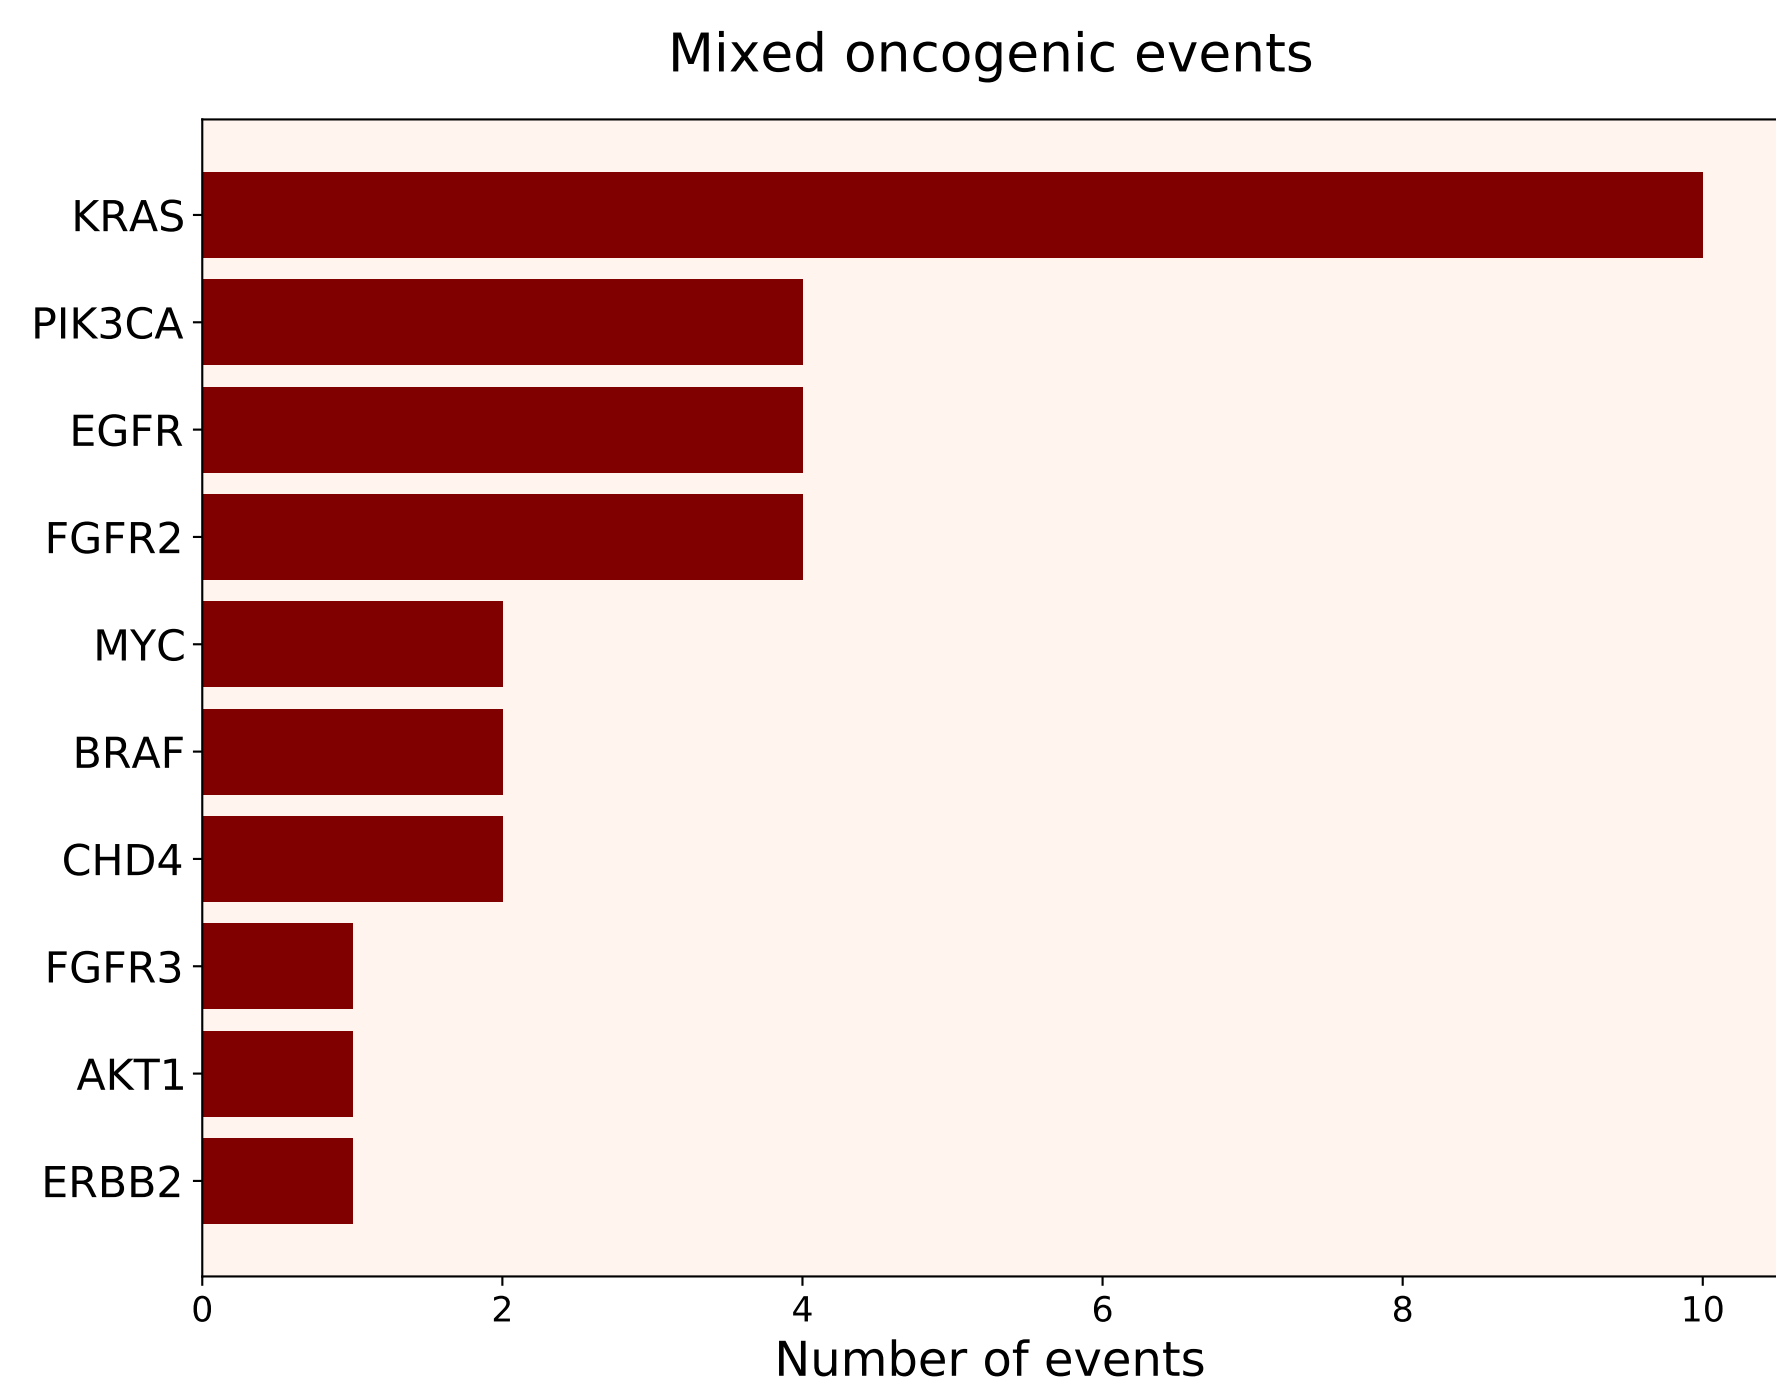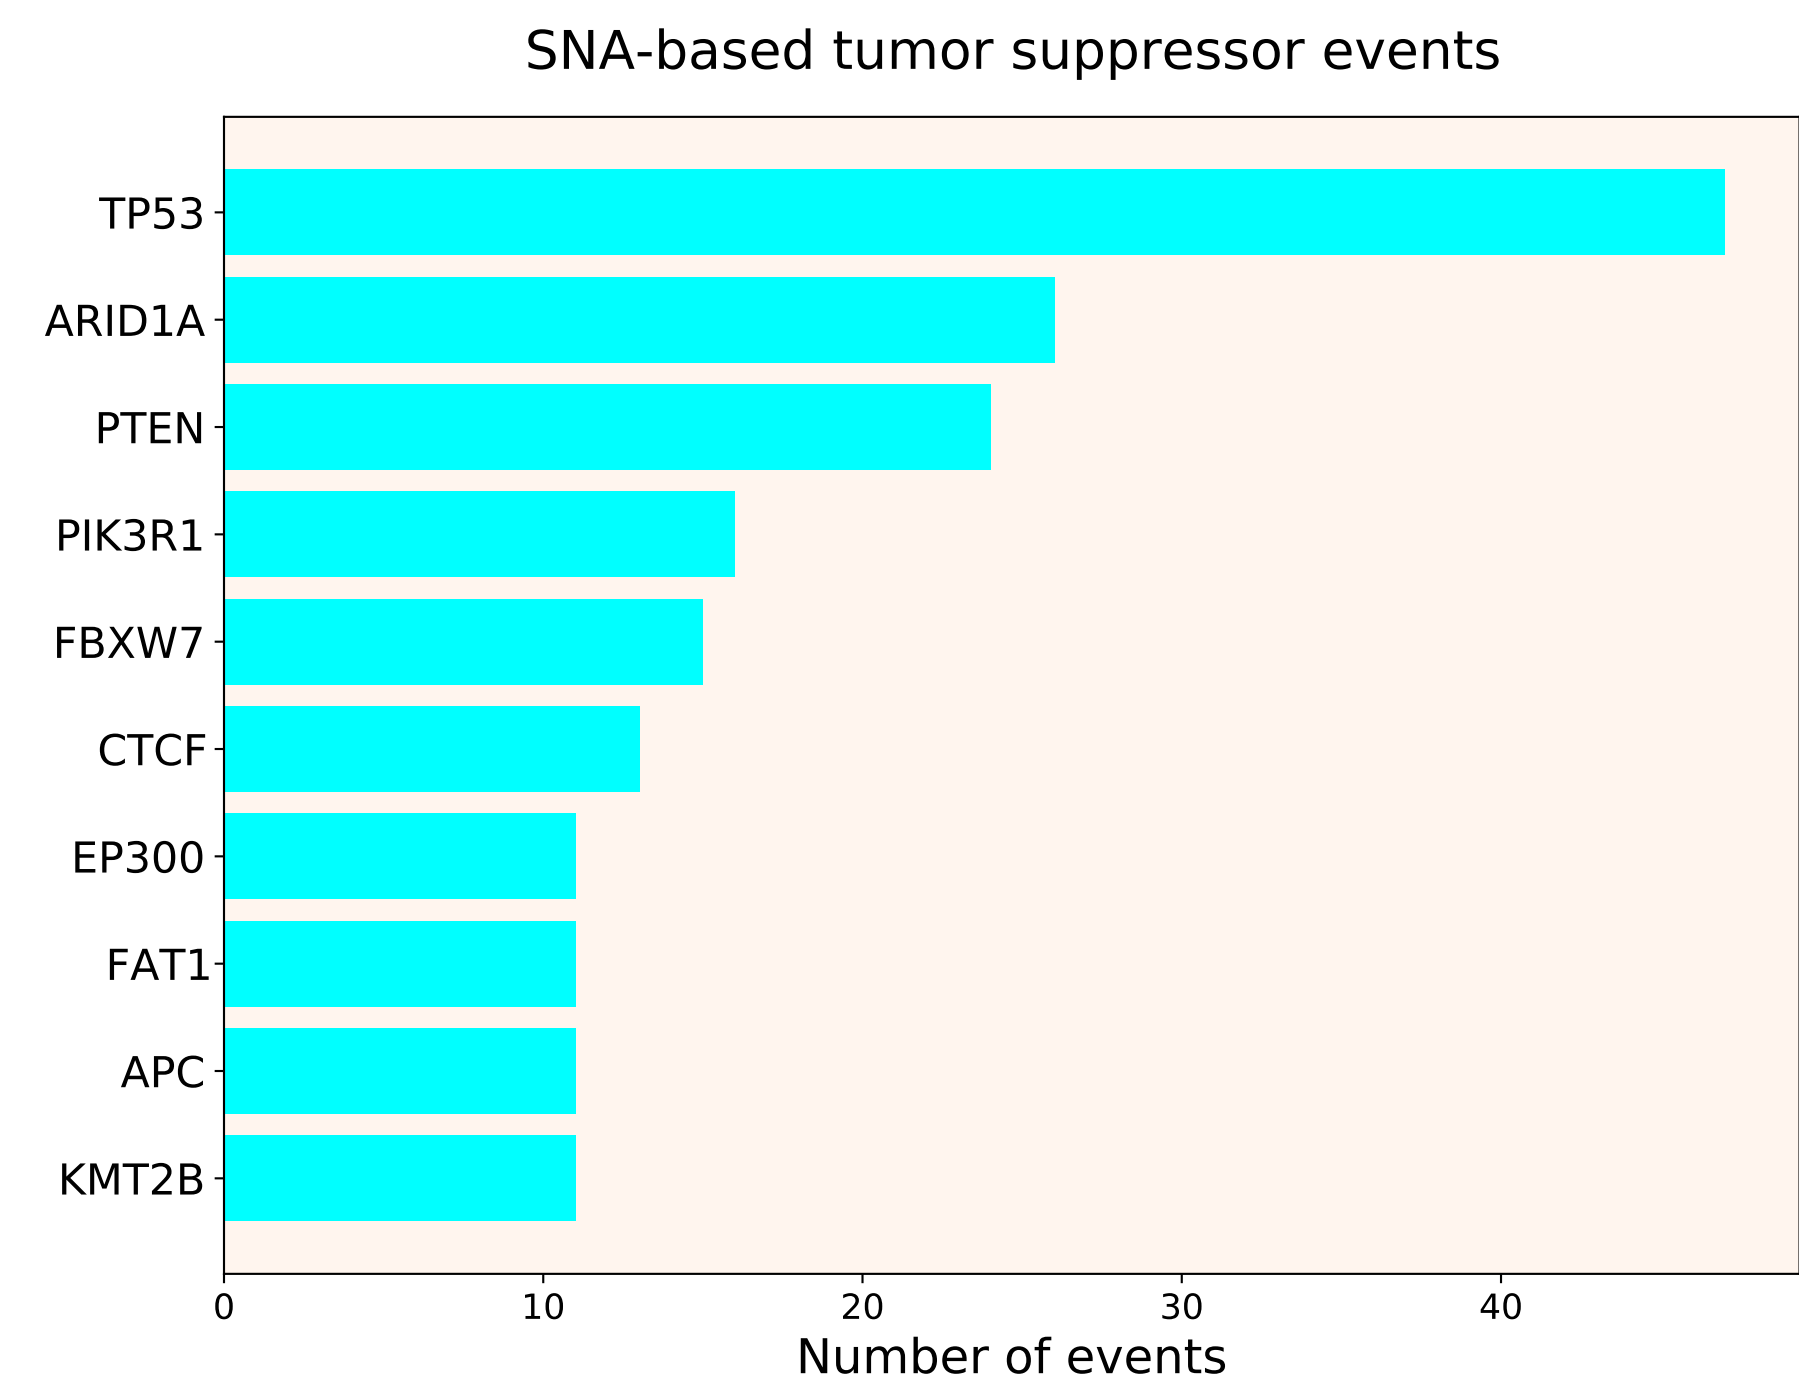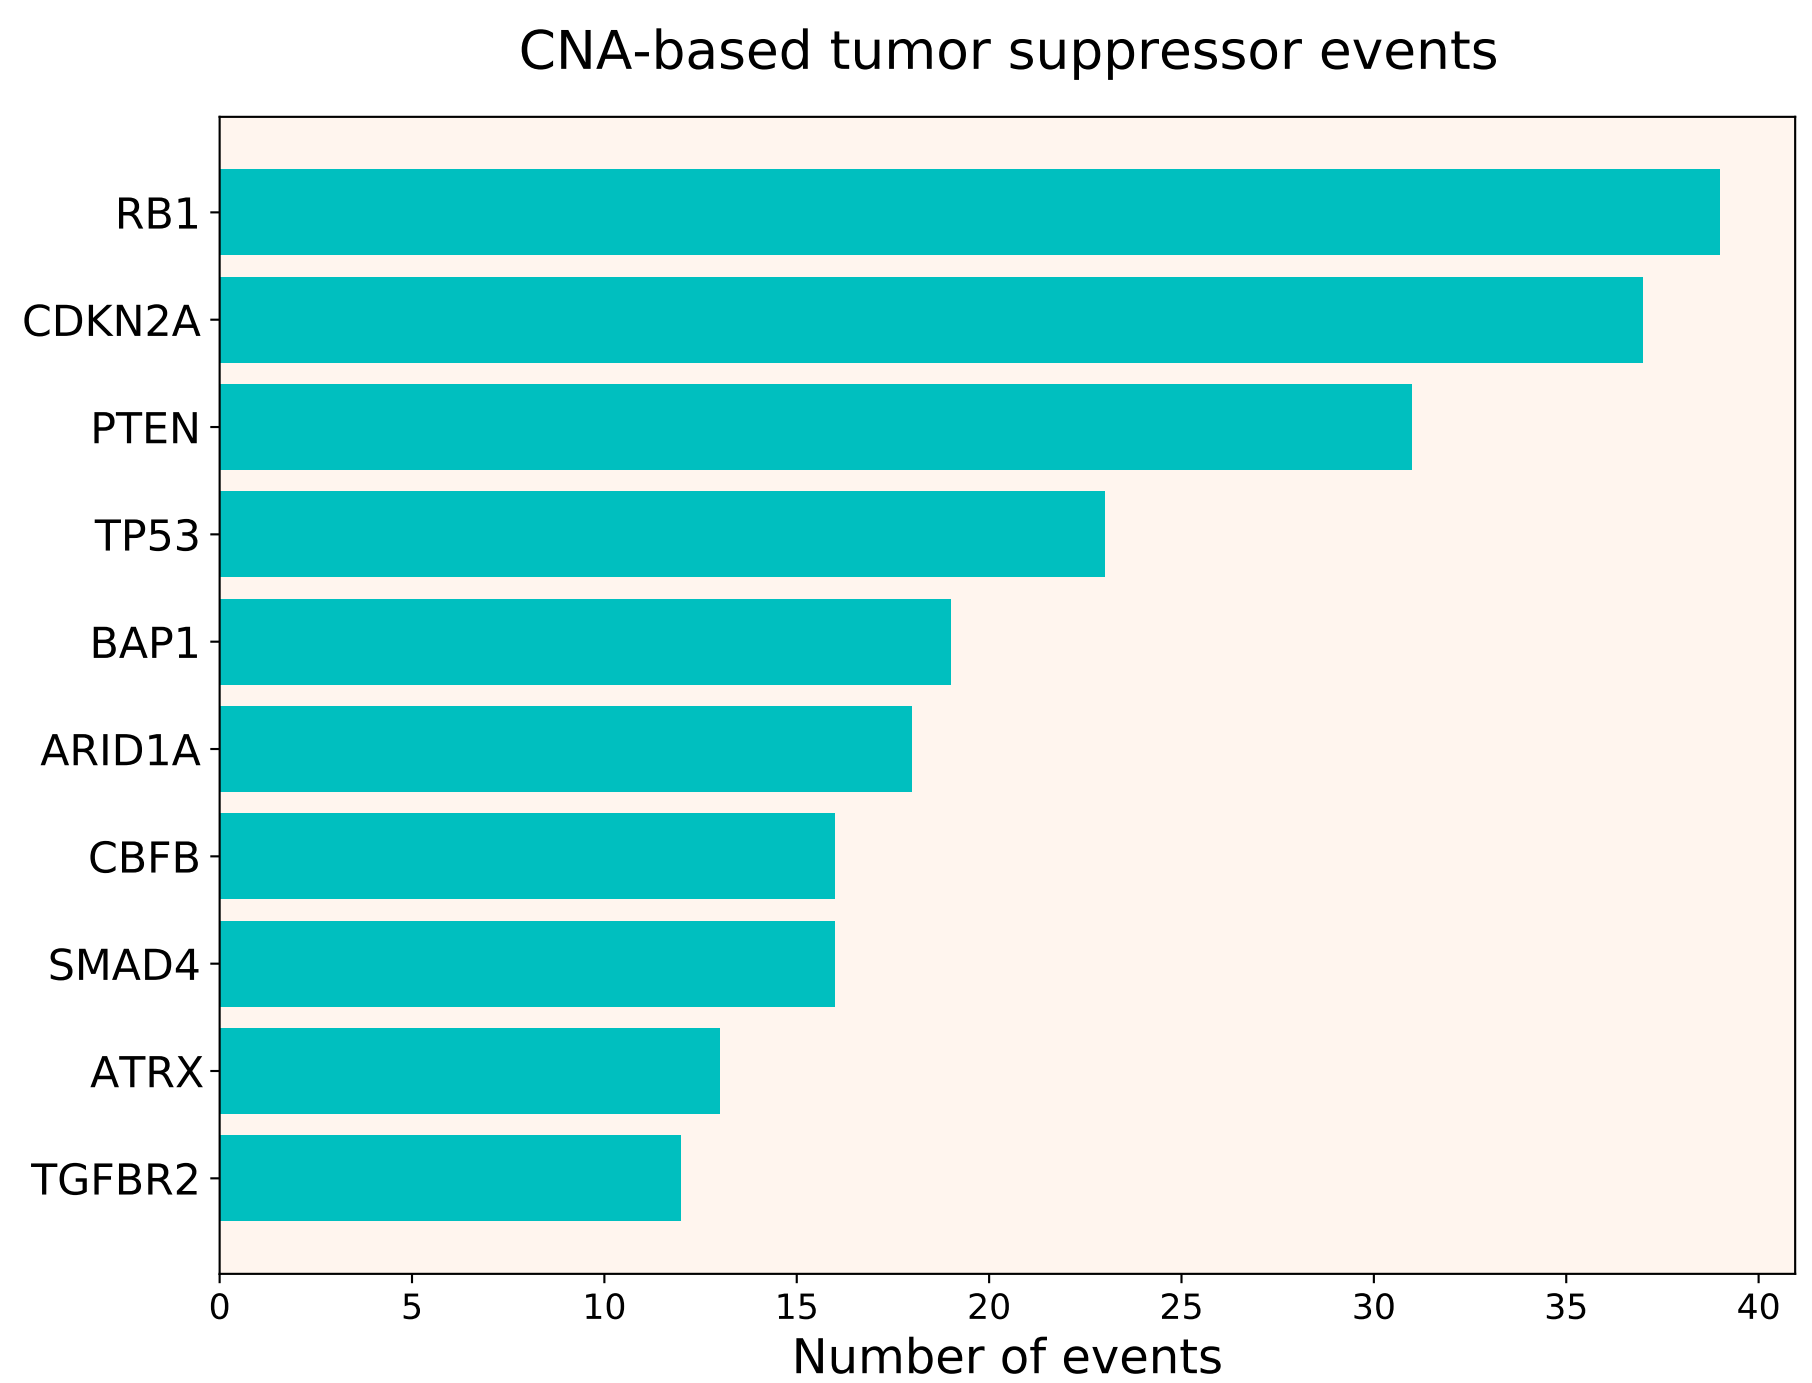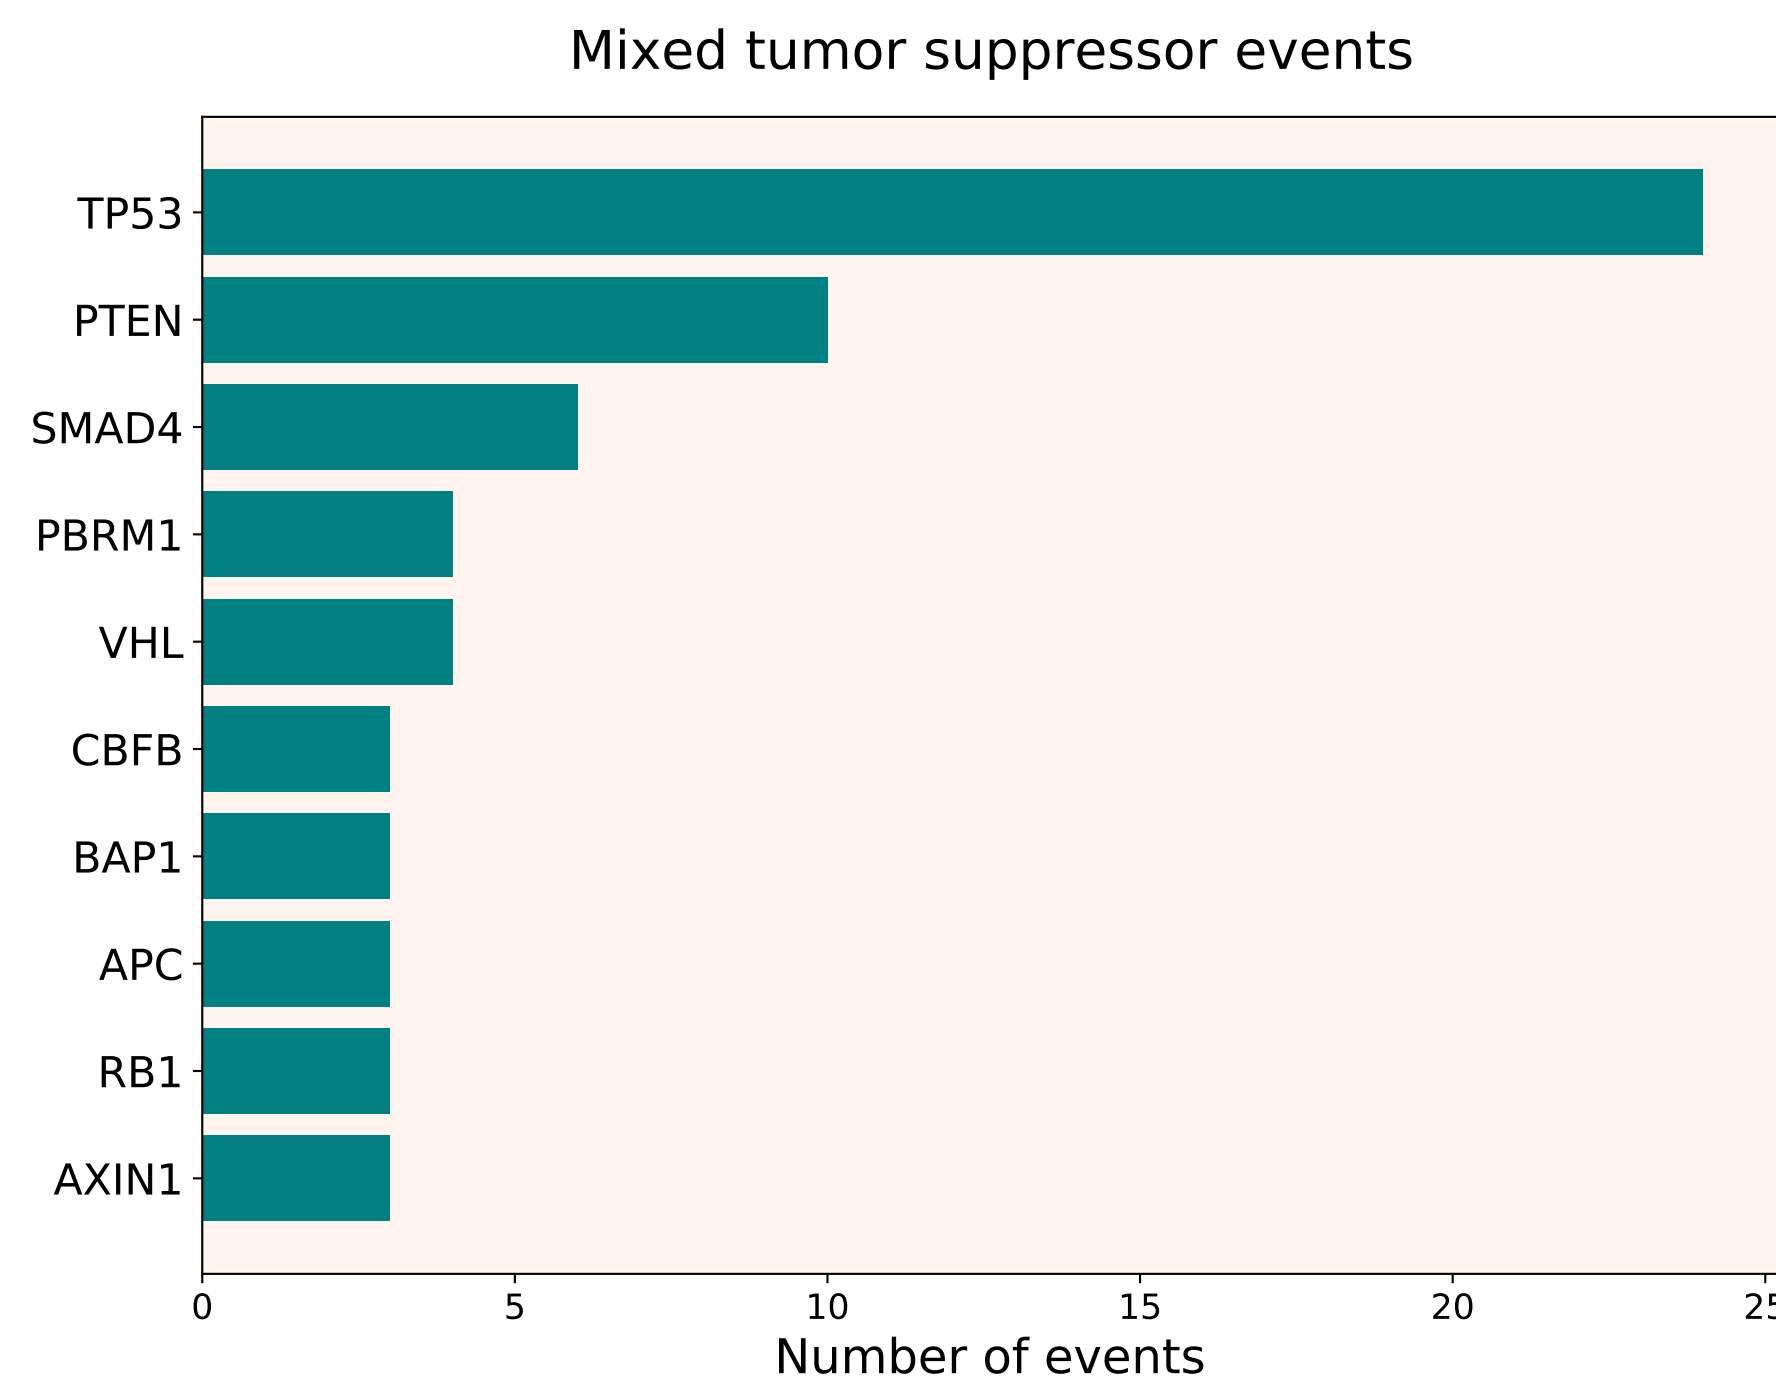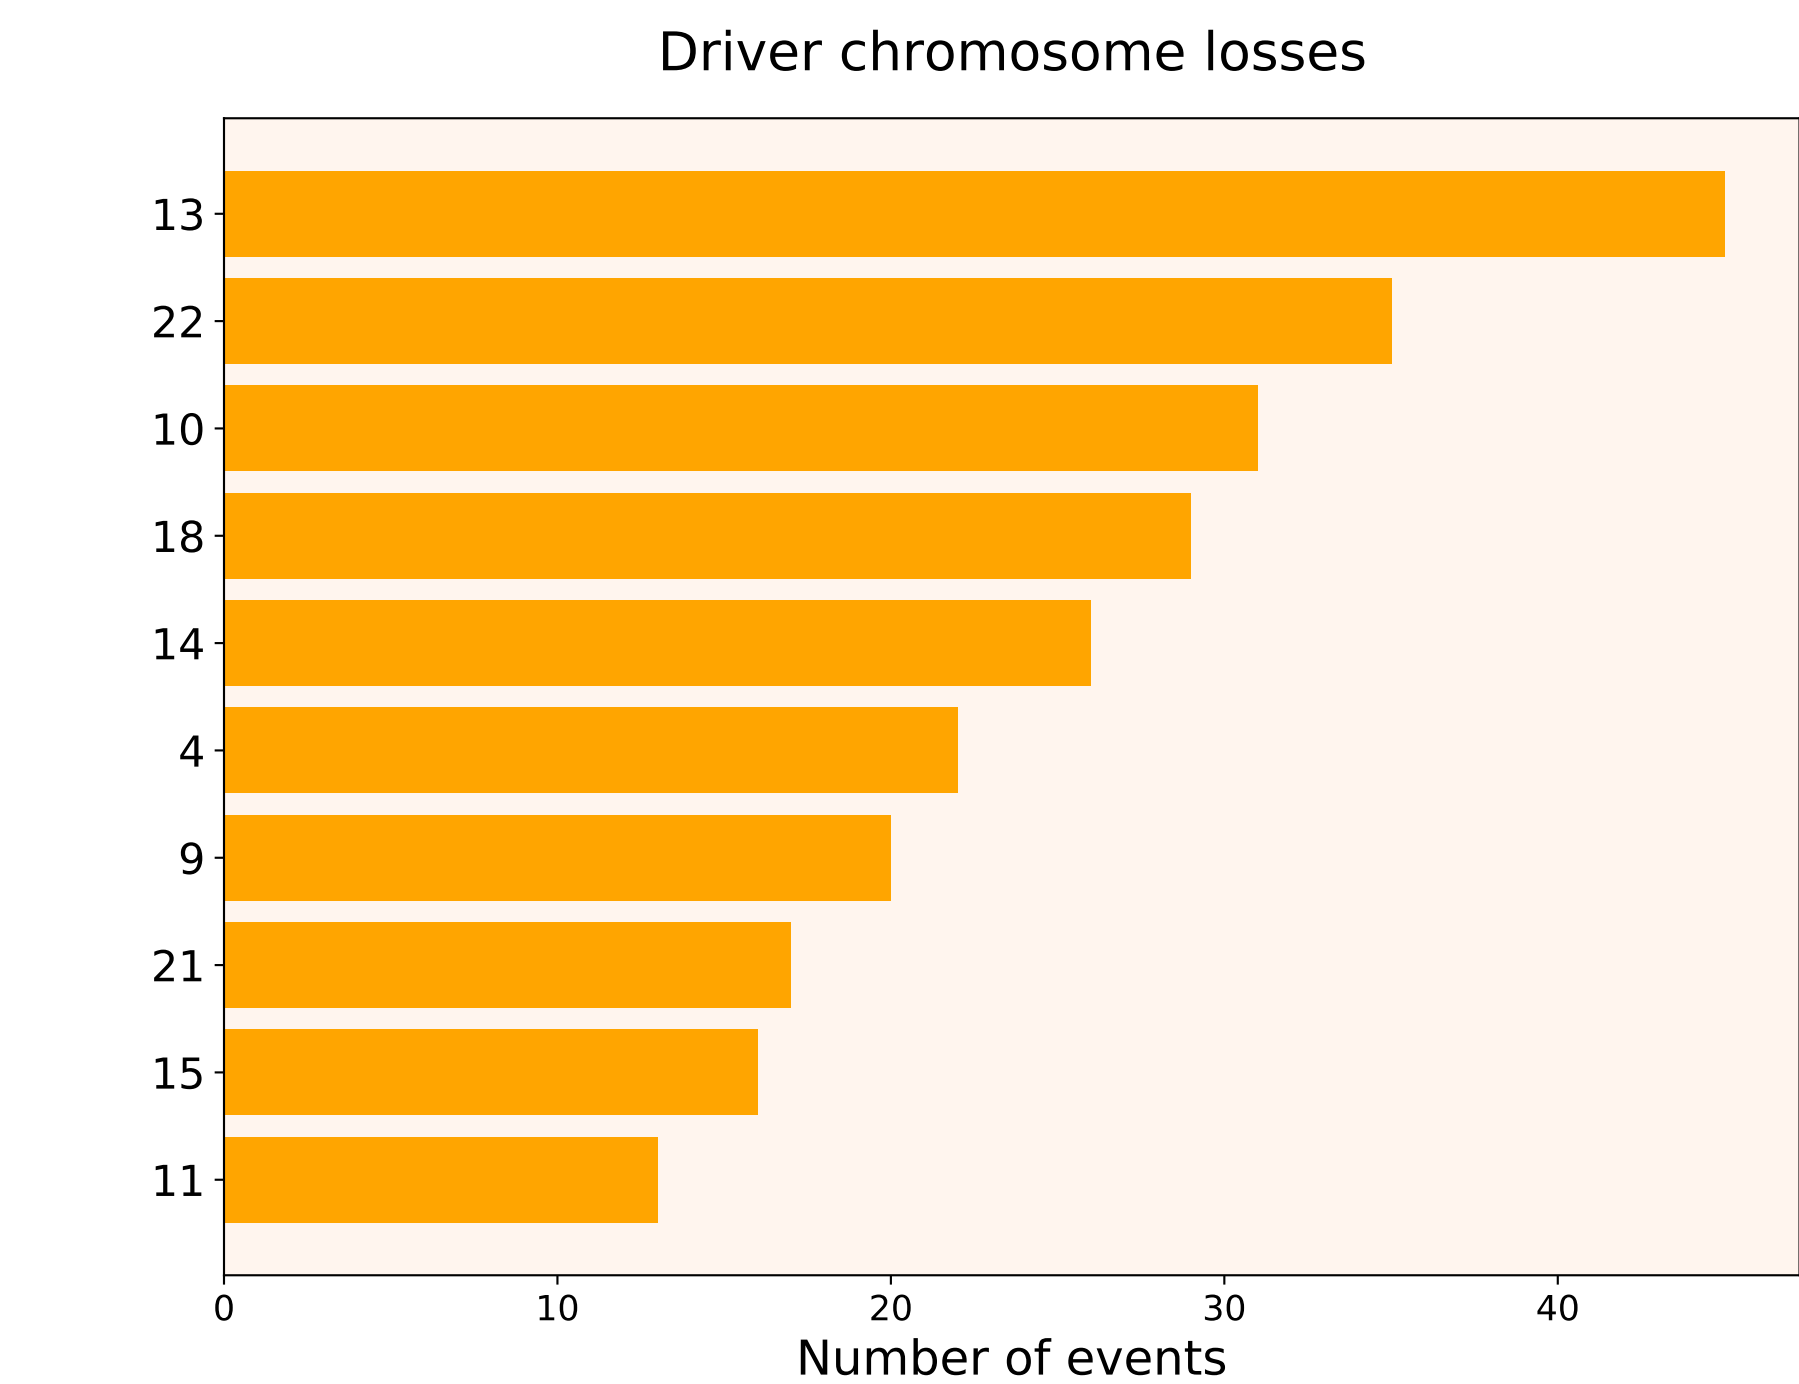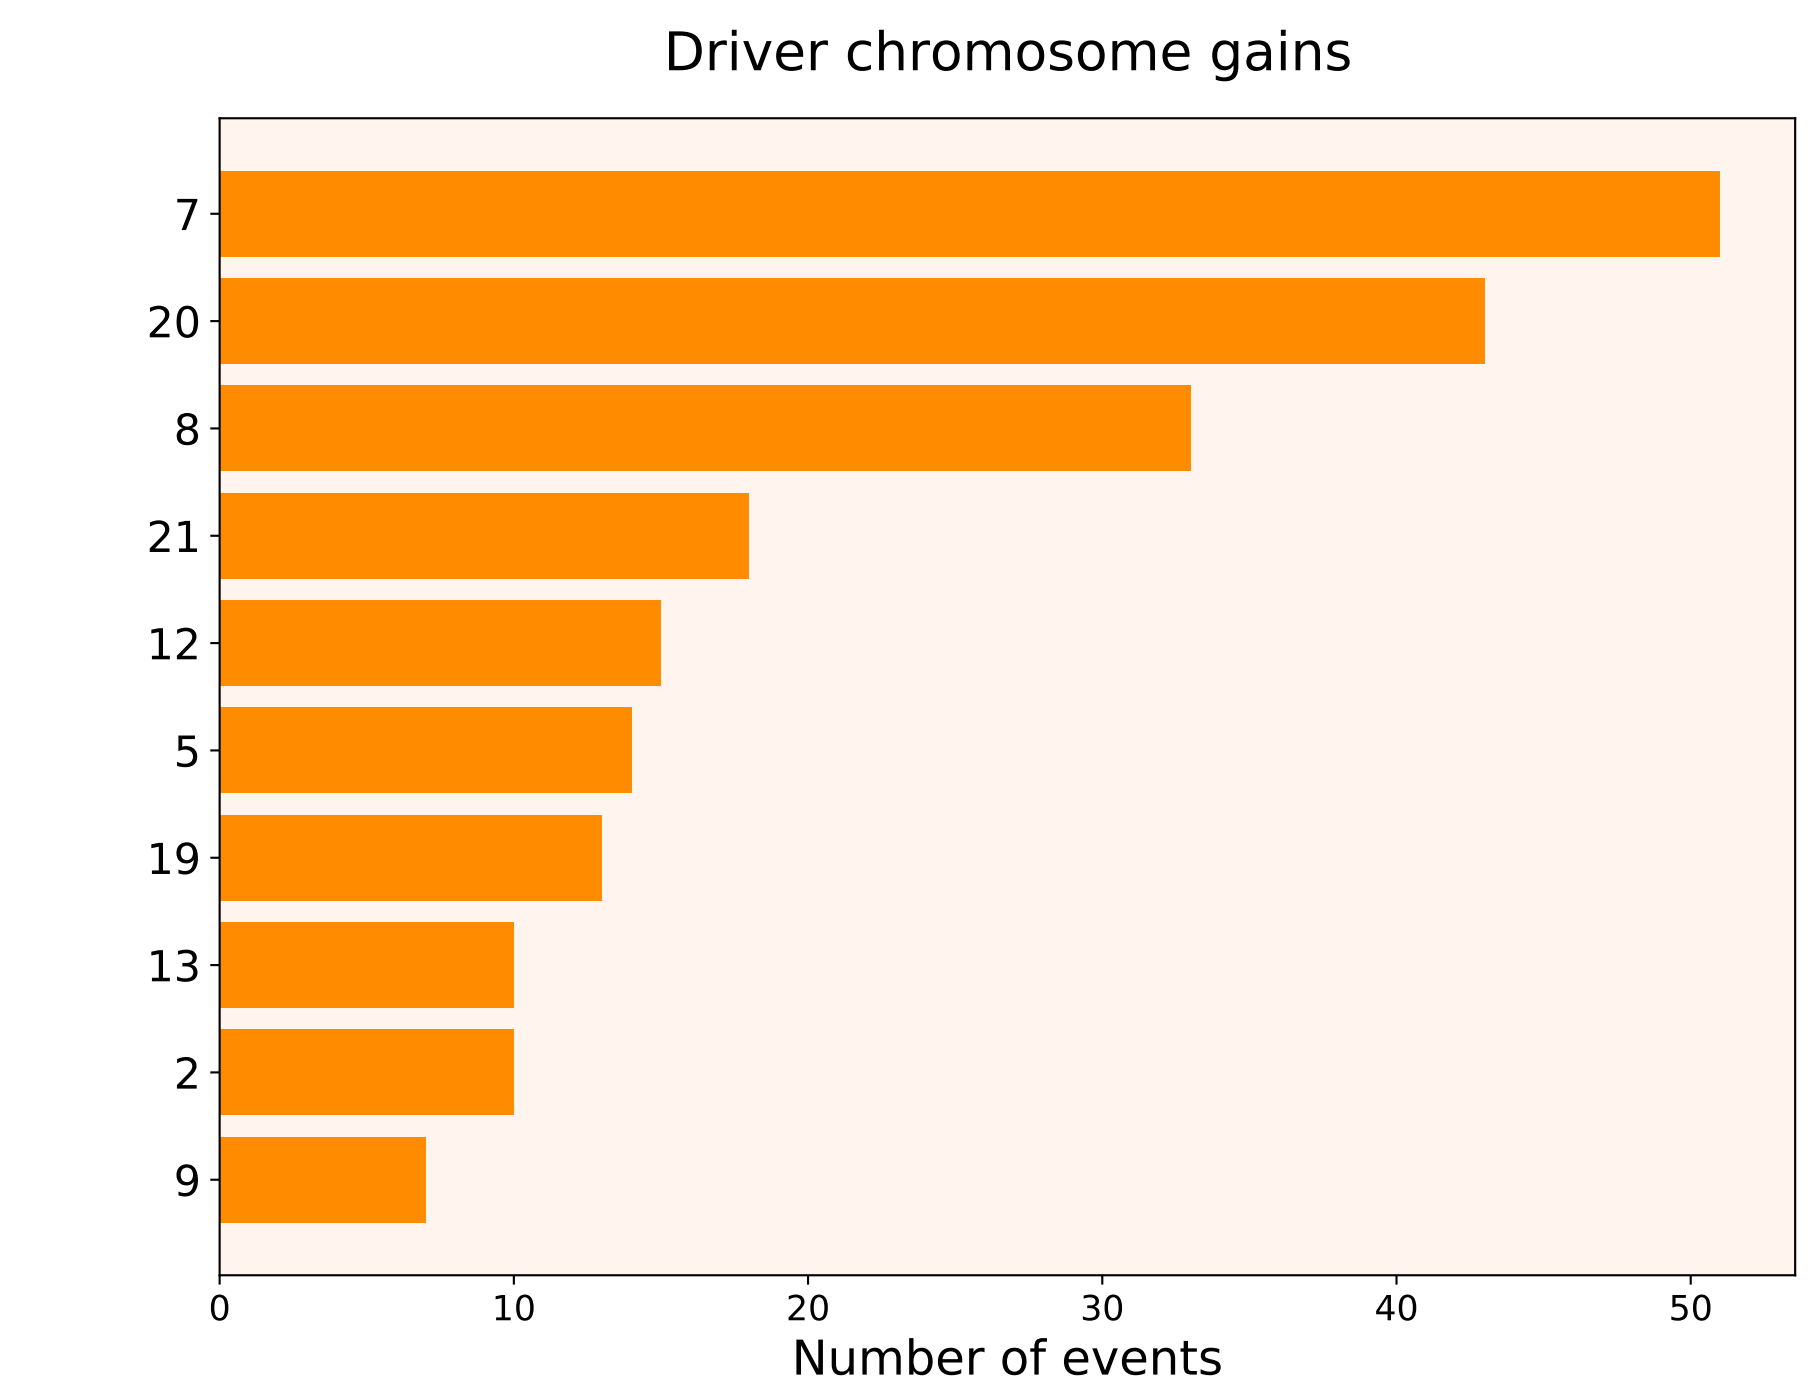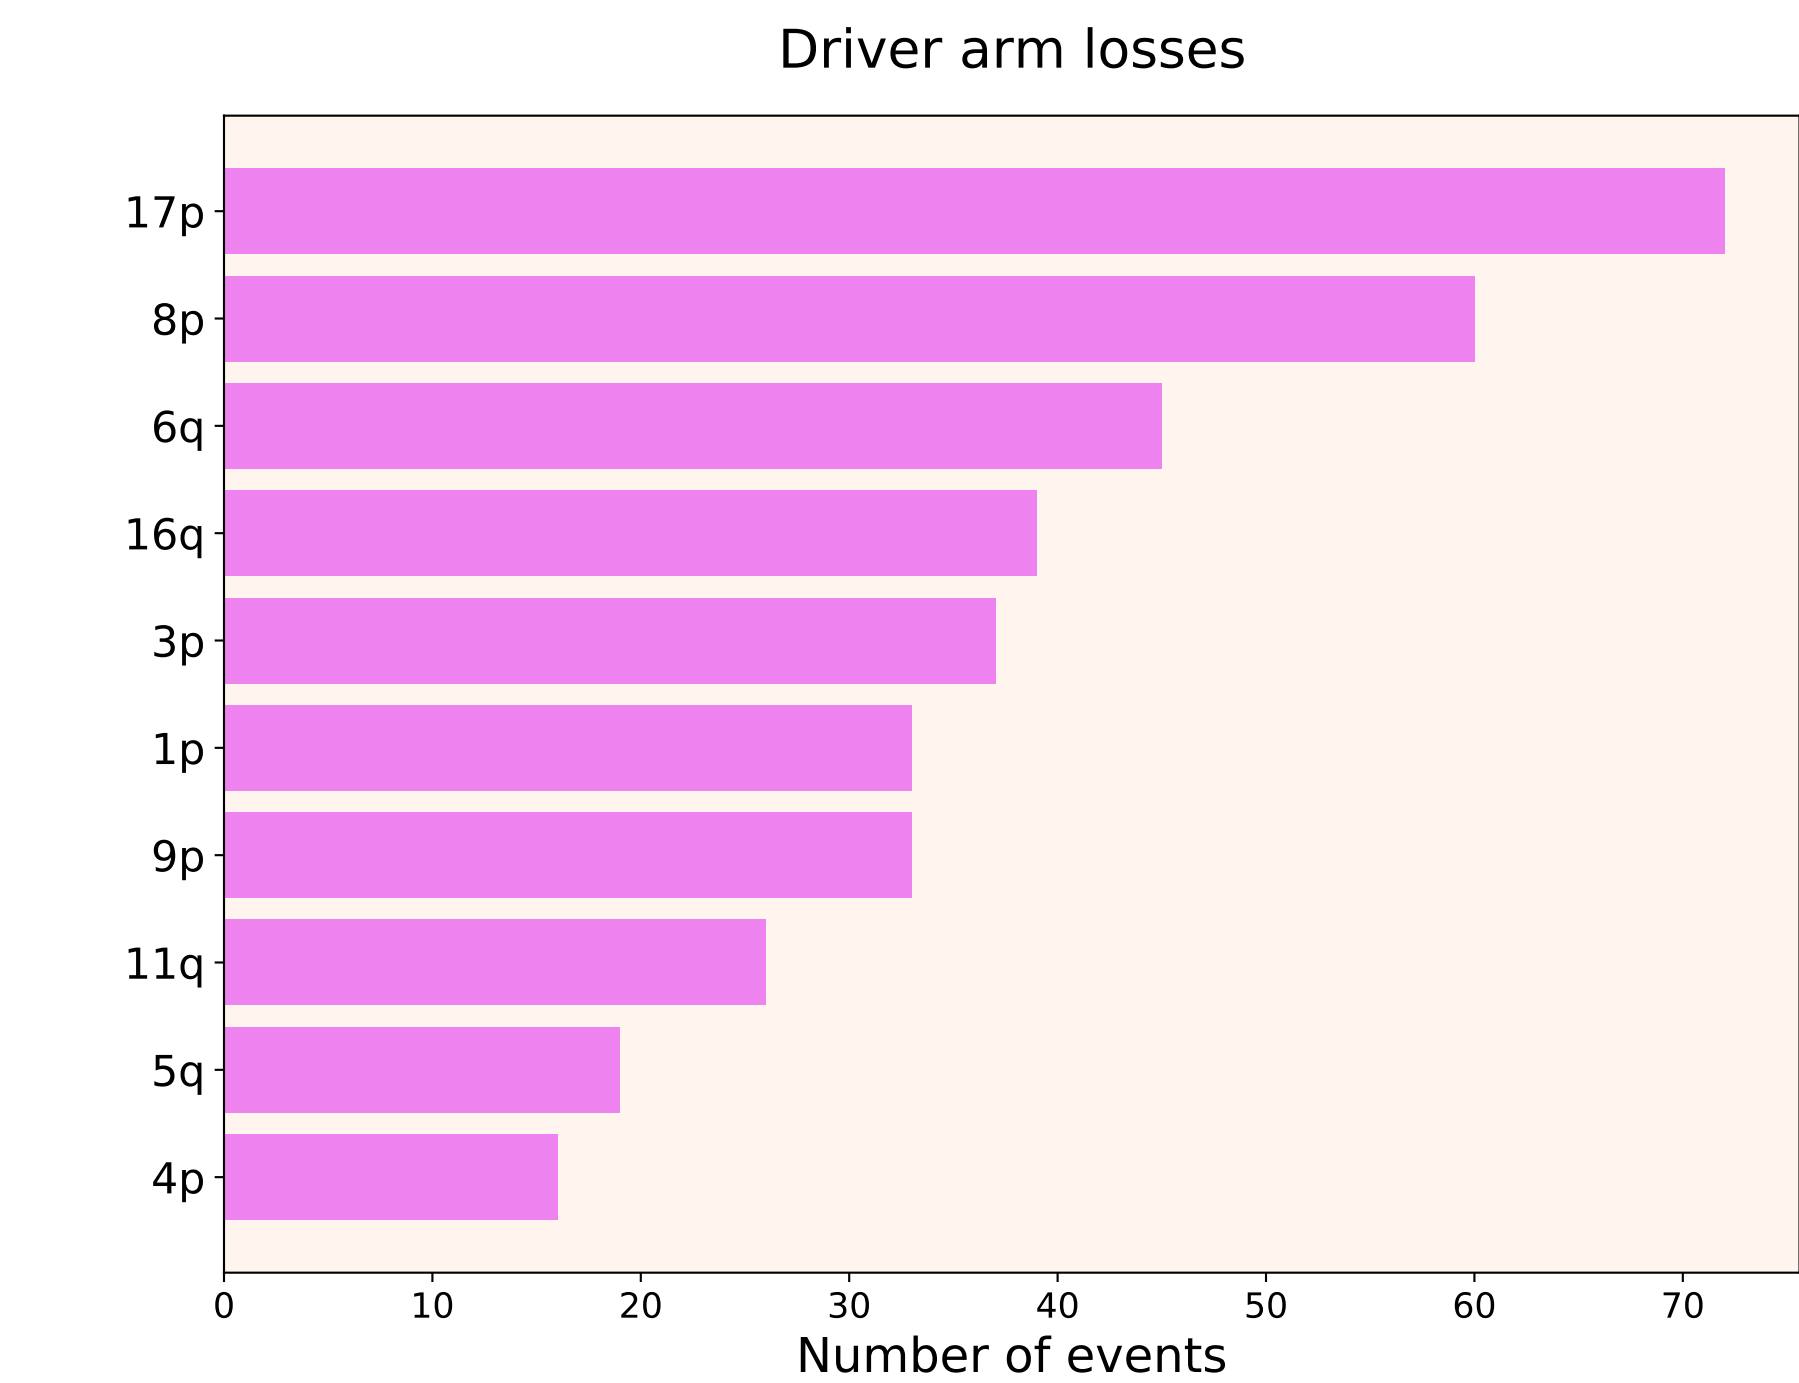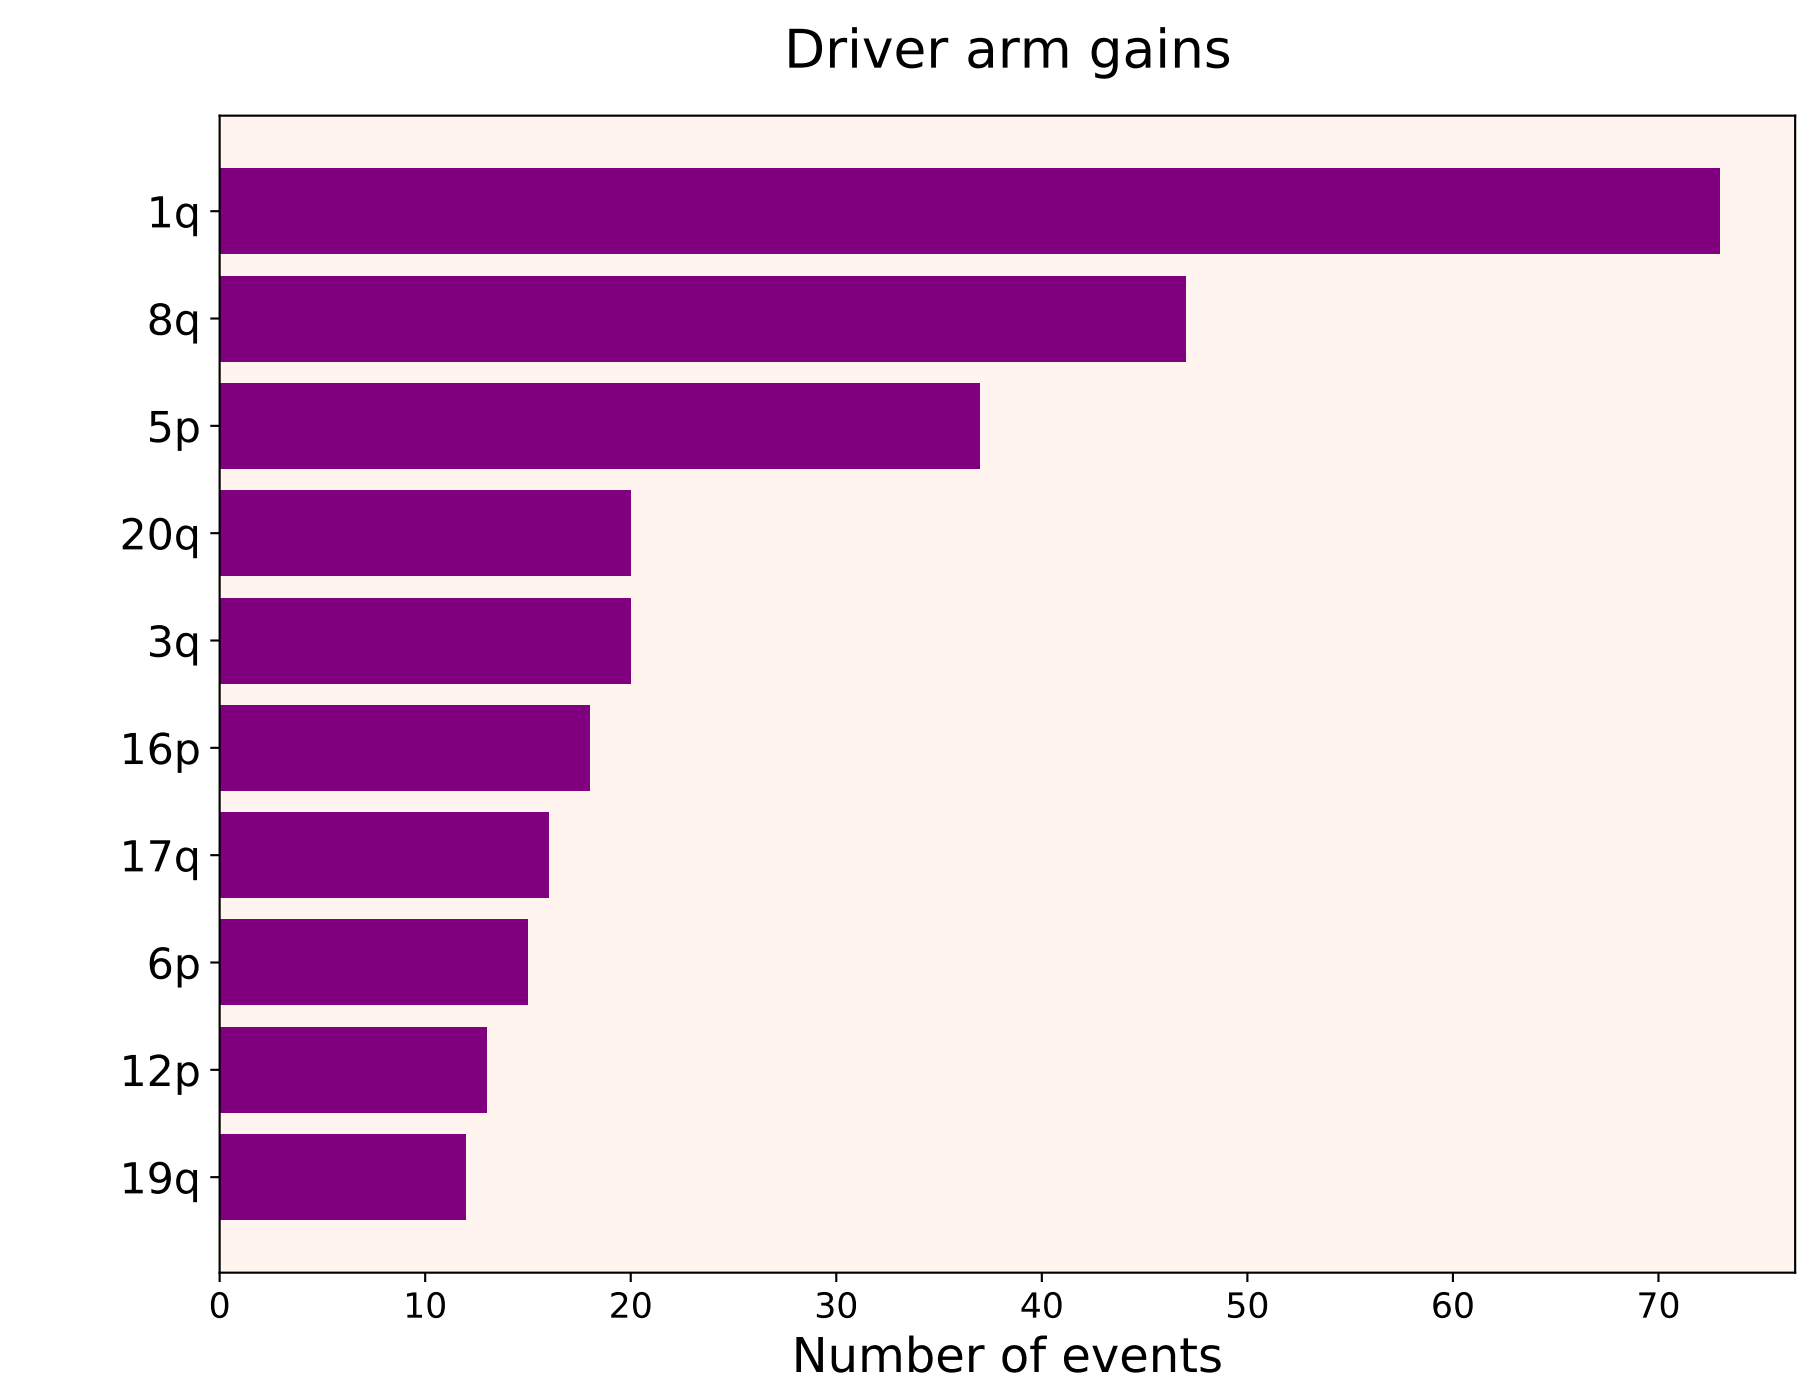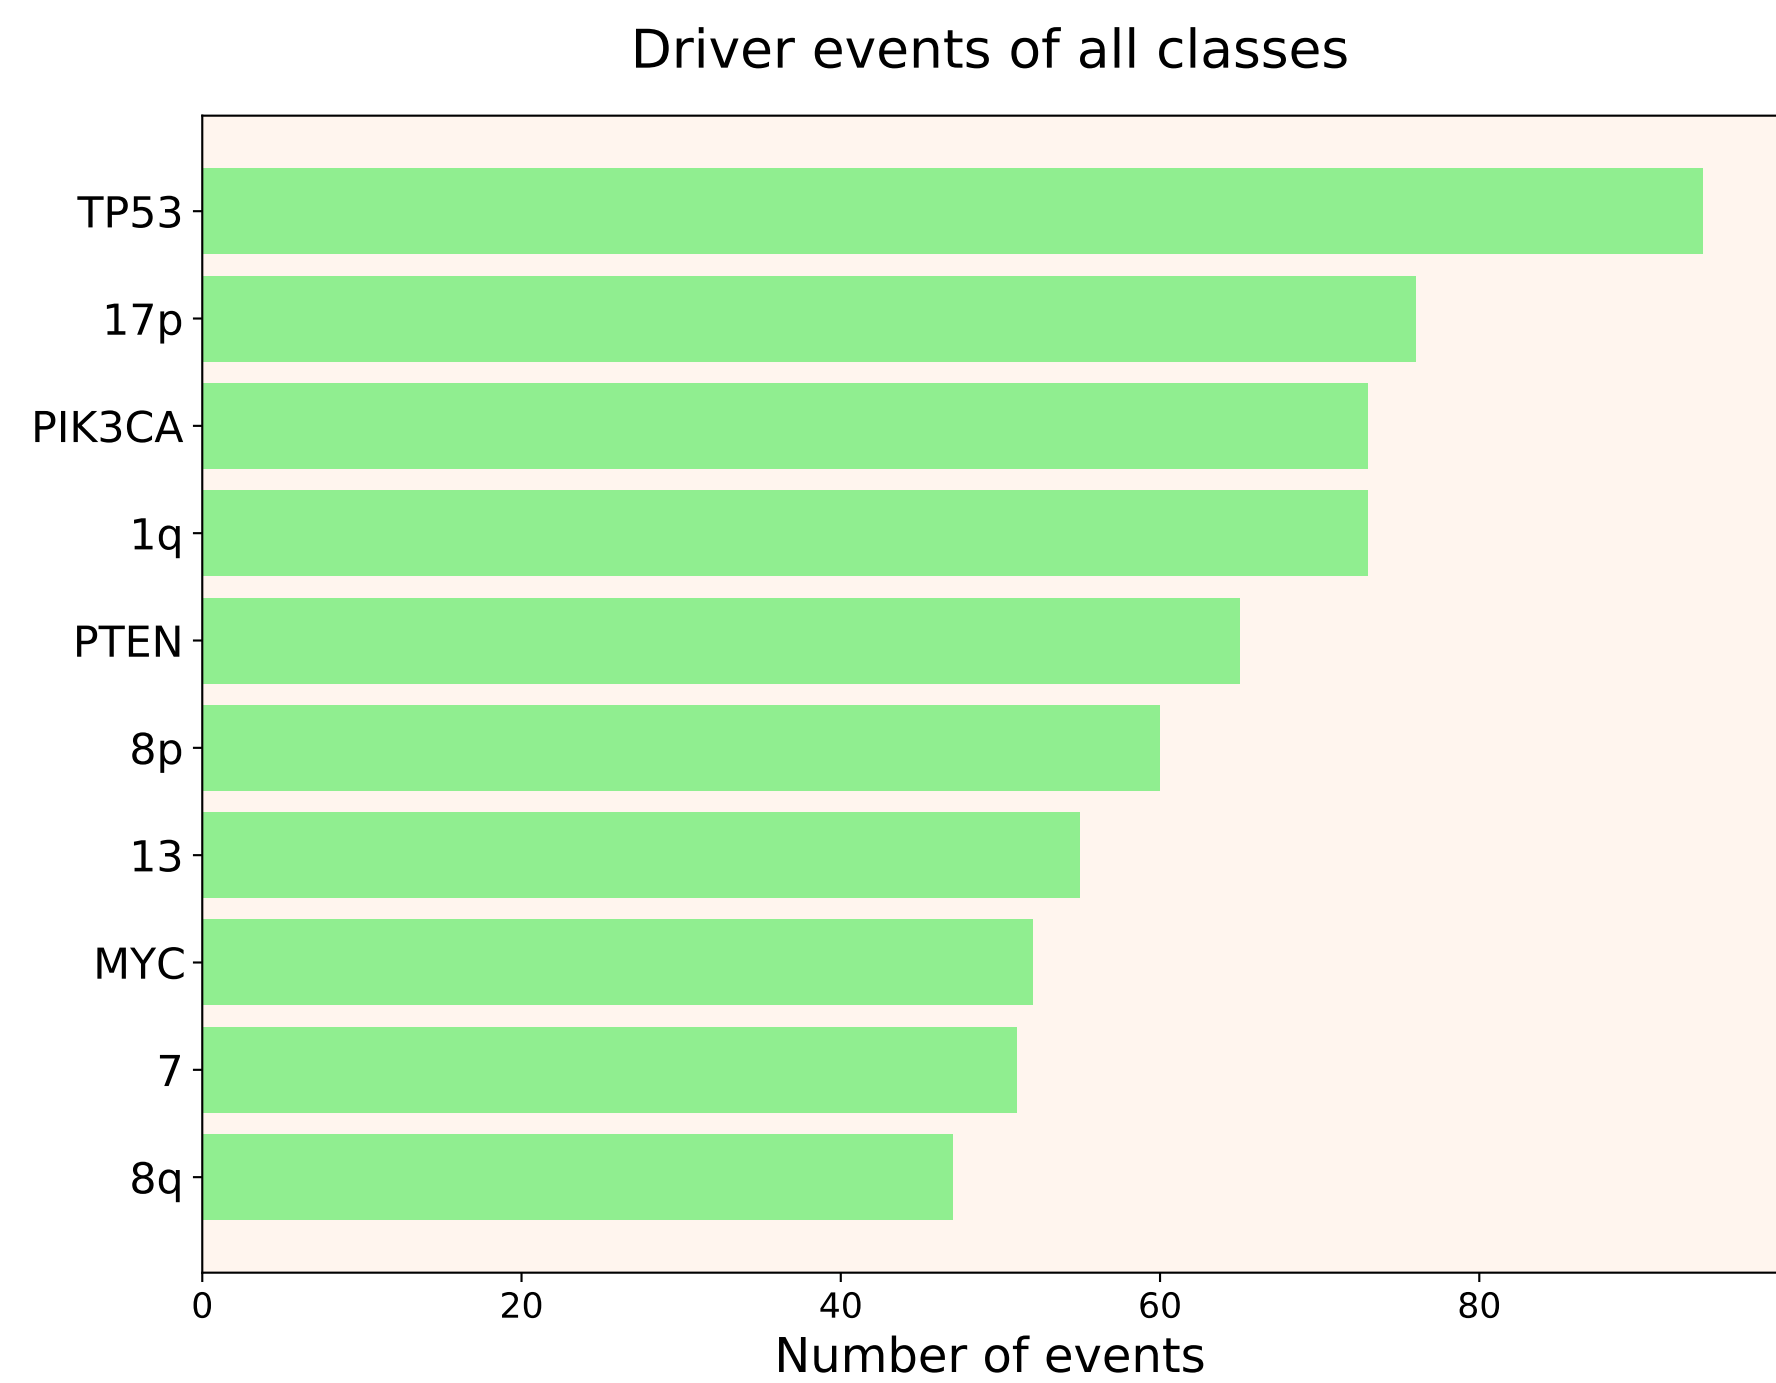

Supplement: Supplemental_Data_S1.zip [file Supplemental_Data_S1.zip]

# BLCA\_FEMALE

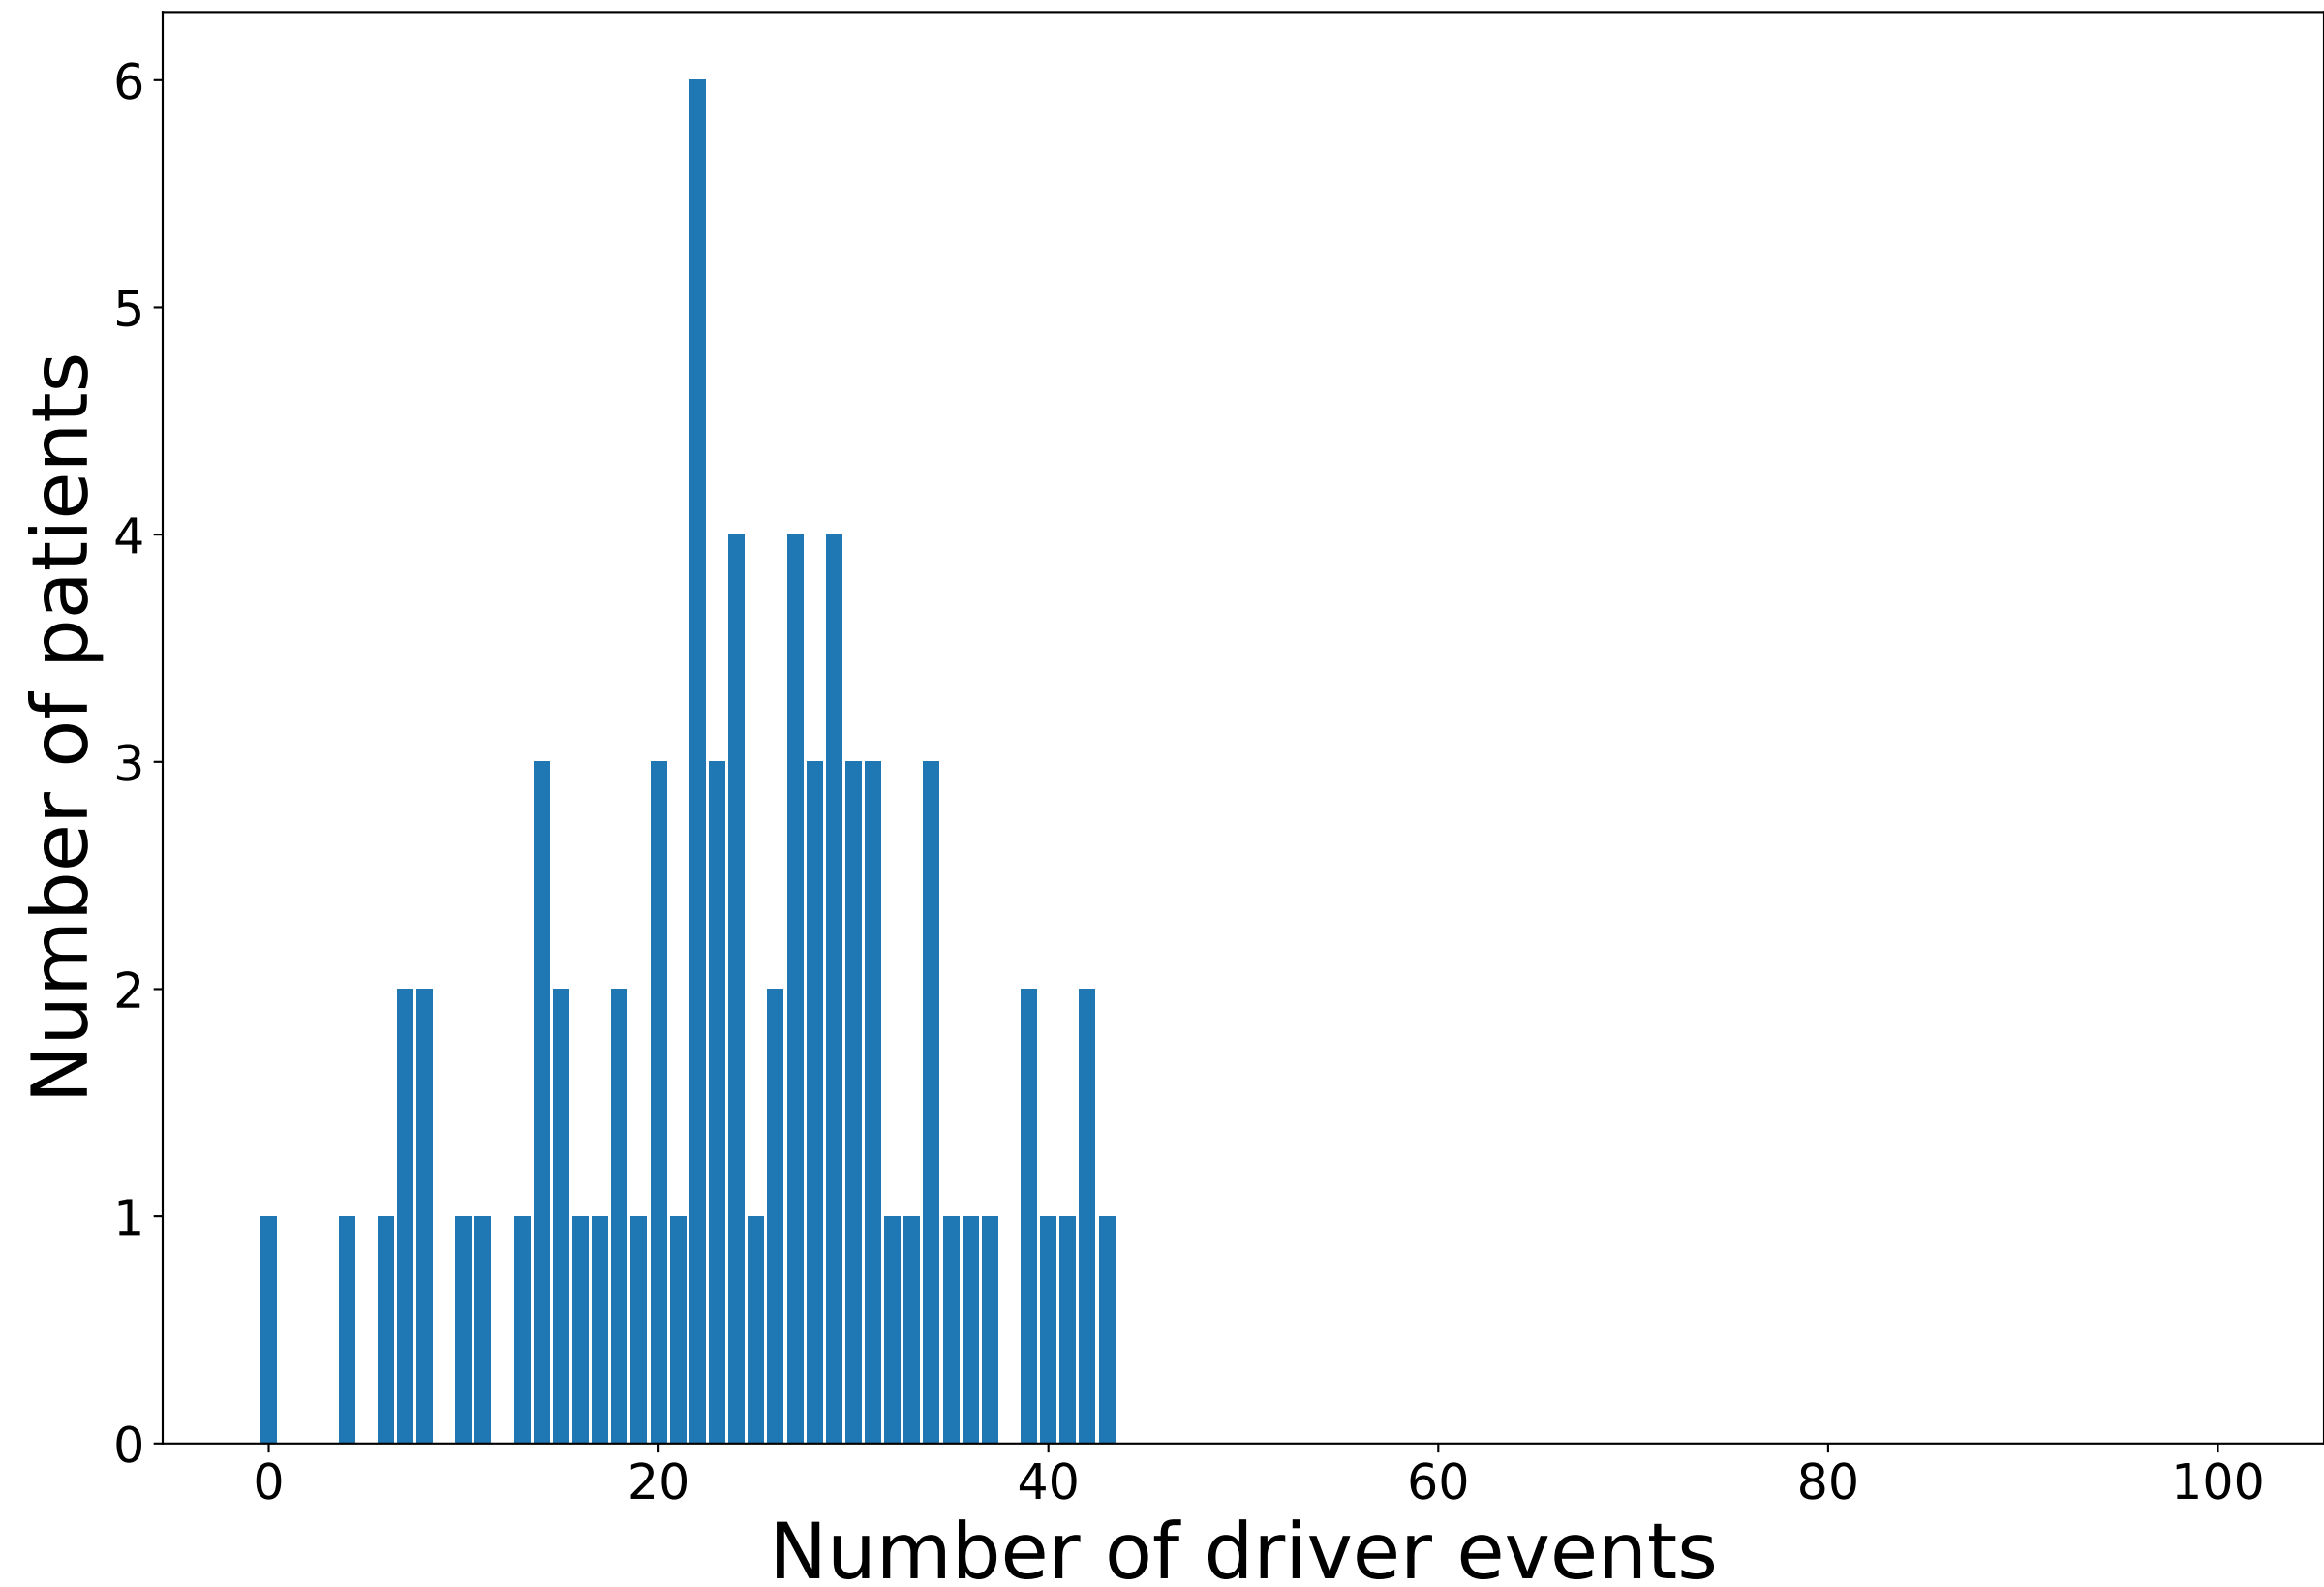

Supplement: Supplemental_Data_S1.zip [file Supplemental_Data_S1.zip]

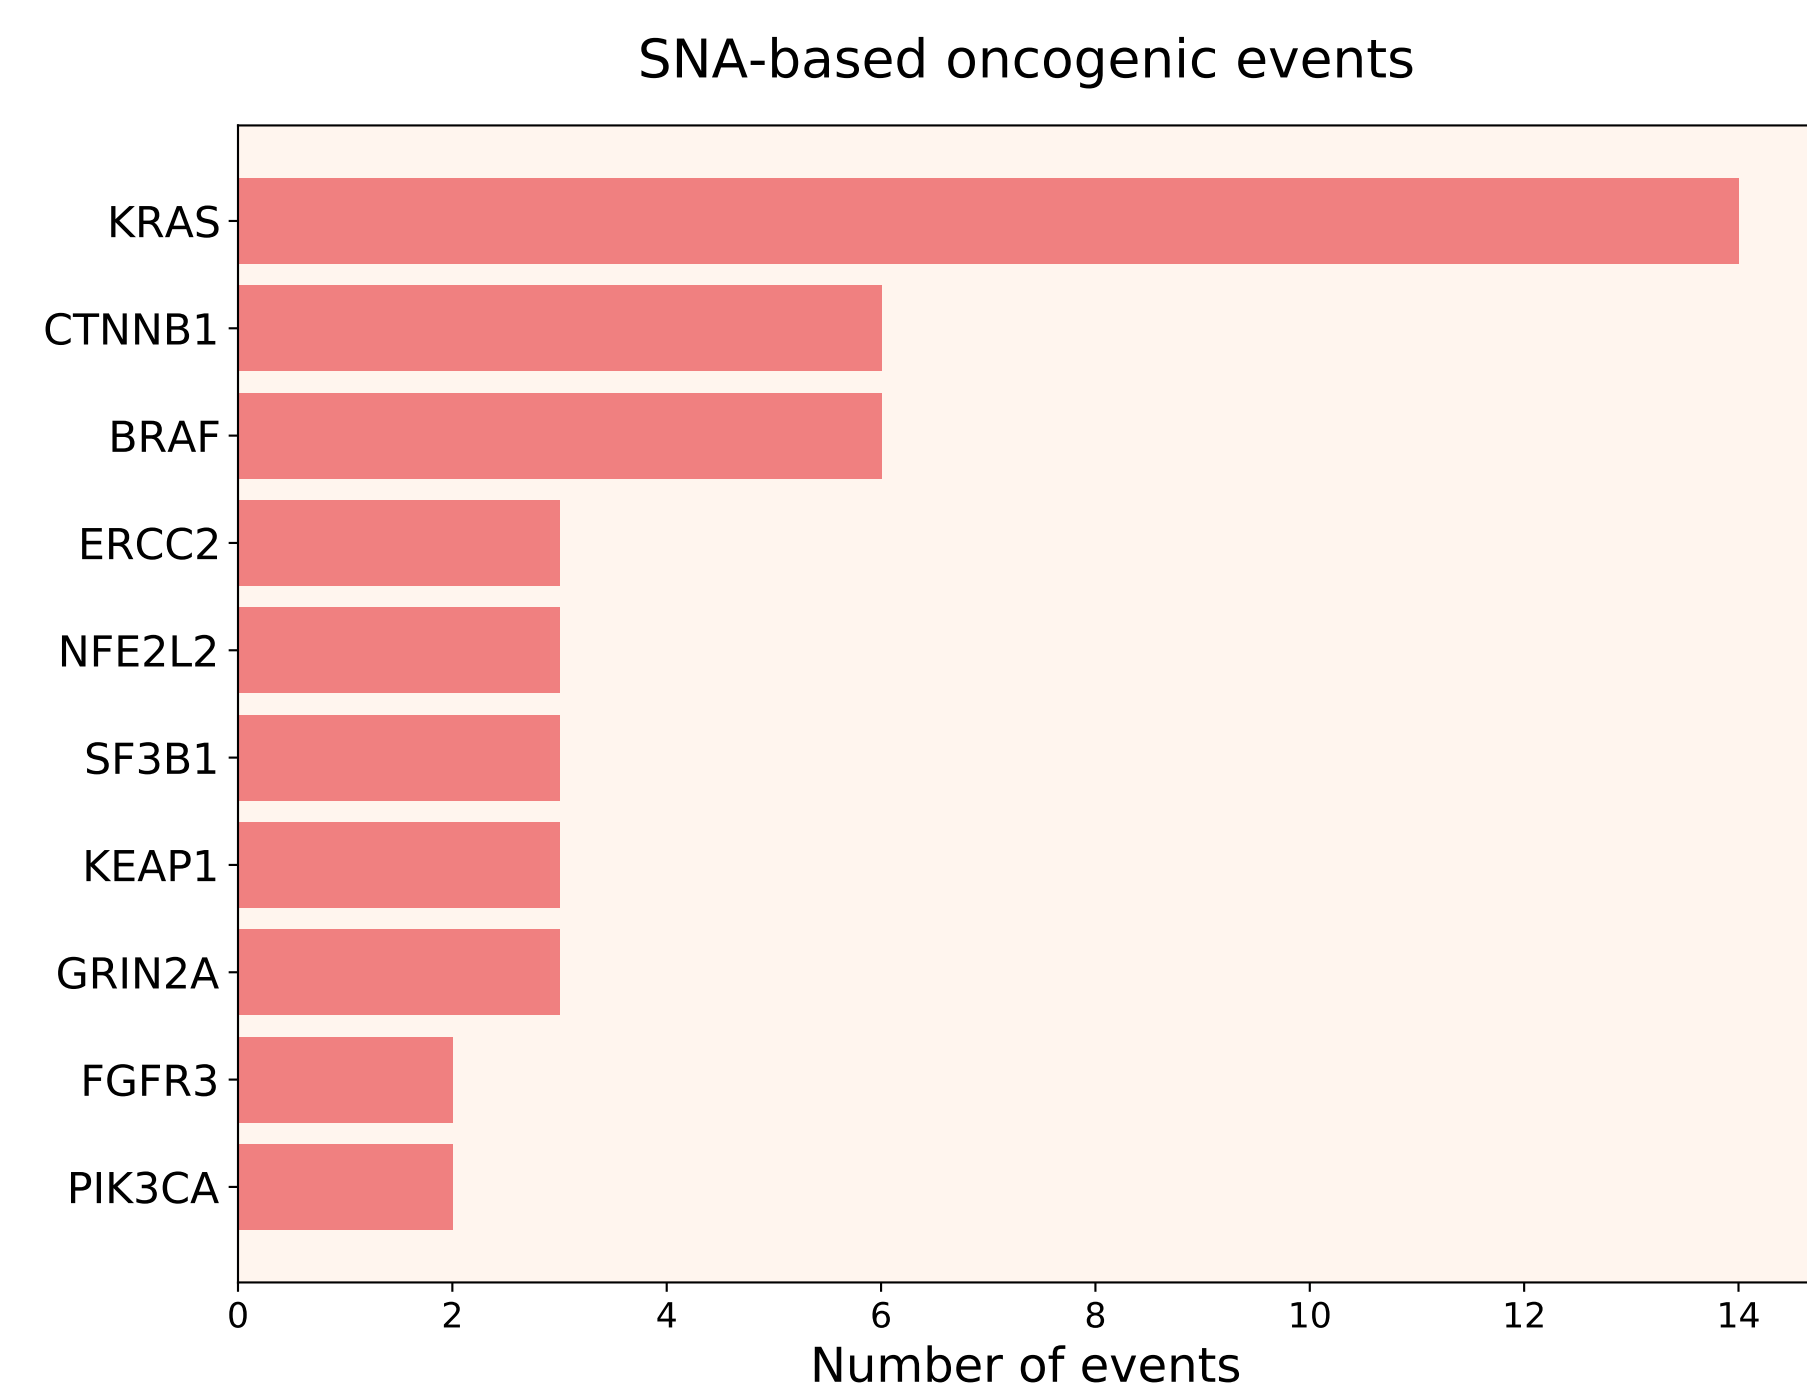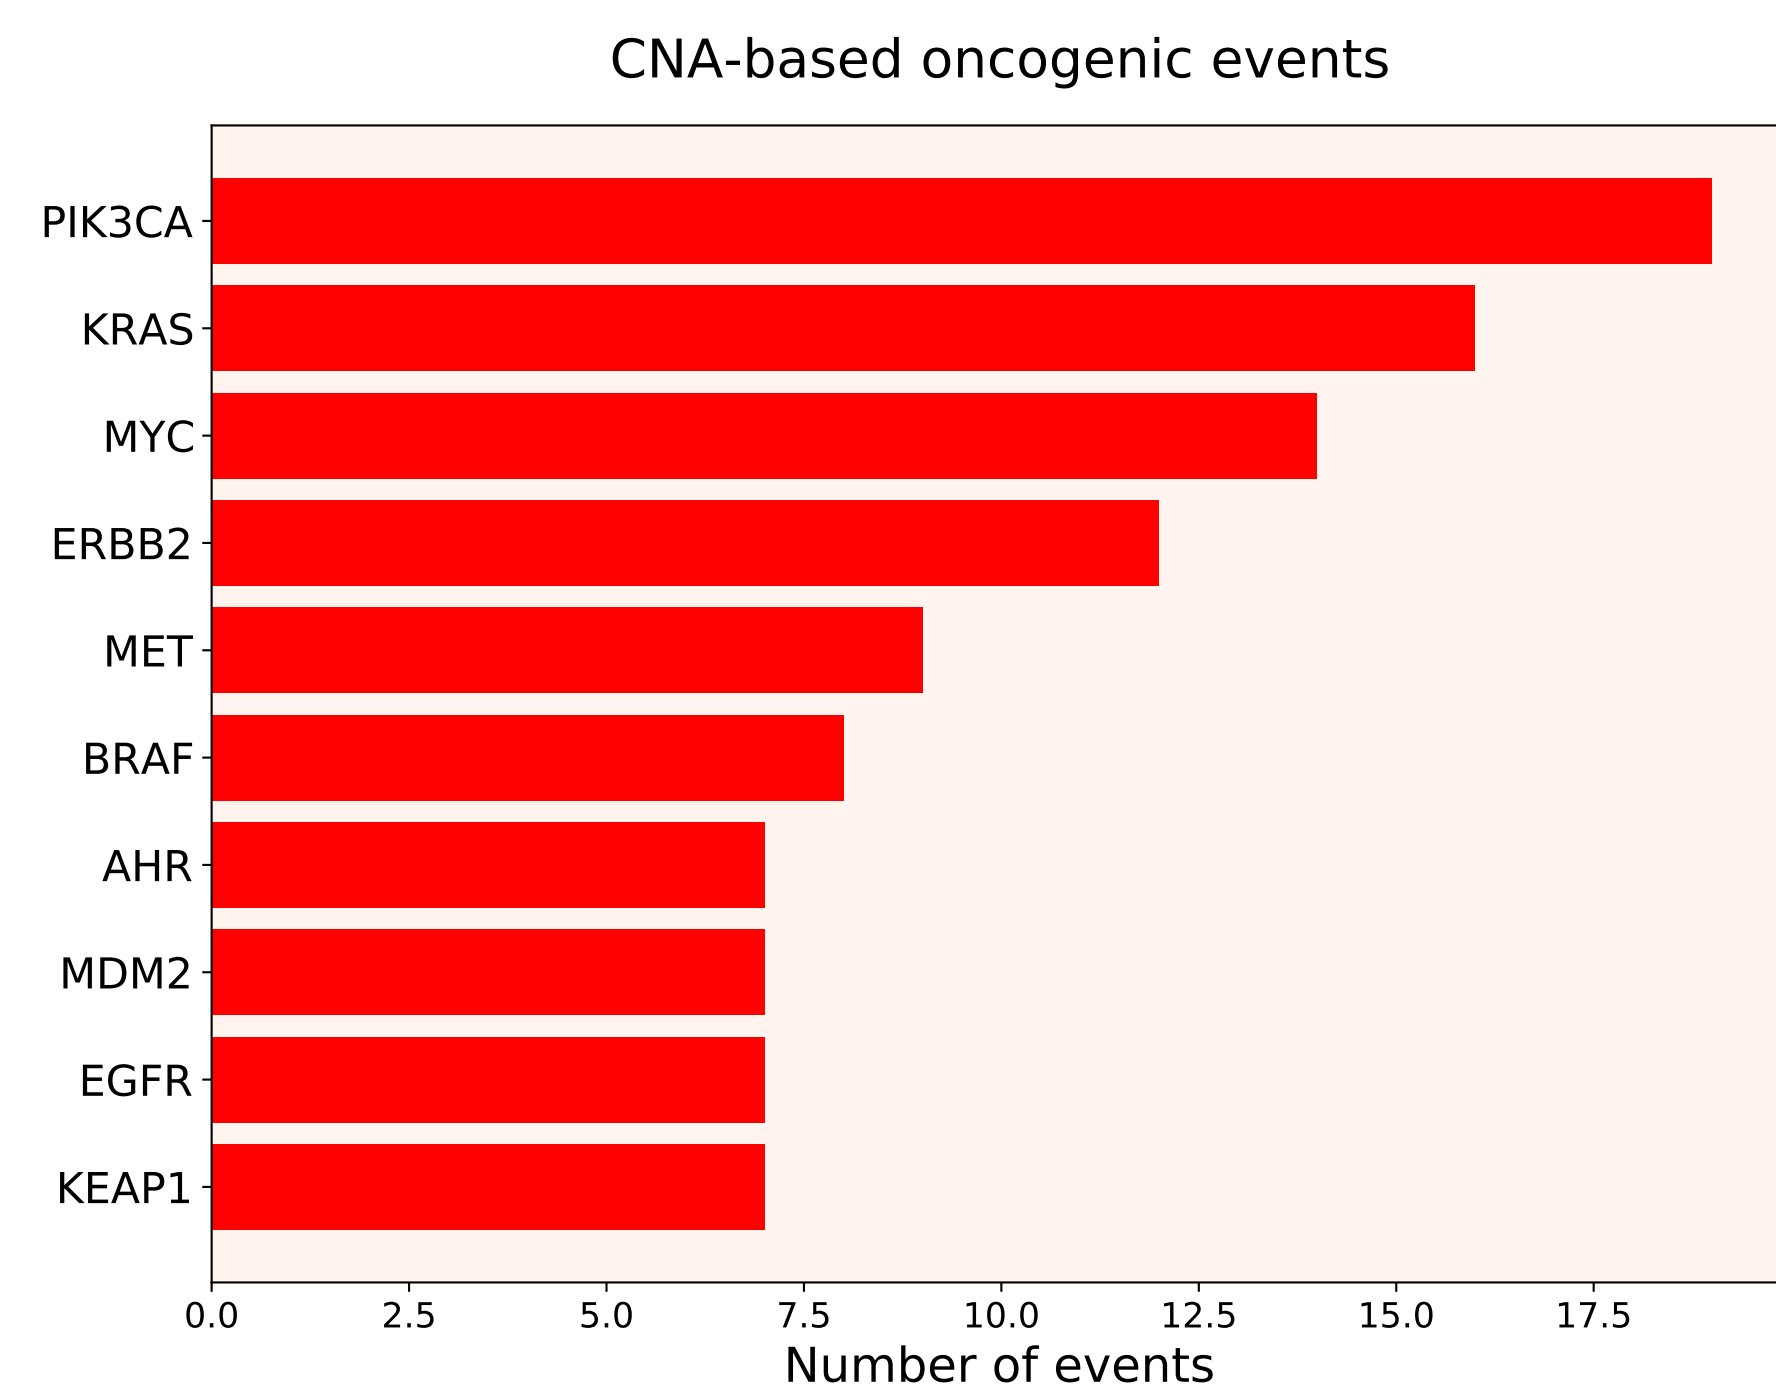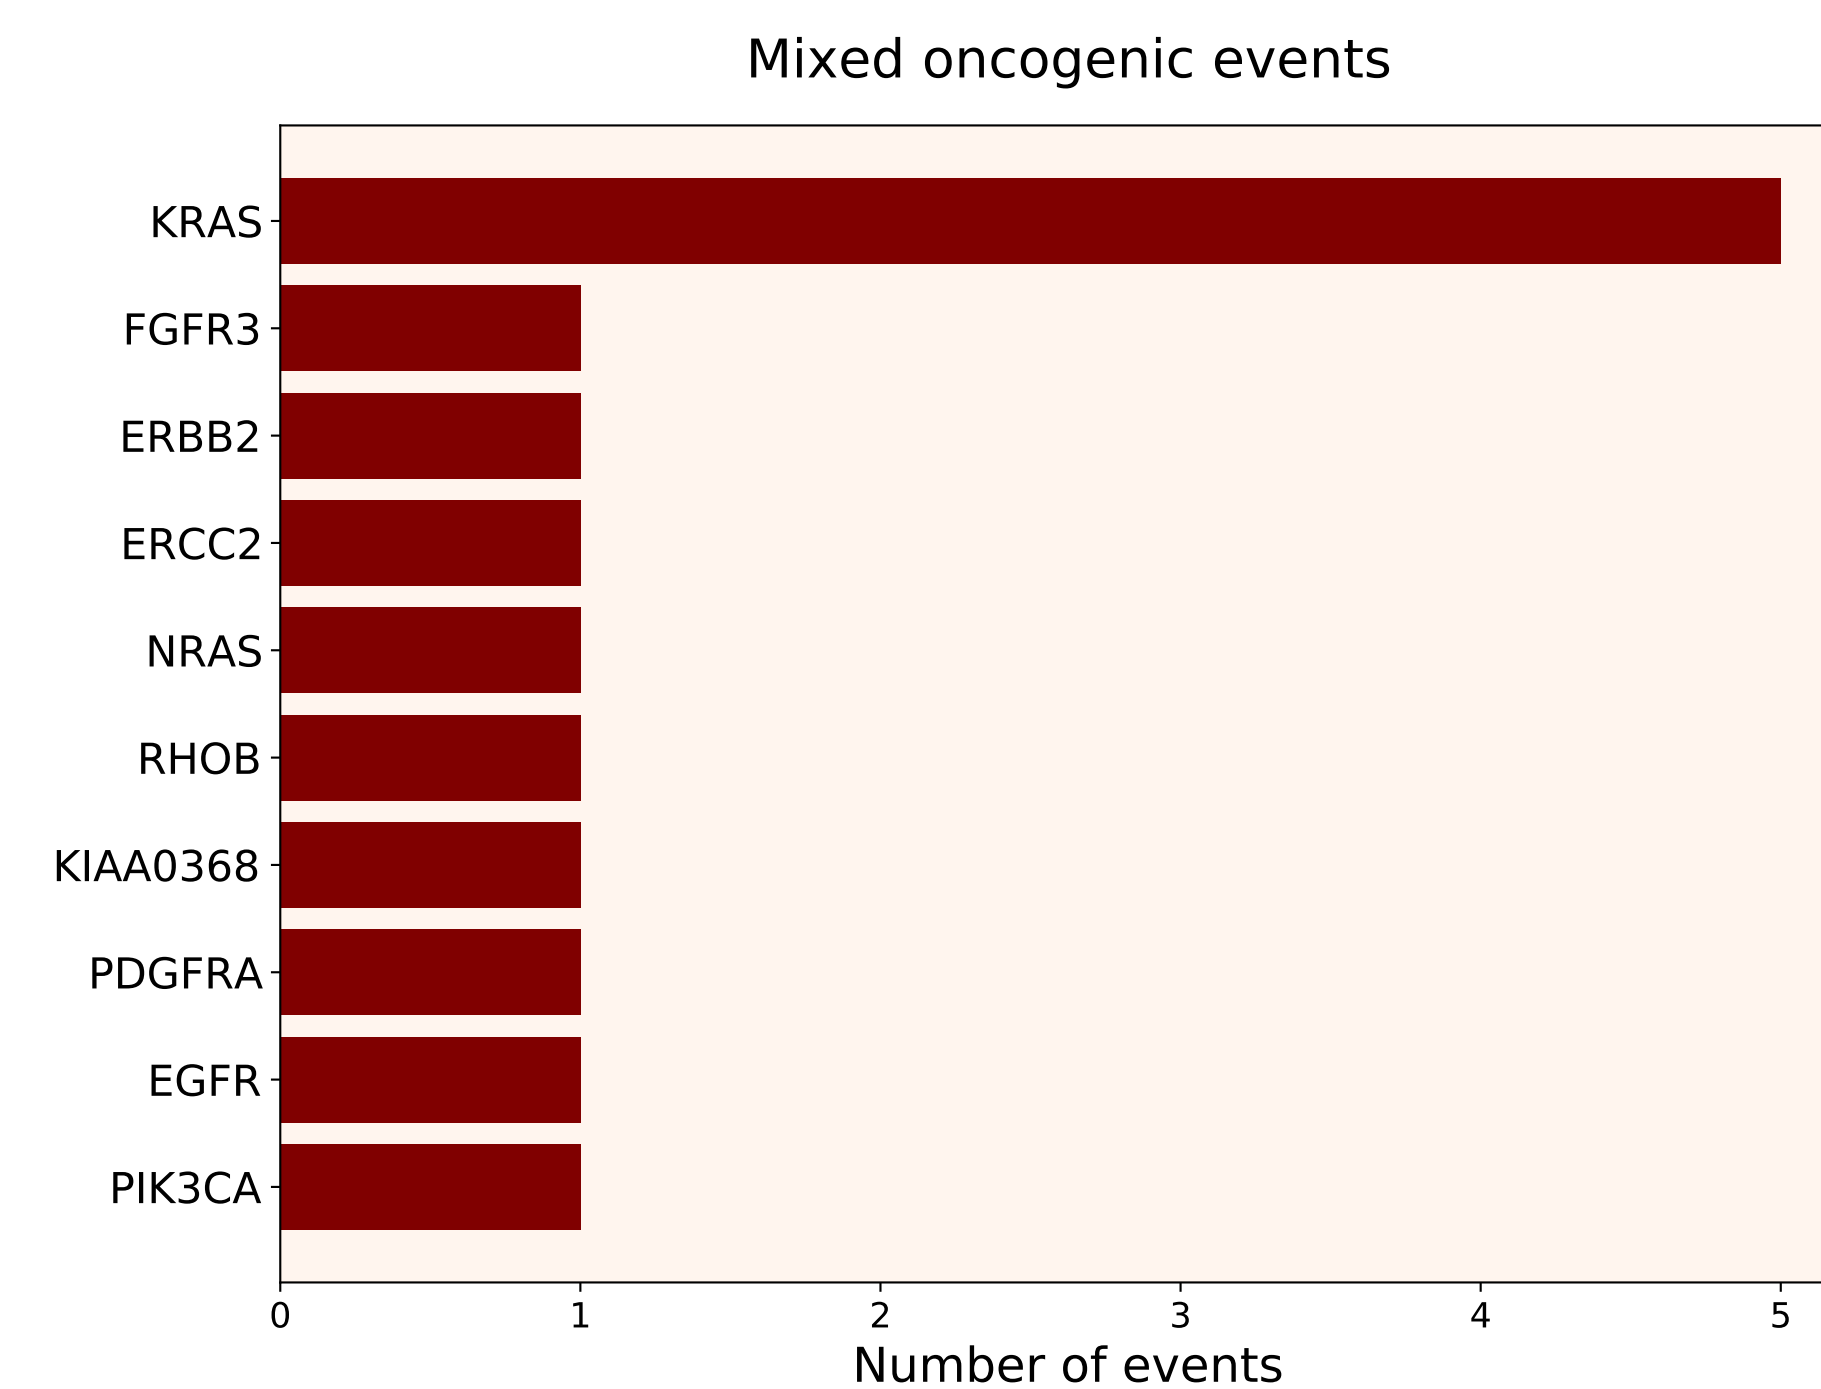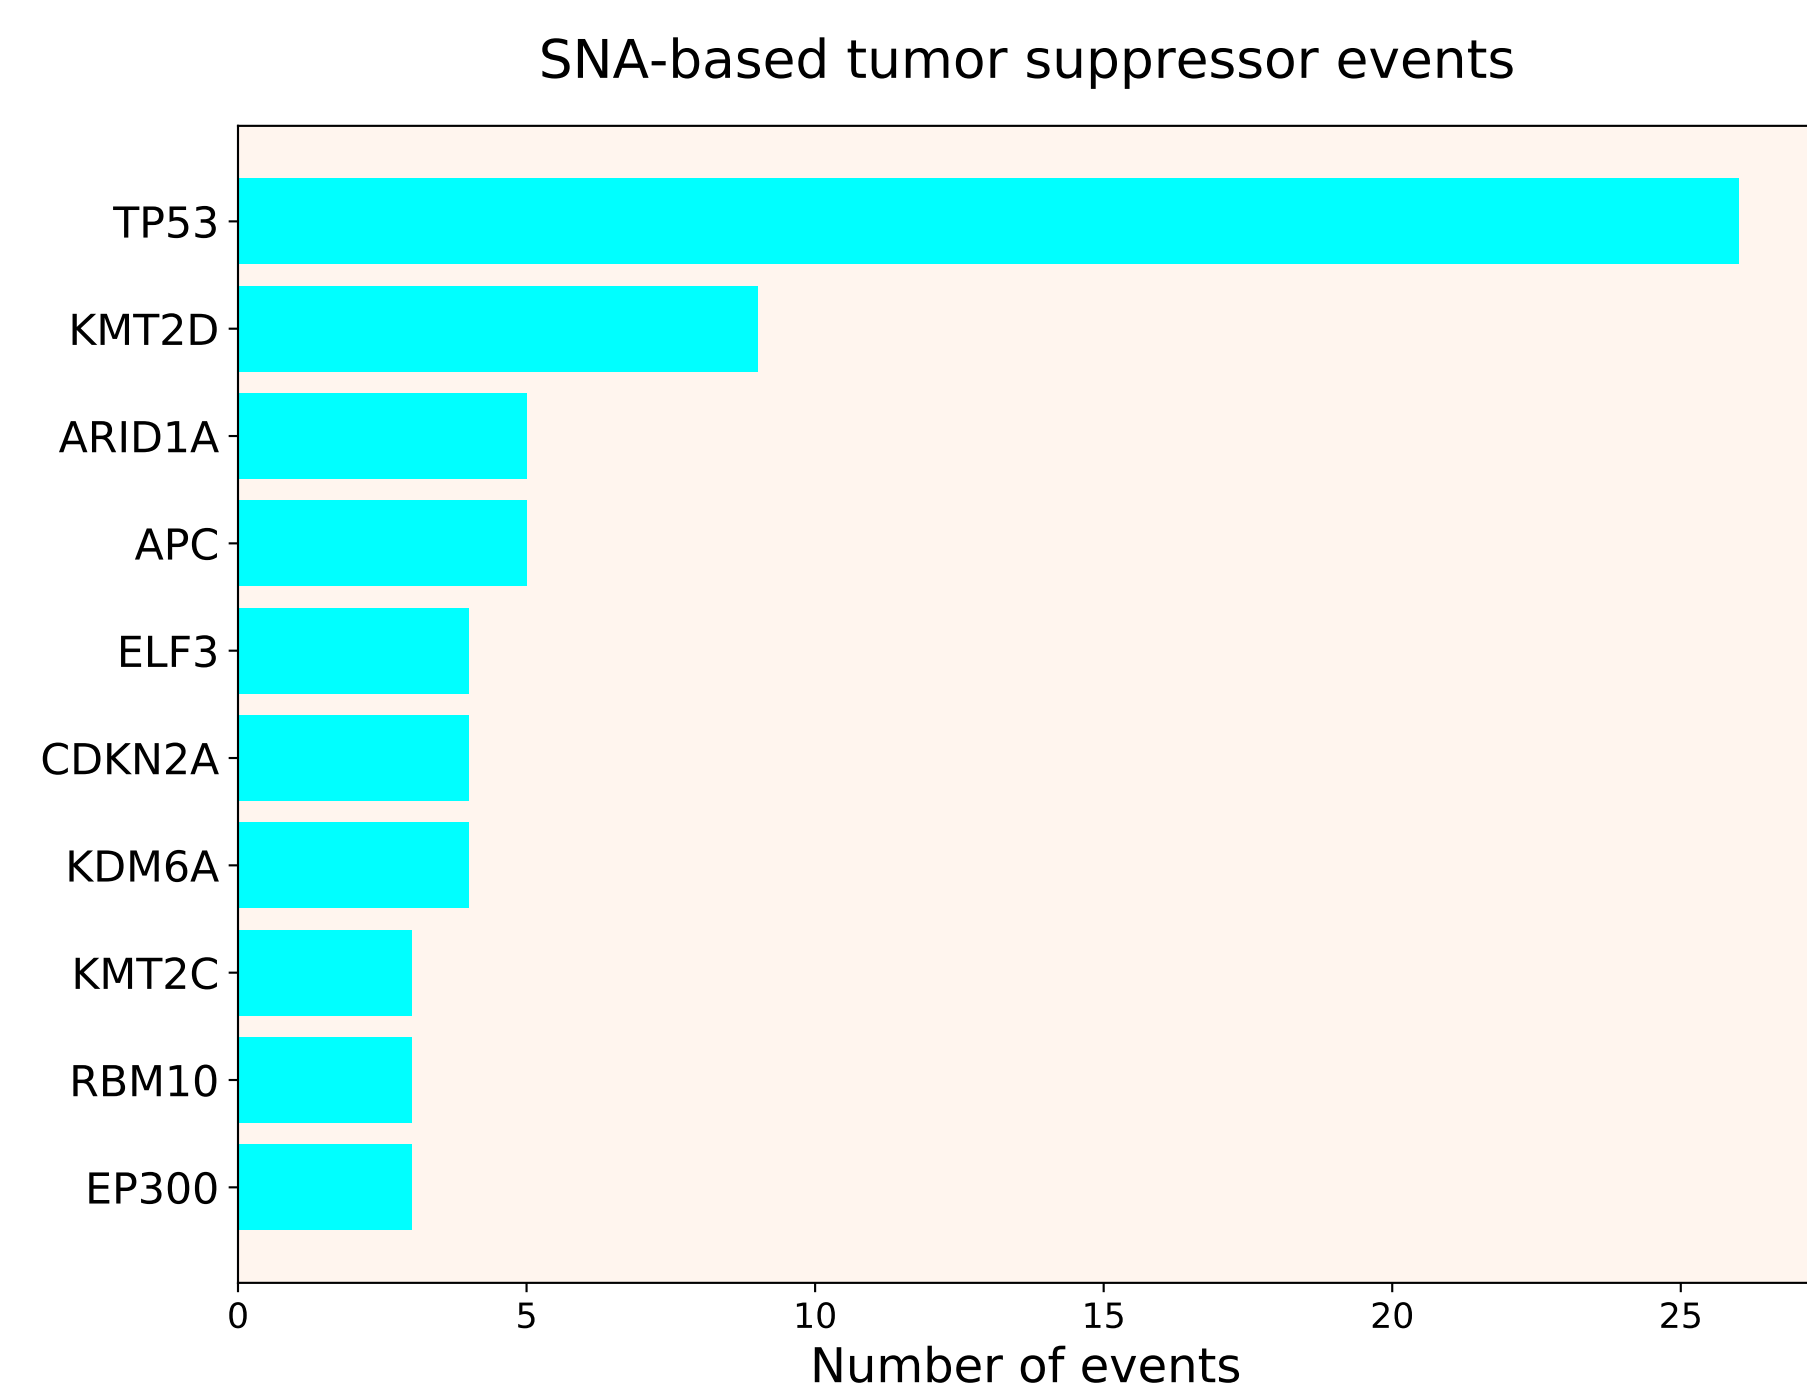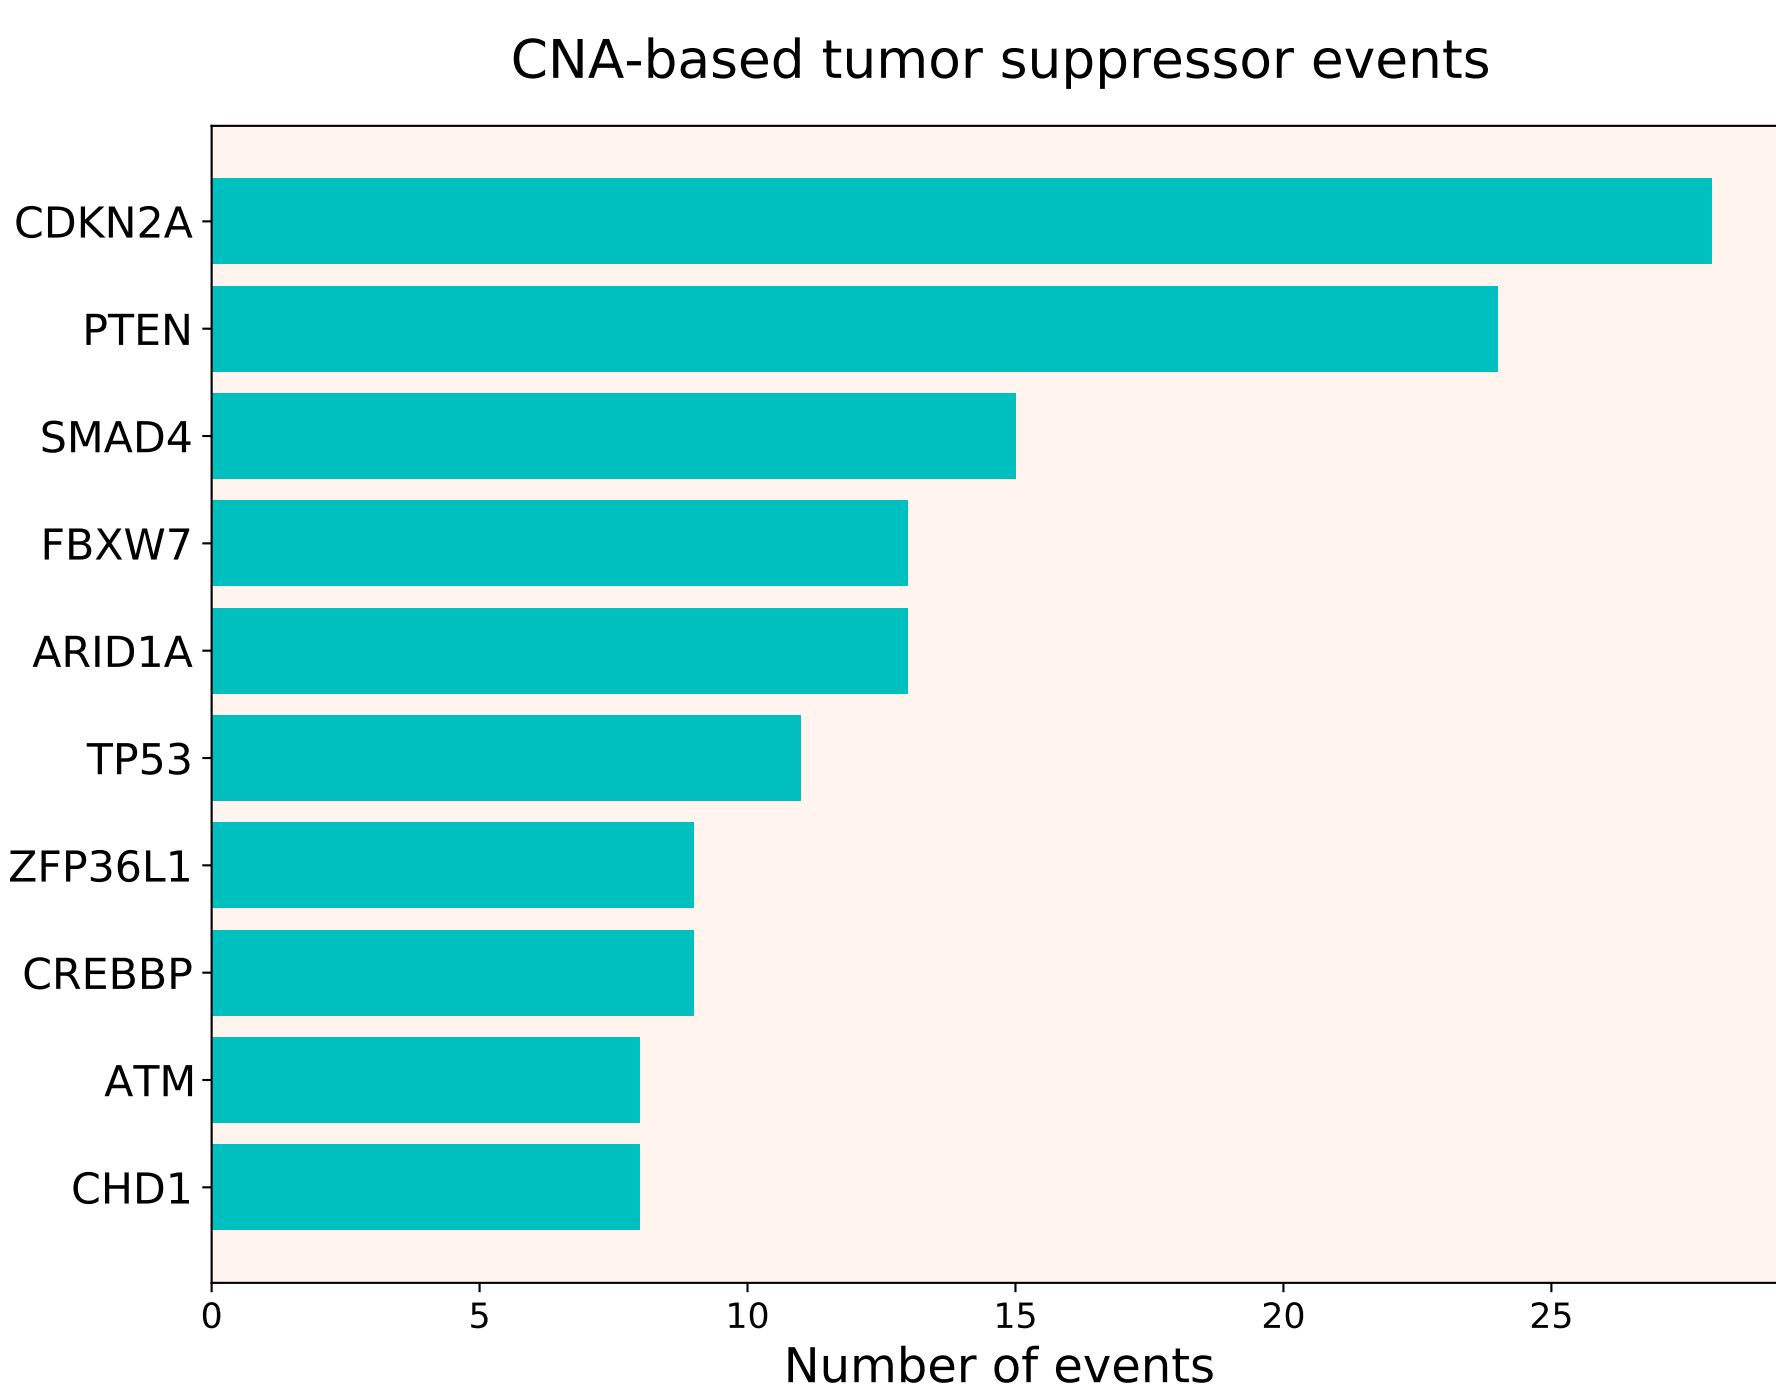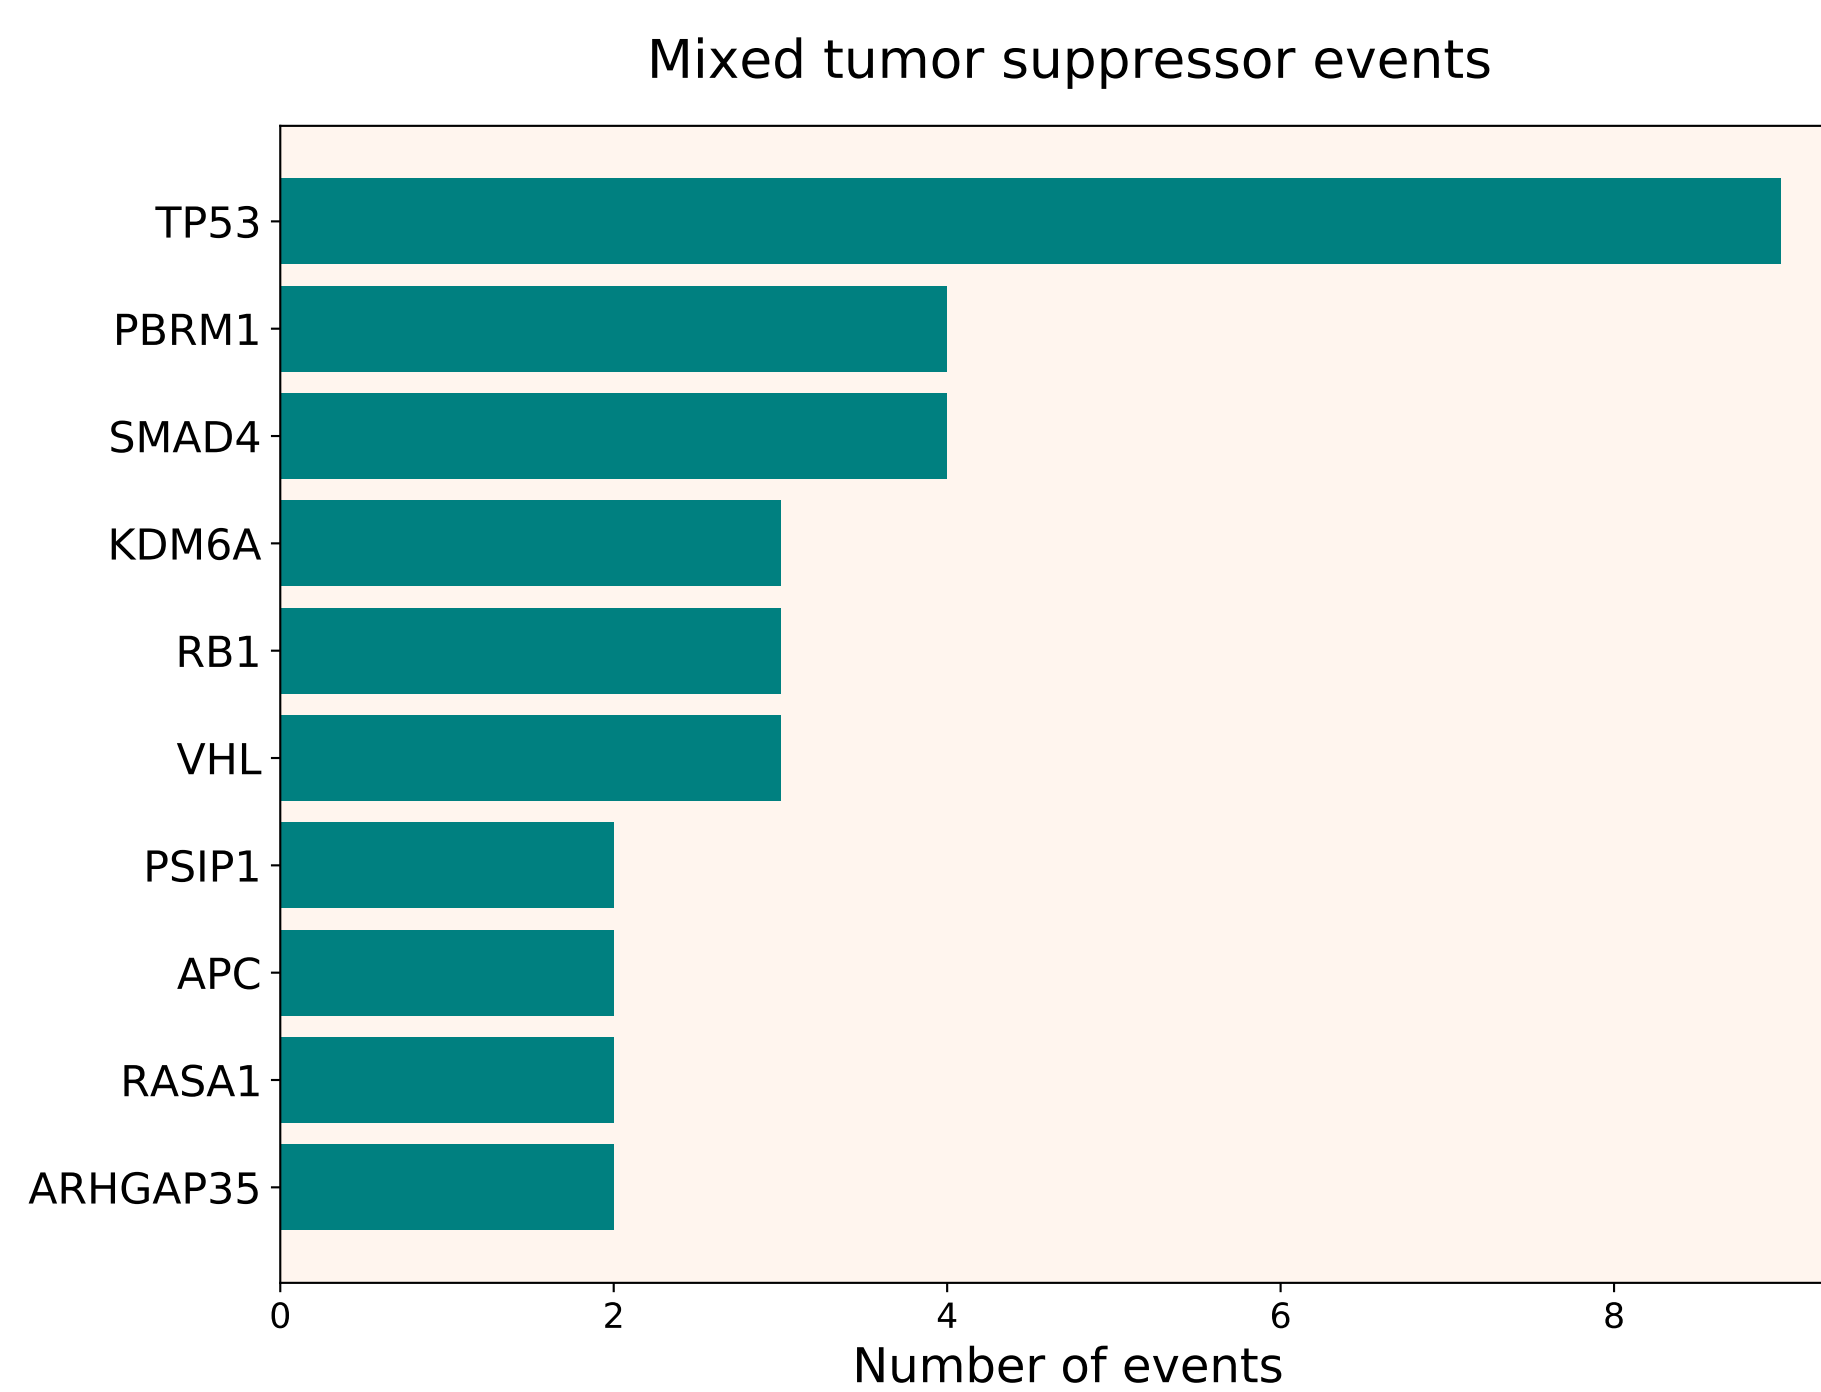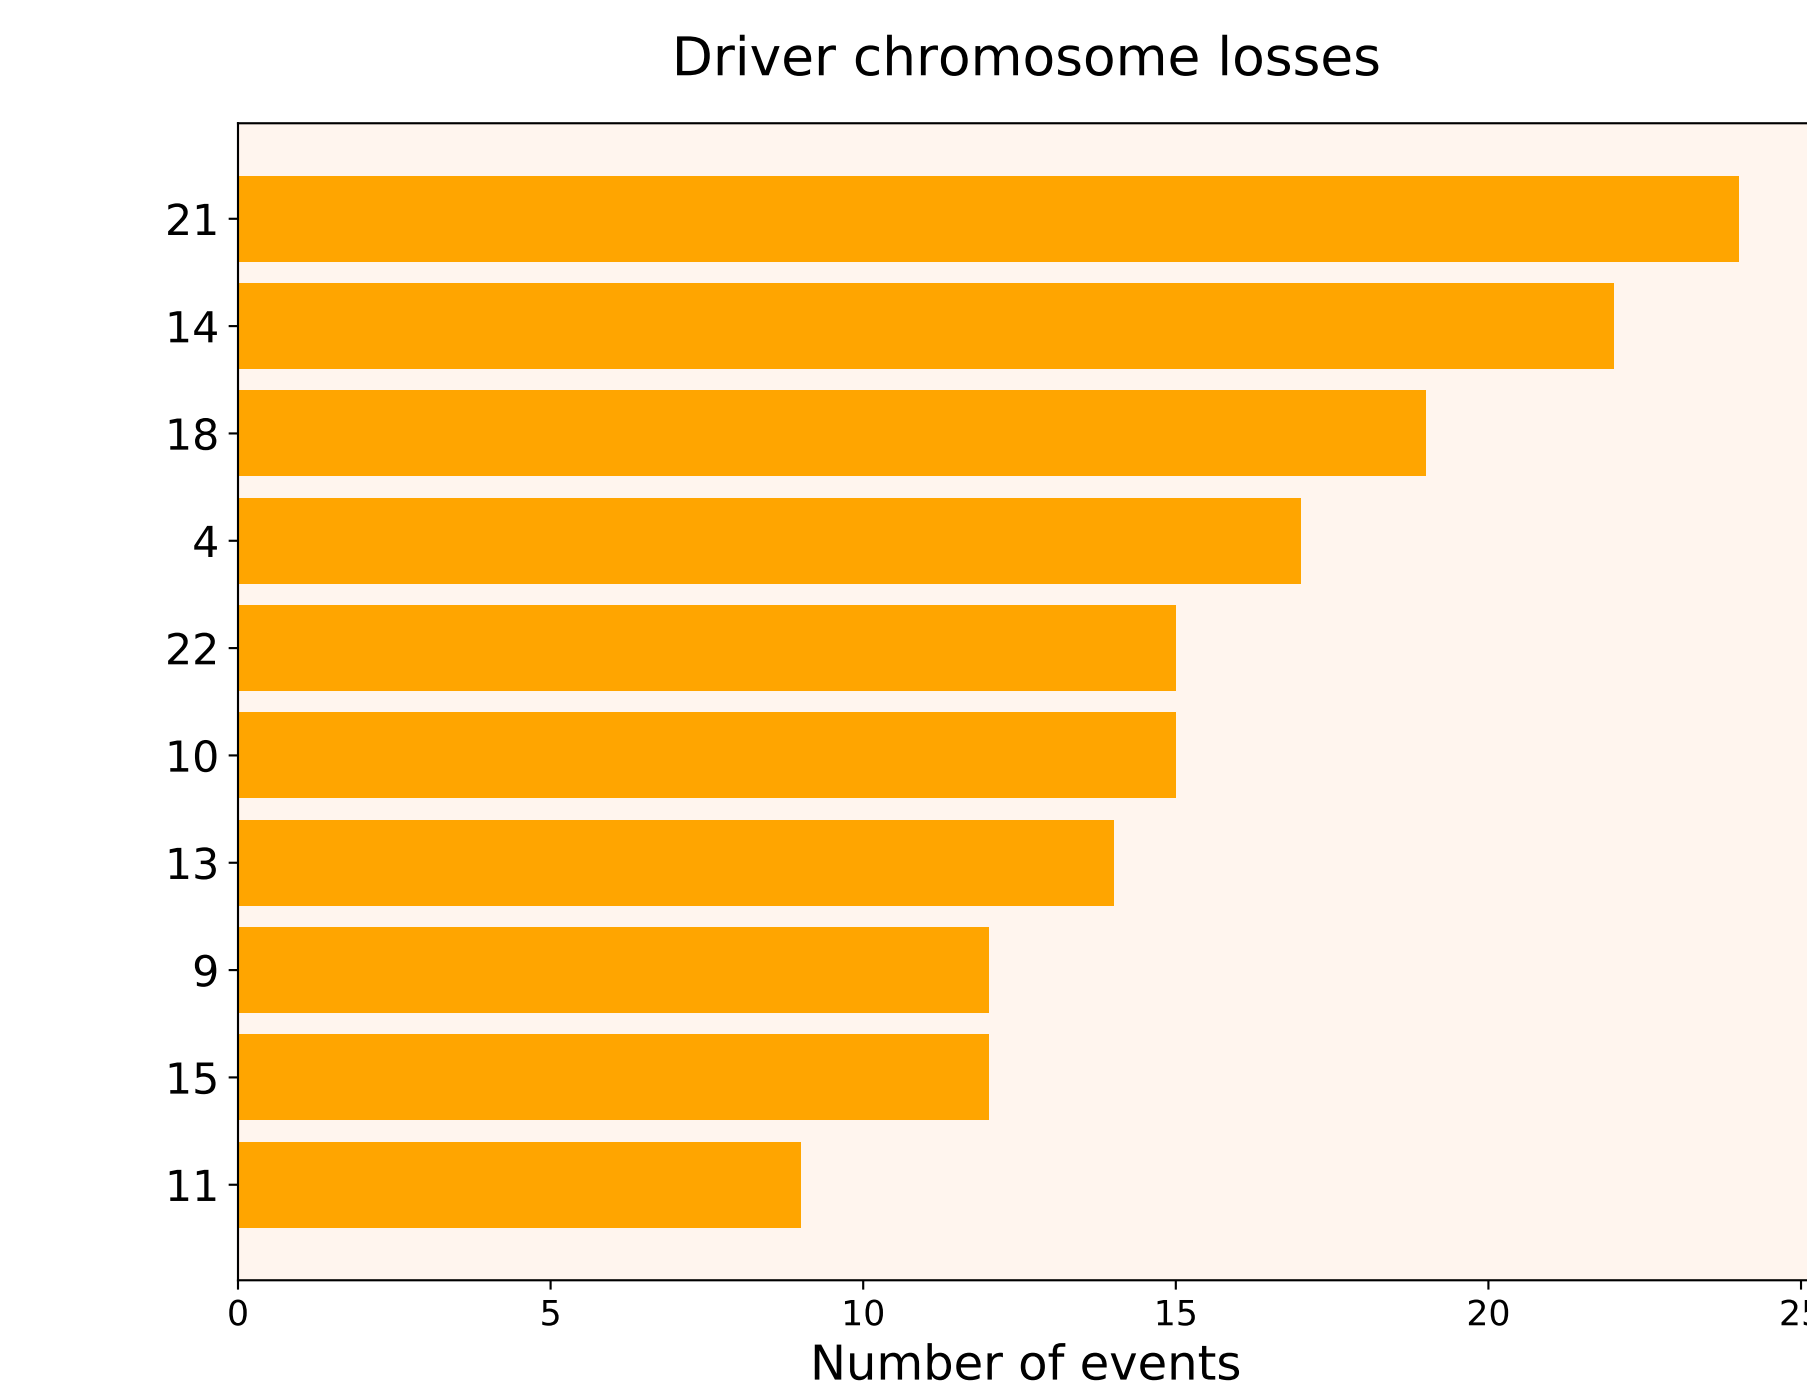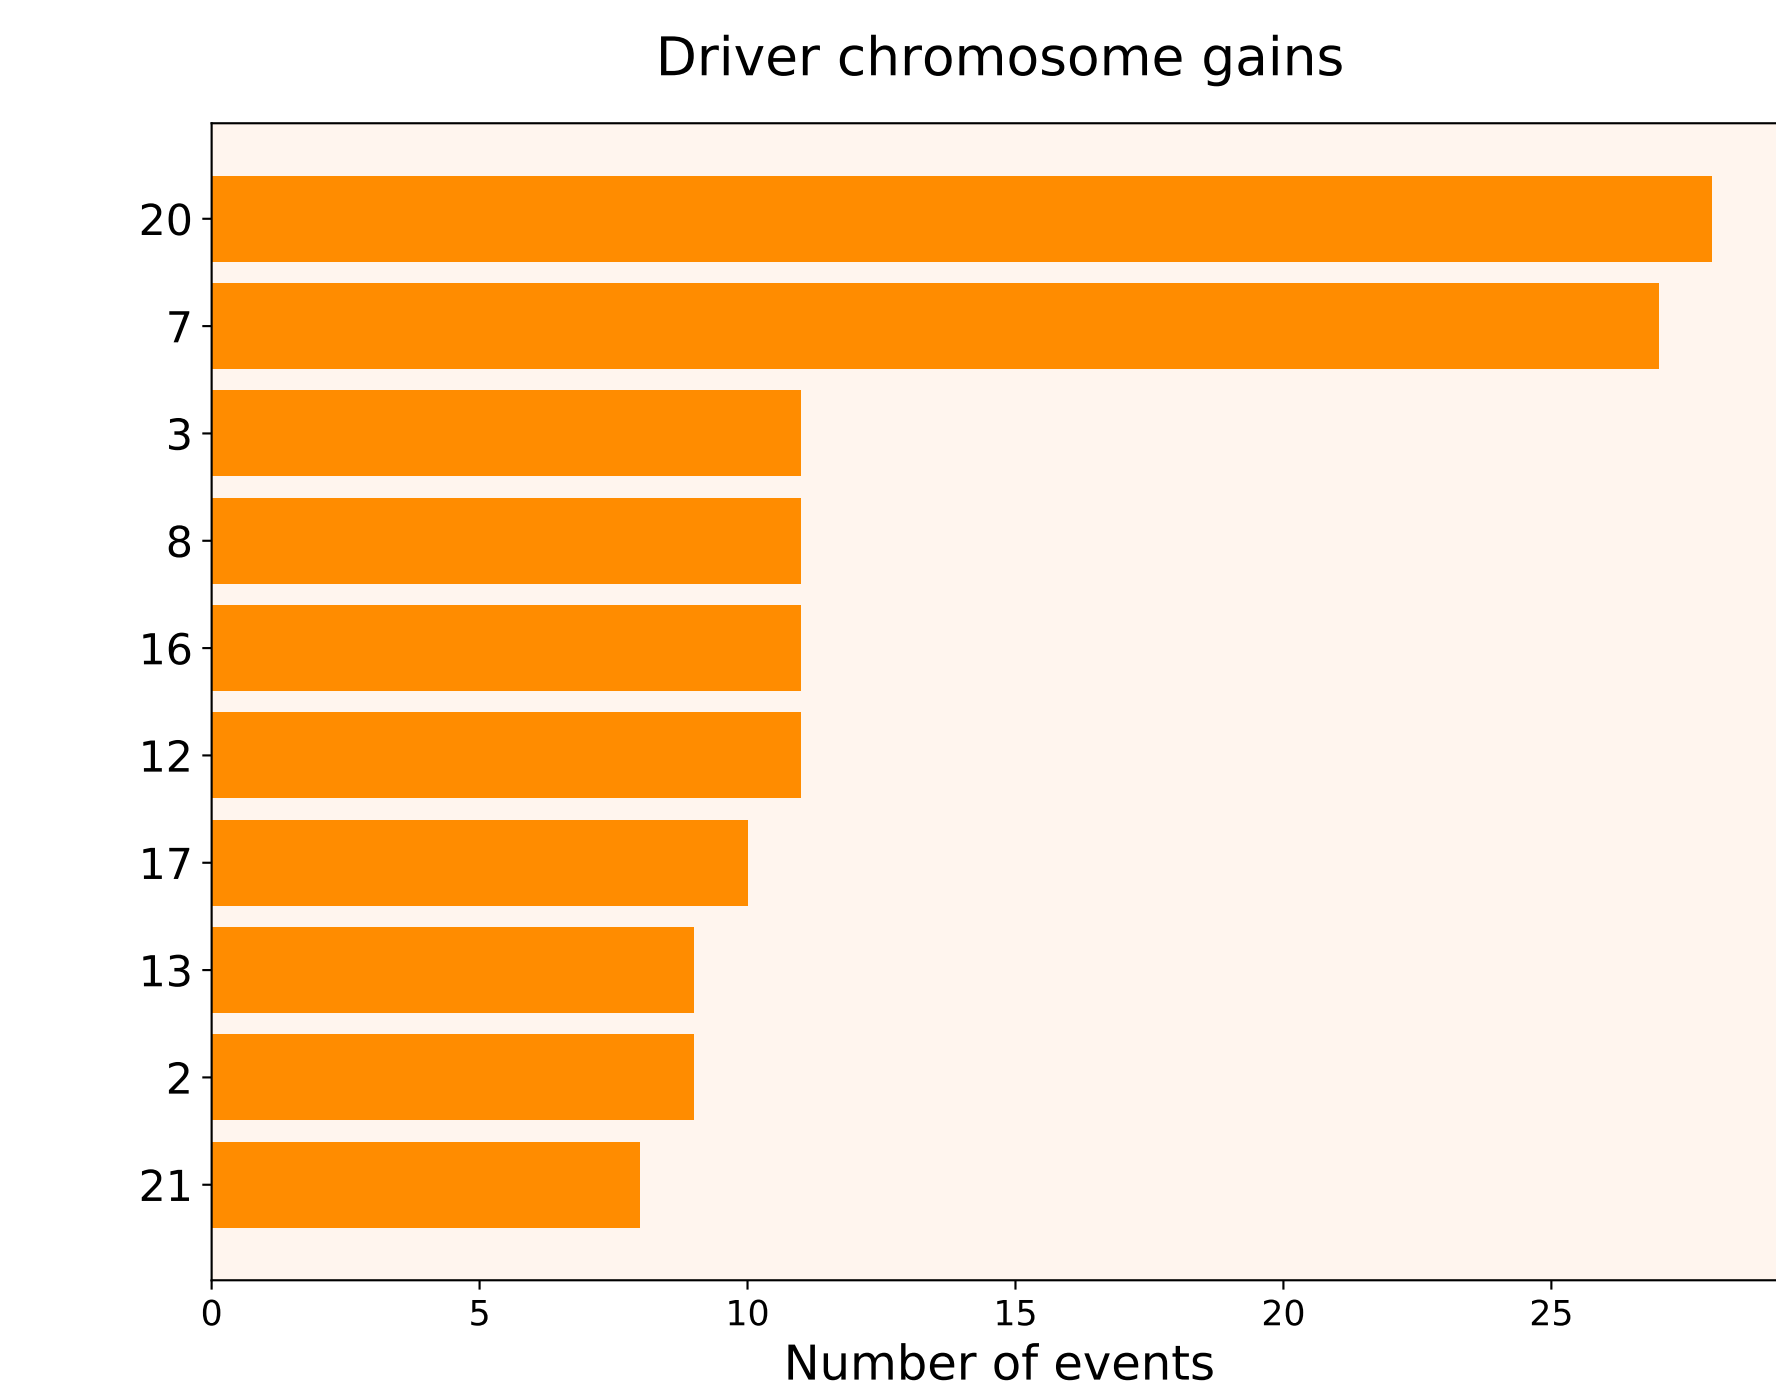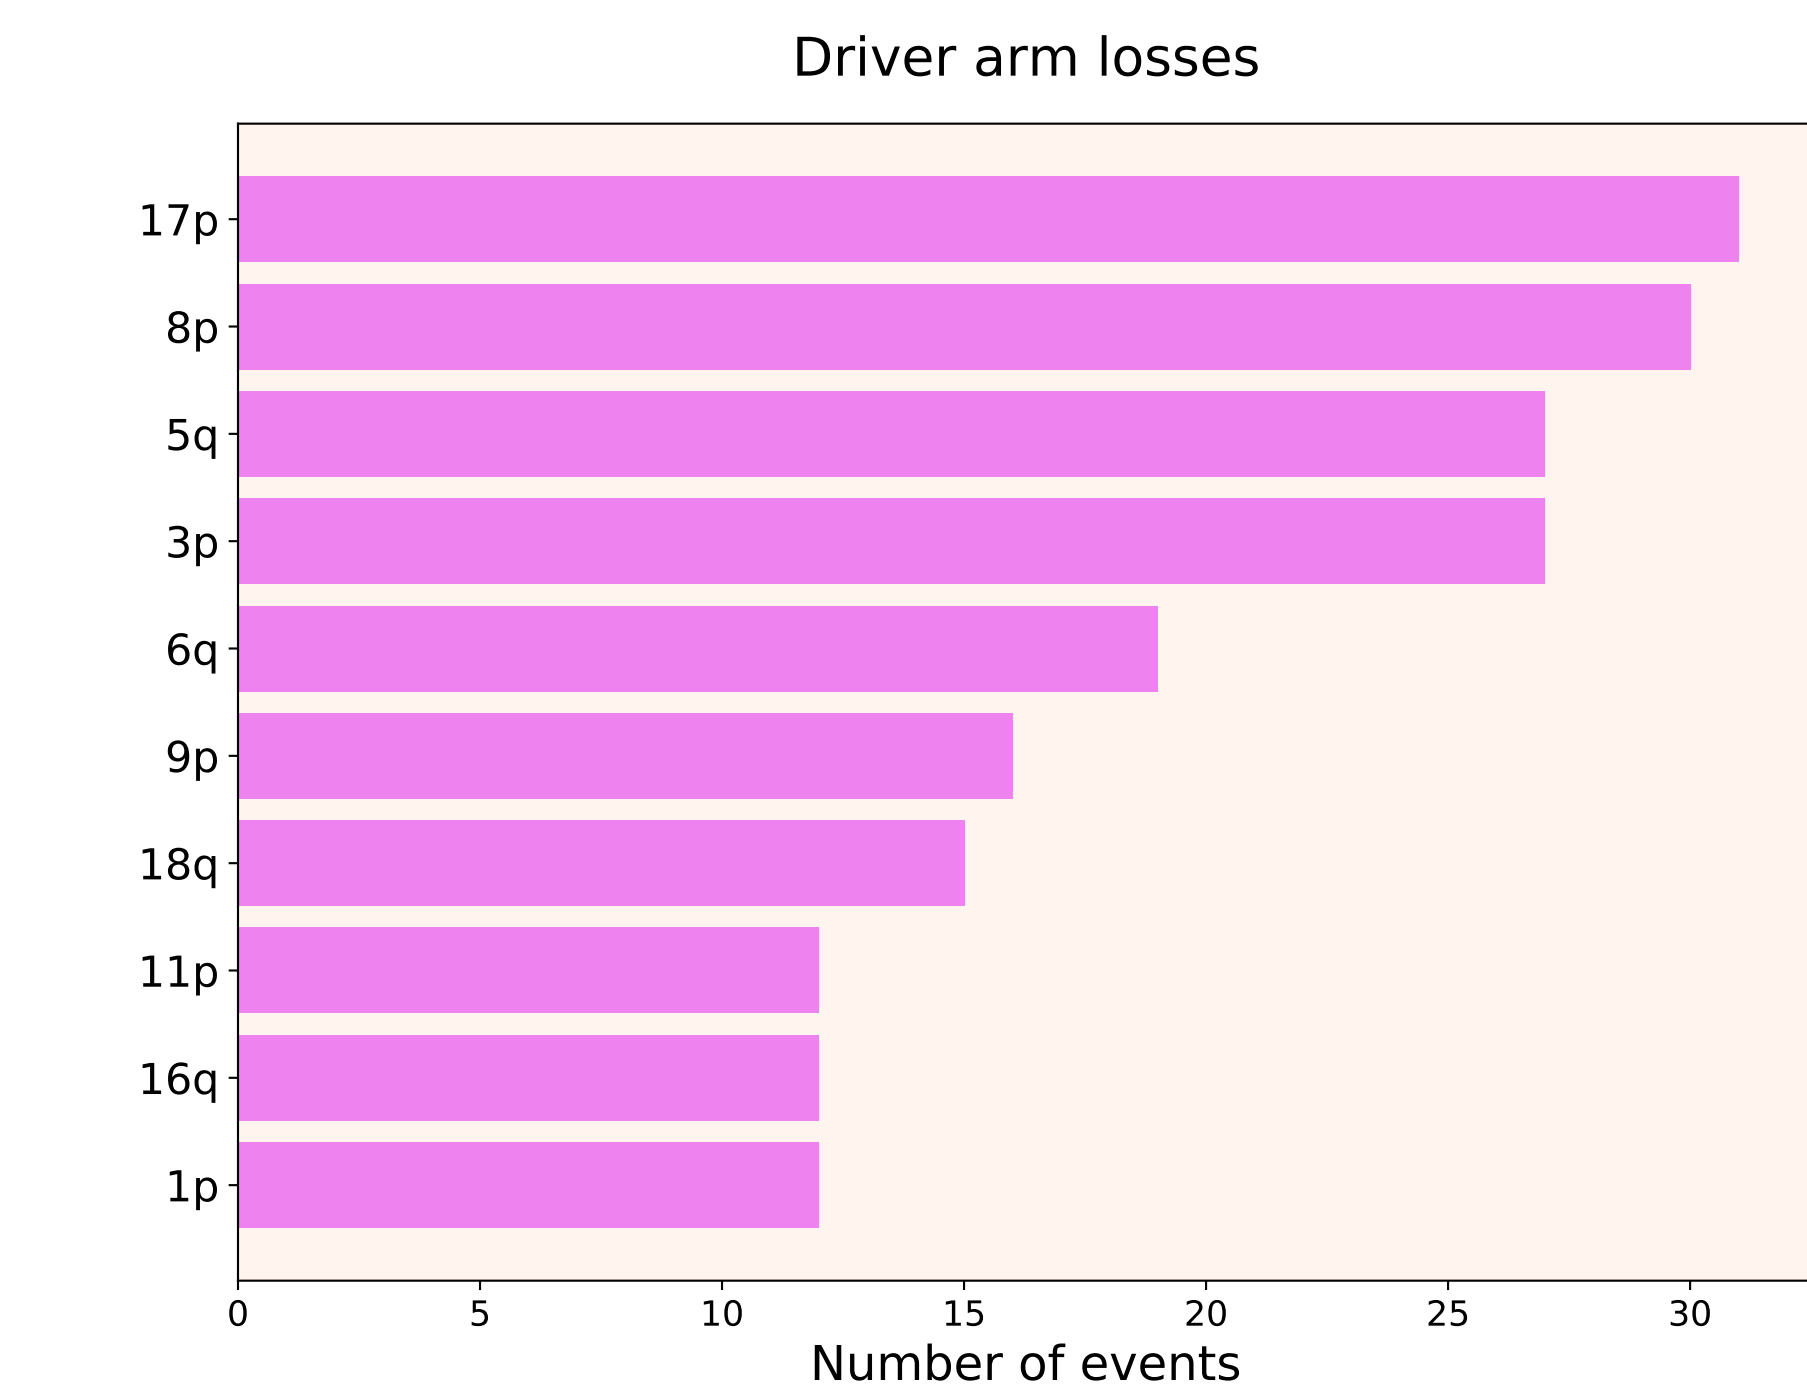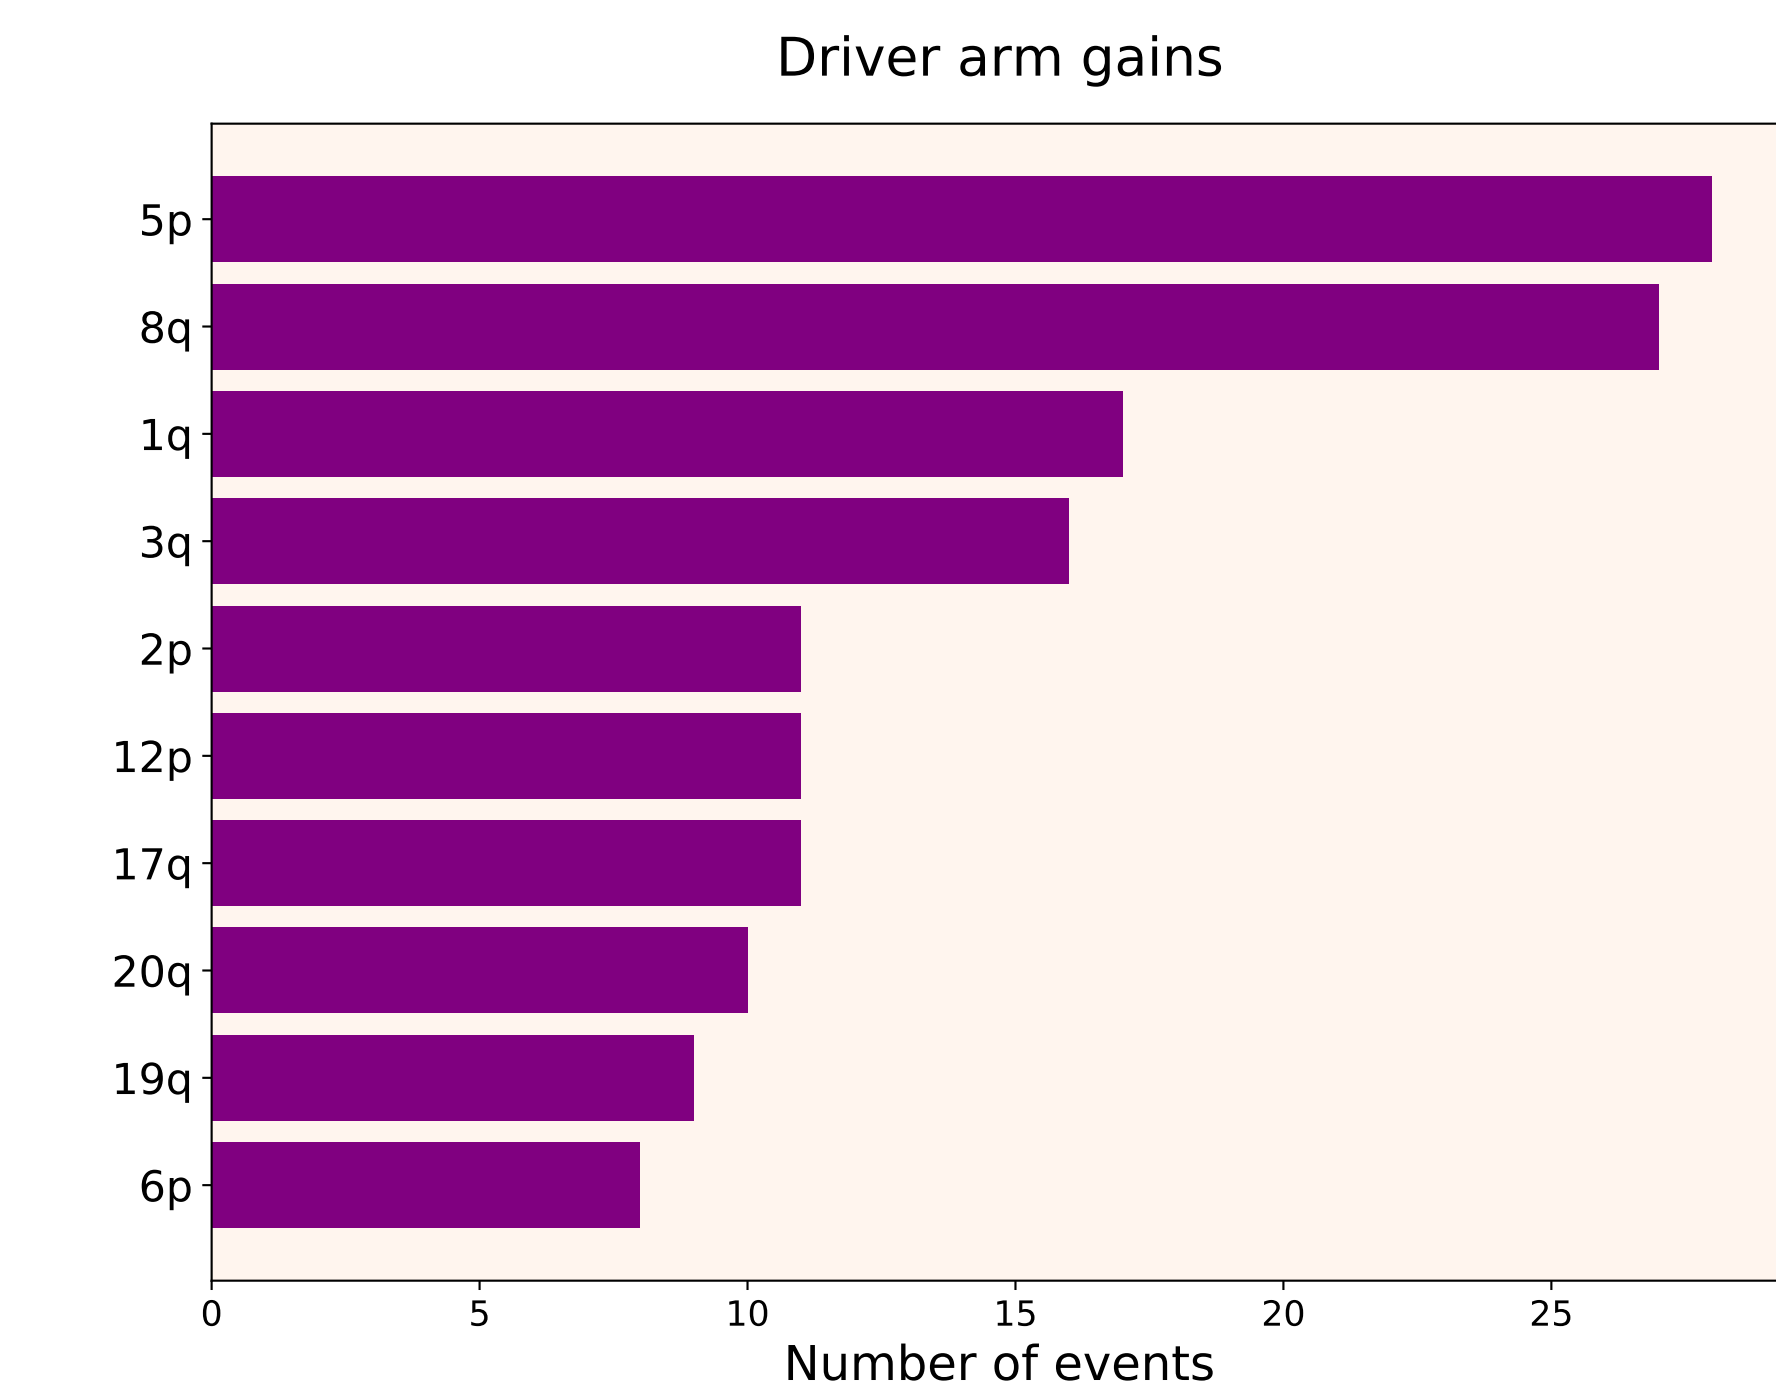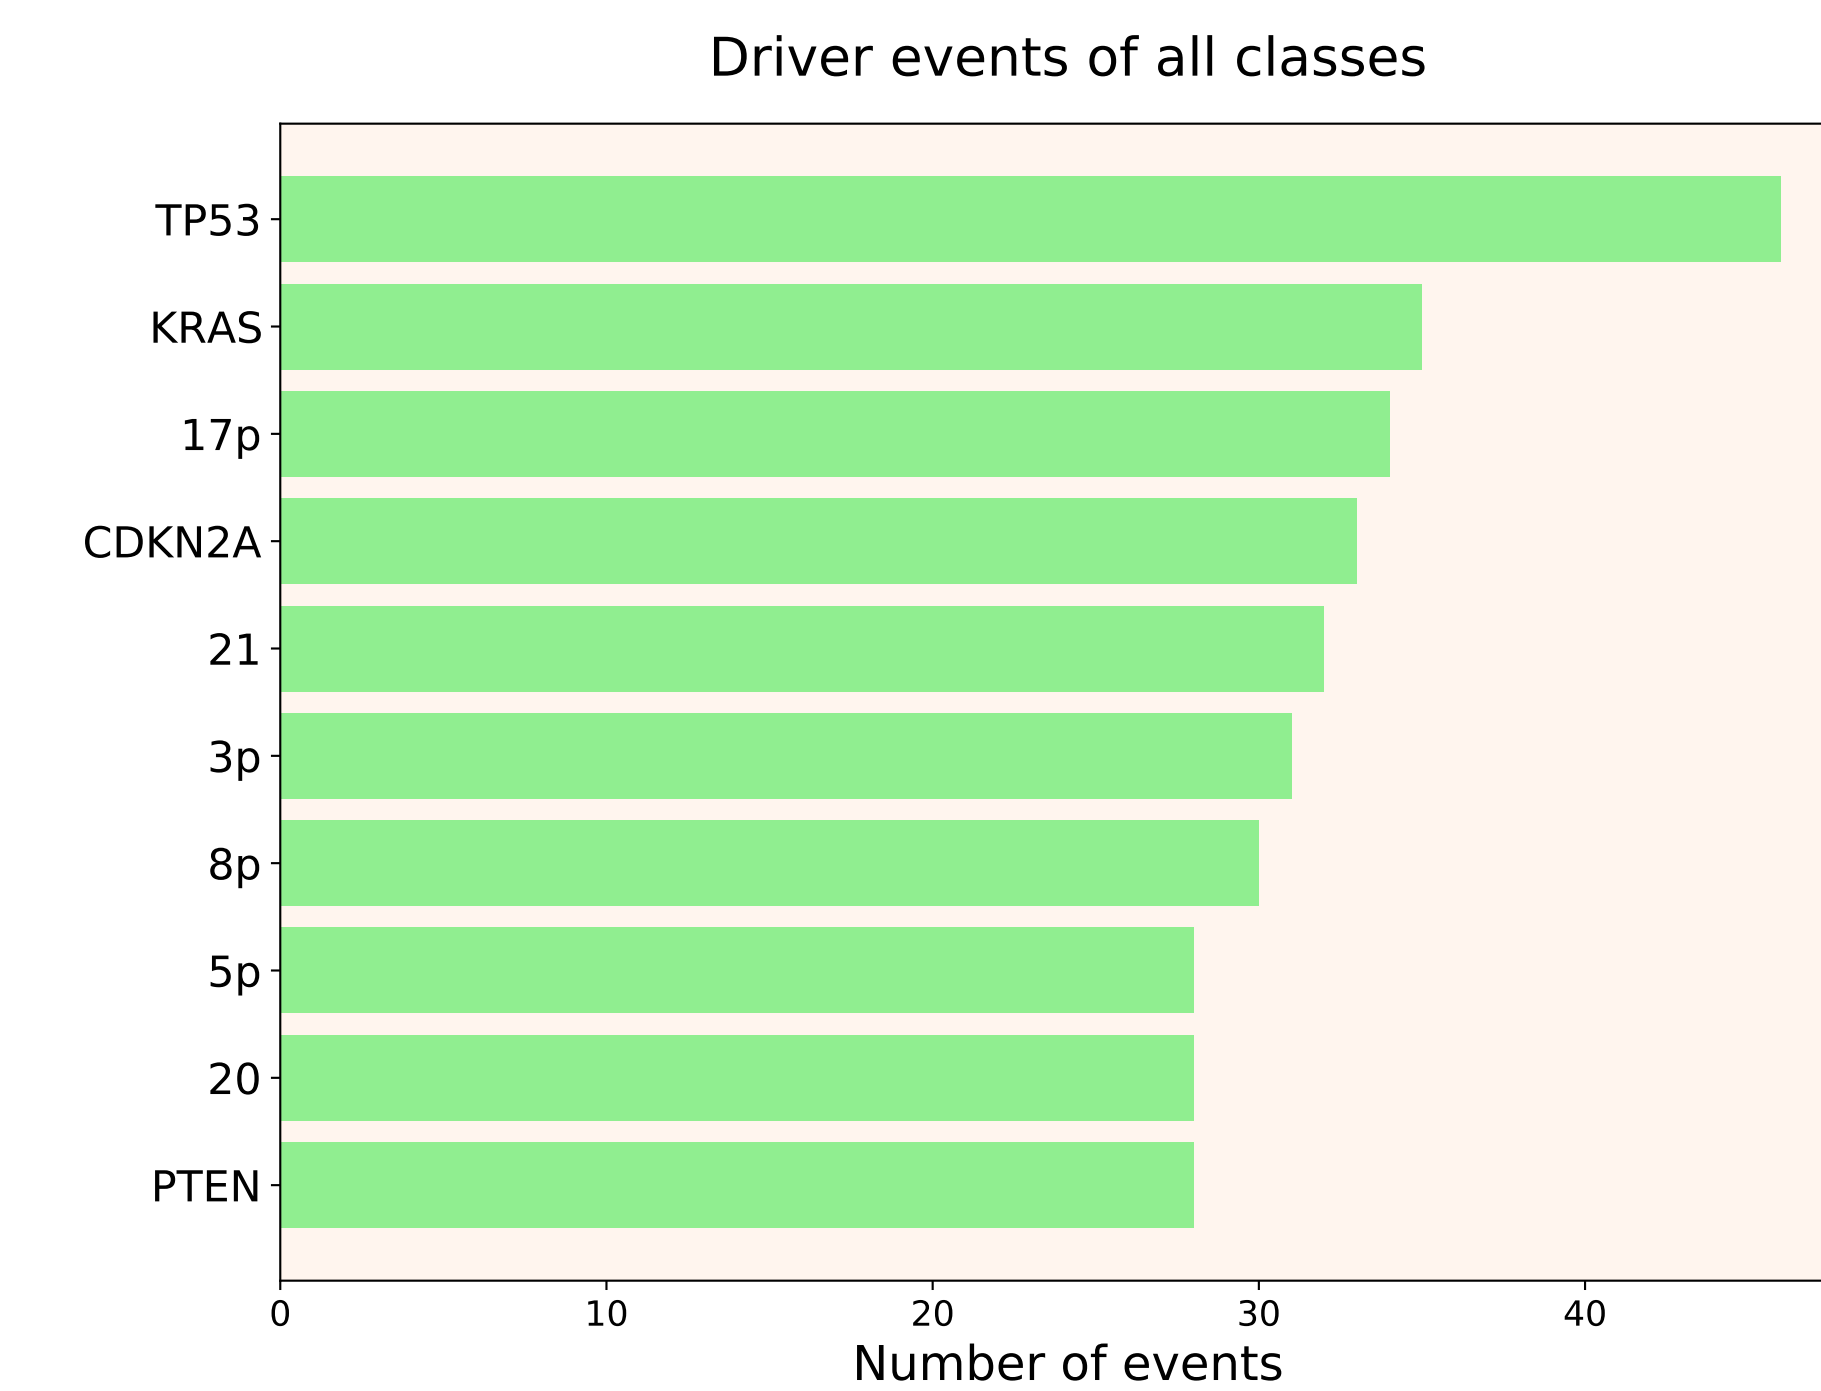

Supplement: Supplemental_Data_S1.zip [file Supplemental_Data_S1.zip]

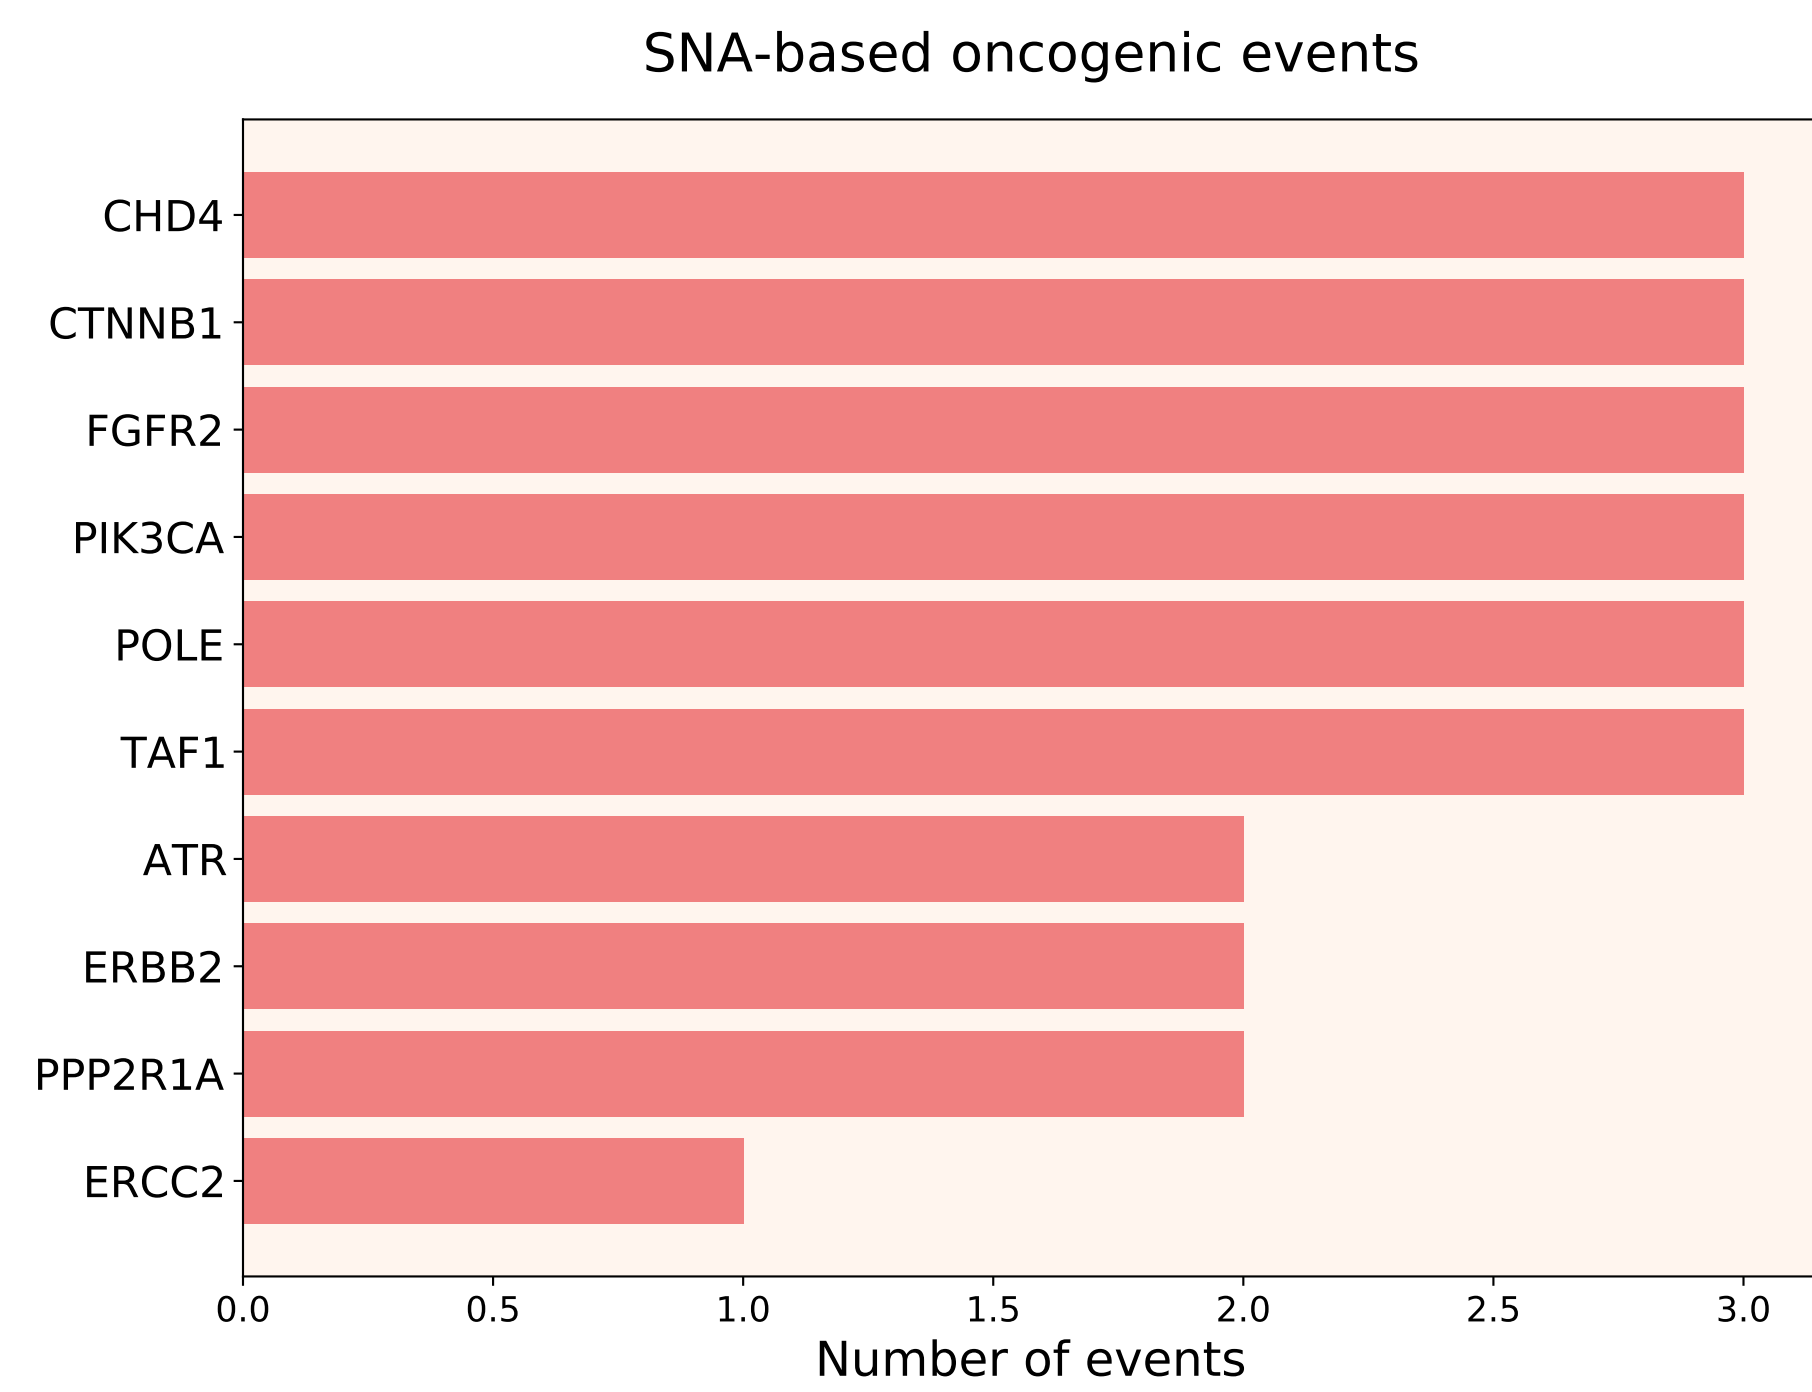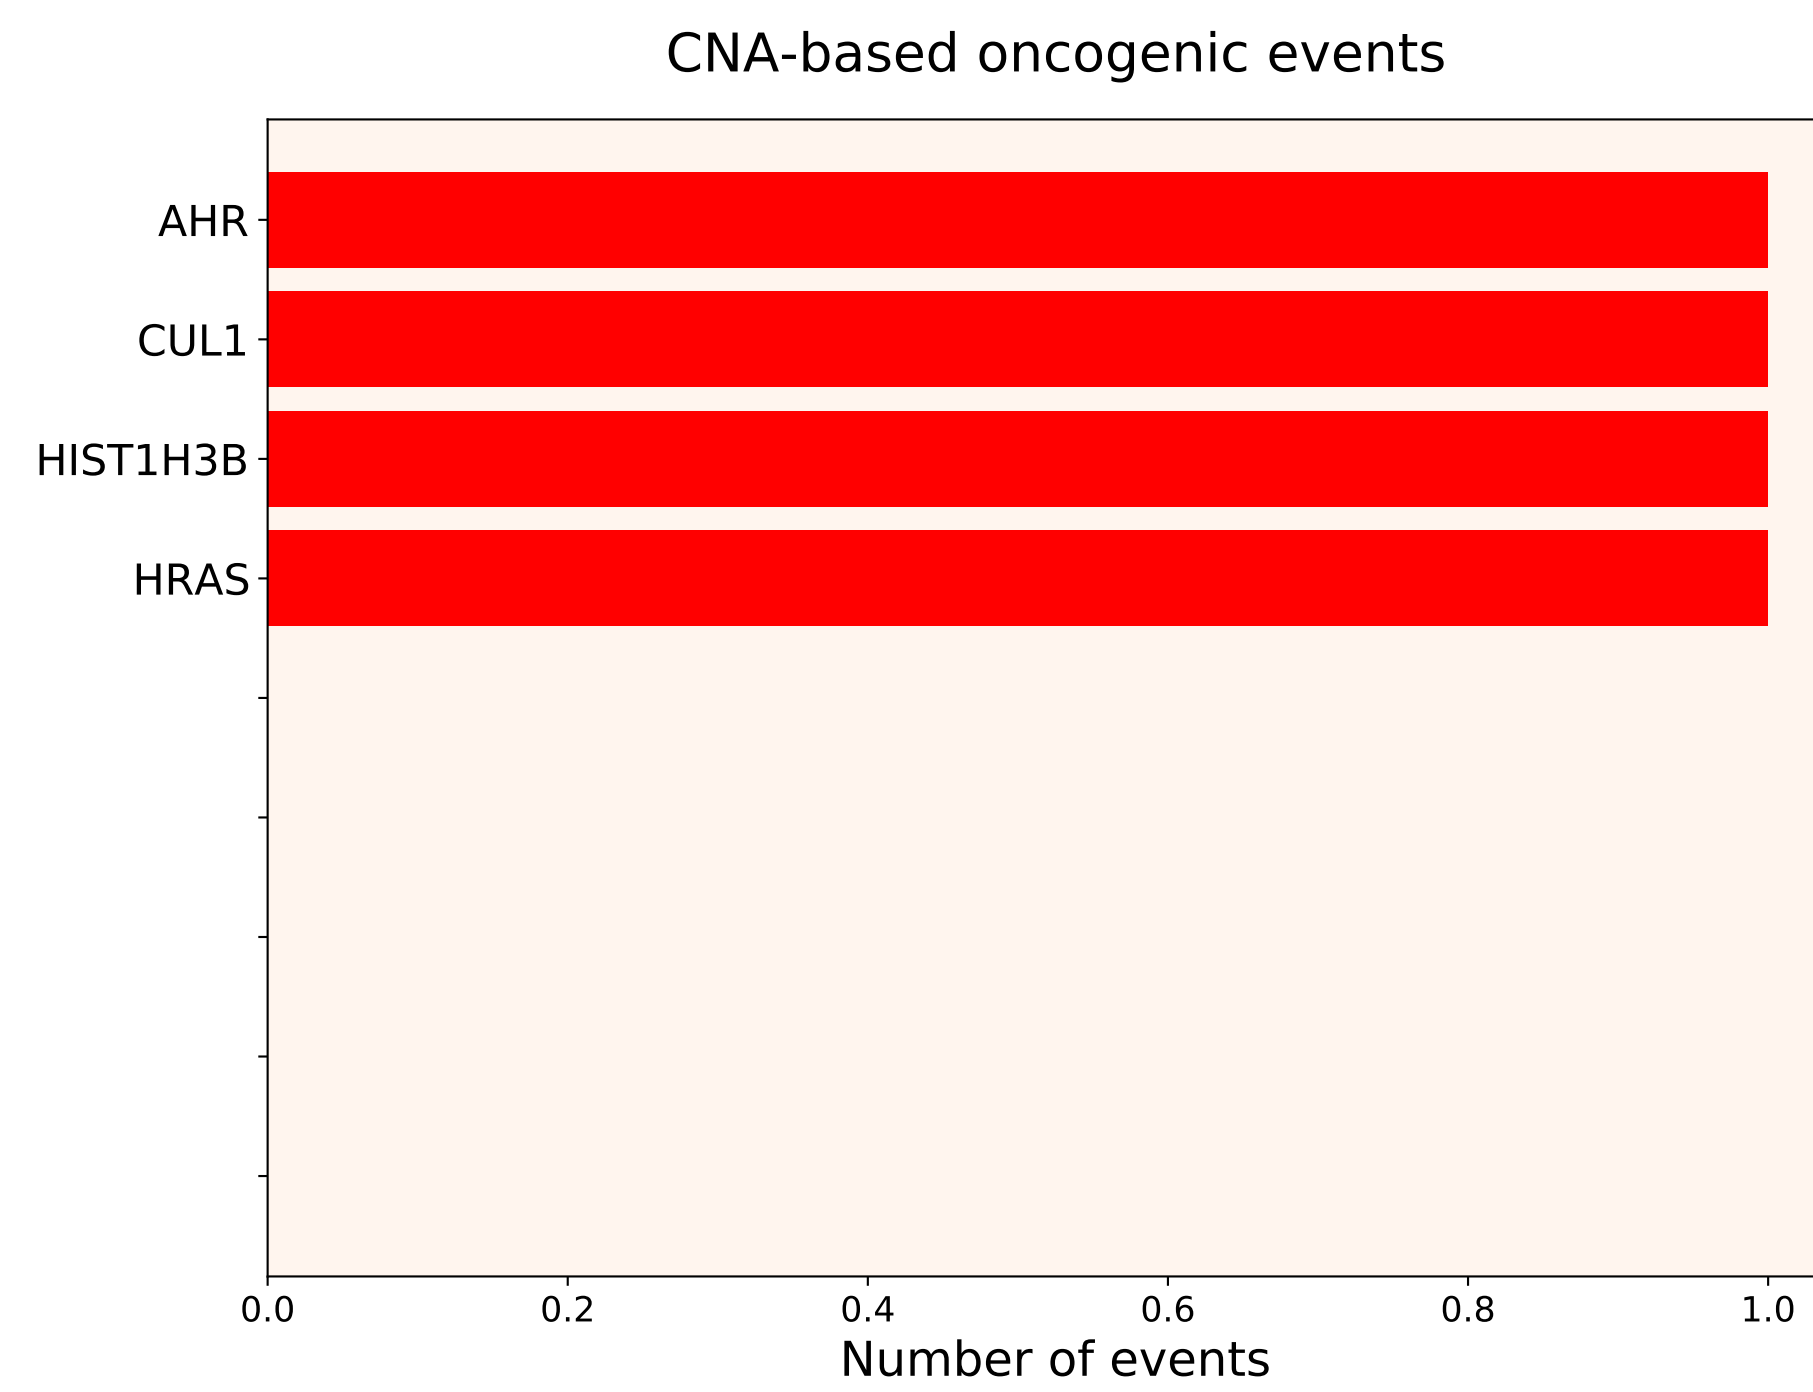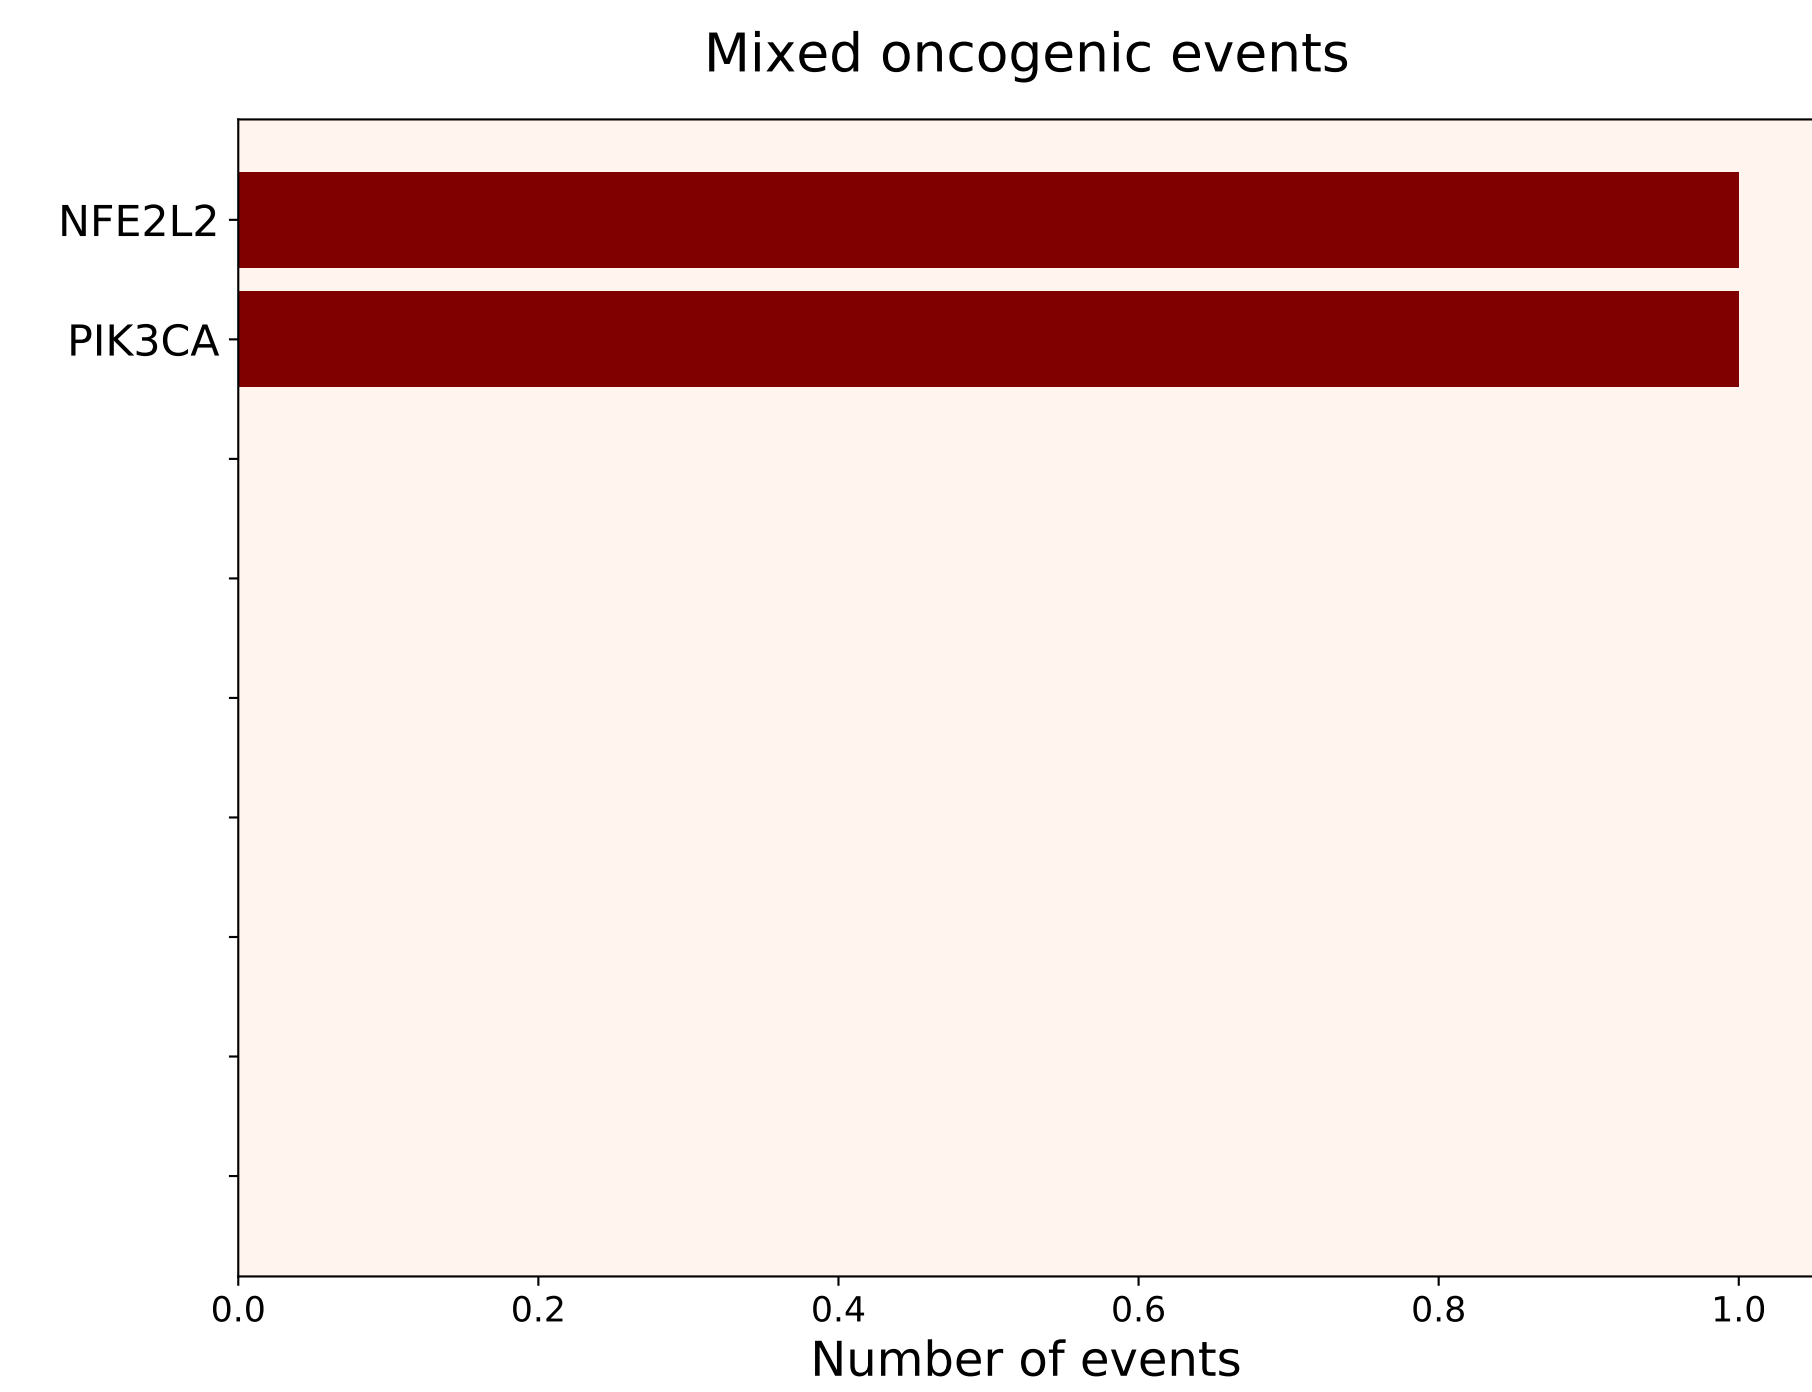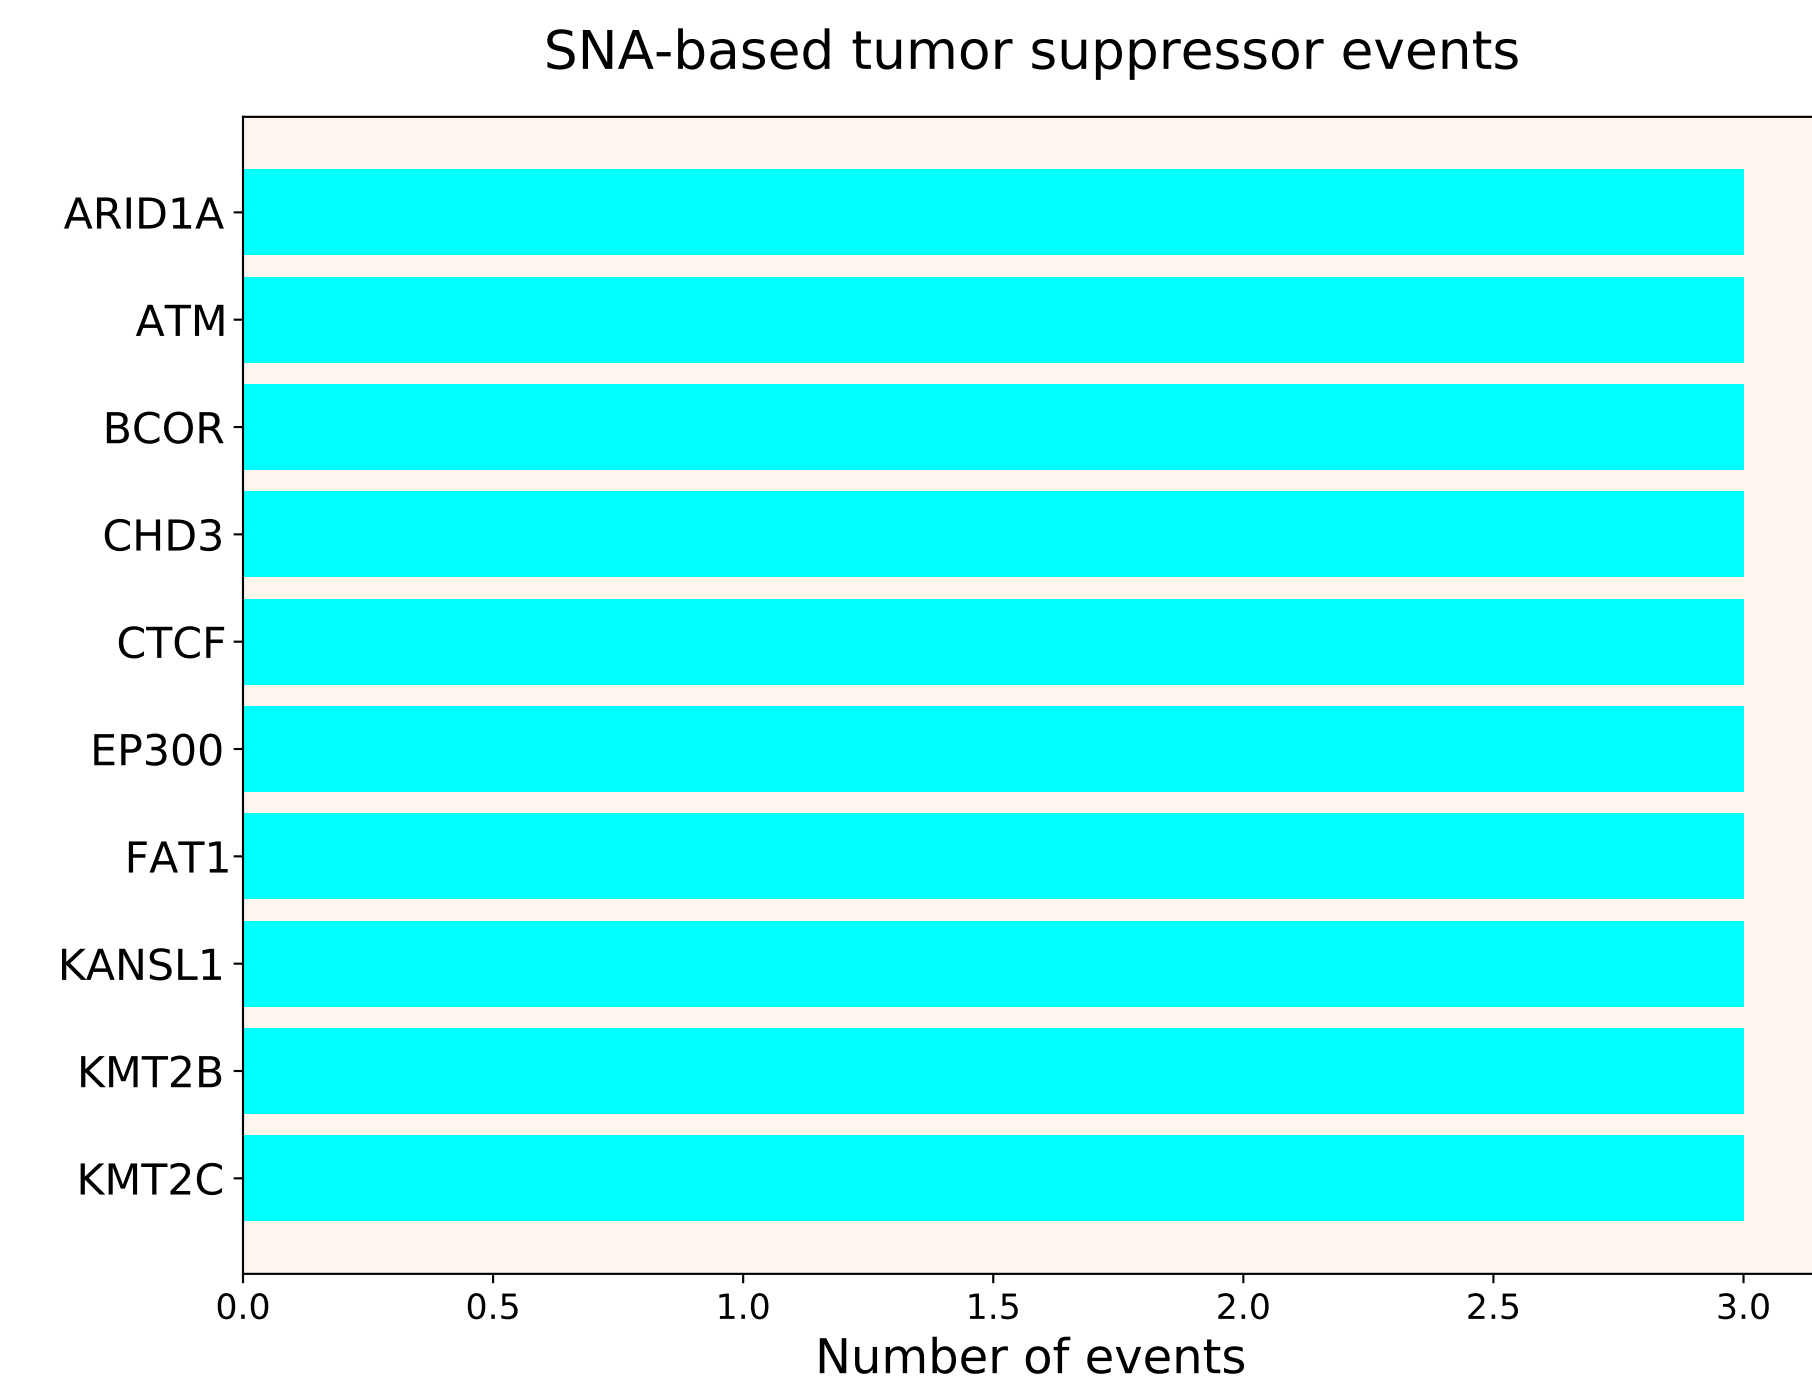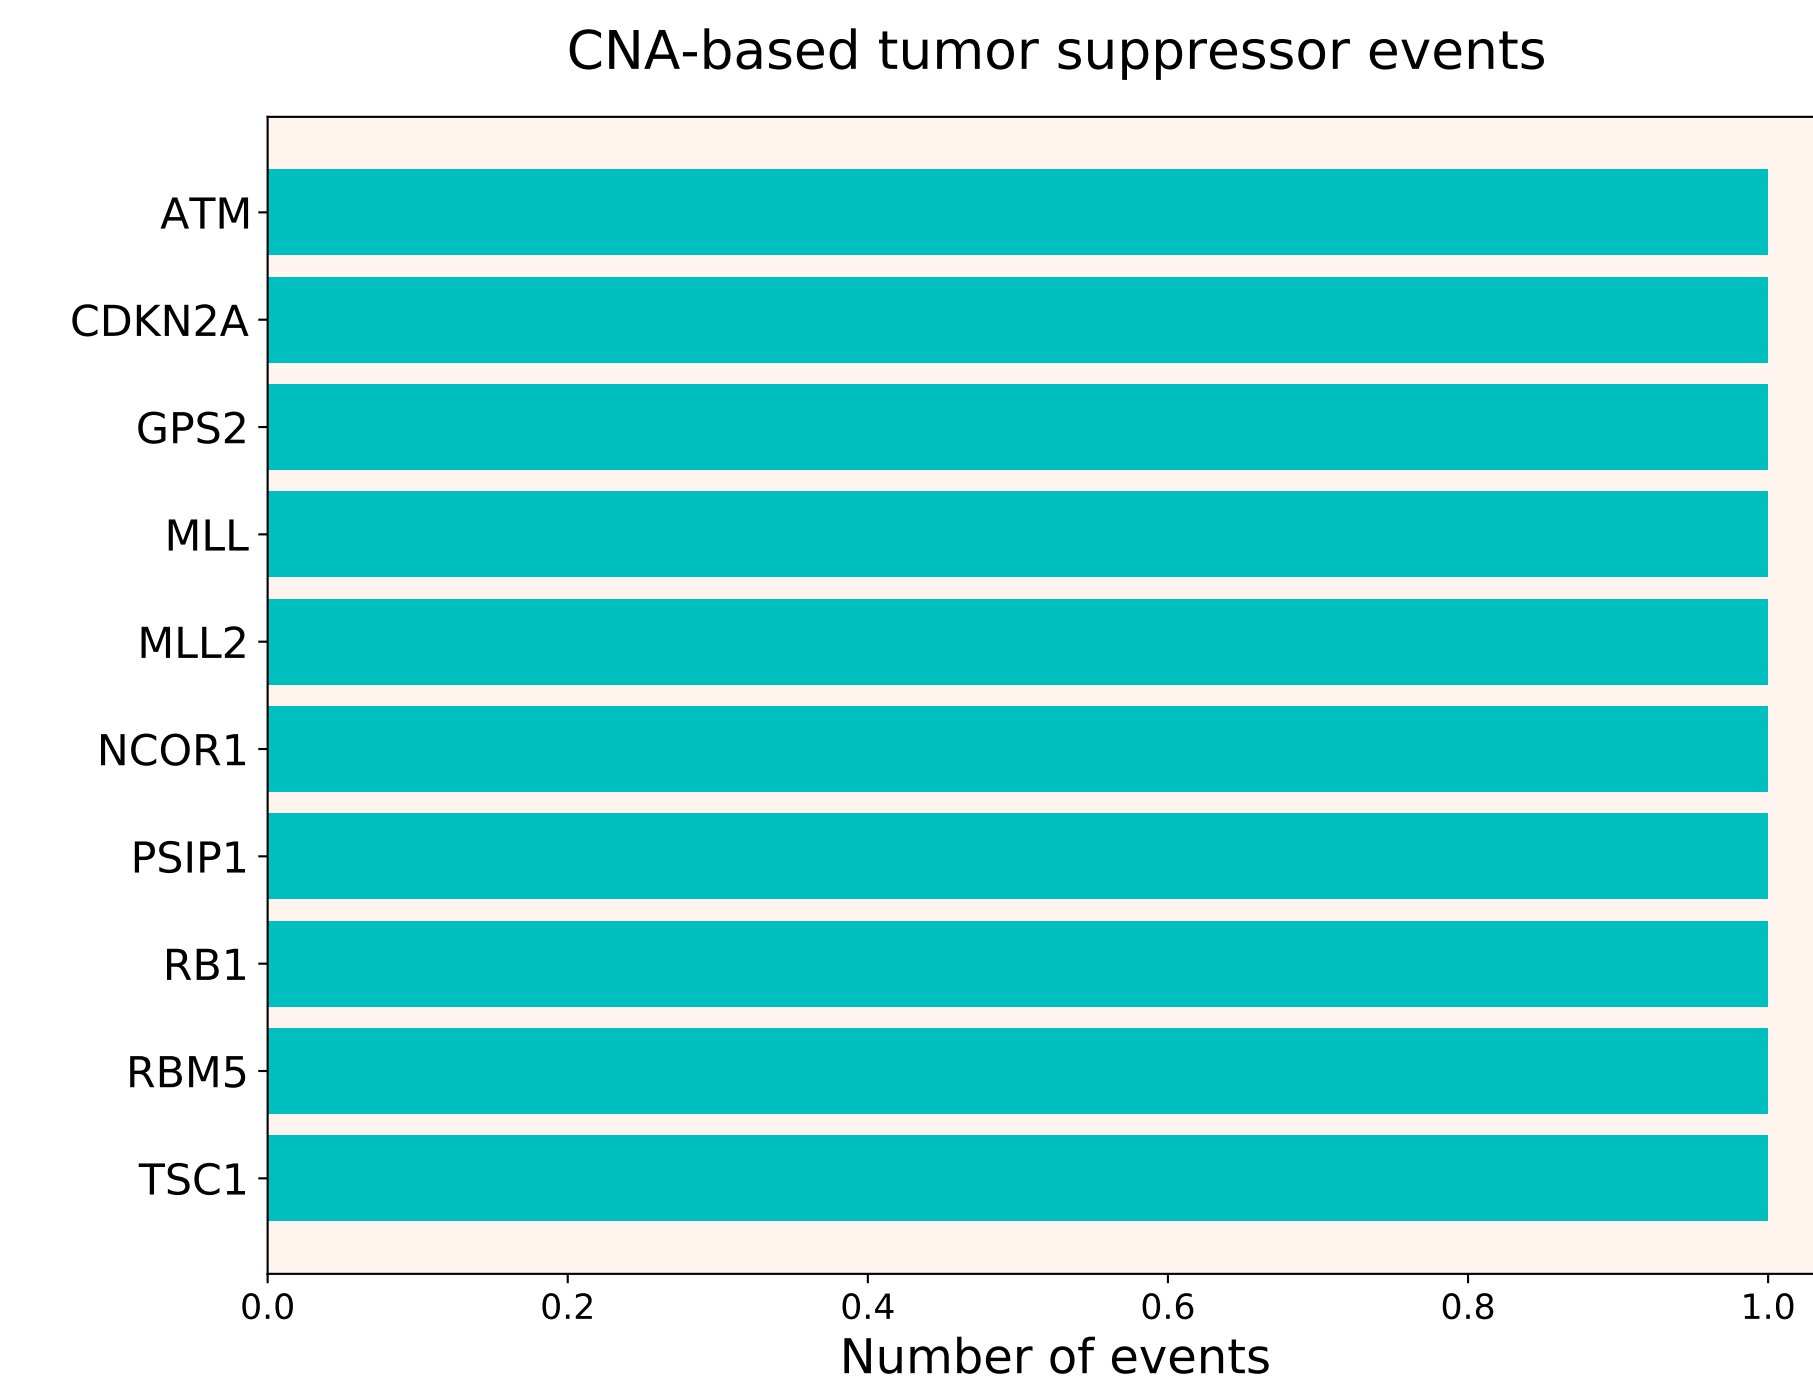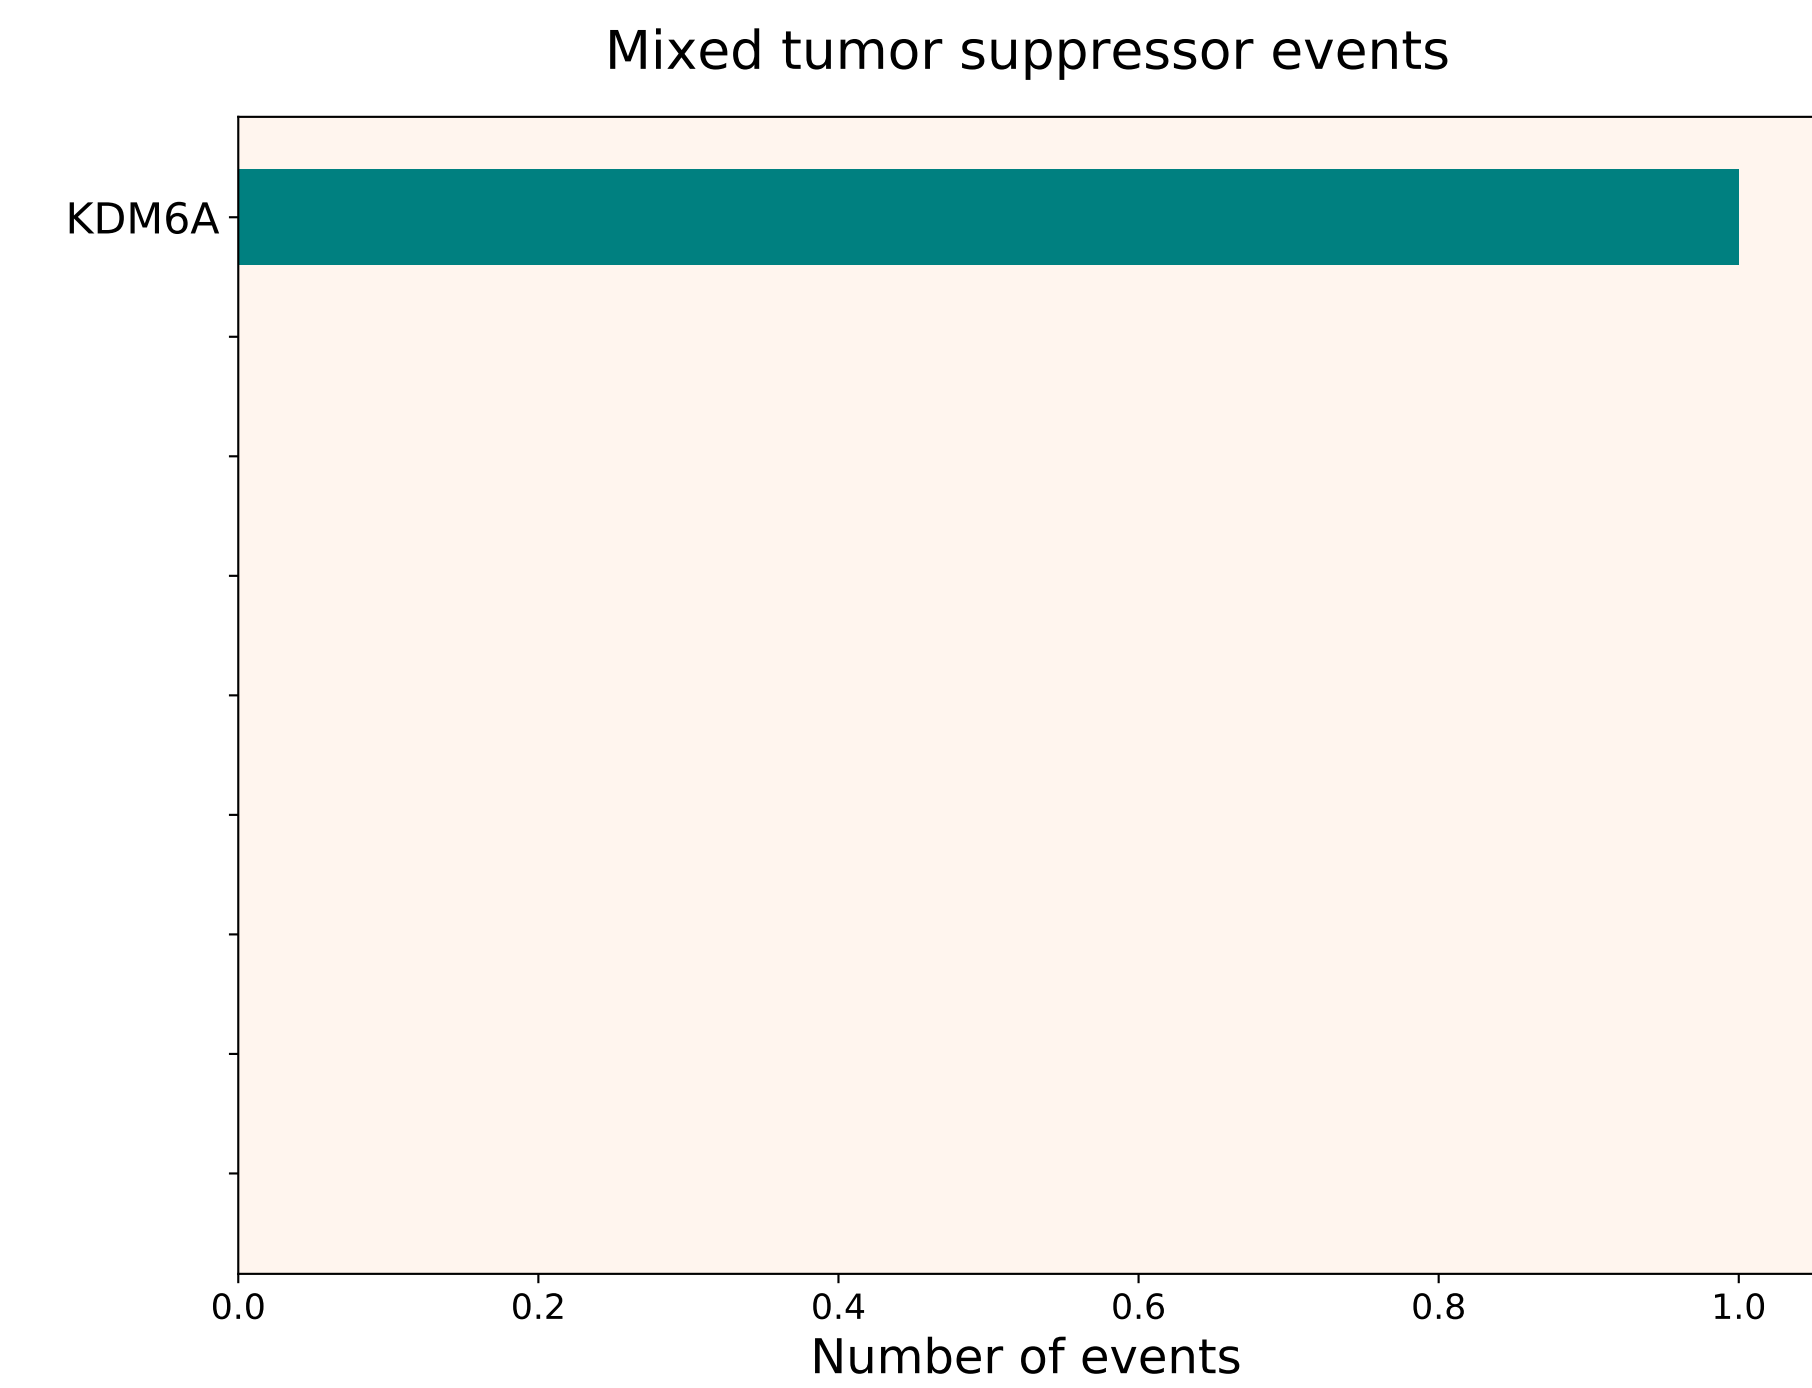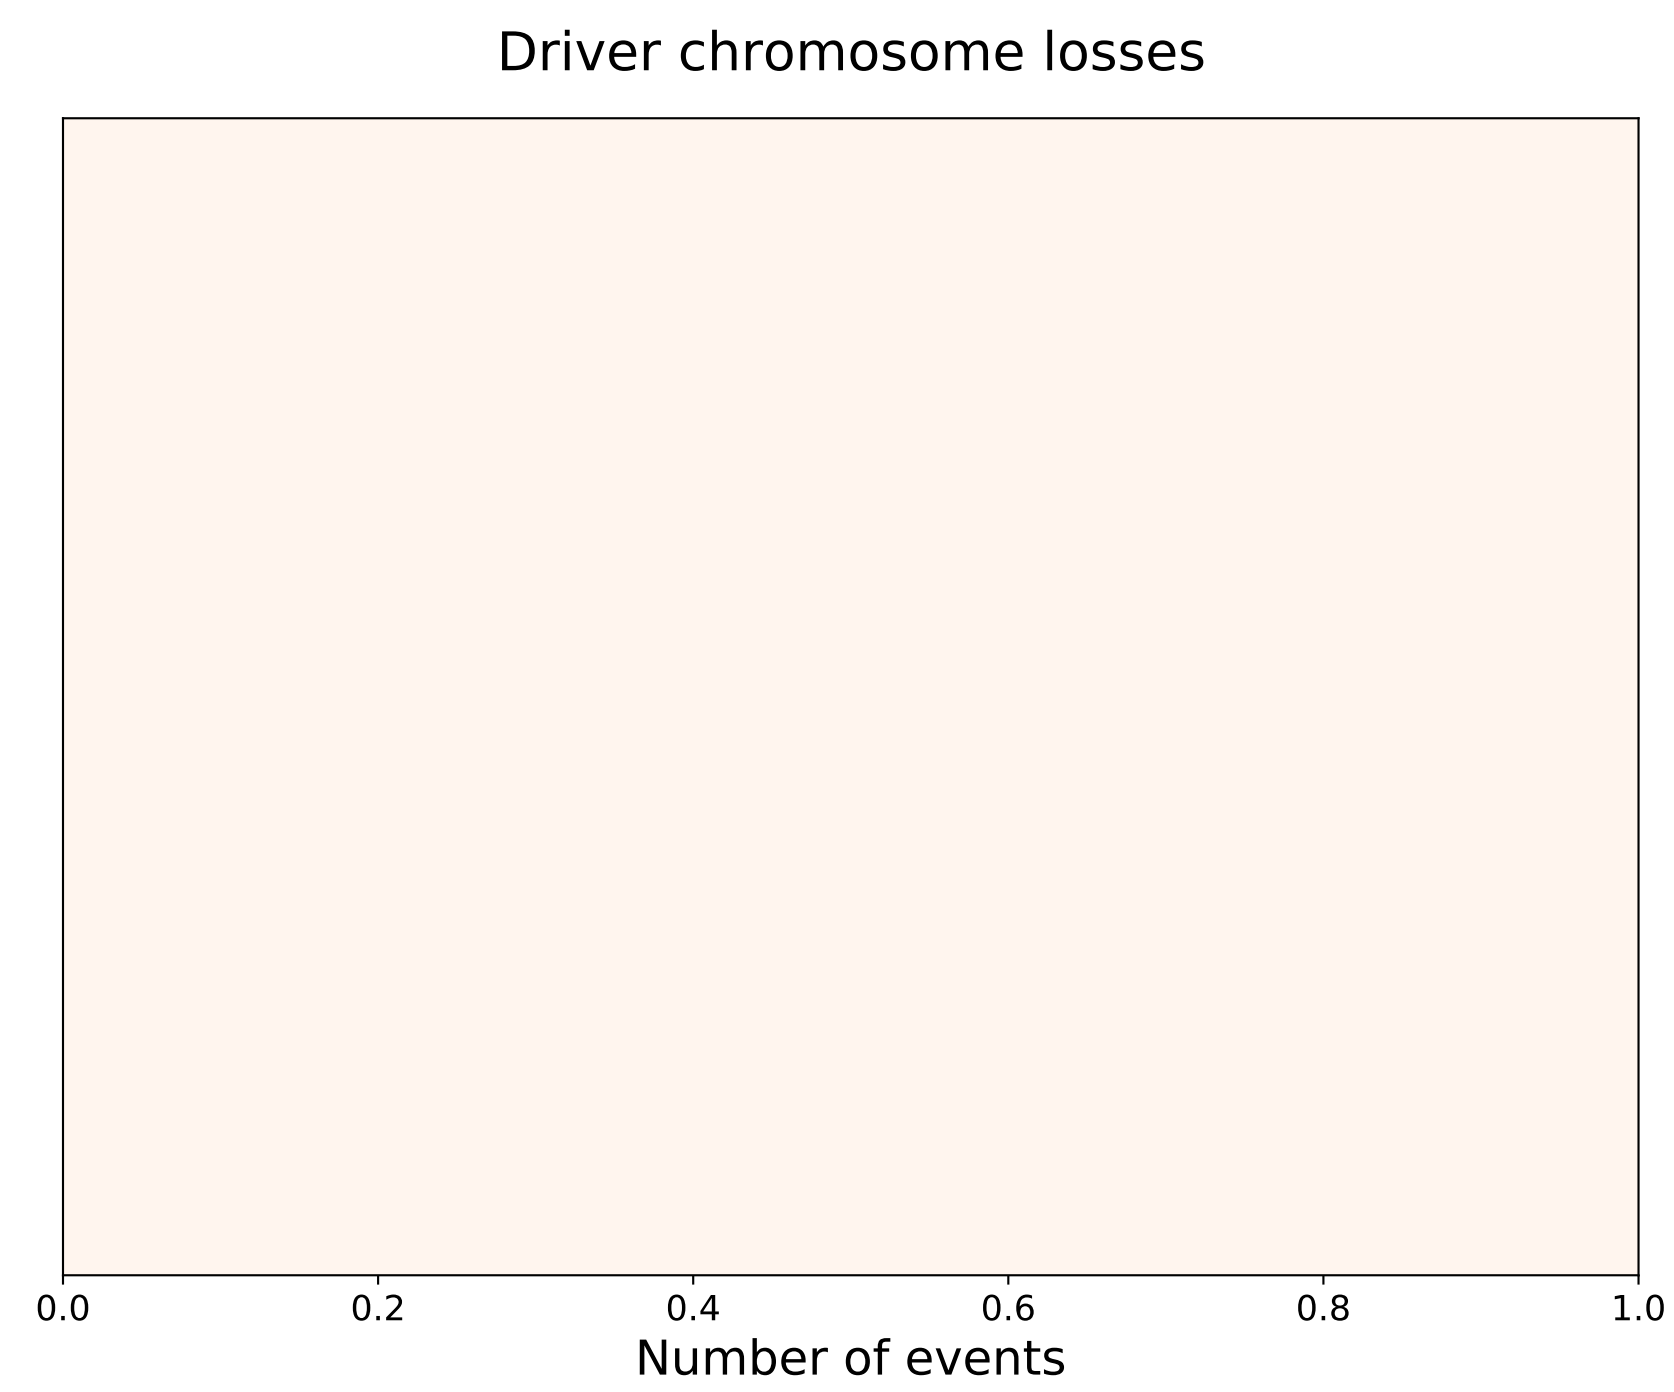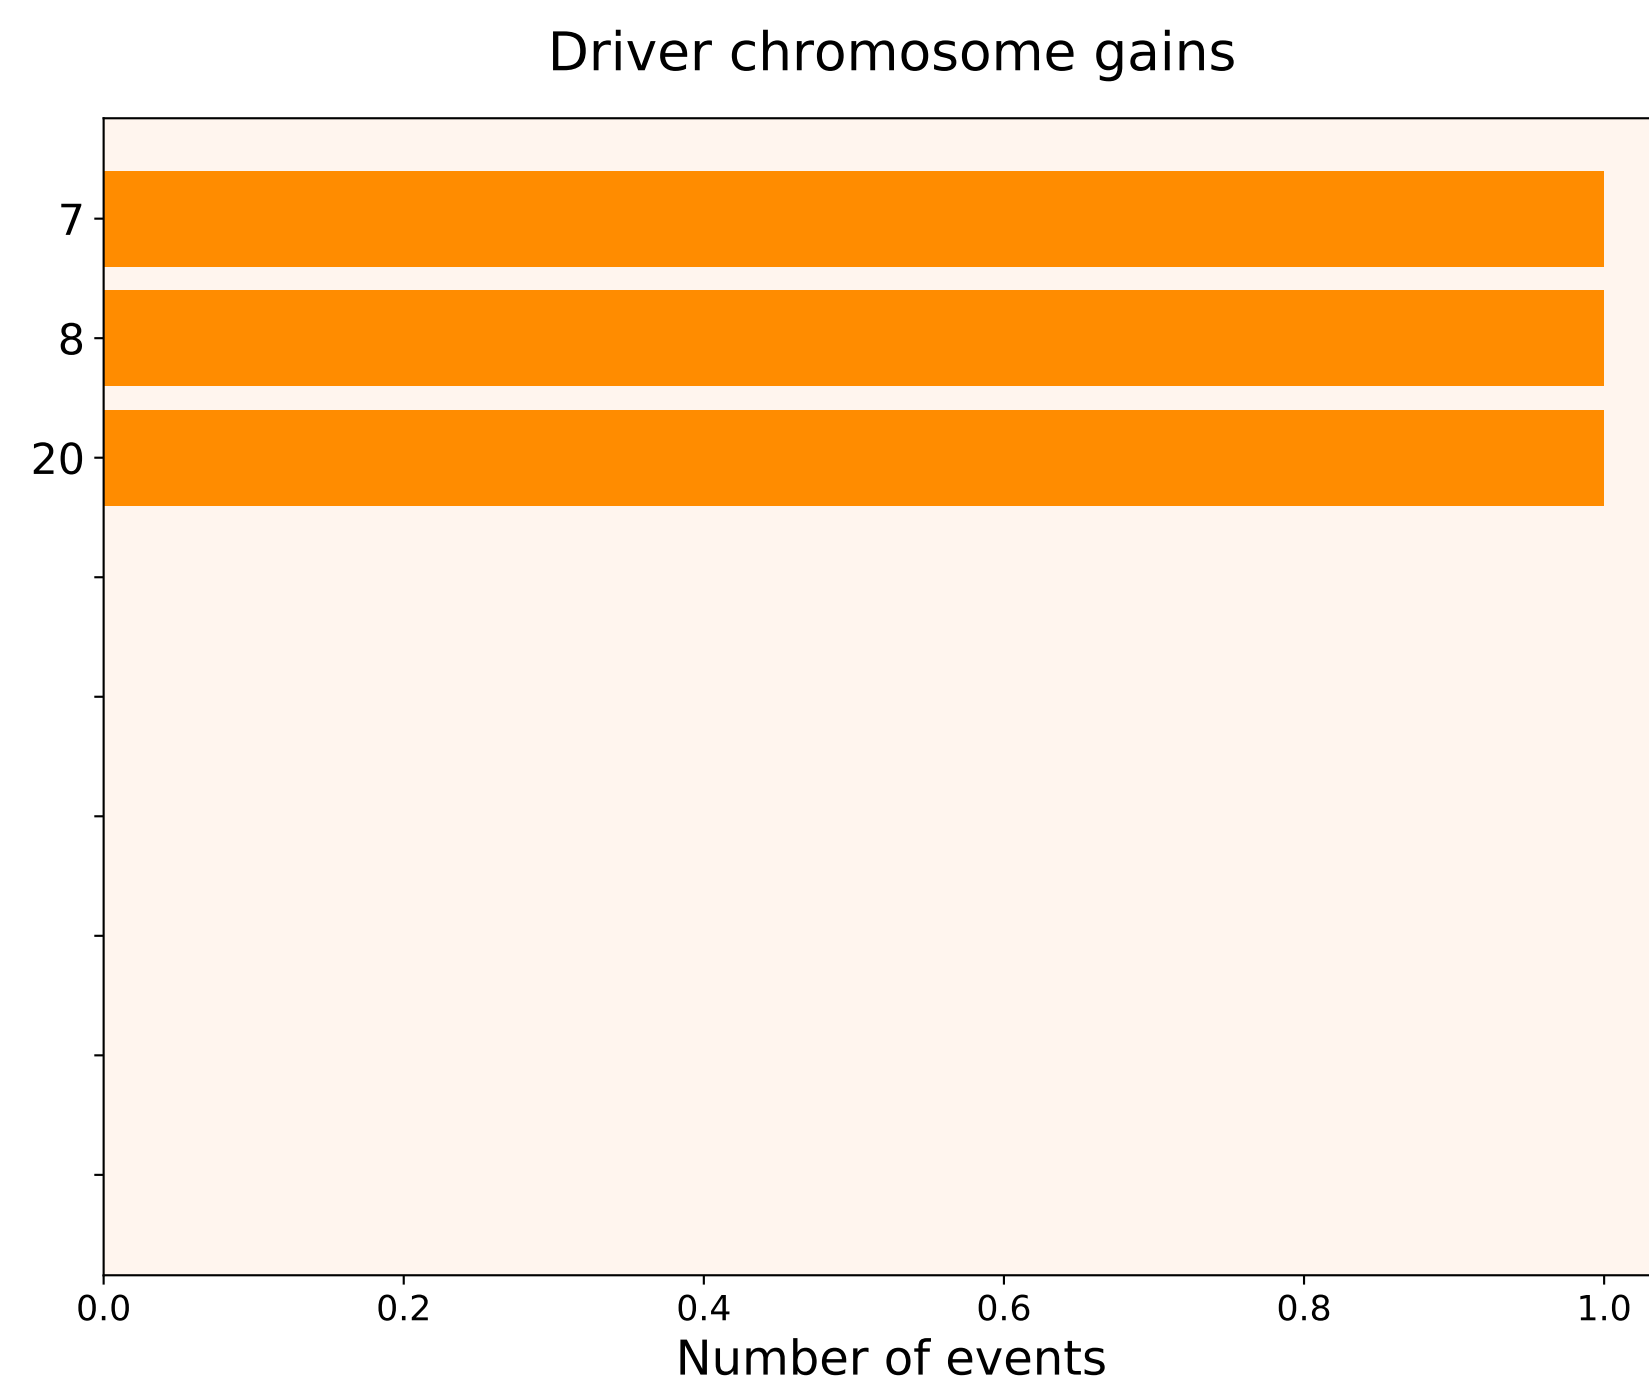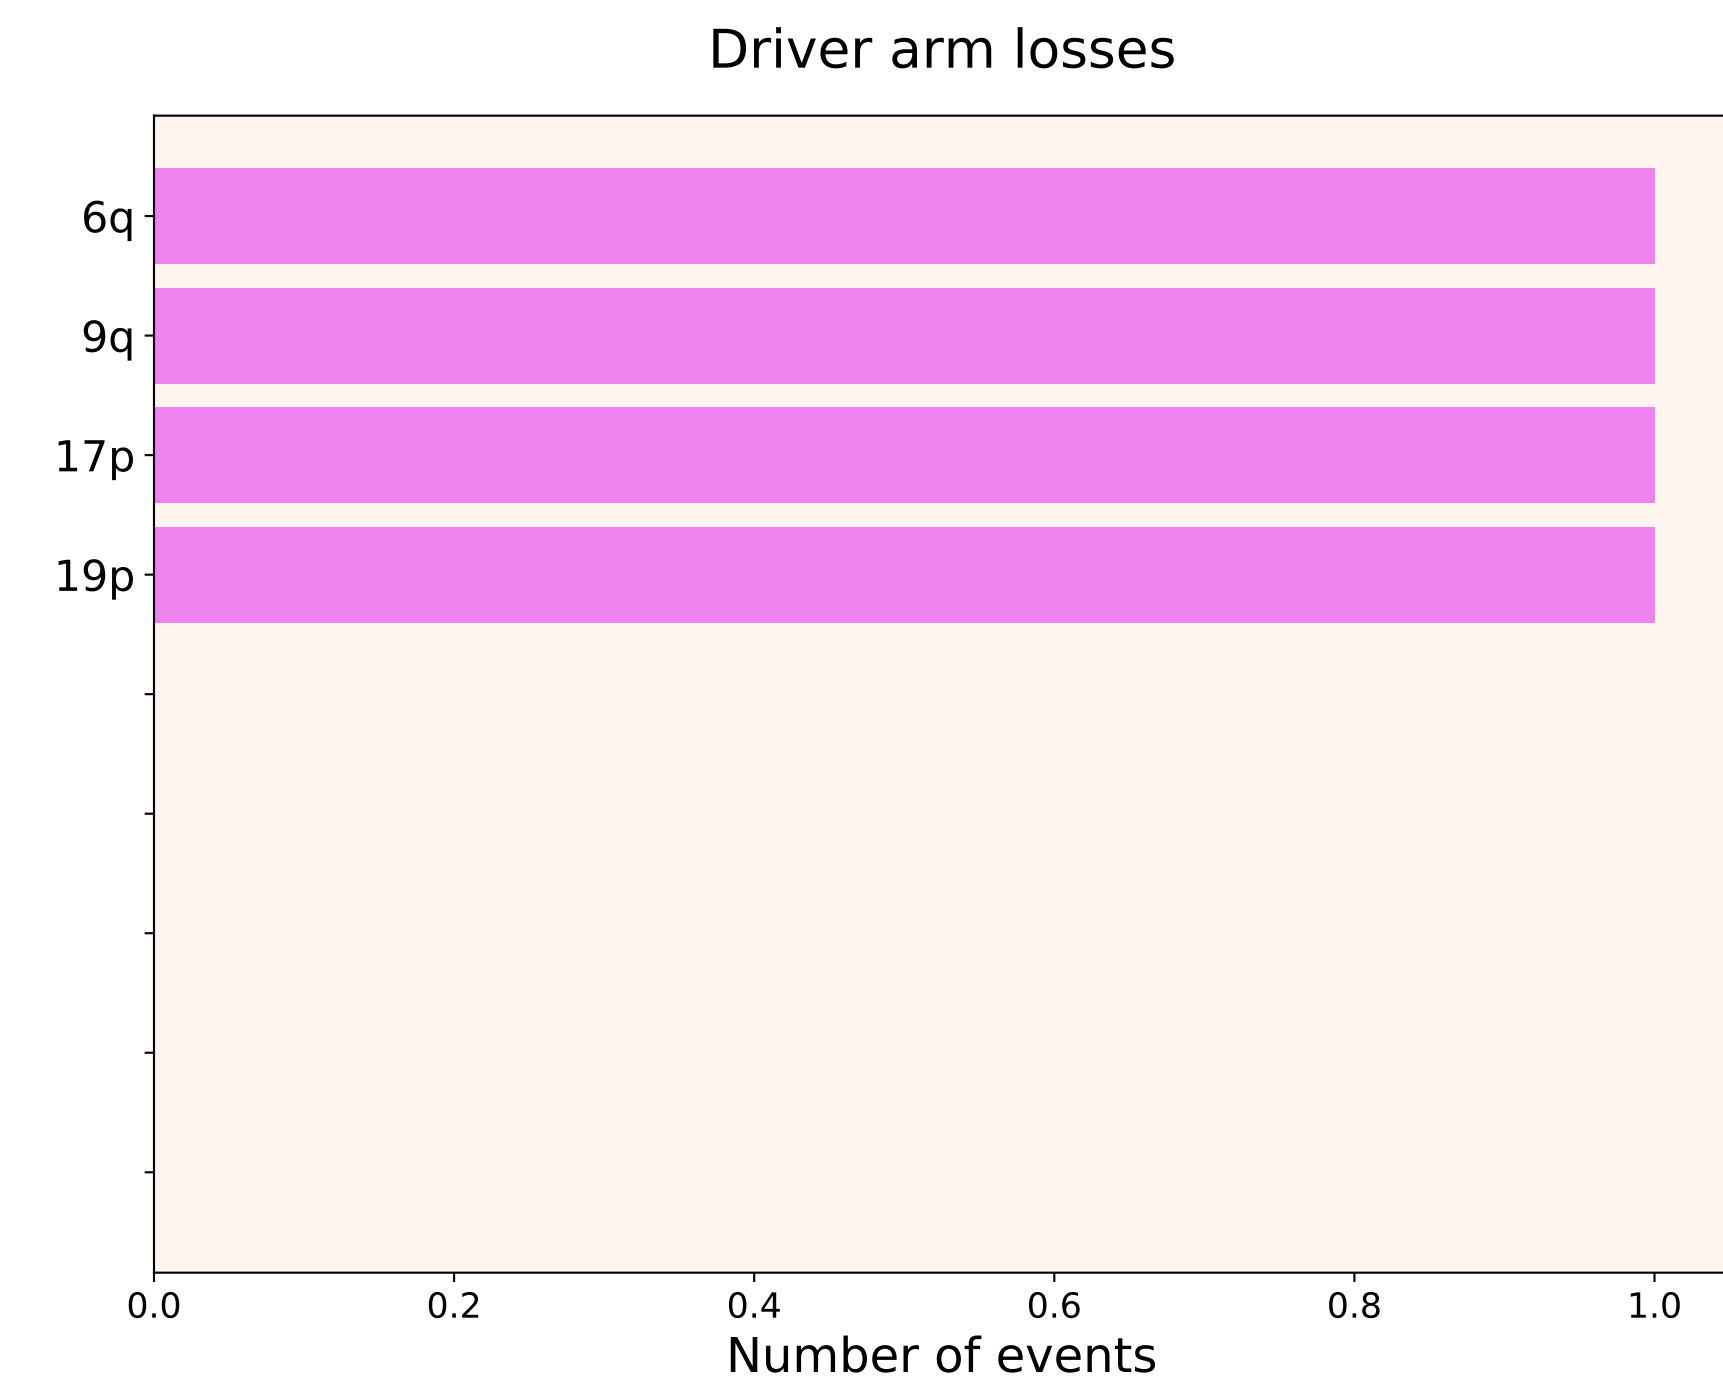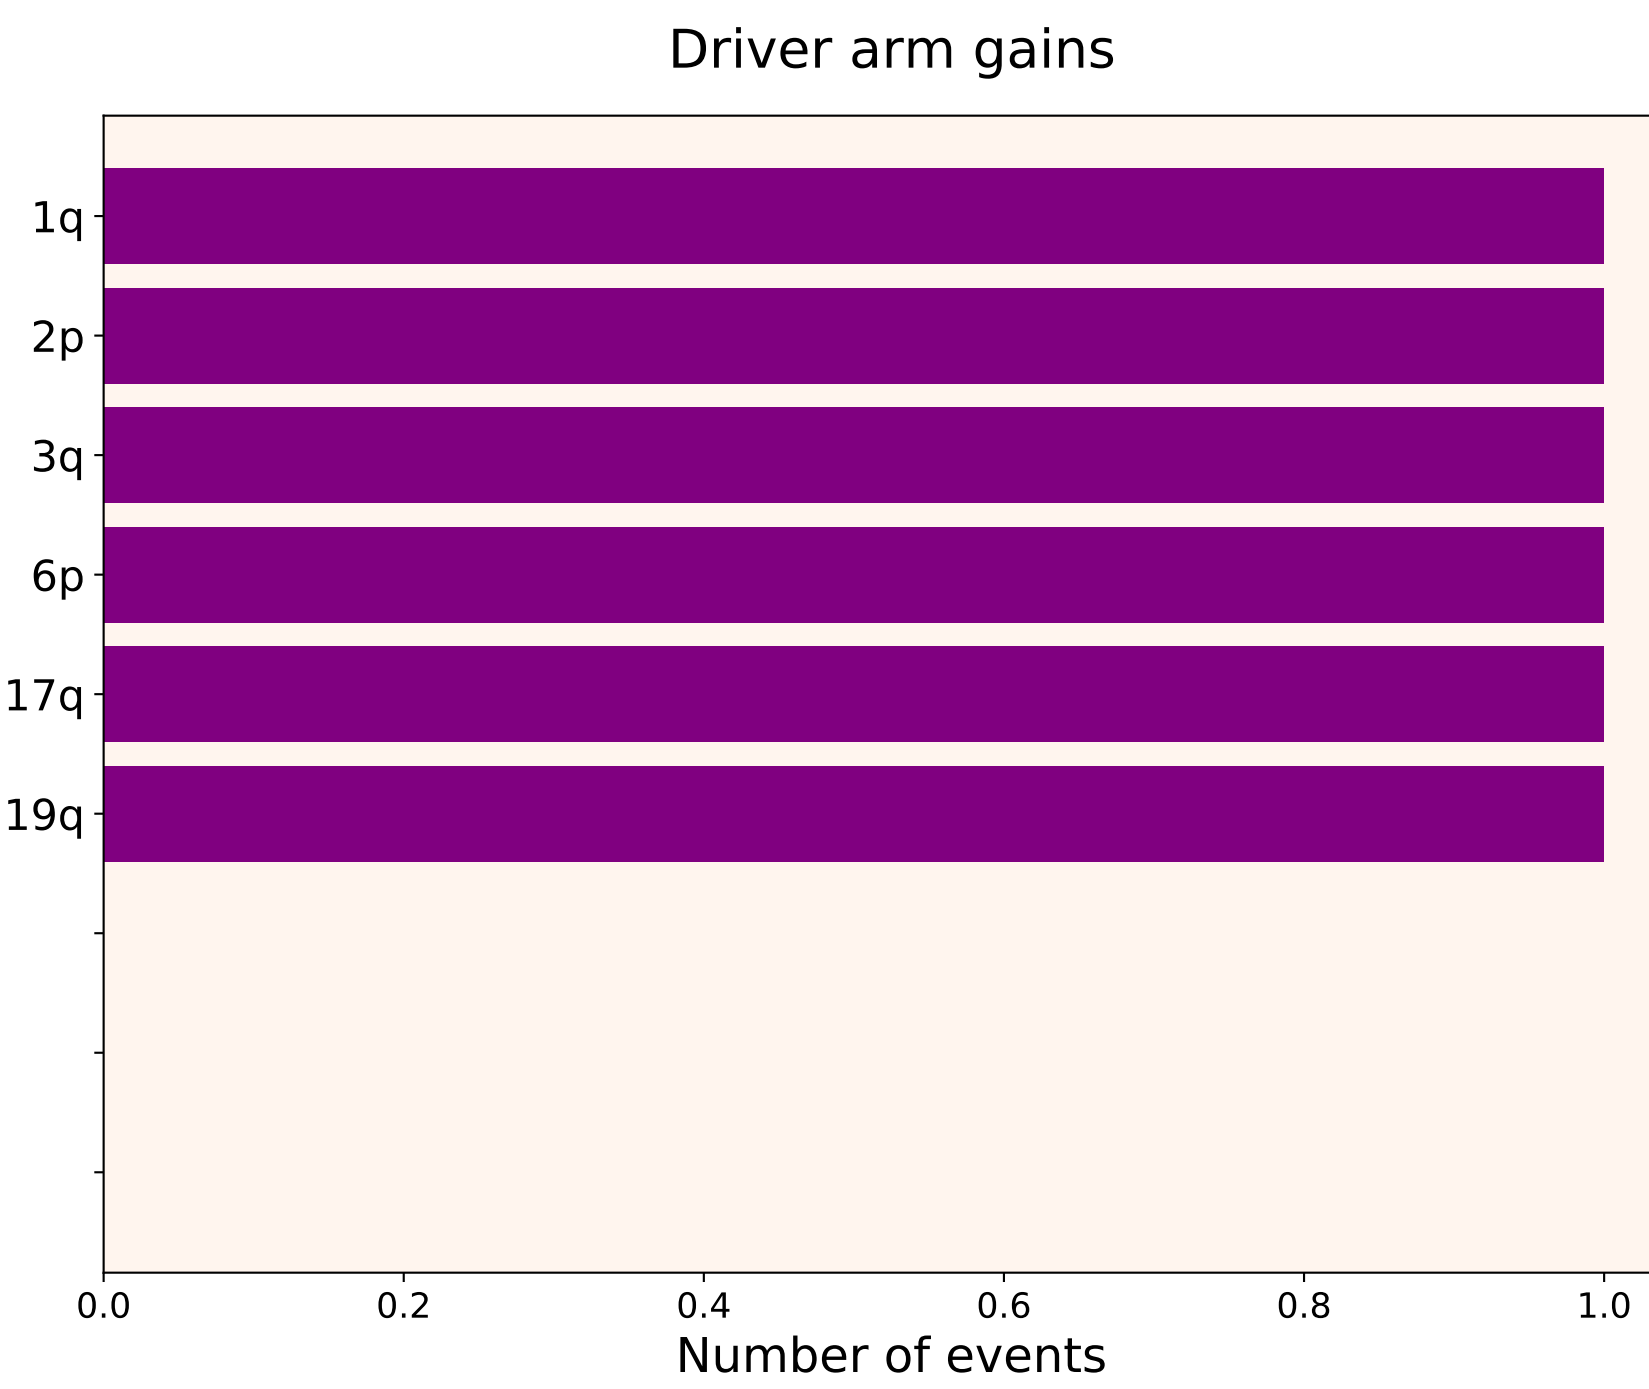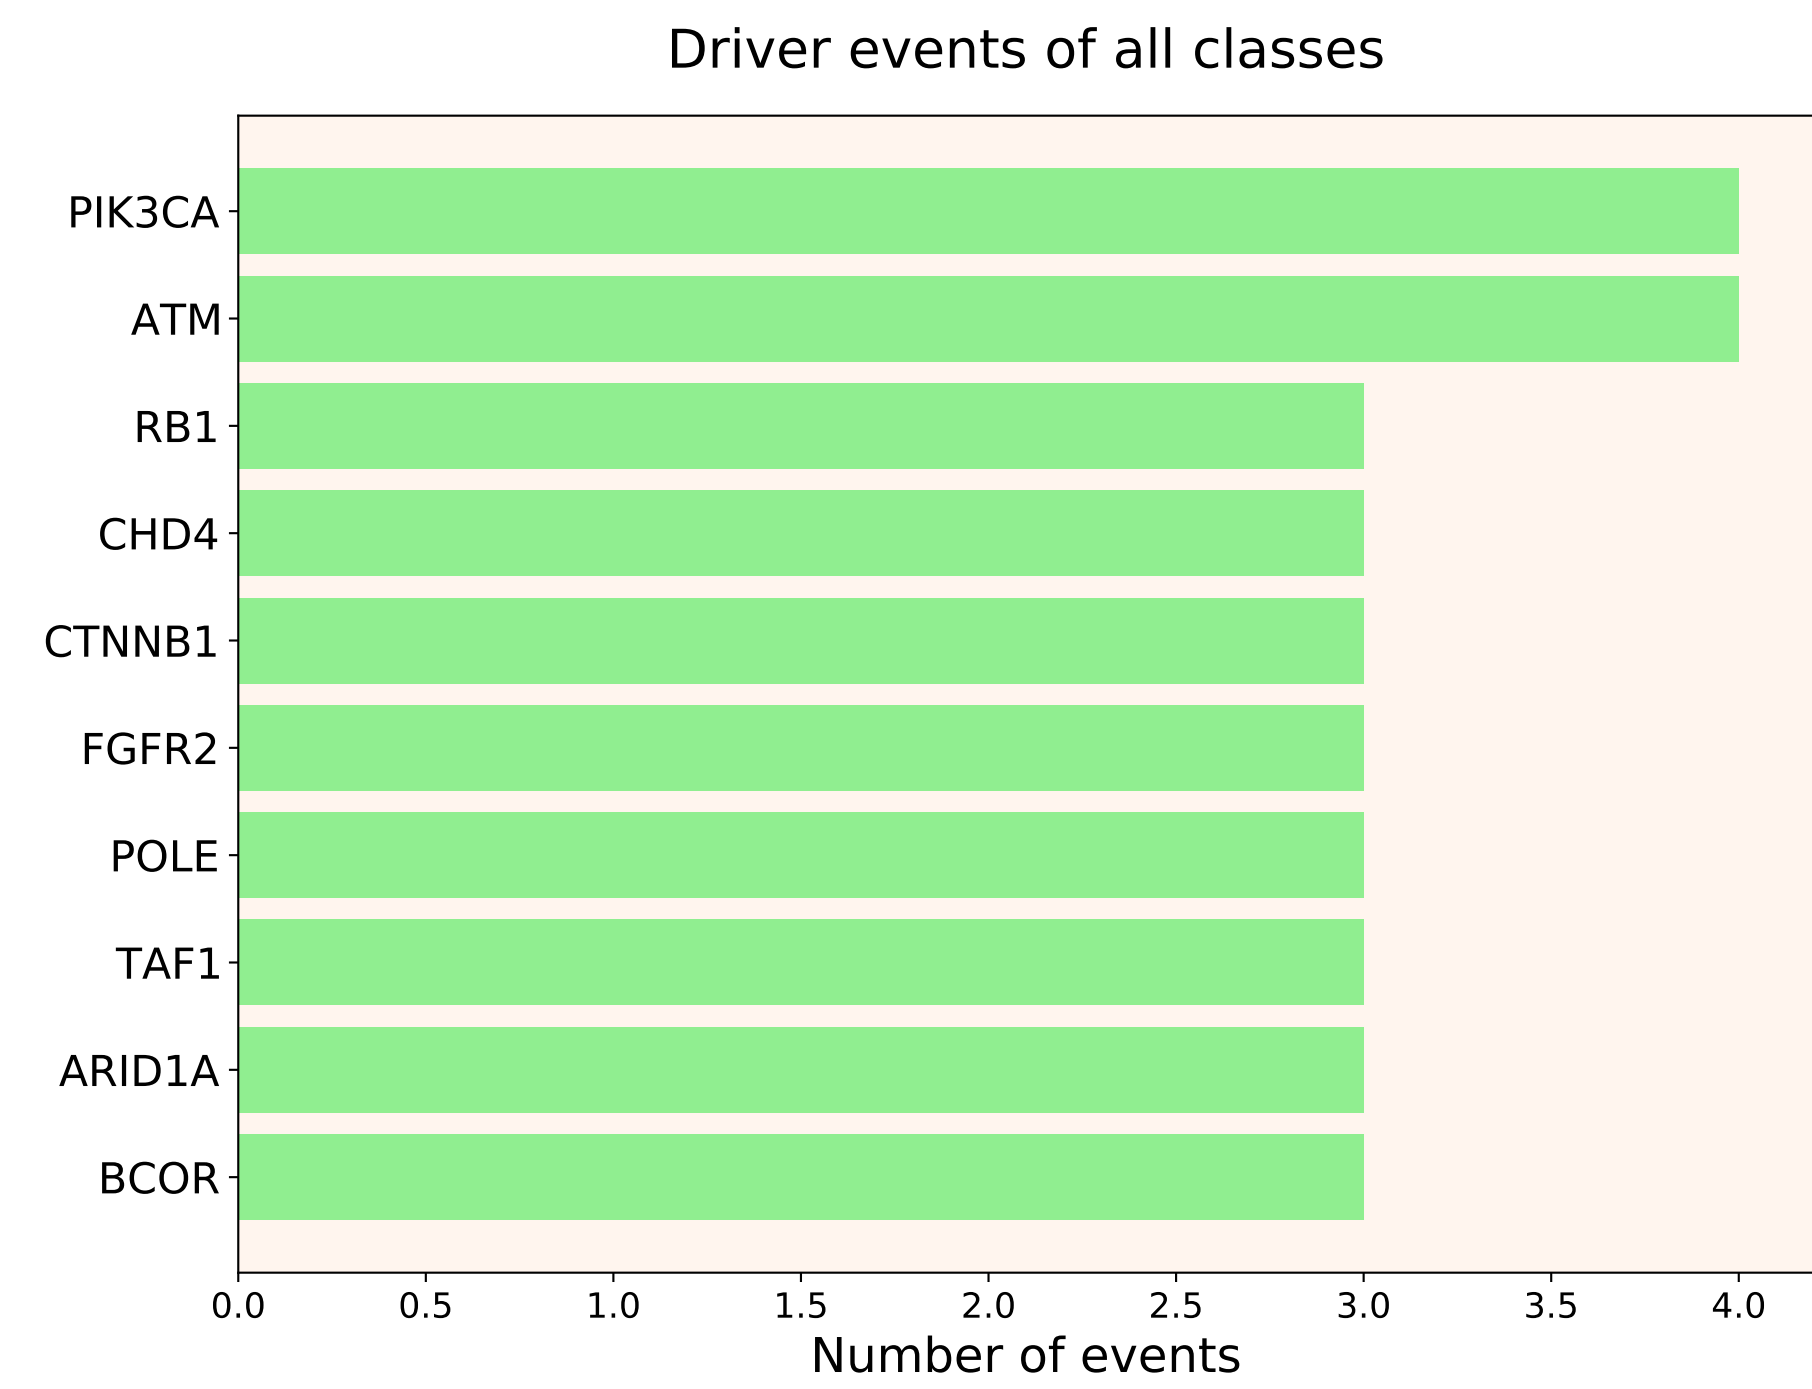

Supplement: Supplemental_Data_S1.zip [file Supplemental_Data_S1.zip]

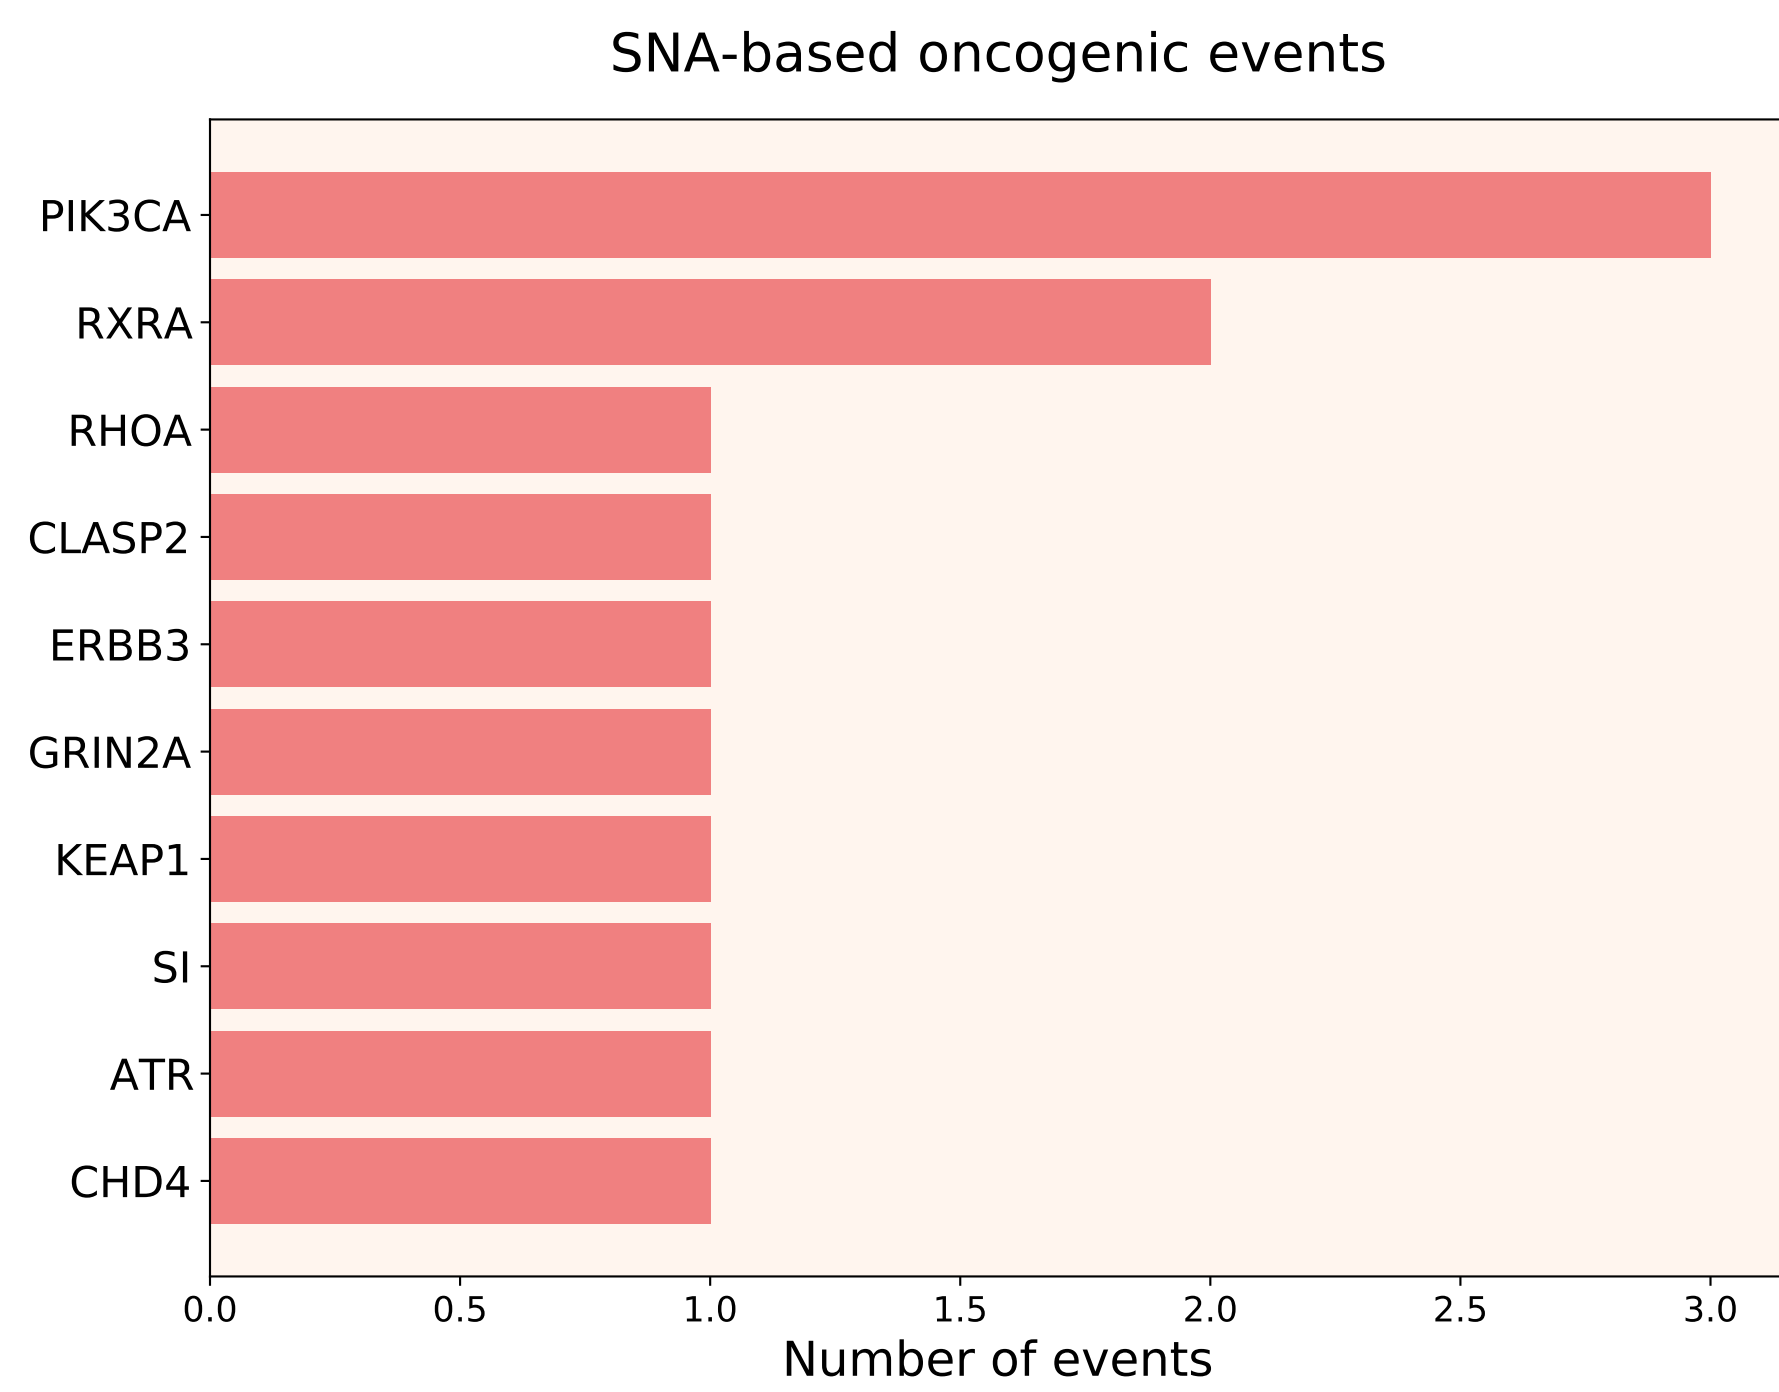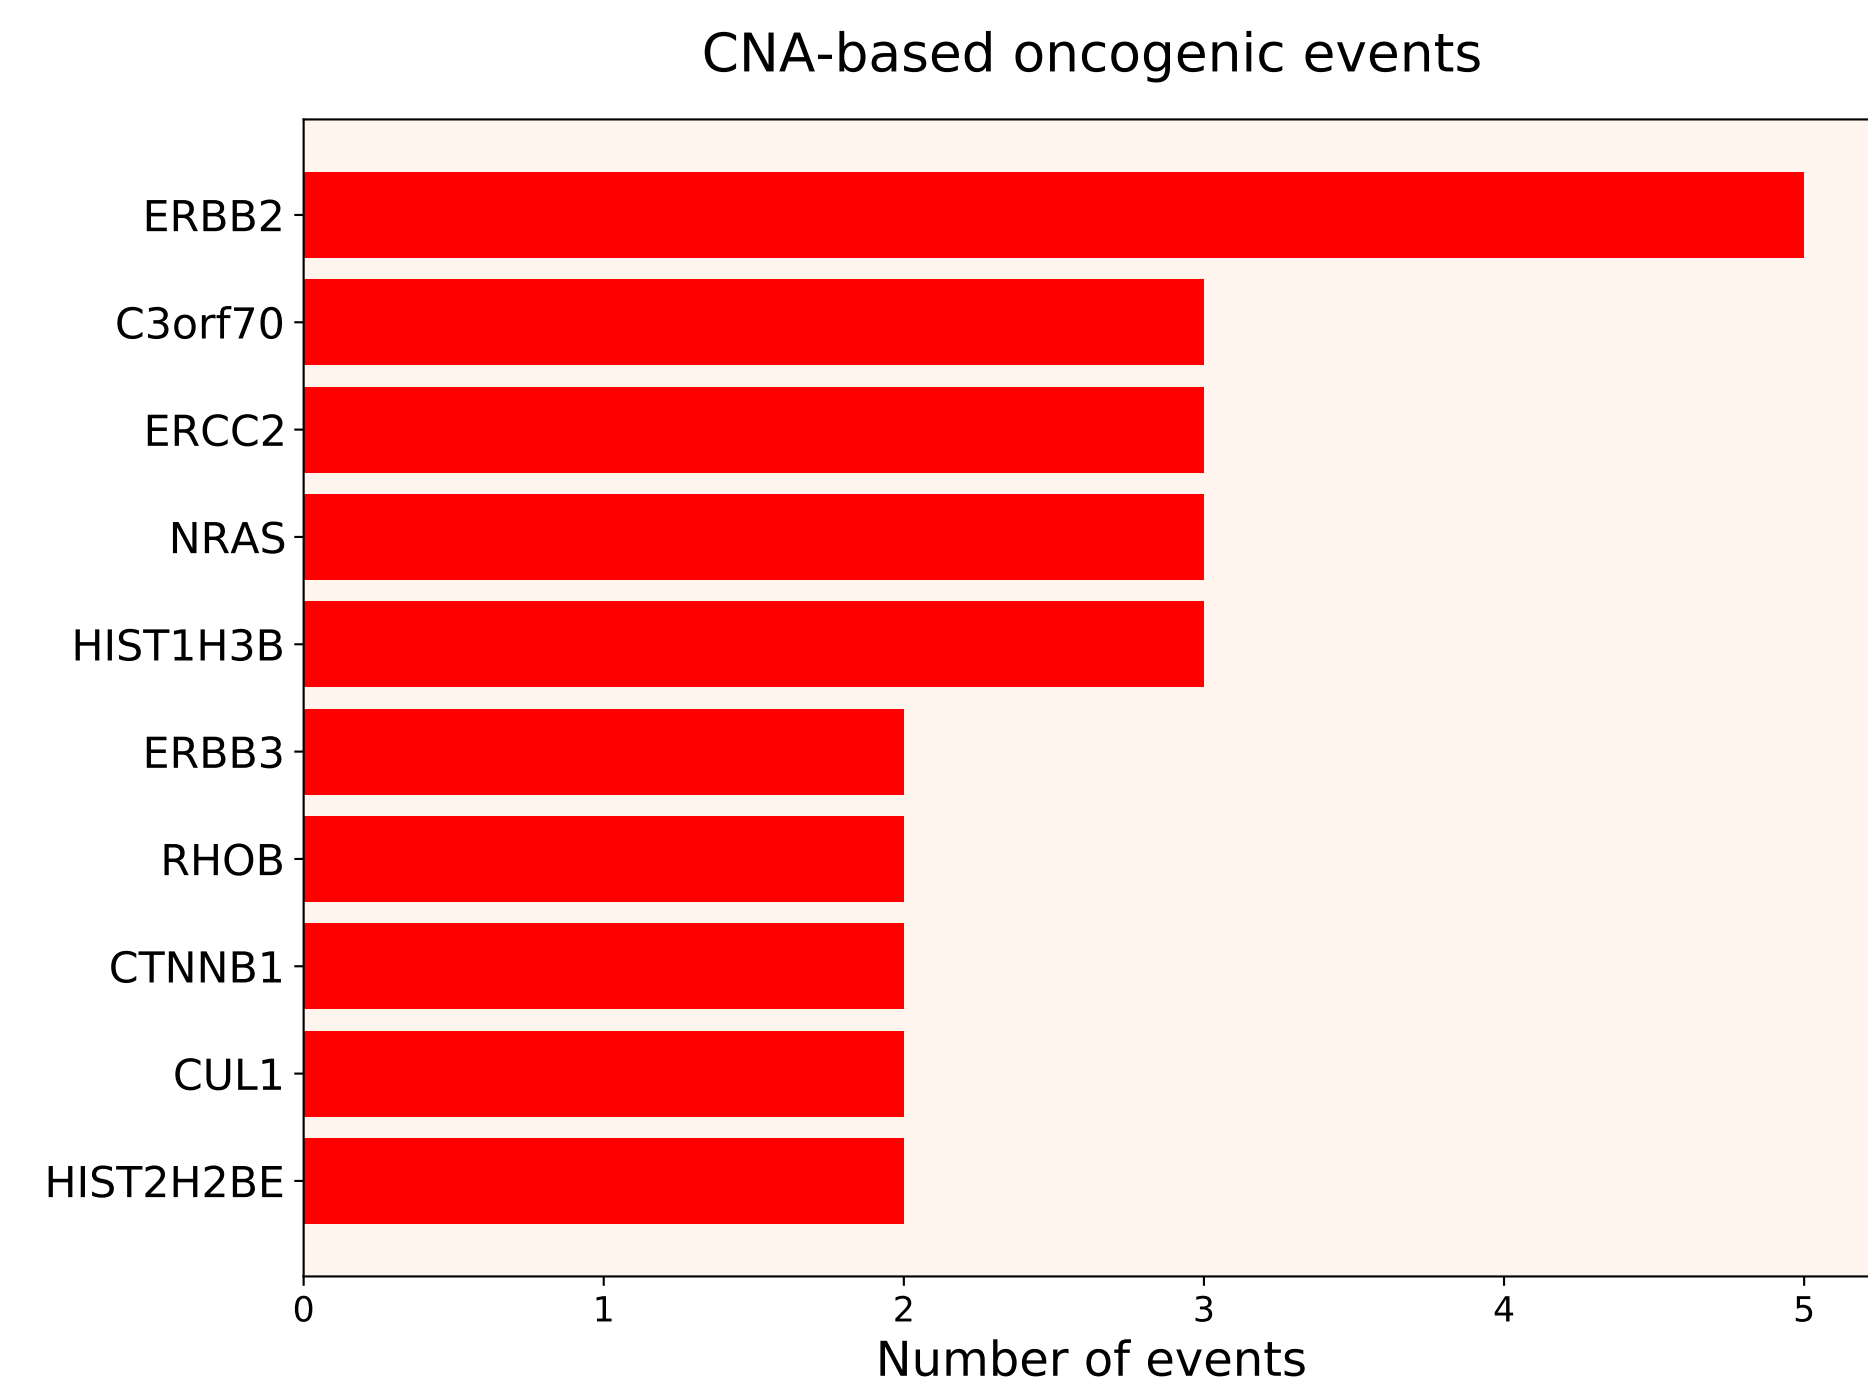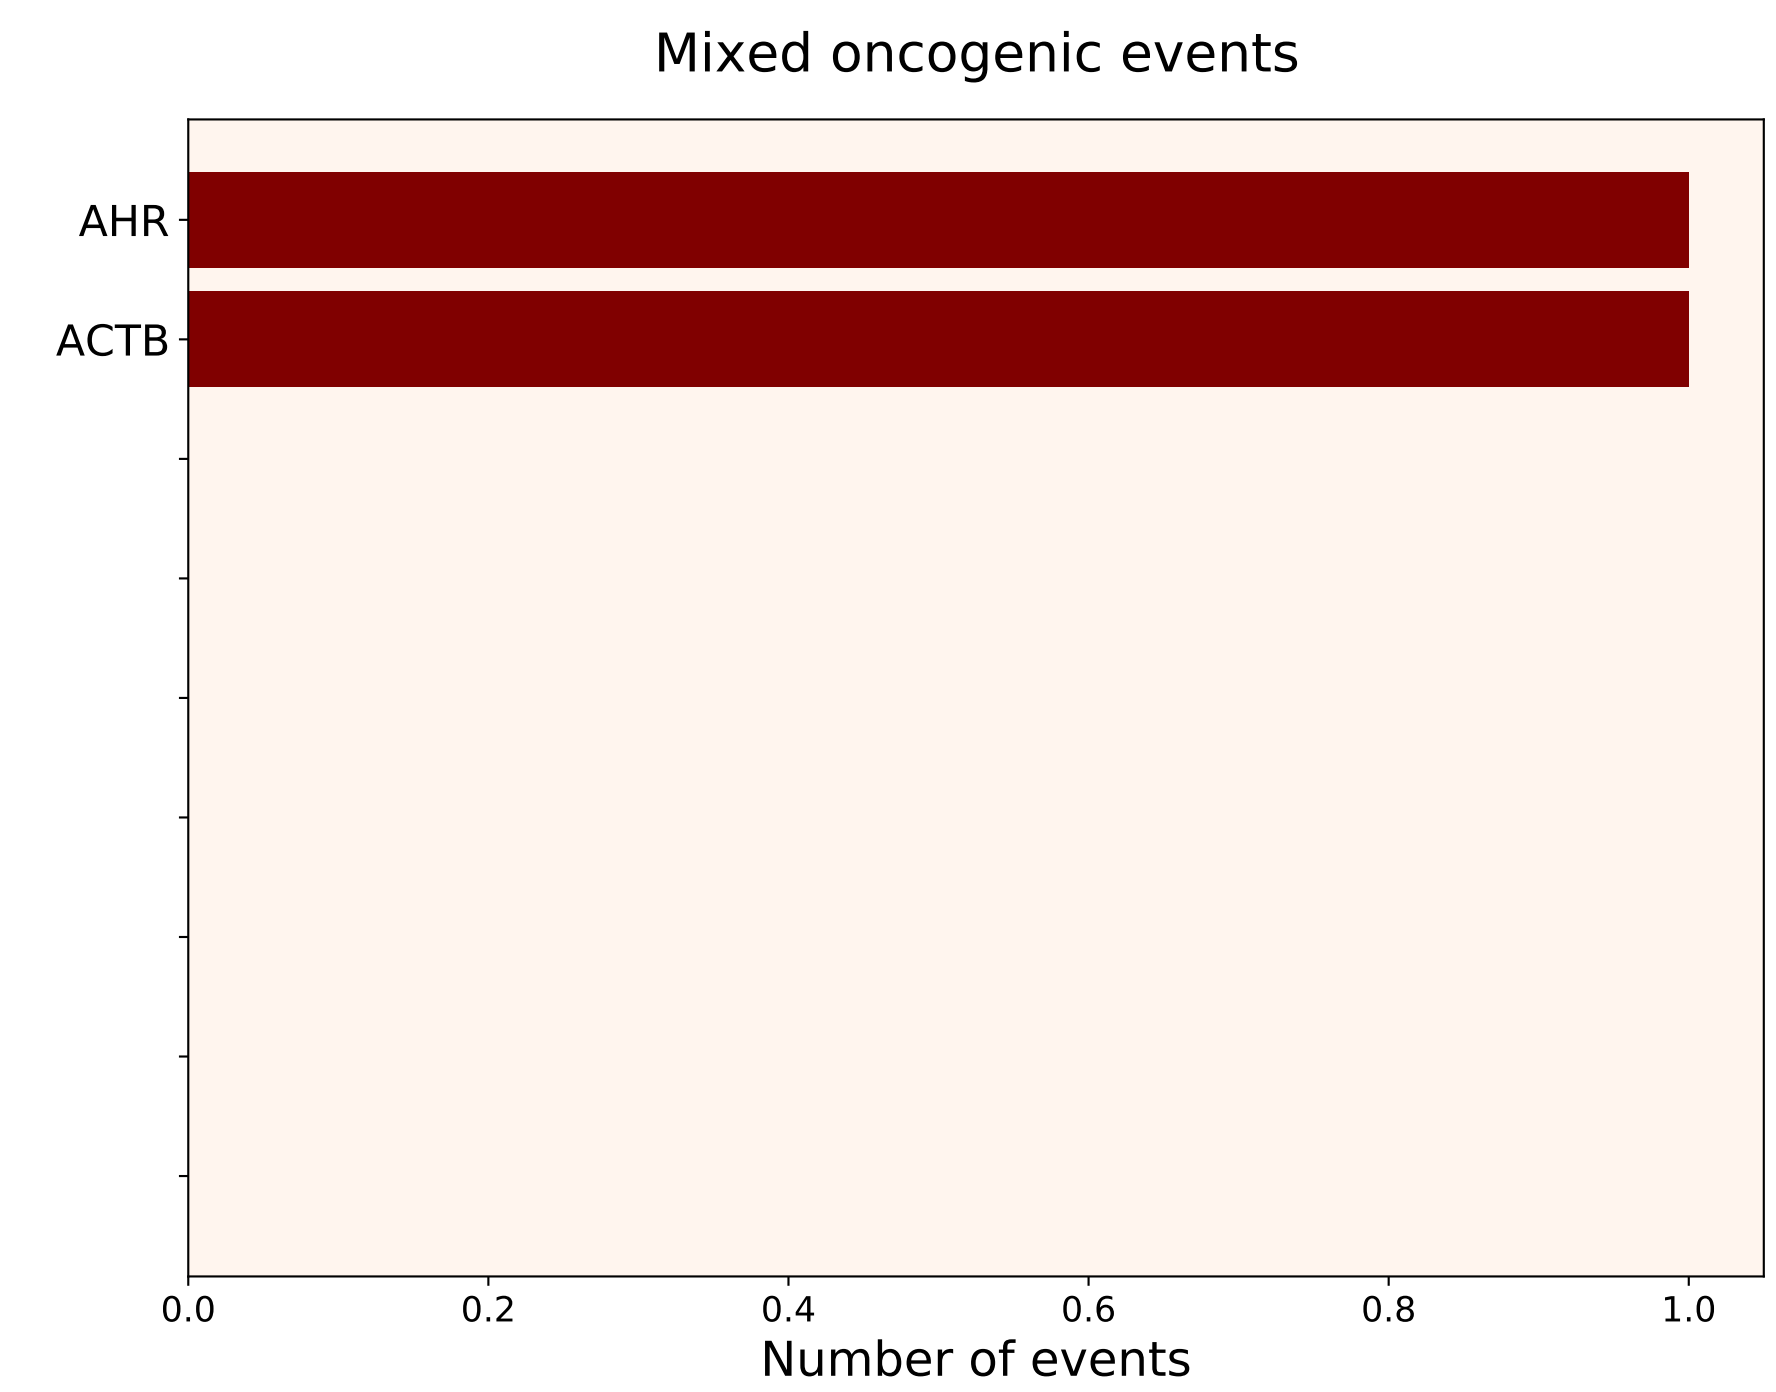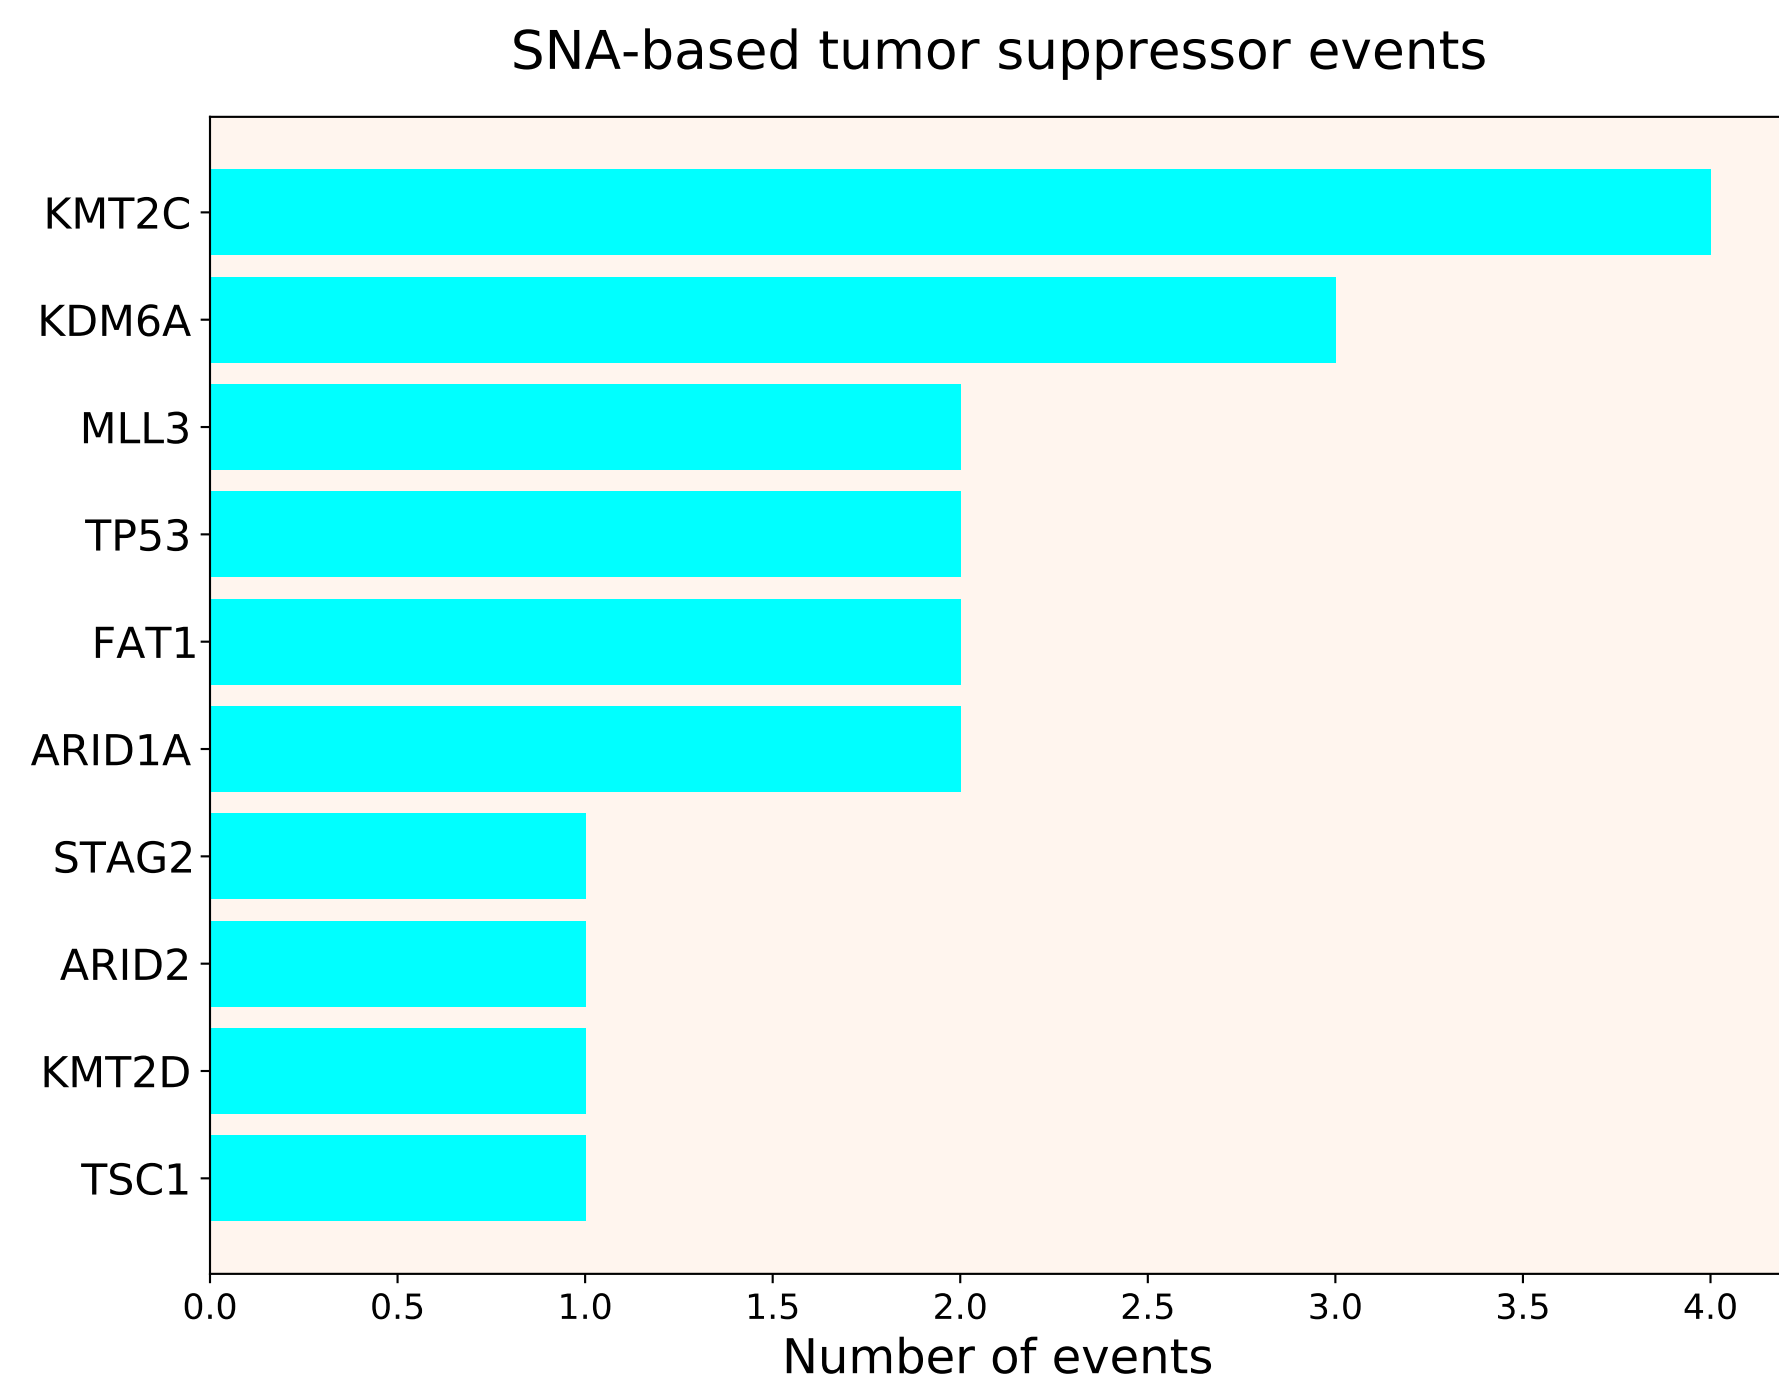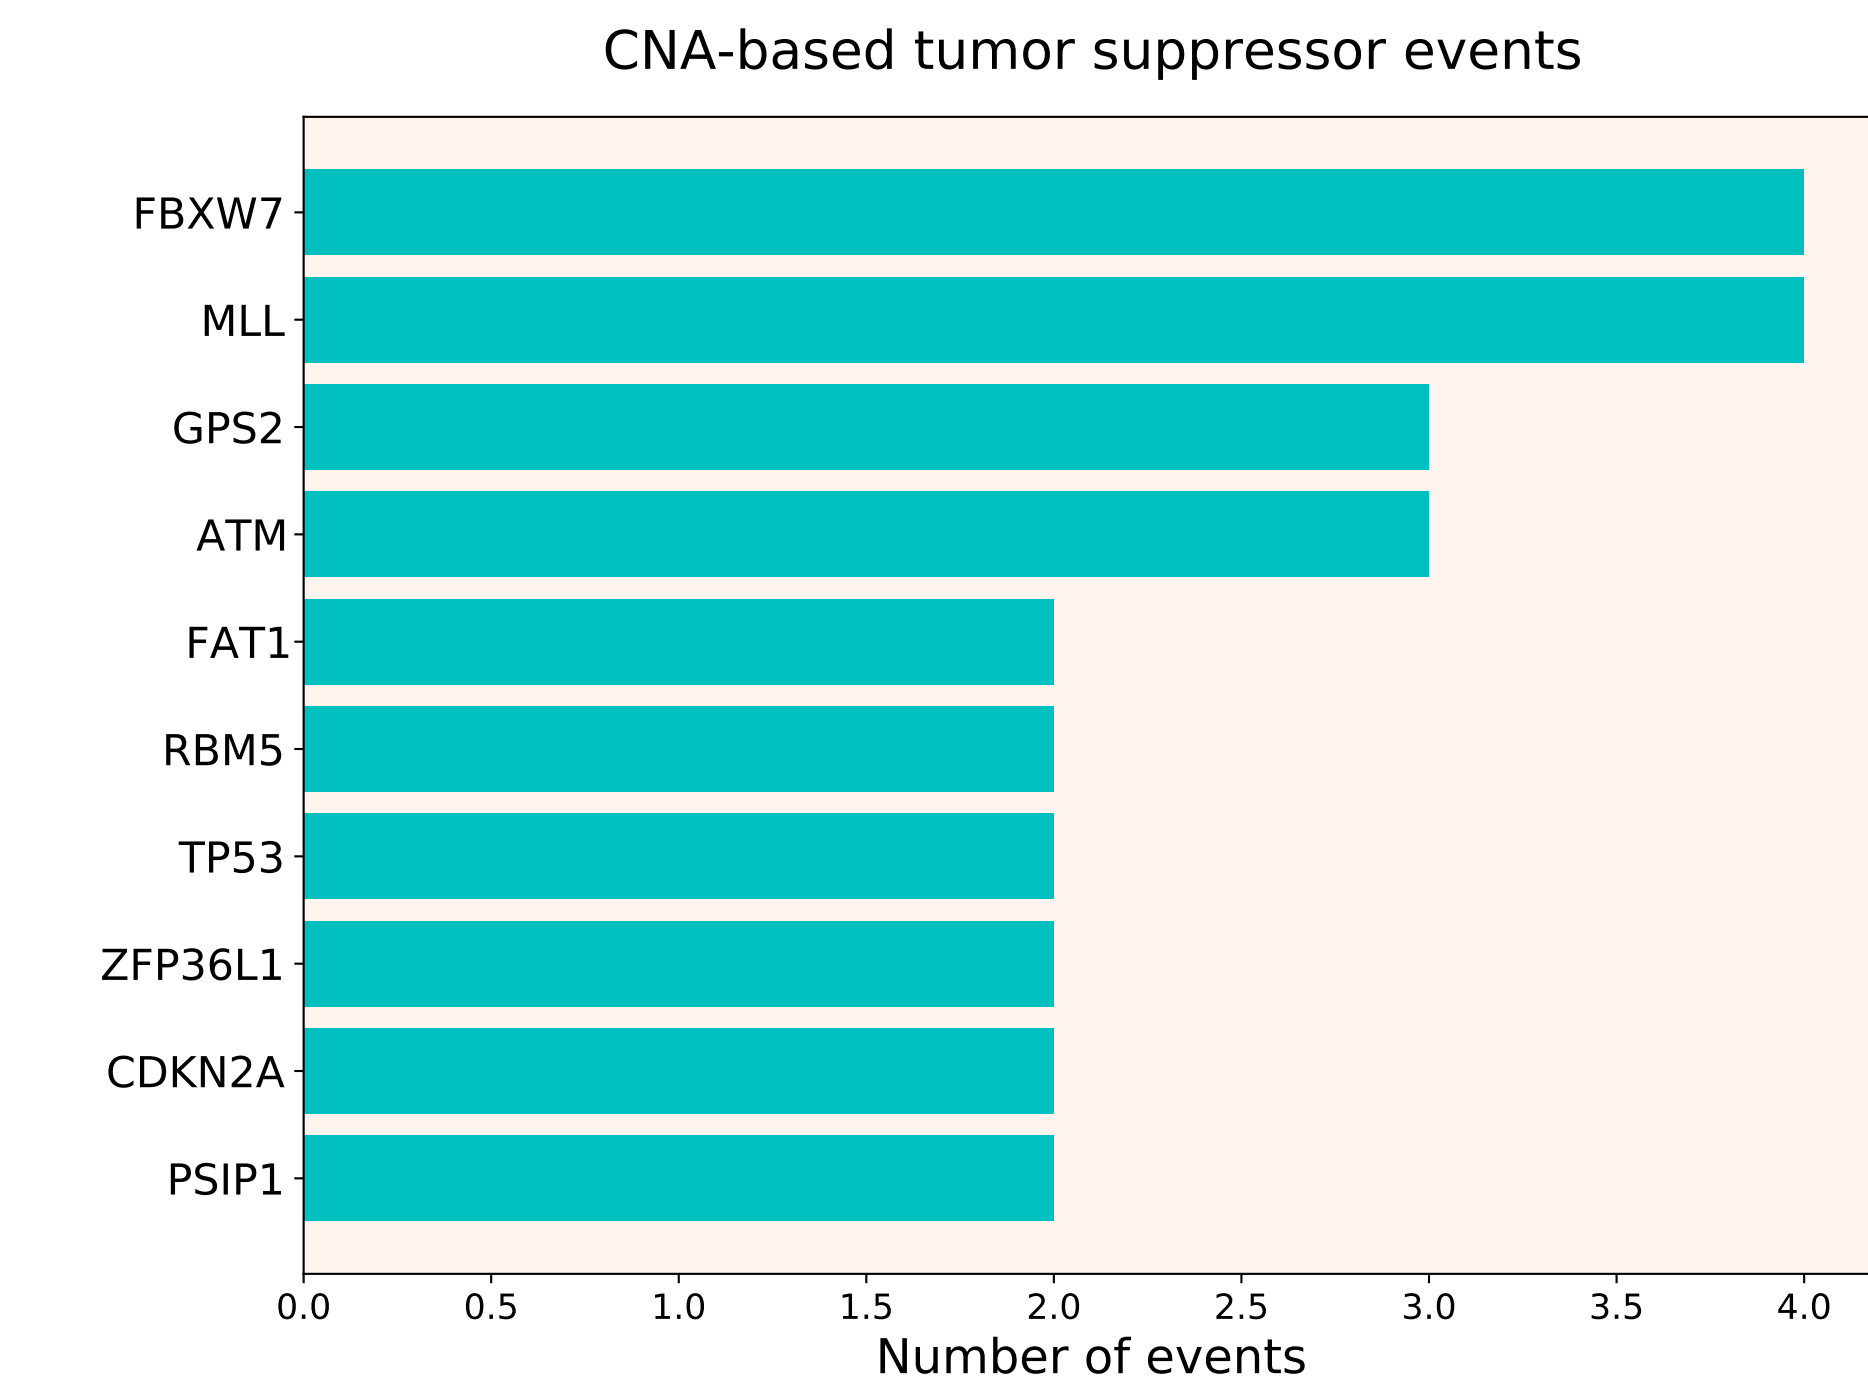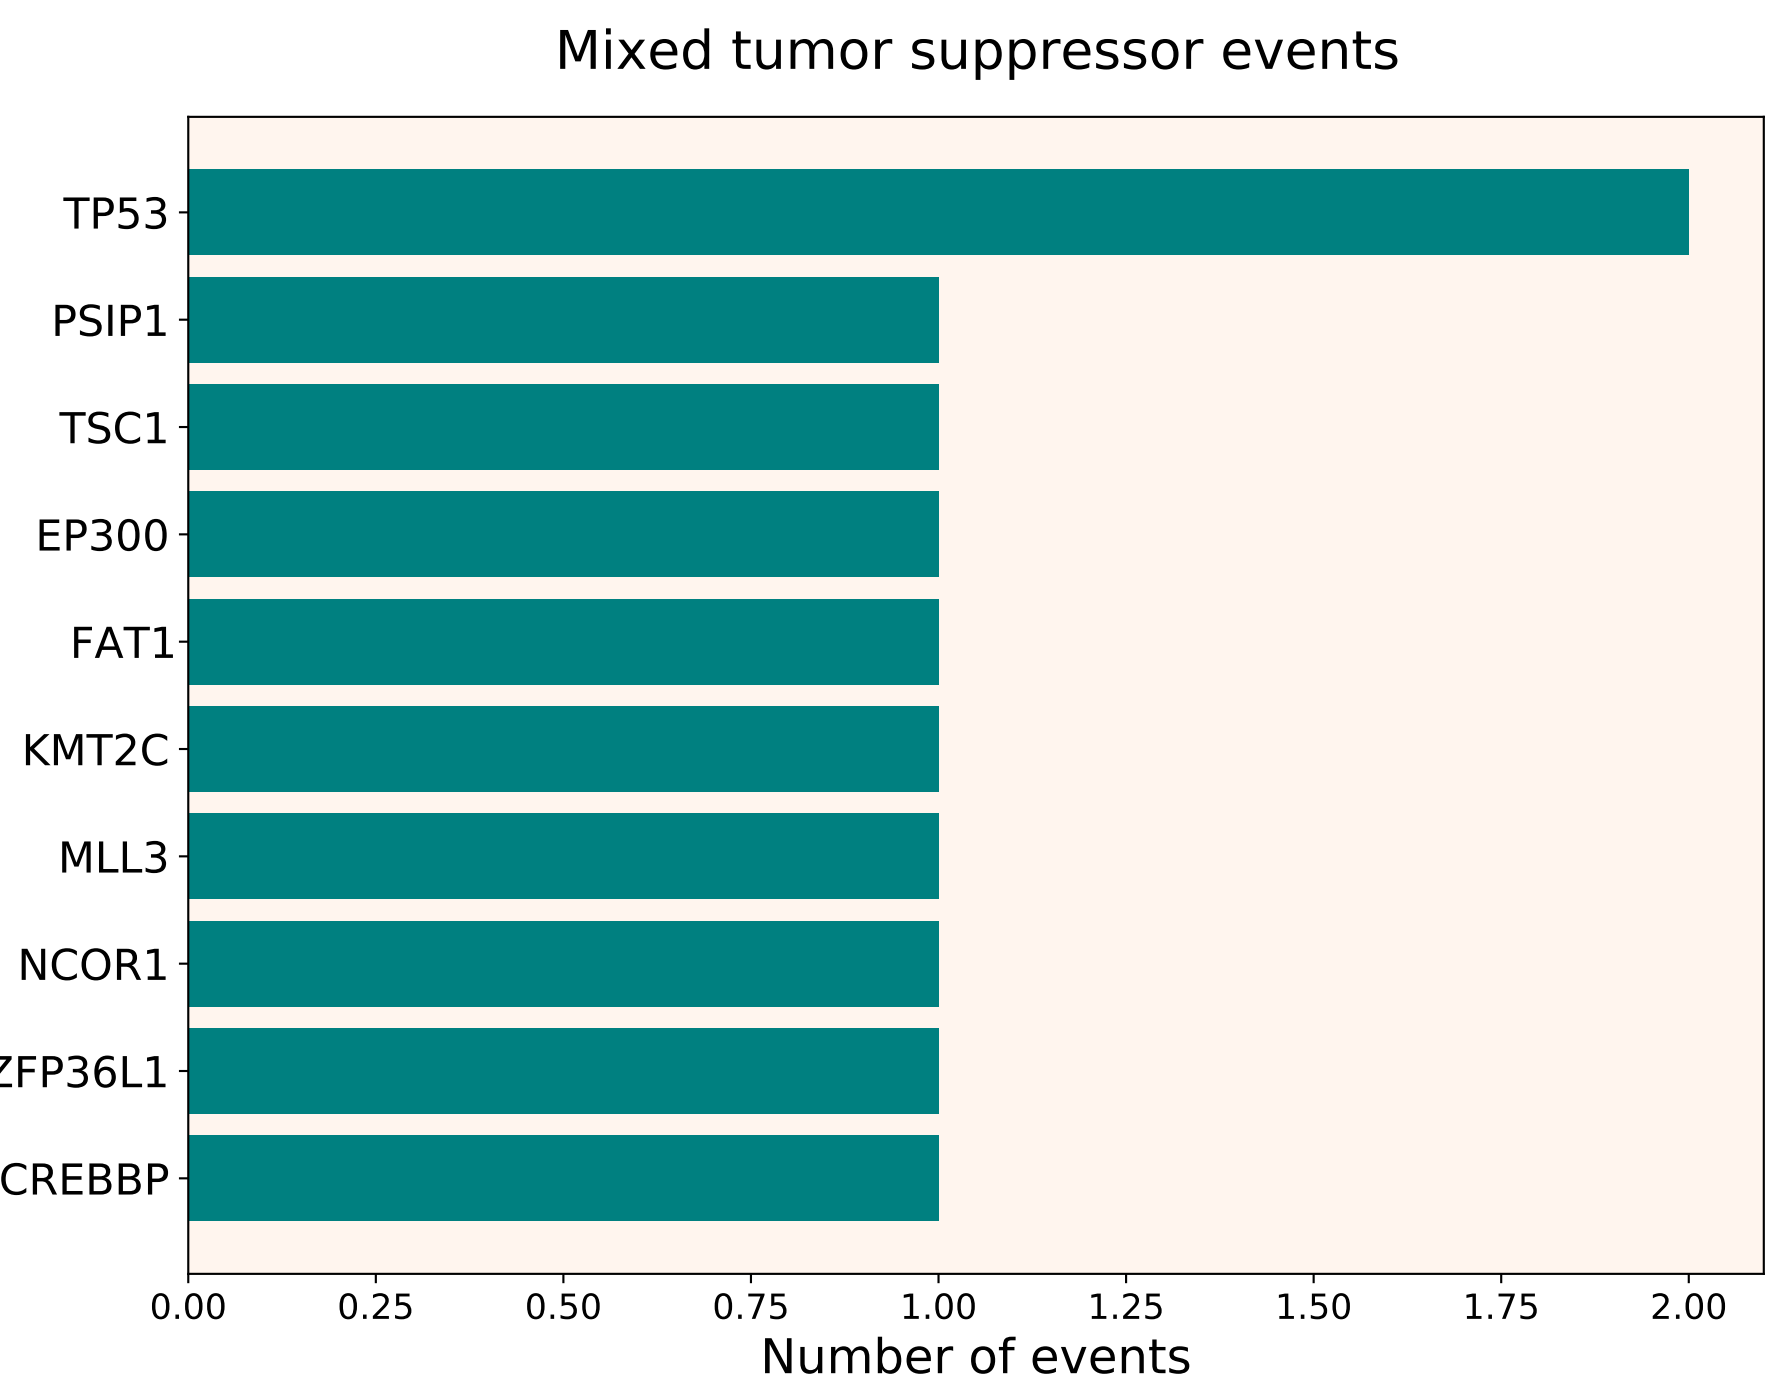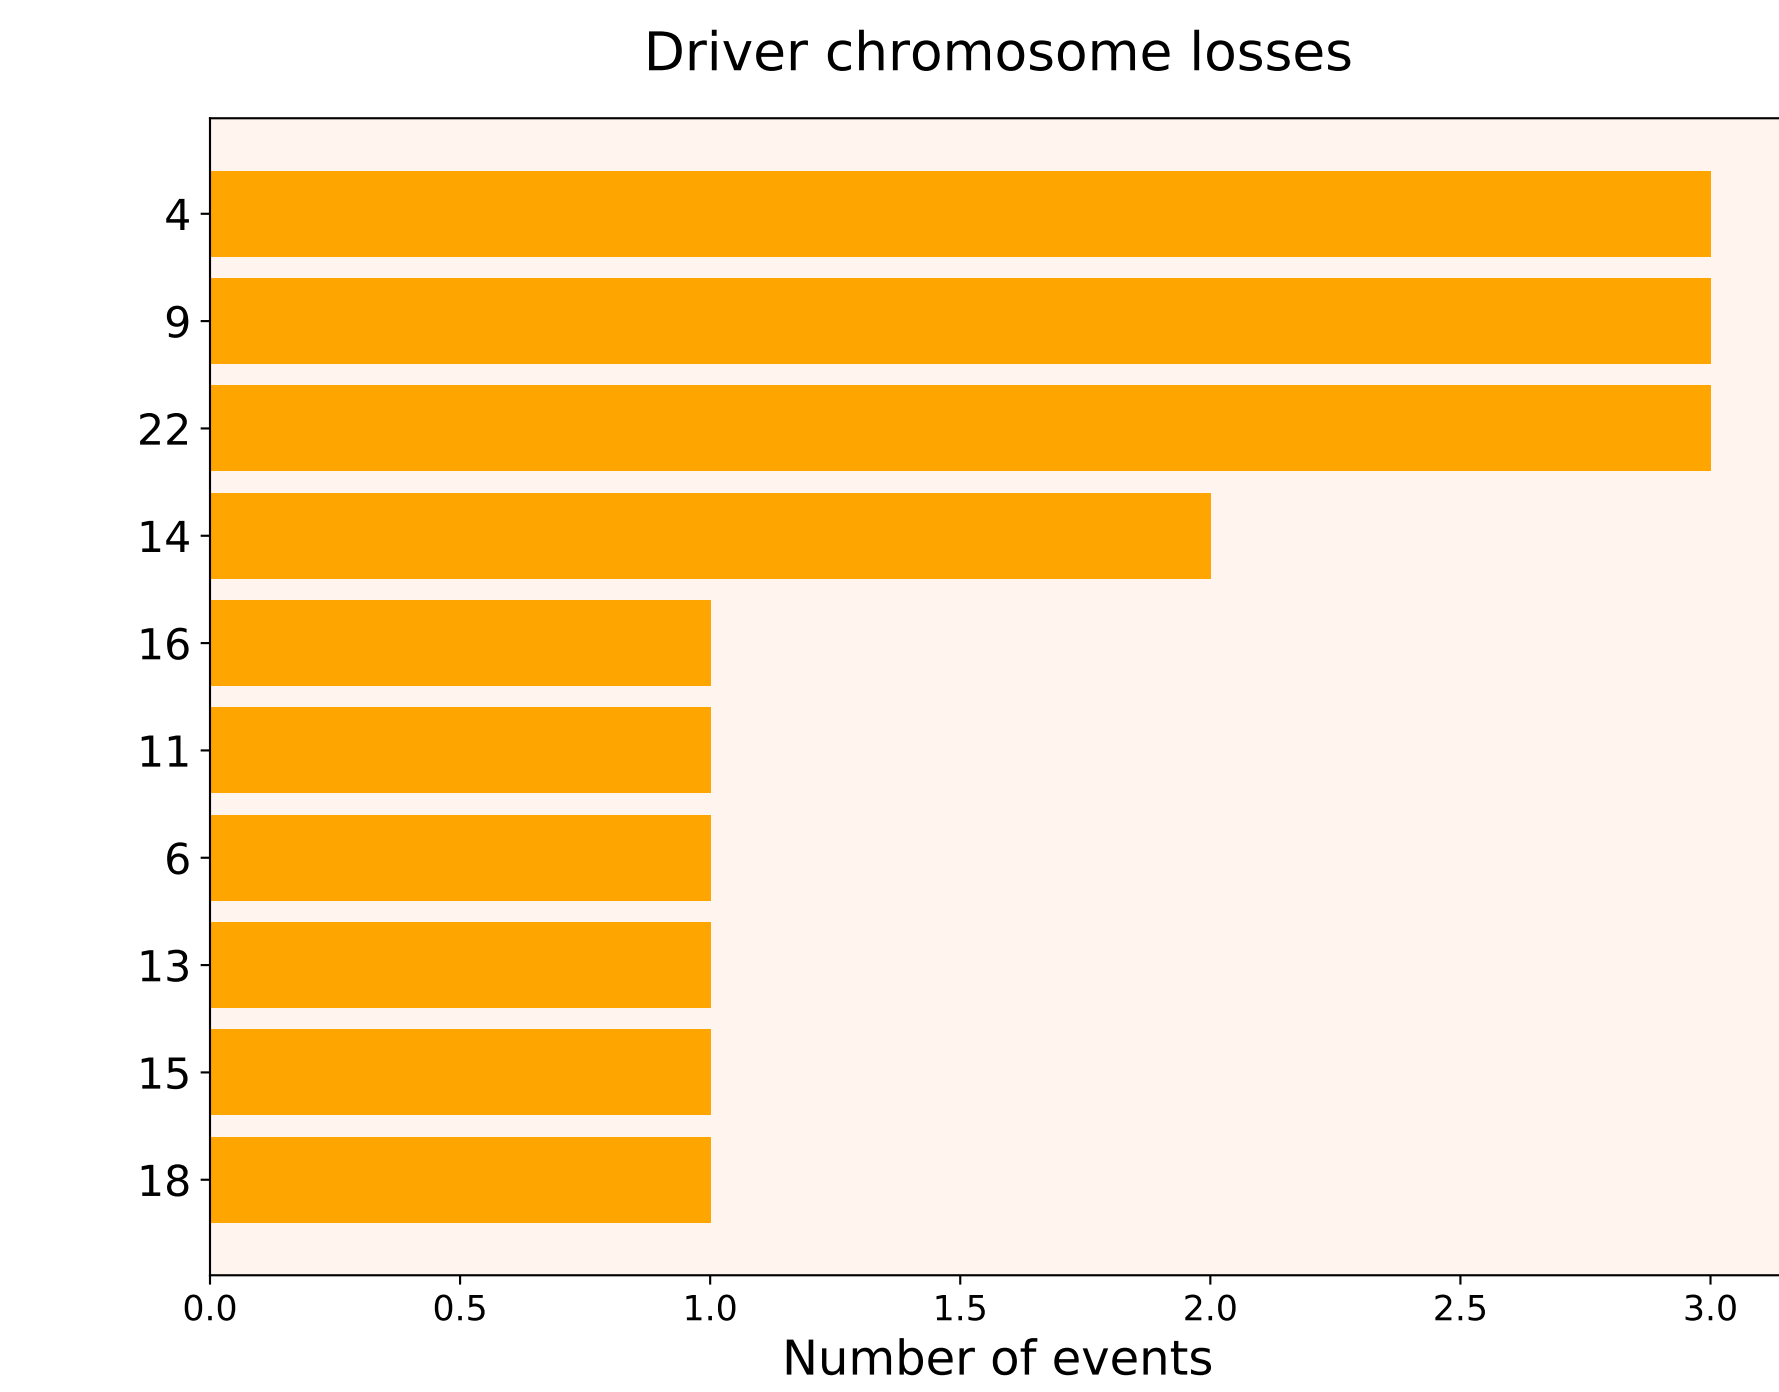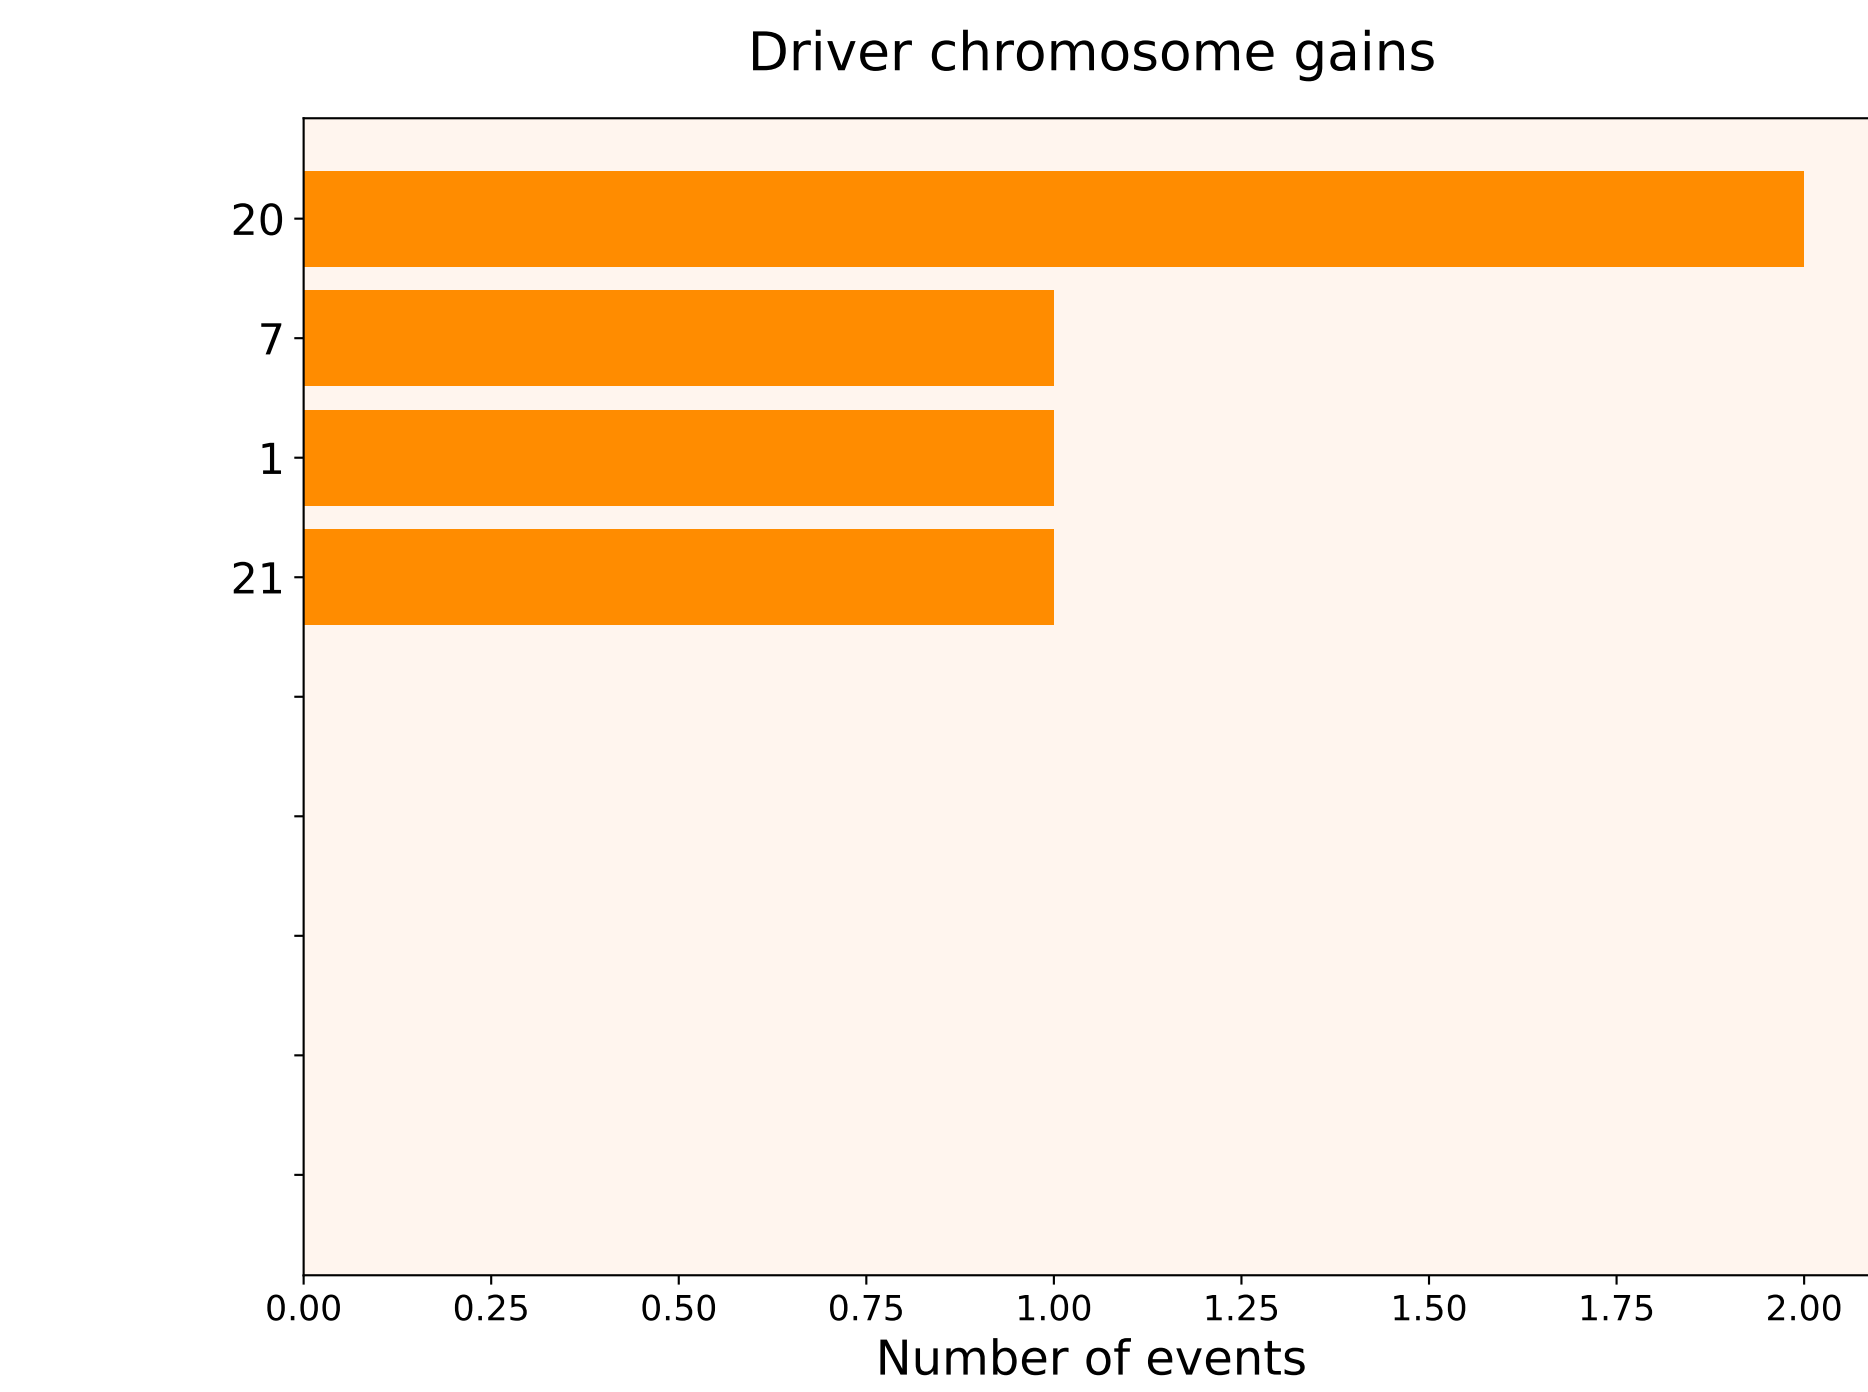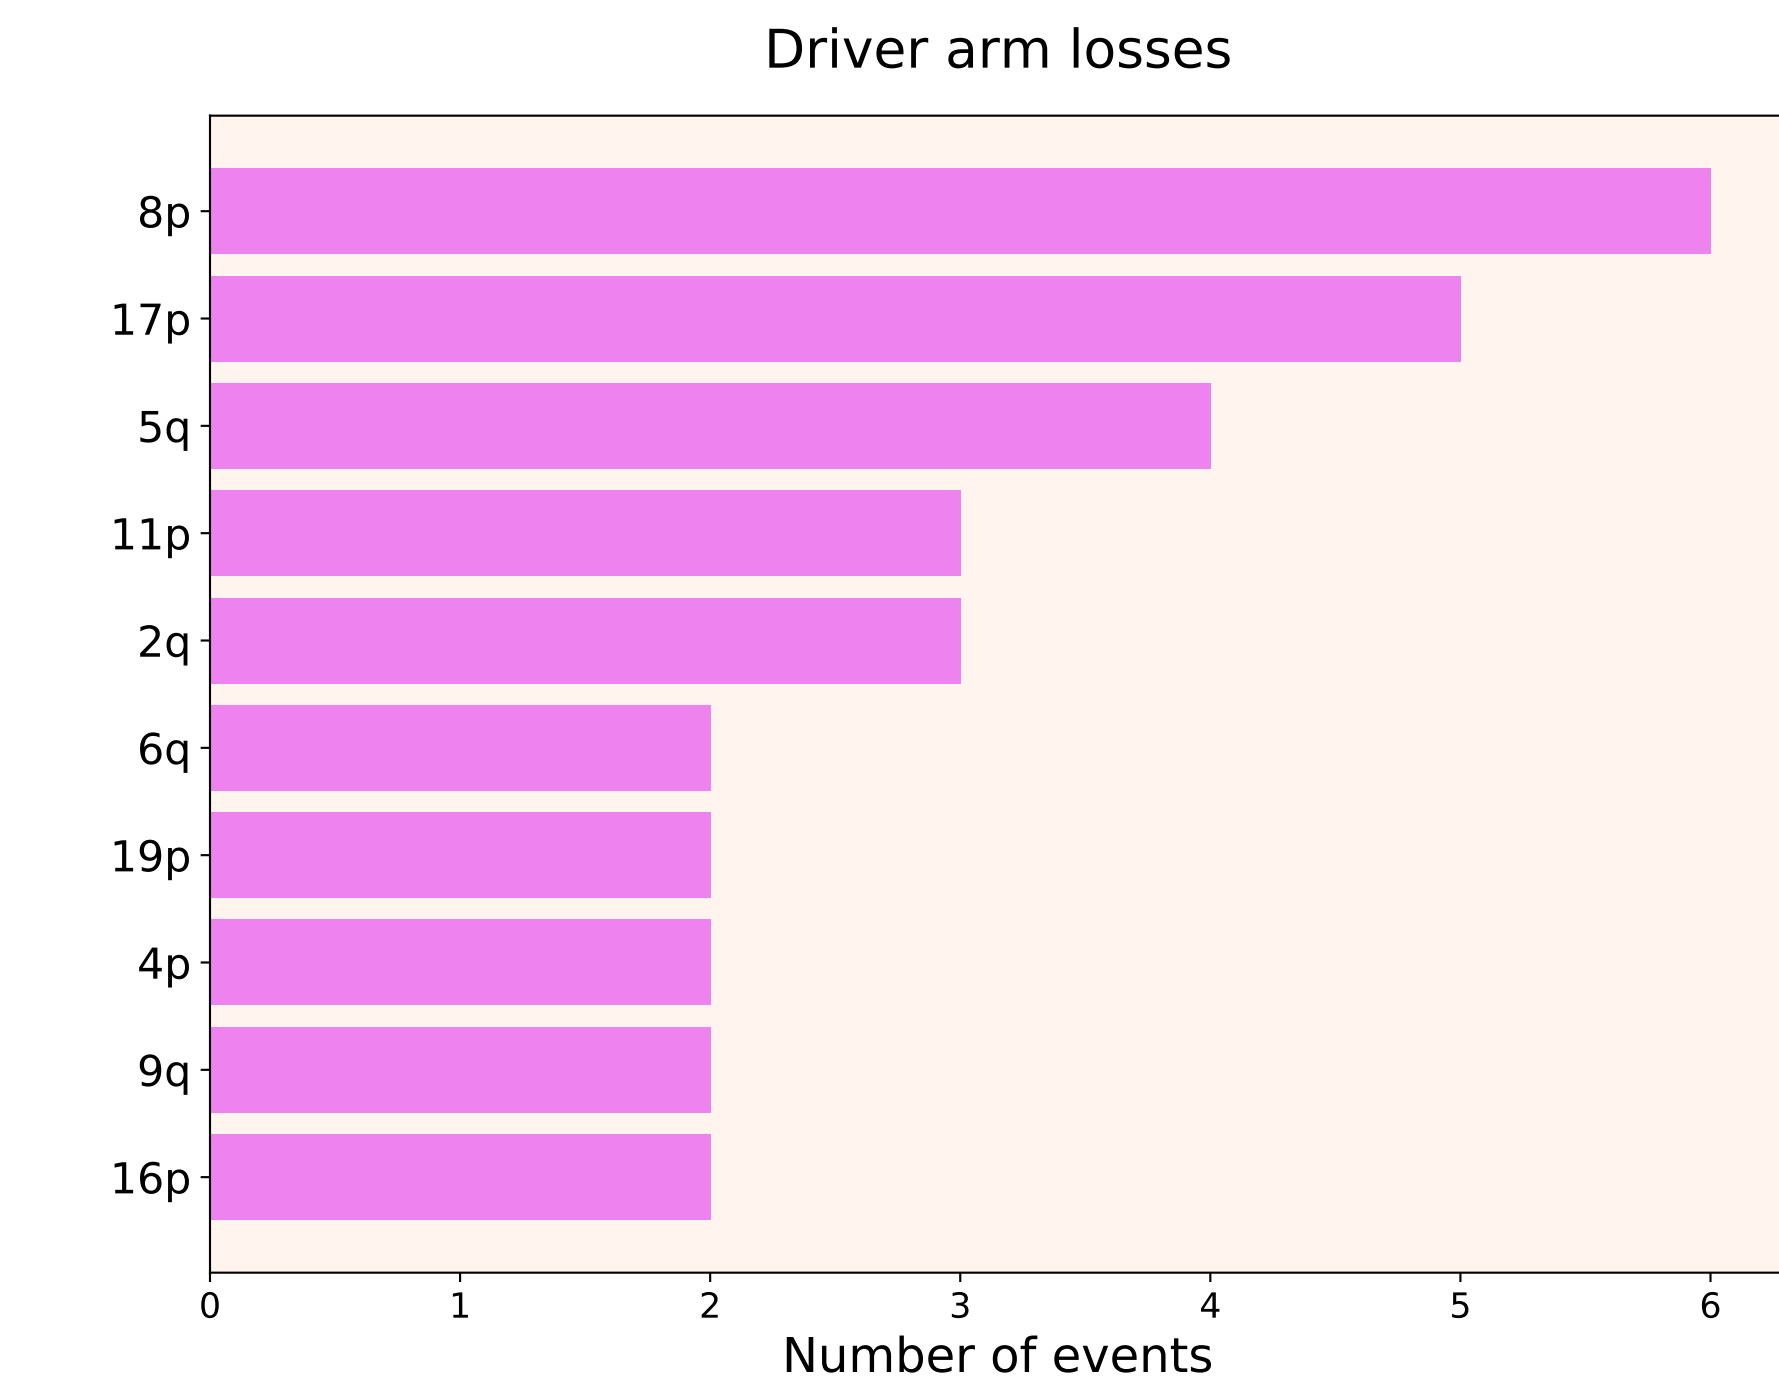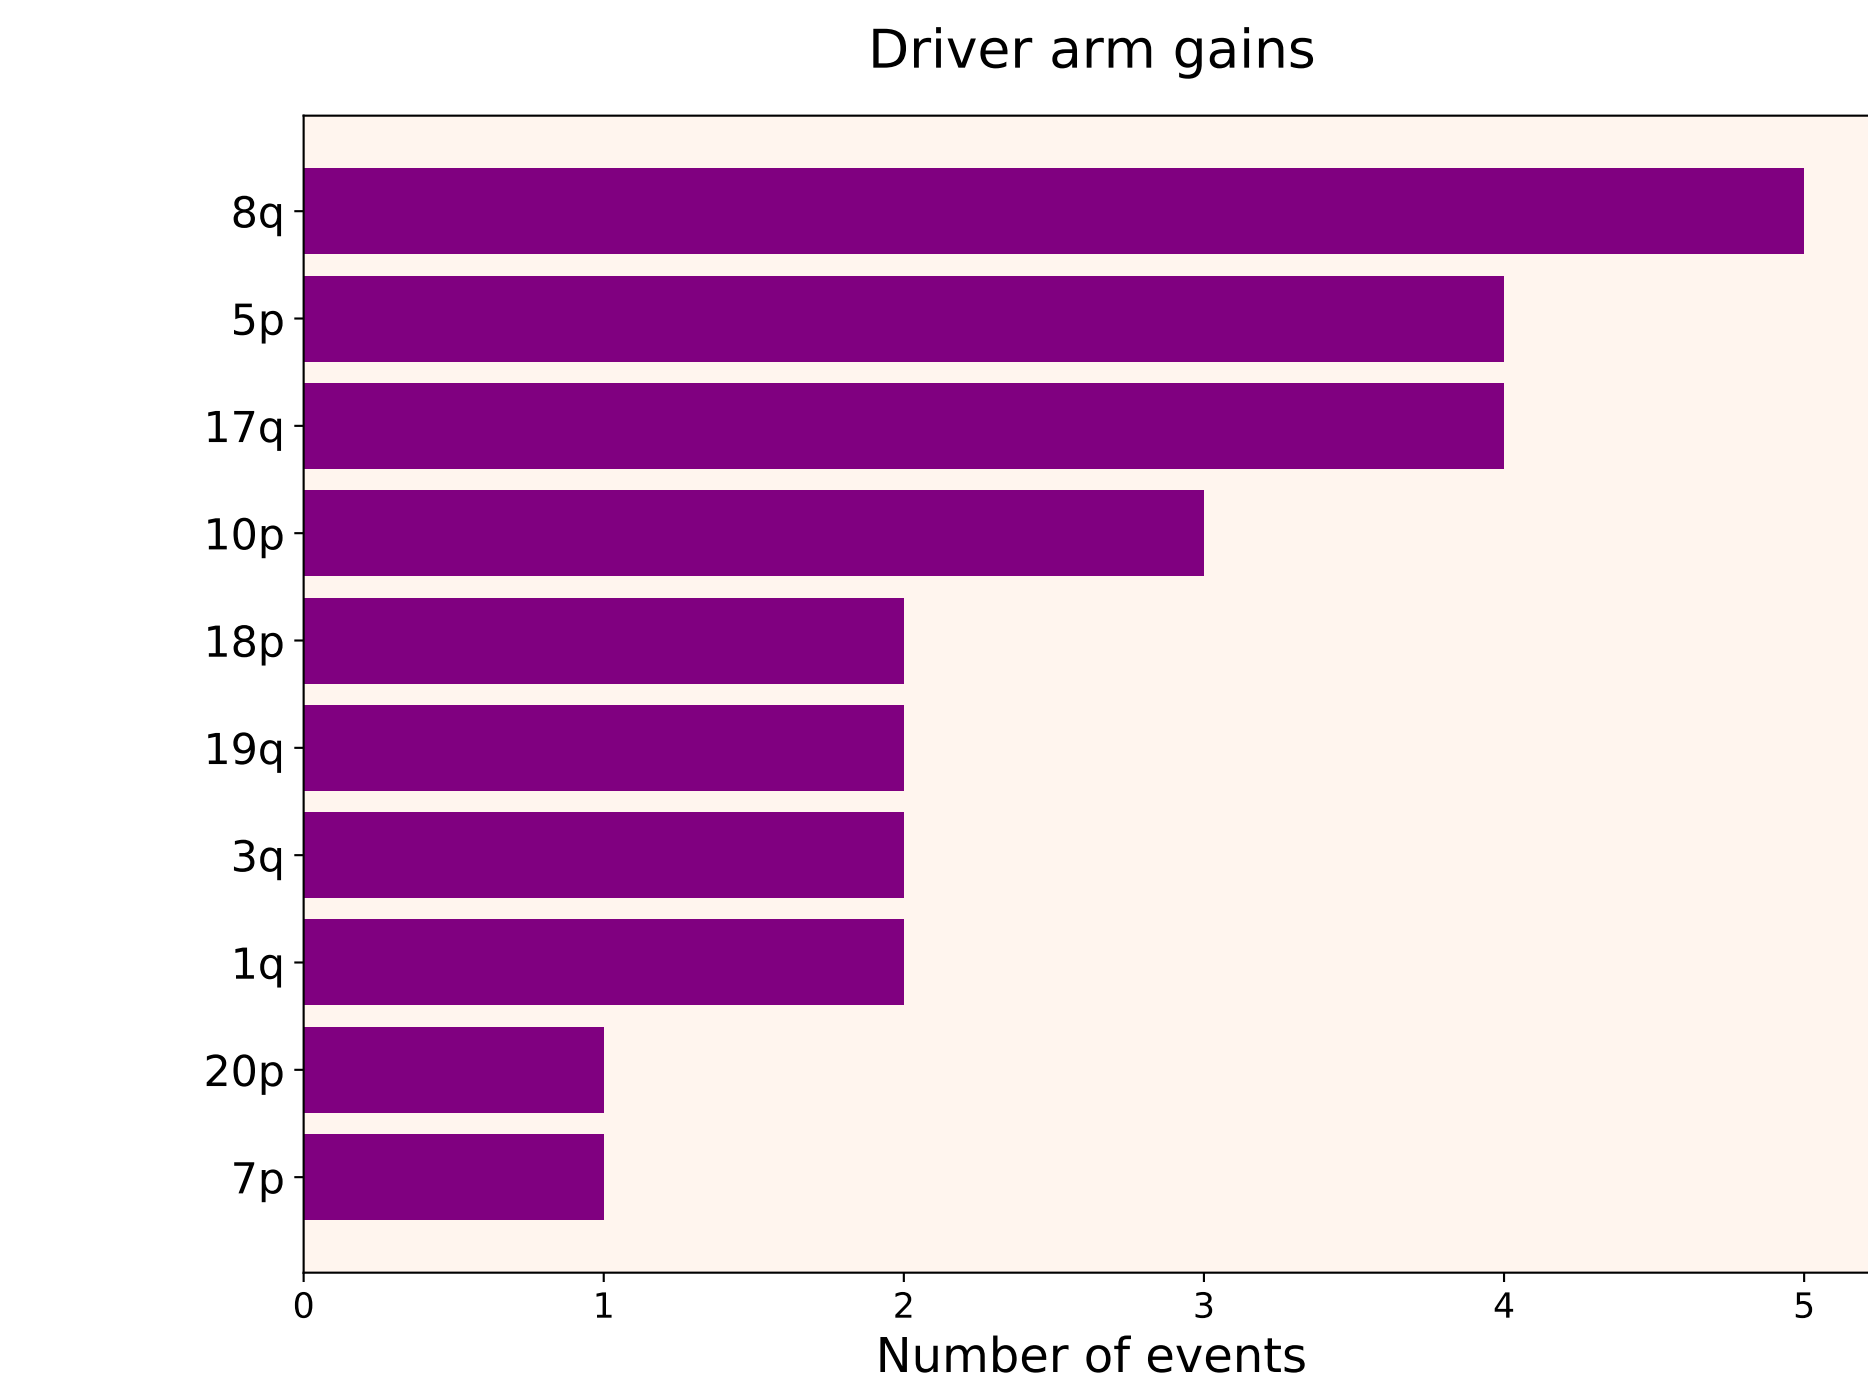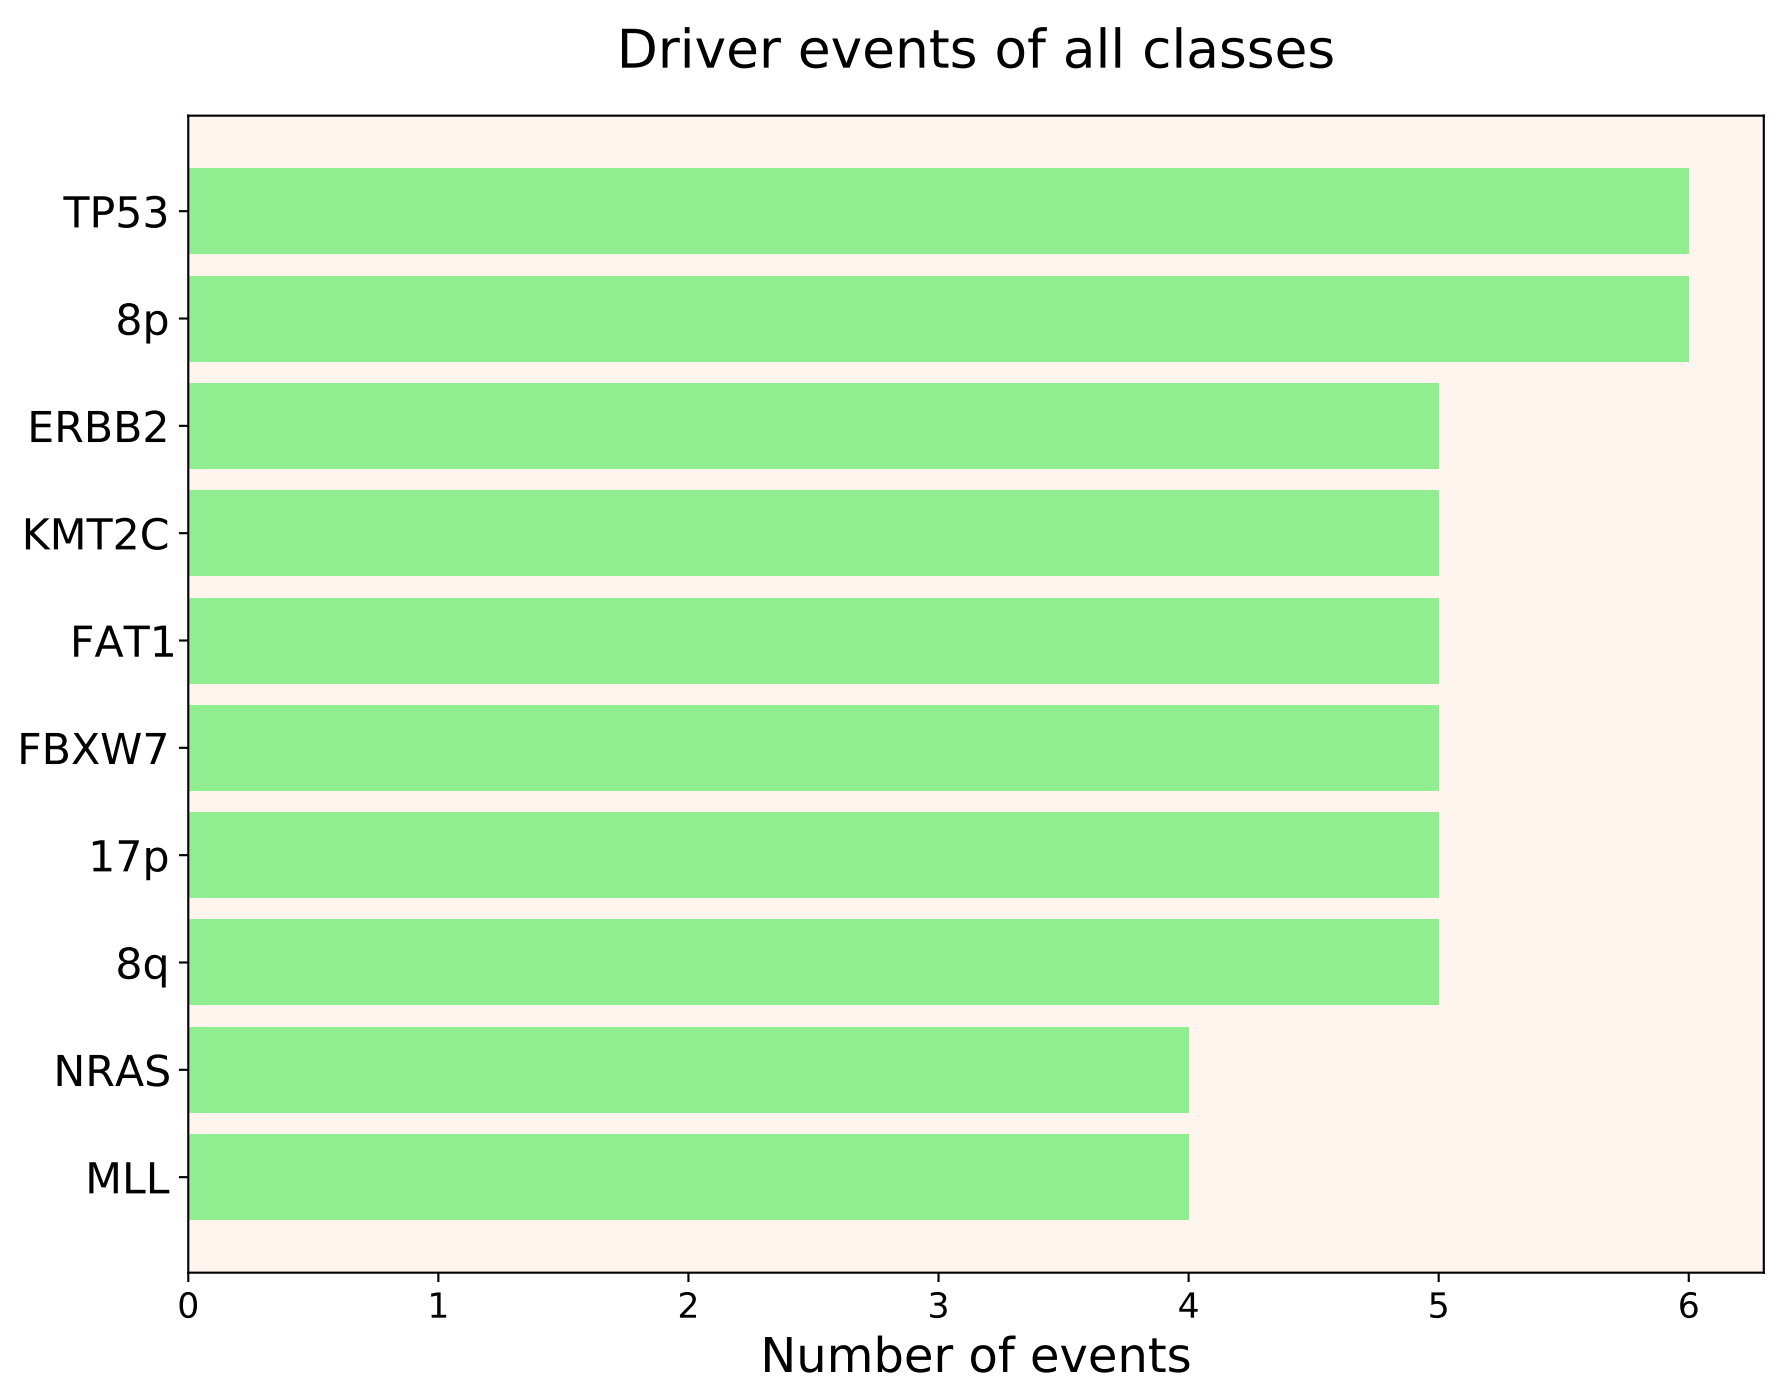

Supplement: Supplemental_Data_S1.zip [file Supplemental_Data_S1.zip]

# THCA

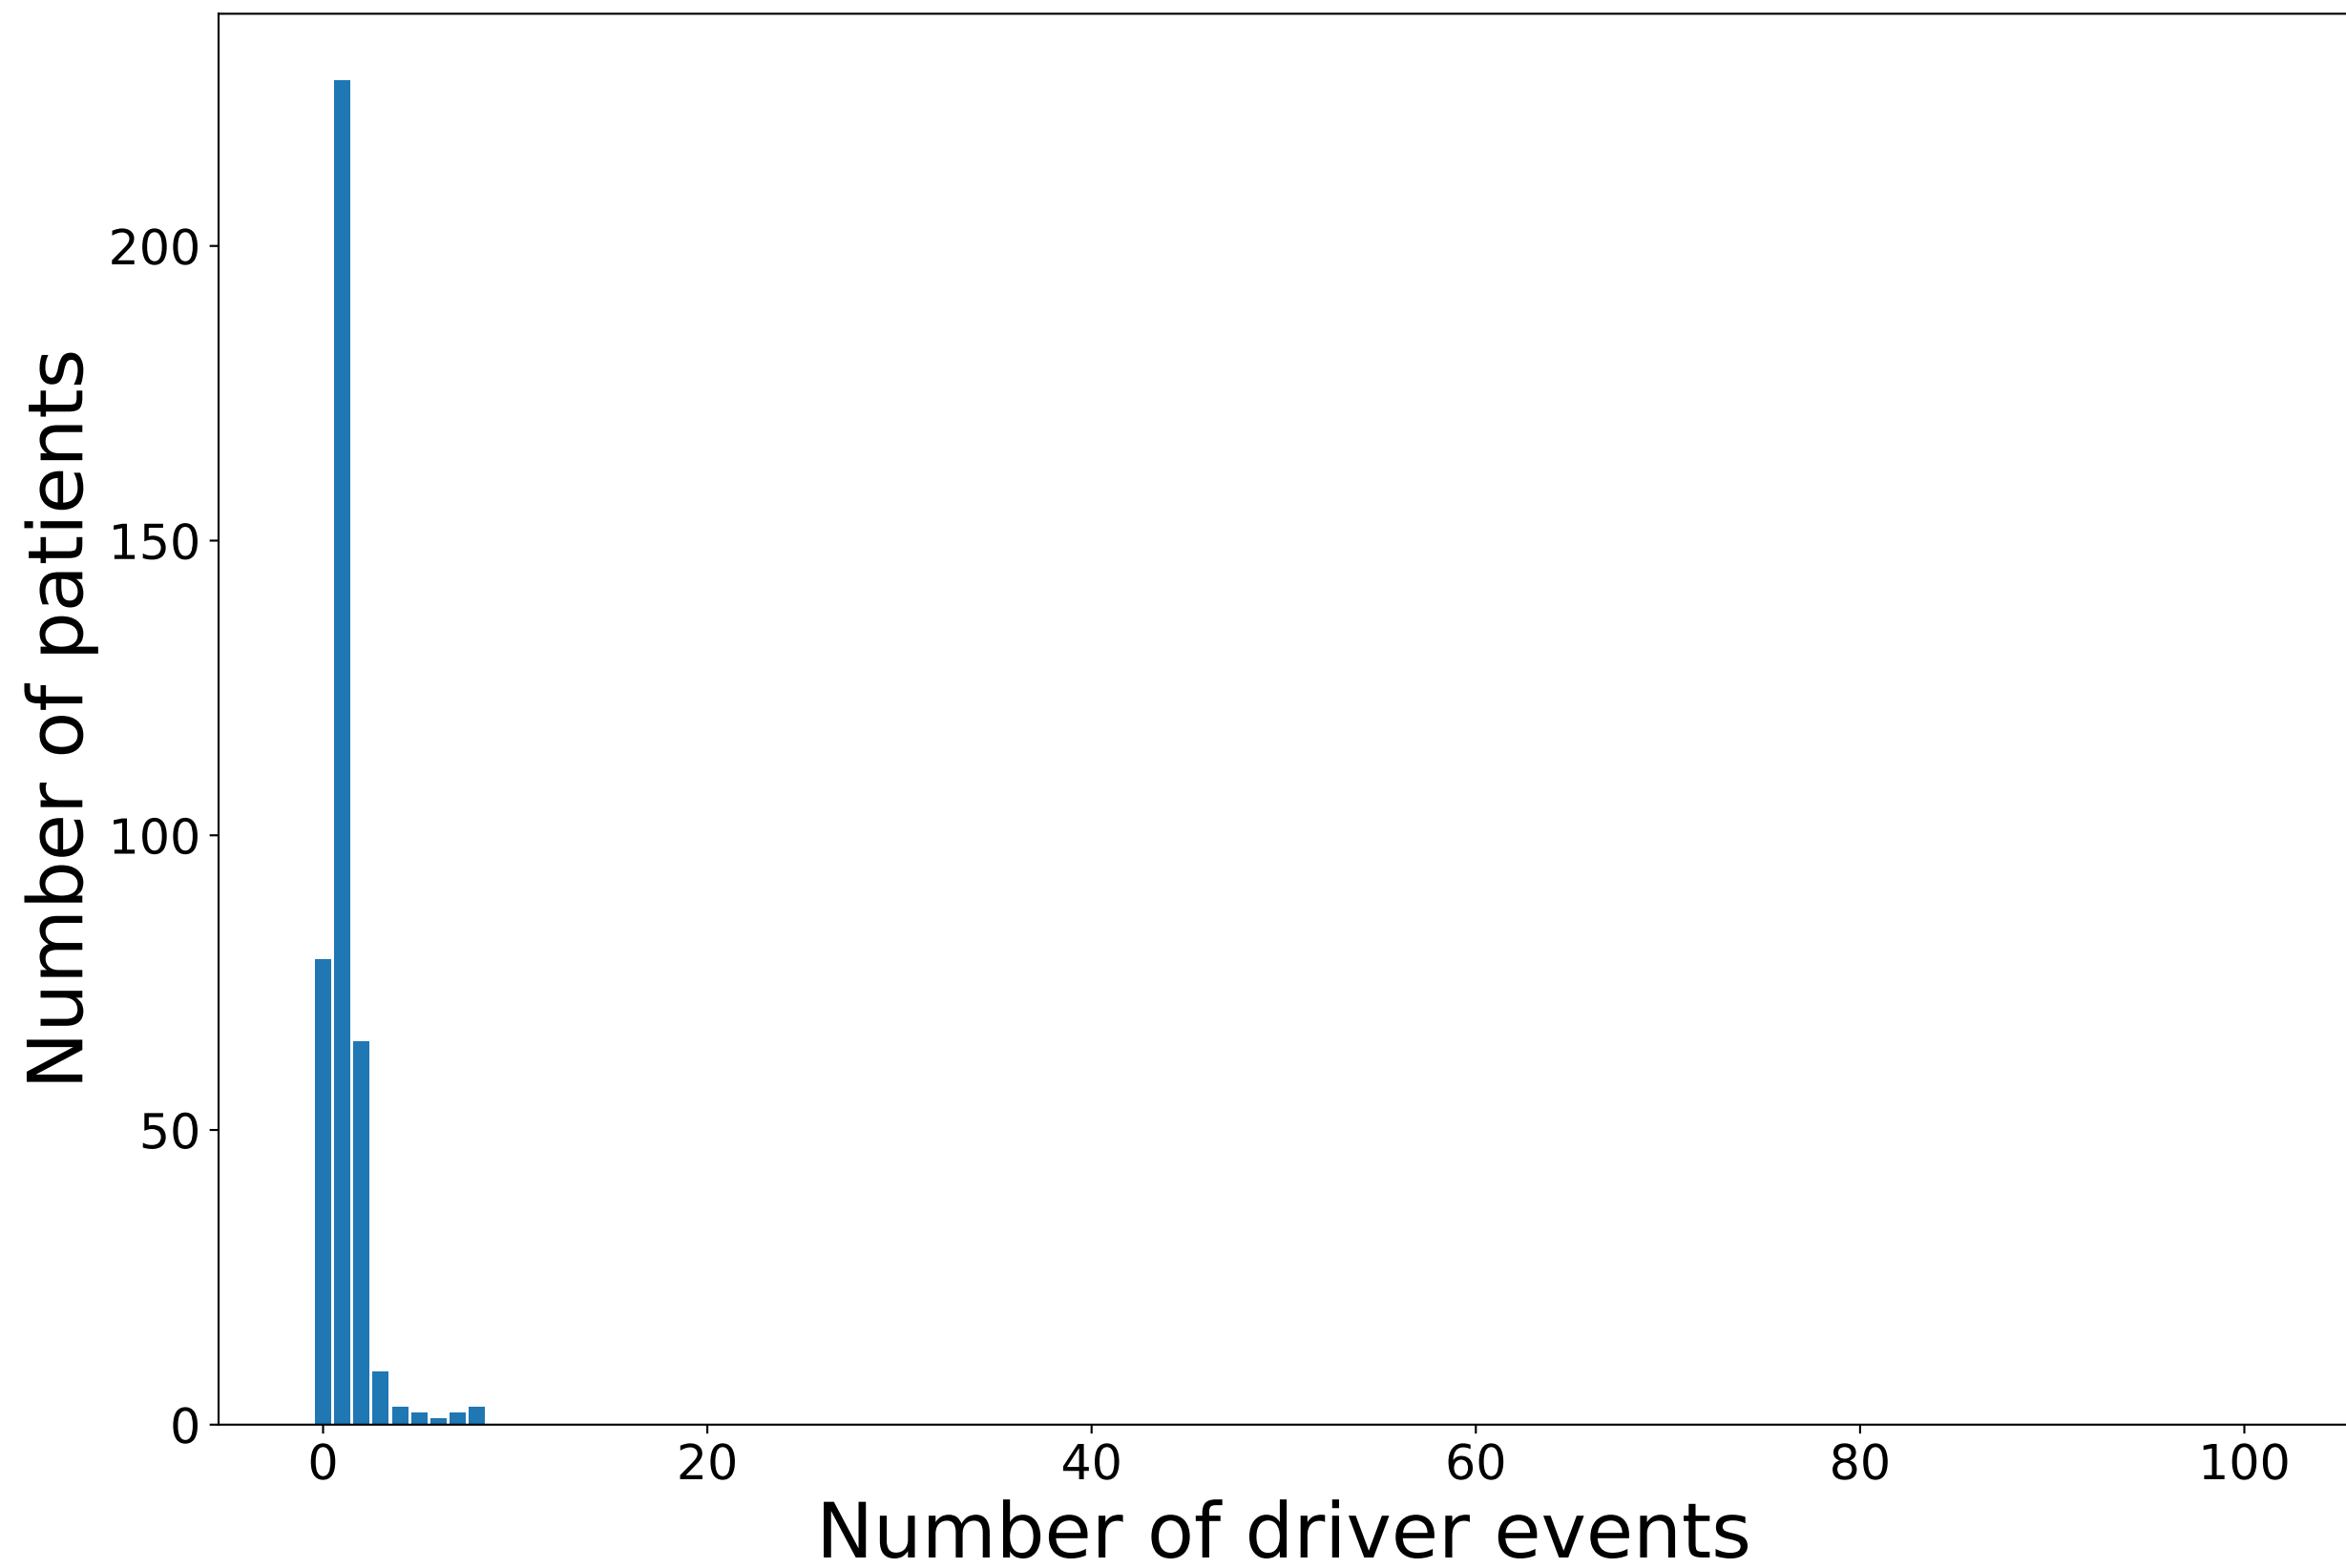

Supplement: Supplemental_Data_S1.zip [file Supplemental_Data_S1.zip]

# PAAD\_MALE

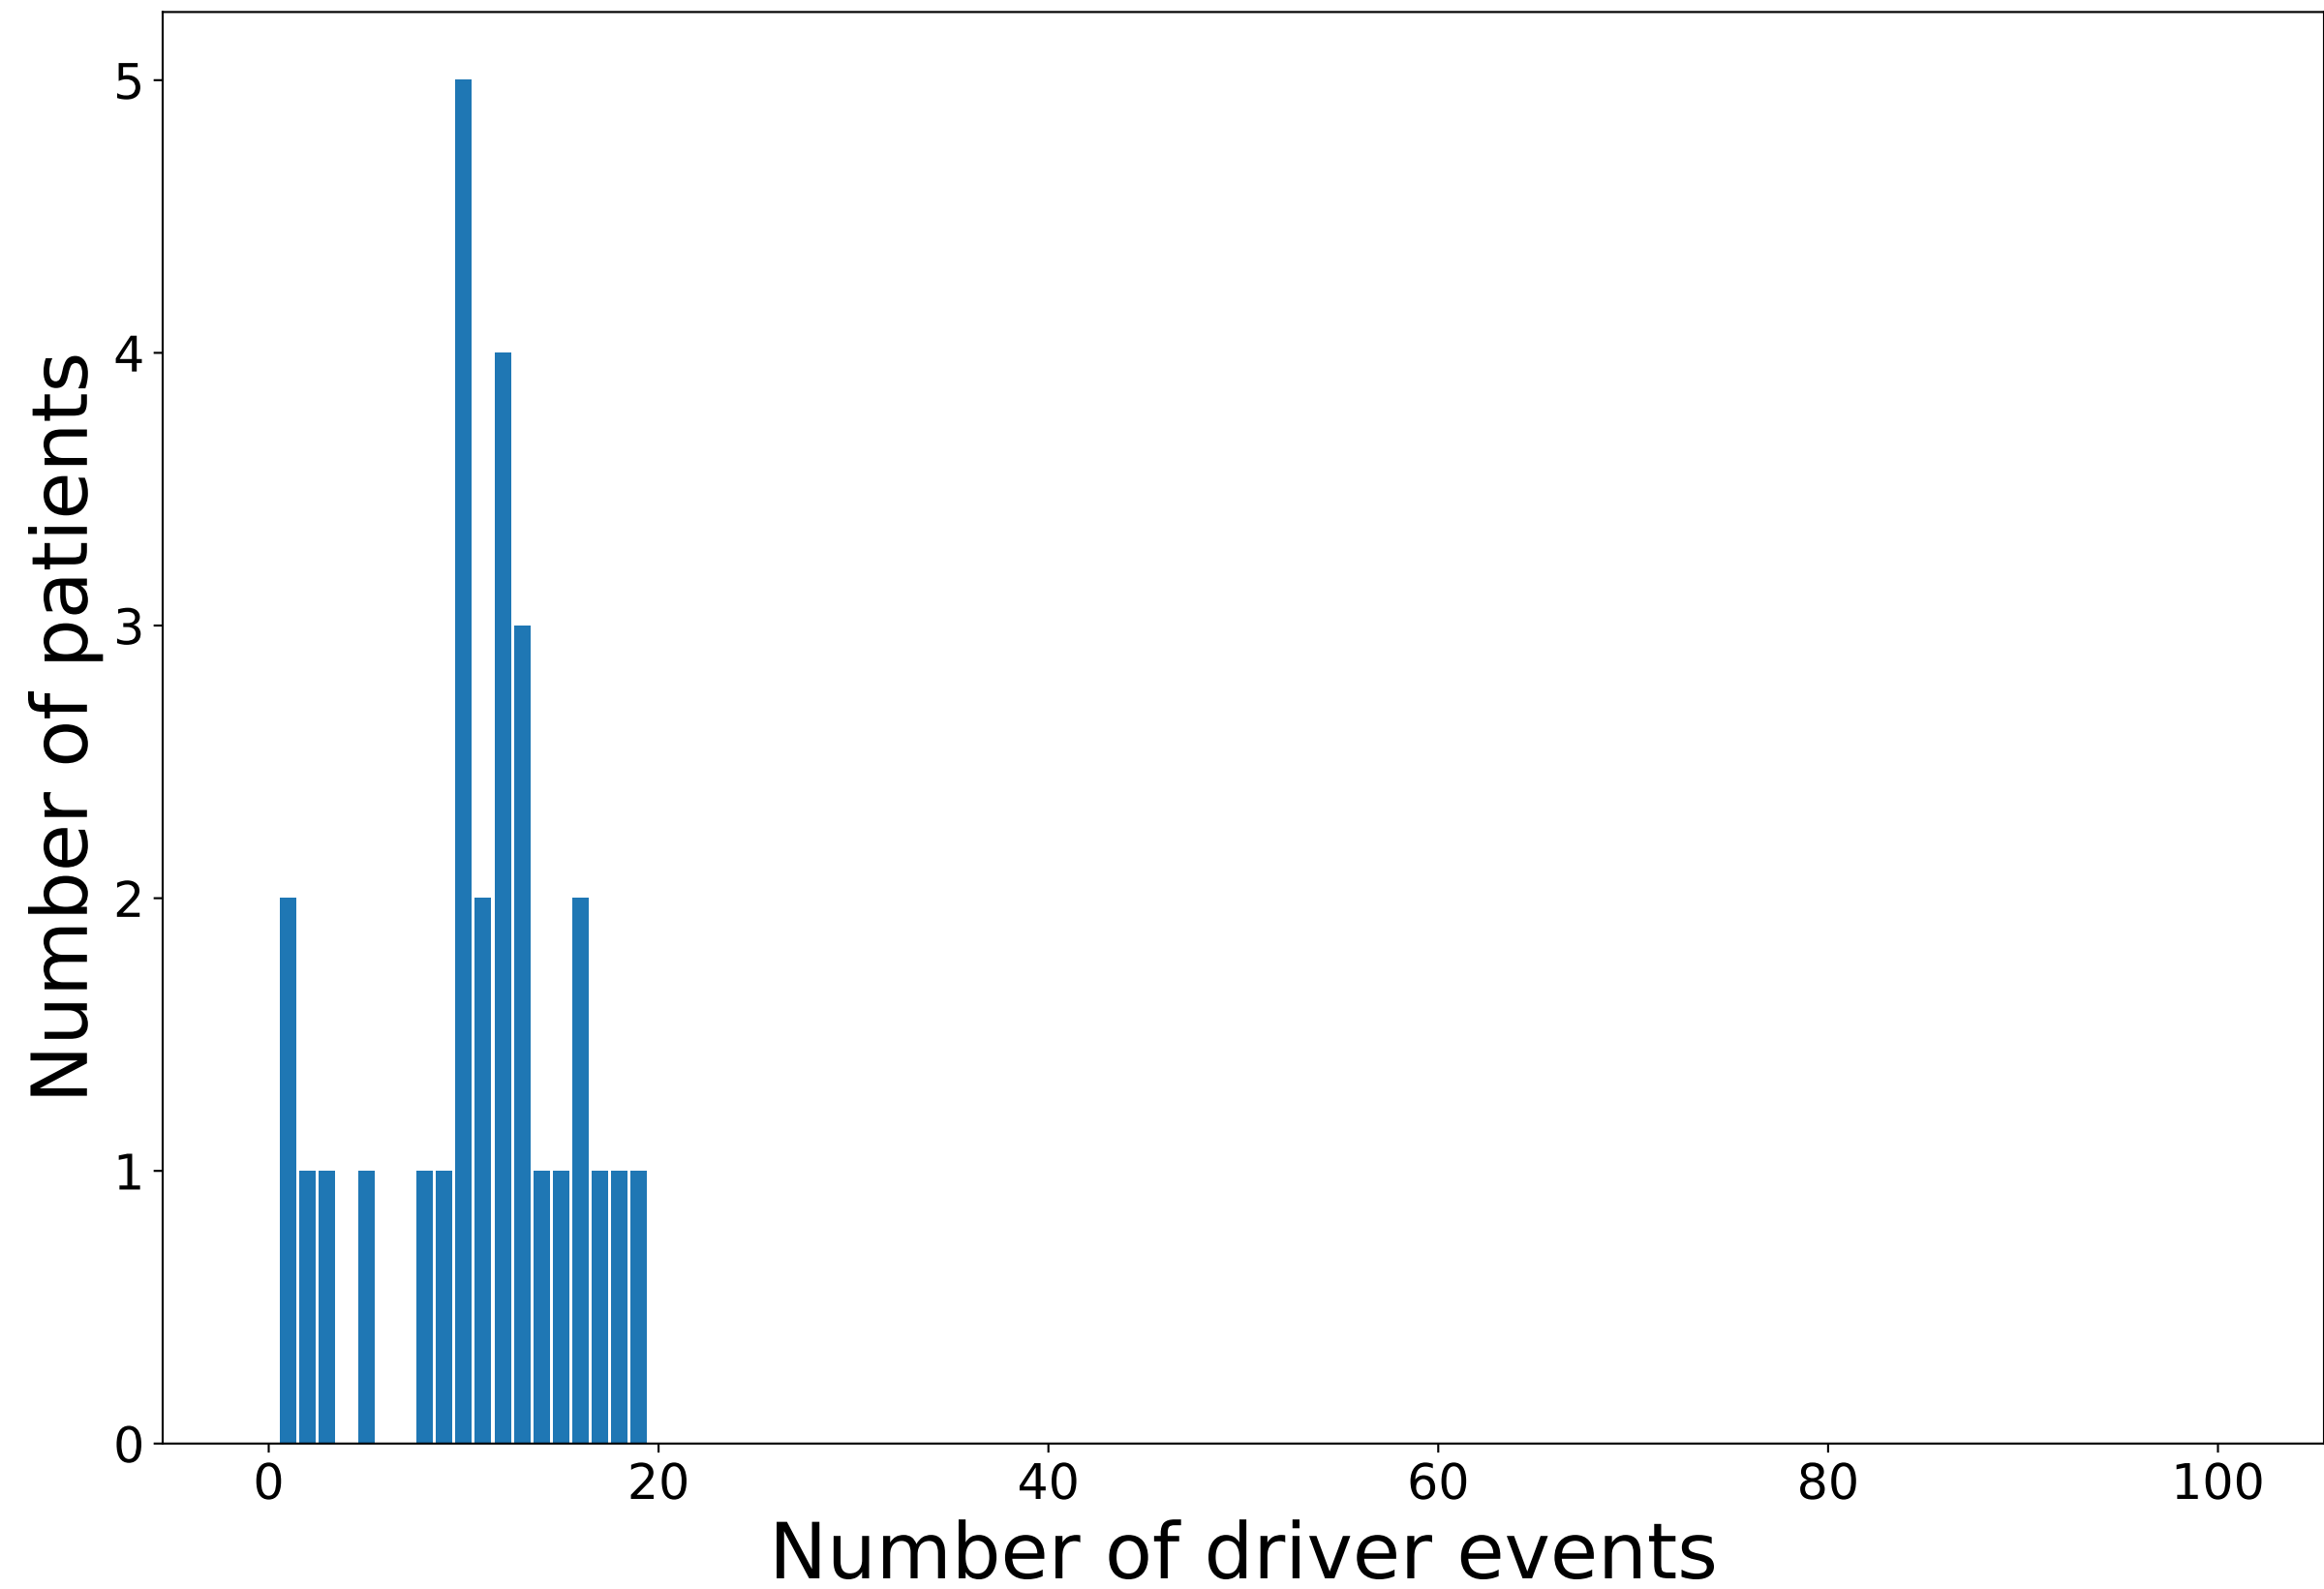

Supplement: Supplemental_Data_S1.zip [file Supplemental_Data_S1.zip]

# SARC\_FEMALE

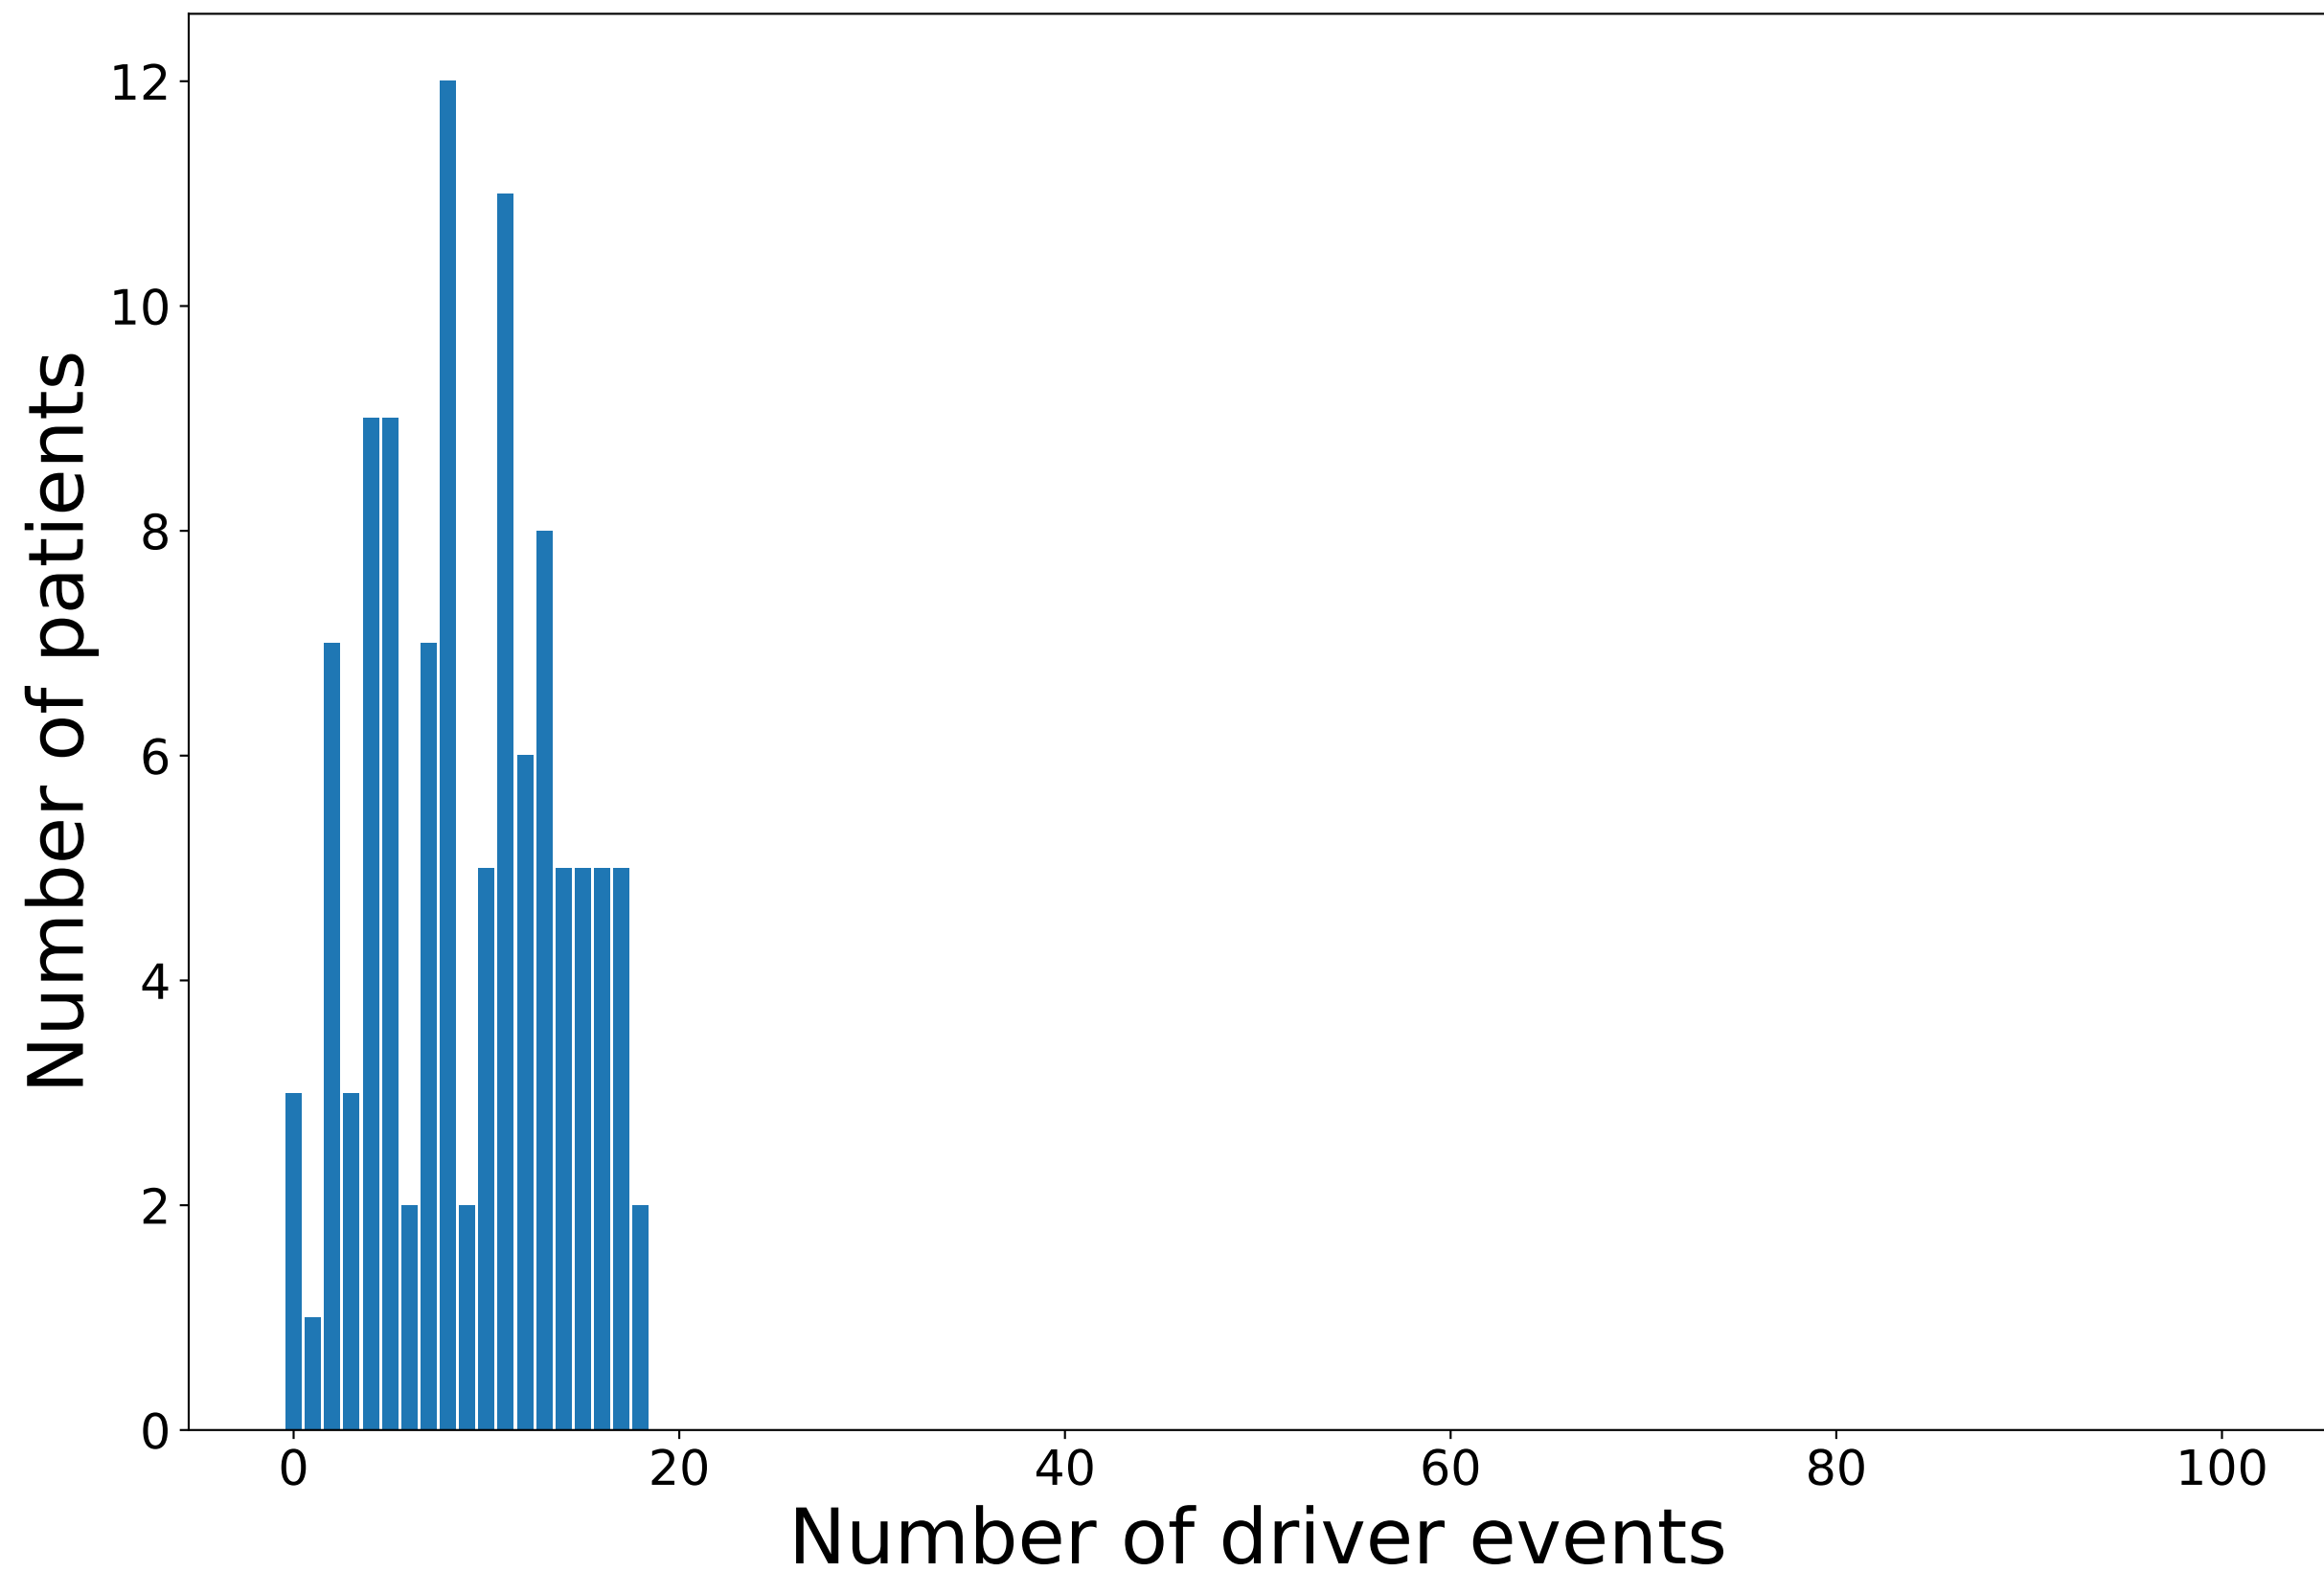

Supplement: Supplemental_Data_S1.zip [file Supplemental_Data_S1.zip]

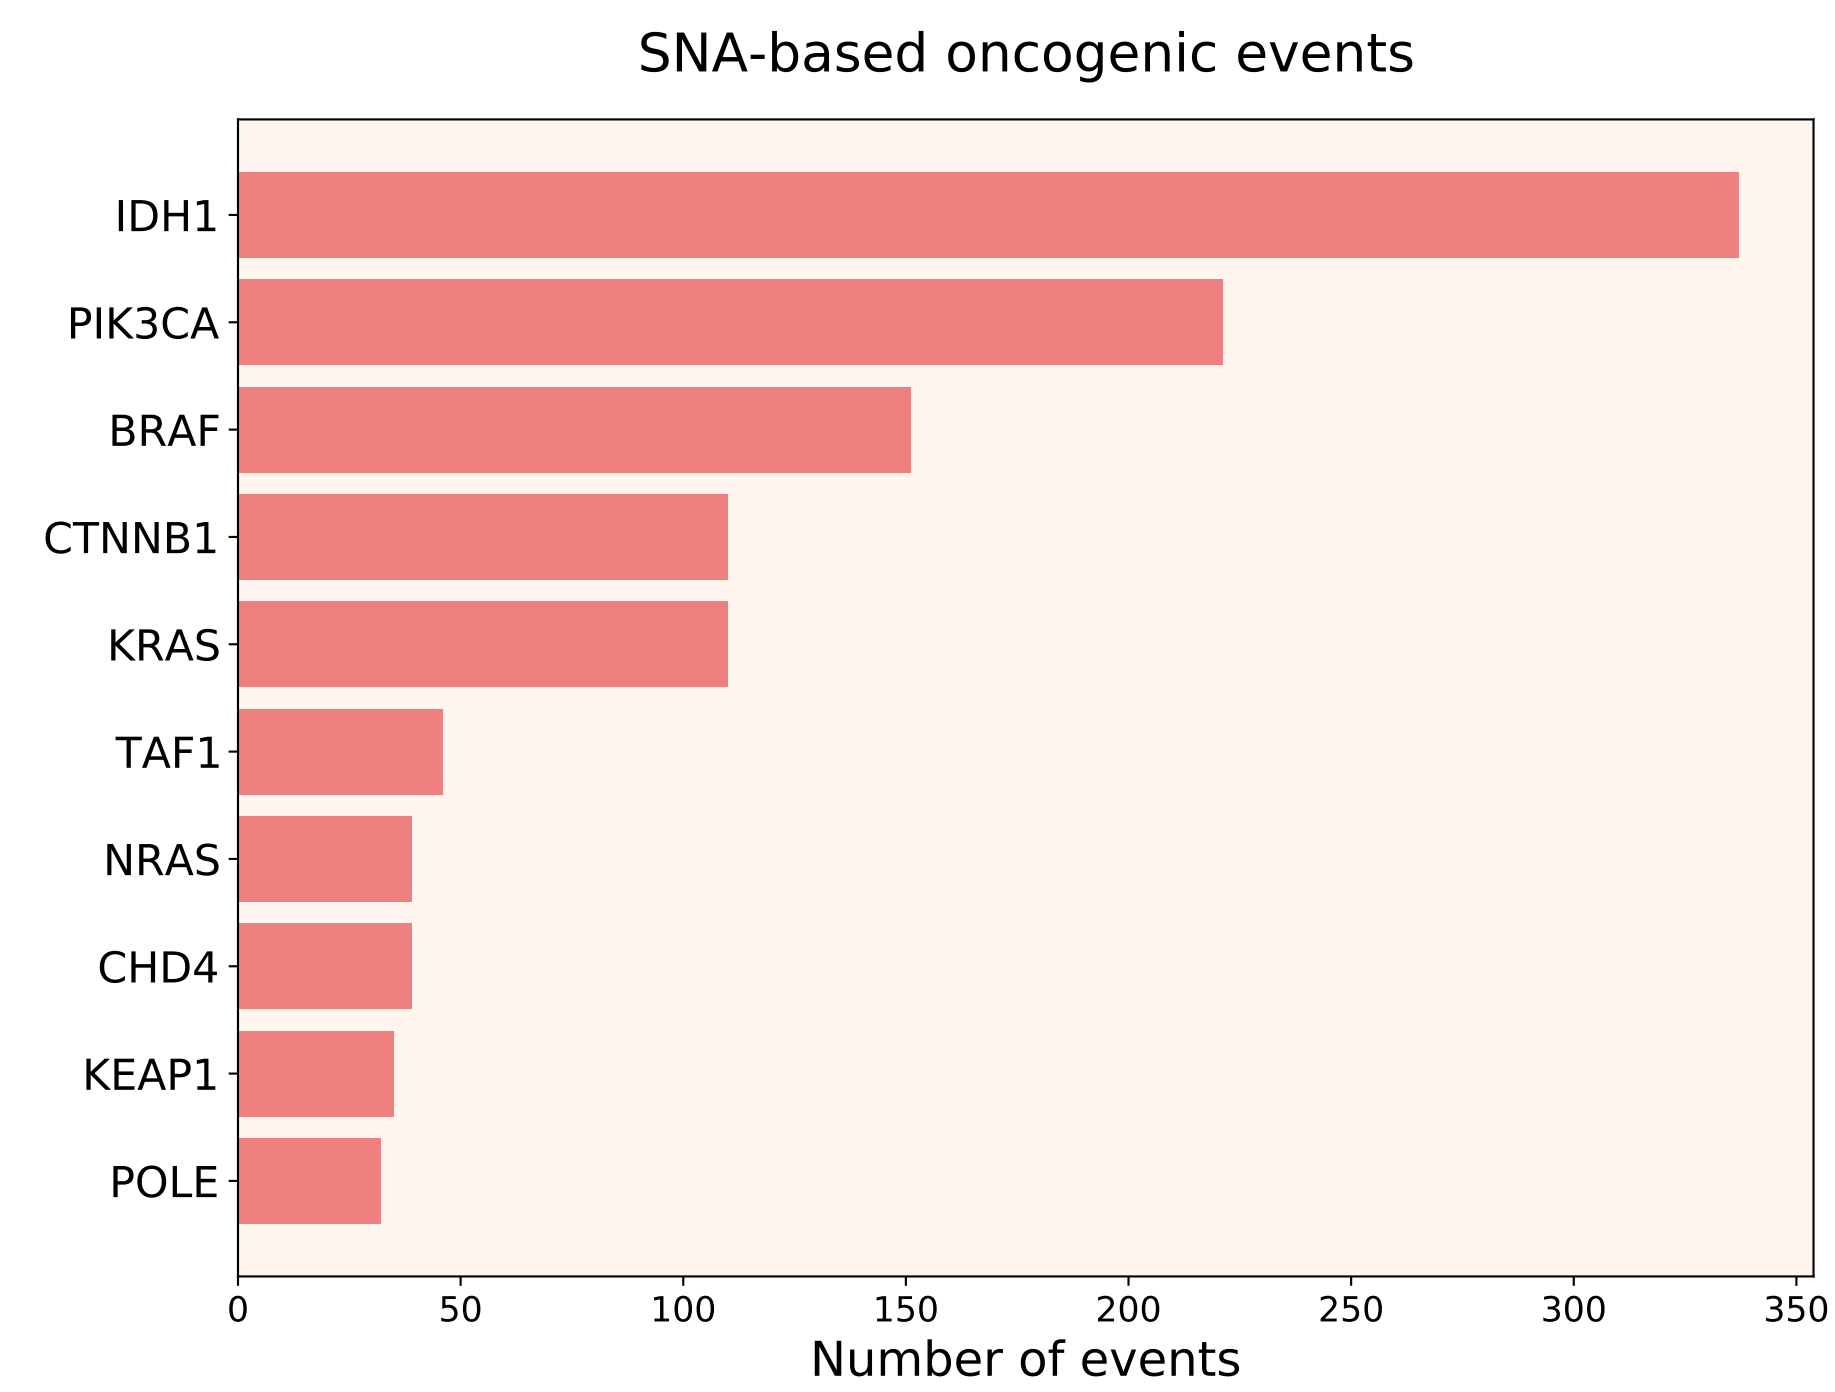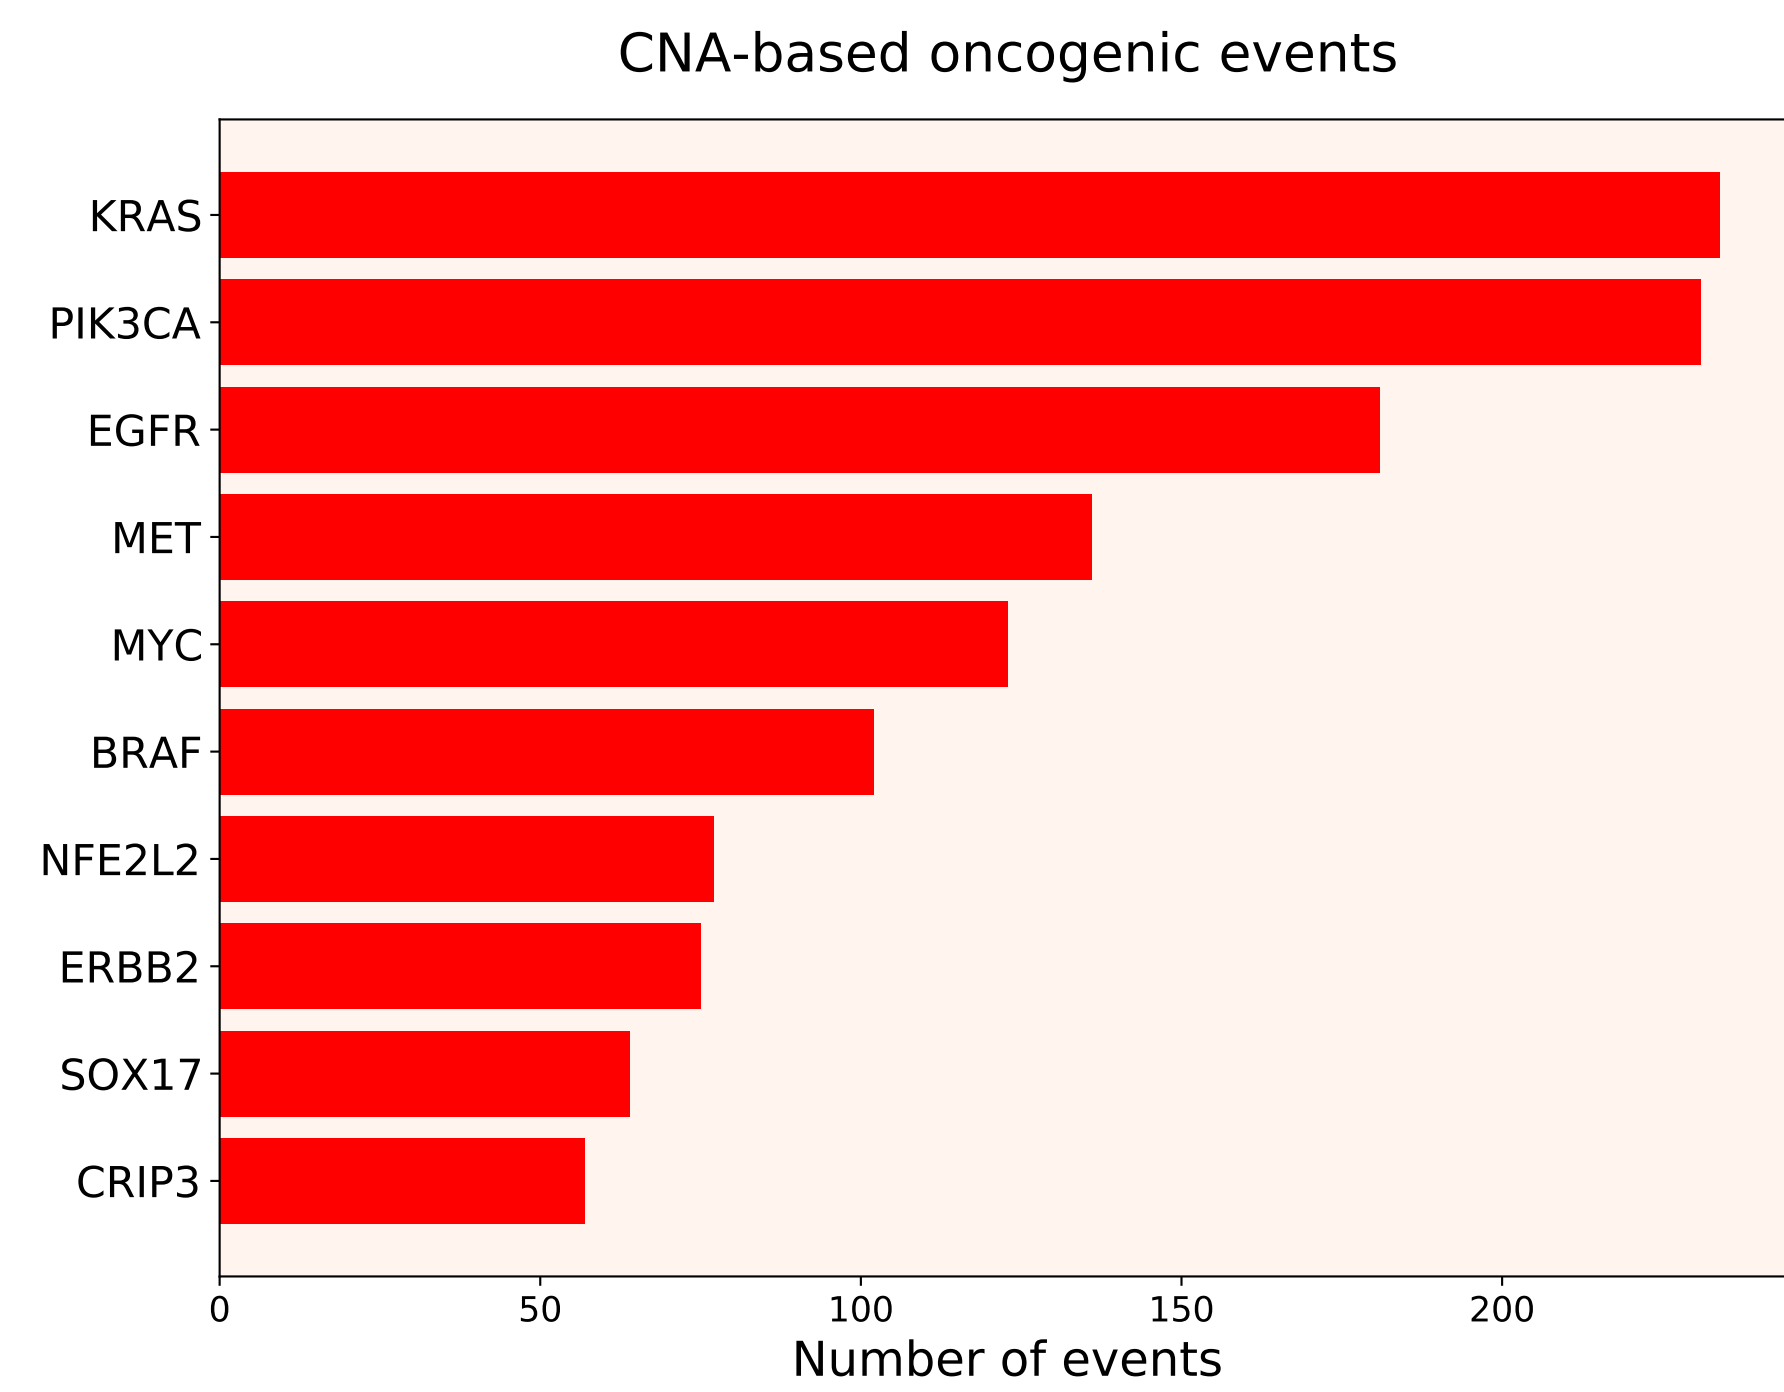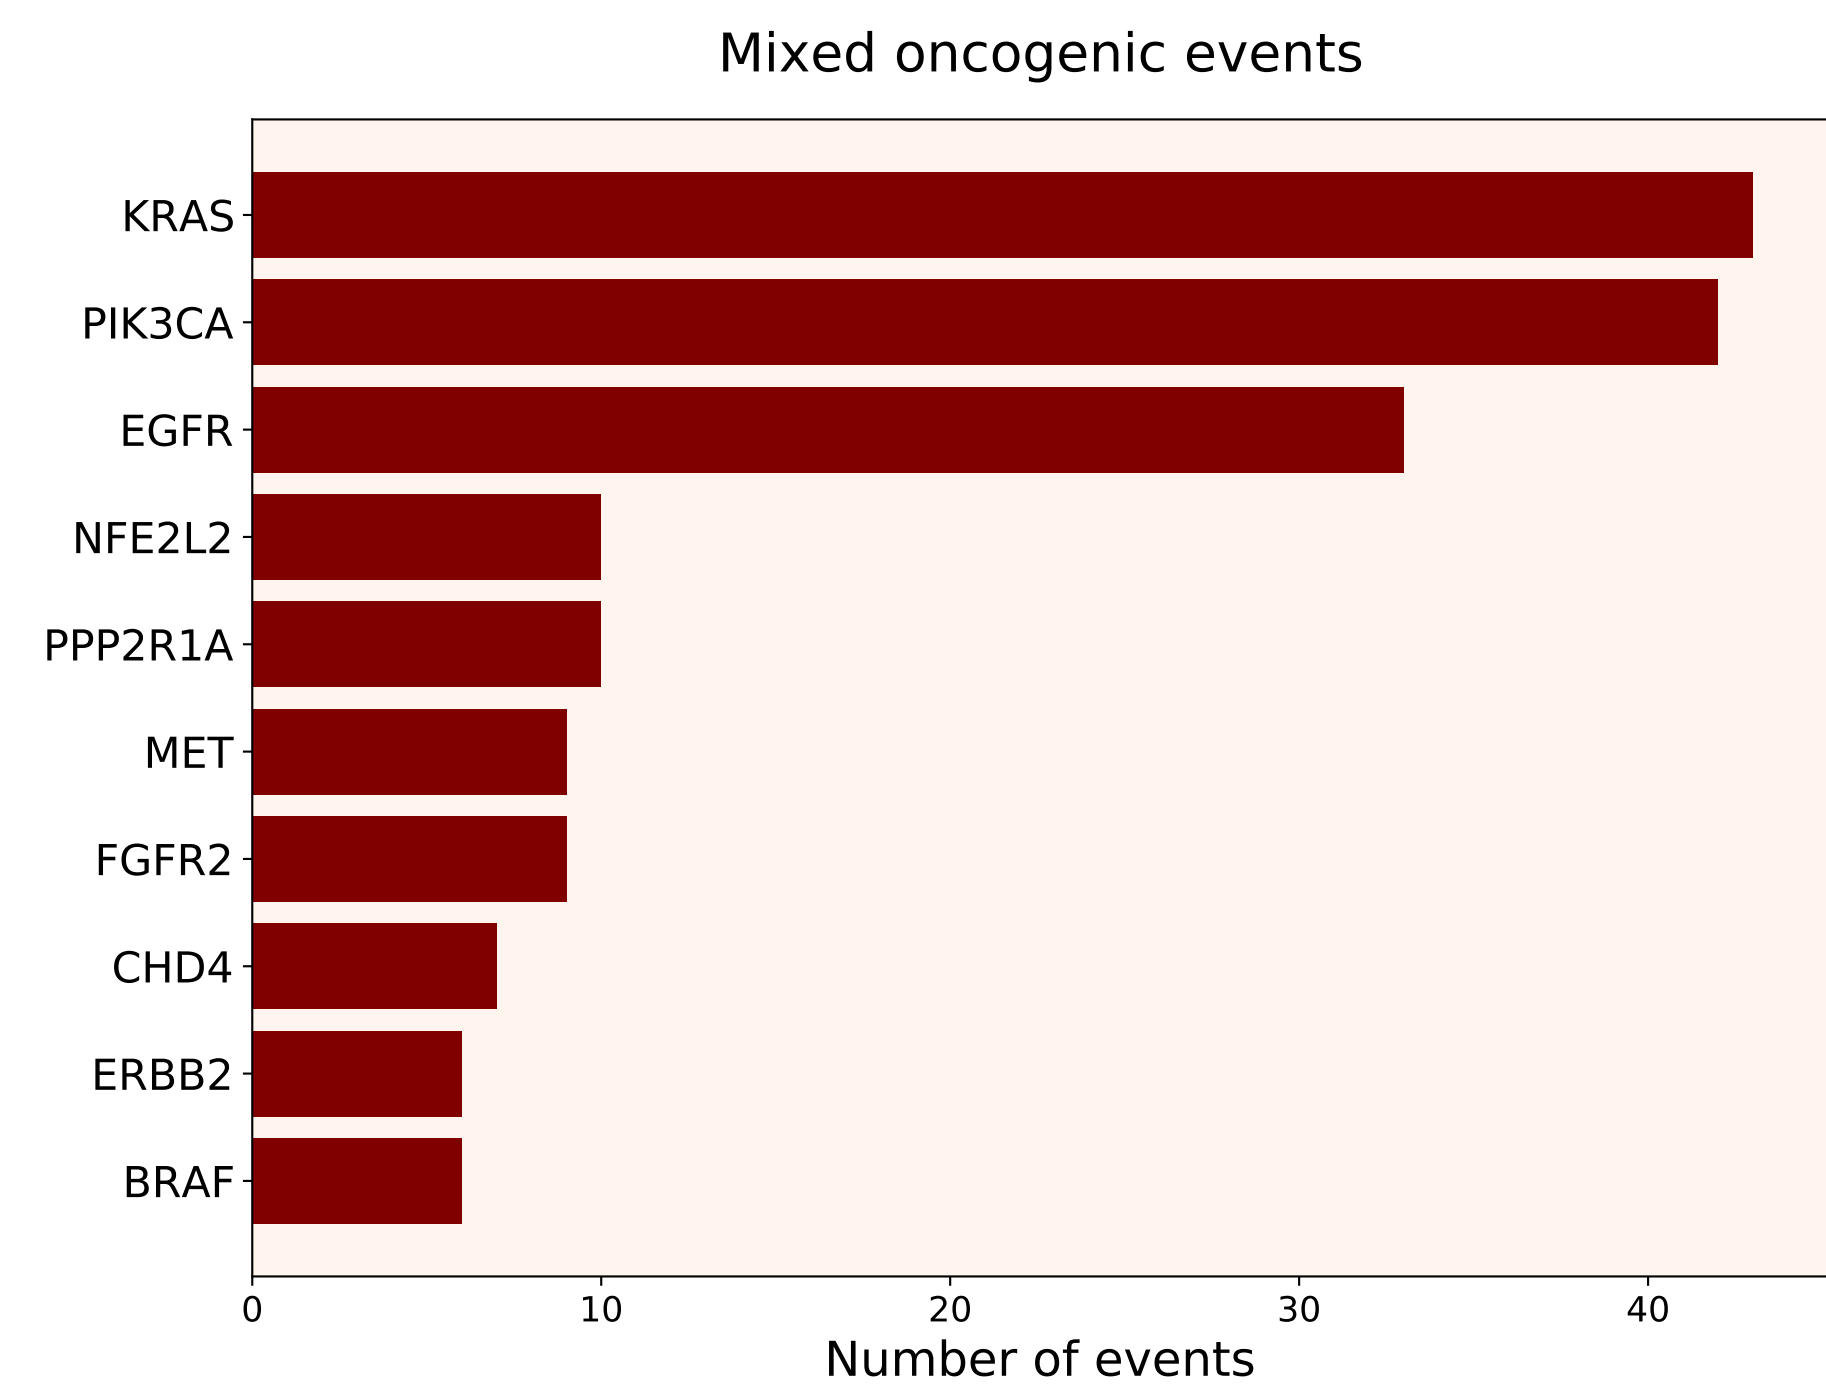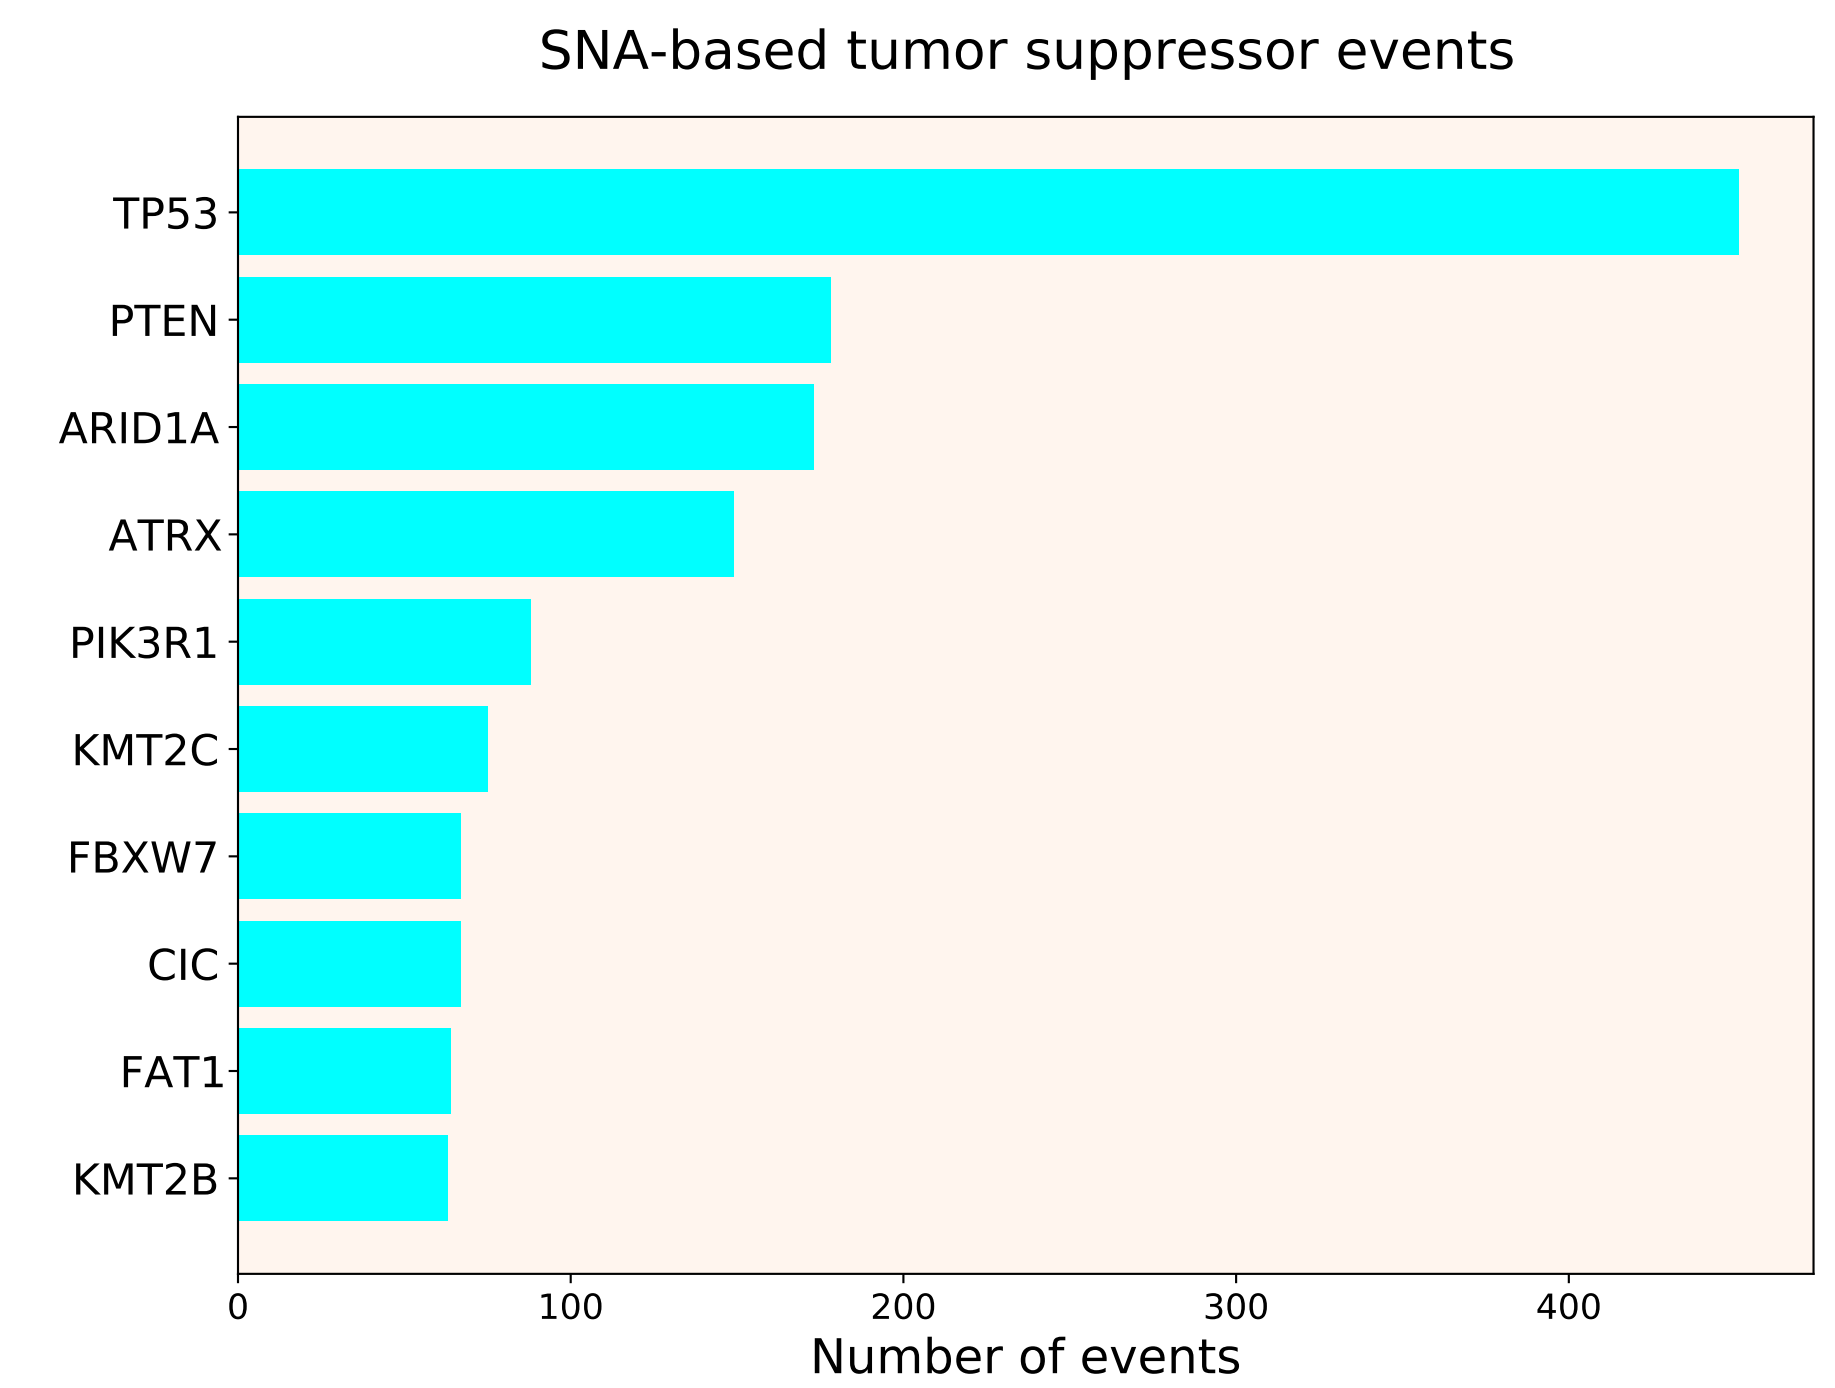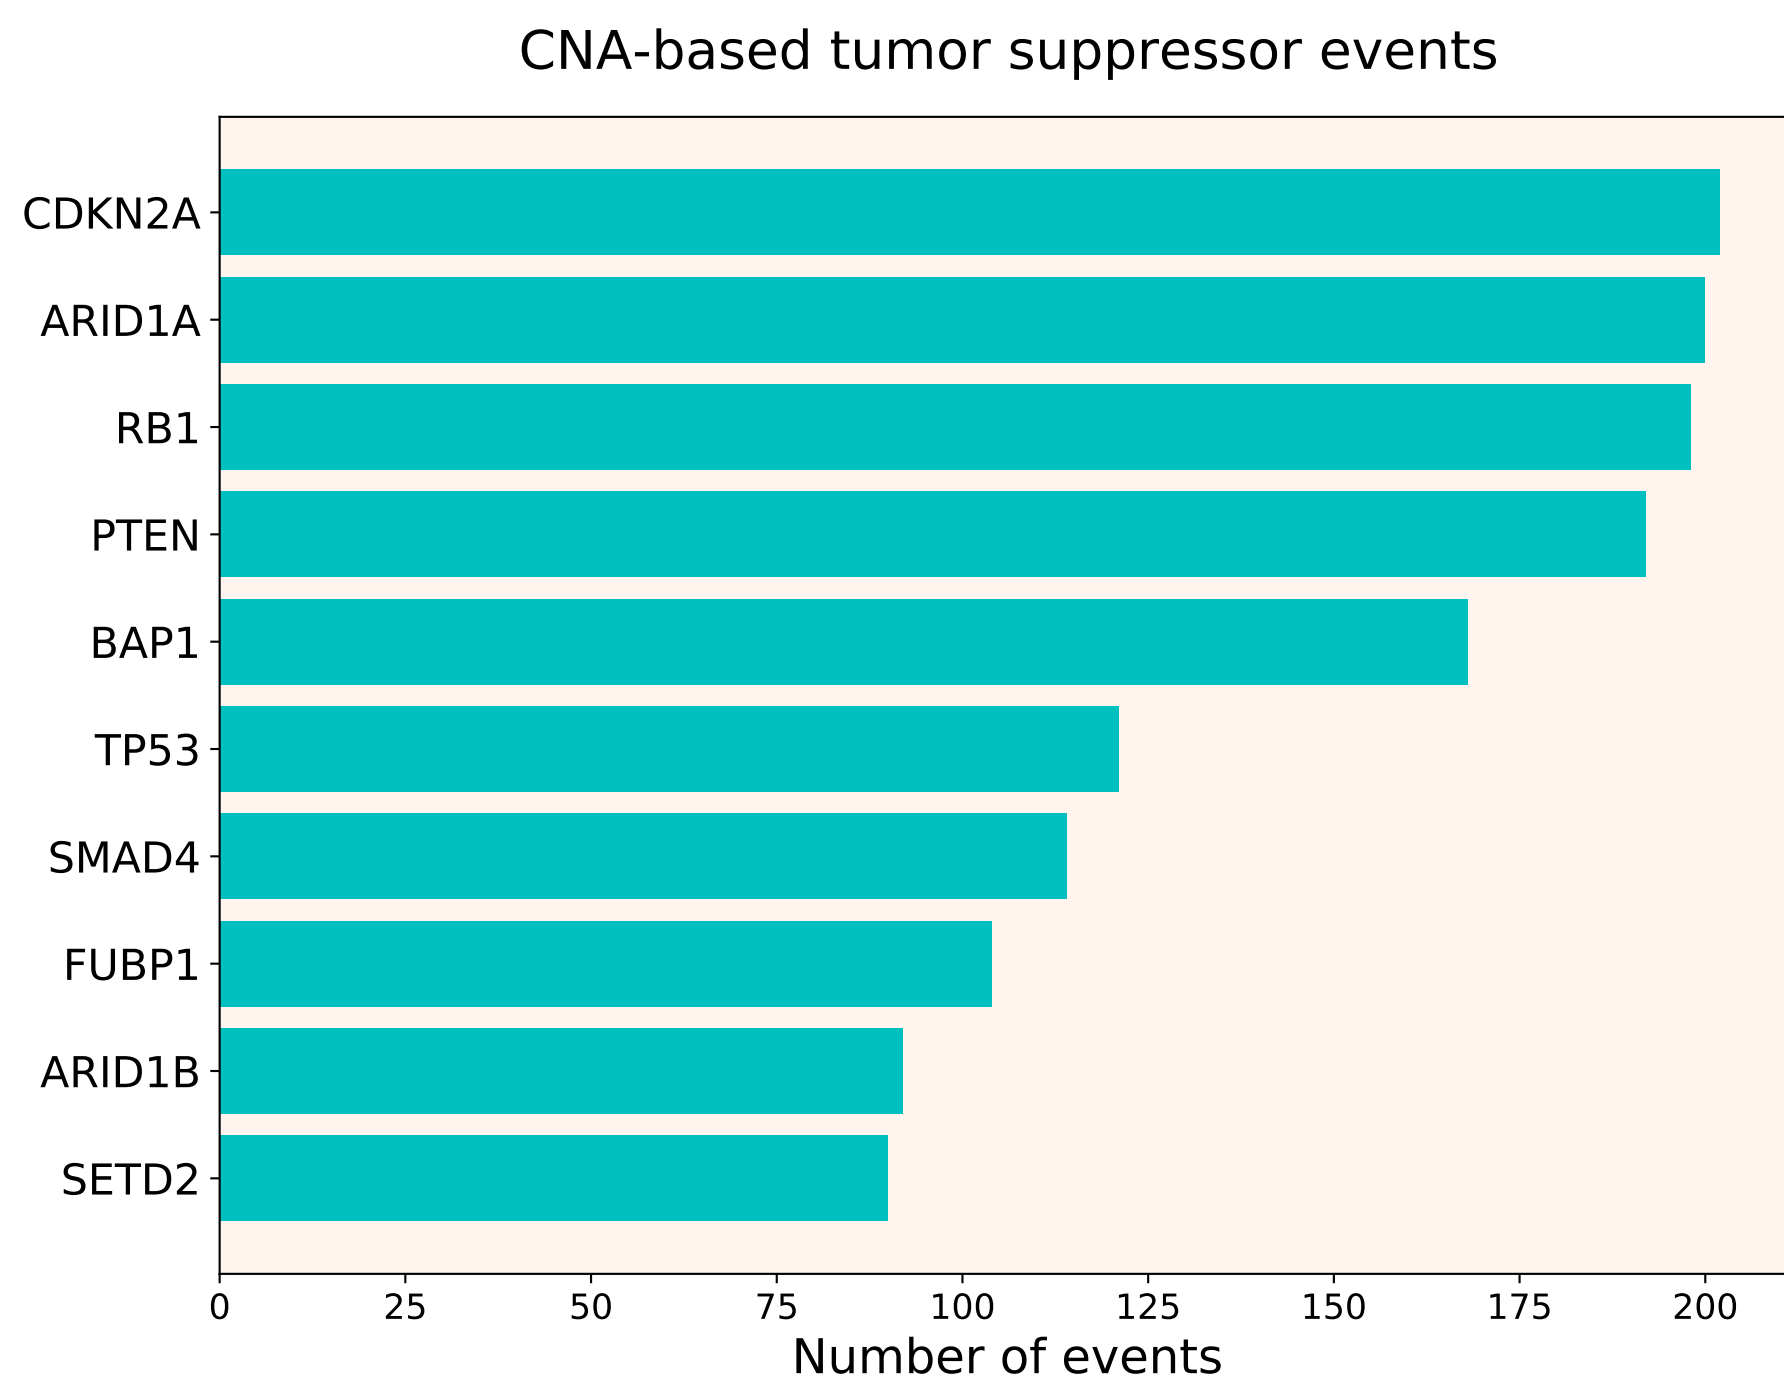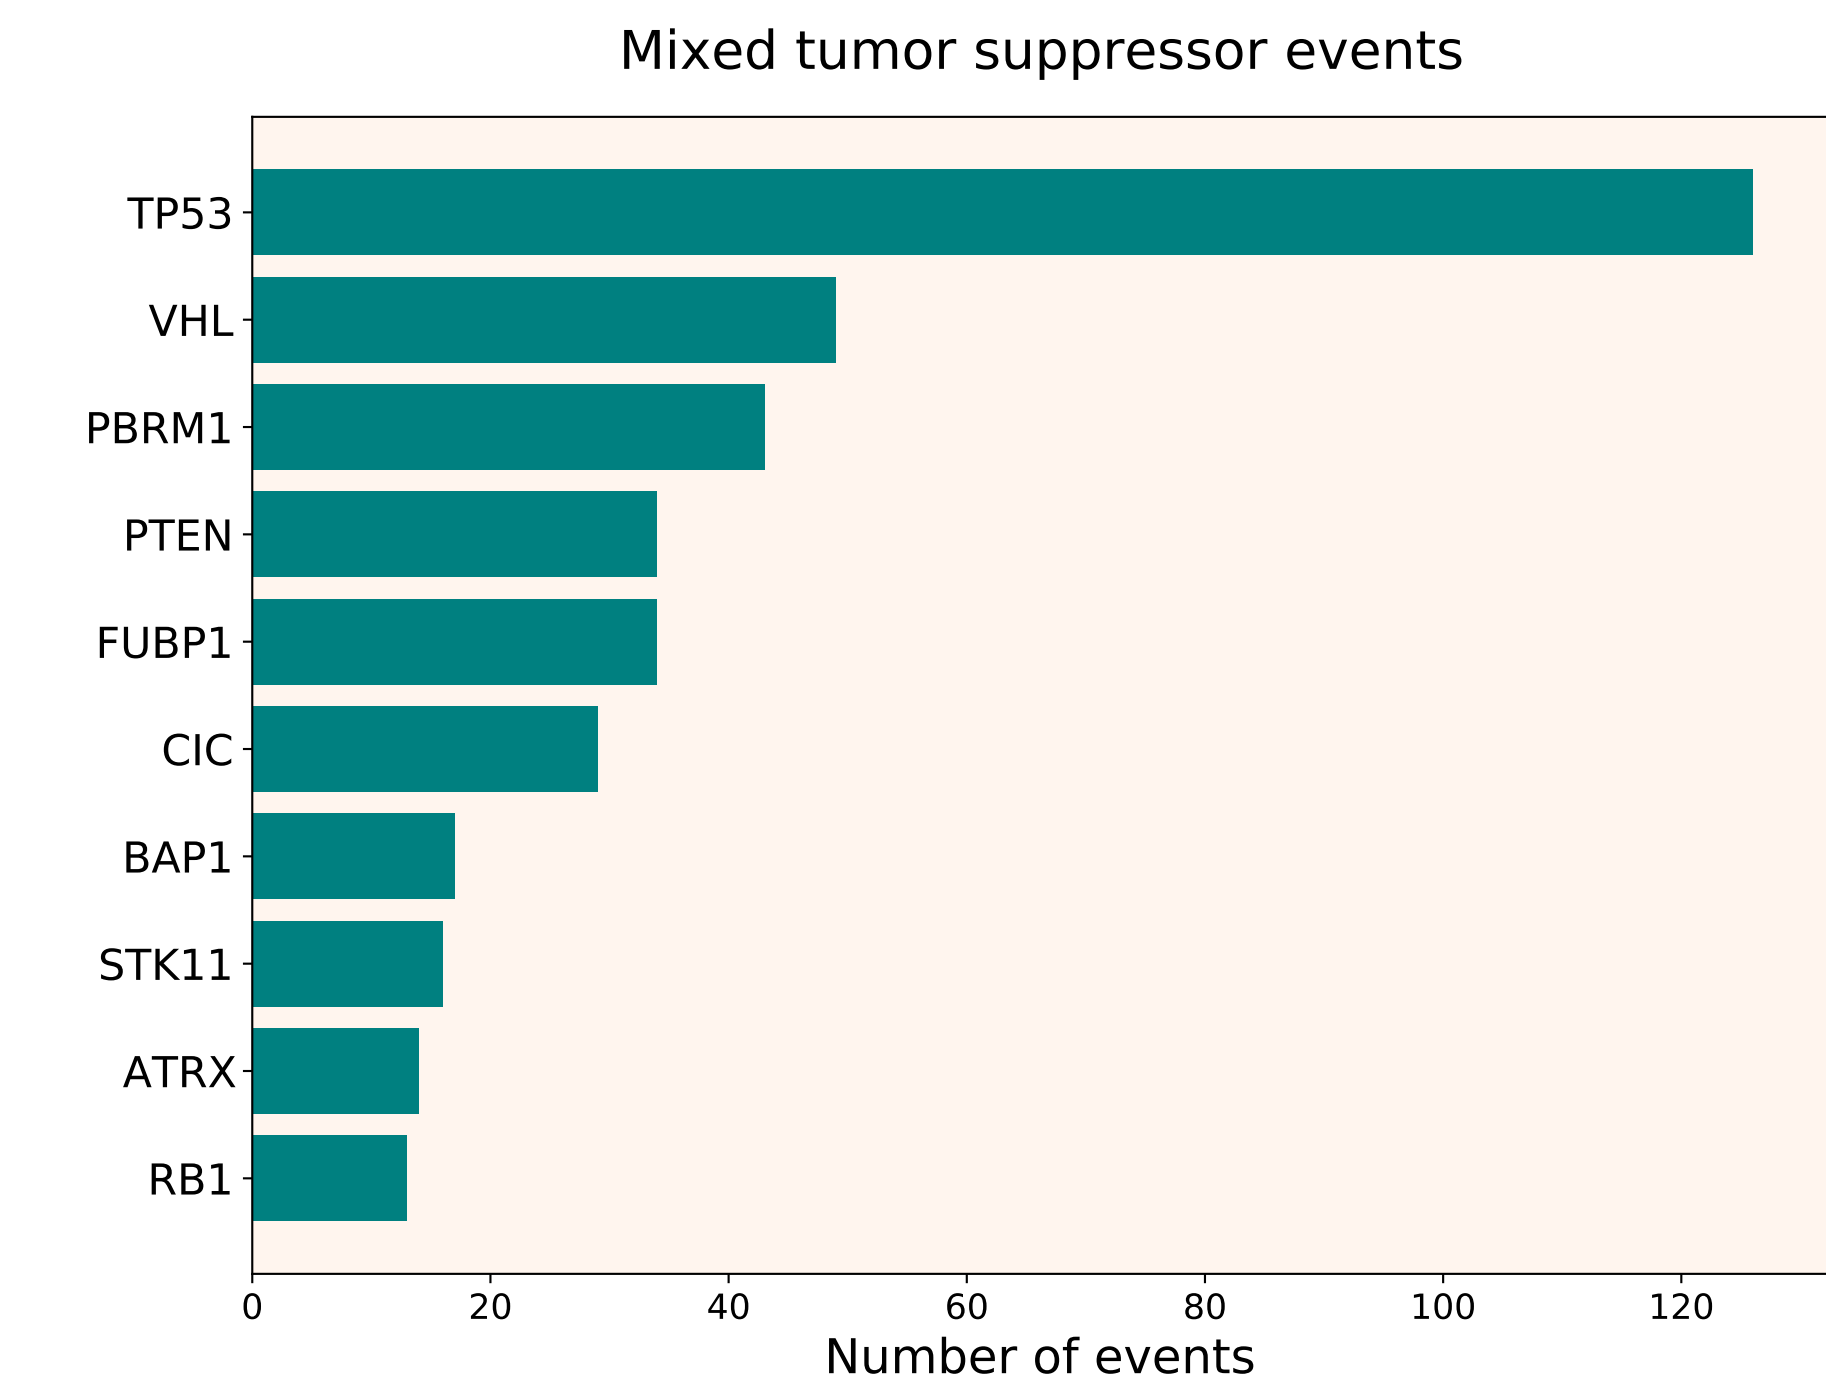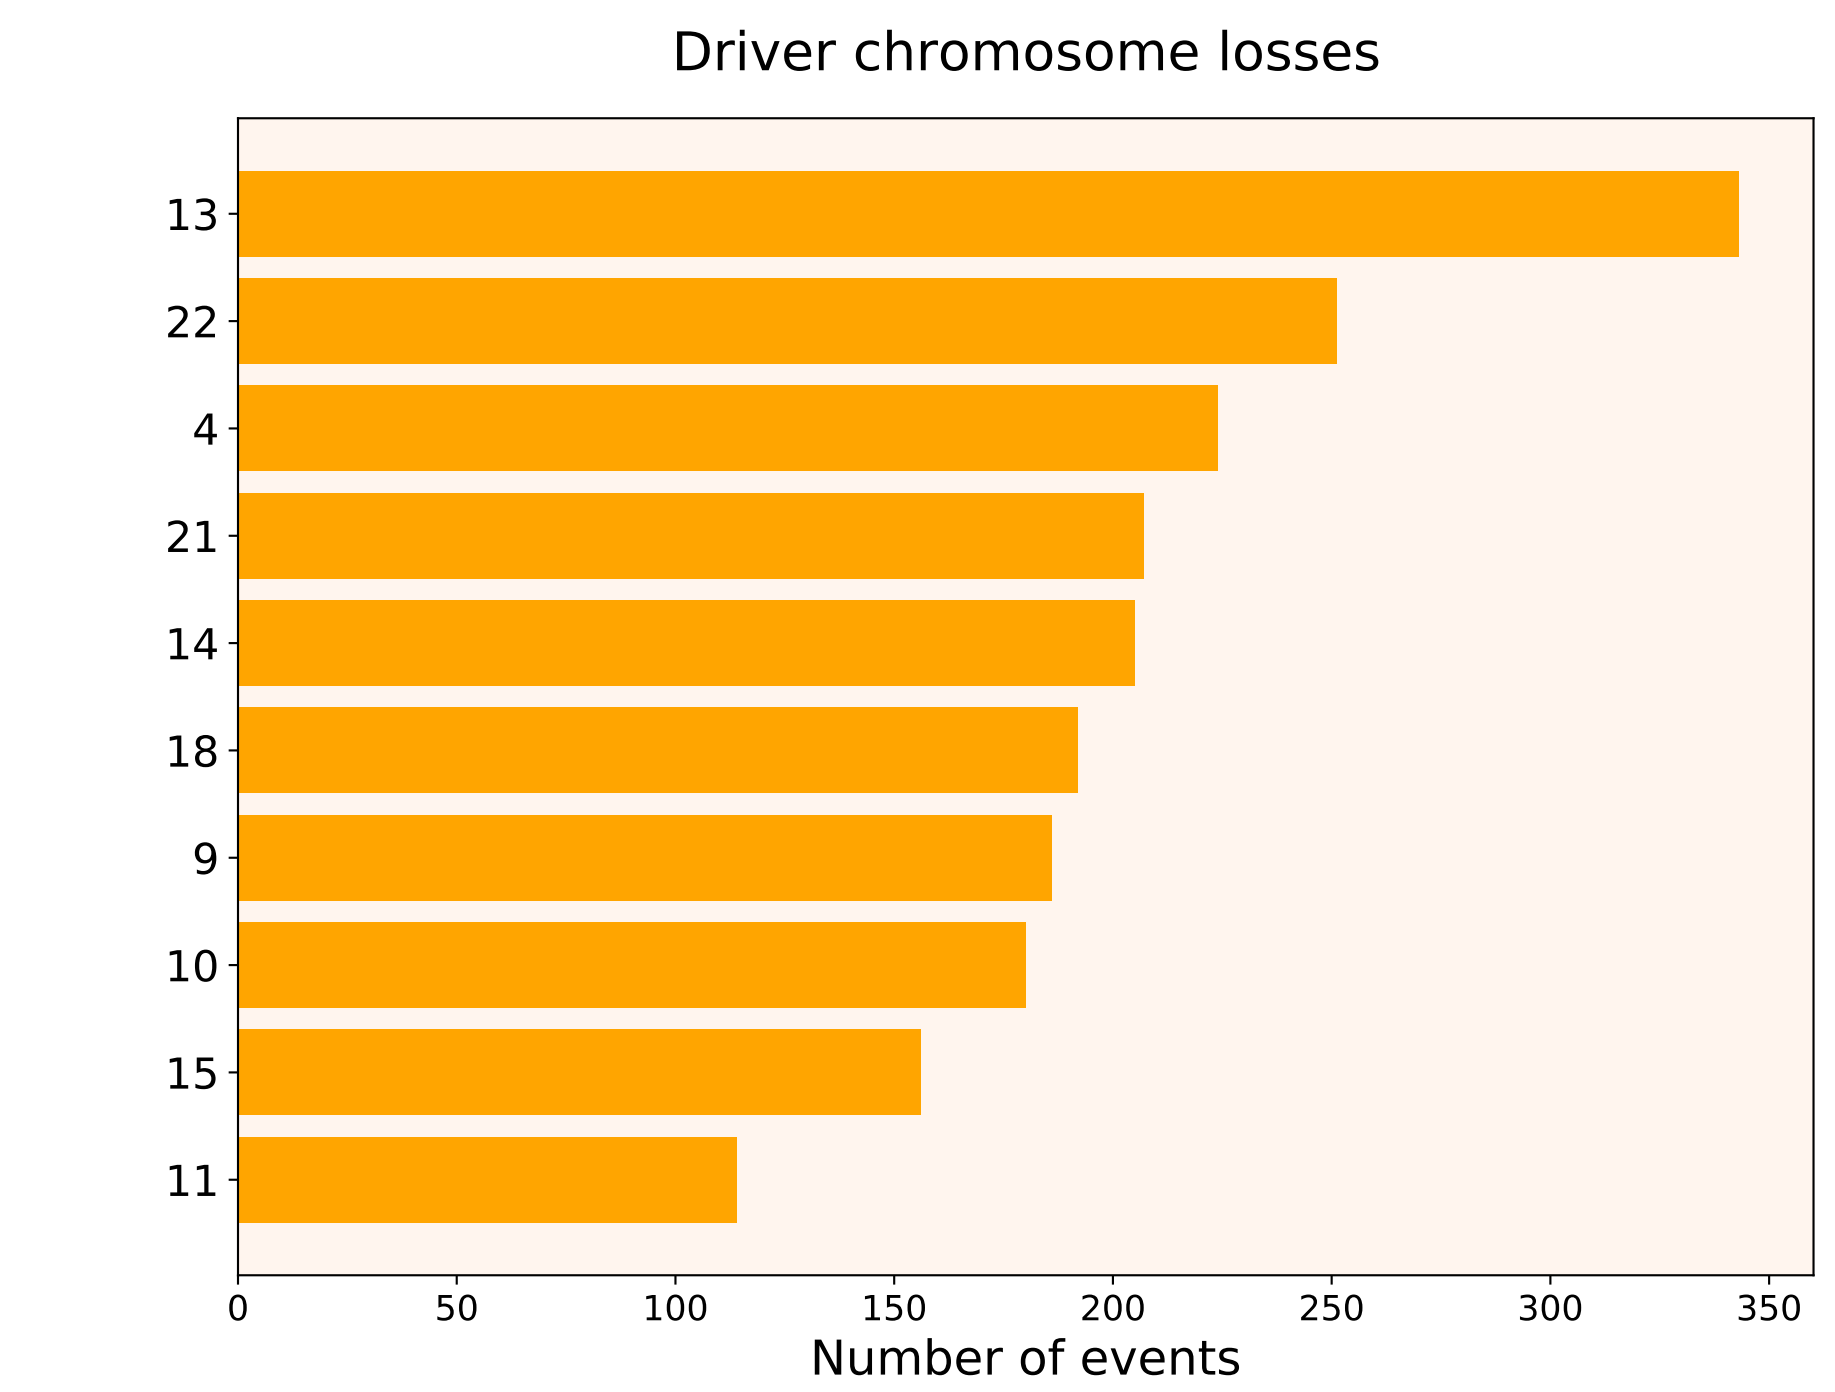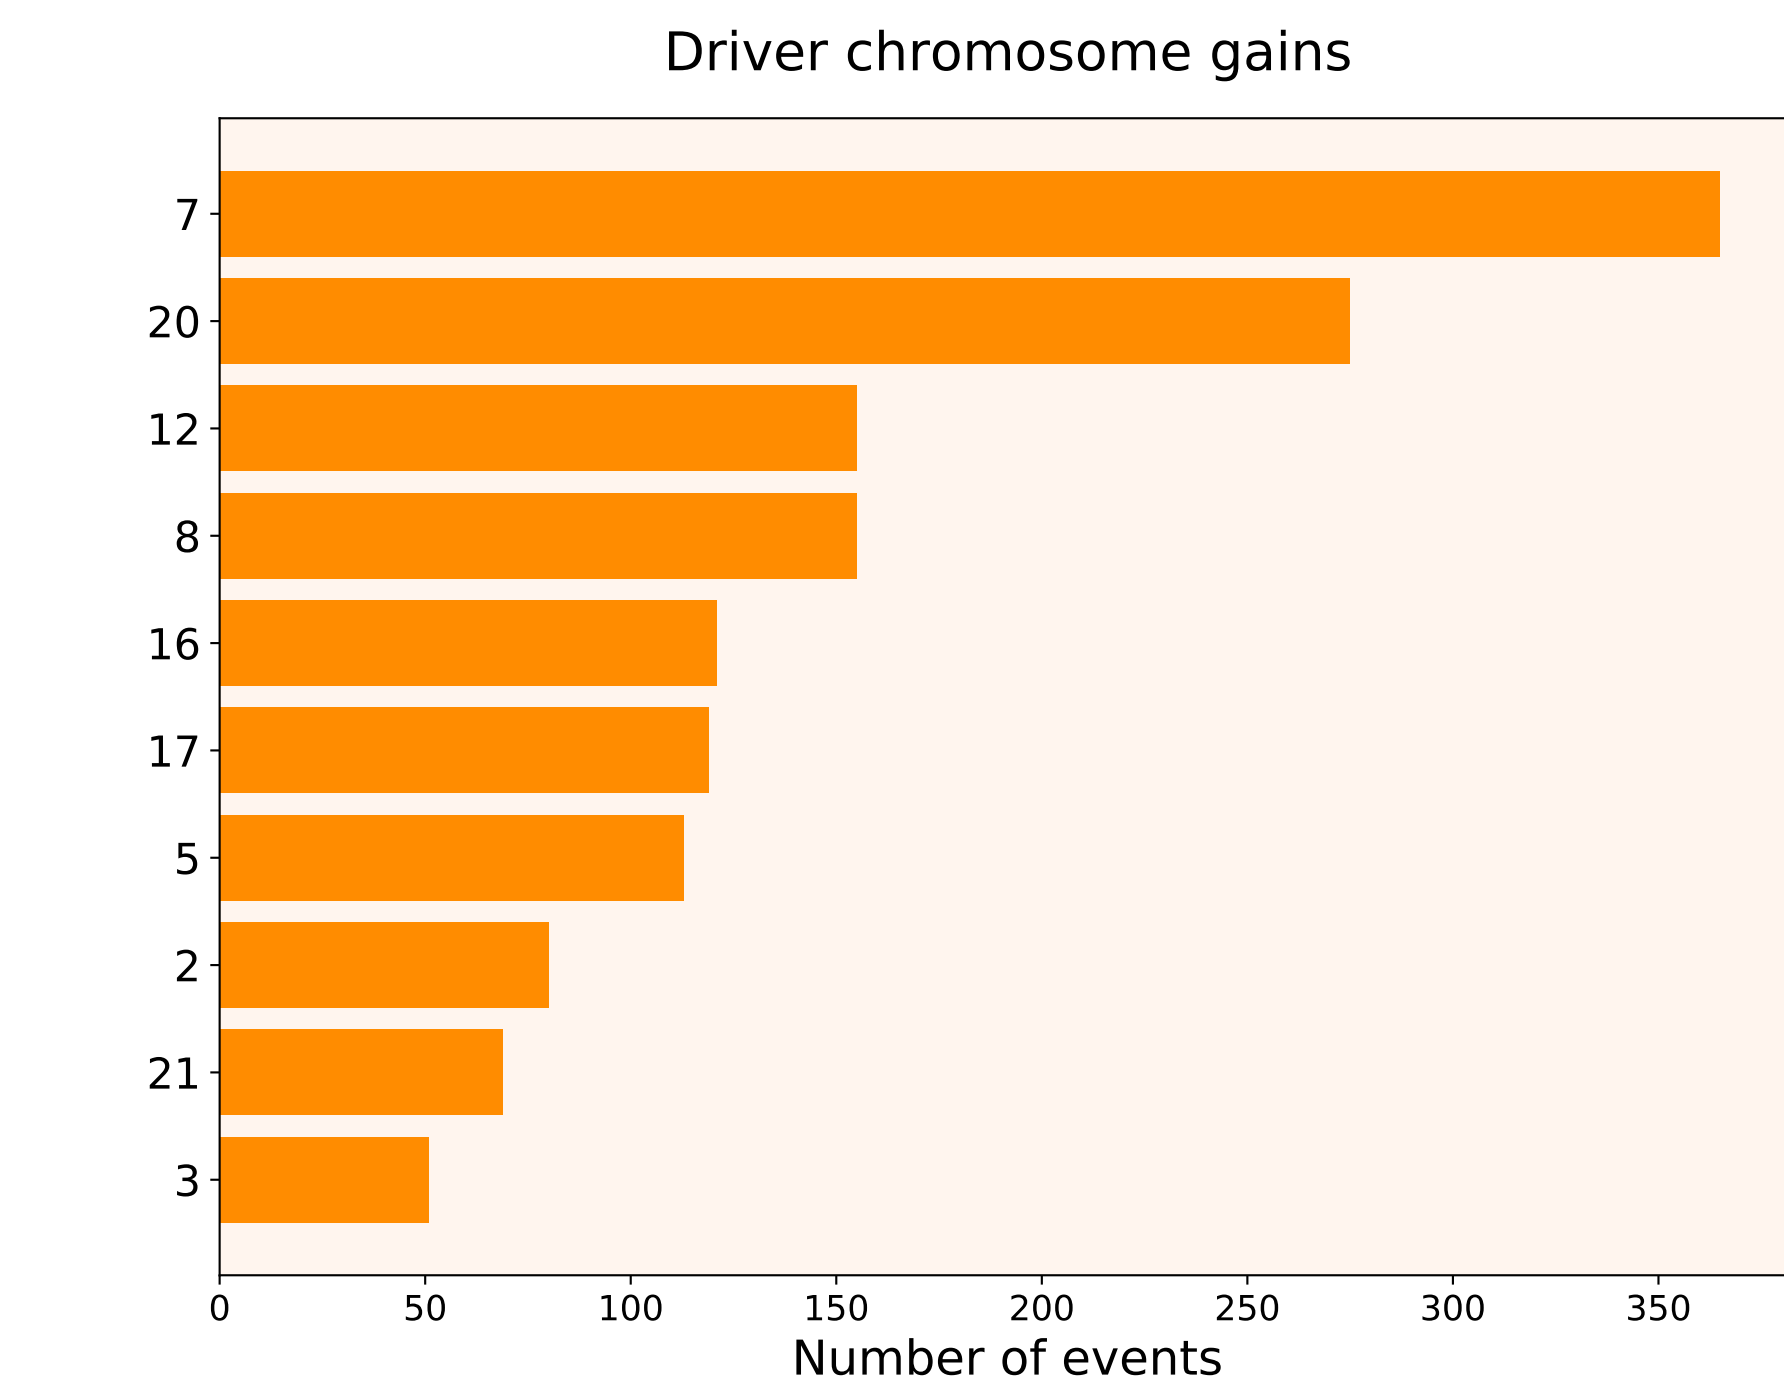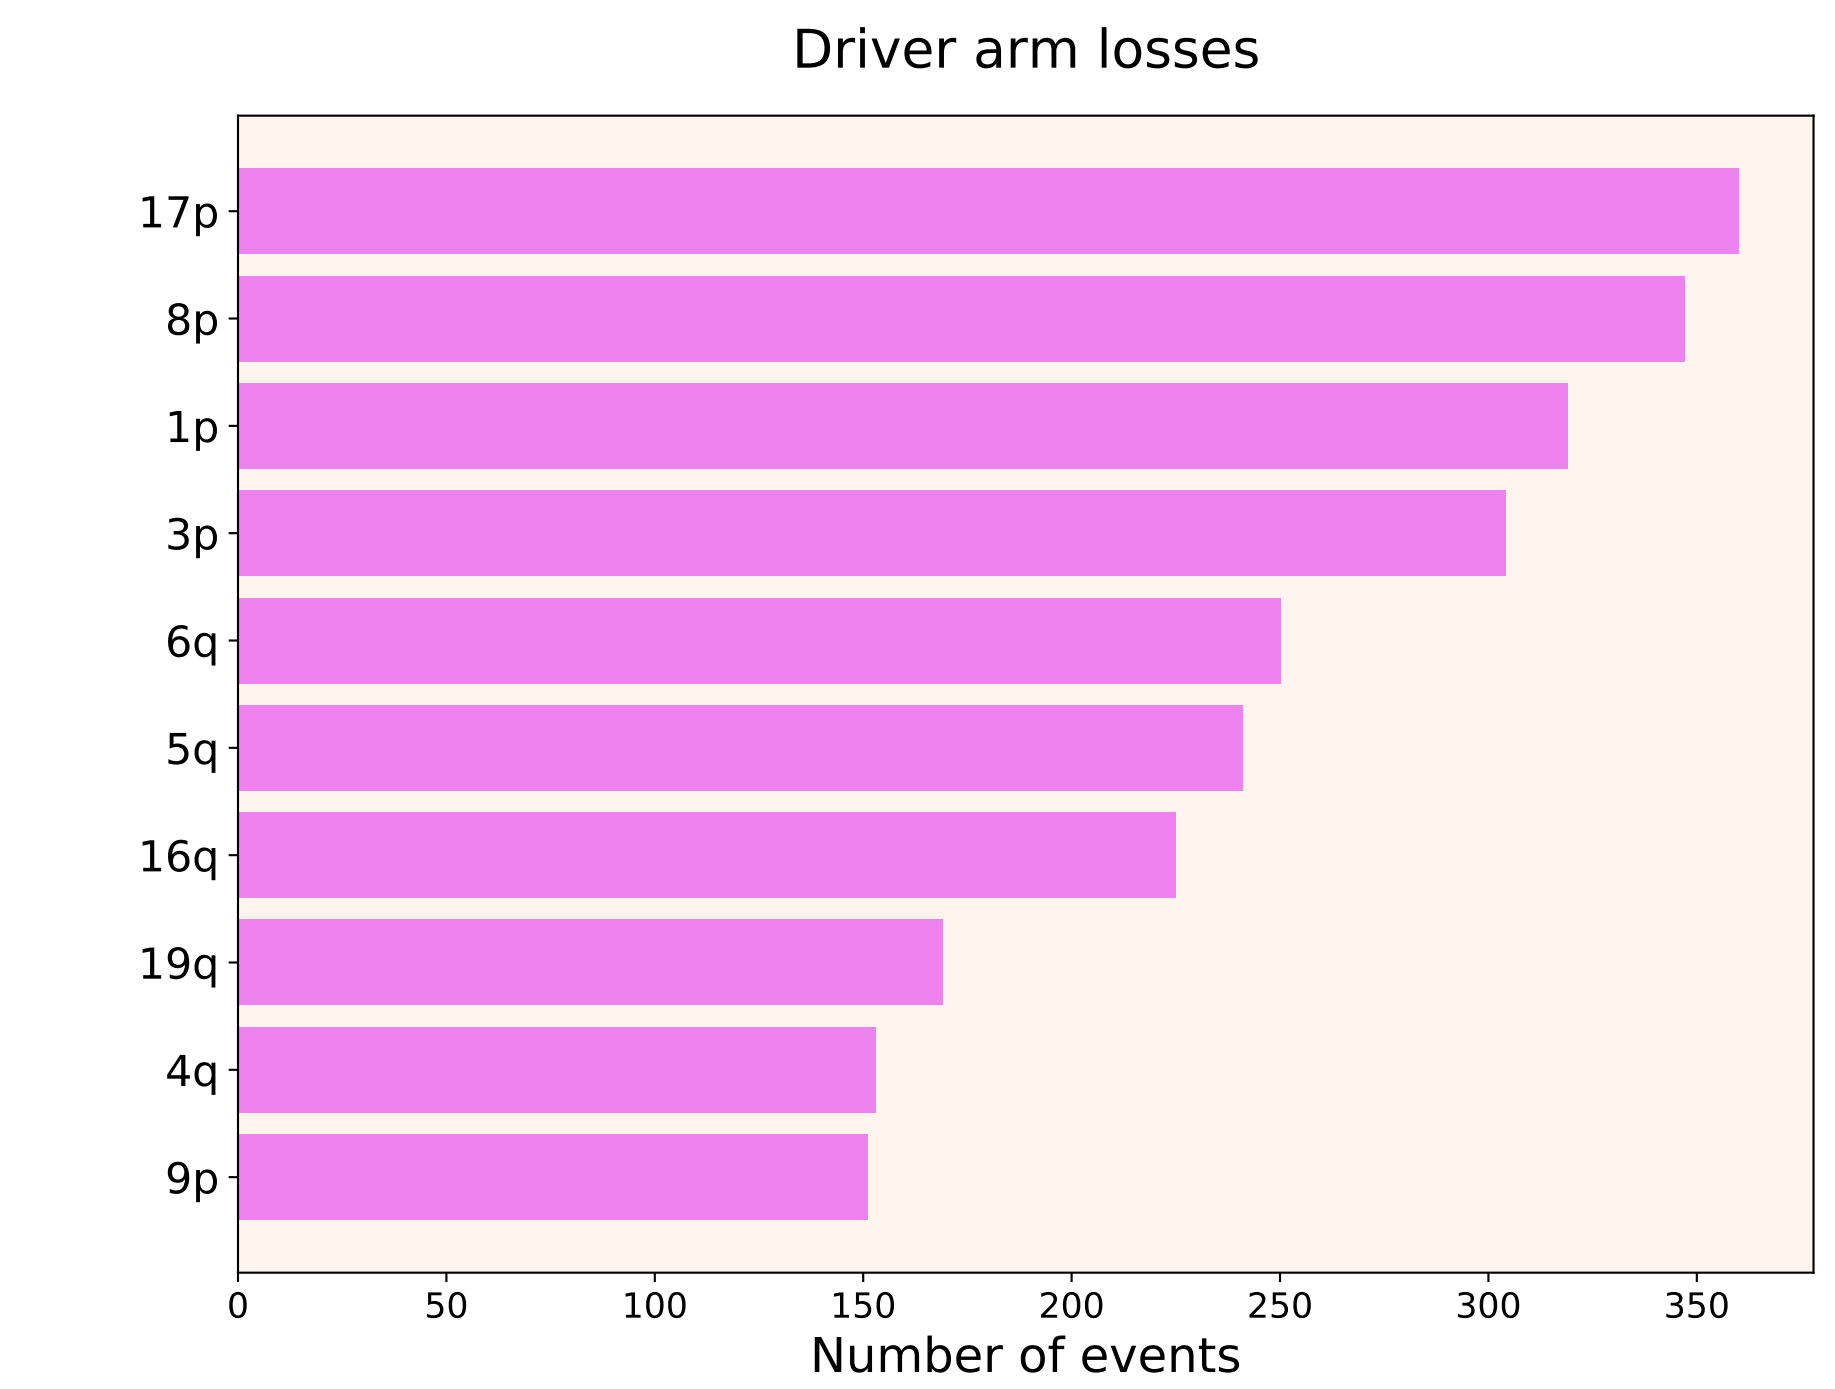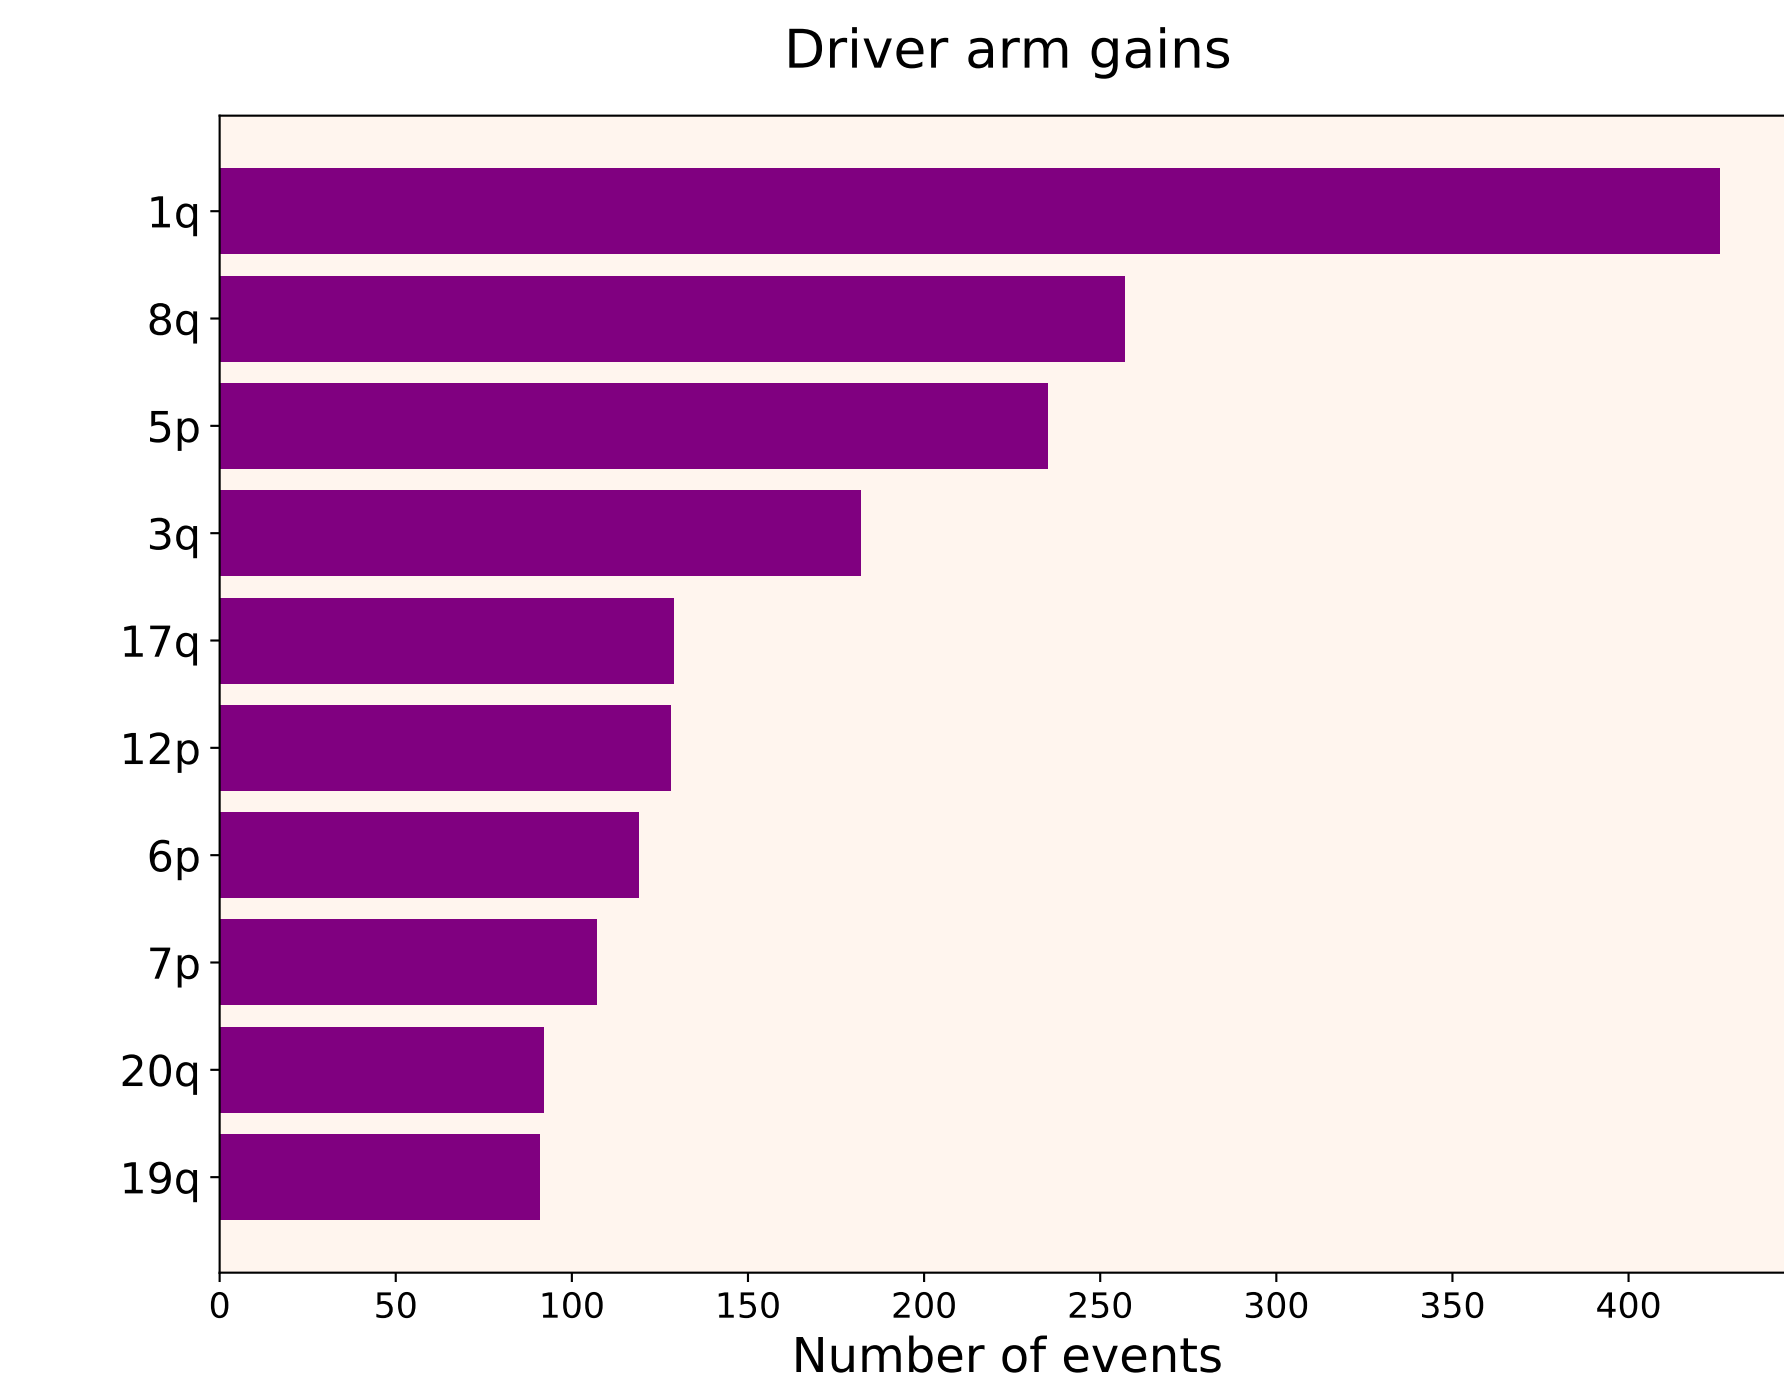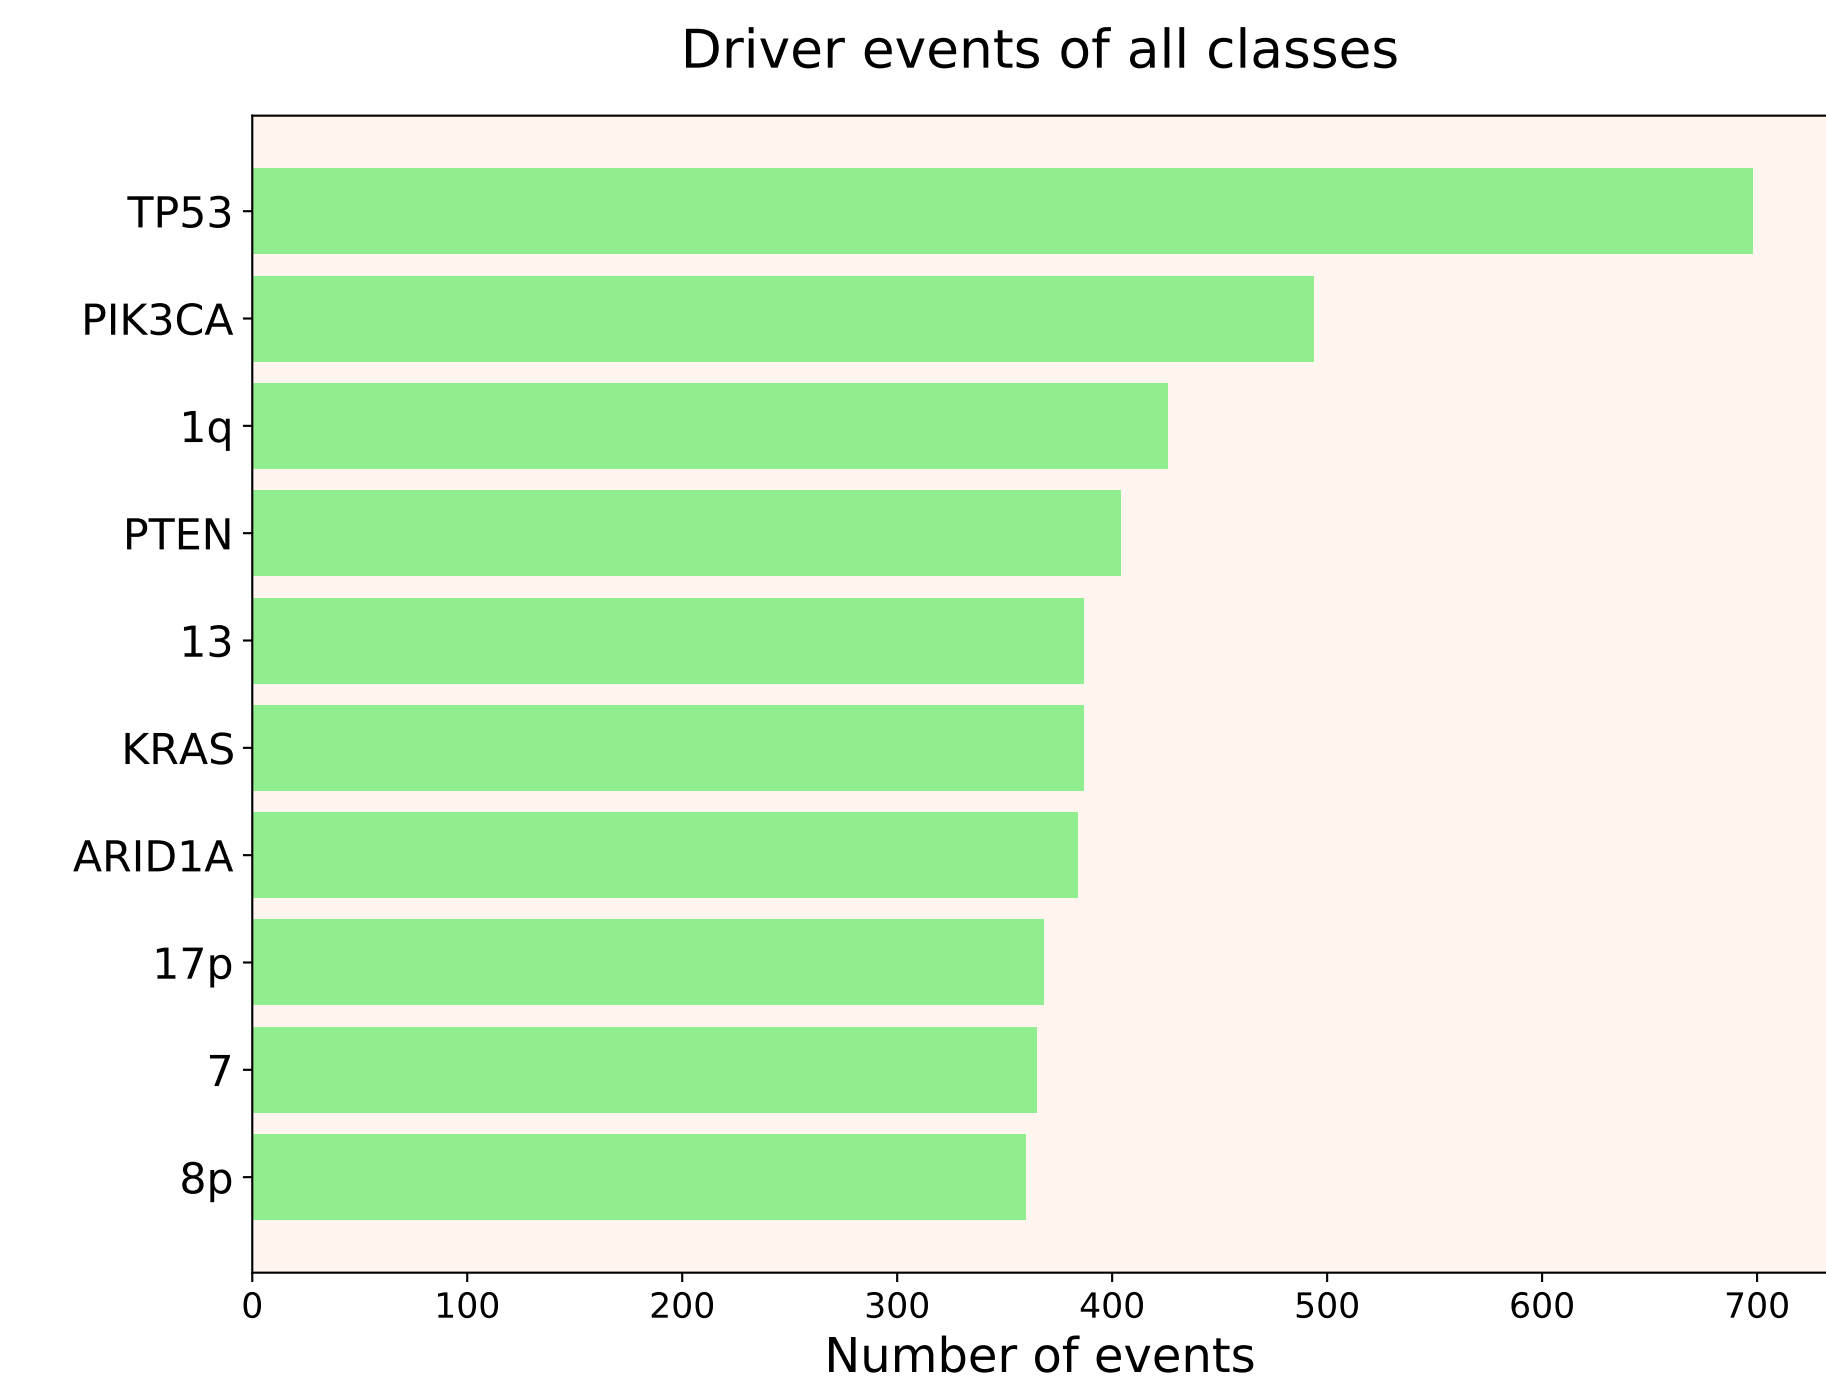

Supplement: Supplemental_Data_S1.zip [file Supplemental_Data_S1.zip]

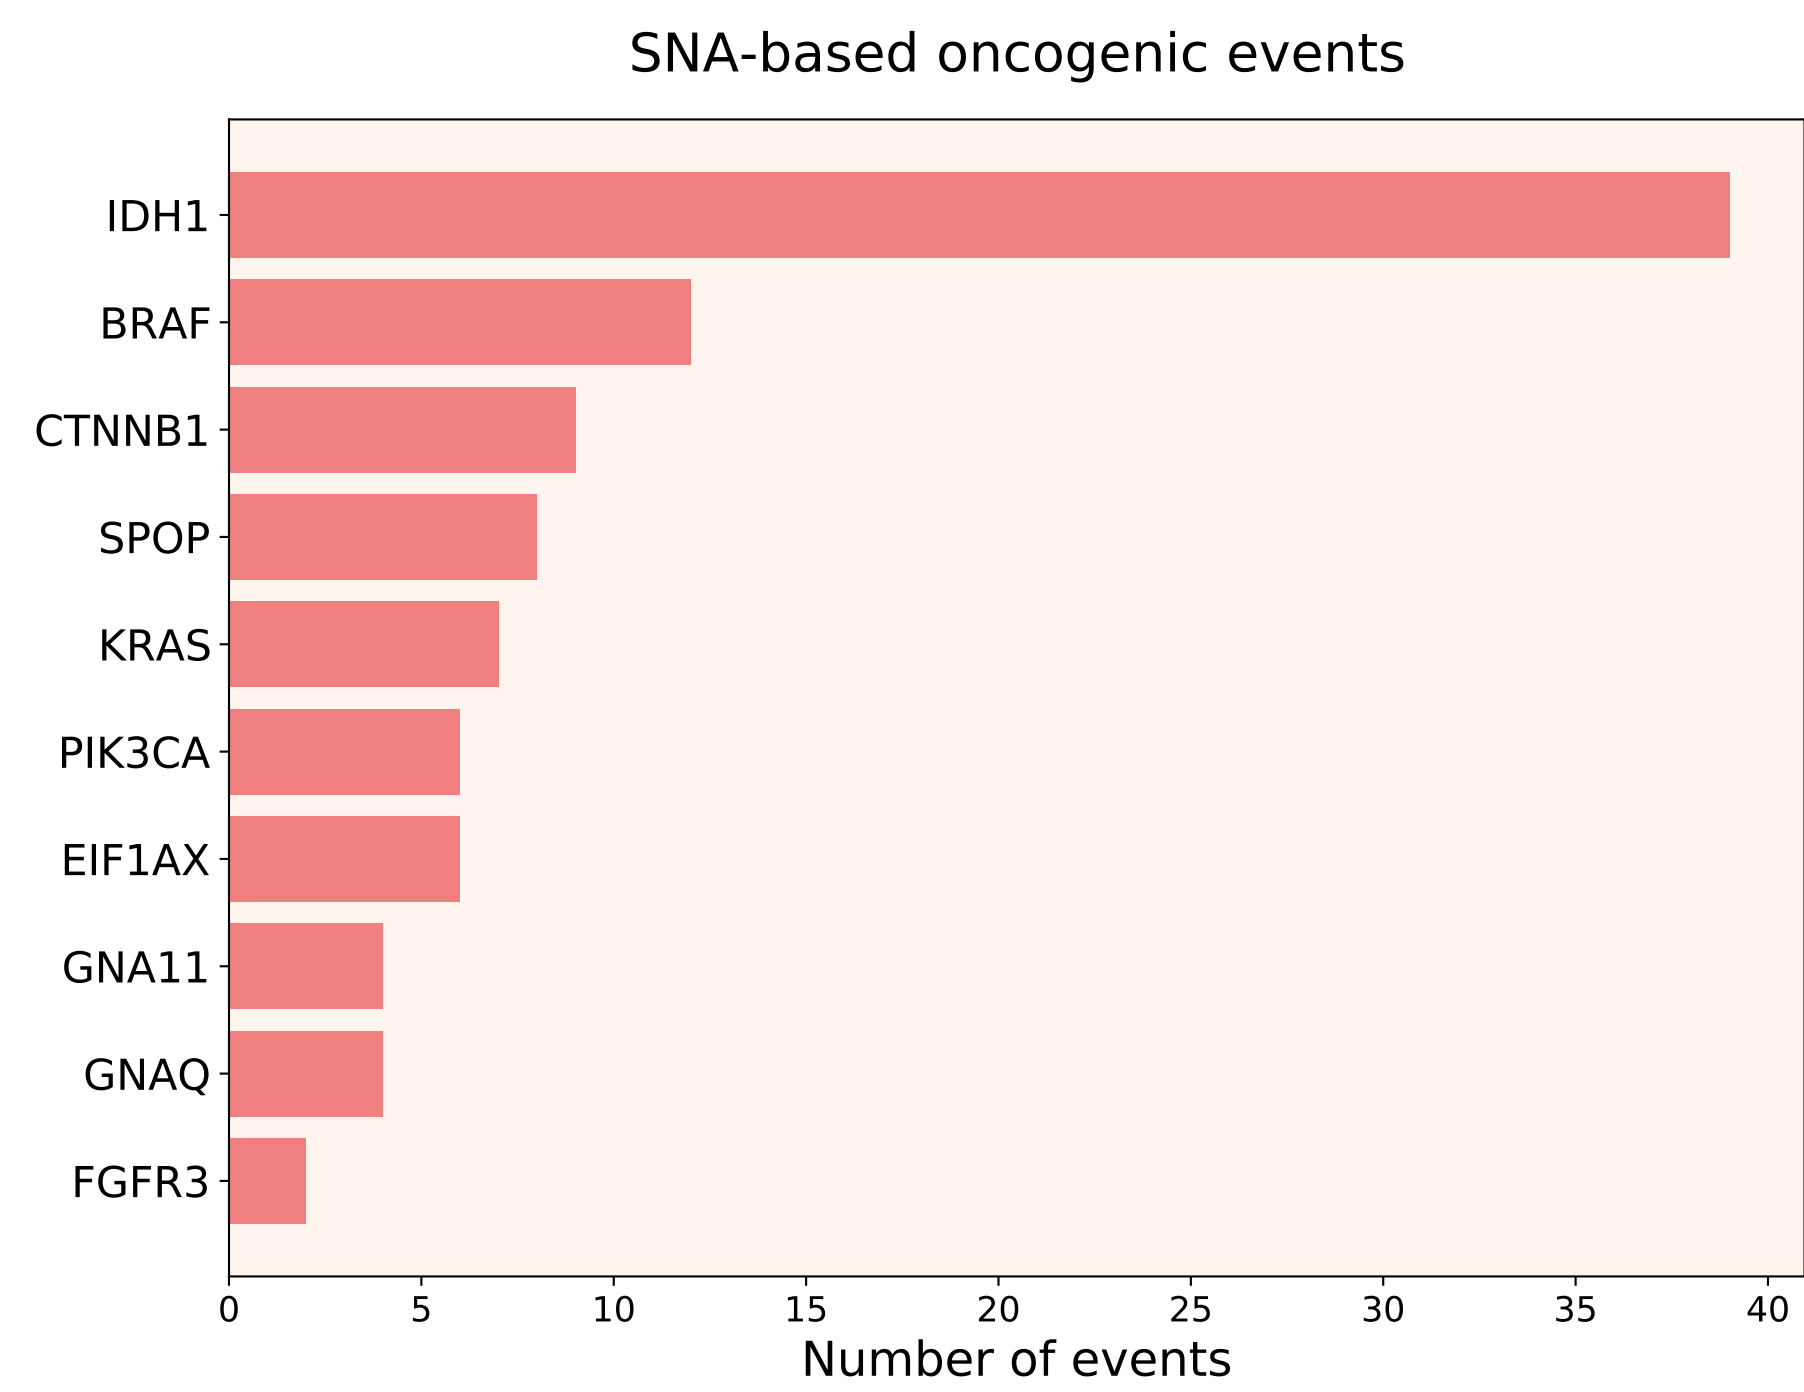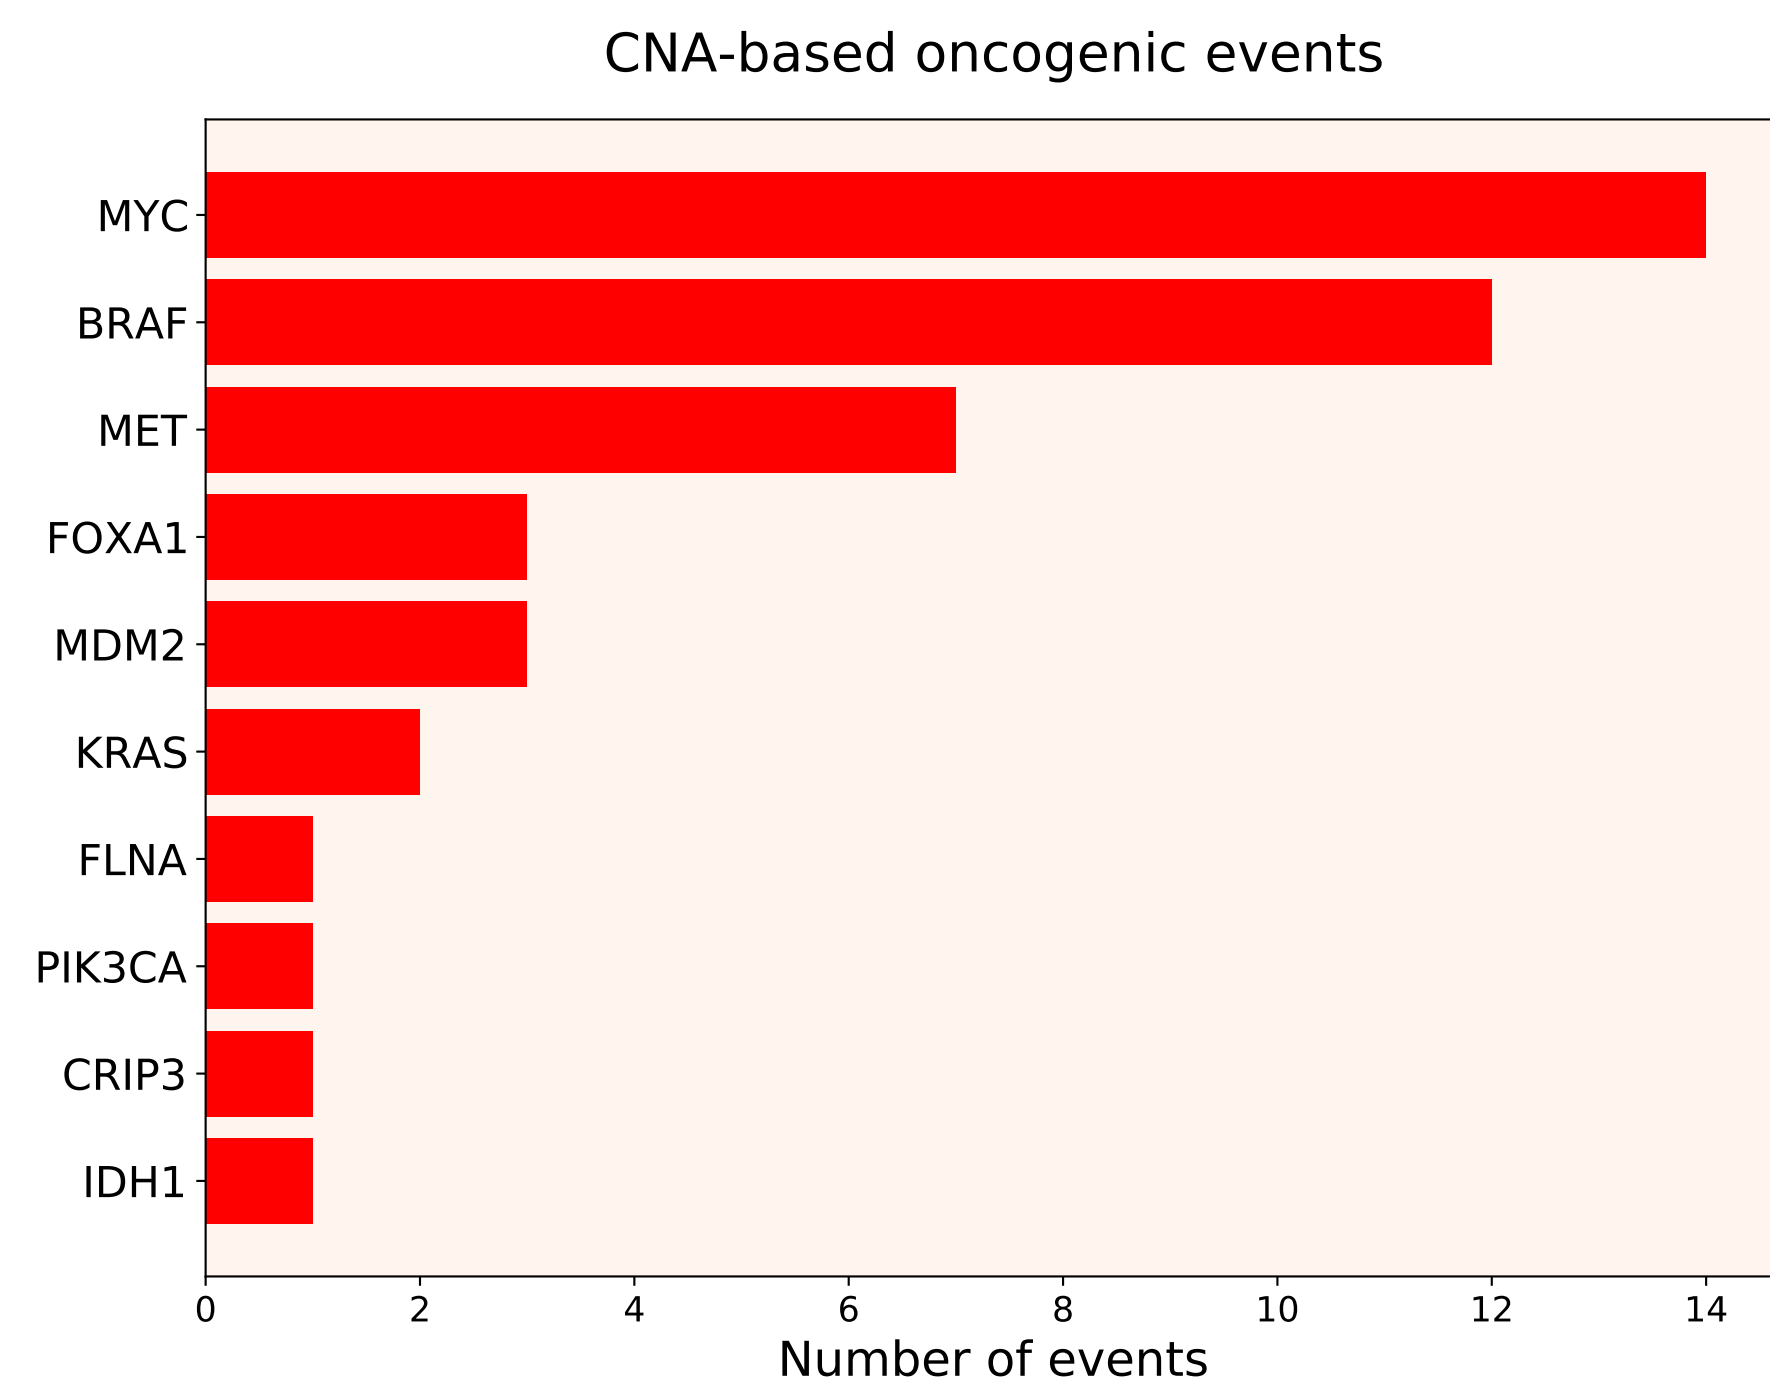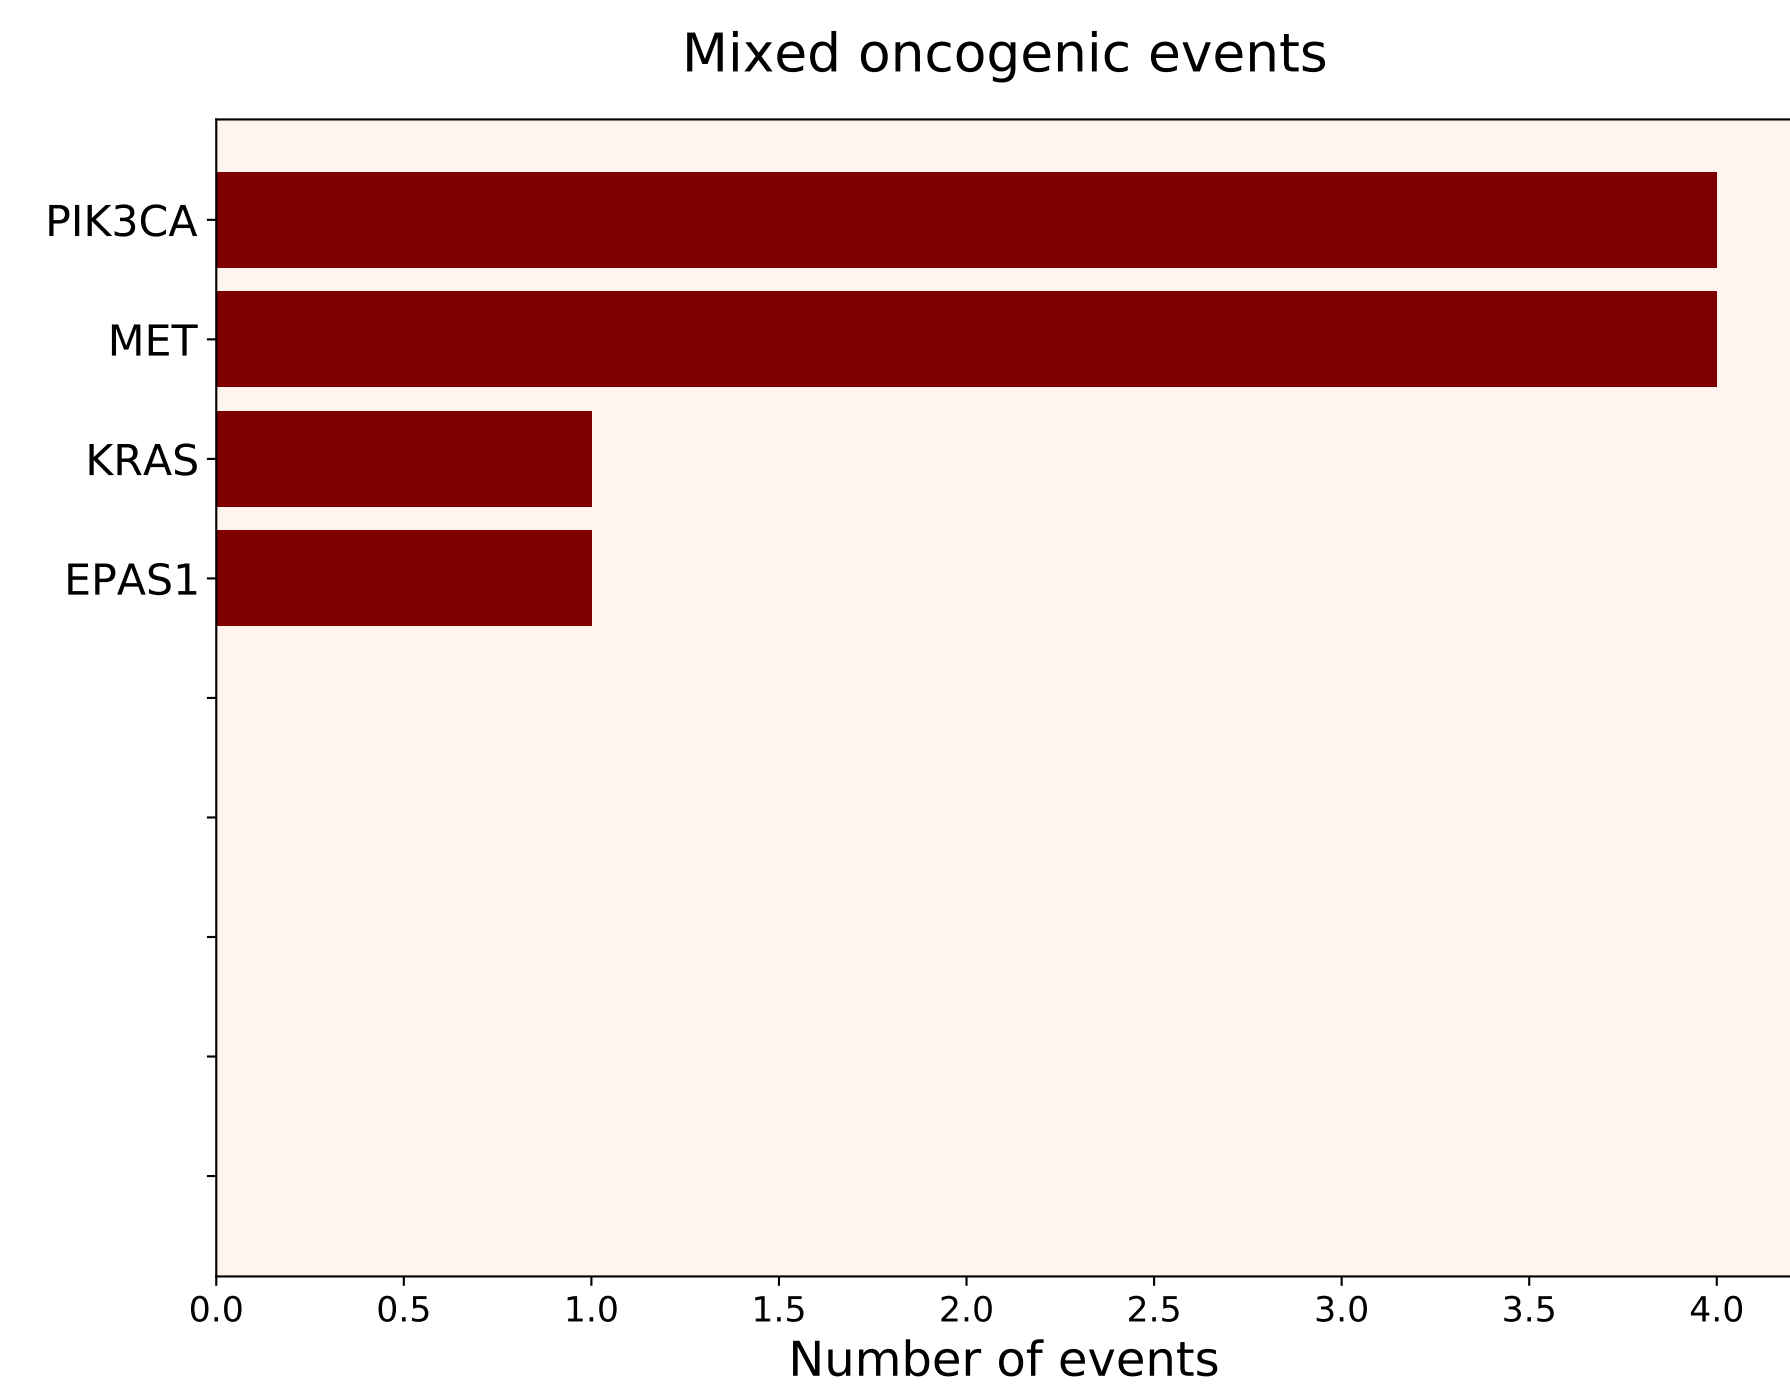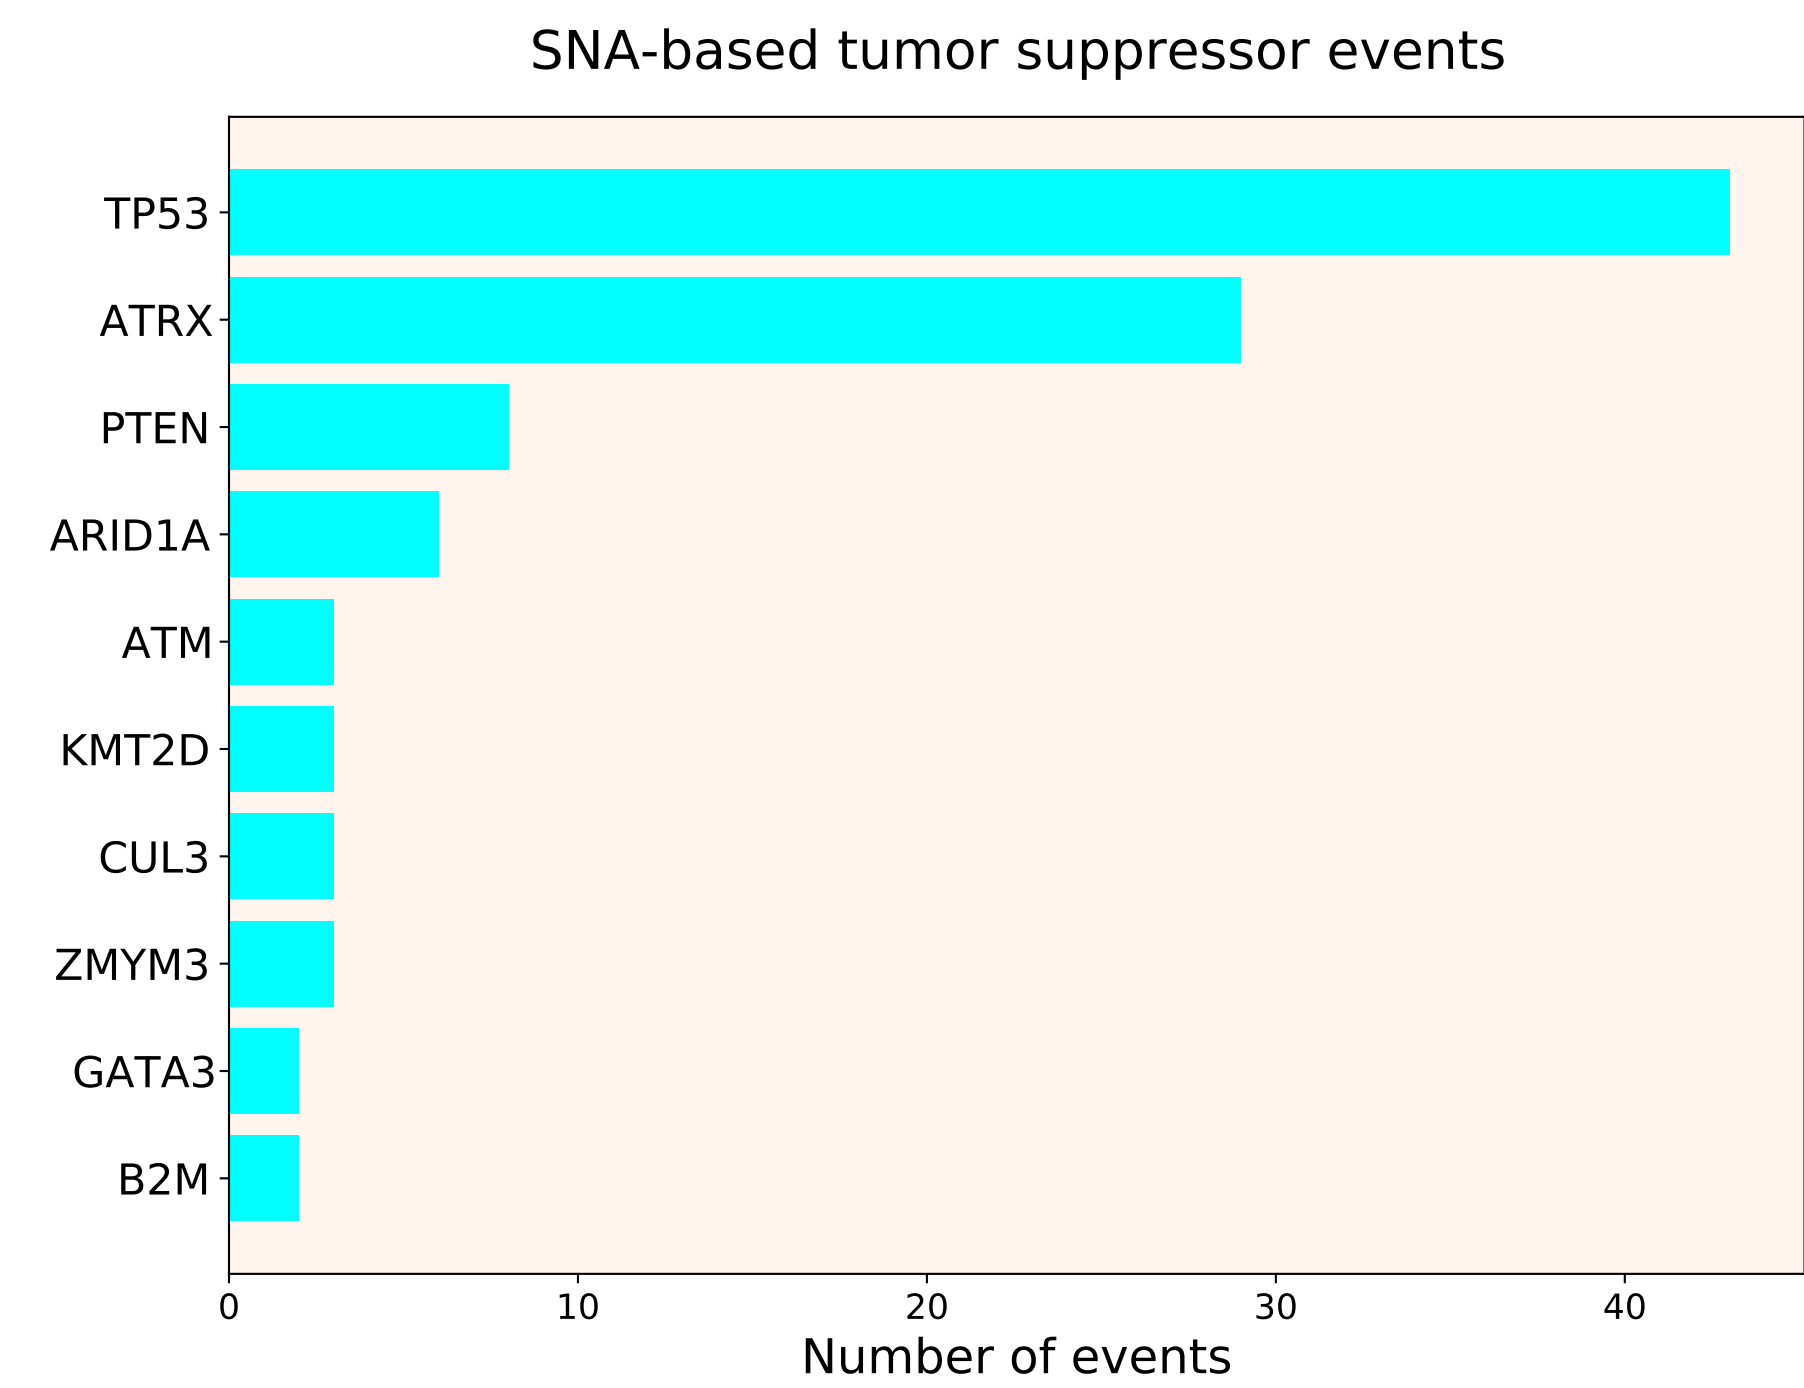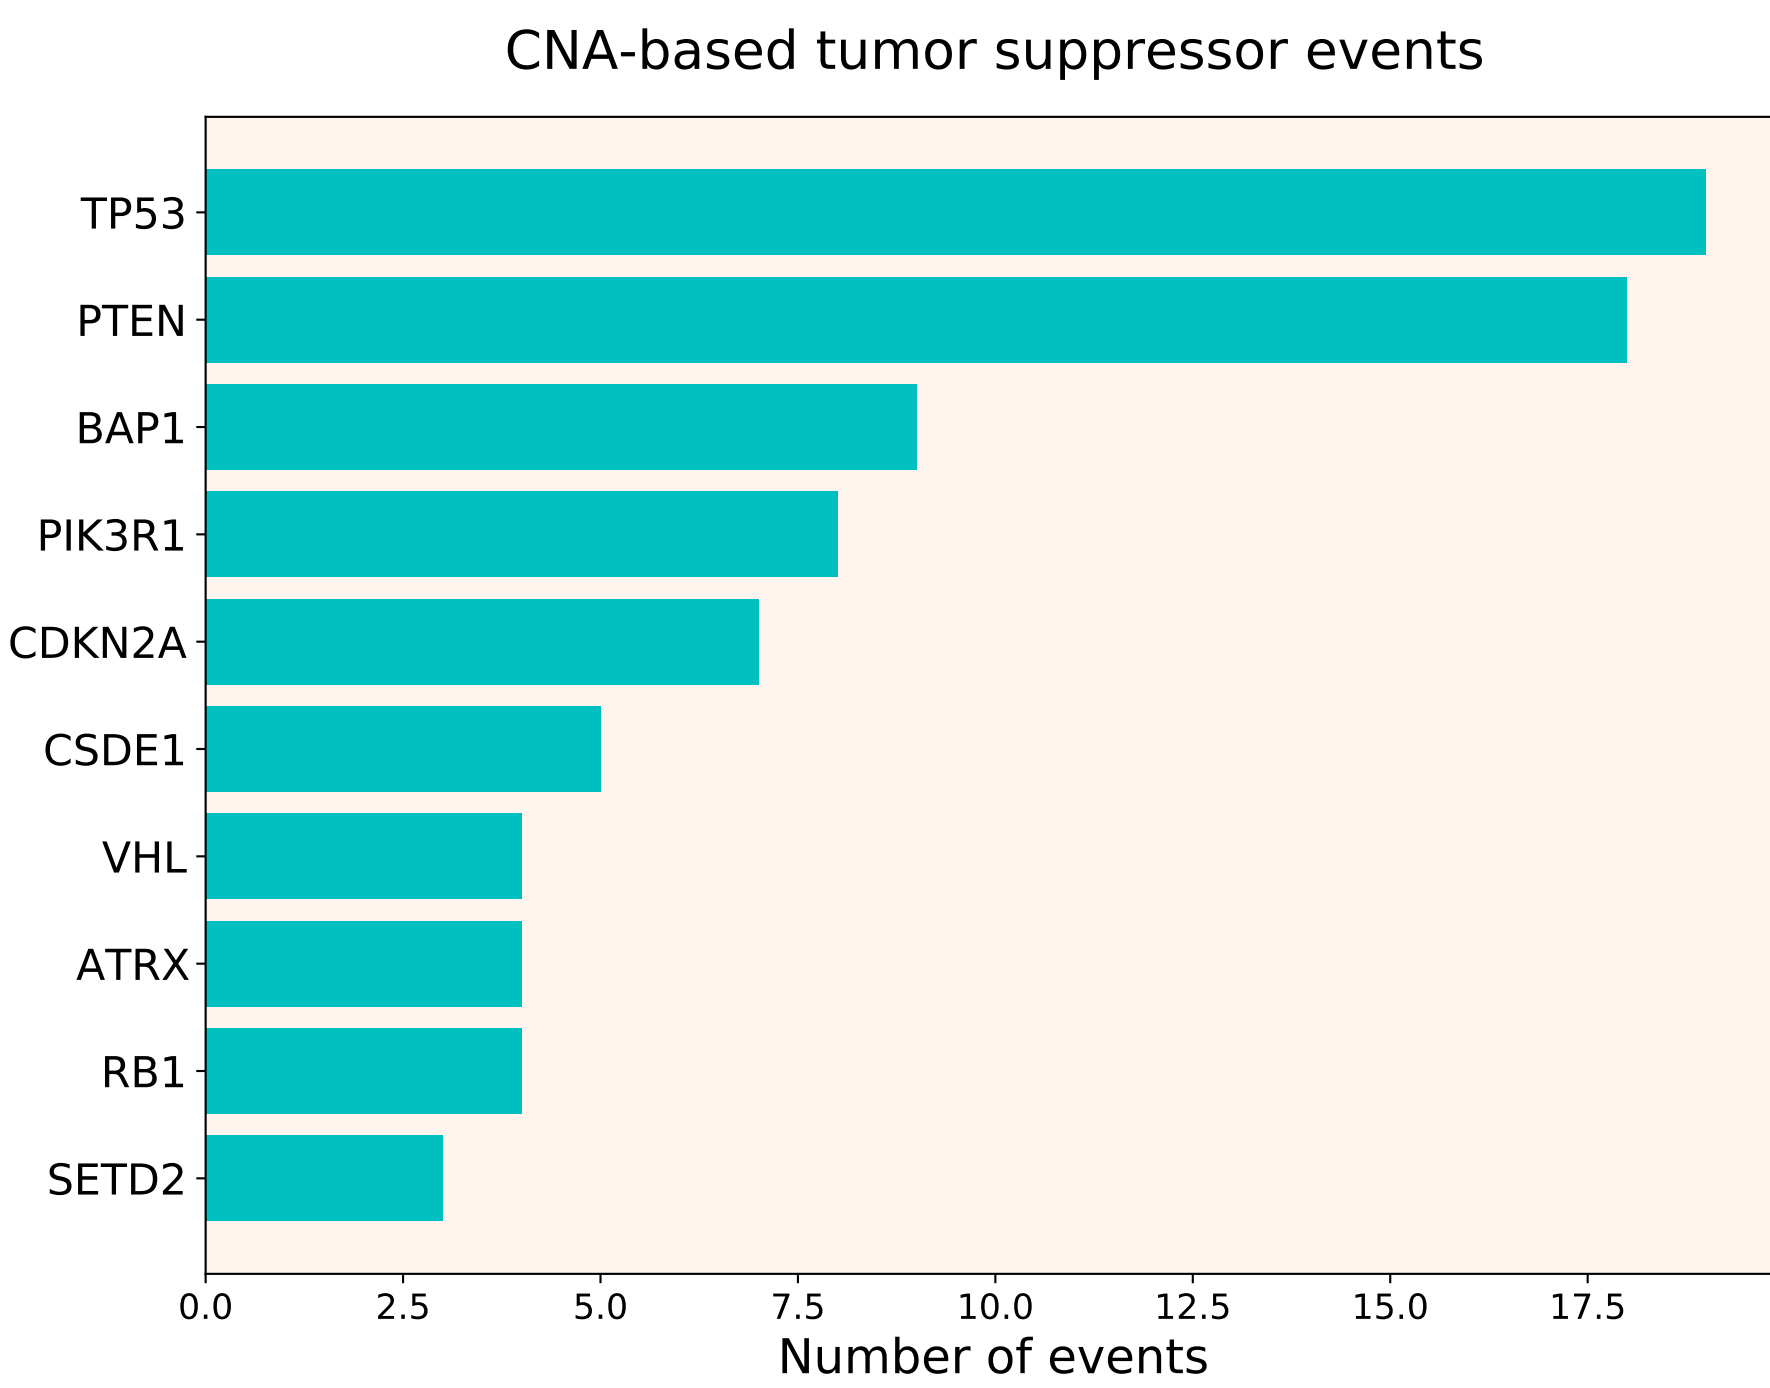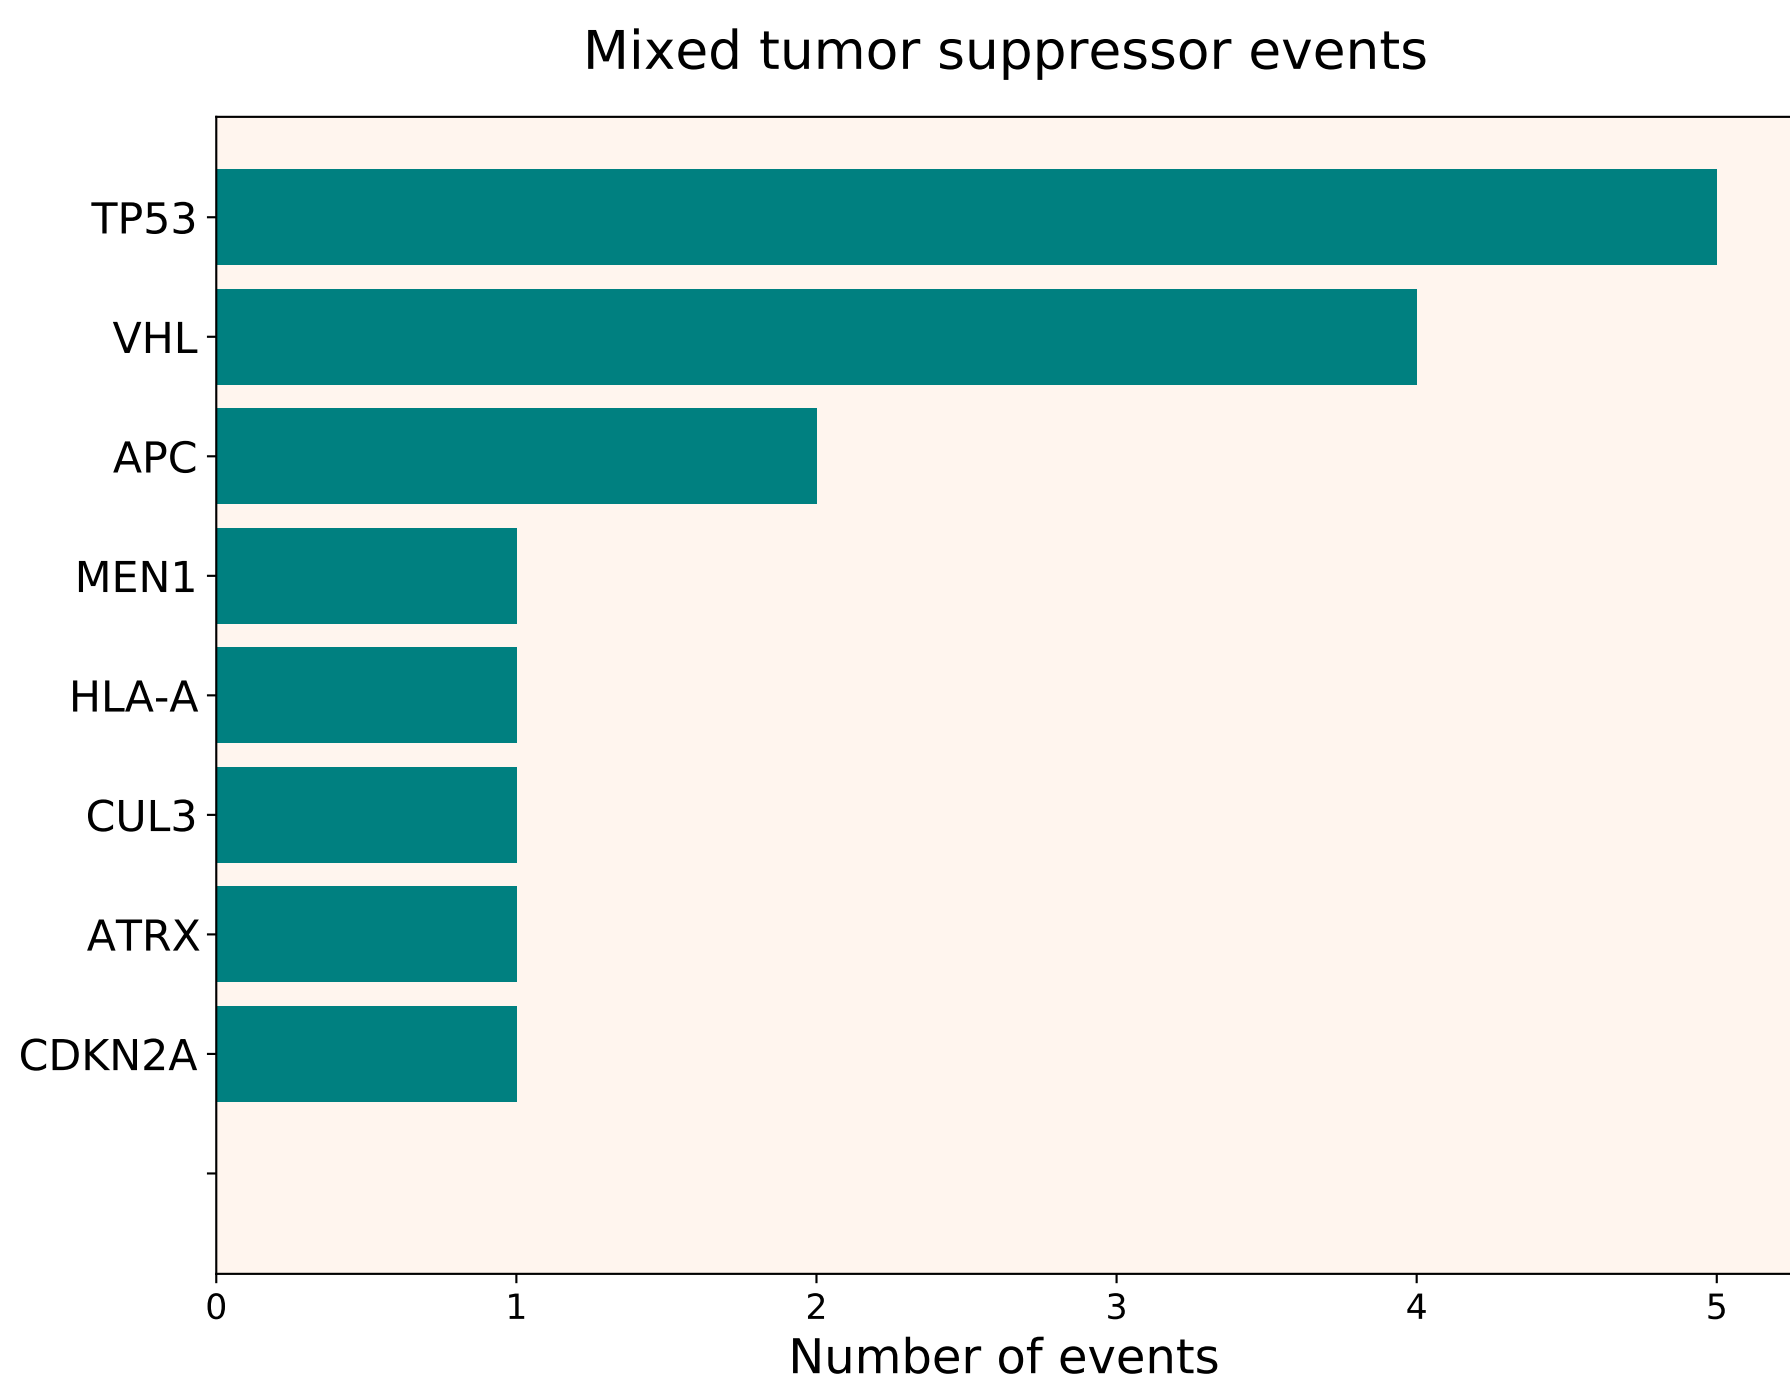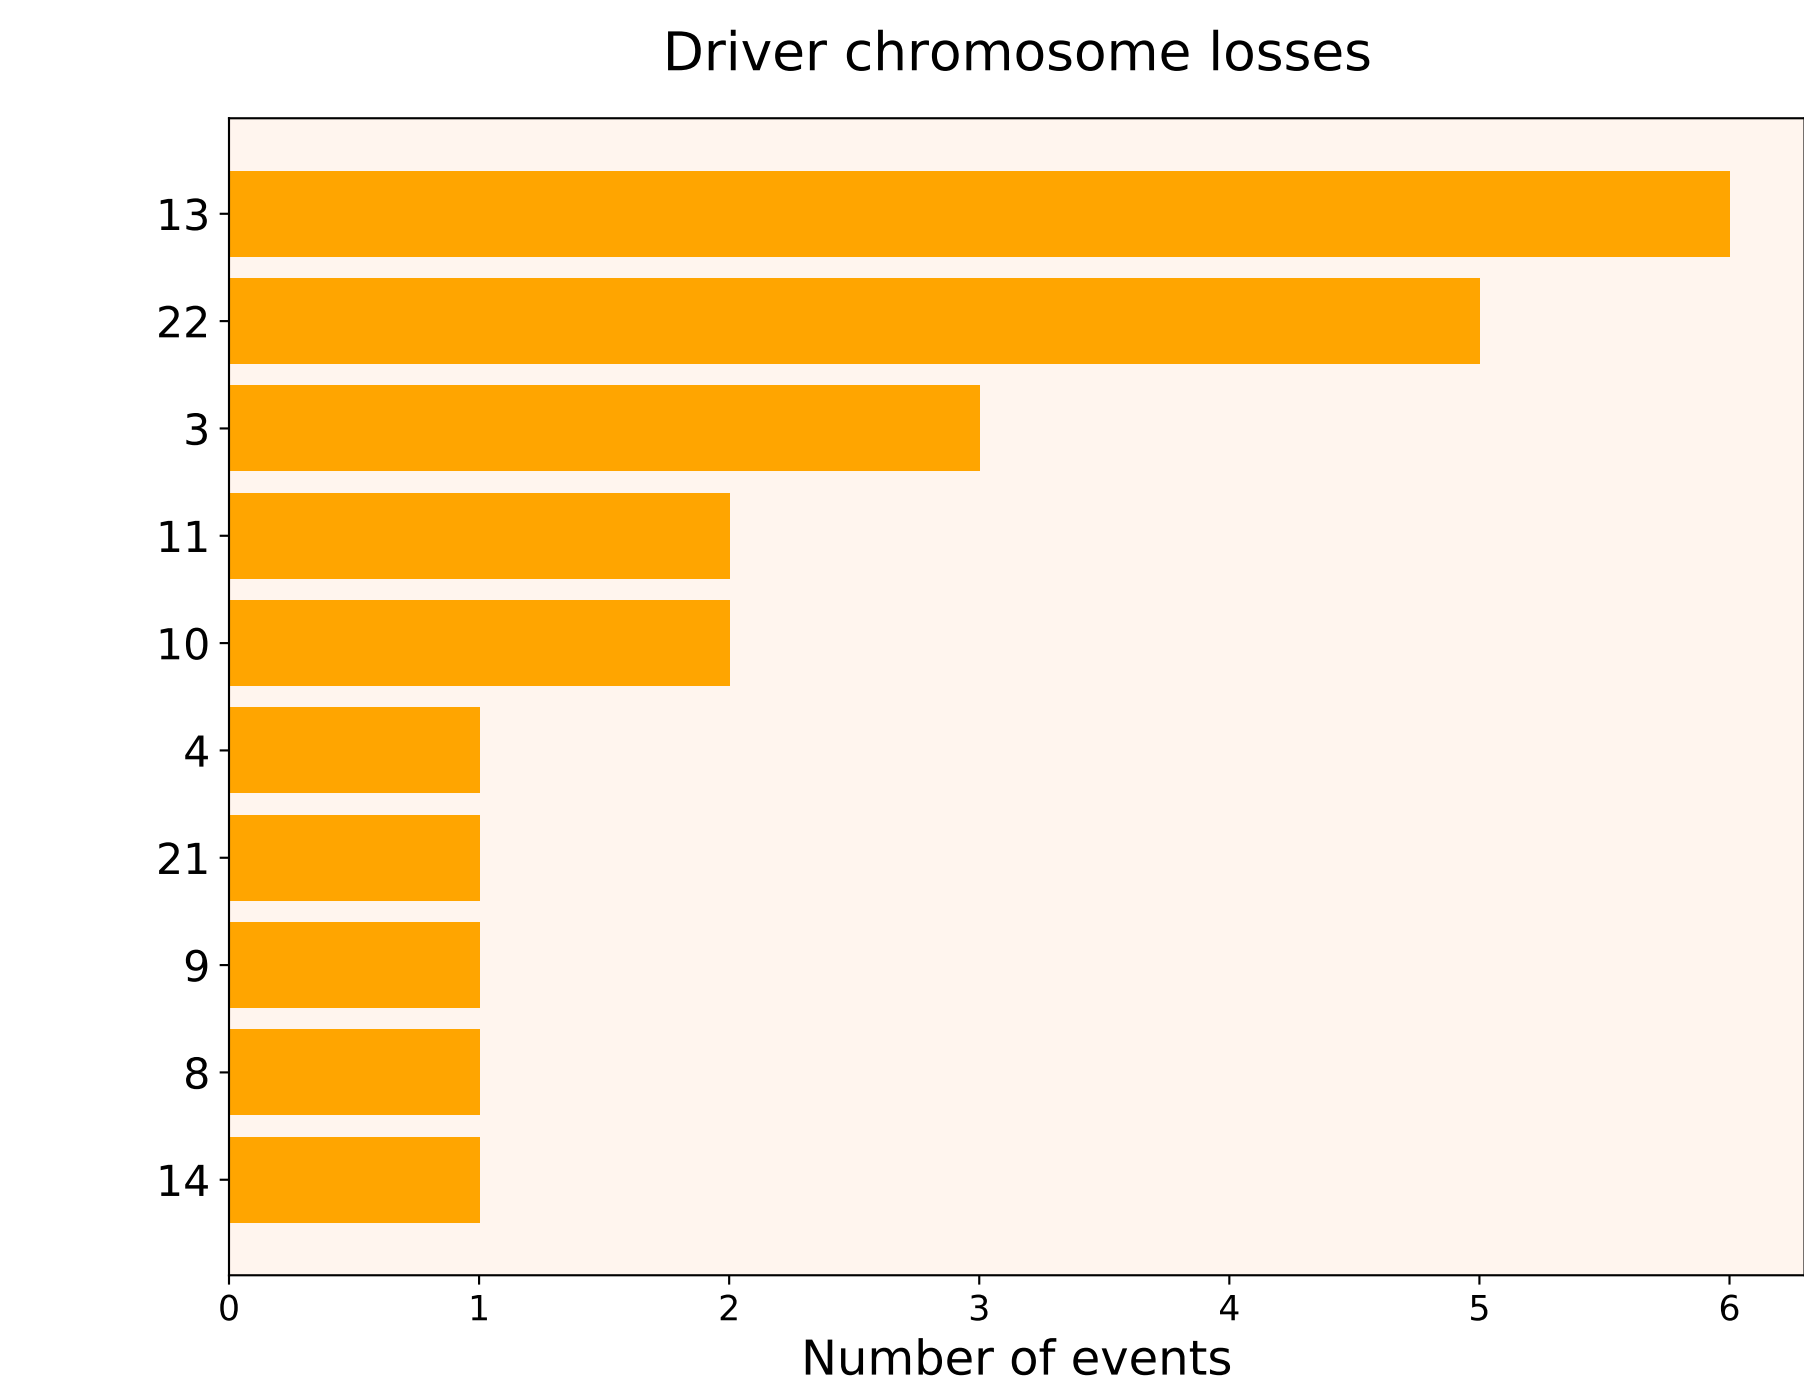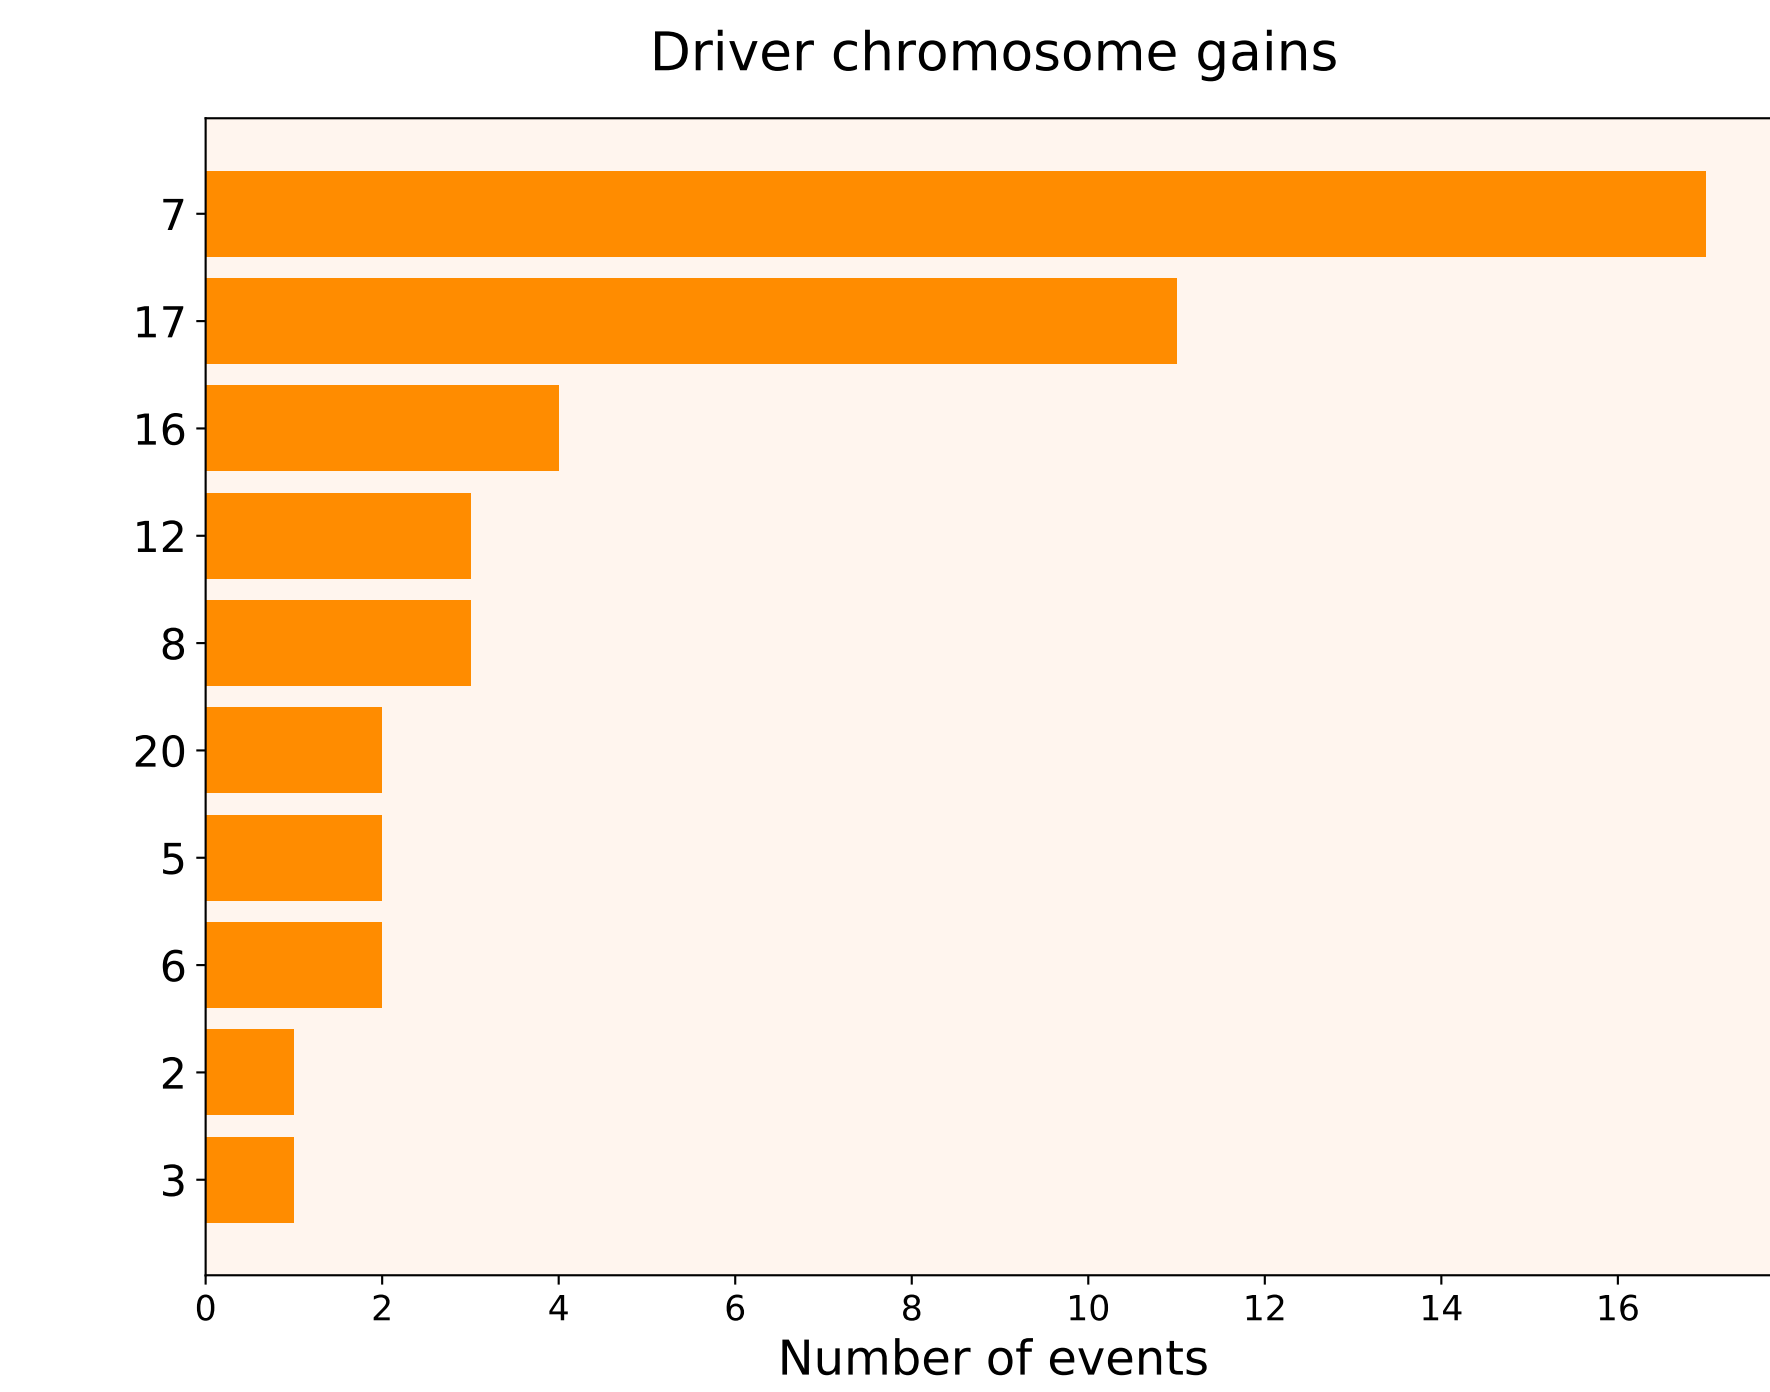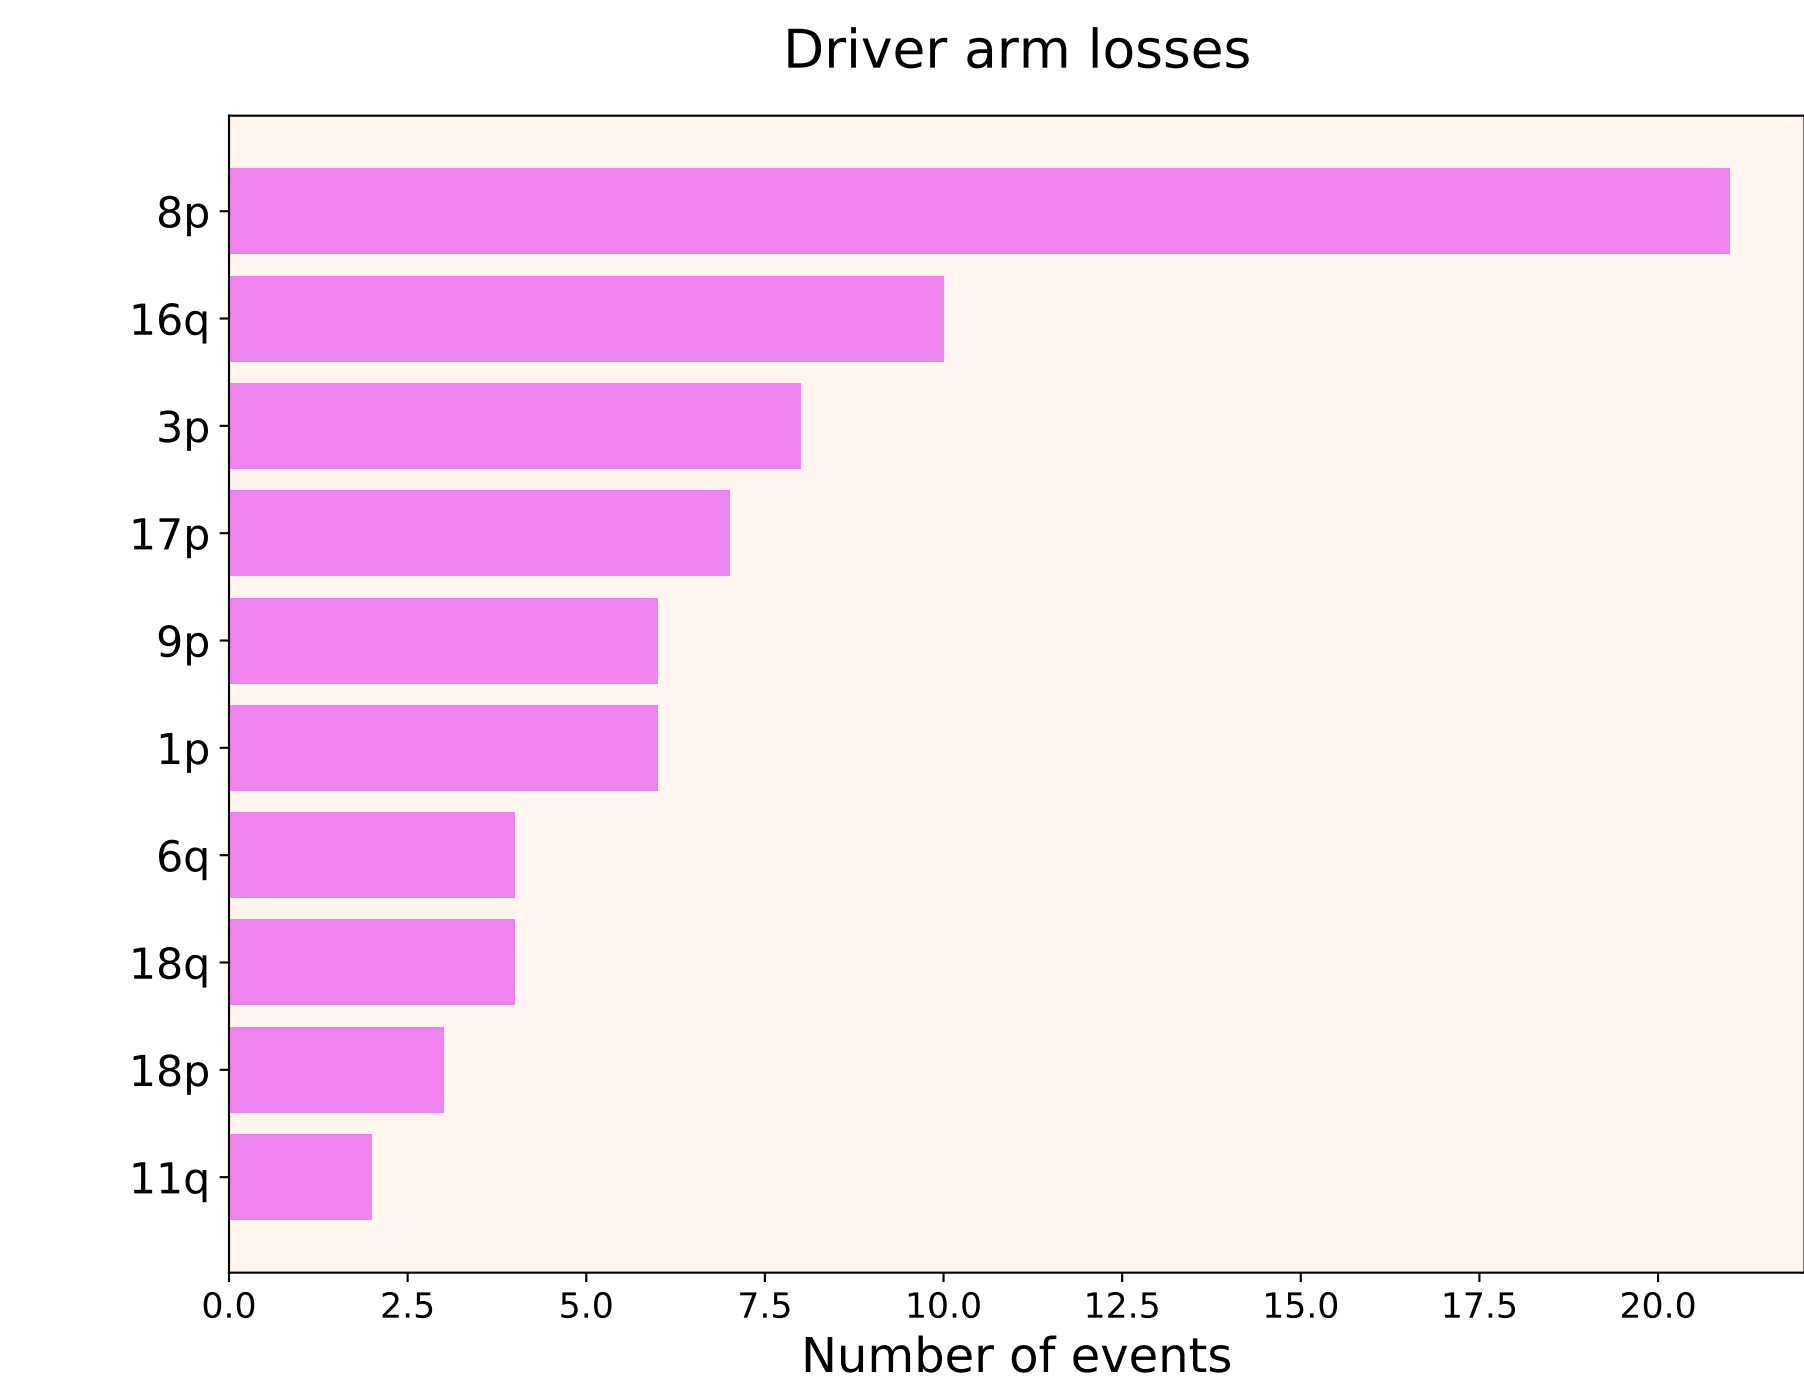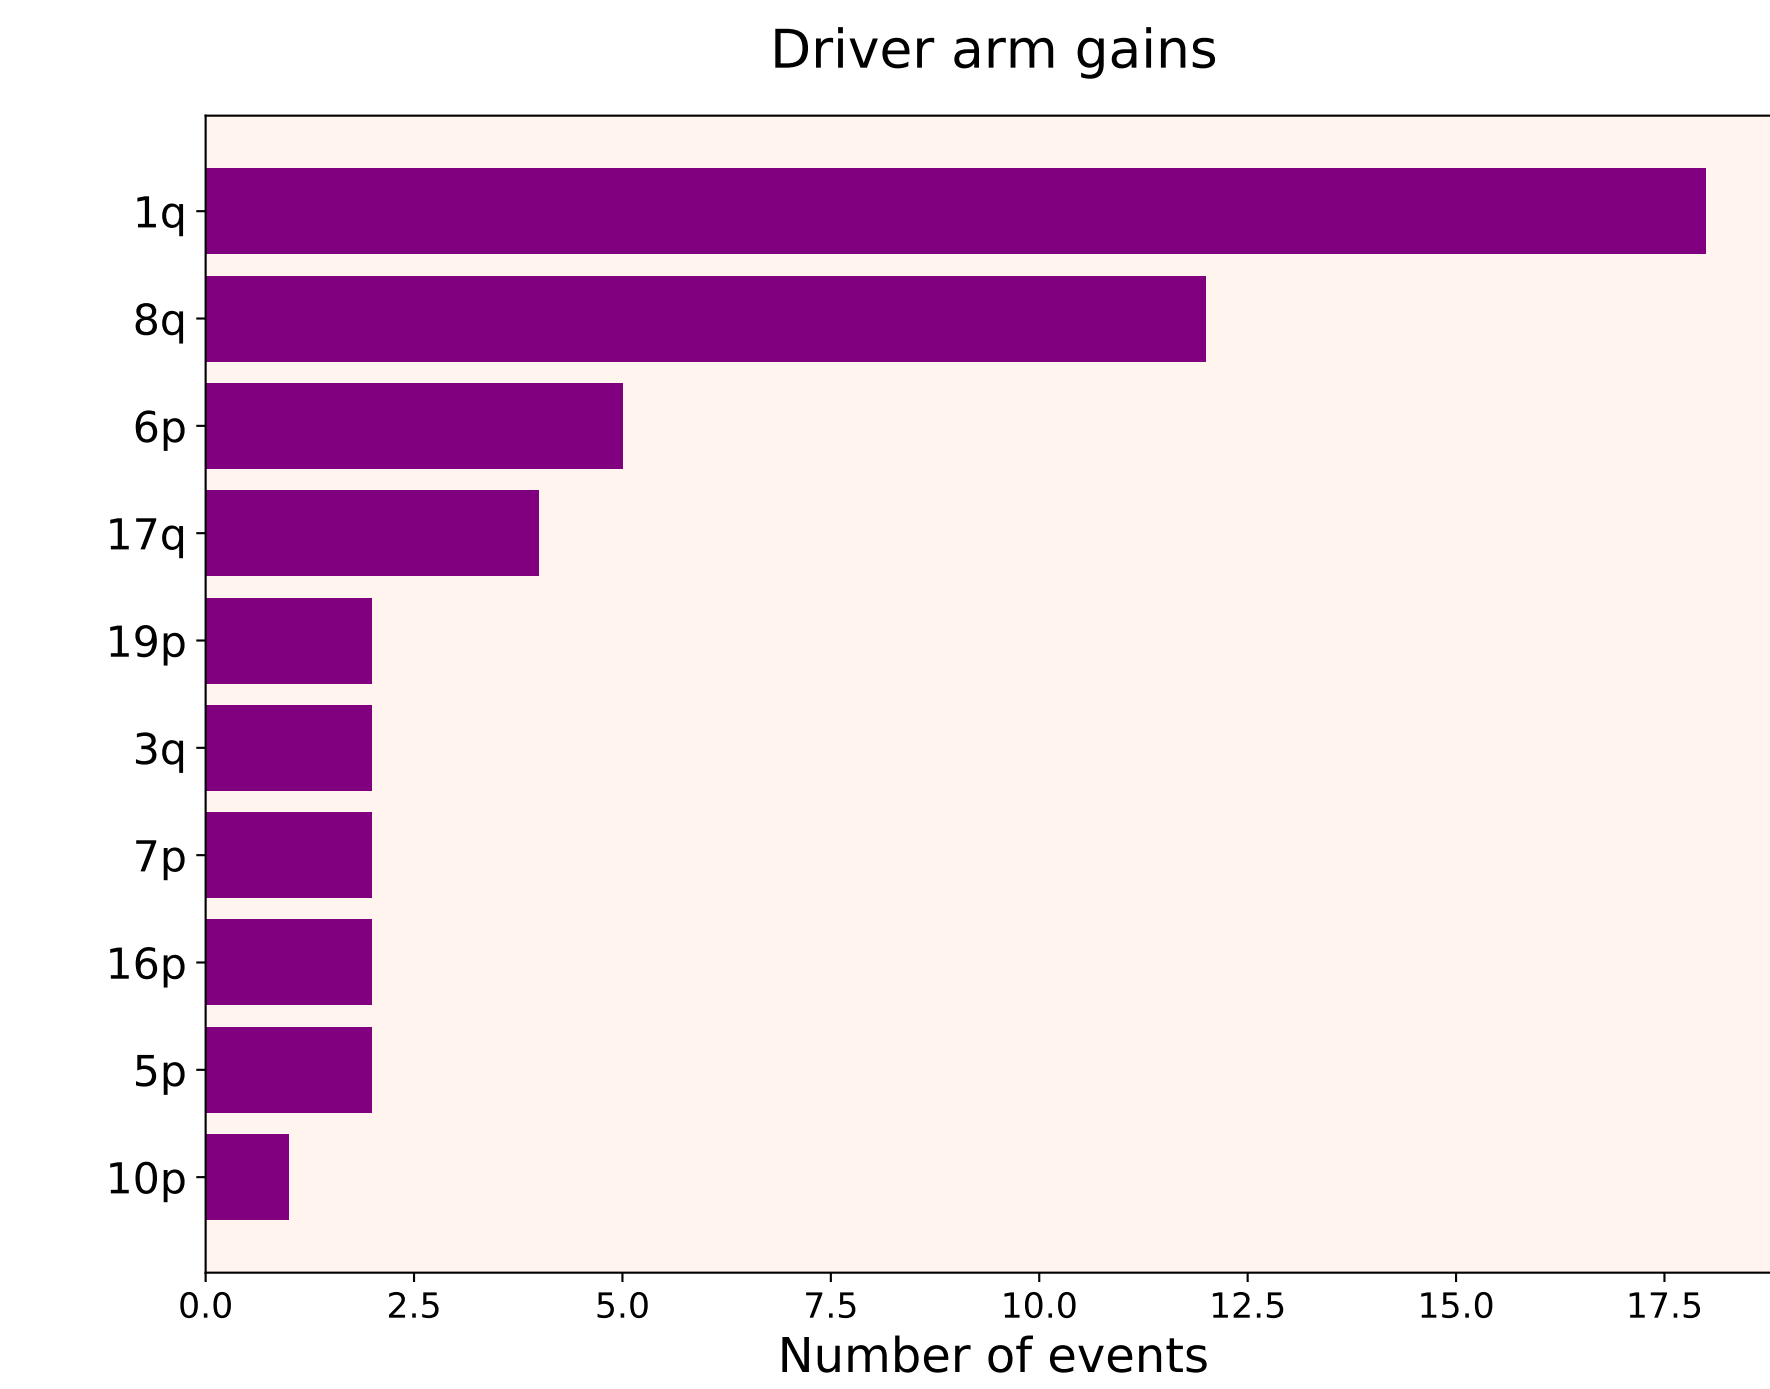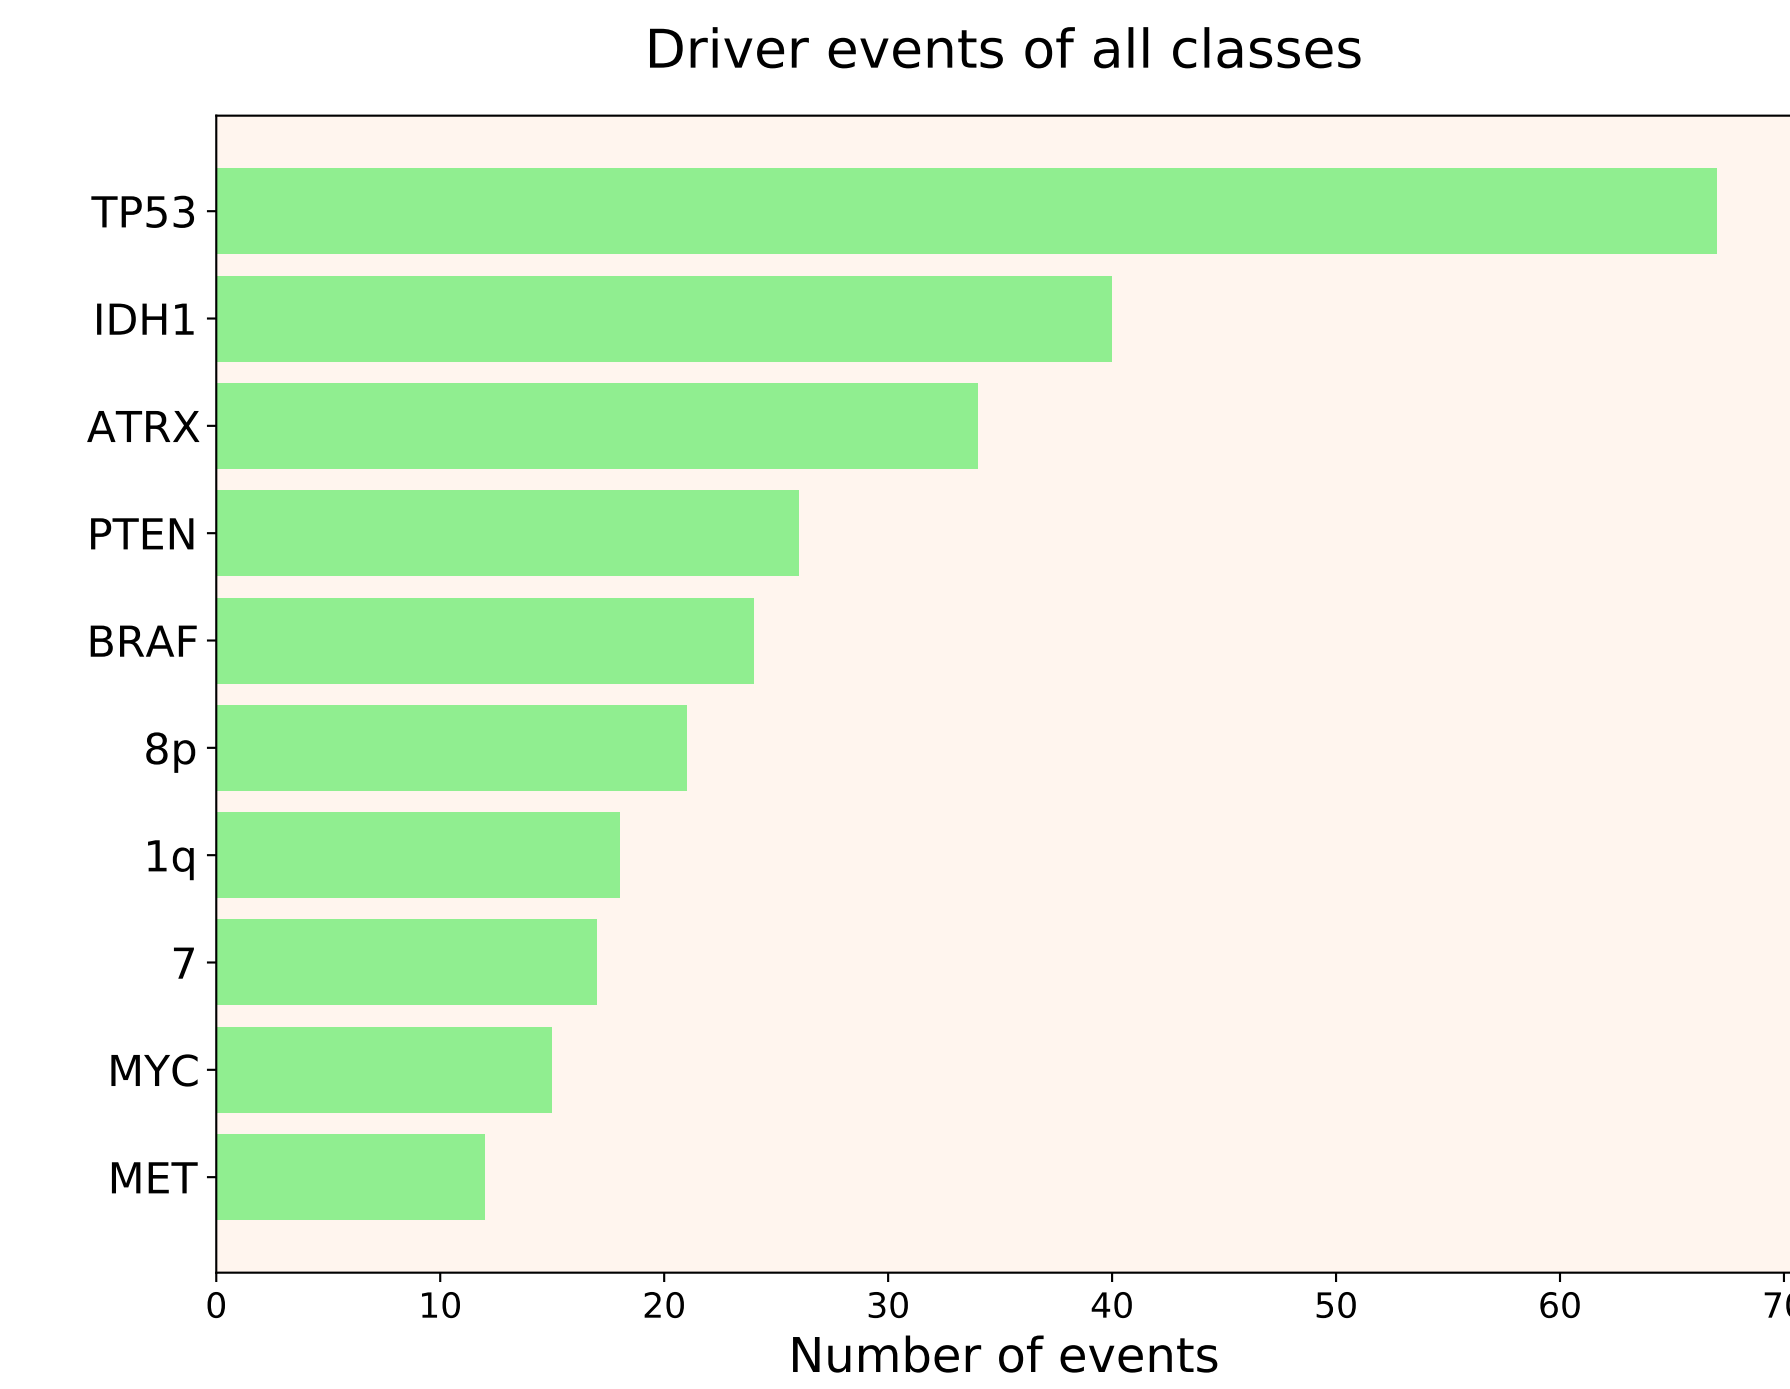

Supplement: Supplemental_Data_S1.zip [file Supplemental_Data_S1.zip]

# OV\_FEMALE

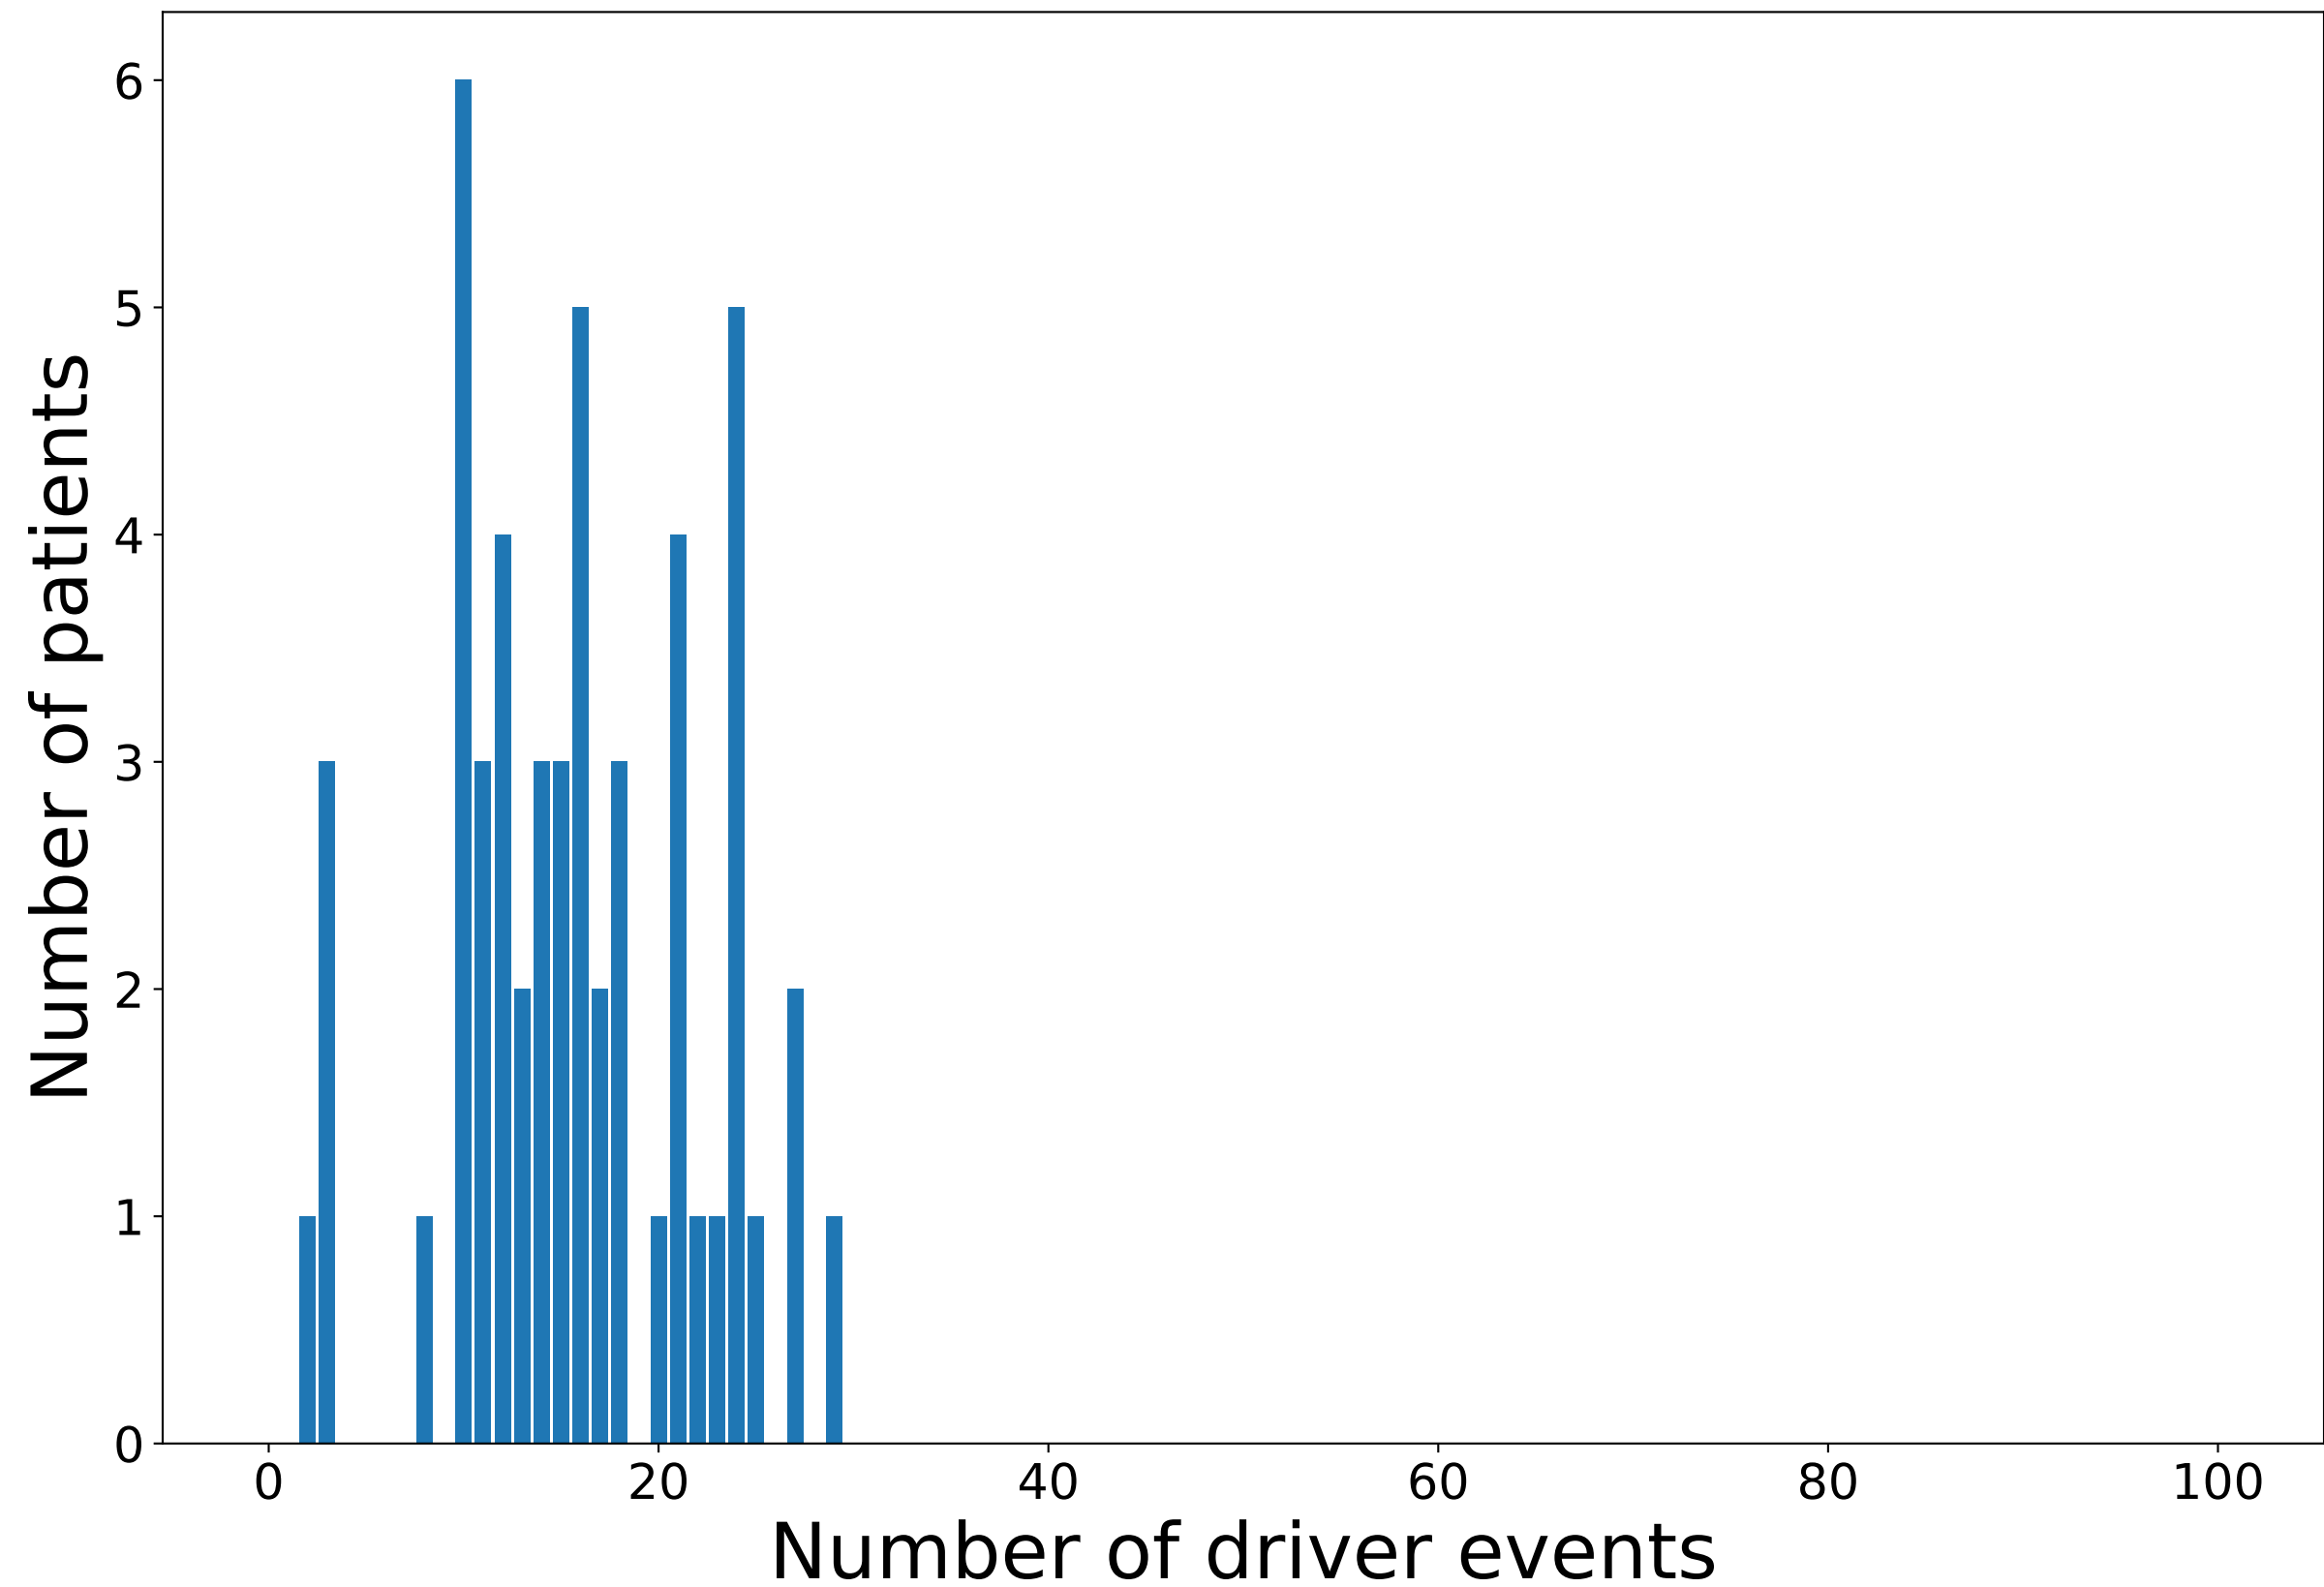

Supplement: Supplemental_Data_S1.zip [file Supplemental_Data_S1.zip]

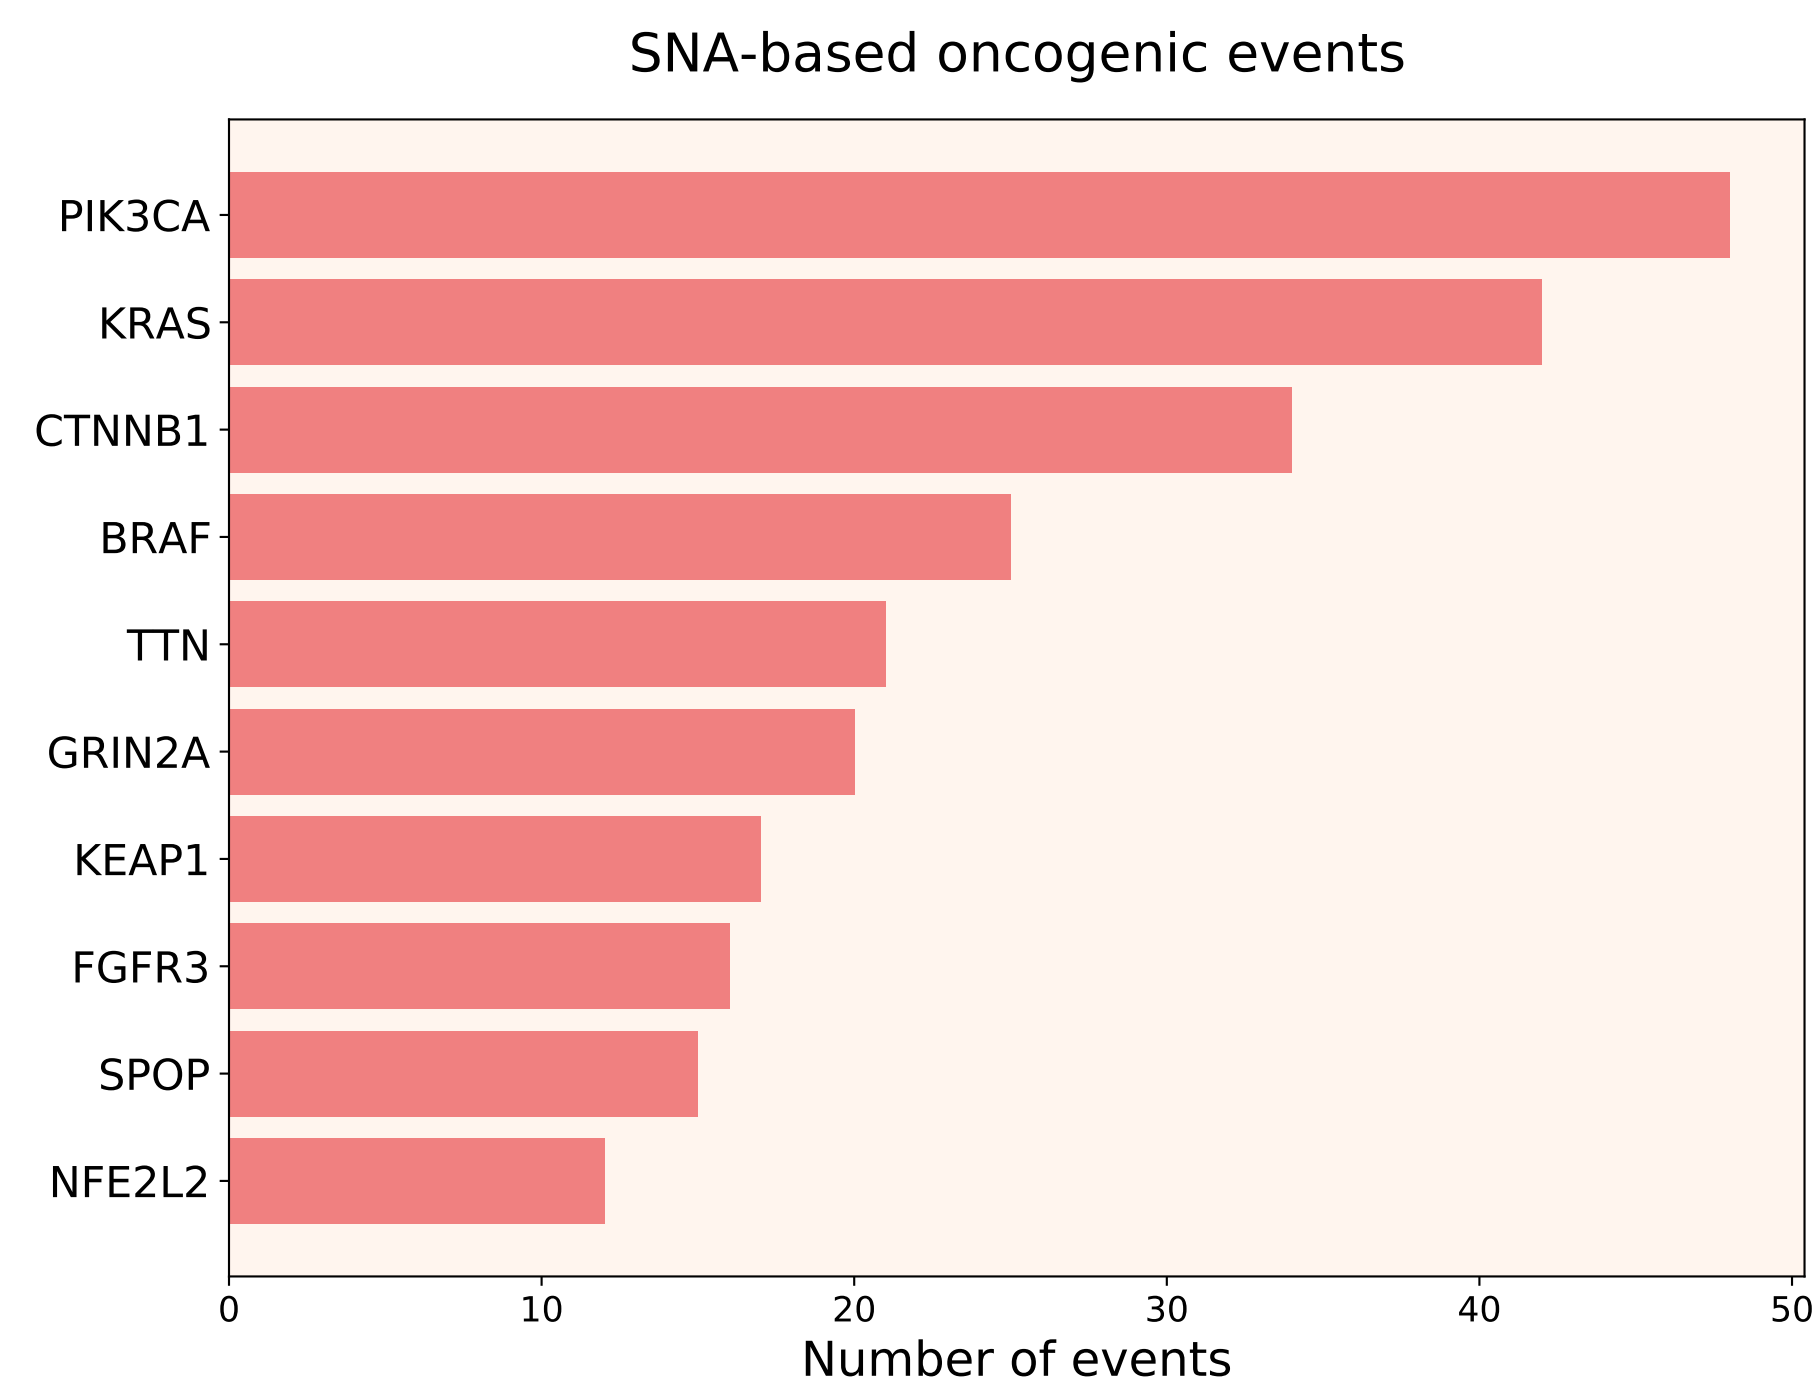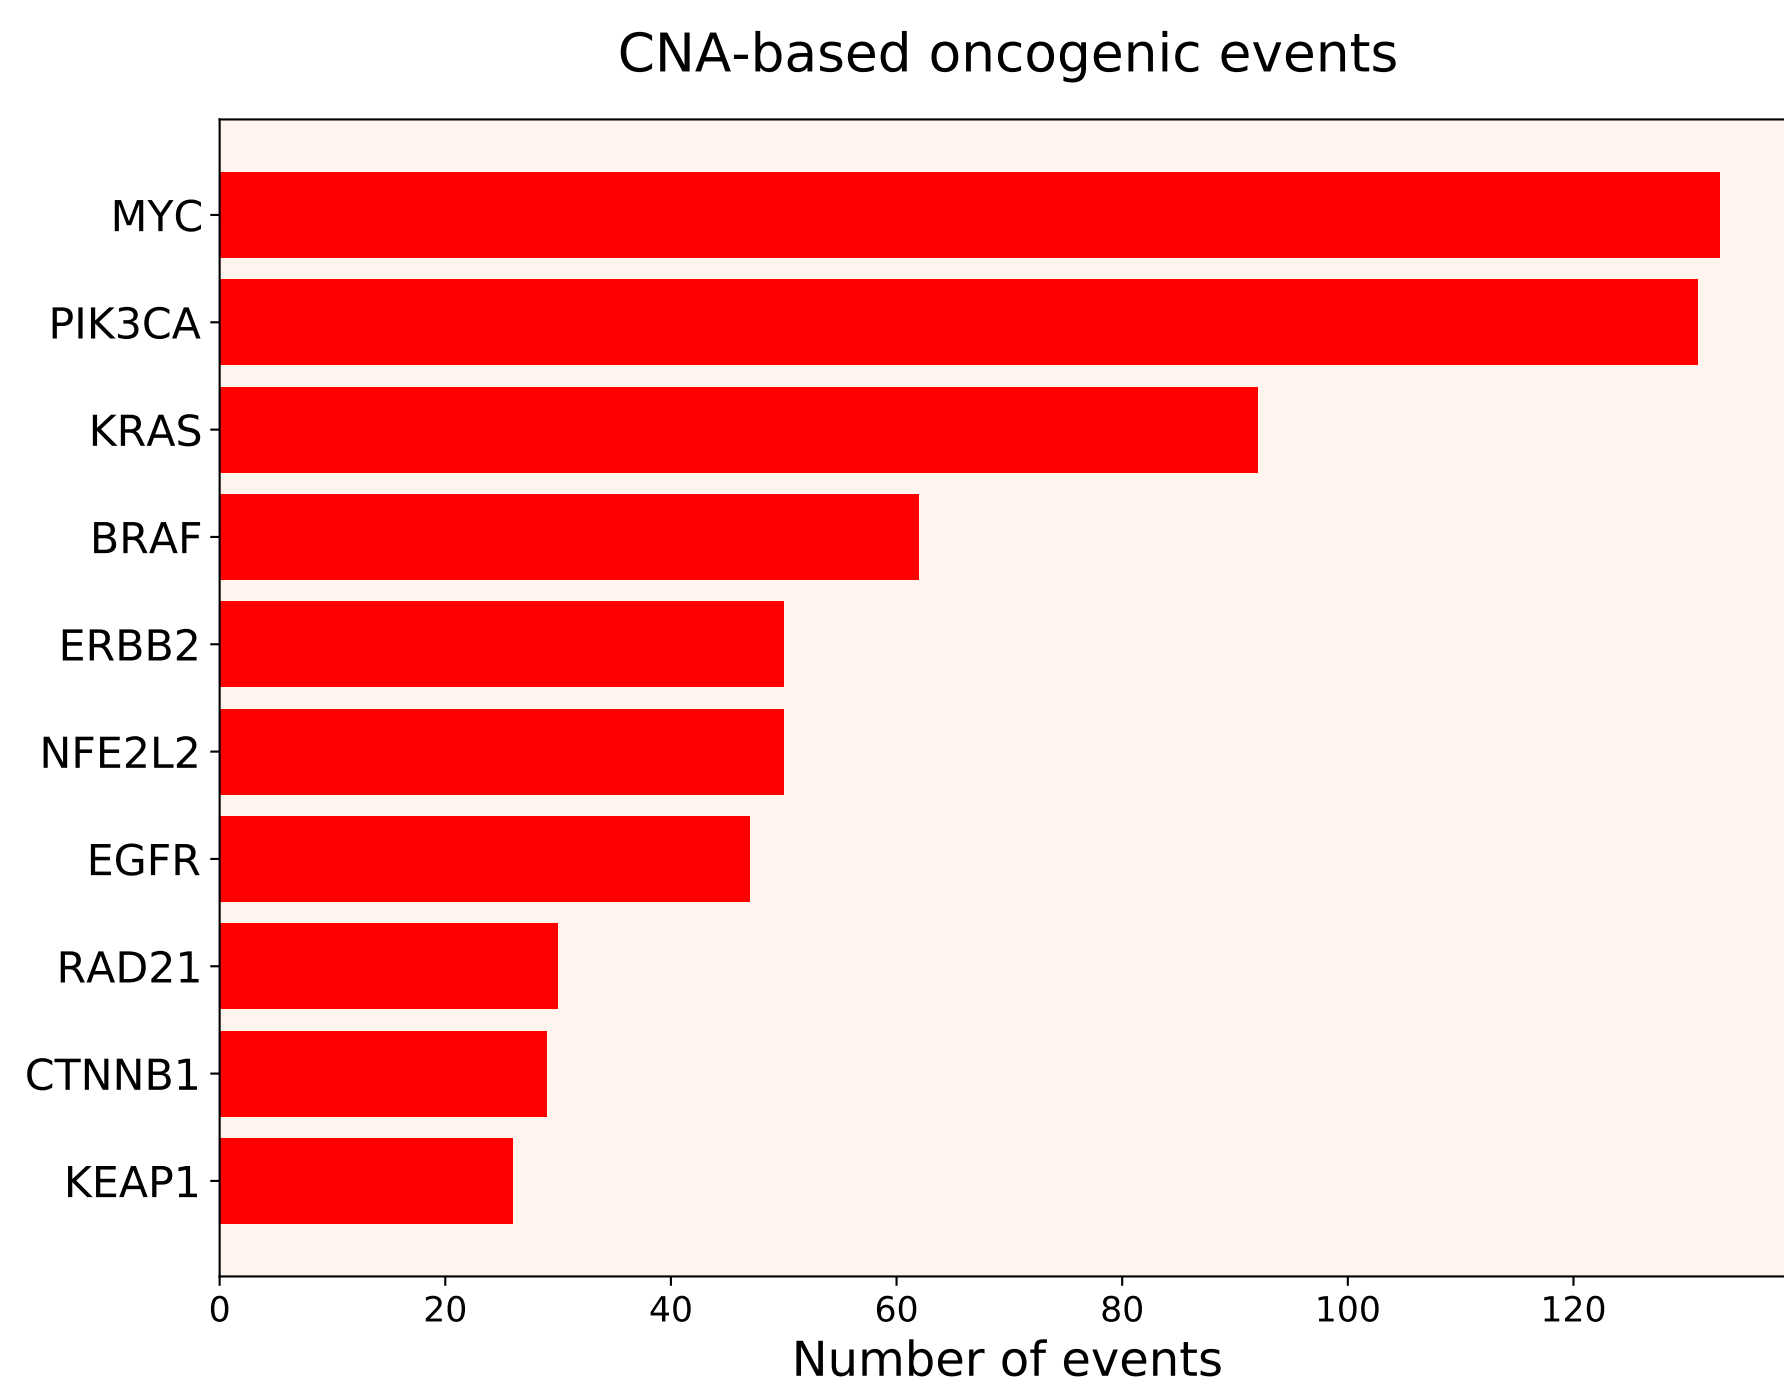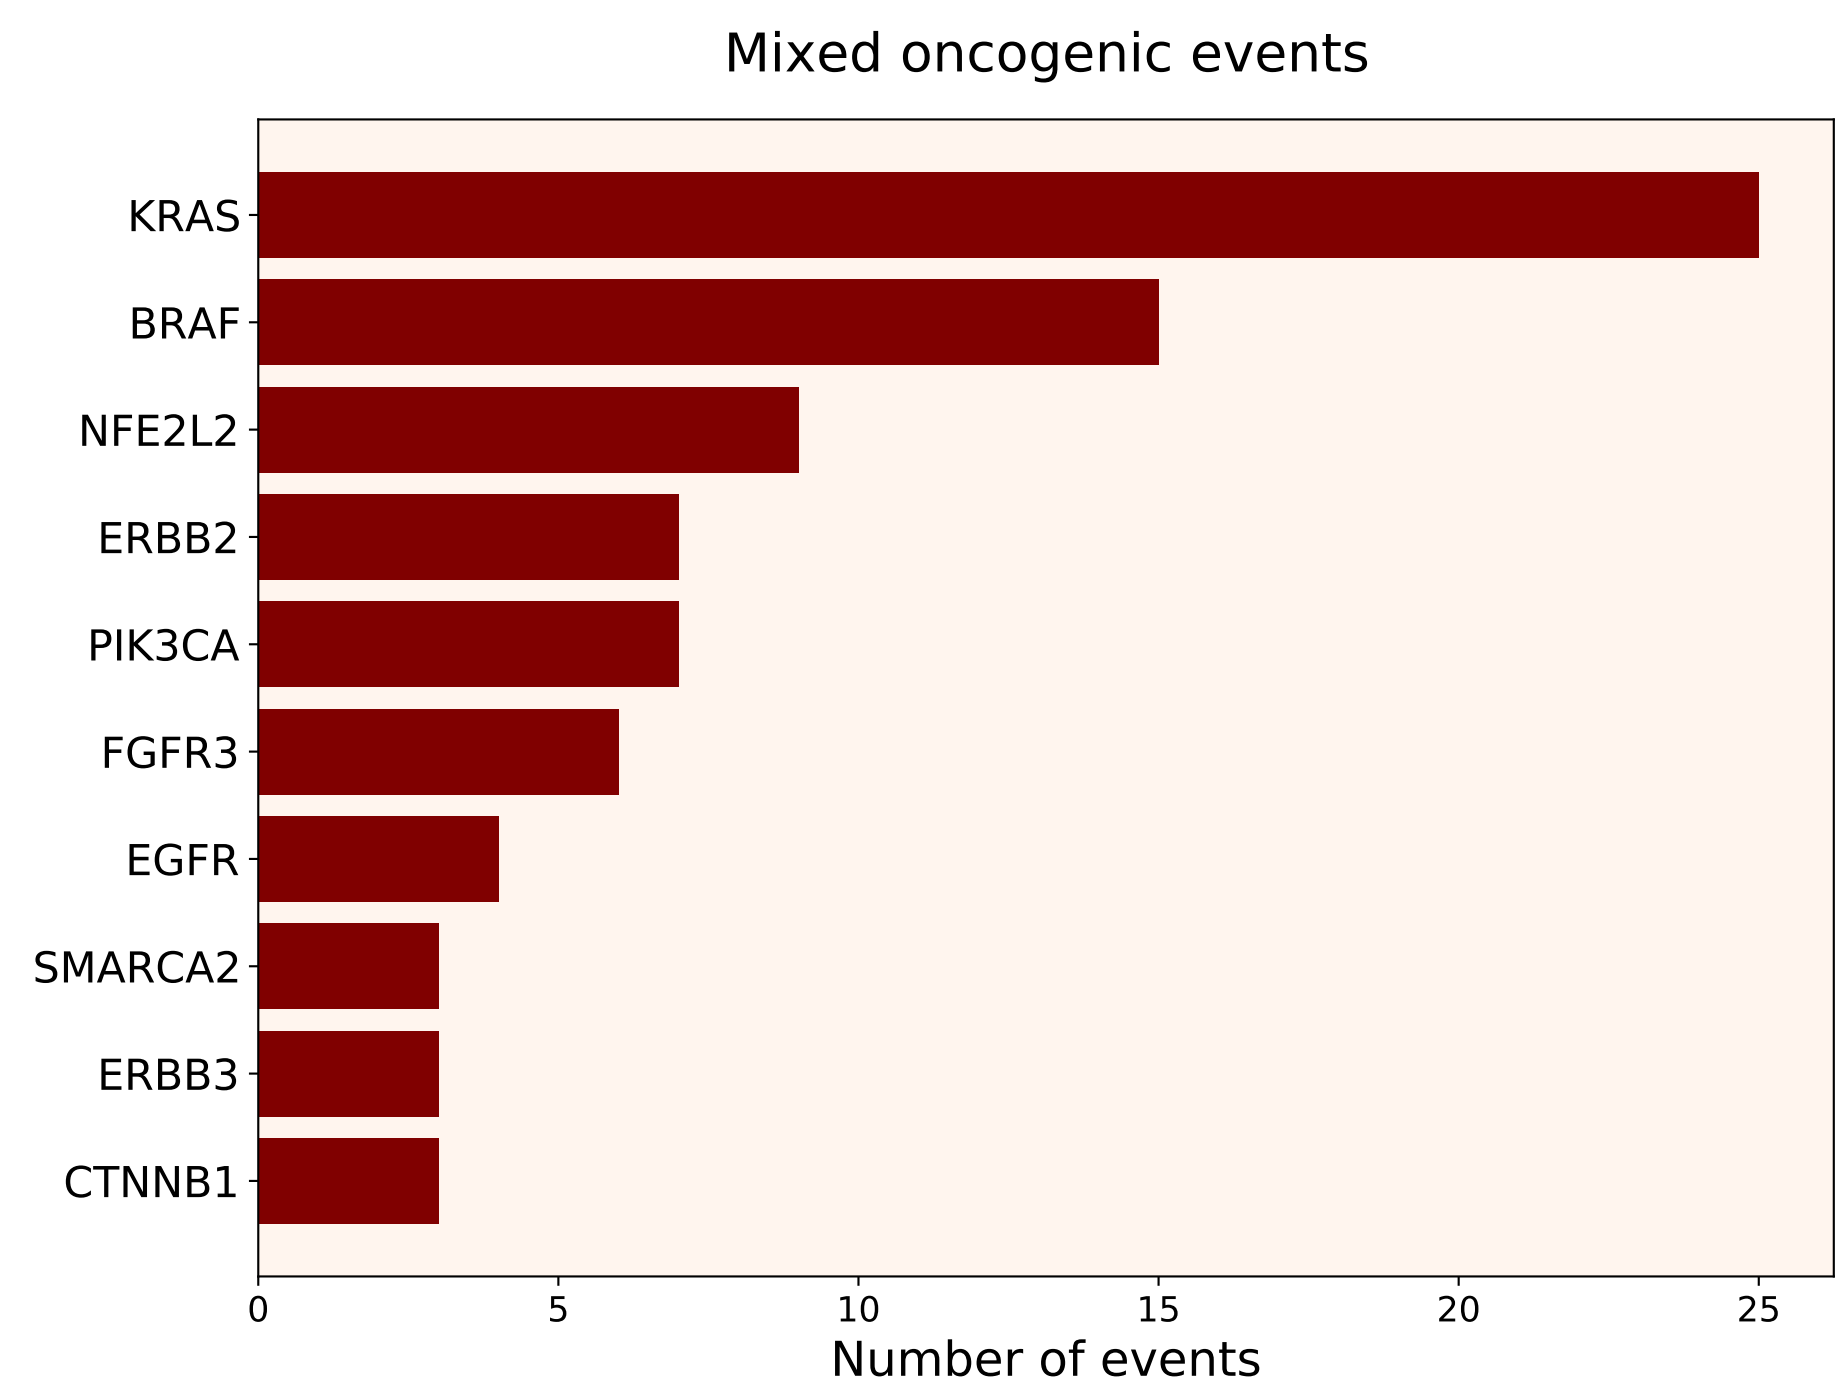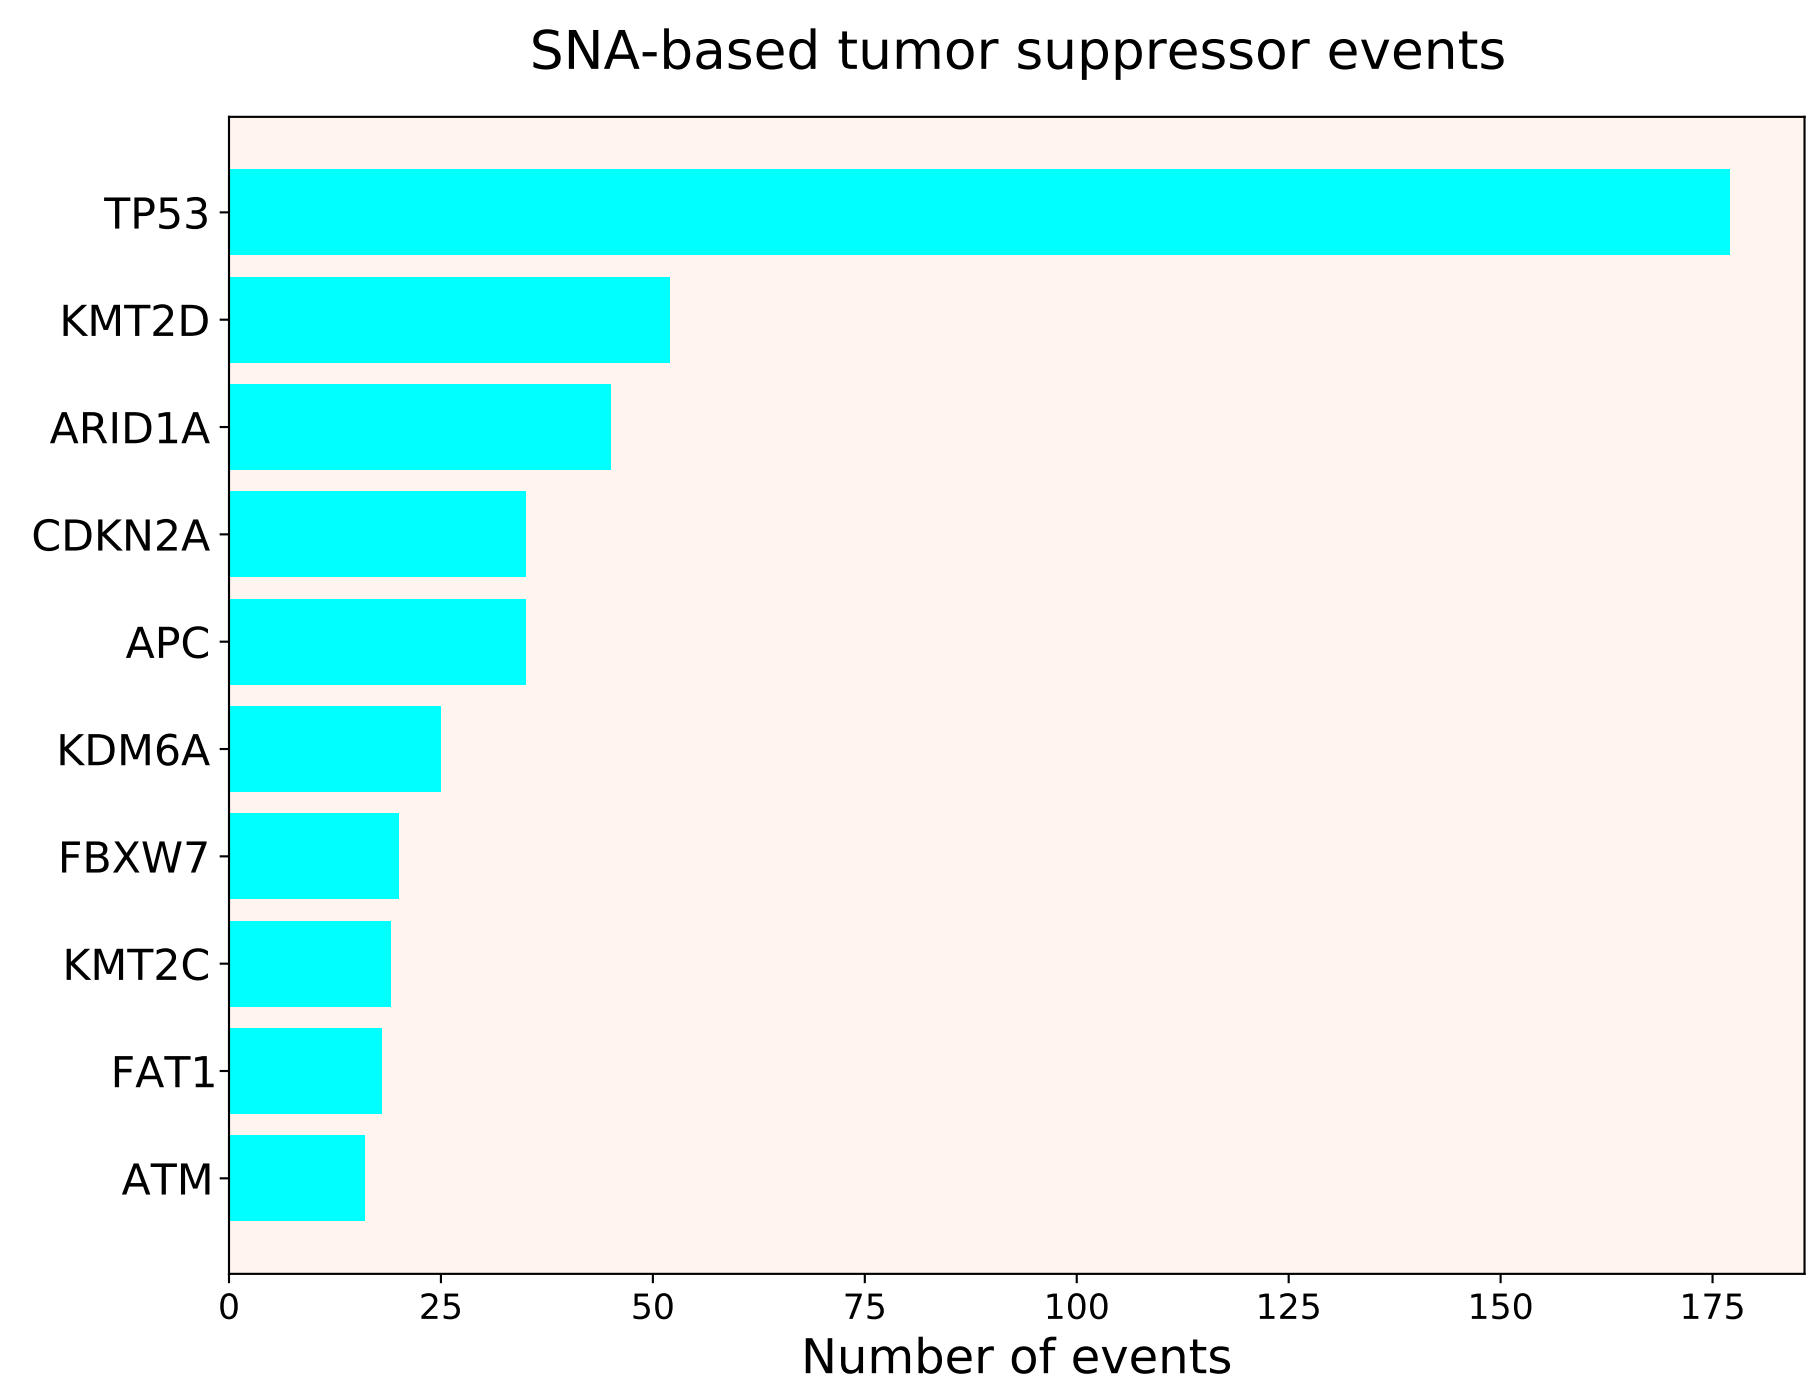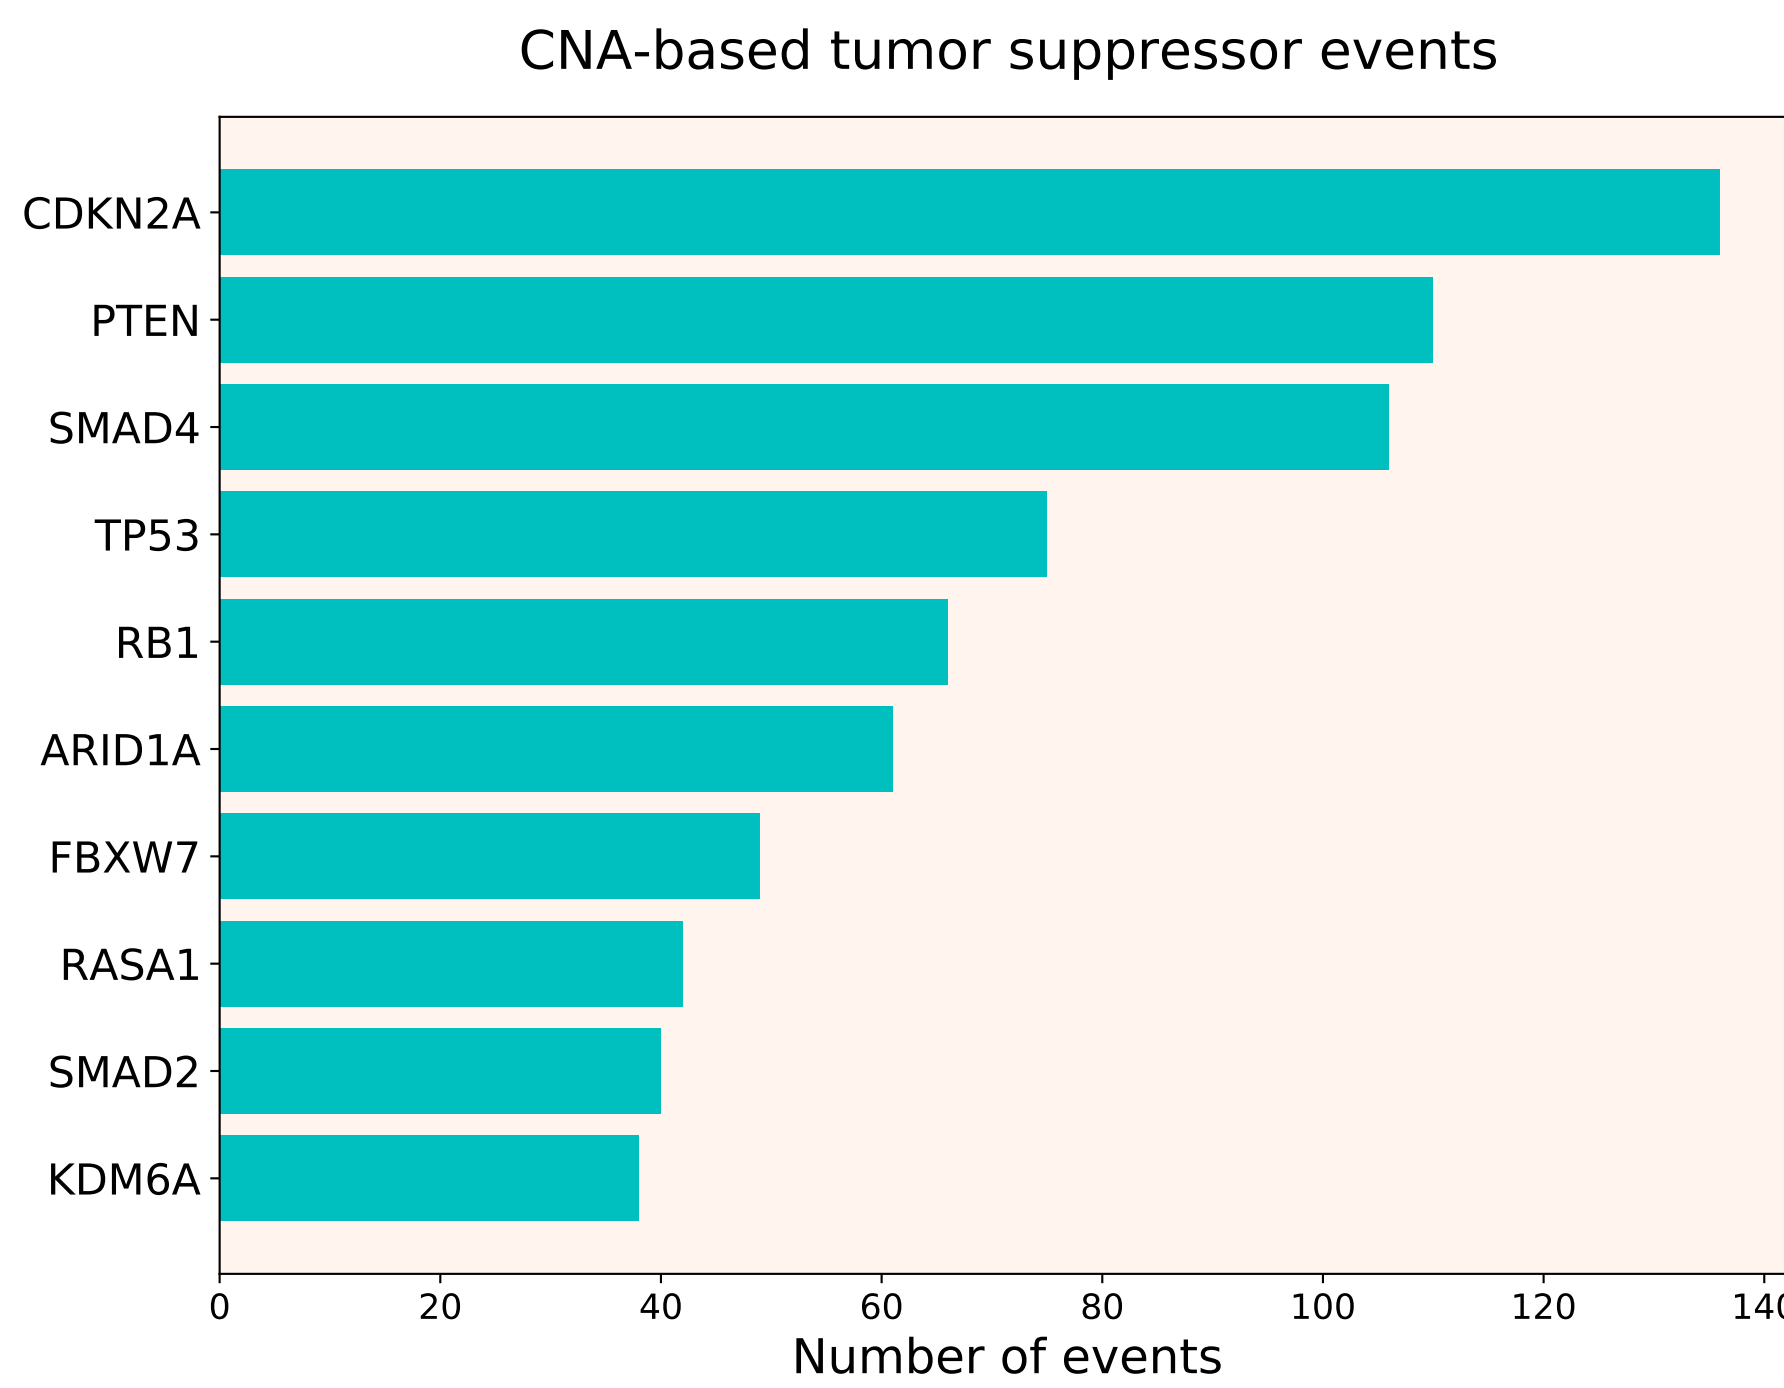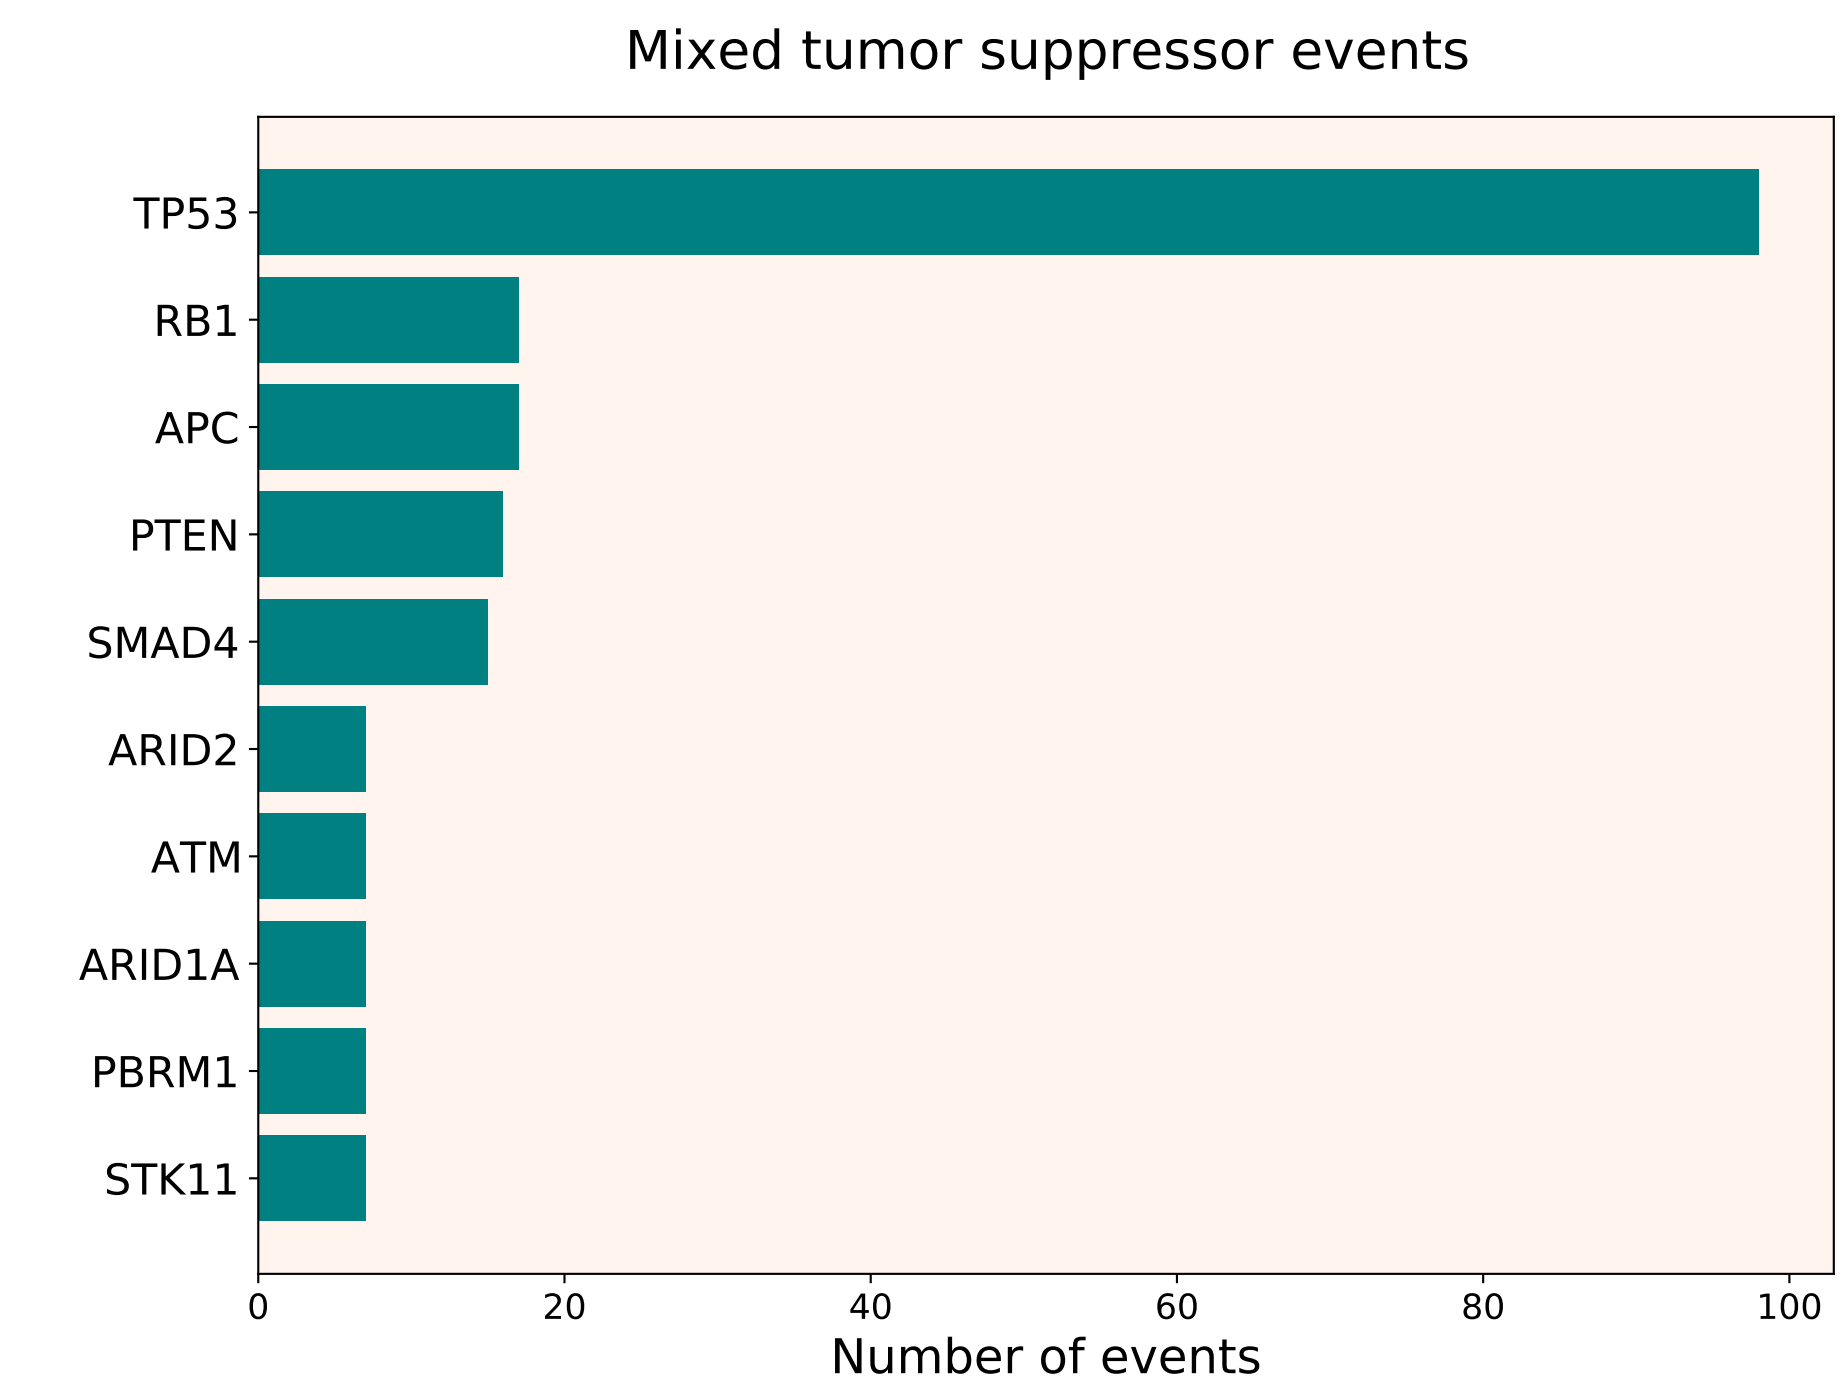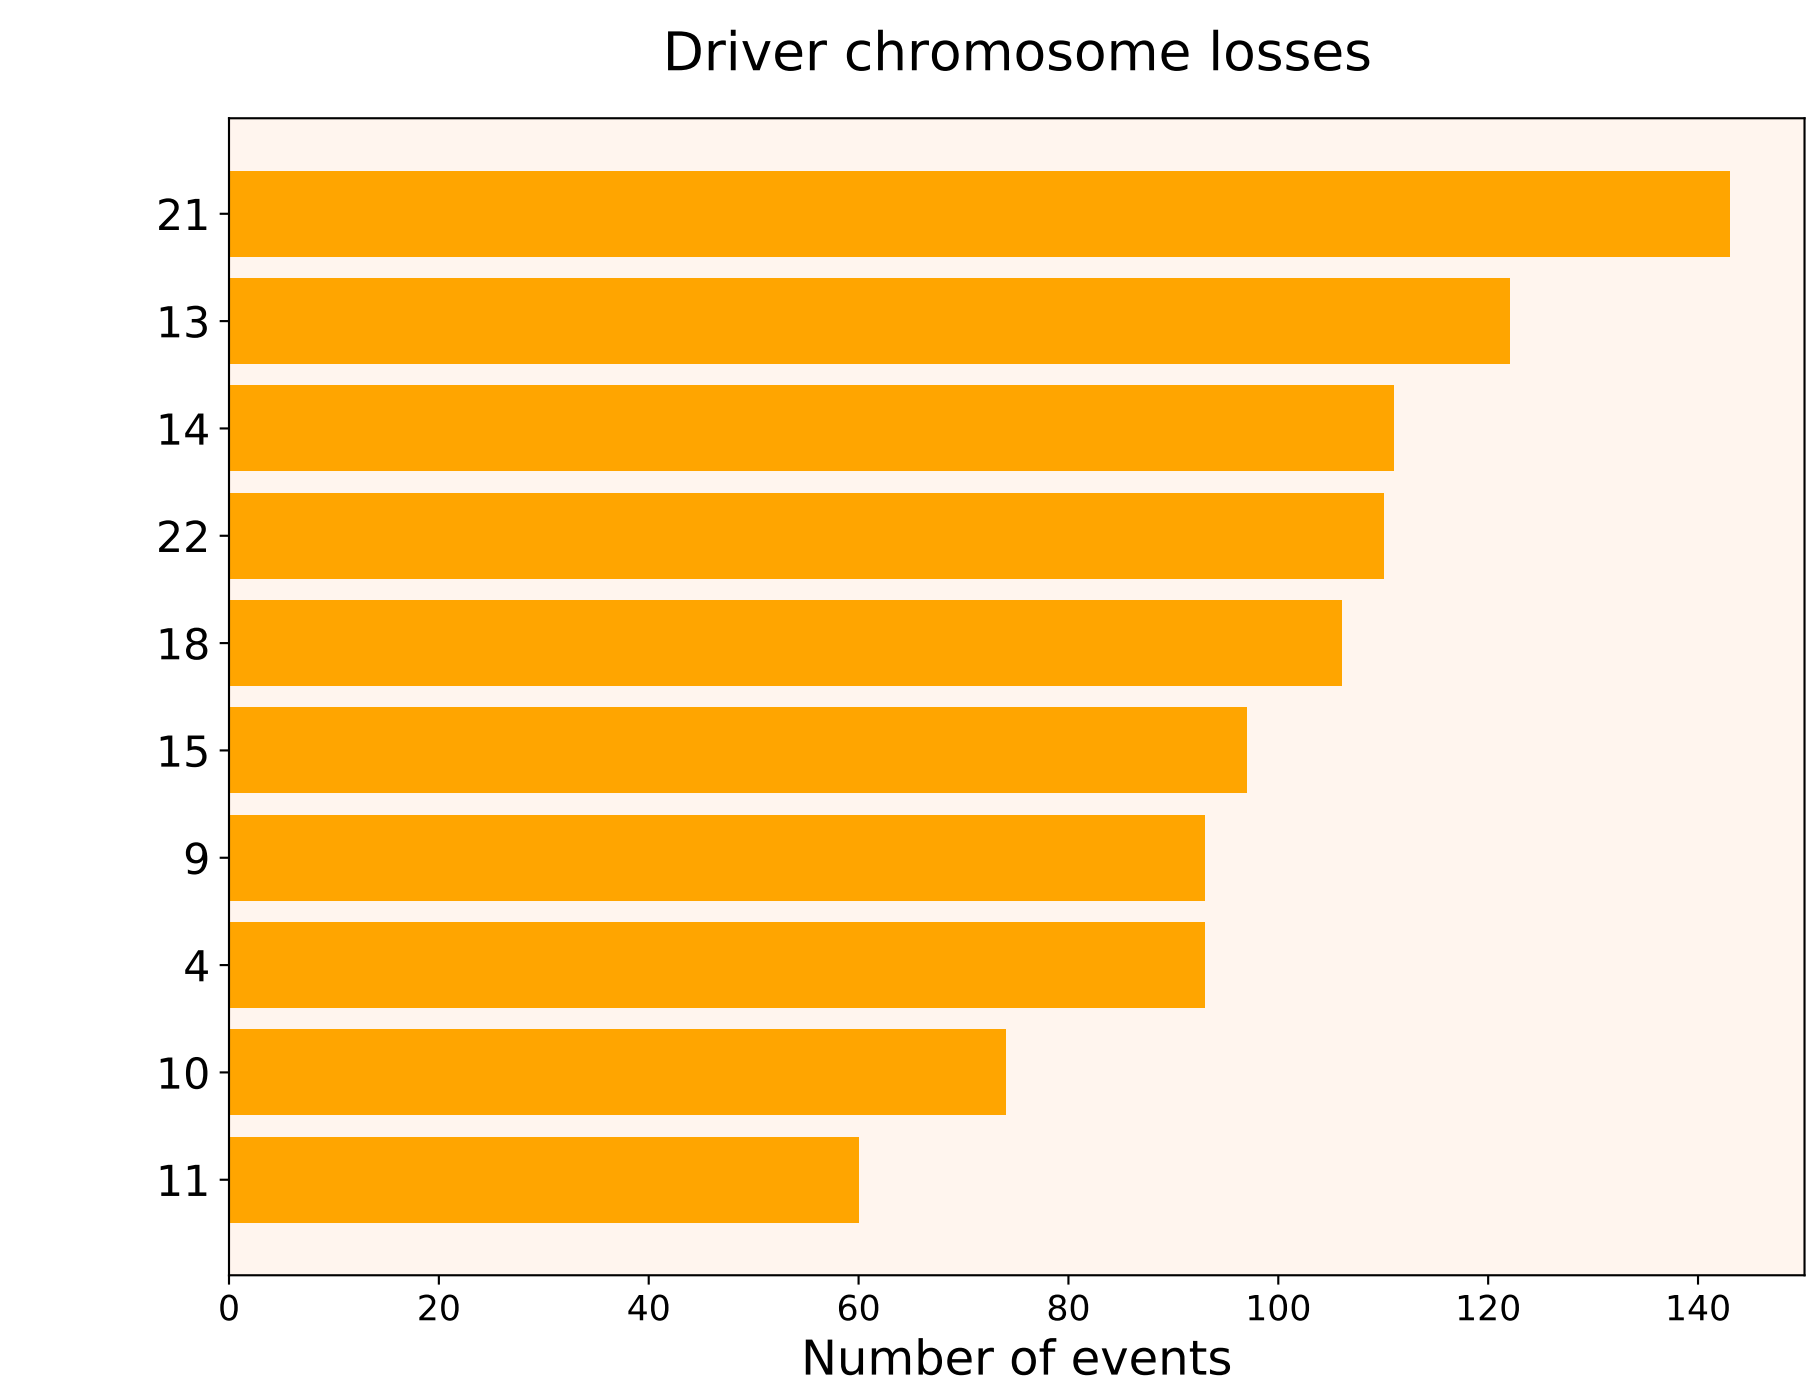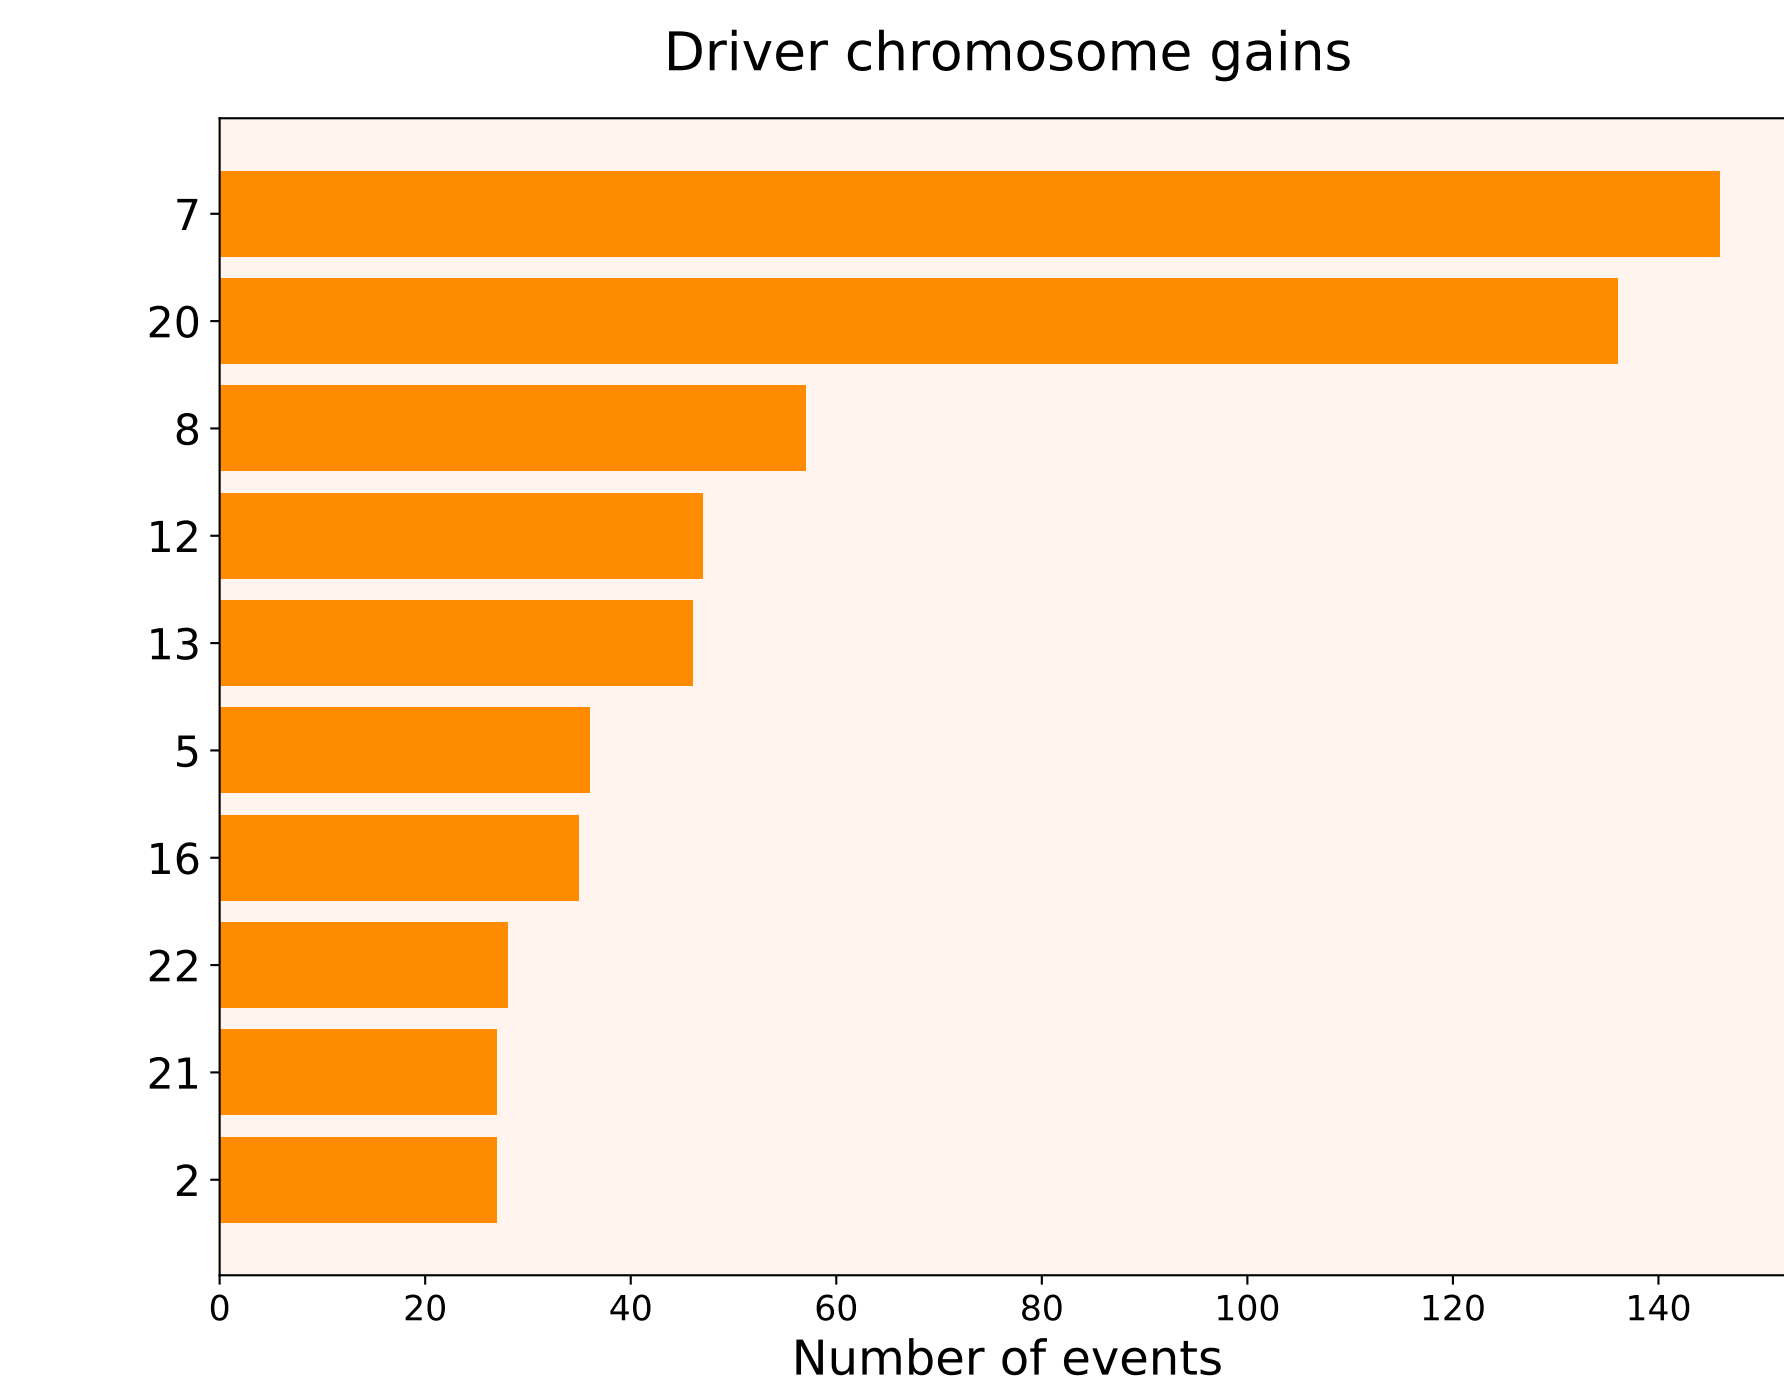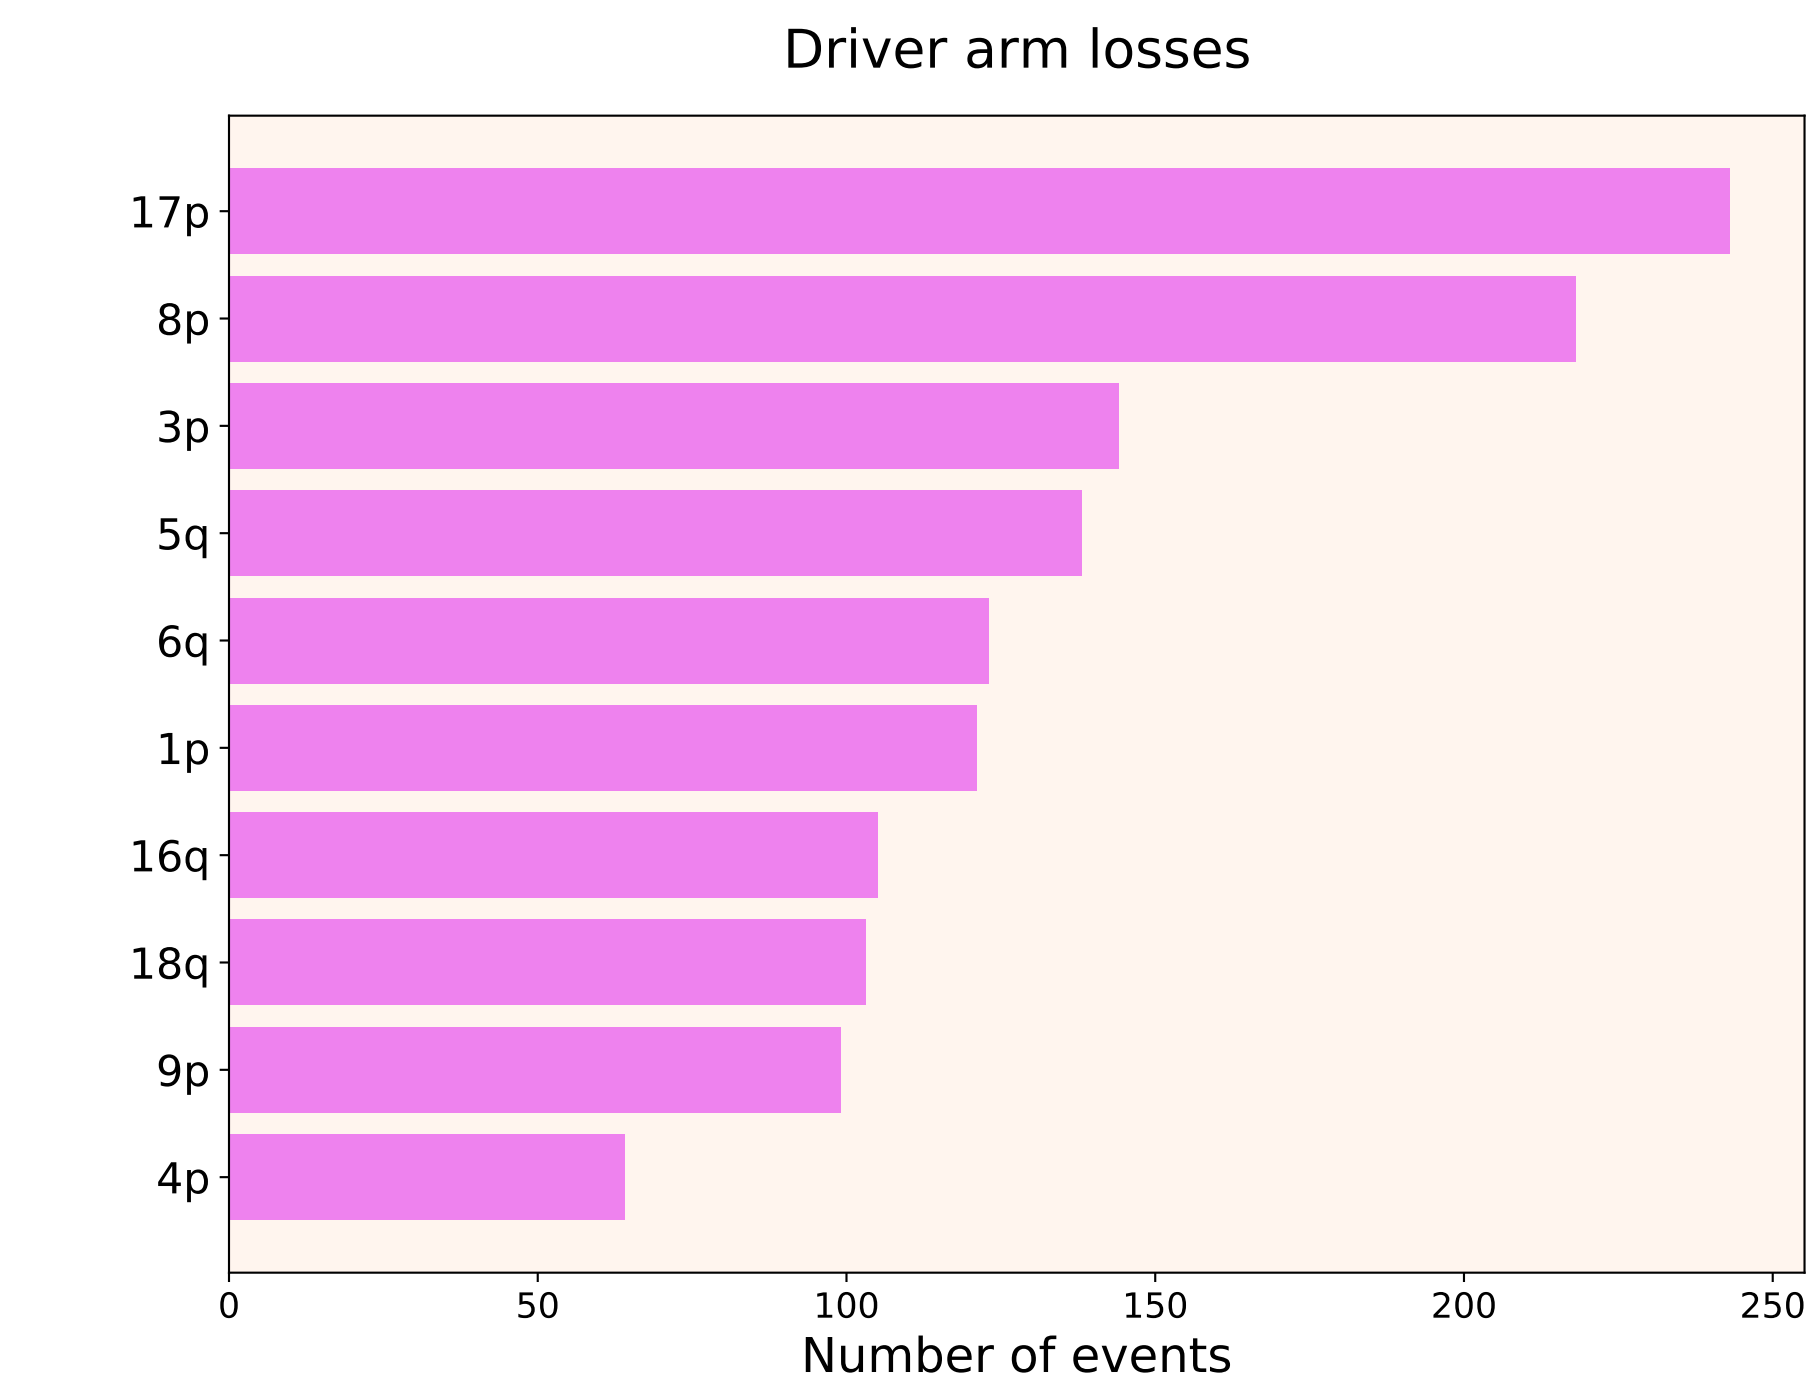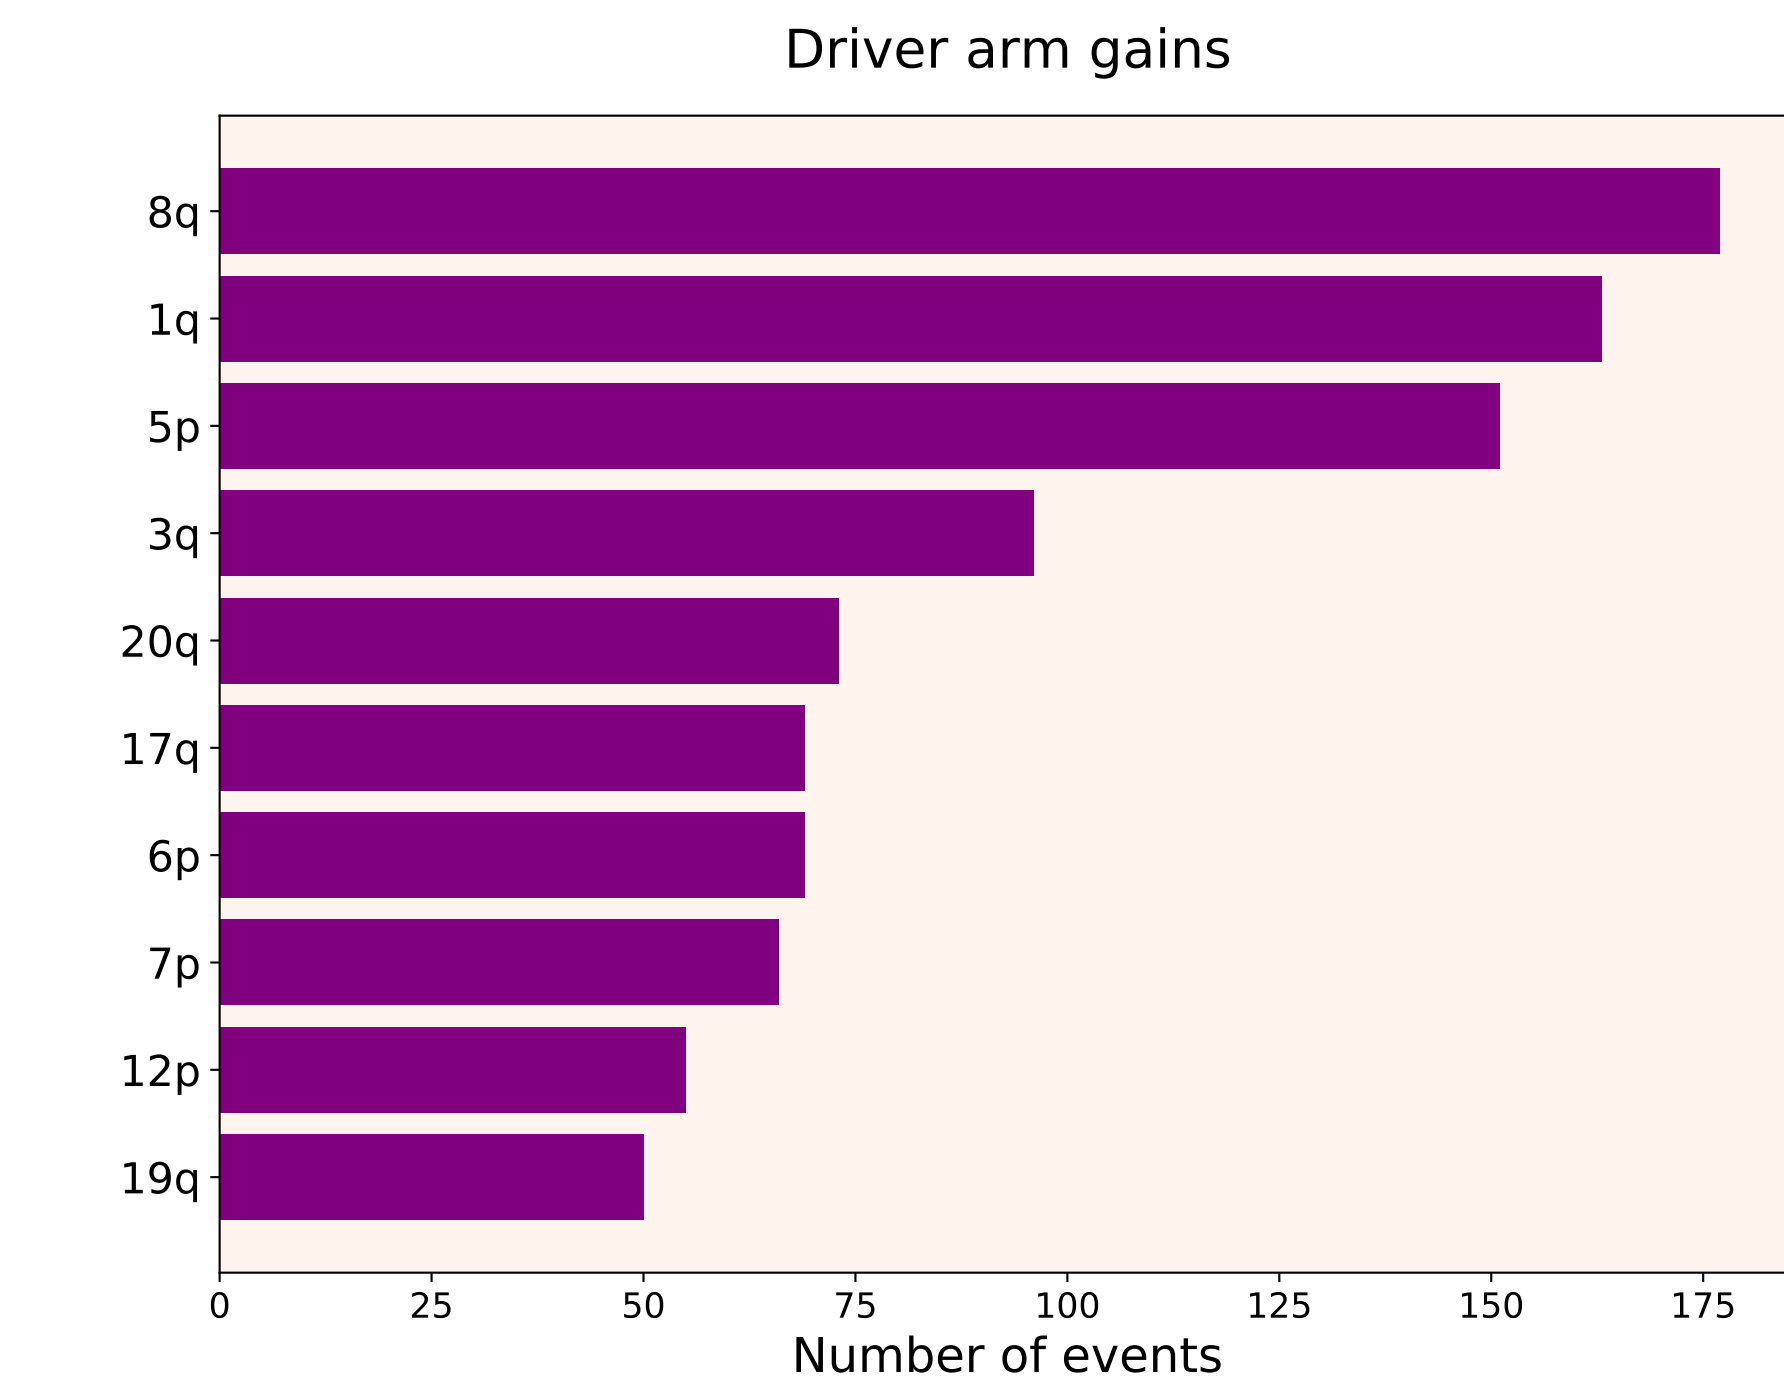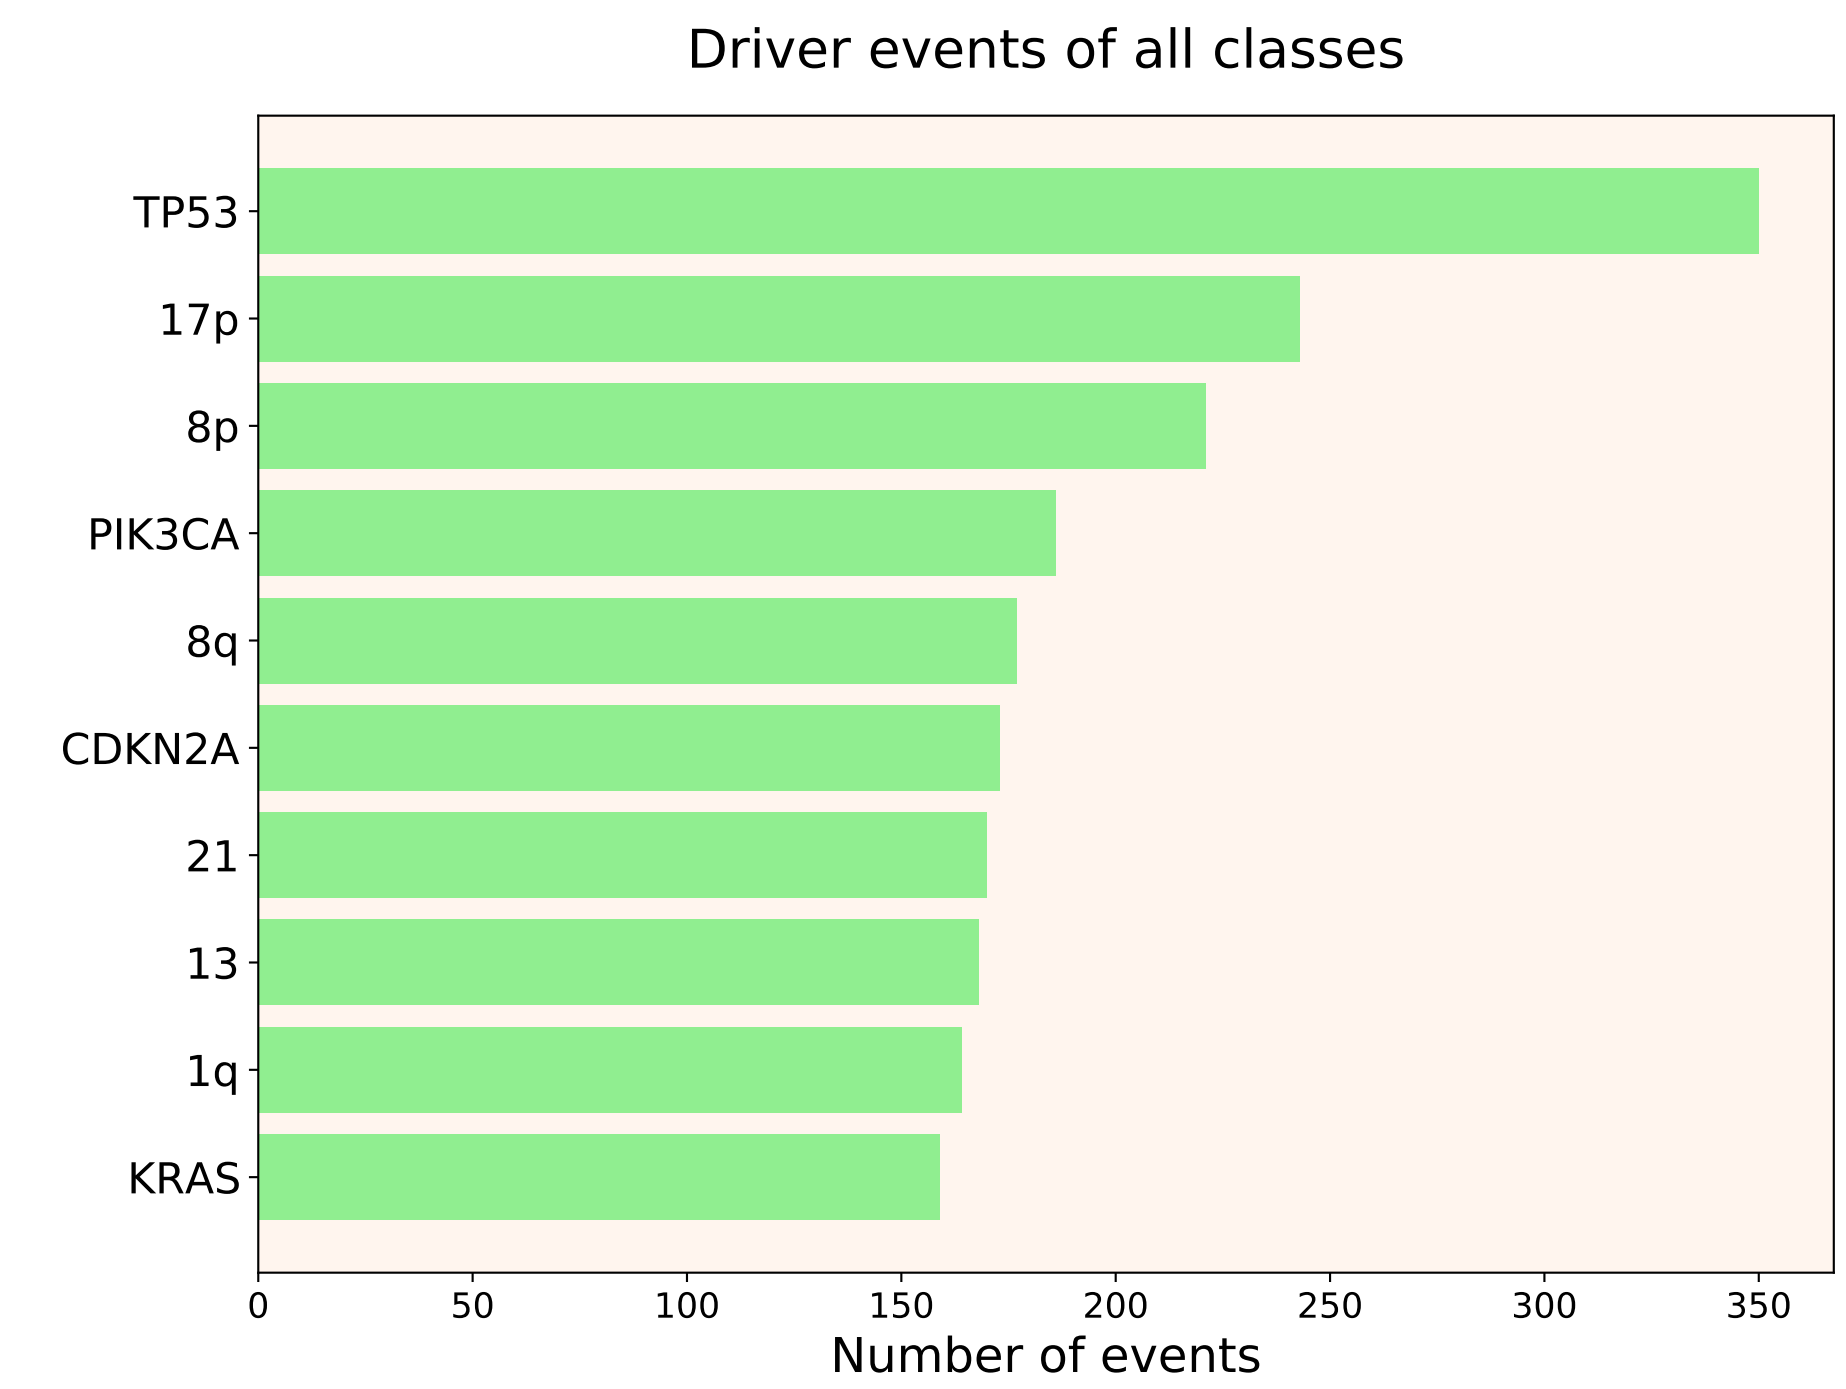

Supplement: Supplemental_Data_S1.zip [file Supplemental_Data_S1.zip]

# TGCT\_MALE

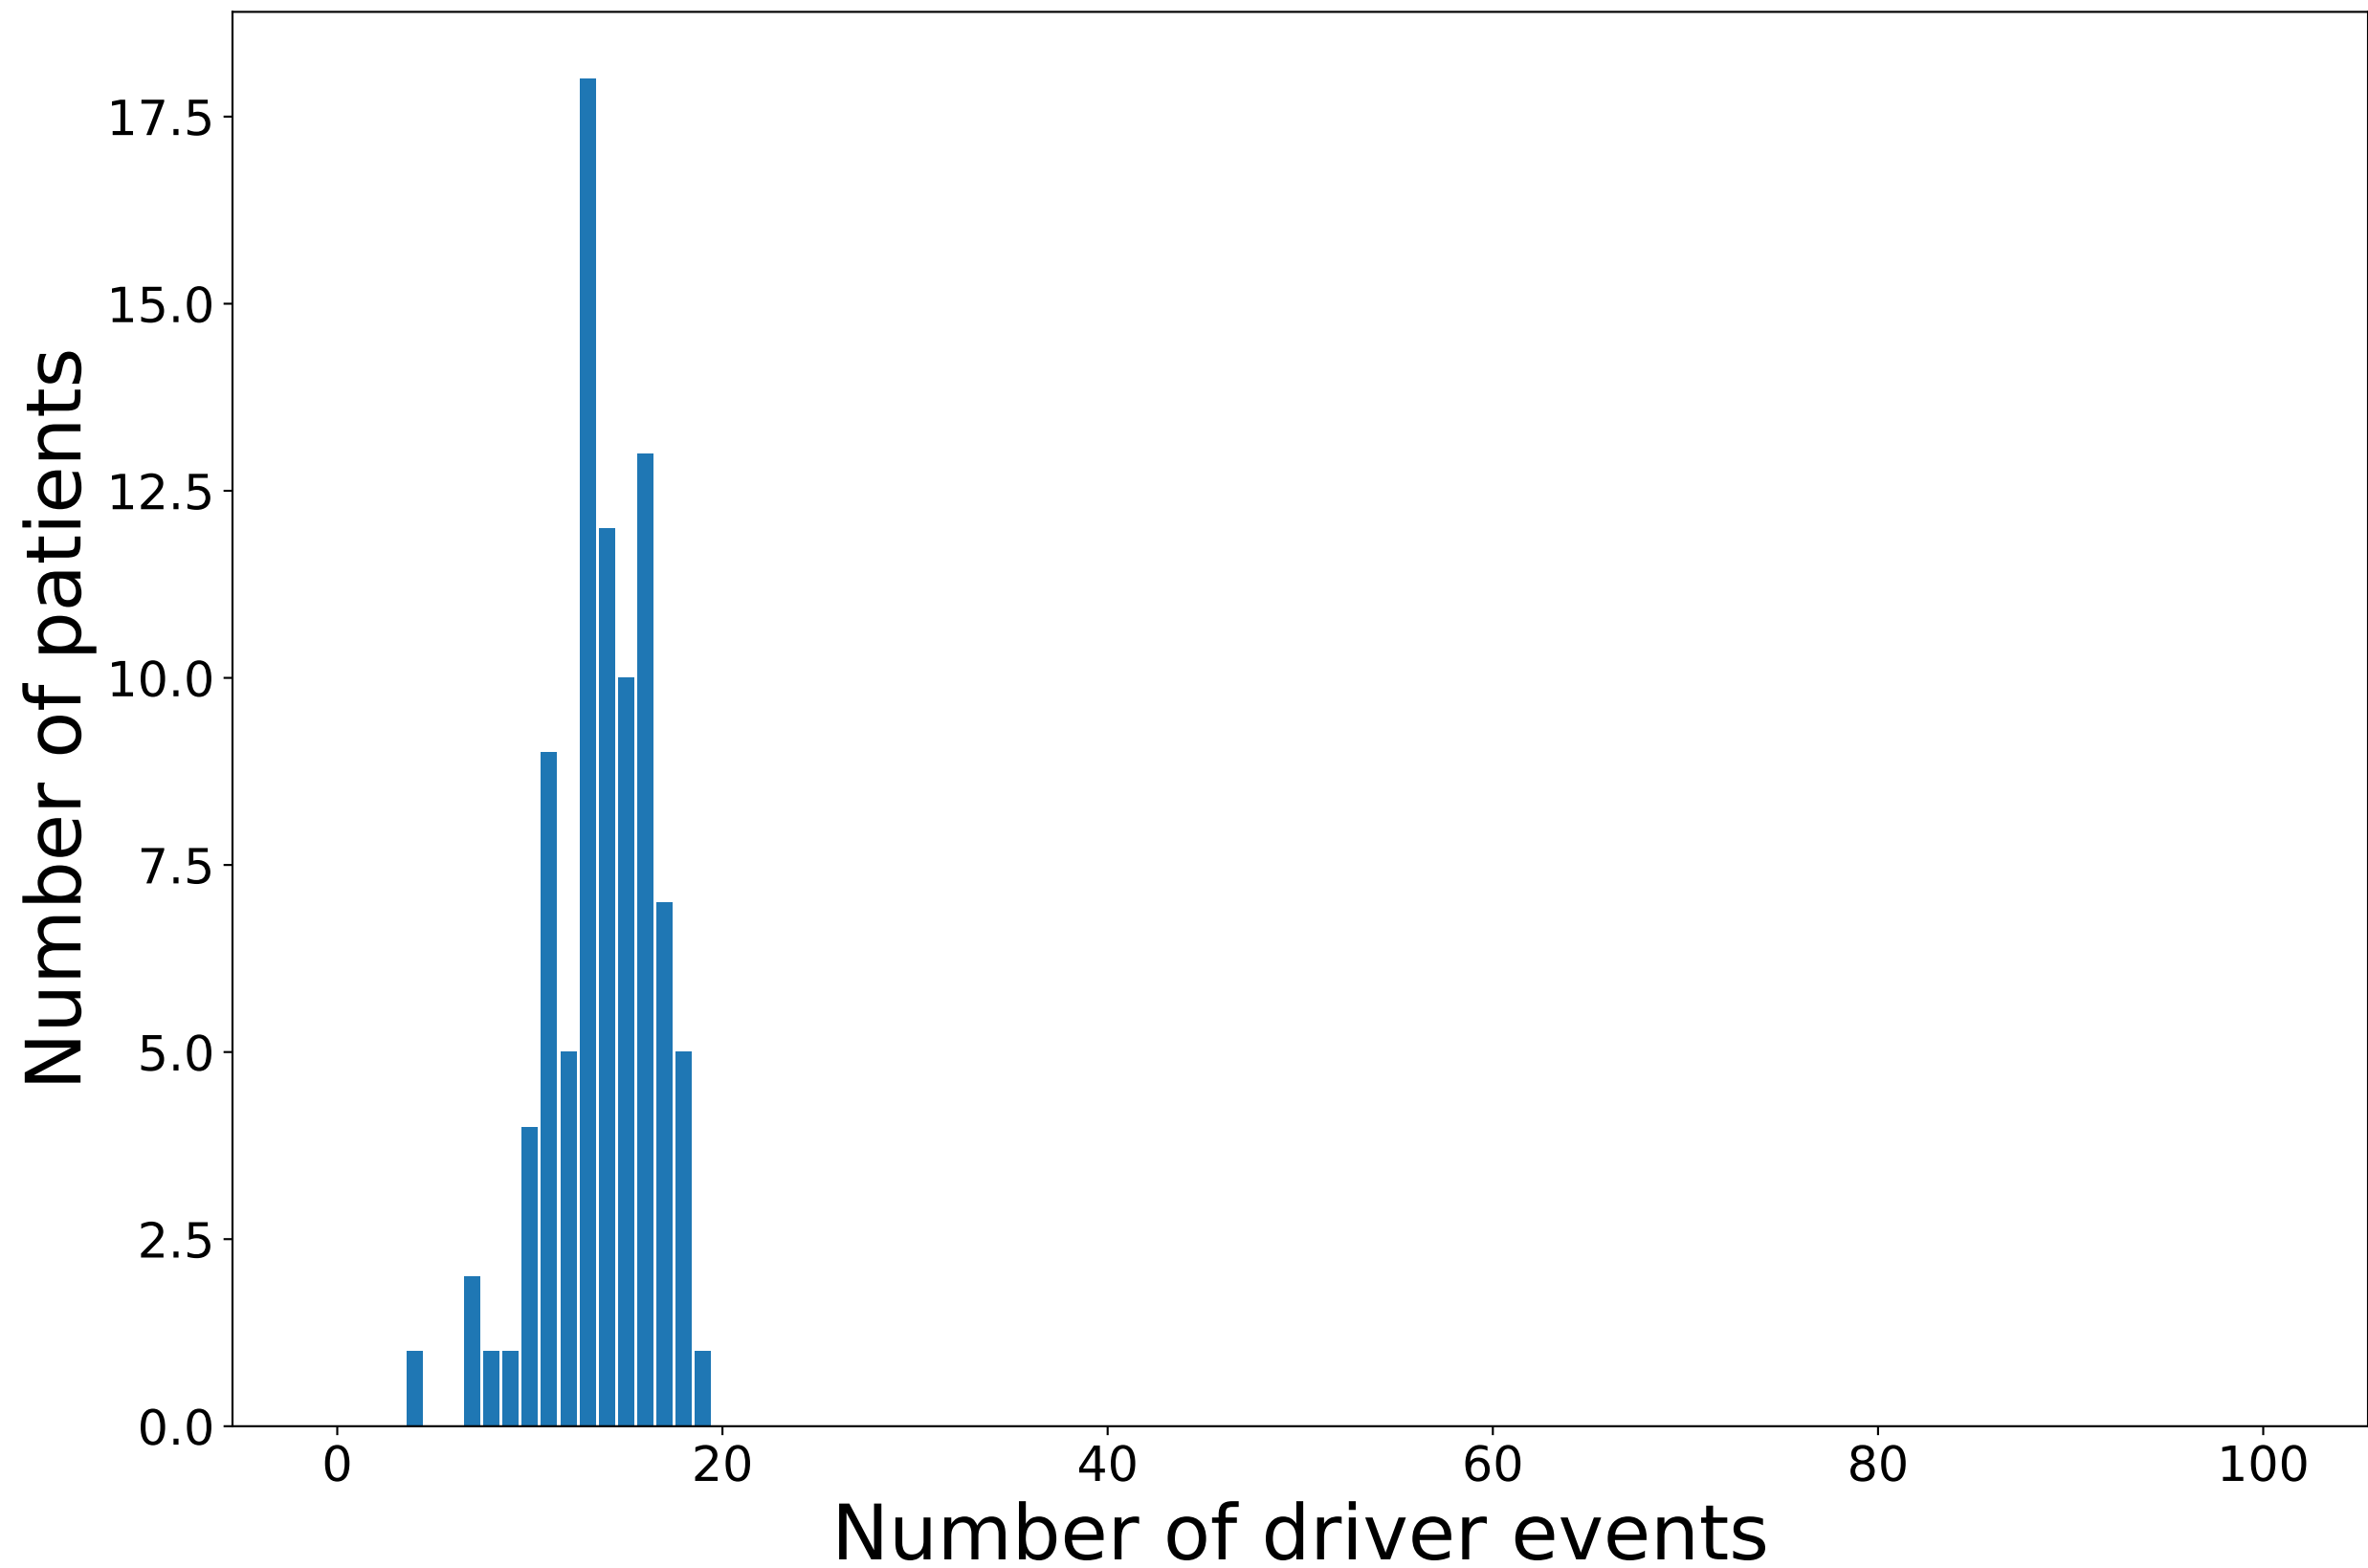

Supplement: Supplemental_Data_S1.zip [file Supplemental_Data_S1.zip]

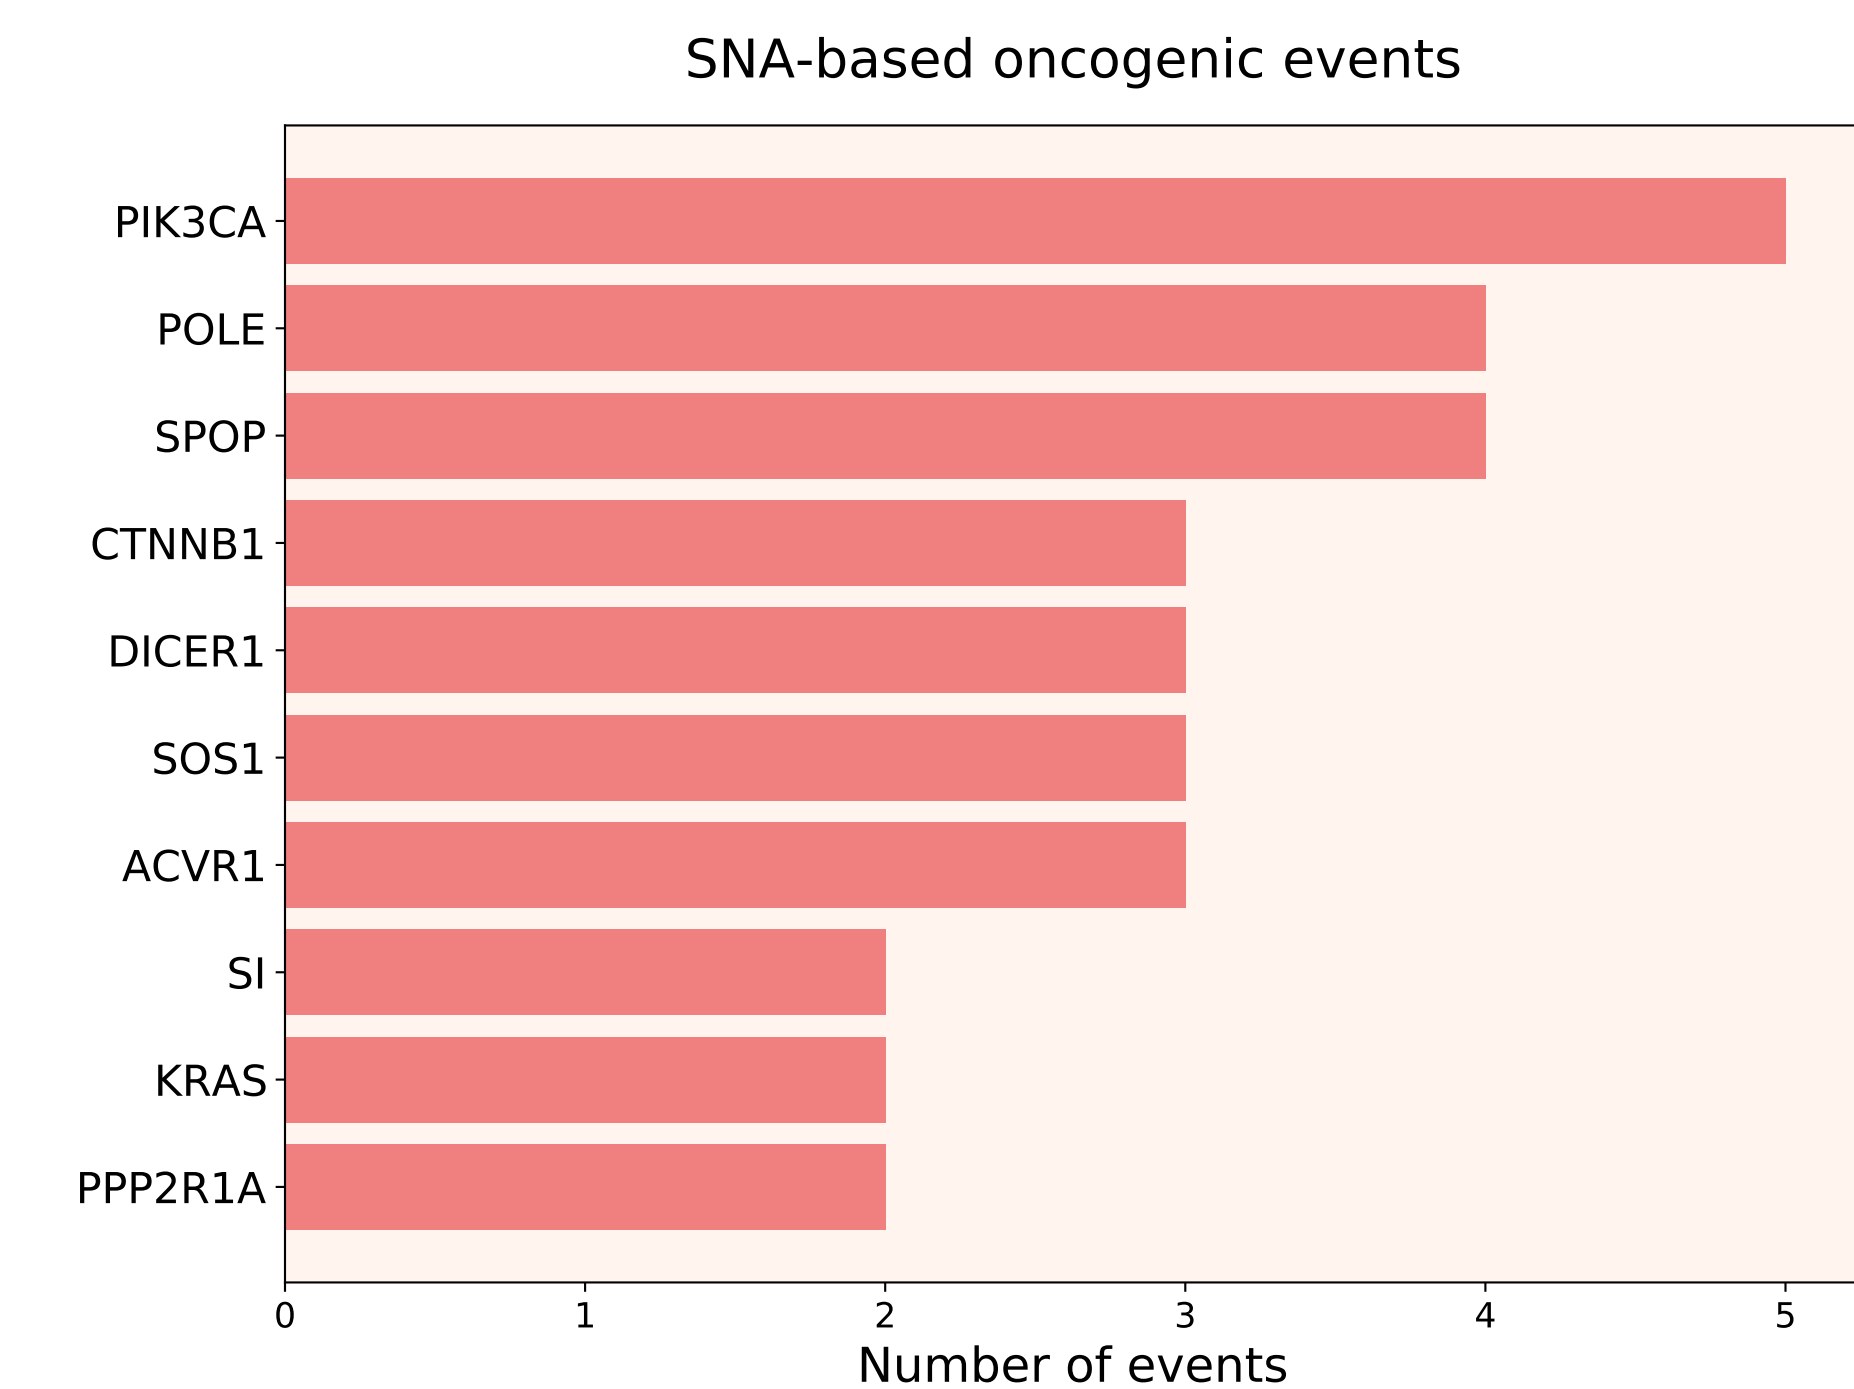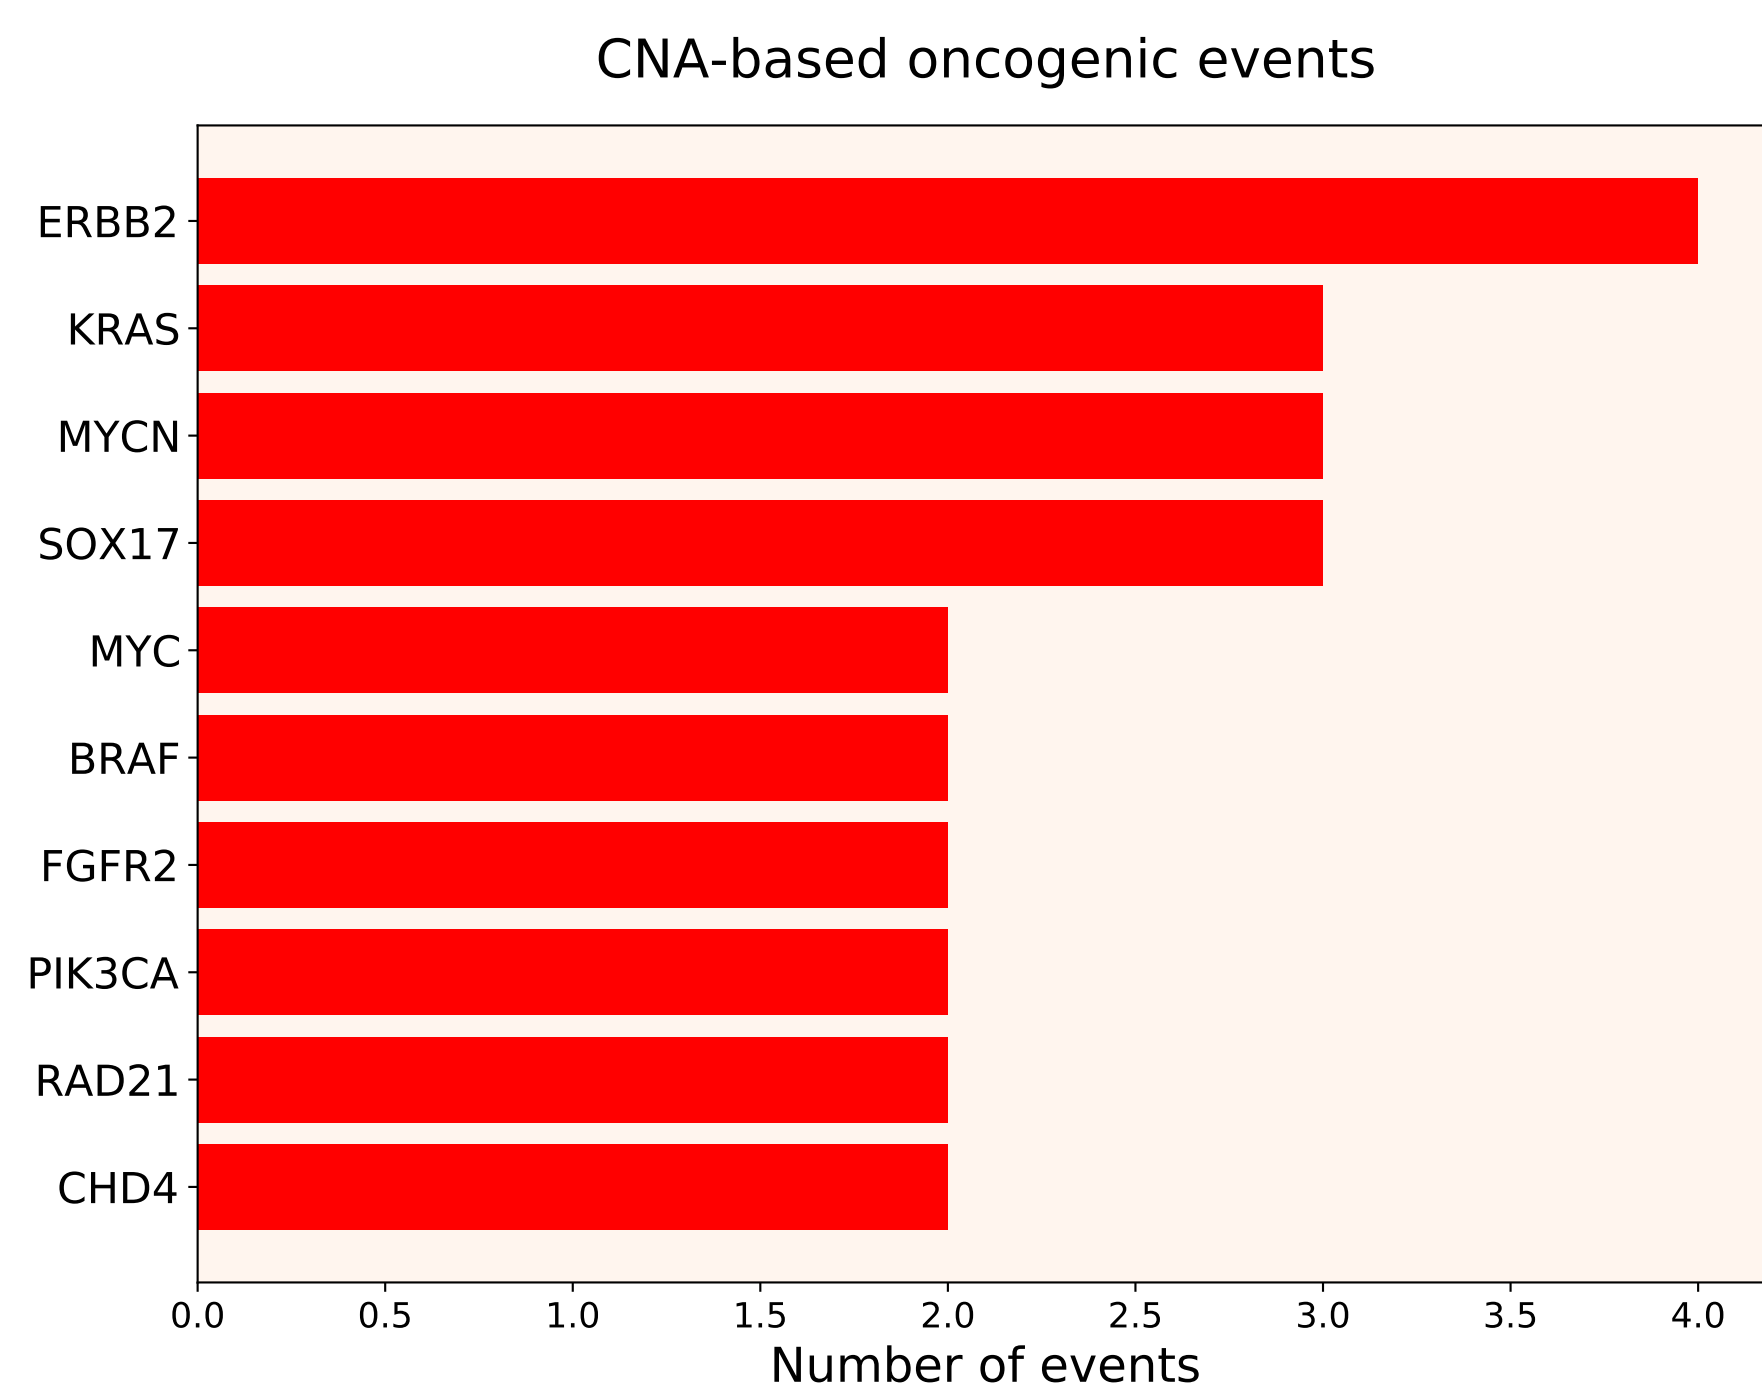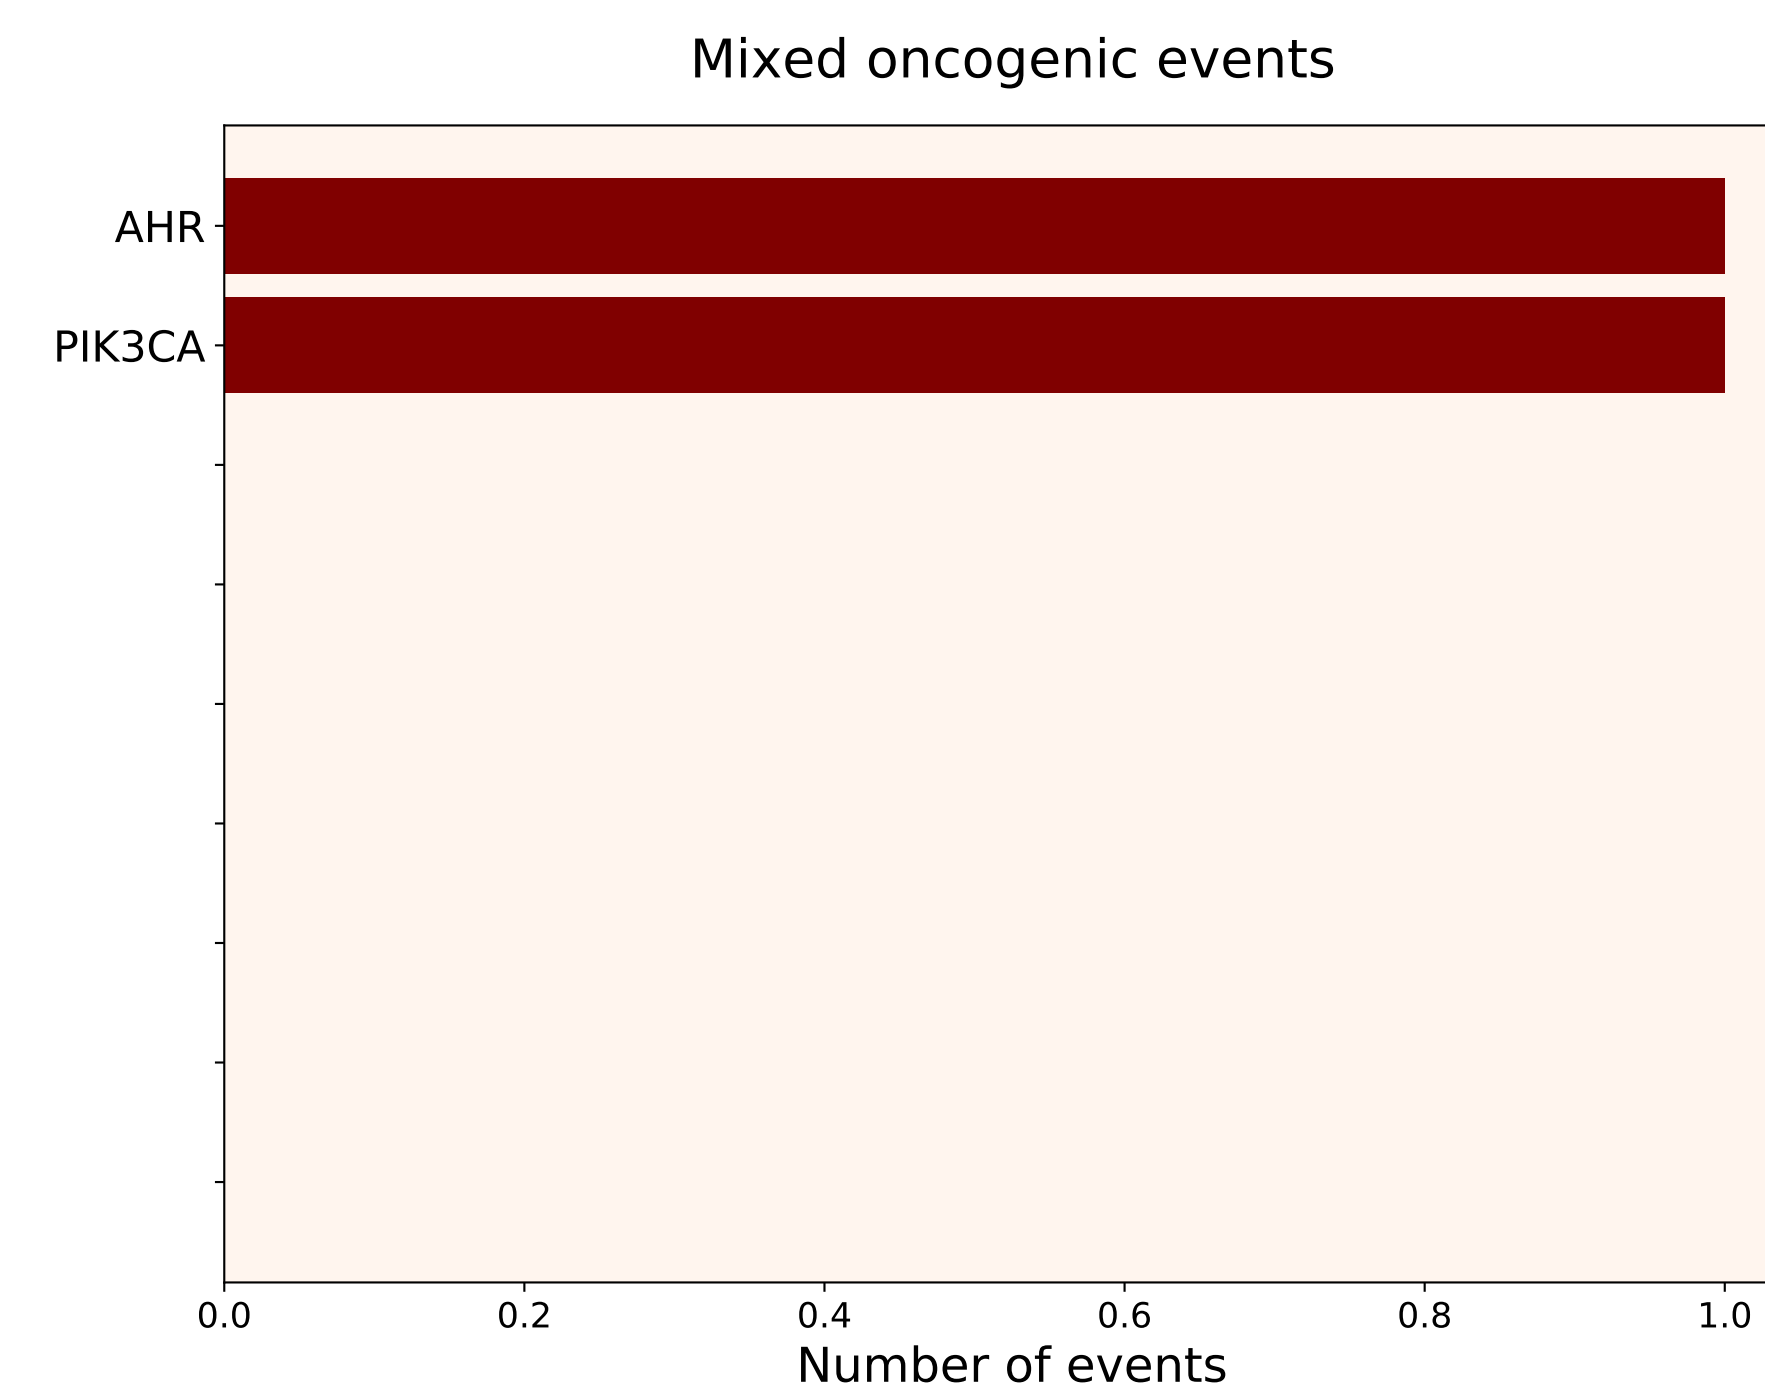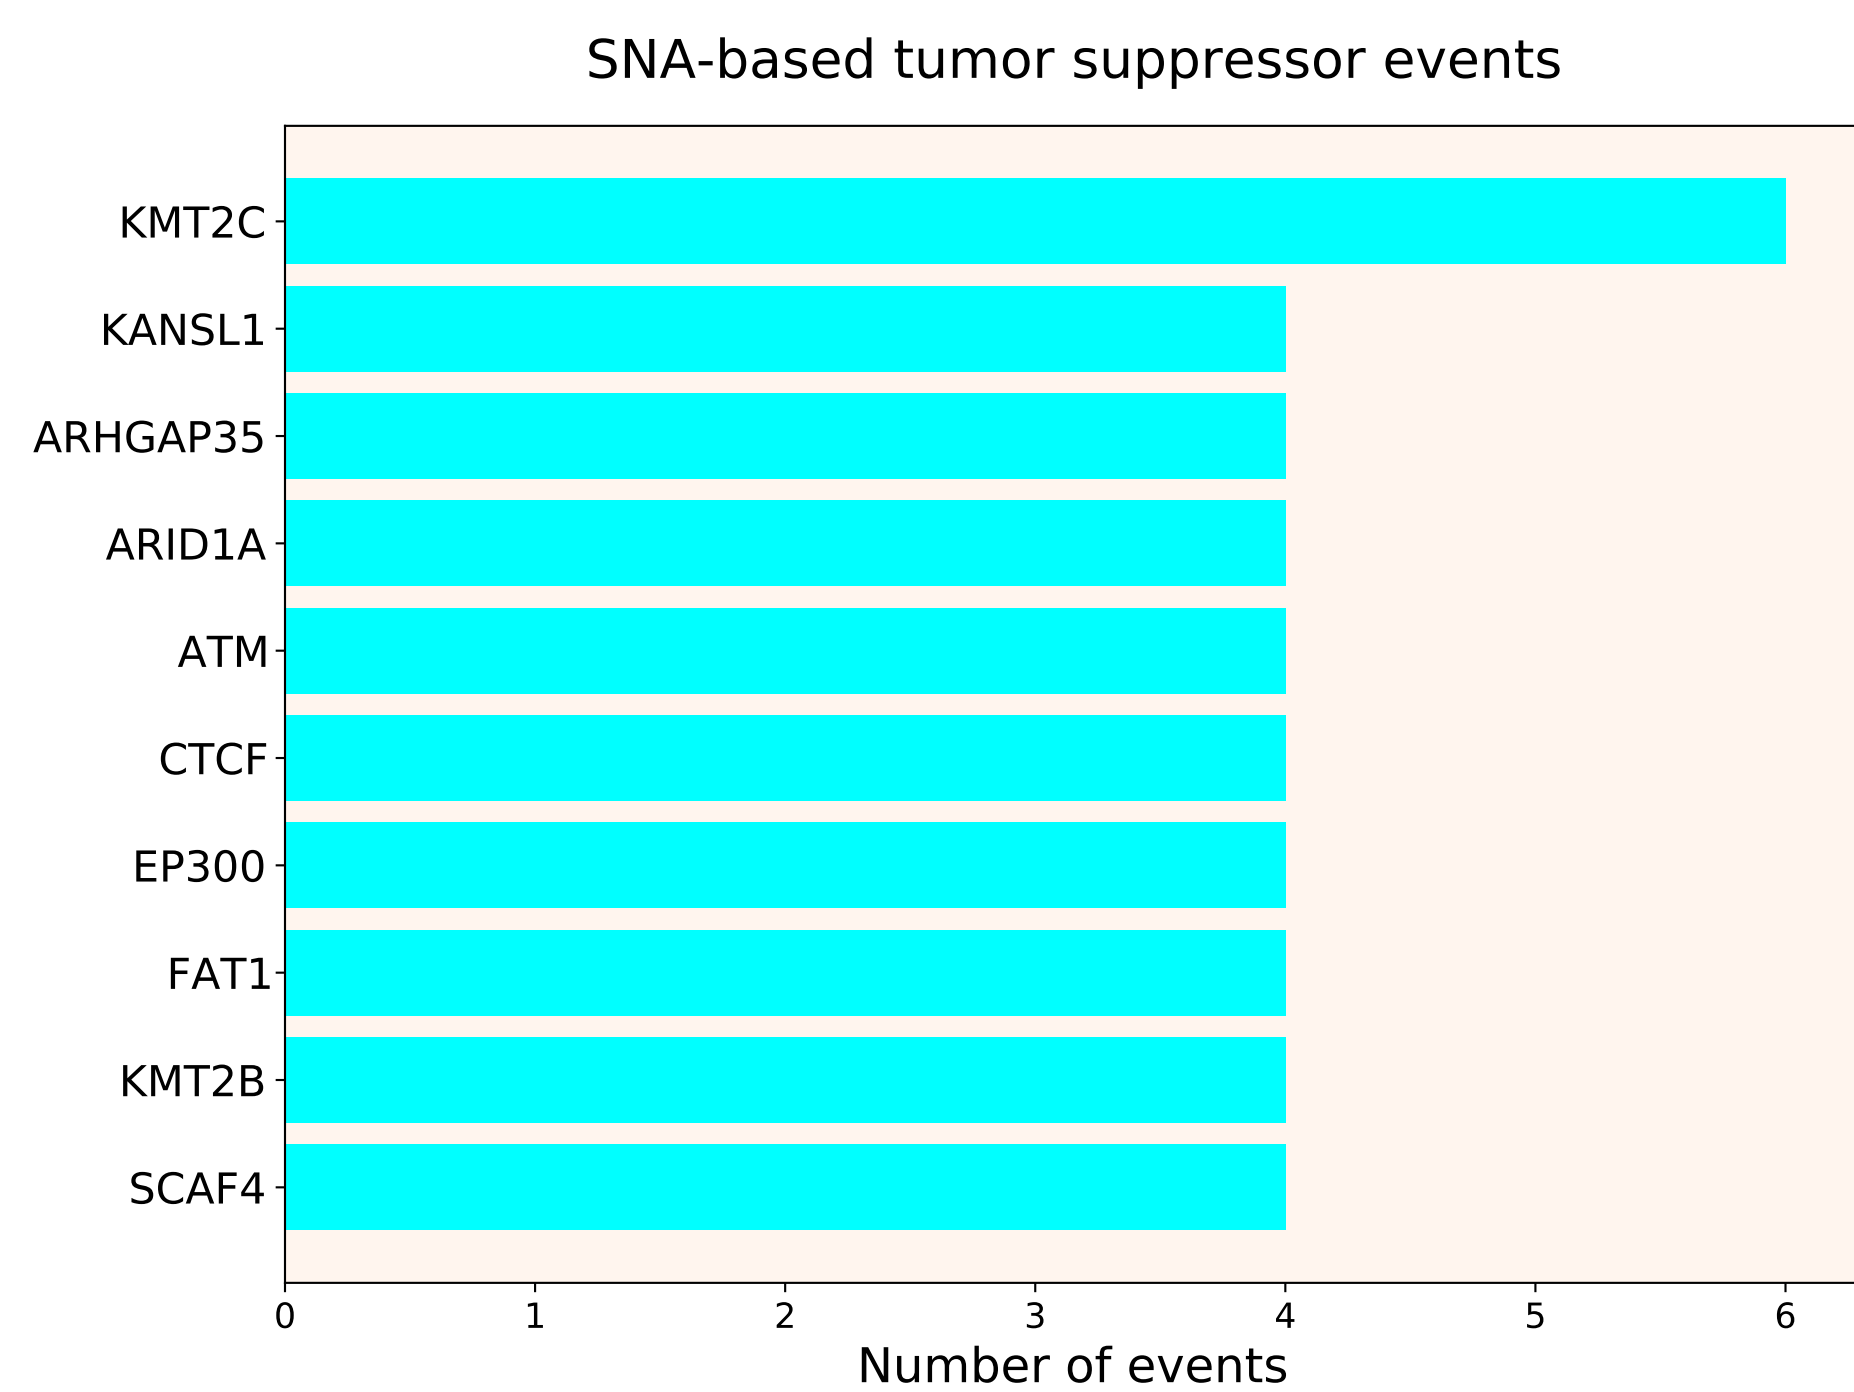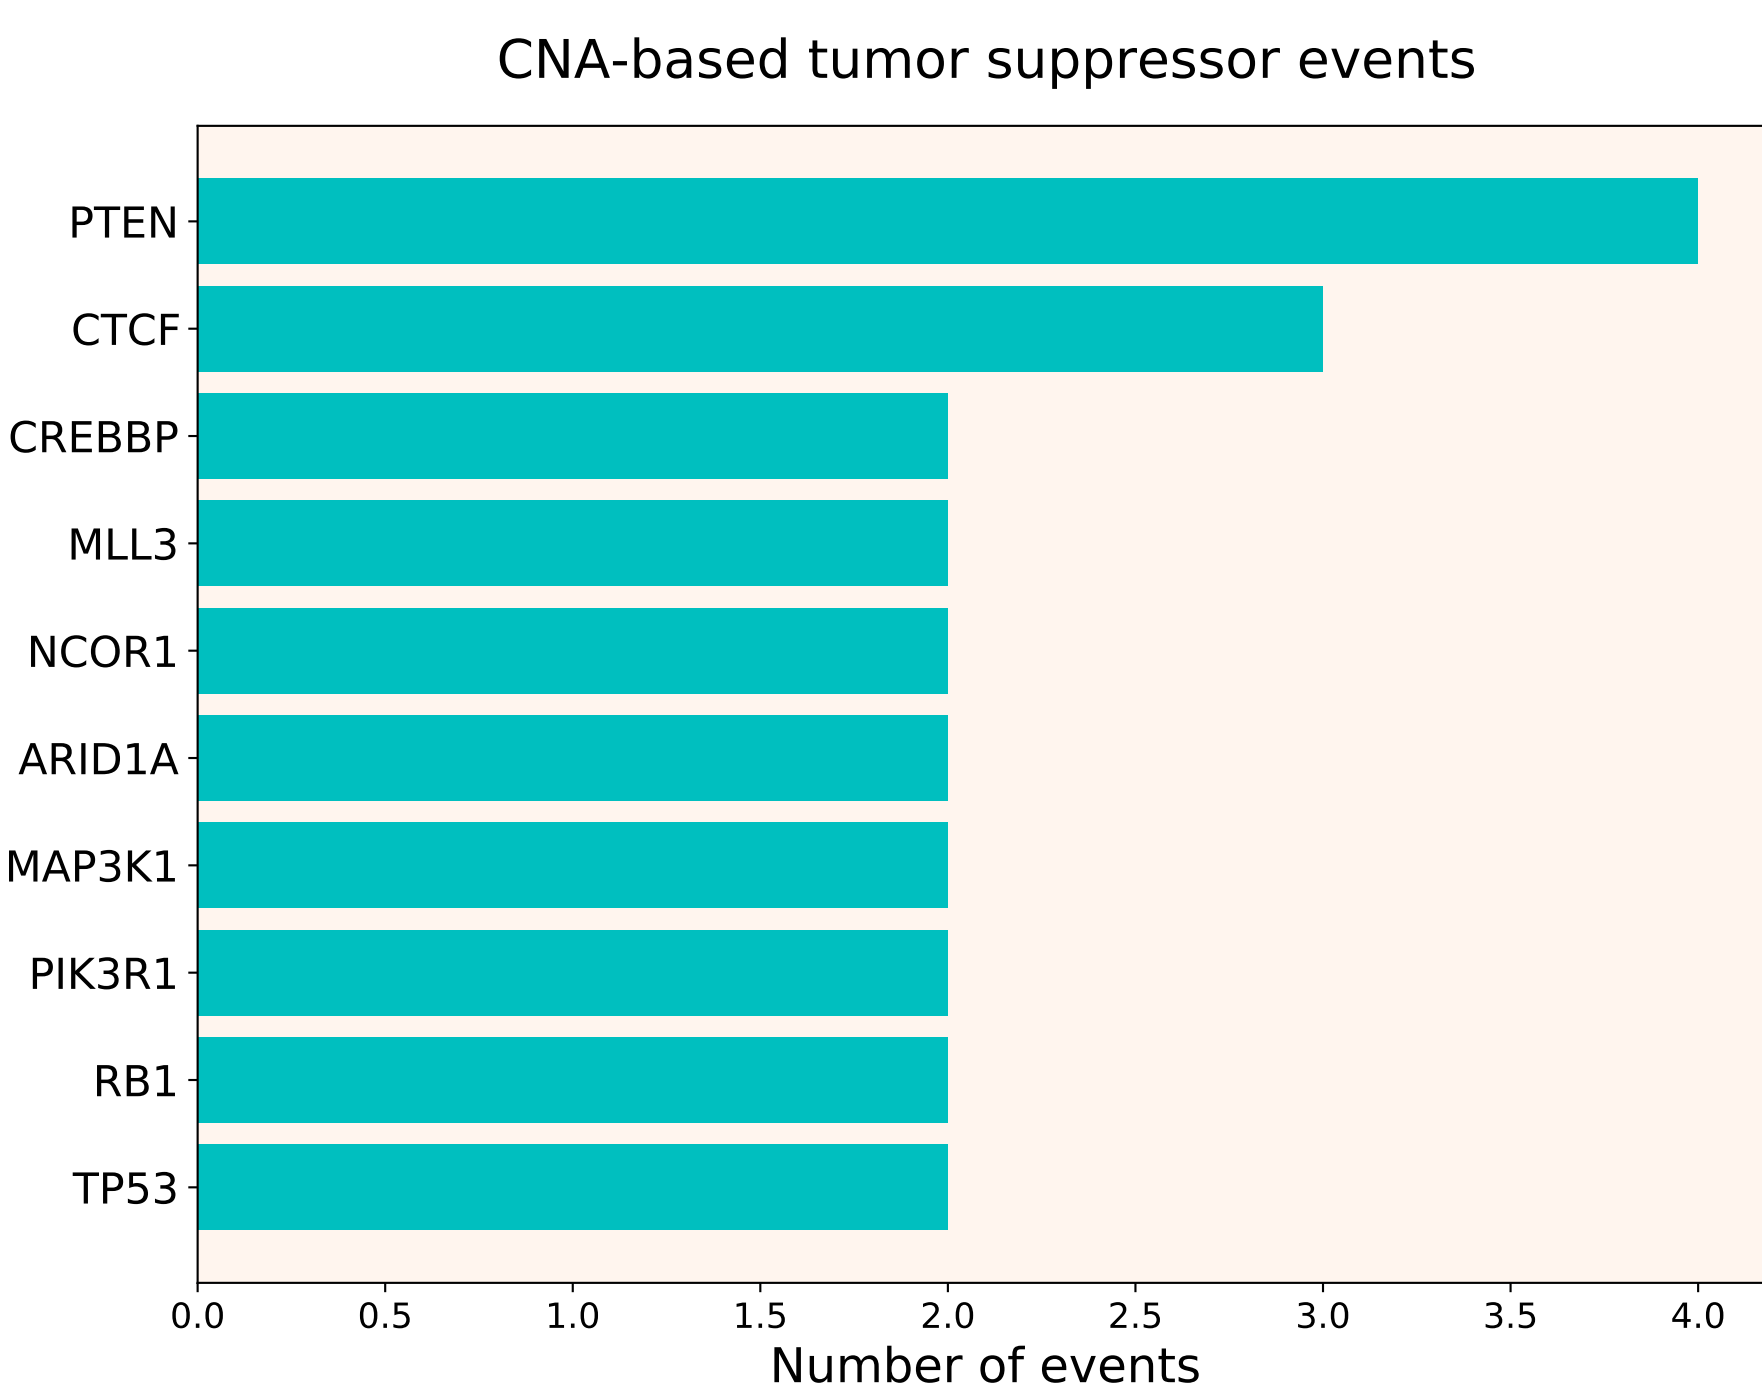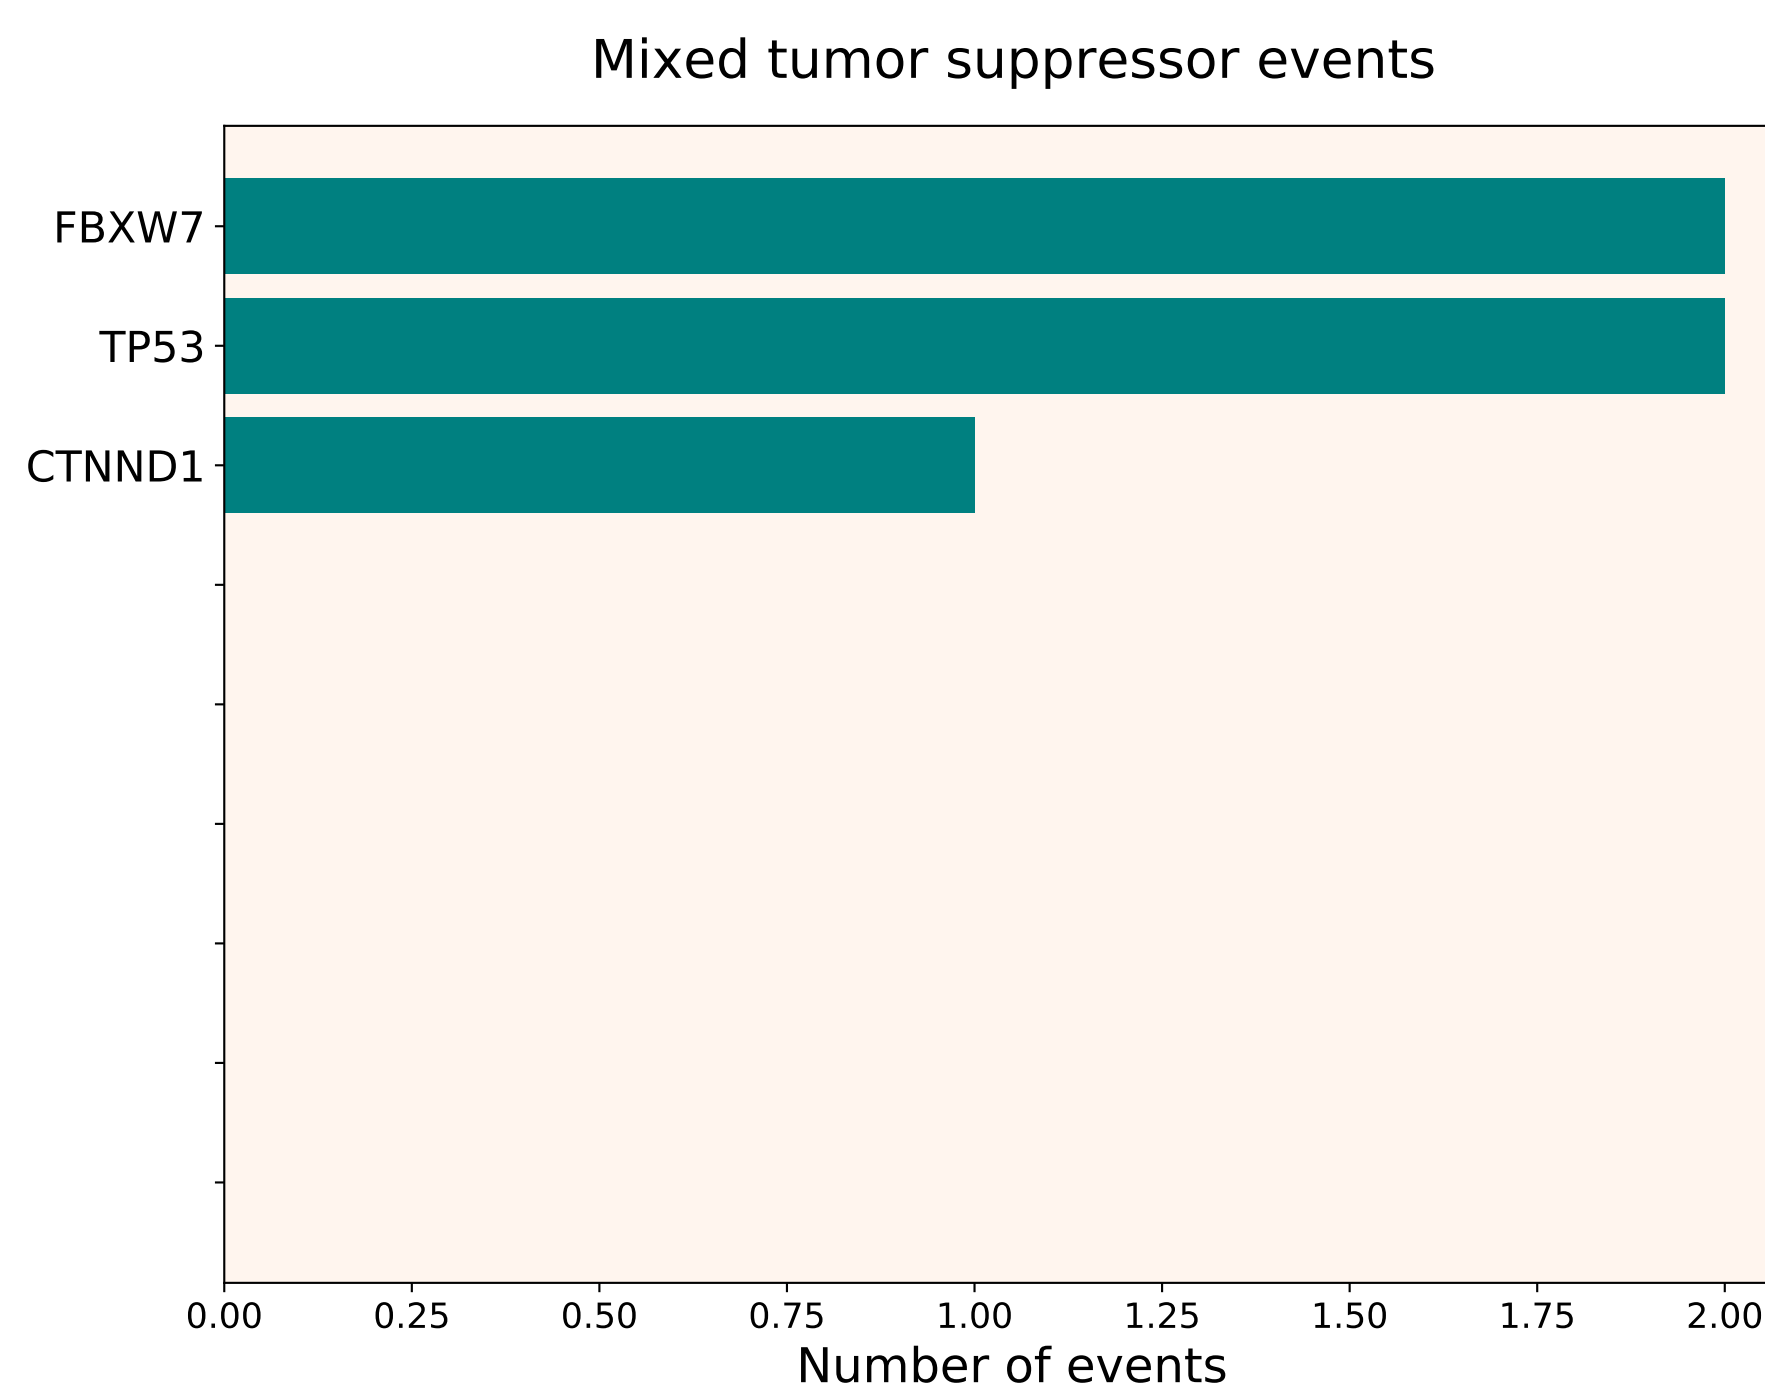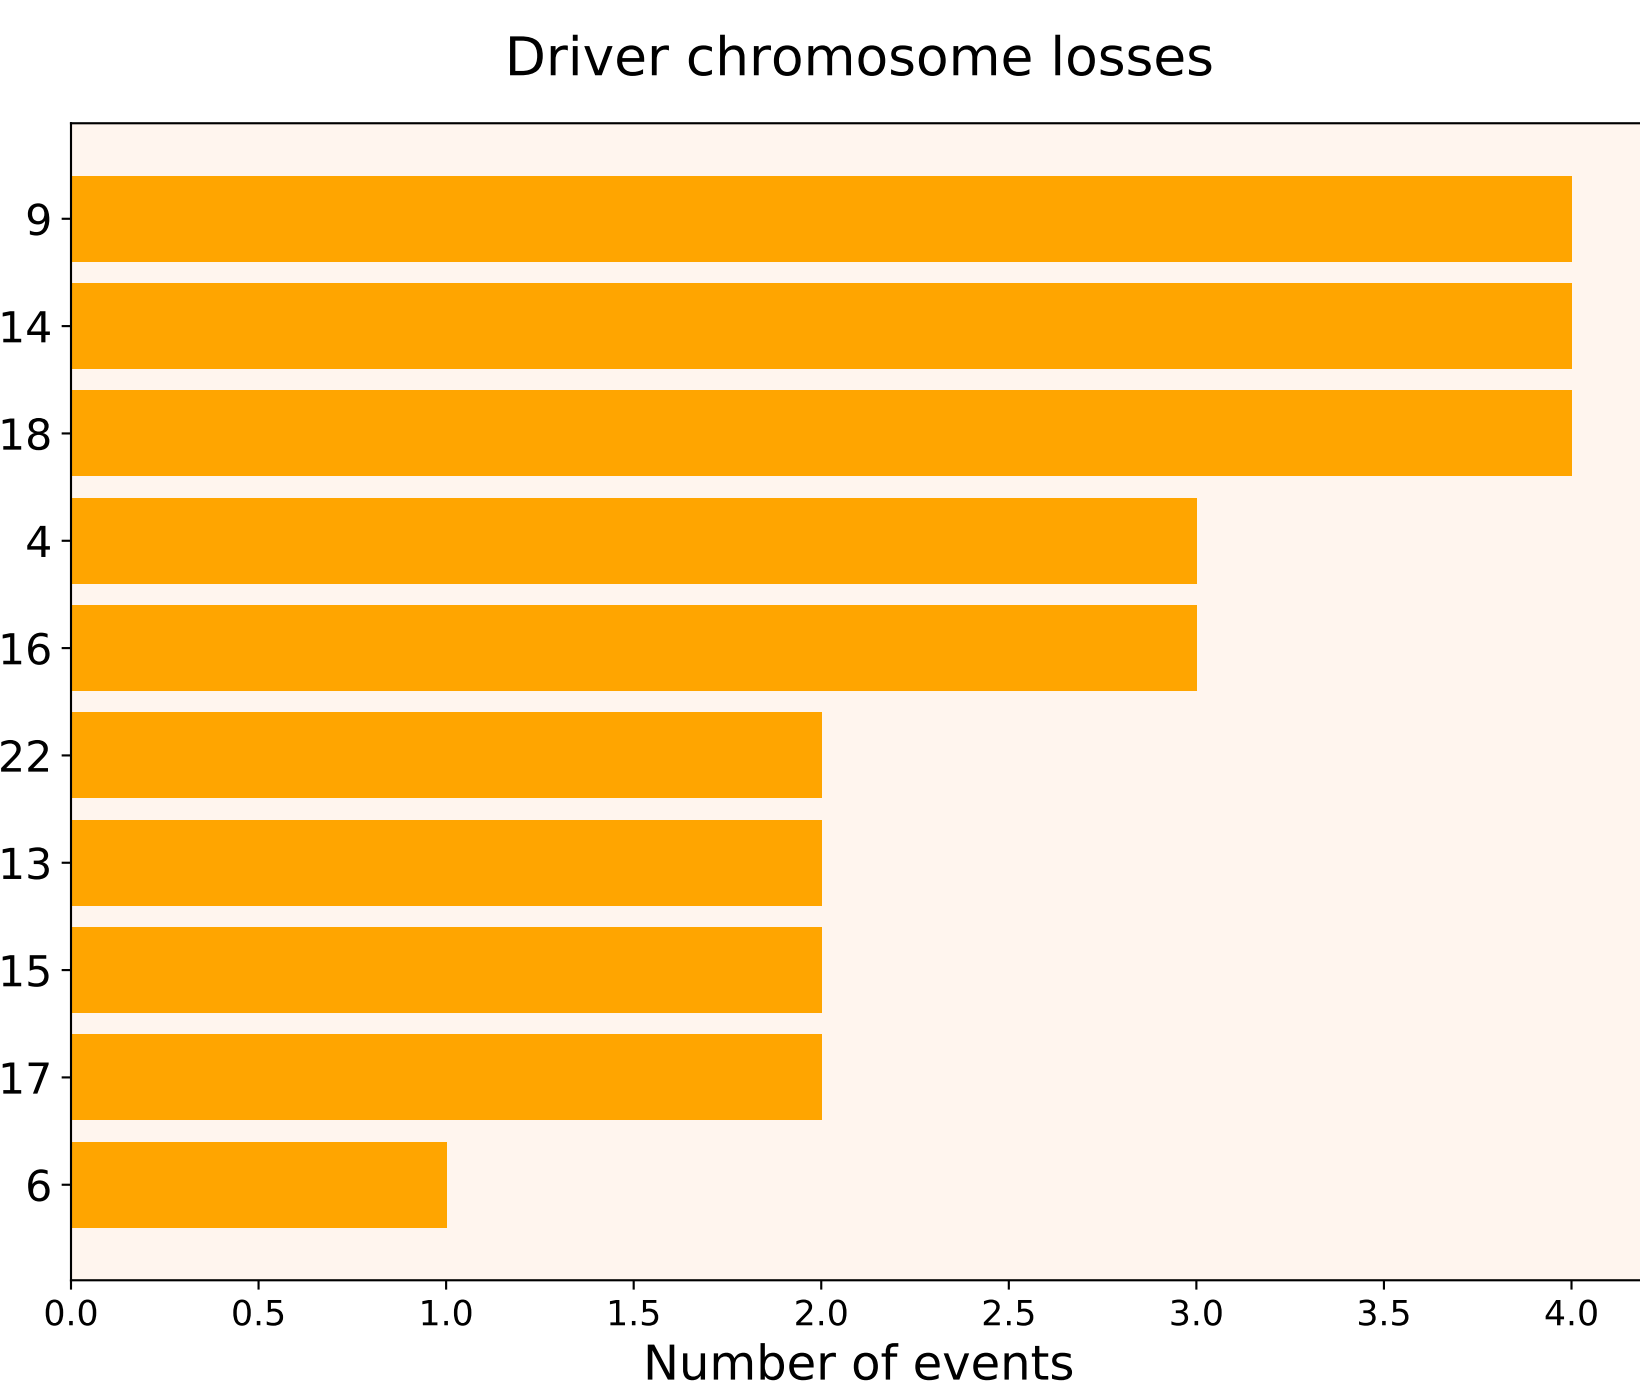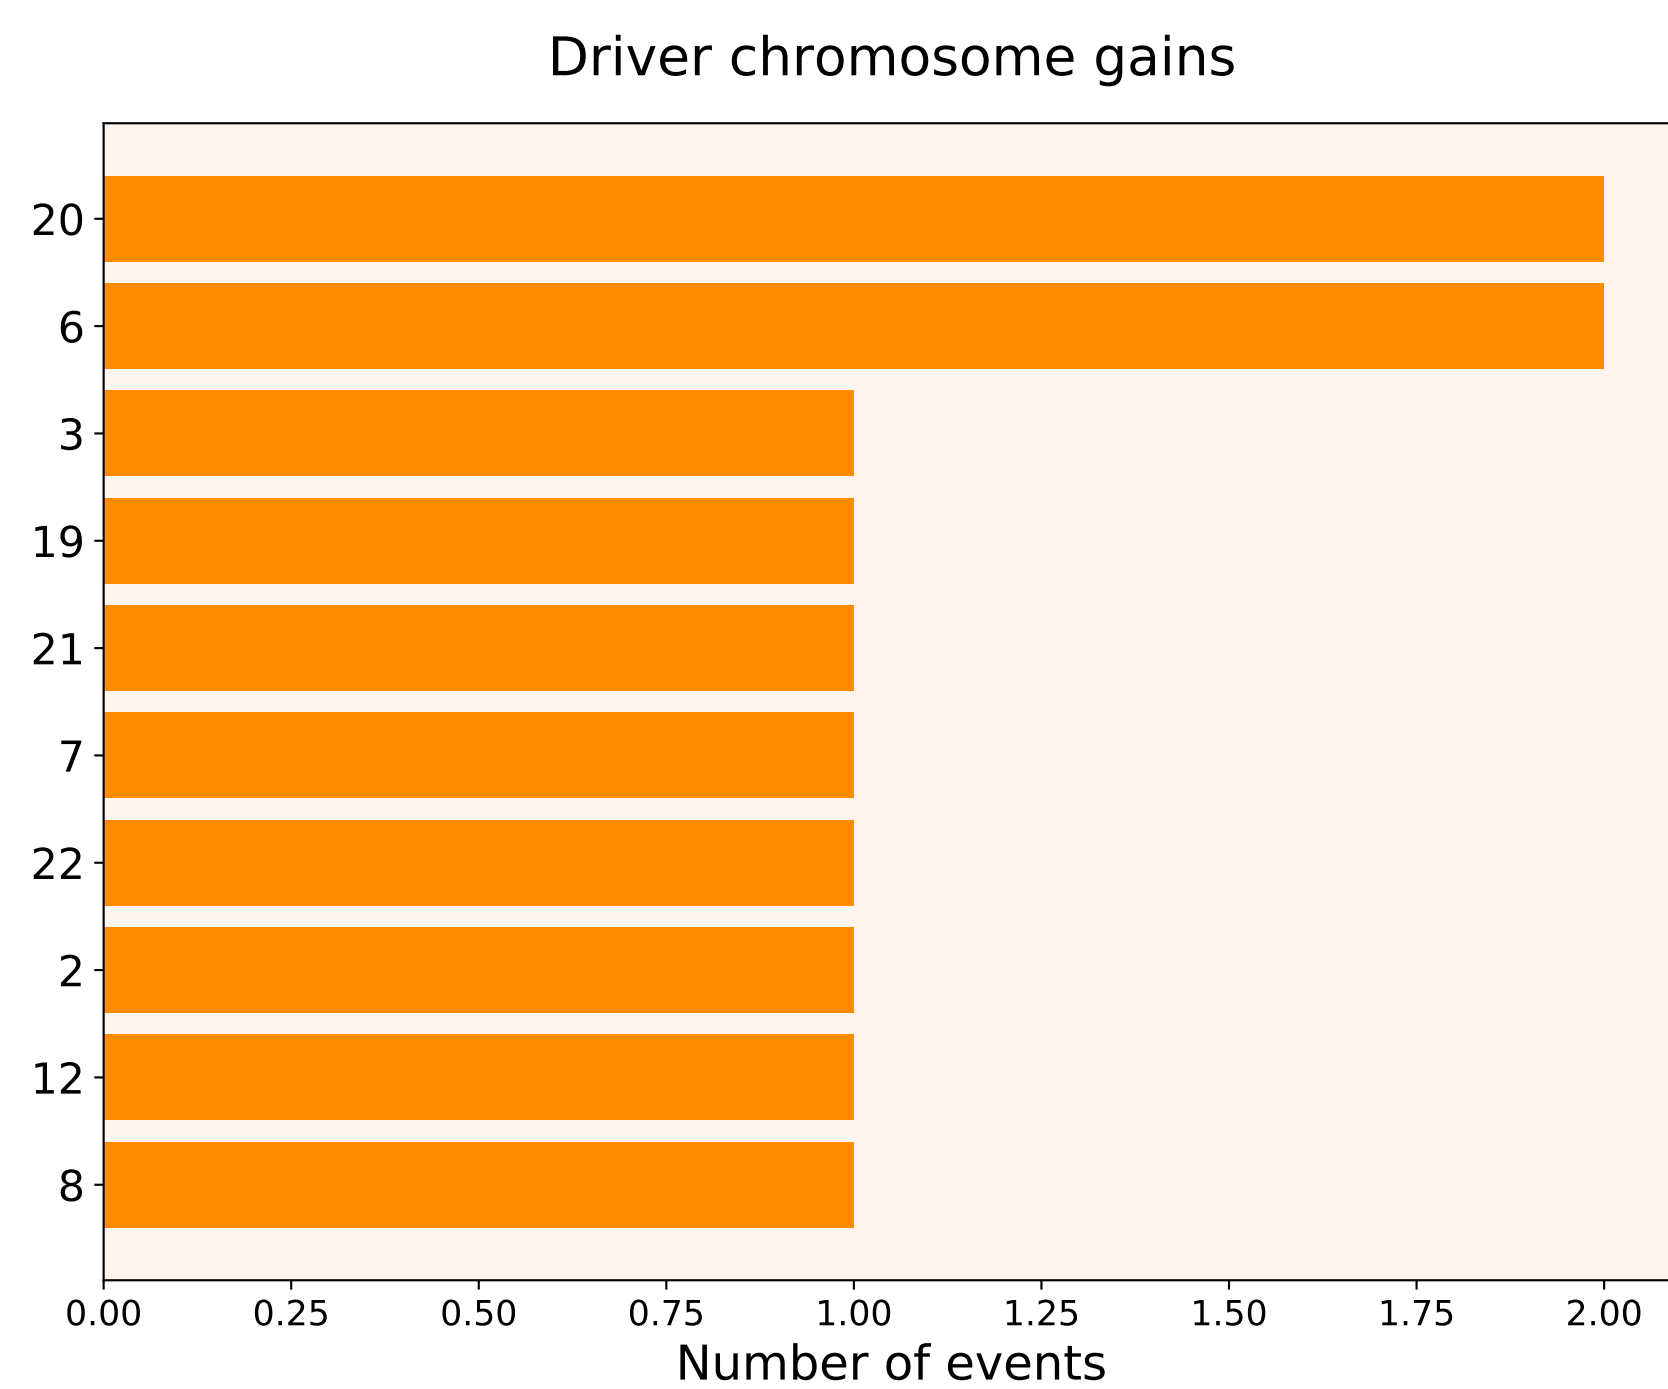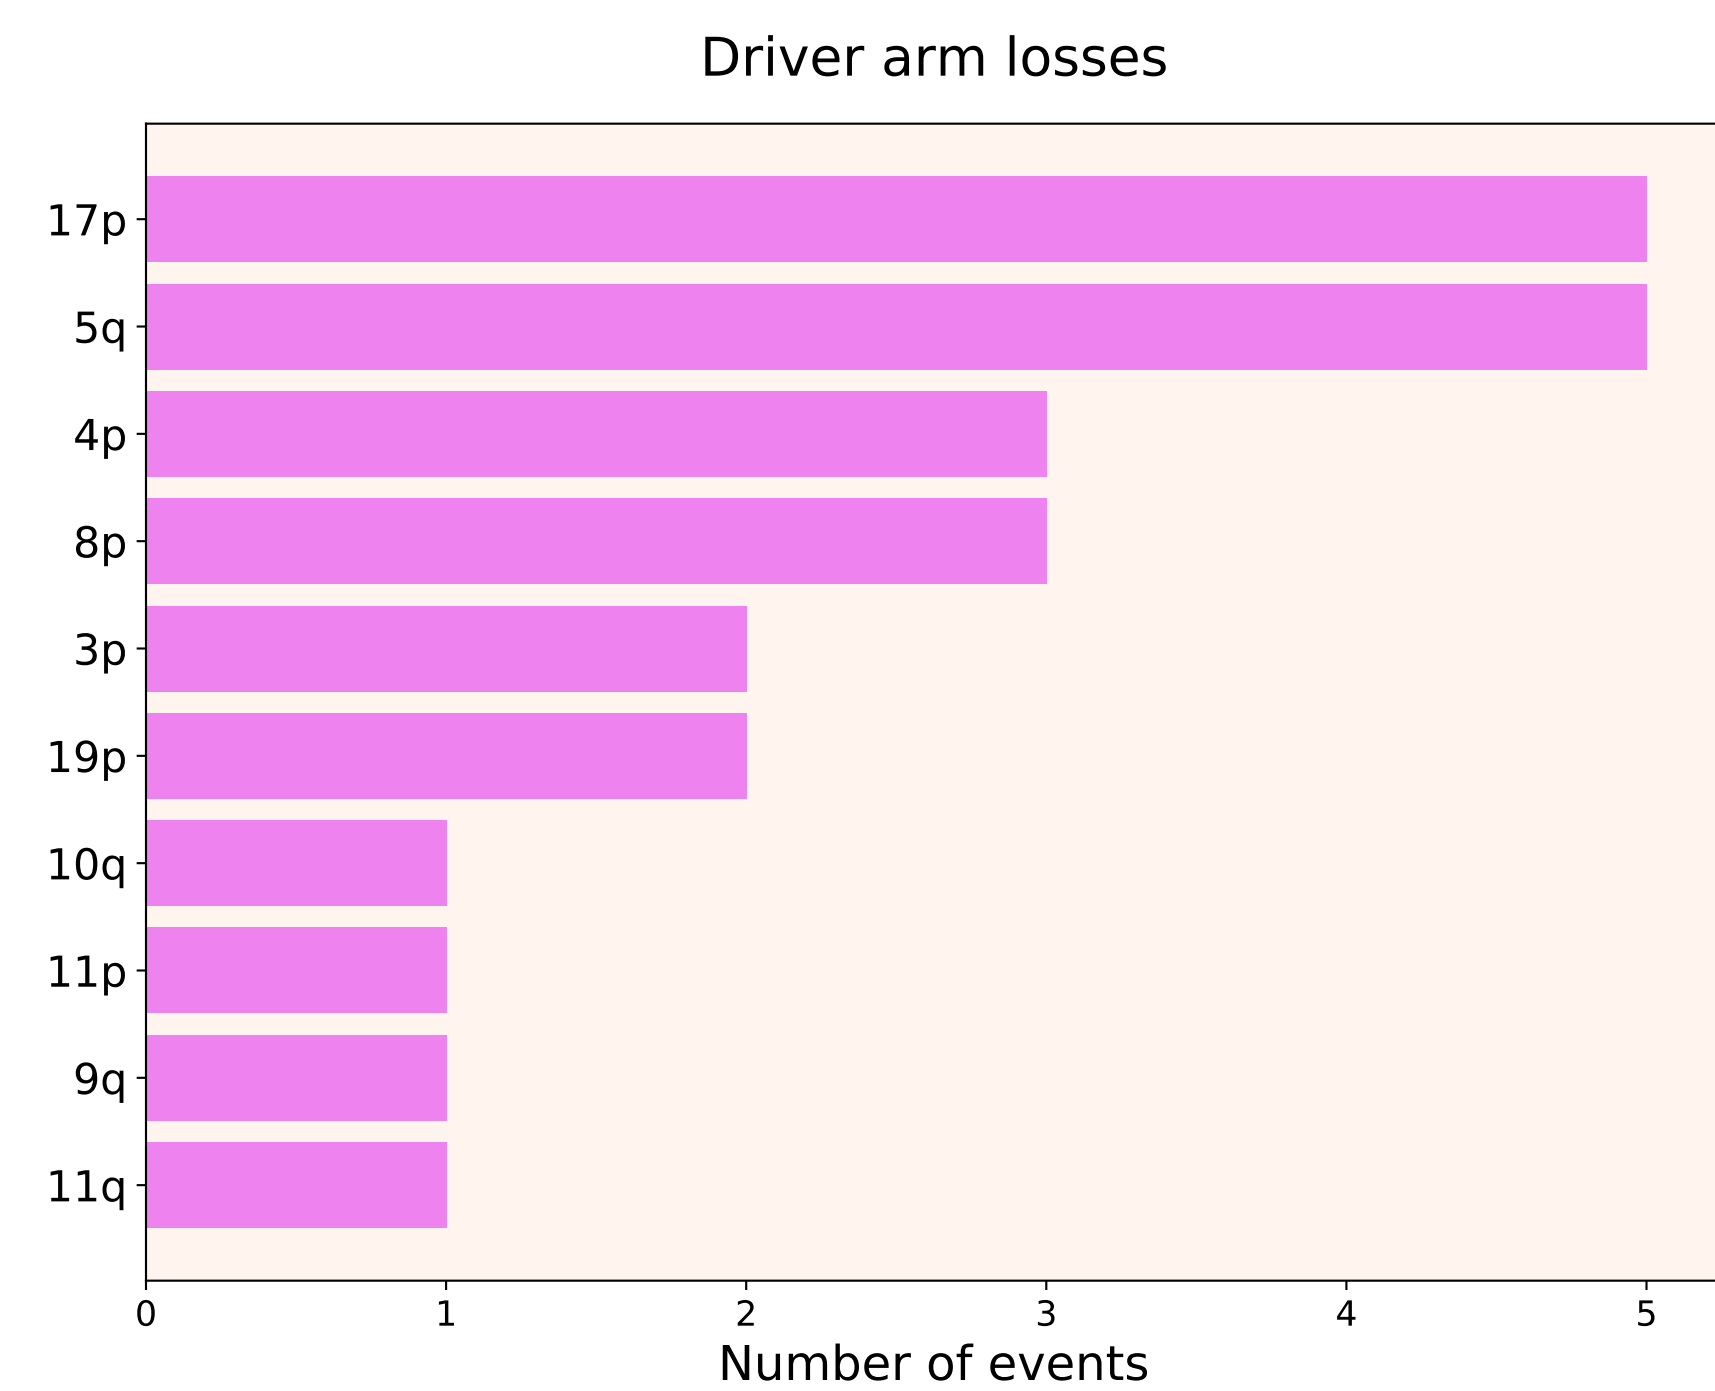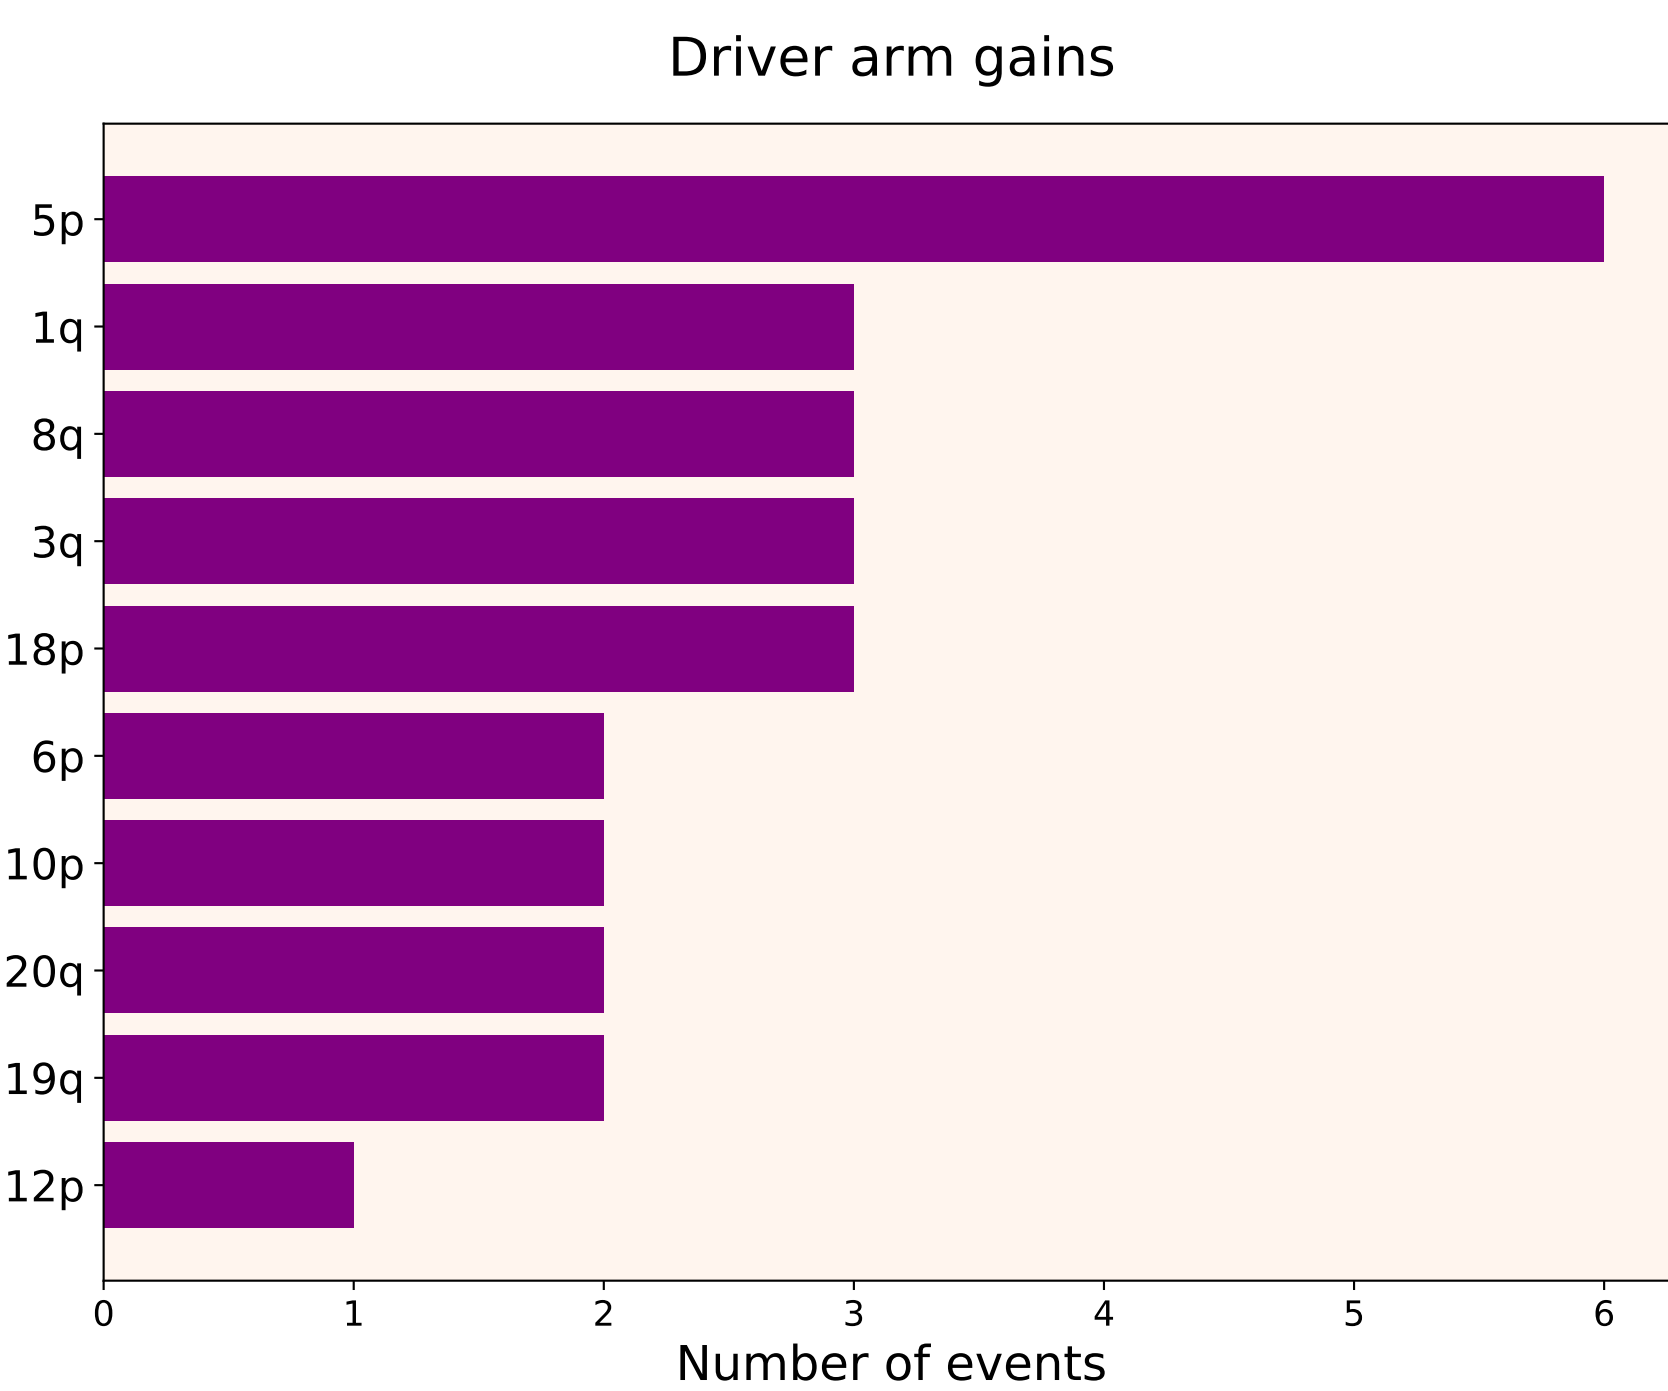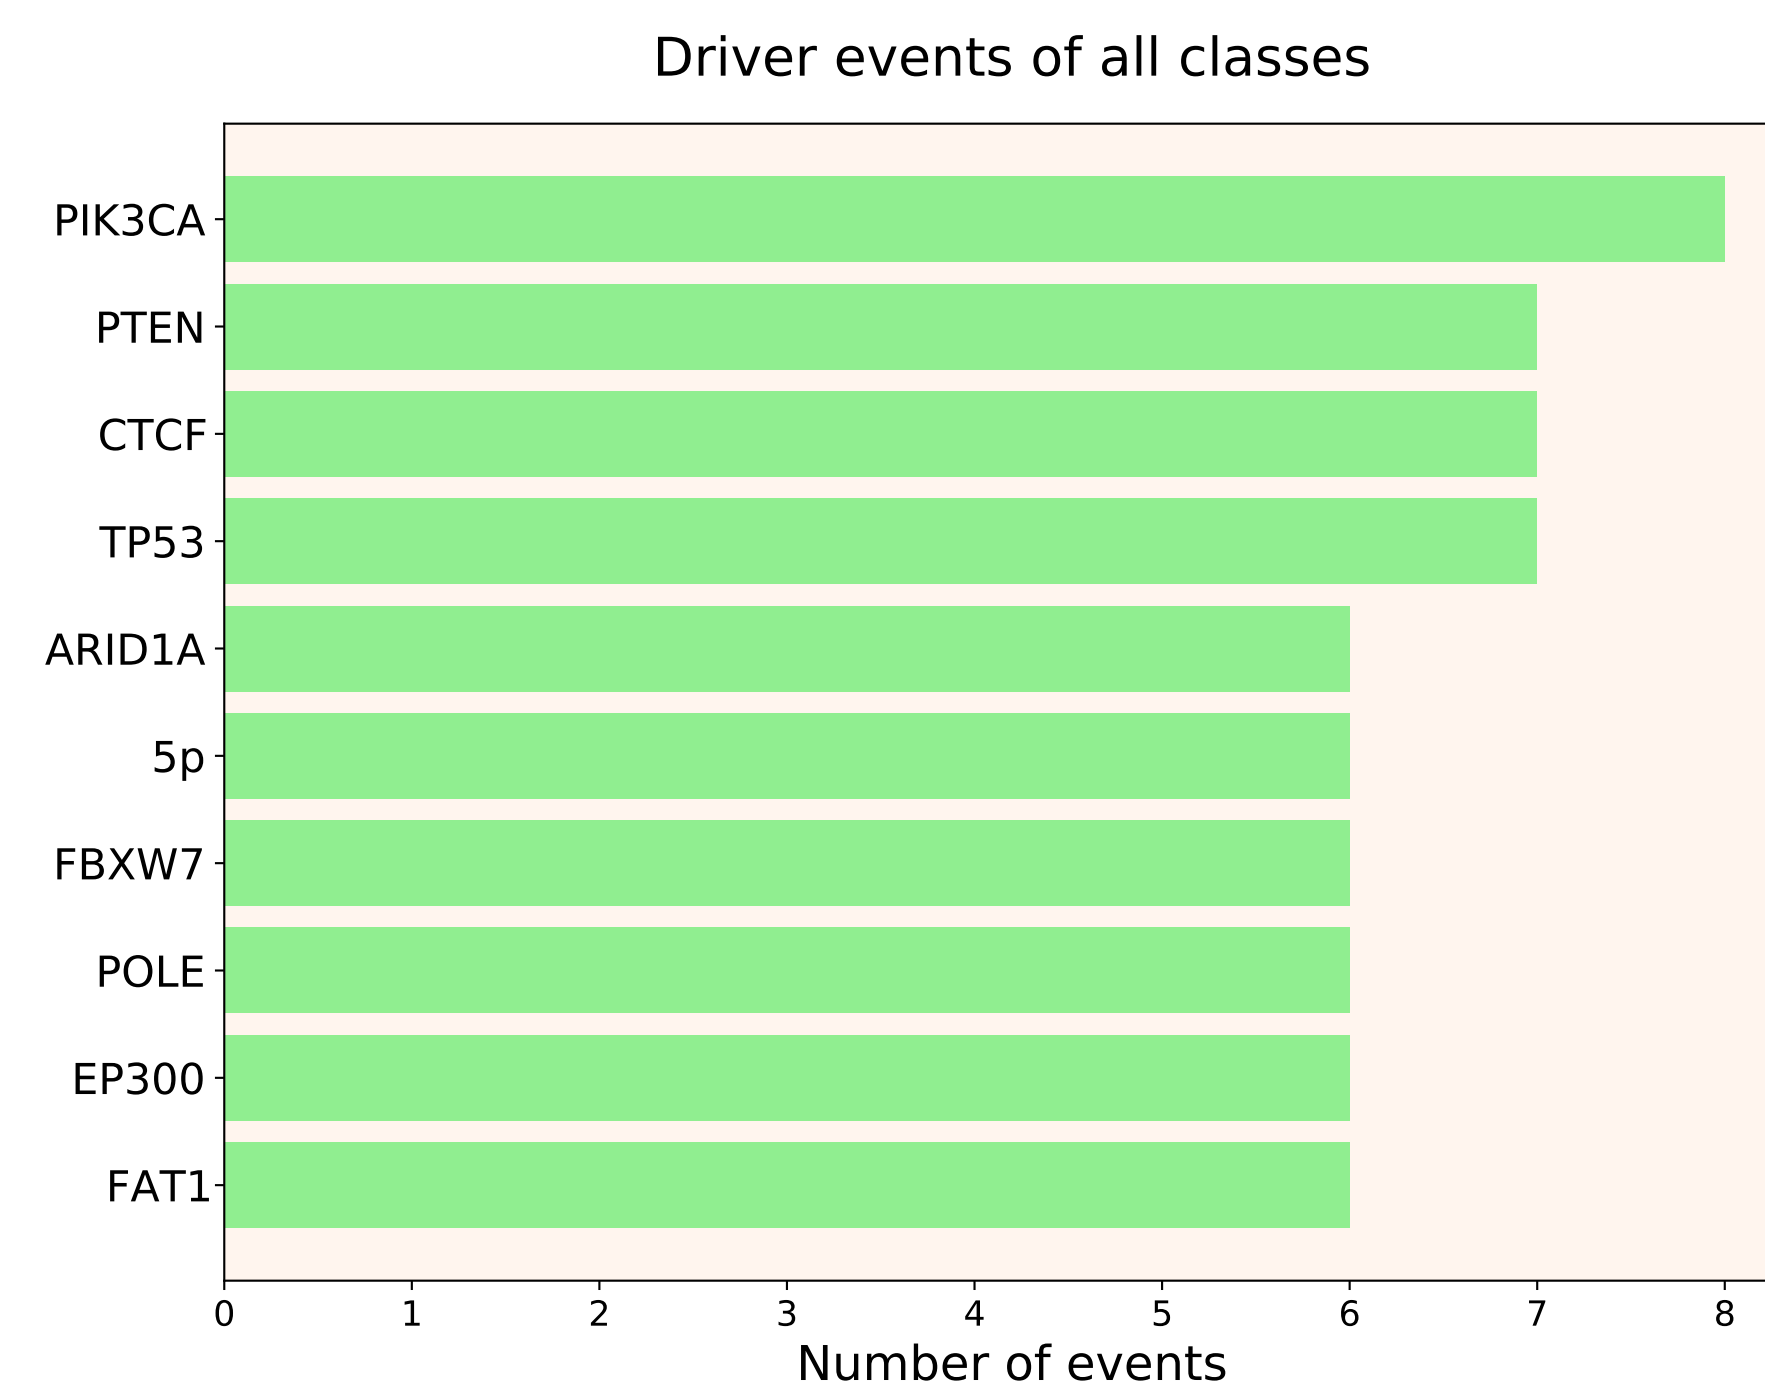

Supplement: Supplemental_Data_S1.zip [file Supplemental_Data_S1.zip]

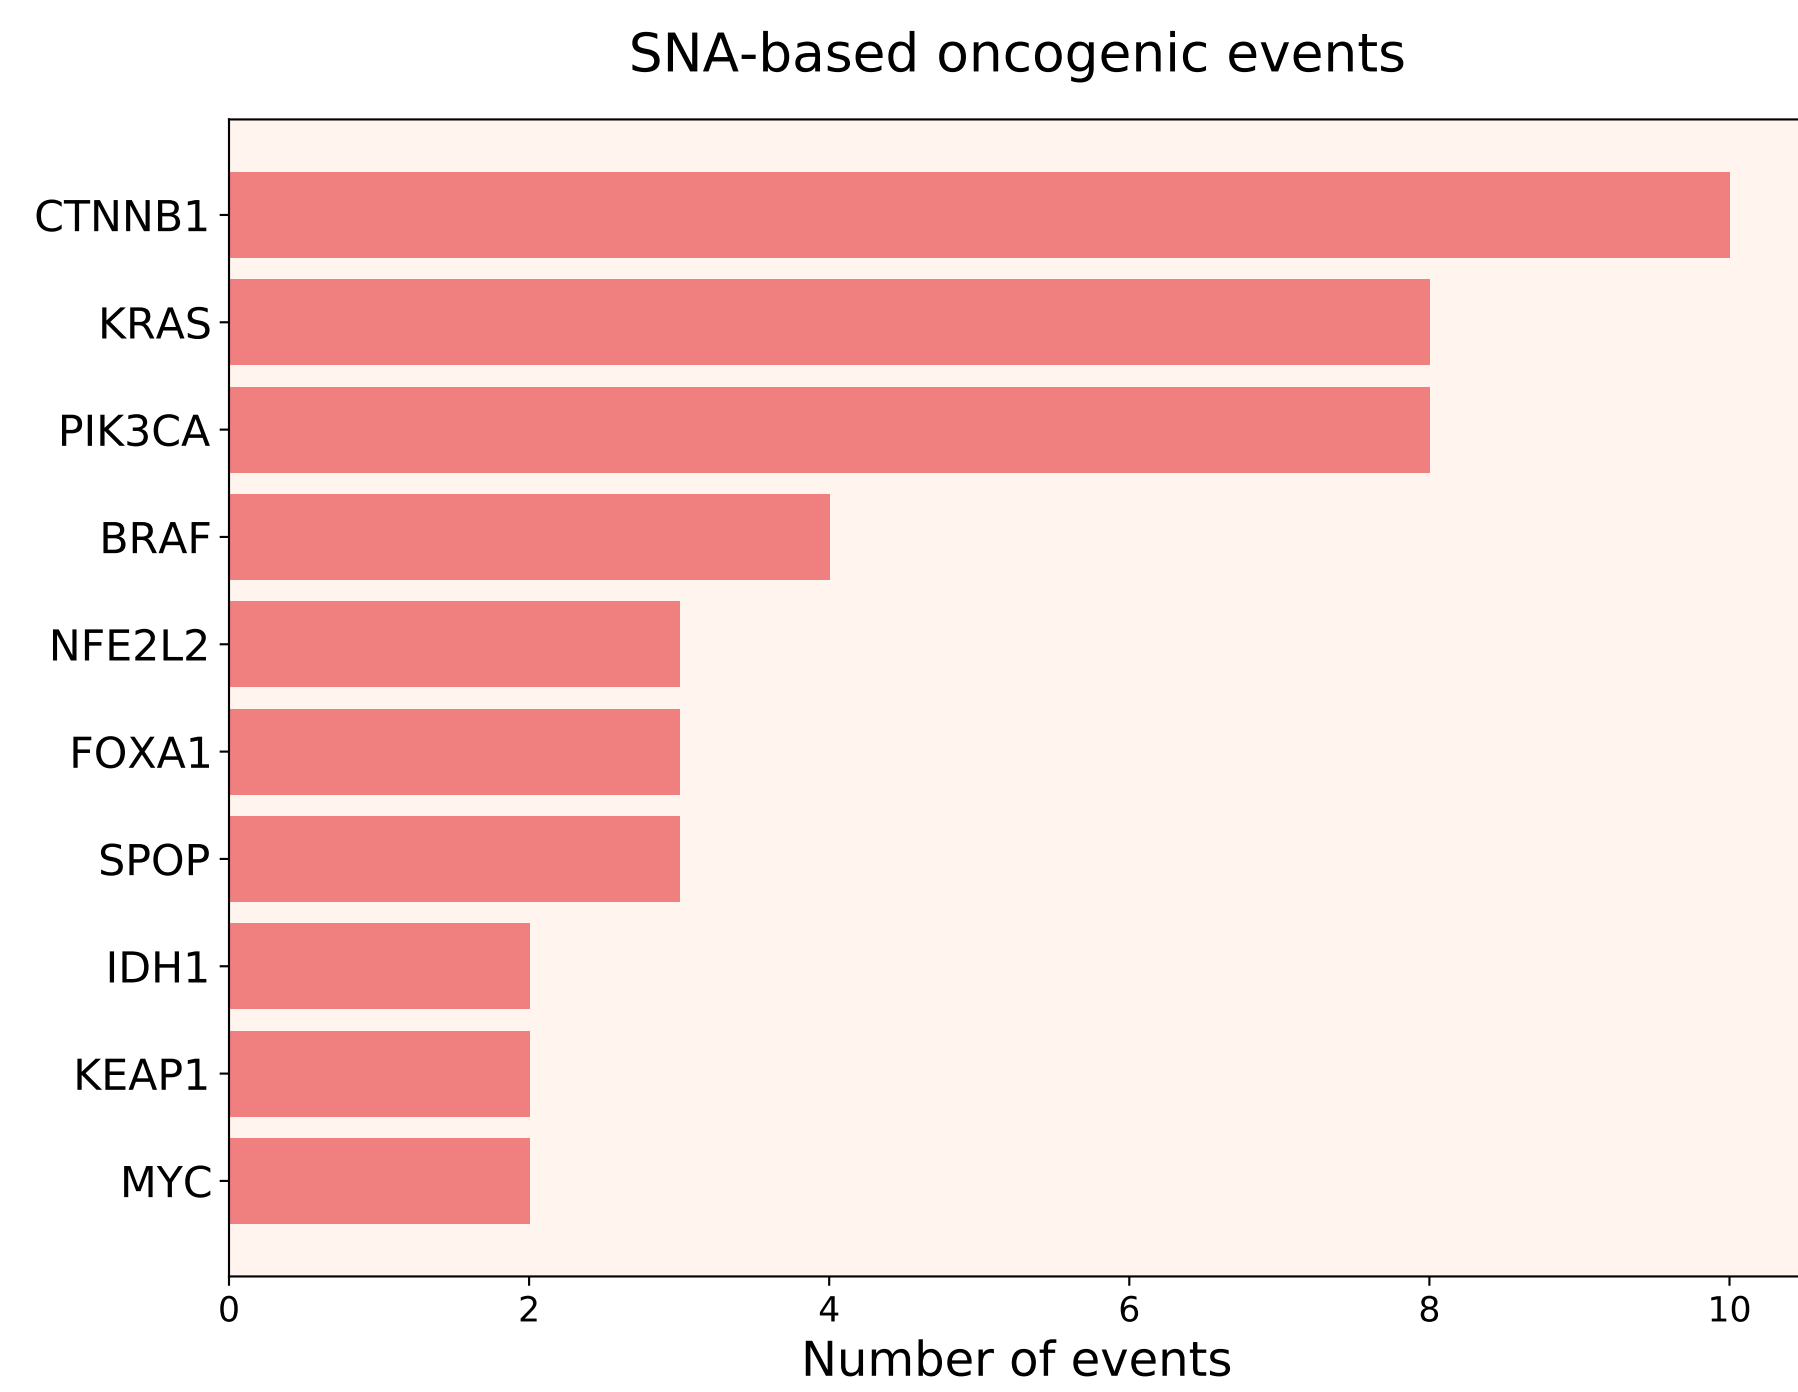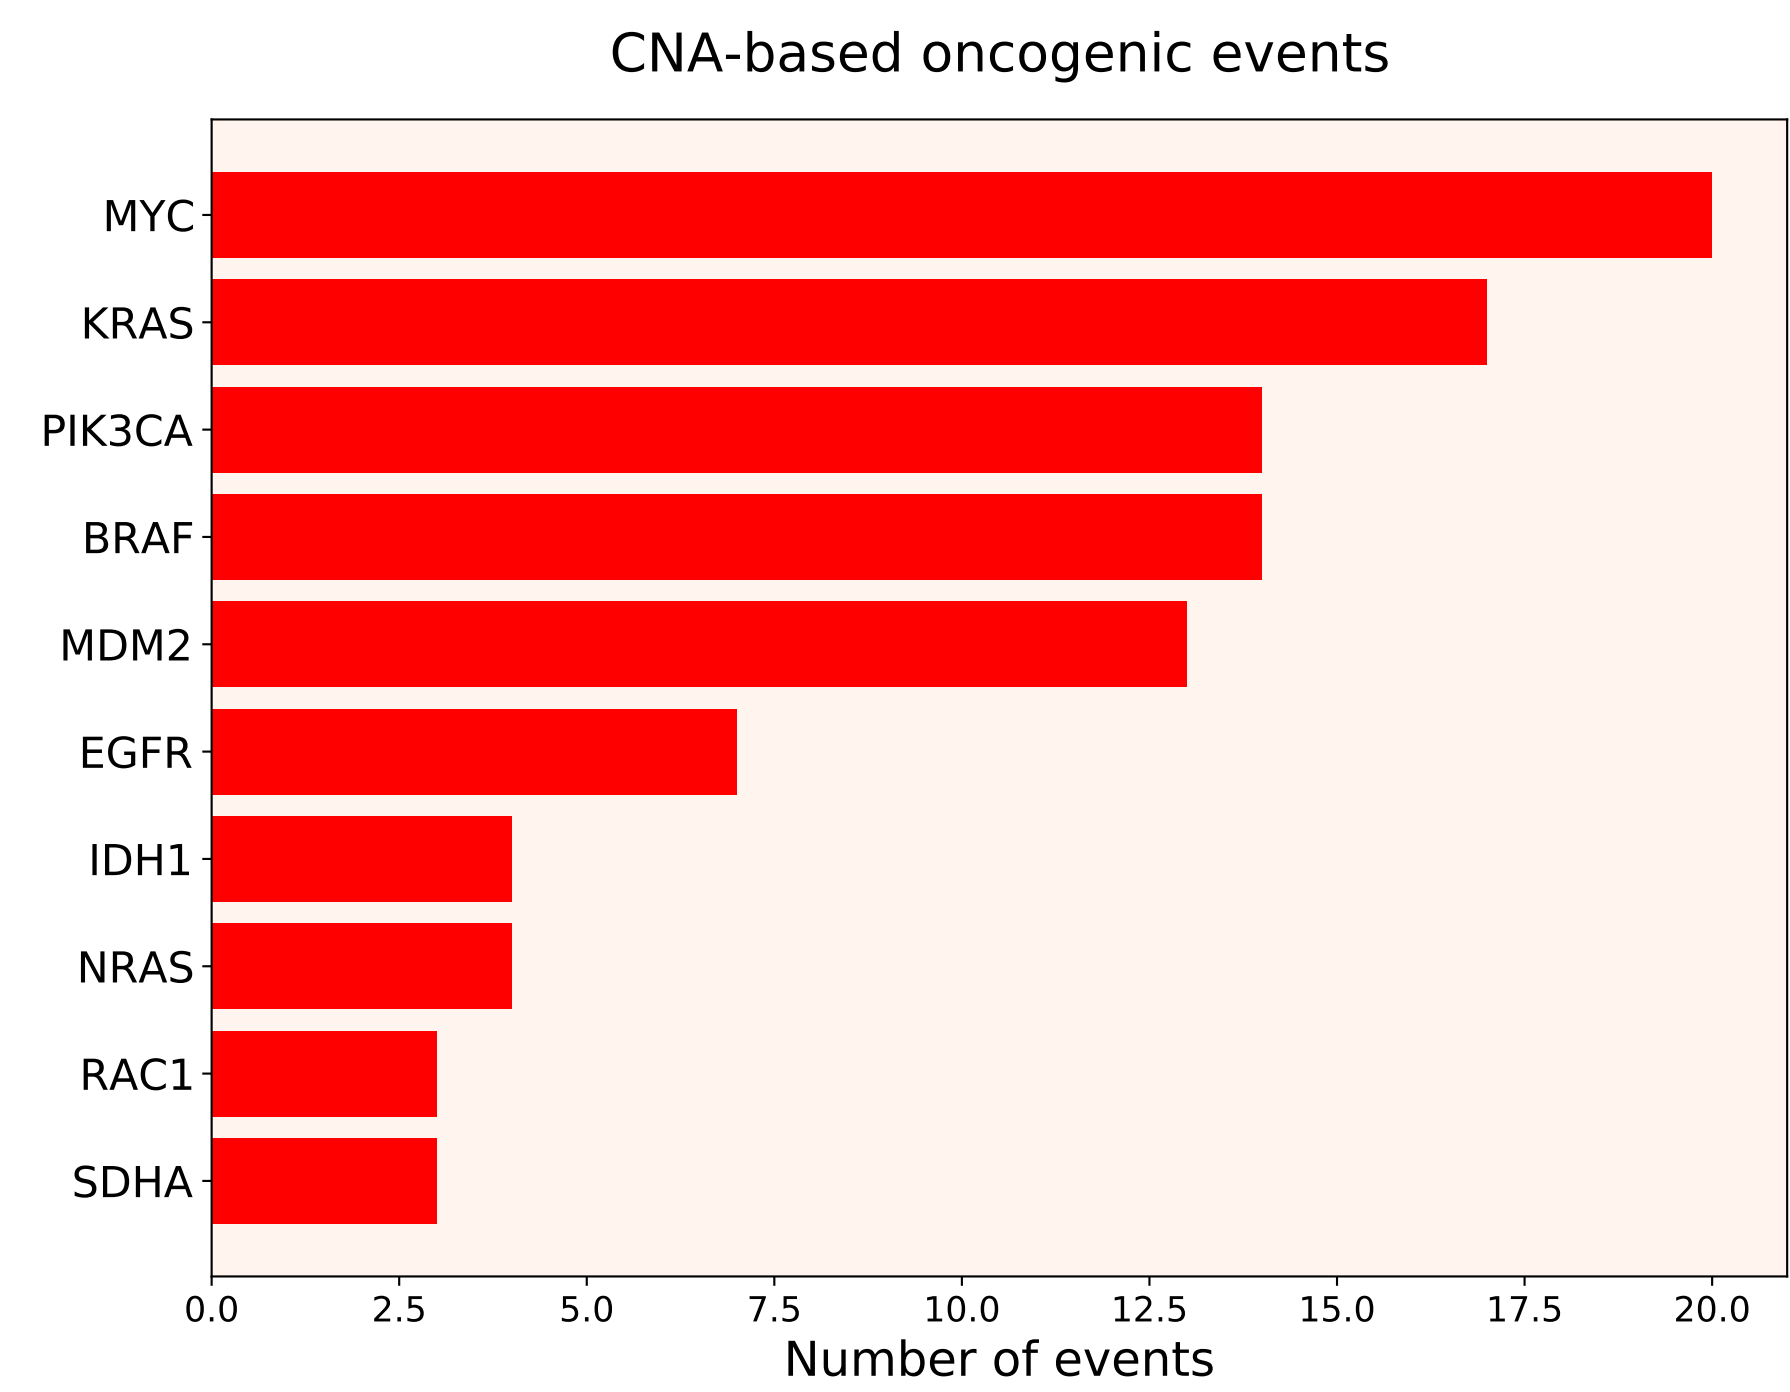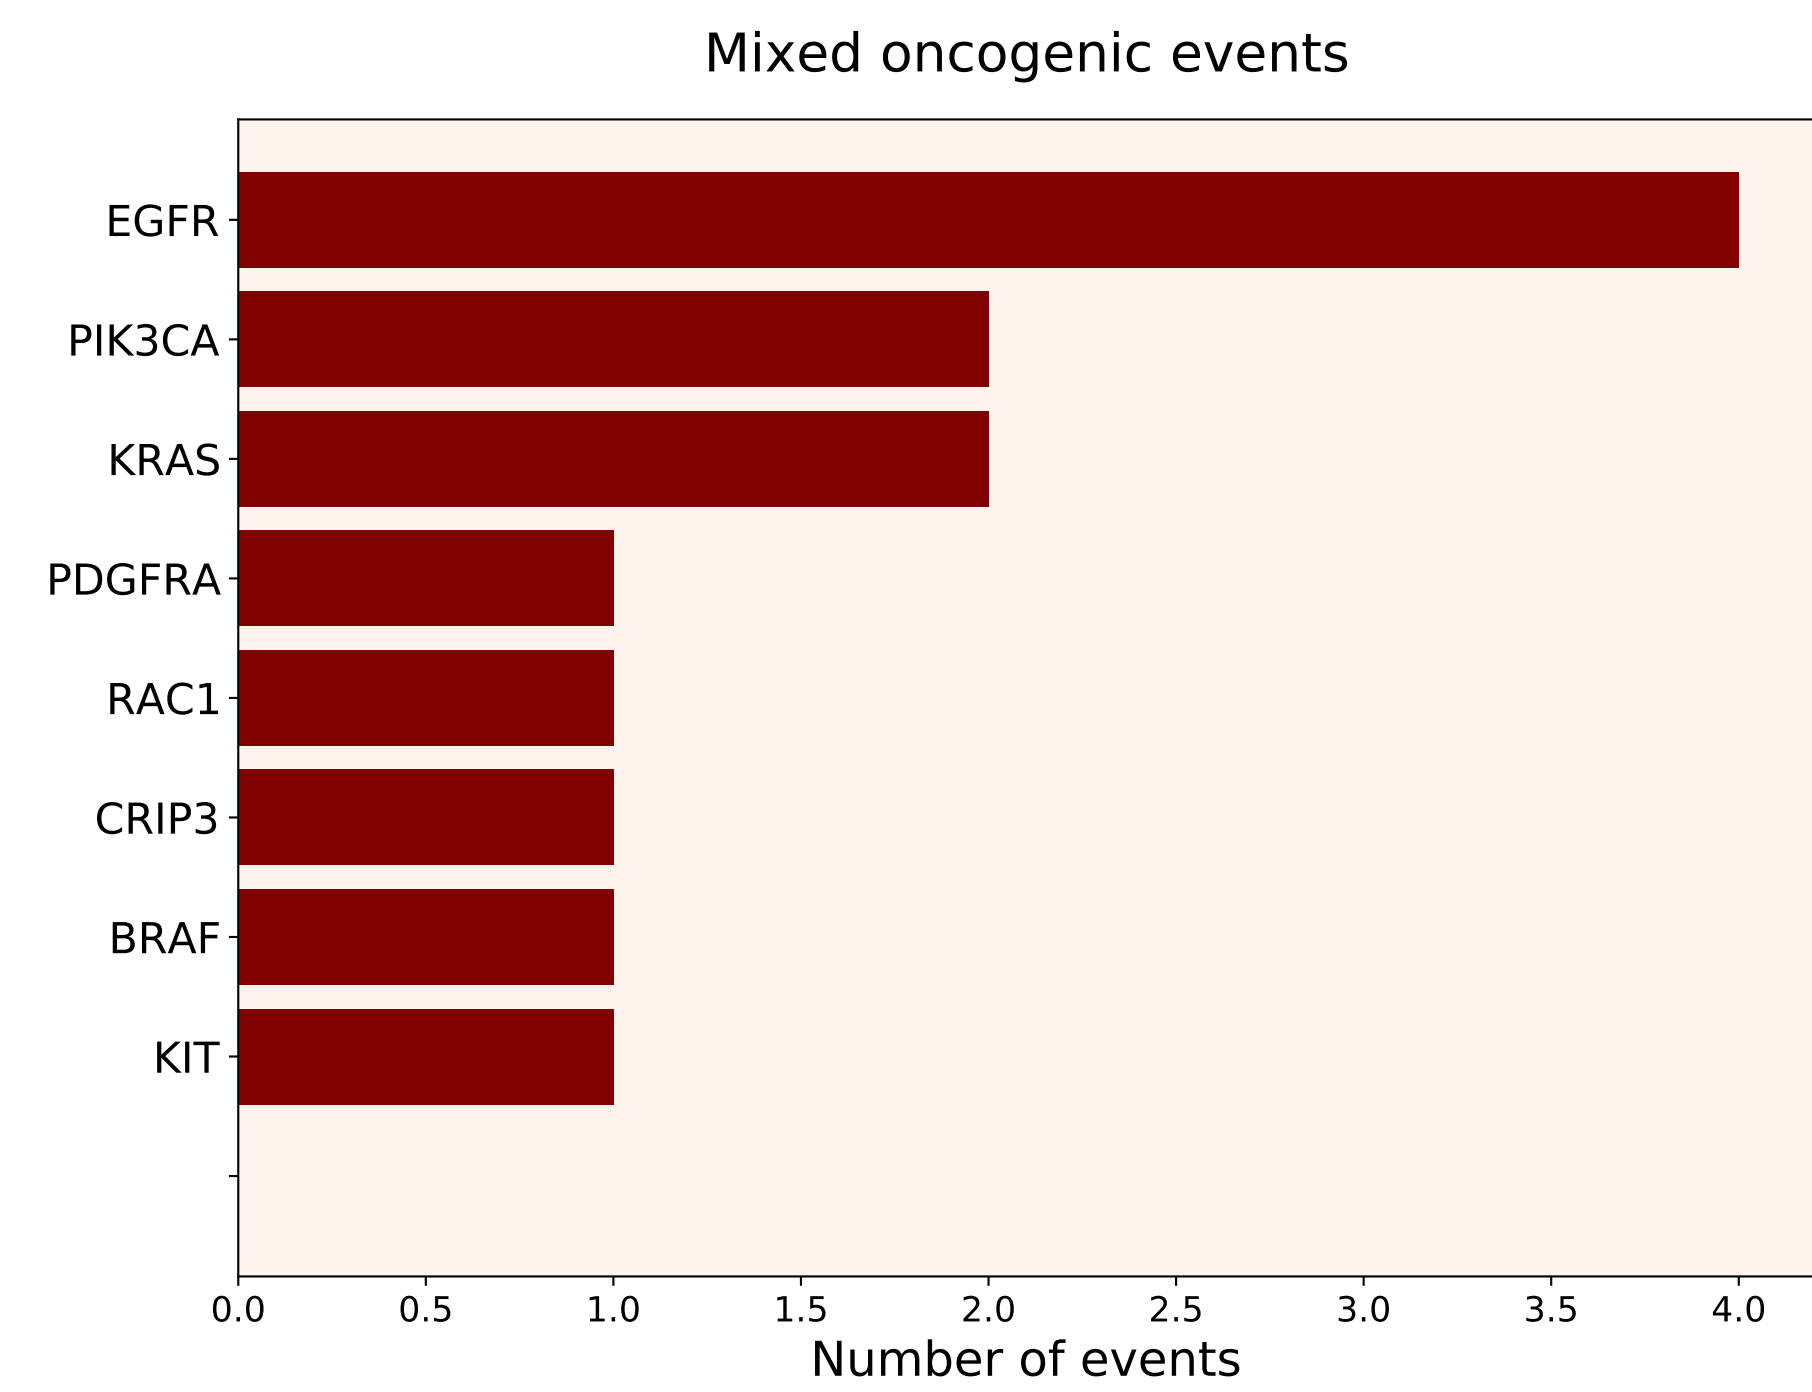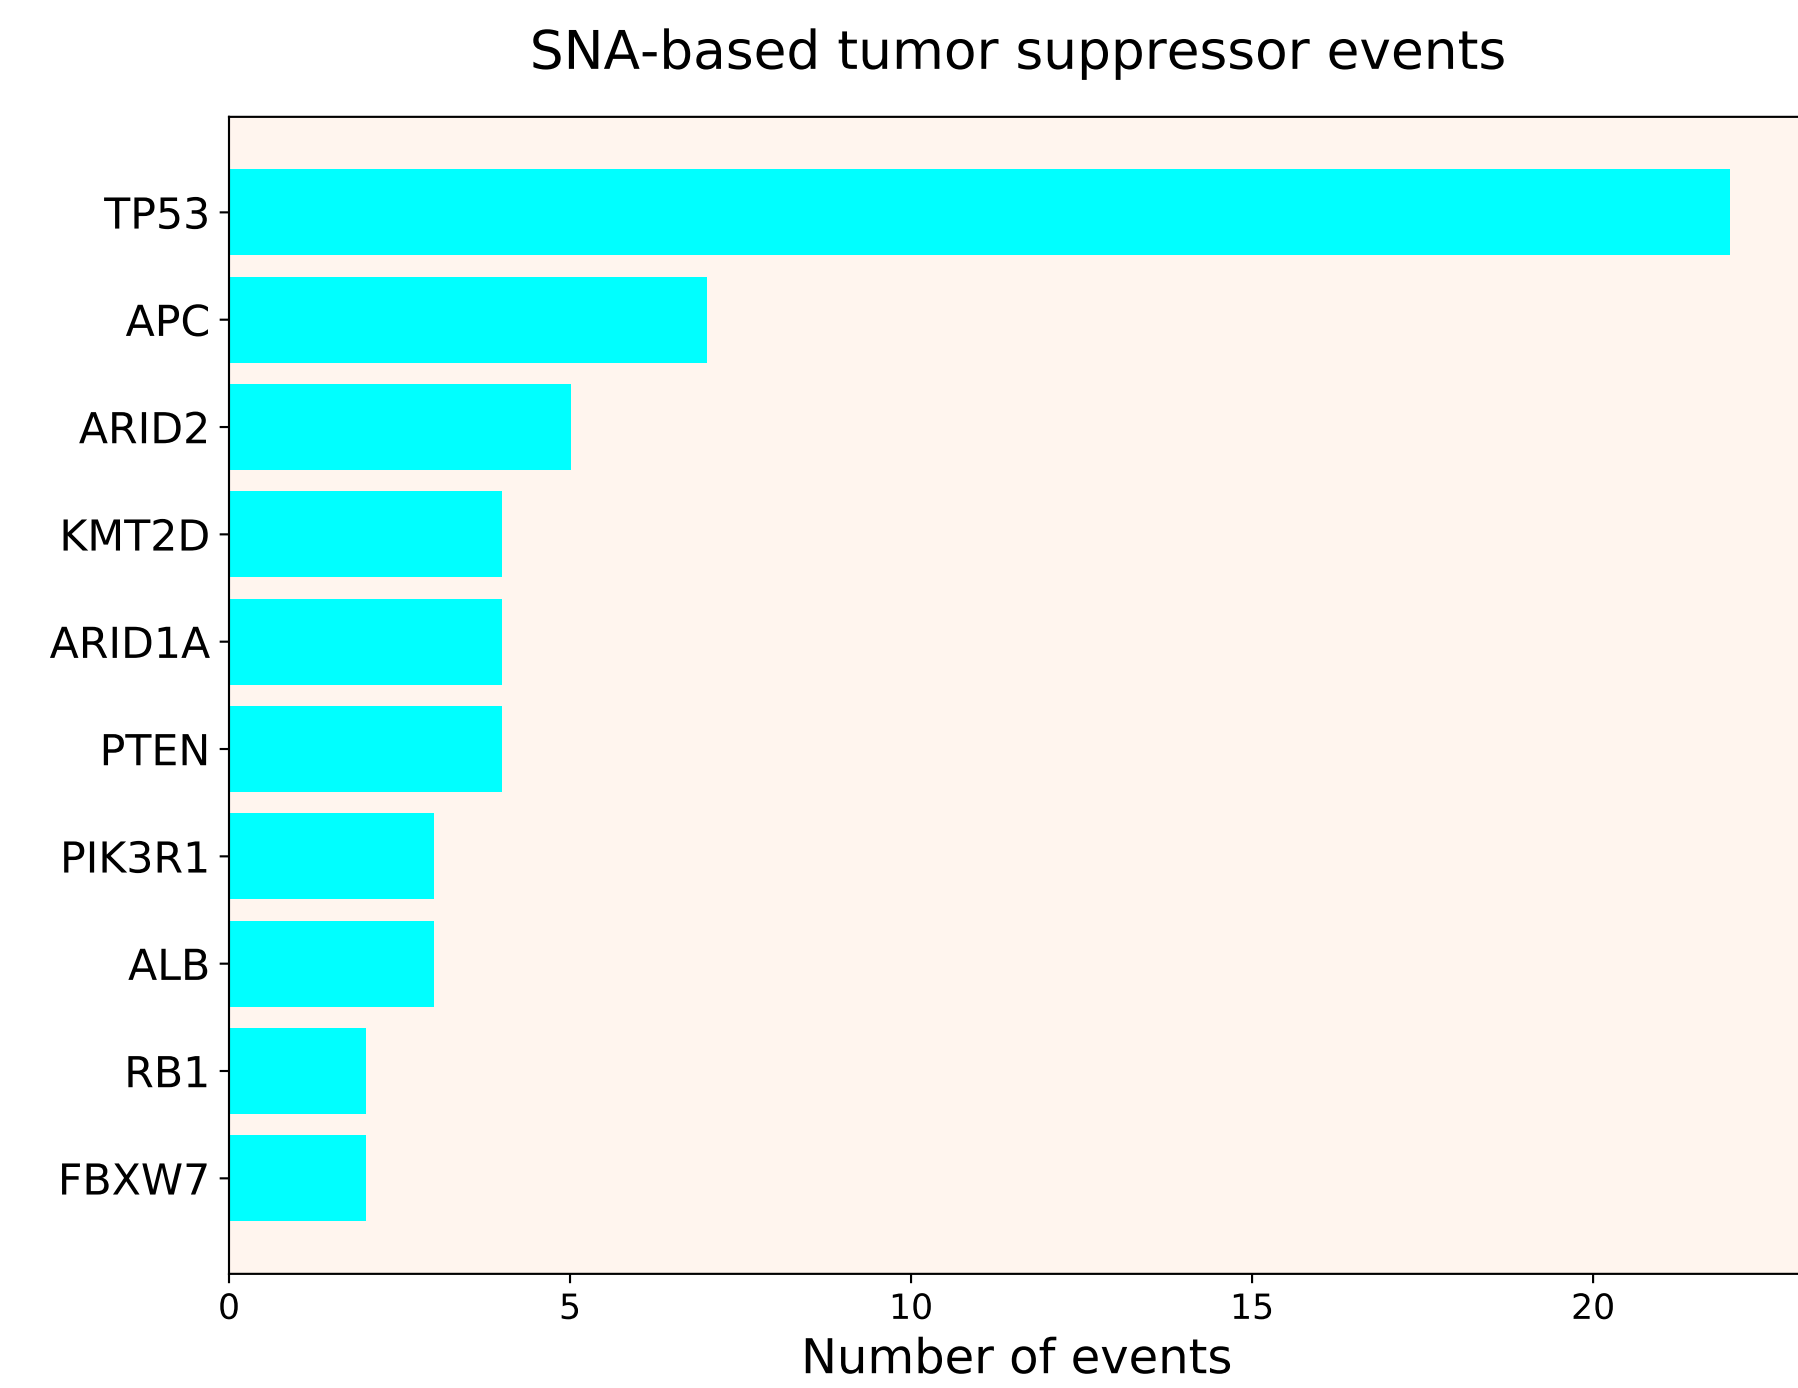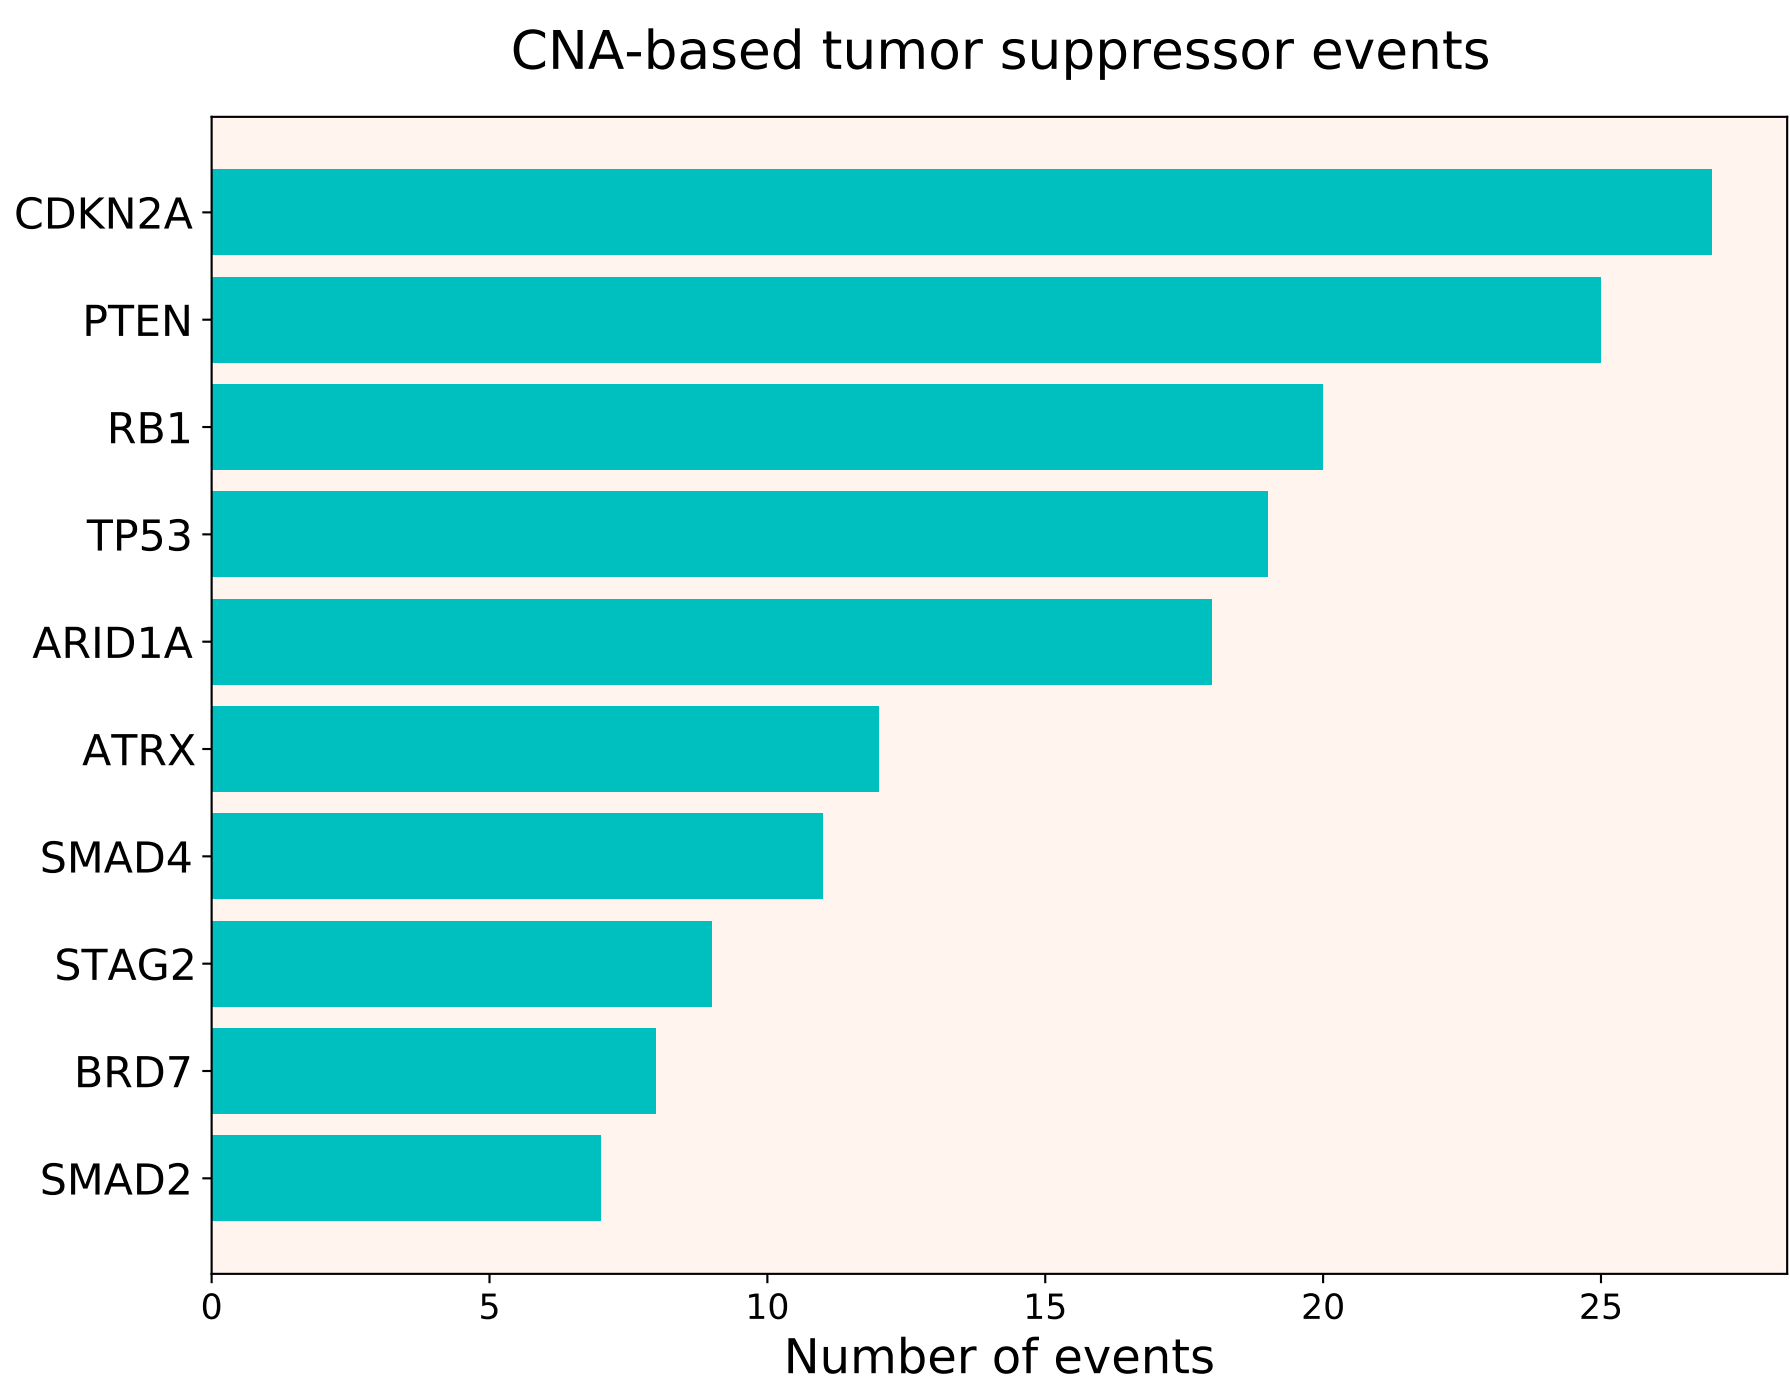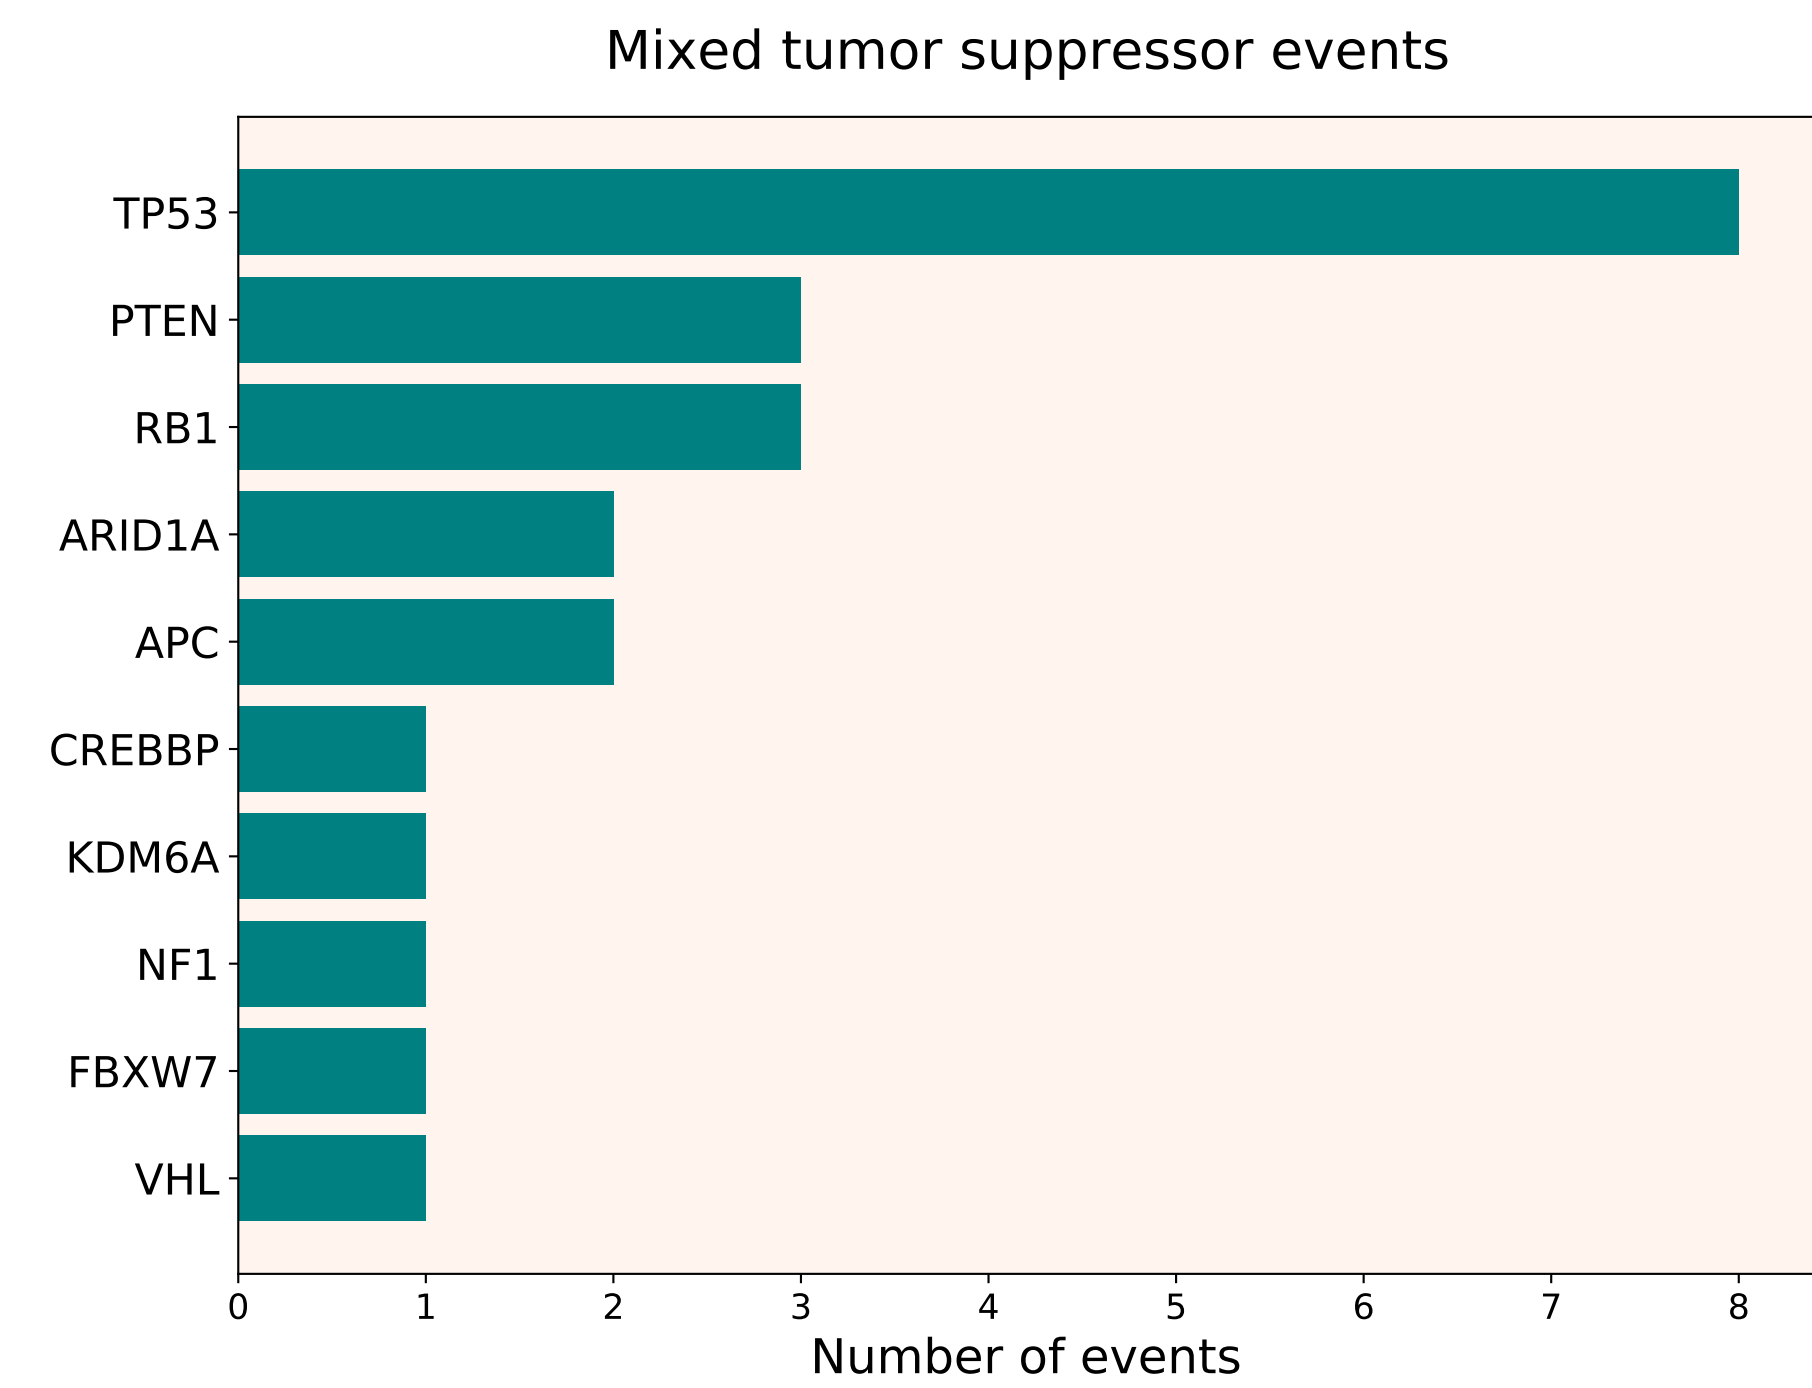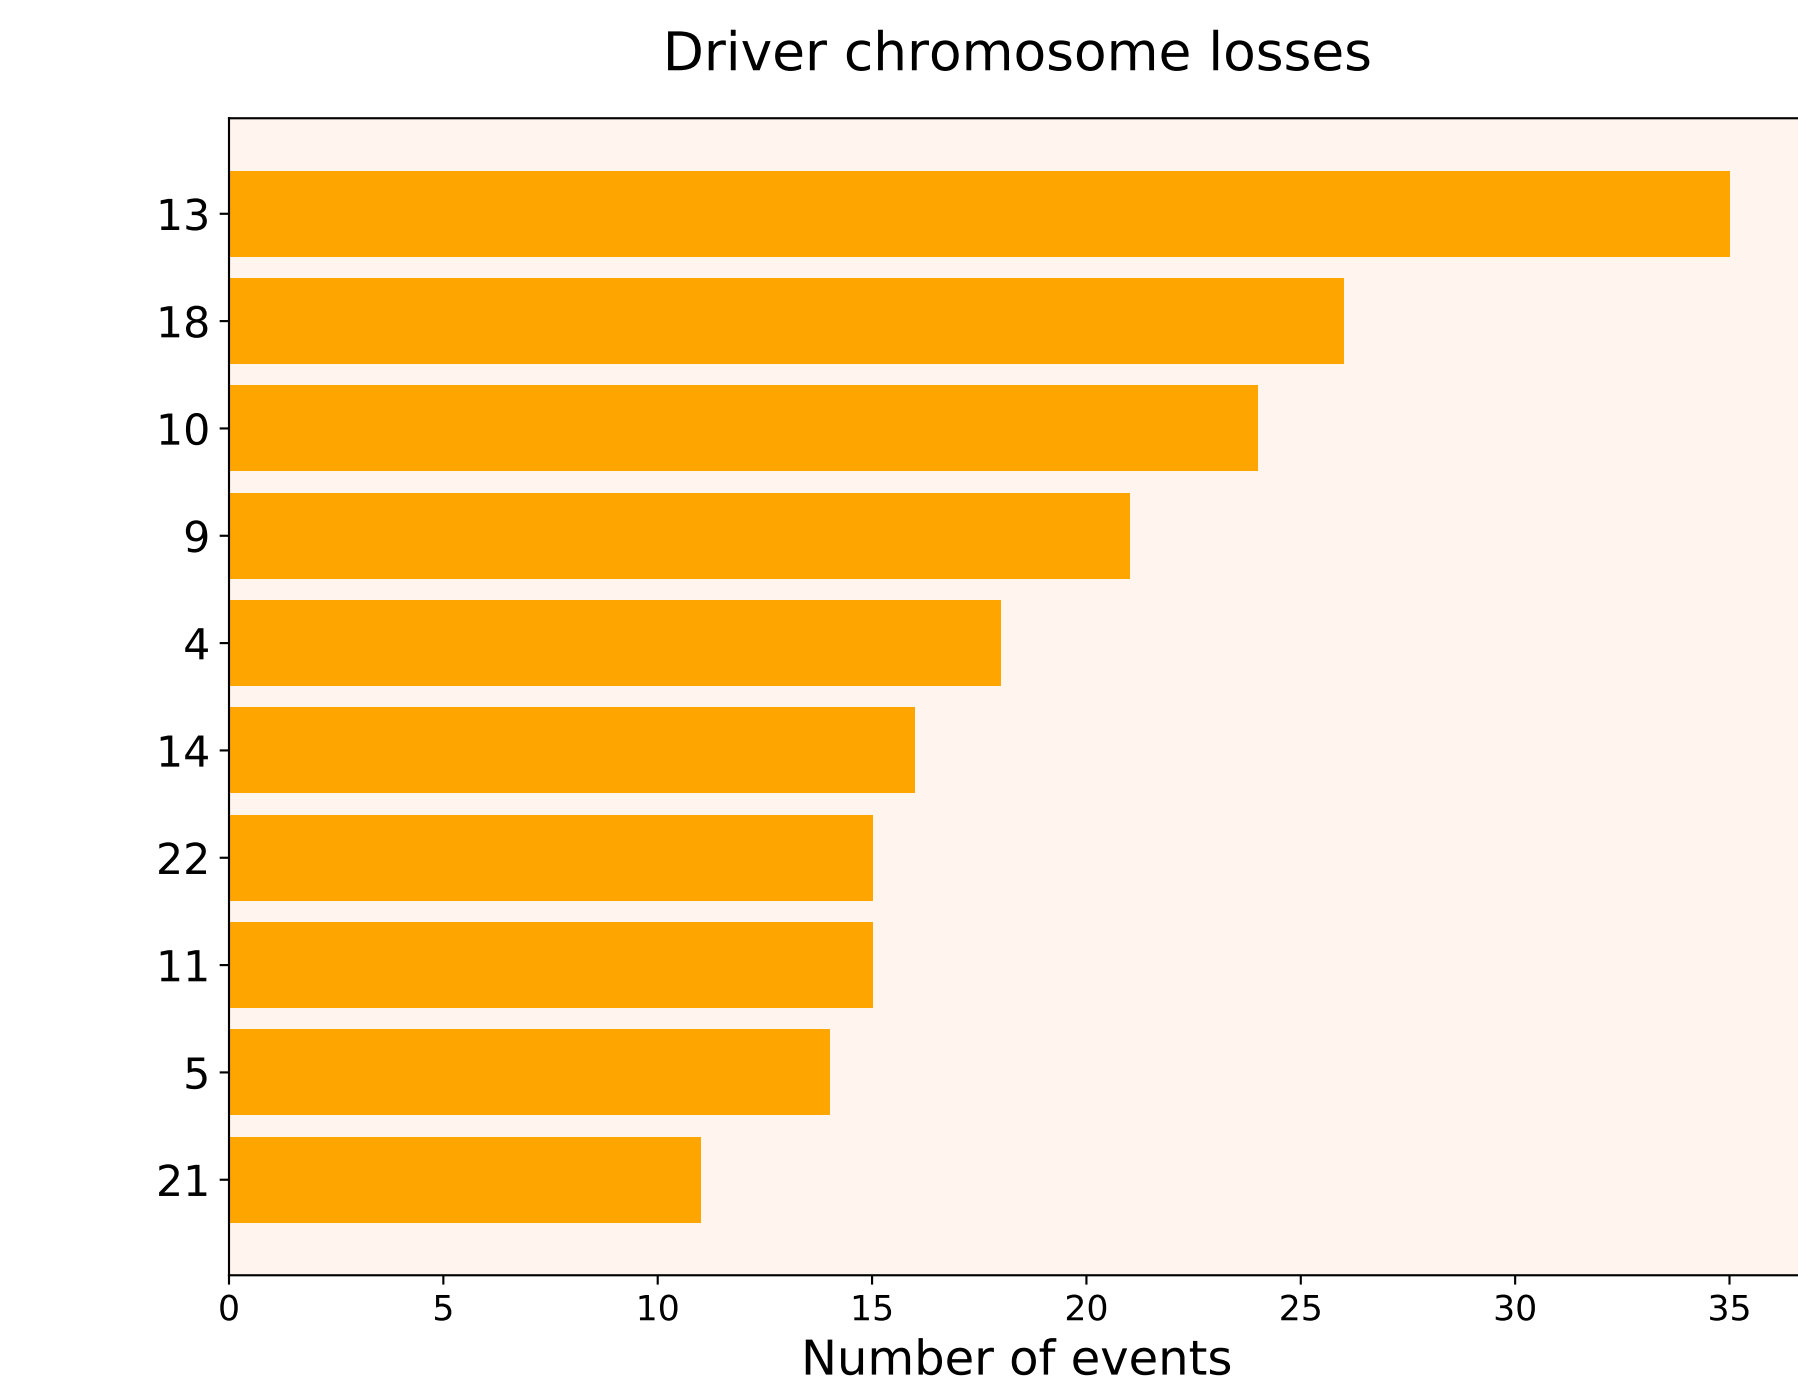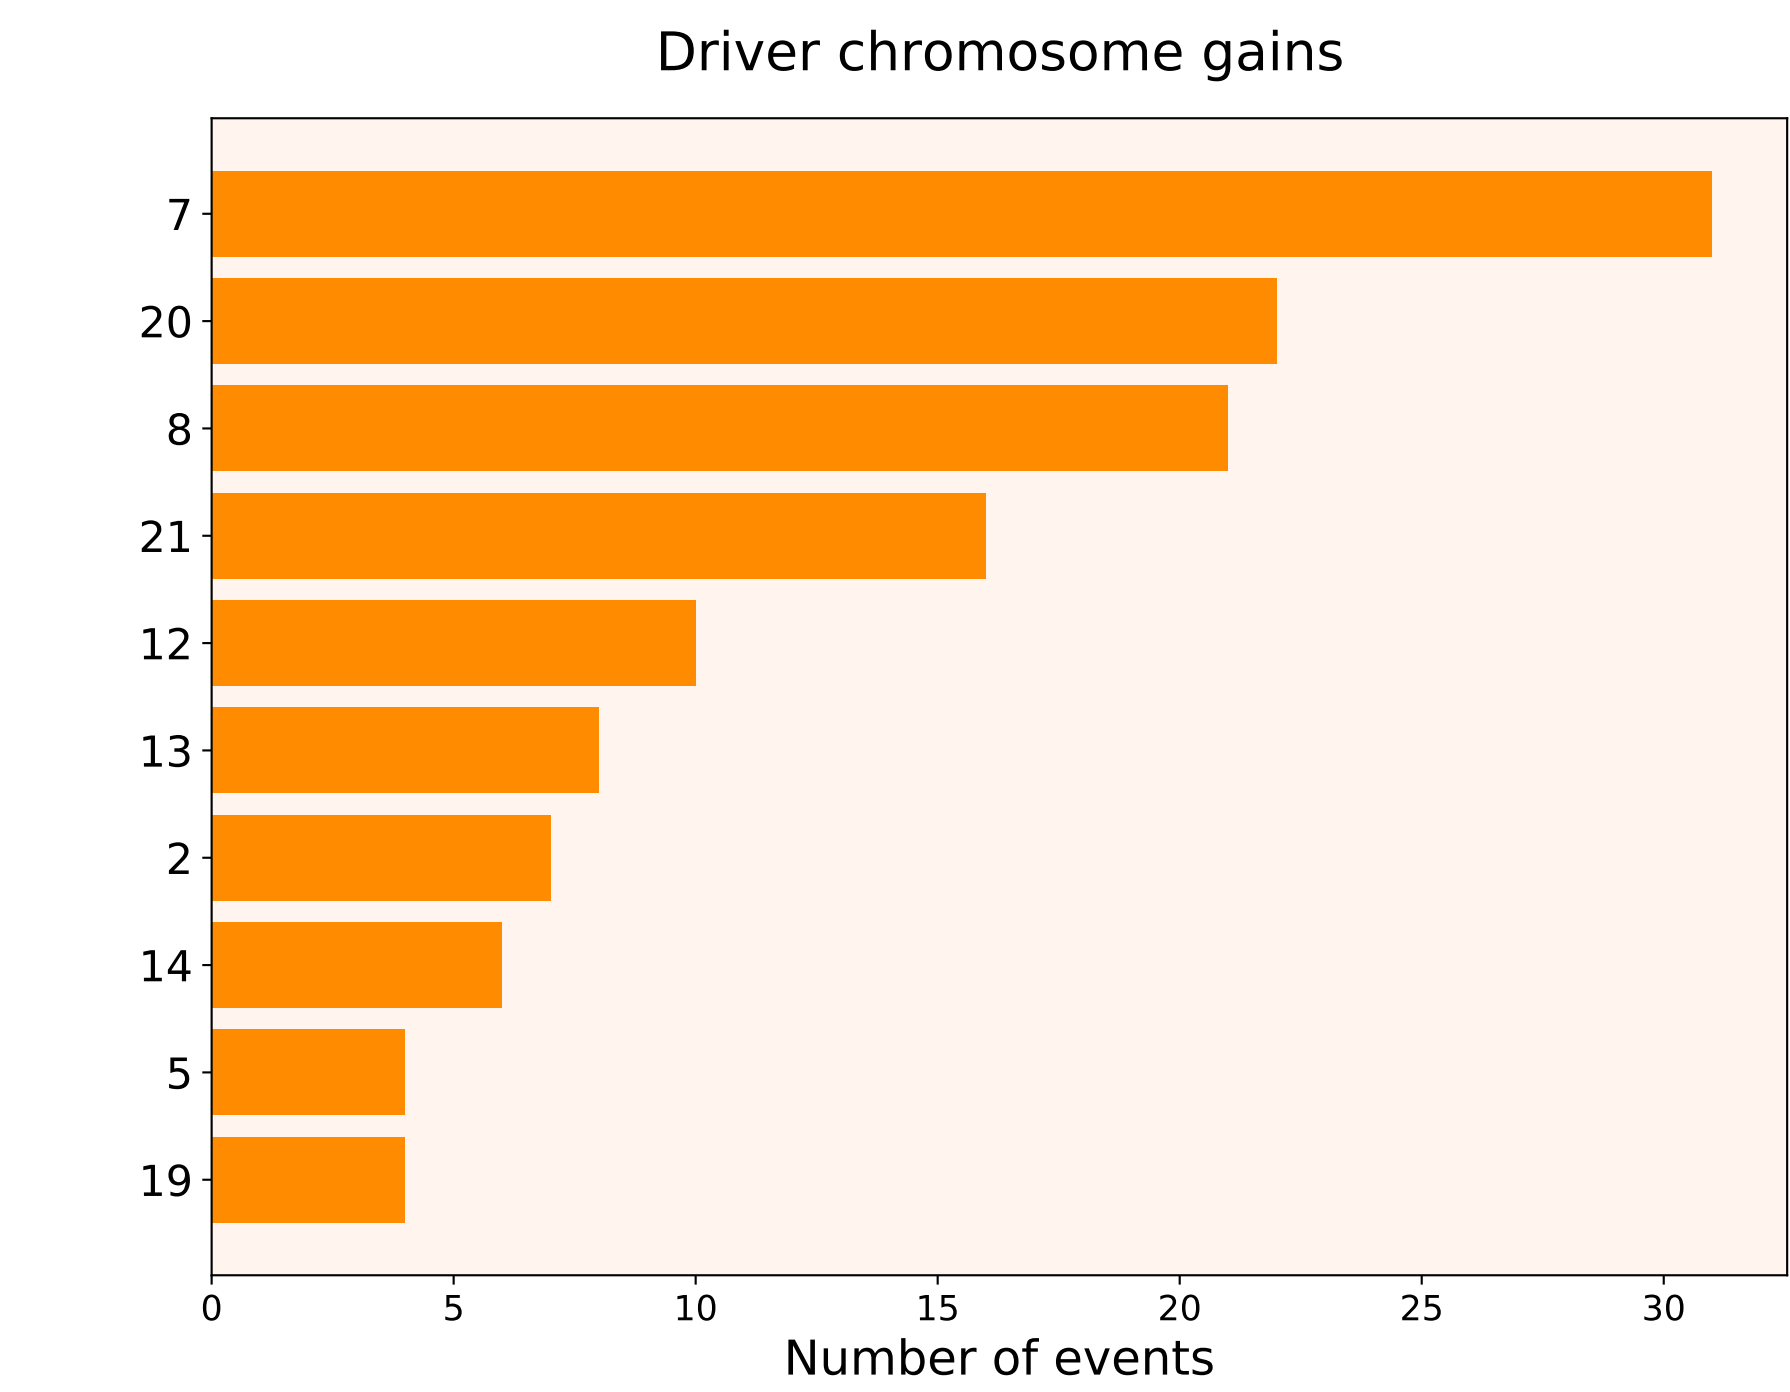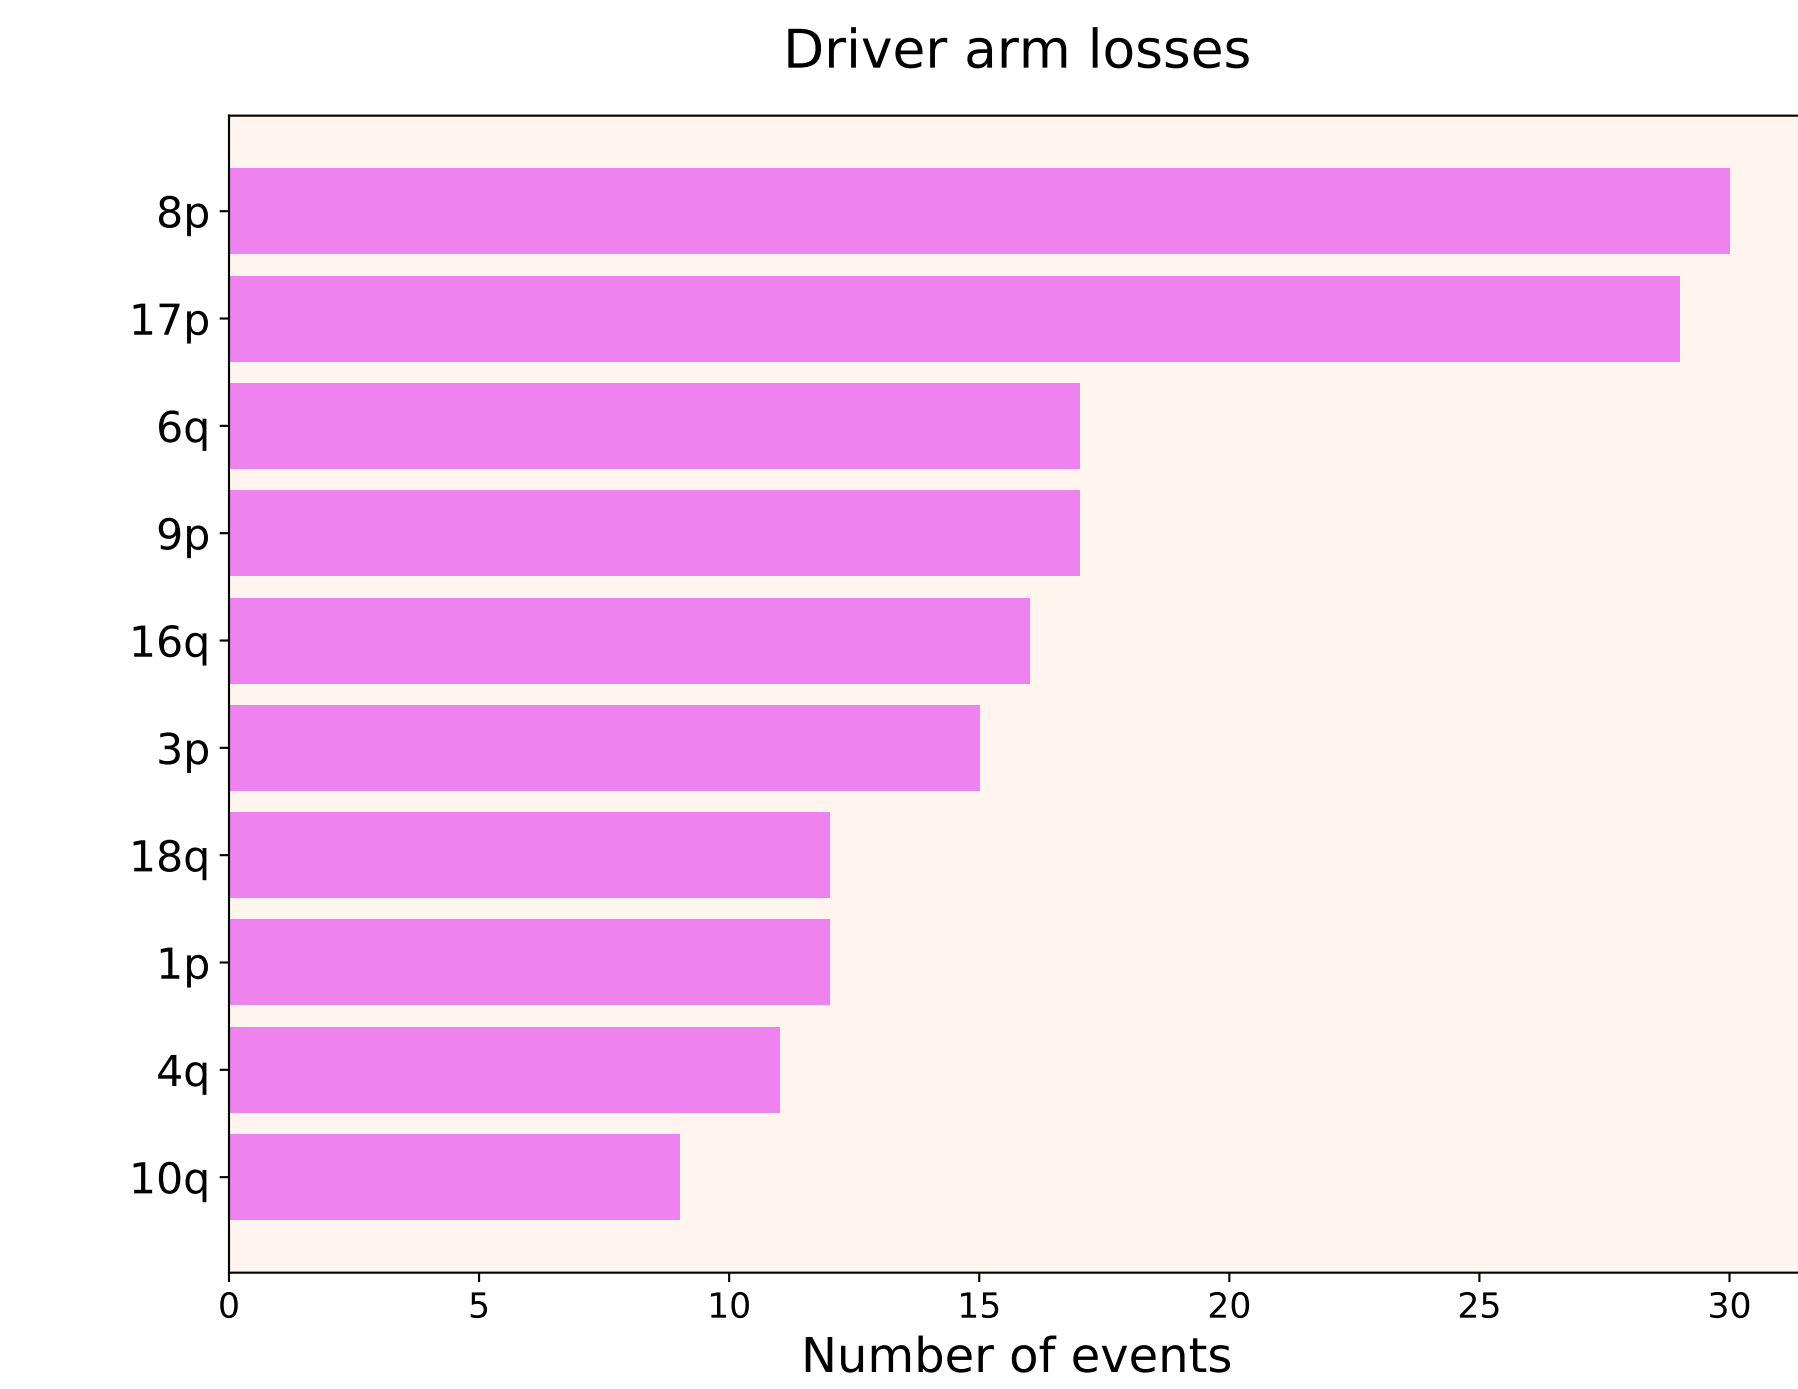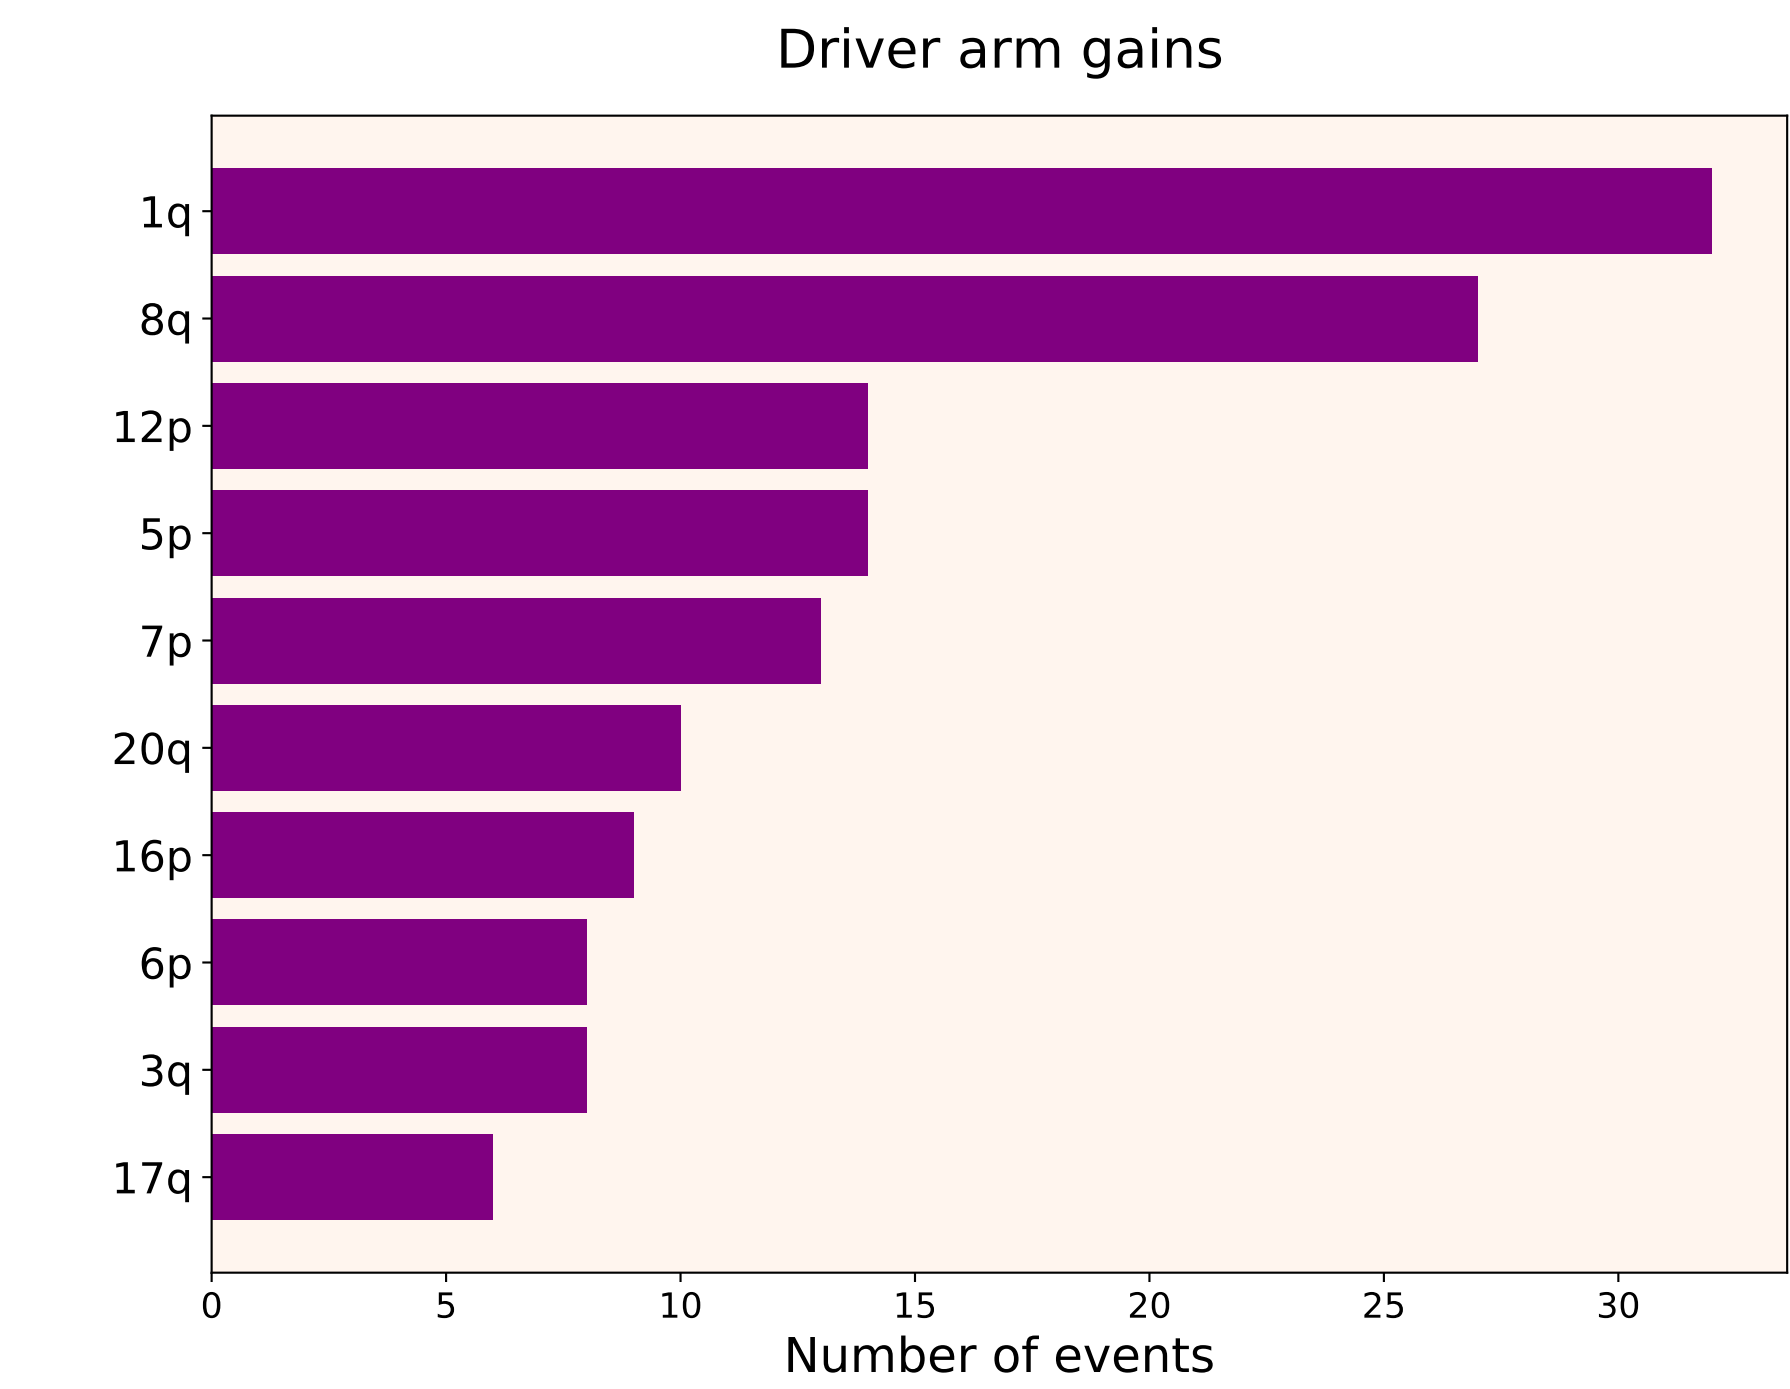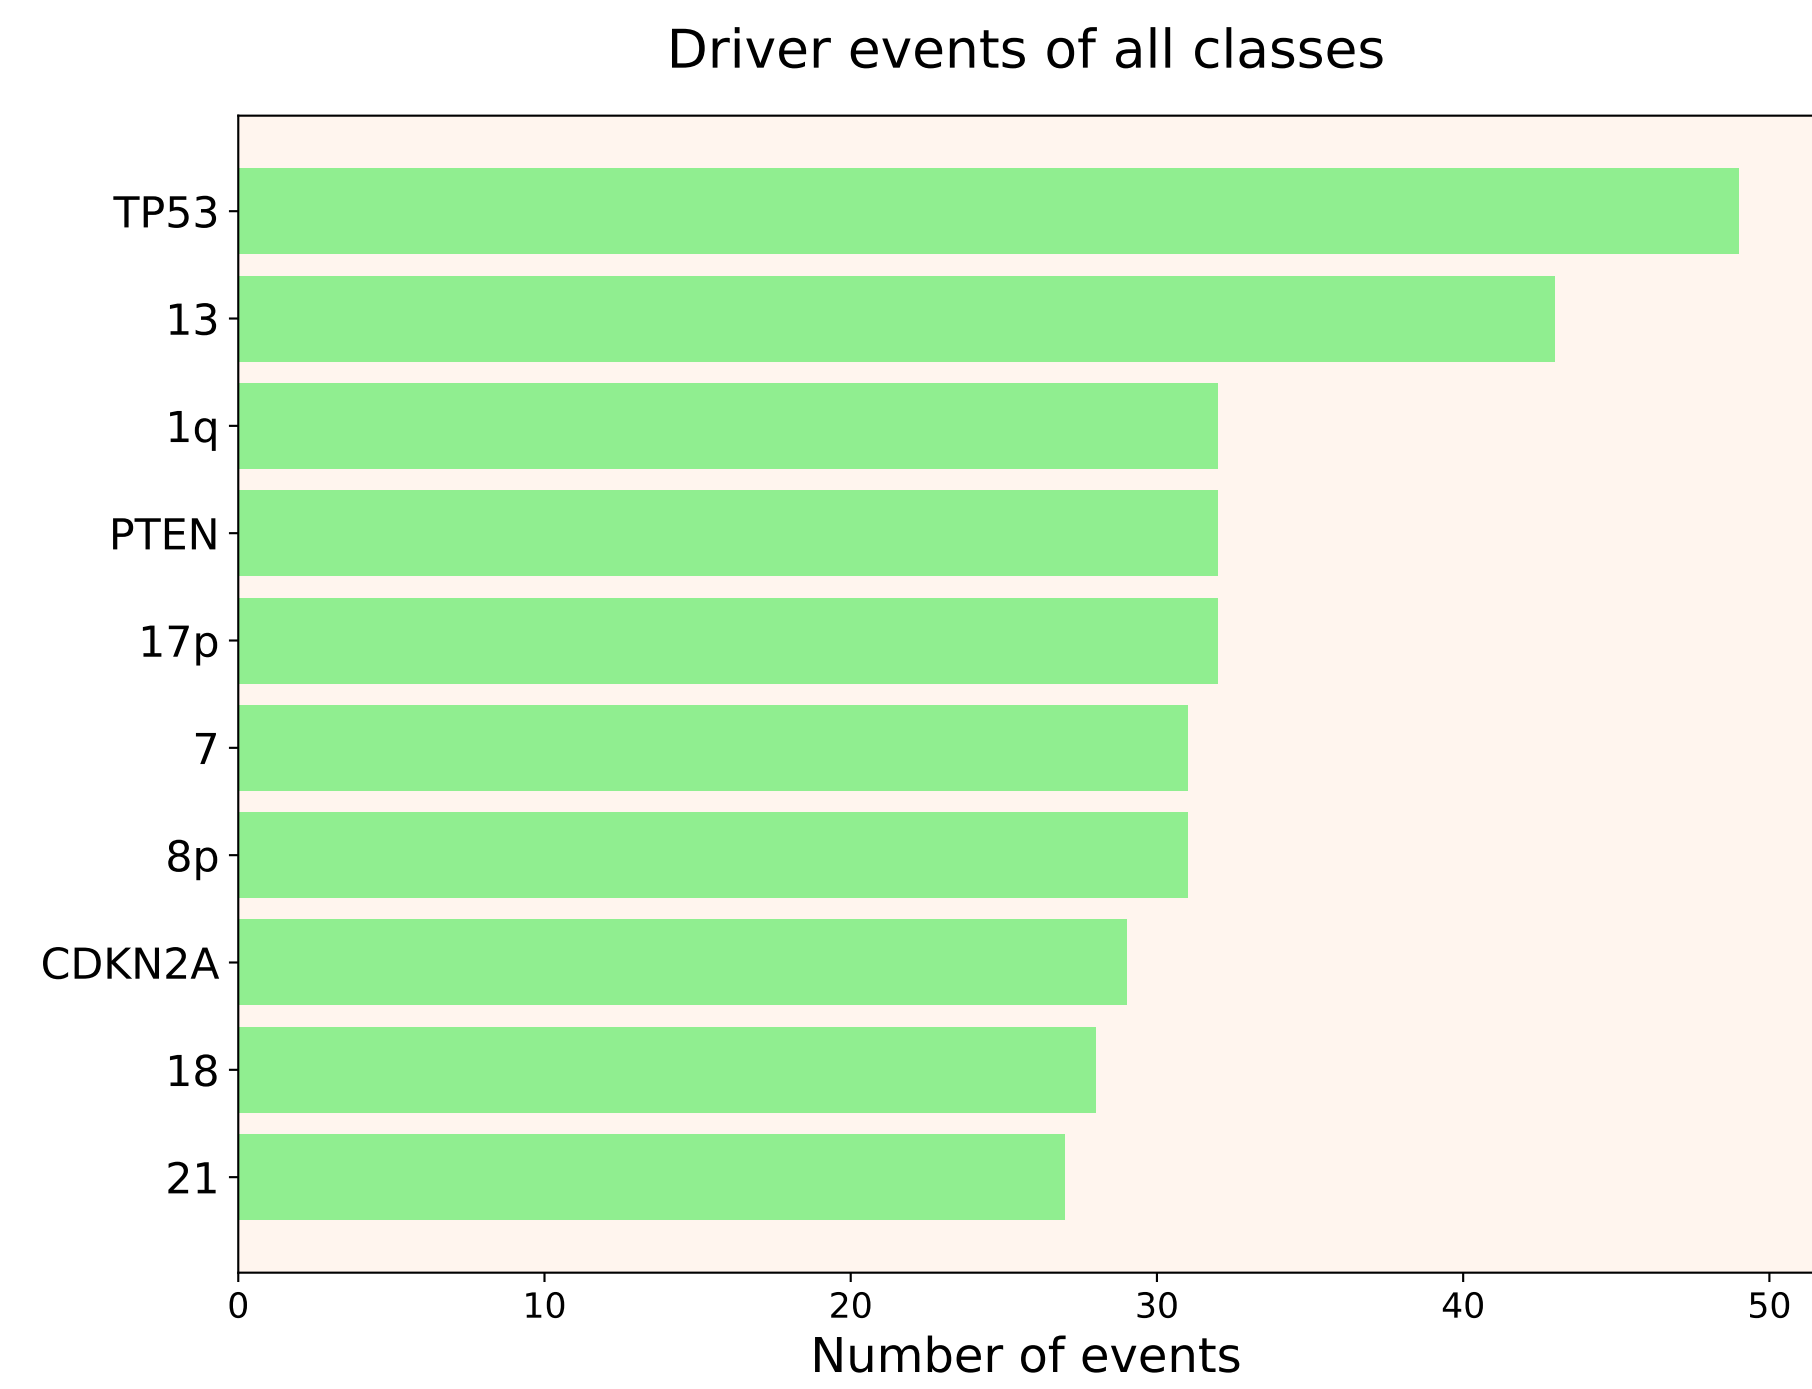

Supplement: Supplemental_Data_S1.zip [file Supplemental_Data_S1.zip]

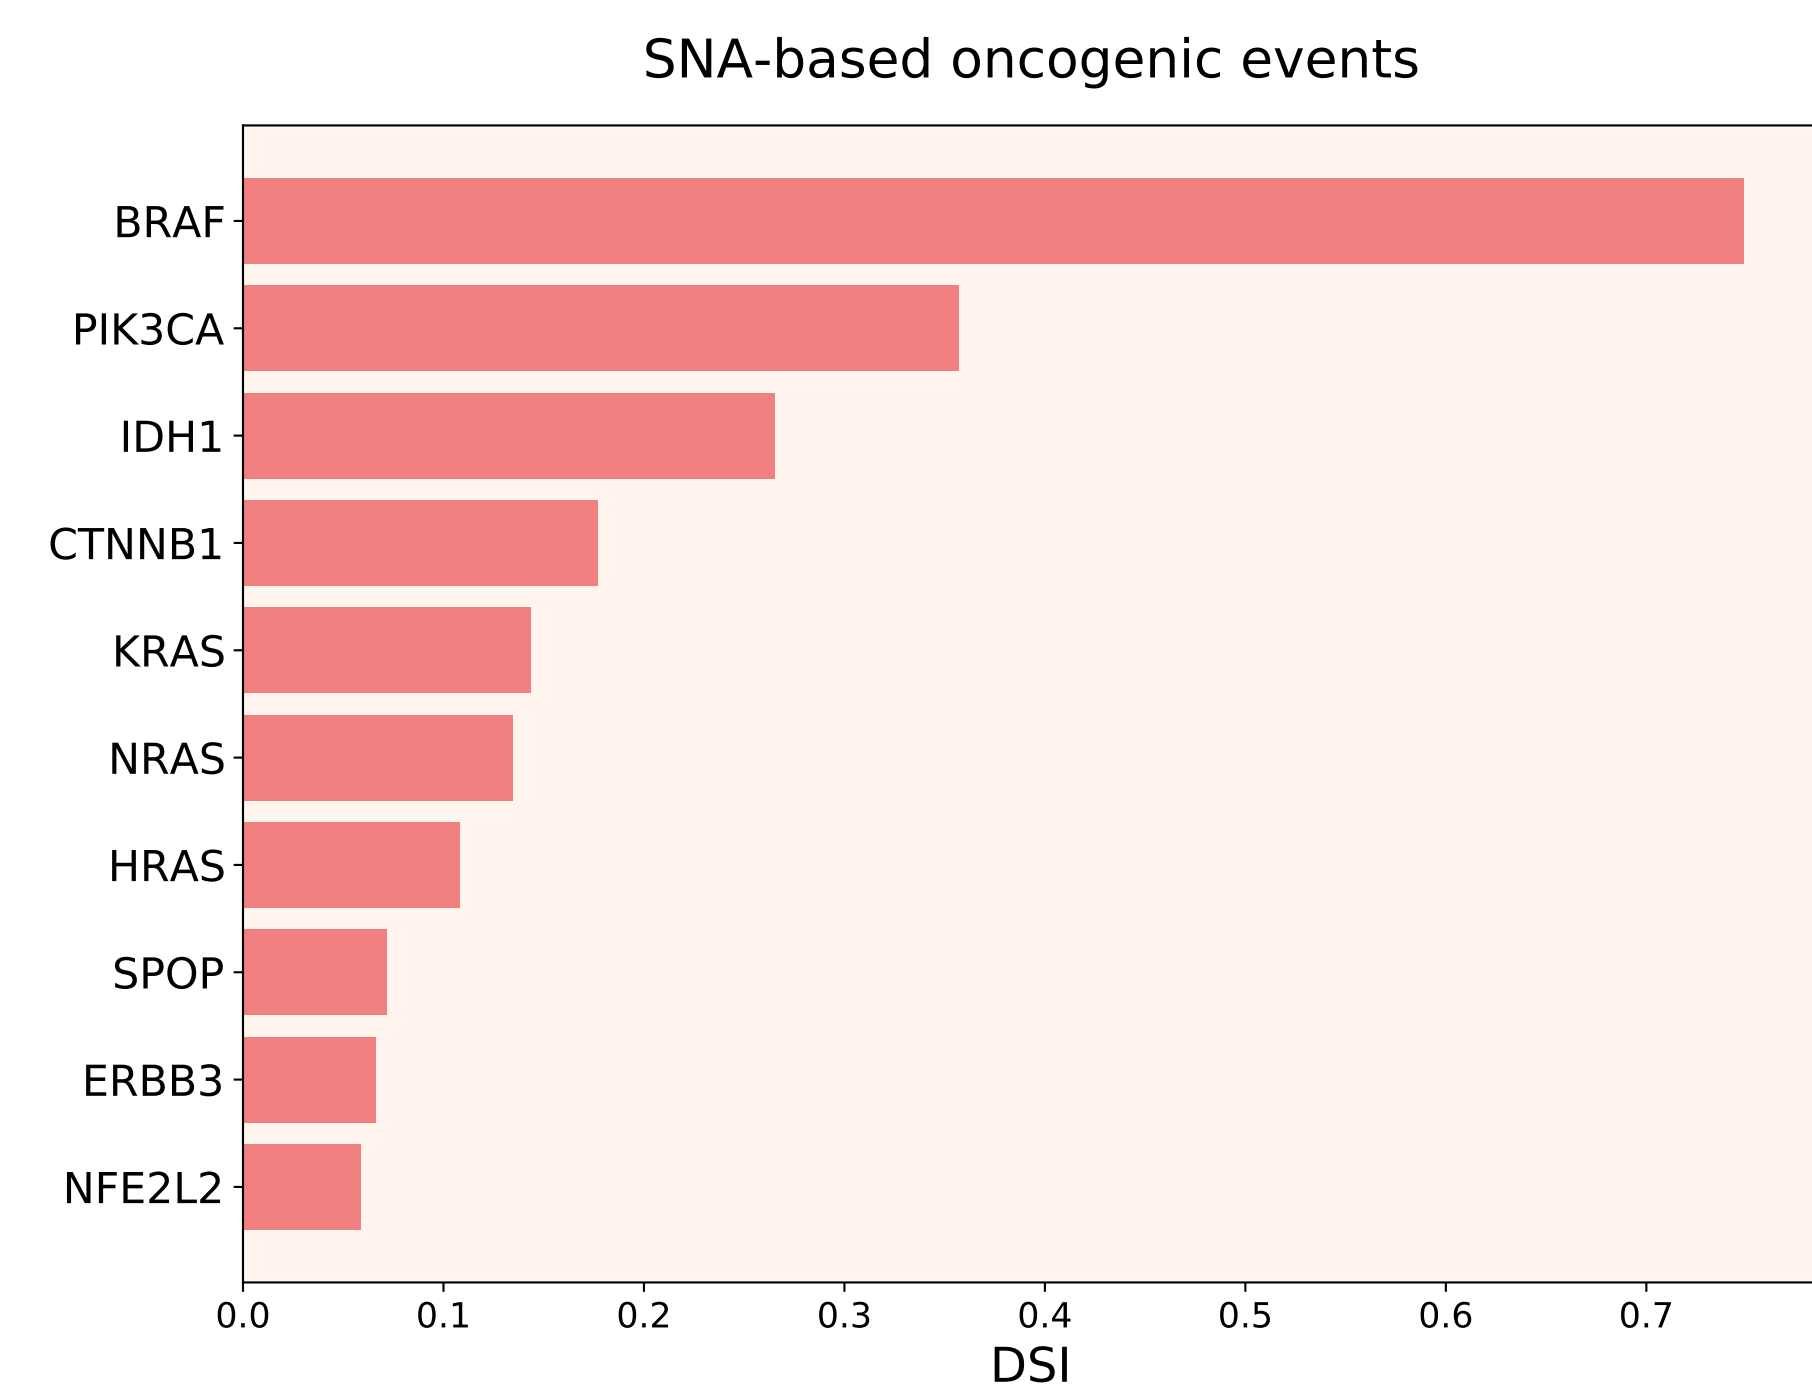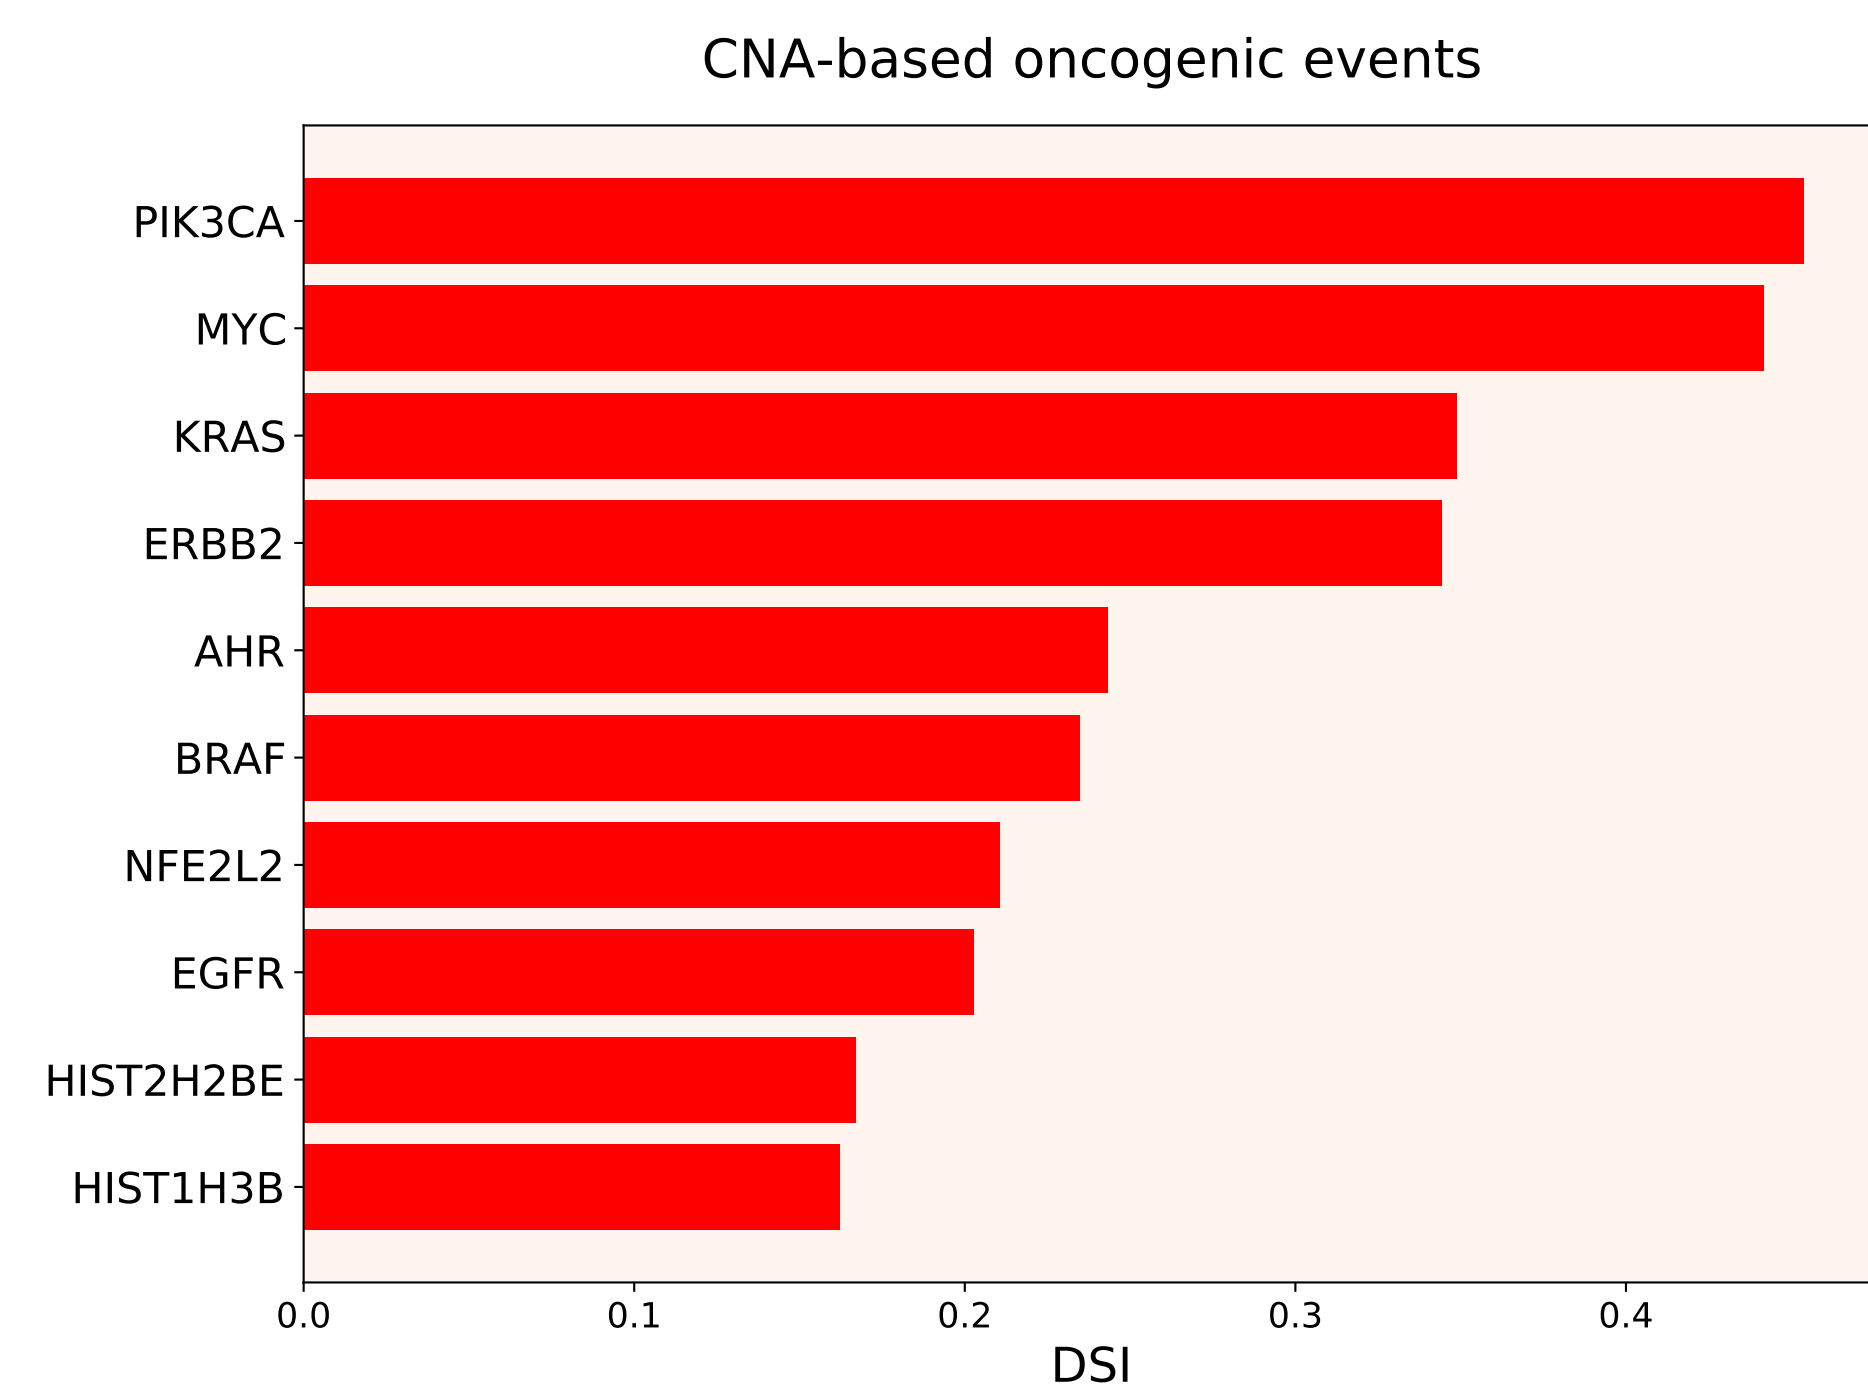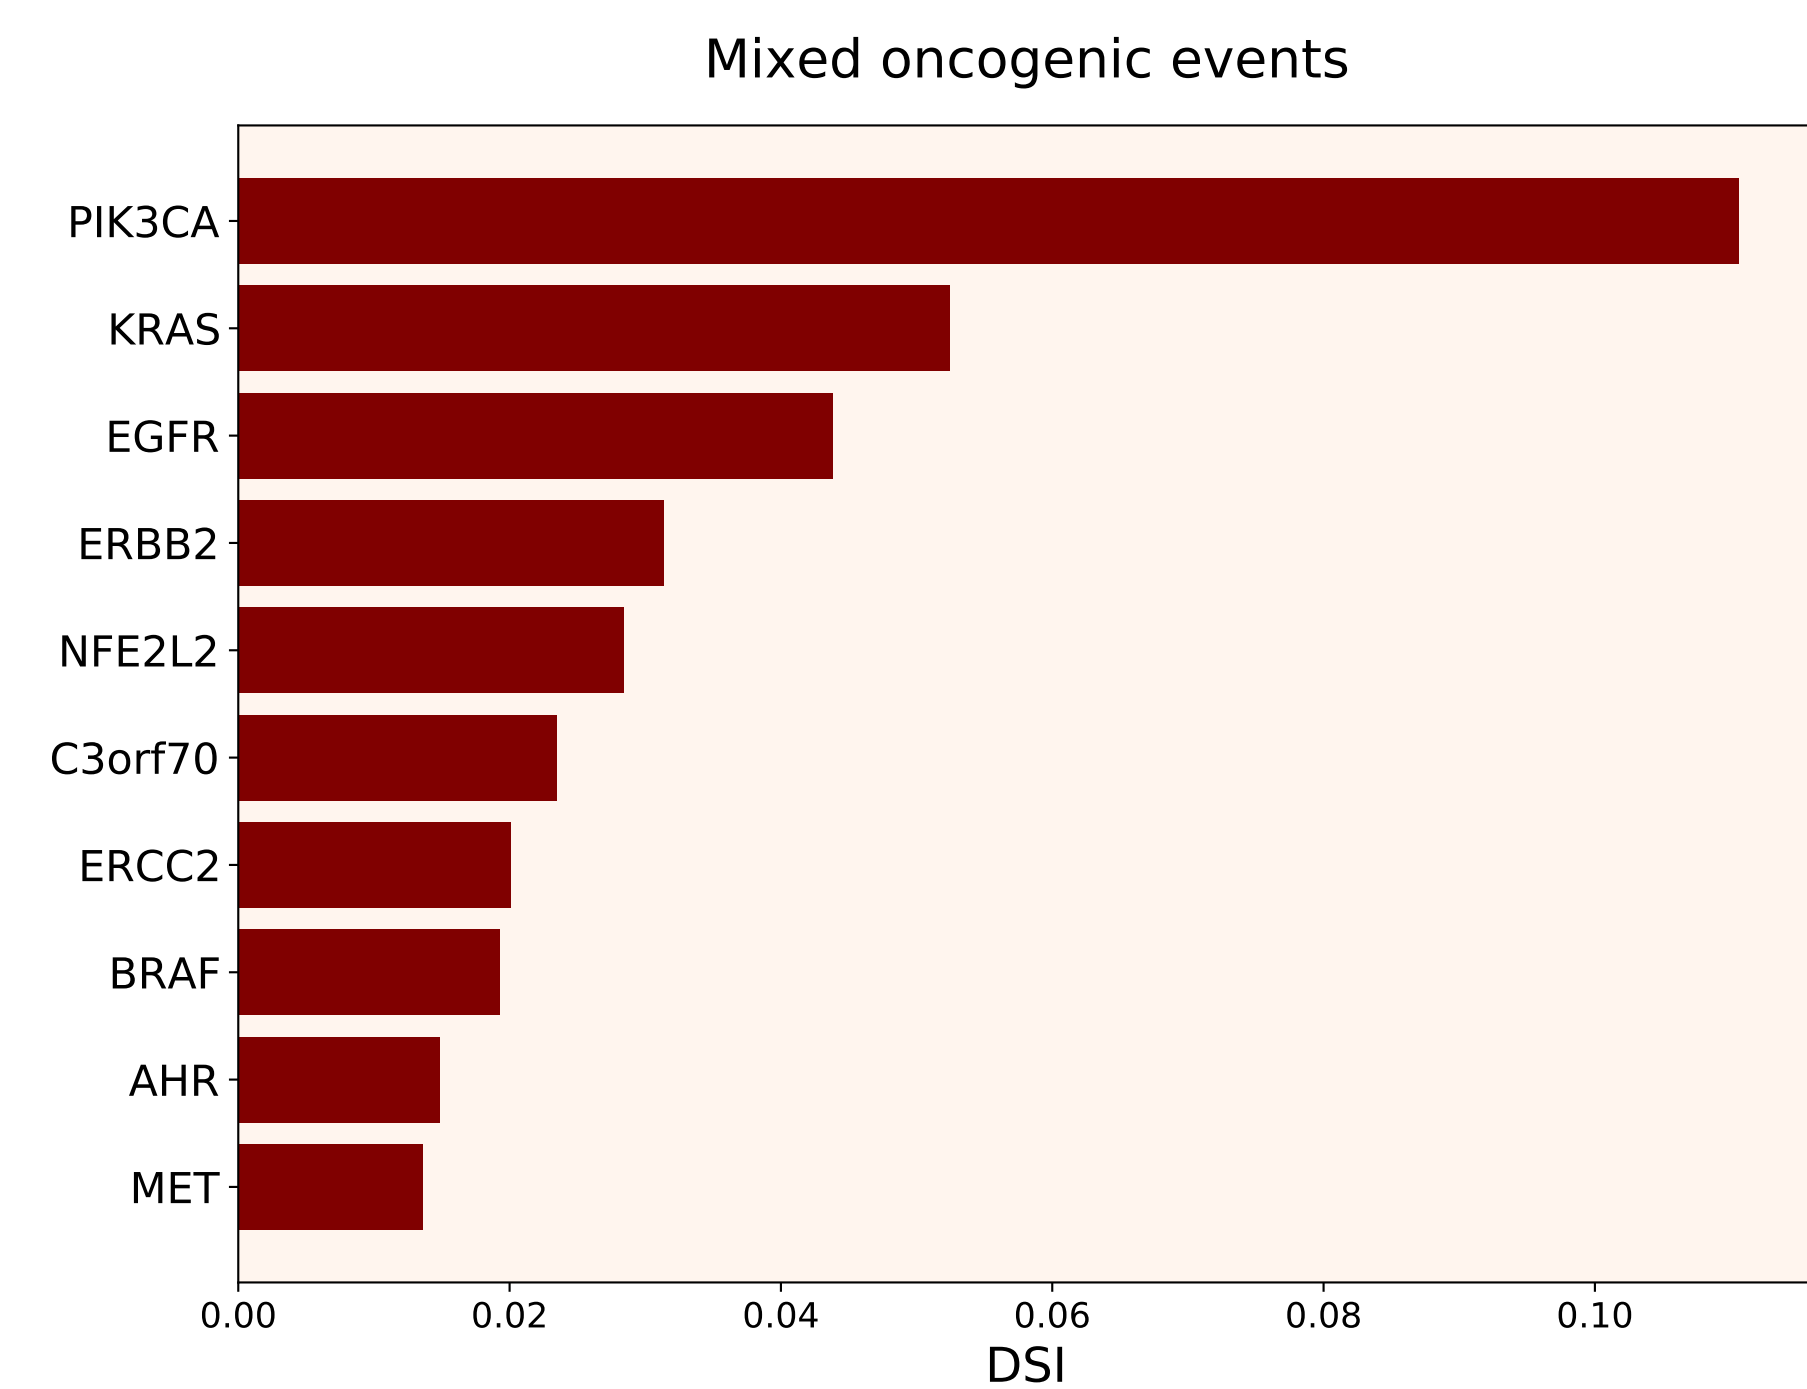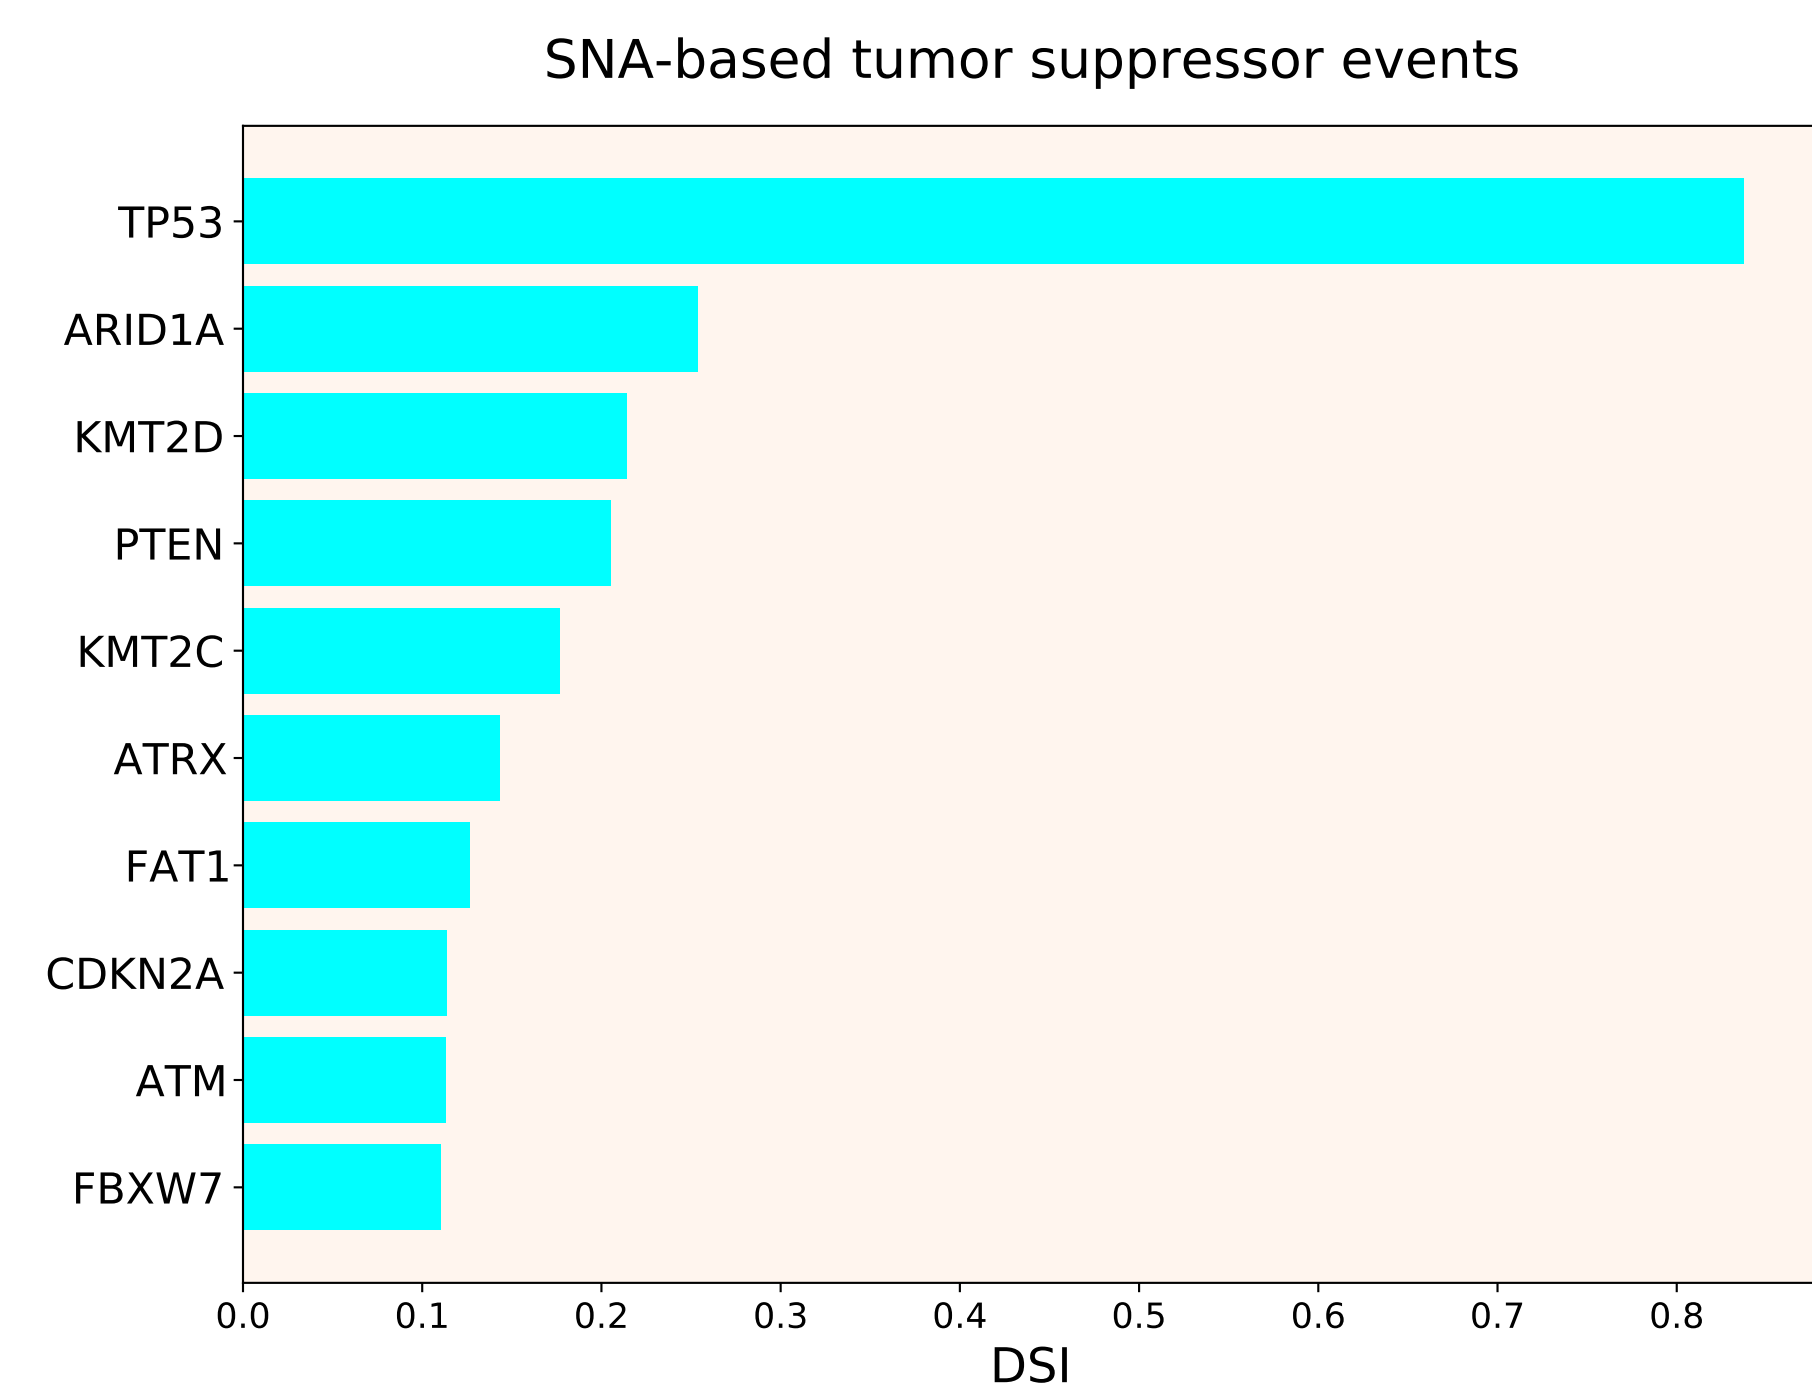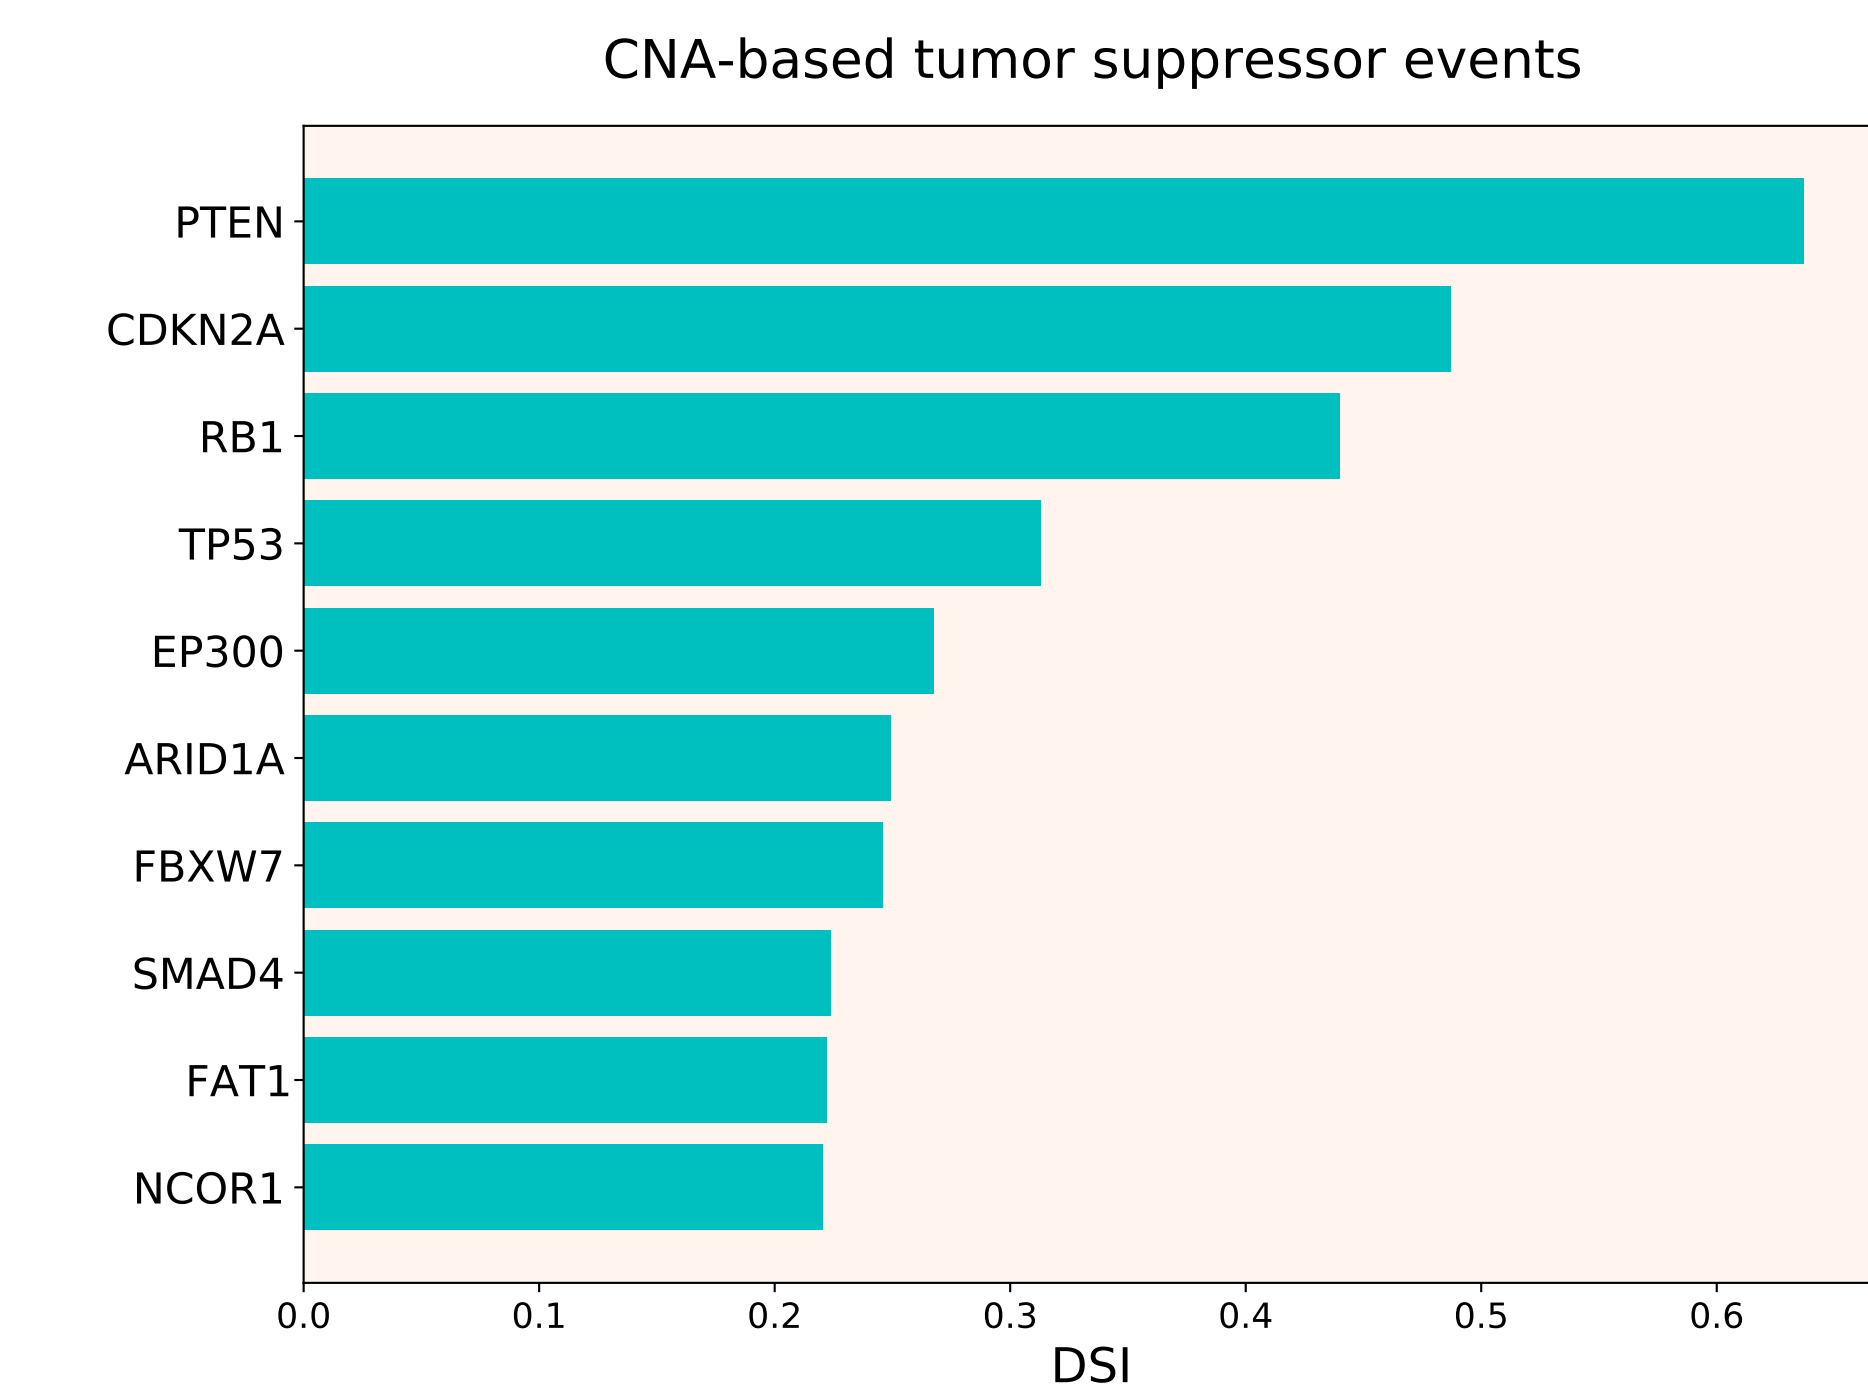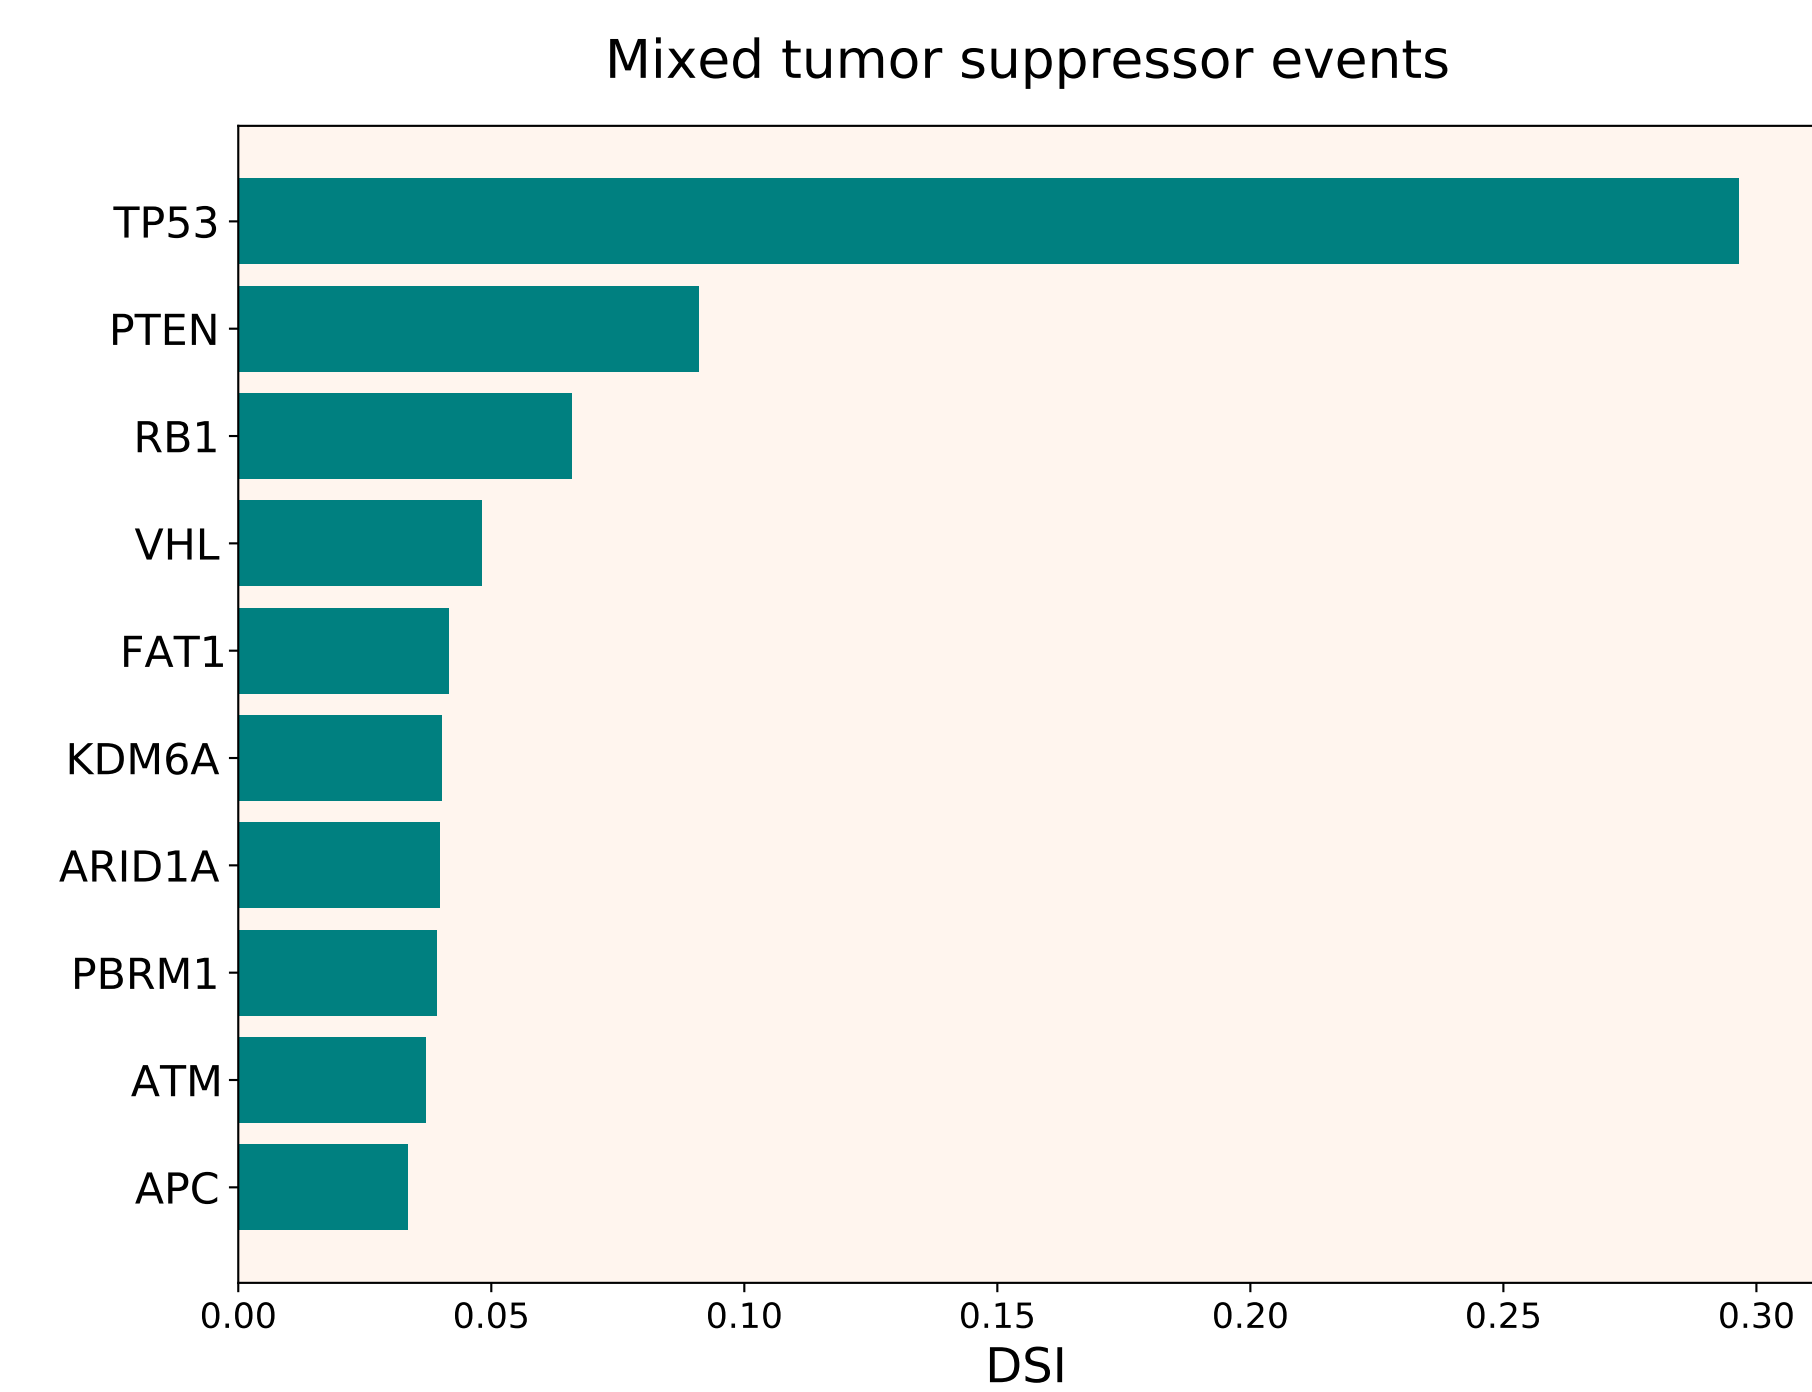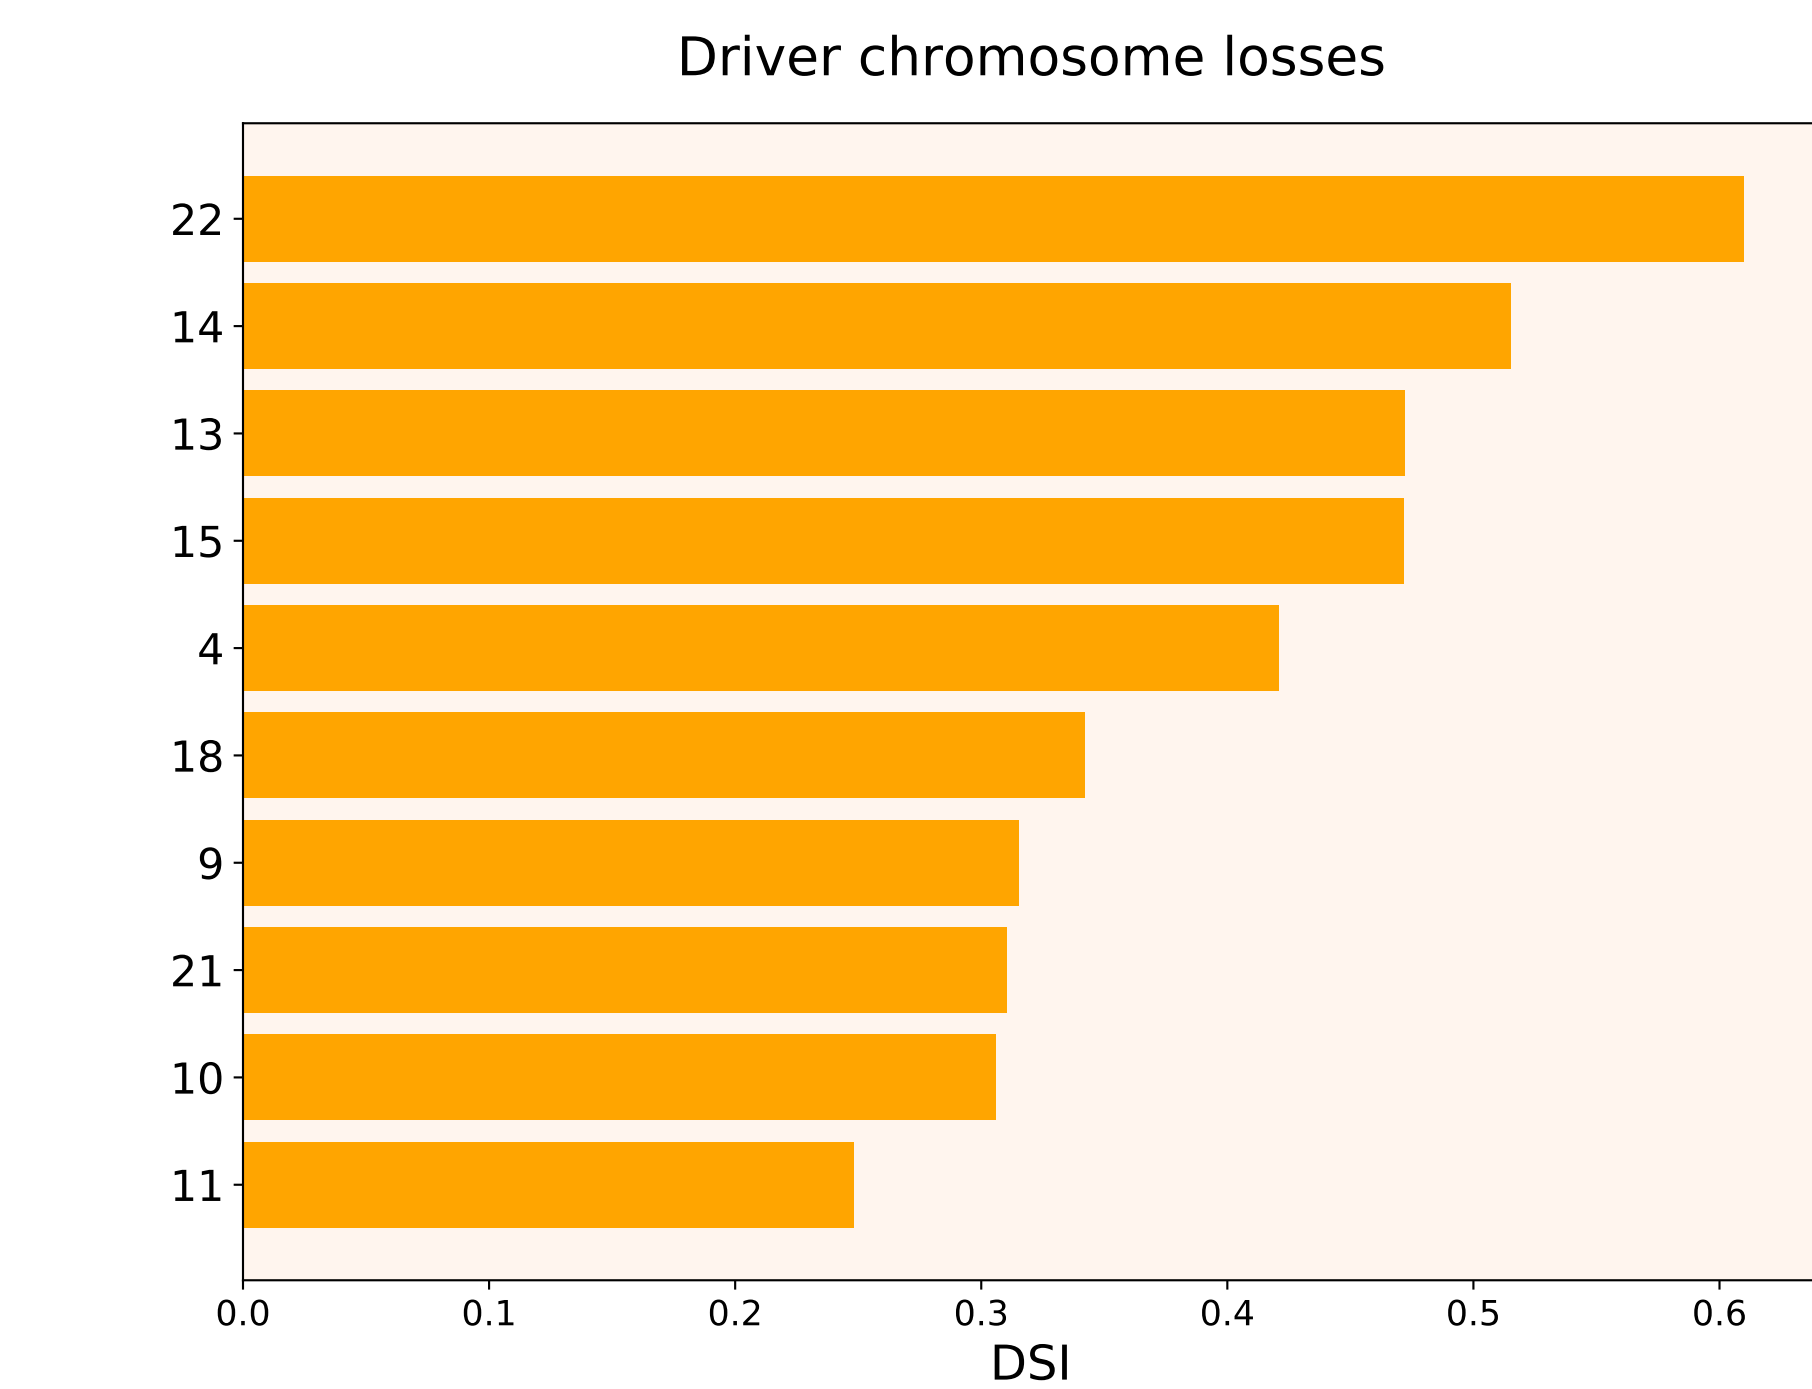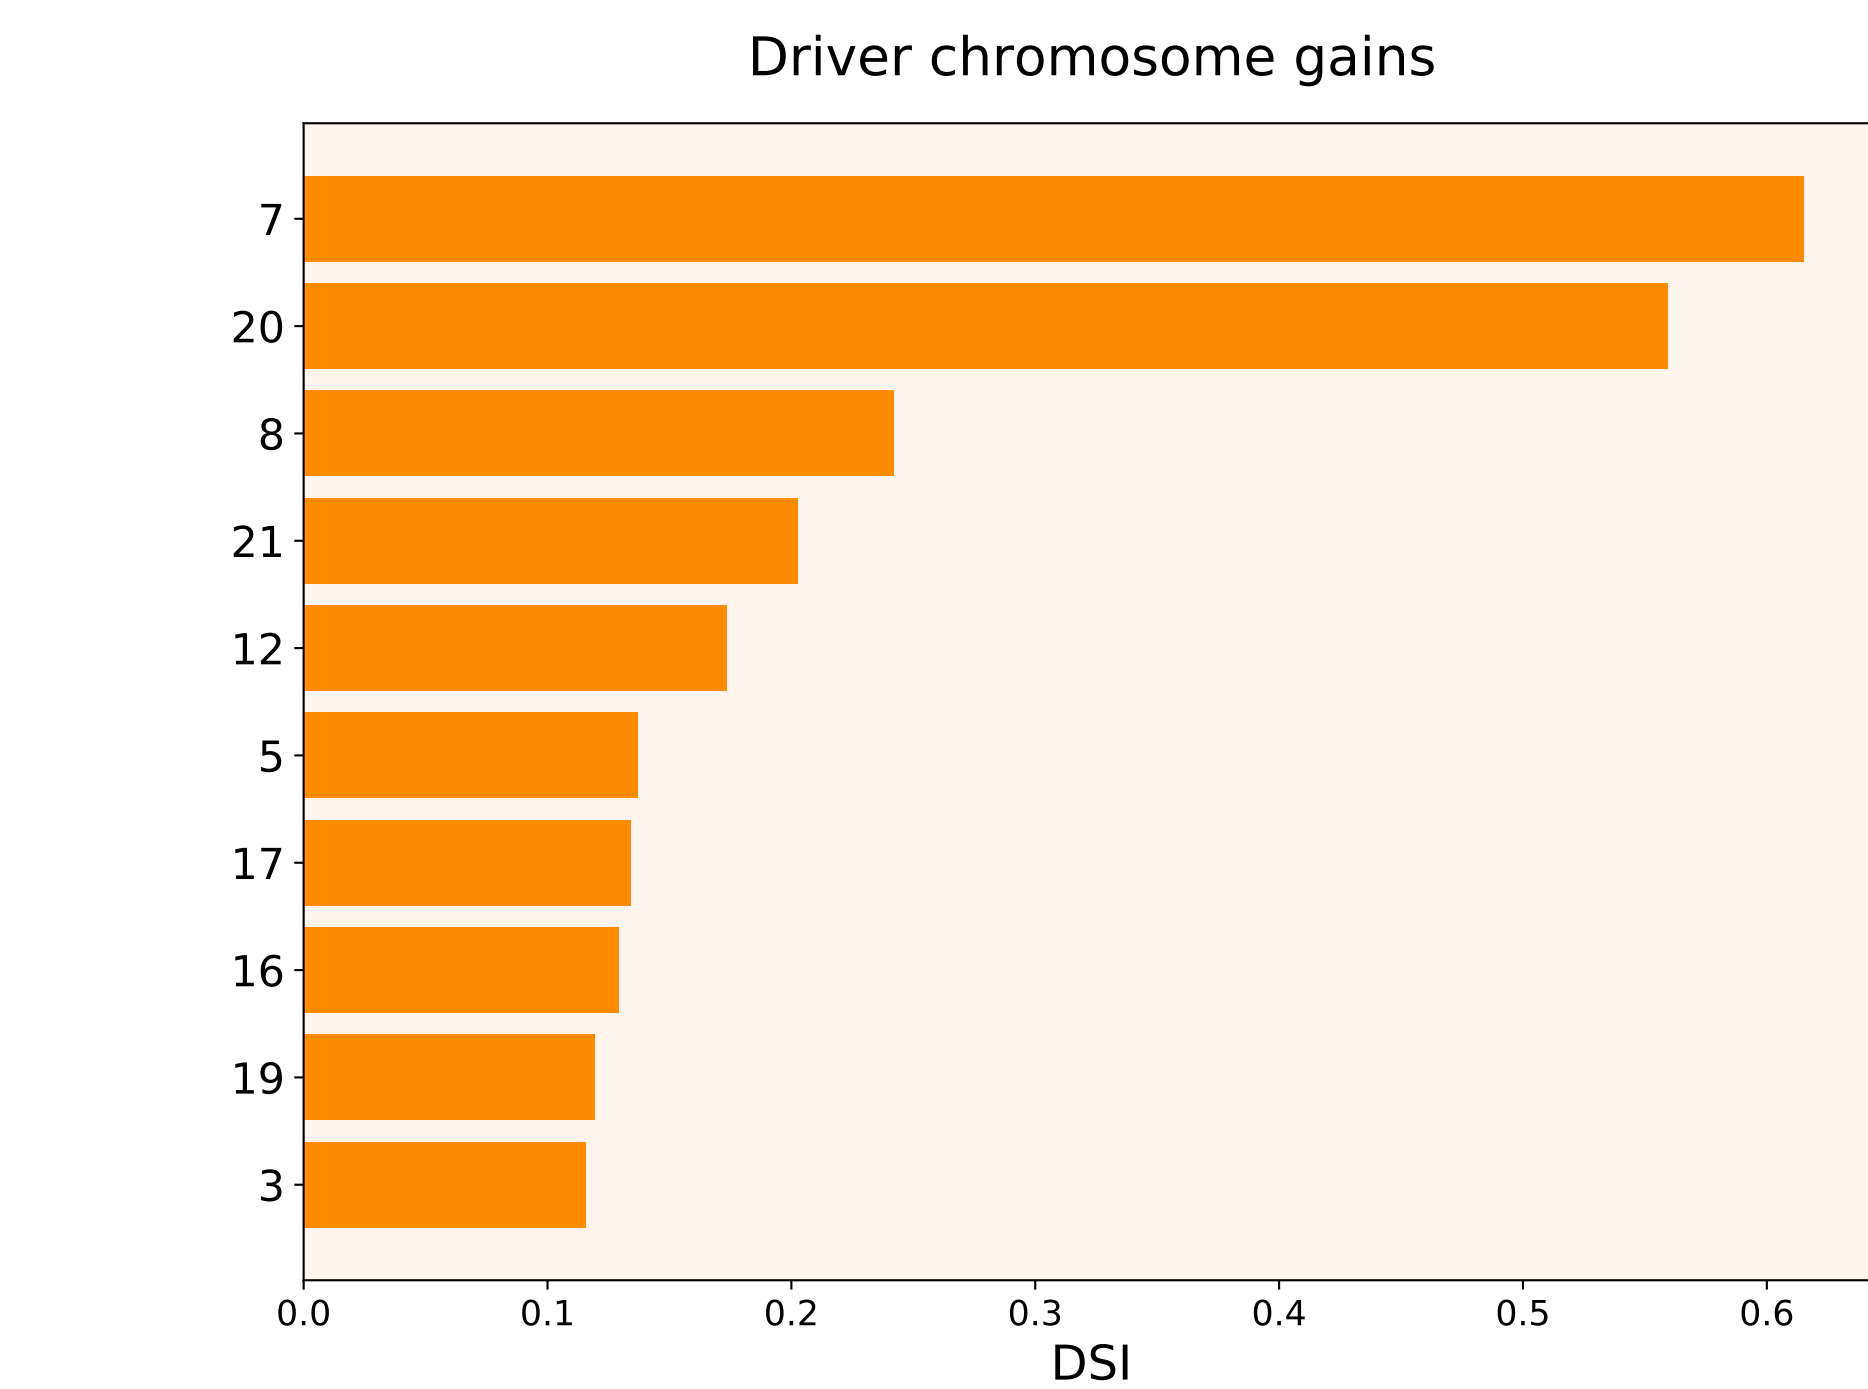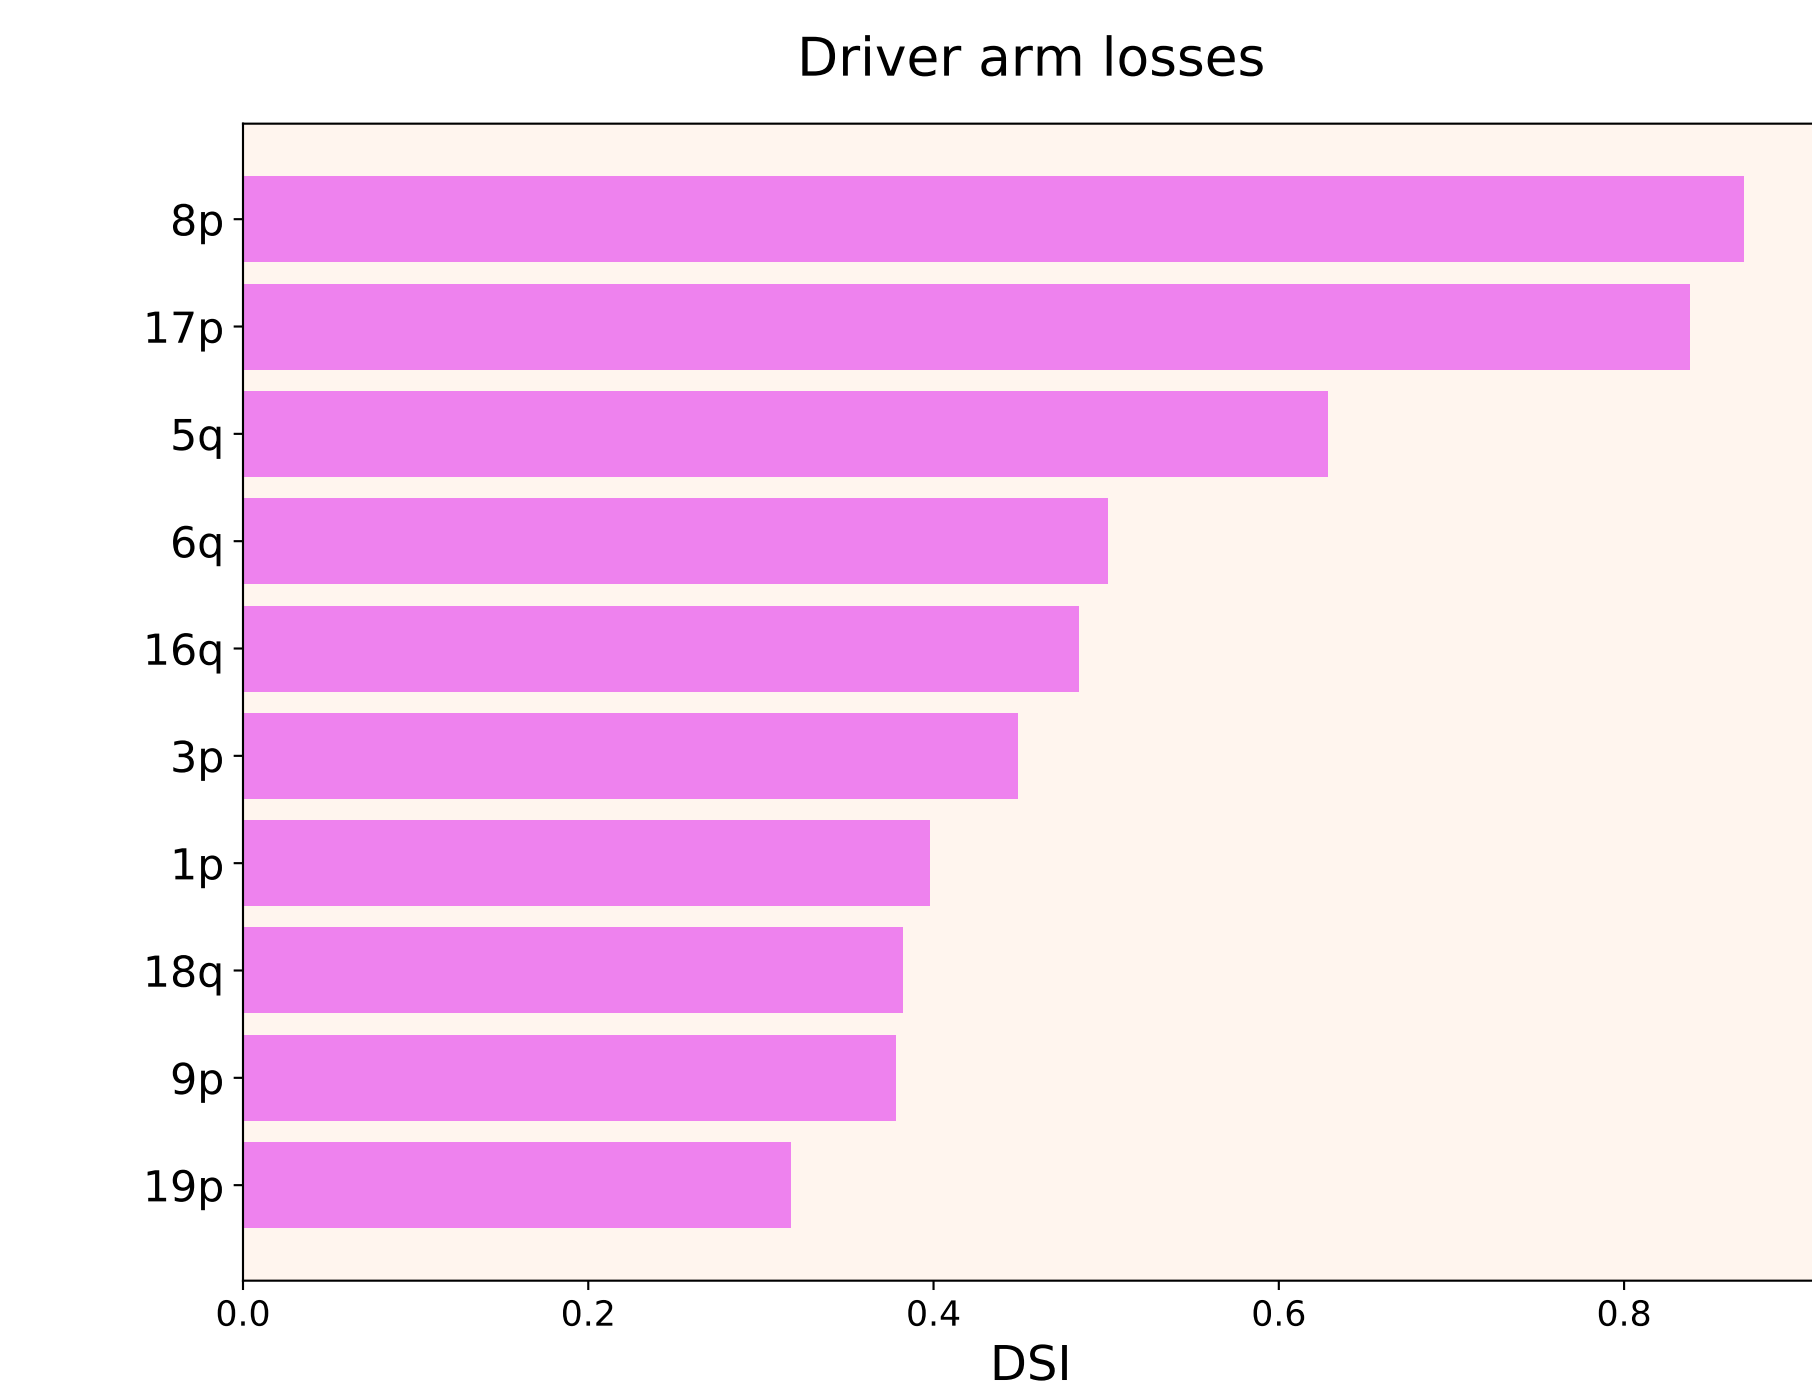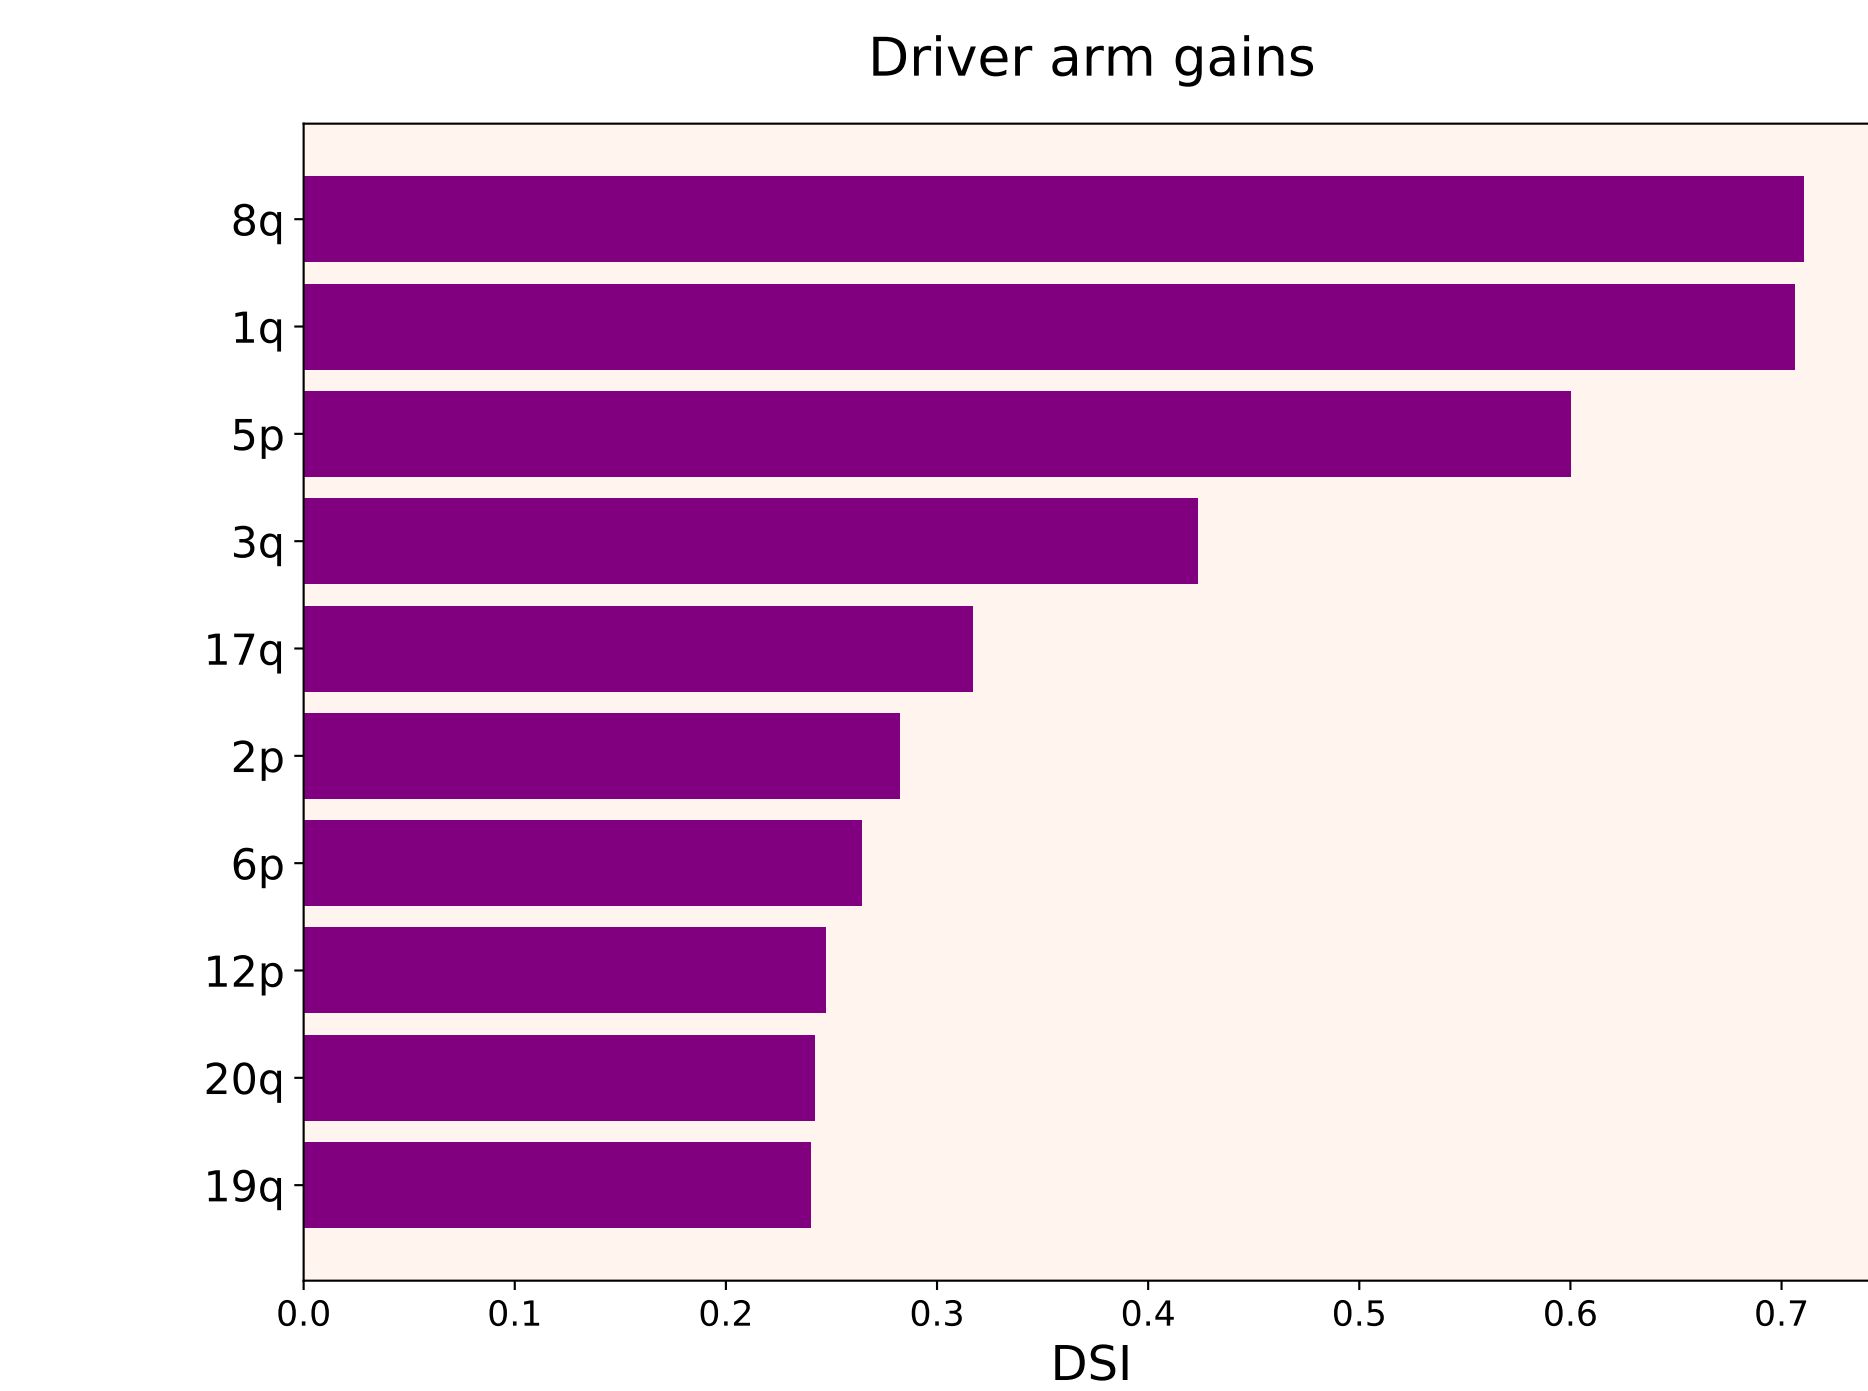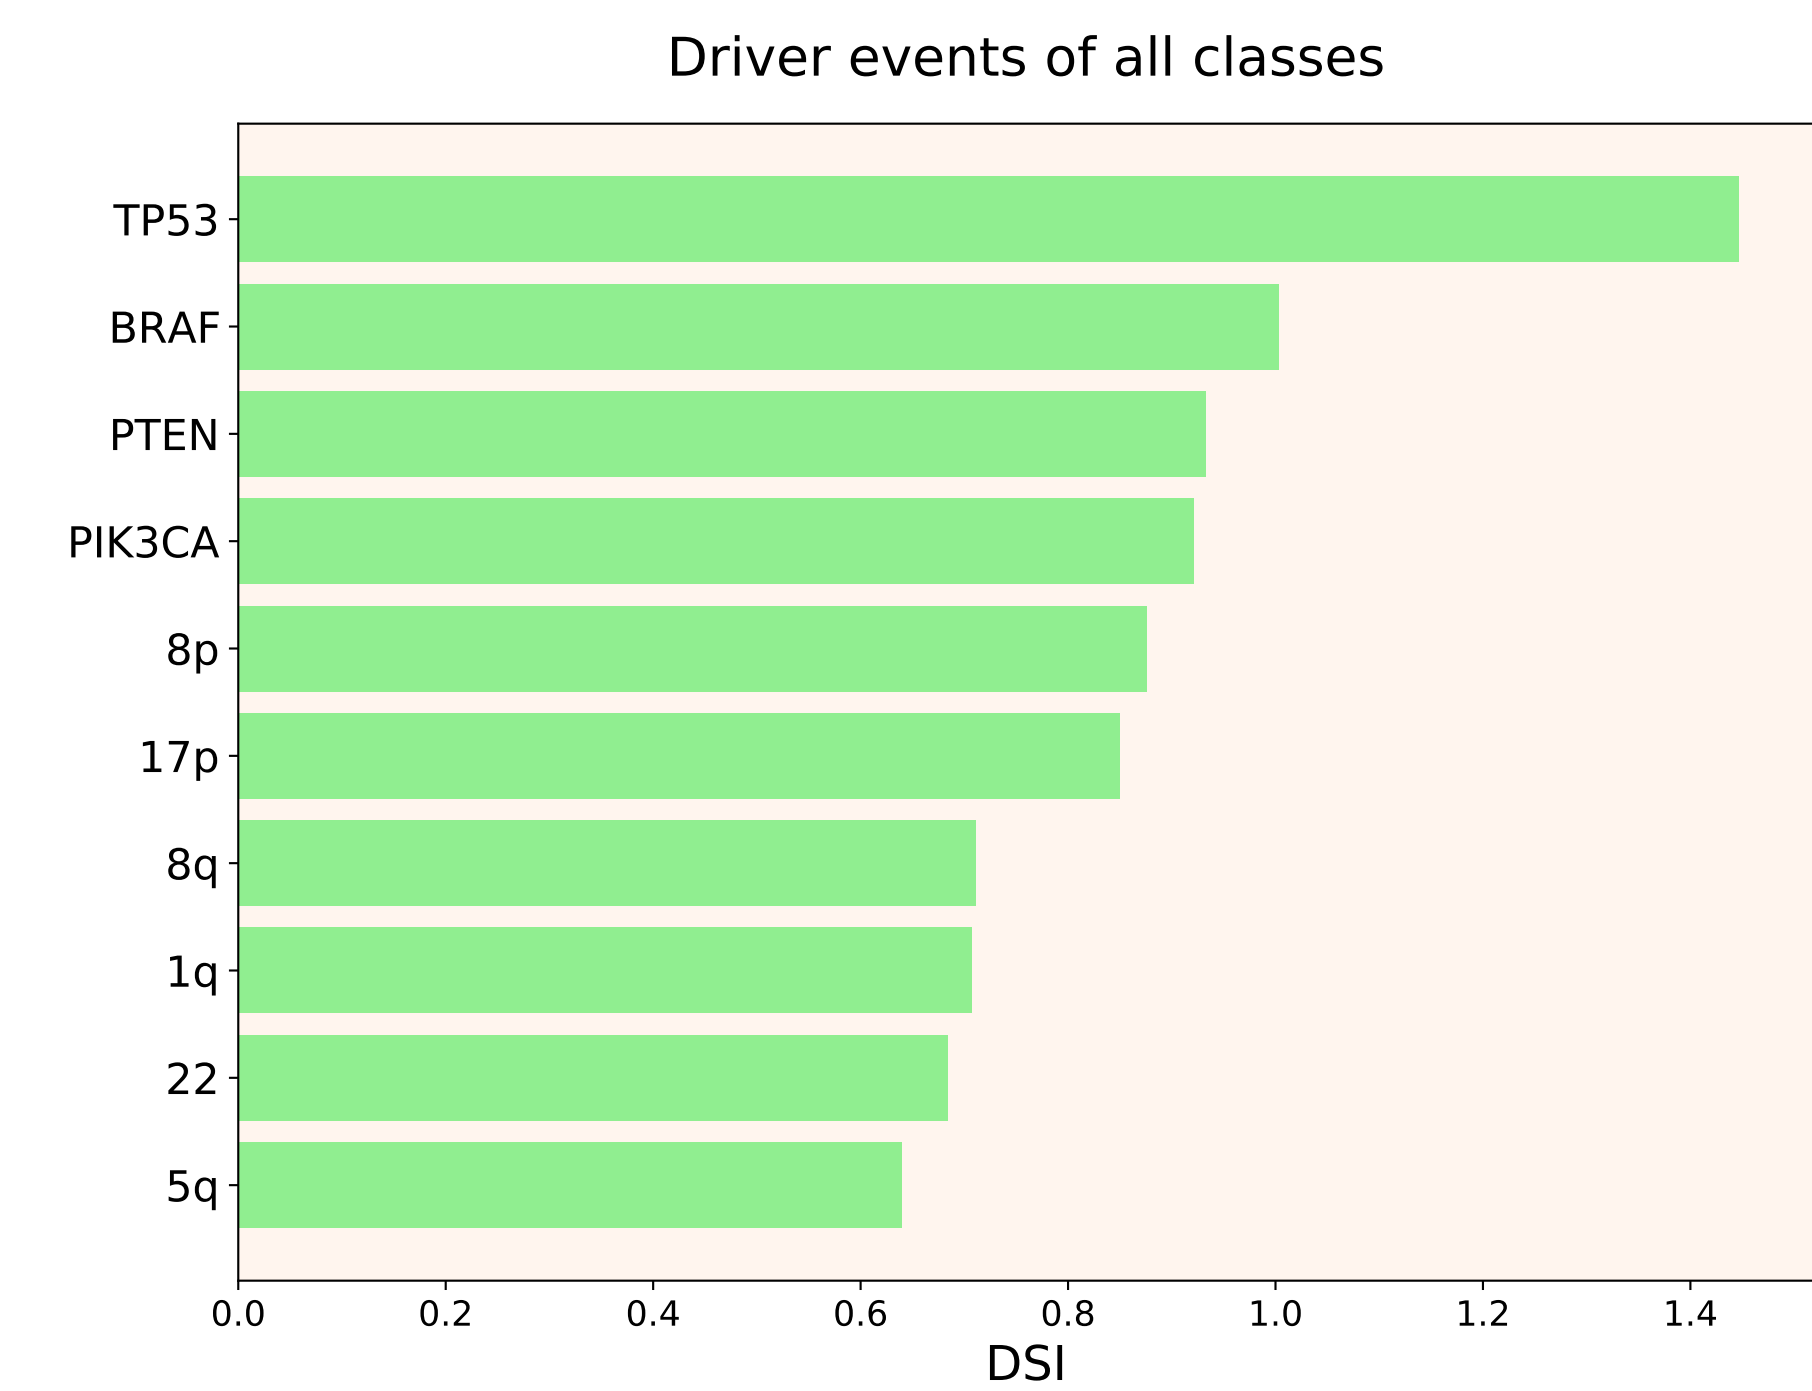

Supplement: Supplemental_Data_S1.zip [file Supplemental_Data_S1.zip]

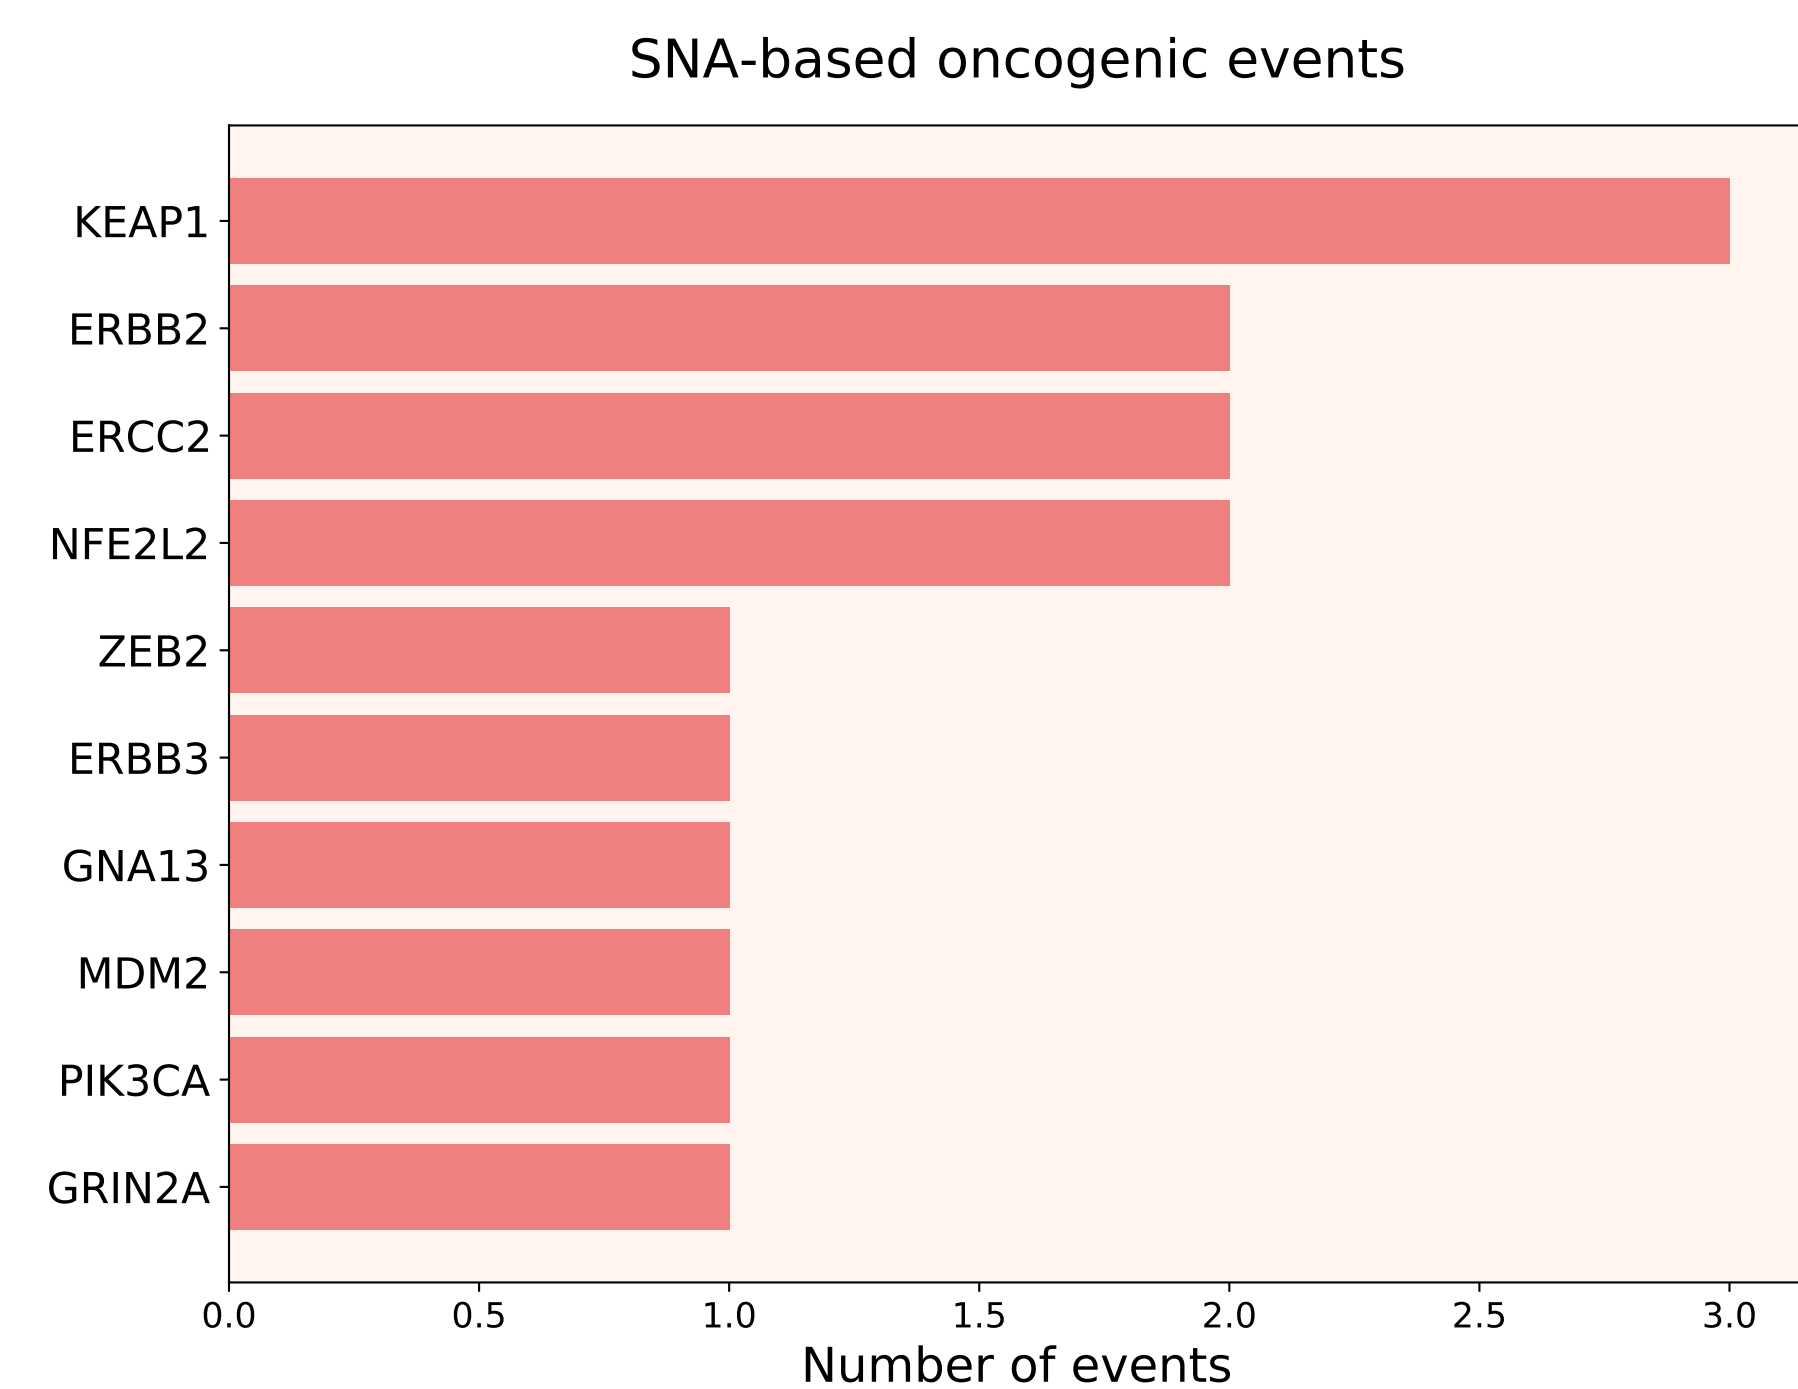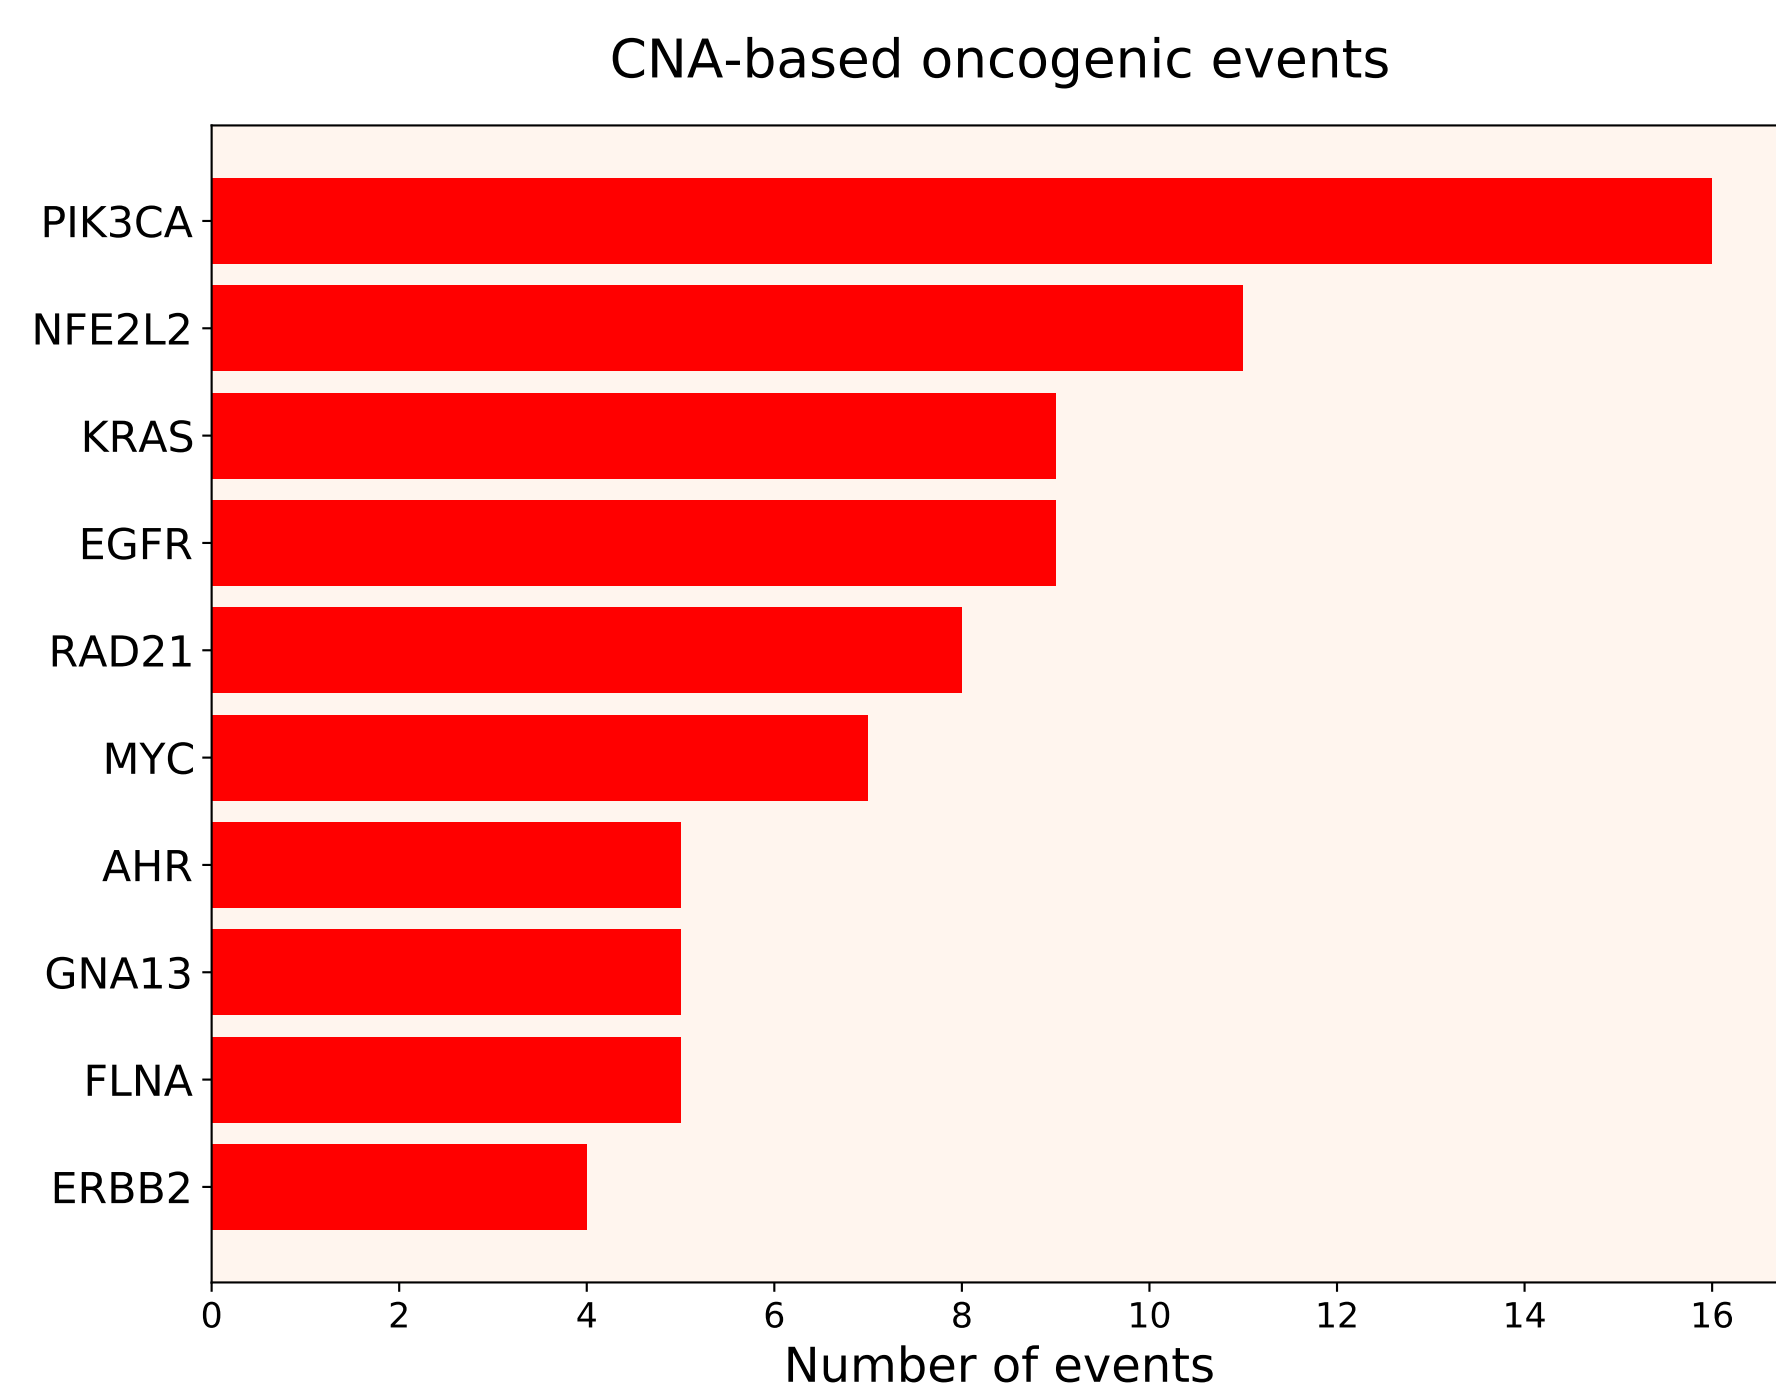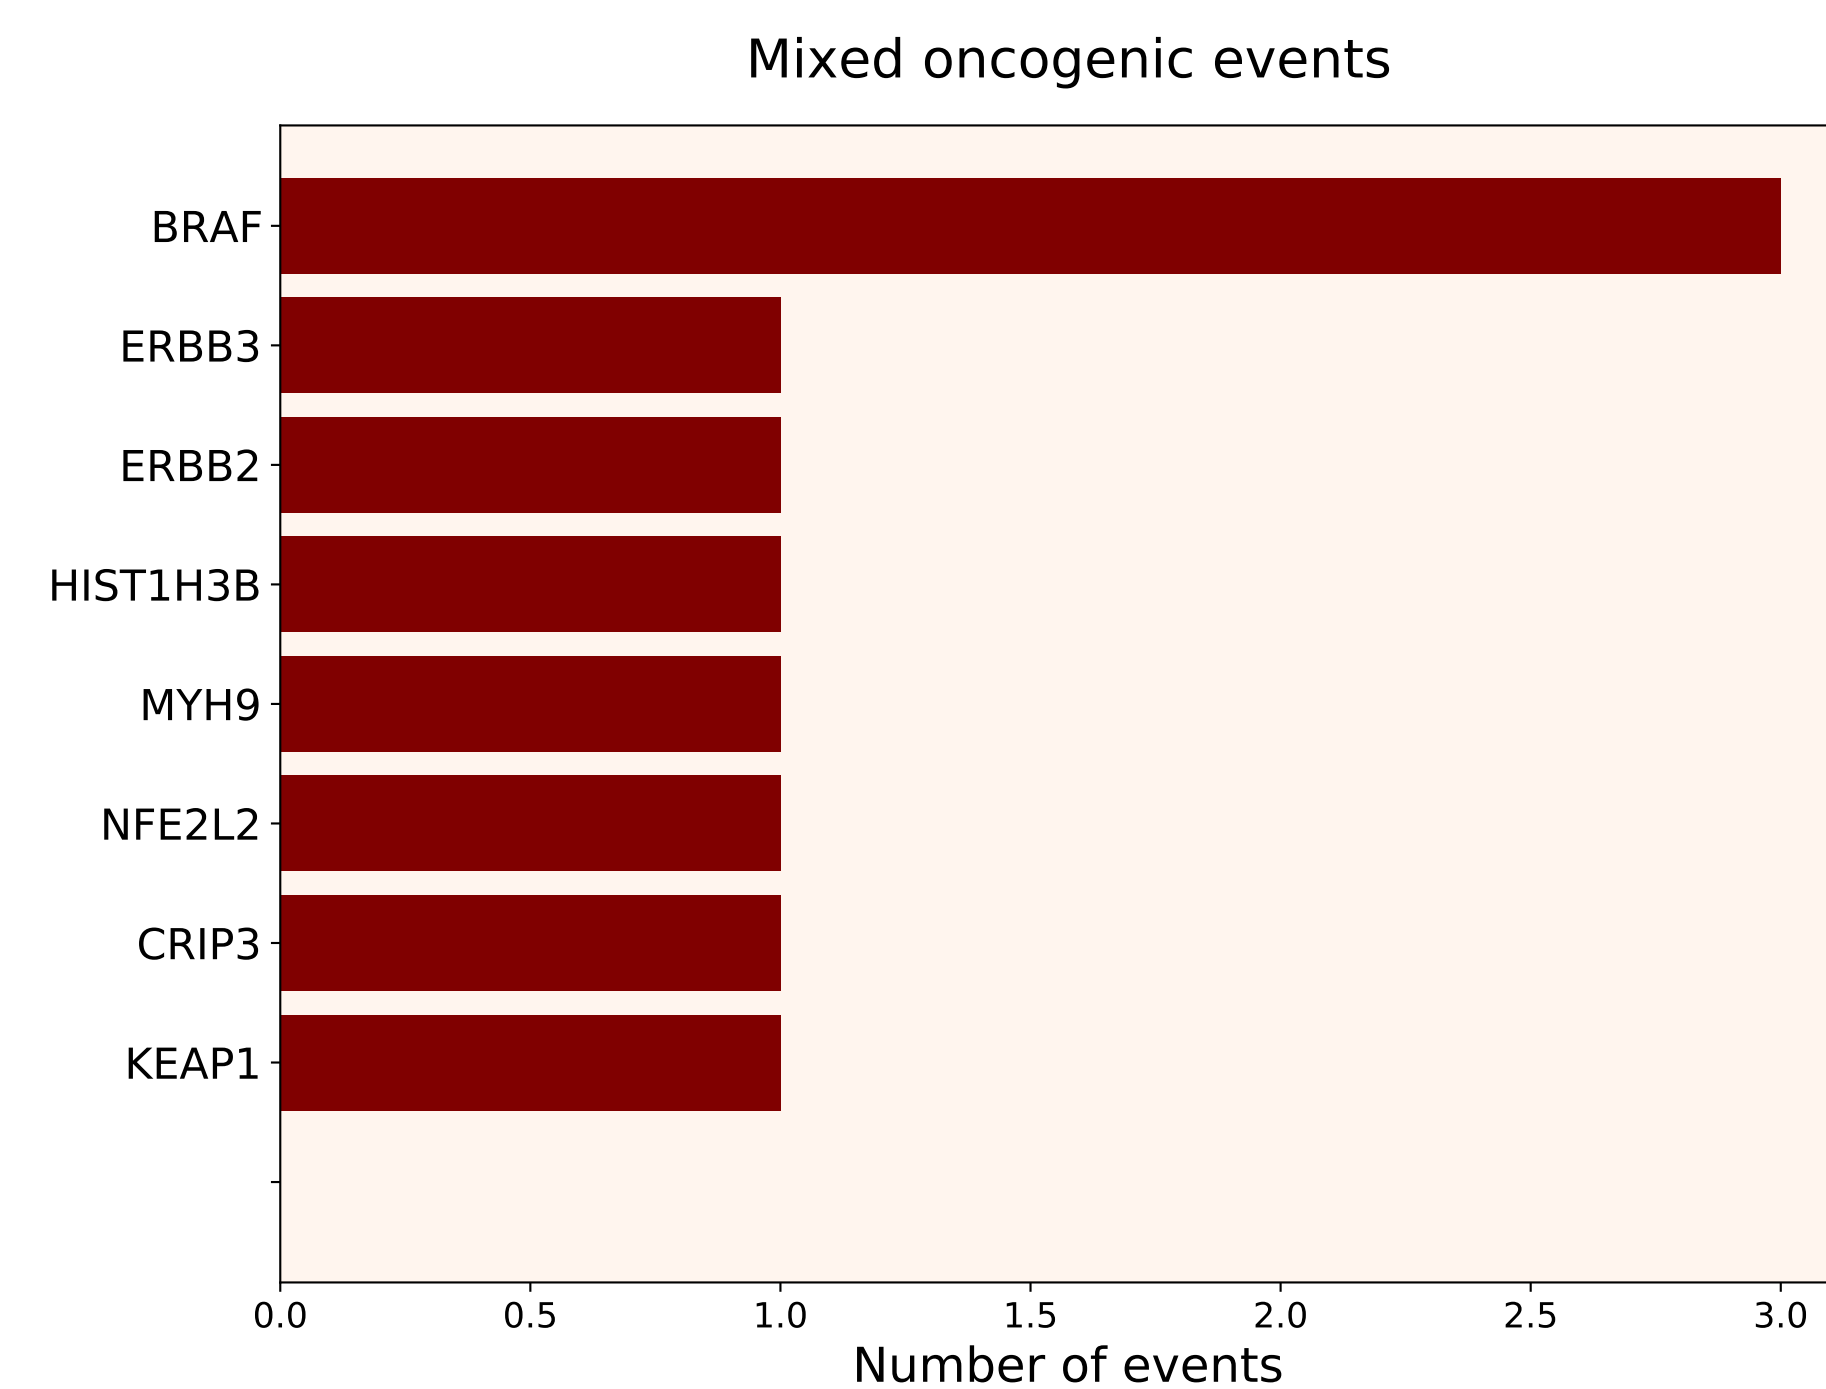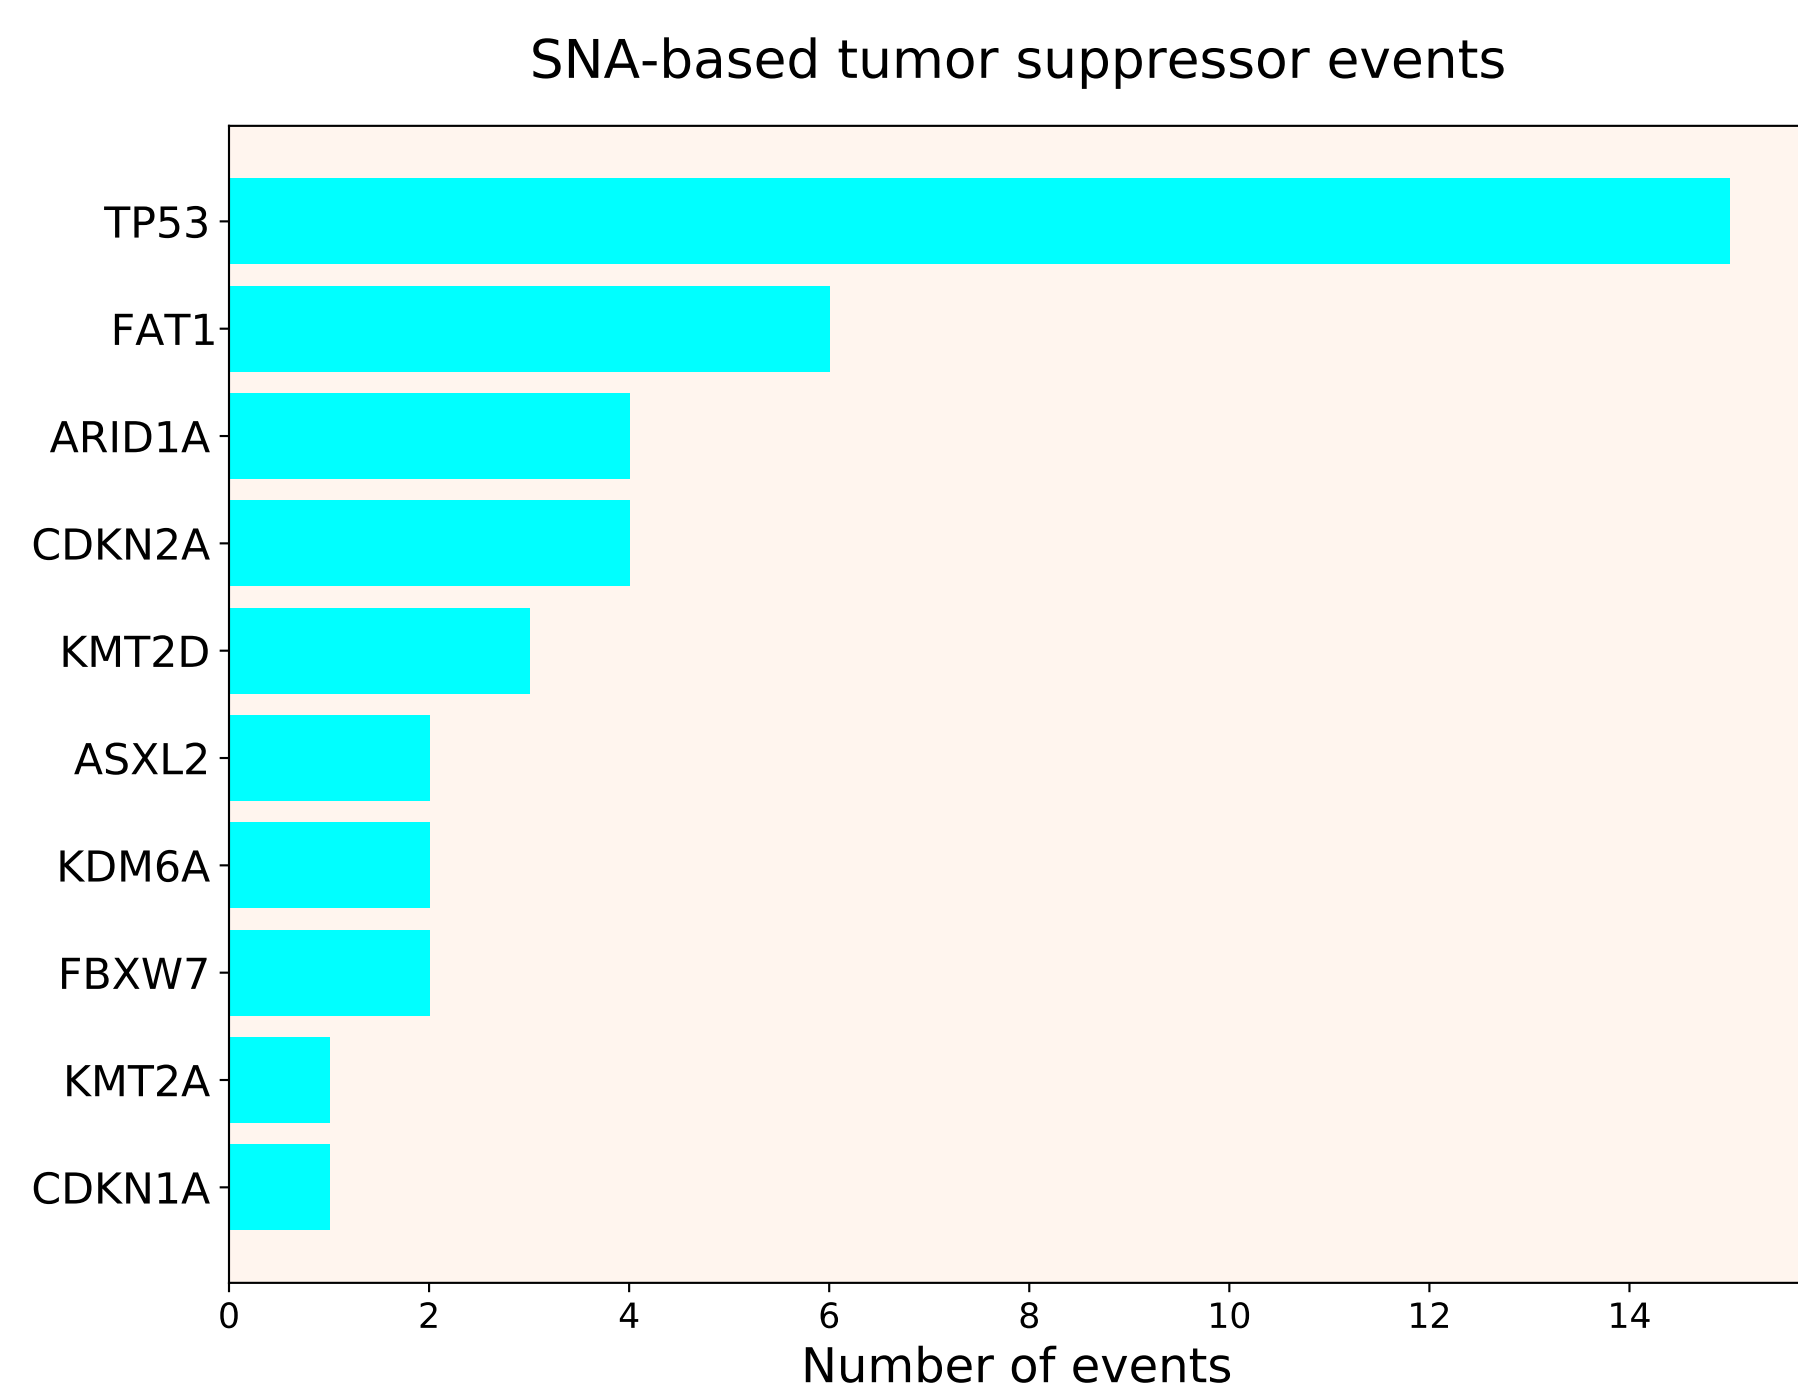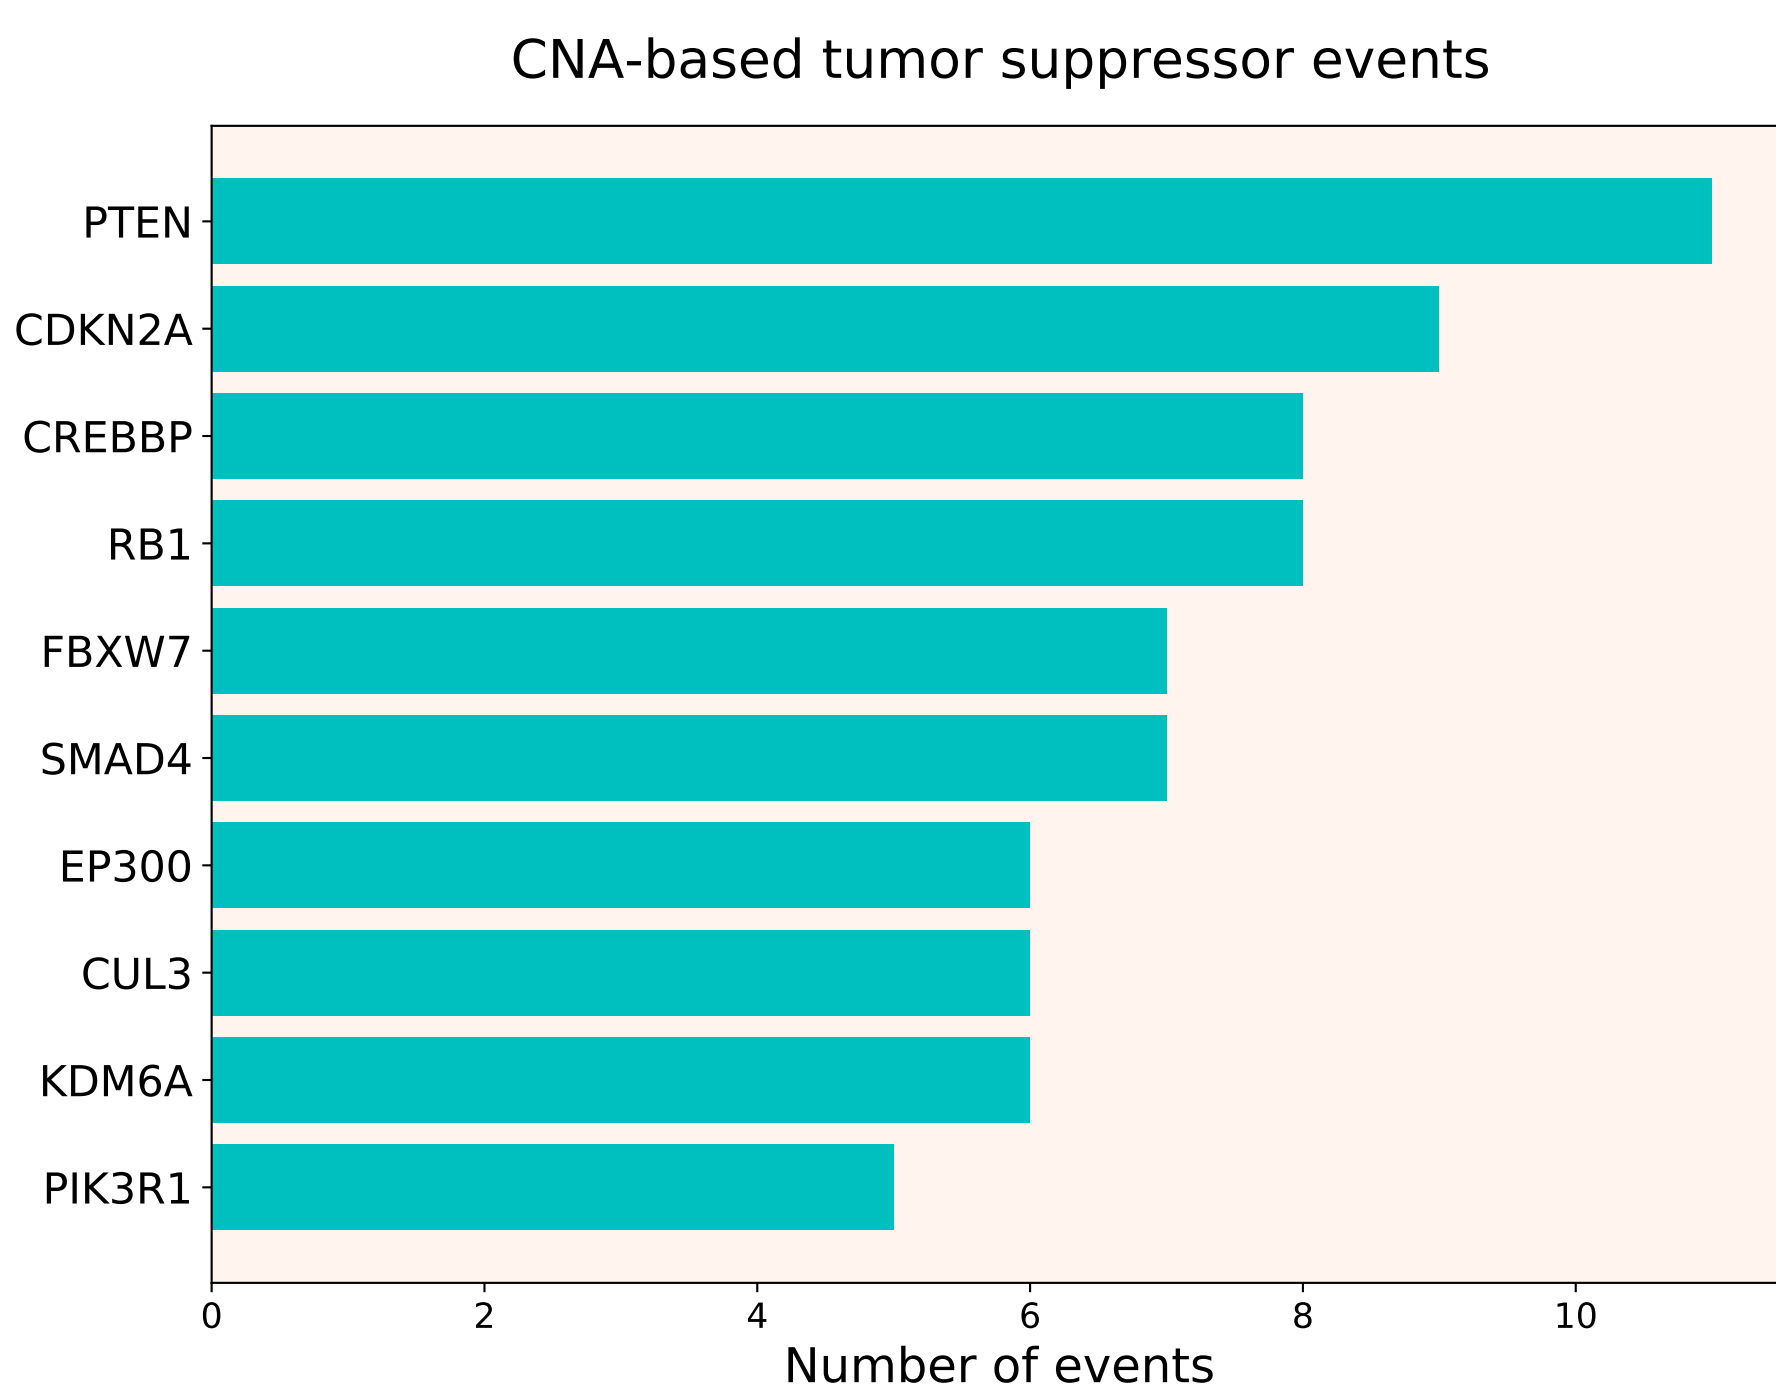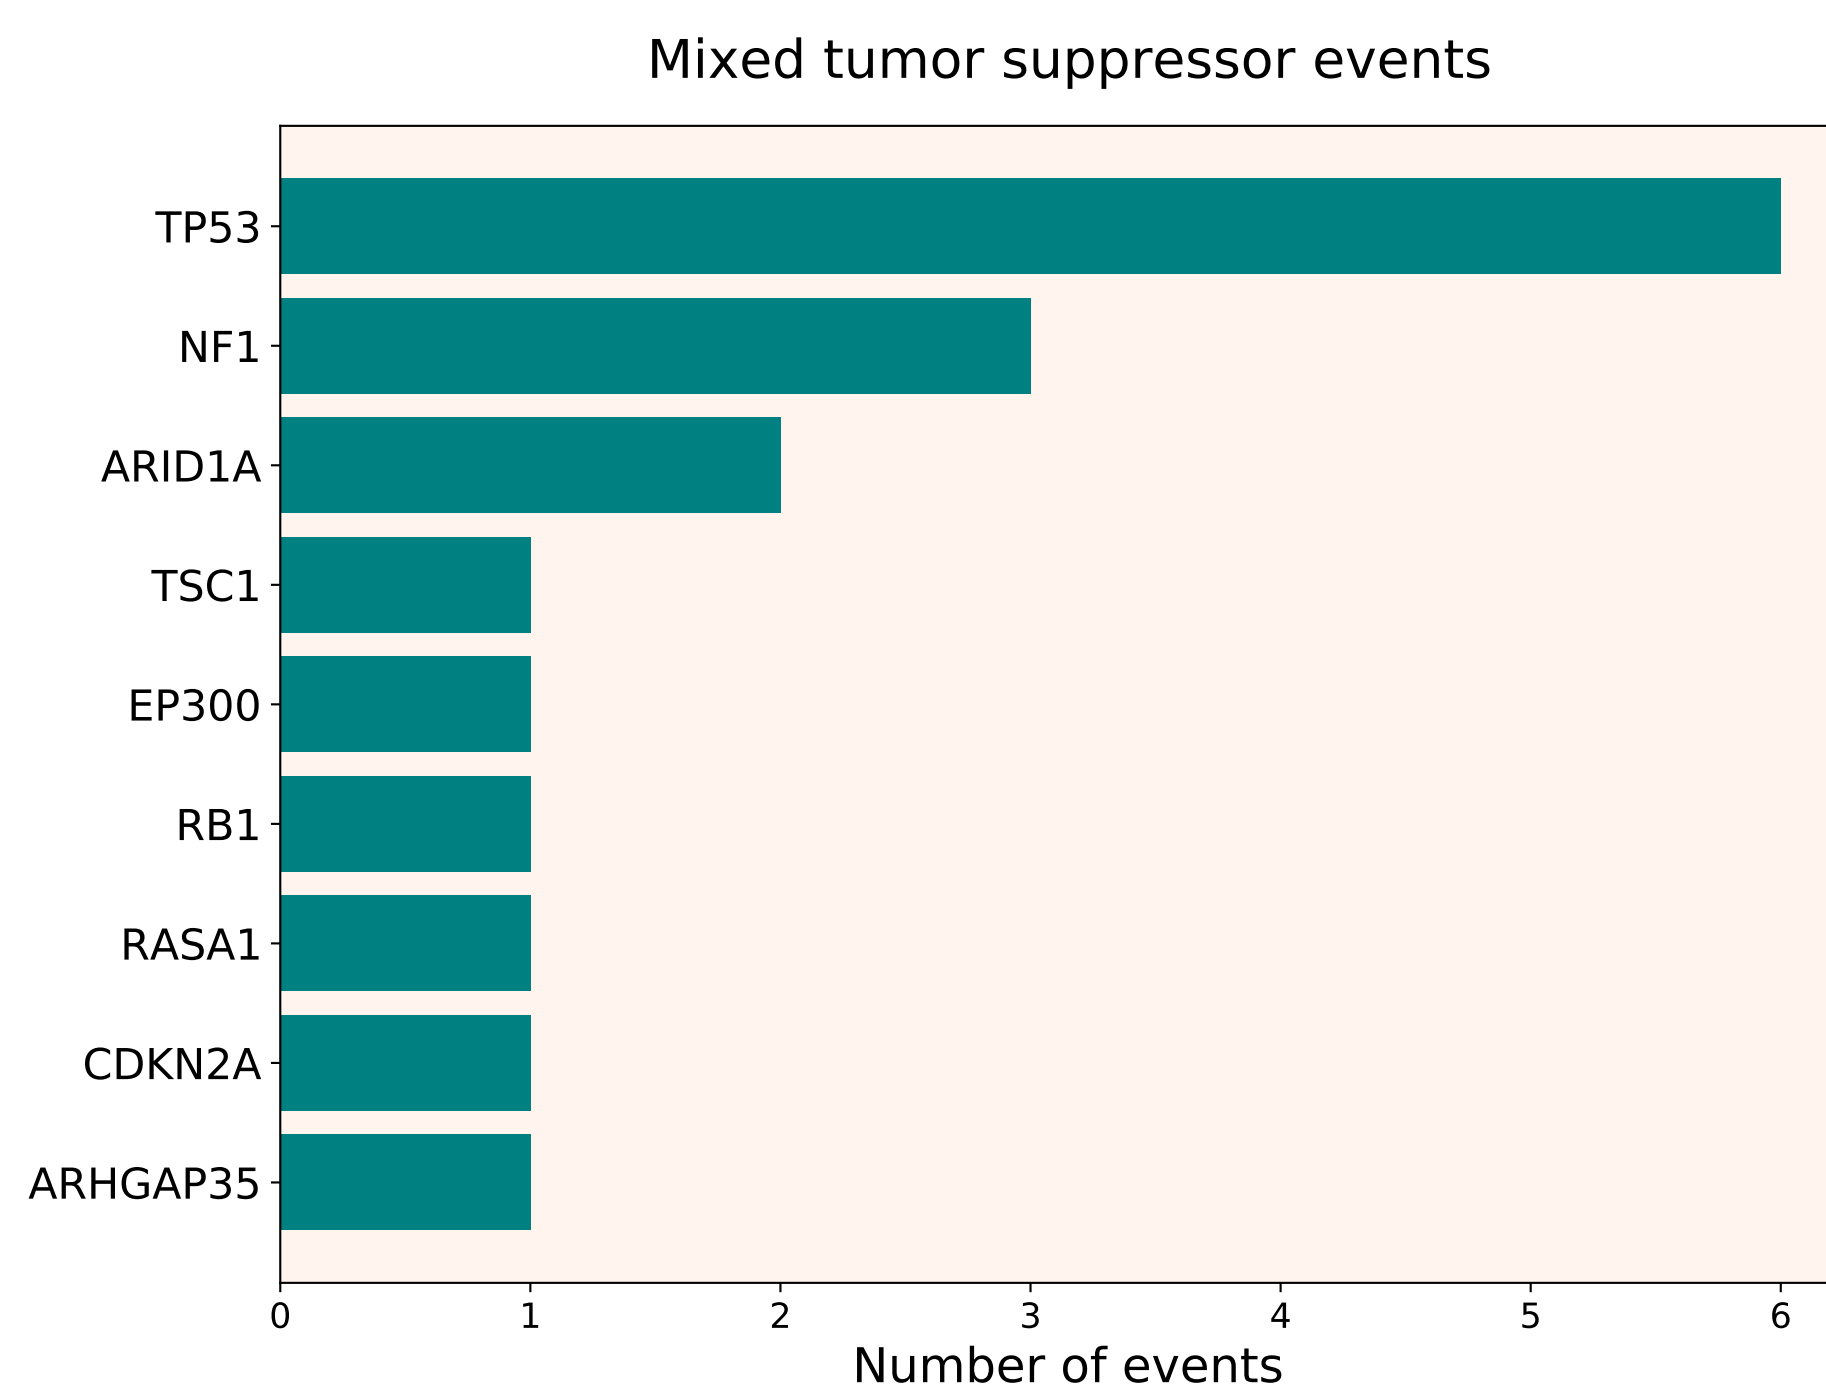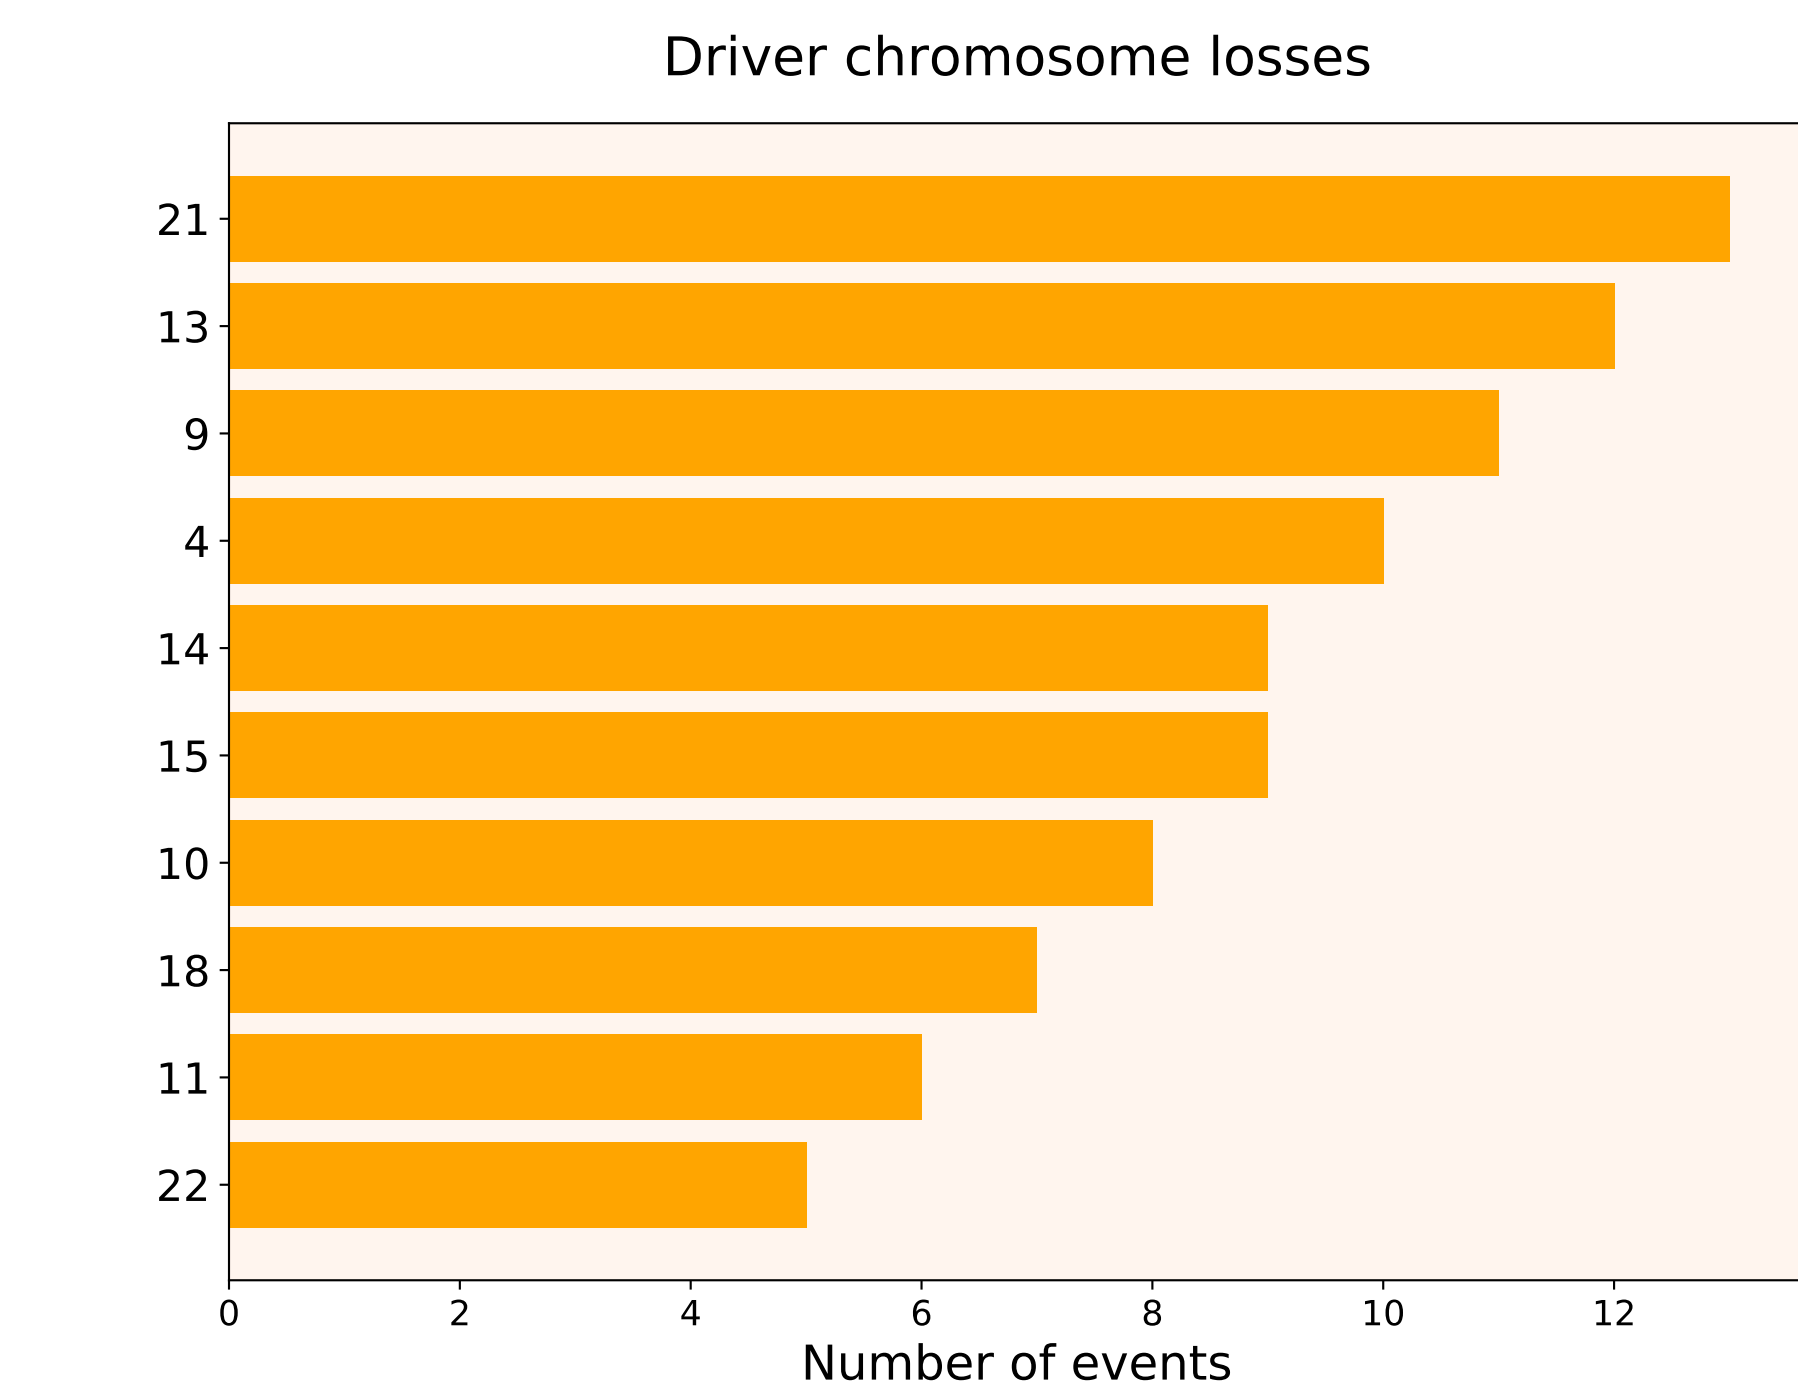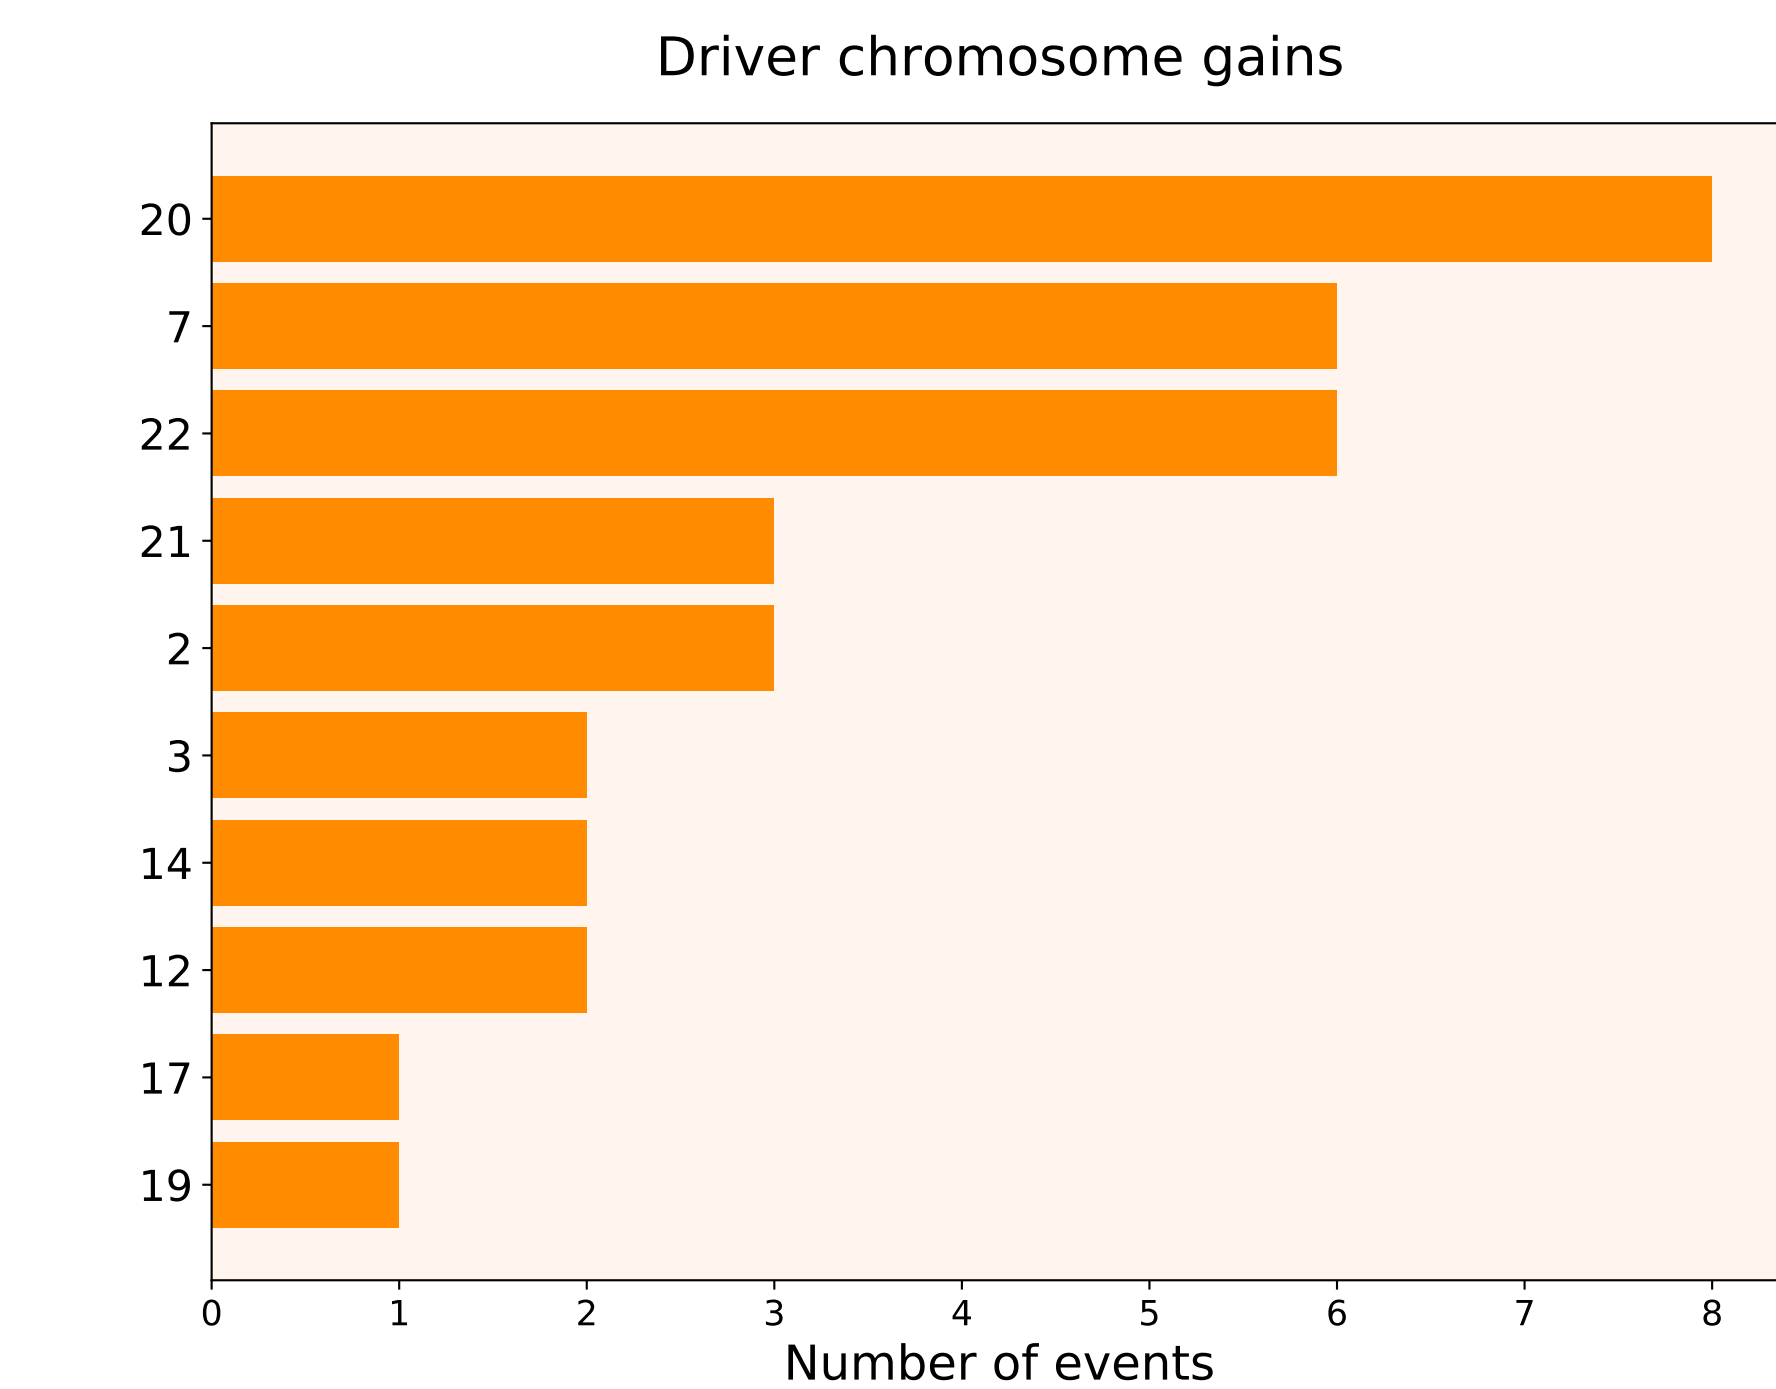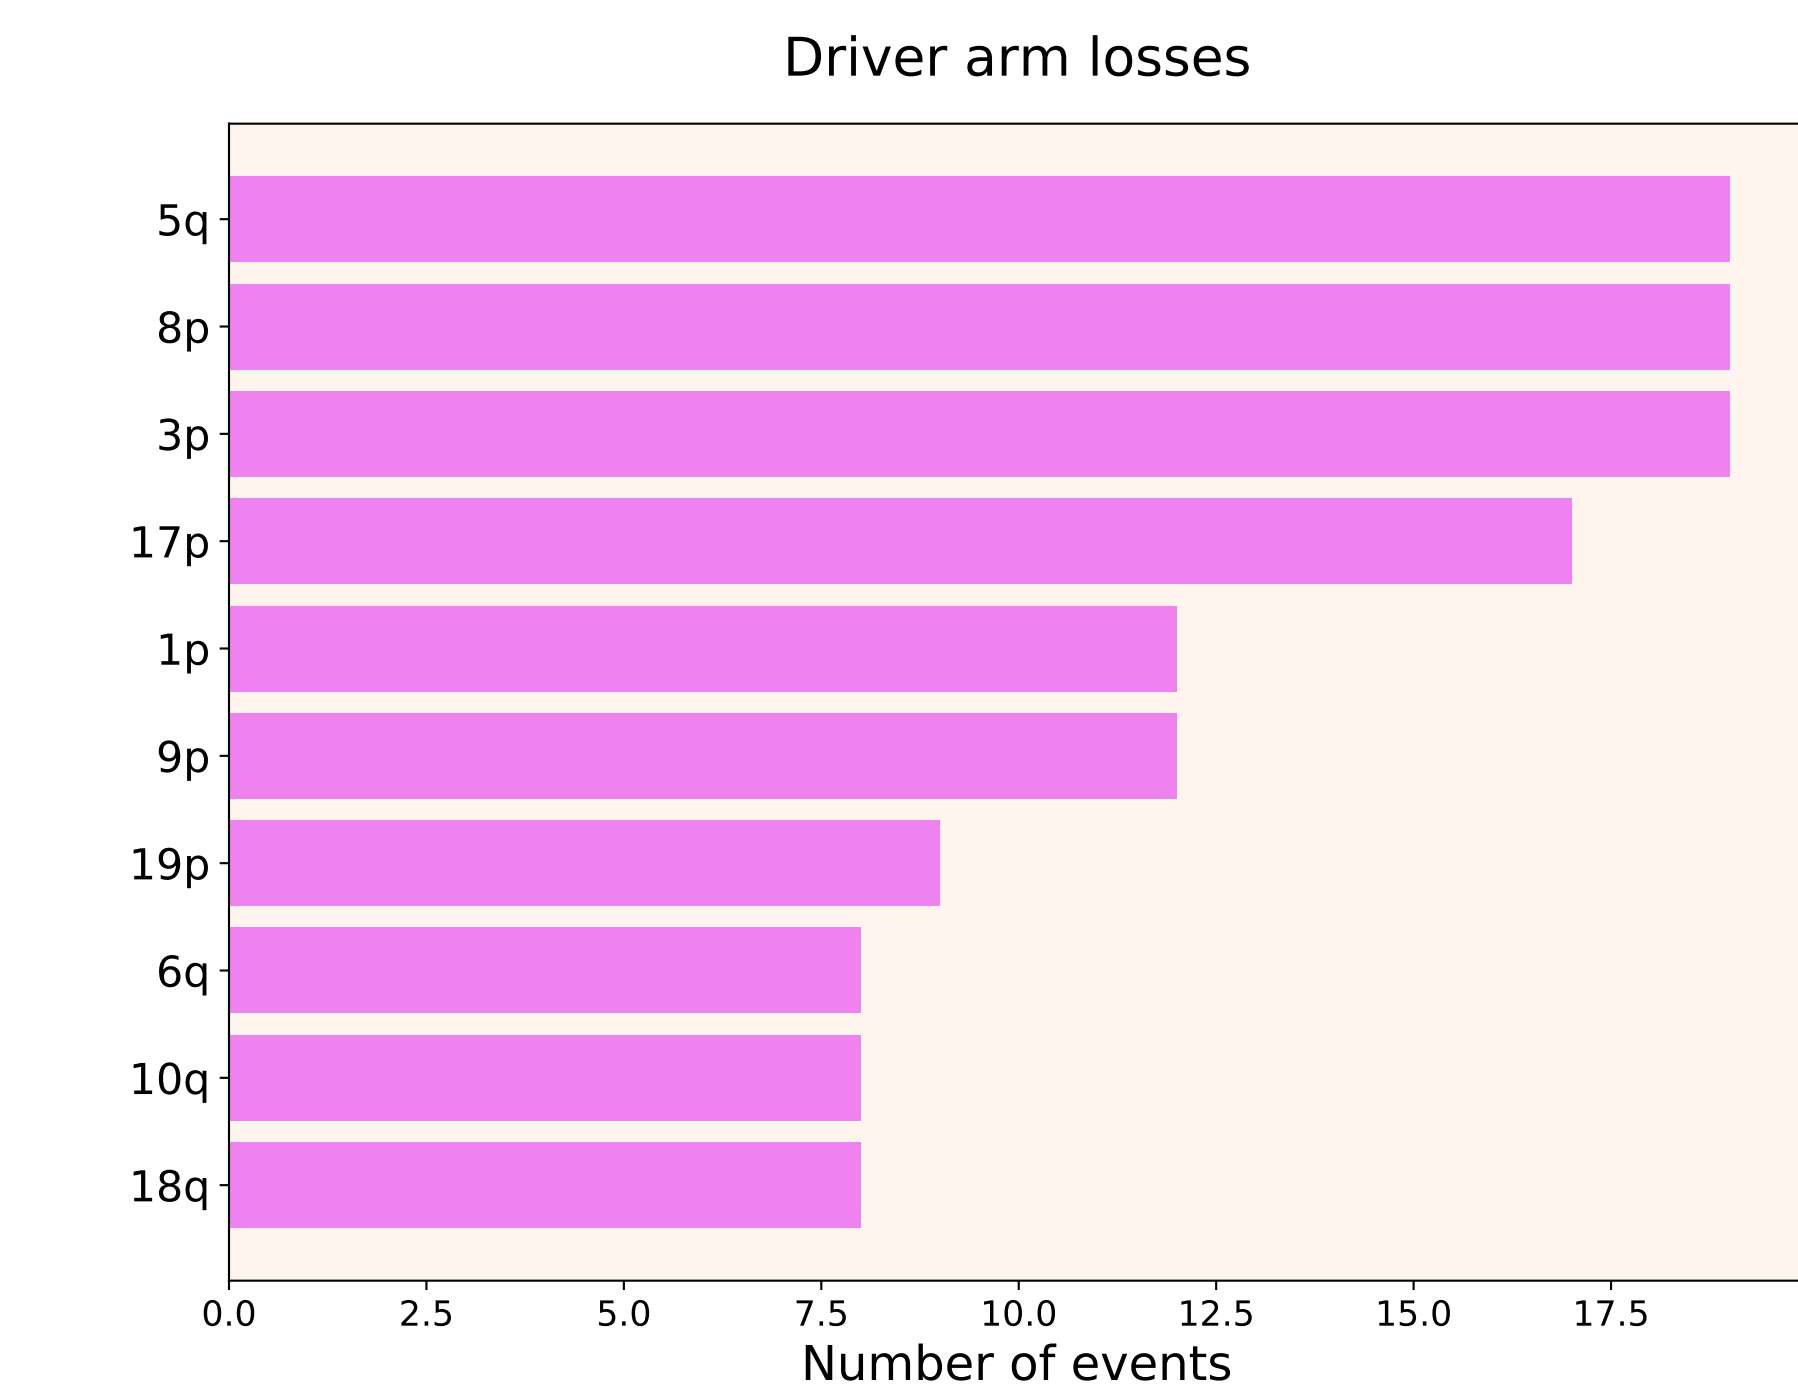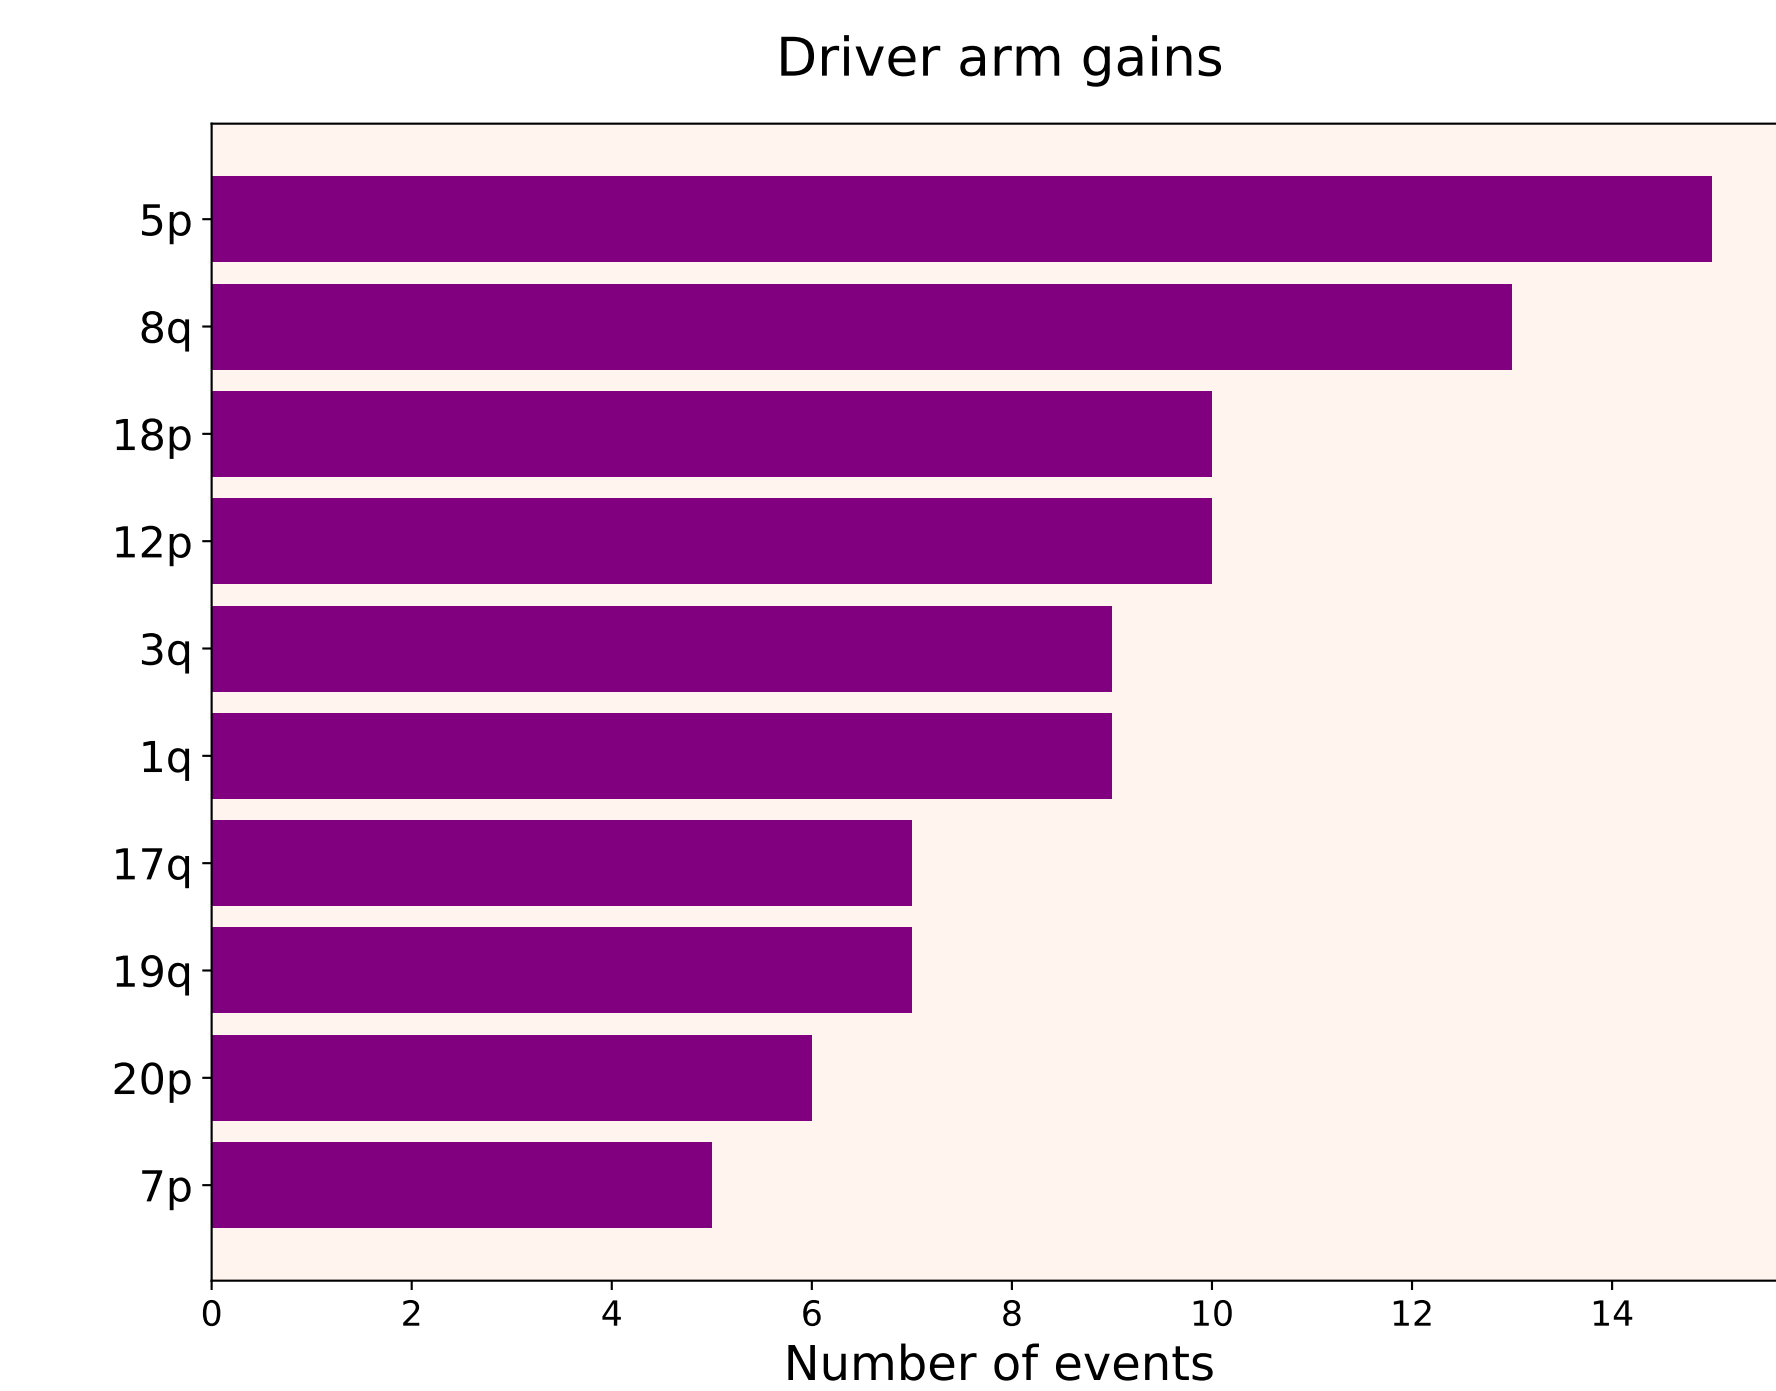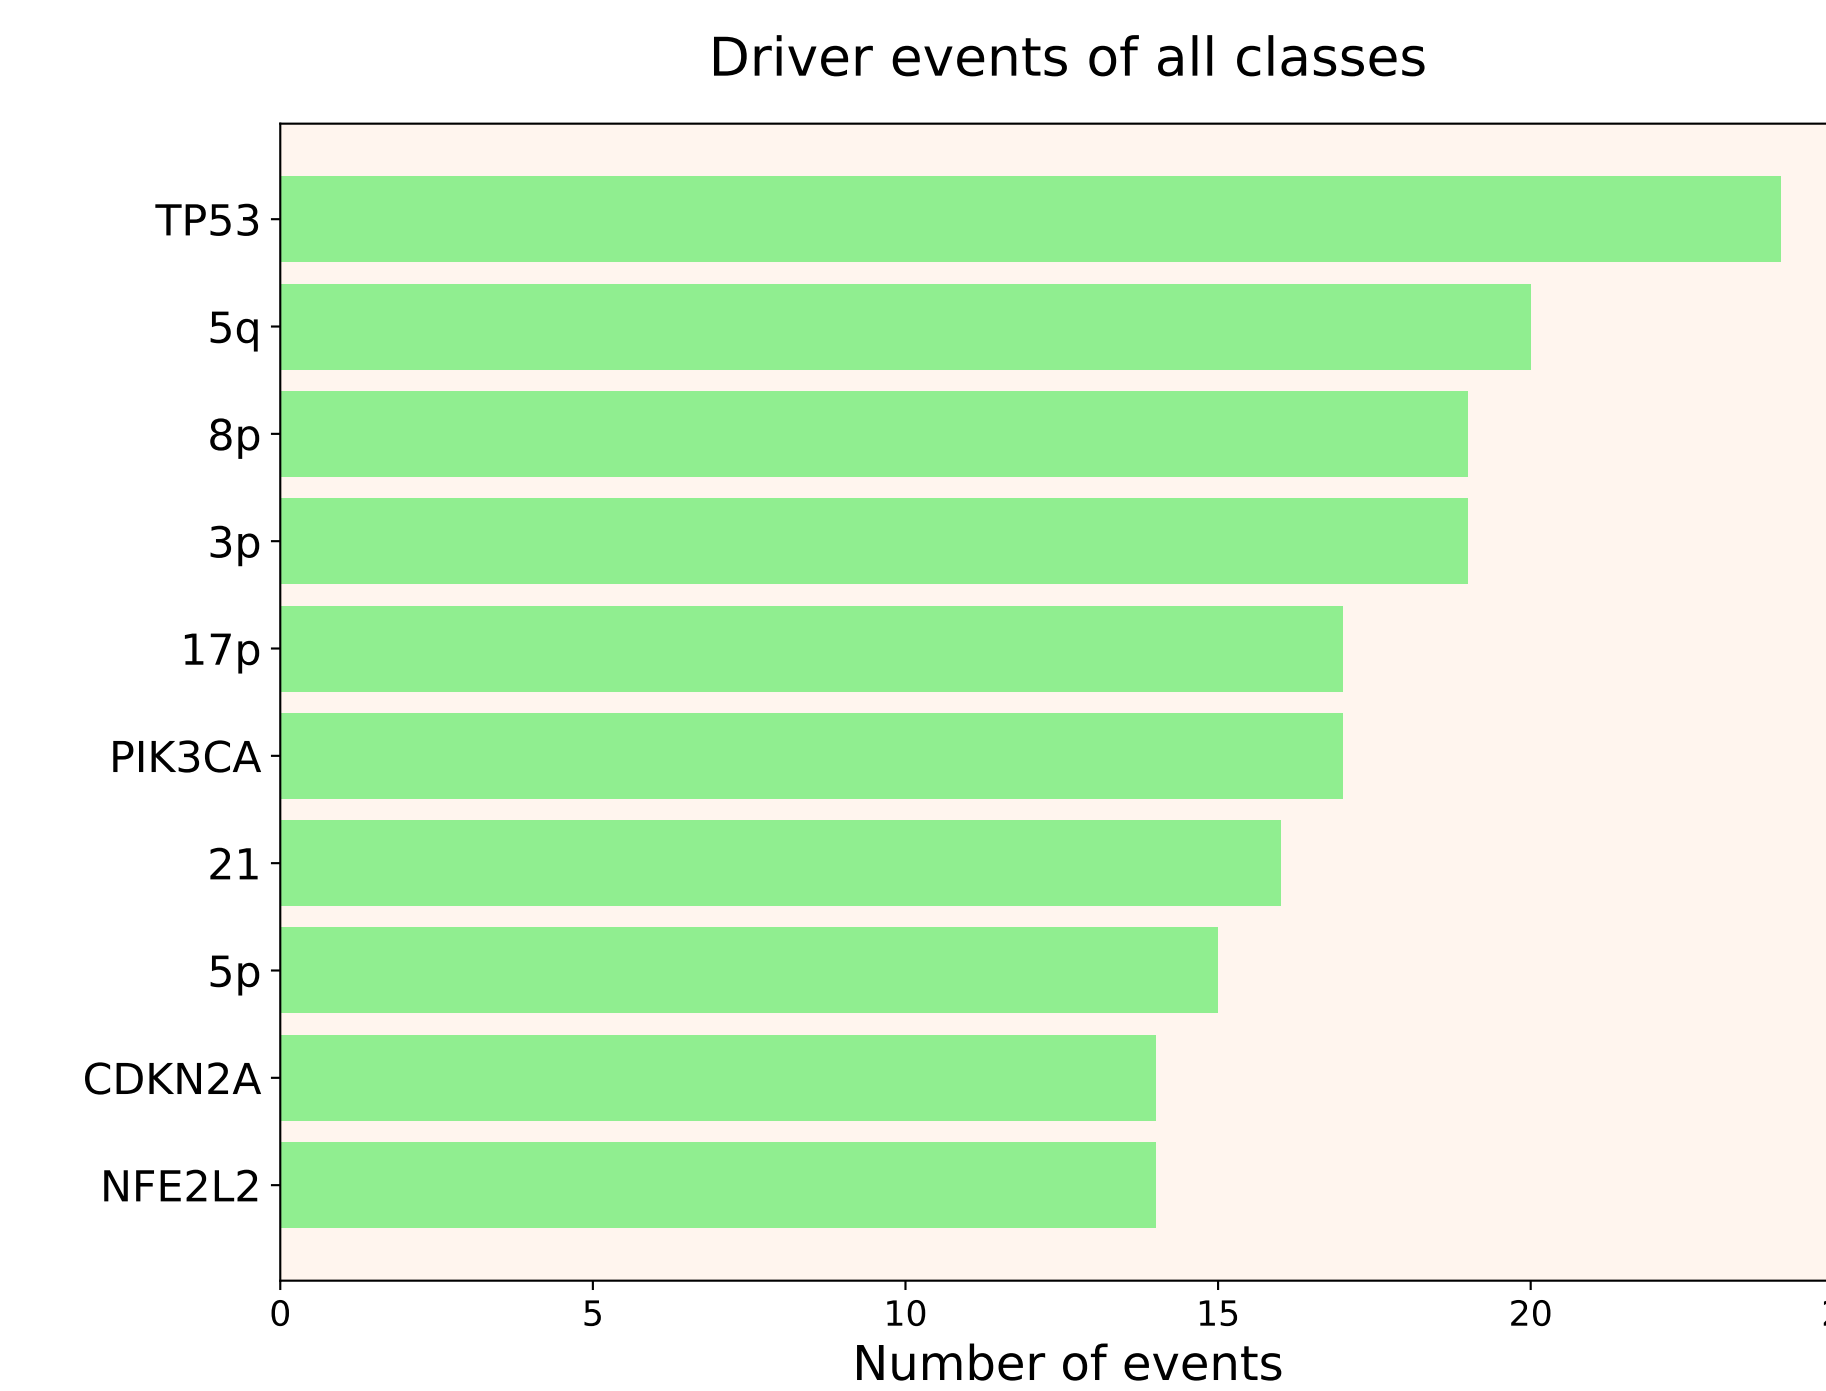

Supplement: Supplemental_Data_S1.zip [file Supplemental_Data_S1.zip]

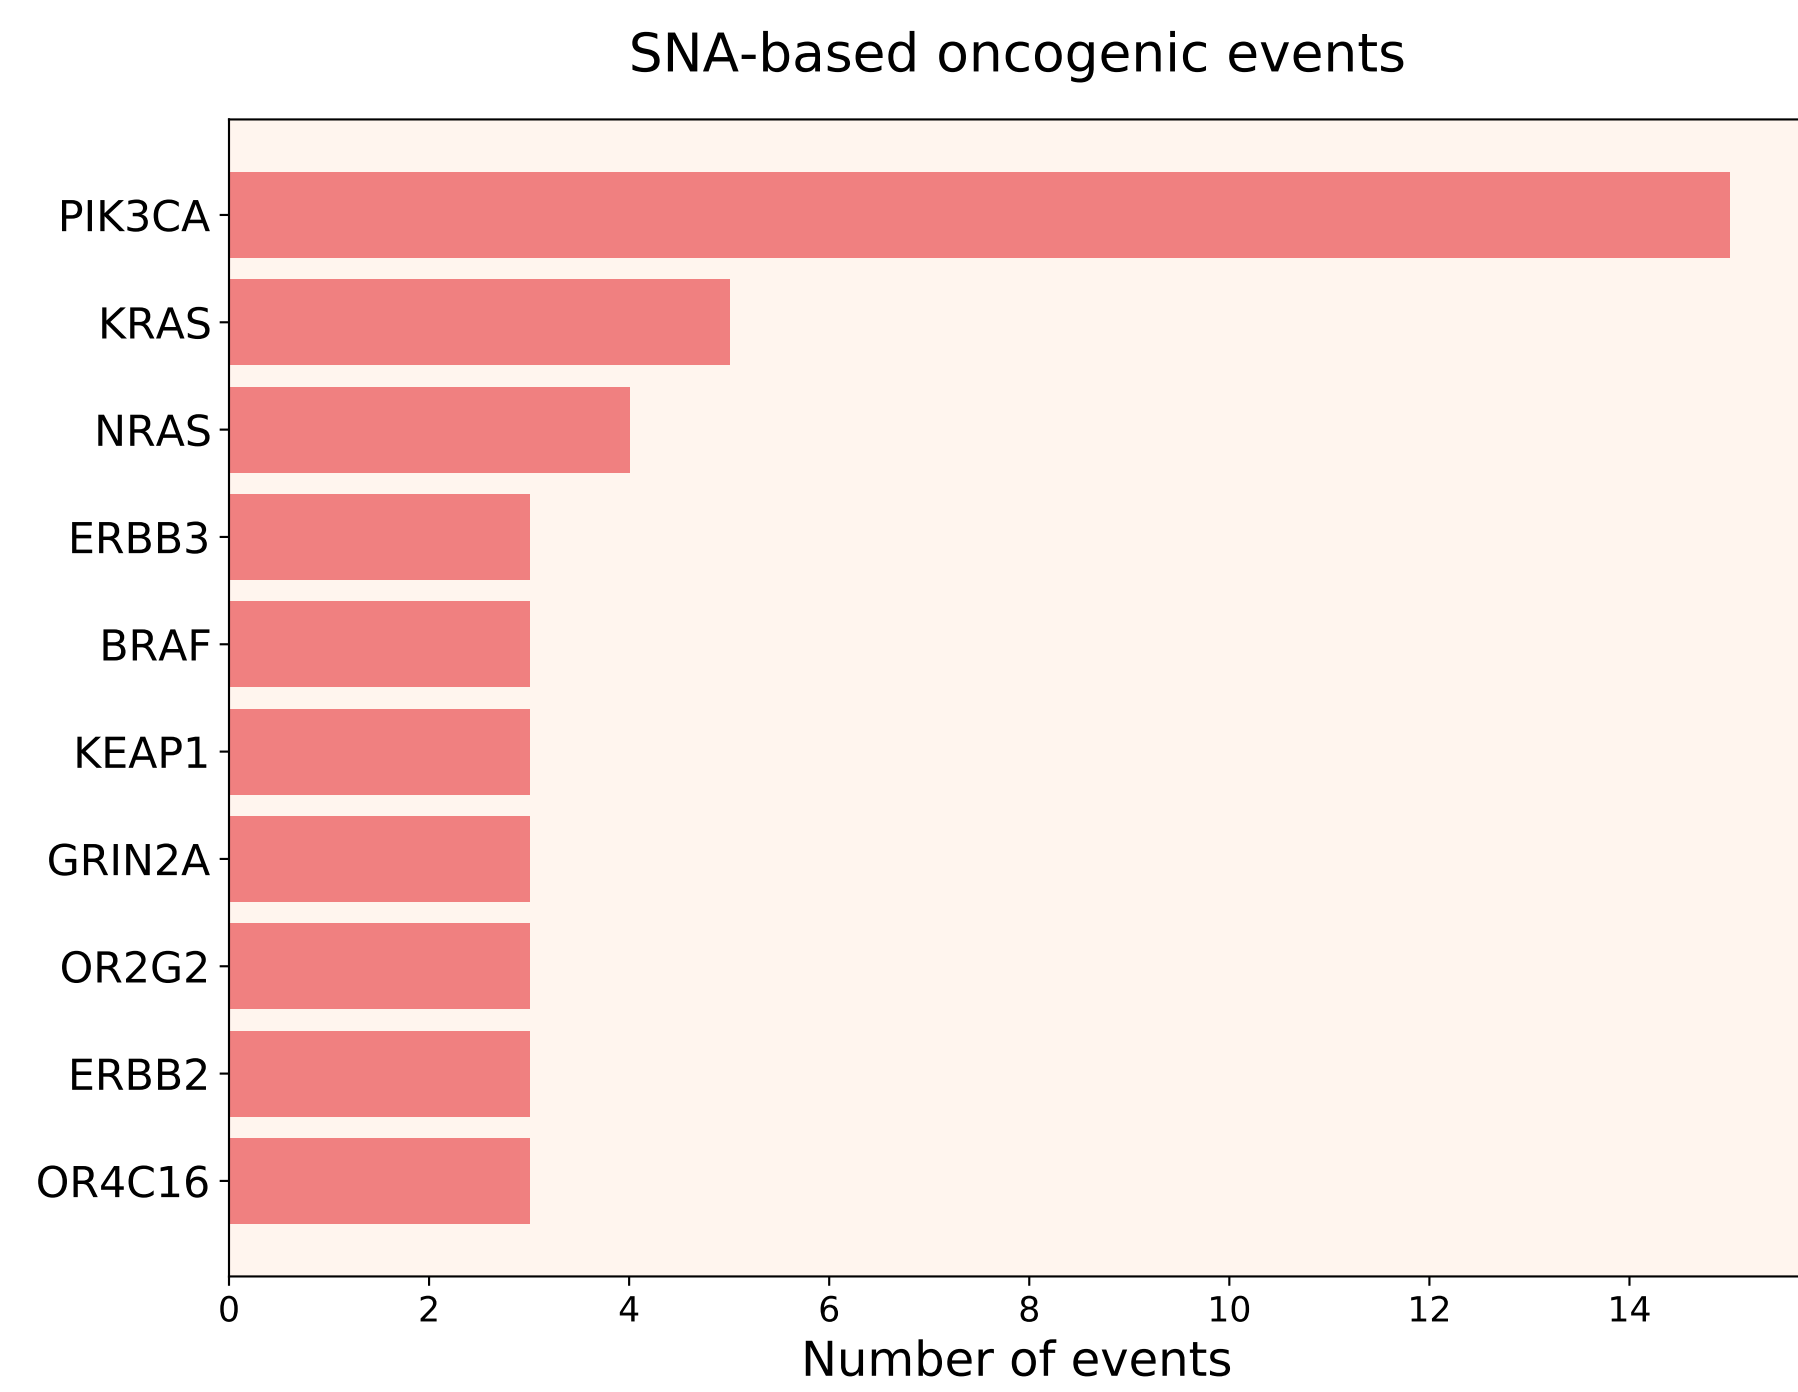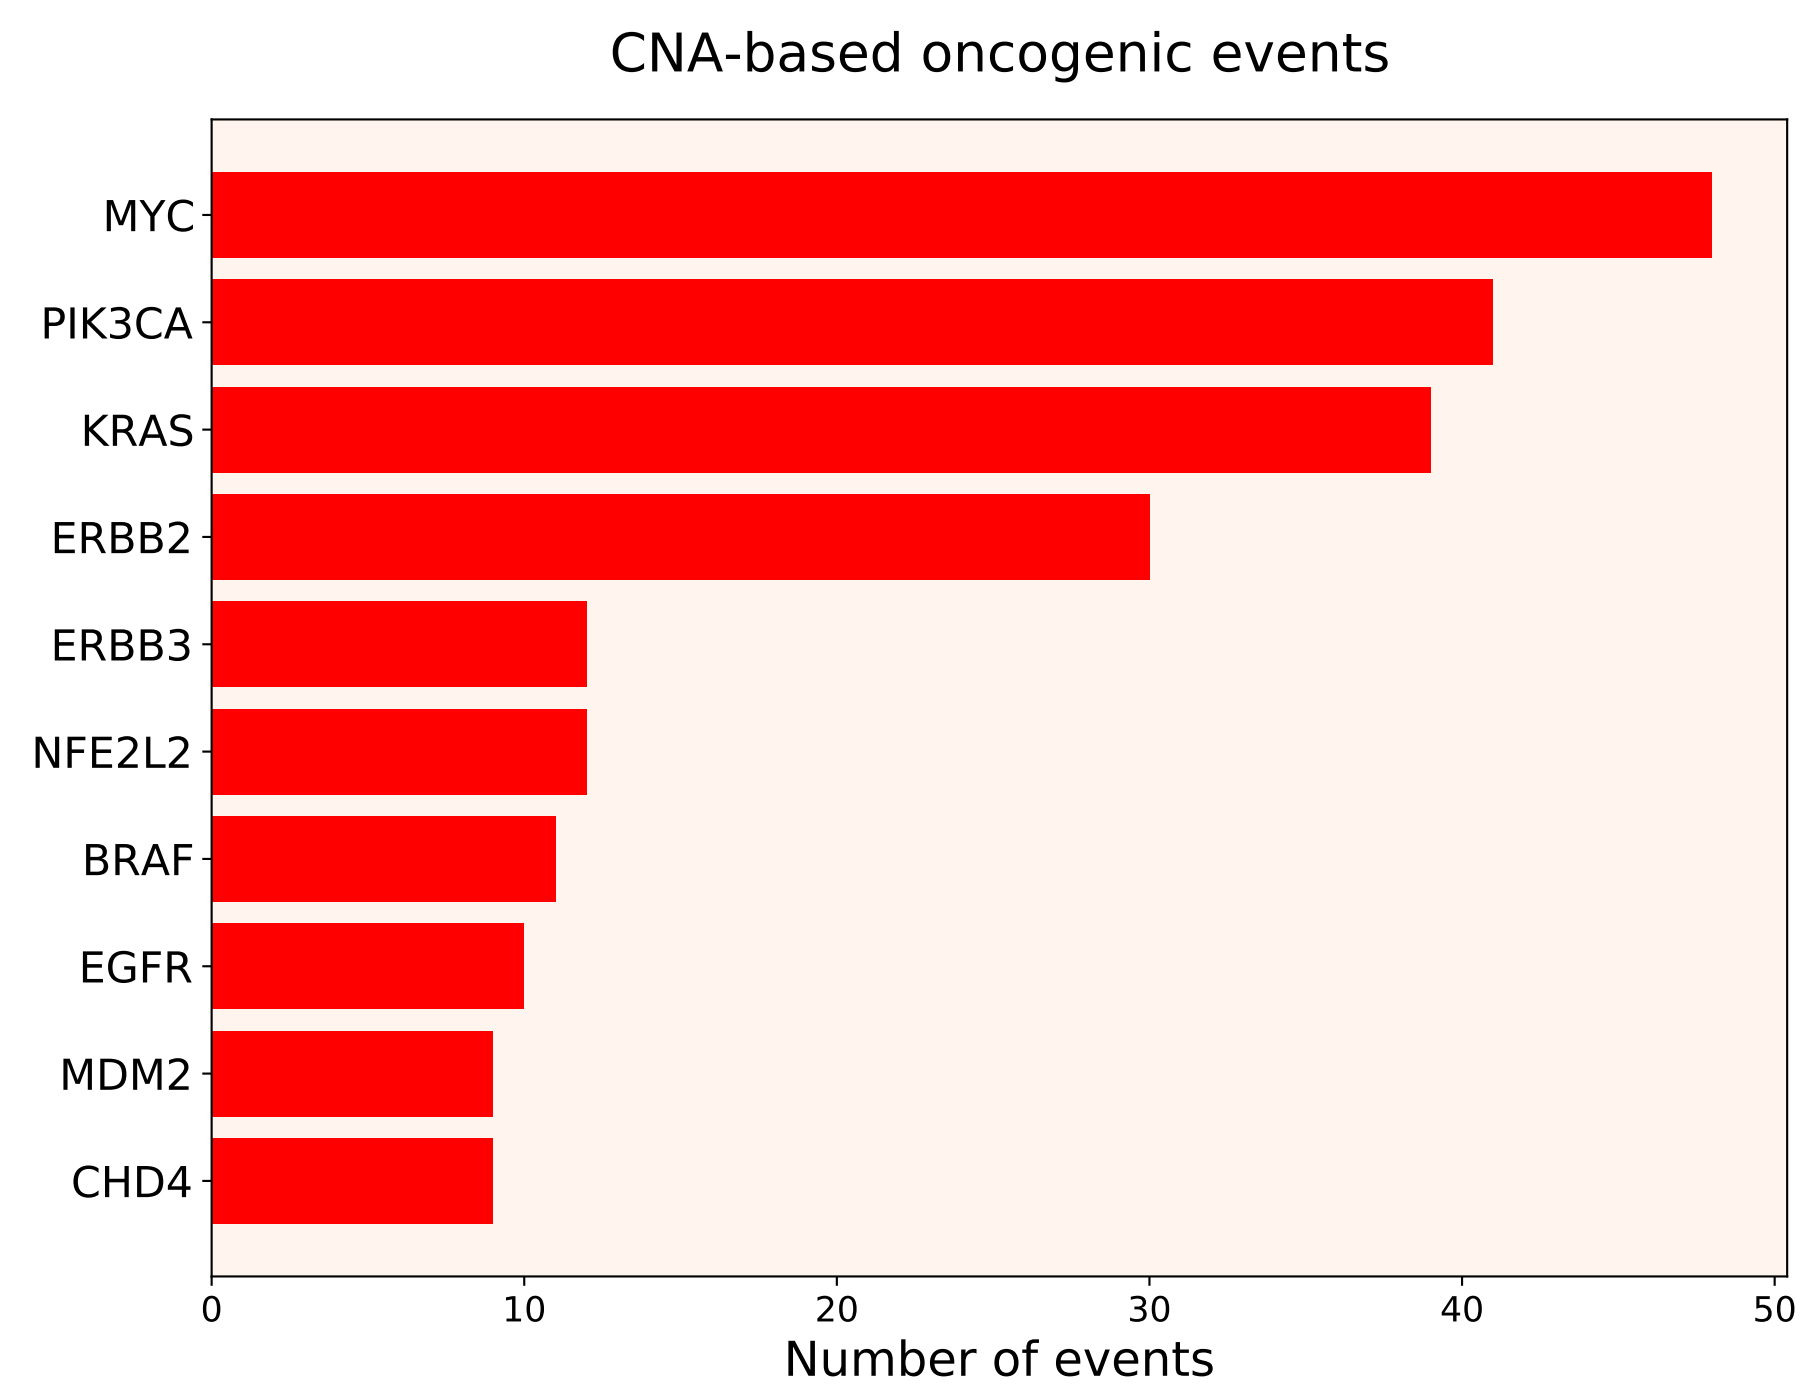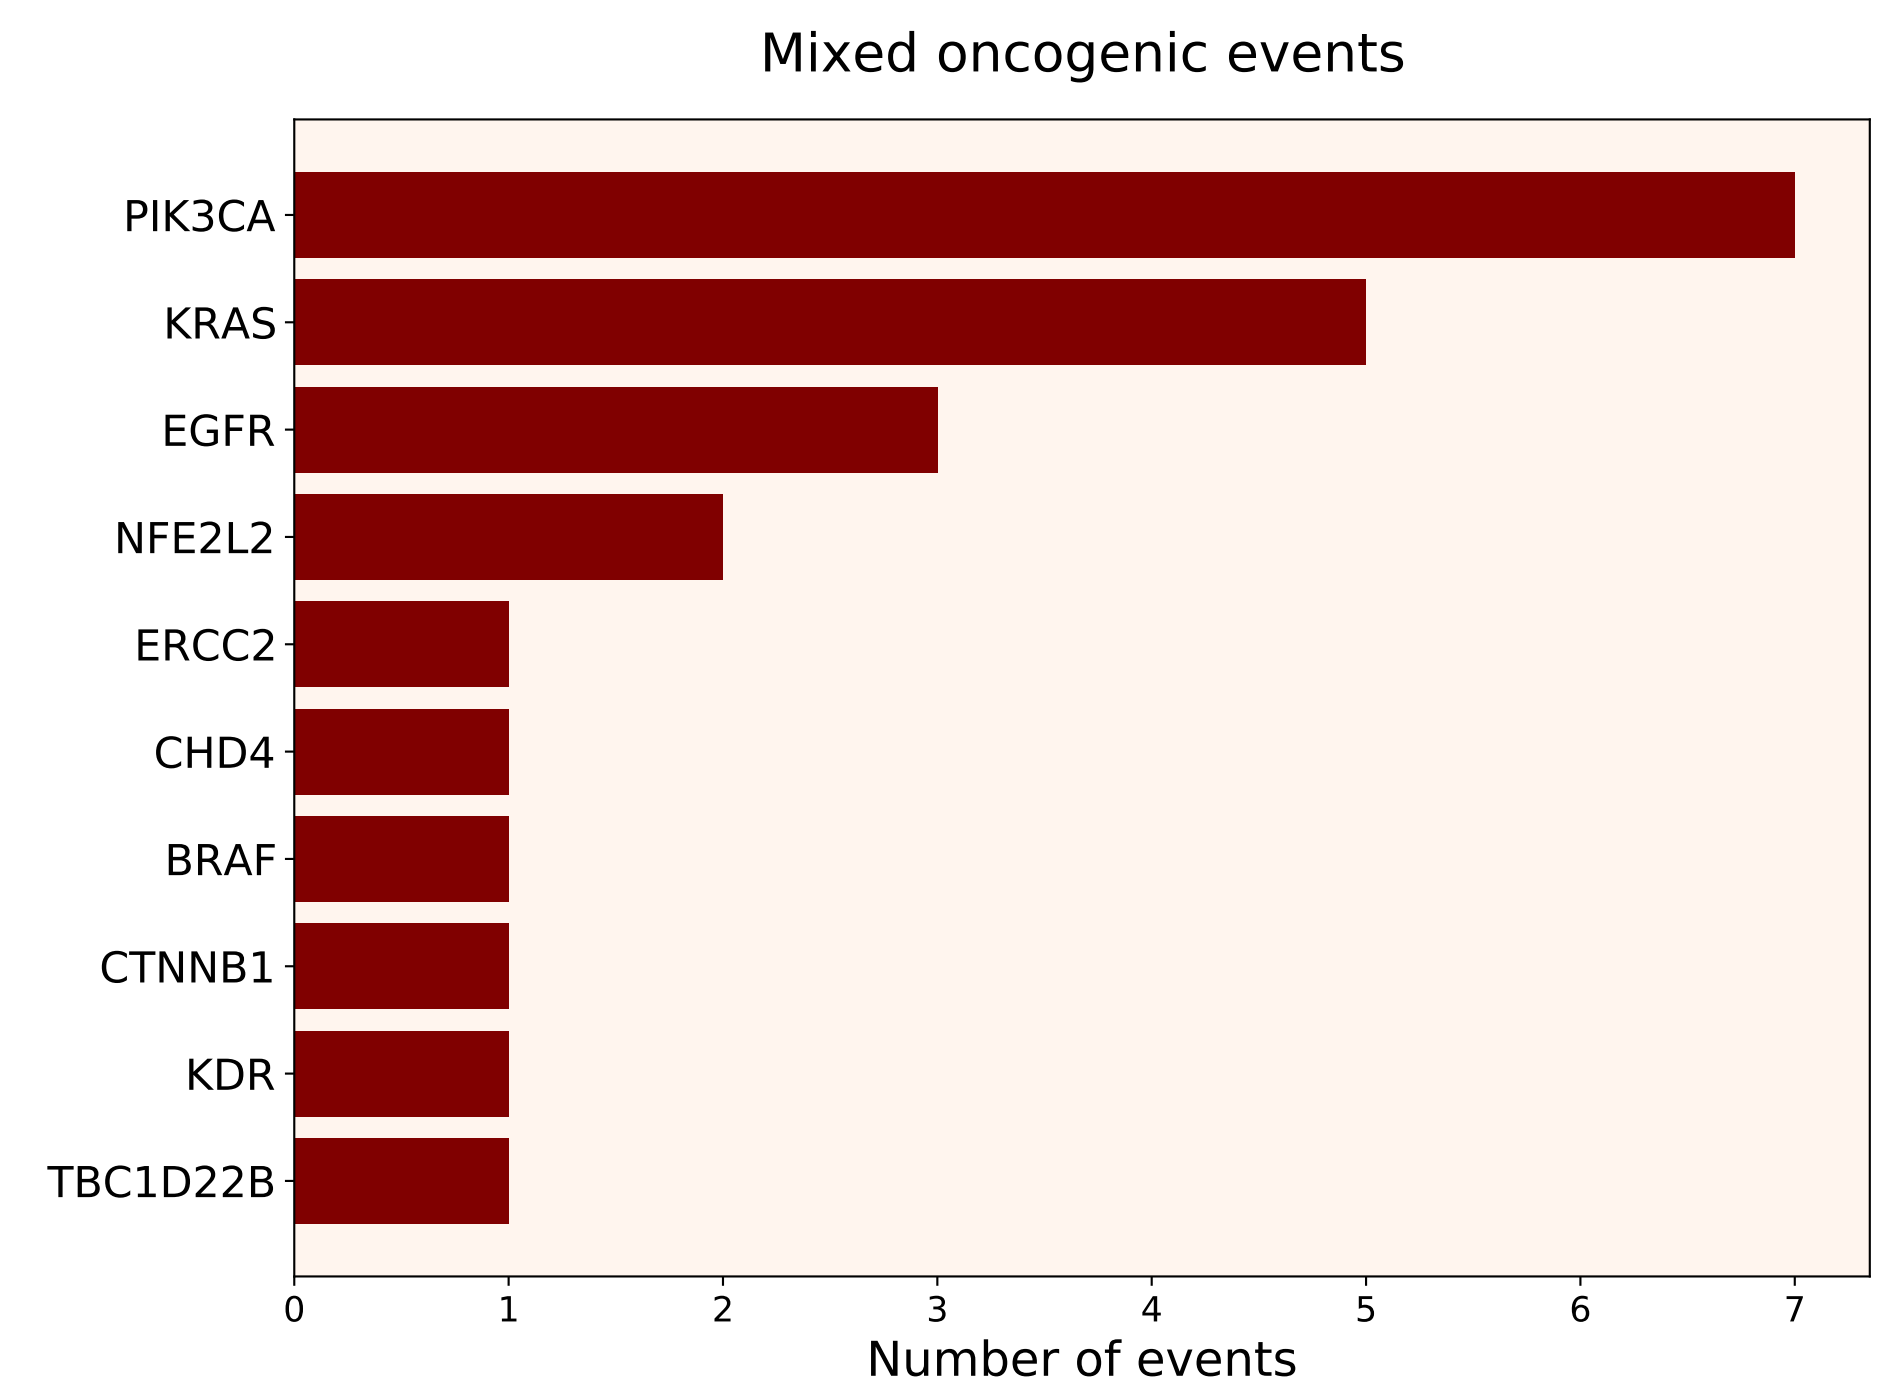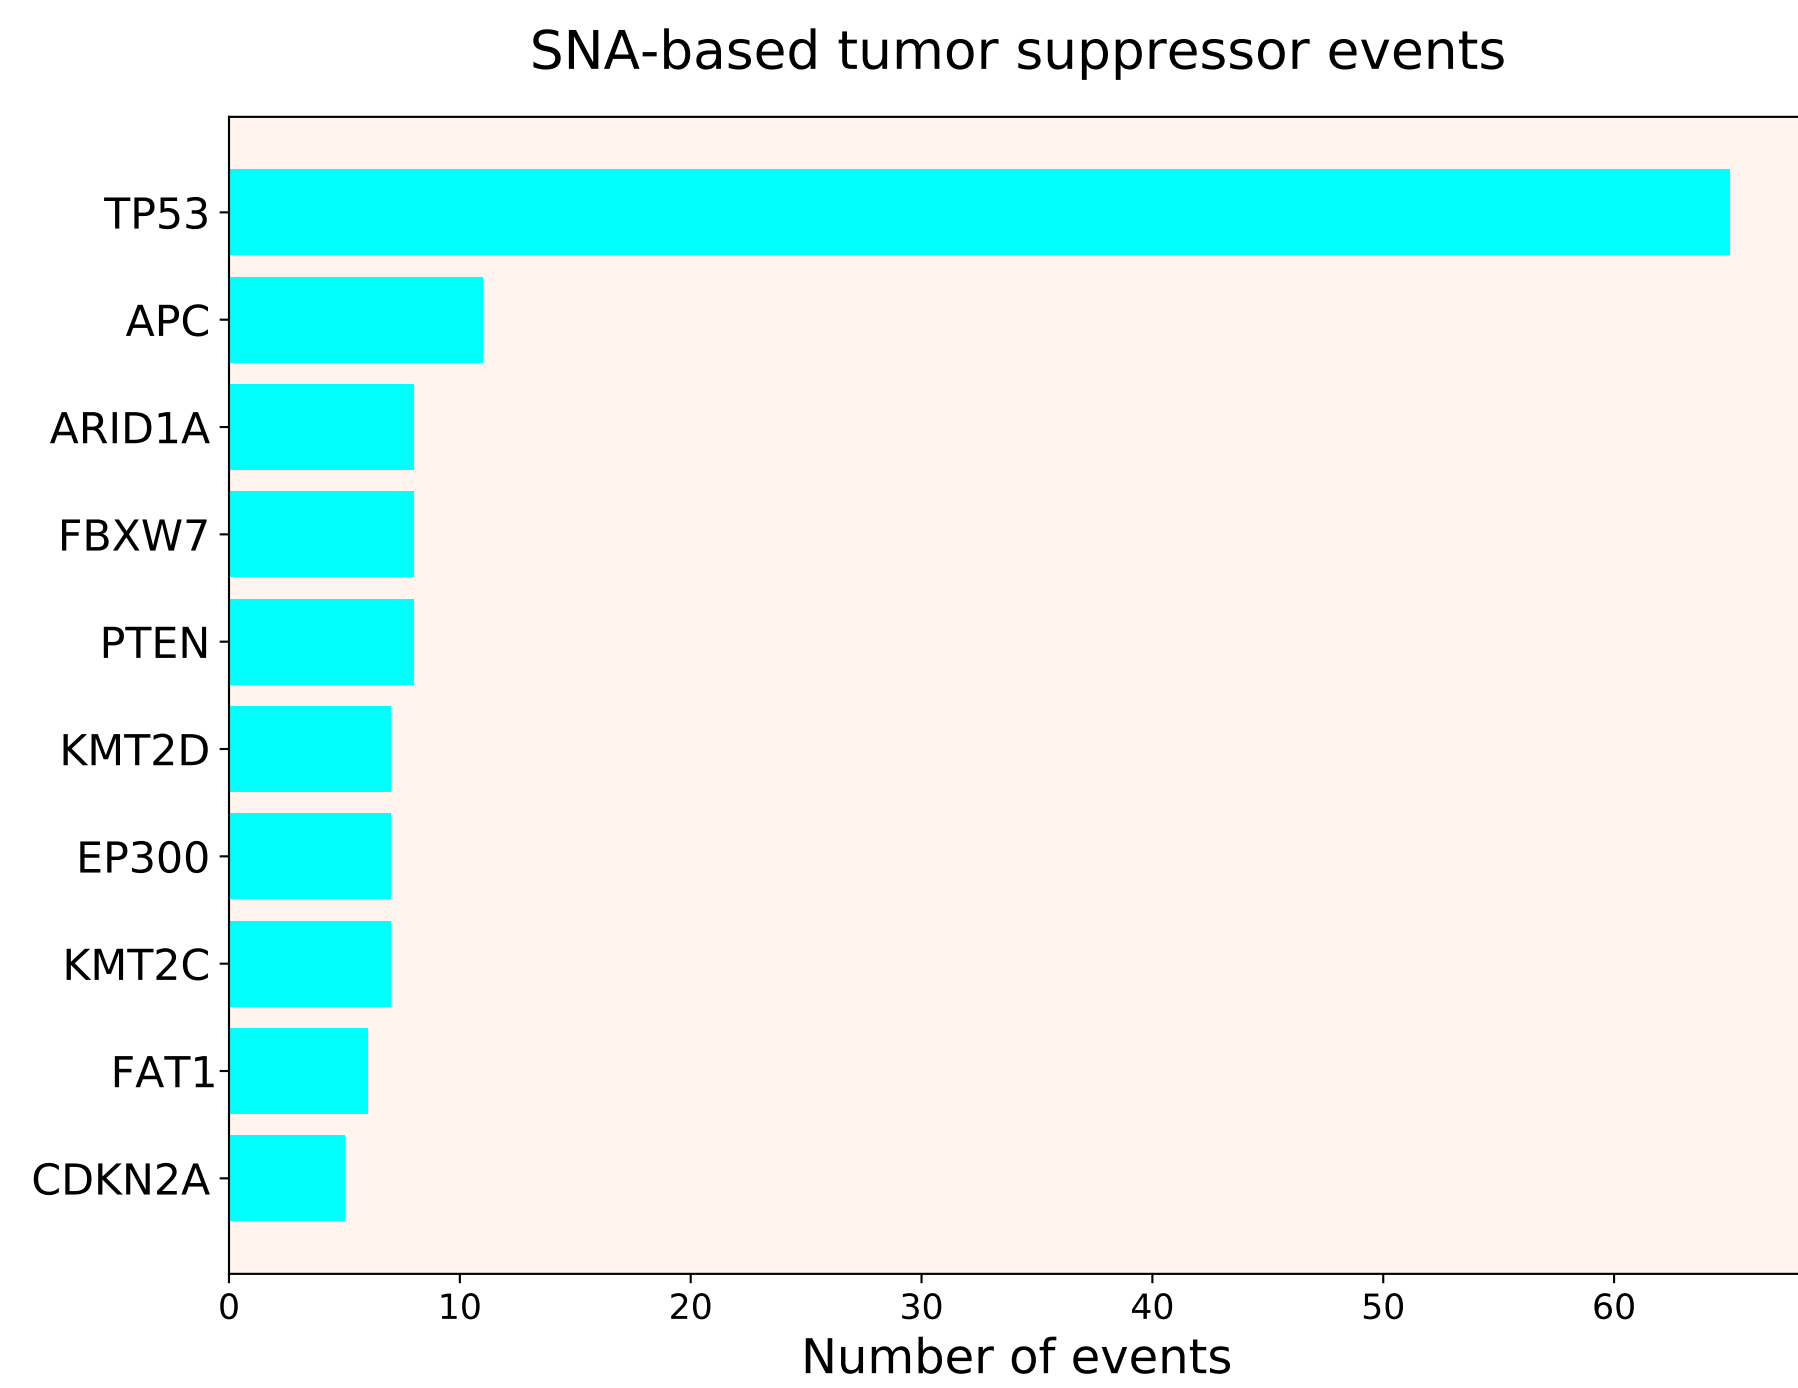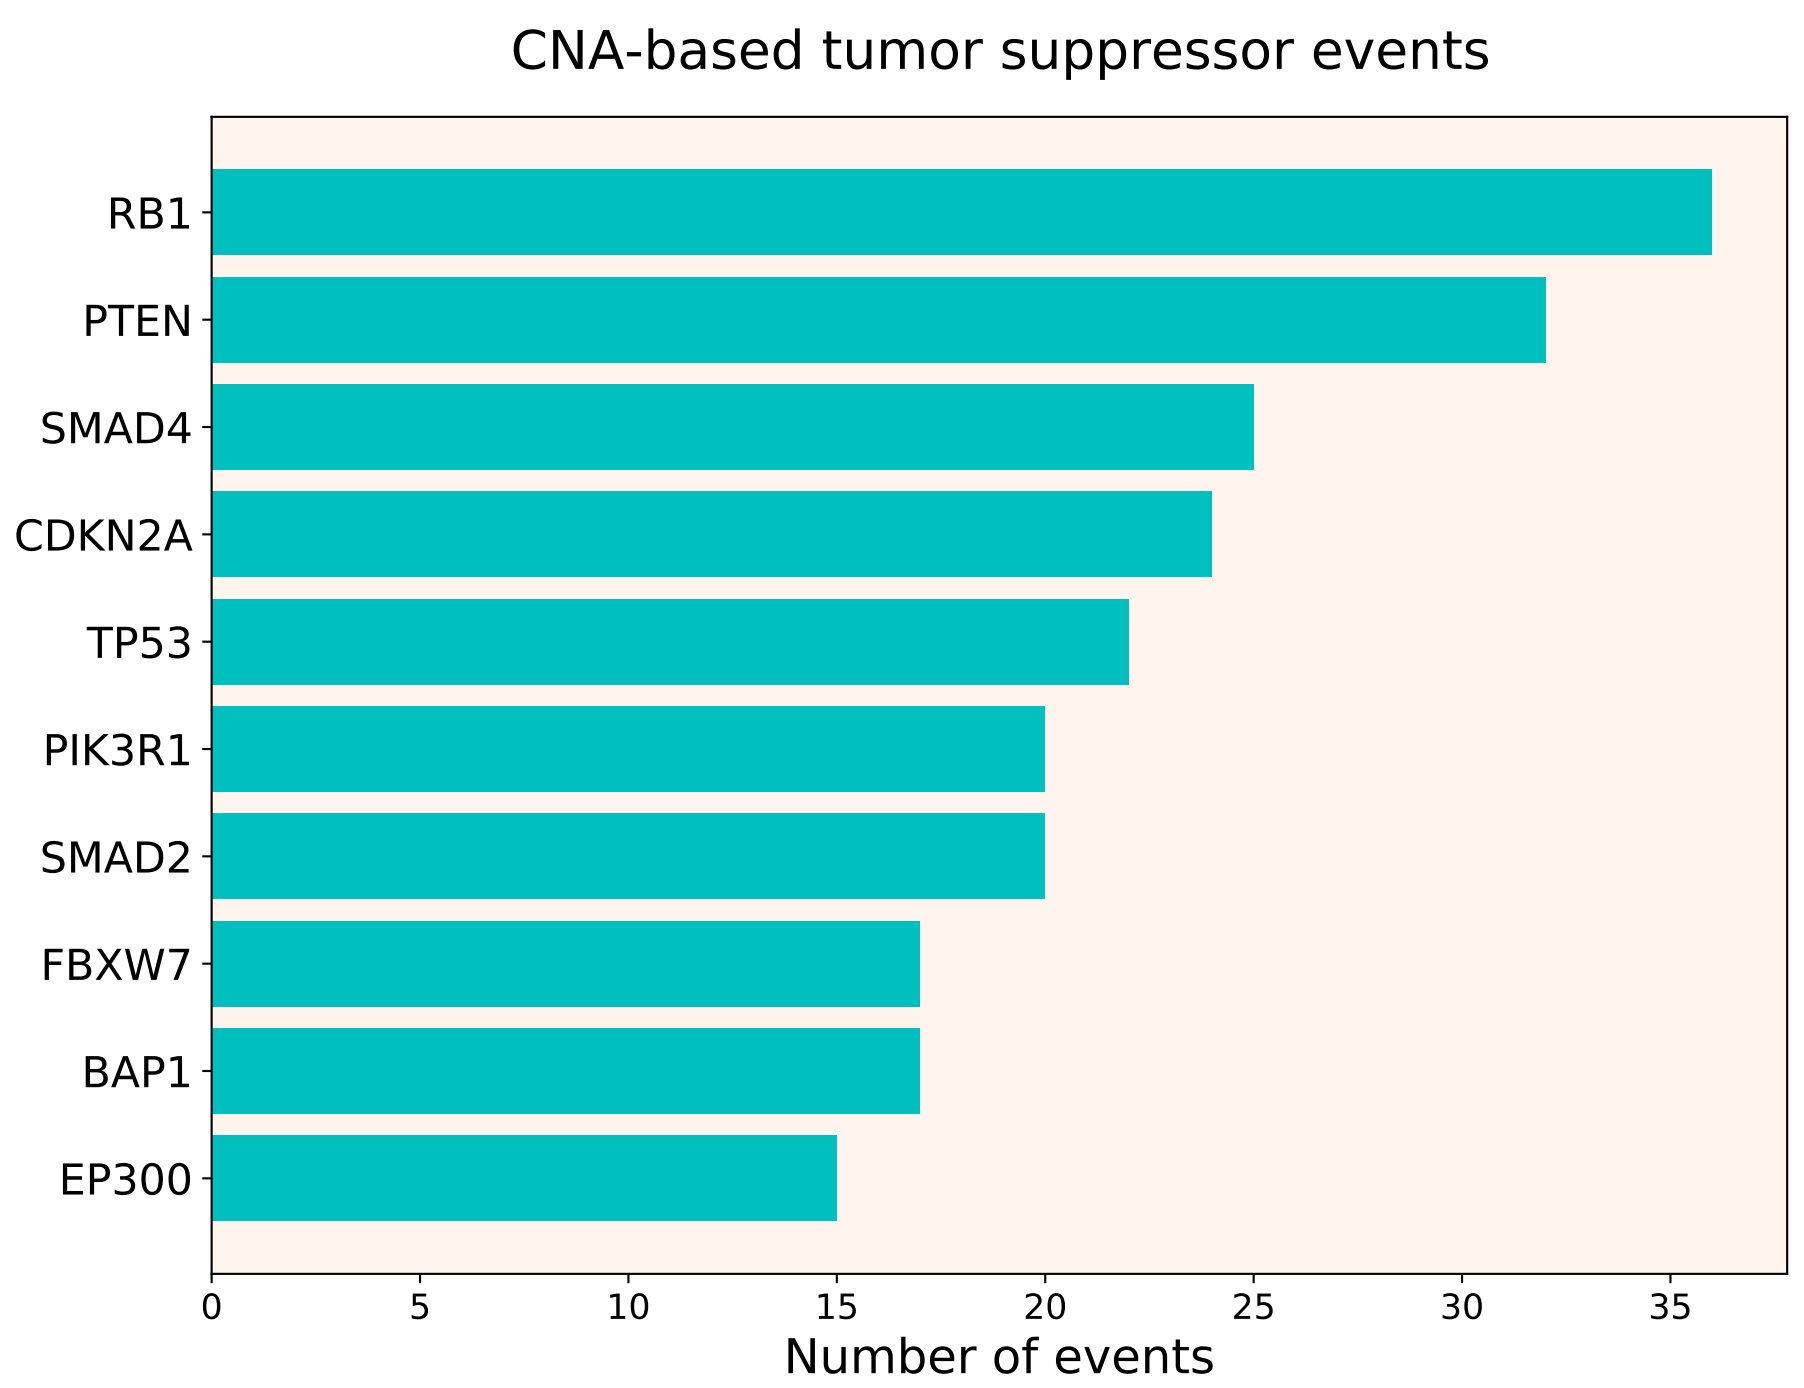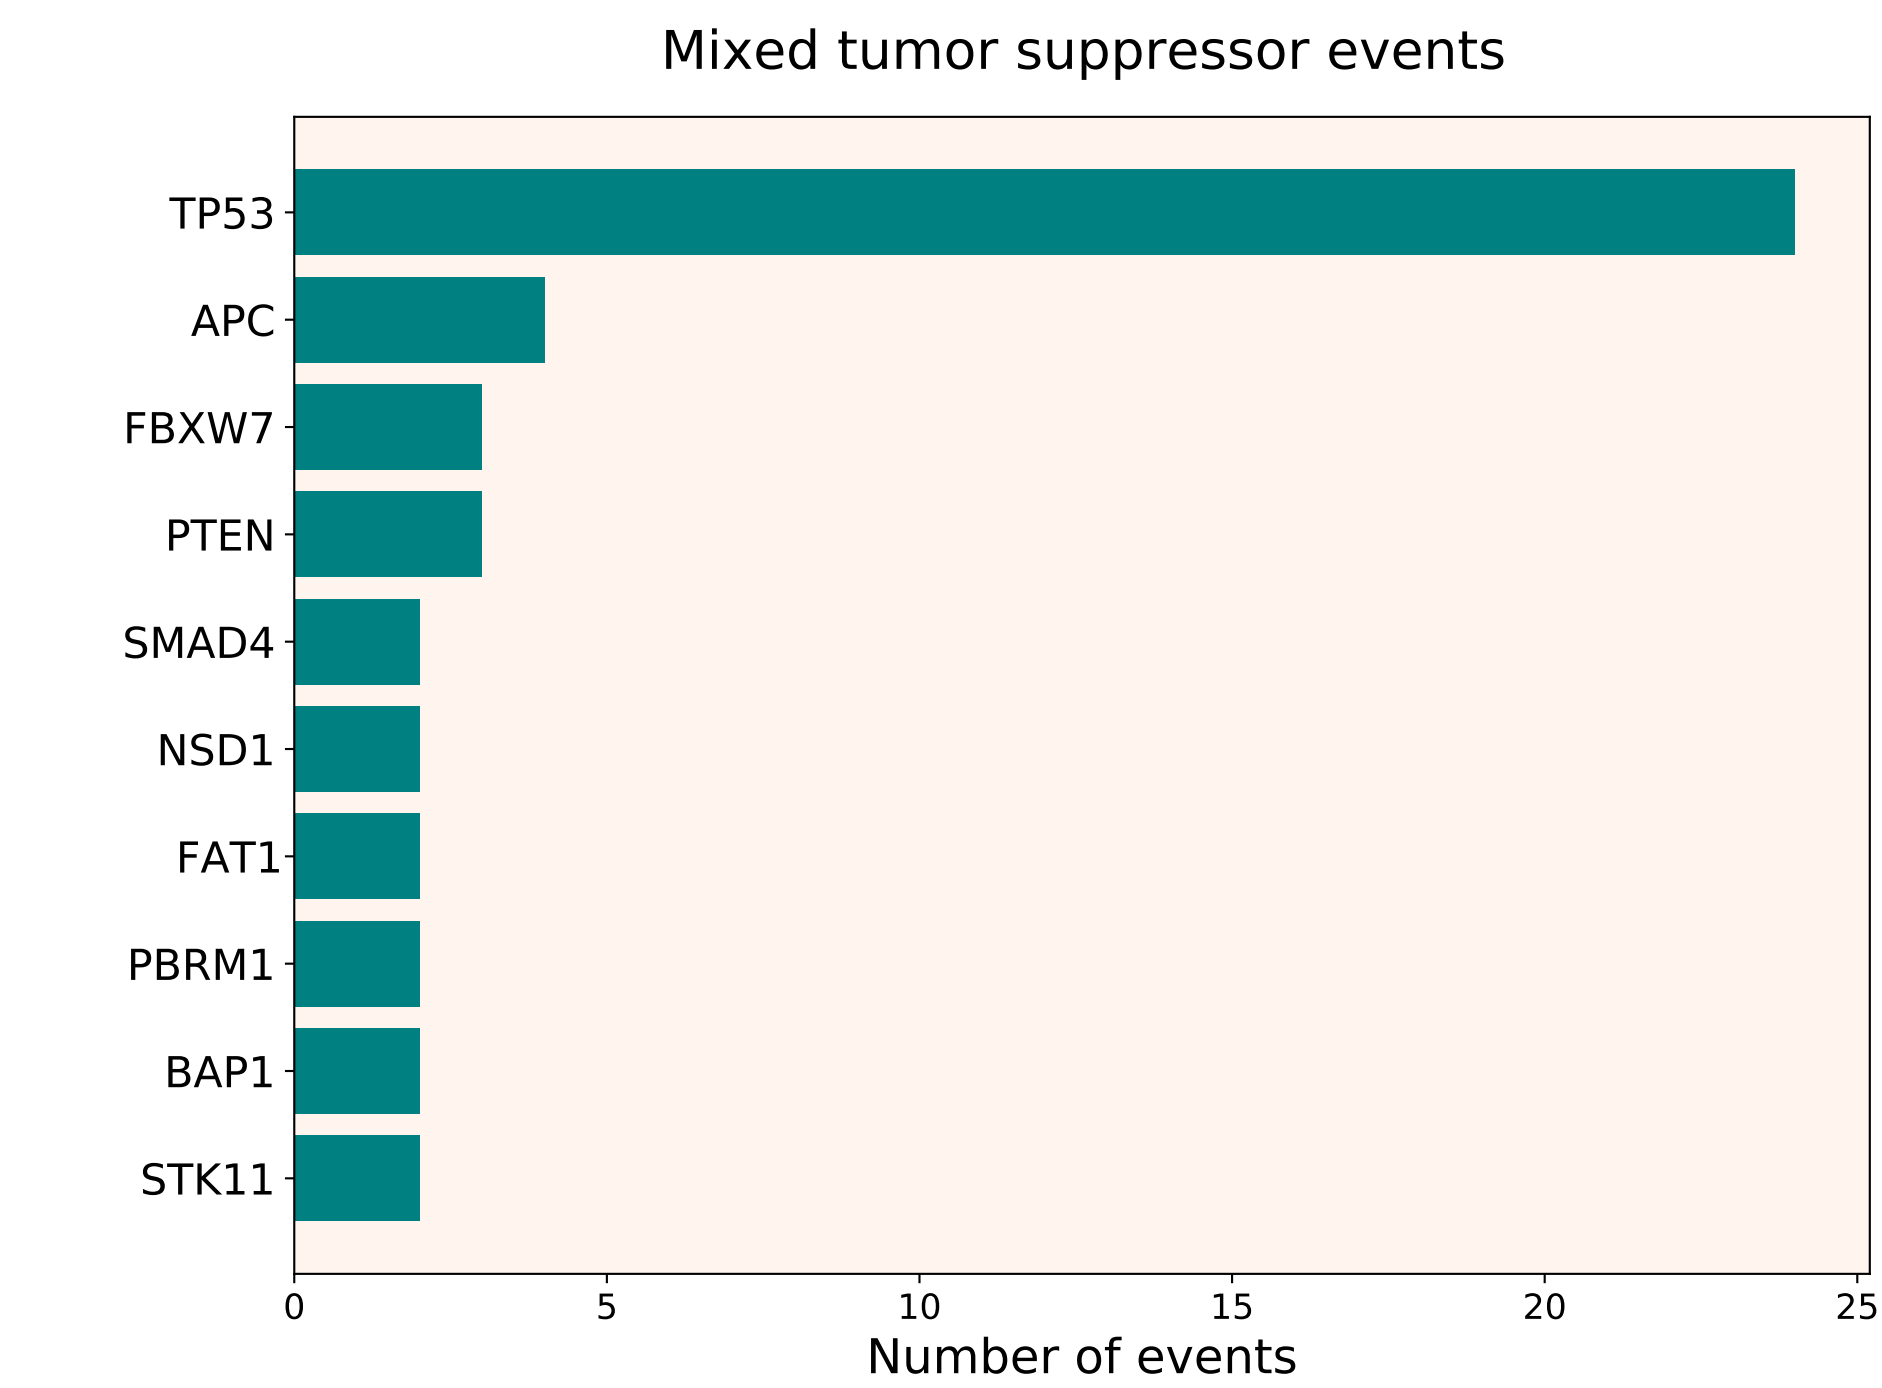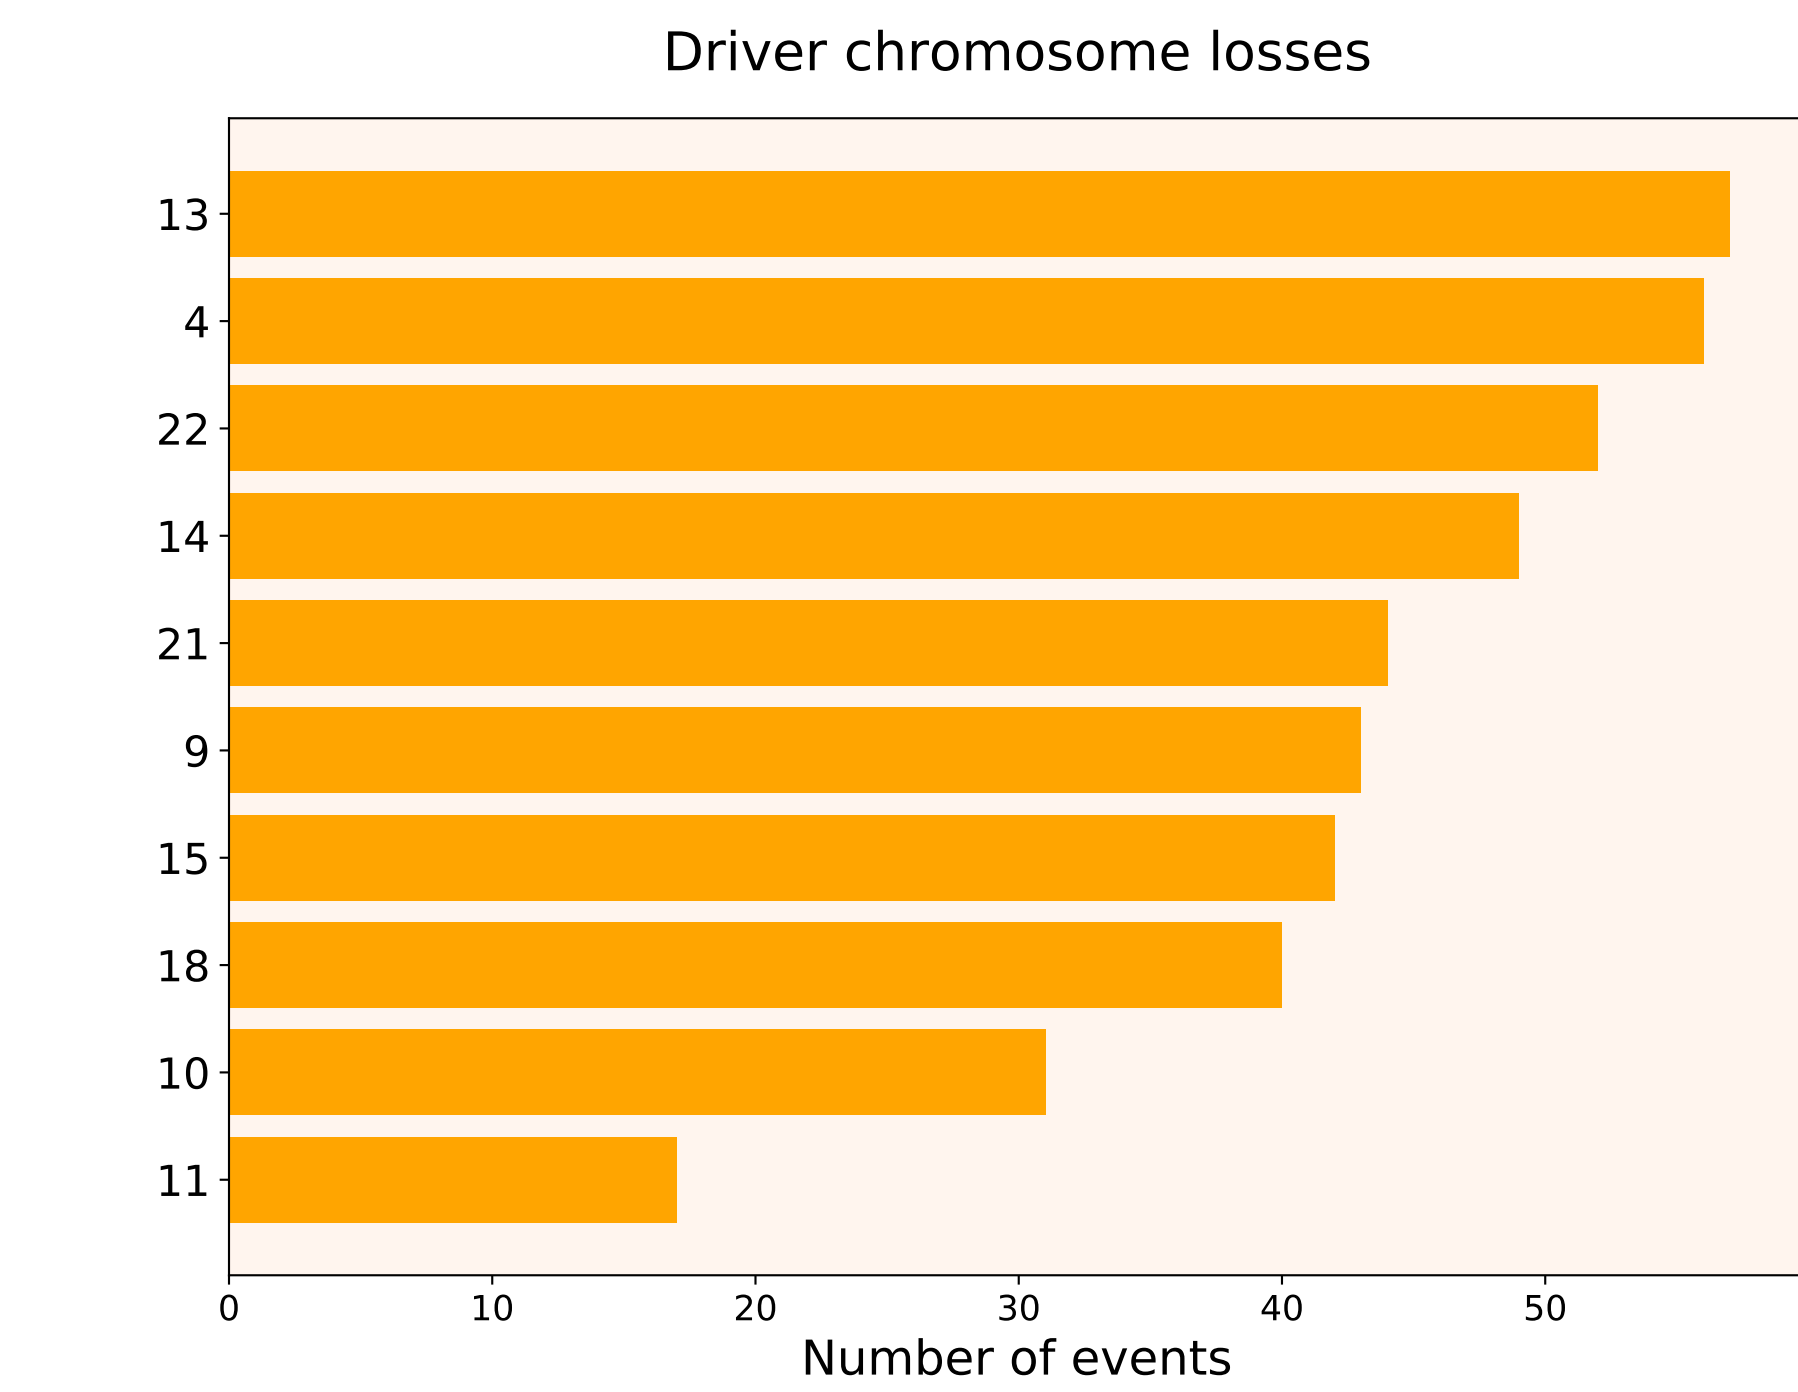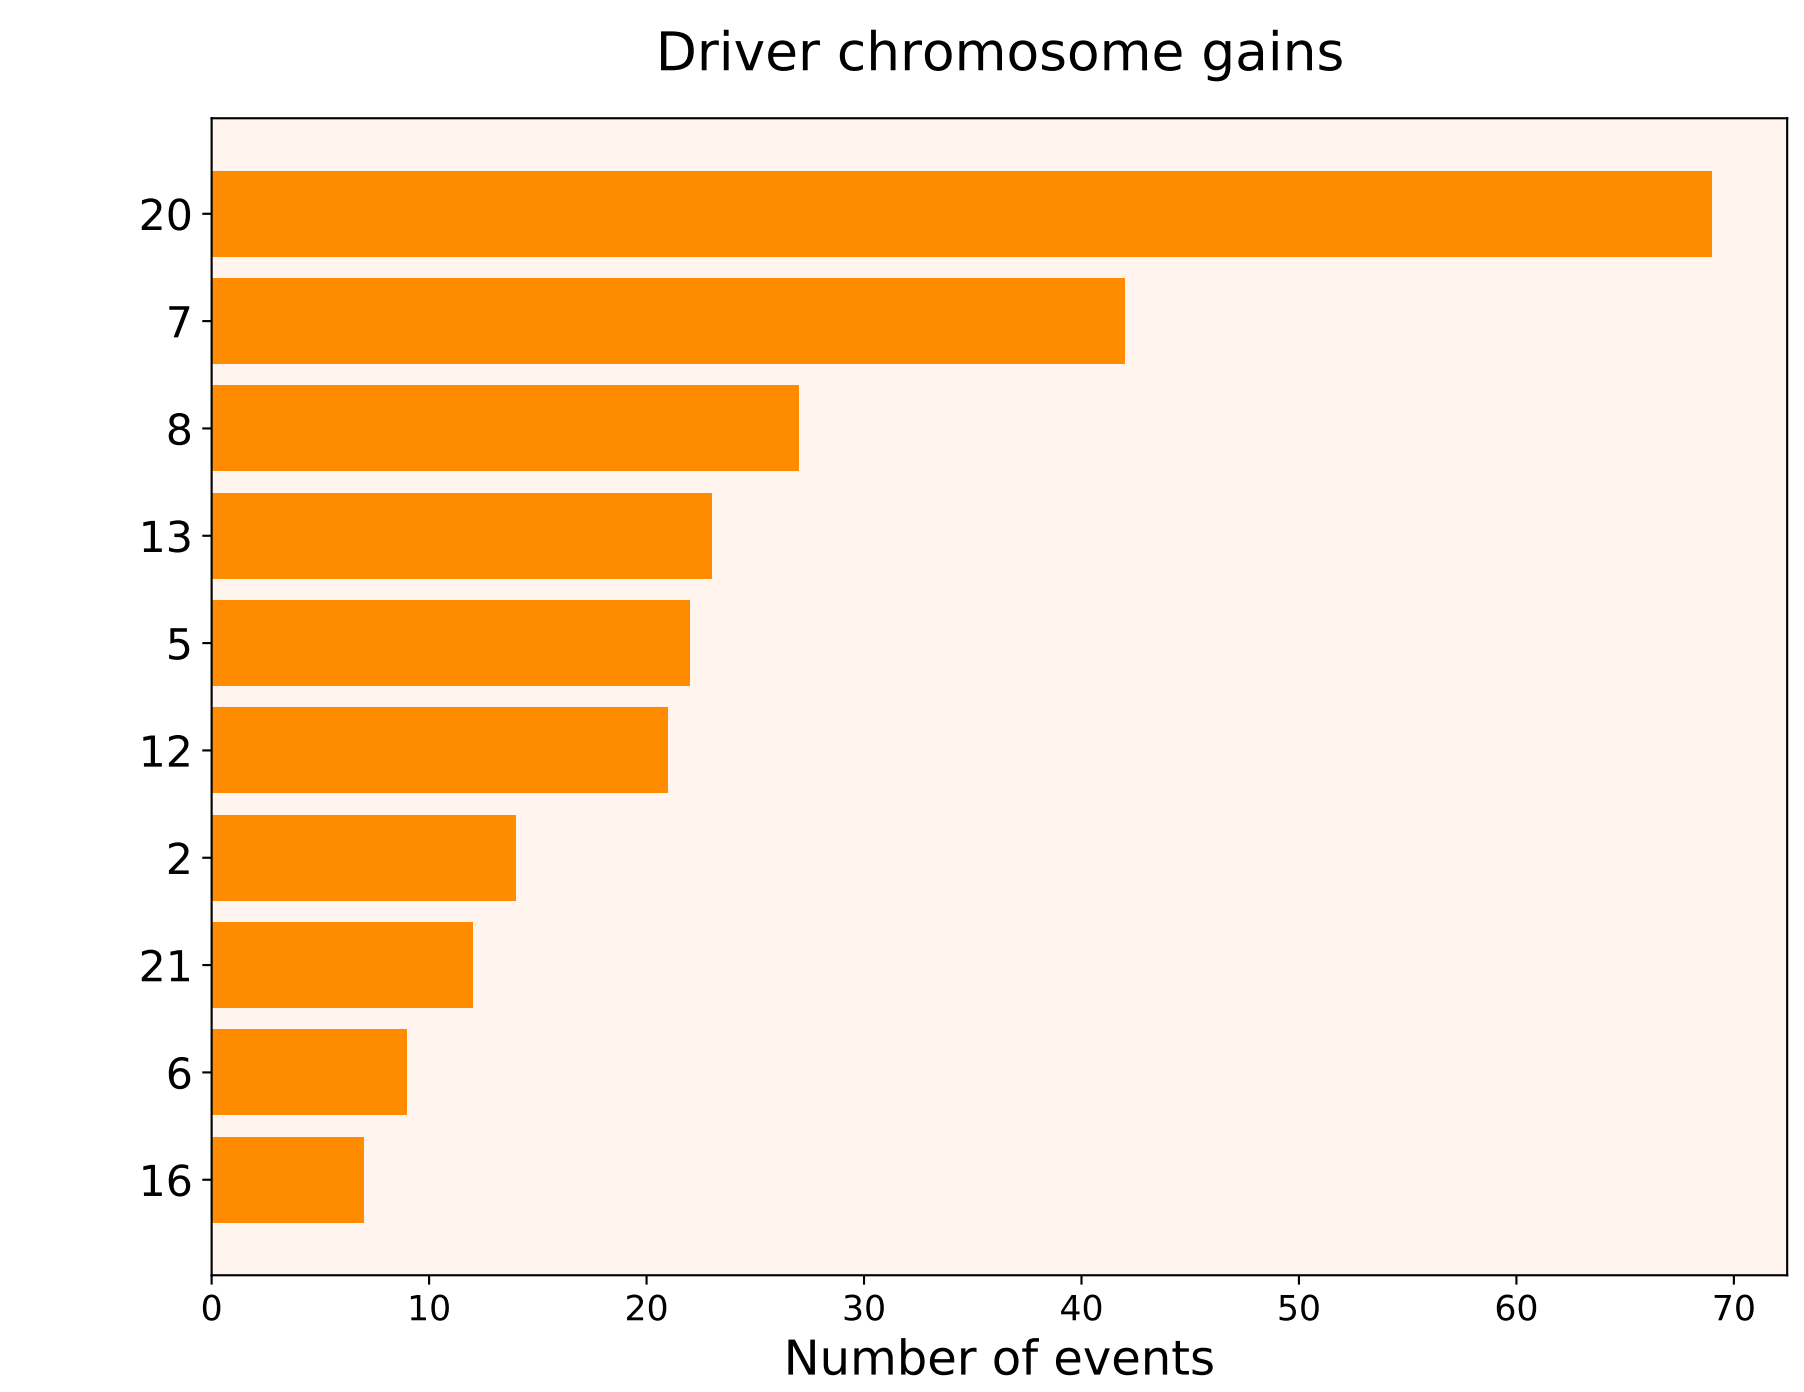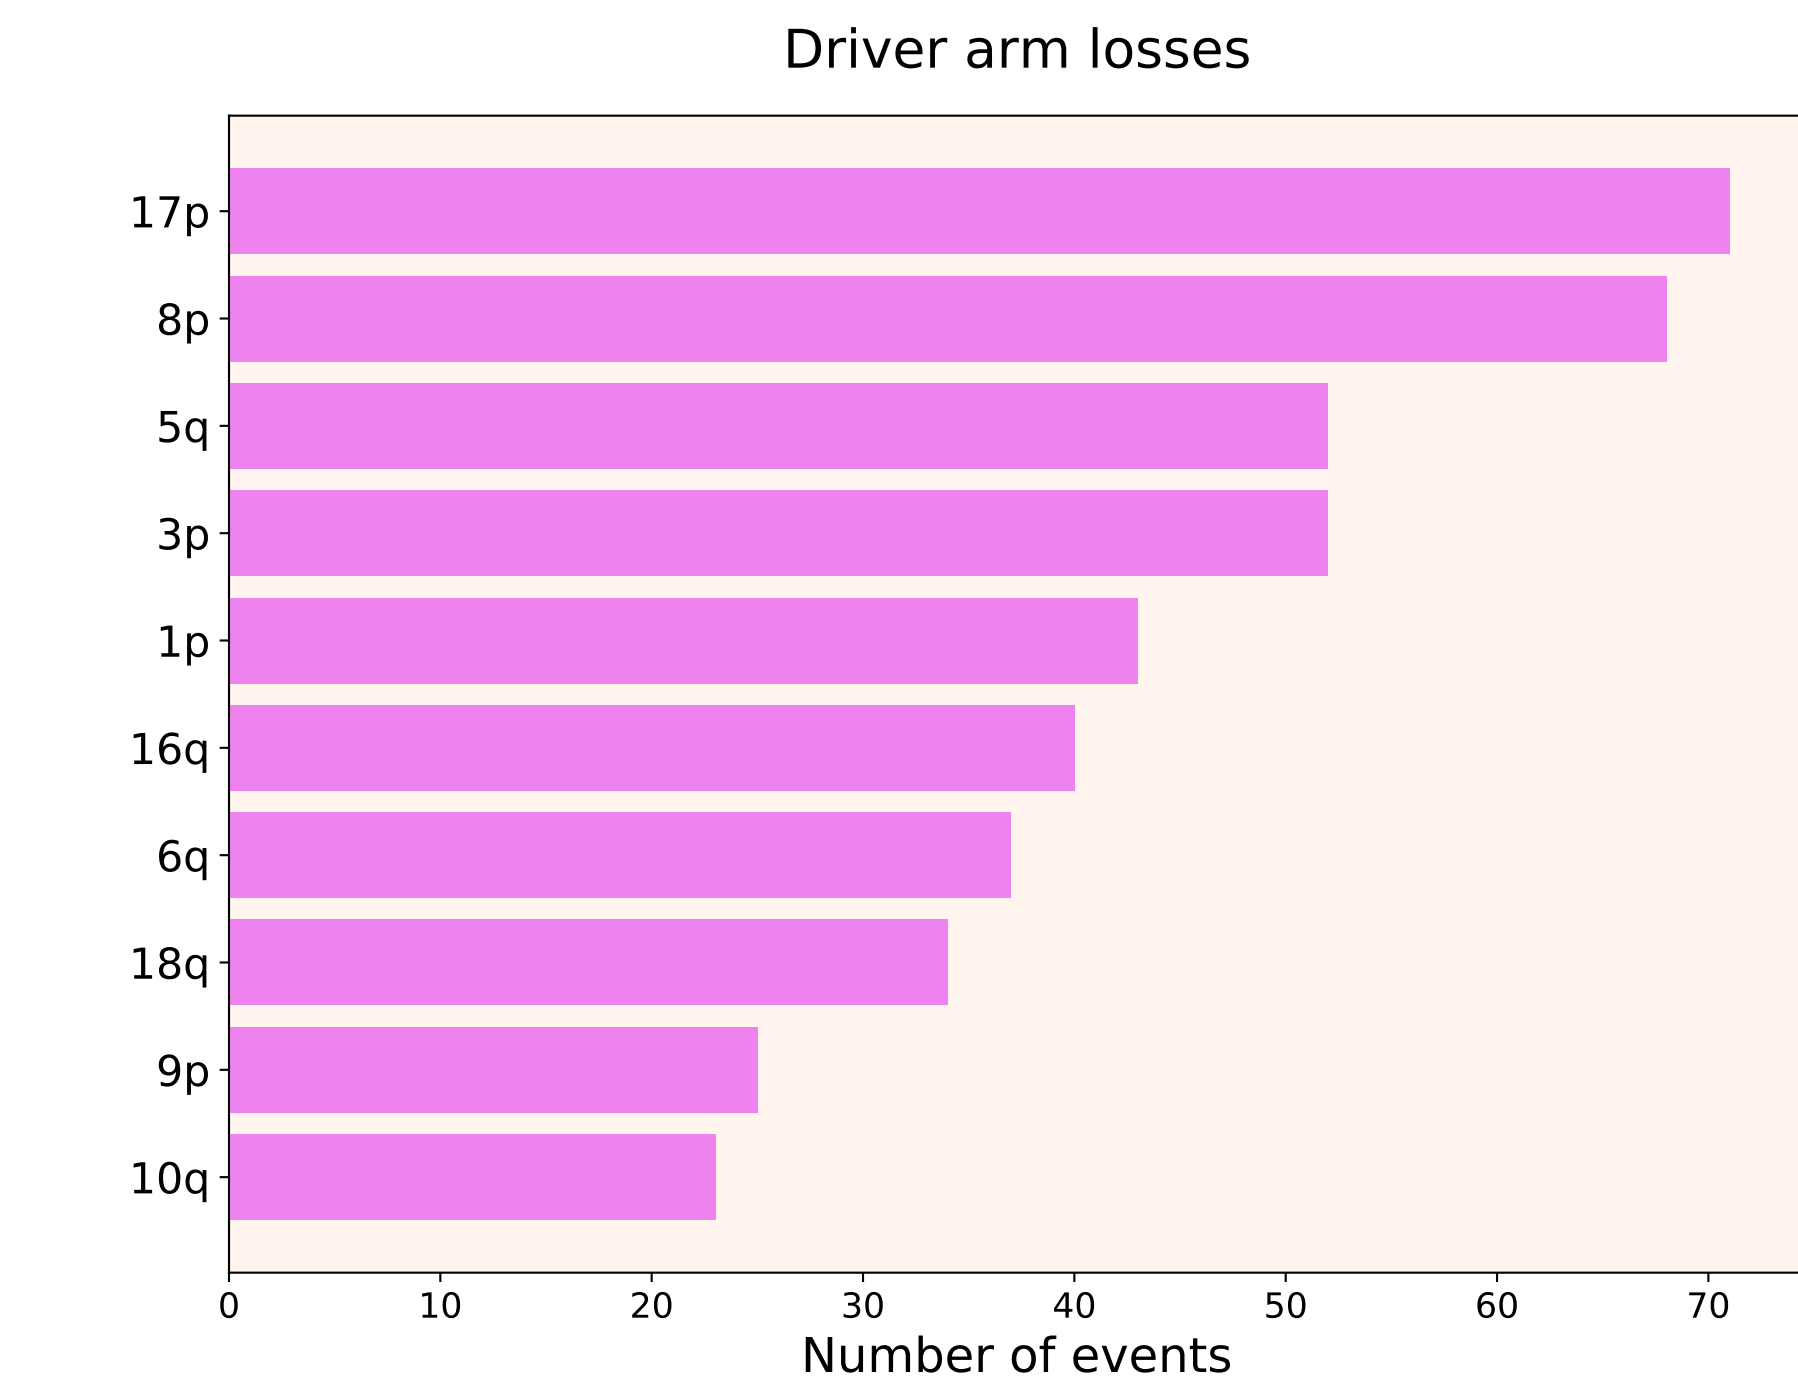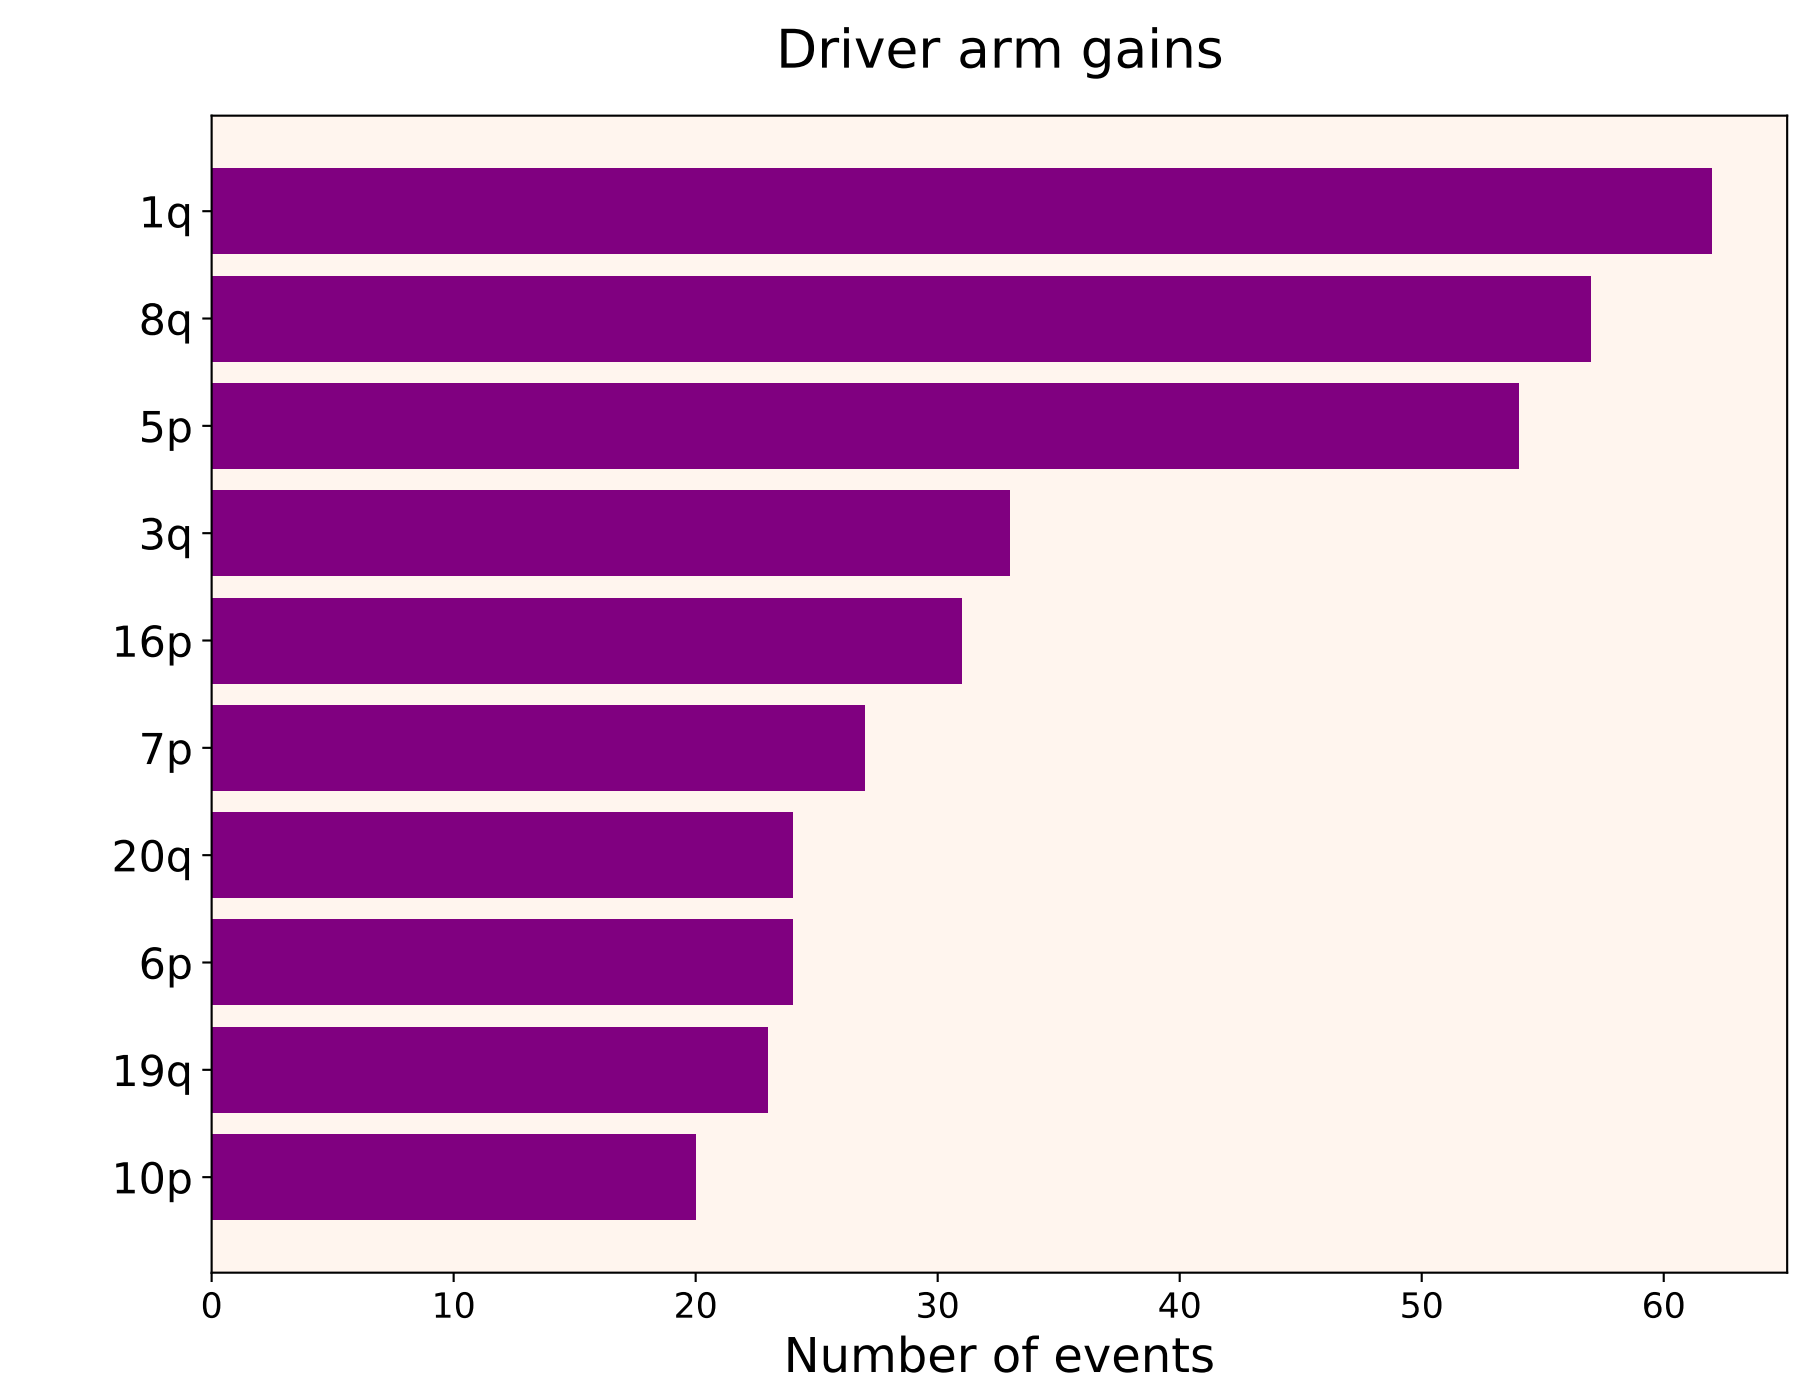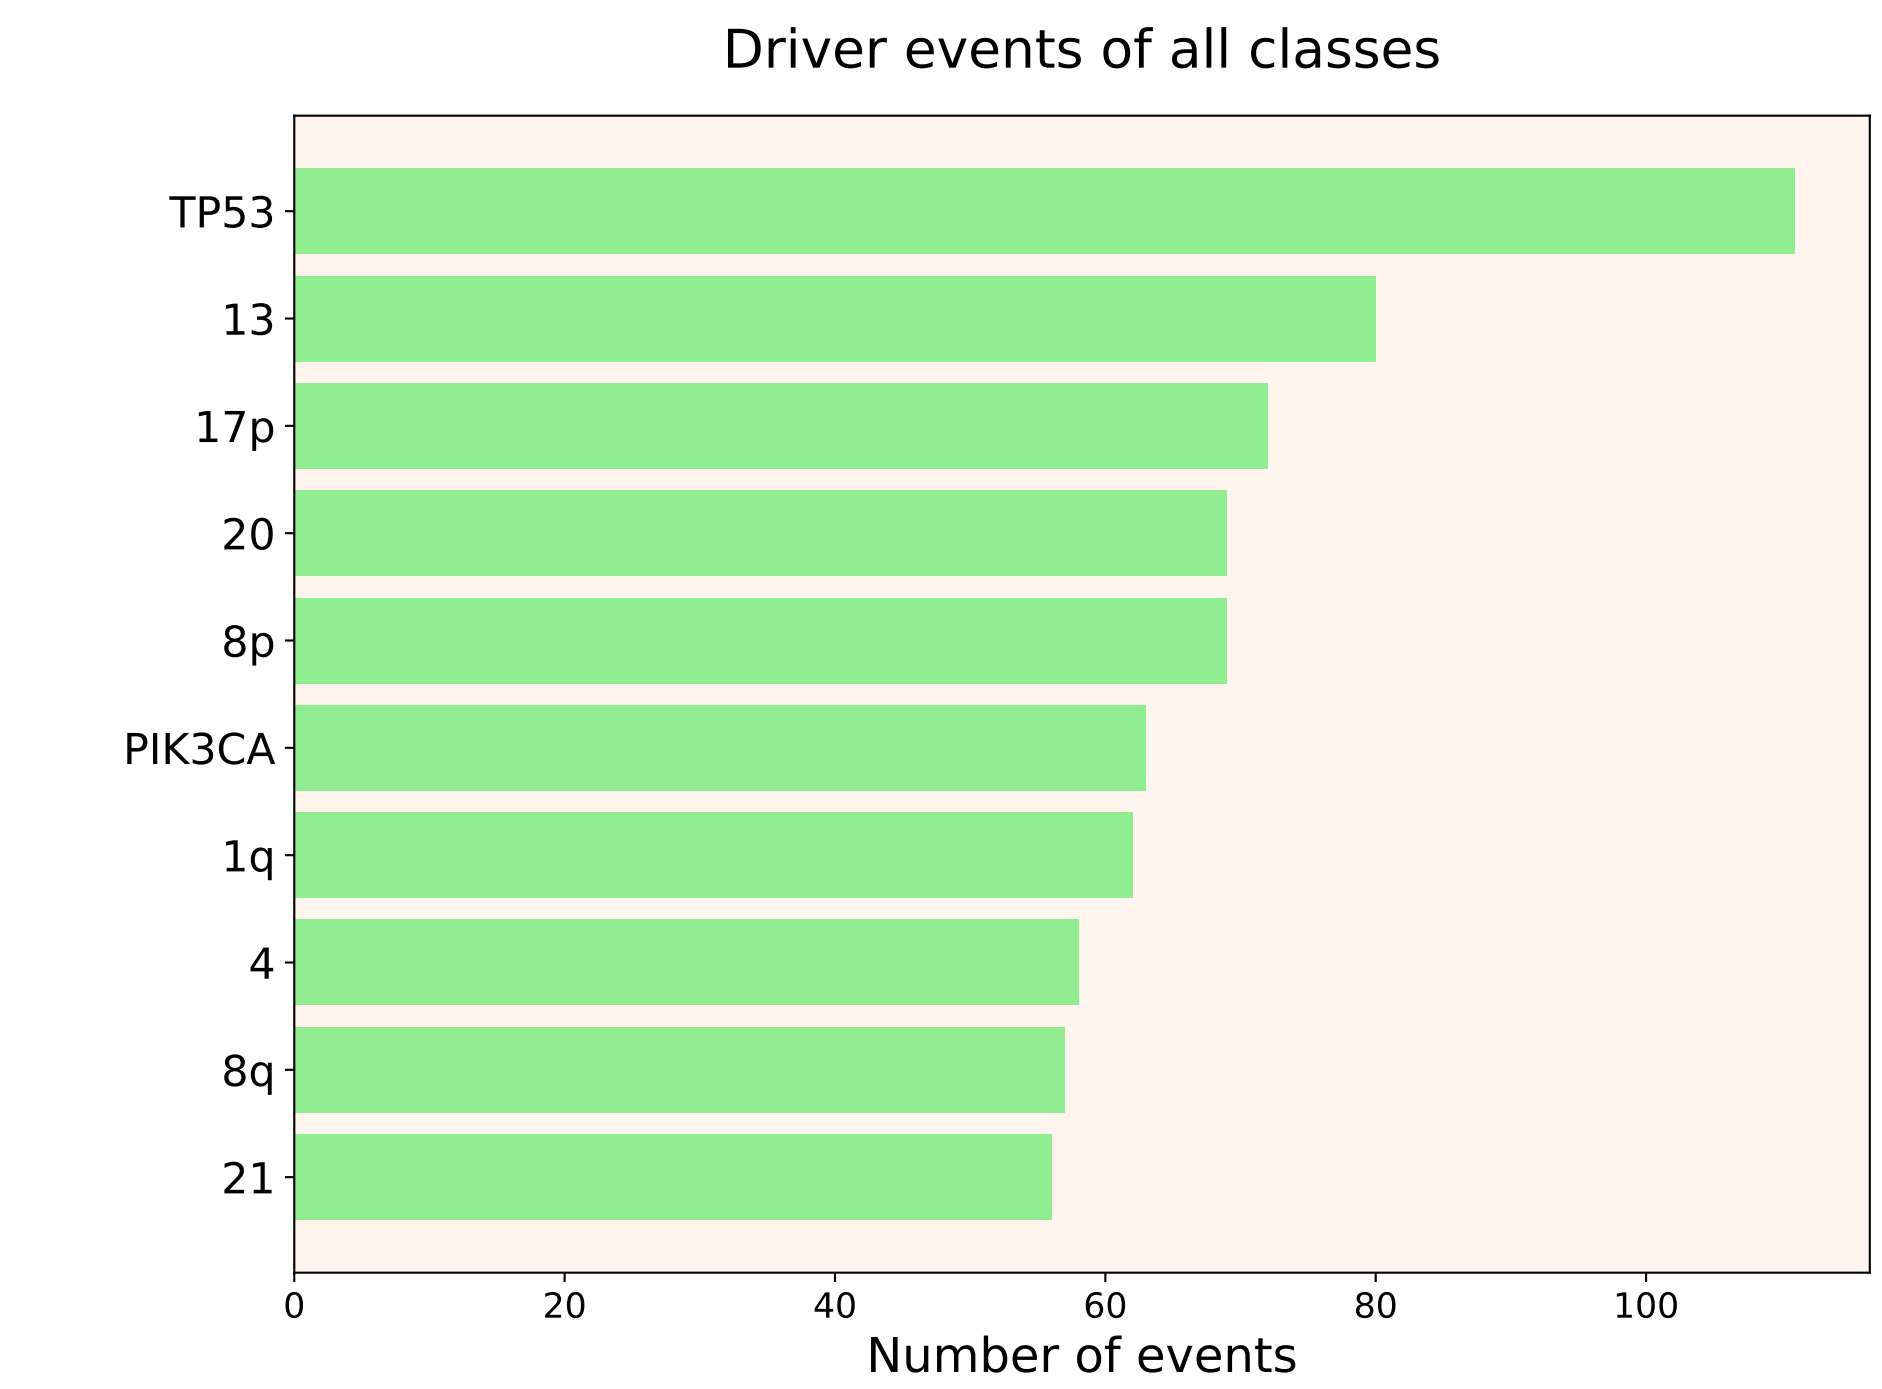

Supplement: Supplemental_Data_S1.zip [file Supplemental_Data_S1.zip]

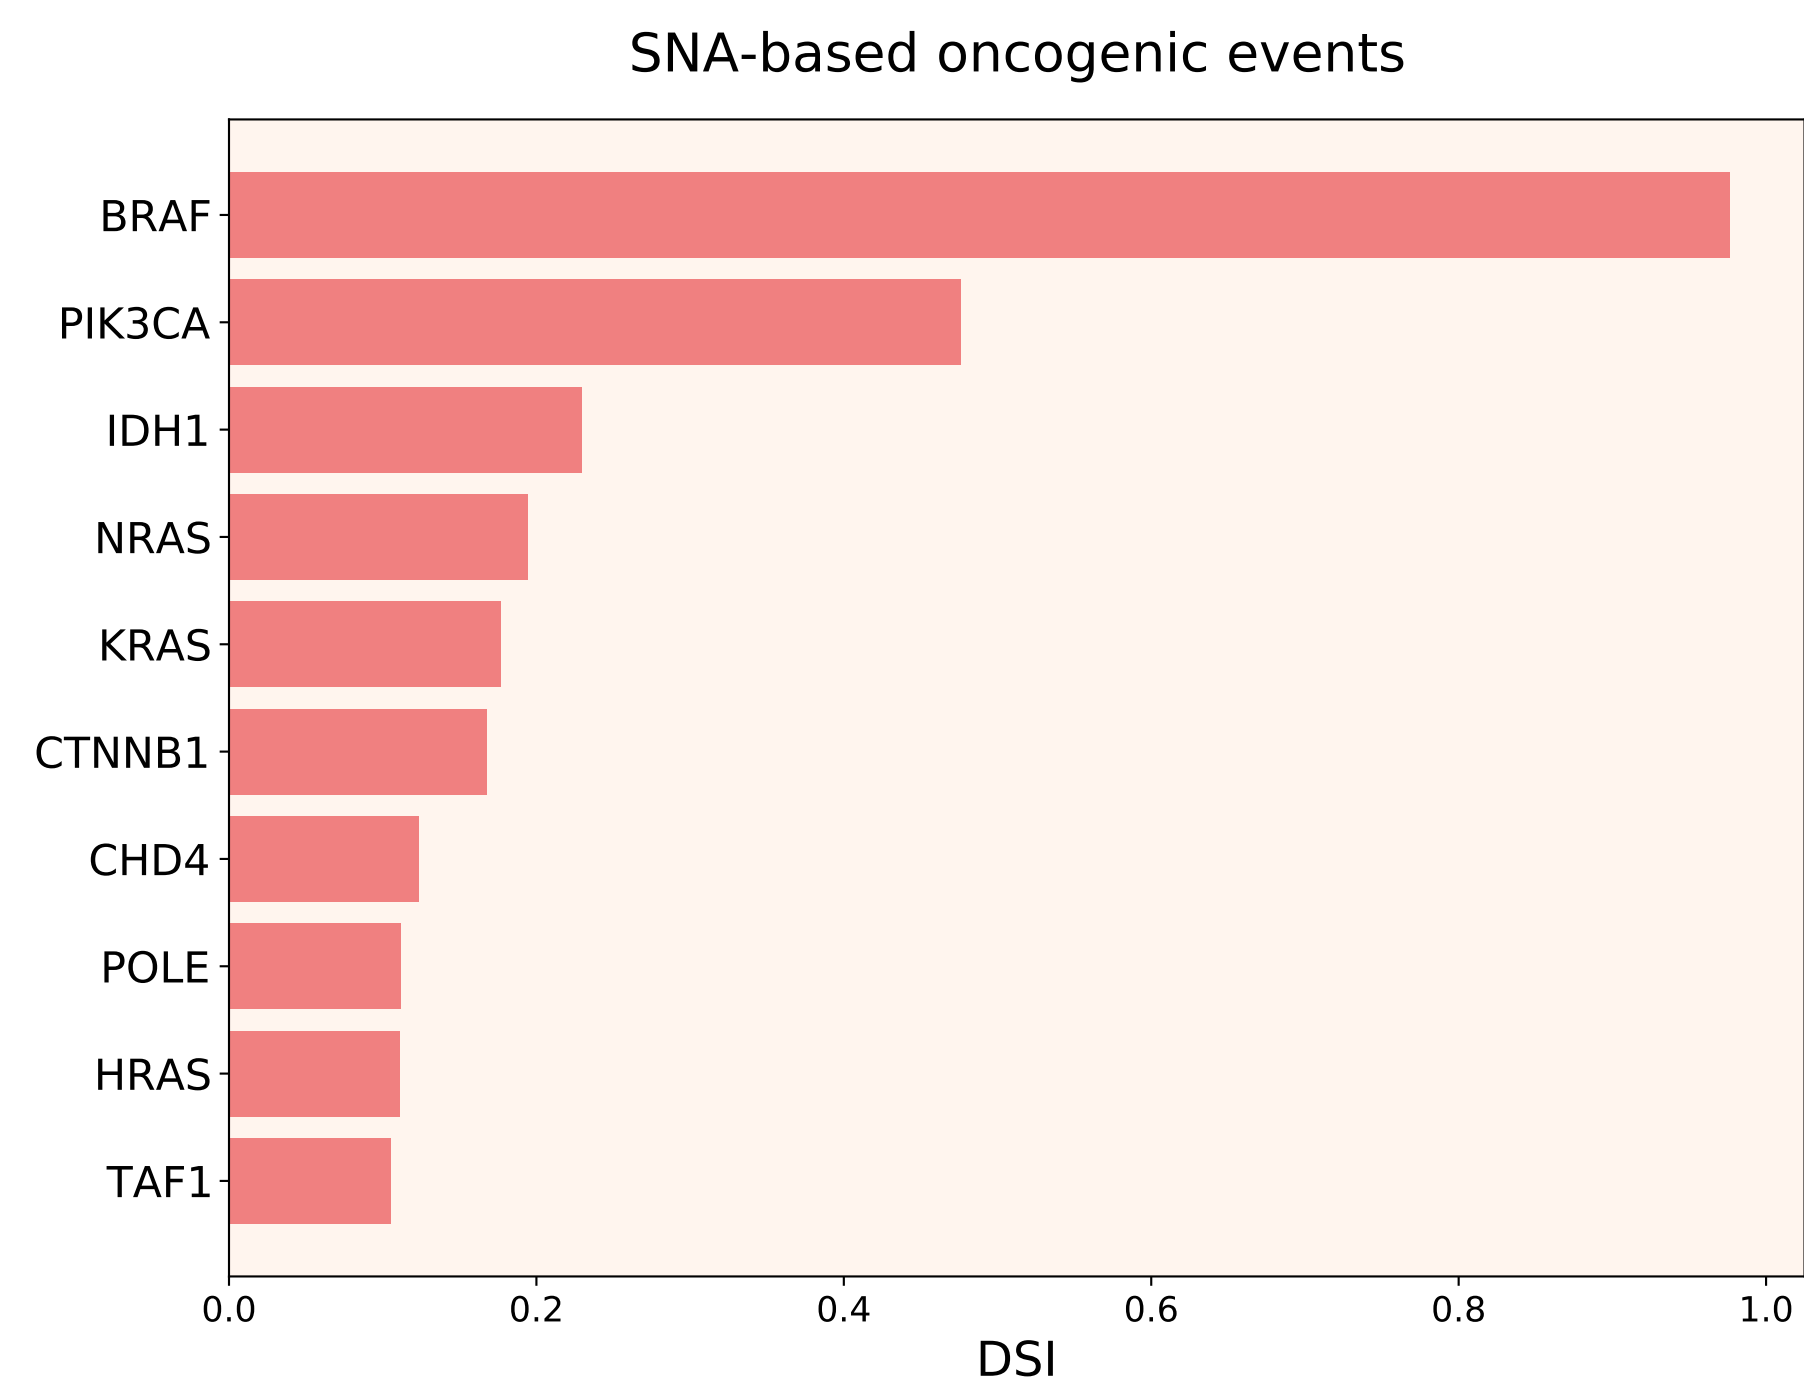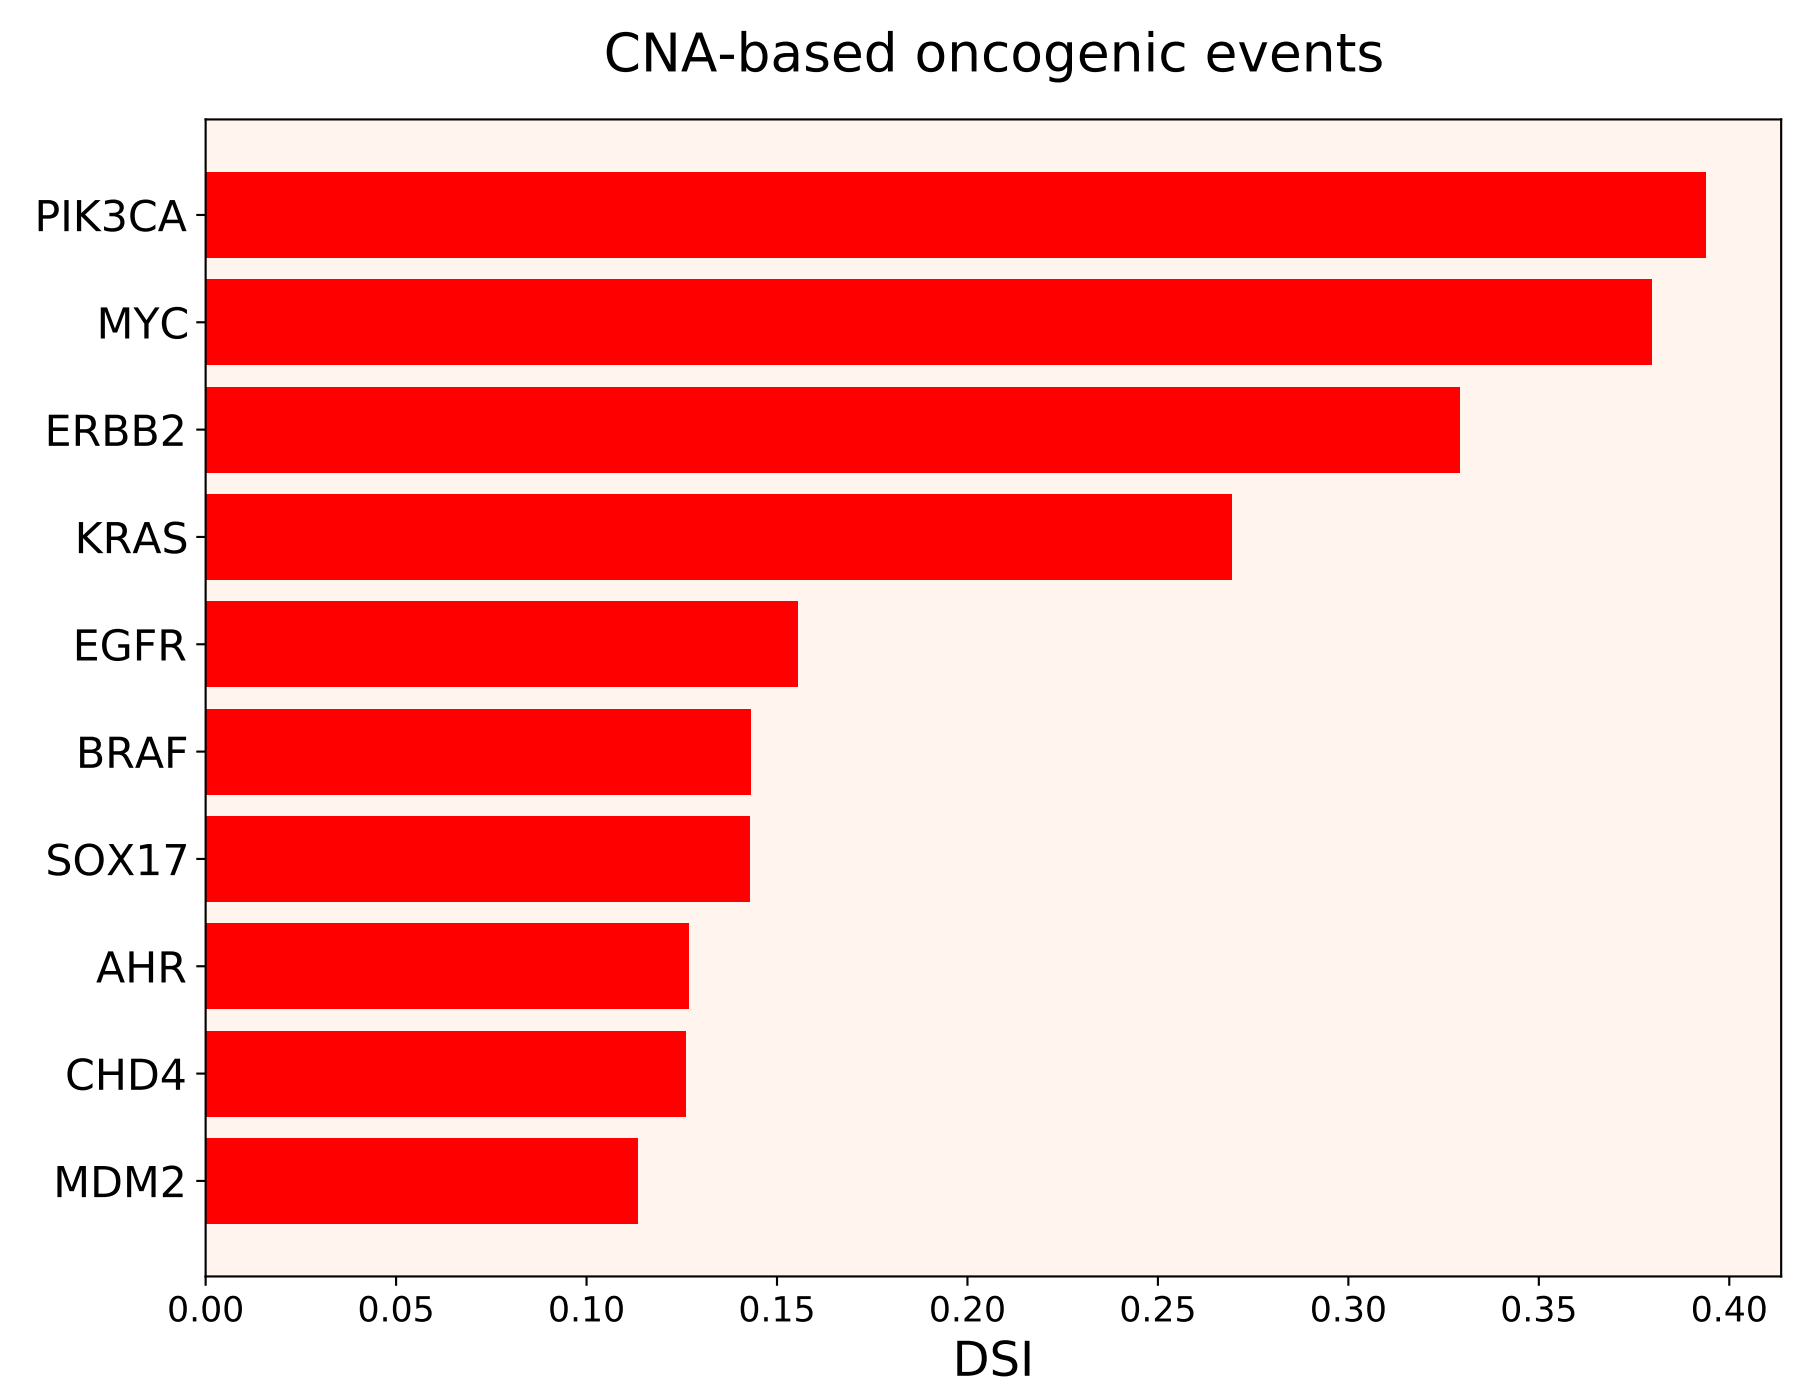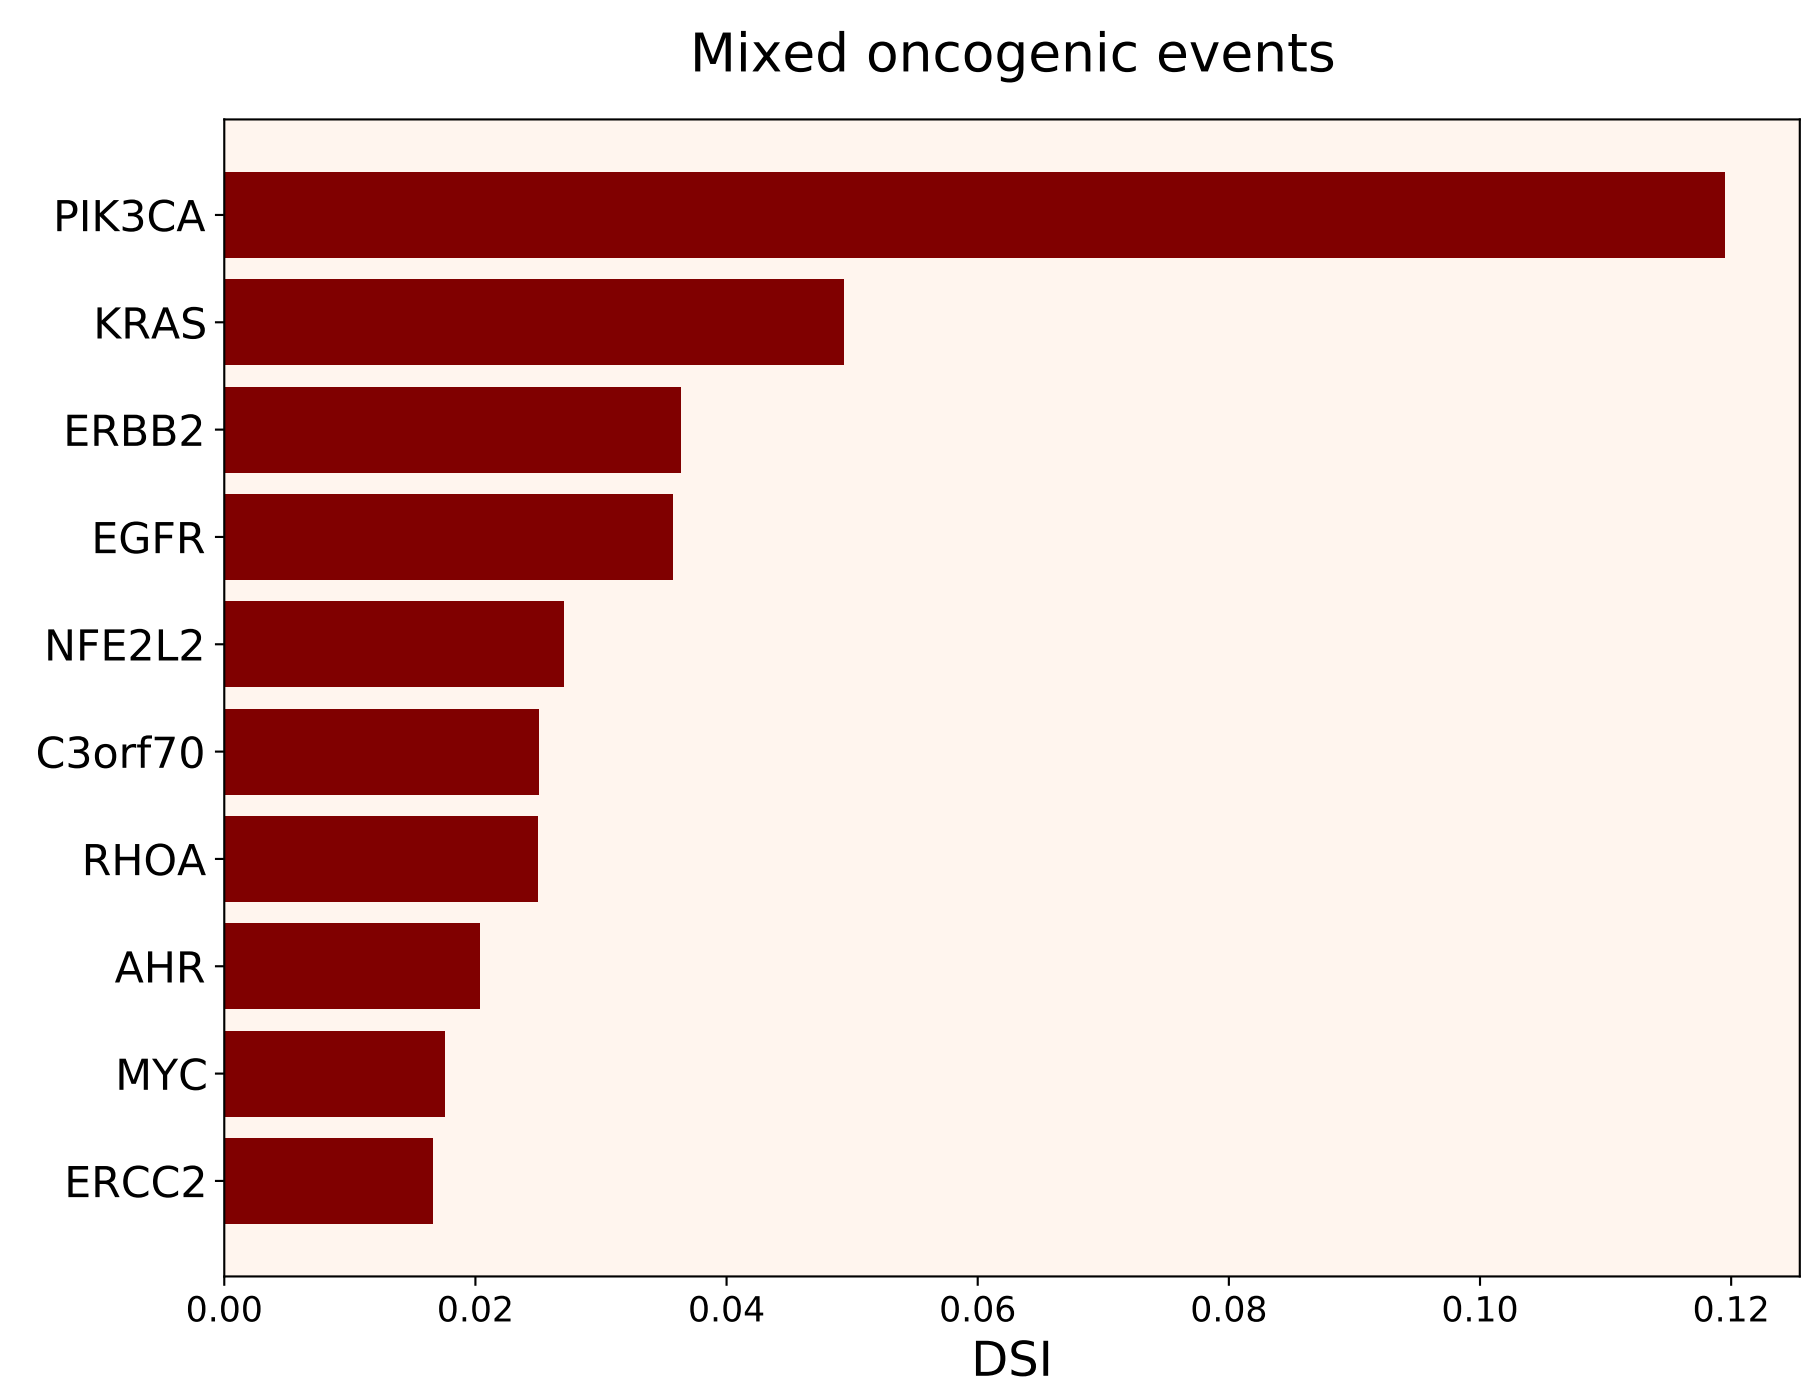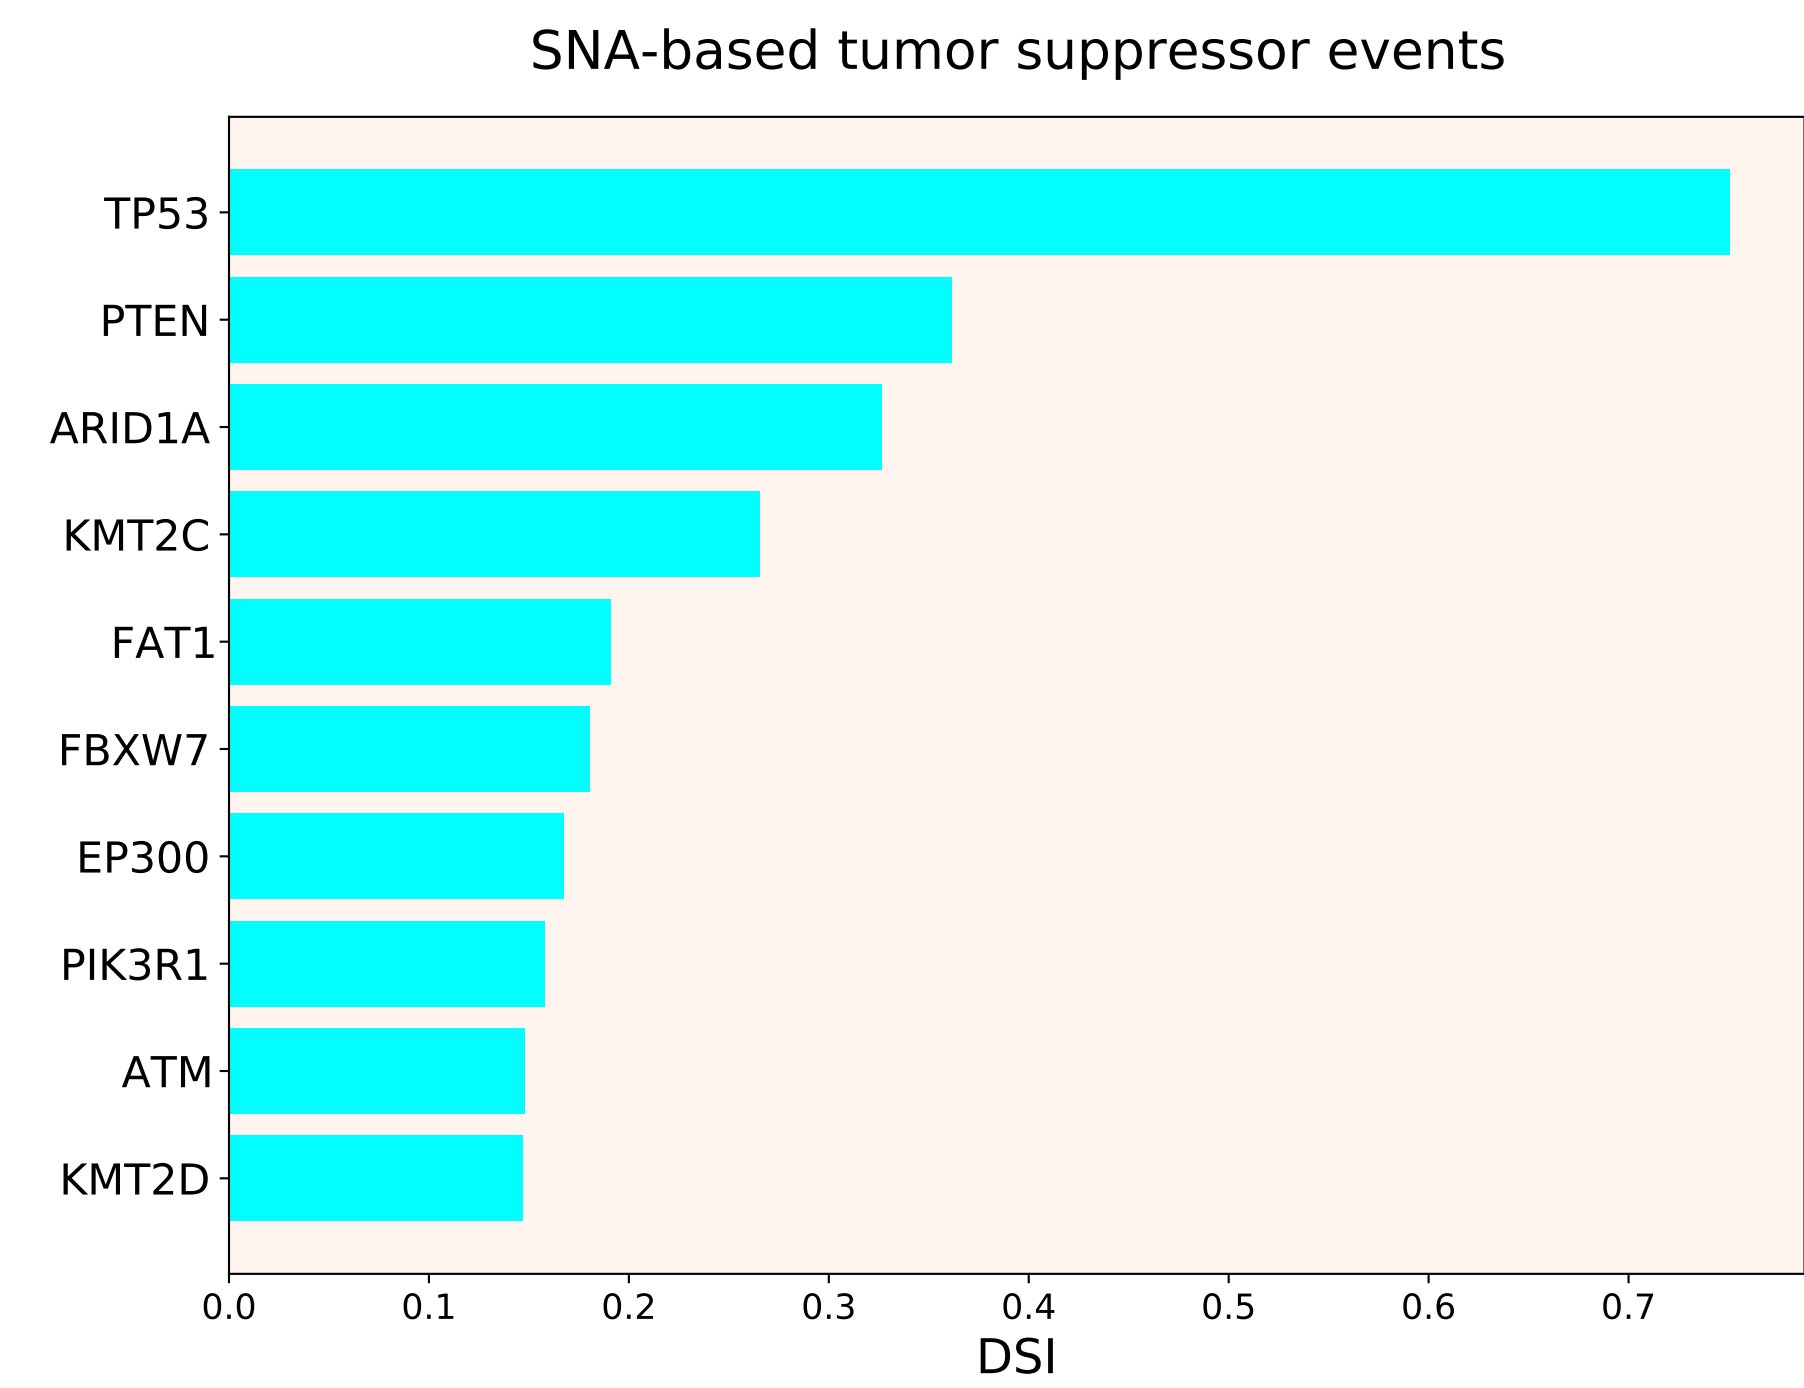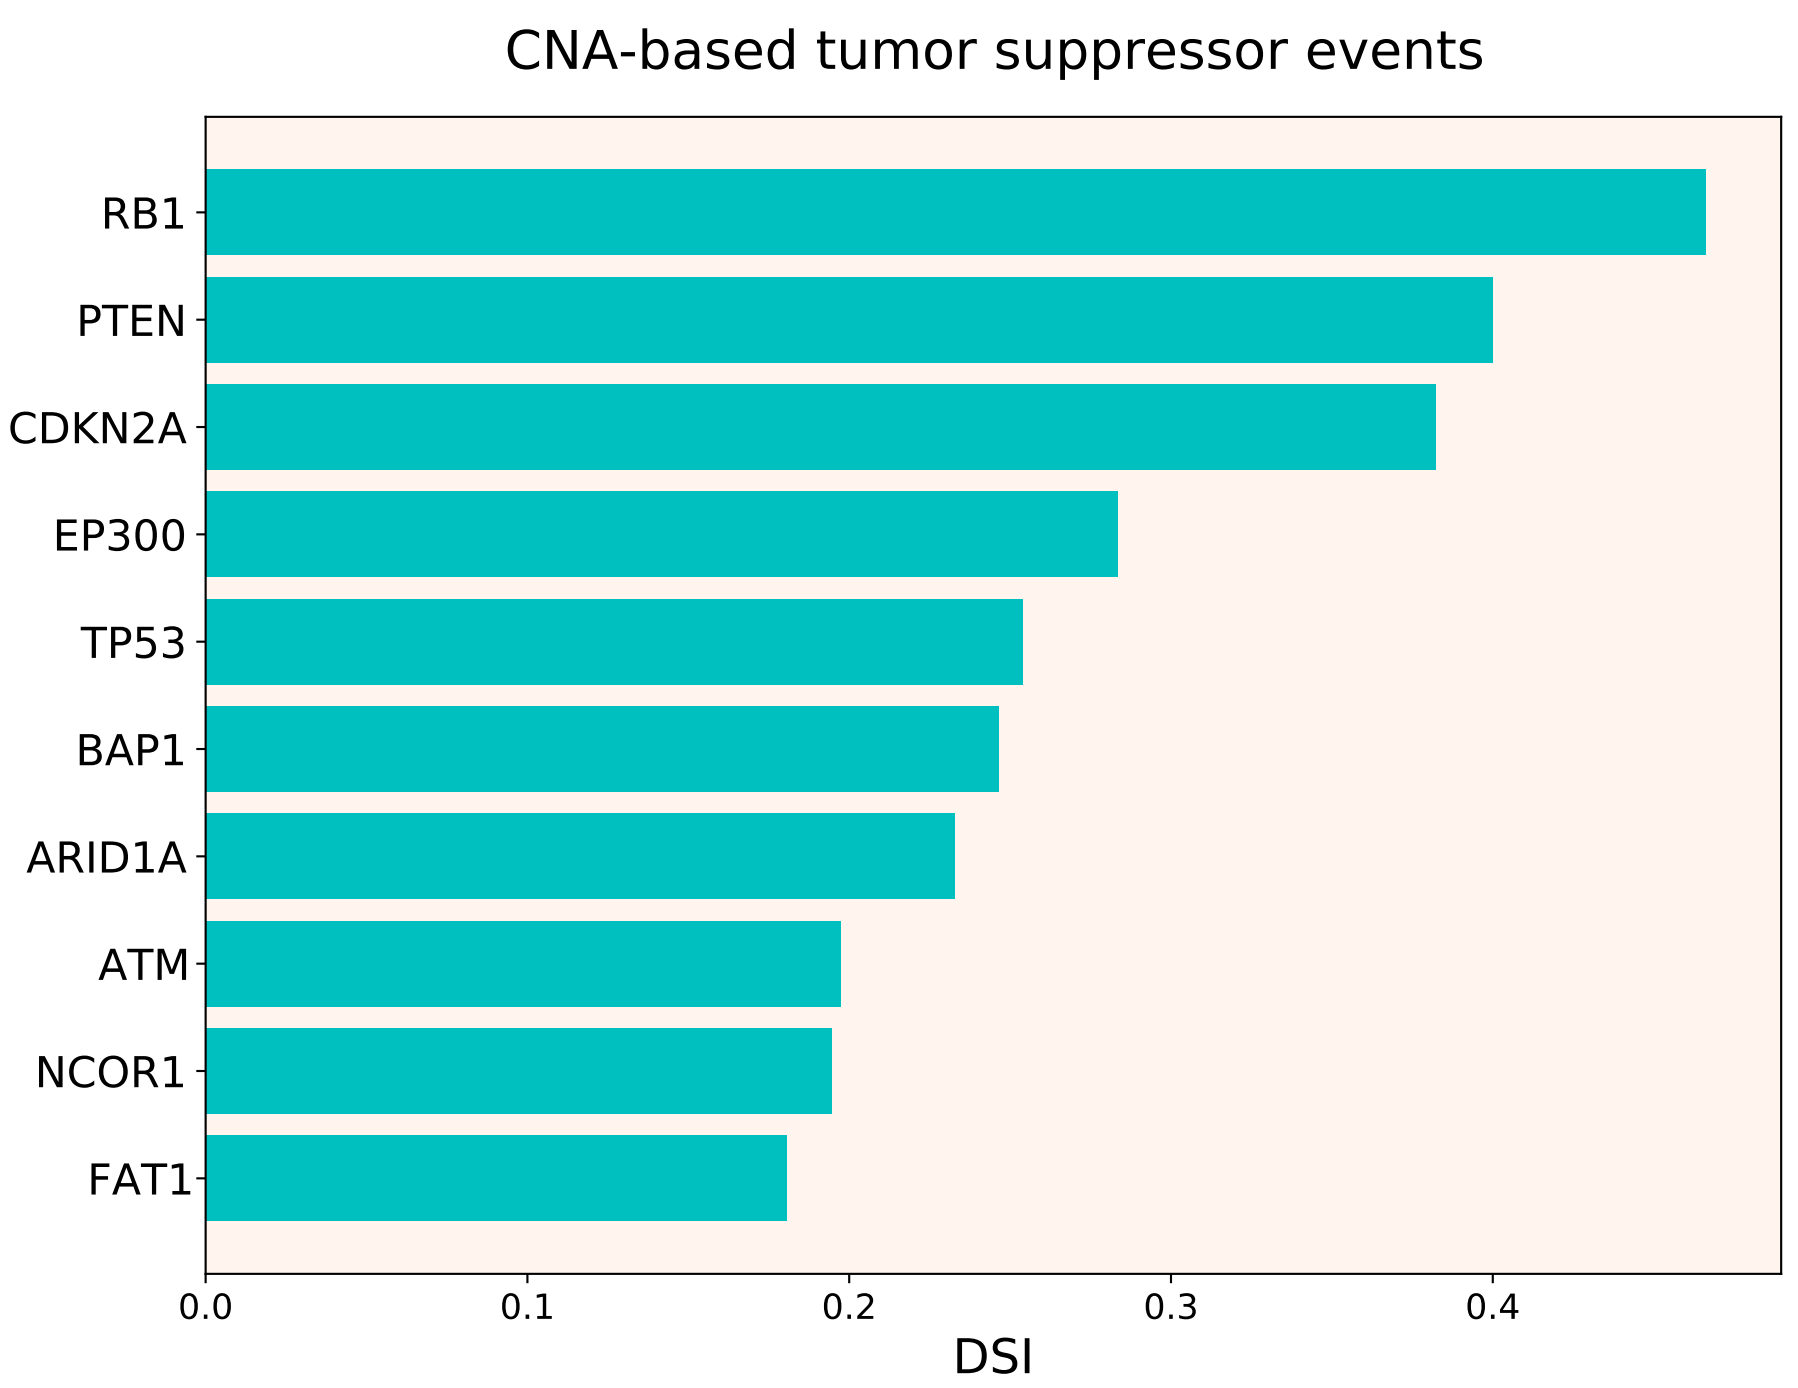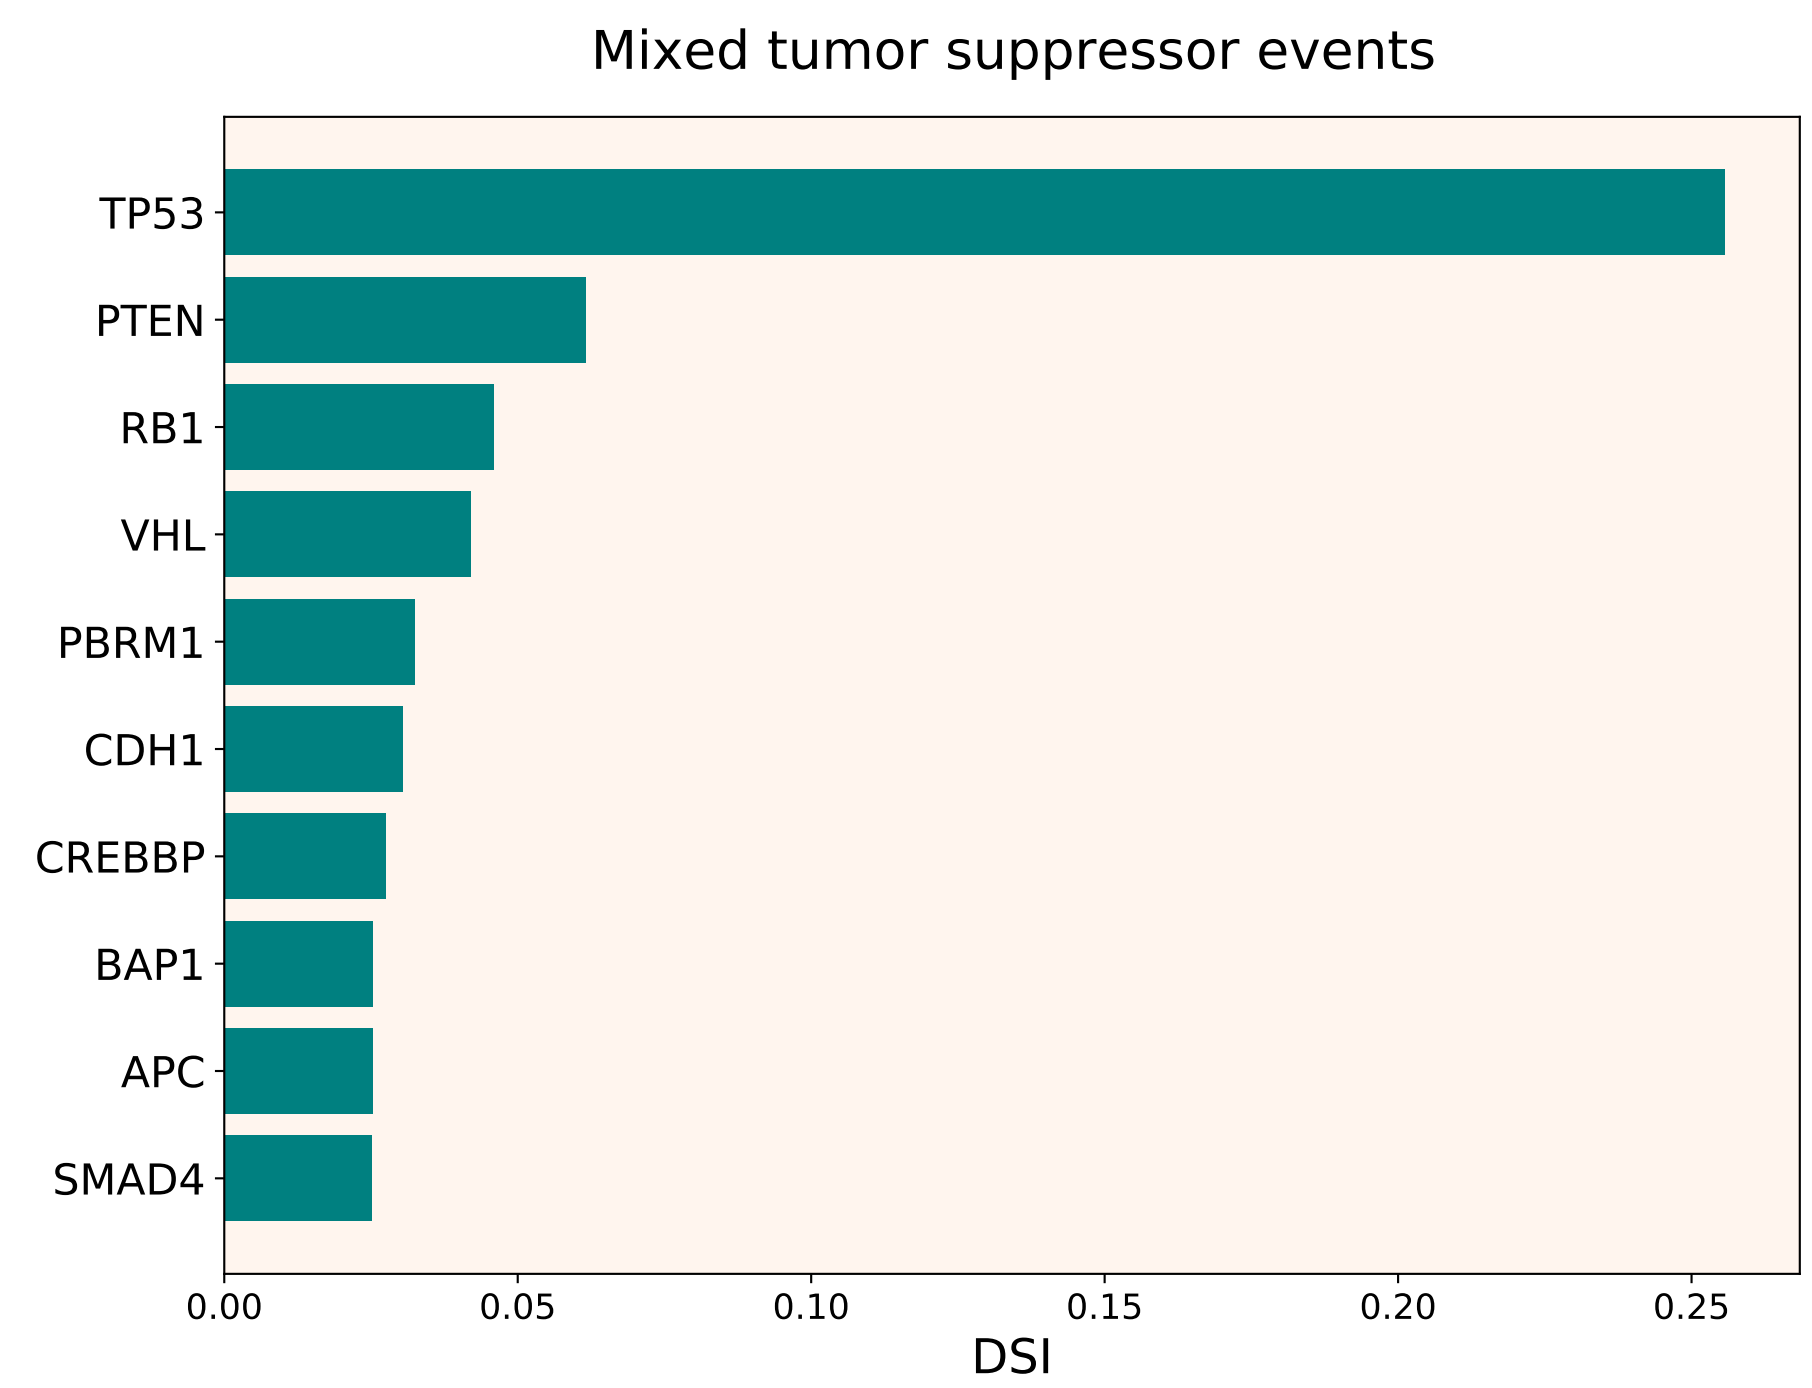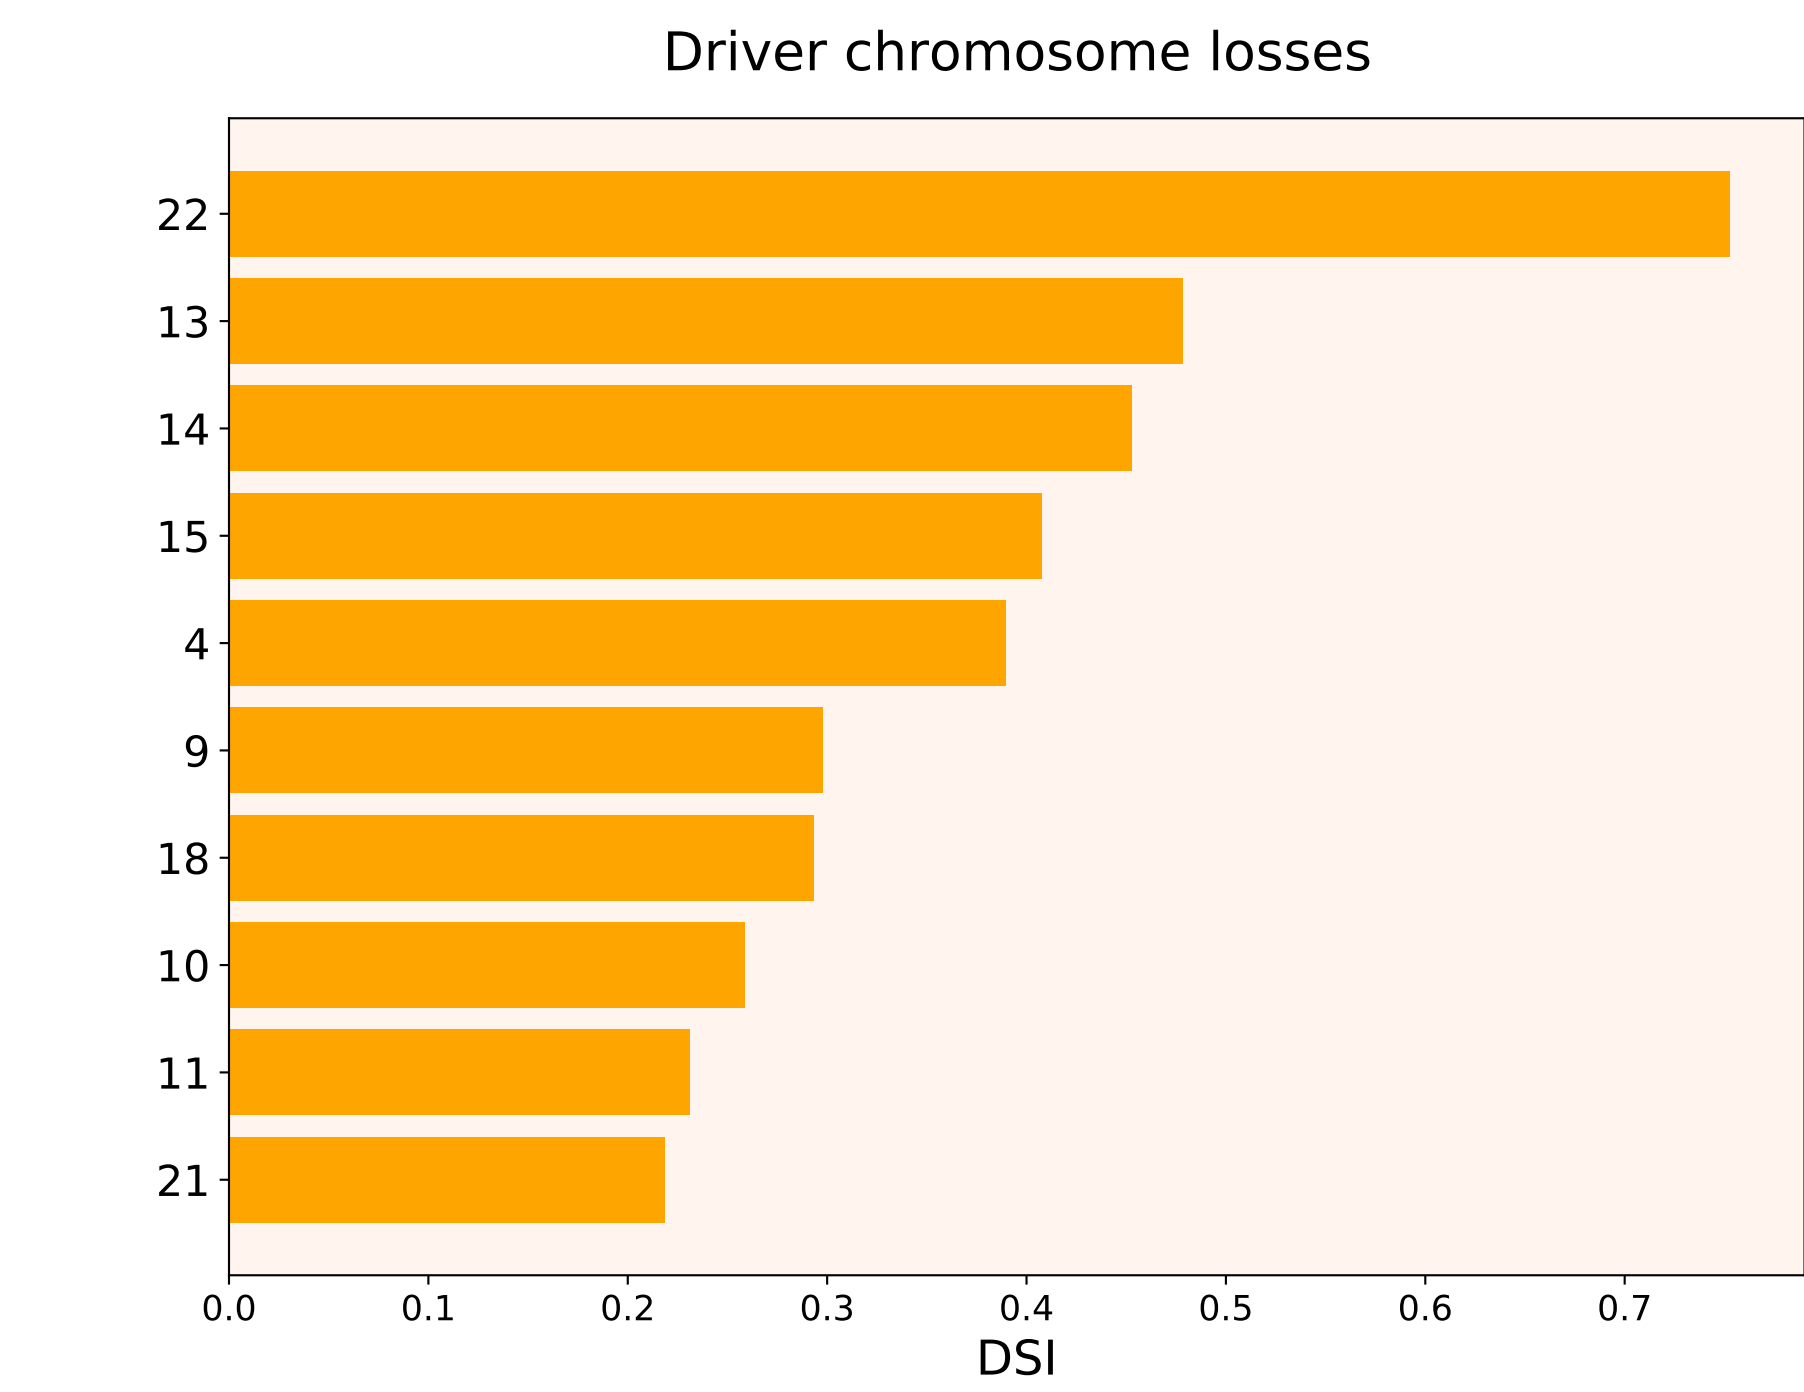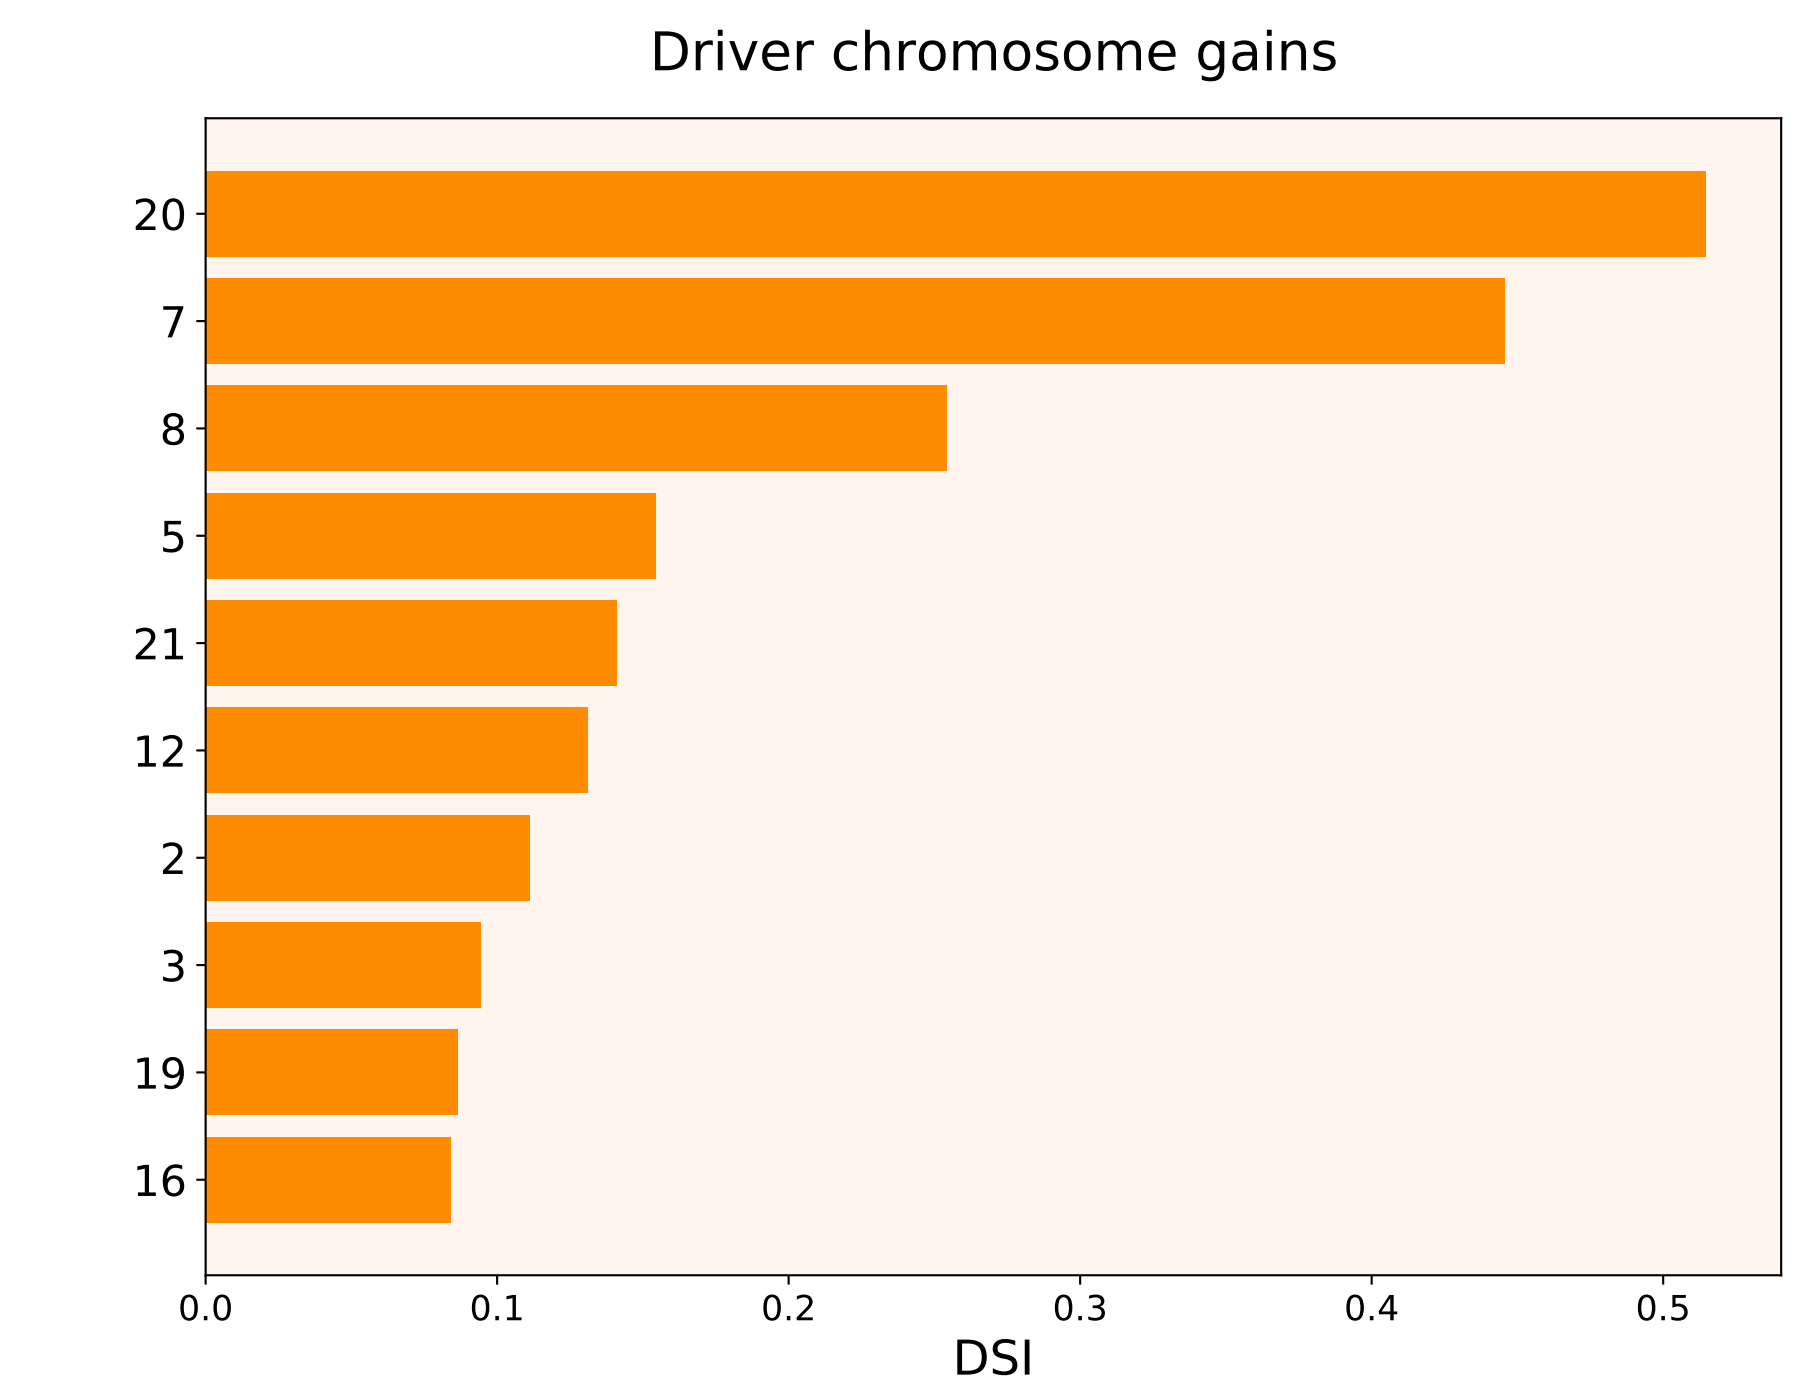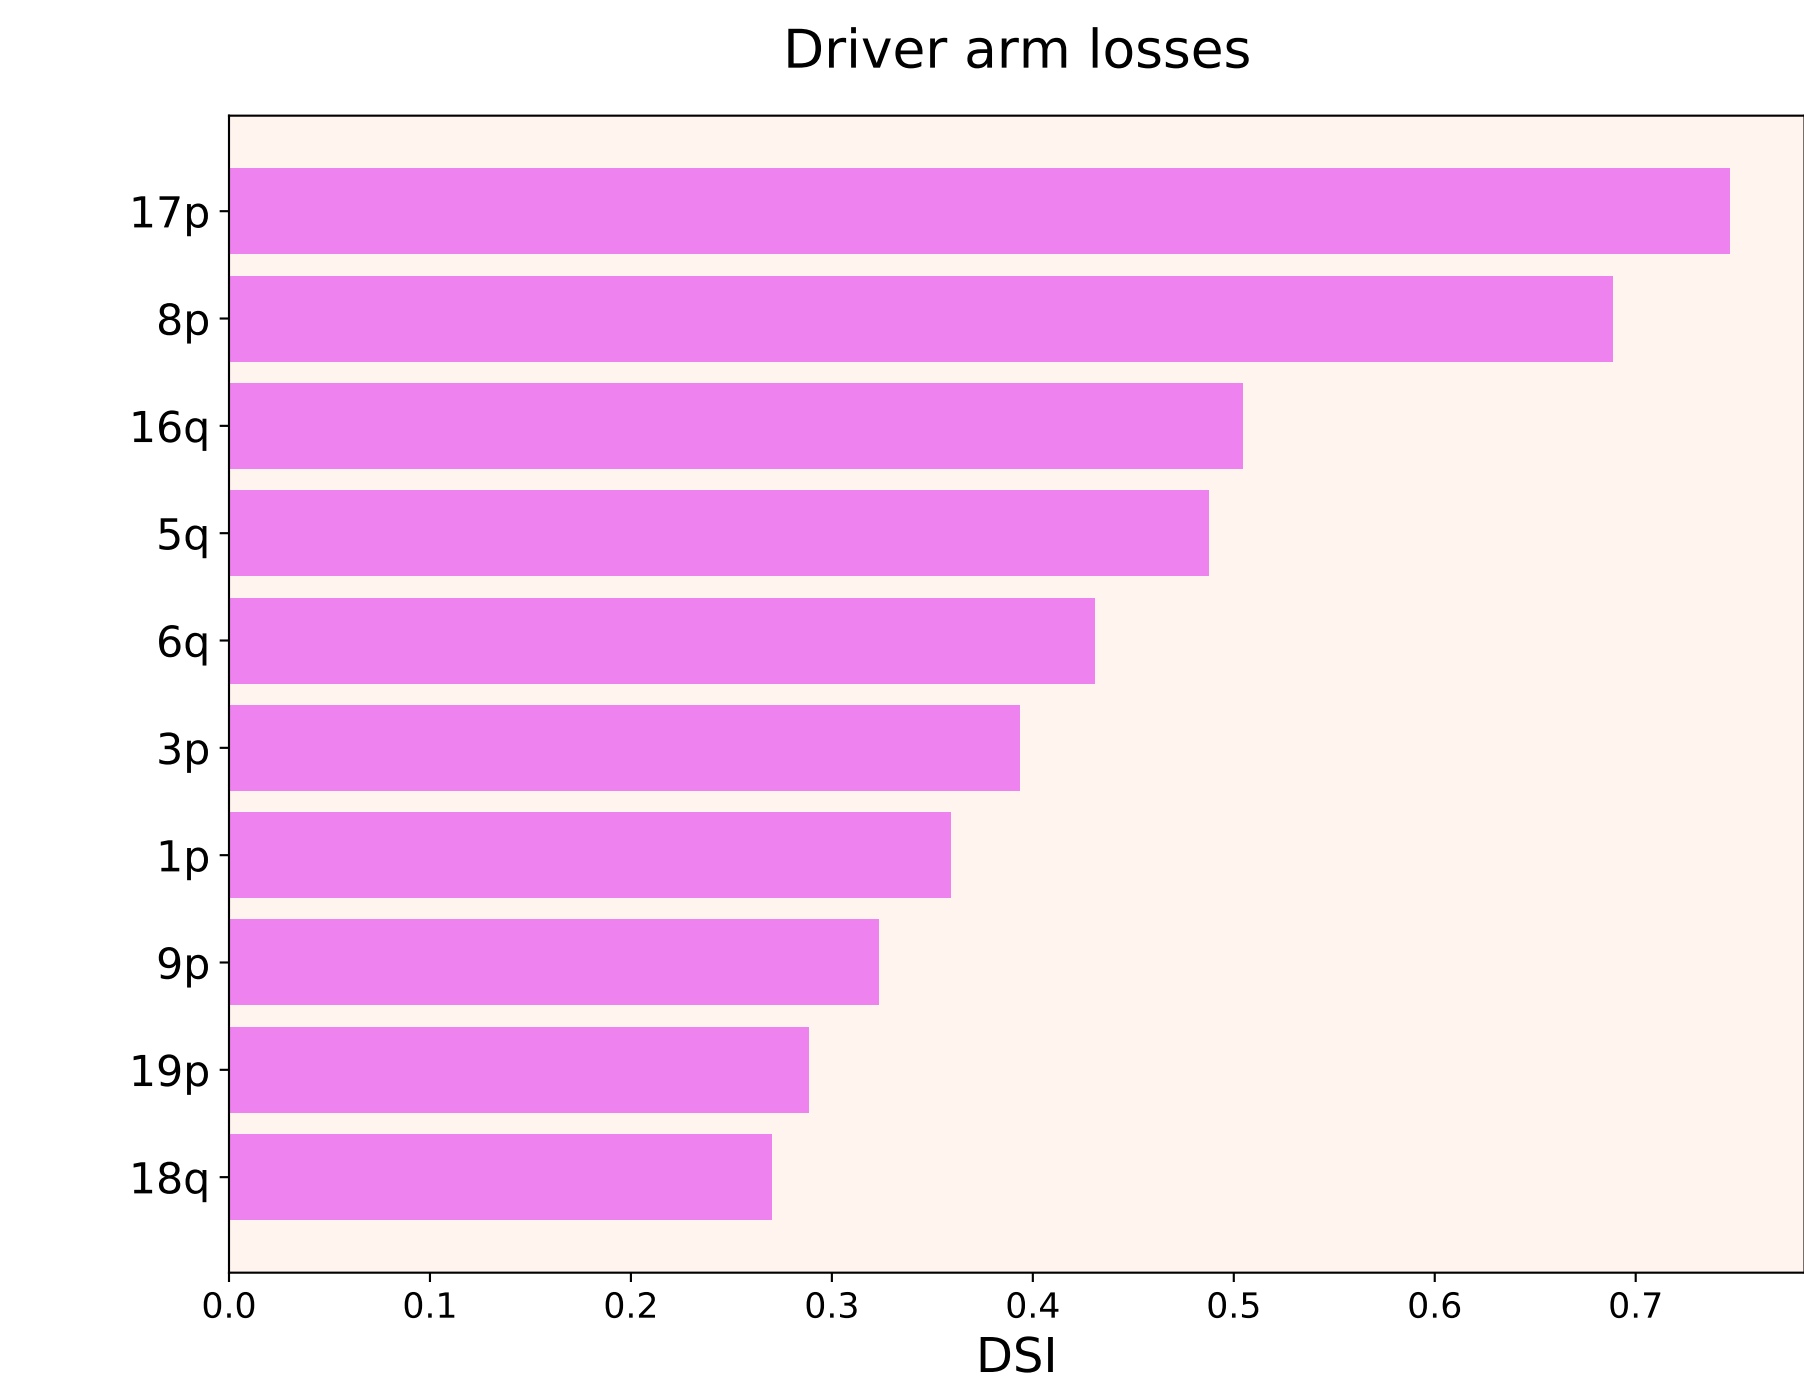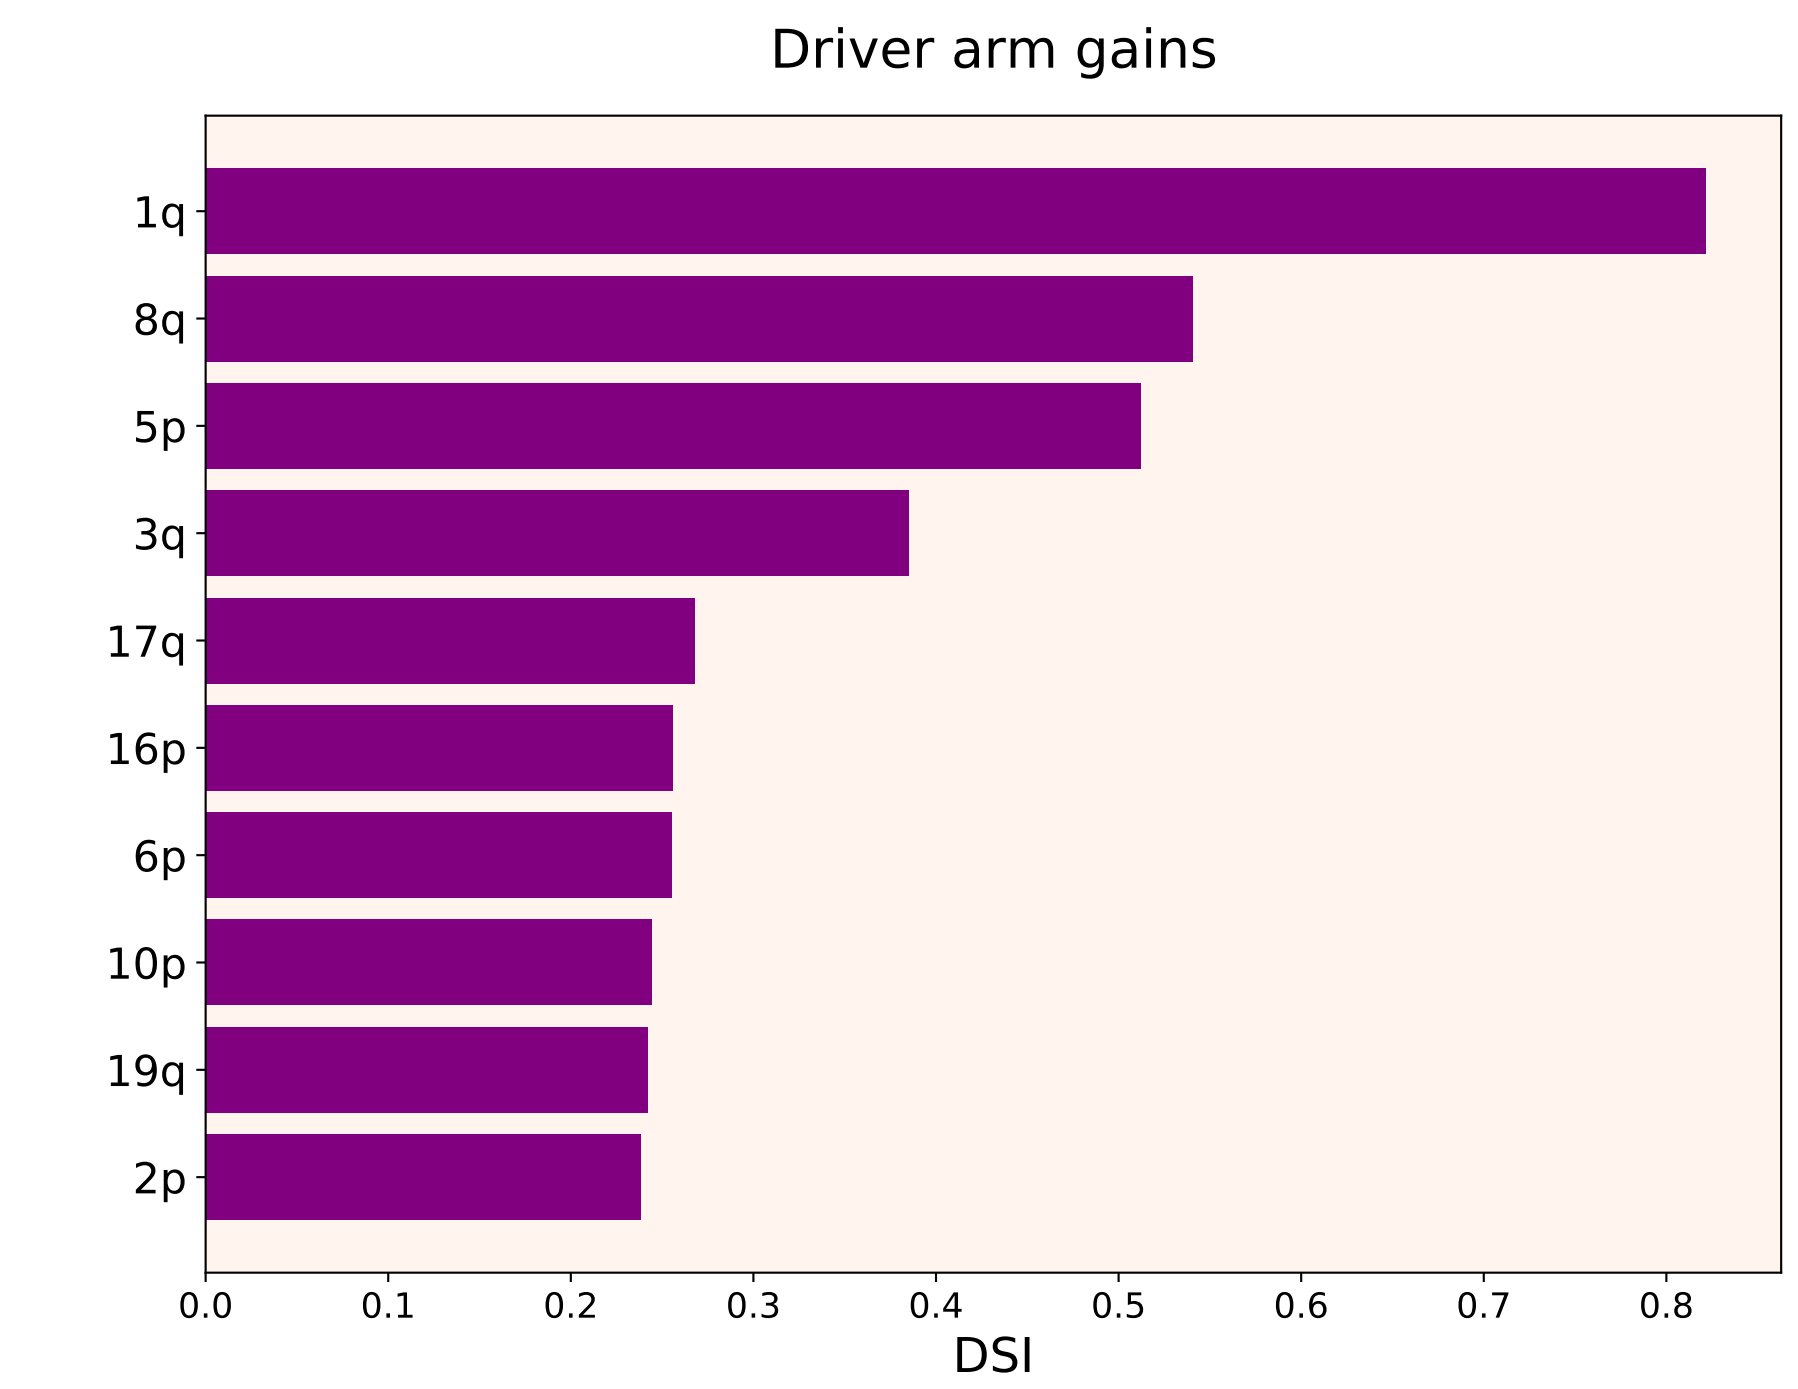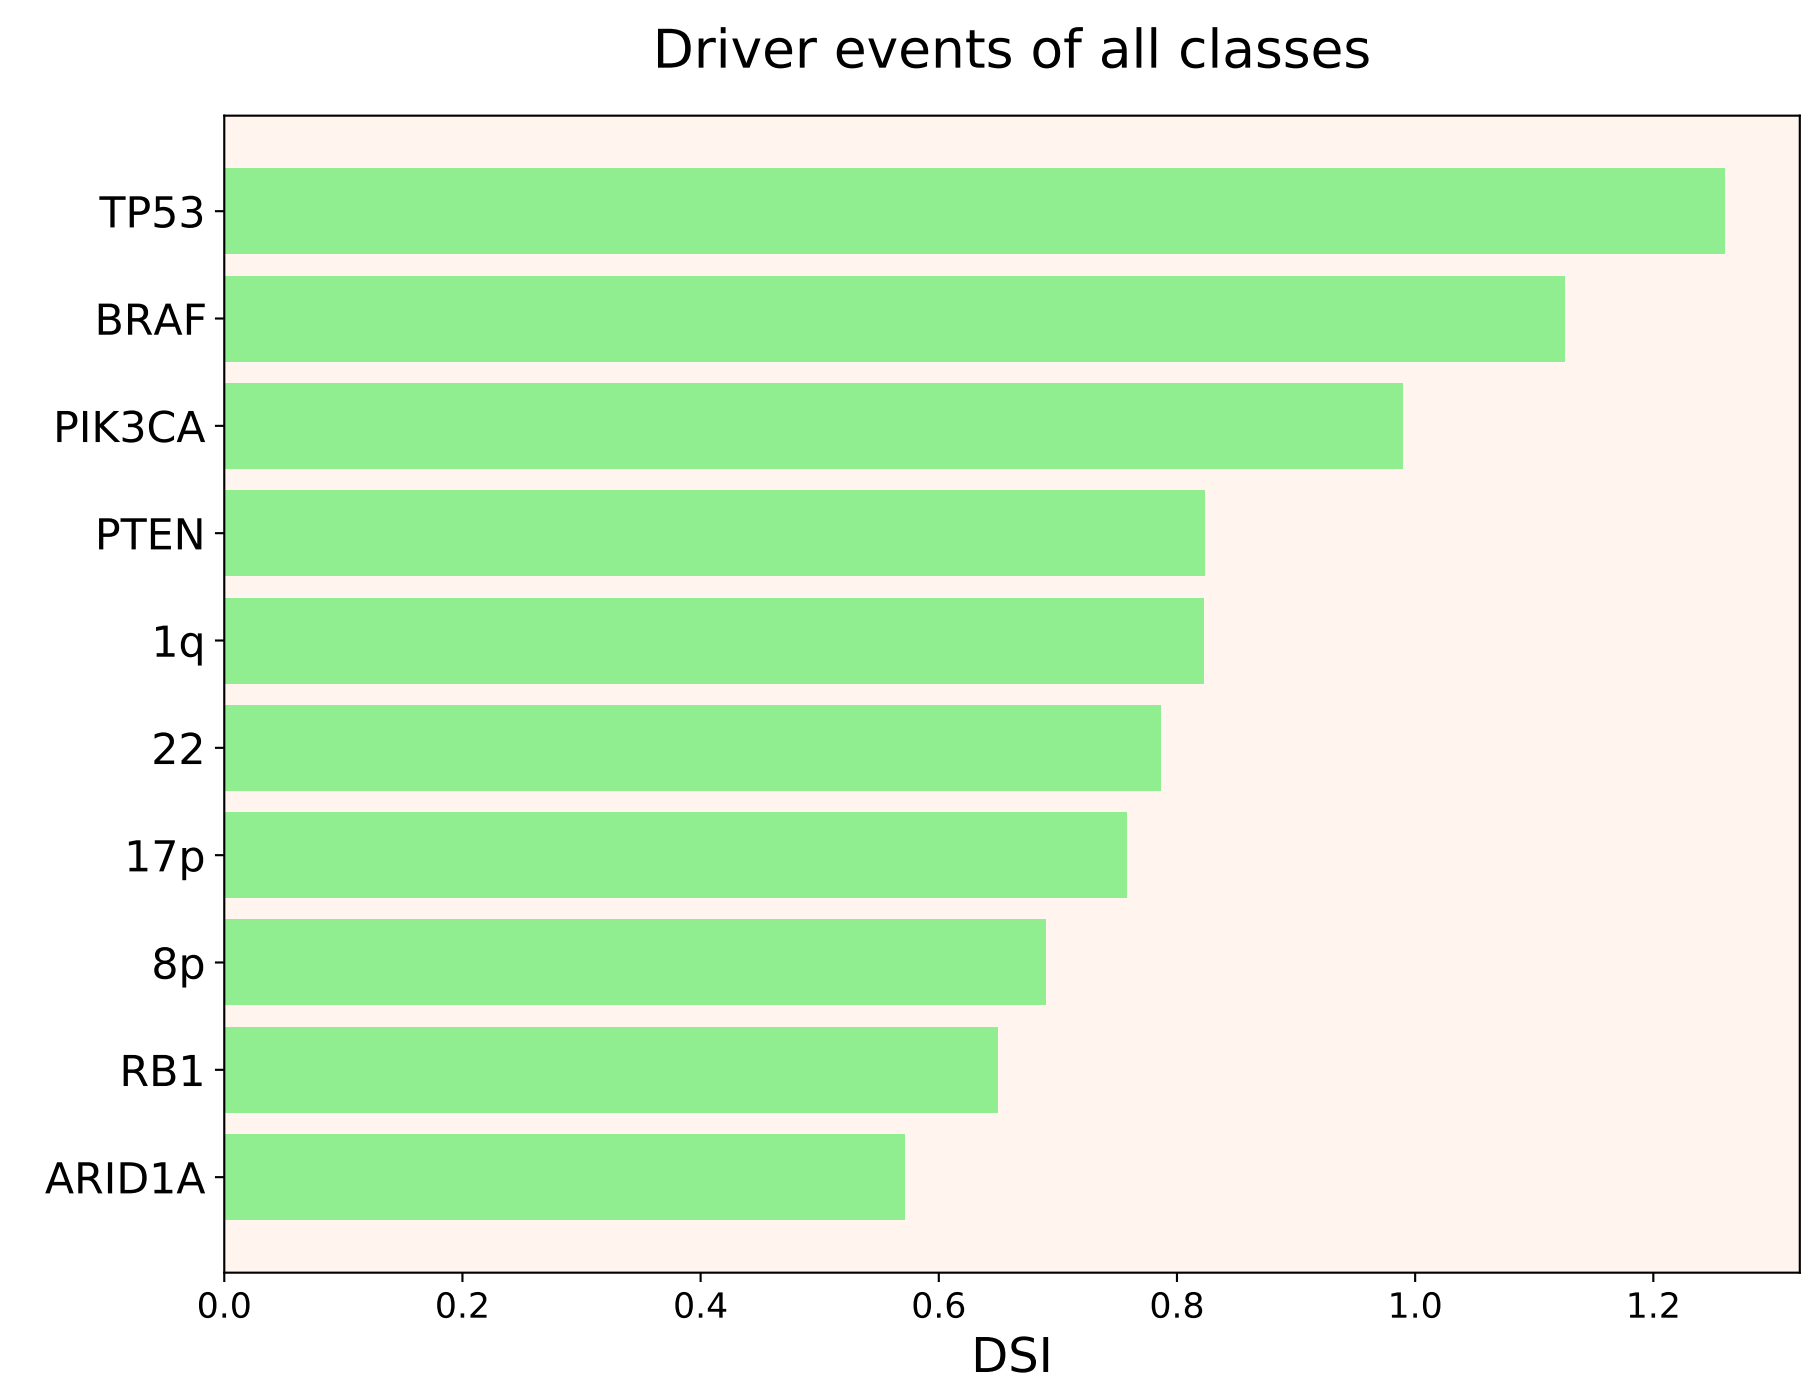

Supplement: Supplemental_Data_S1.zip [file Supplemental_Data_S1.zip]

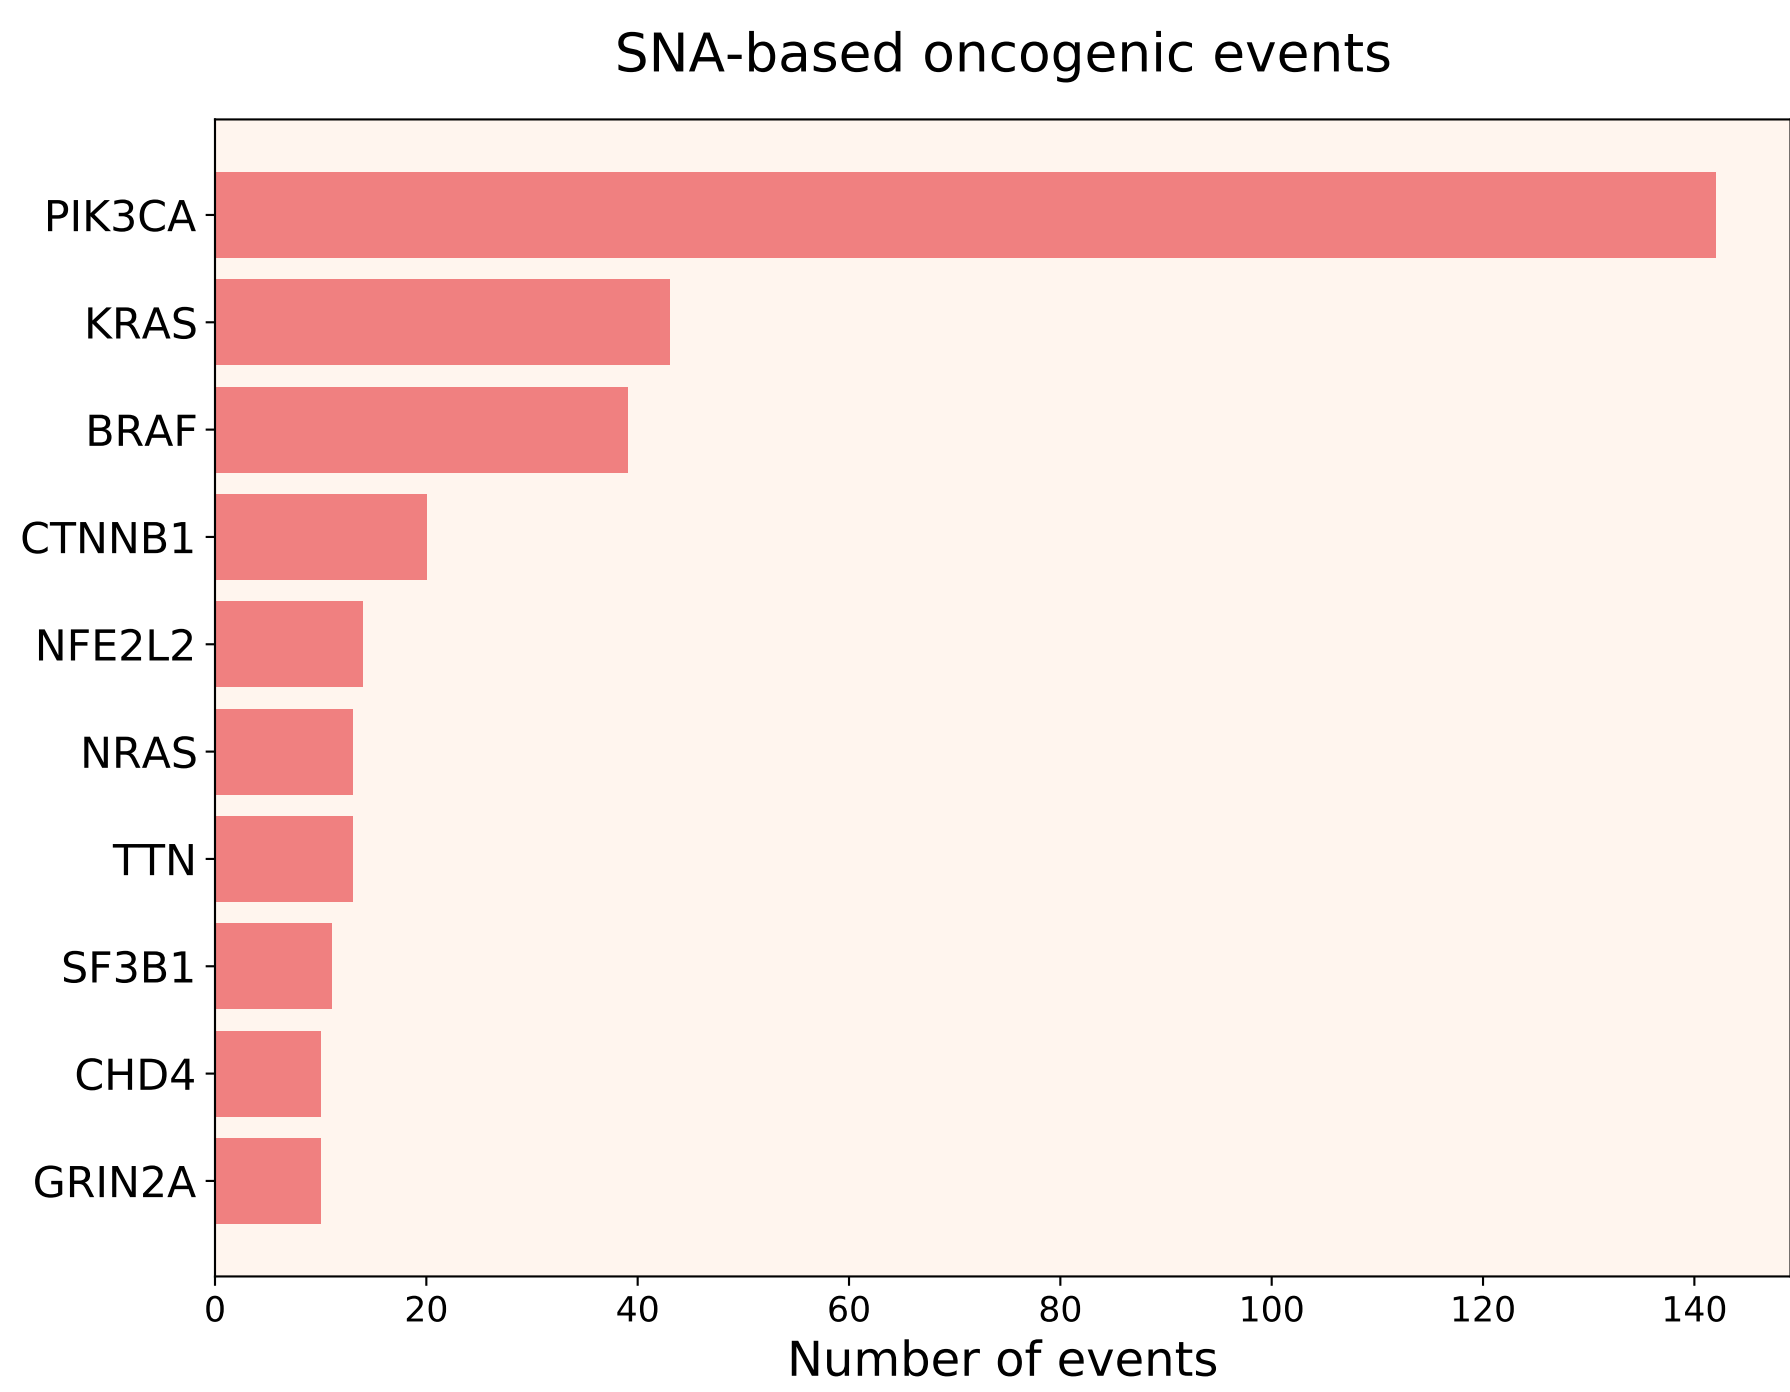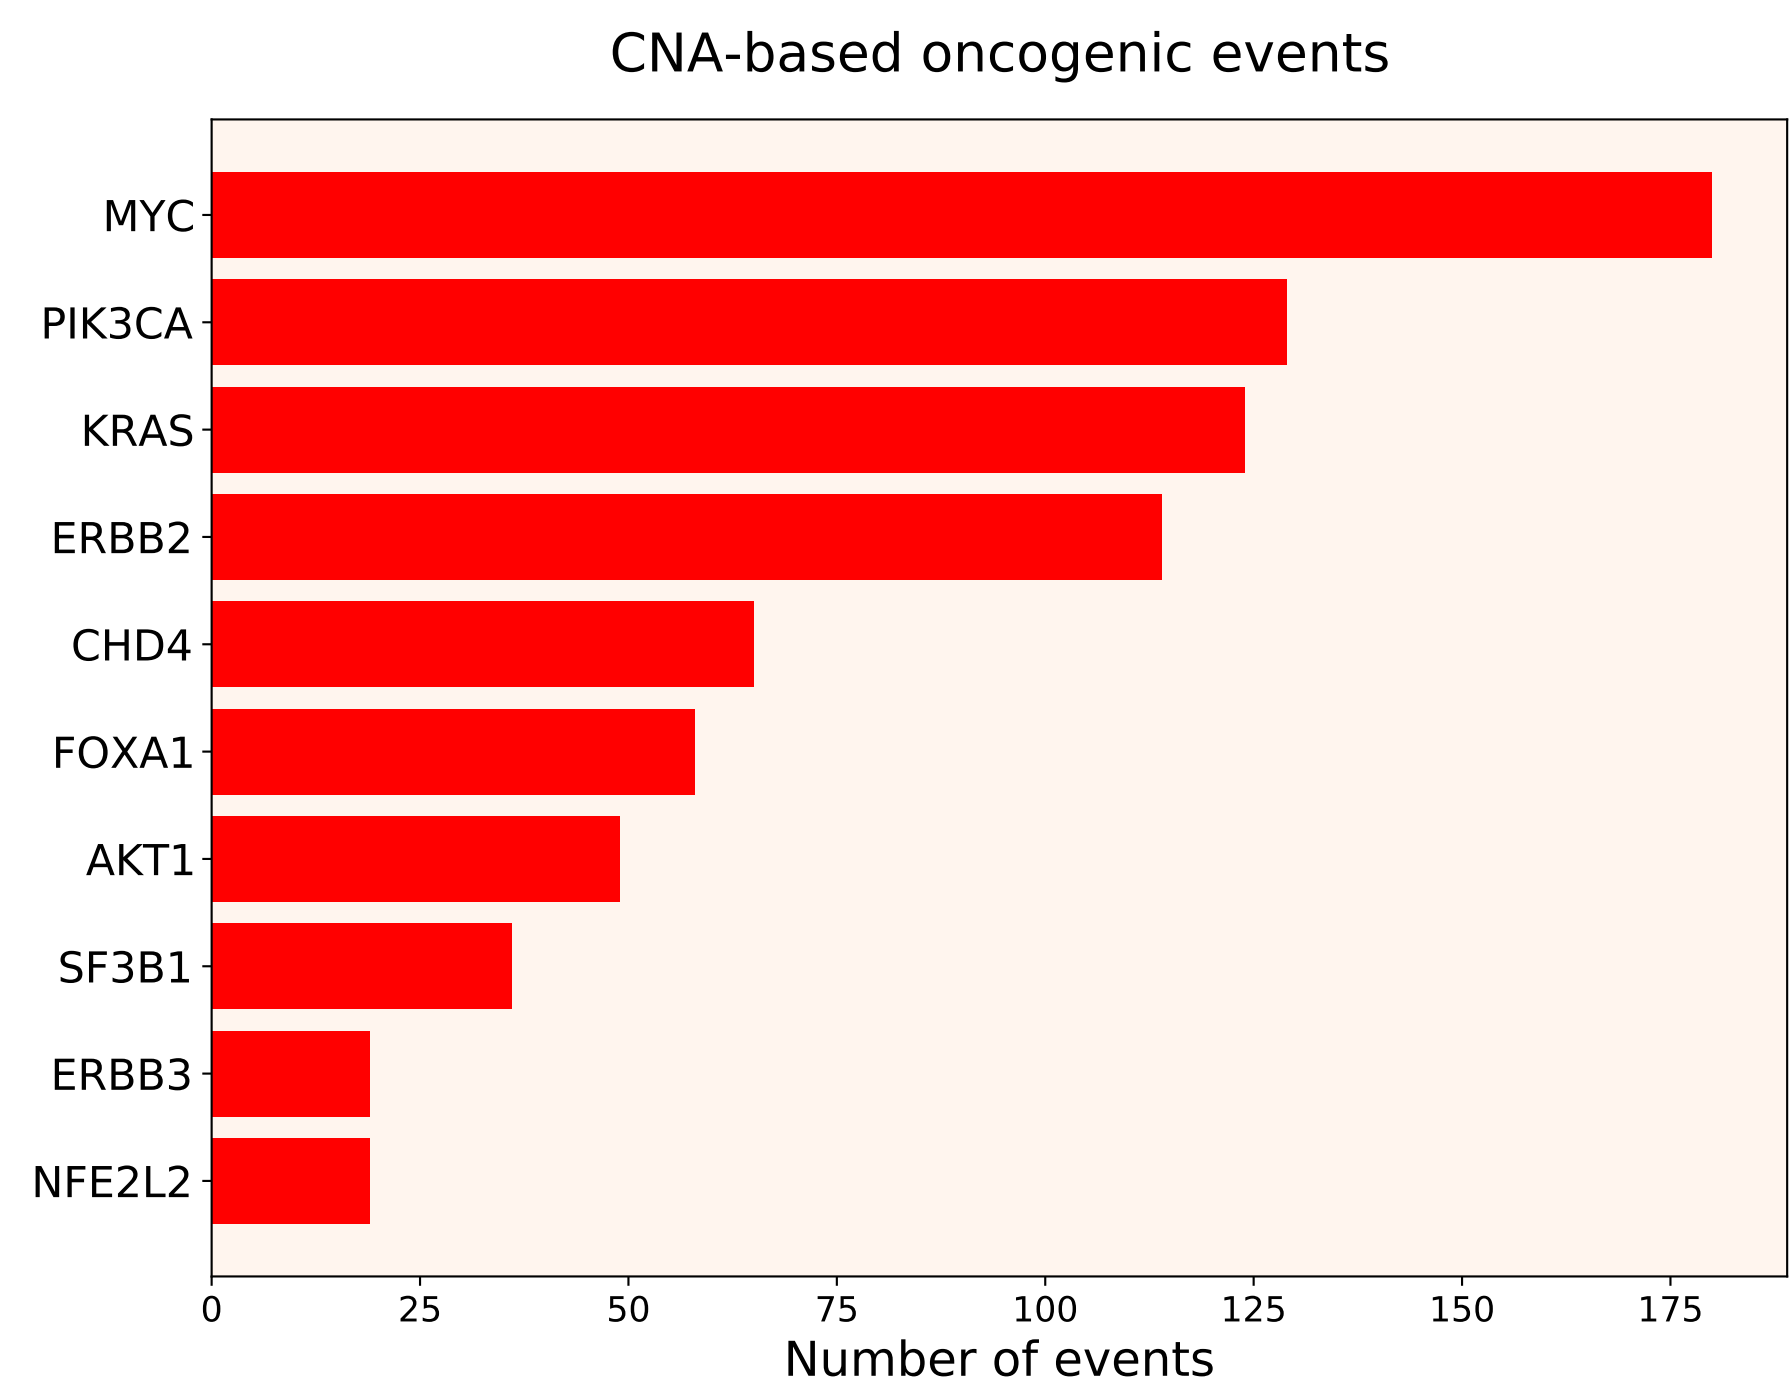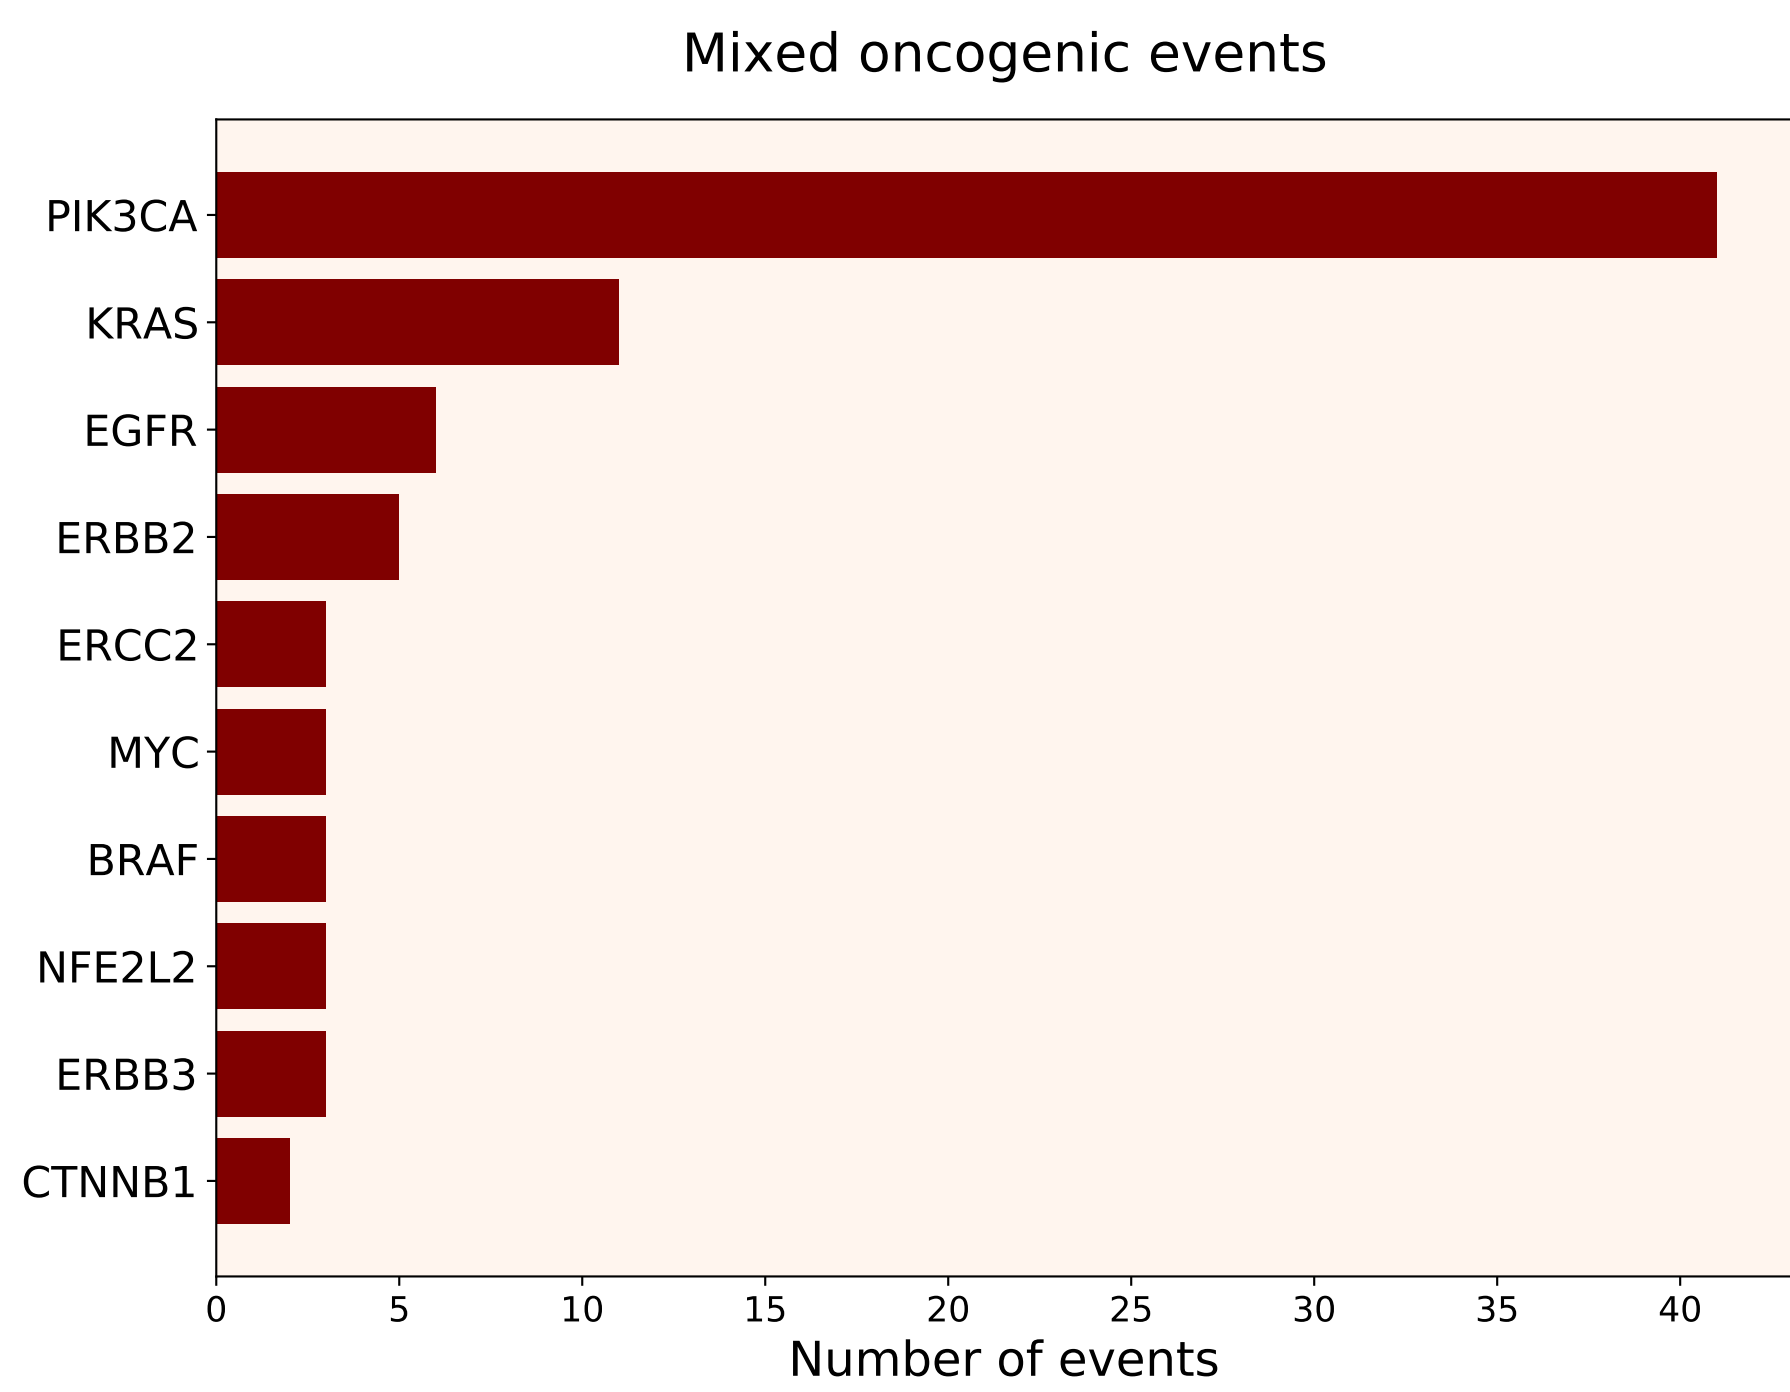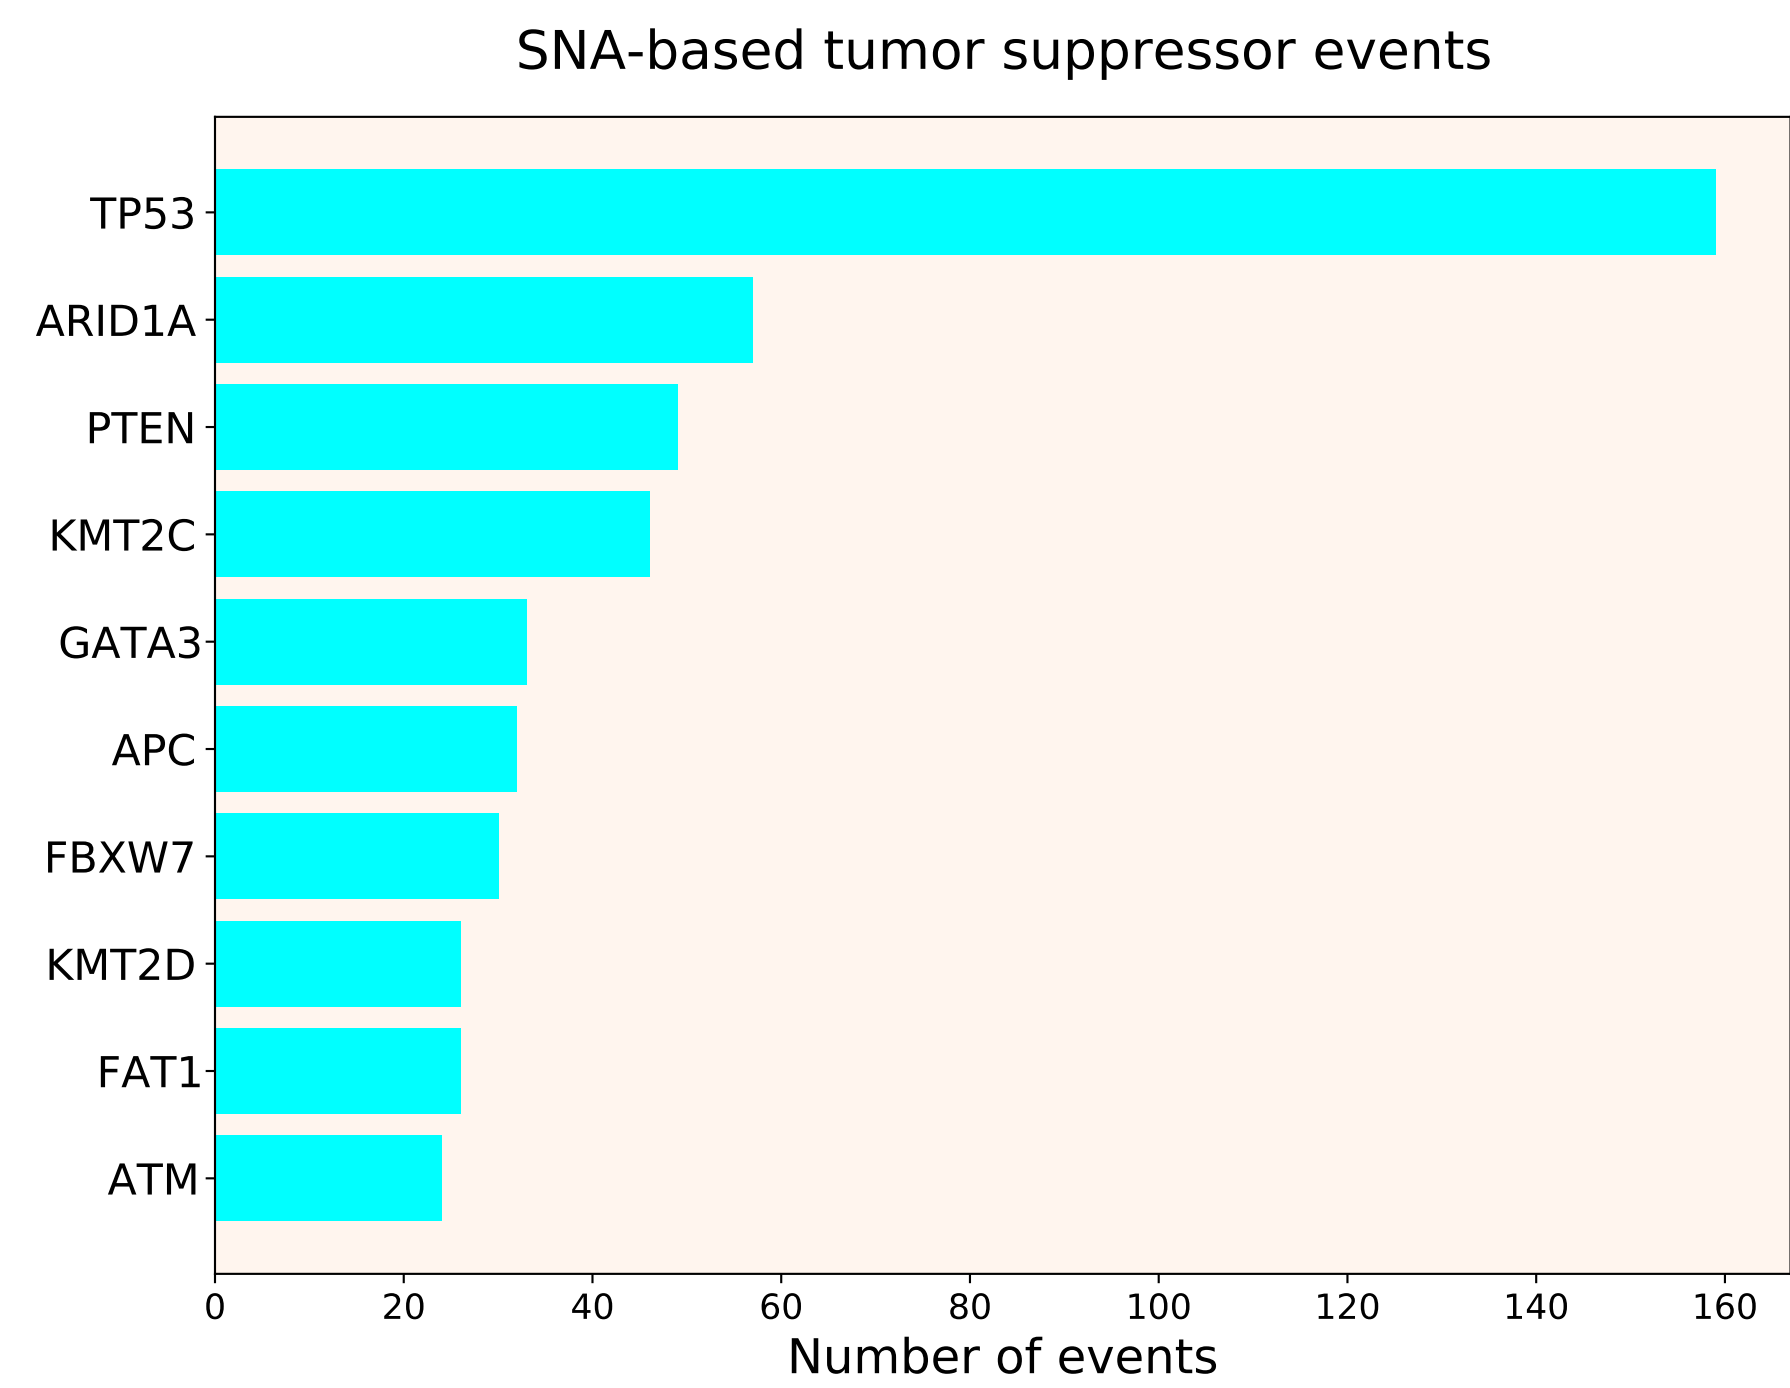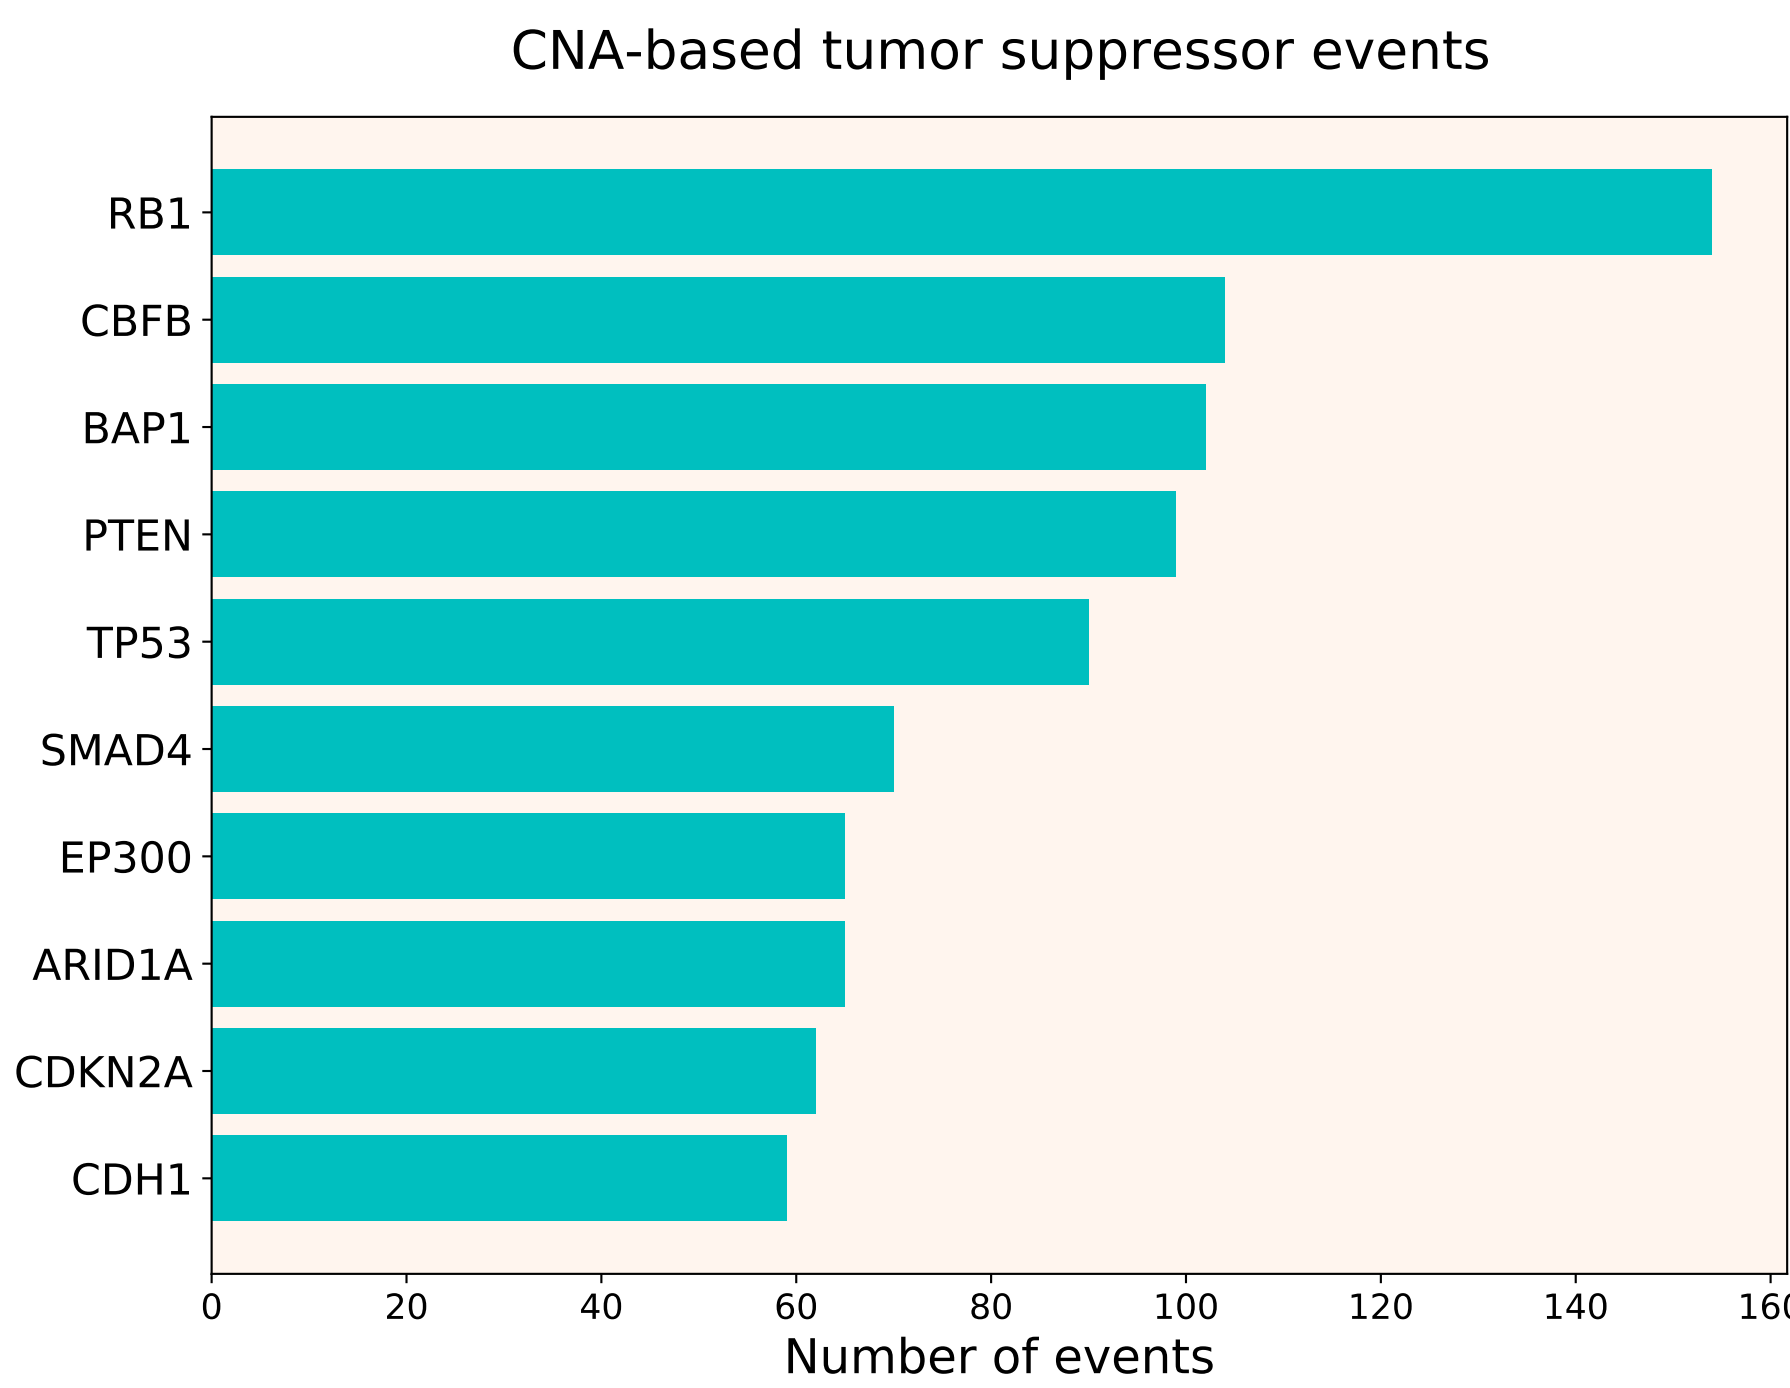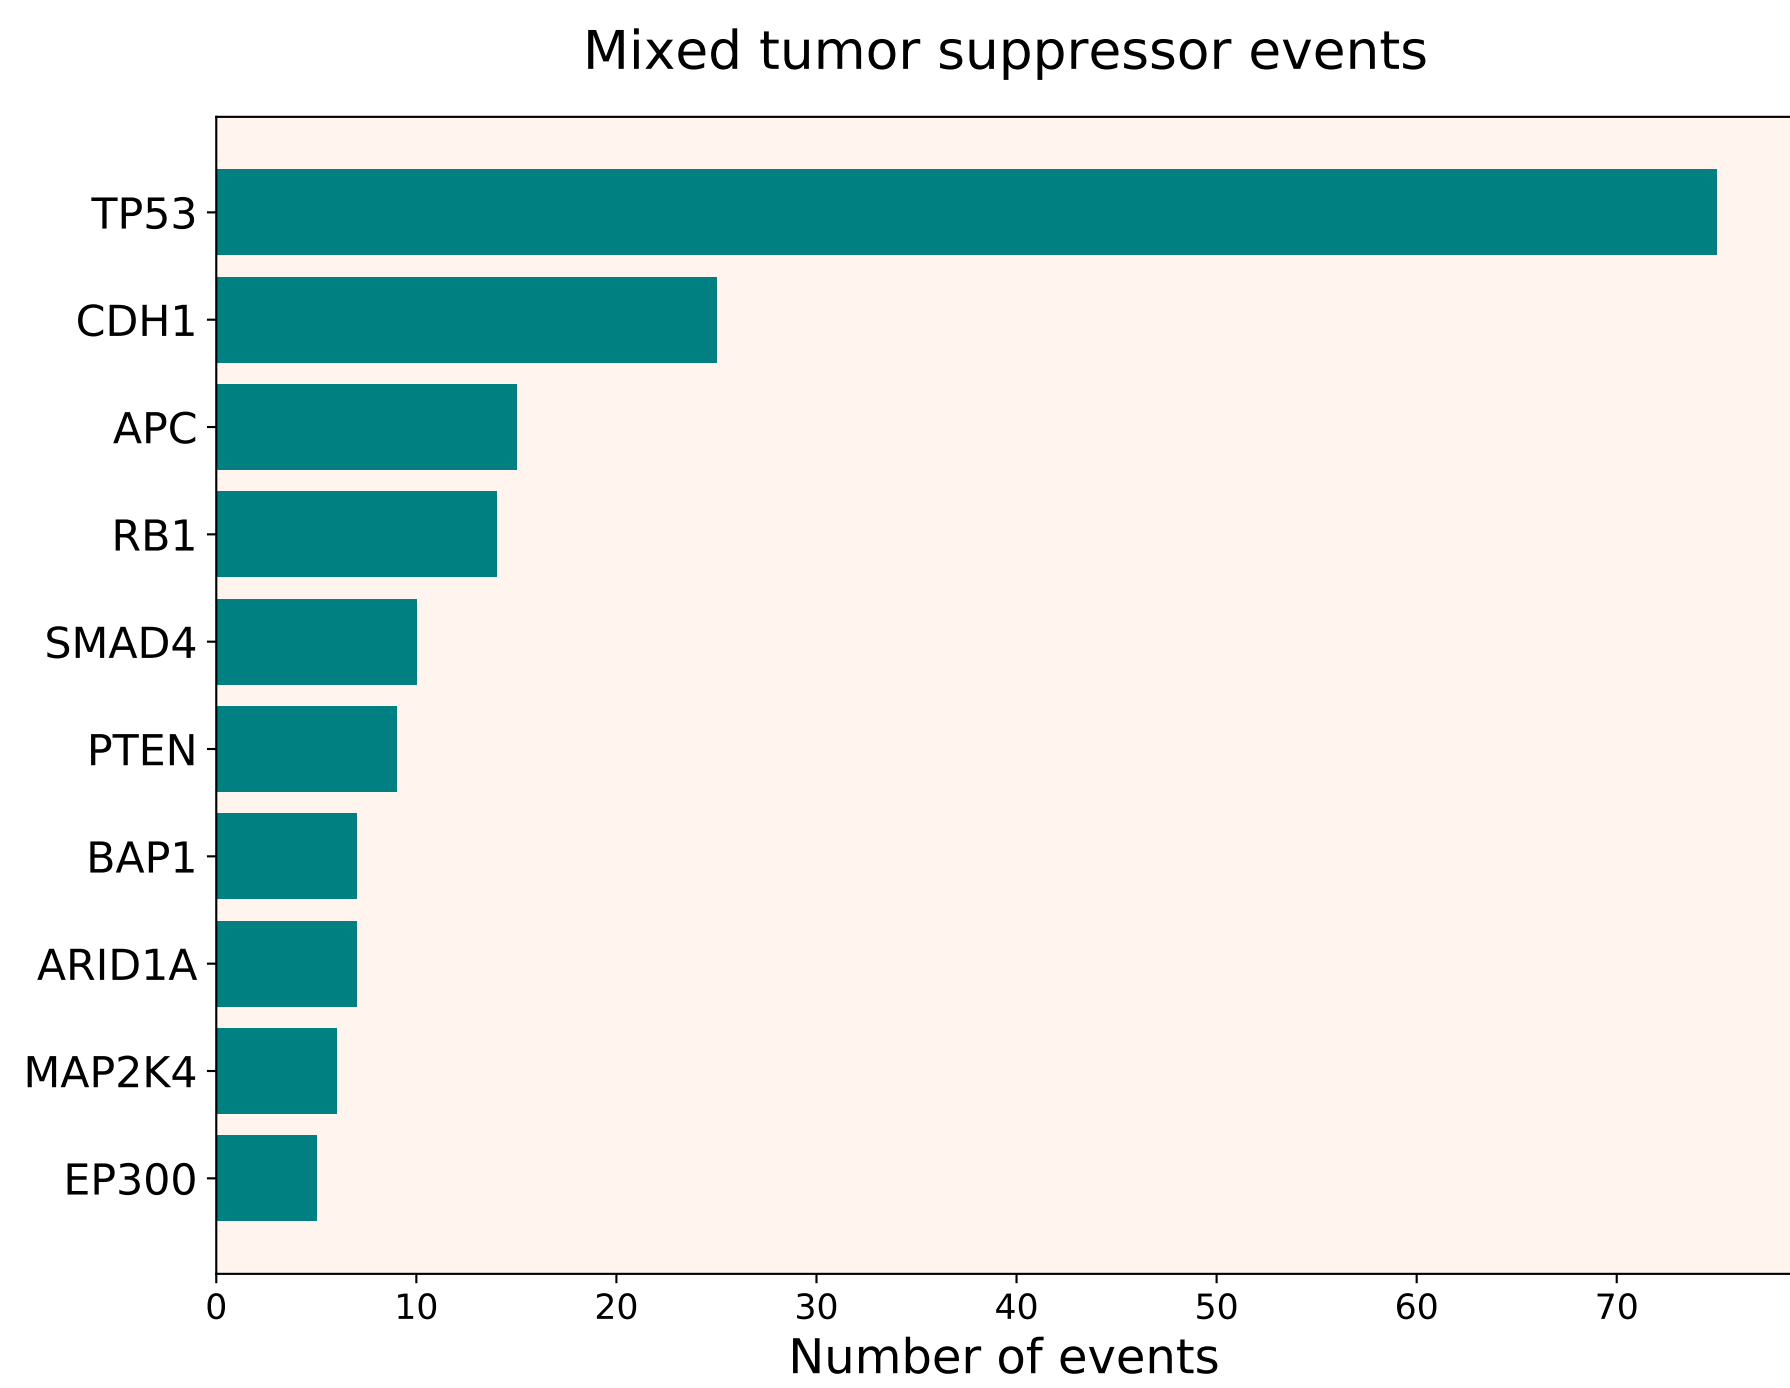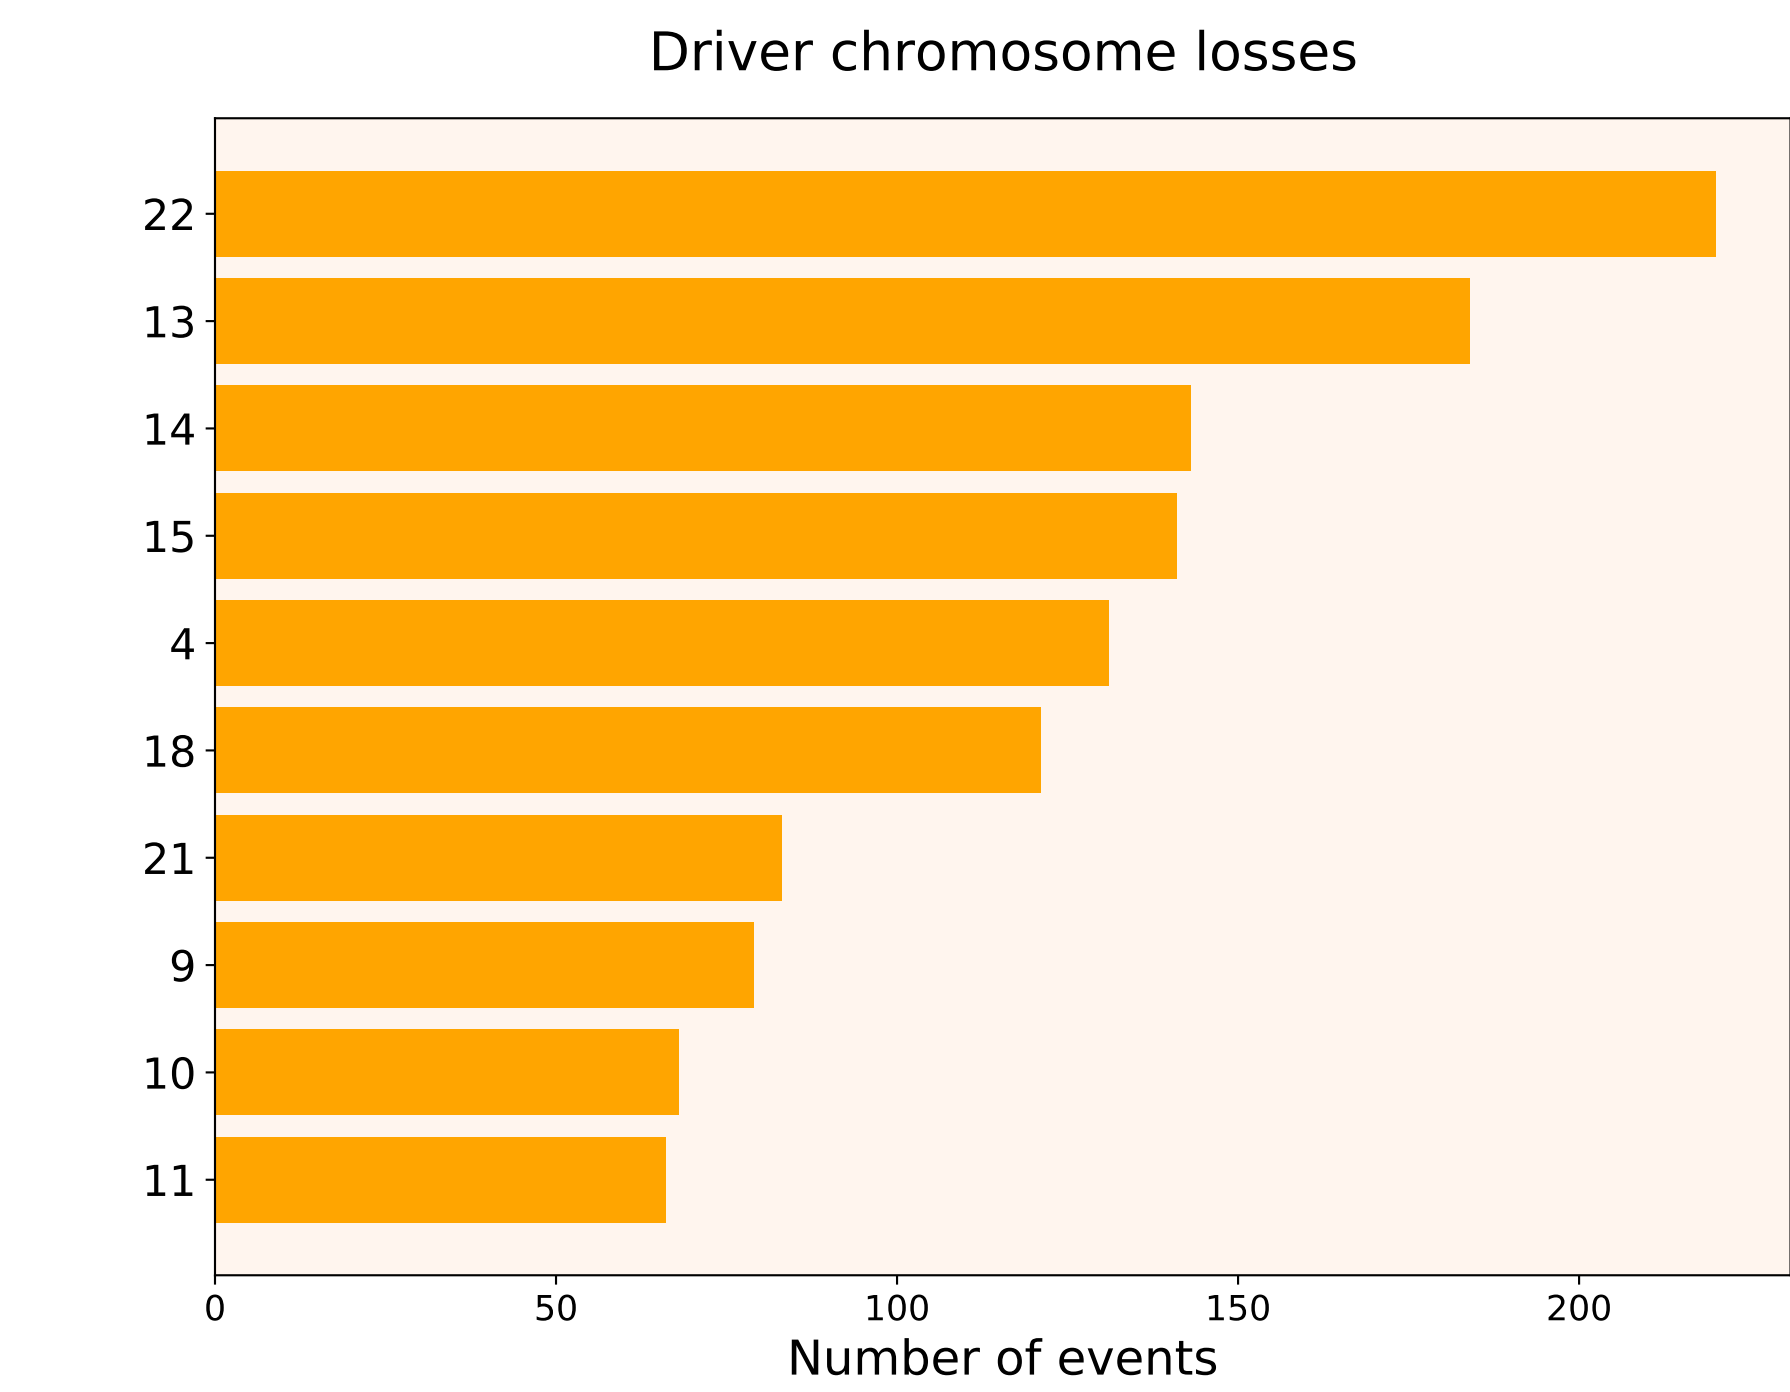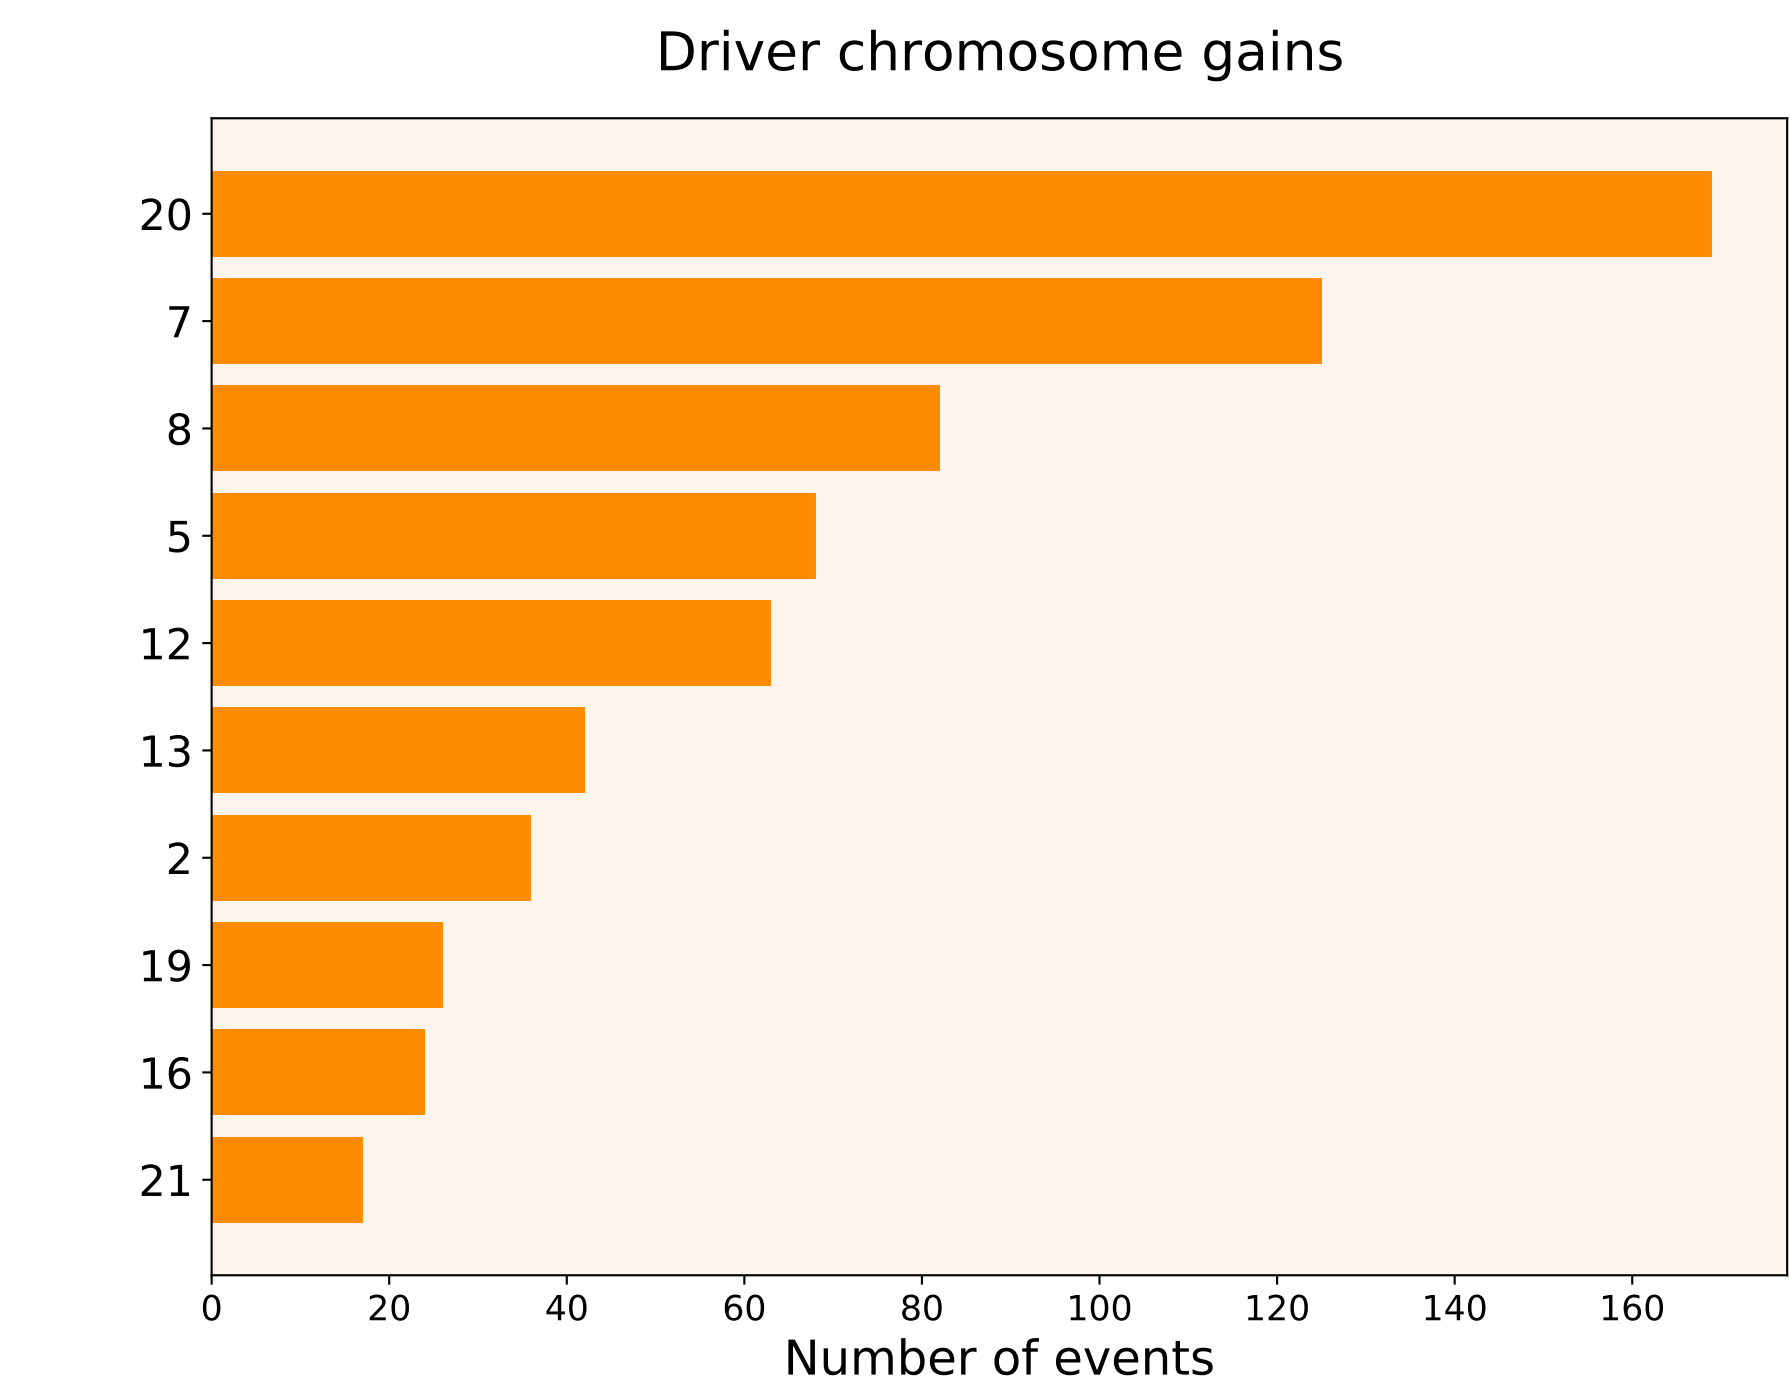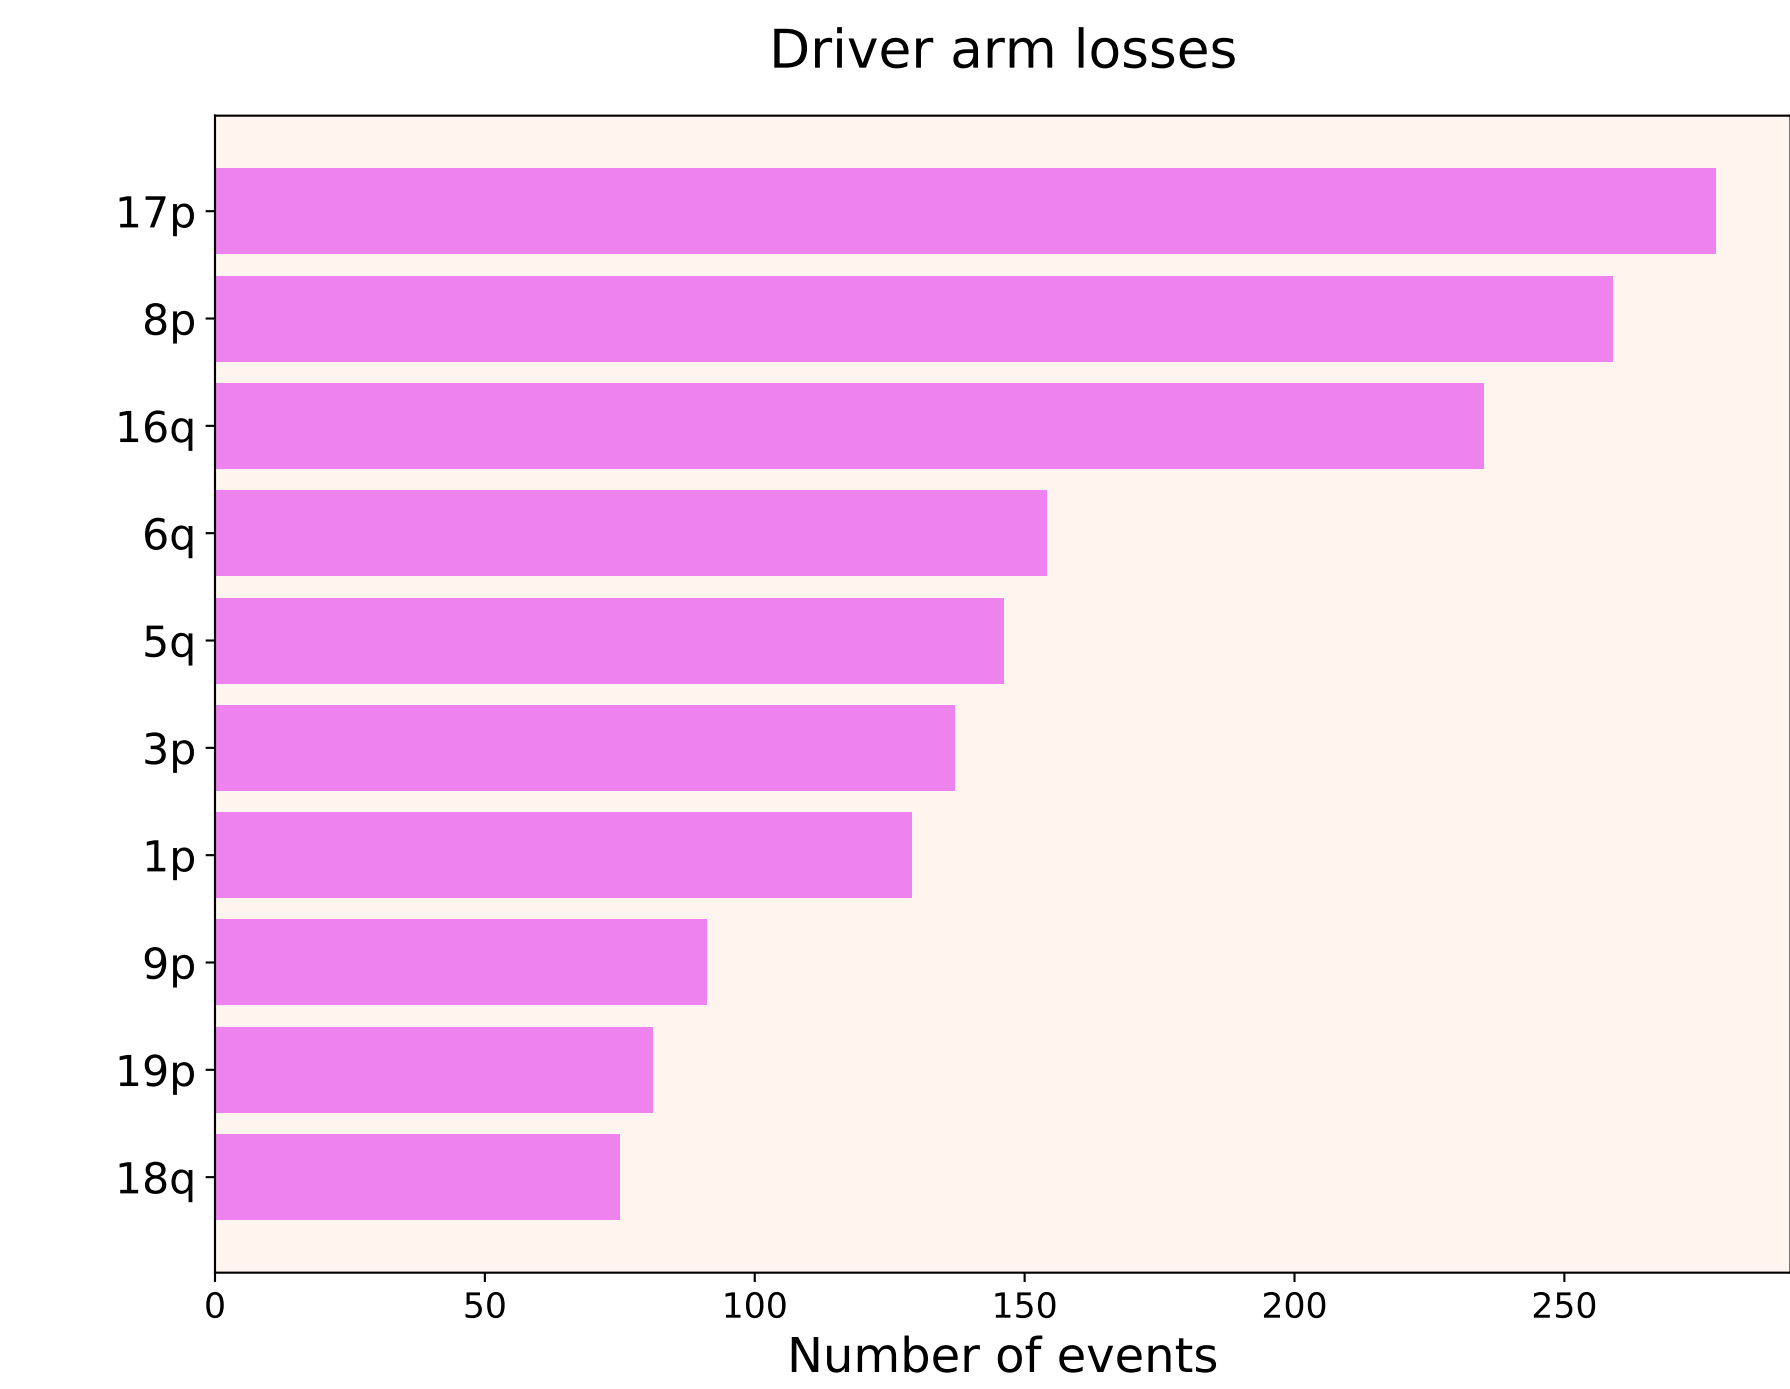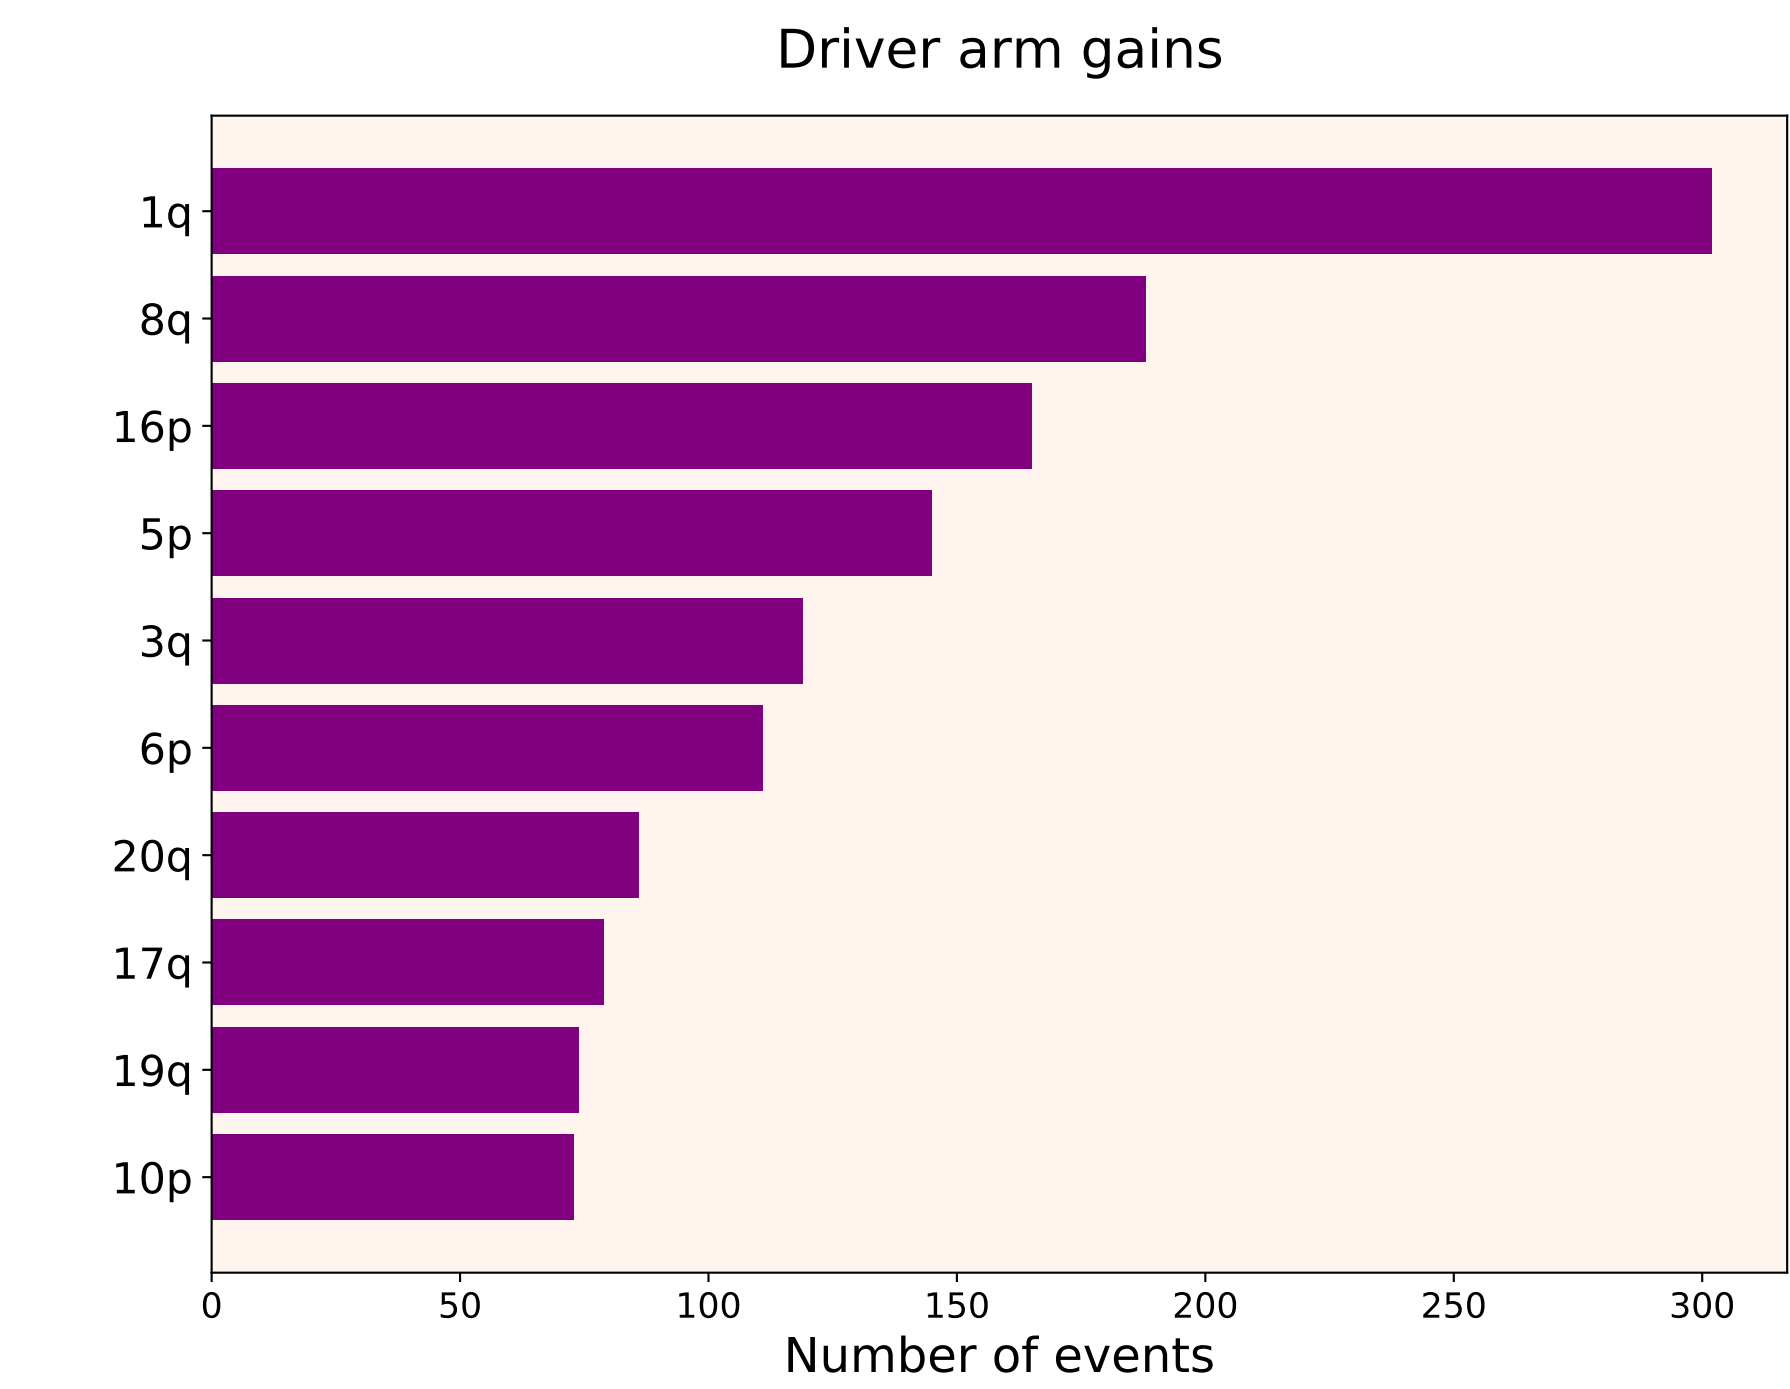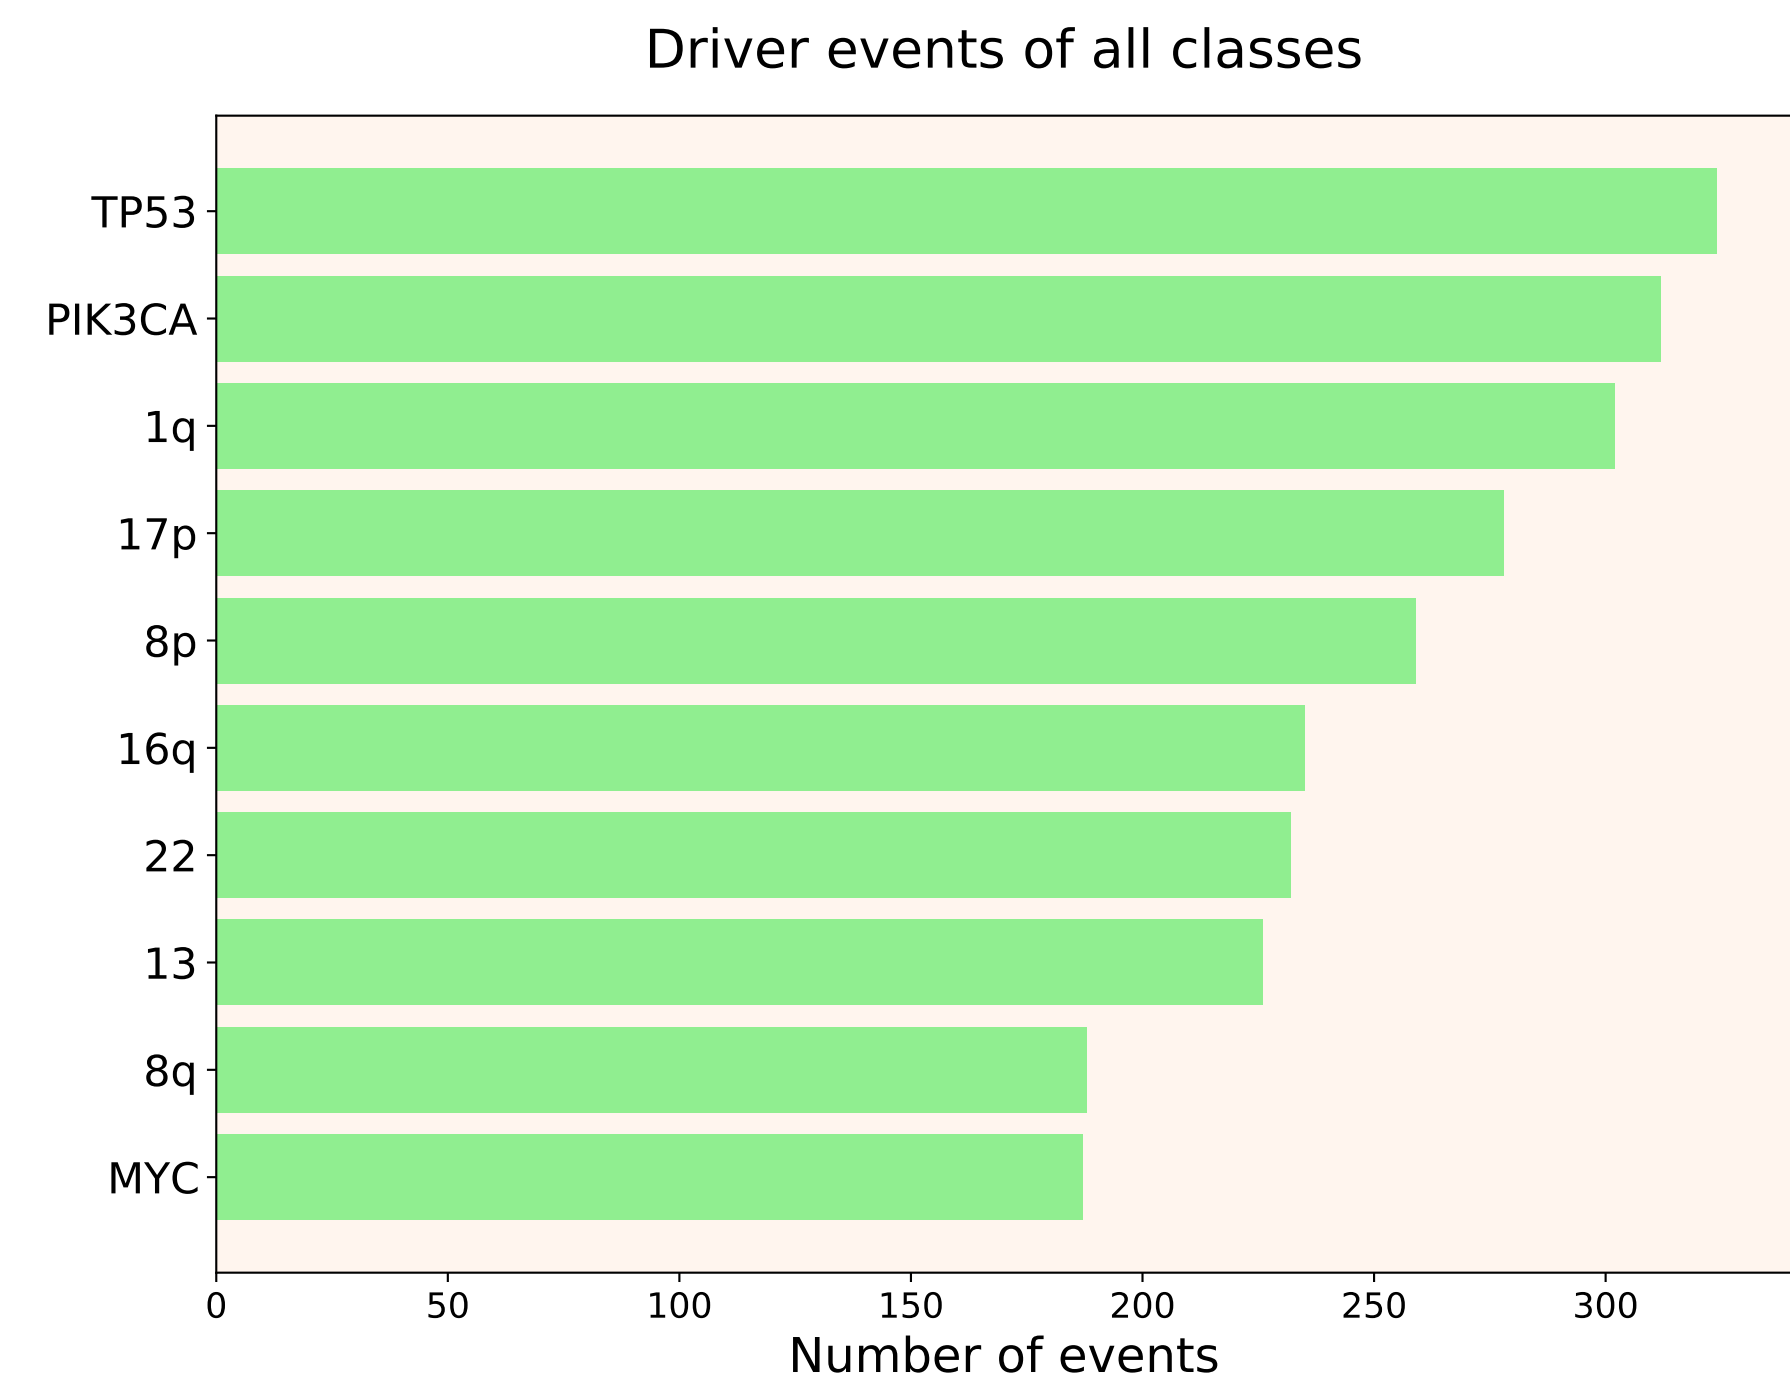

Supplement: Supplemental_Data_S1.zip [file Supplemental_Data_S1.zip]

# LUSC\_MALE

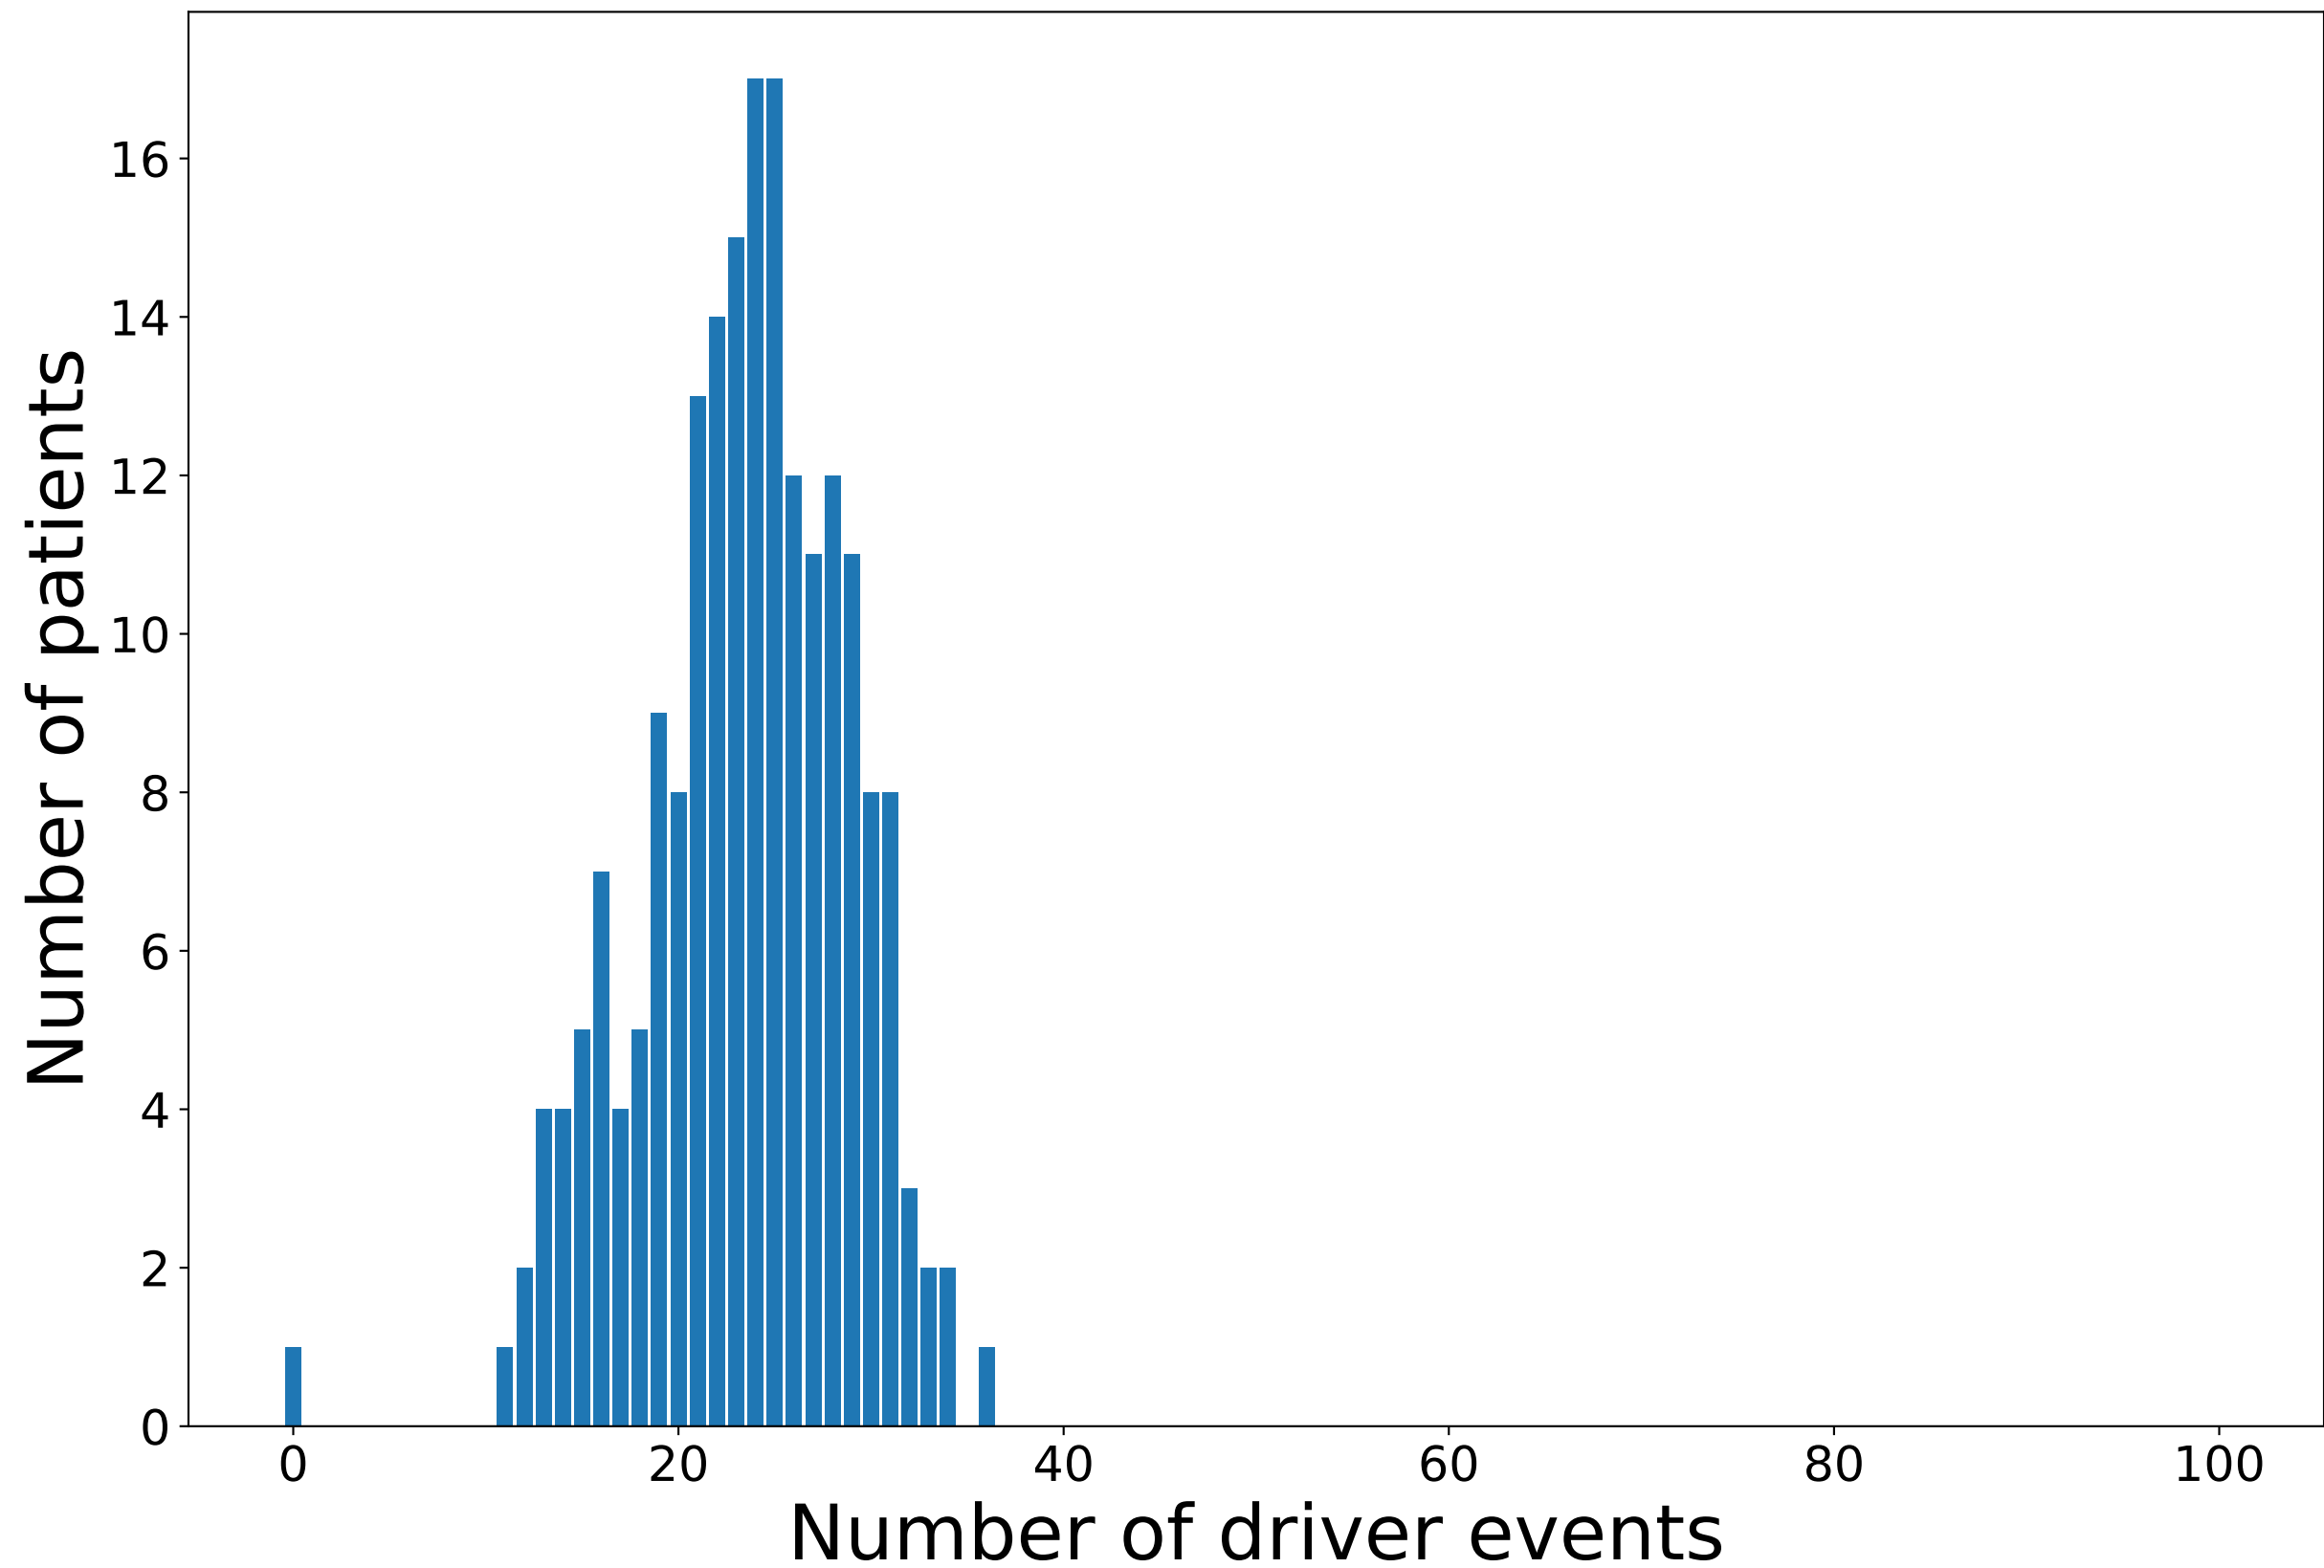

Supplement: Supplemental_Data_S1.zip [file Supplemental_Data_S1.zip]

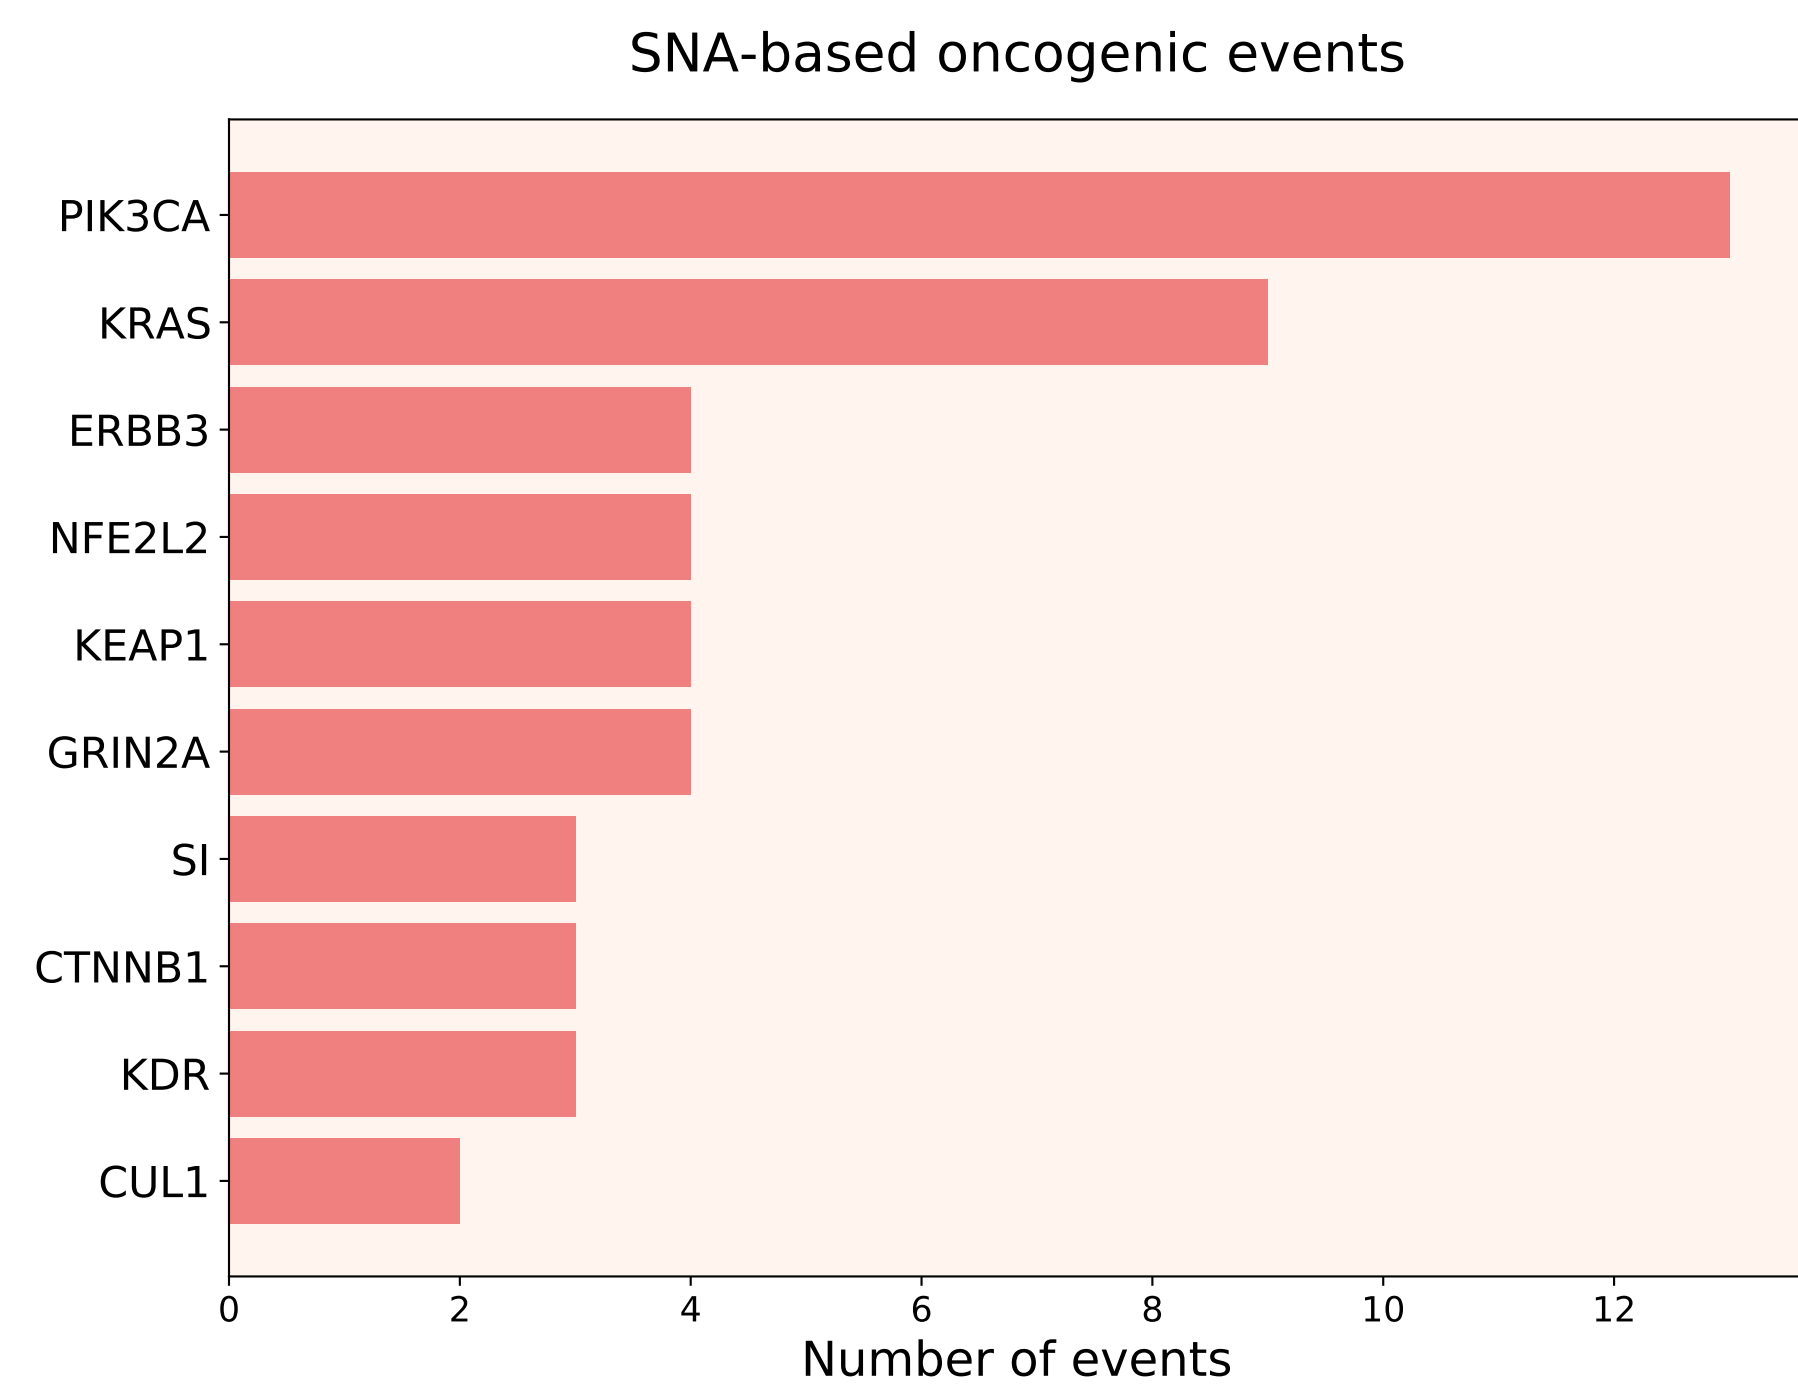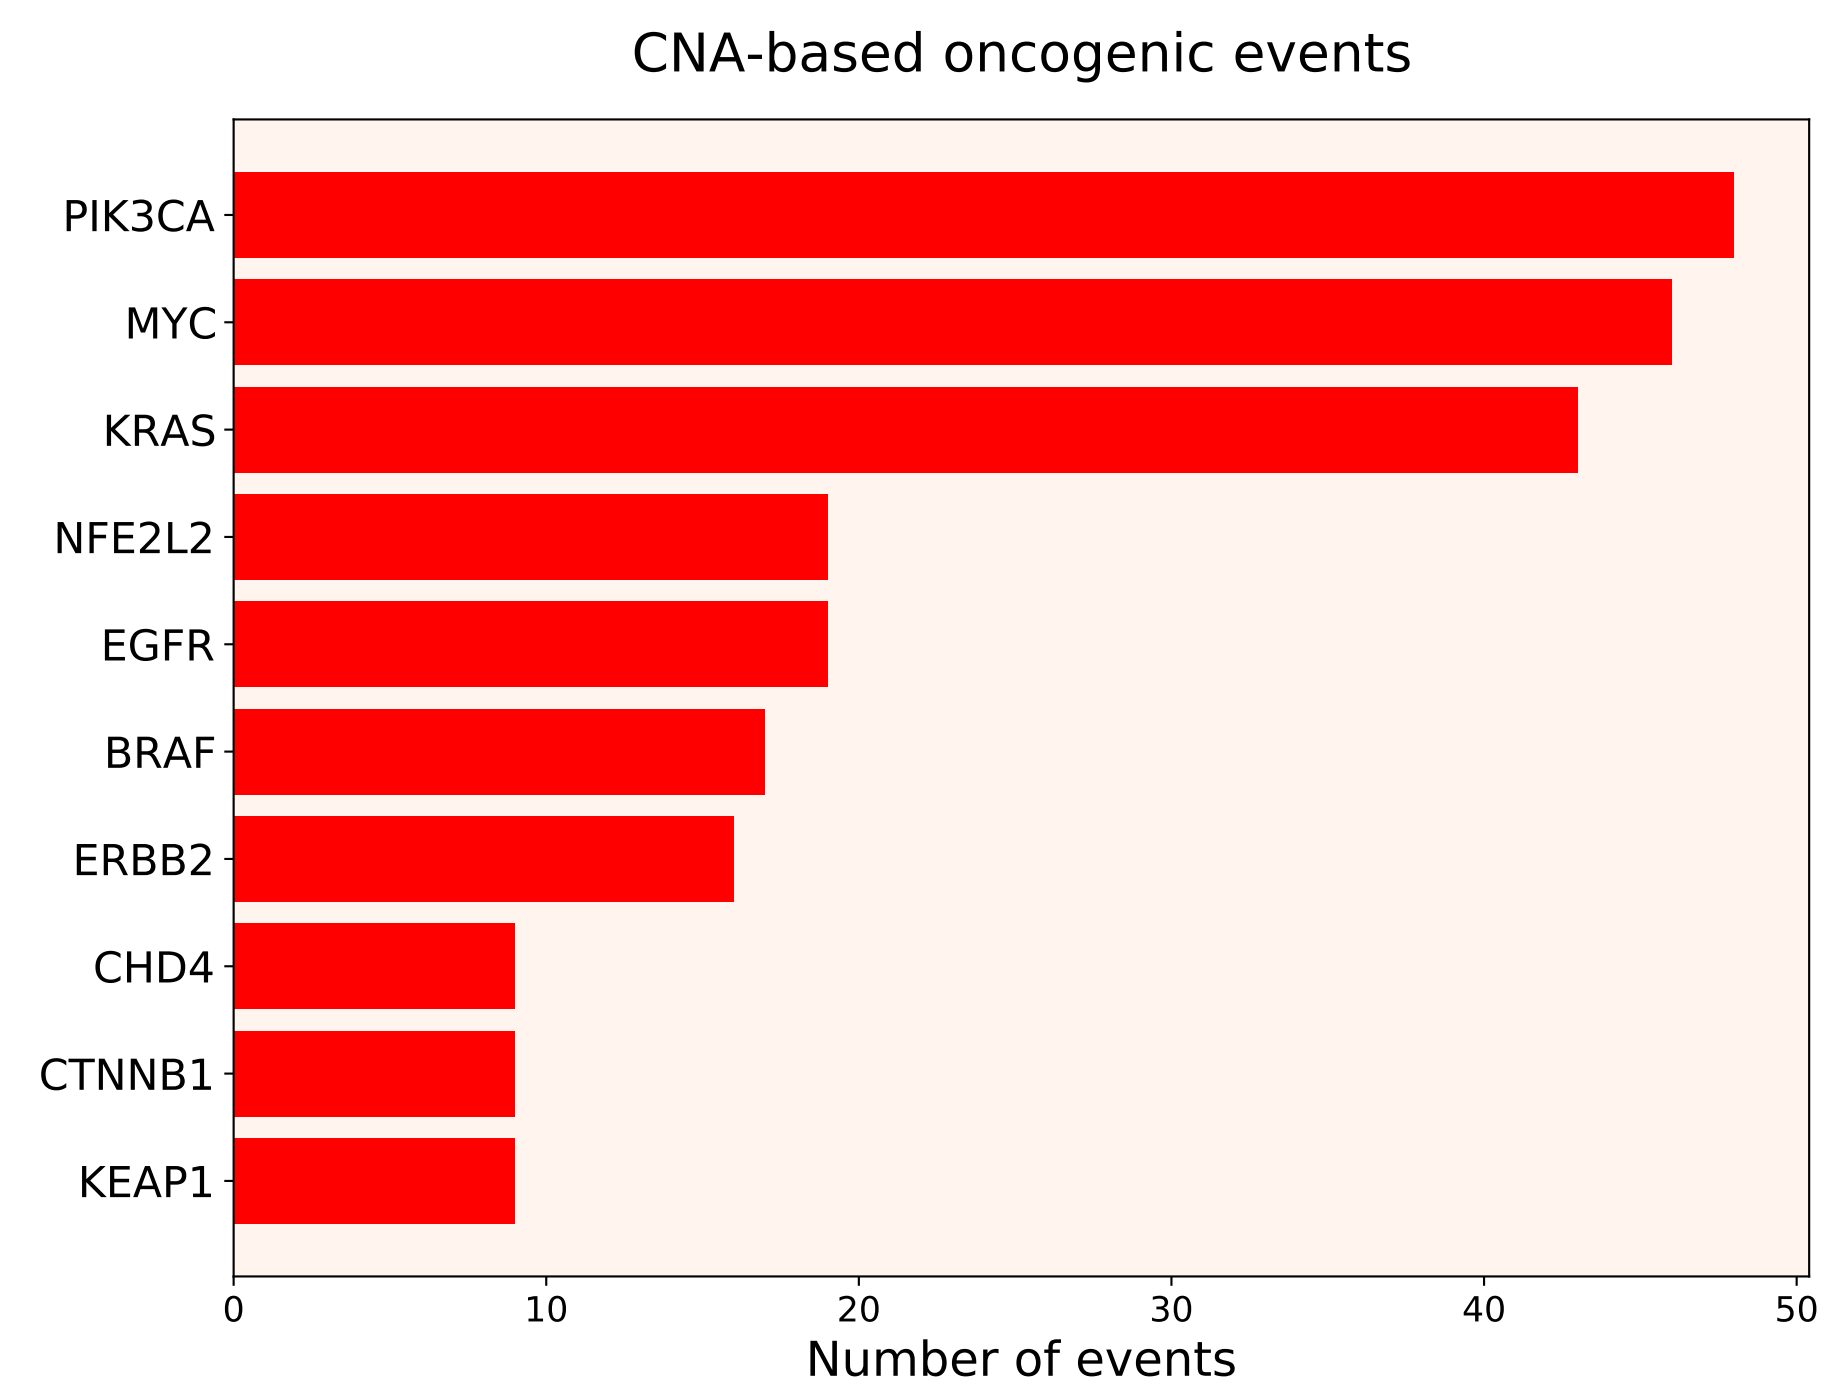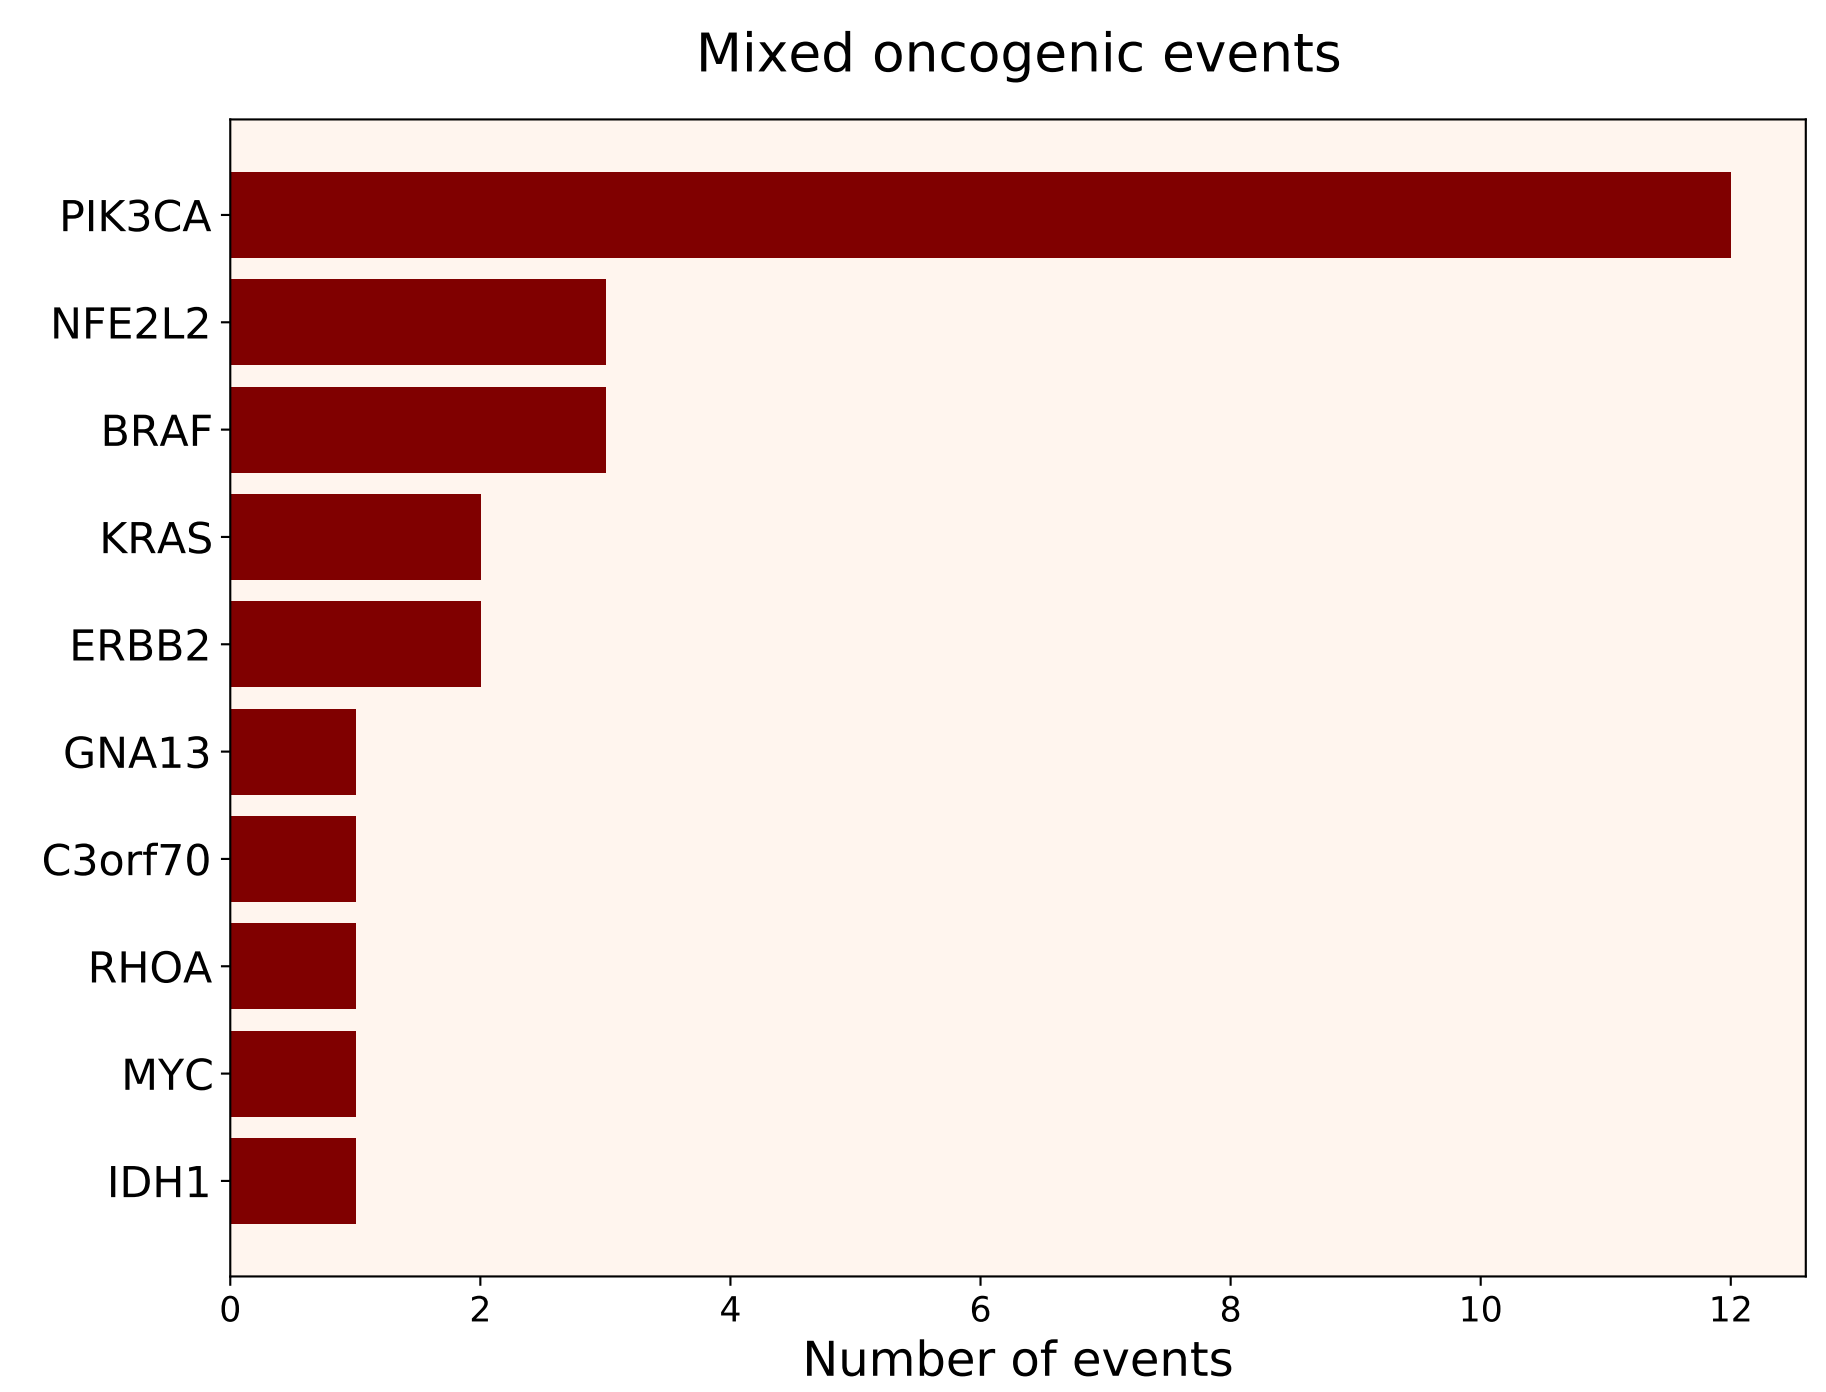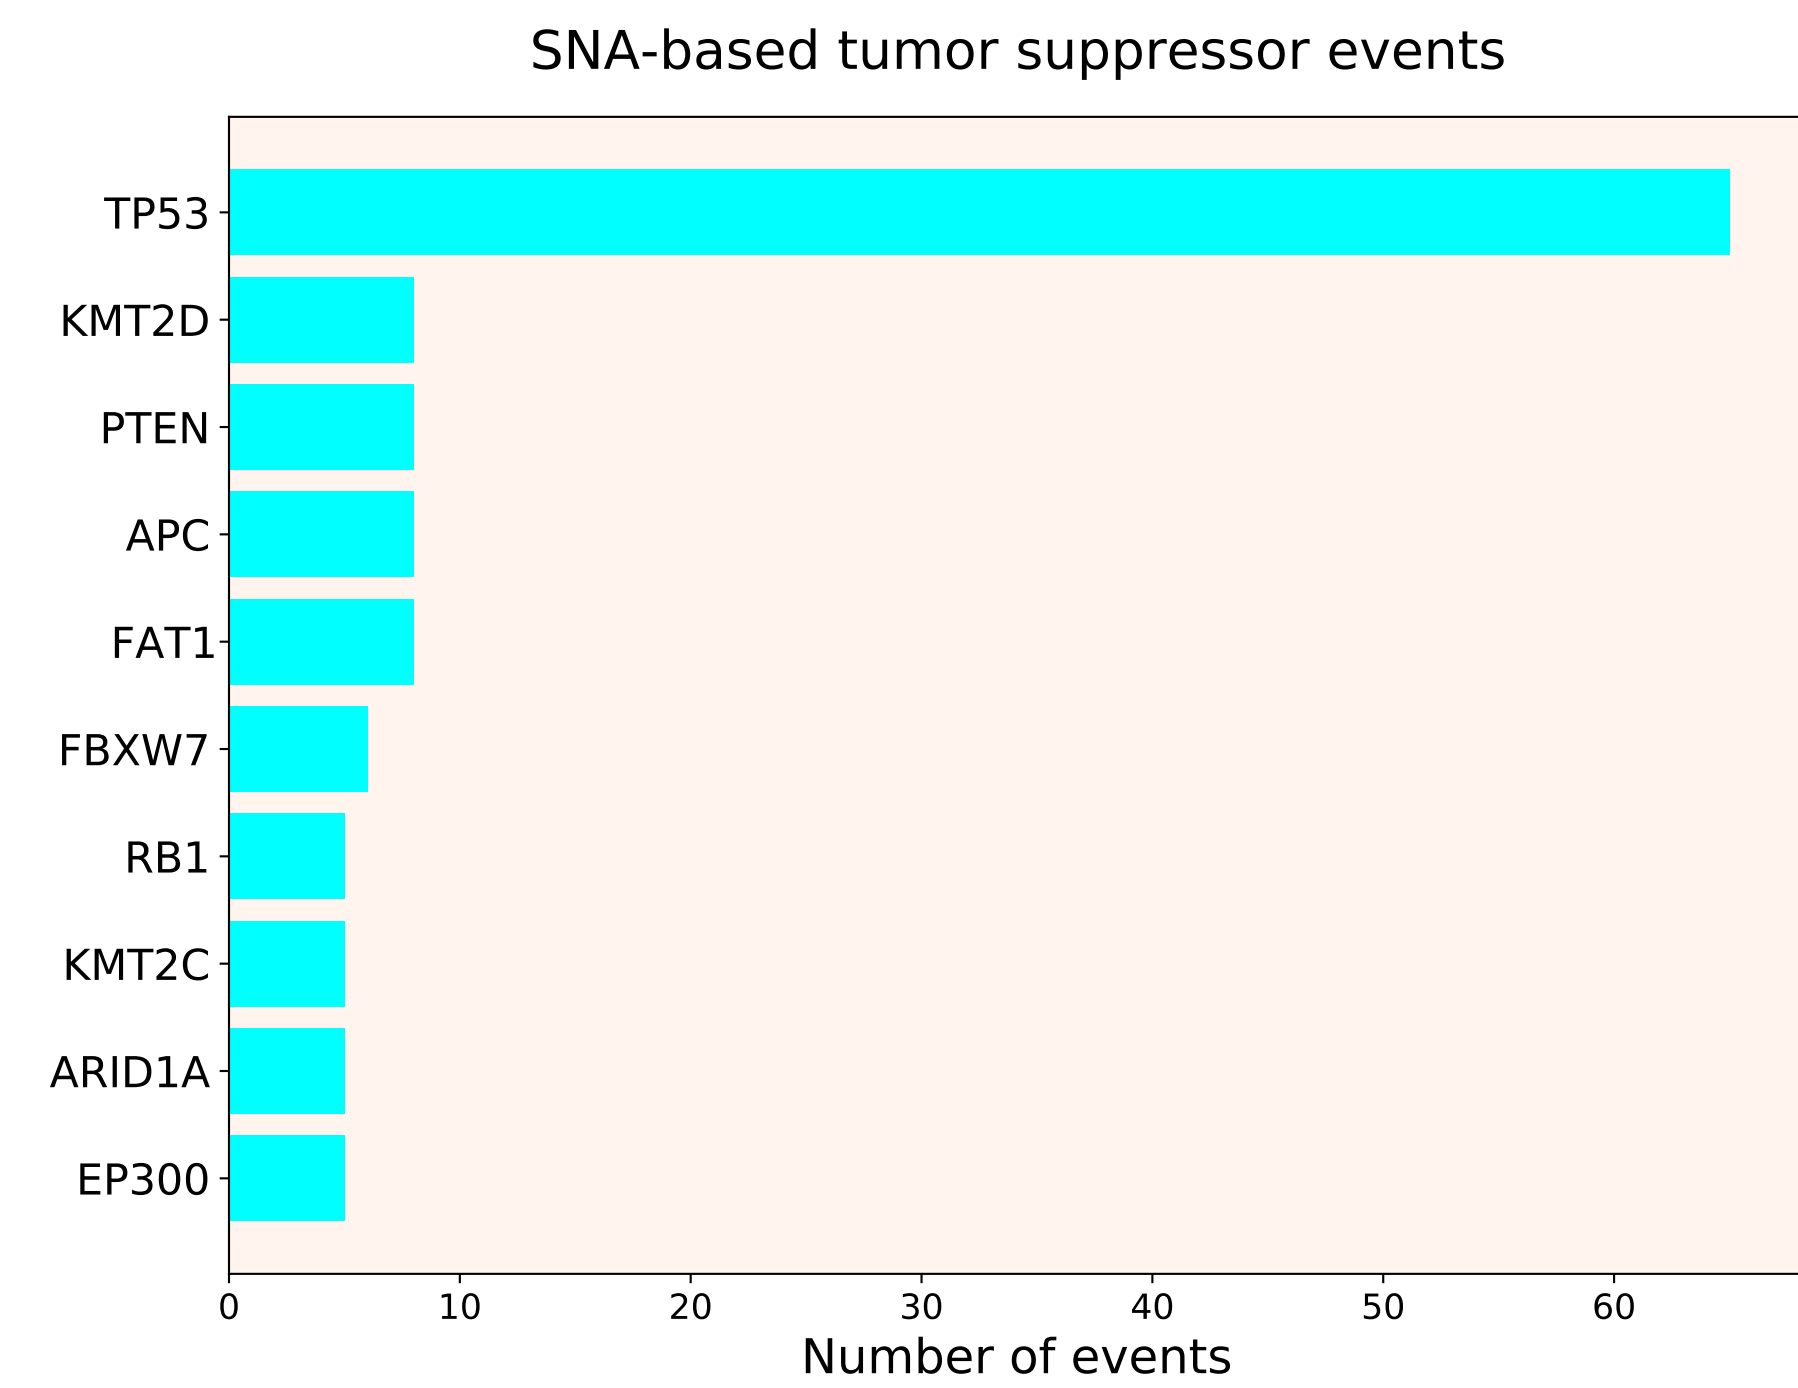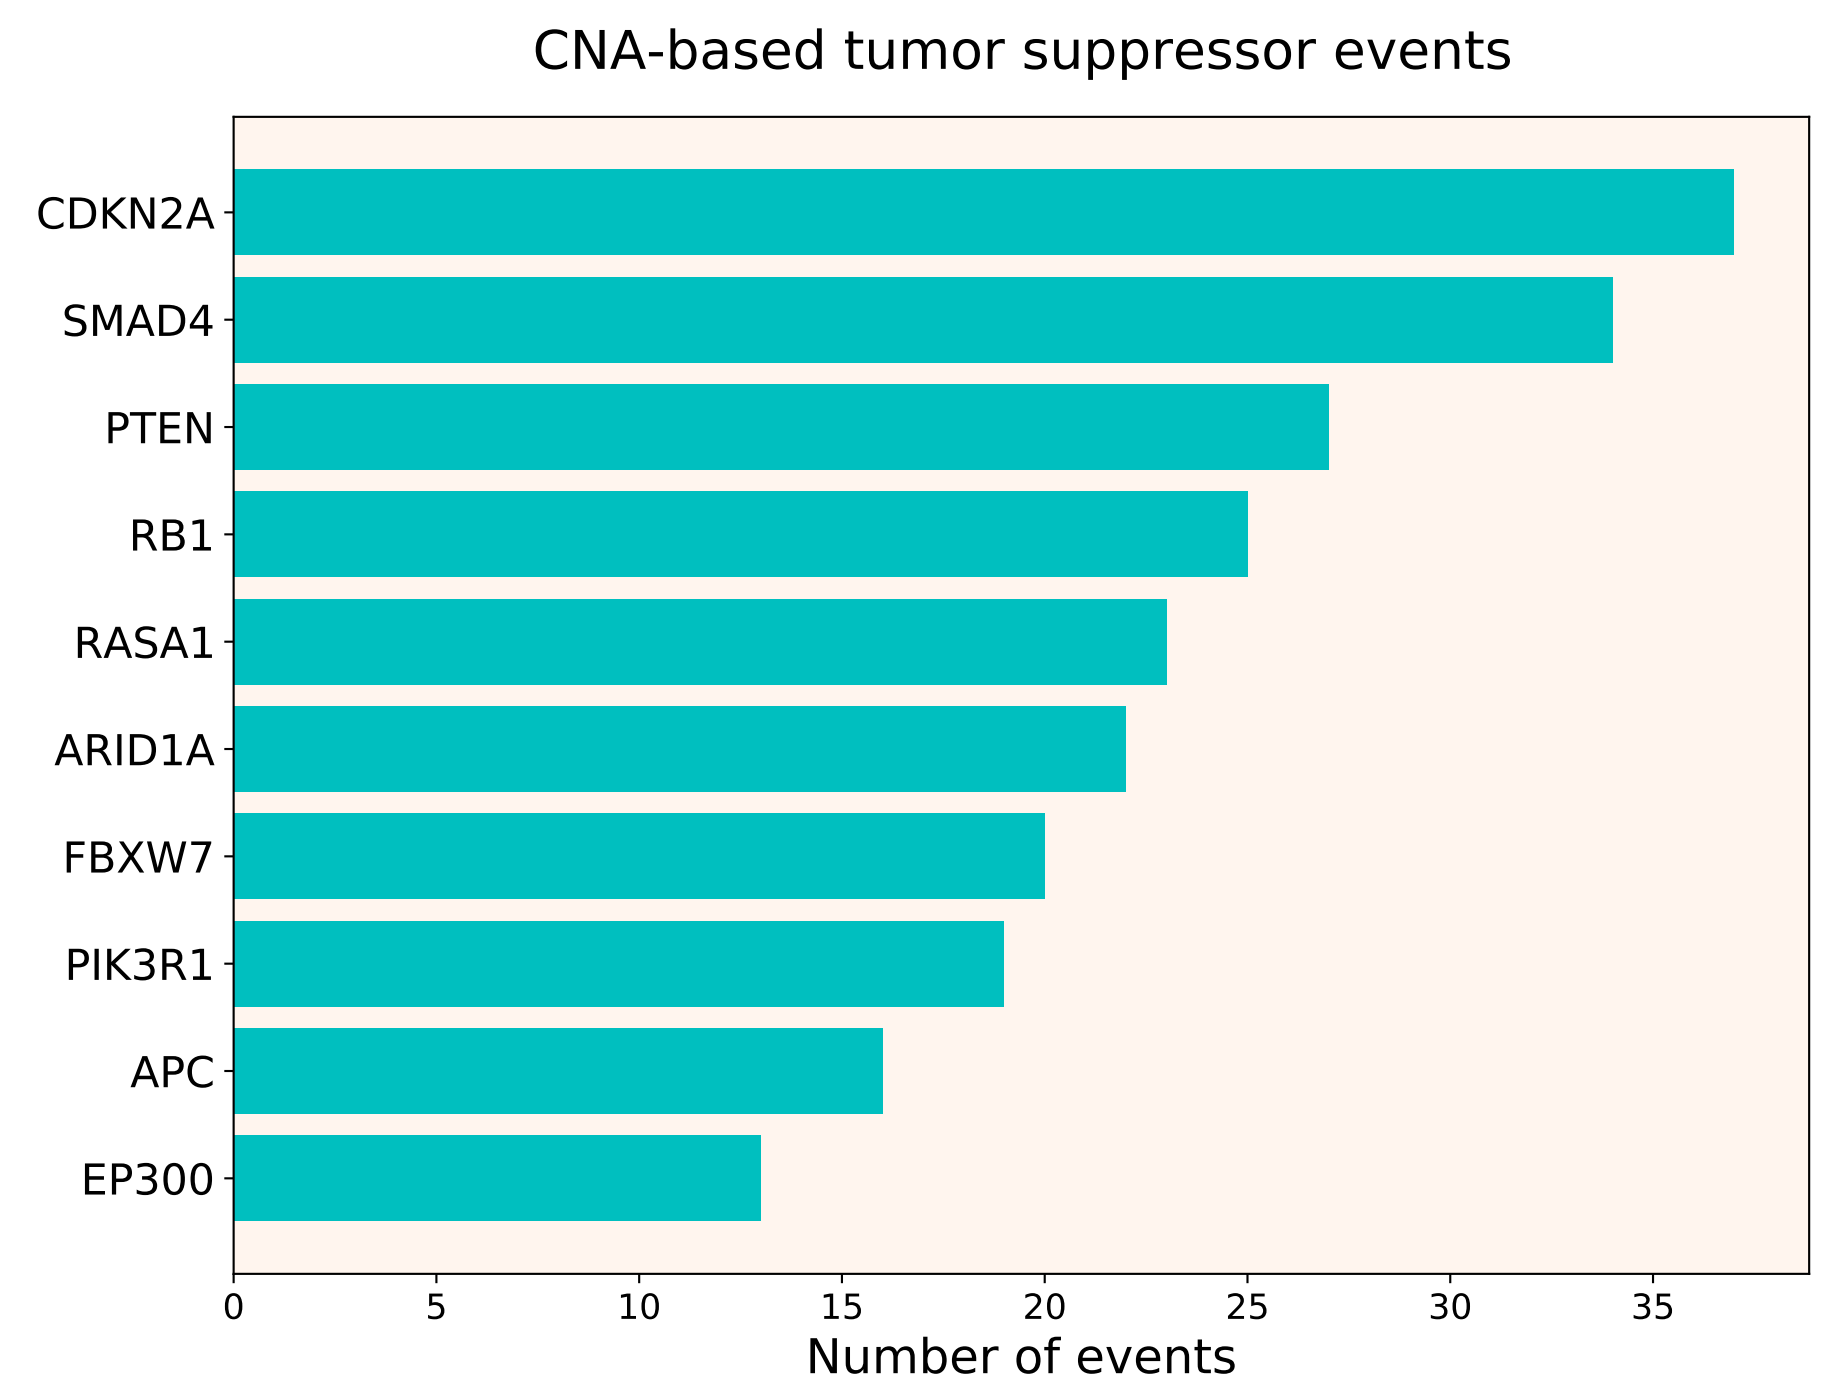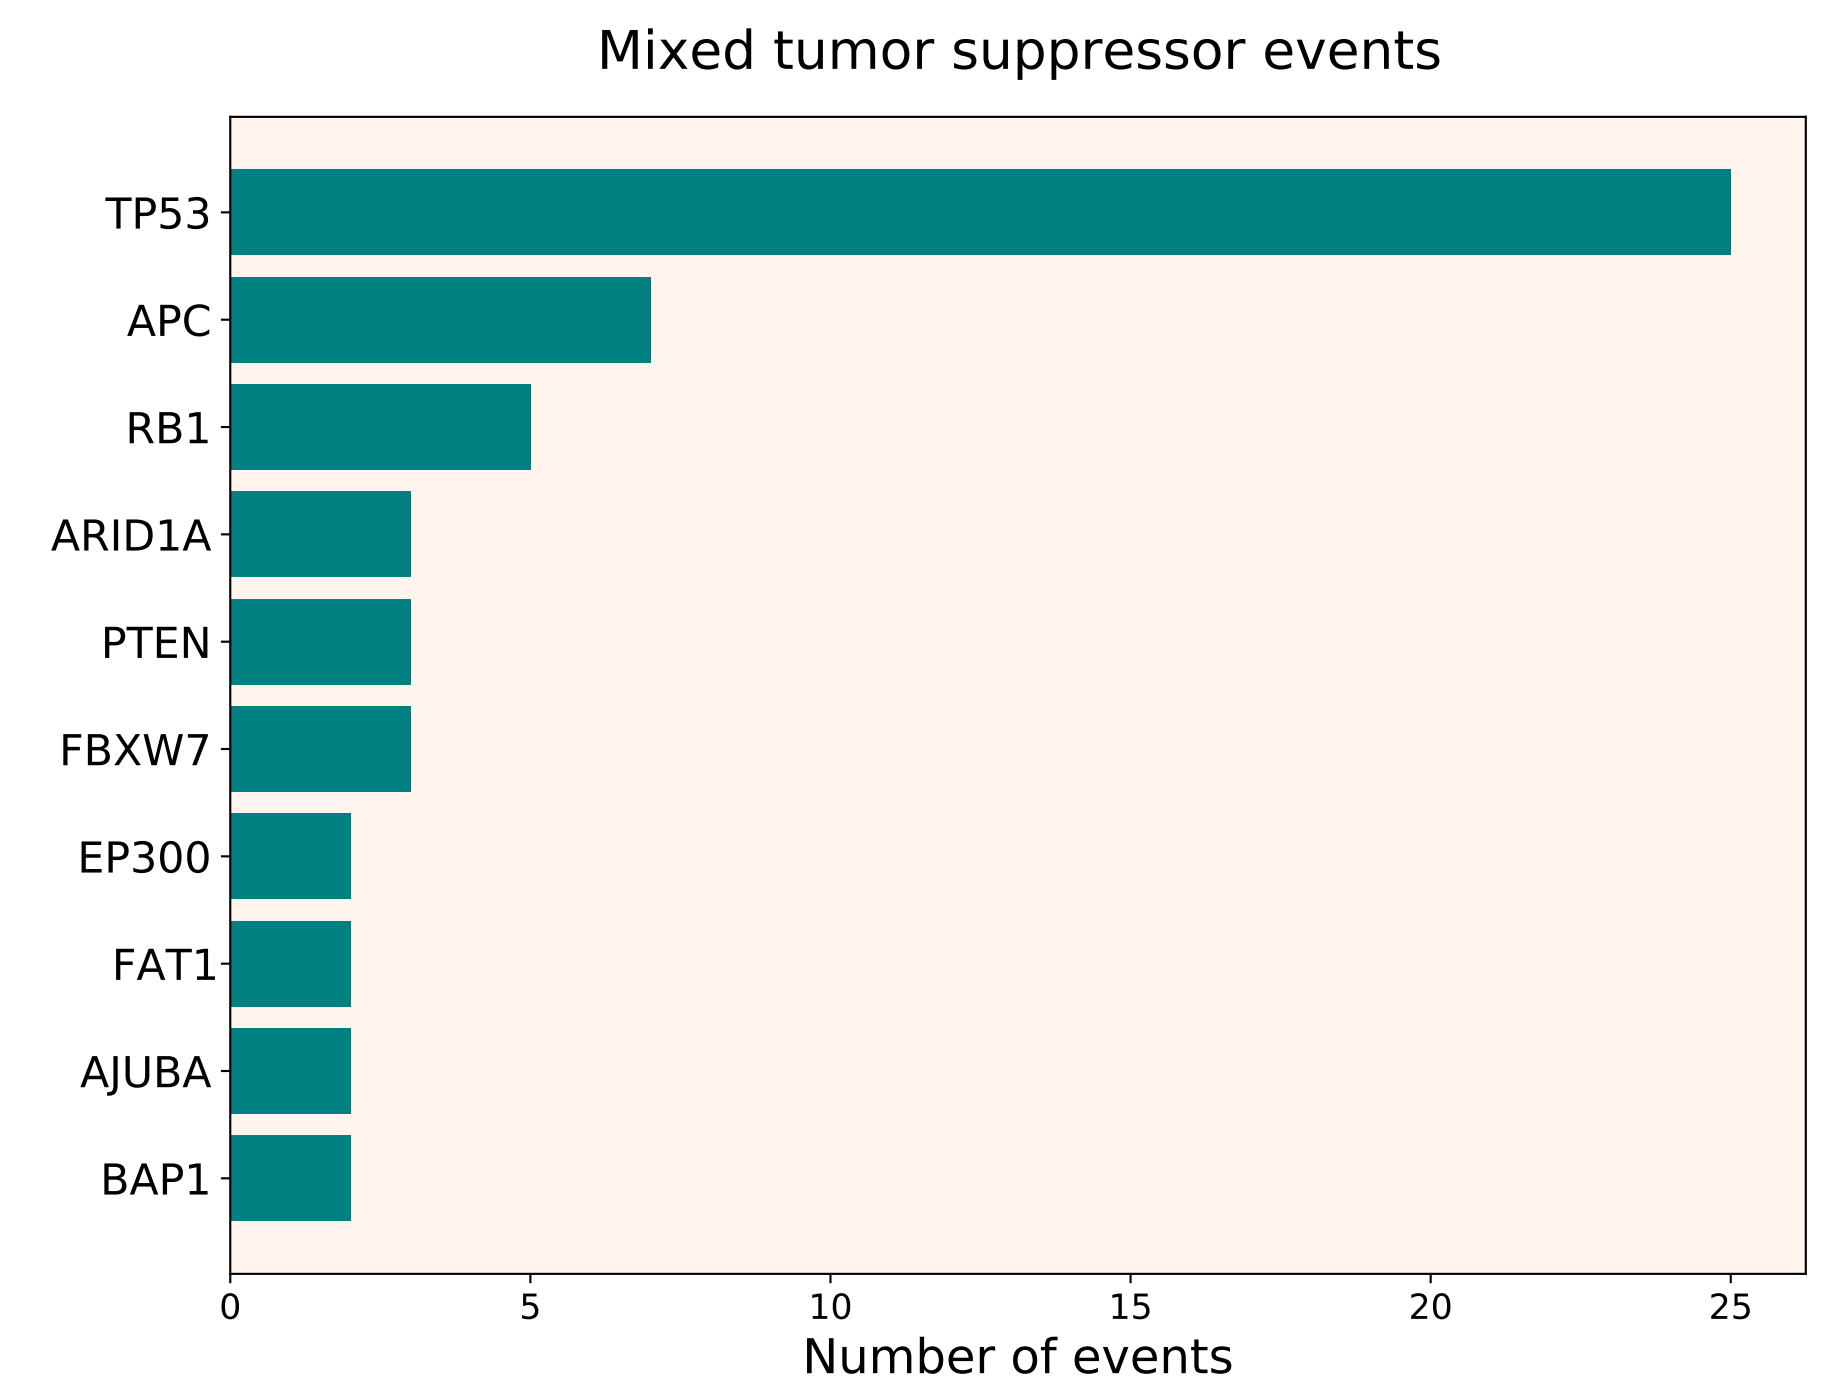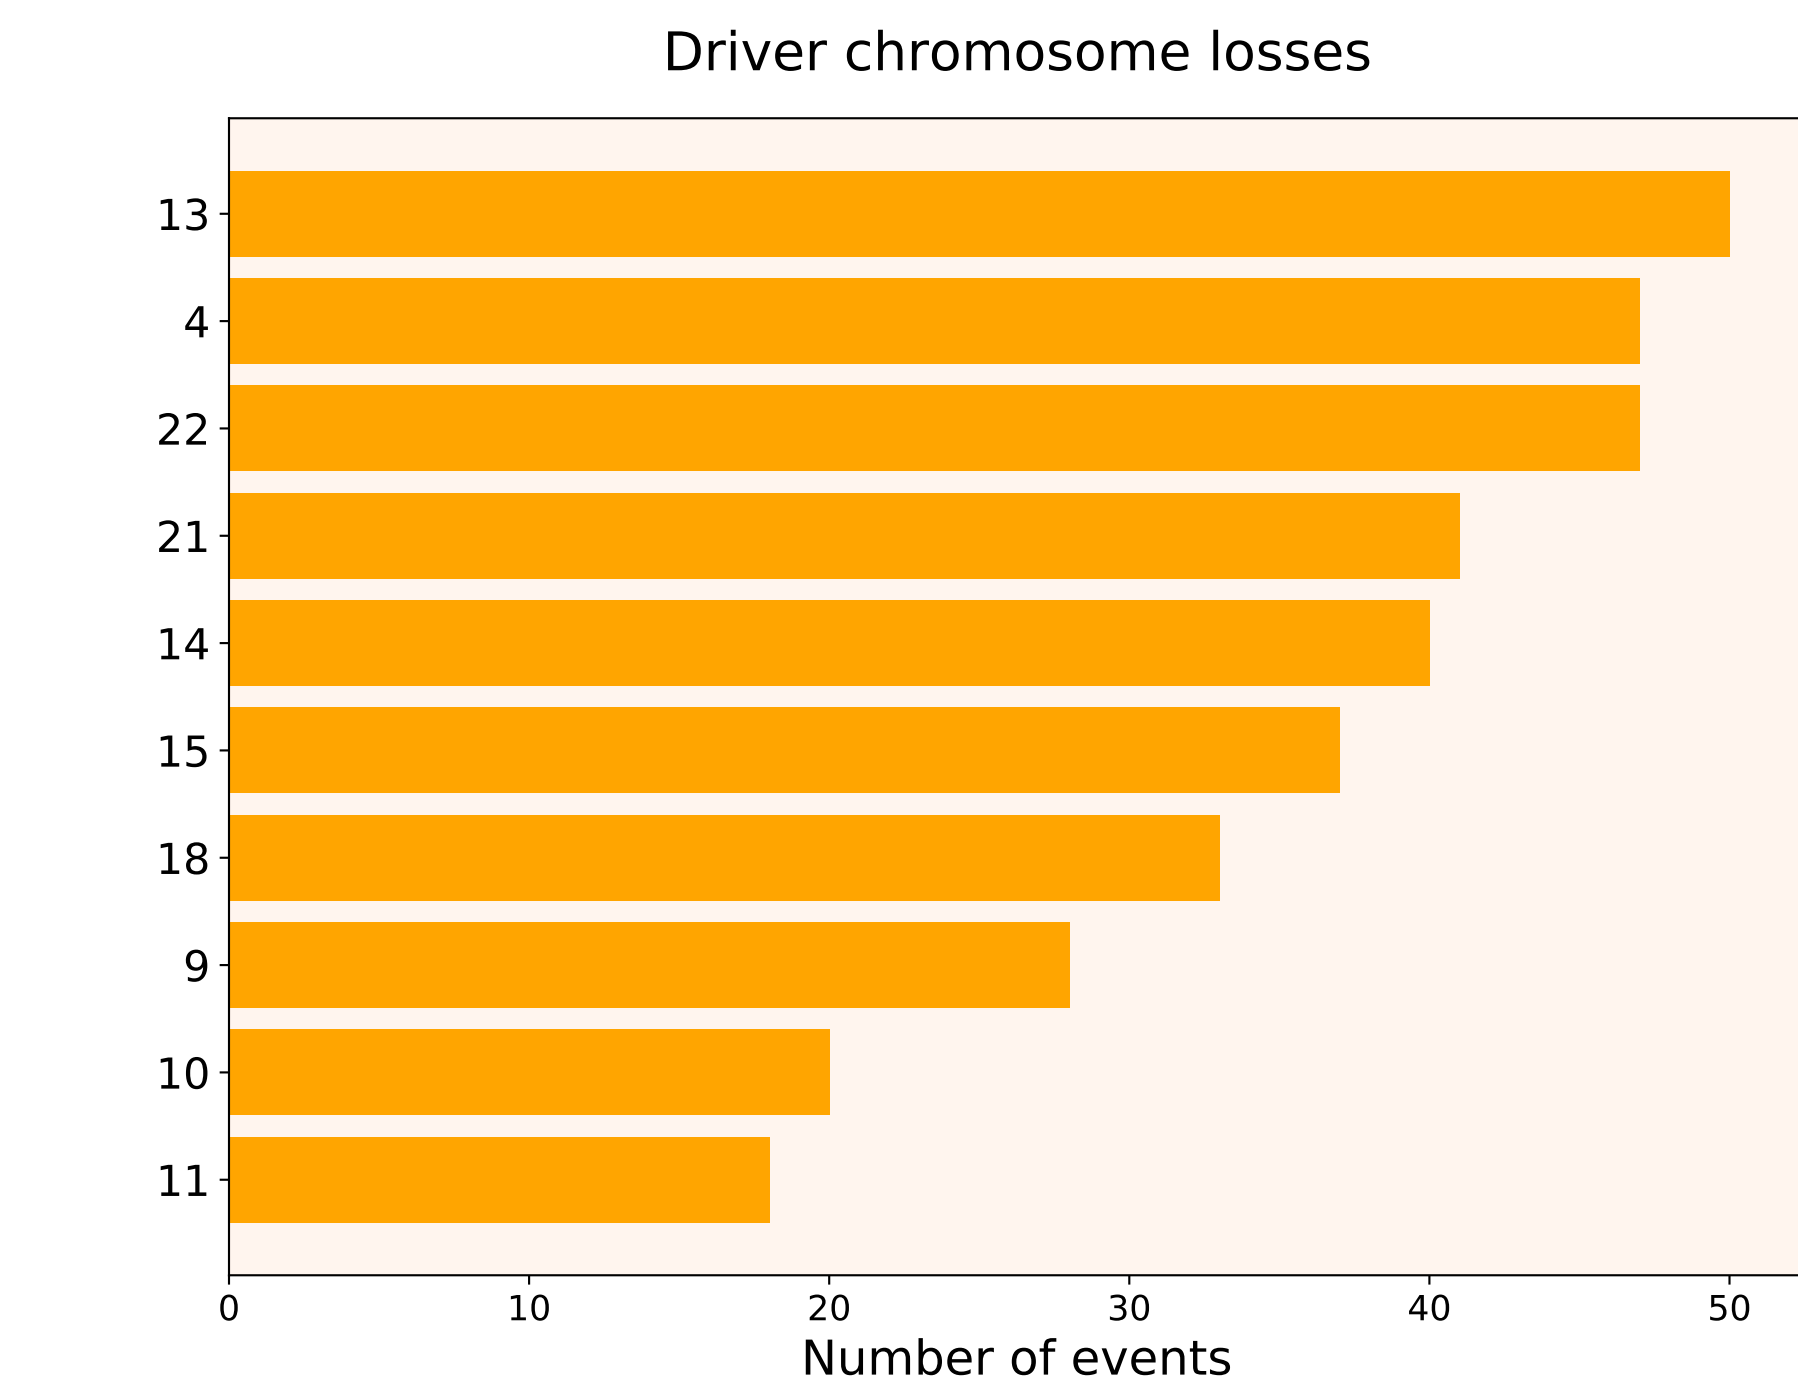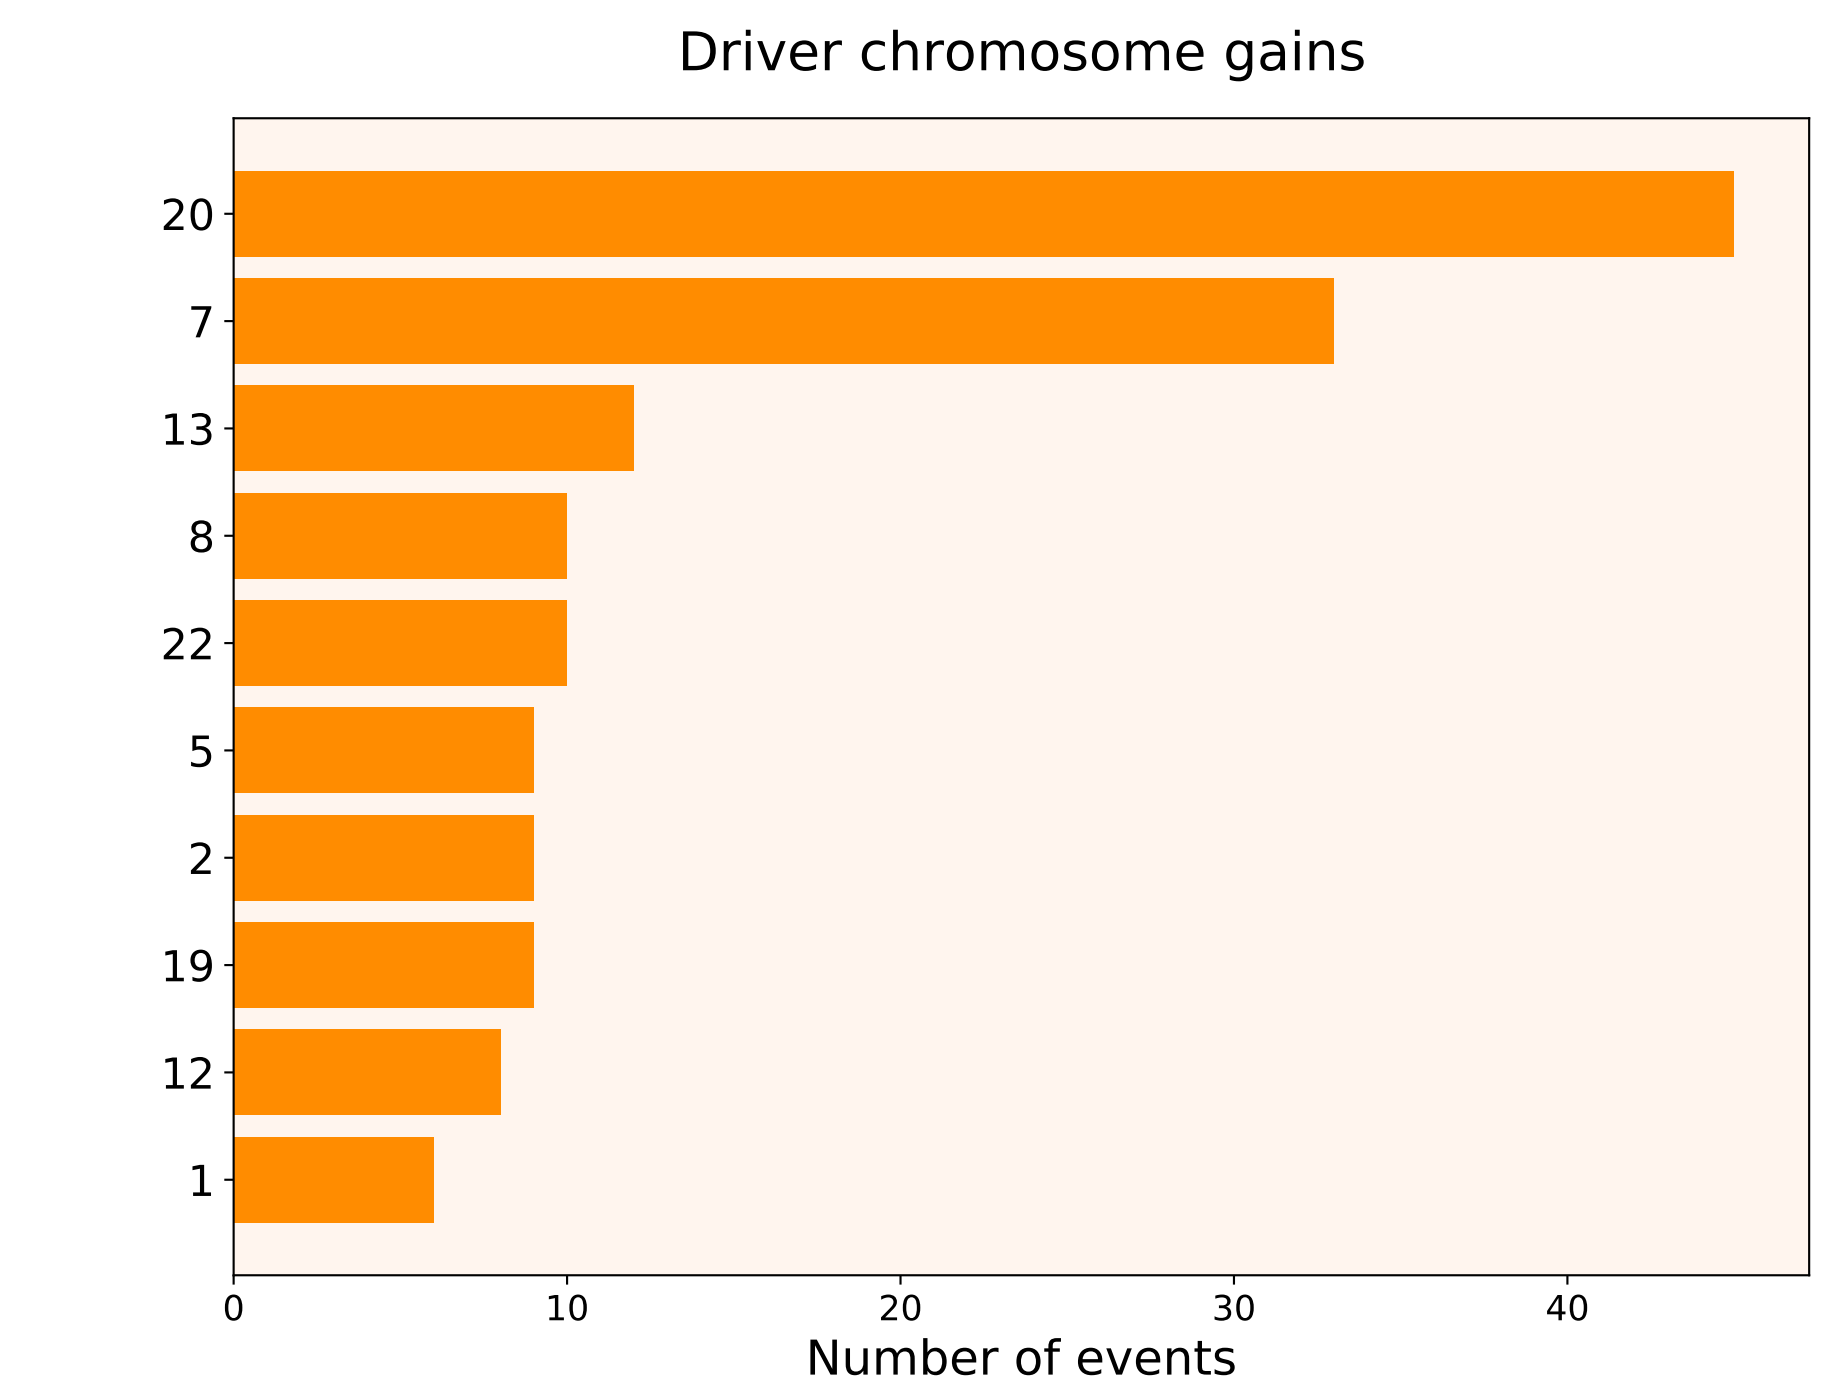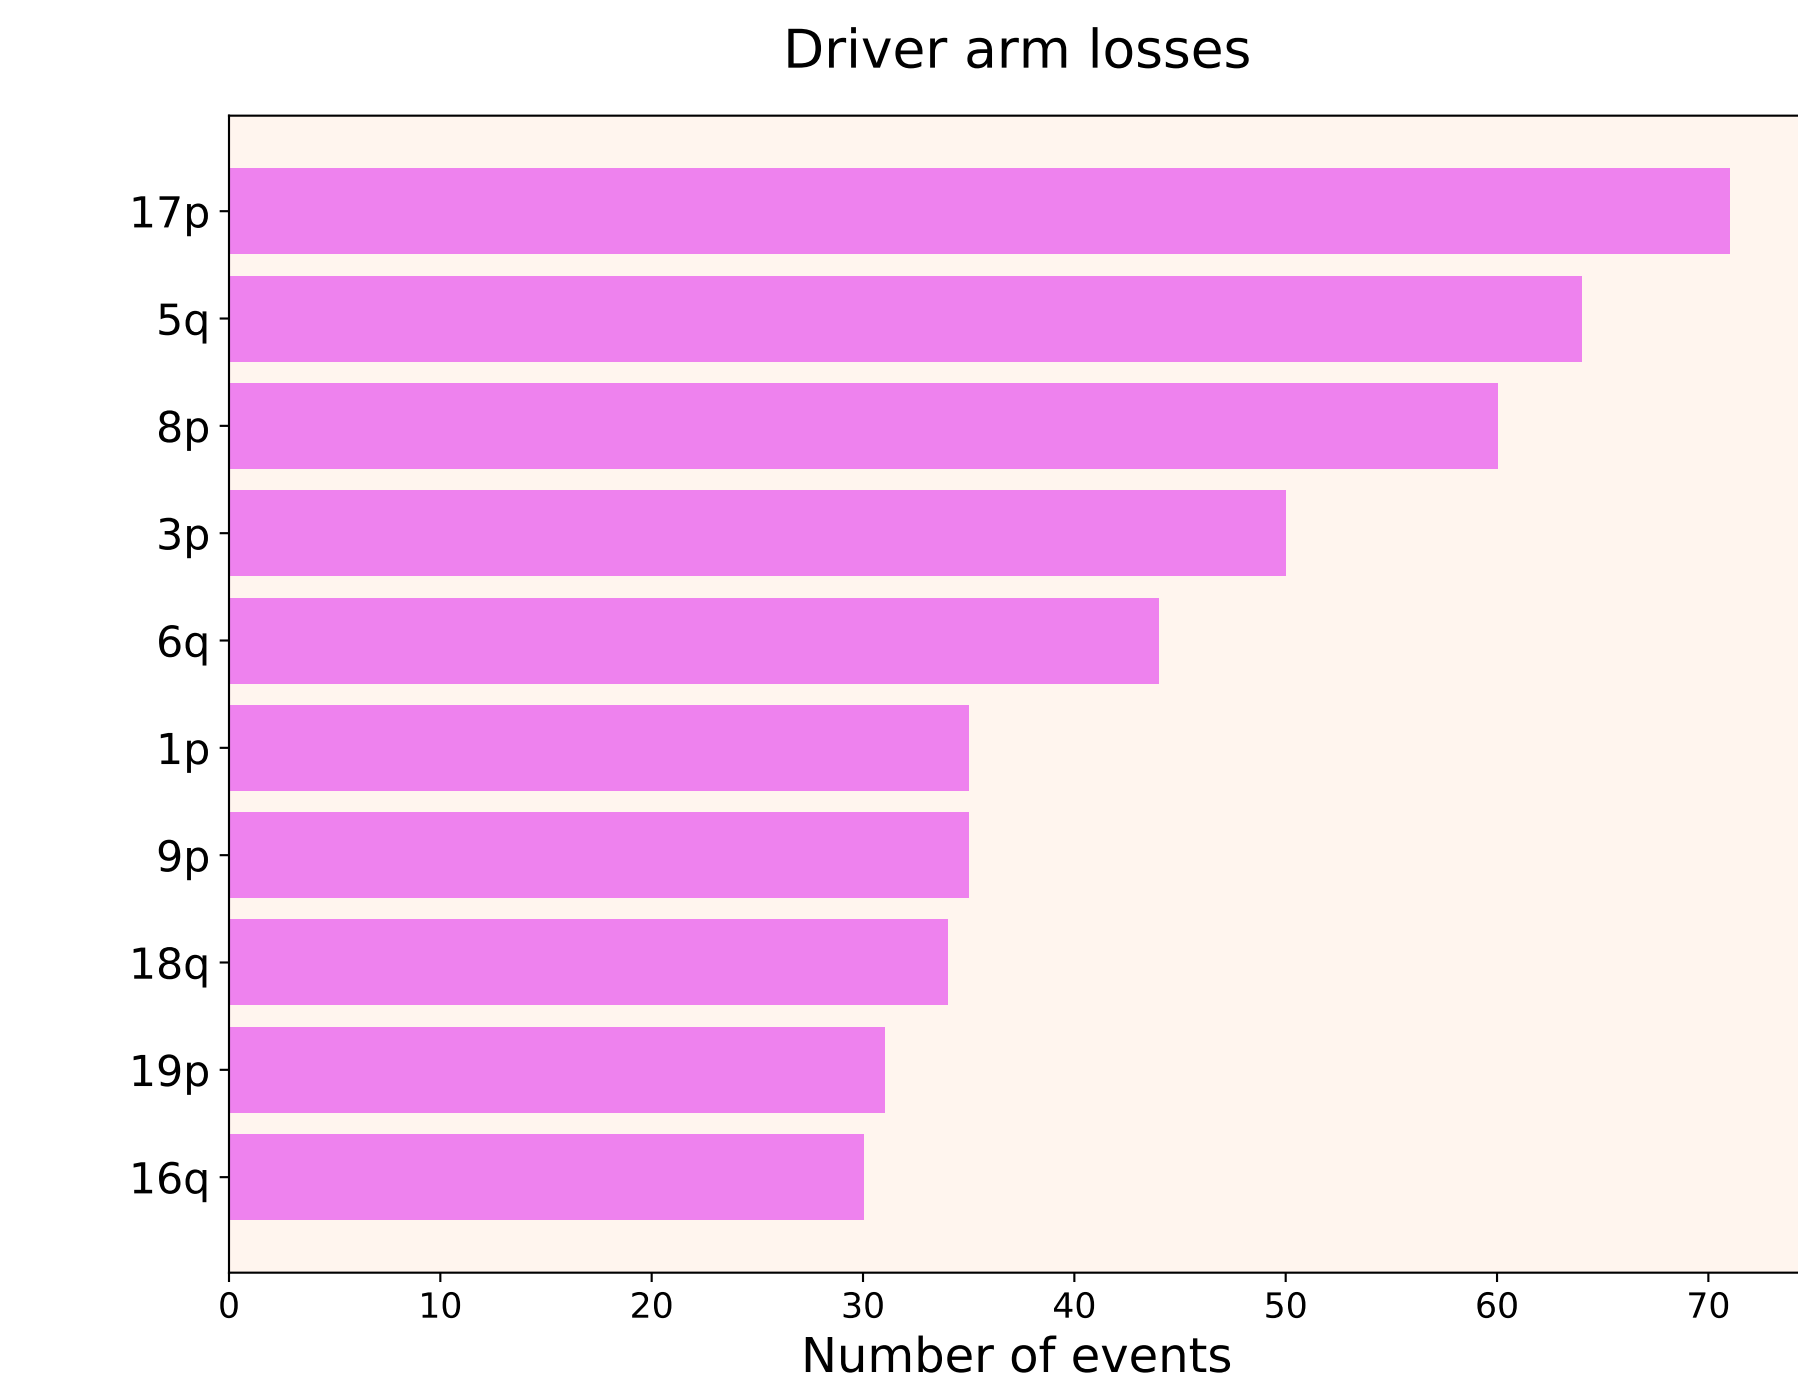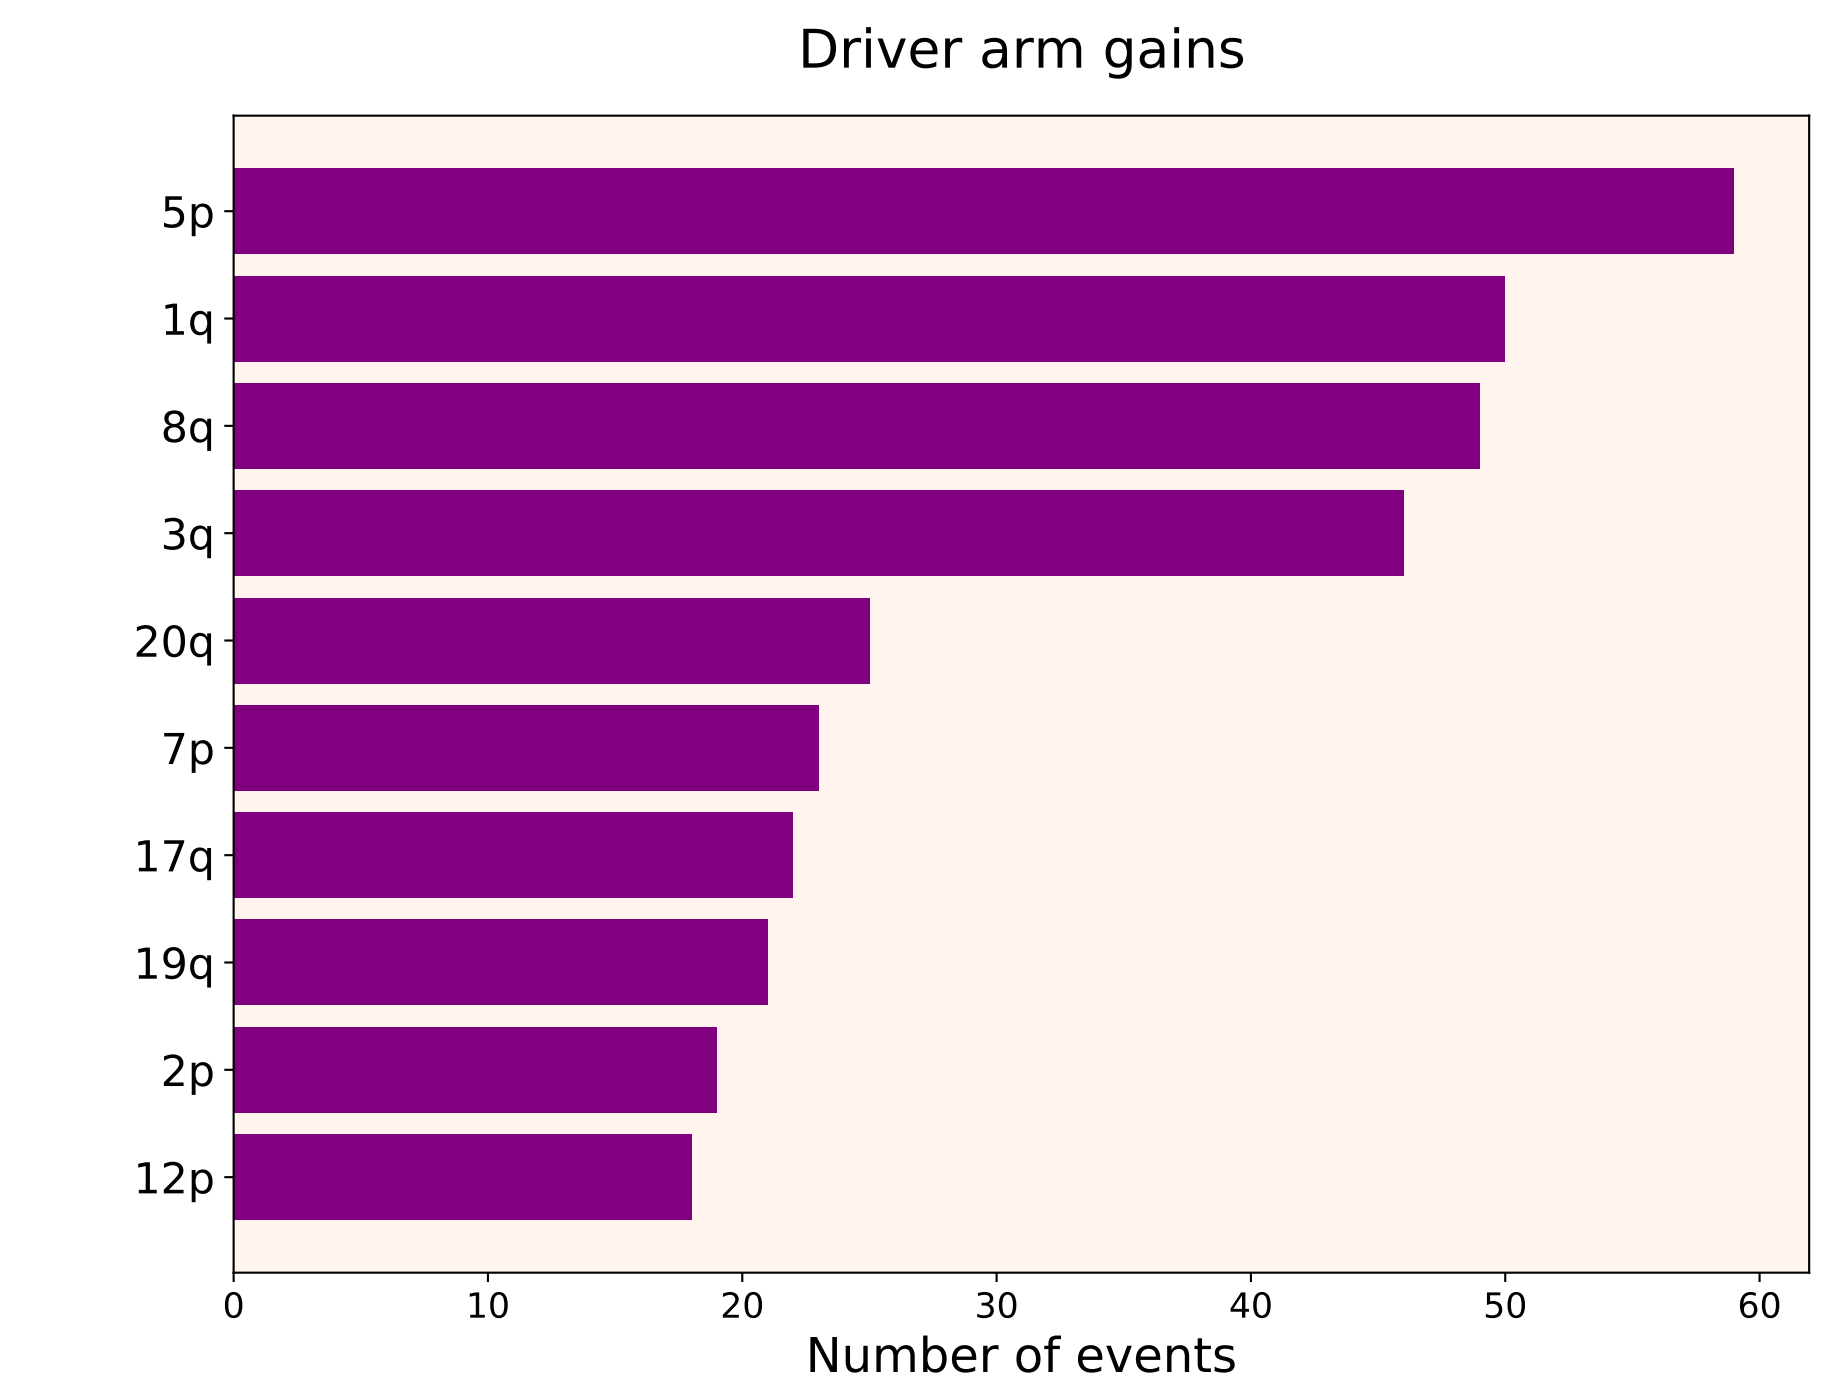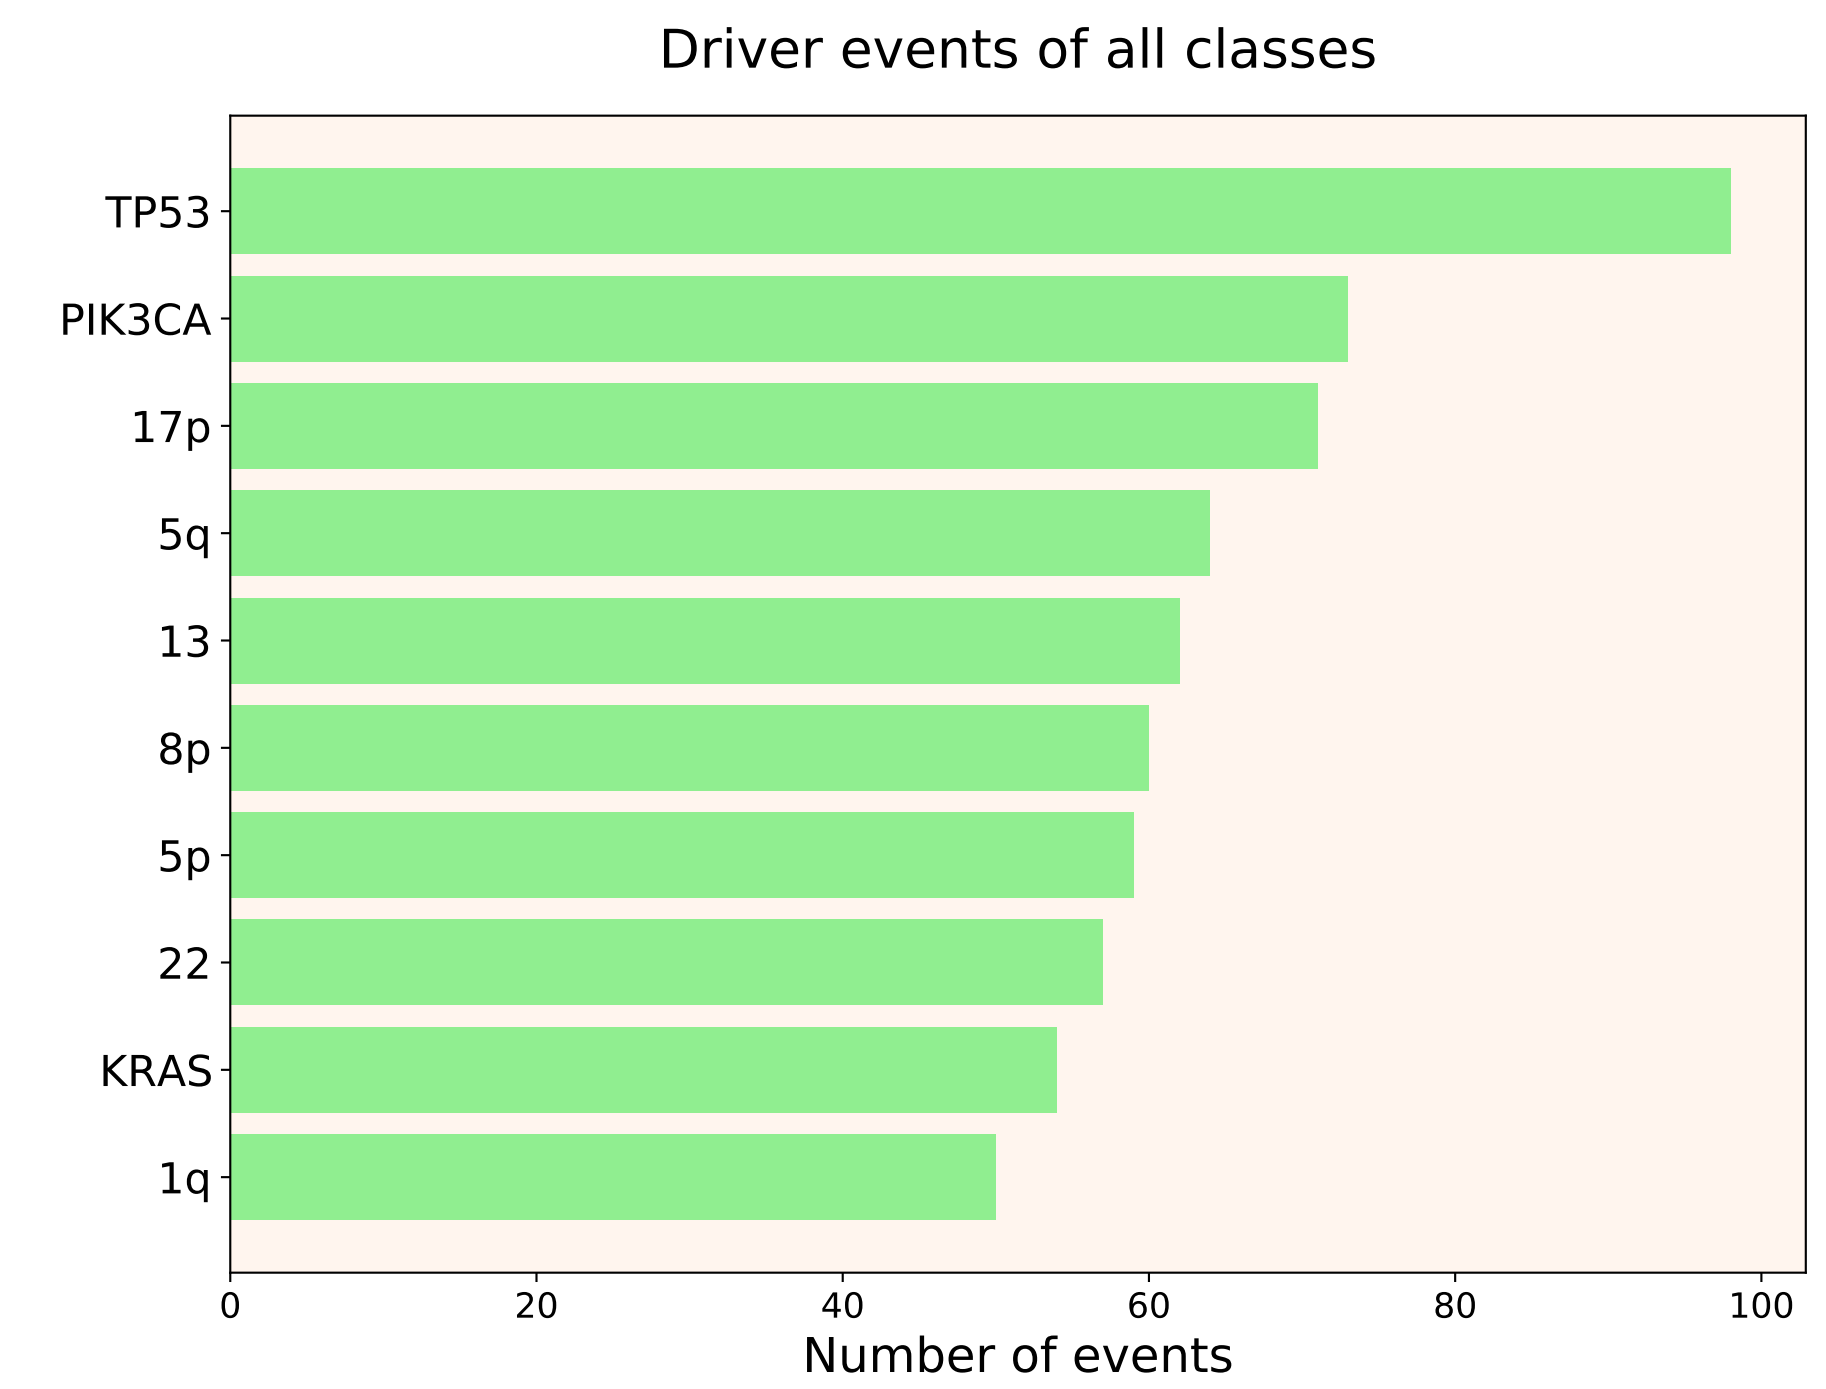

Supplement: Supplemental_Data_S1.zip [file Supplemental_Data_S1.zip]

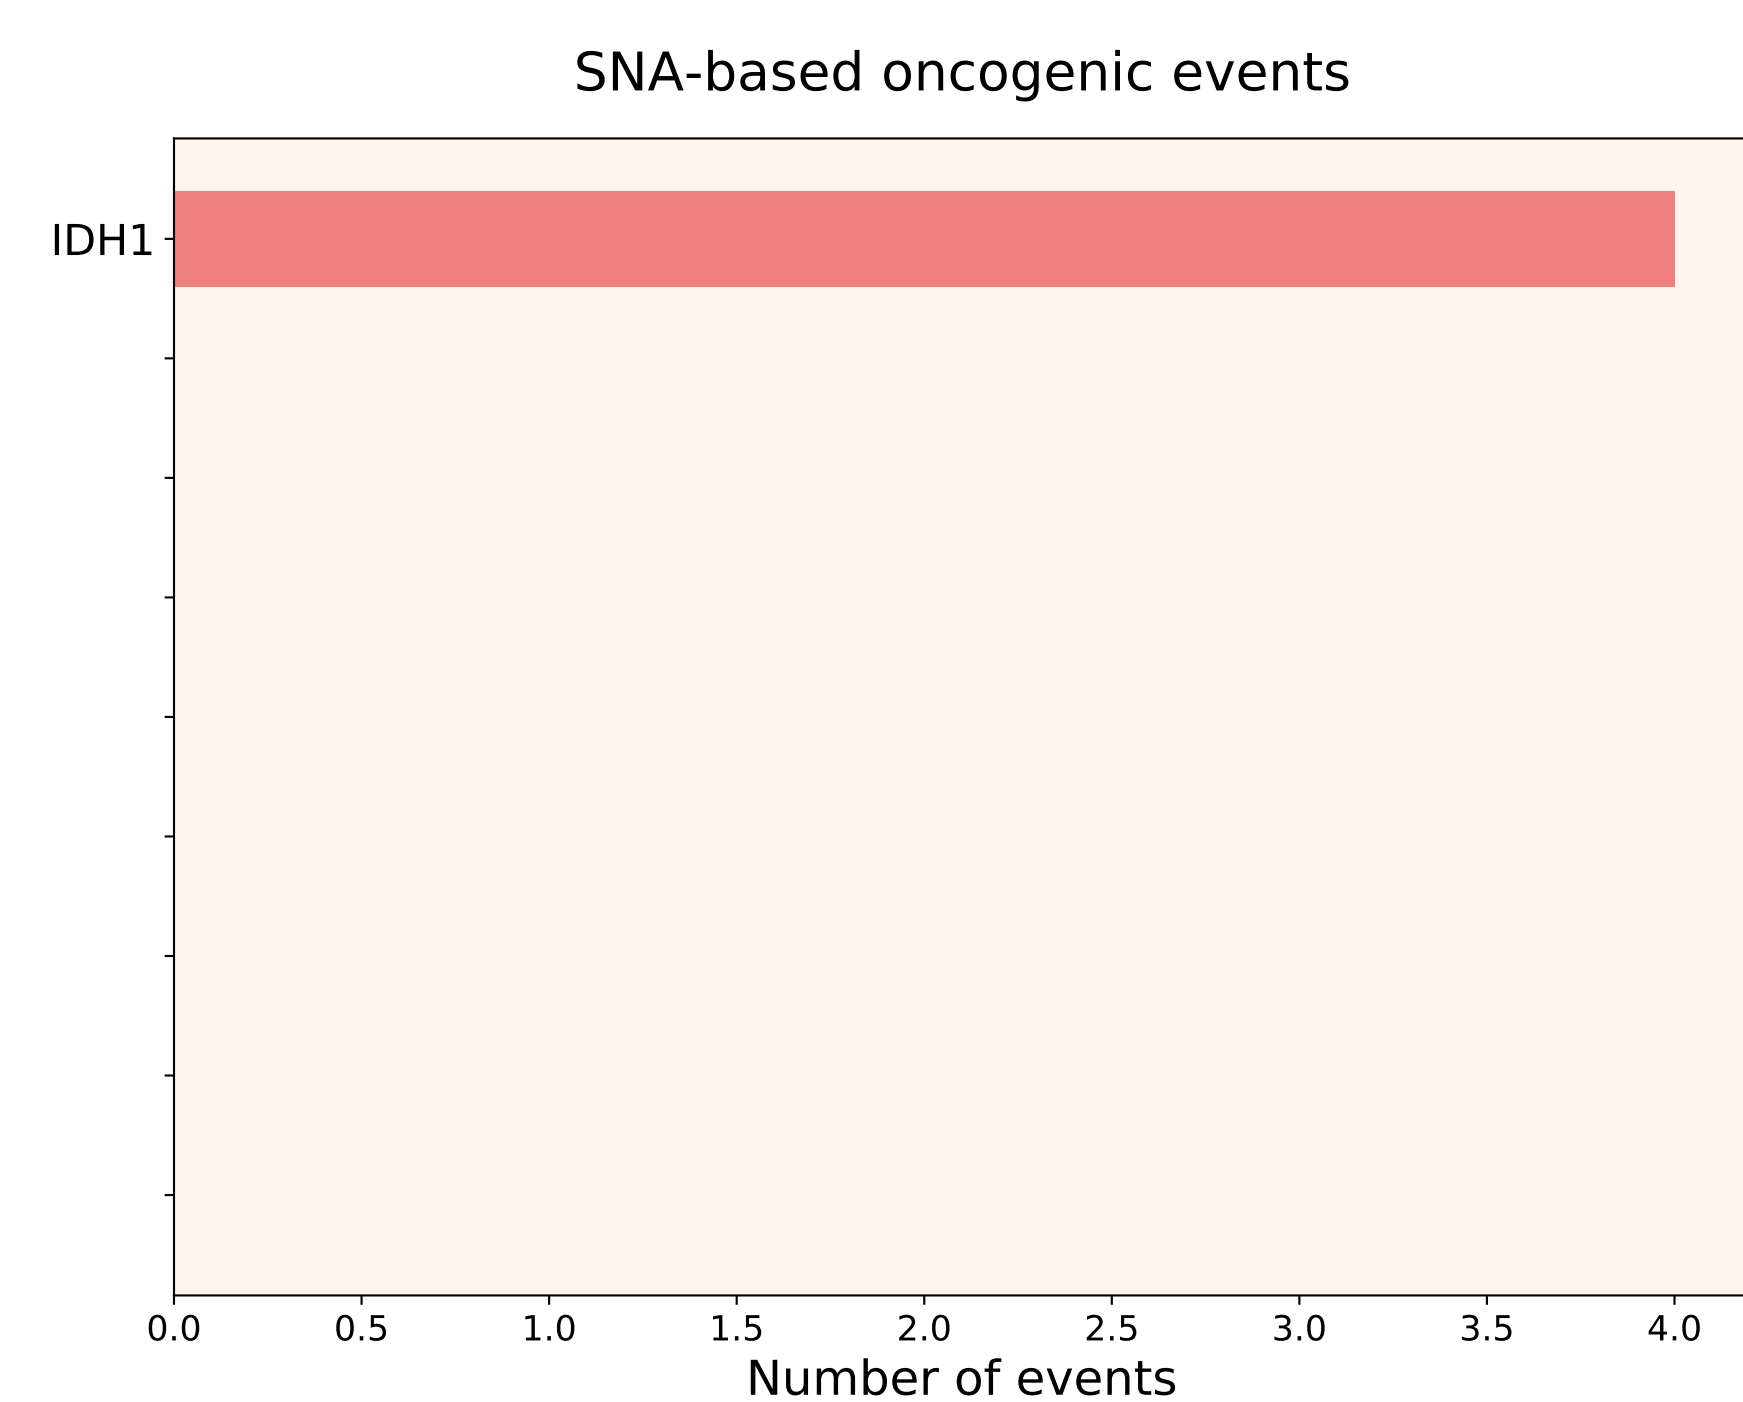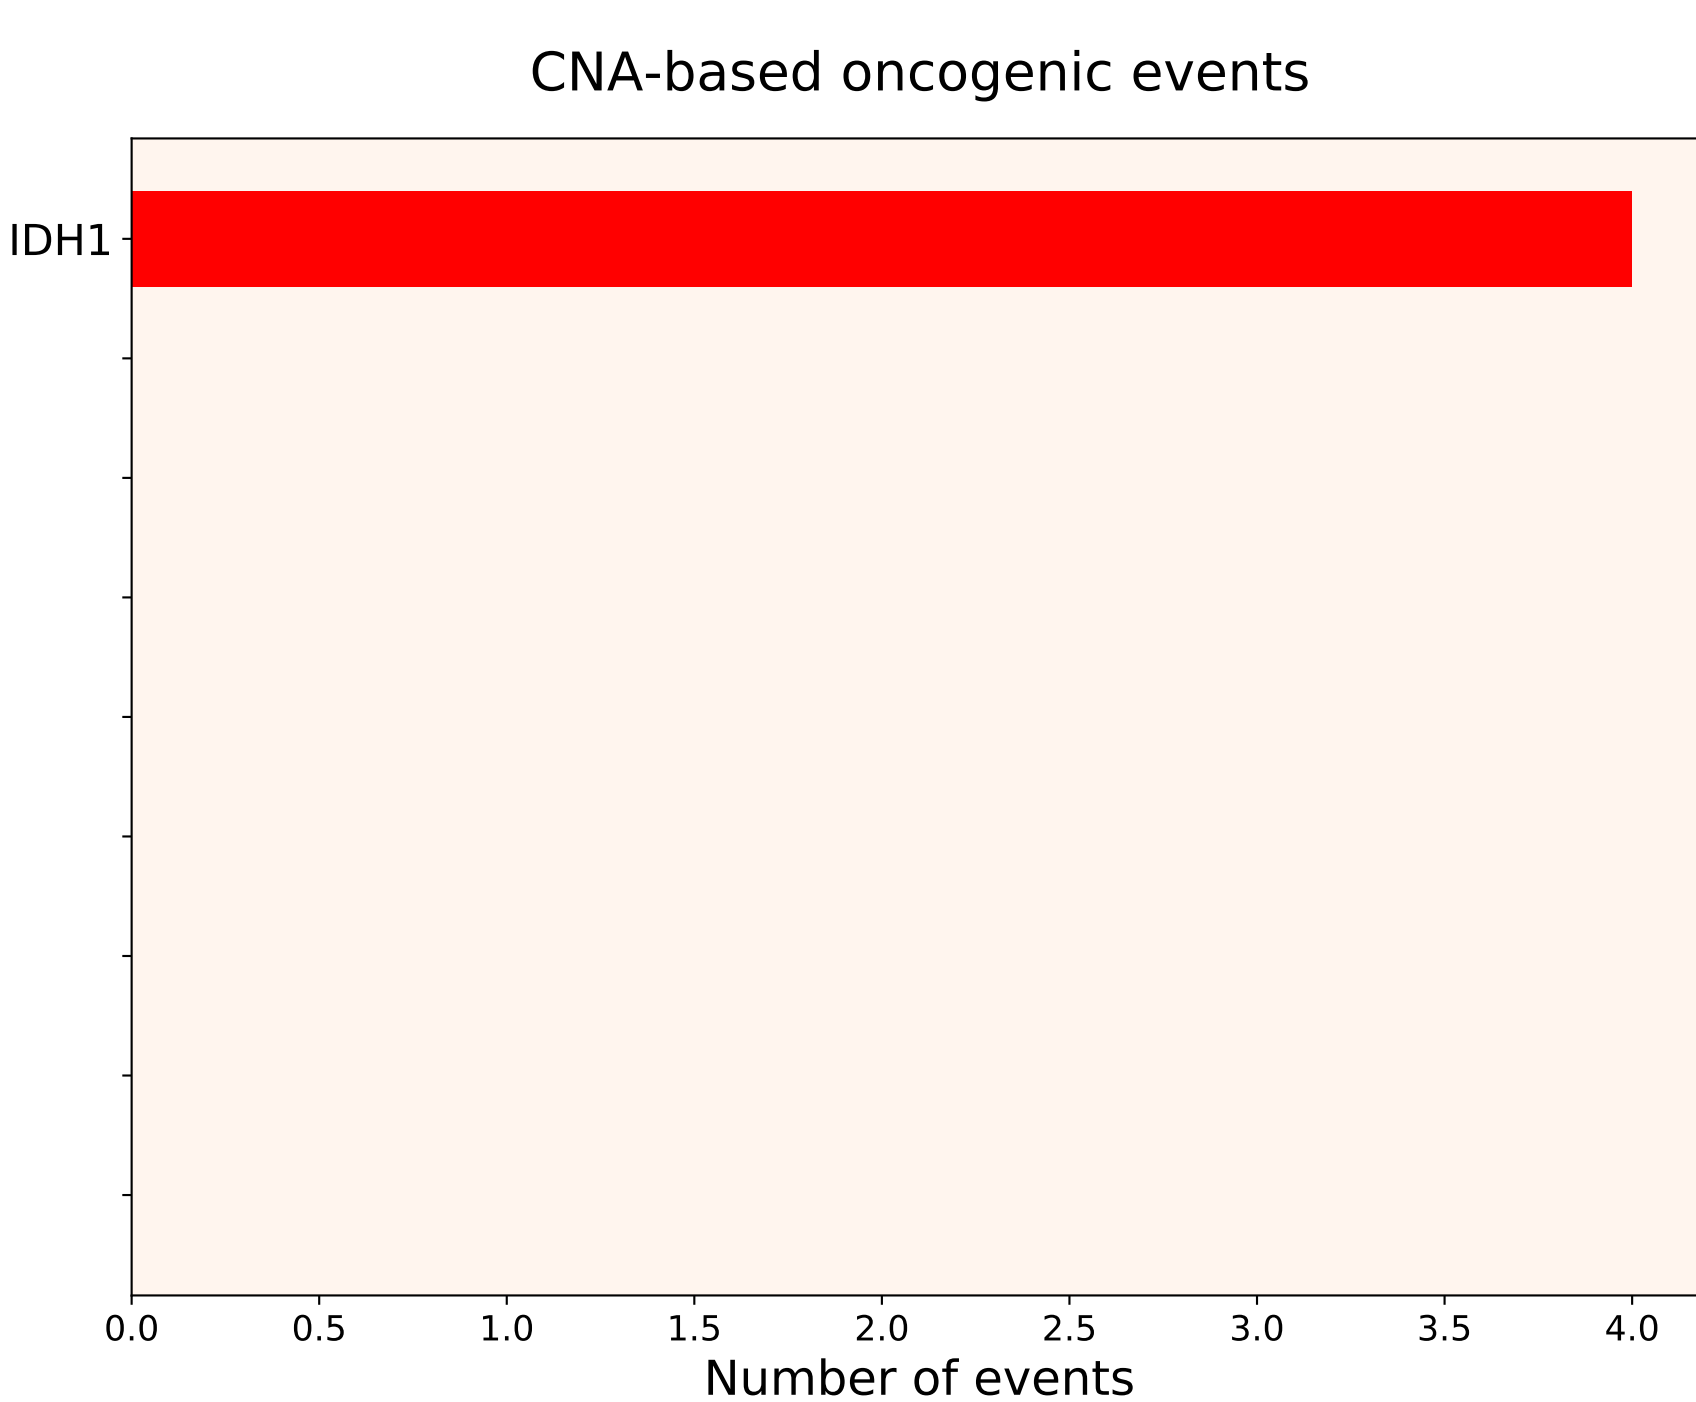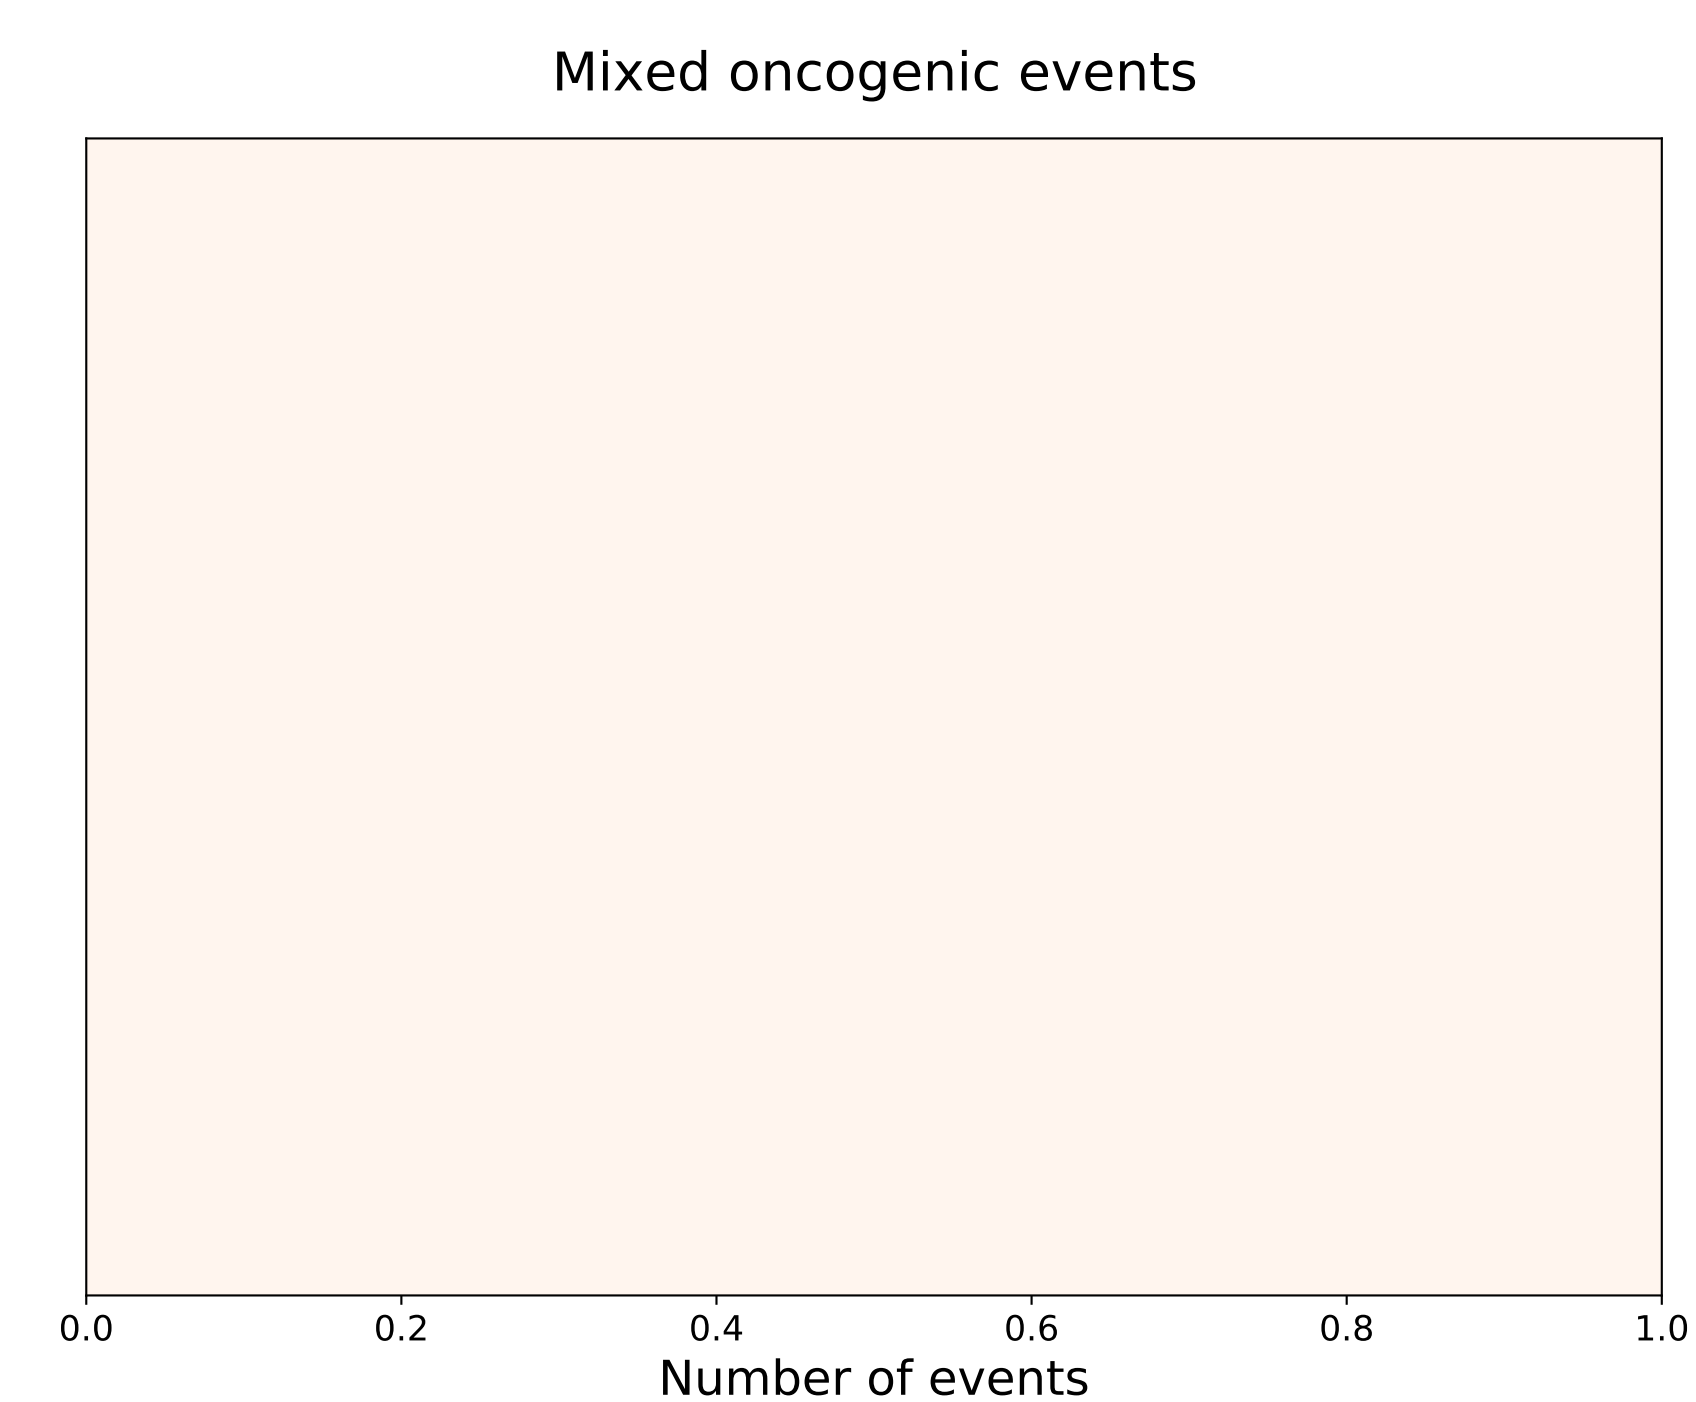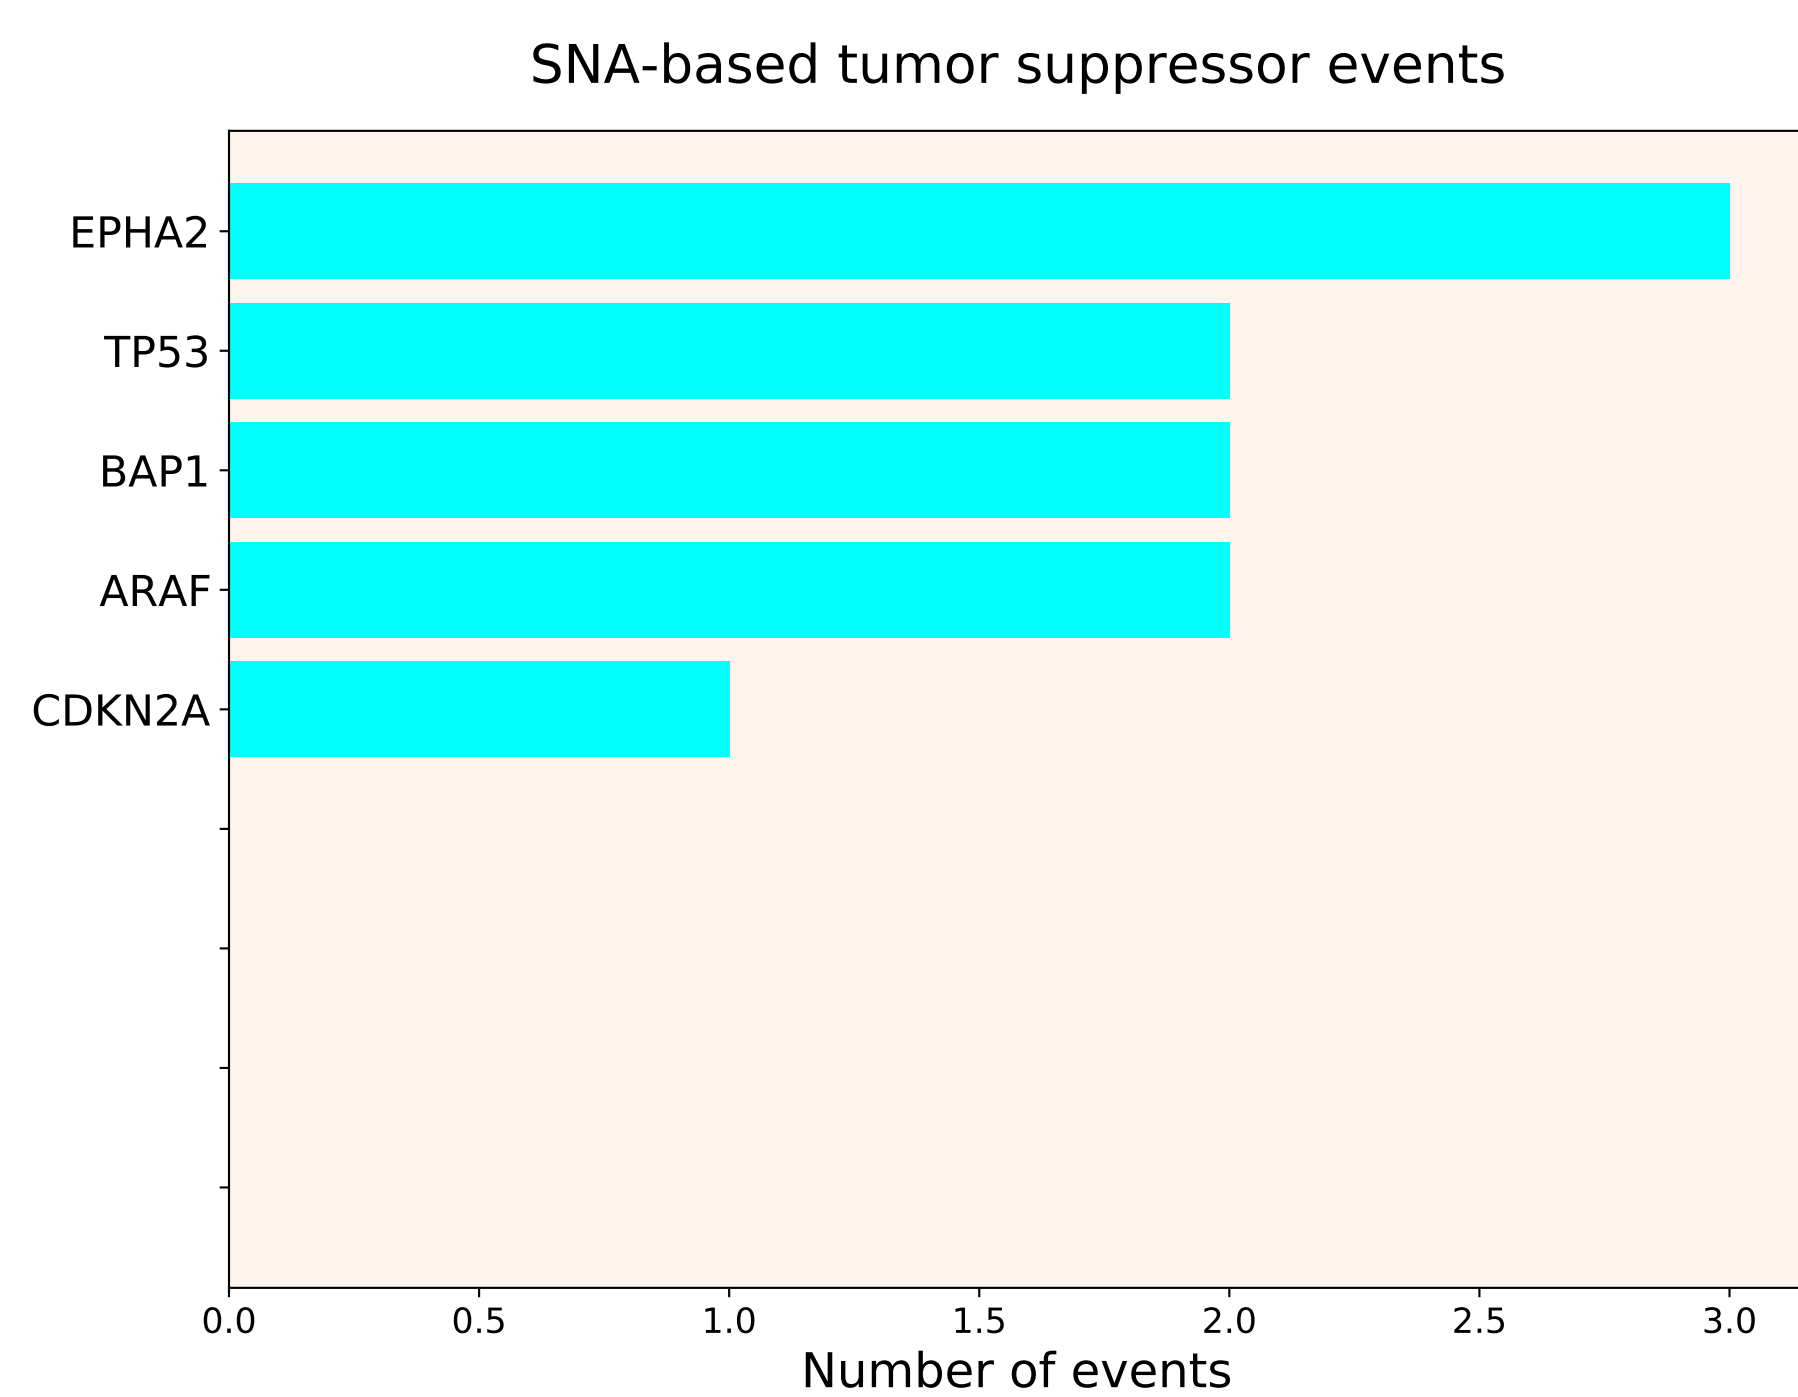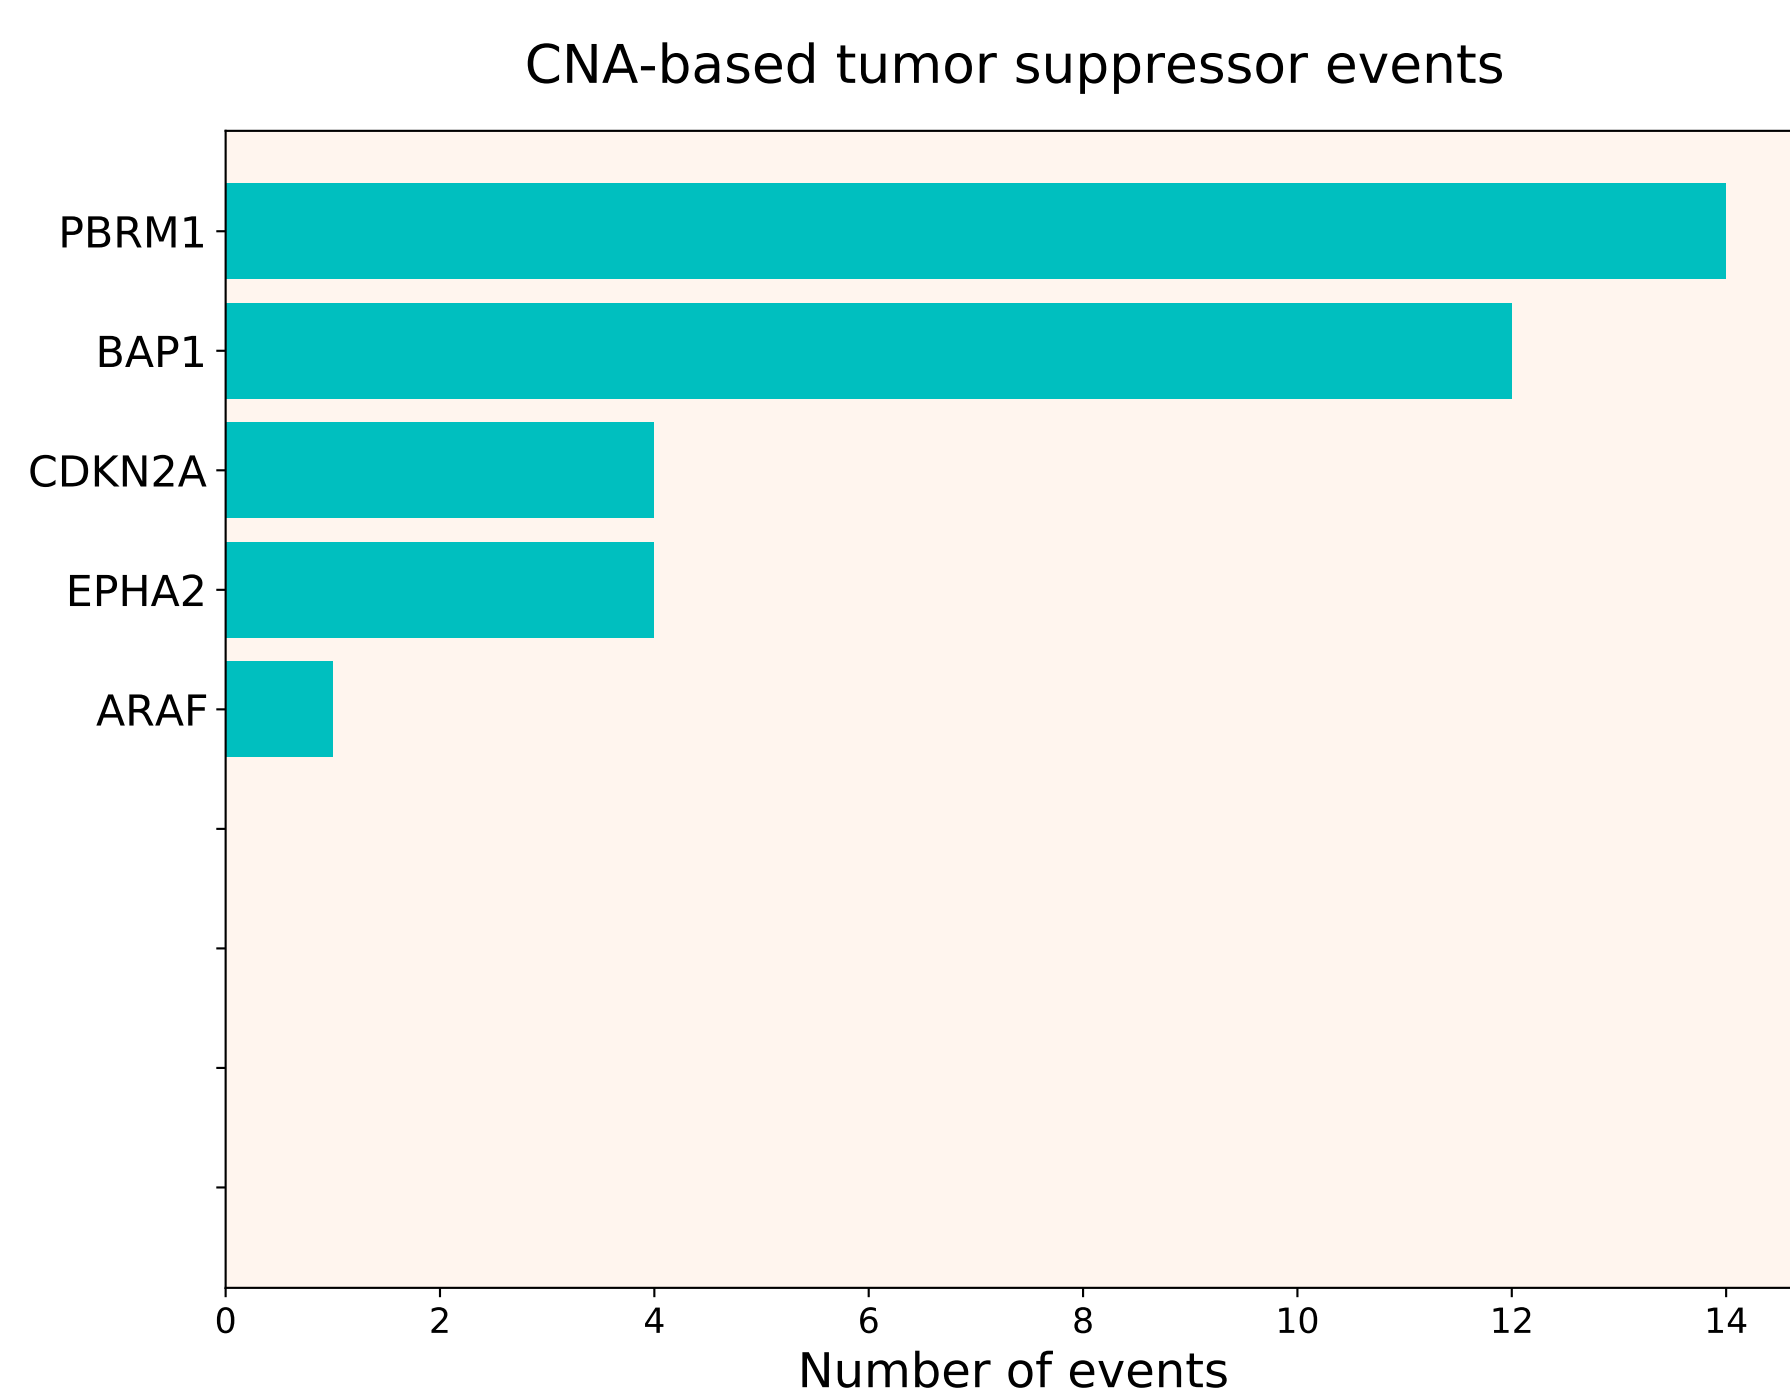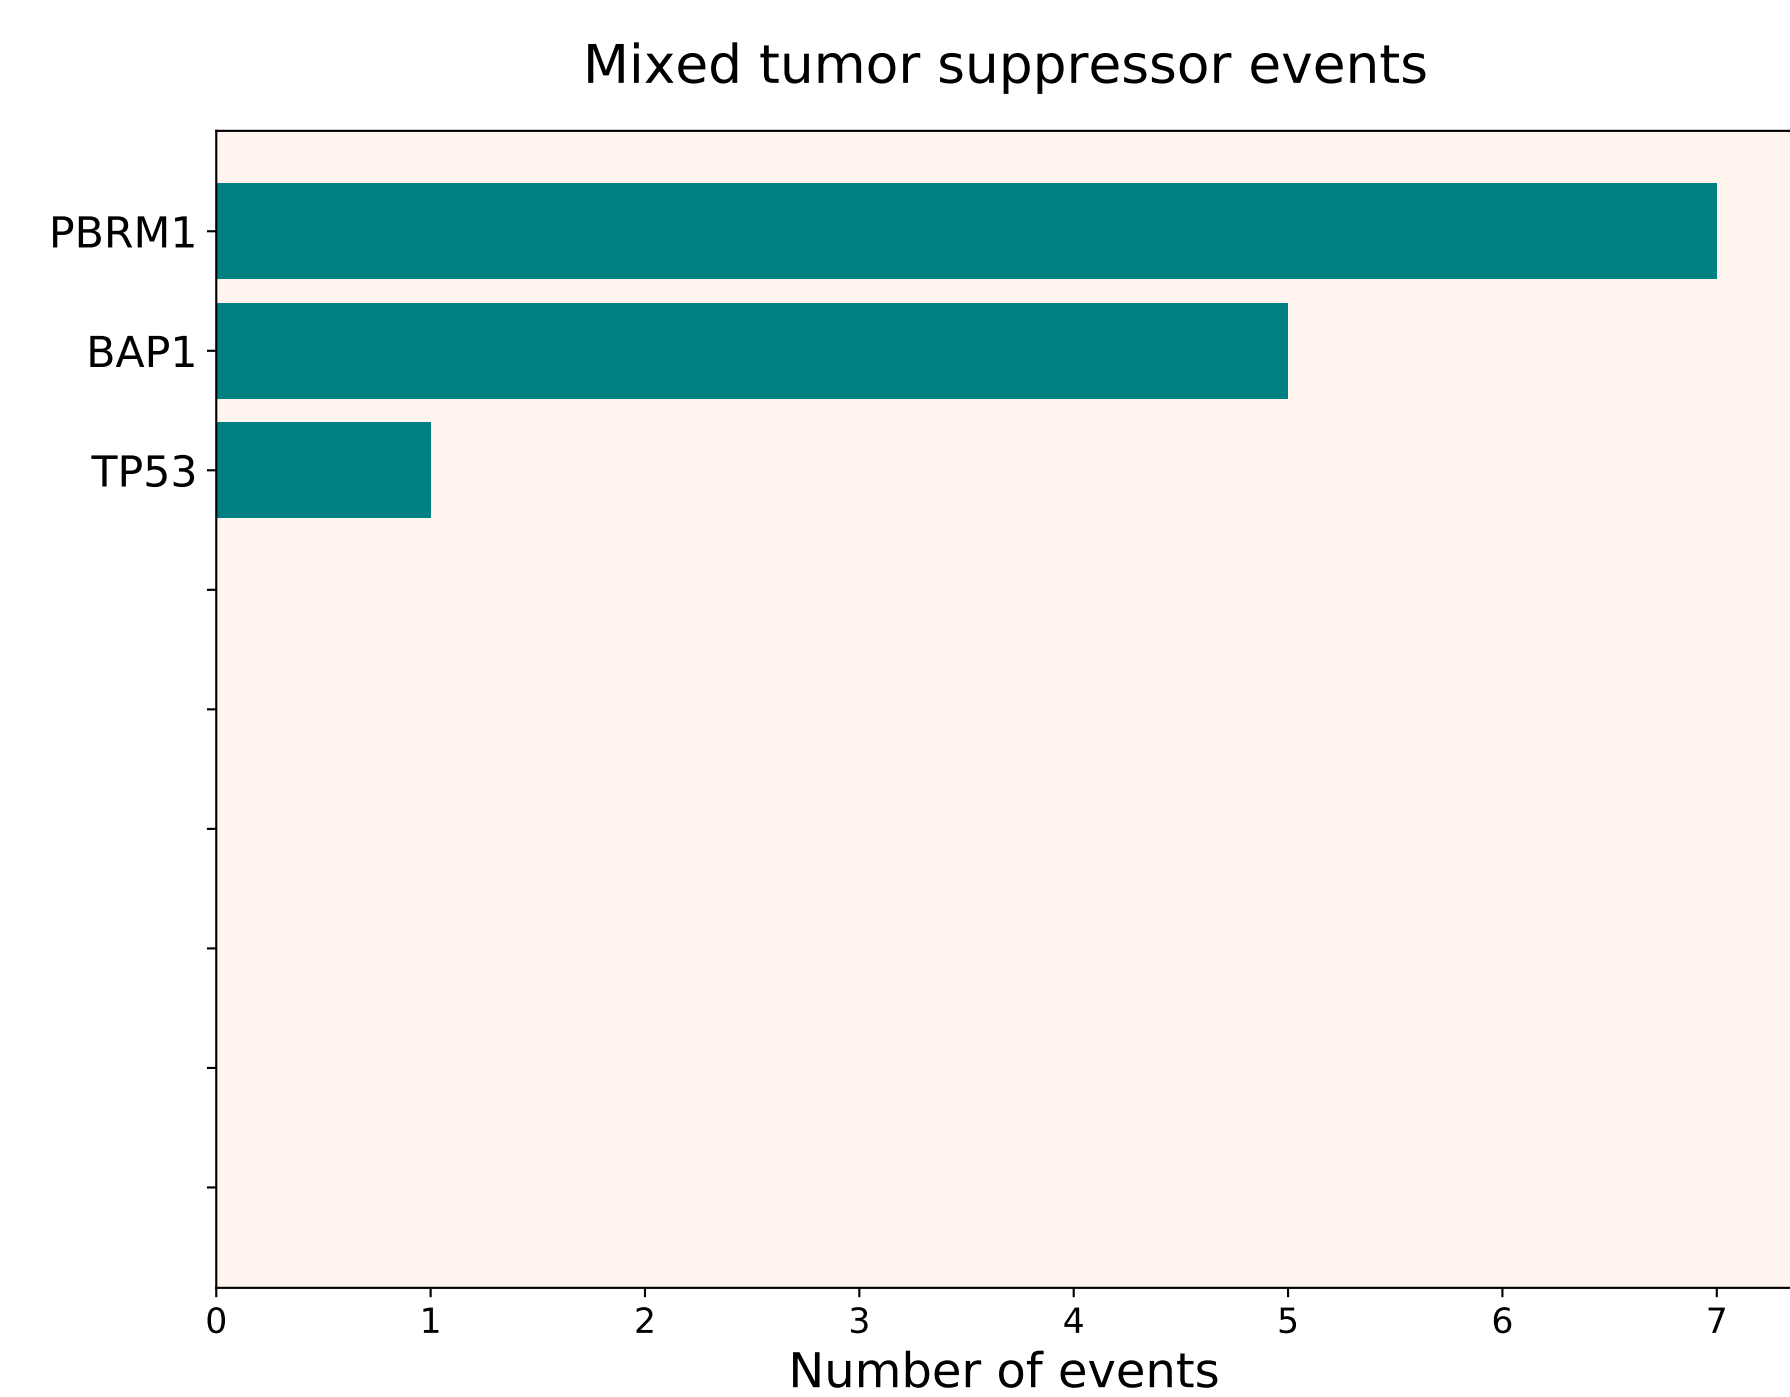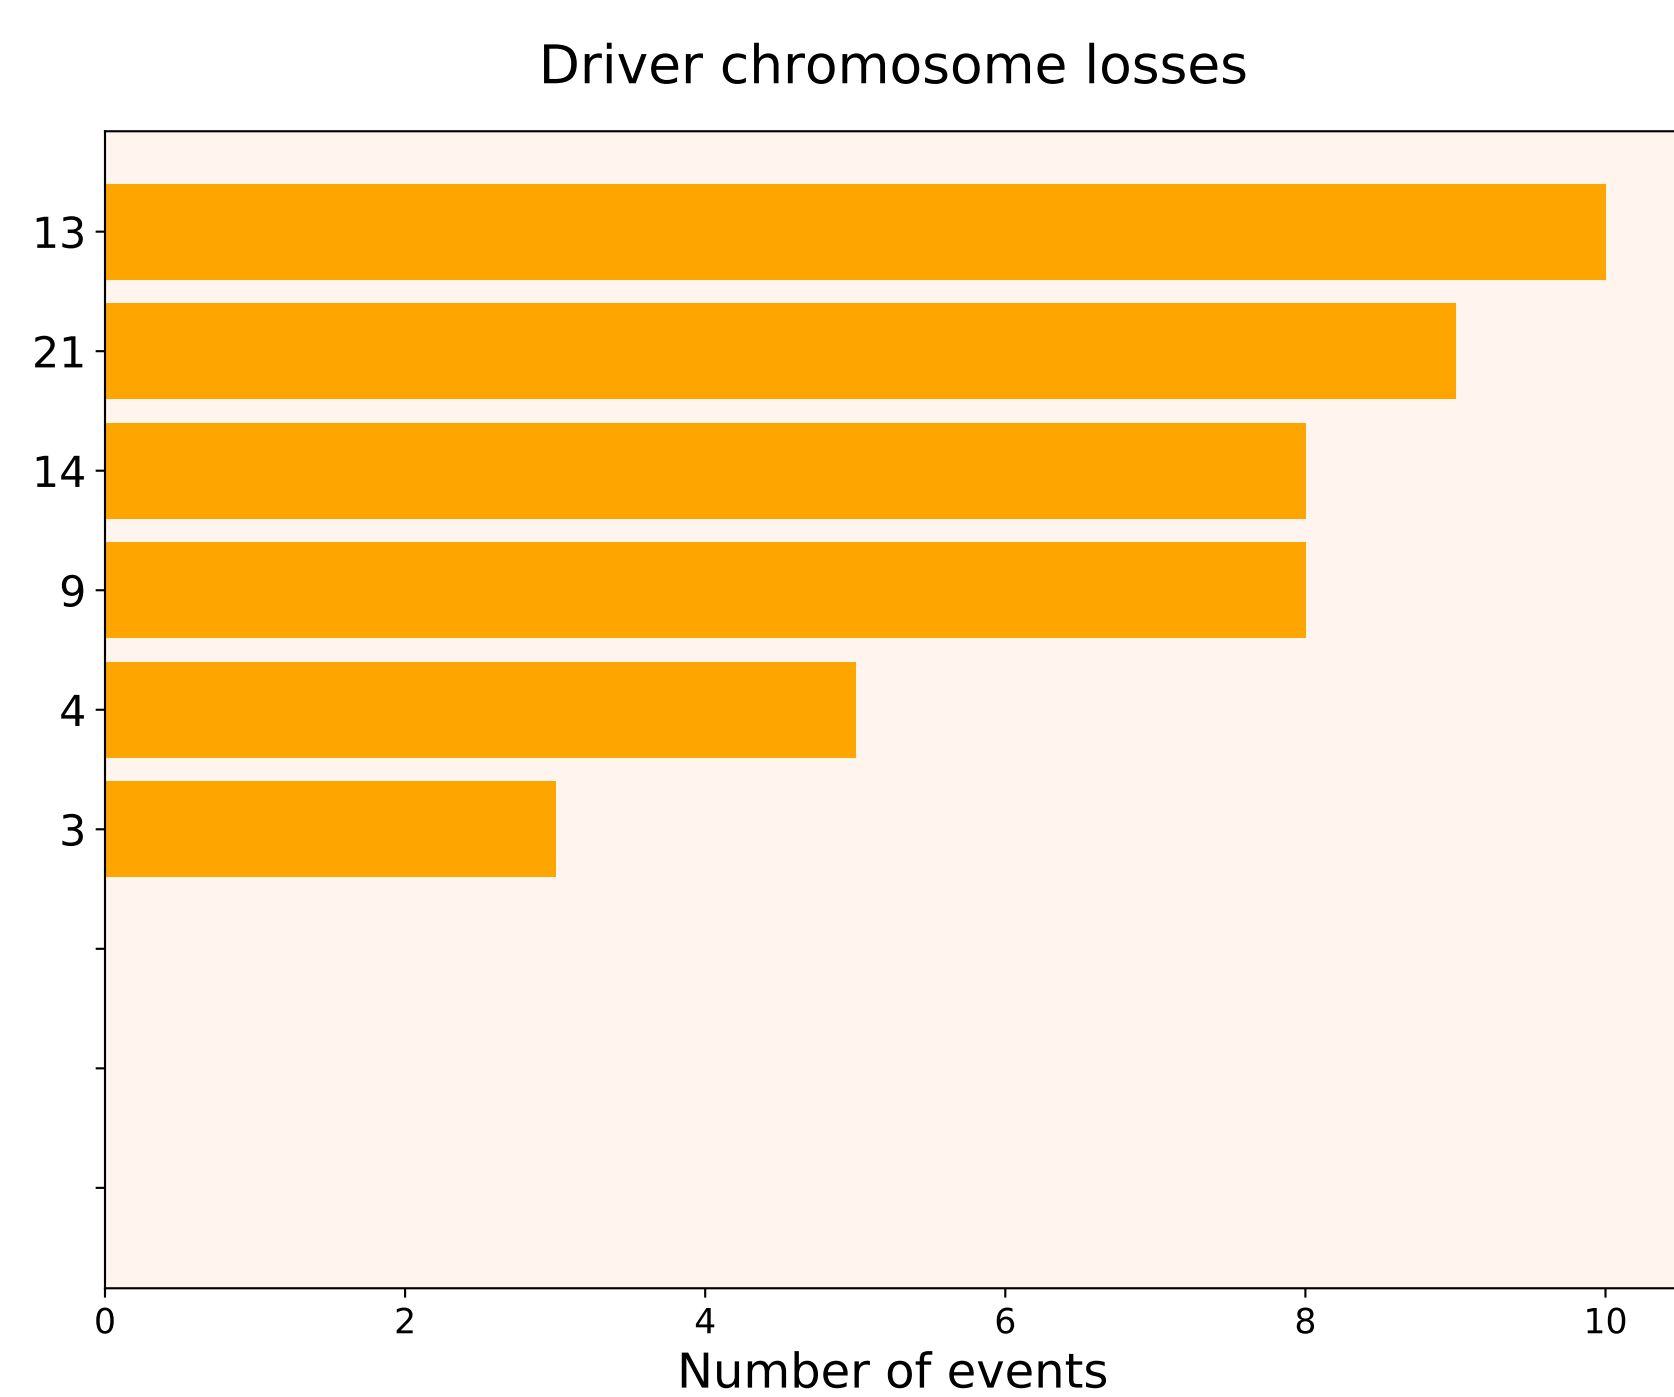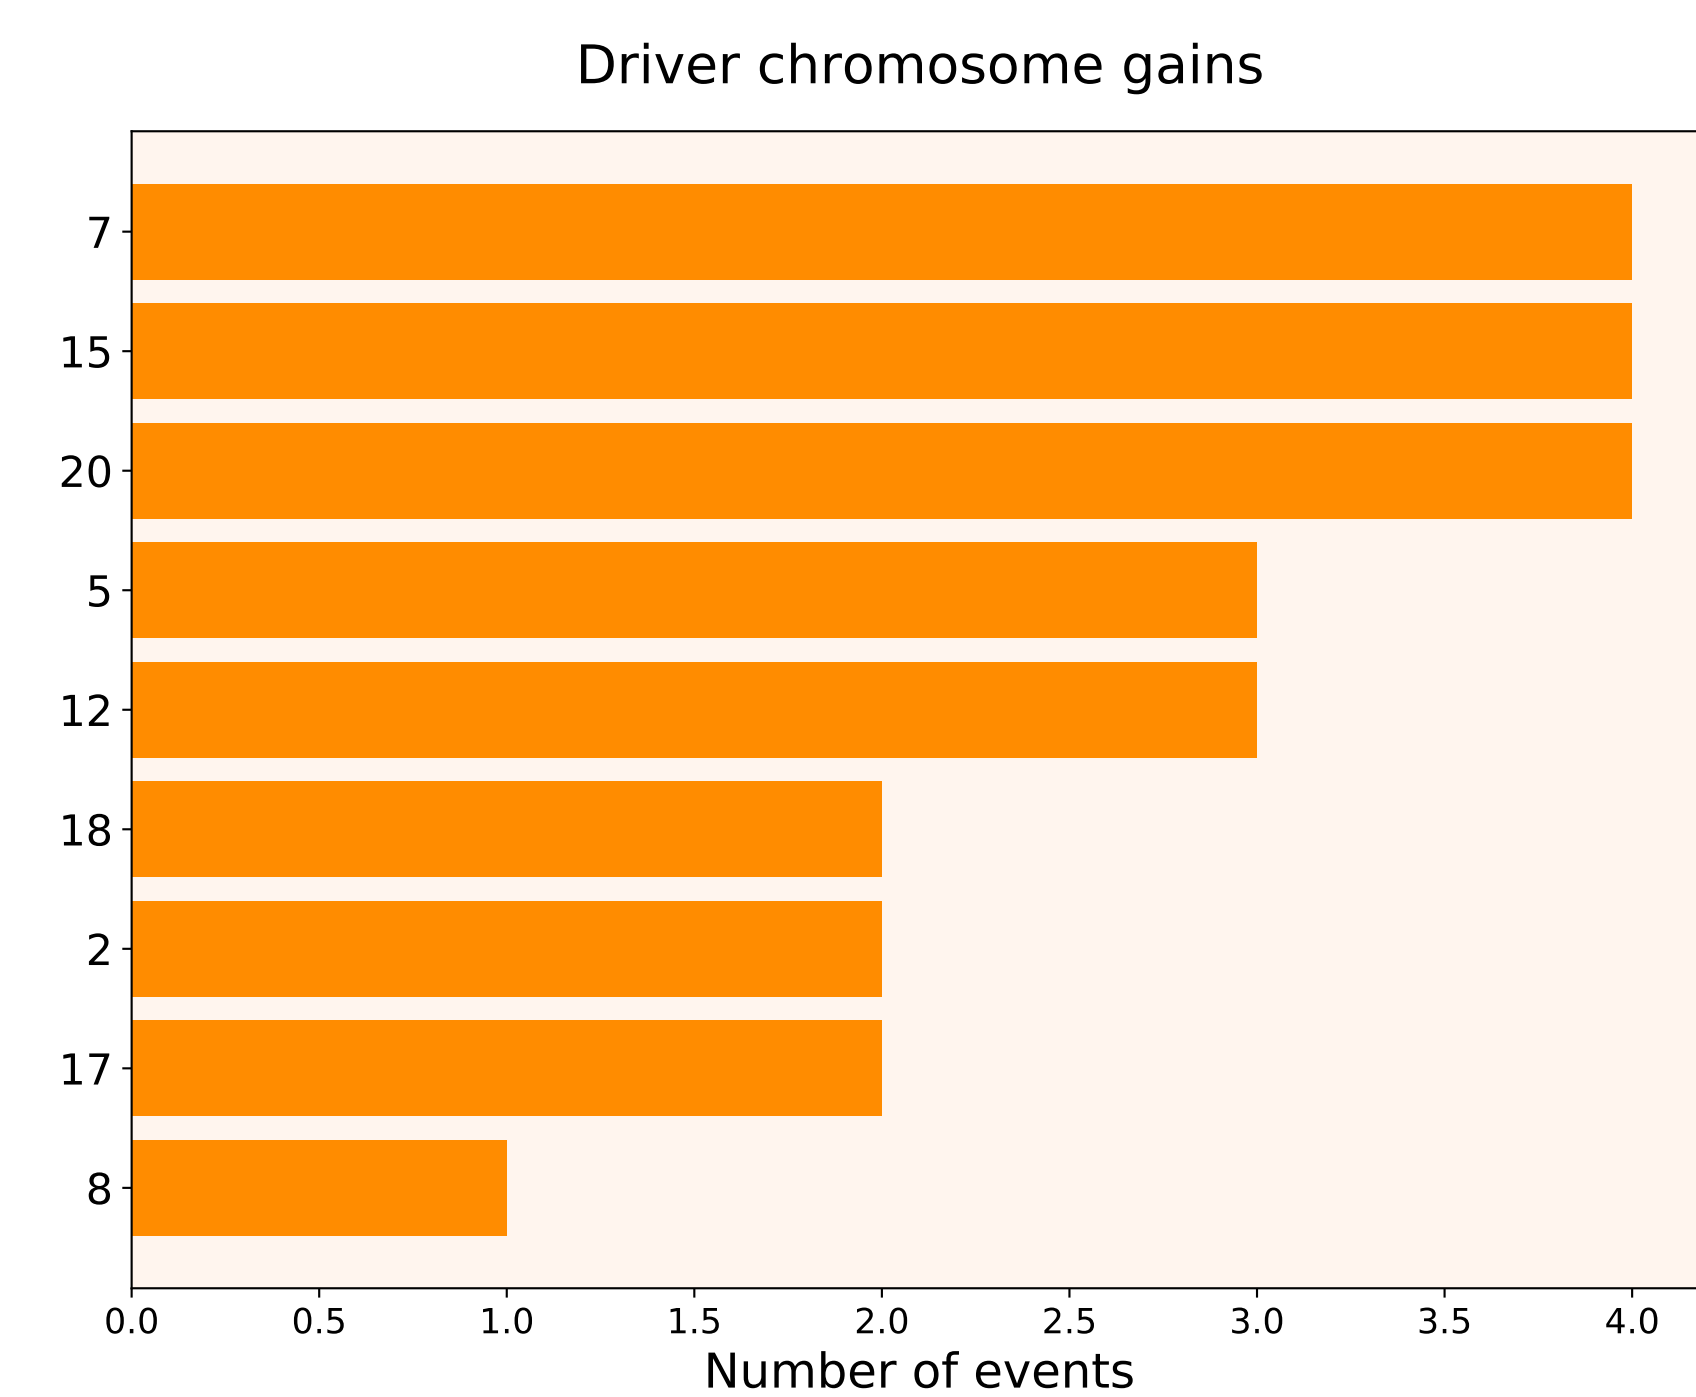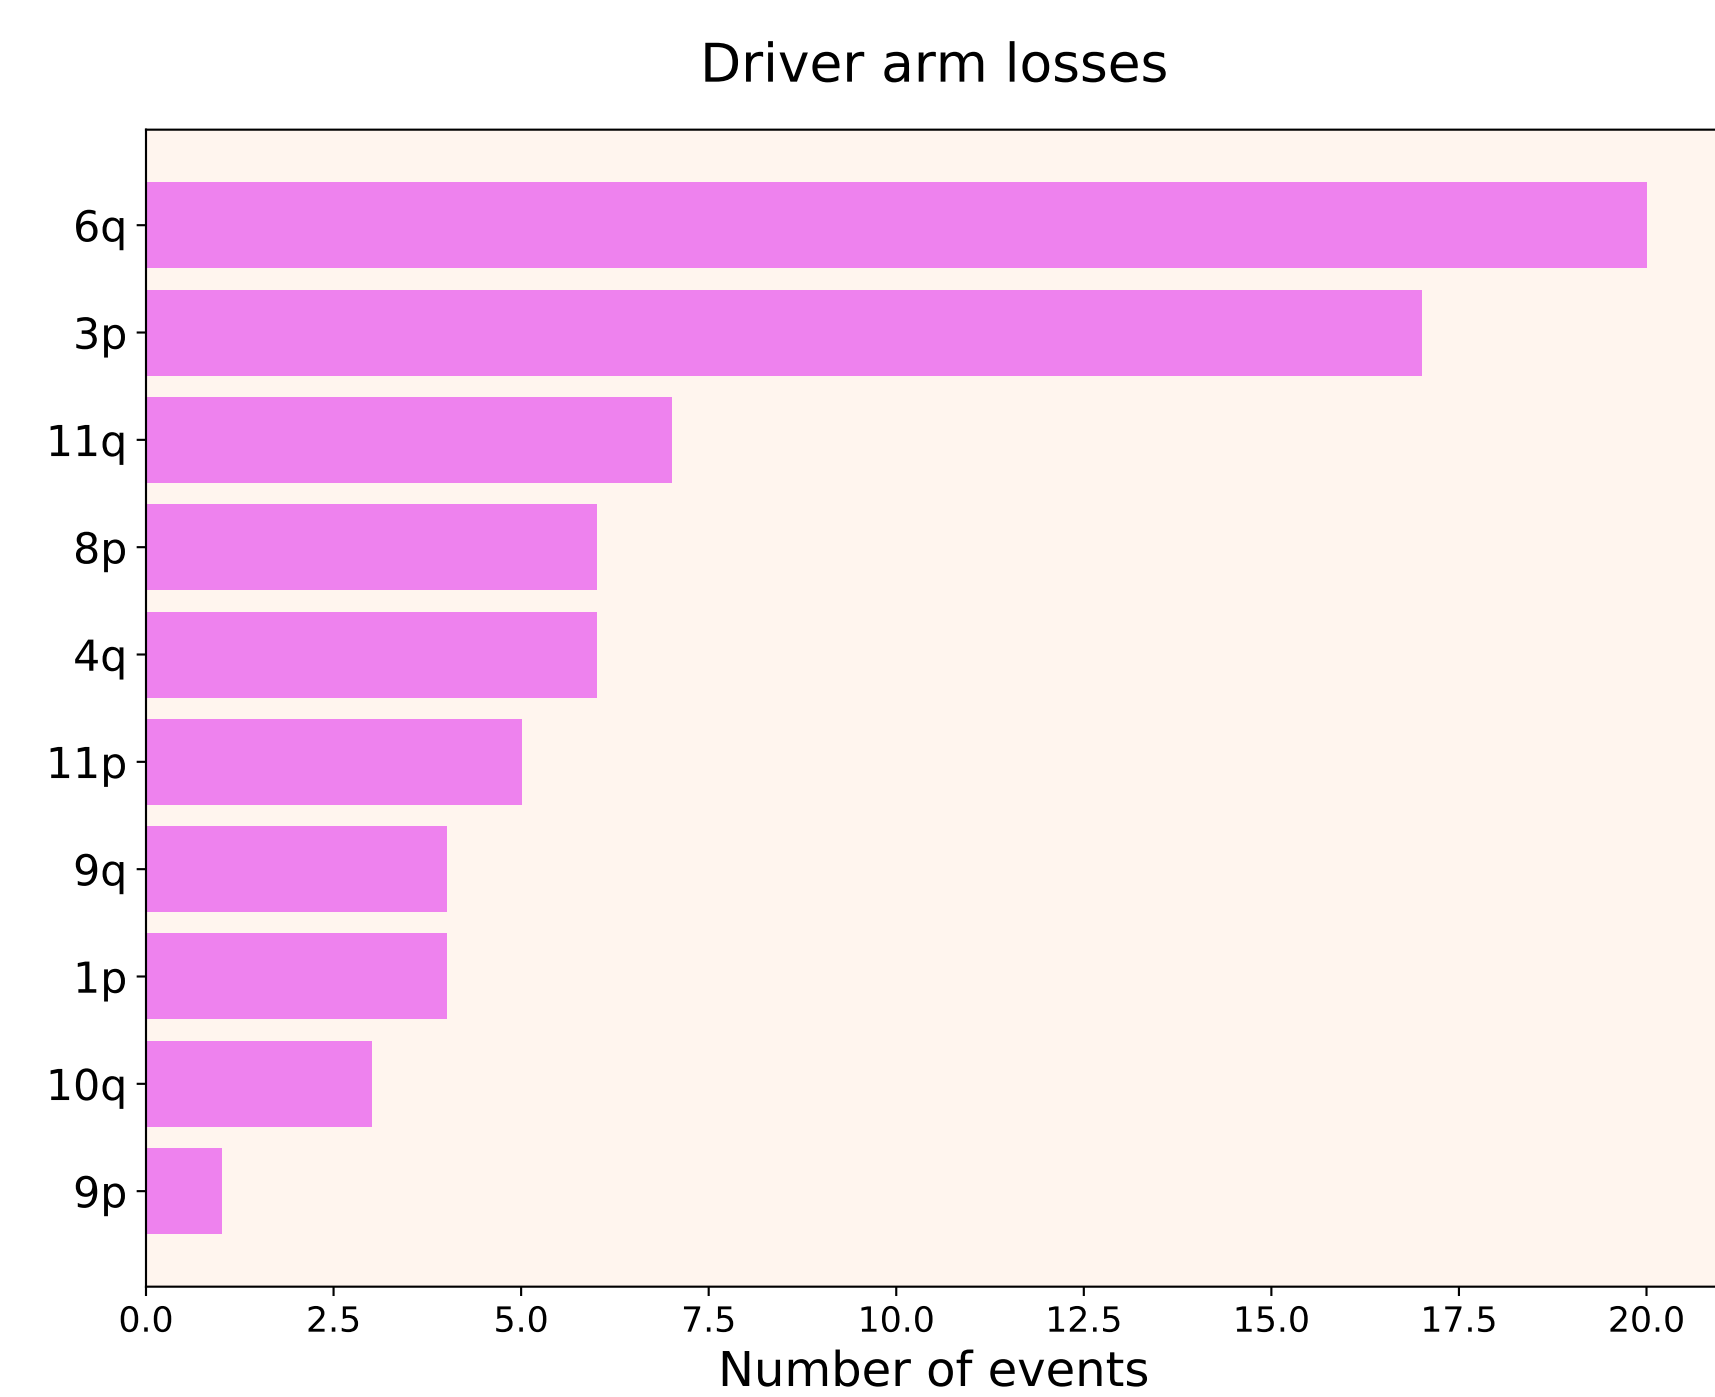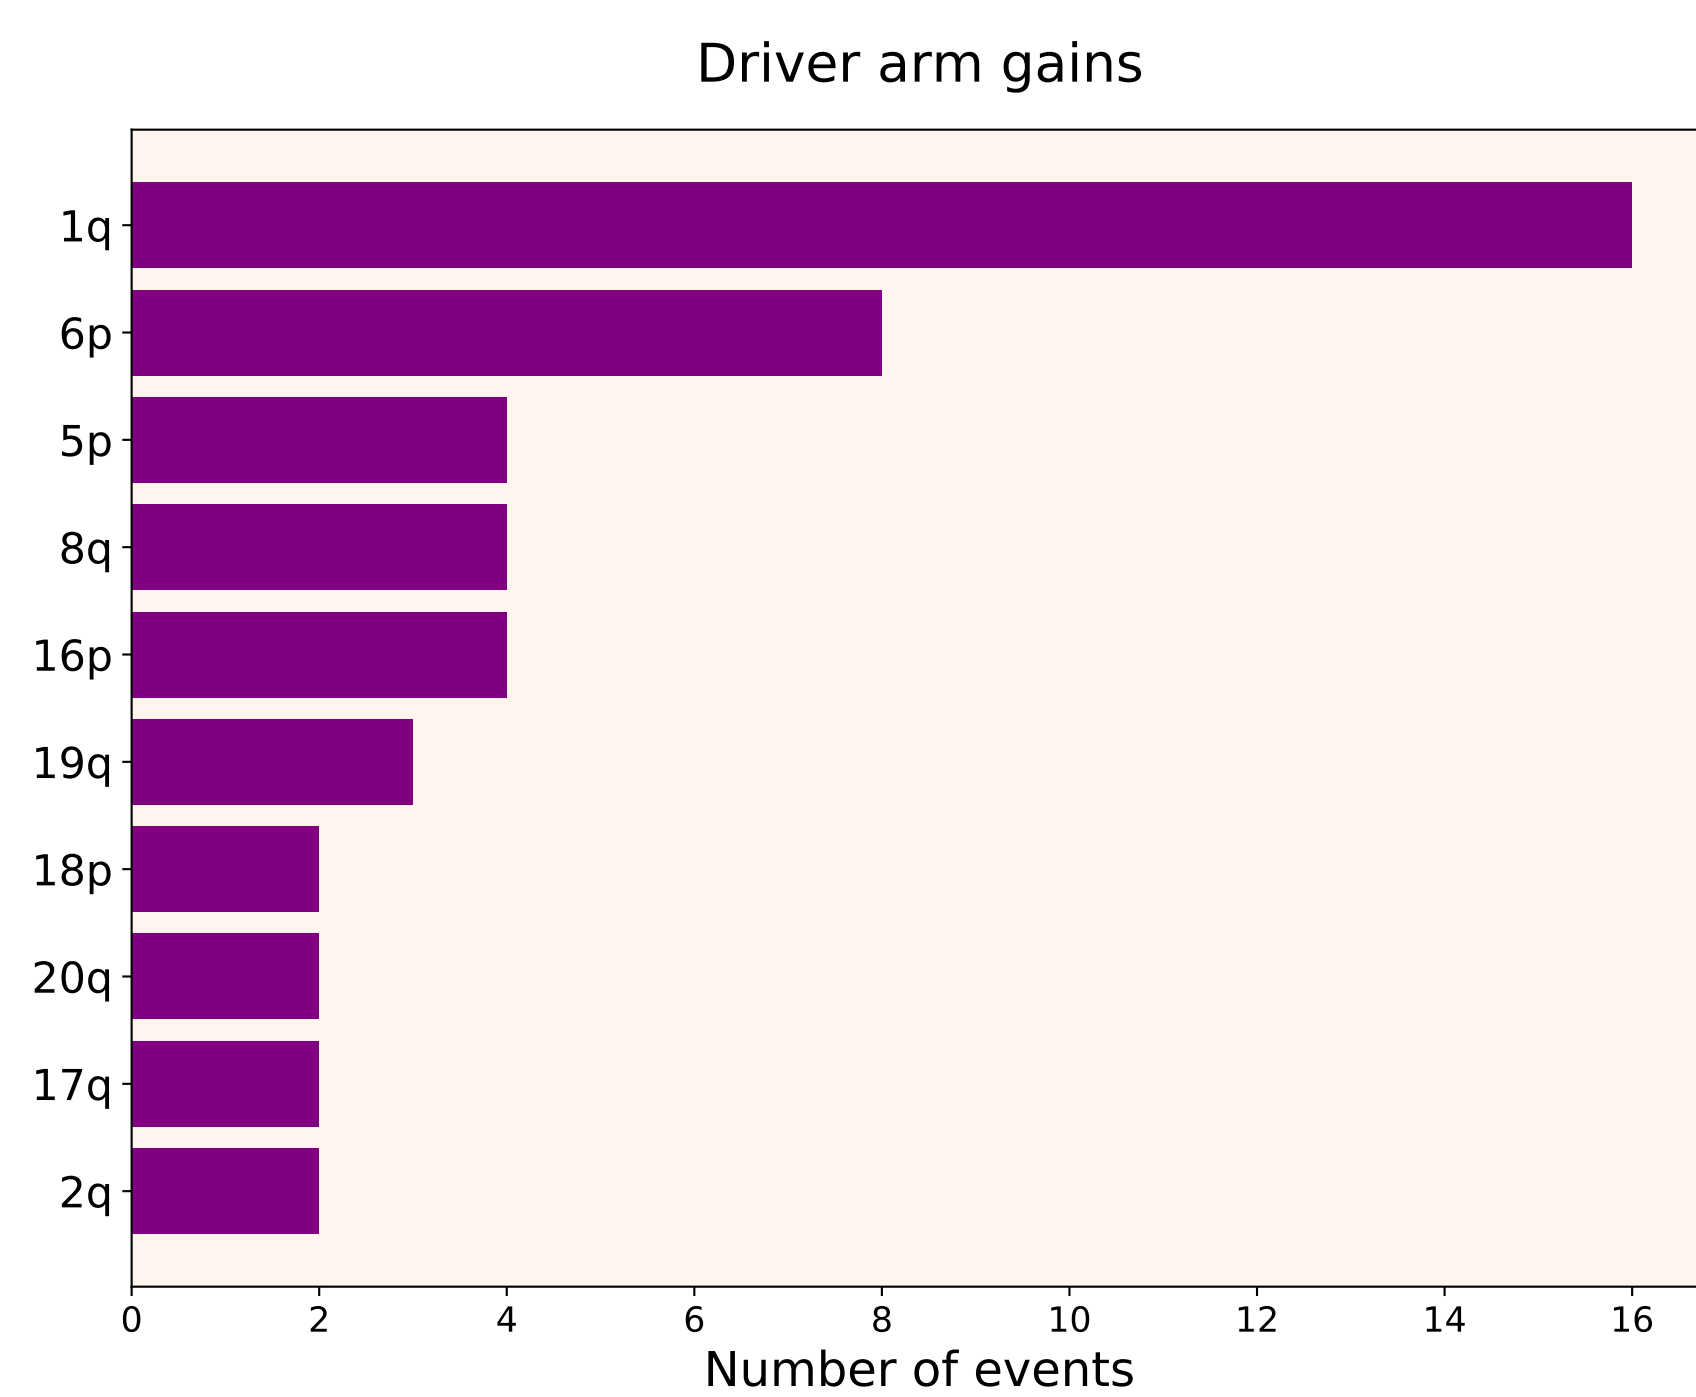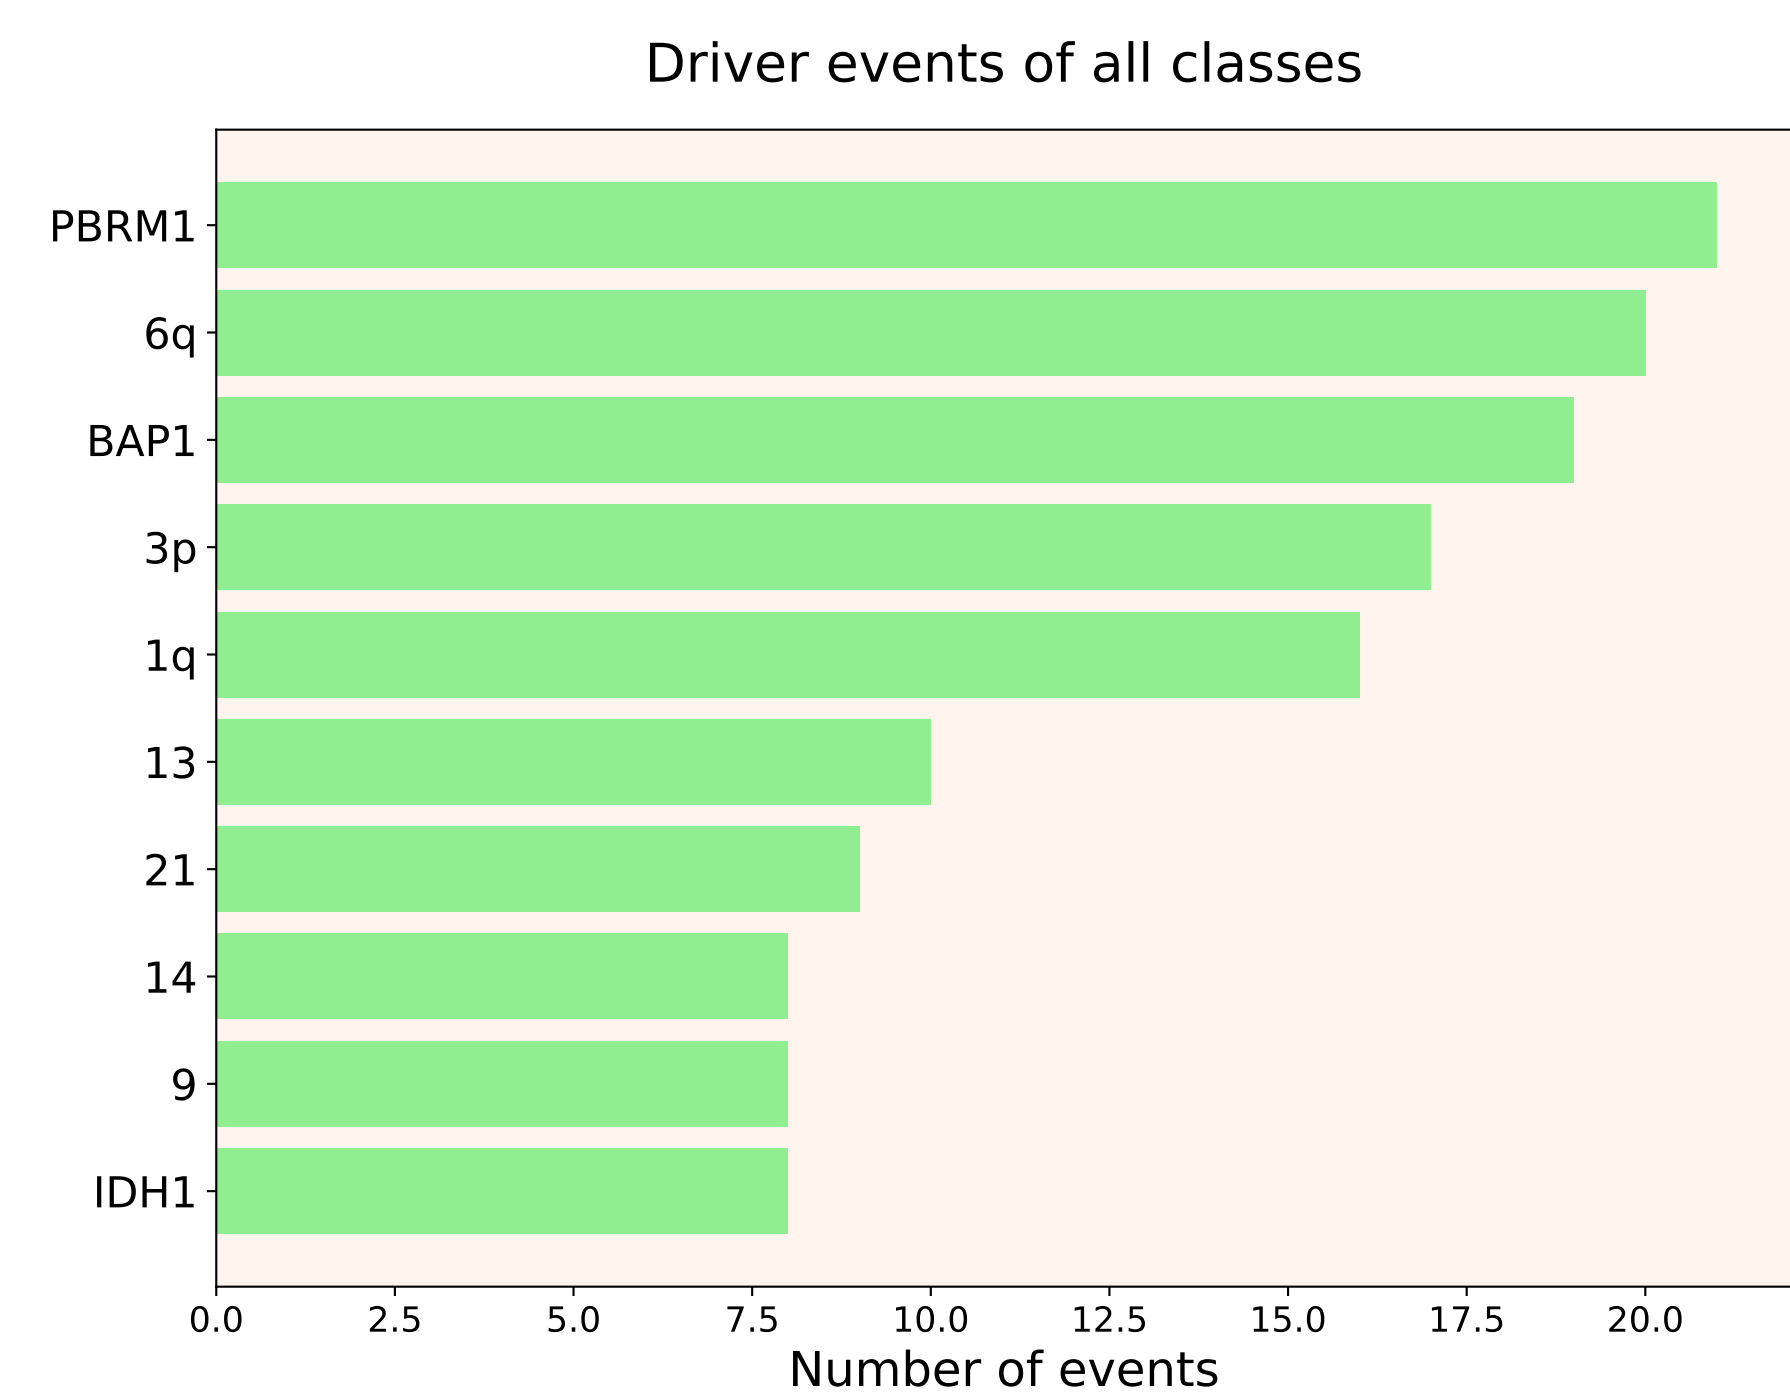

Supplement: Supplemental_Data_S1.zip [file Supplemental_Data_S1.zip]

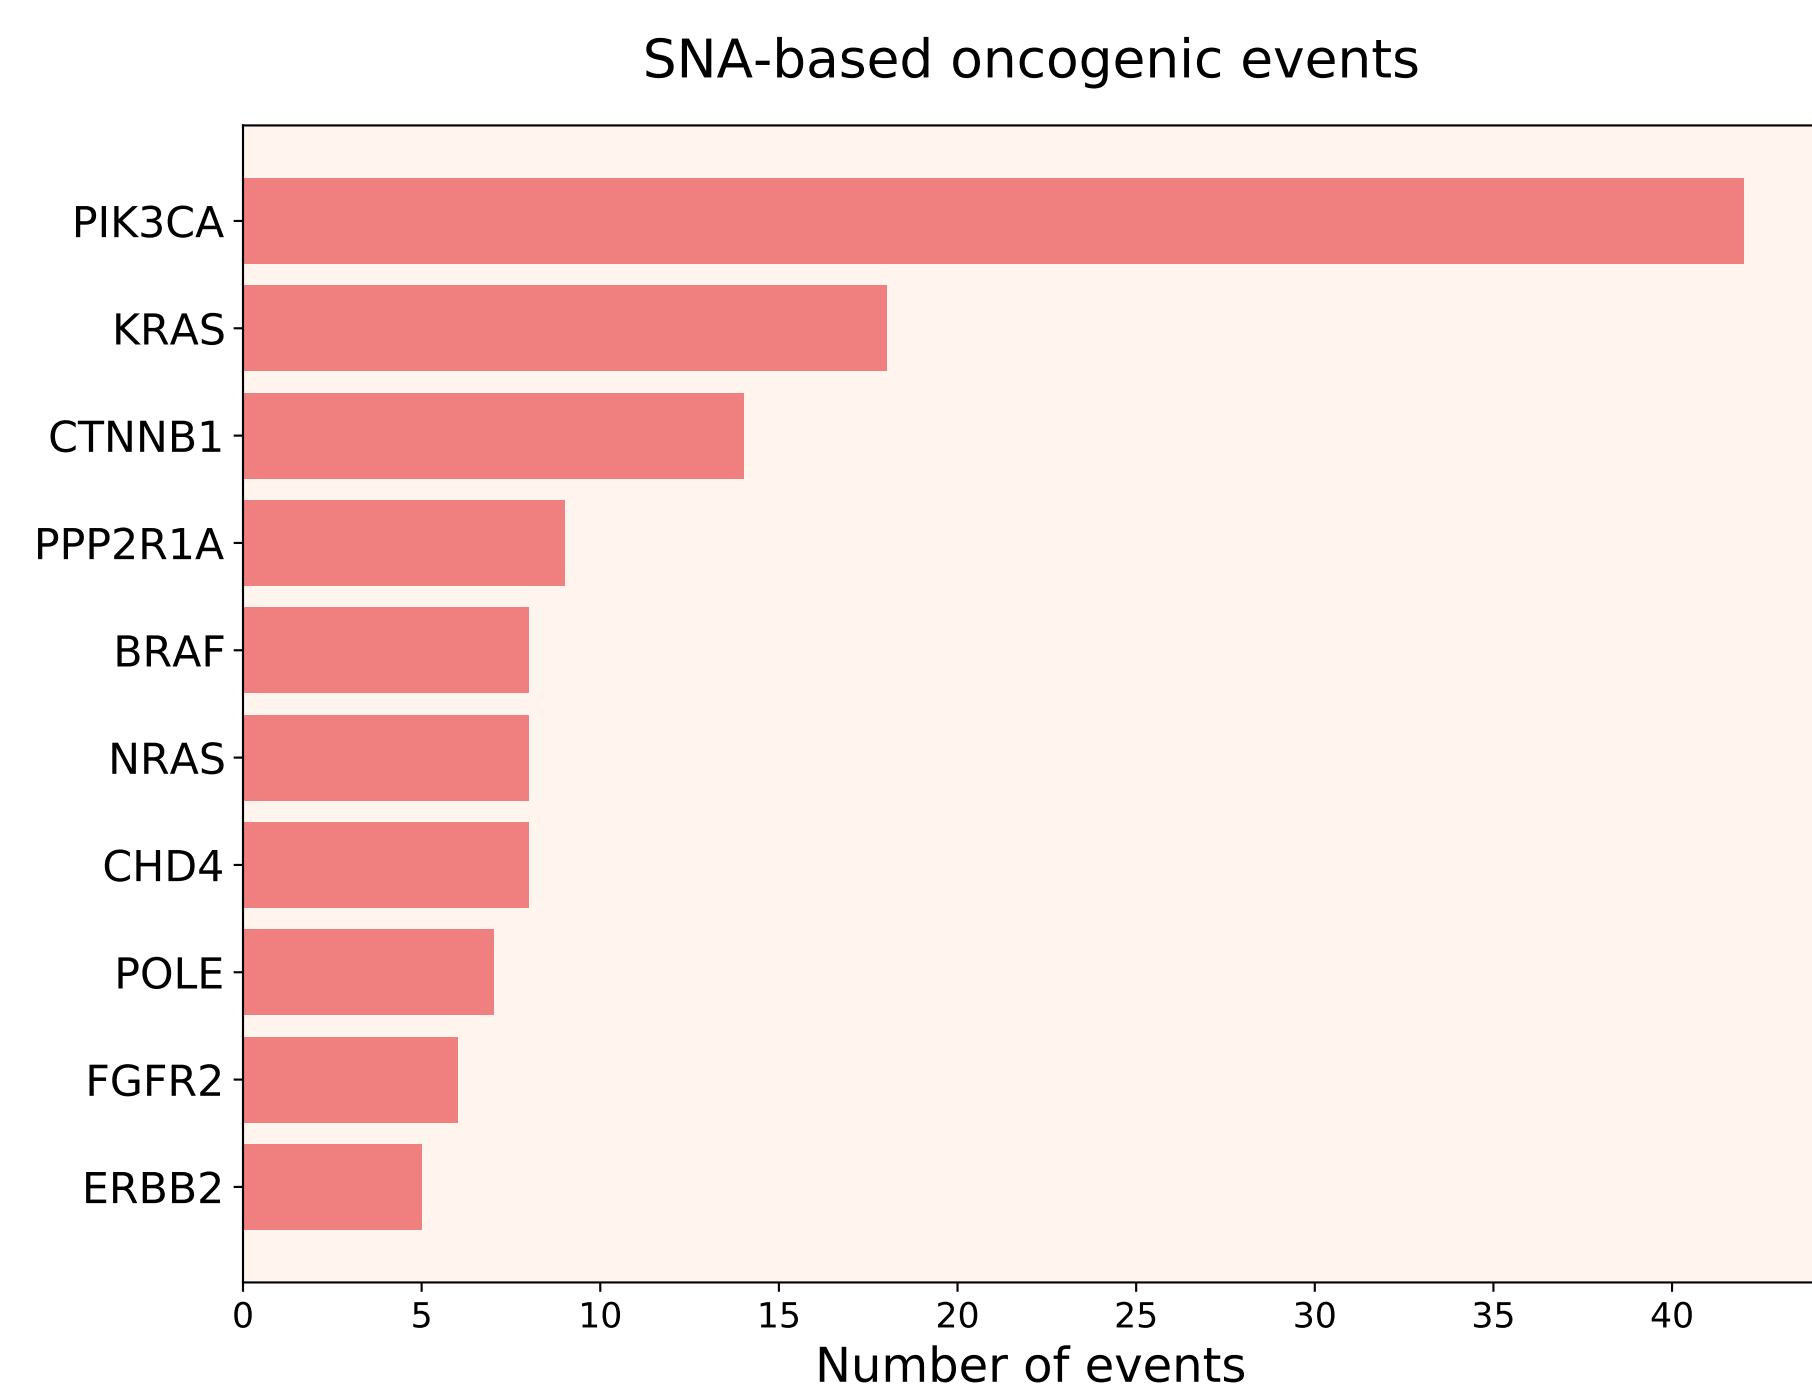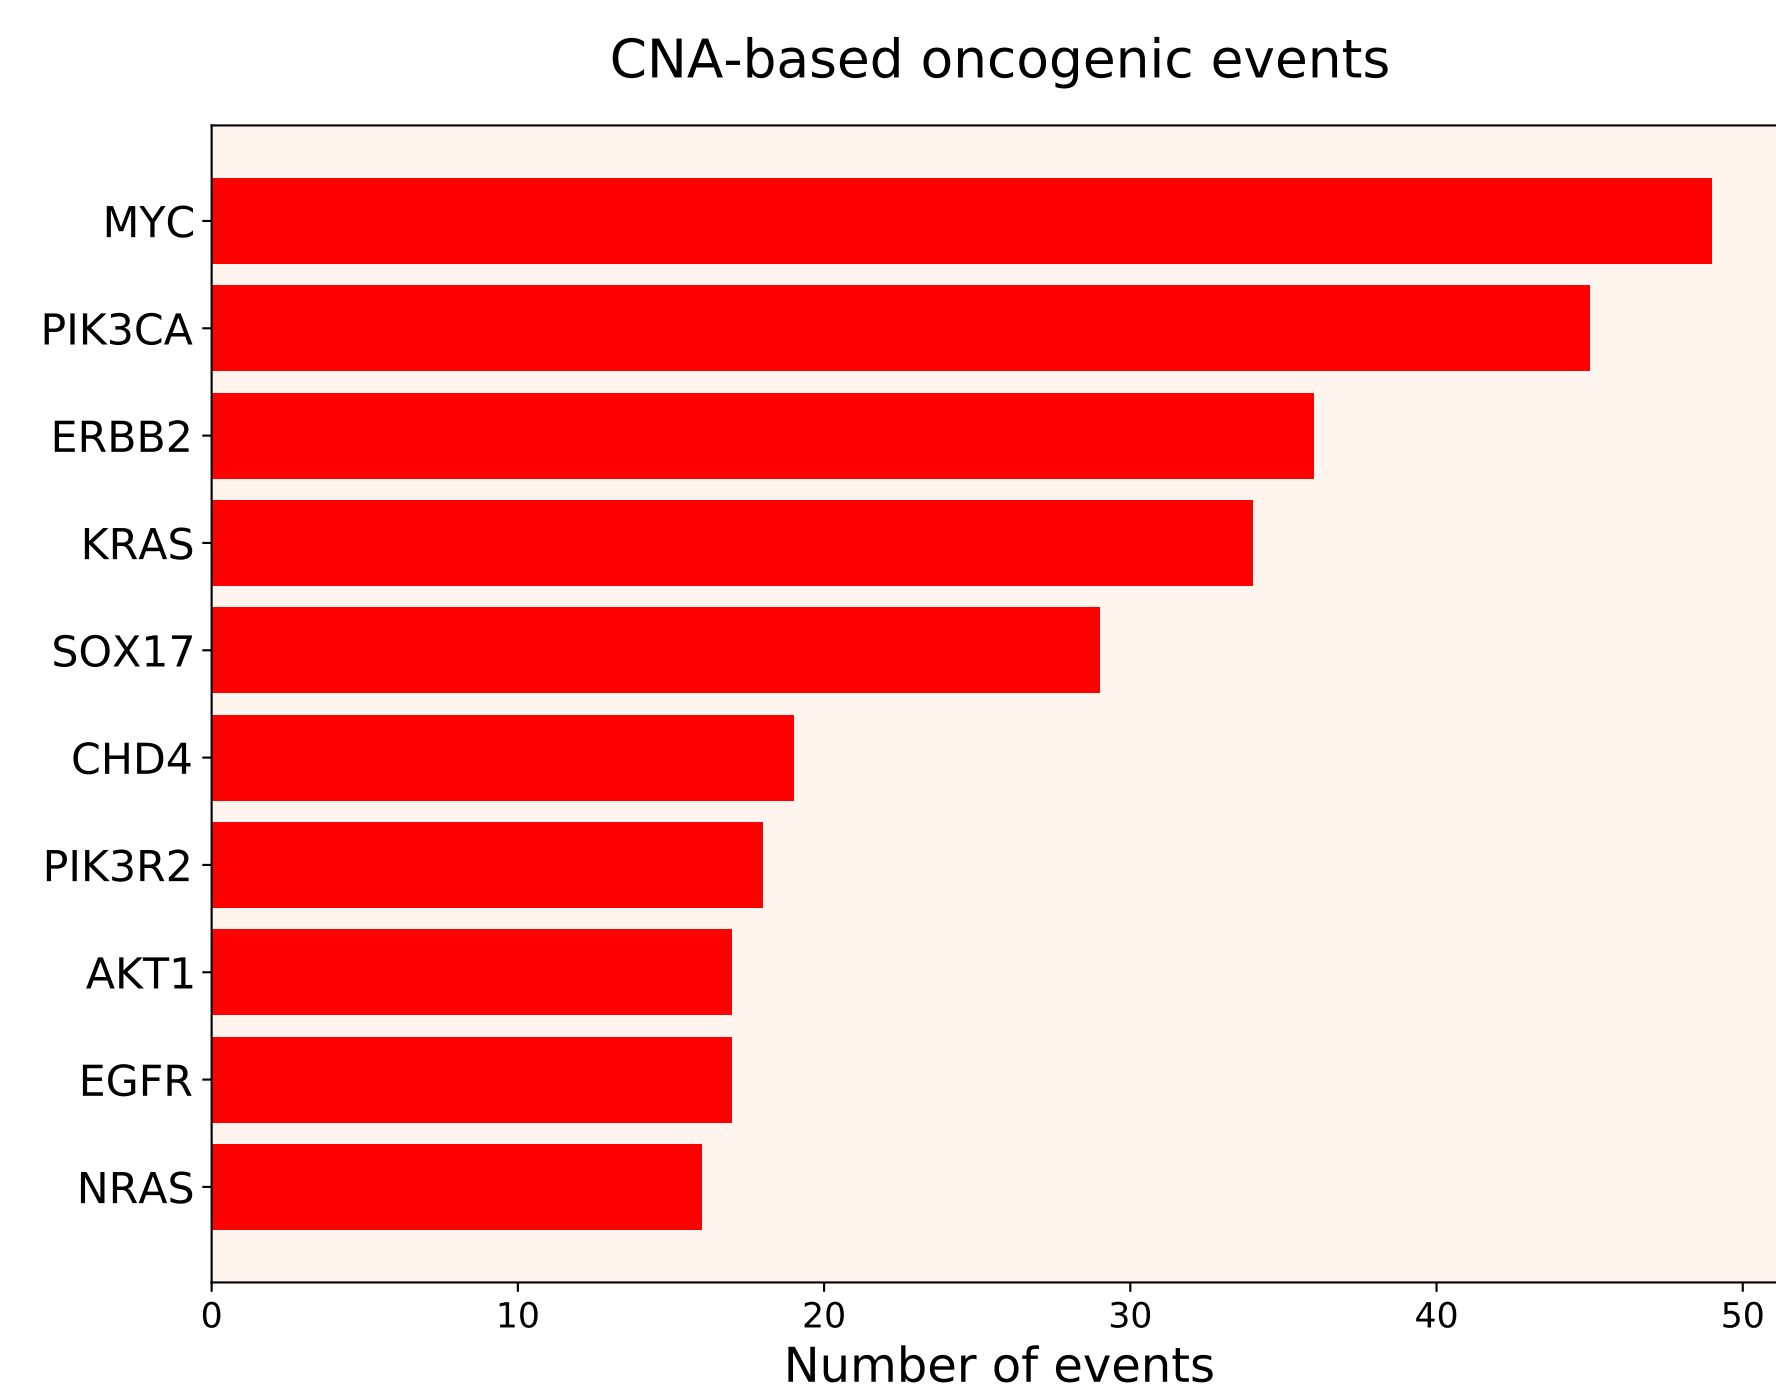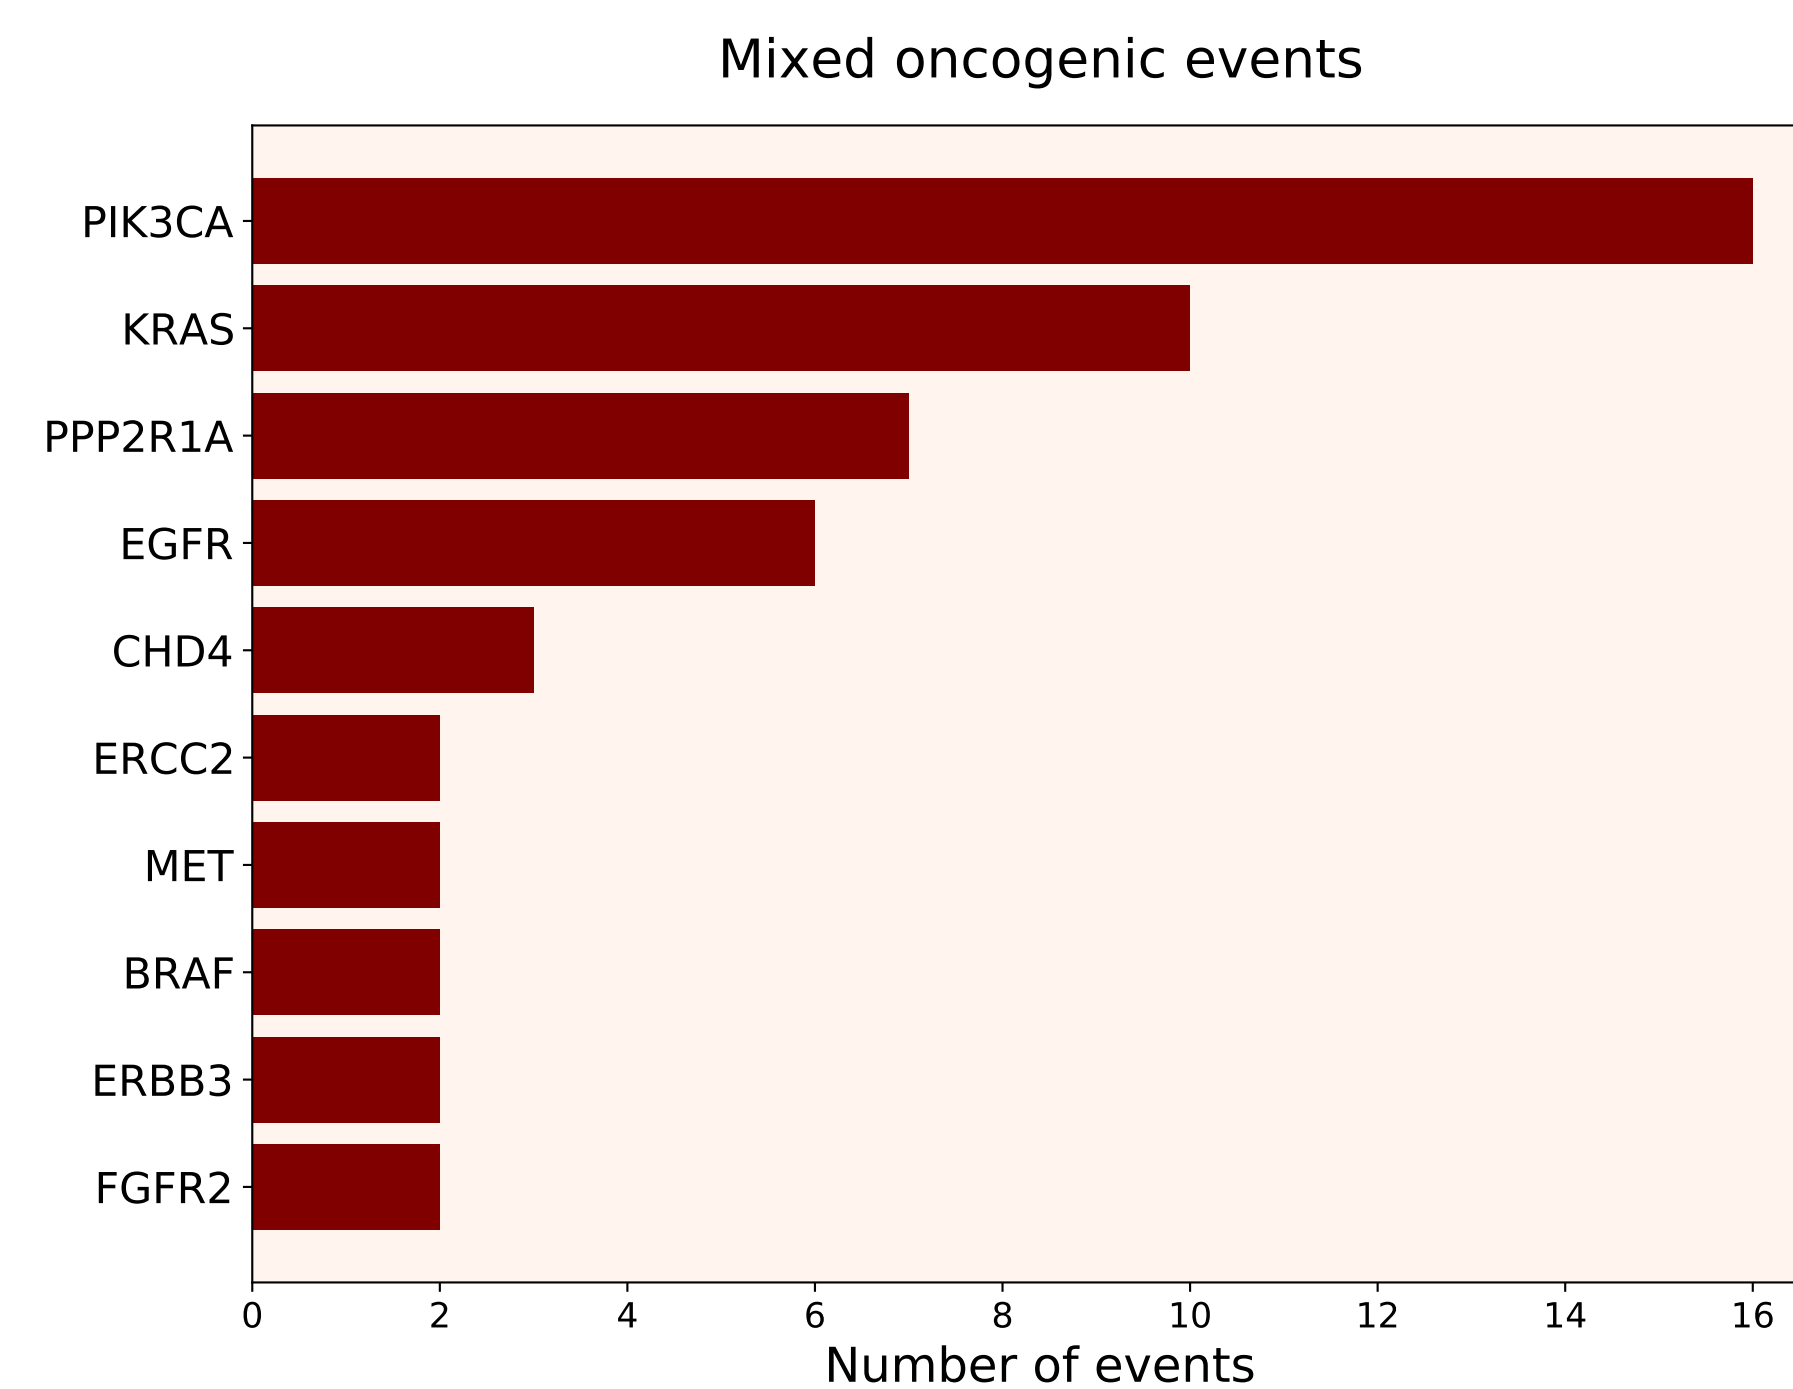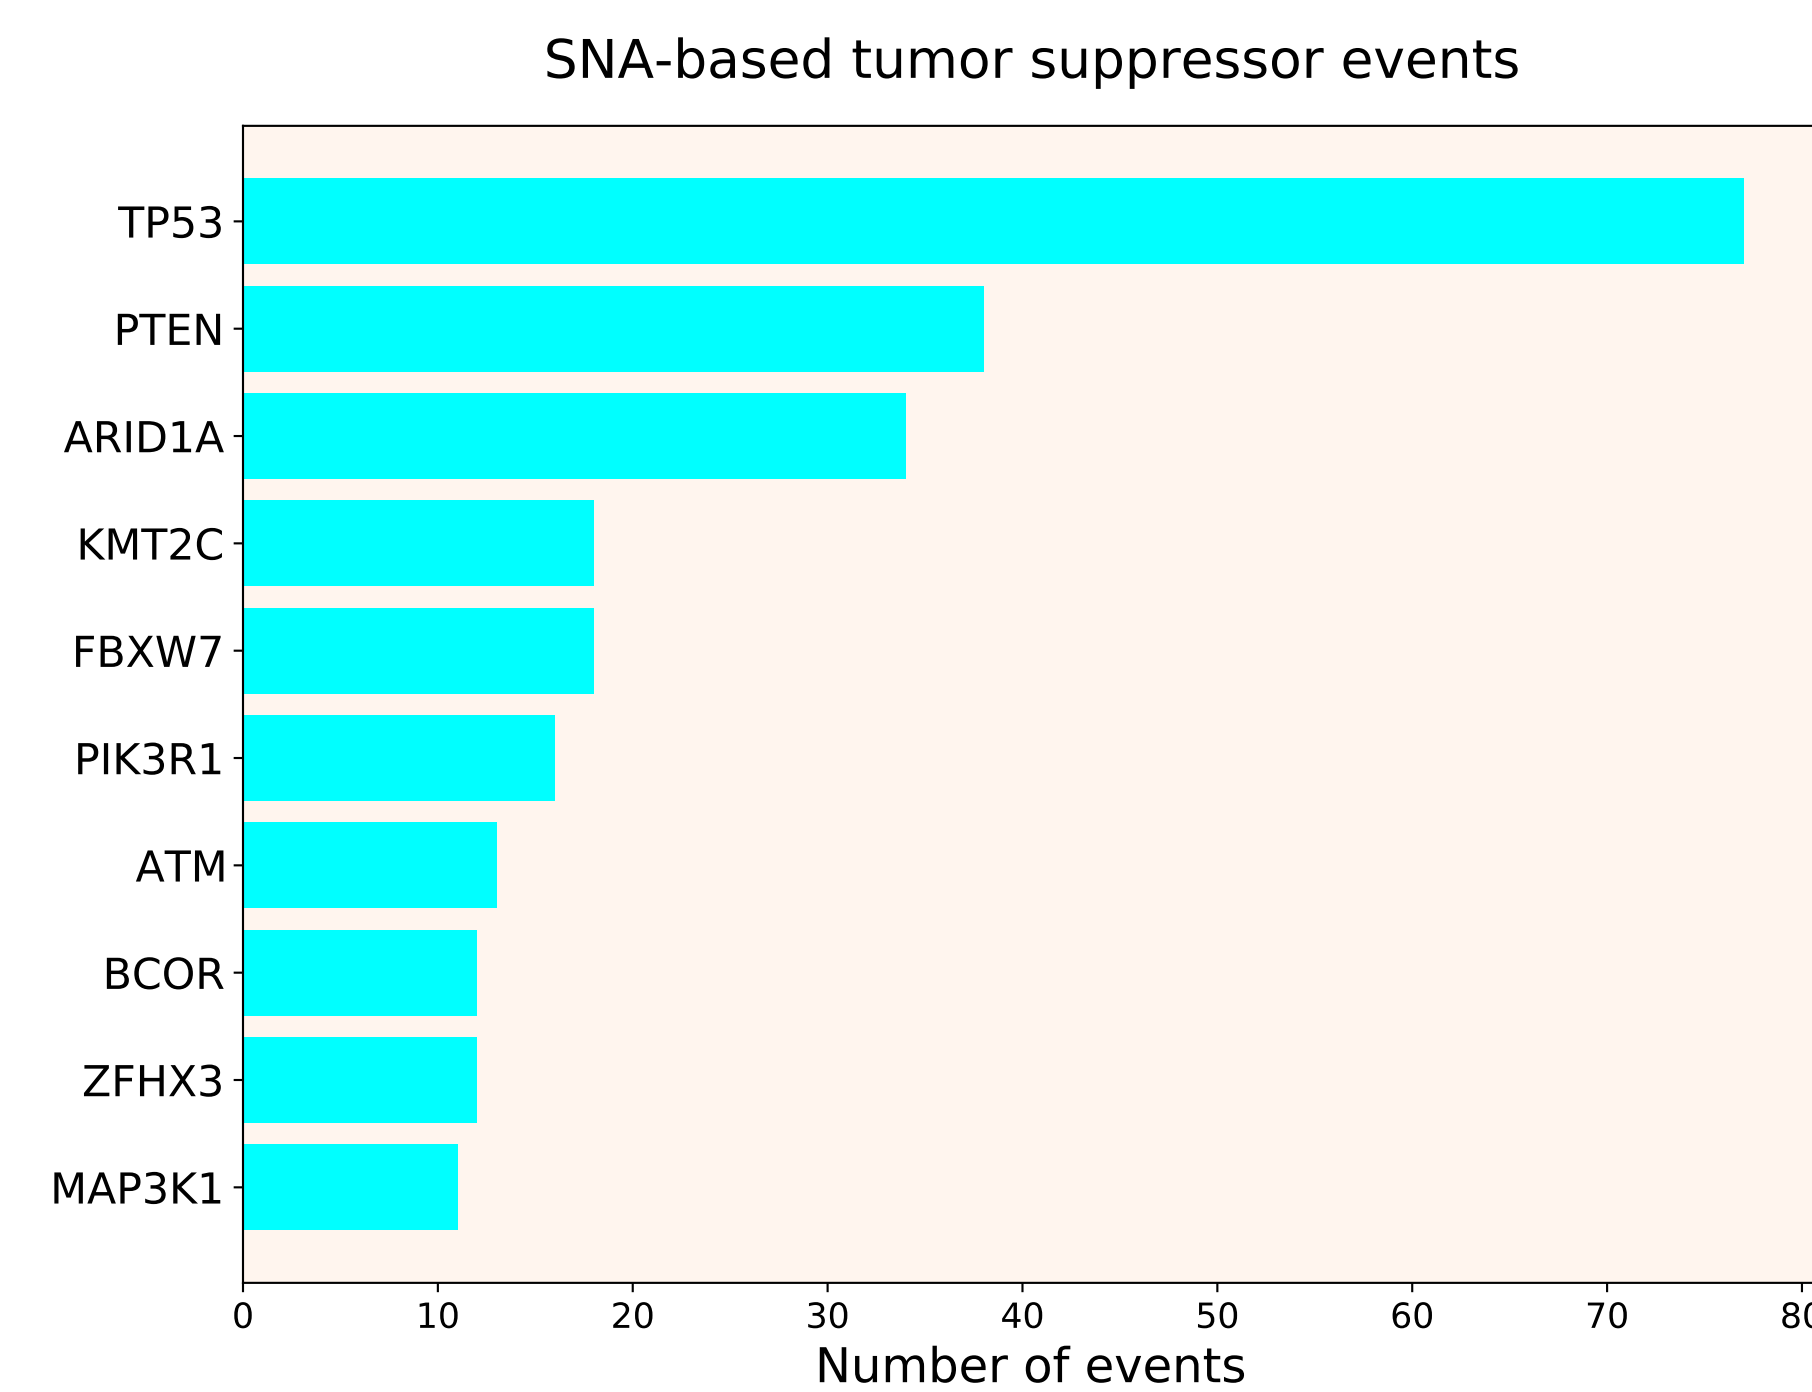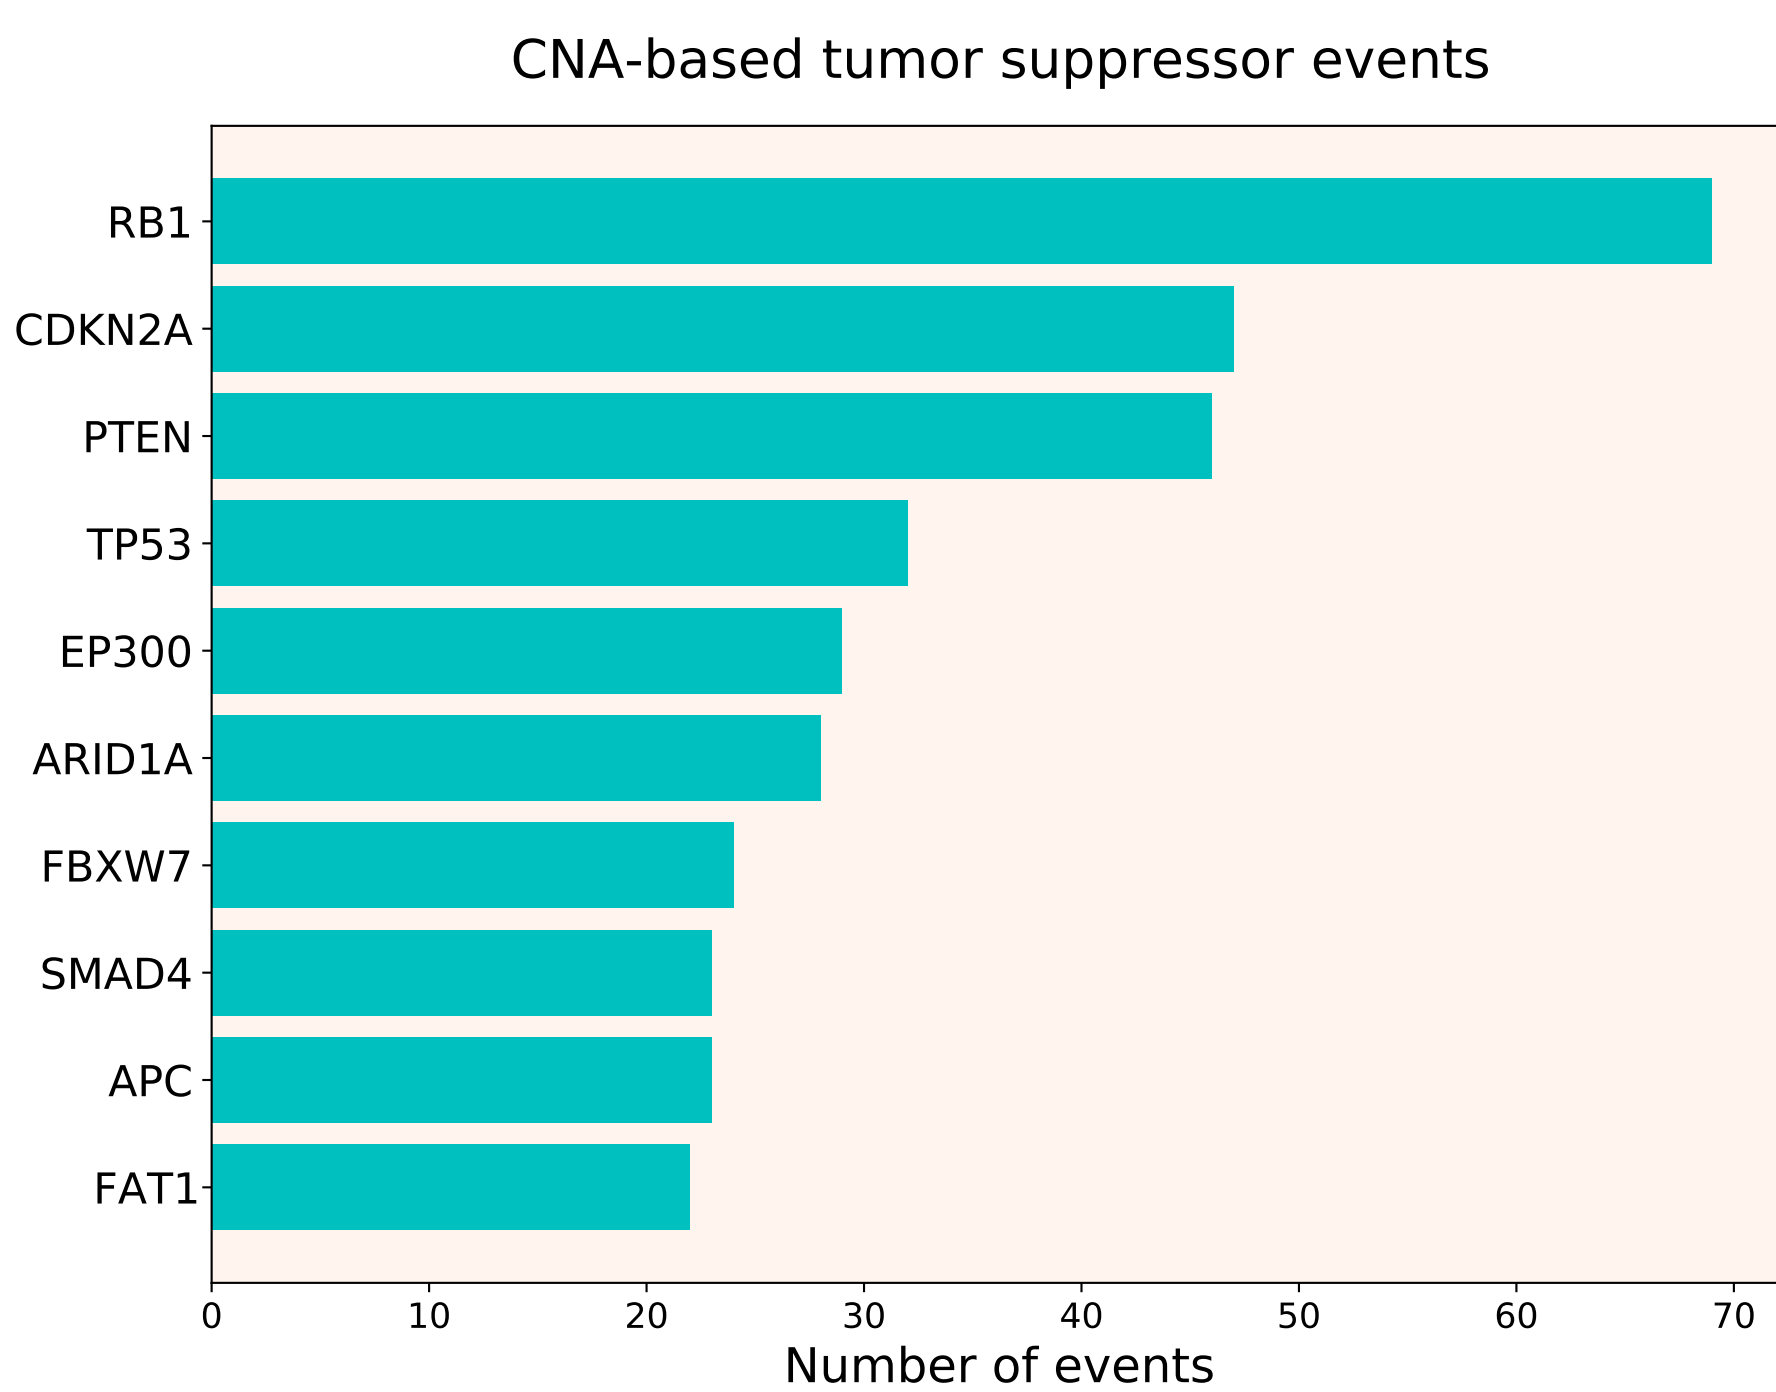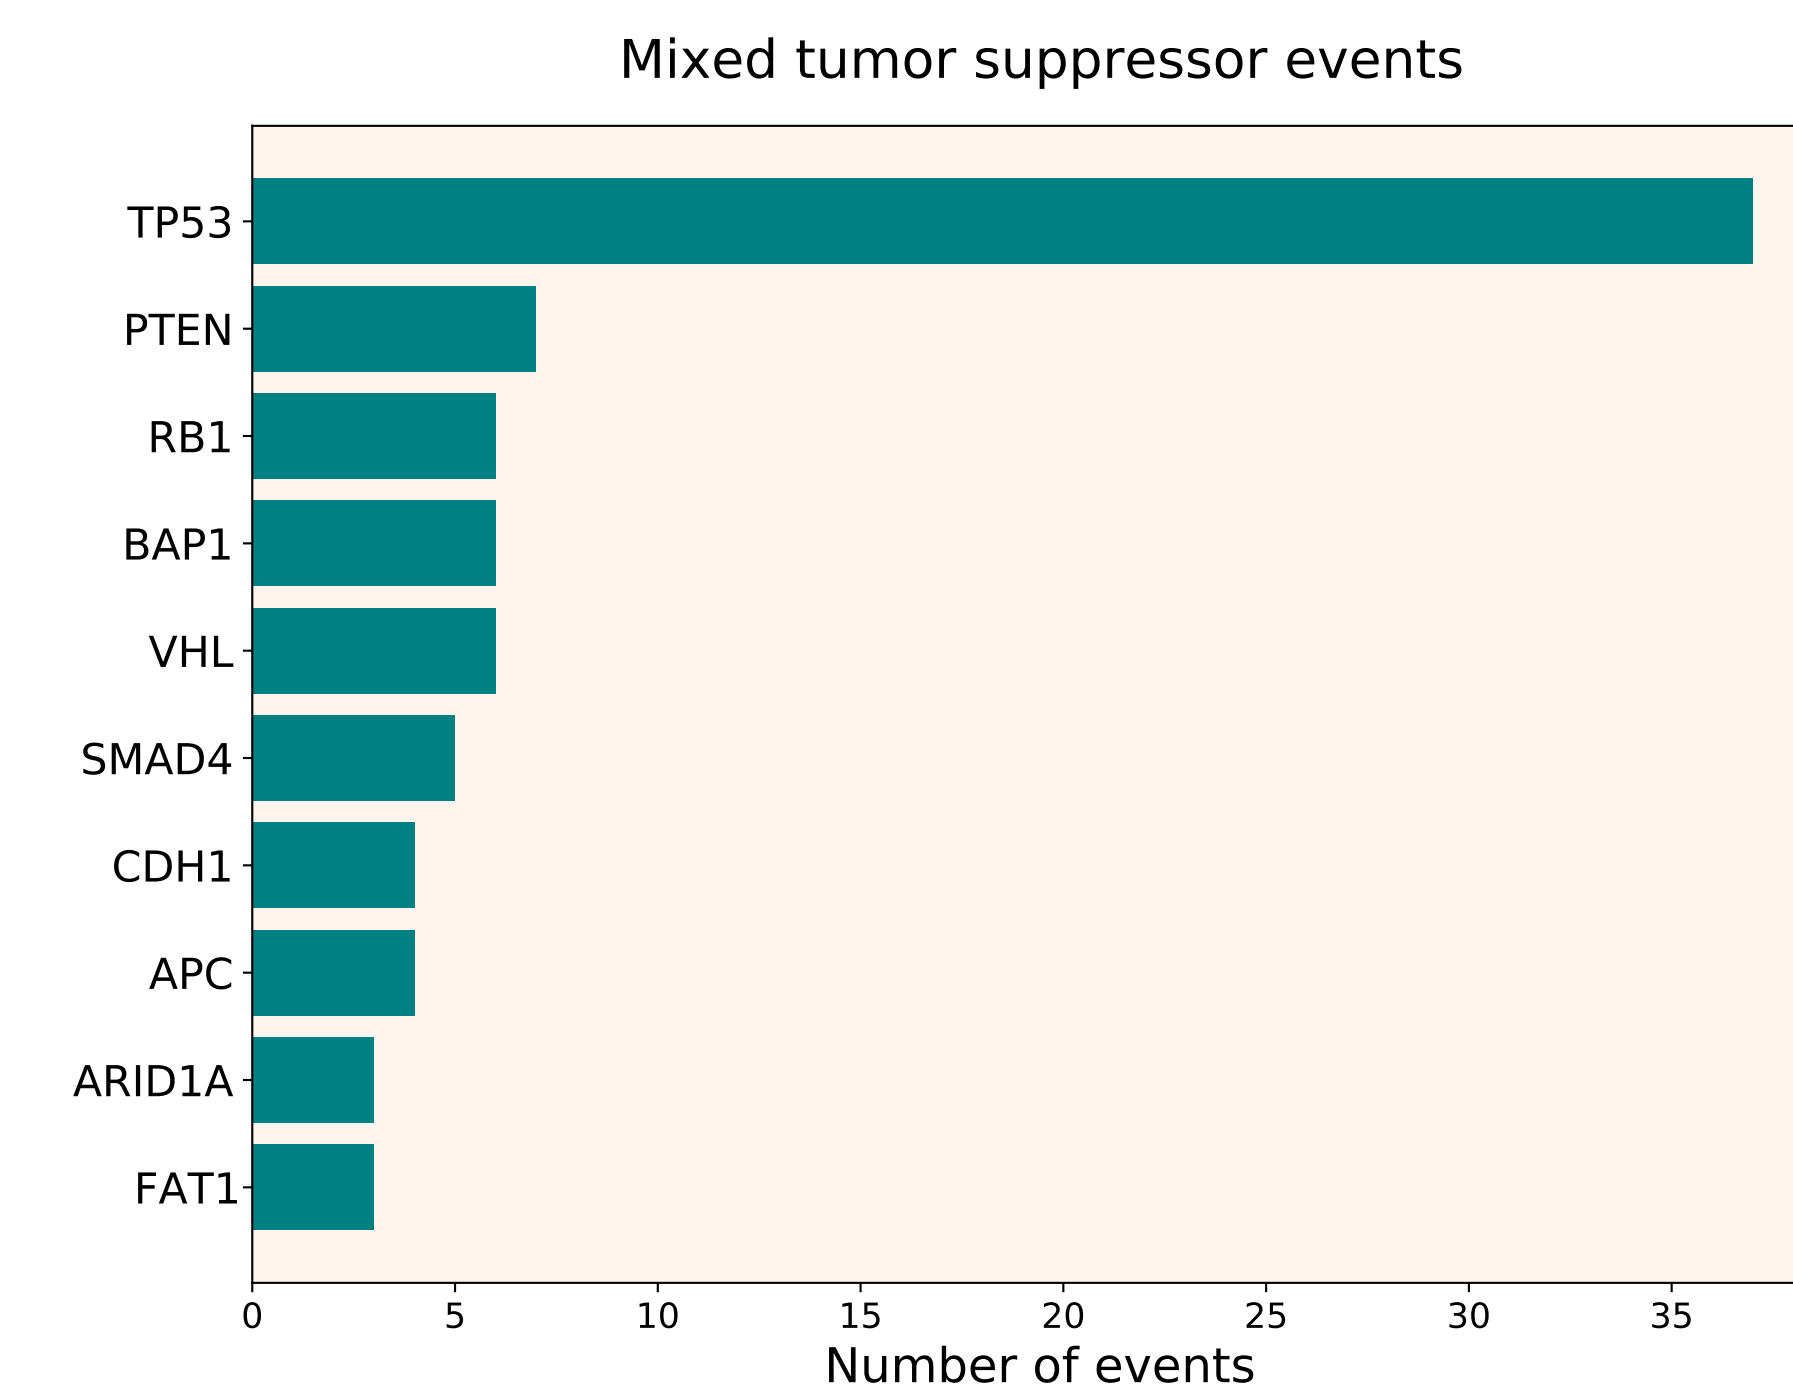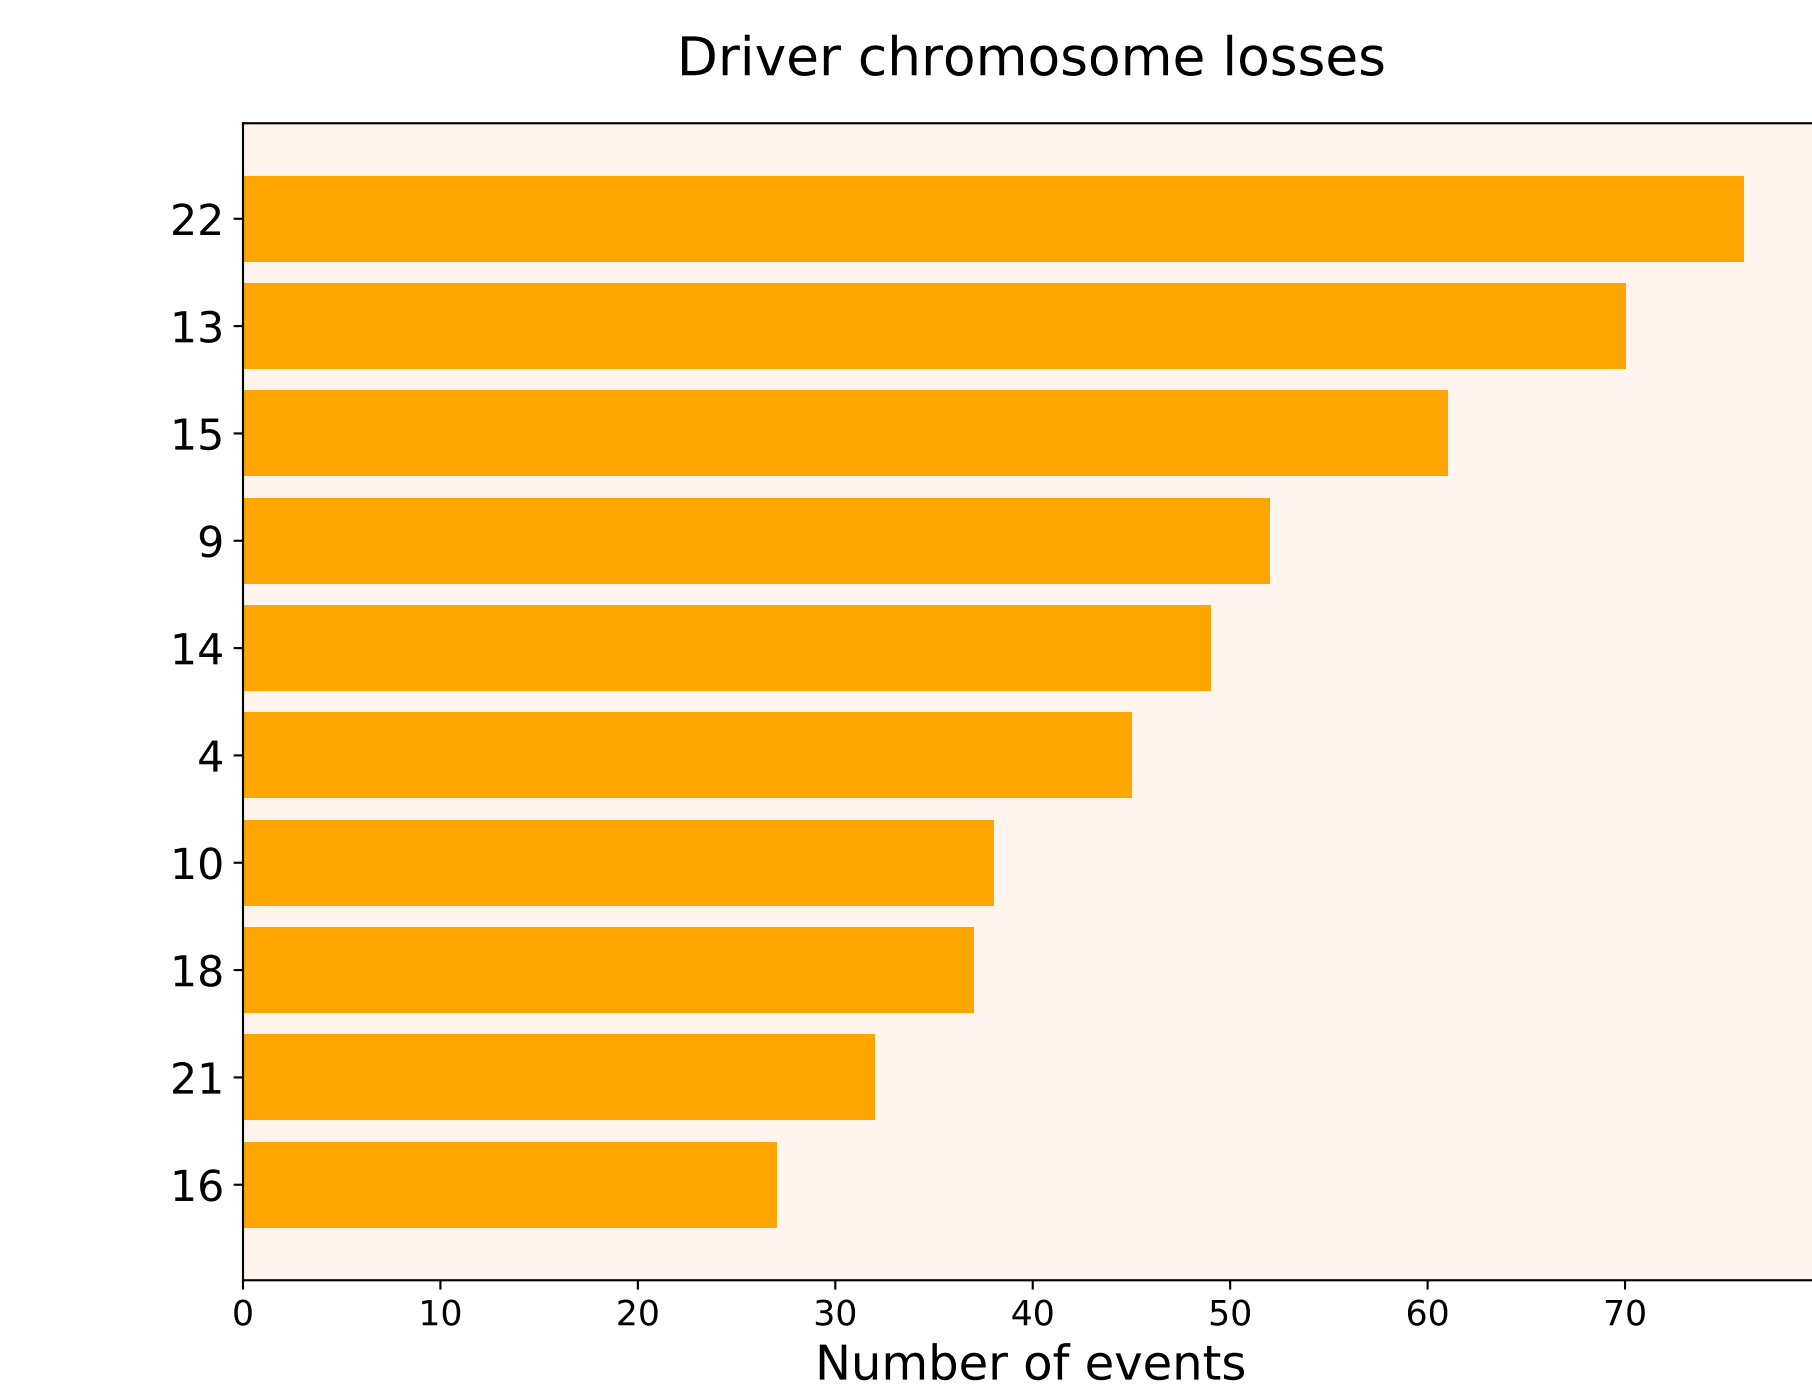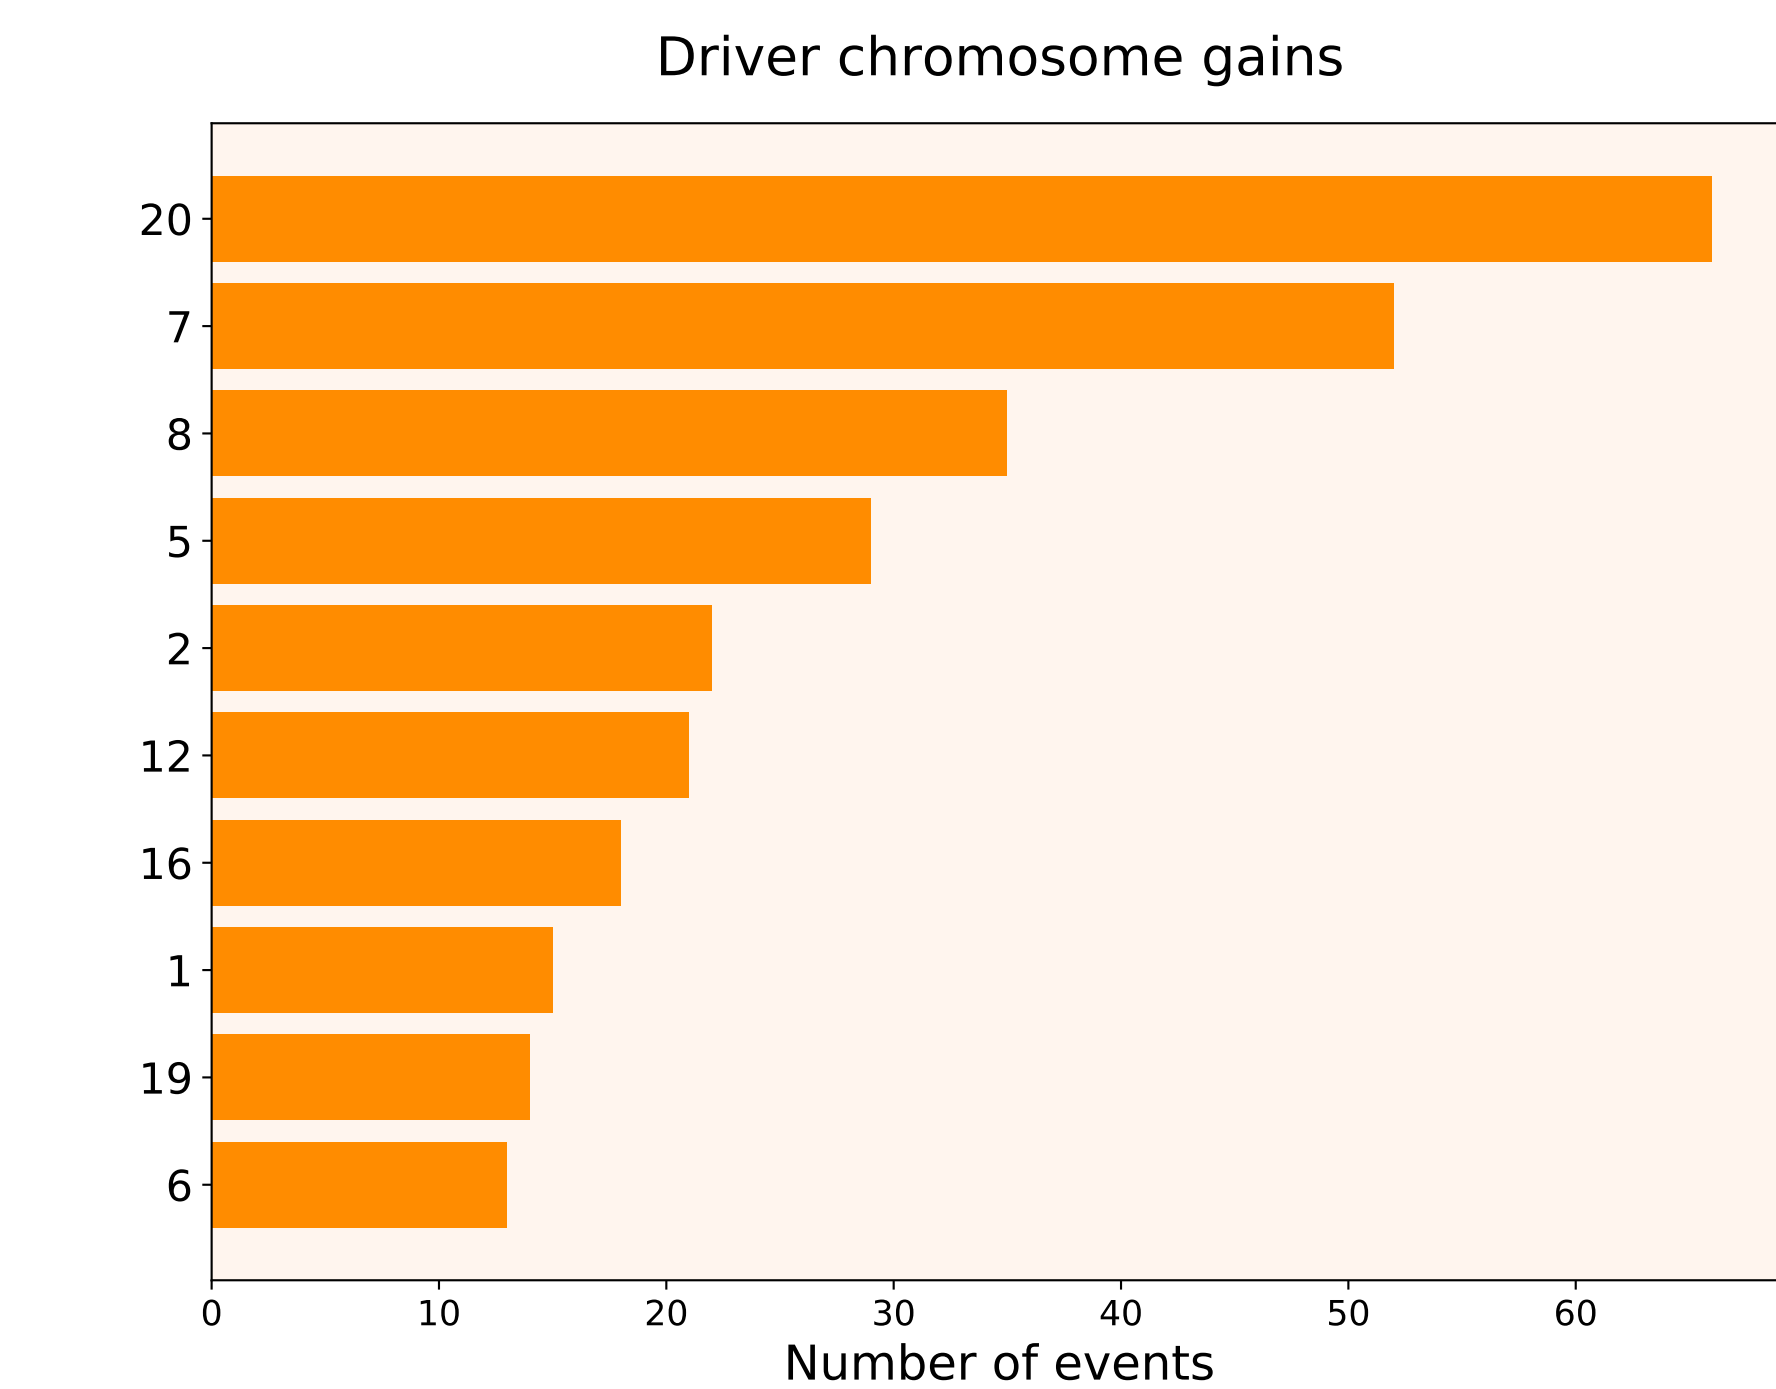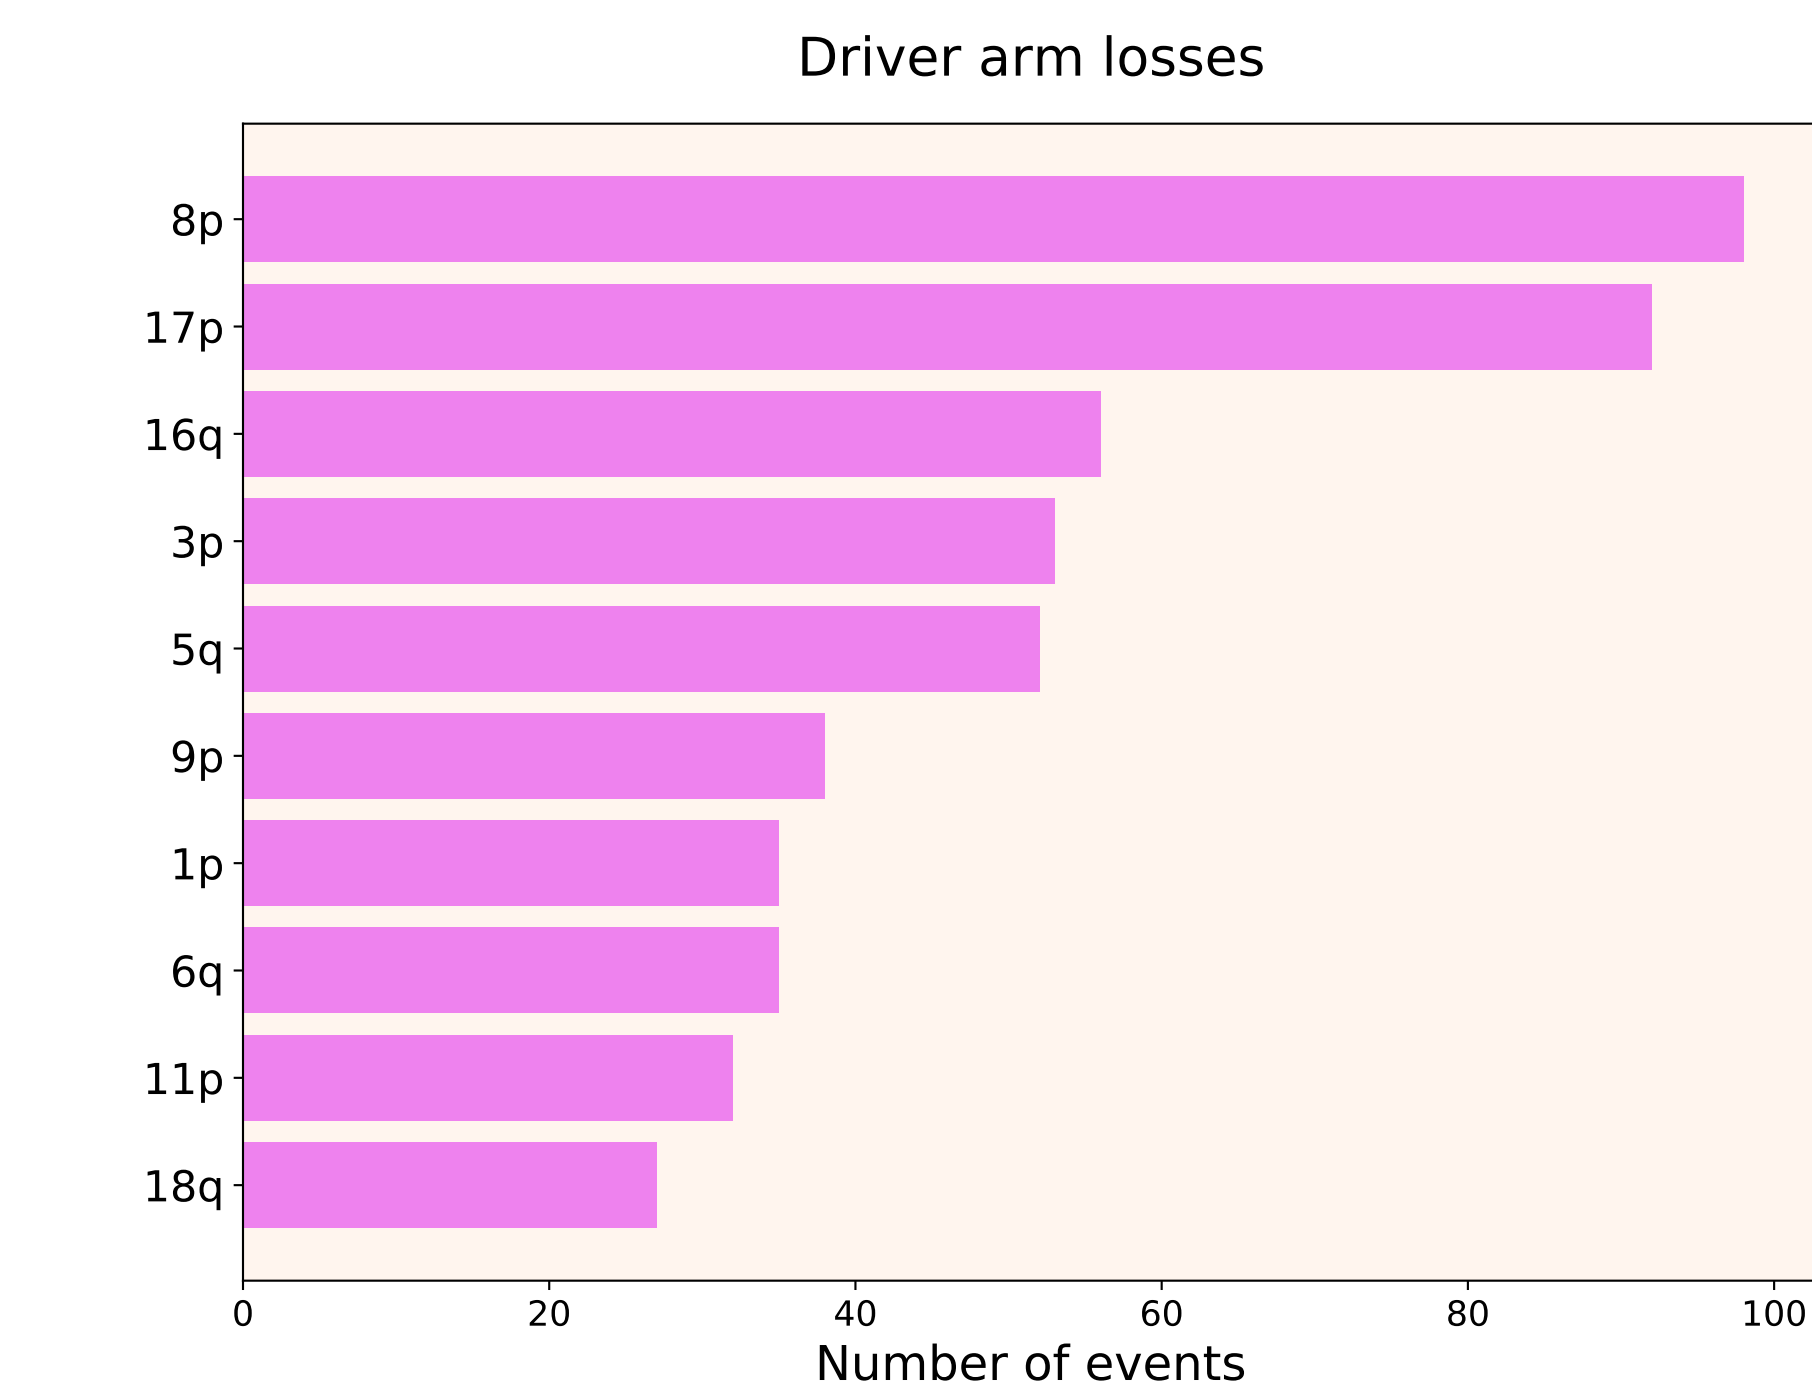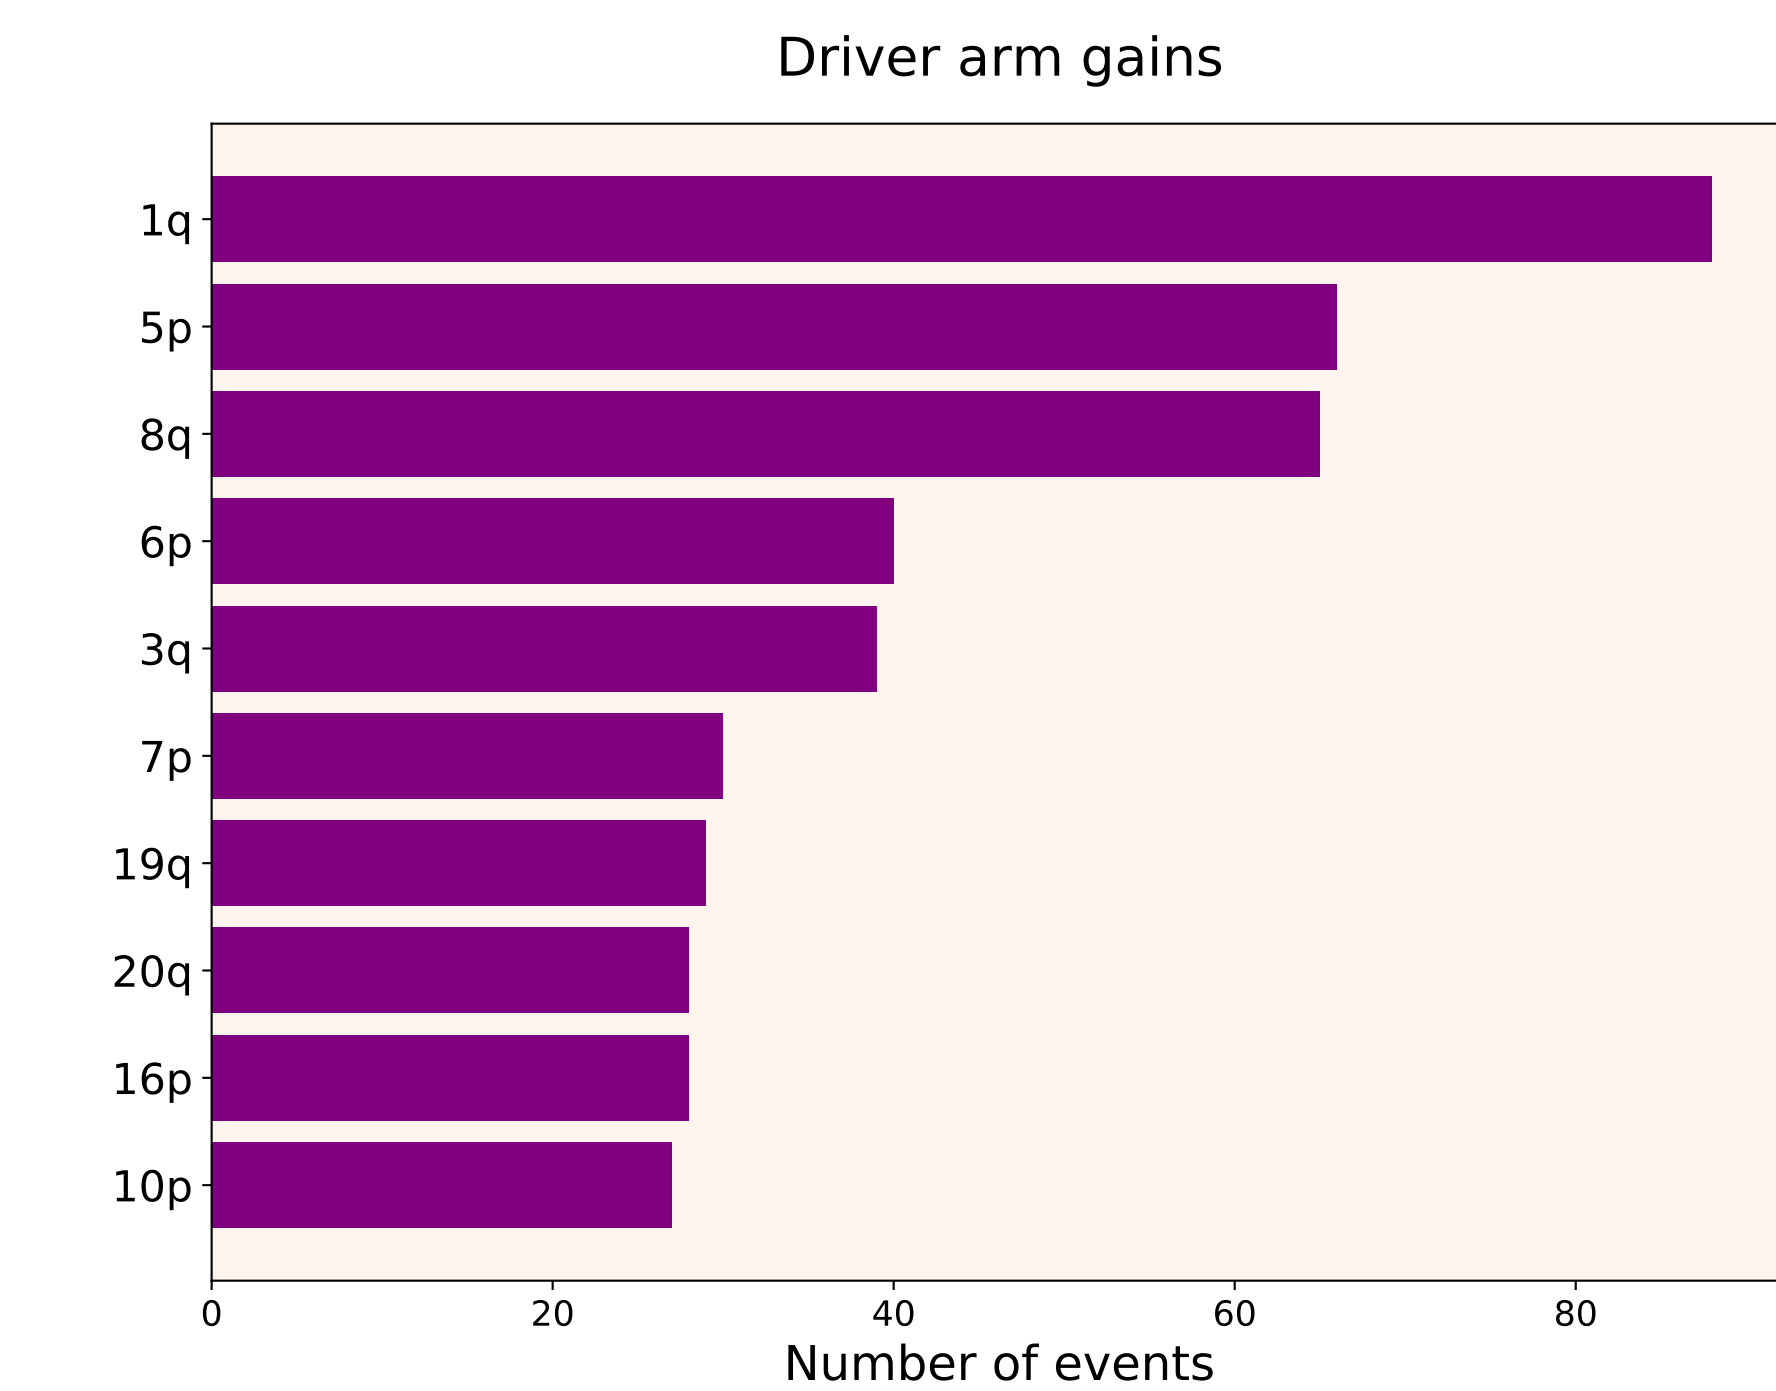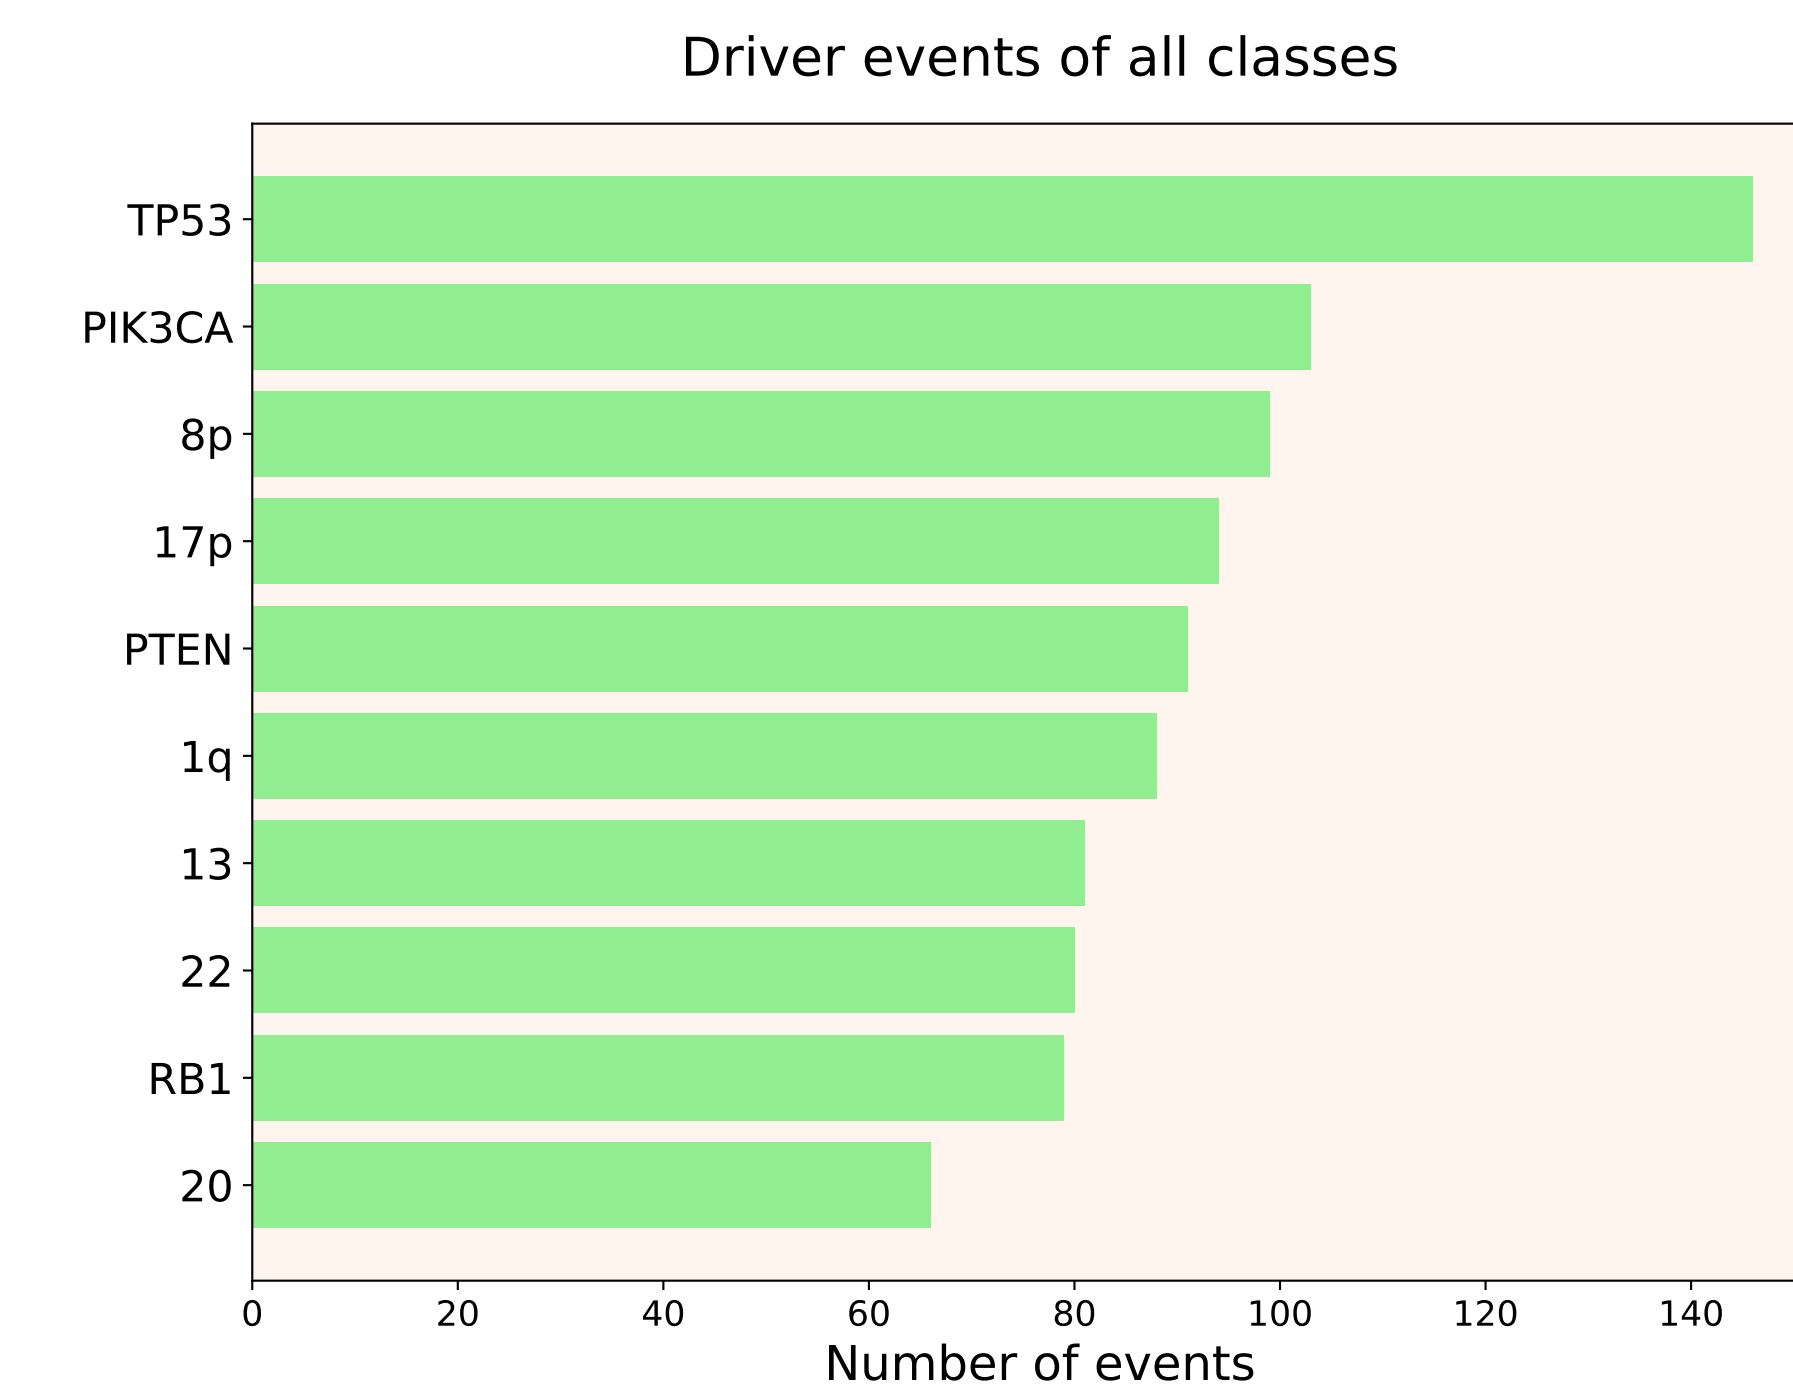

Supplement: Supplemental_Data_S1.zip [file Supplemental_Data_S1.zip]

# PRAD\_MALE

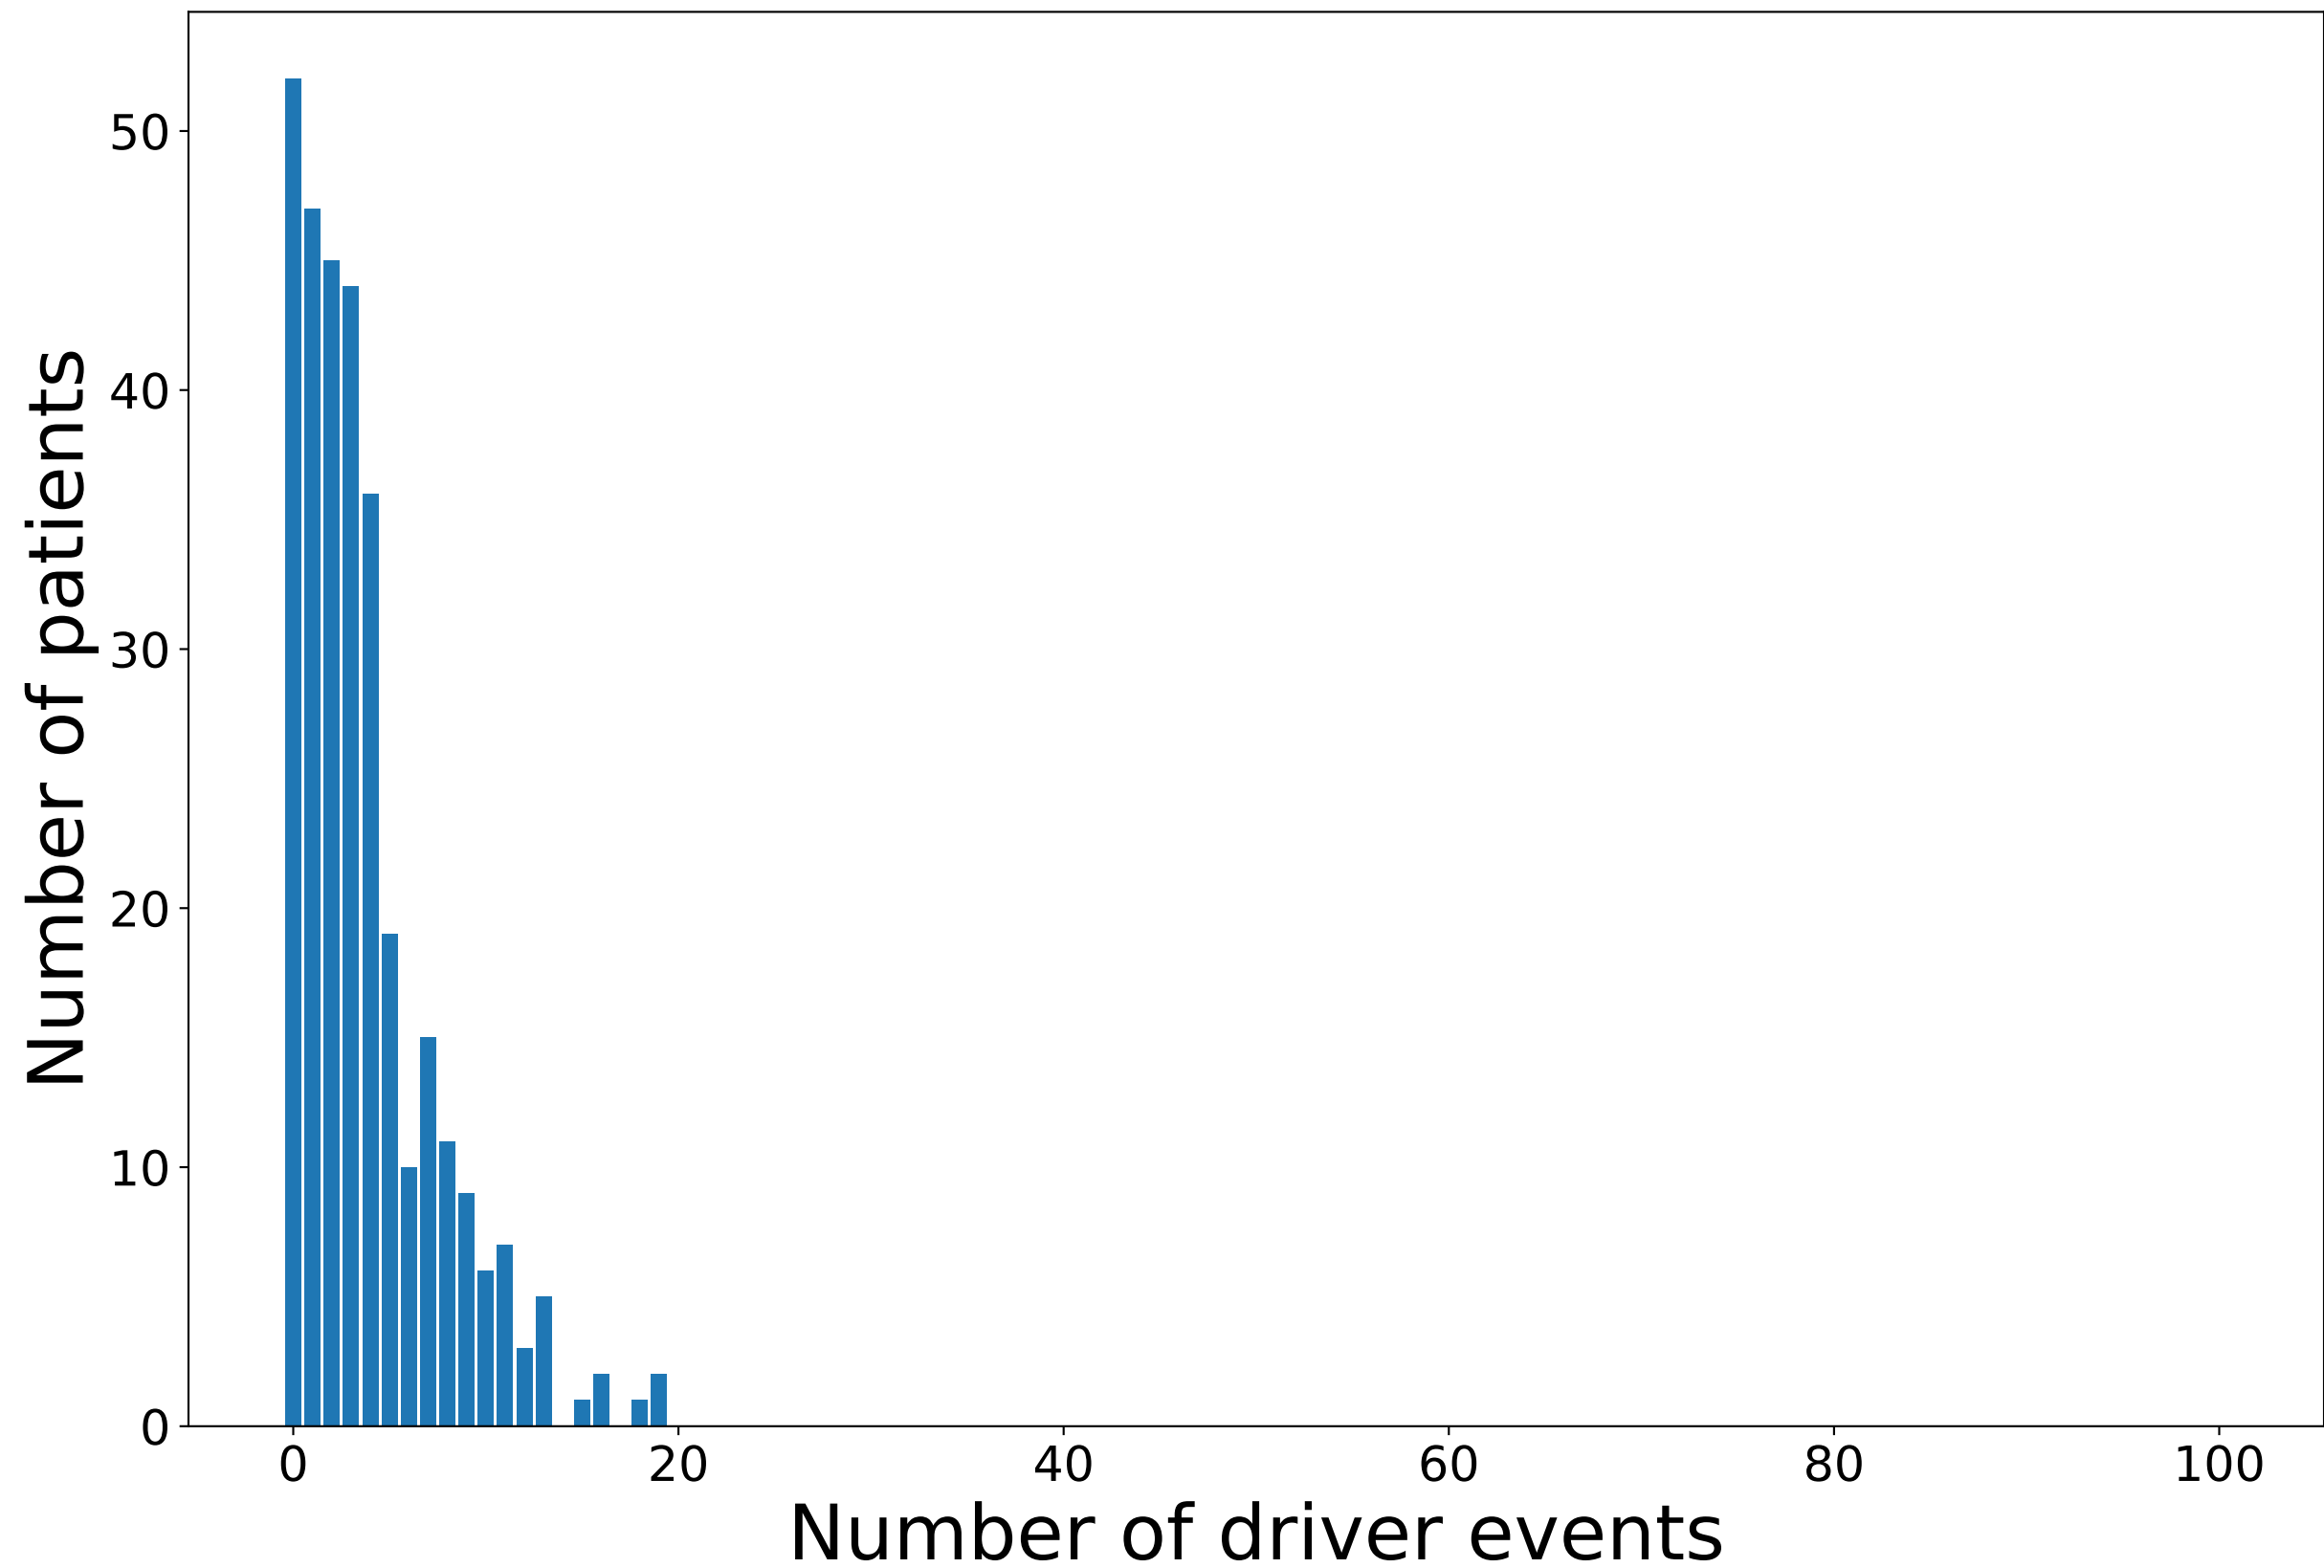

Supplement: Supplemental_Data_S1.zip [file Supplemental_Data_S1.zip]

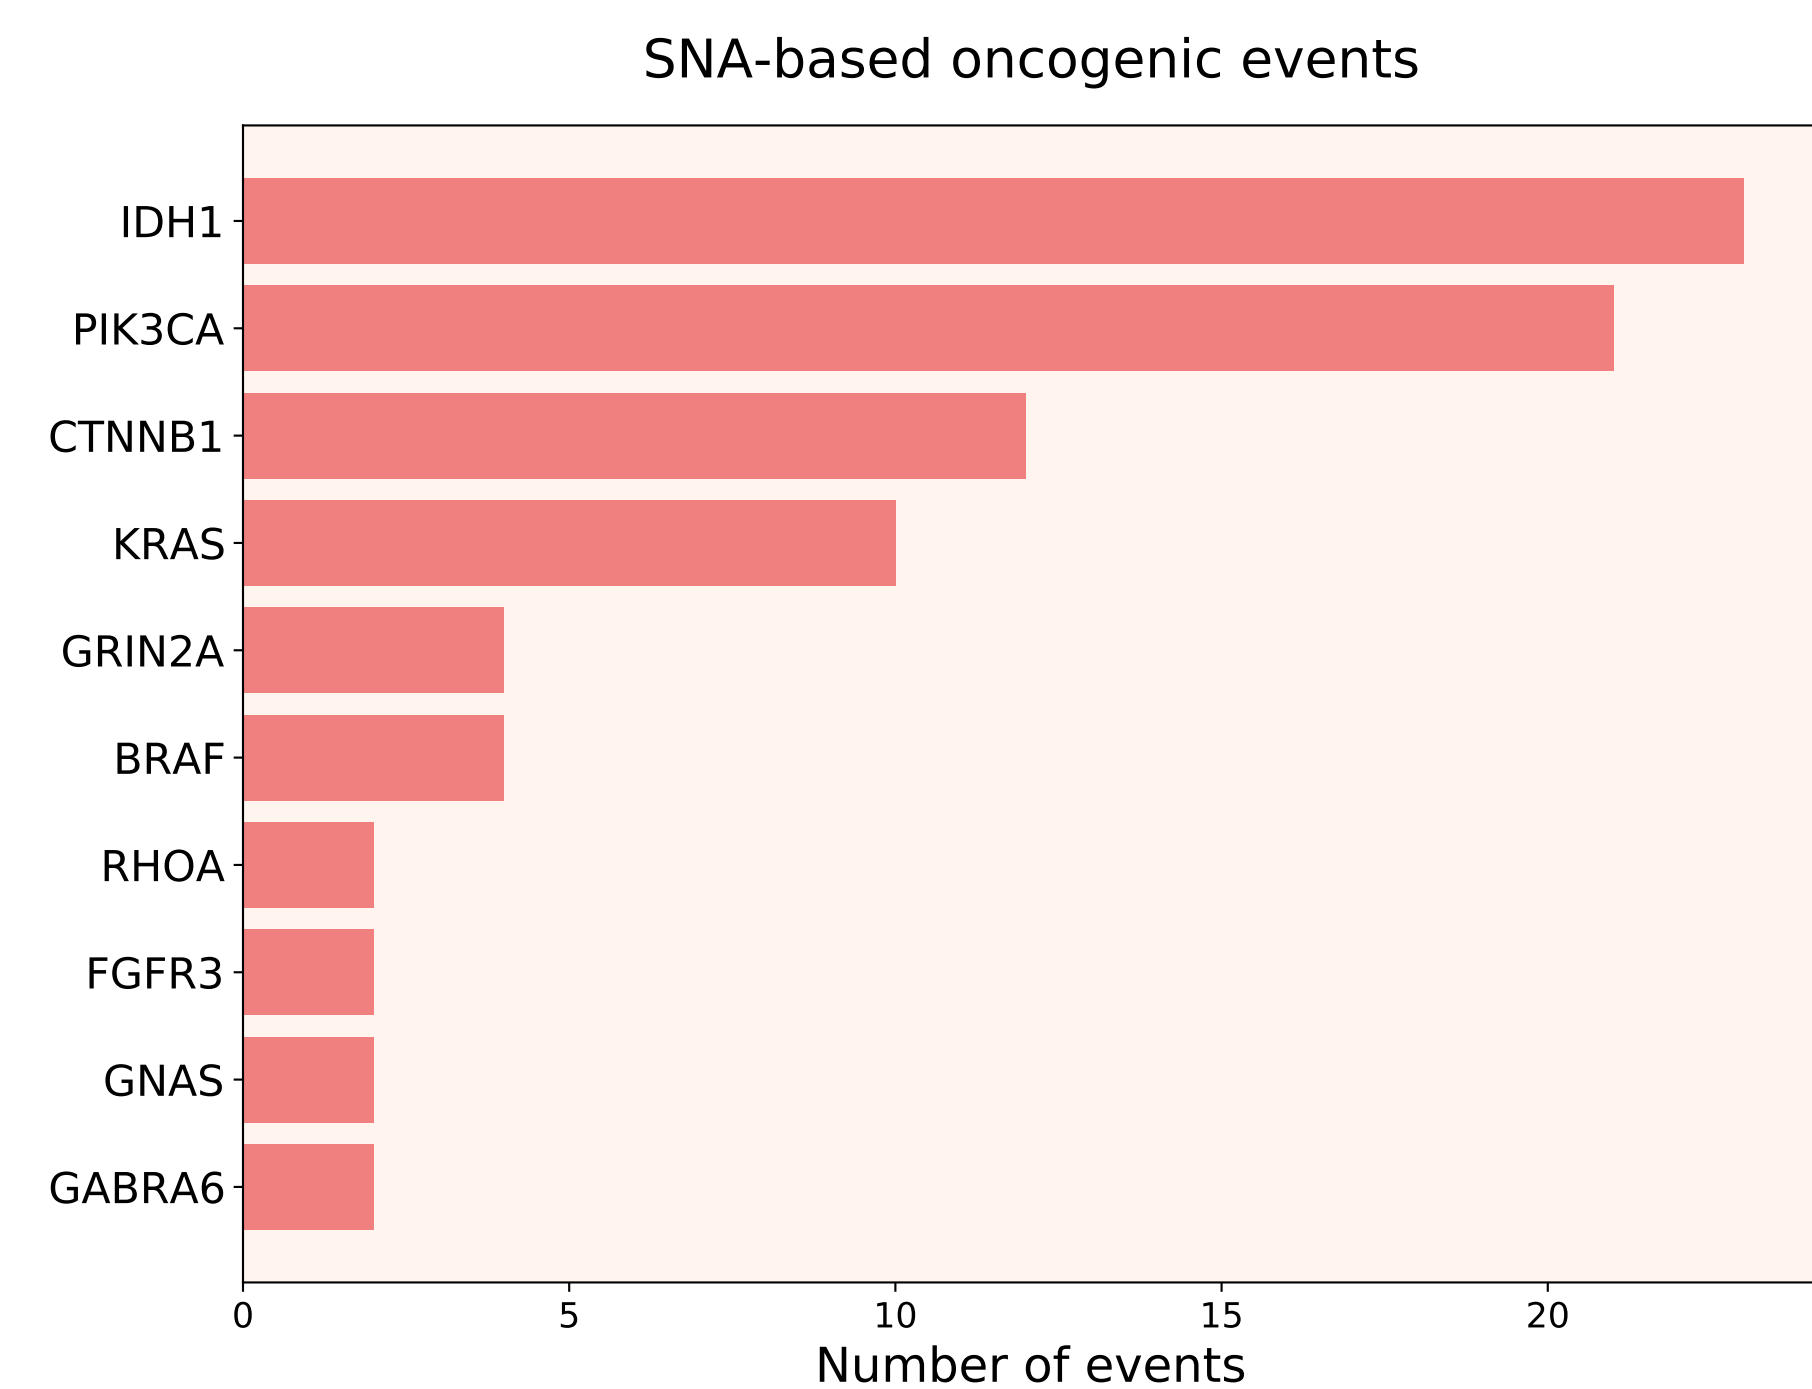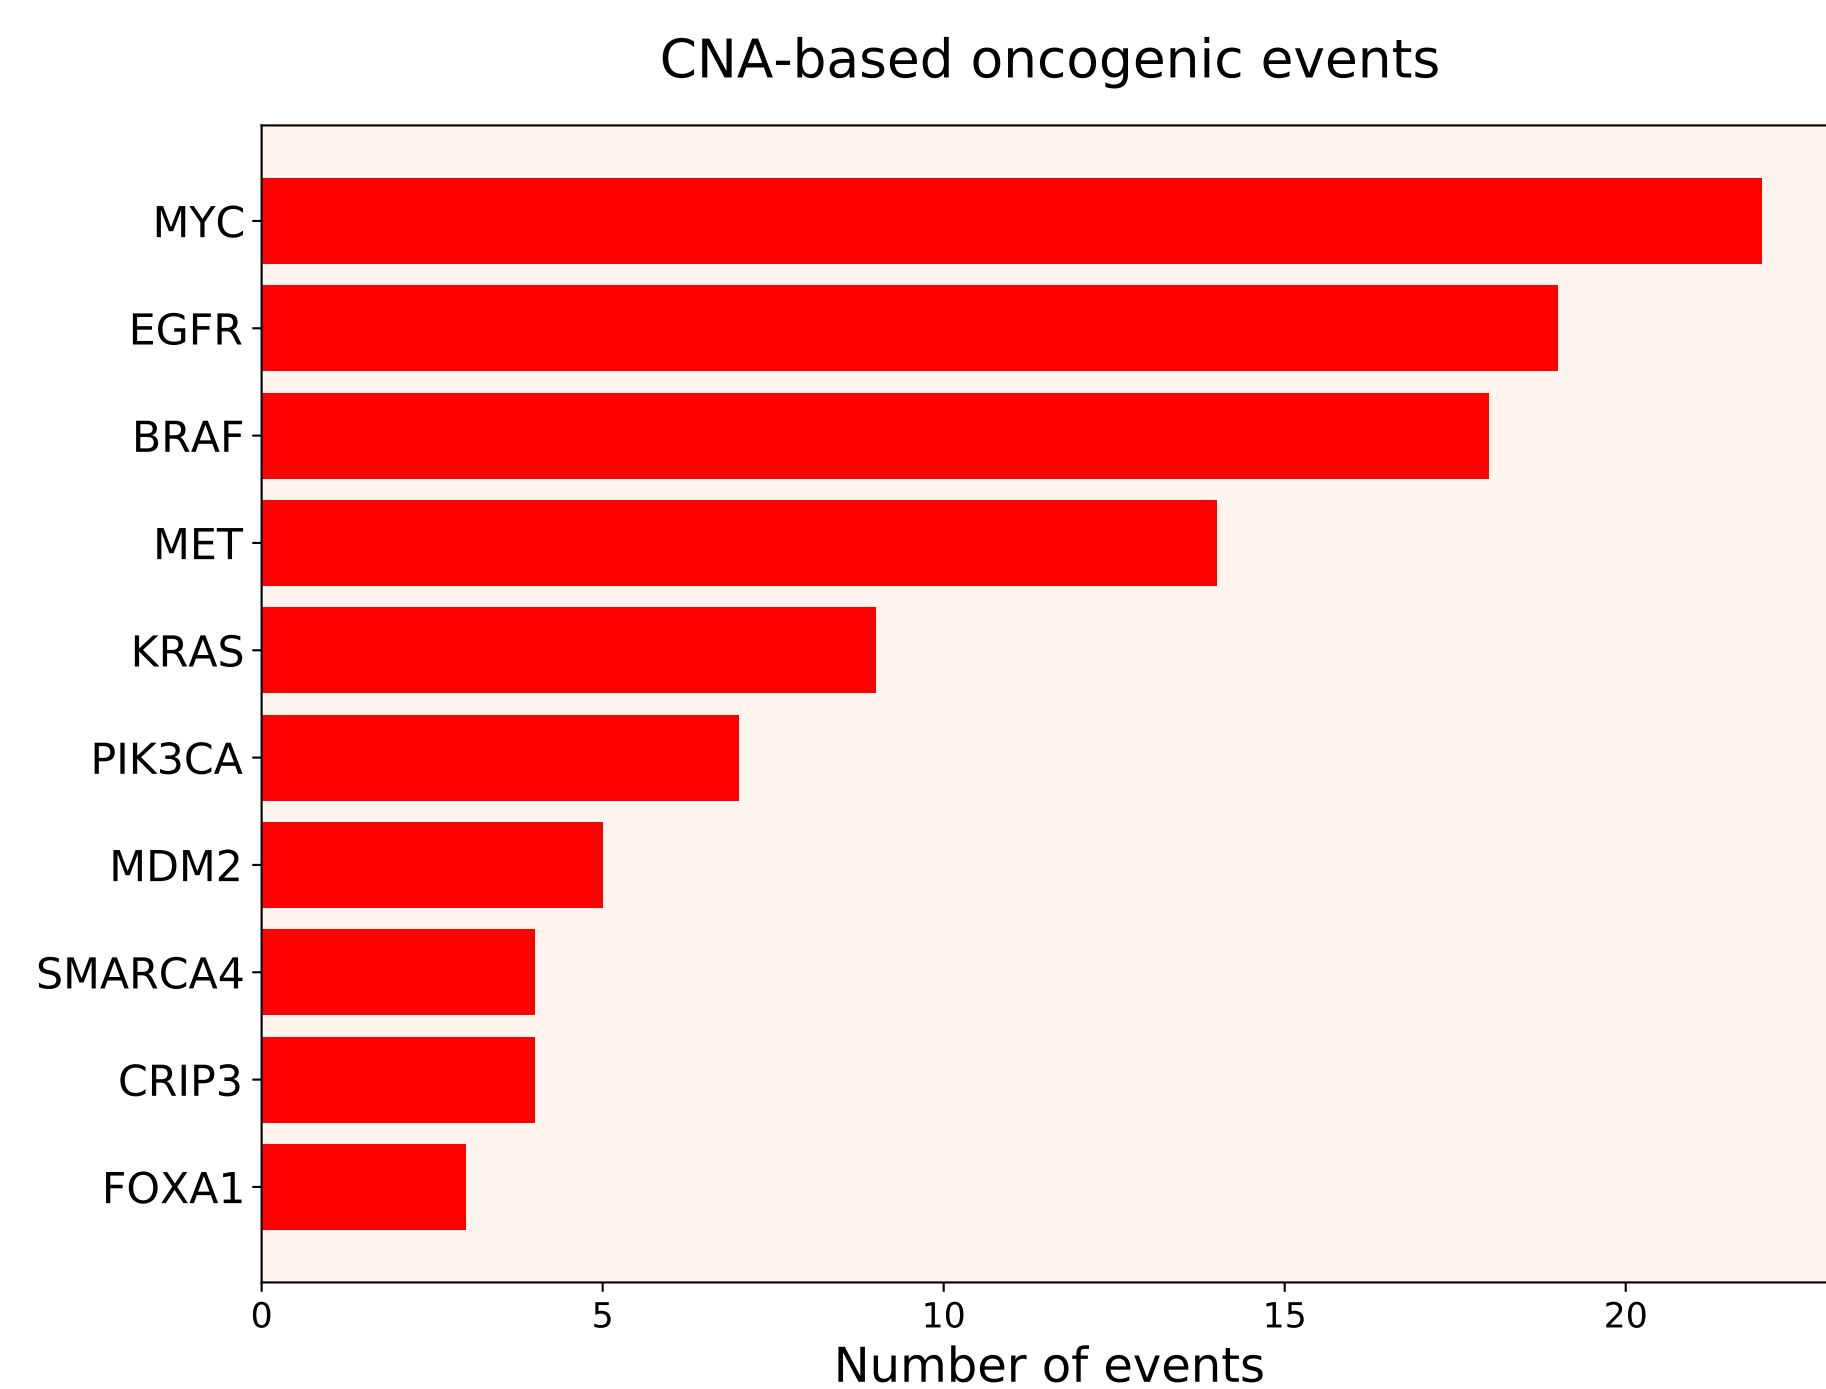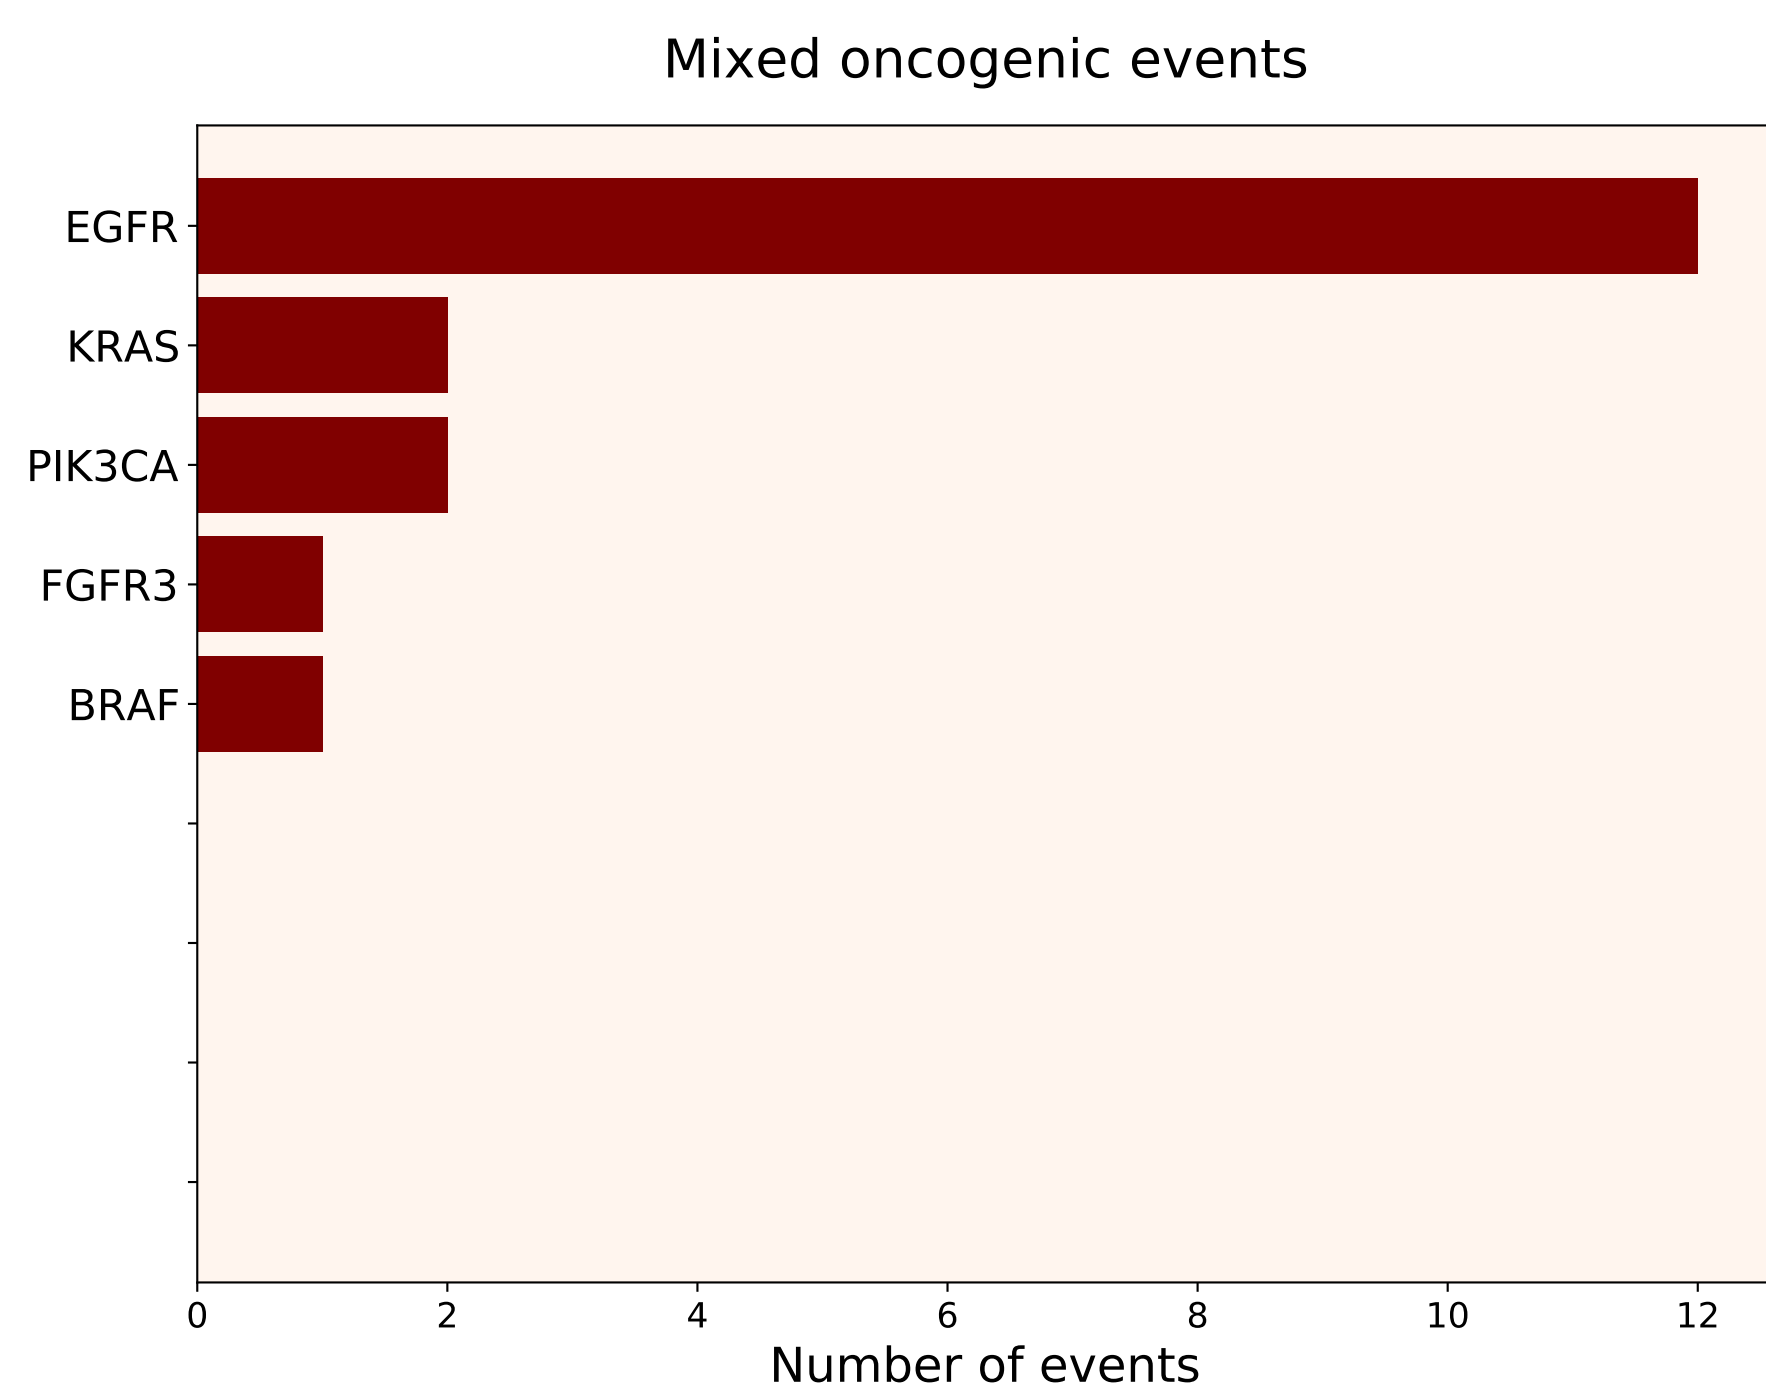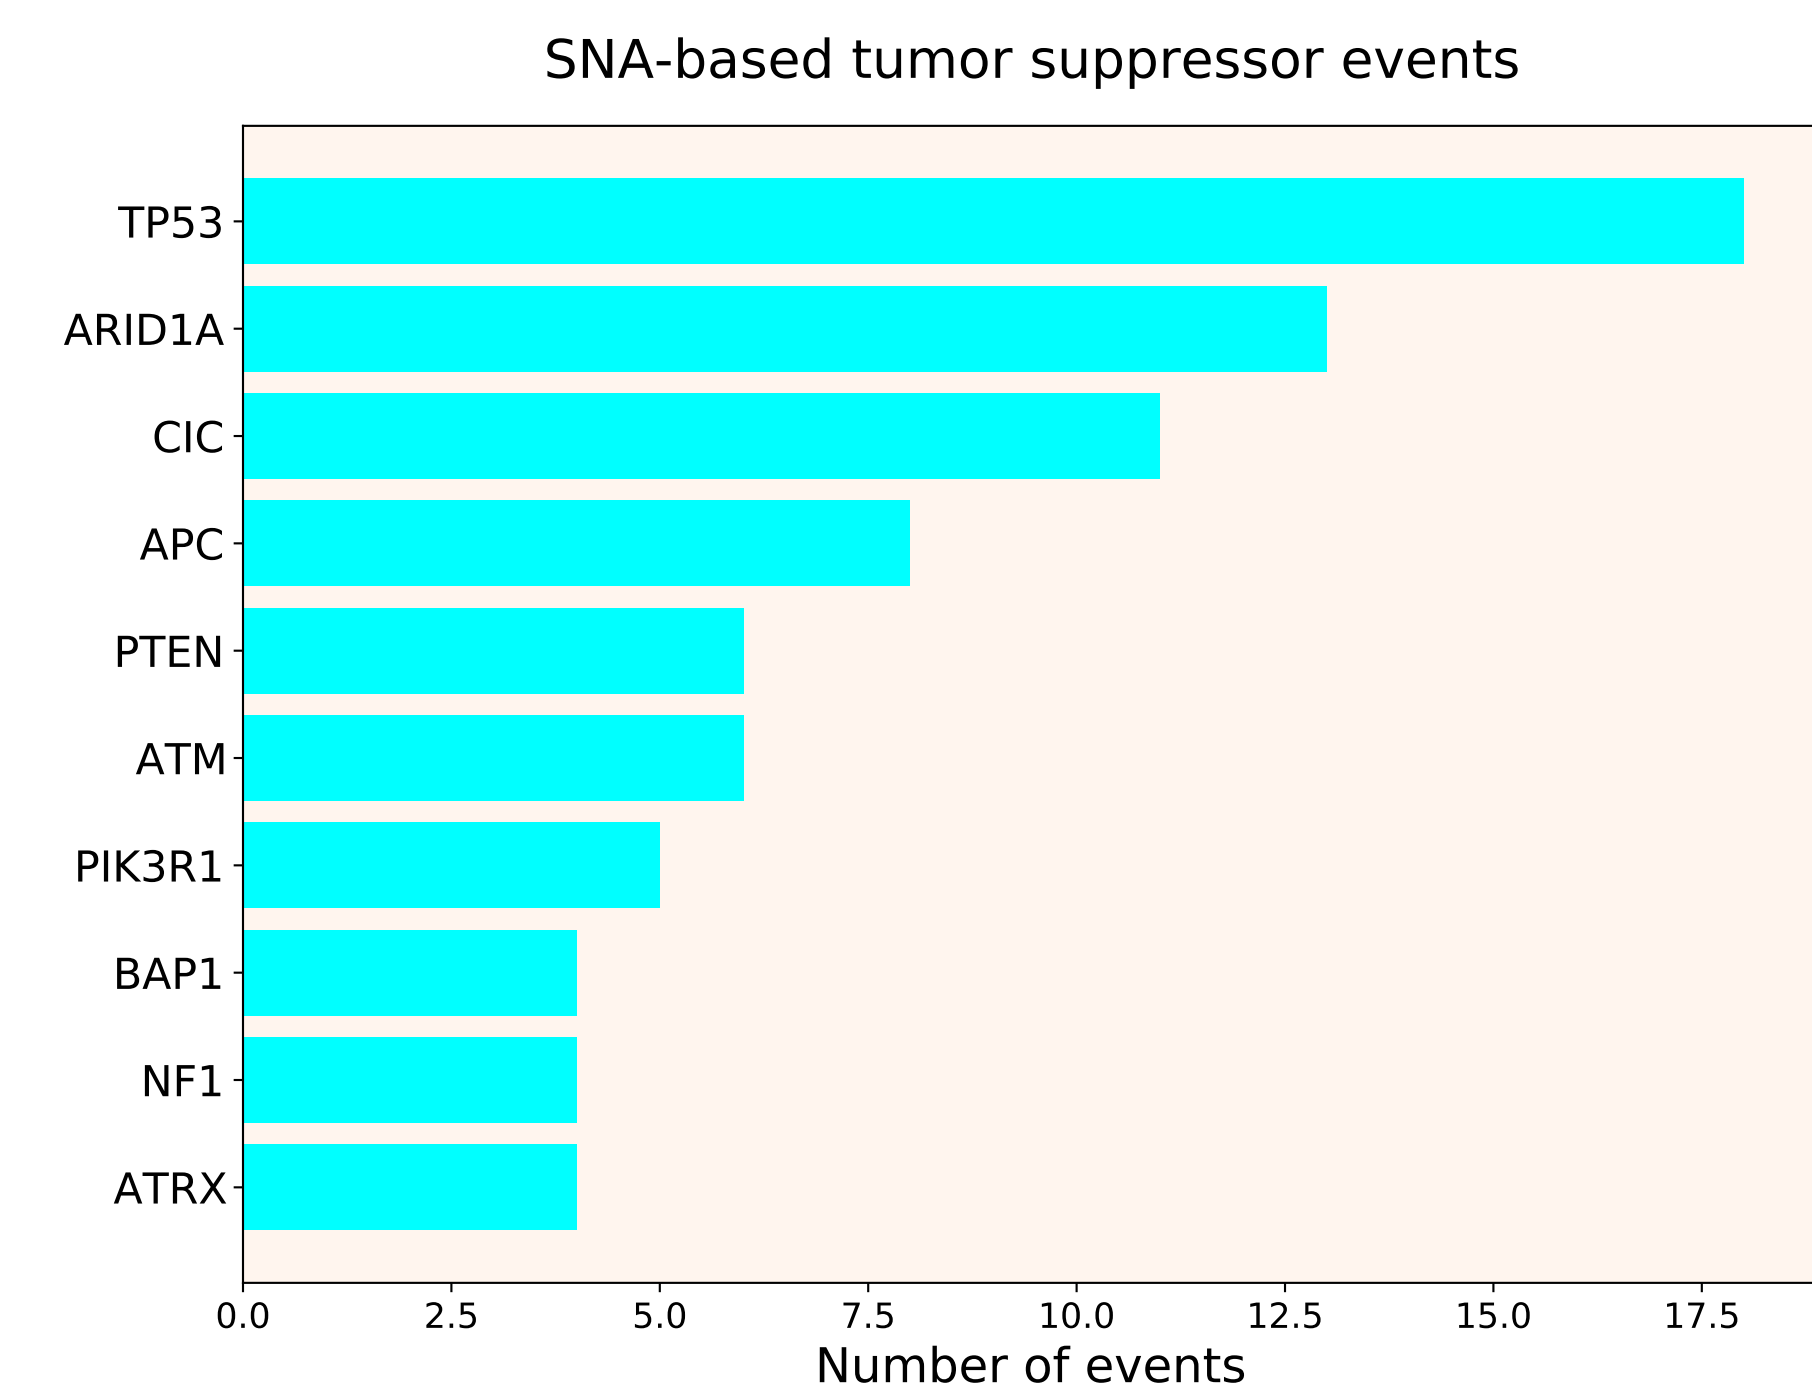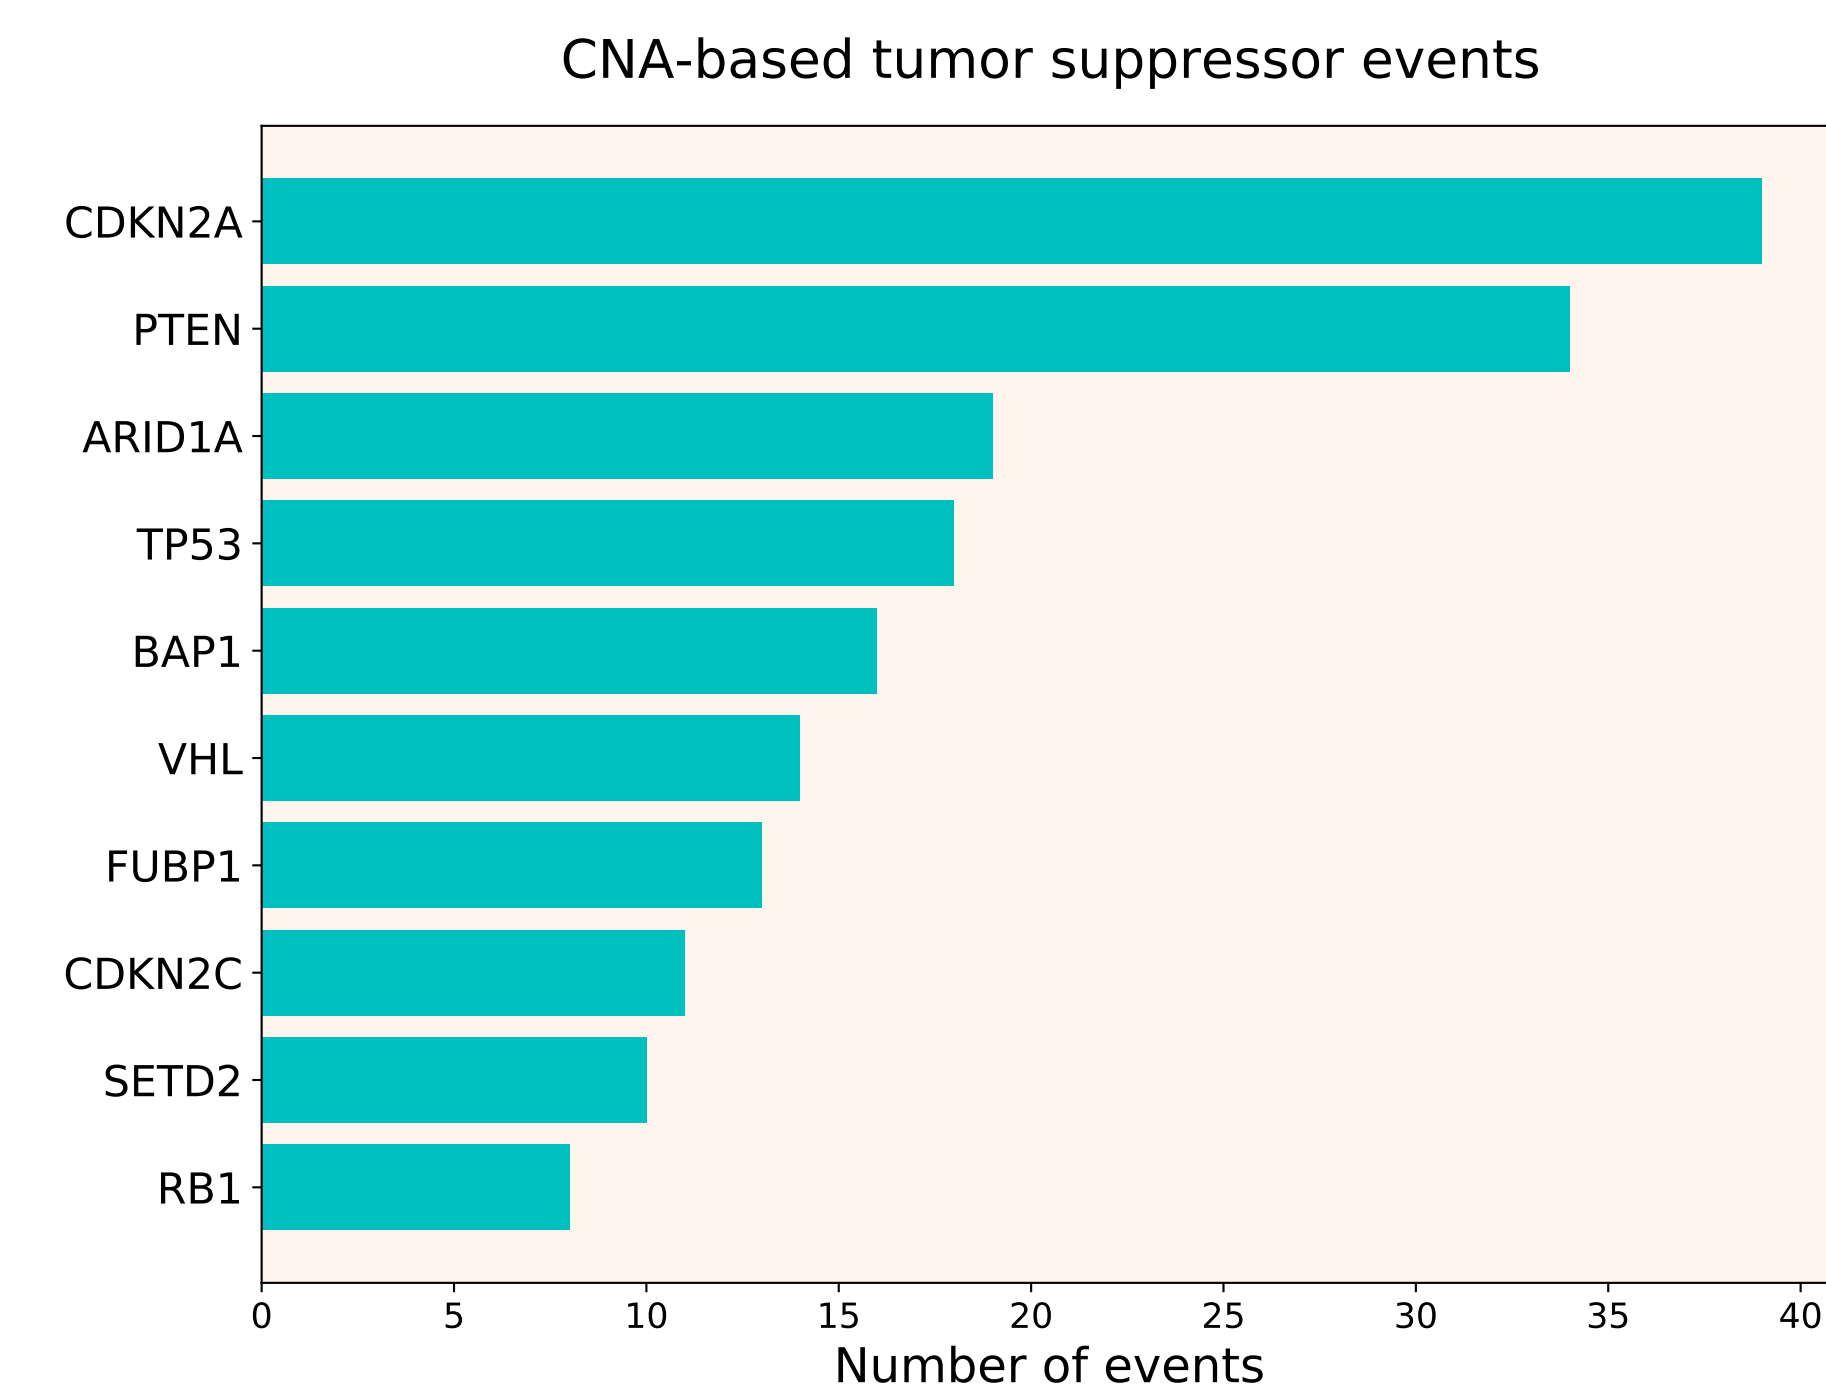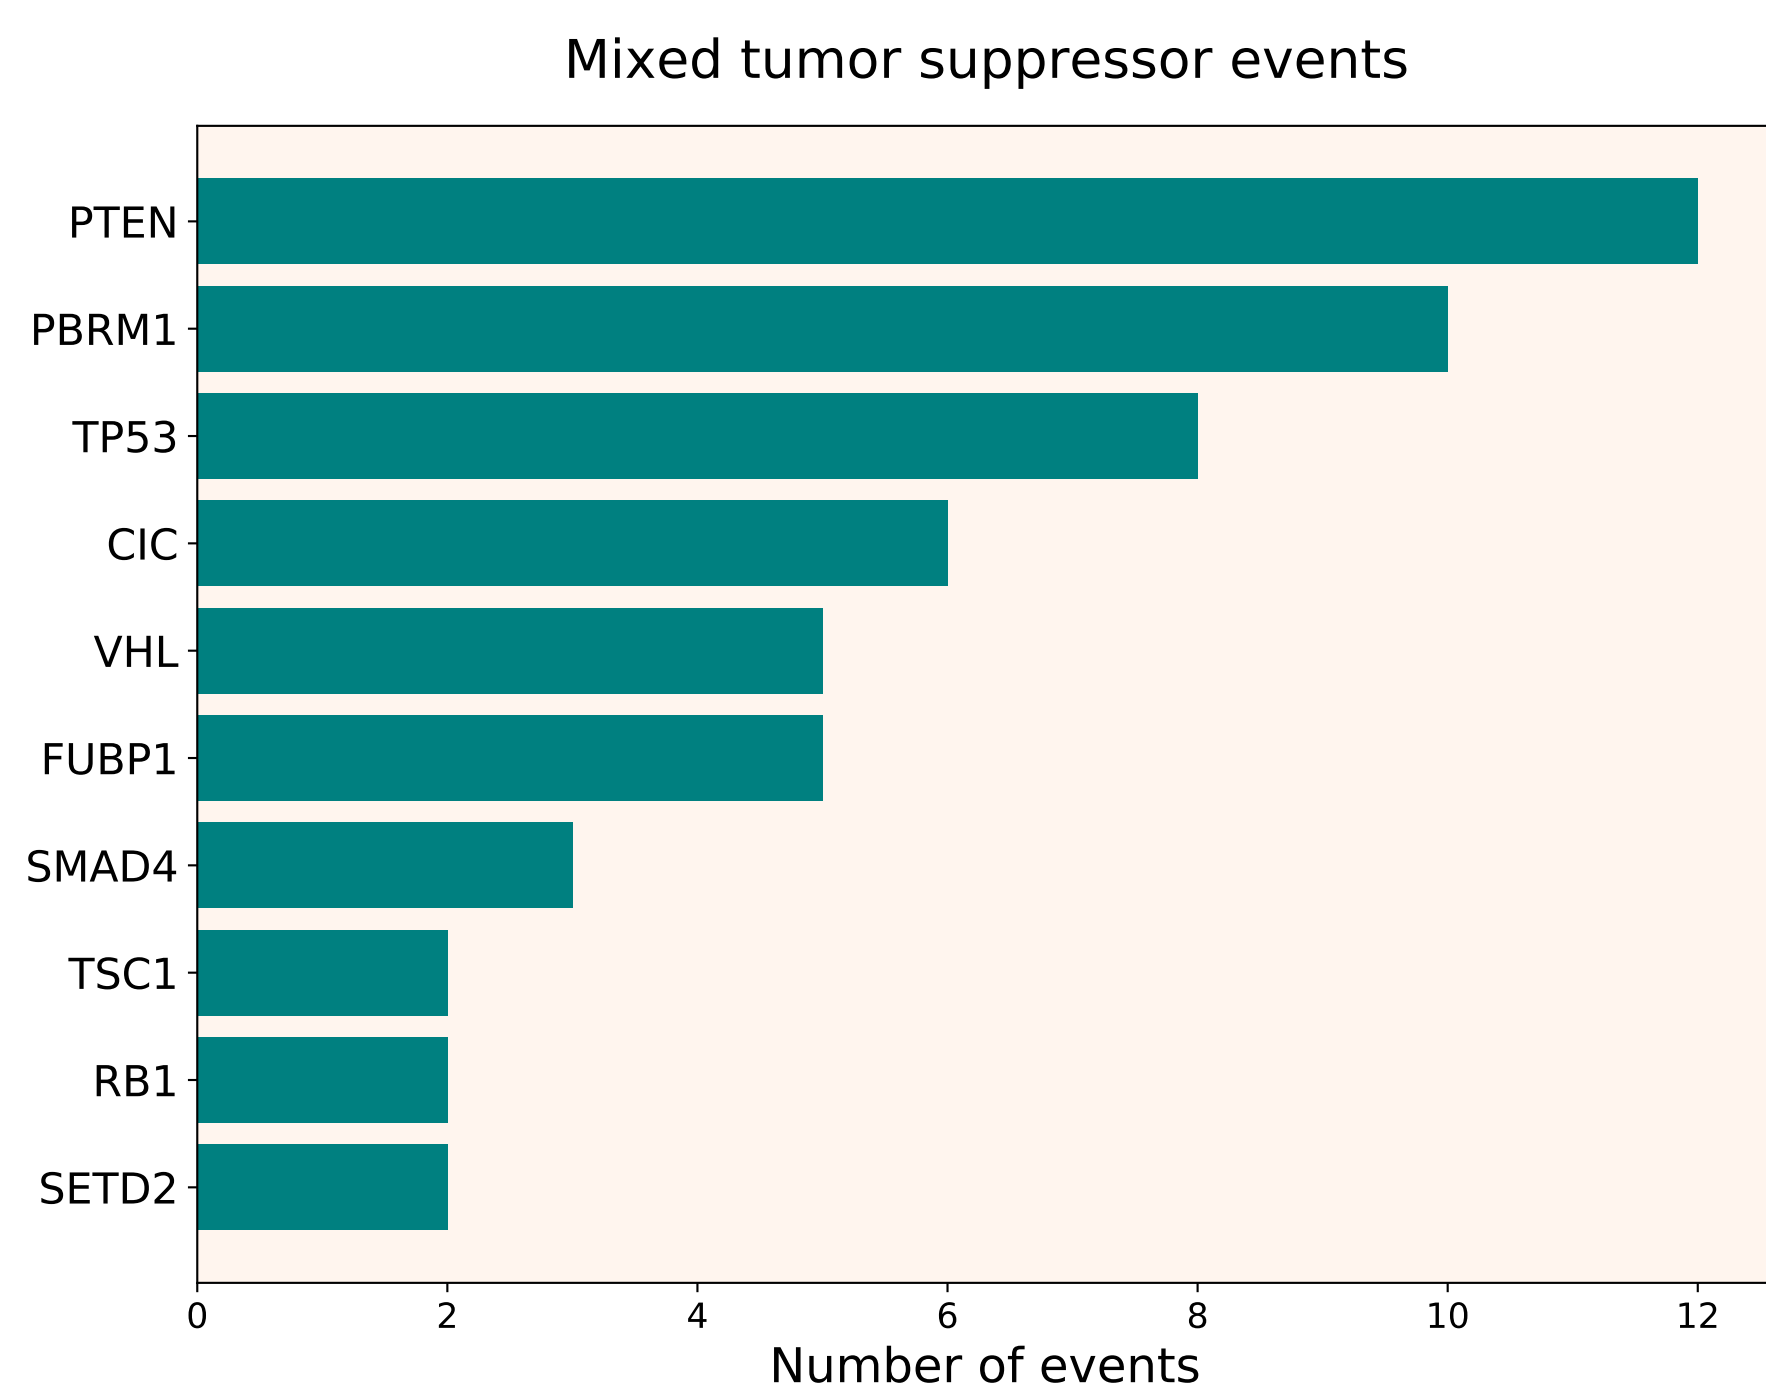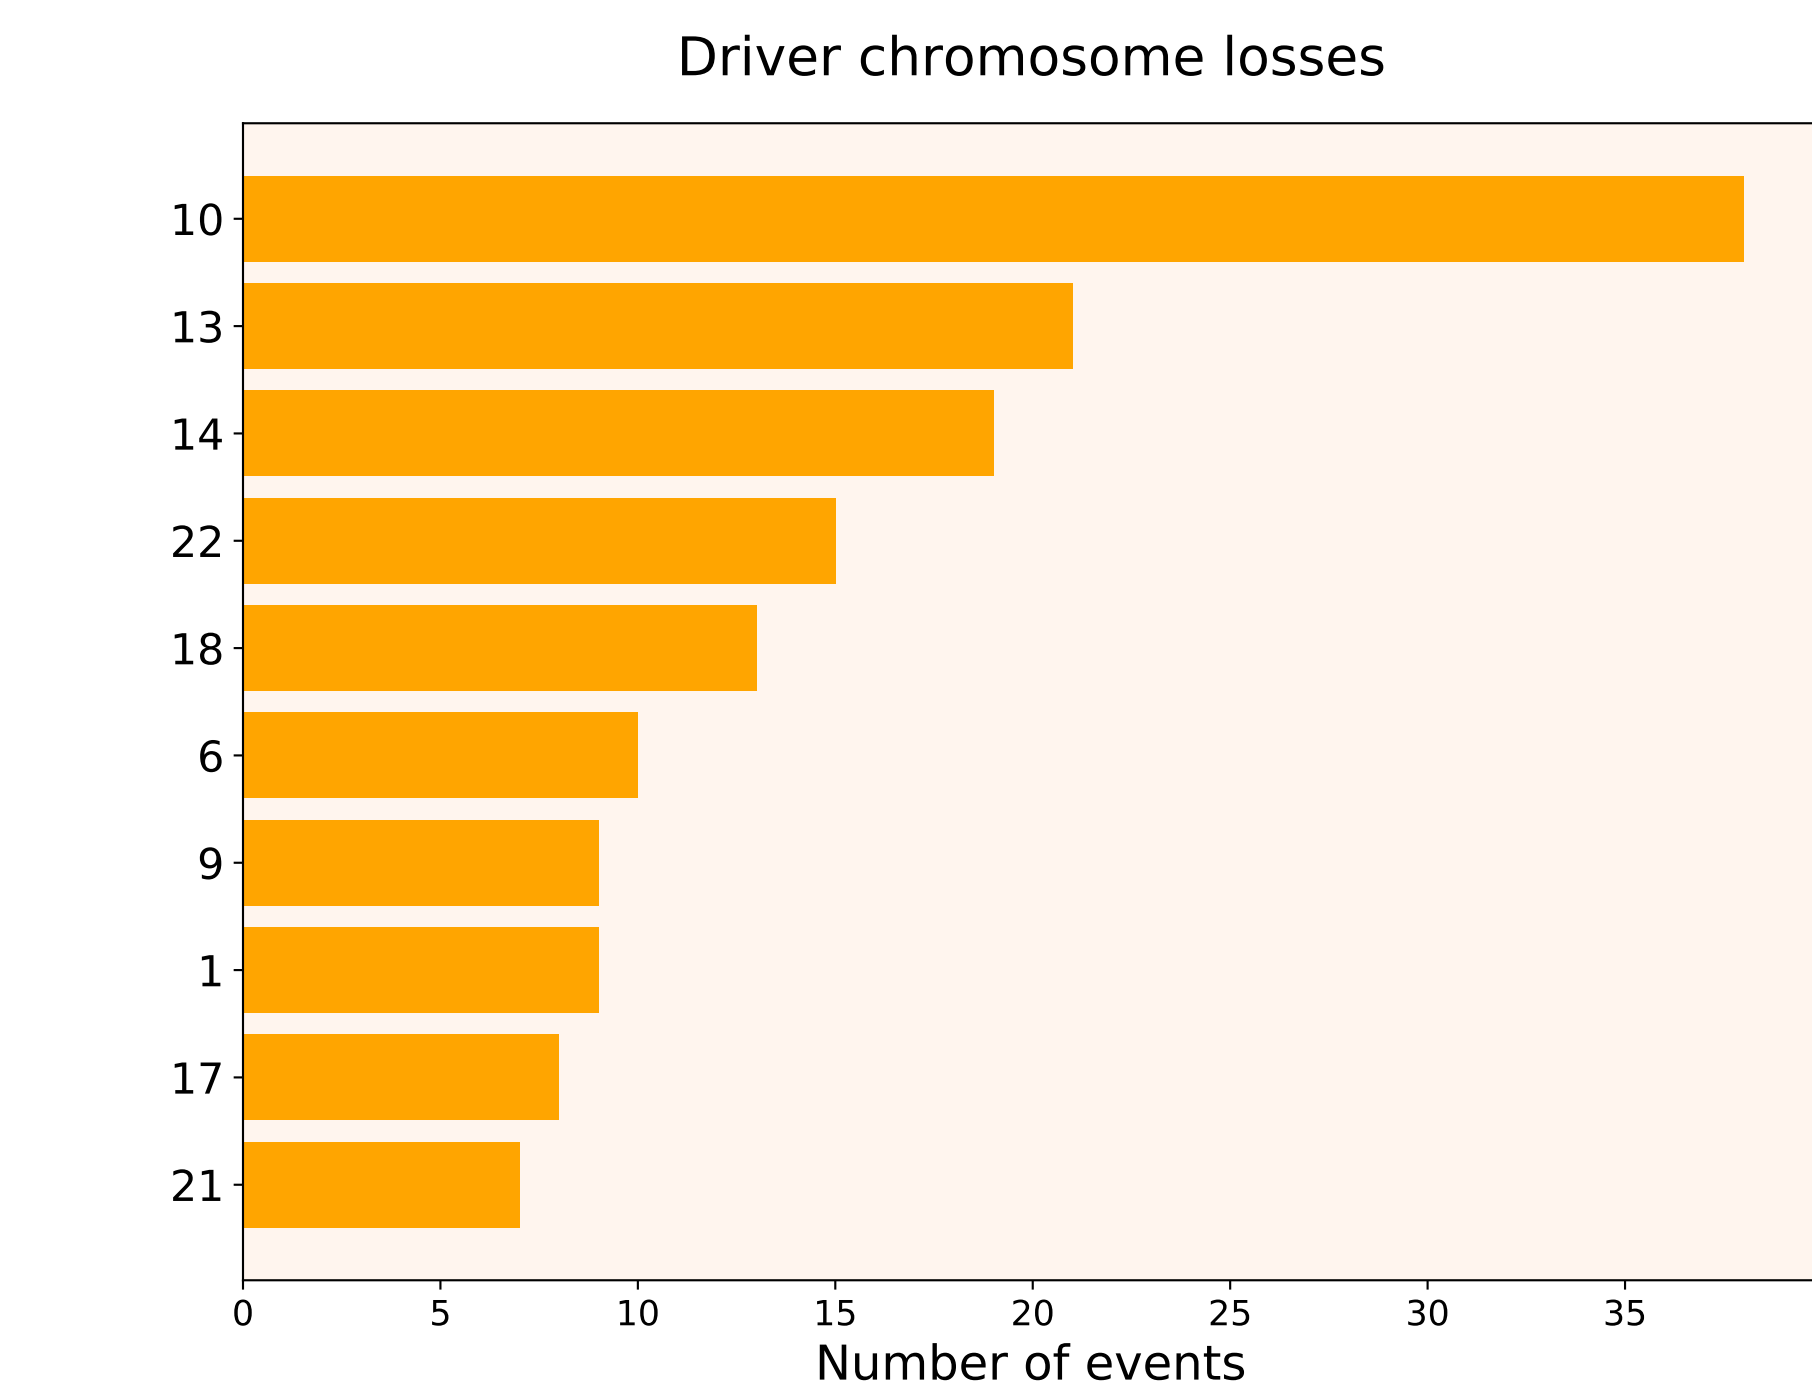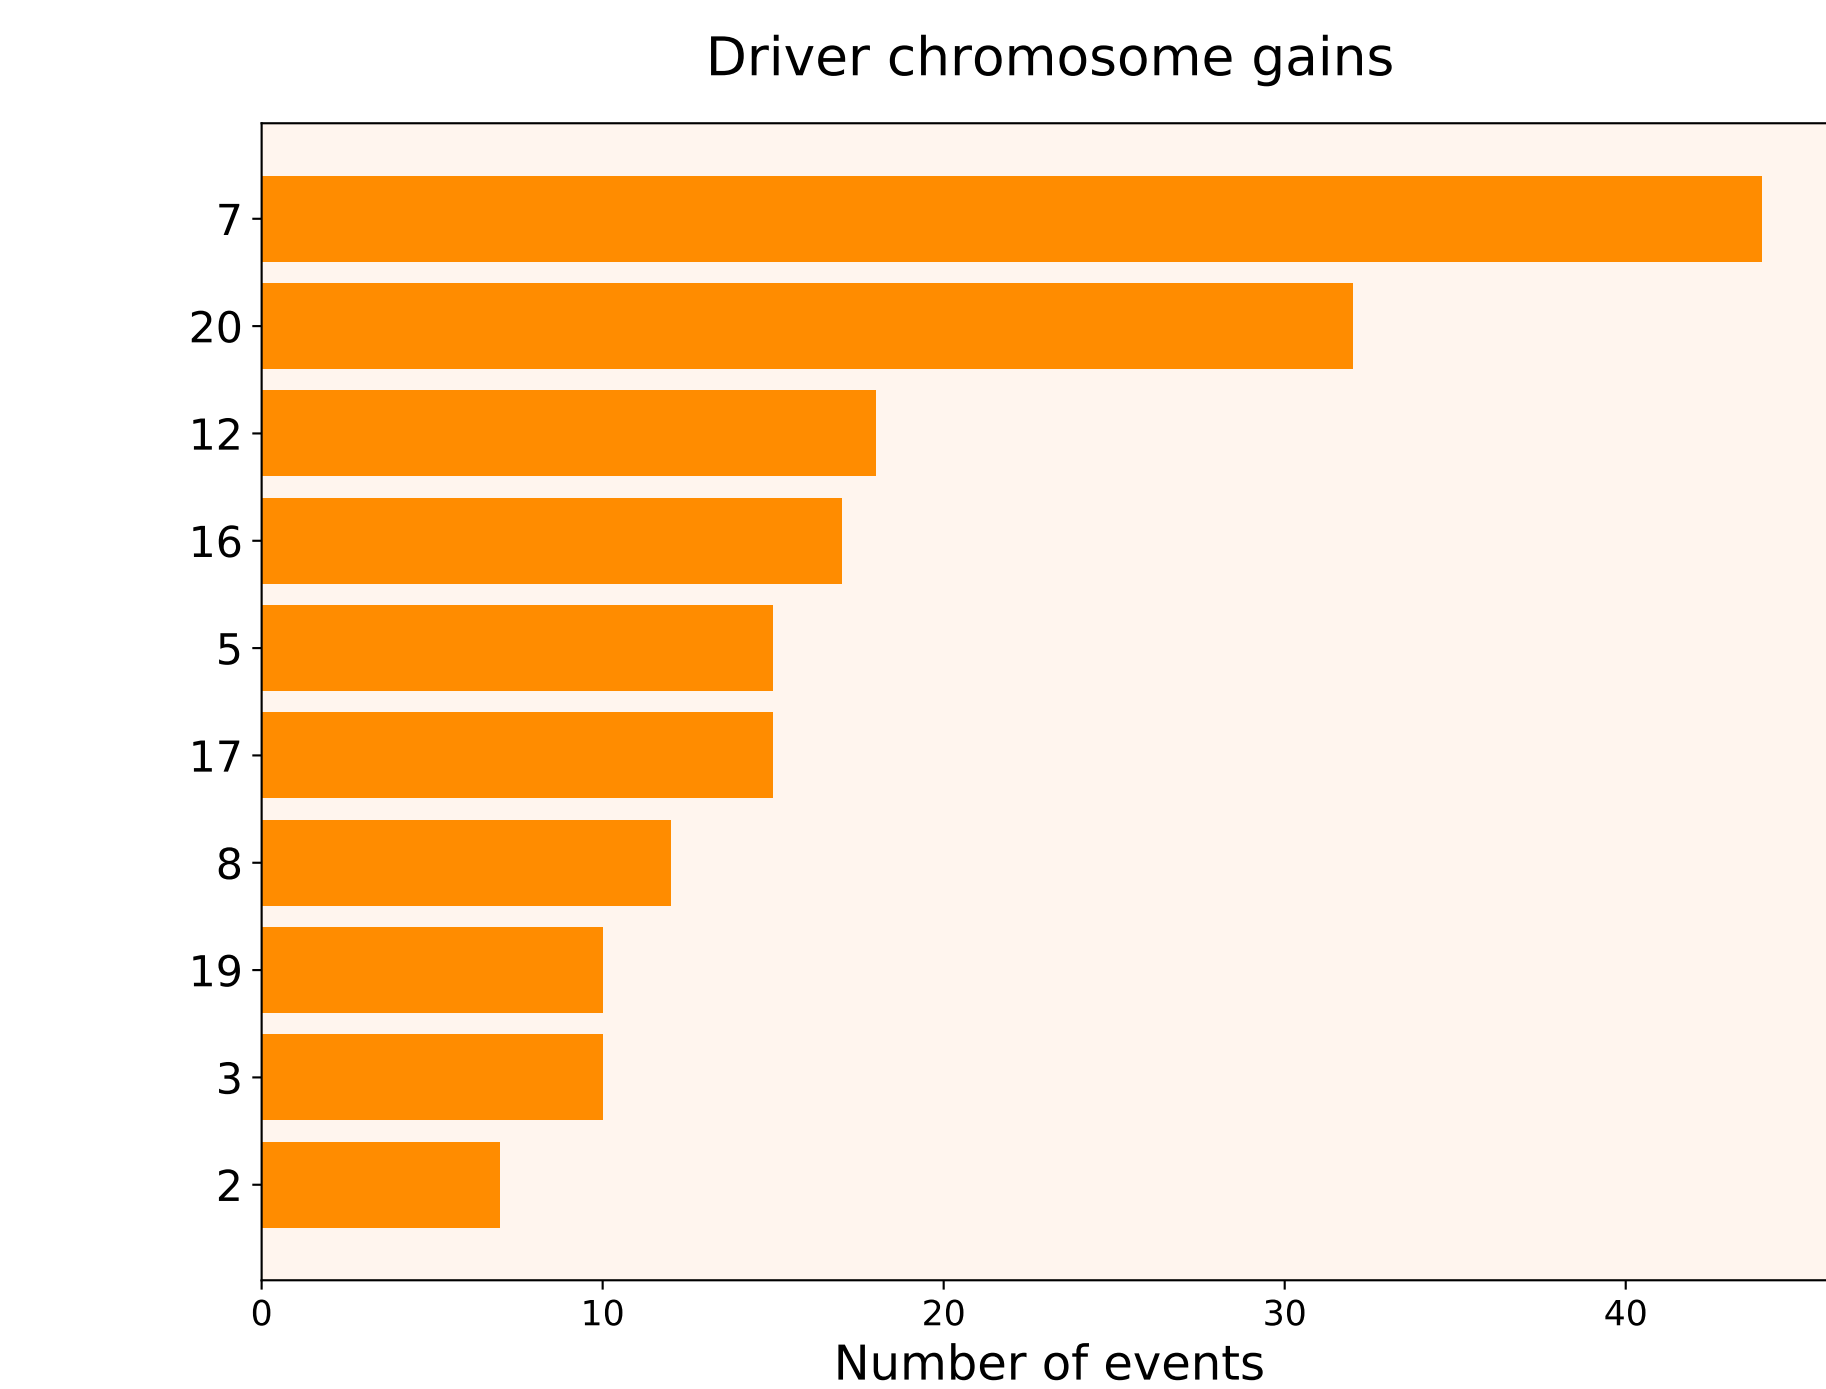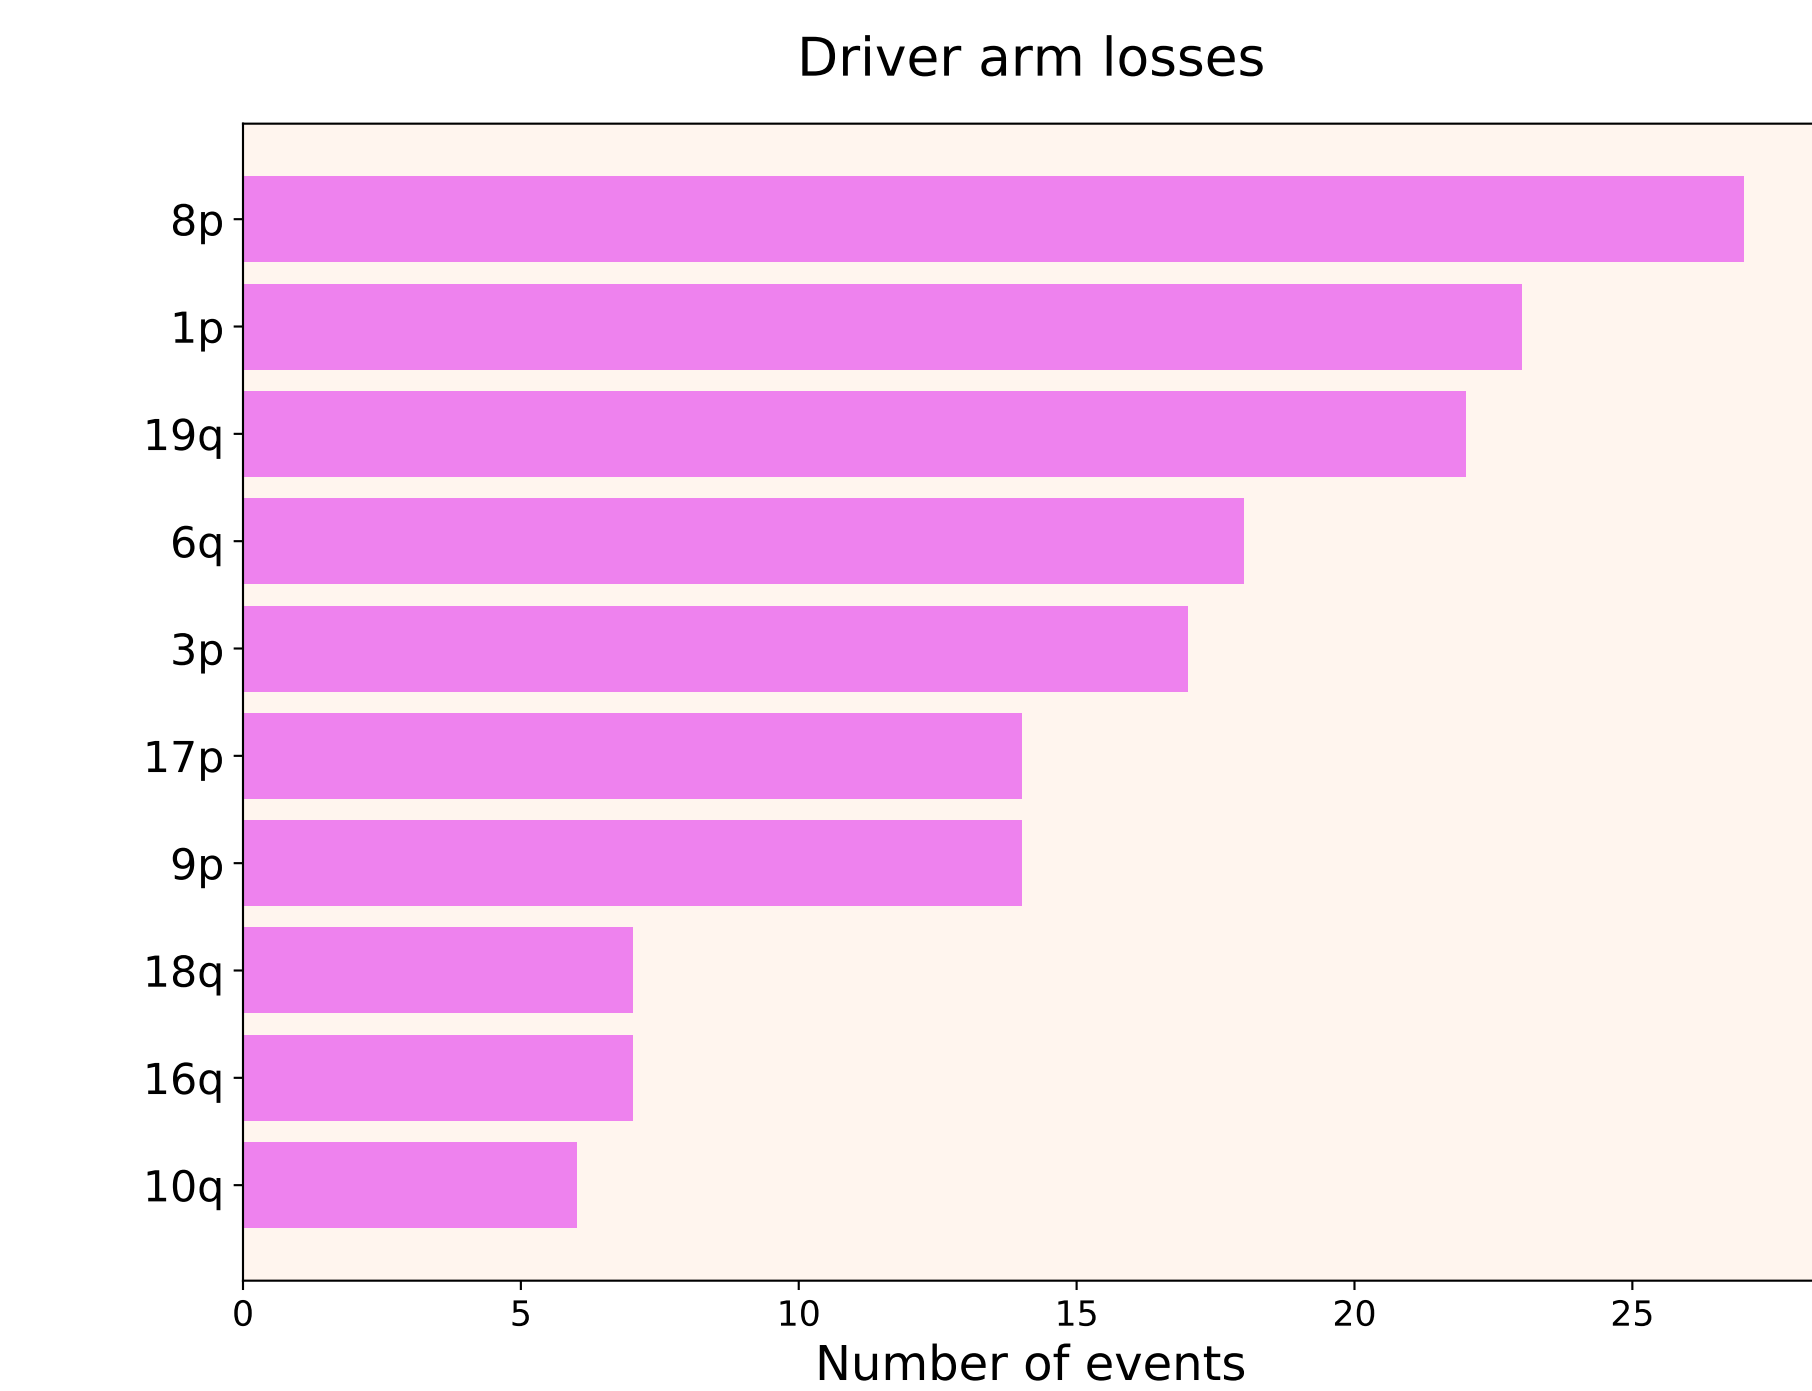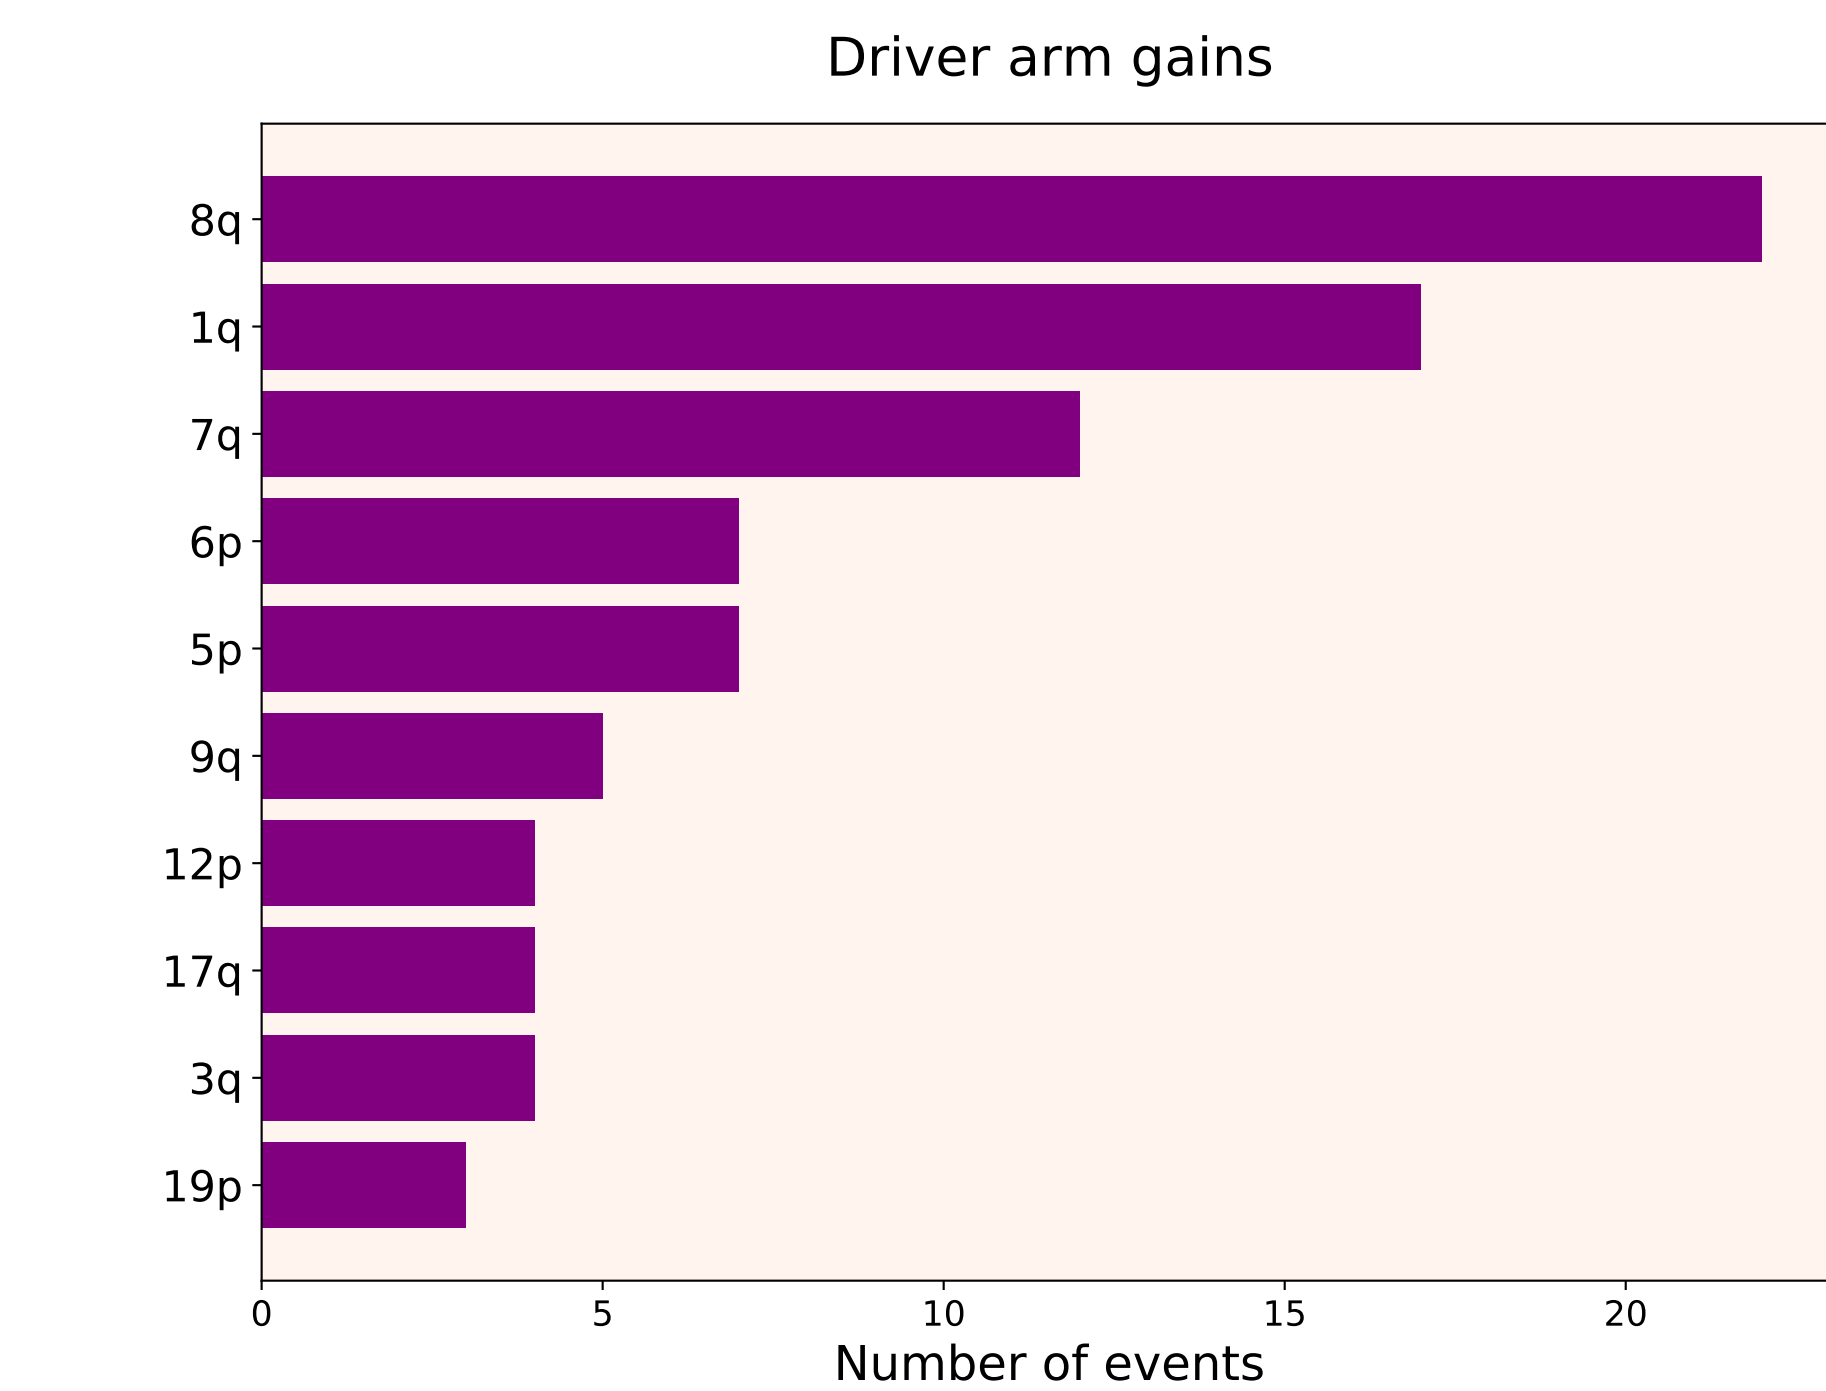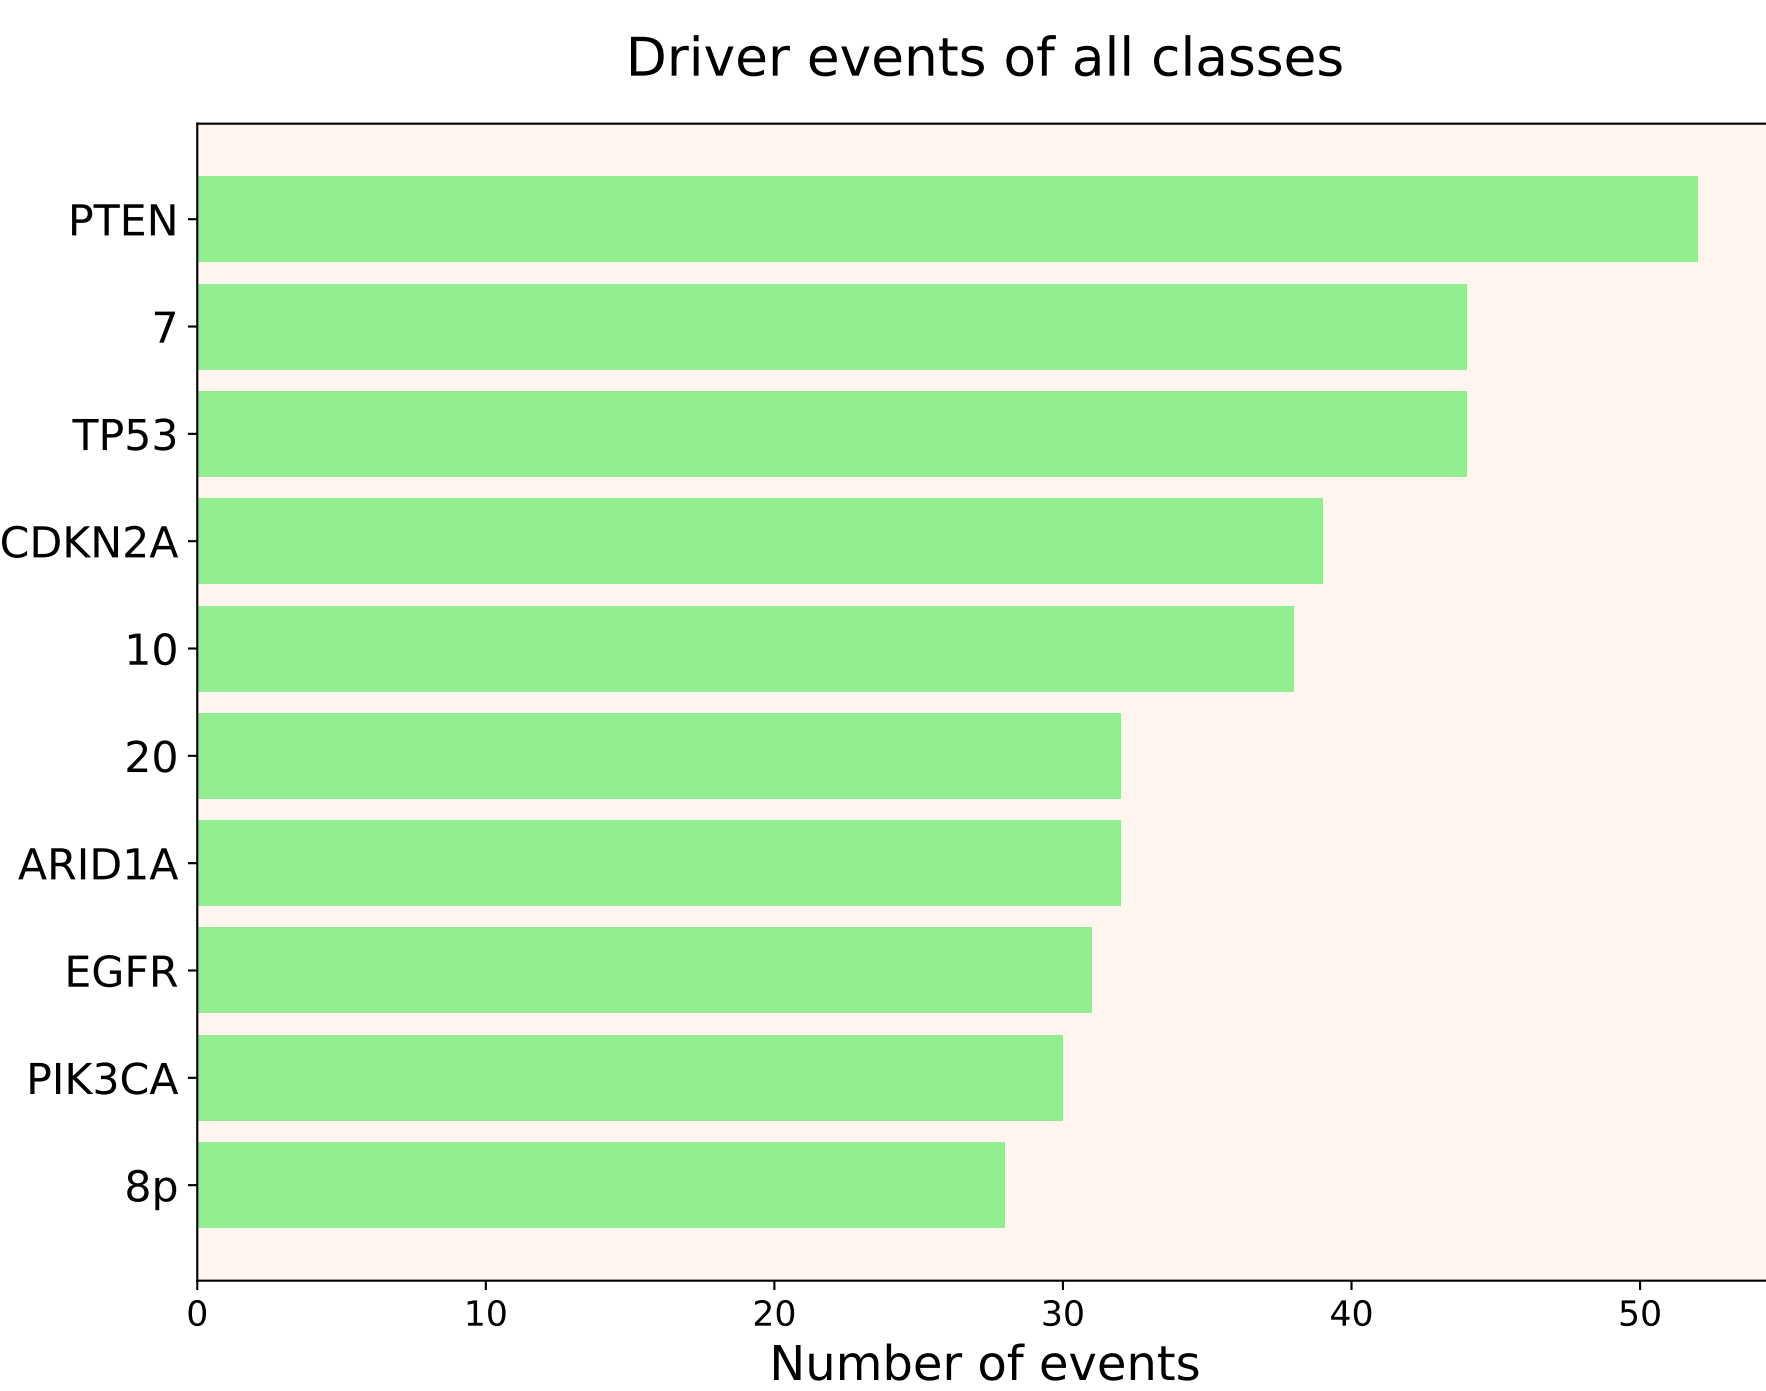

Supplement: Supplemental_Data_S1.zip [file Supplemental_Data_S1.zip]

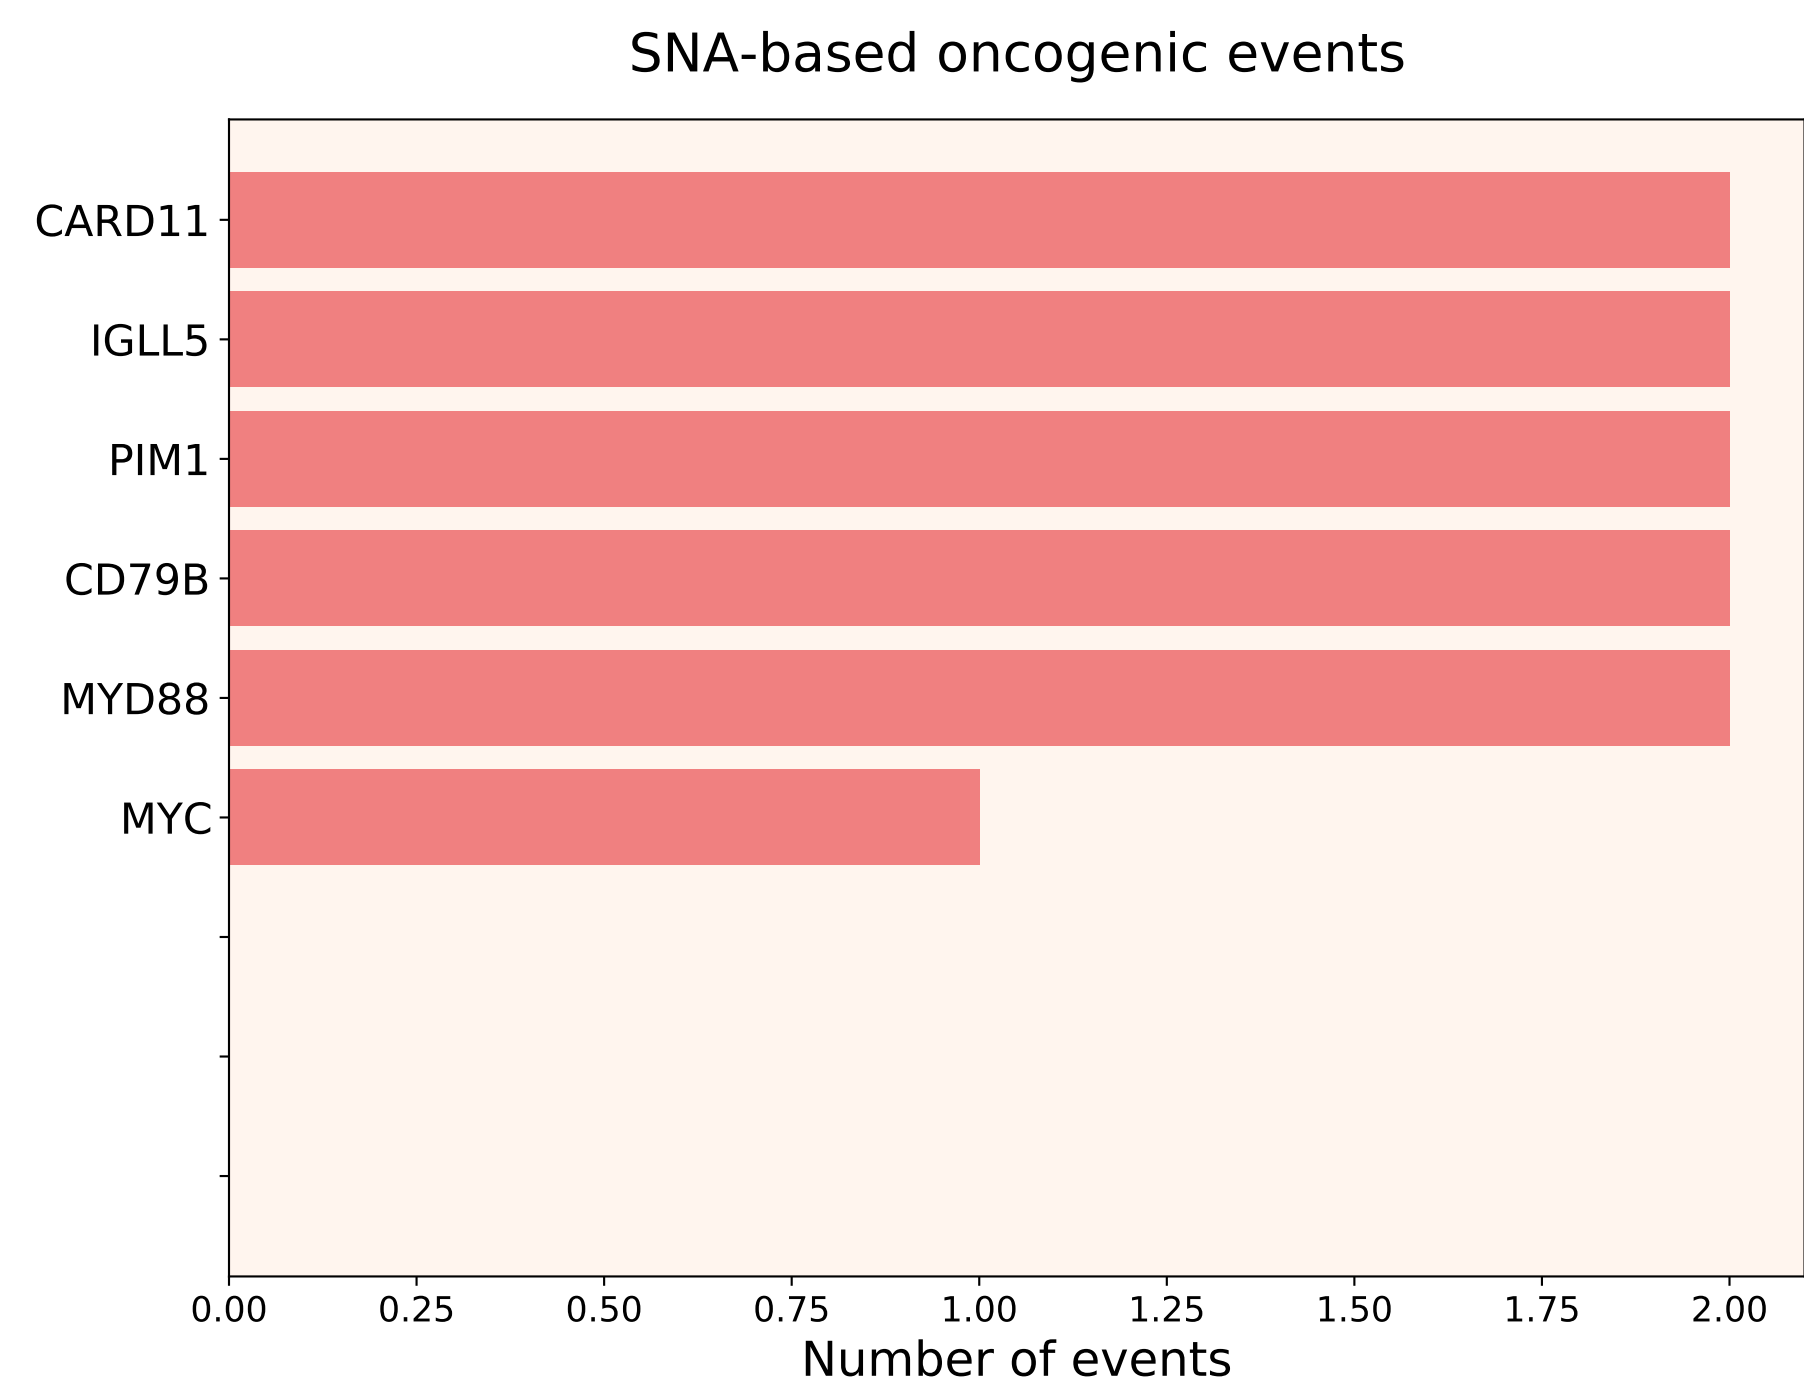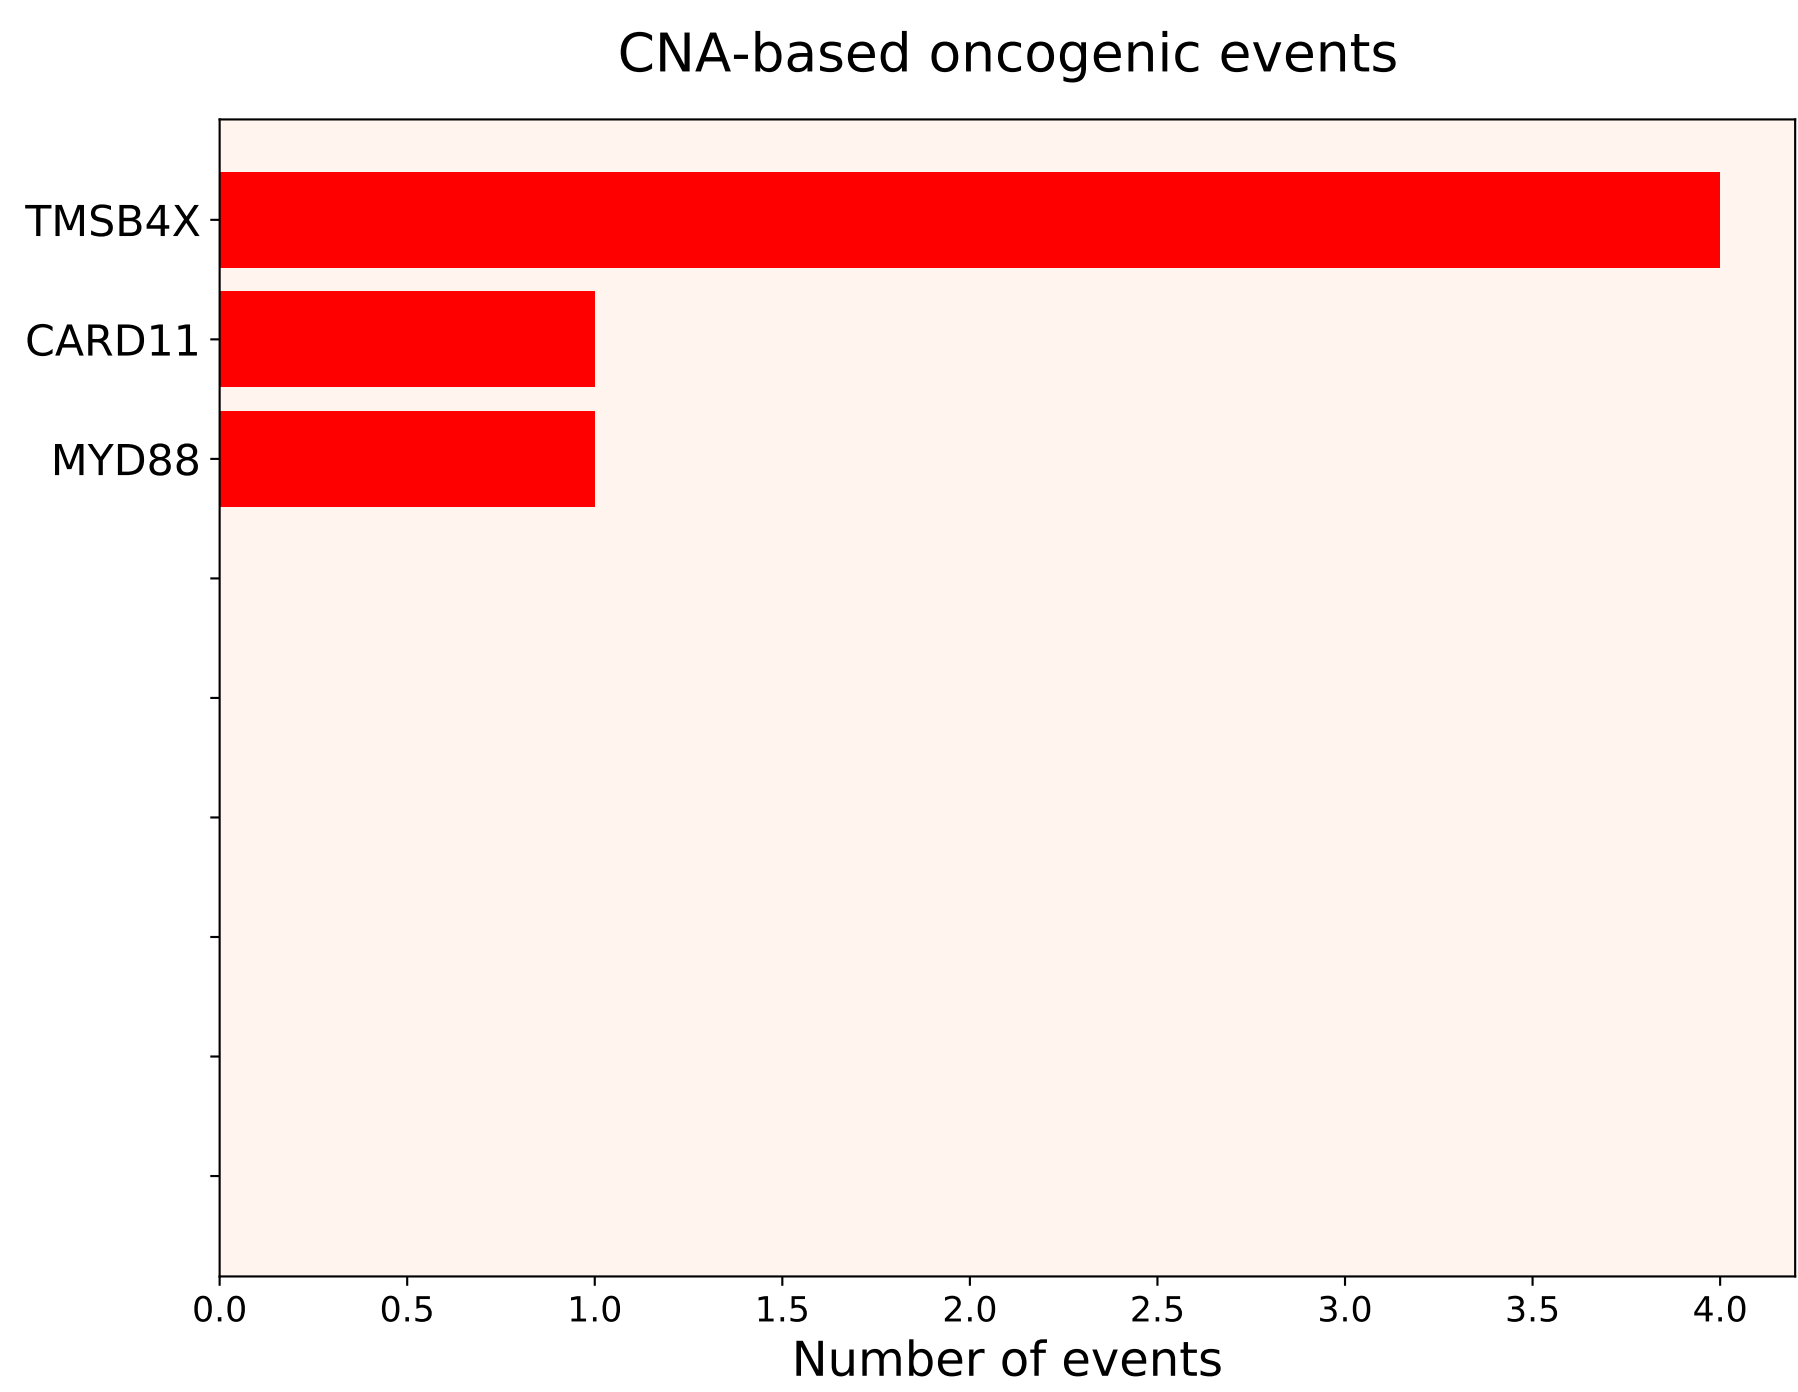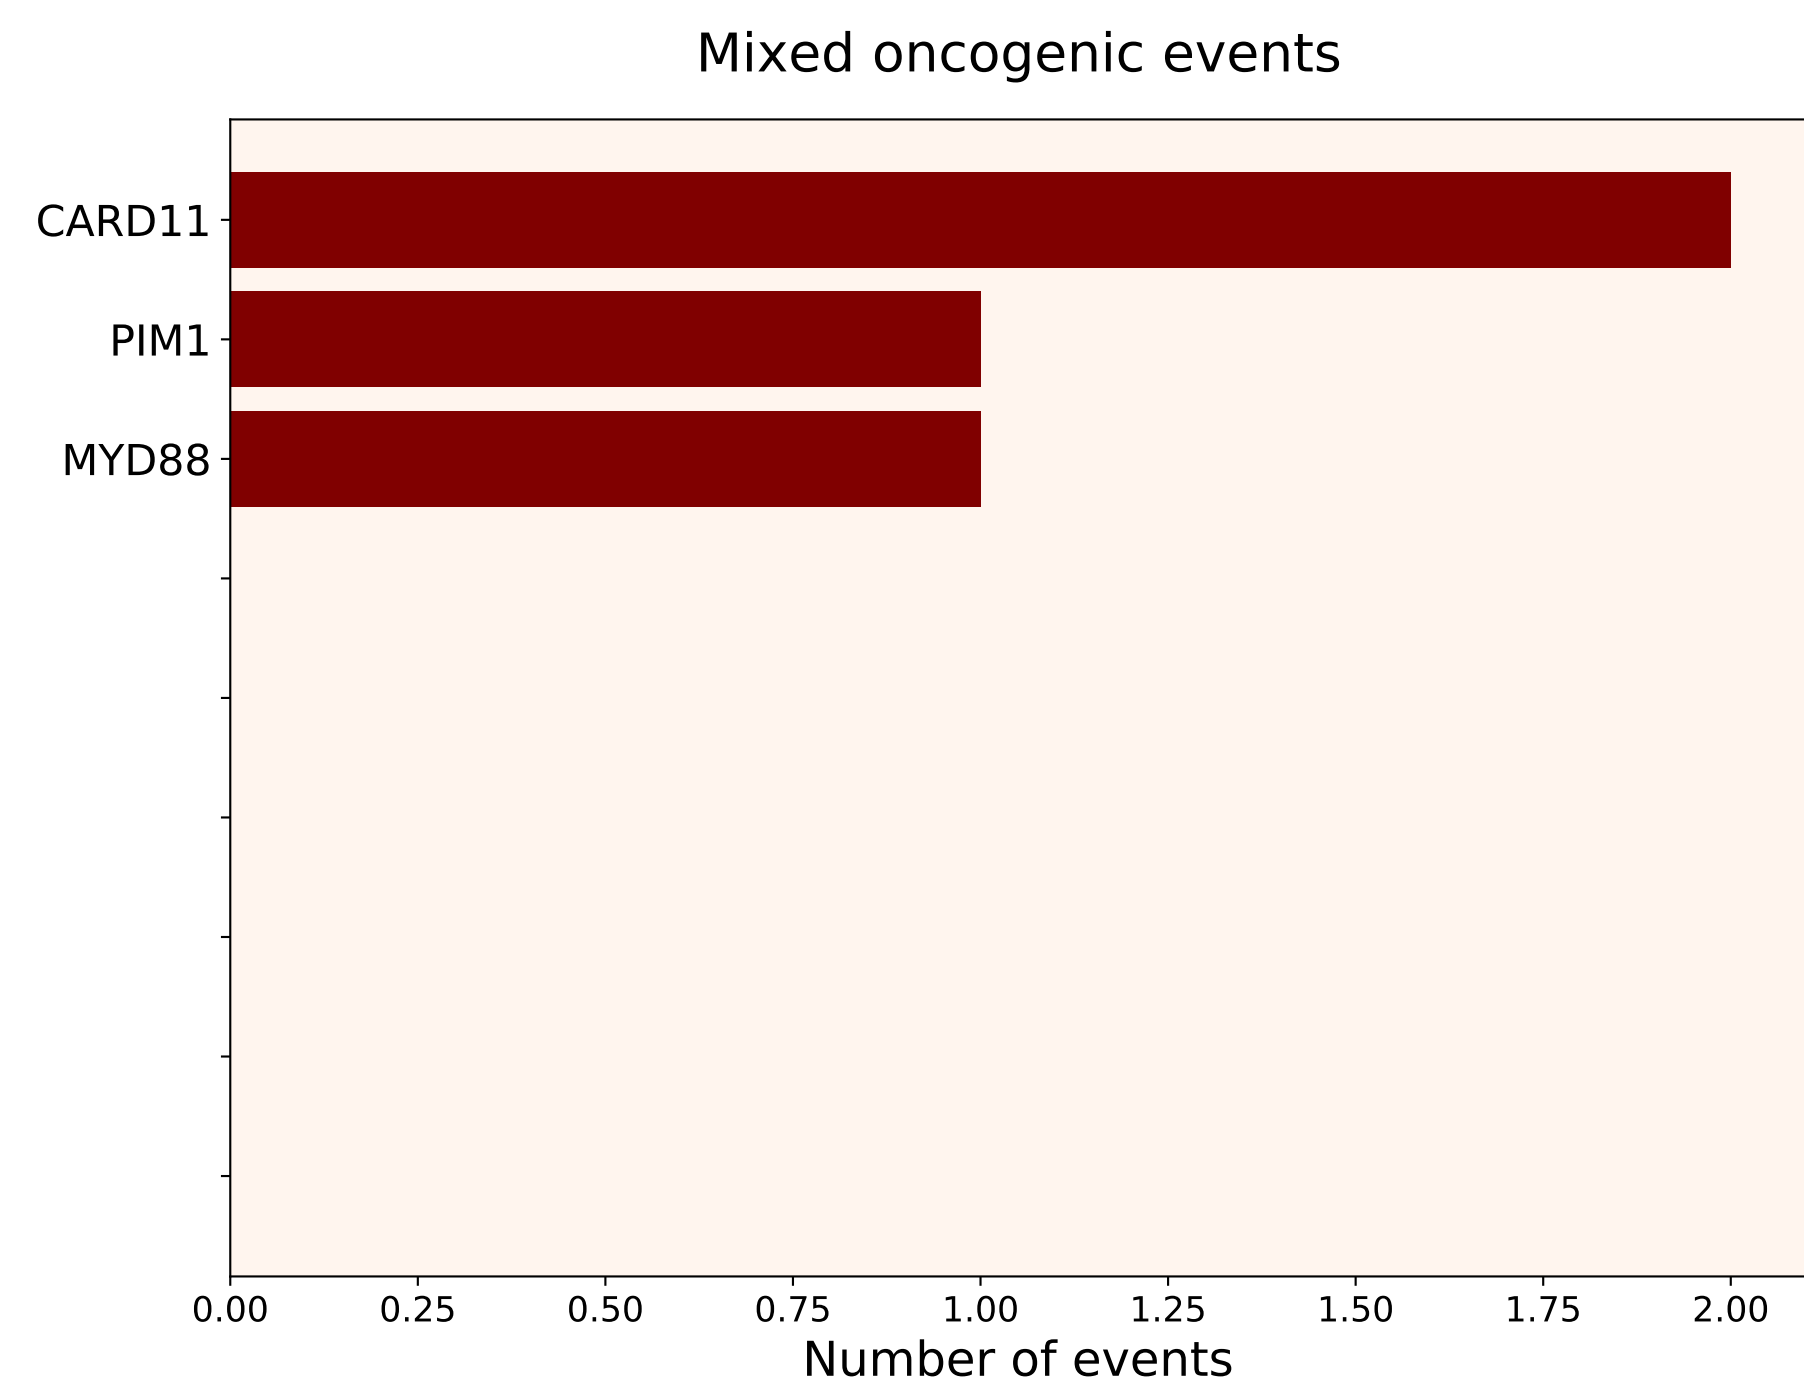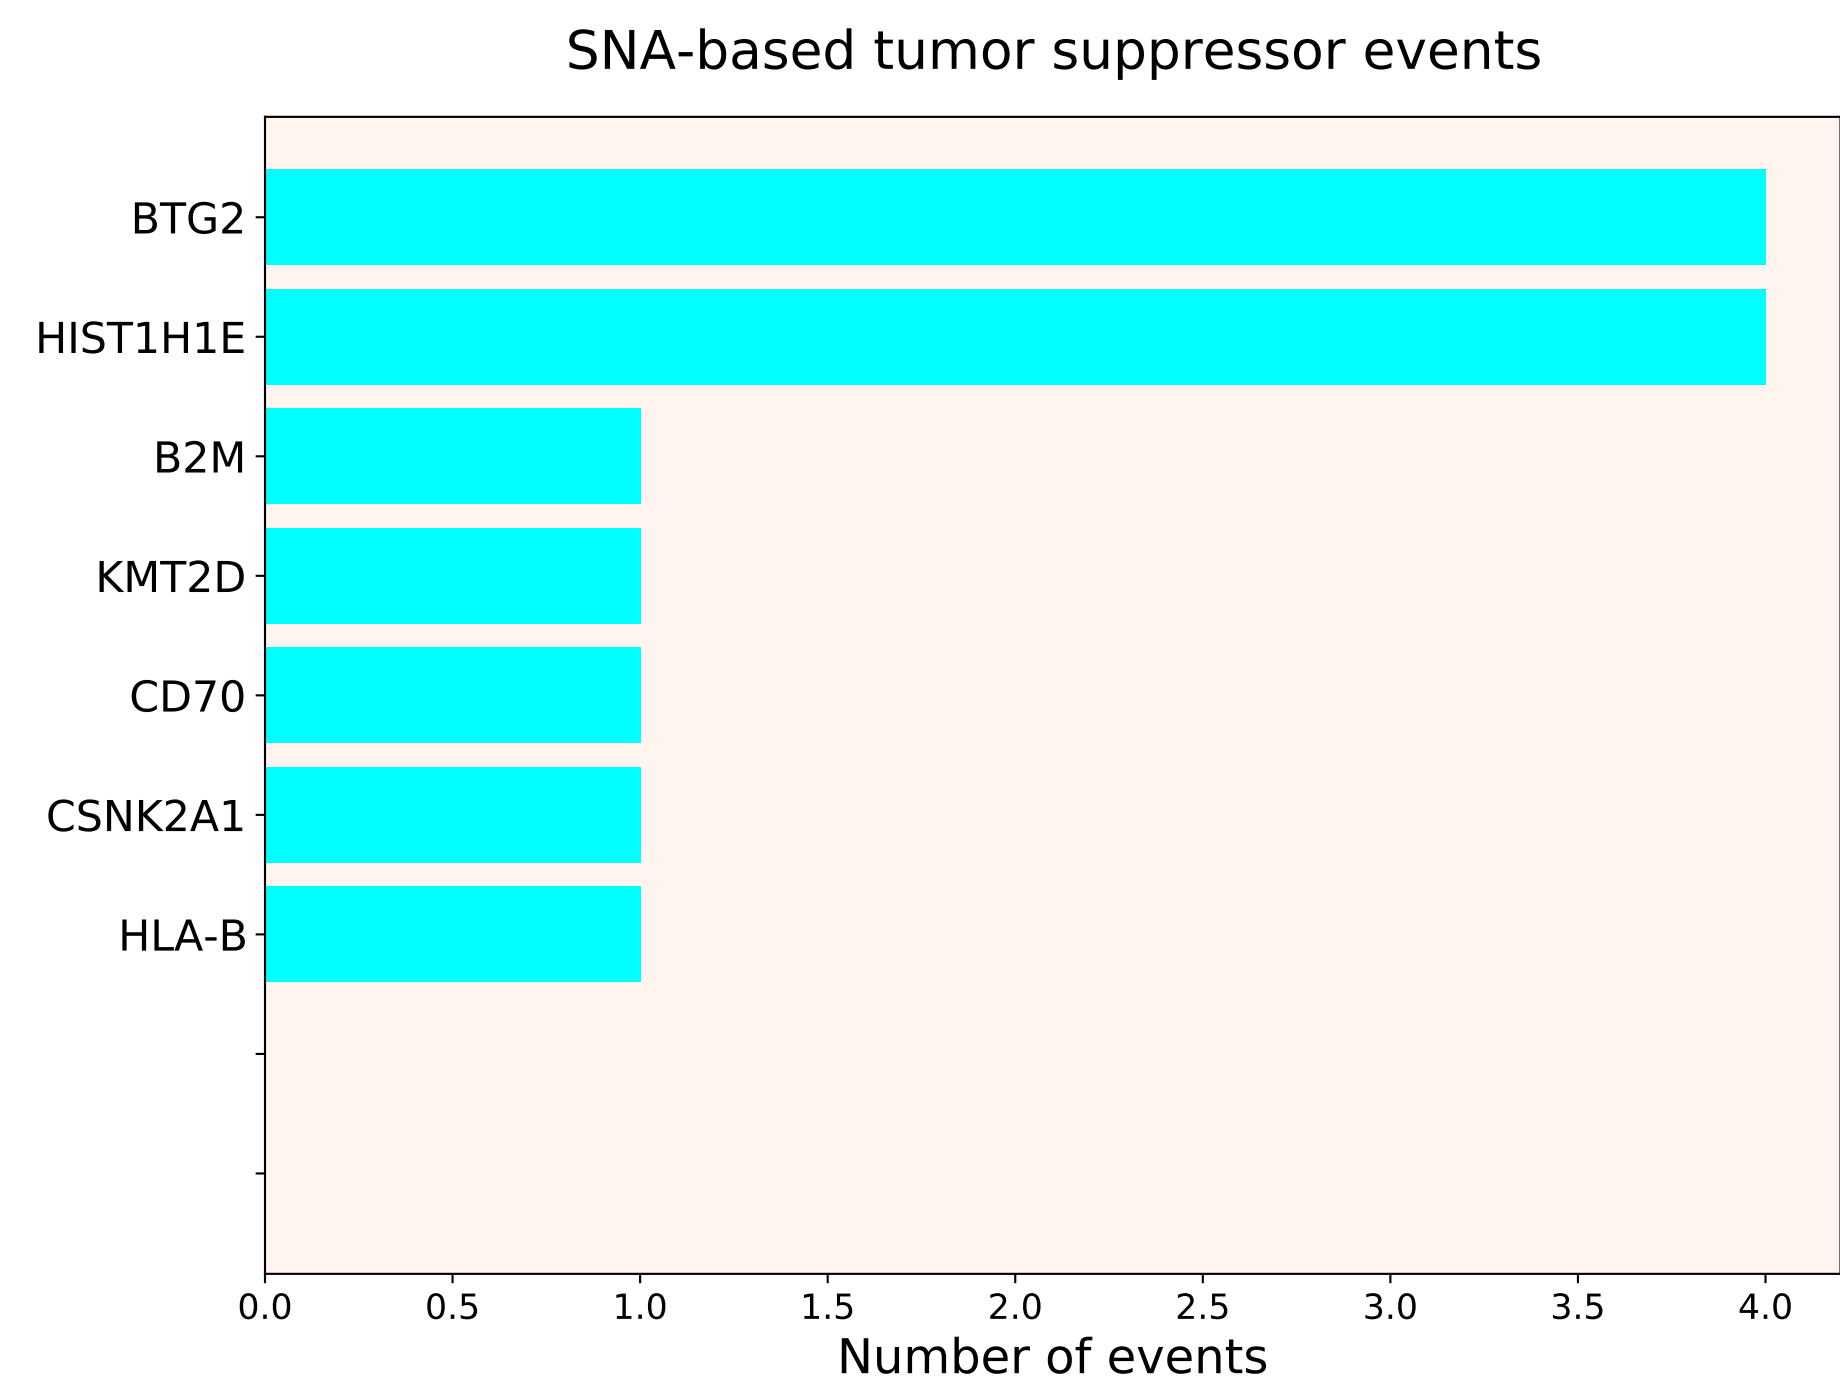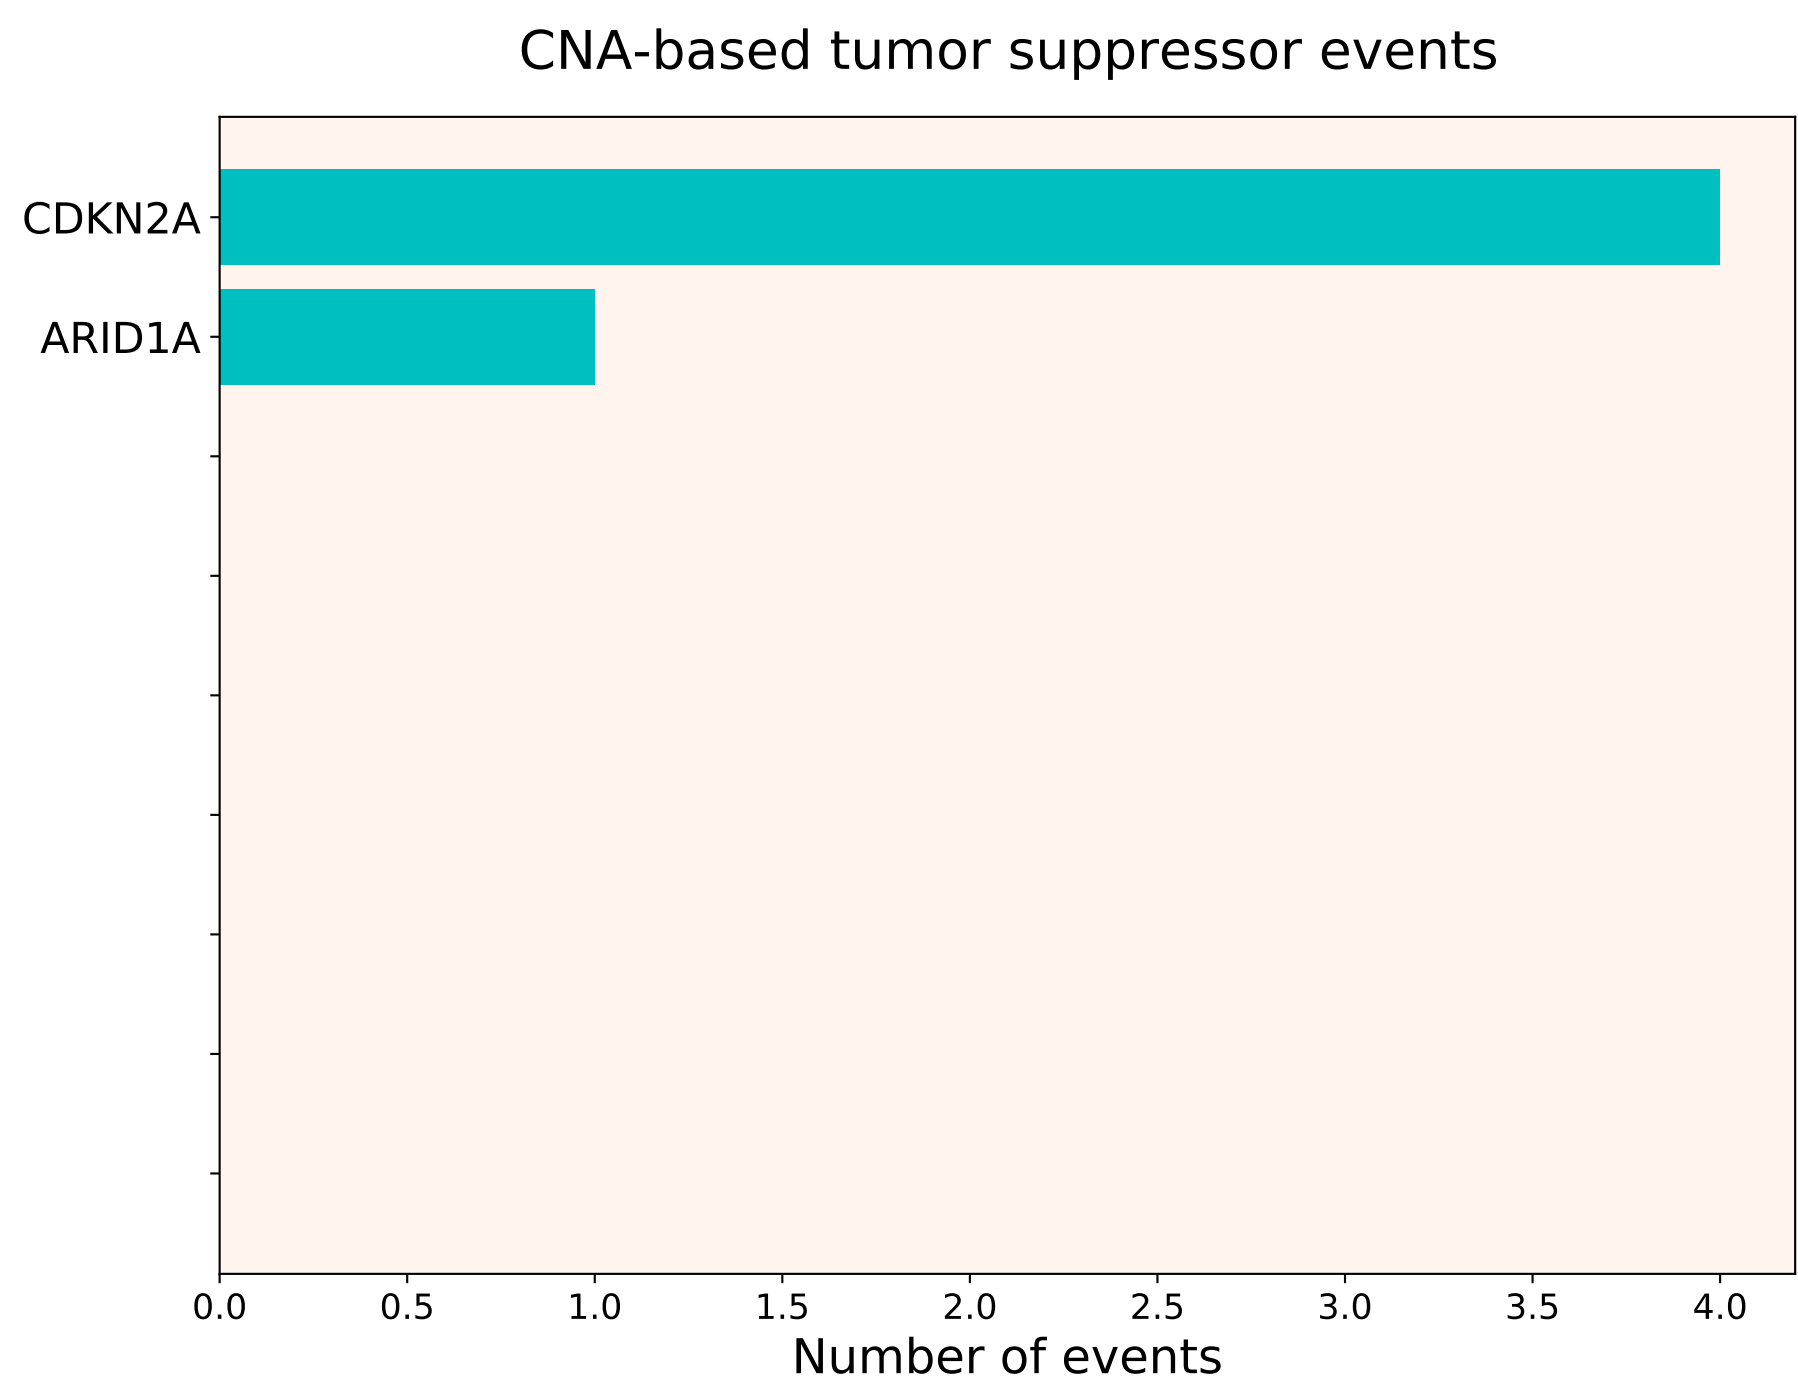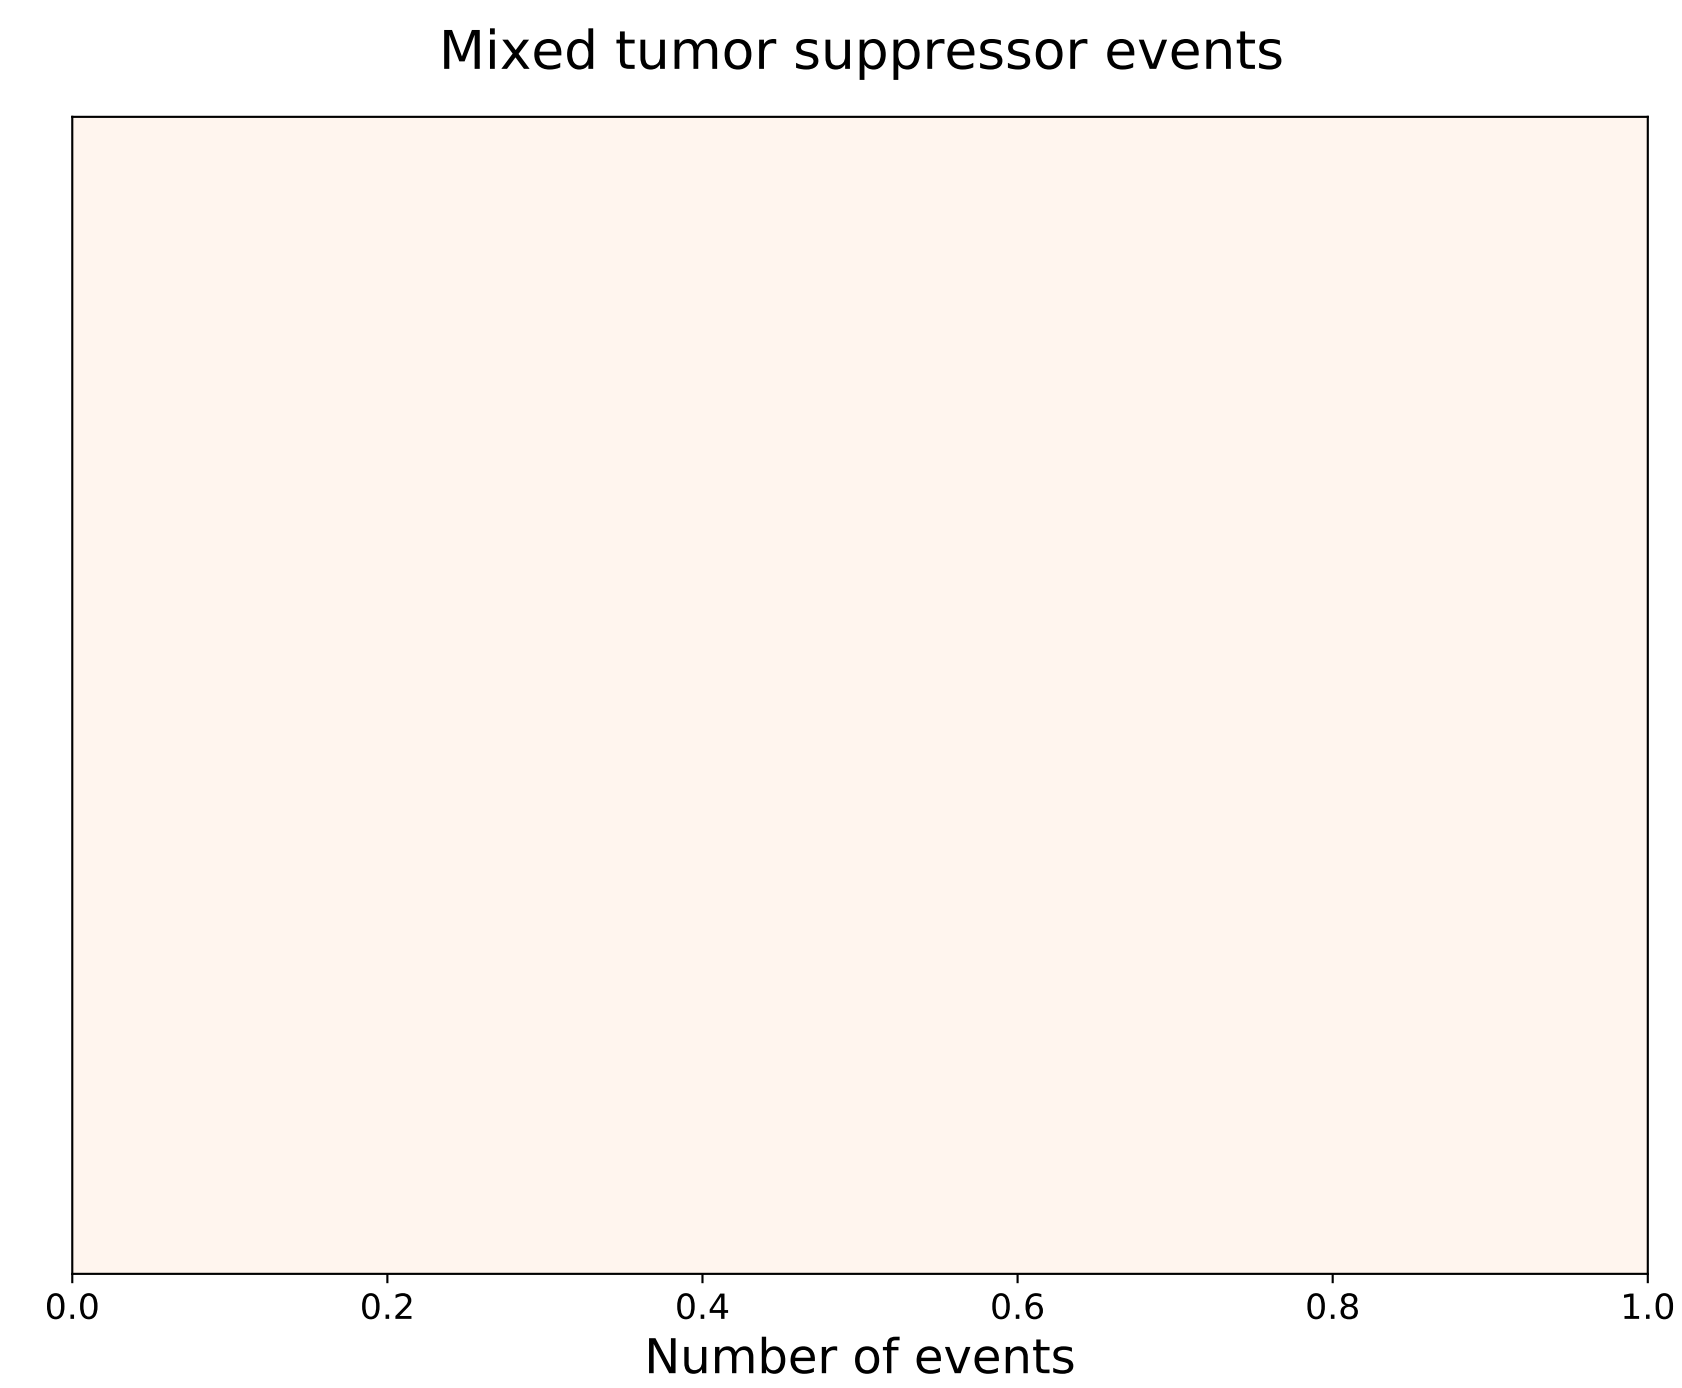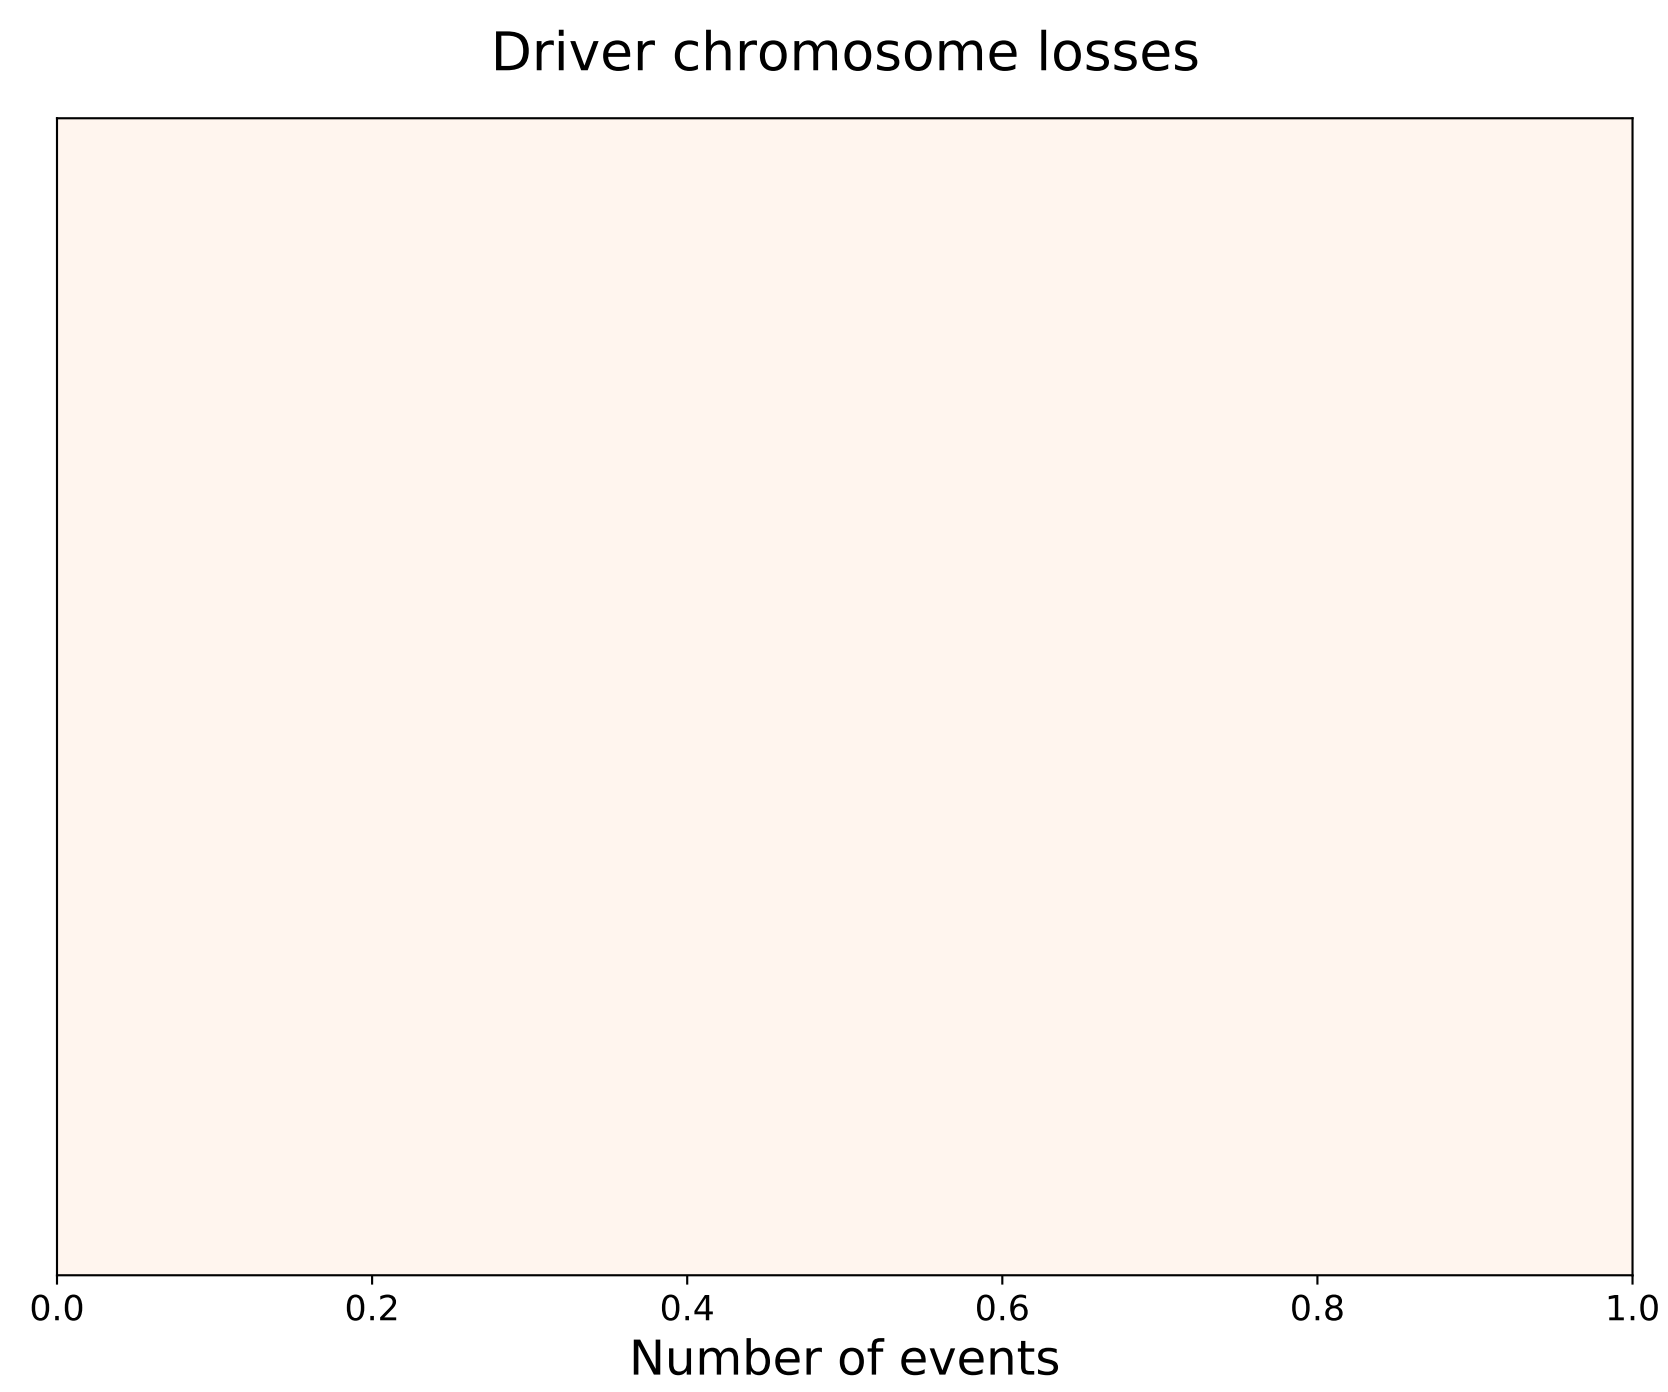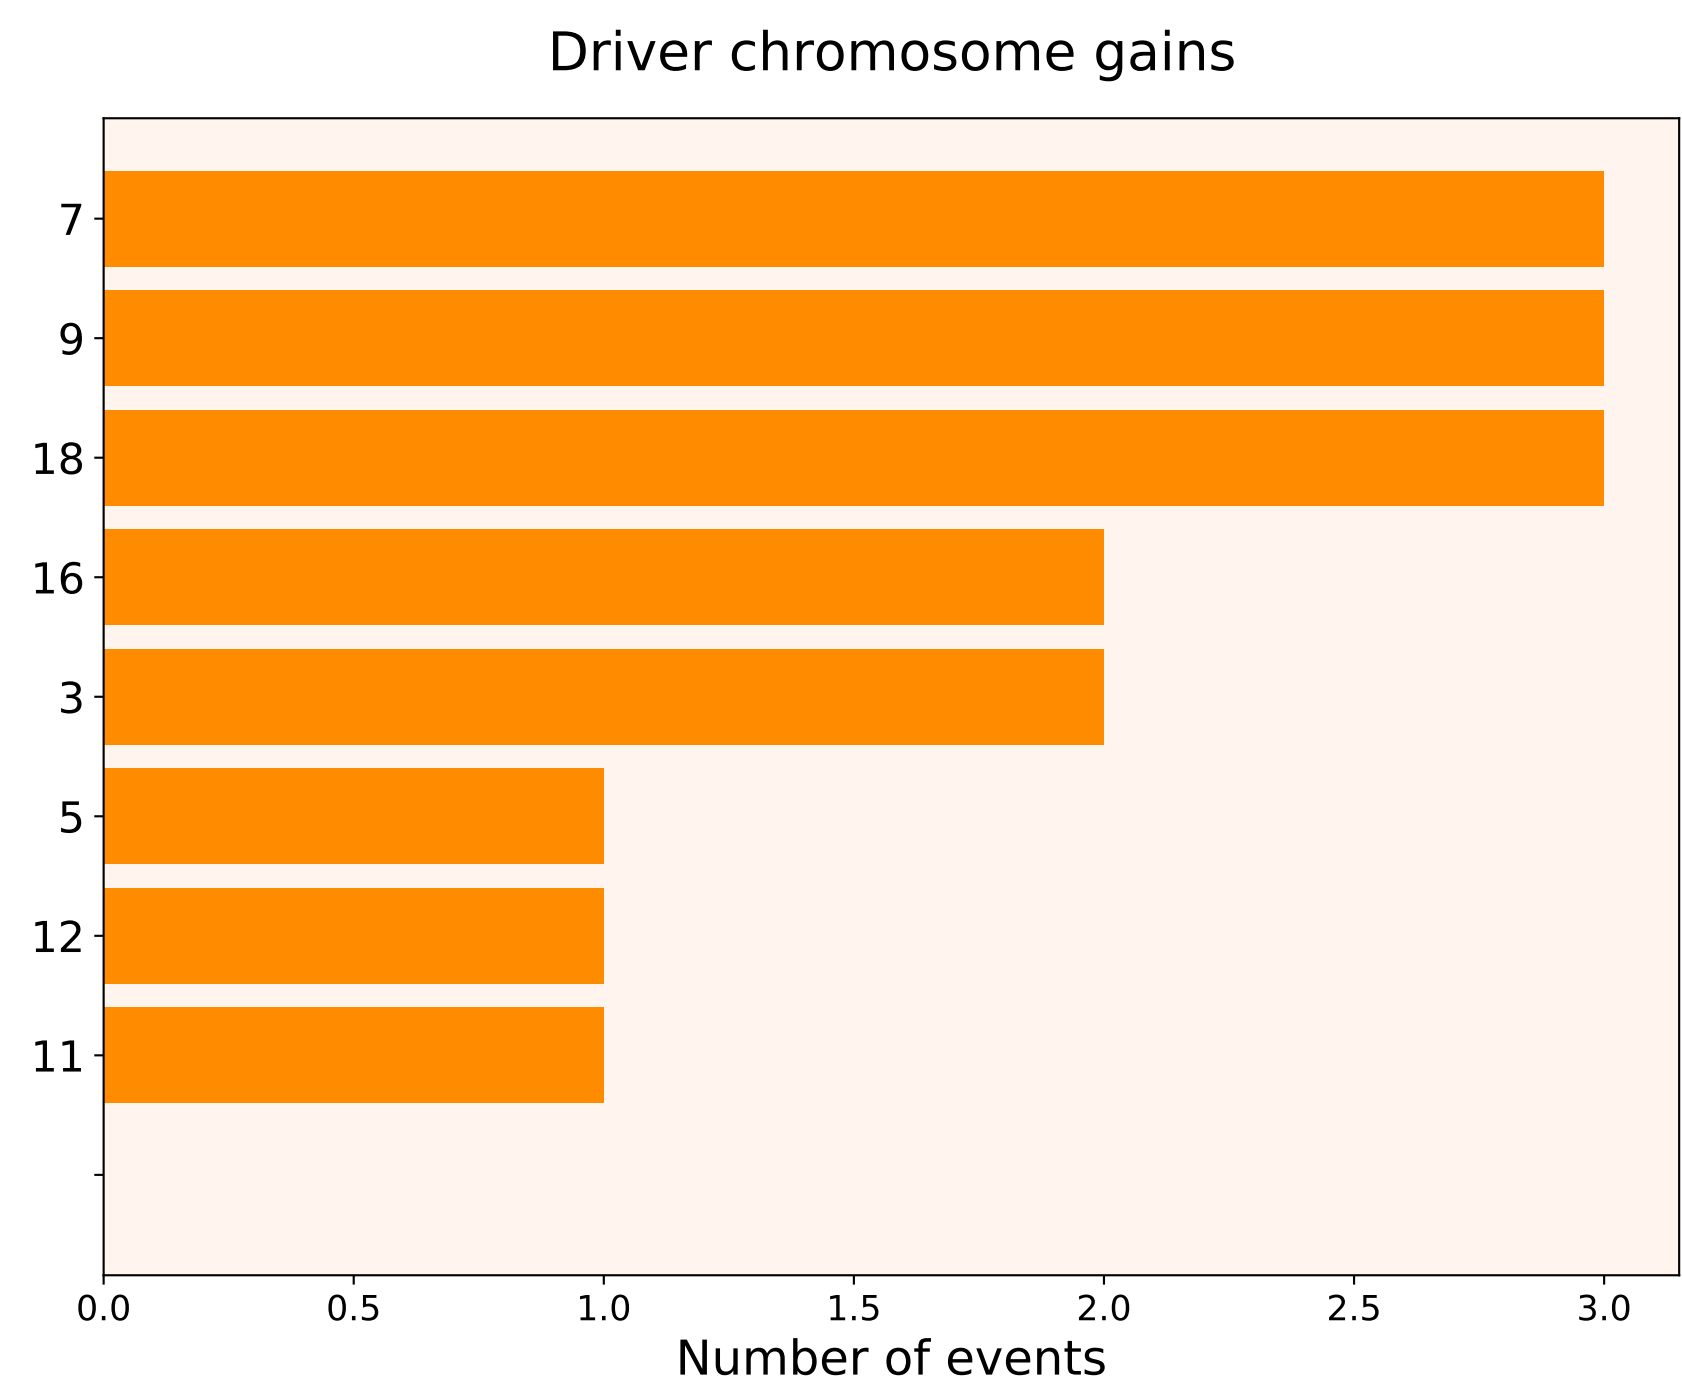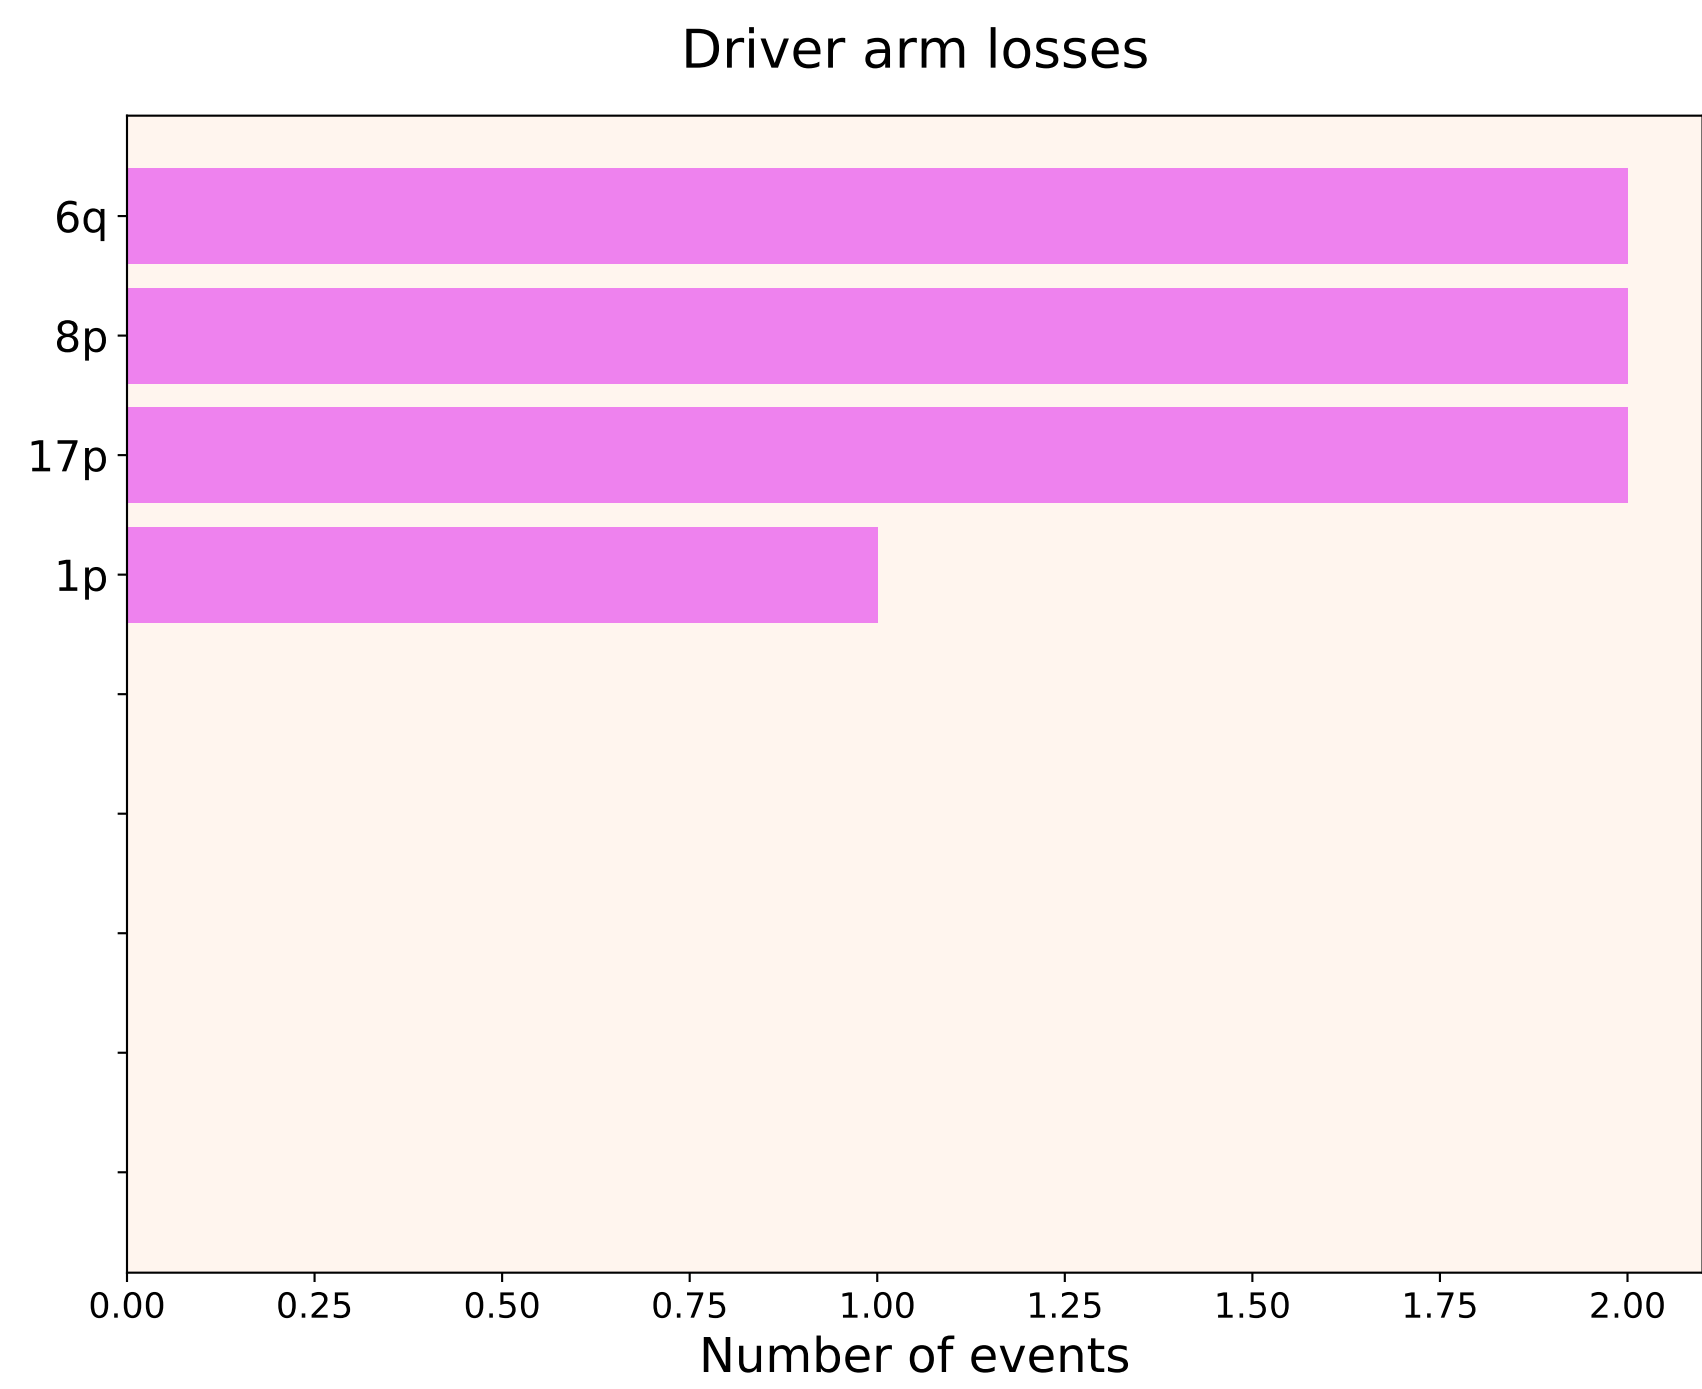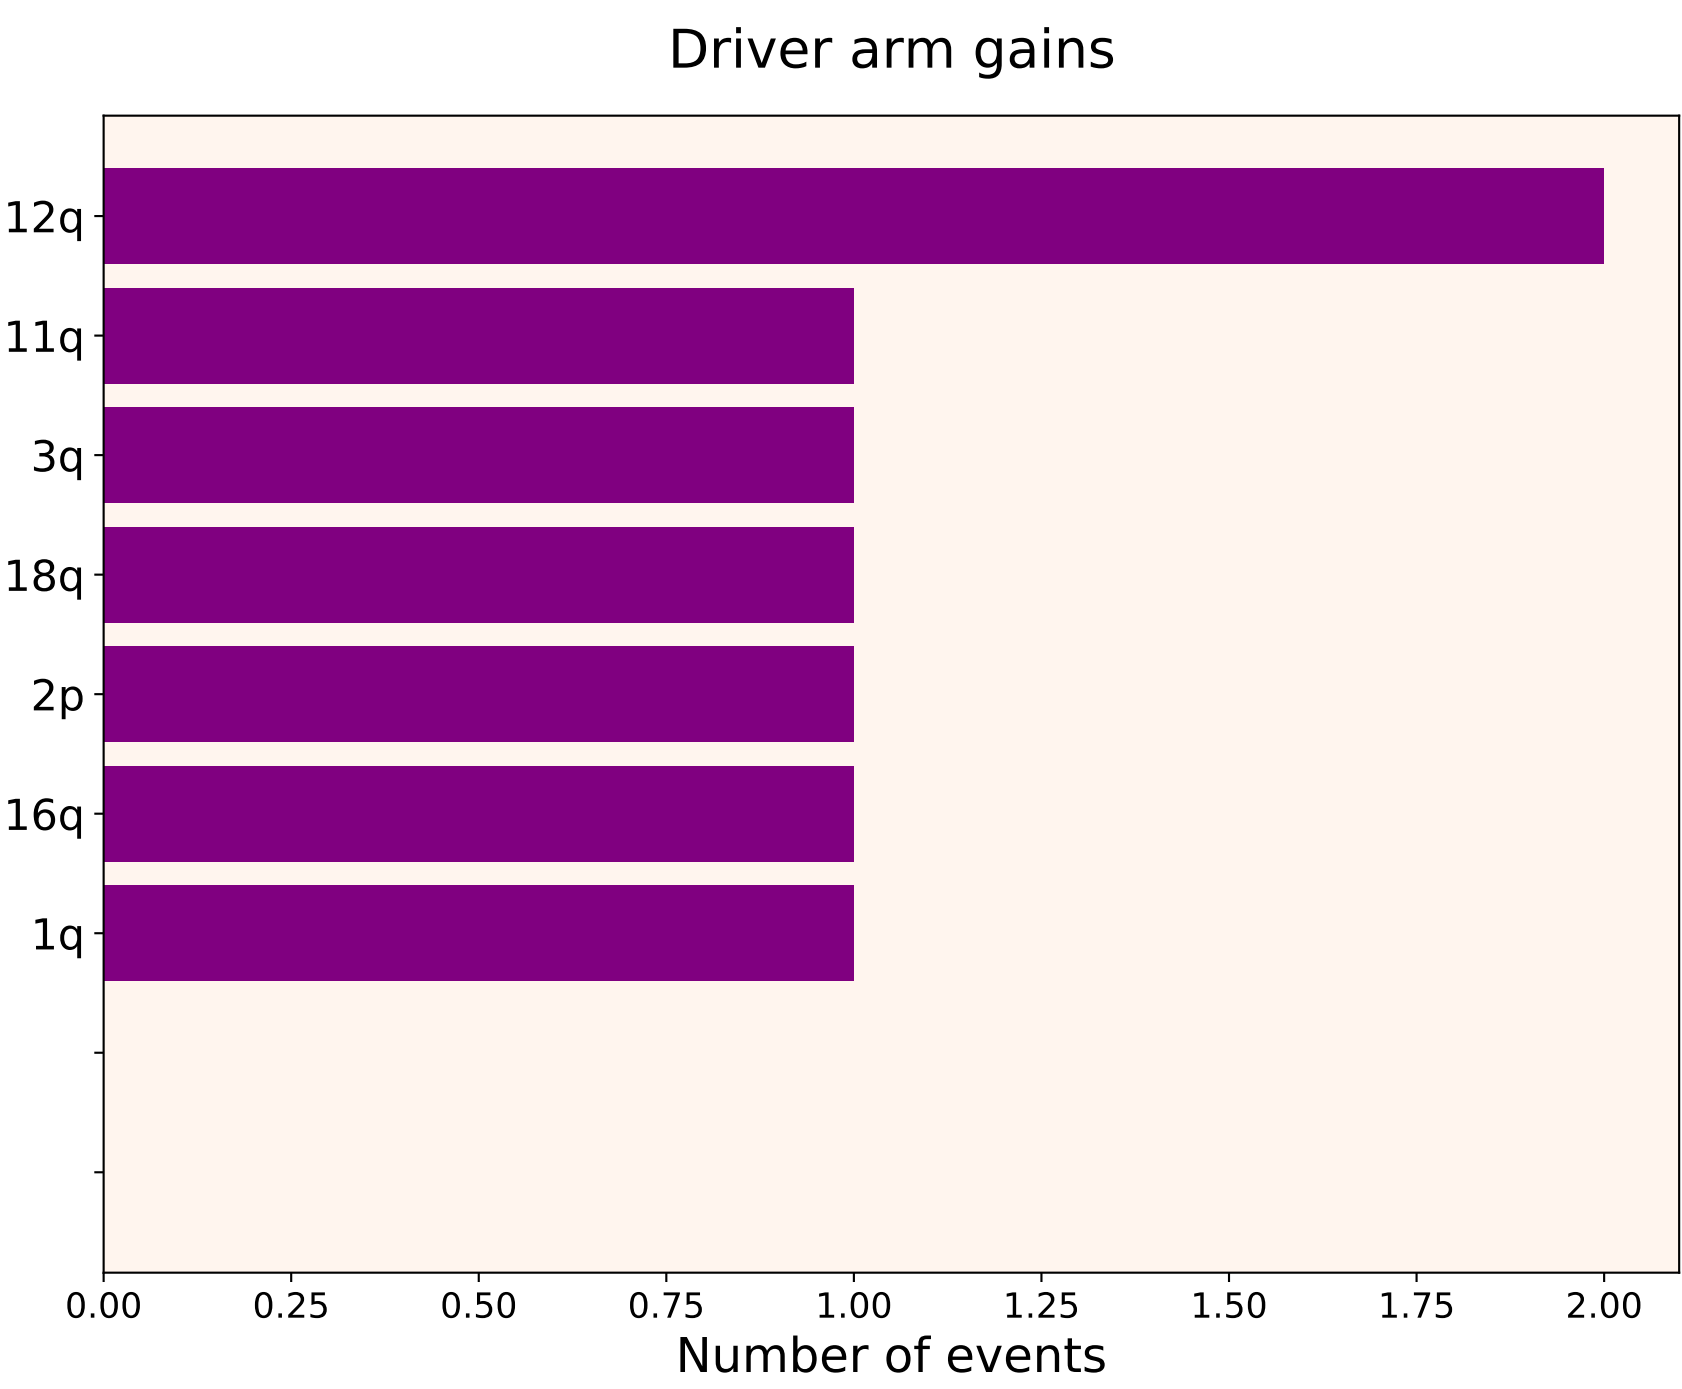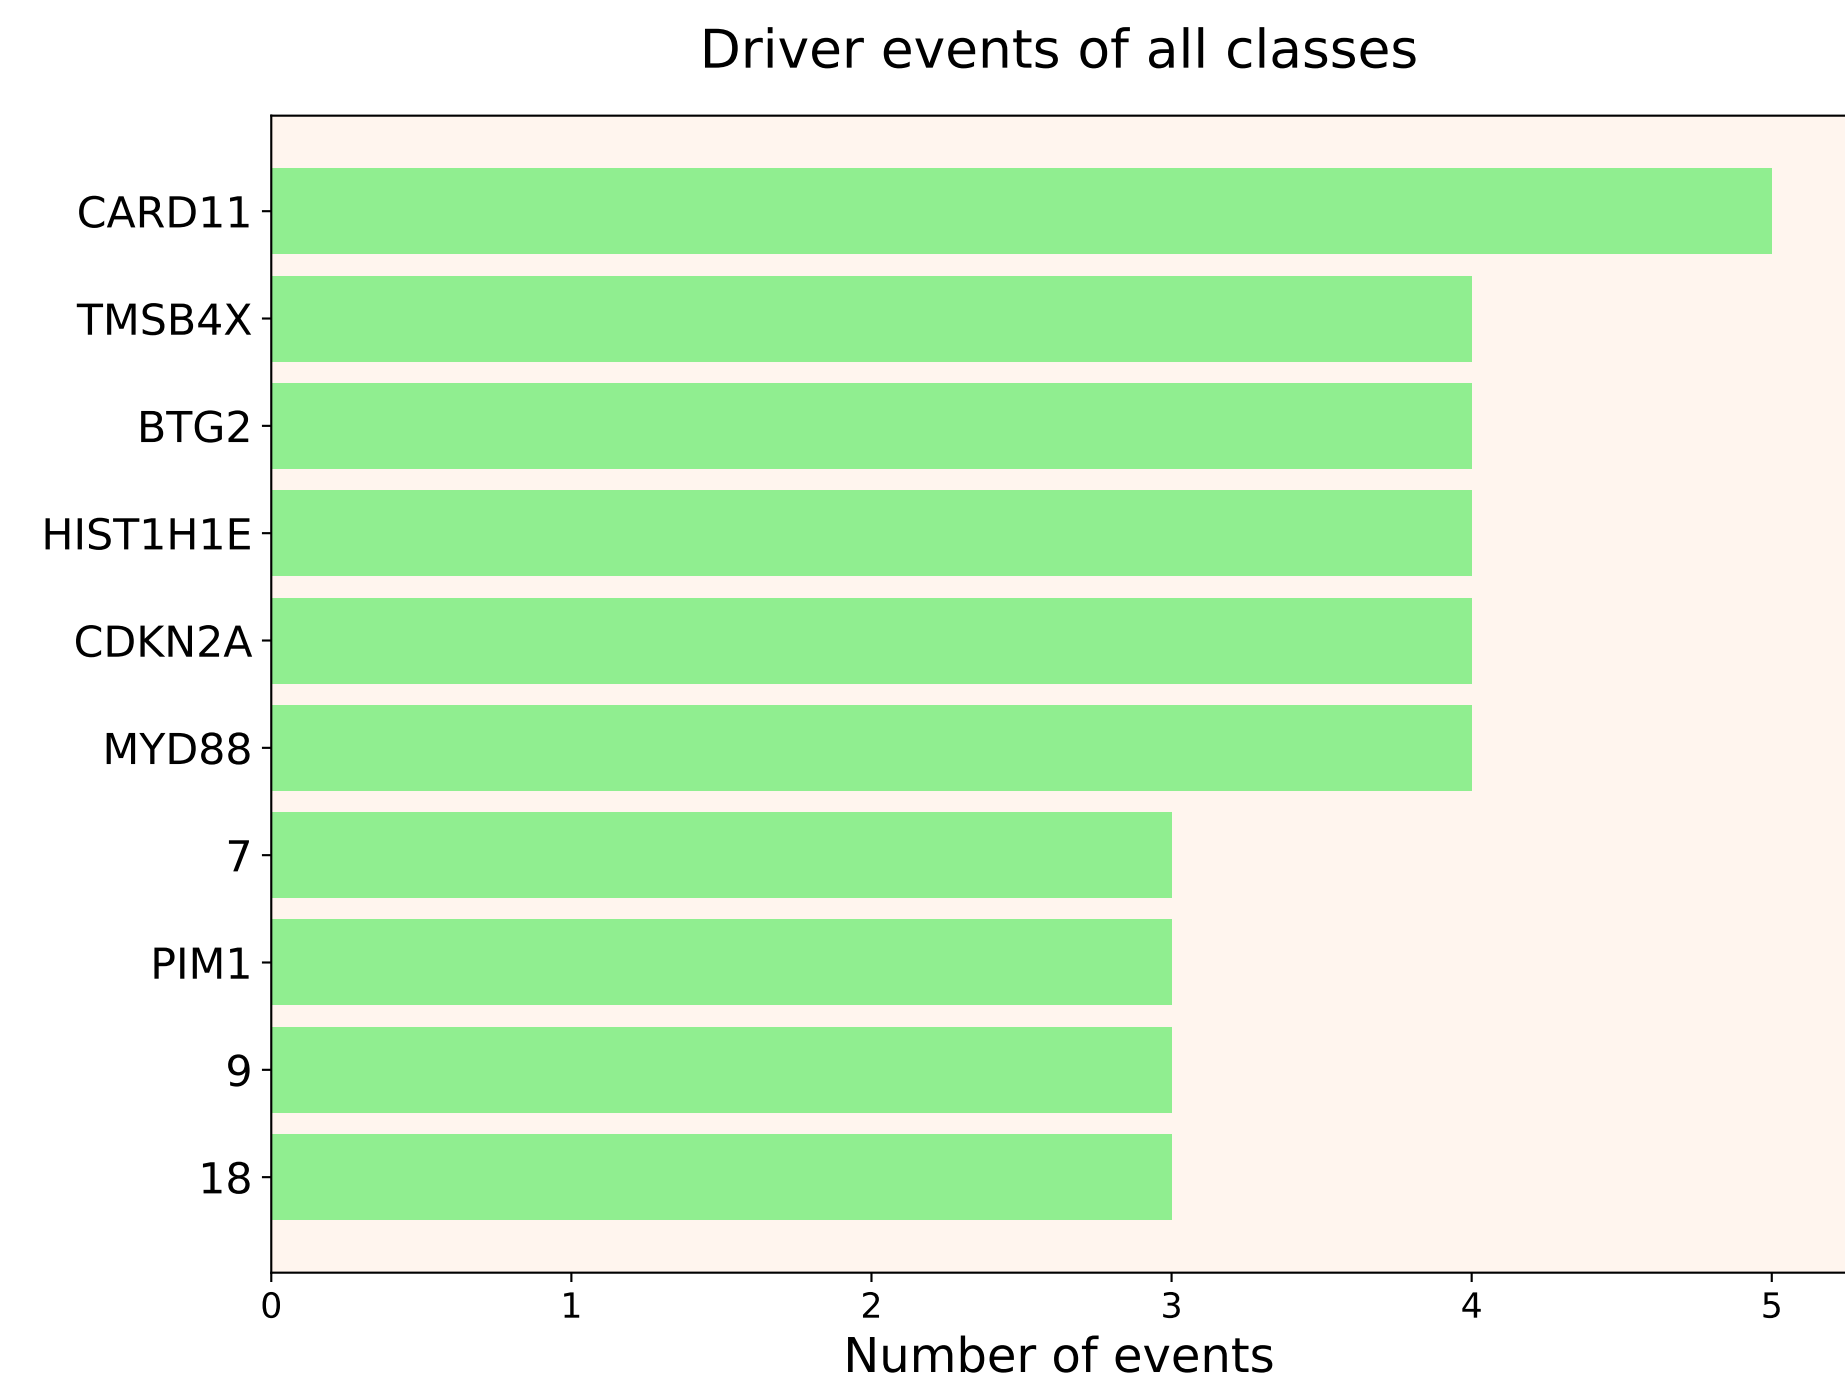

Supplement: Supplemental_Data_S1.zip [file Supplemental_Data_S1.zip]

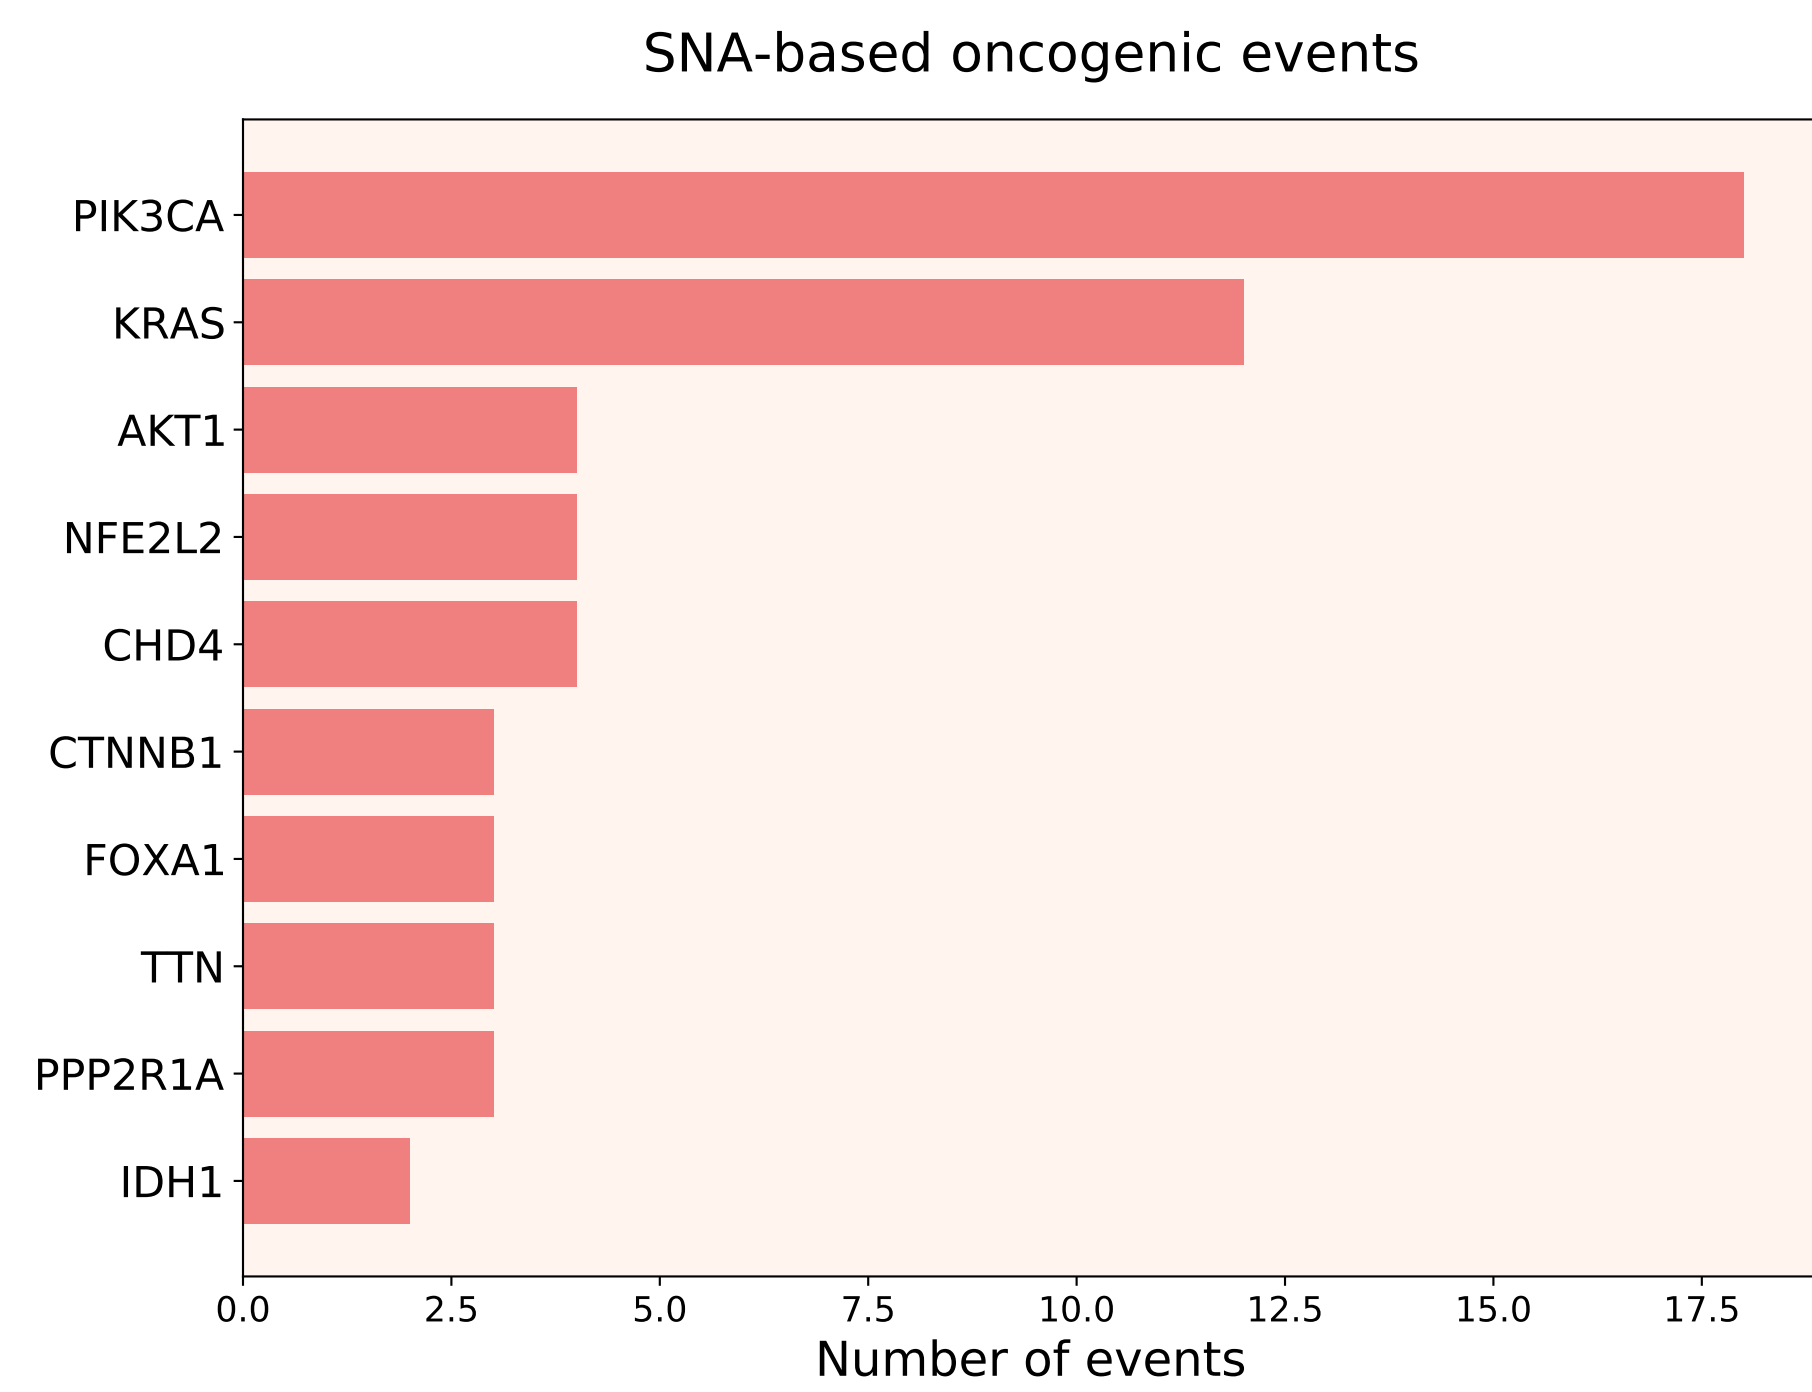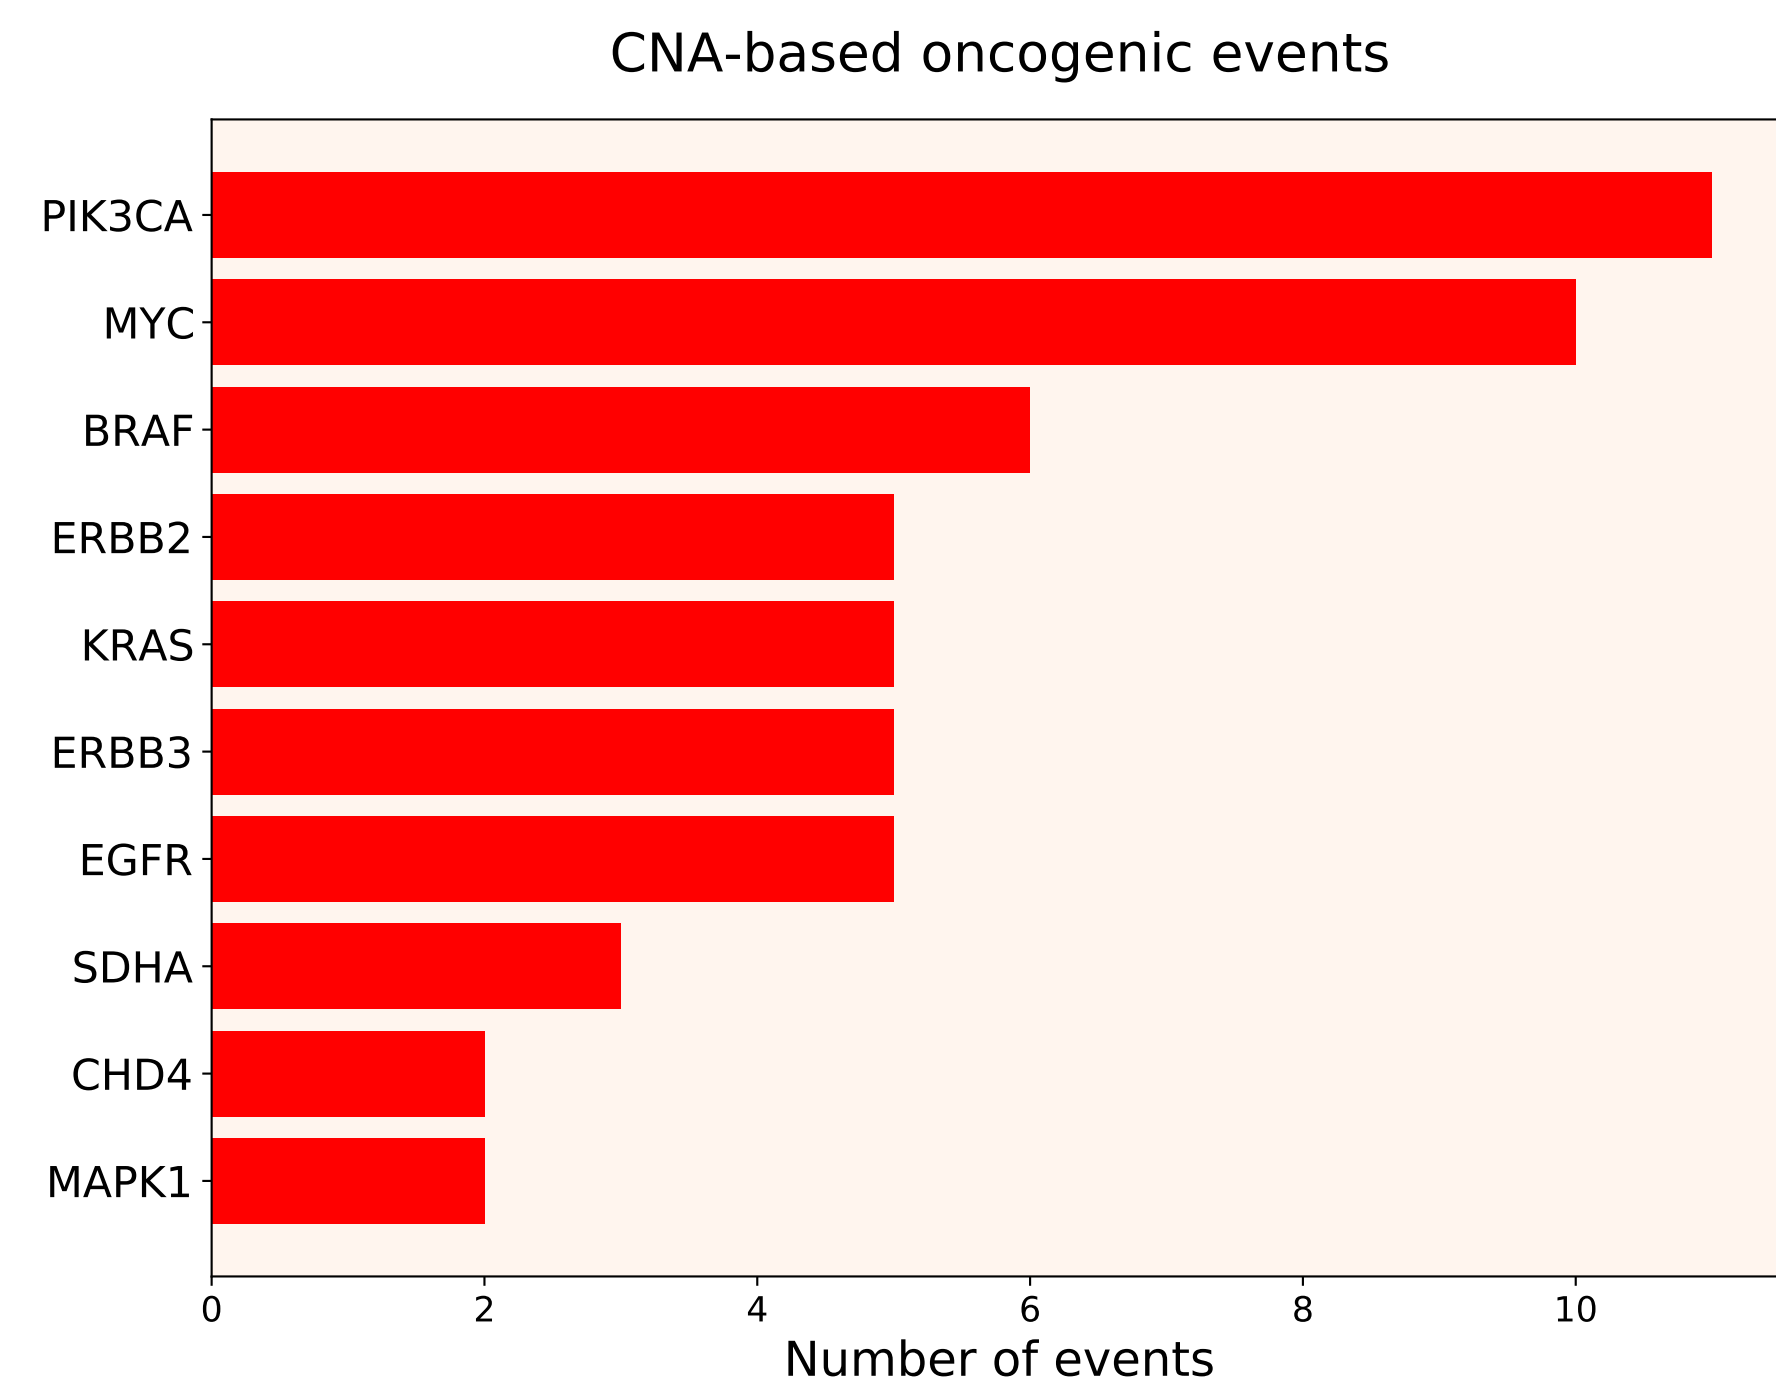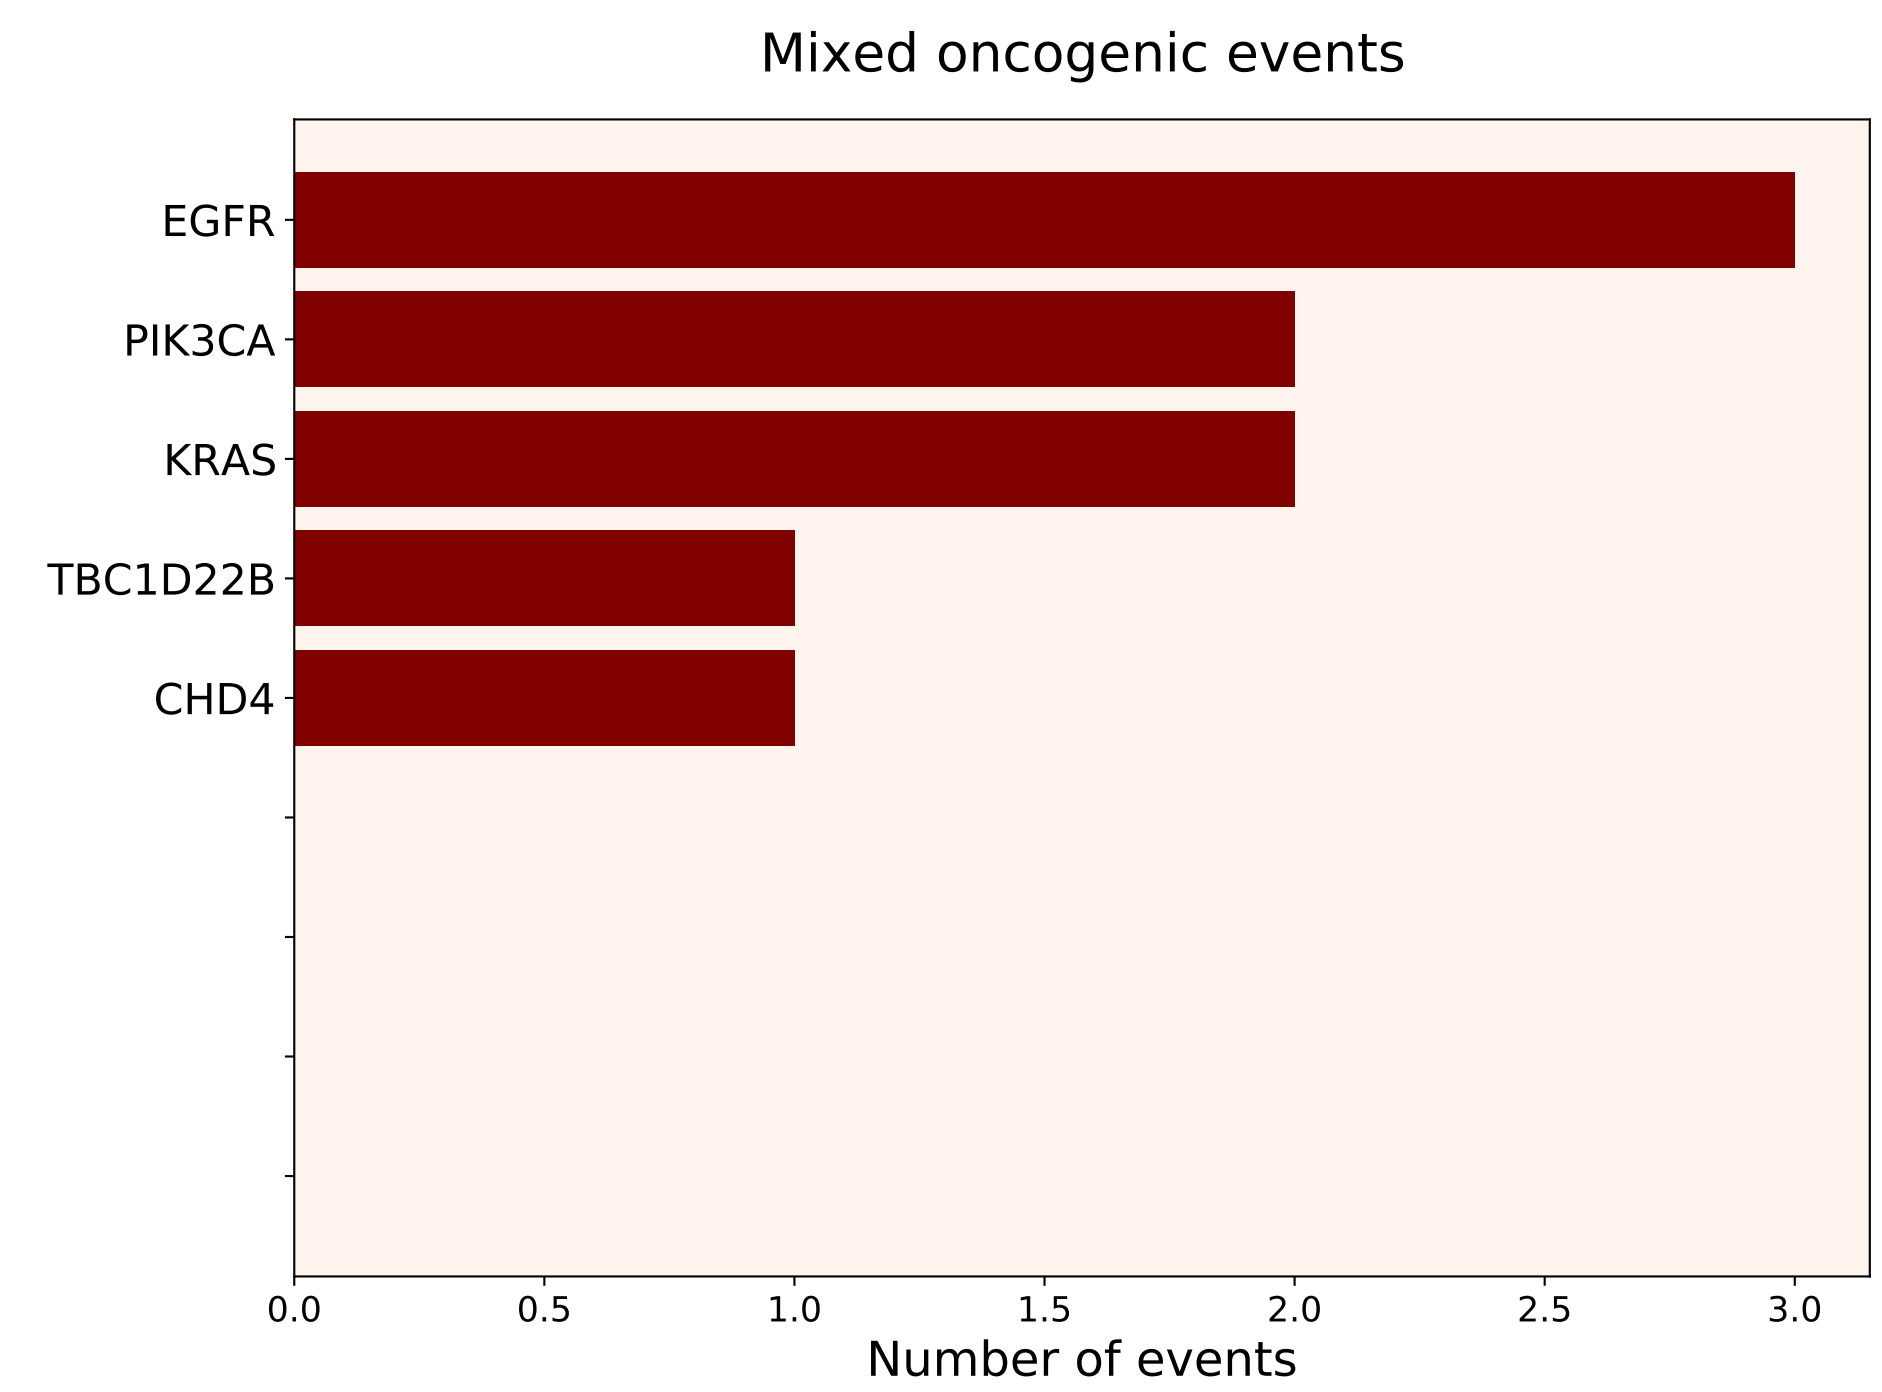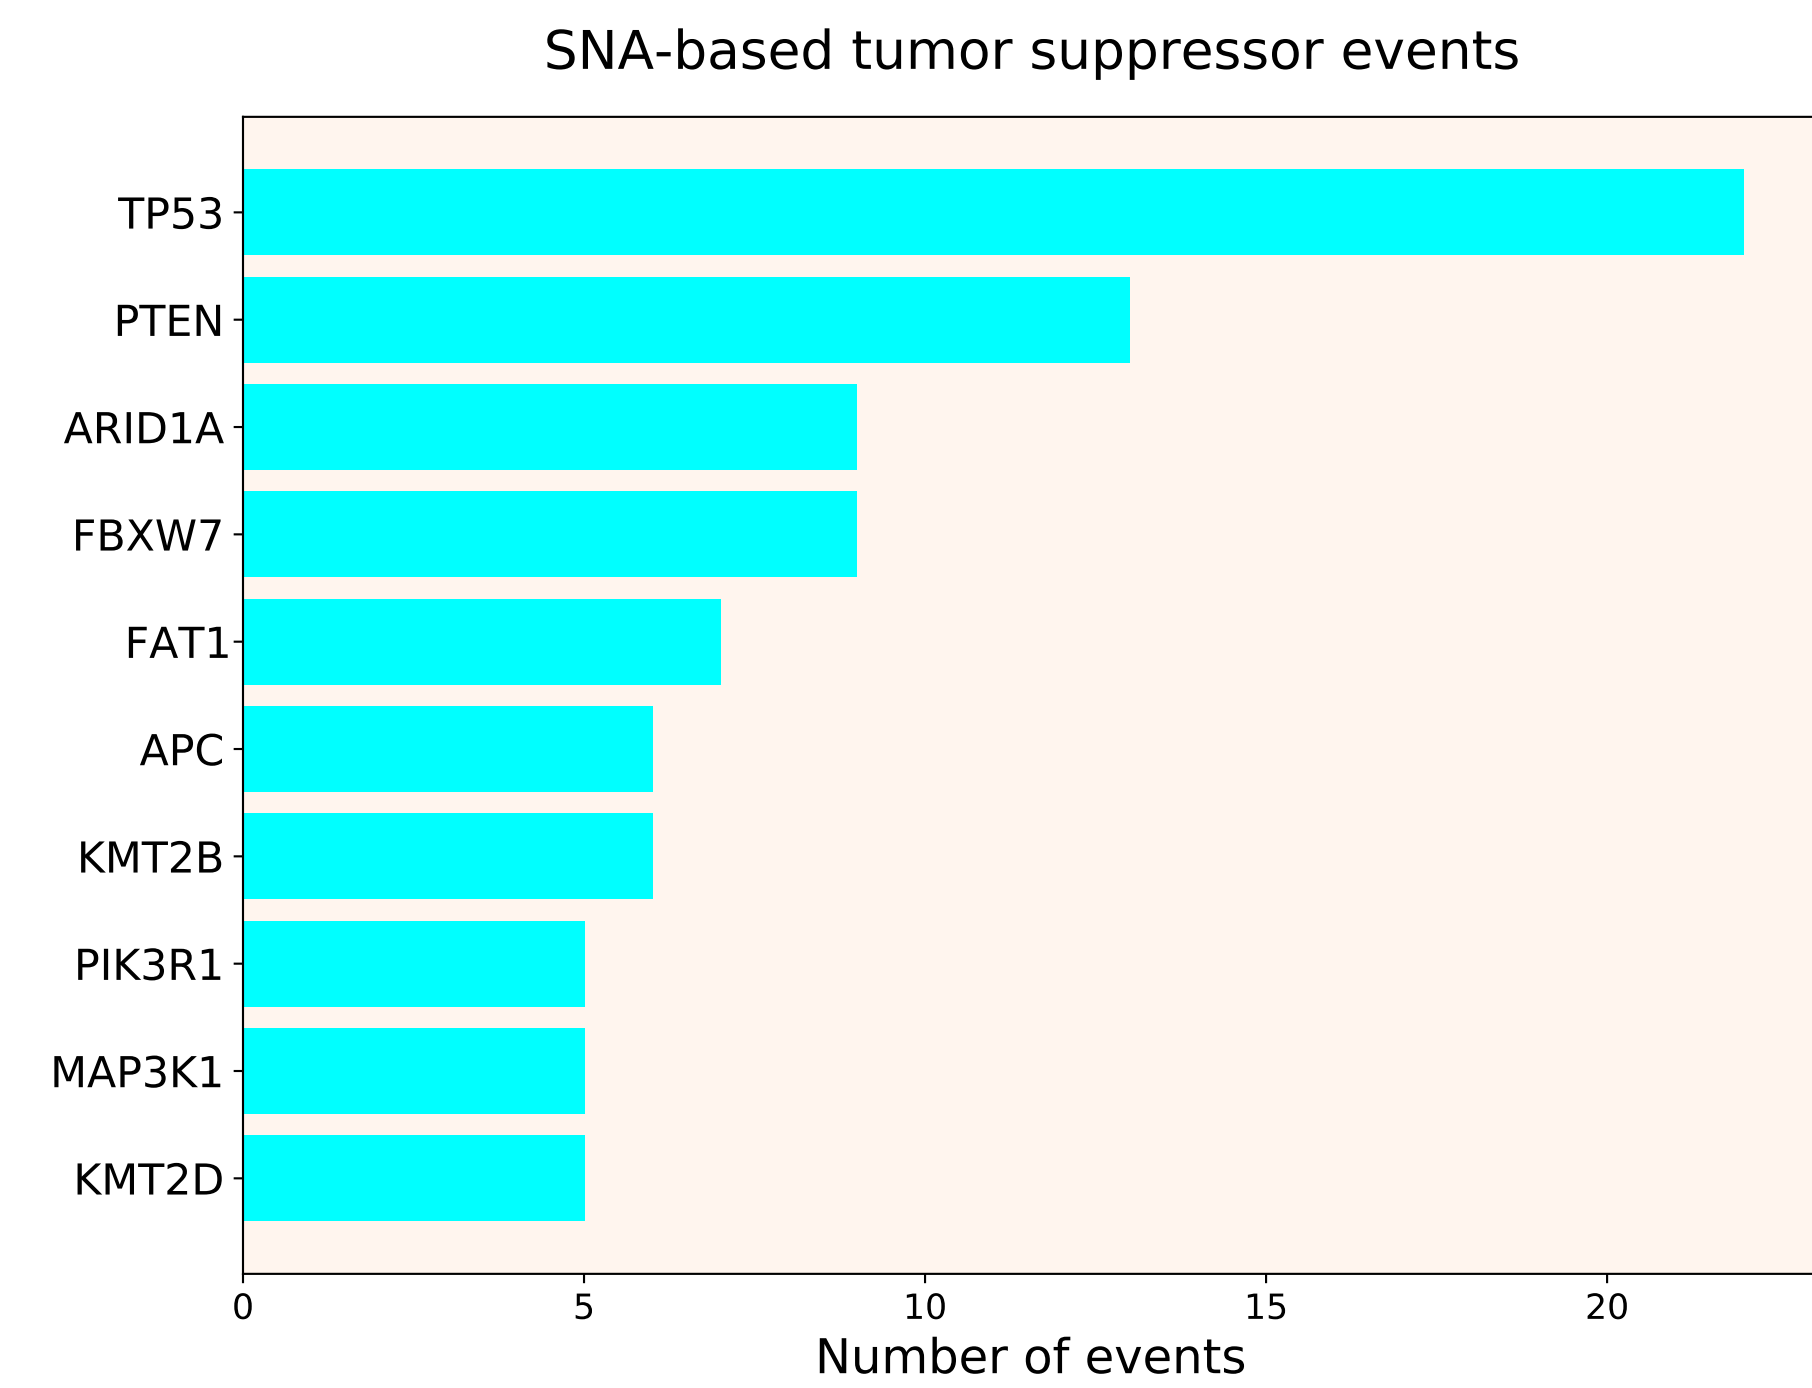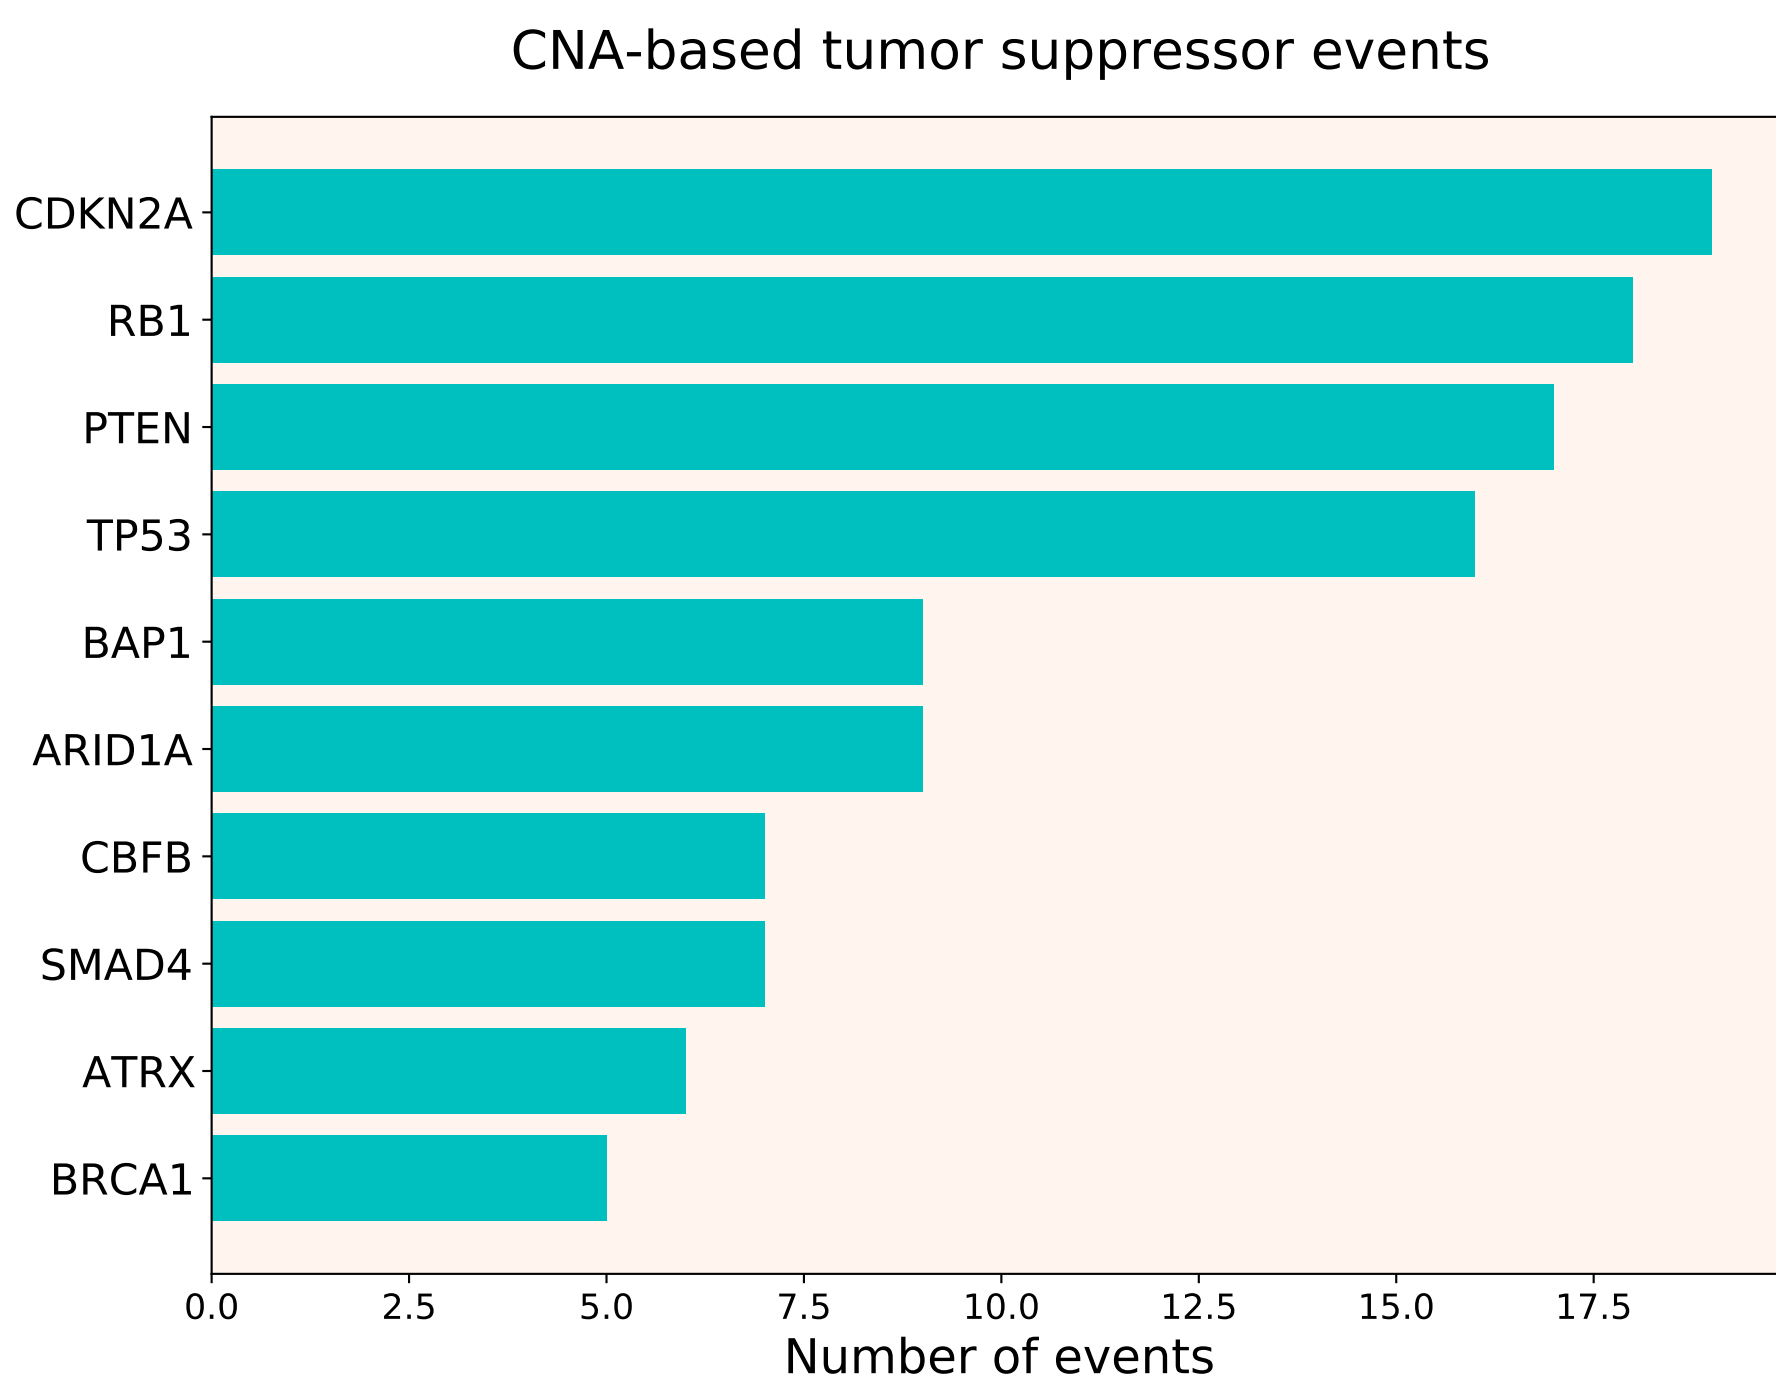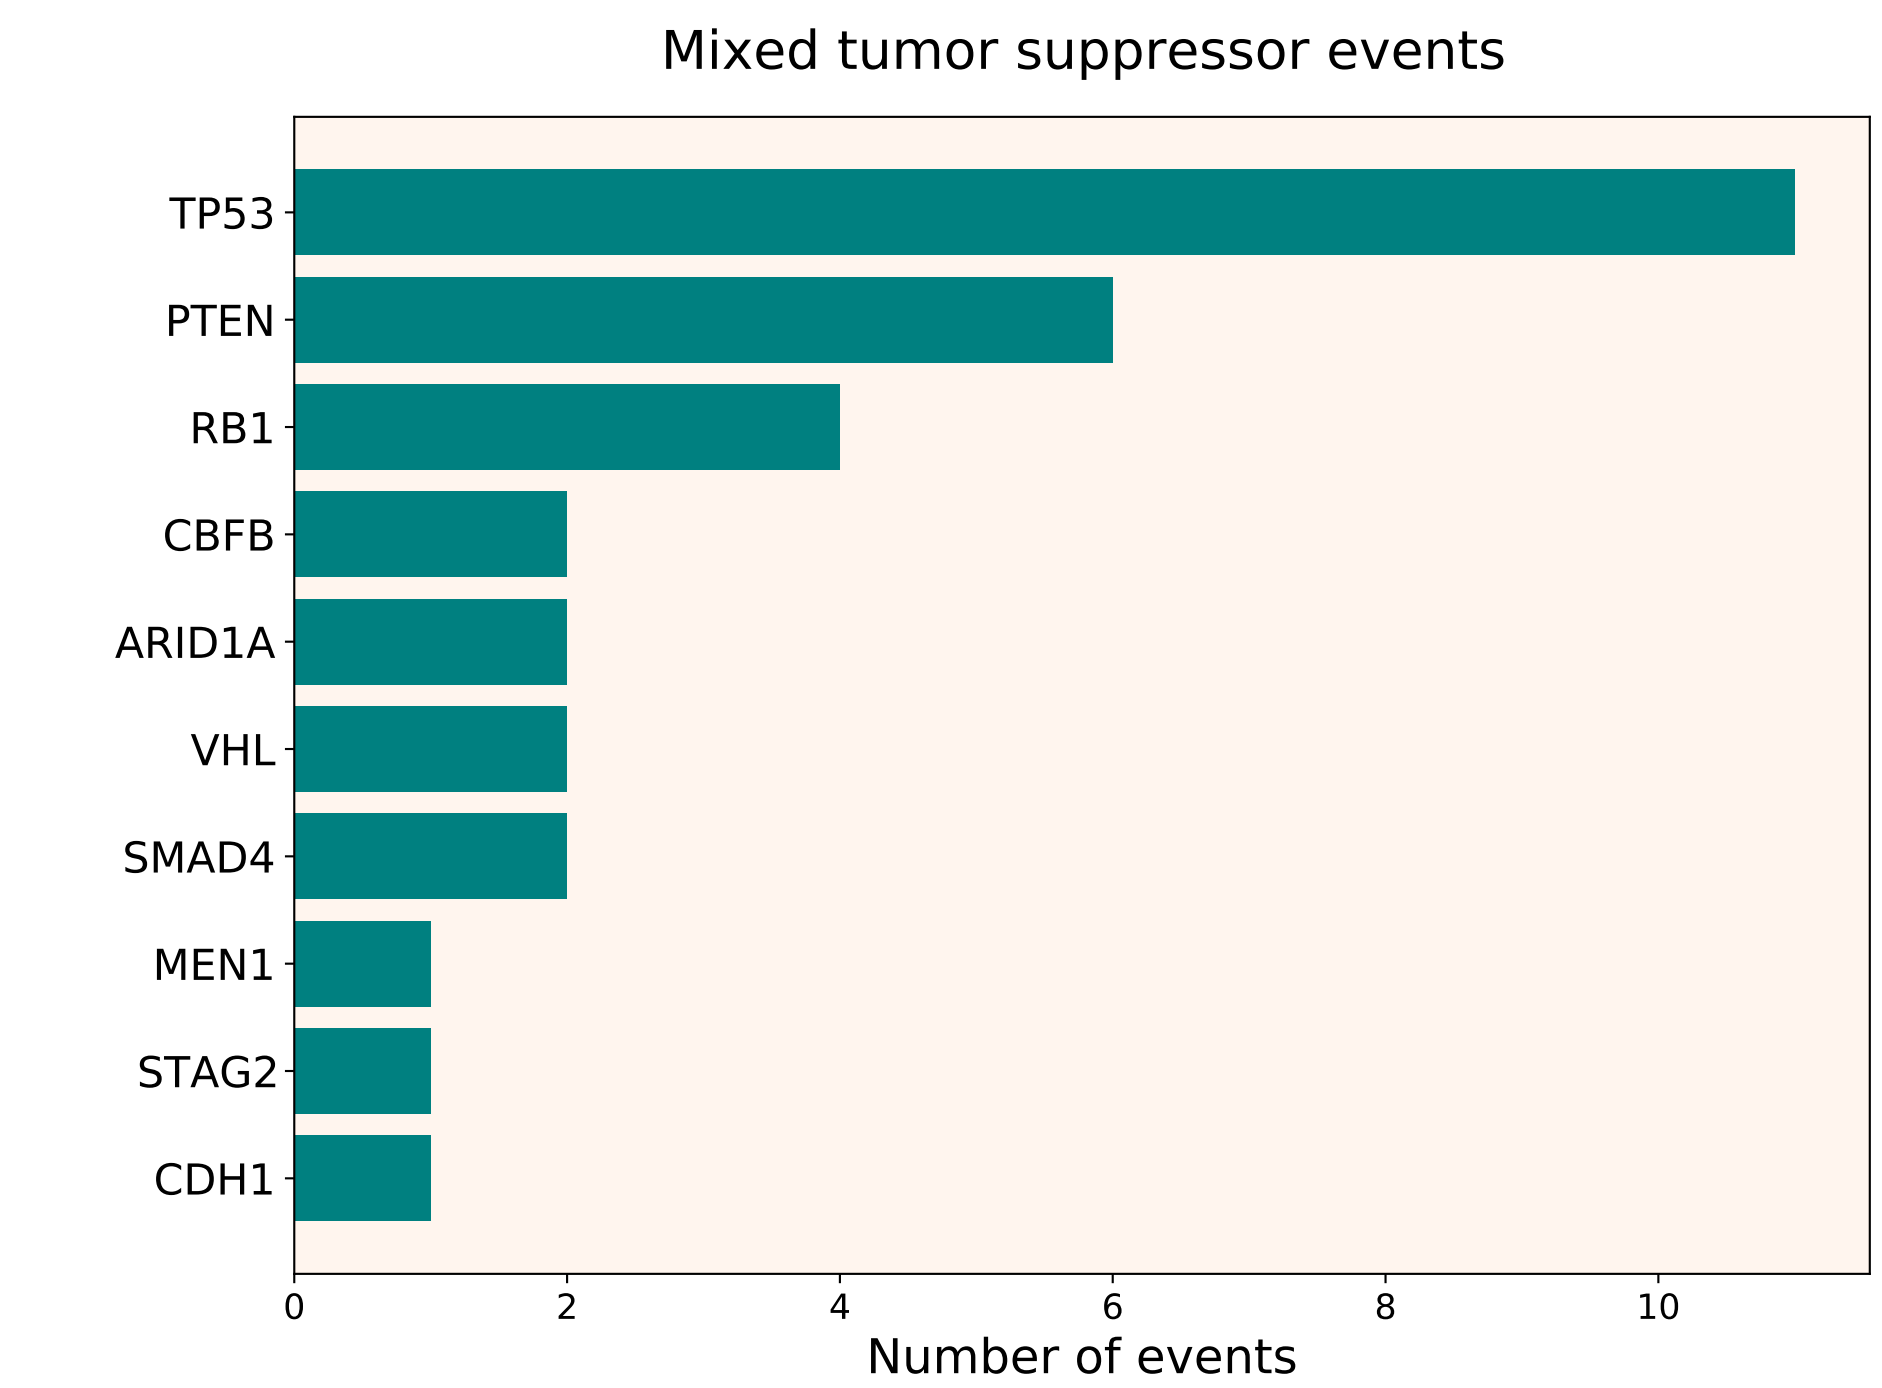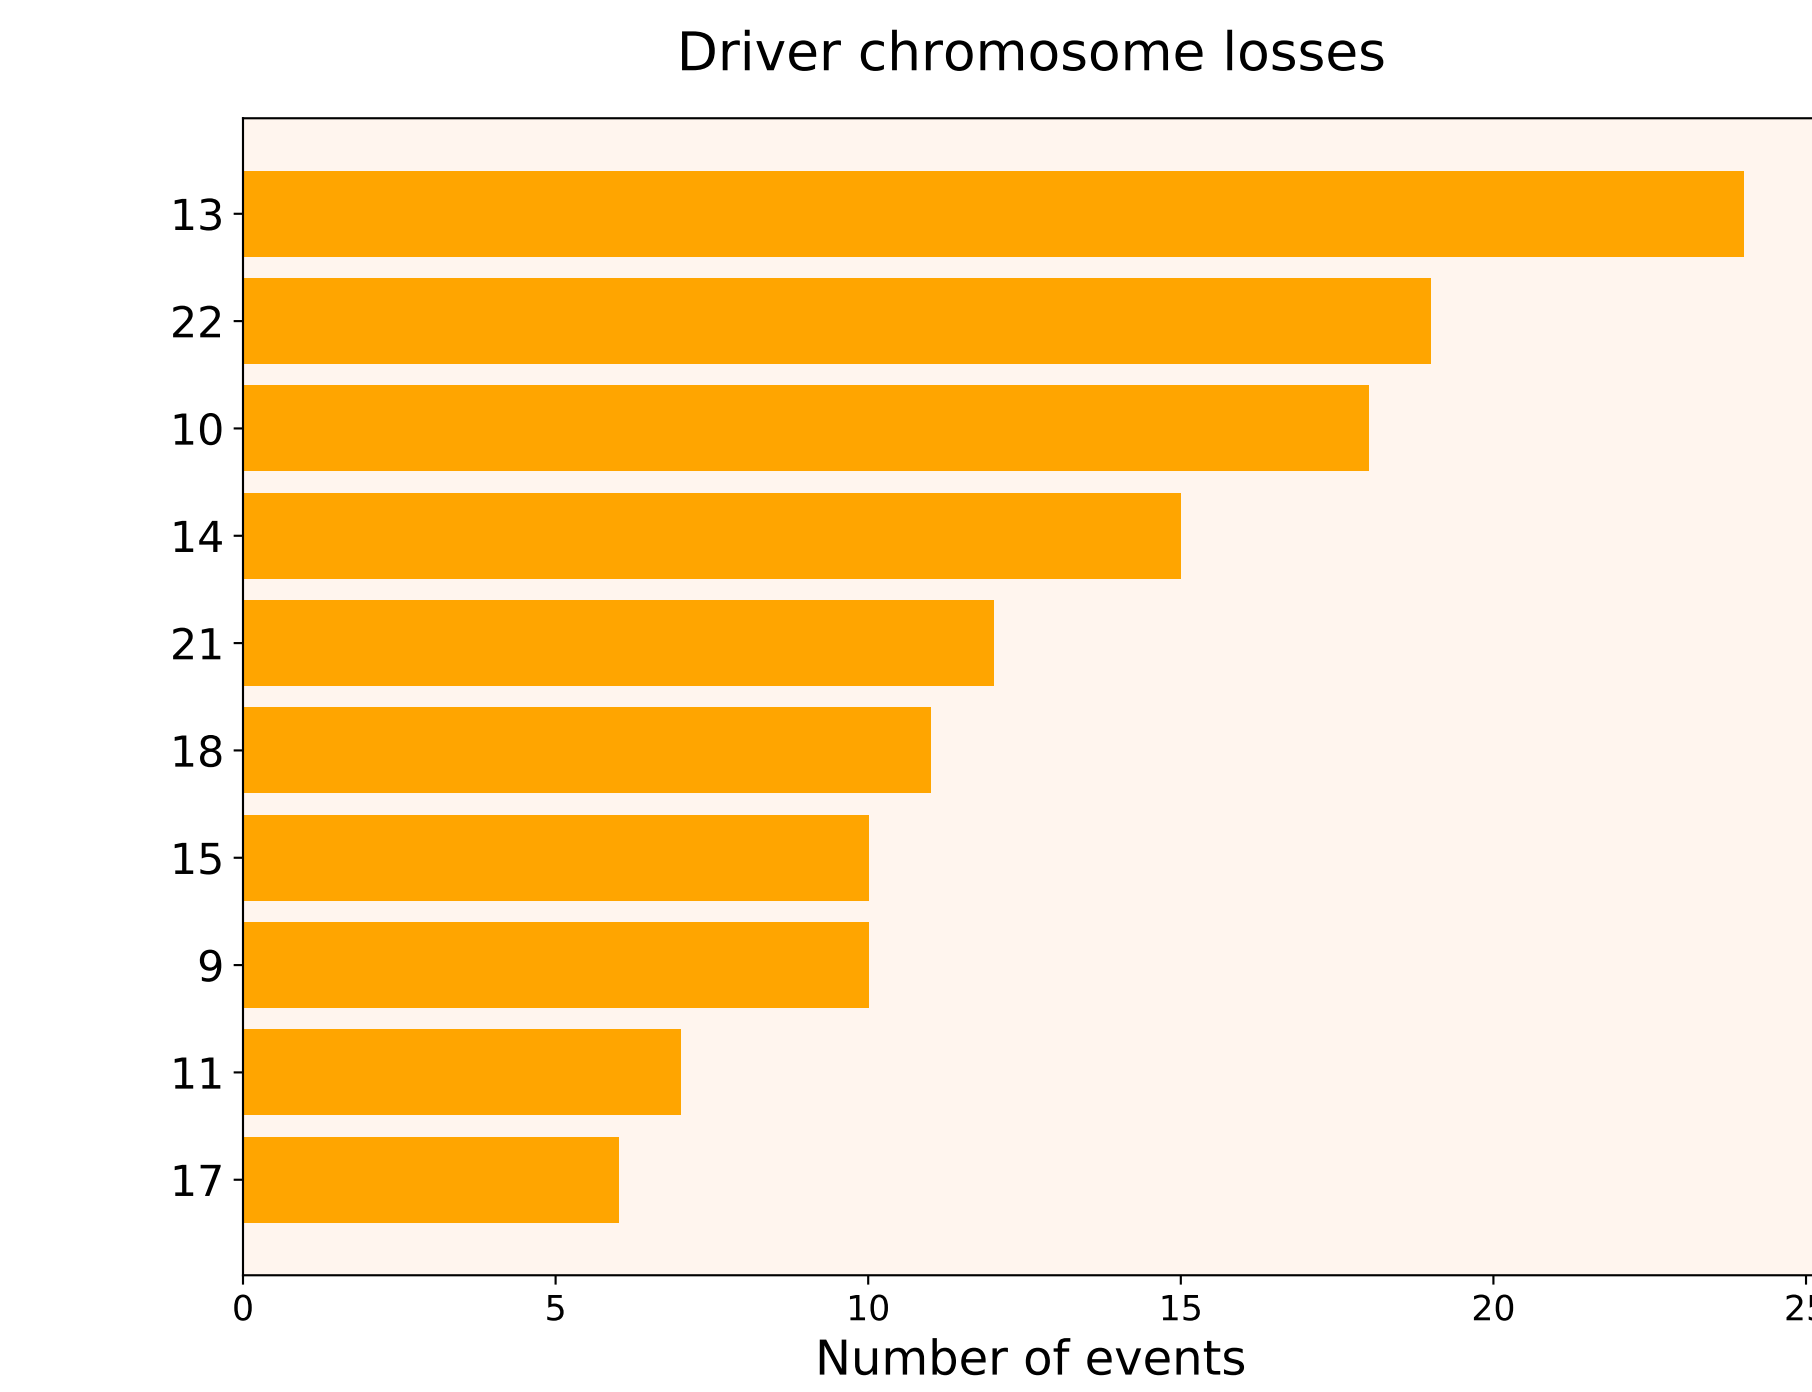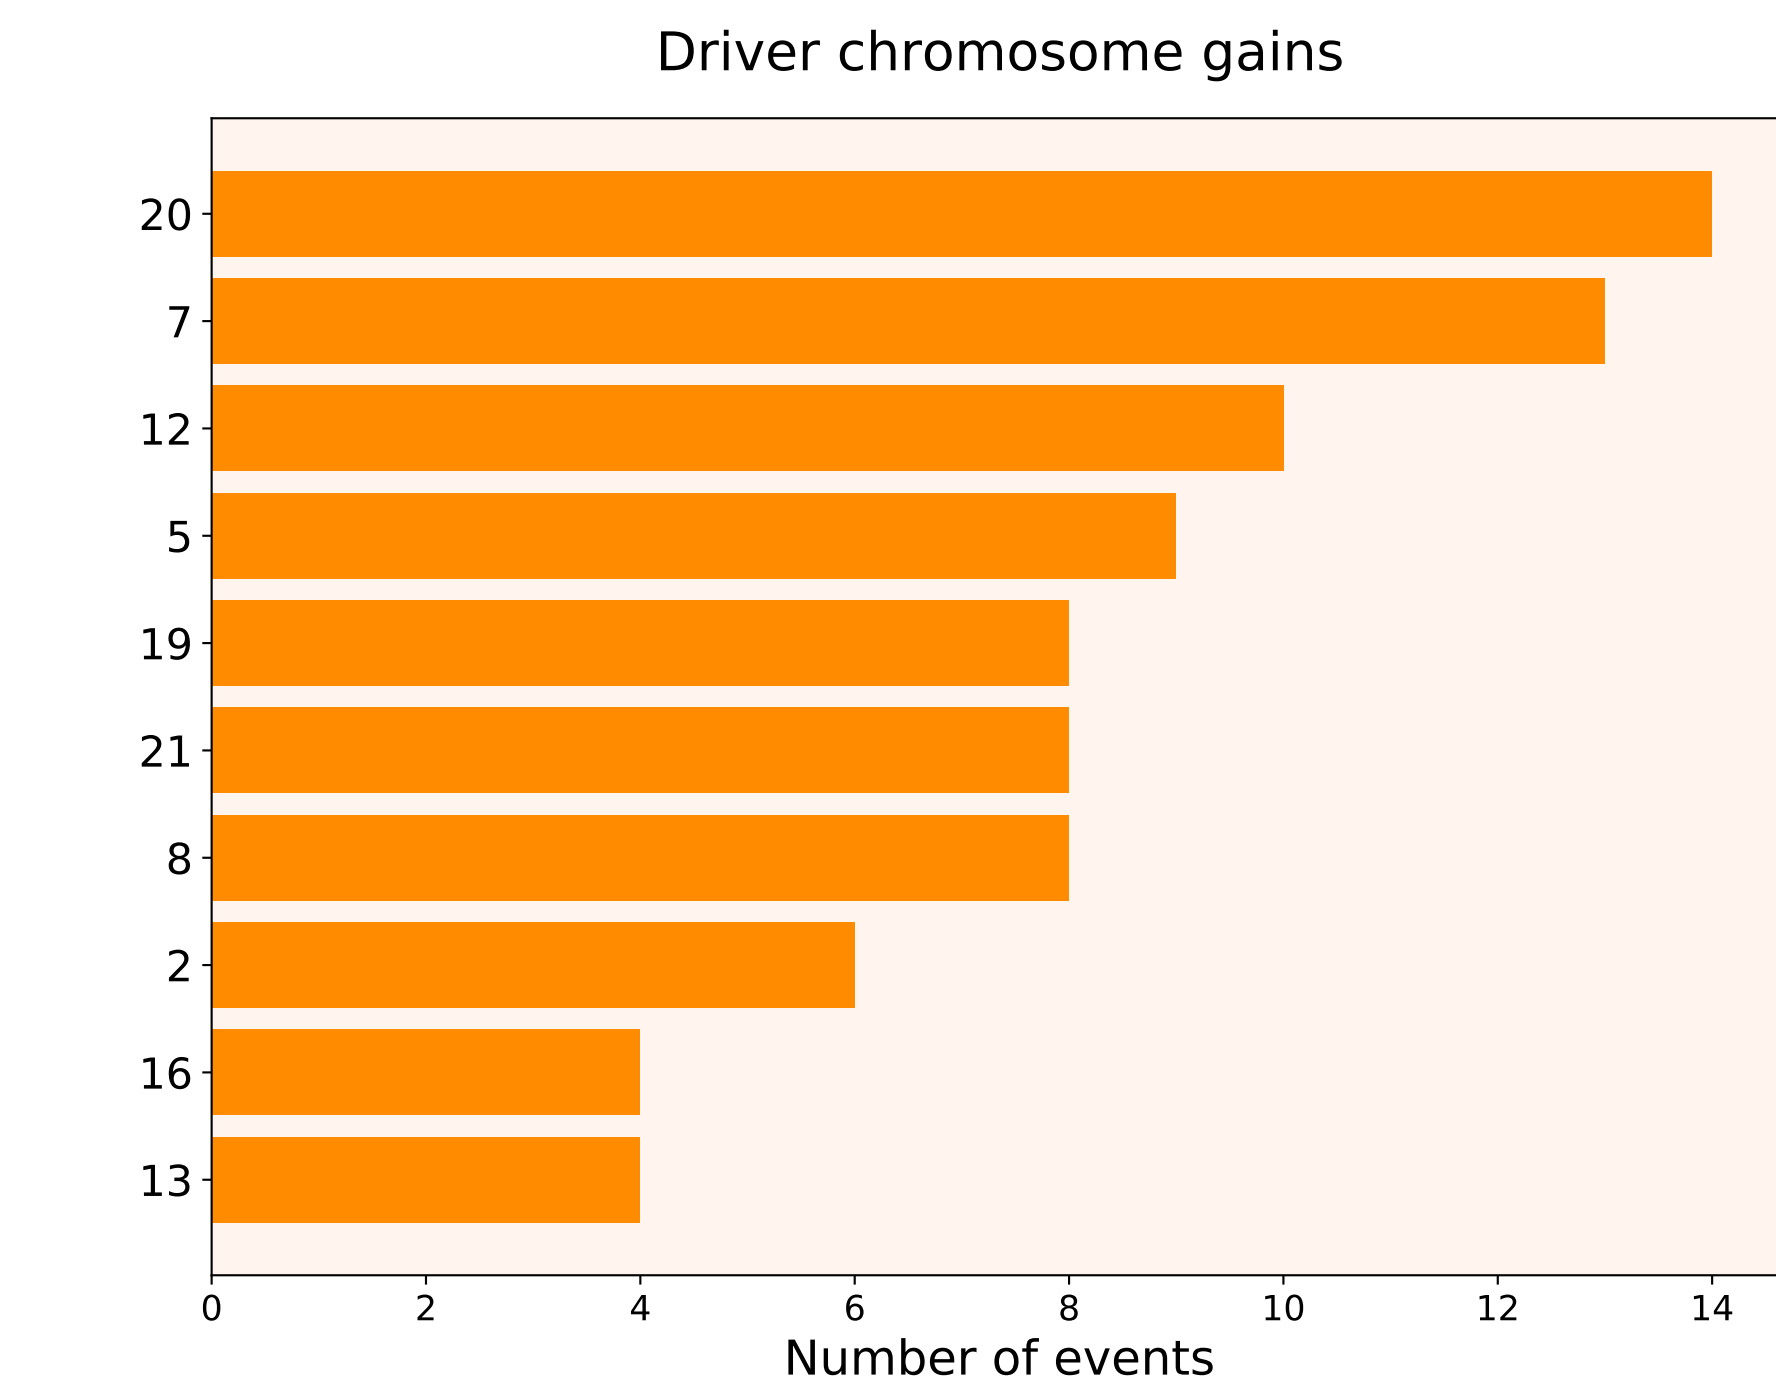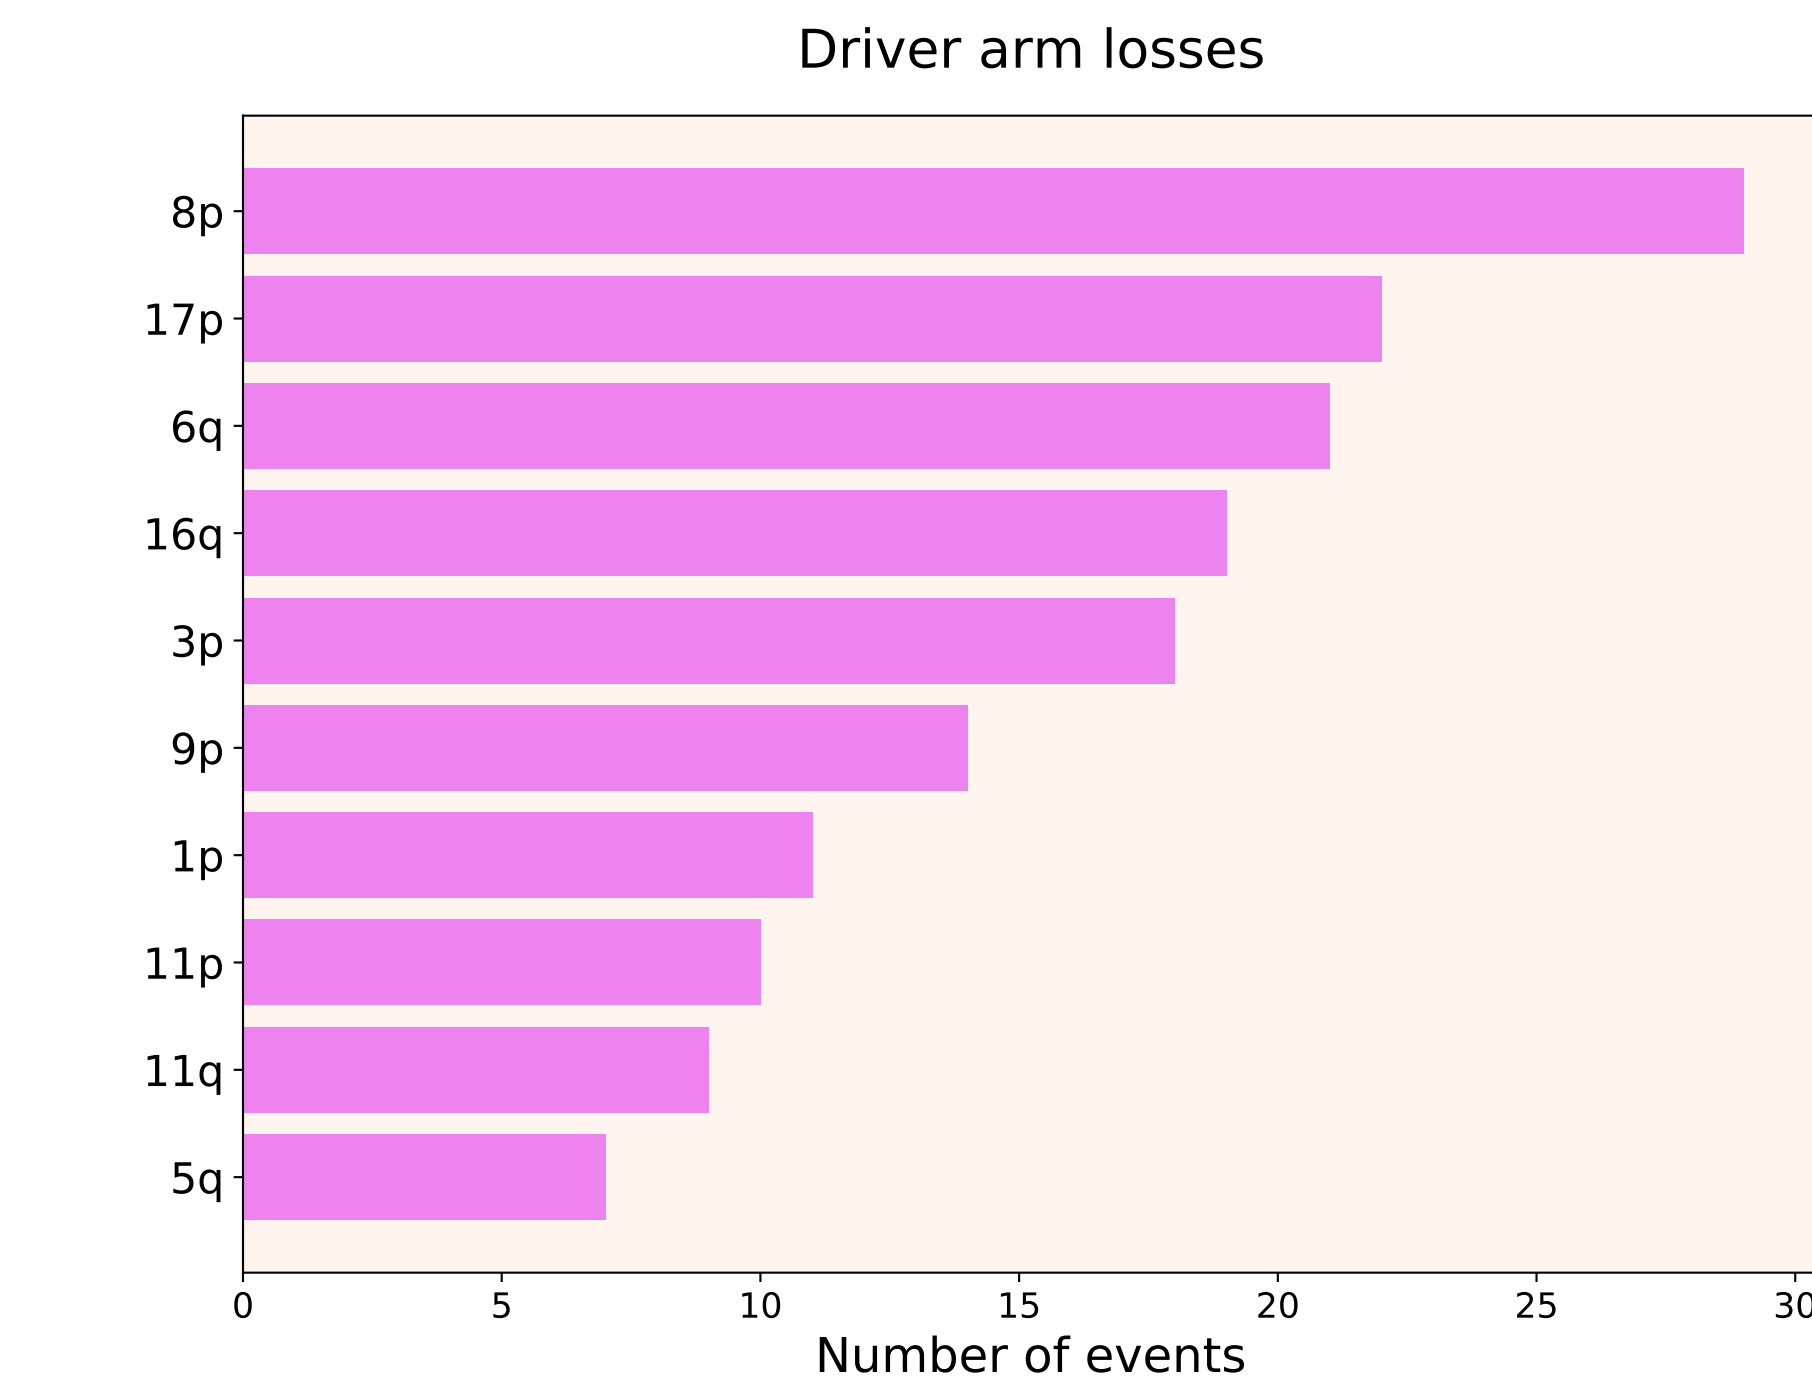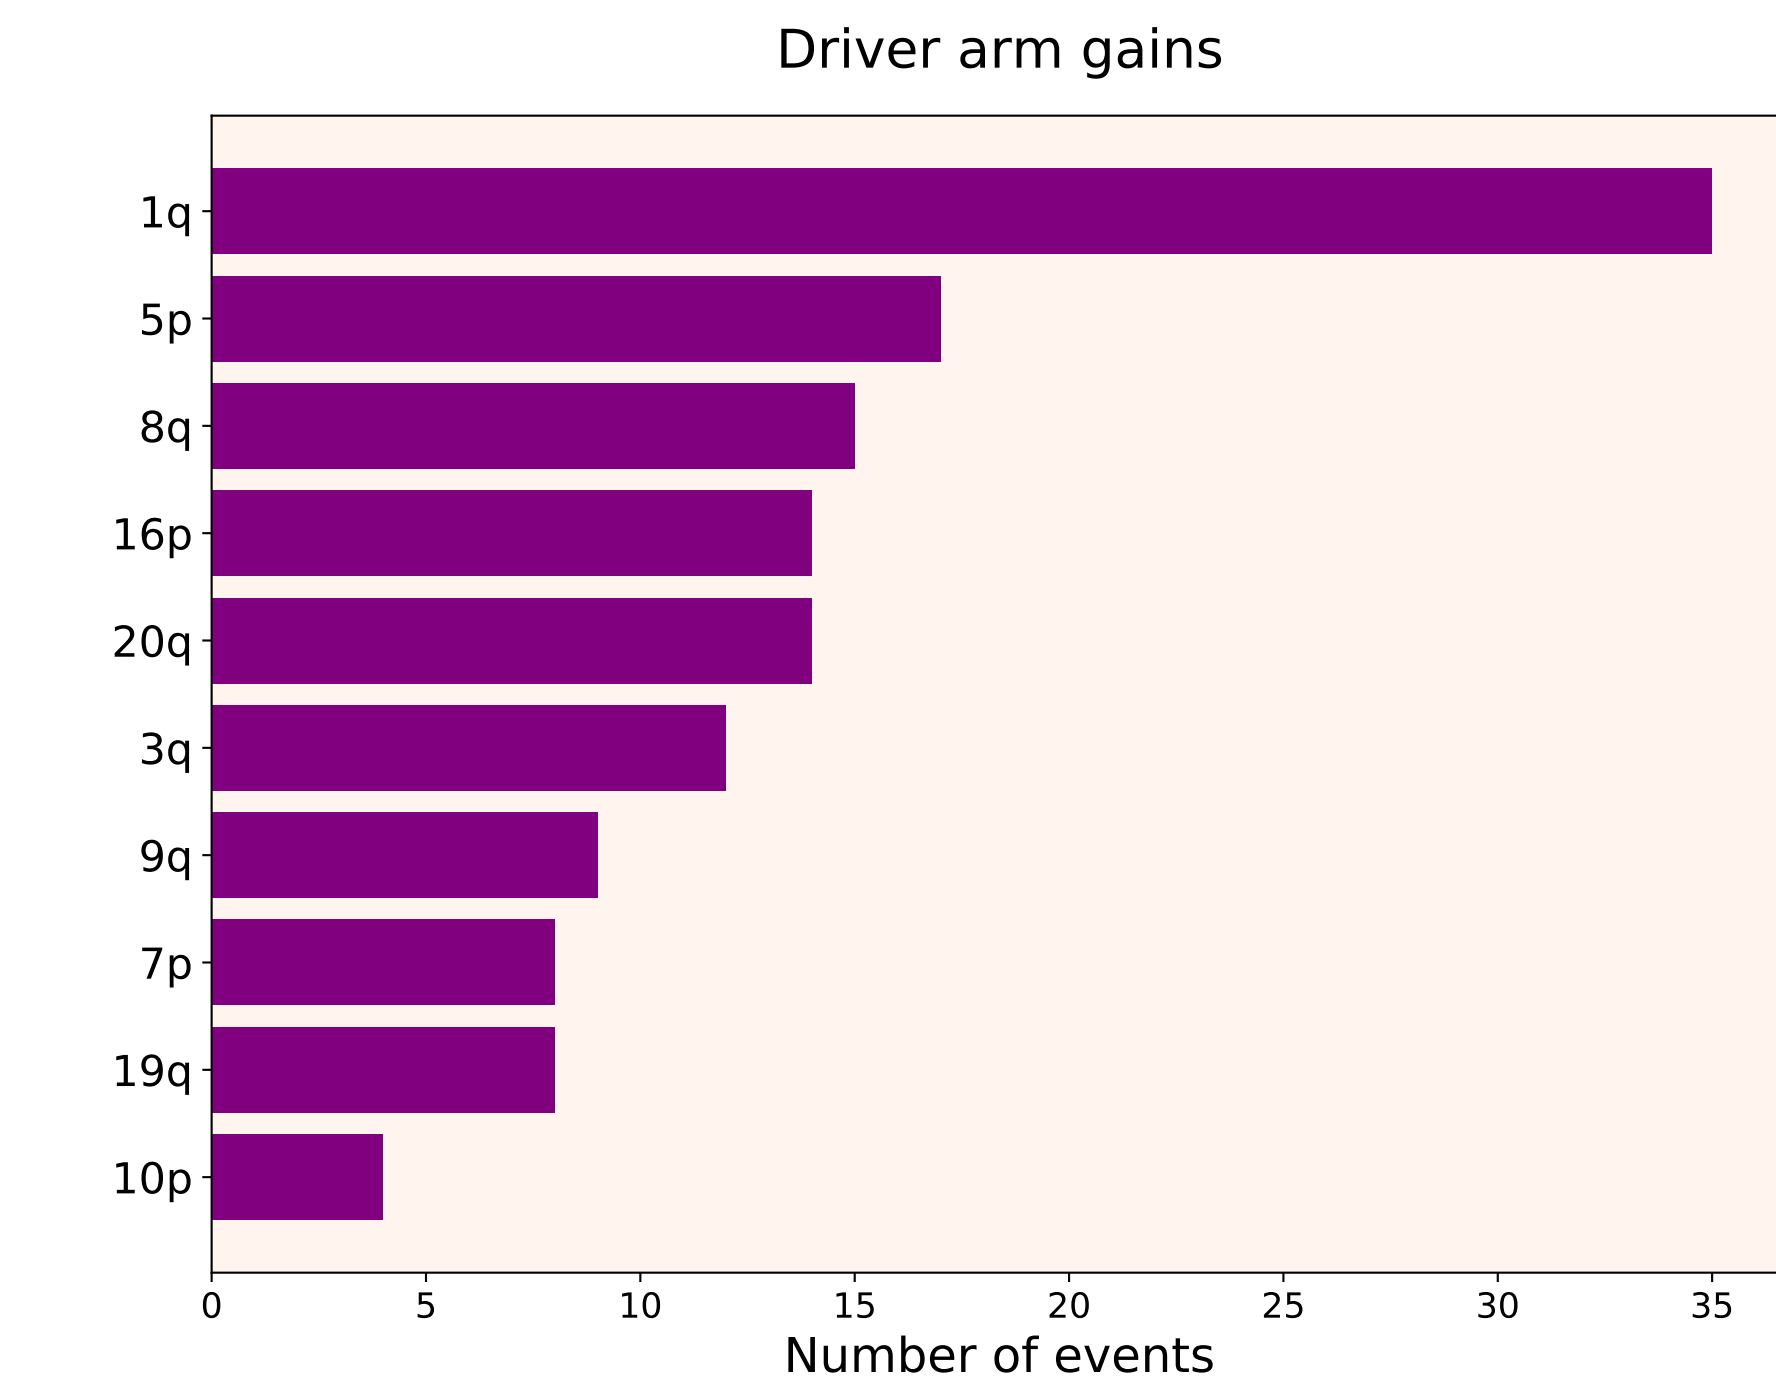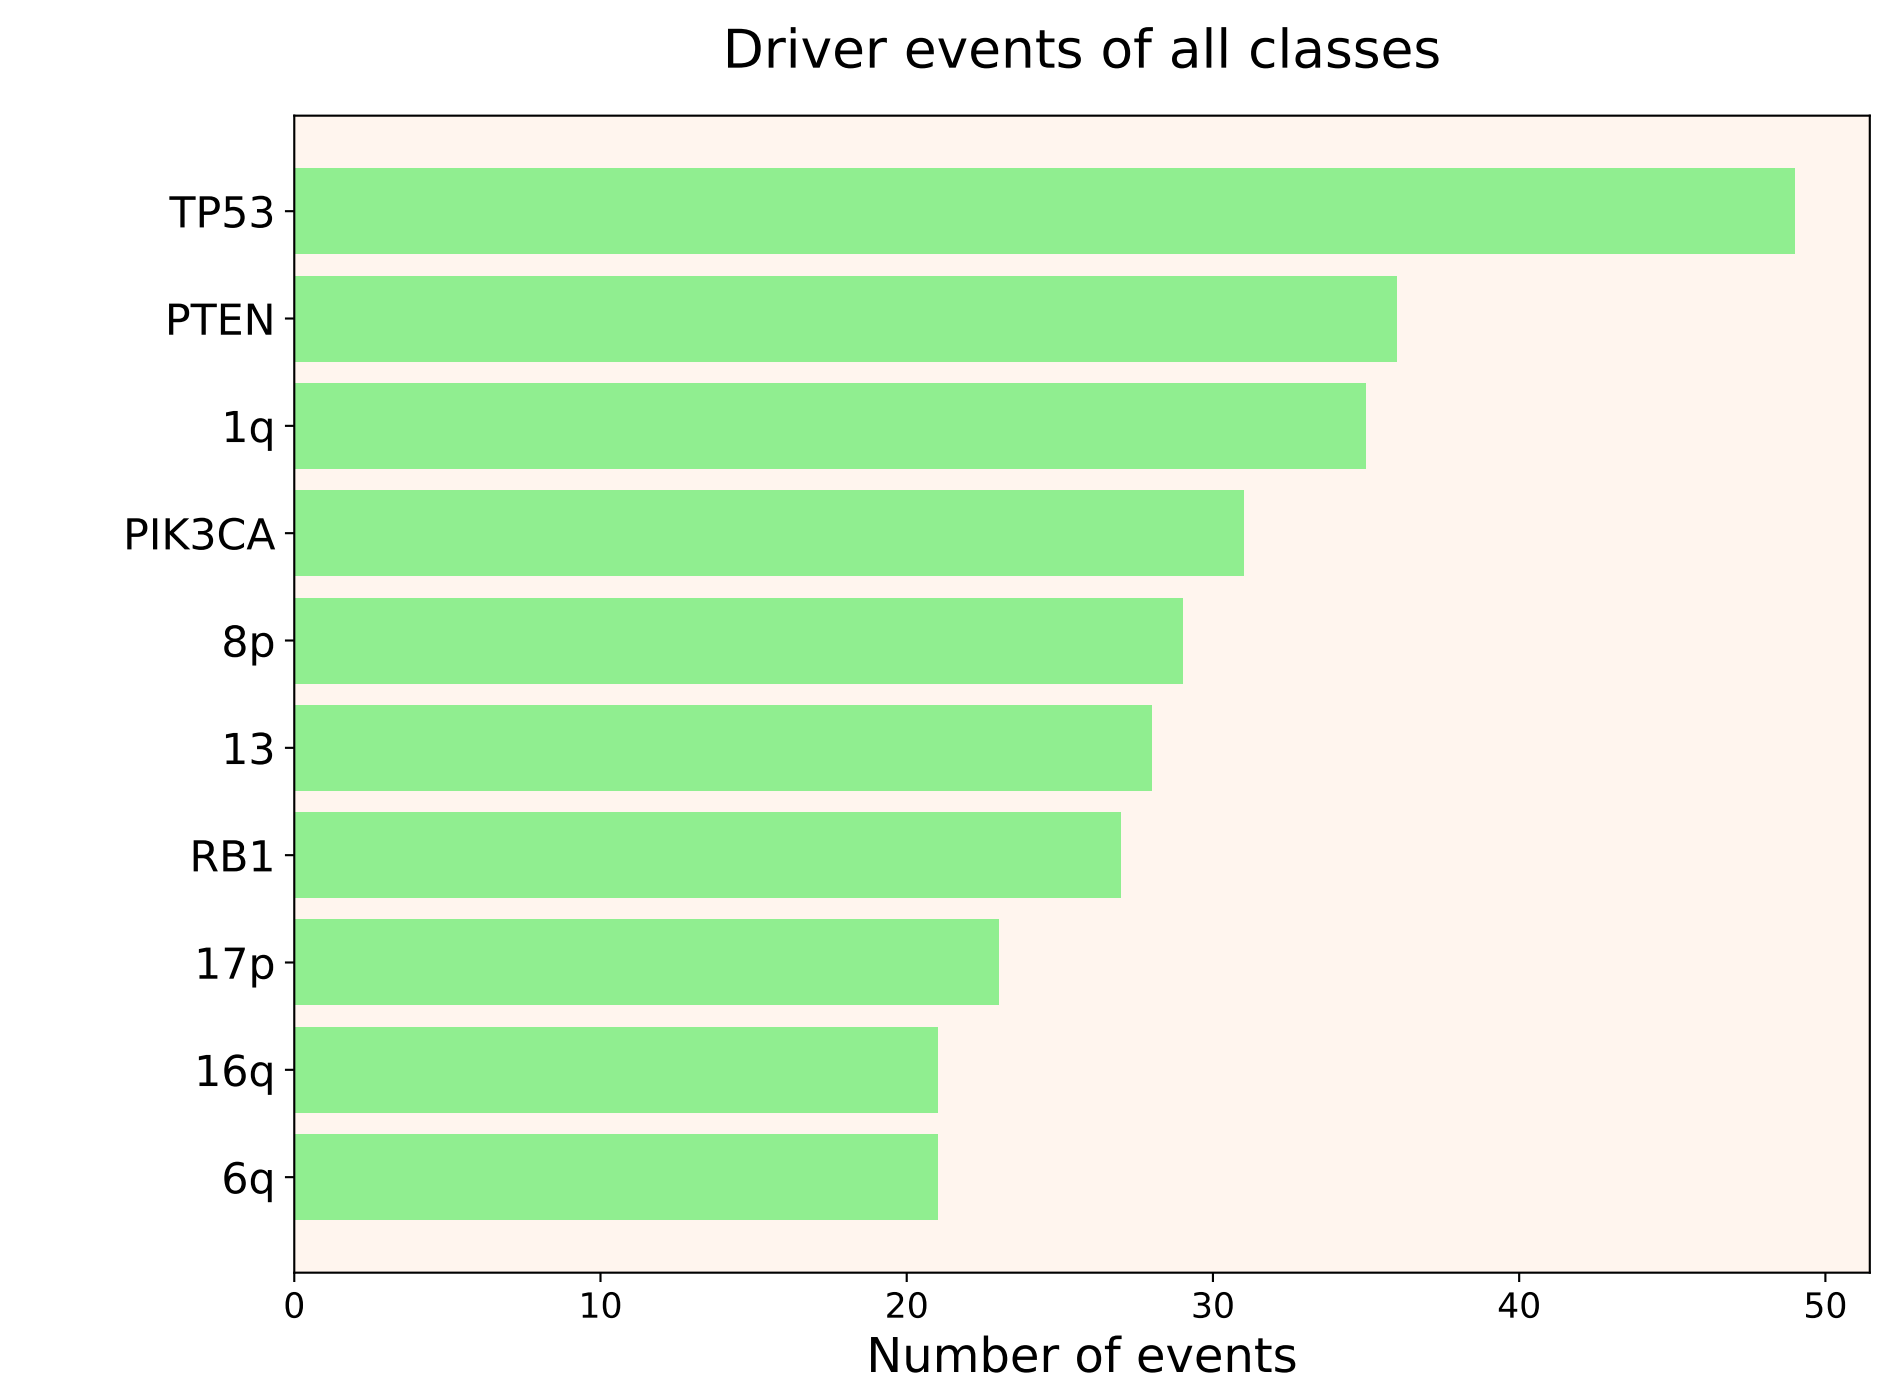

Supplement: Supplemental_Data_S1.zip [file Supplemental_Data_S1.zip]

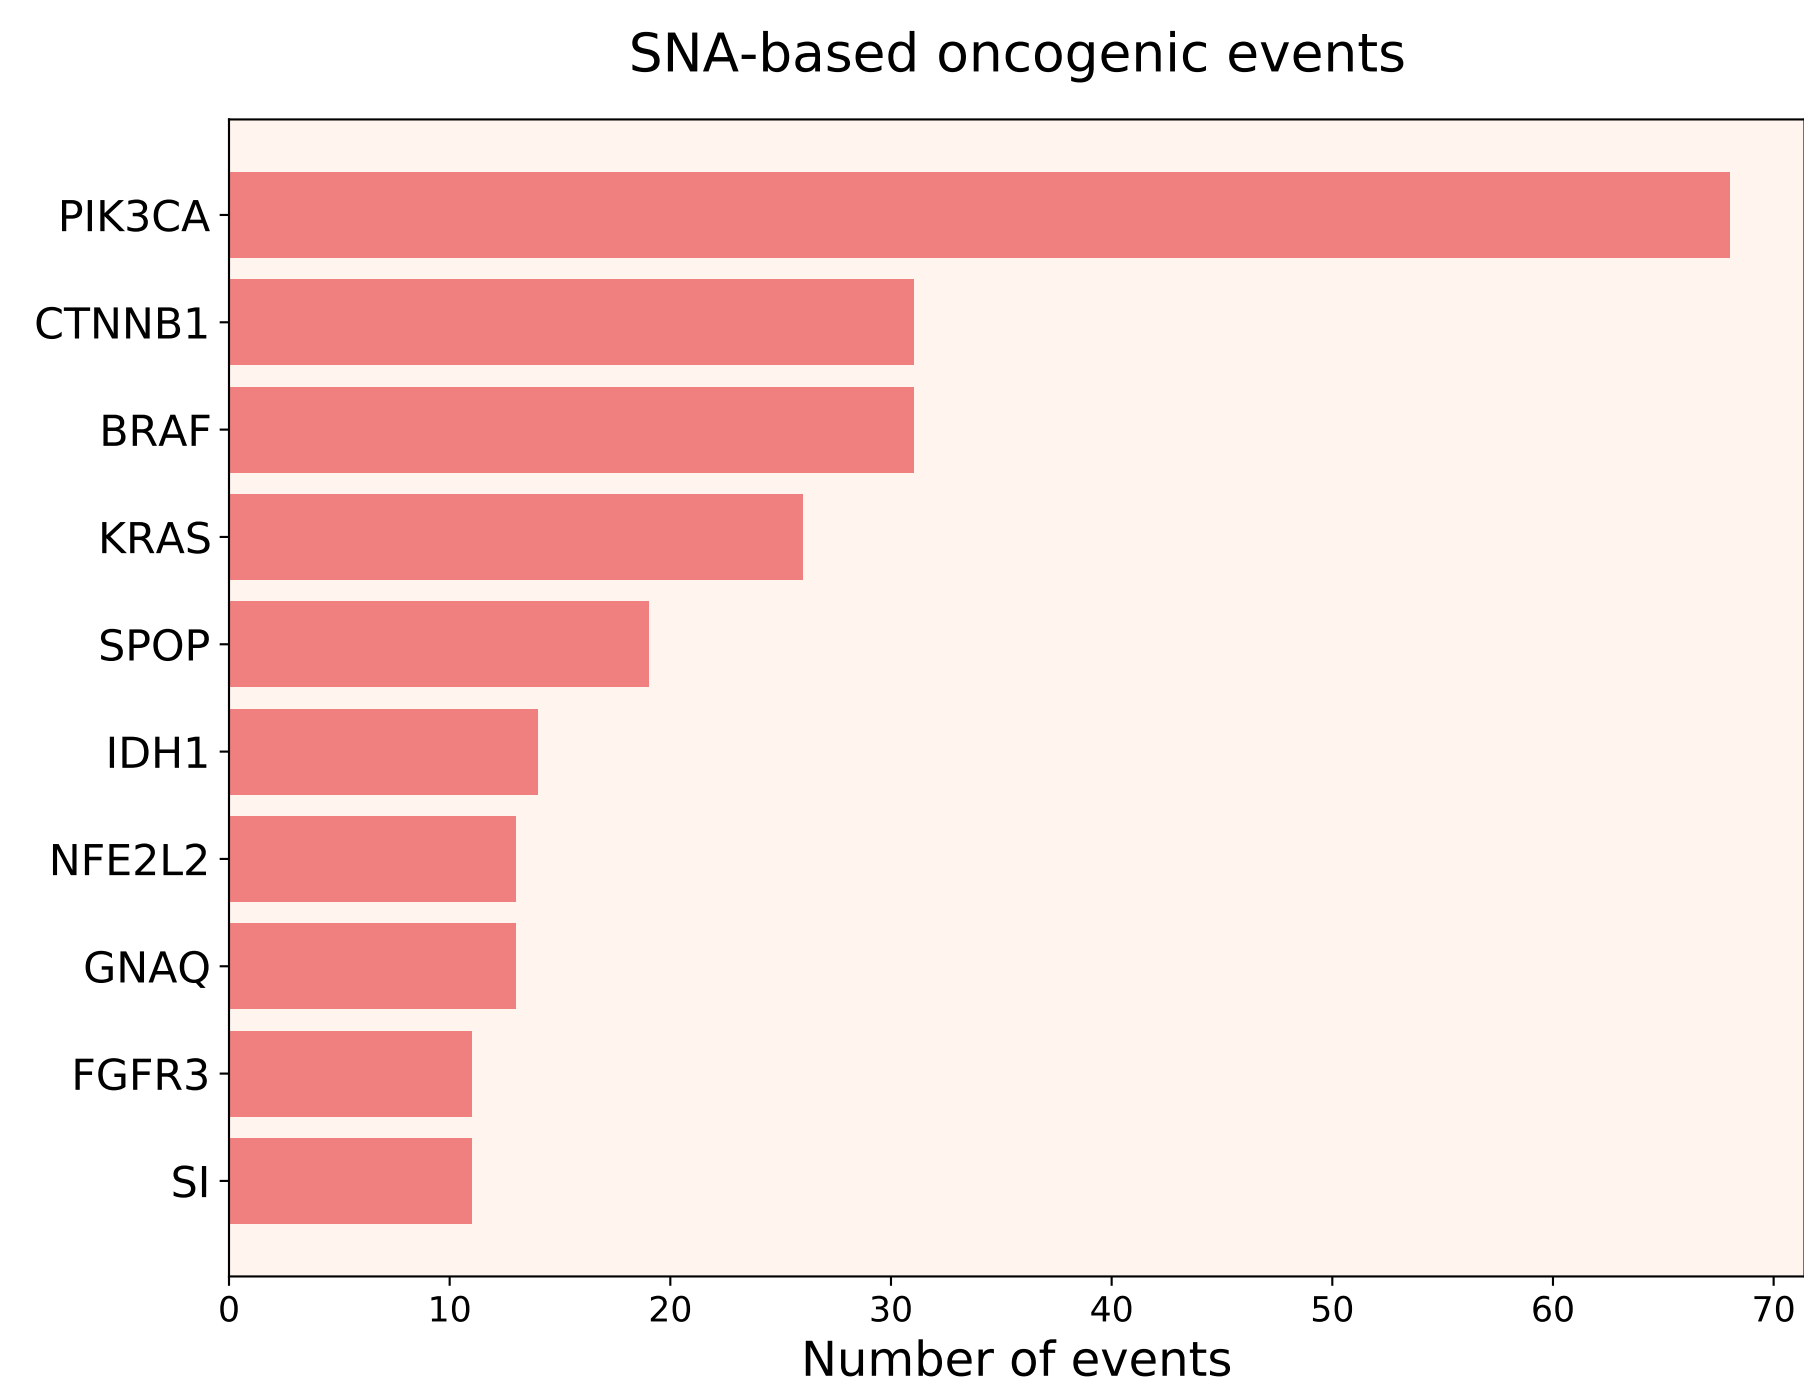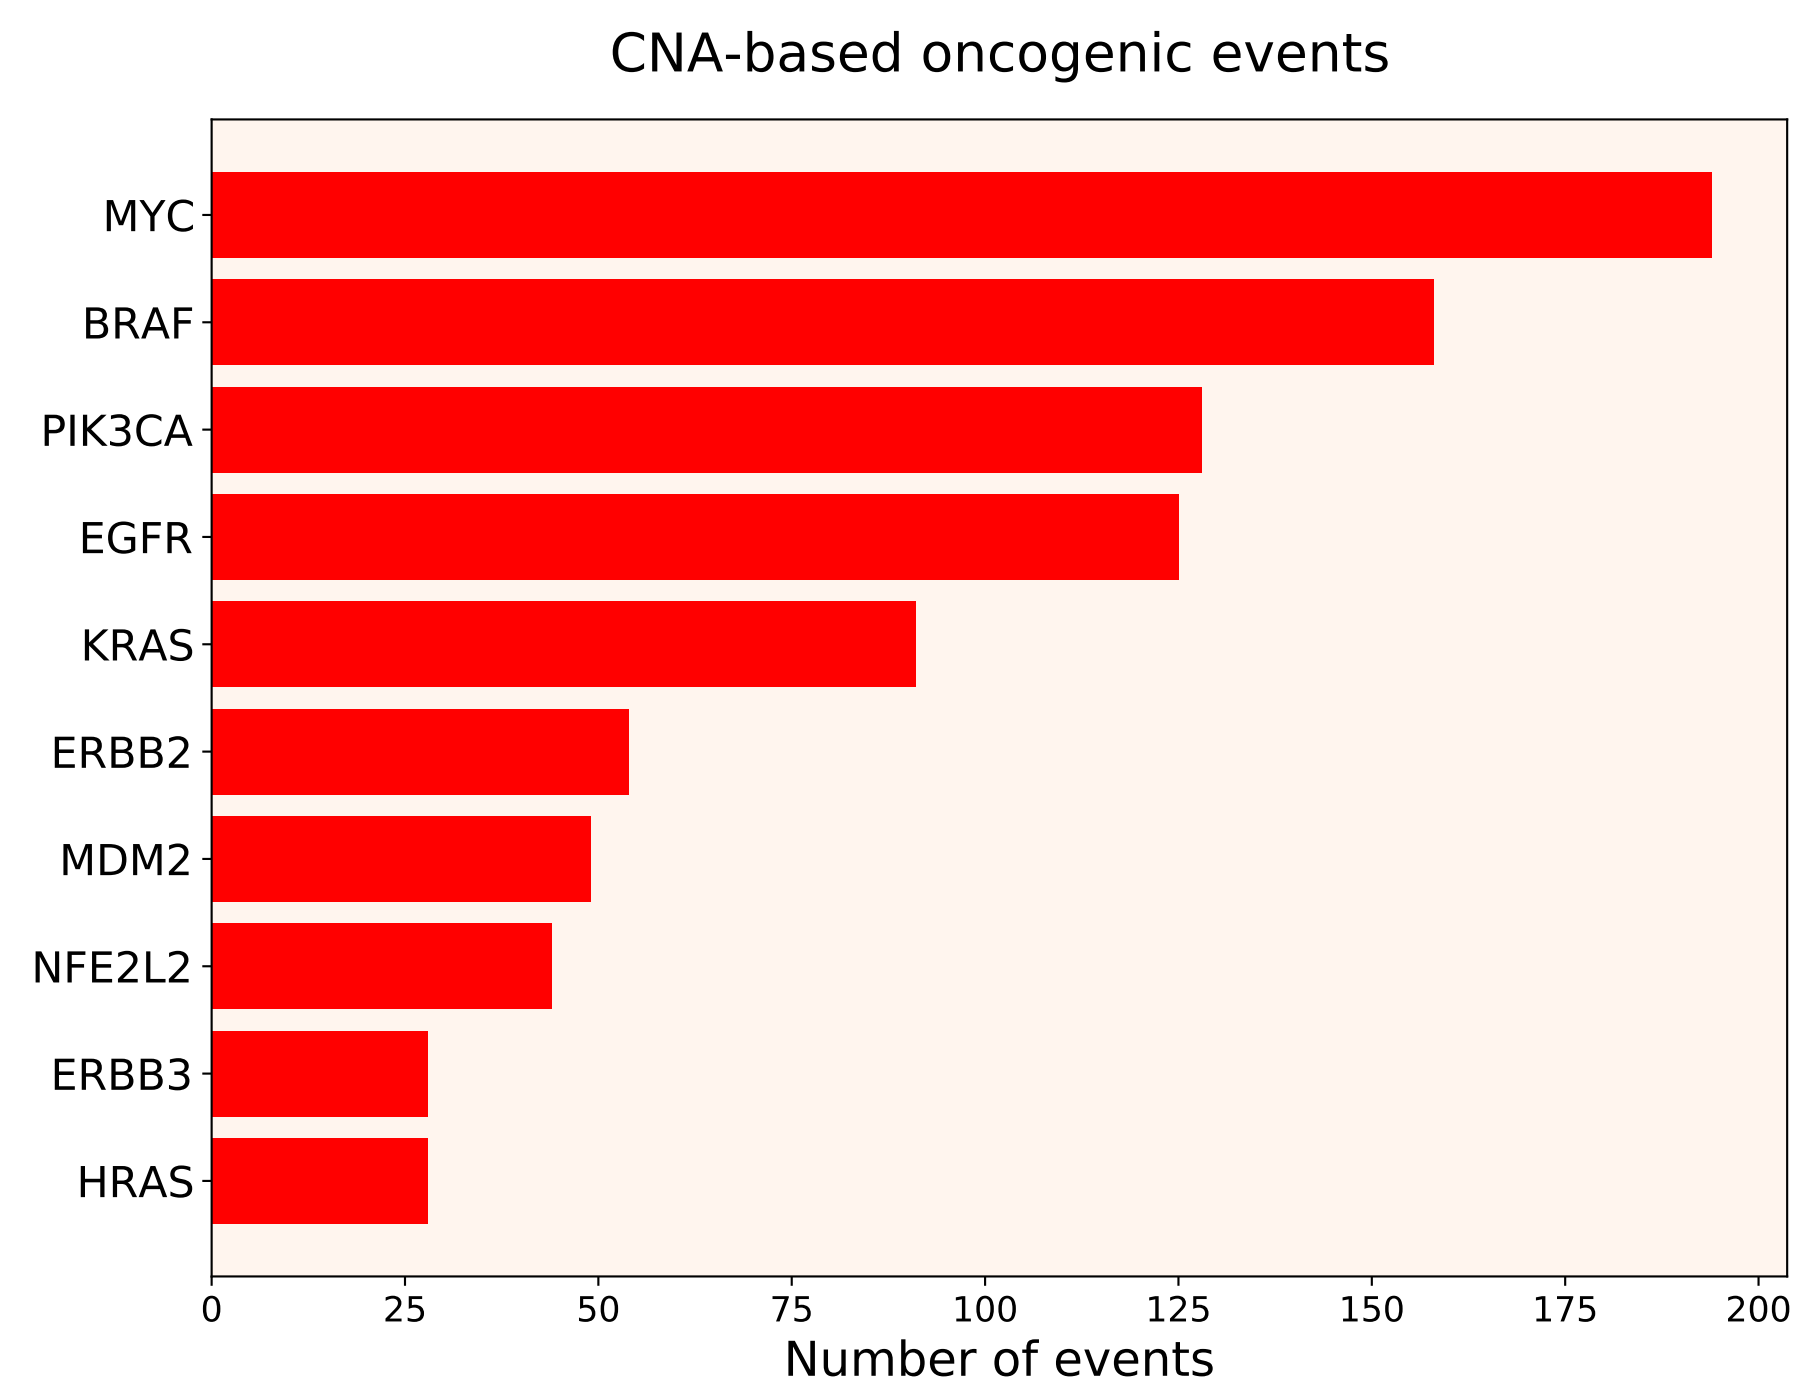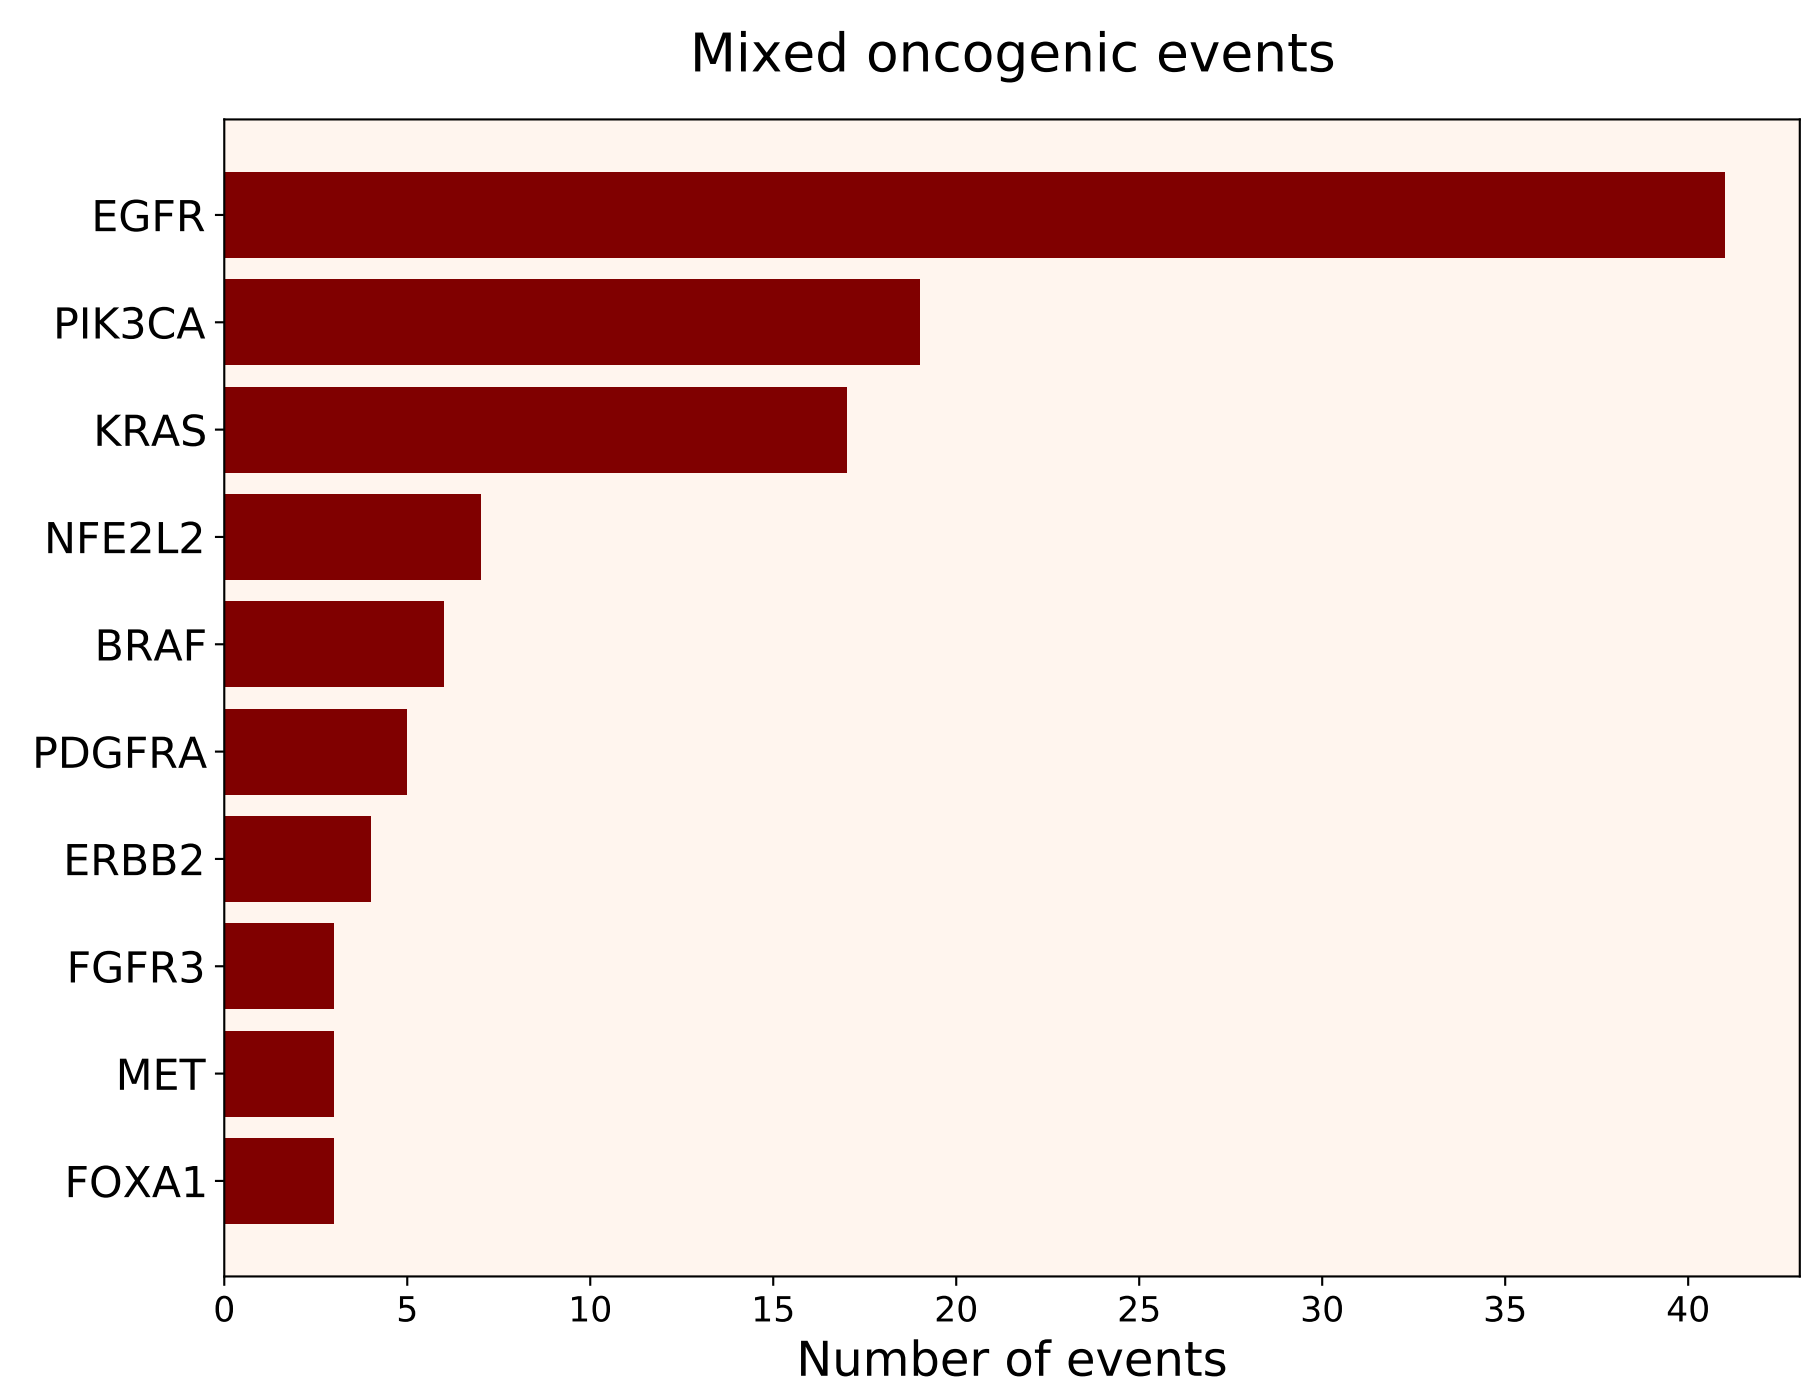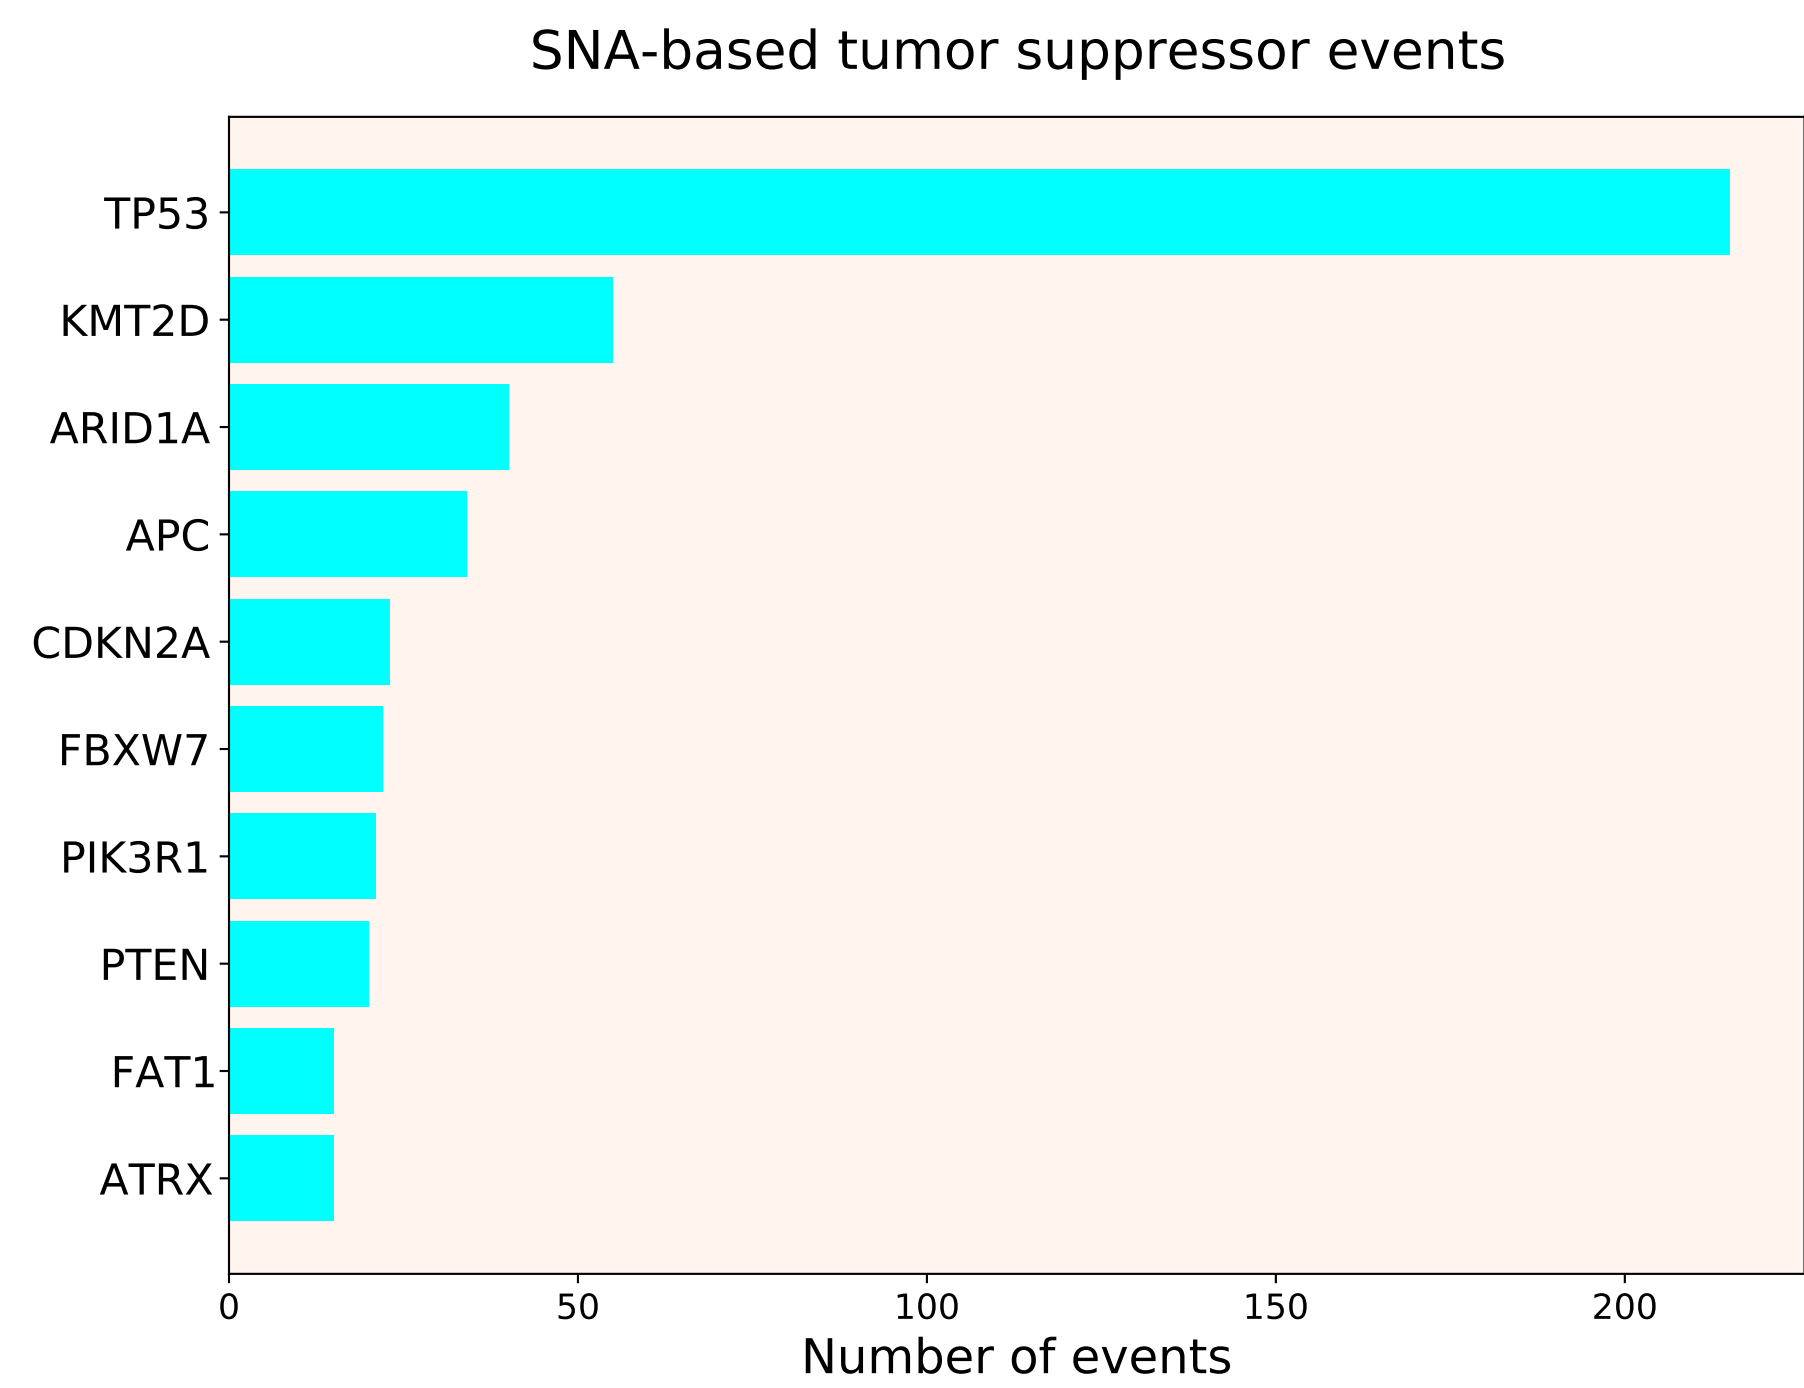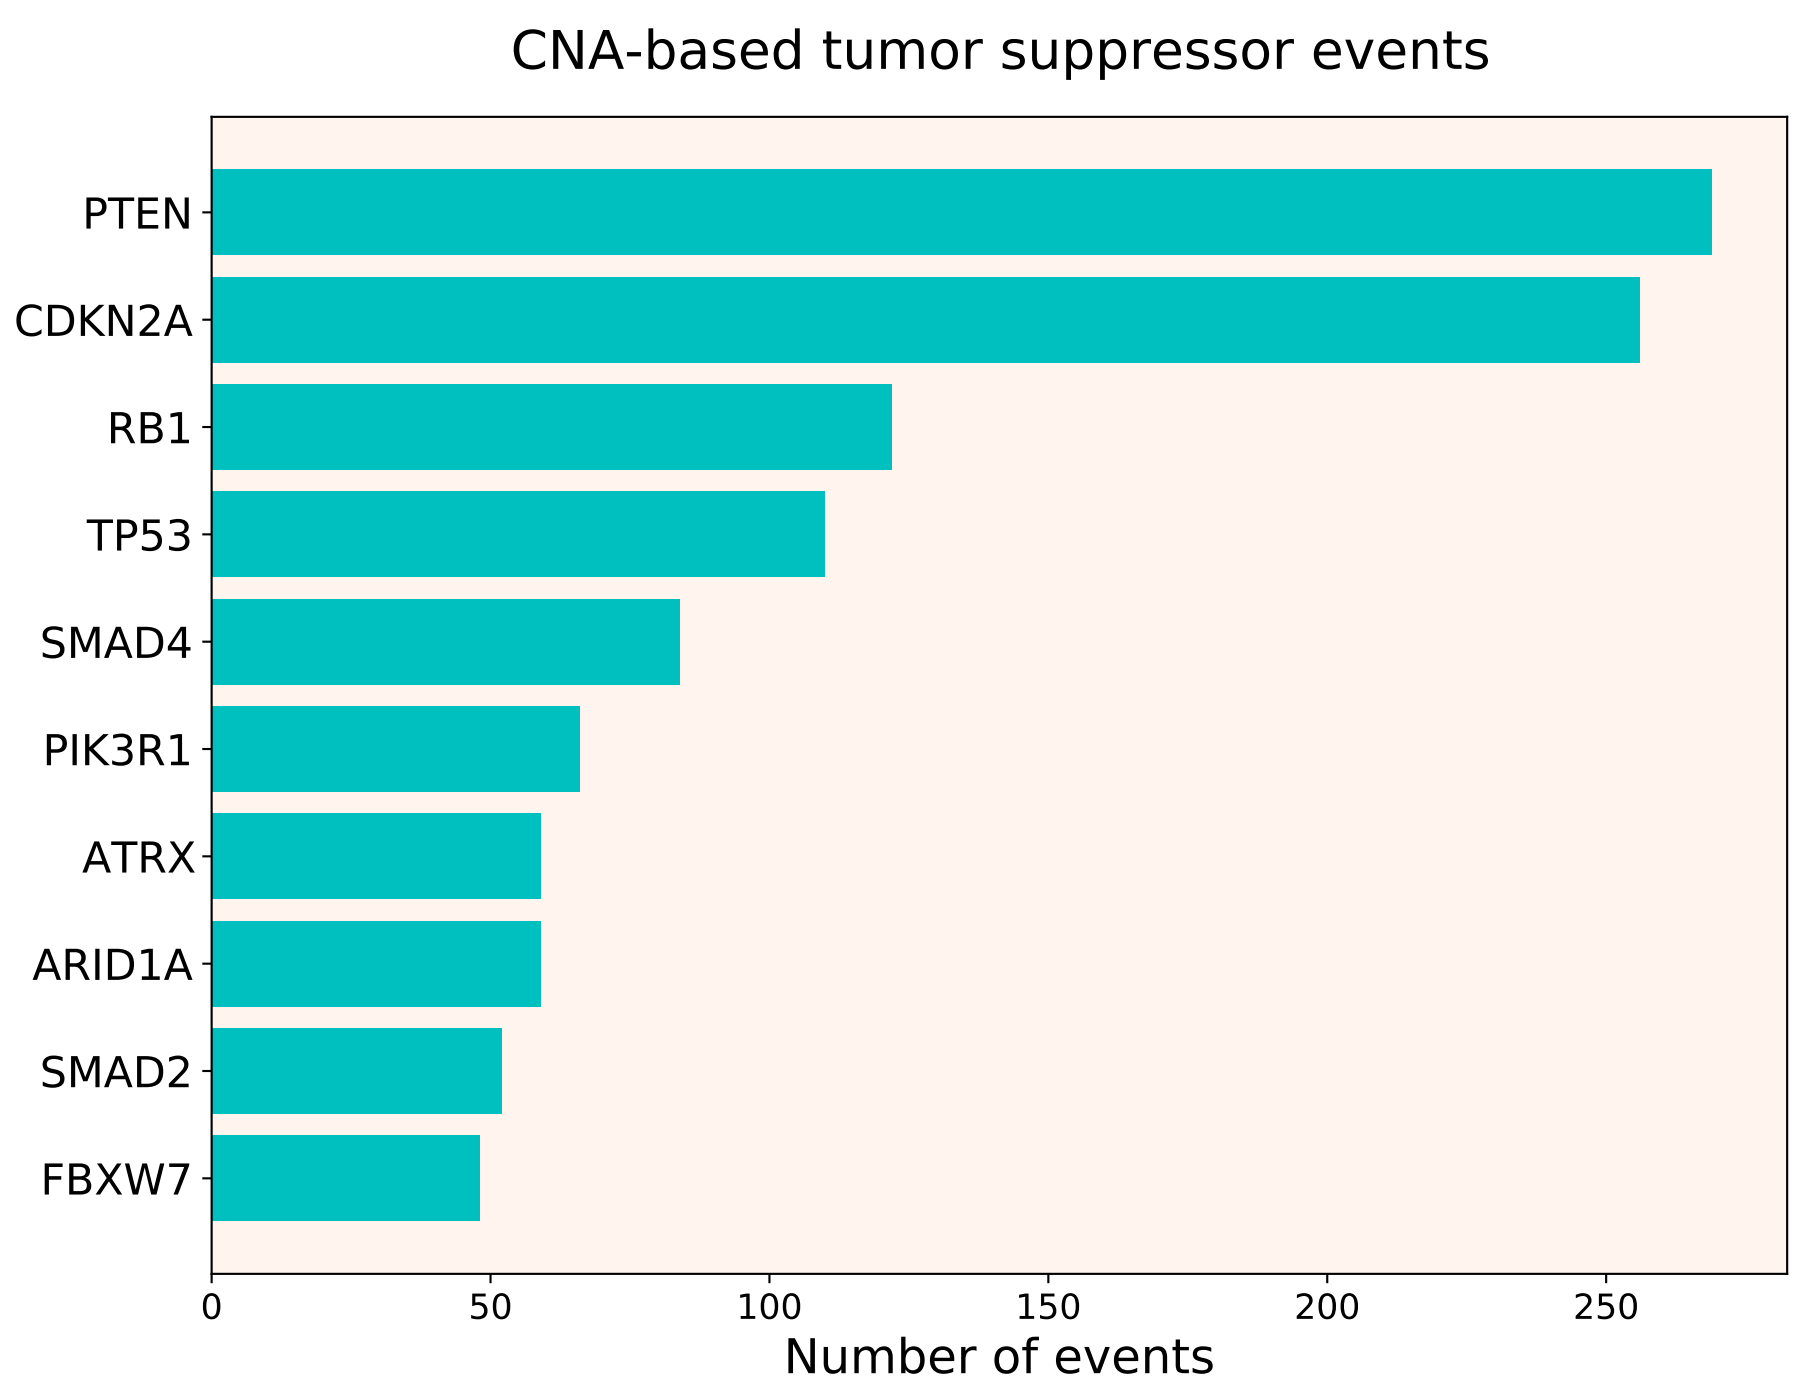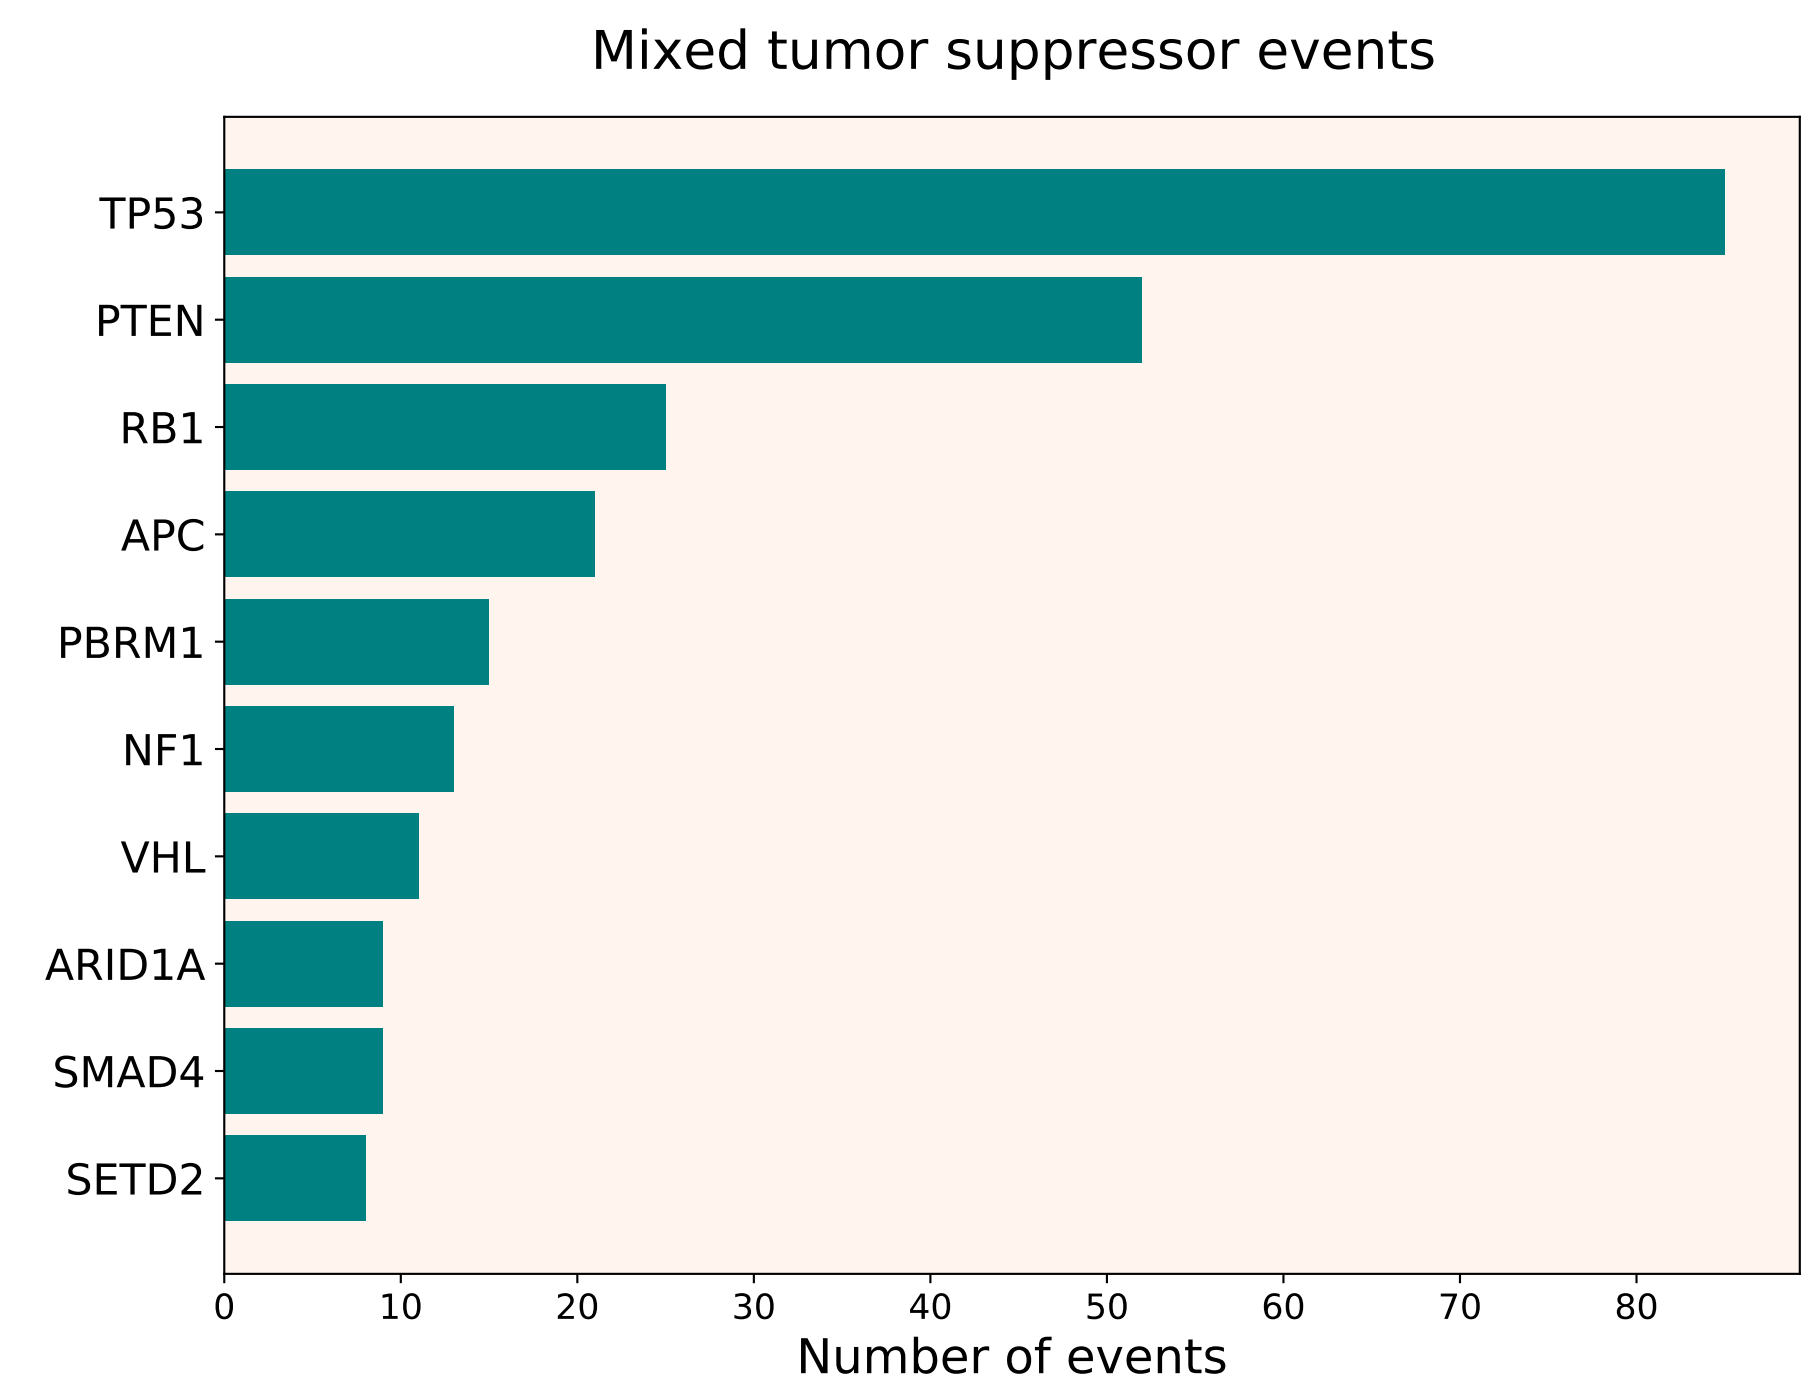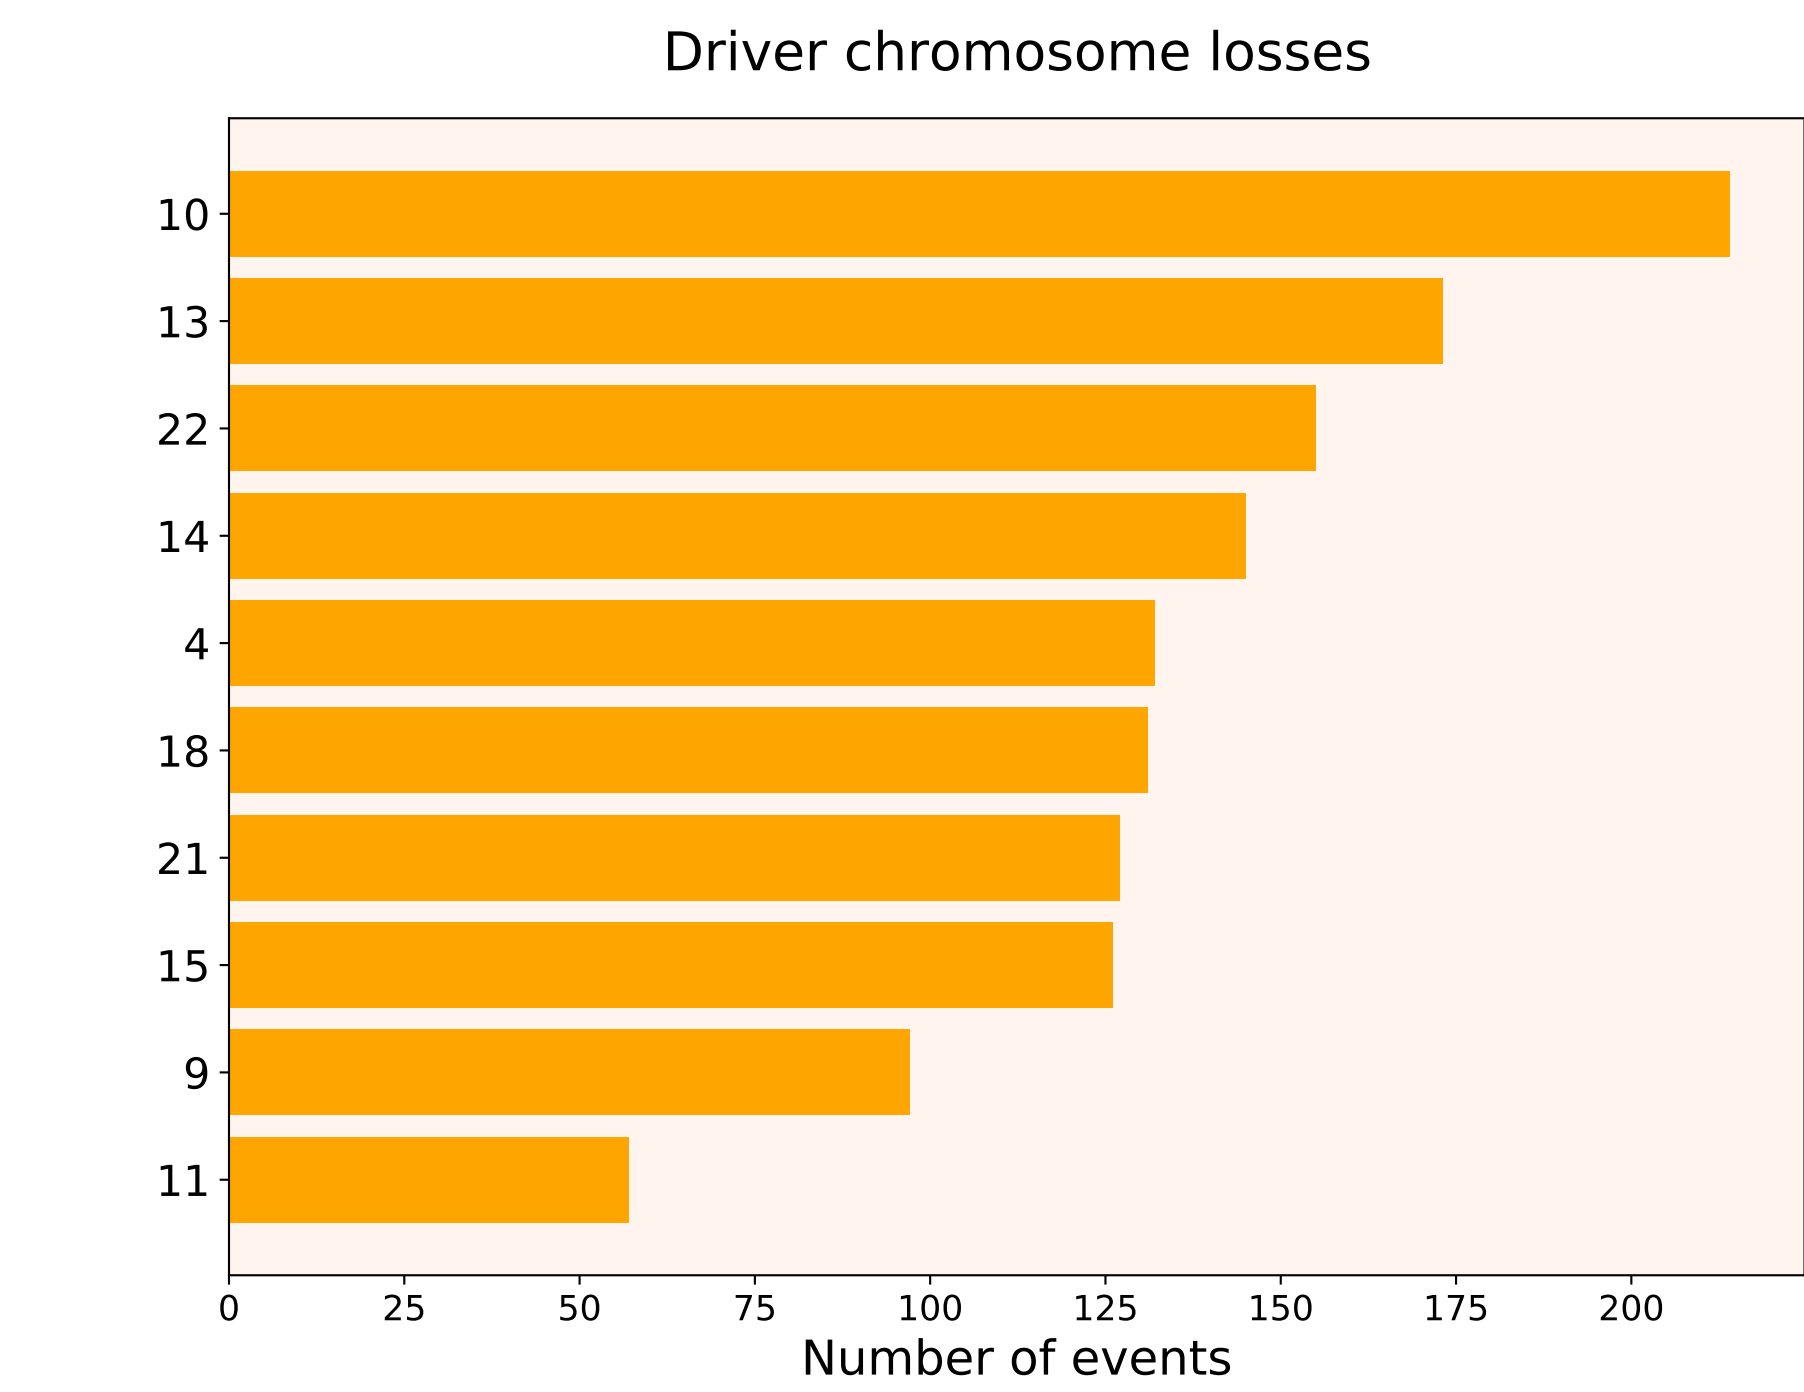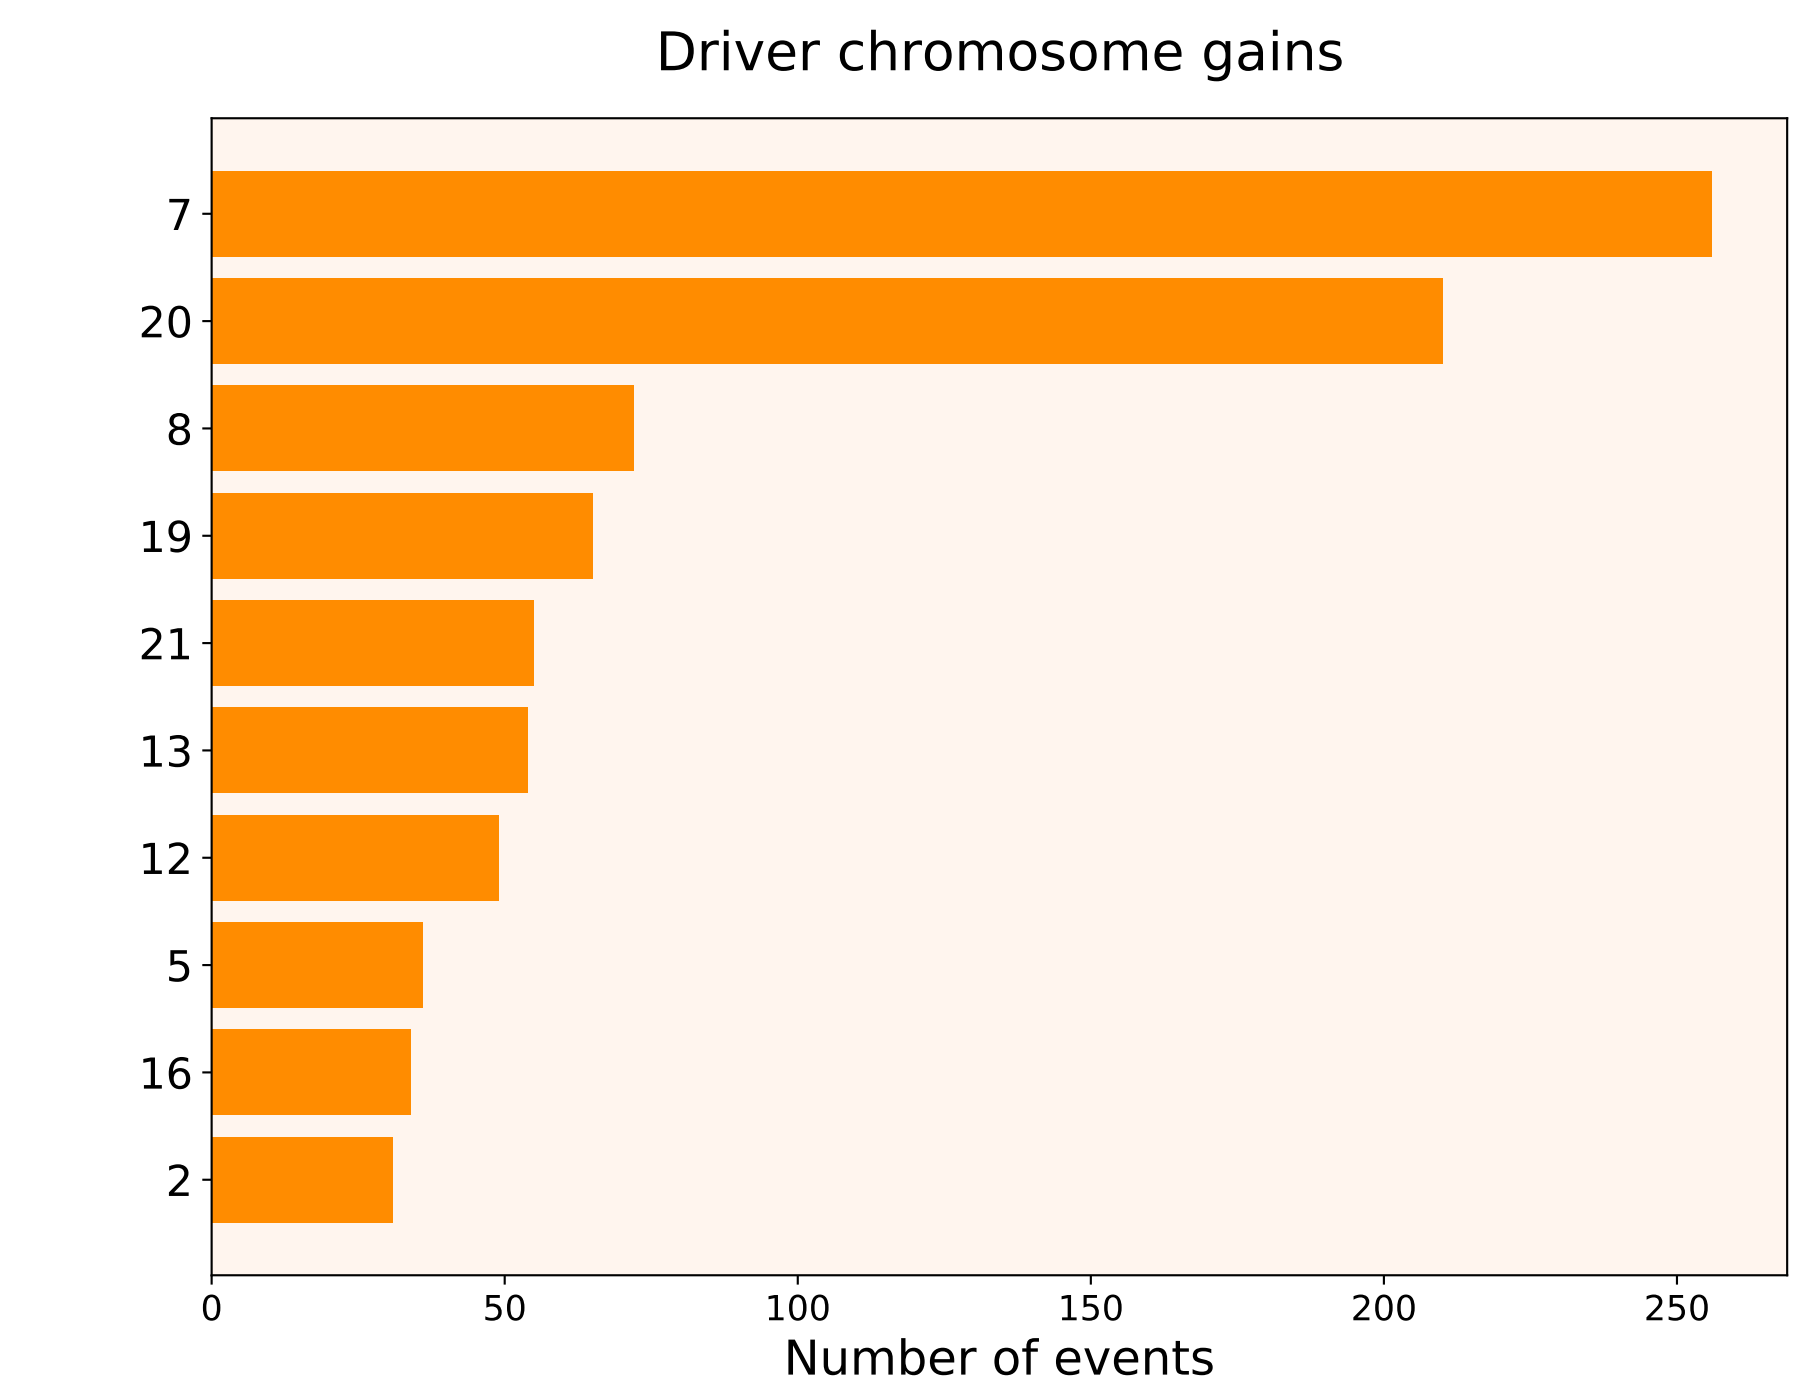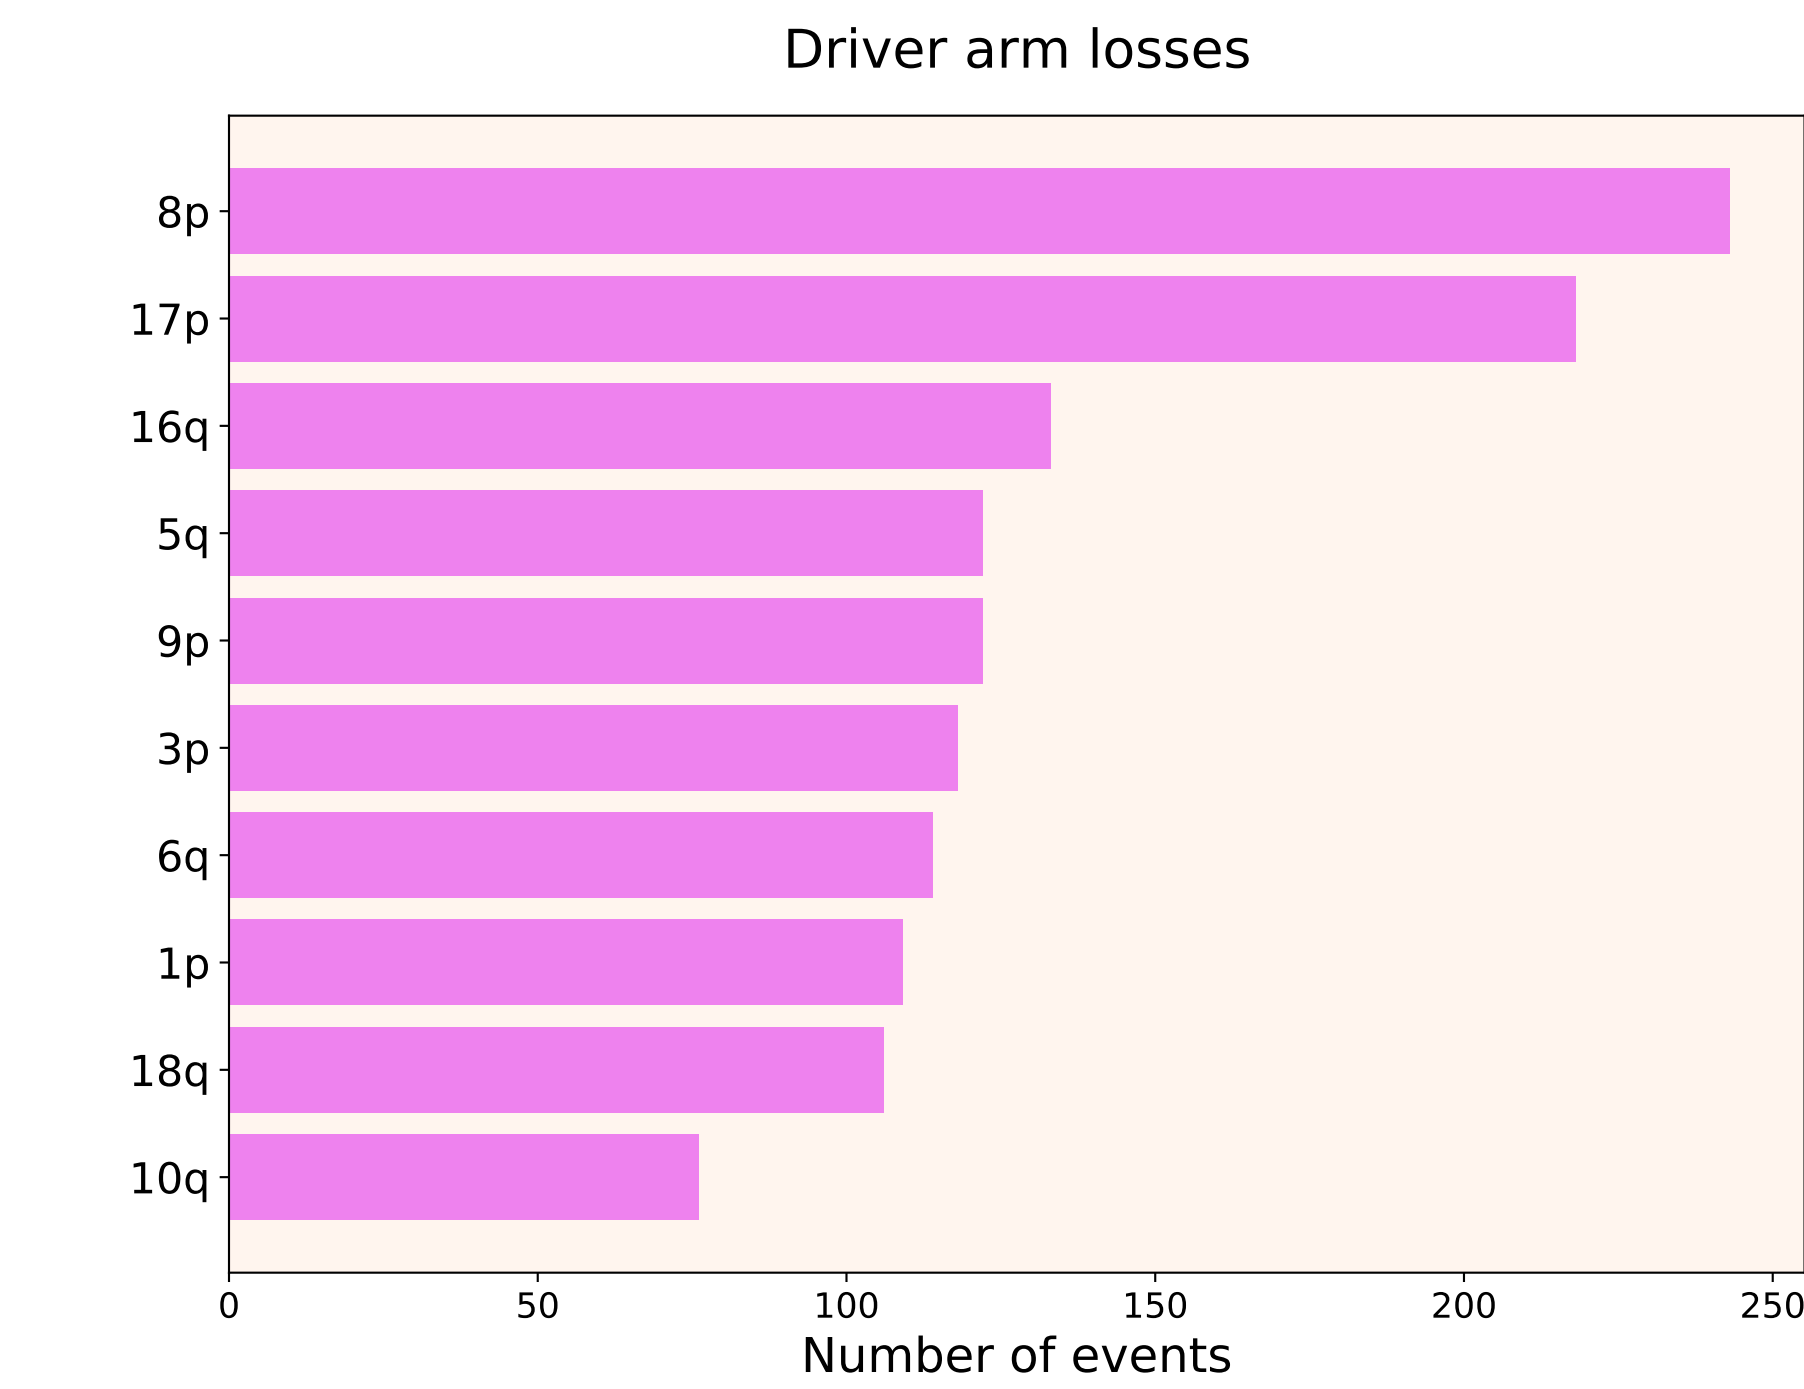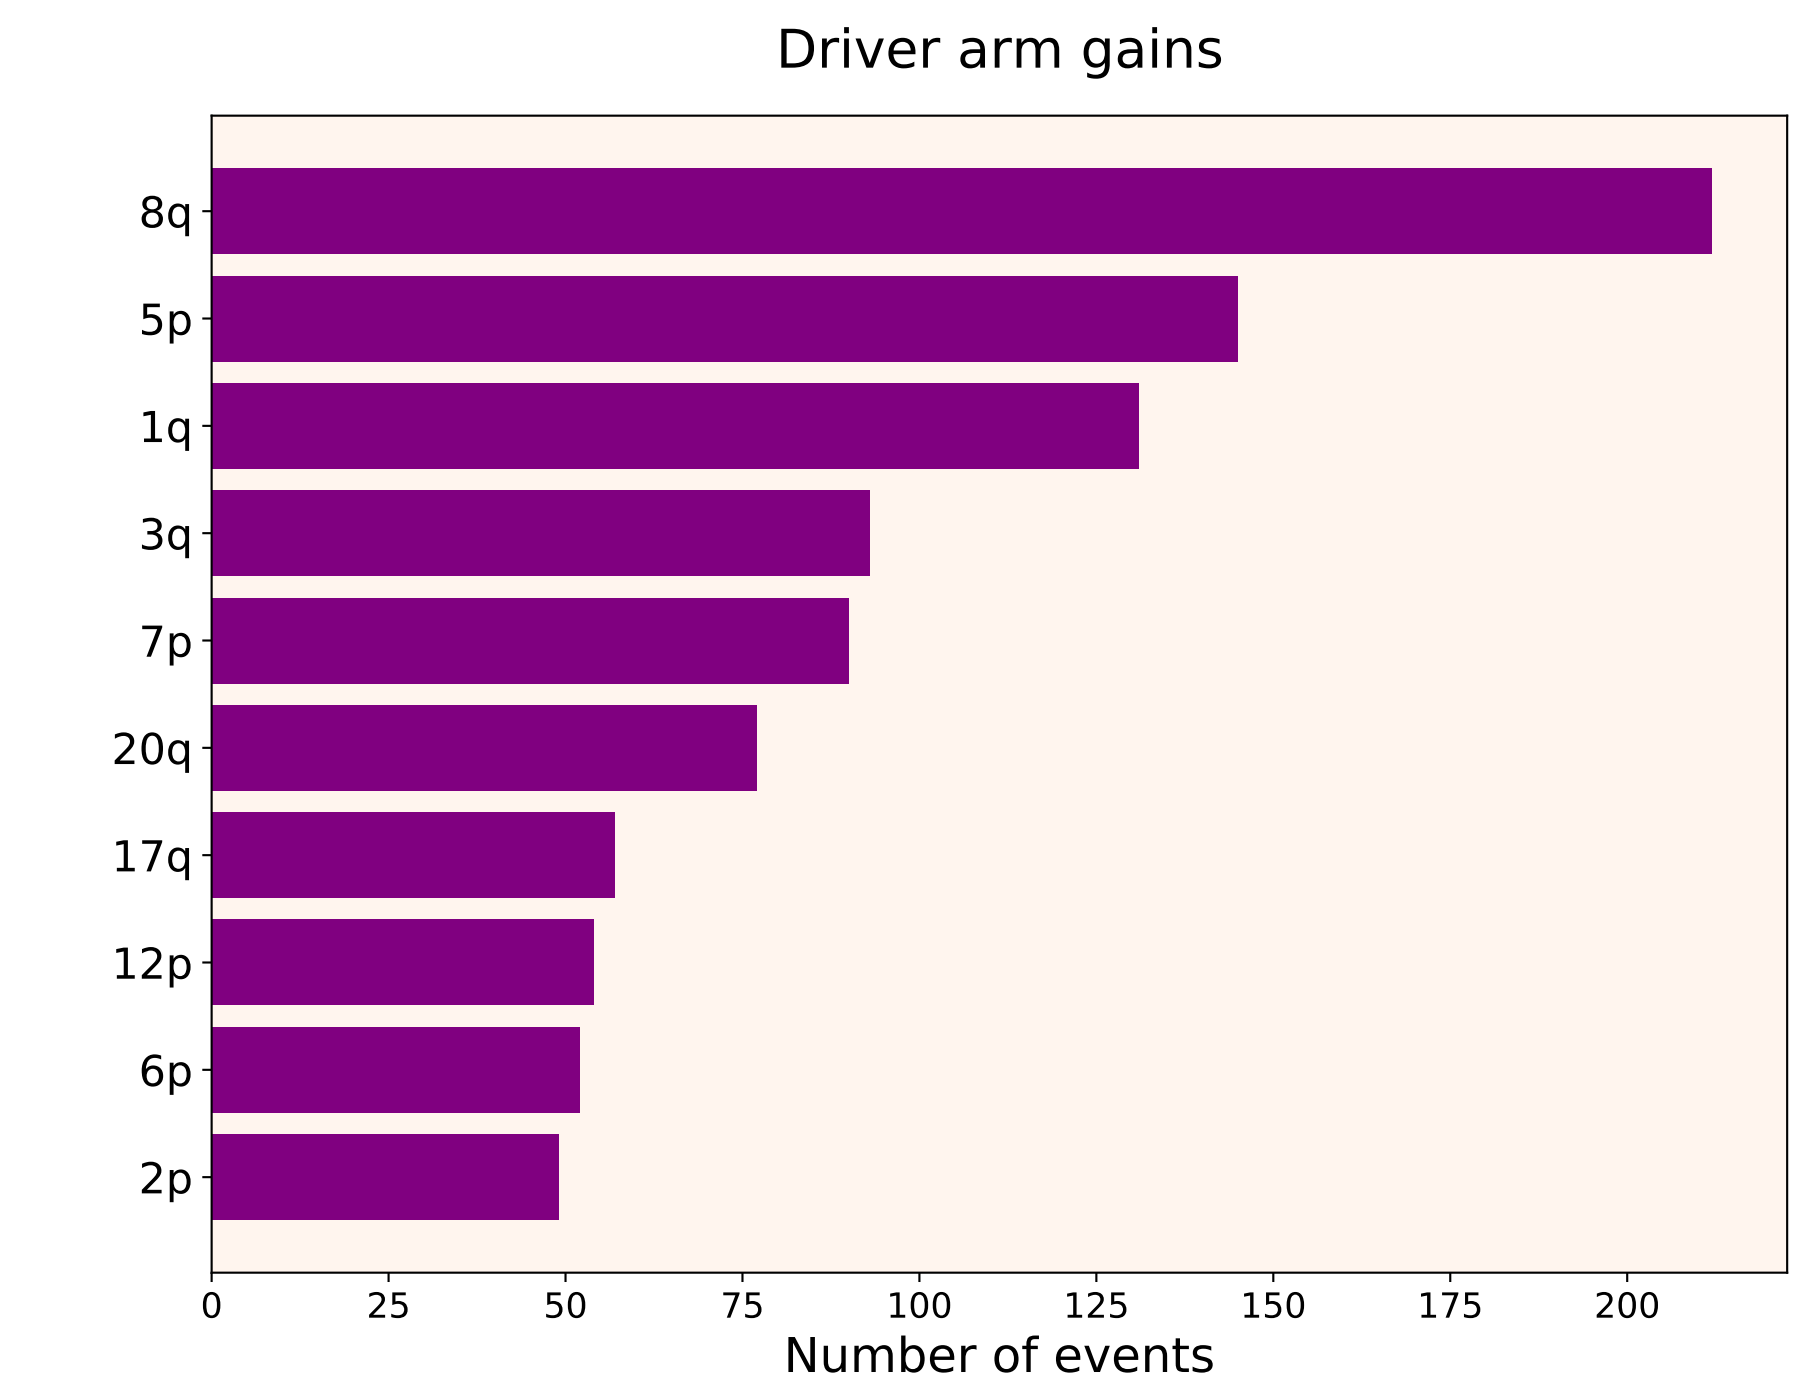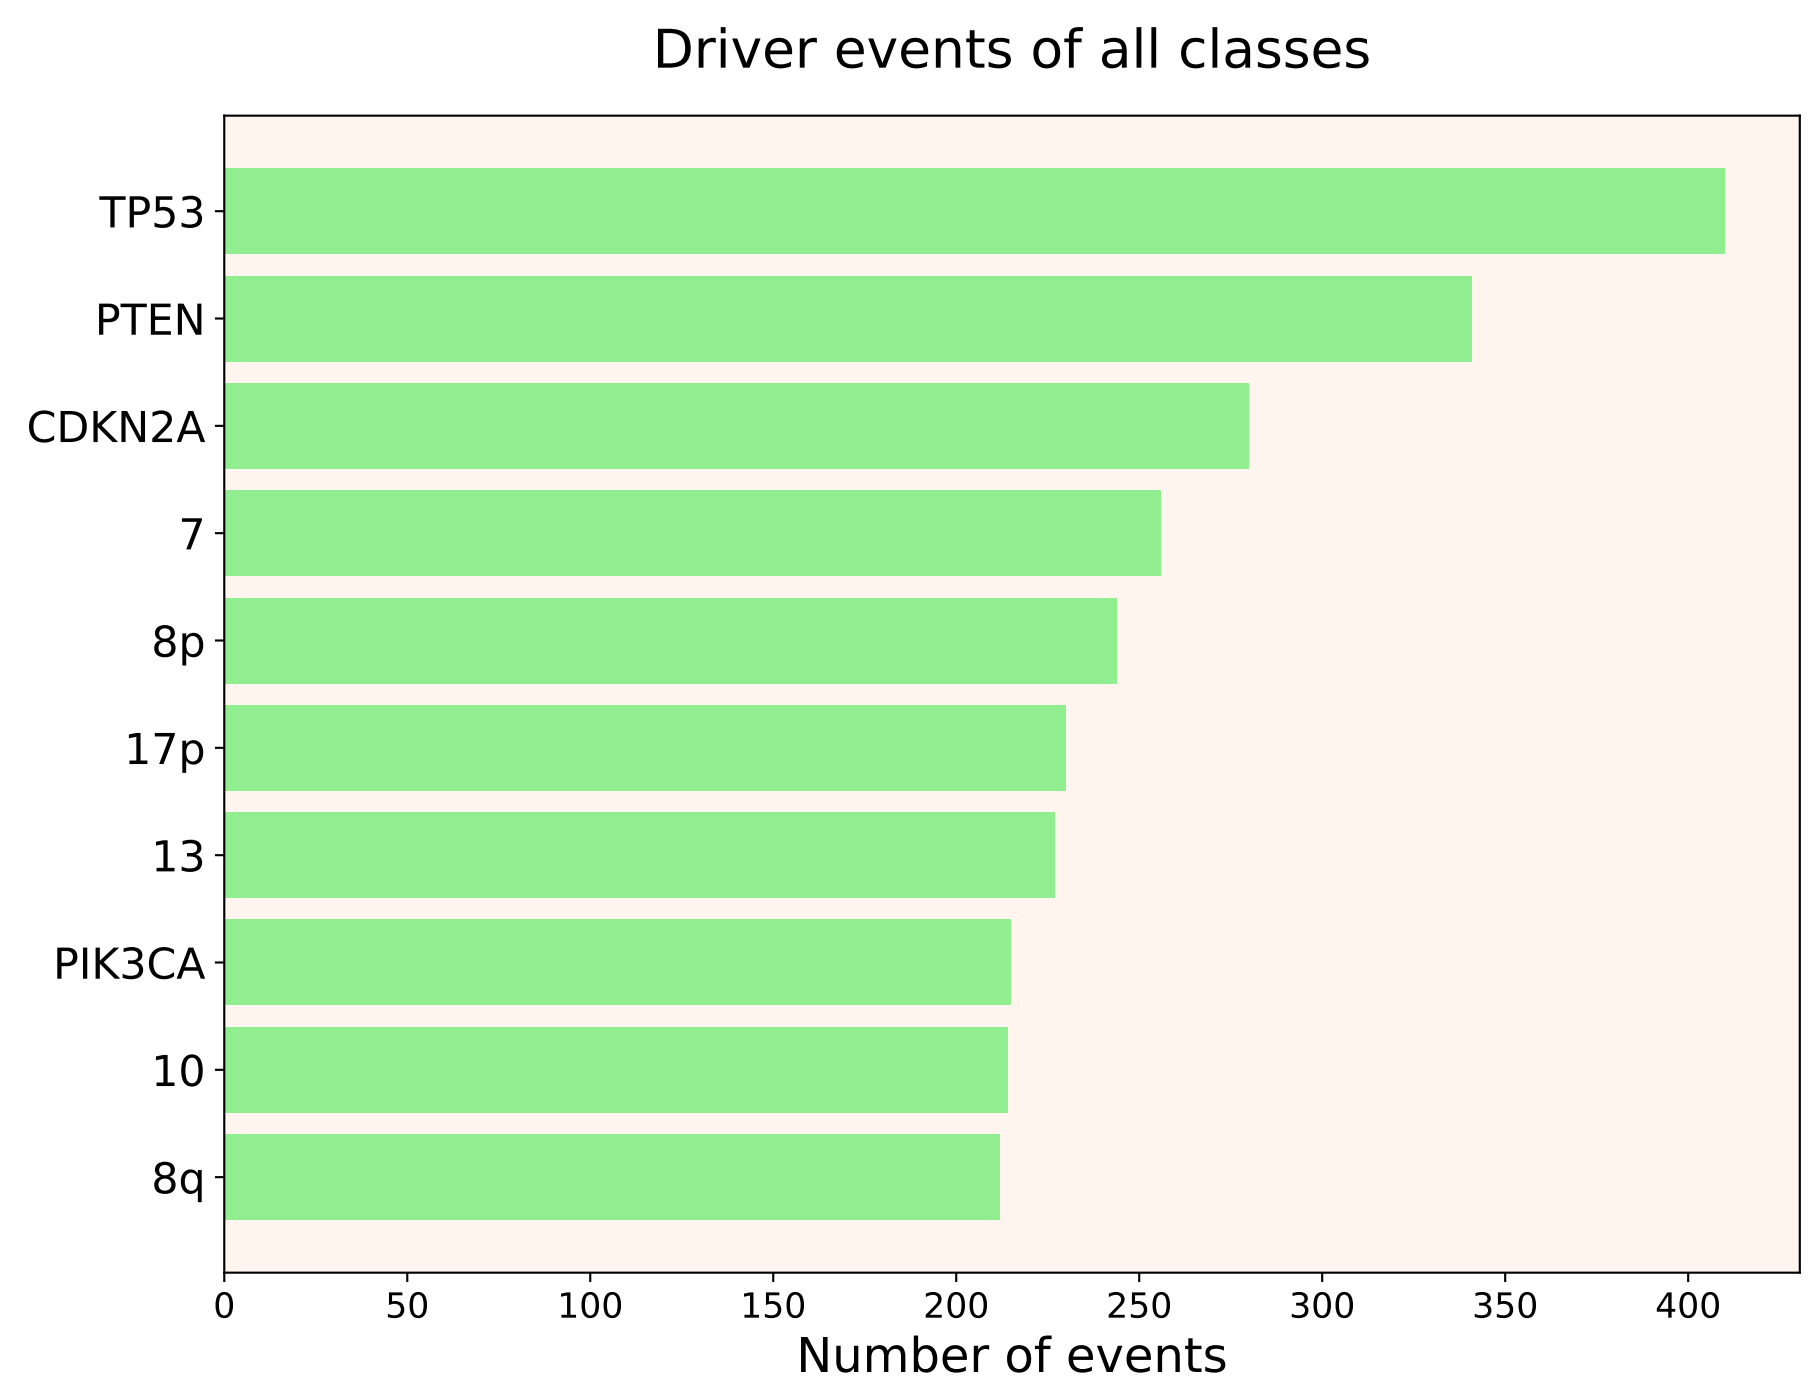

Supplement: Supplemental_Data_S1.zip [file Supplemental_Data_S1.zip]

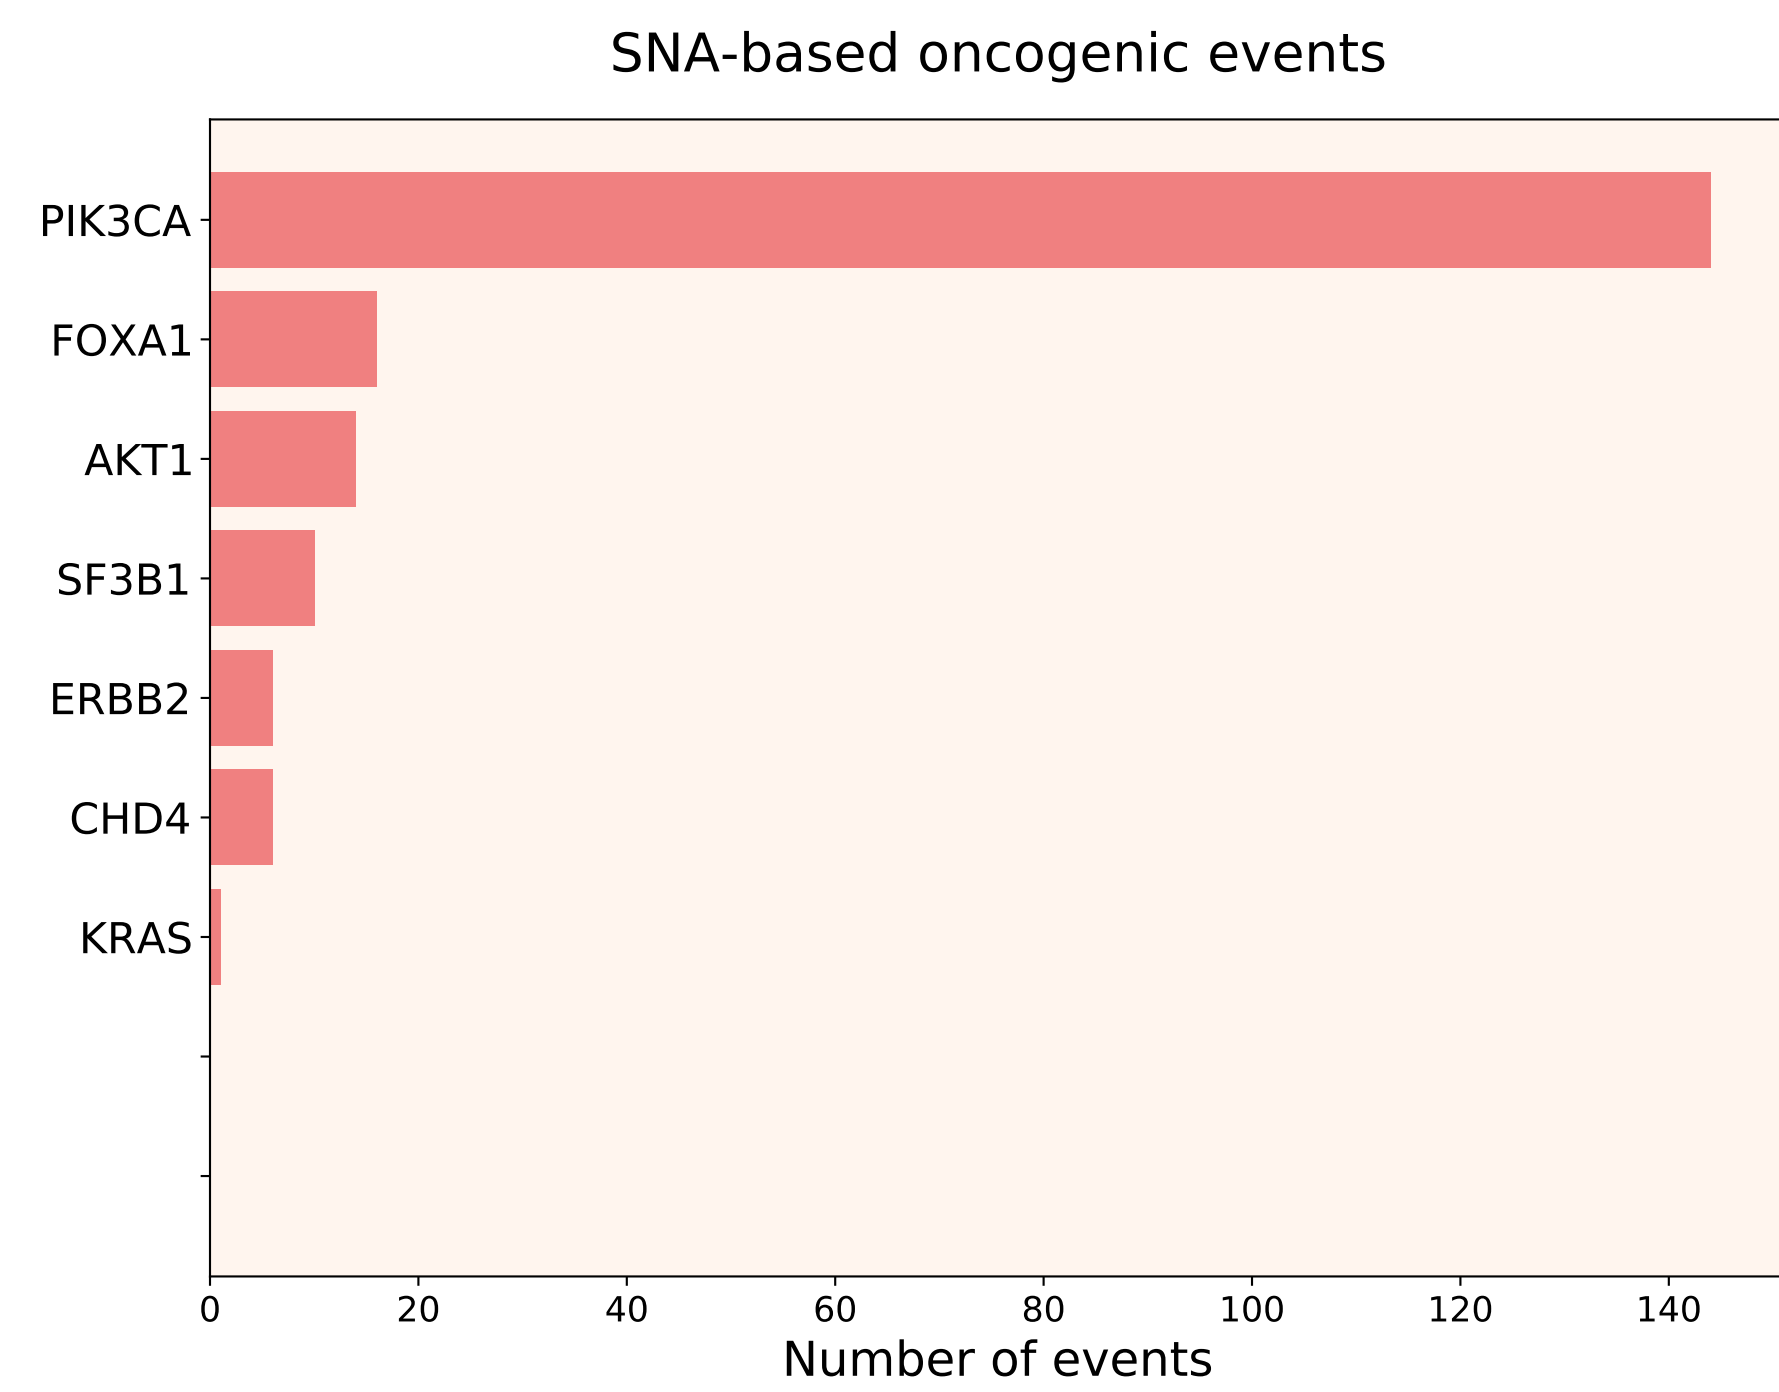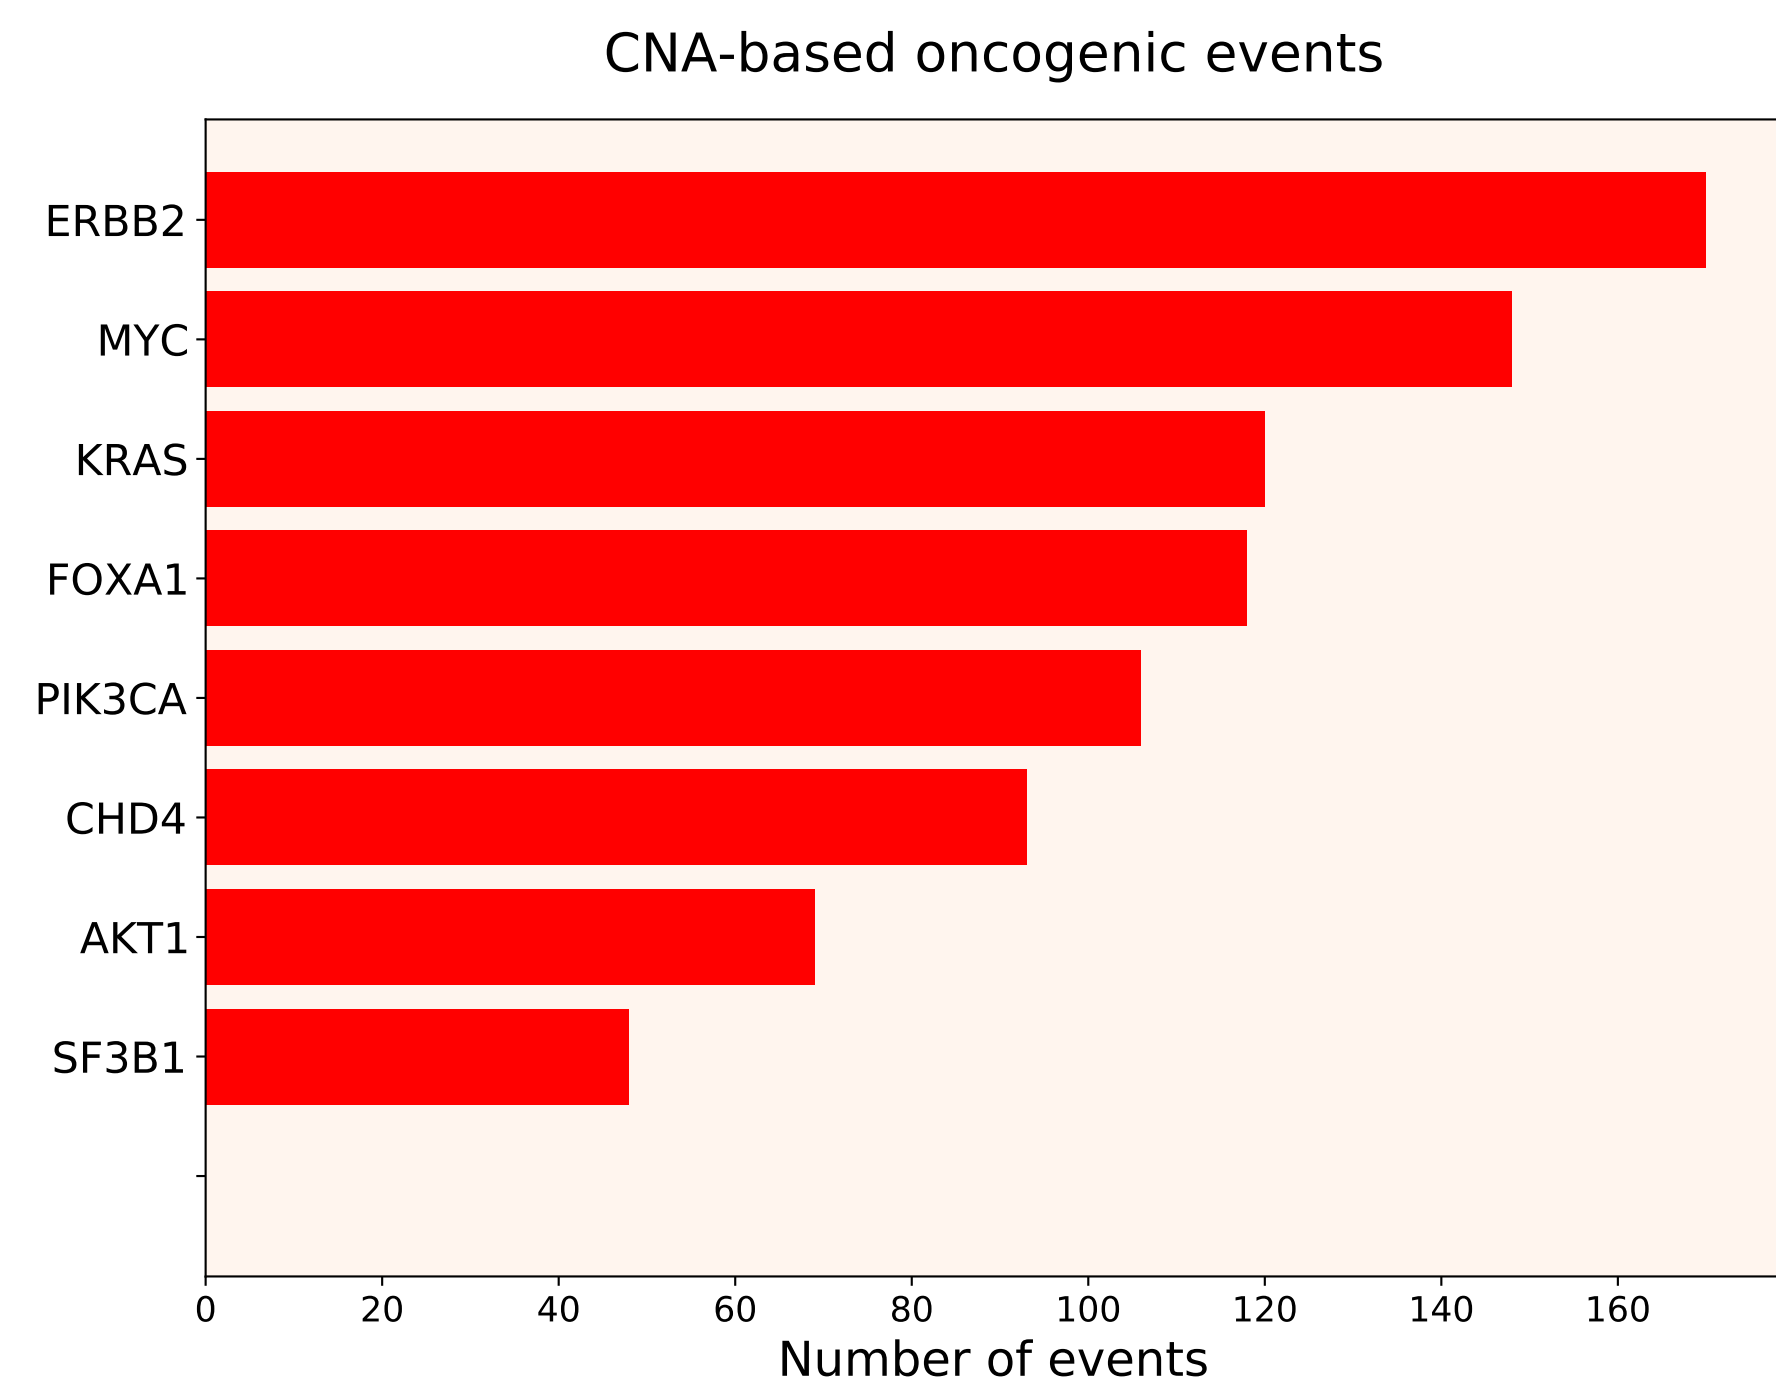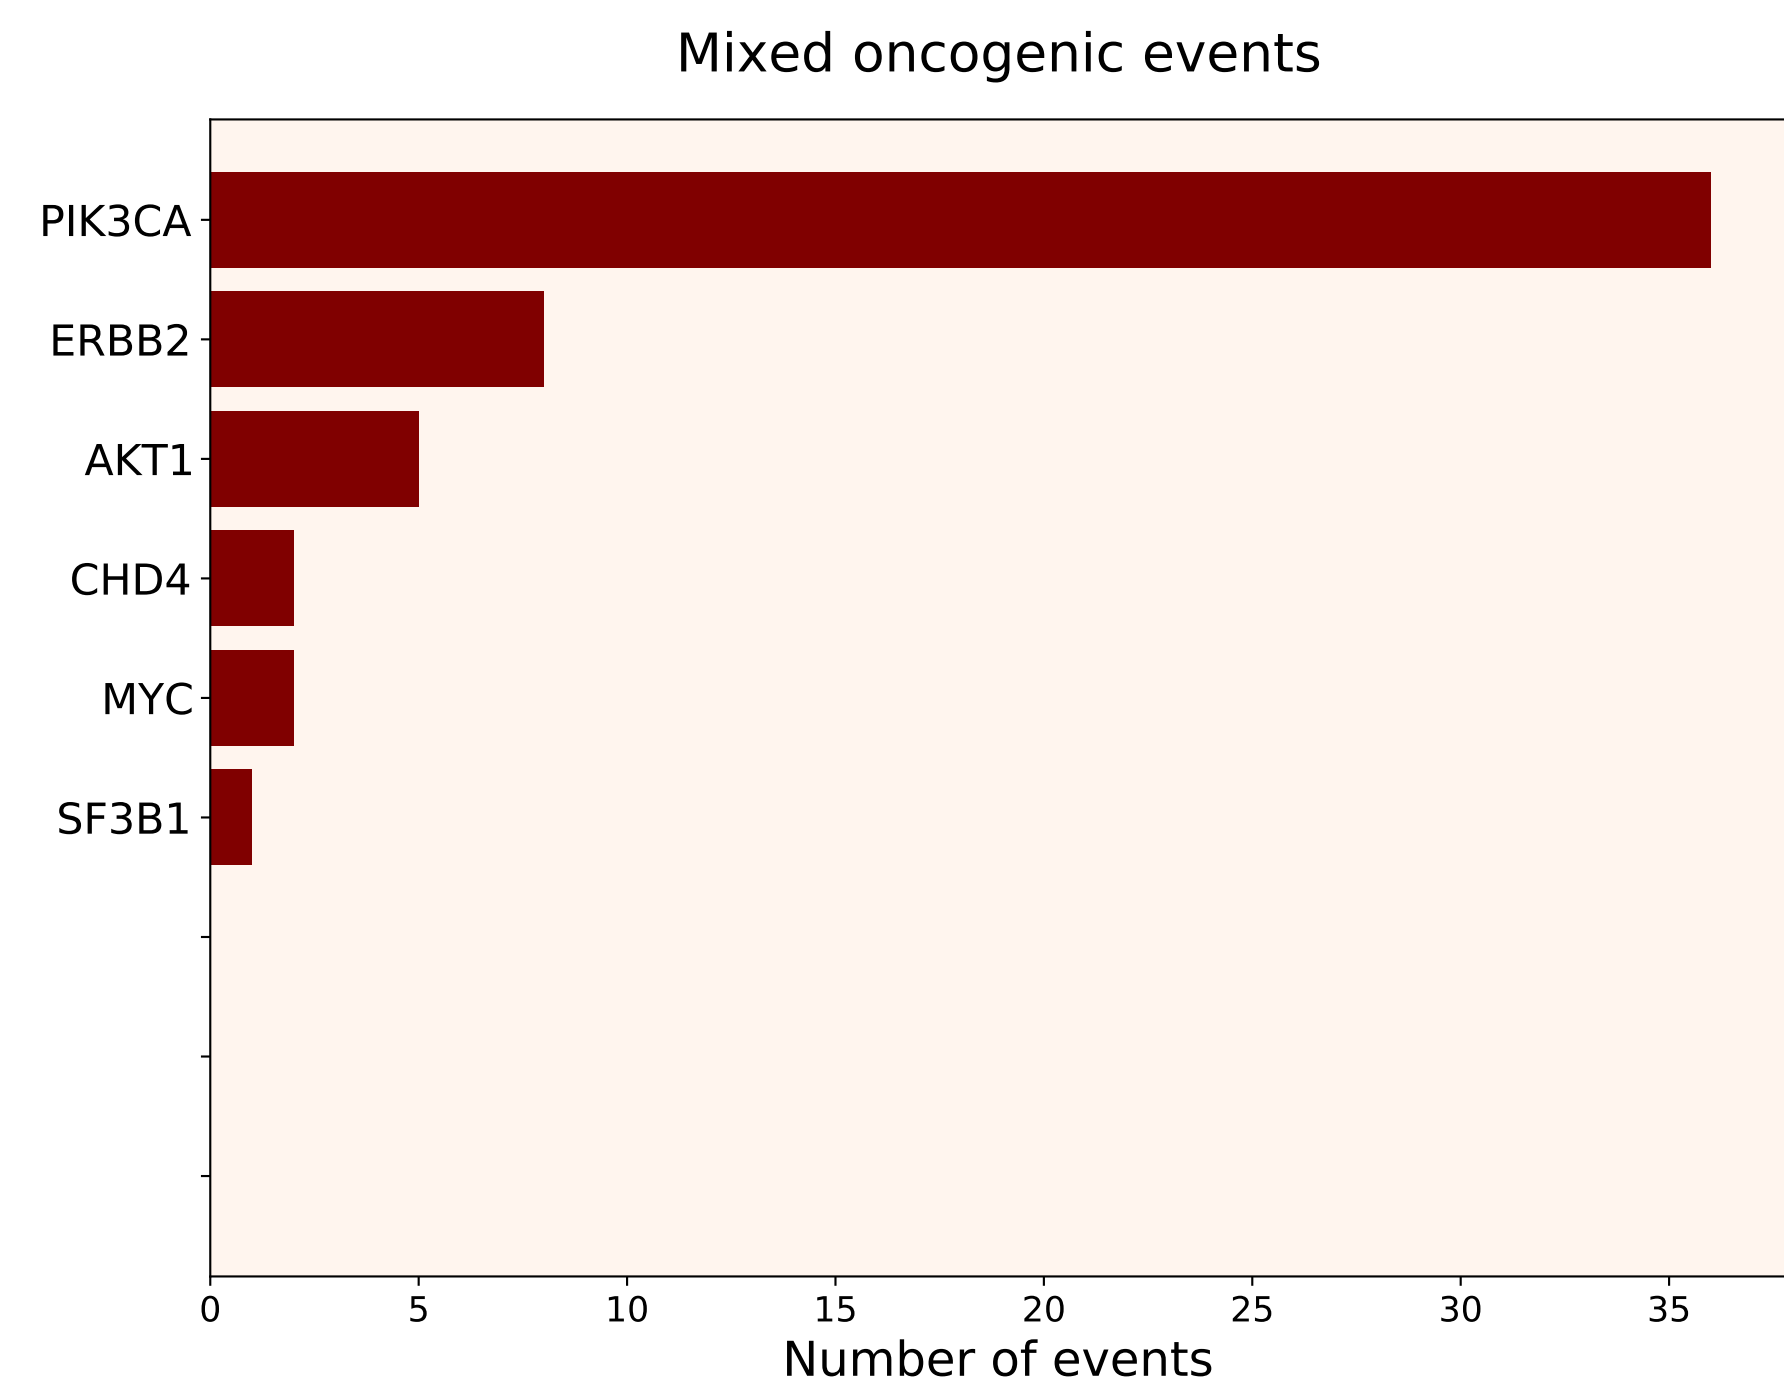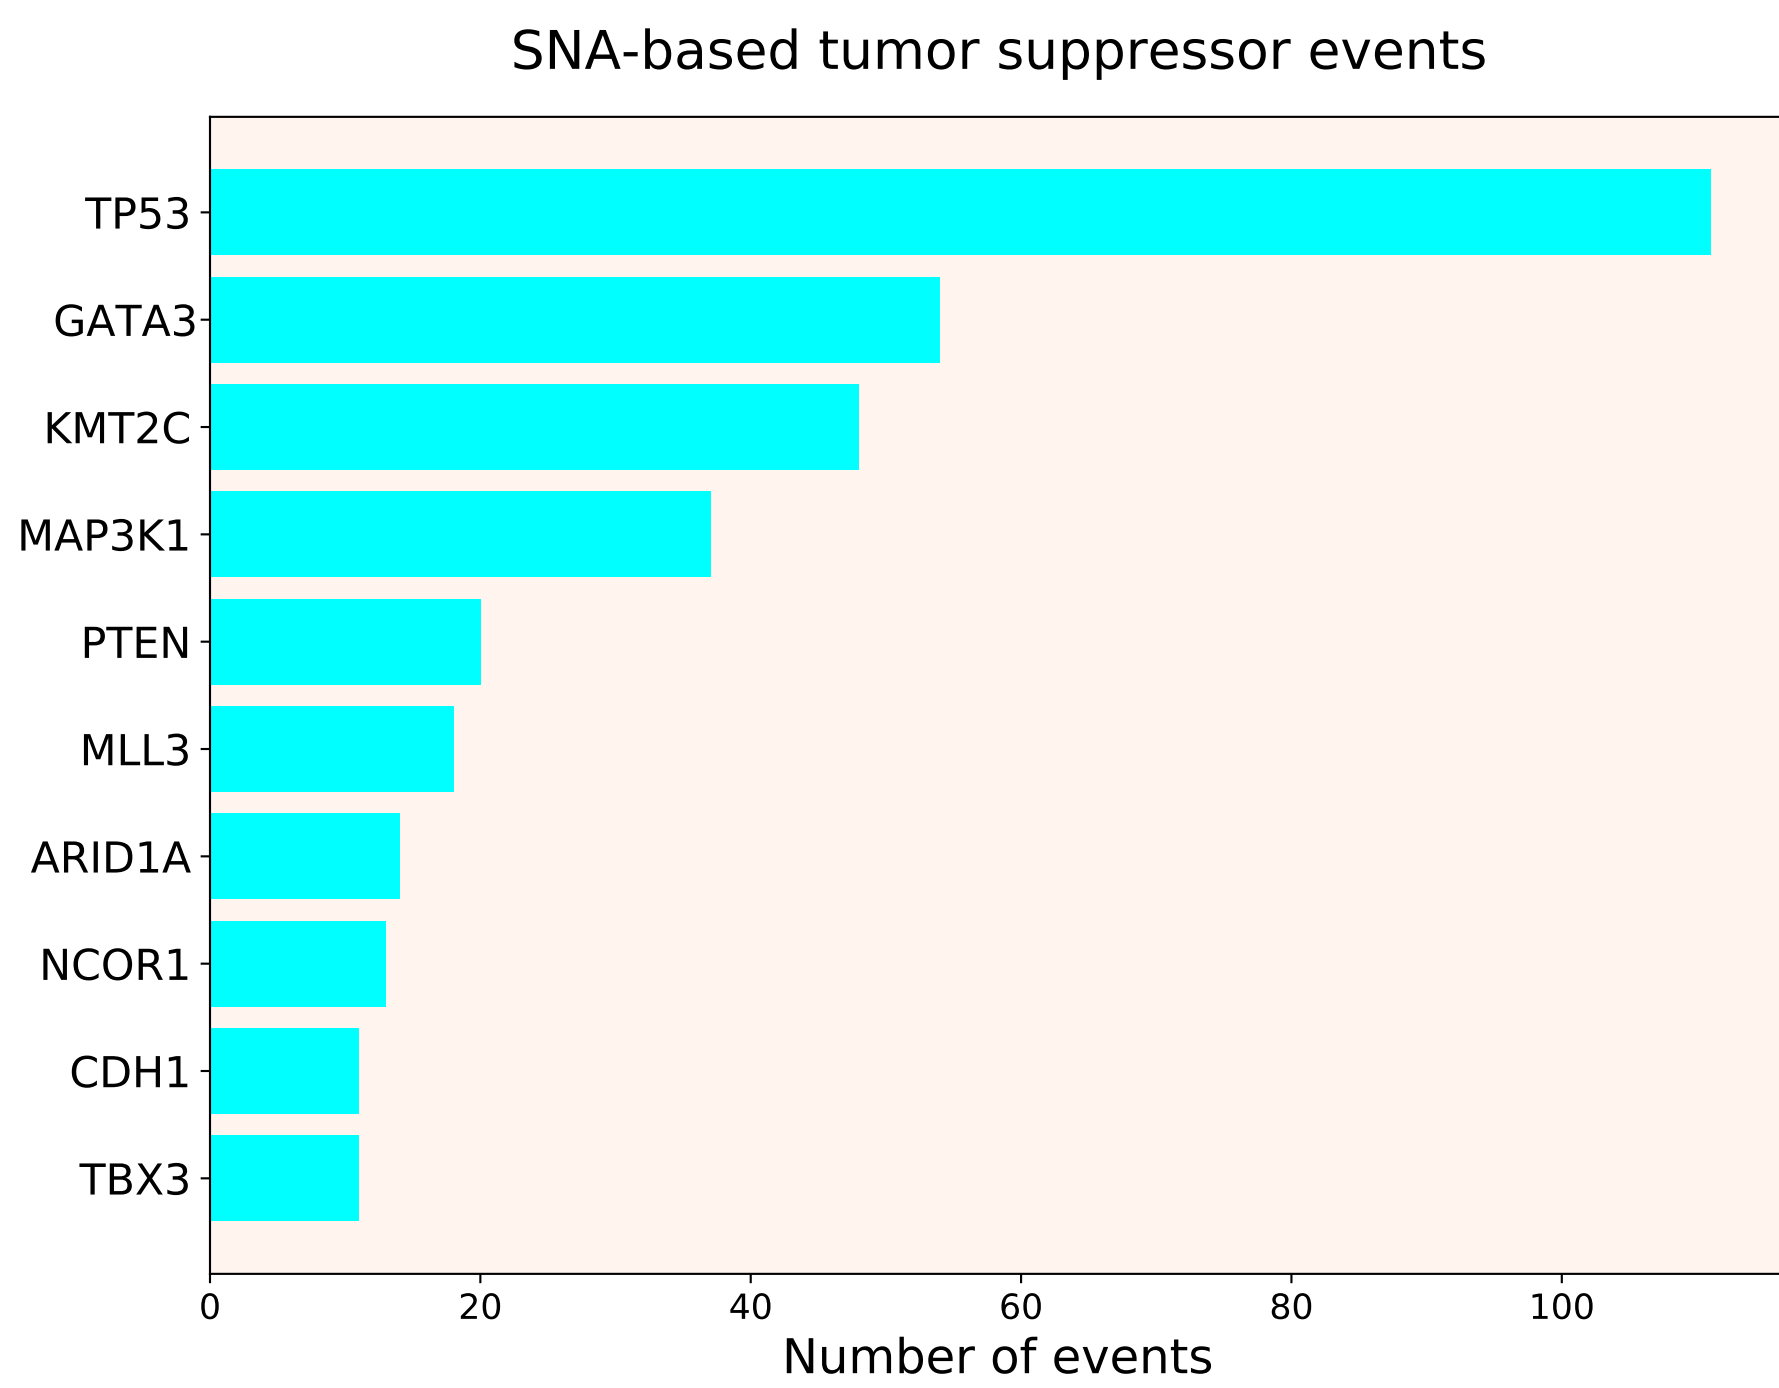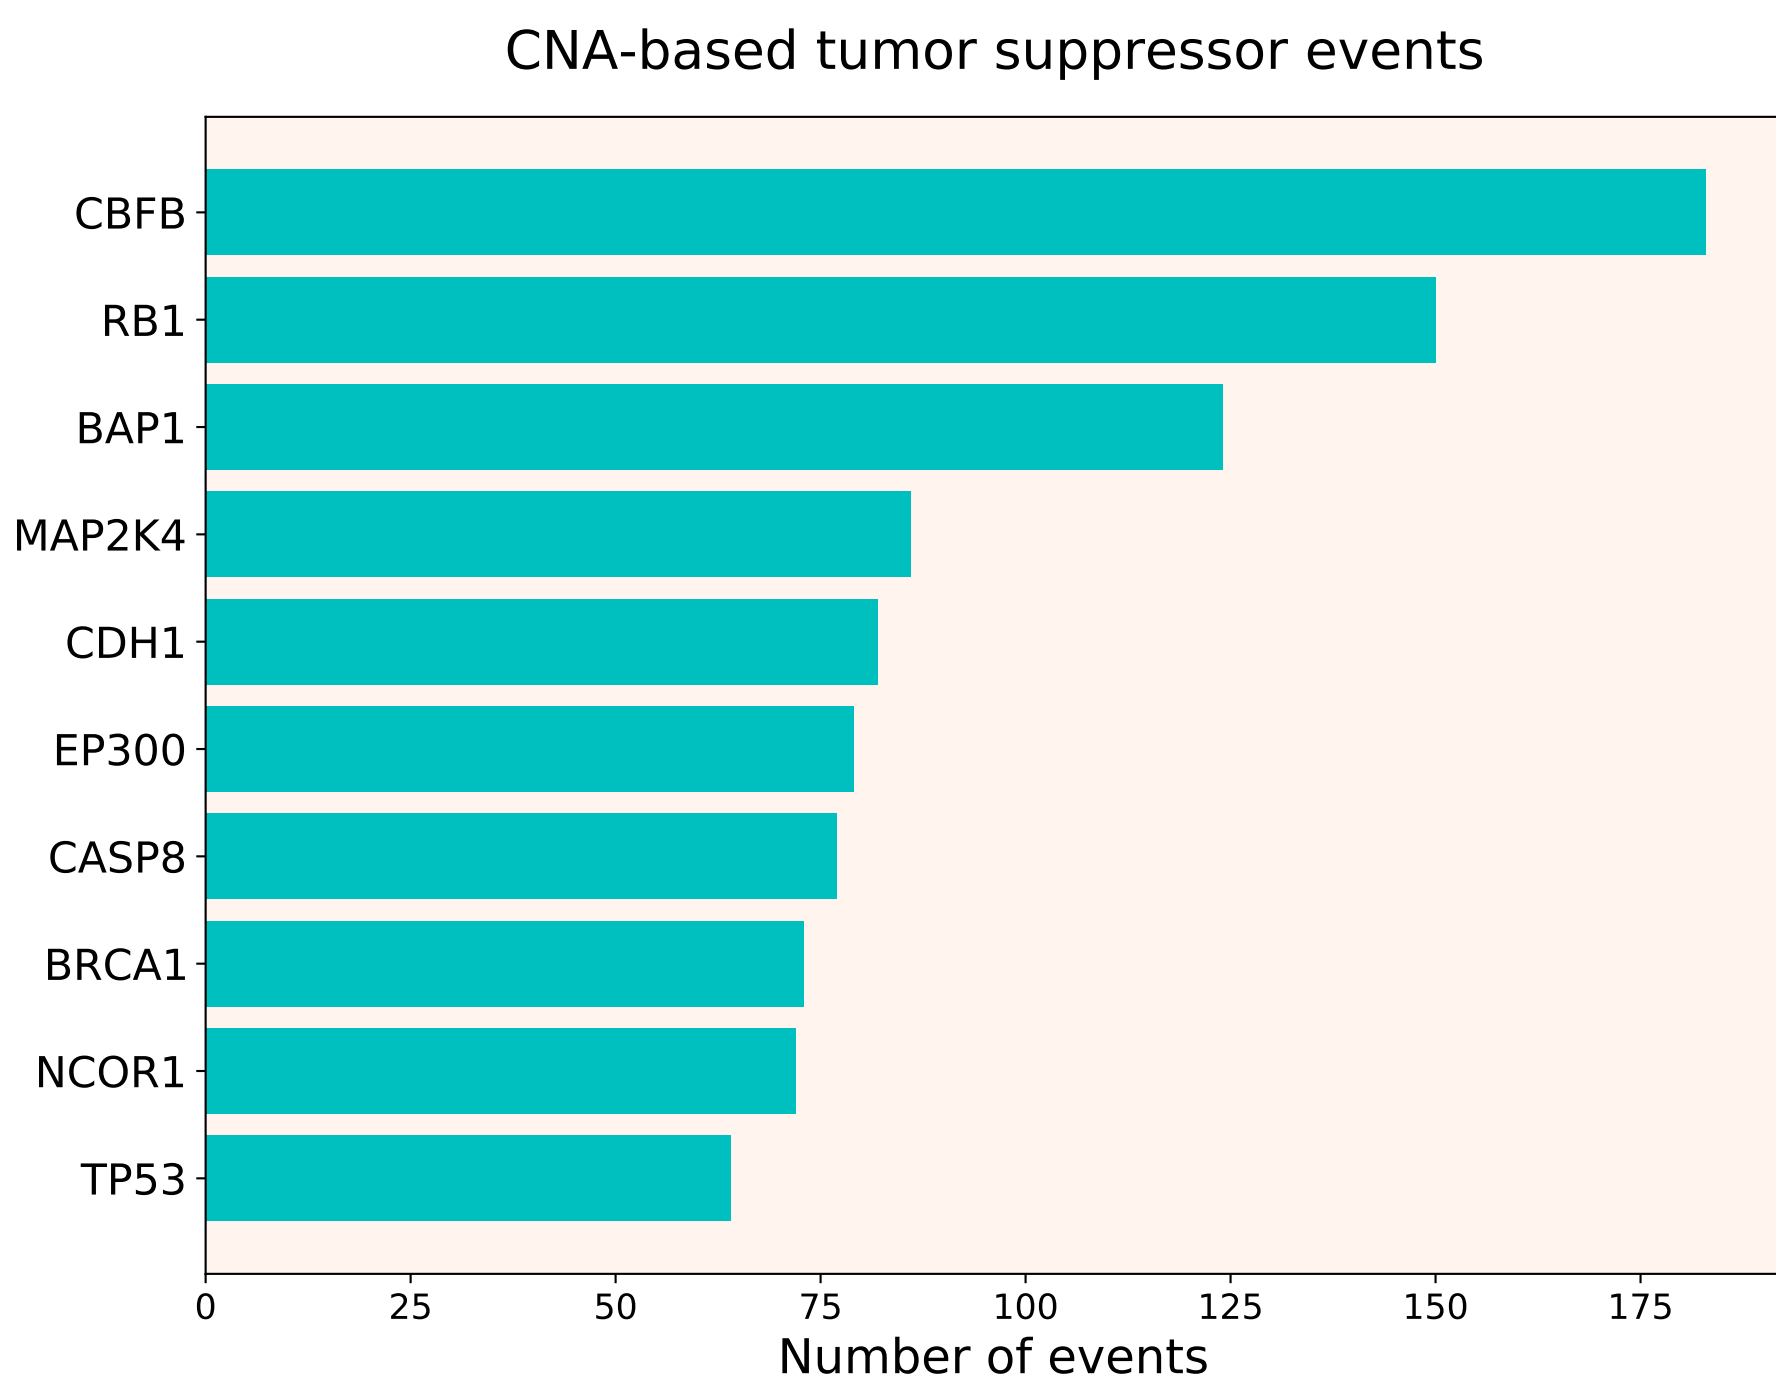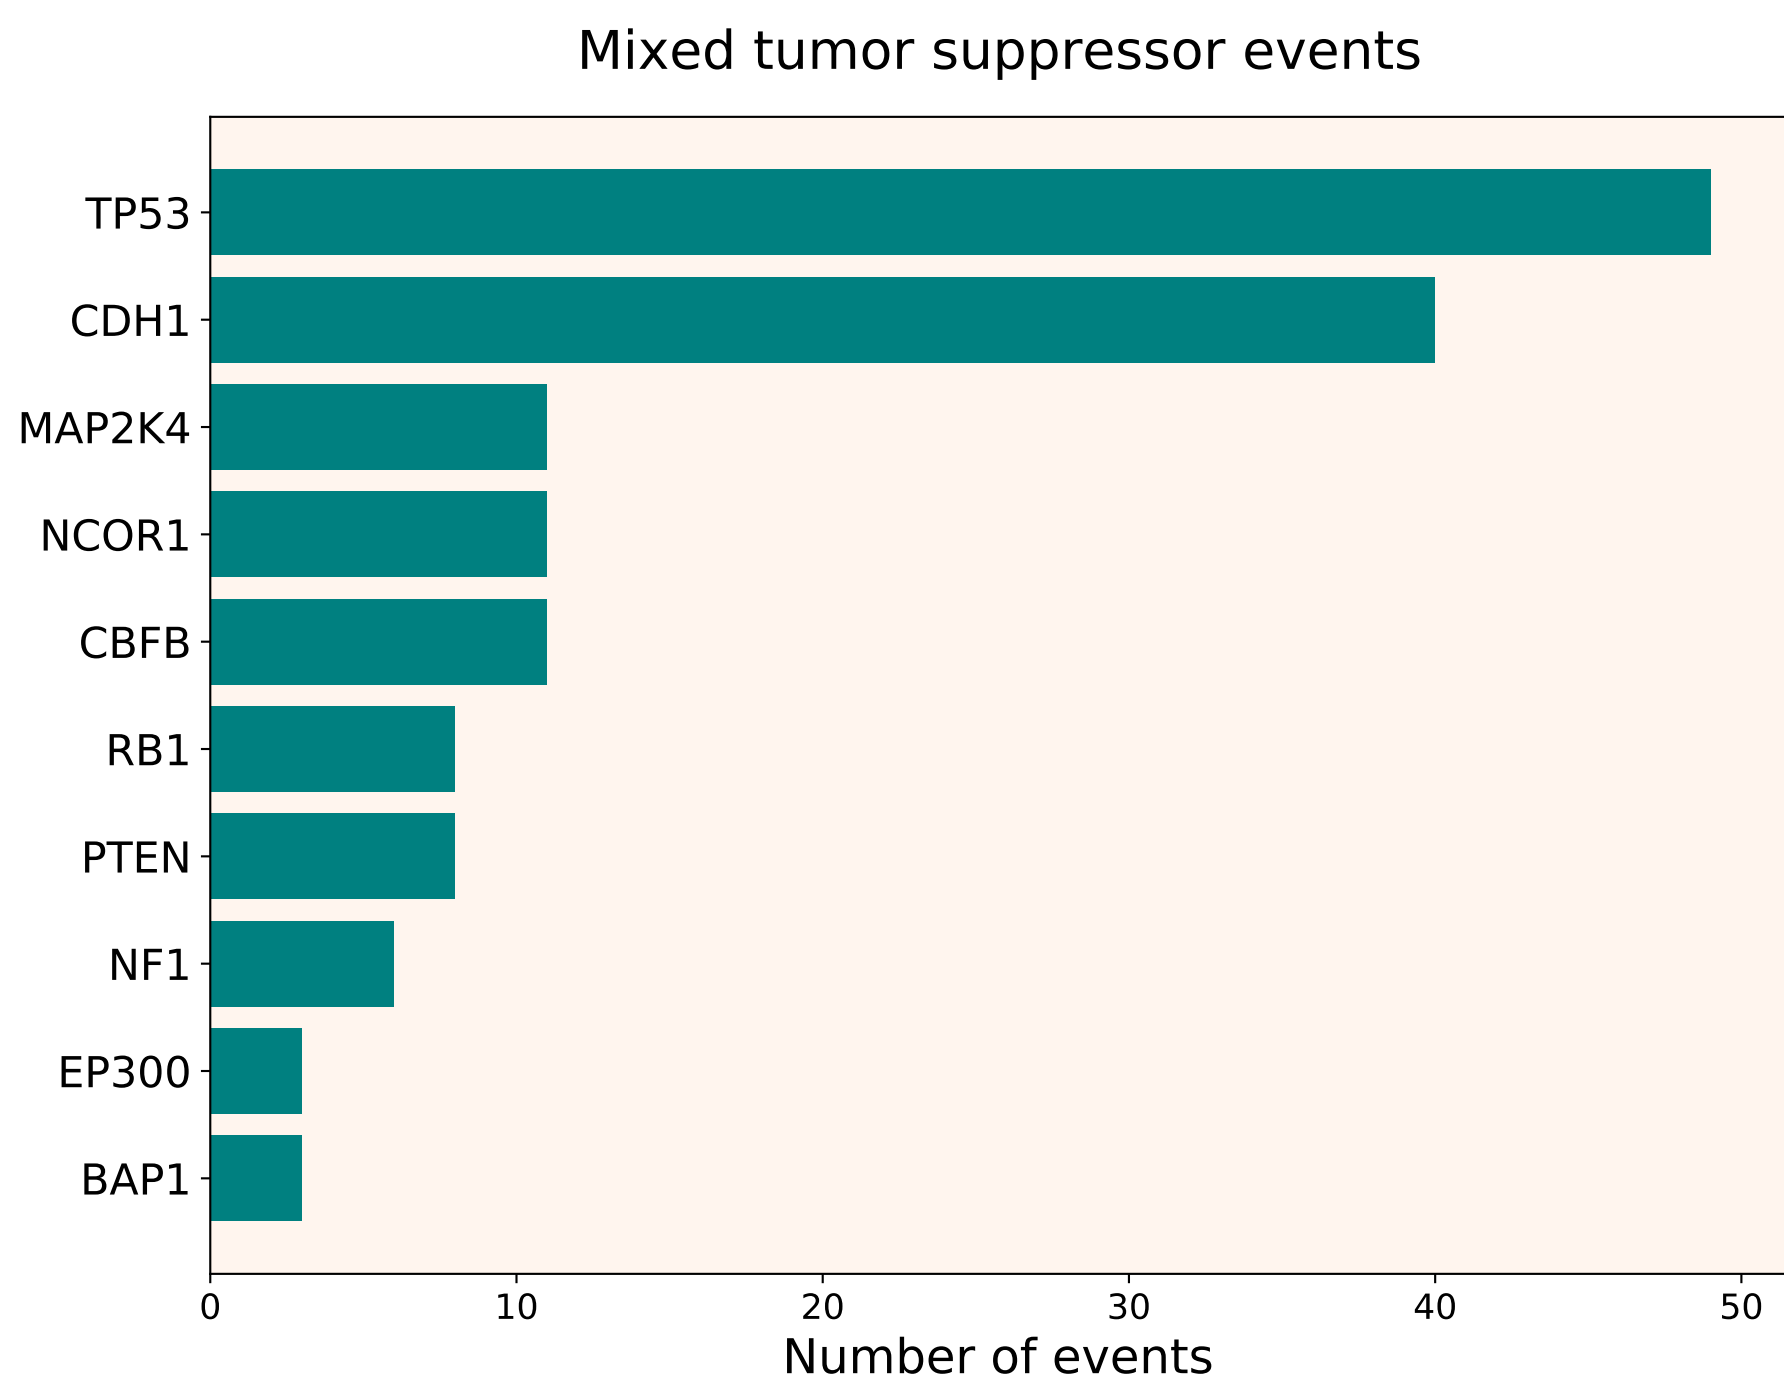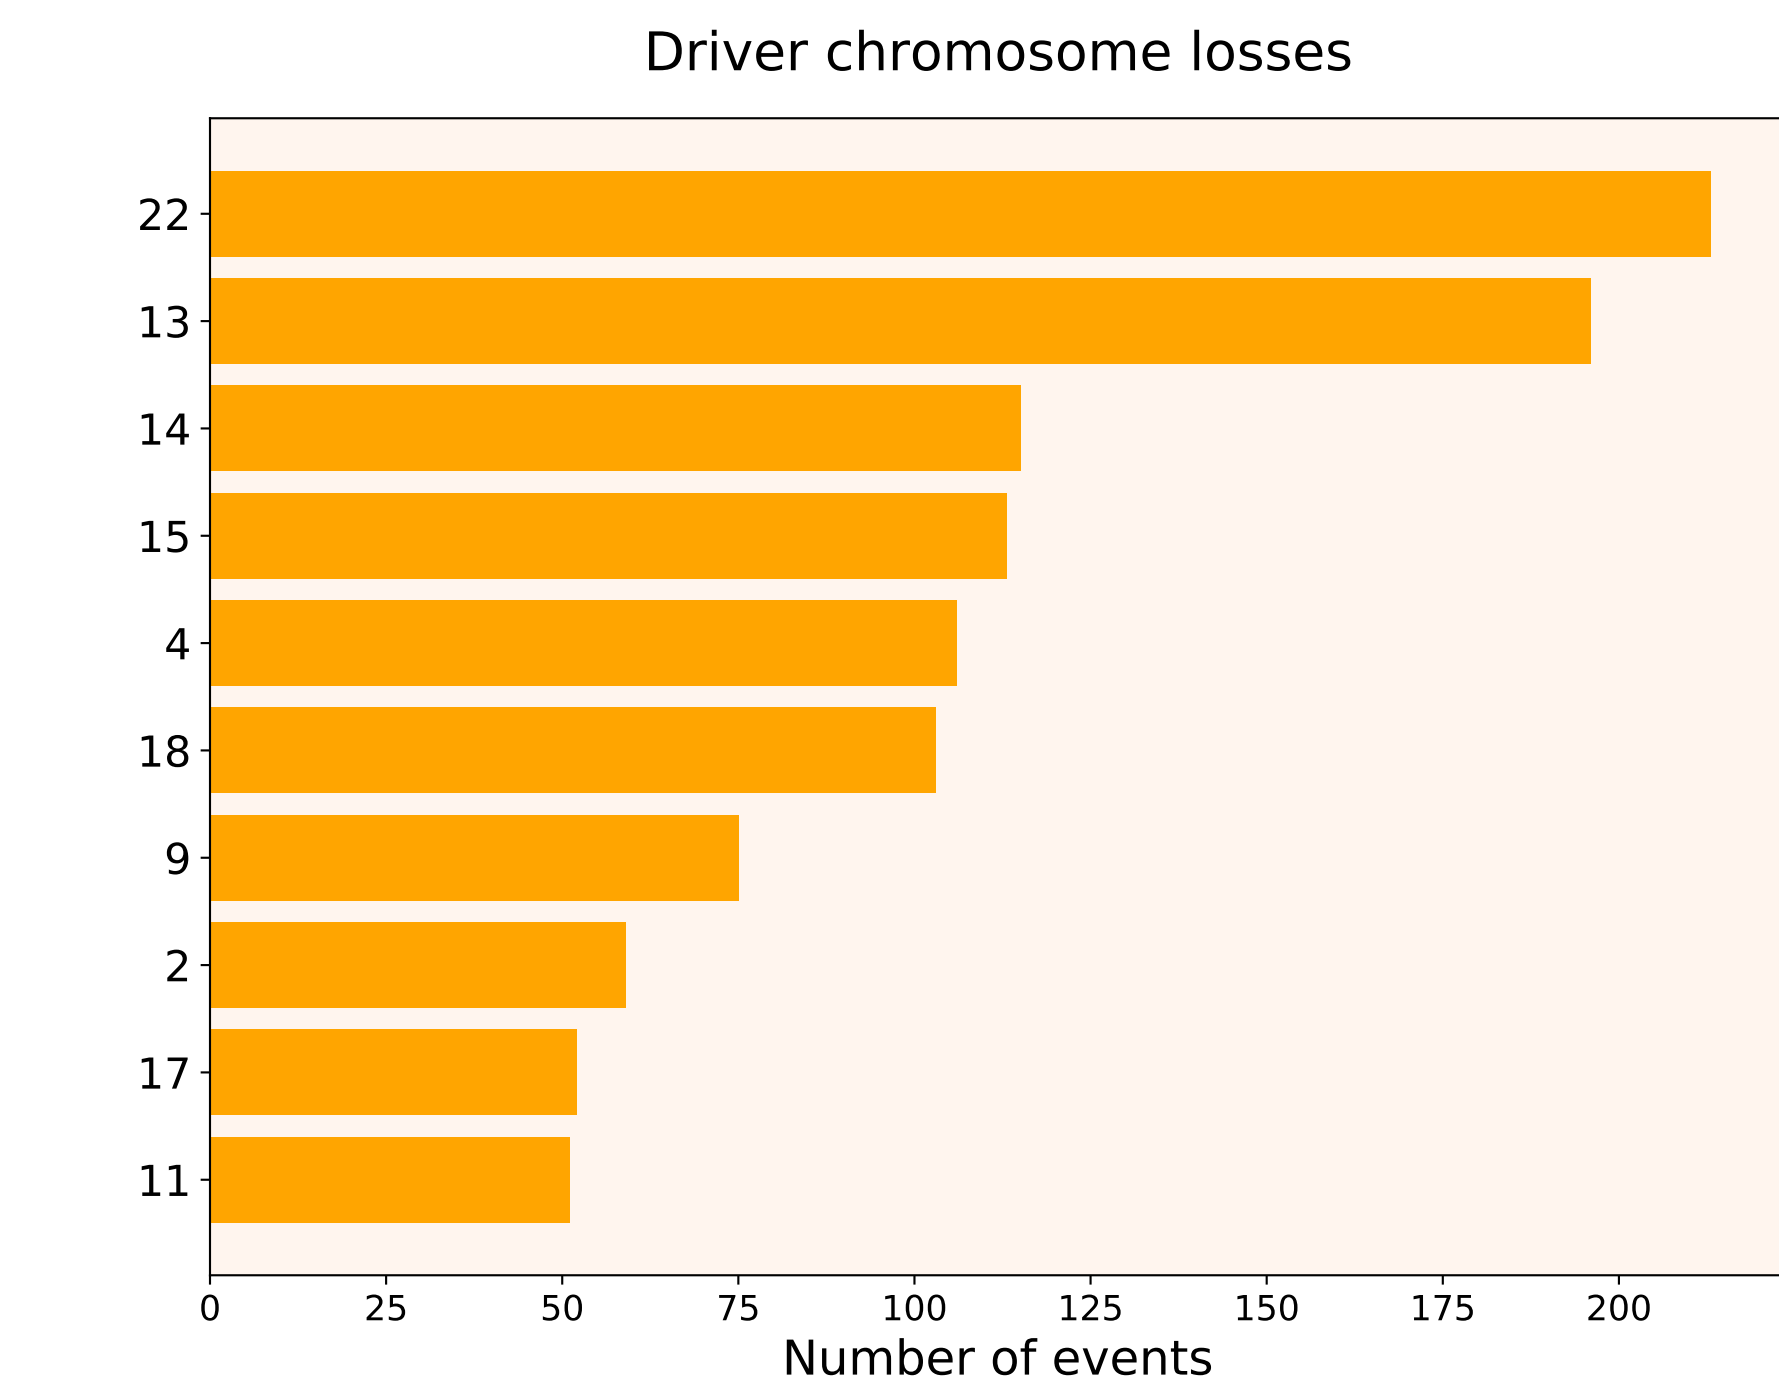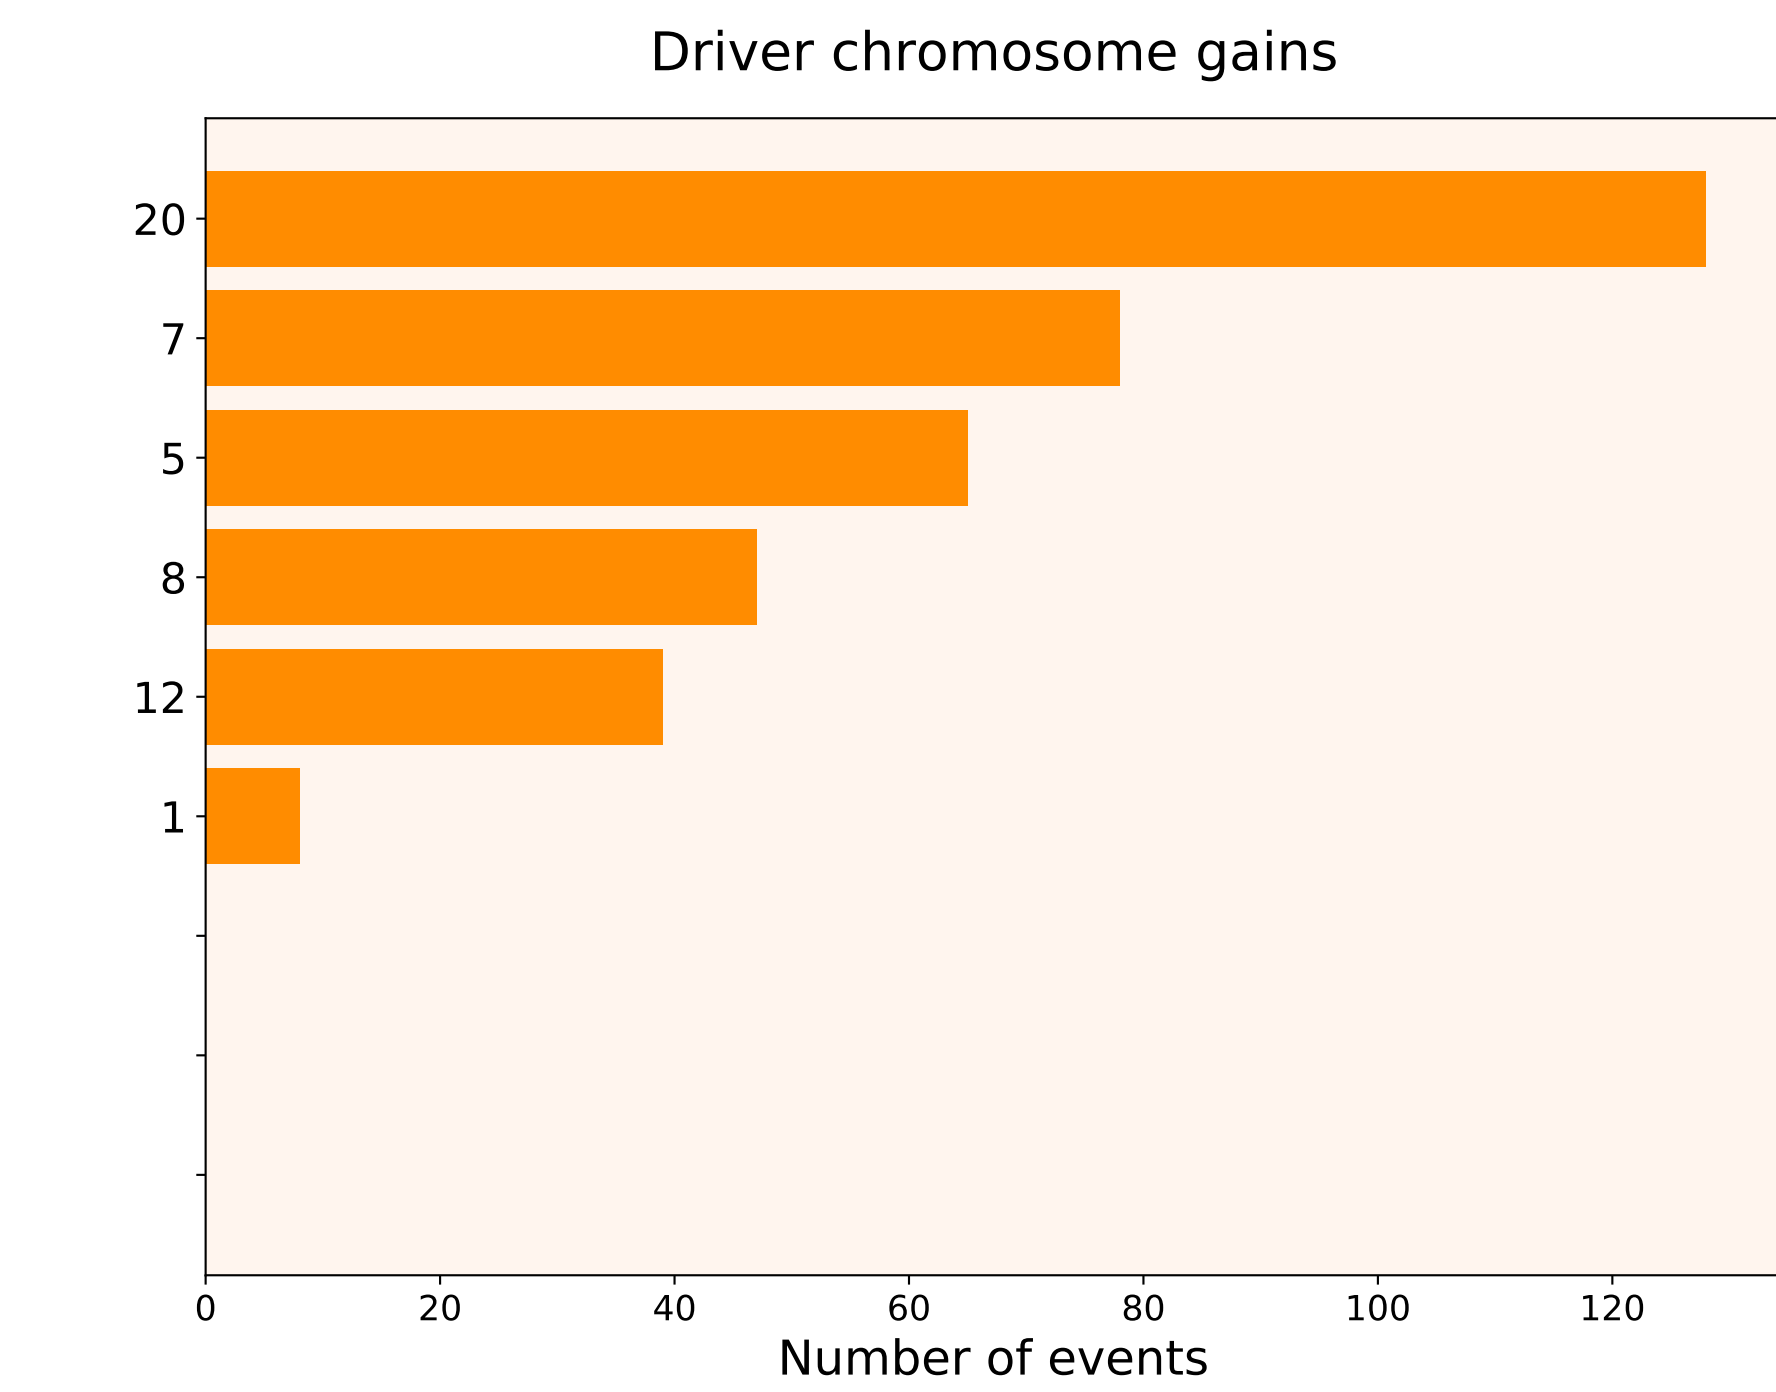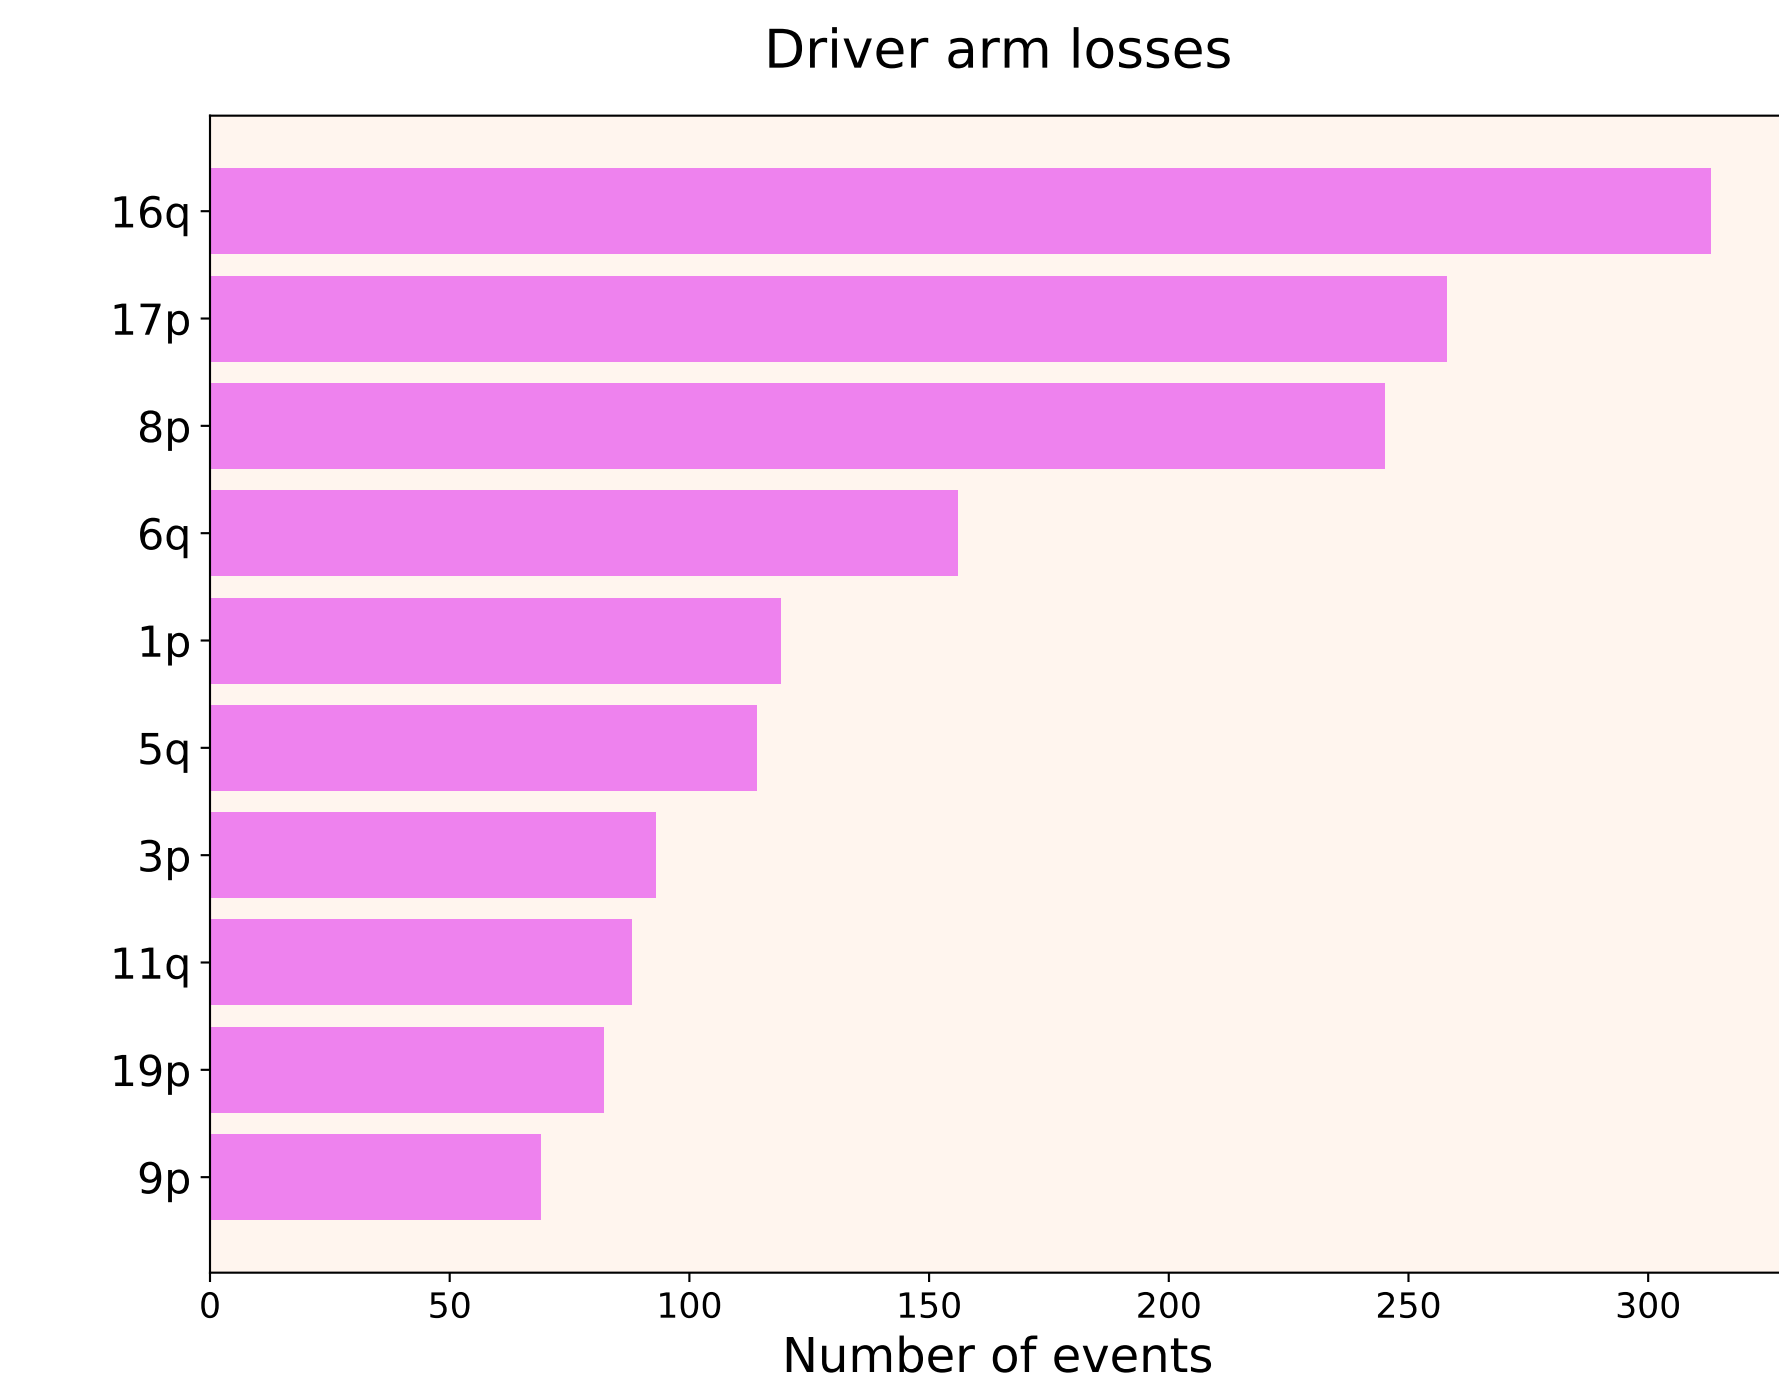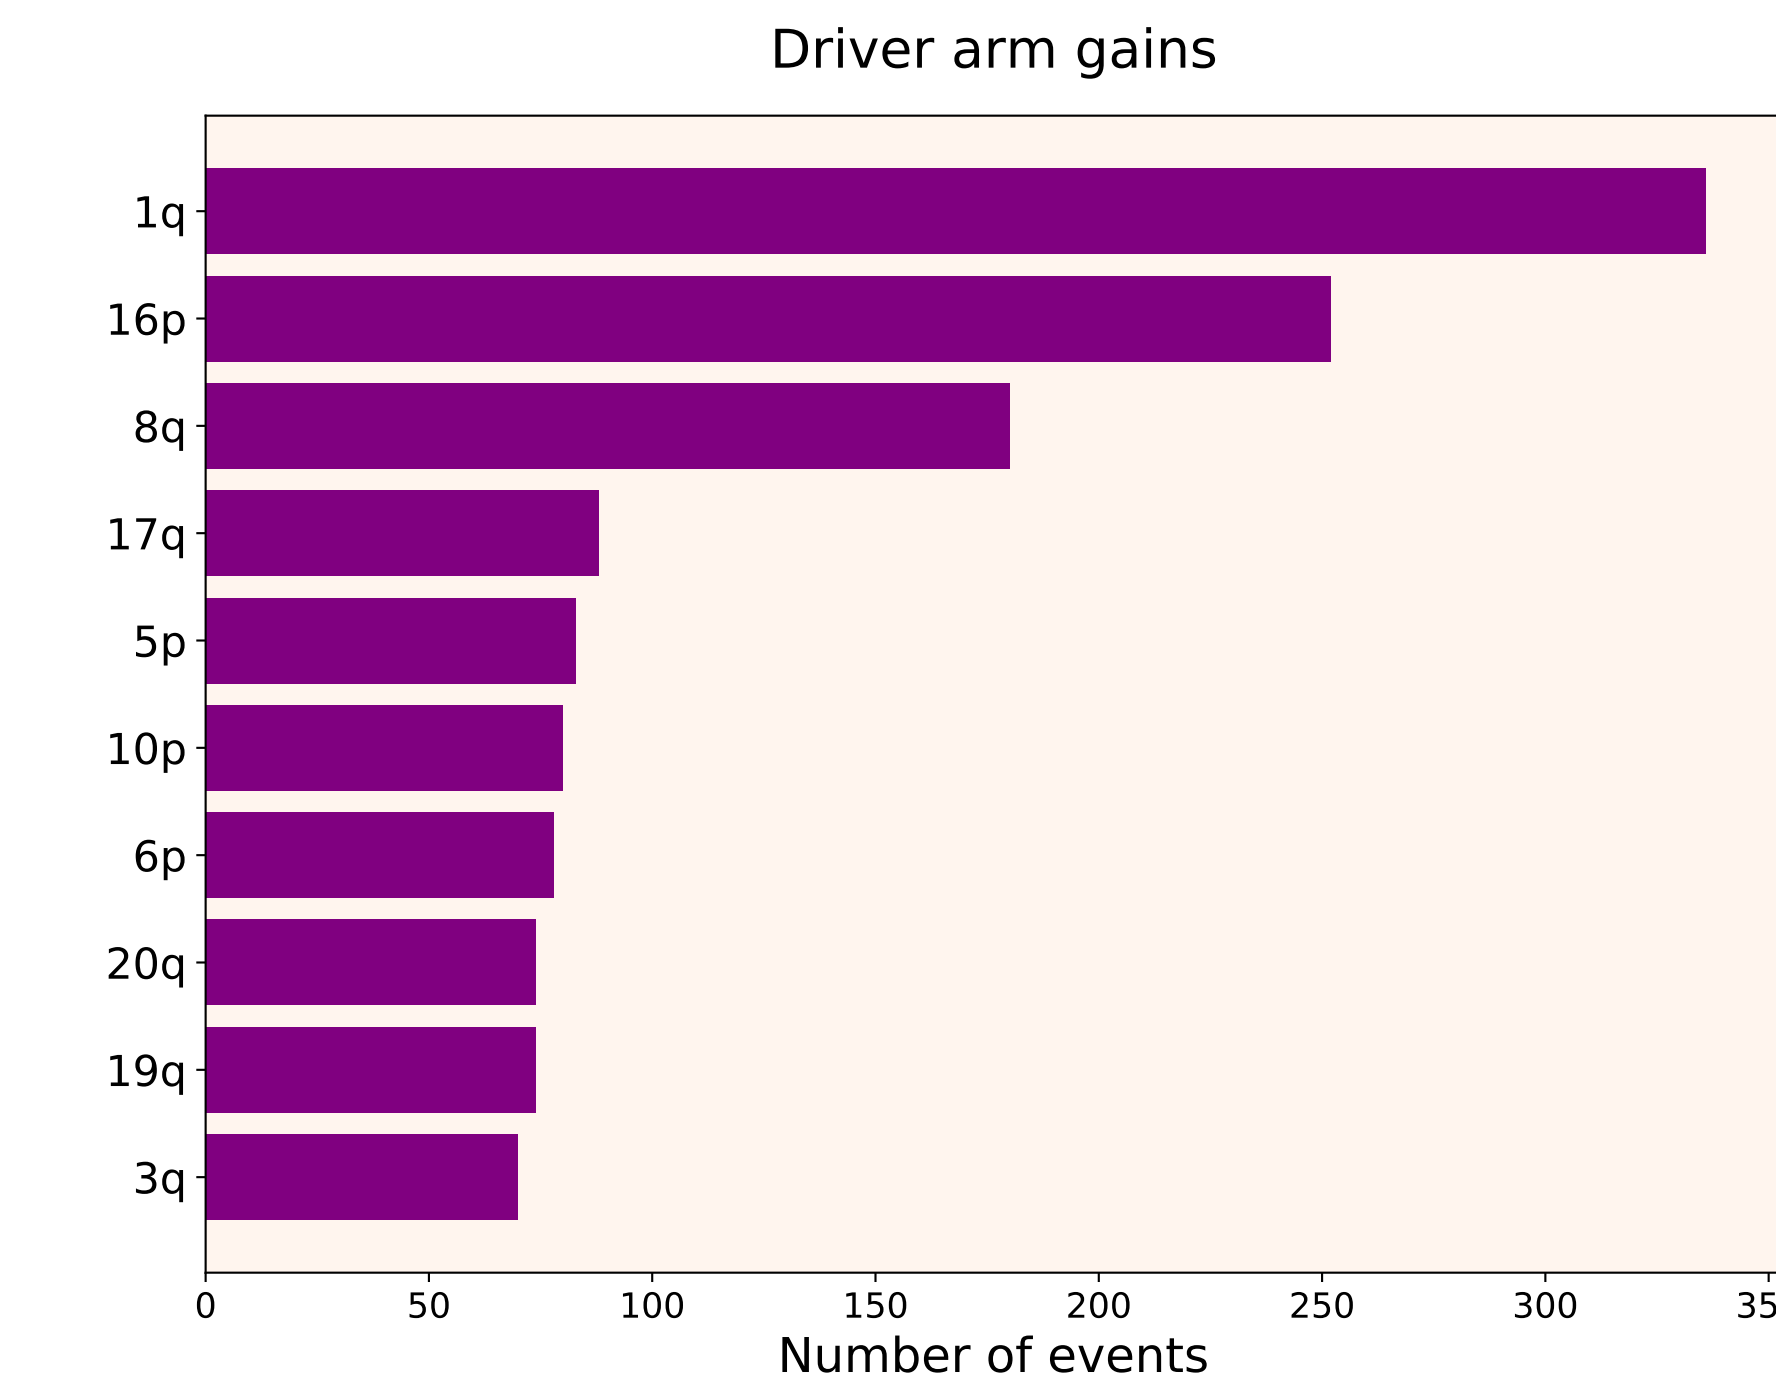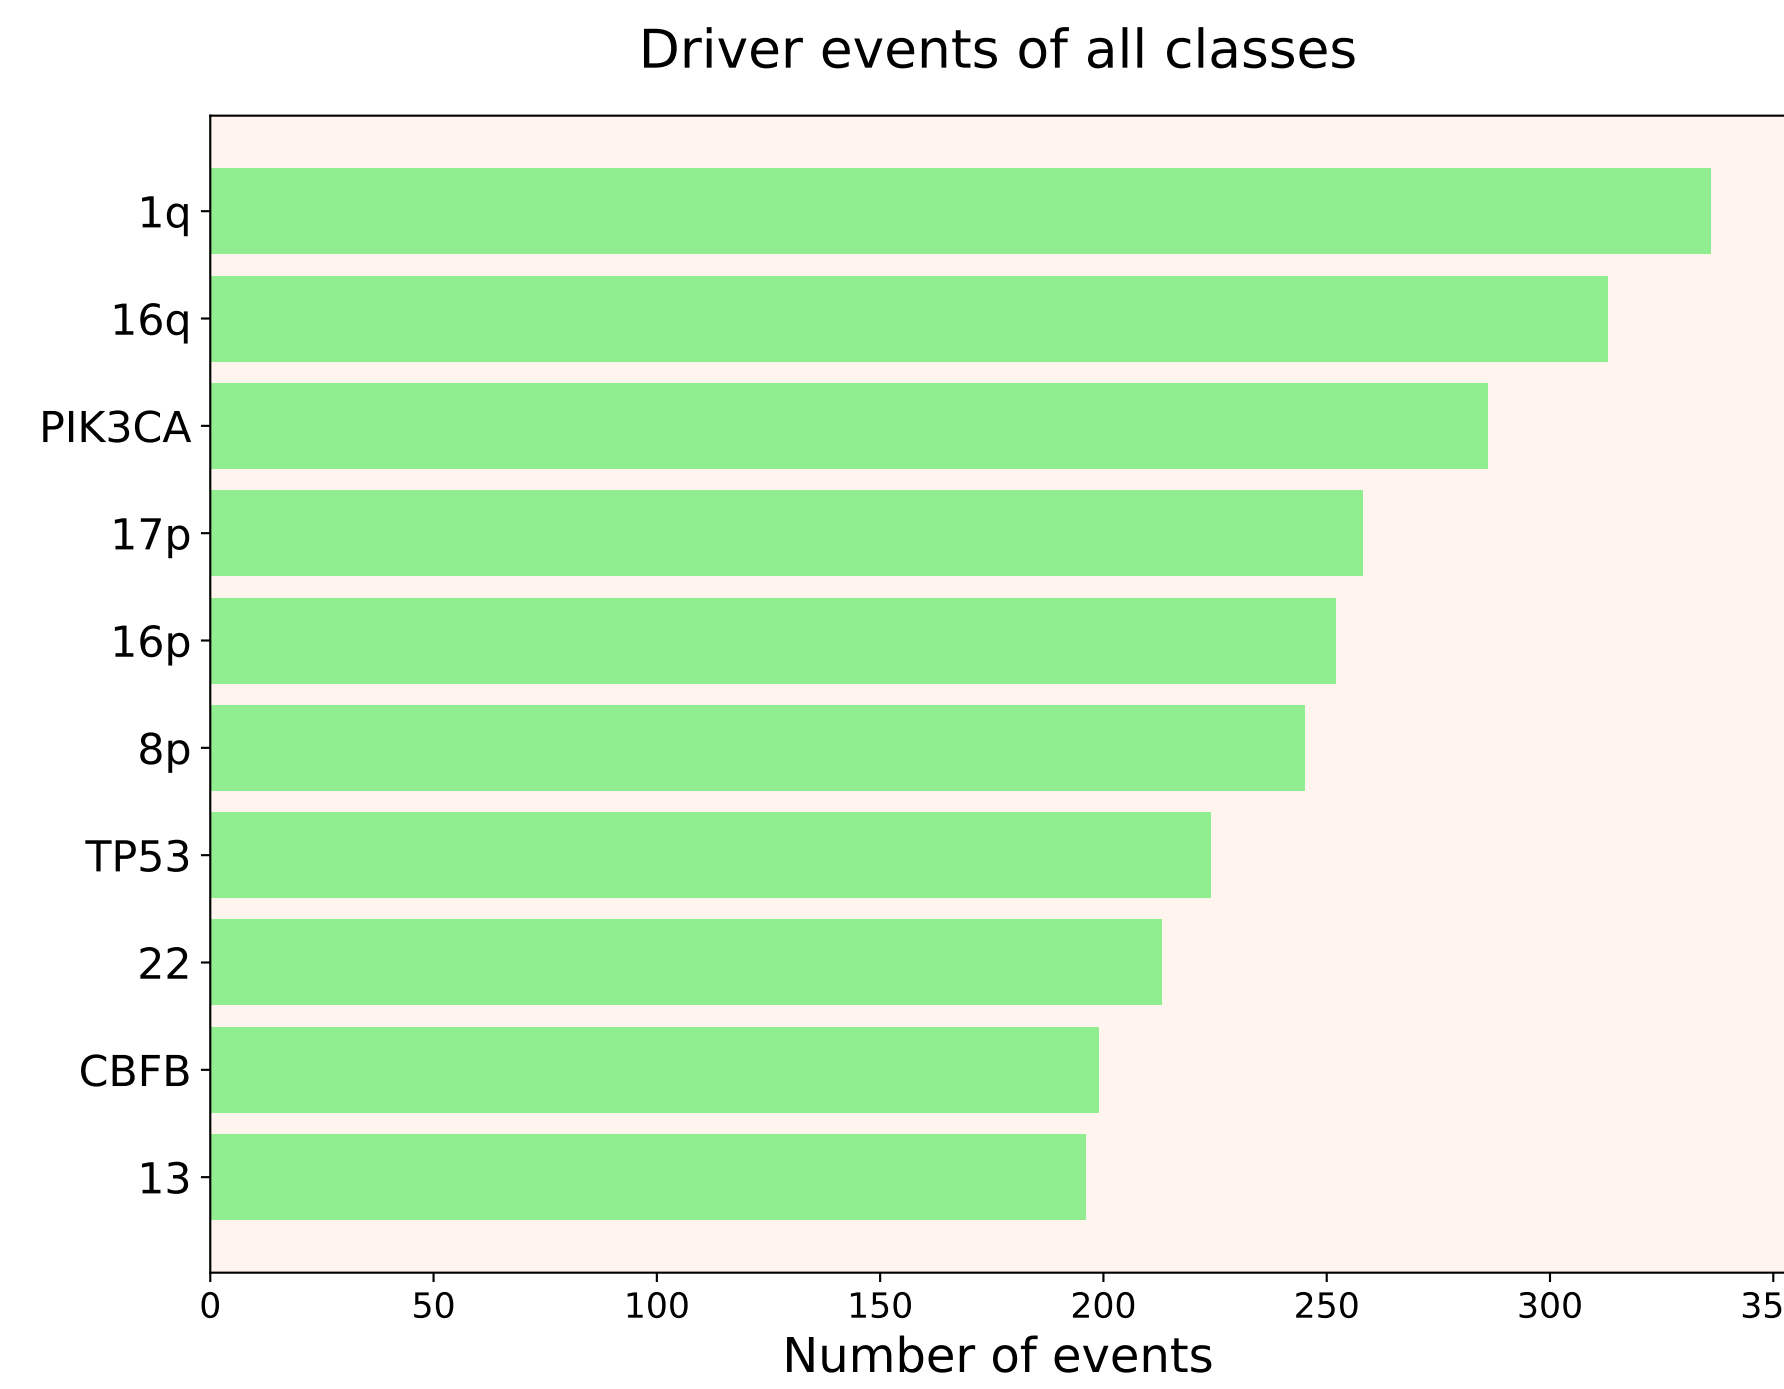

Supplement: Supplemental_Data_S1.zip [file Supplemental_Data_S1.zip]

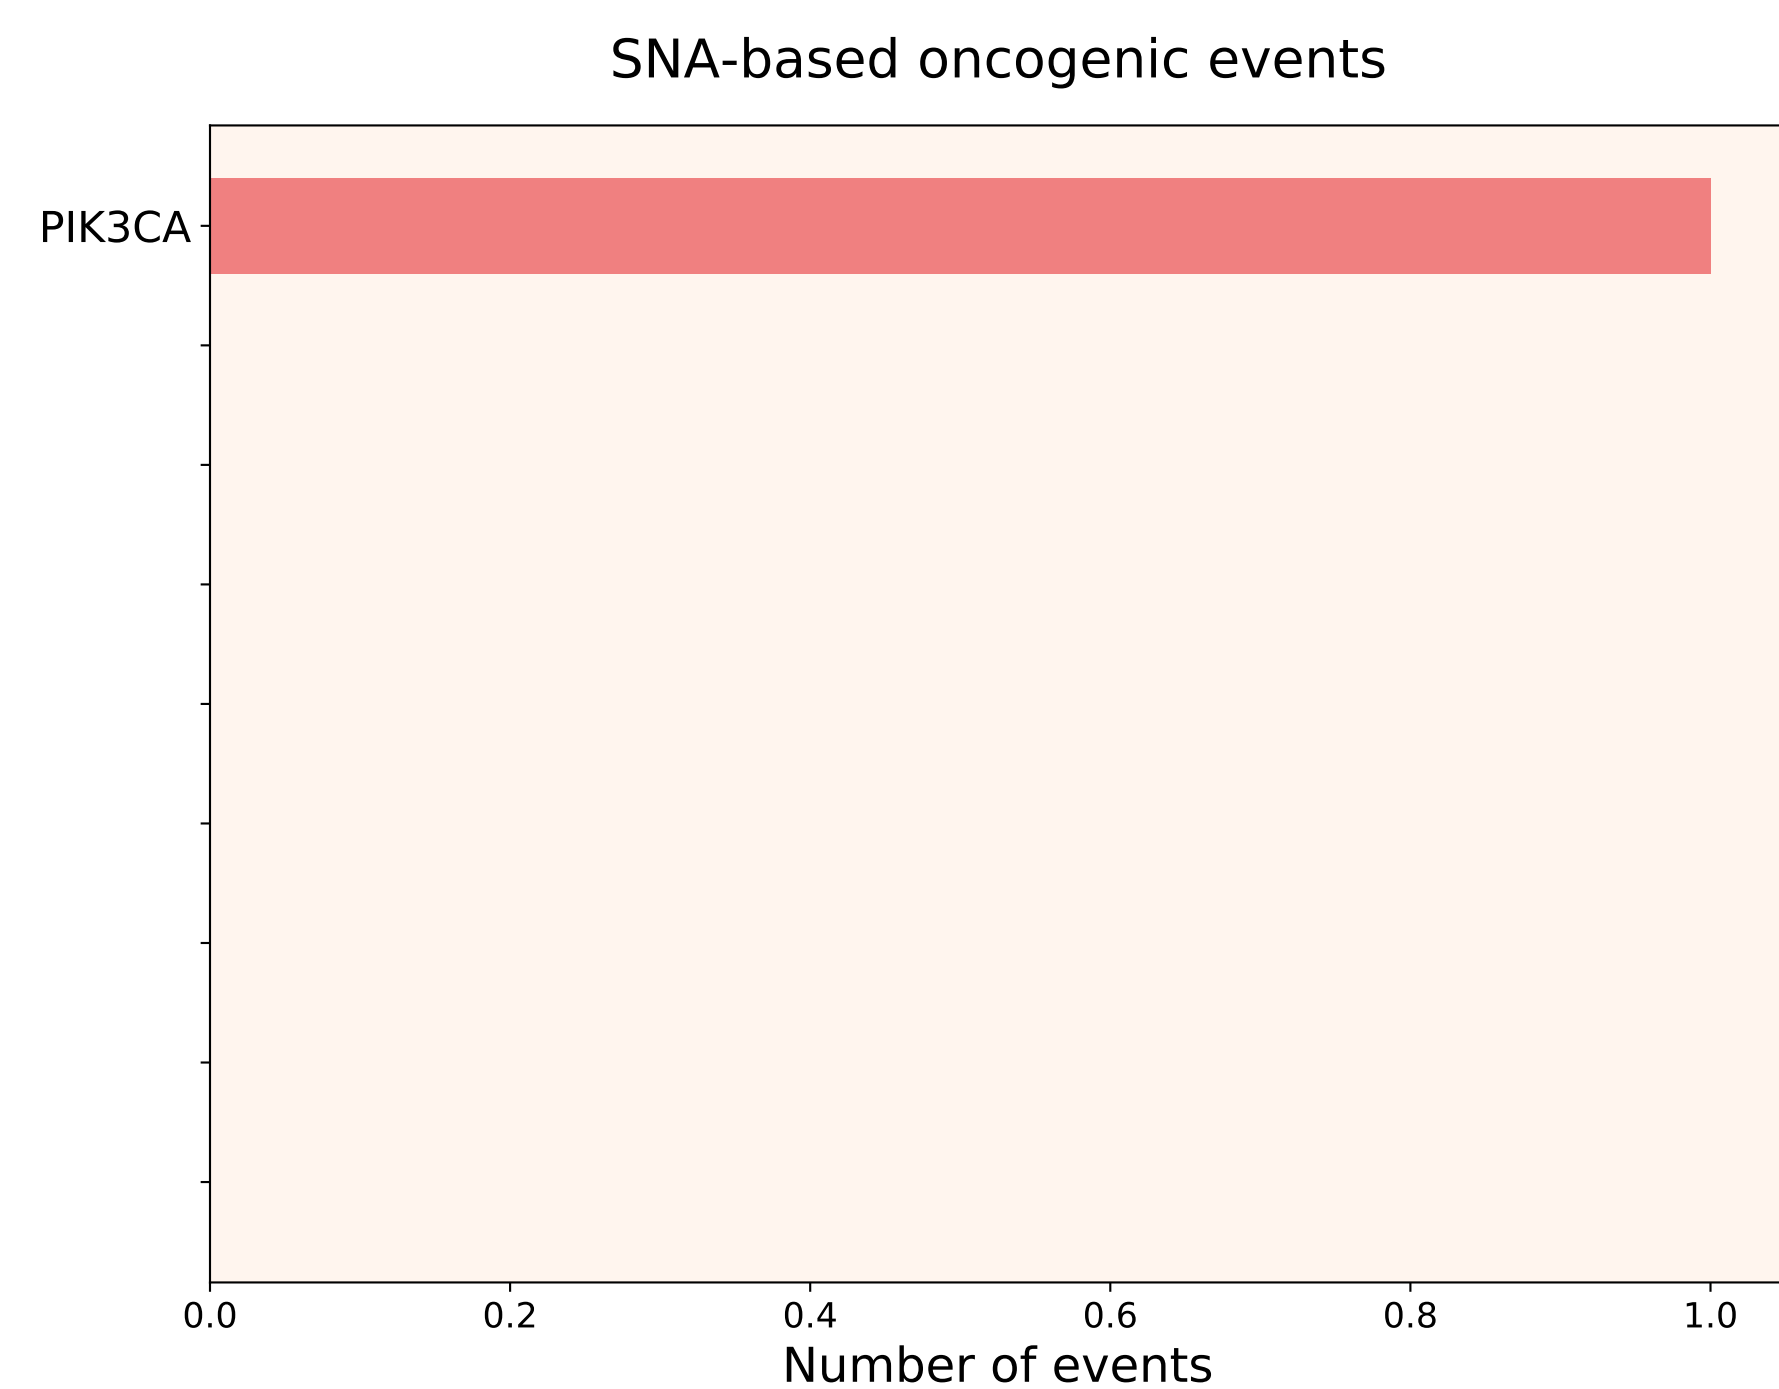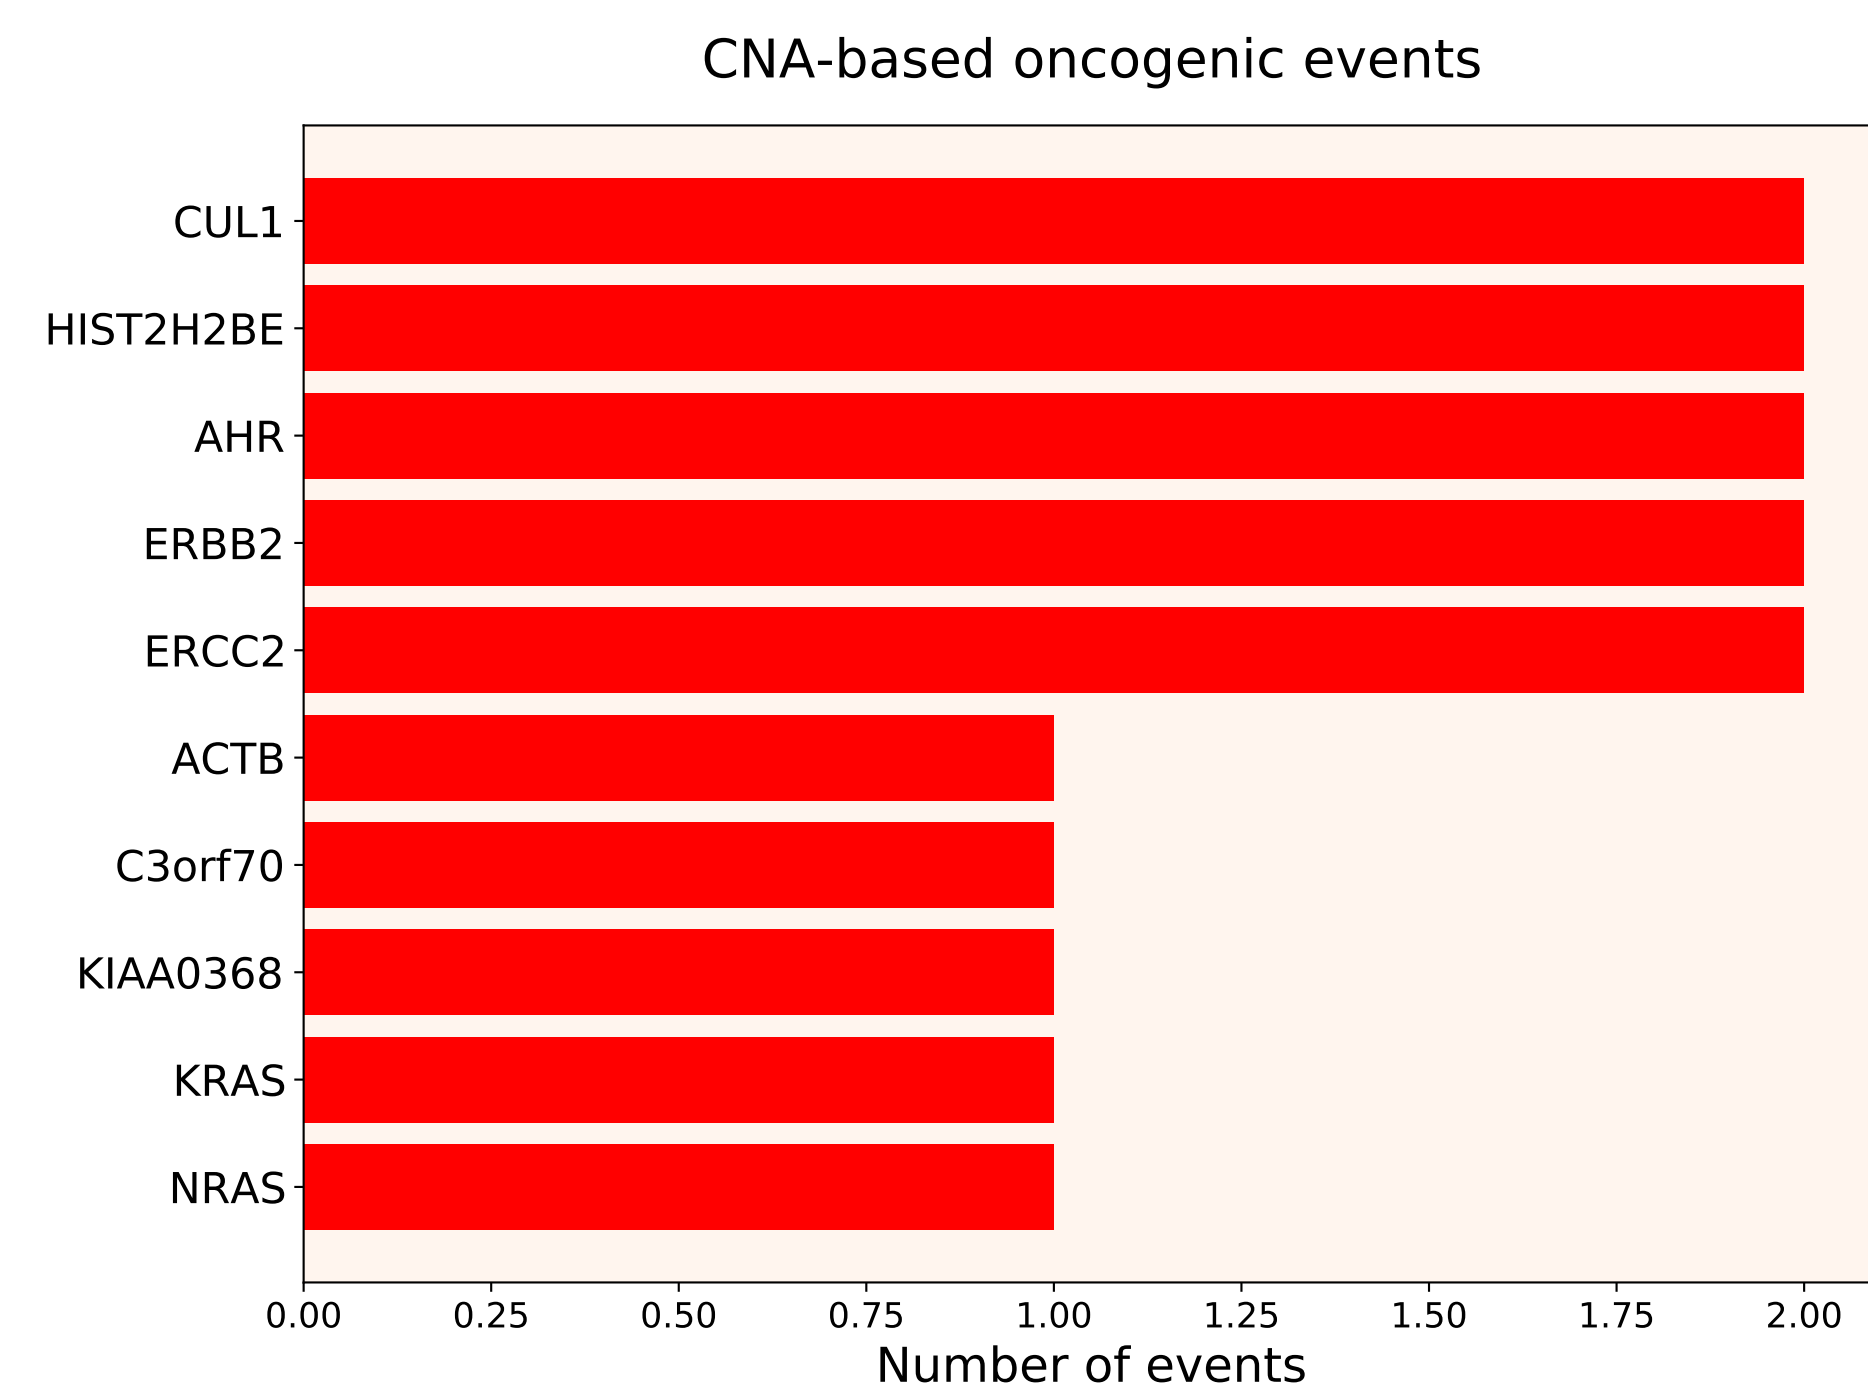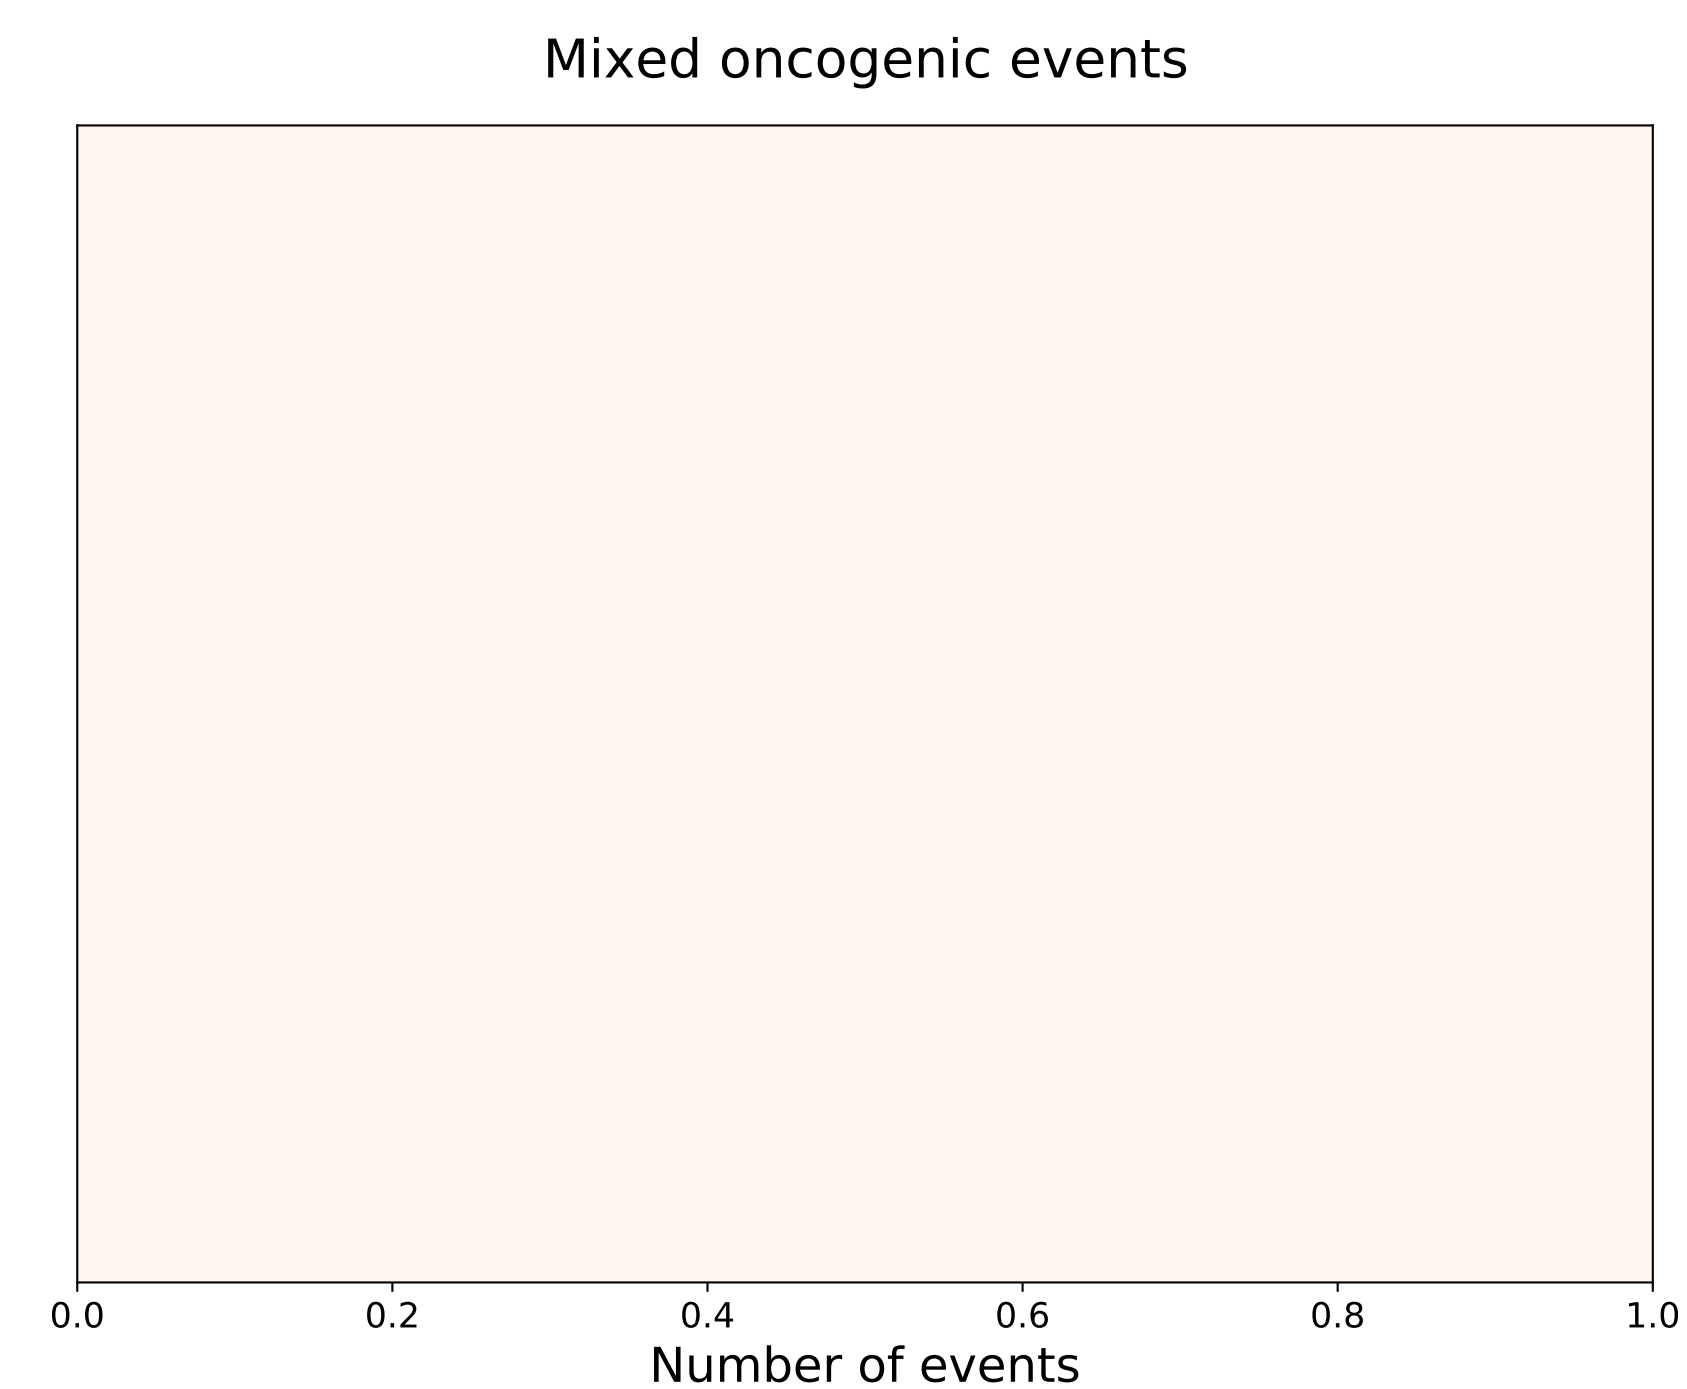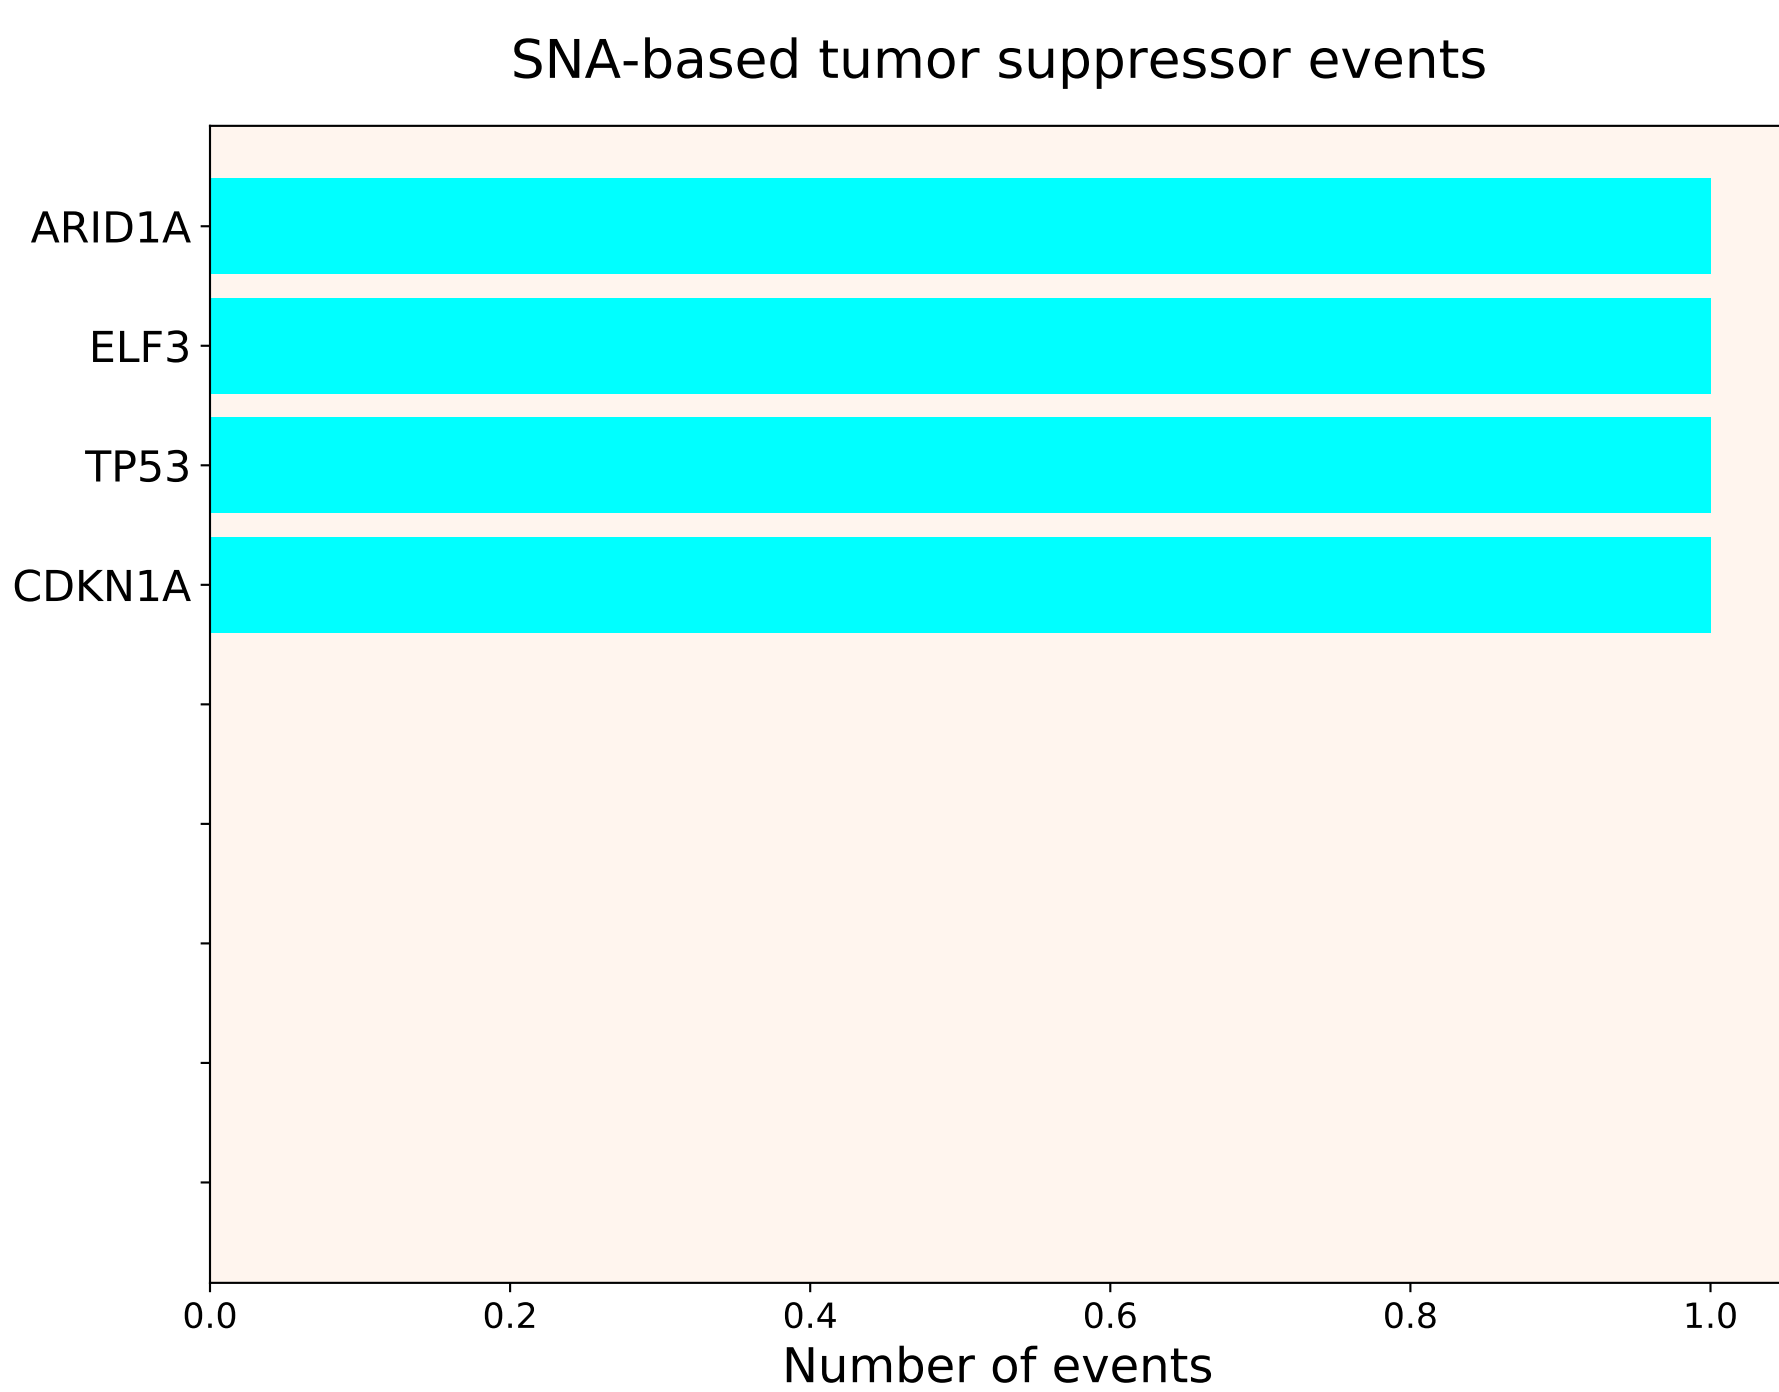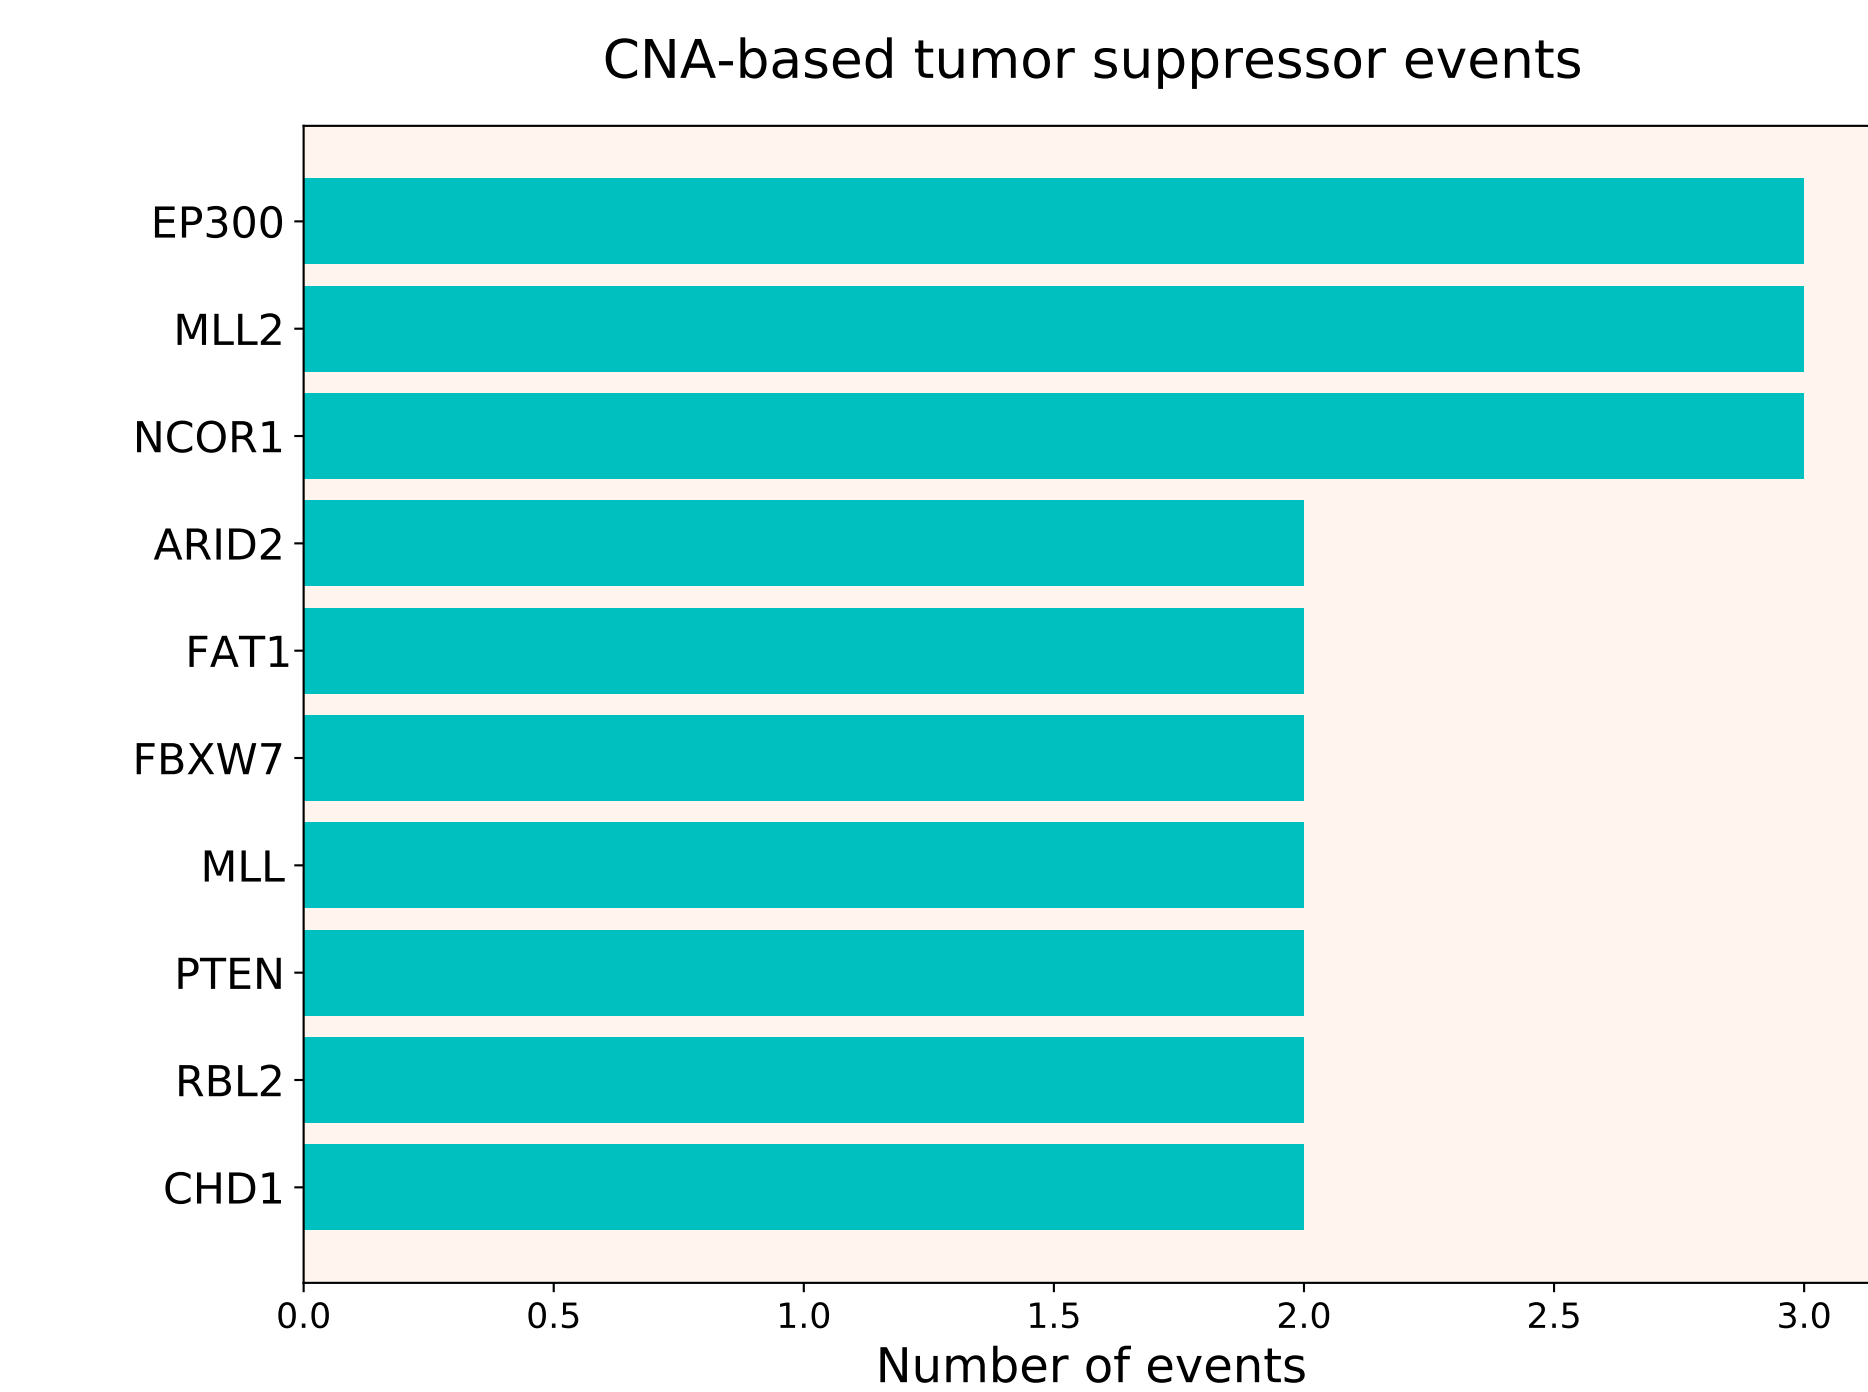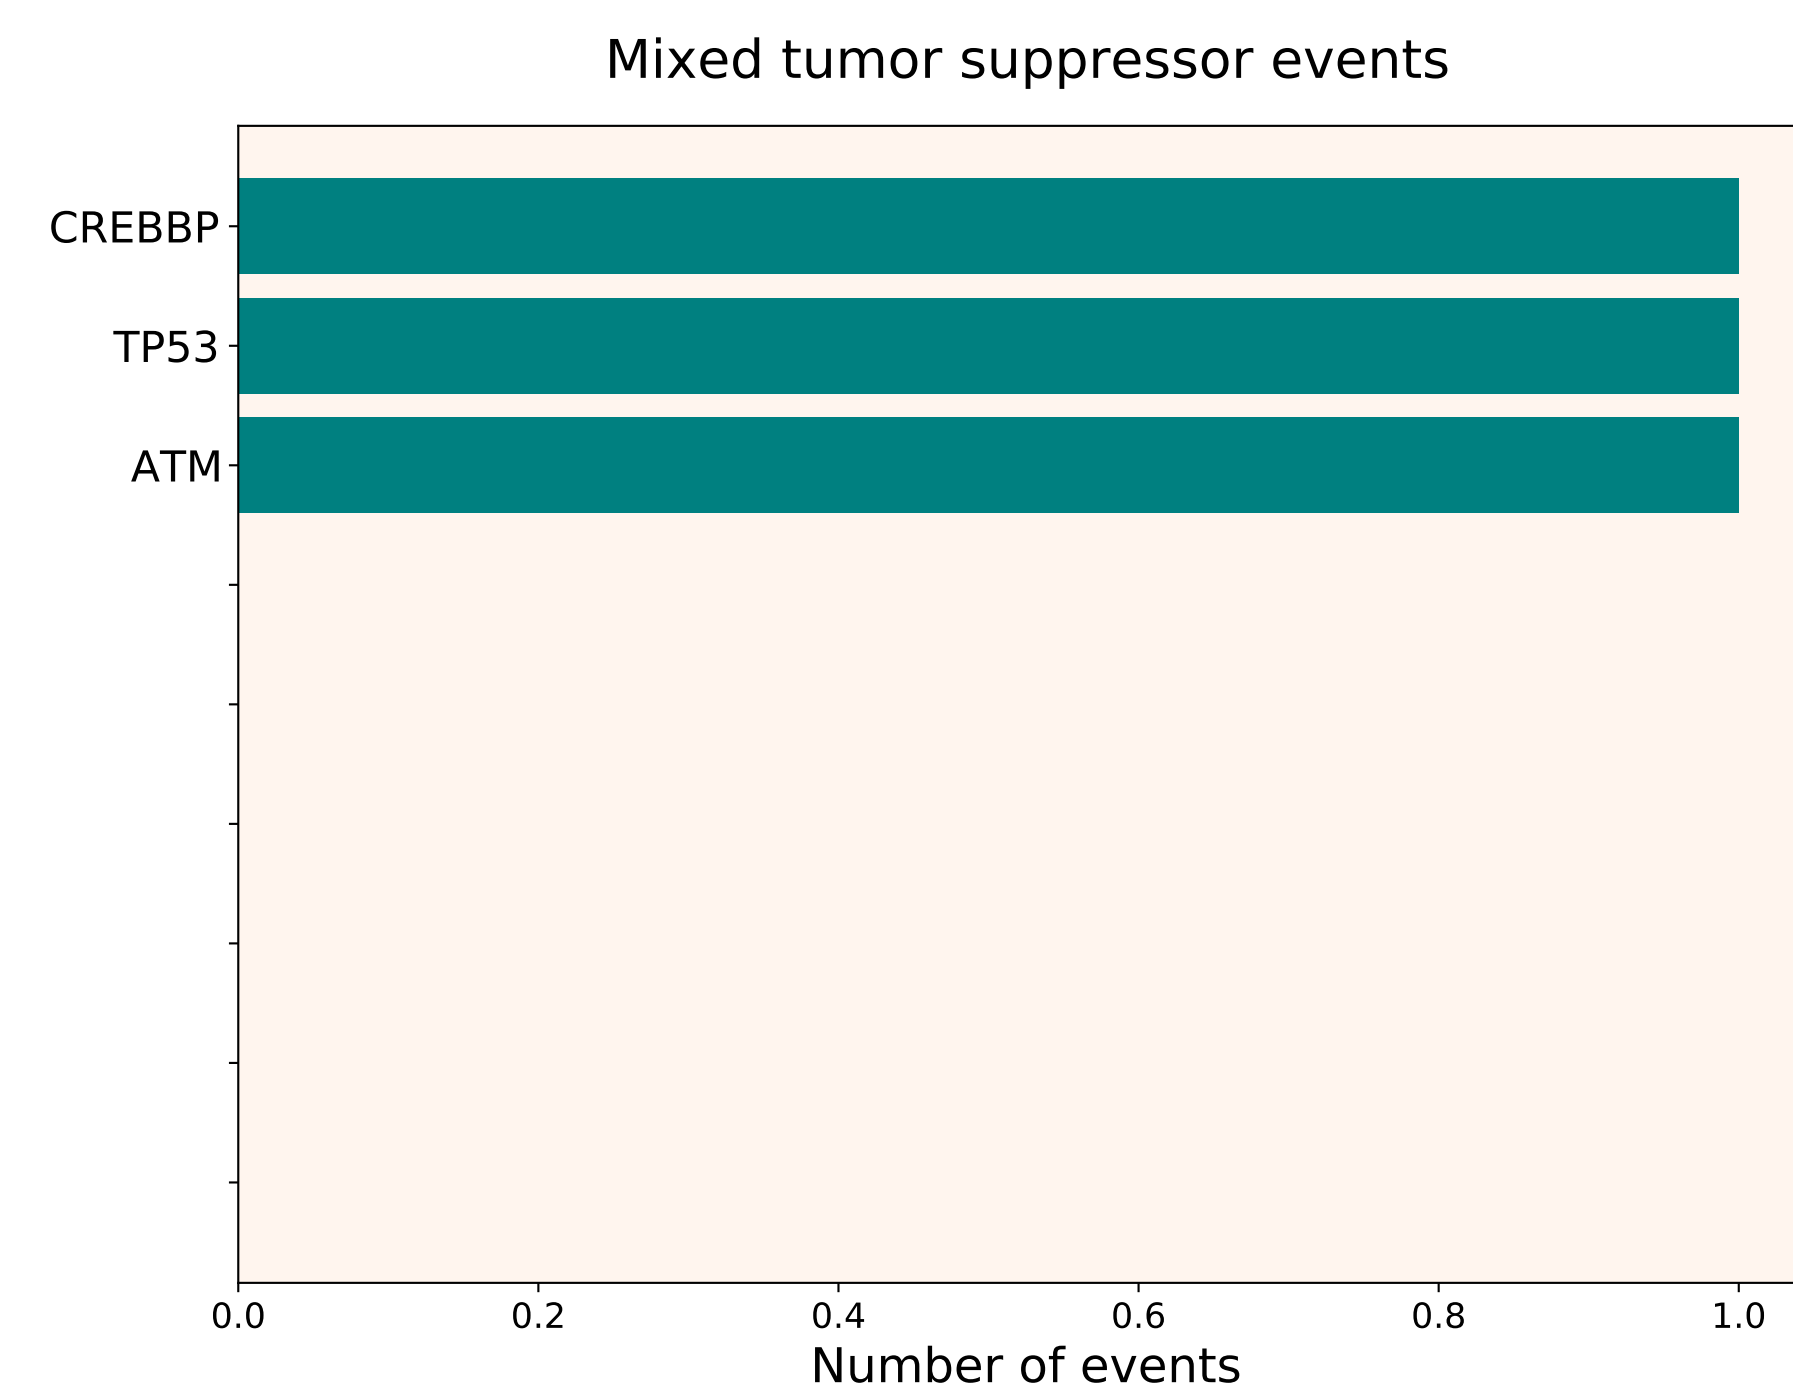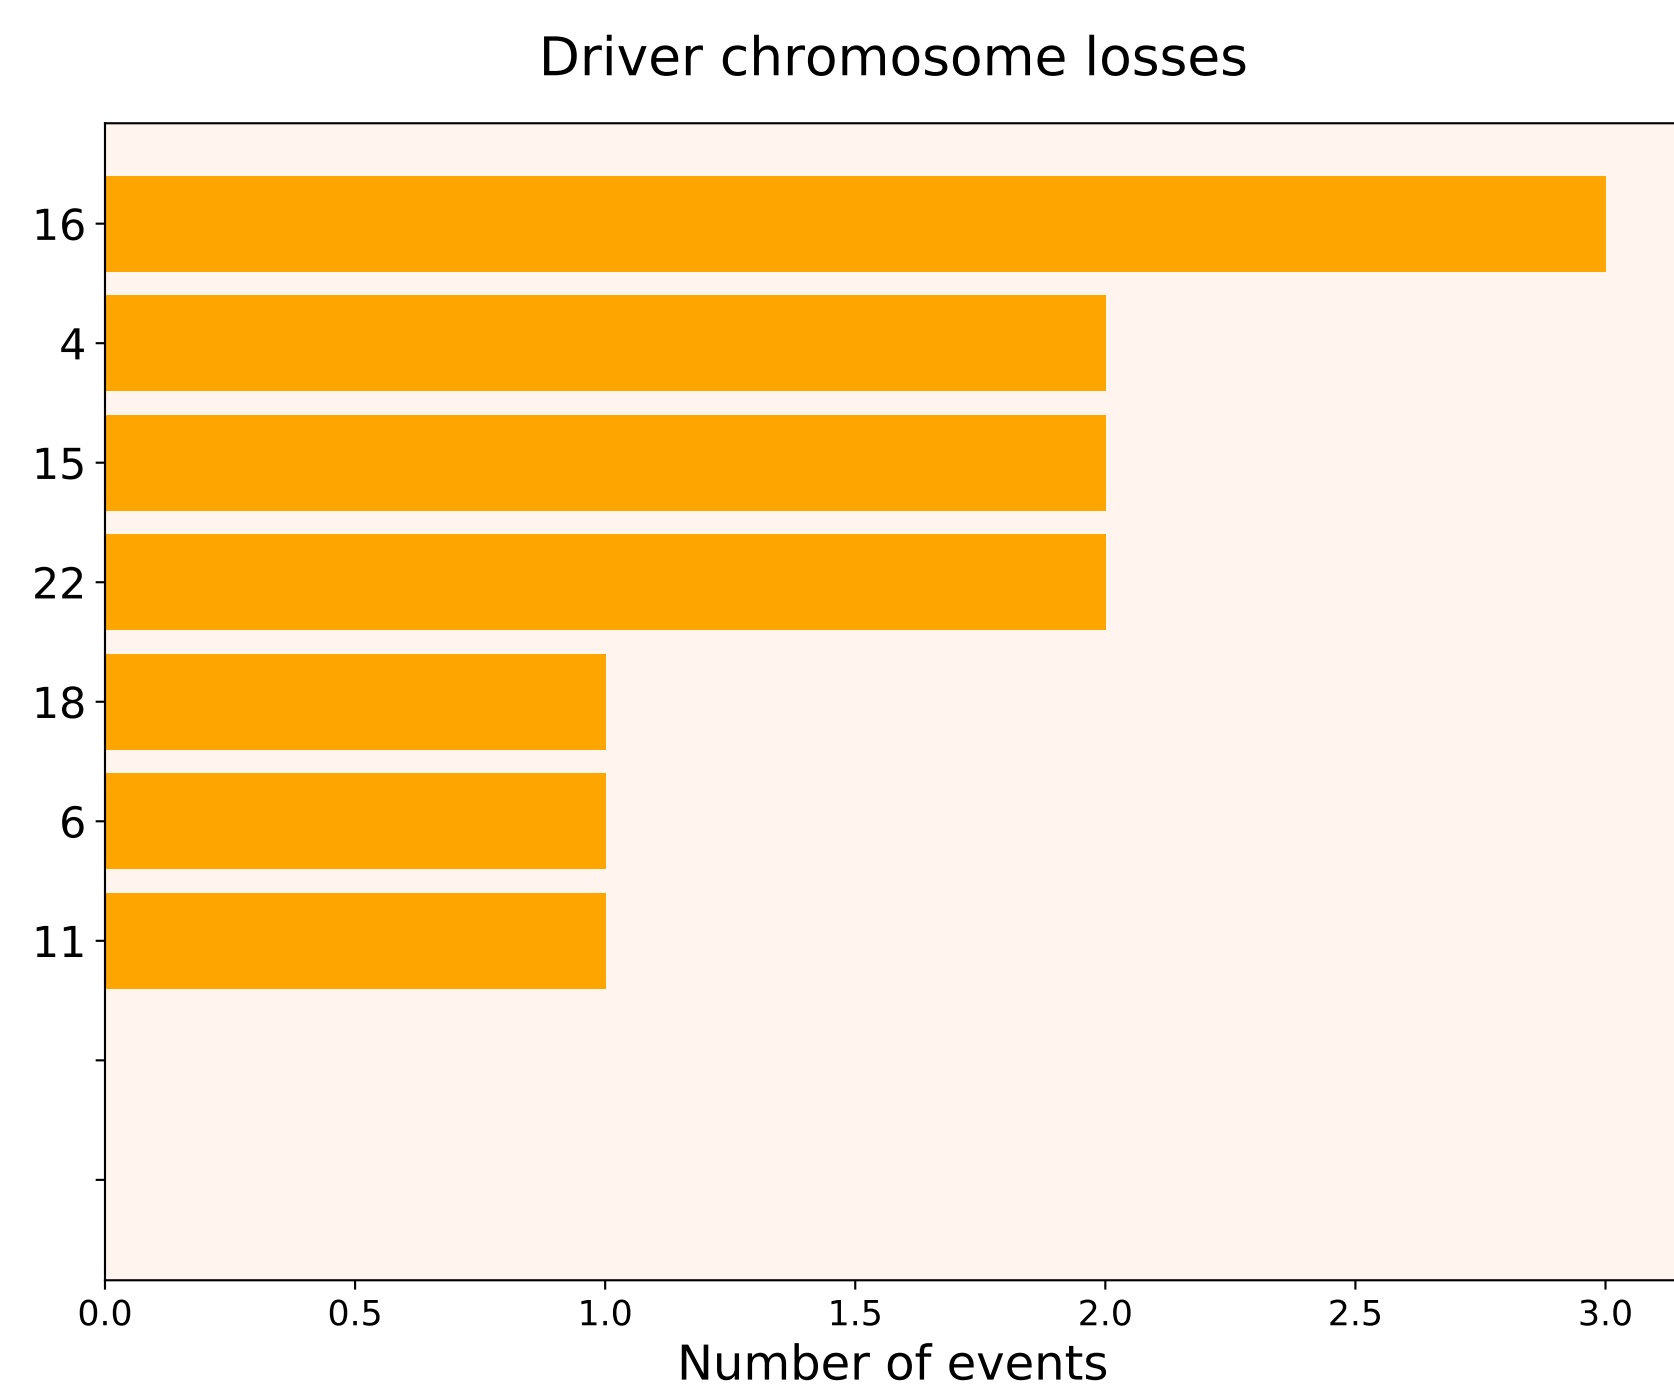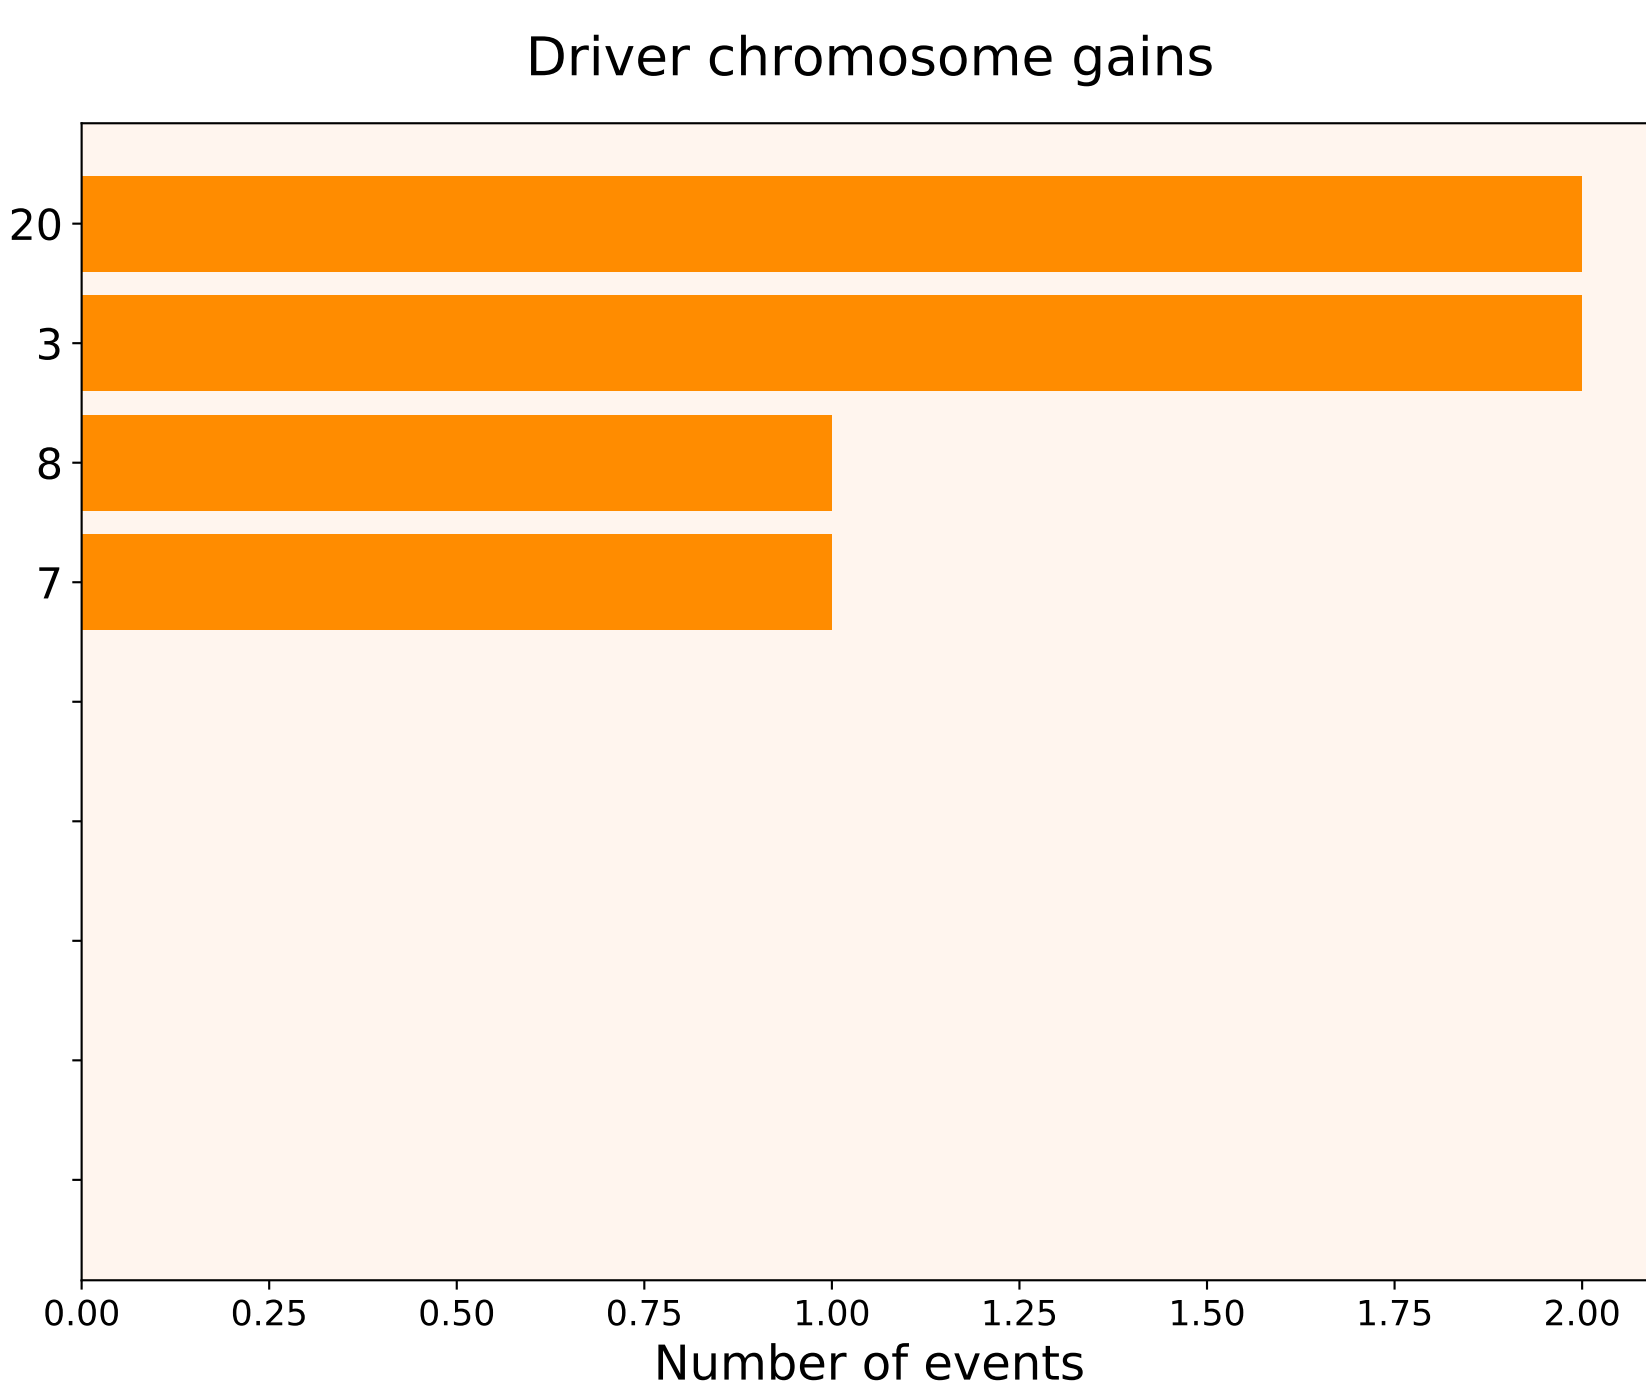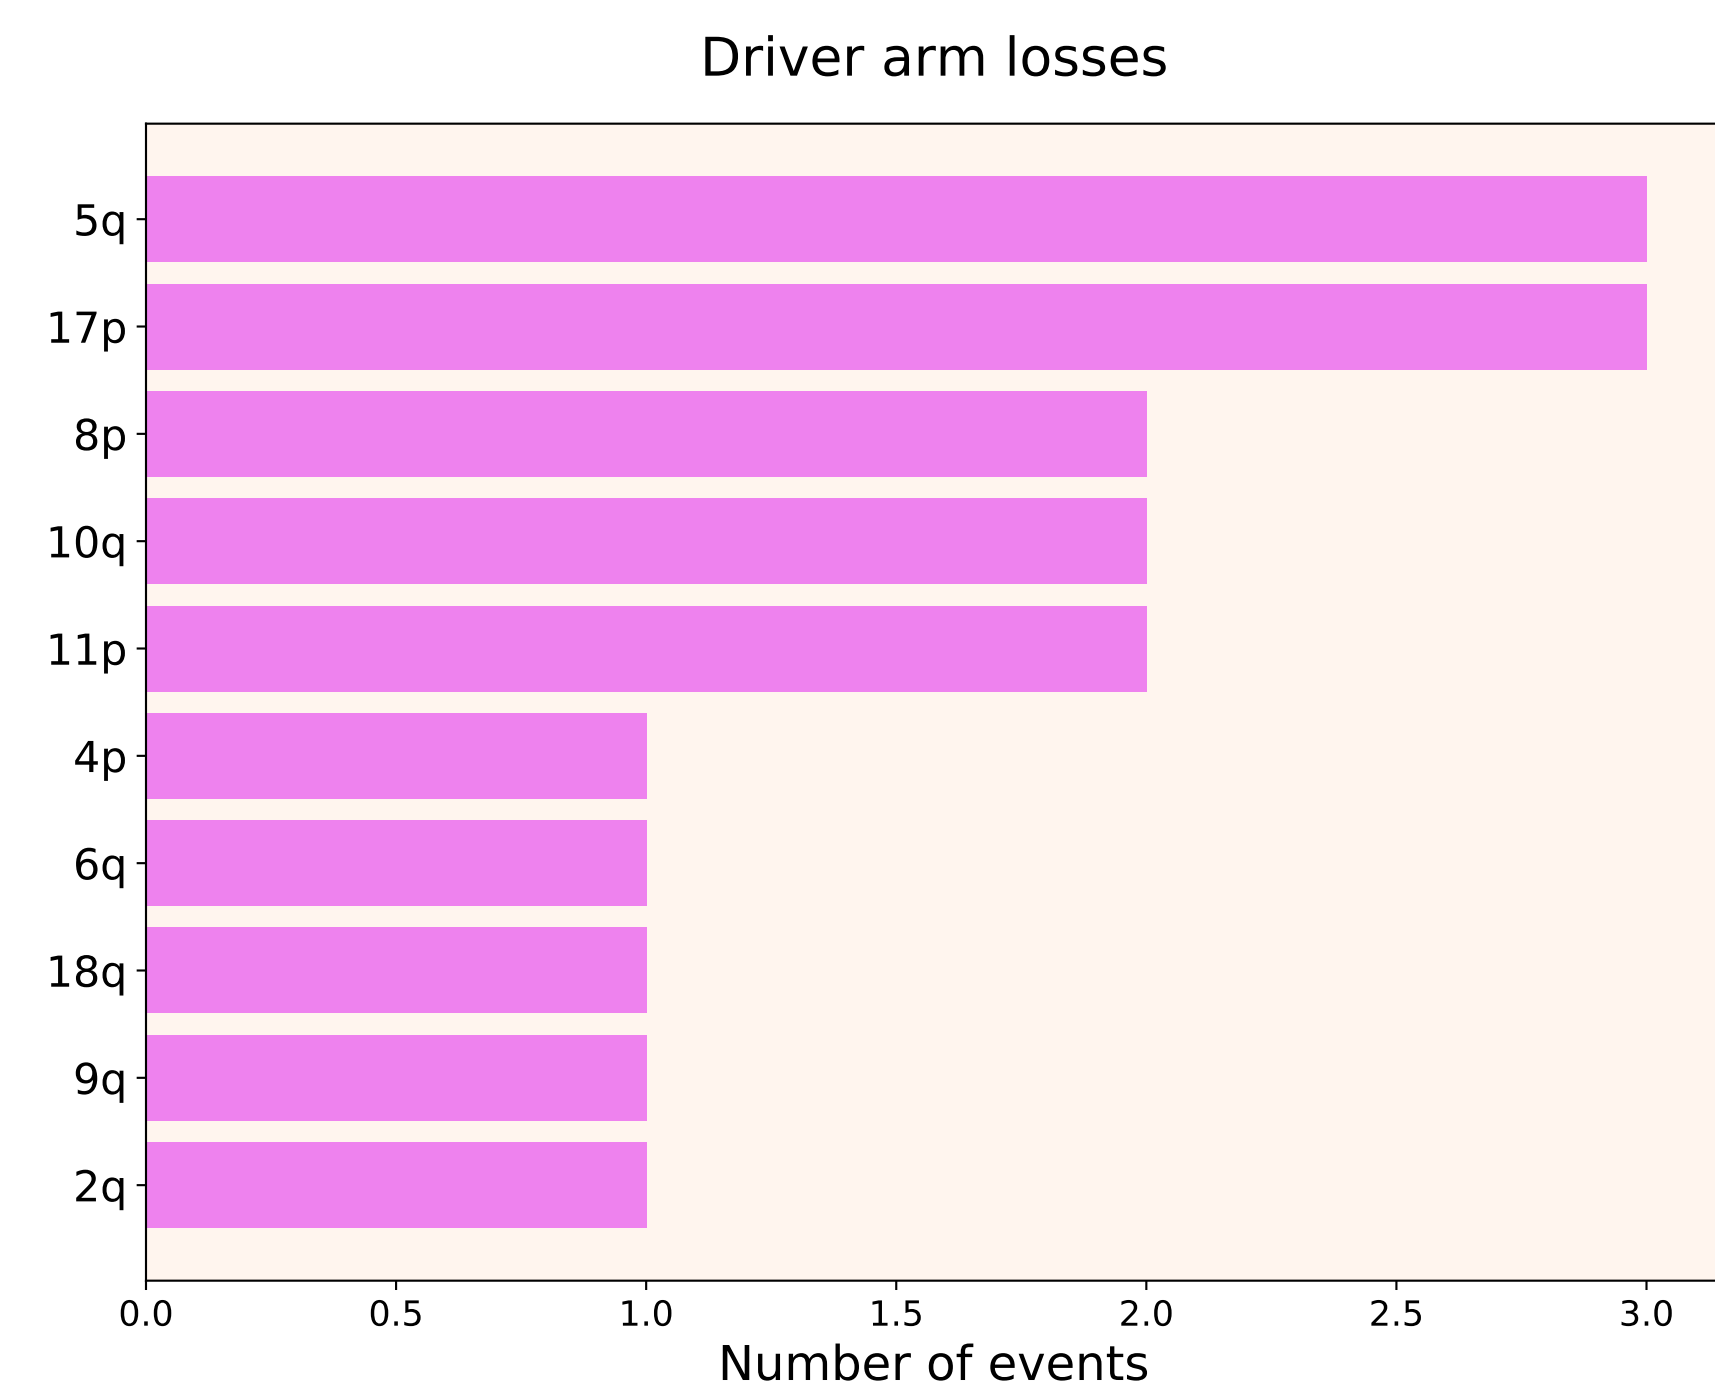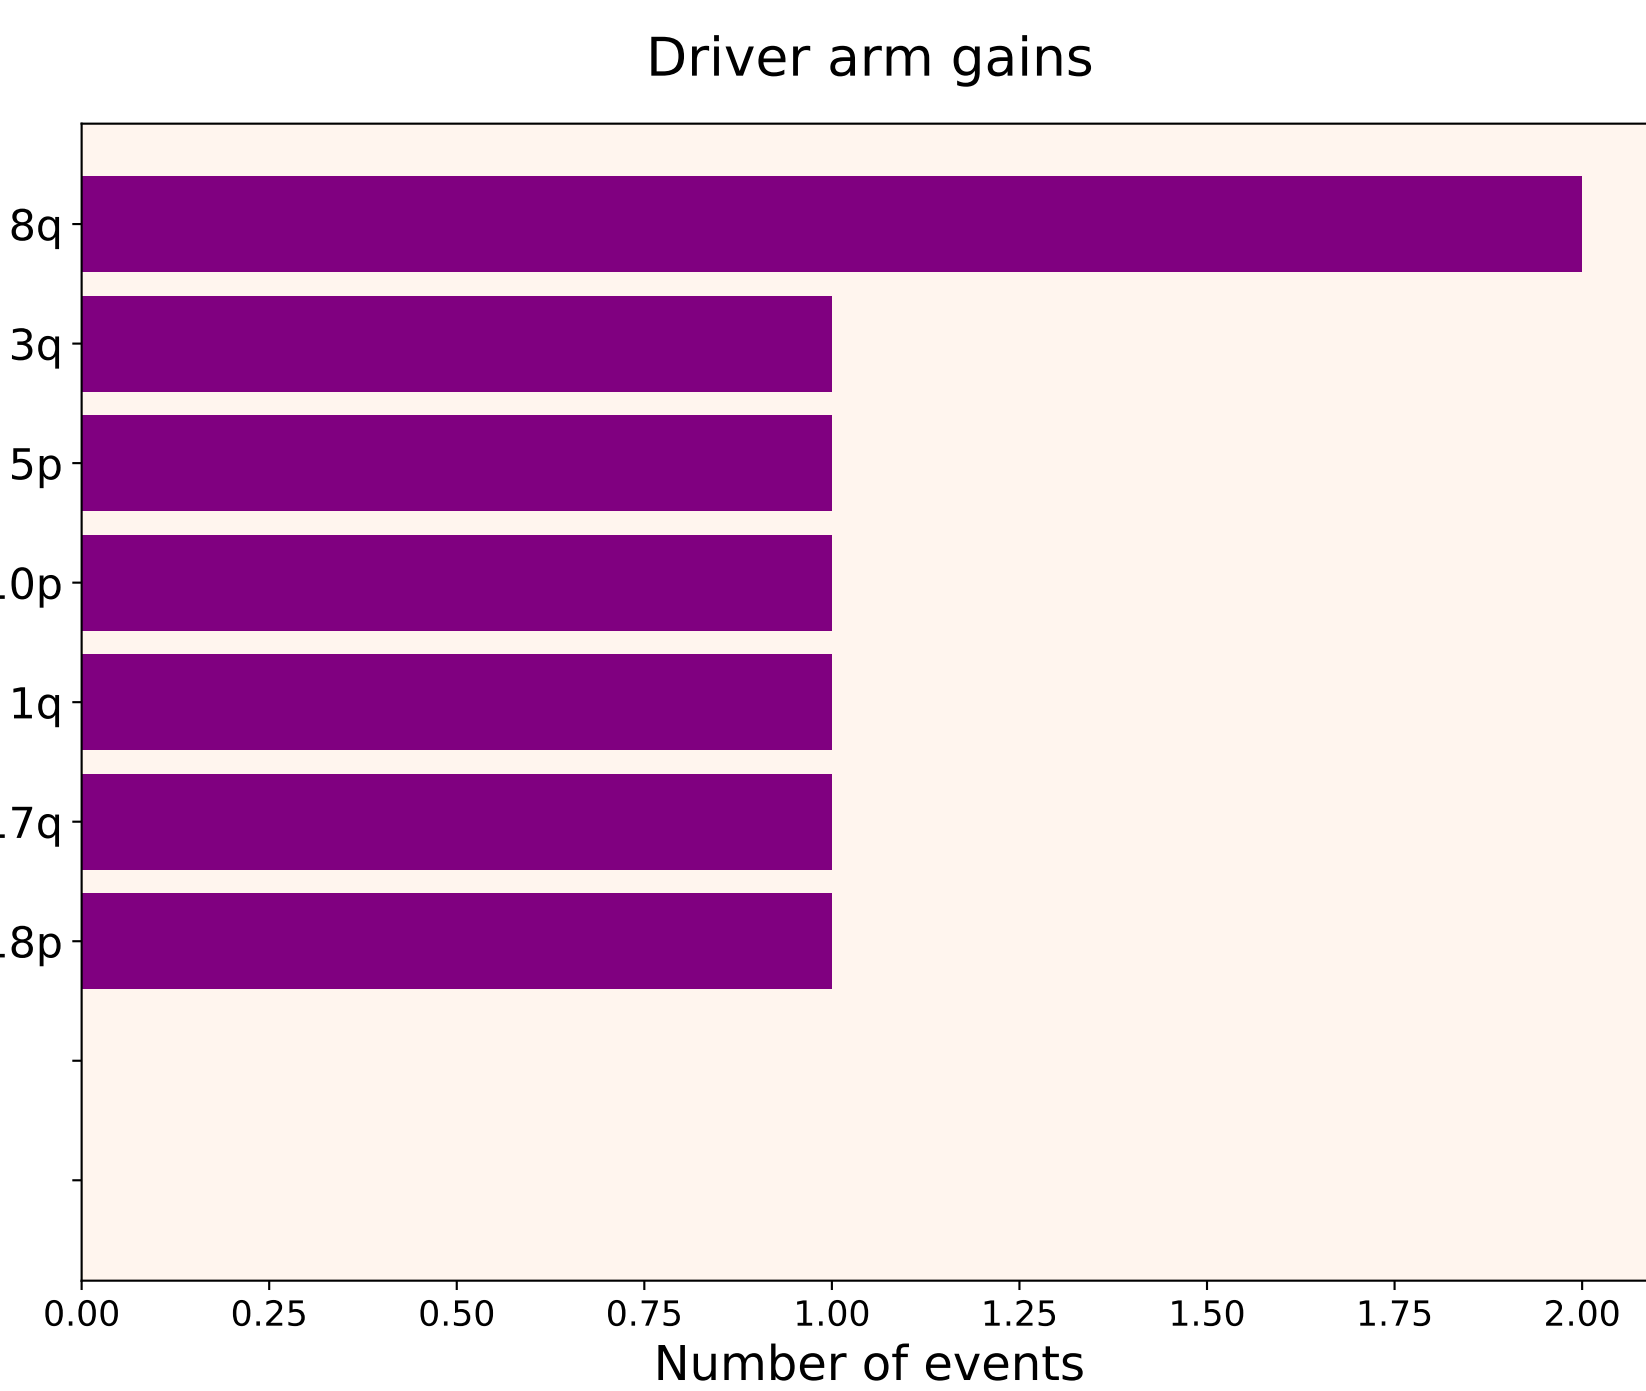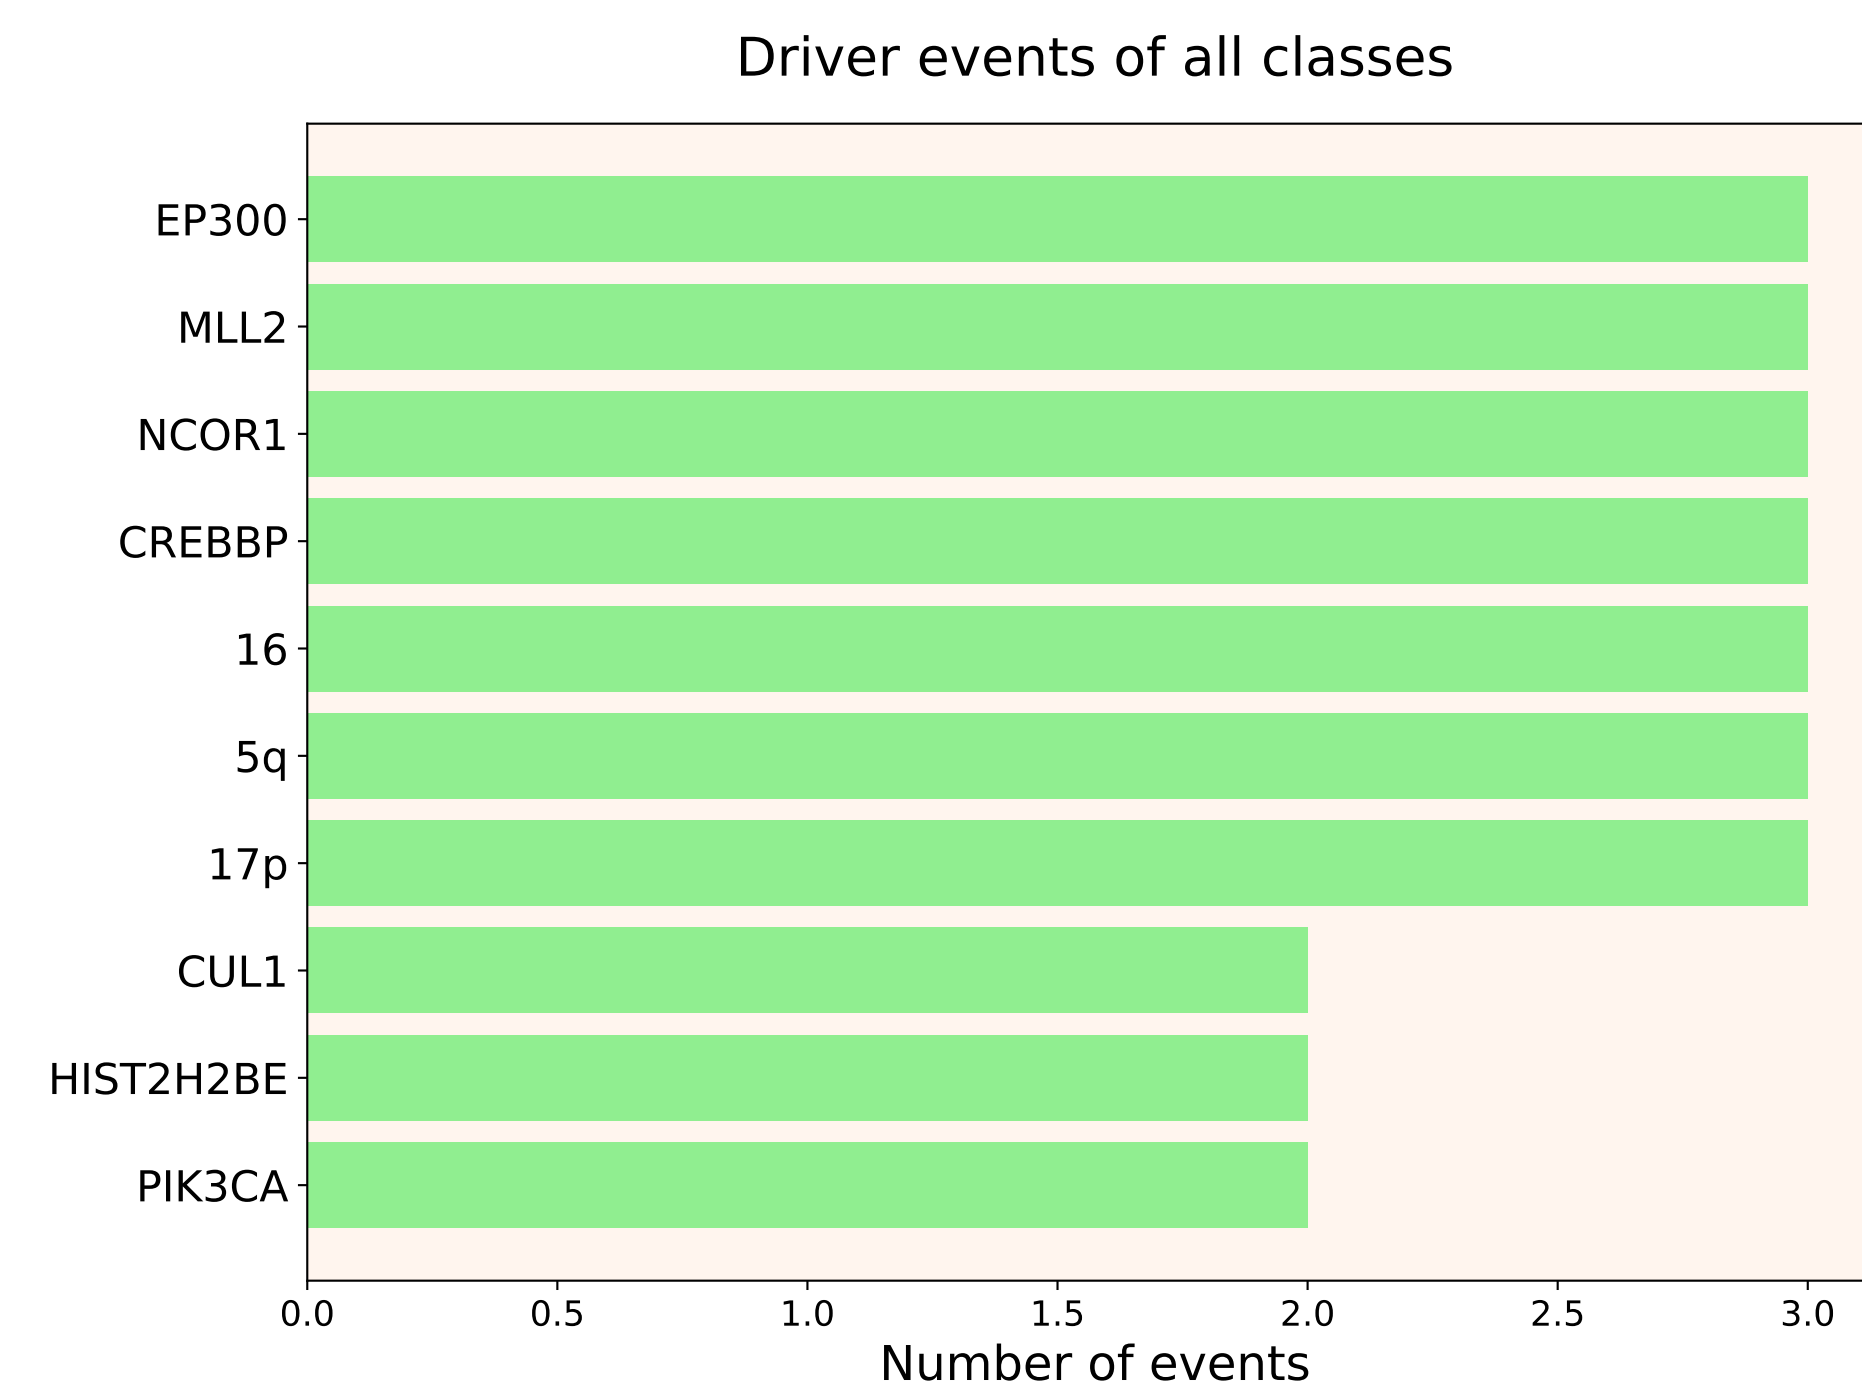

Supplement: Supplemental_Data_S1.zip [file Supplemental_Data_S1.zip]

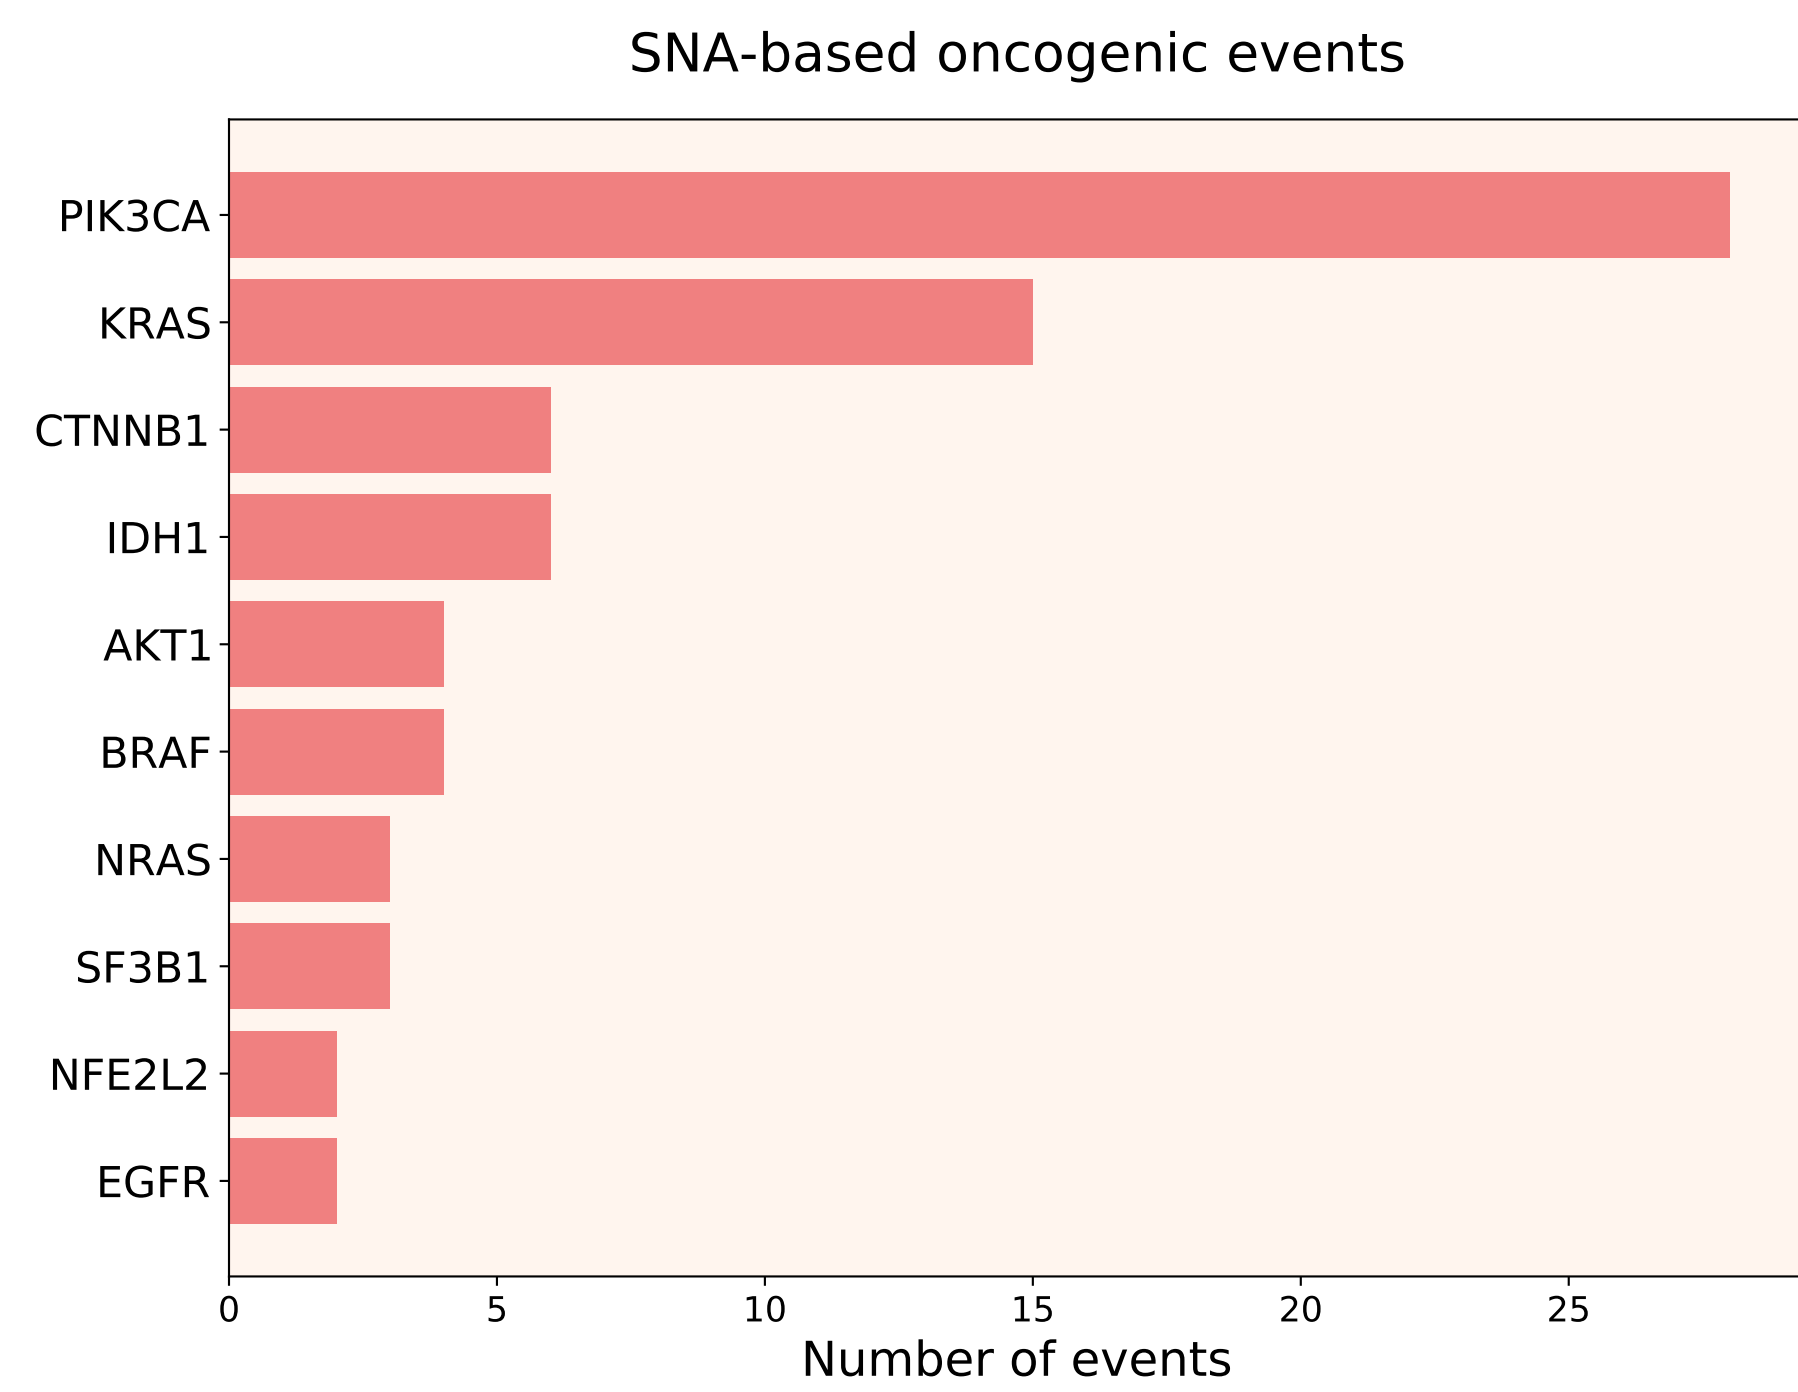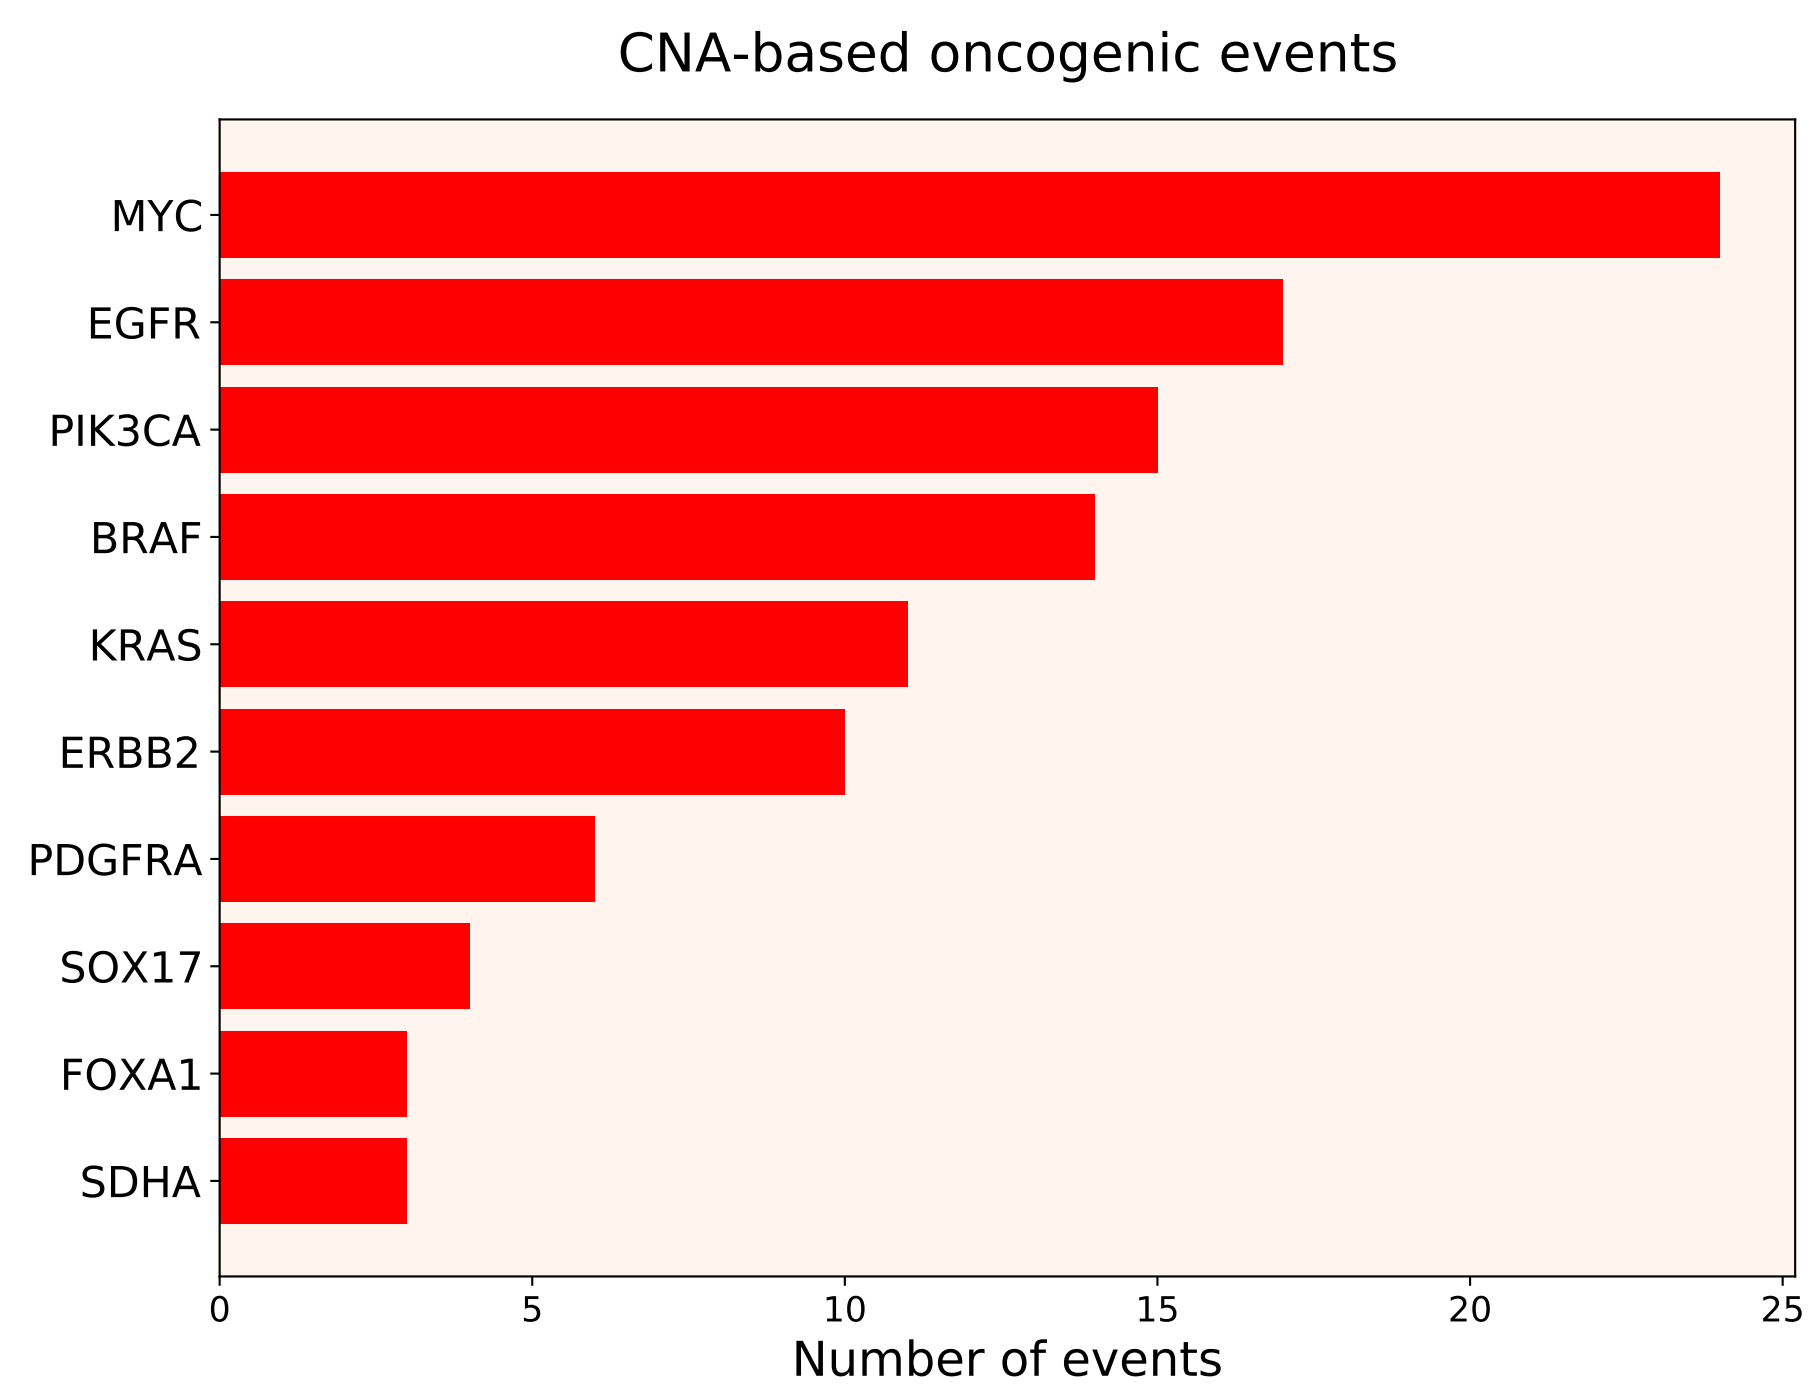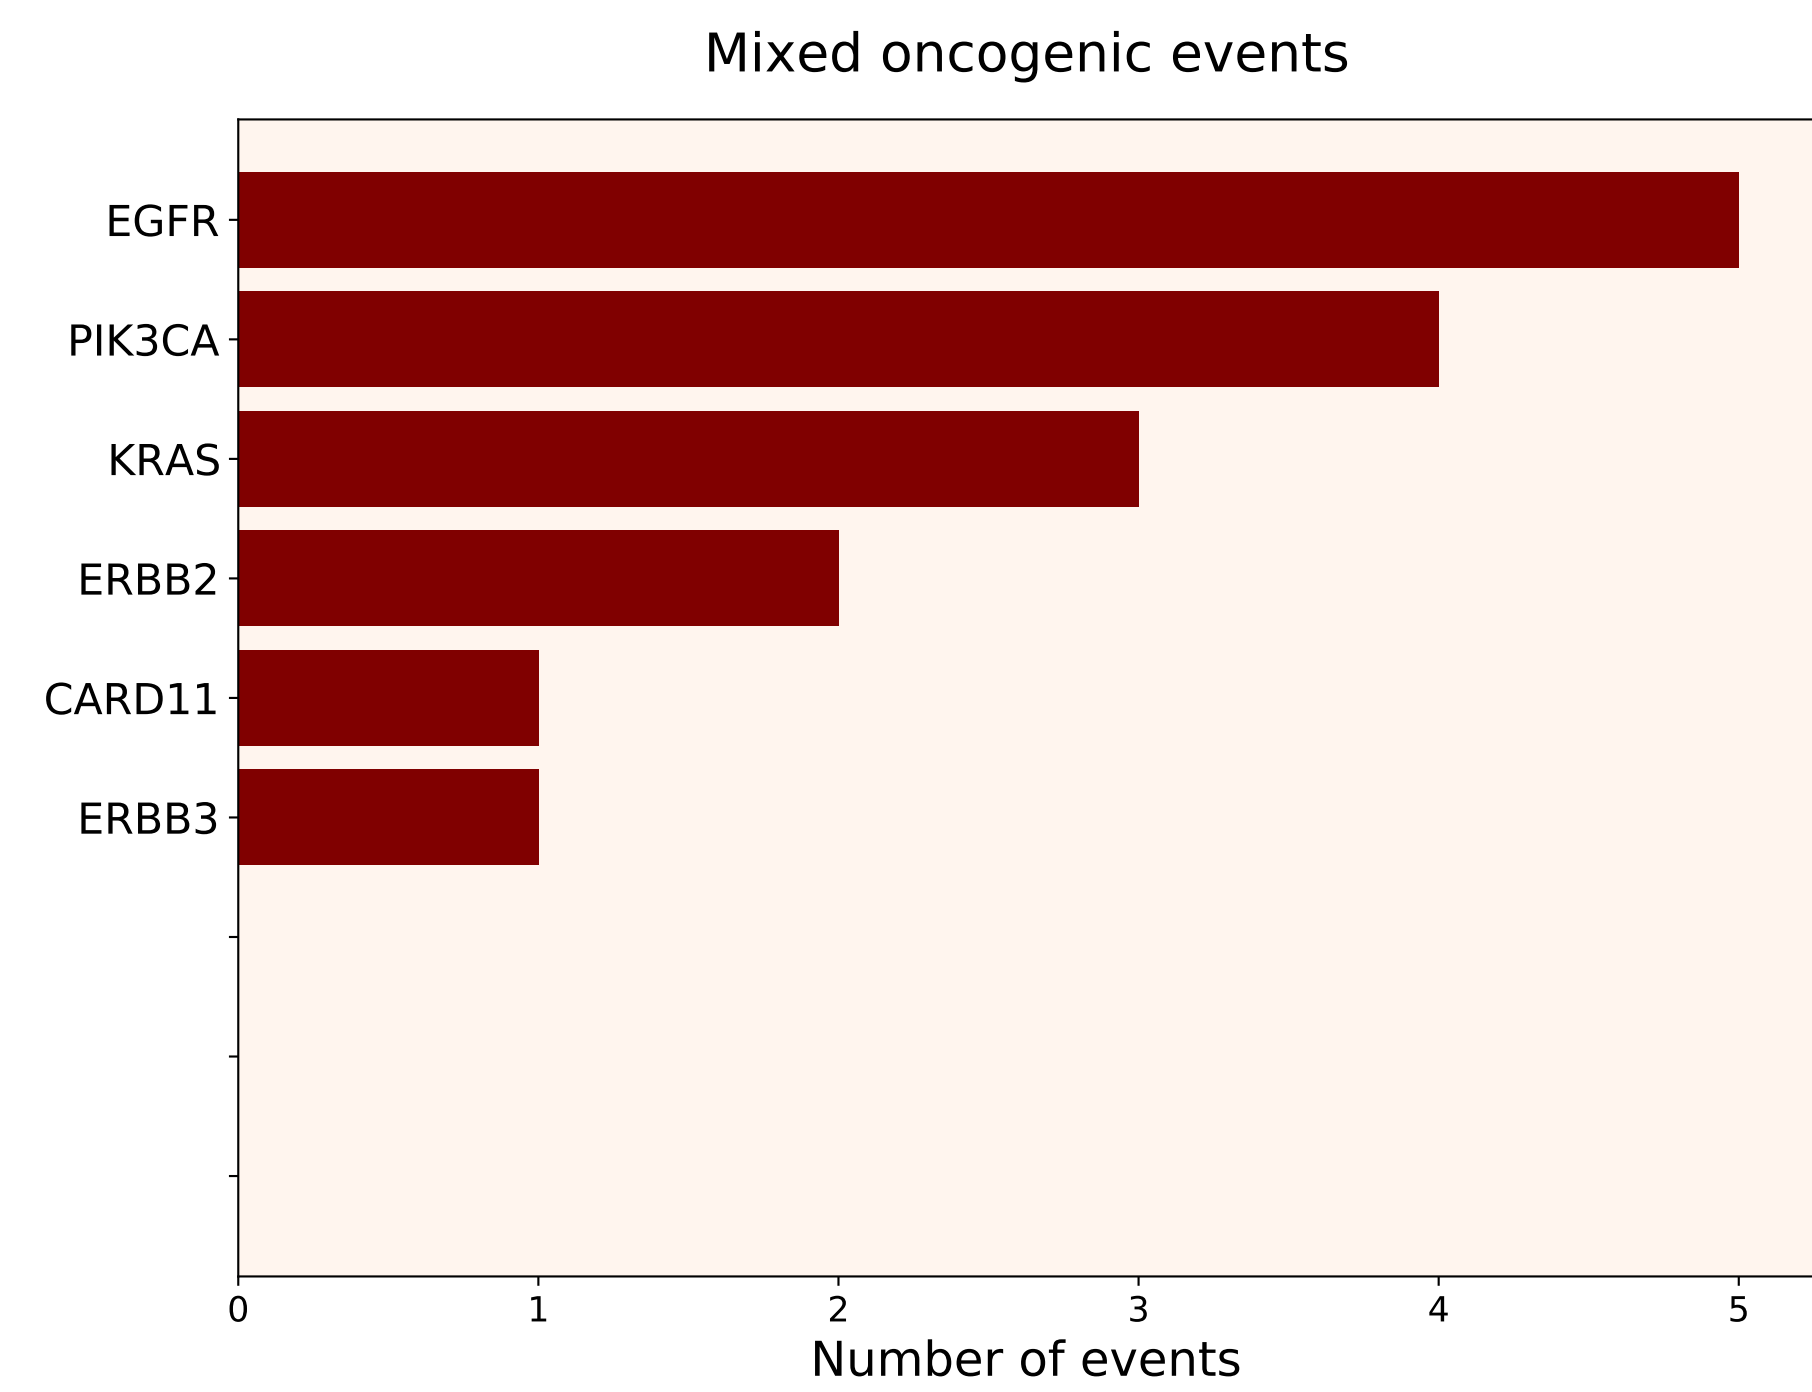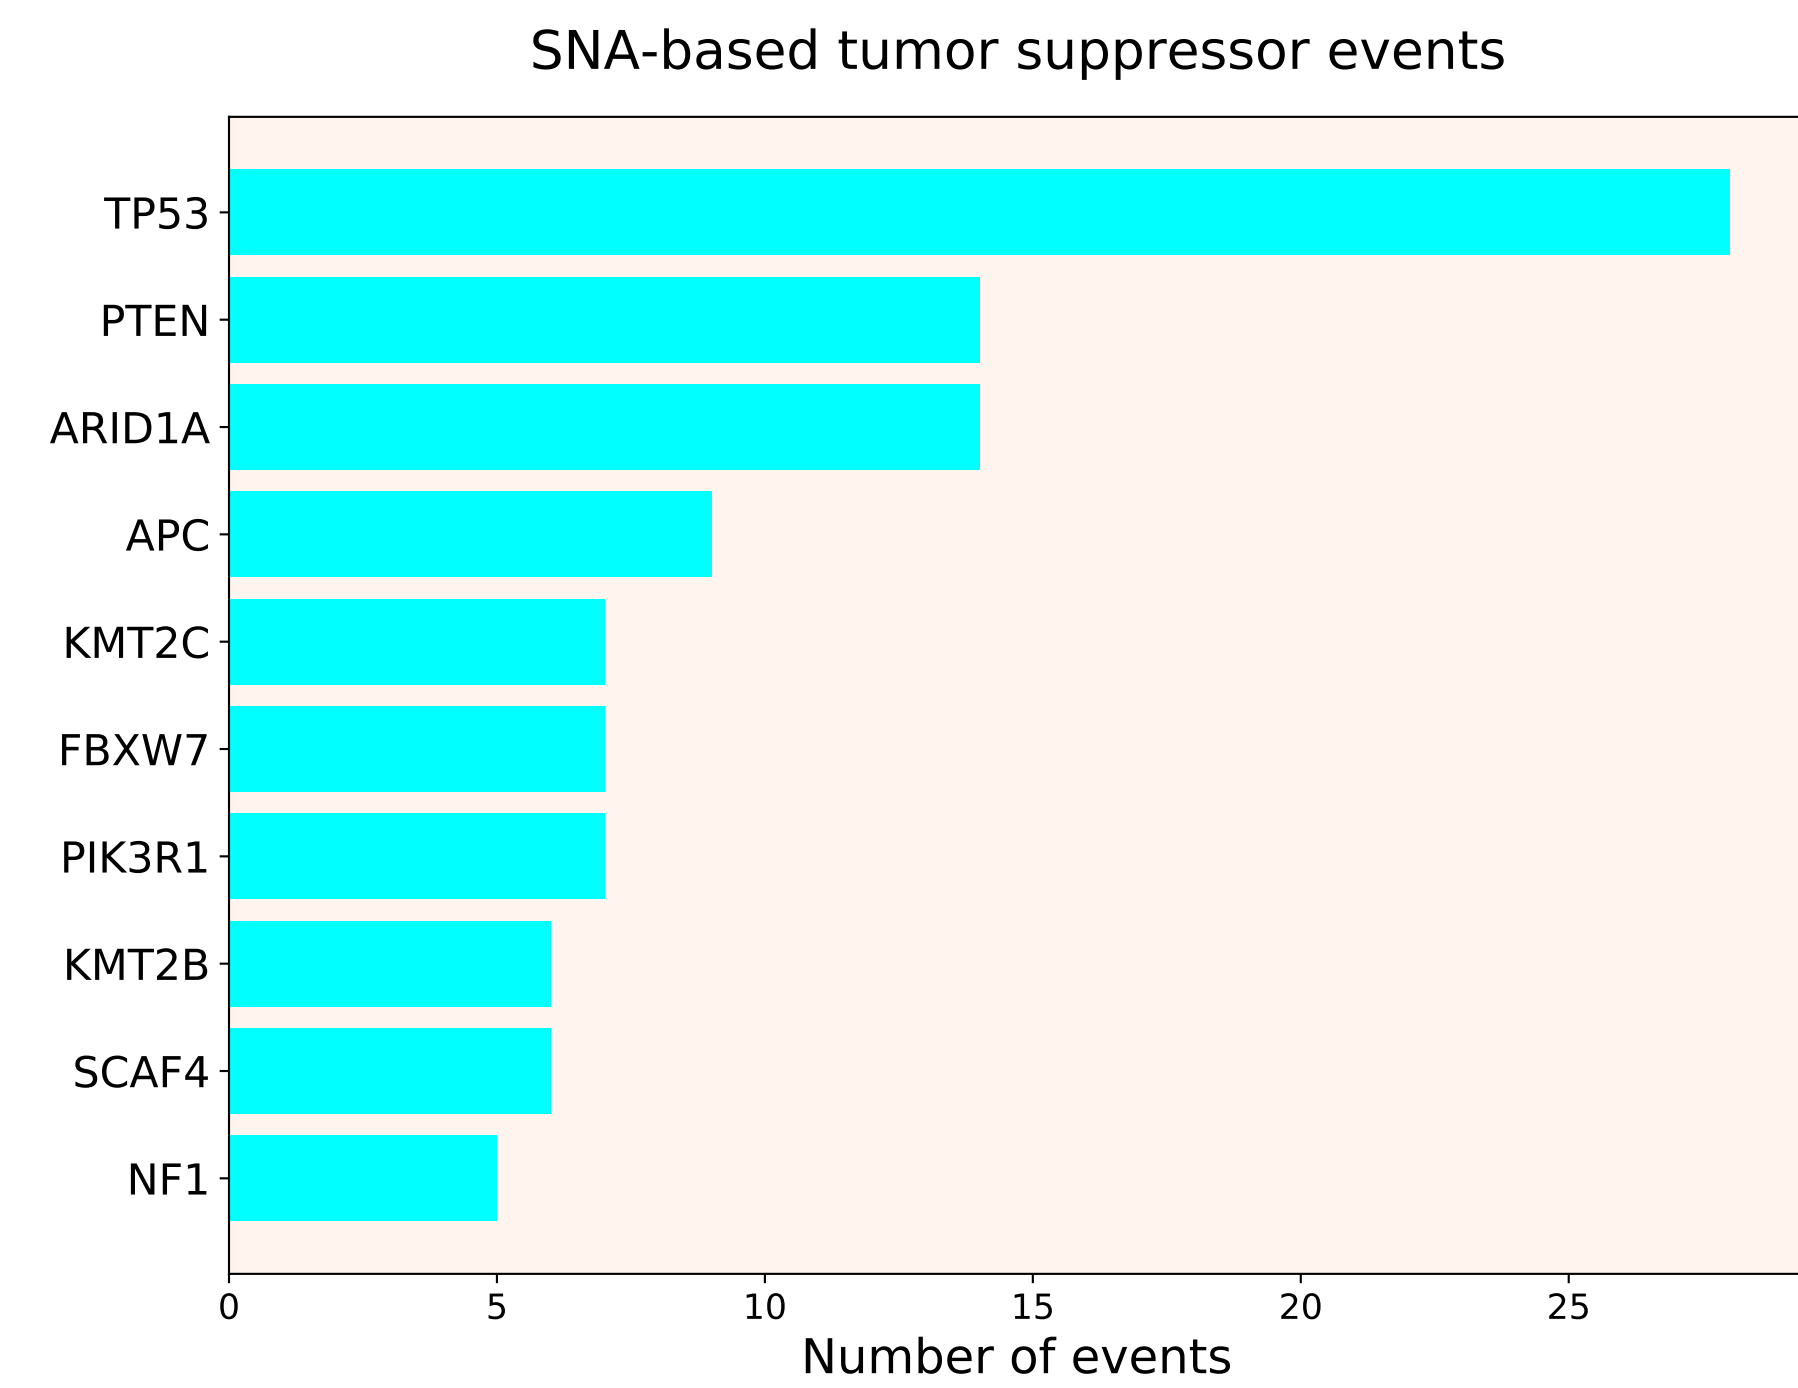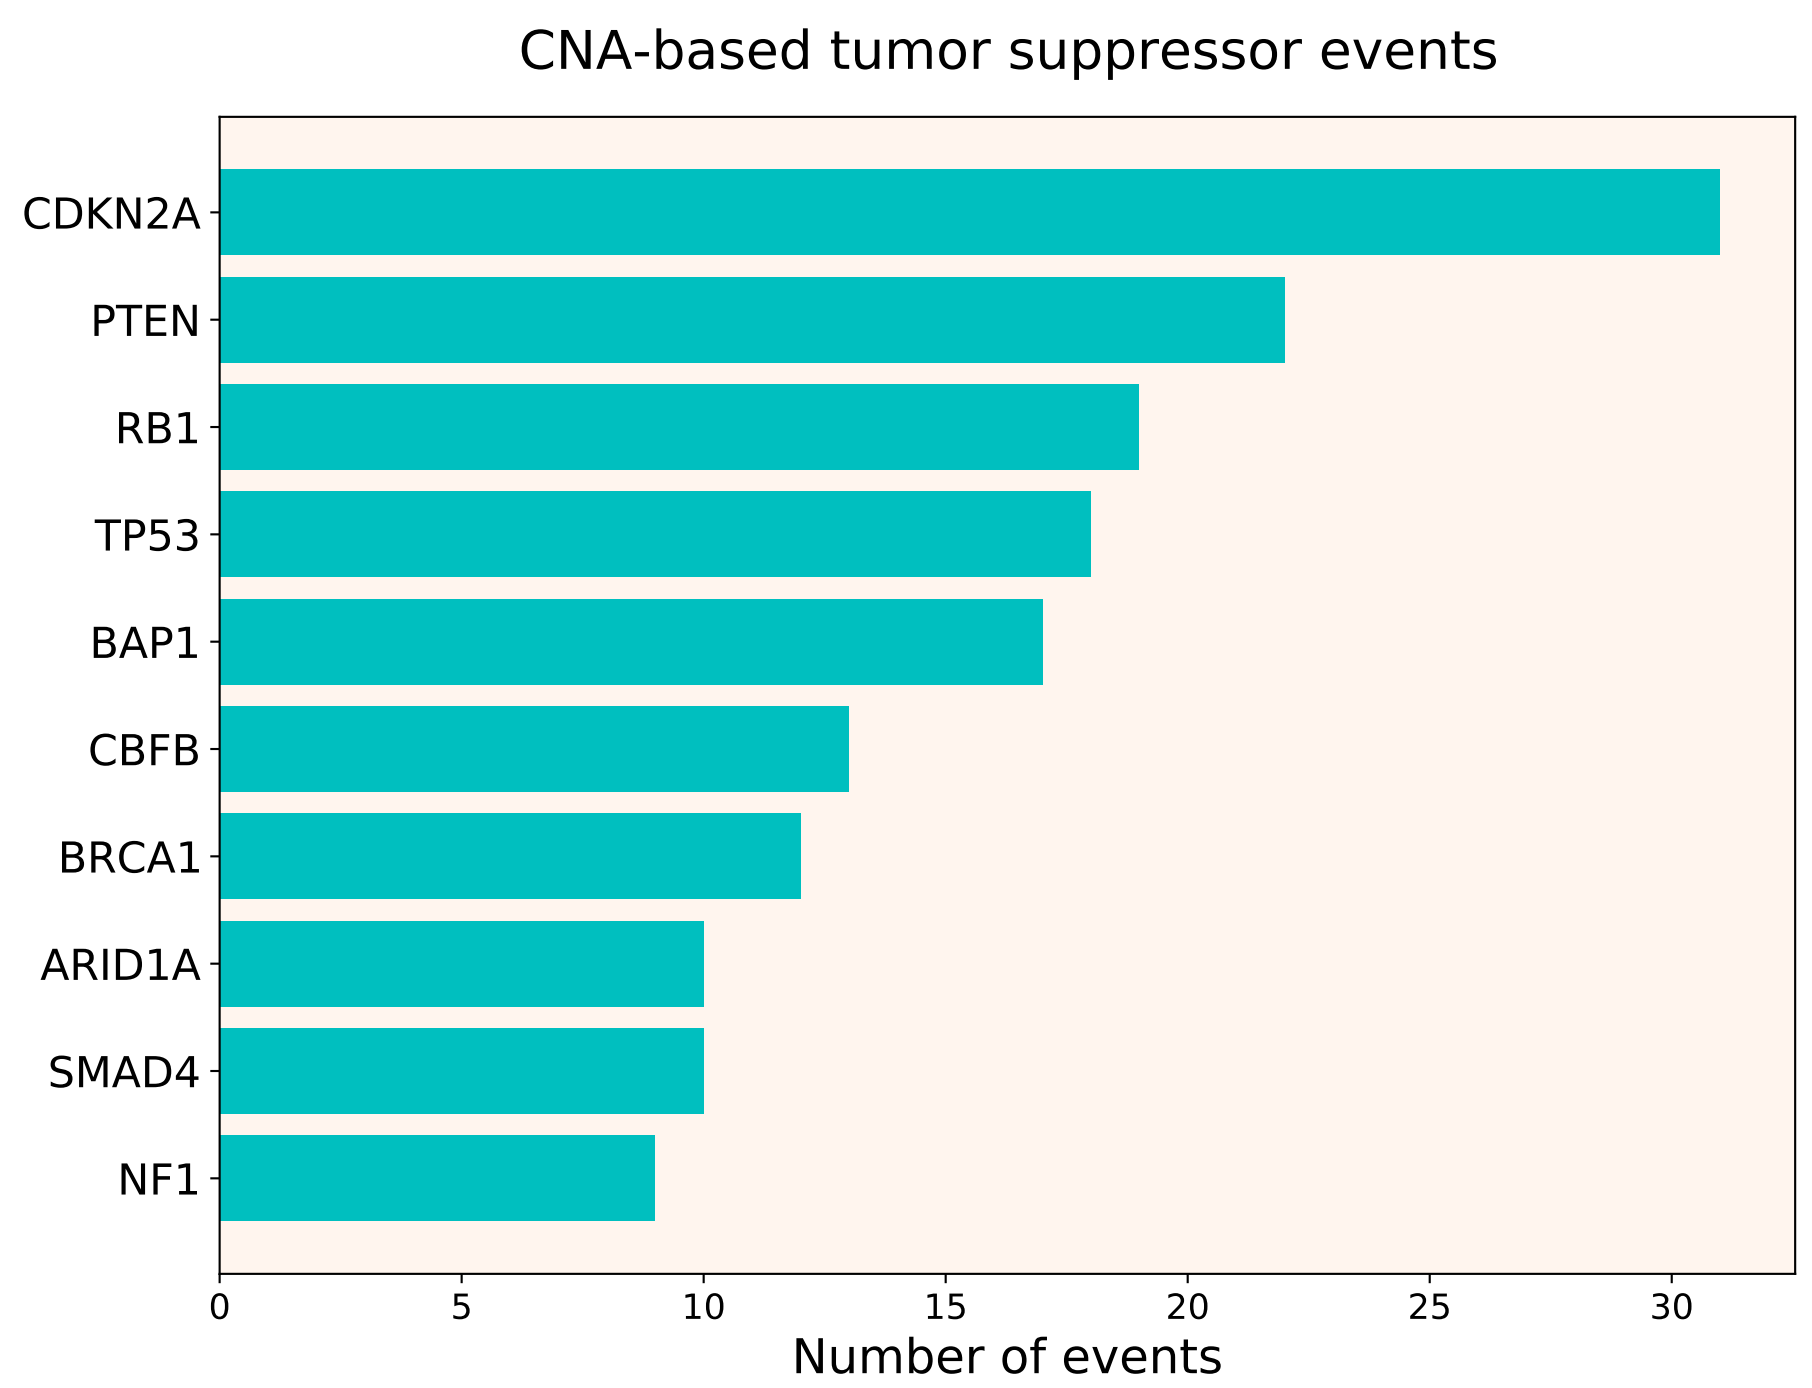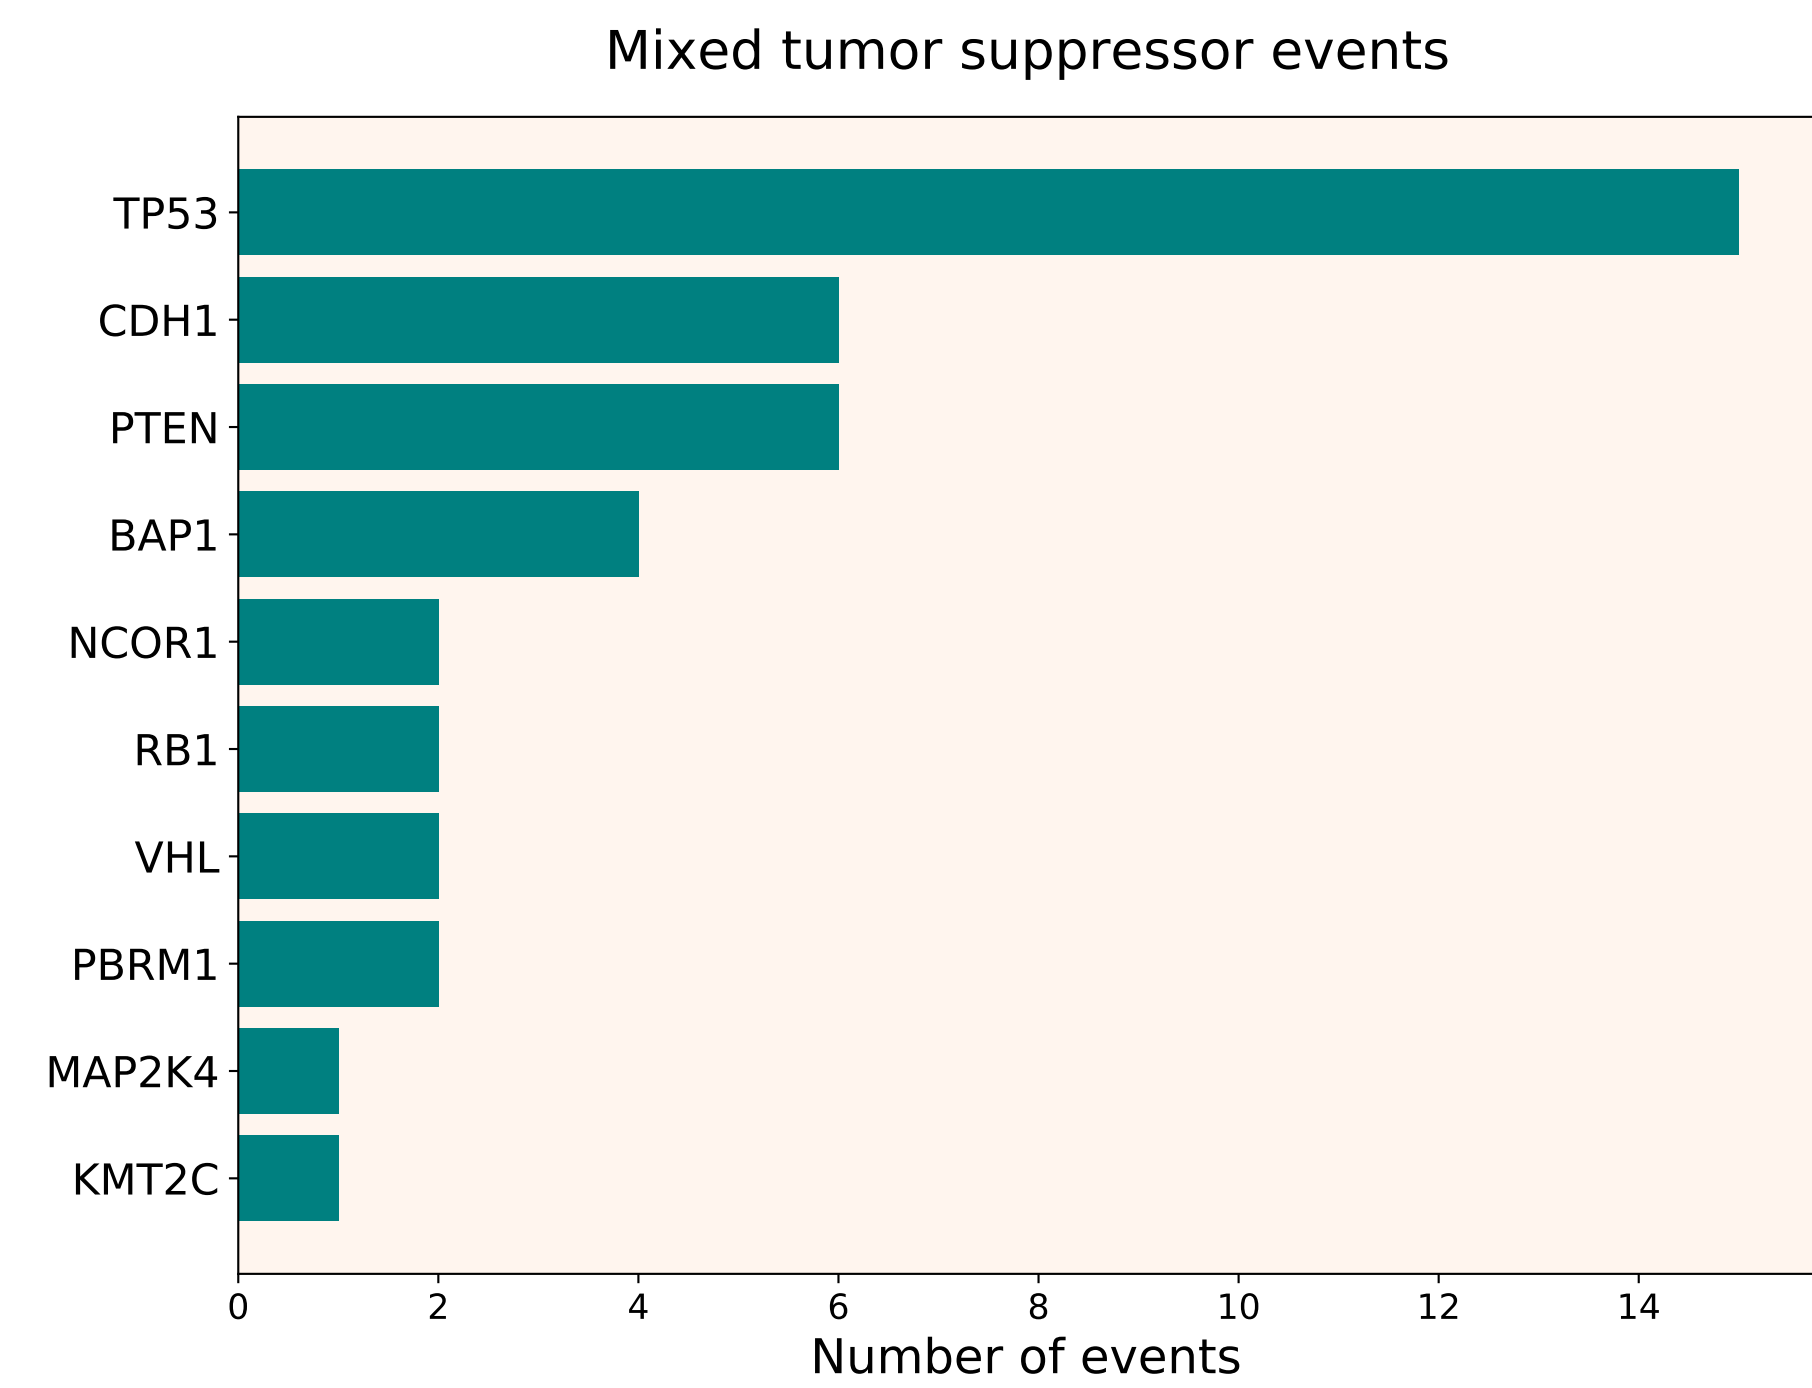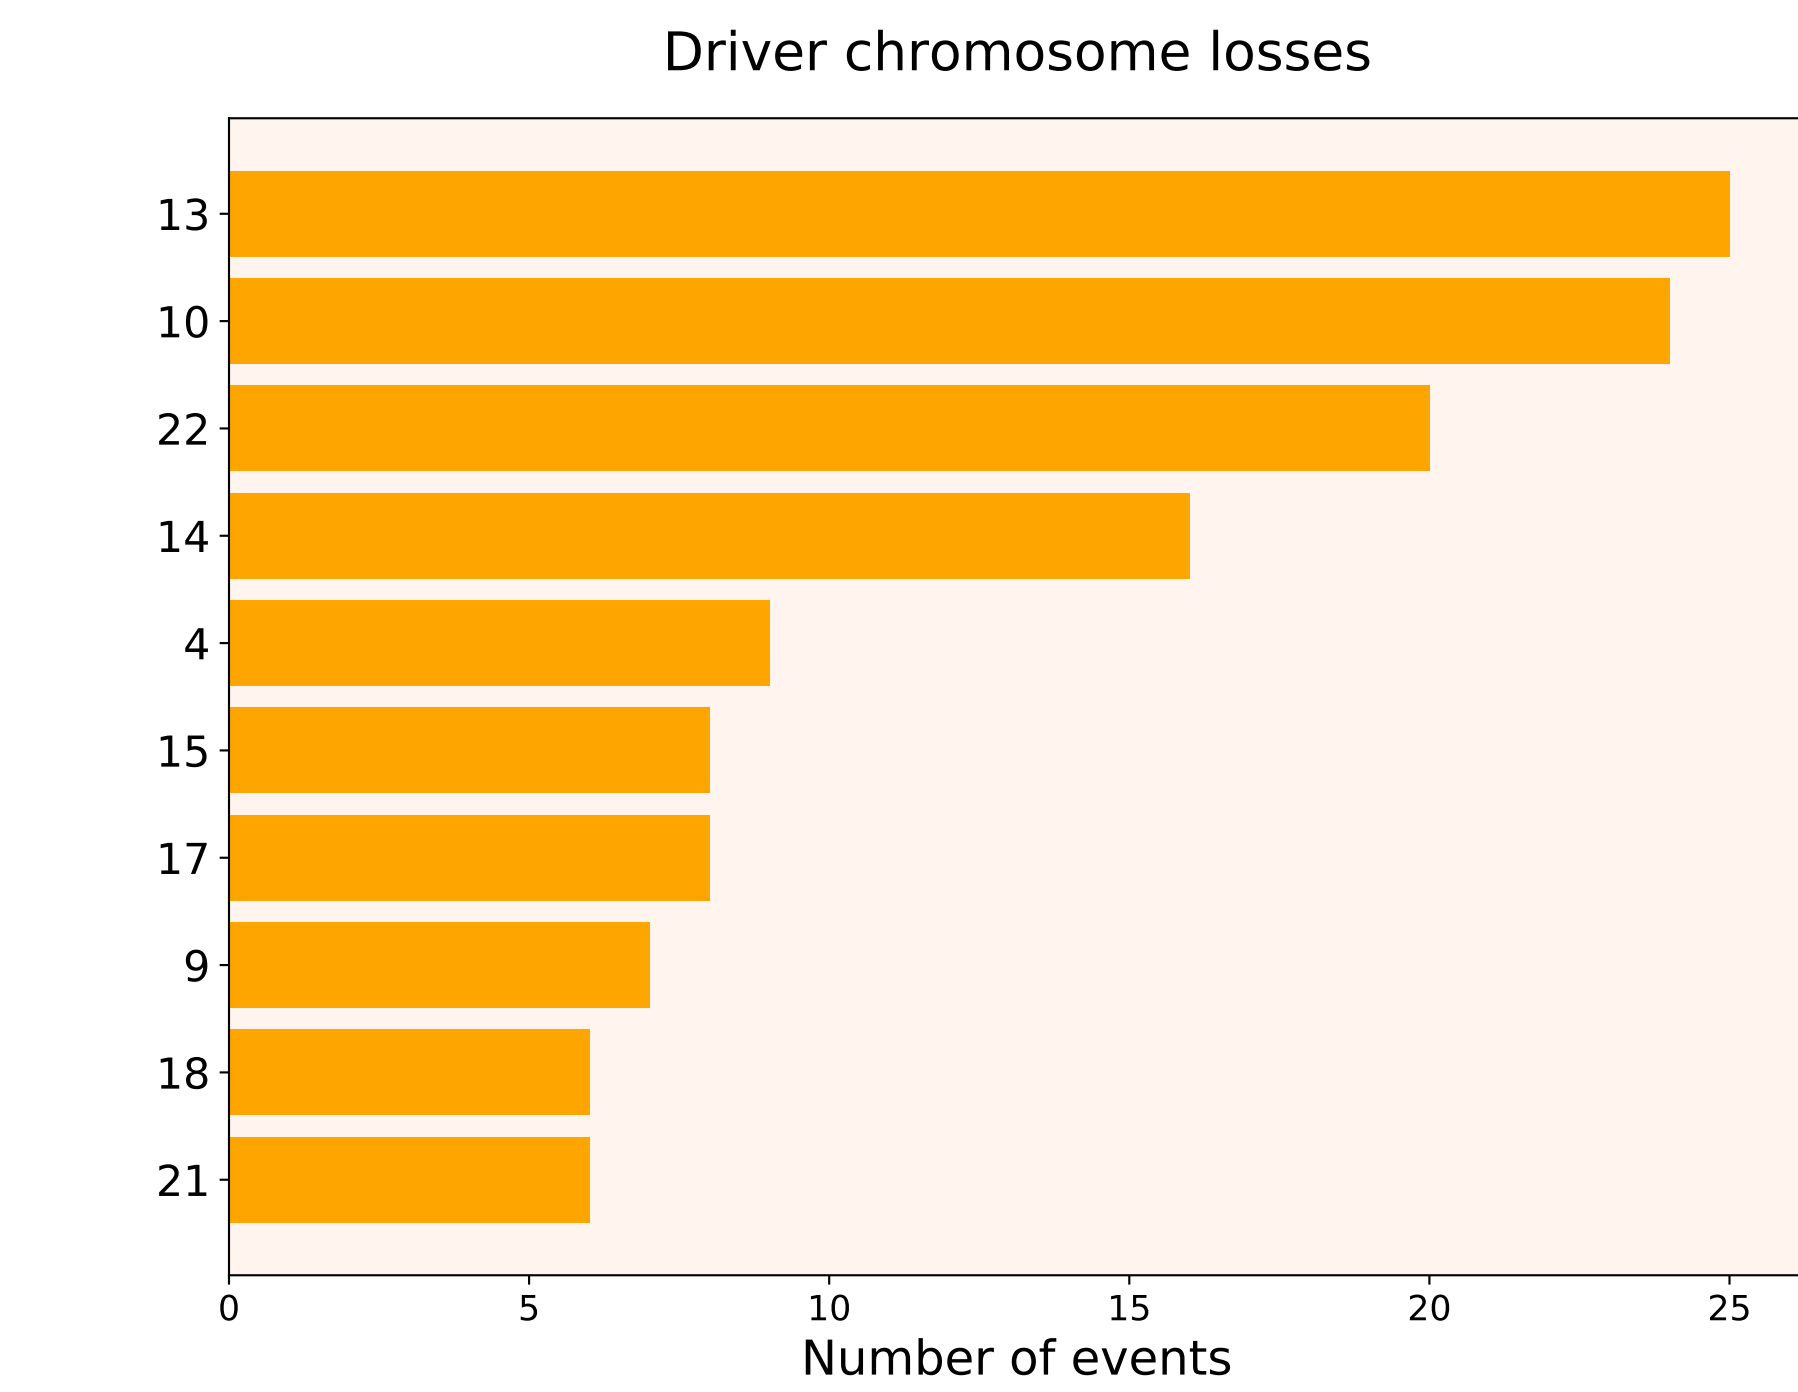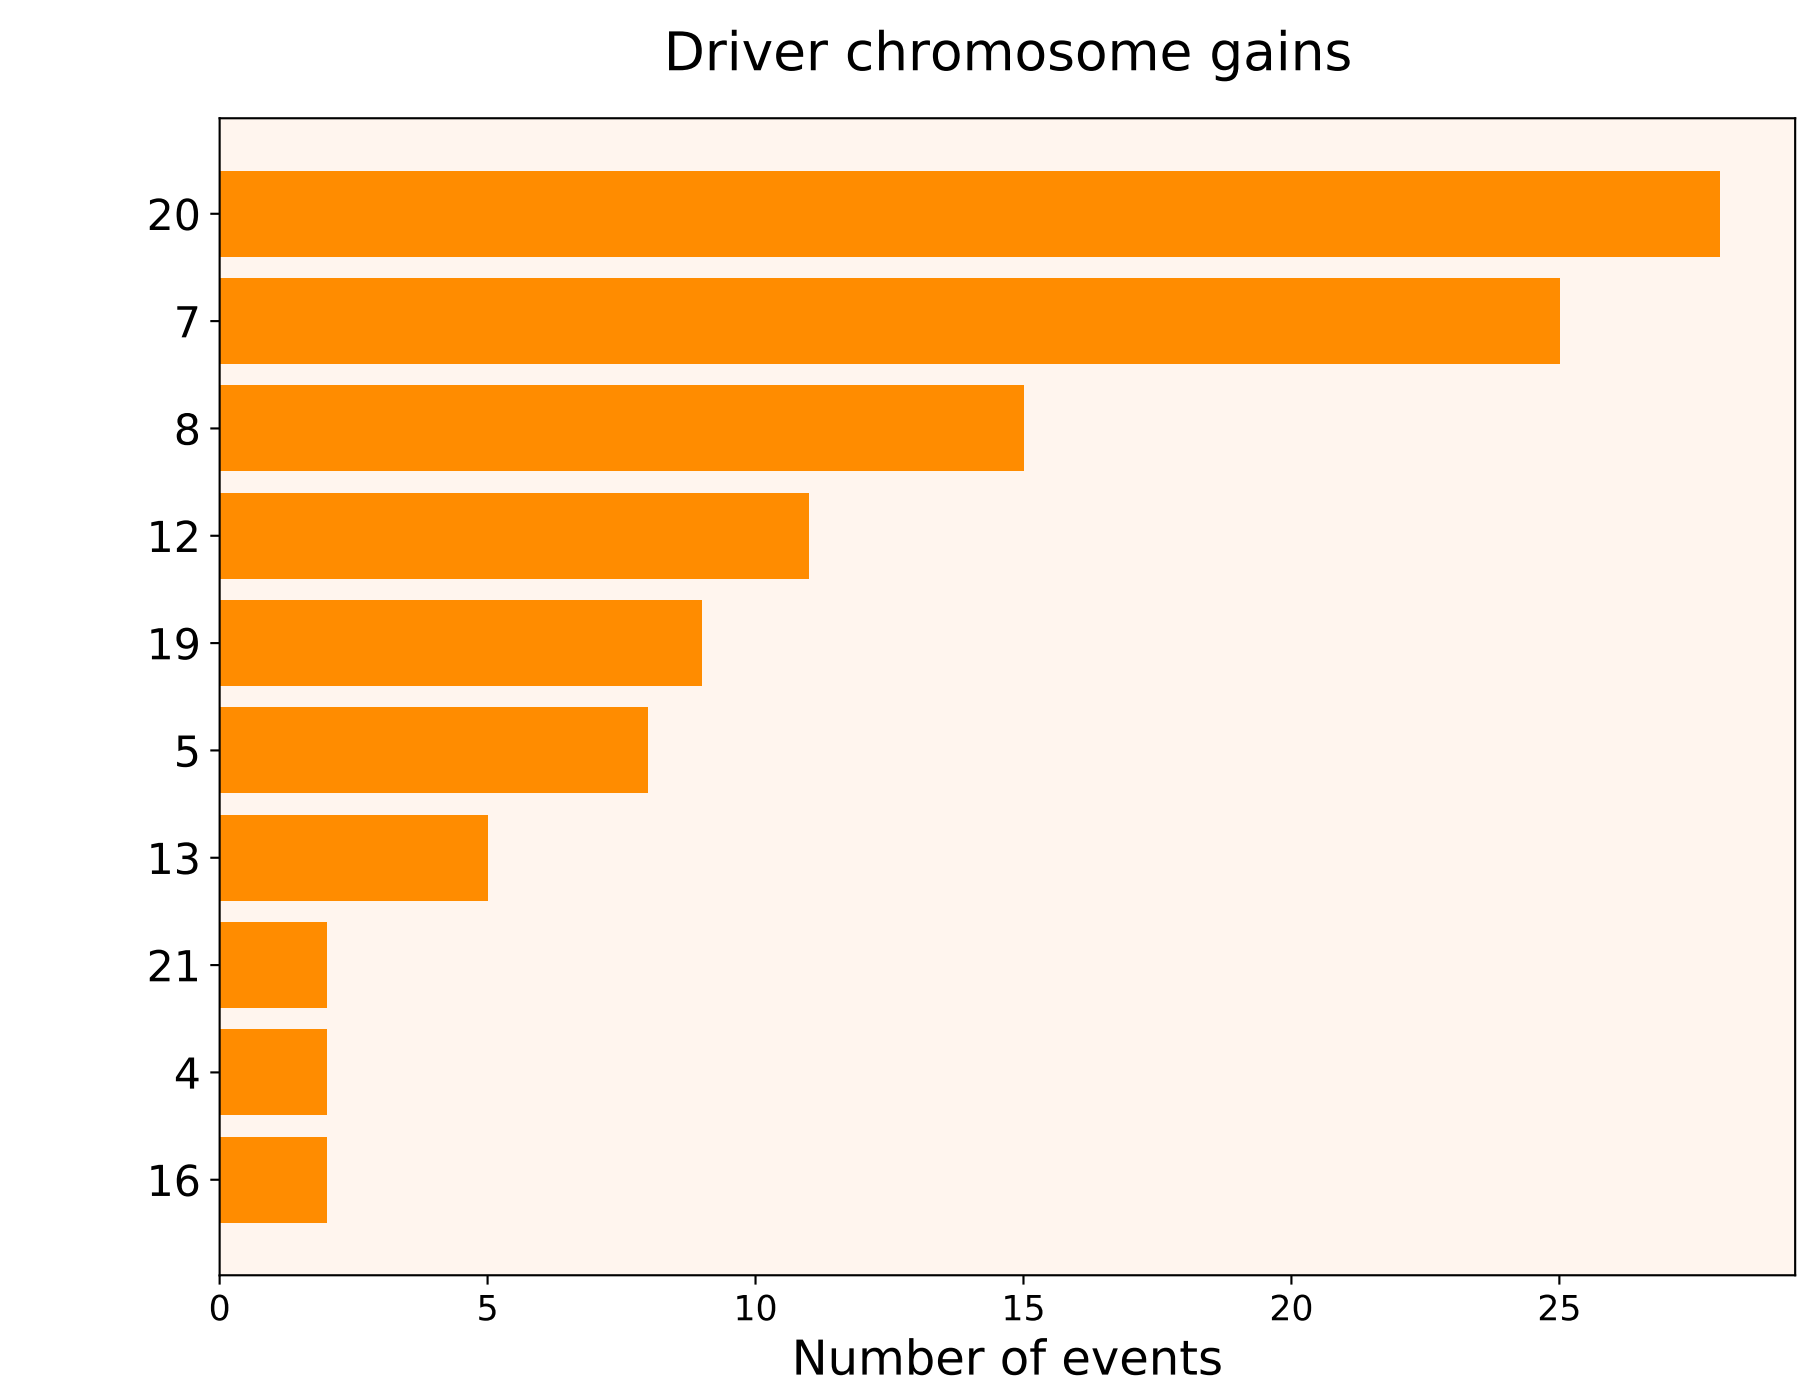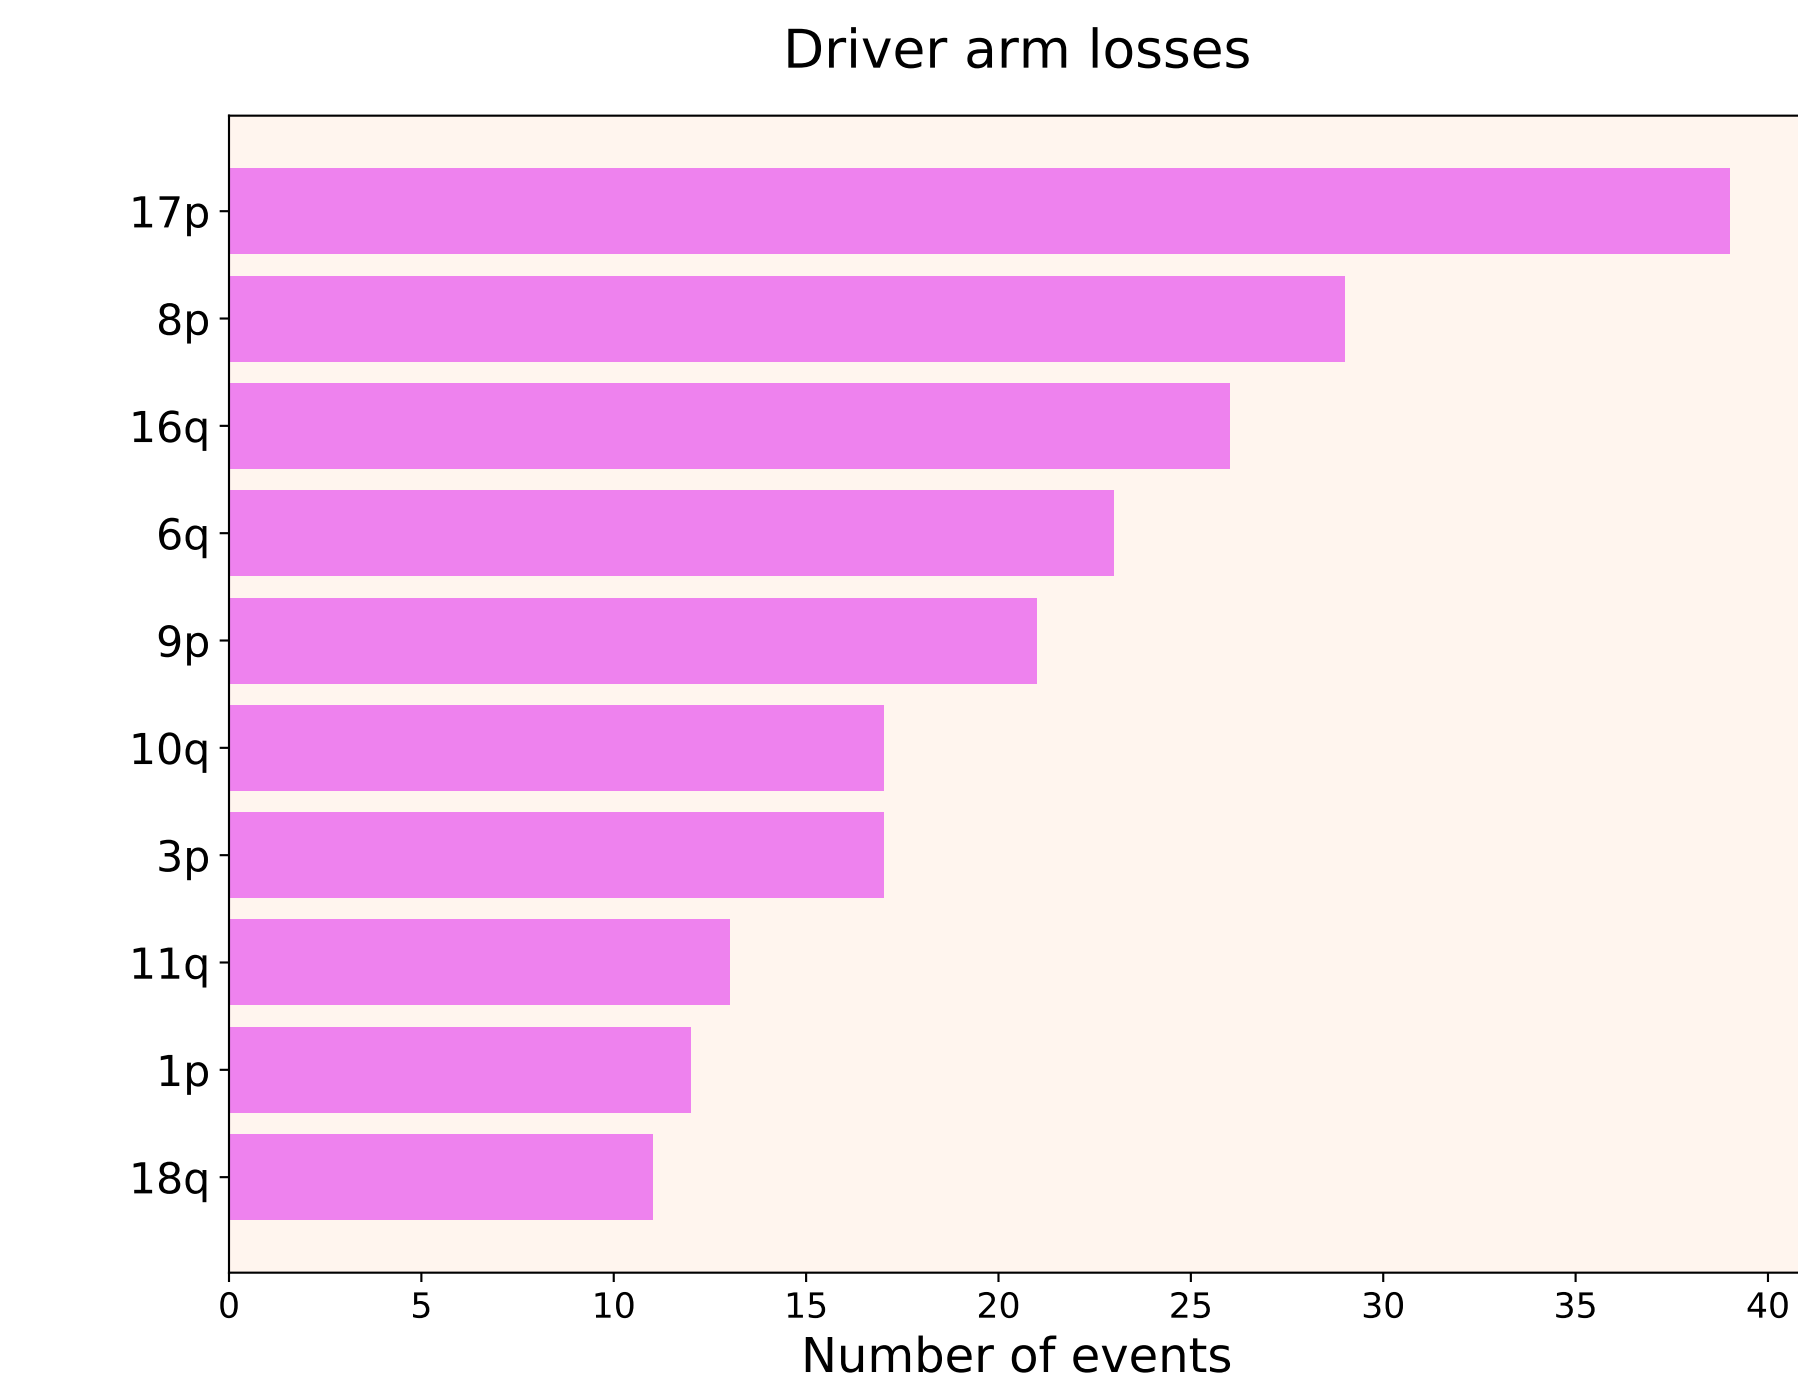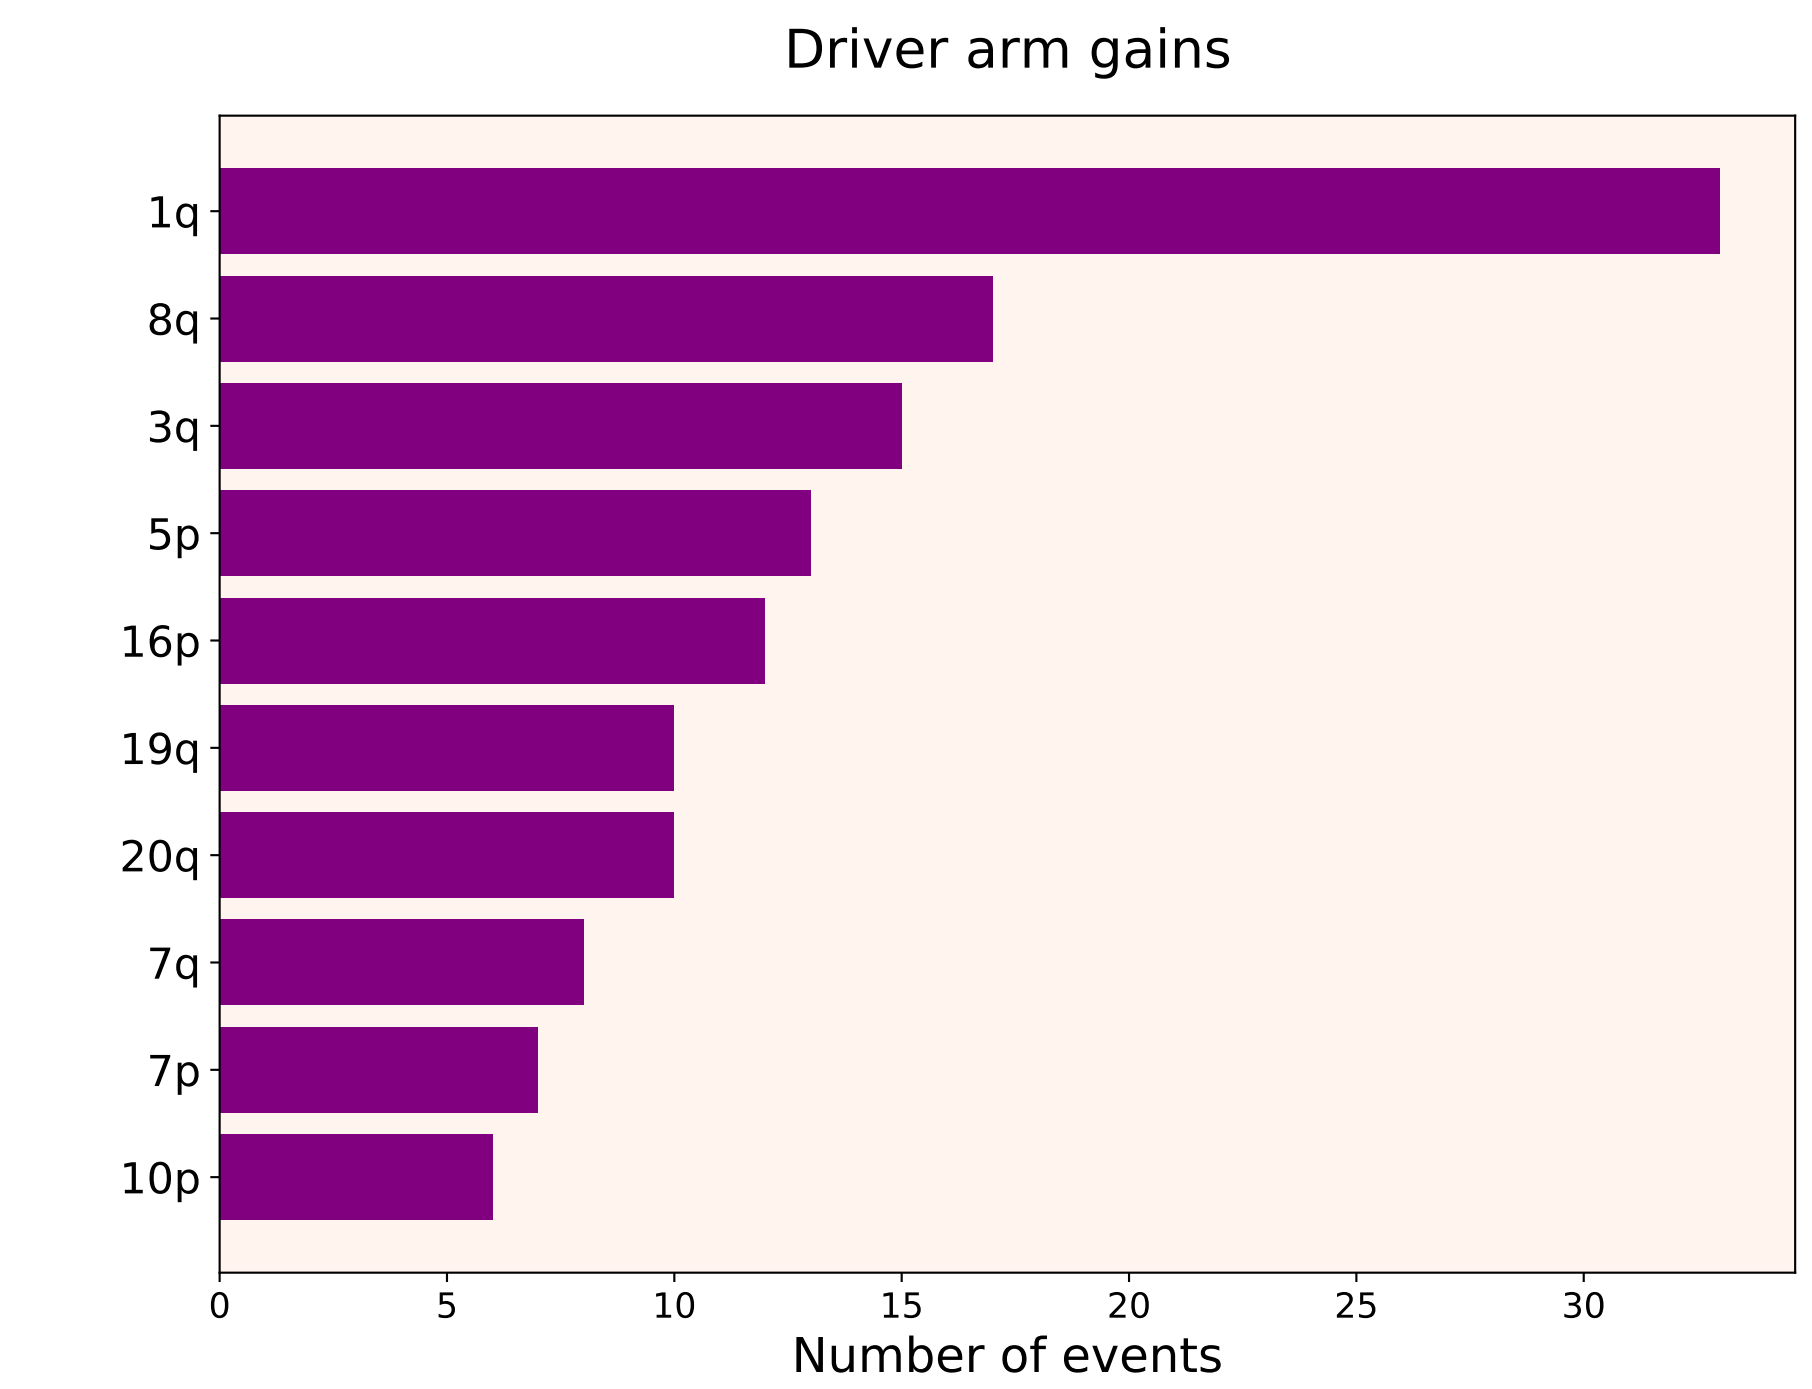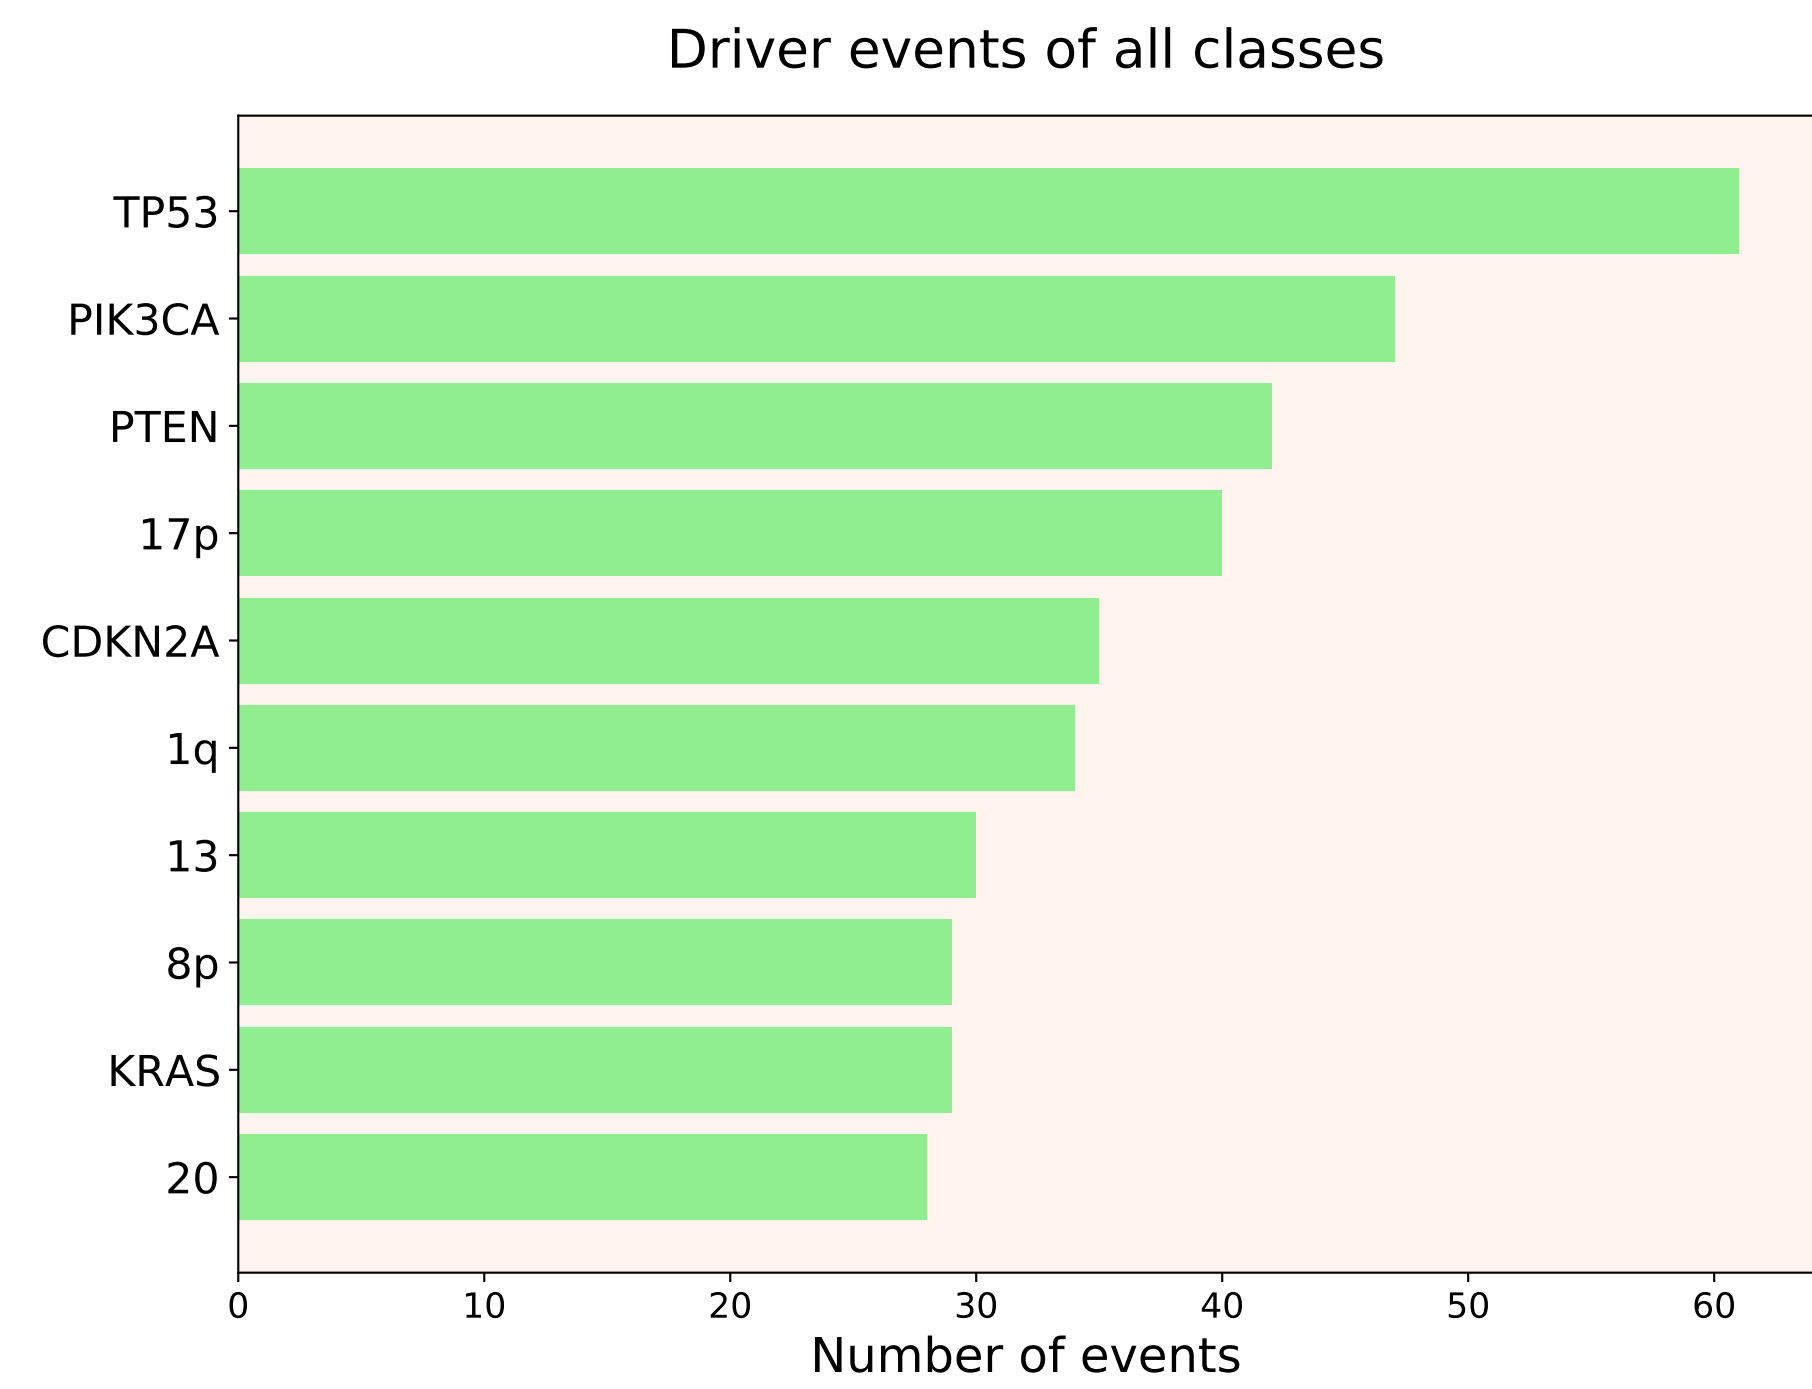

Supplement: Supplemental_Data_S1.zip [file Supplemental_Data_S1.zip]

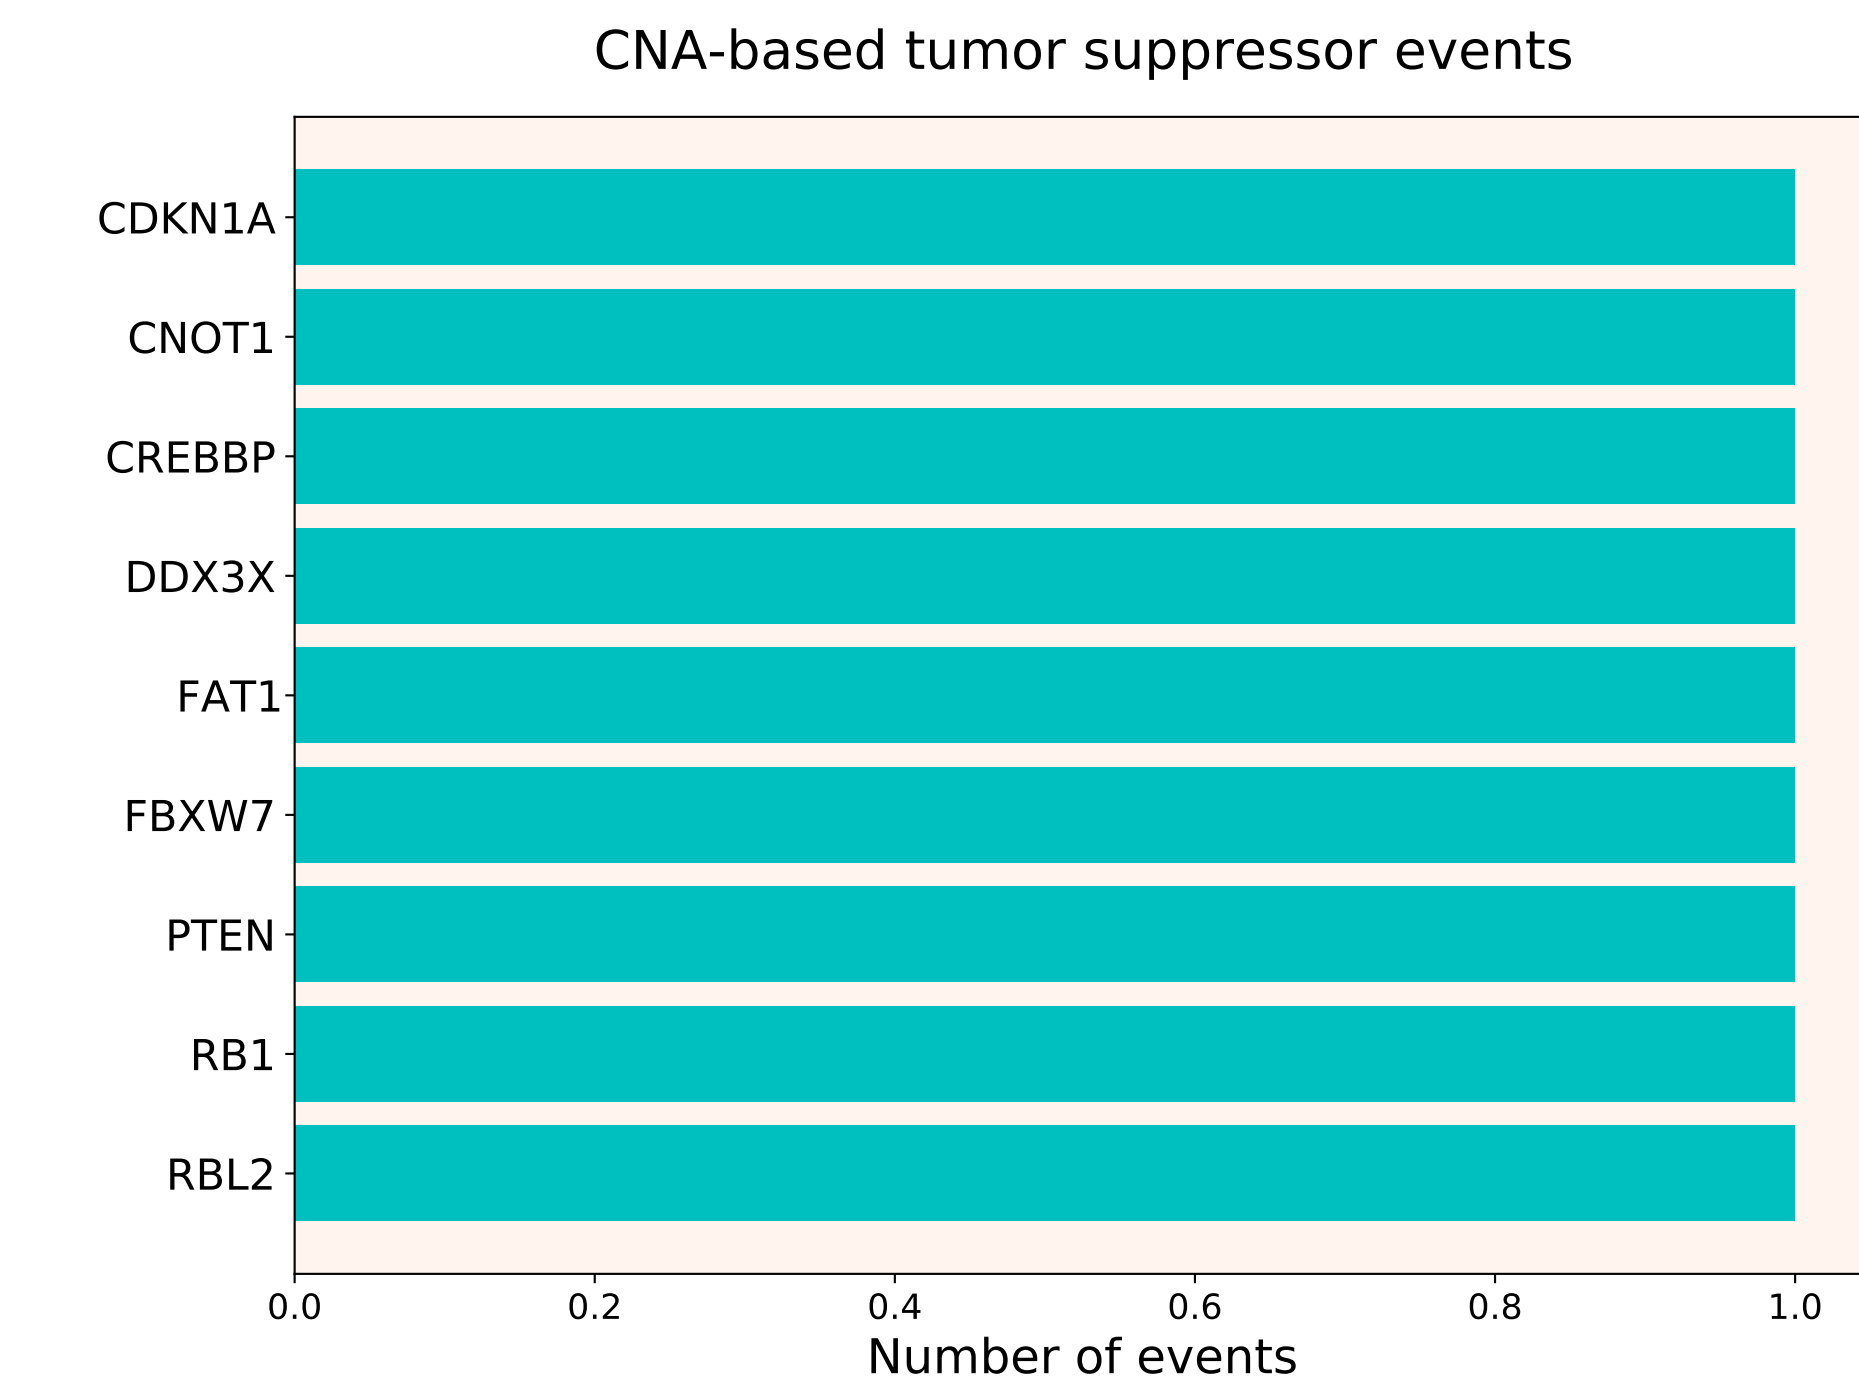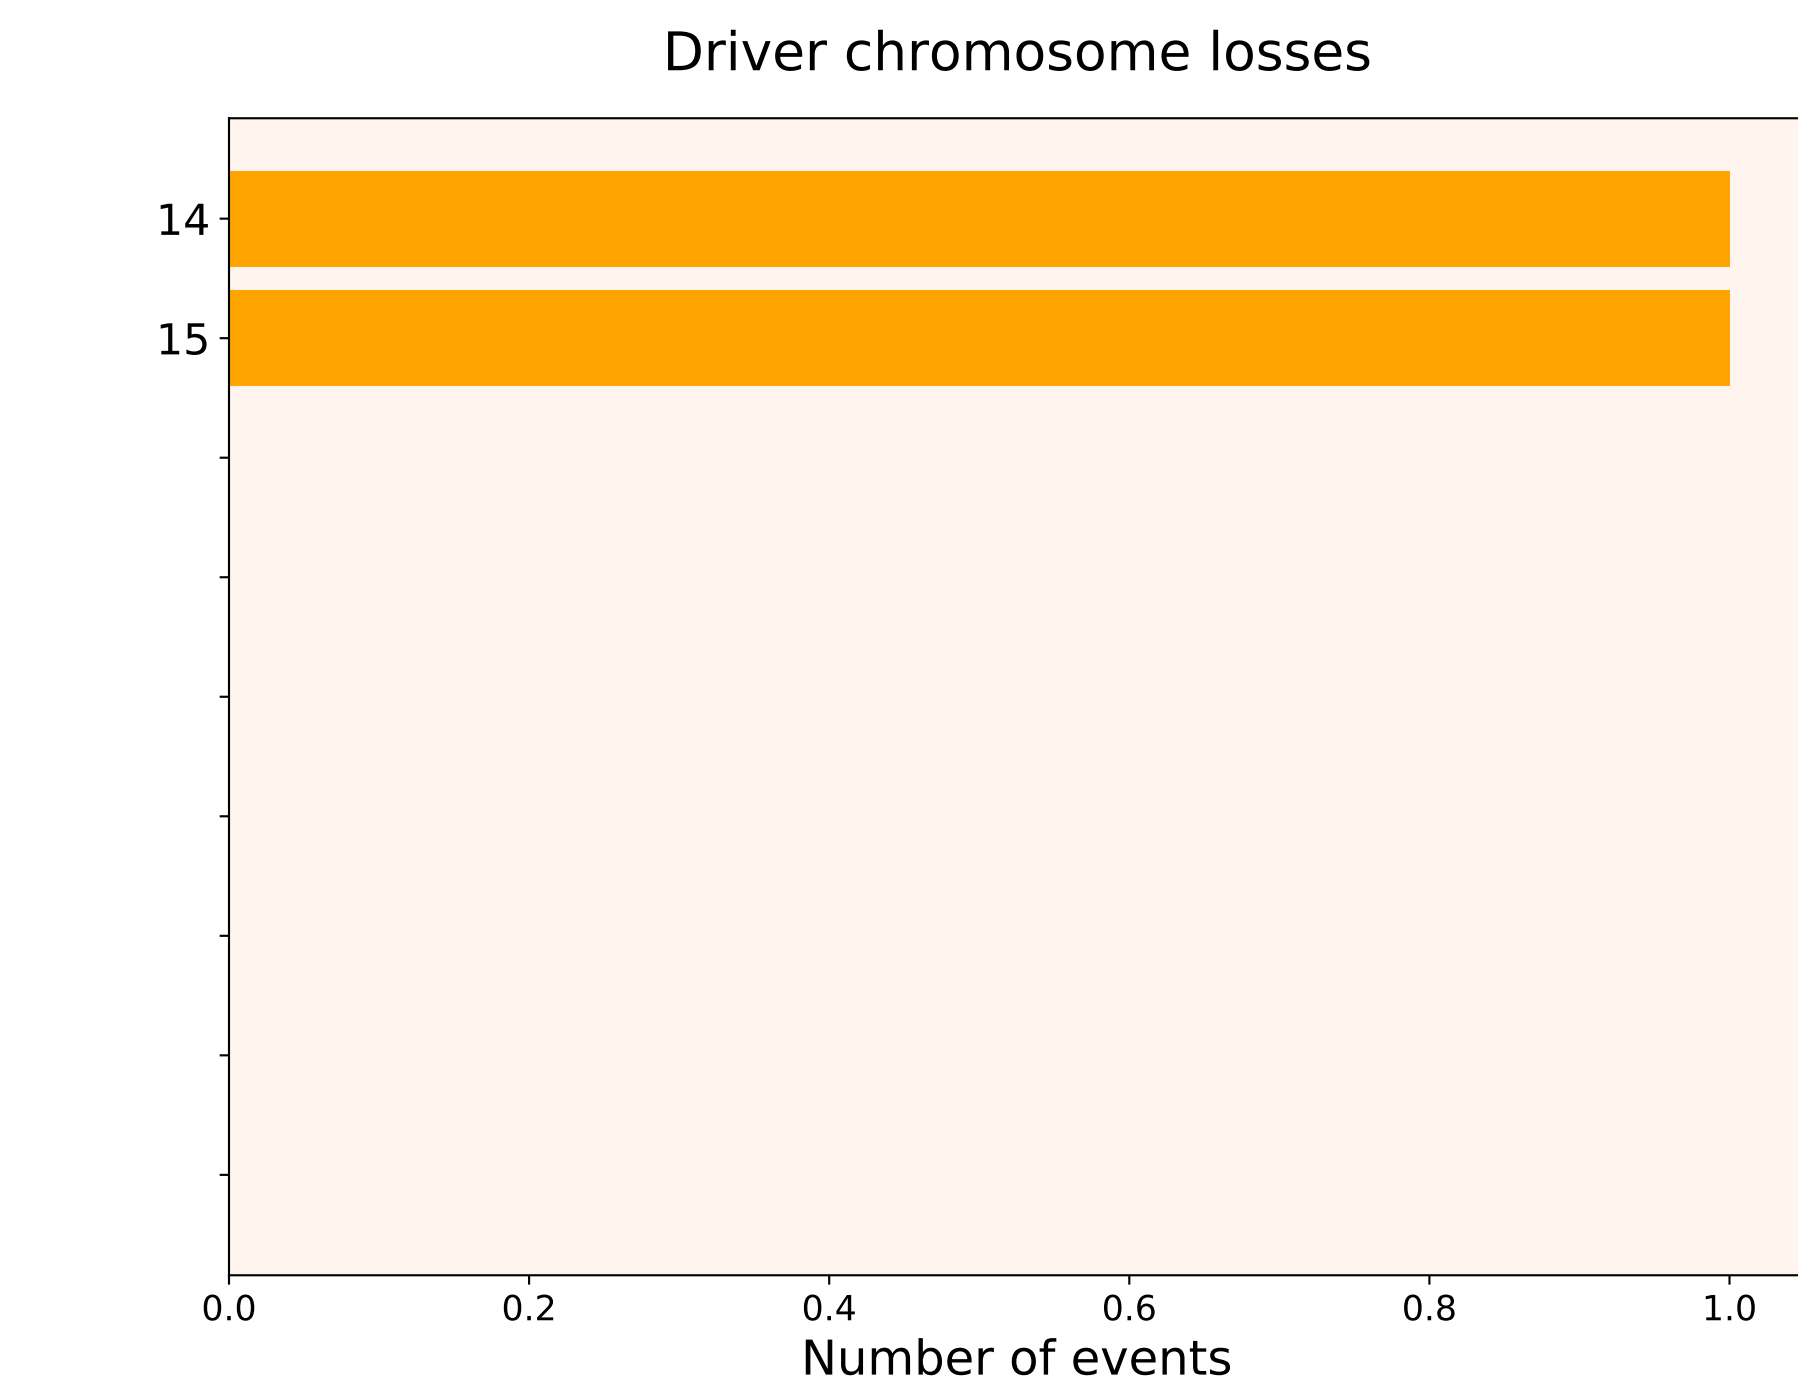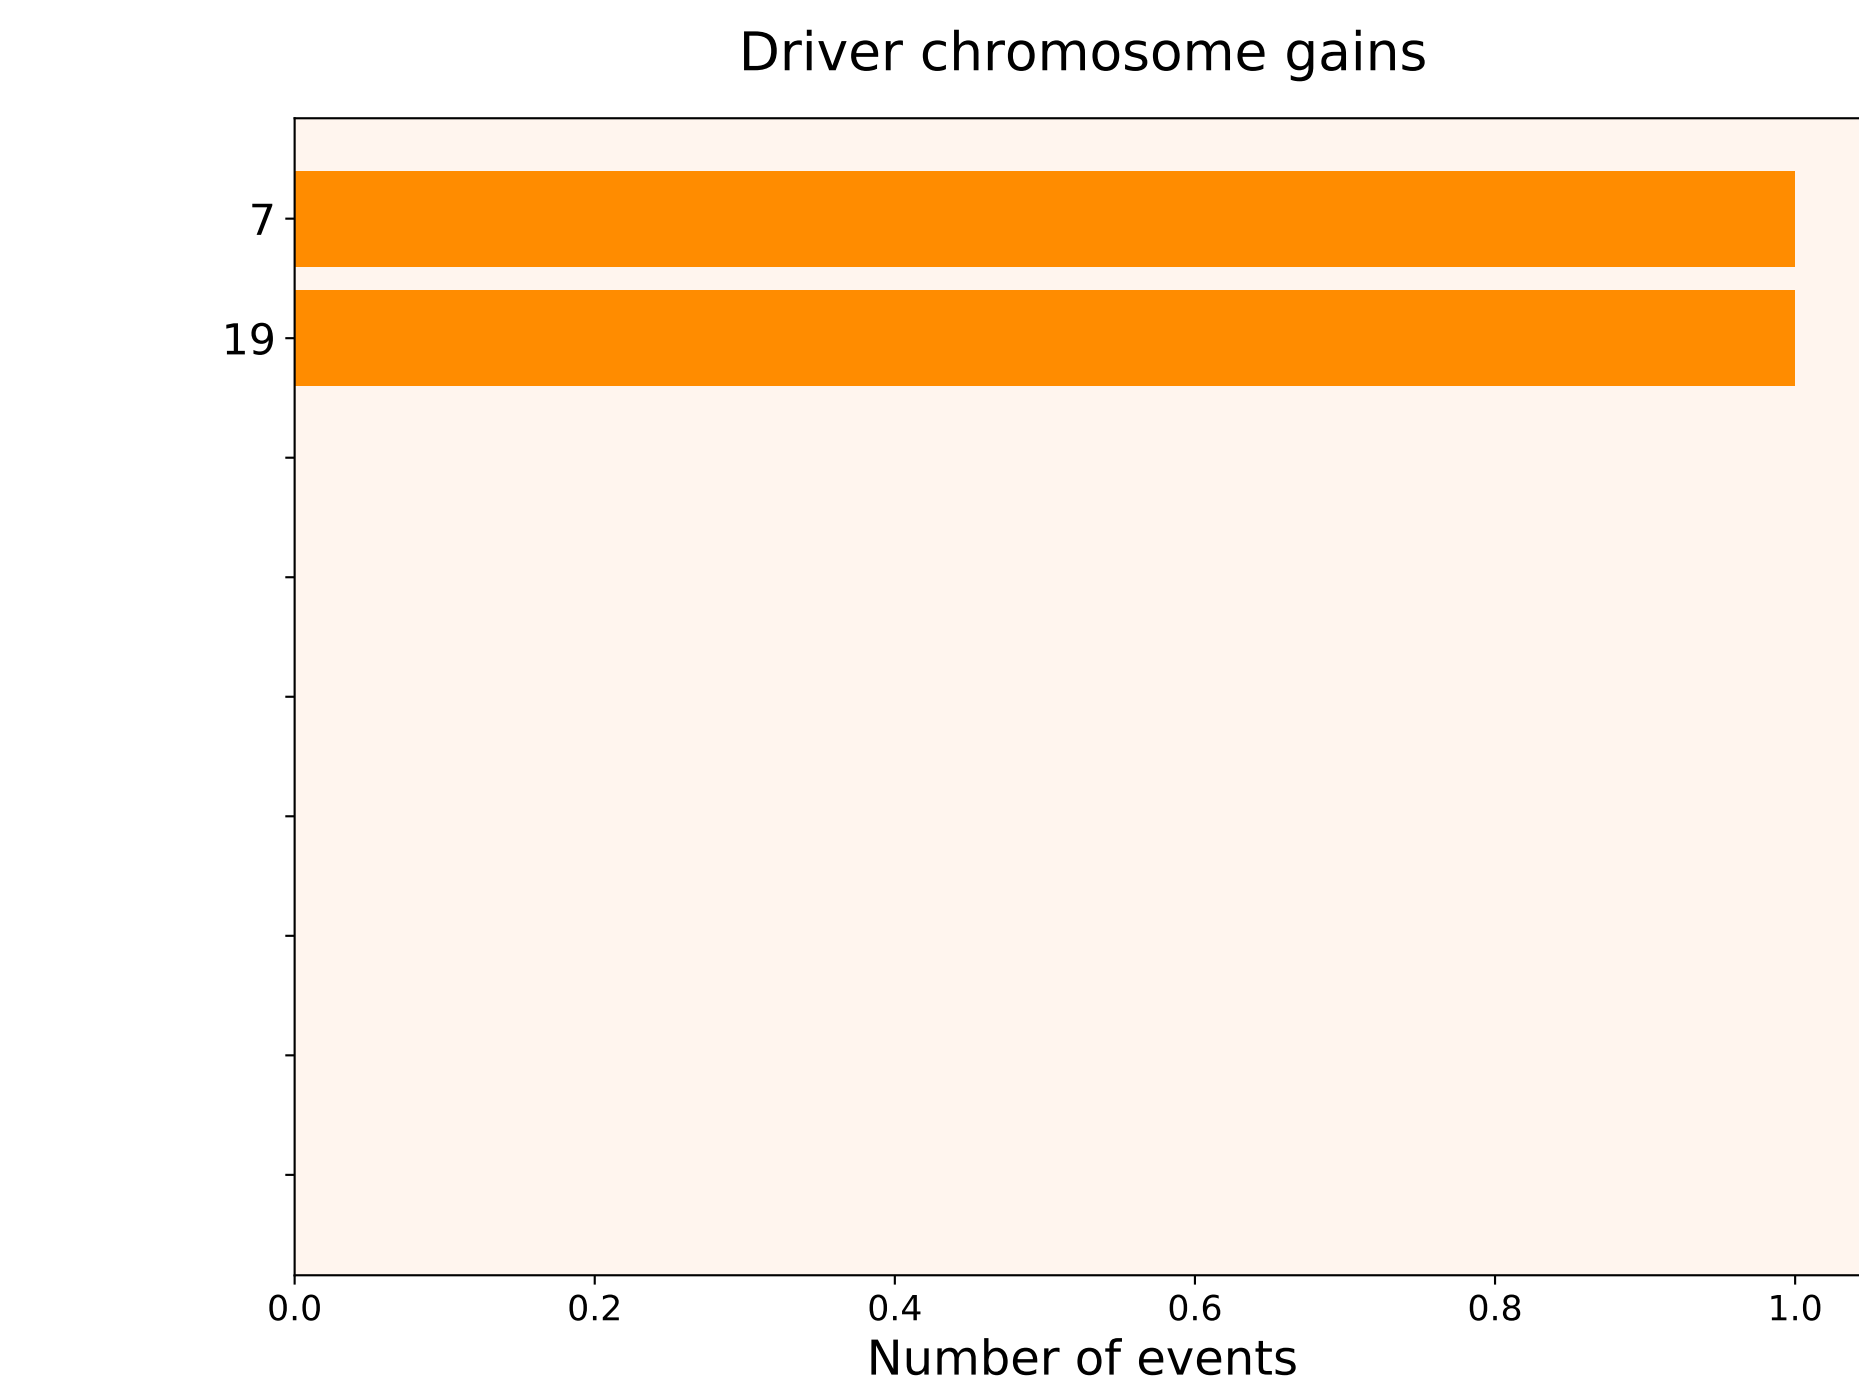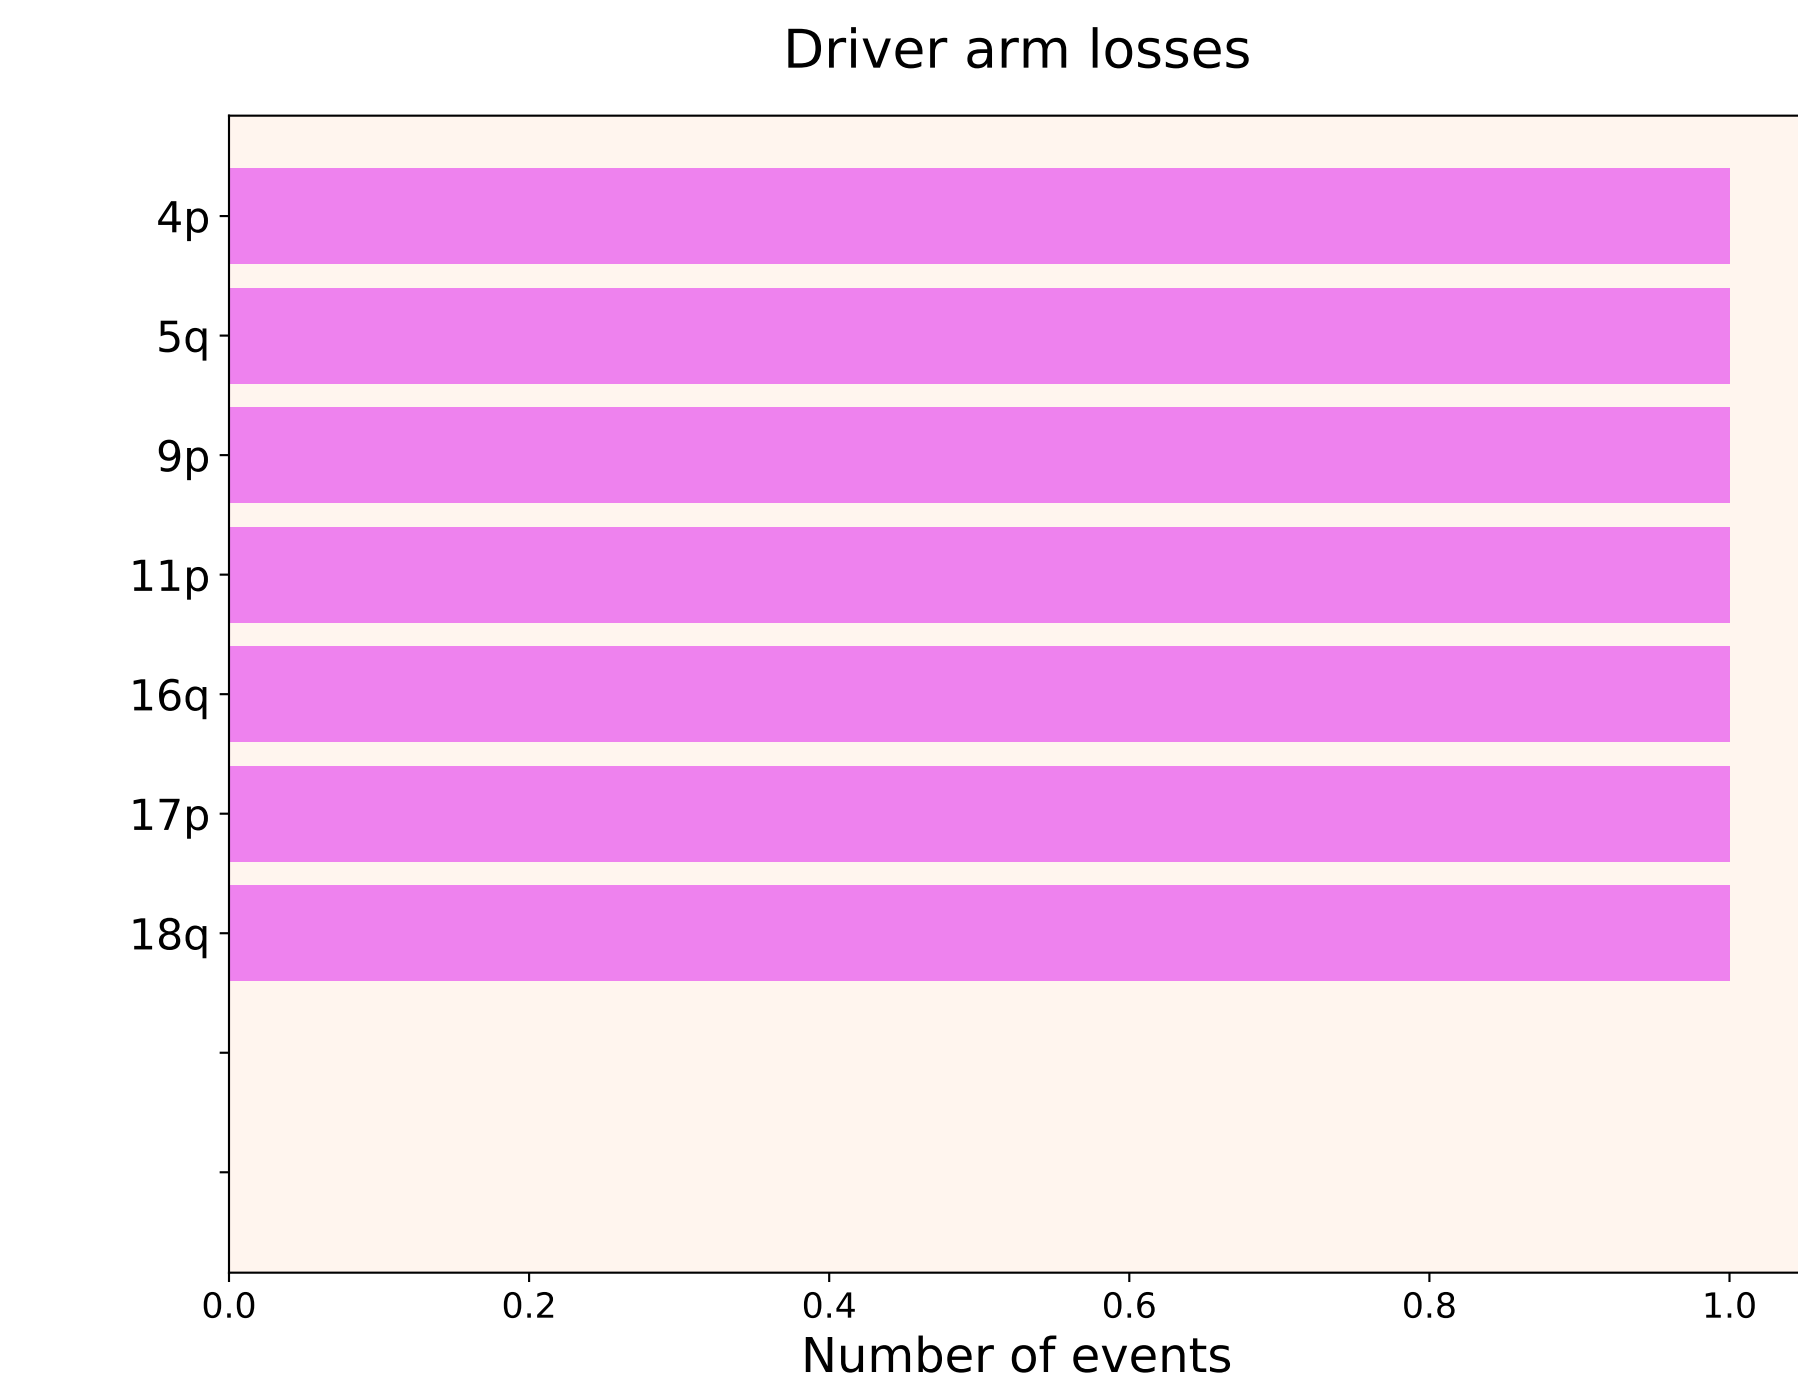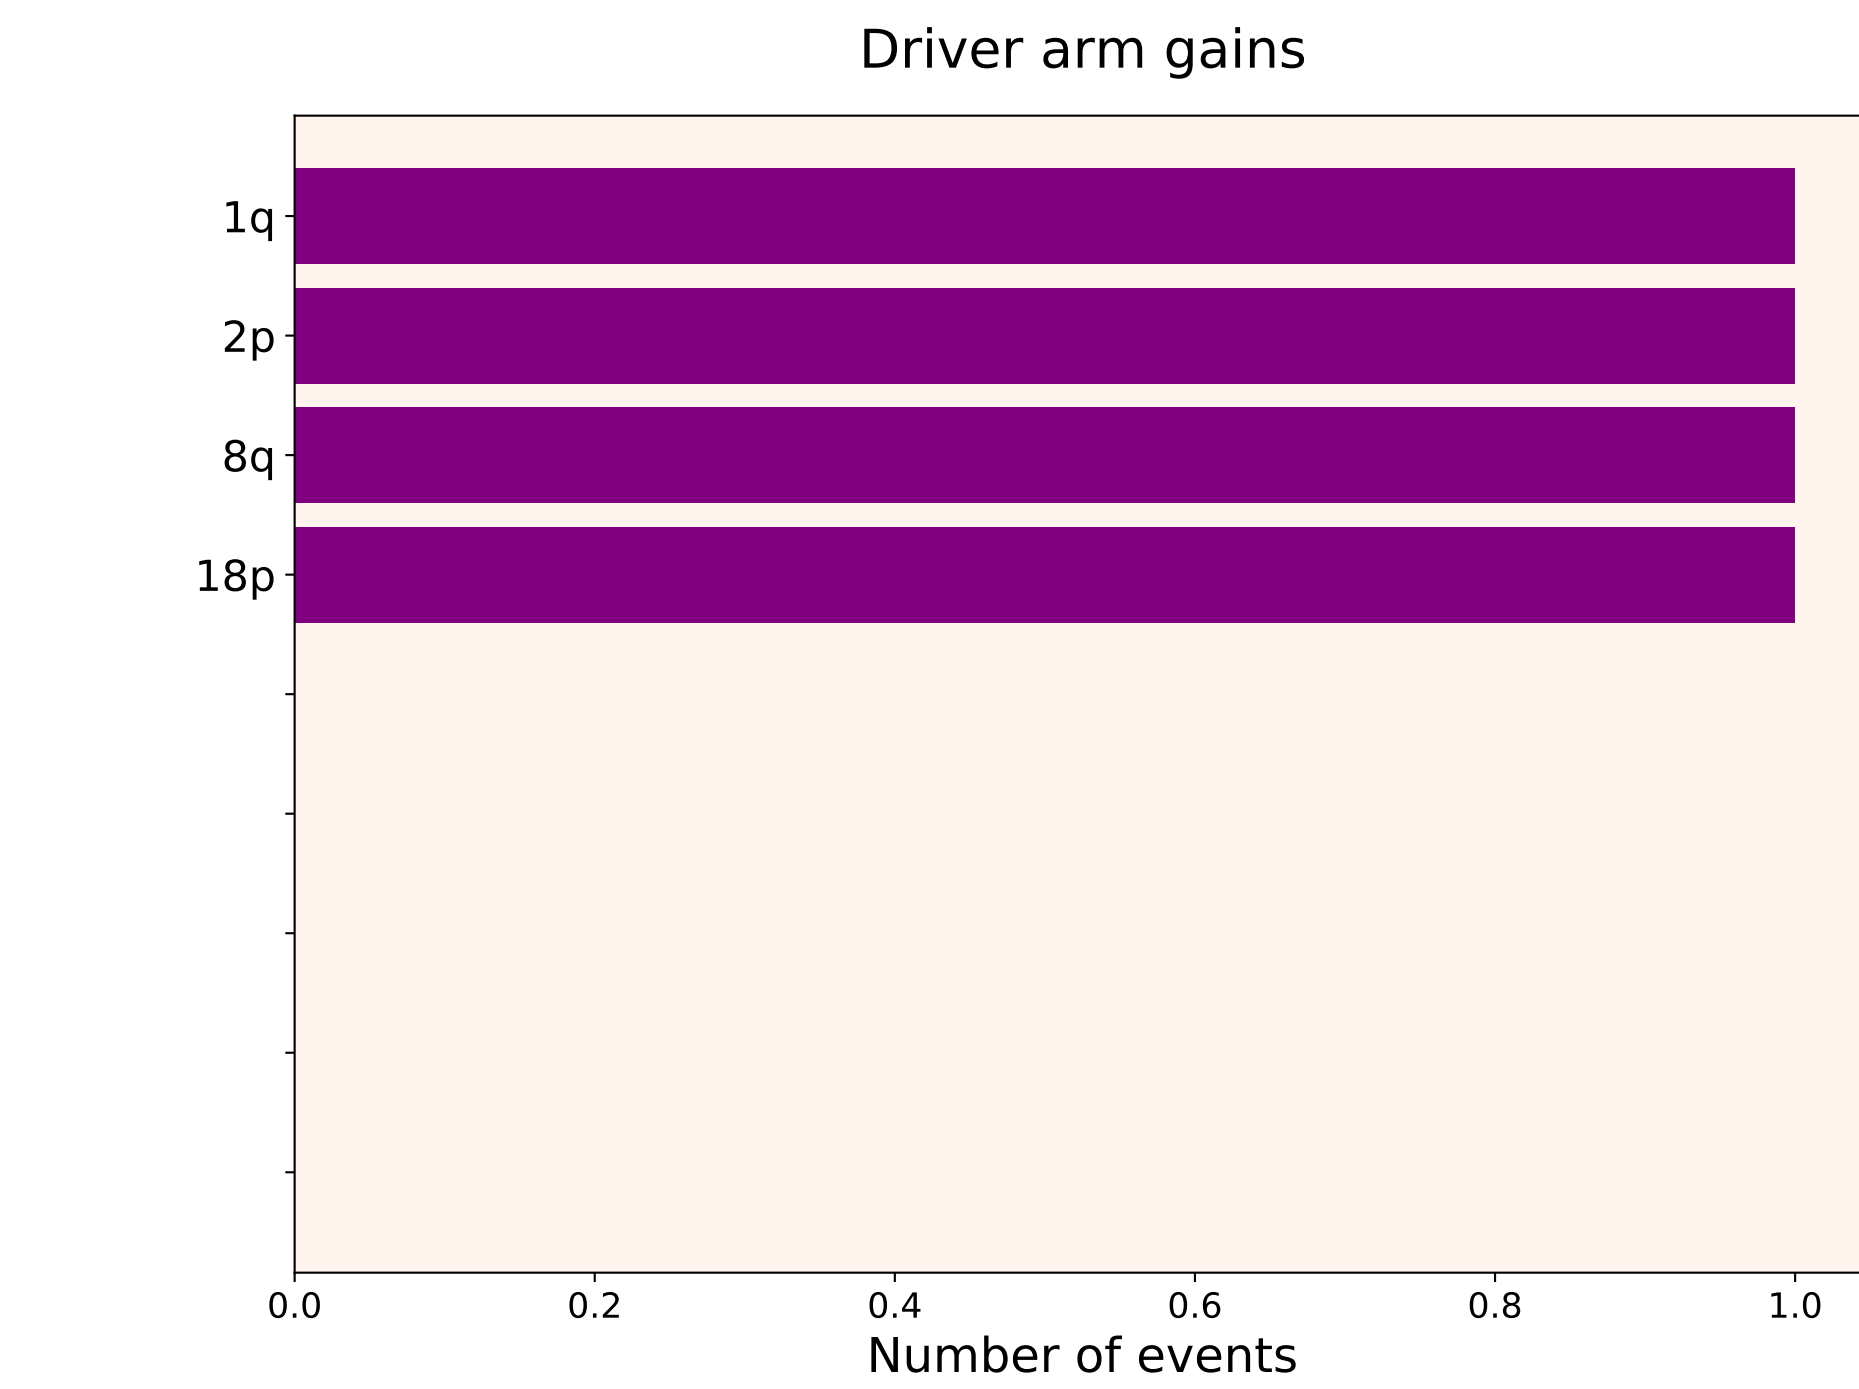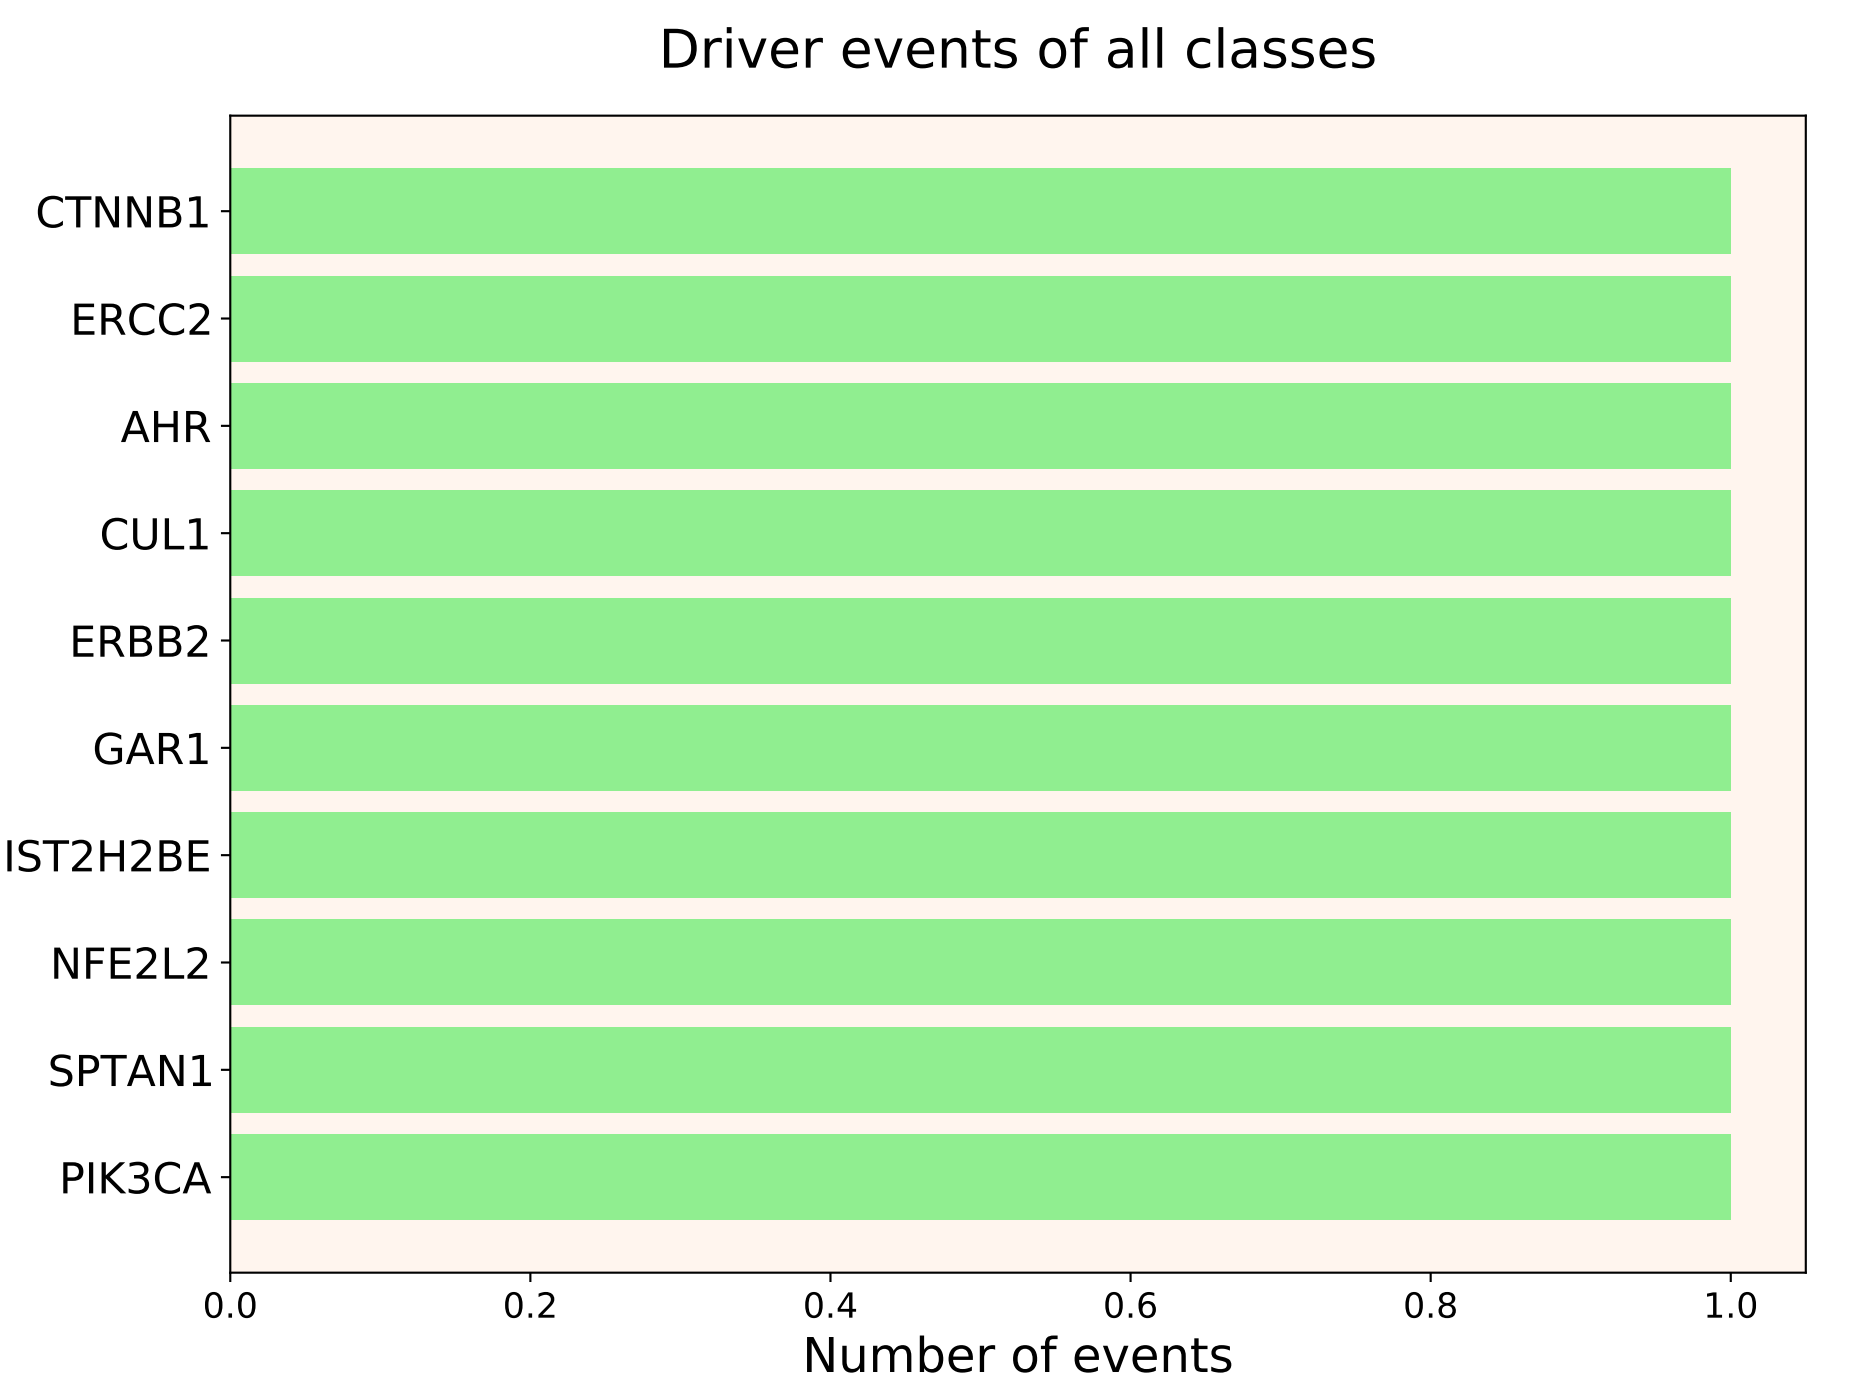

Supplement: Supplemental_Data_S1.zip [file Supplemental_Data_S1.zip]

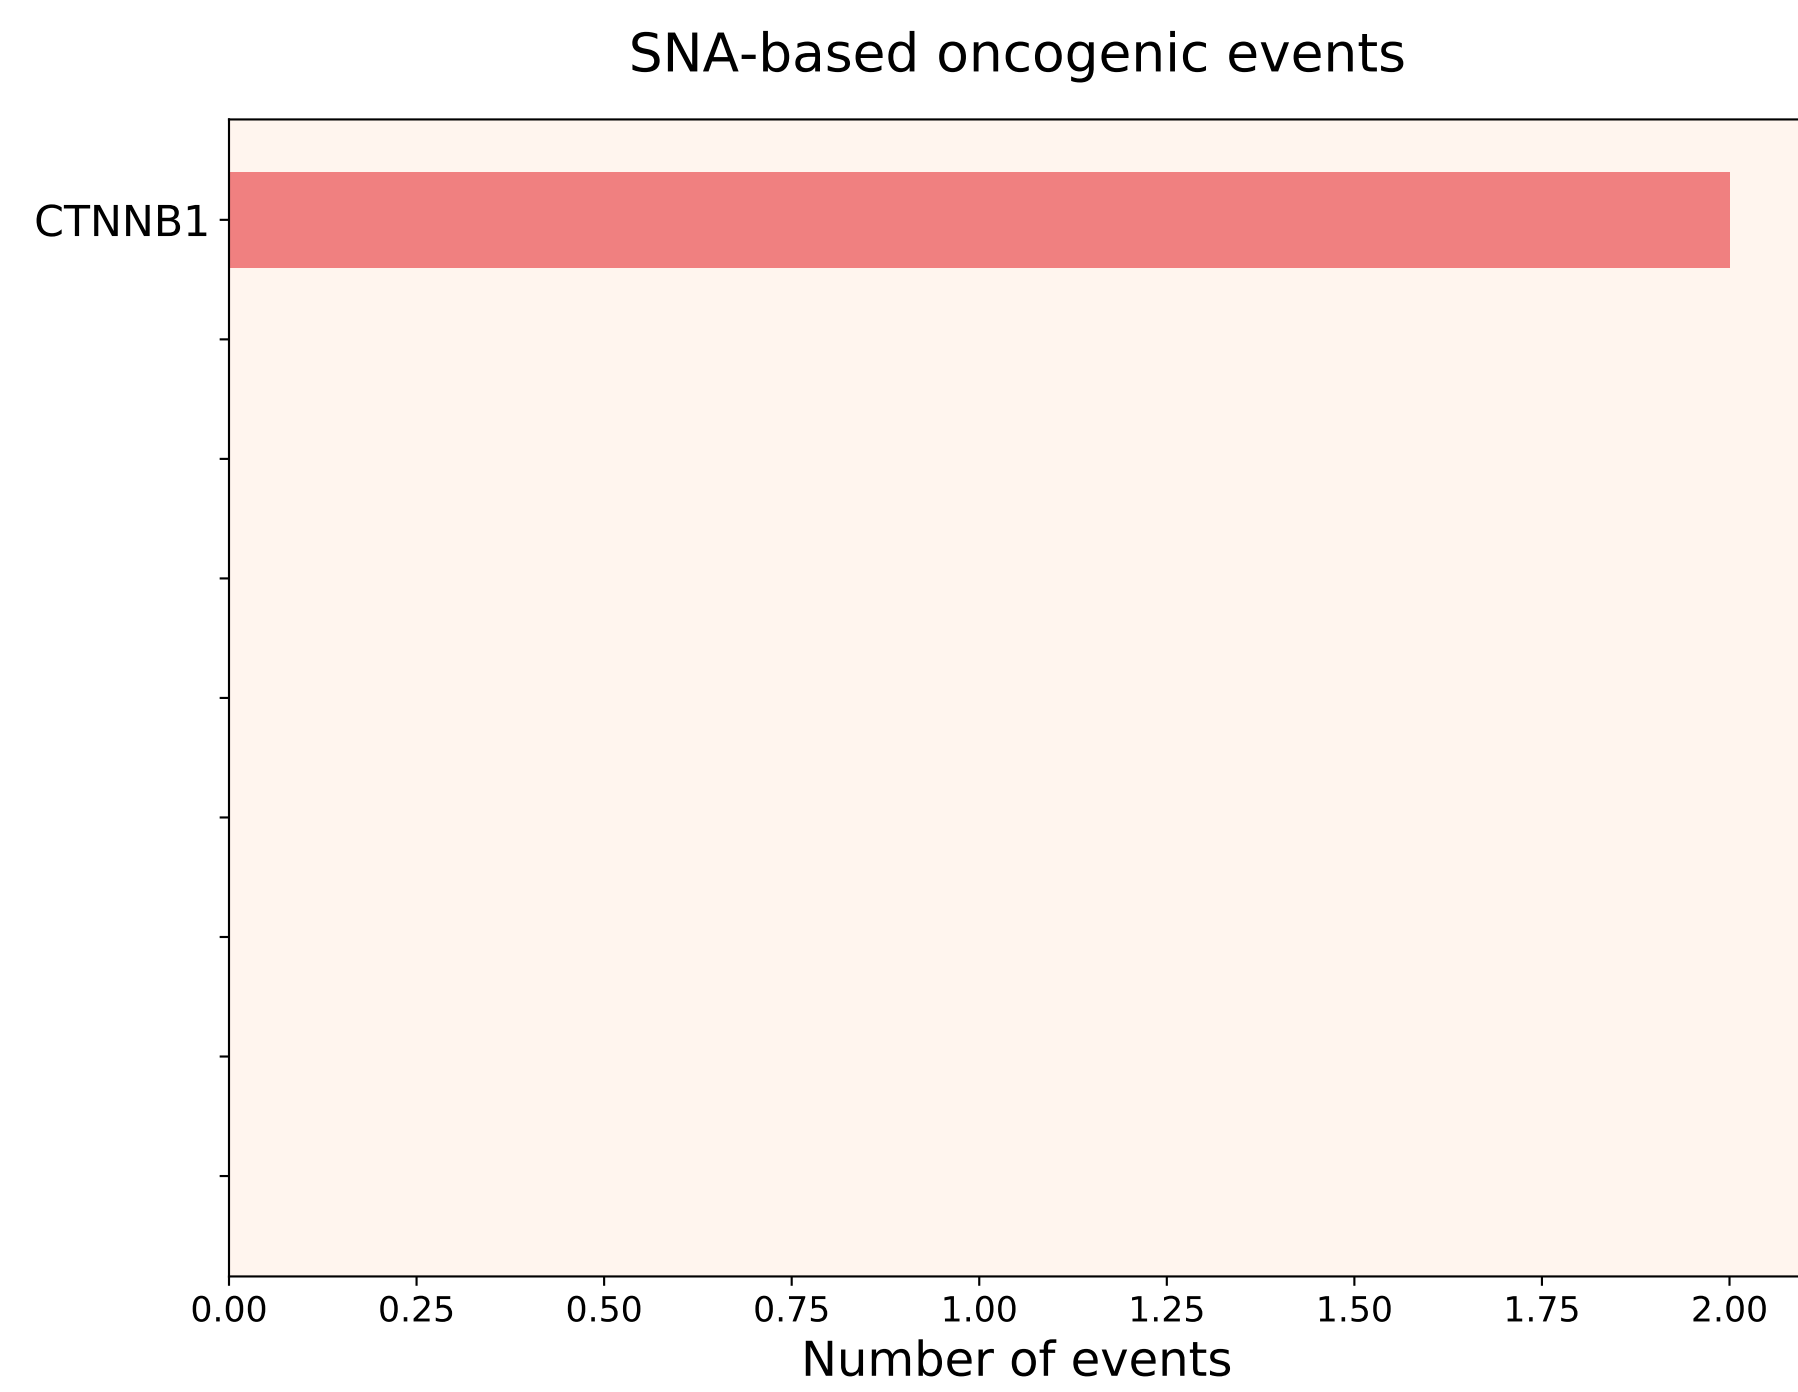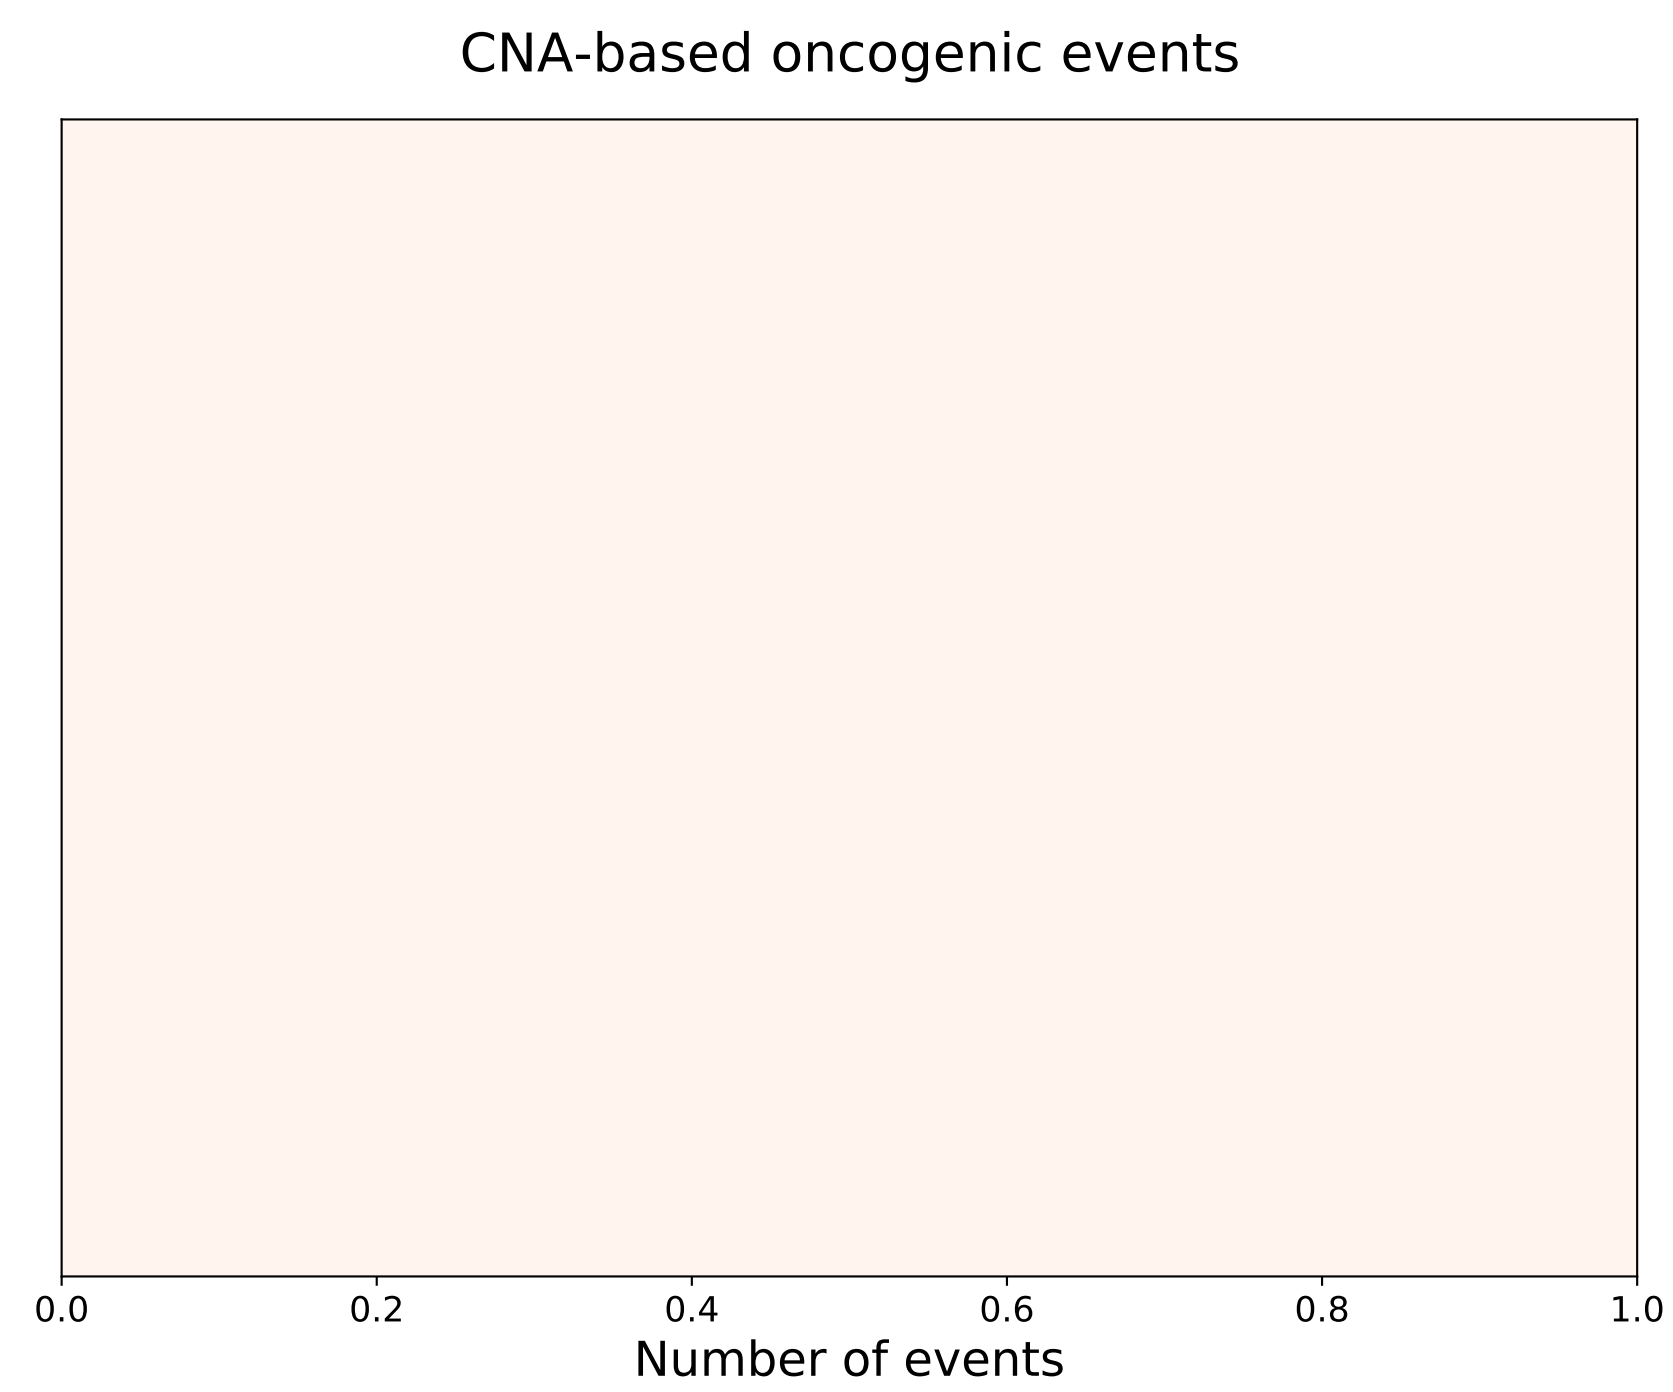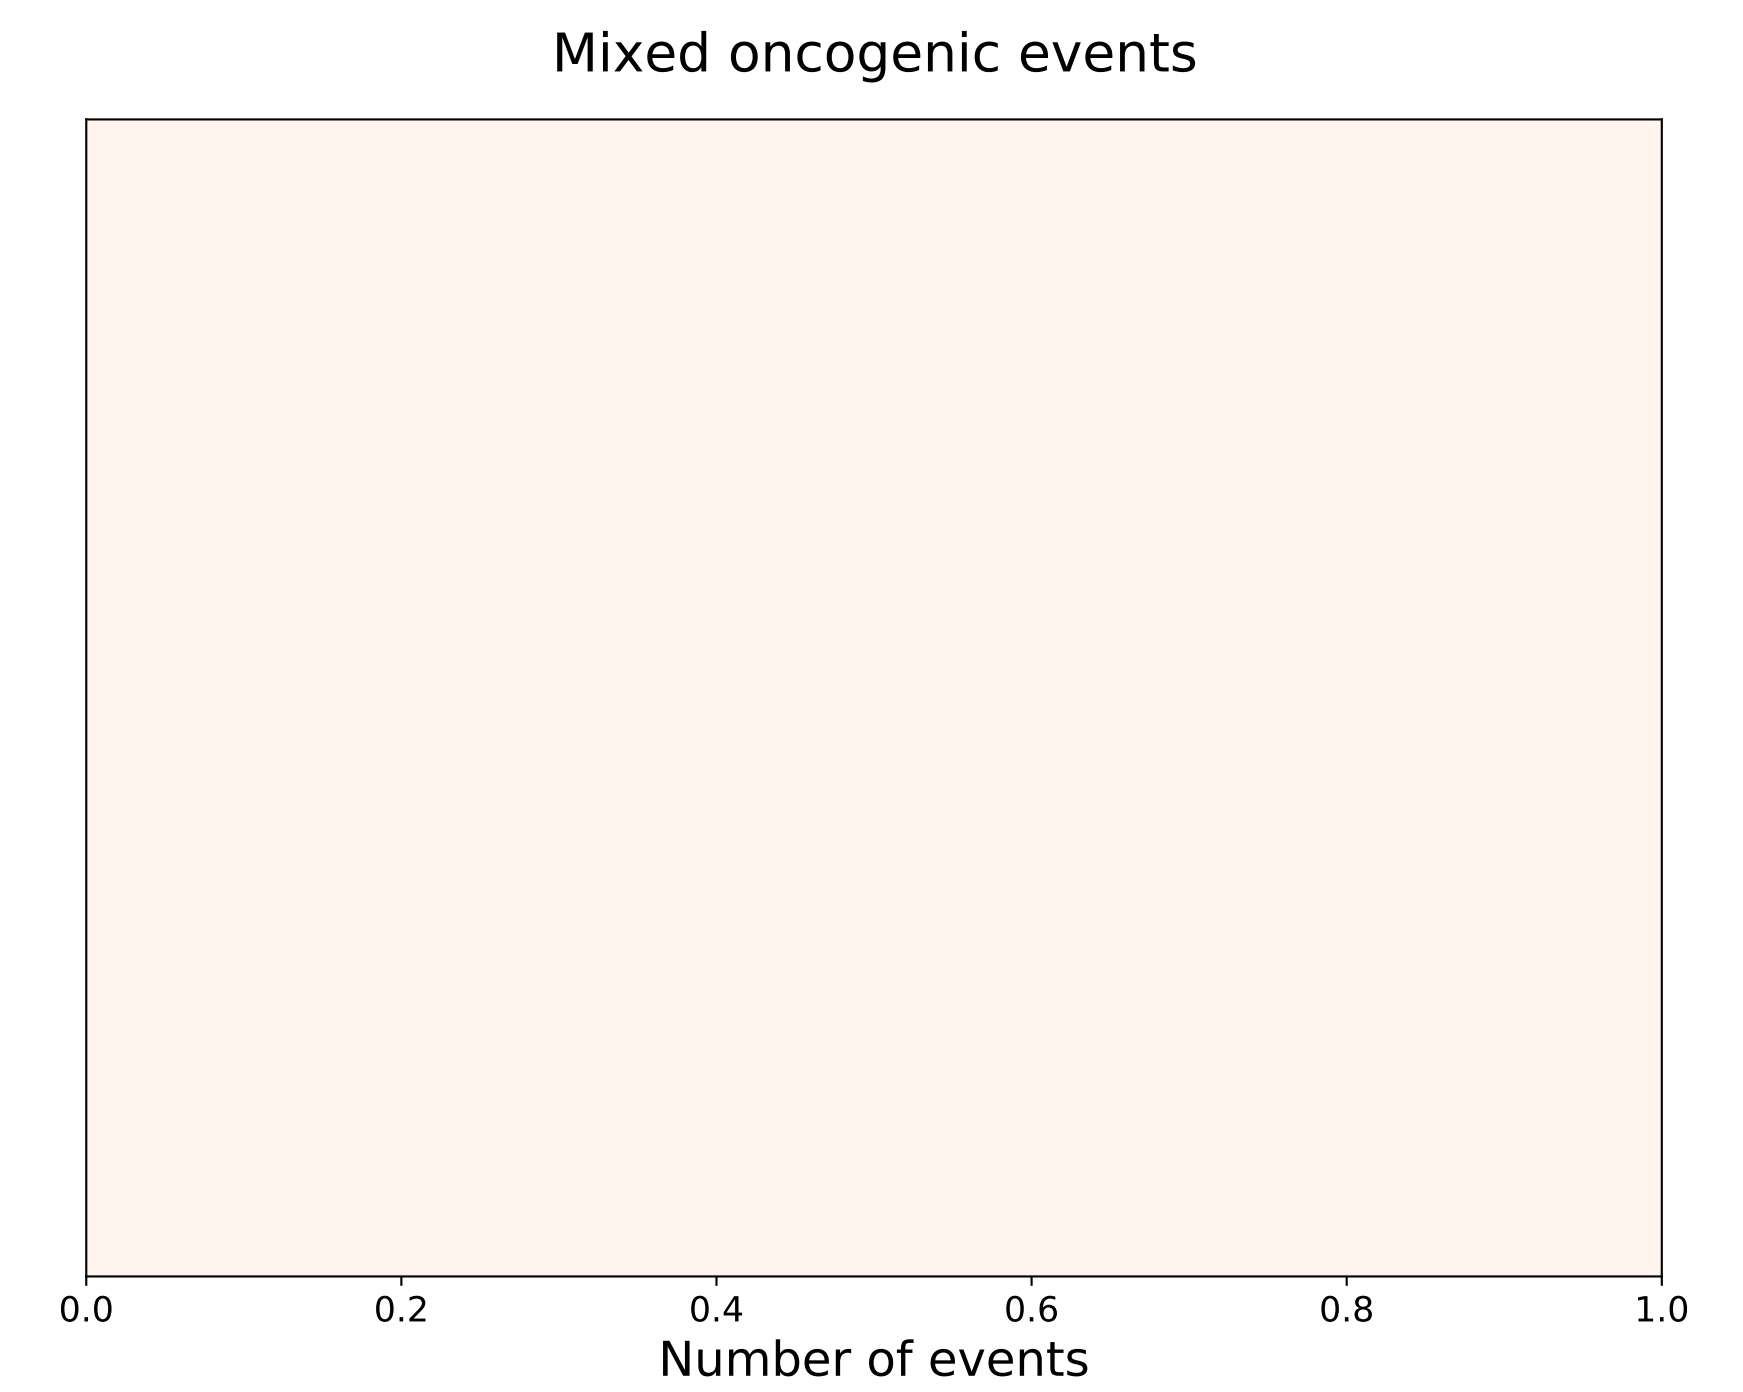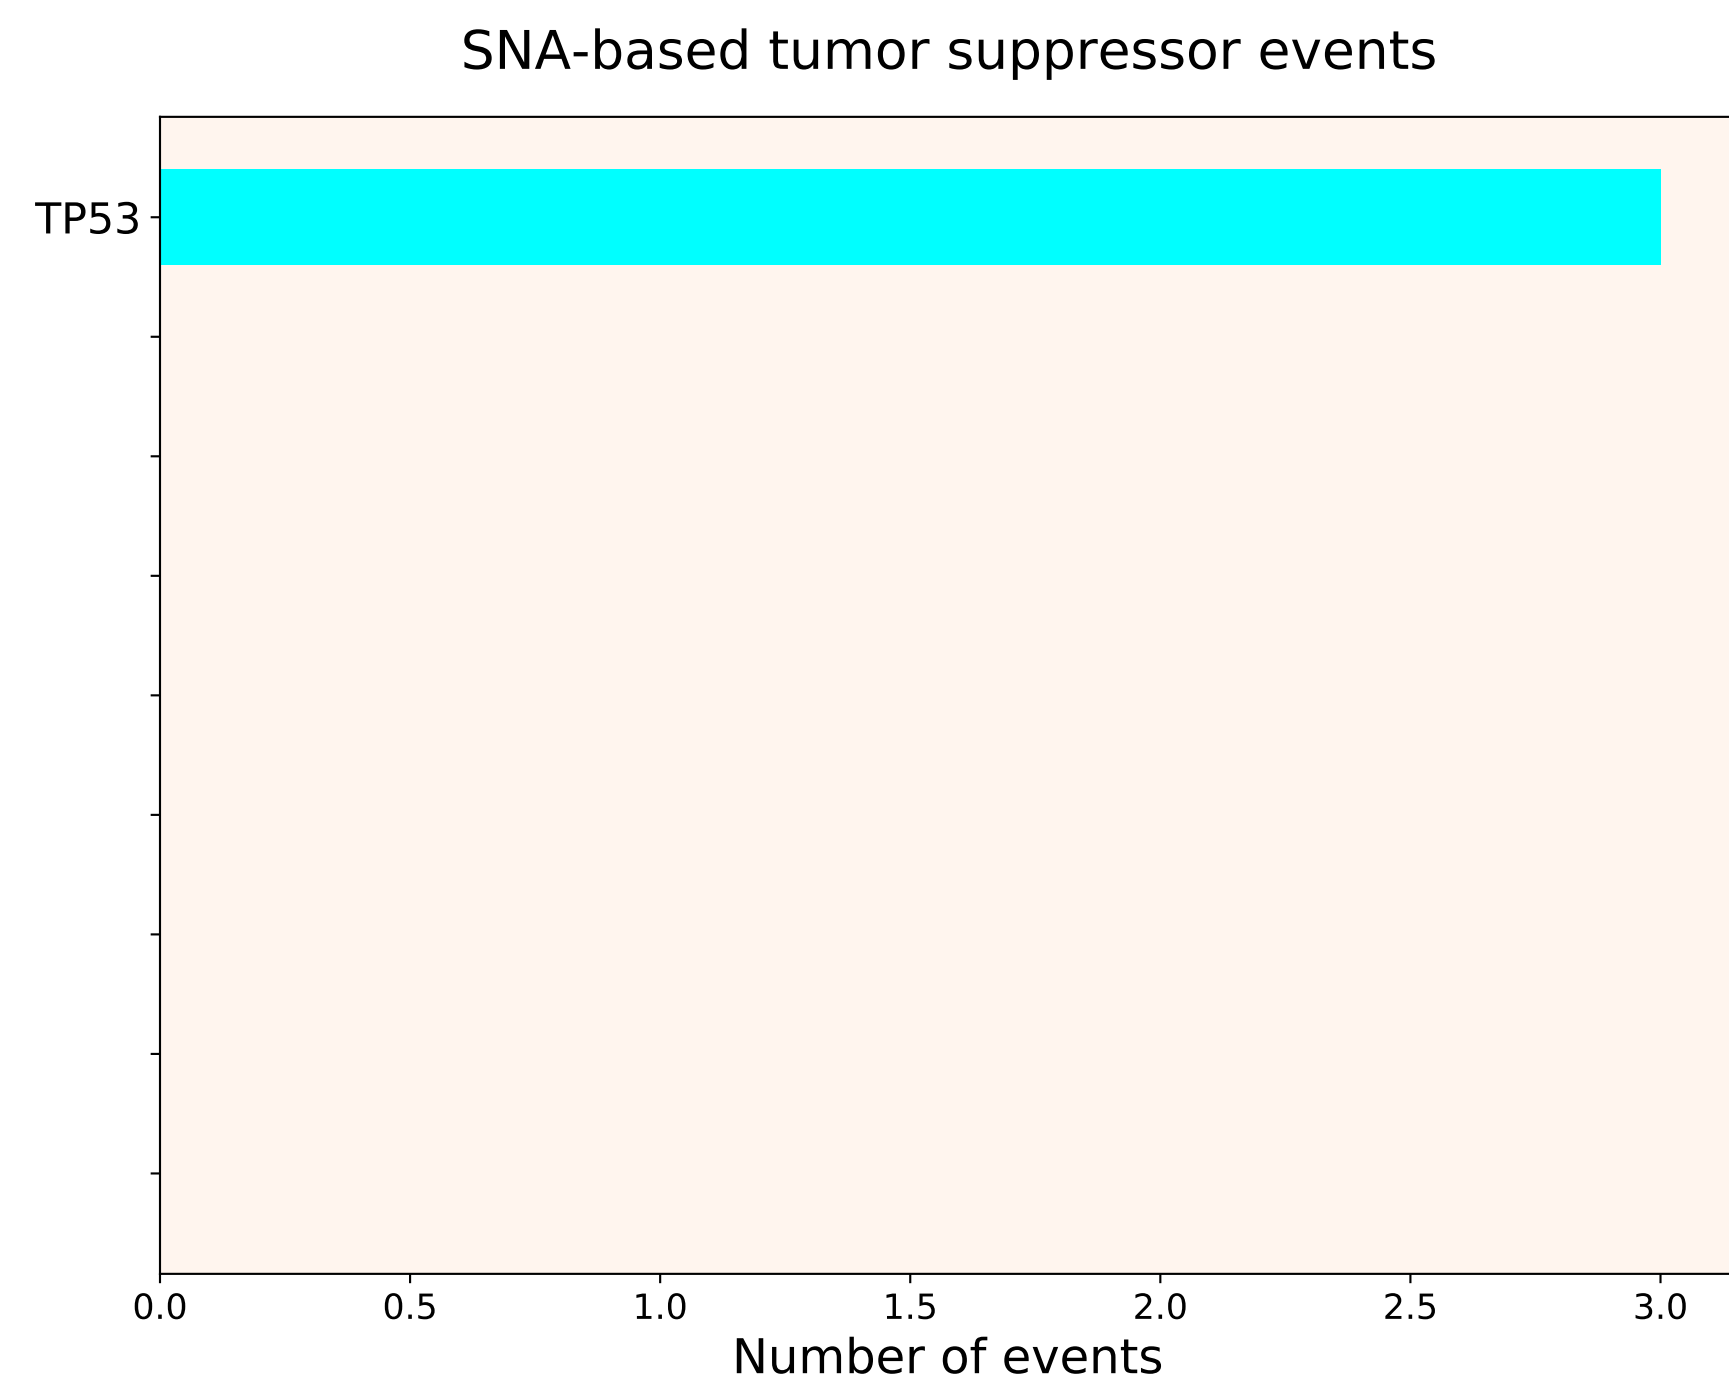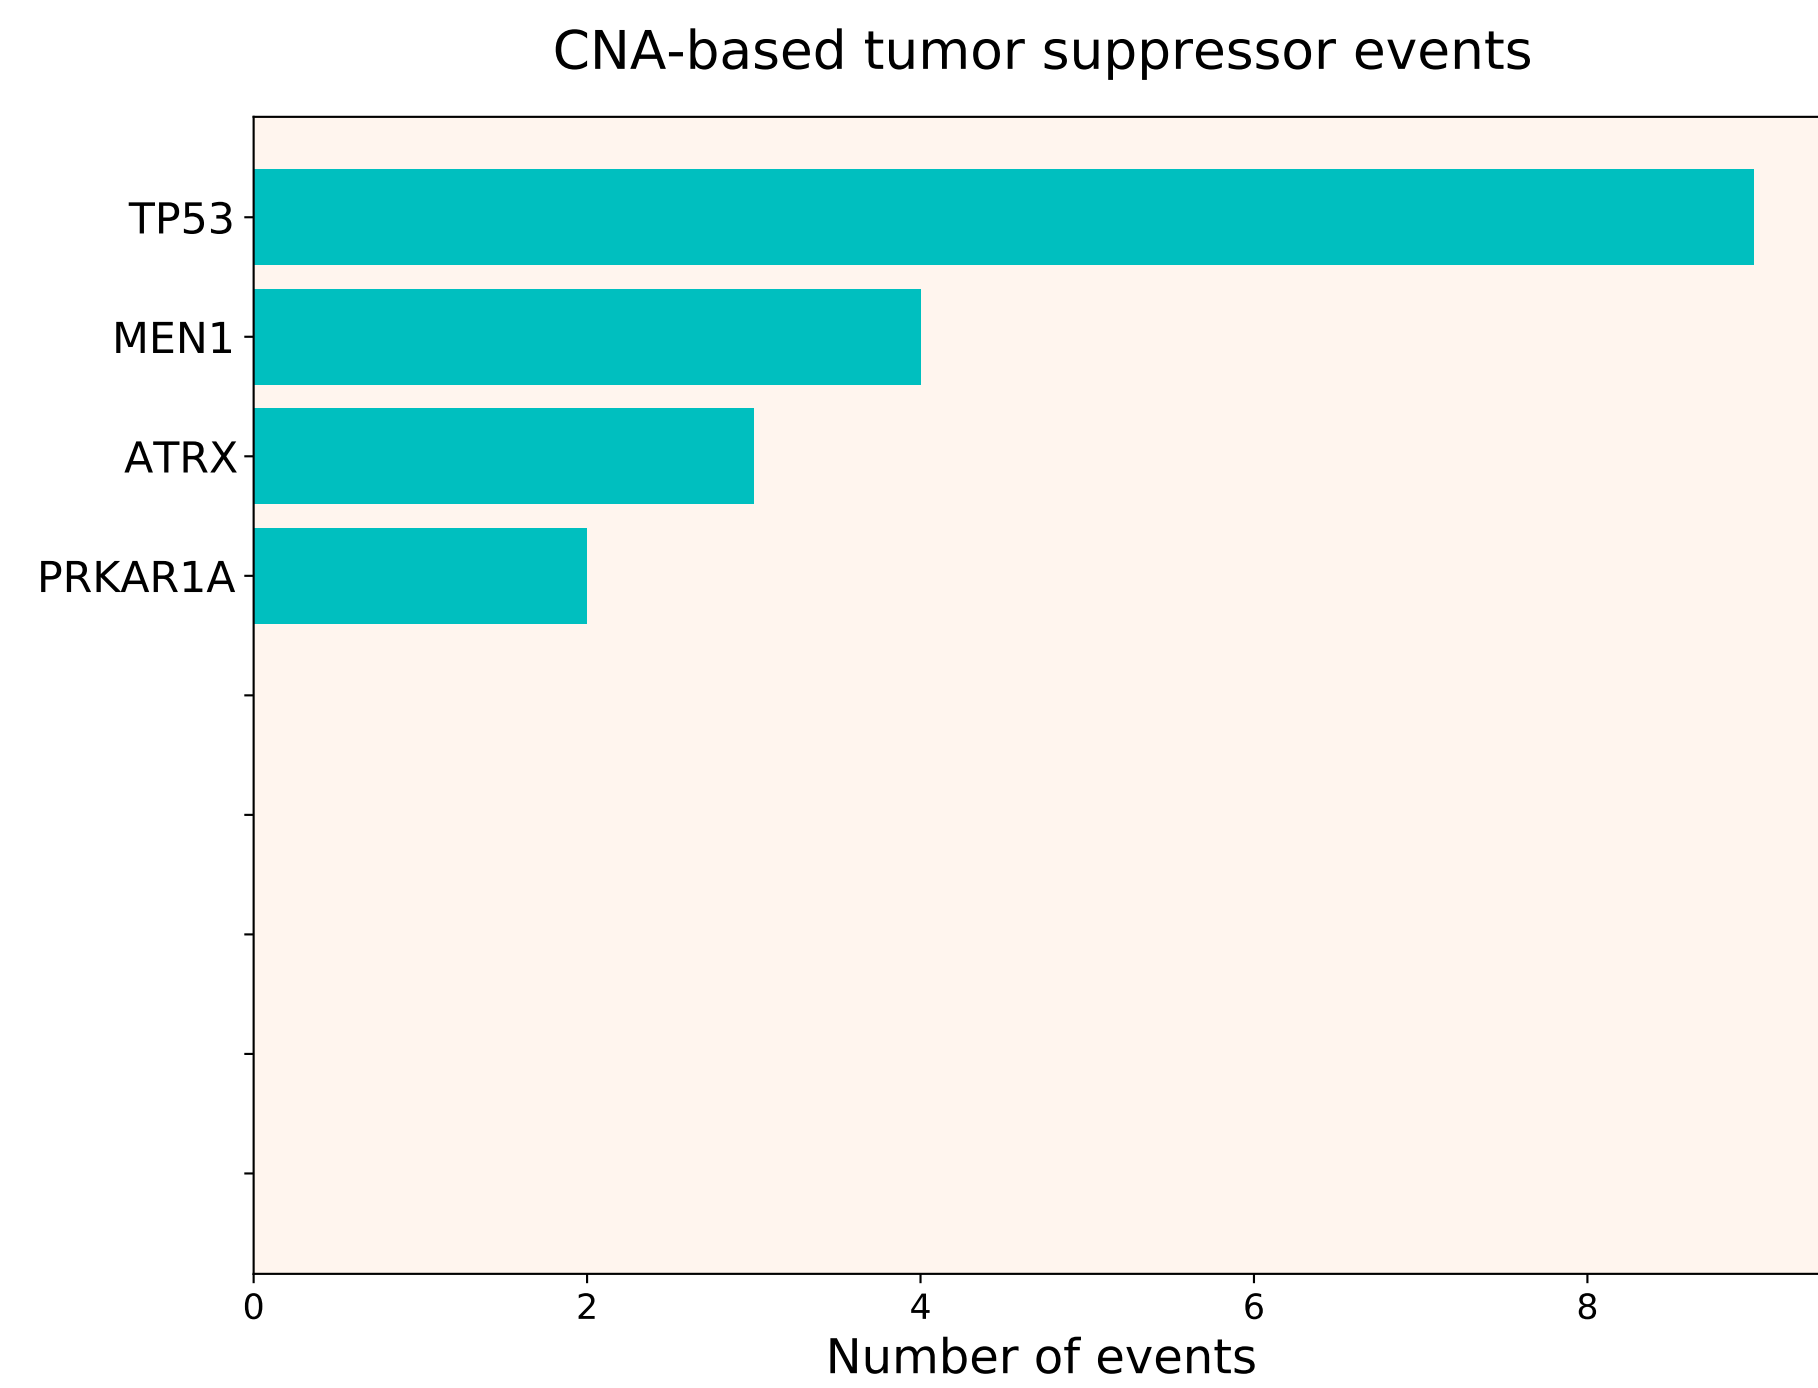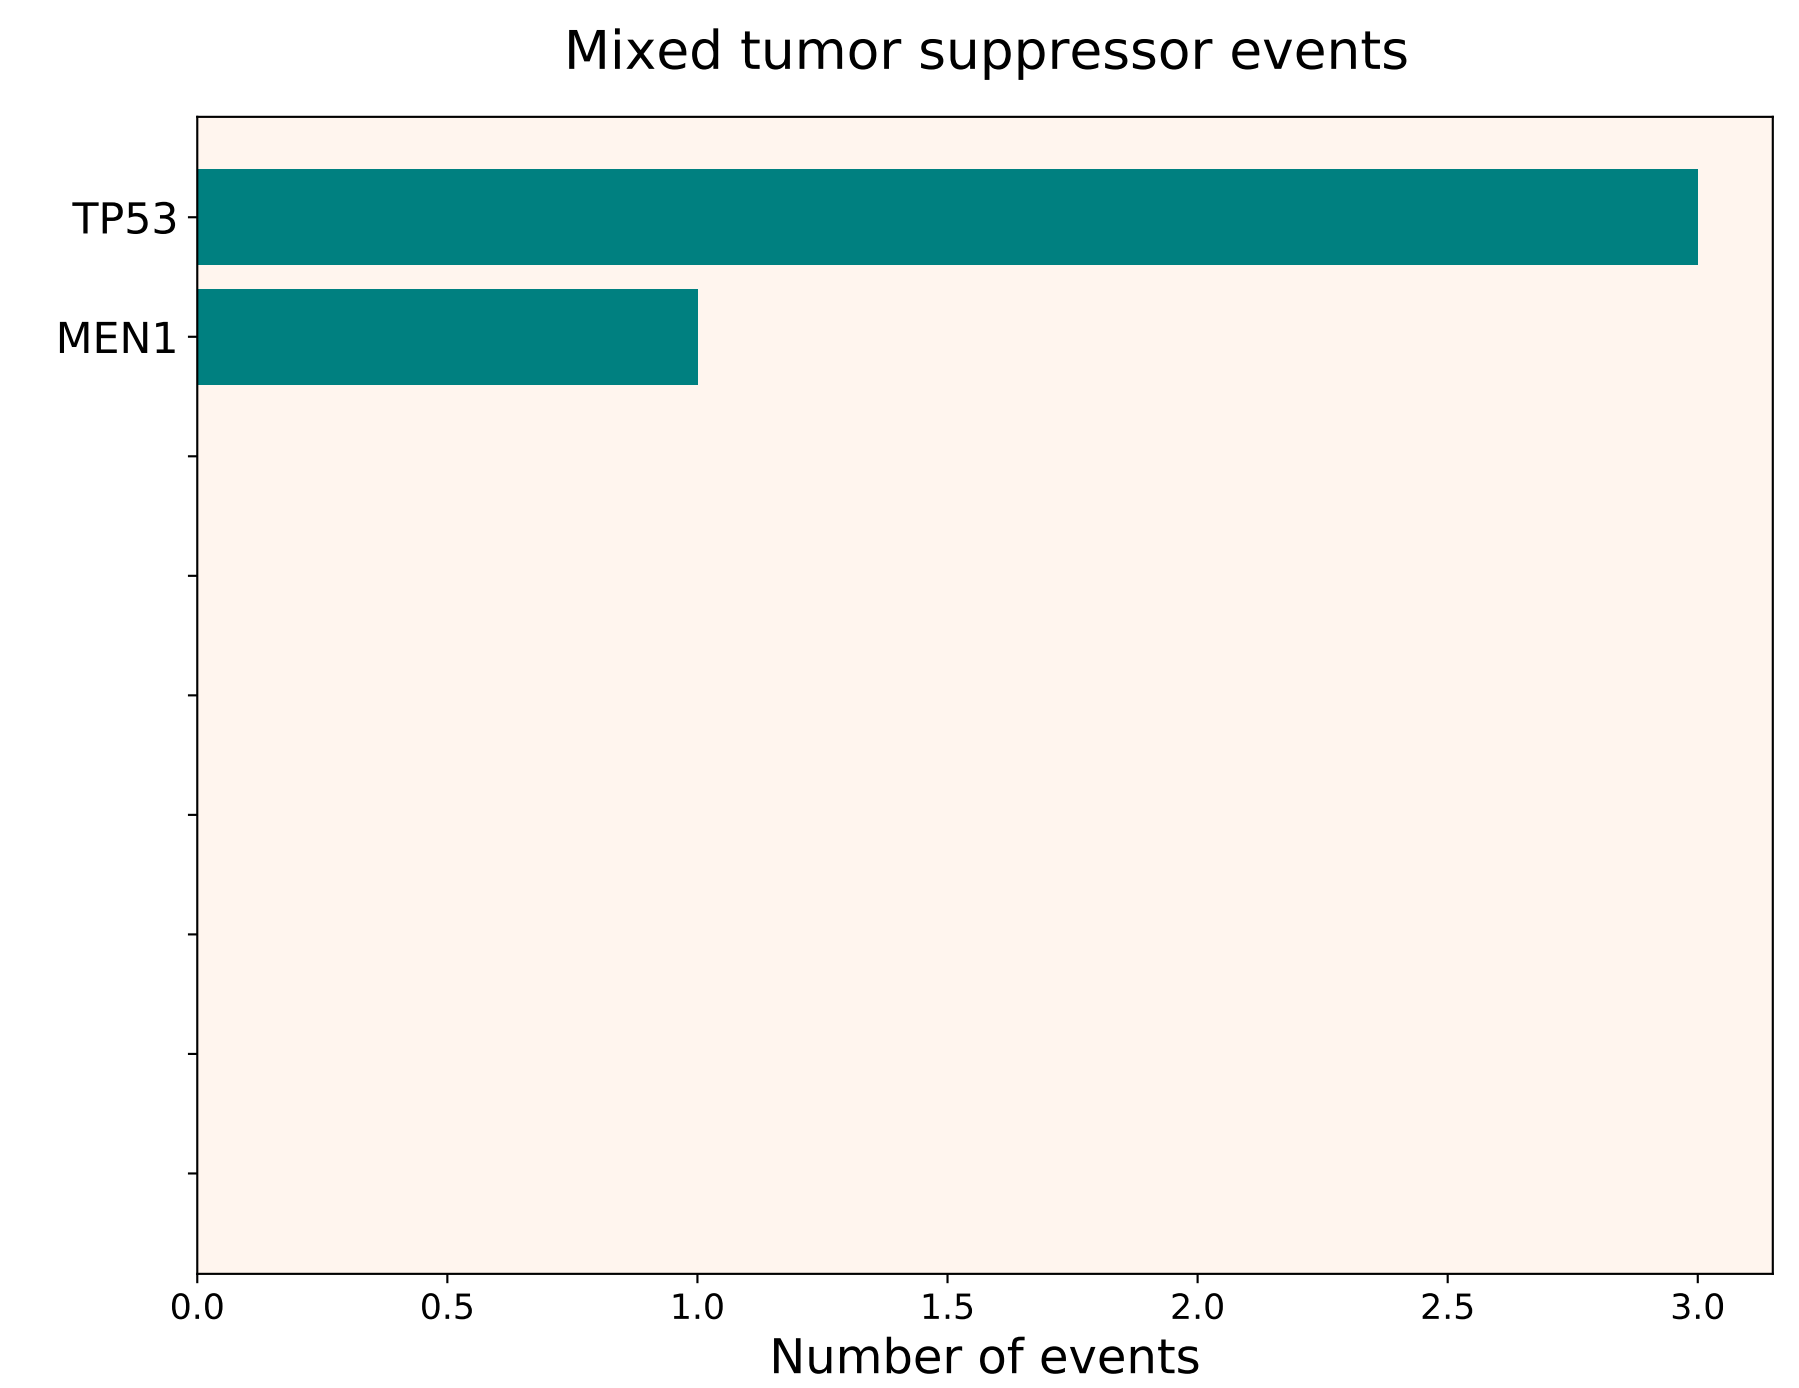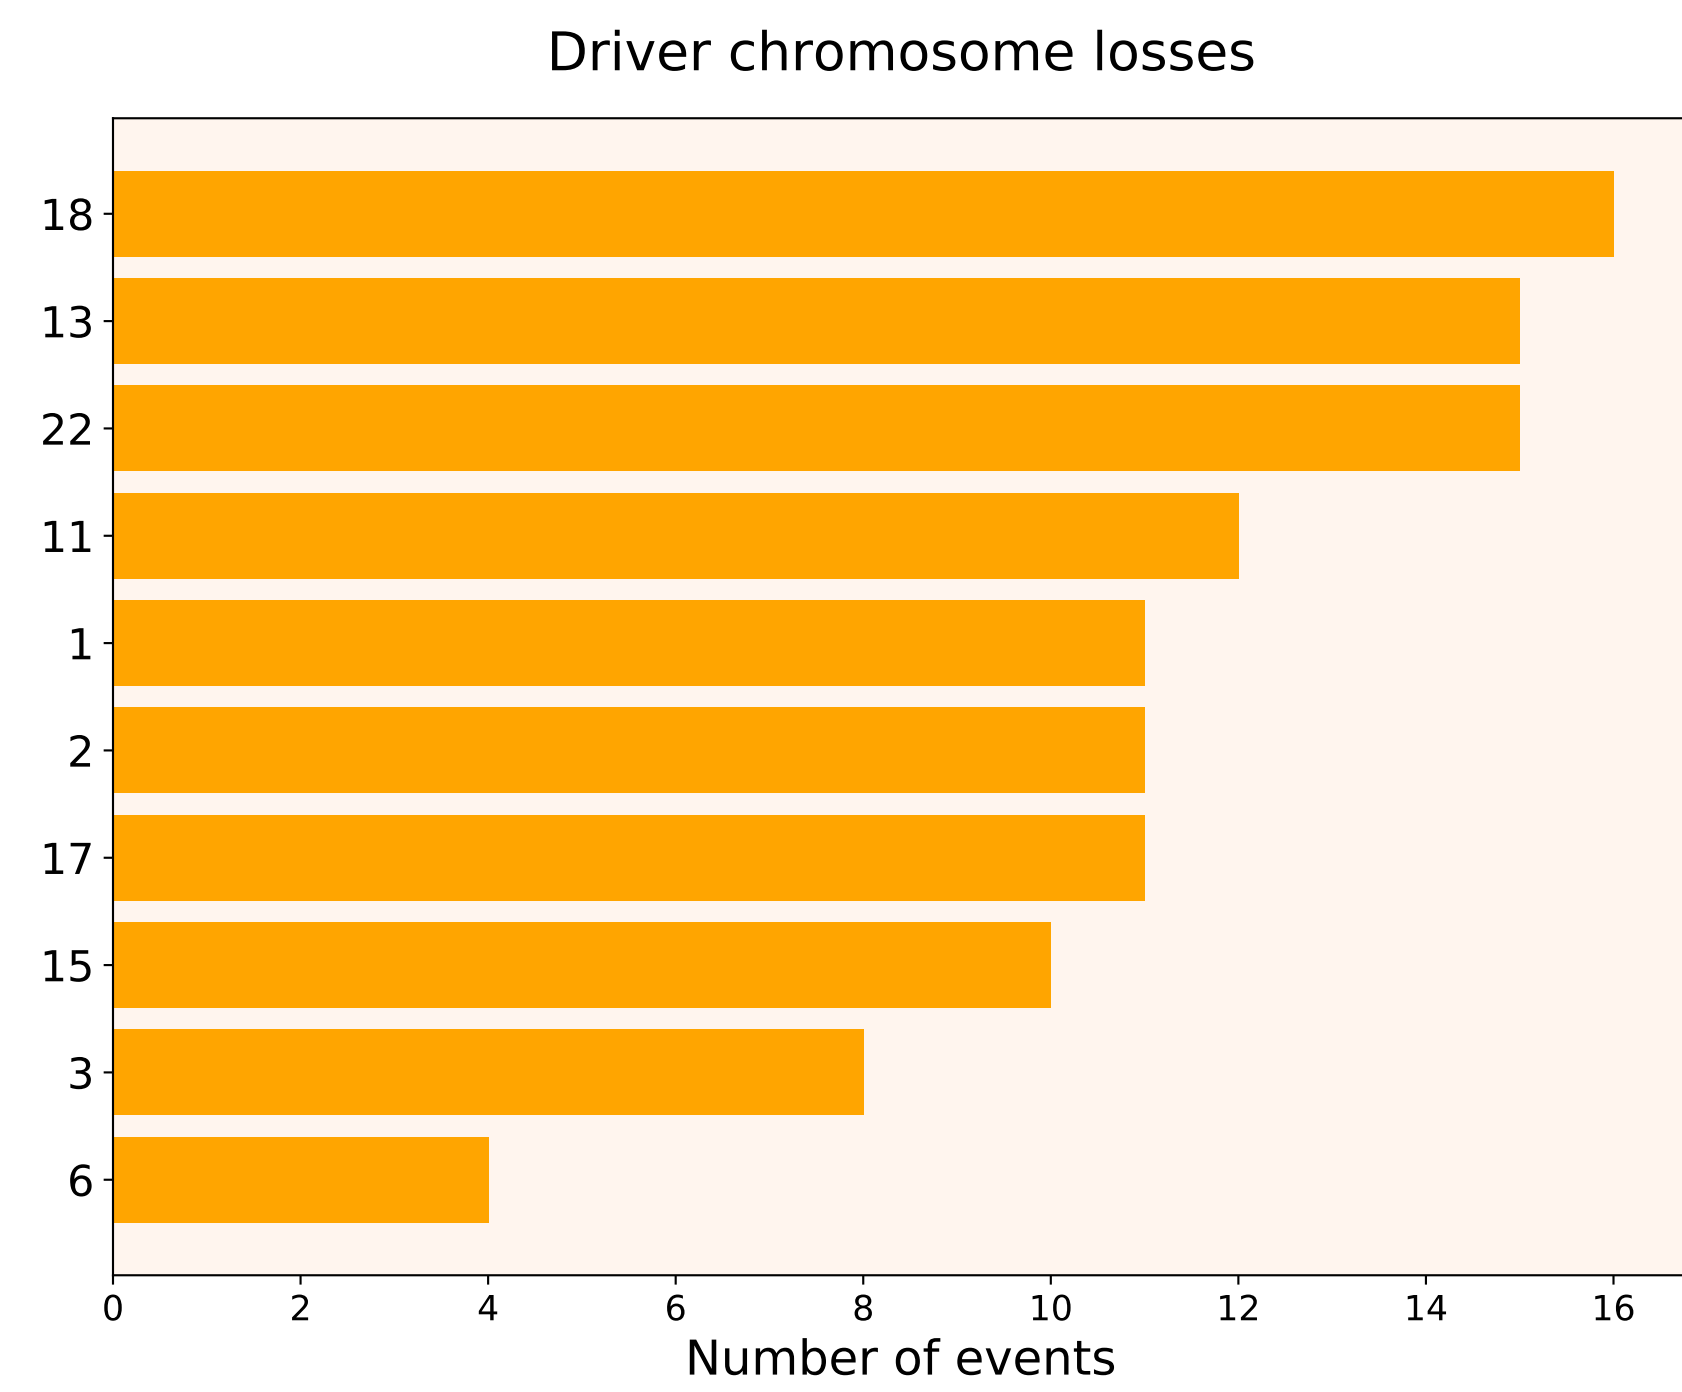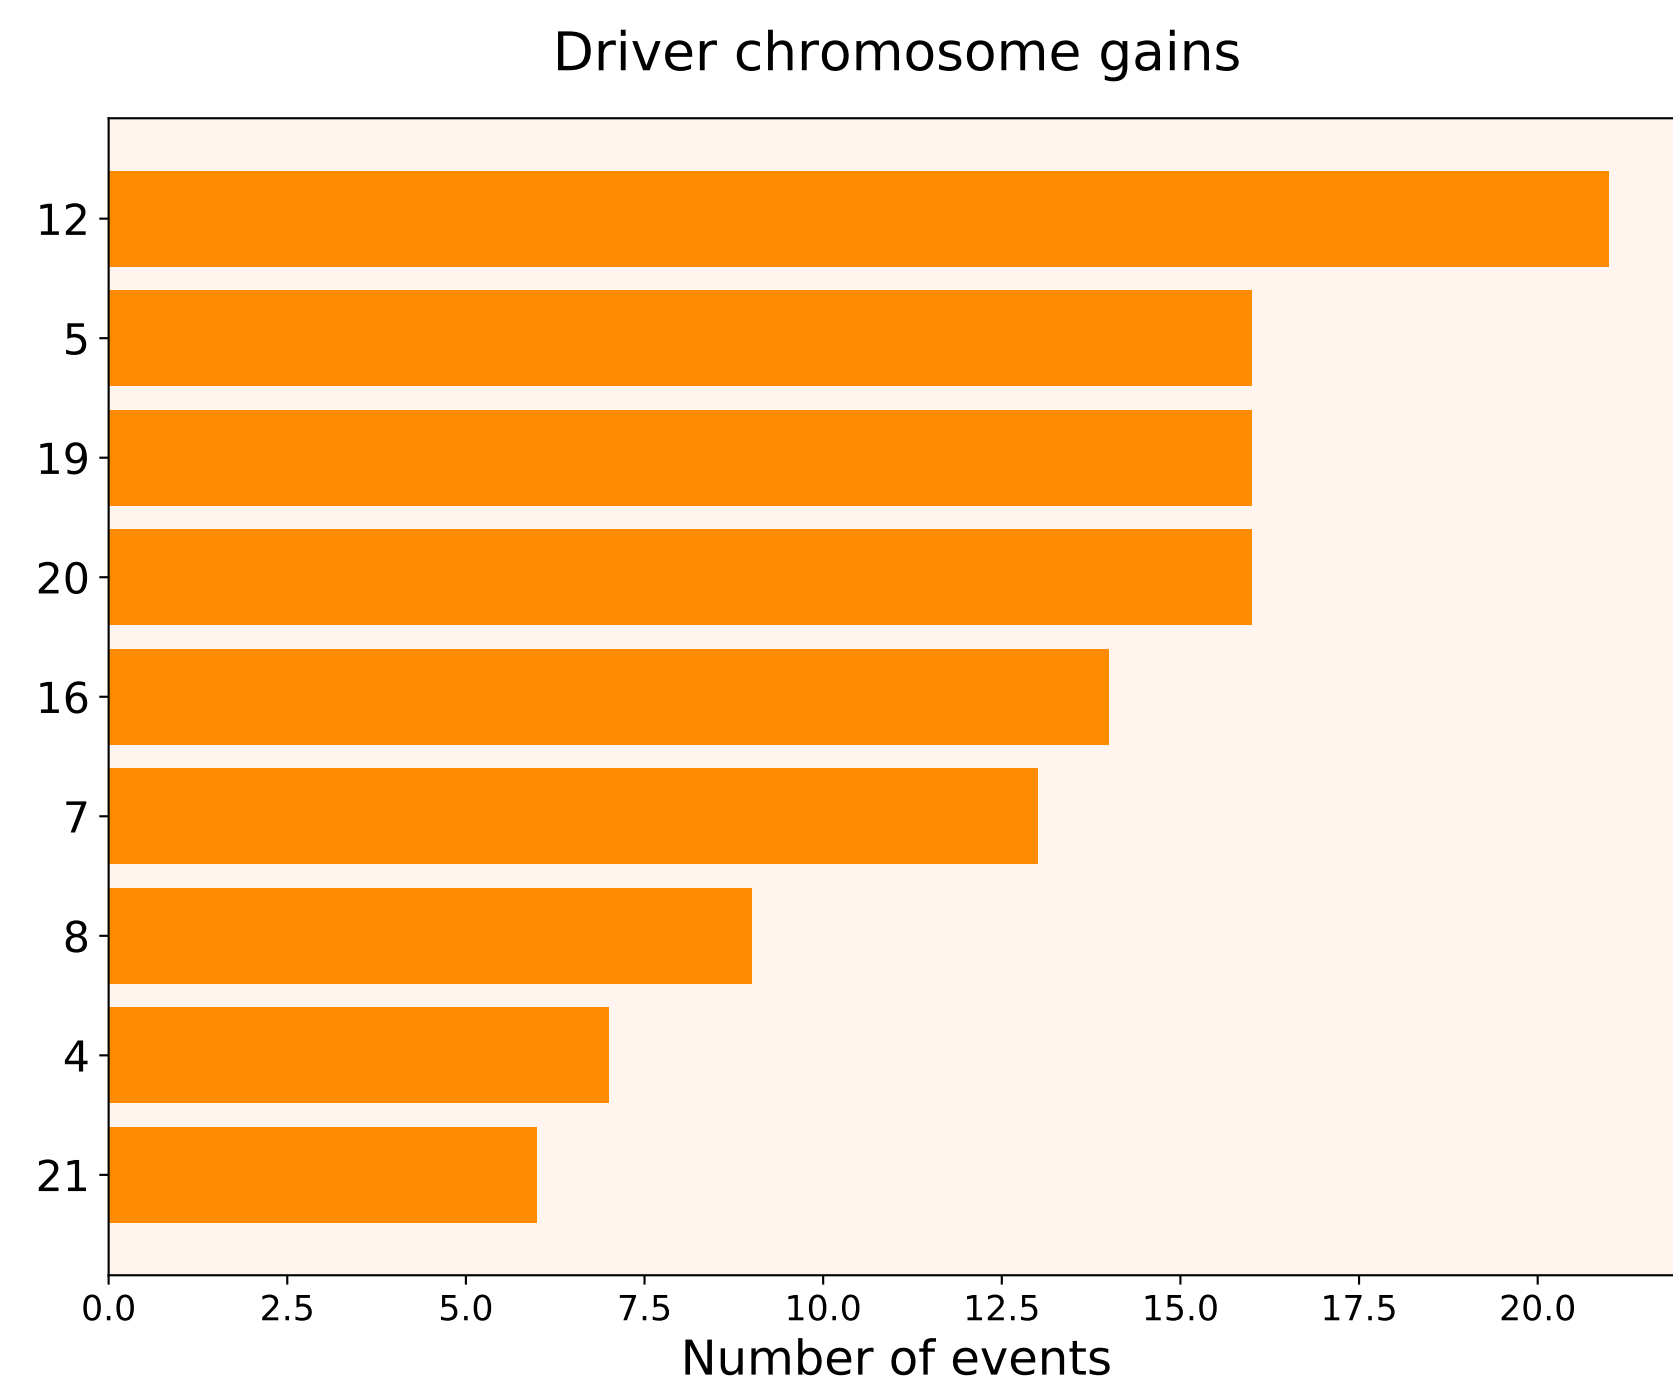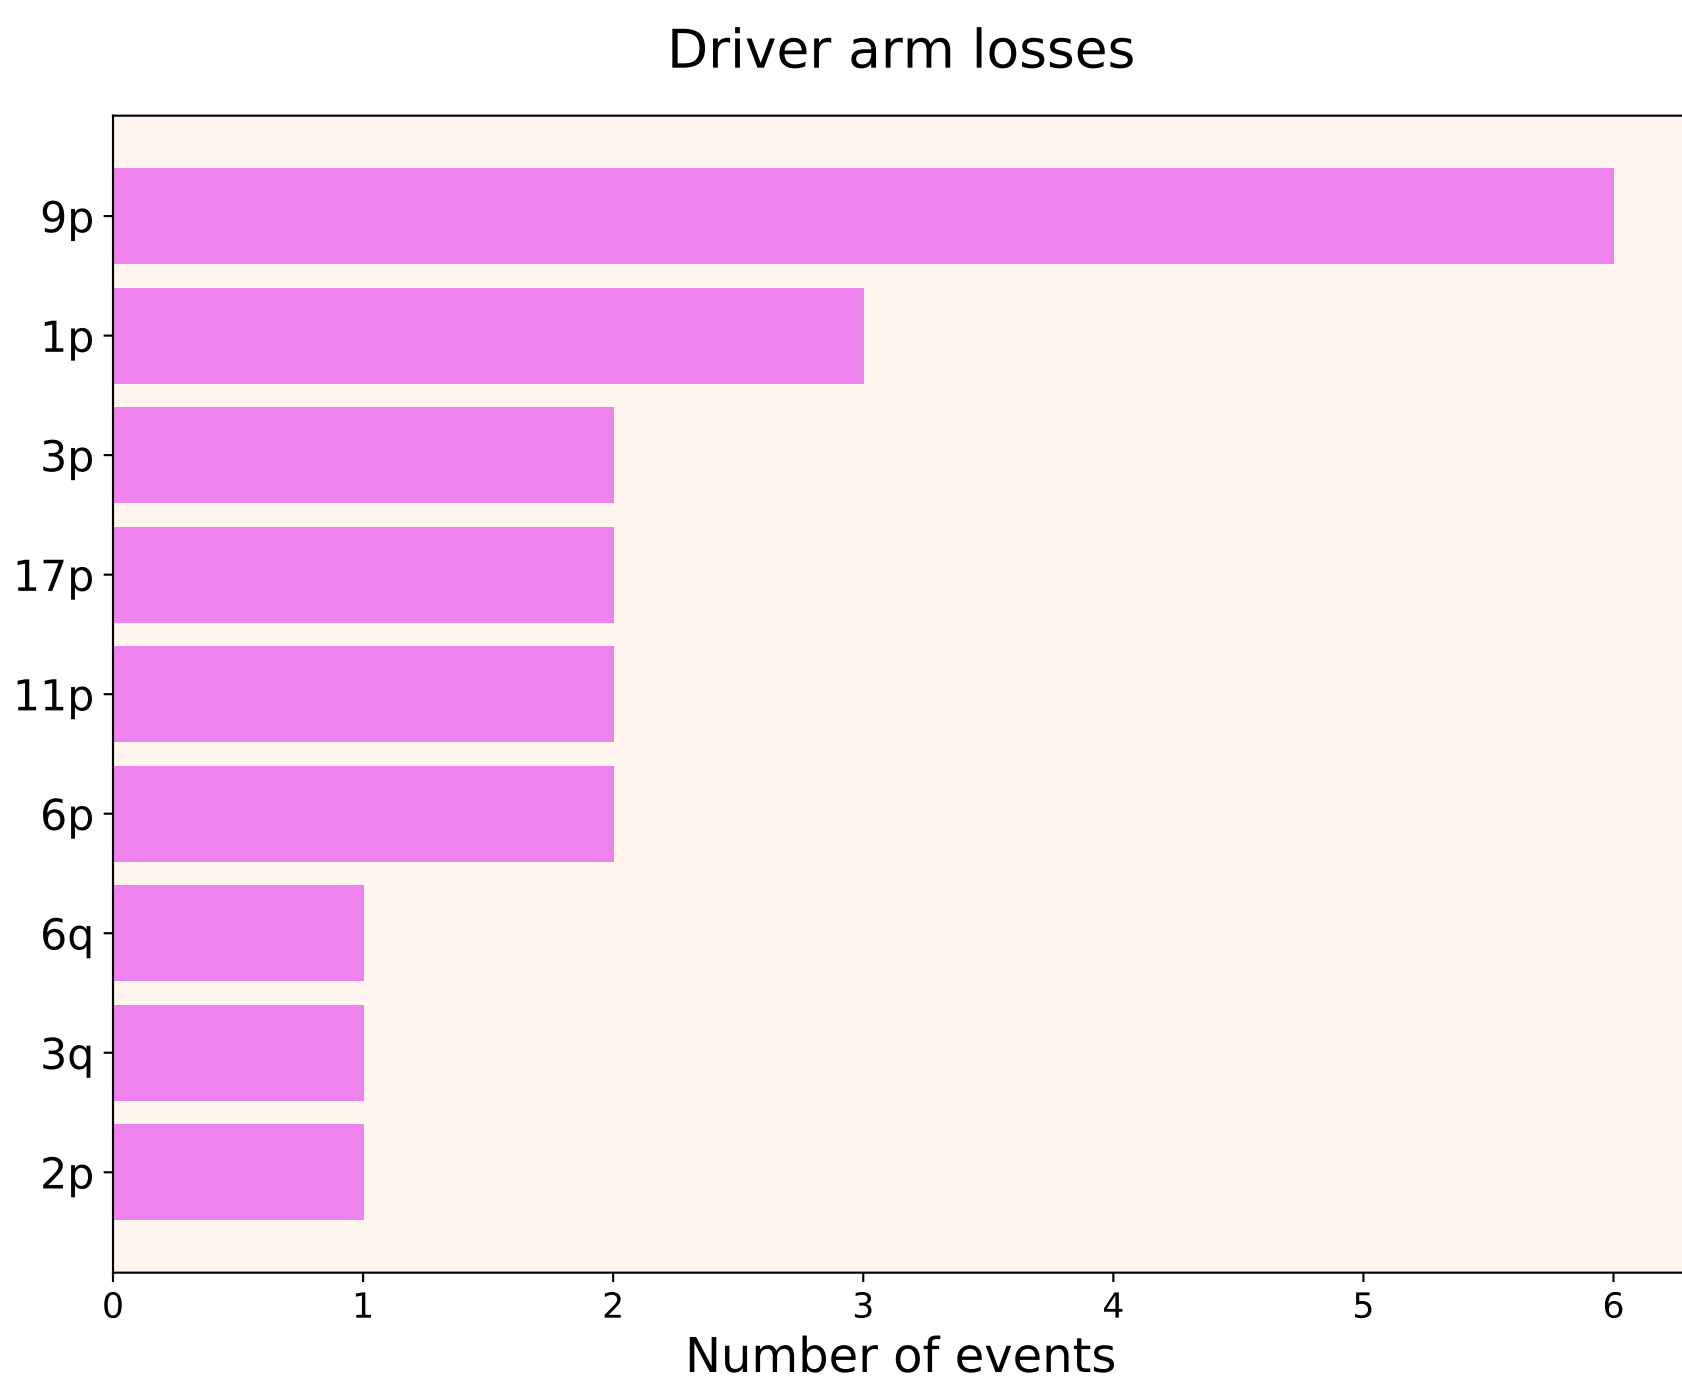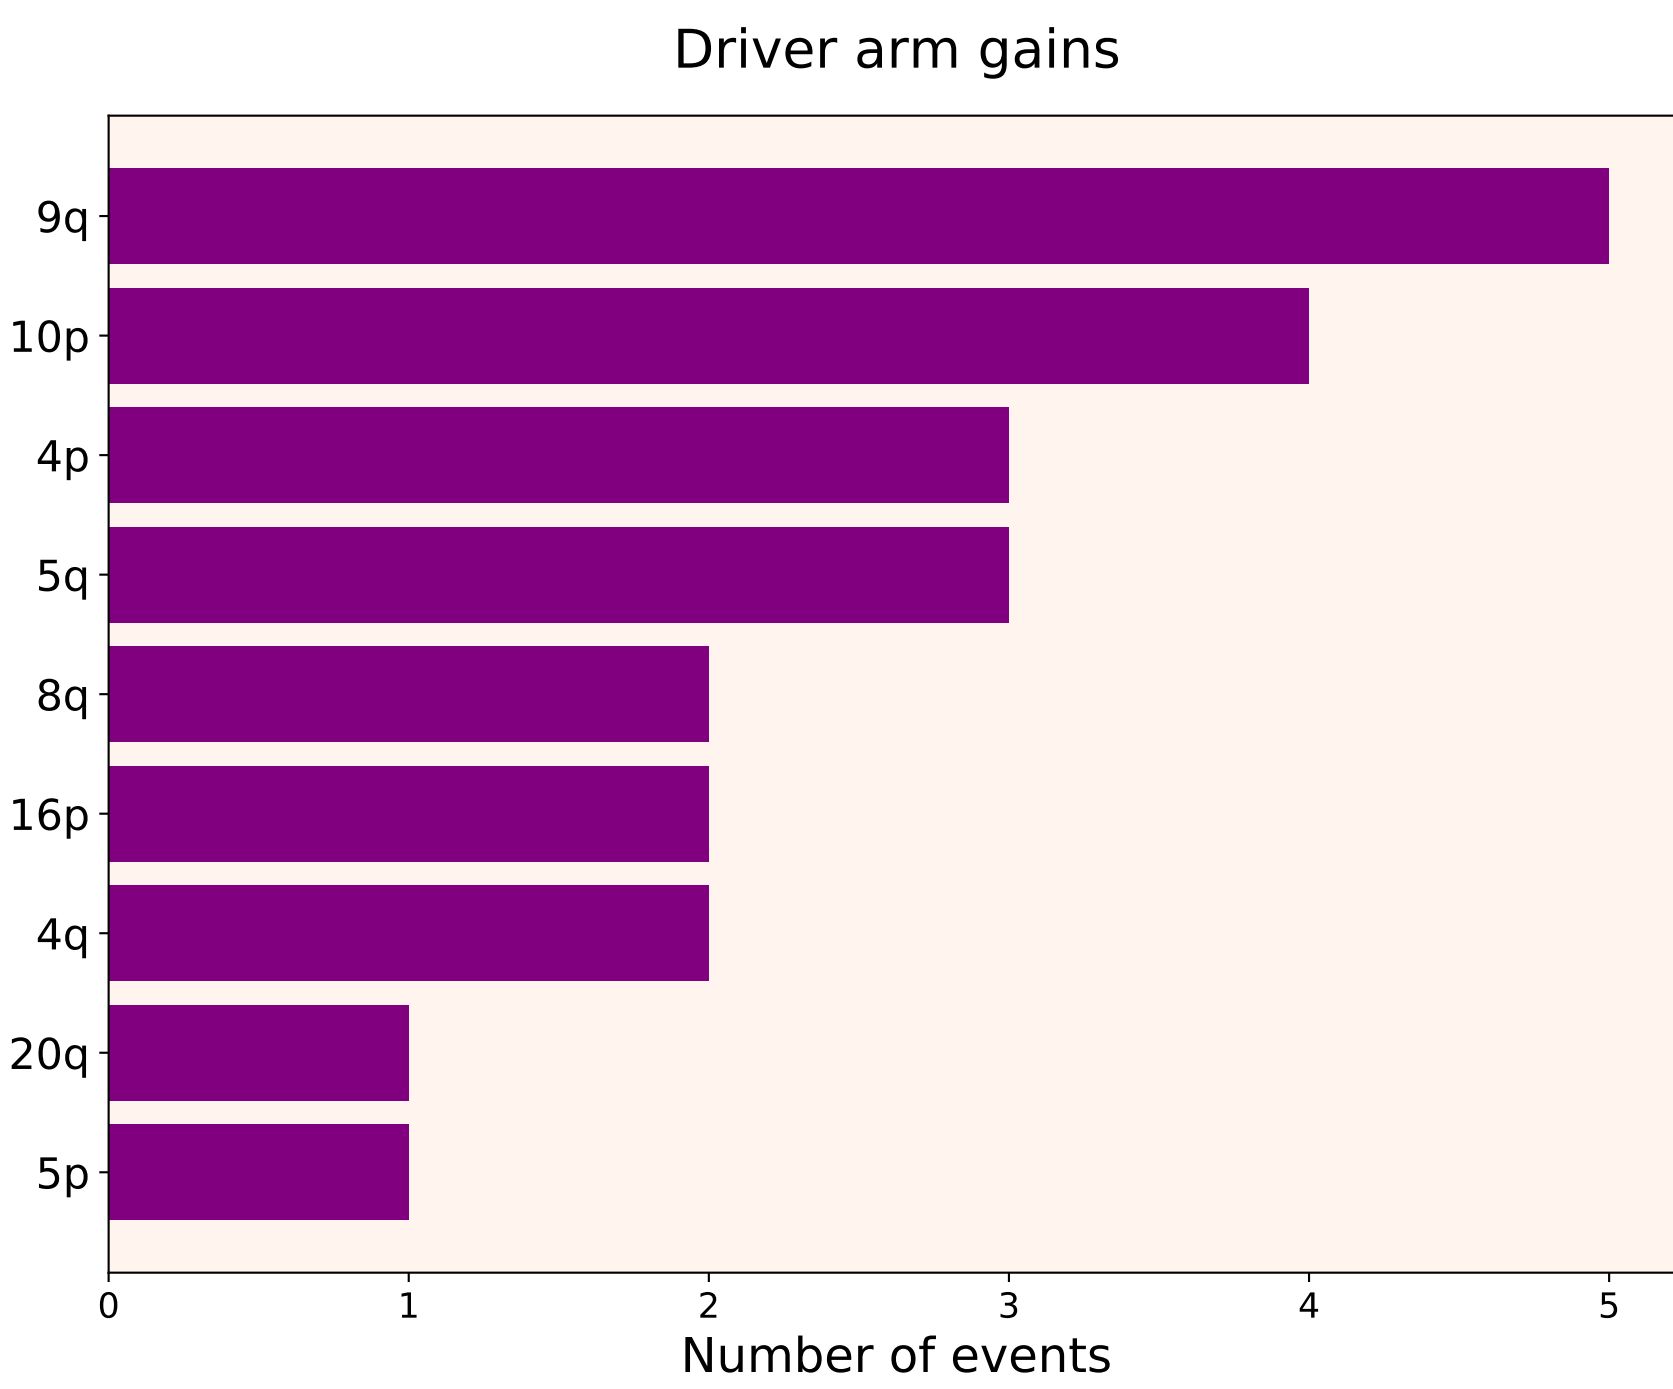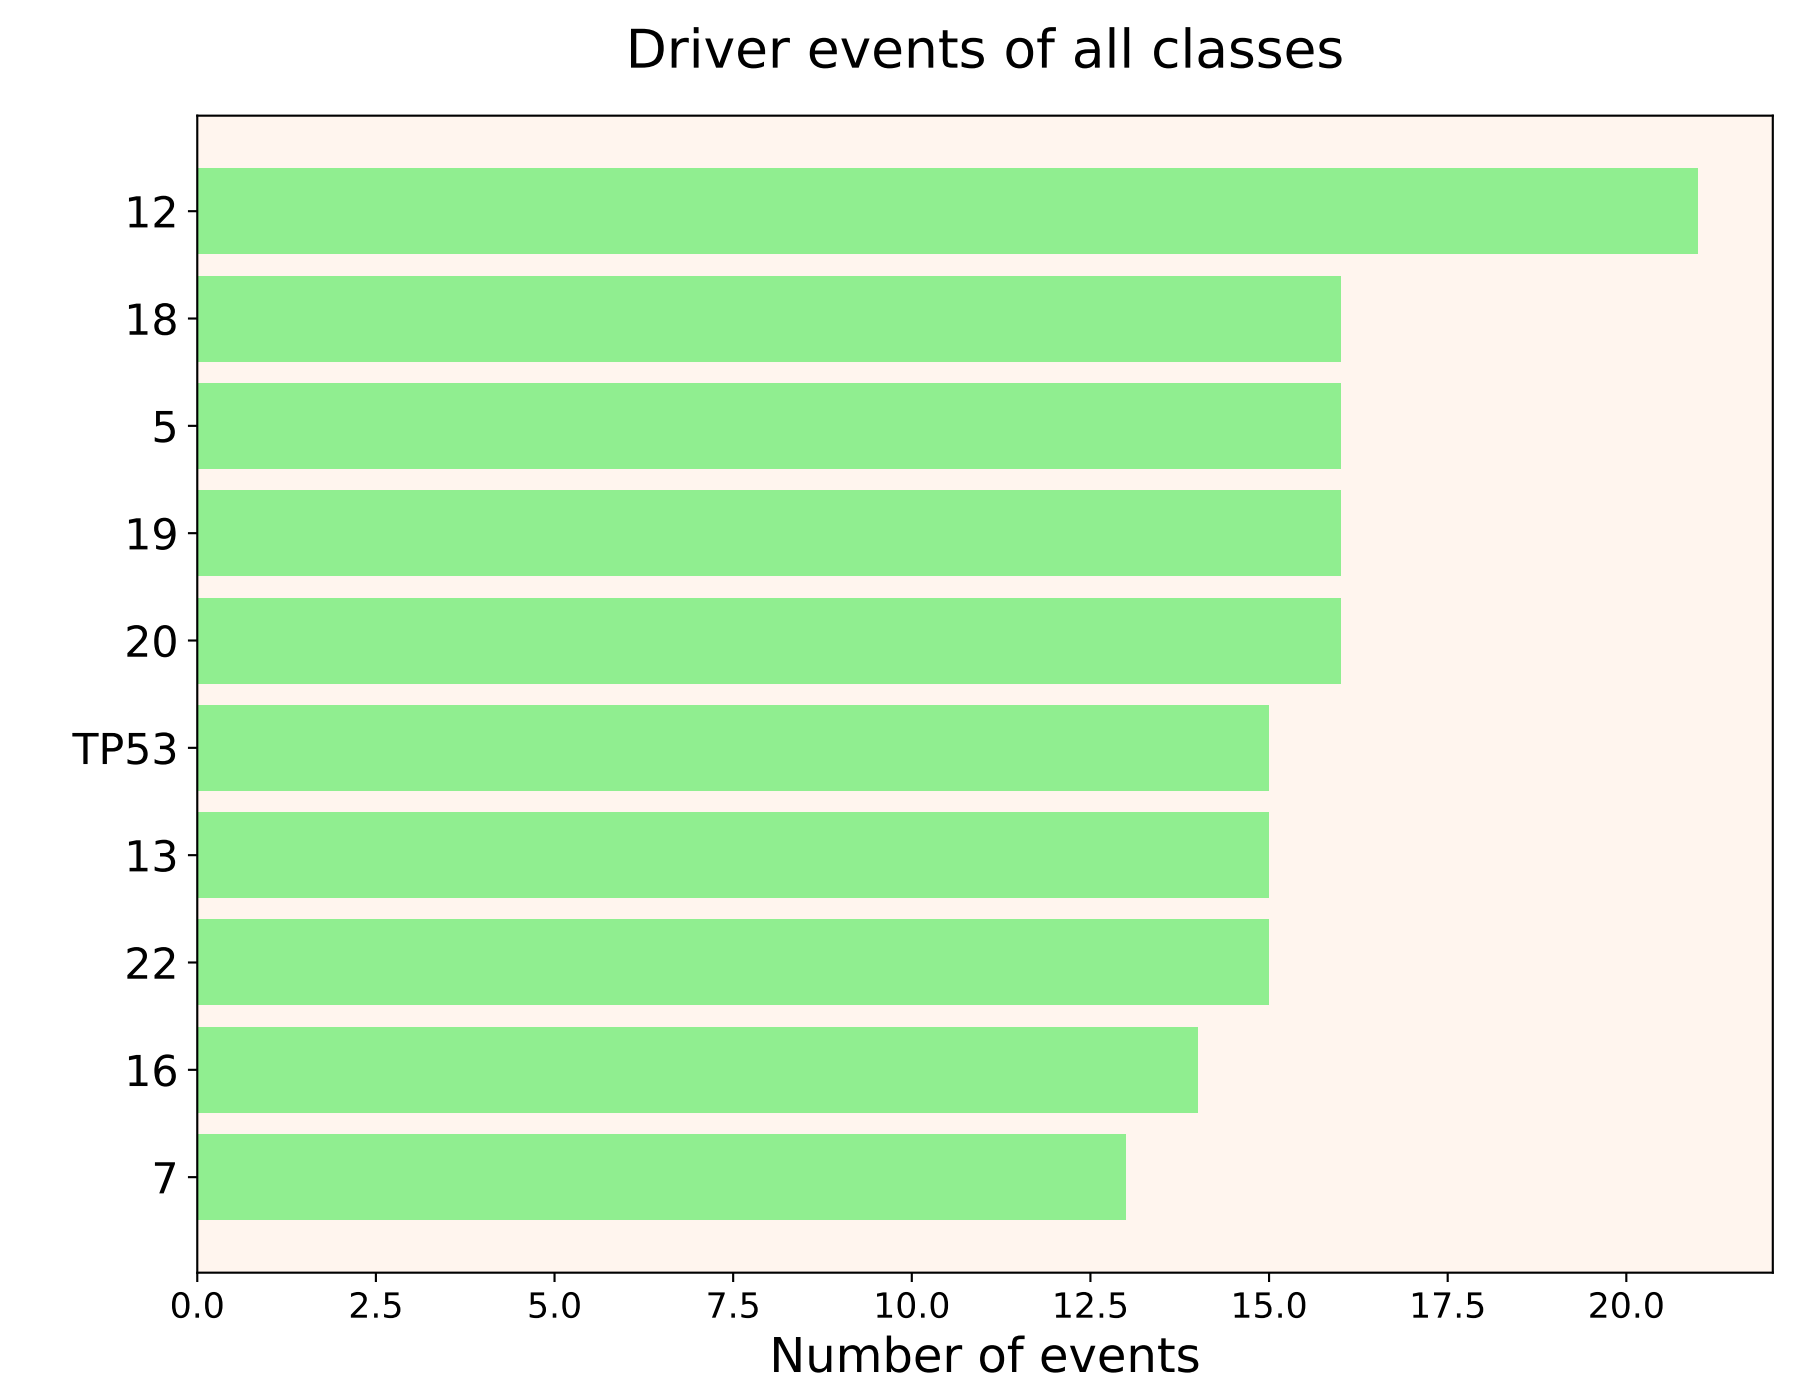

Supplement: Supplemental_Data_S1.zip [file Supplemental_Data_S1.zip]

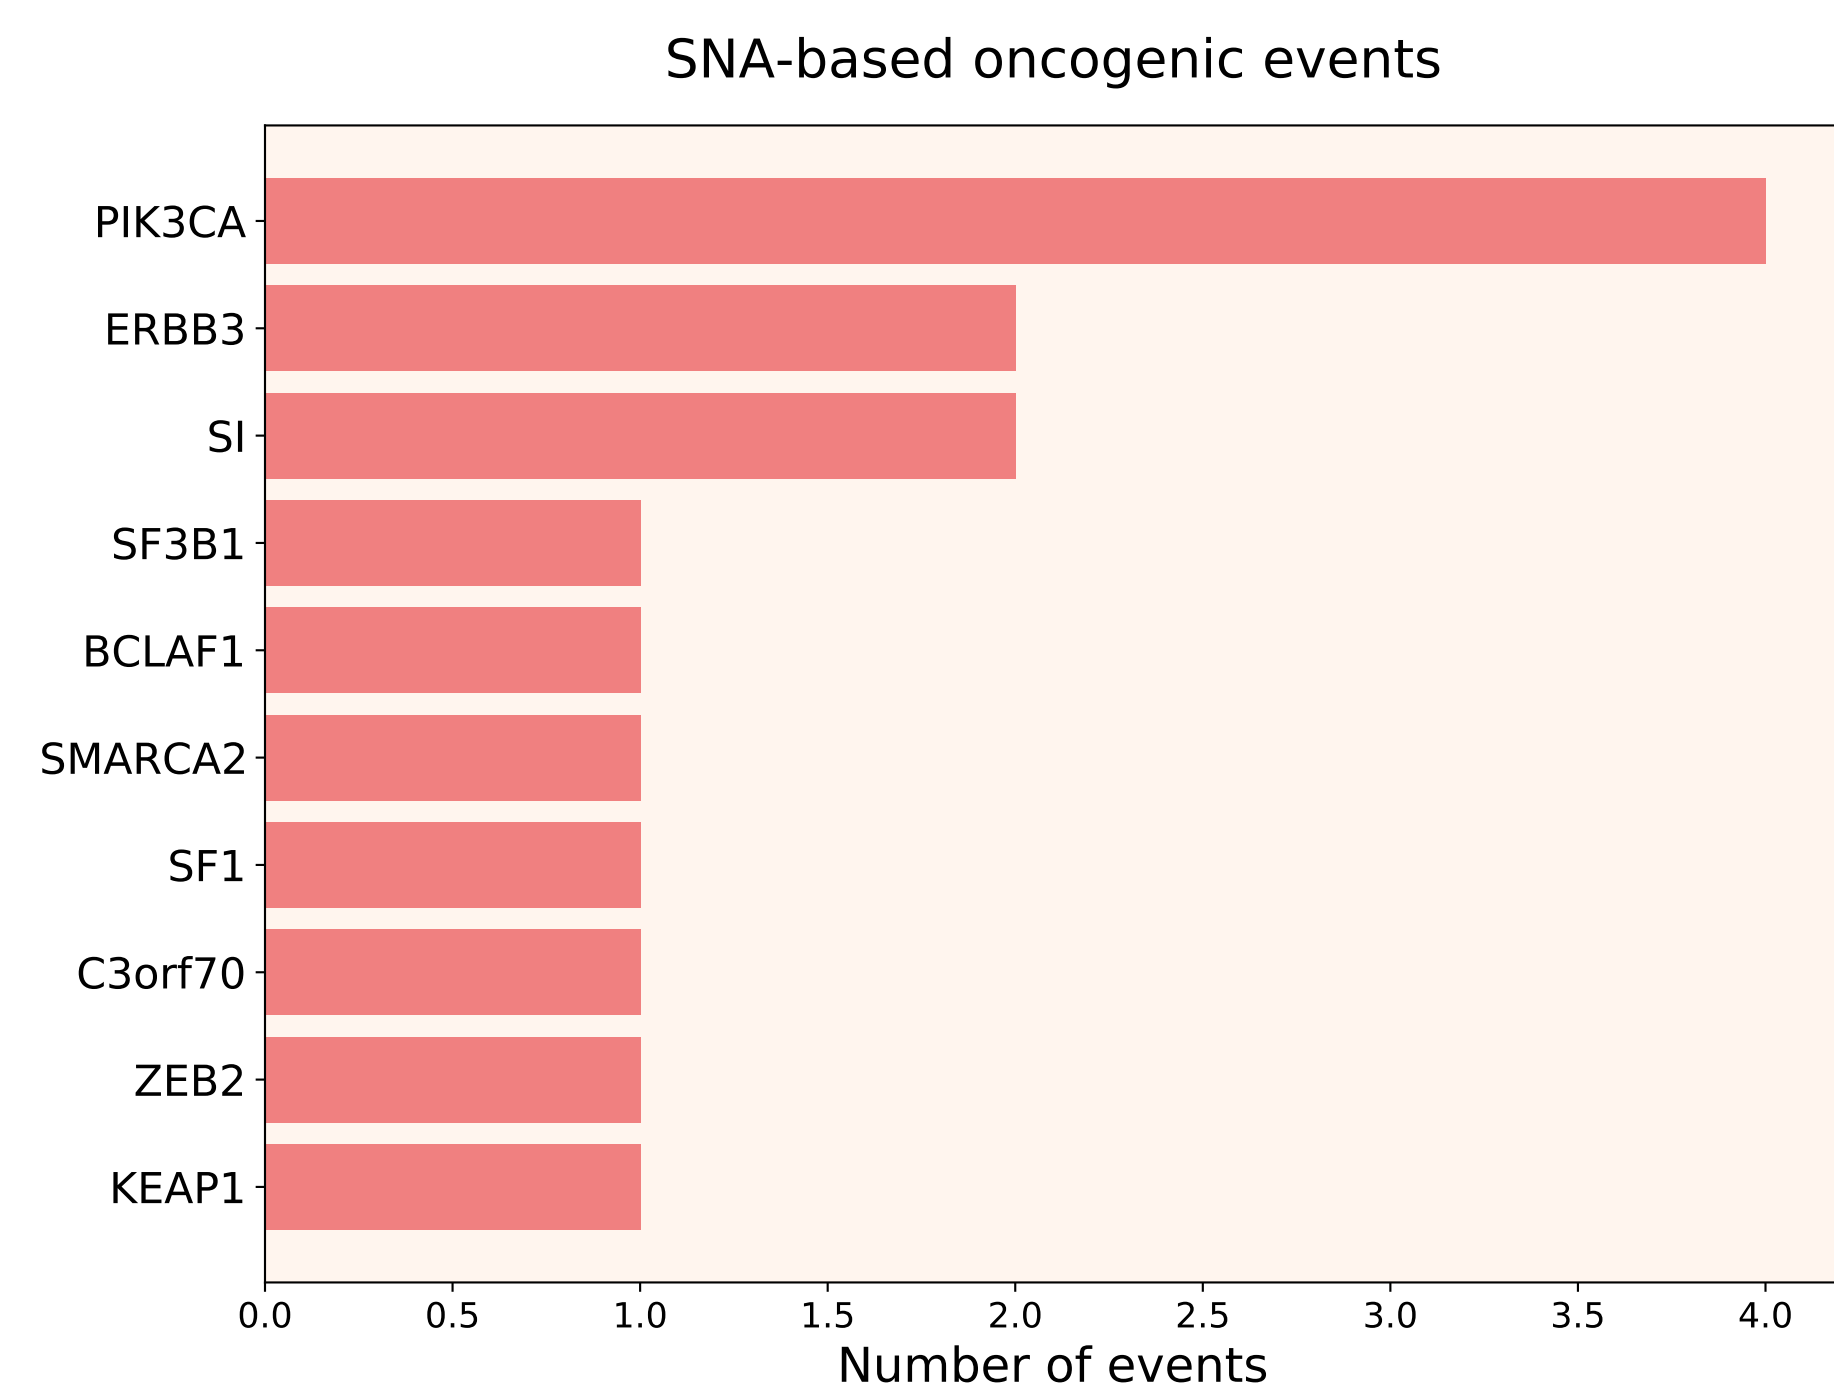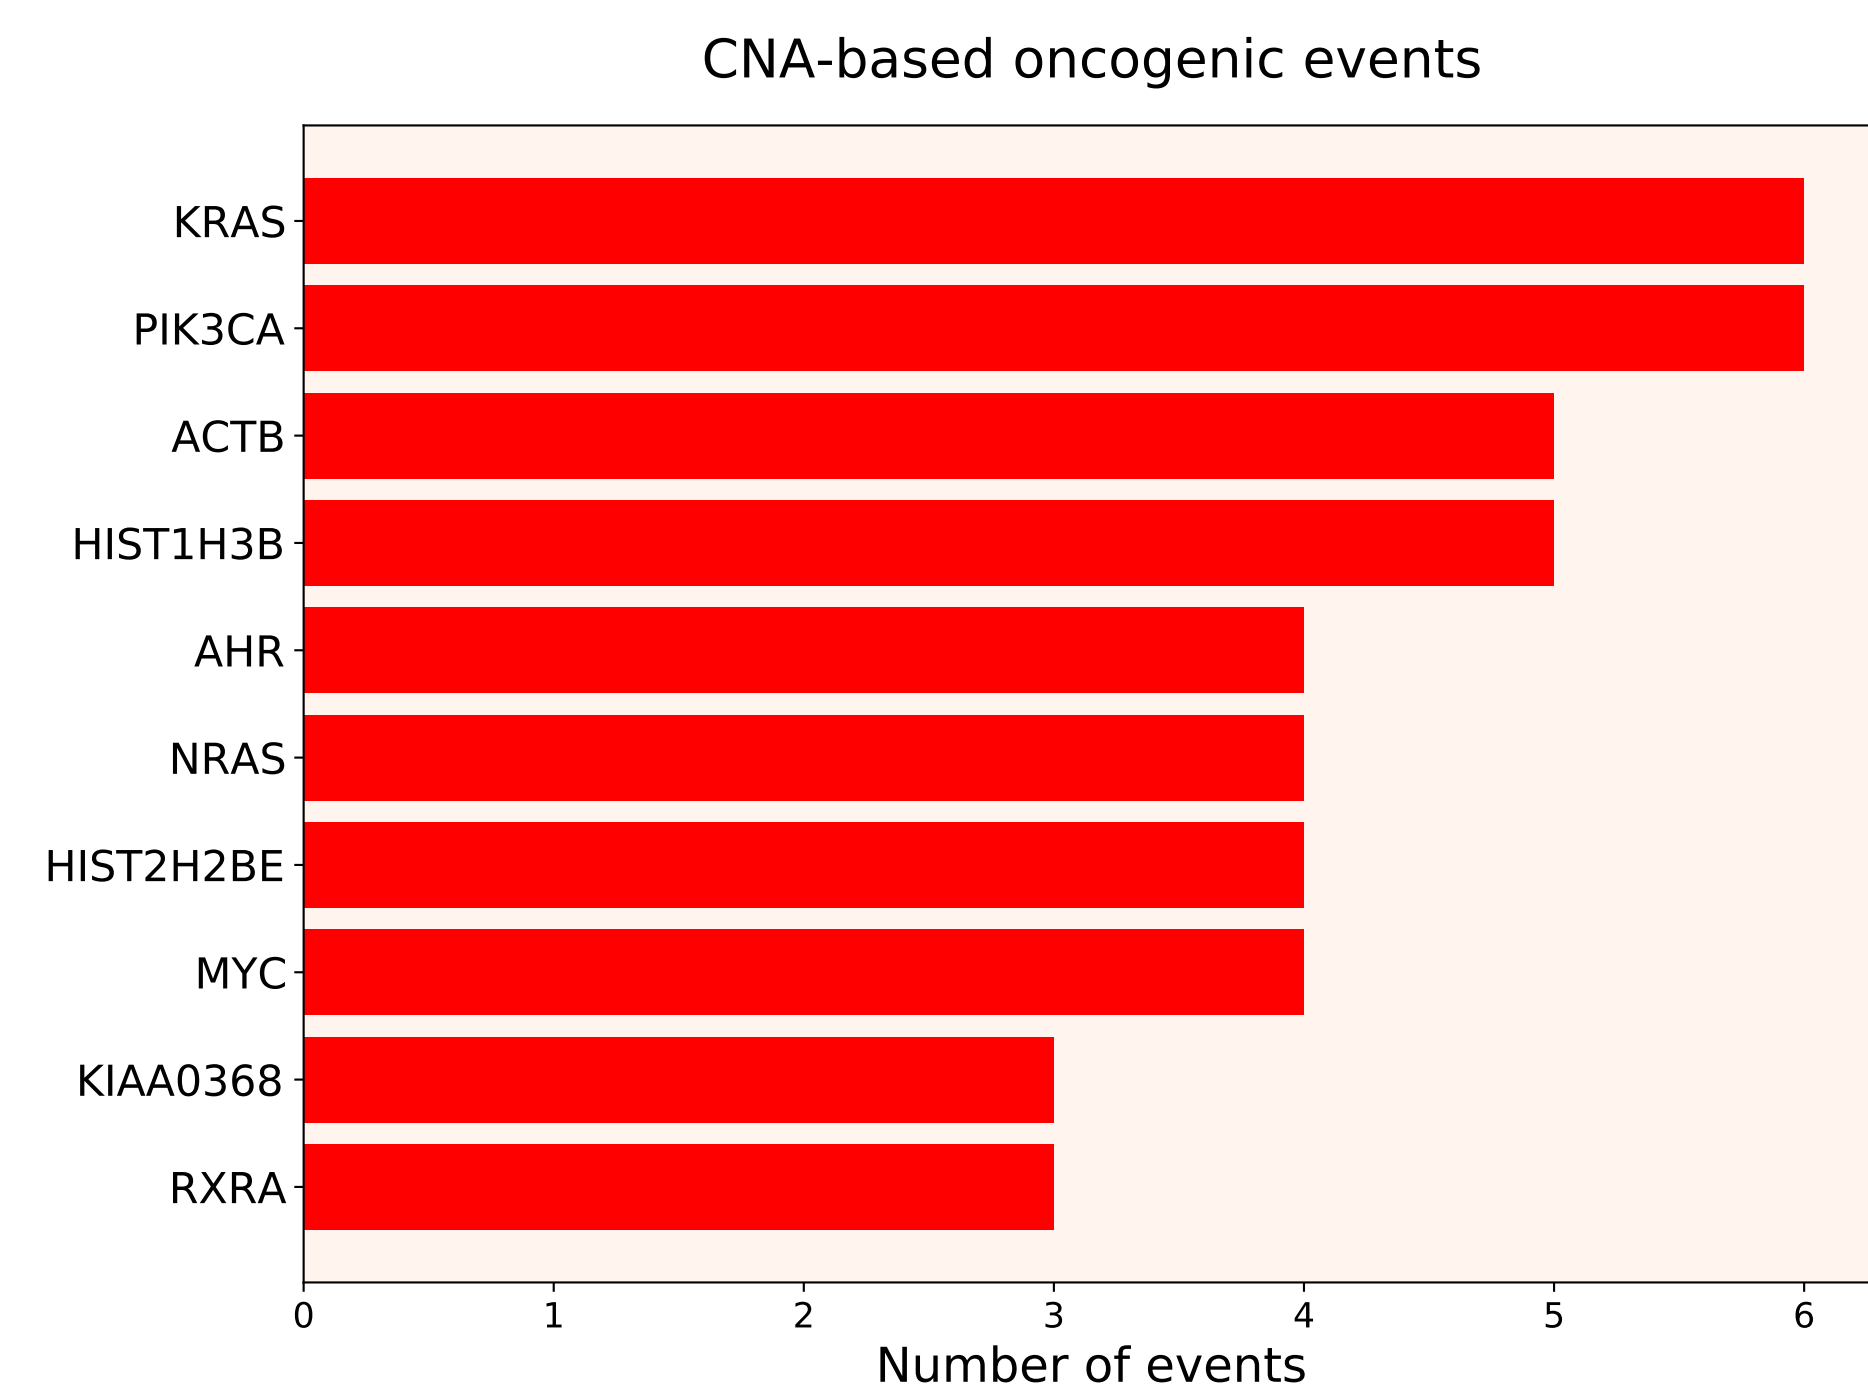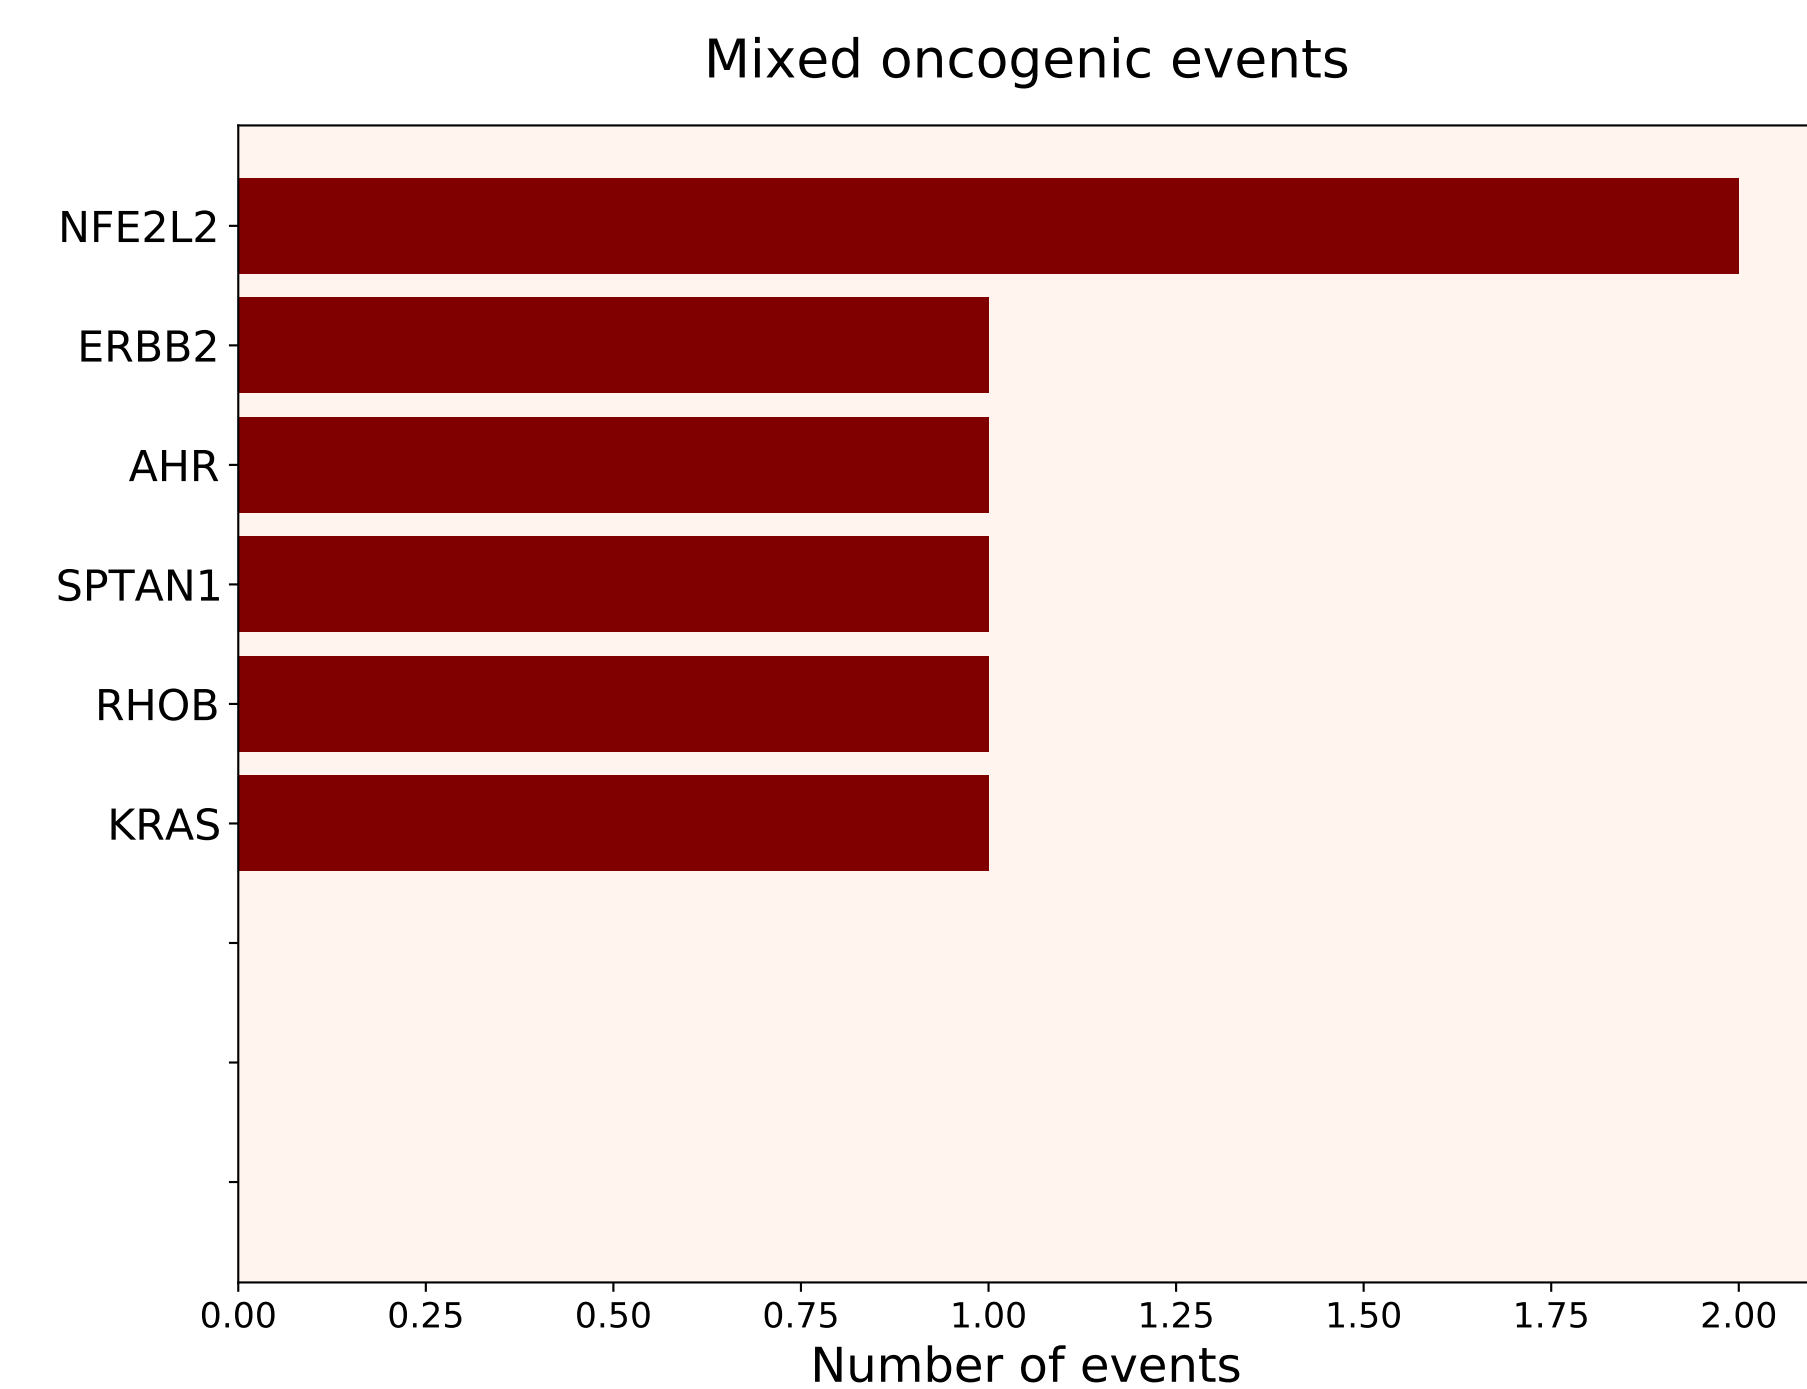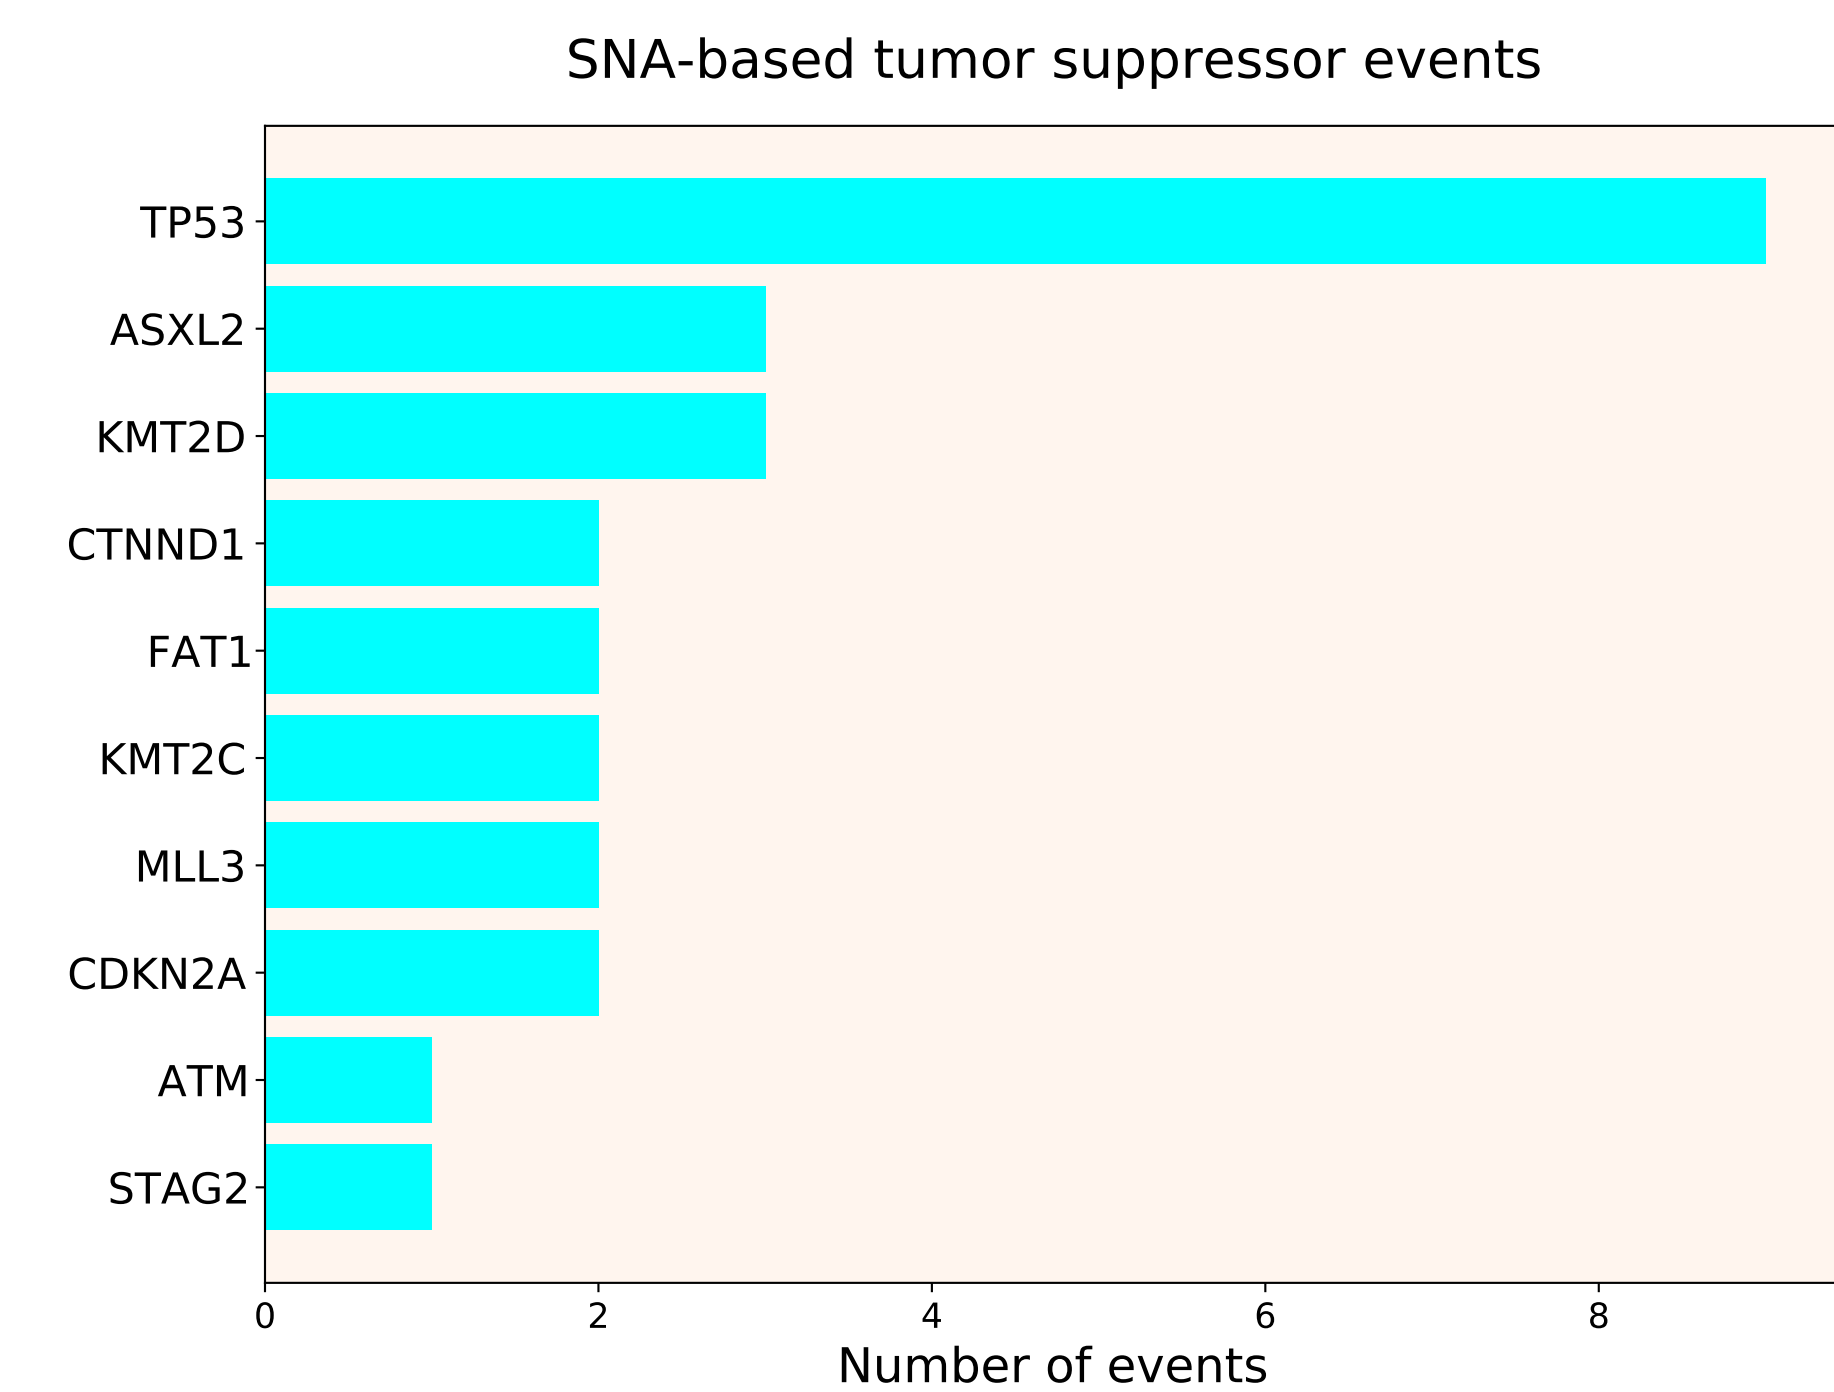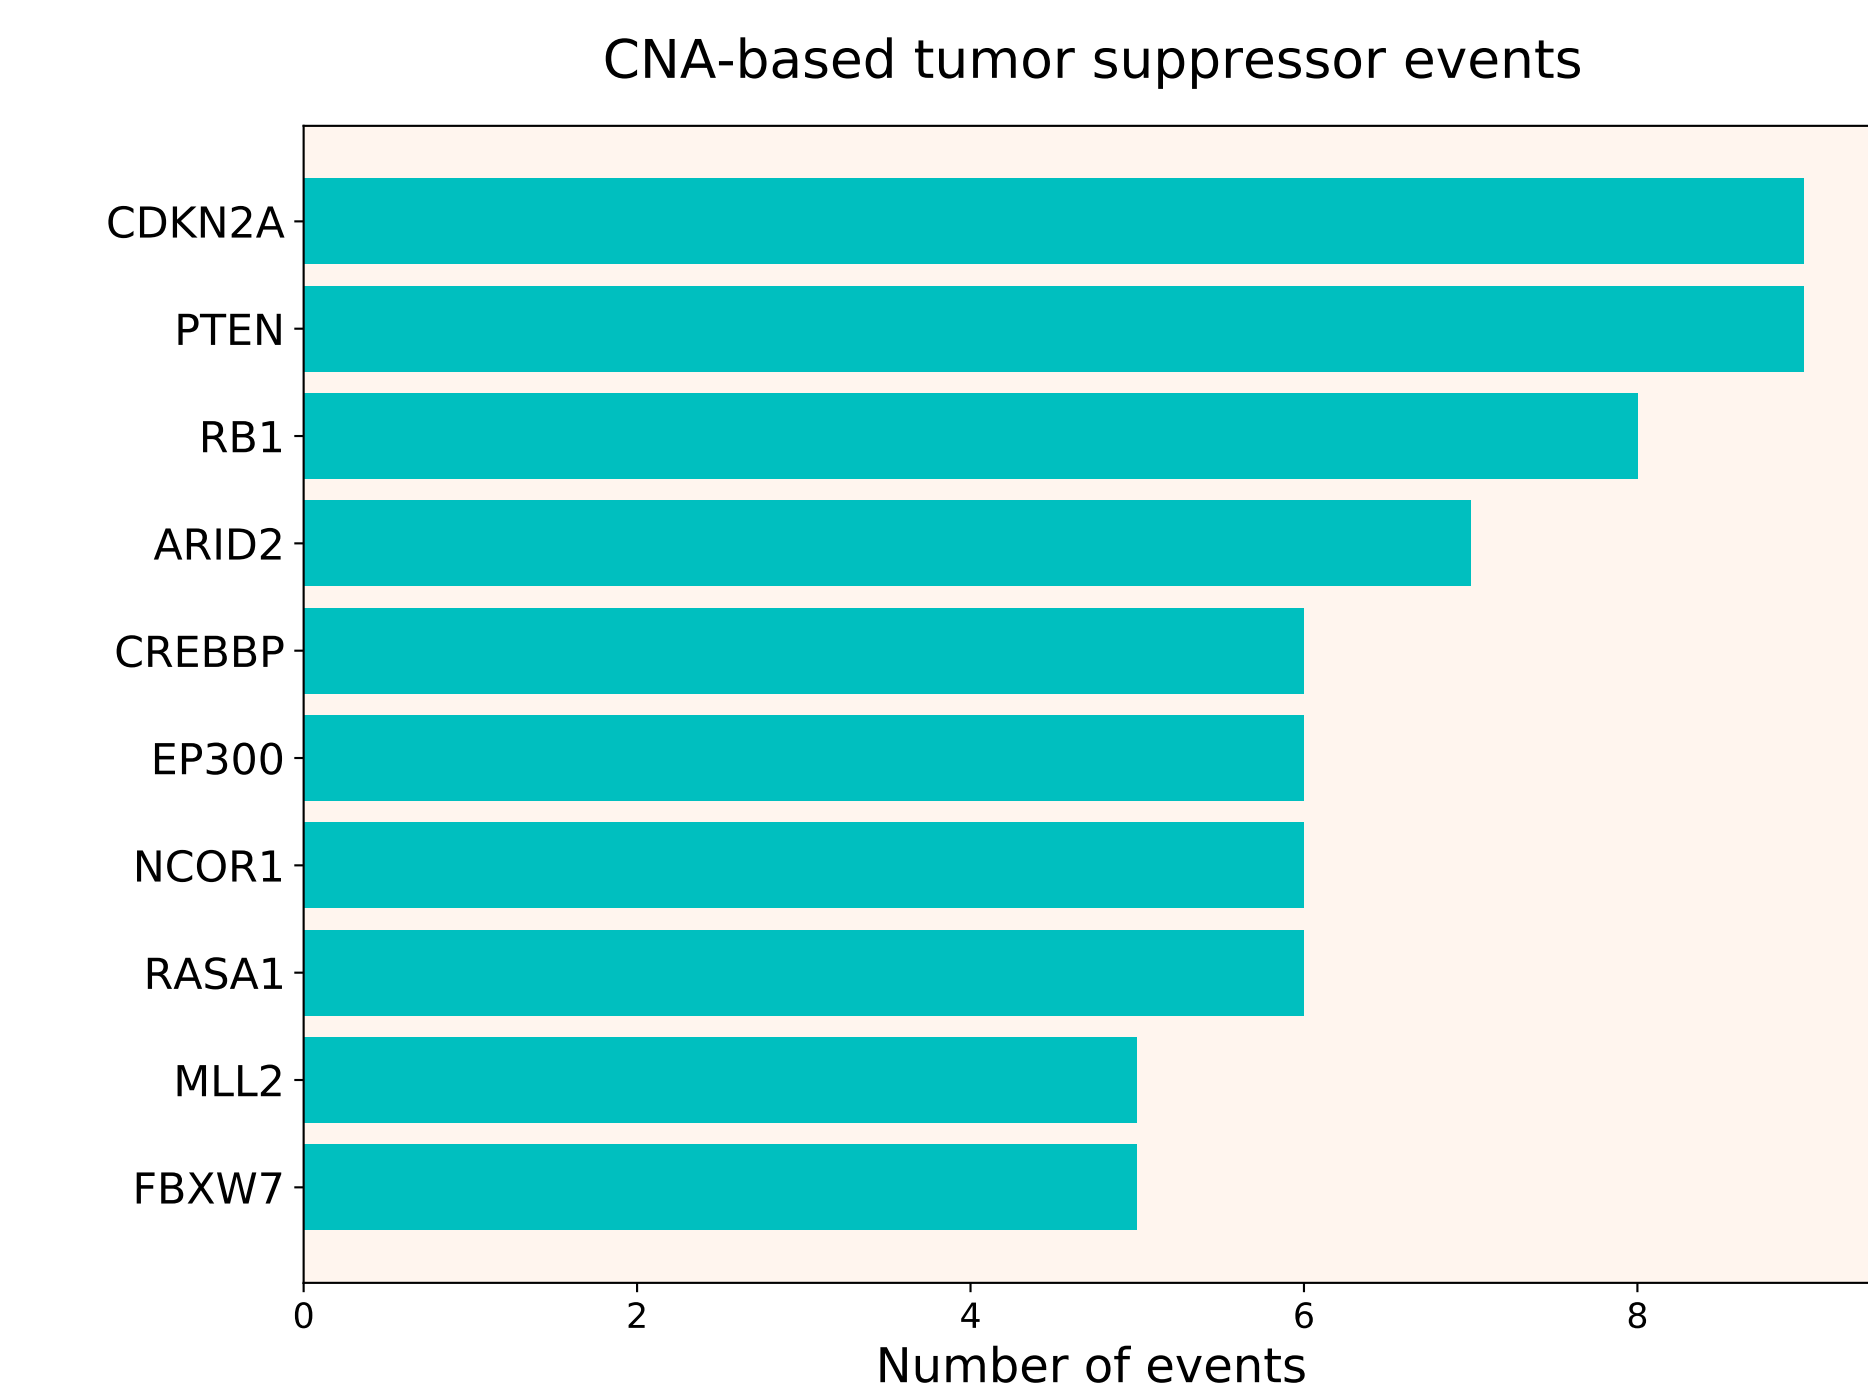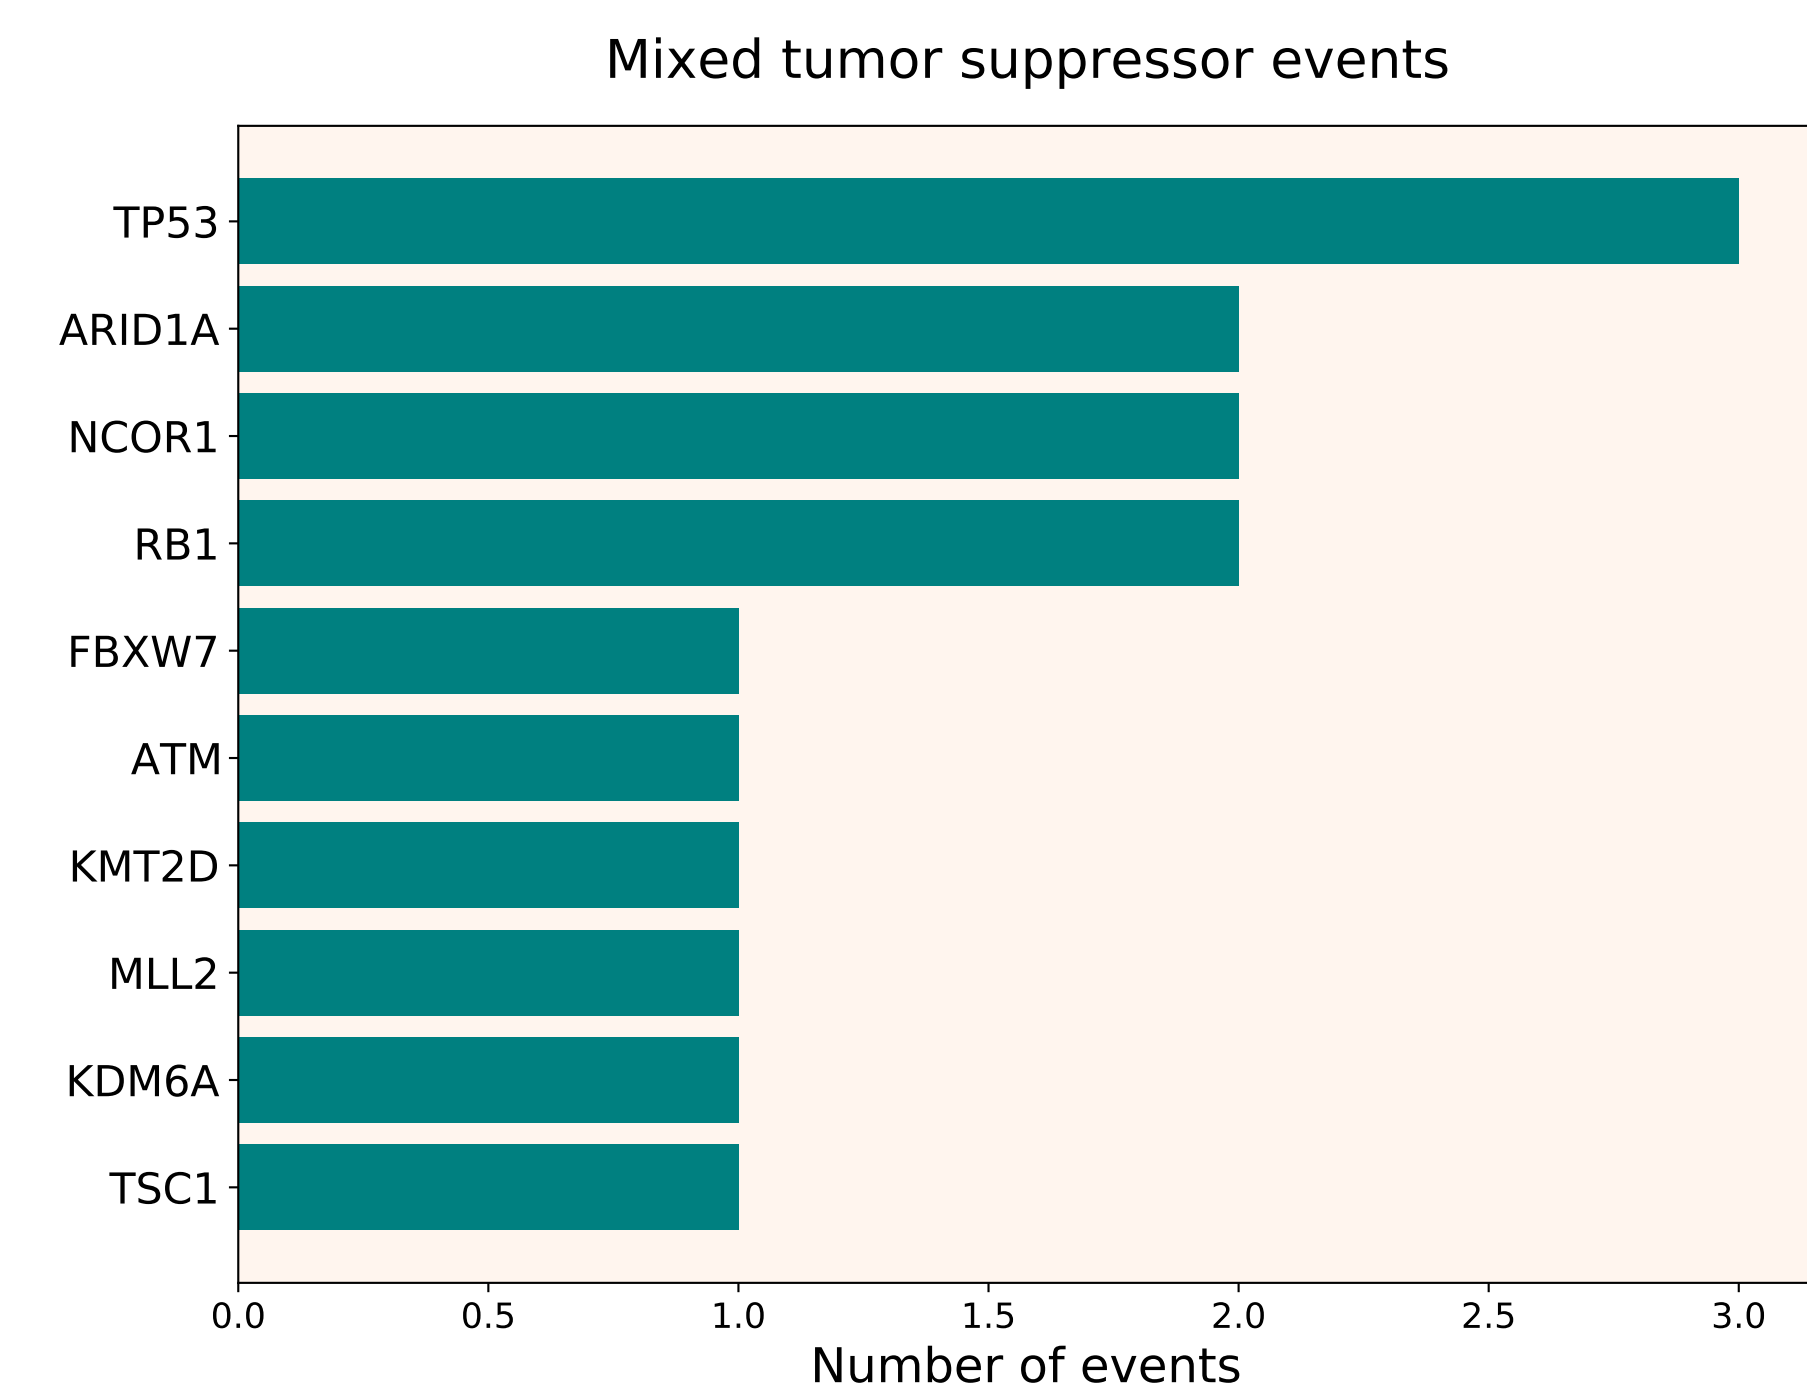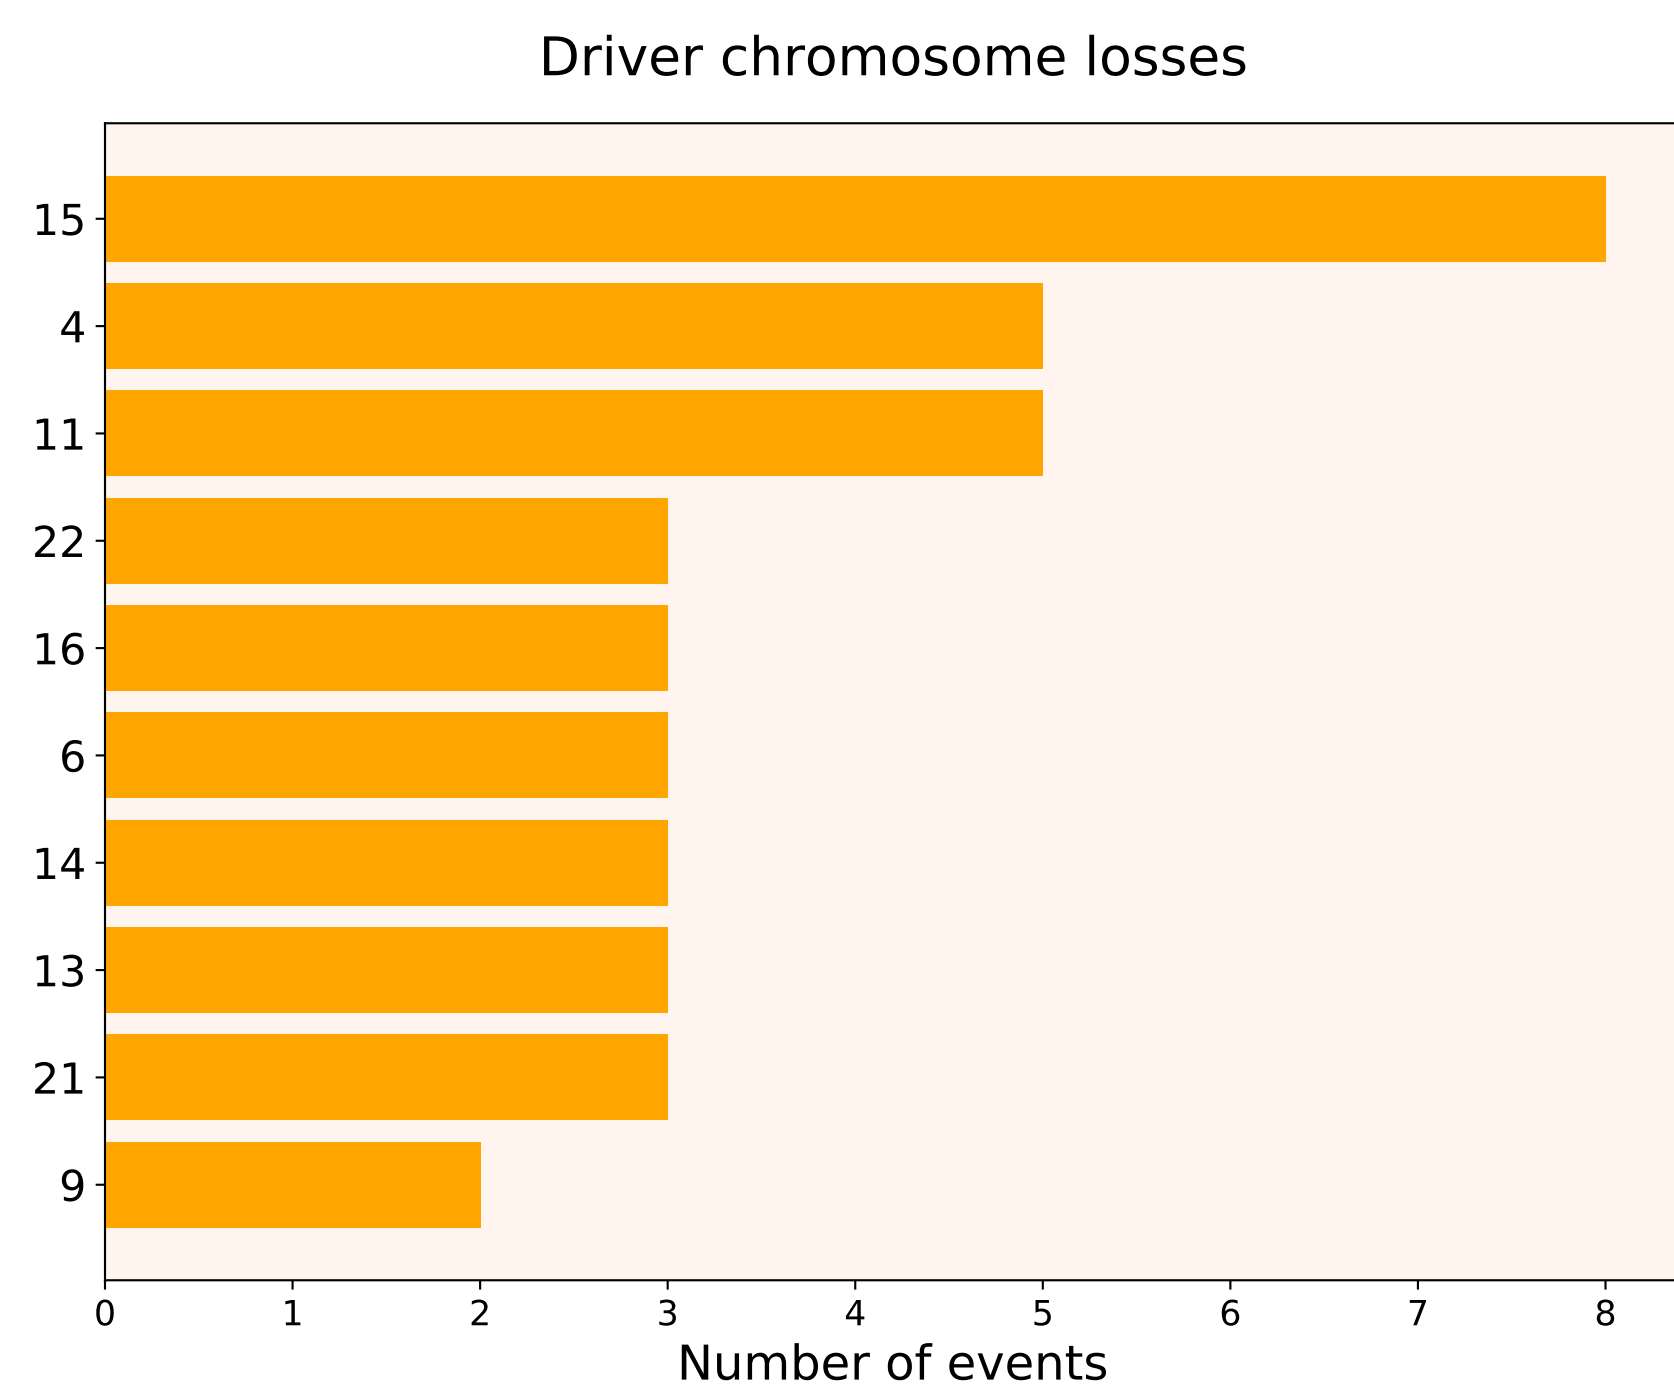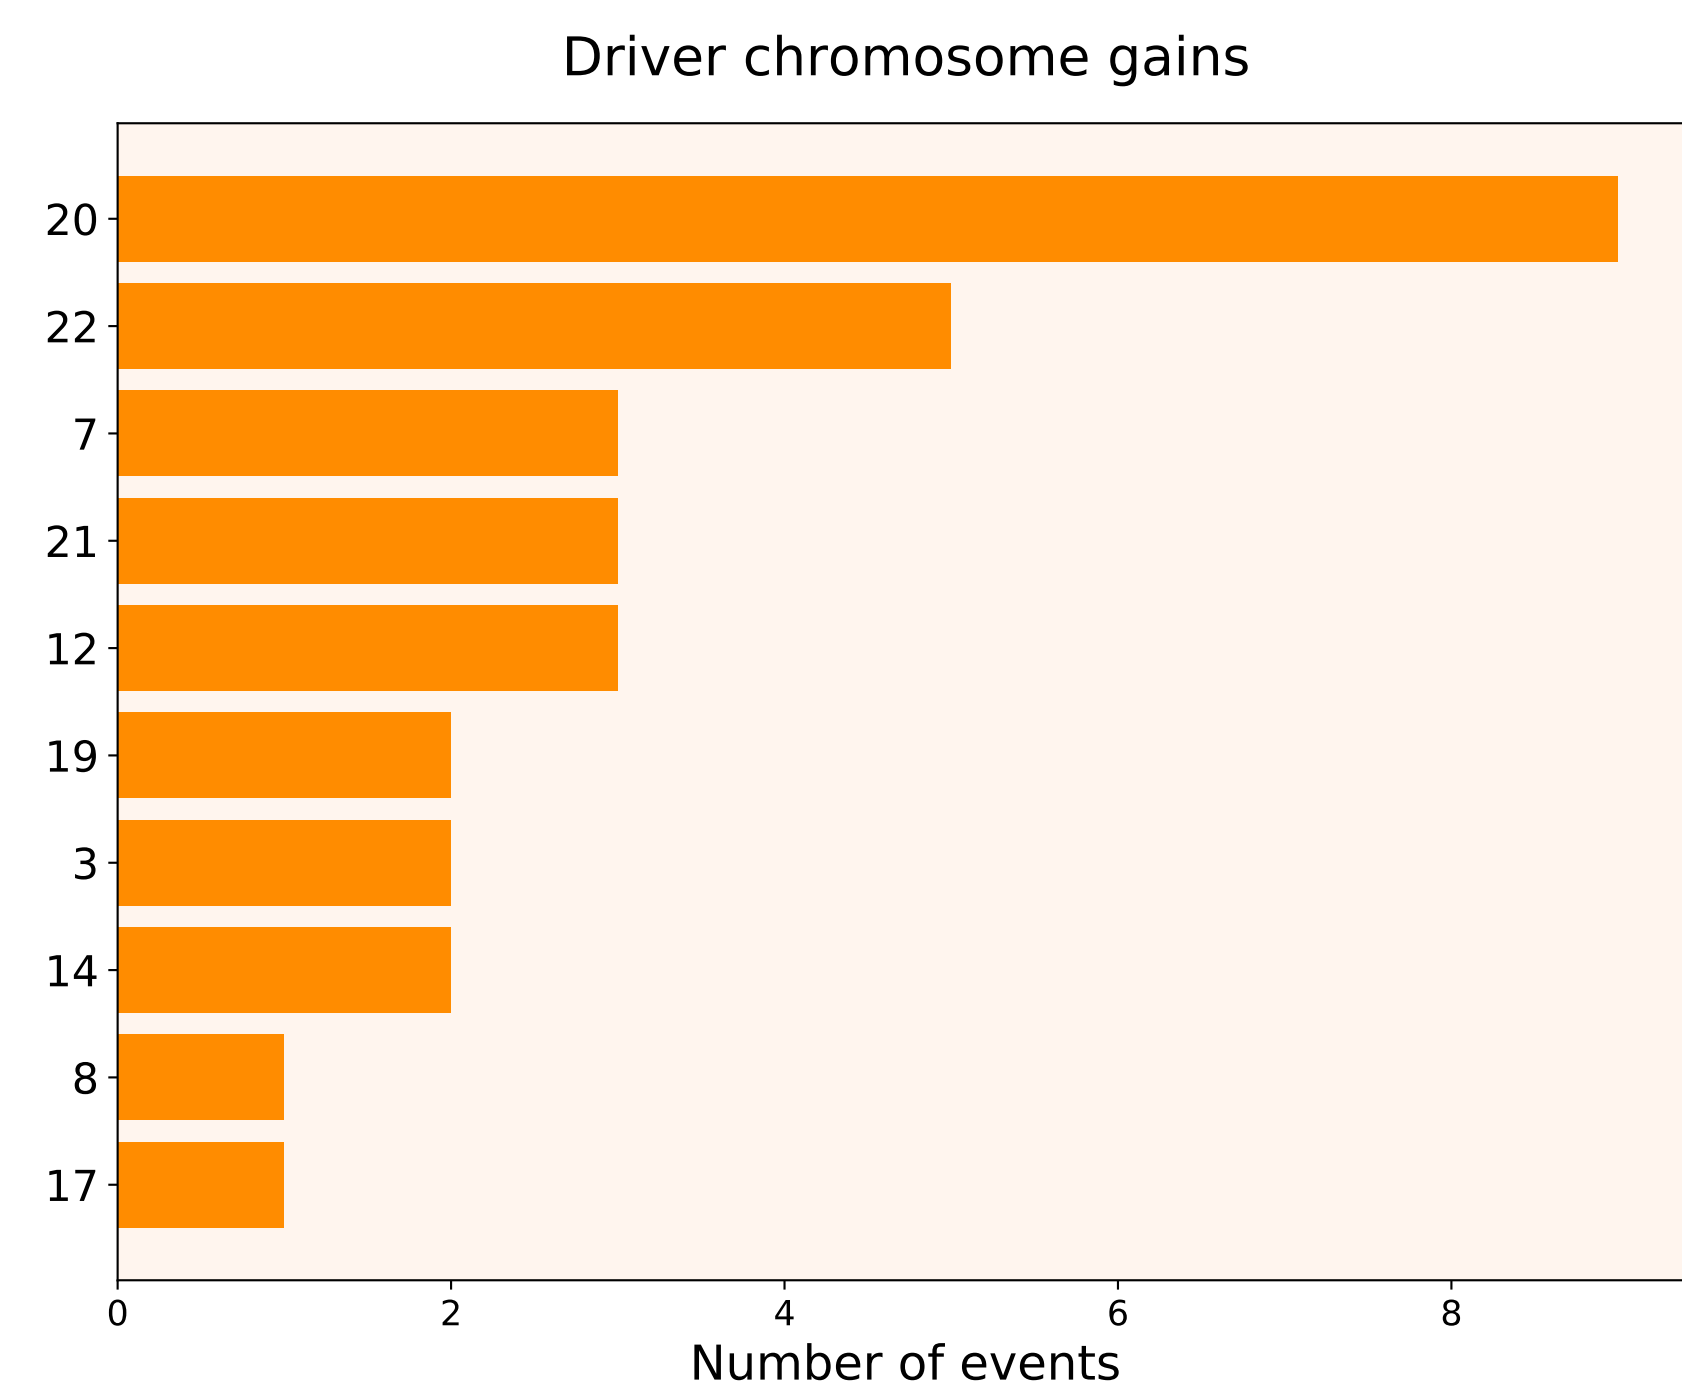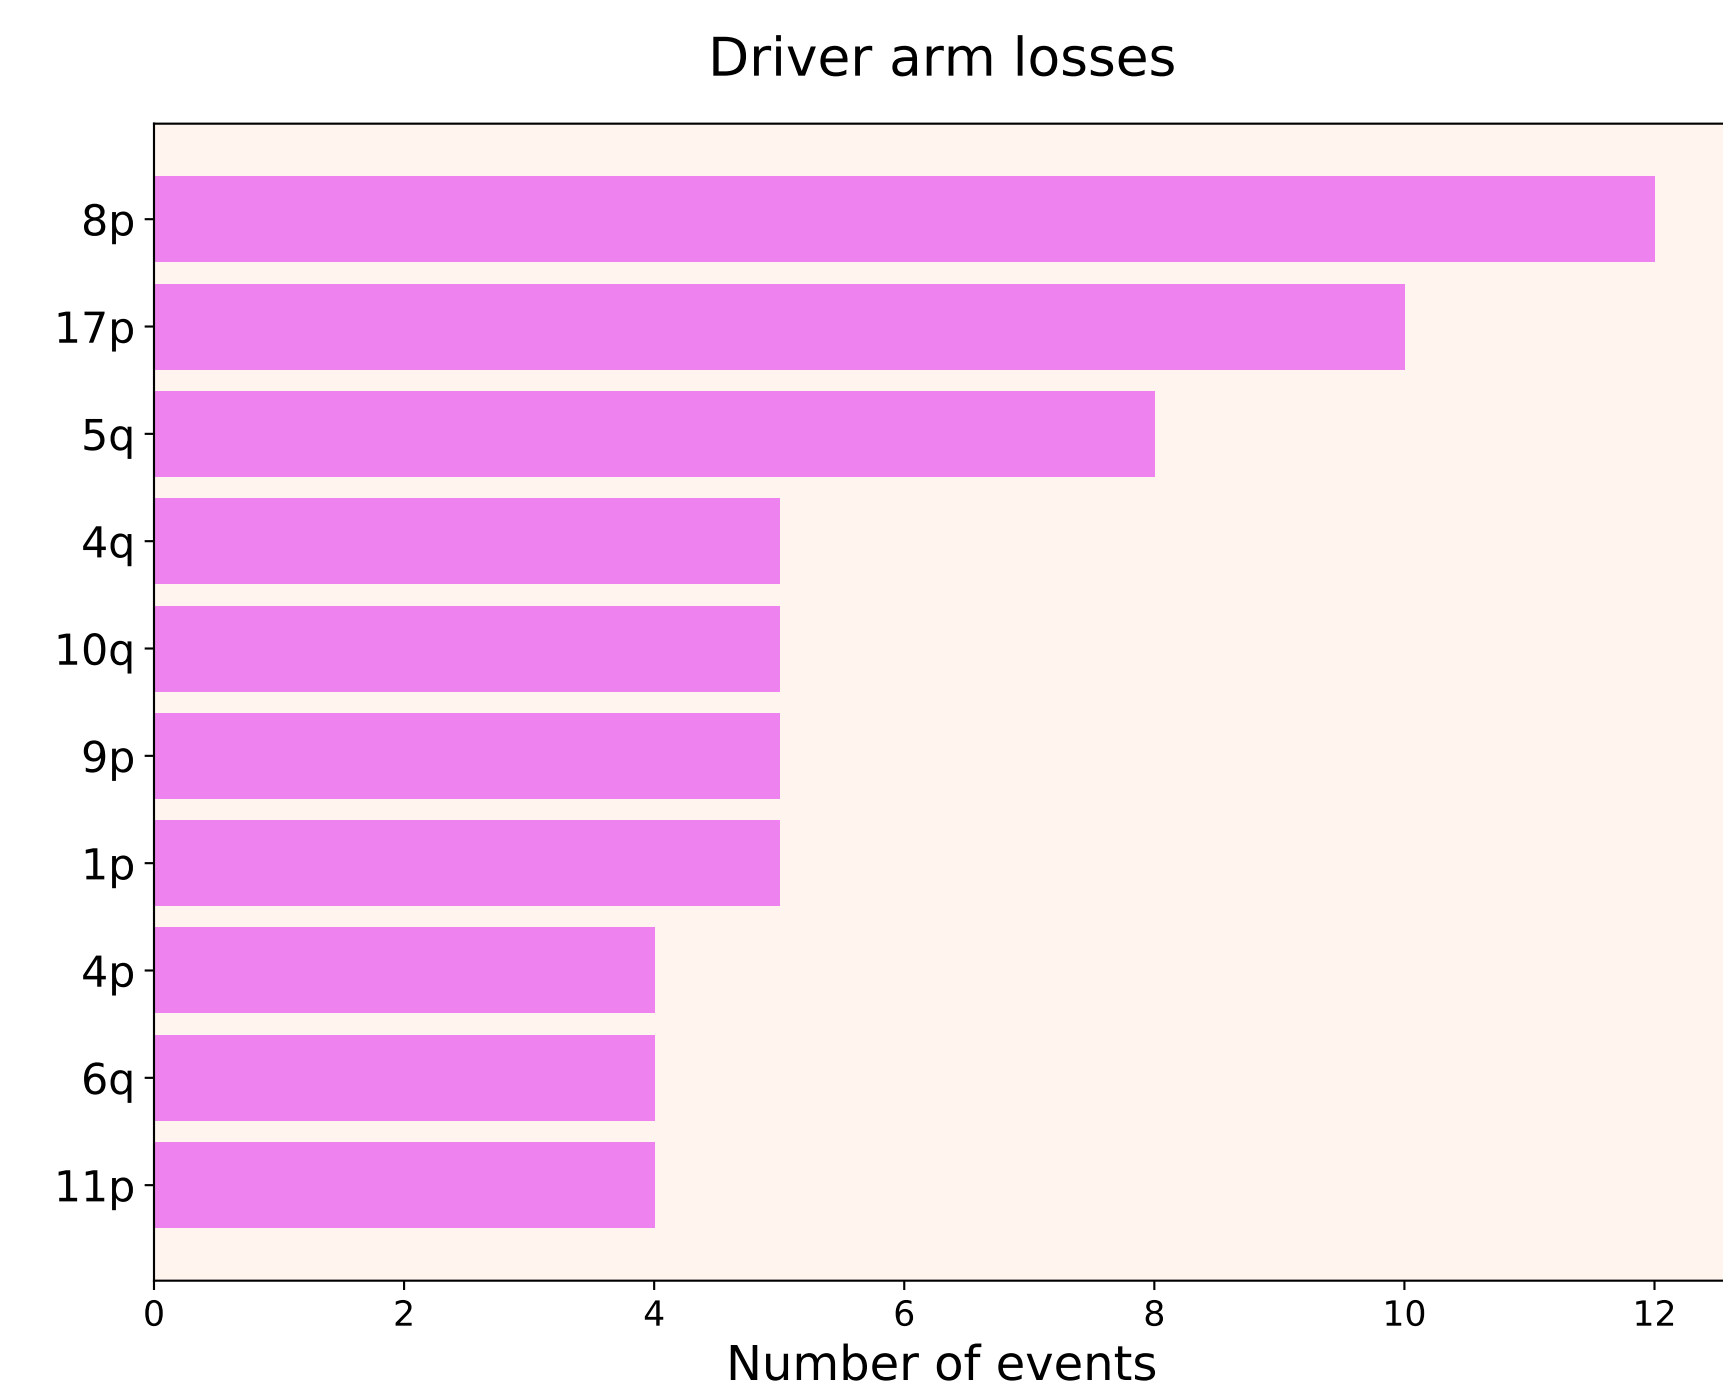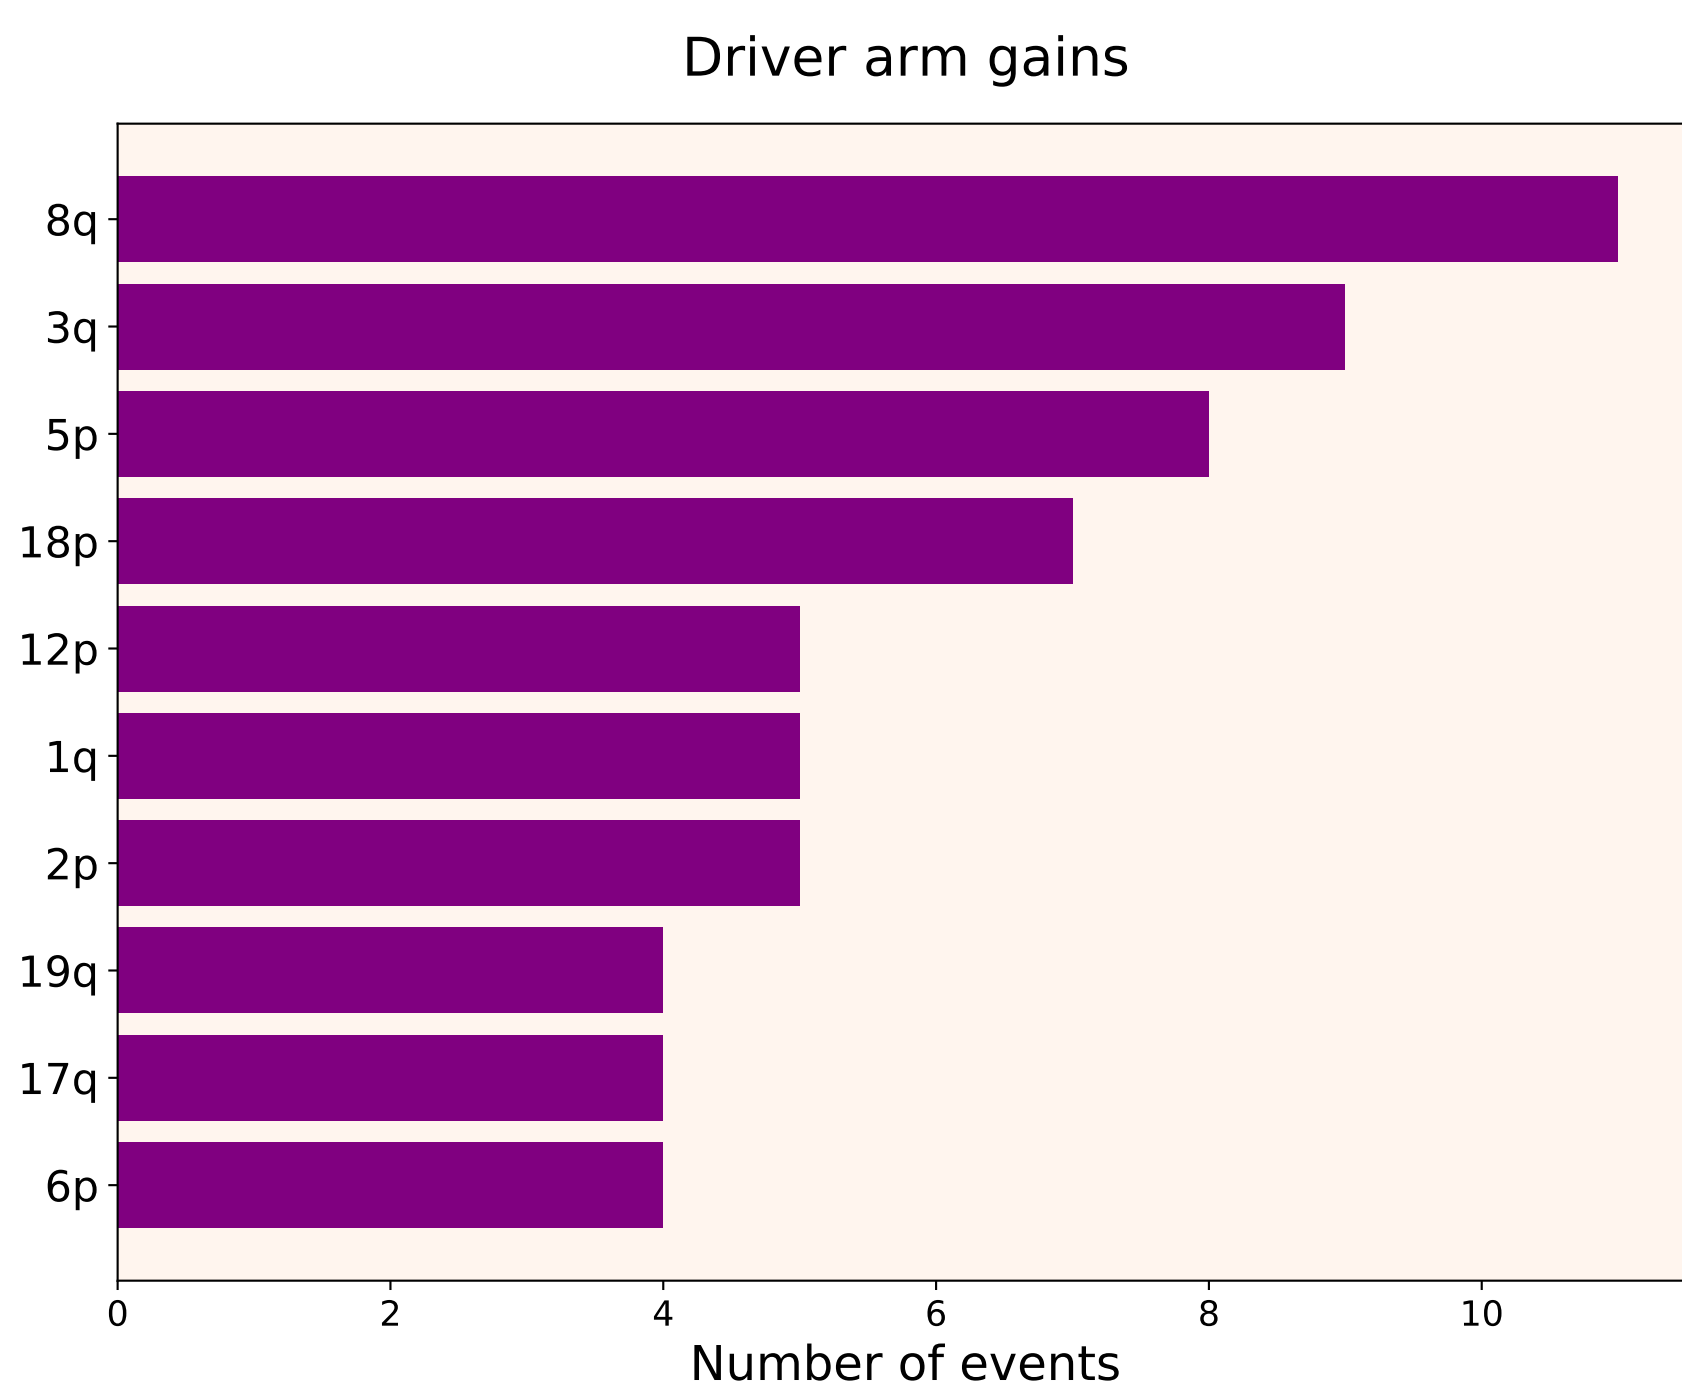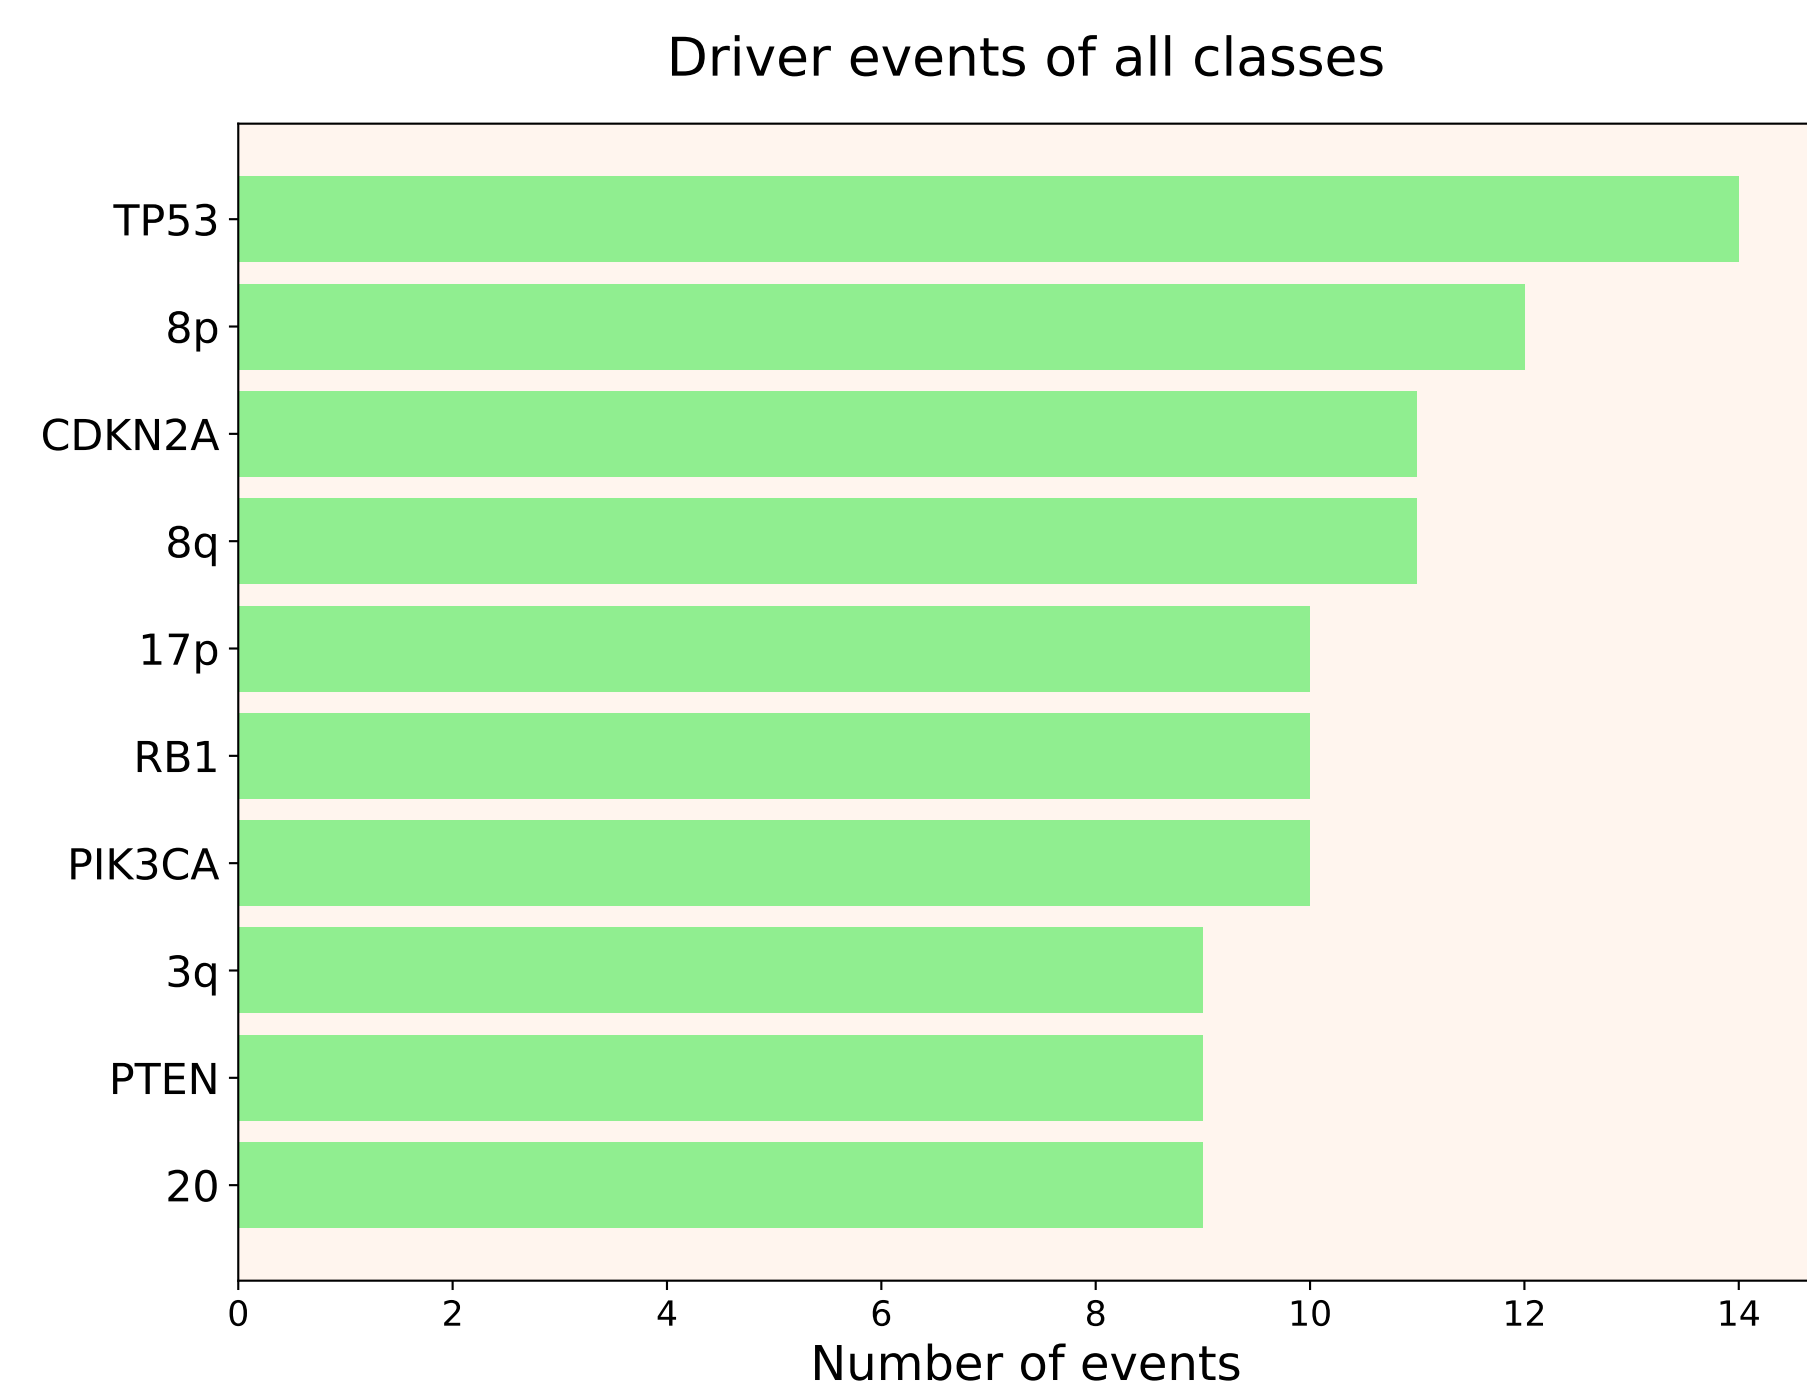

Supplement: Supplemental_Data_S1.zip [file Supplemental_Data_S1.zip]

# TGCT



Supplement: Supplemental_Data_S1.zip [file Supplemental_Data_S1.zip]

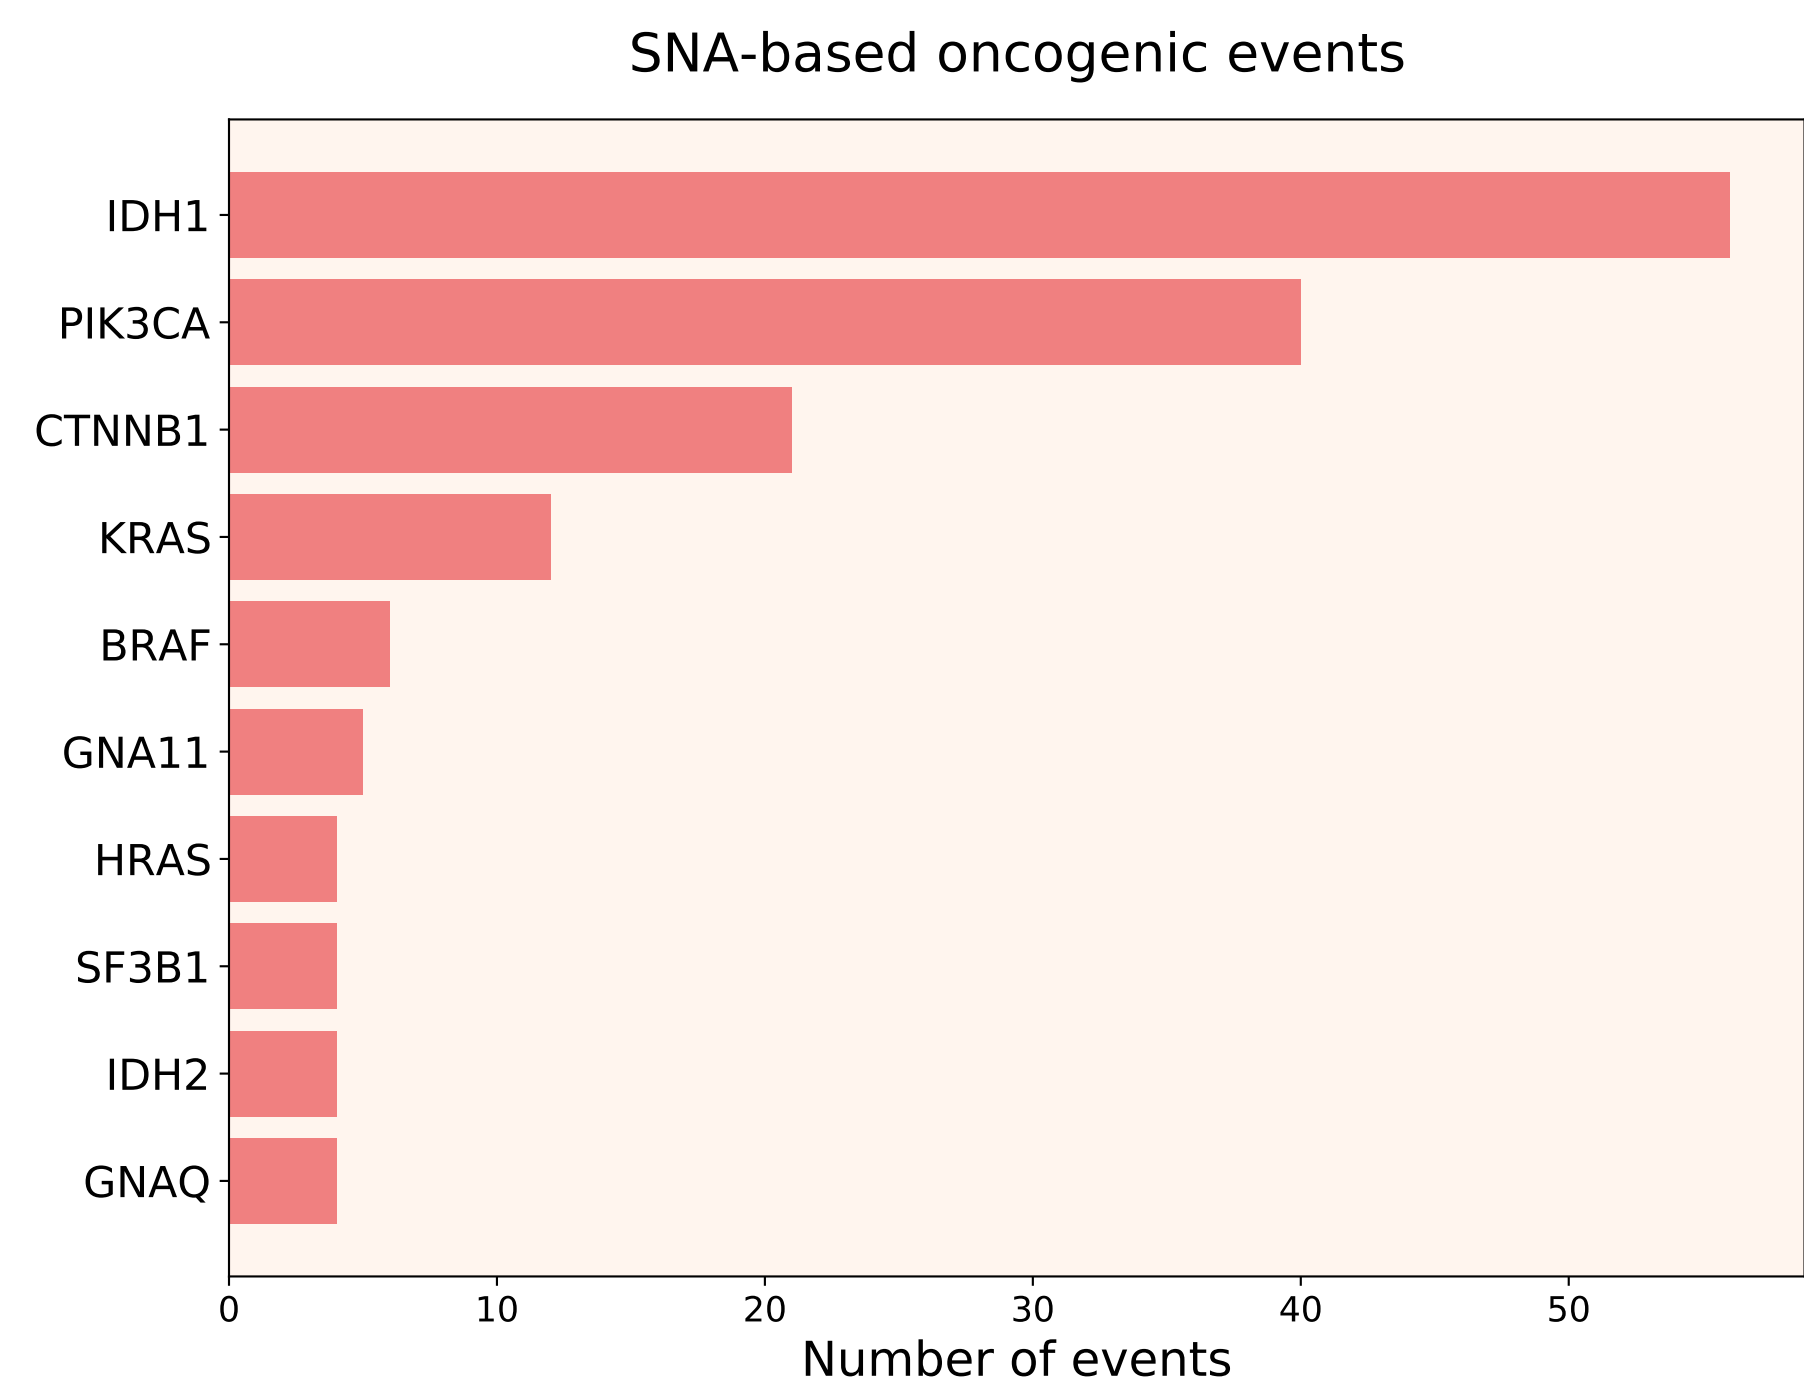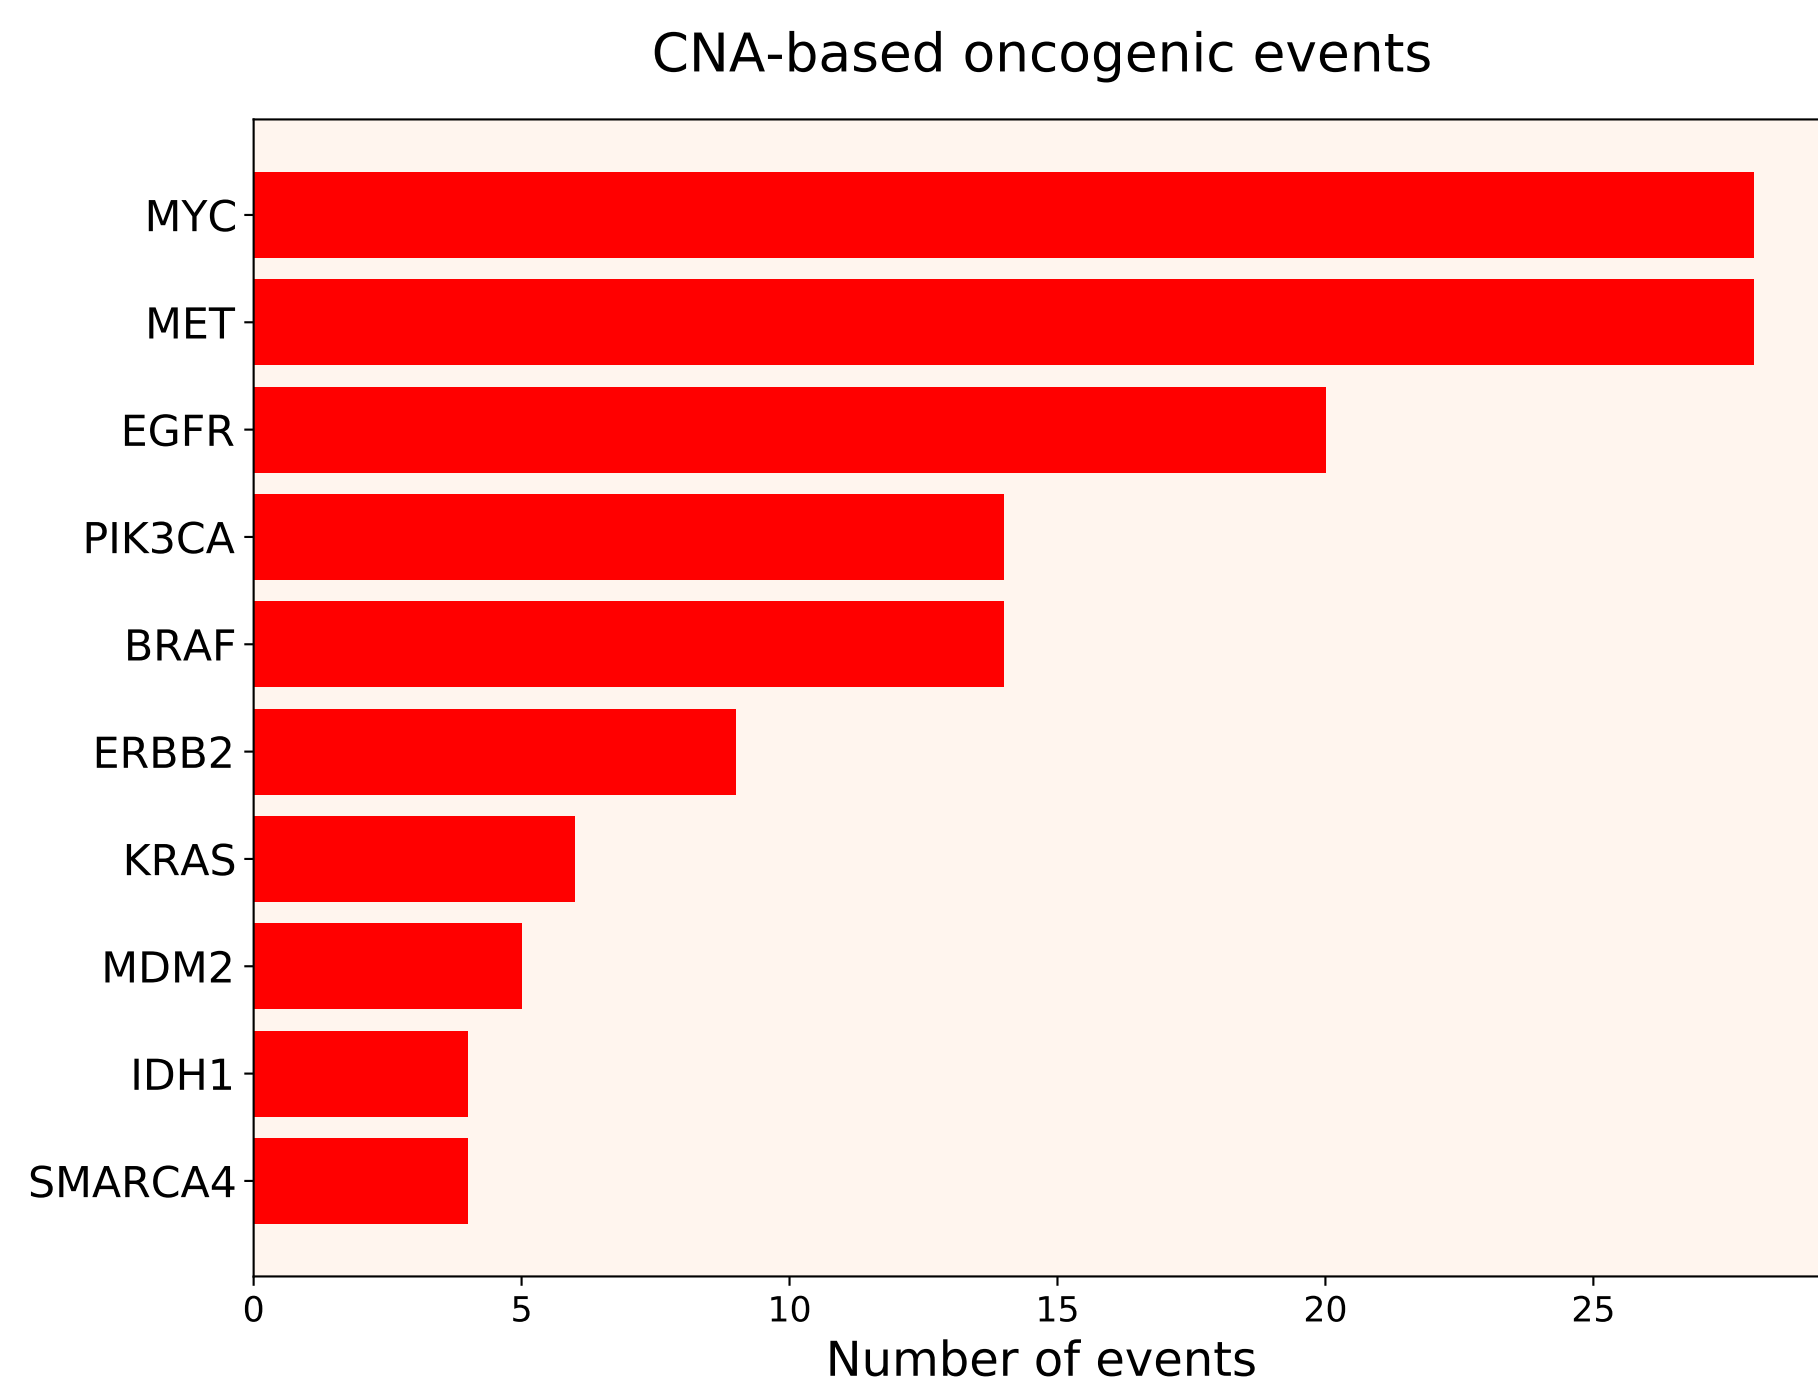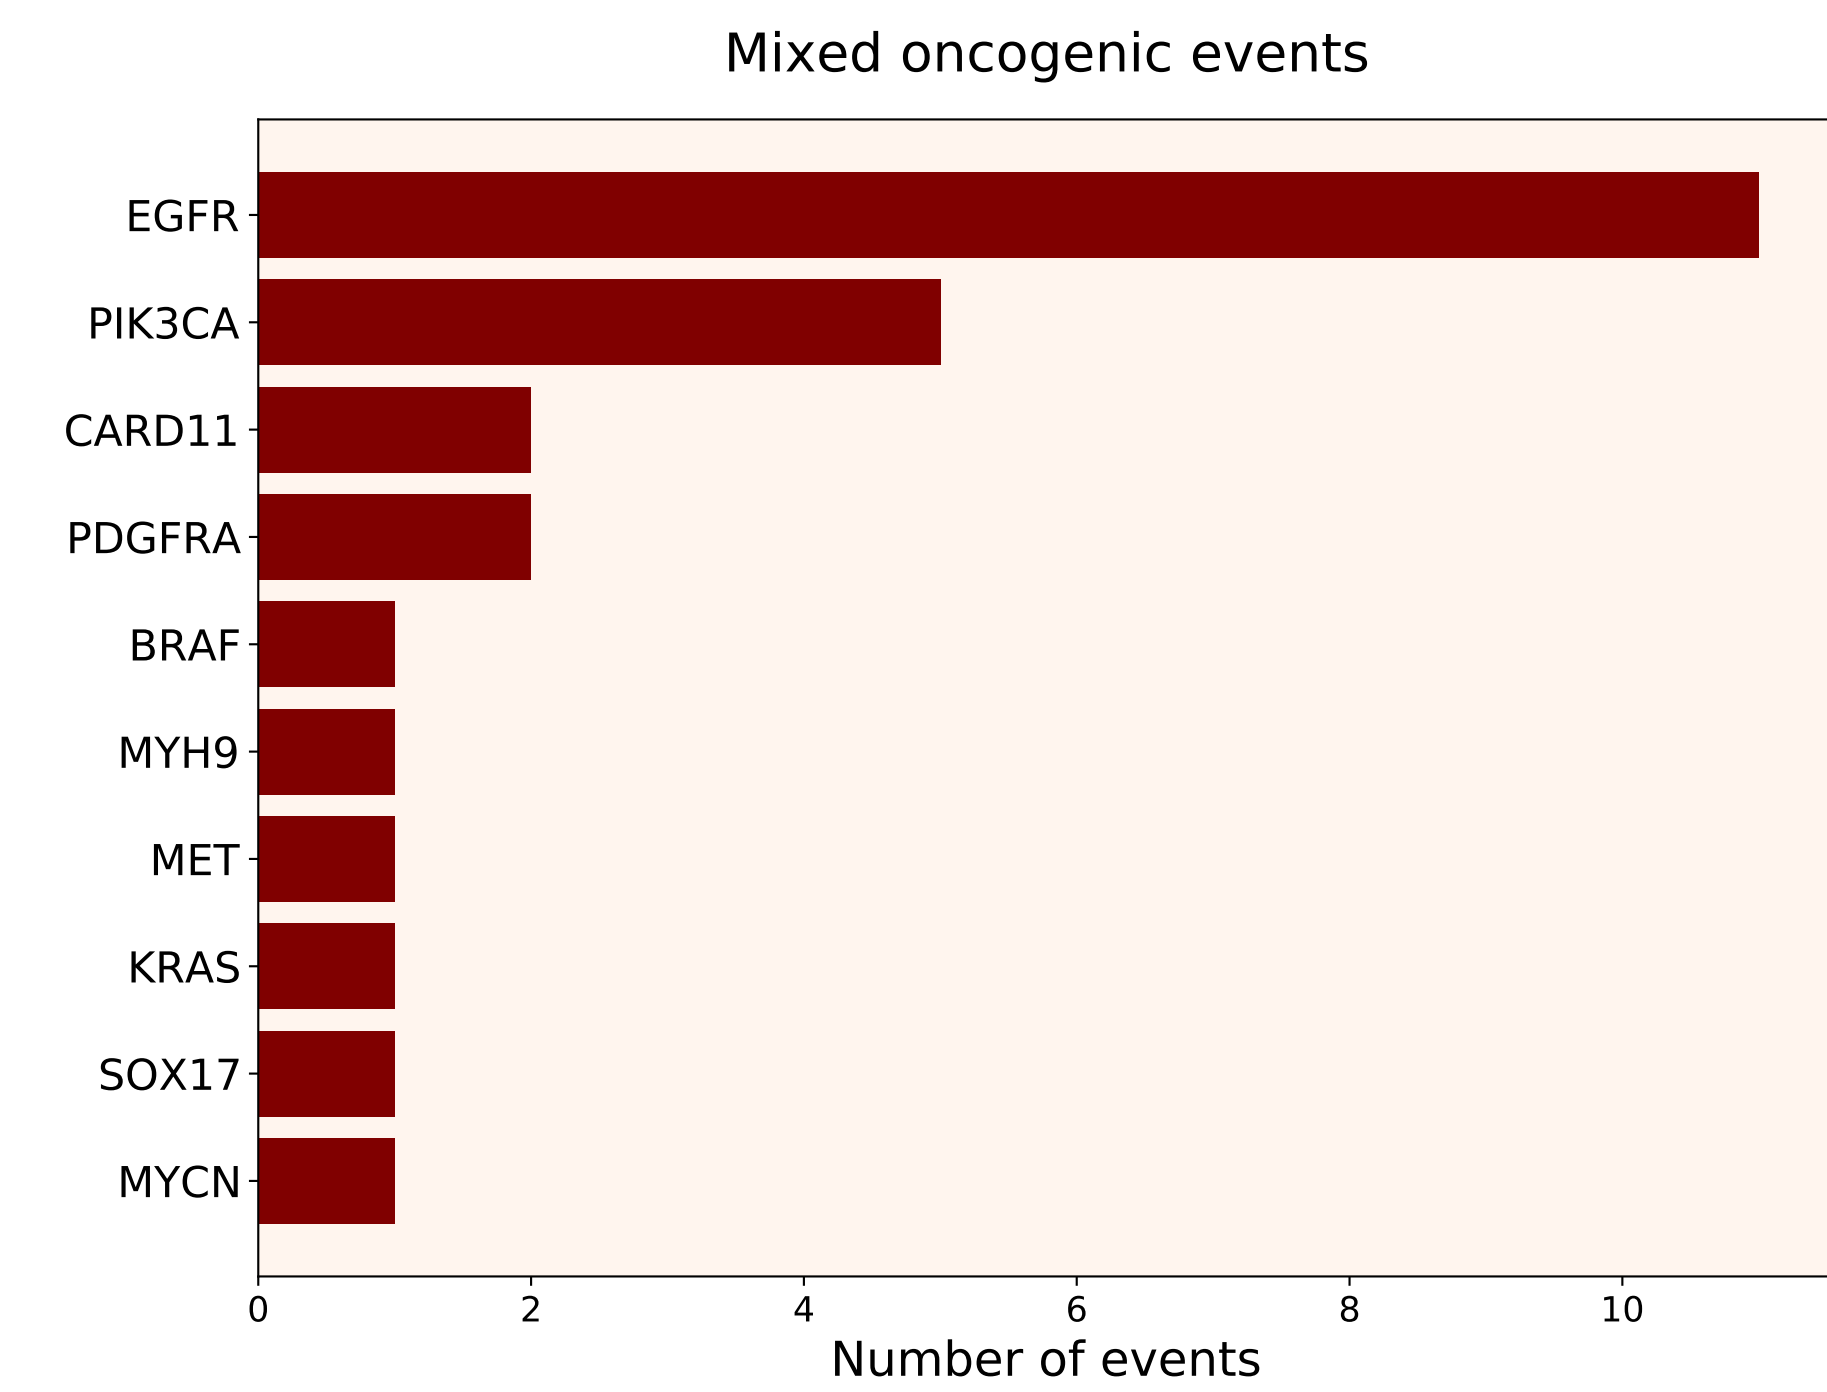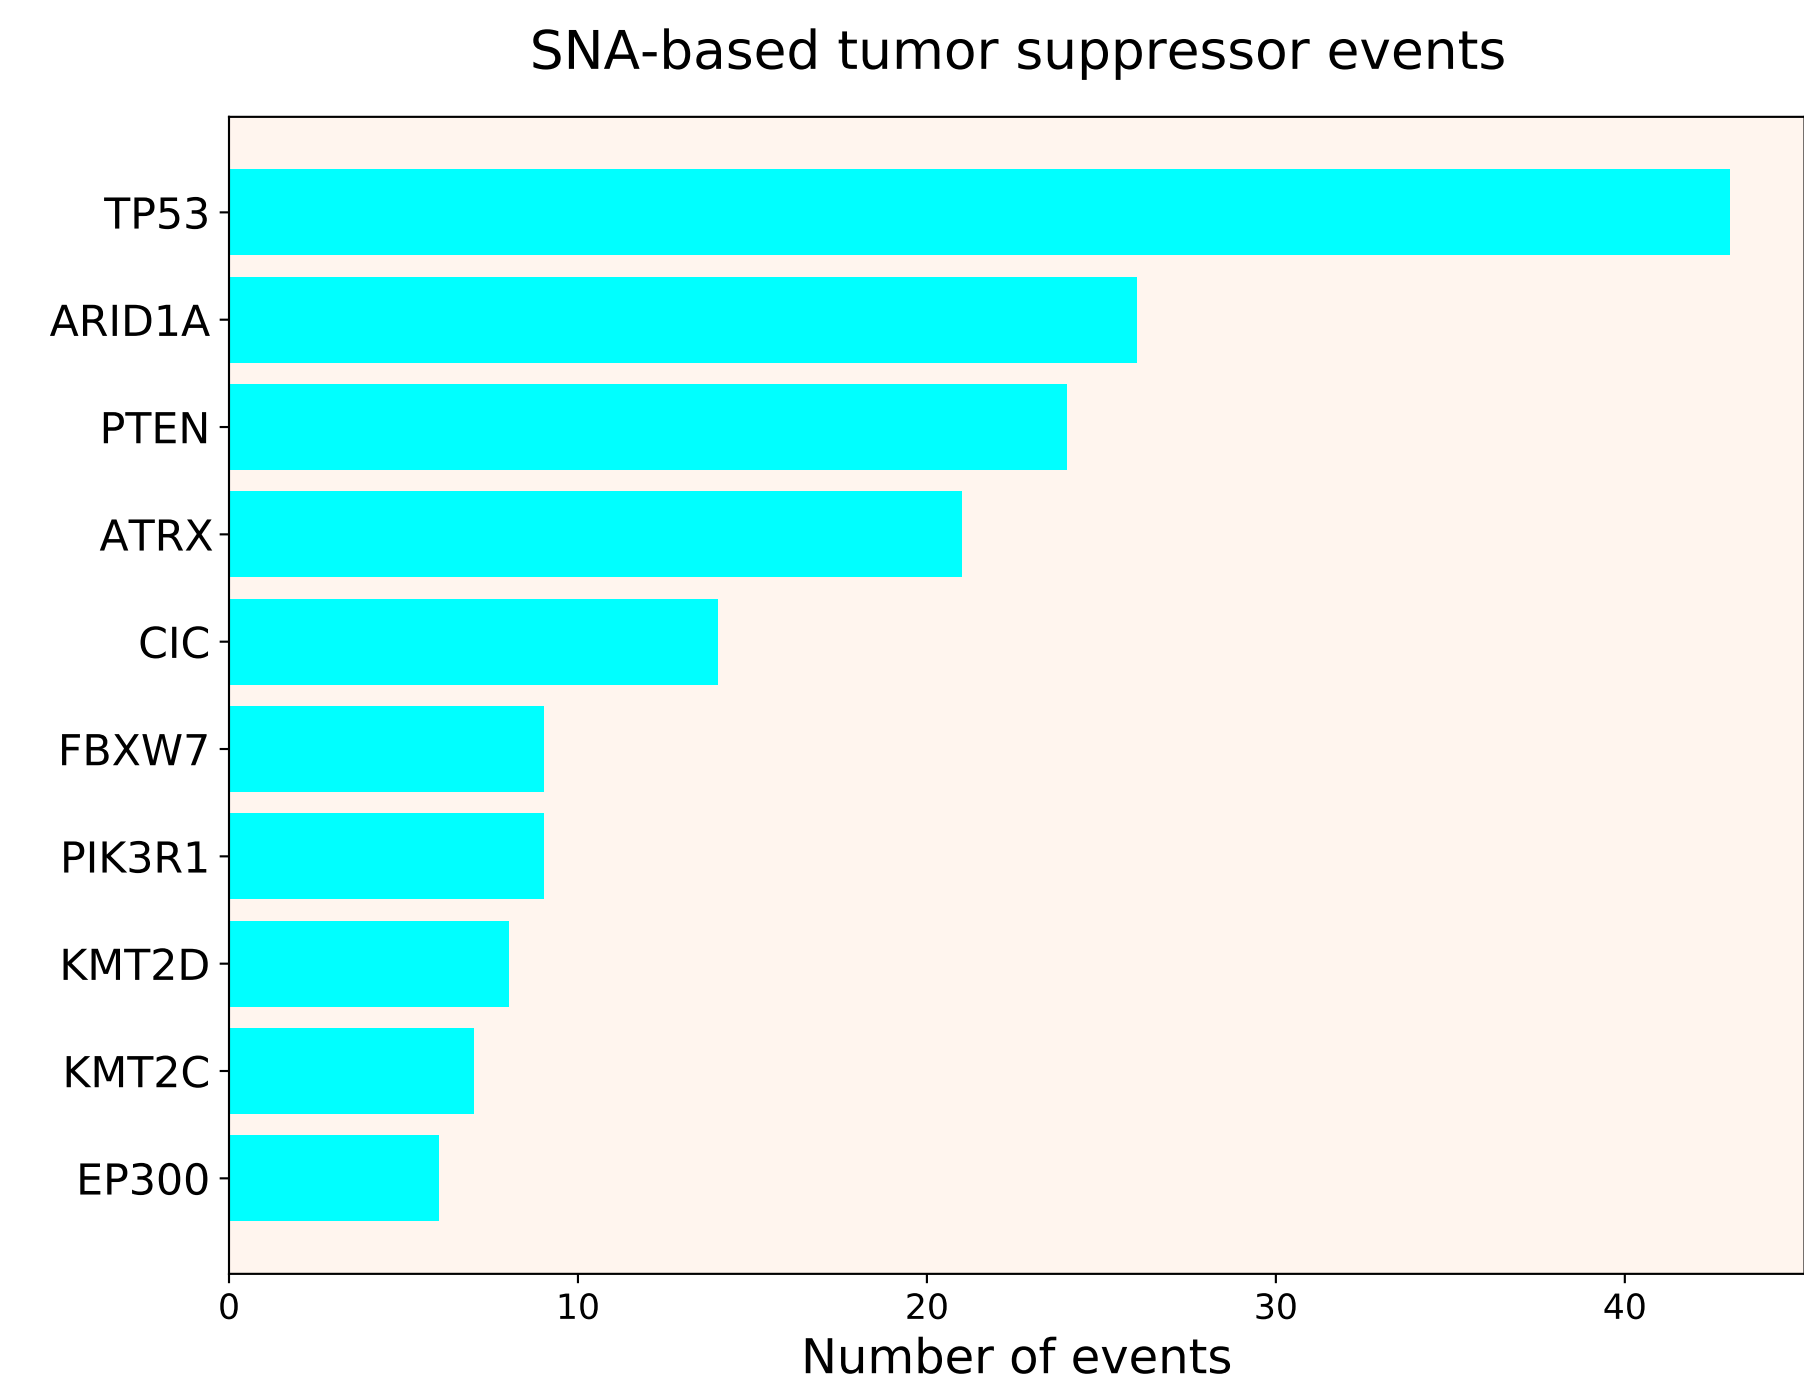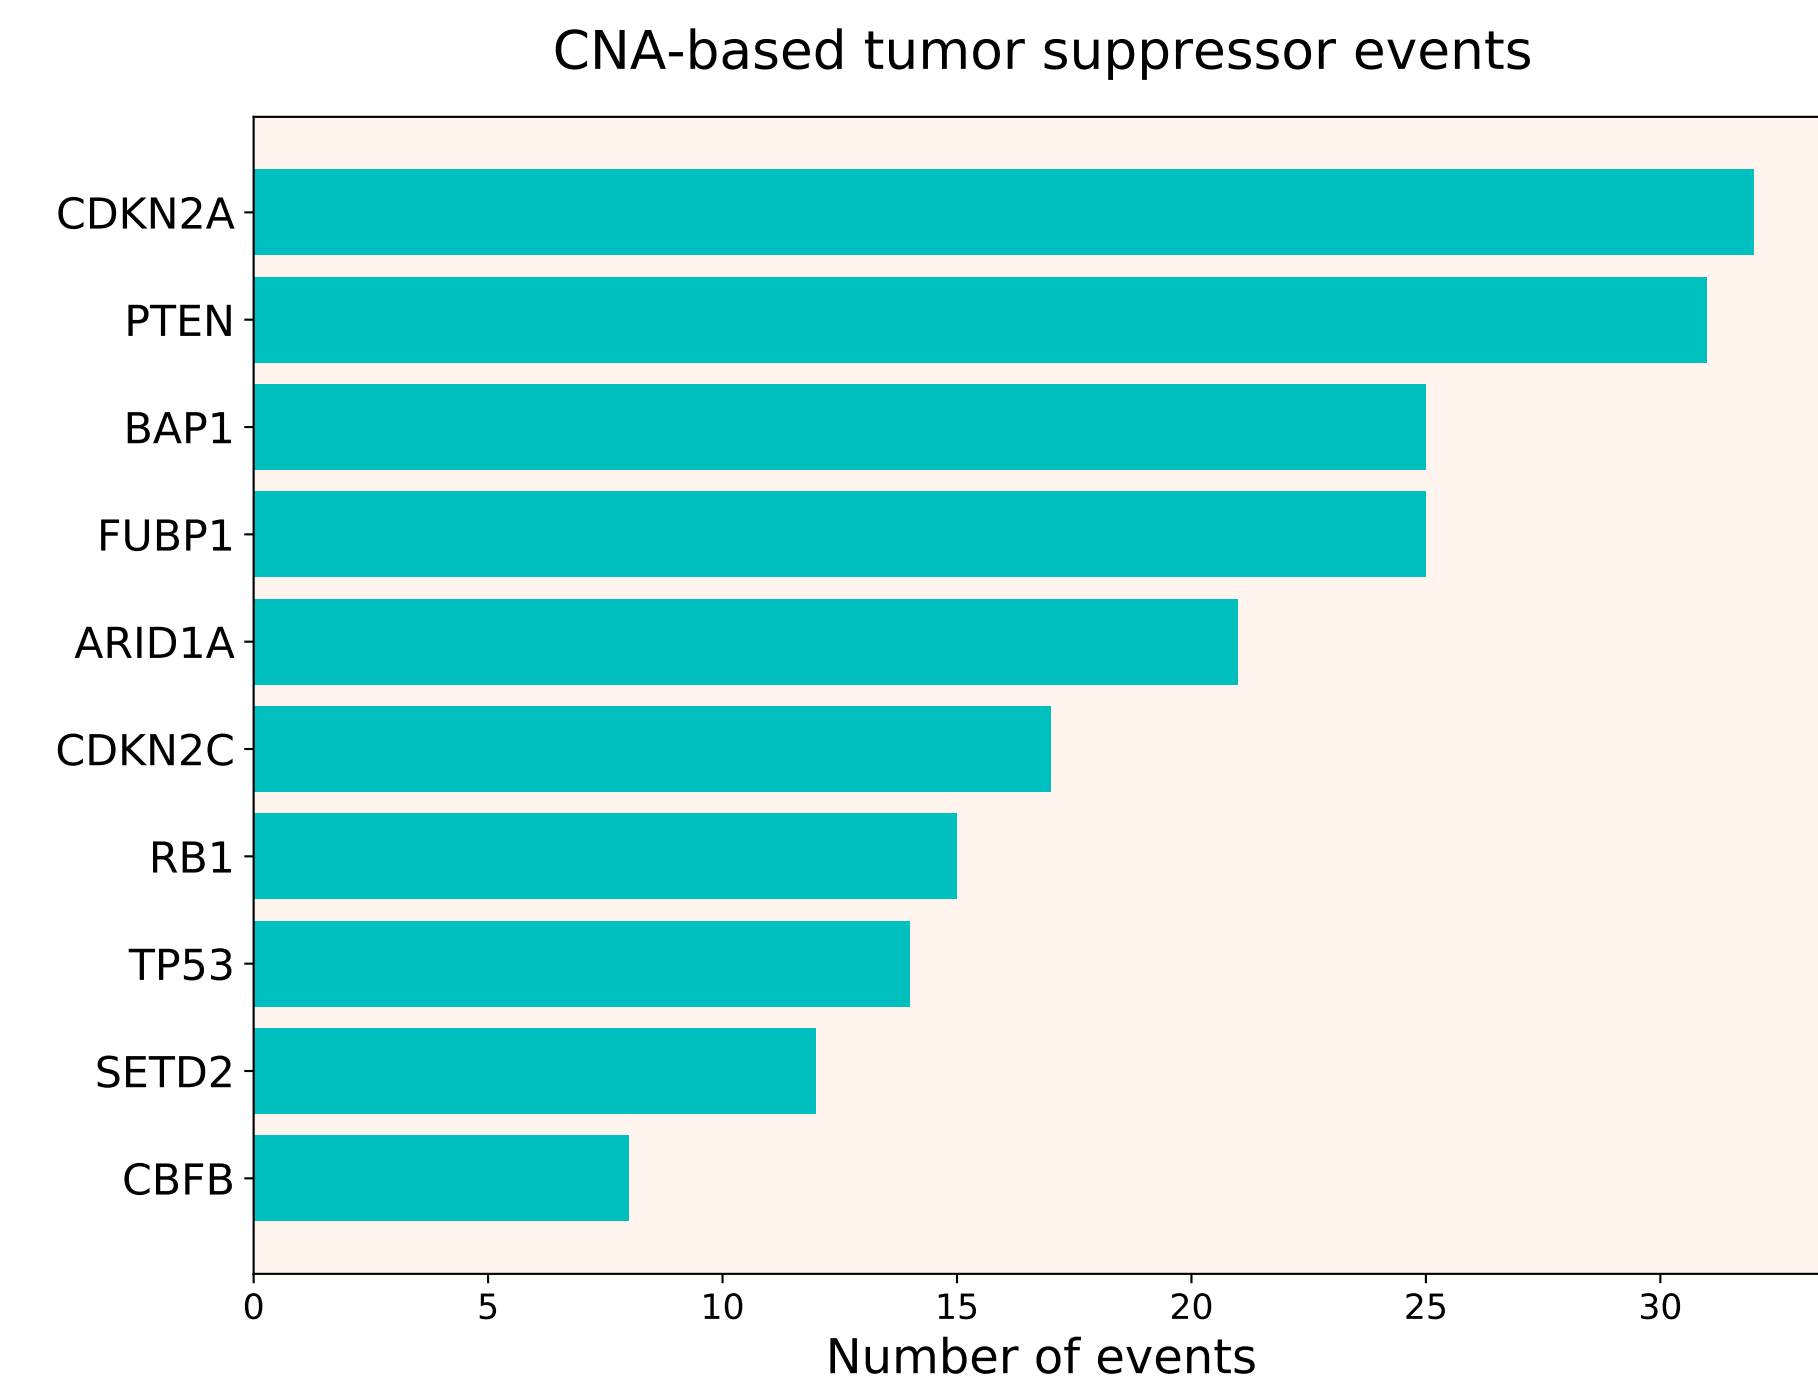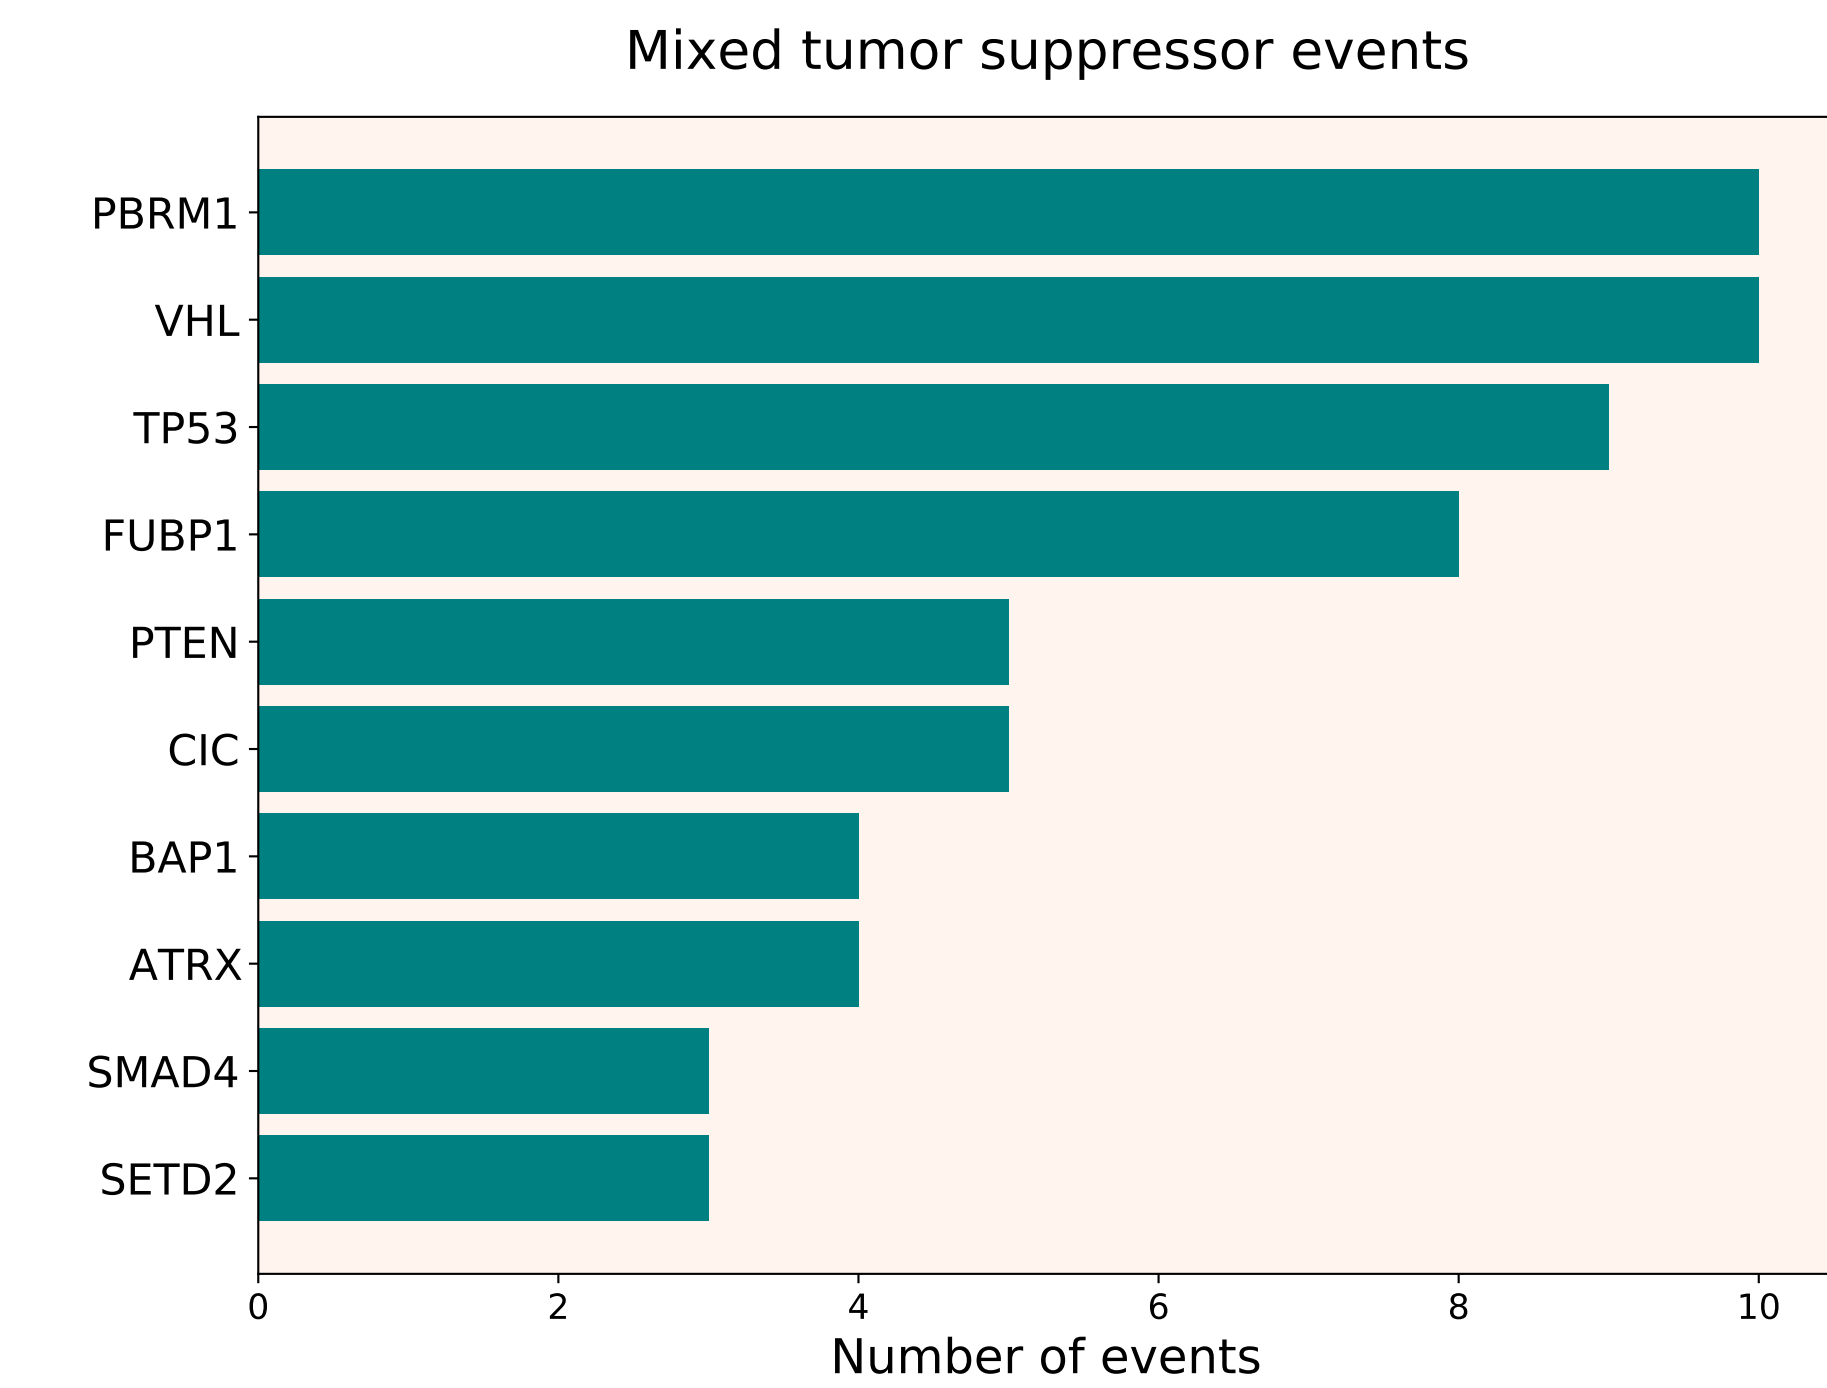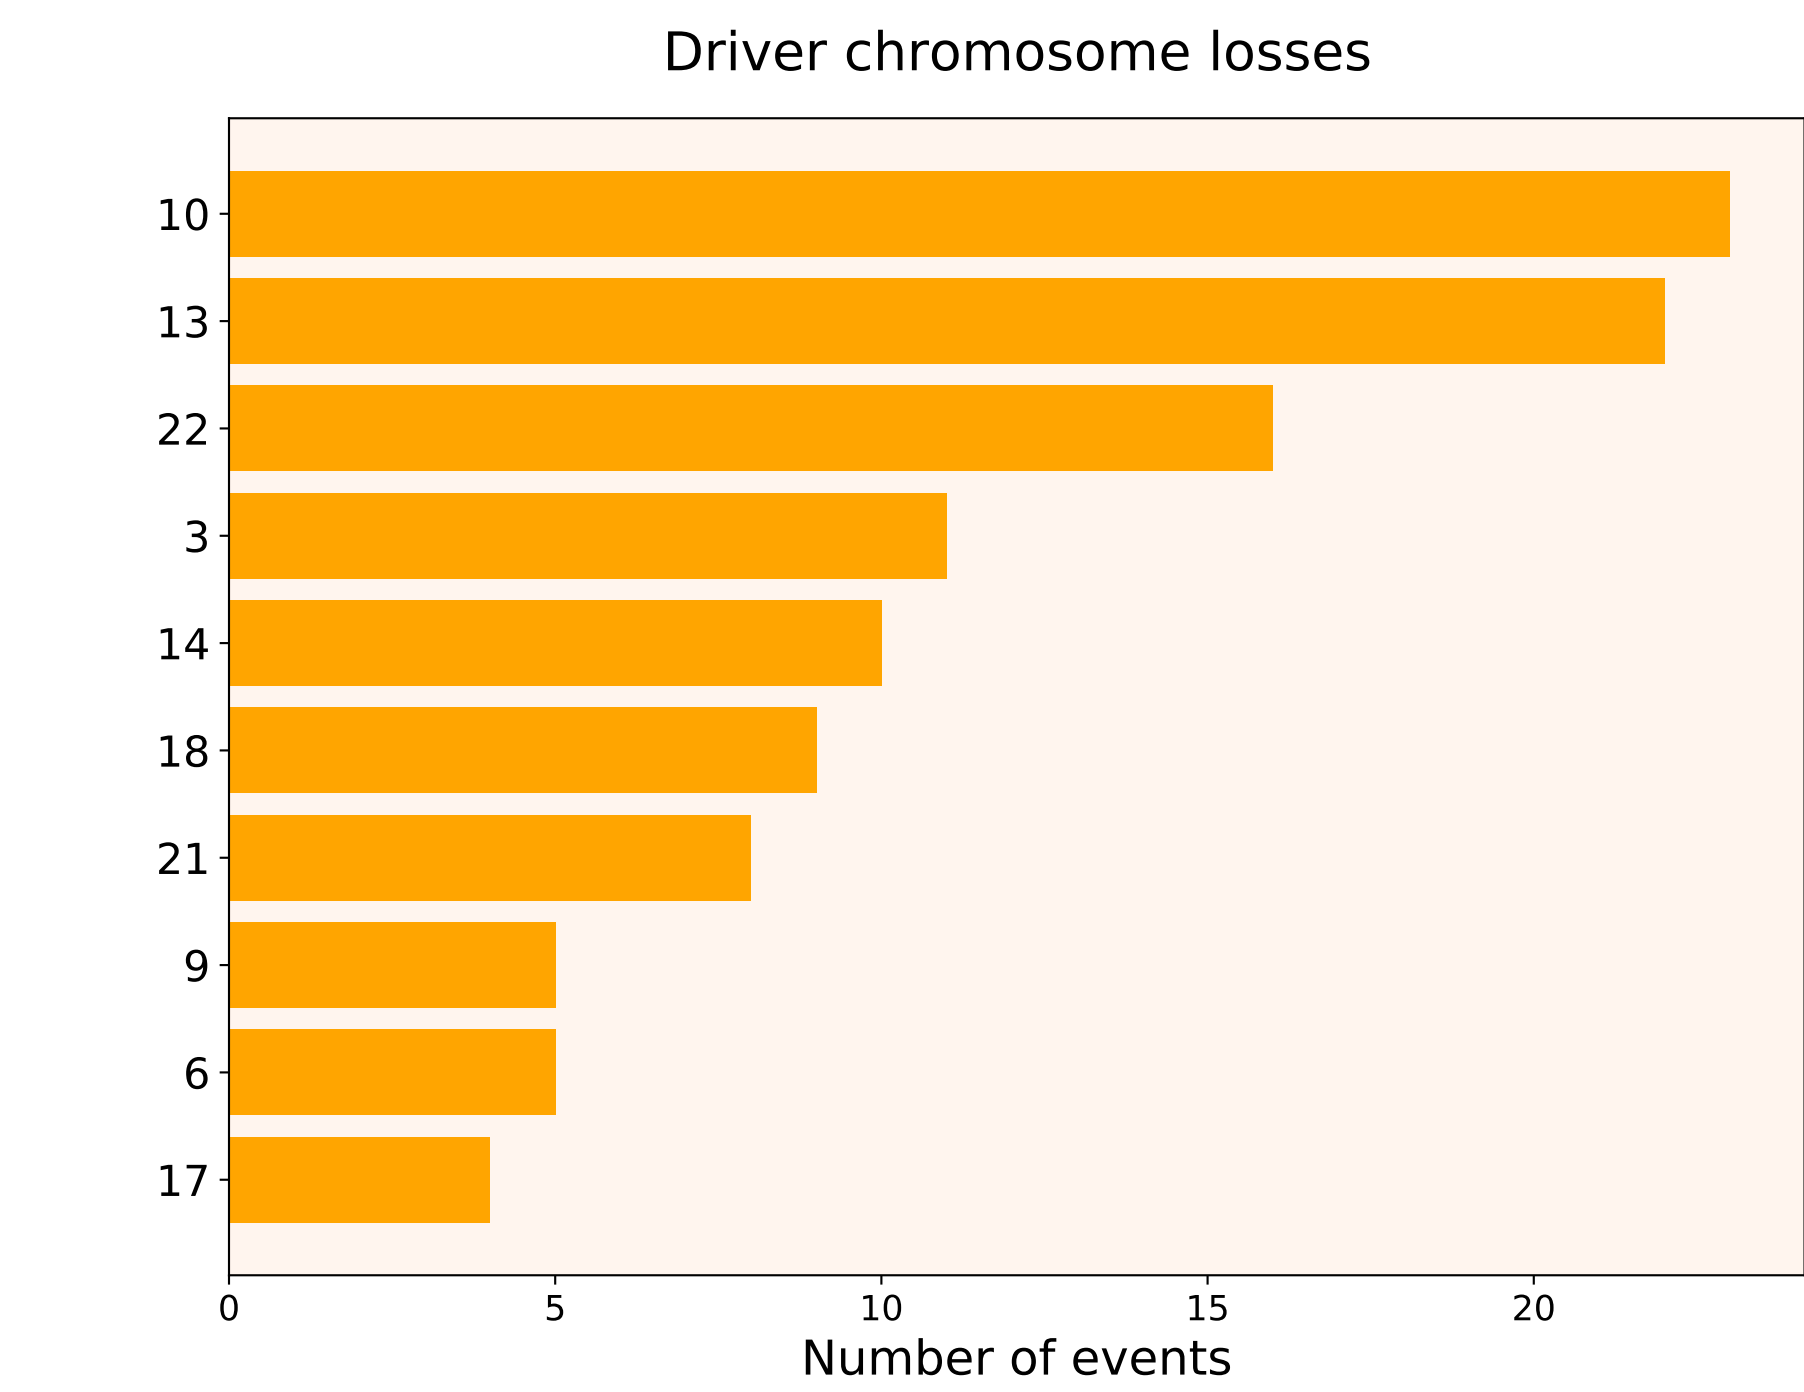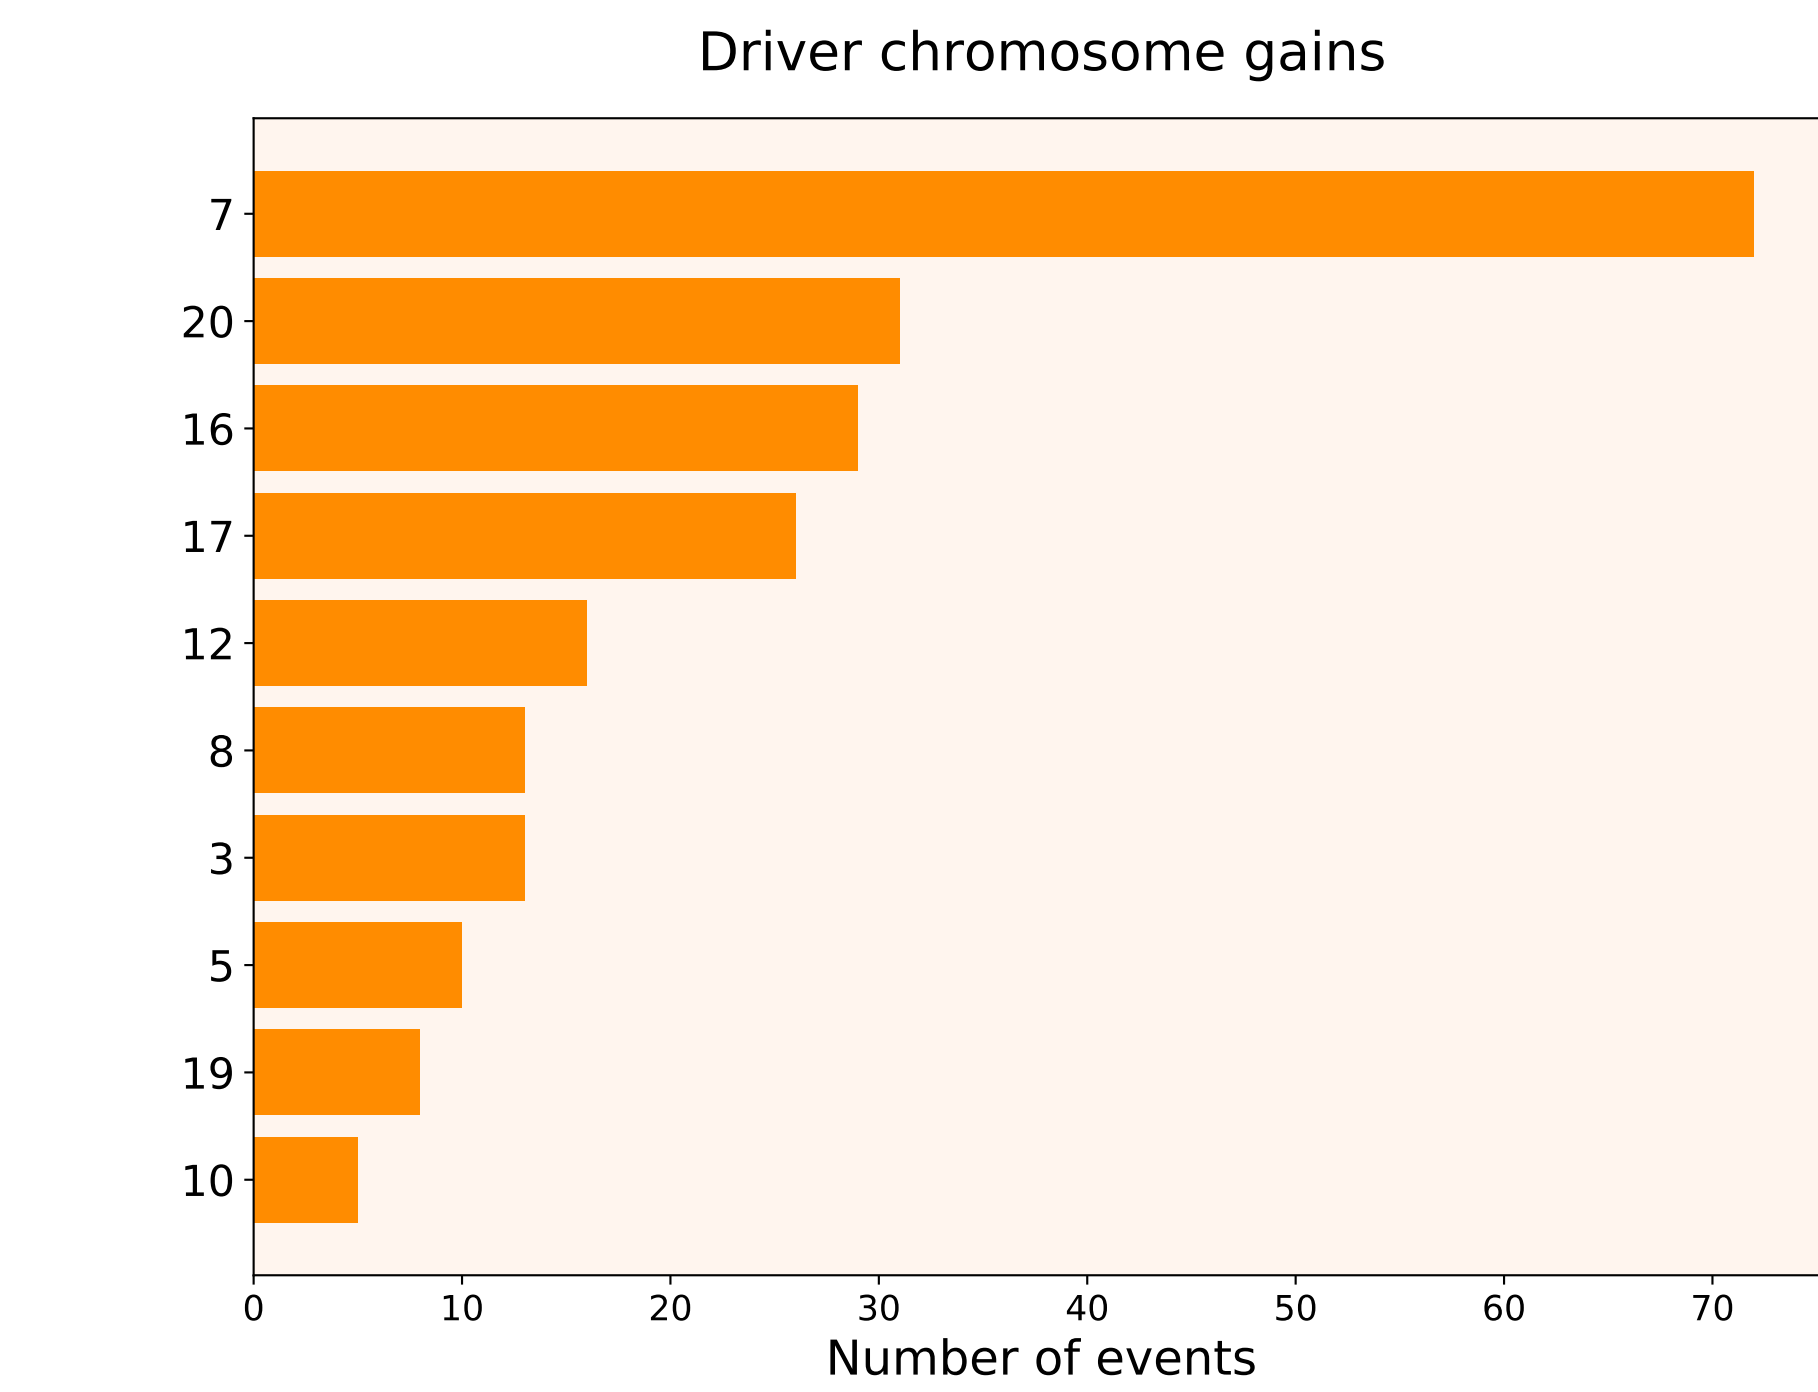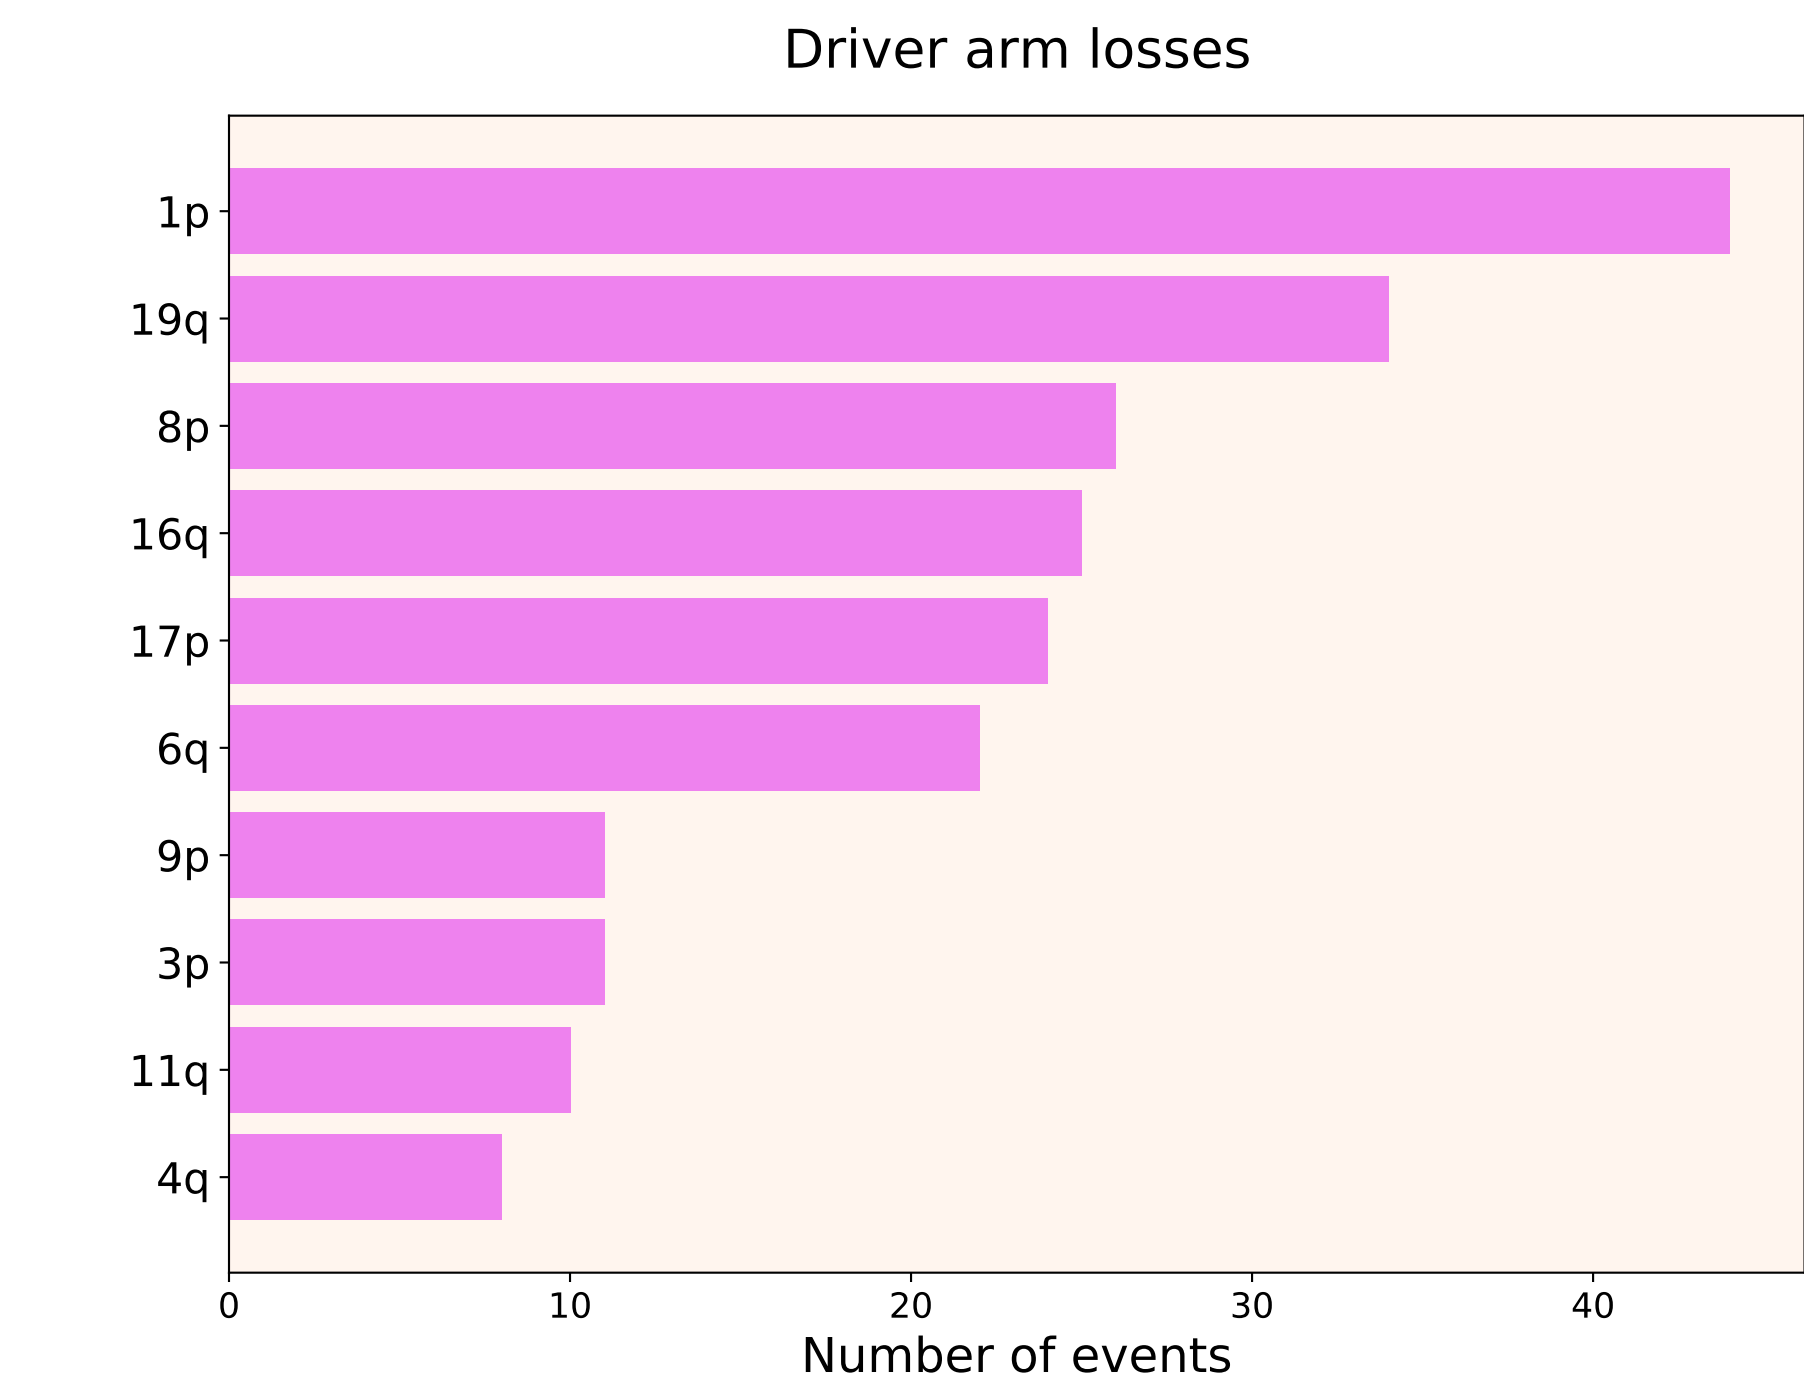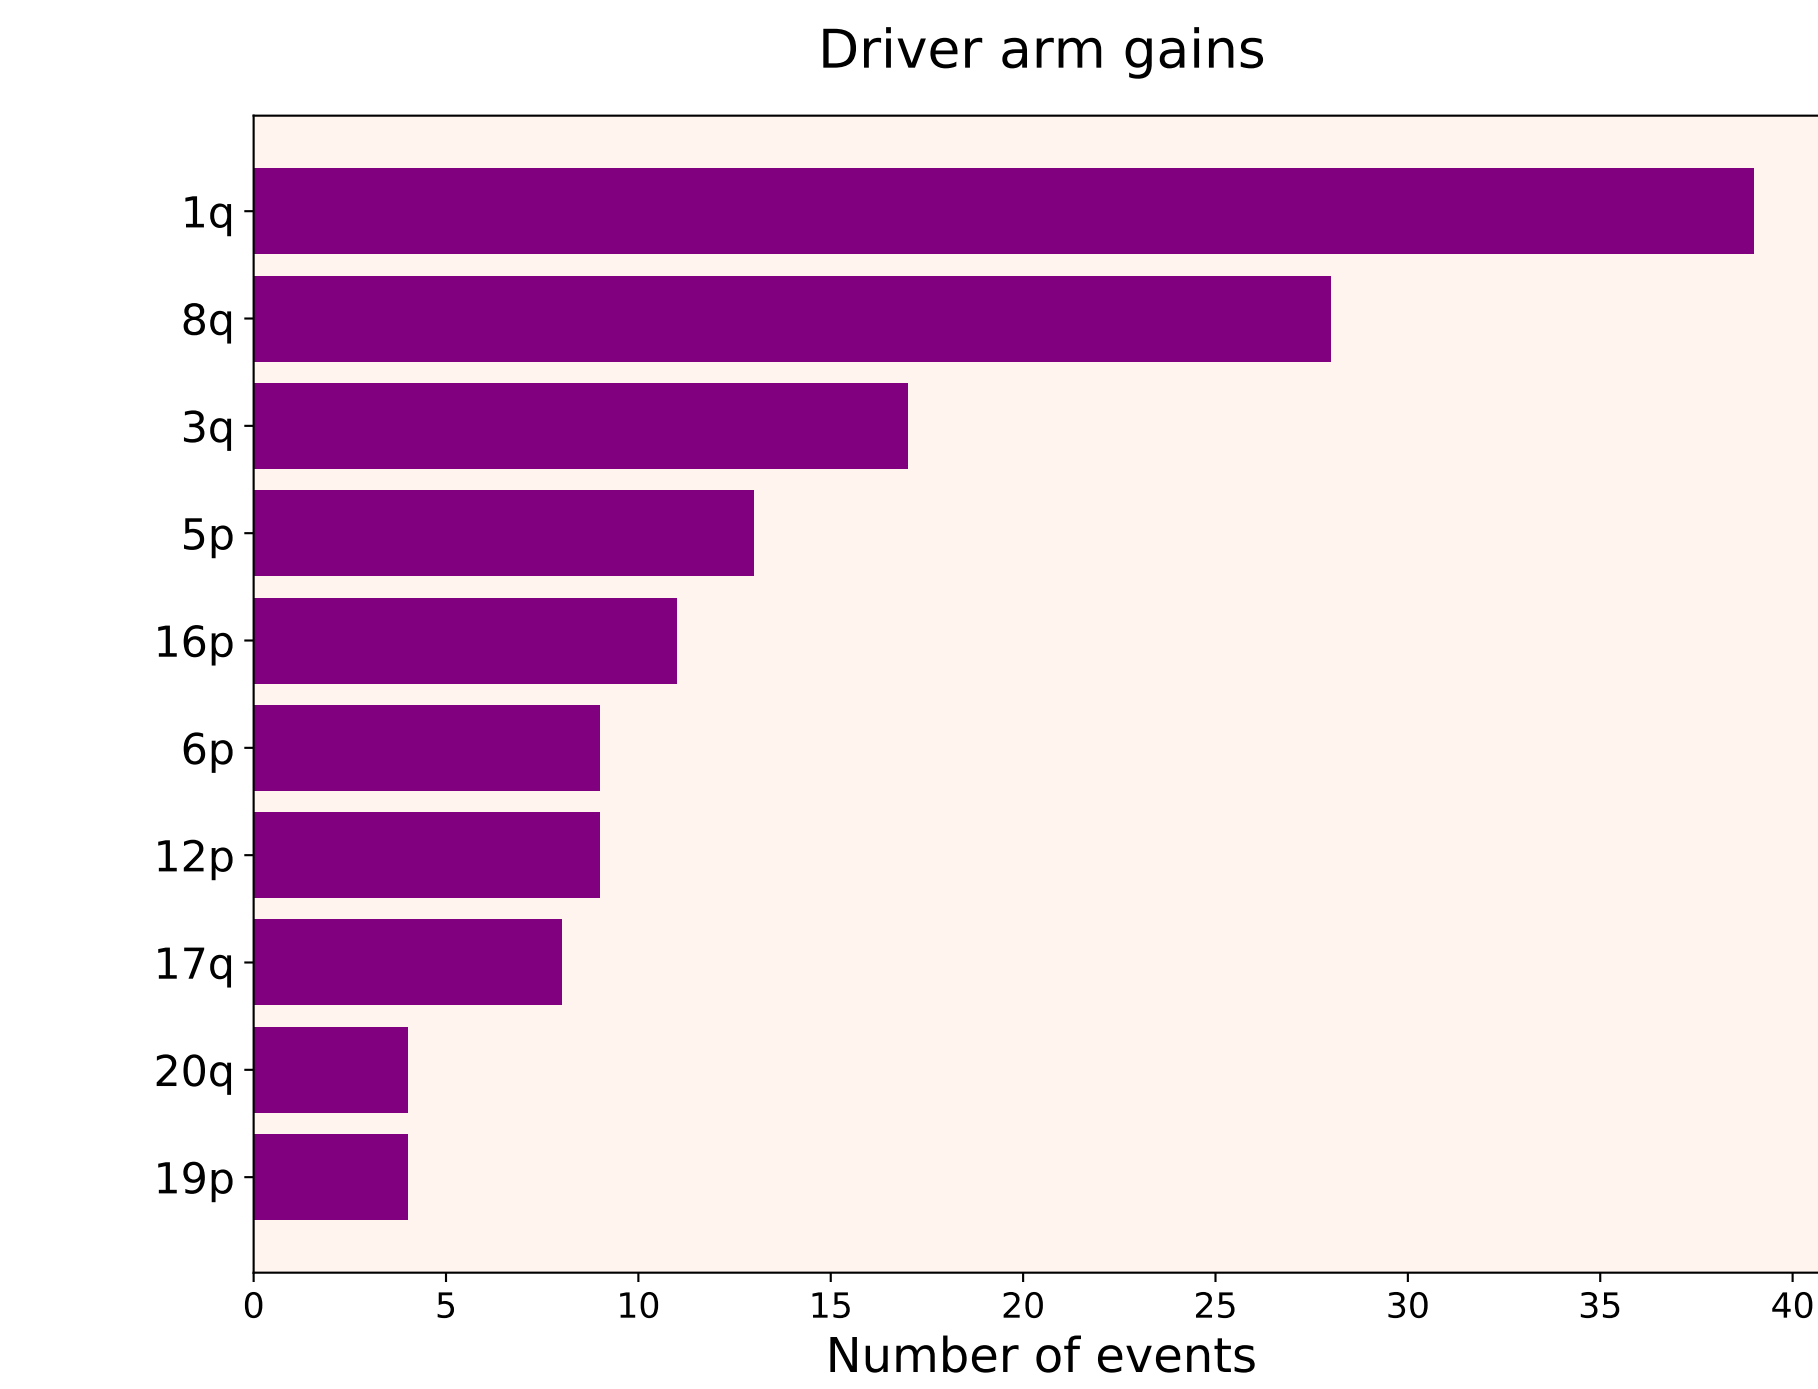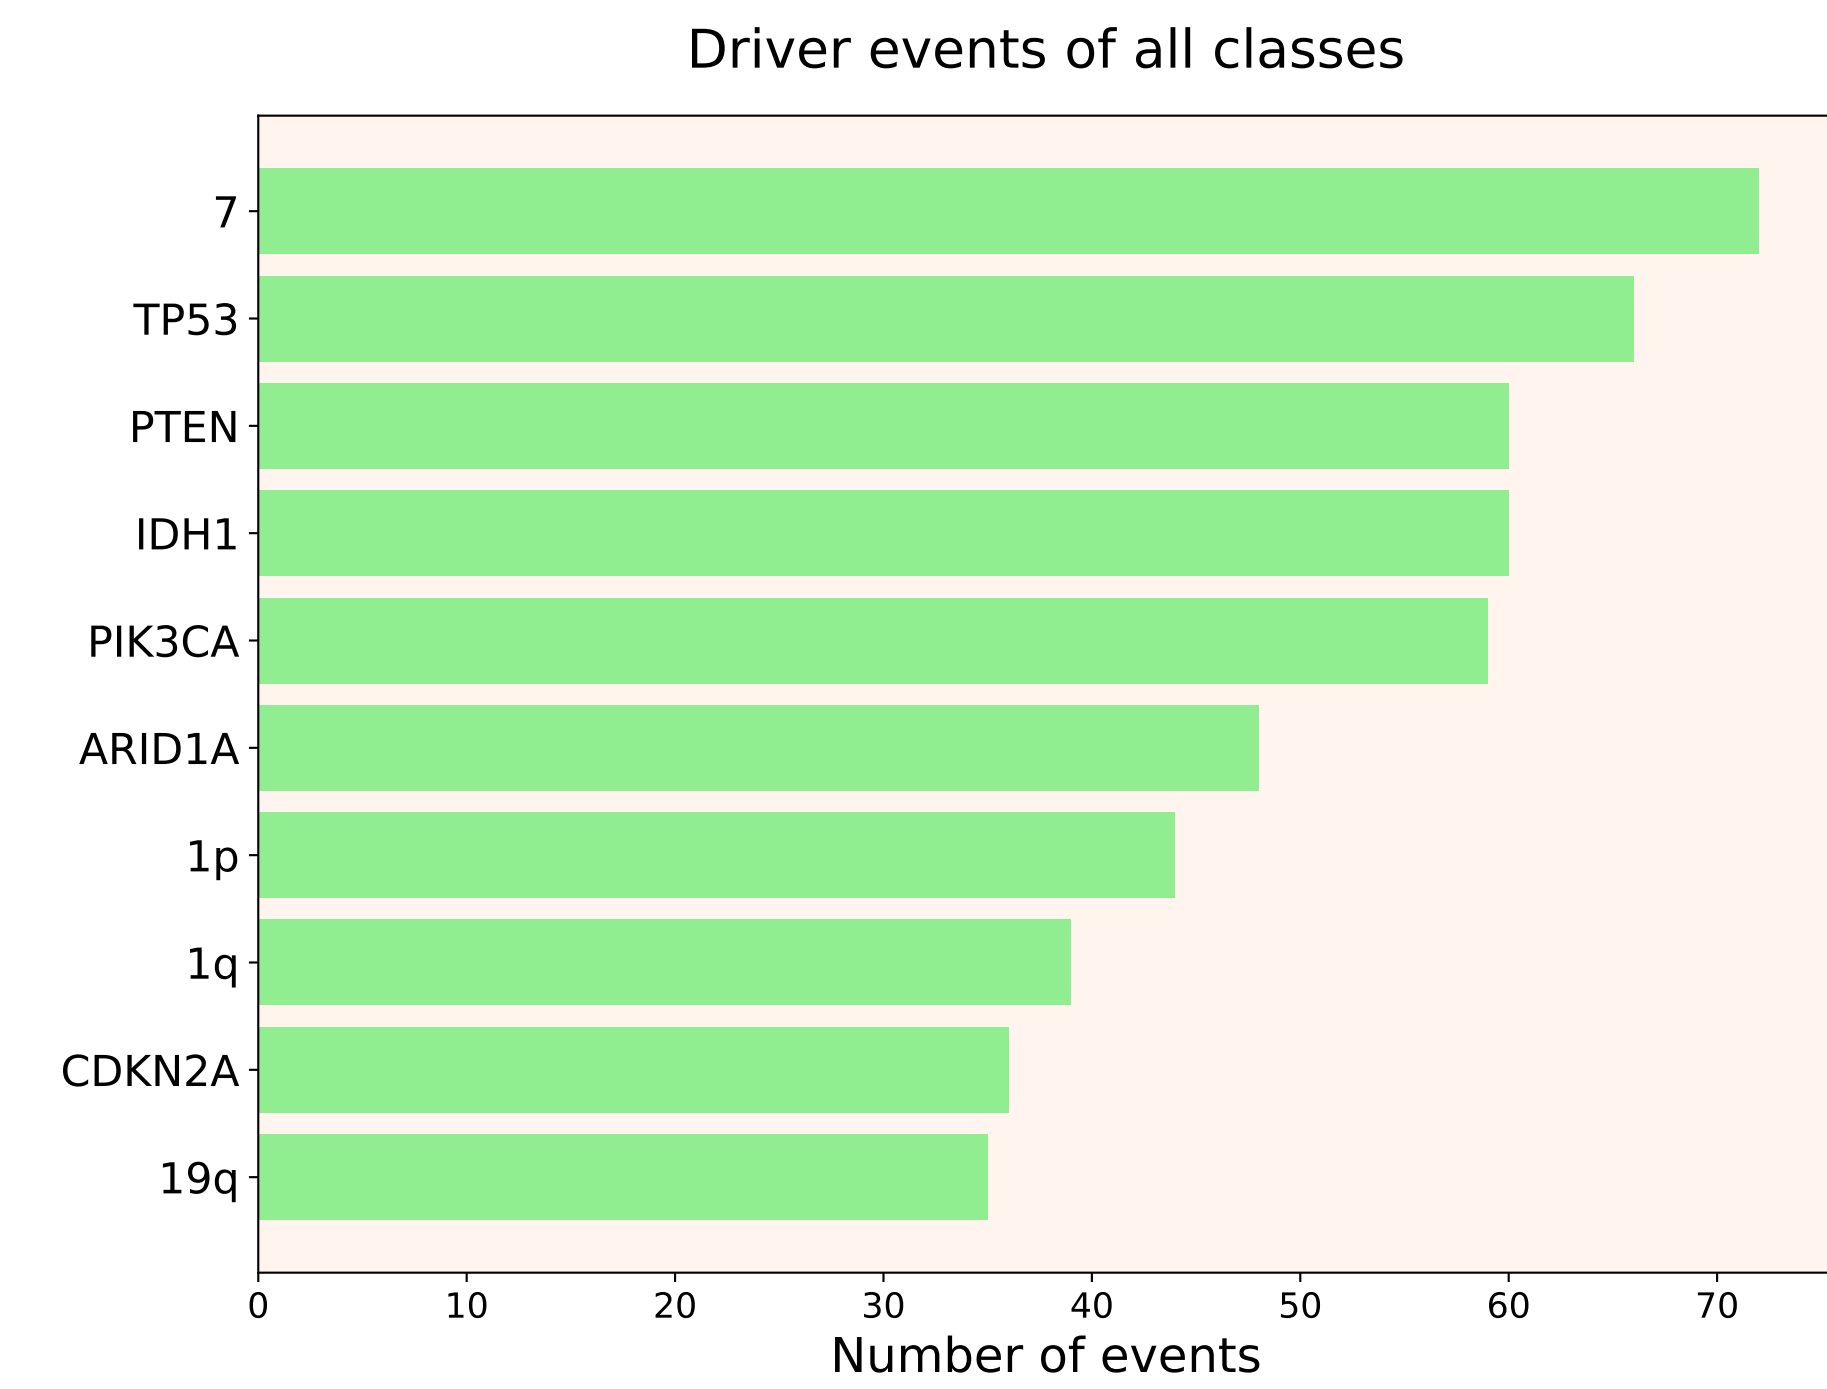

Supplement: Supplemental_Data_S1.zip [file Supplemental_Data_S1.zip]

# THYM\_MALE

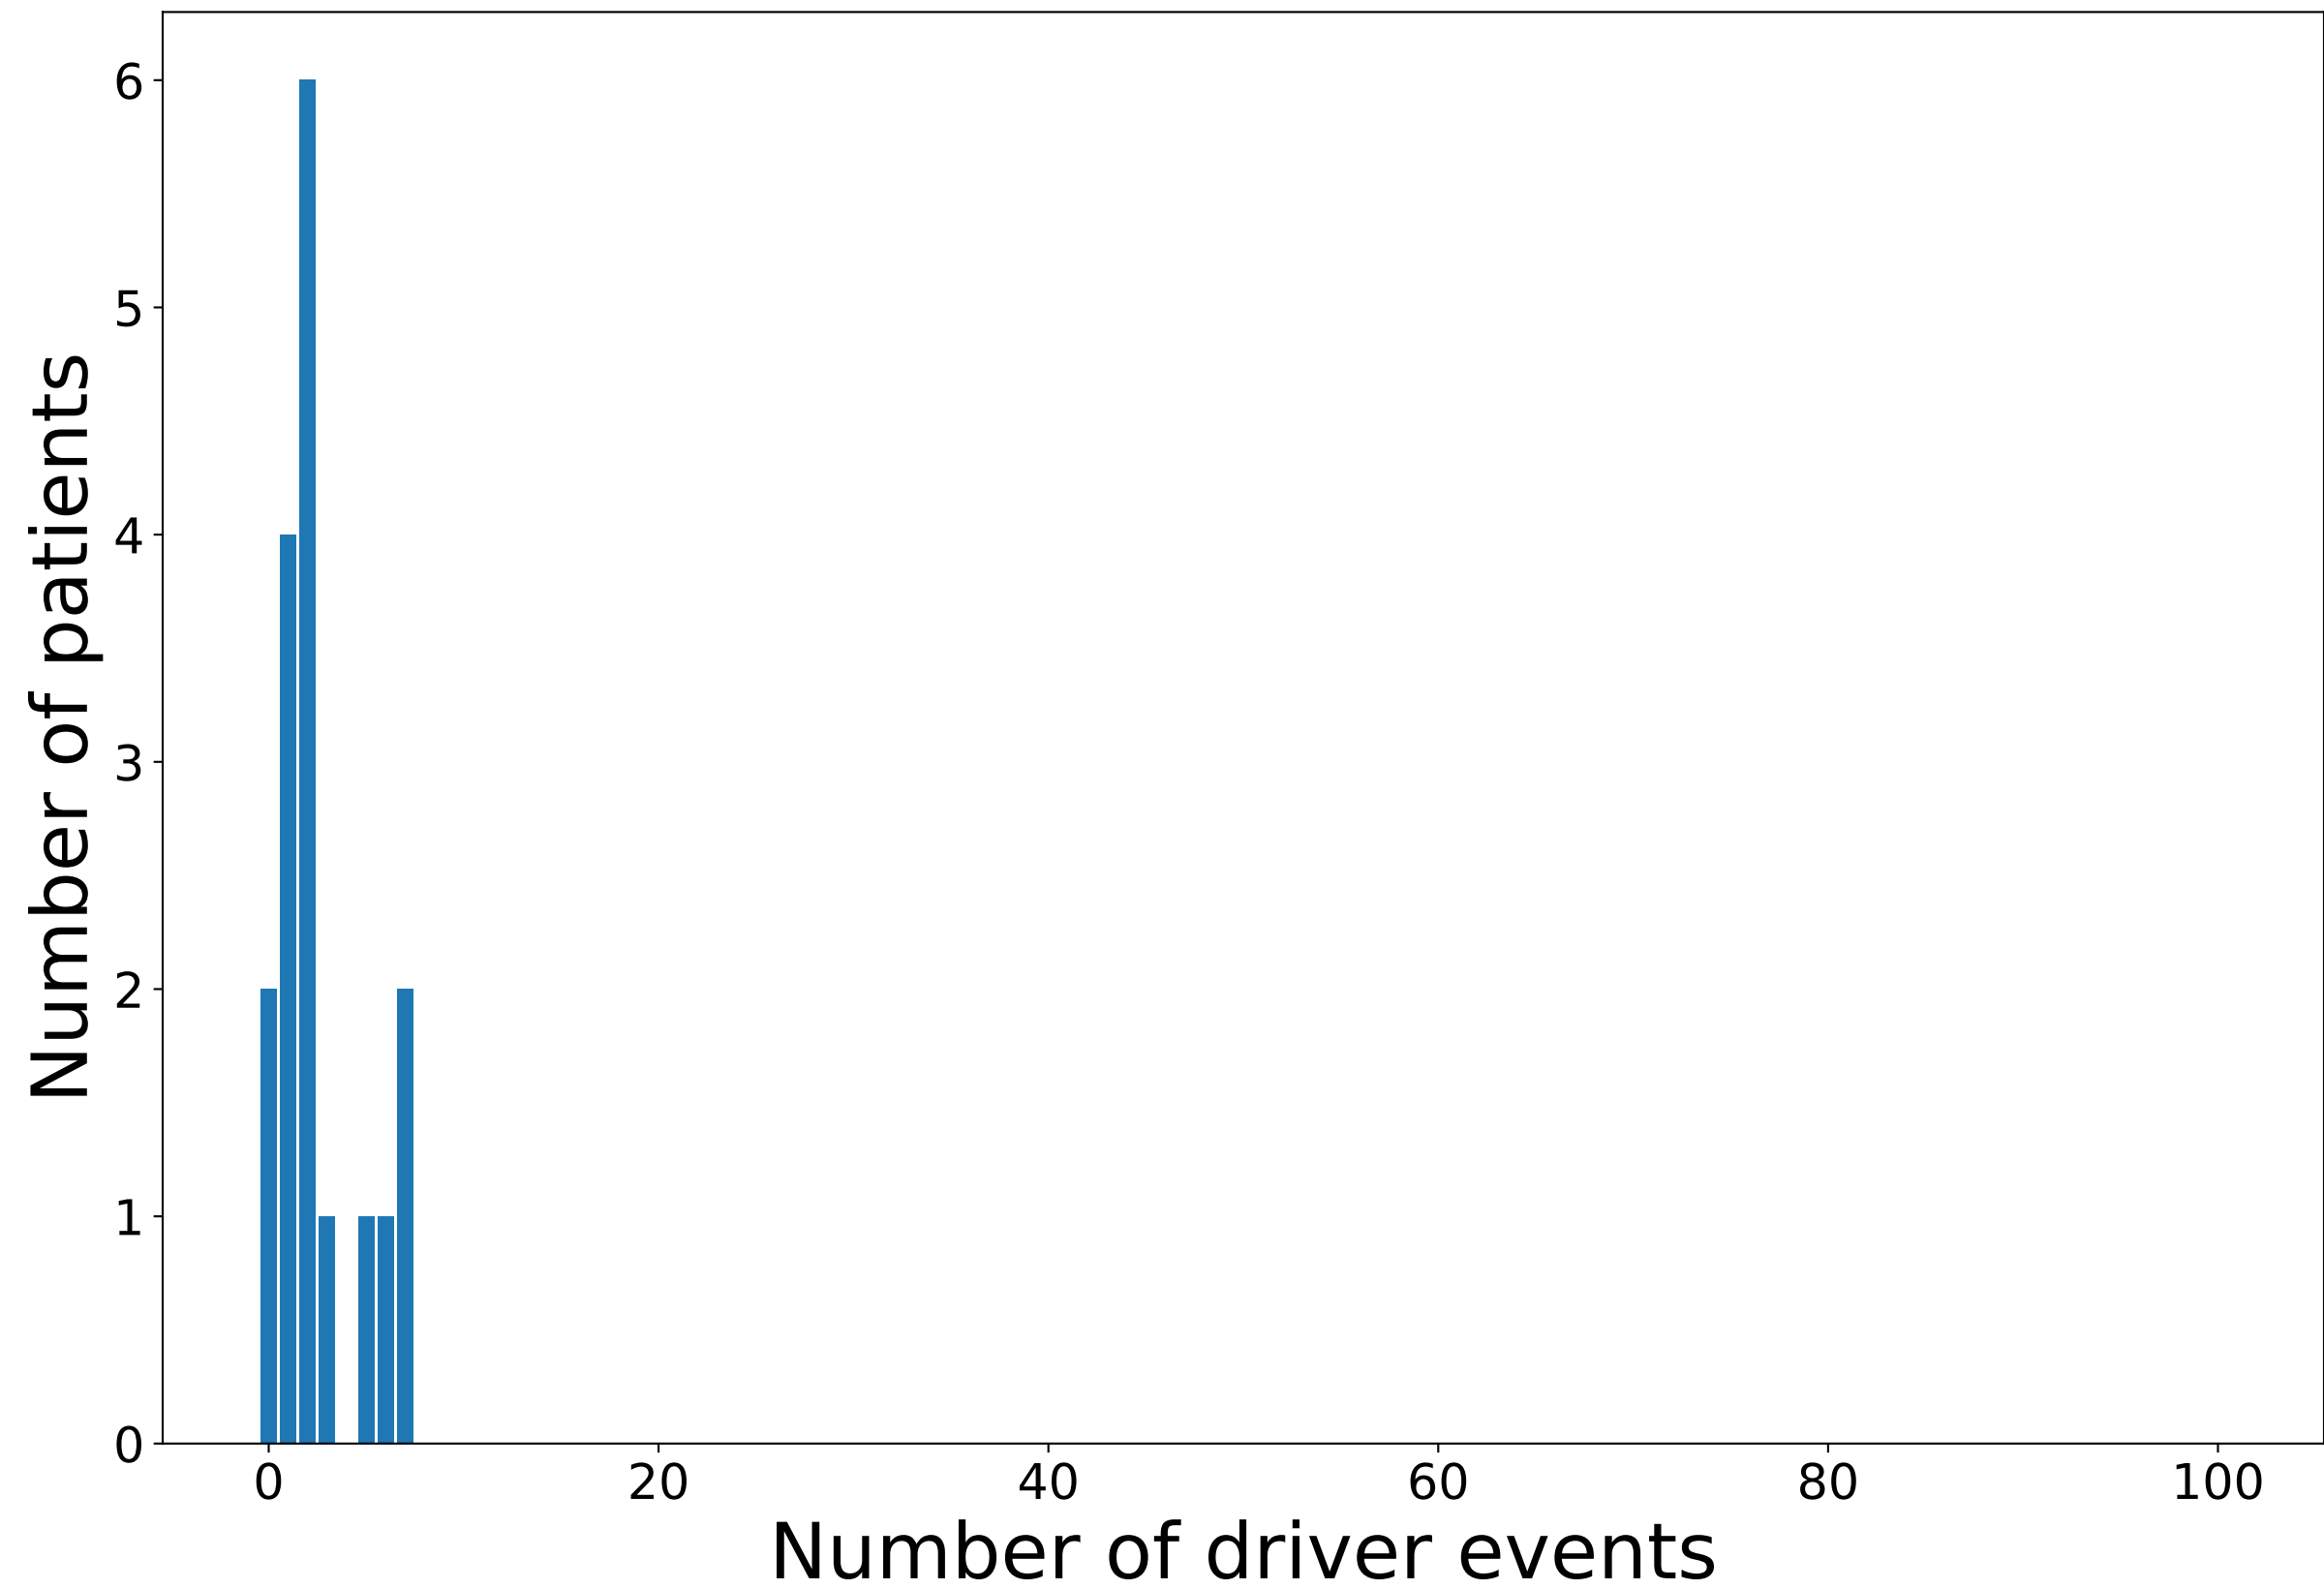

Supplement: Supplemental_Data_S1.zip [file Supplemental_Data_S1.zip]

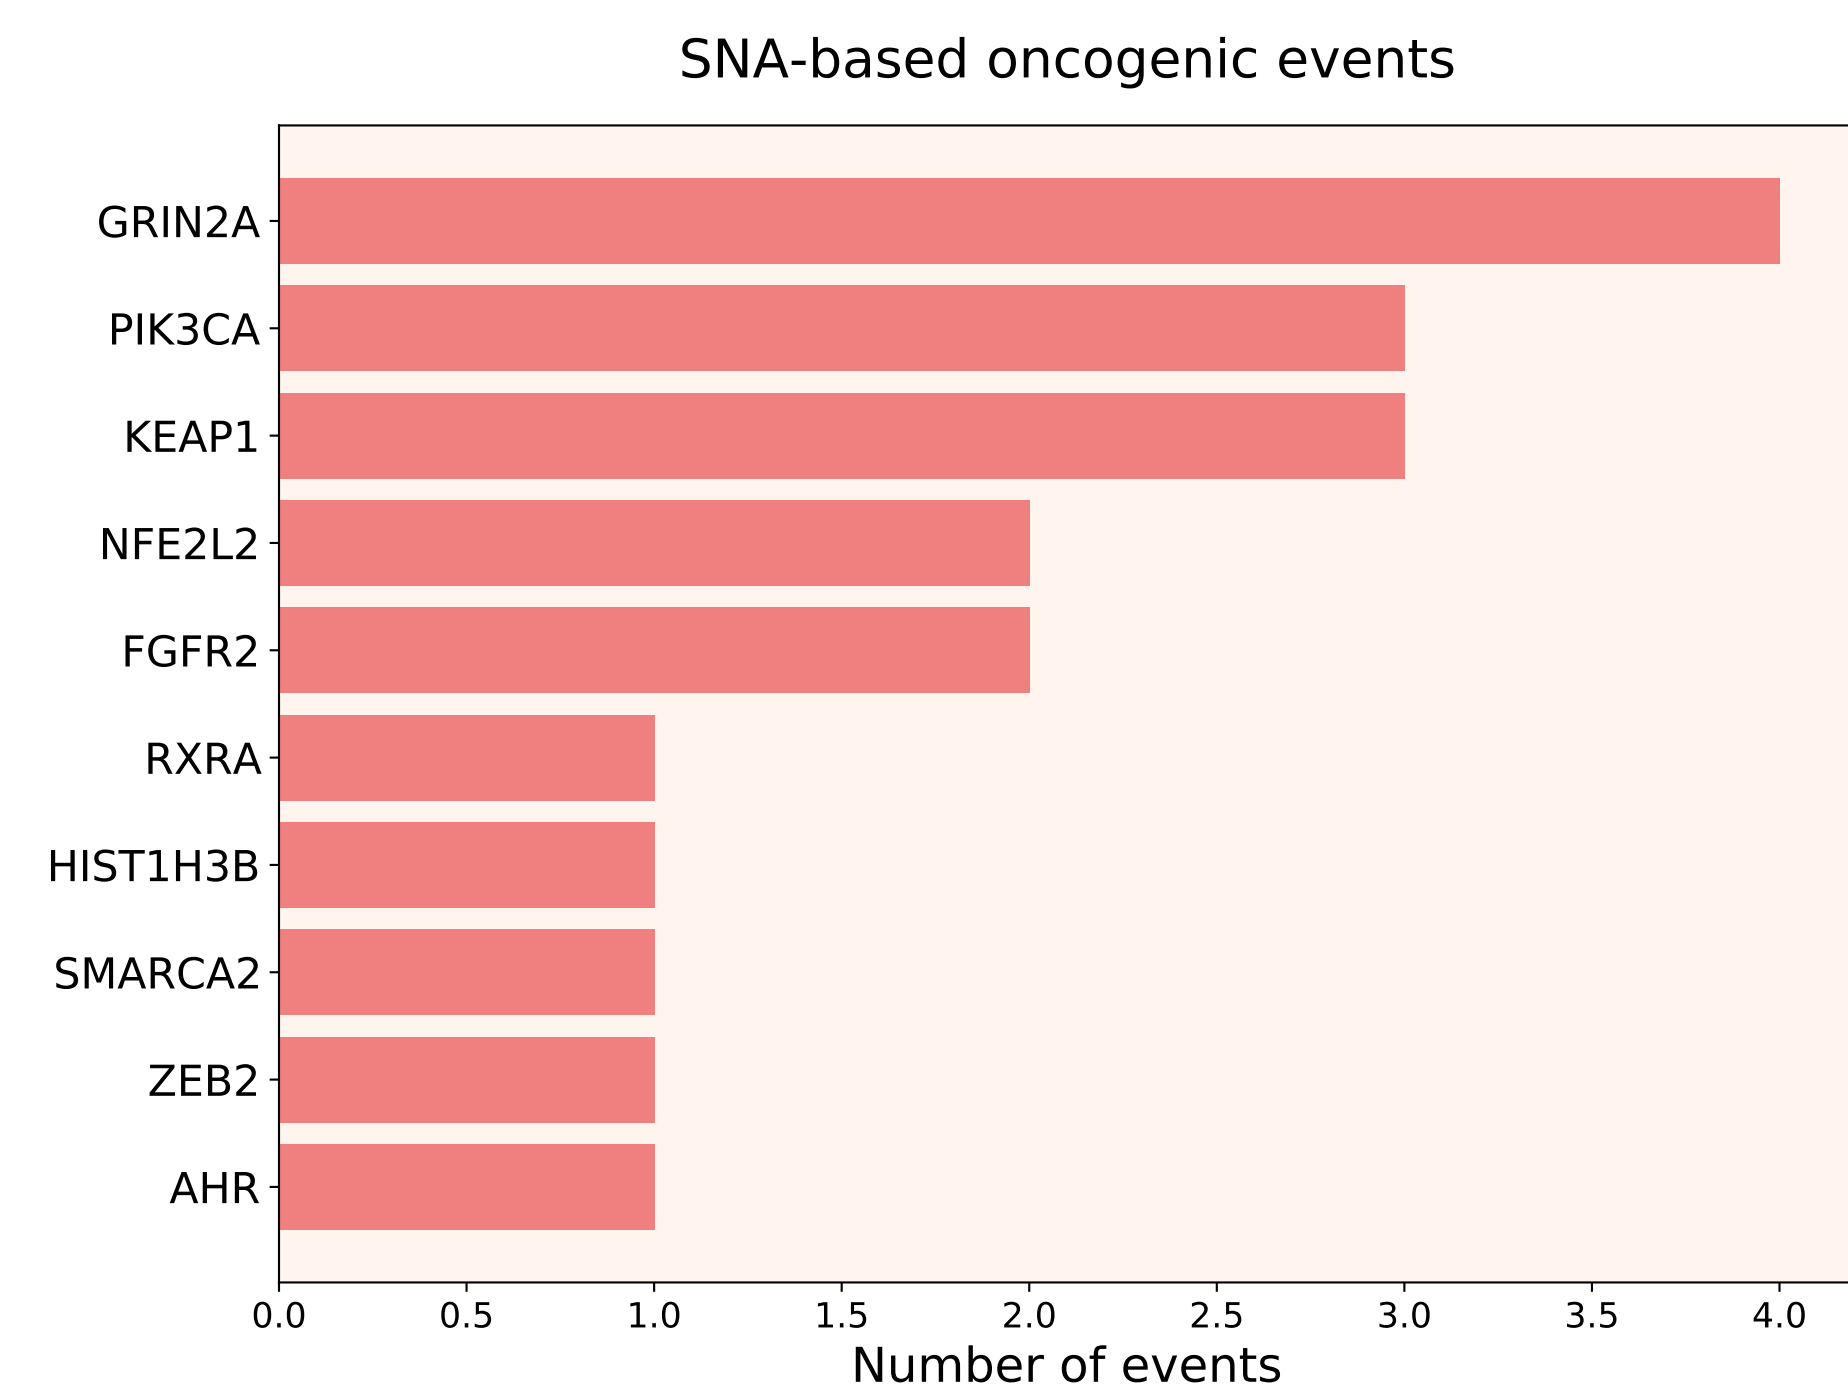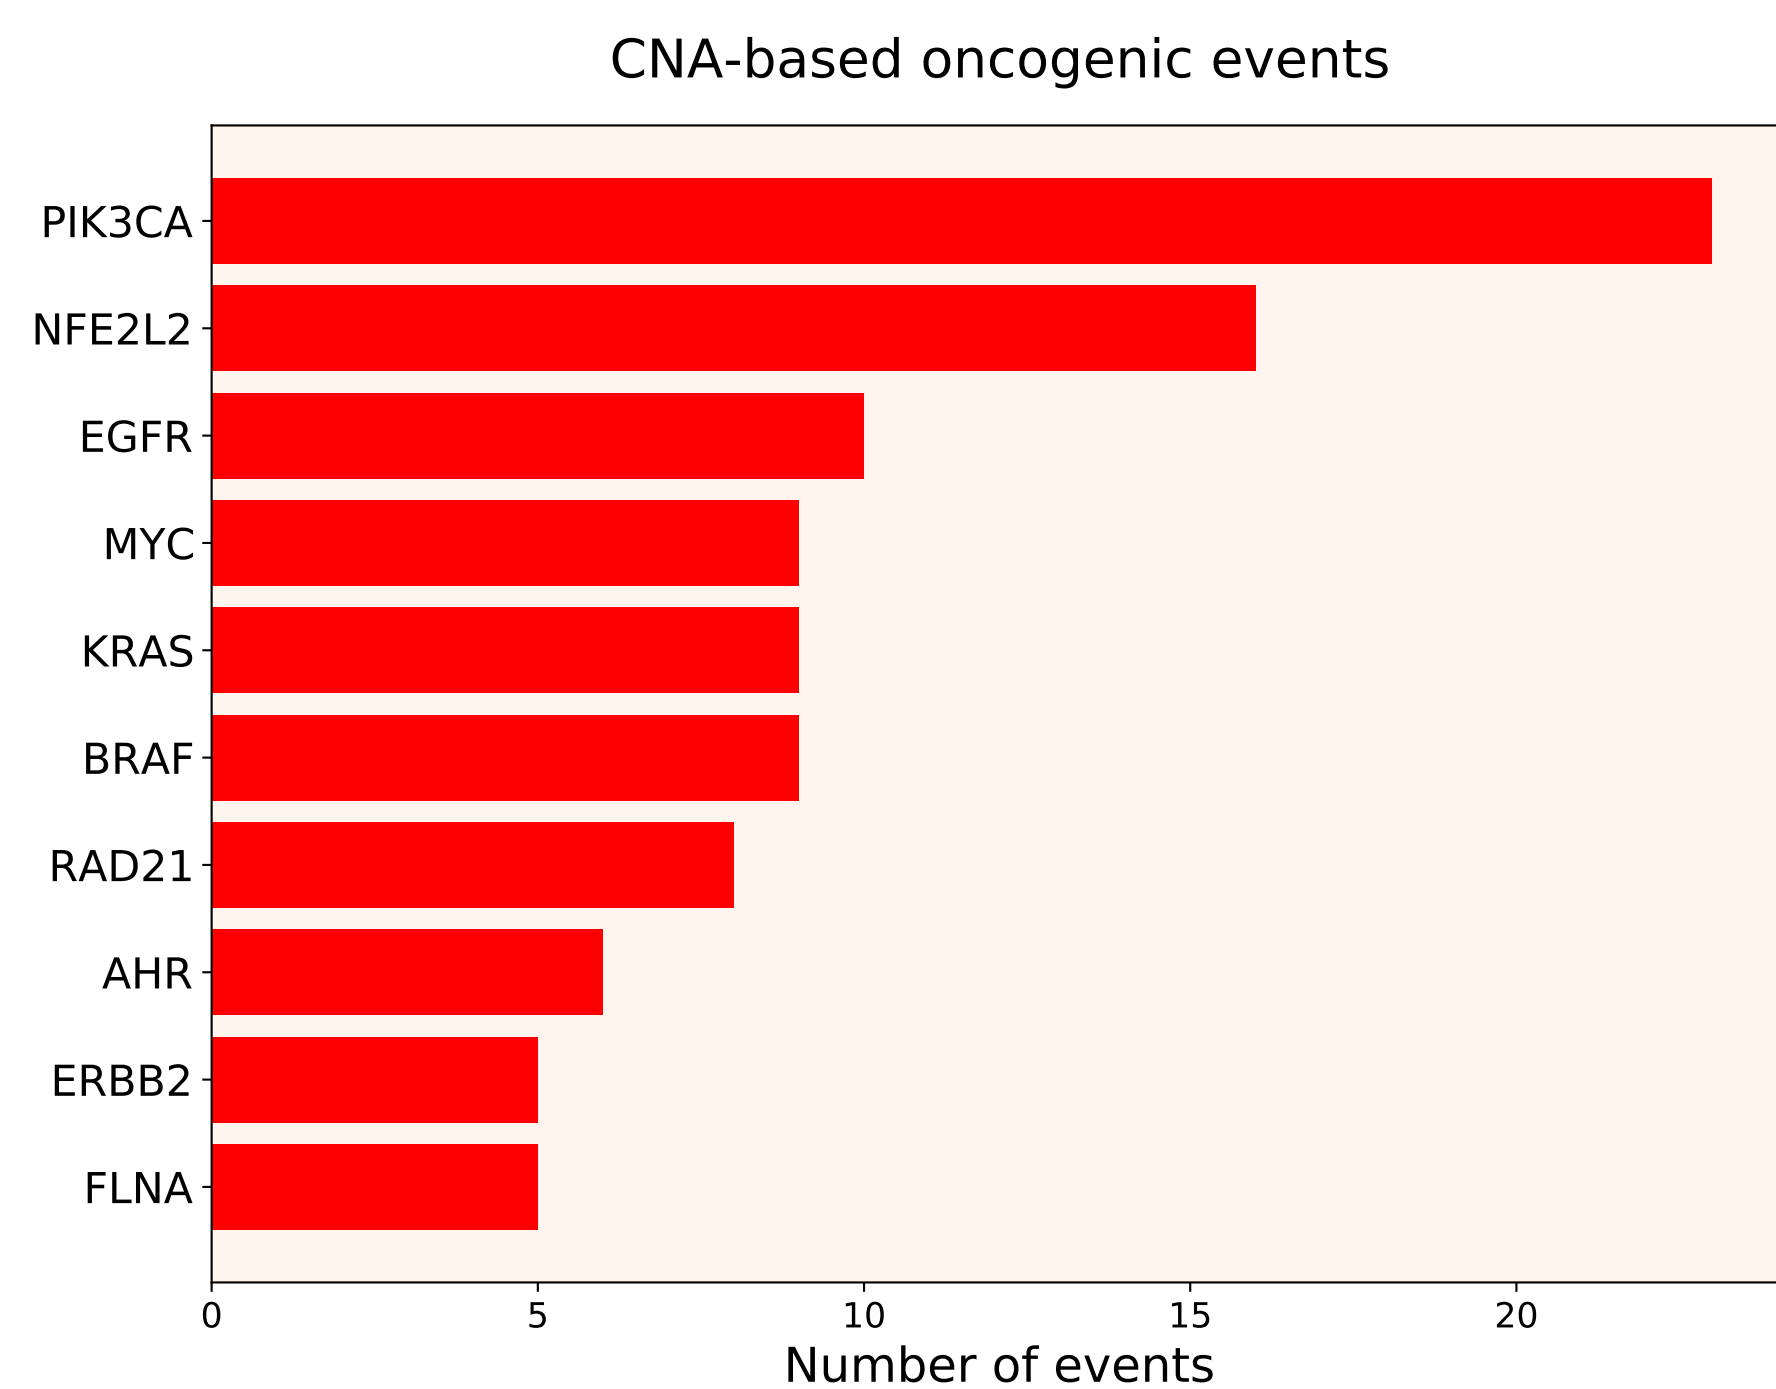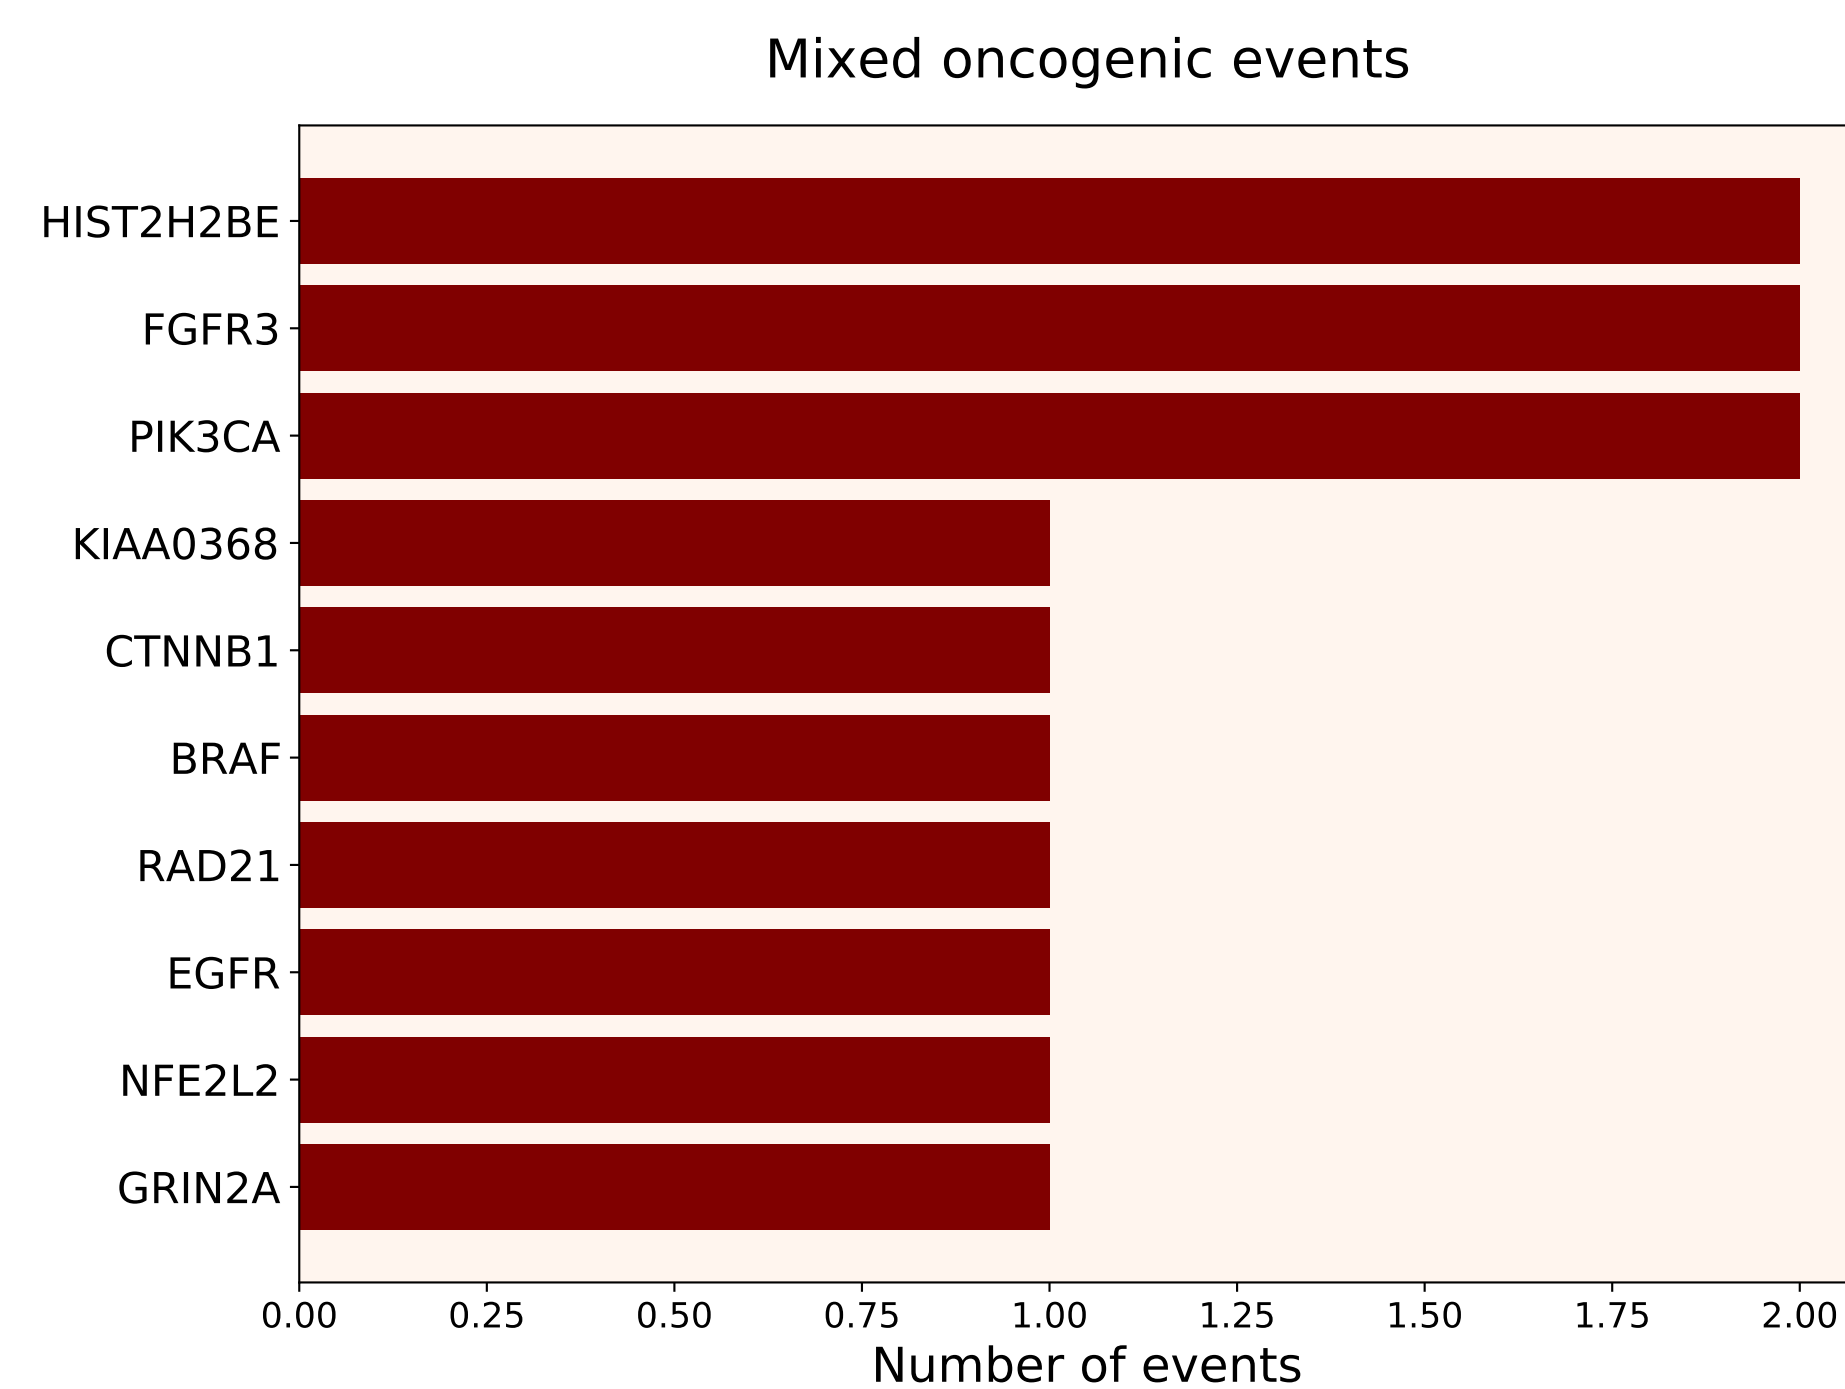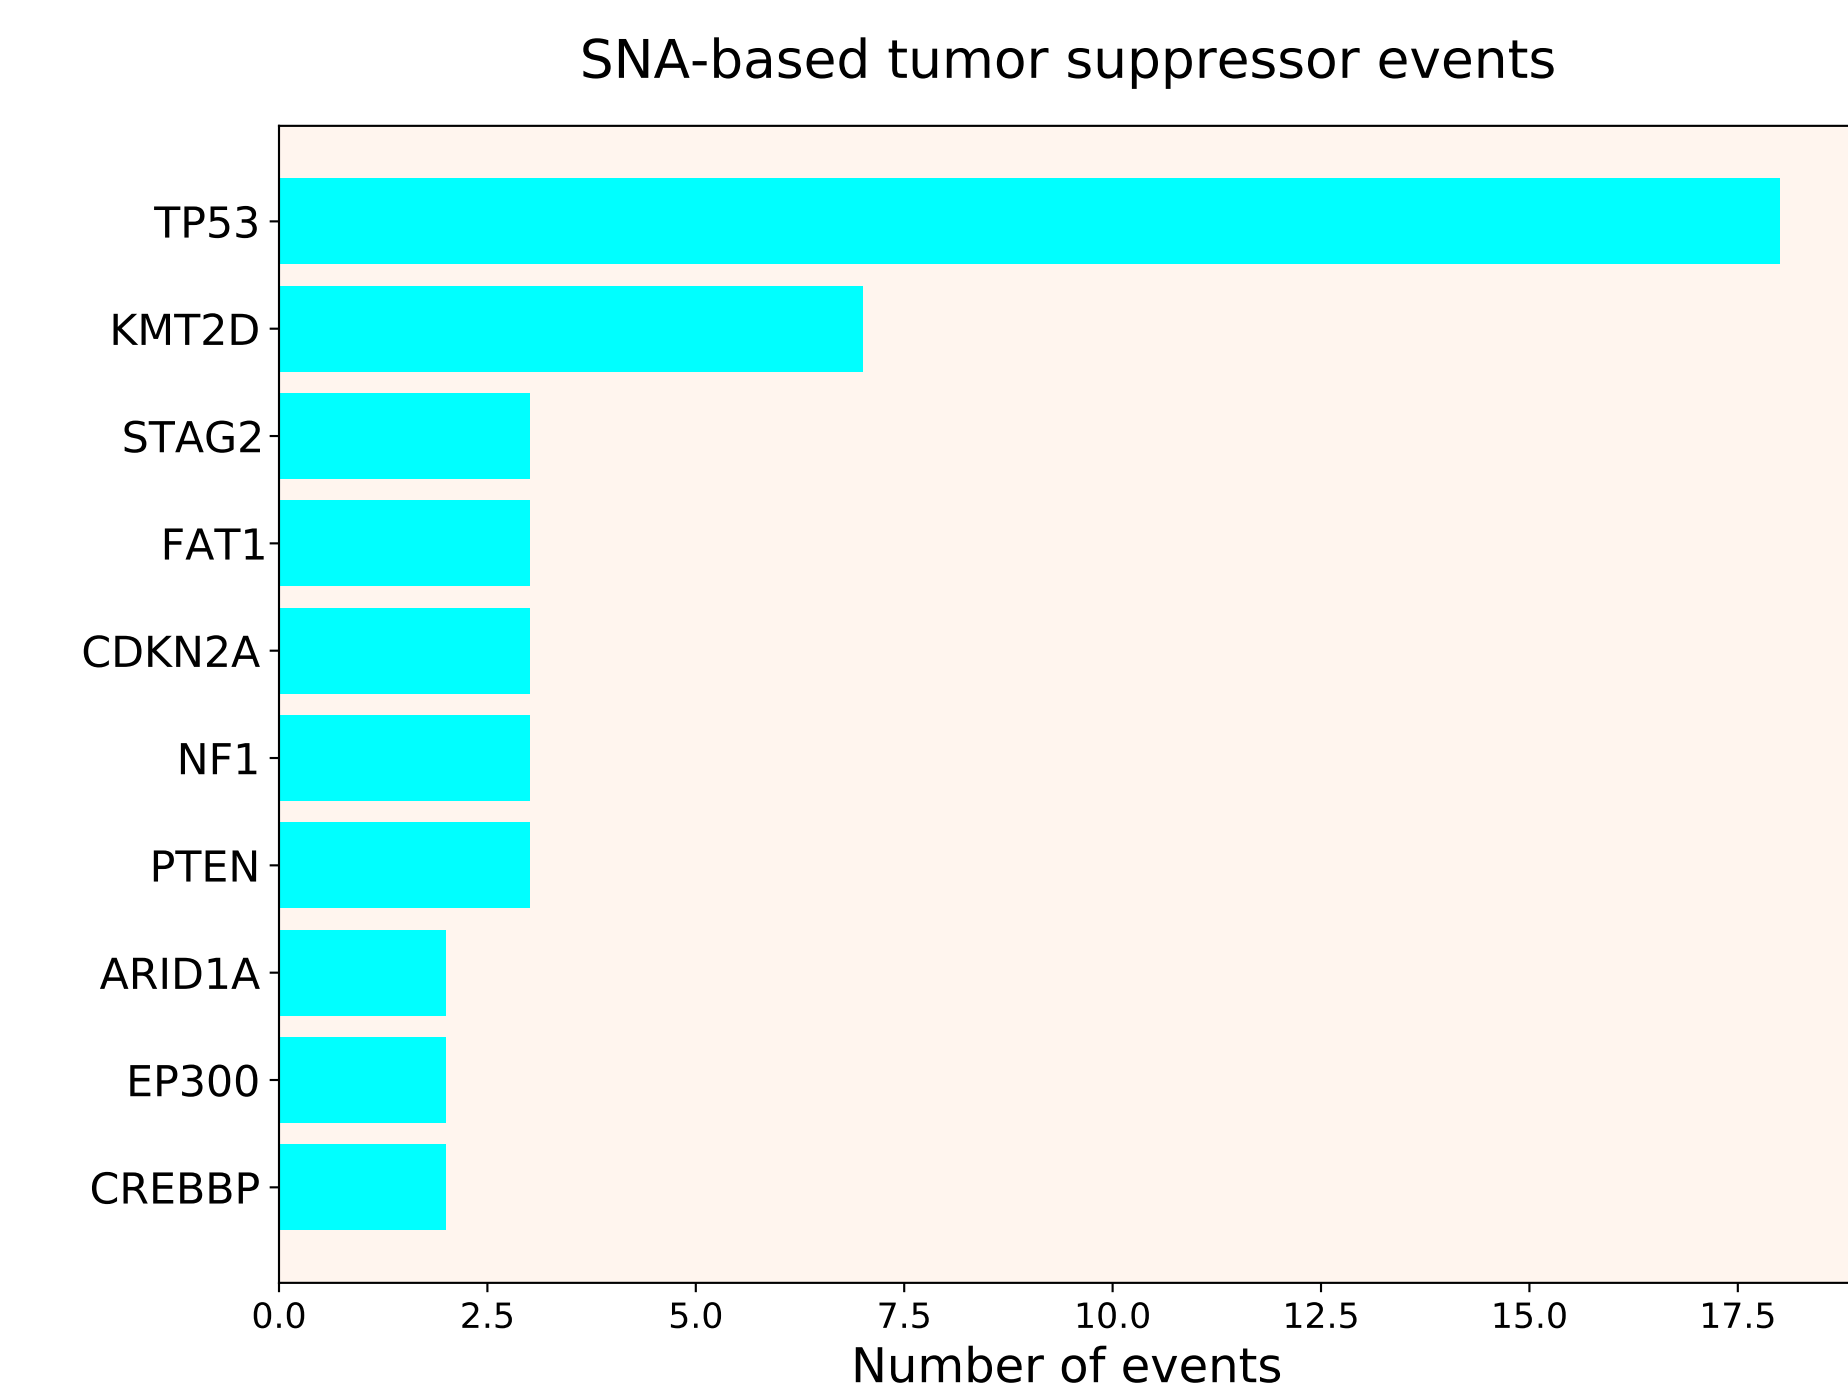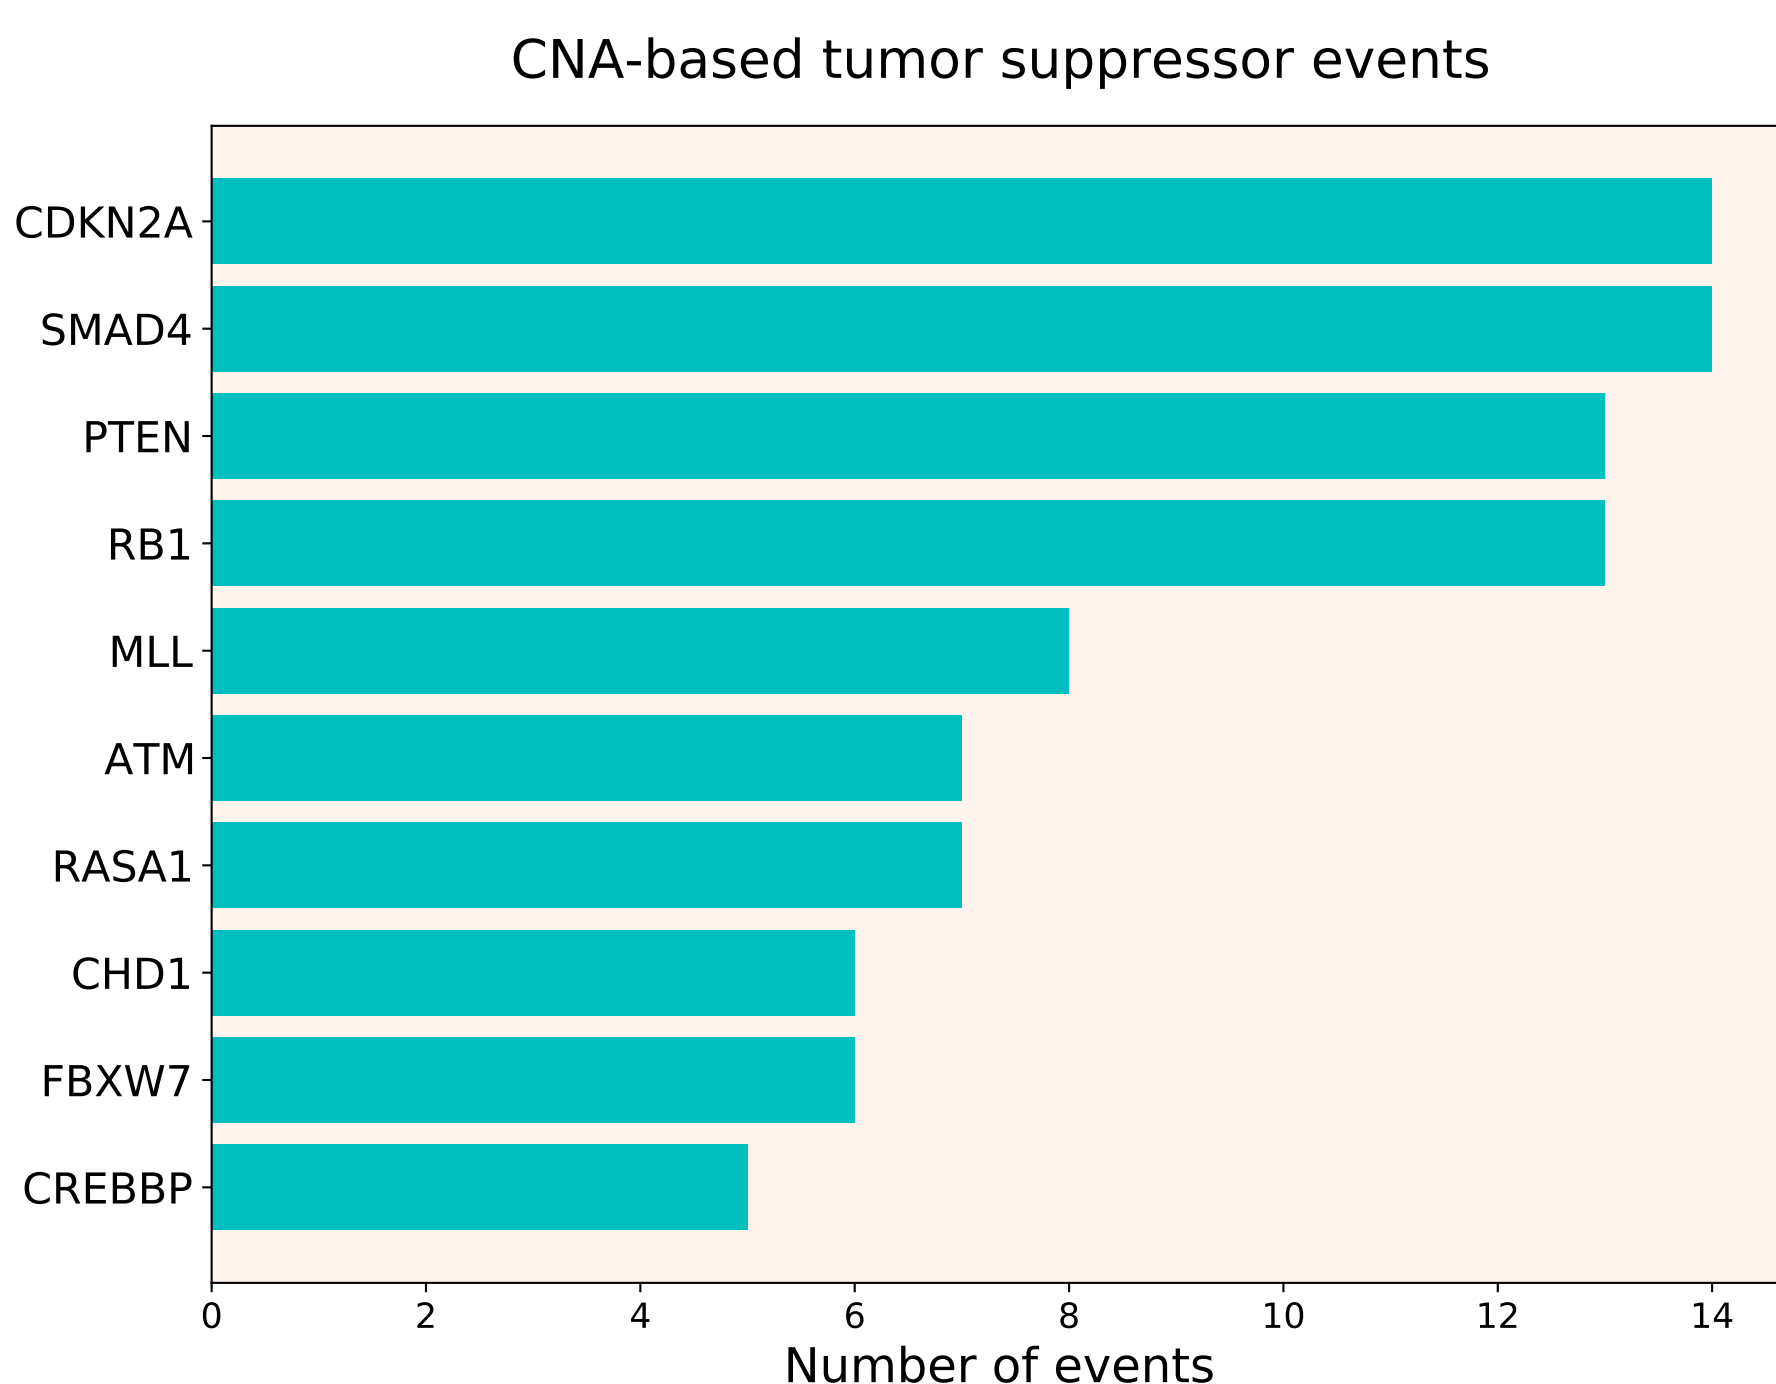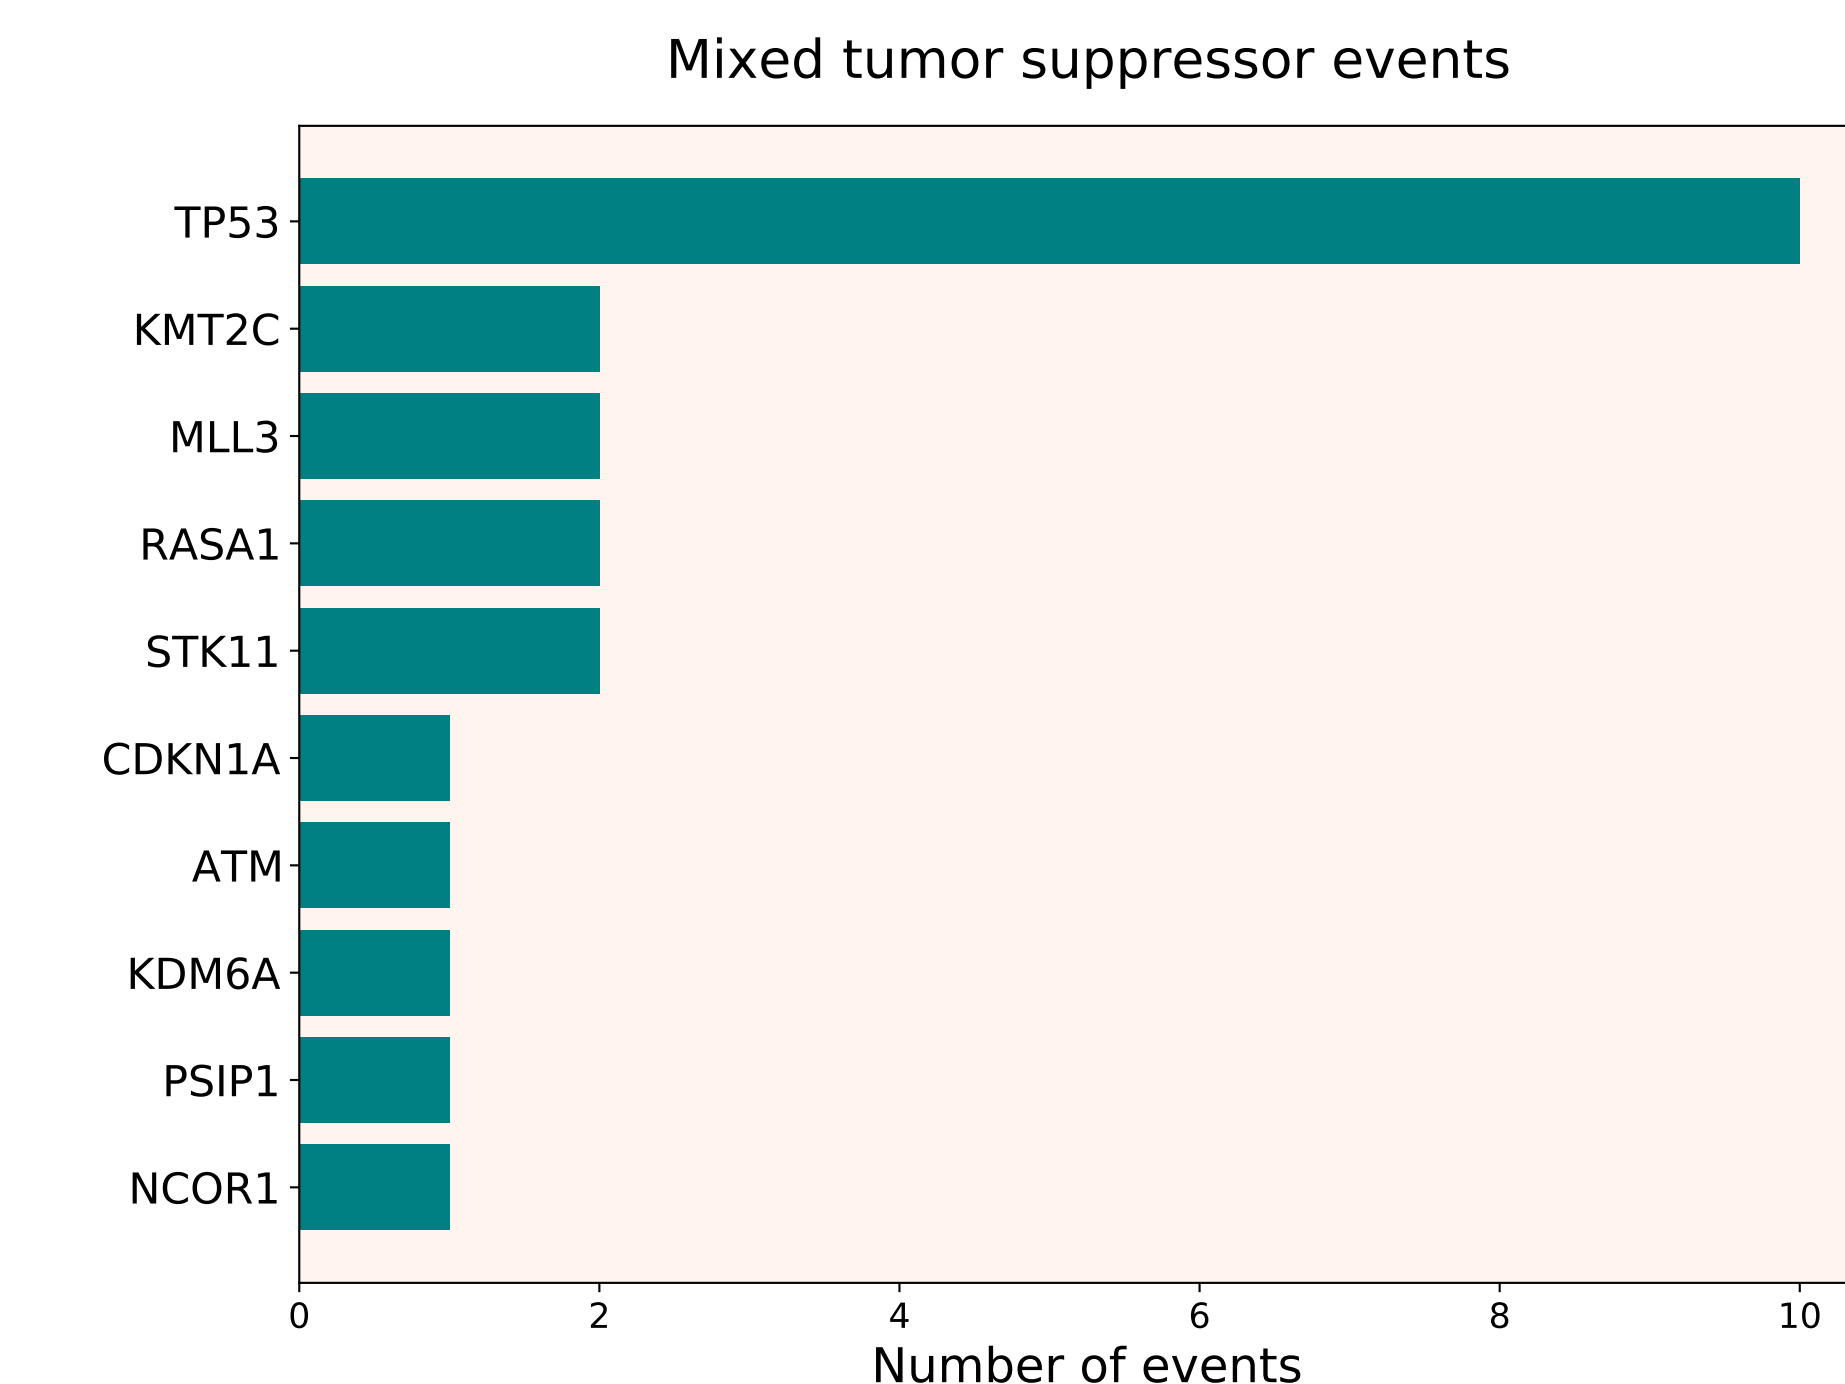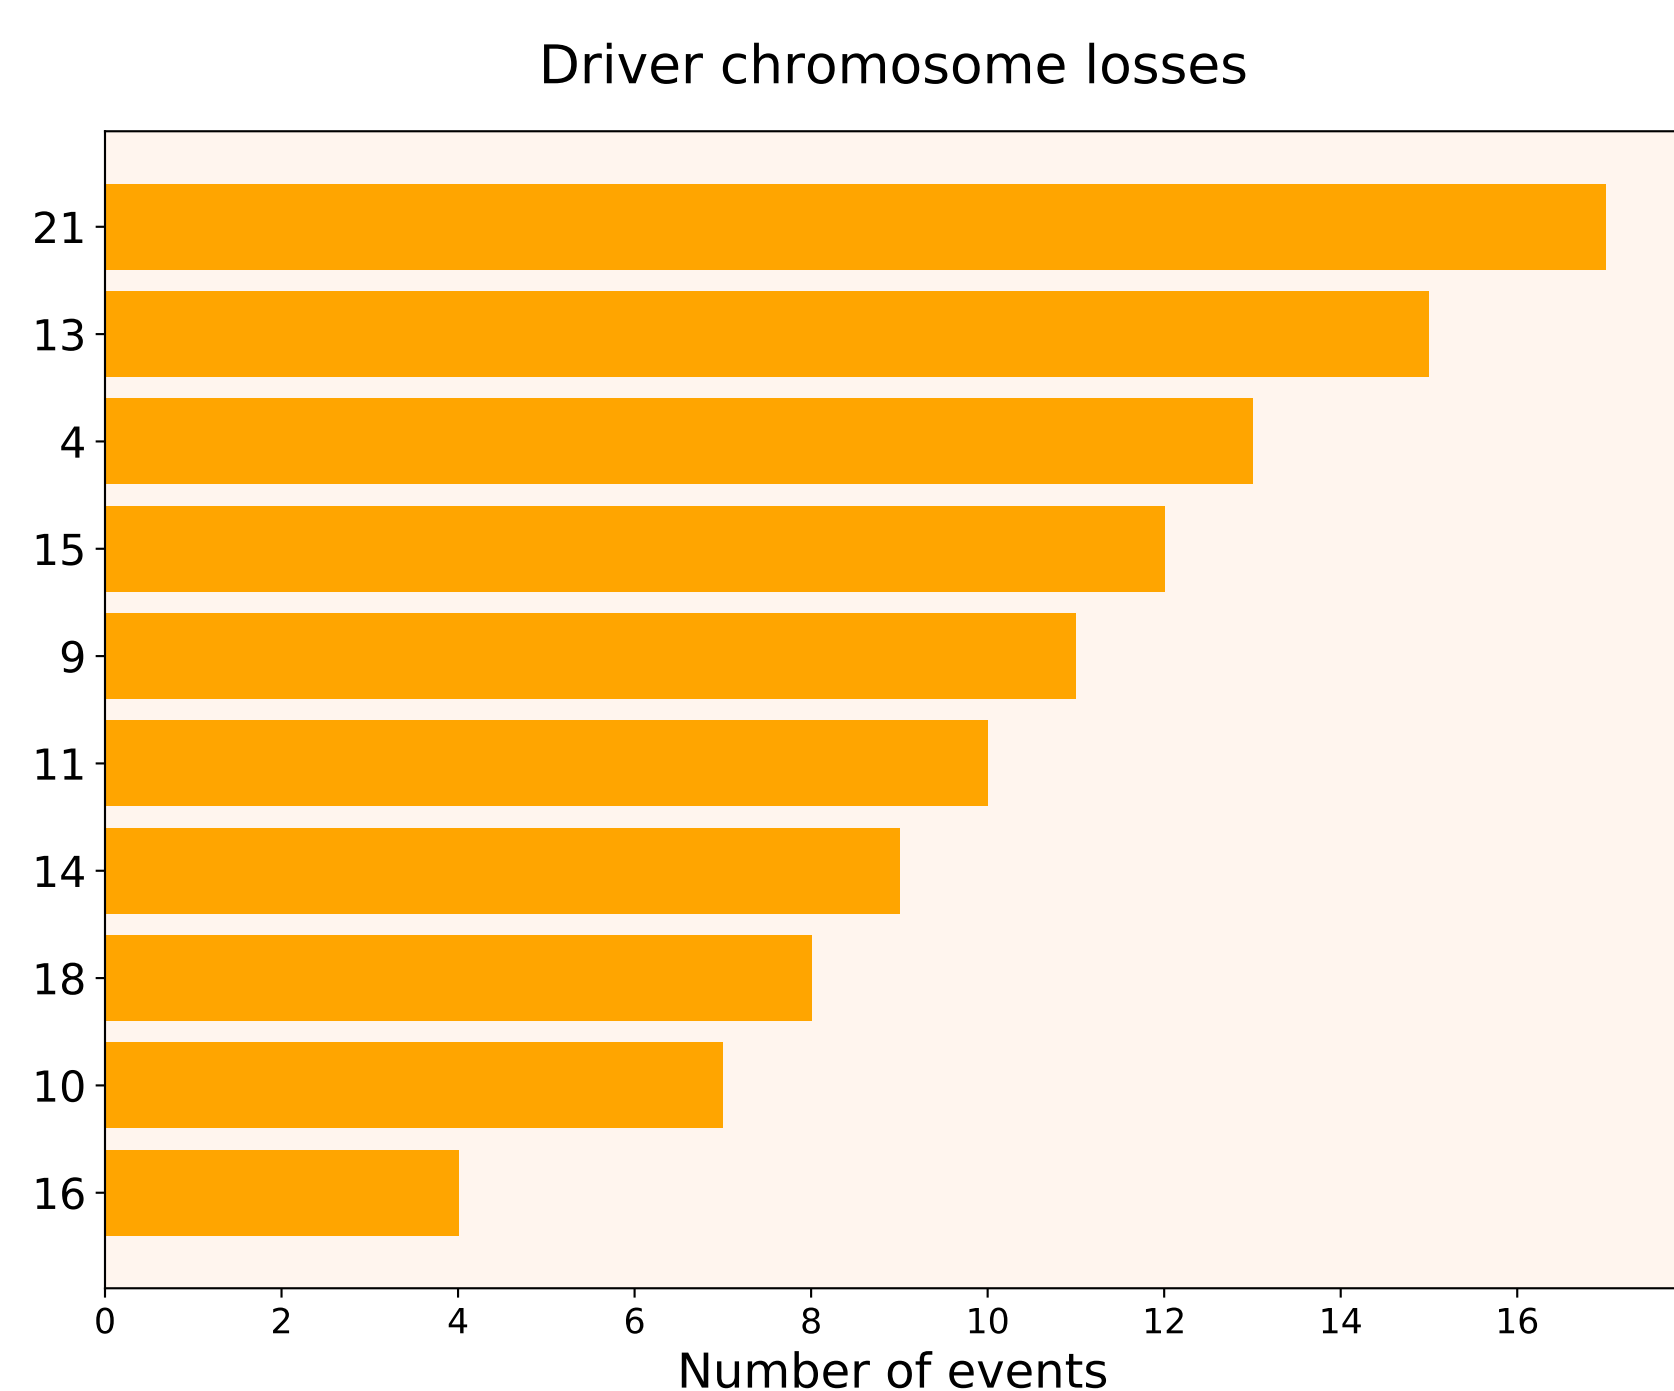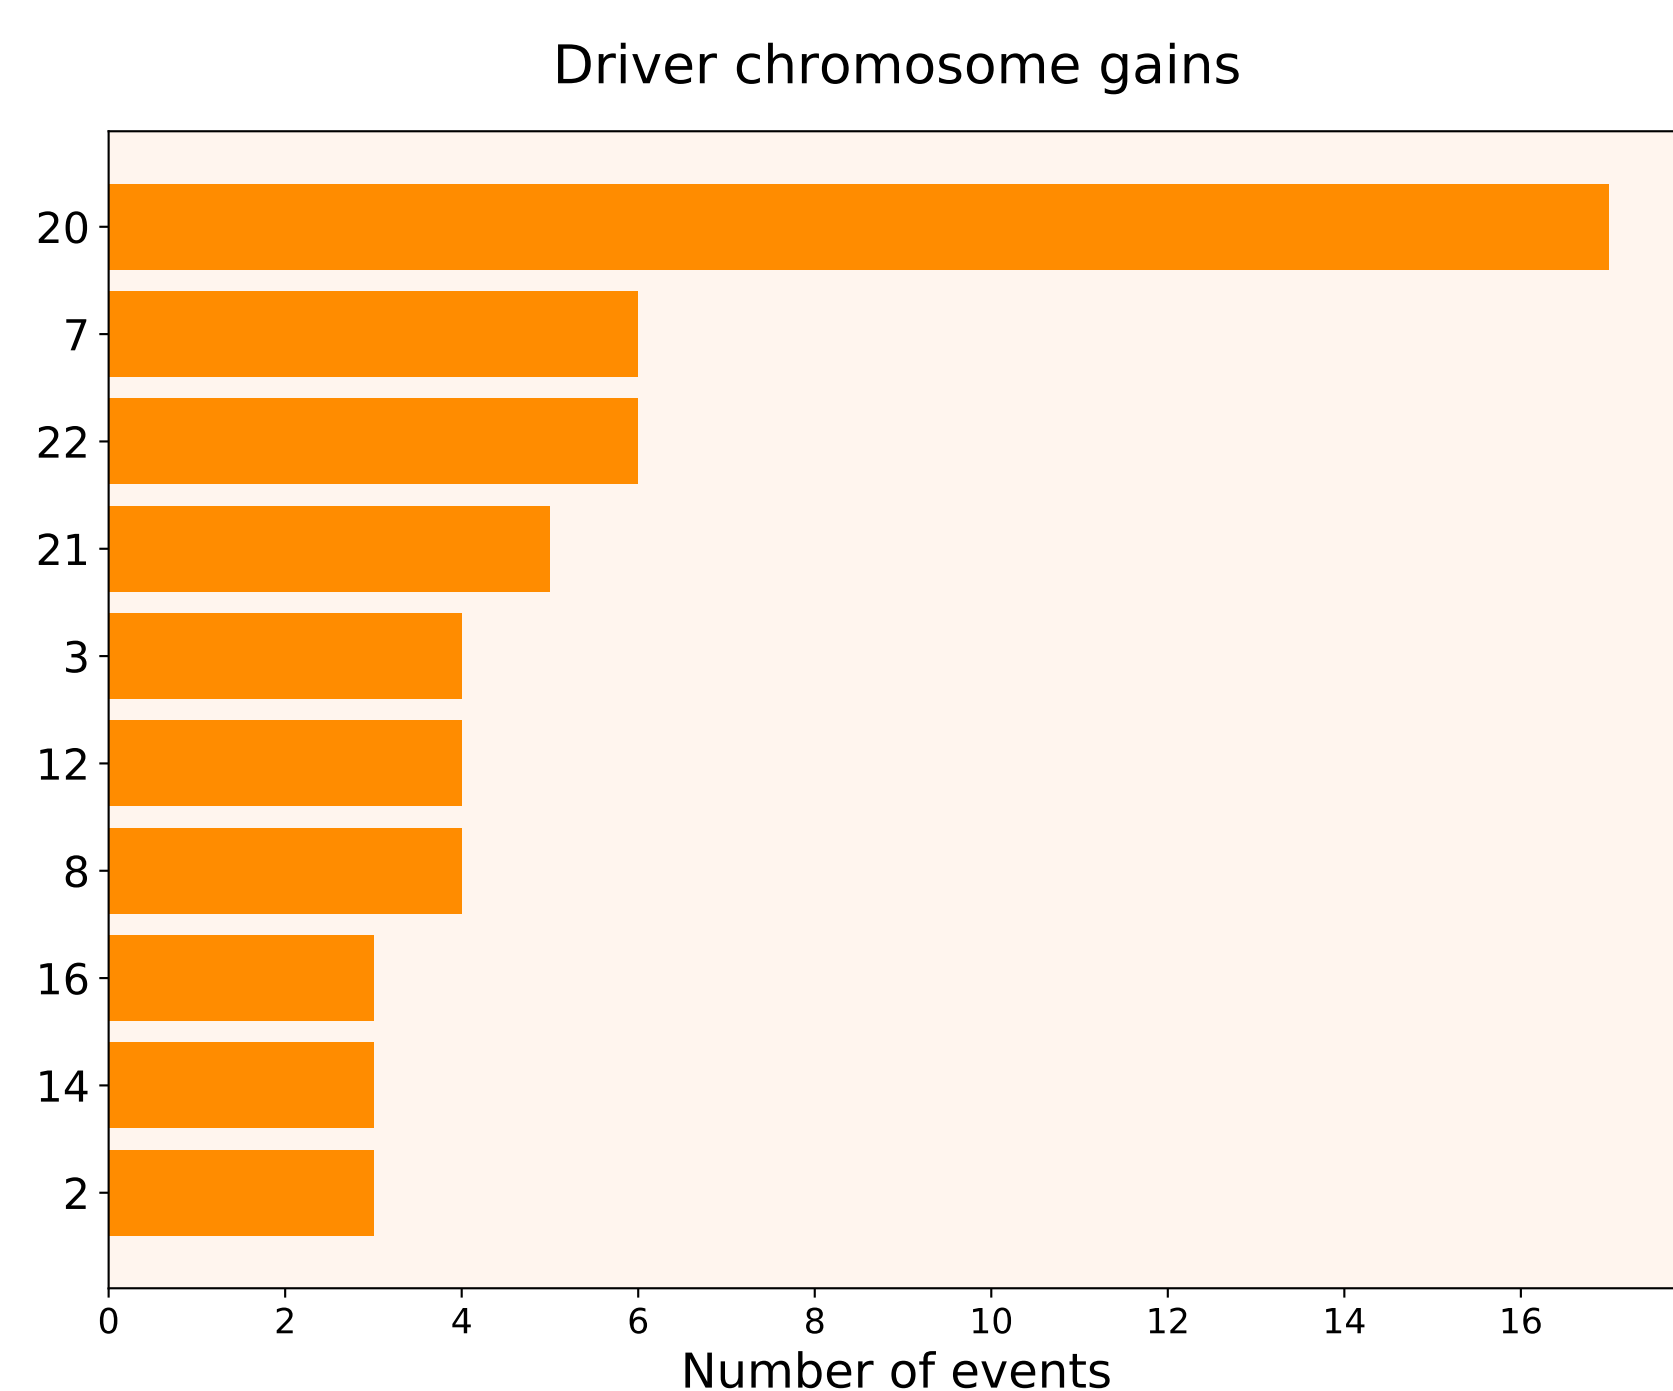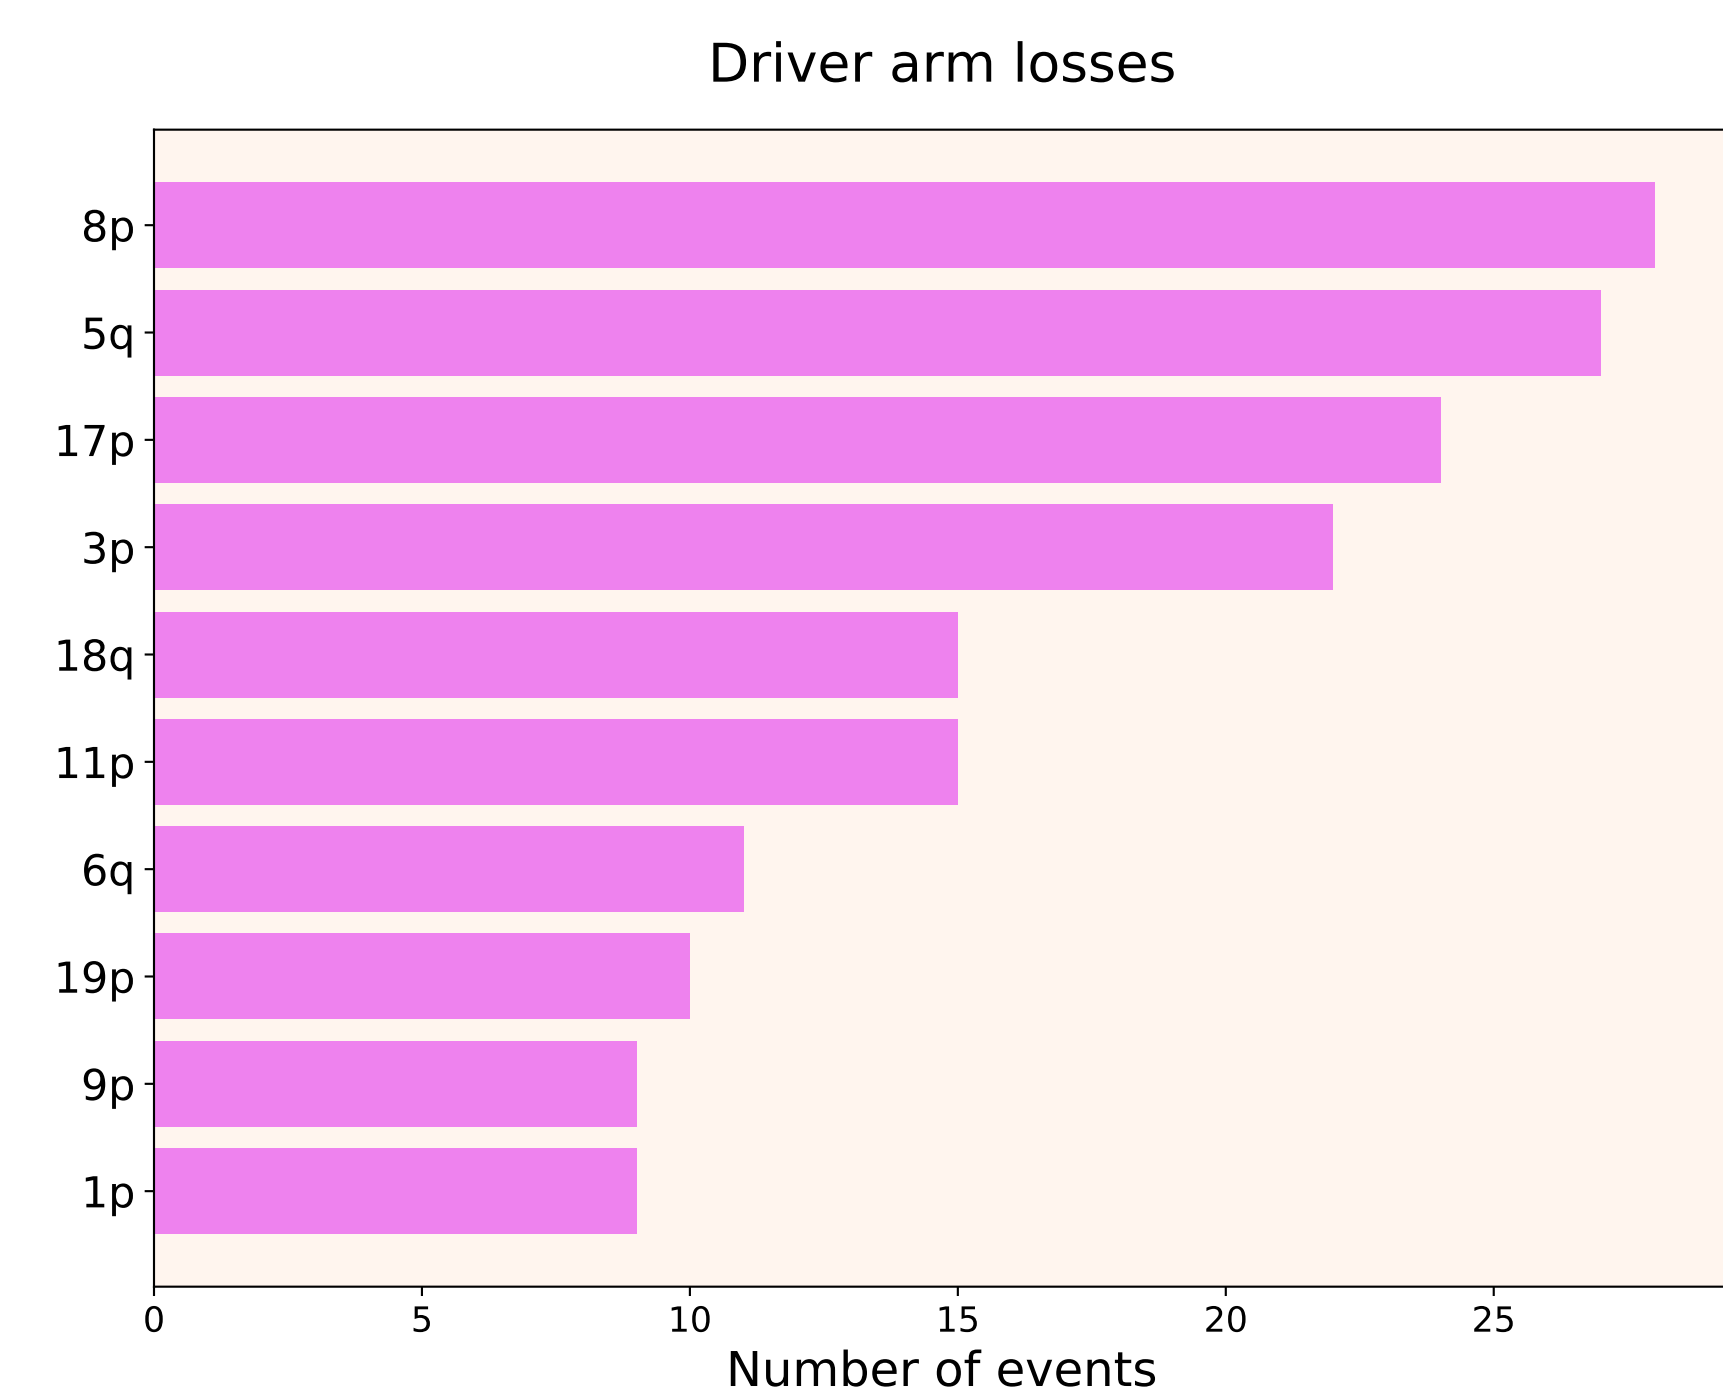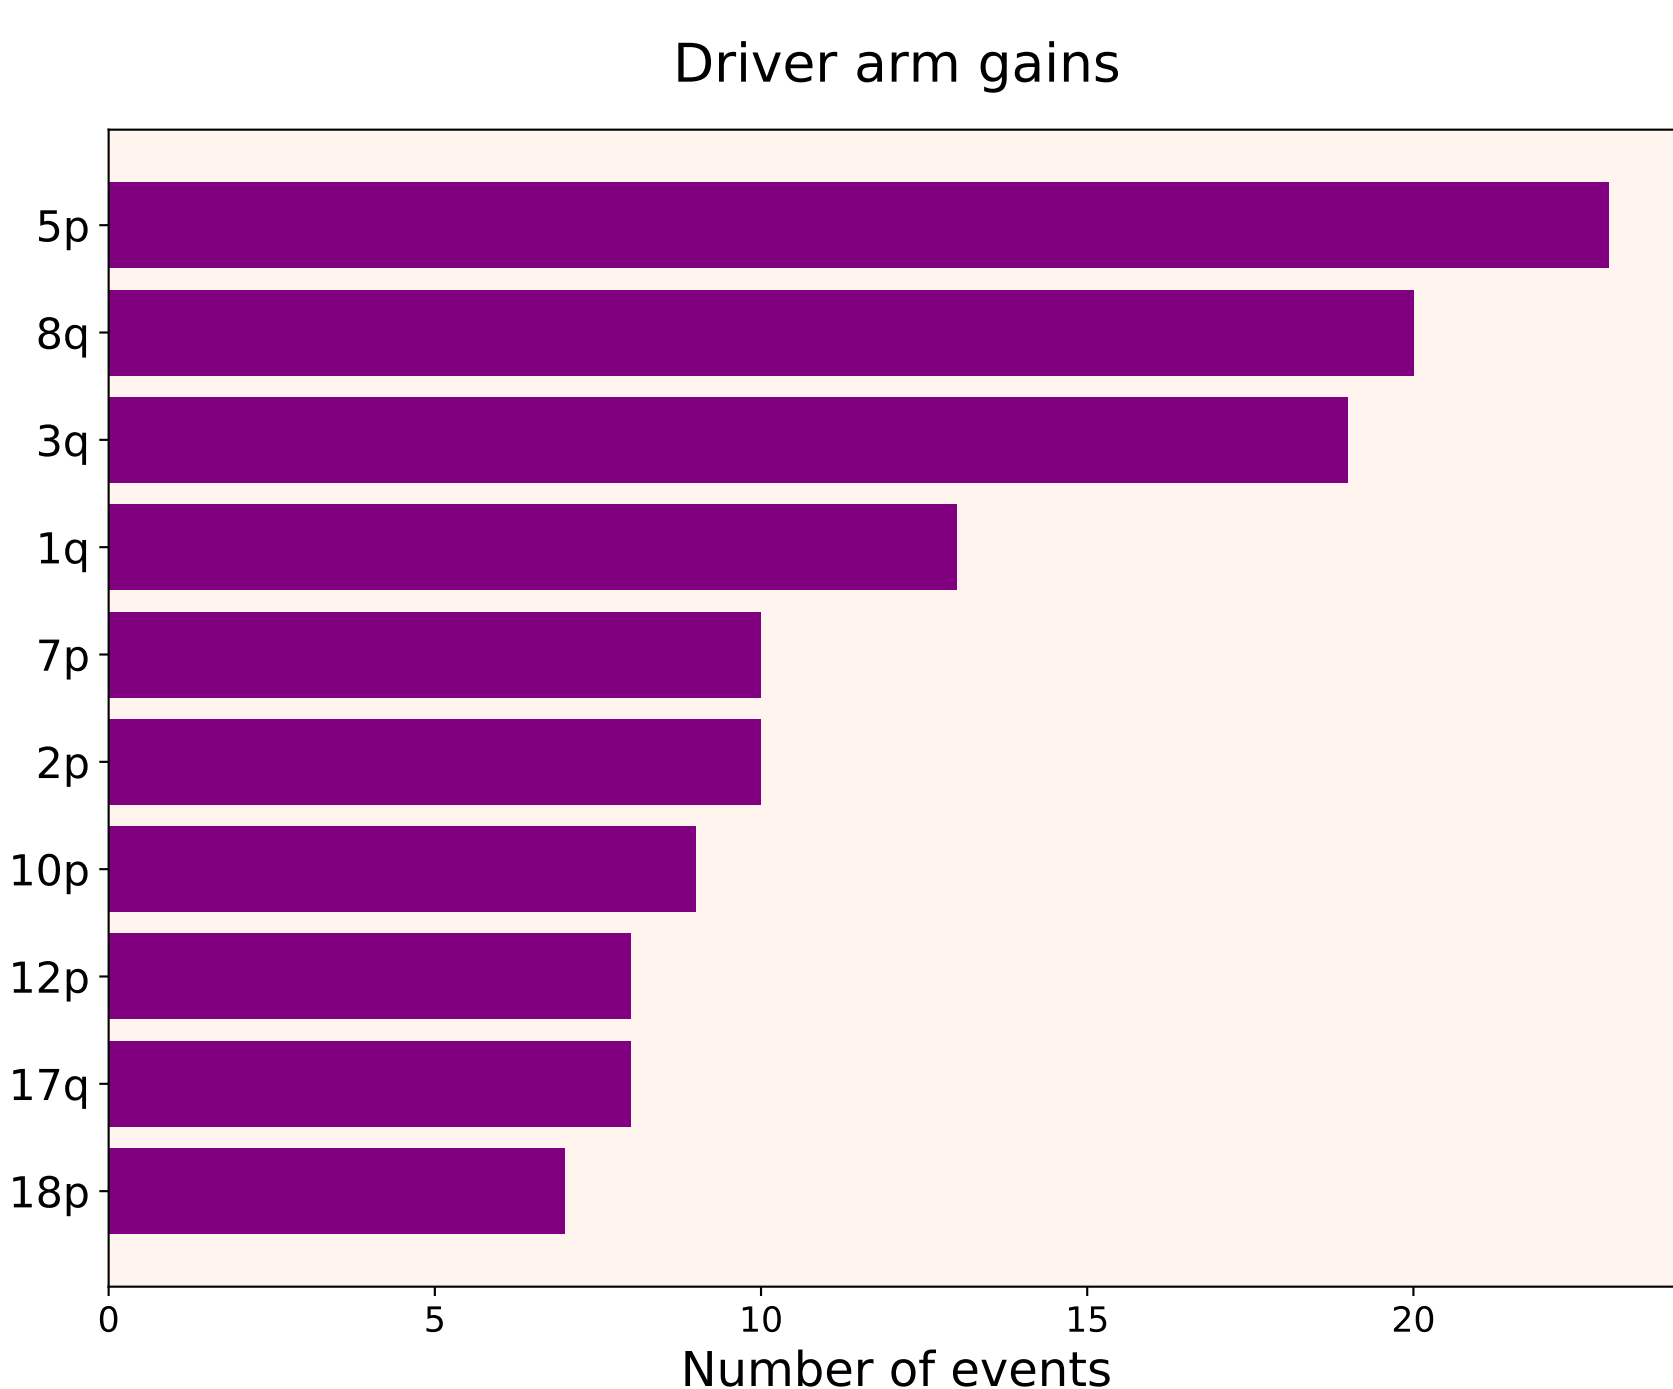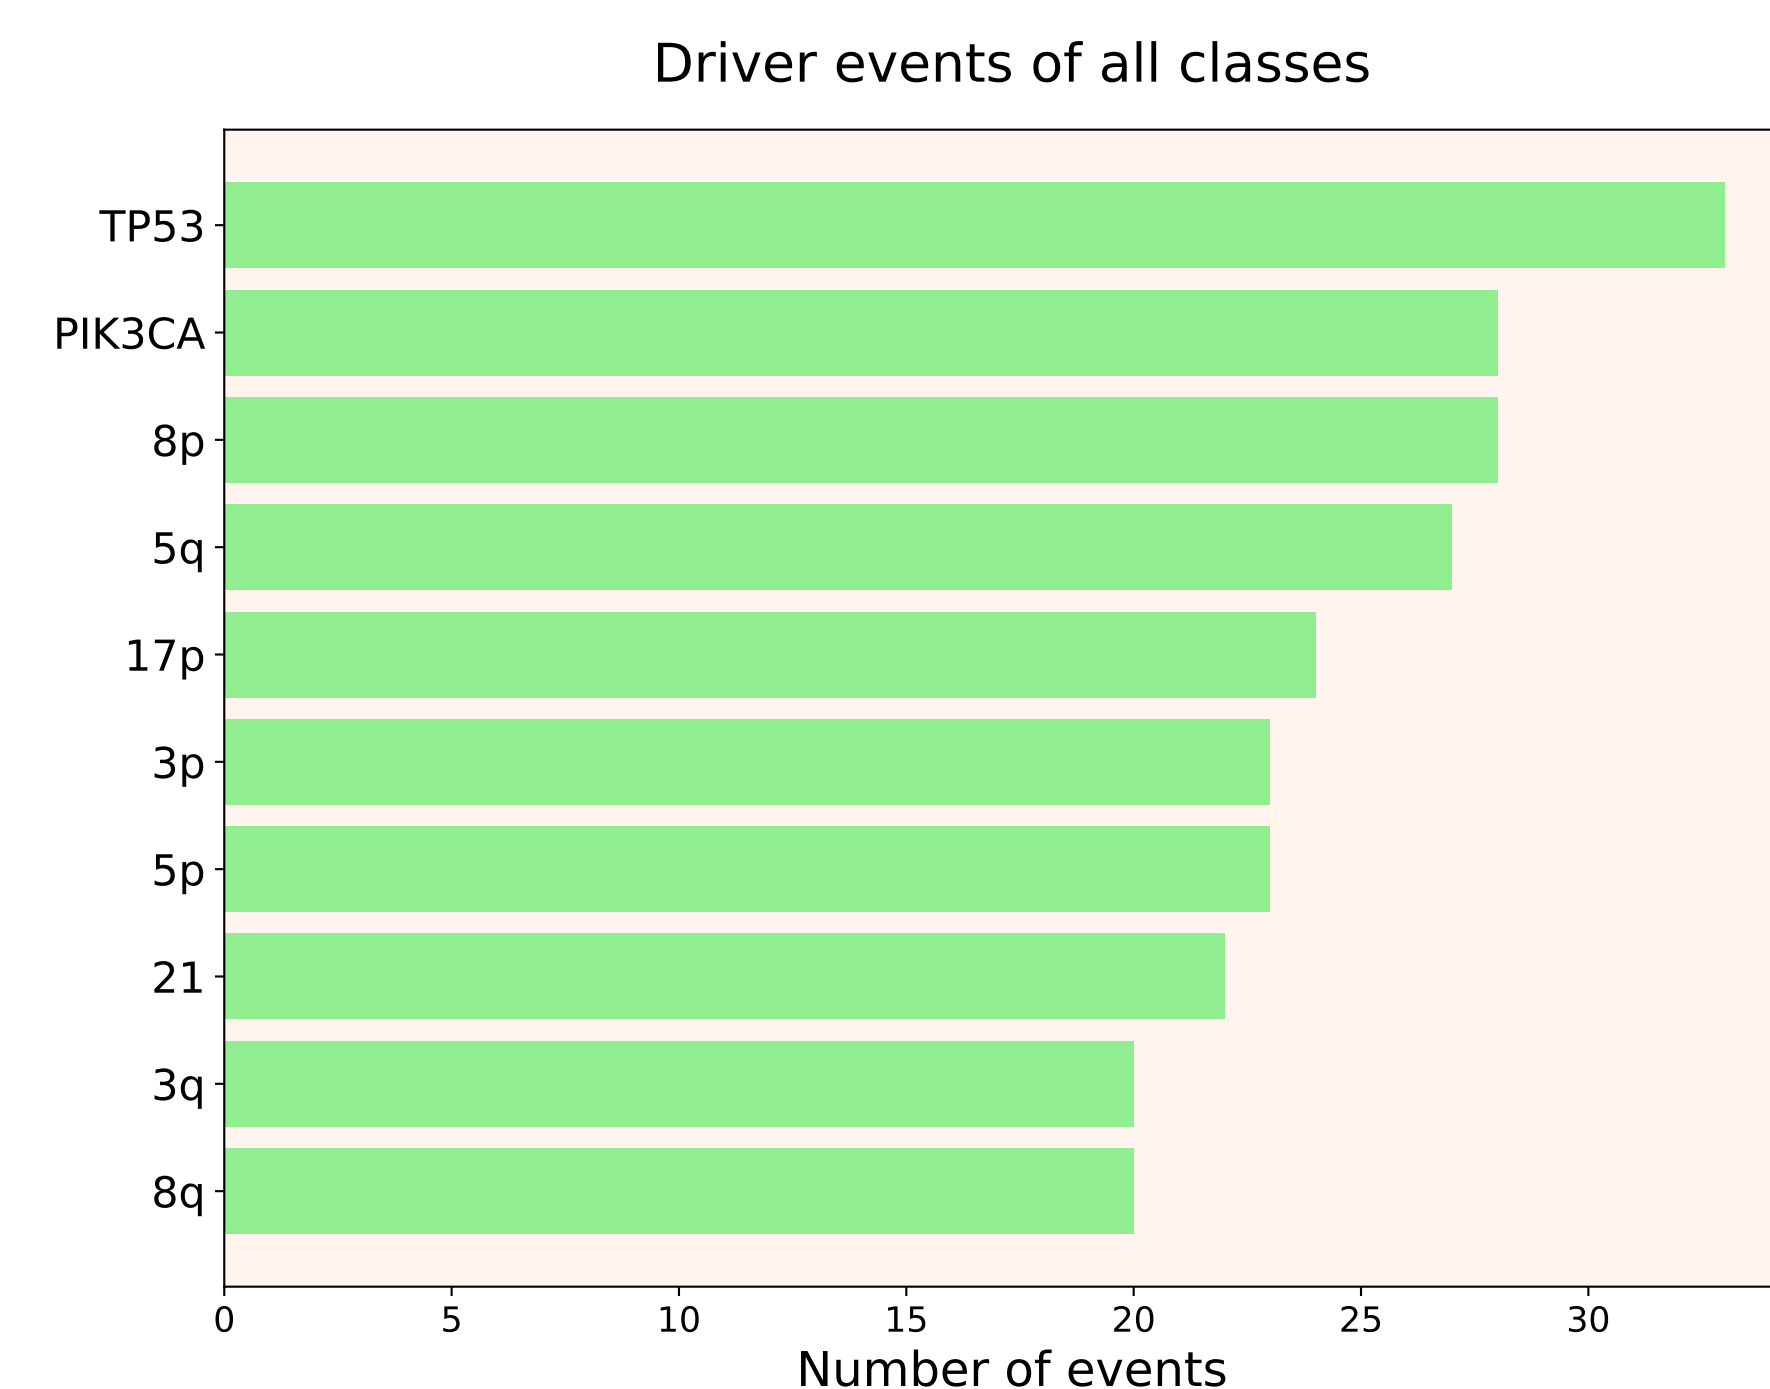

Supplement: Supplemental_Data_S1.zip [file Supplemental_Data_S1.zip]

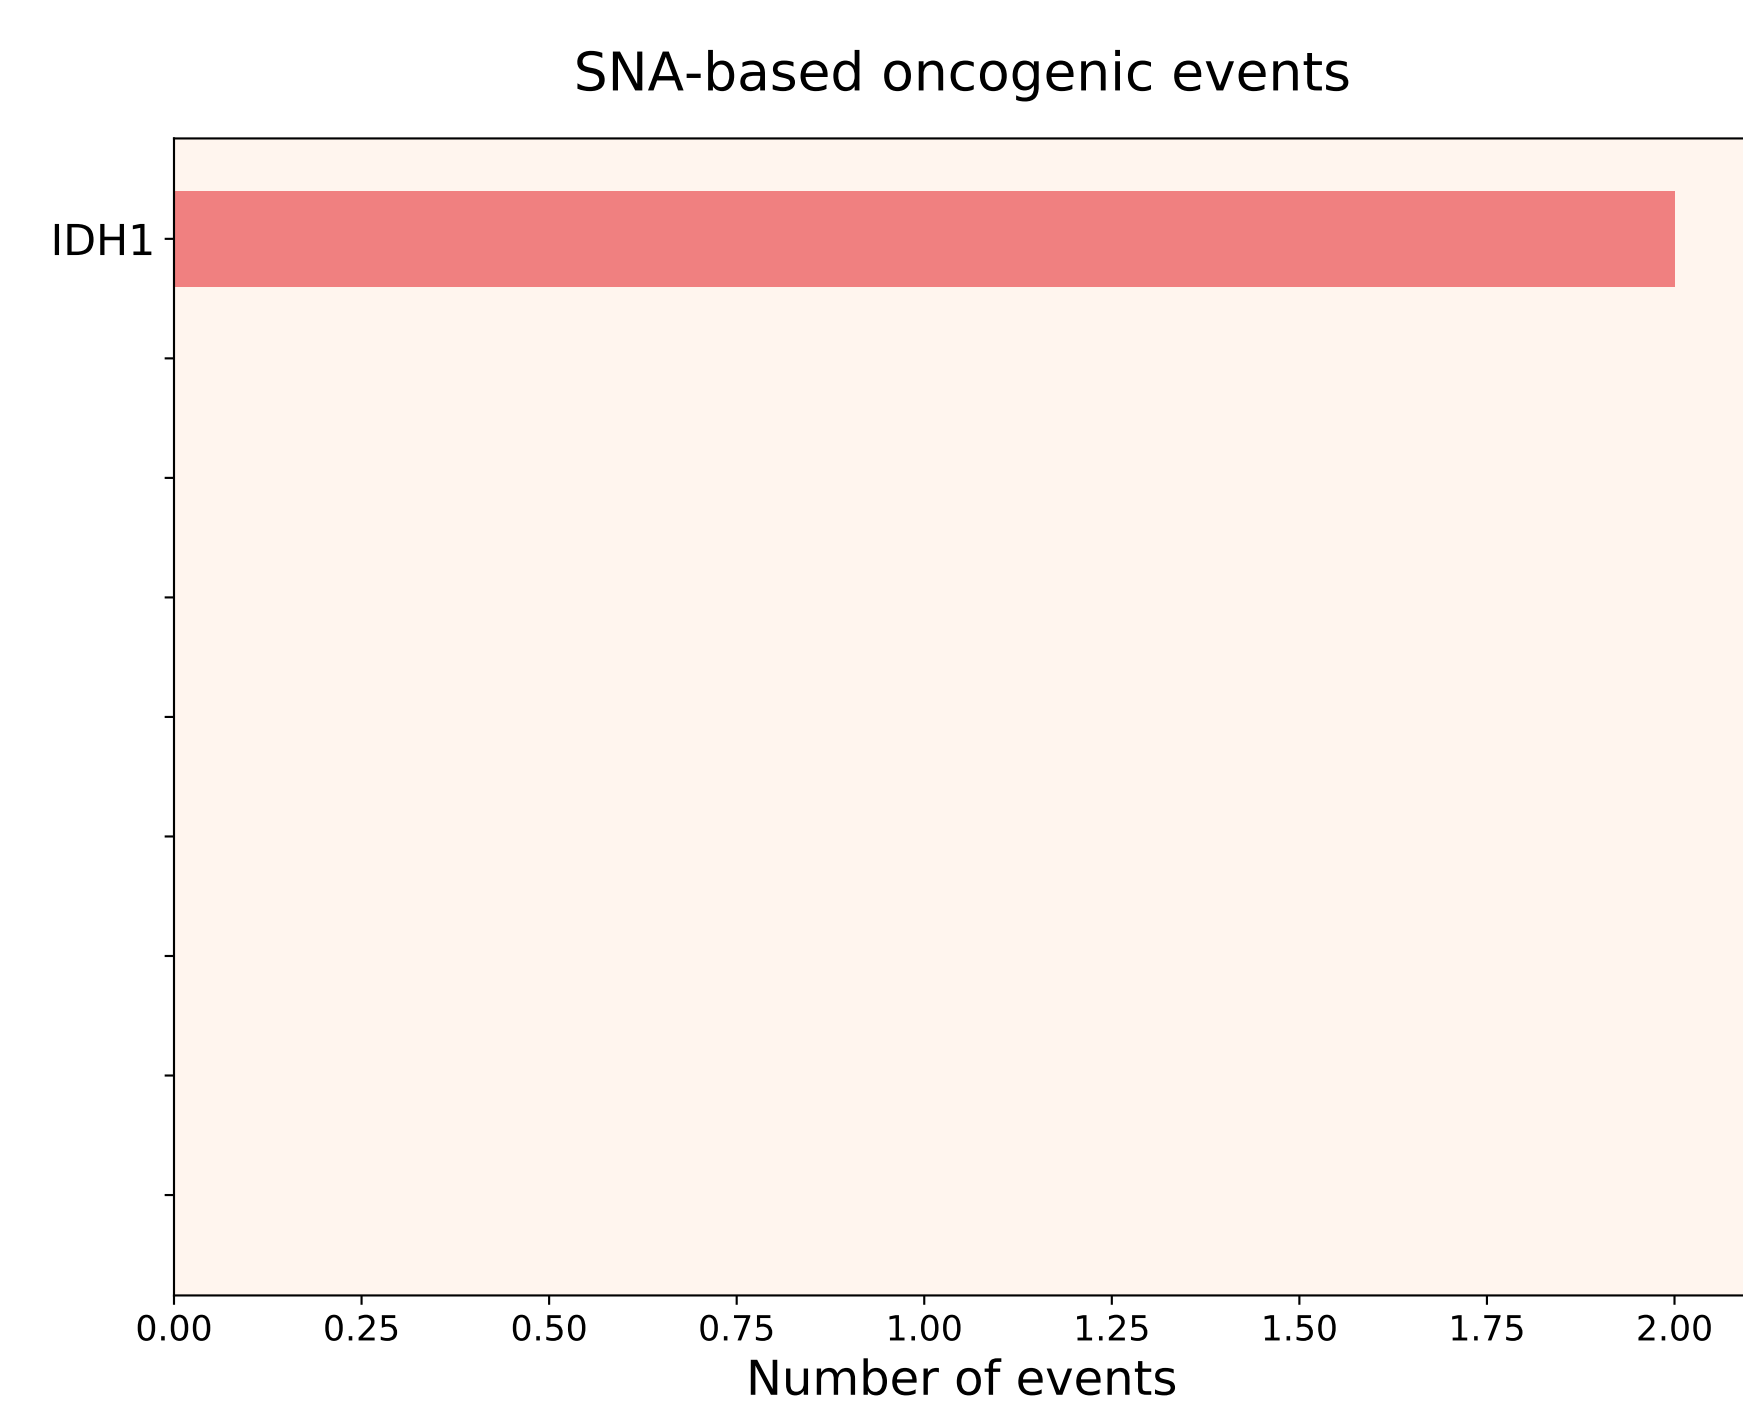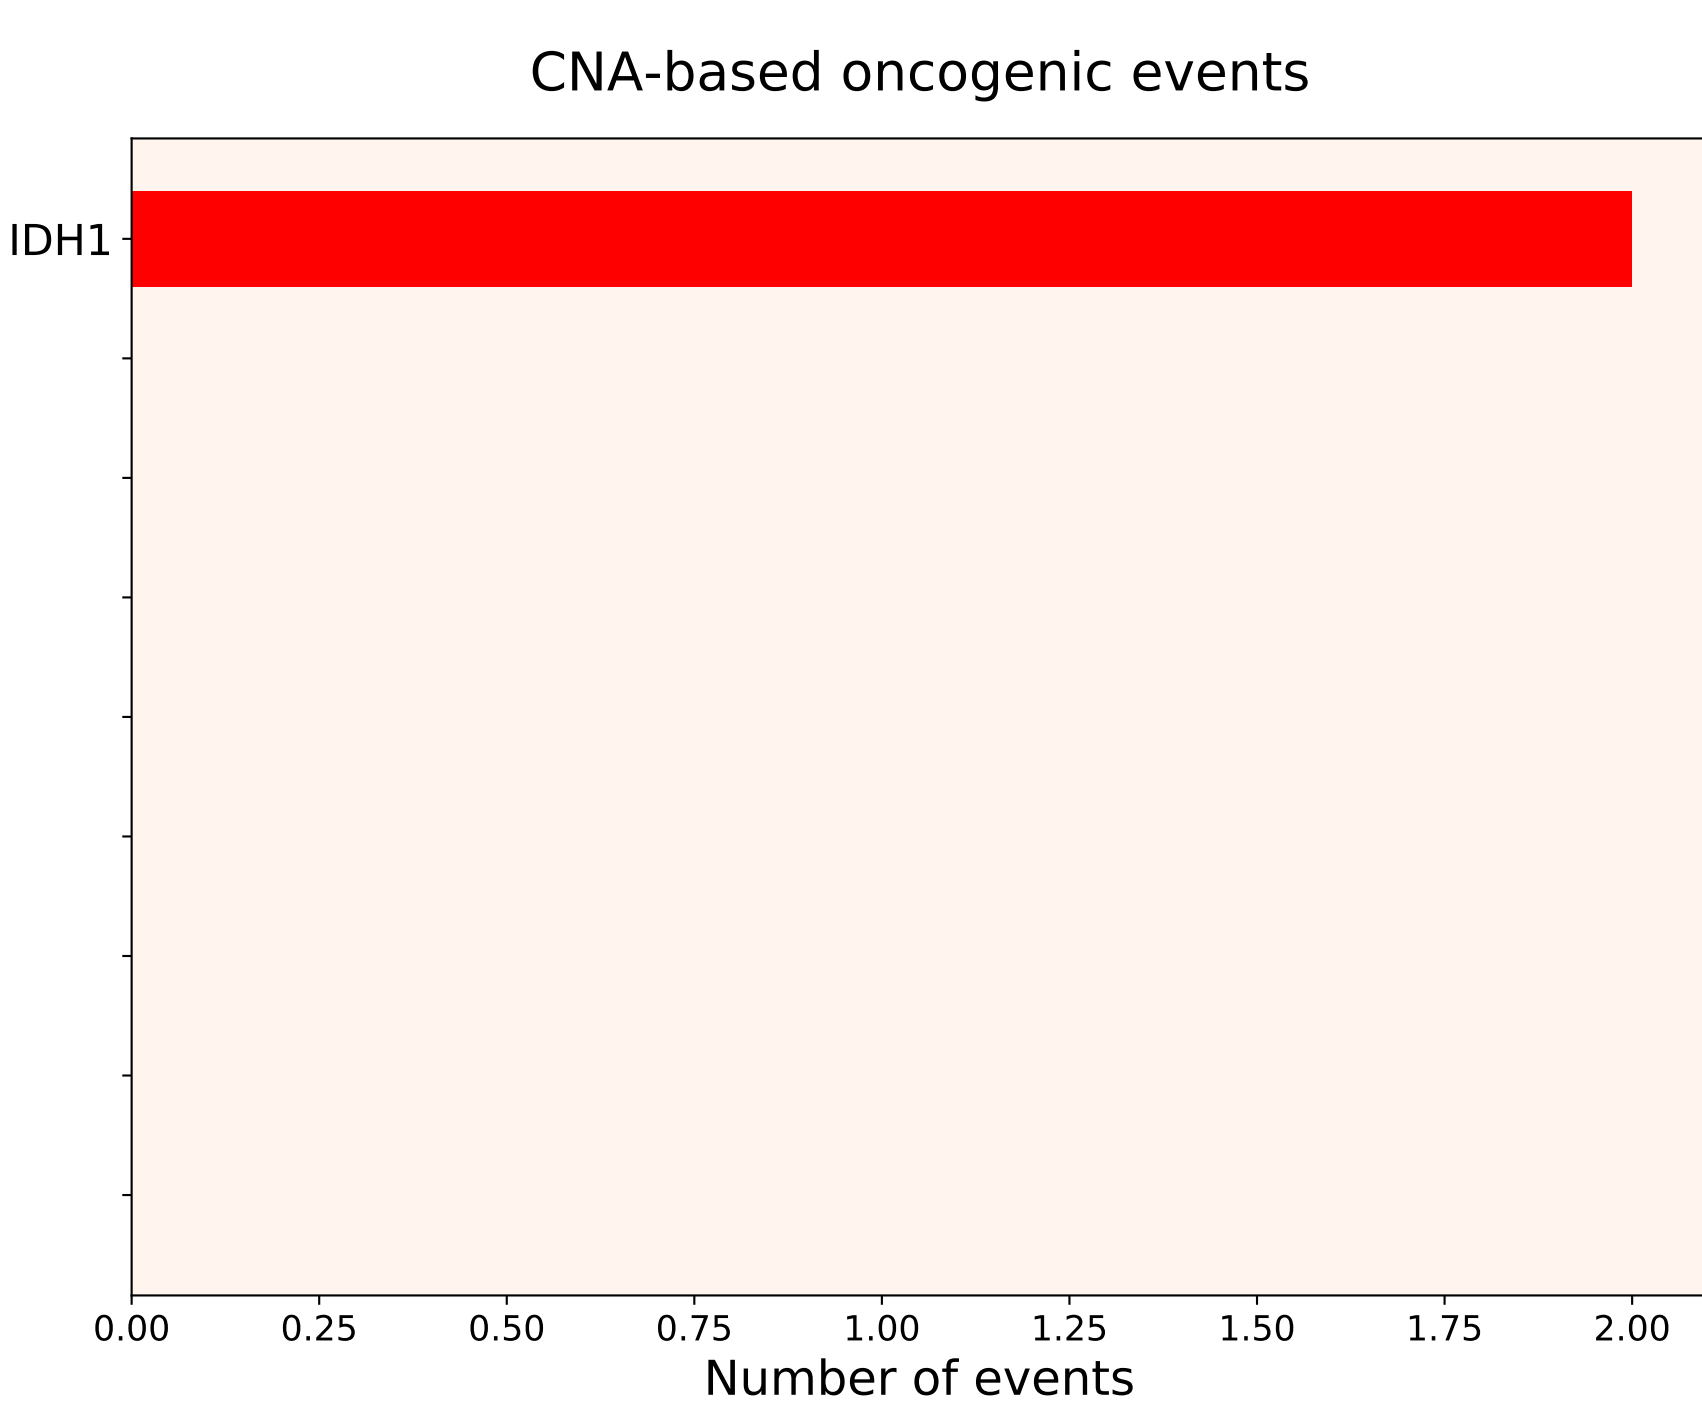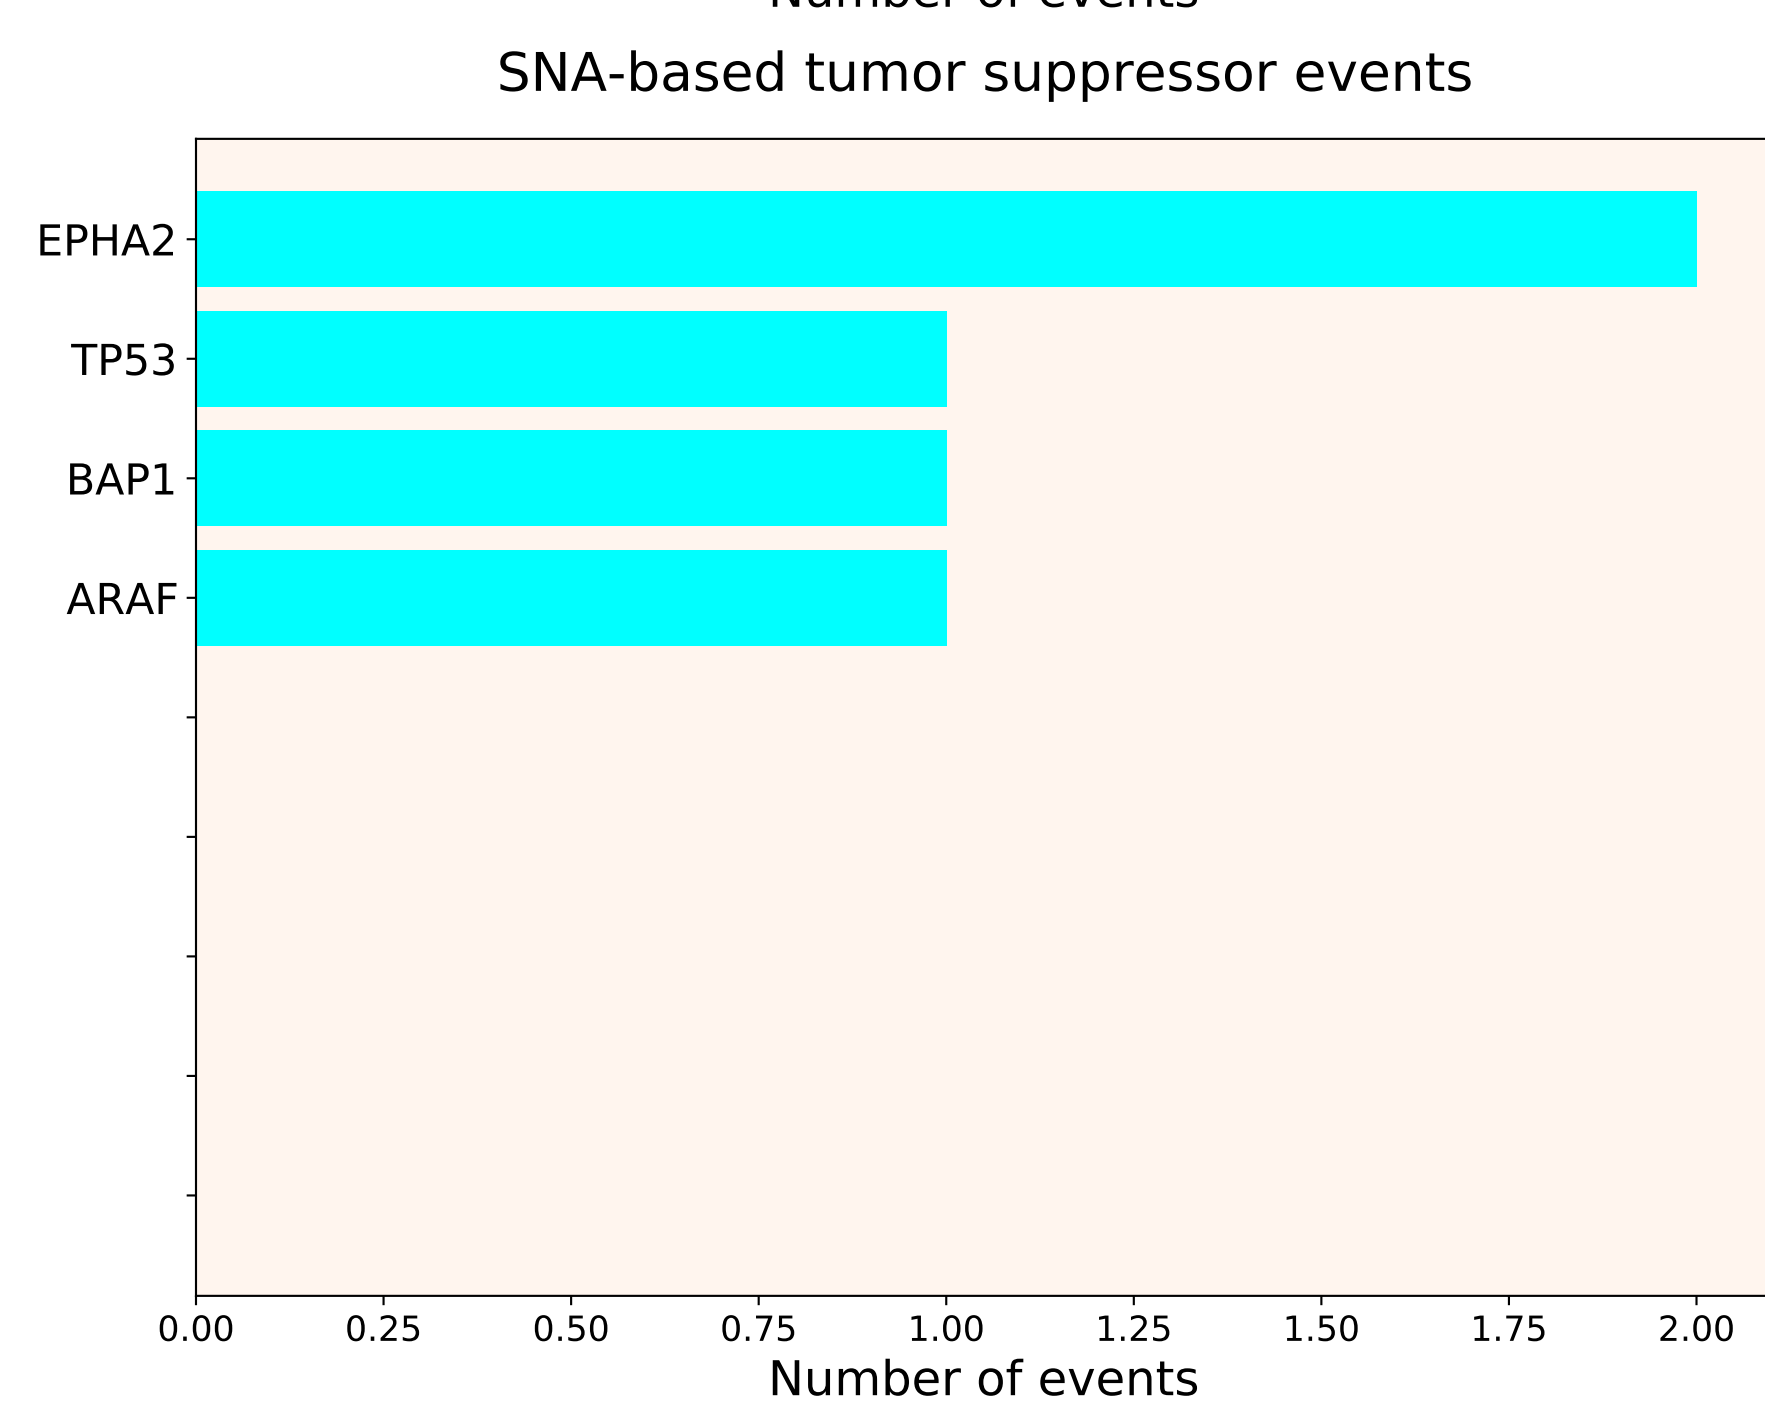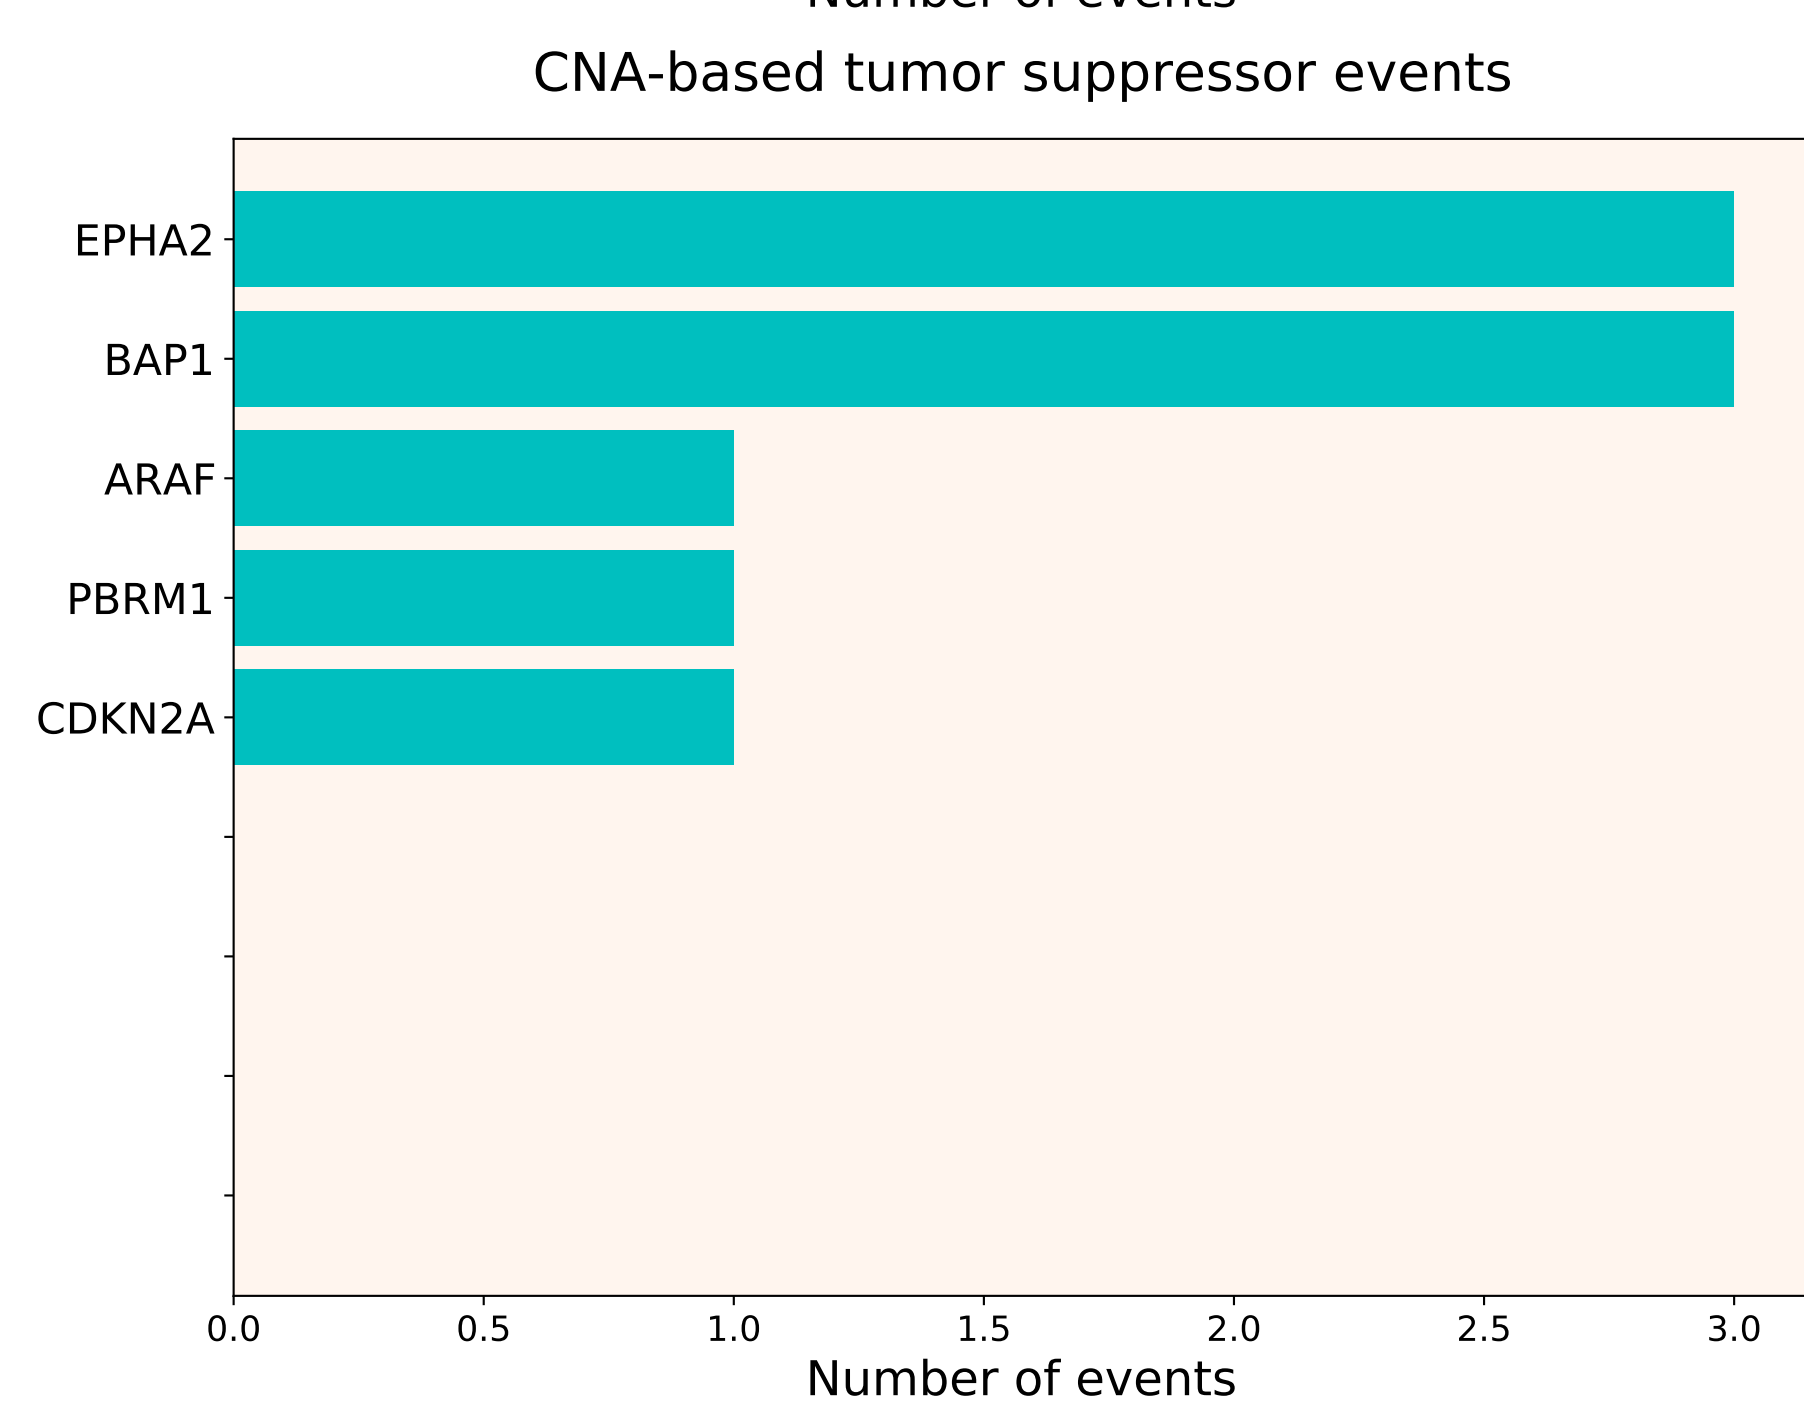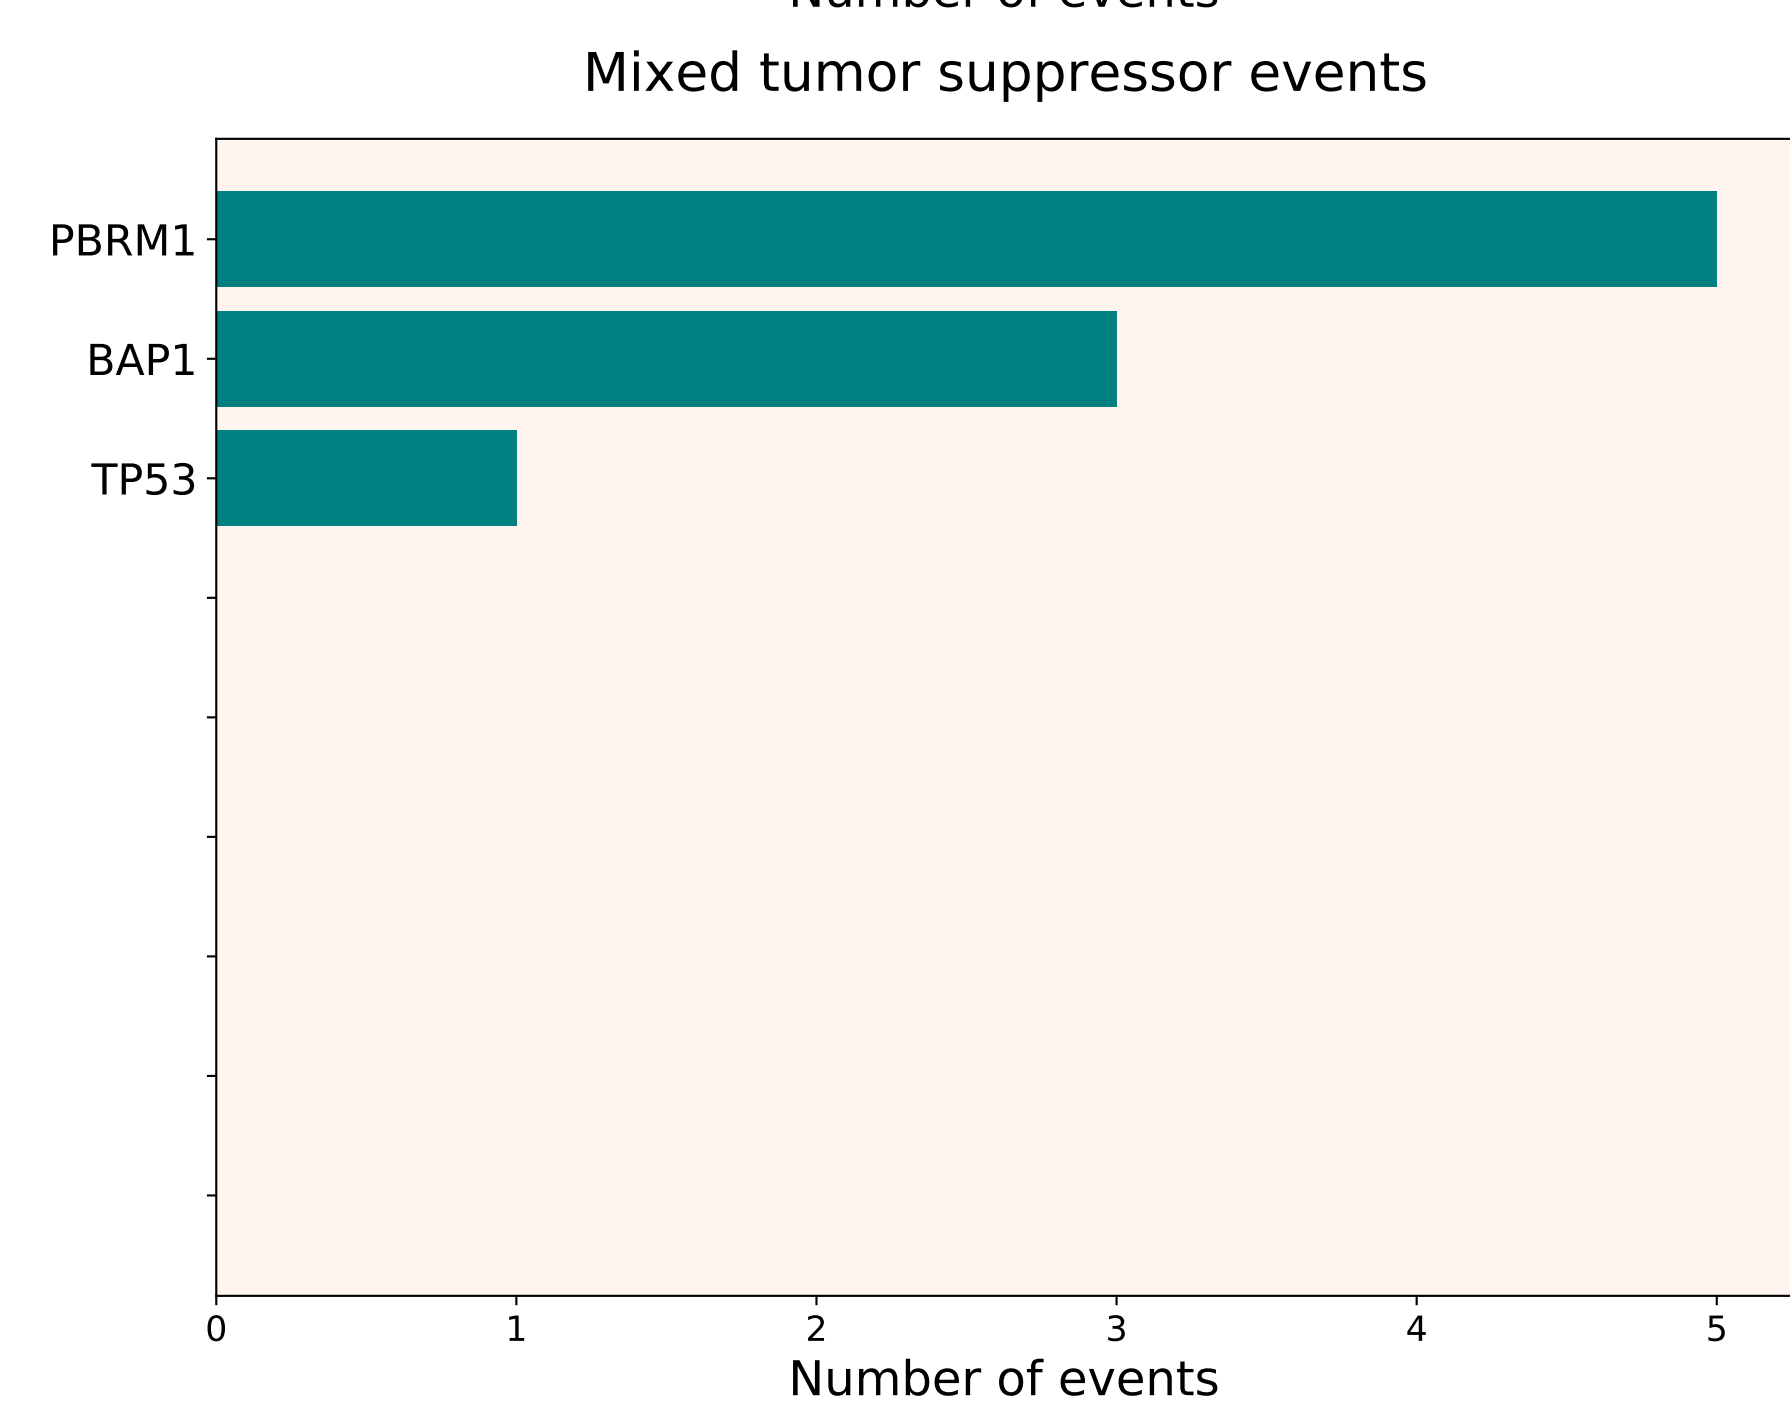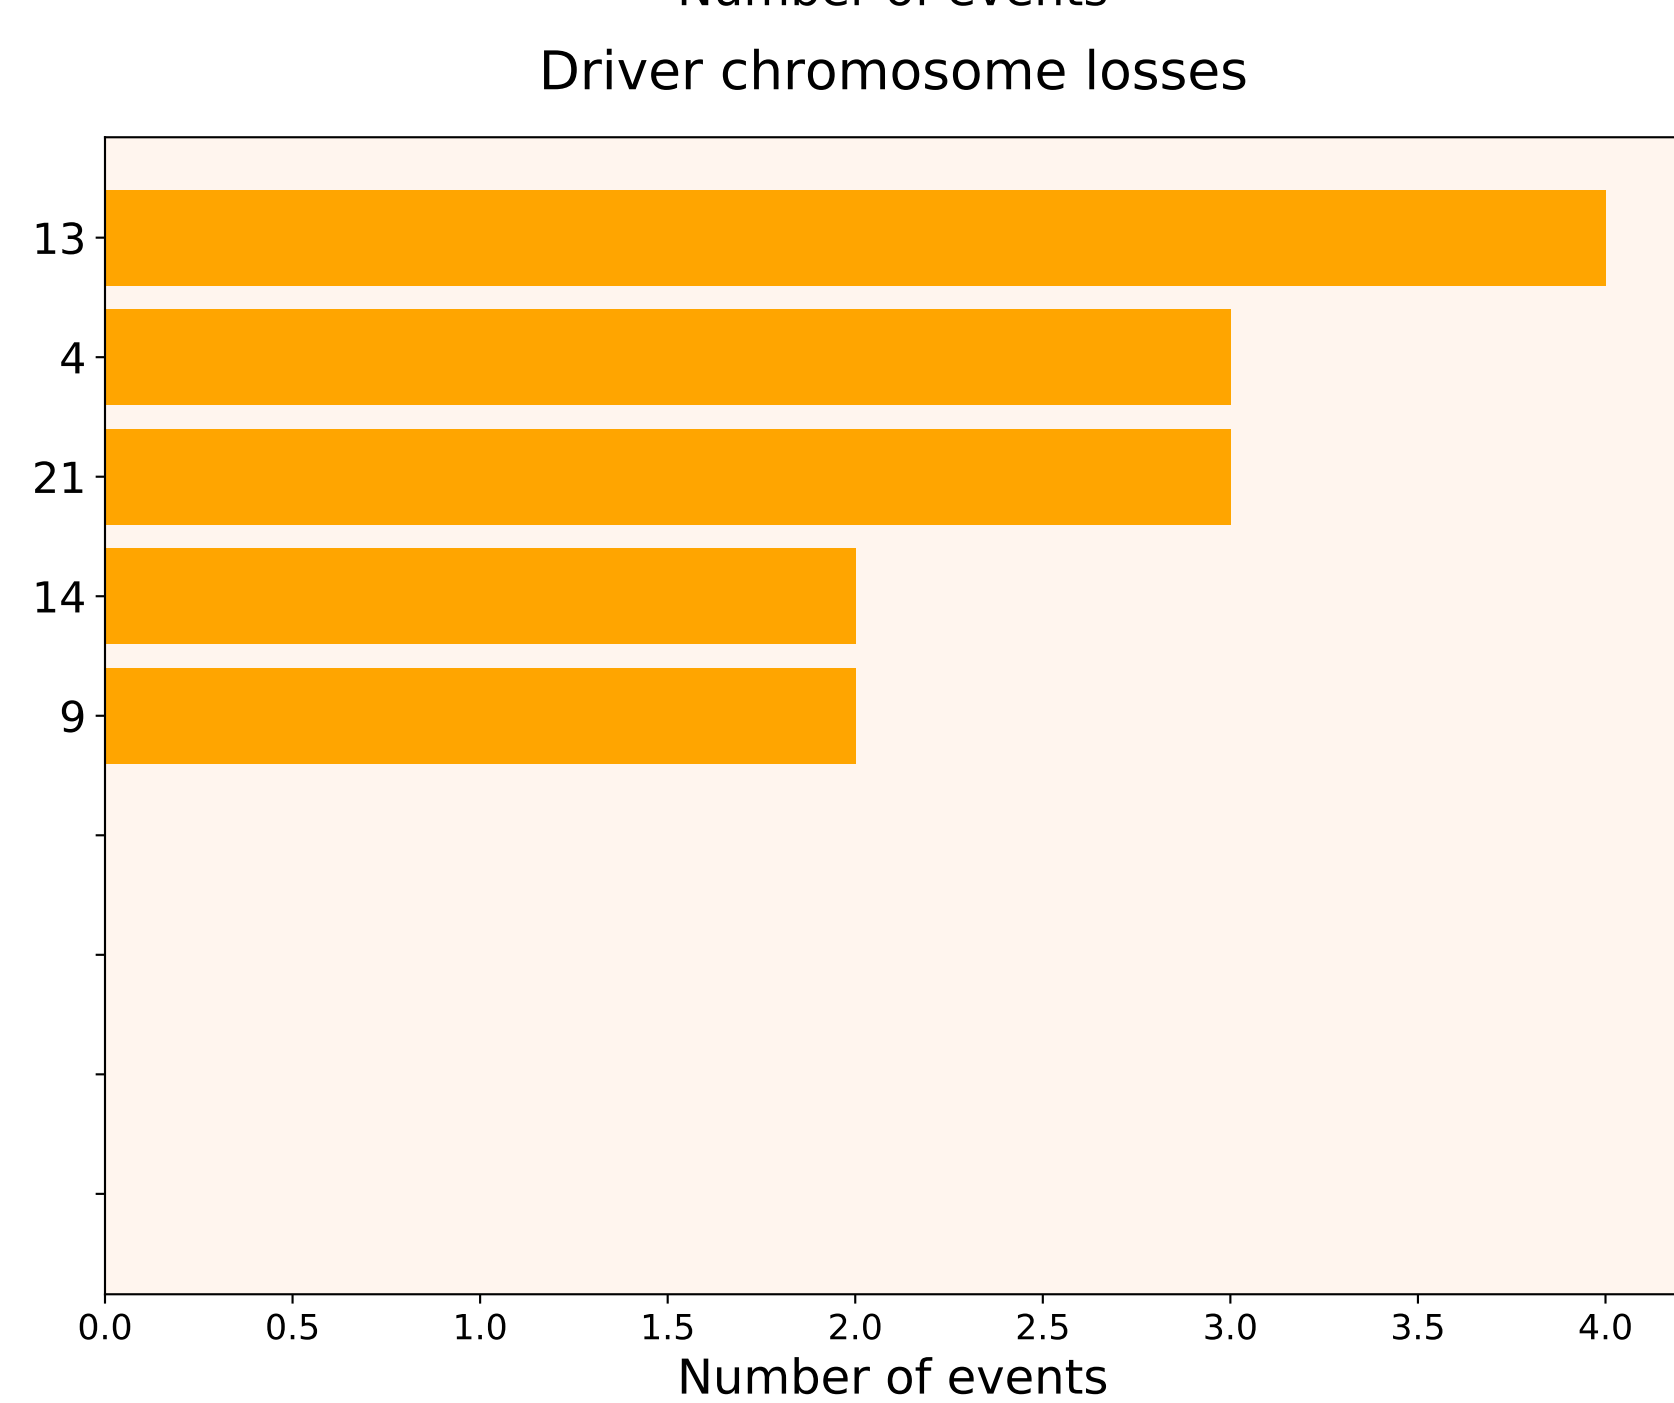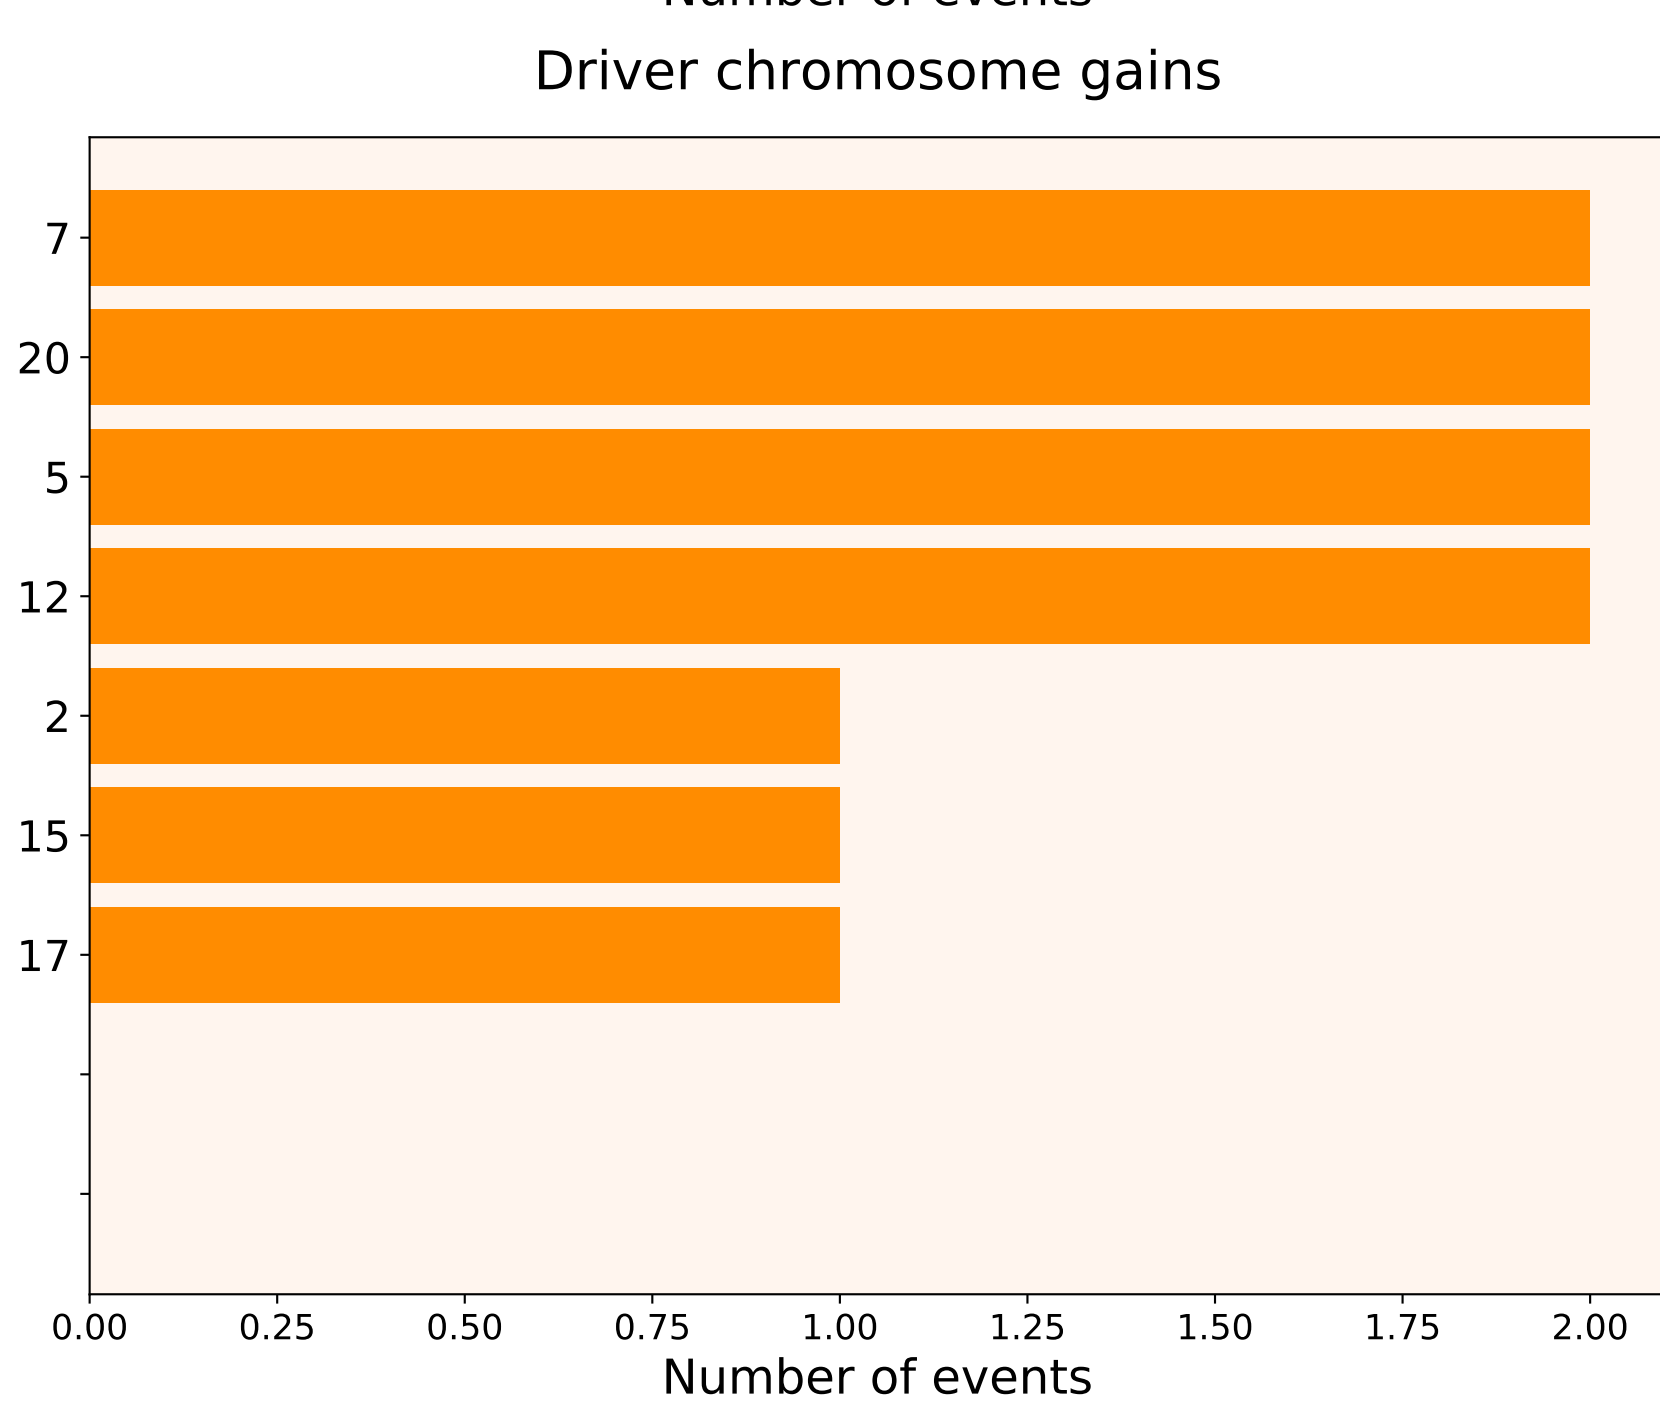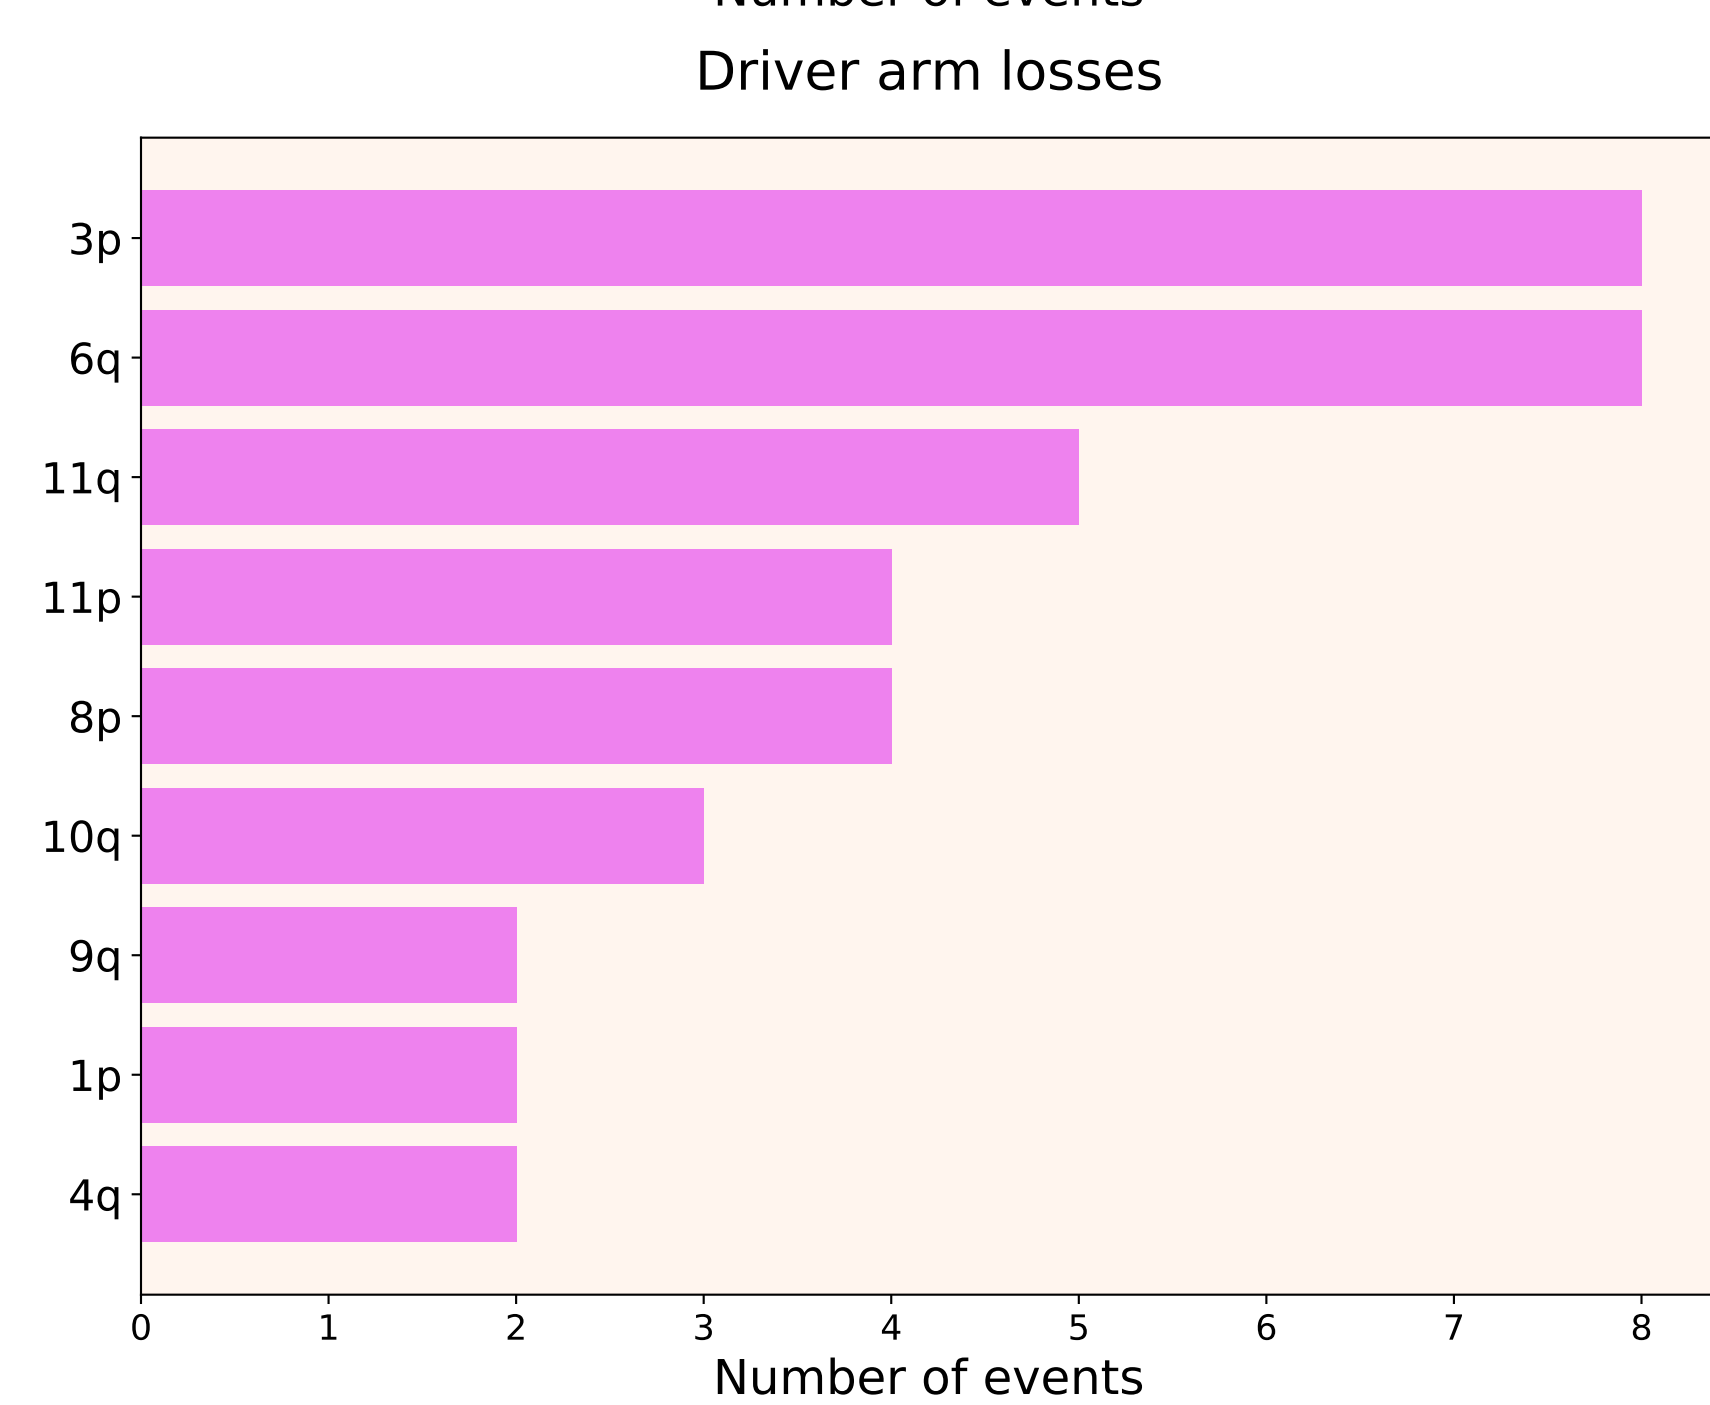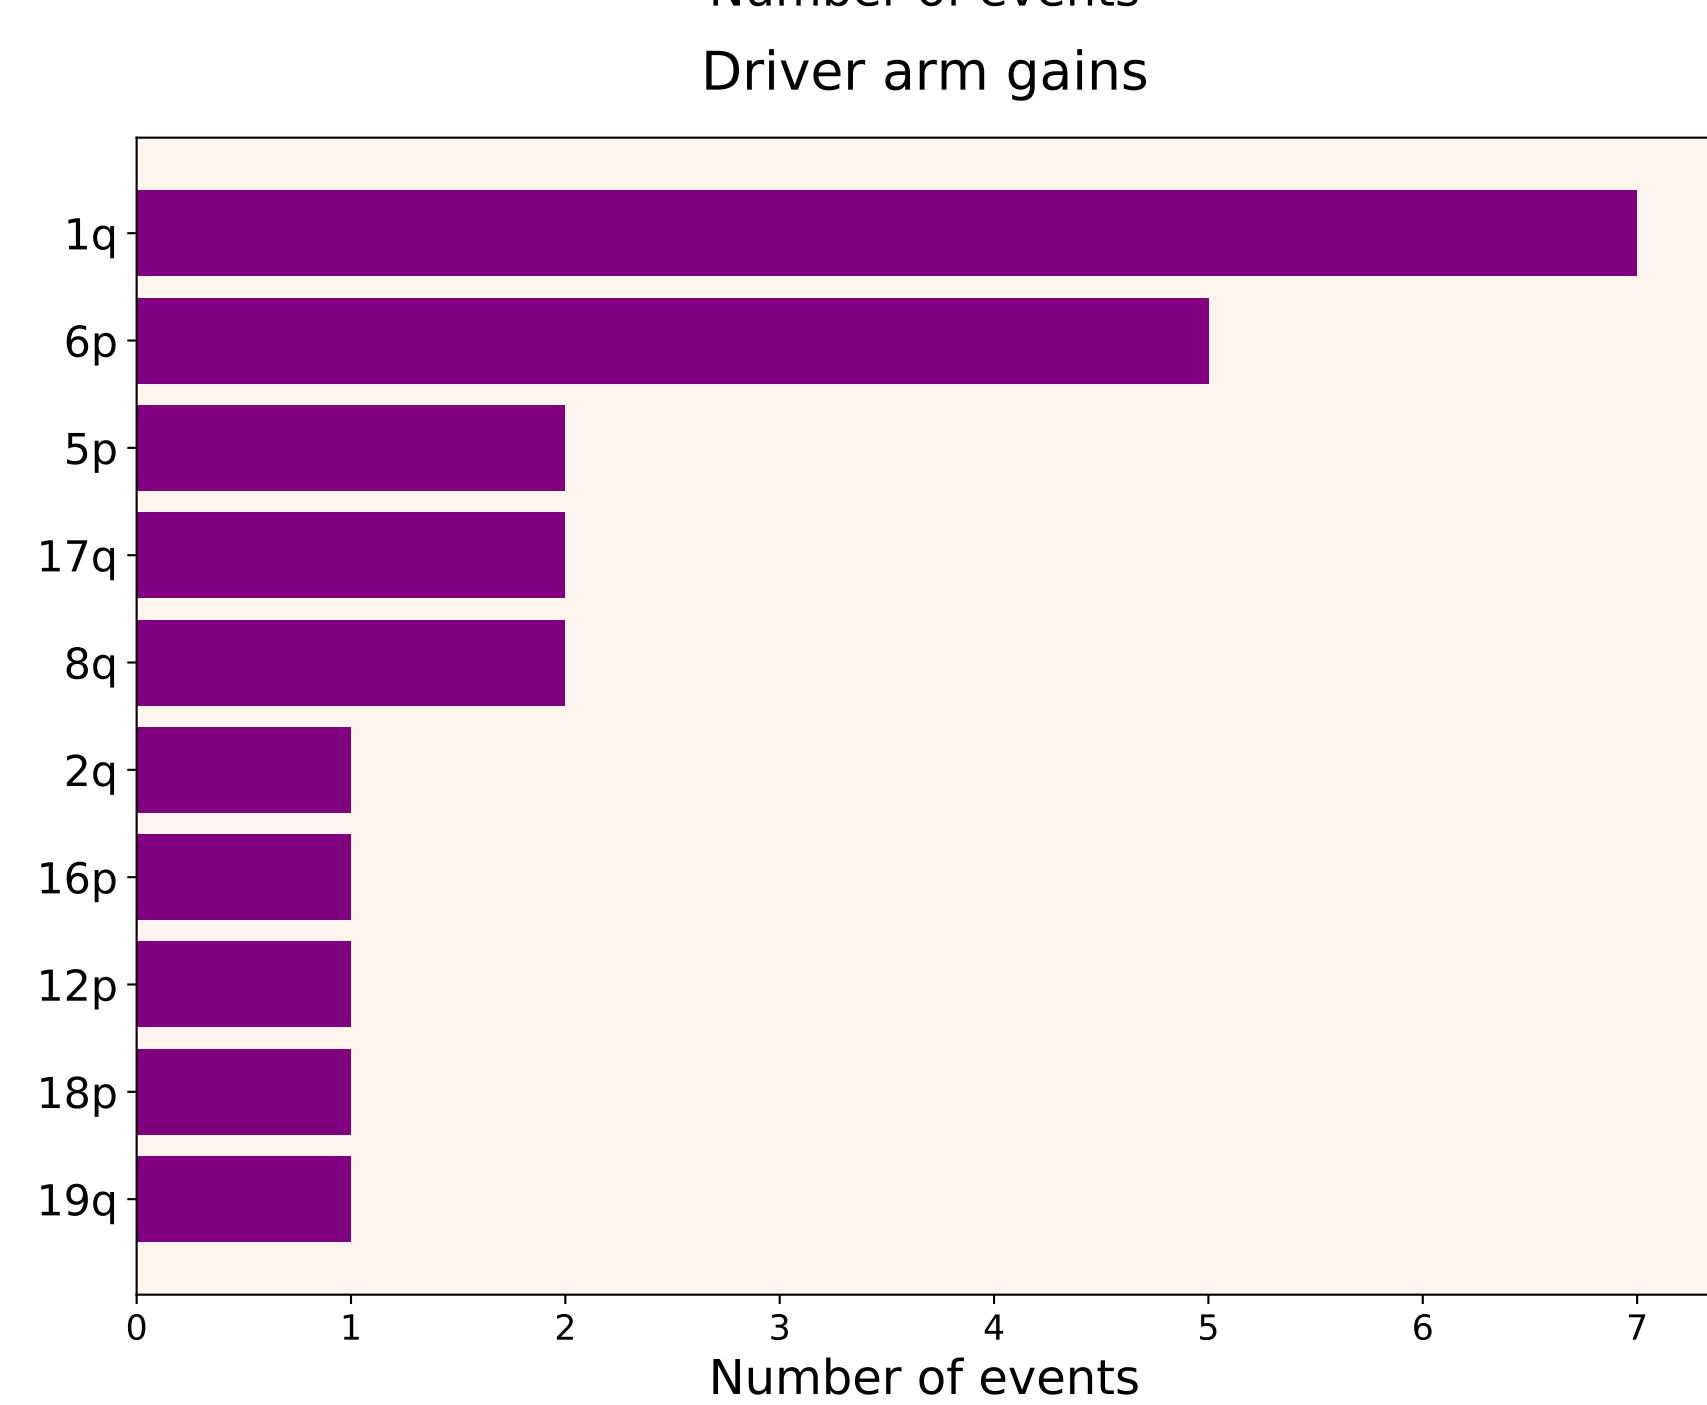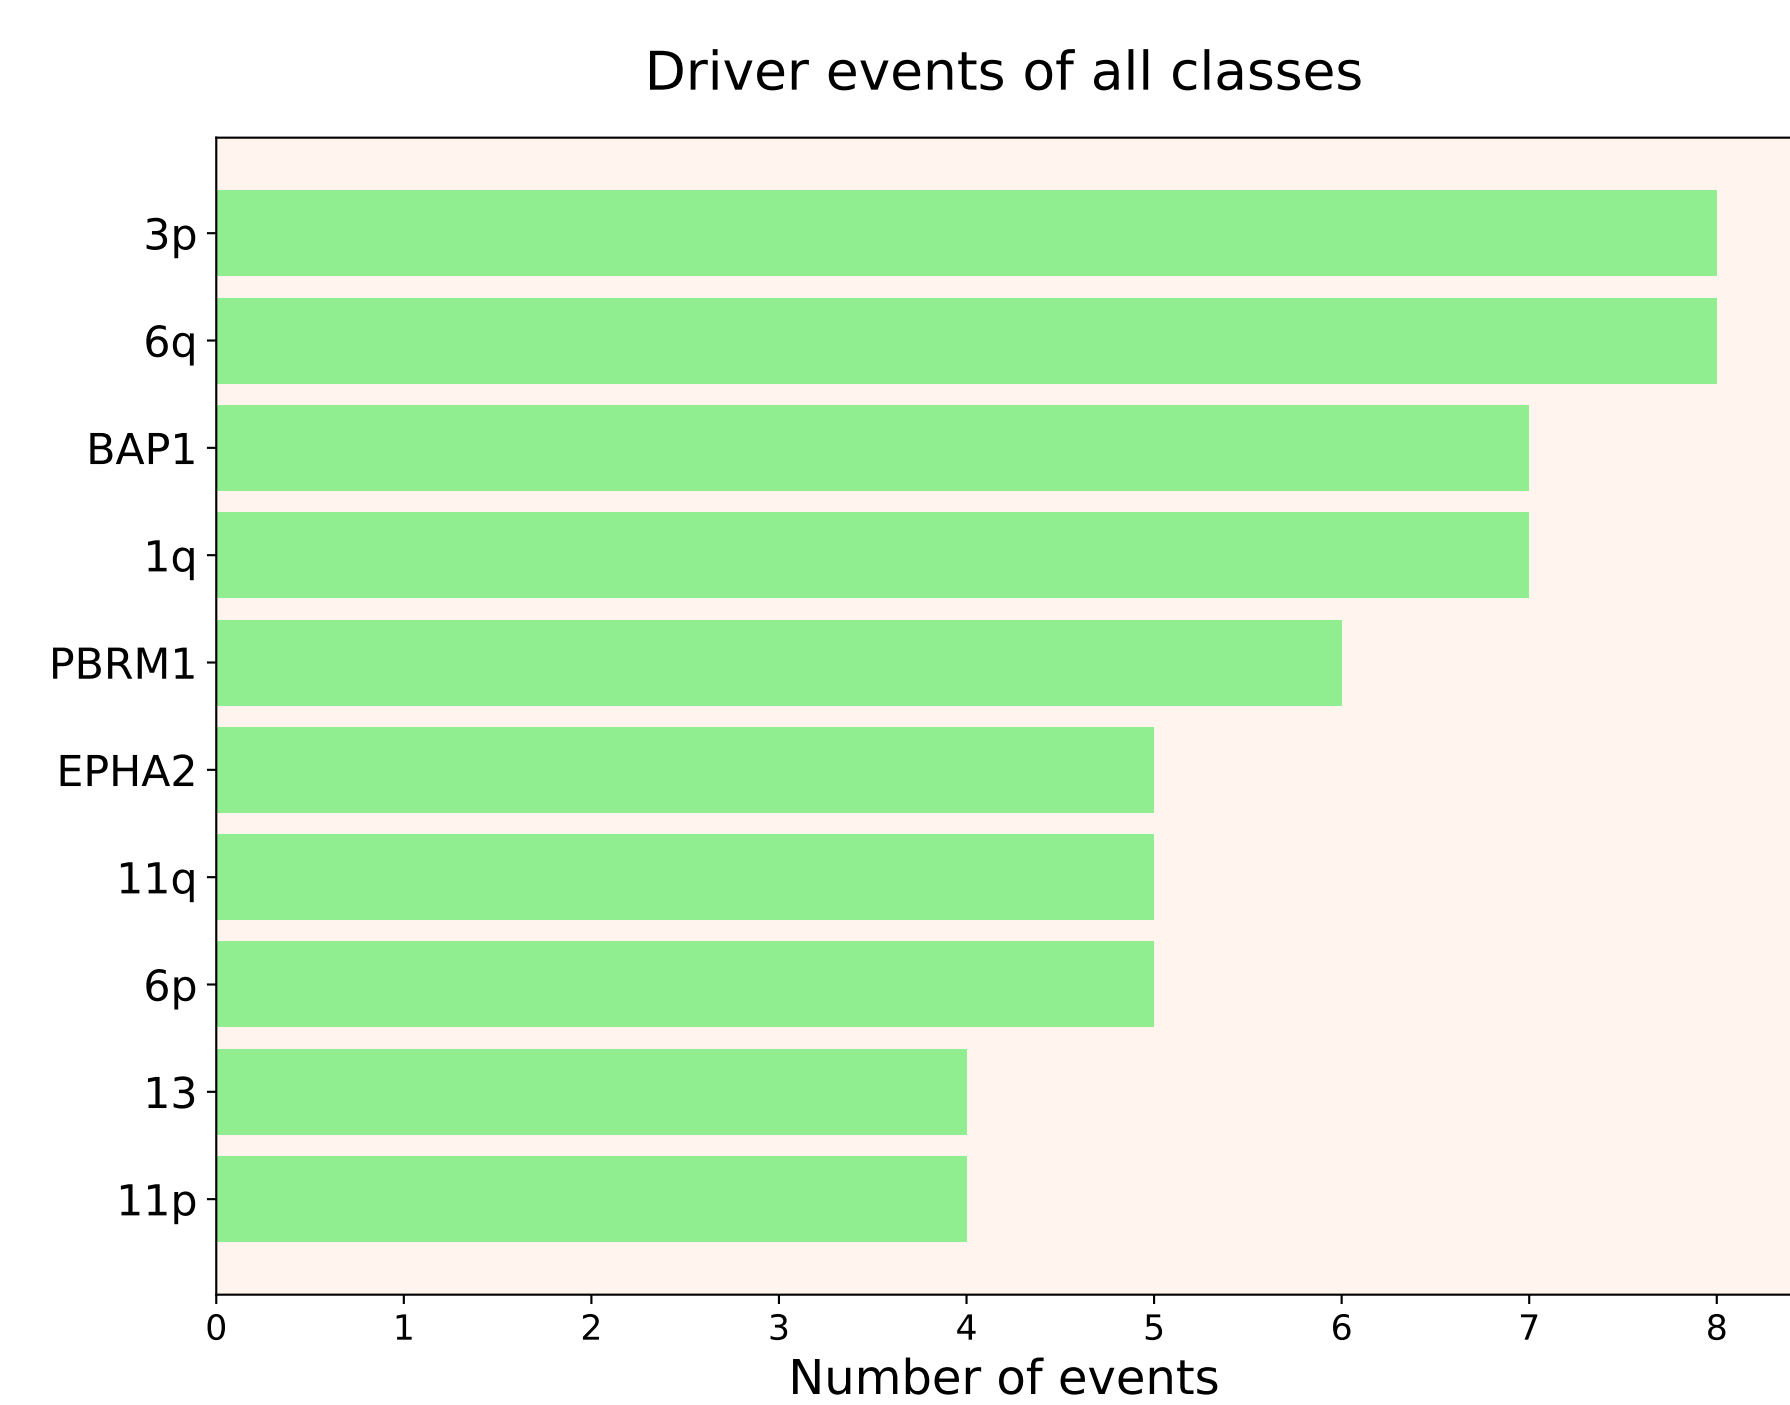

Supplement: Supplemental_Data_S1.zip [file Supplemental_Data_S1.zip]

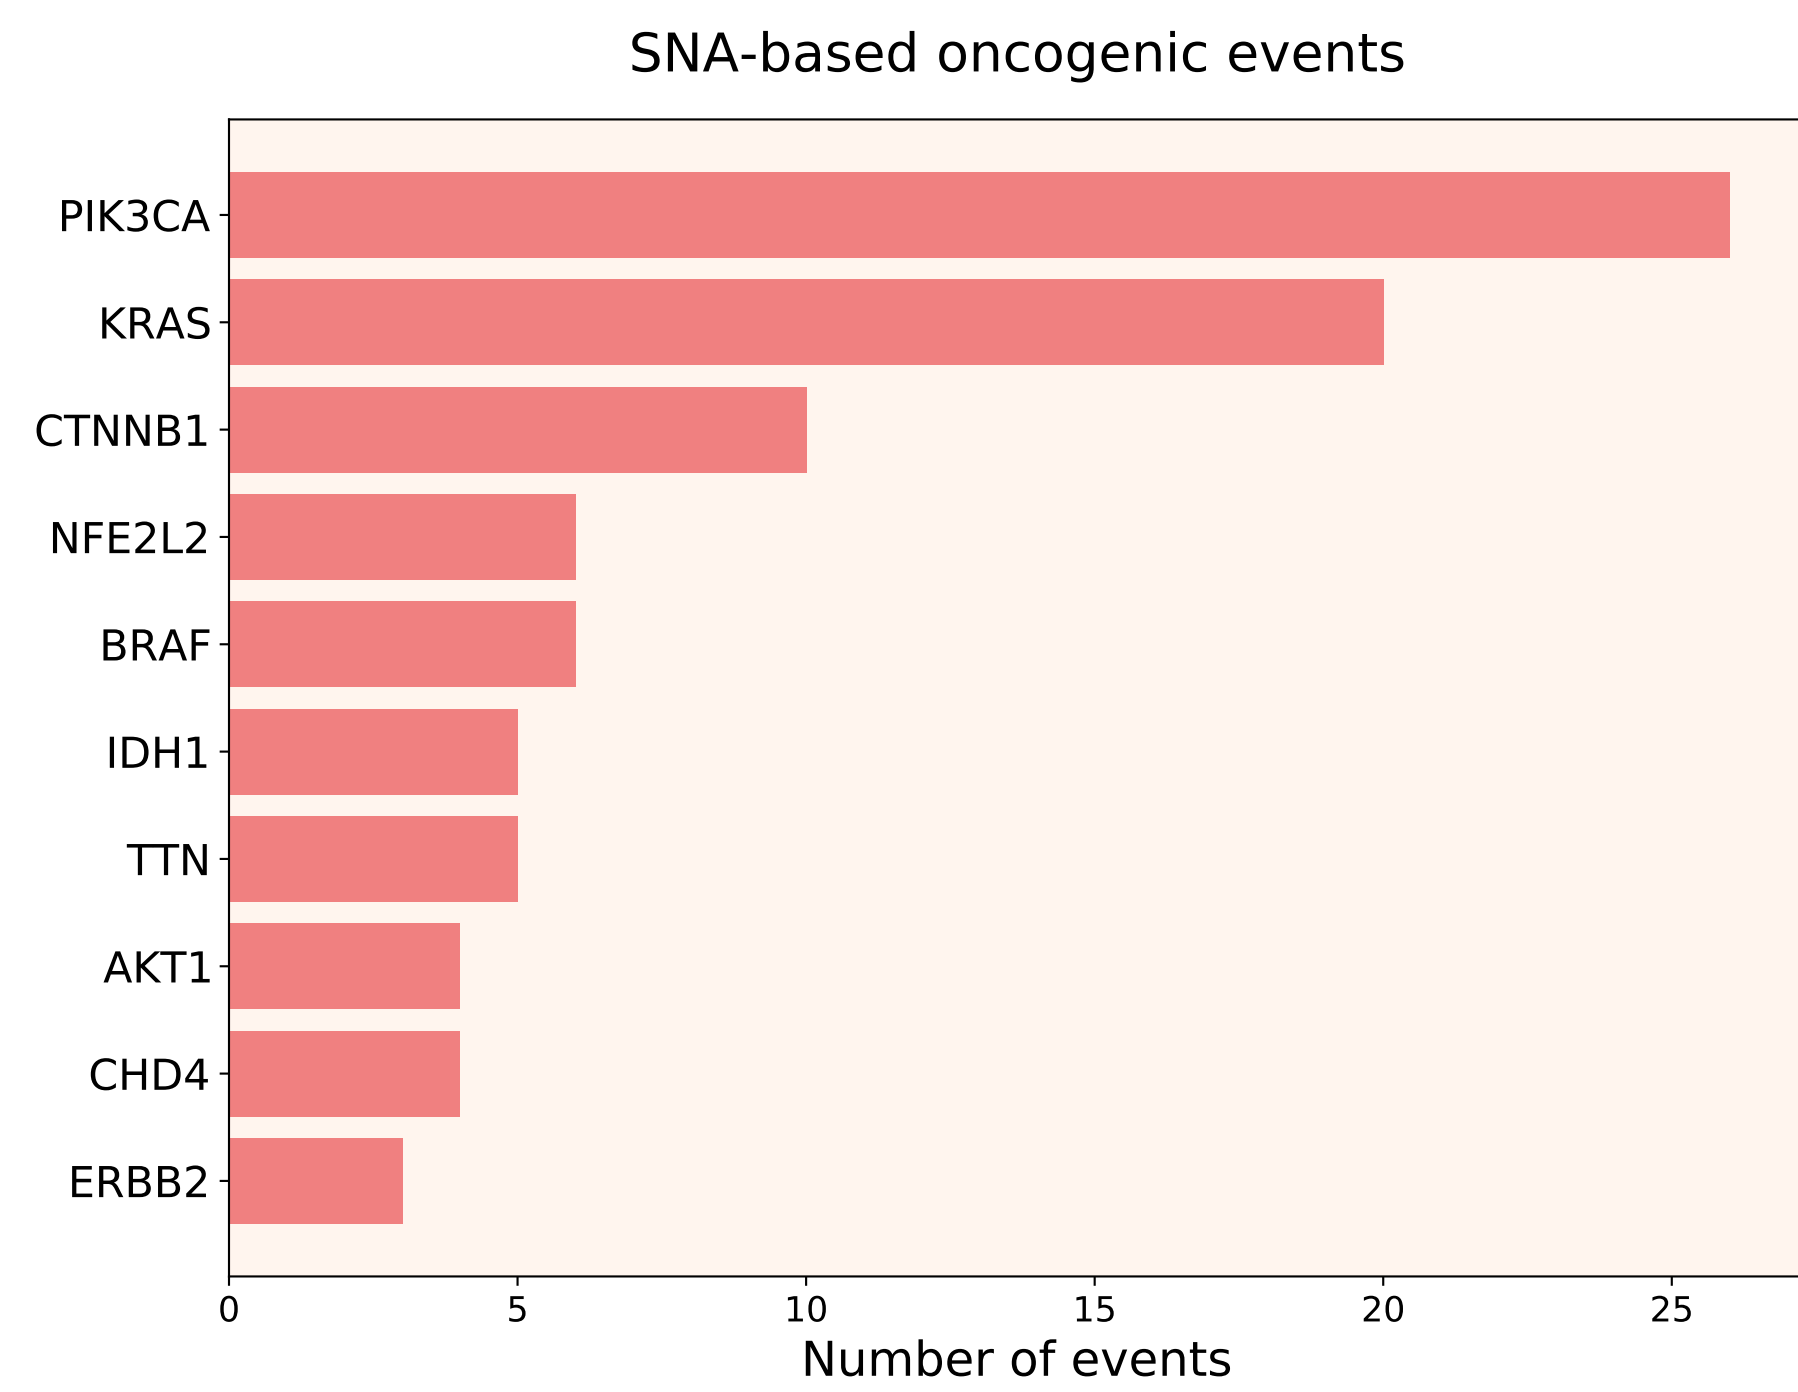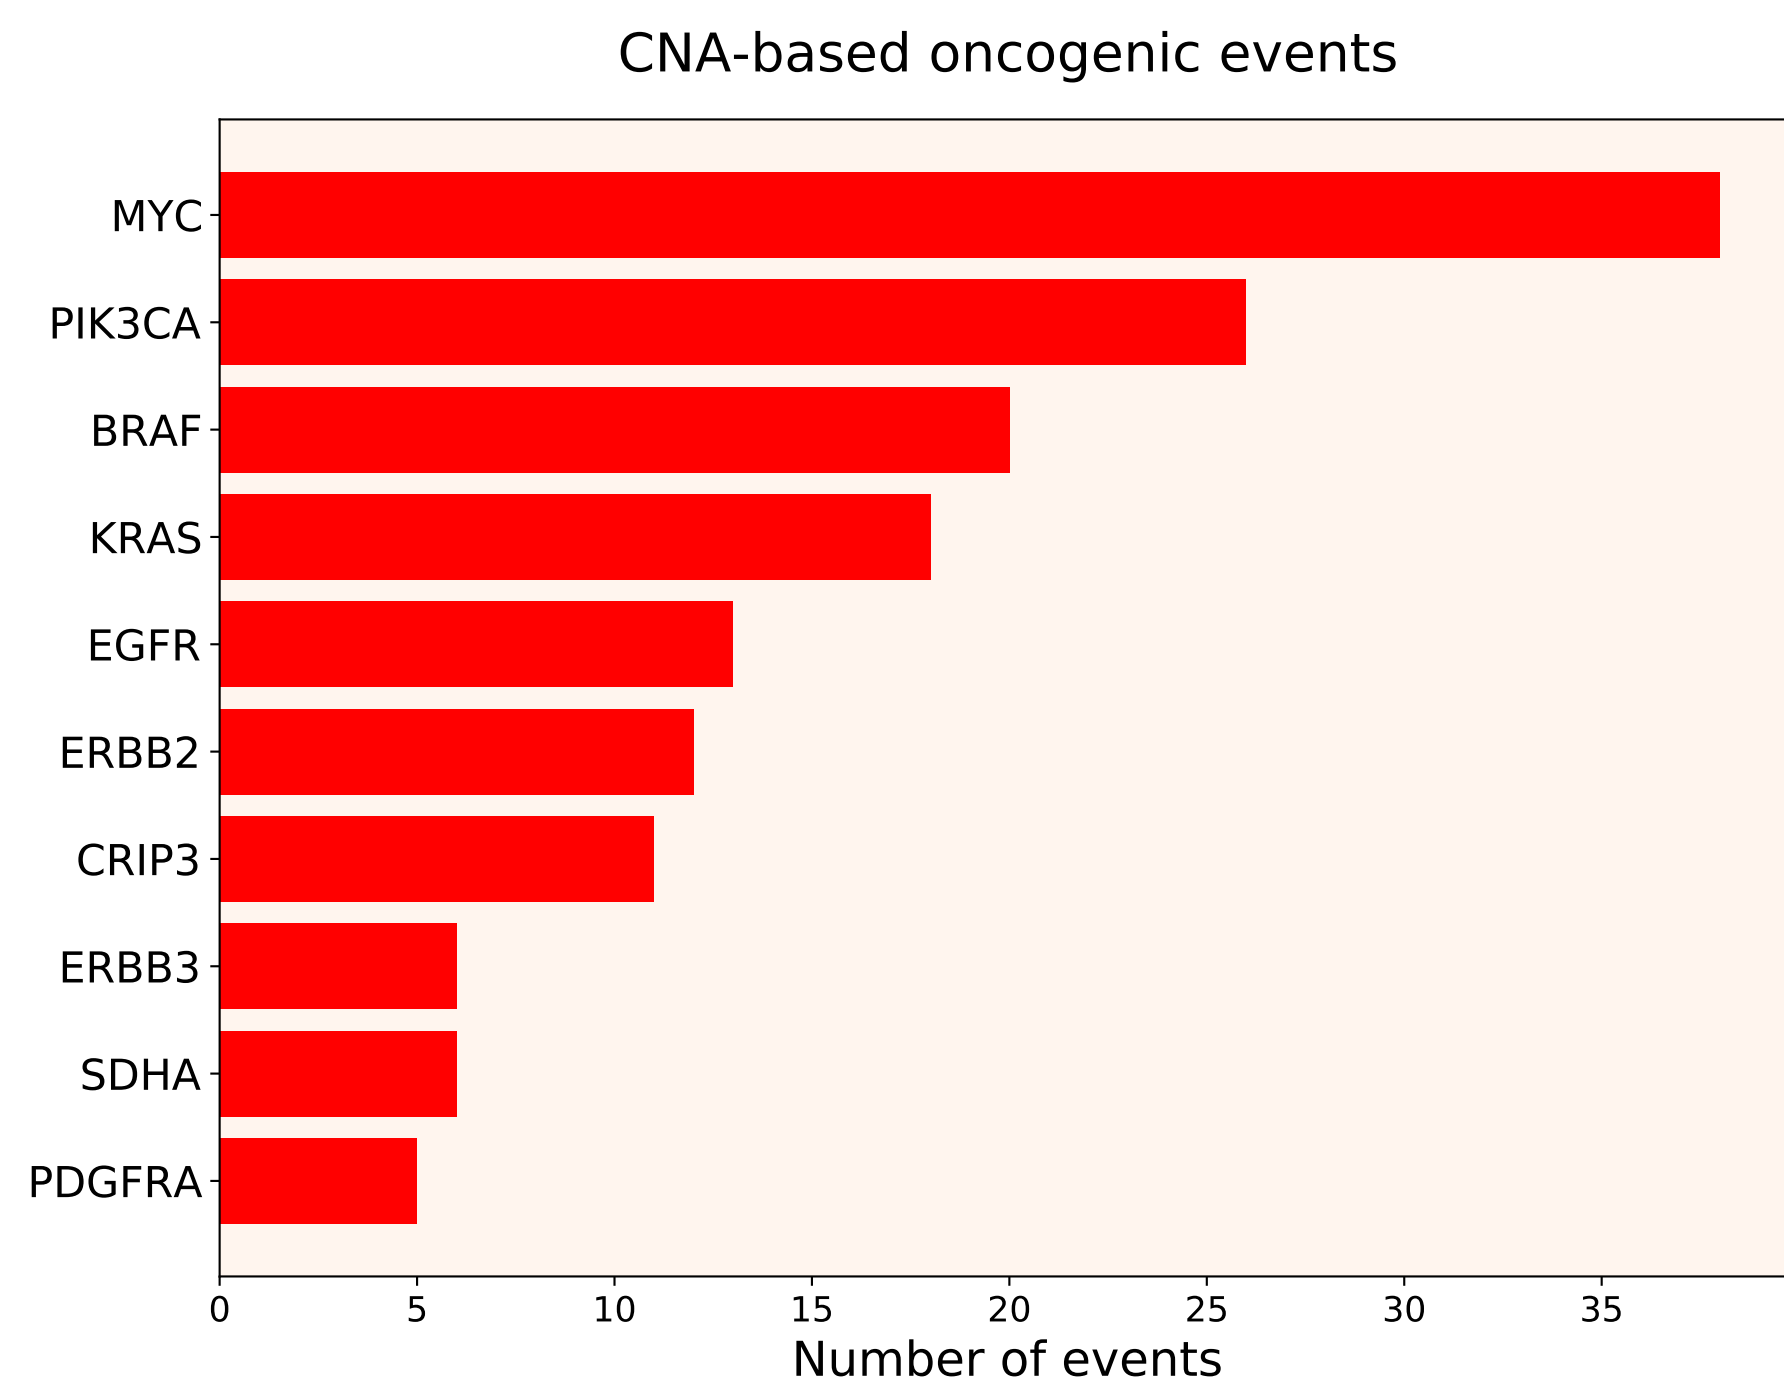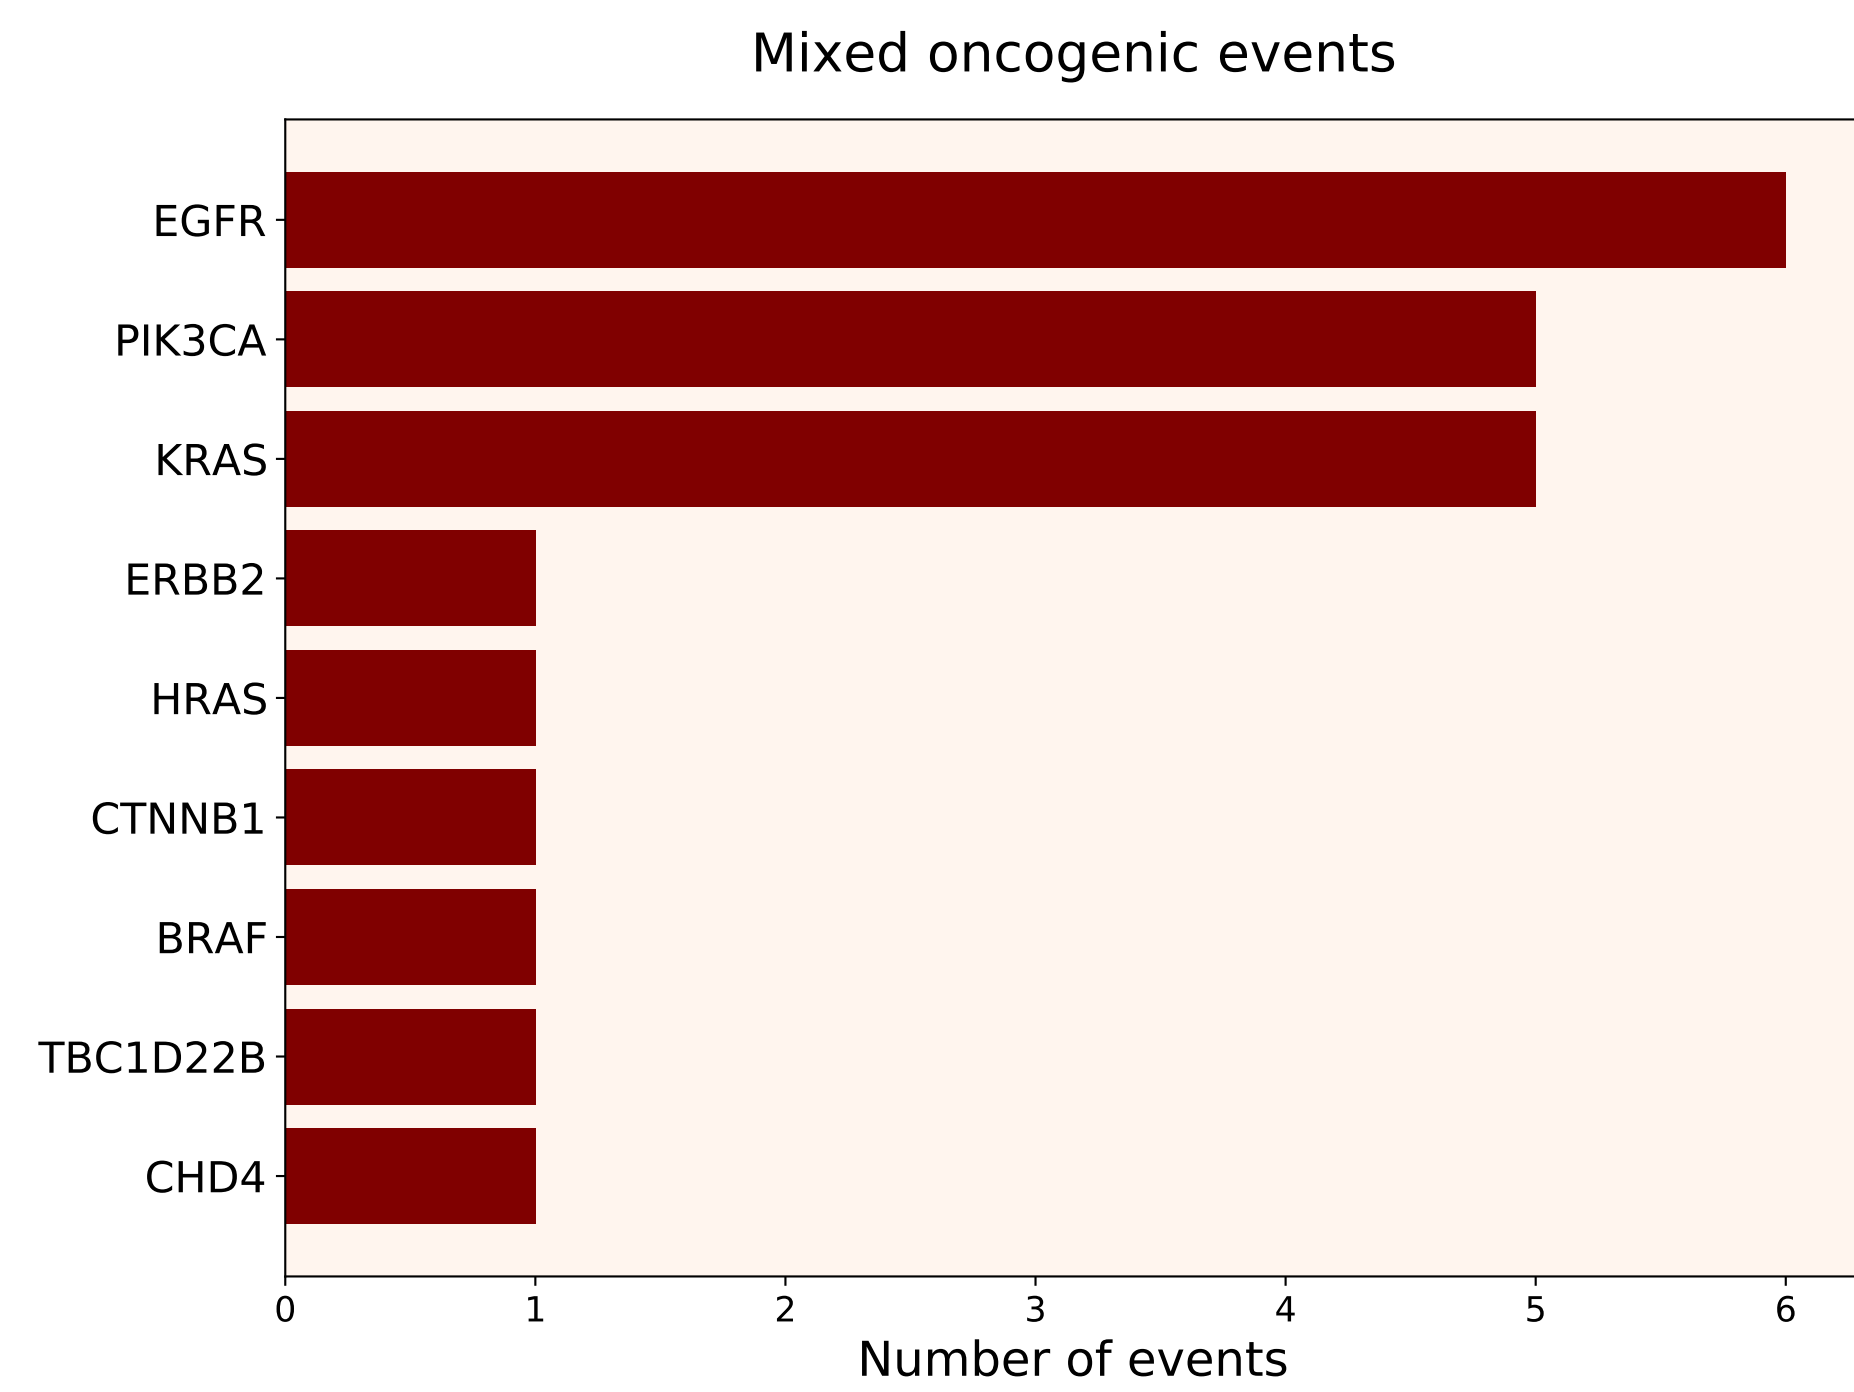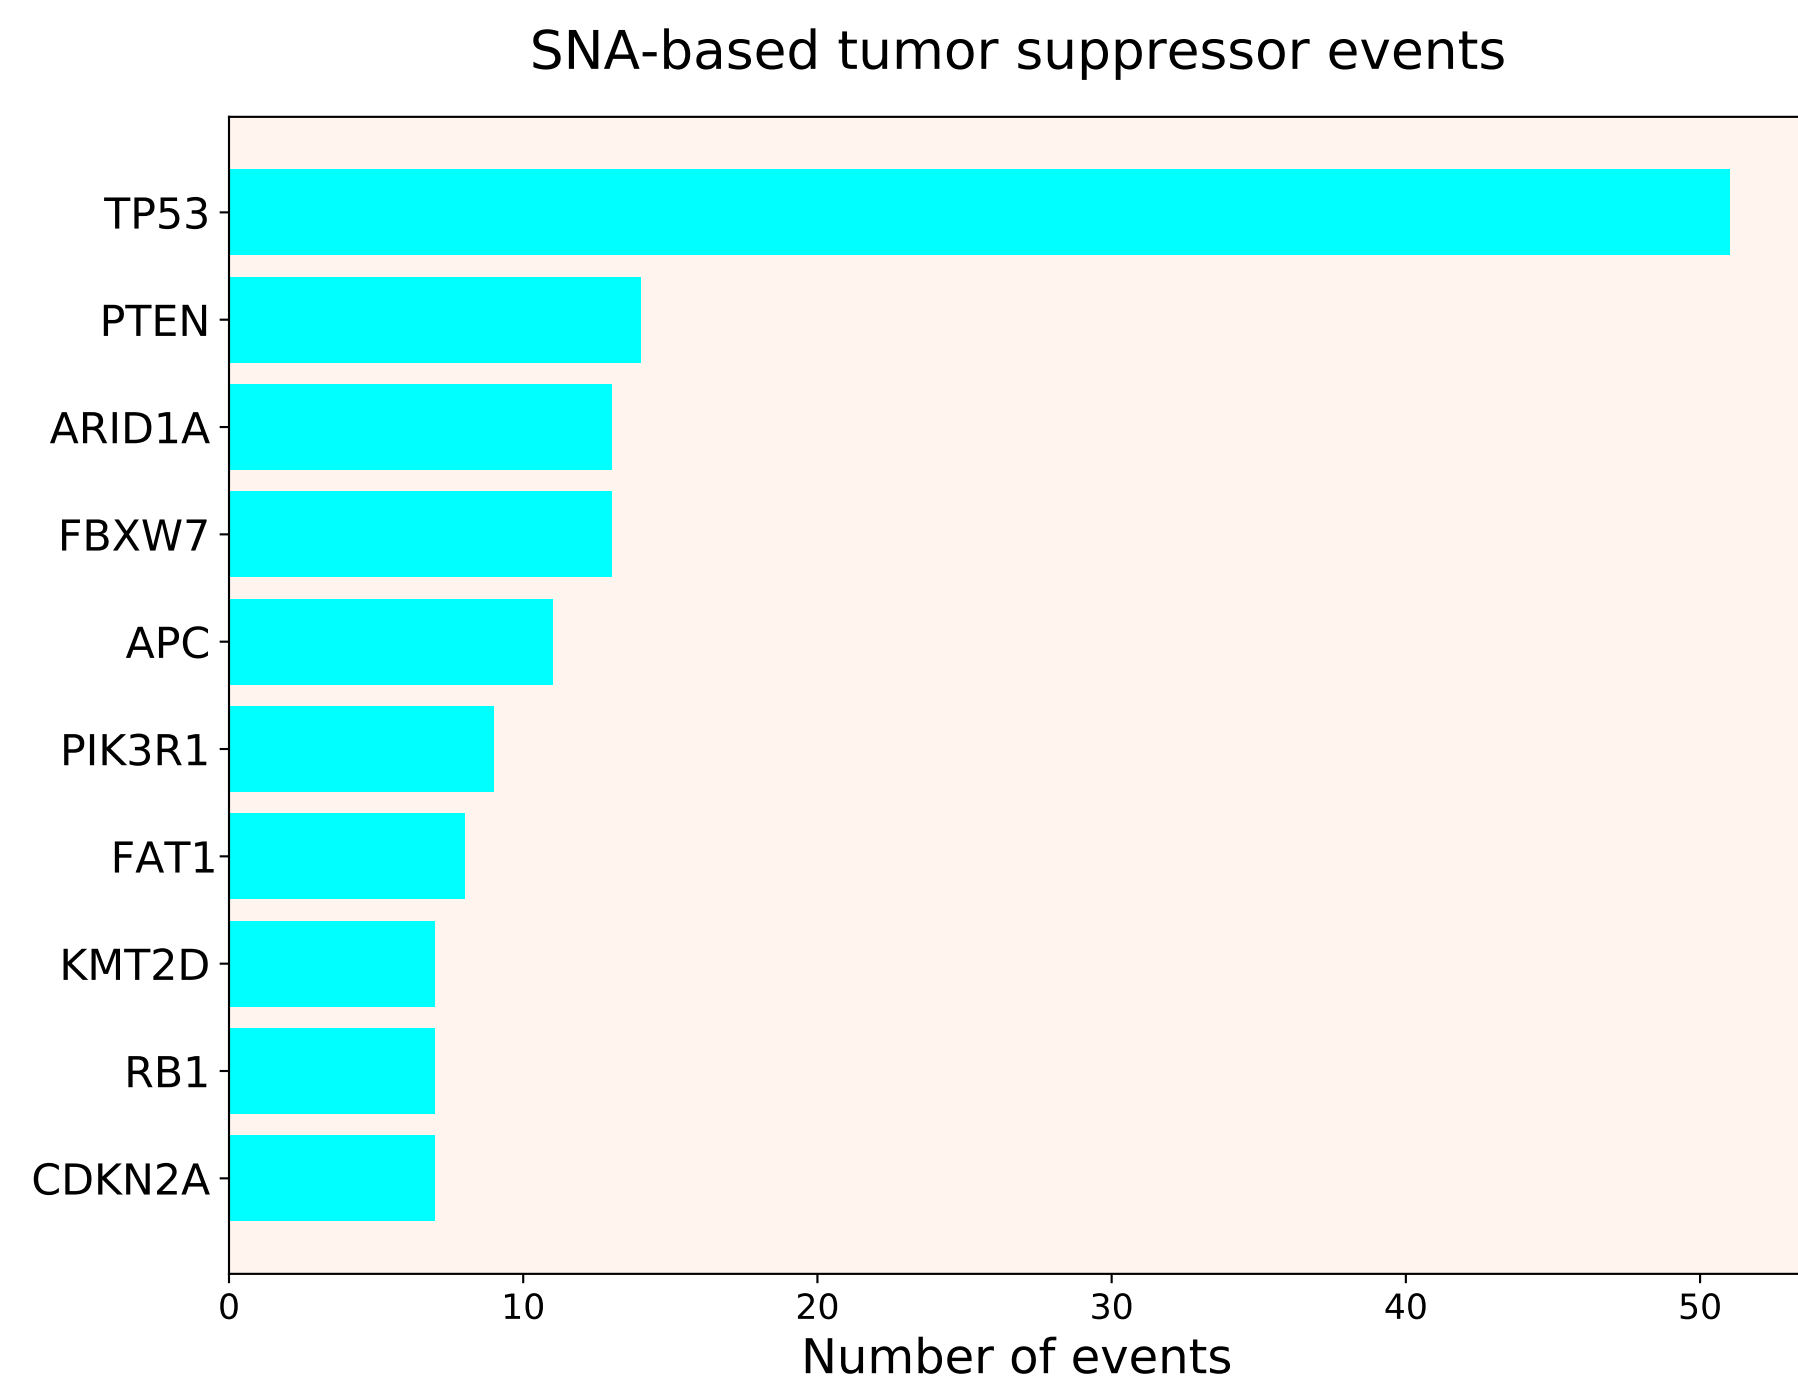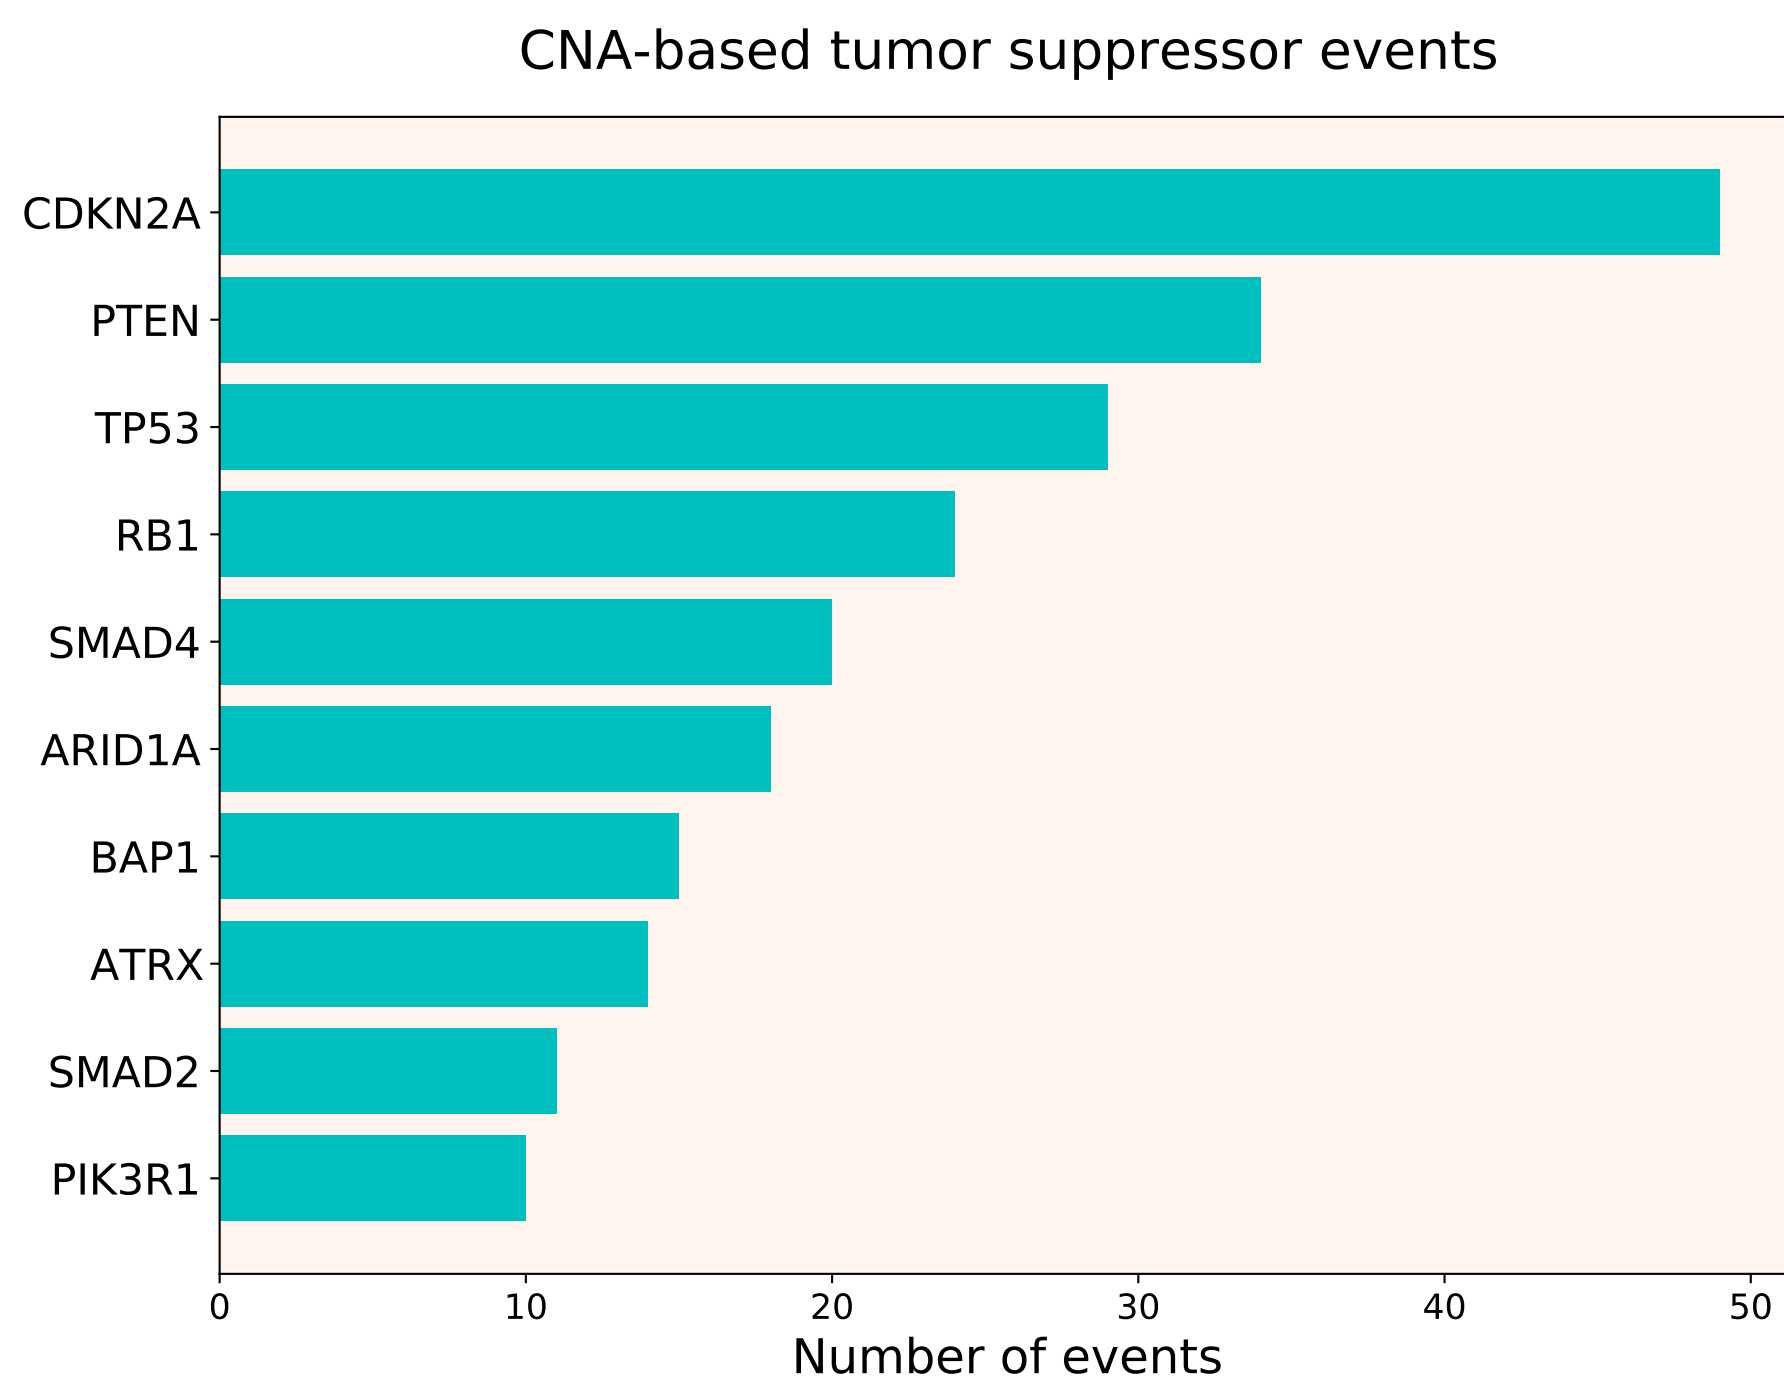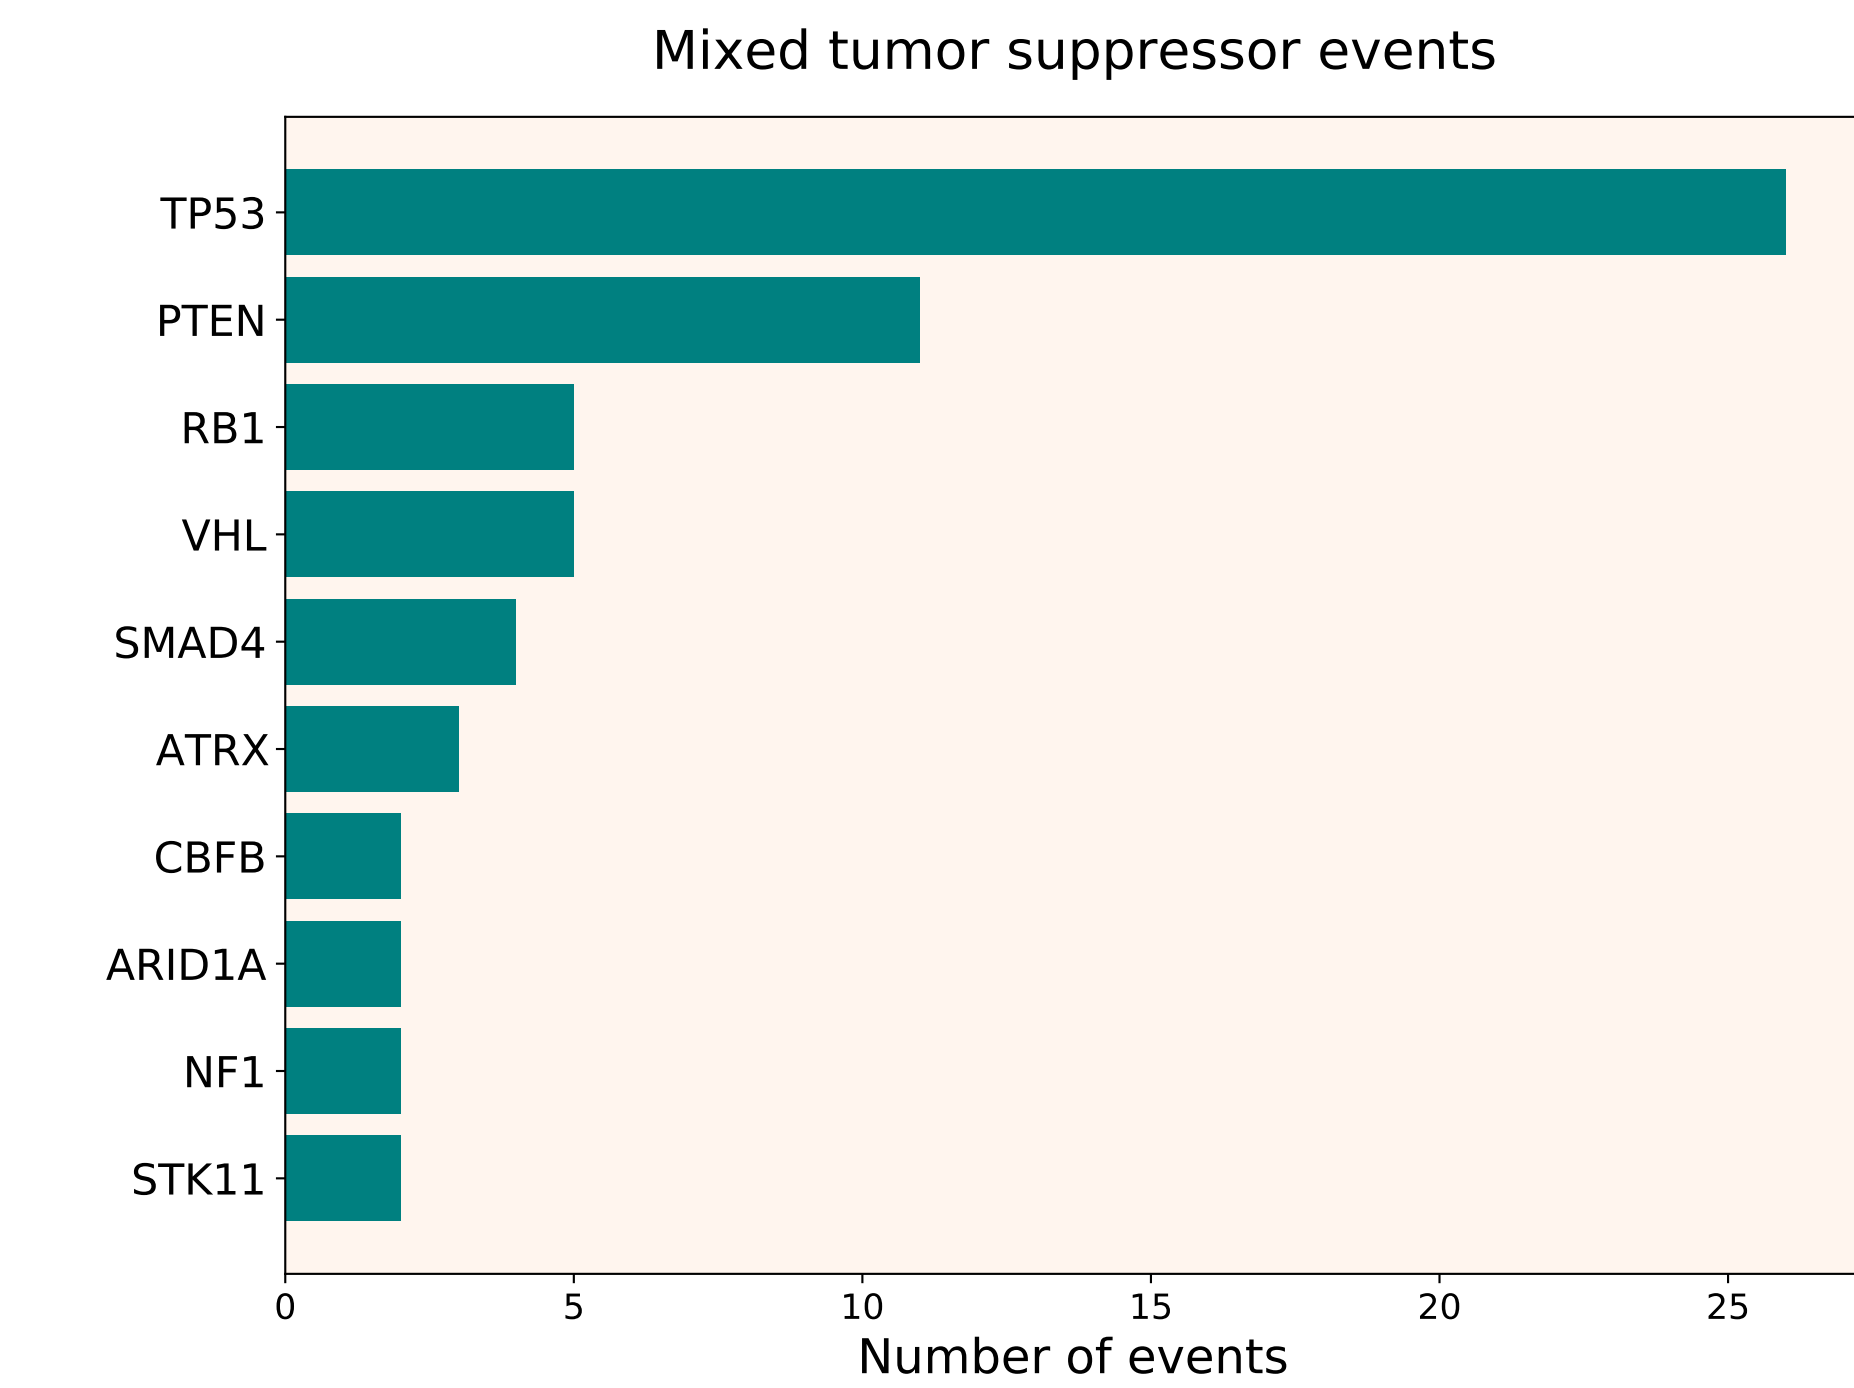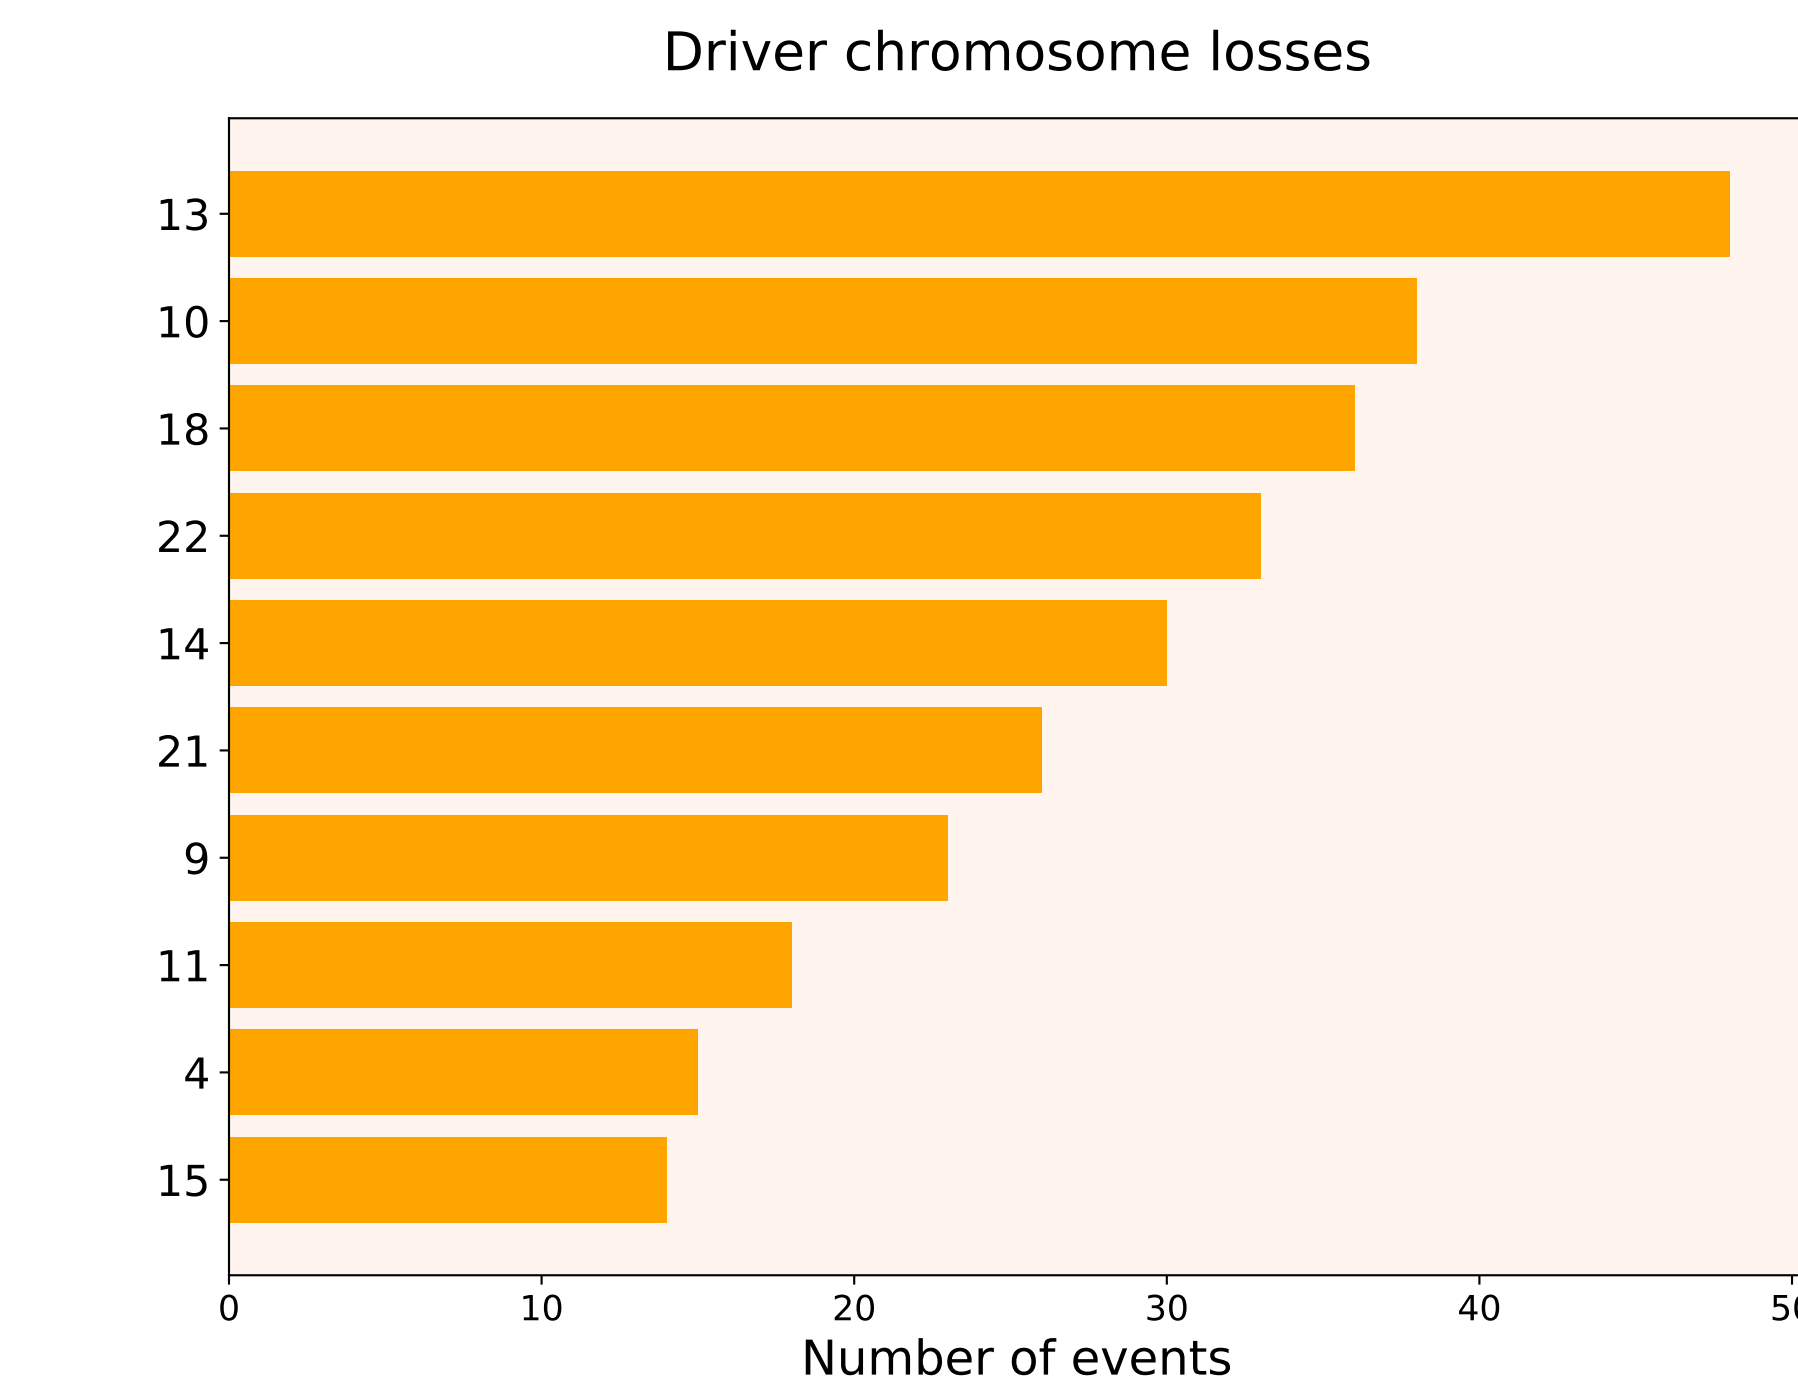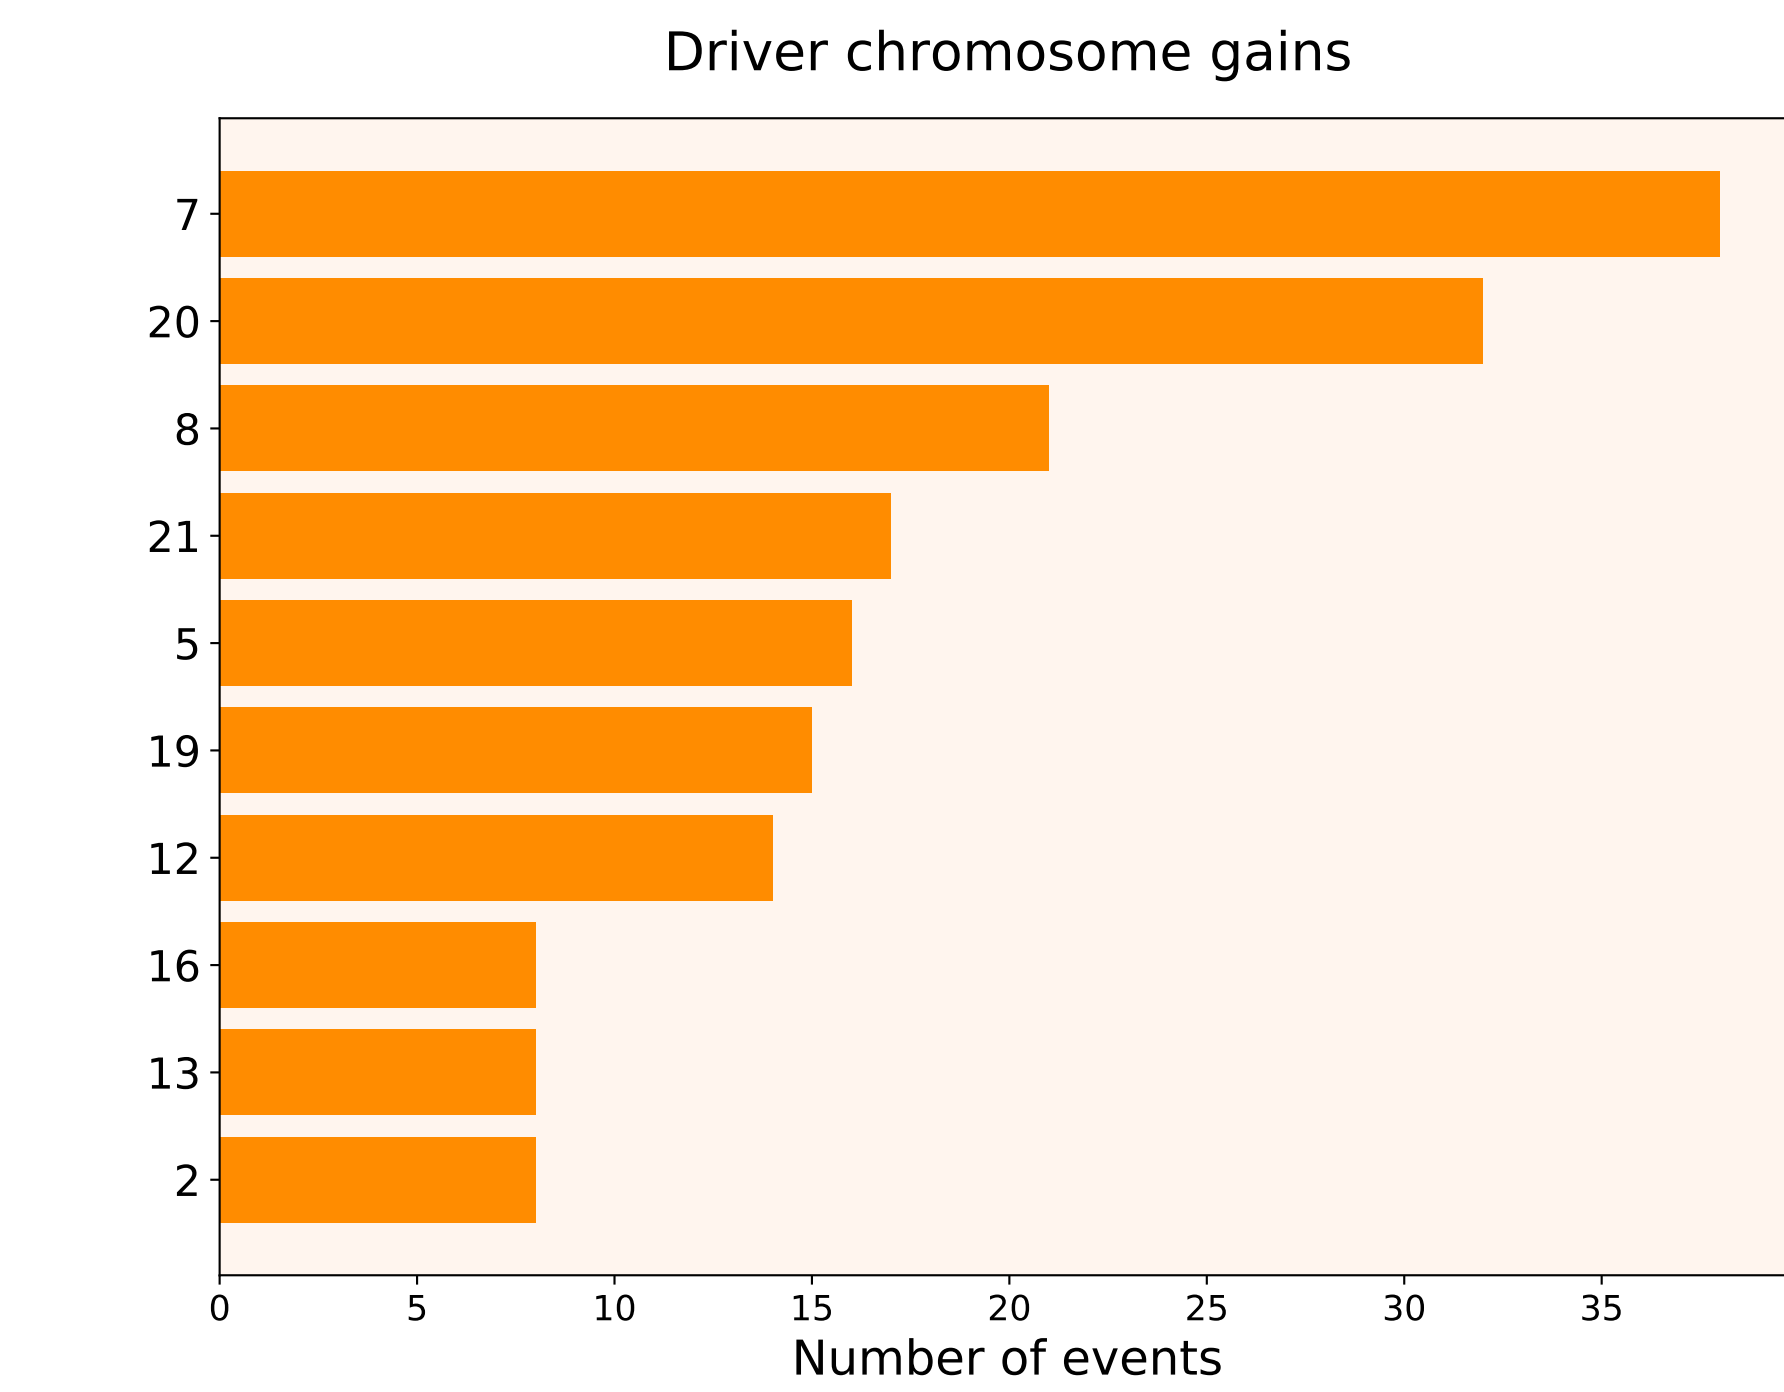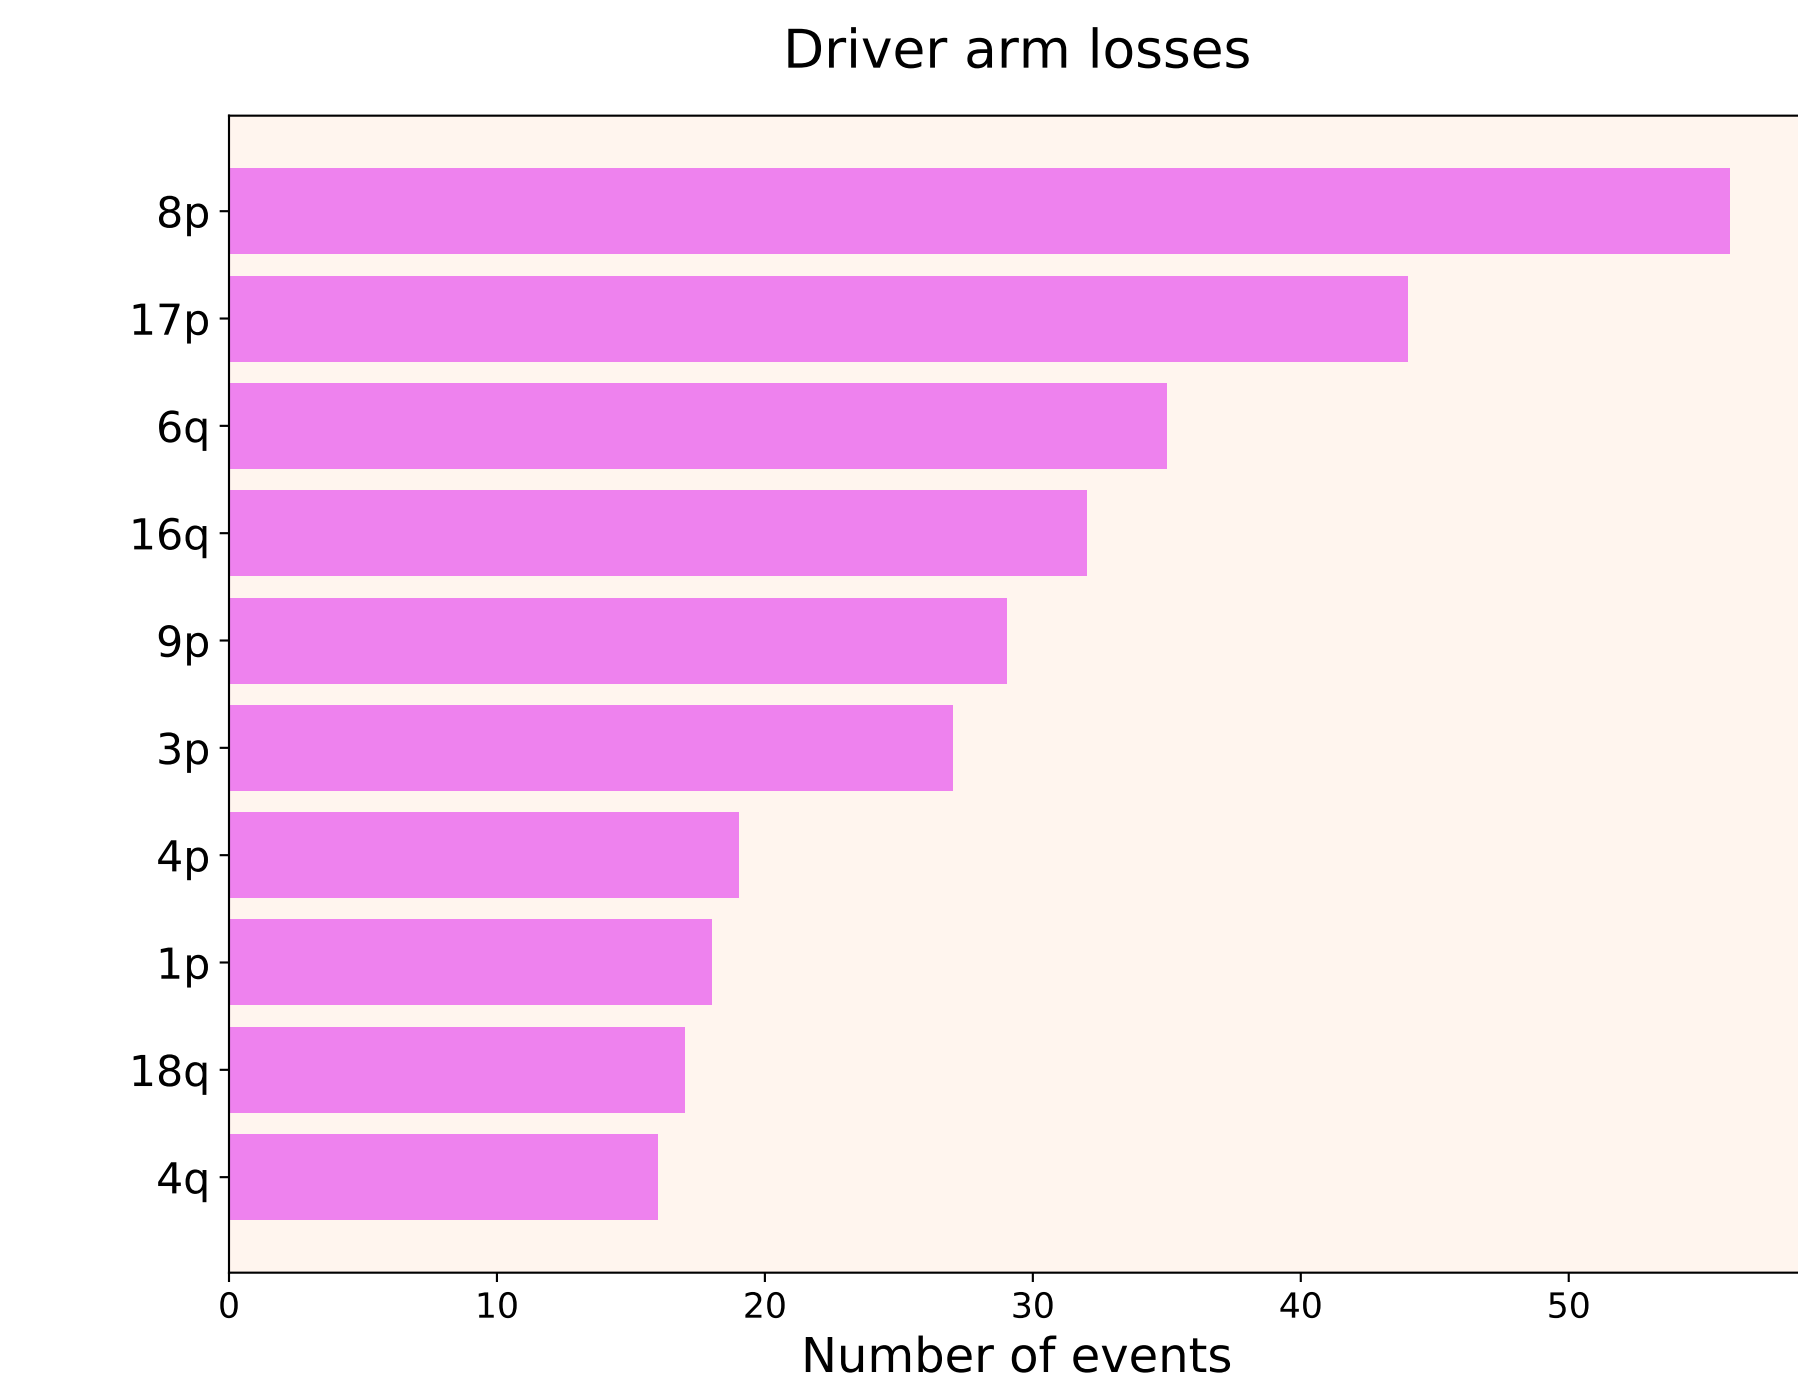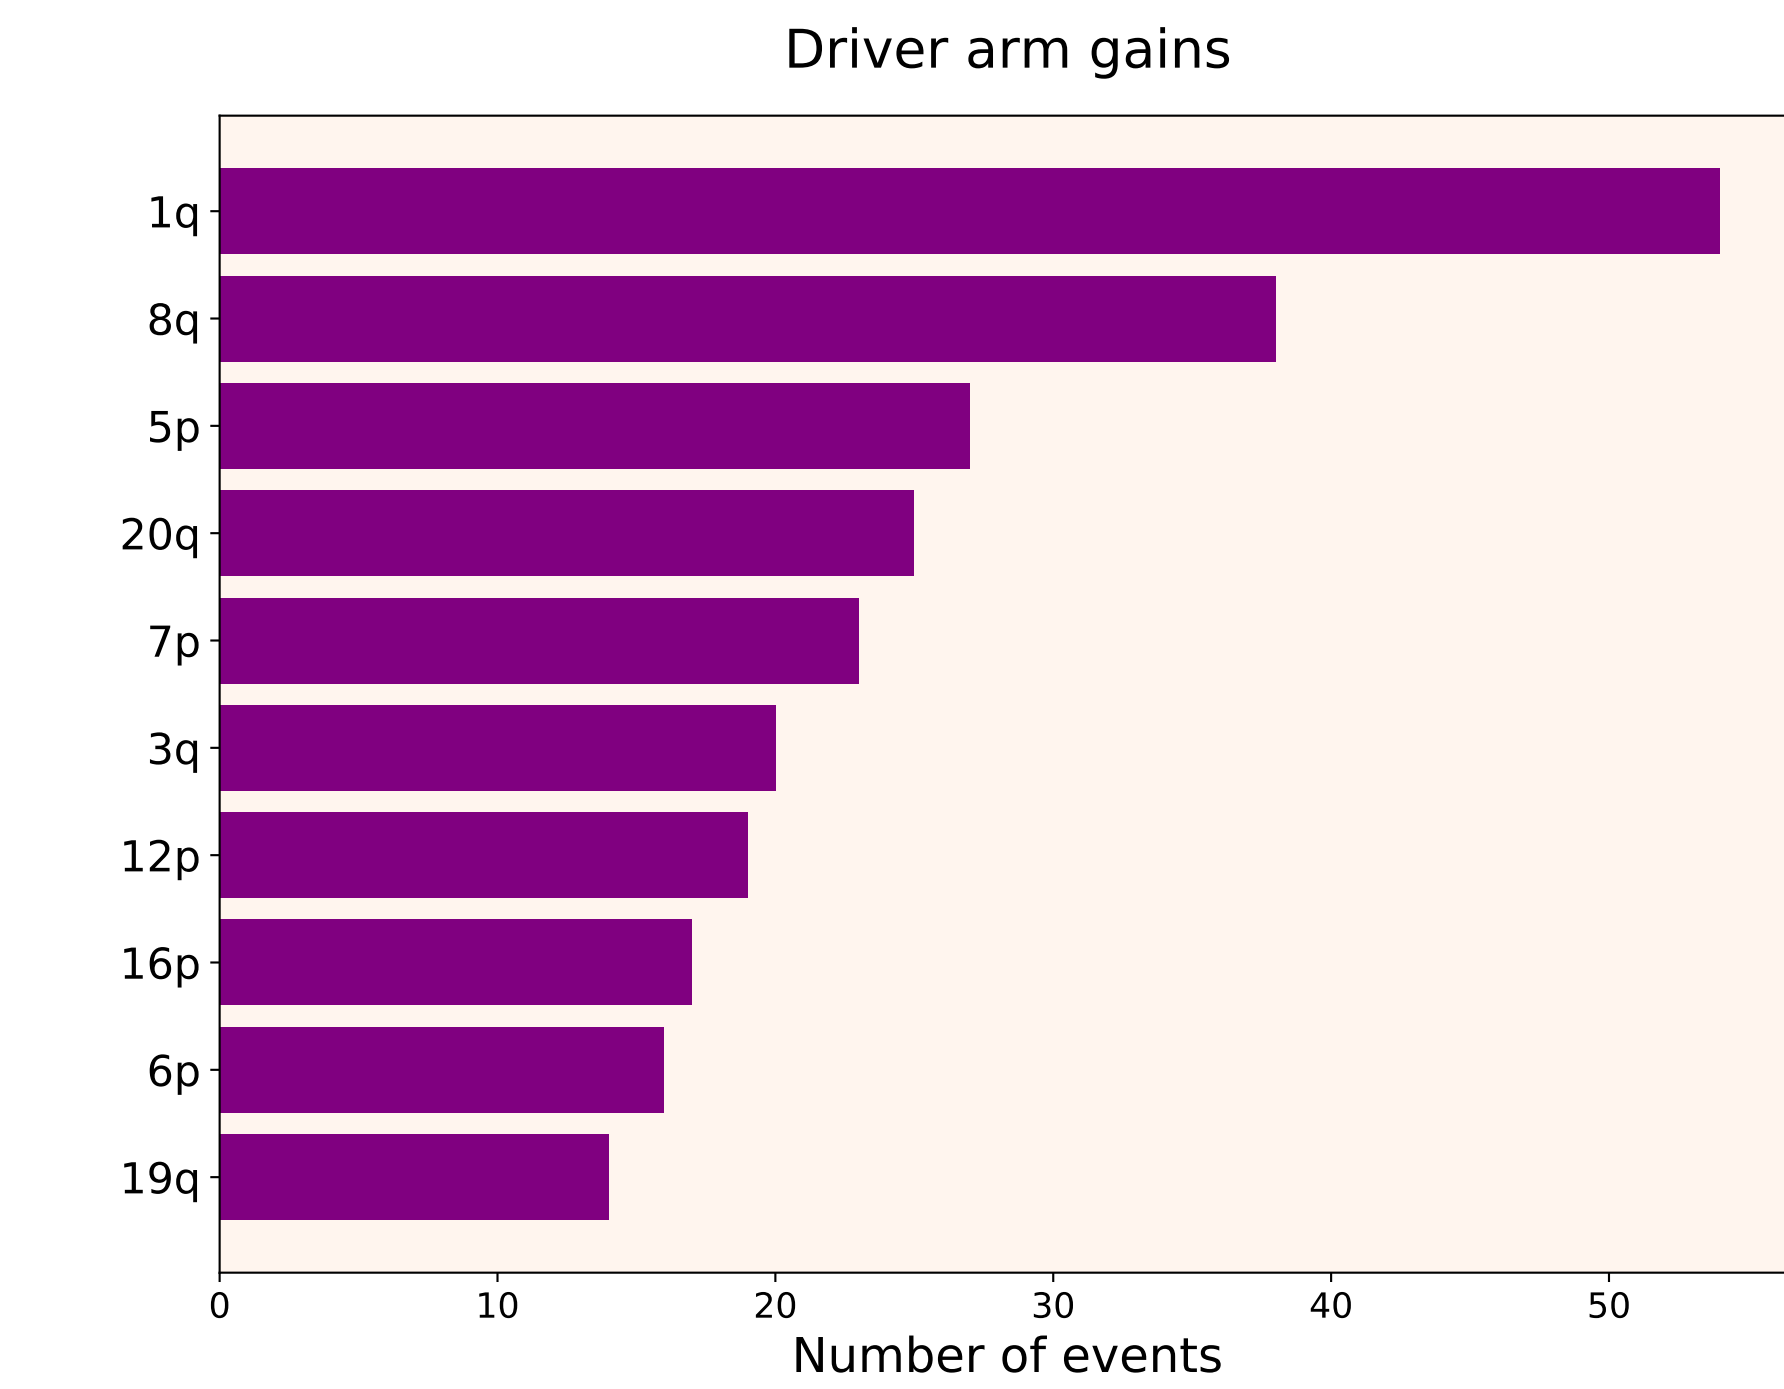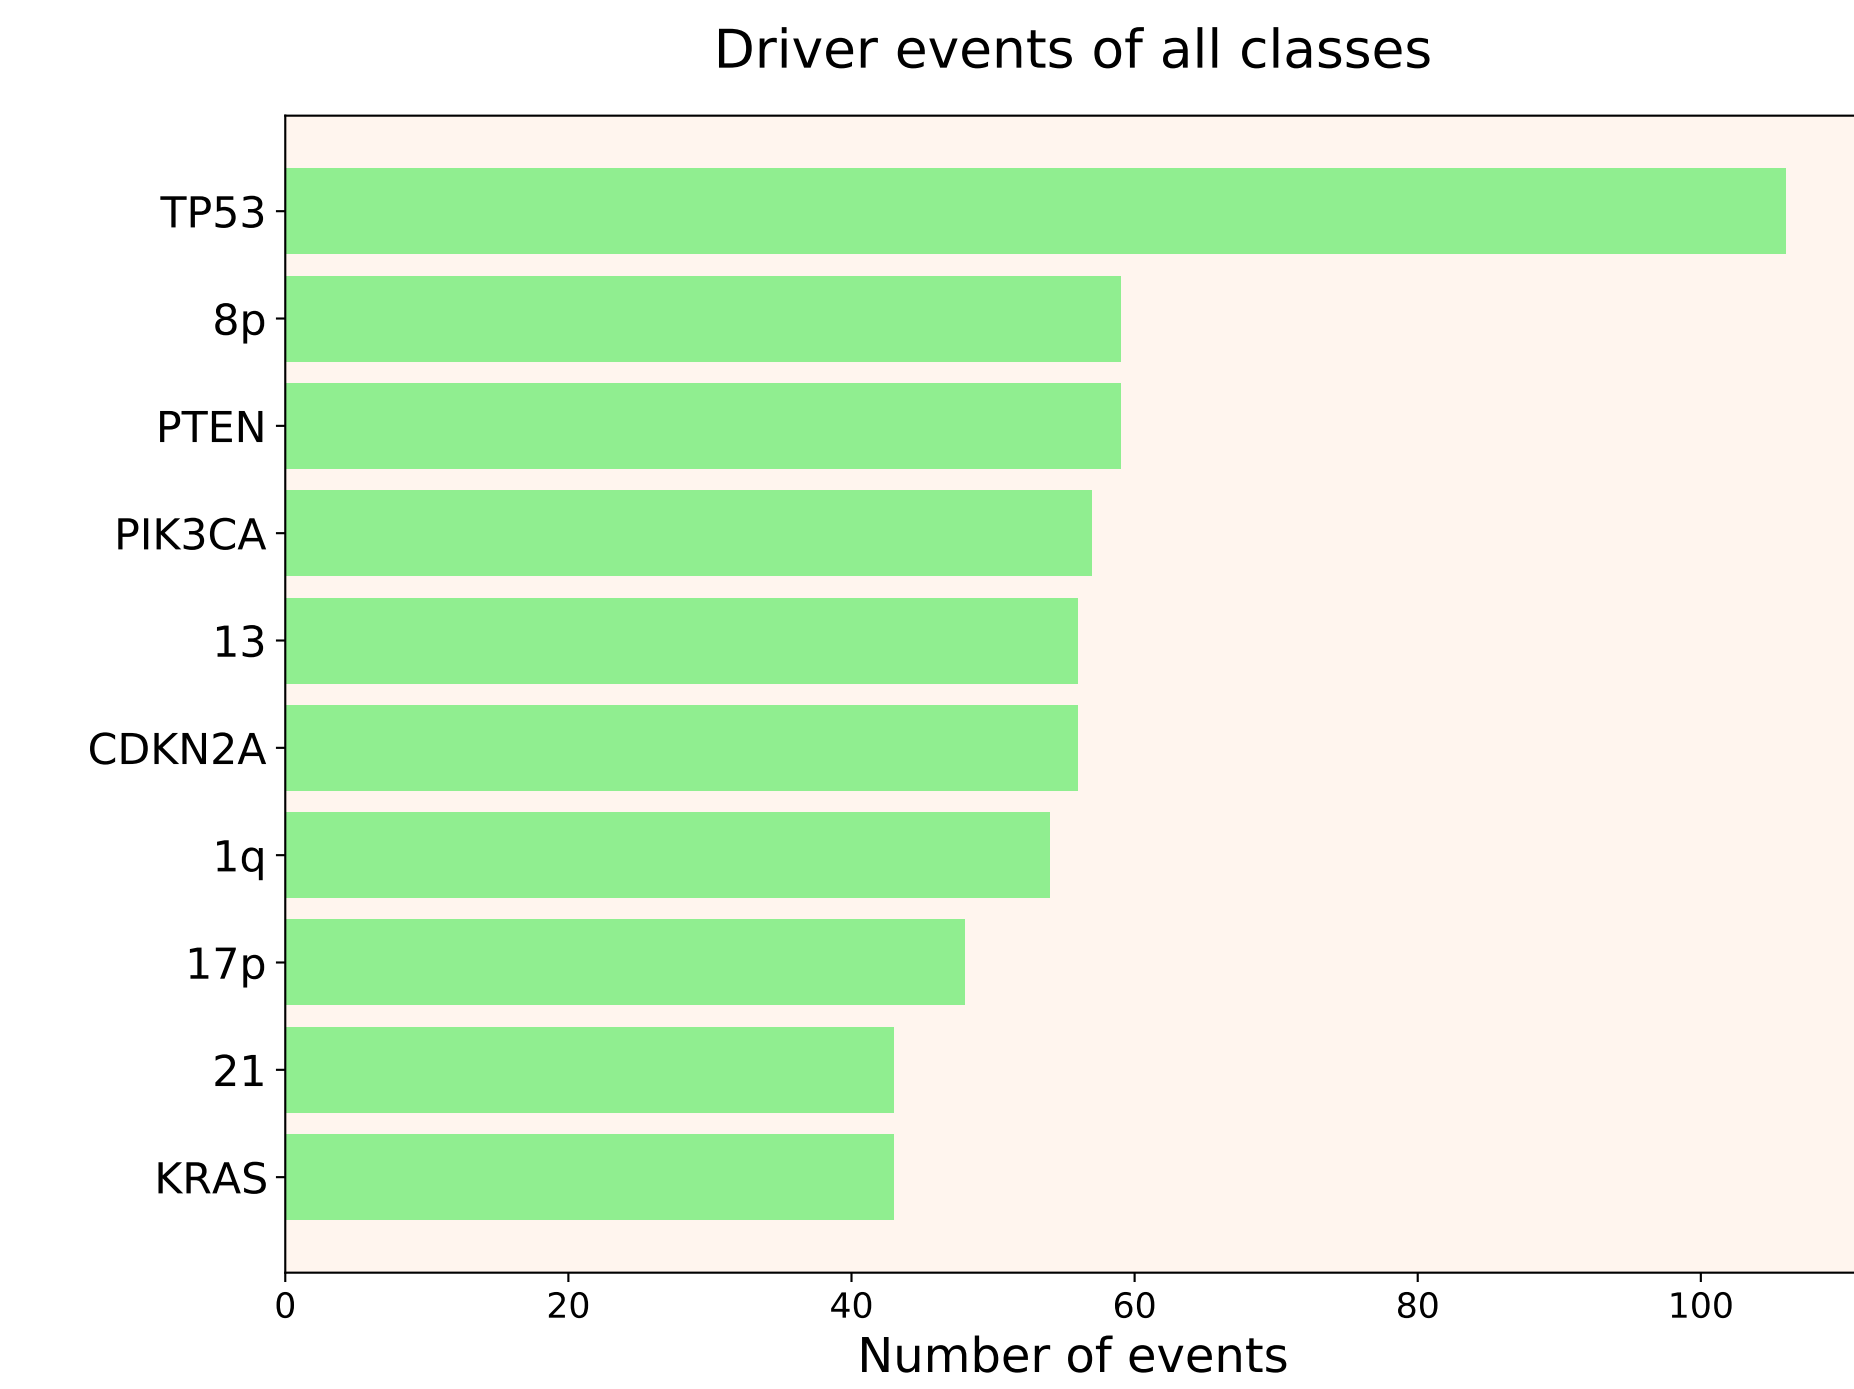

Supplement: Supplemental_Data_S1.zip [file Supplemental_Data_S1.zip]
