# Supplementary figures and images for: Novel Driver Strength Index highlights important cancer genes in TCGA PanCanAtlas patients (part 3 of 4)
Source: PeerJ journal article supplement (doi:10.7717/peerj.13860), 2022-08-11

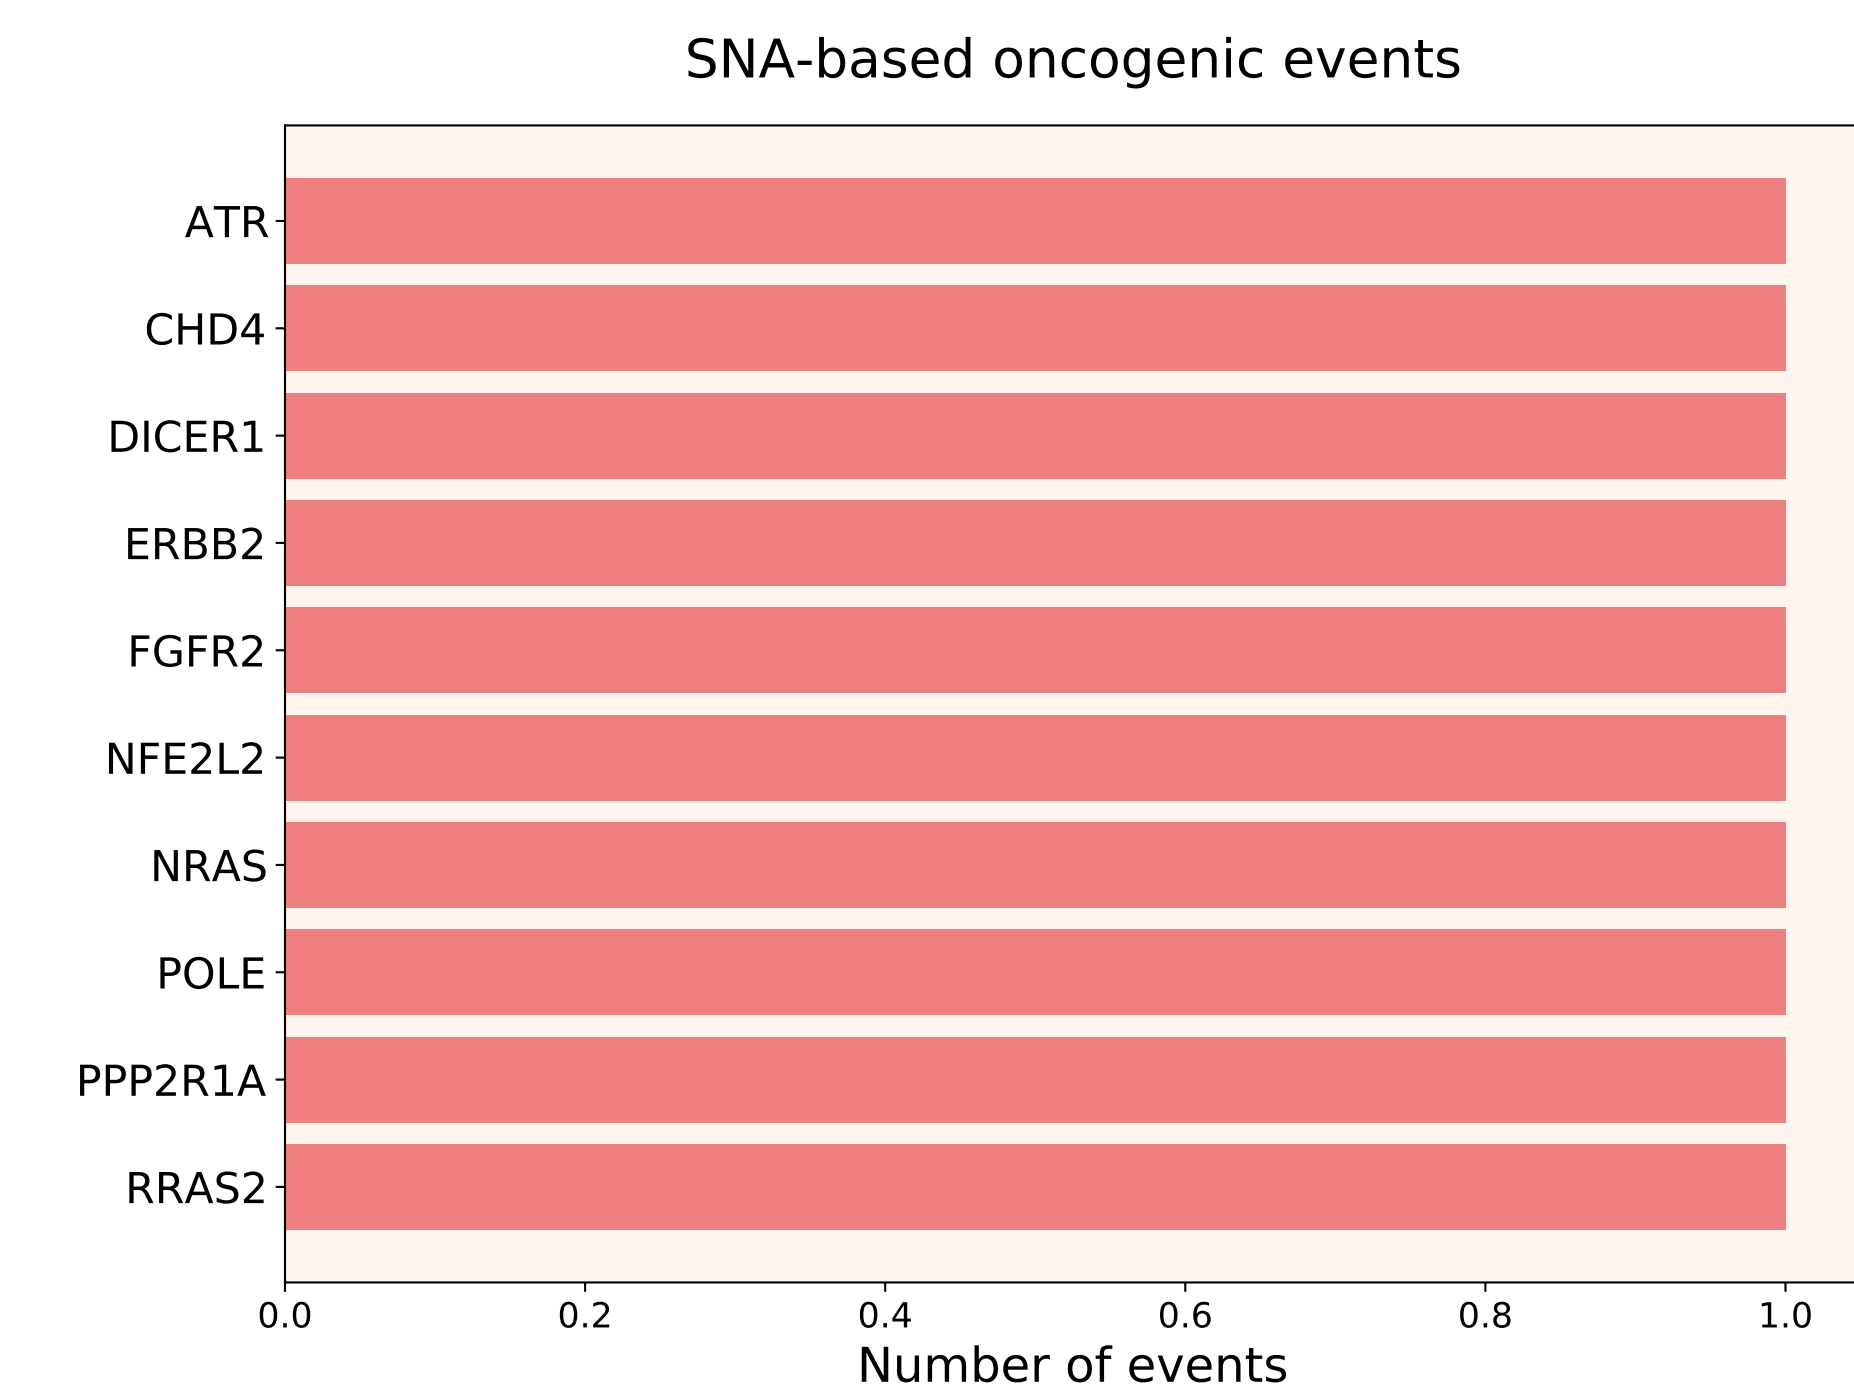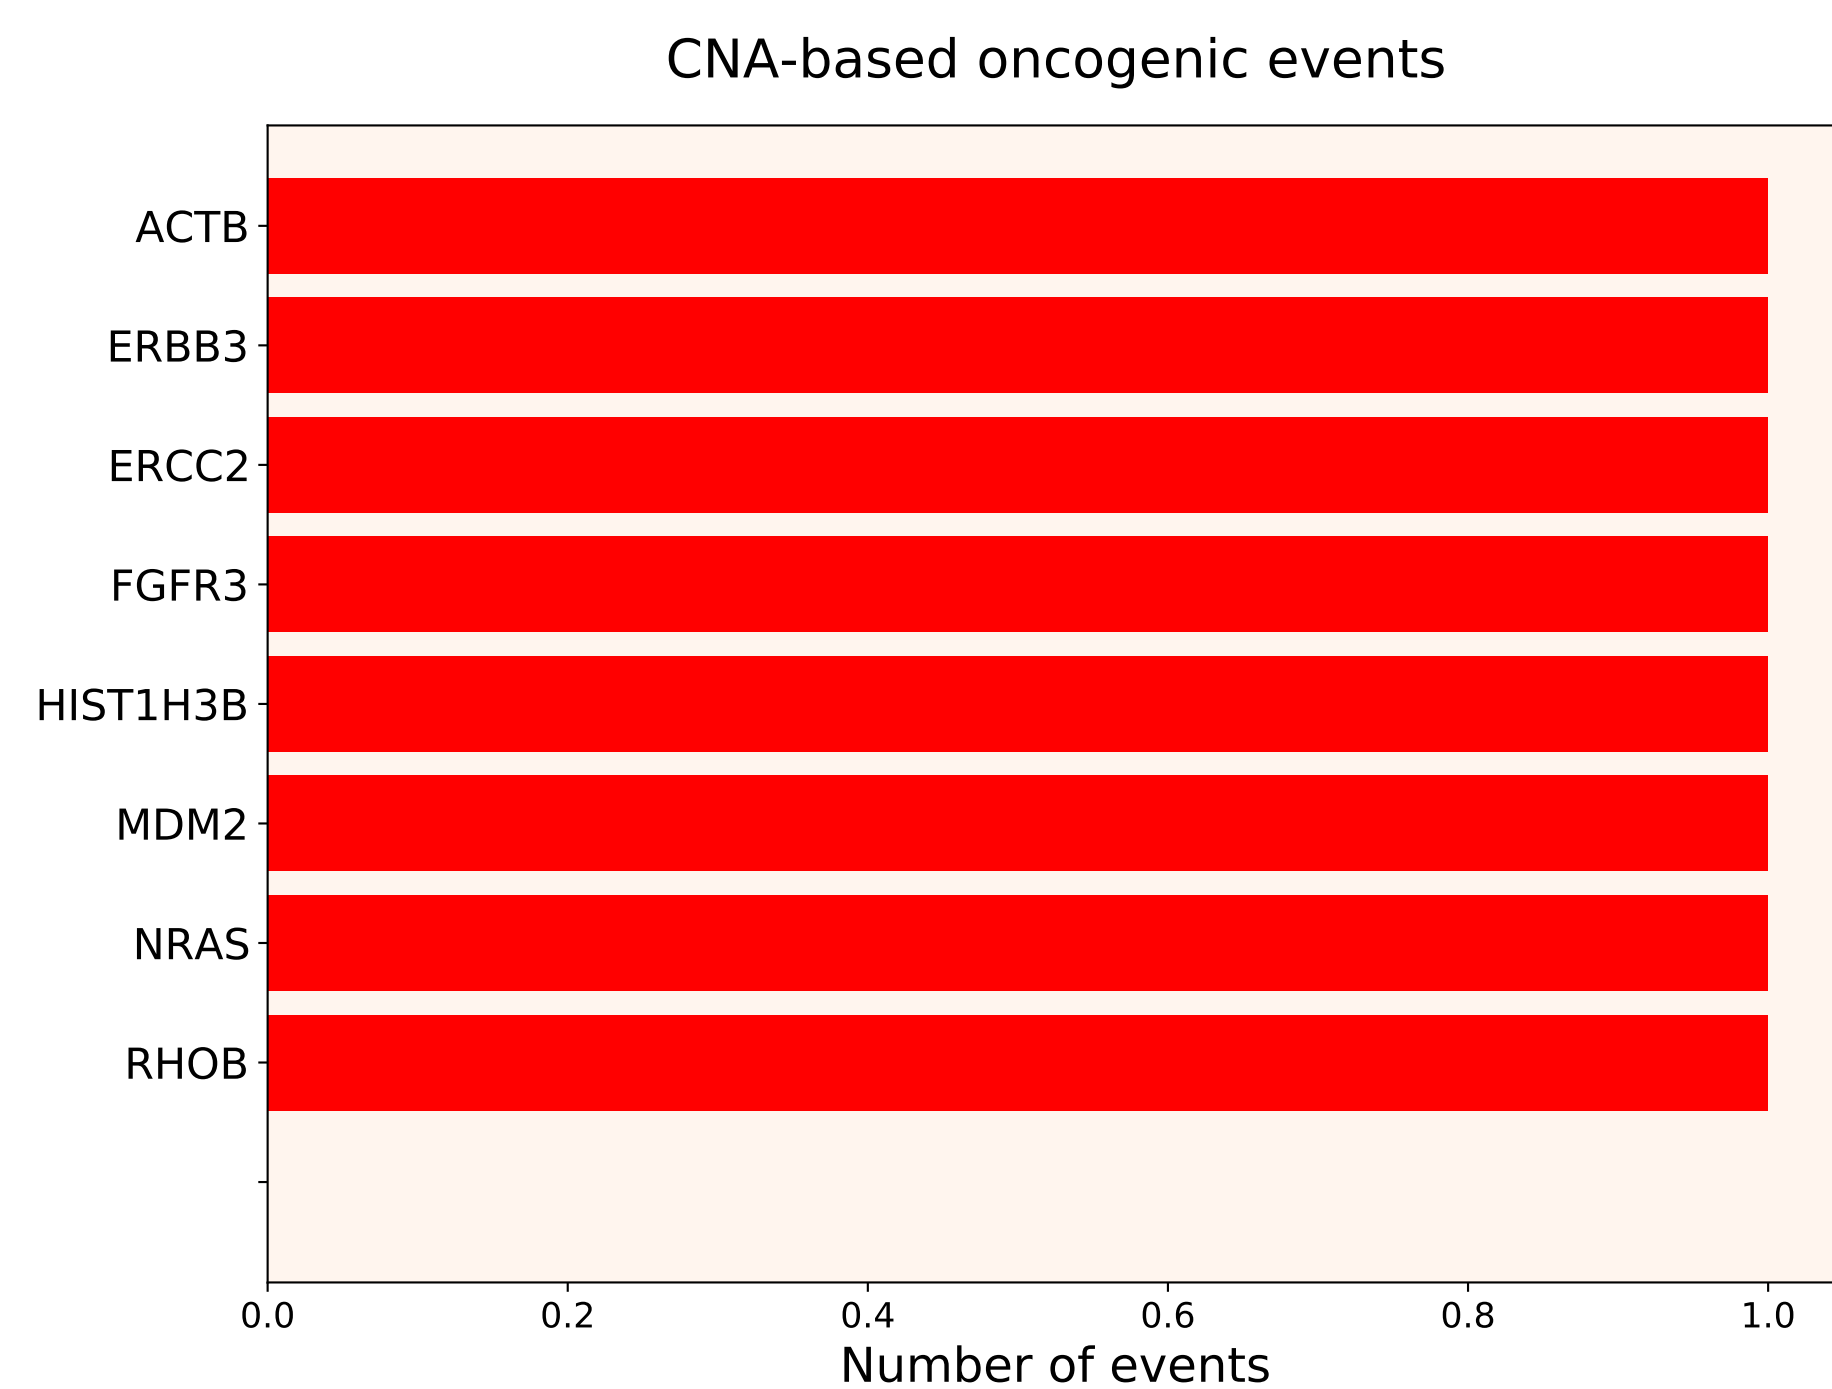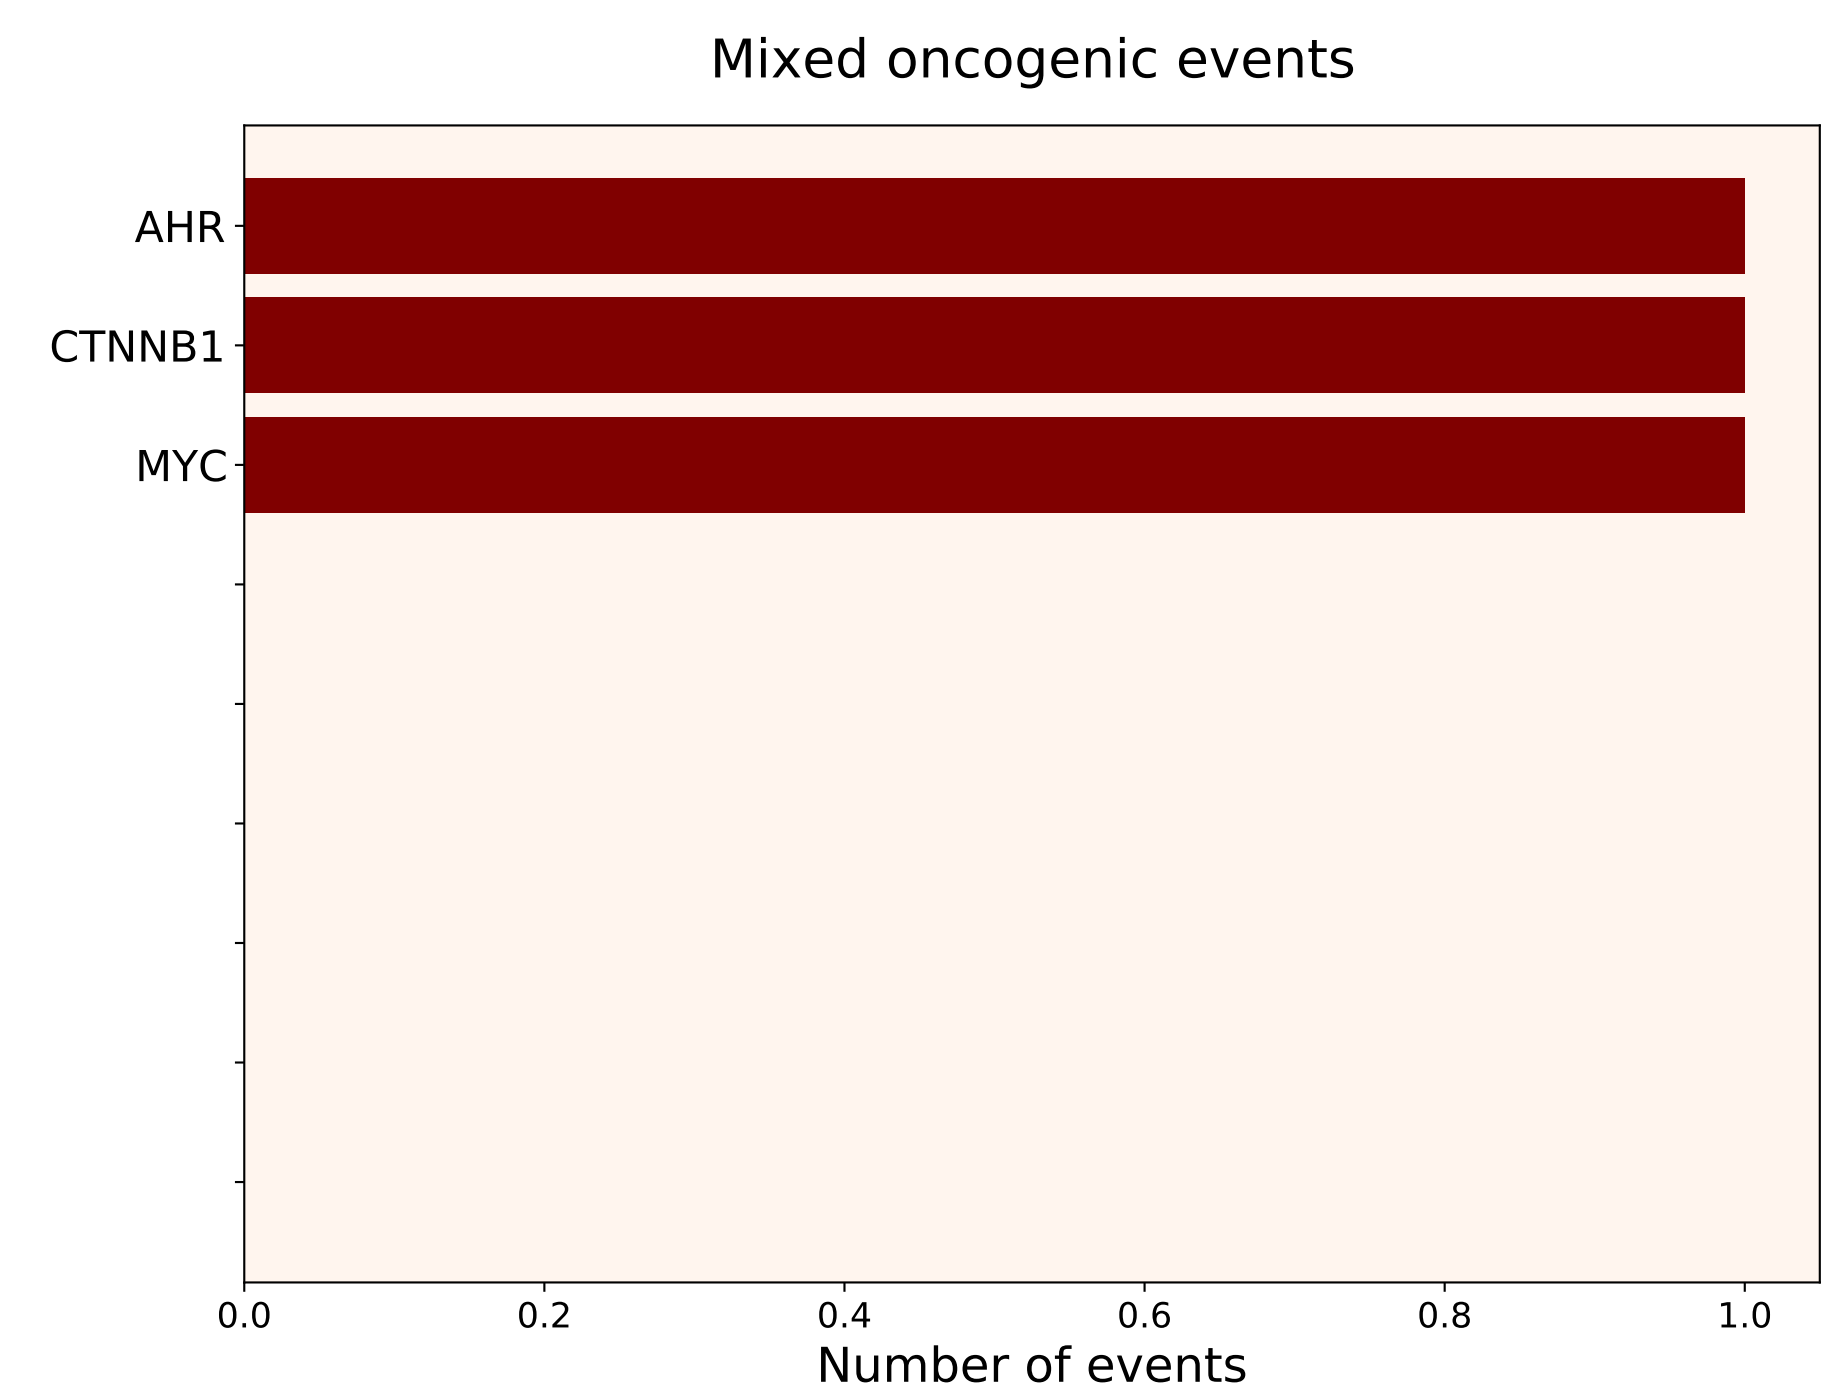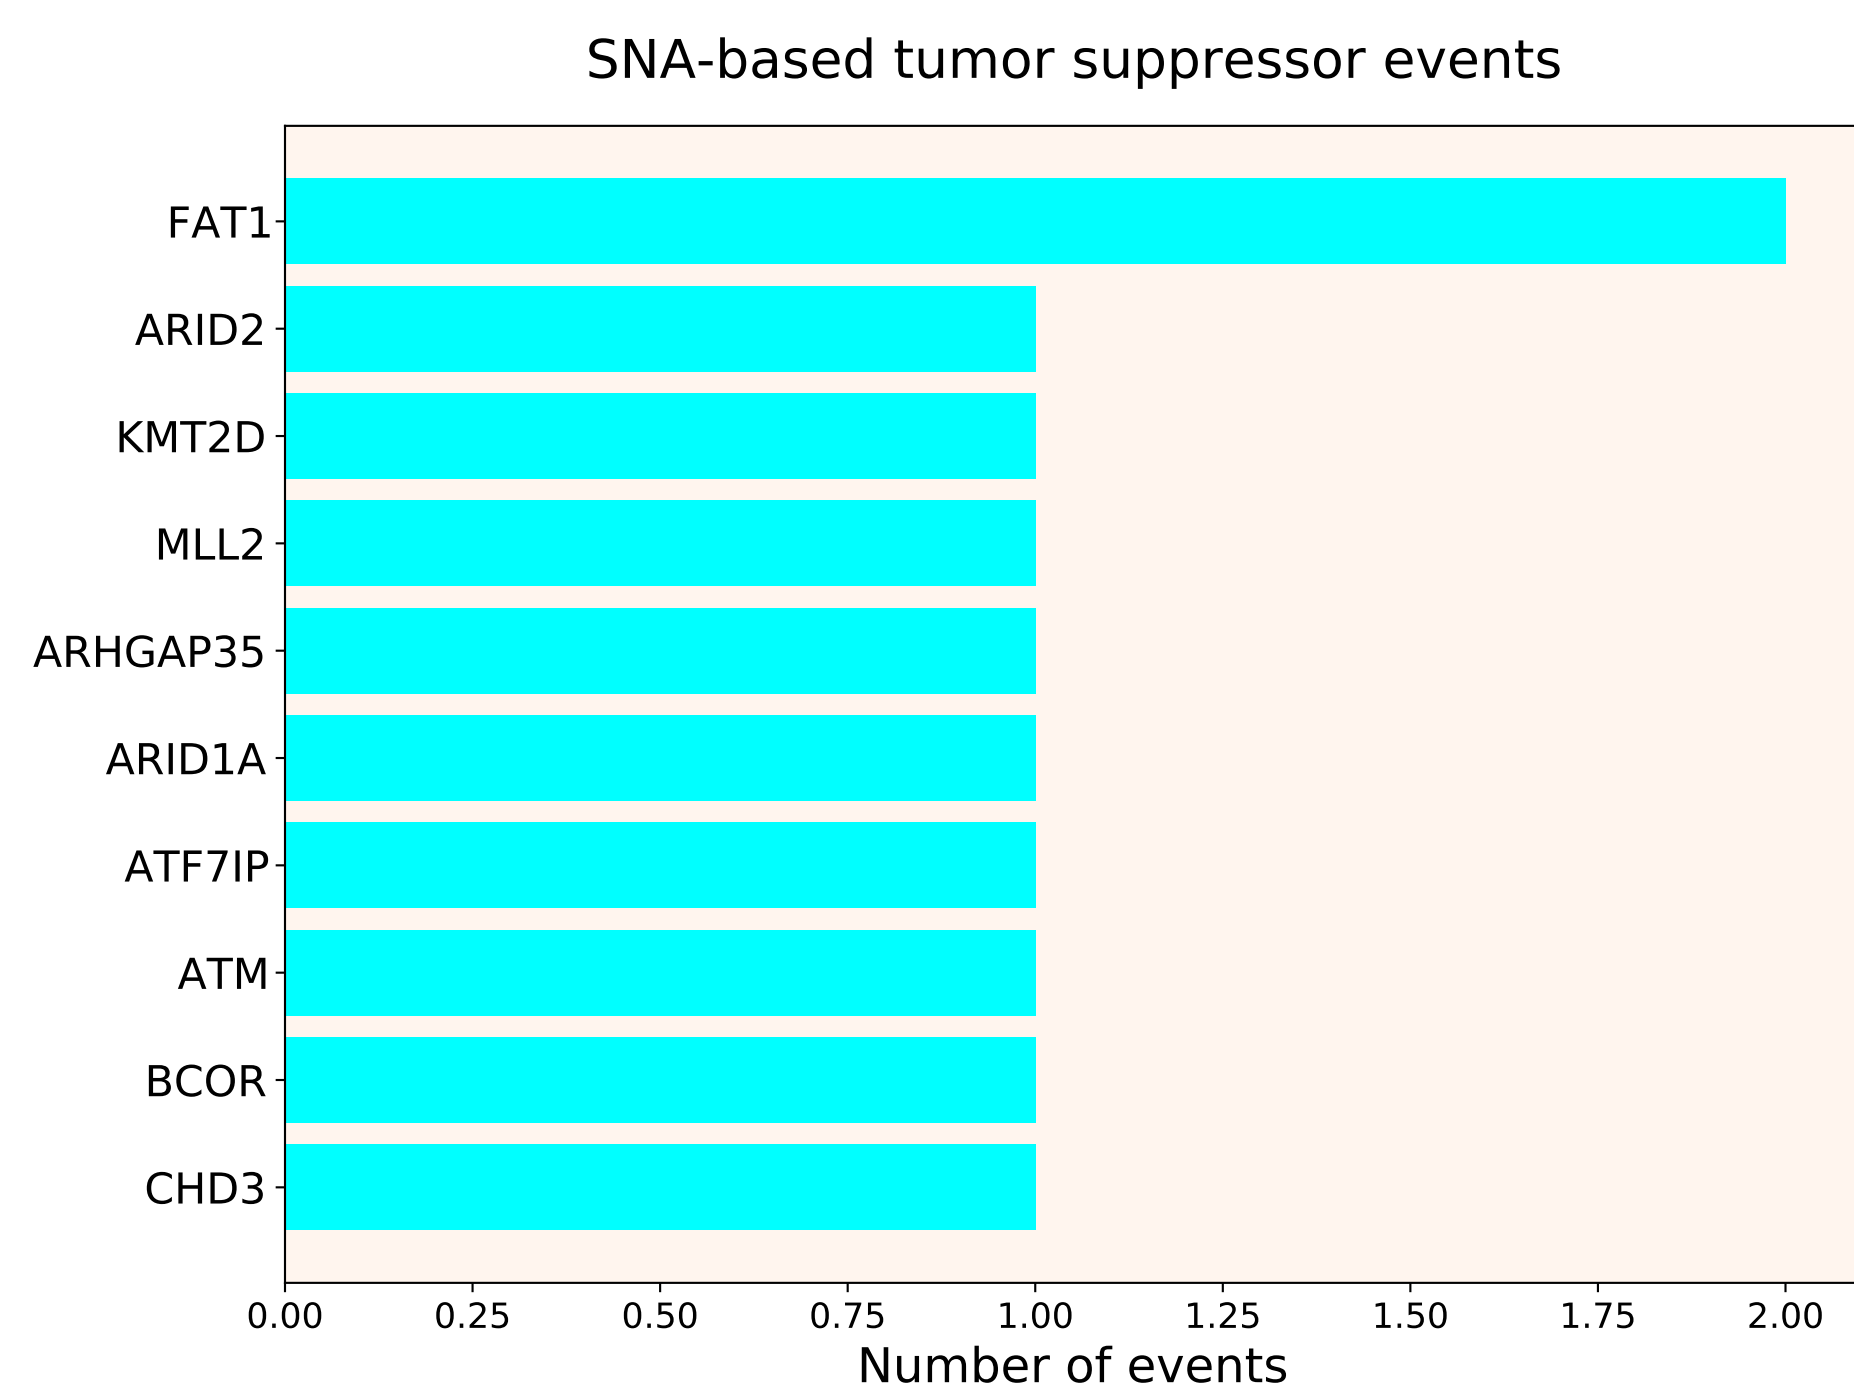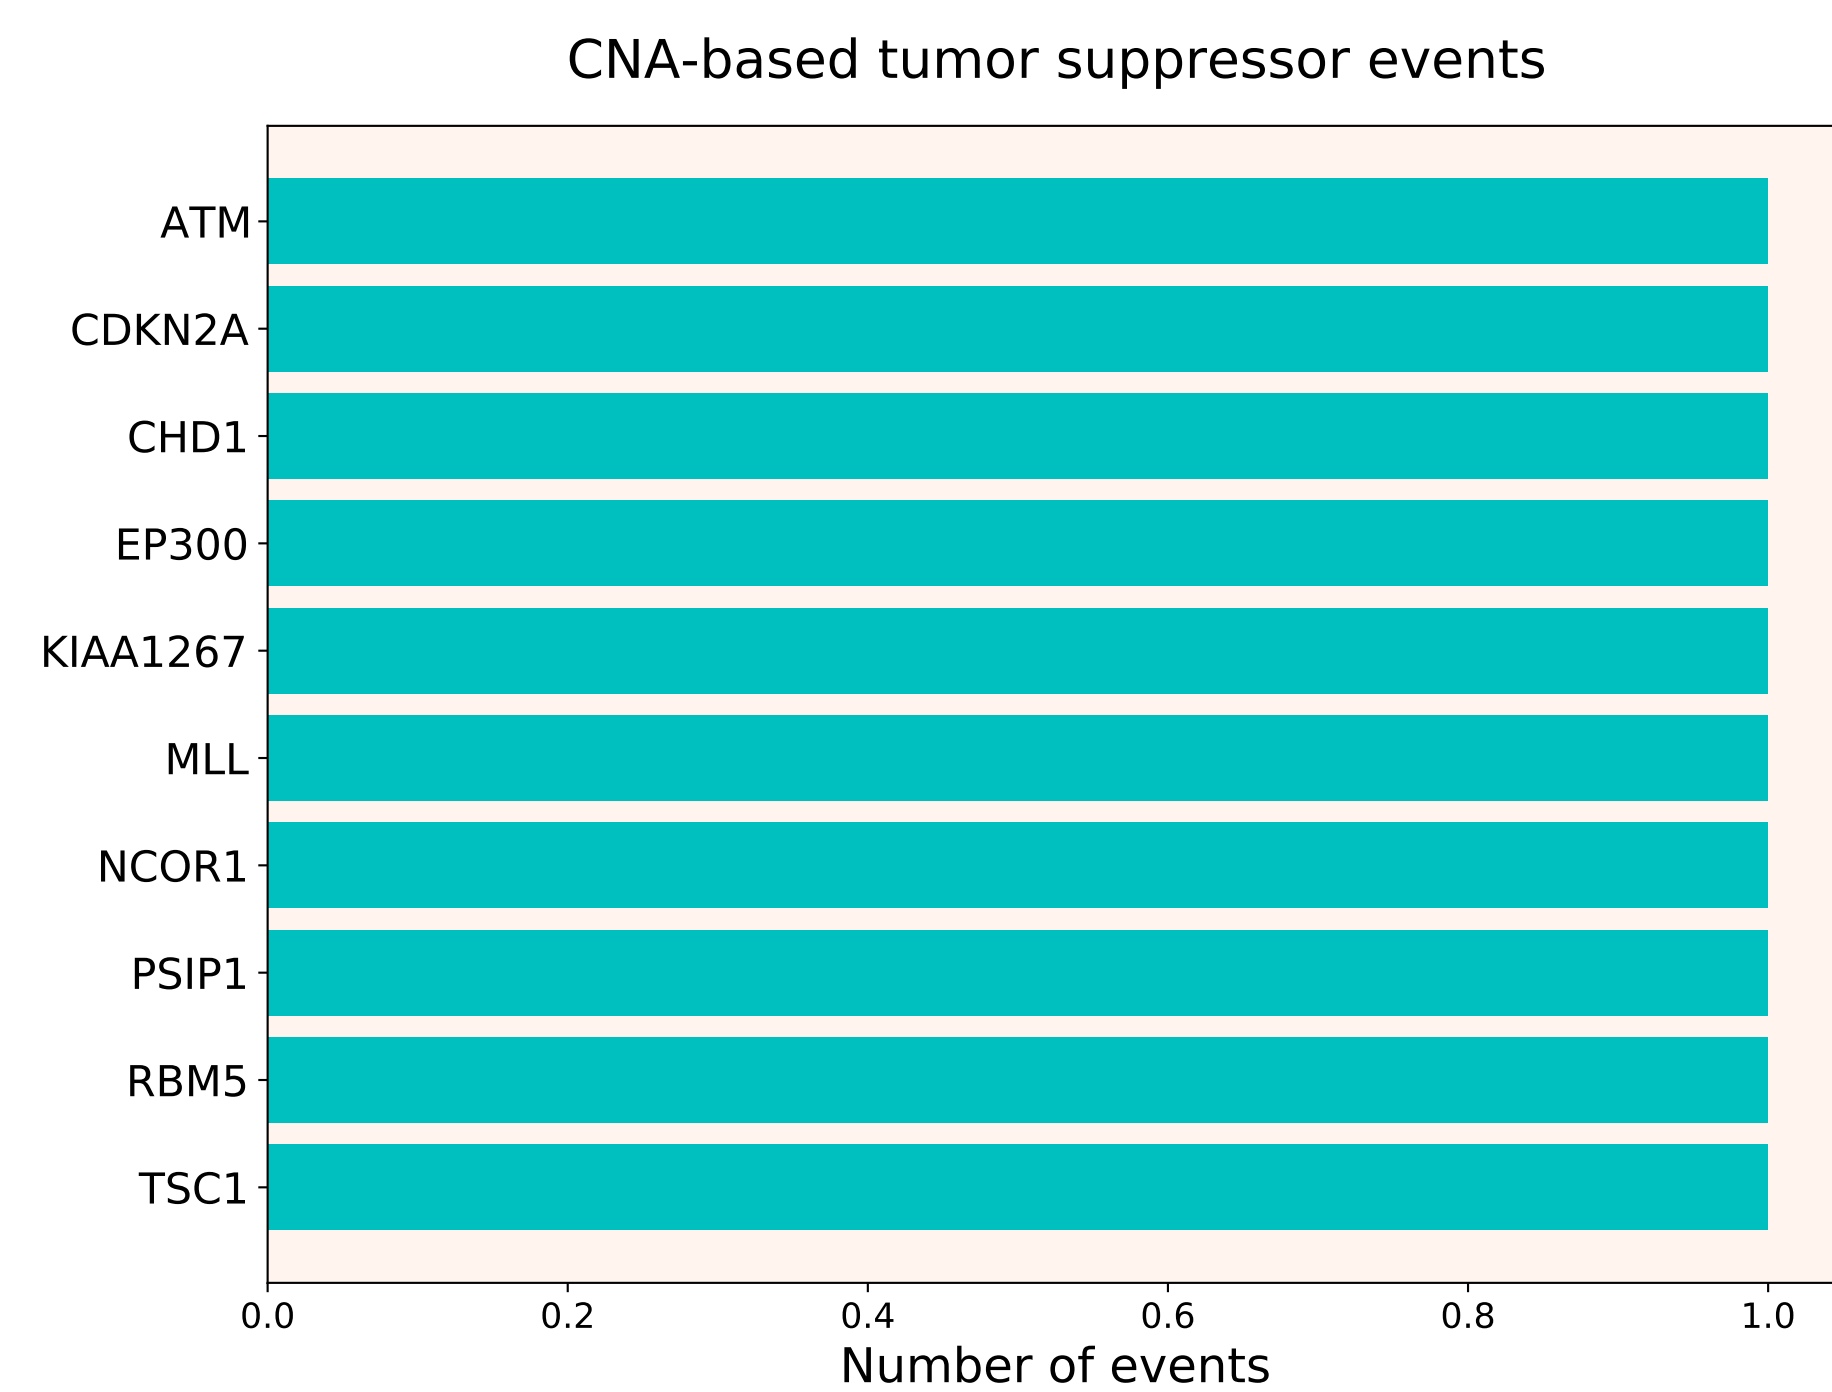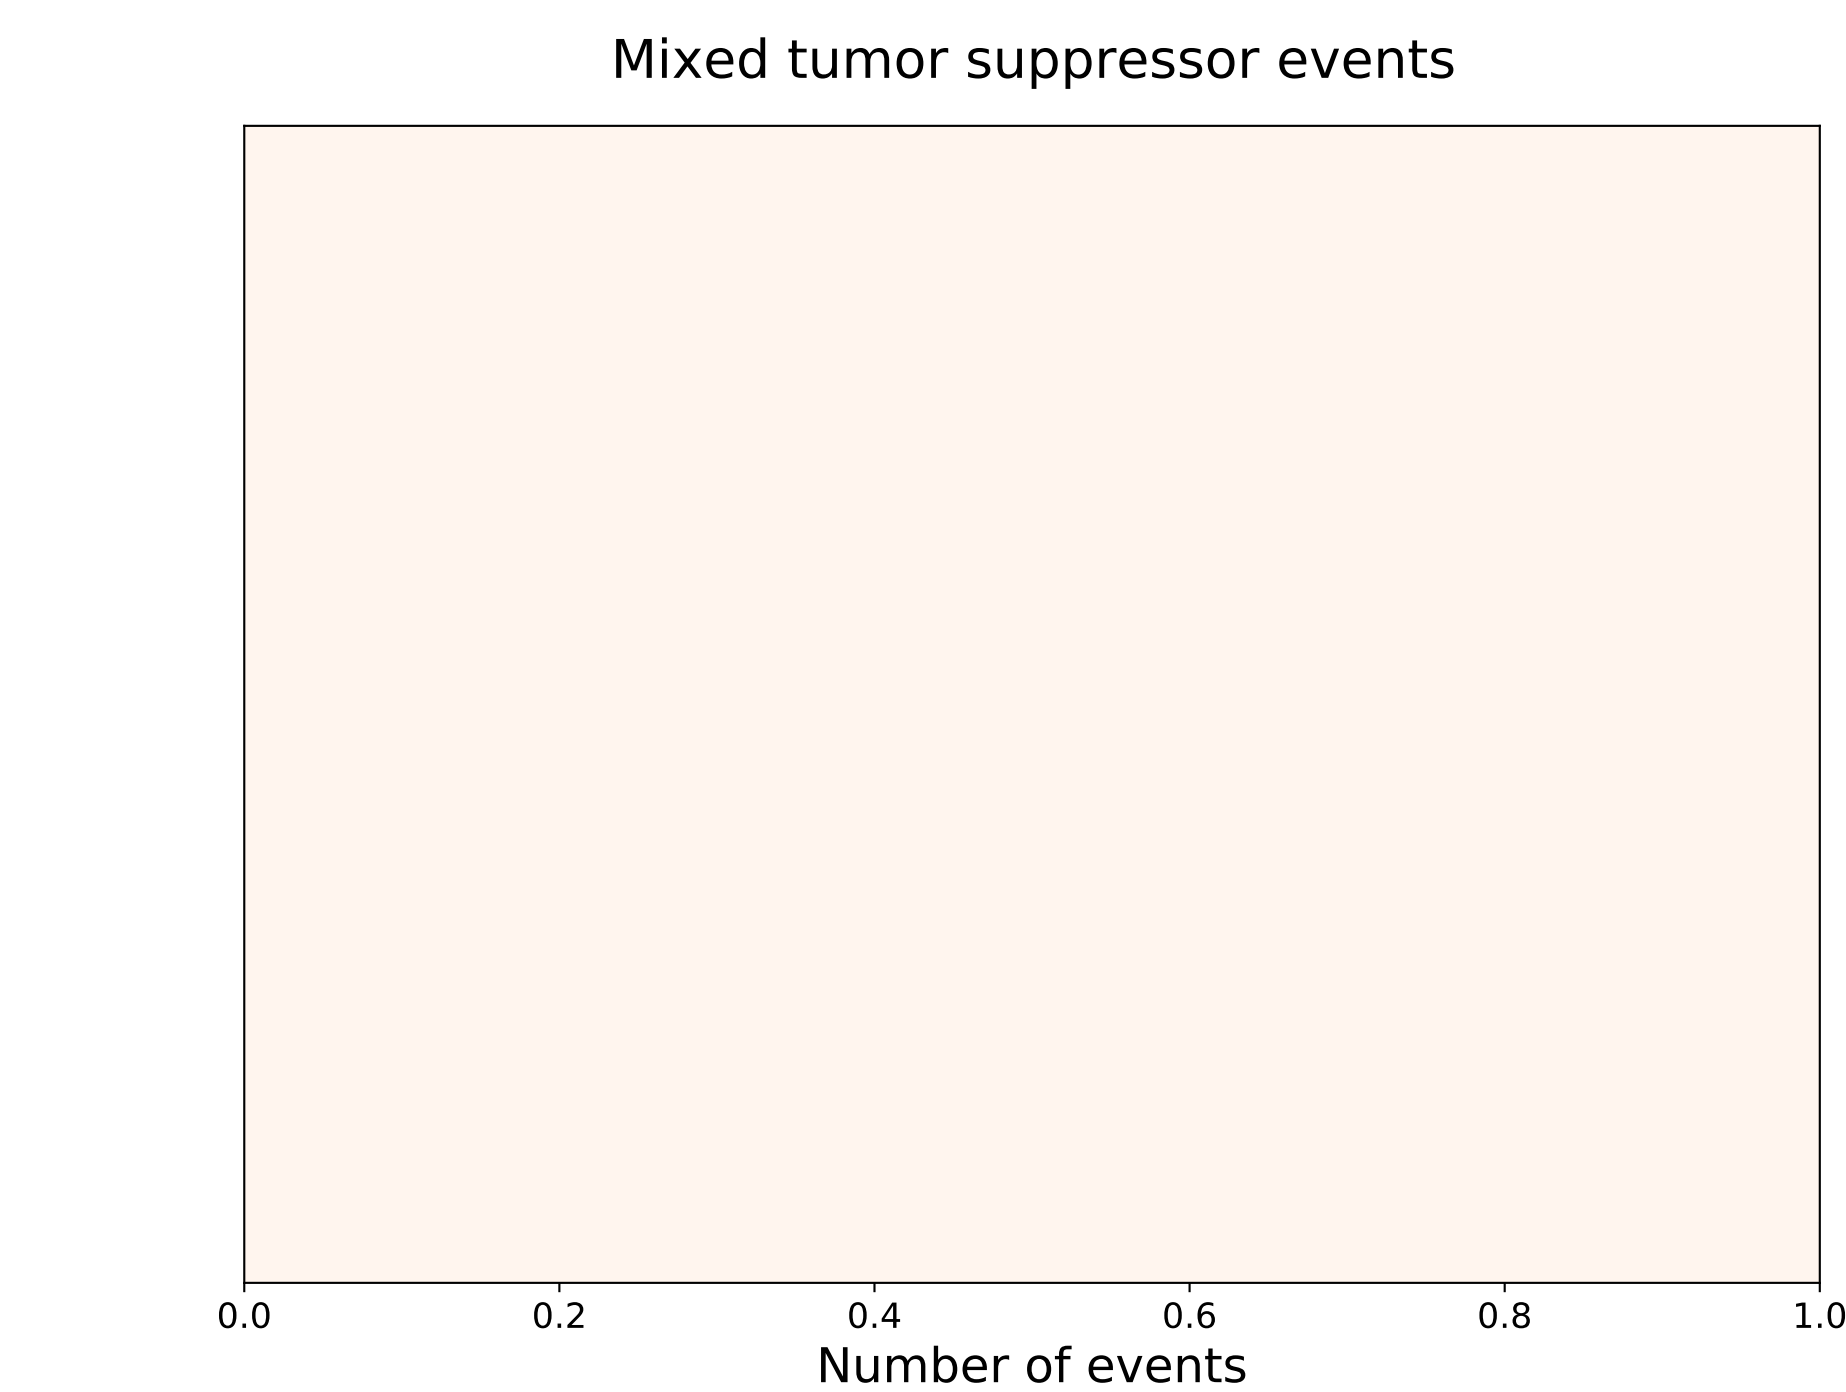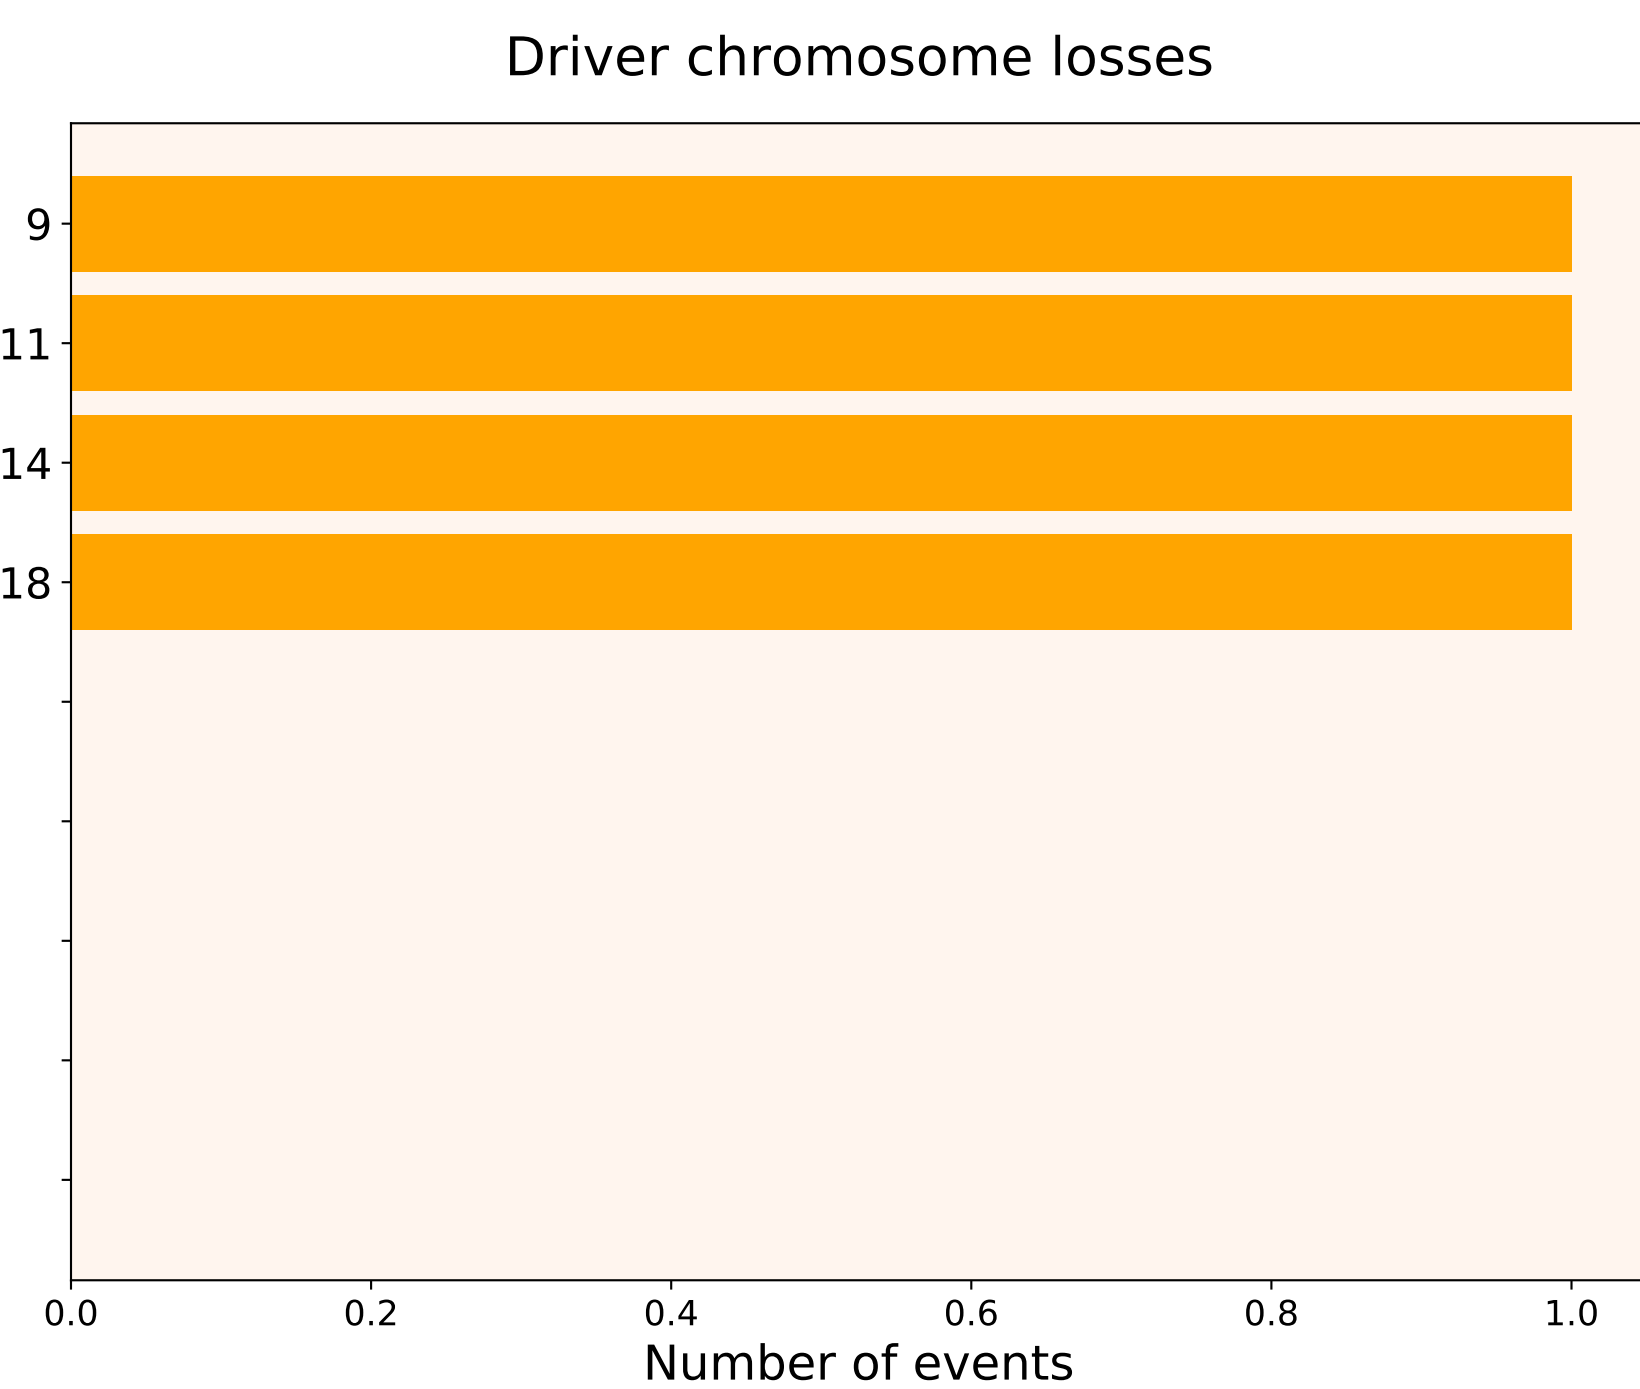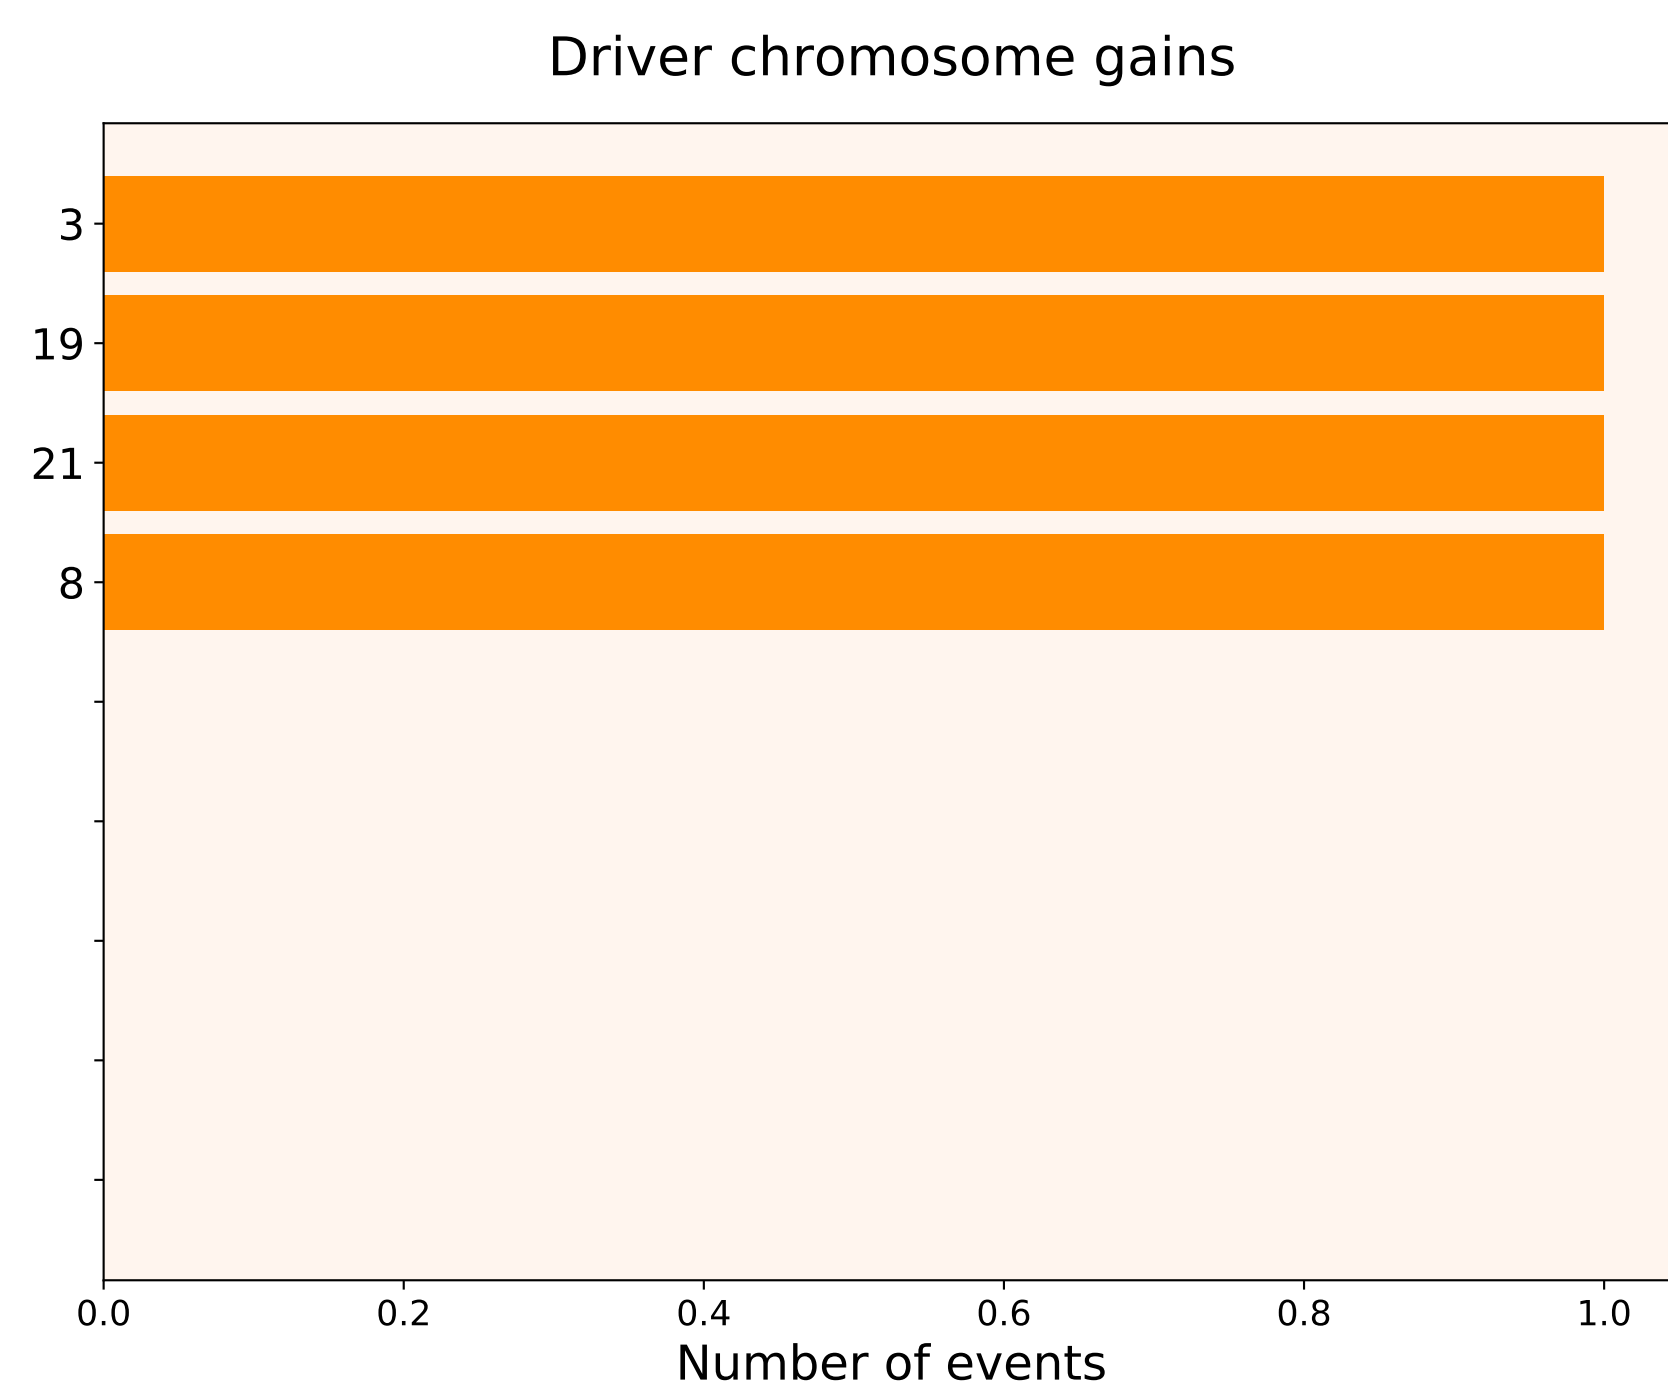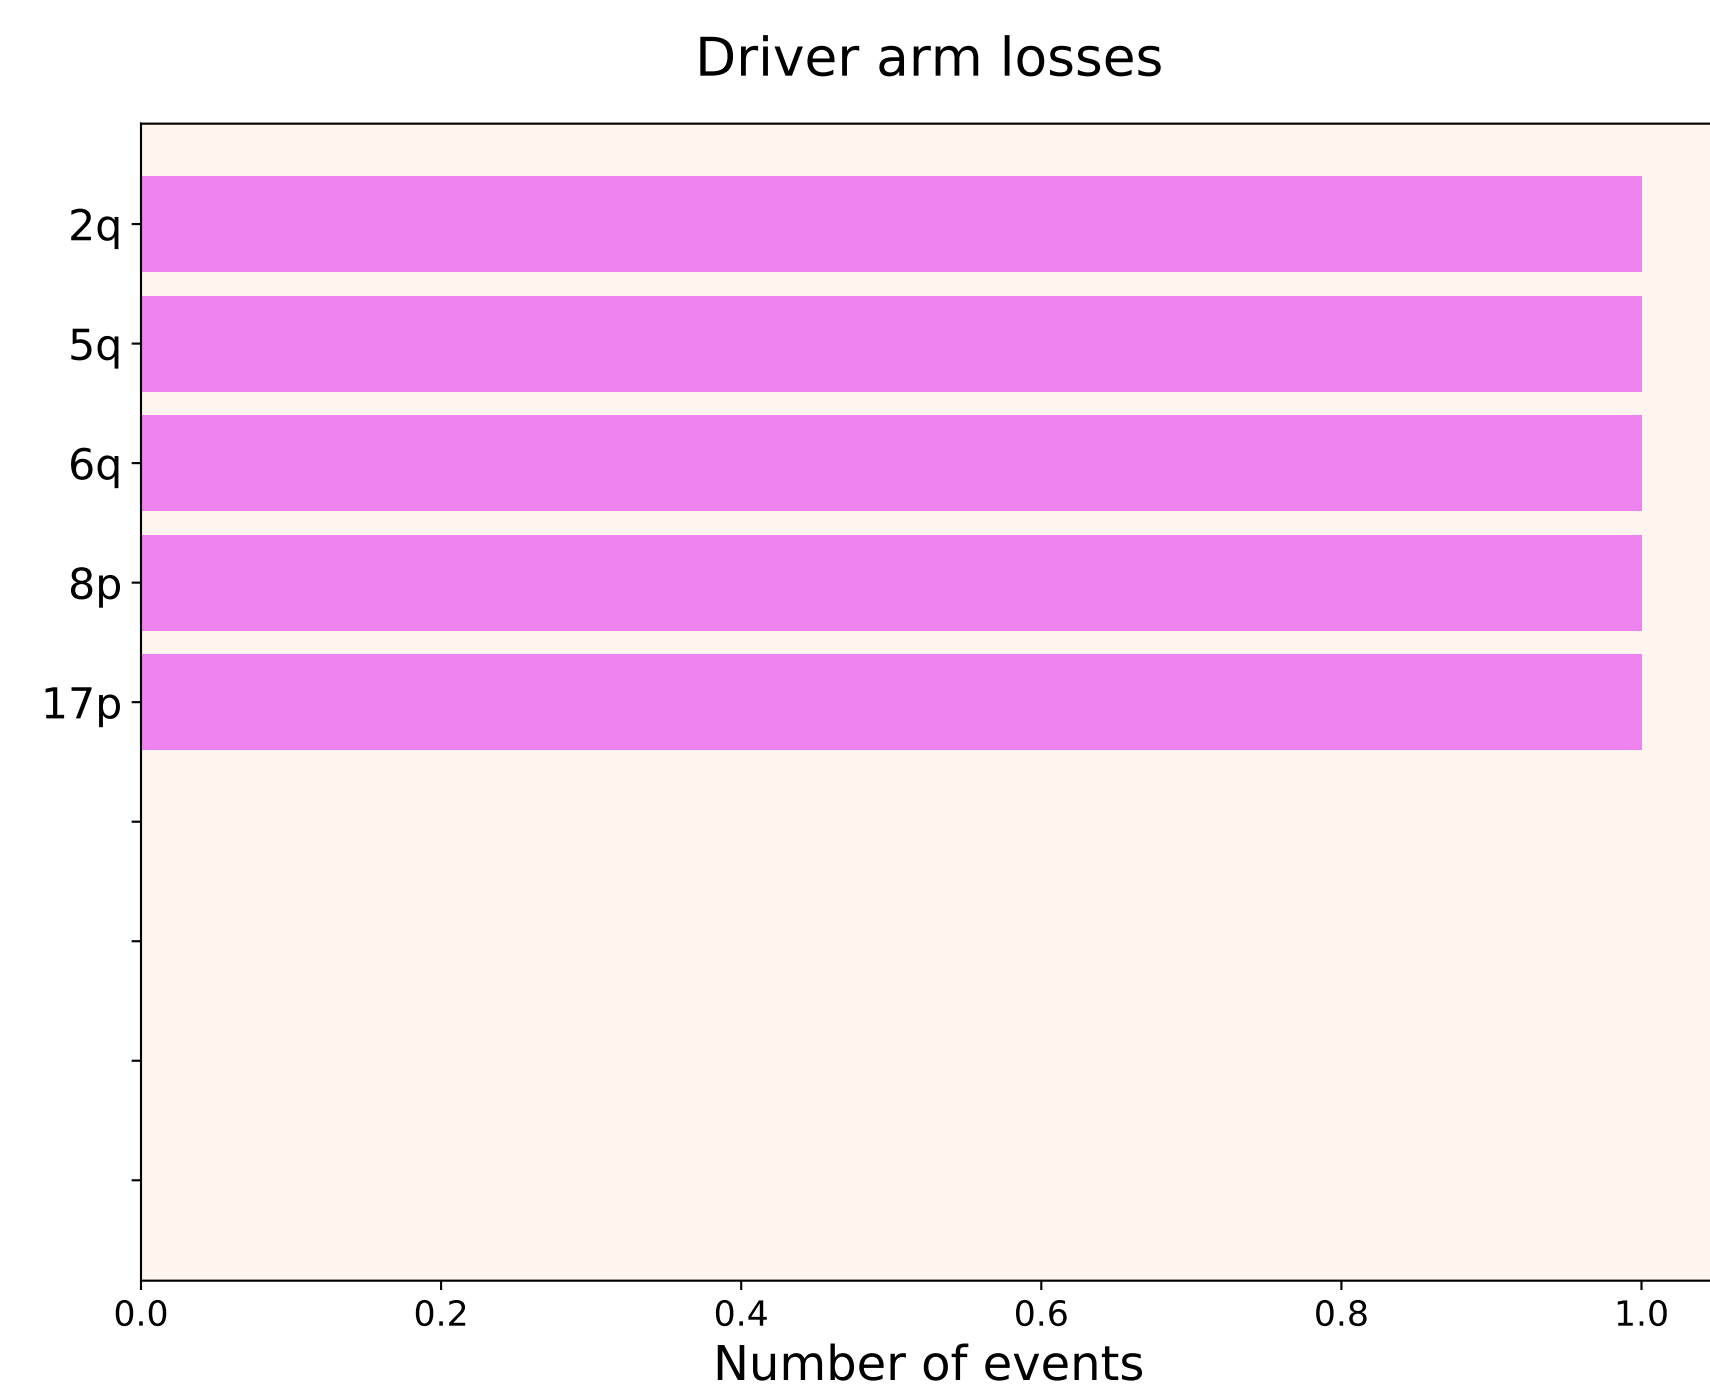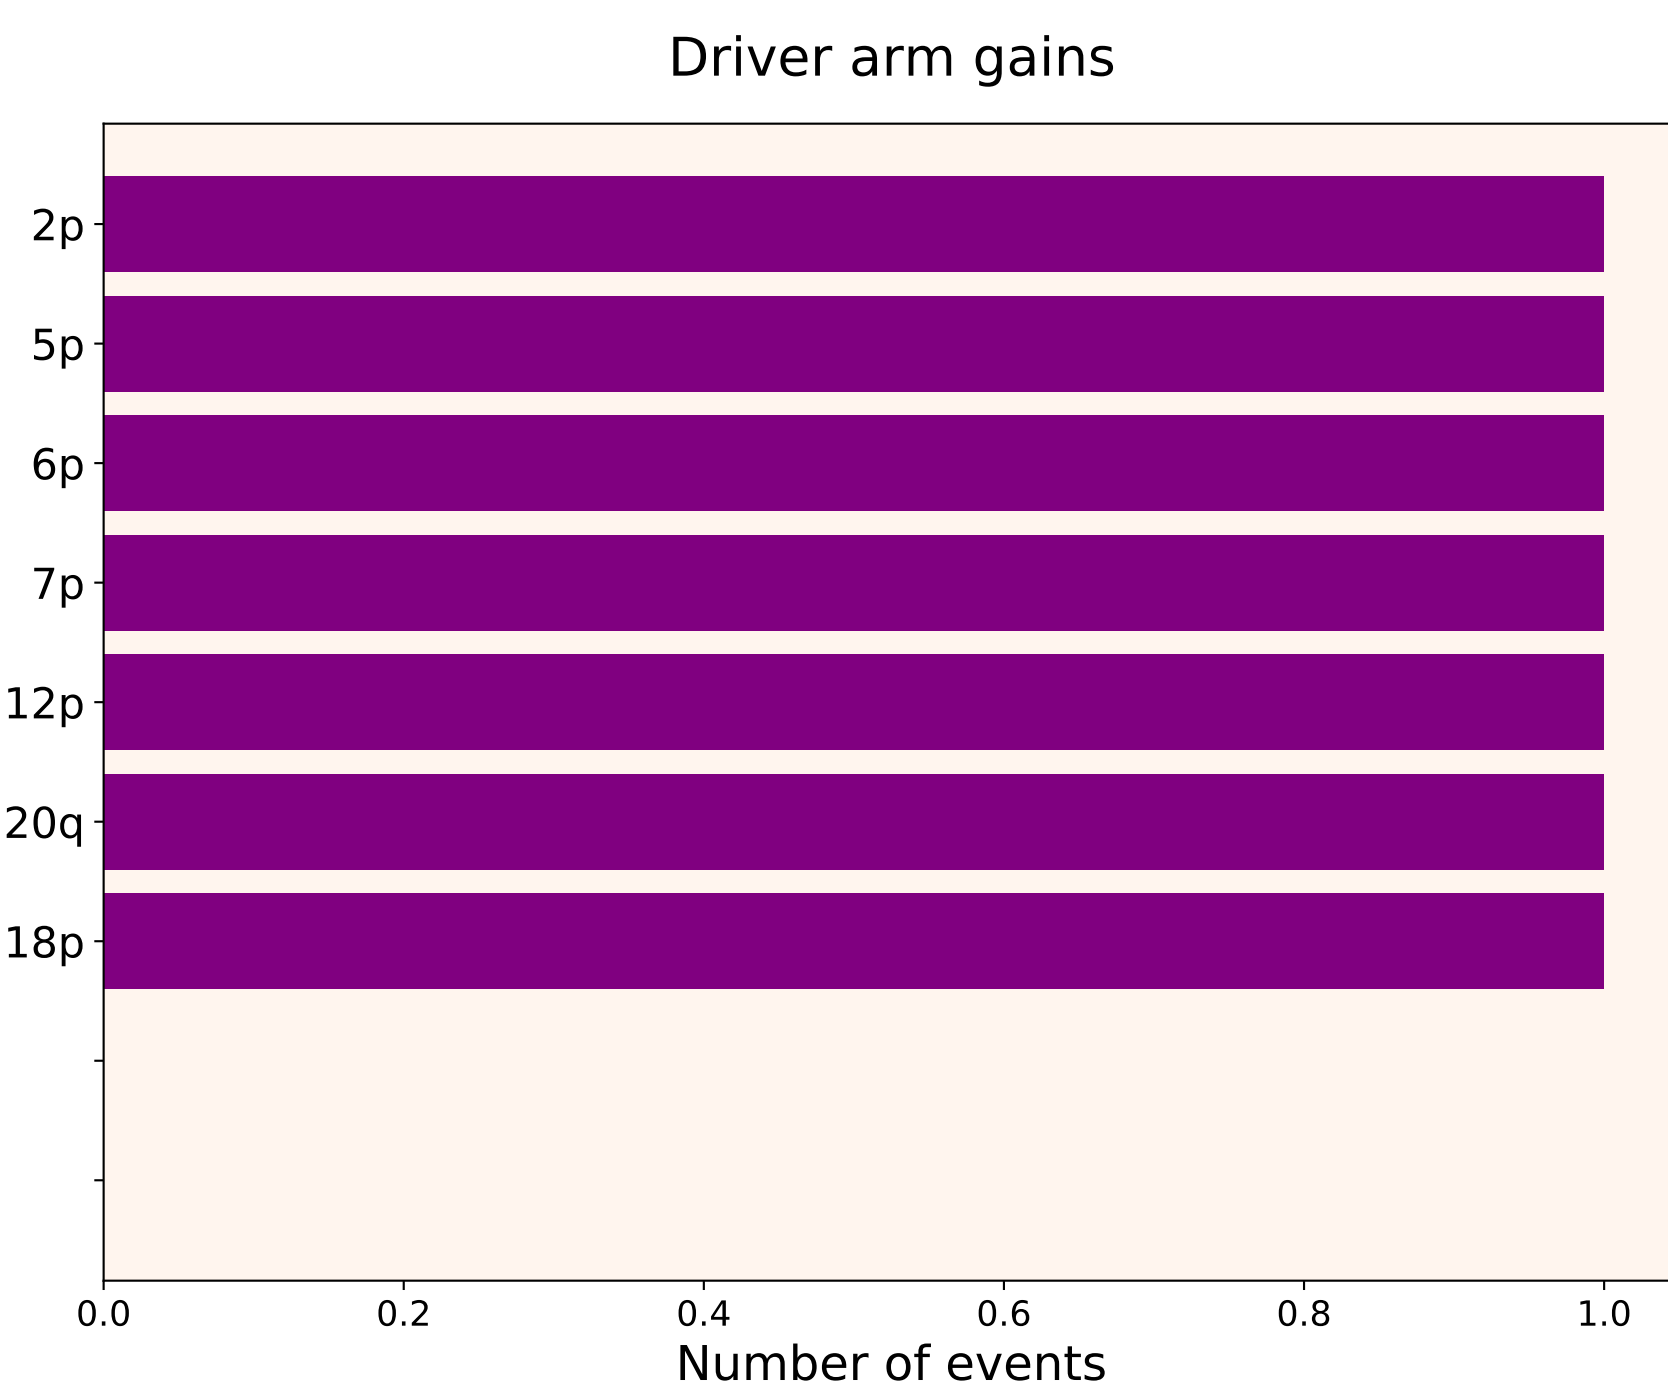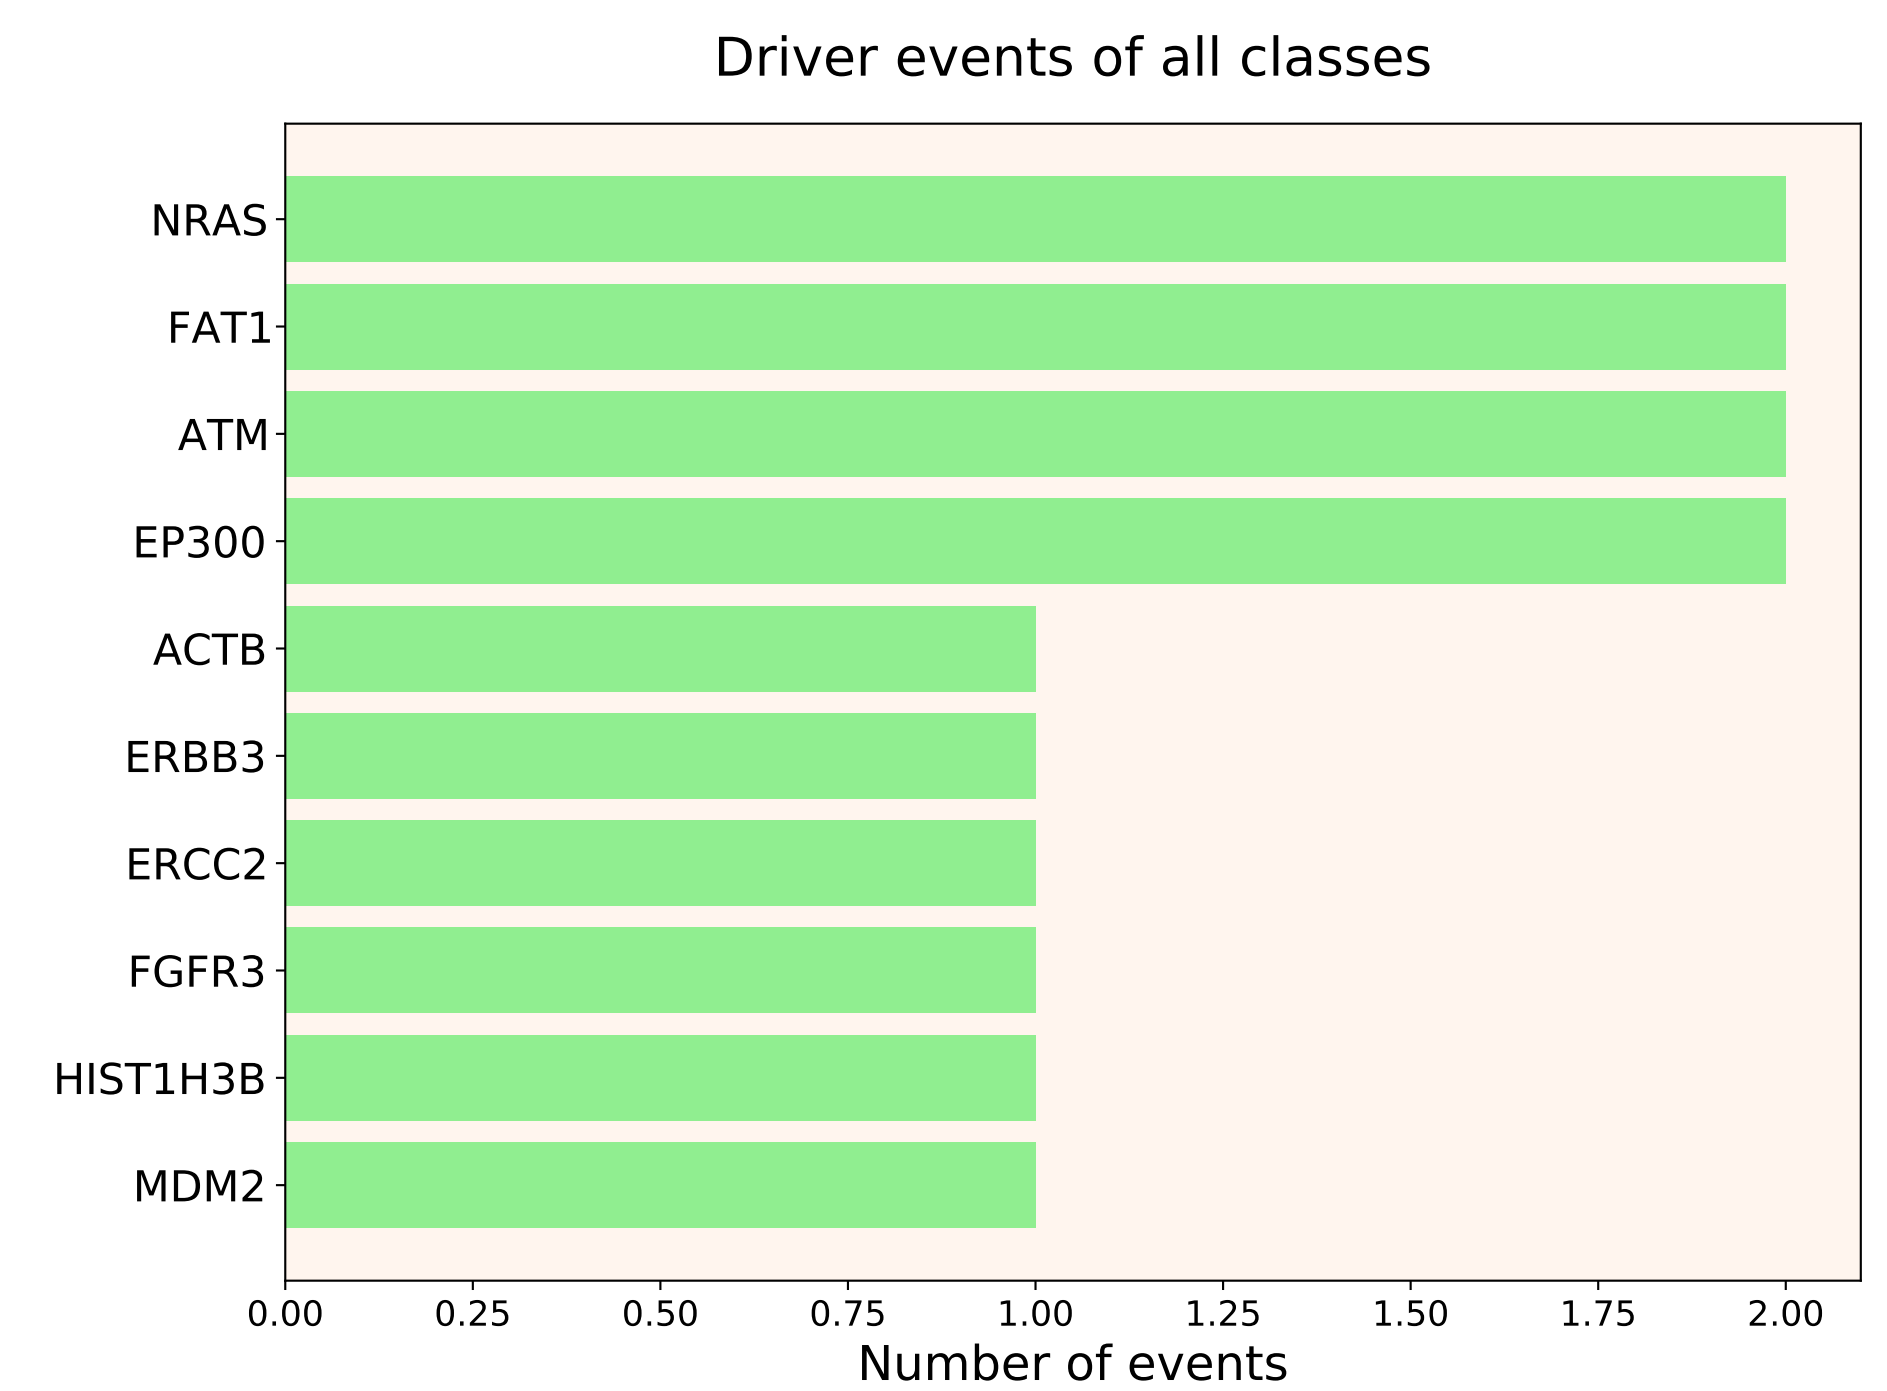

Supplement: Supplemental_Data_S1.zip [file Supplemental_Data_S1.zip]

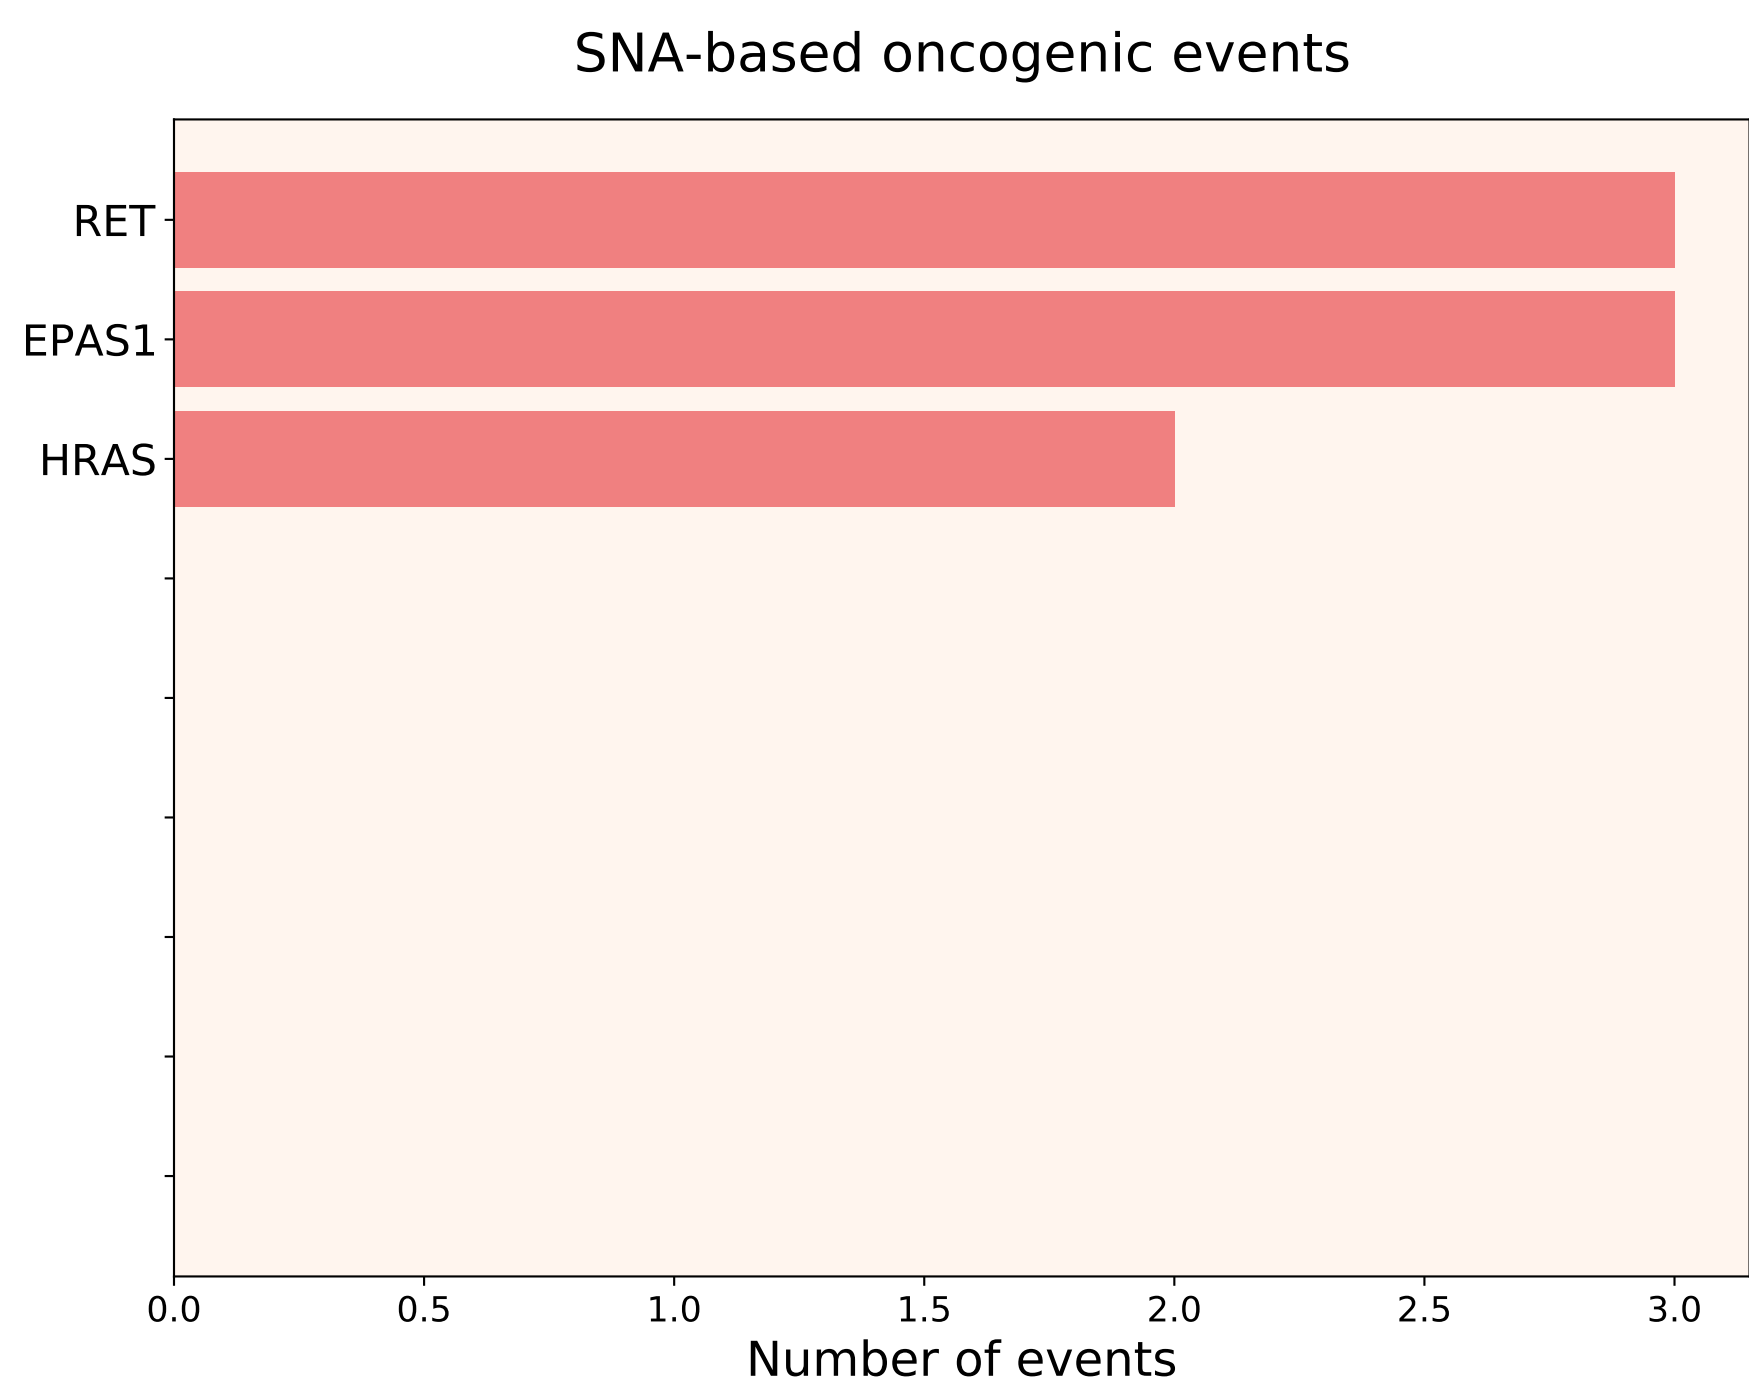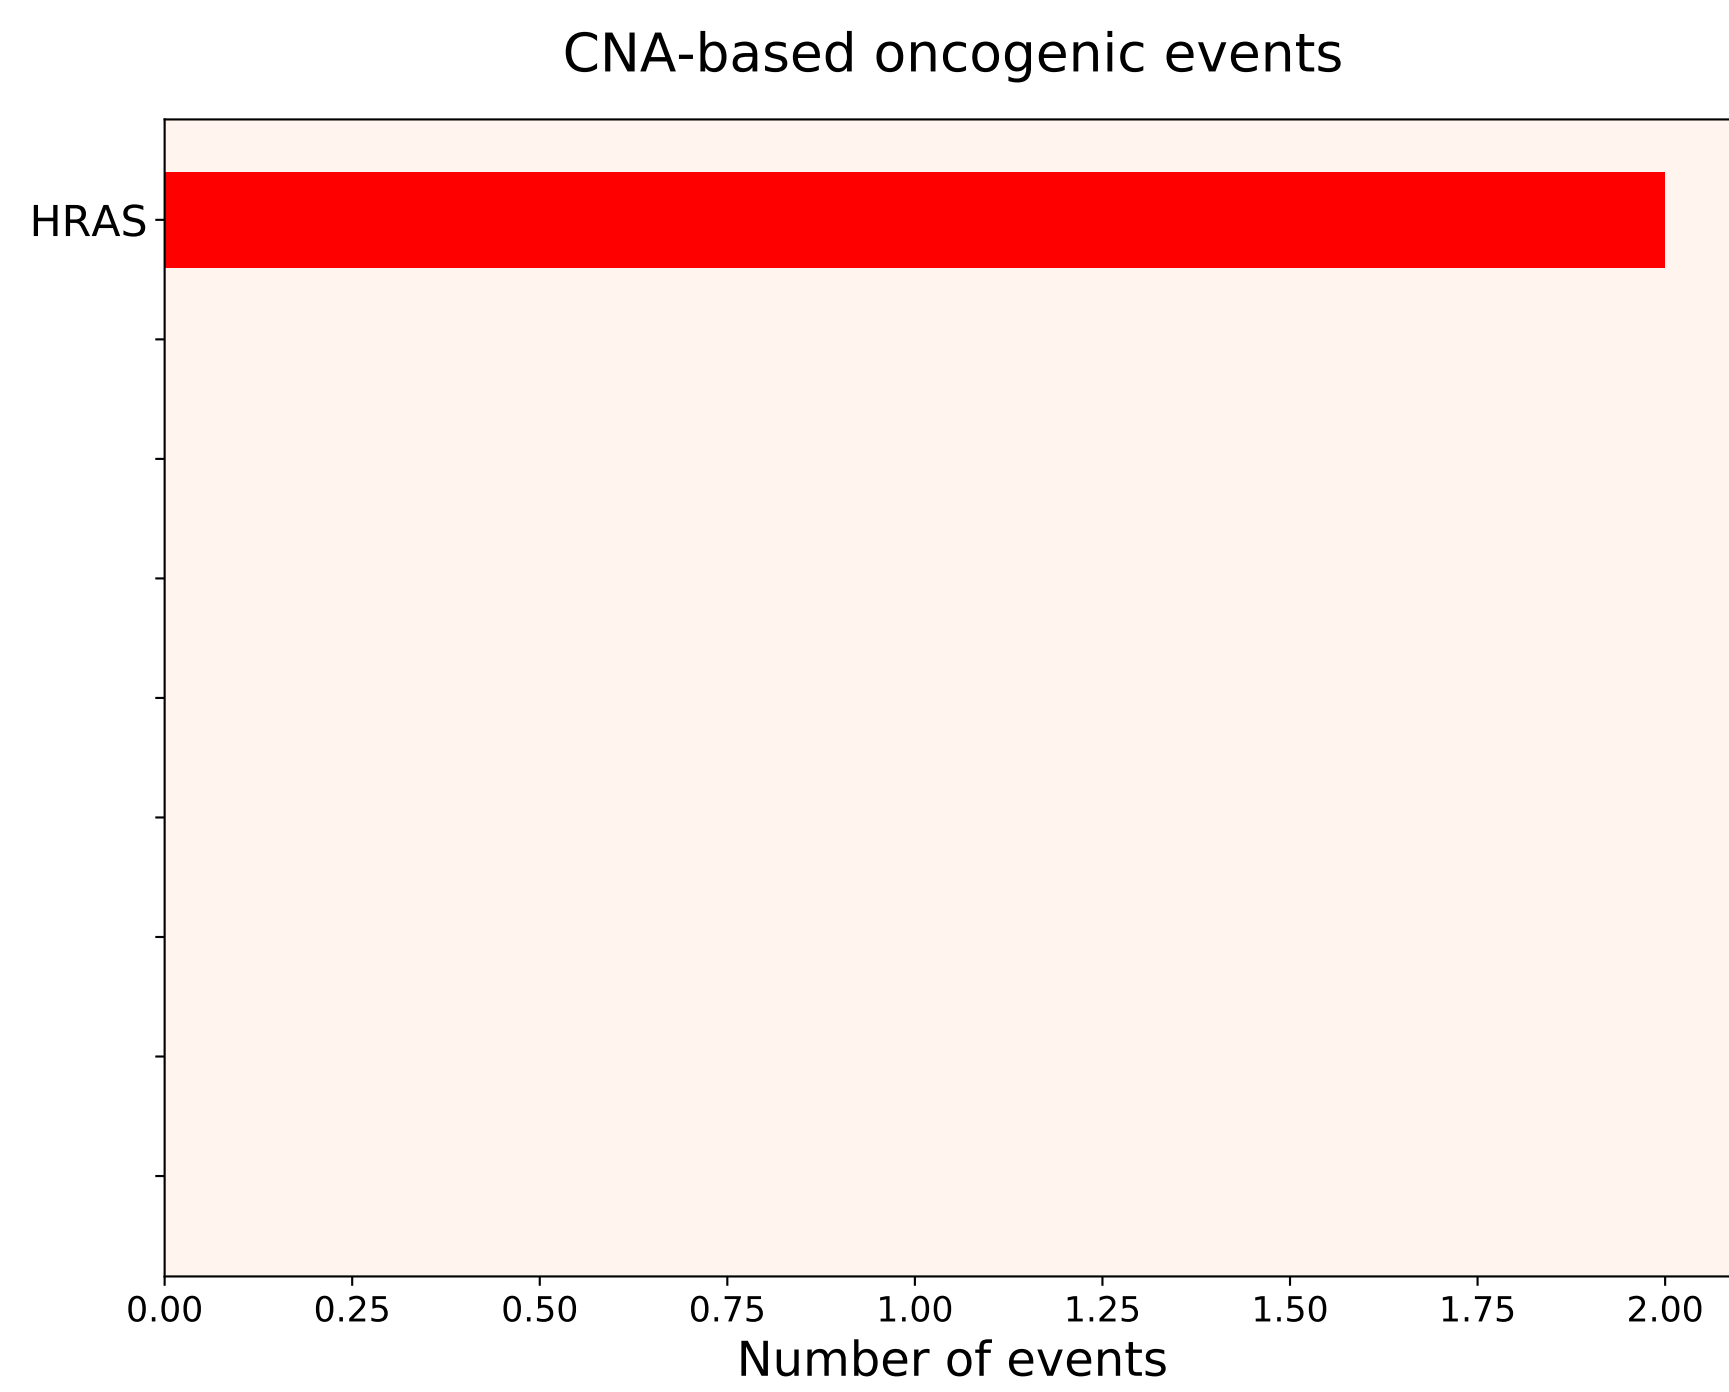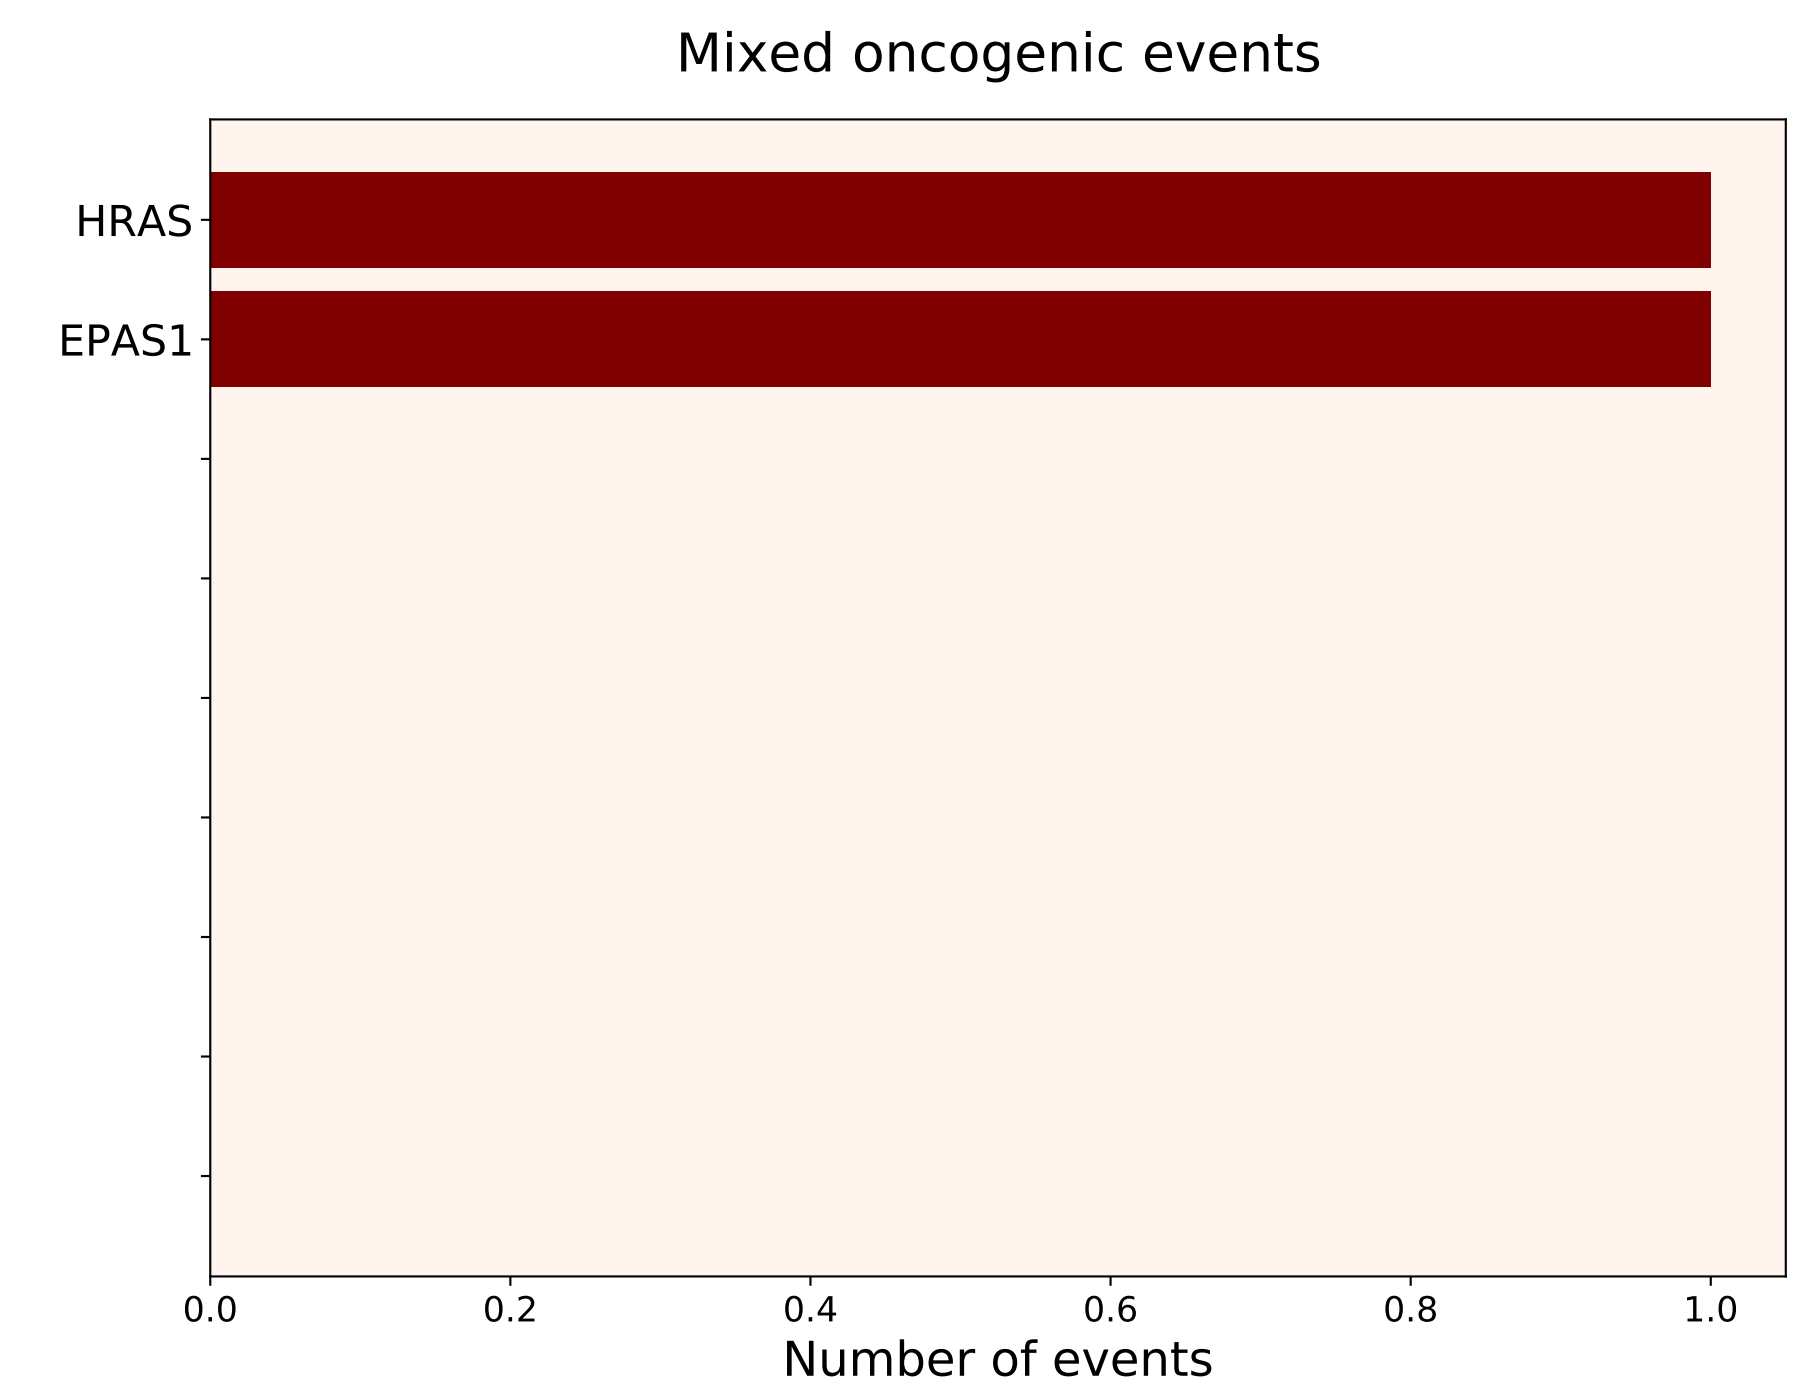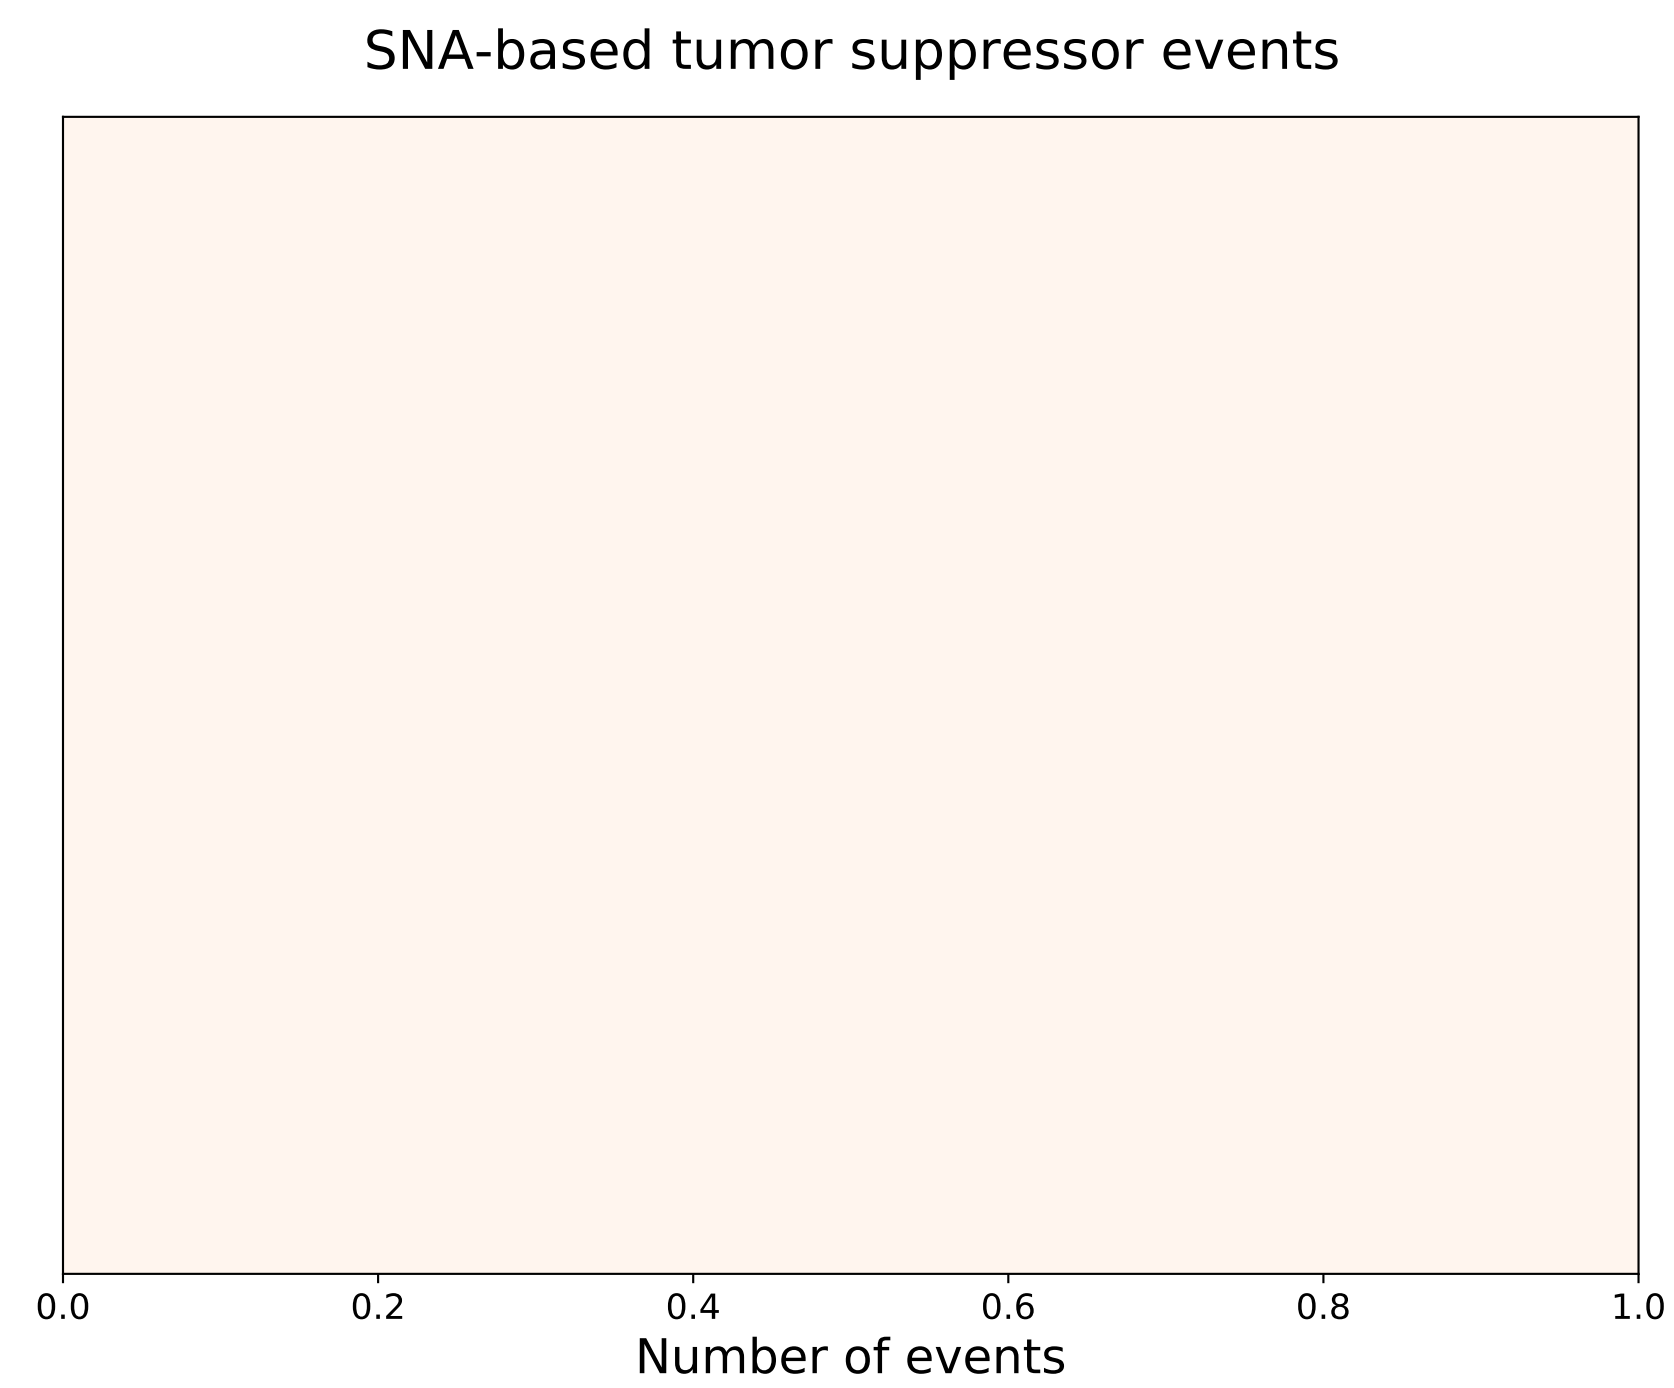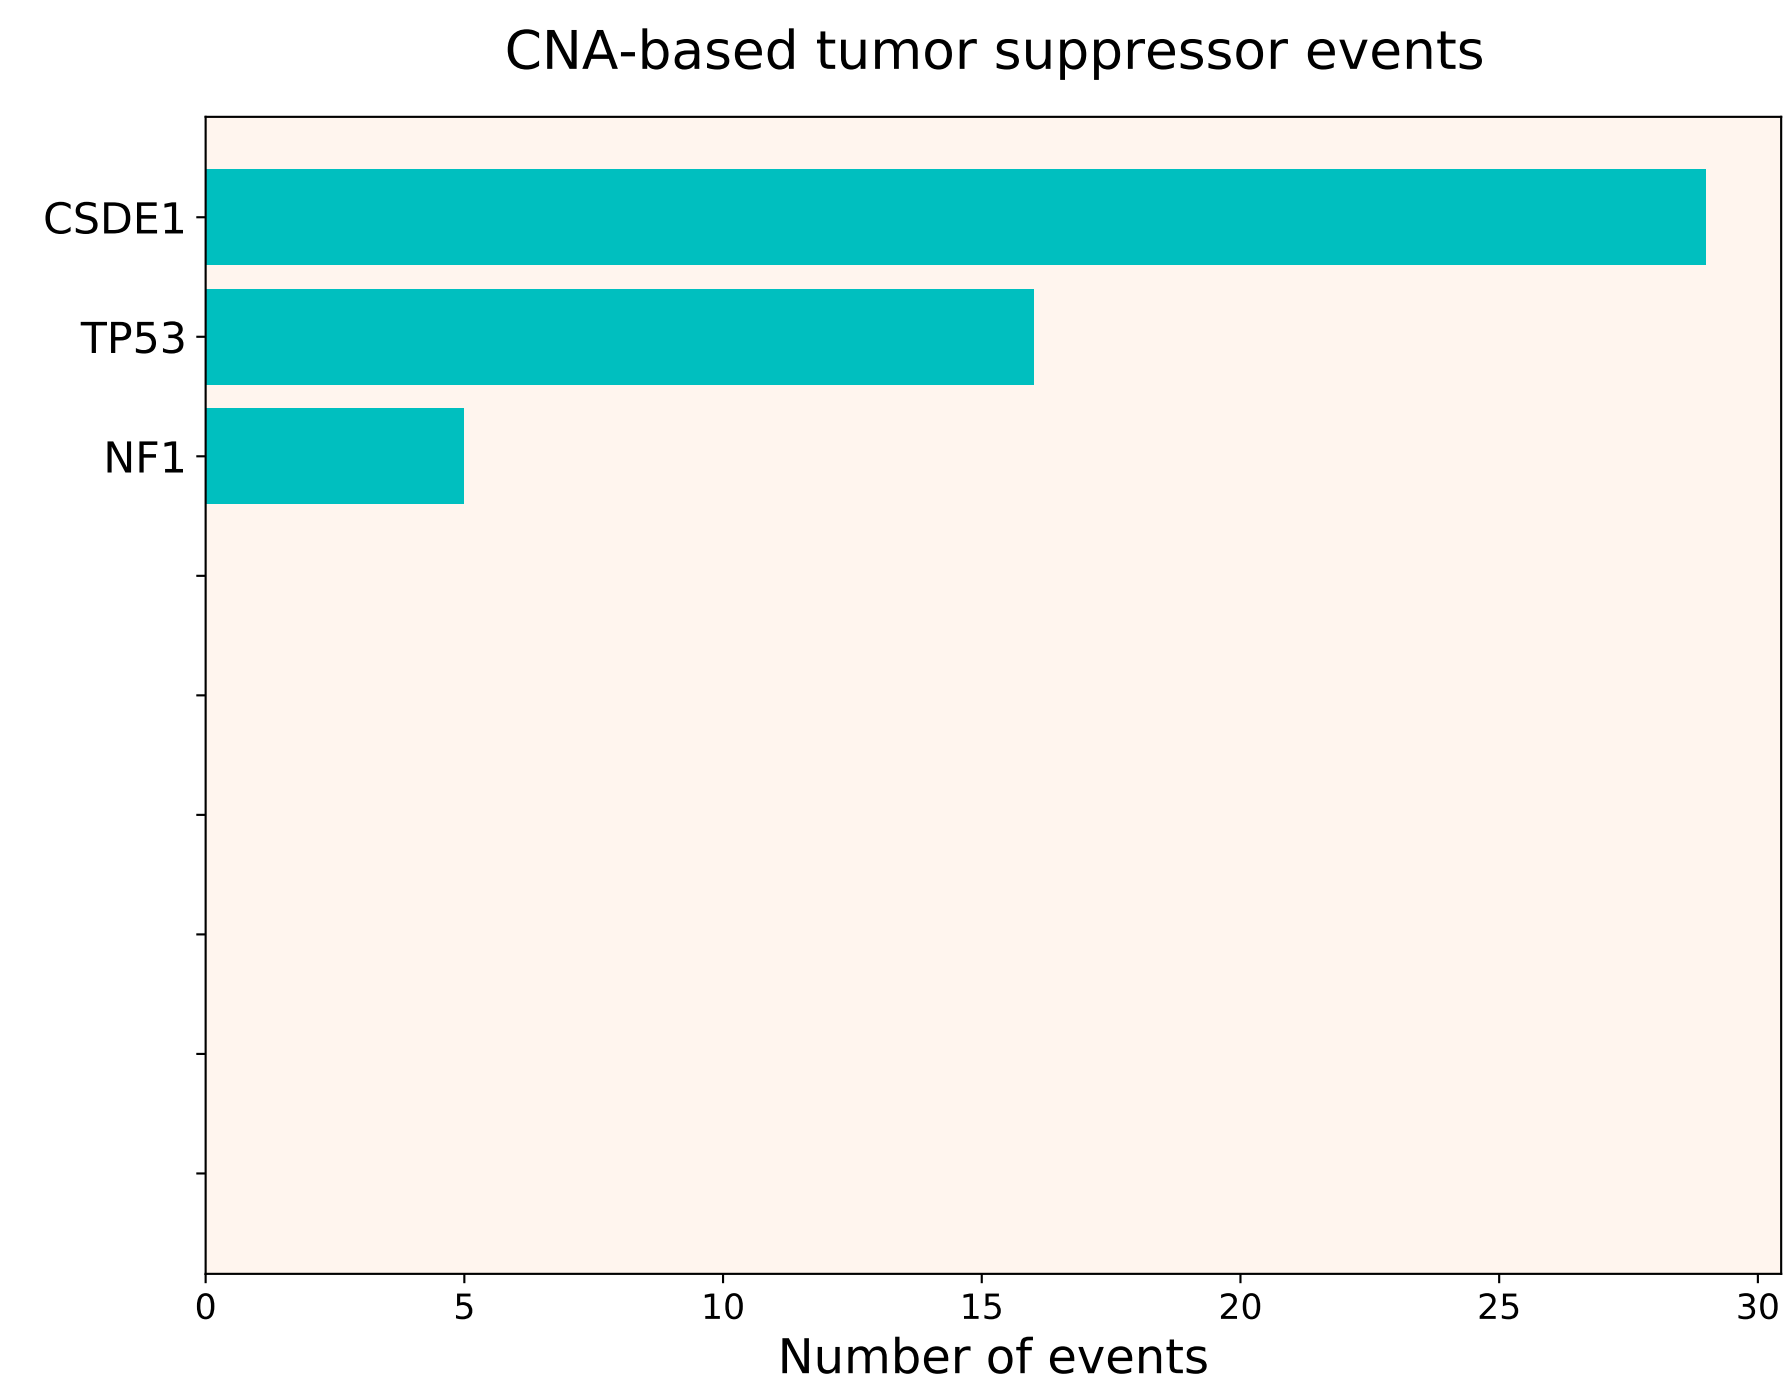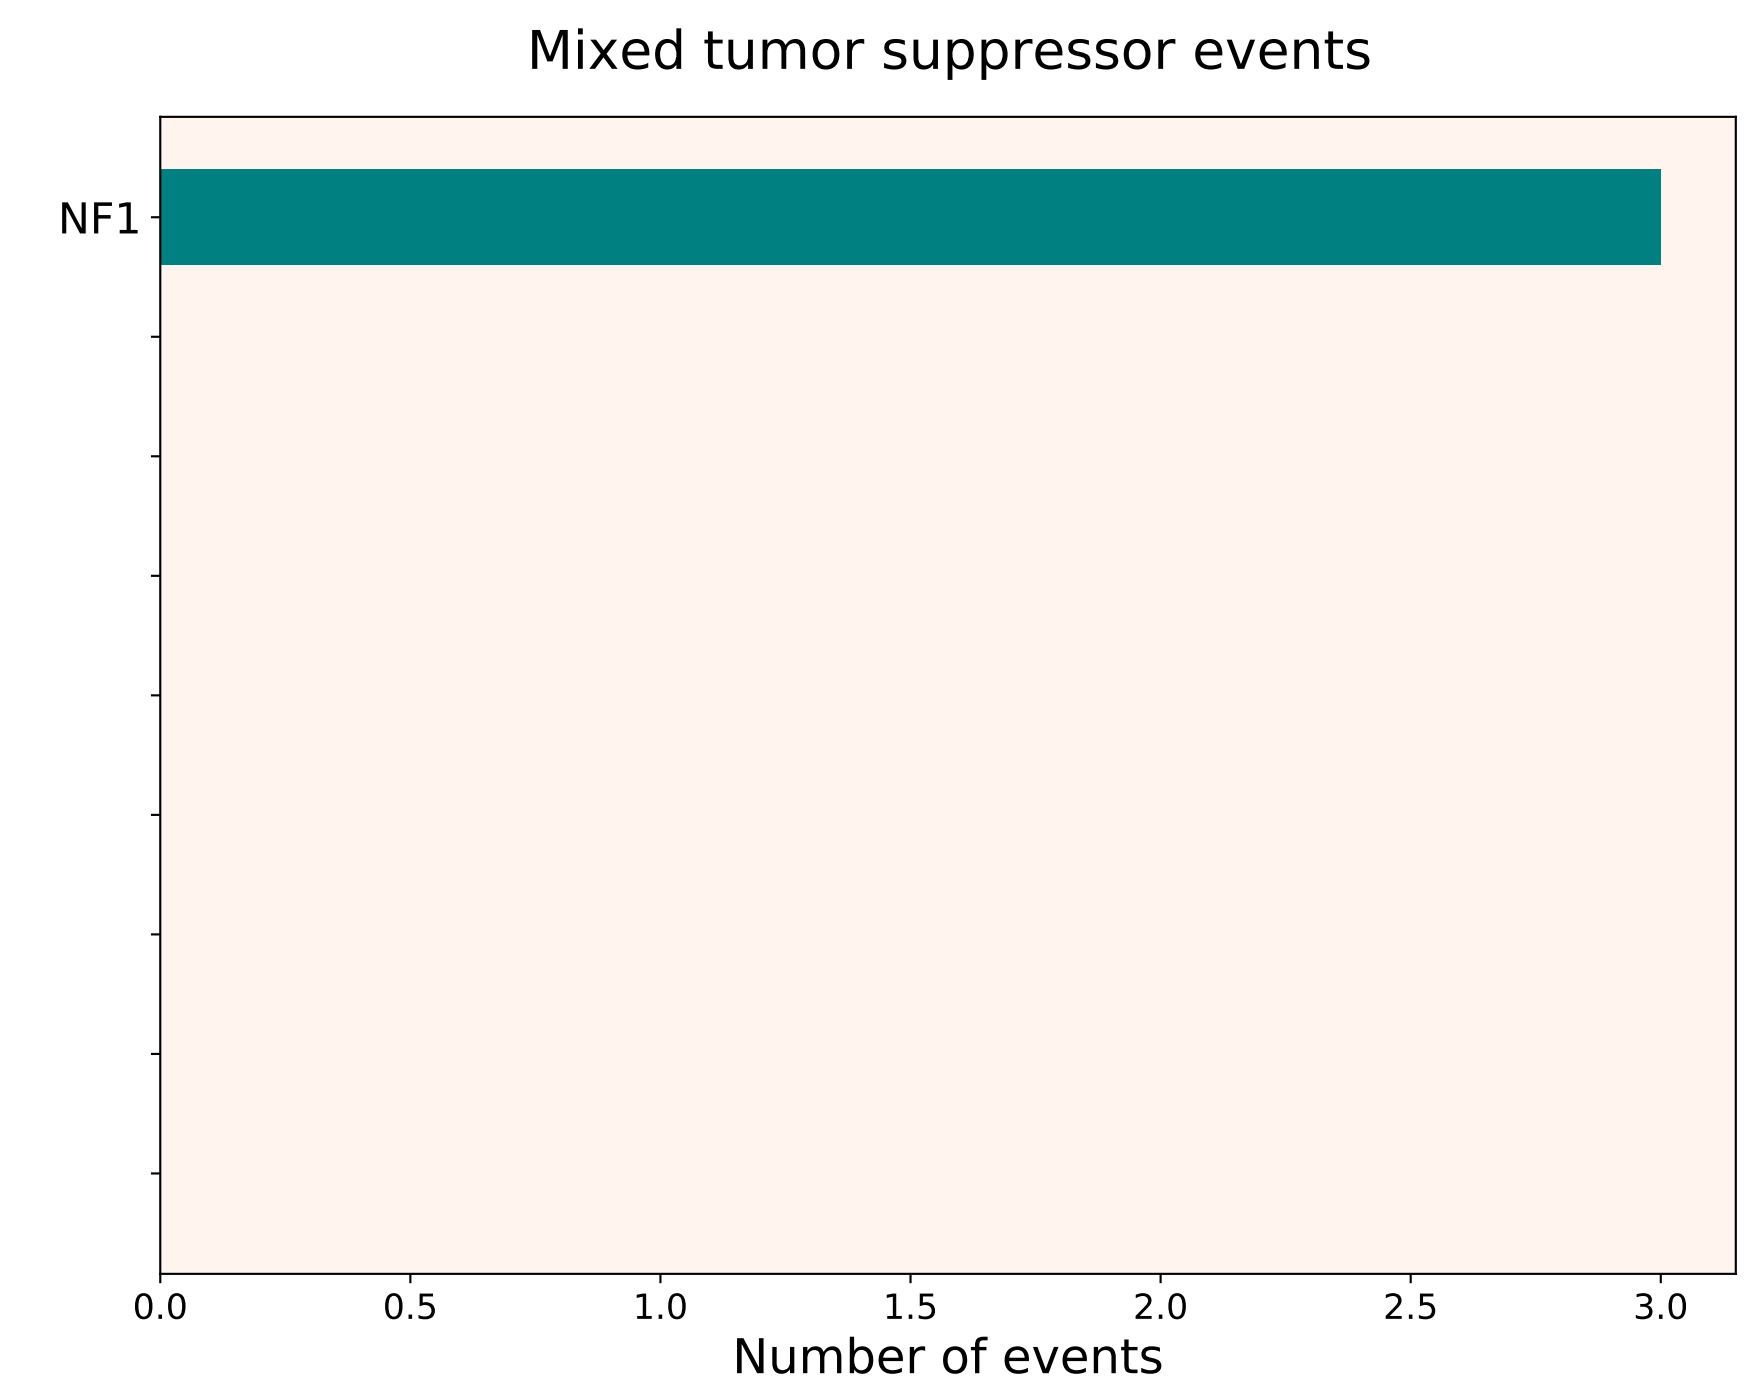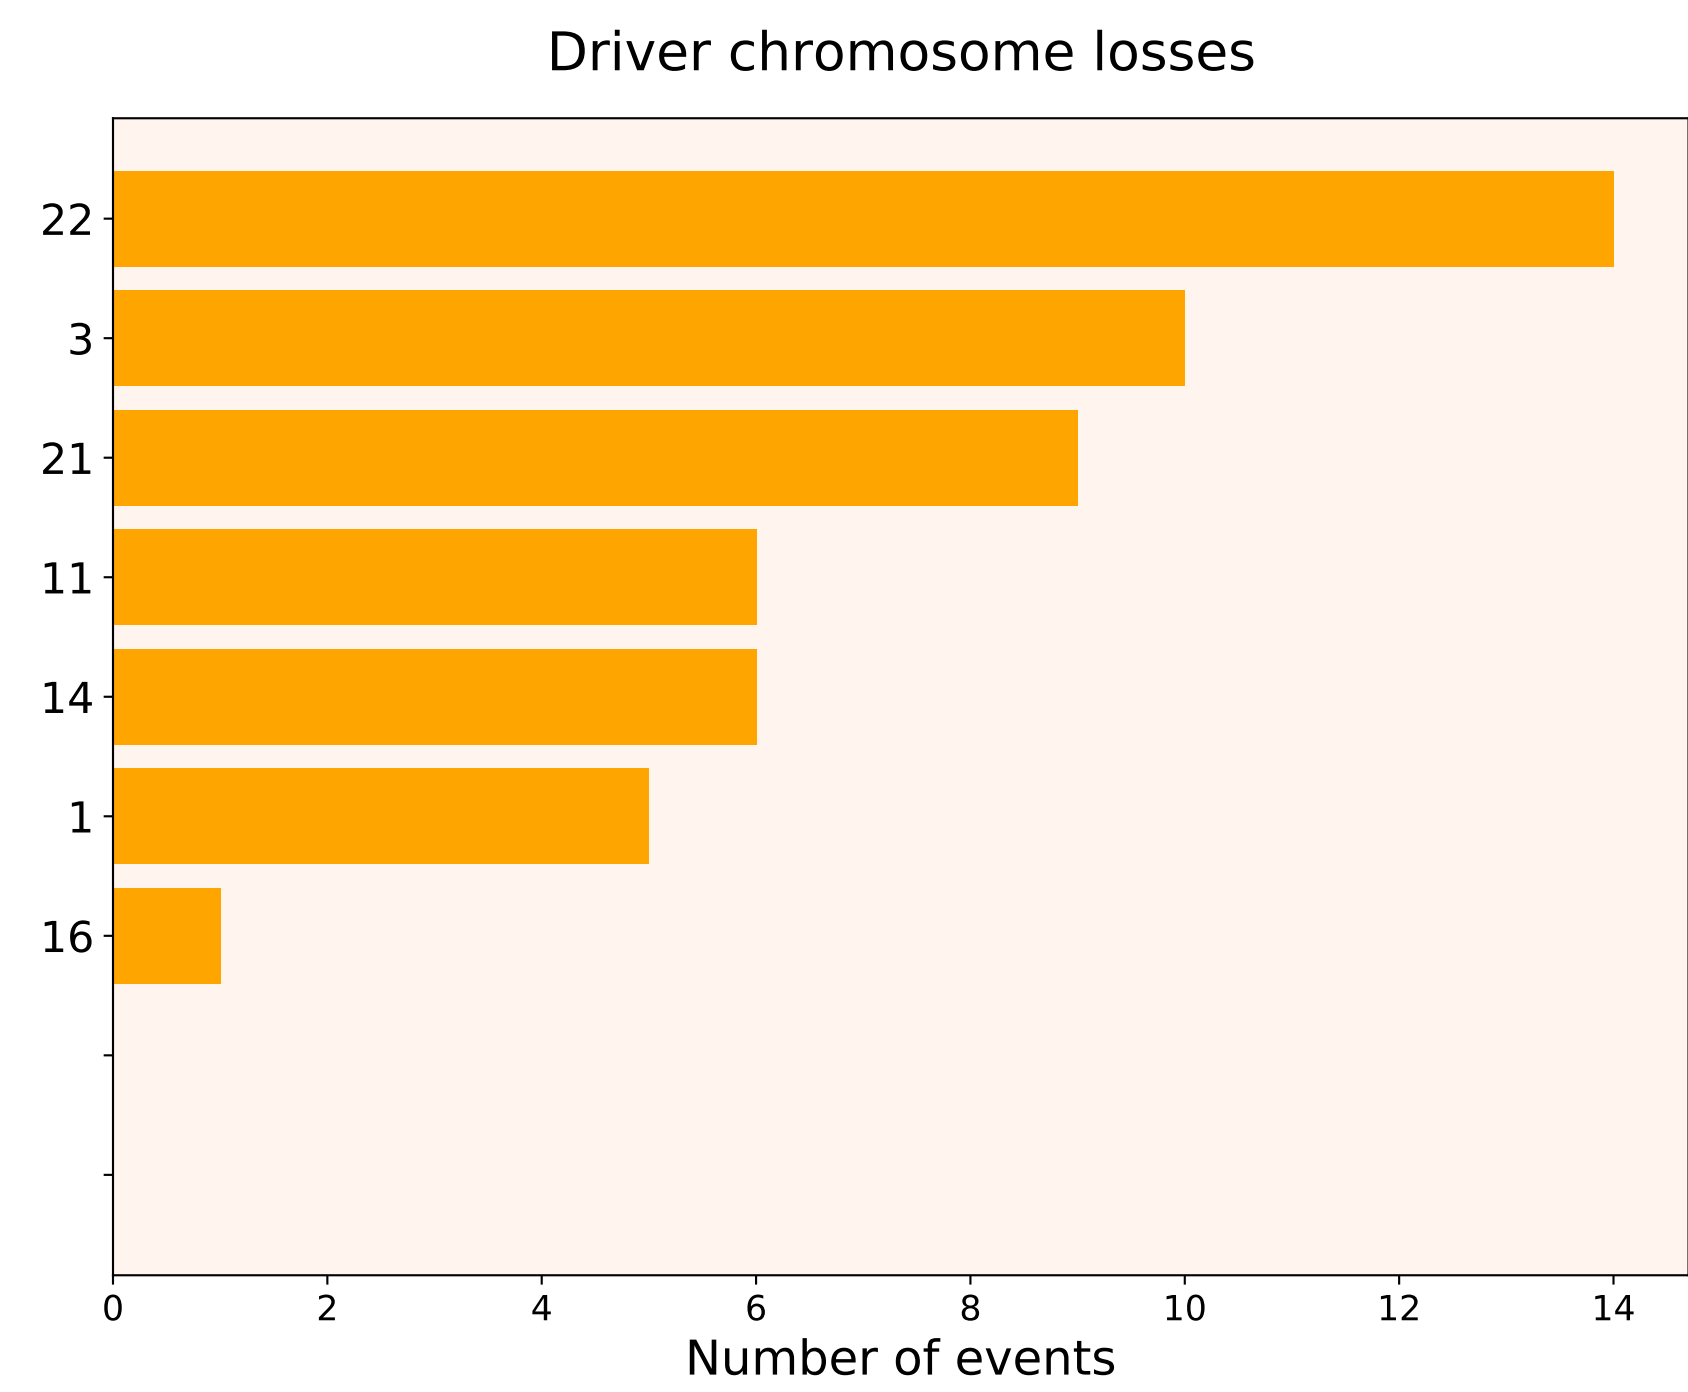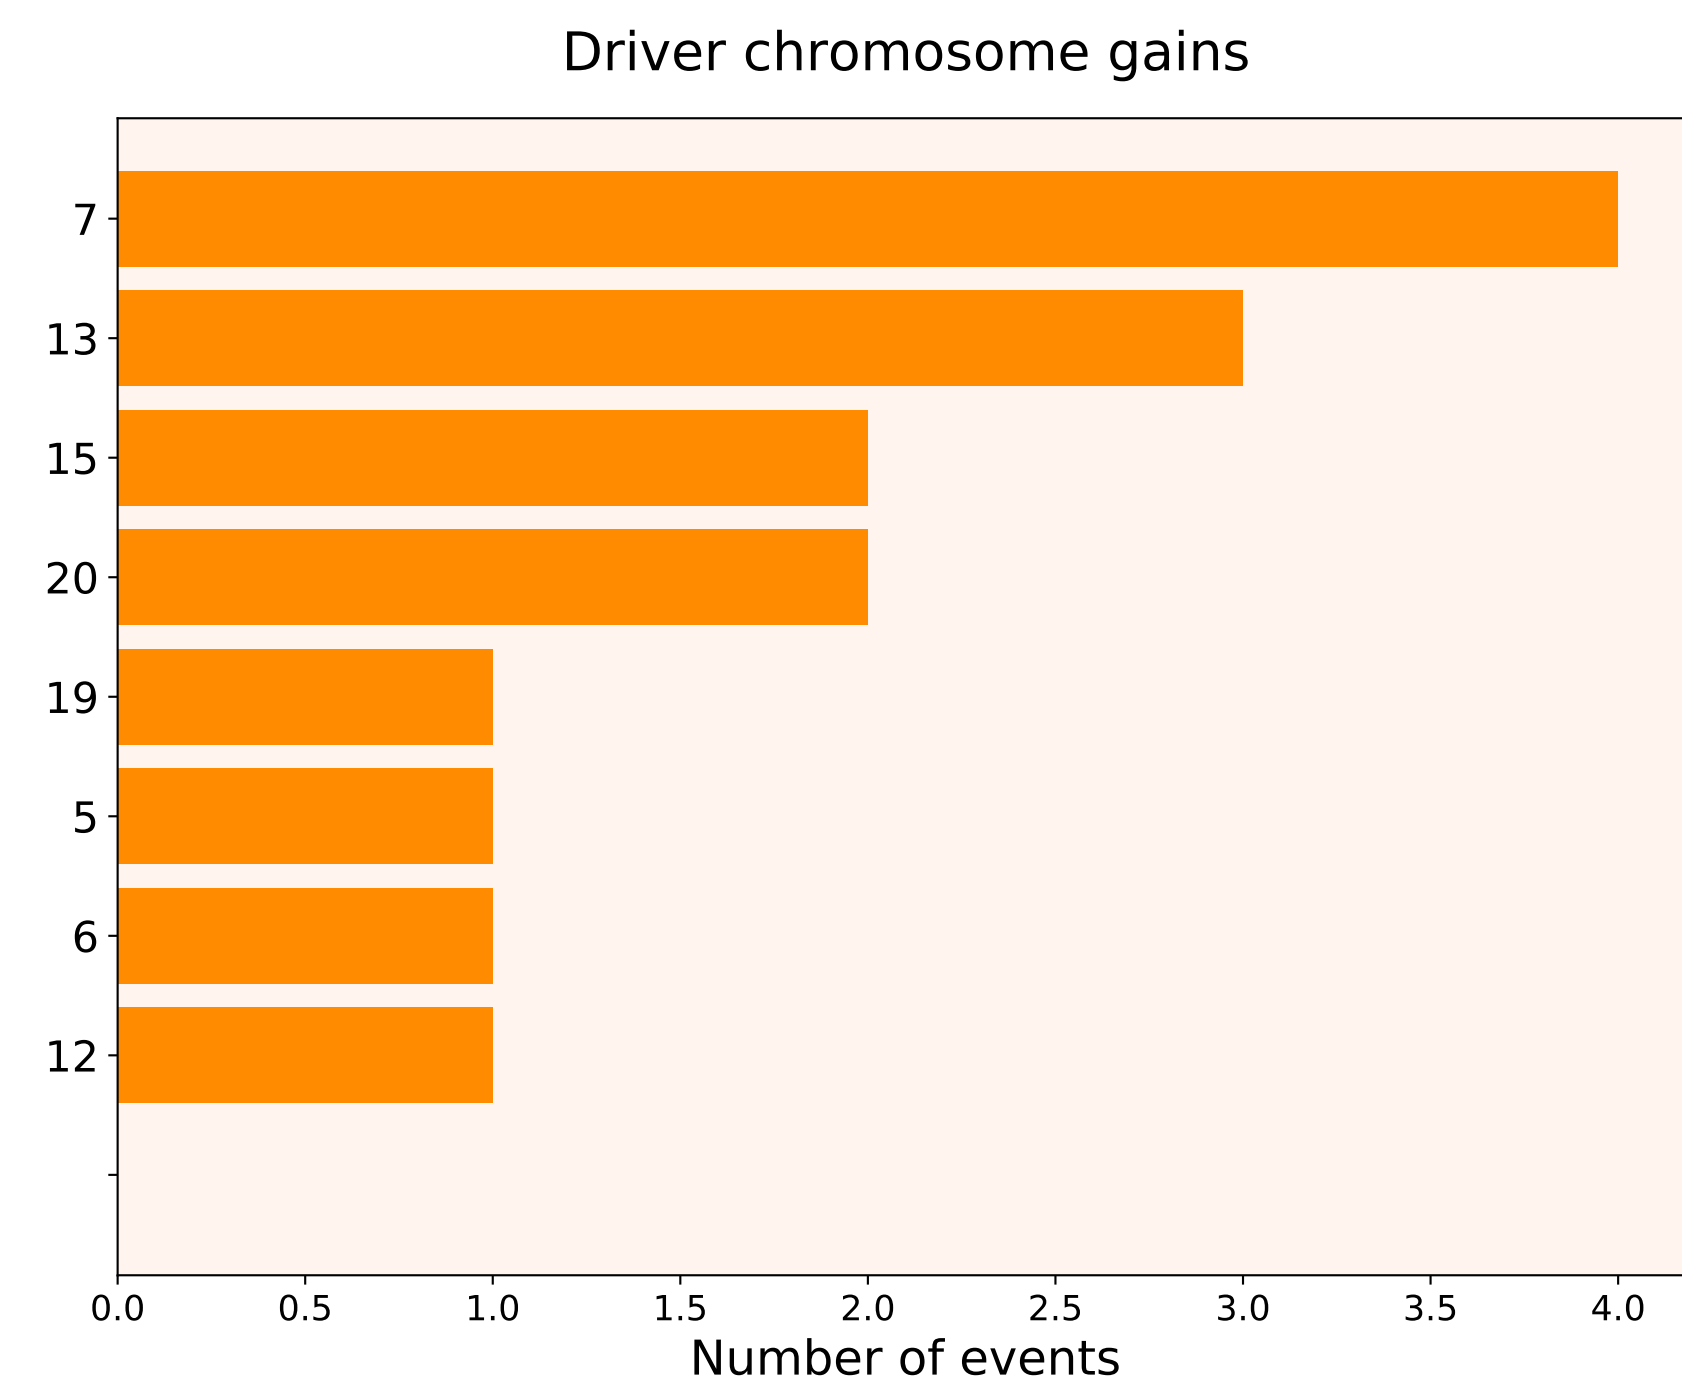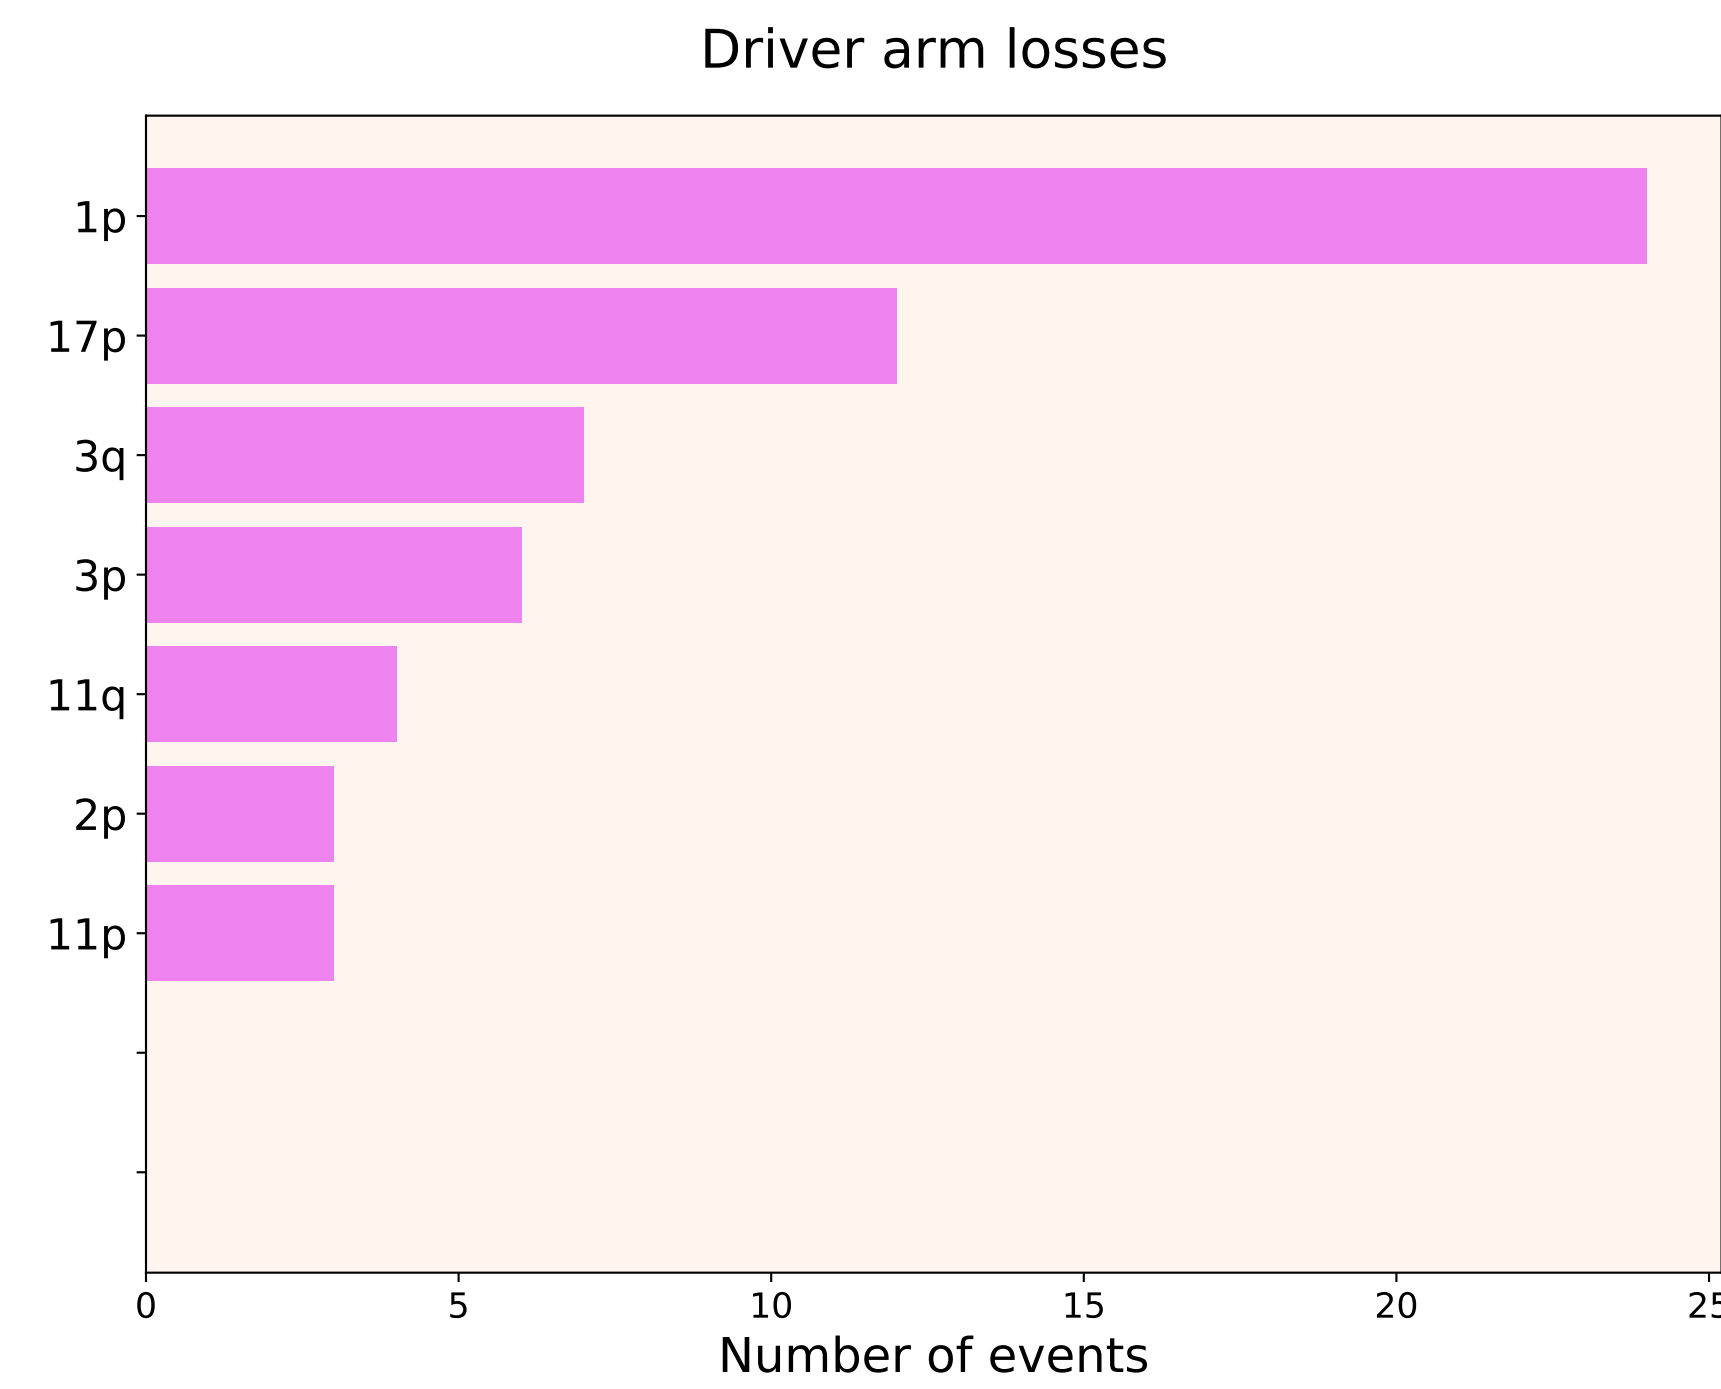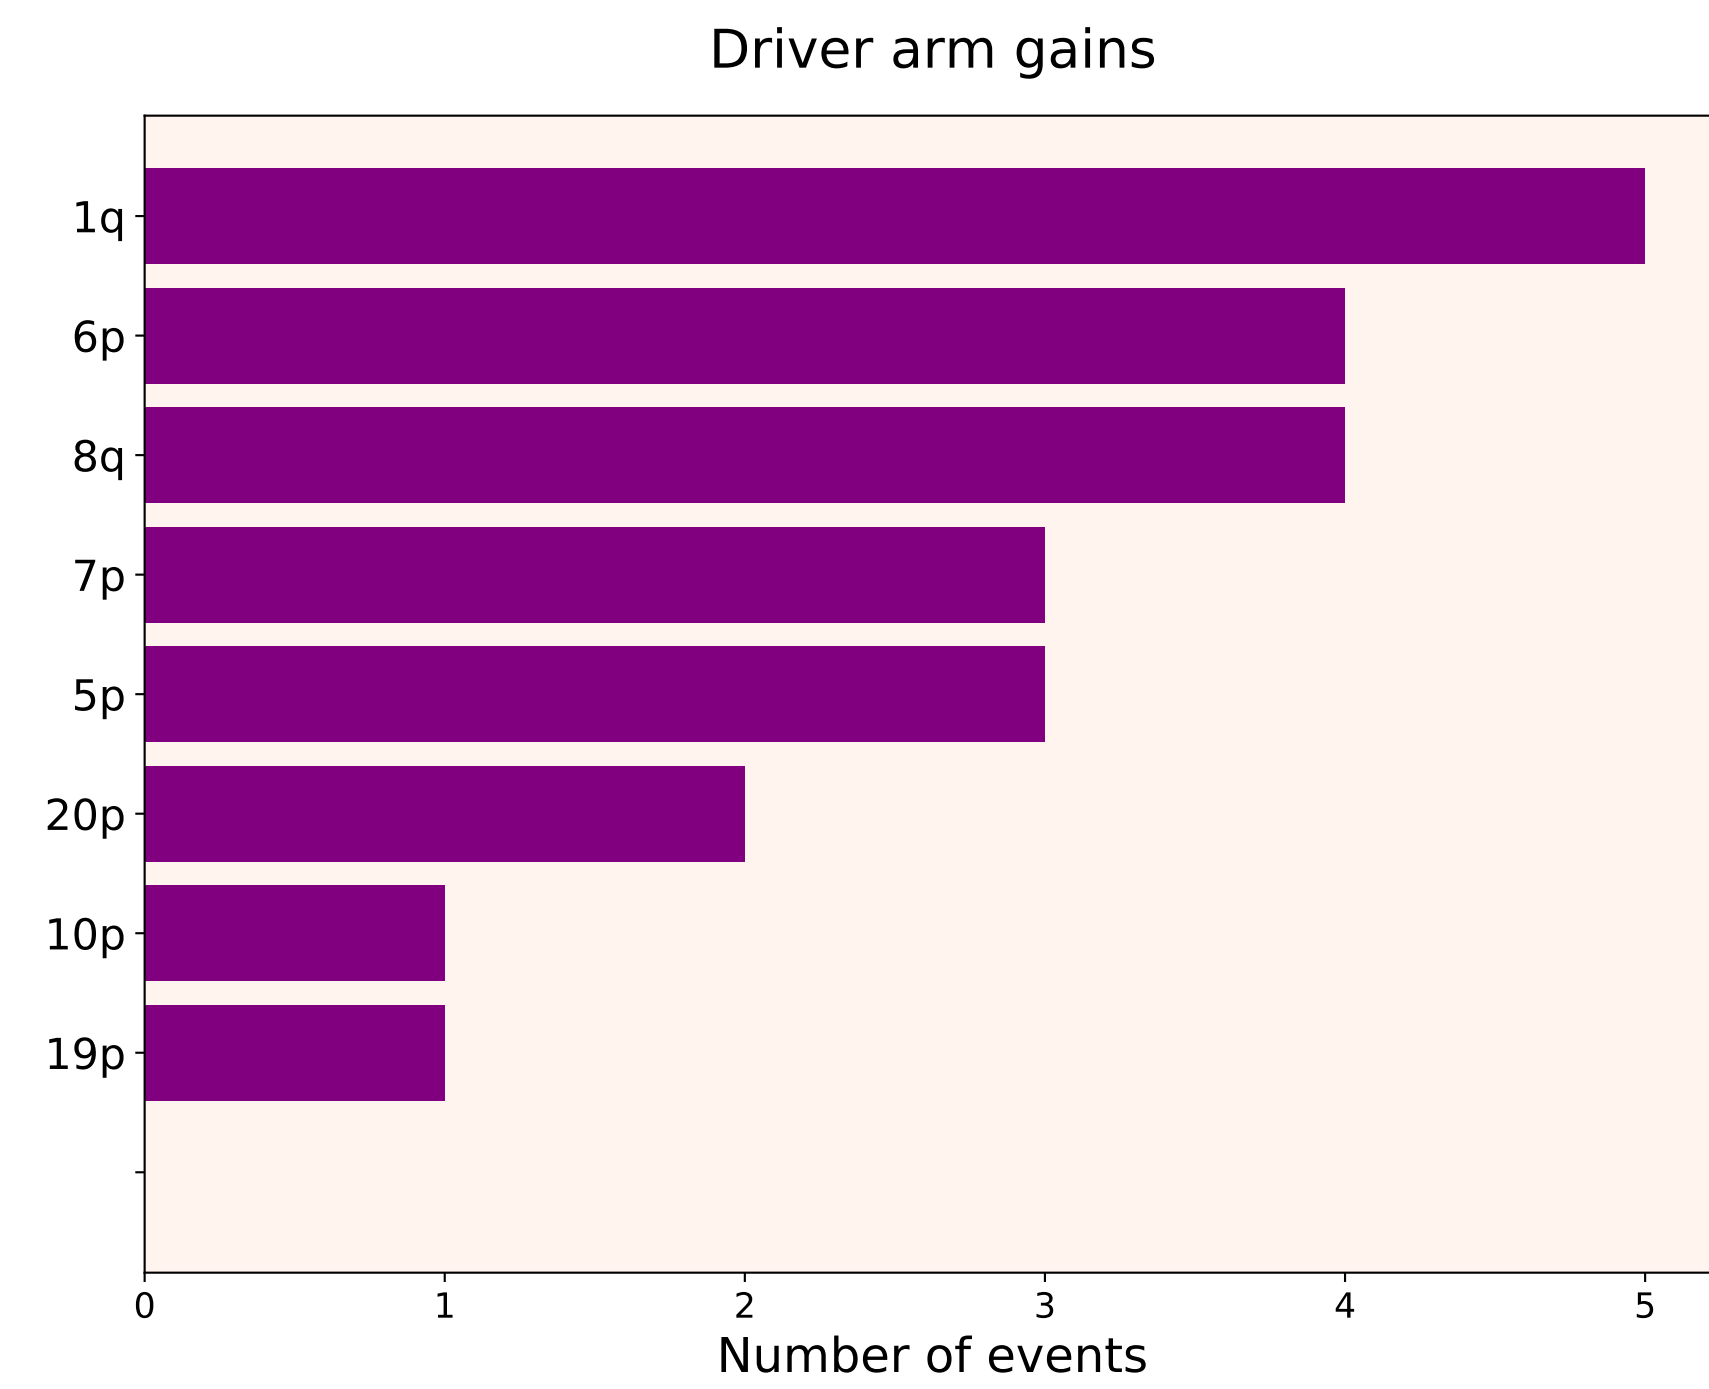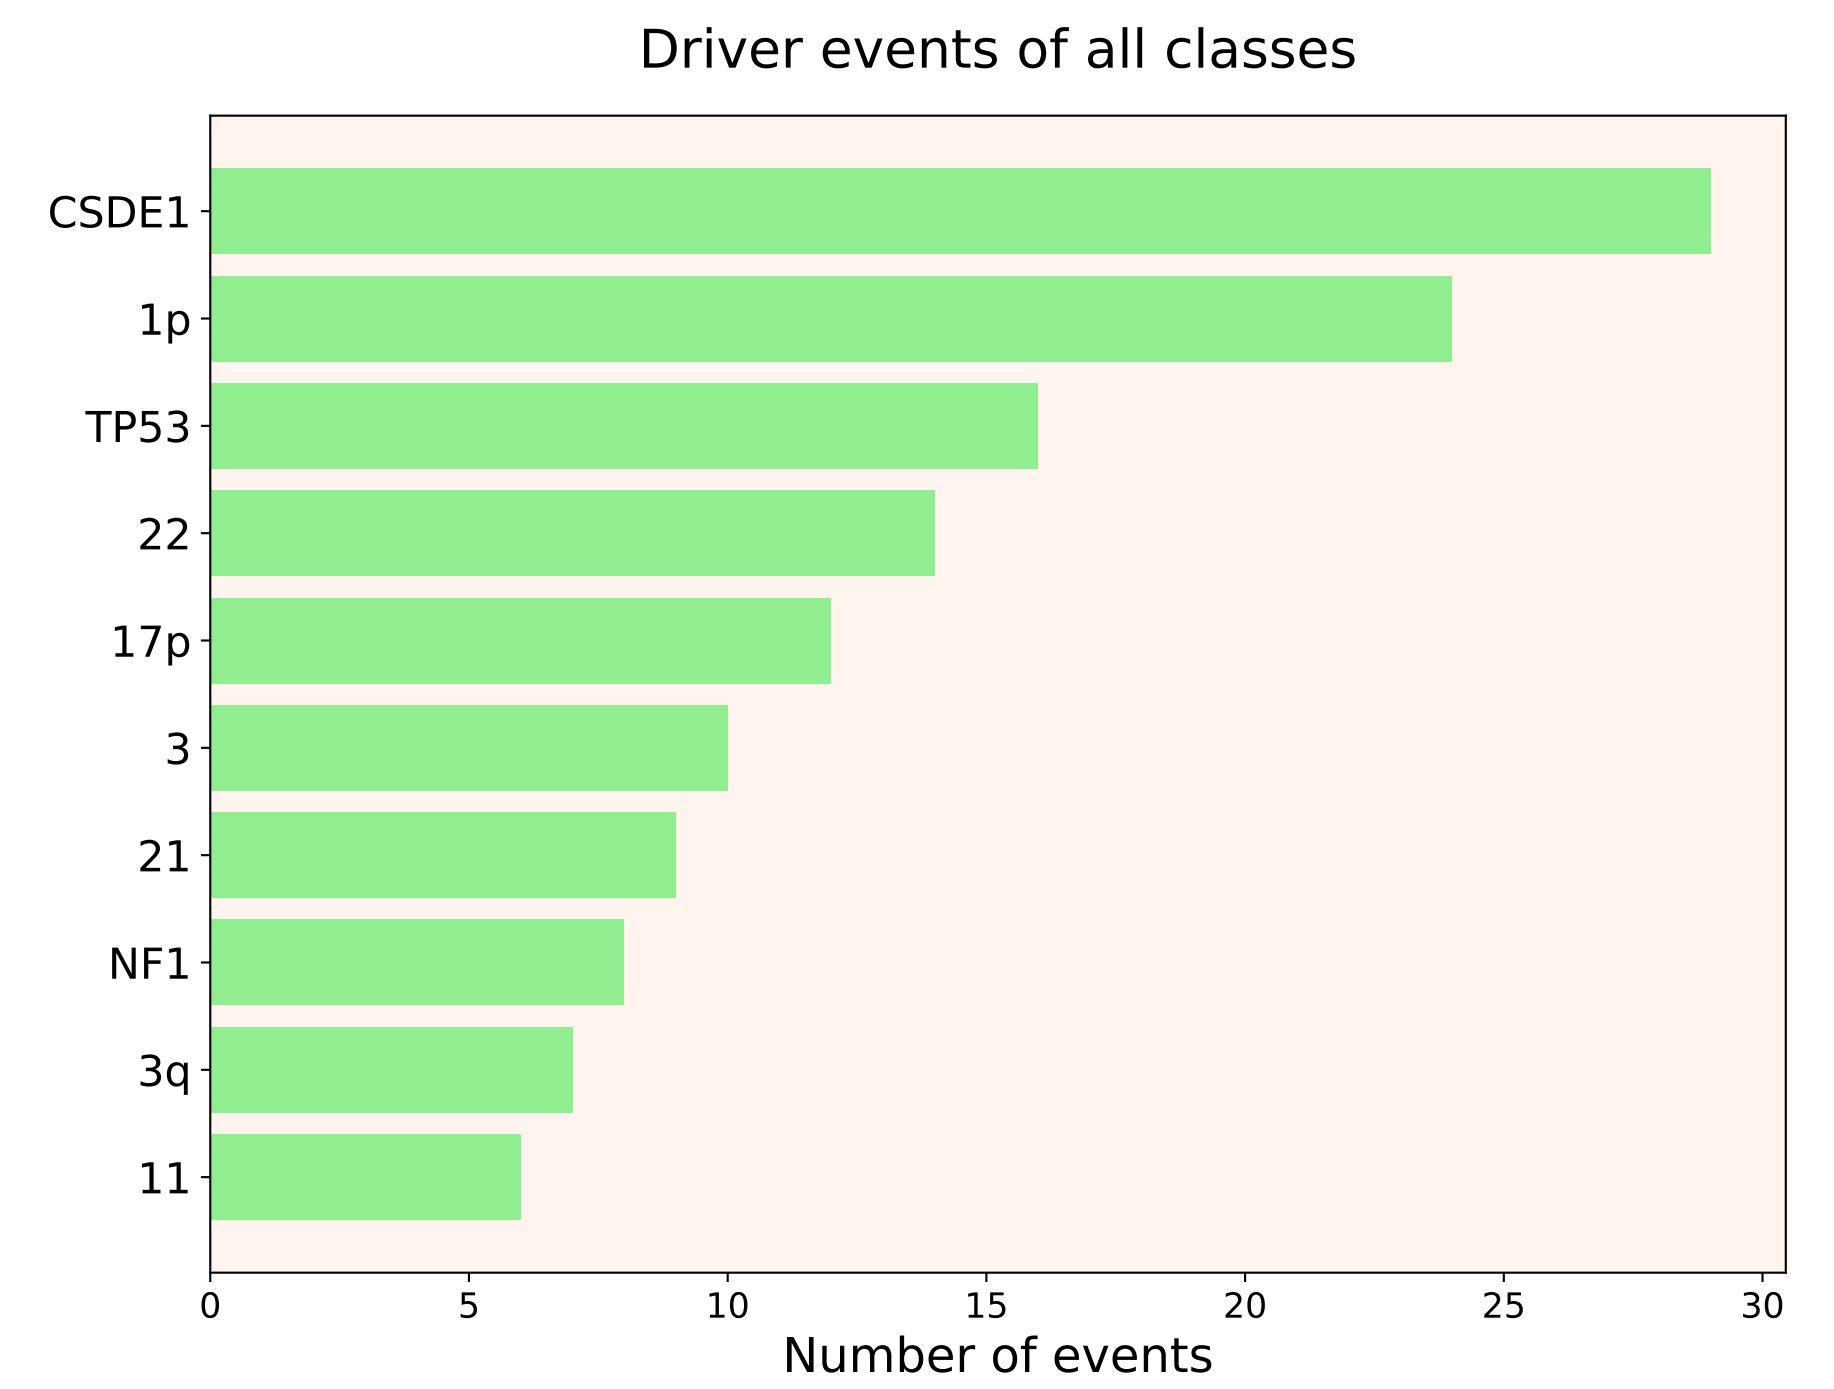

Supplement: Supplemental_Data_S1.zip [file Supplemental_Data_S1.zip]

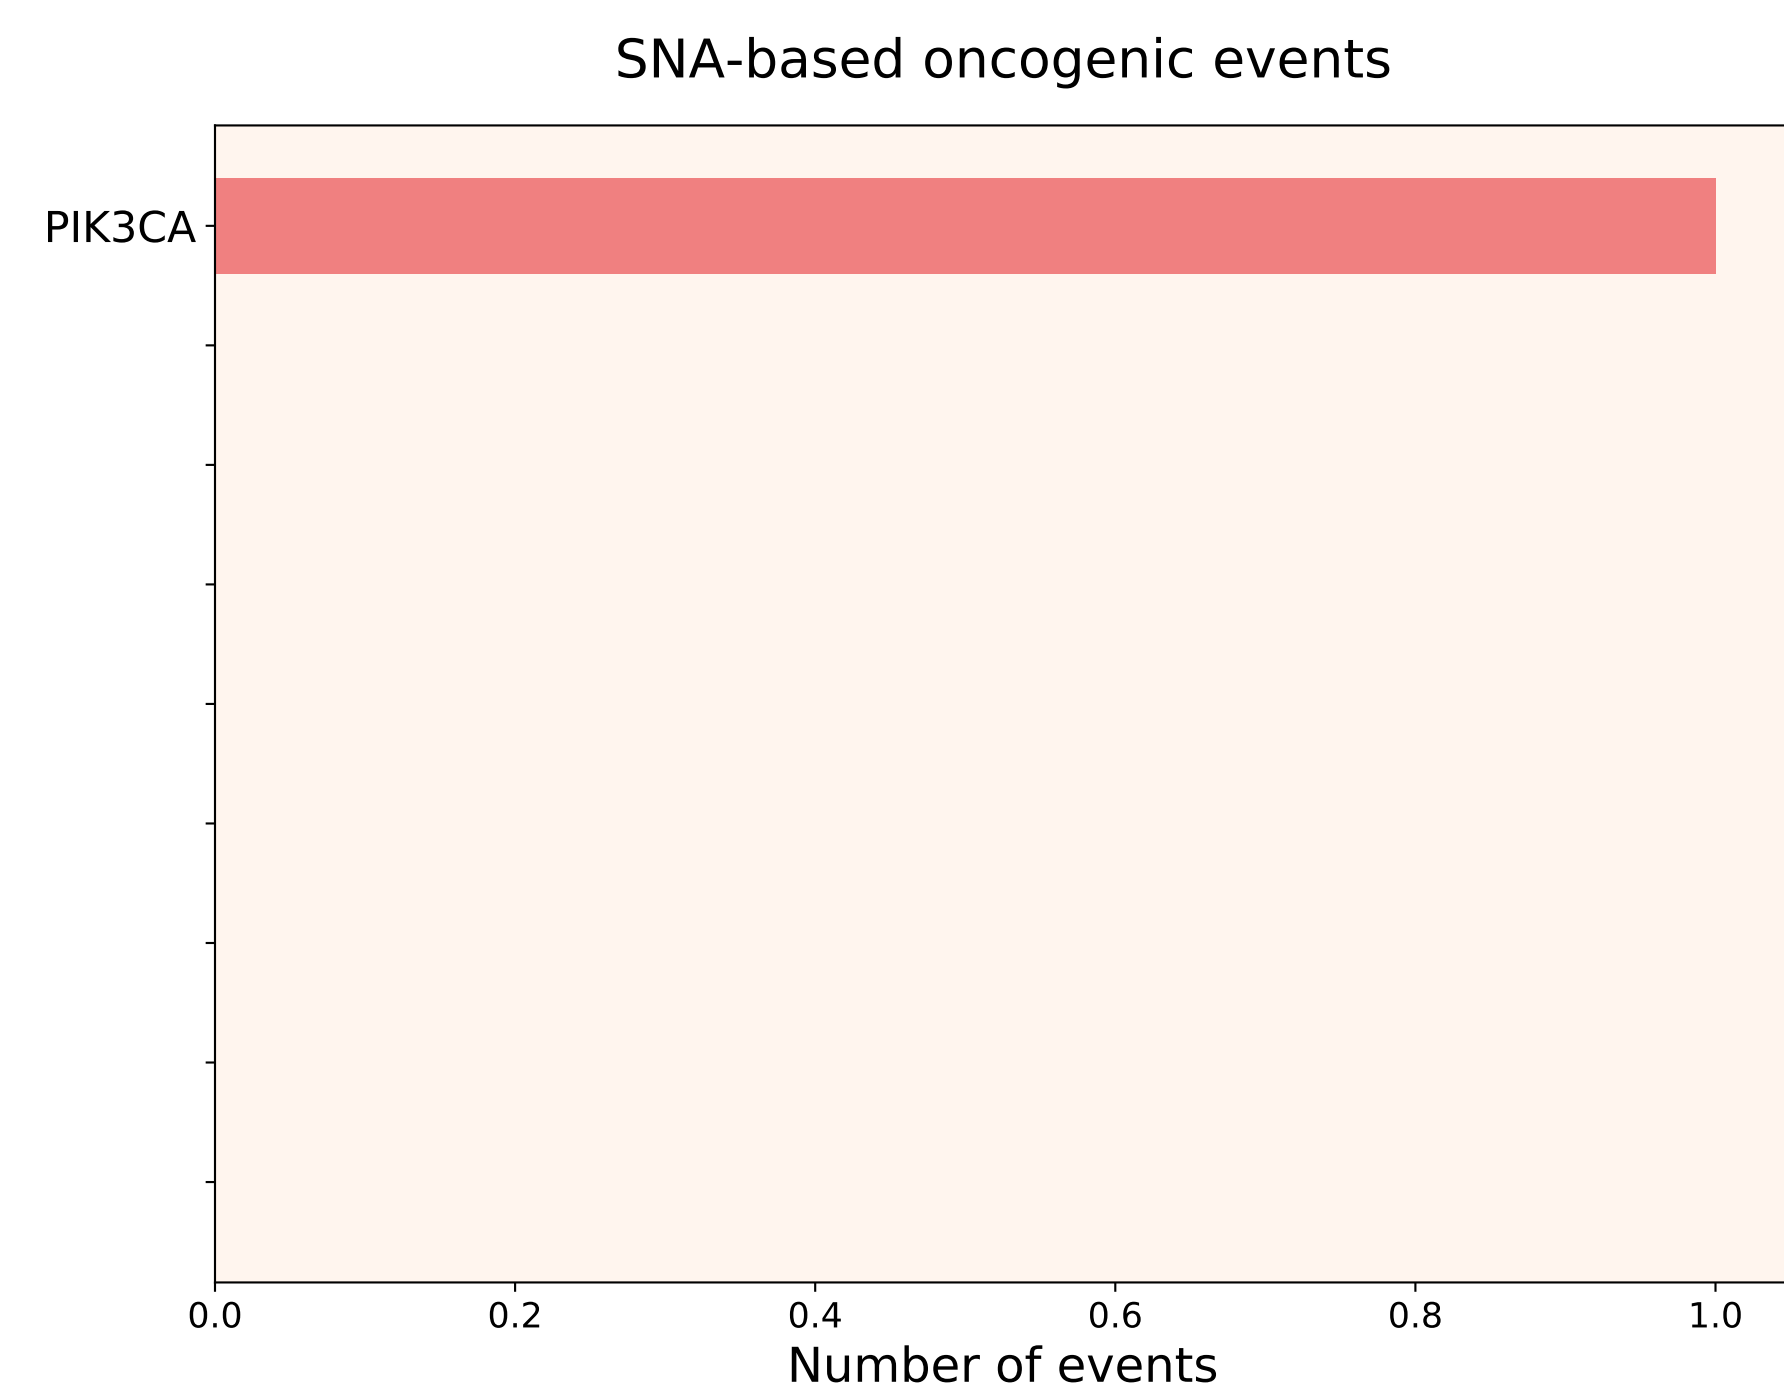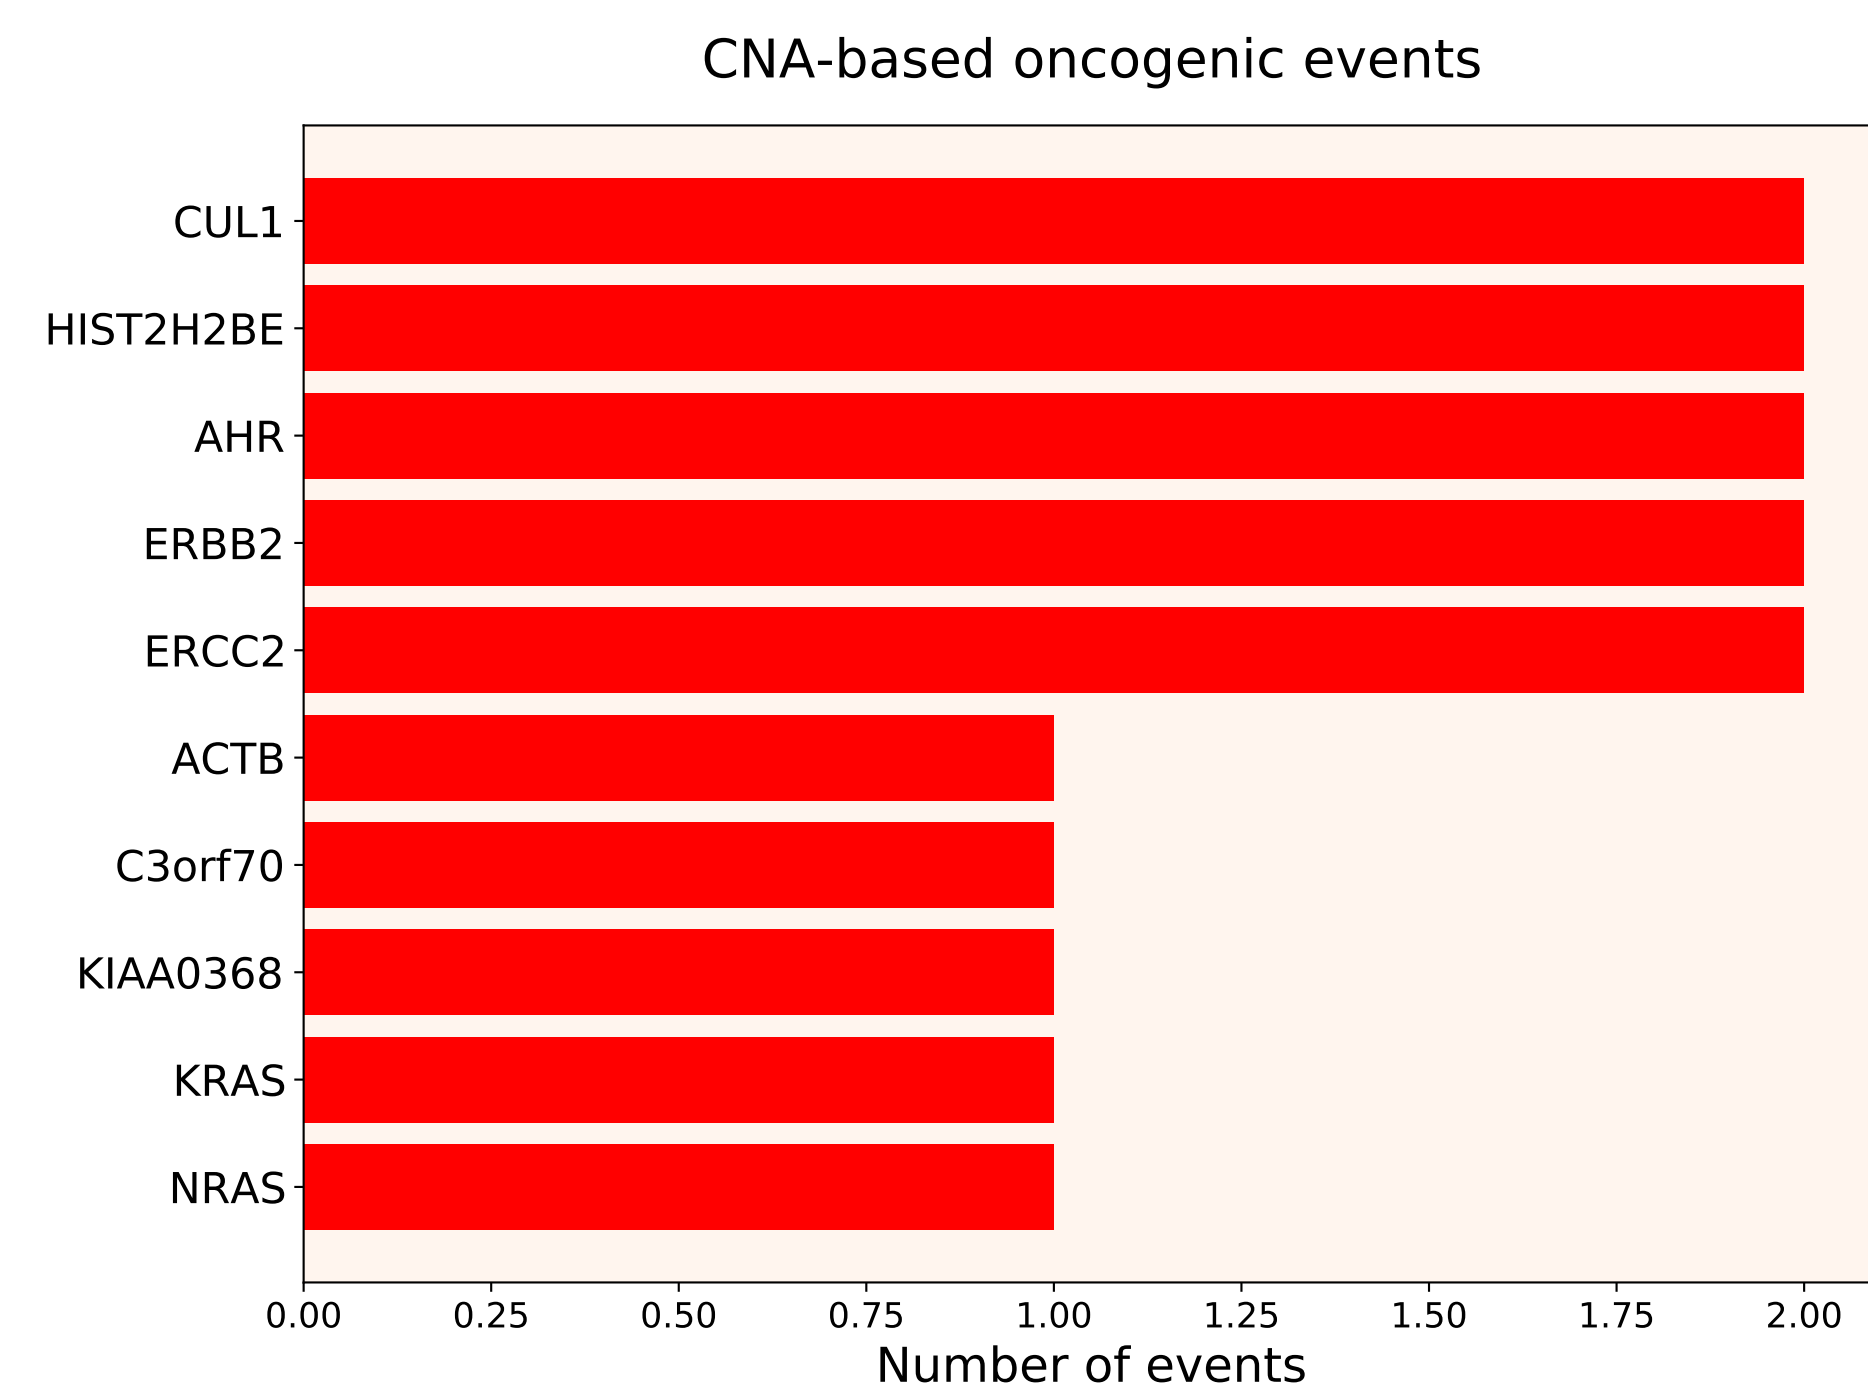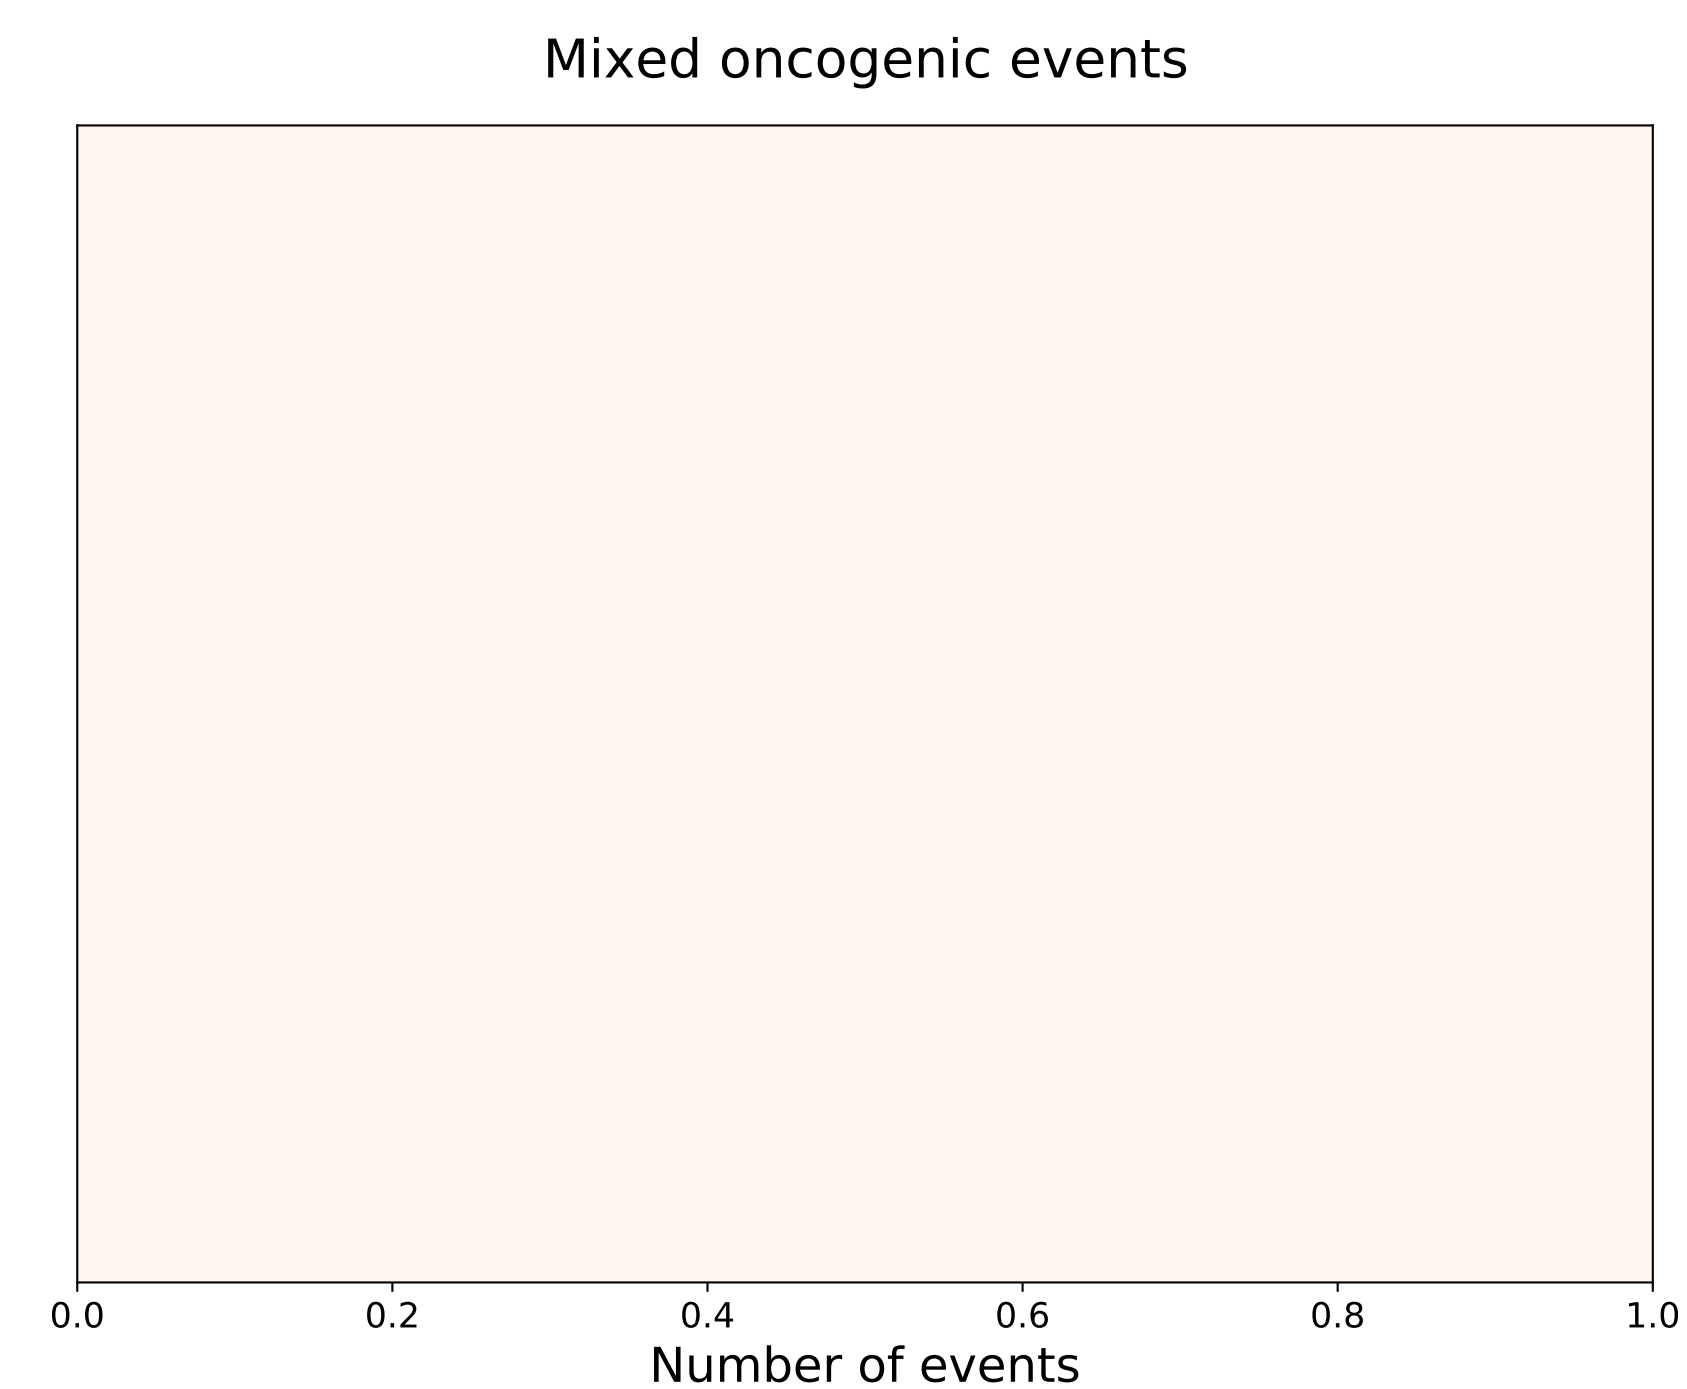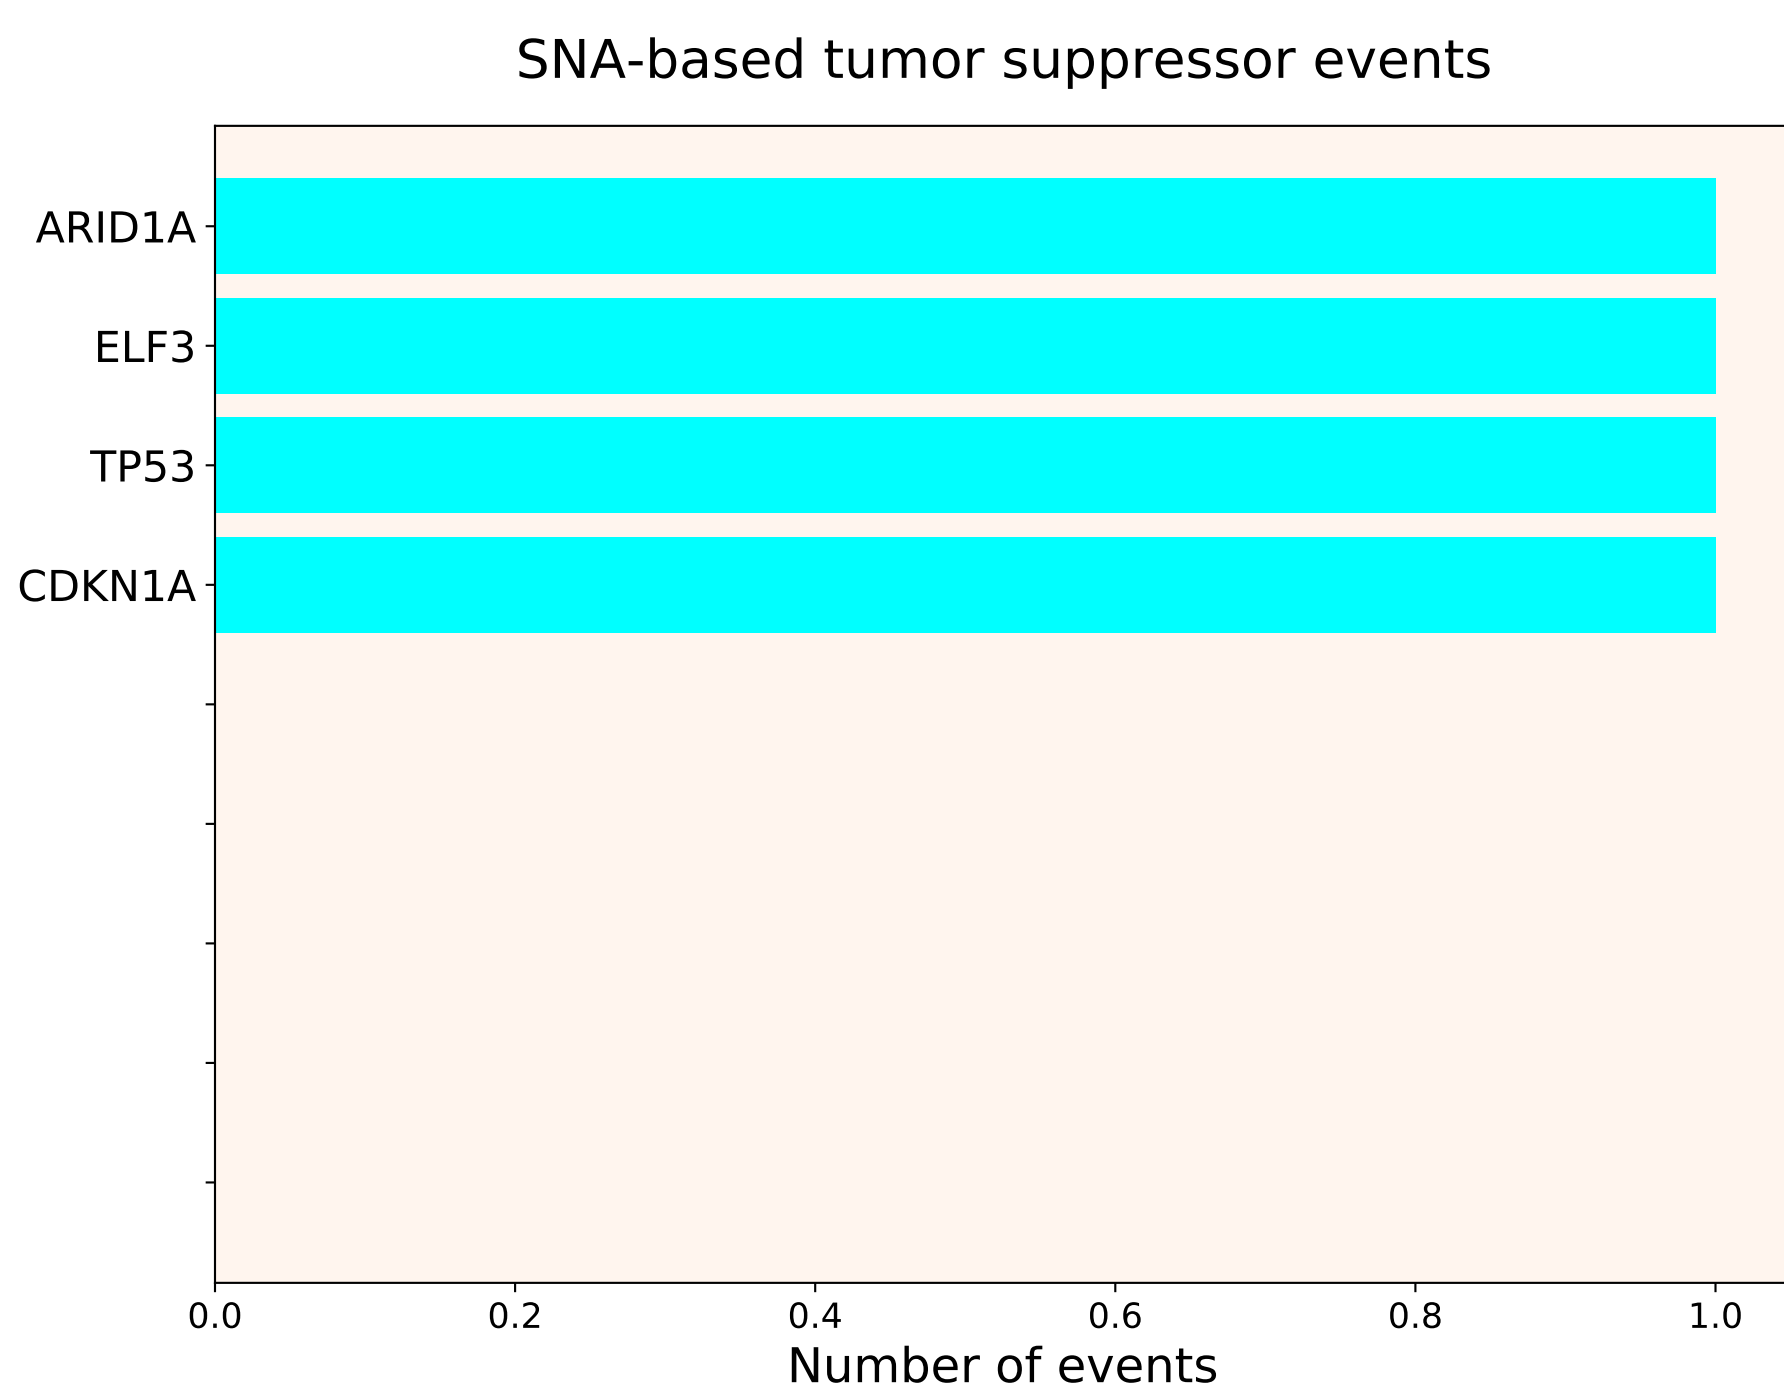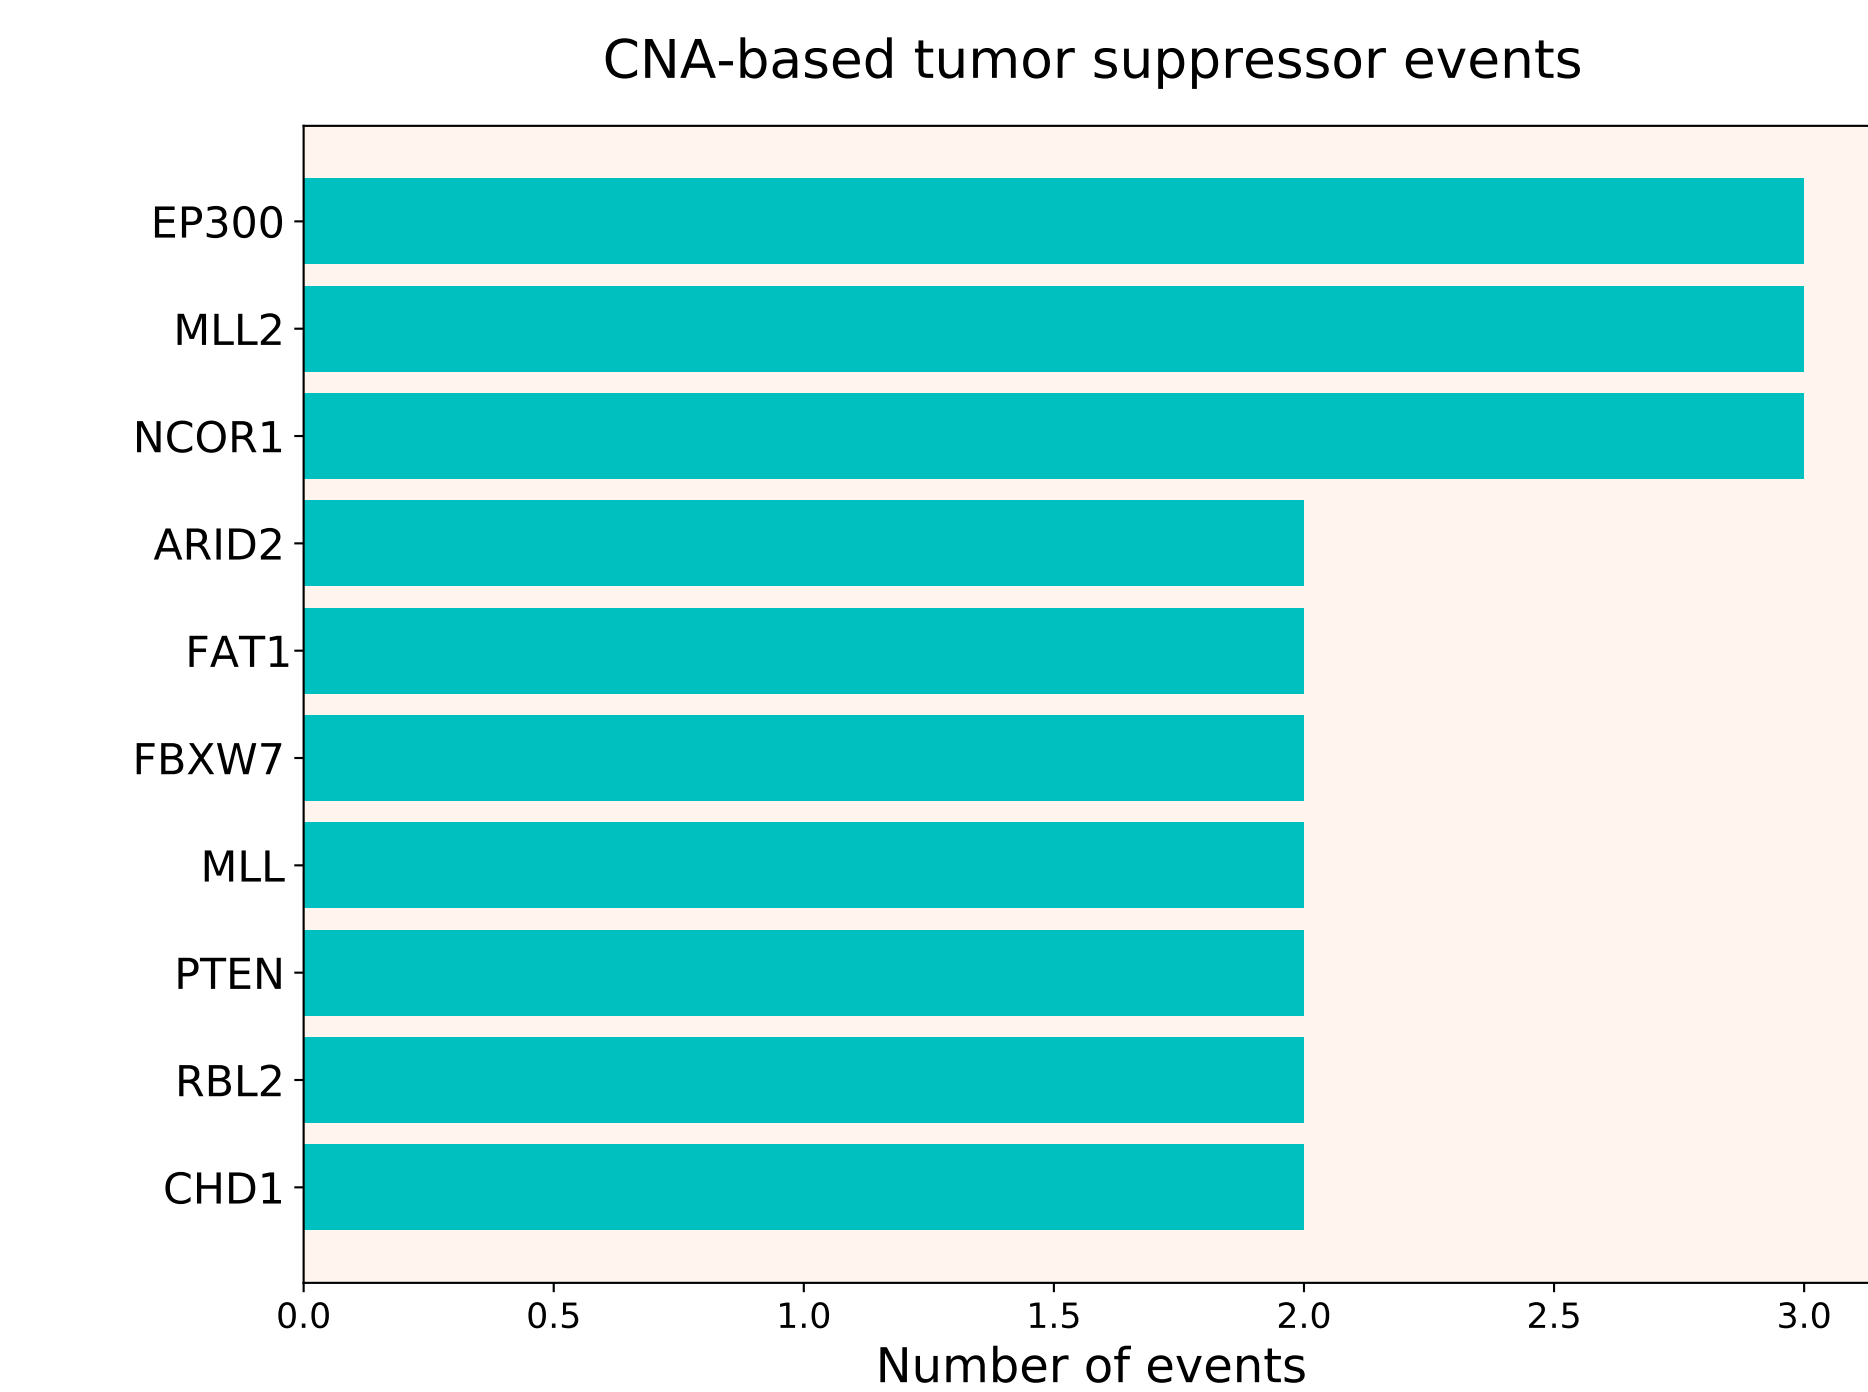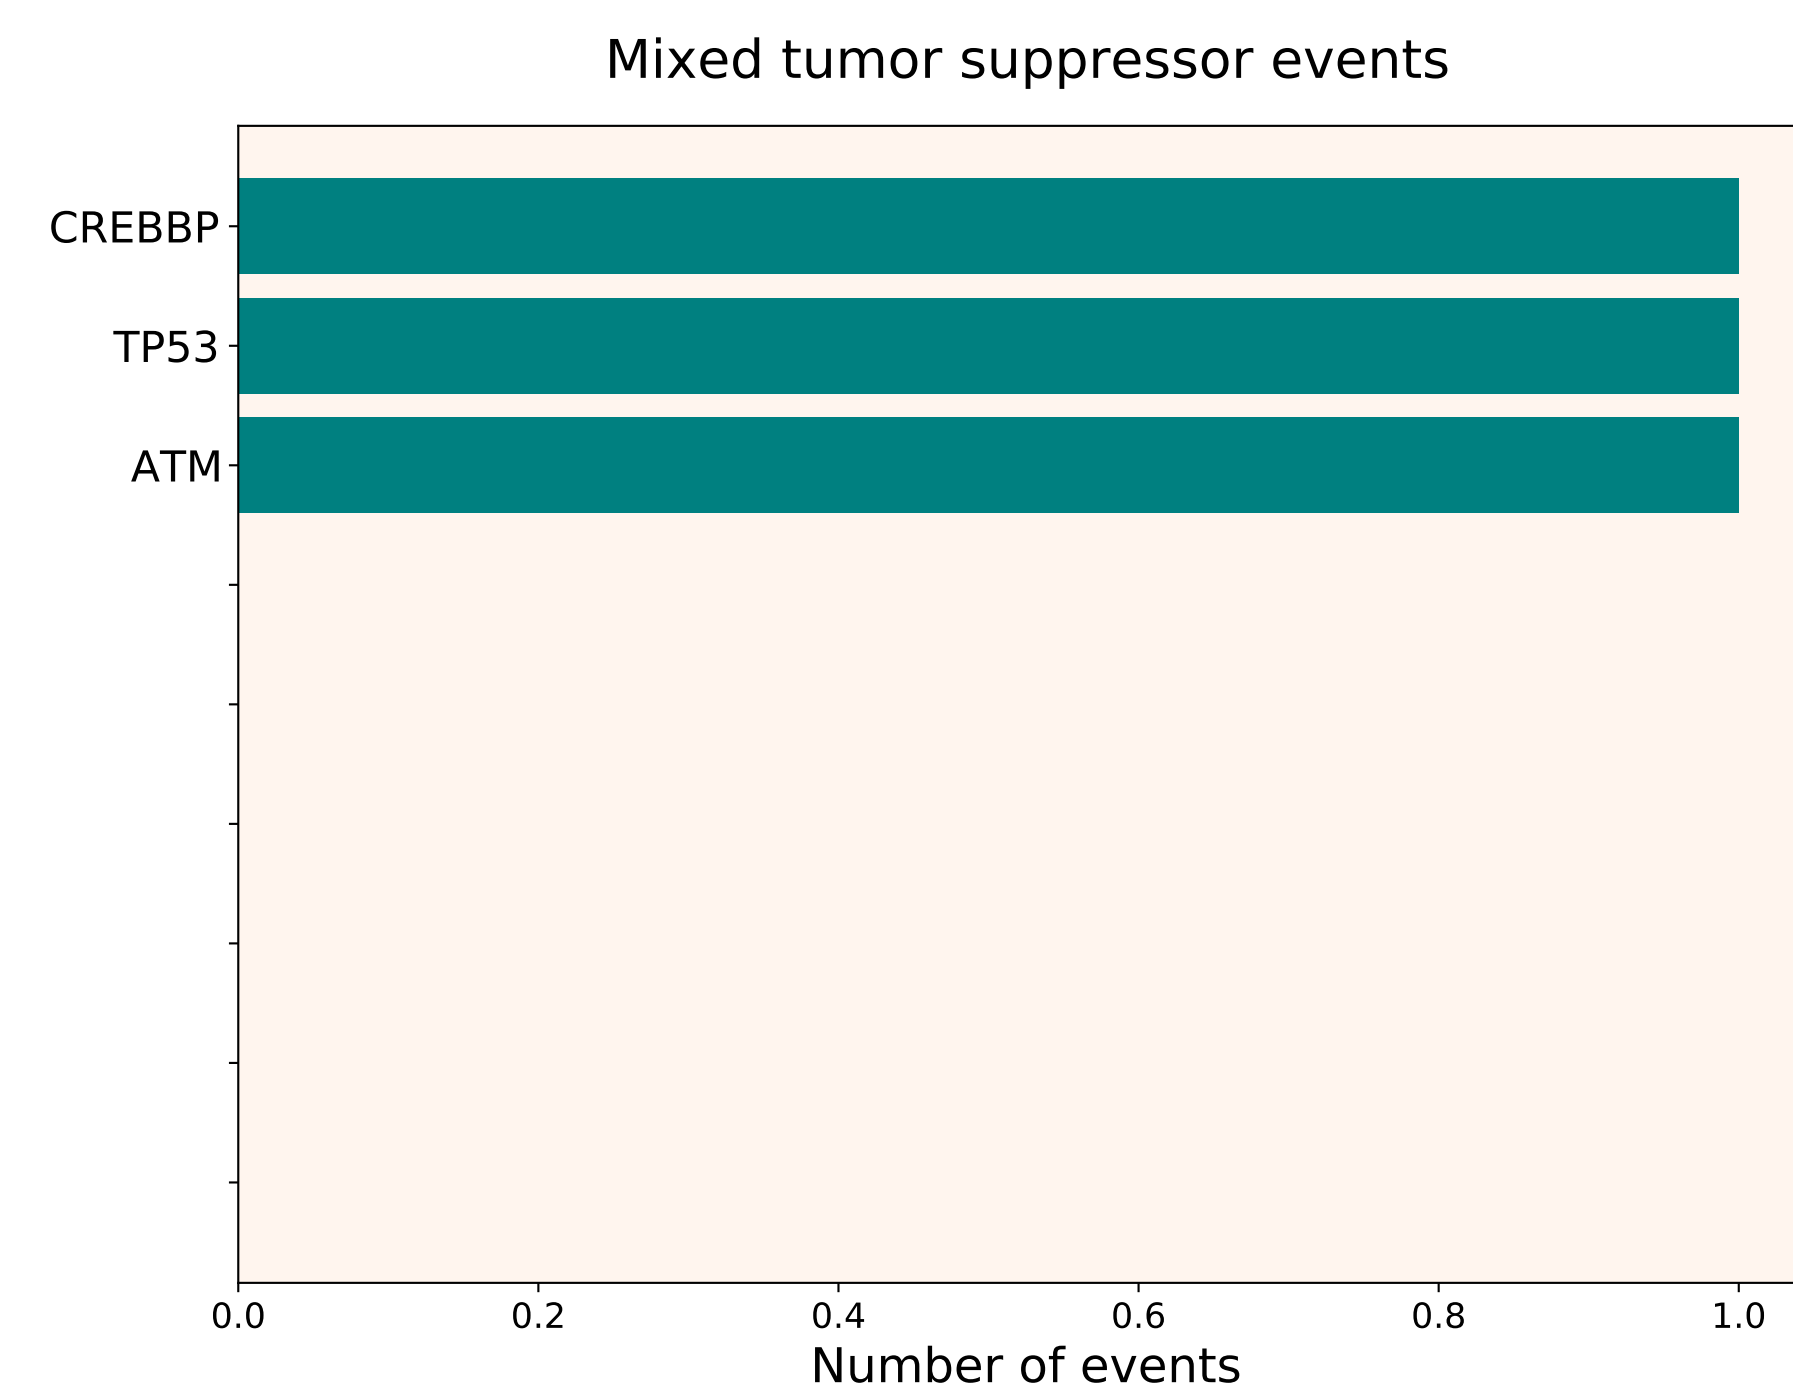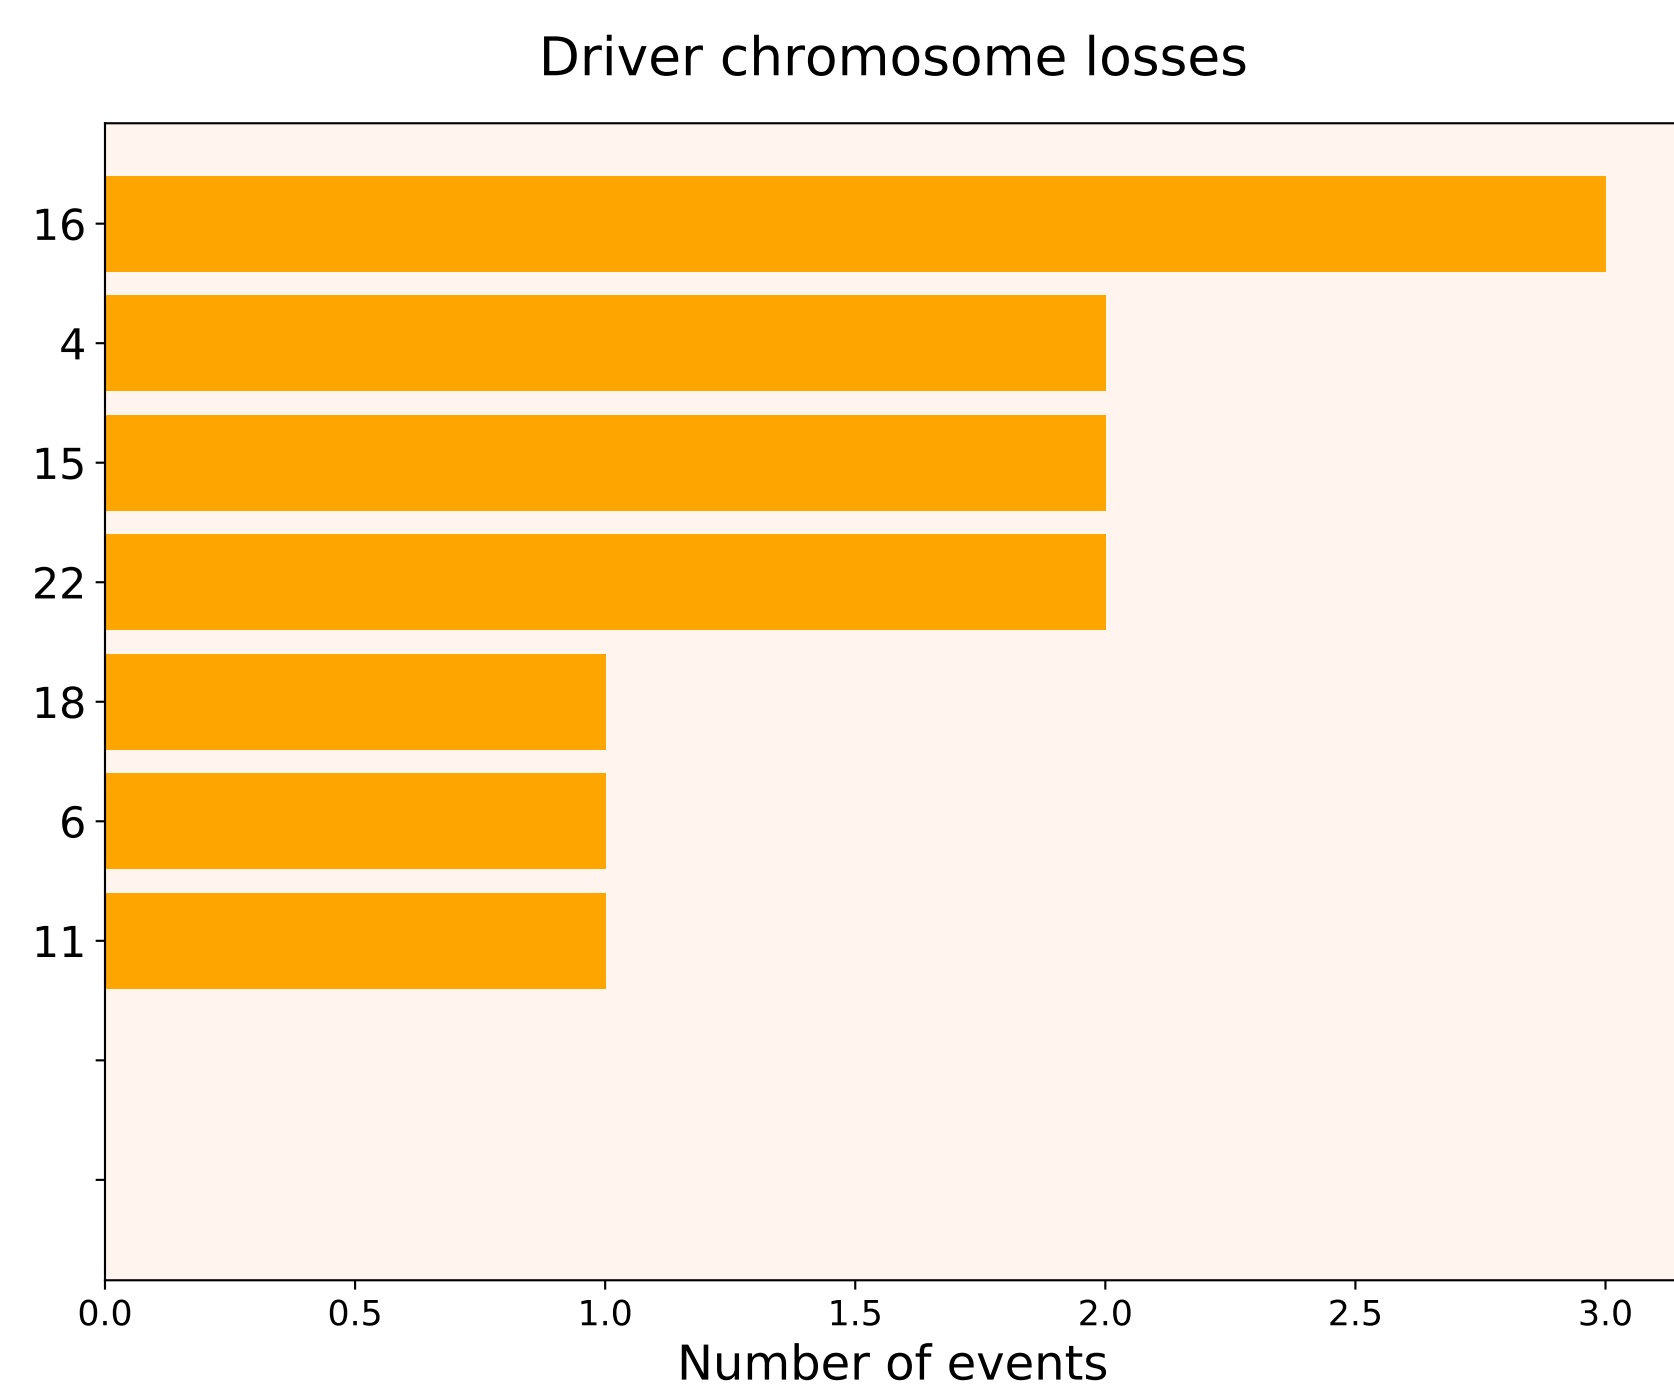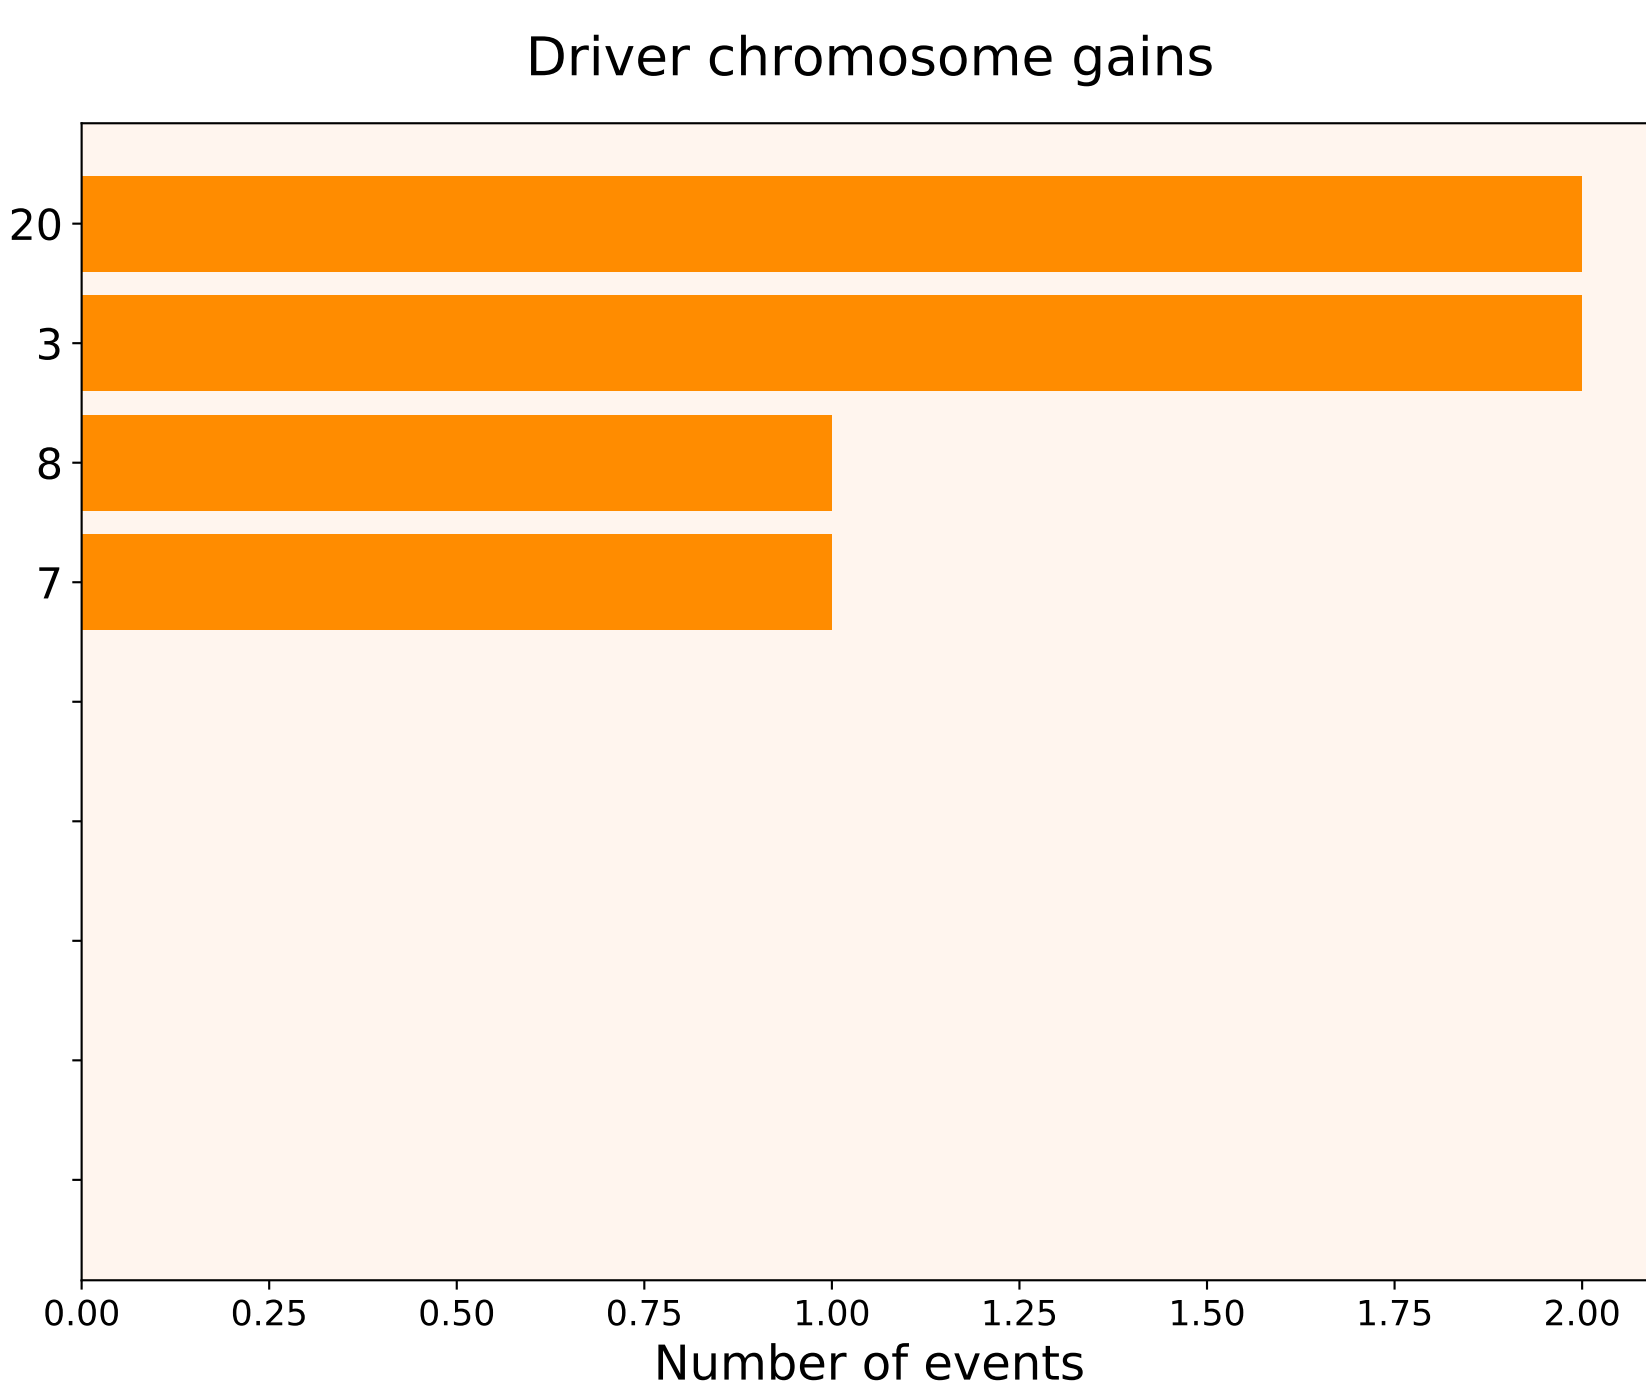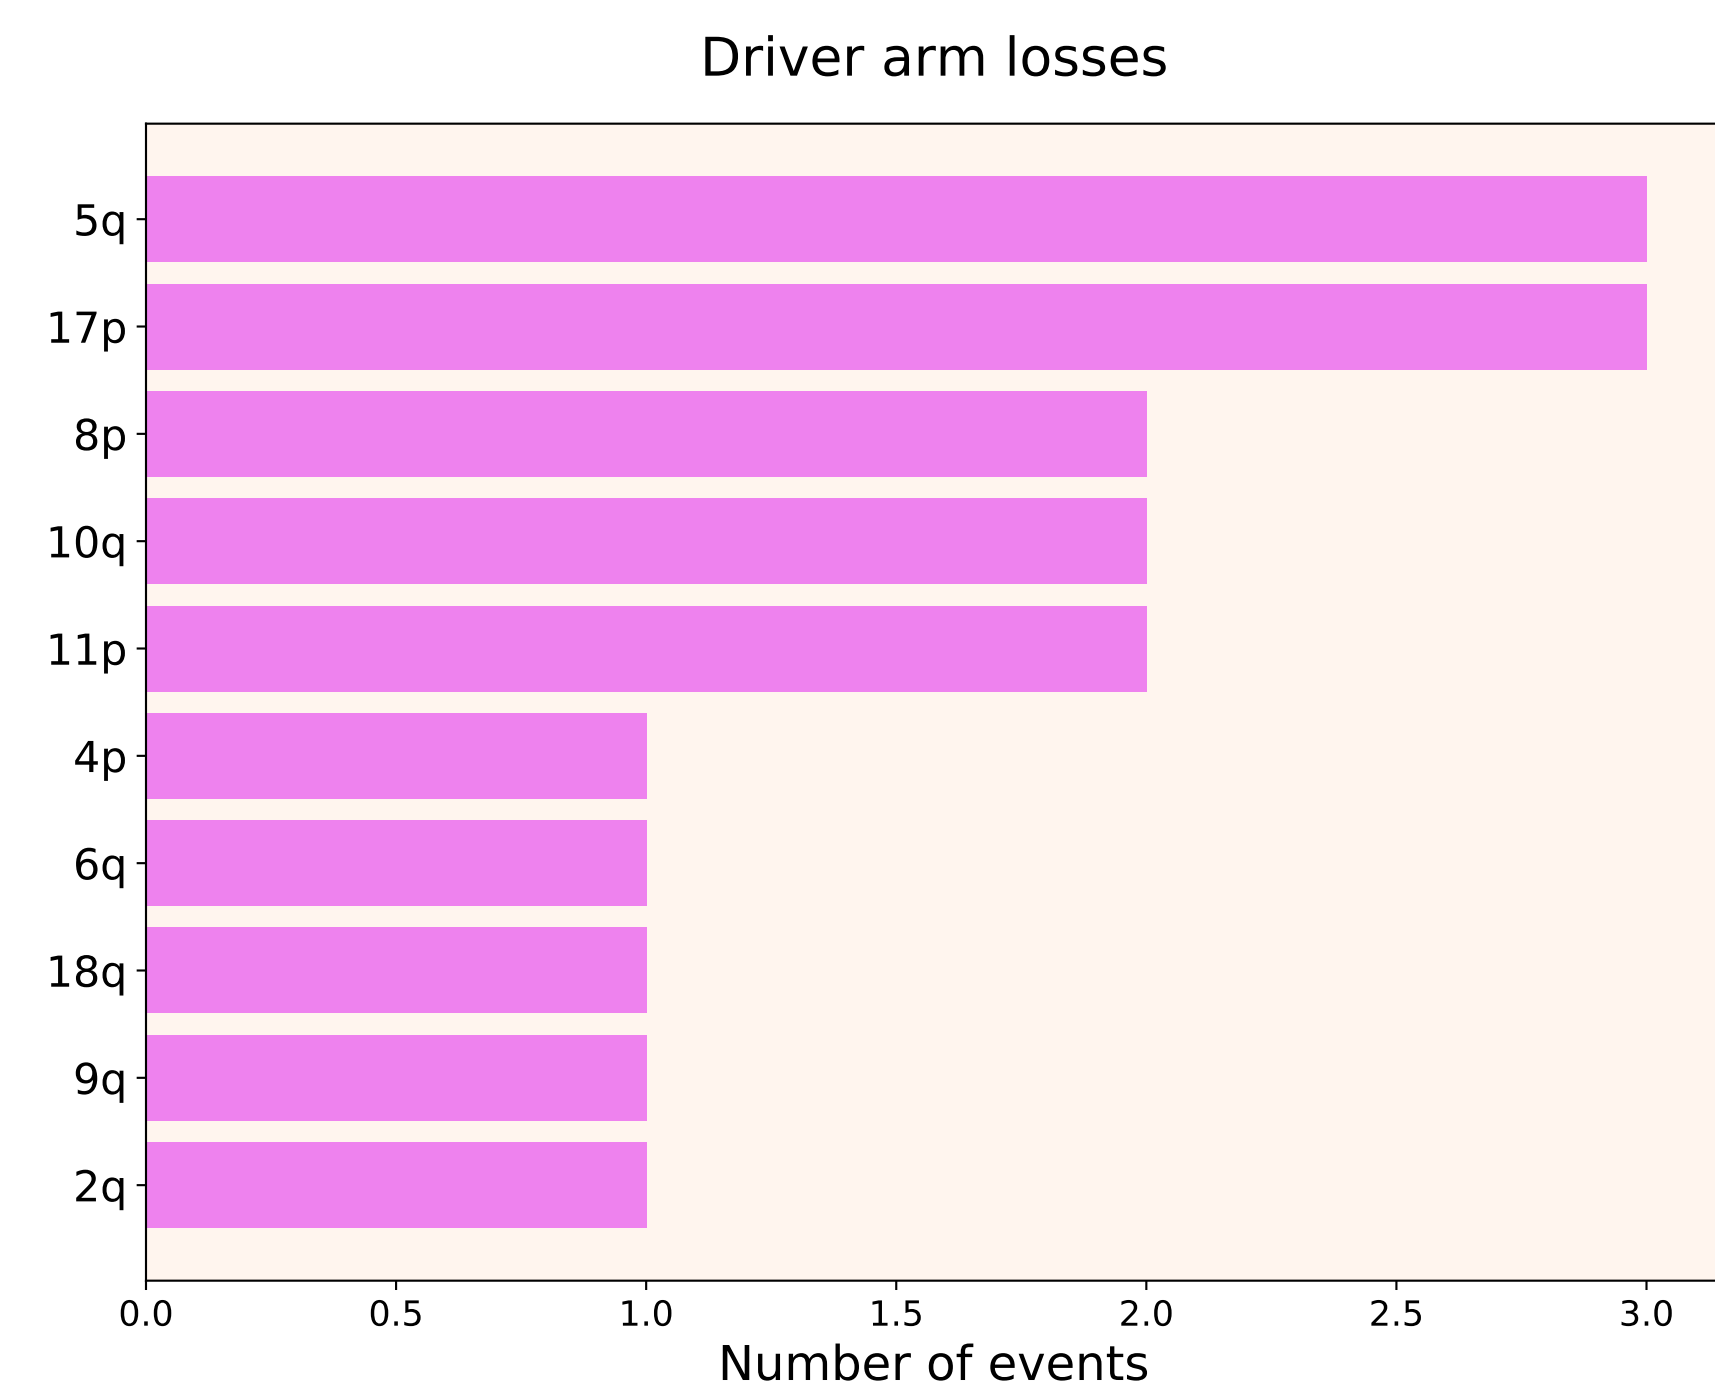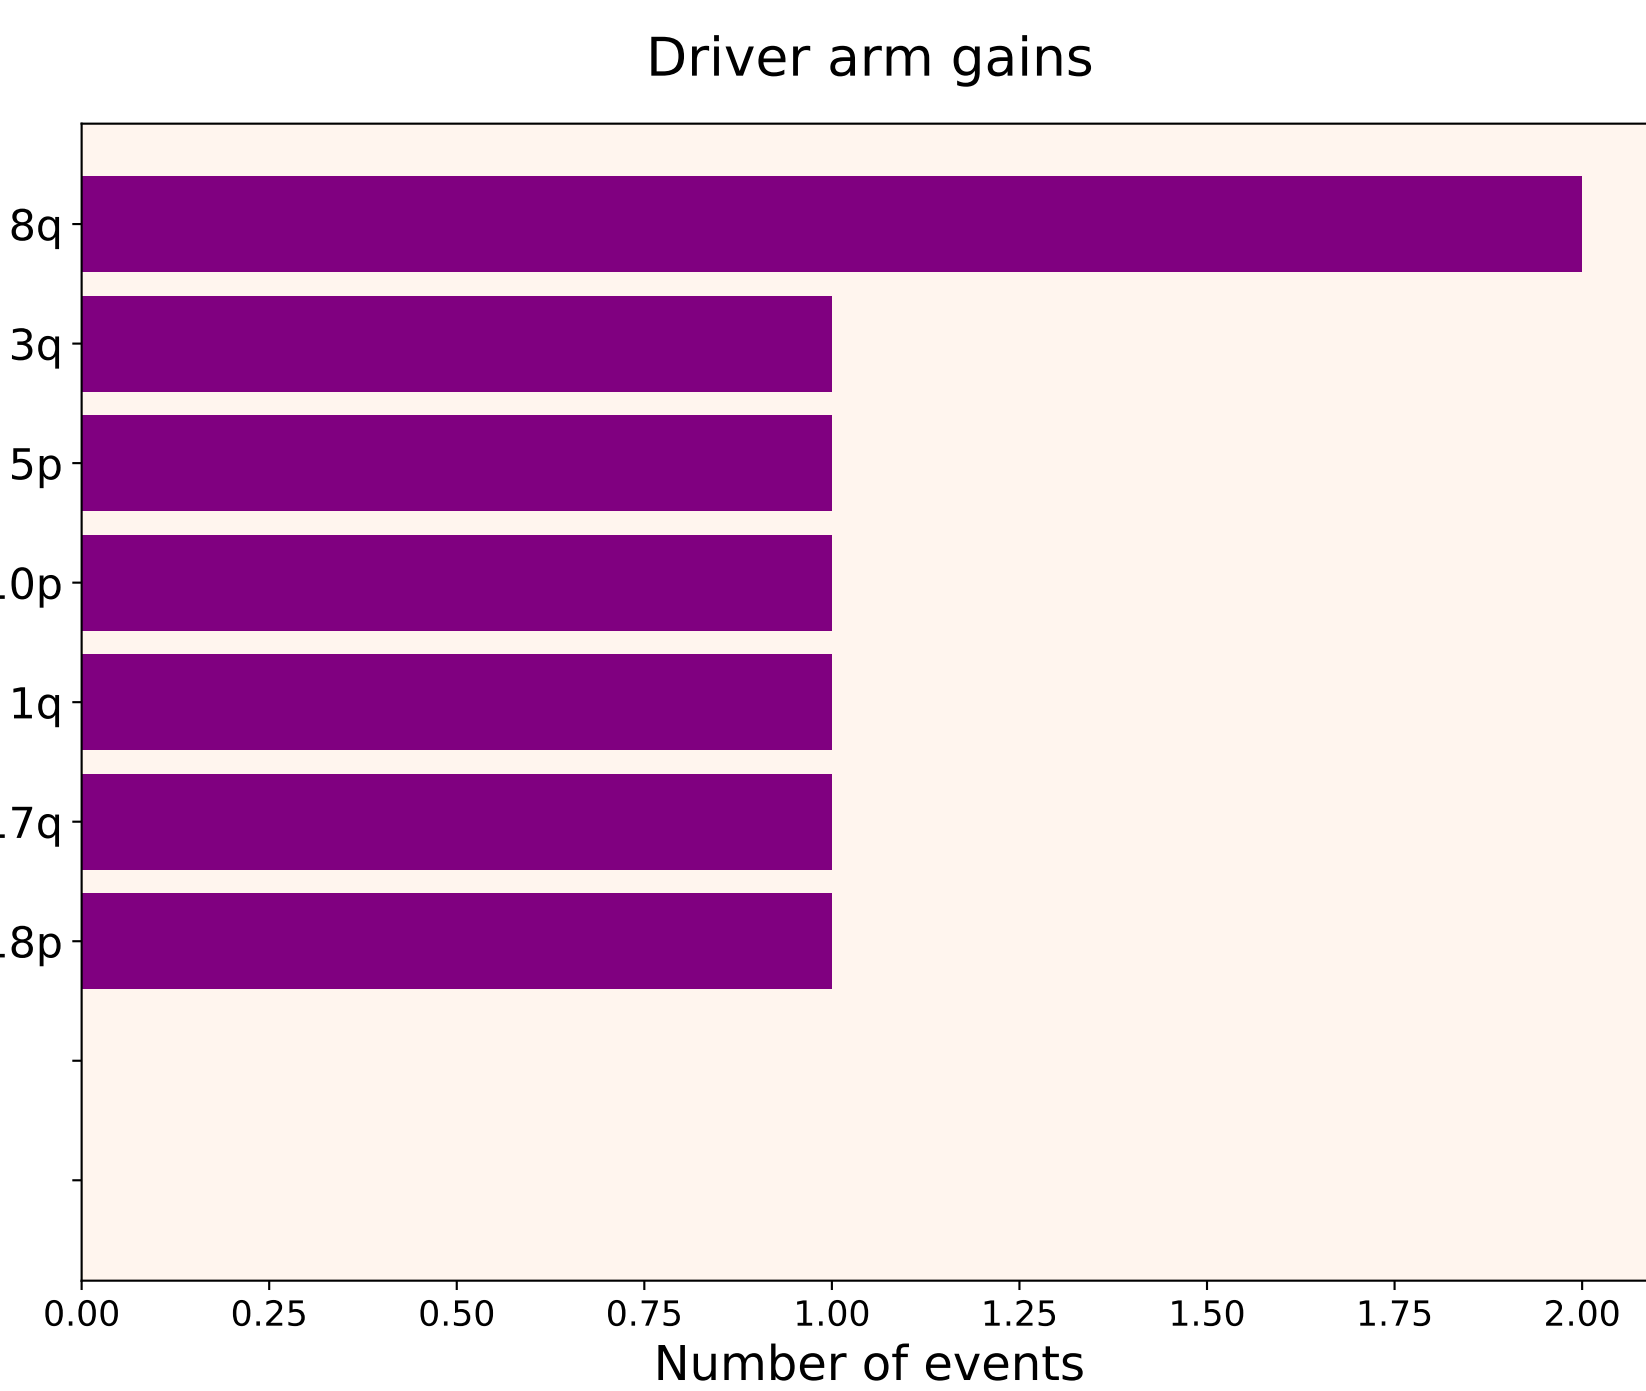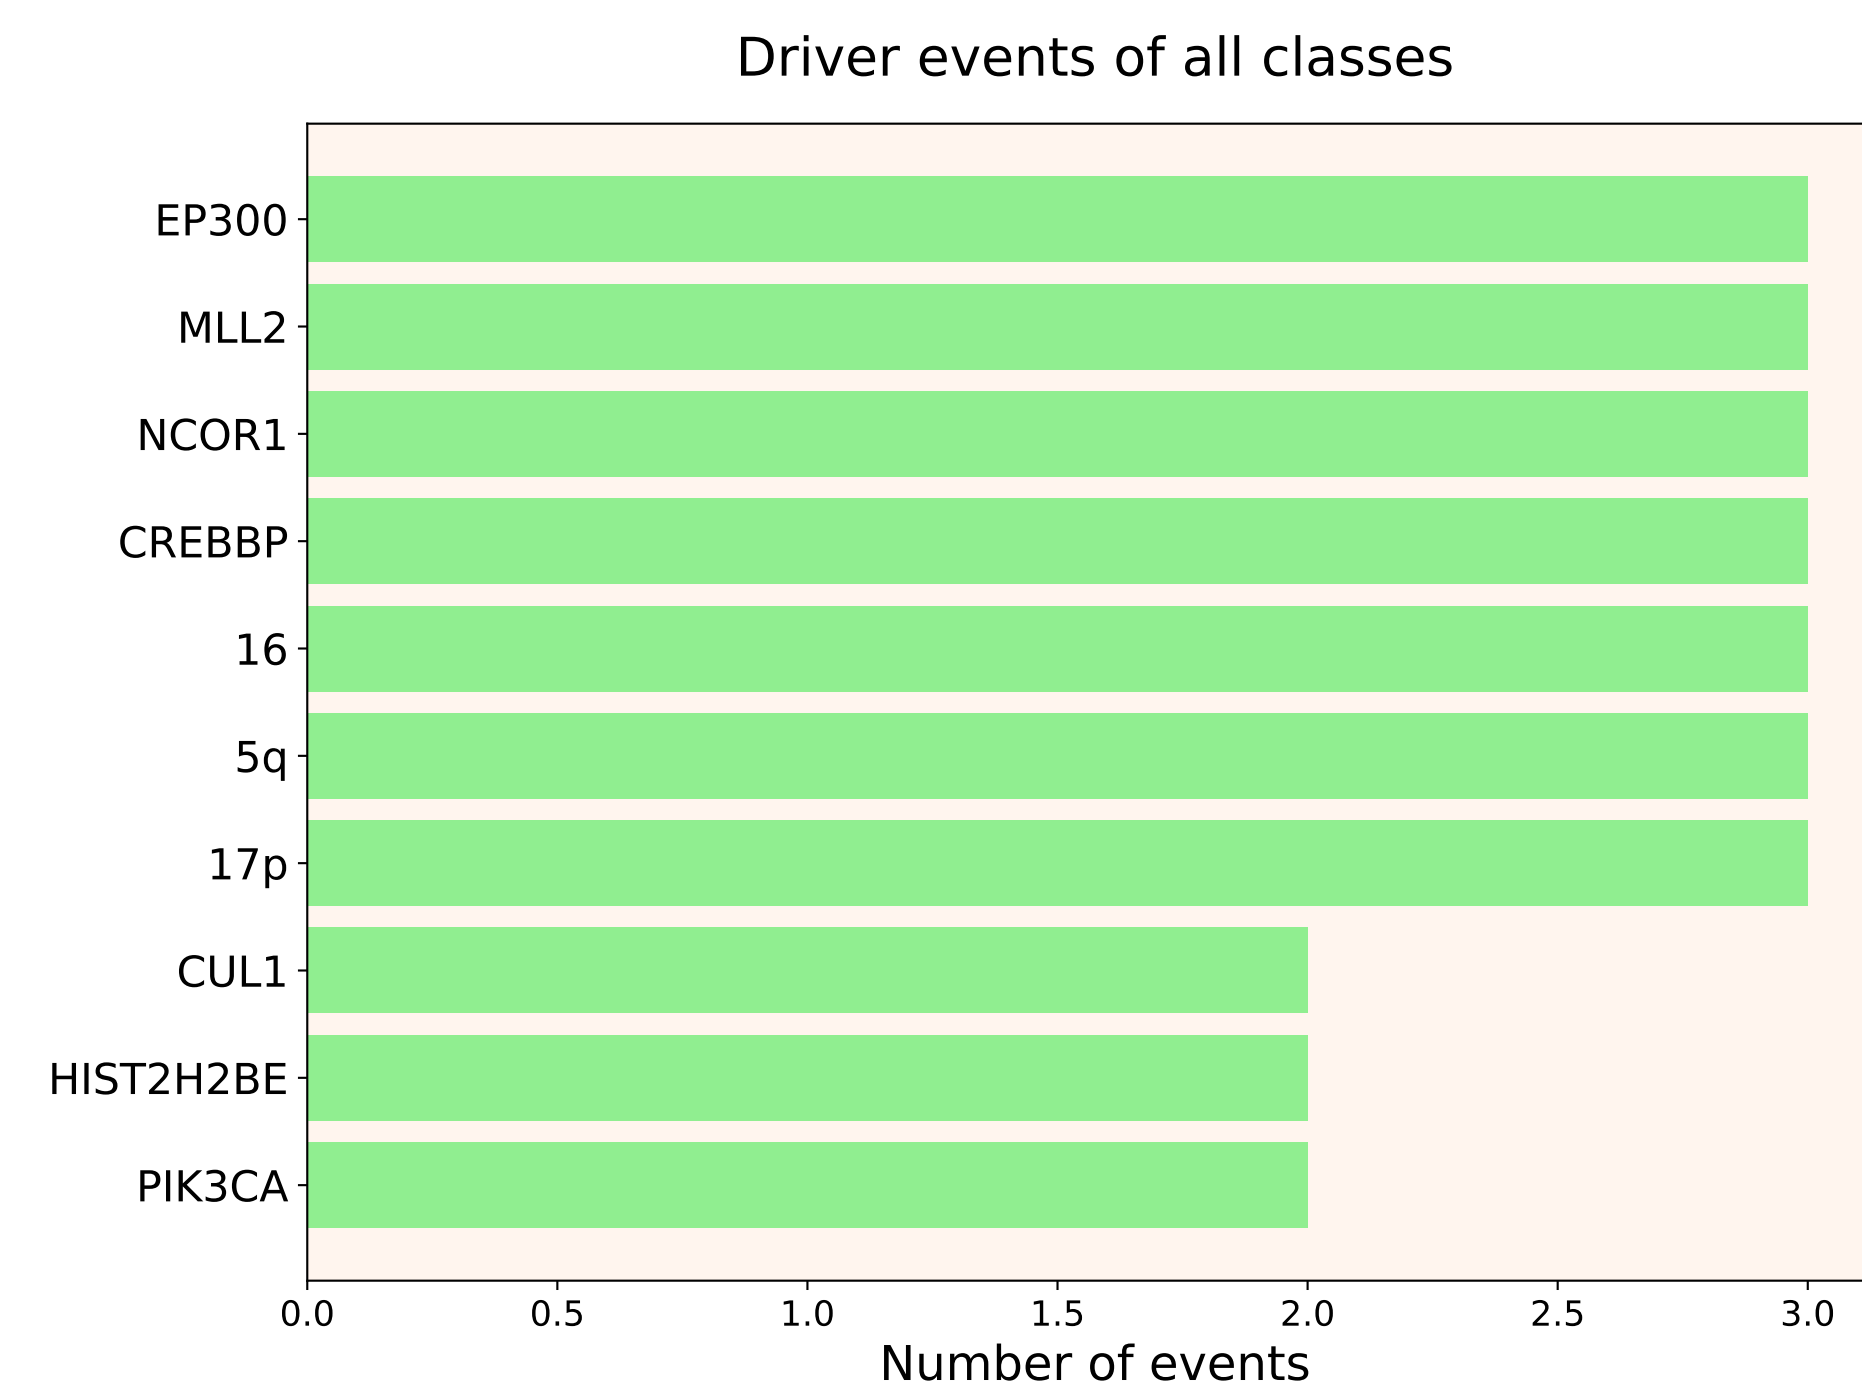

Supplement: Supplemental_Data_S1.zip [file Supplemental_Data_S1.zip]

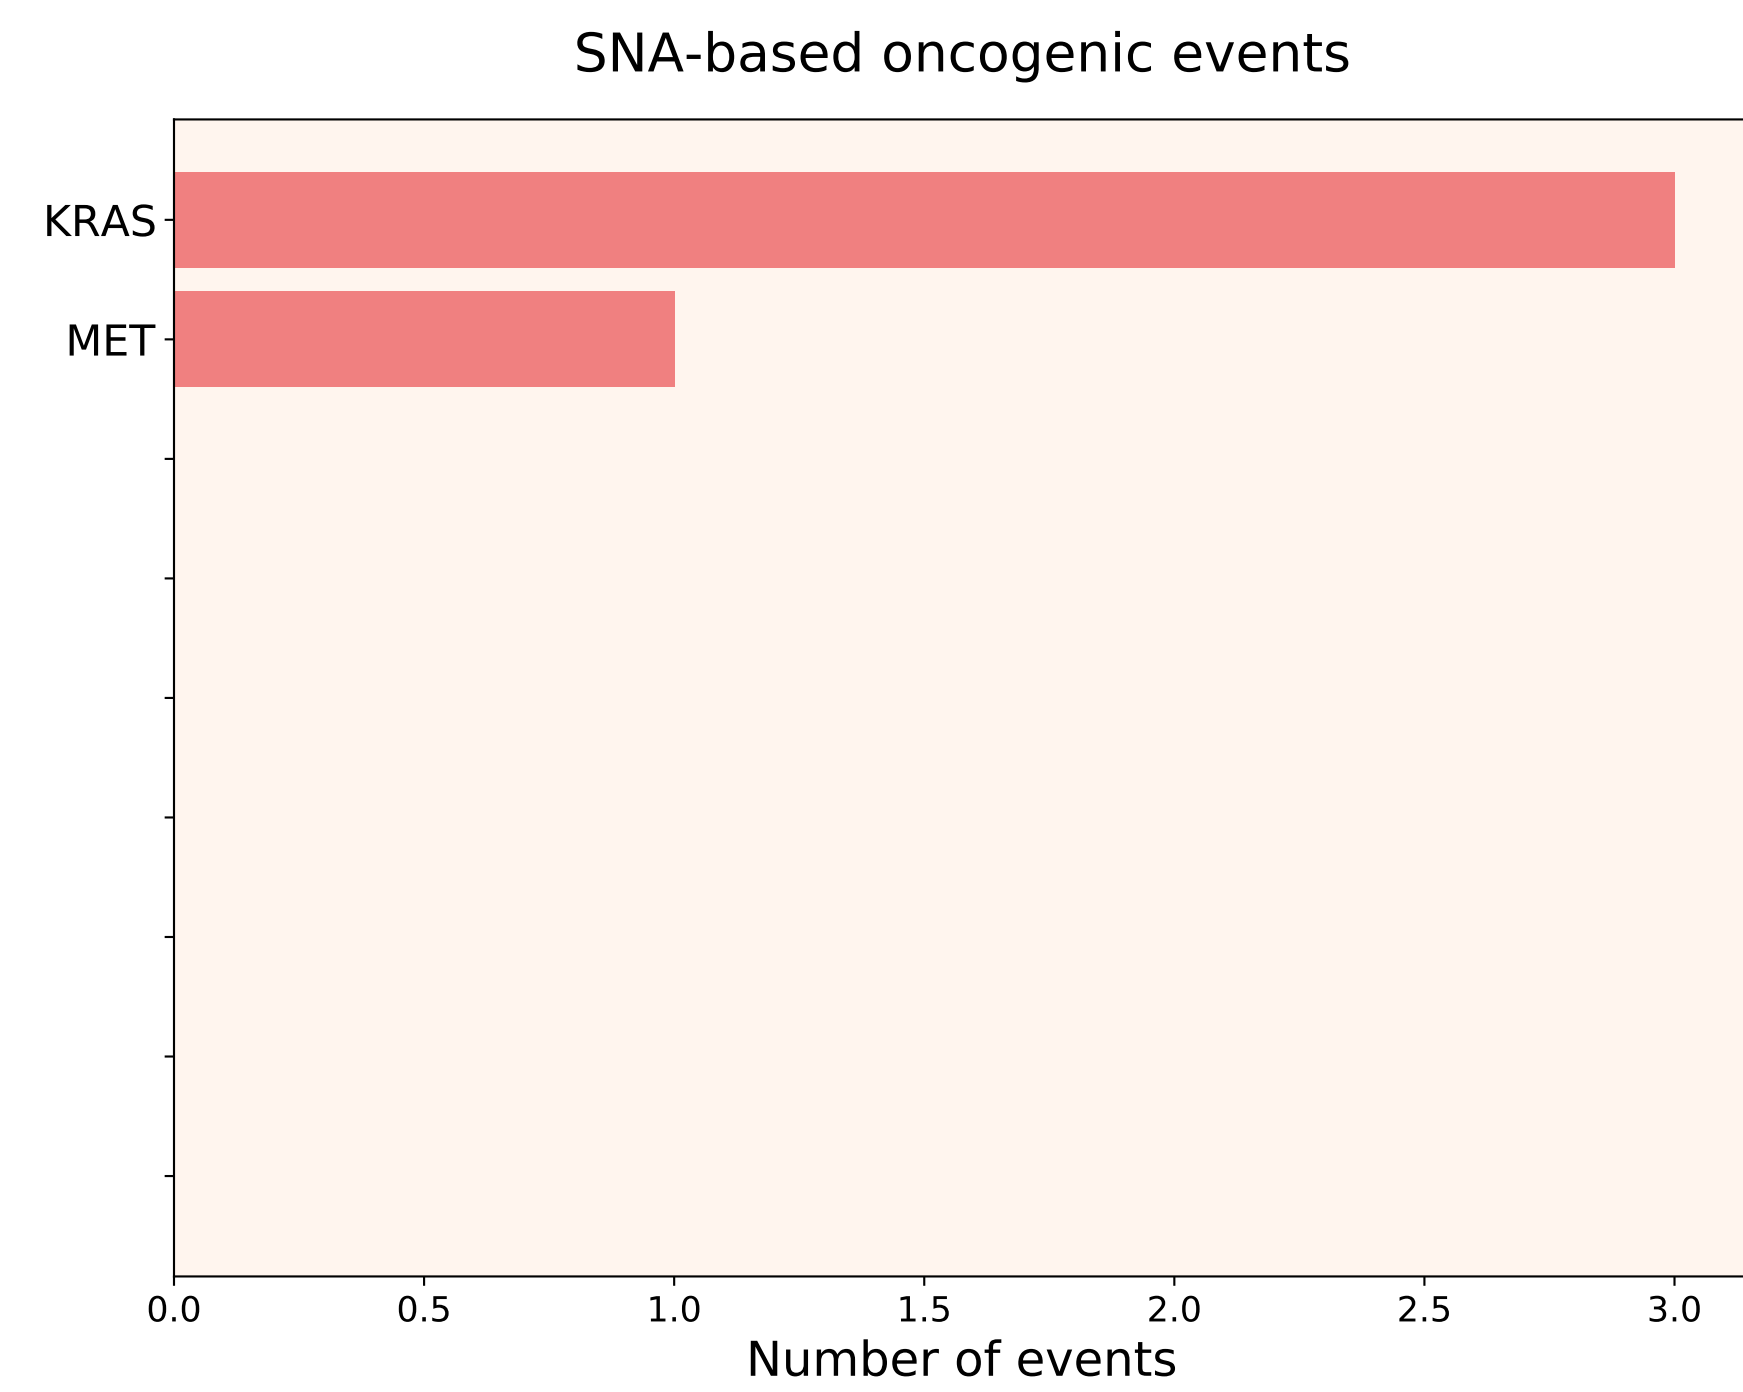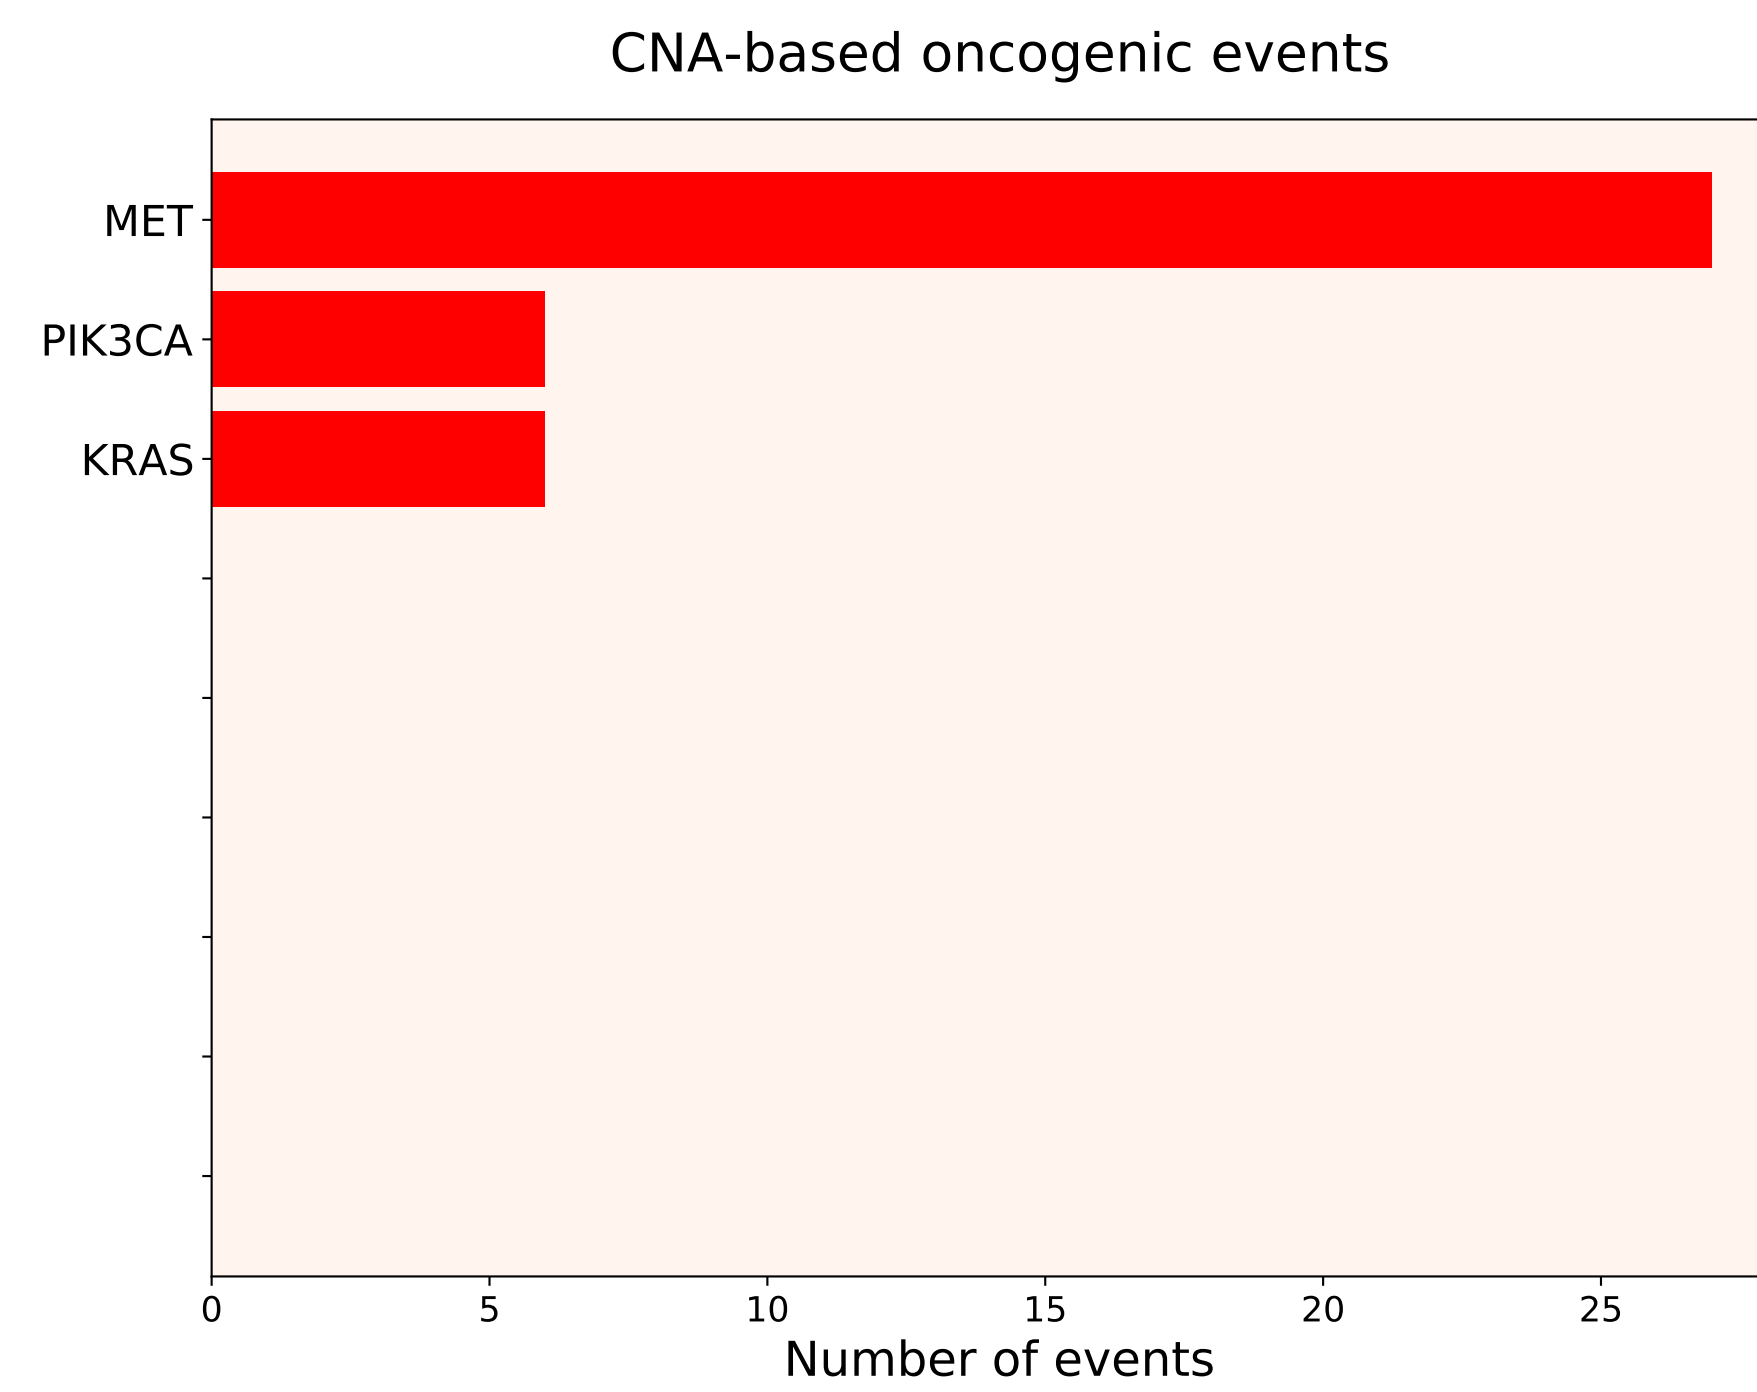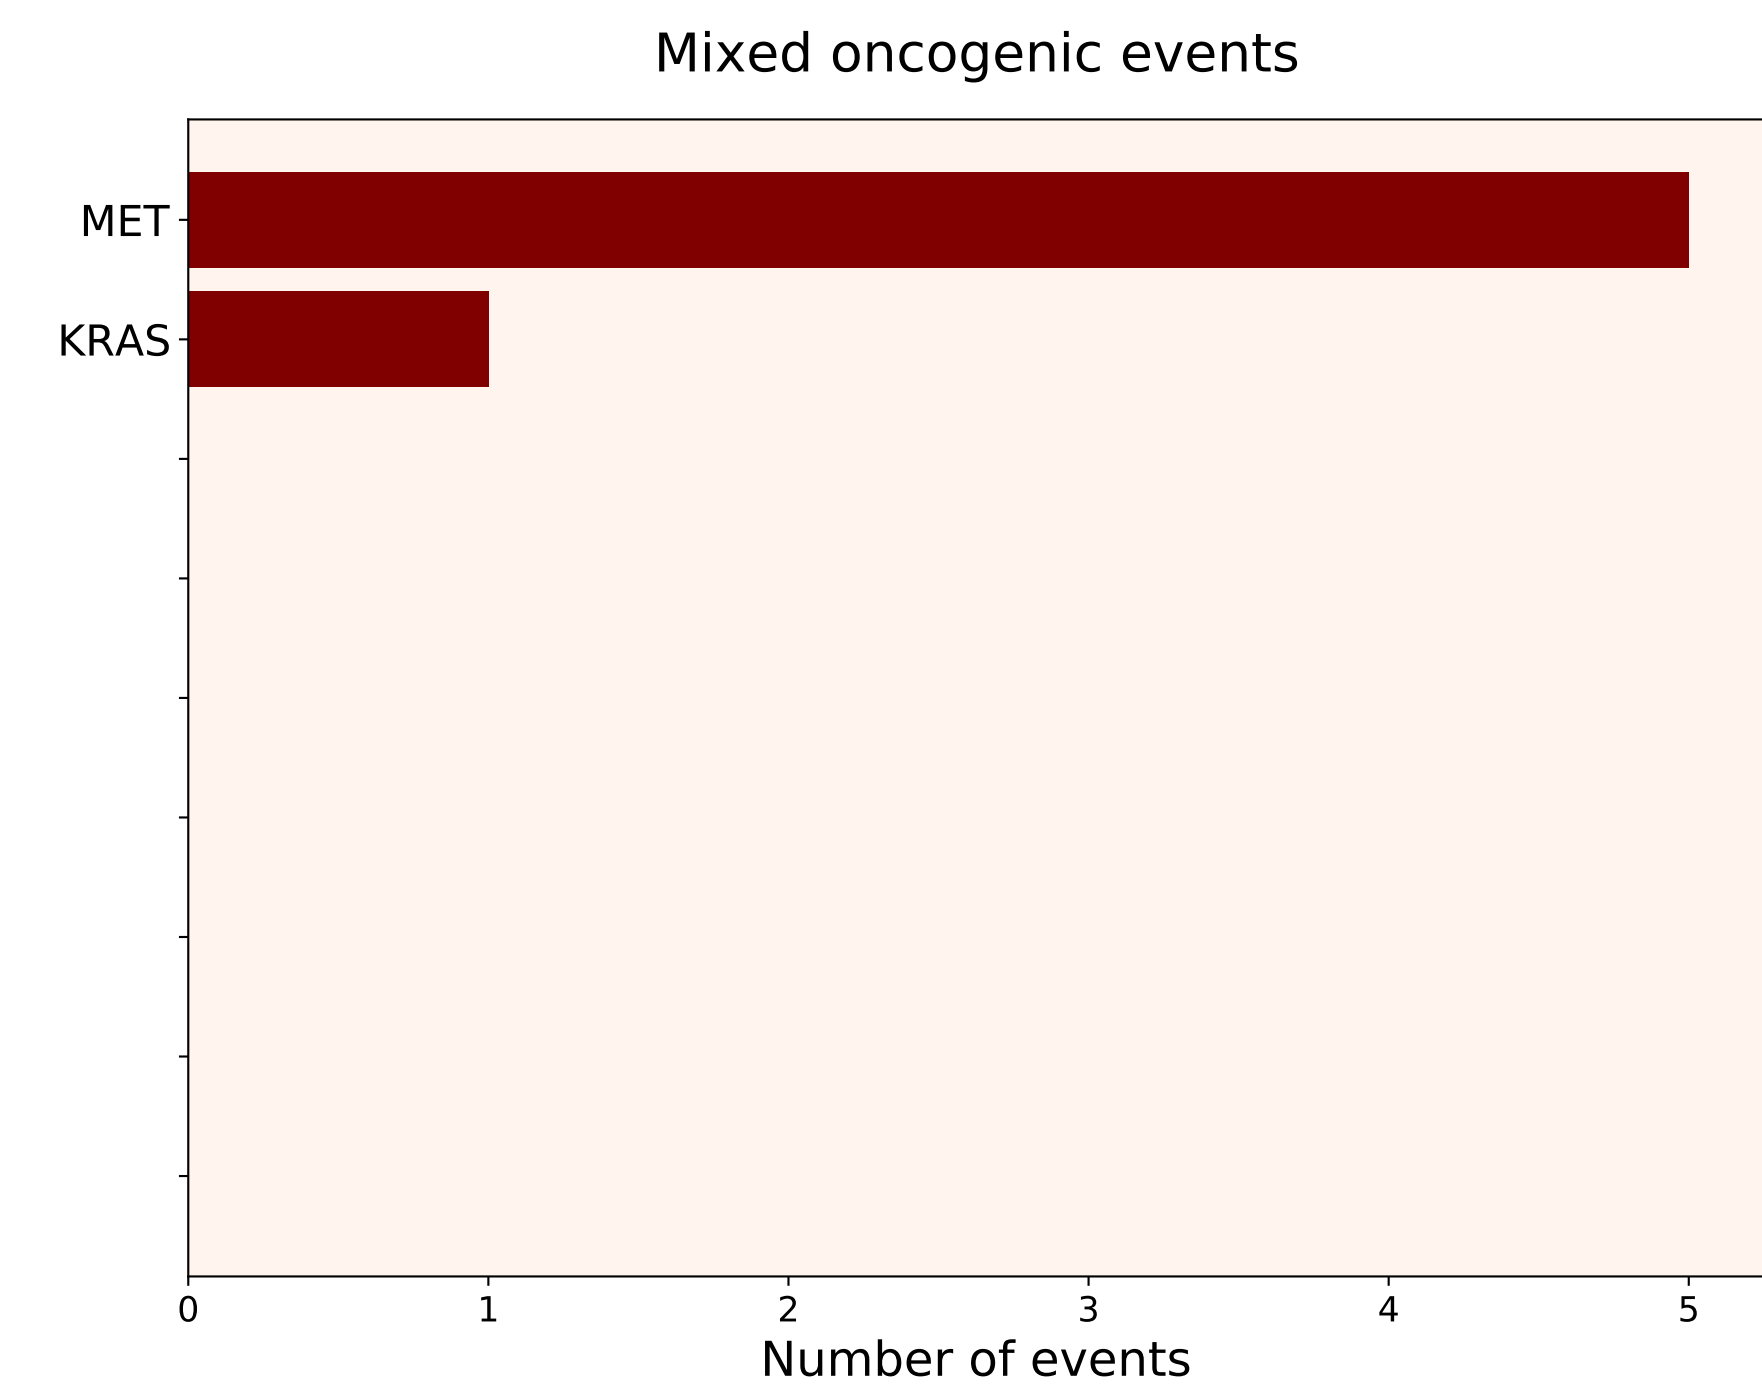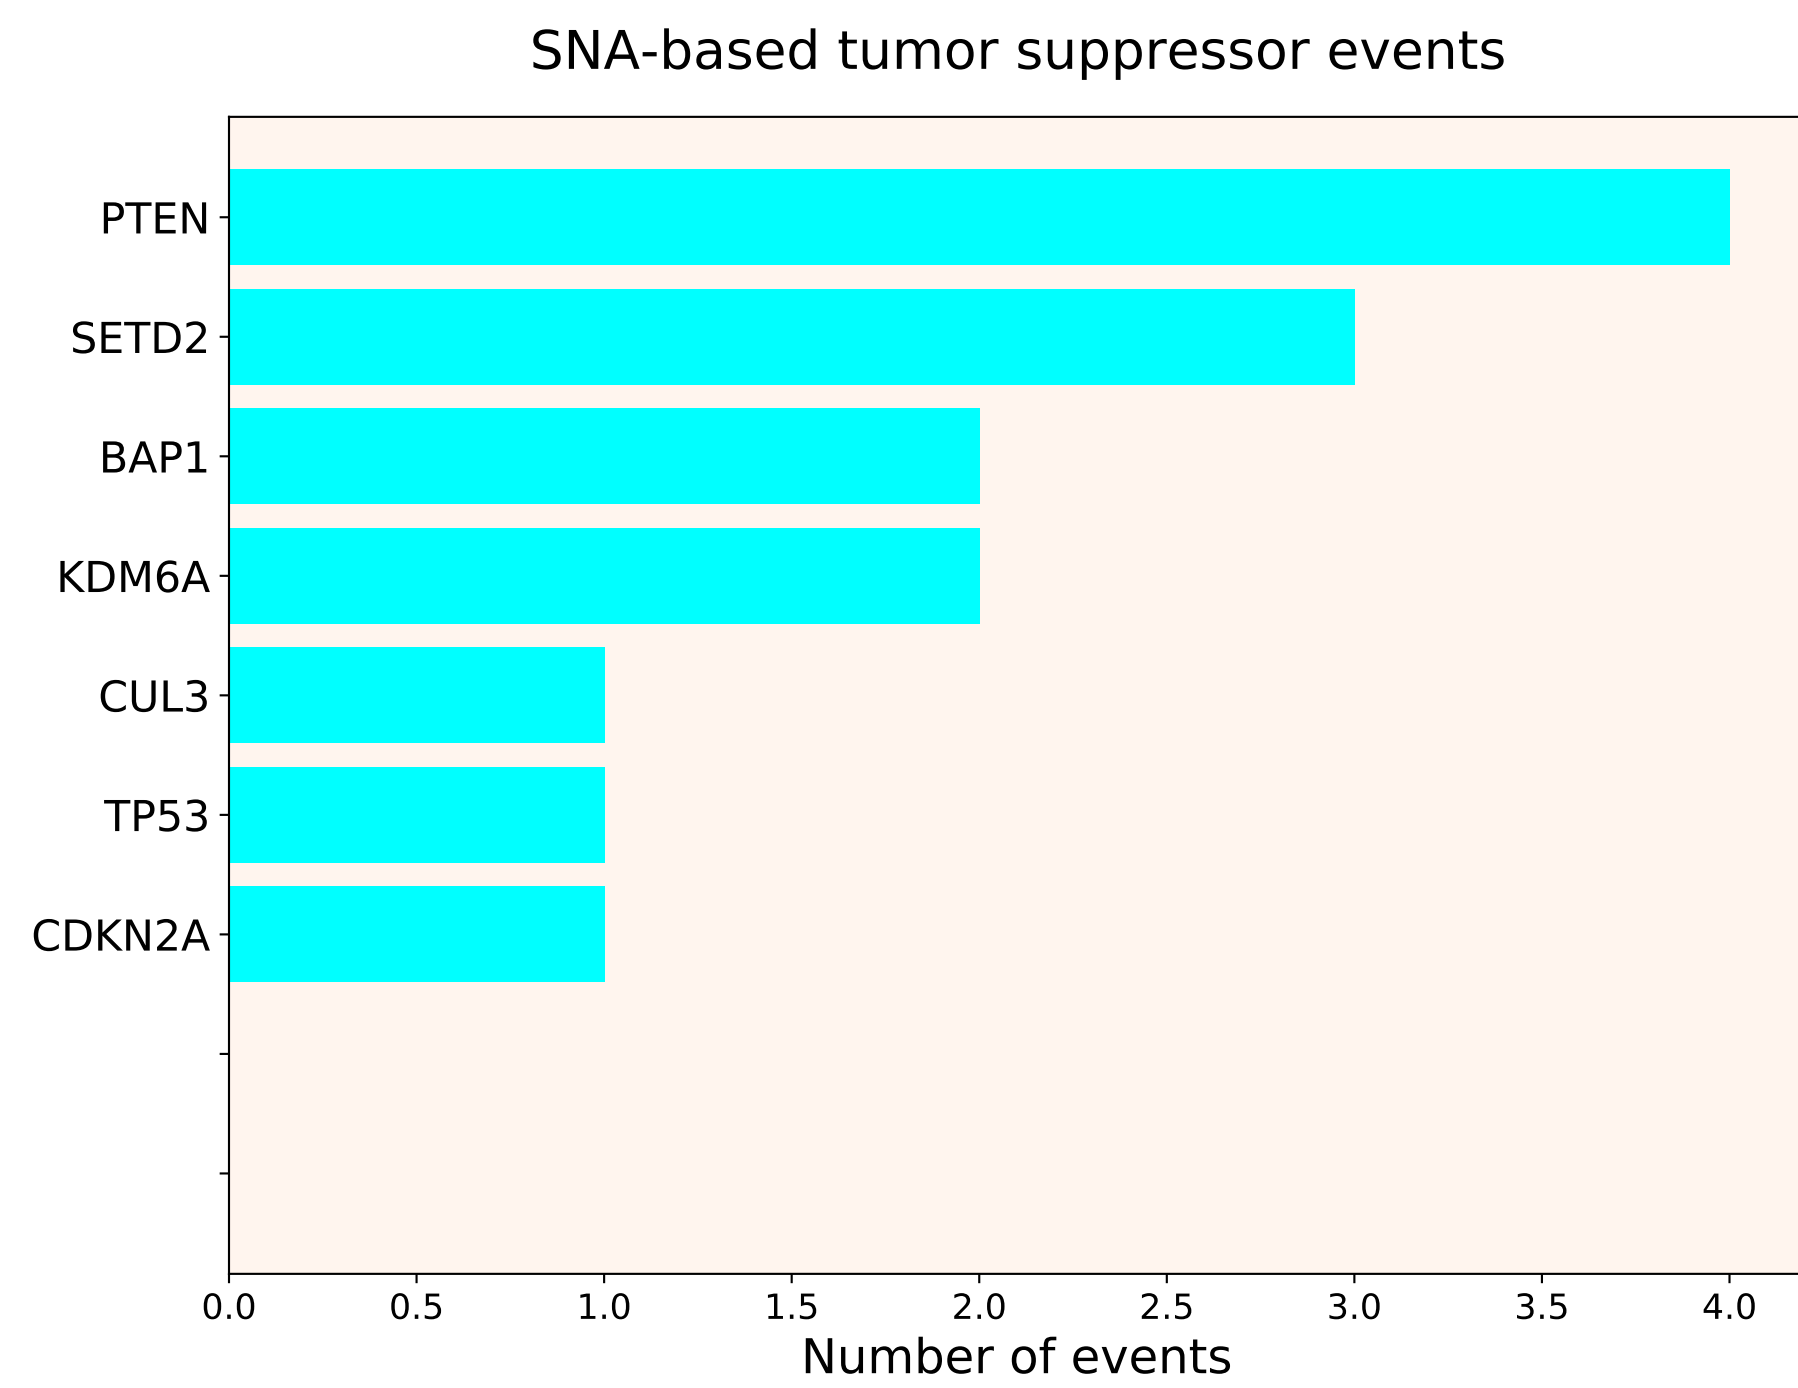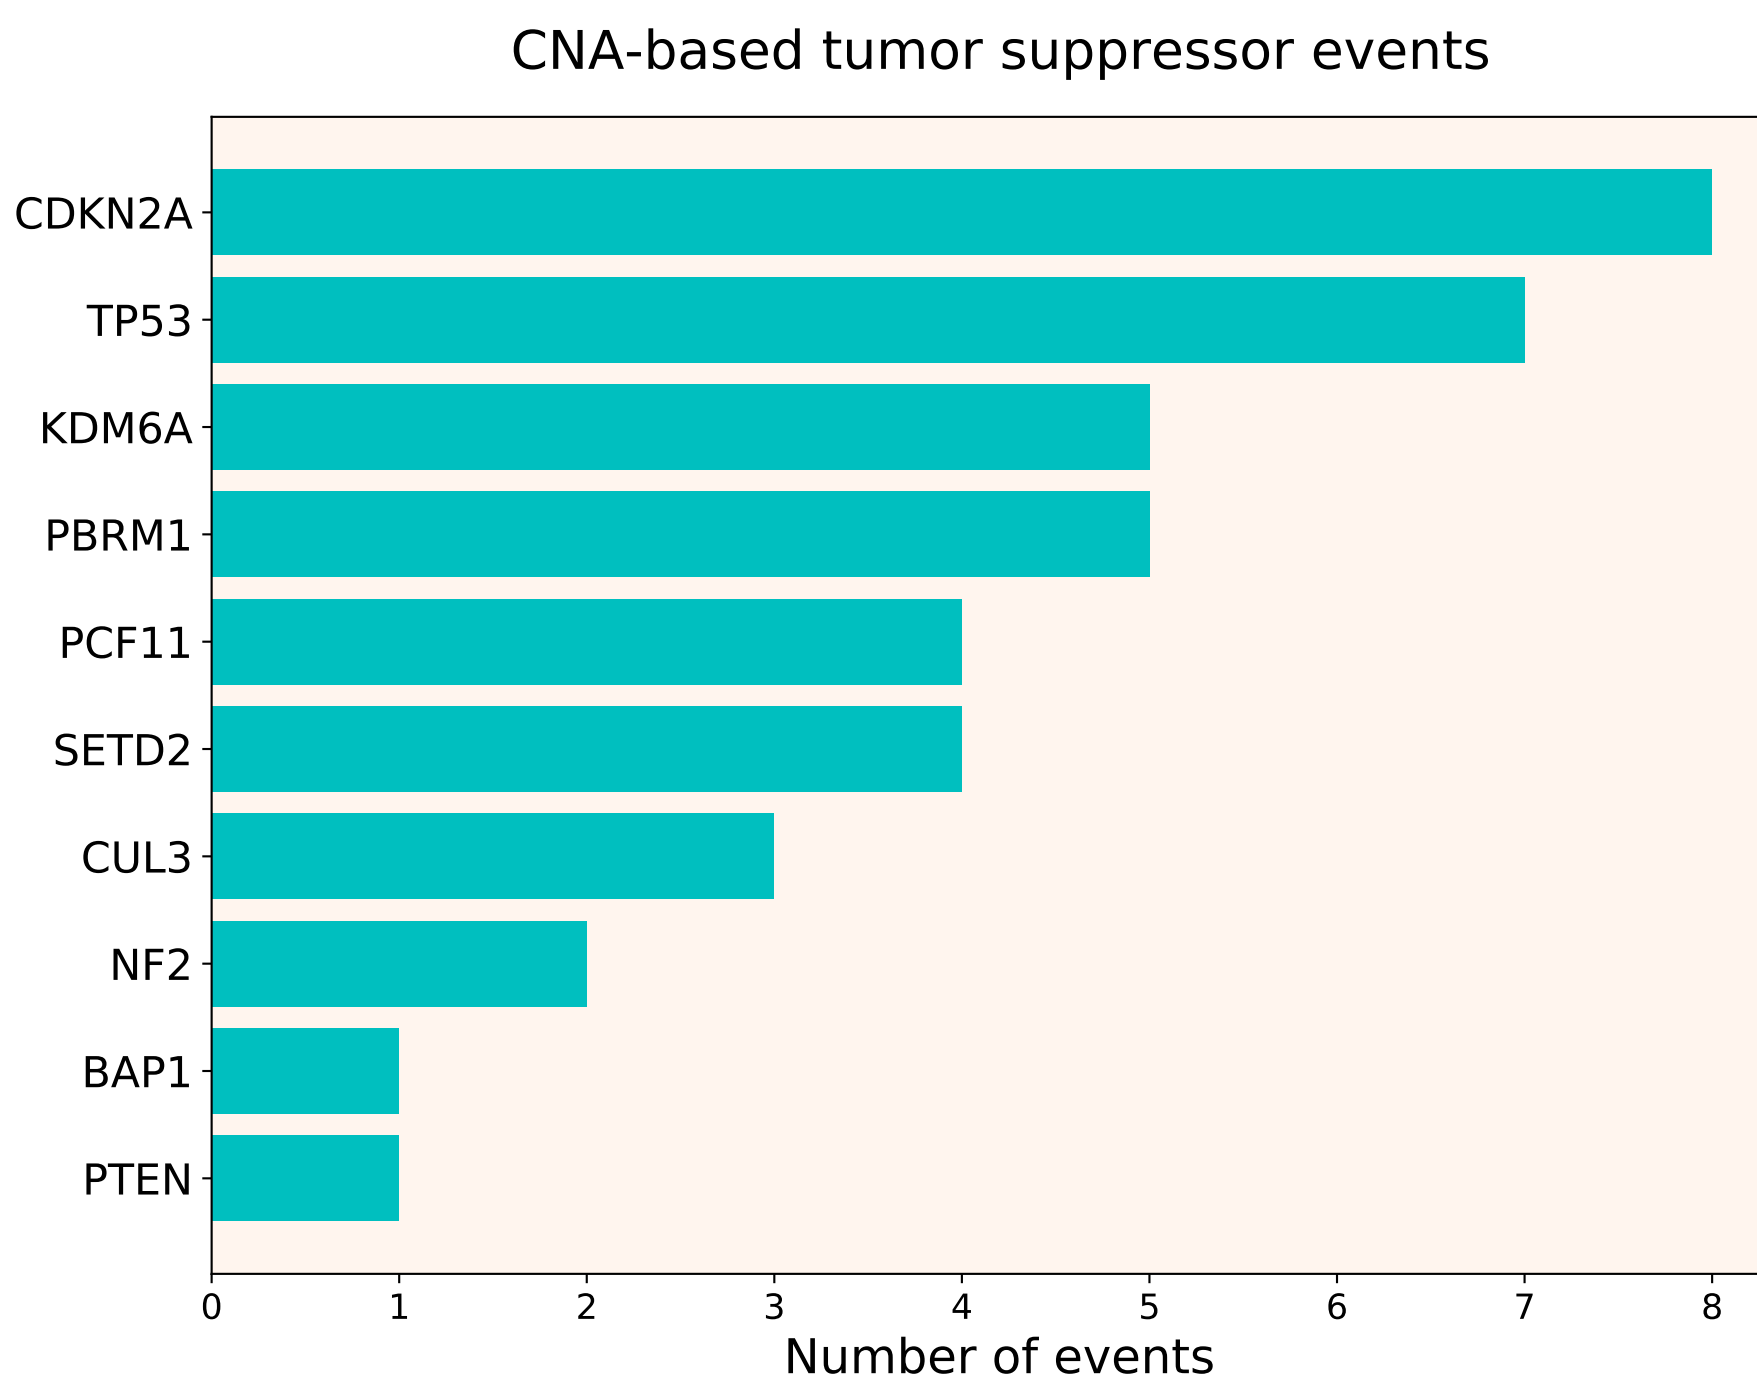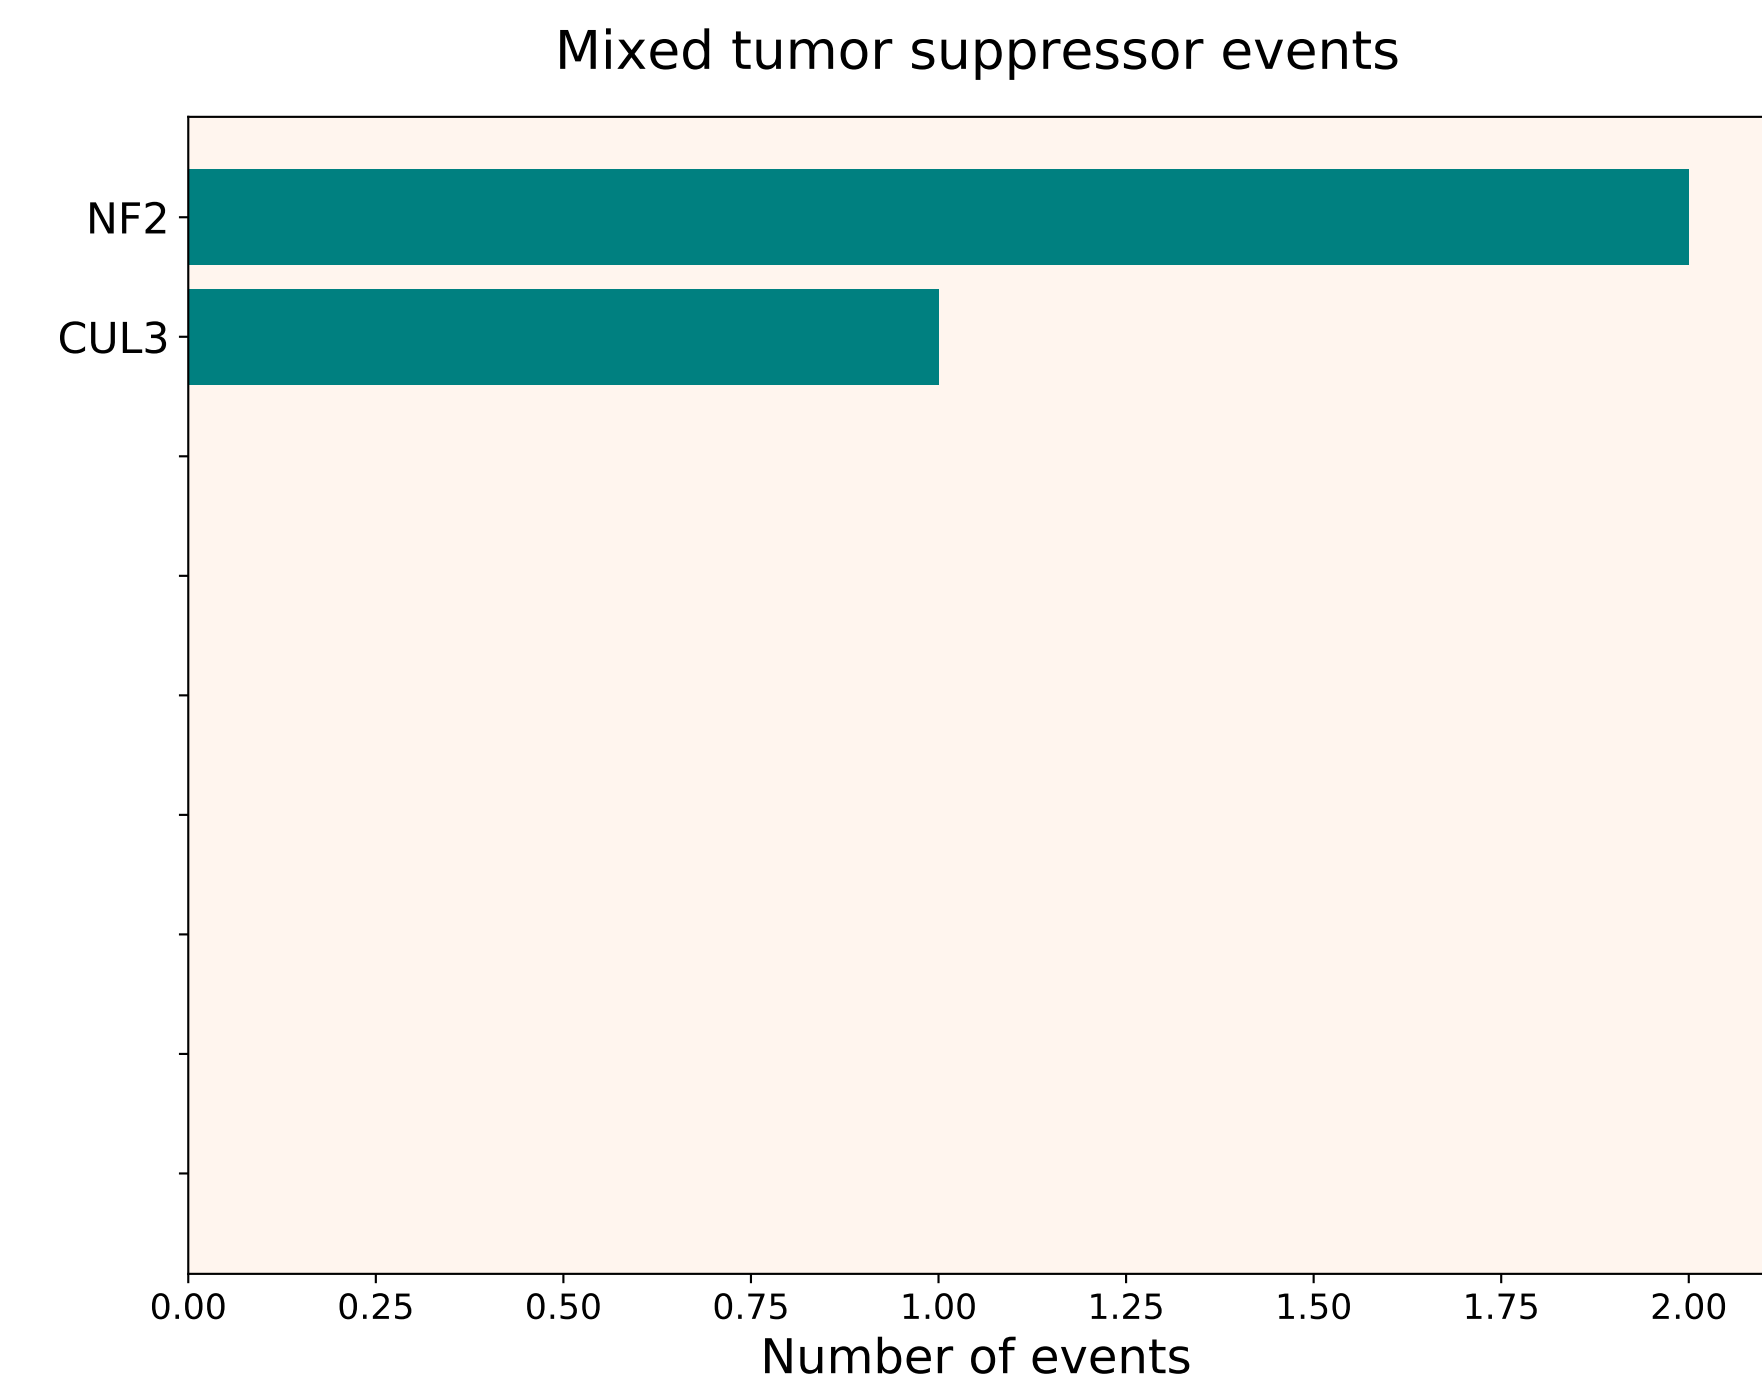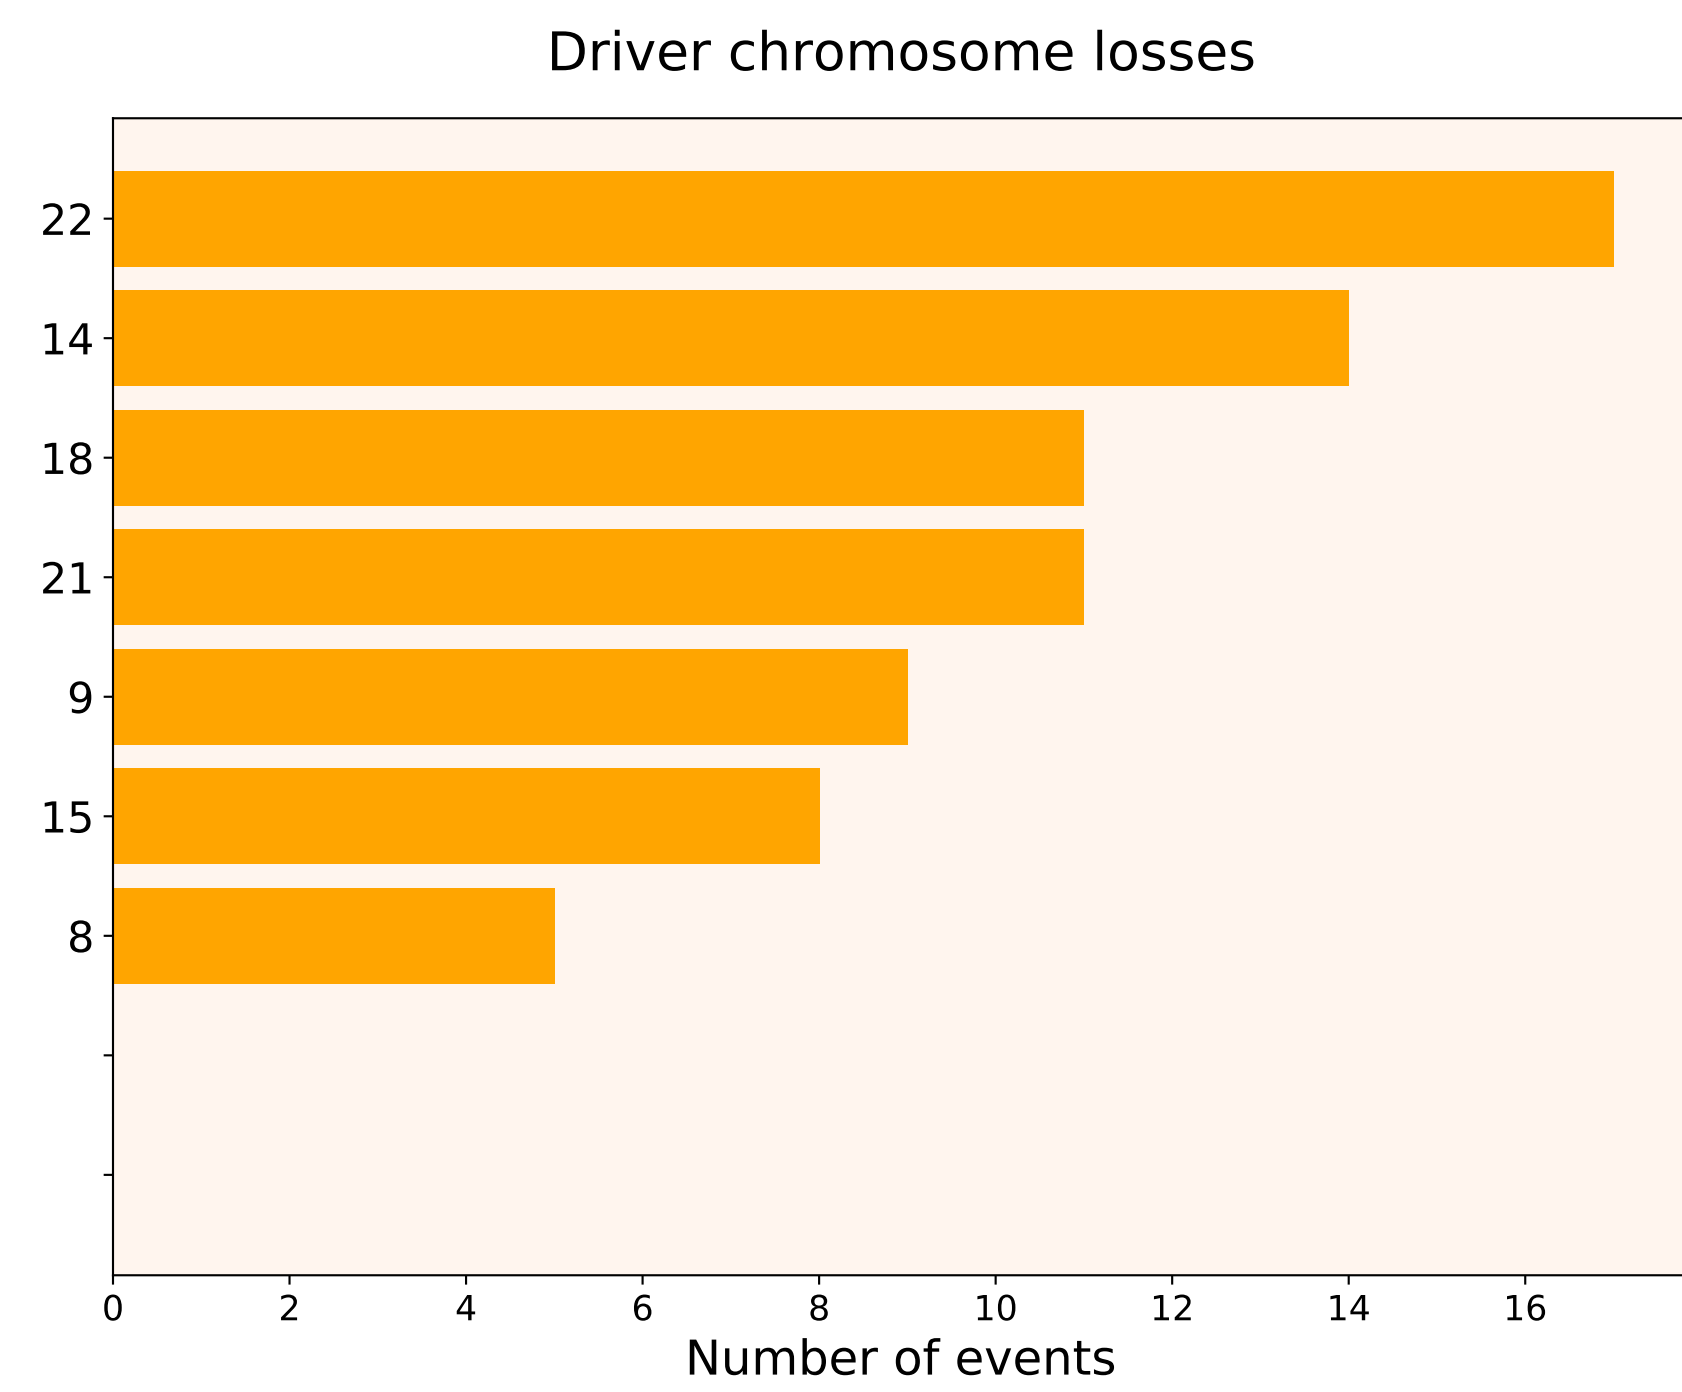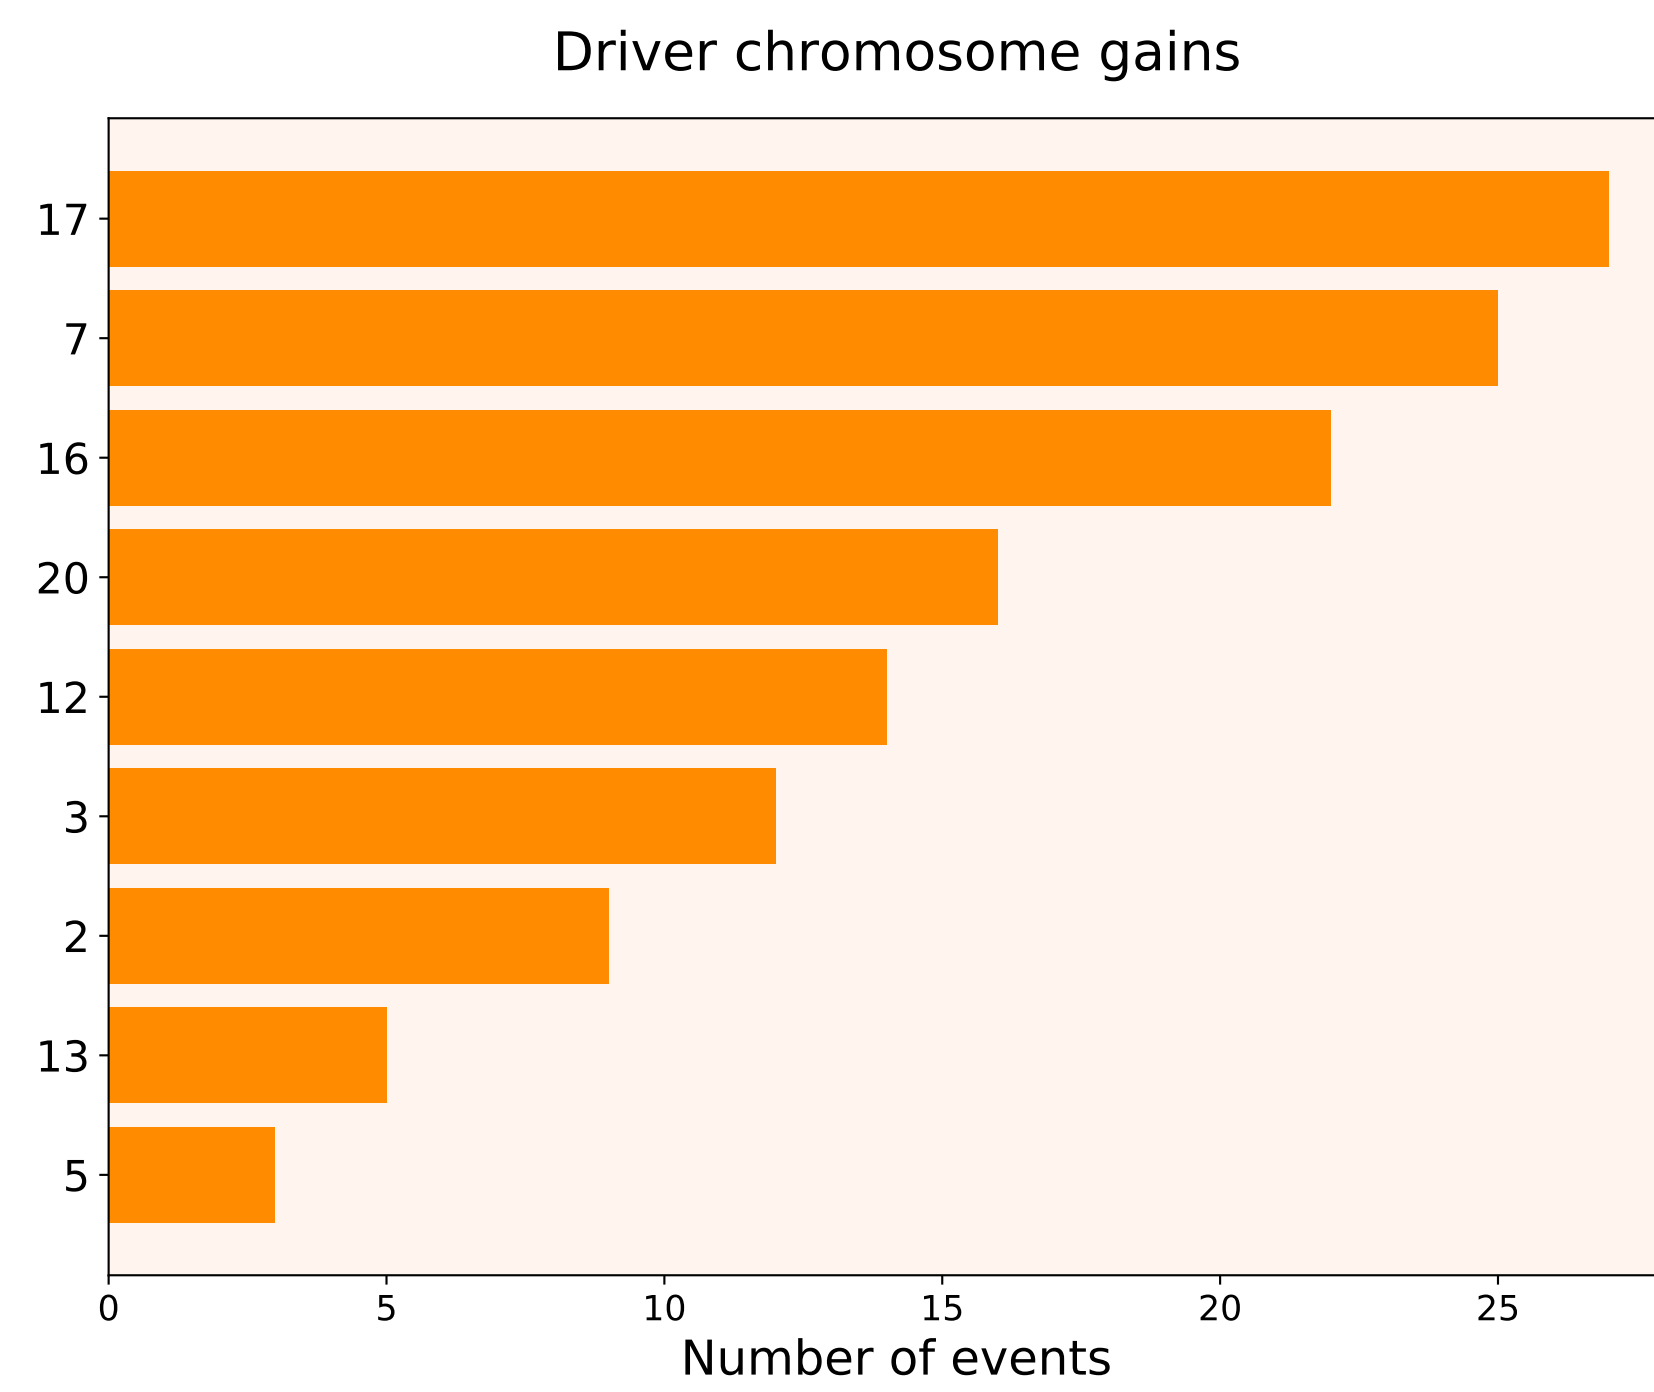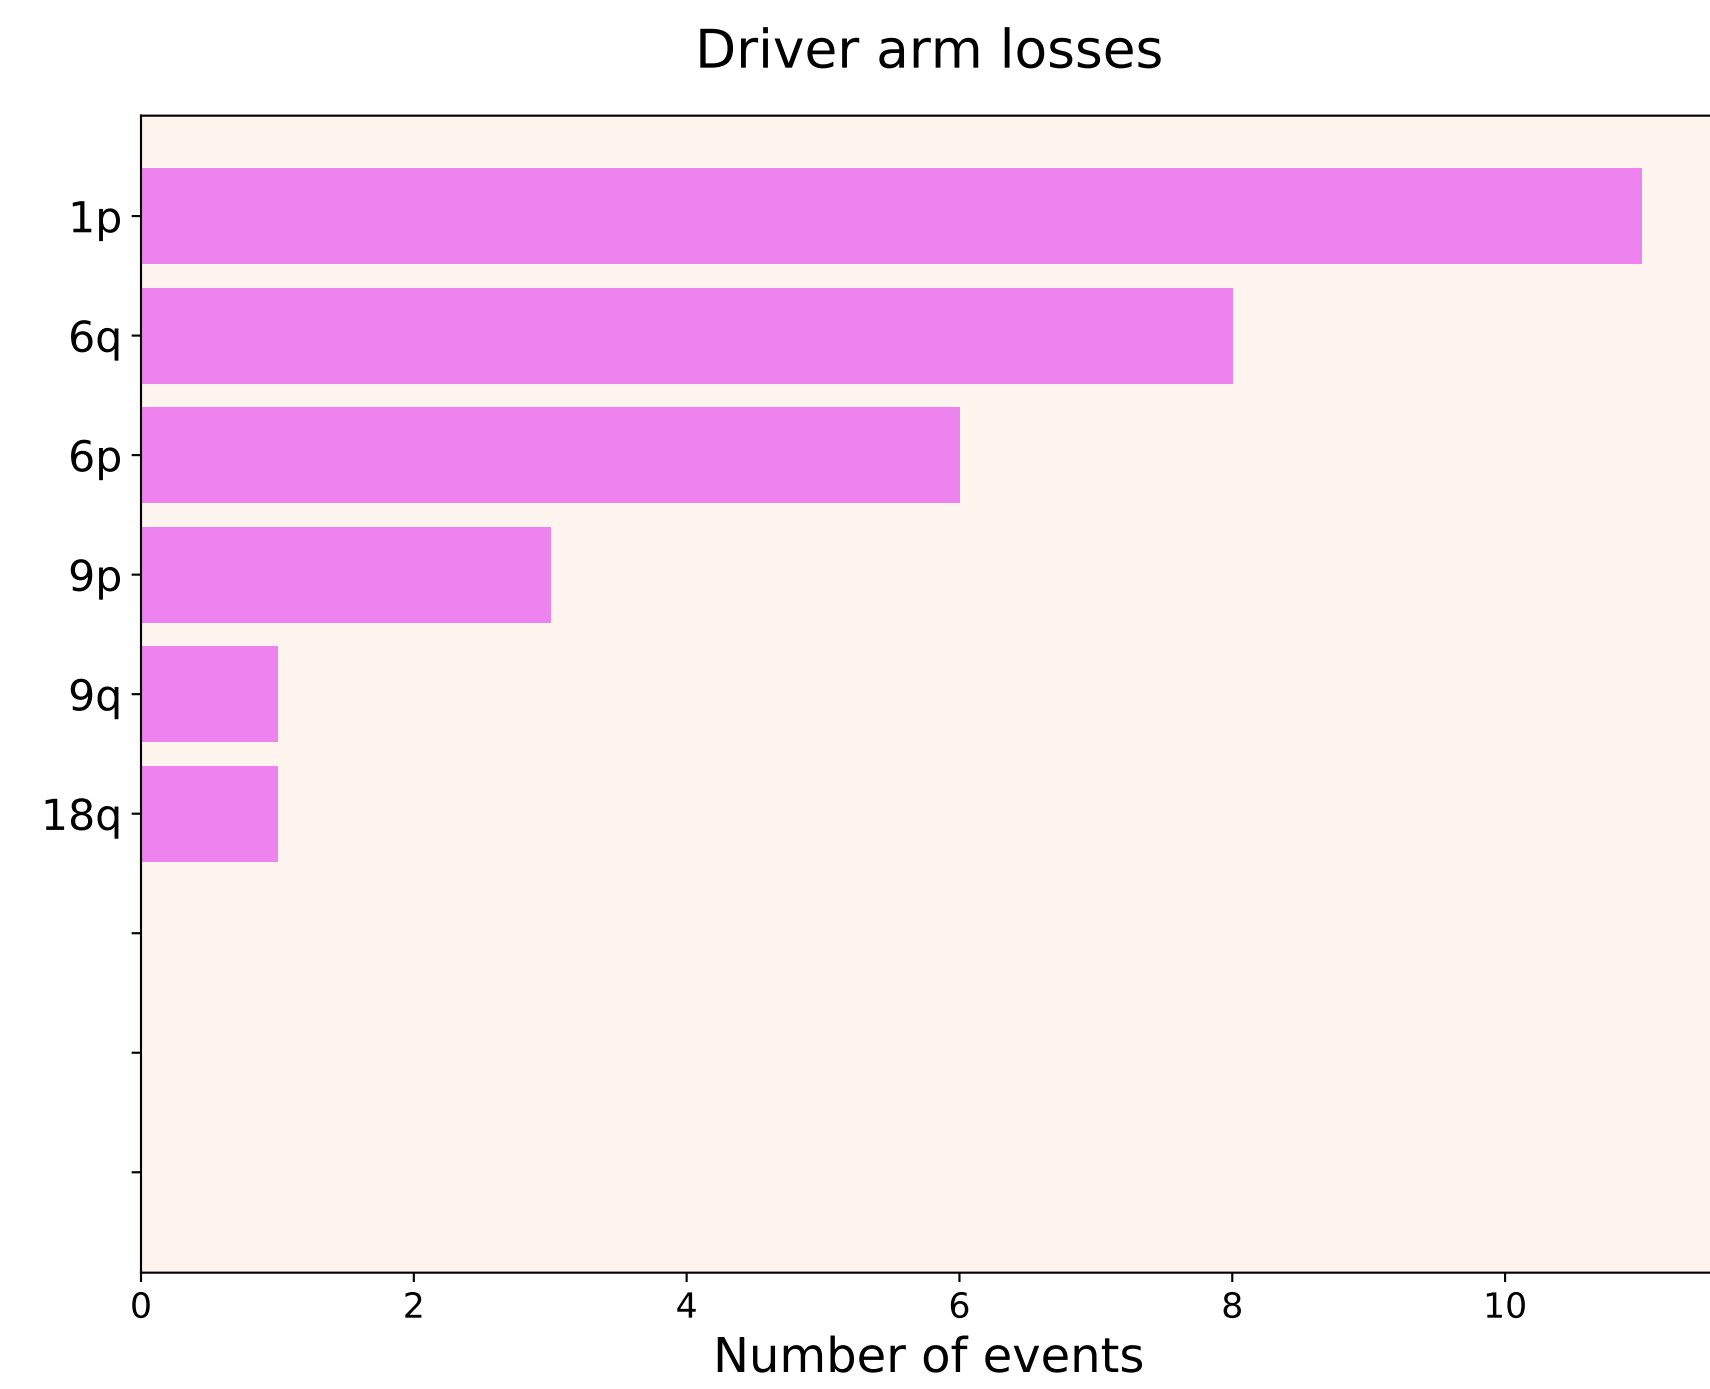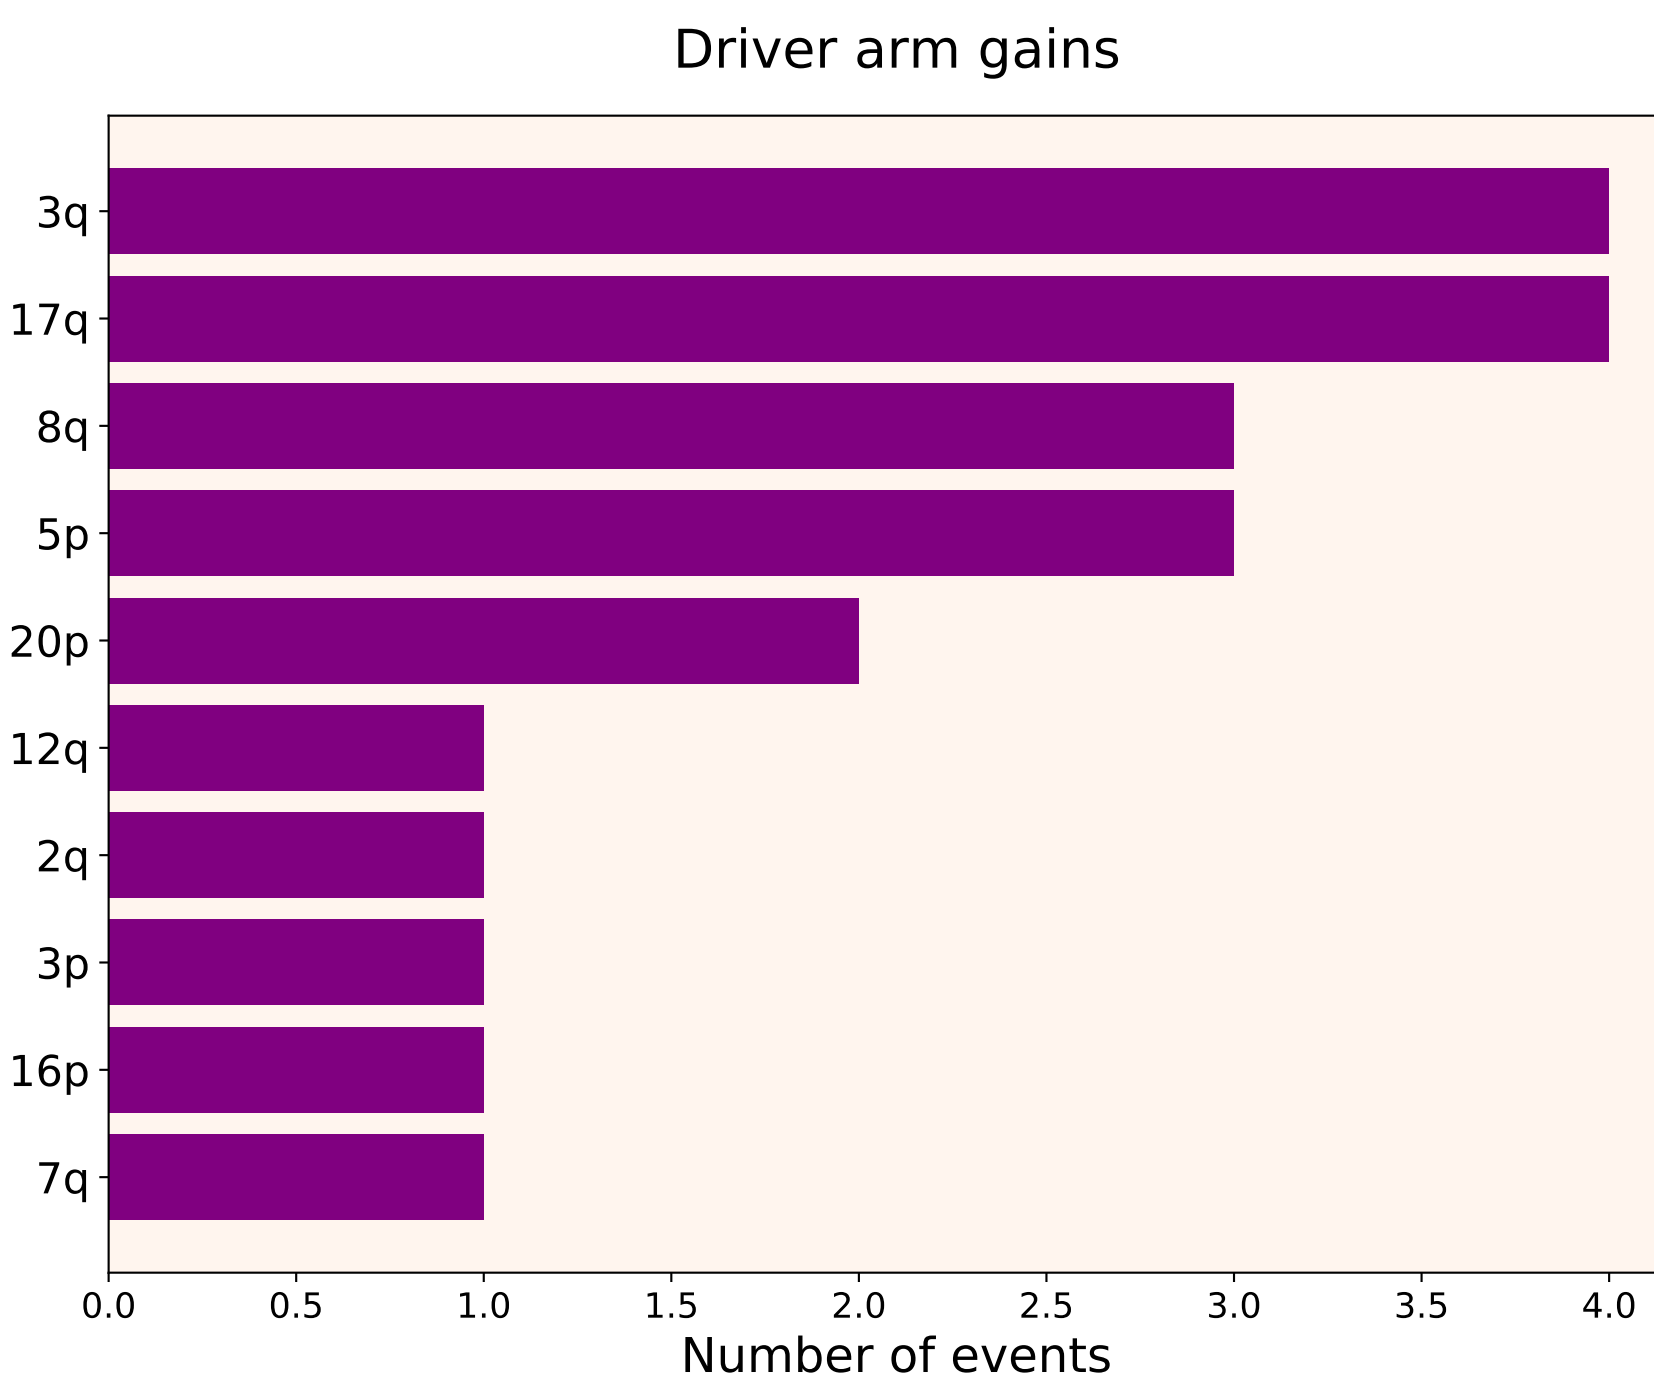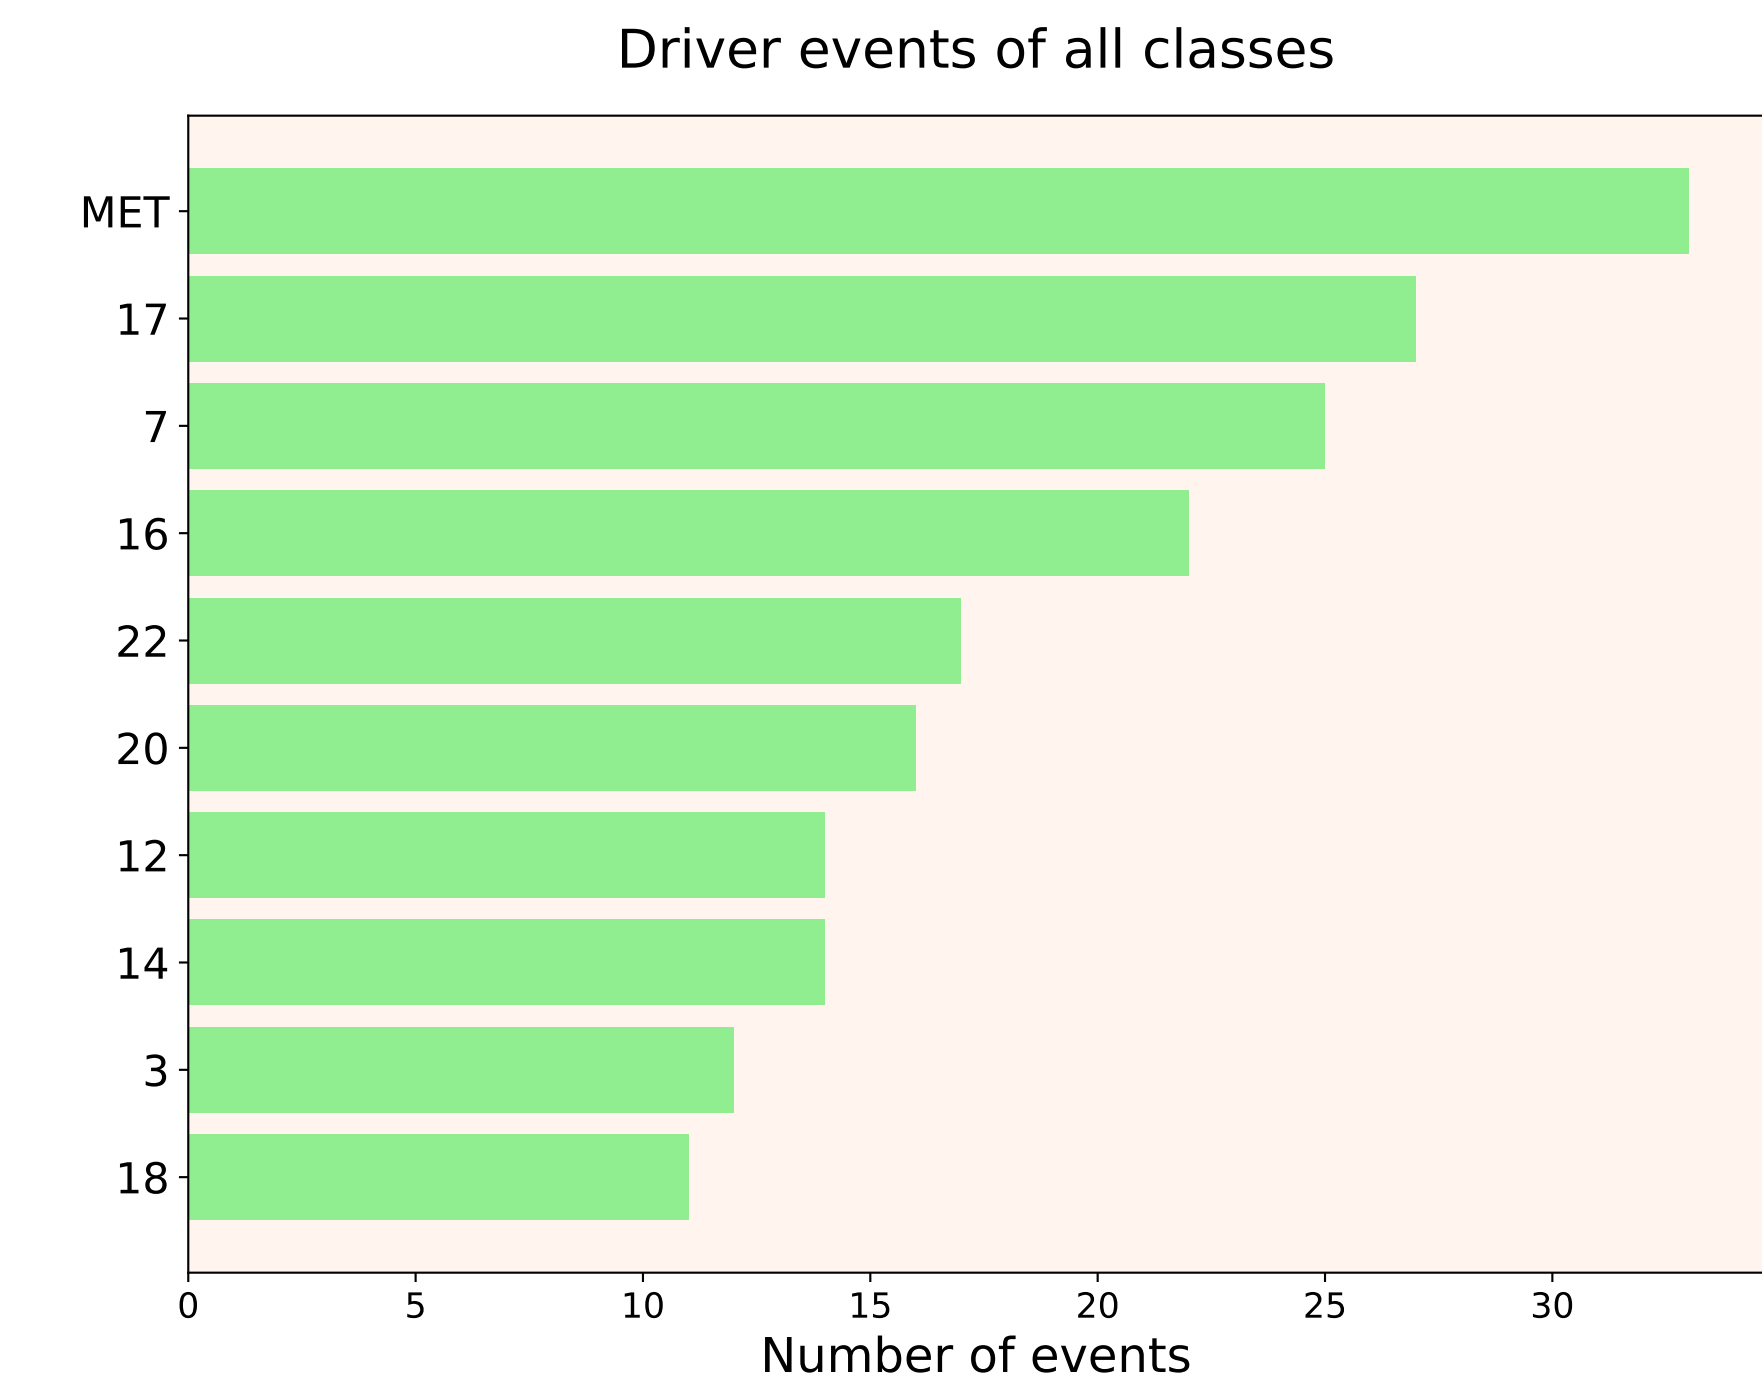

Supplement: Supplemental_Data_S1.zip [file Supplemental_Data_S1.zip]

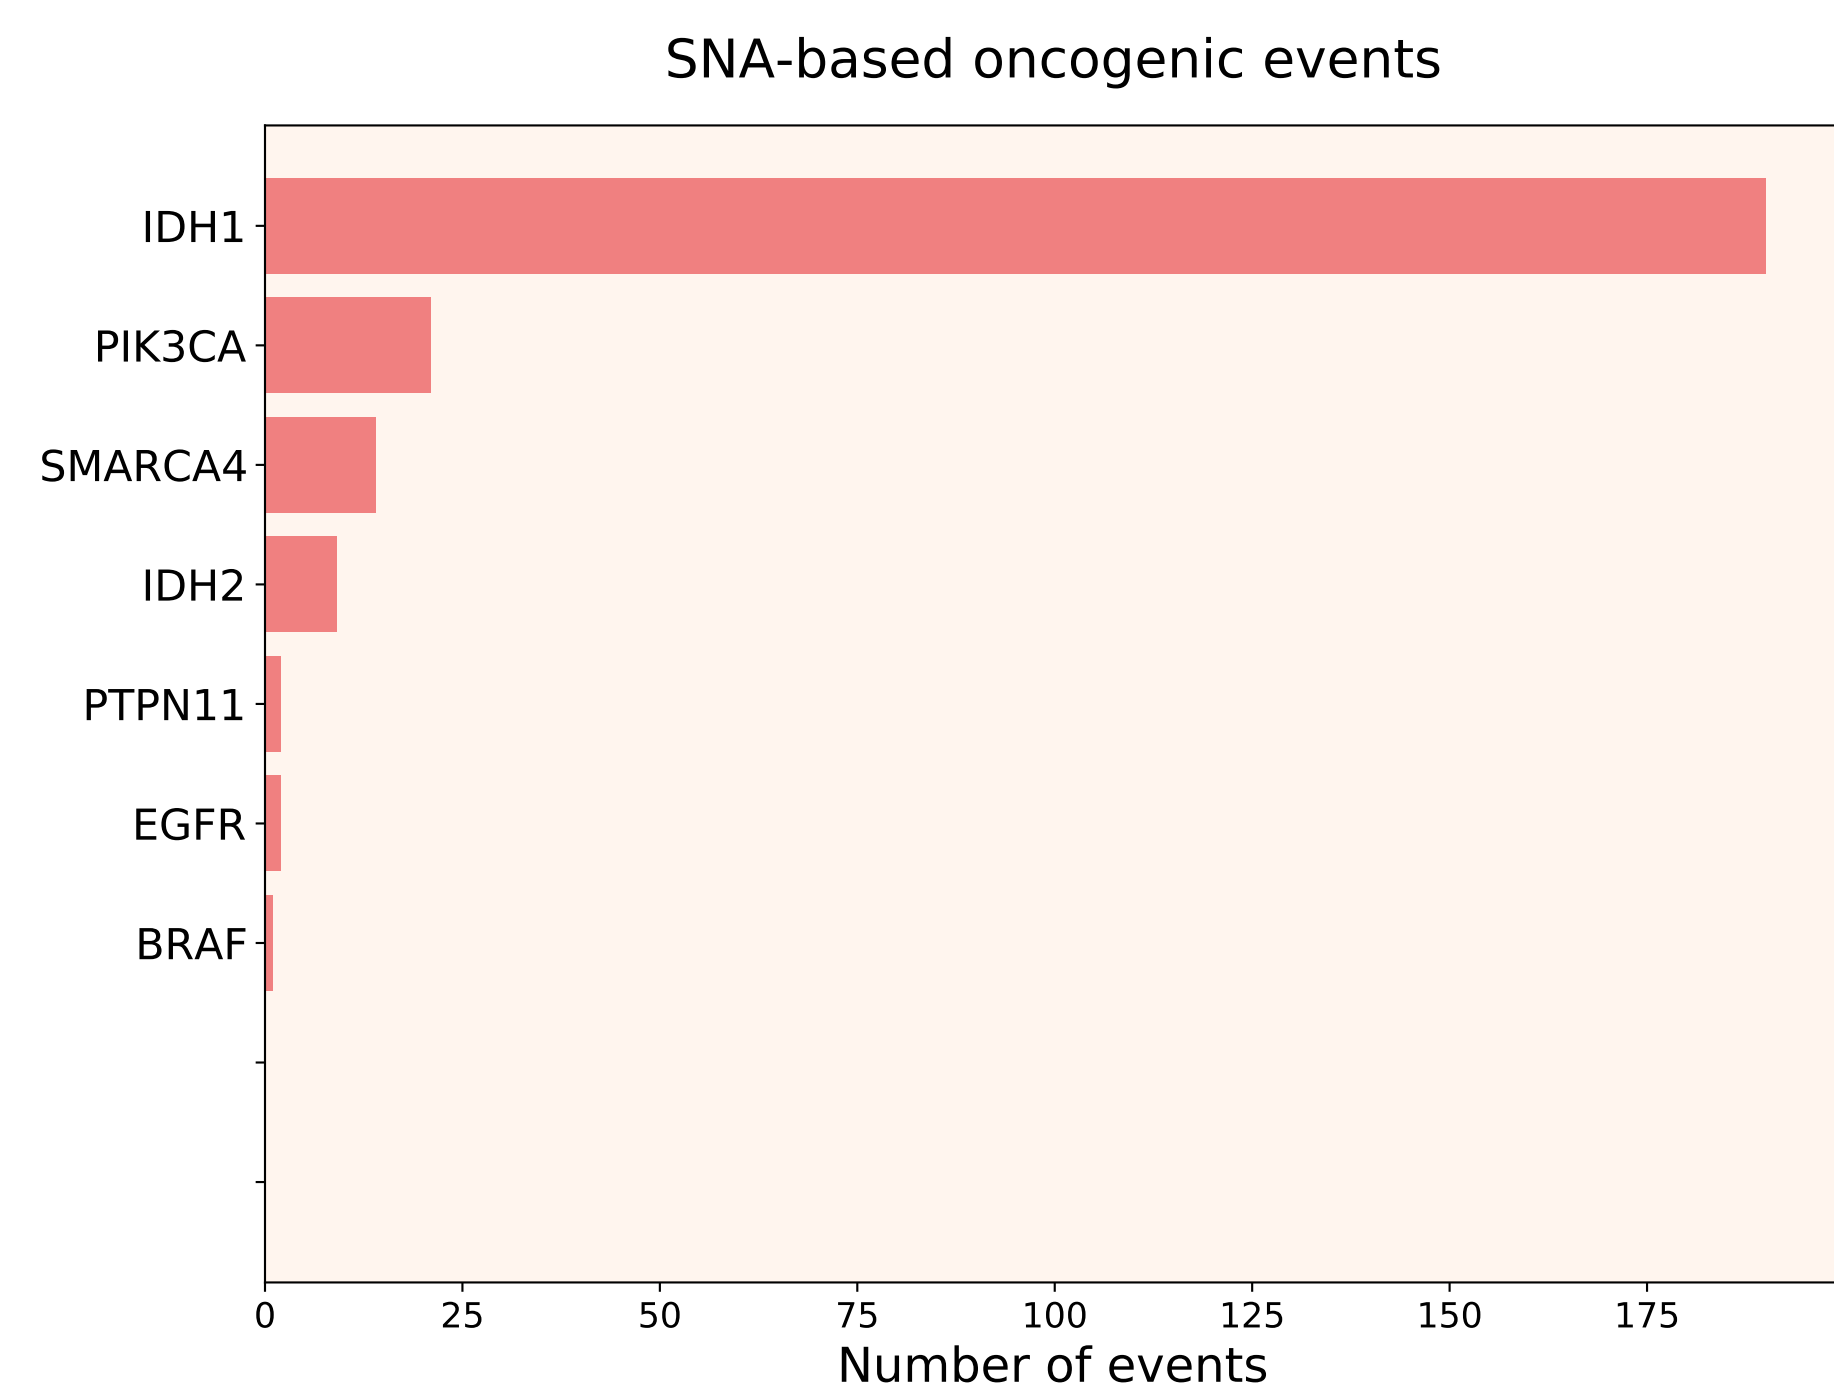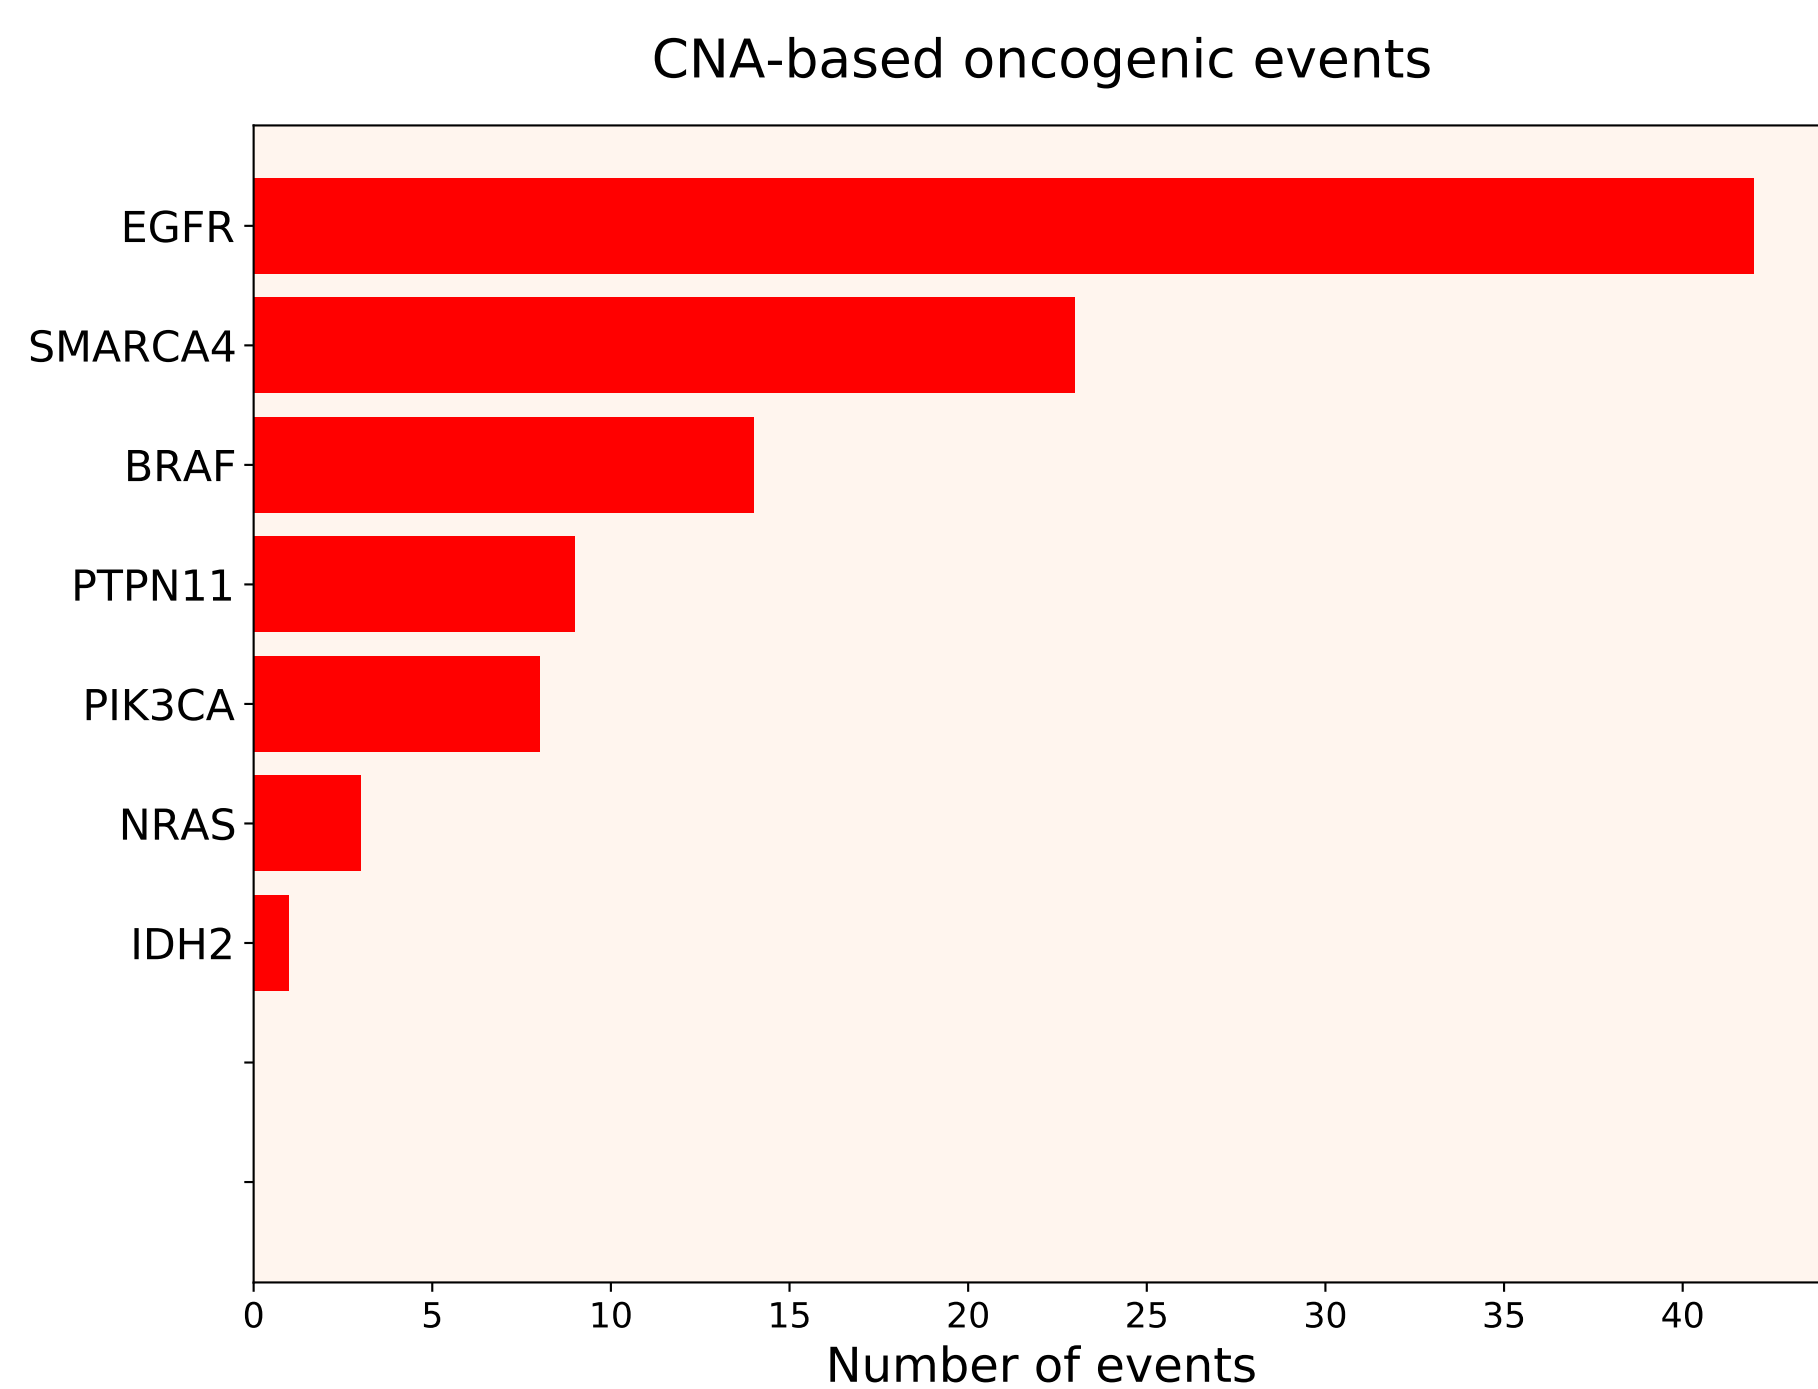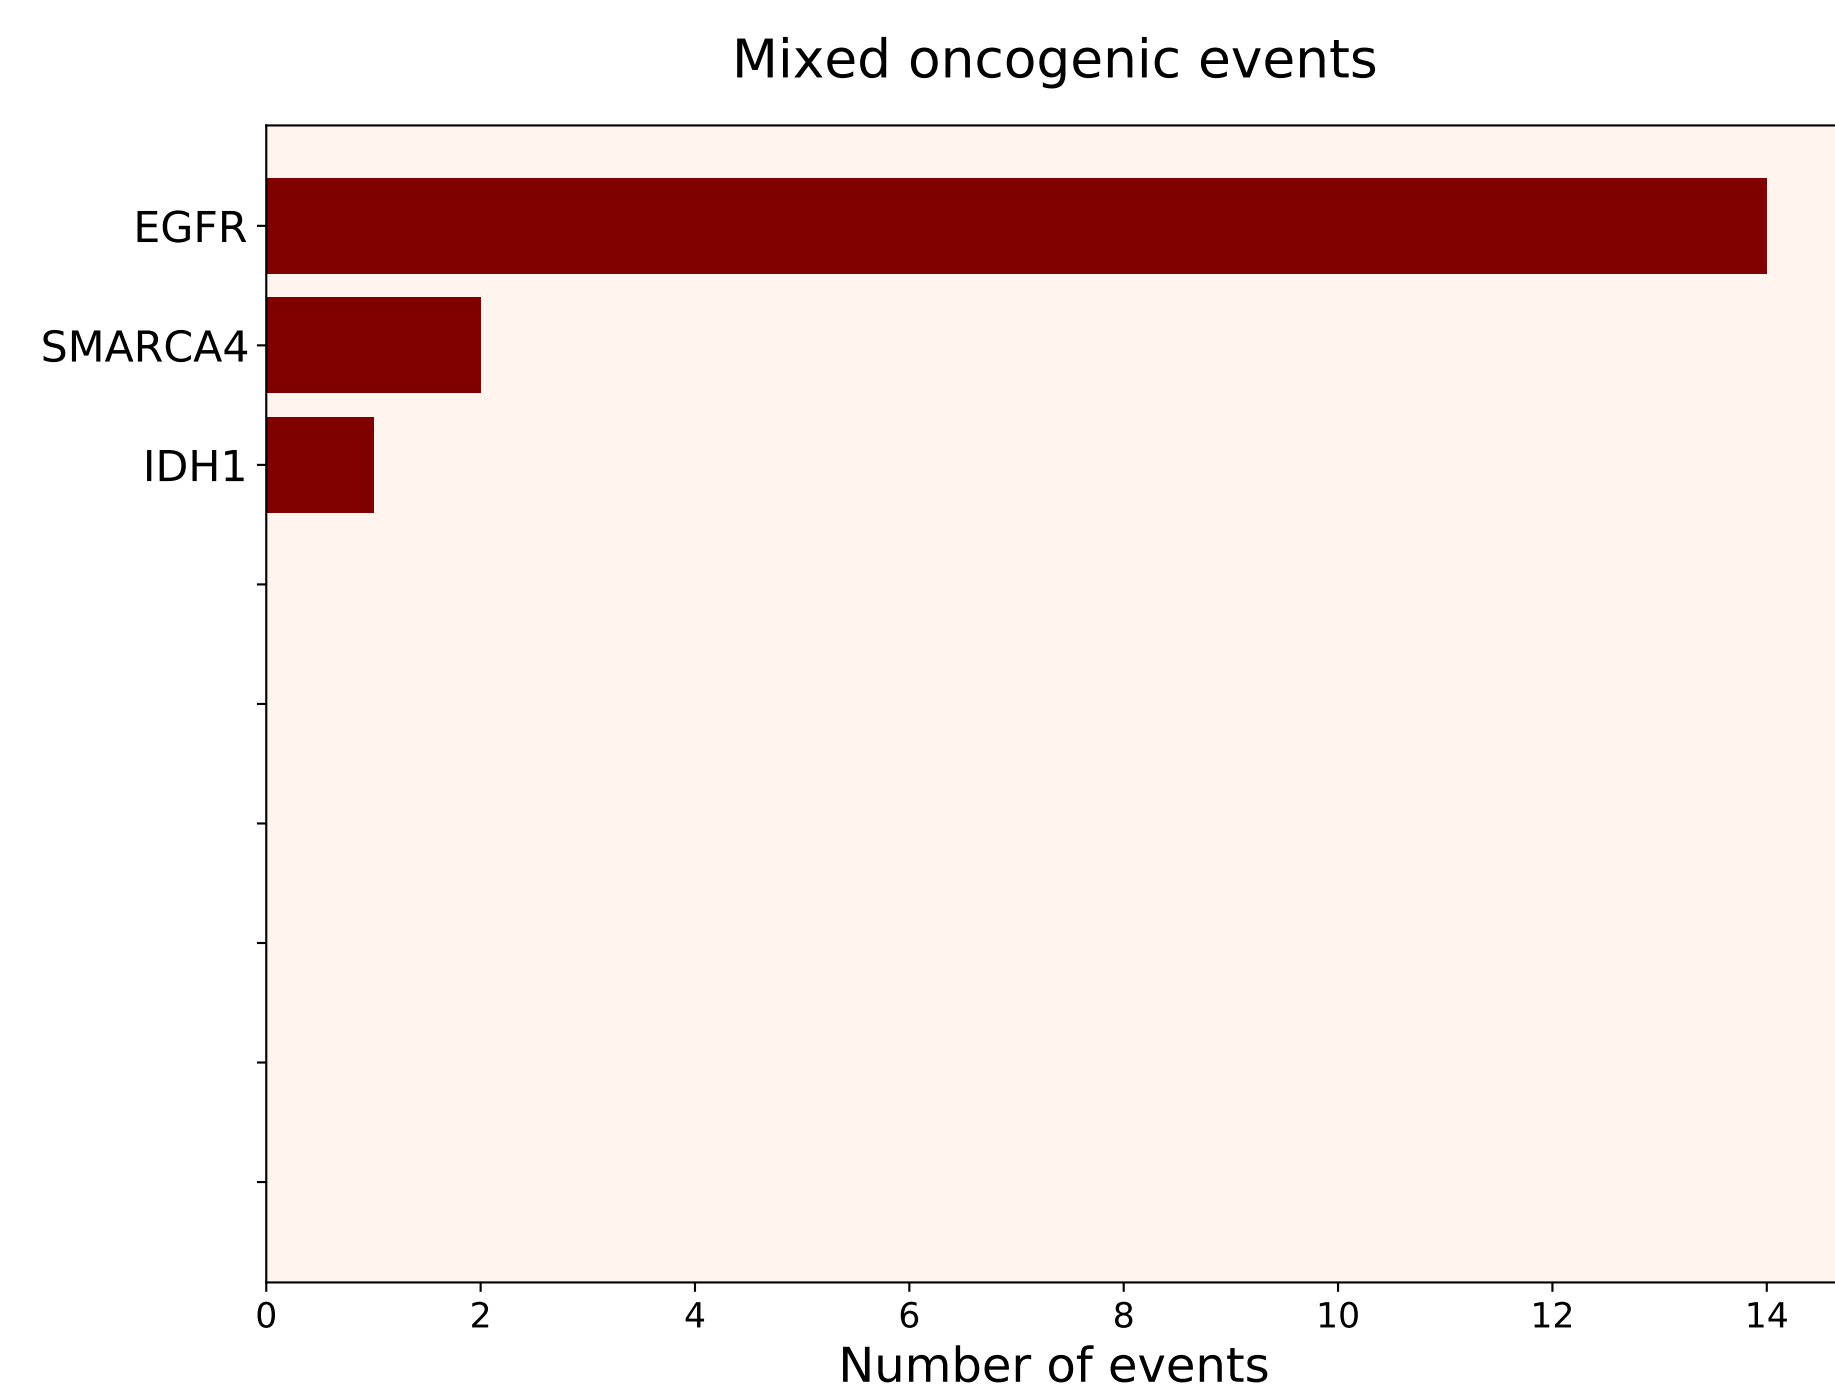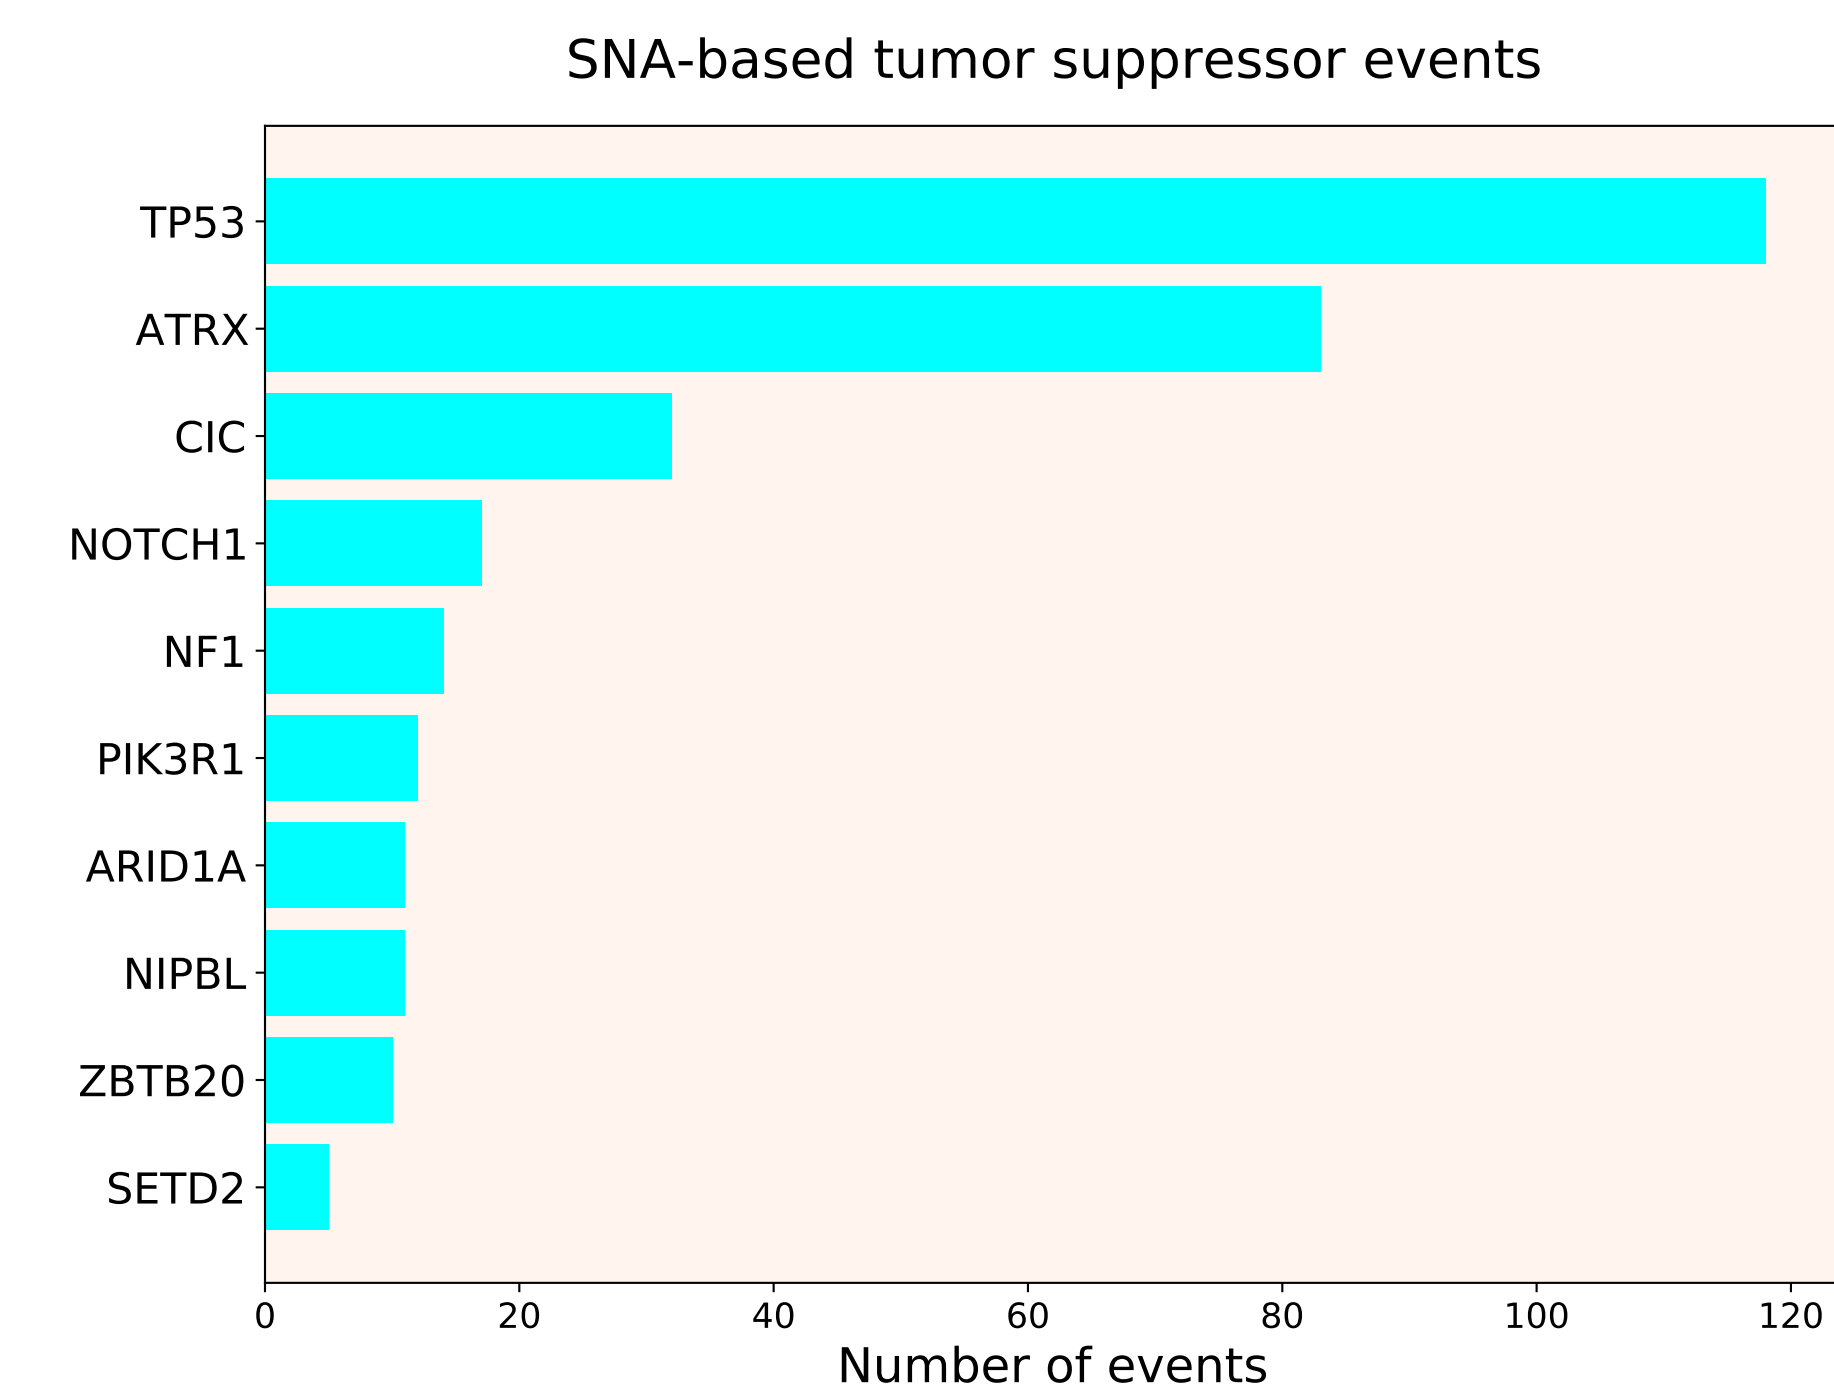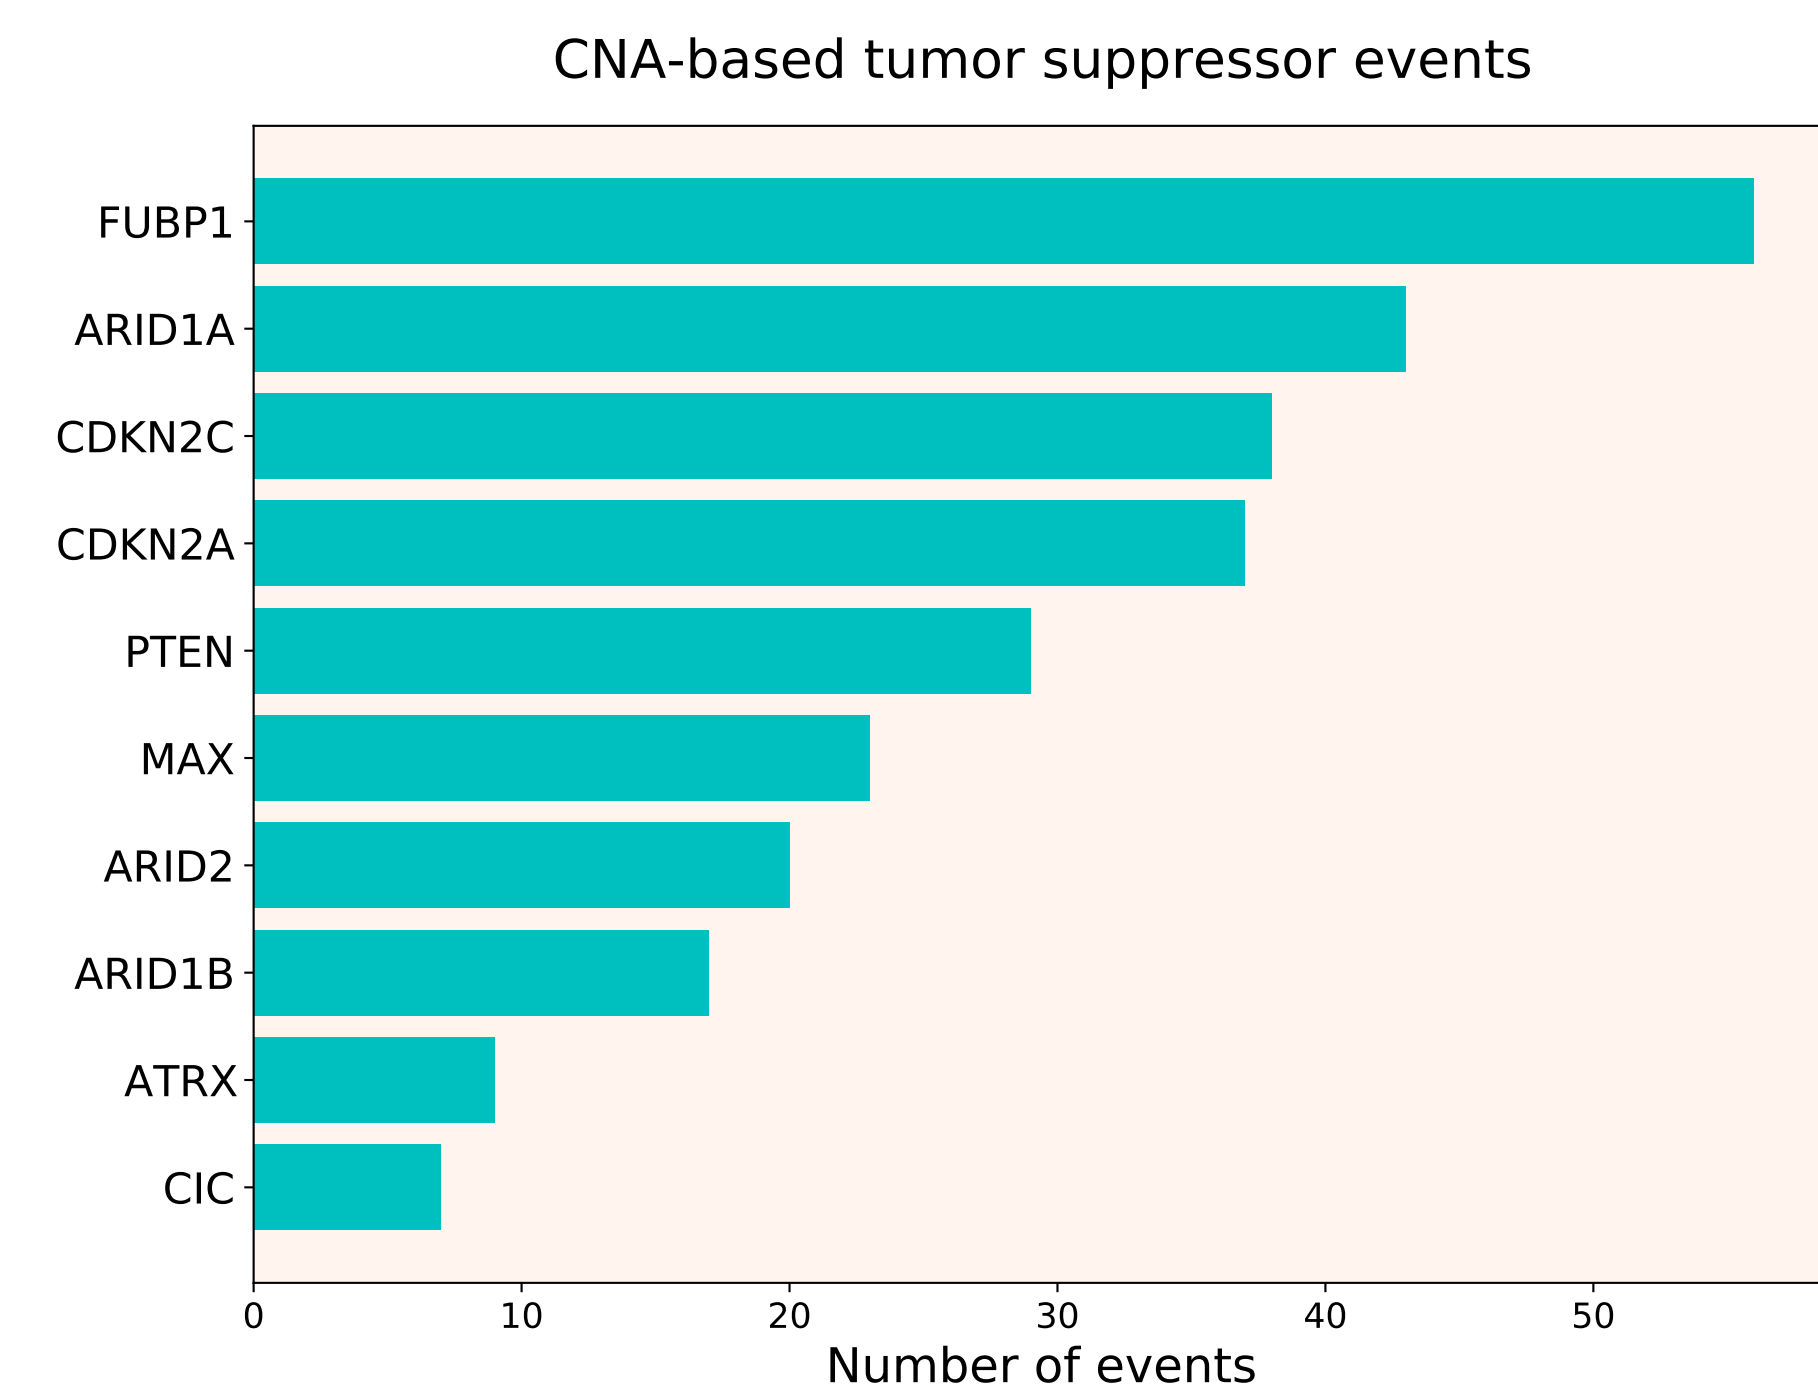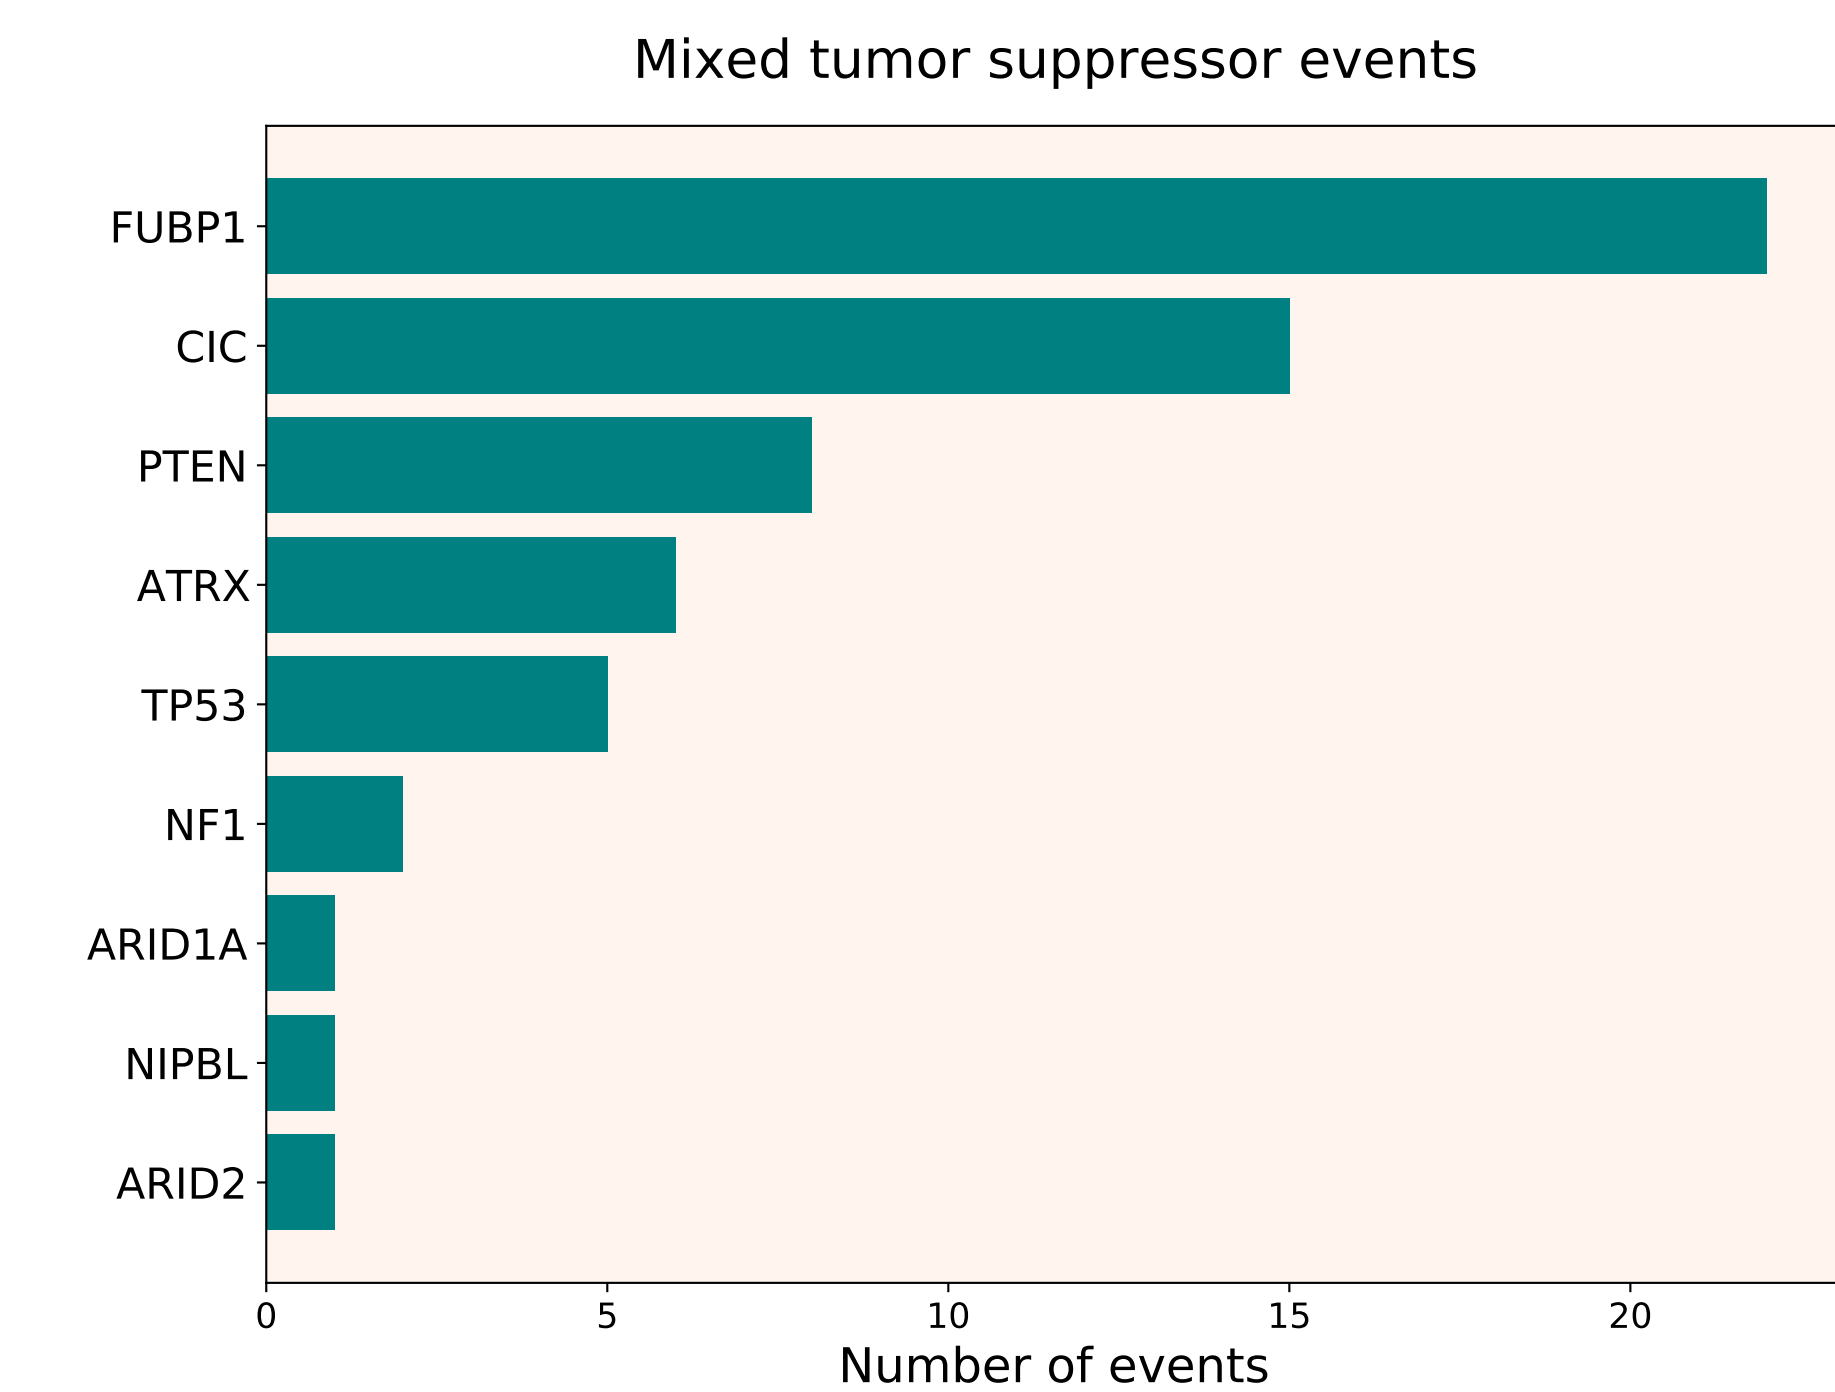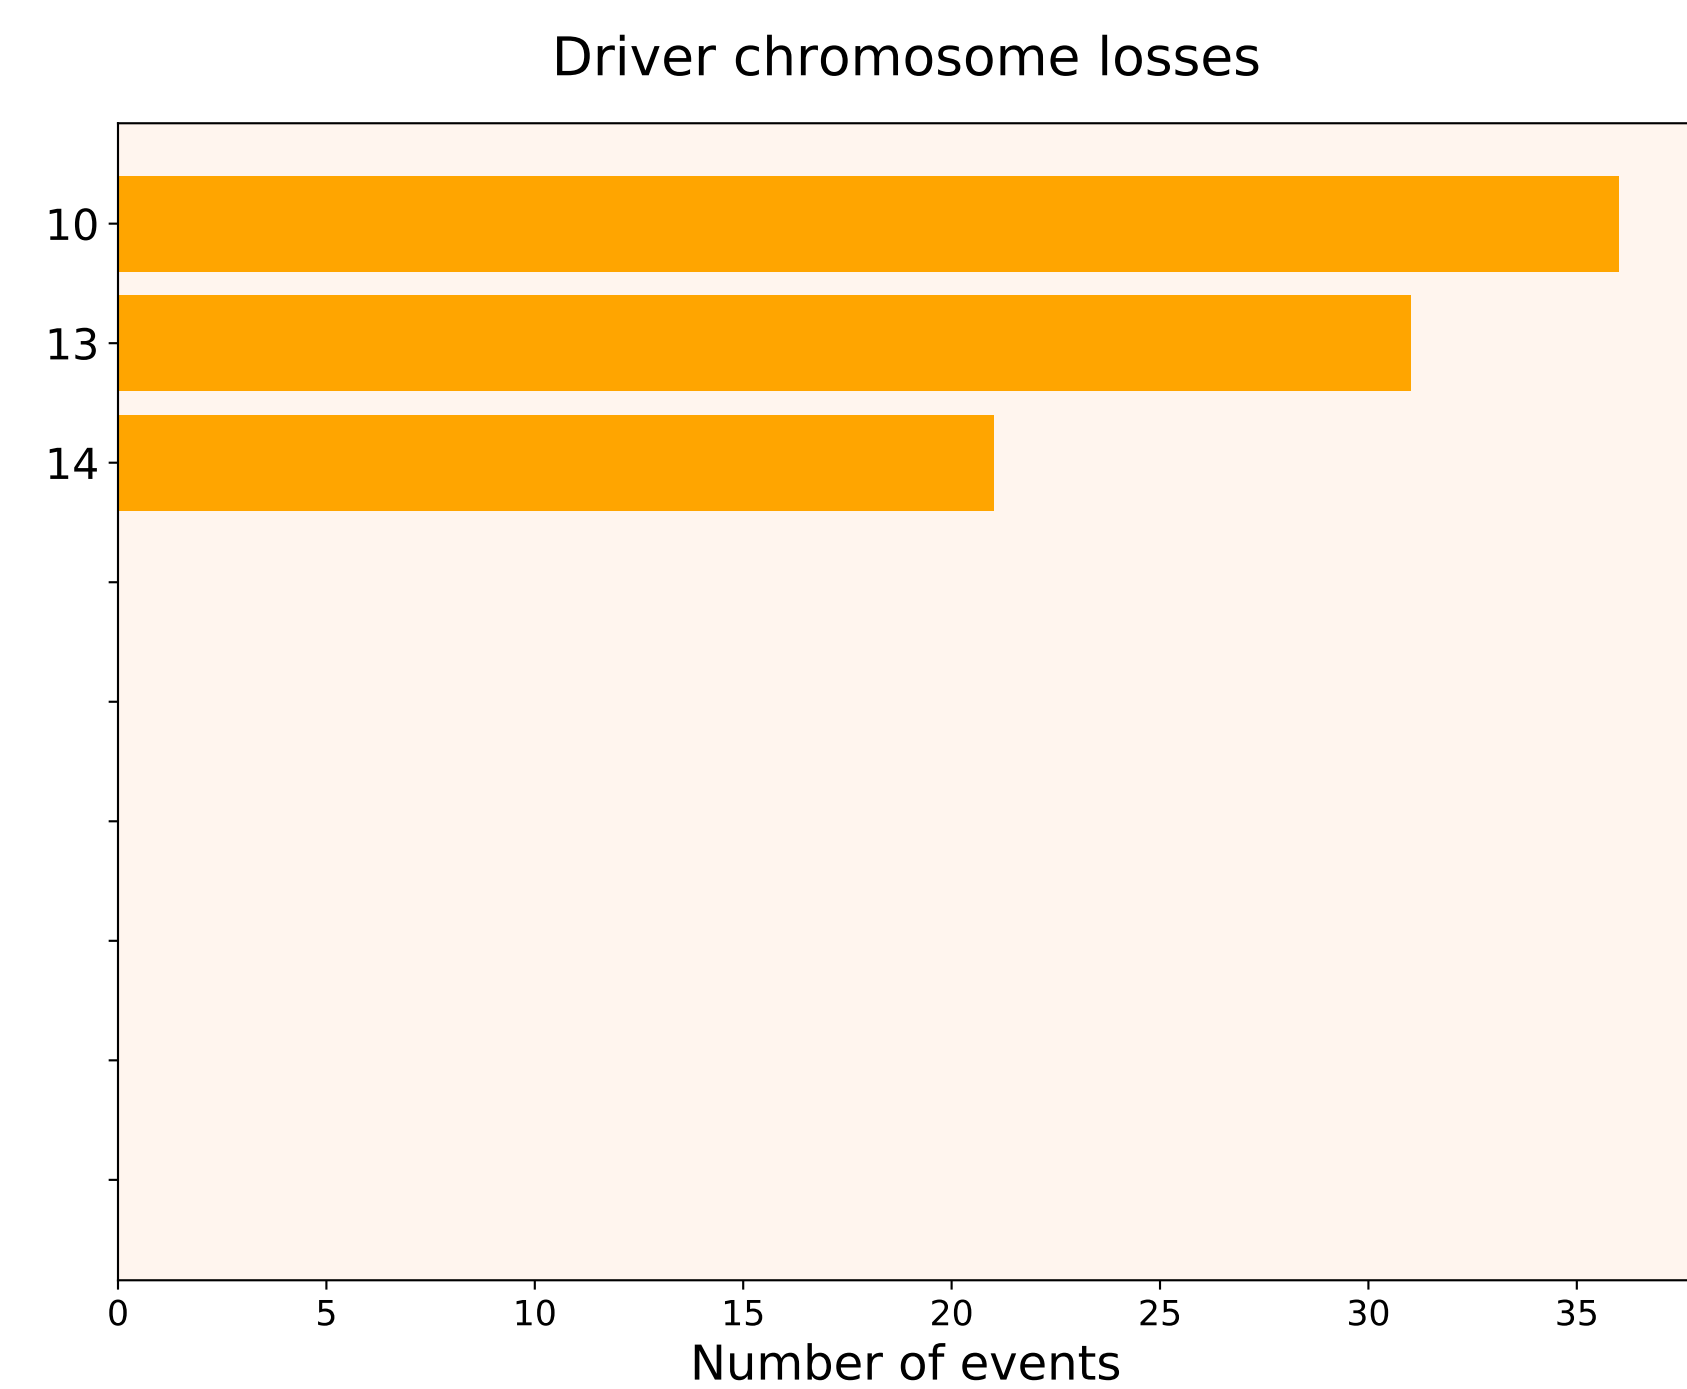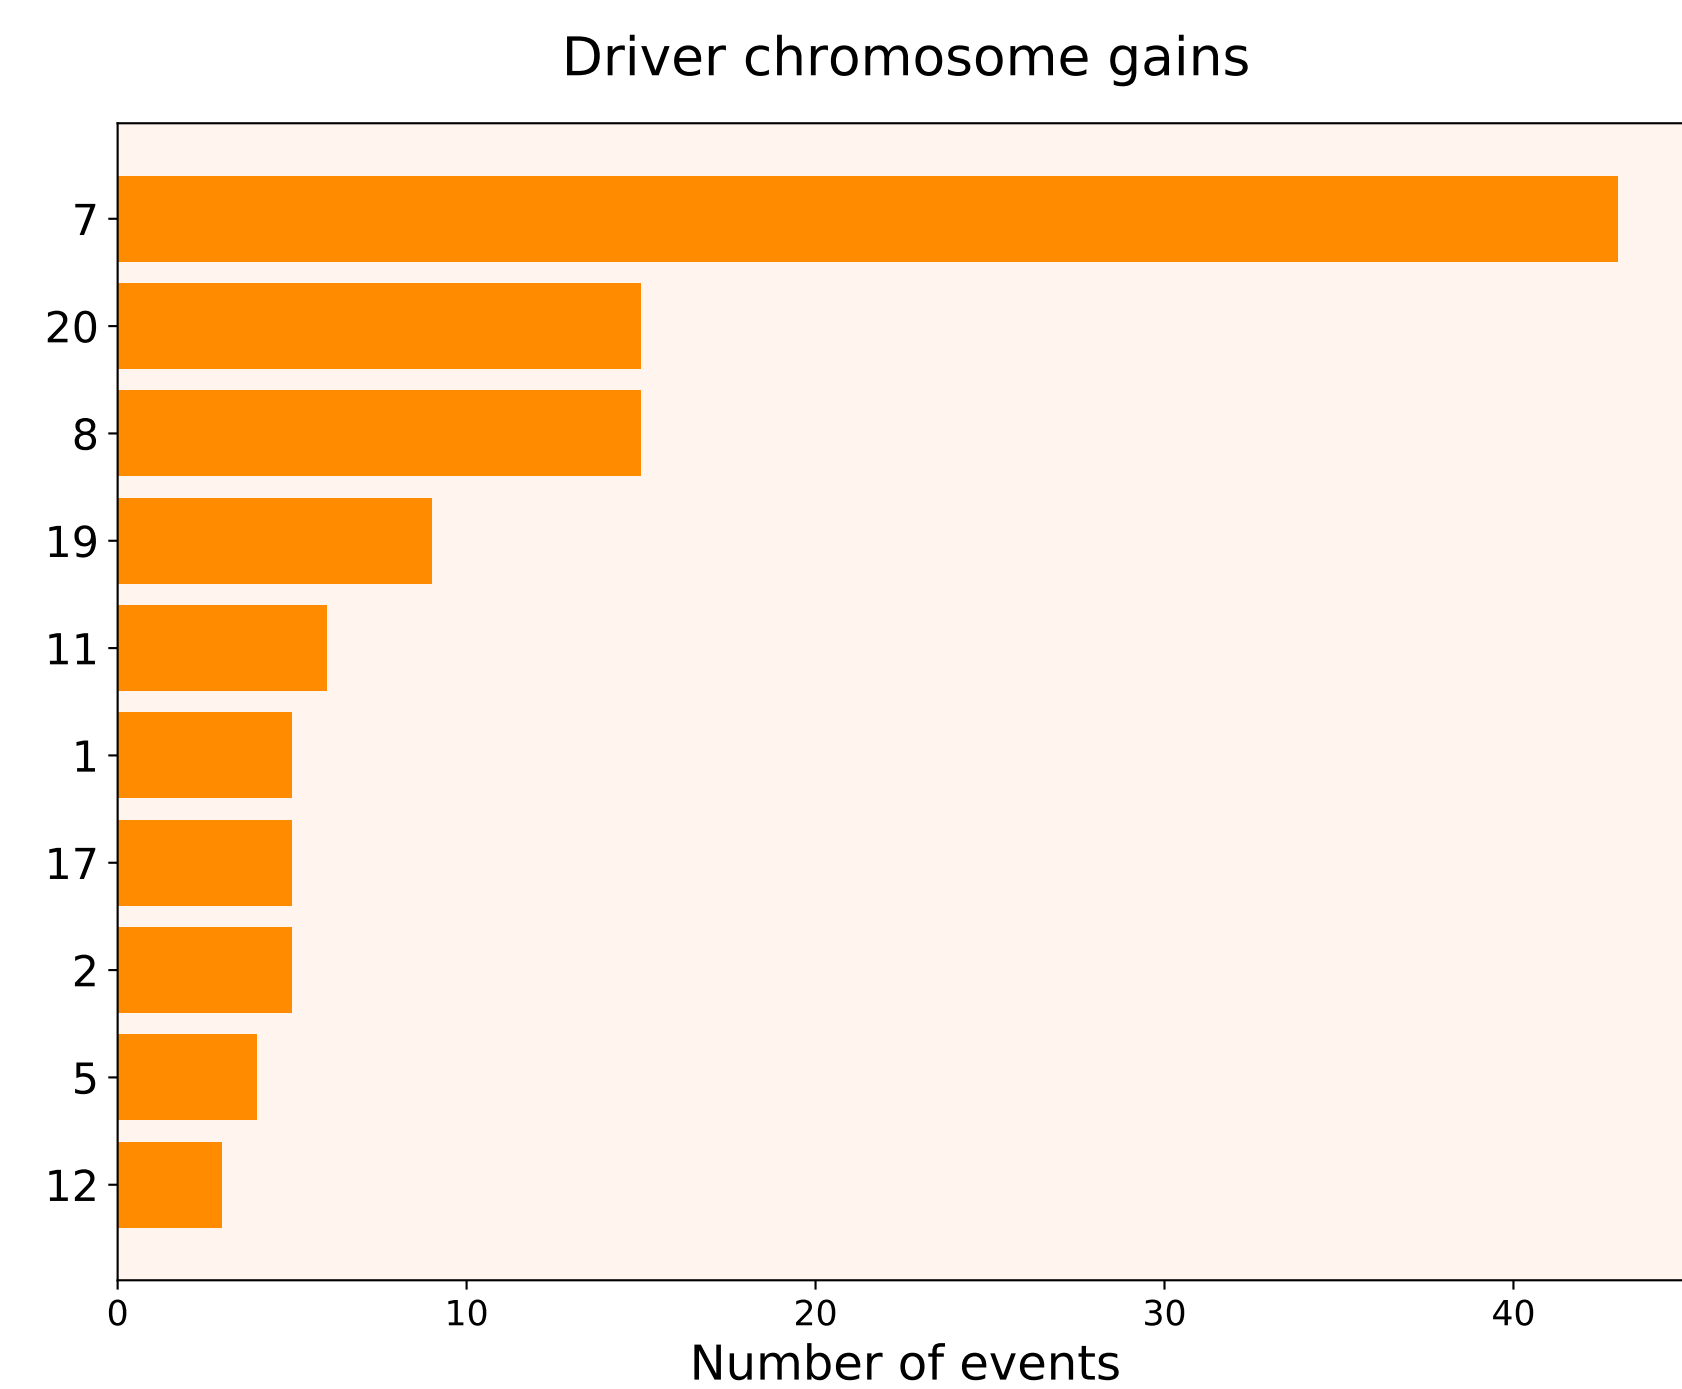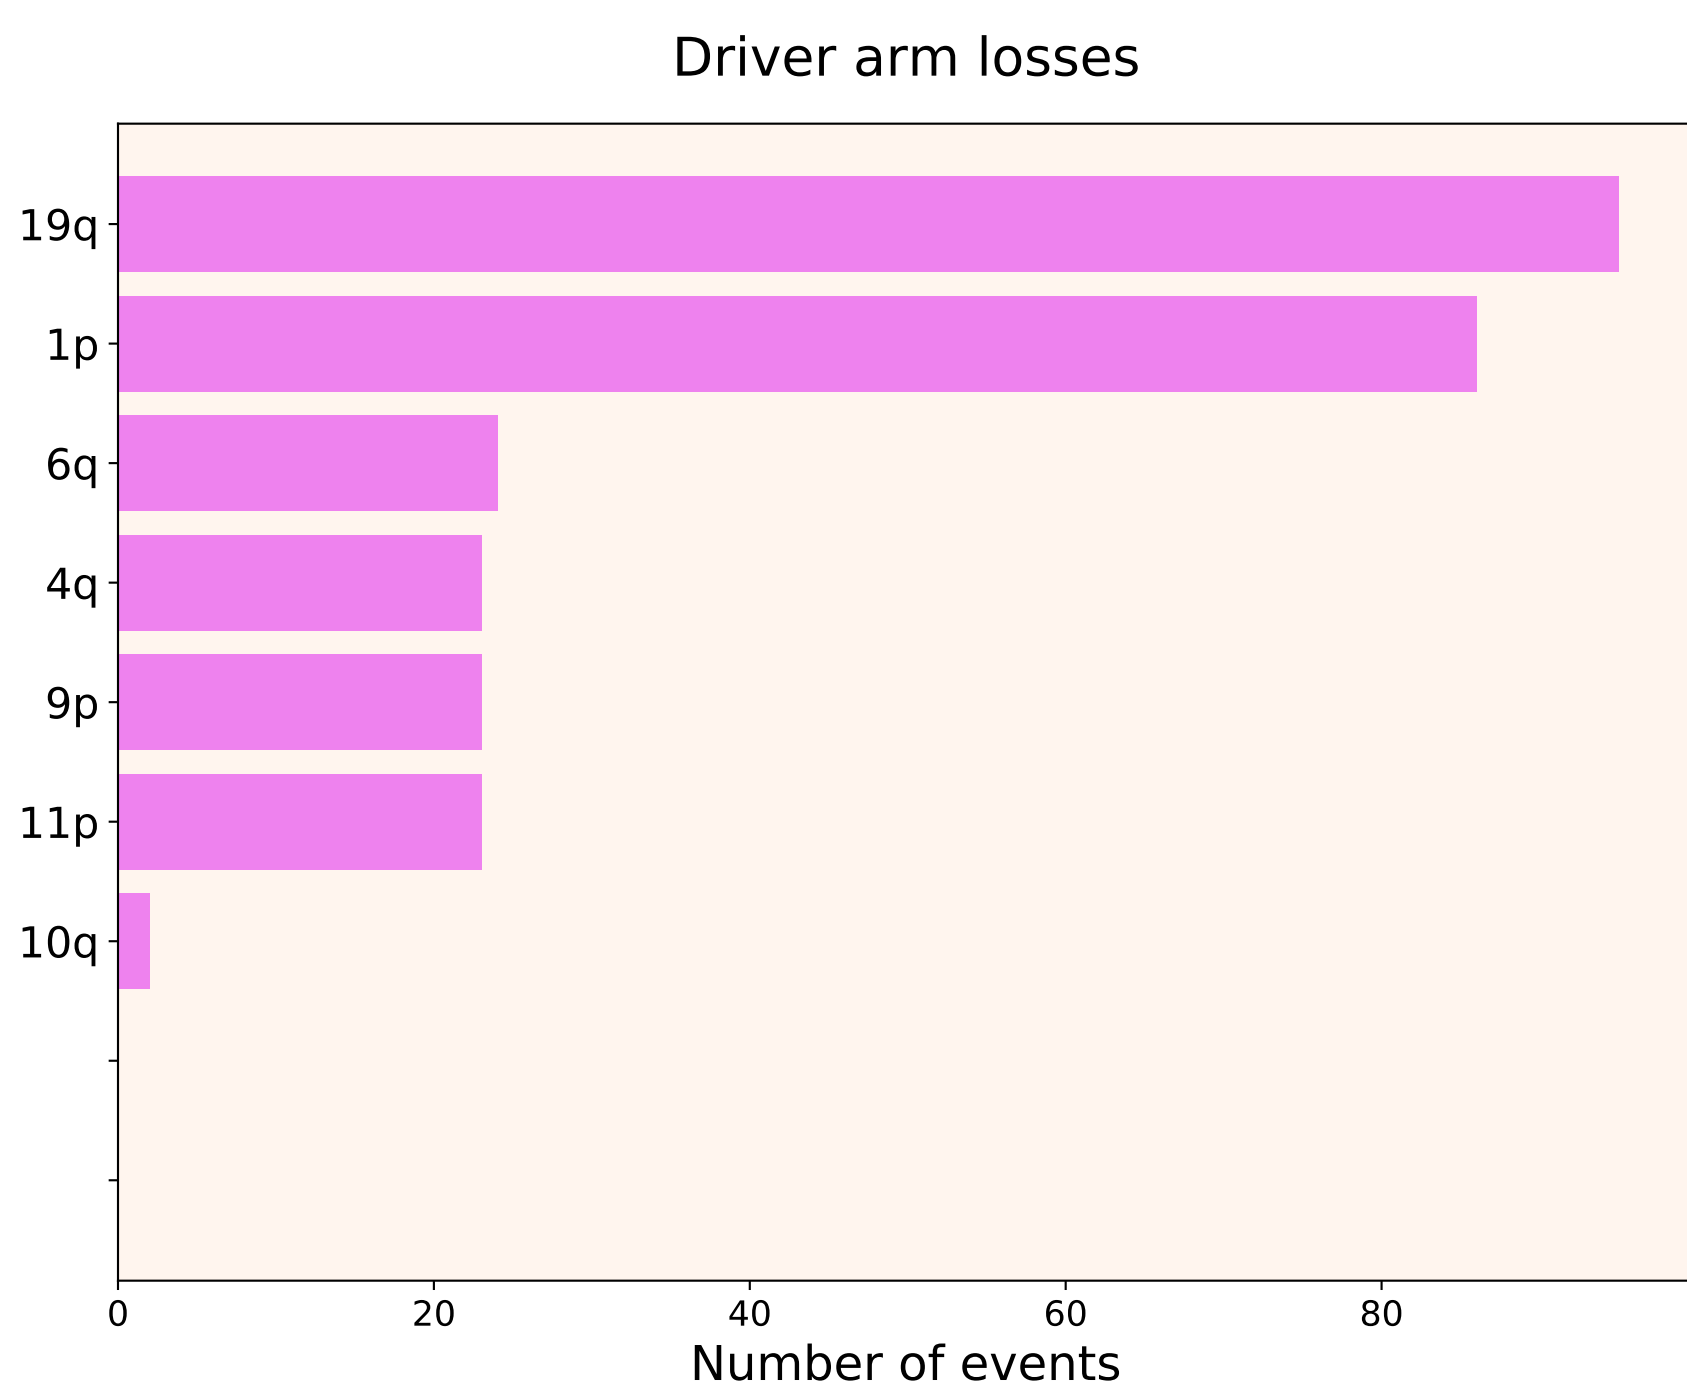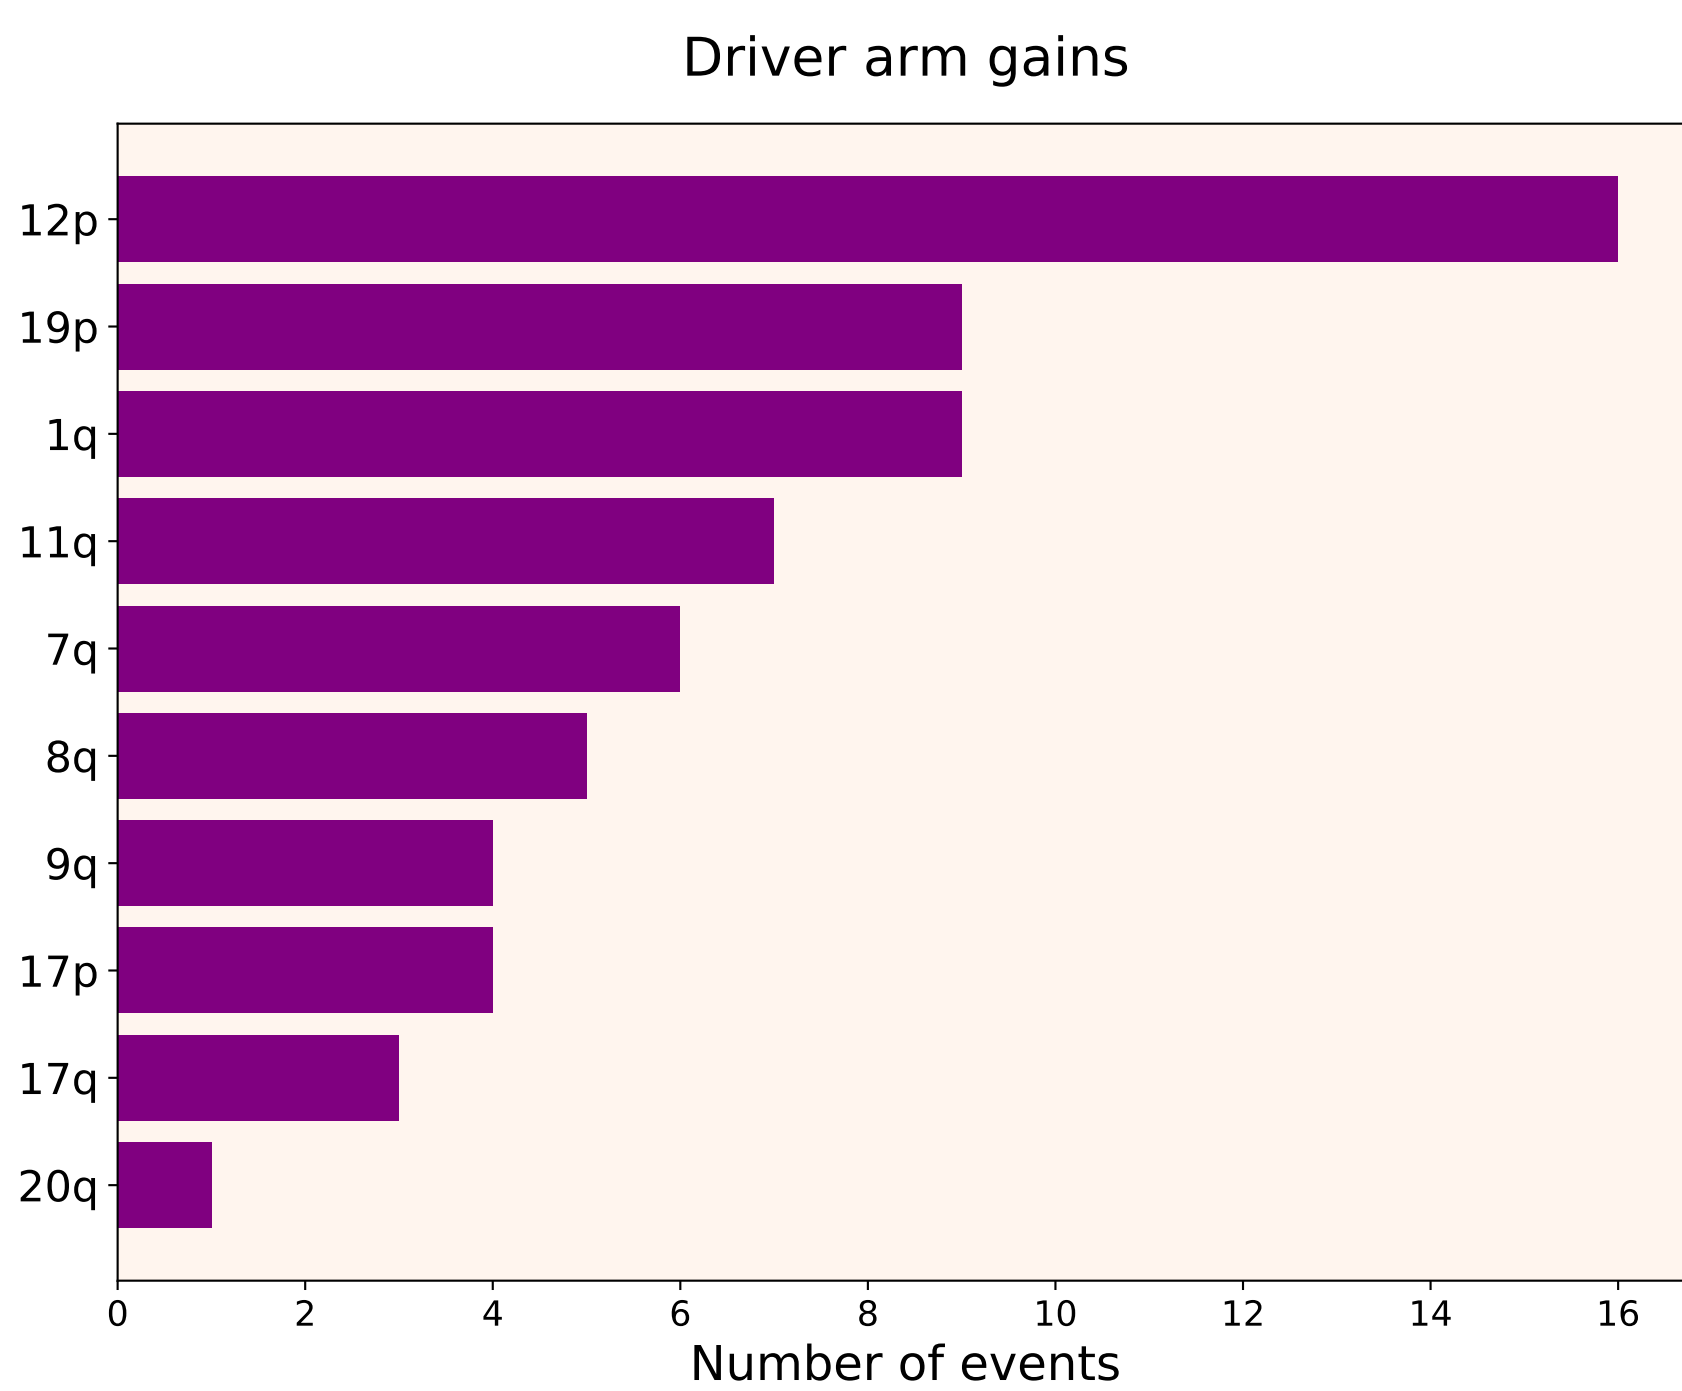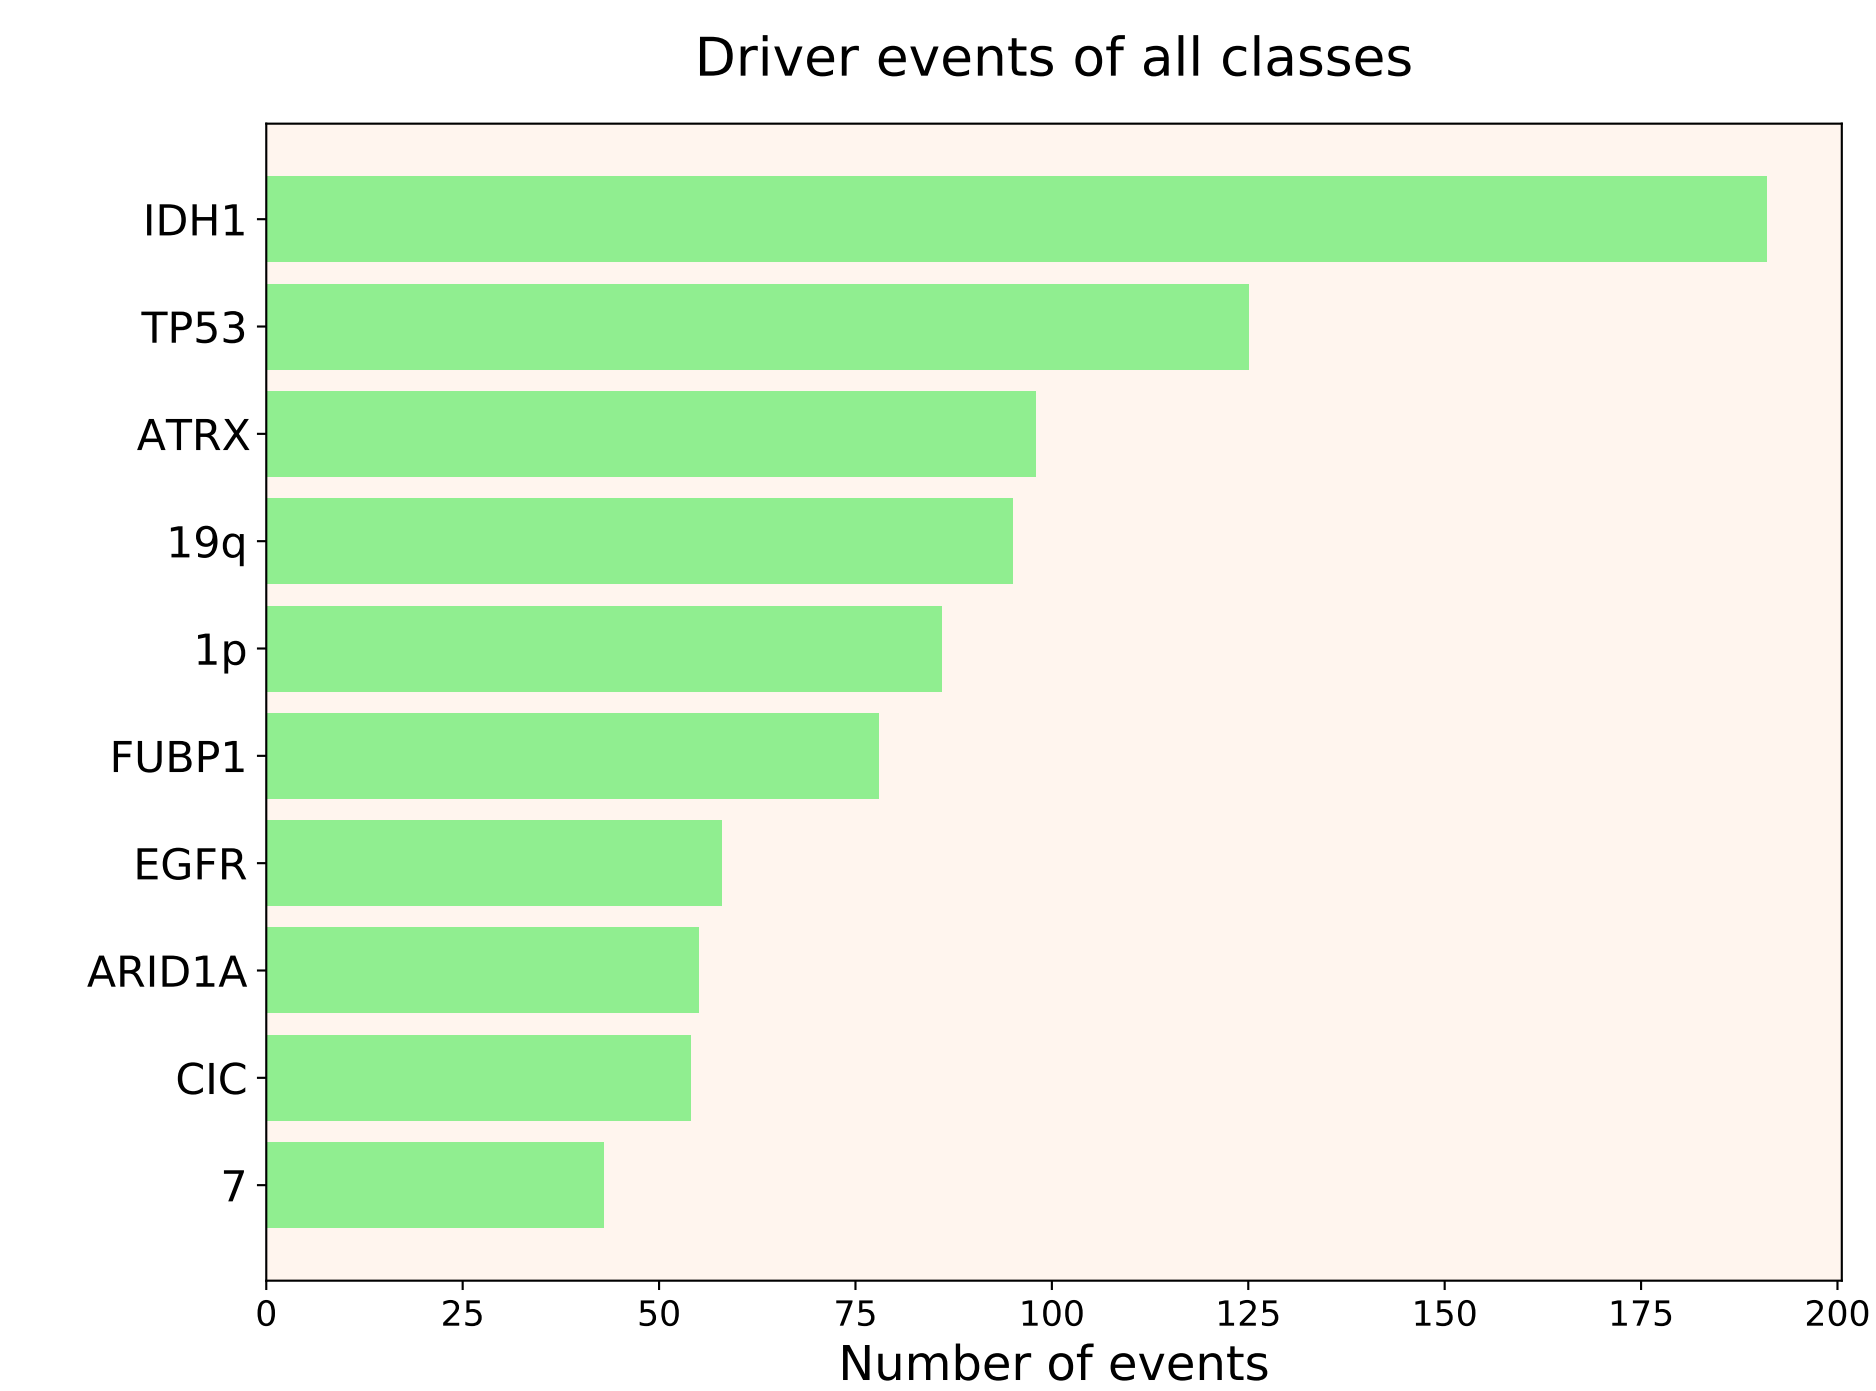

Supplement: Supplemental_Data_S1.zip [file Supplemental_Data_S1.zip]

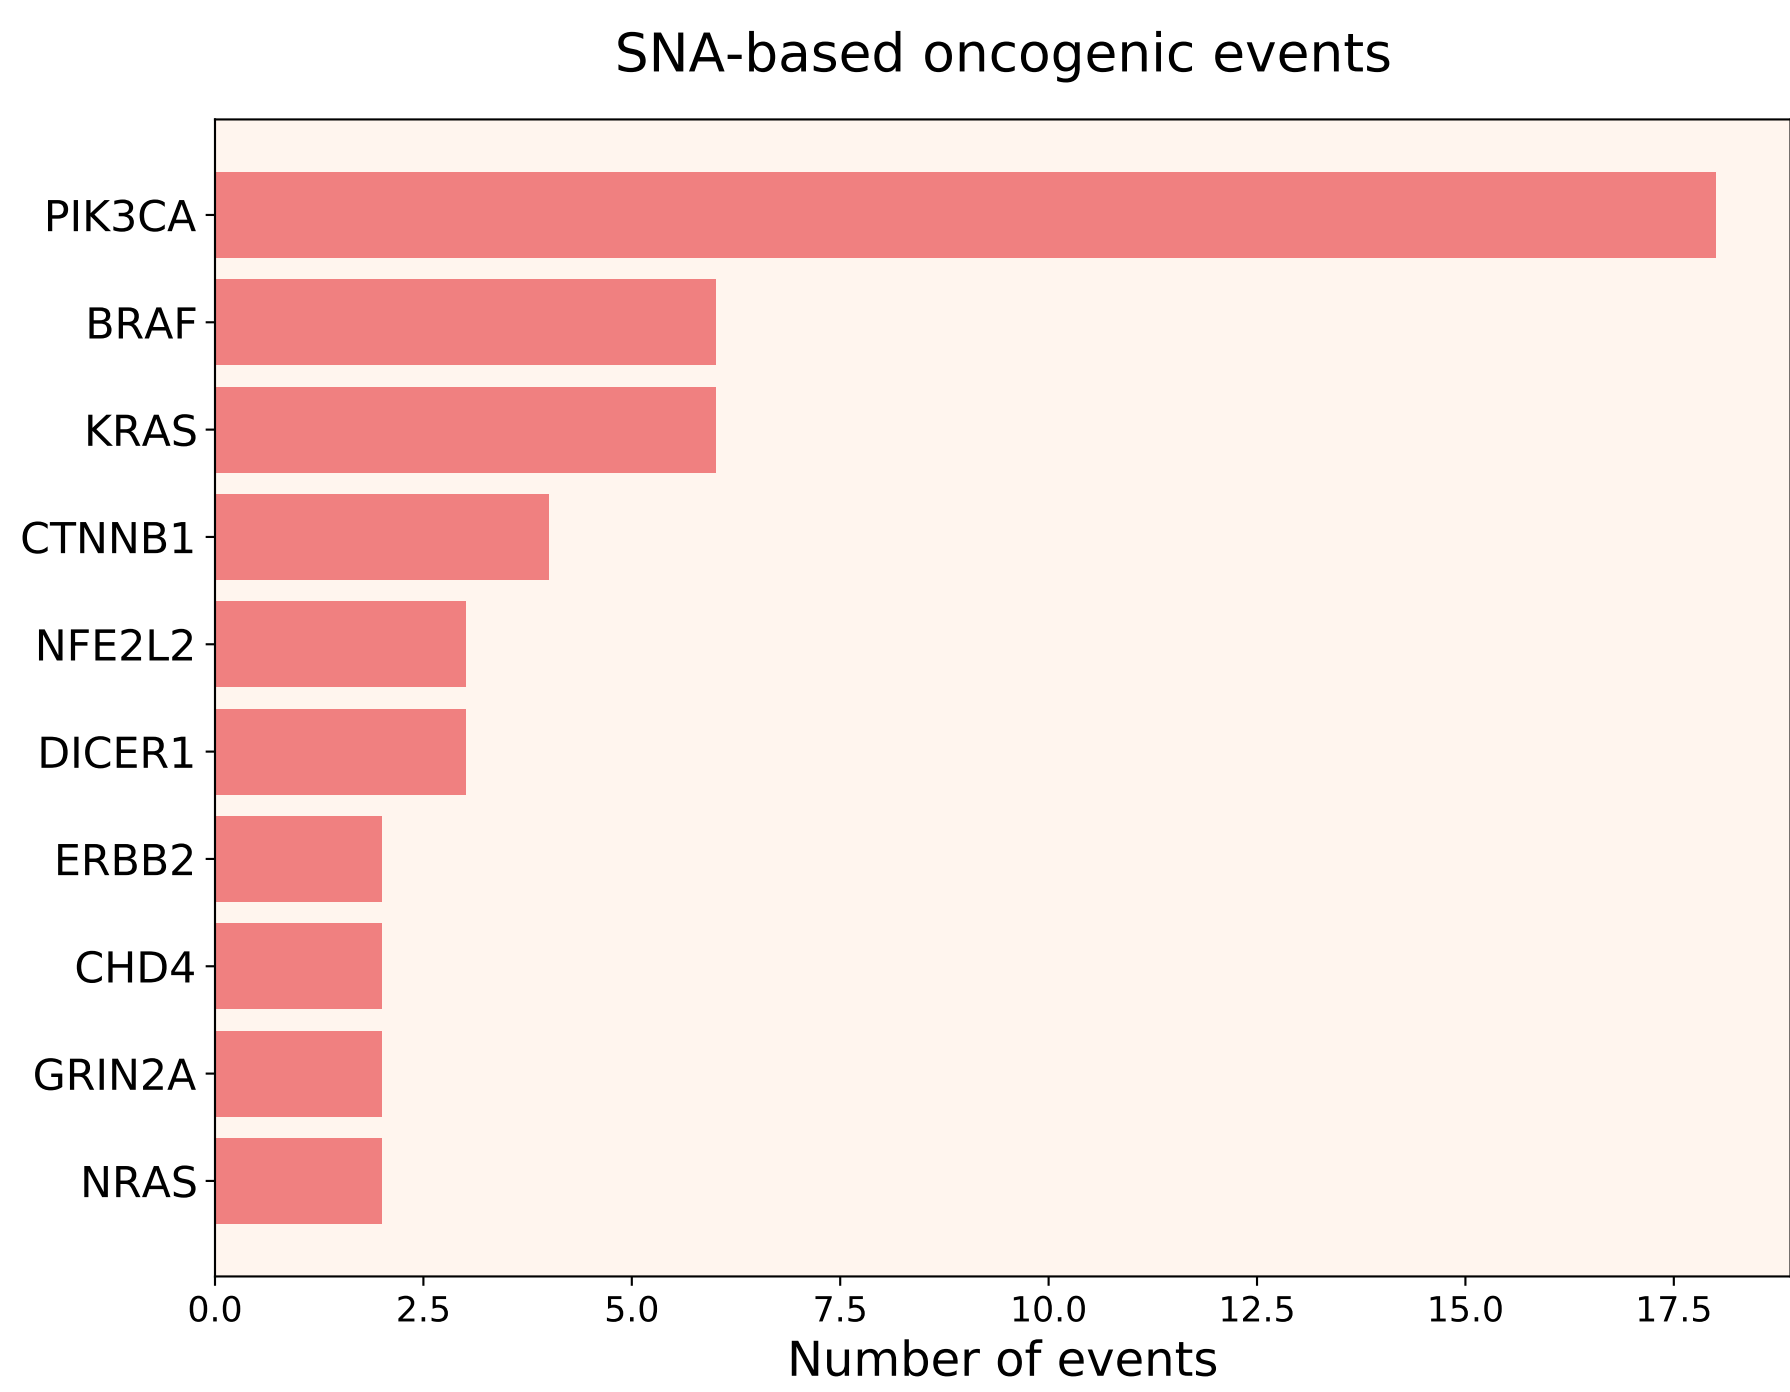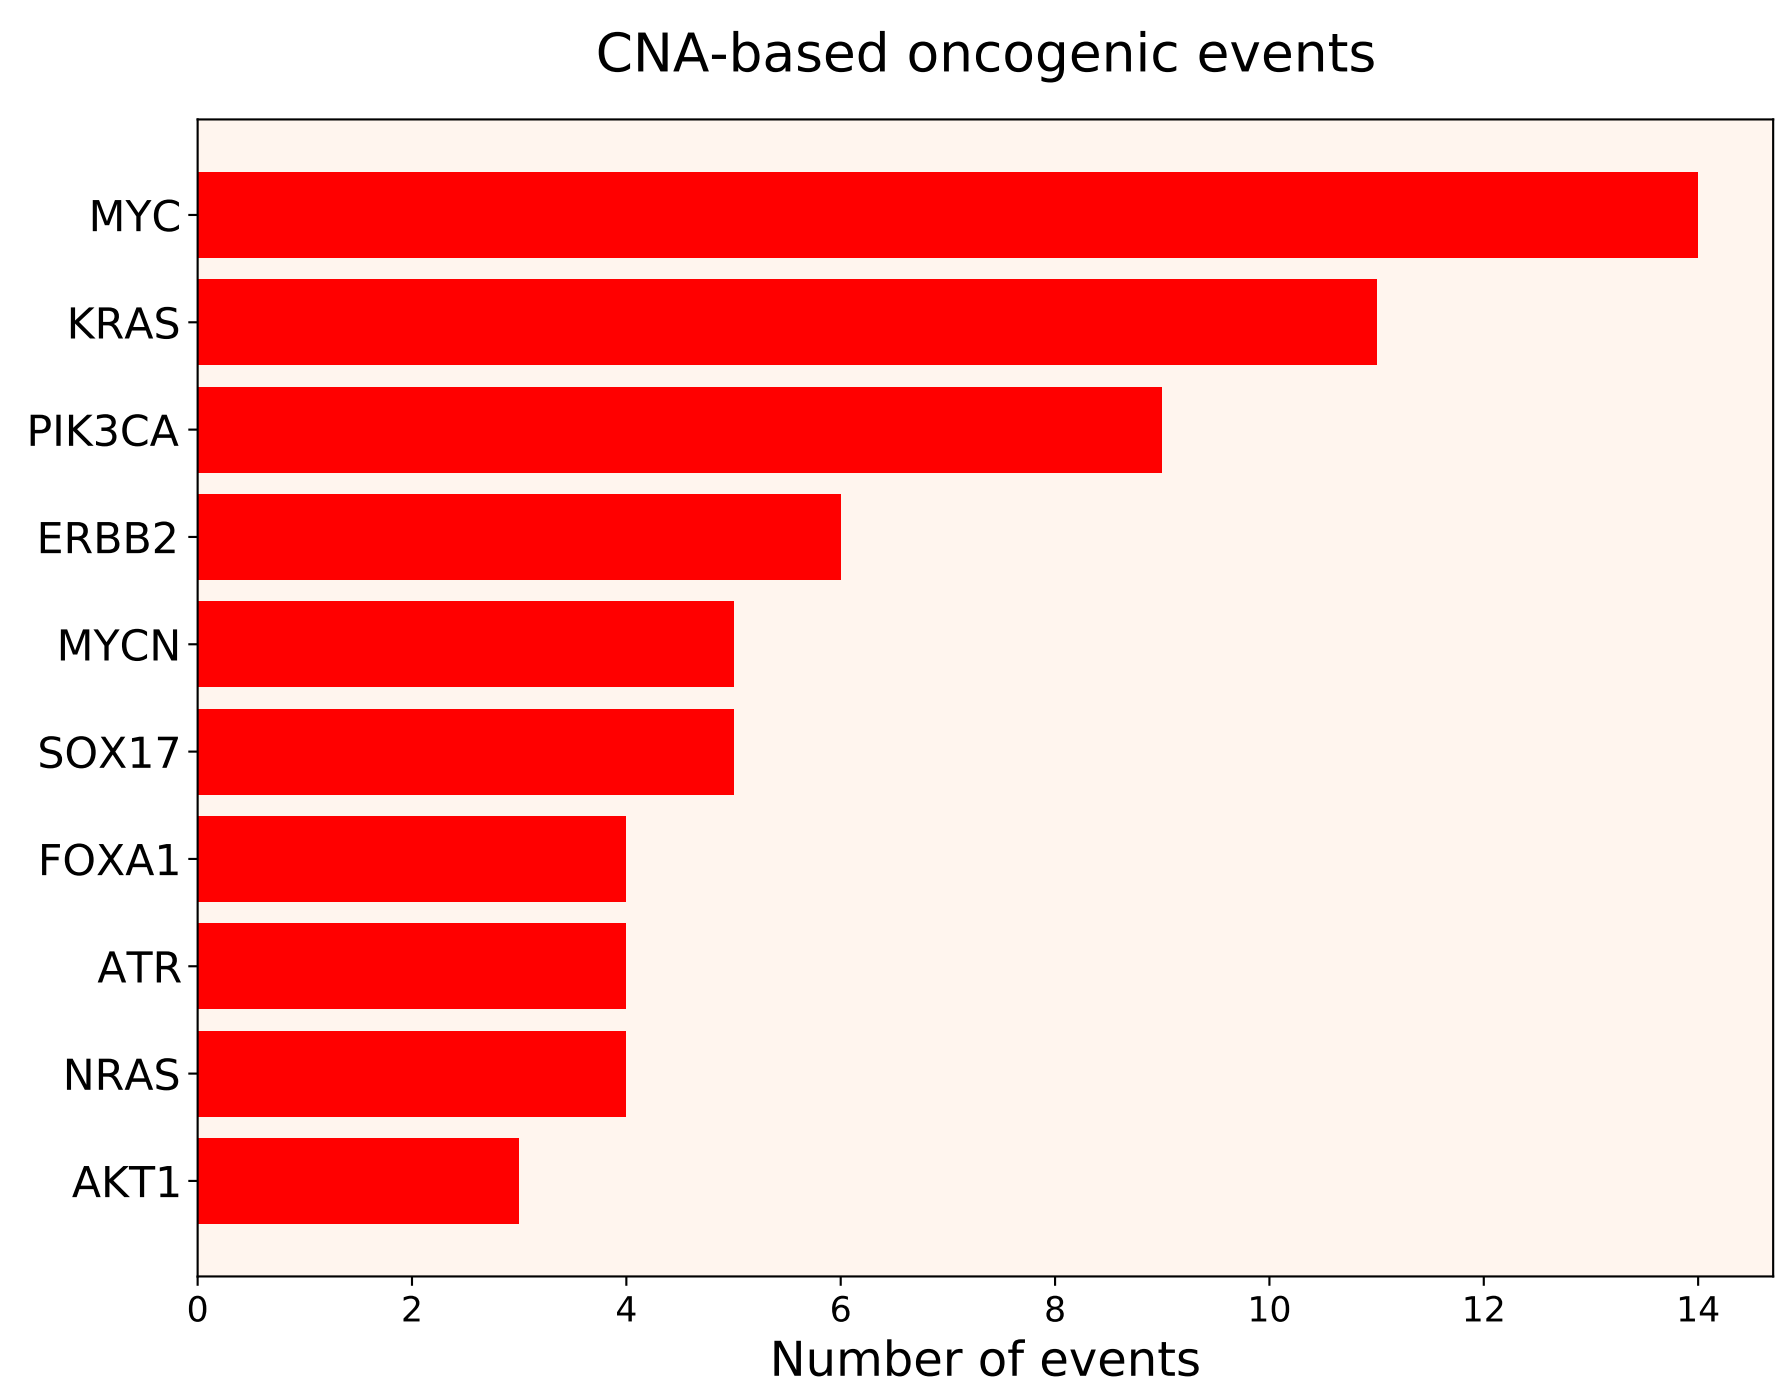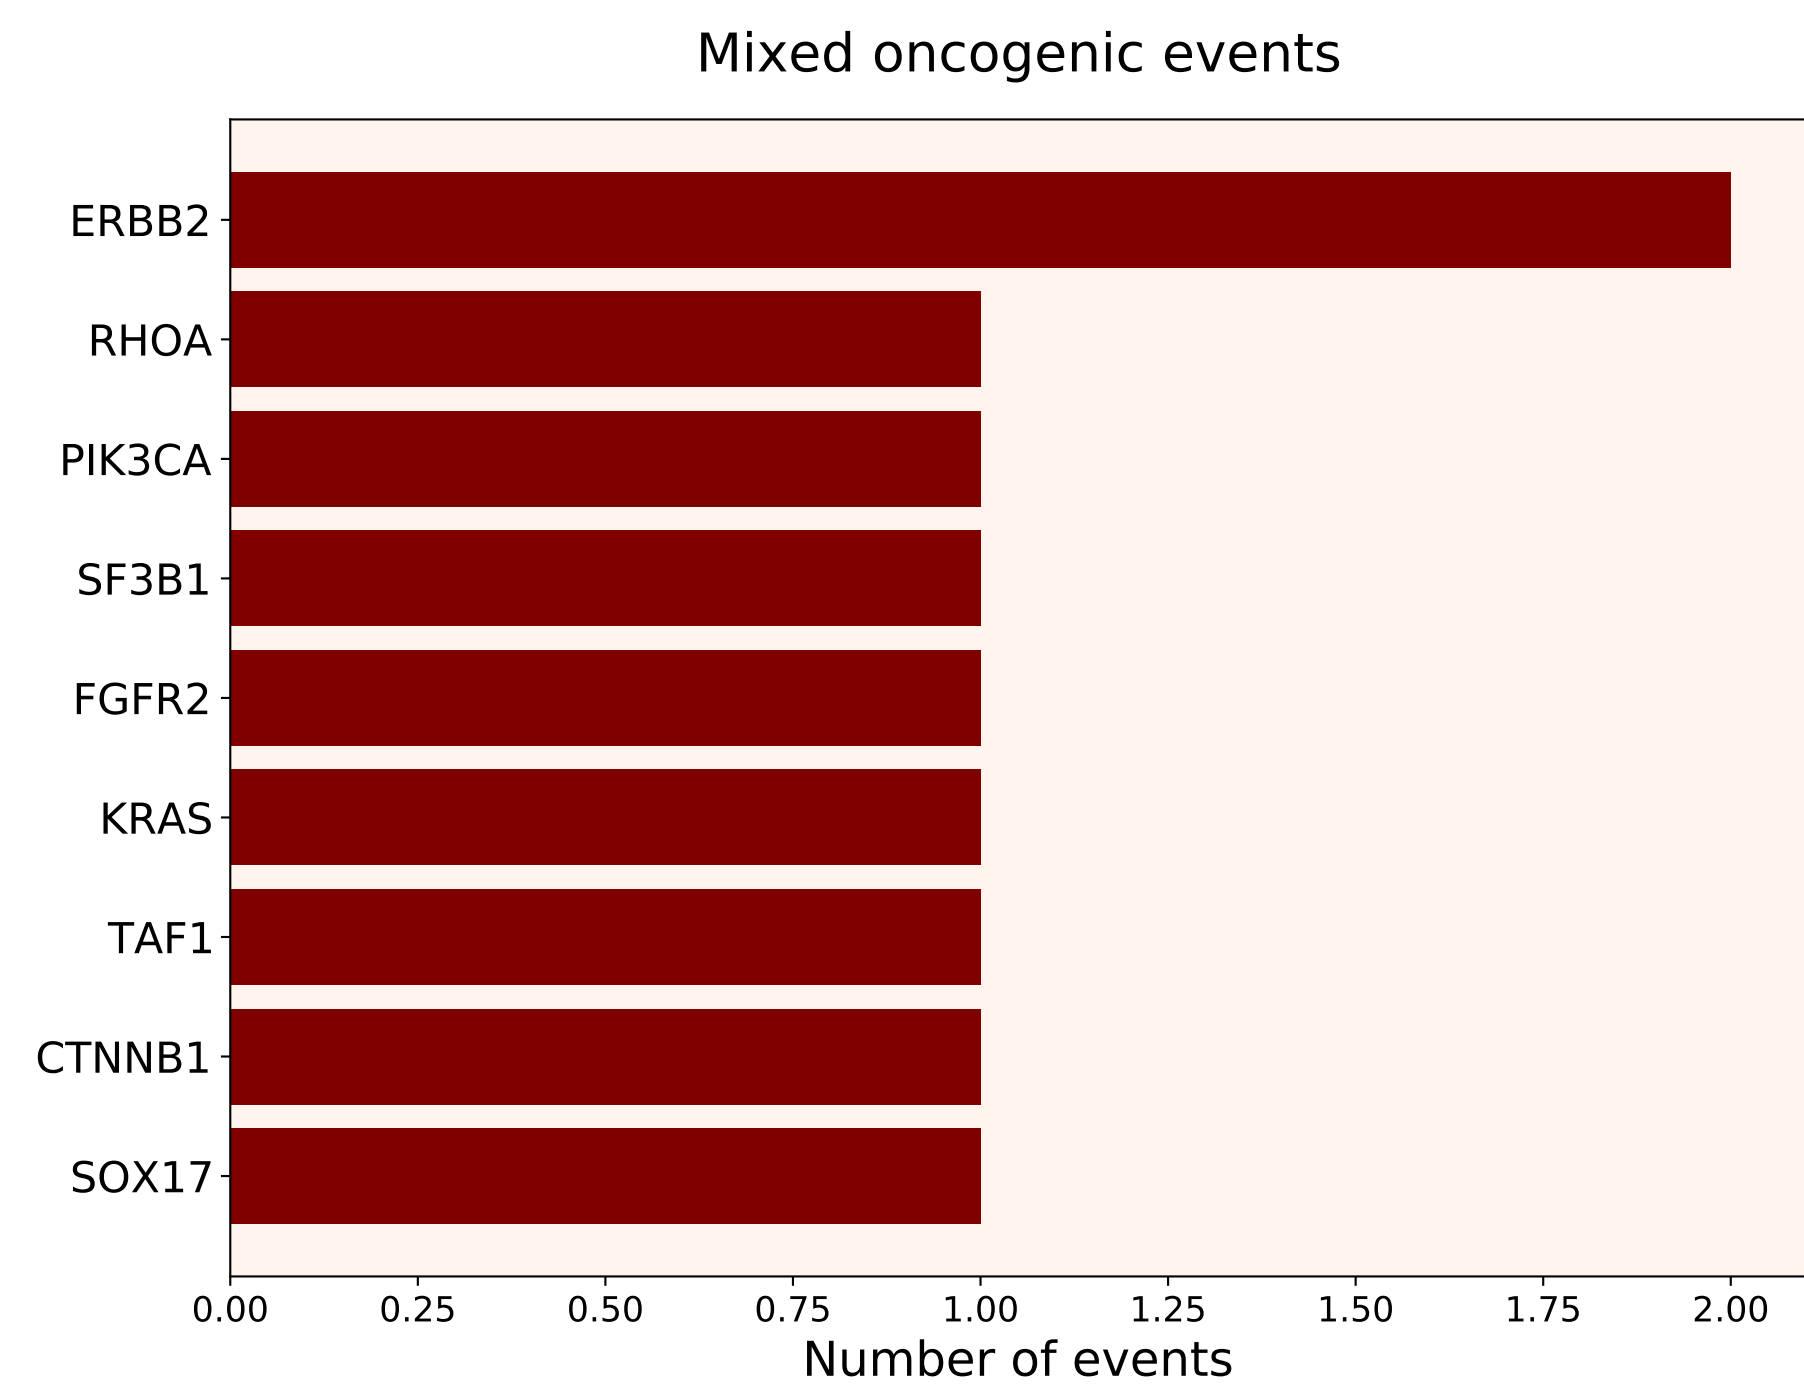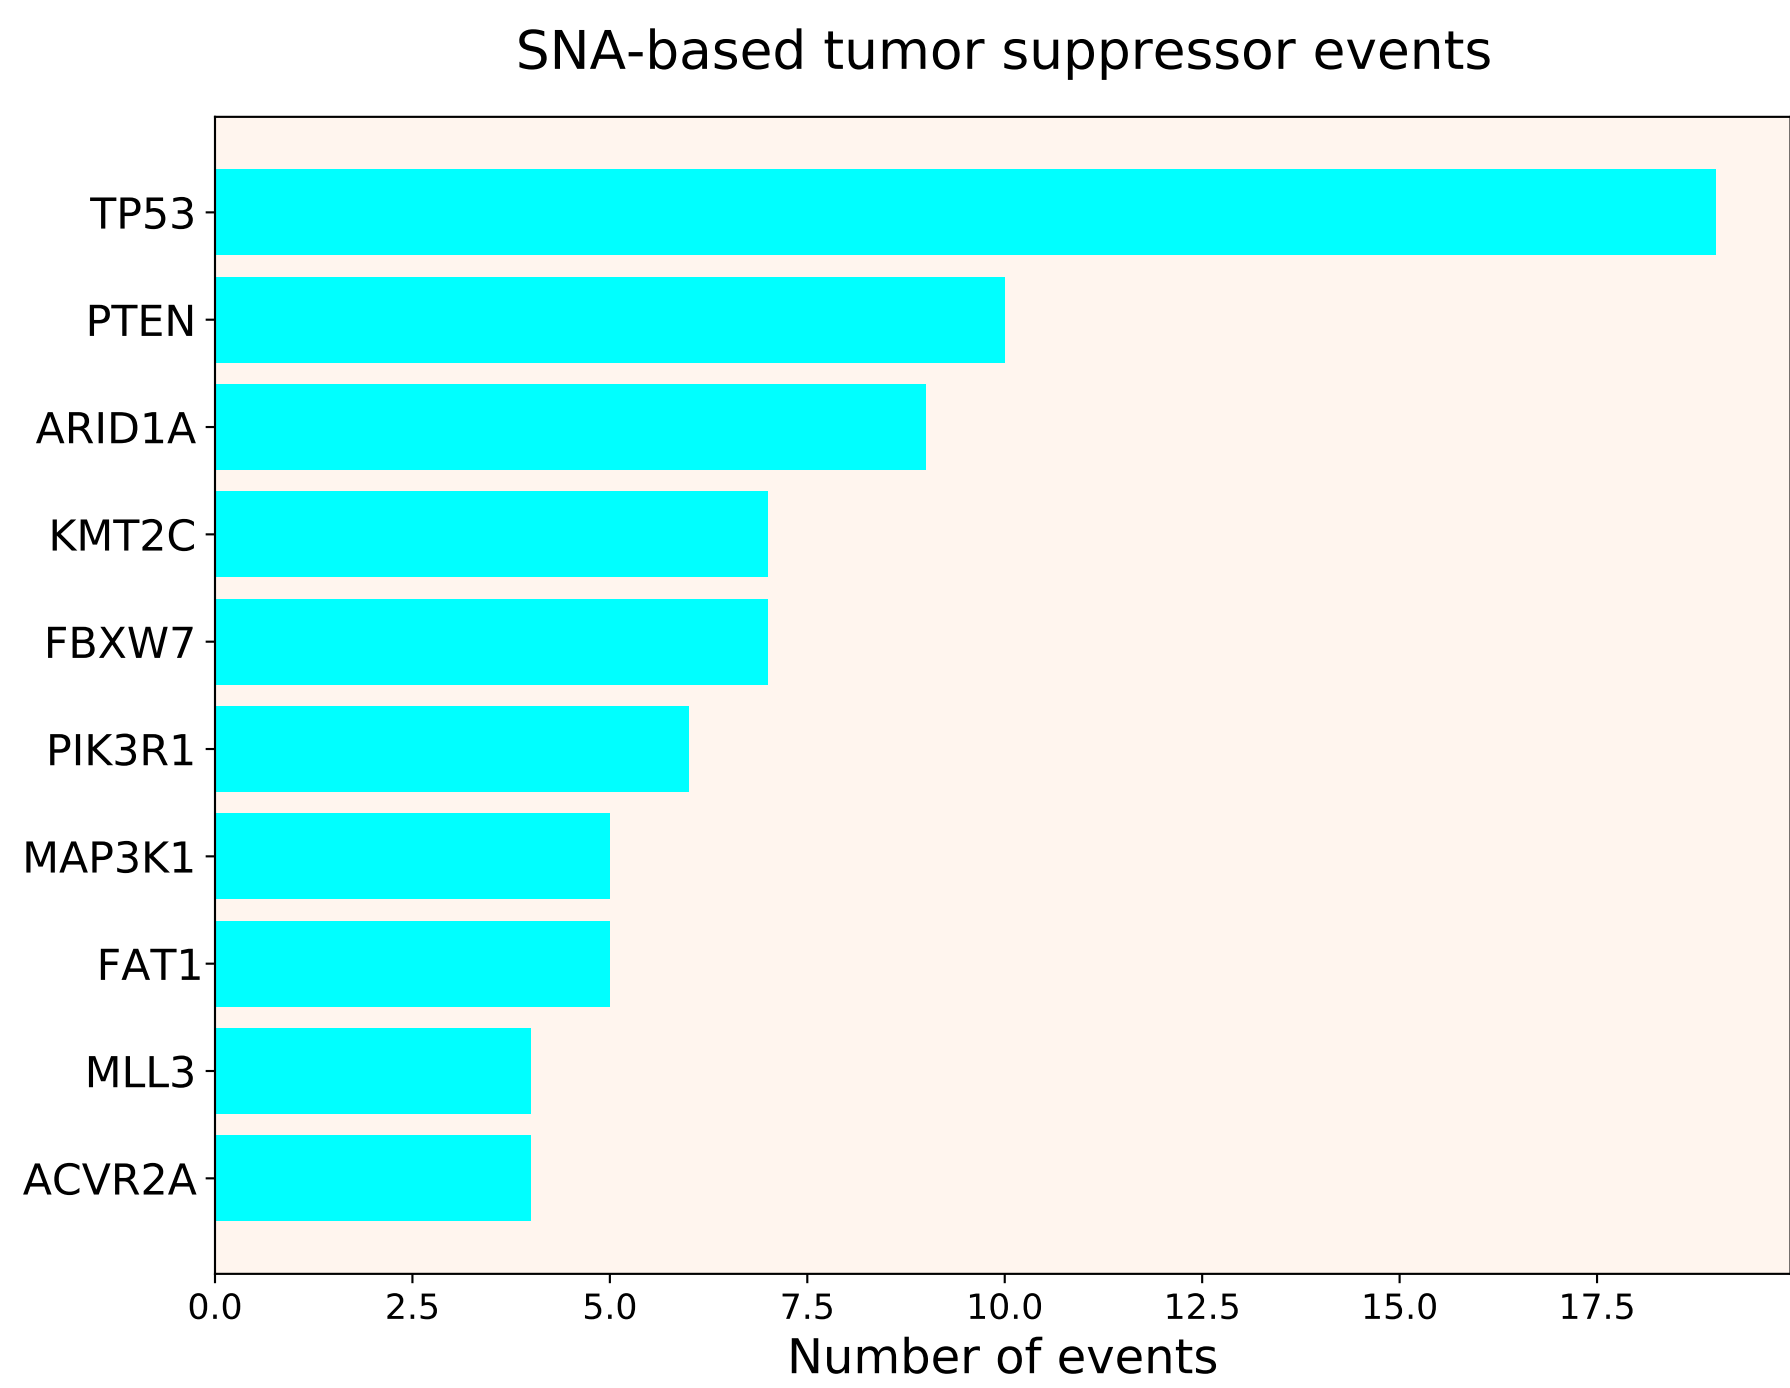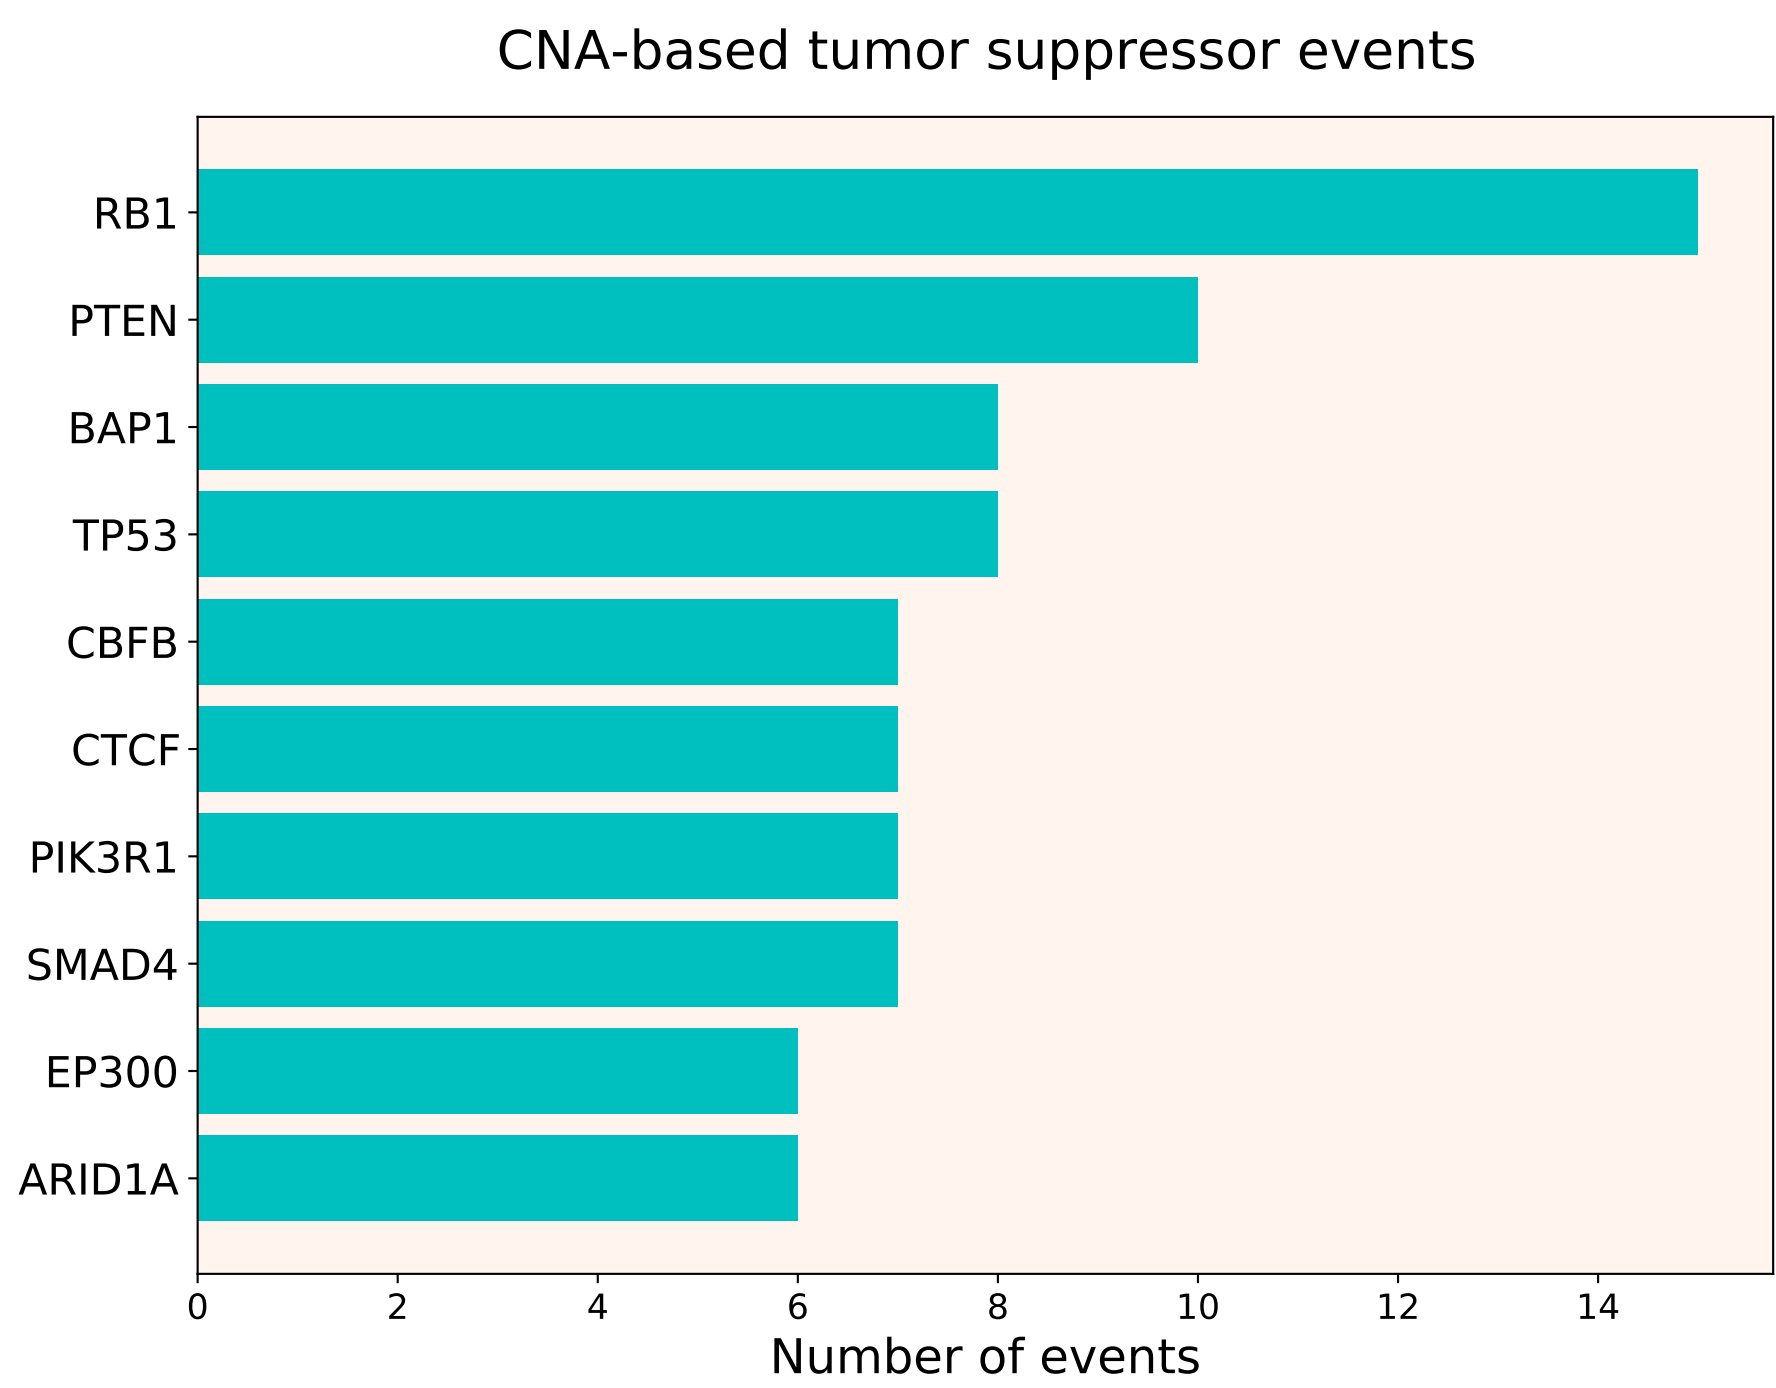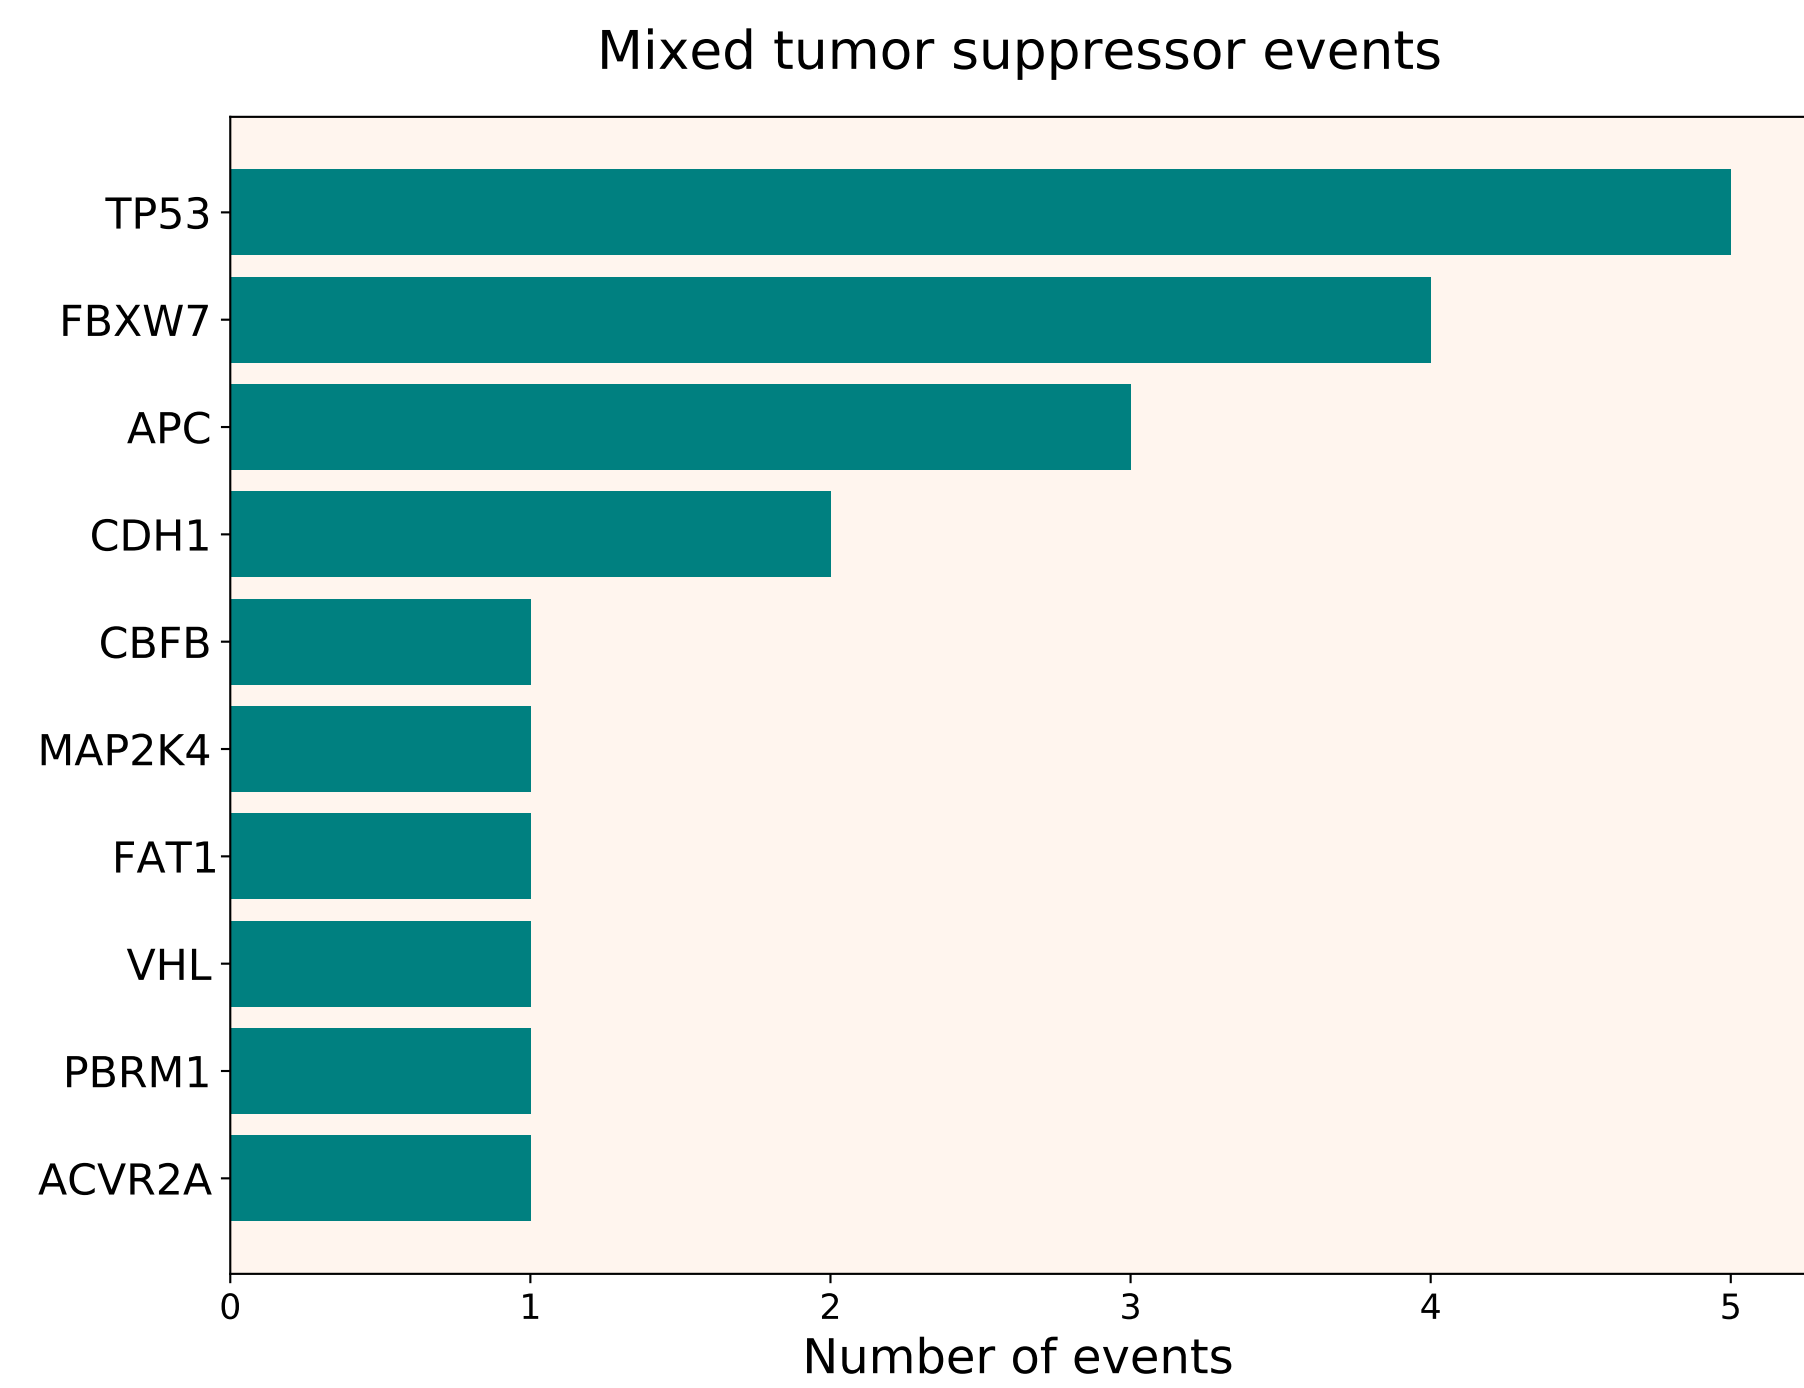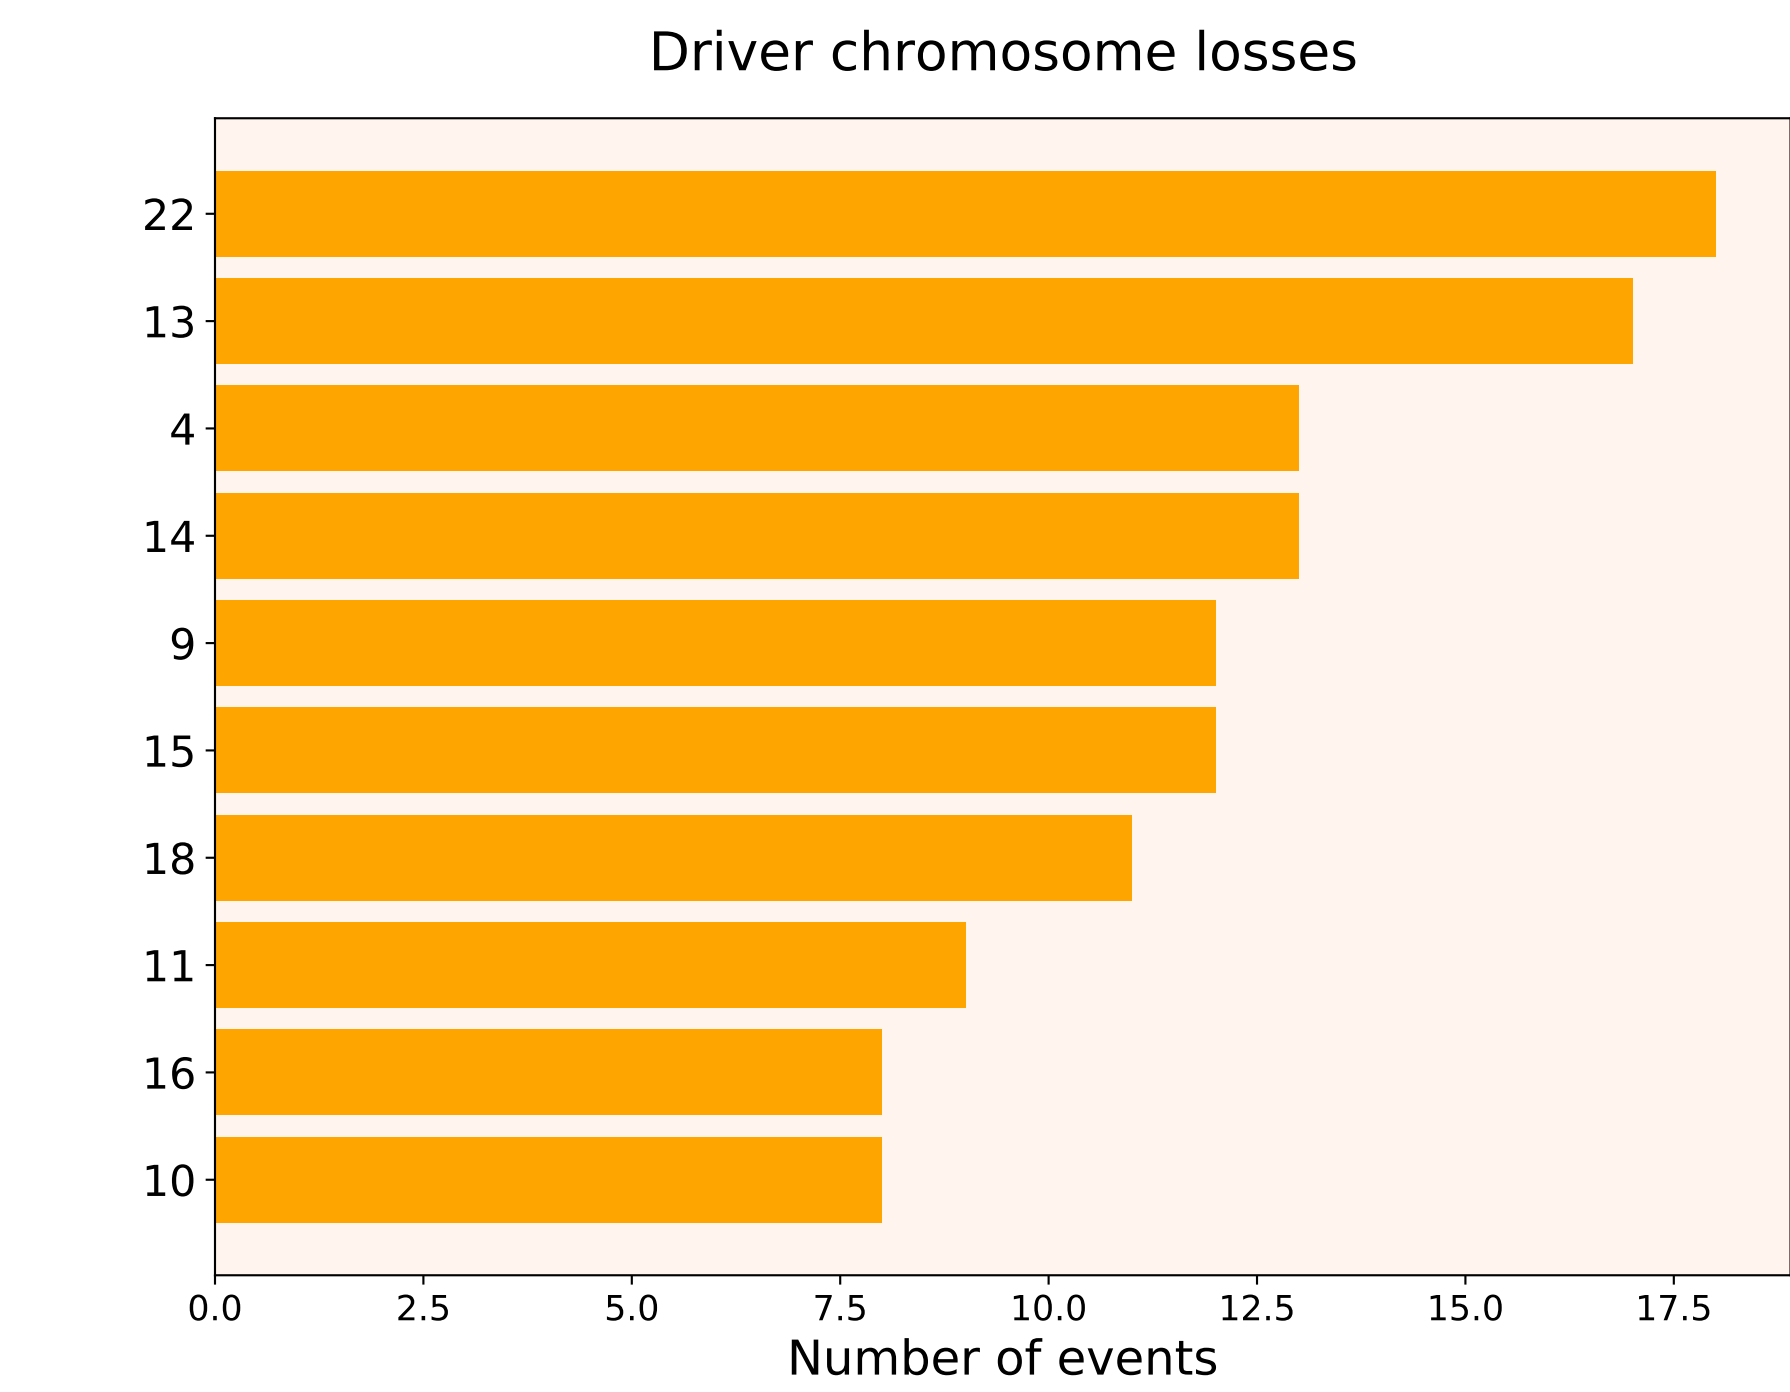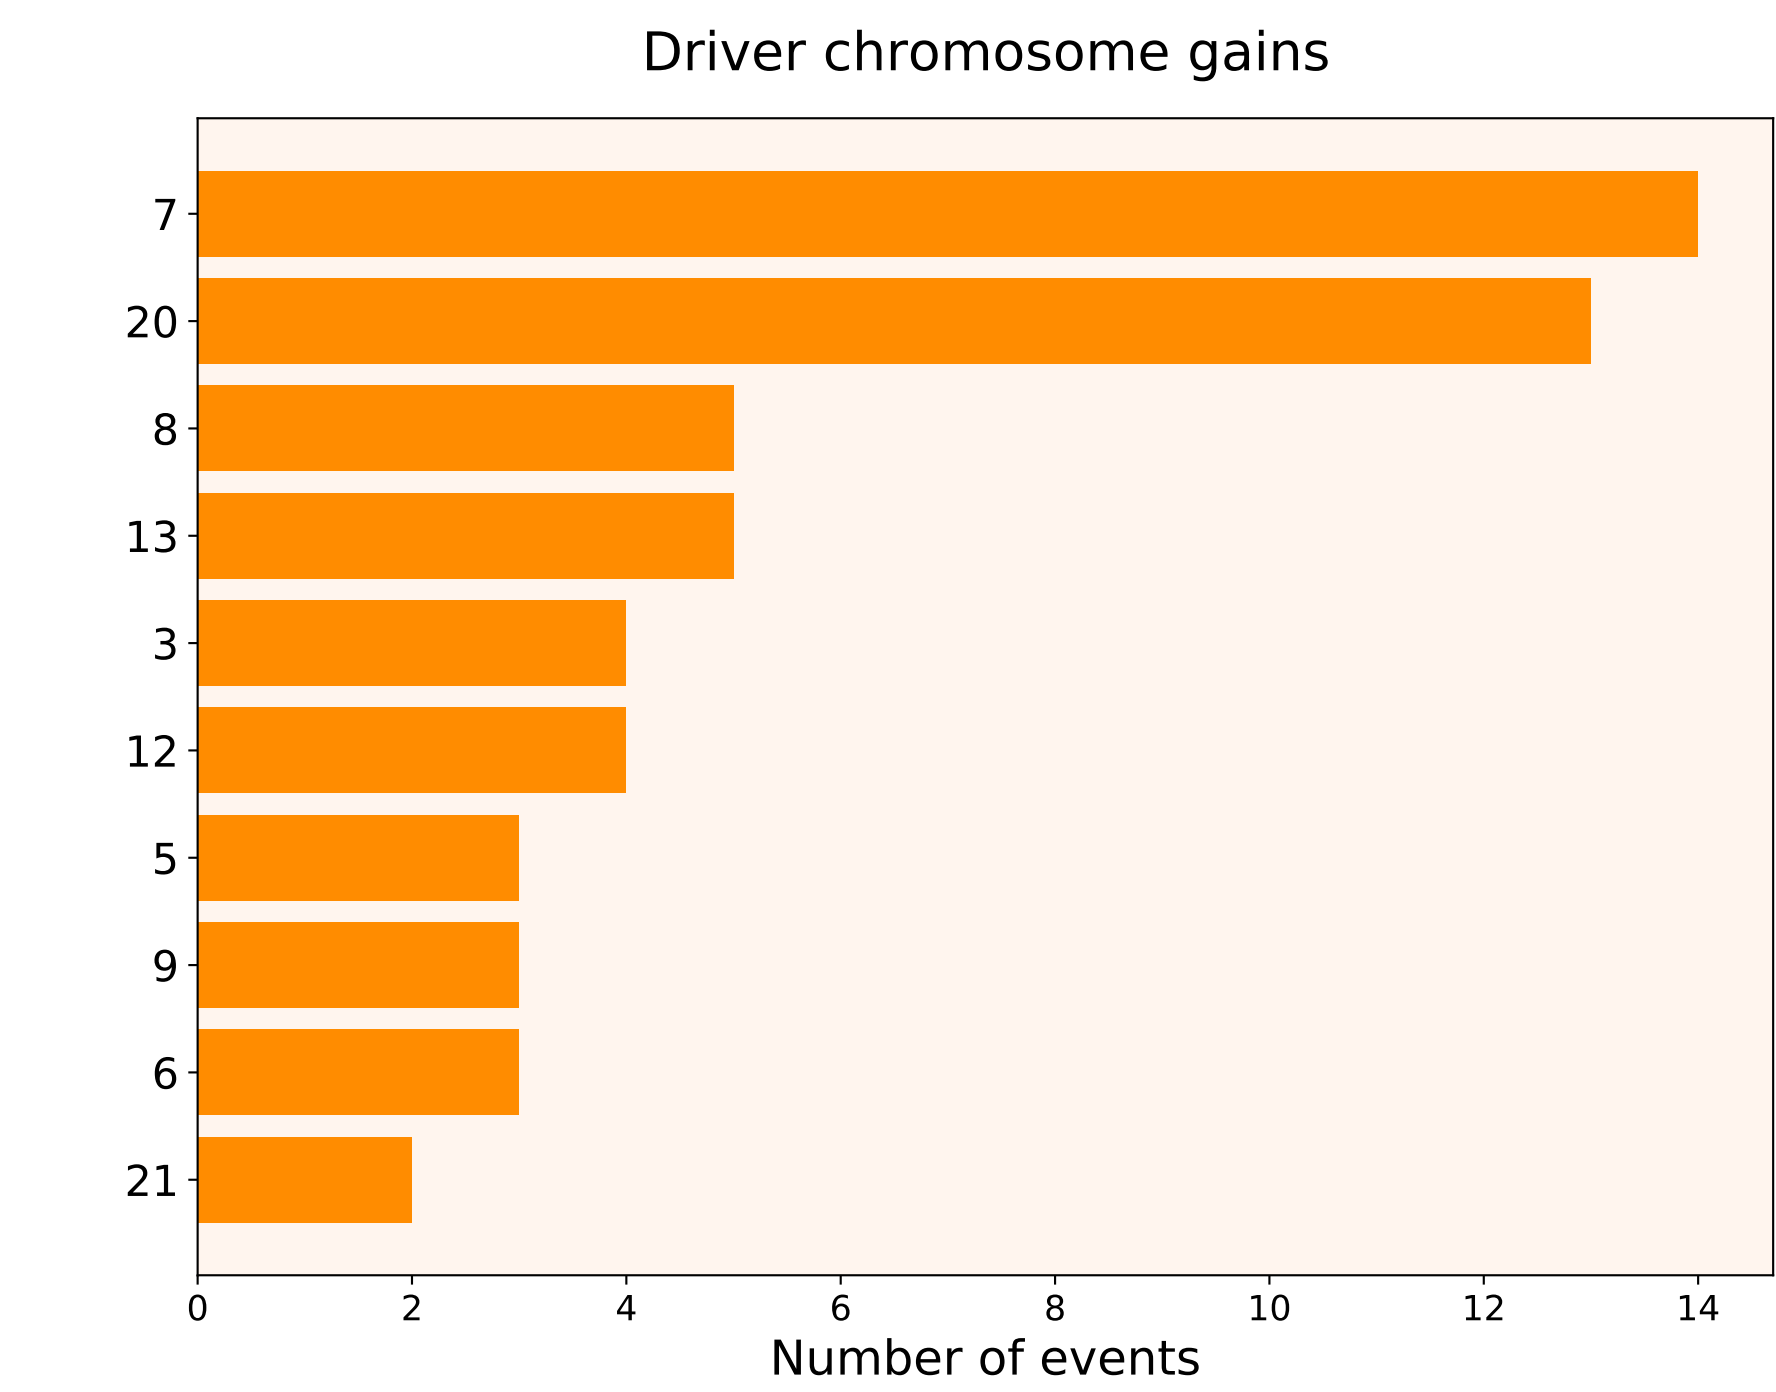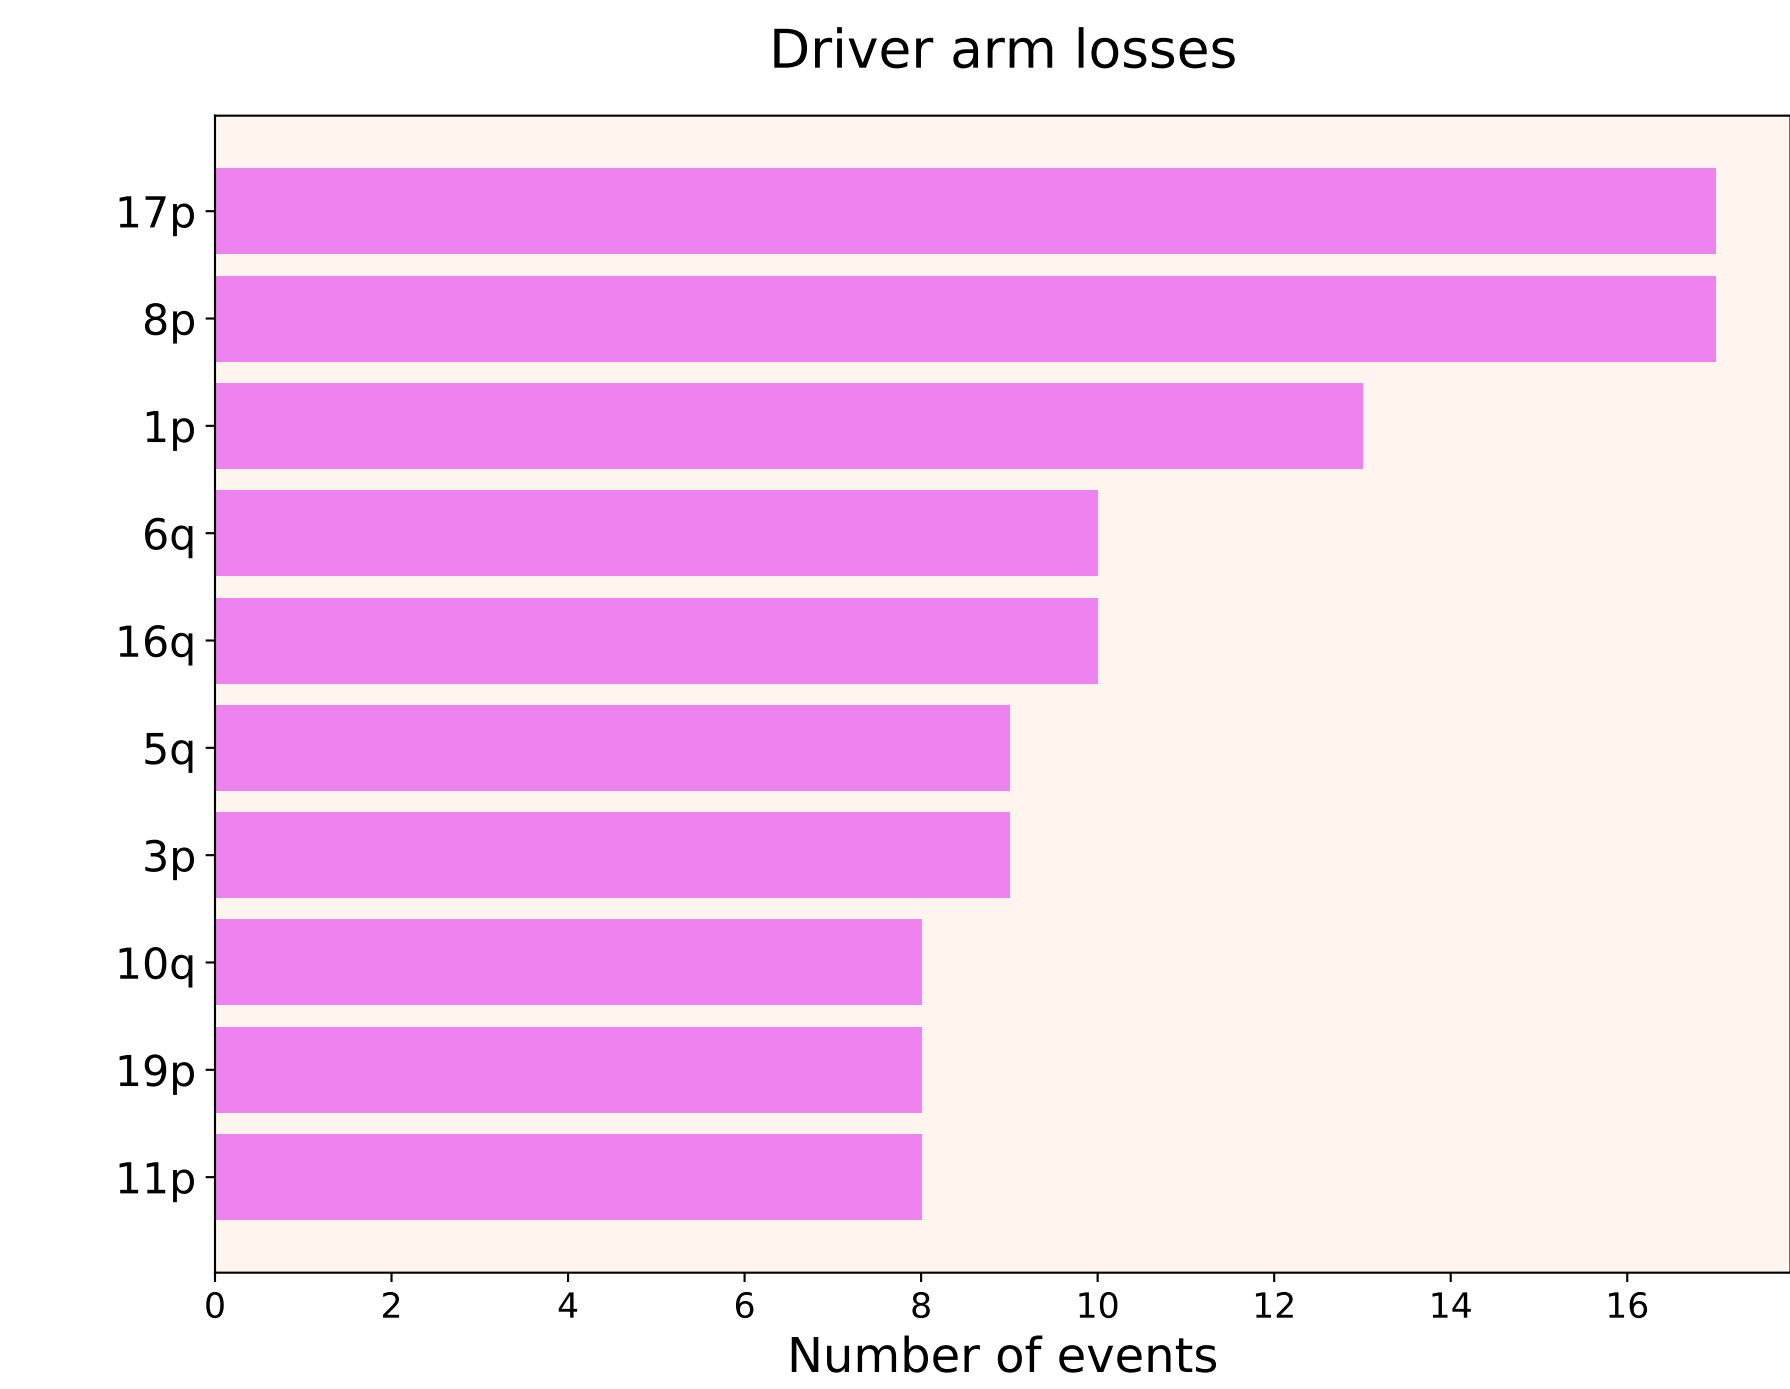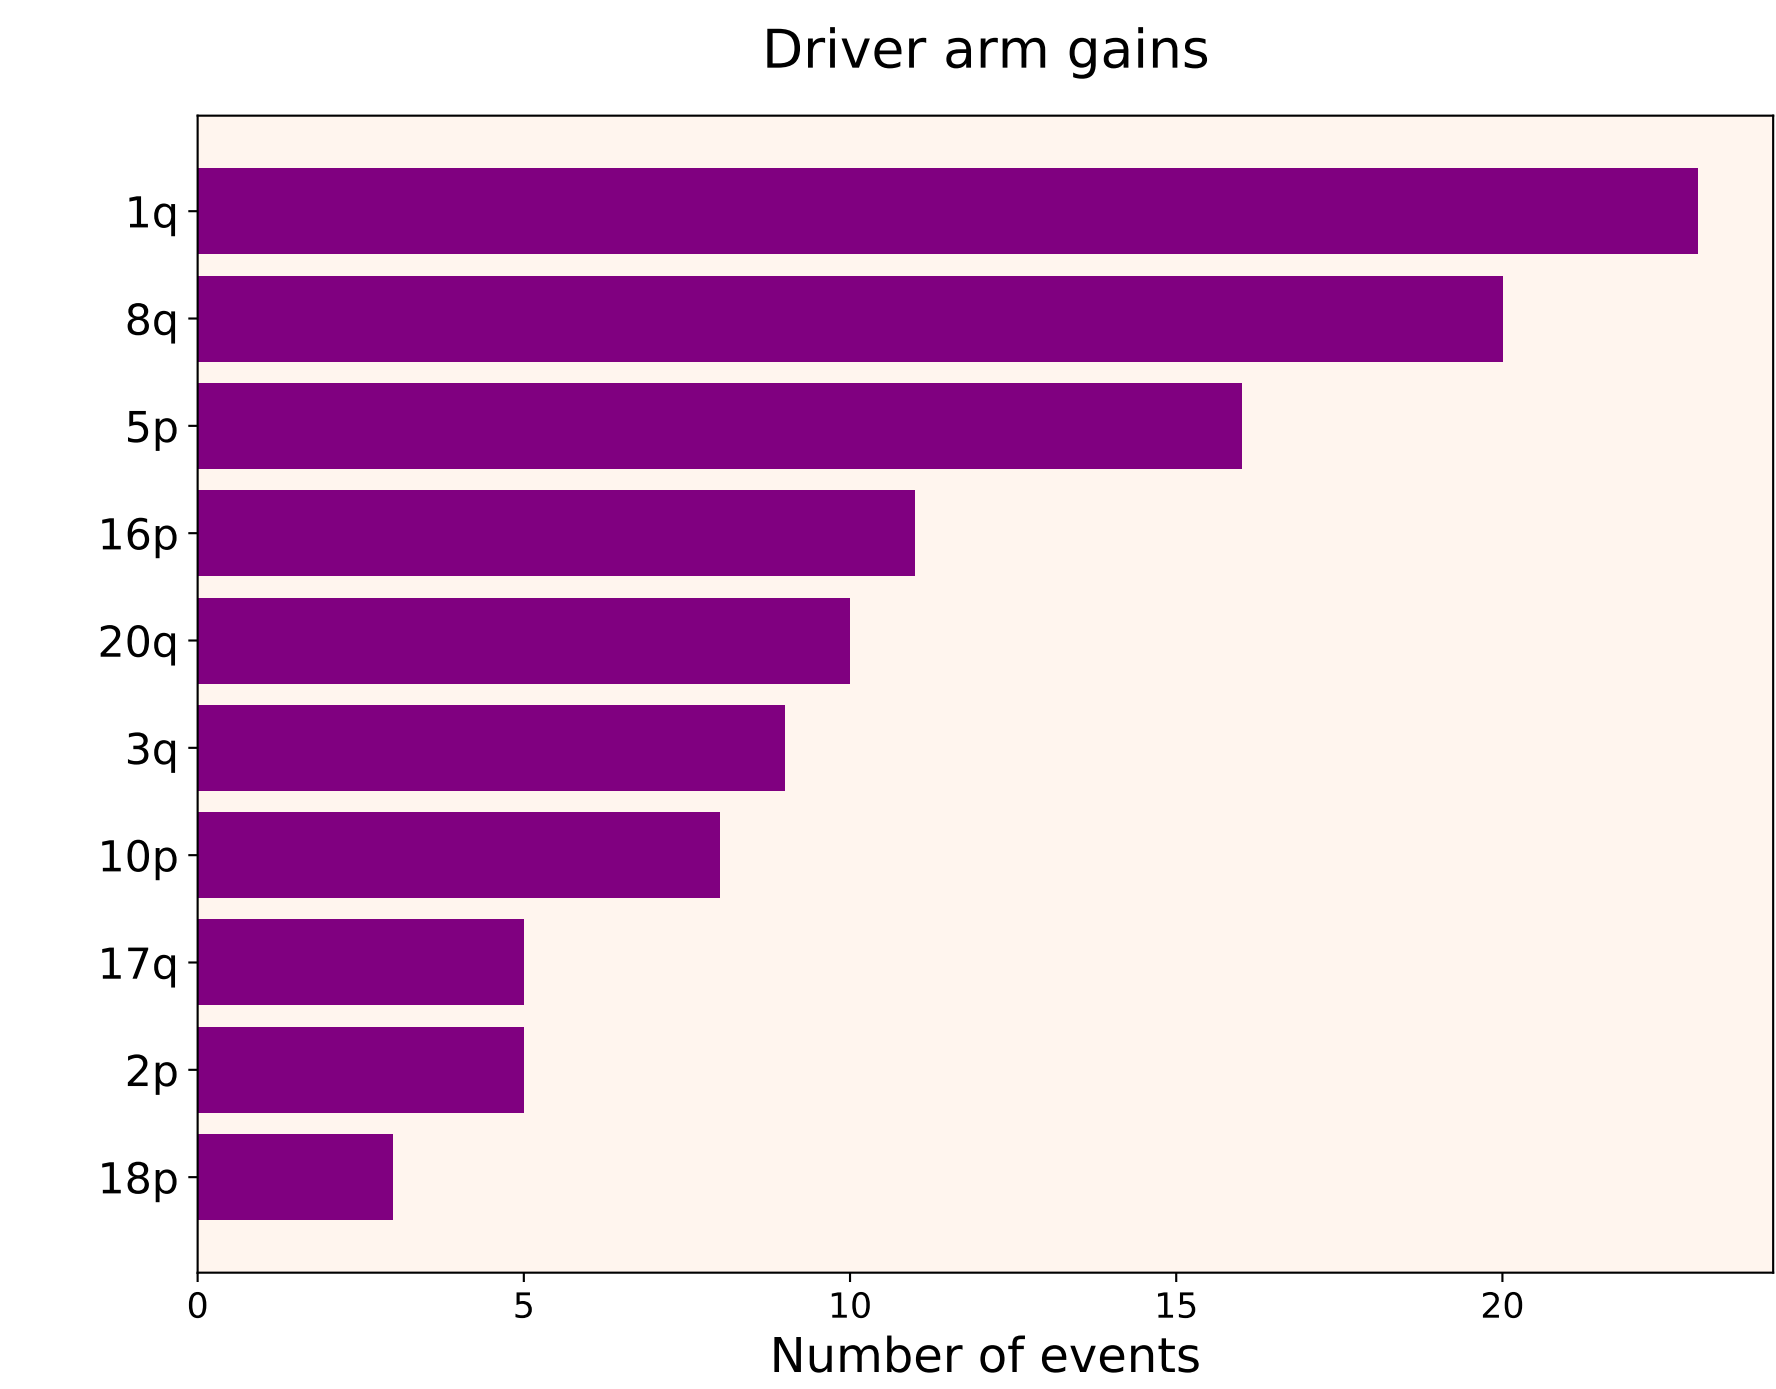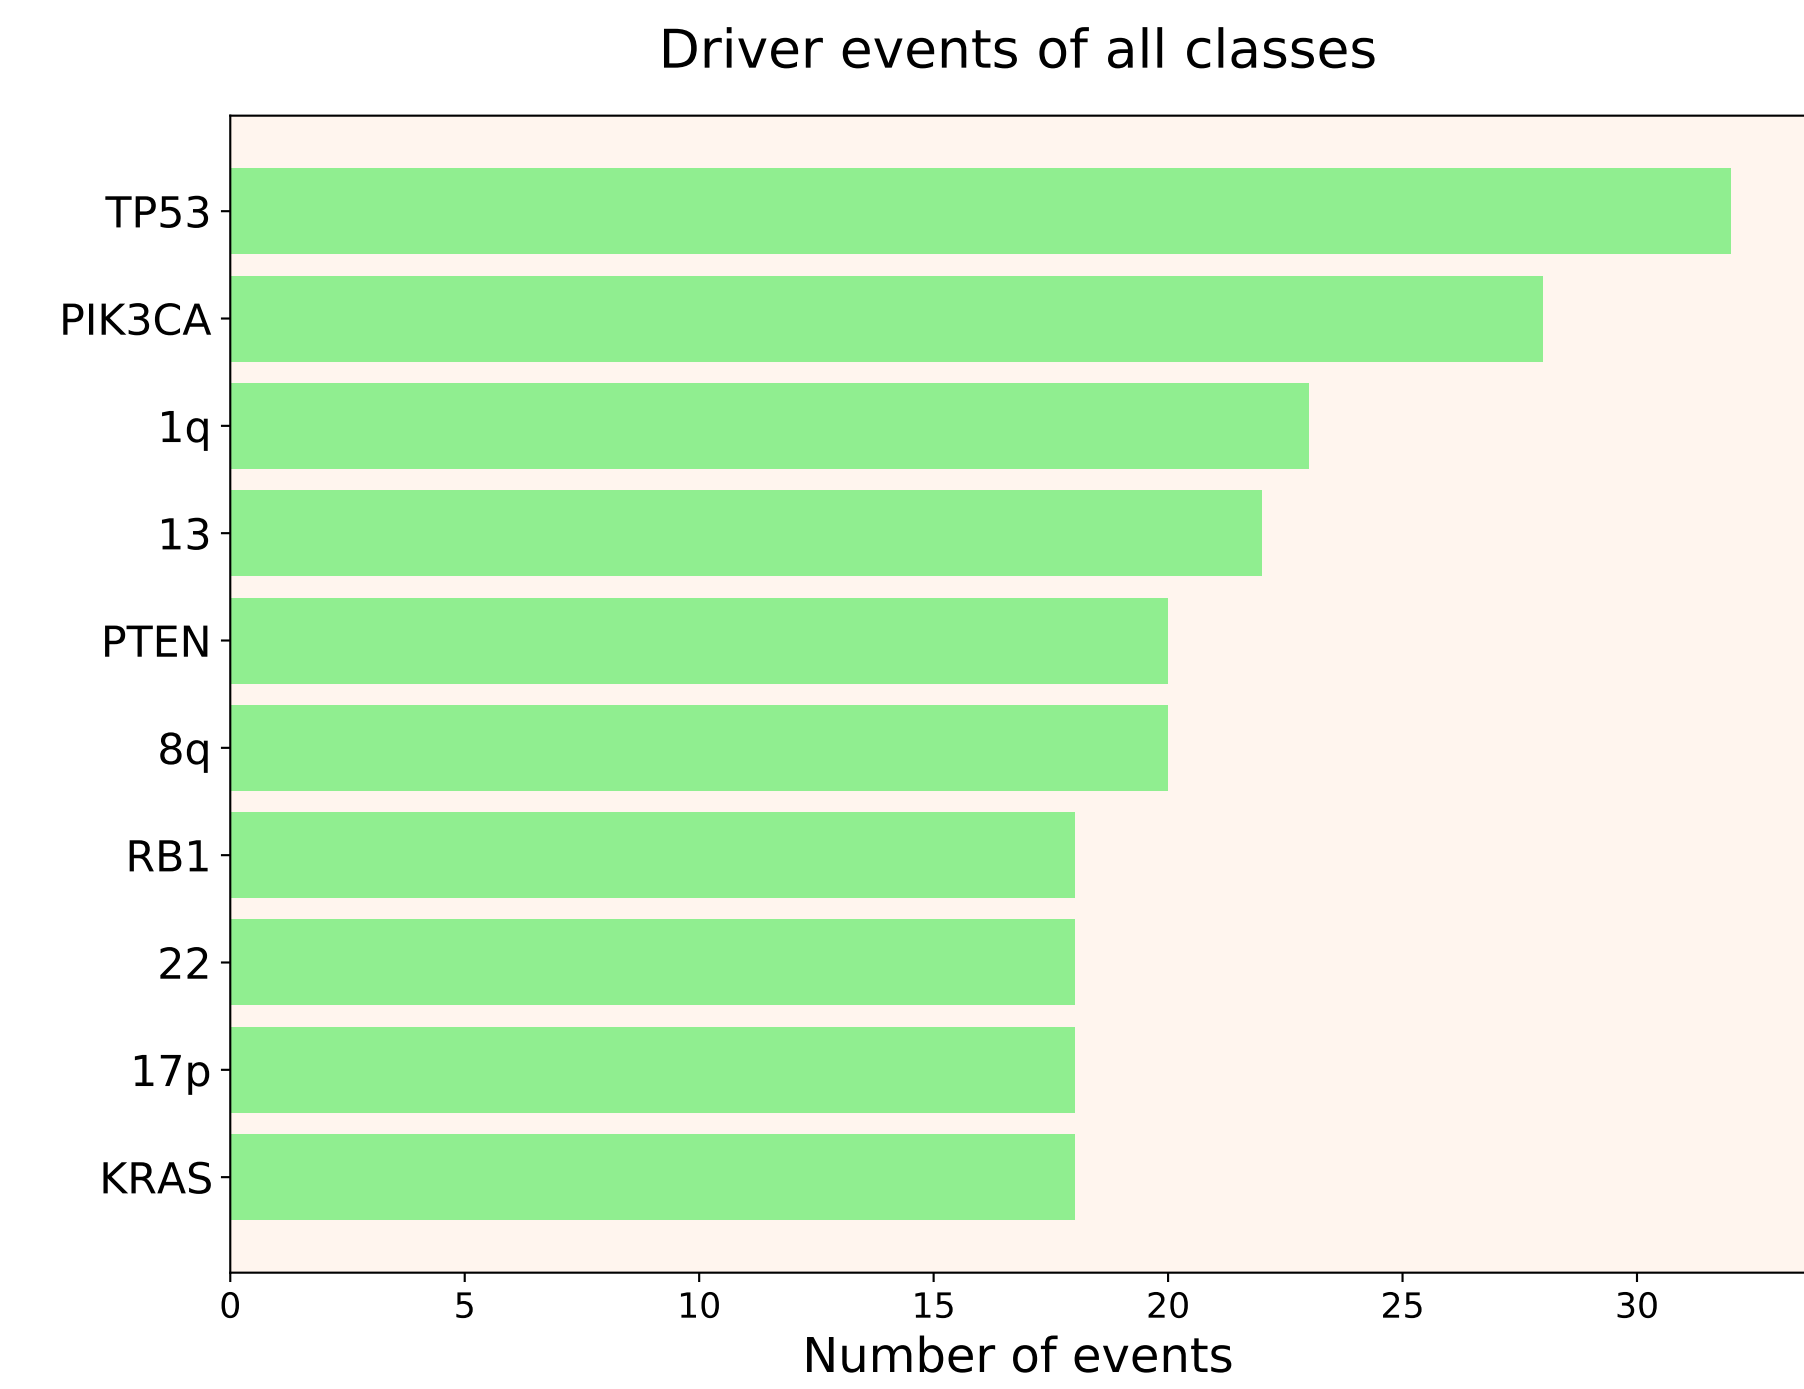

Supplement: Supplemental_Data_S1.zip [file Supplemental_Data_S1.zip]

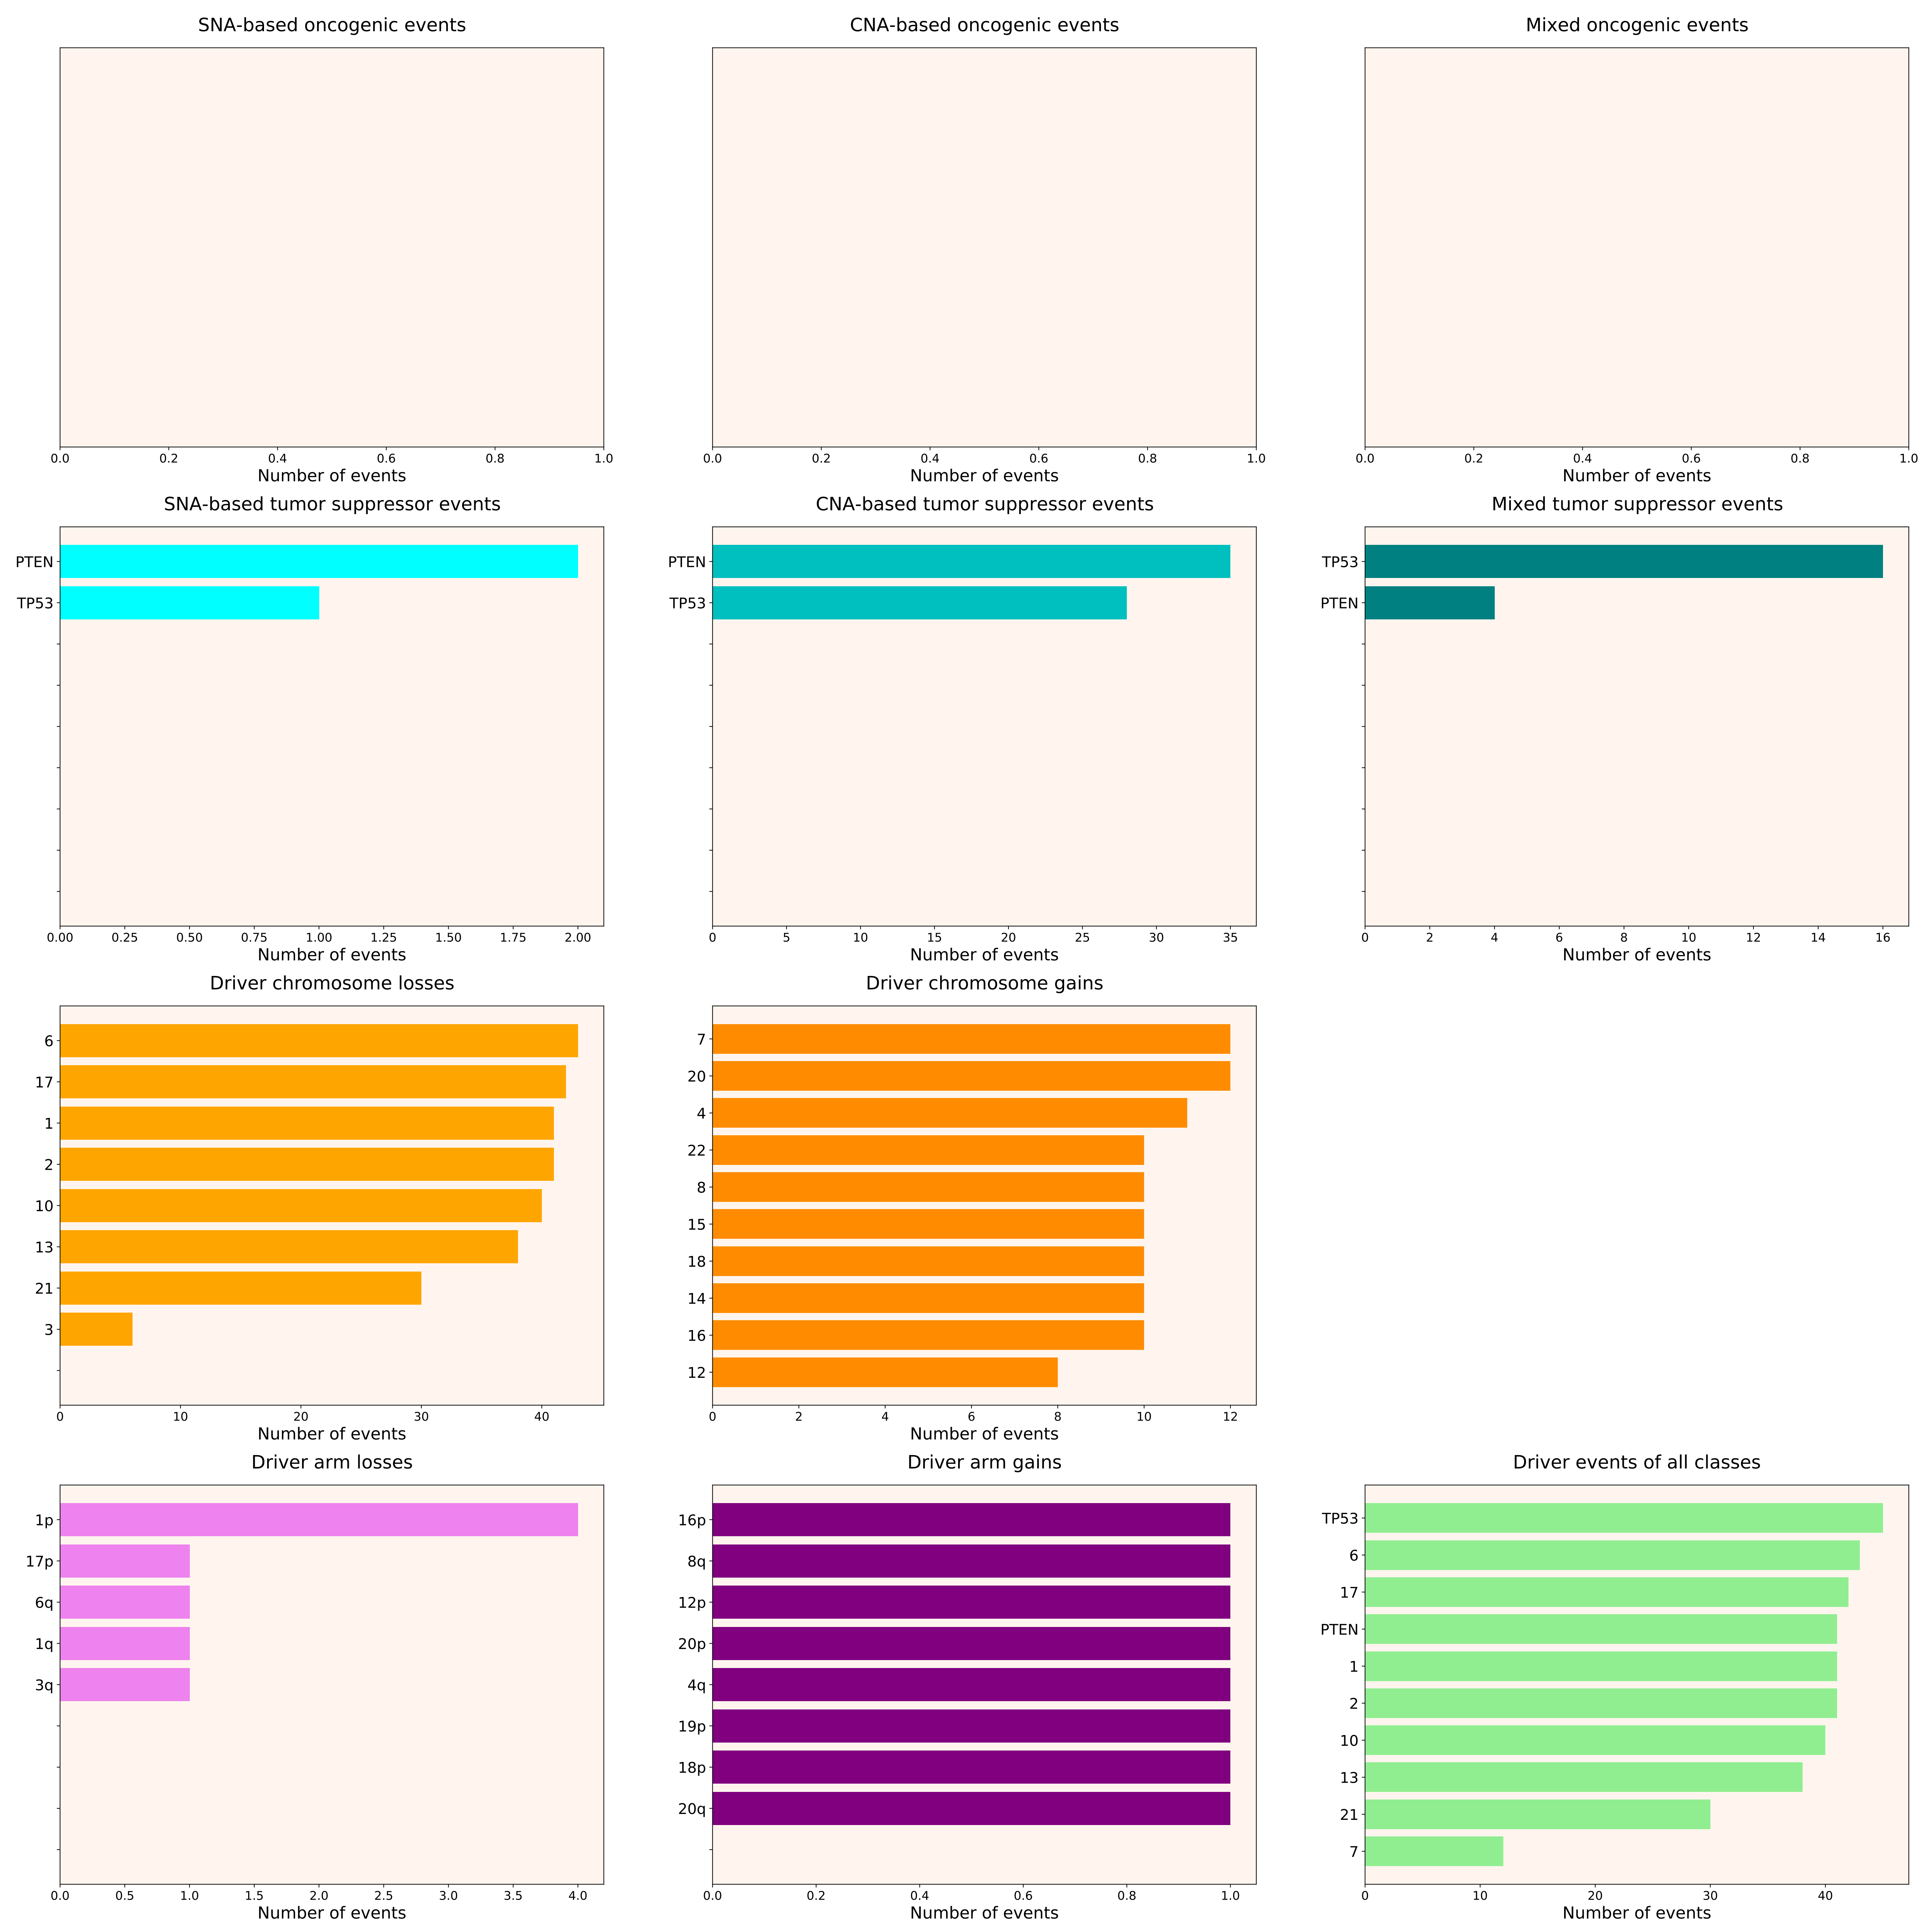

Supplement: Supplemental_Data_S1.zip [file Supplemental_Data_S1.zip]

# COAD\_FEMALE

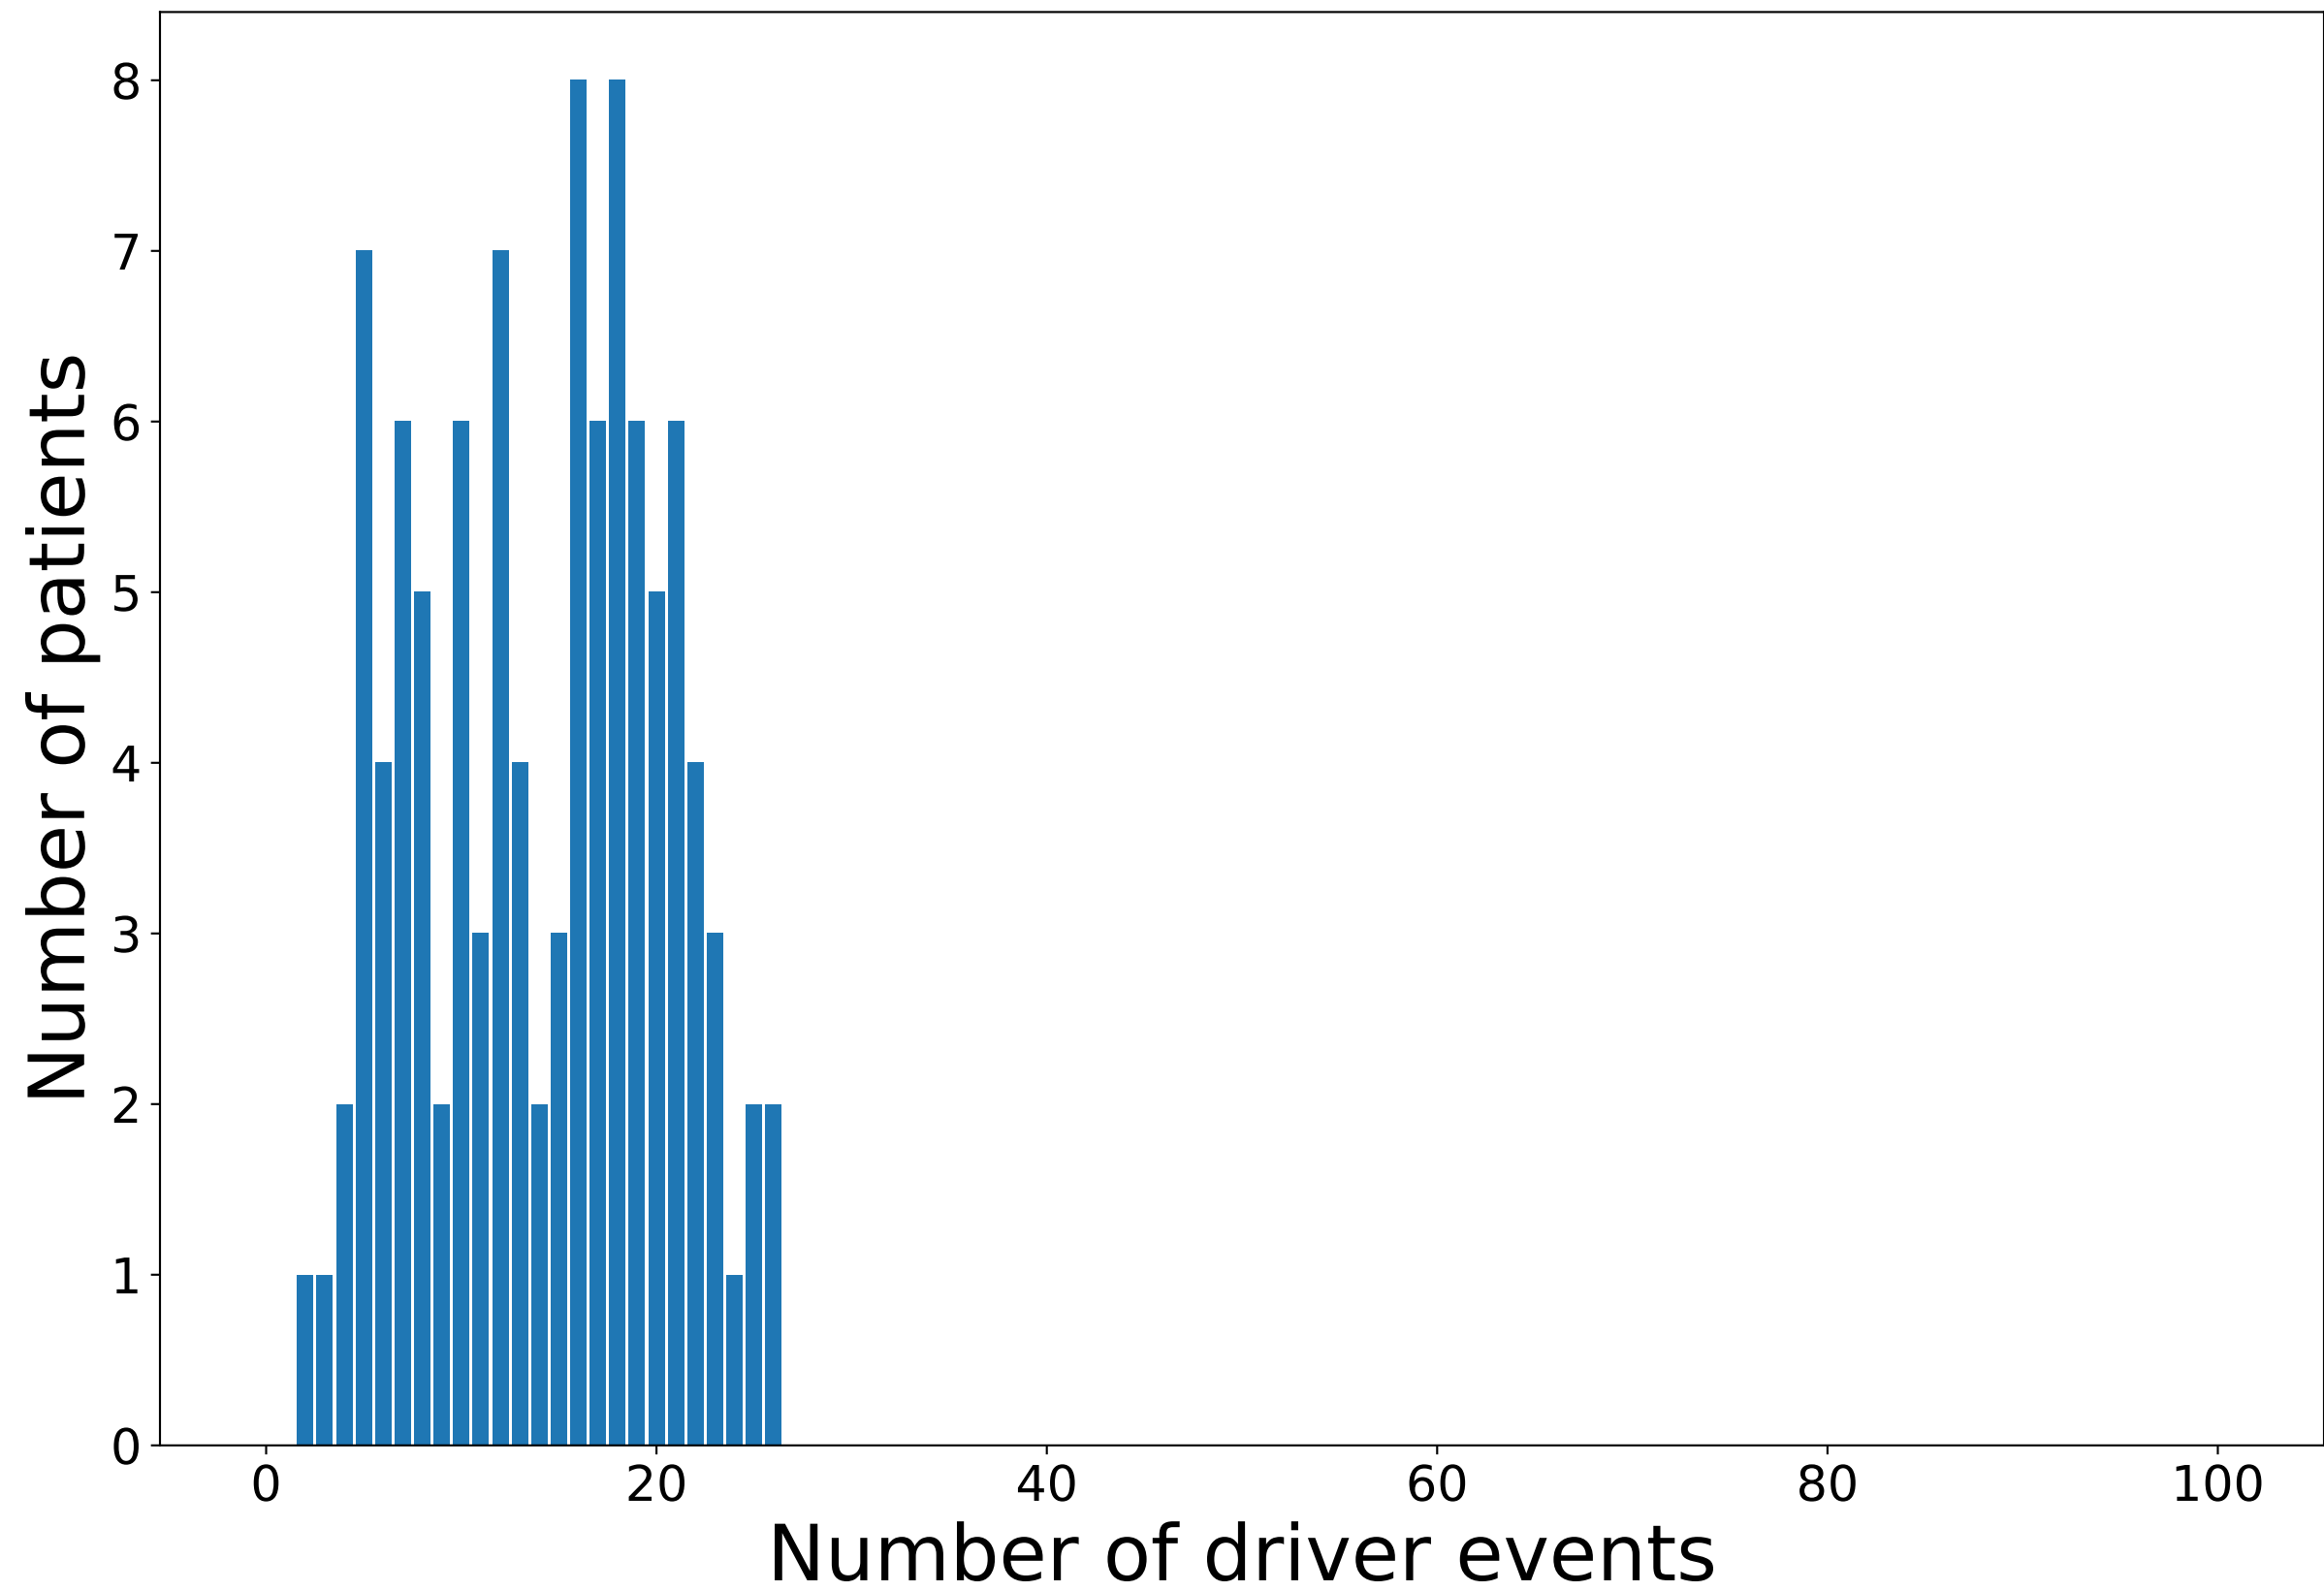

Supplement: Supplemental_Data_S1.zip [file Supplemental_Data_S1.zip]

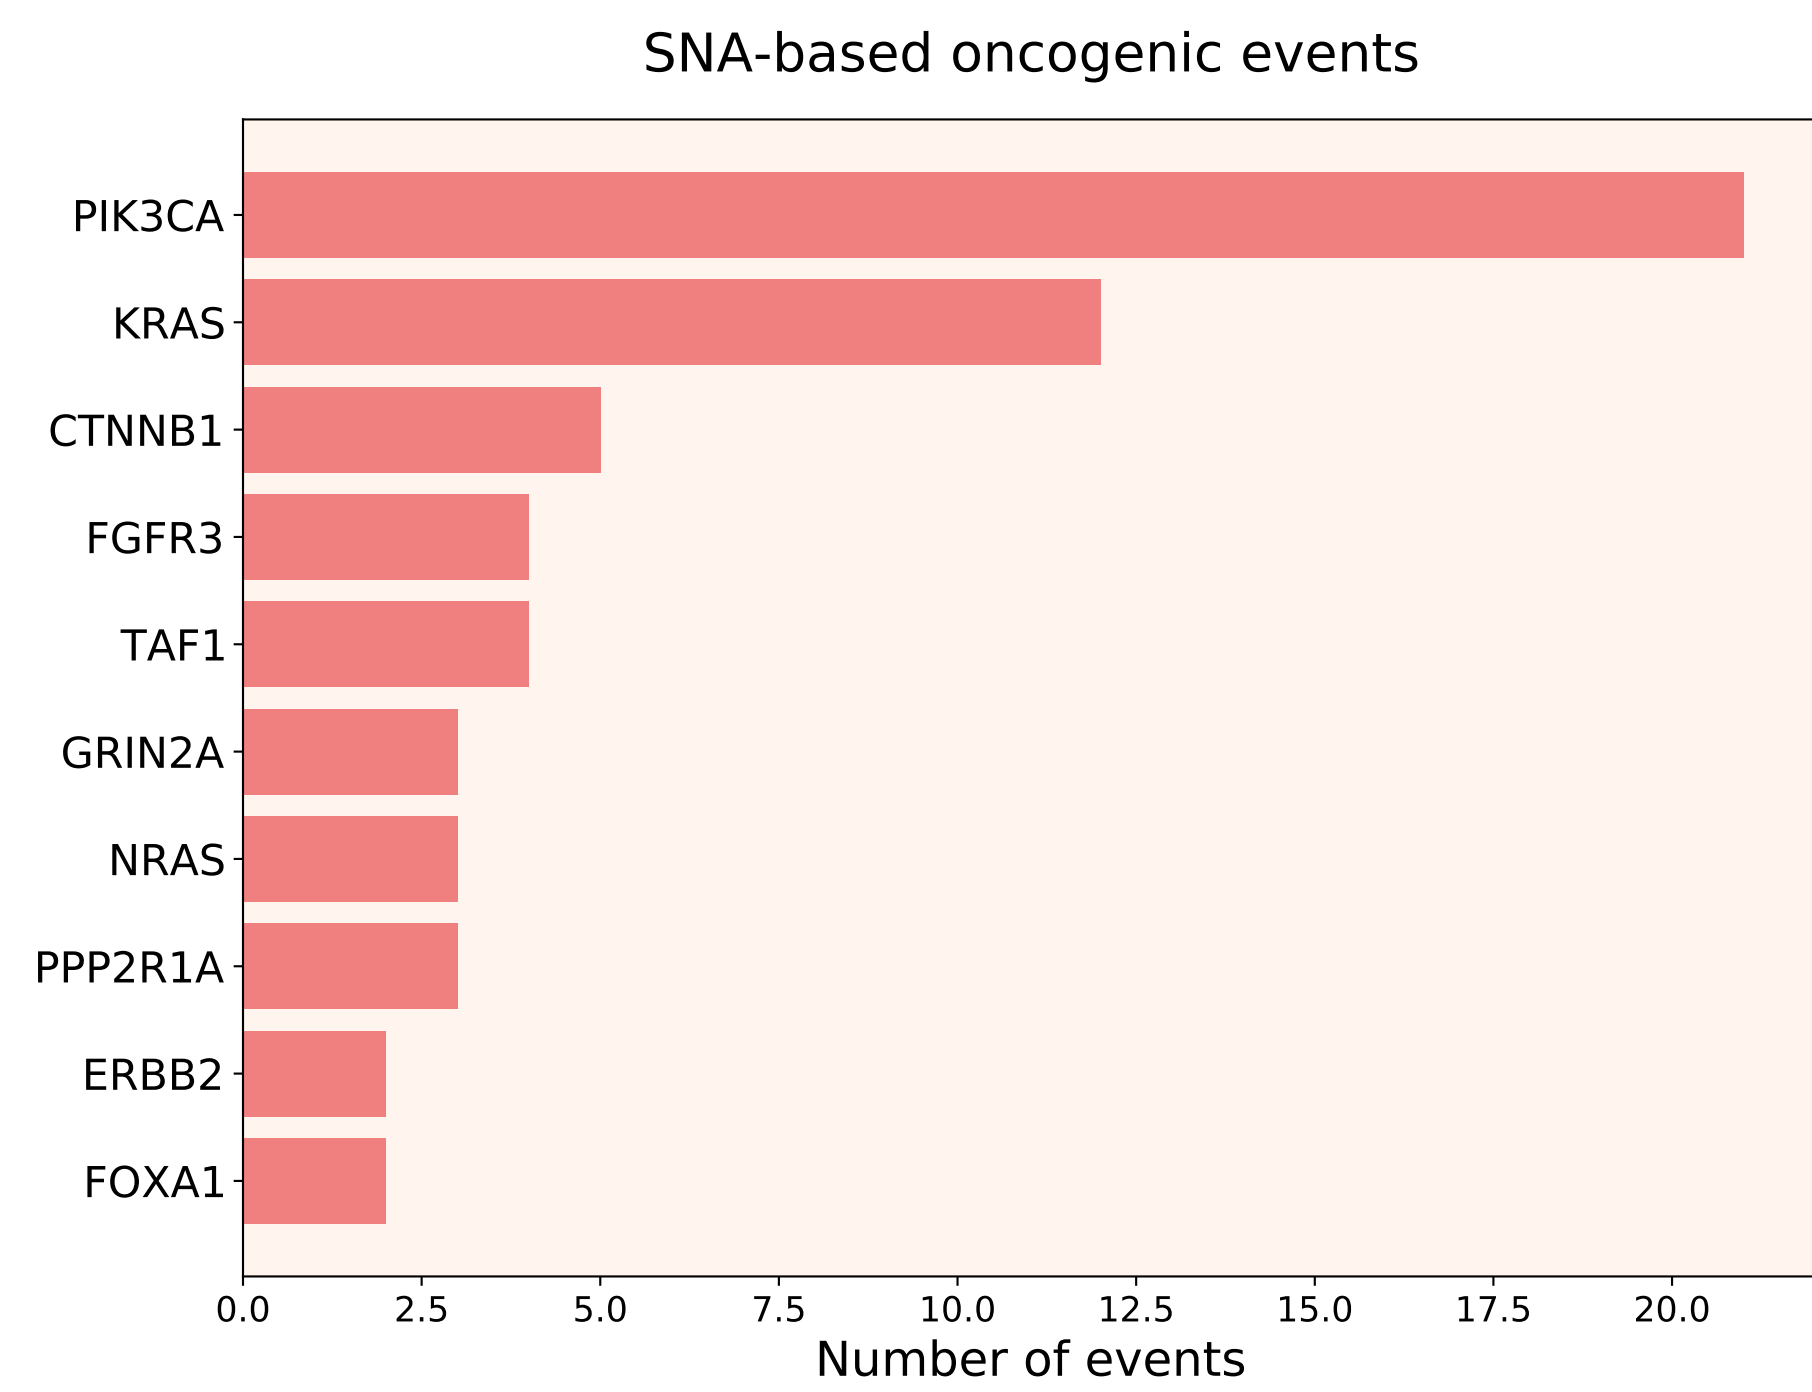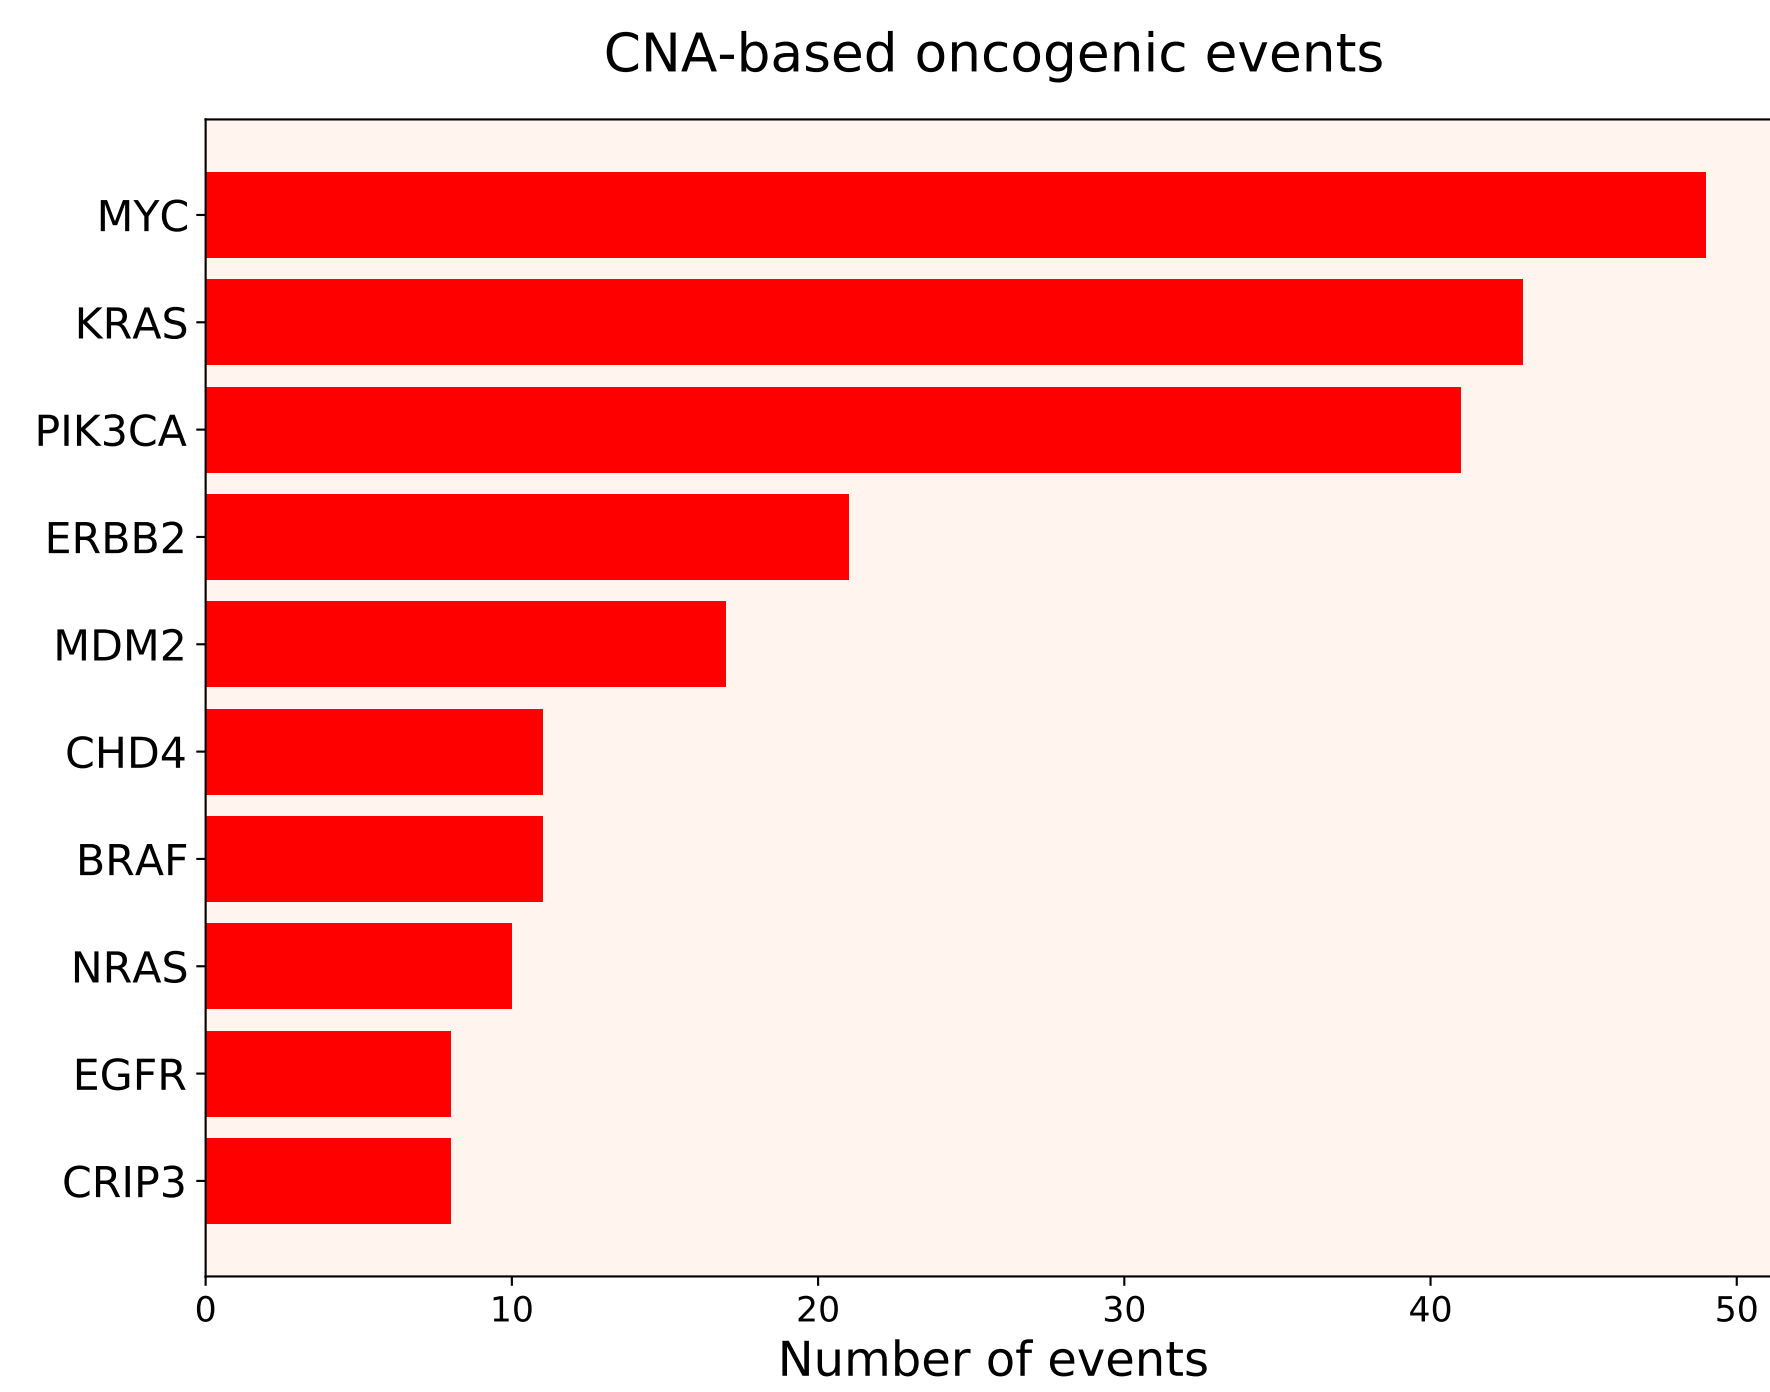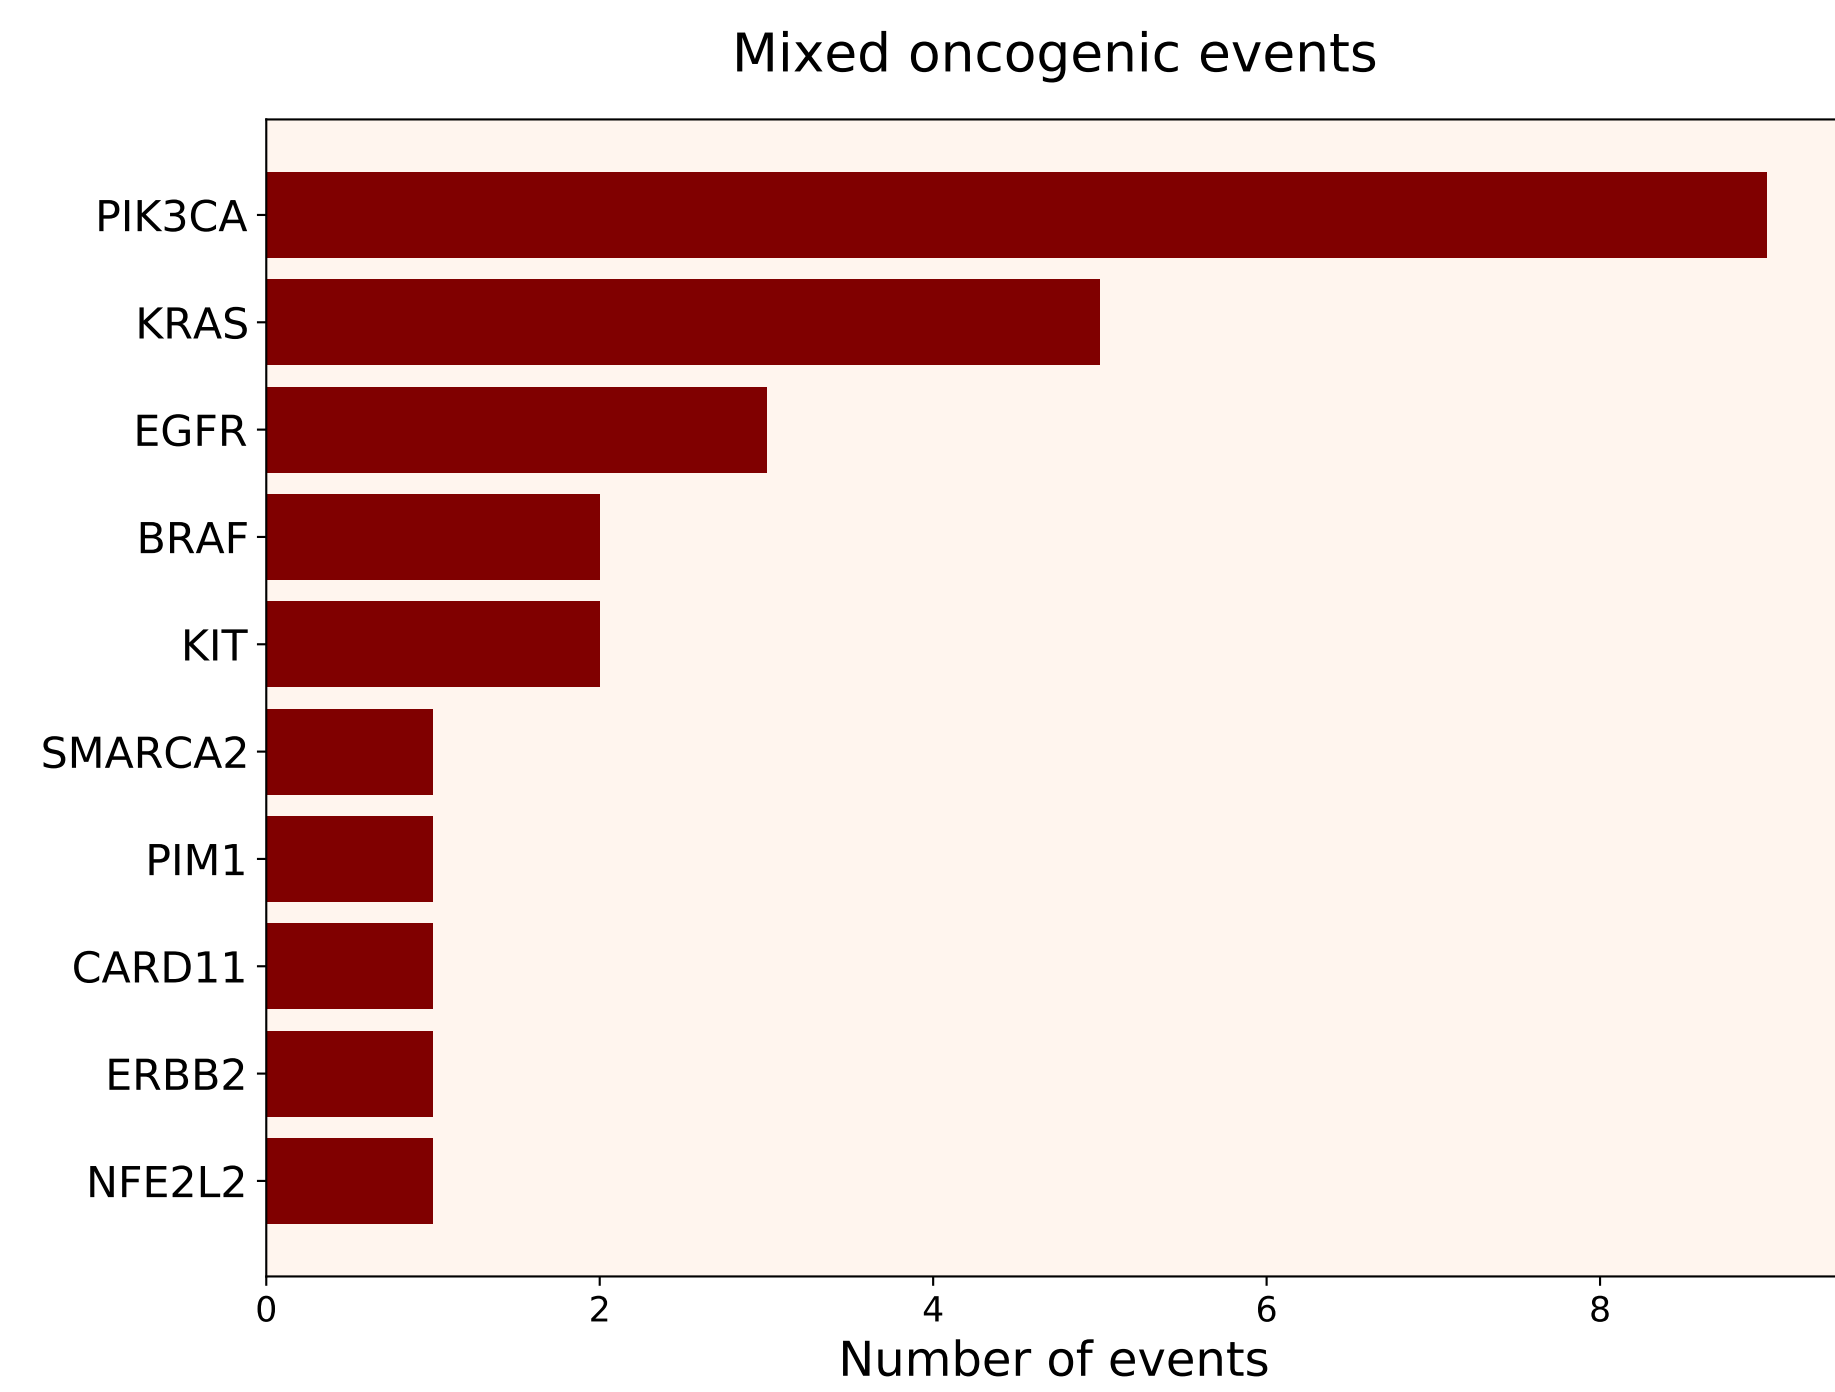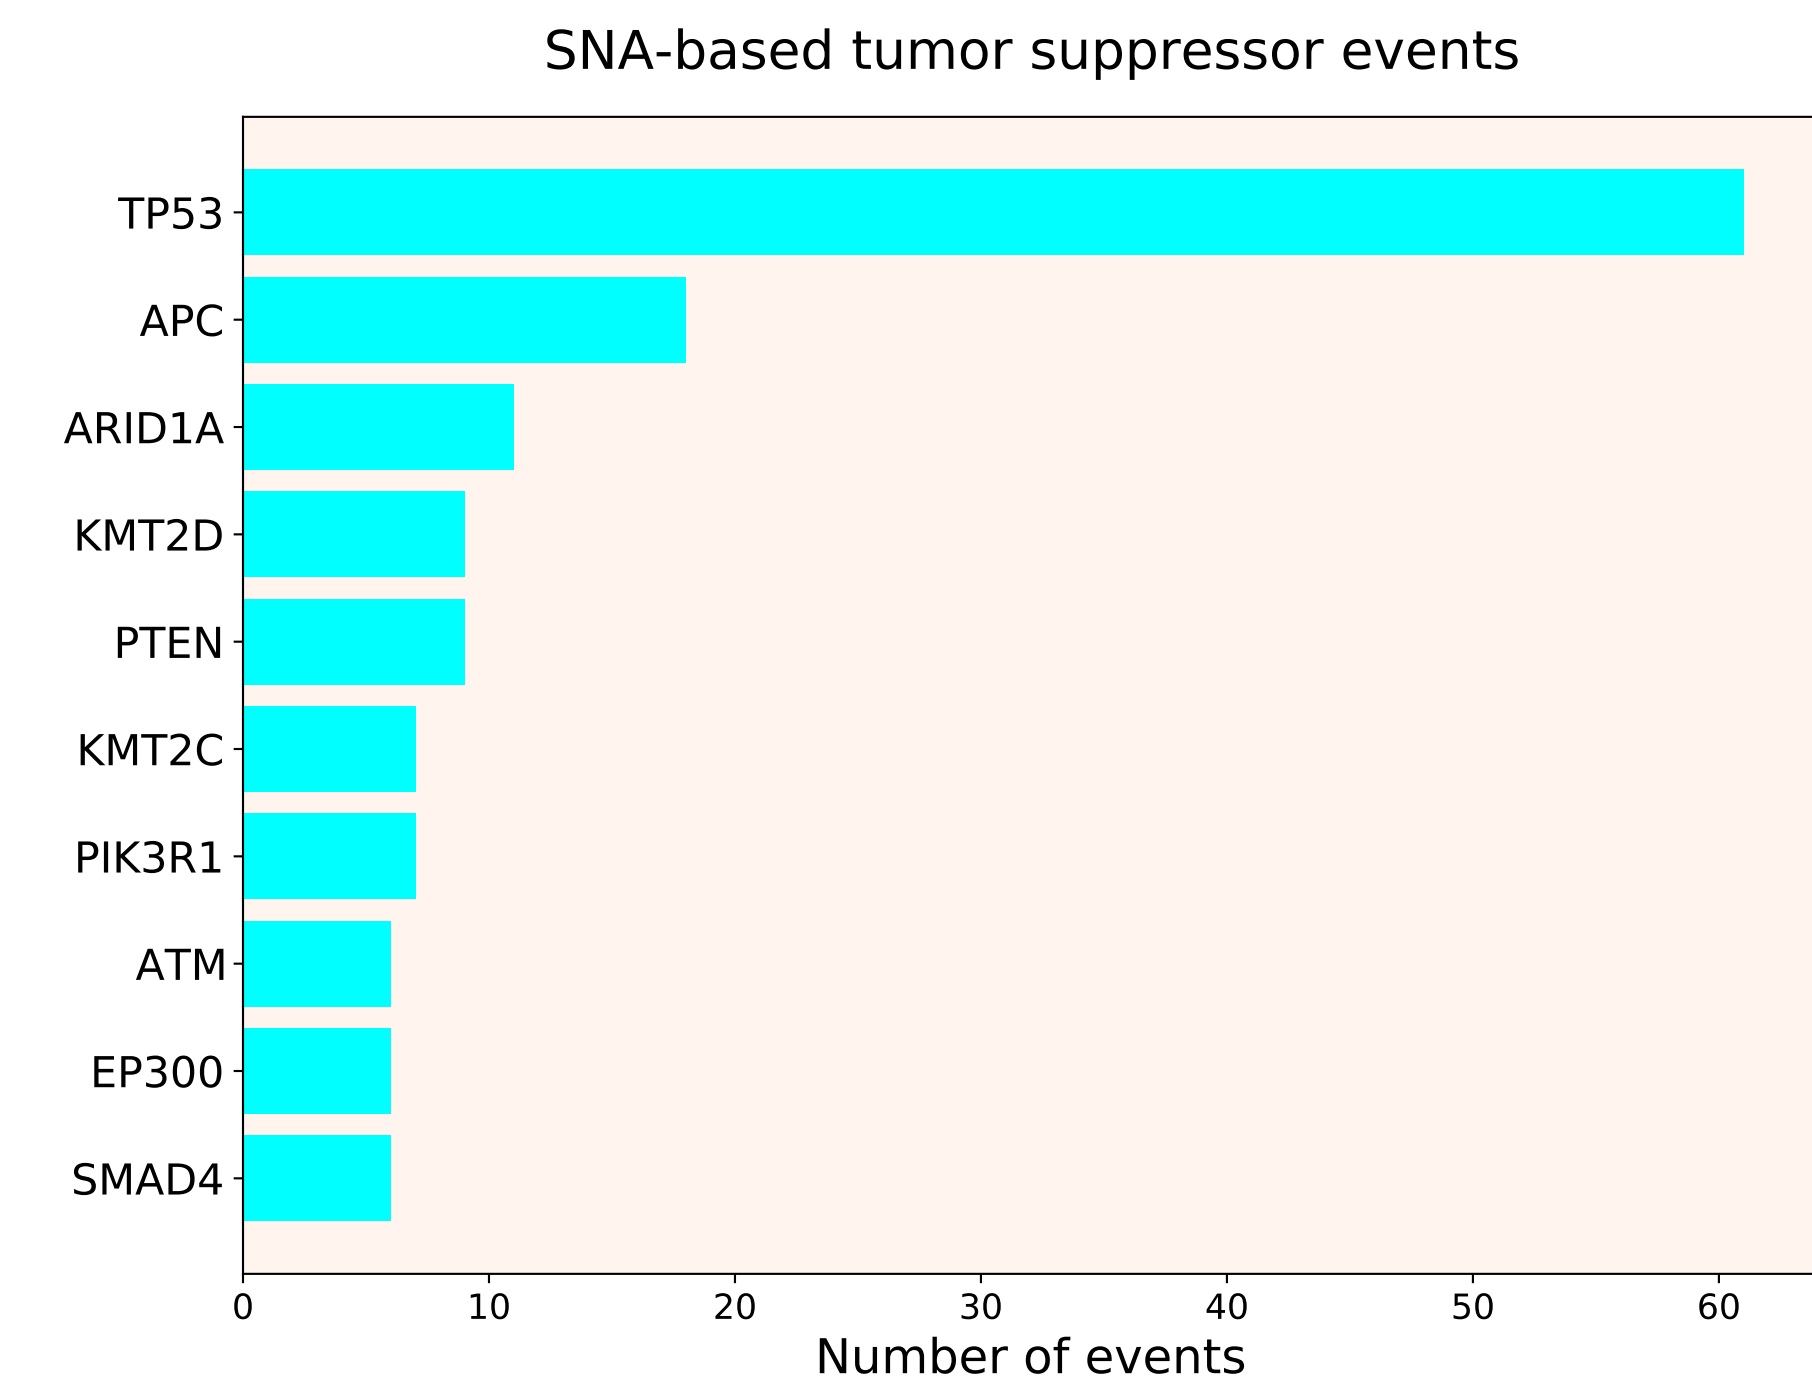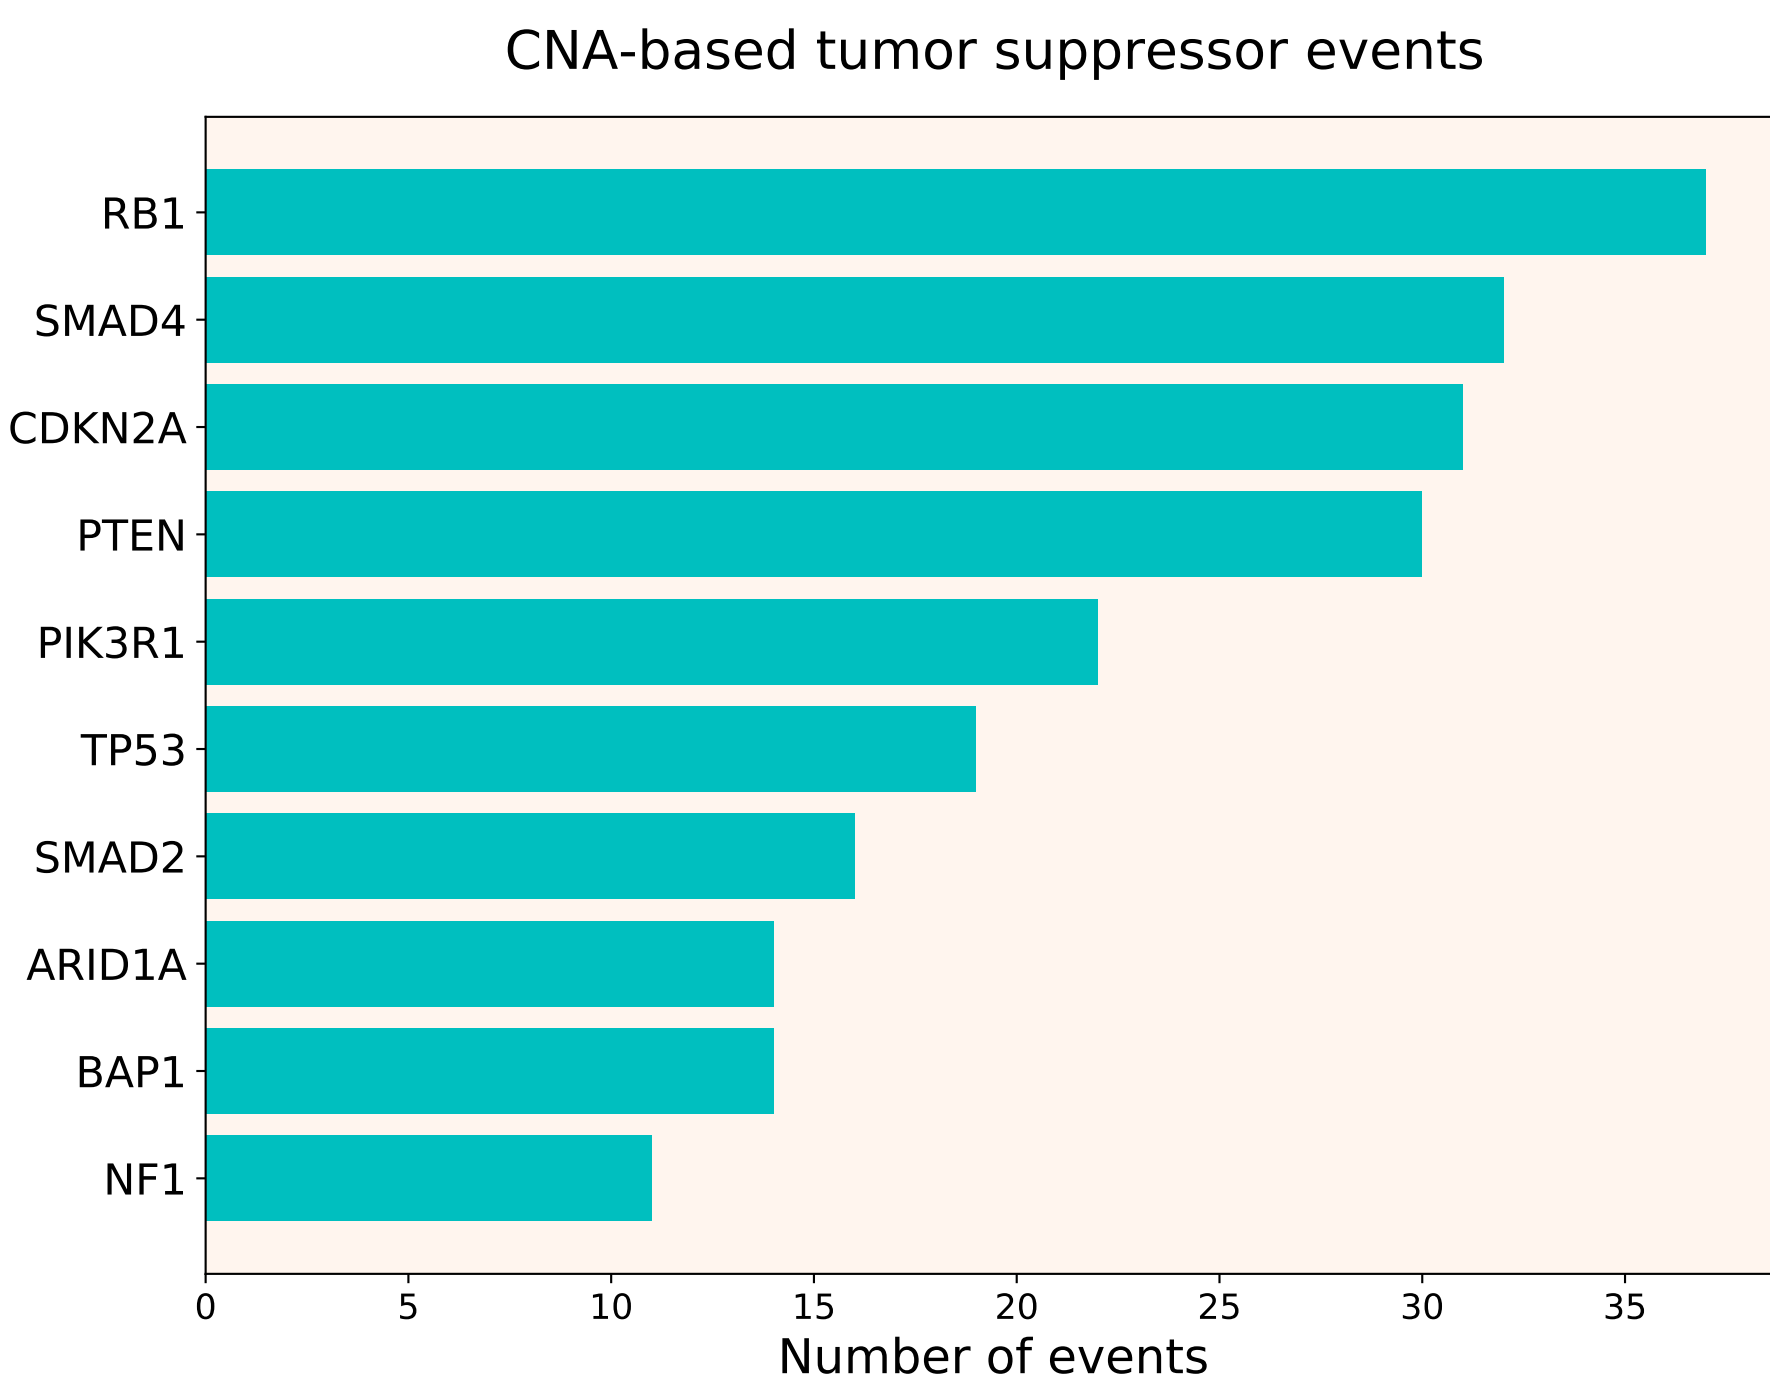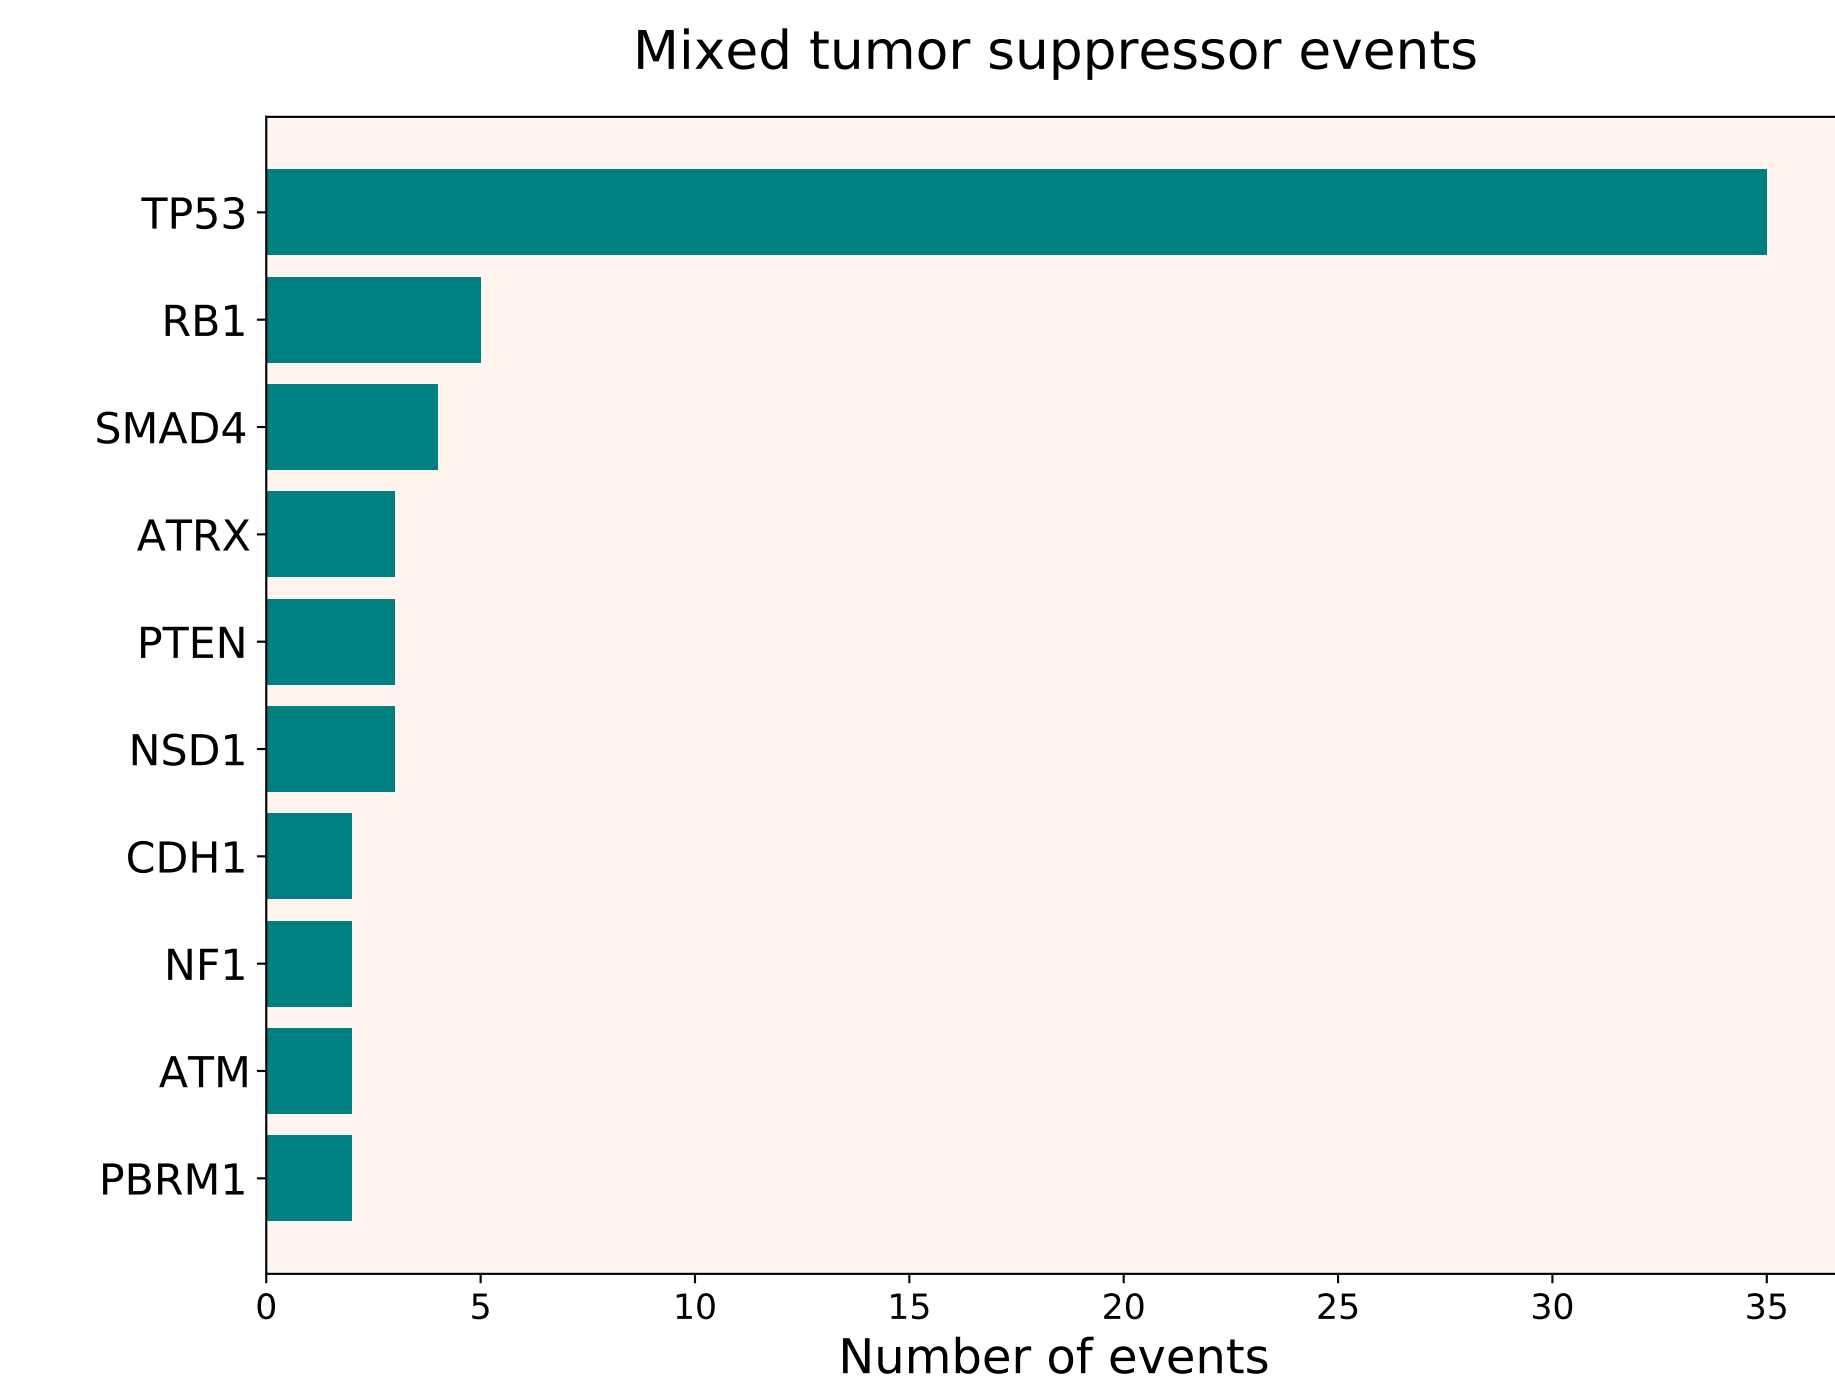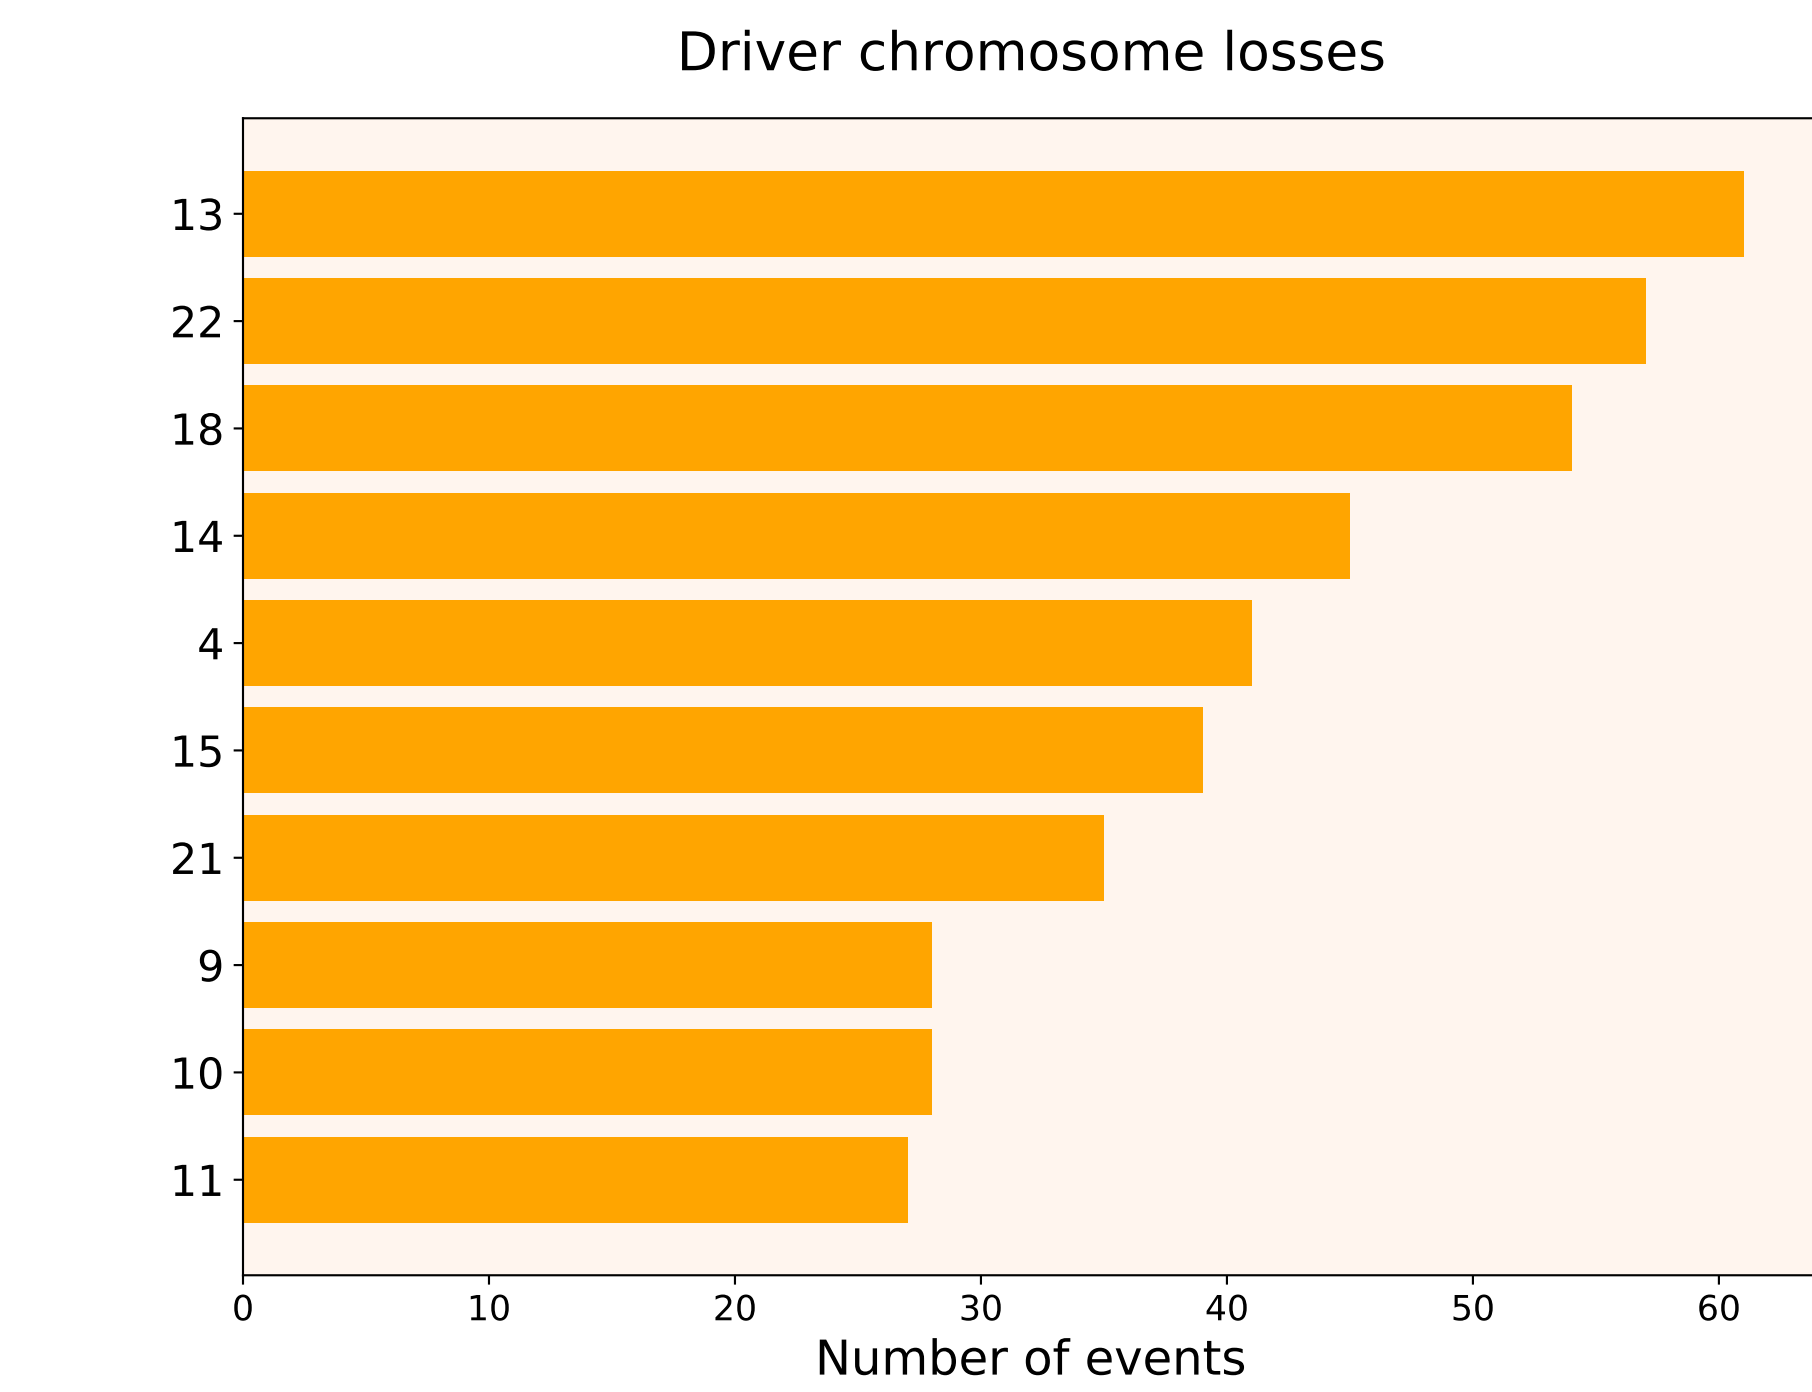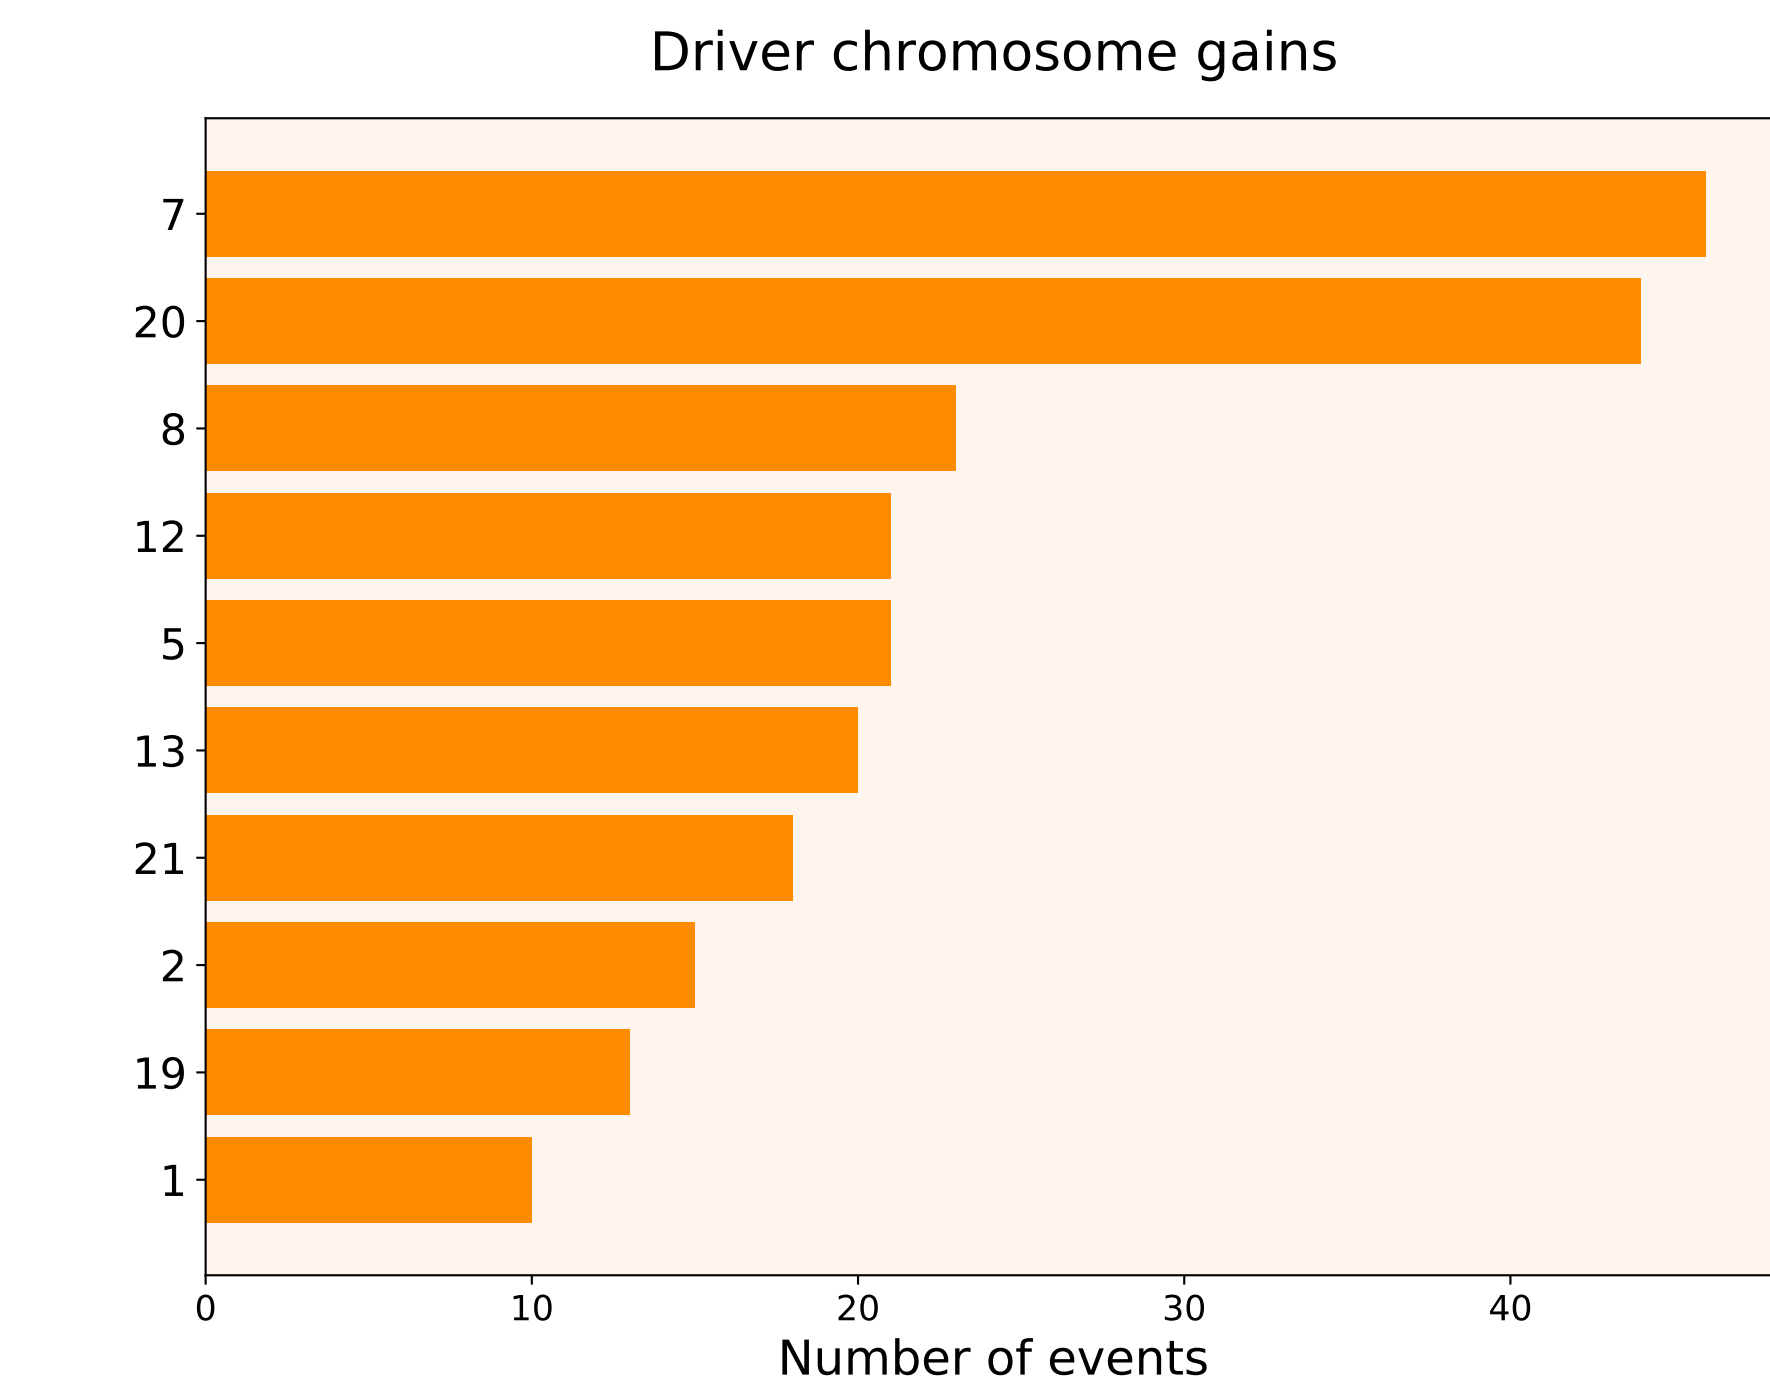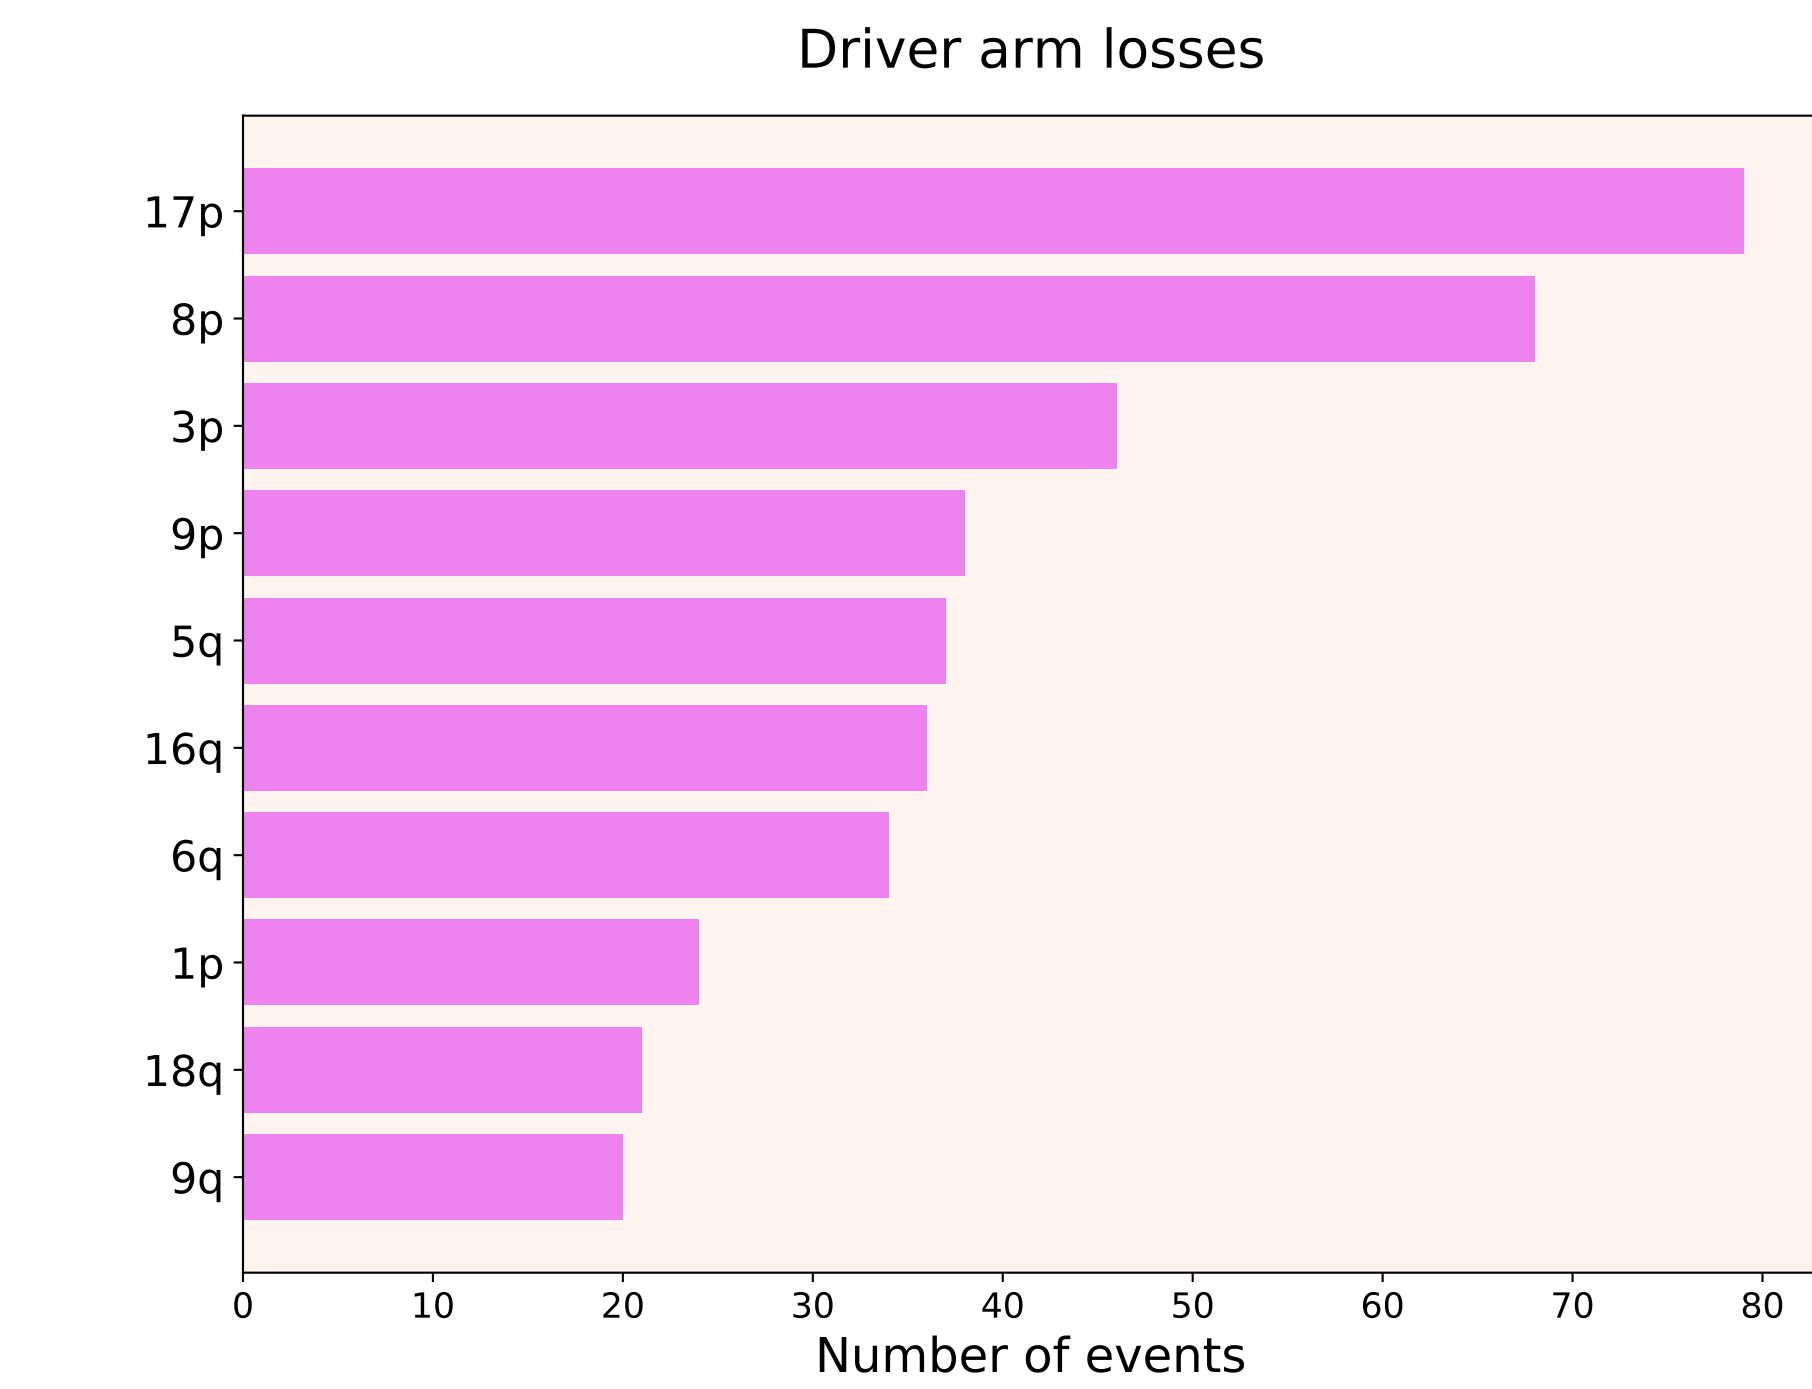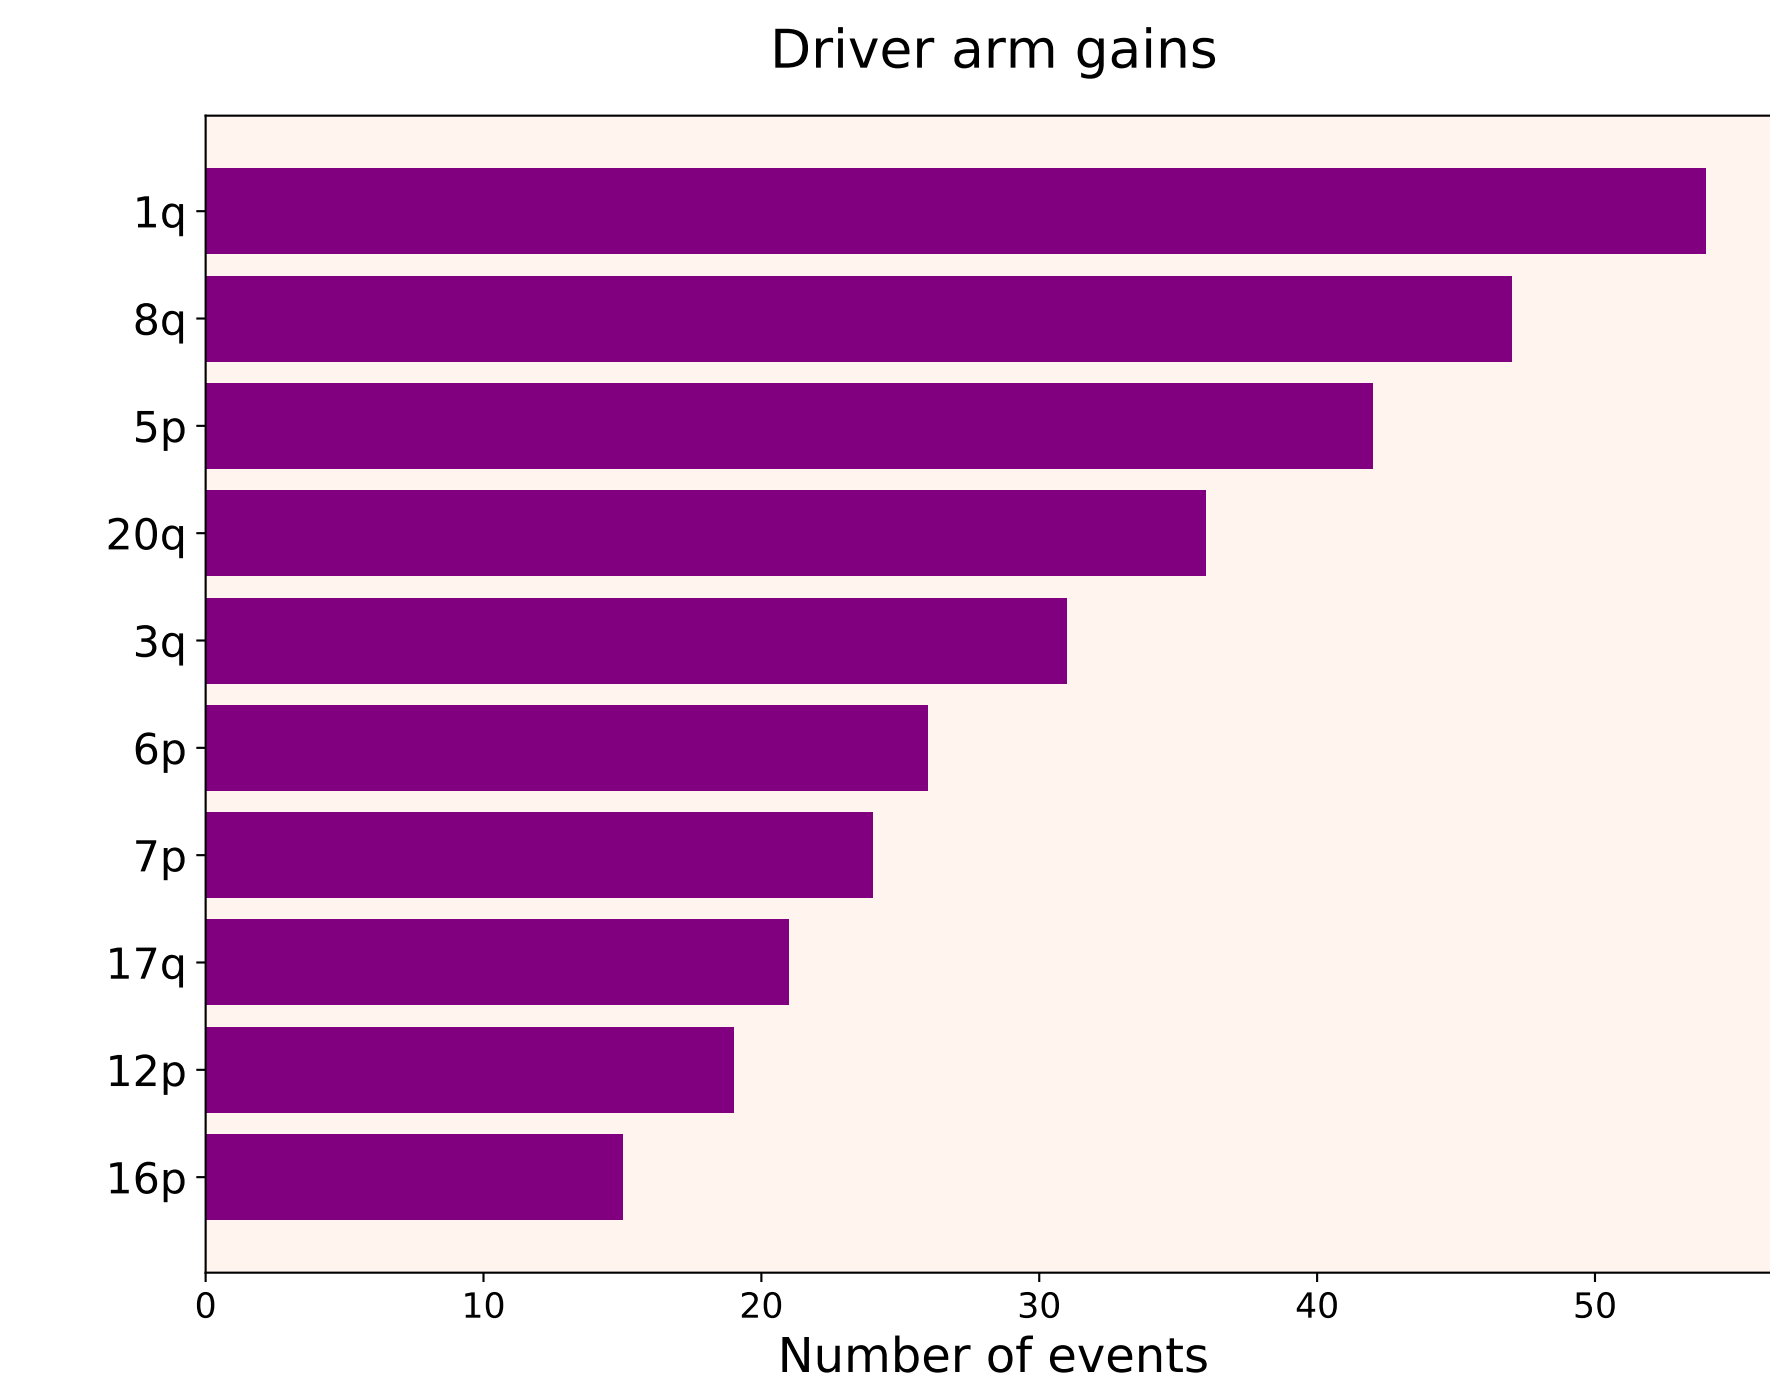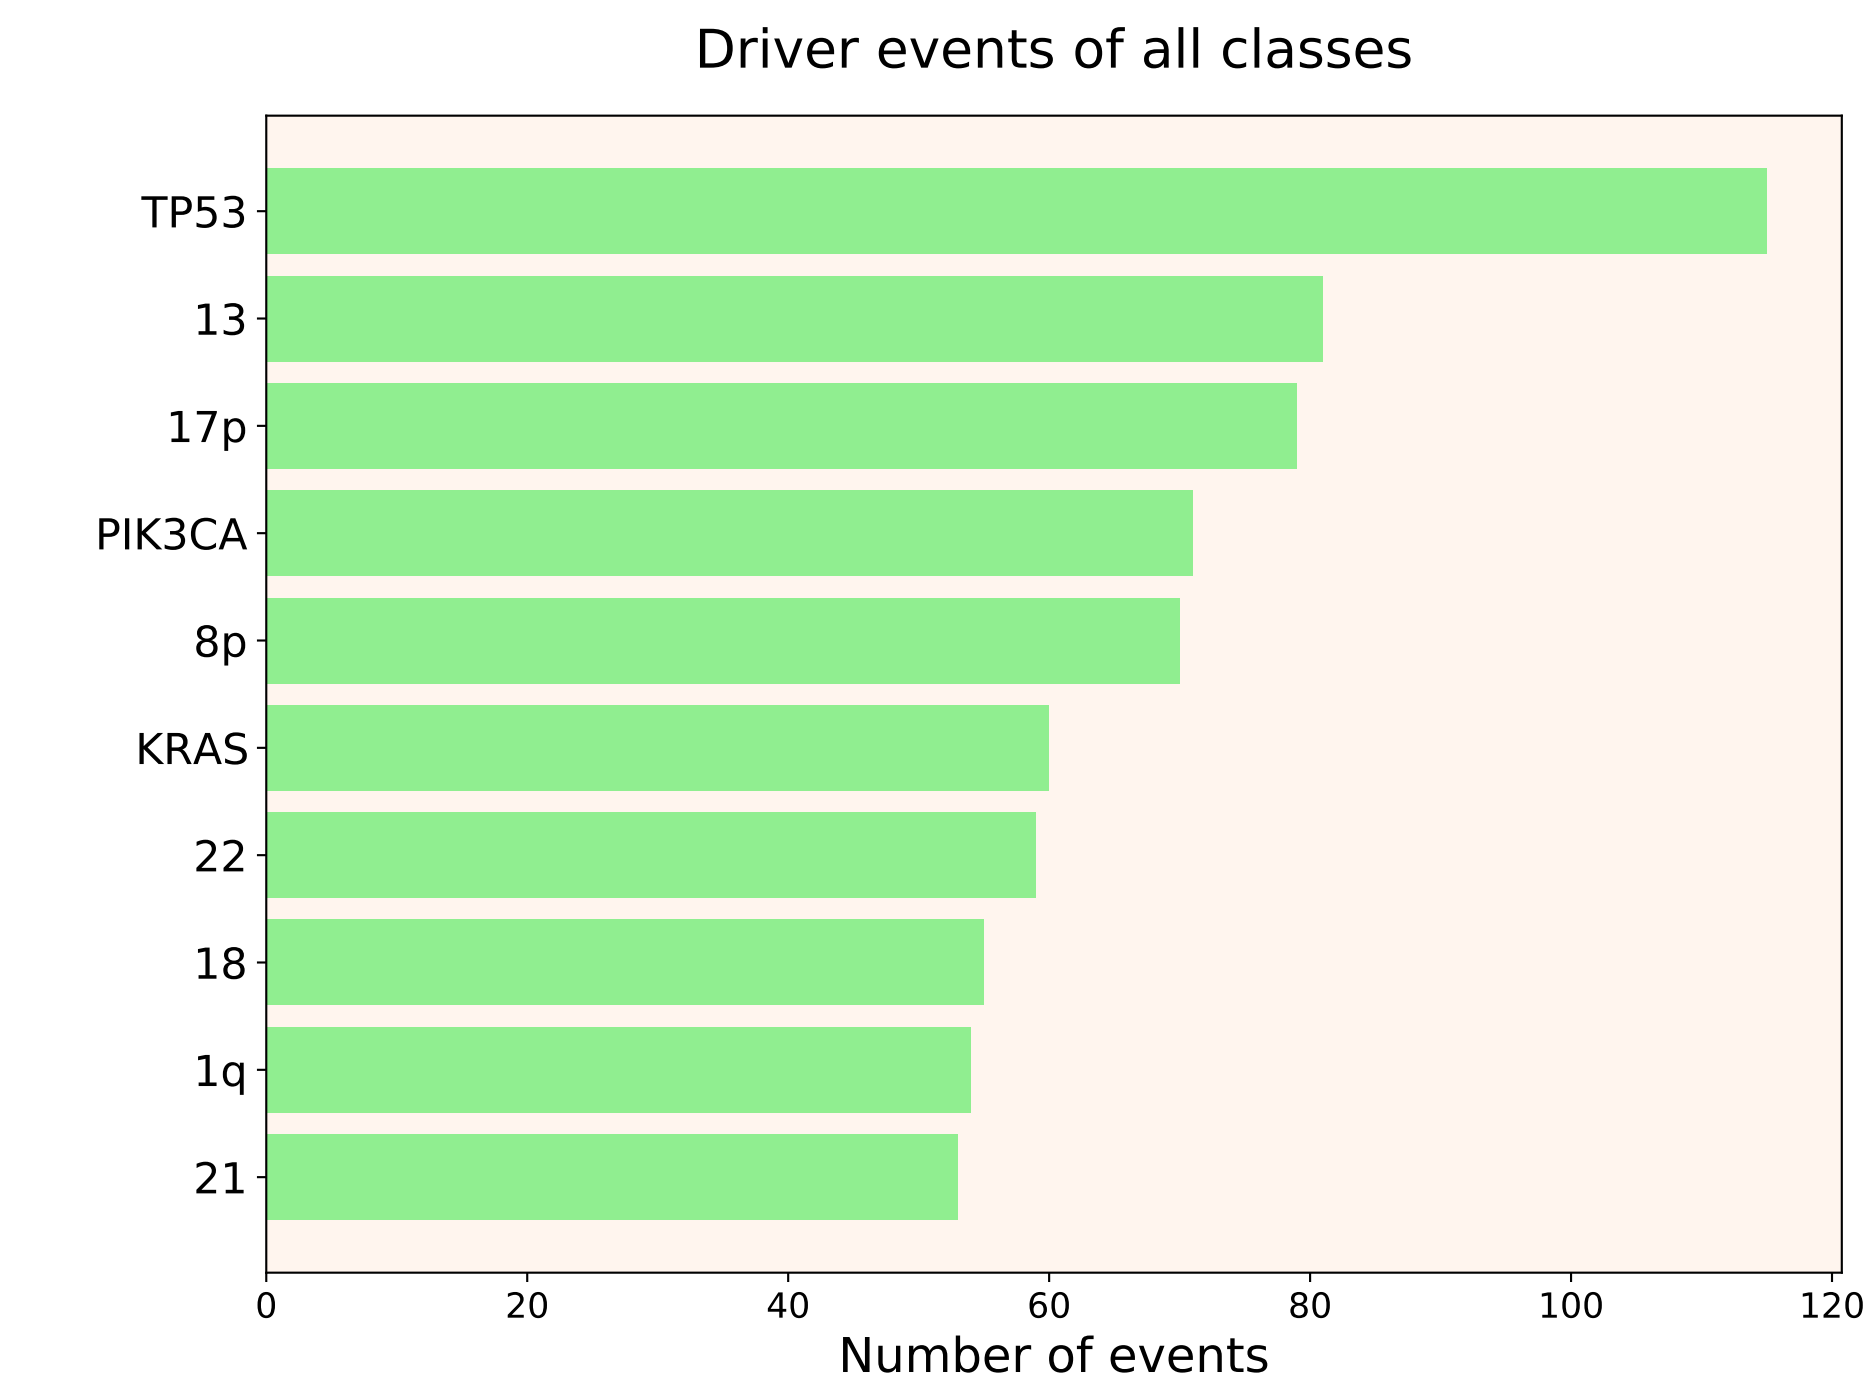

Supplement: Supplemental_Data_S1.zip [file Supplemental_Data_S1.zip]

# SKCM\_MALE

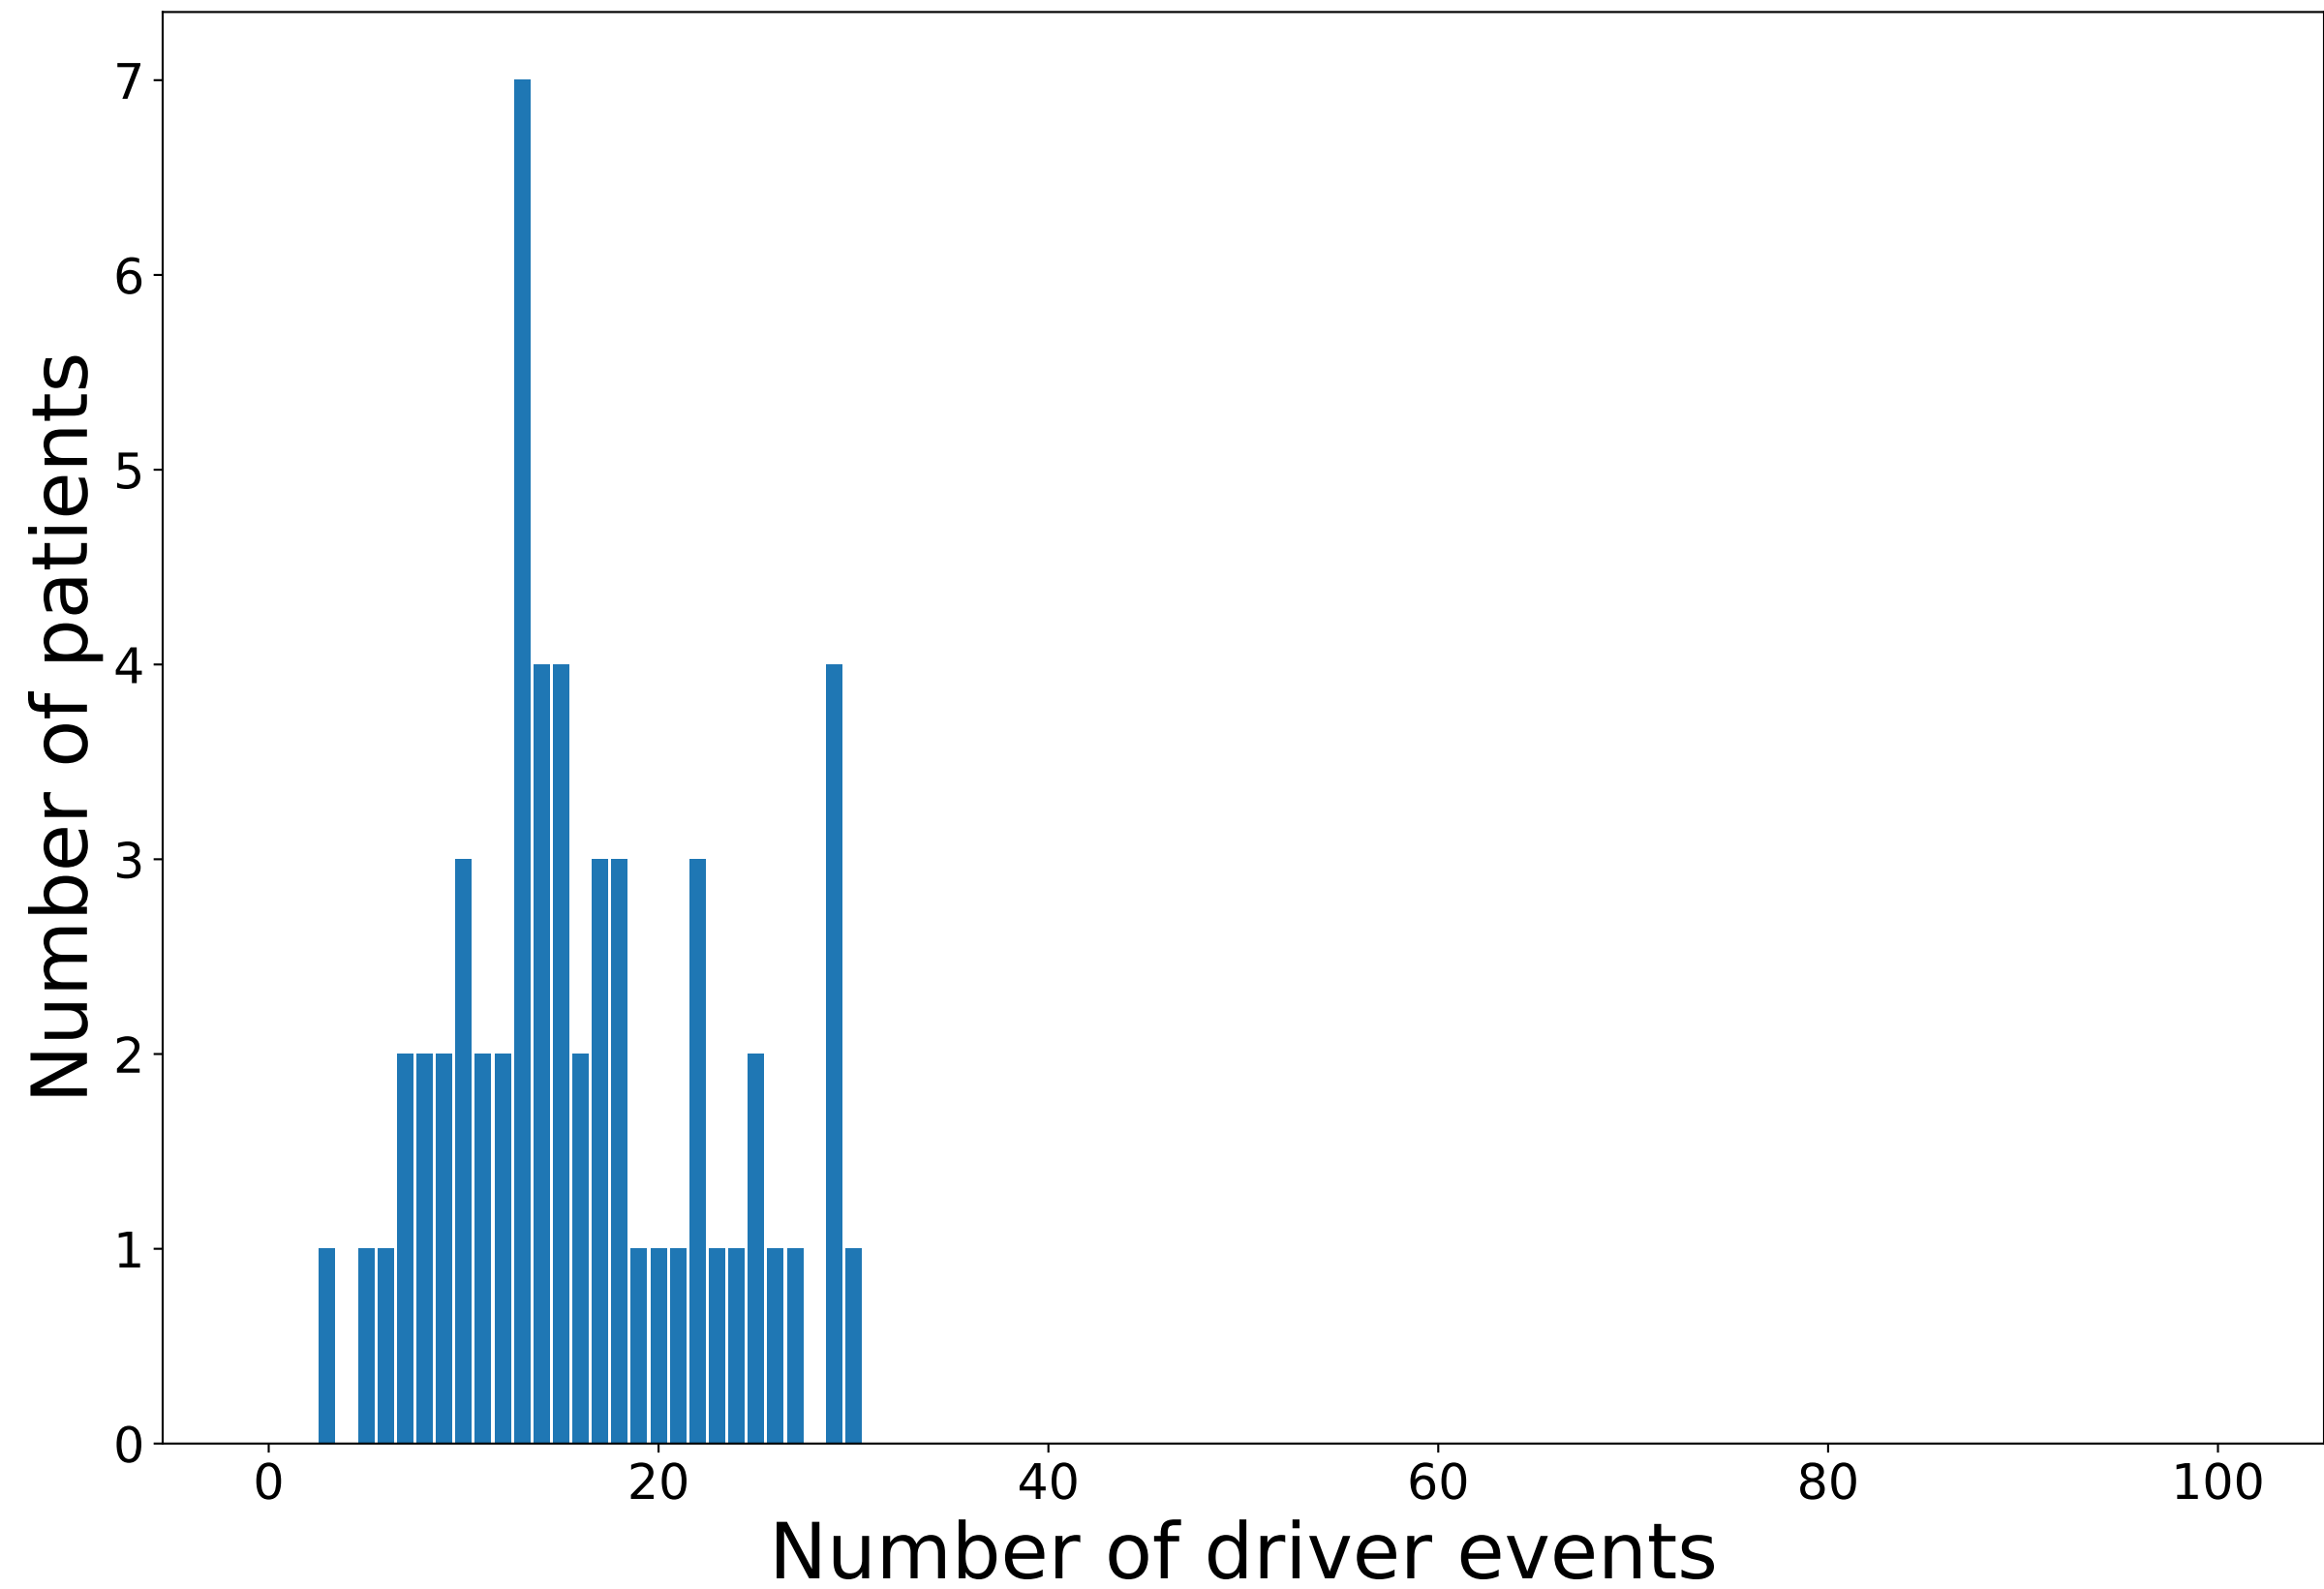

Supplement: Supplemental_Data_S1.zip [file Supplemental_Data_S1.zip]

# BRCA\_FEMALE

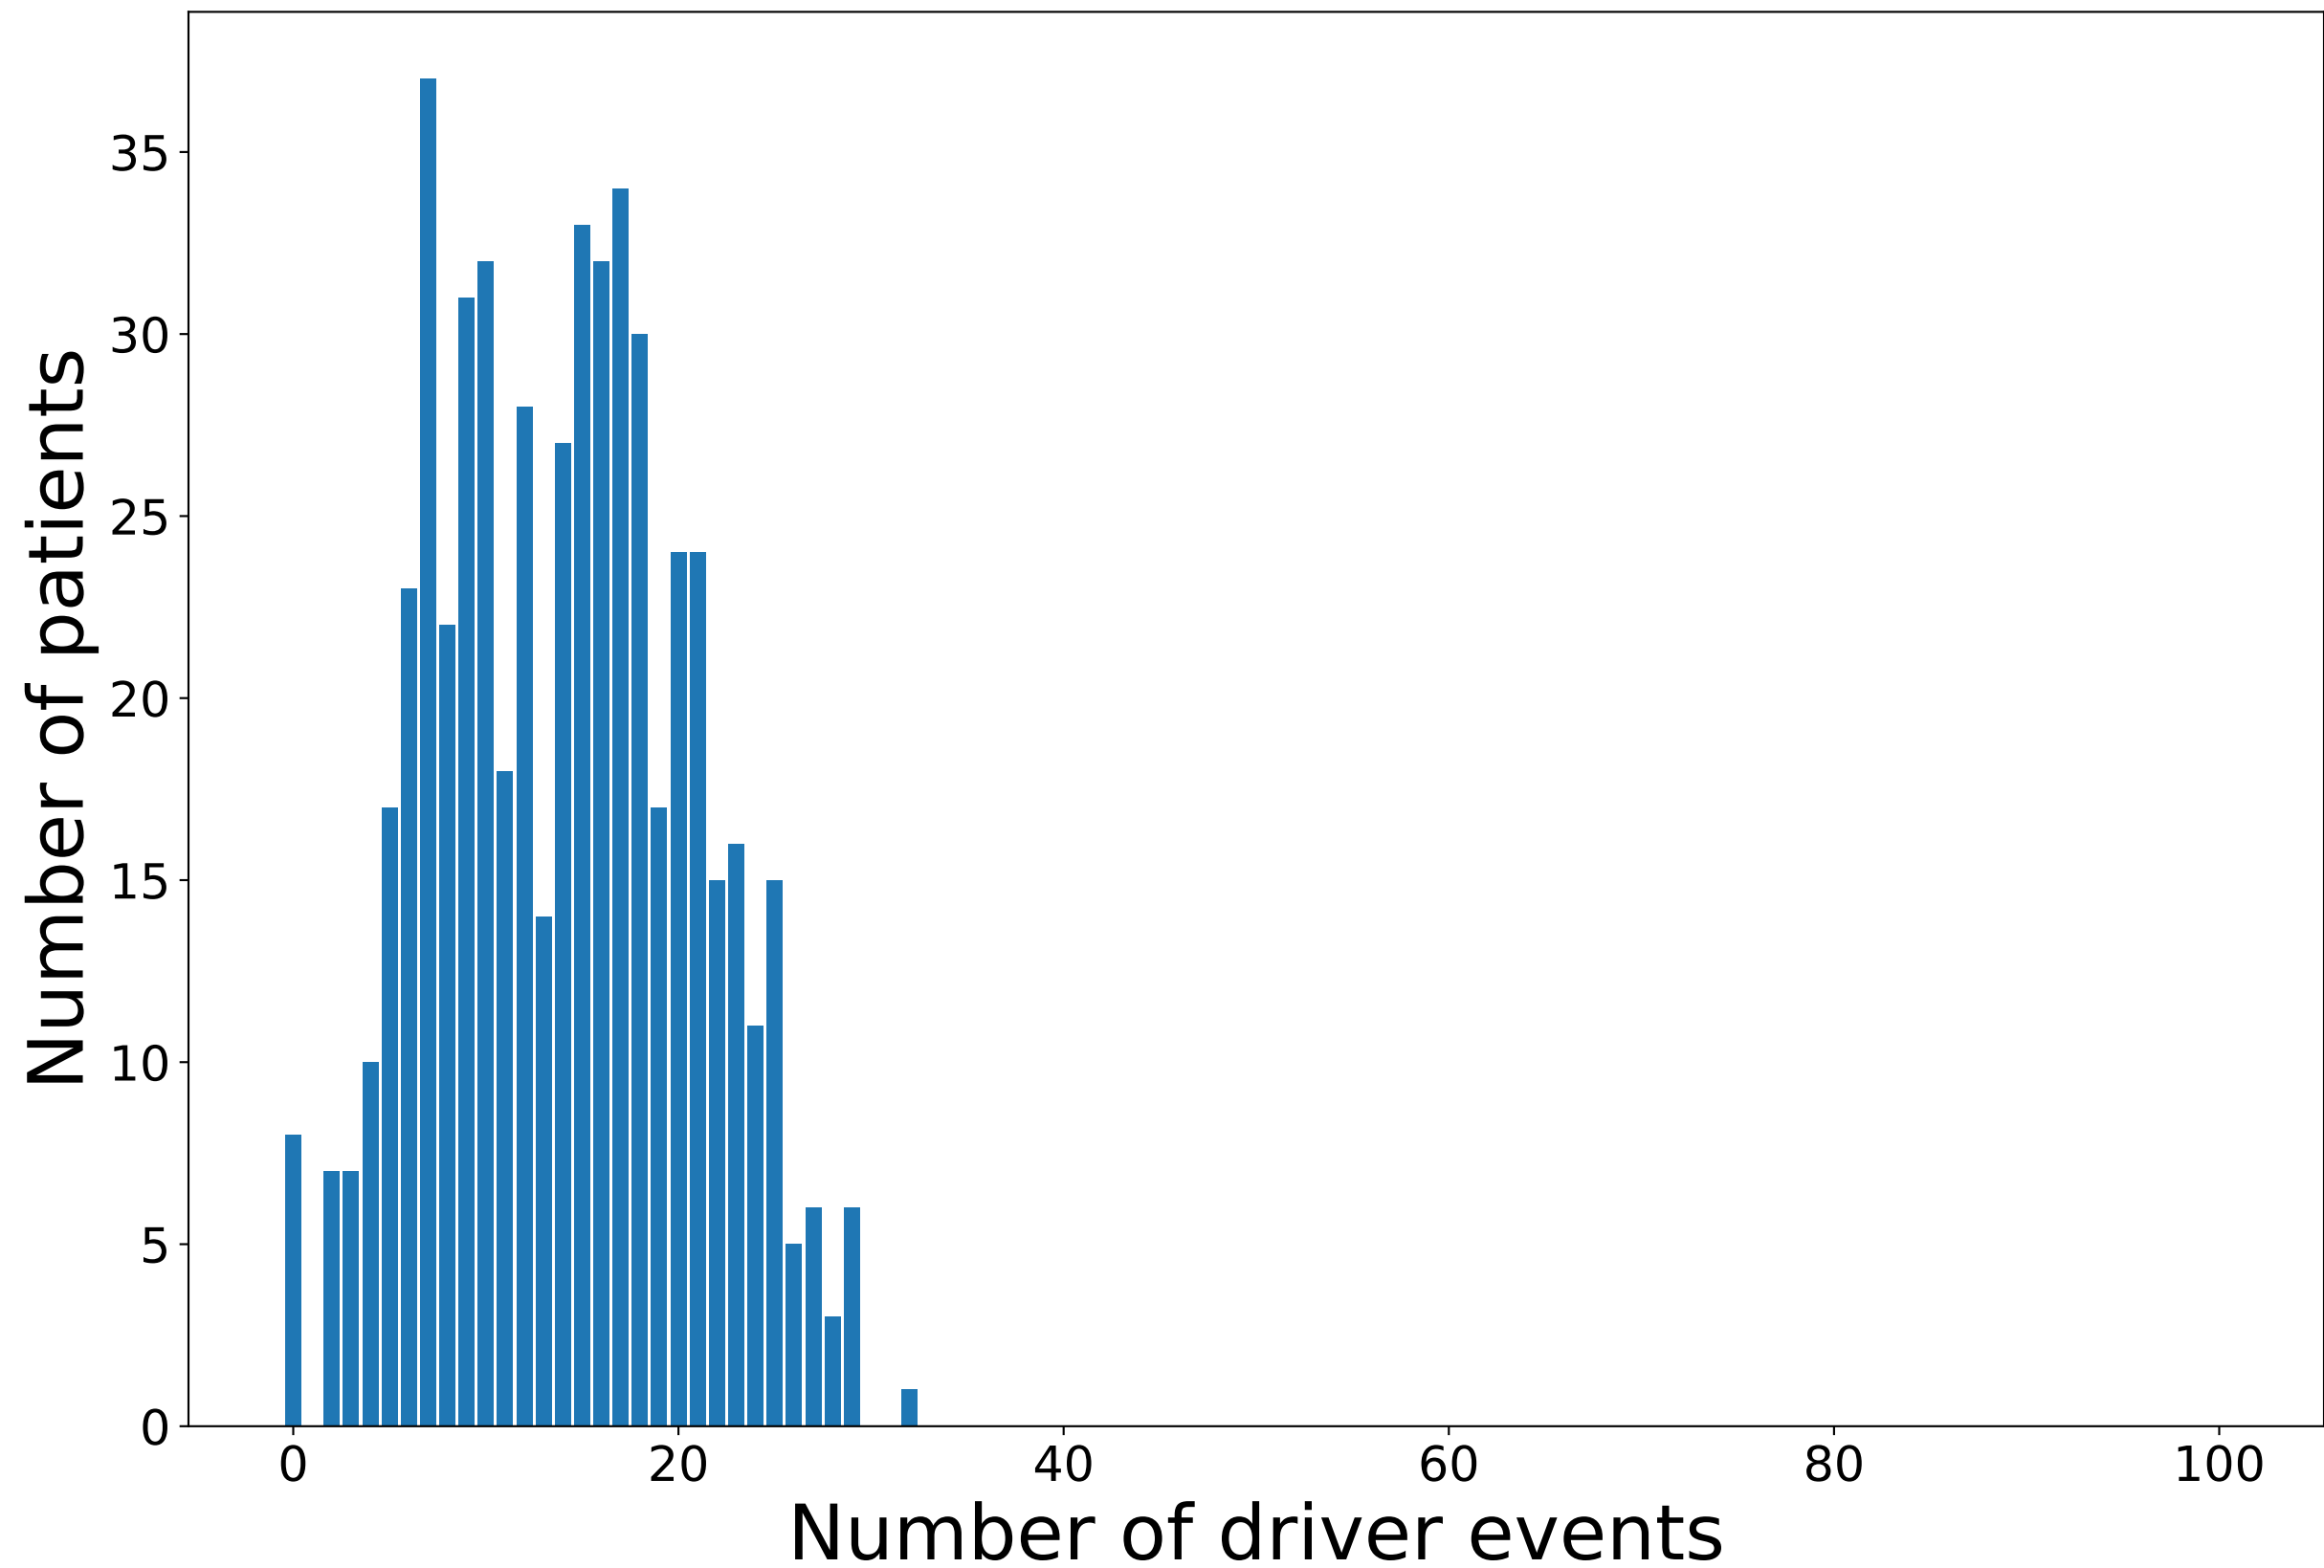

Supplement: Supplemental_Data_S1.zip [file Supplemental_Data_S1.zip]

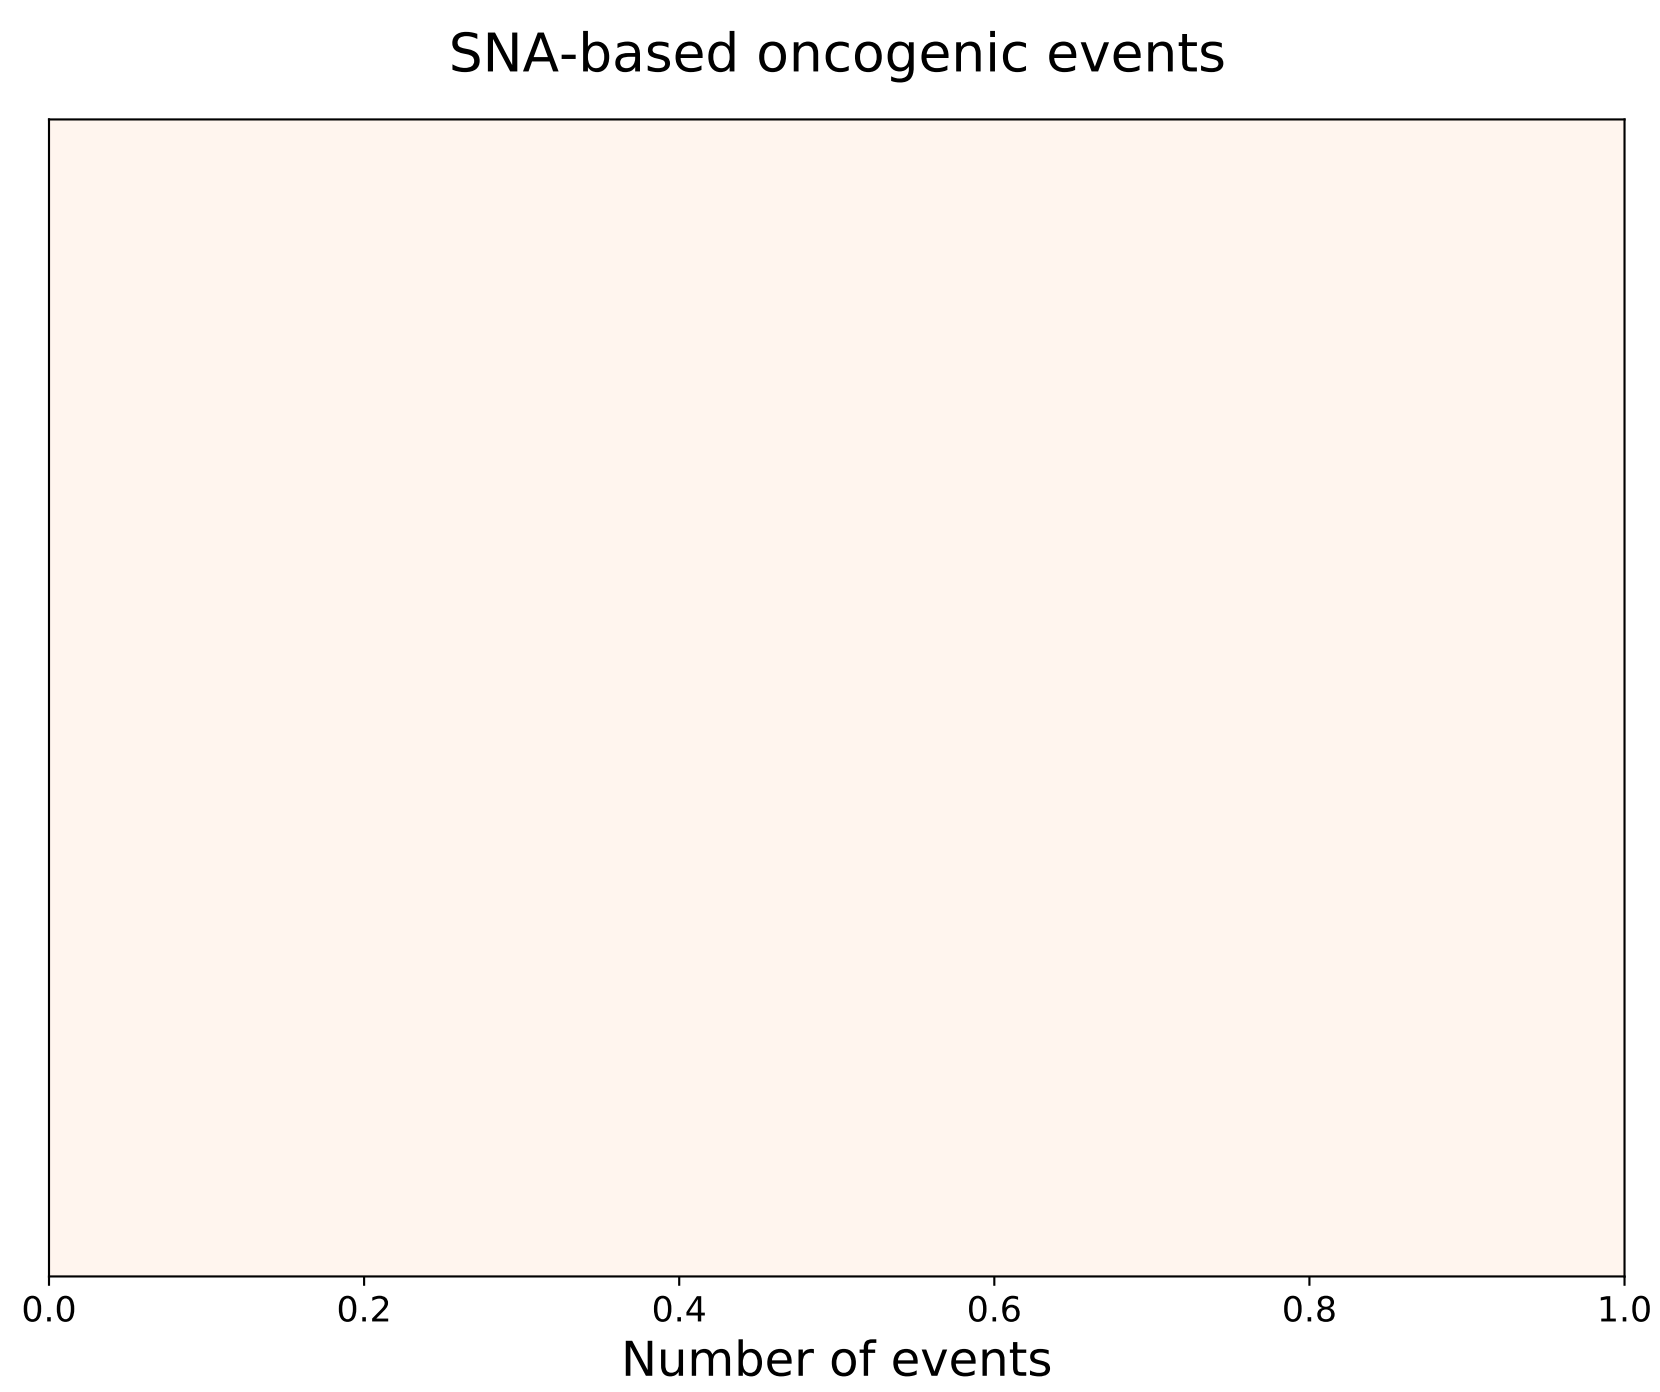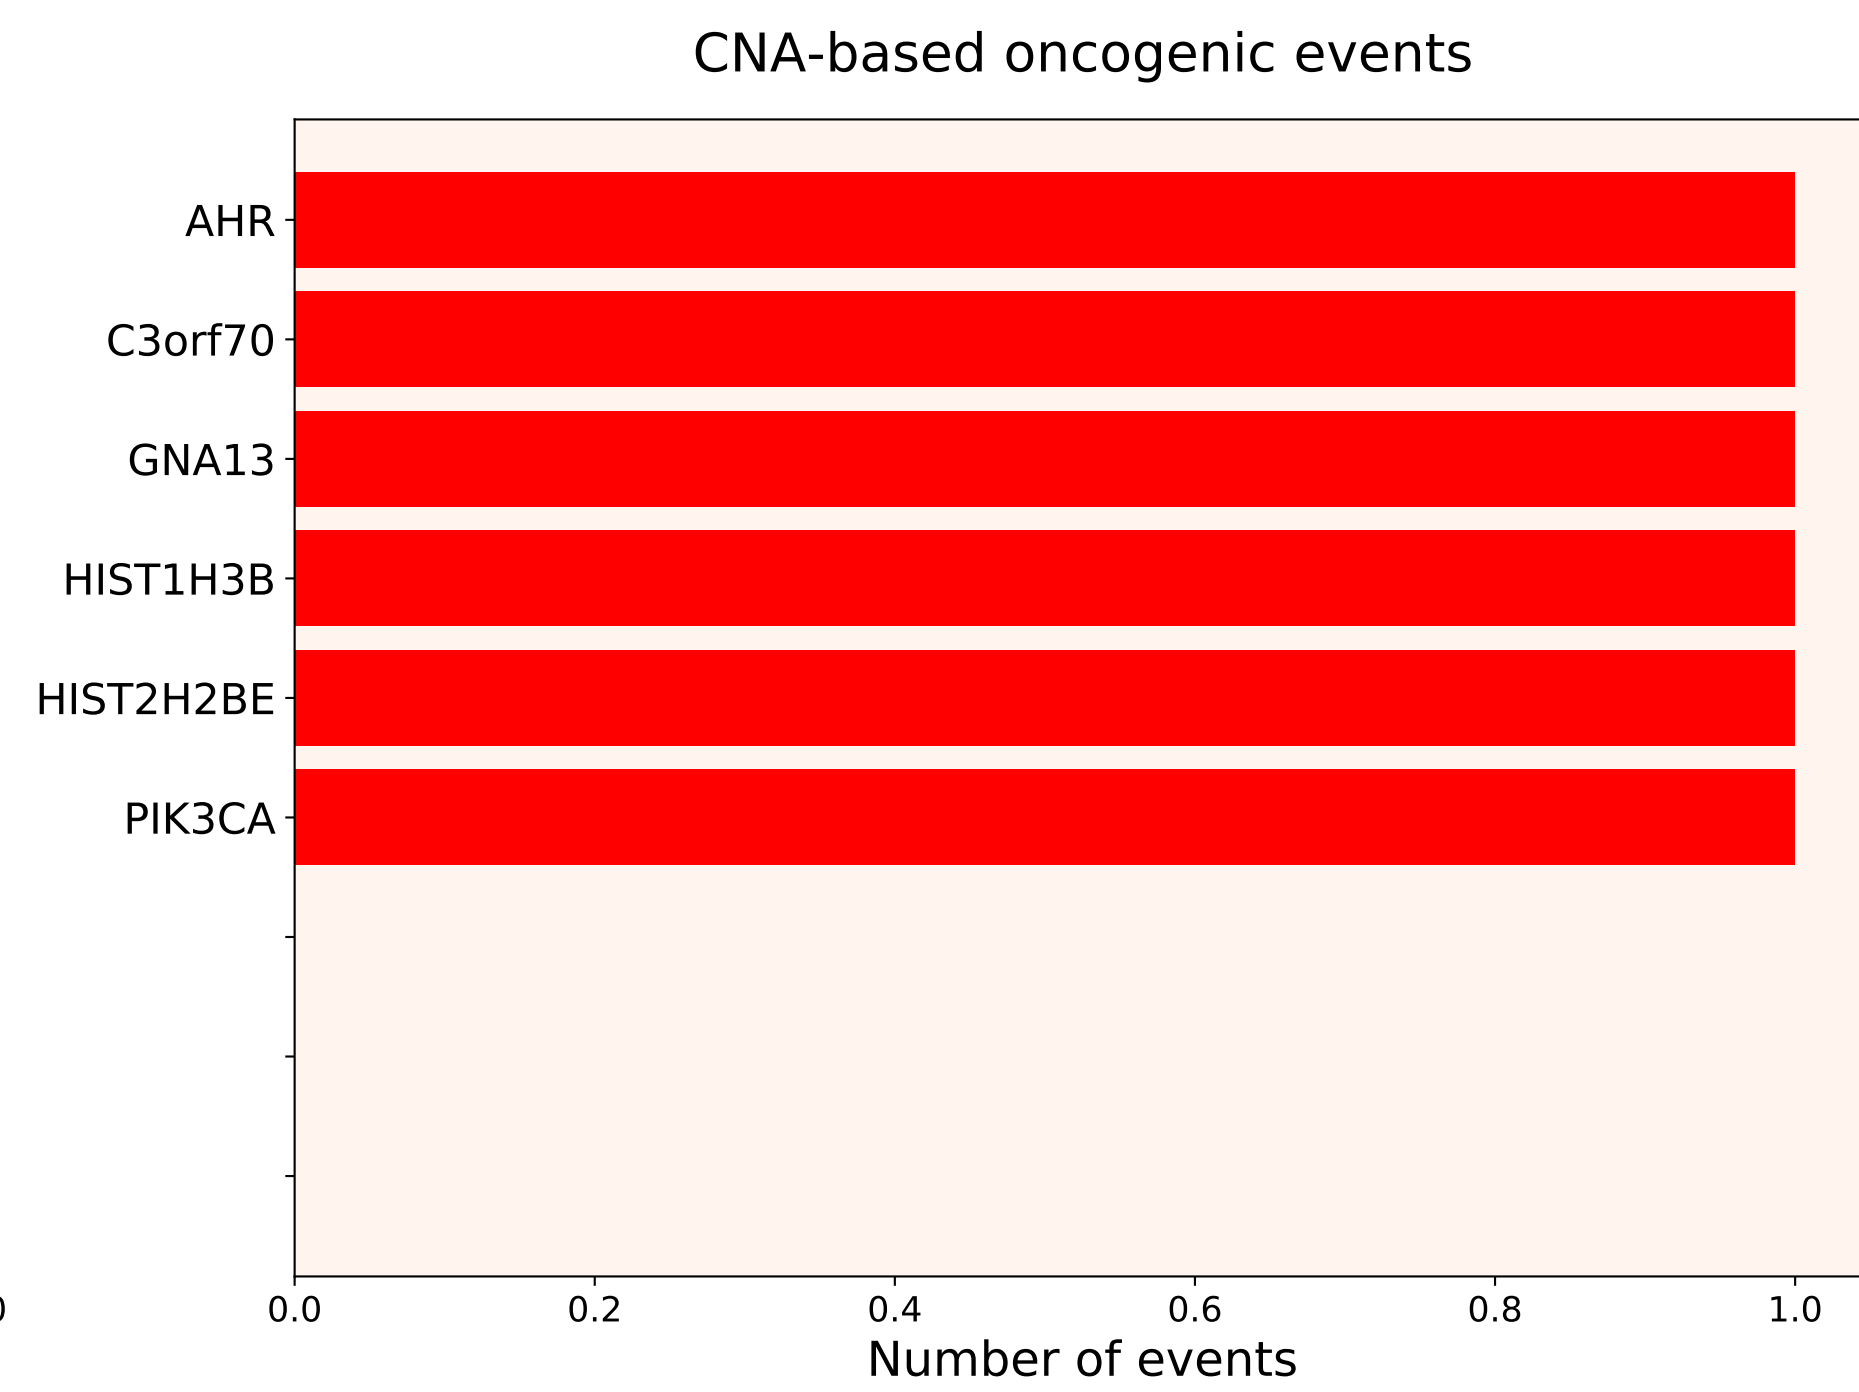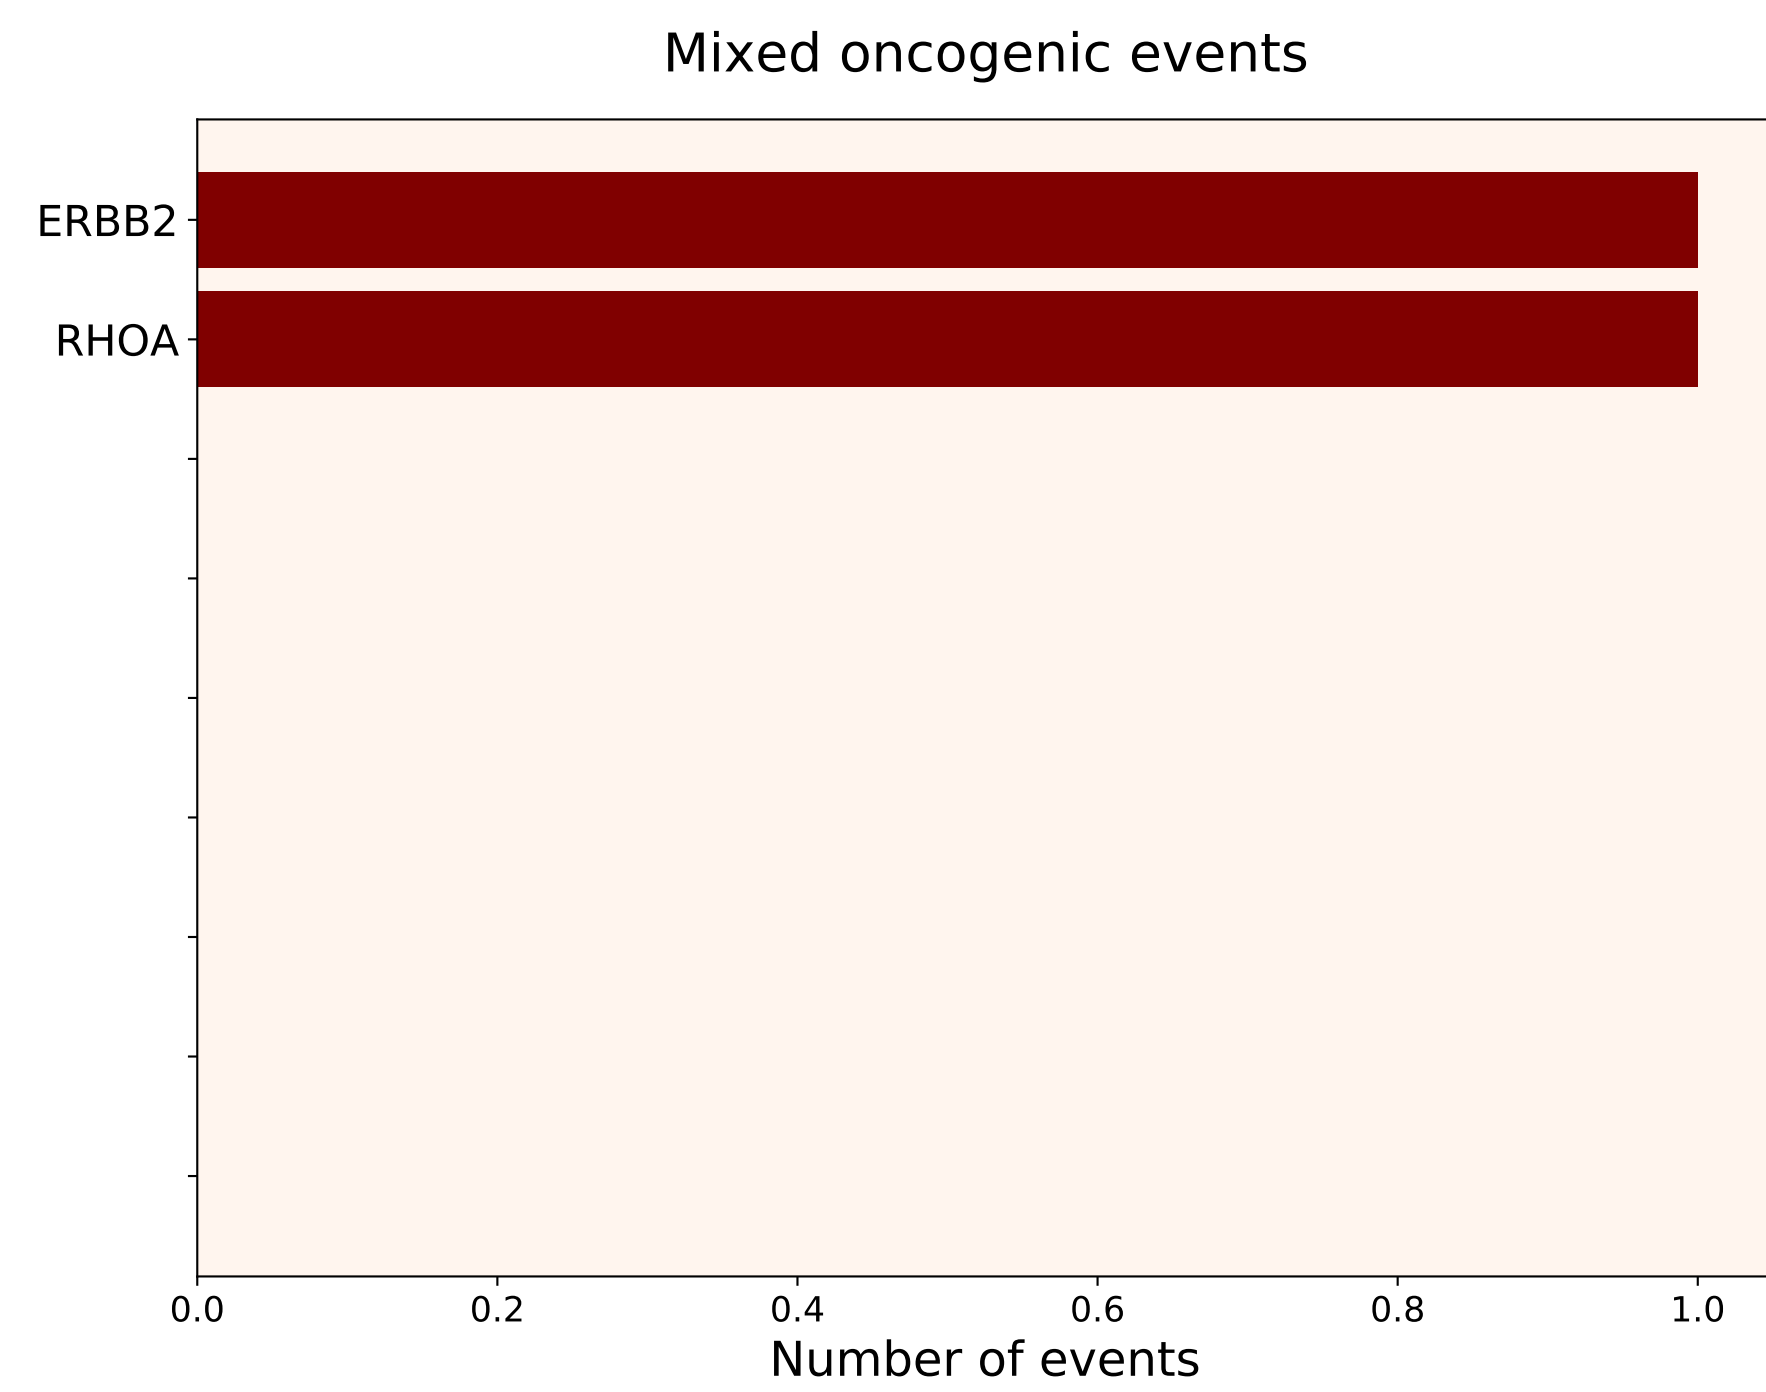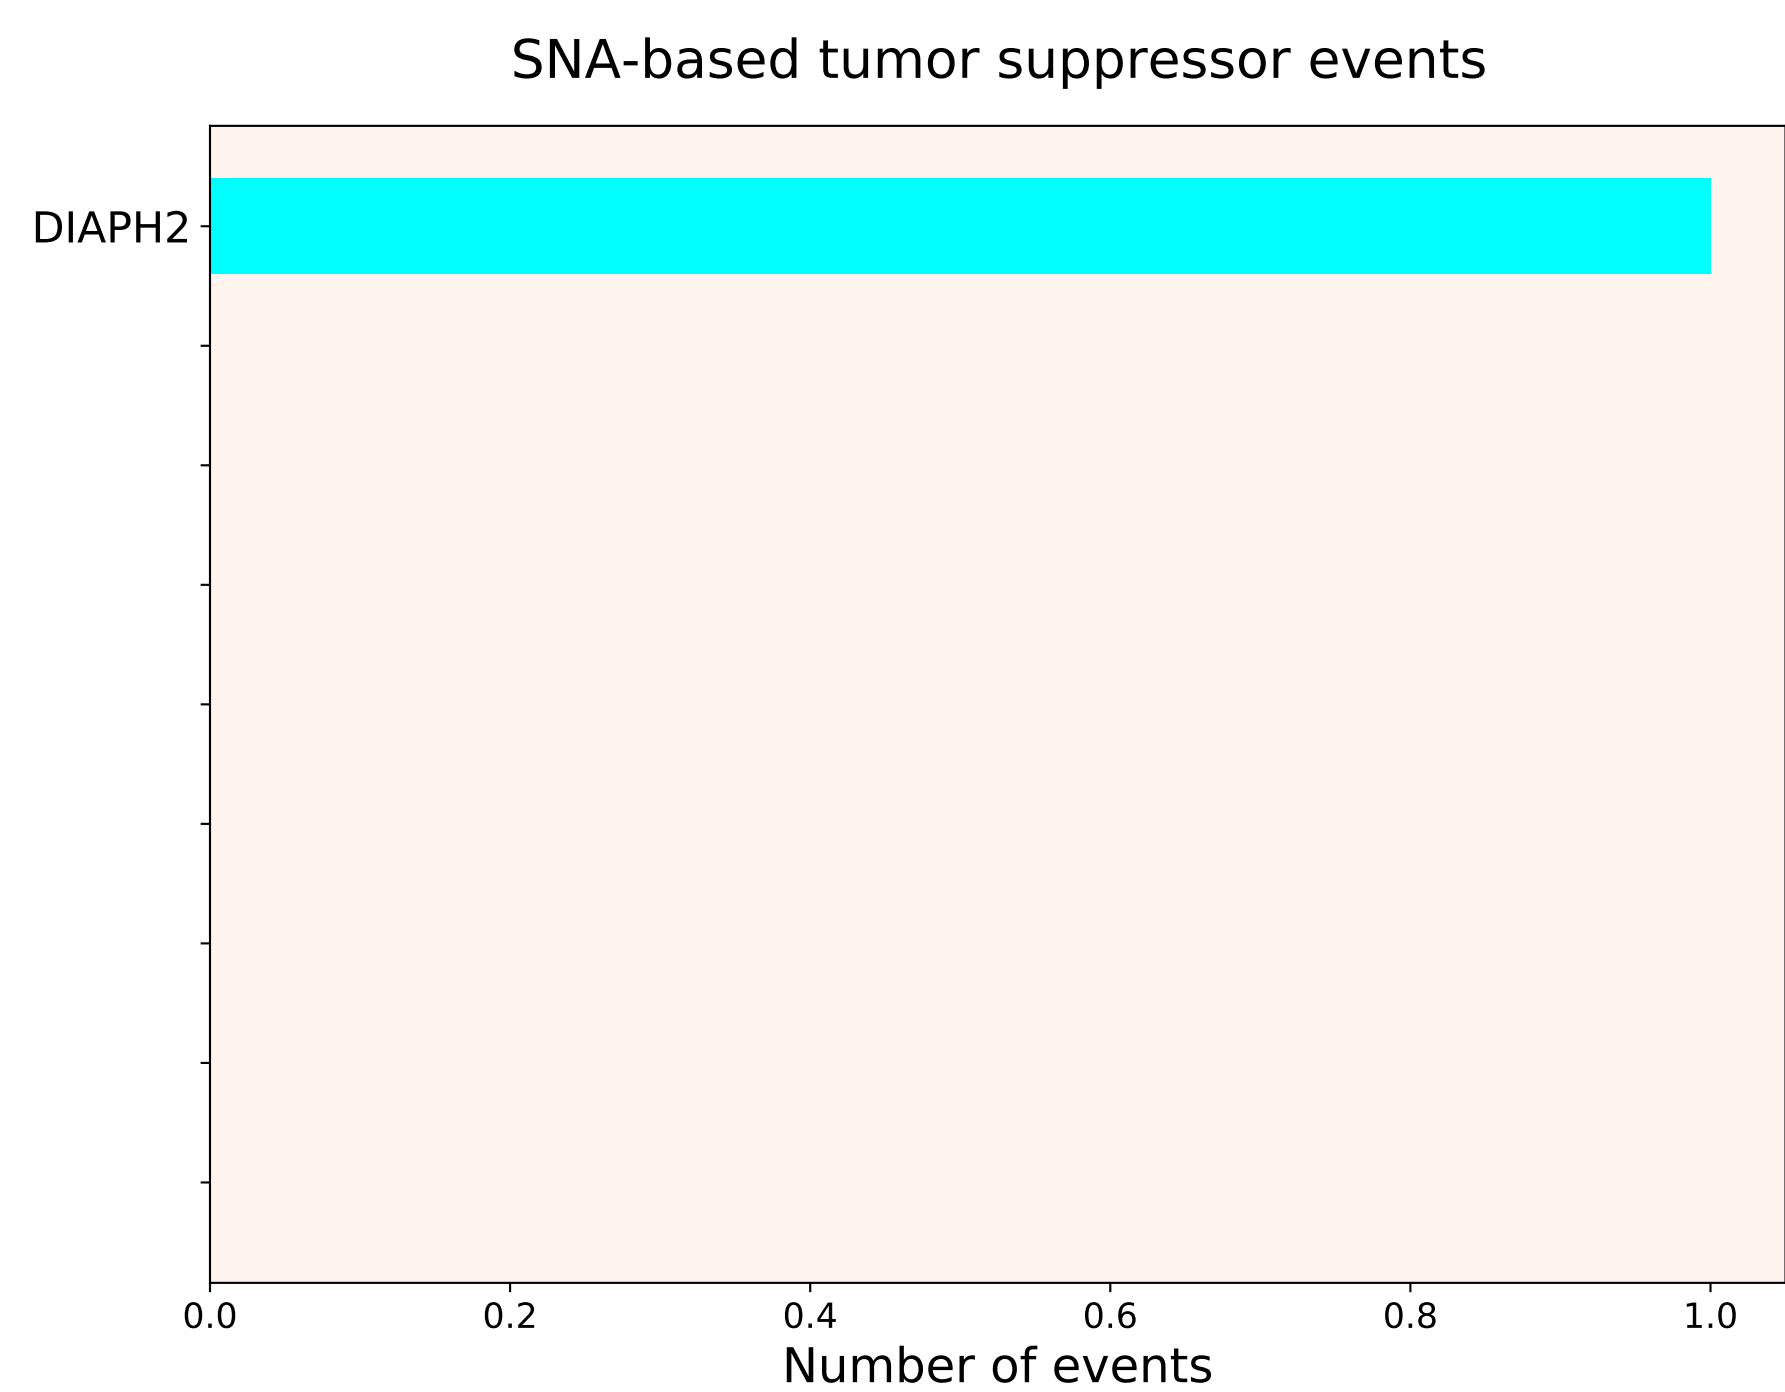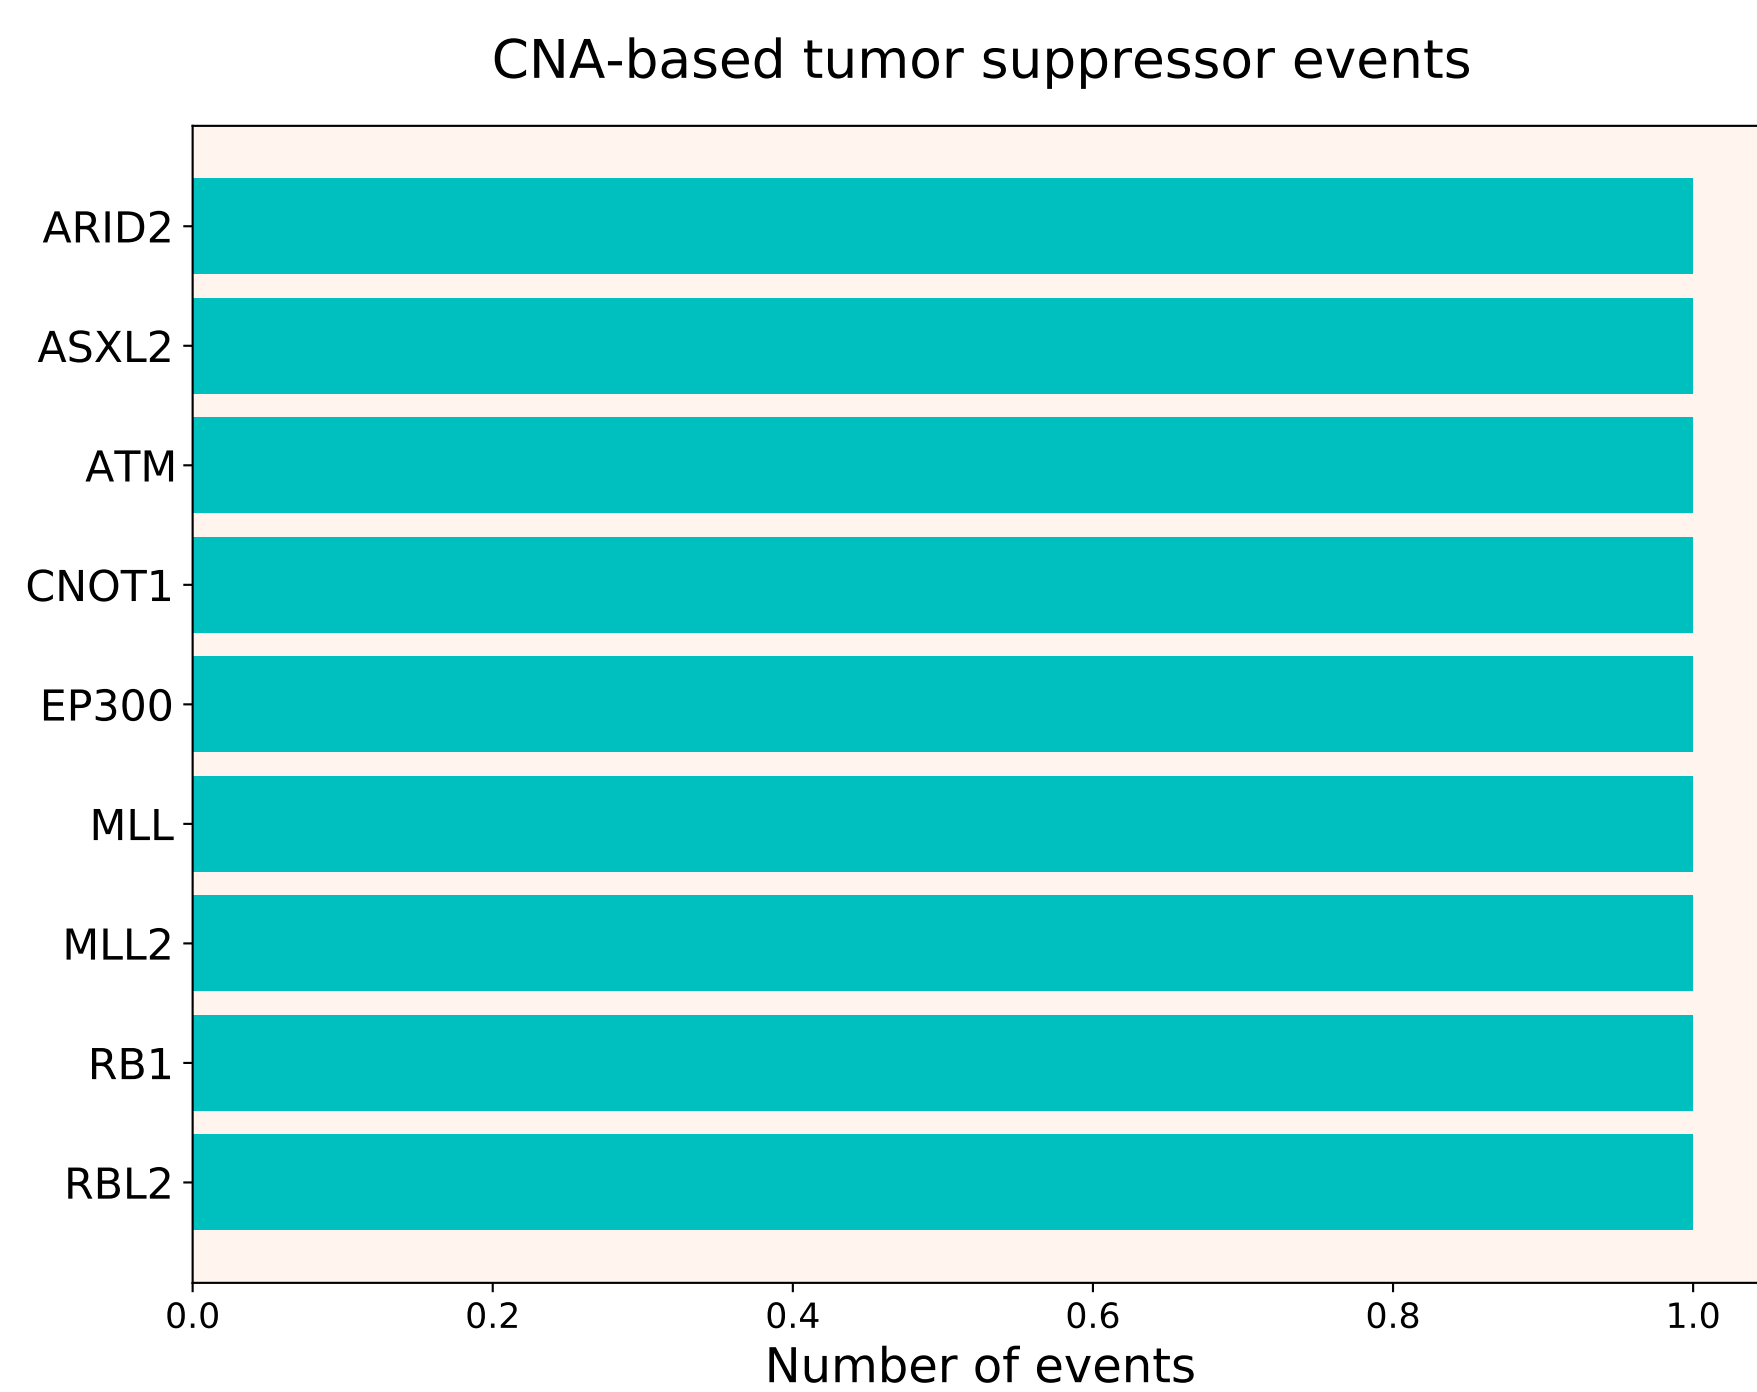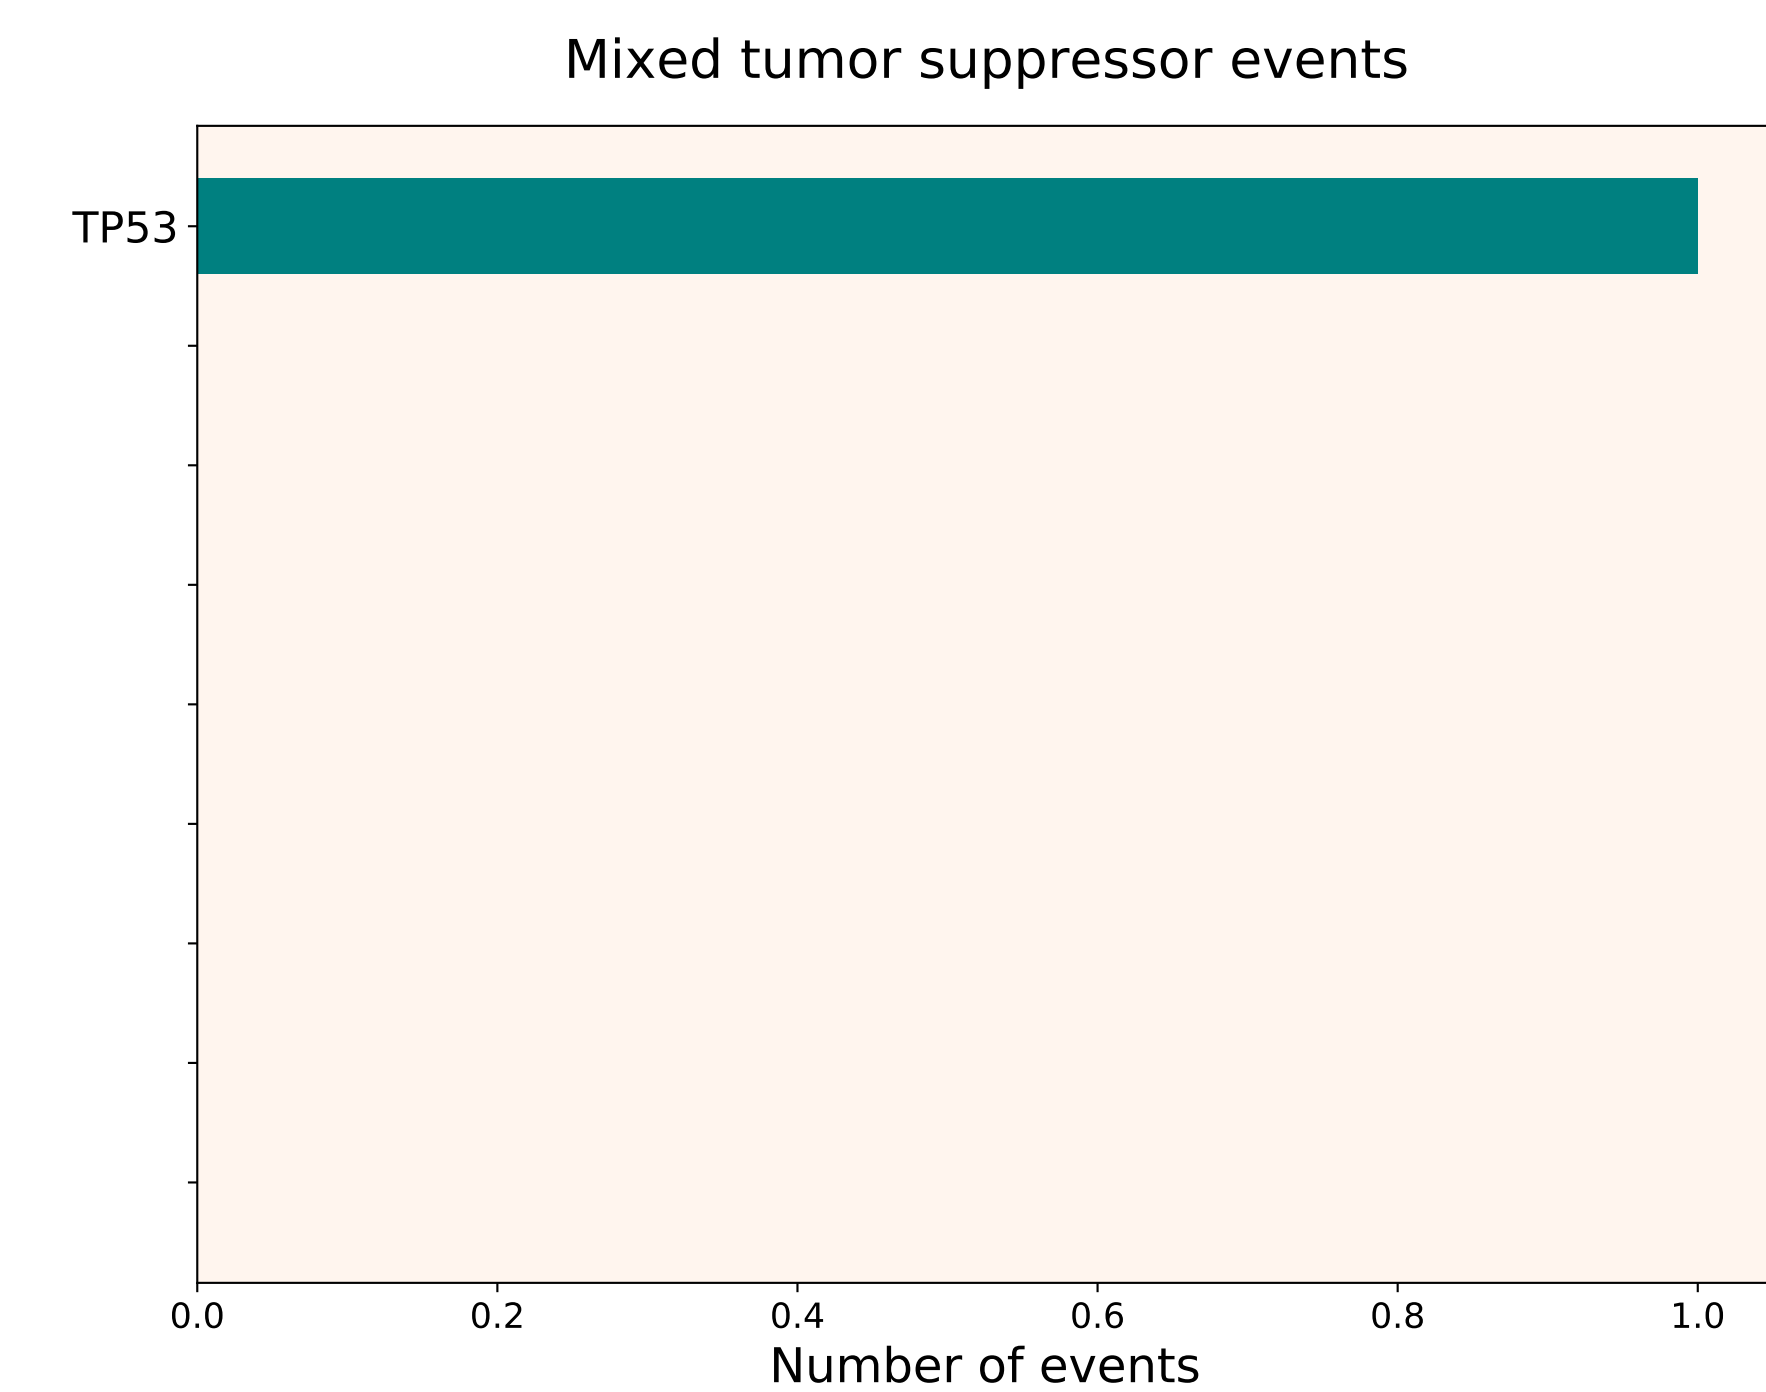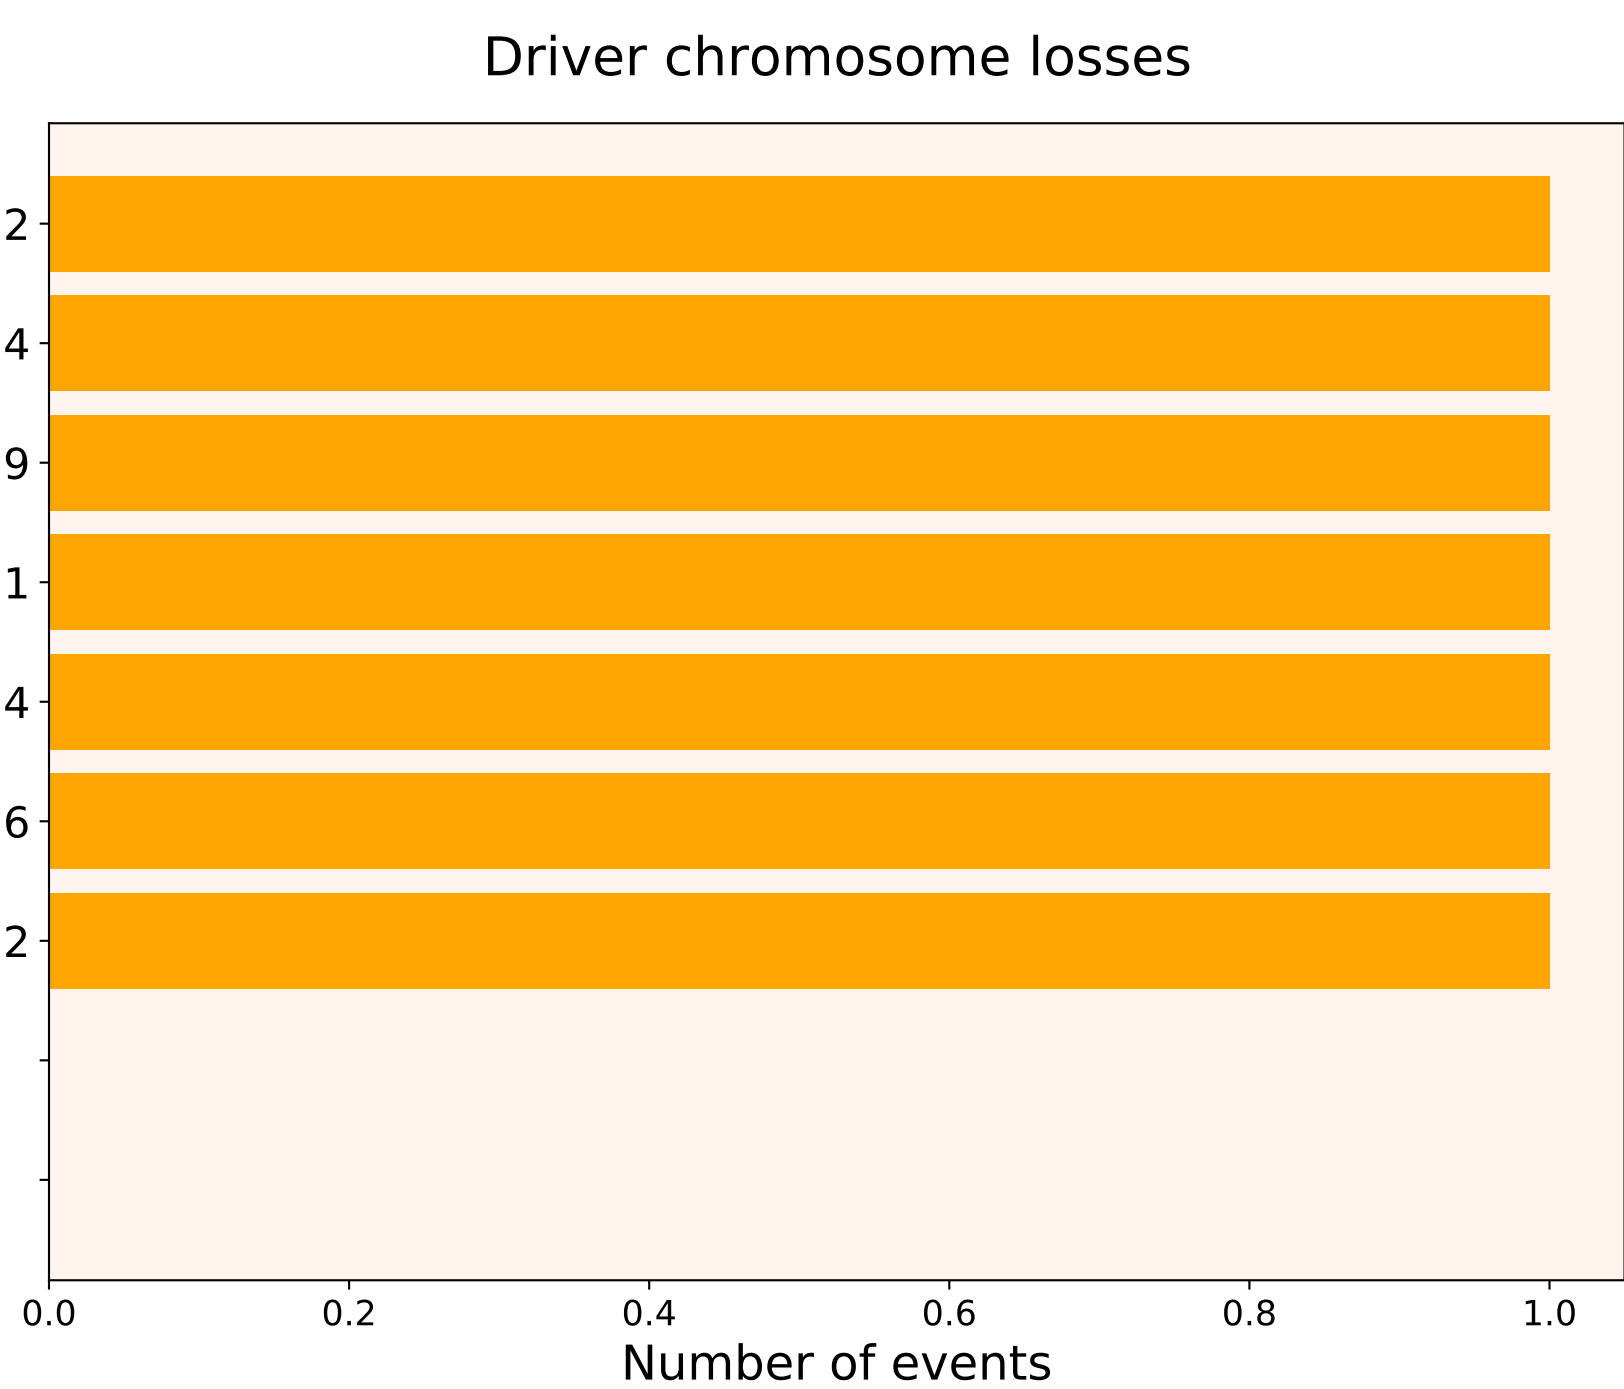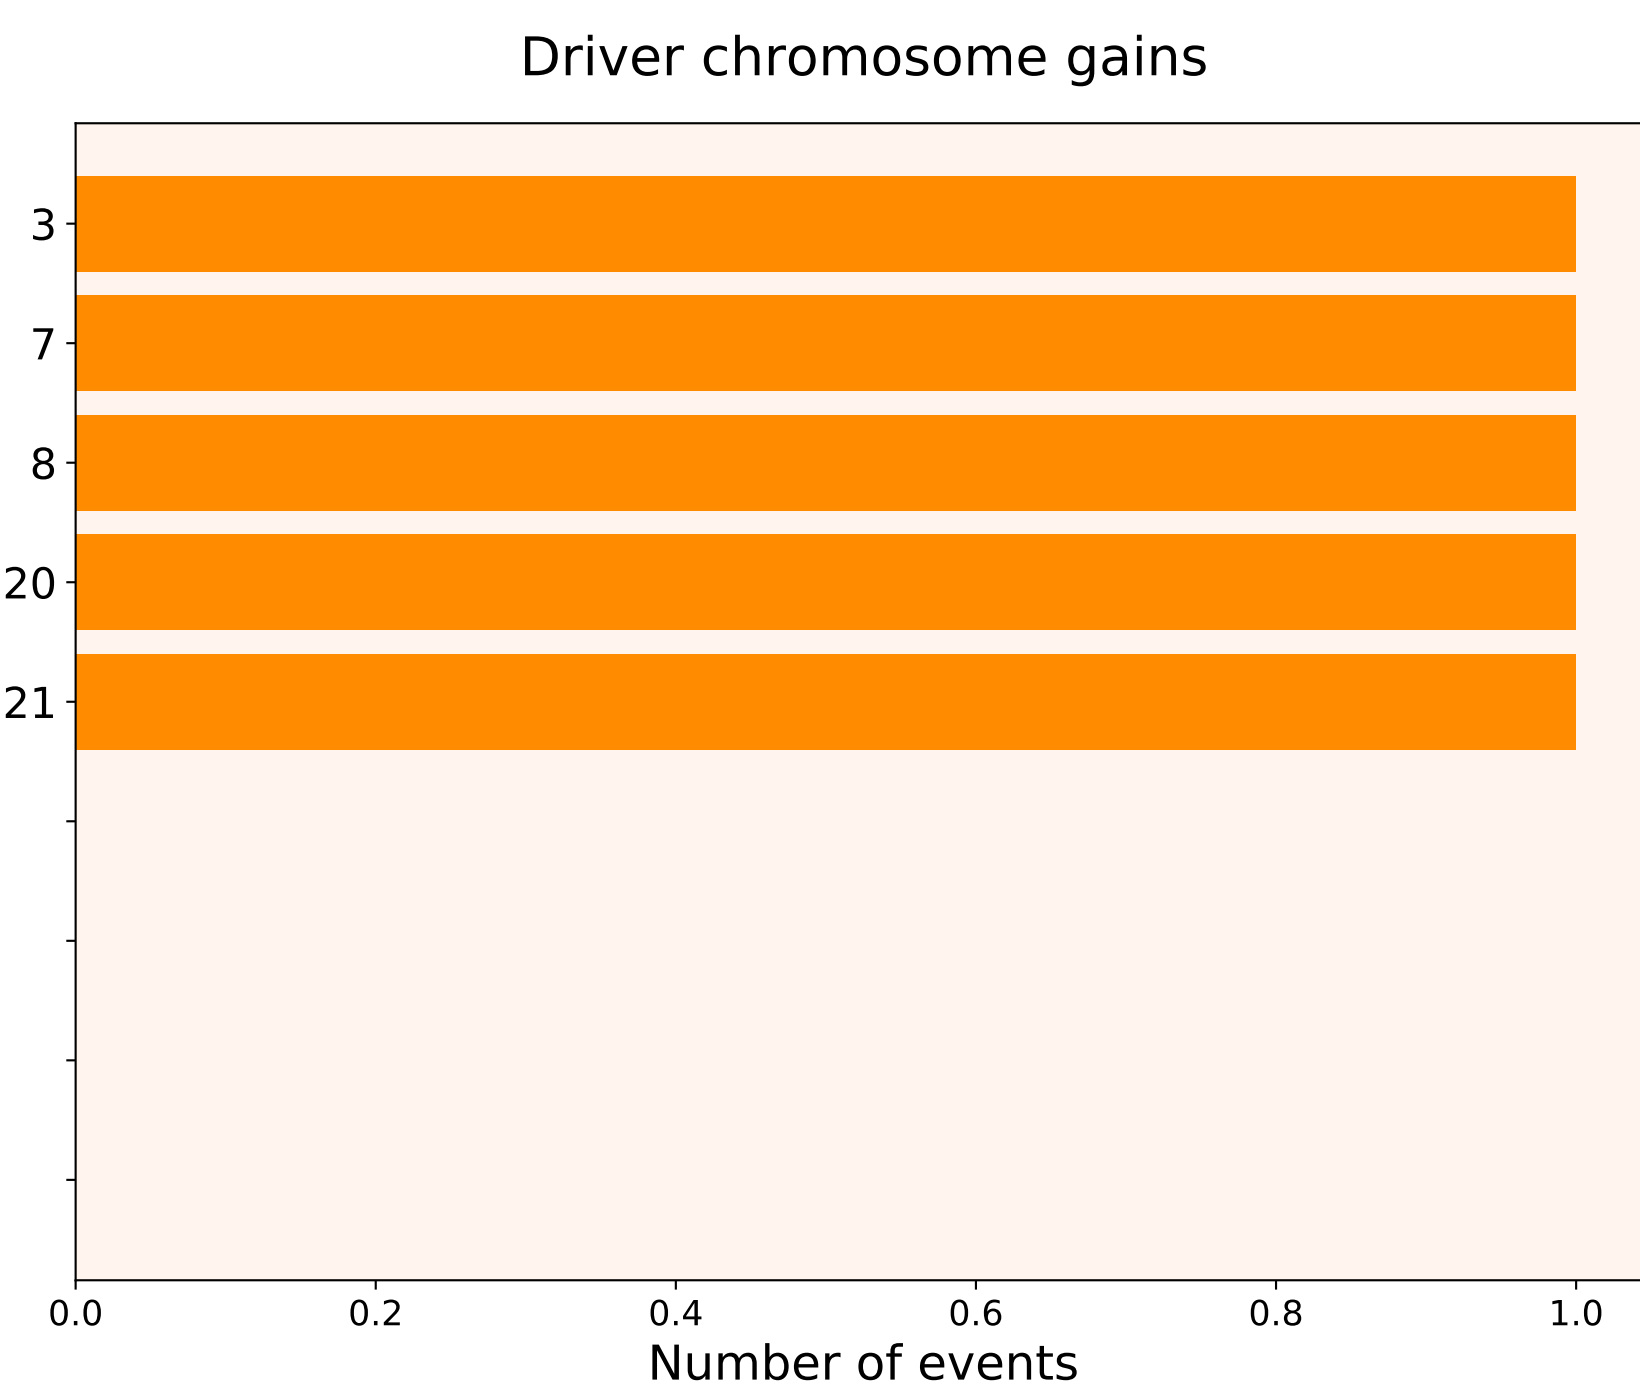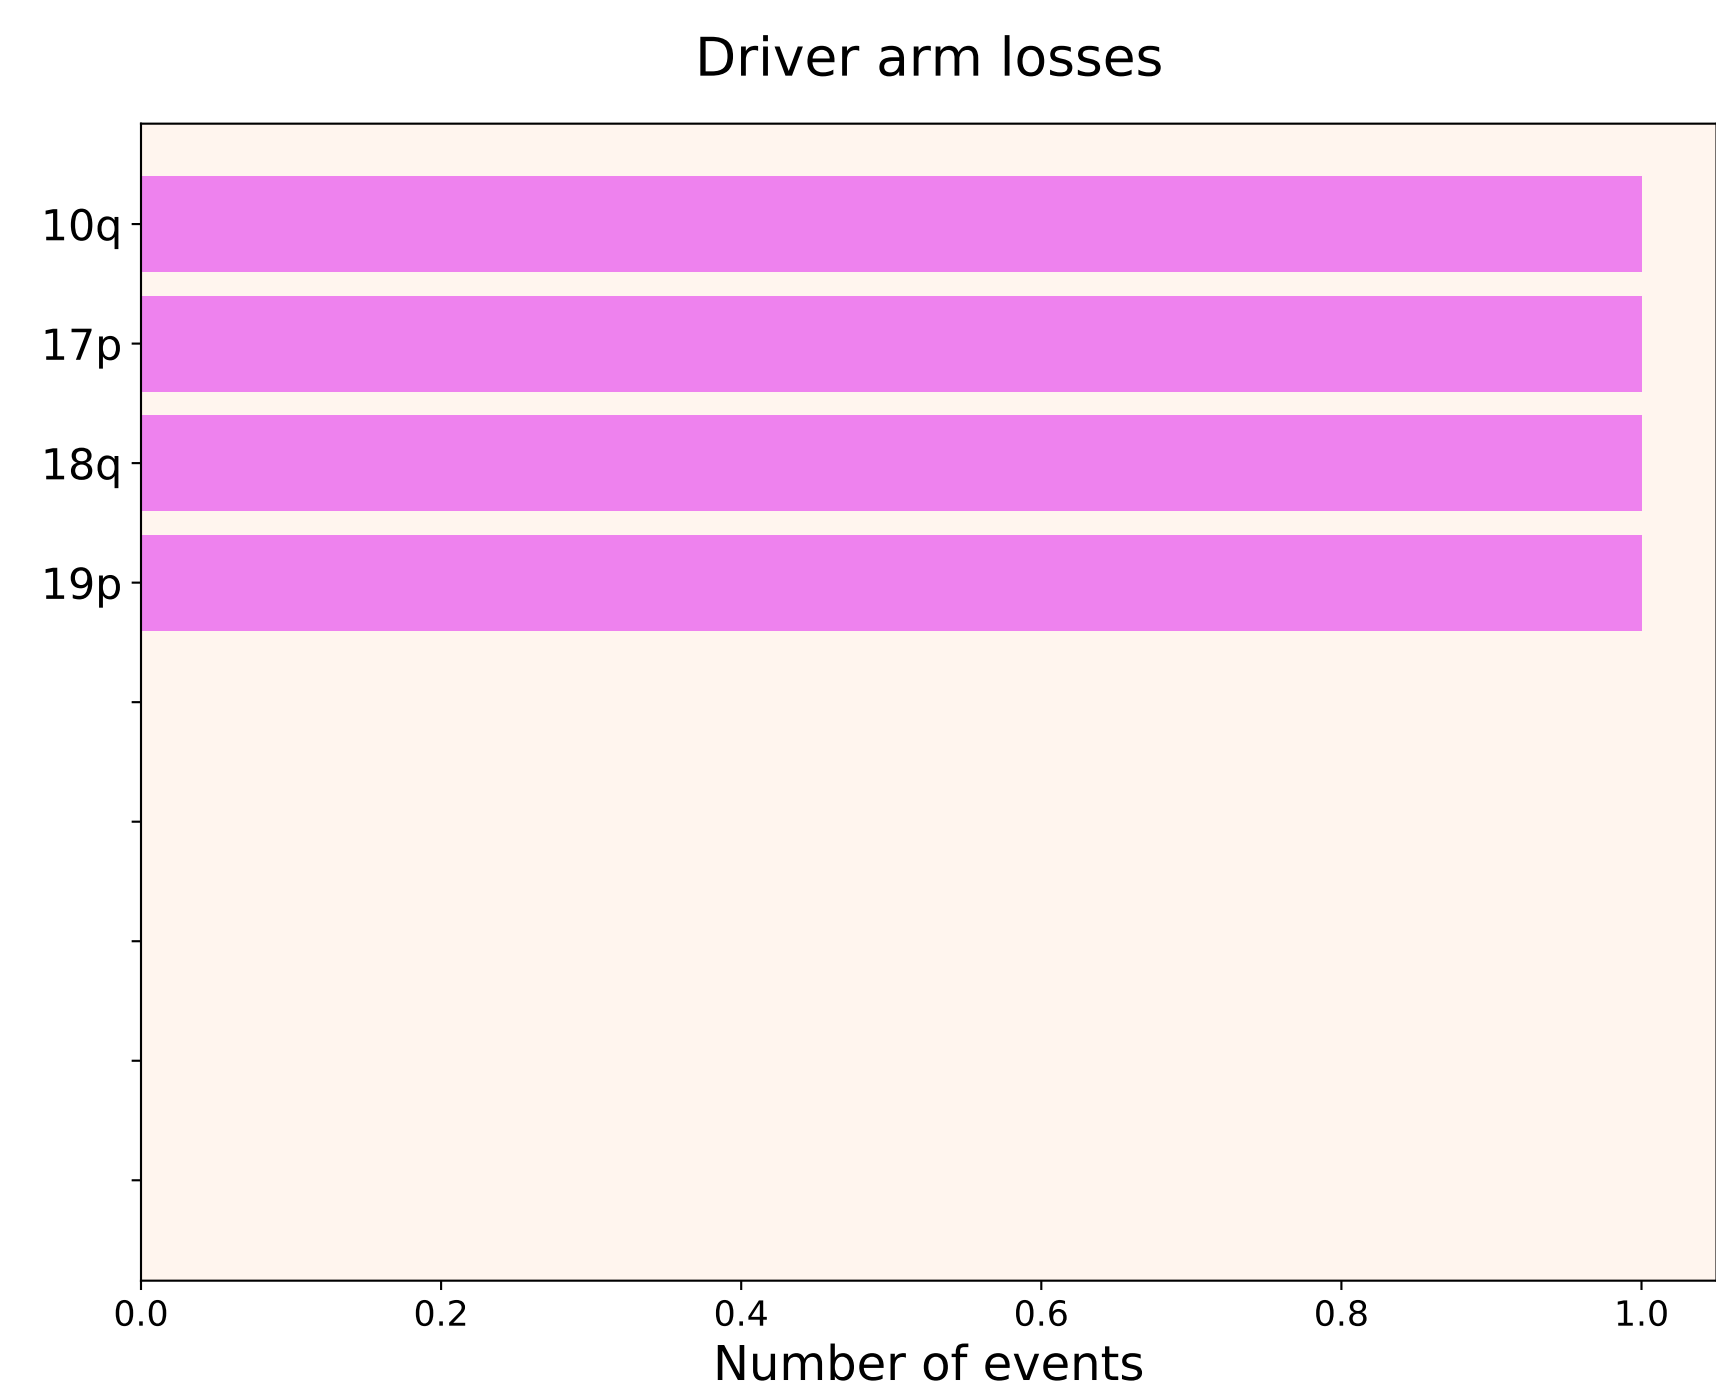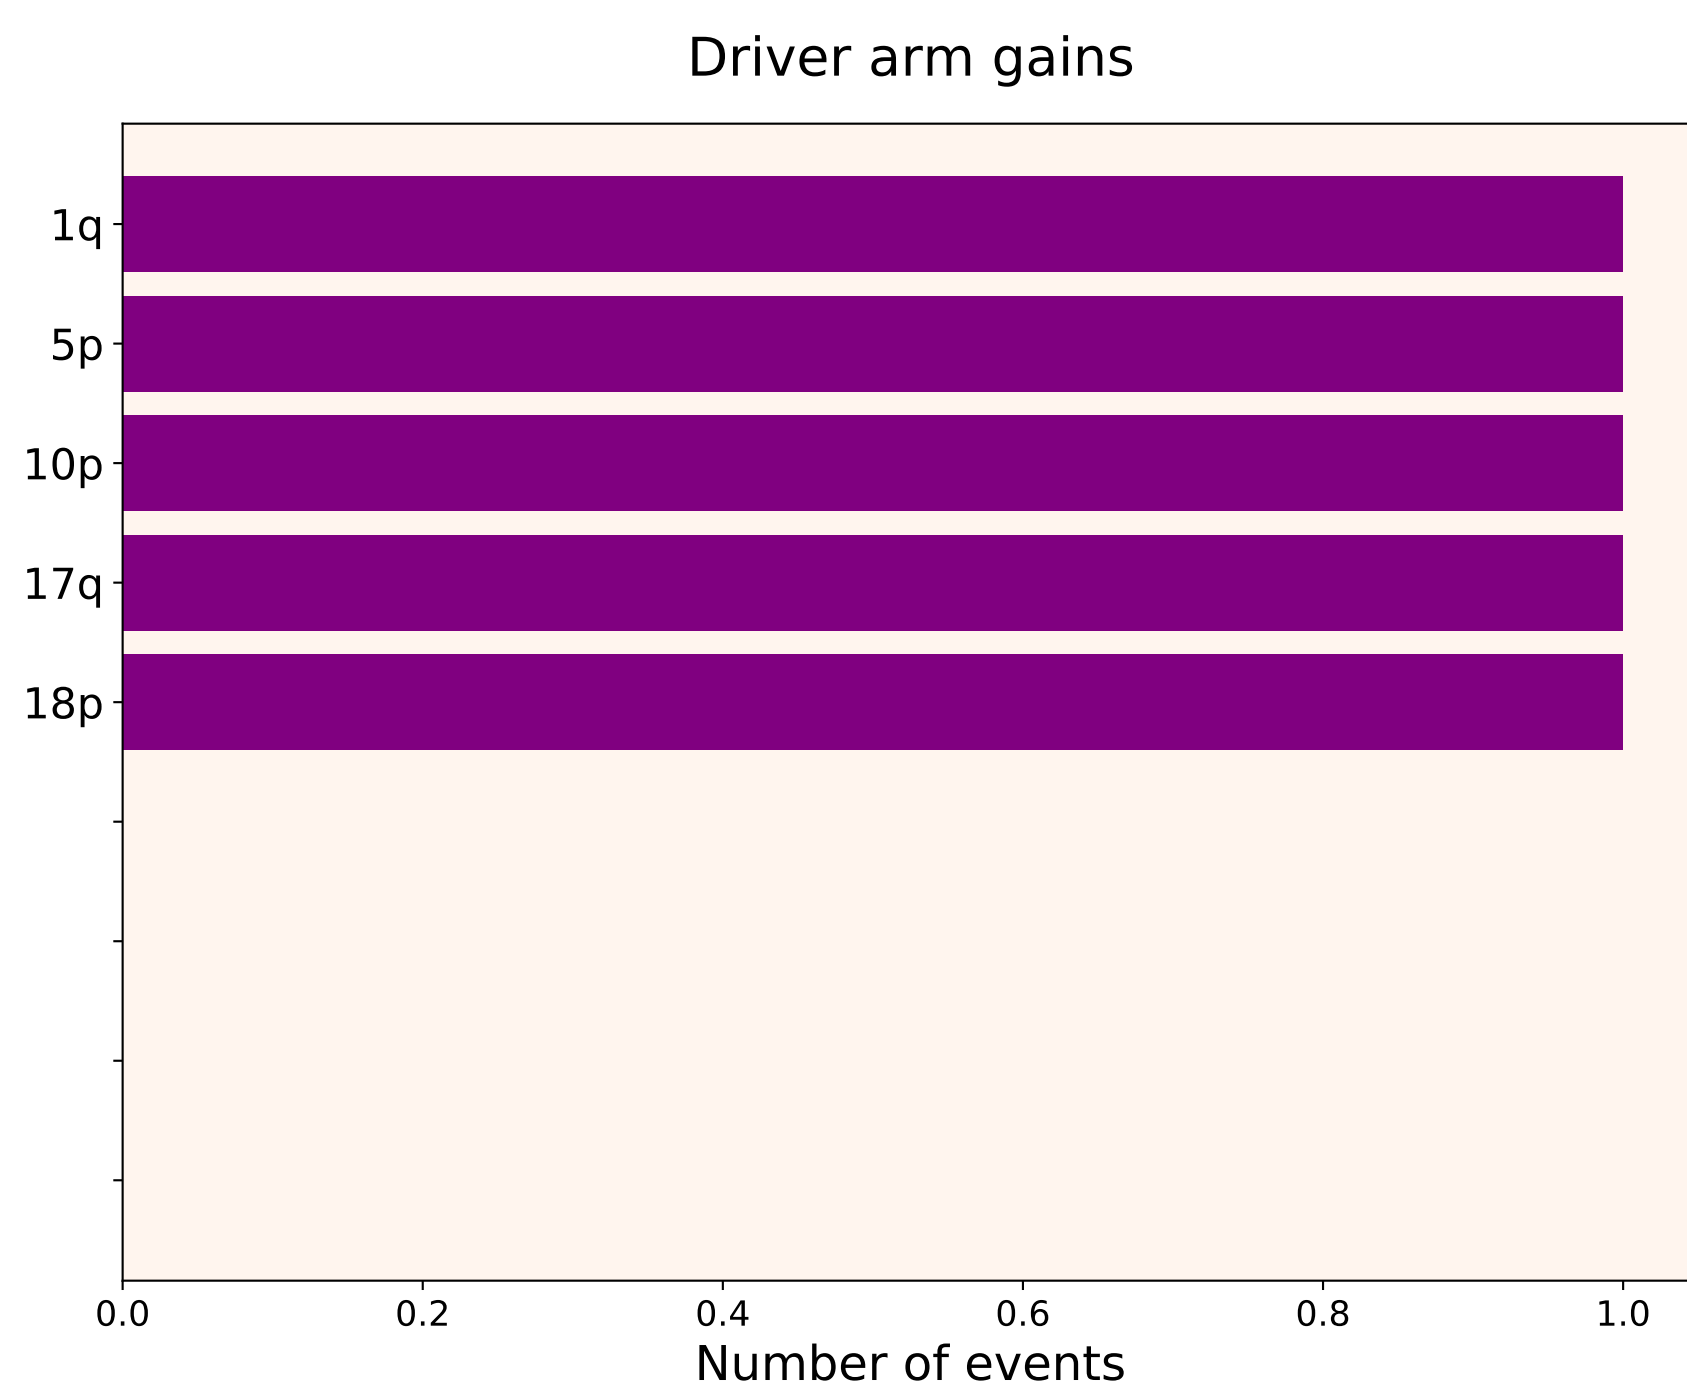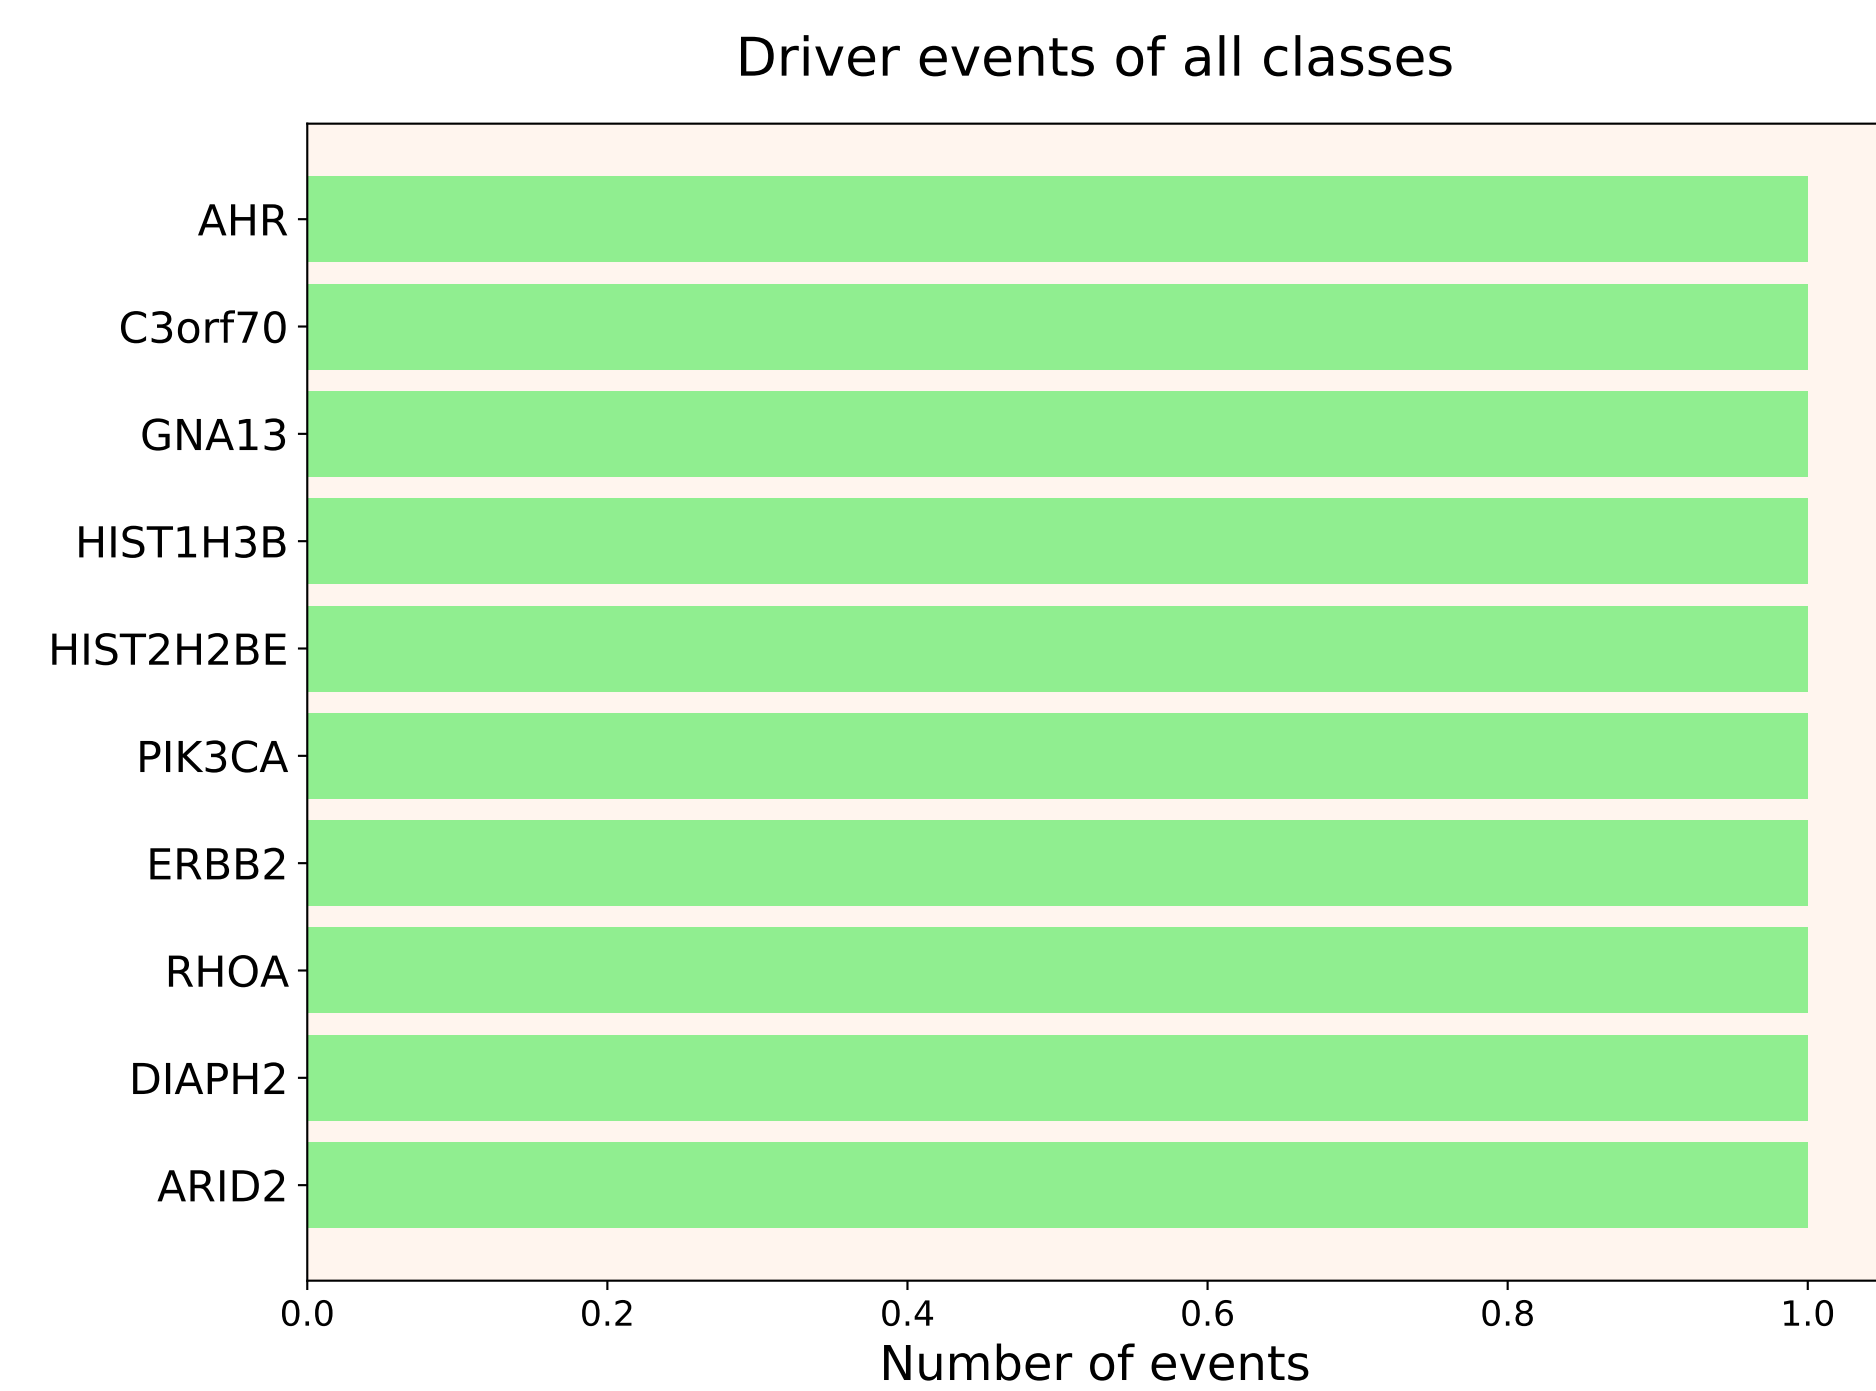

Supplement: Supplemental_Data_S1.zip [file Supplemental_Data_S1.zip]

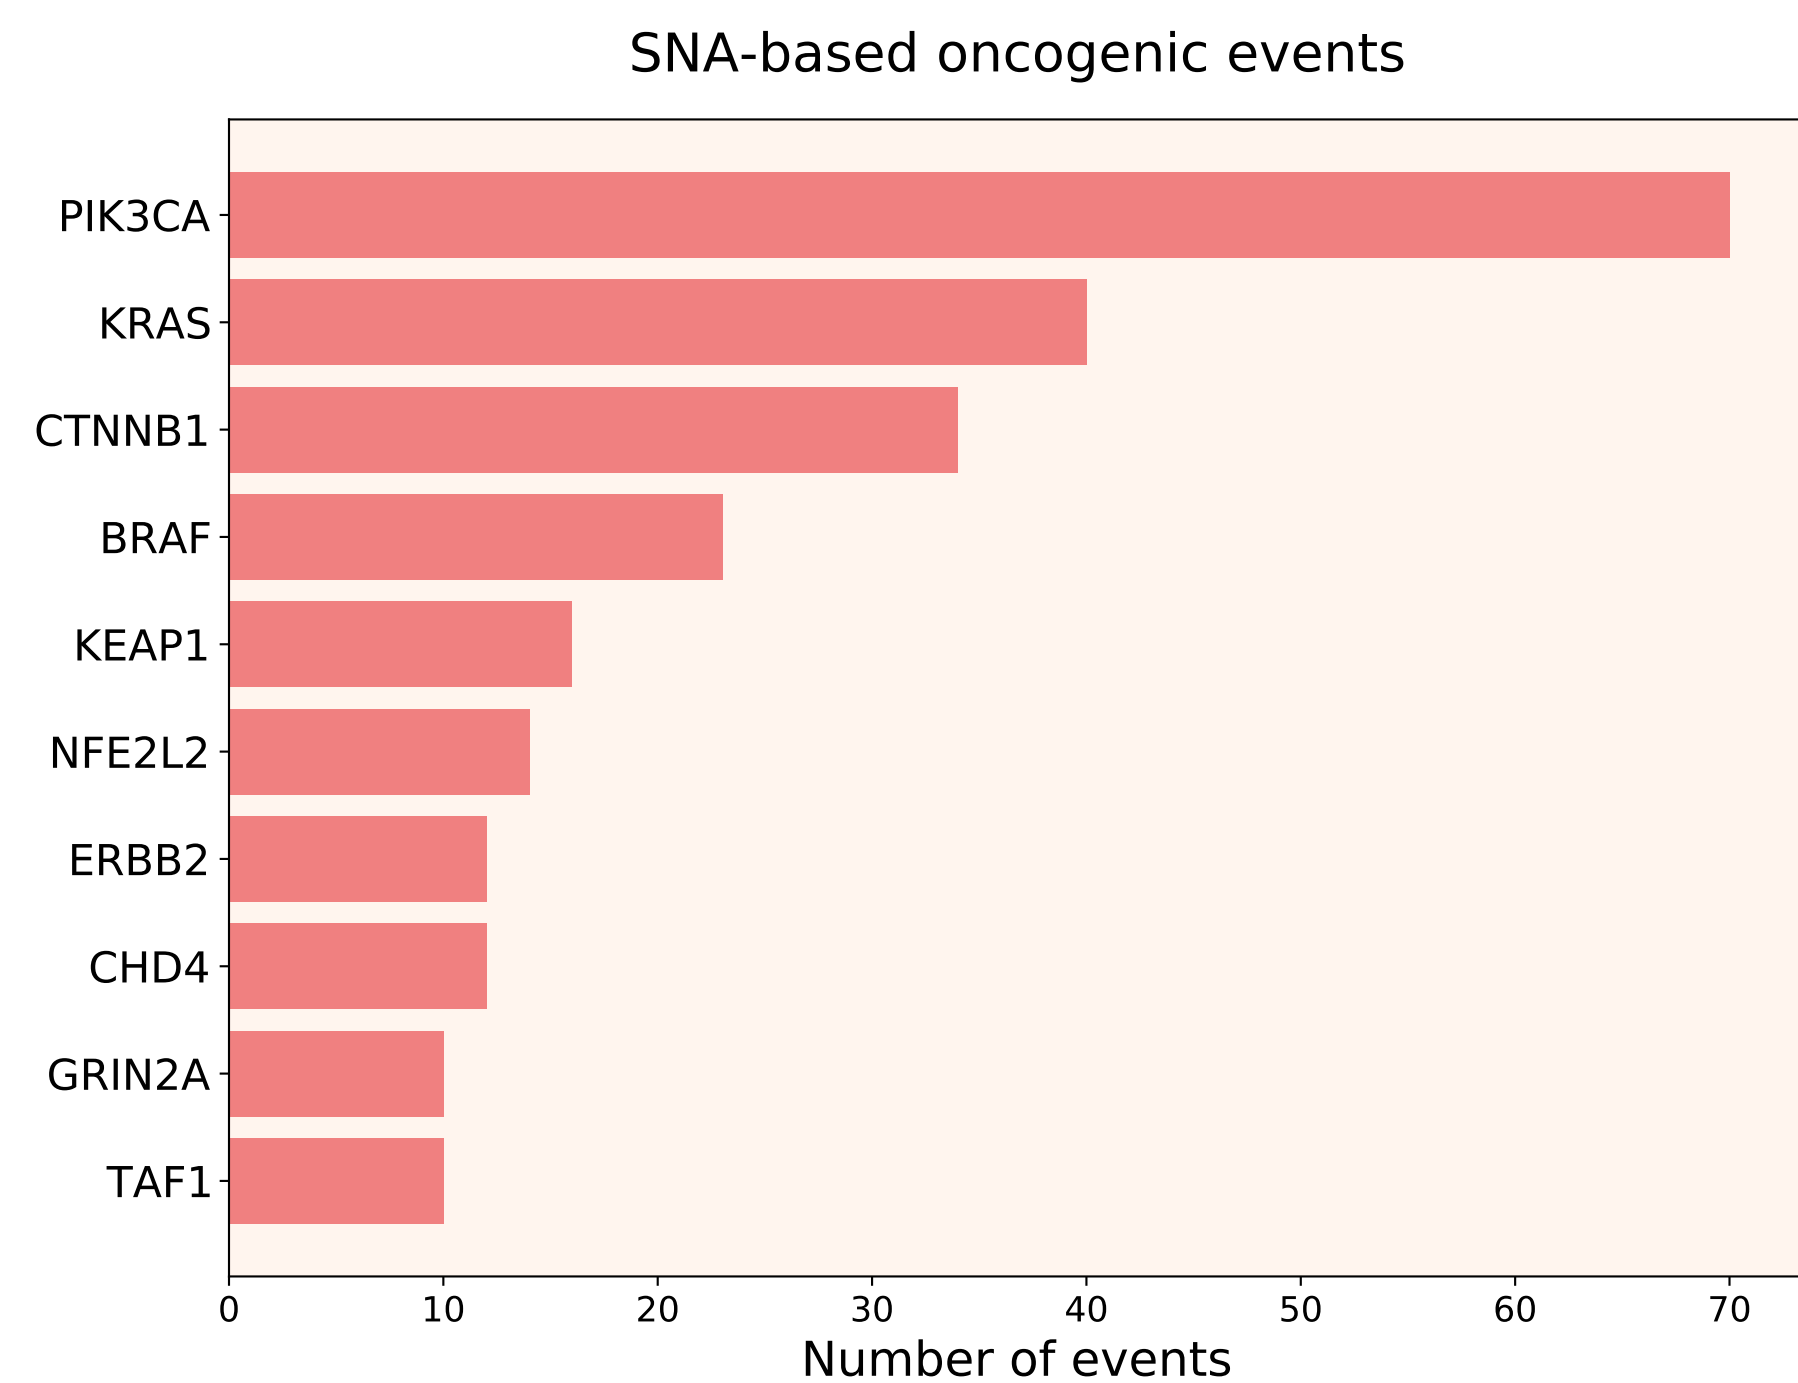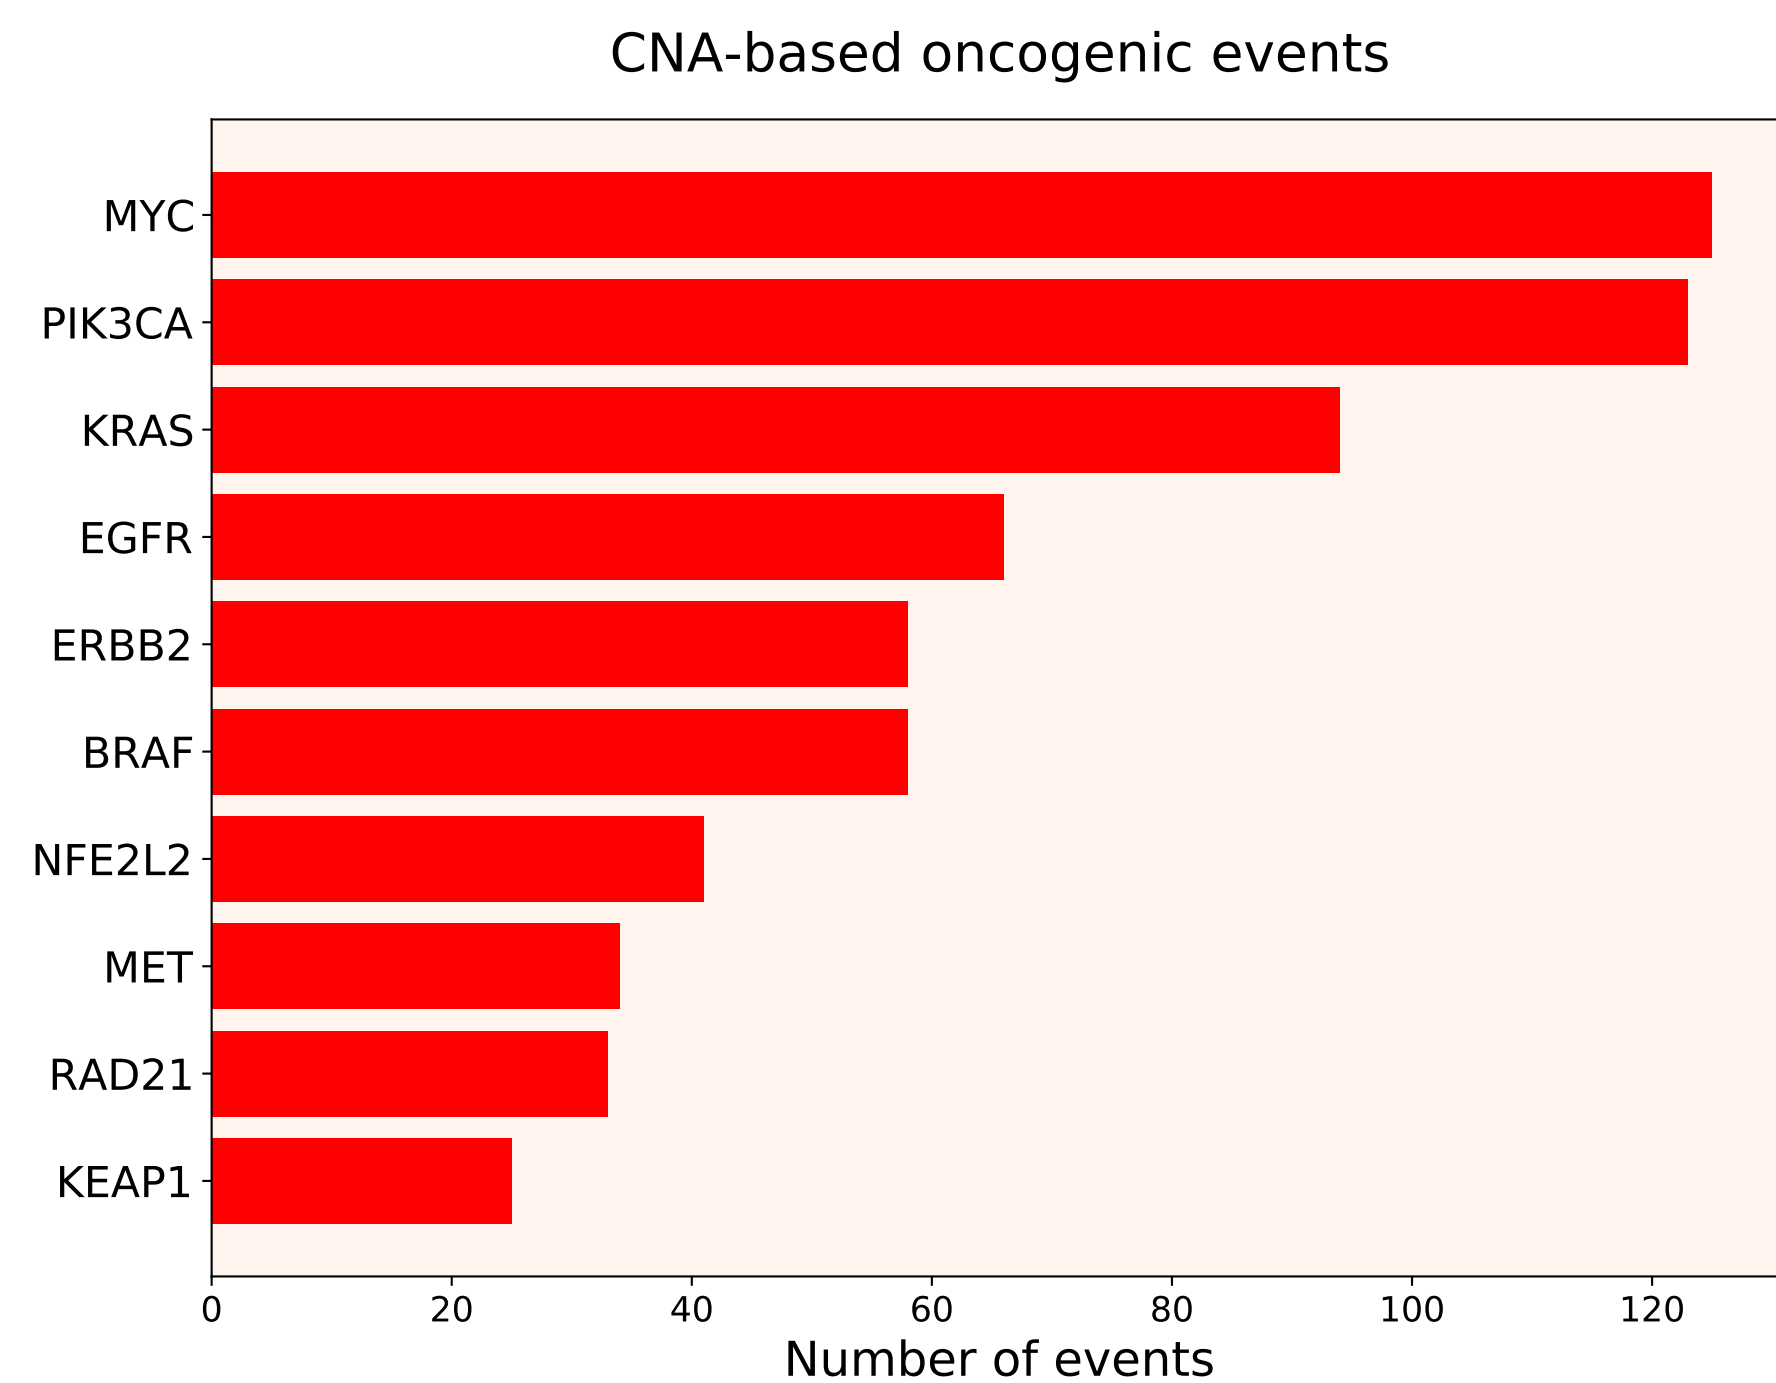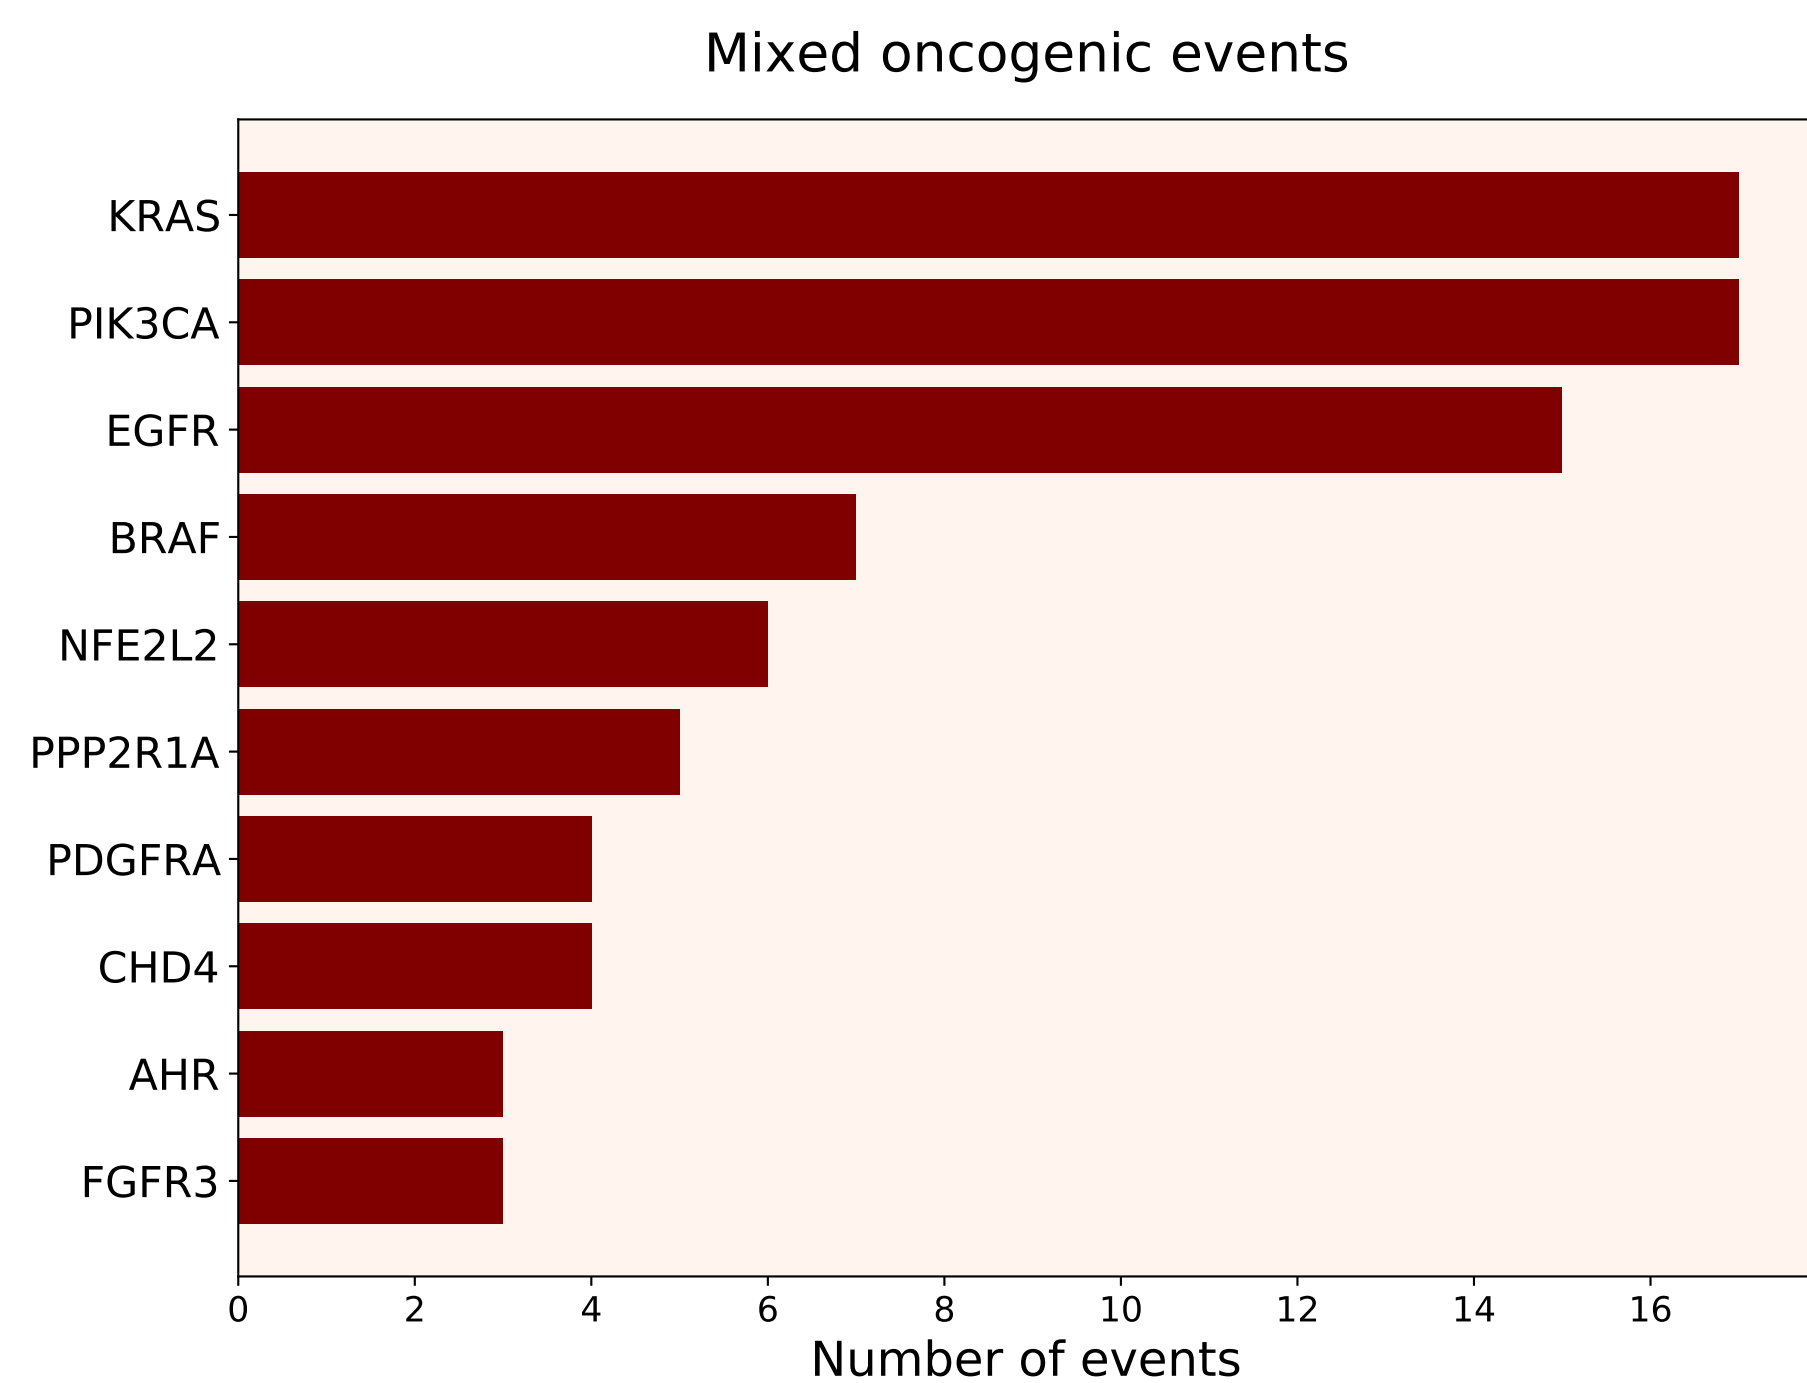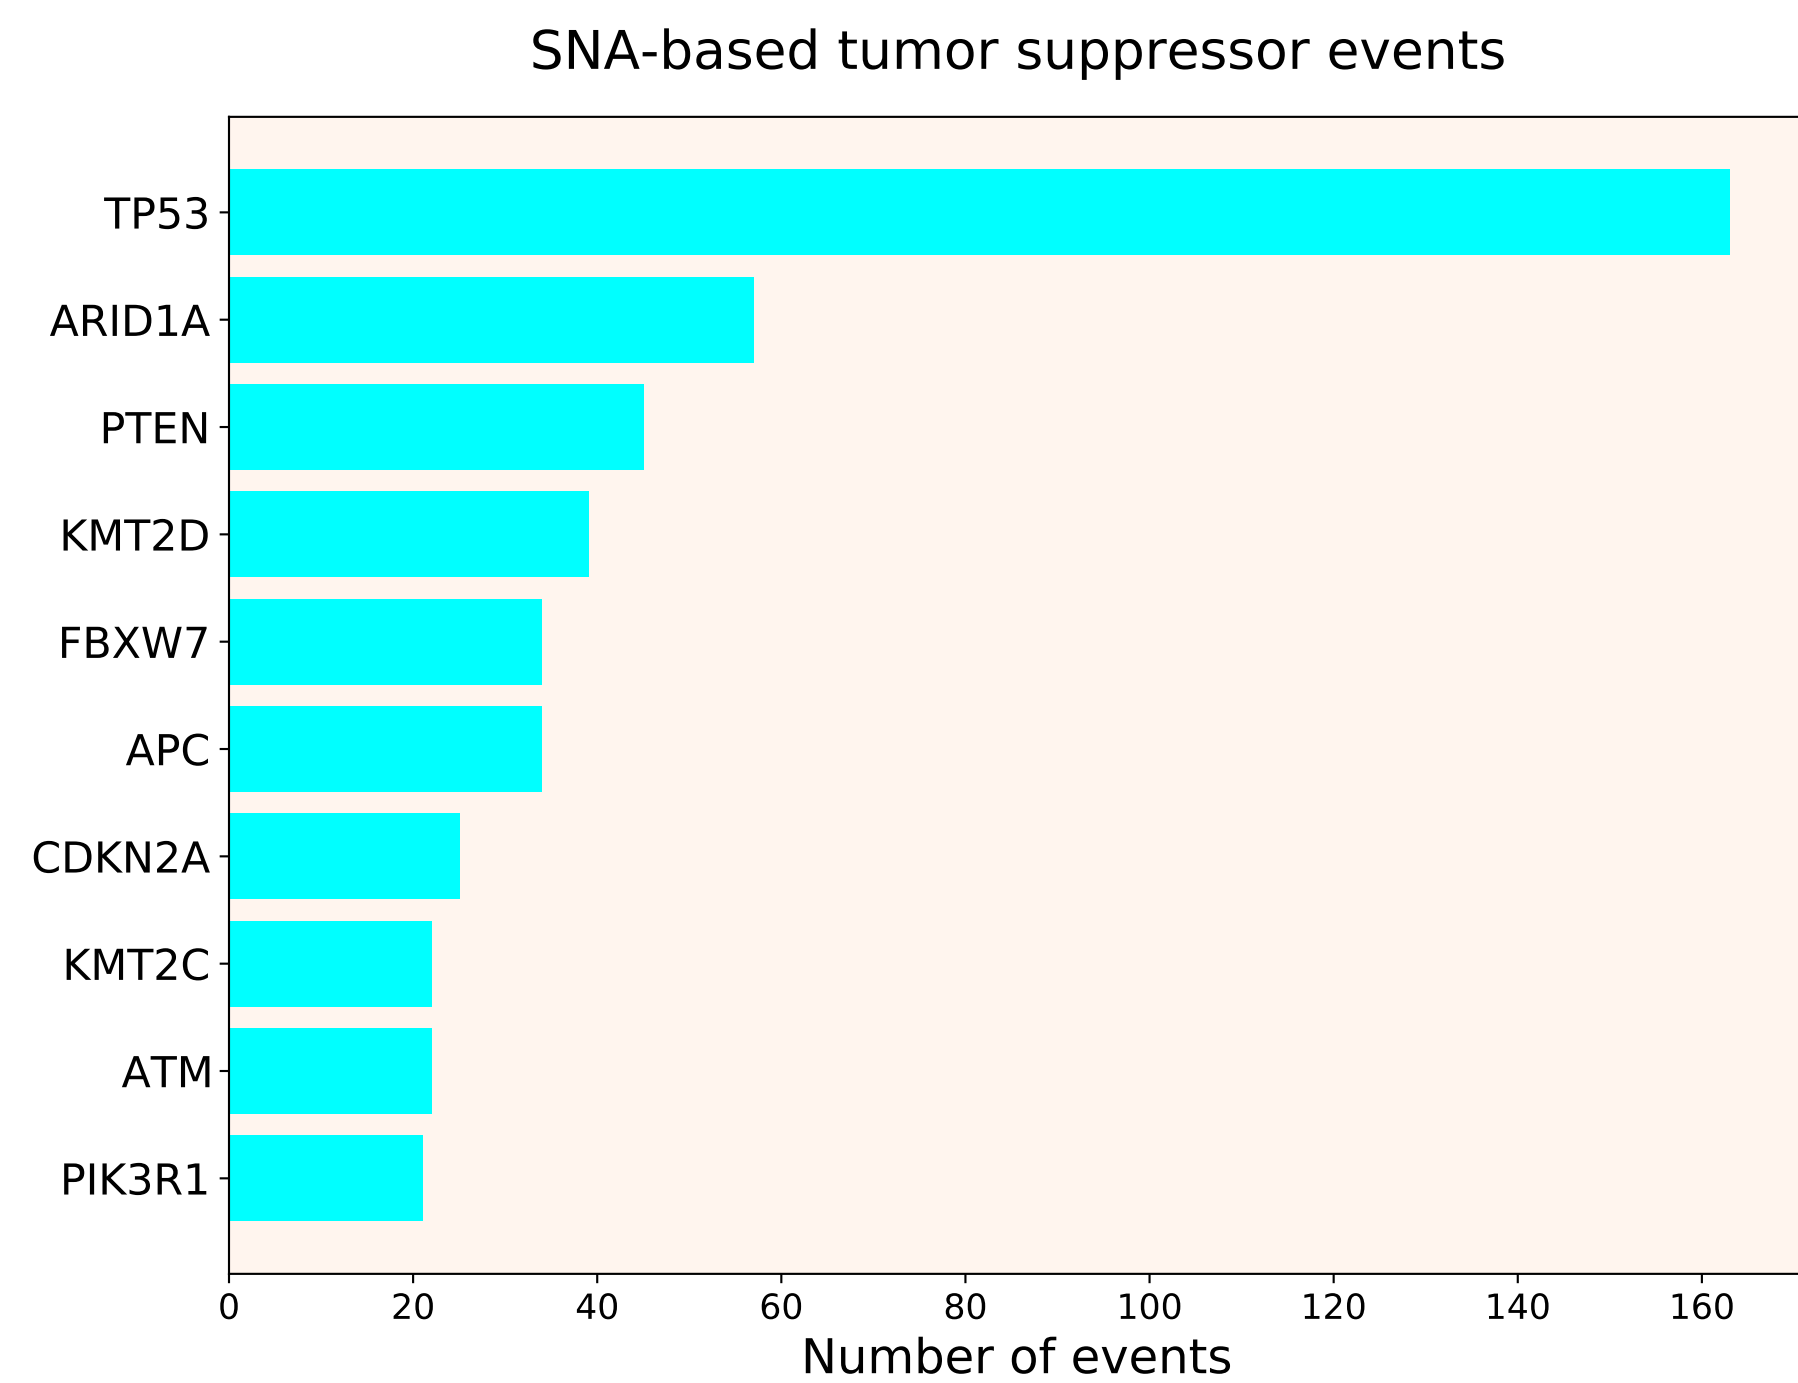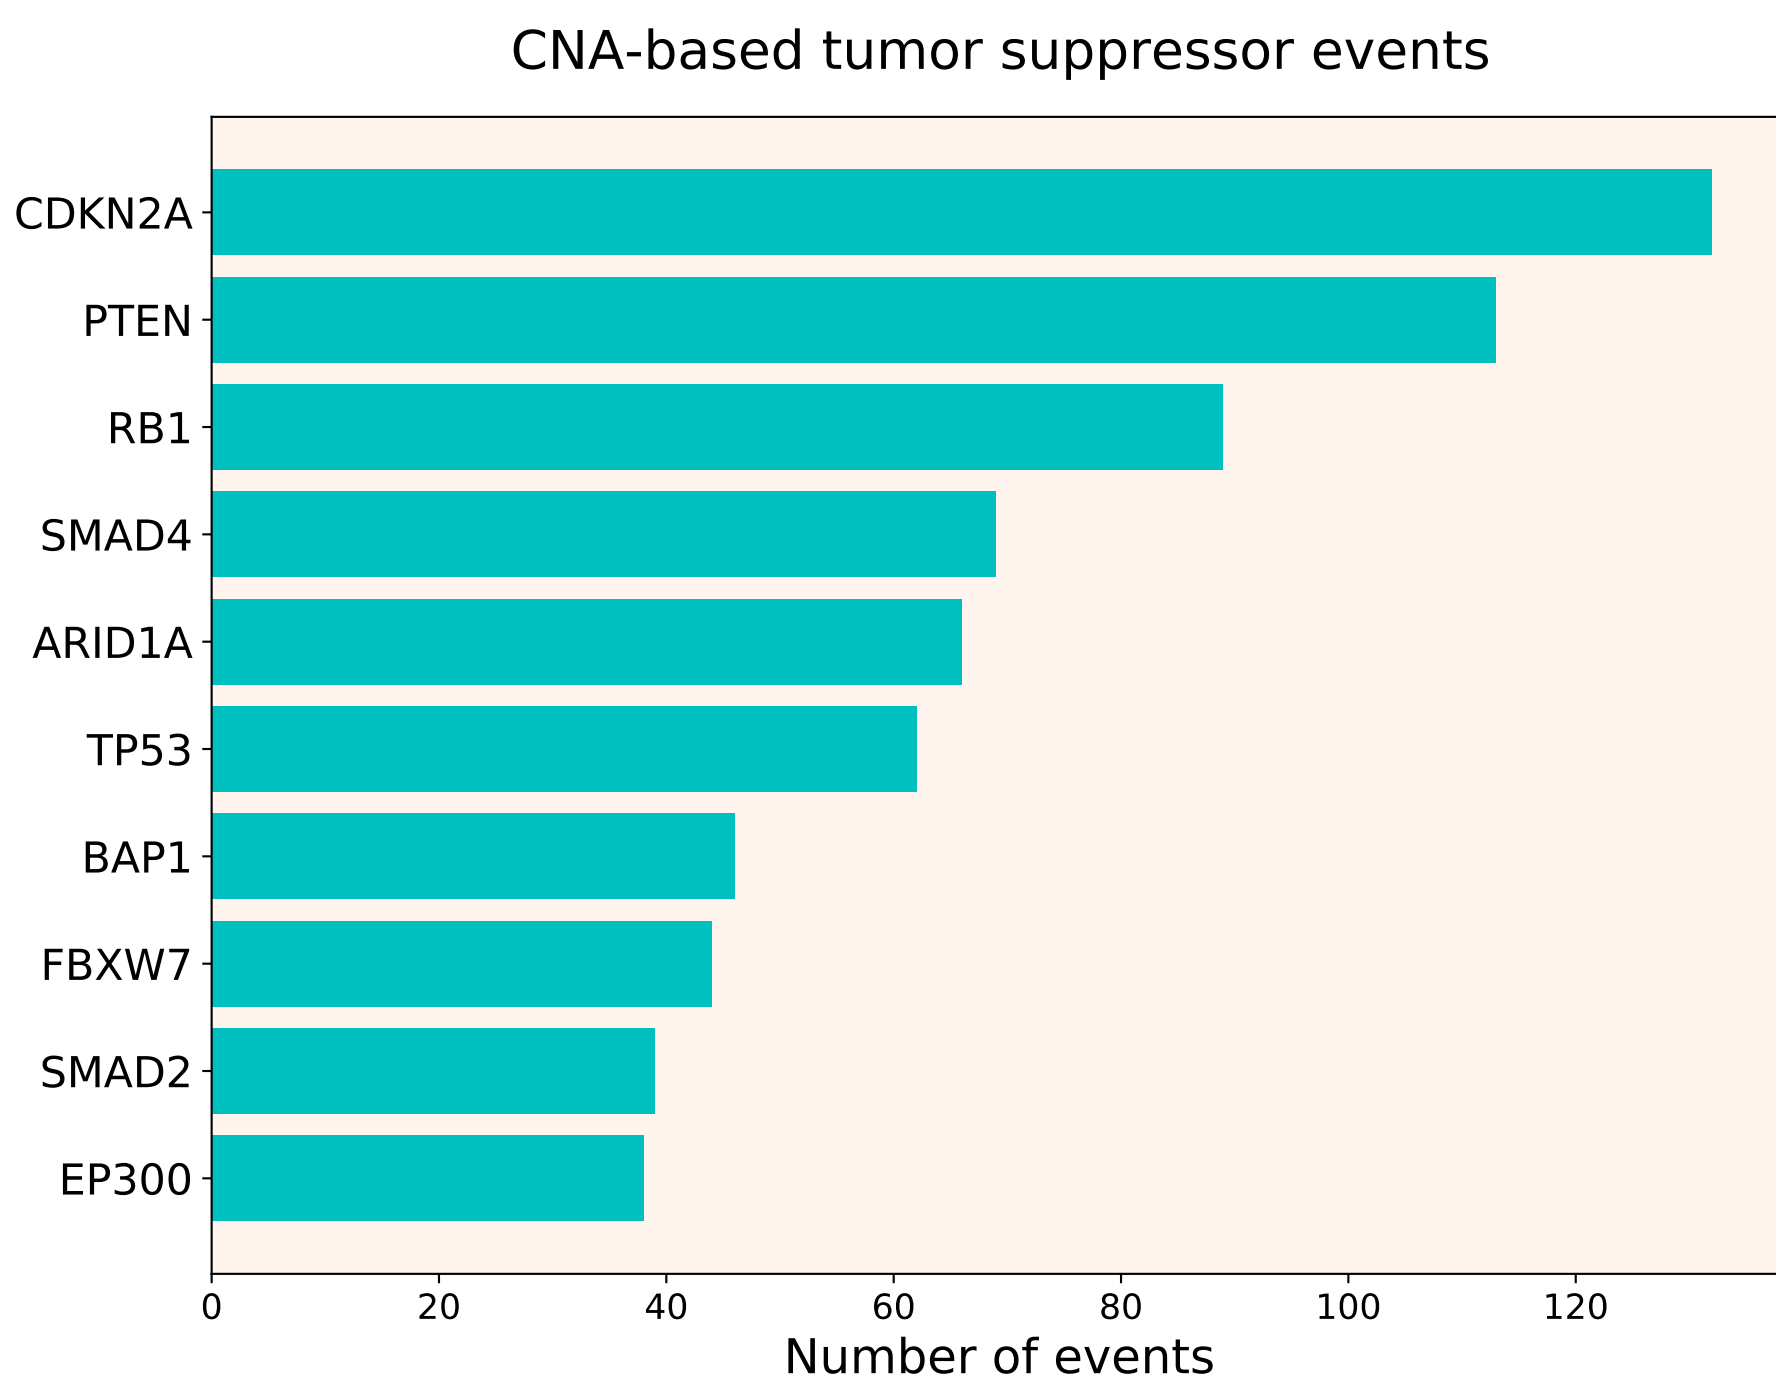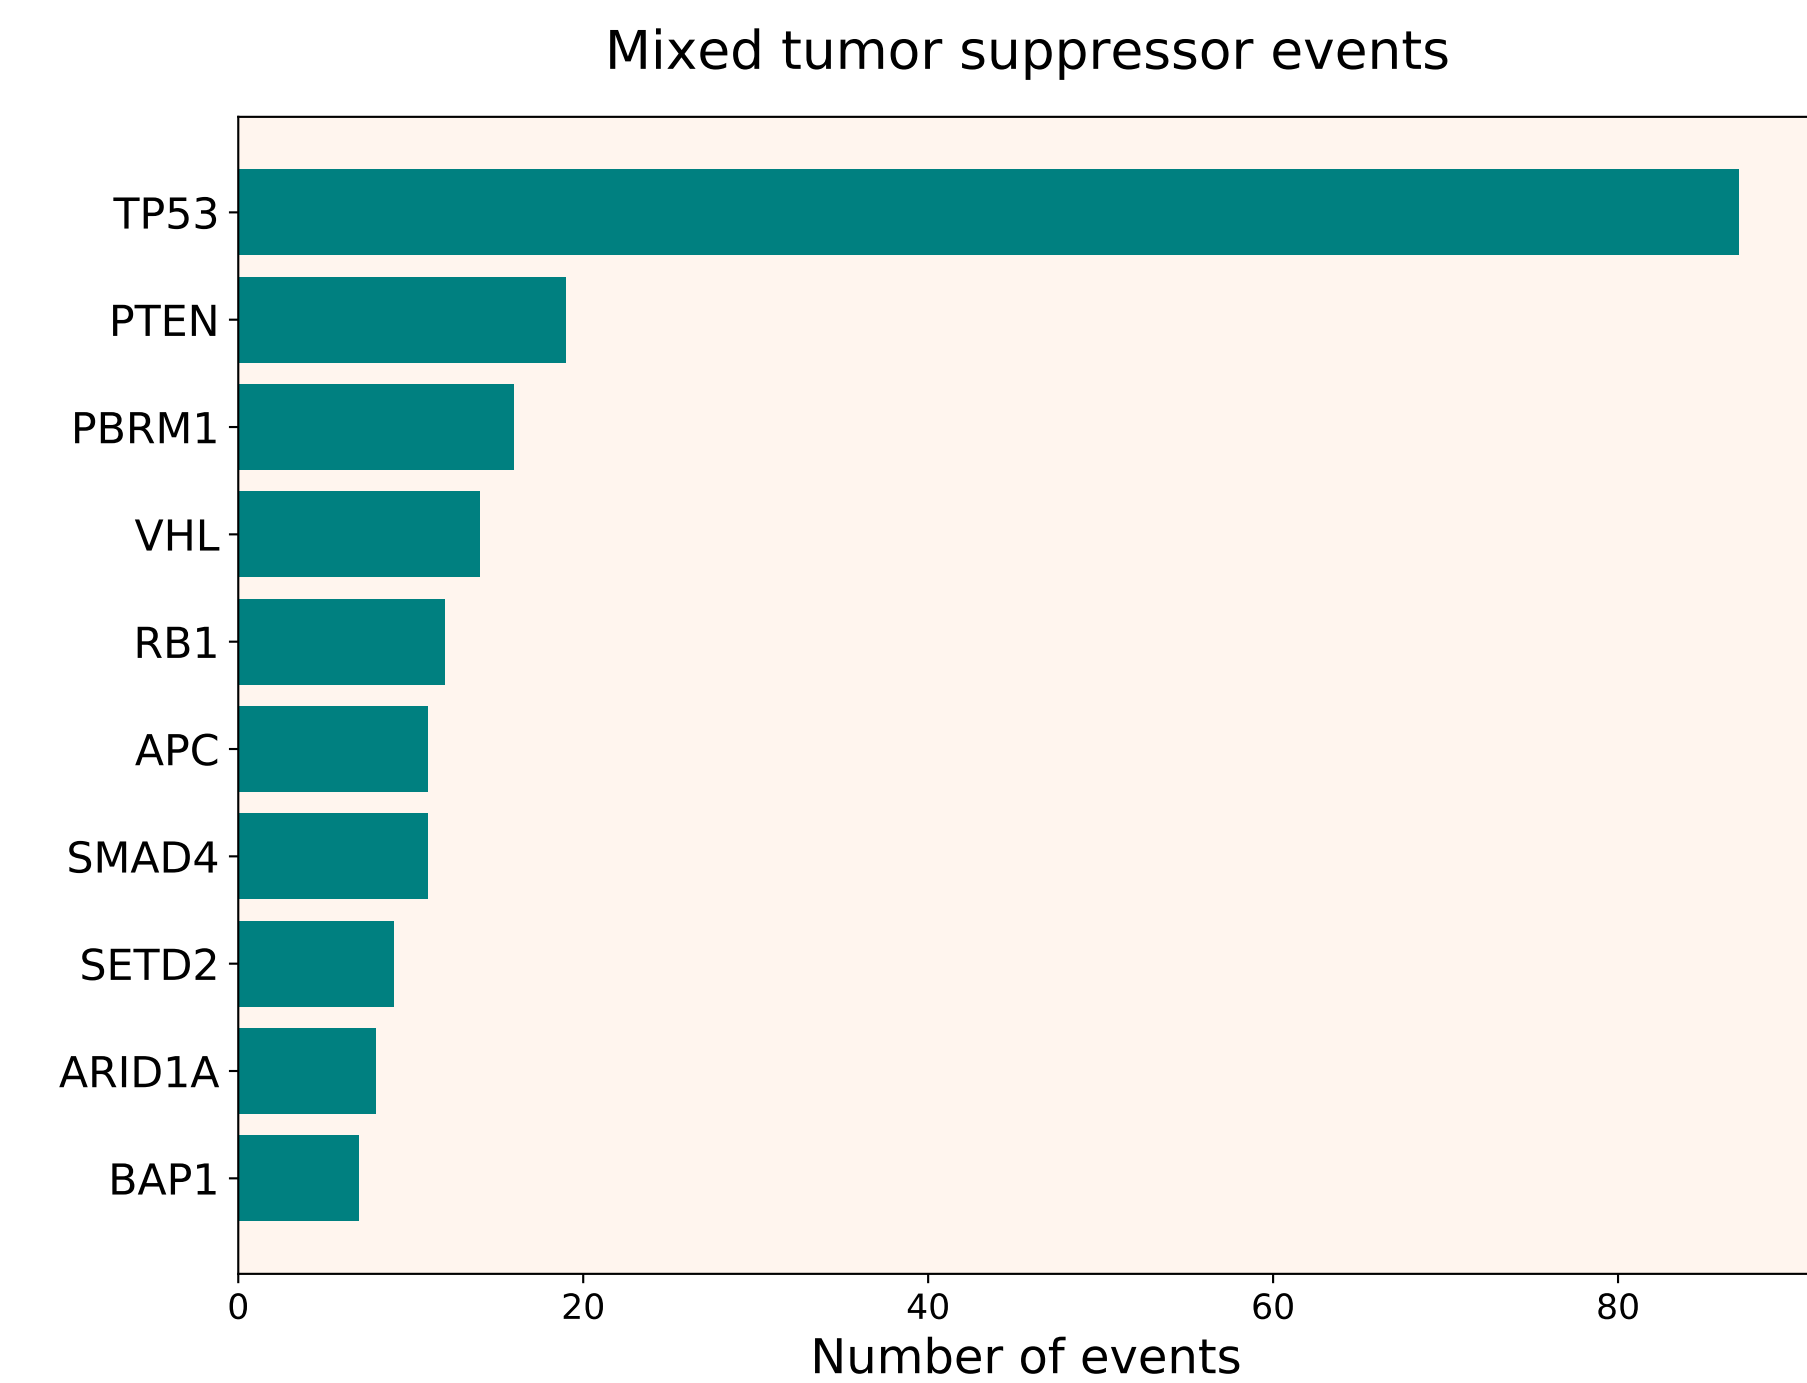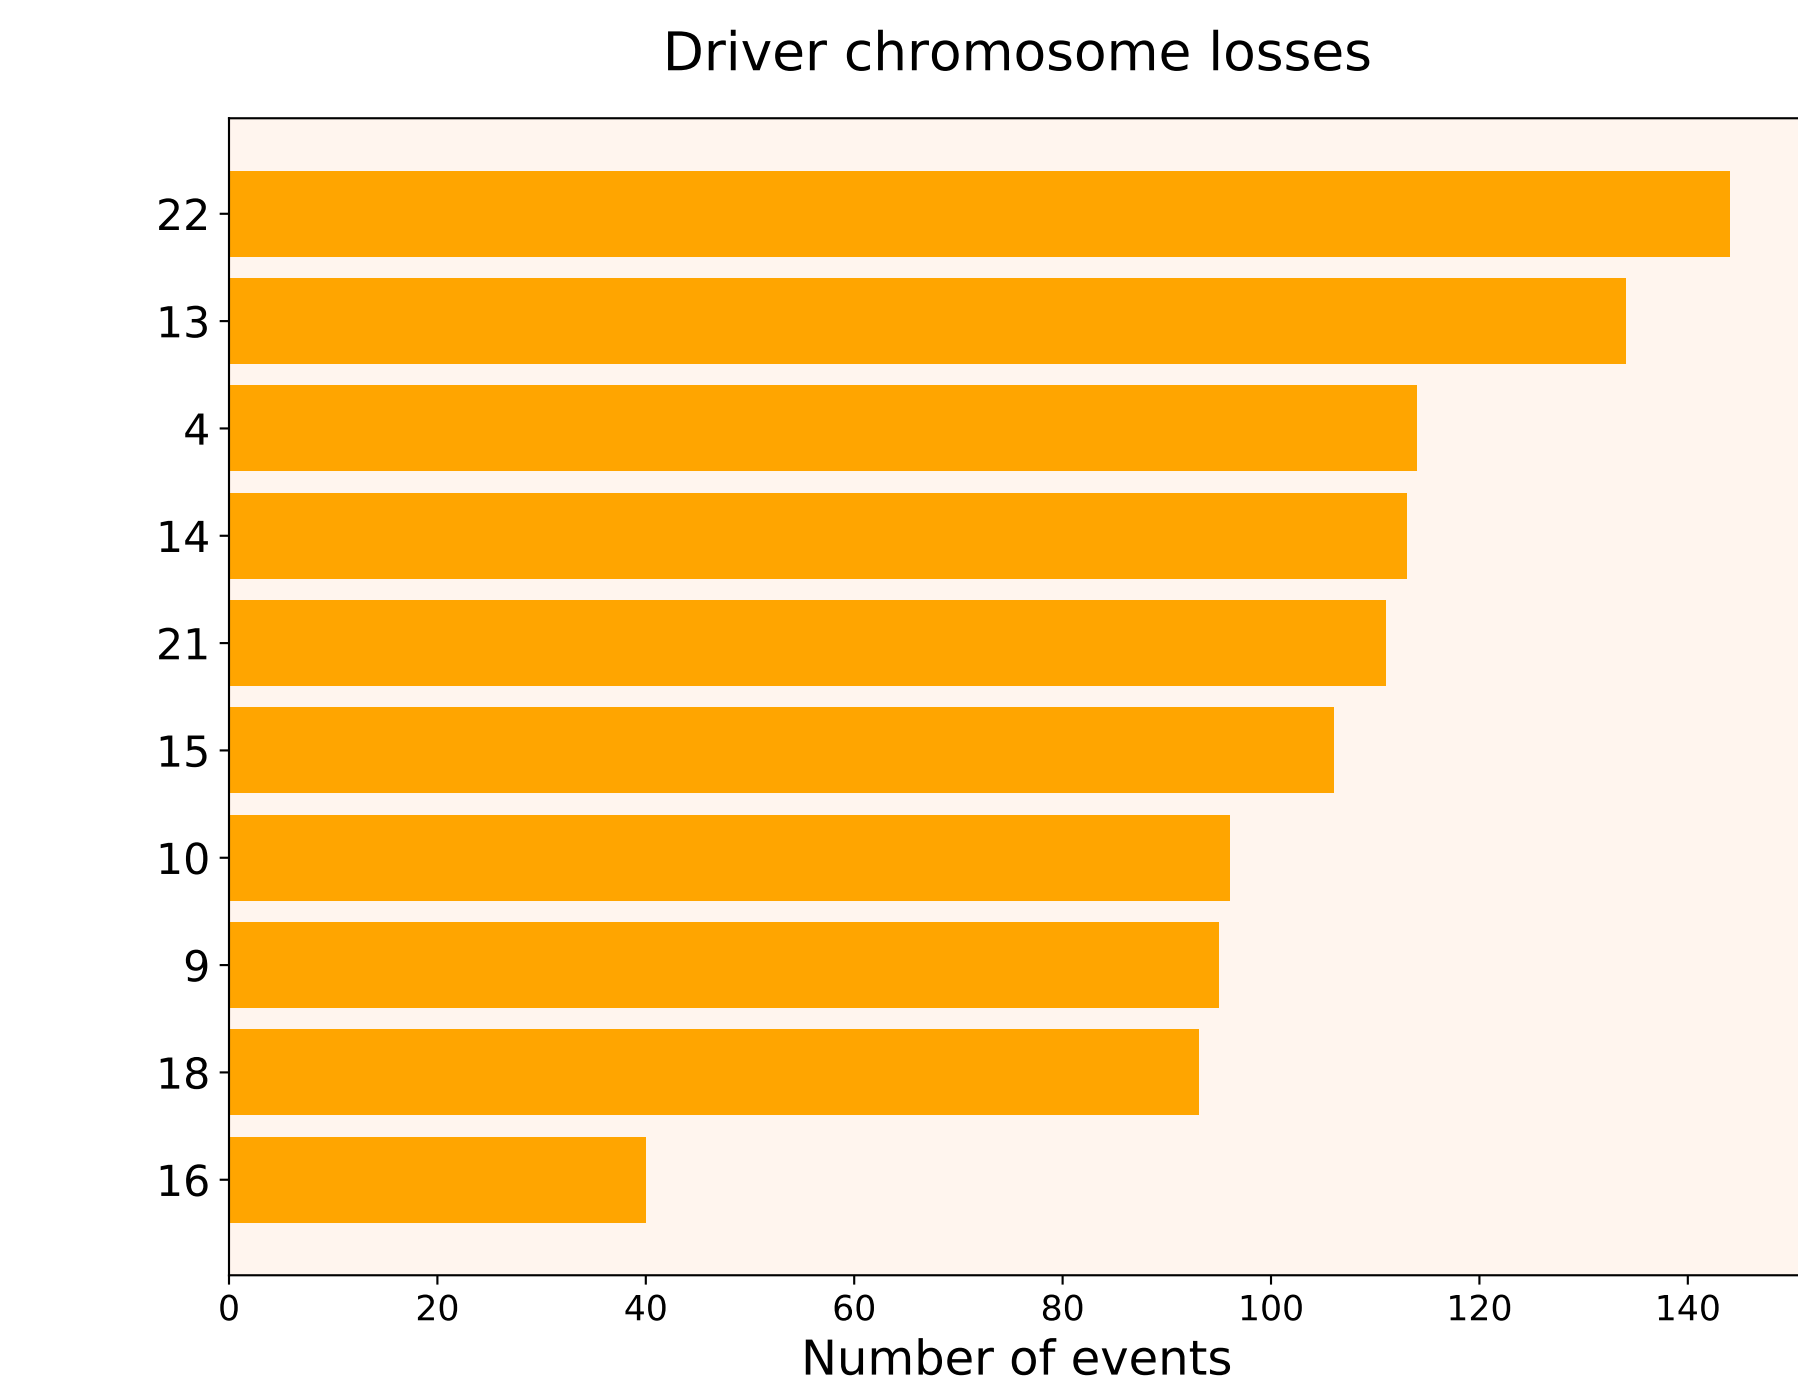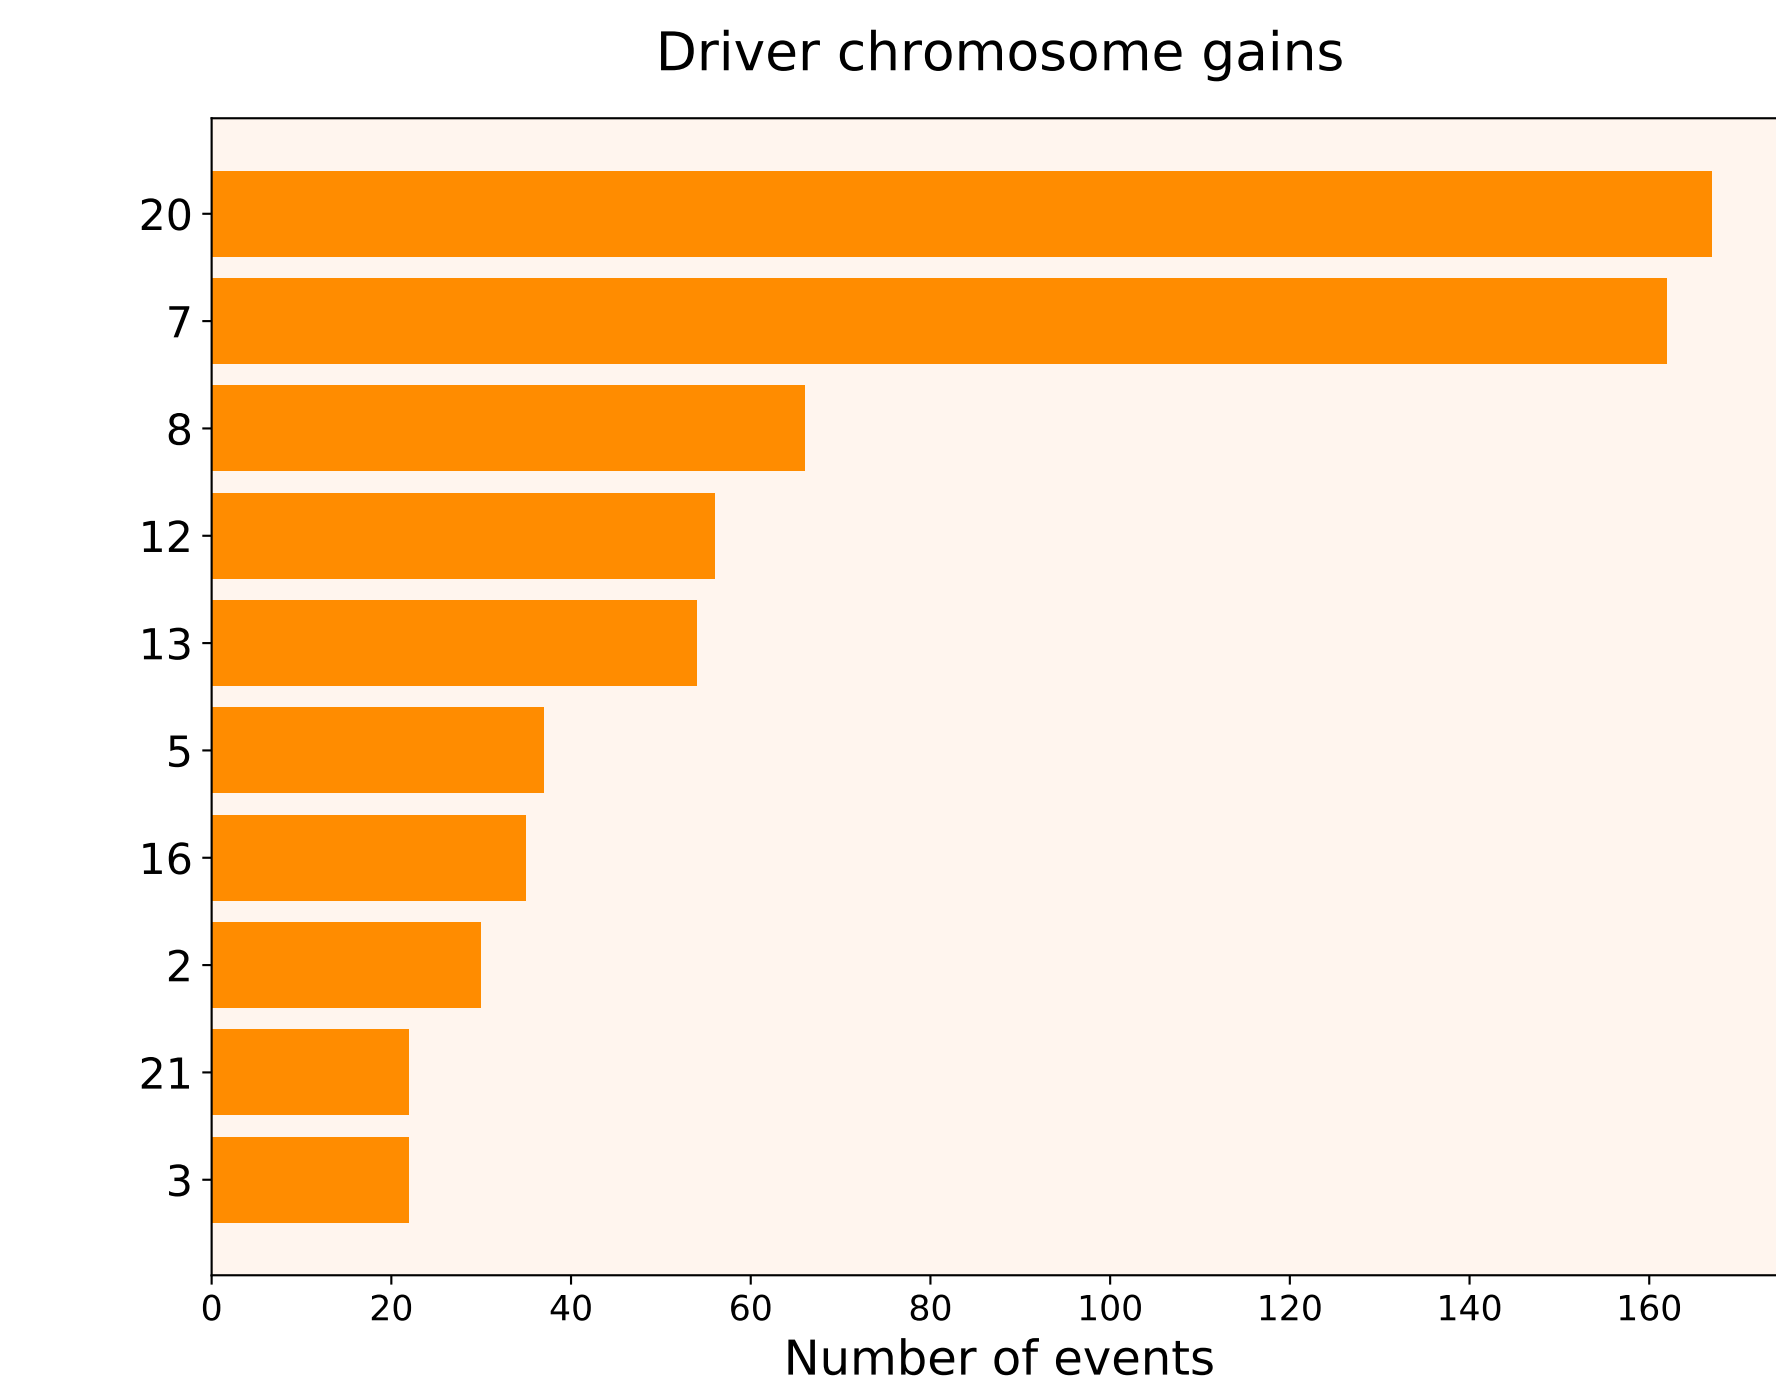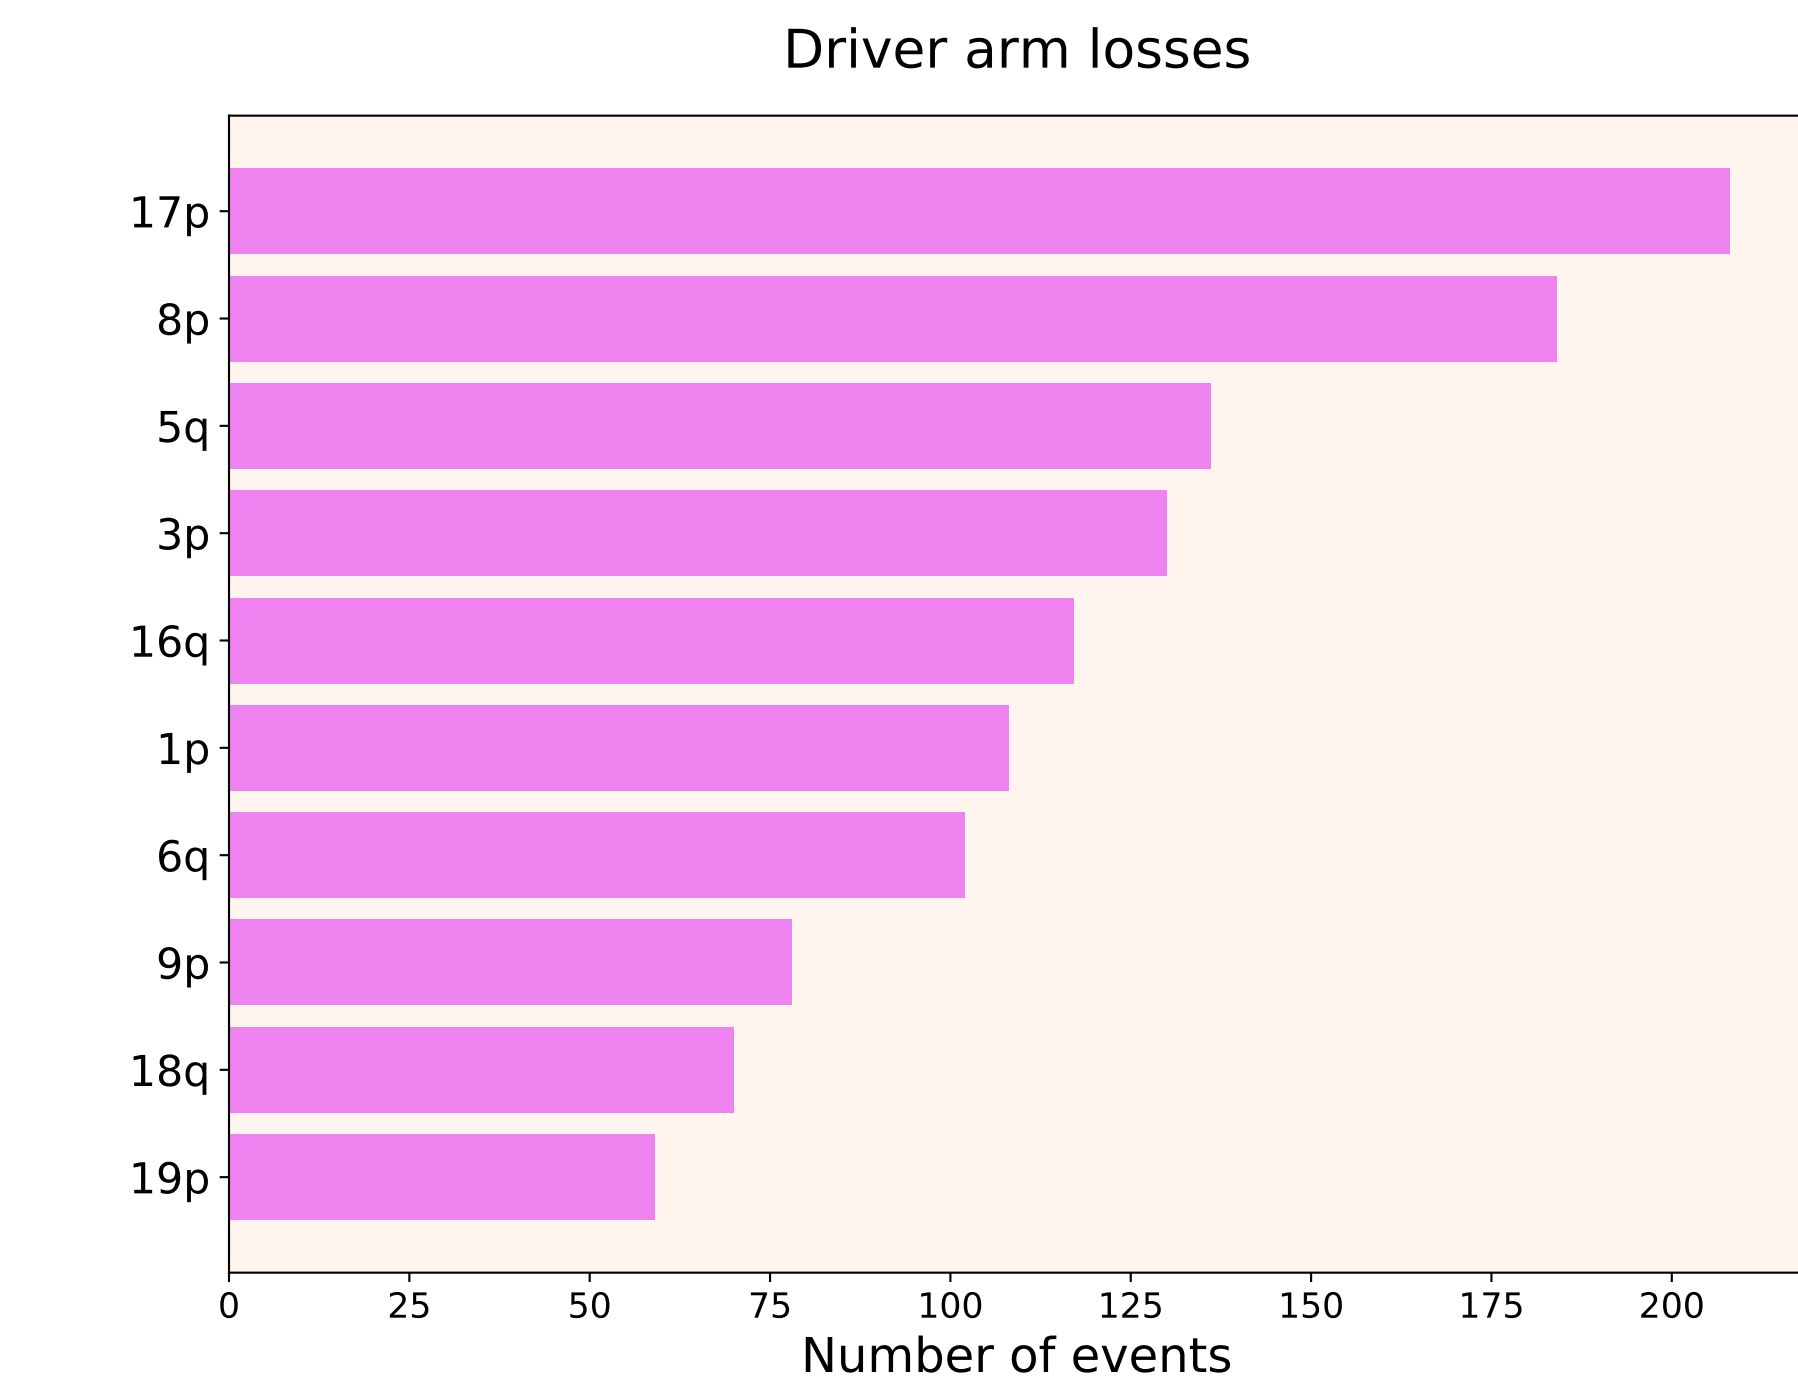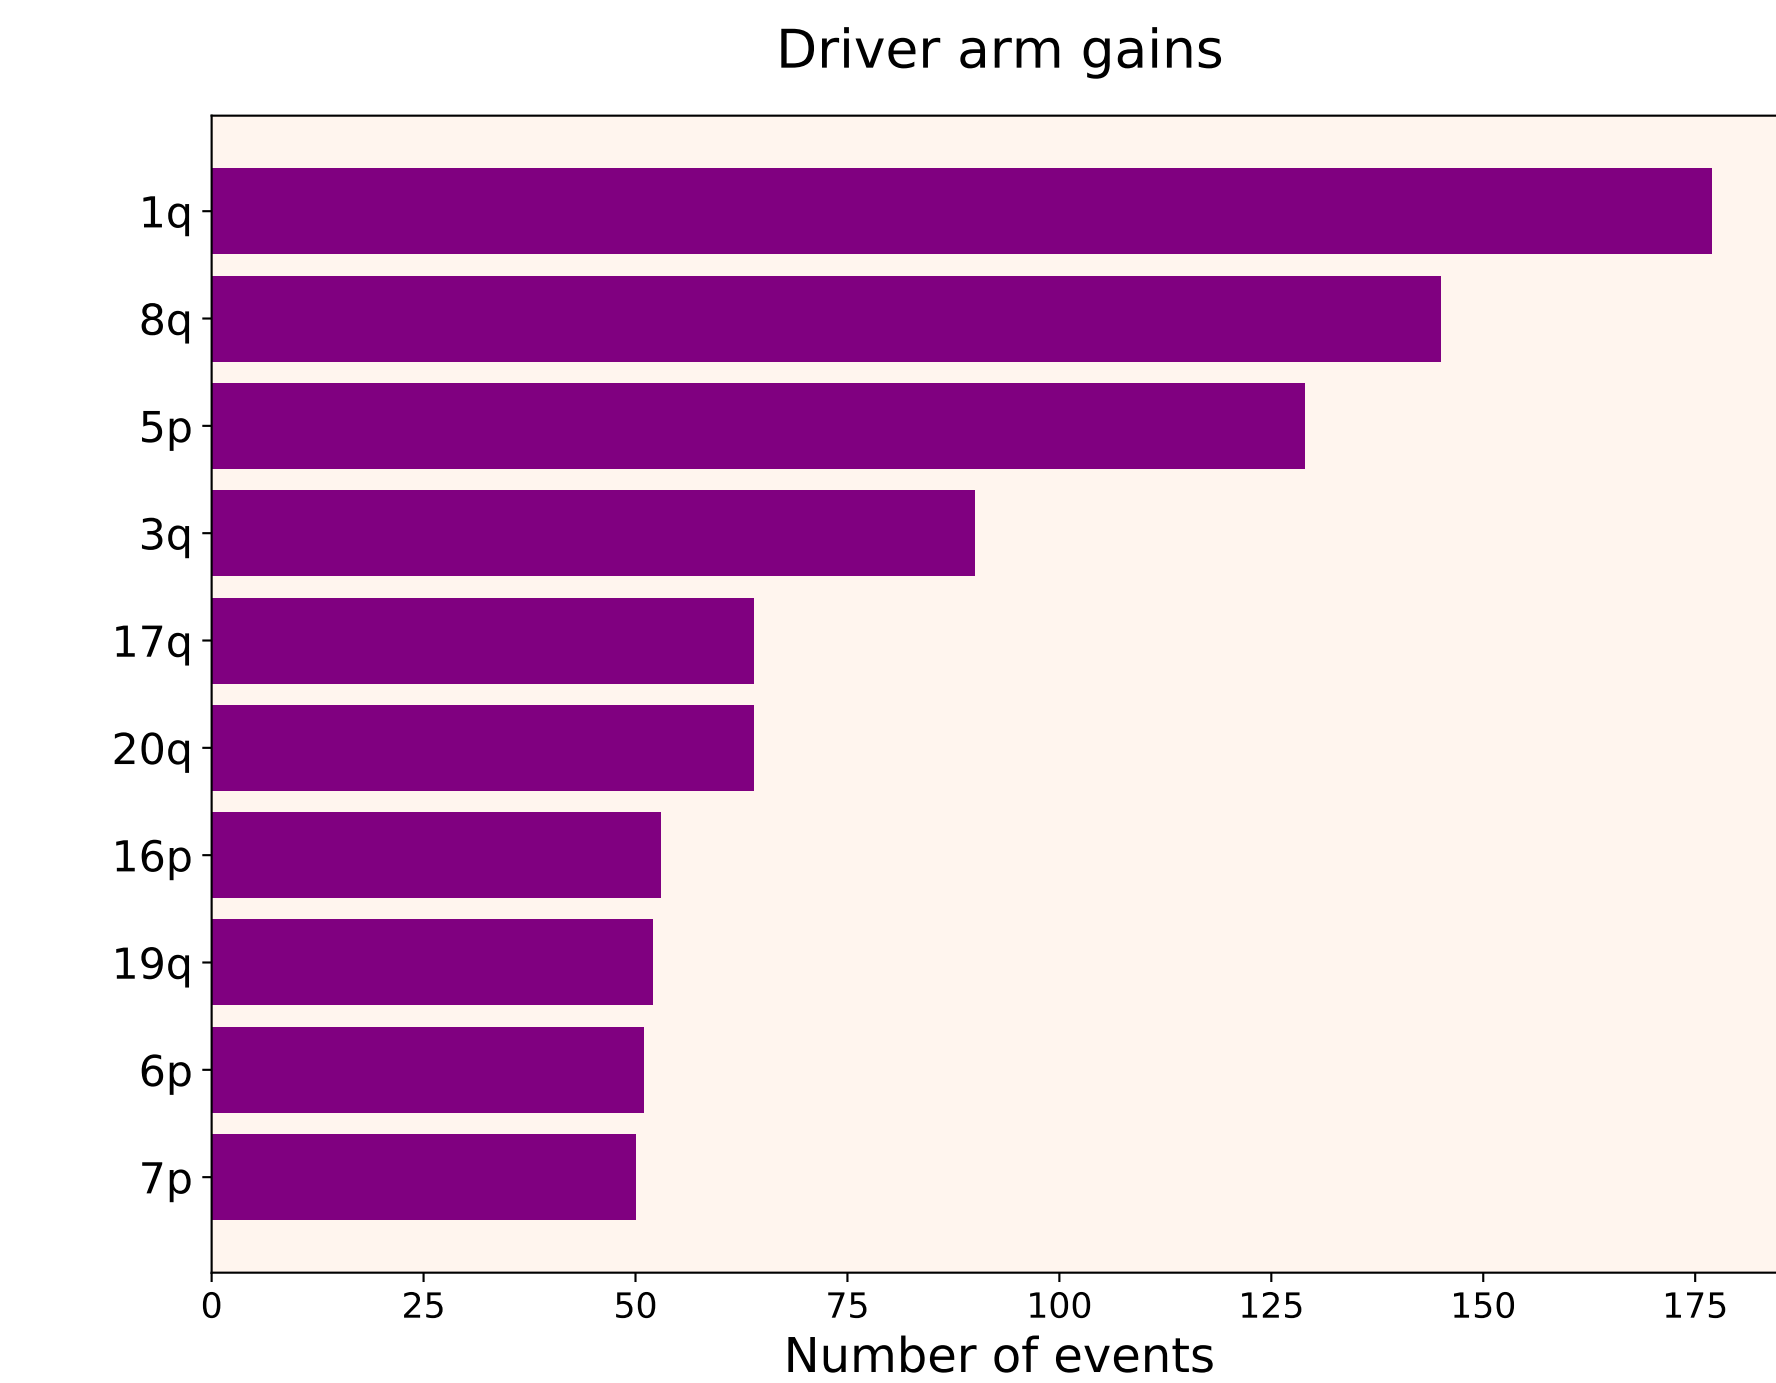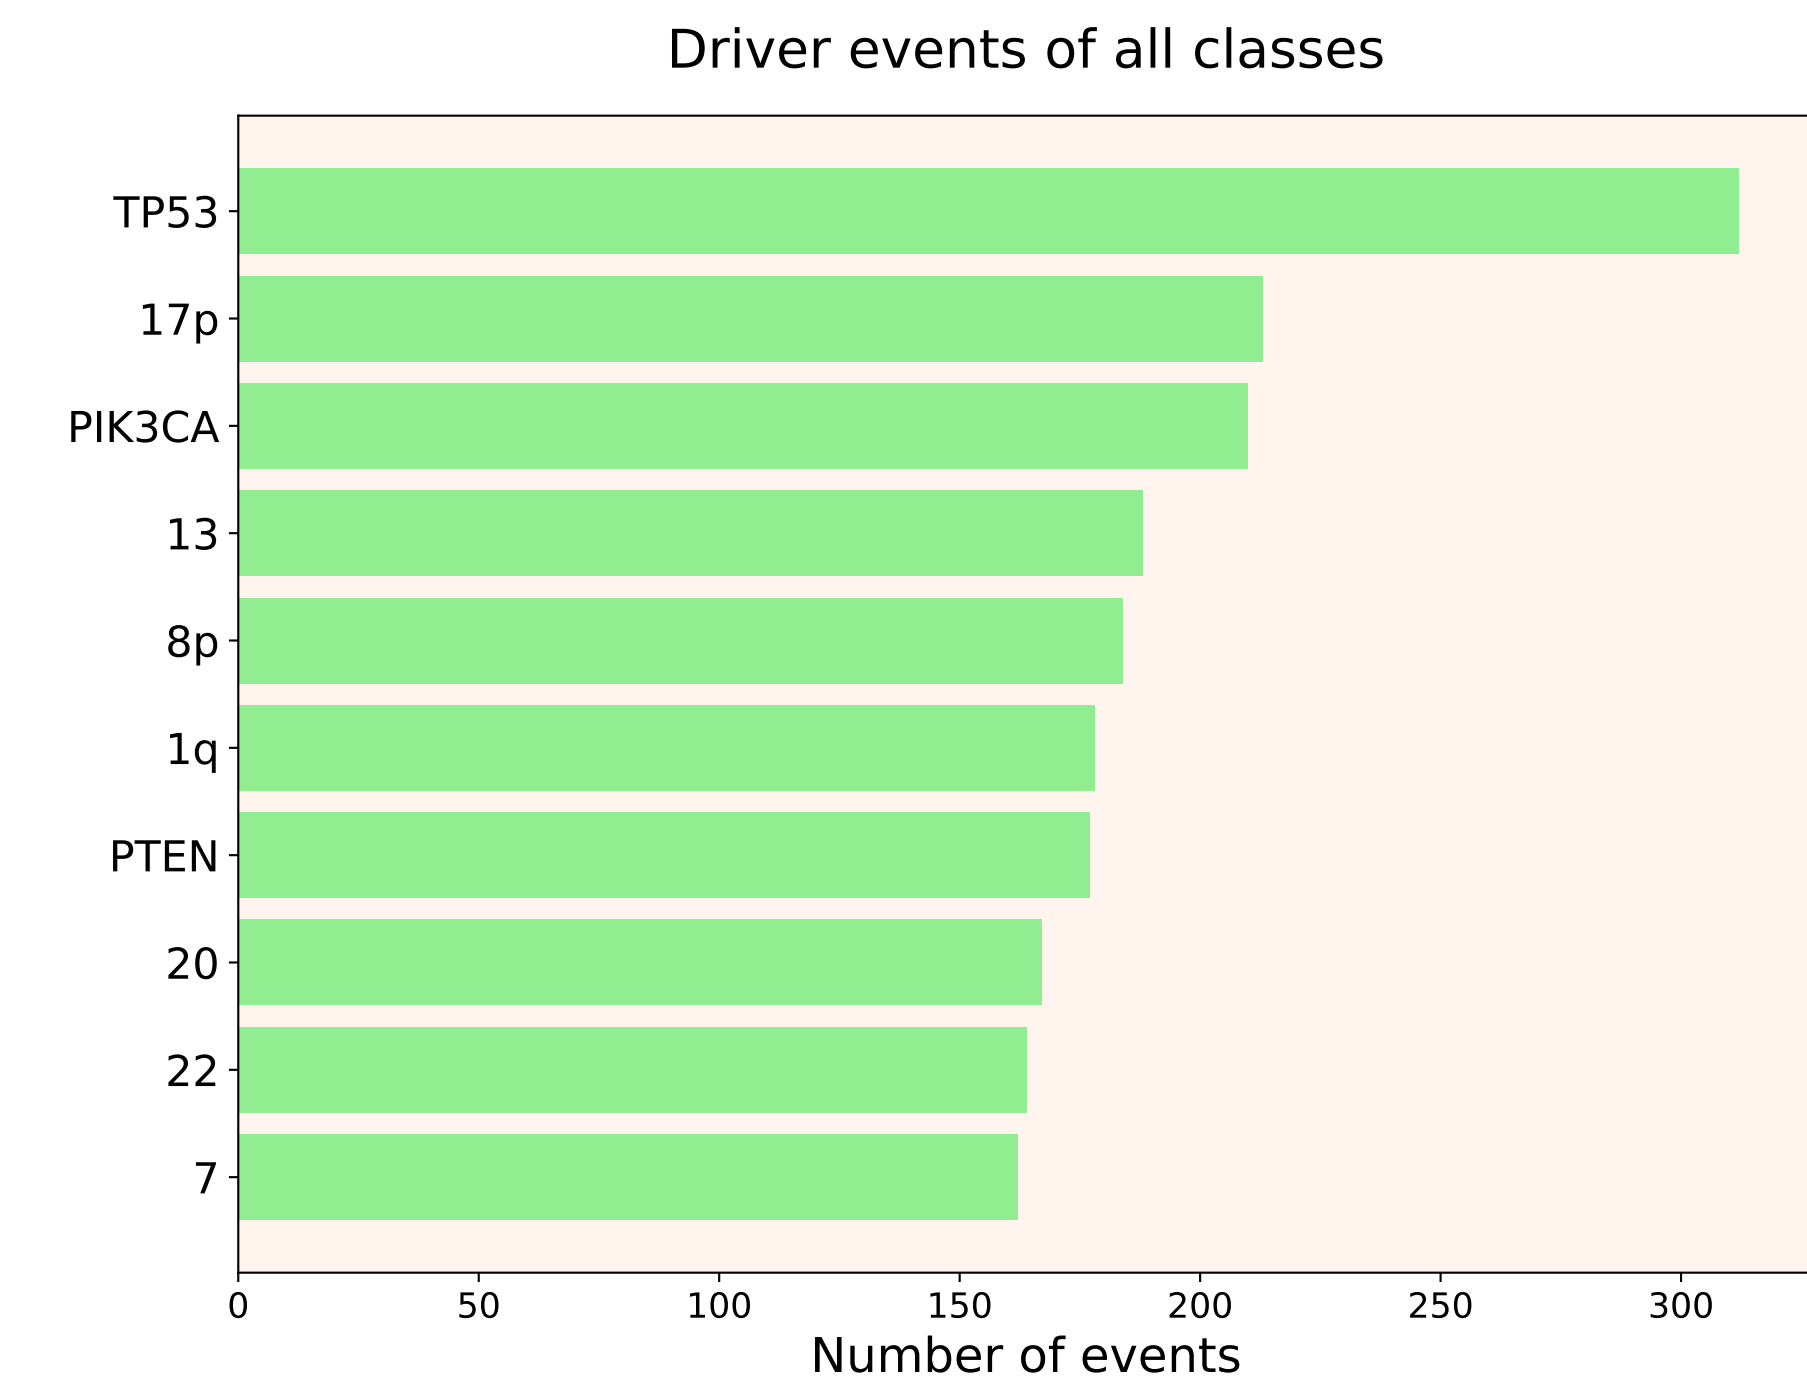

Supplement: Supplemental_Data_S1.zip [file Supplemental_Data_S1.zip]

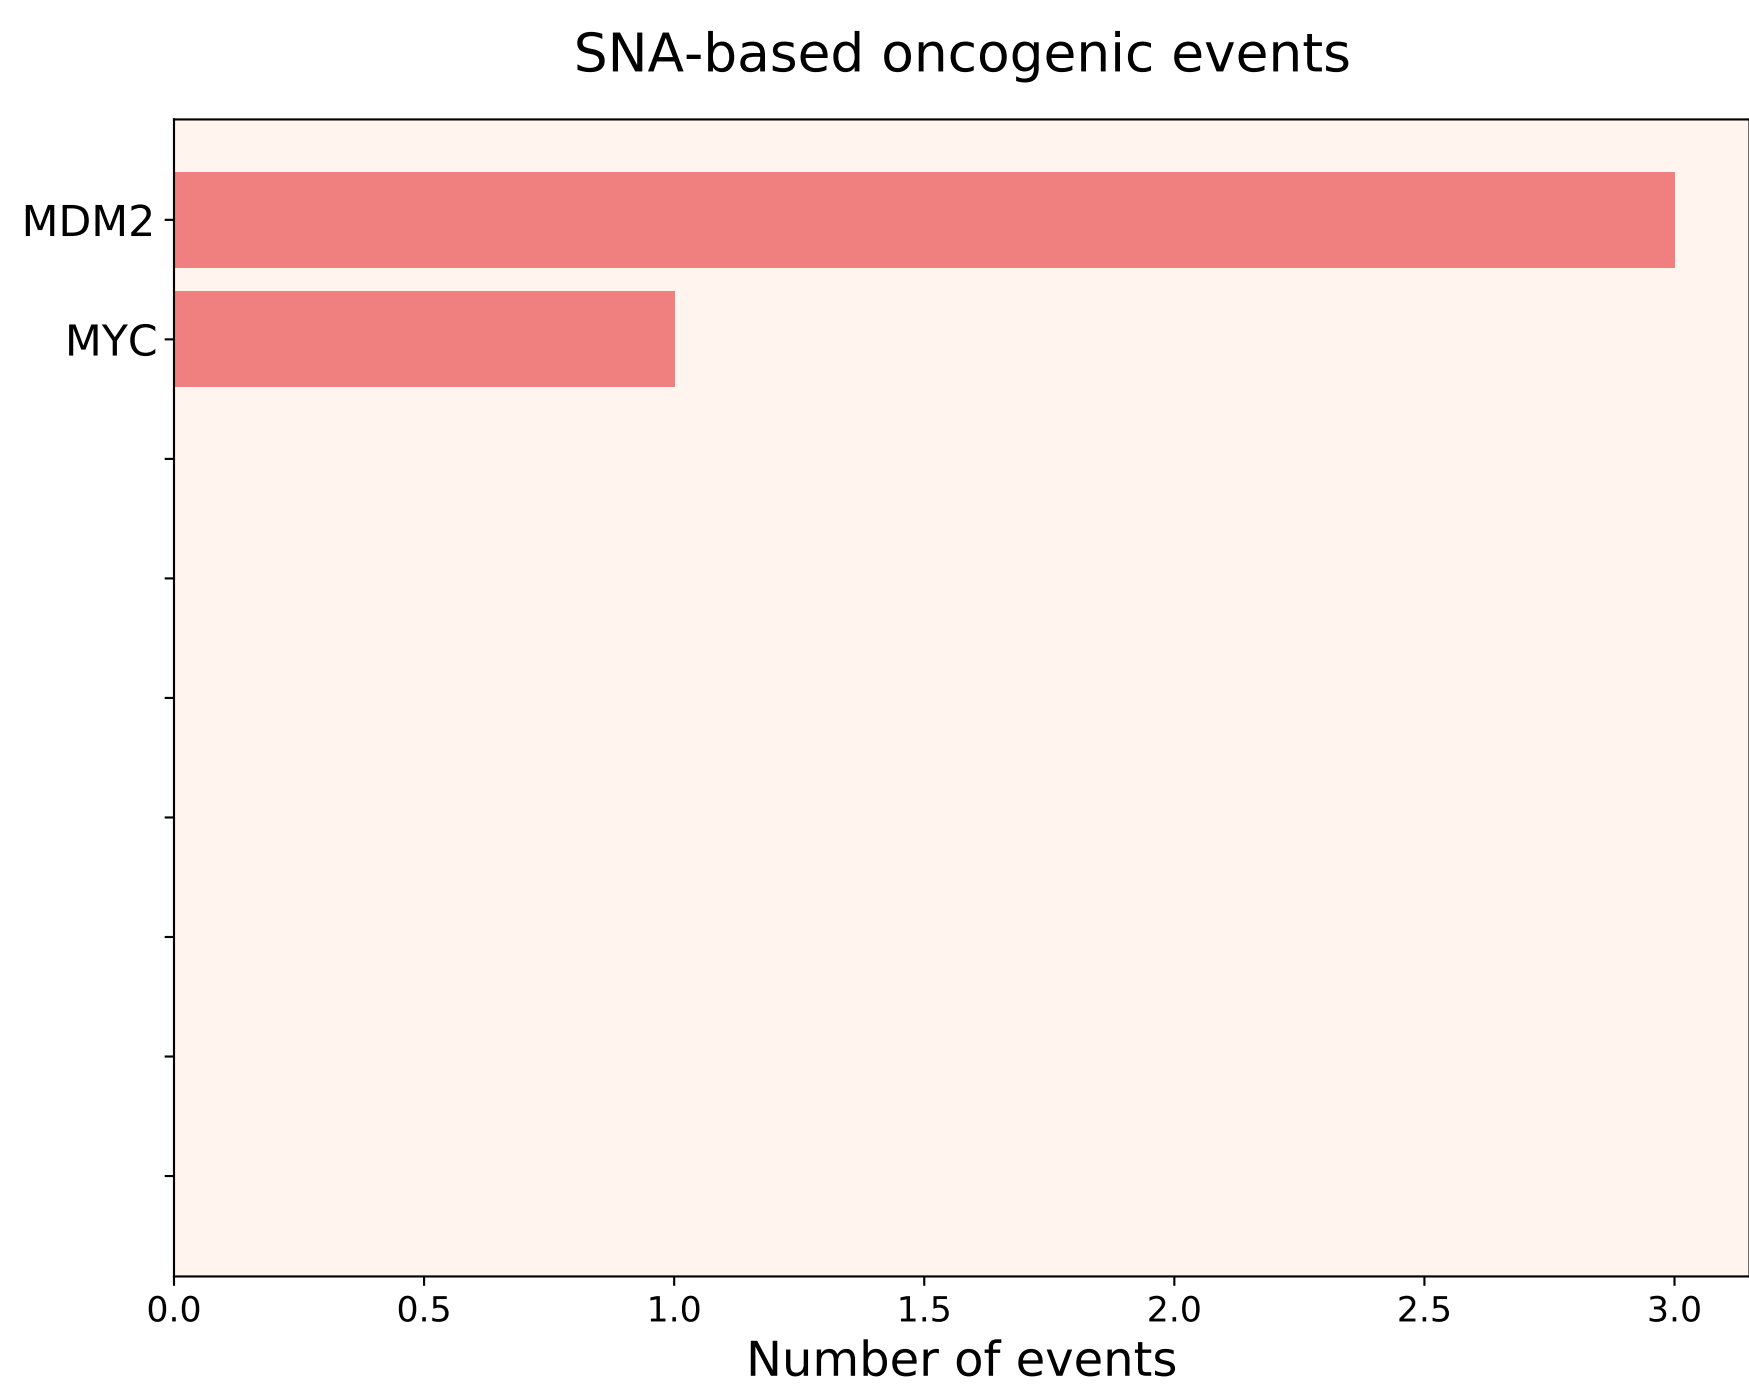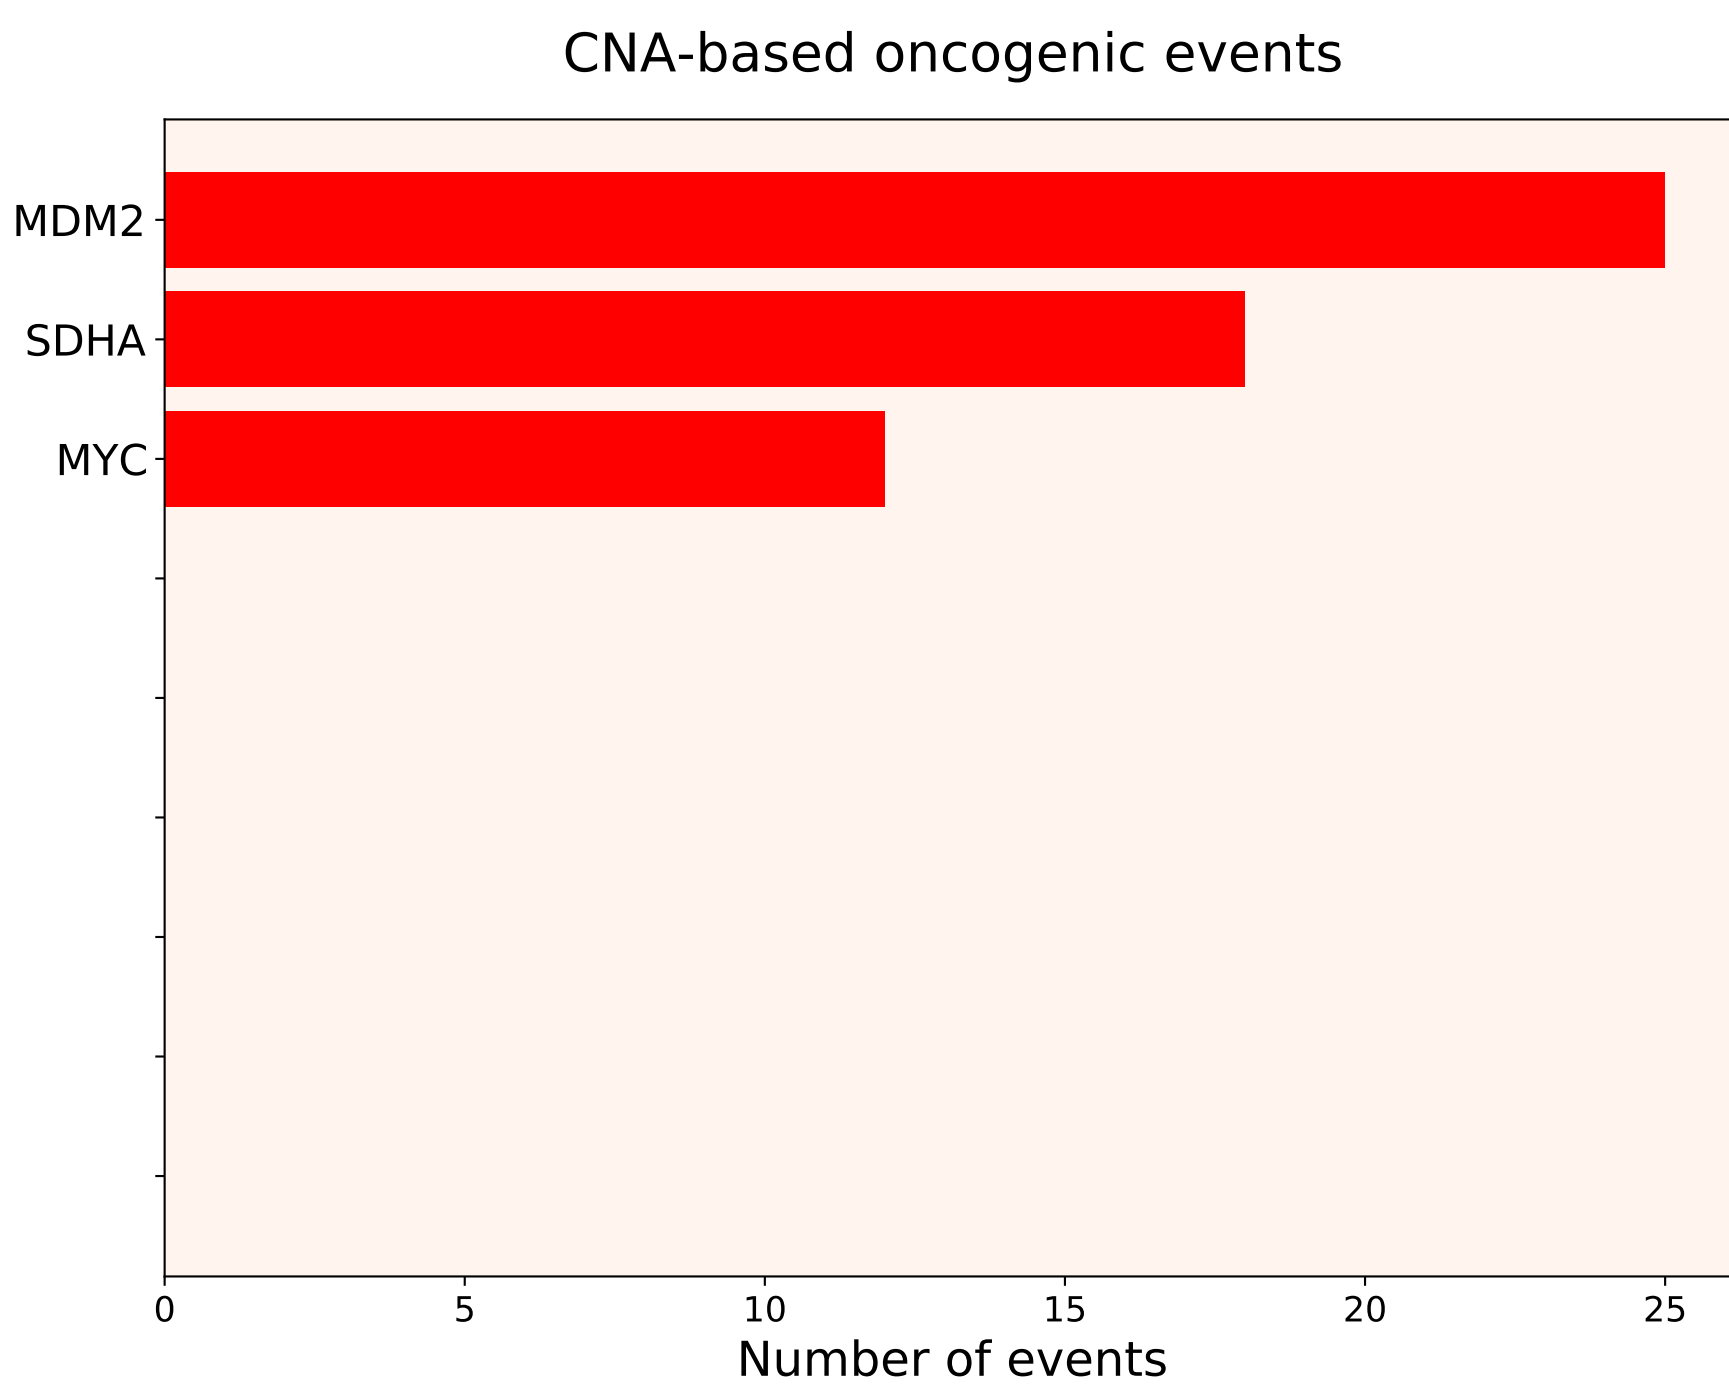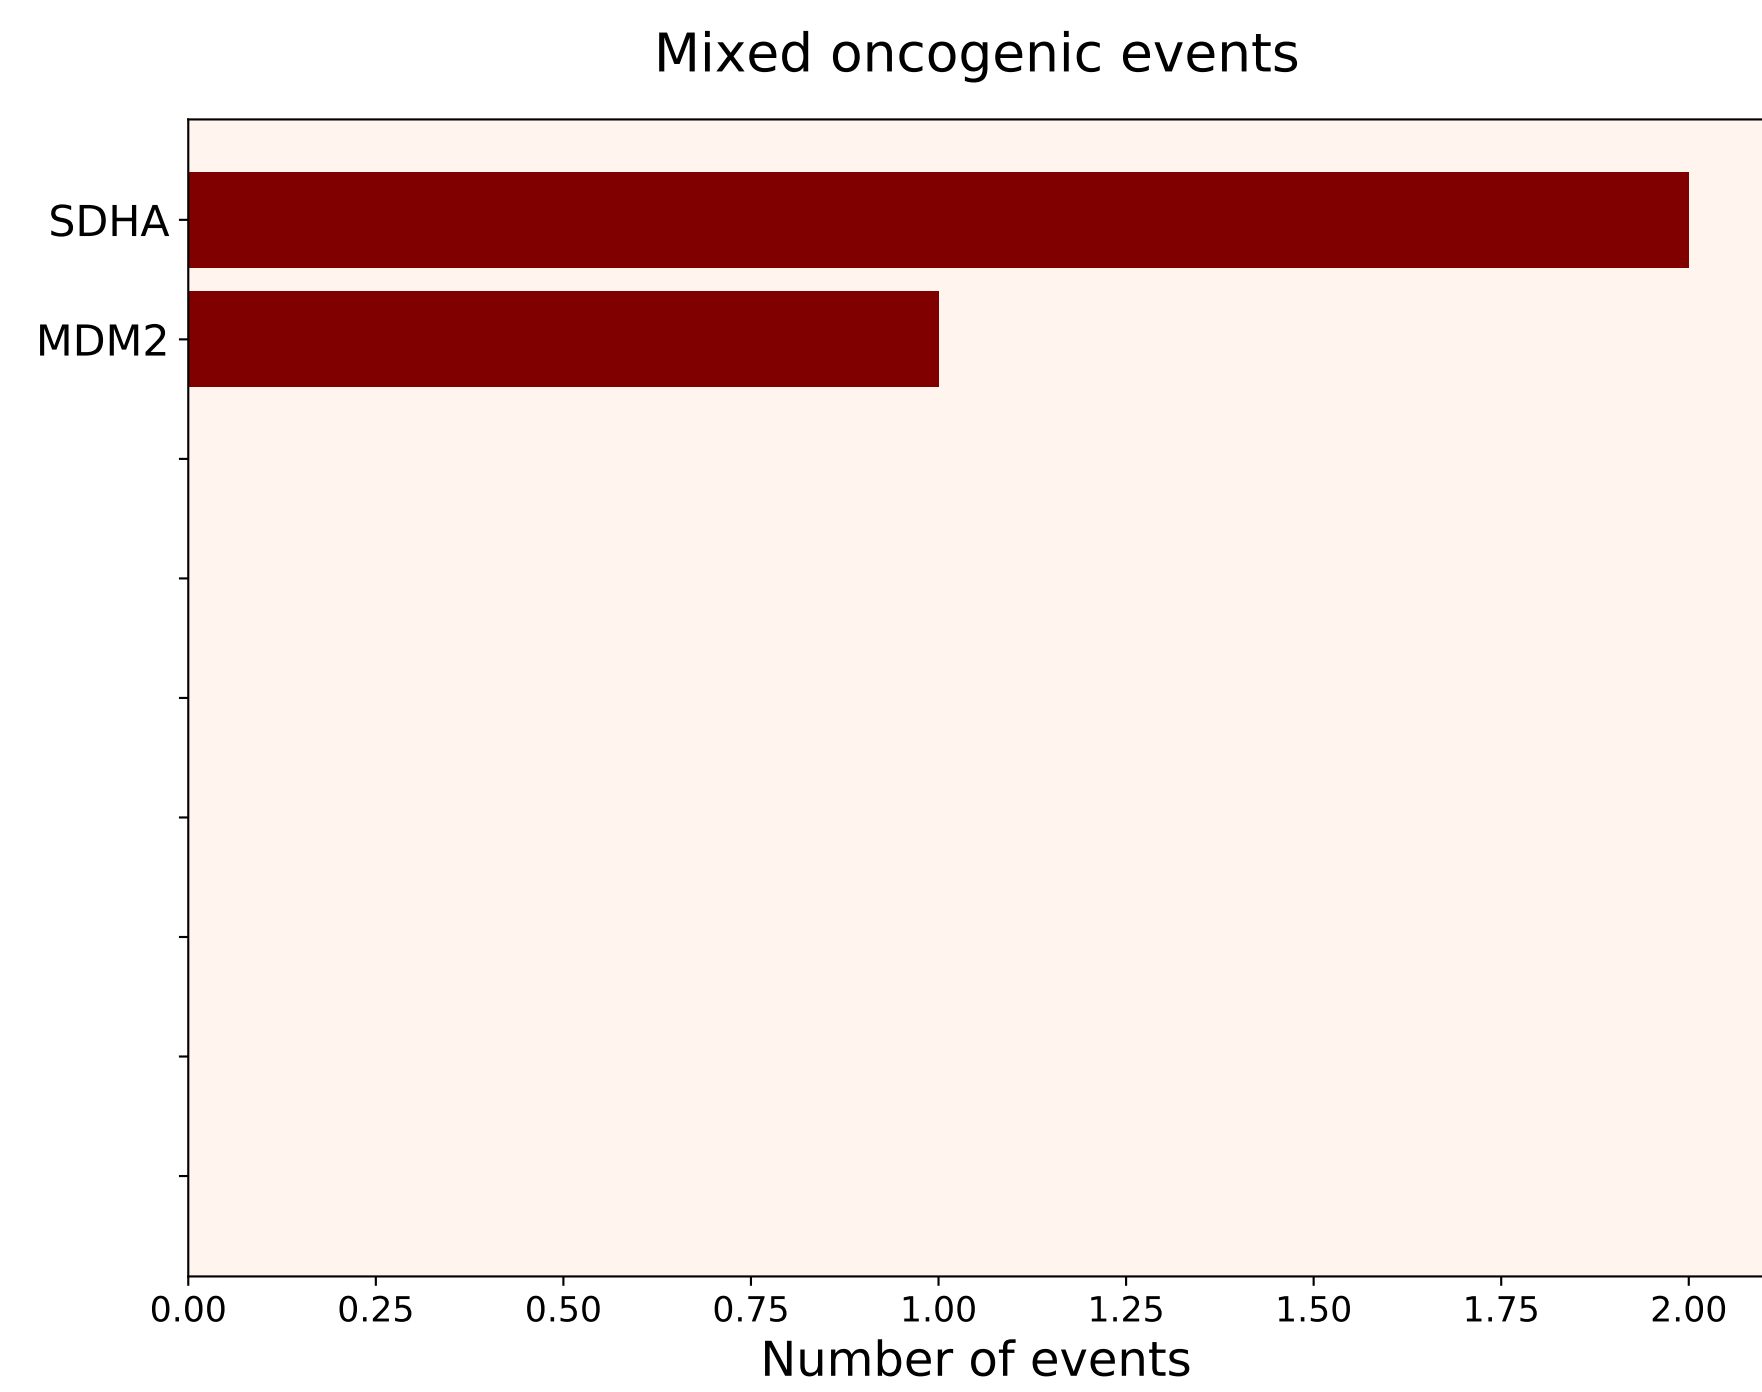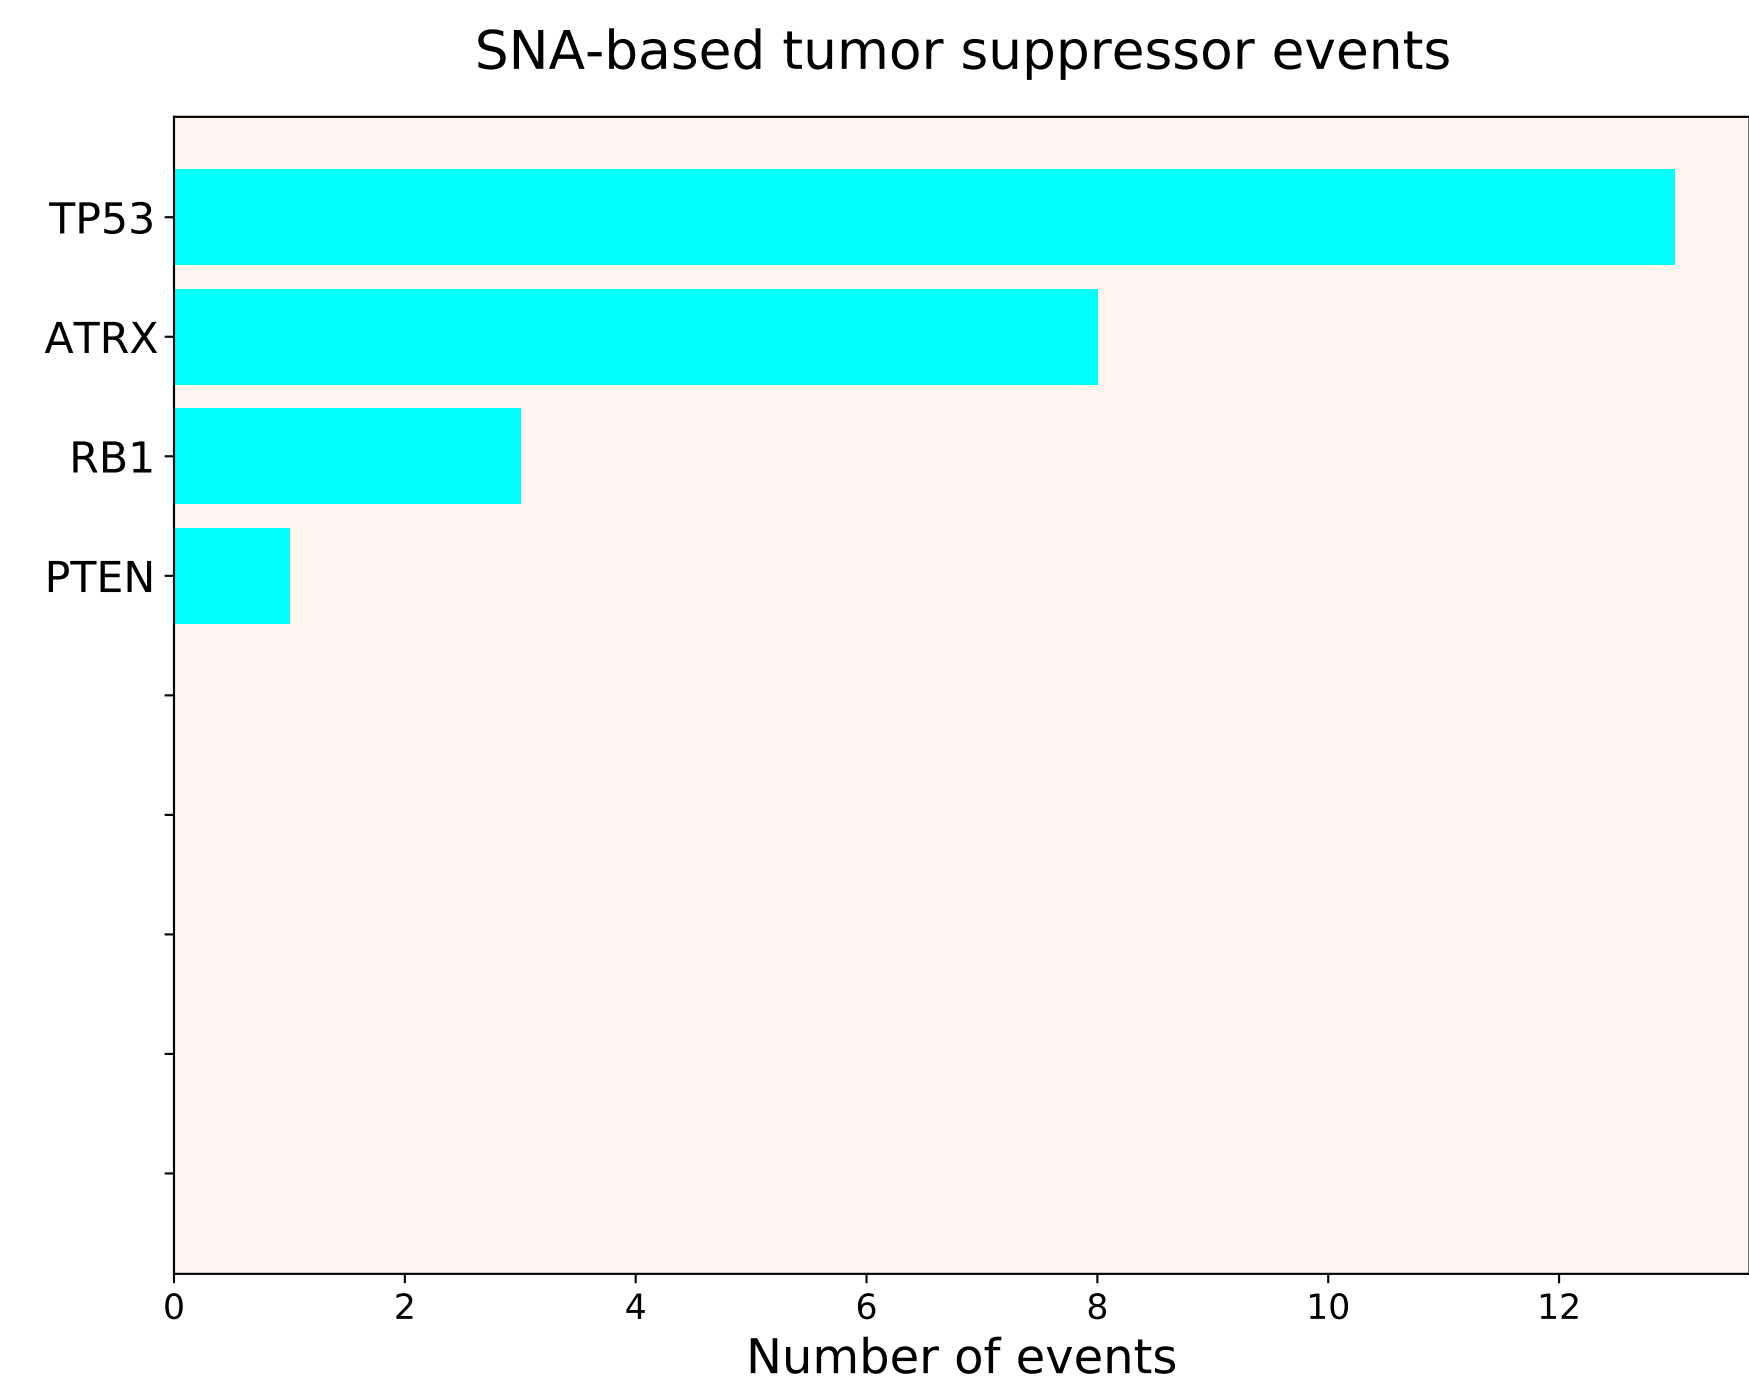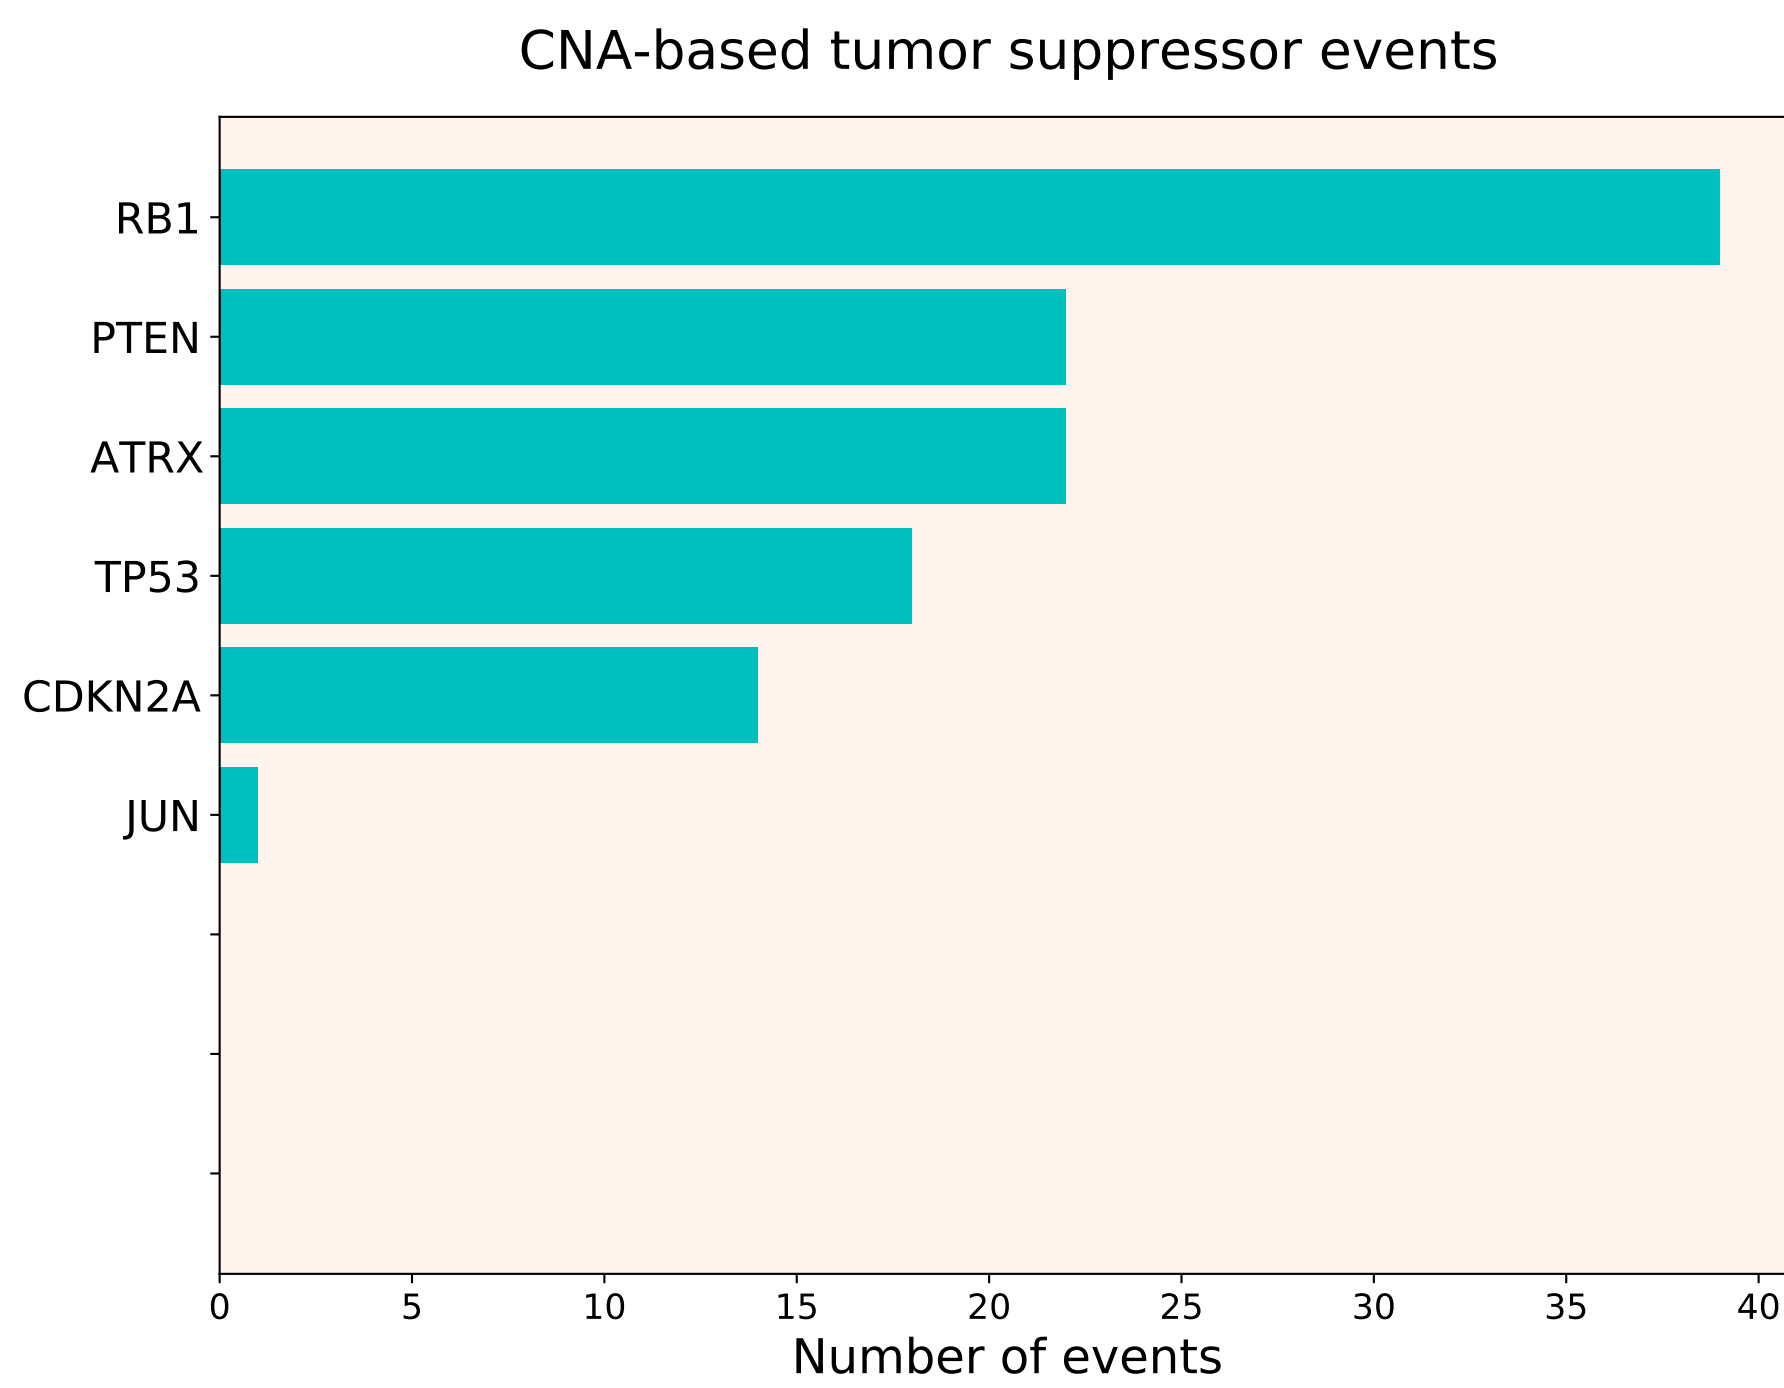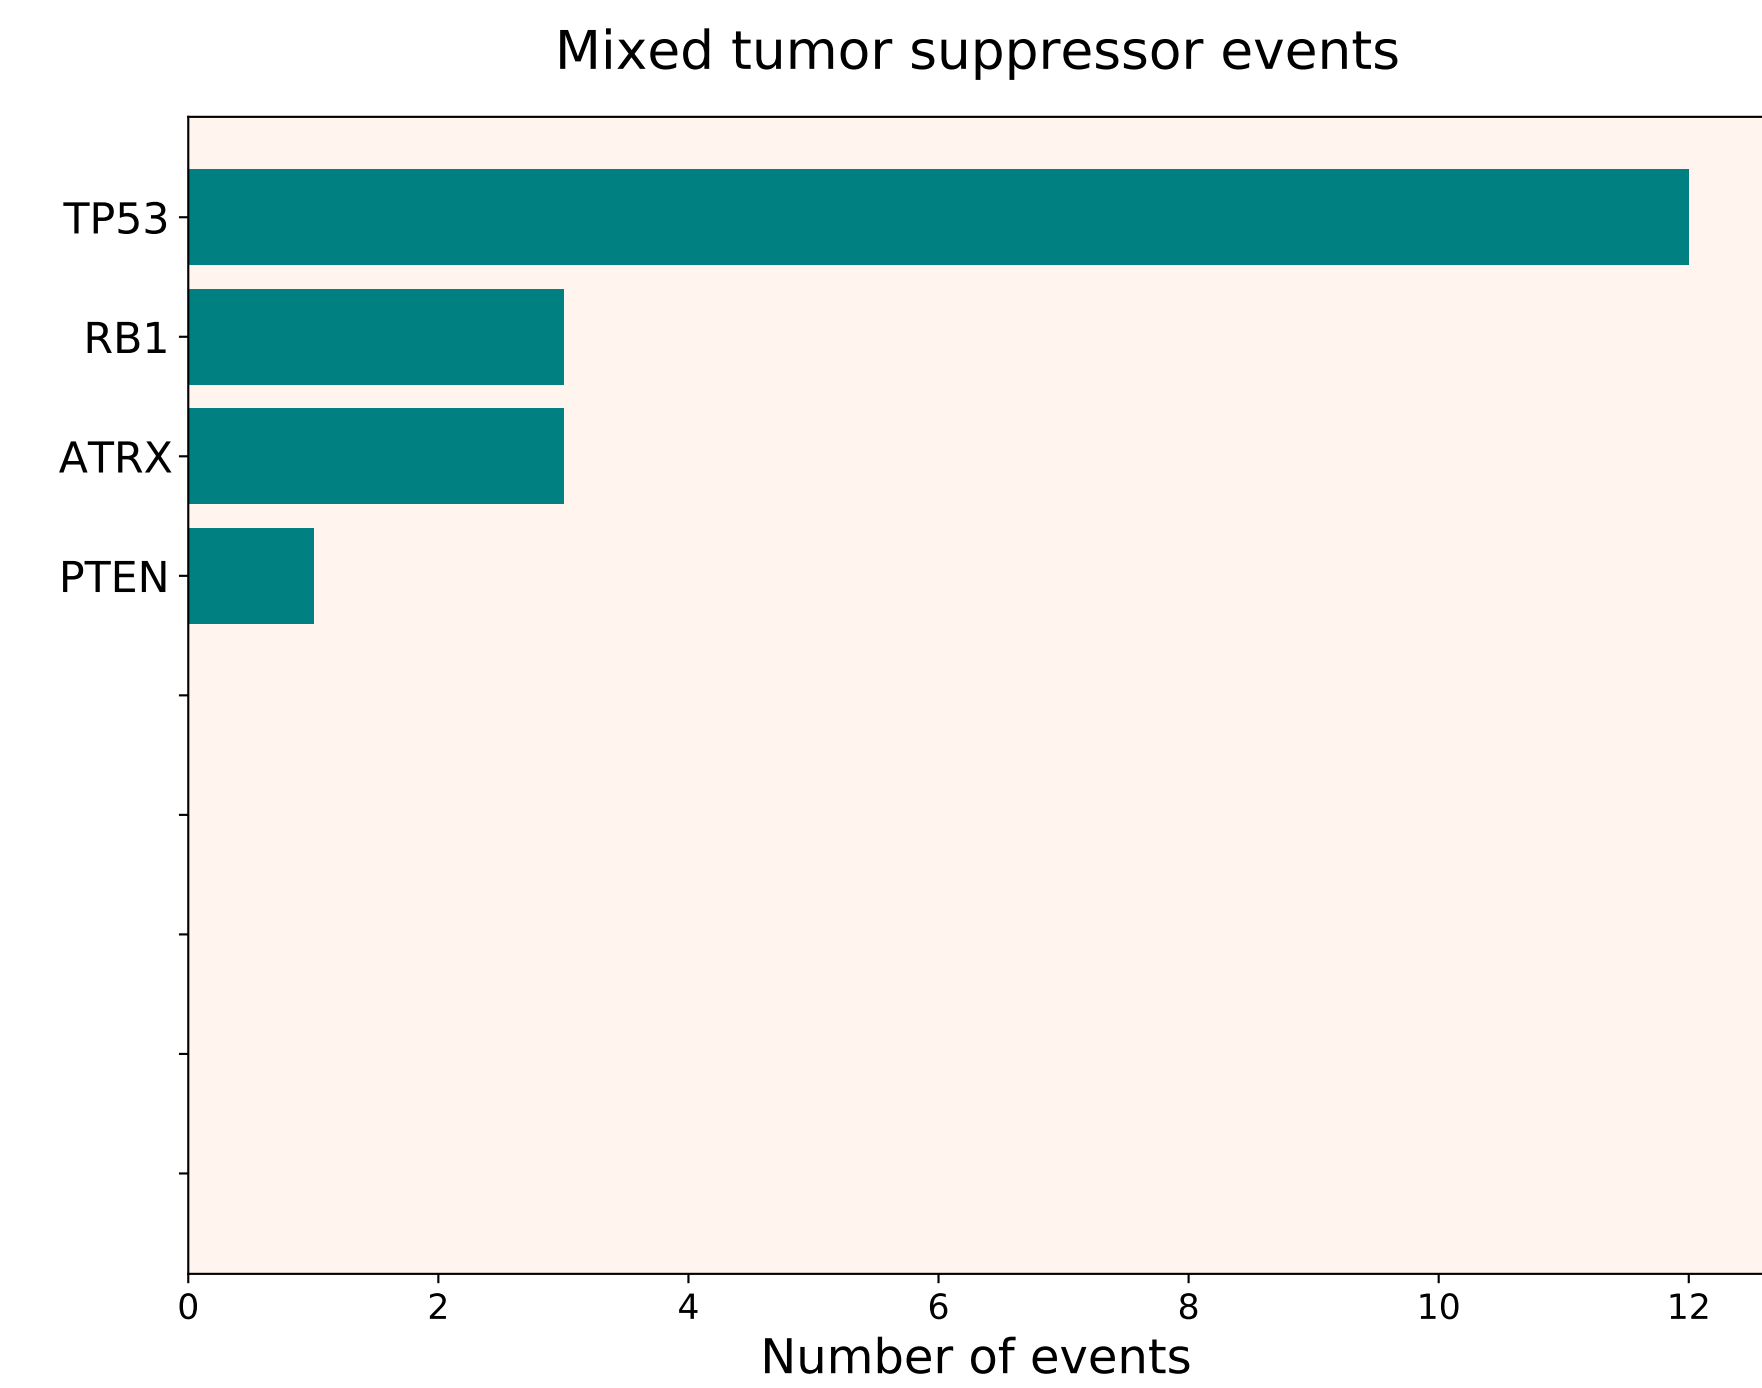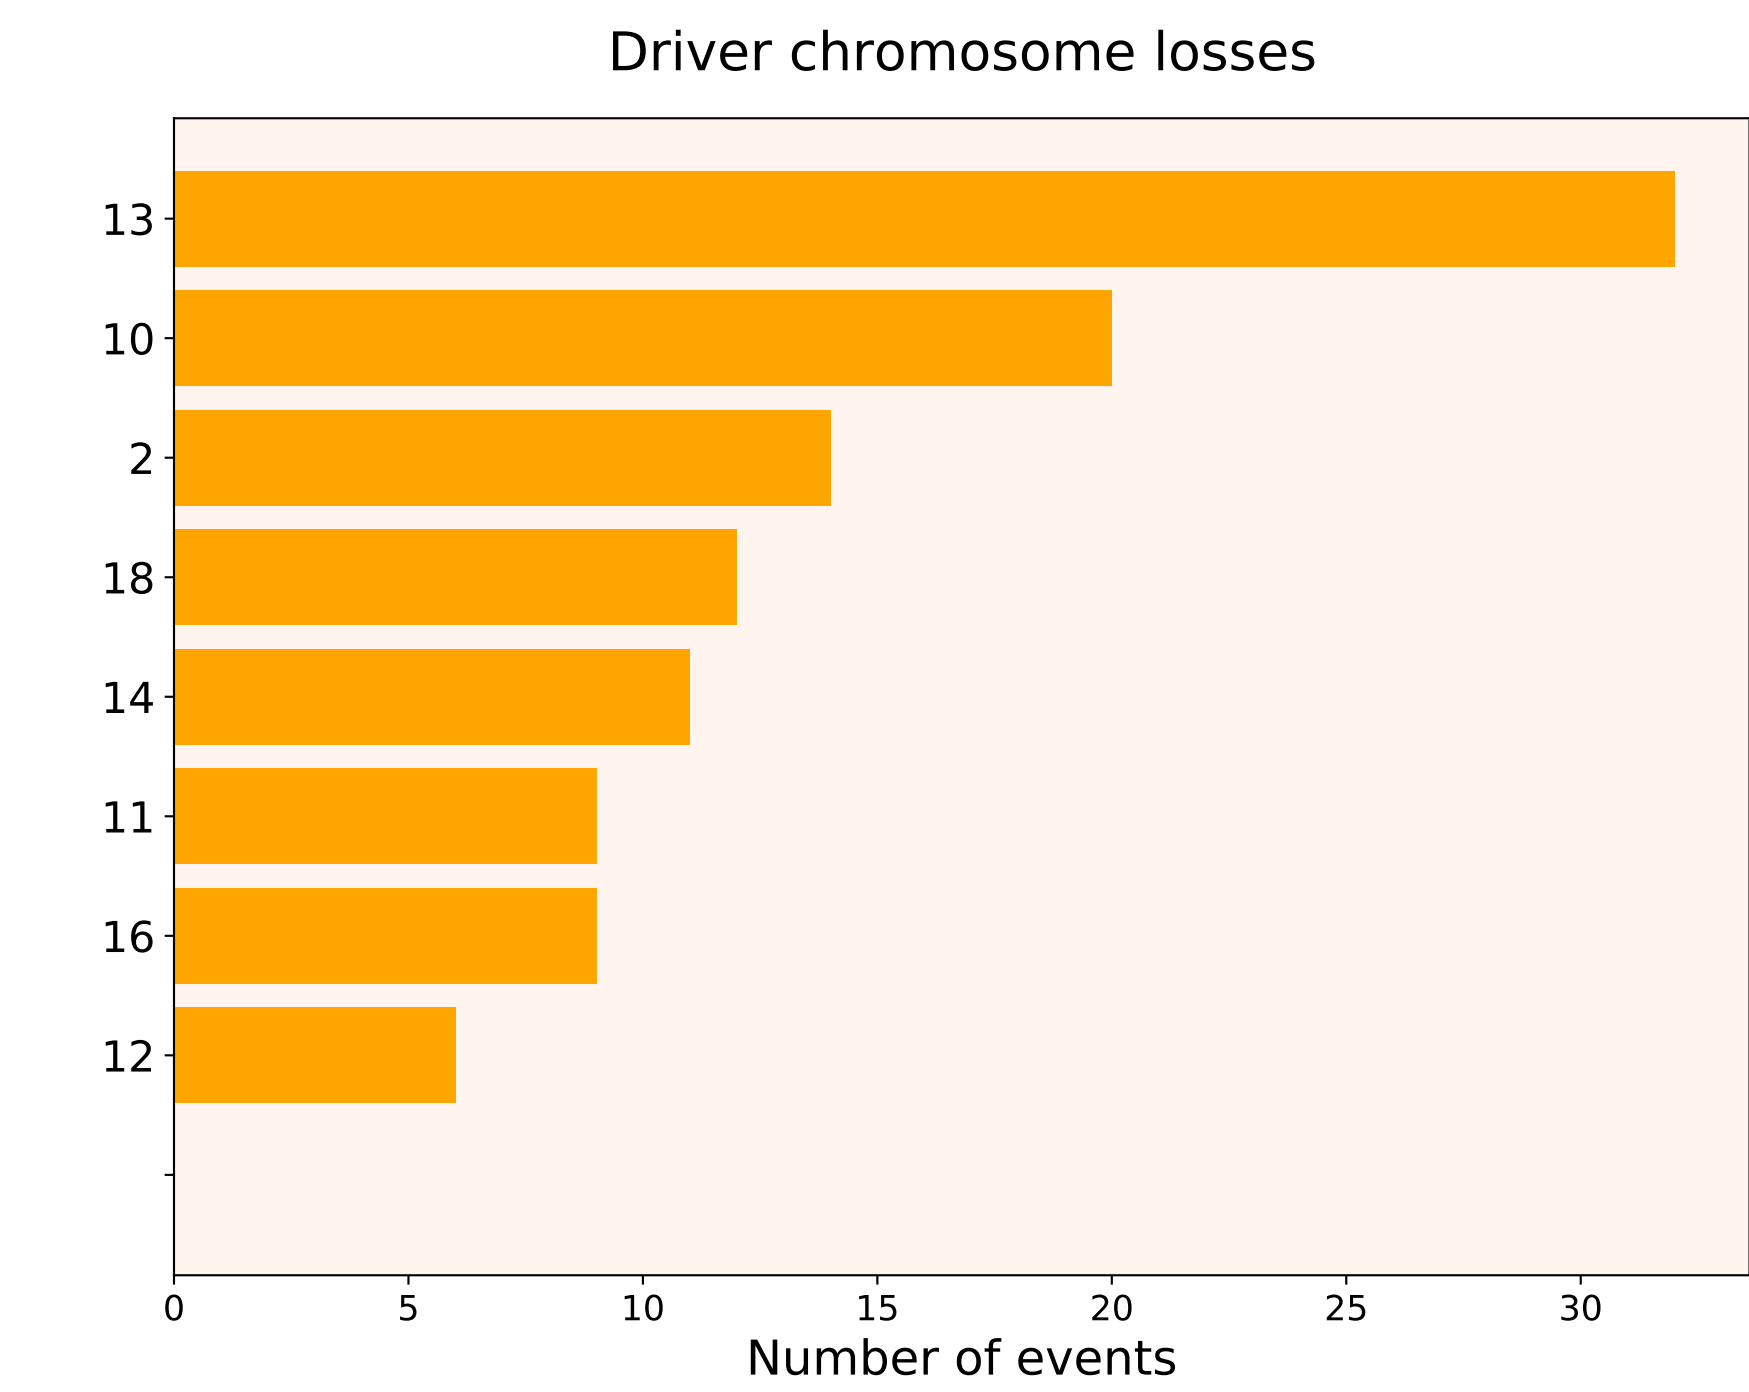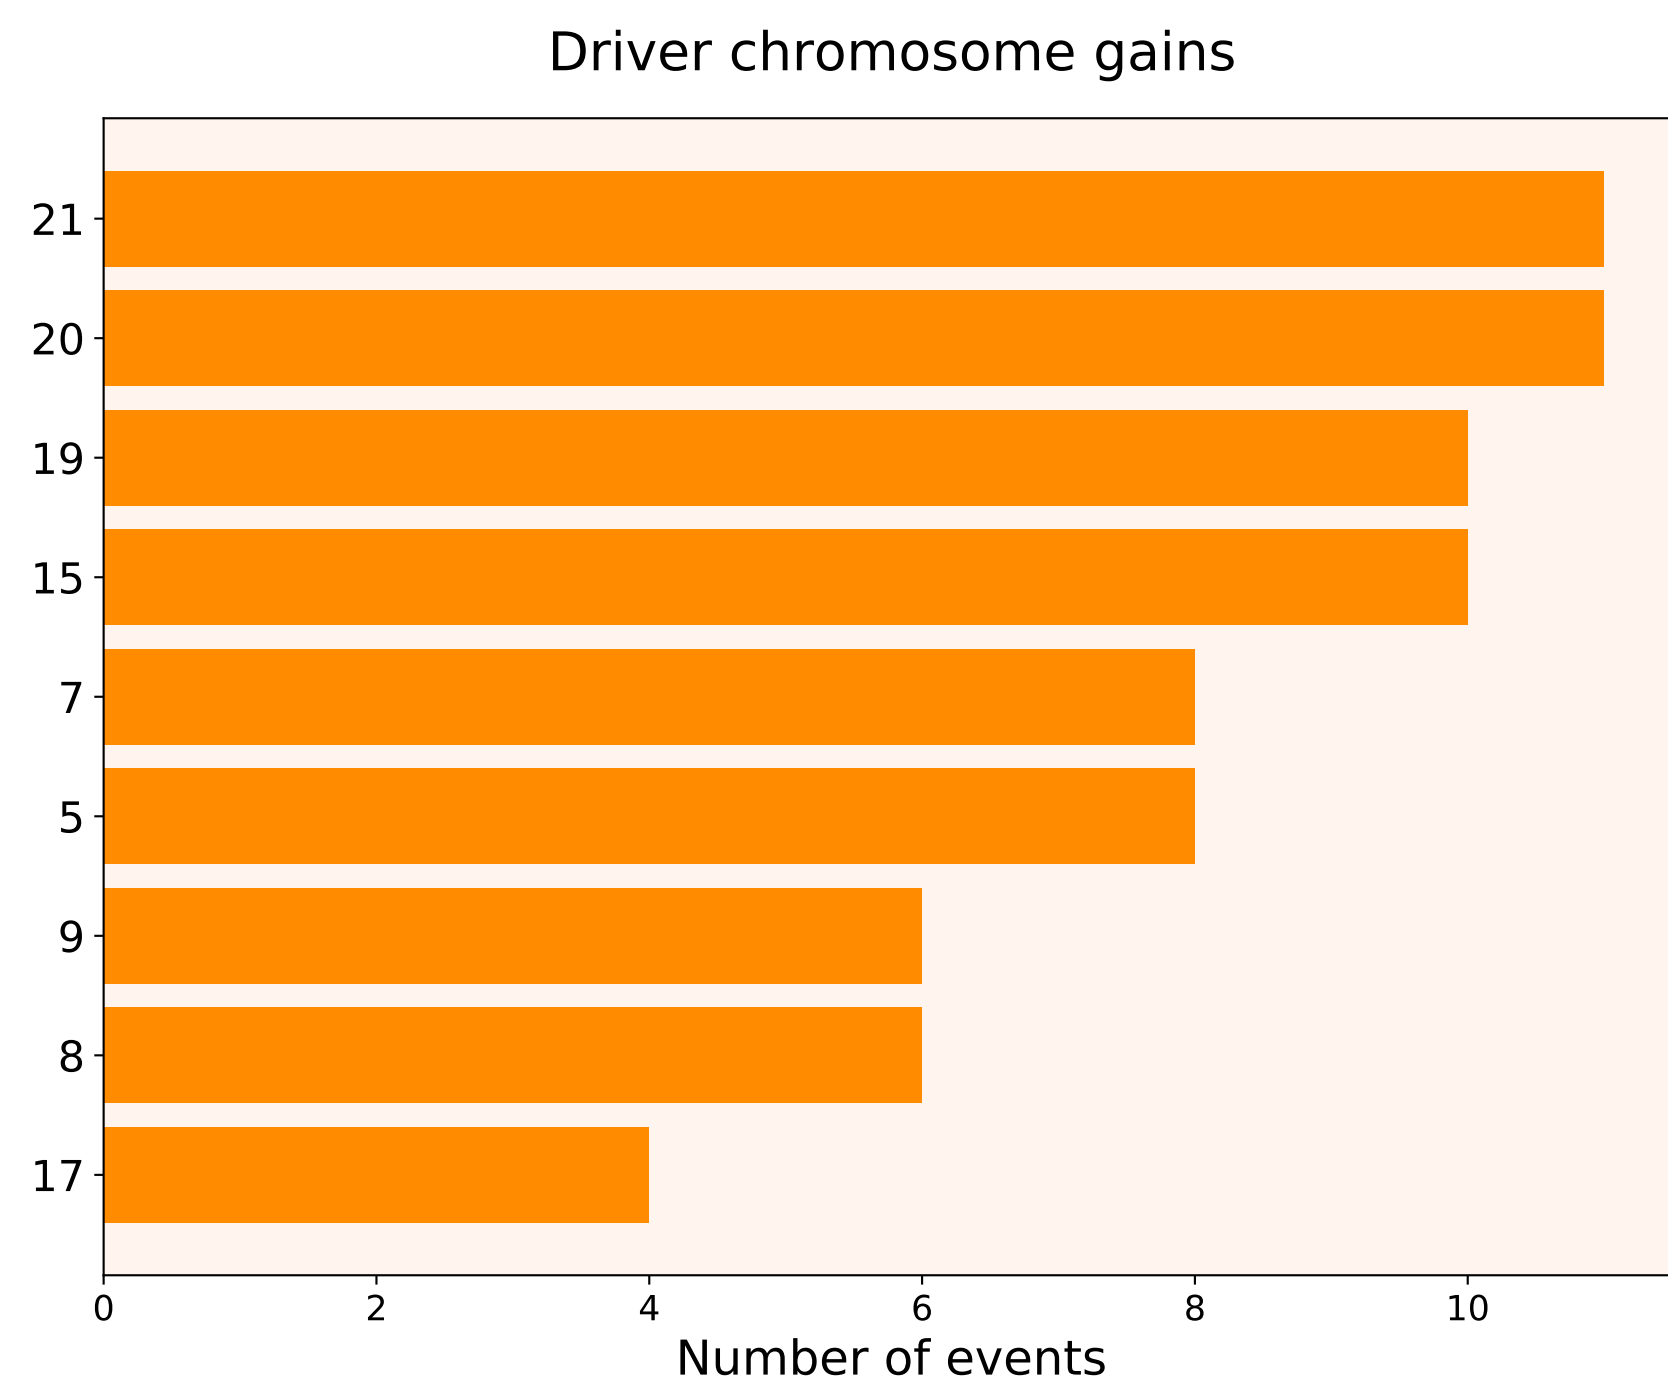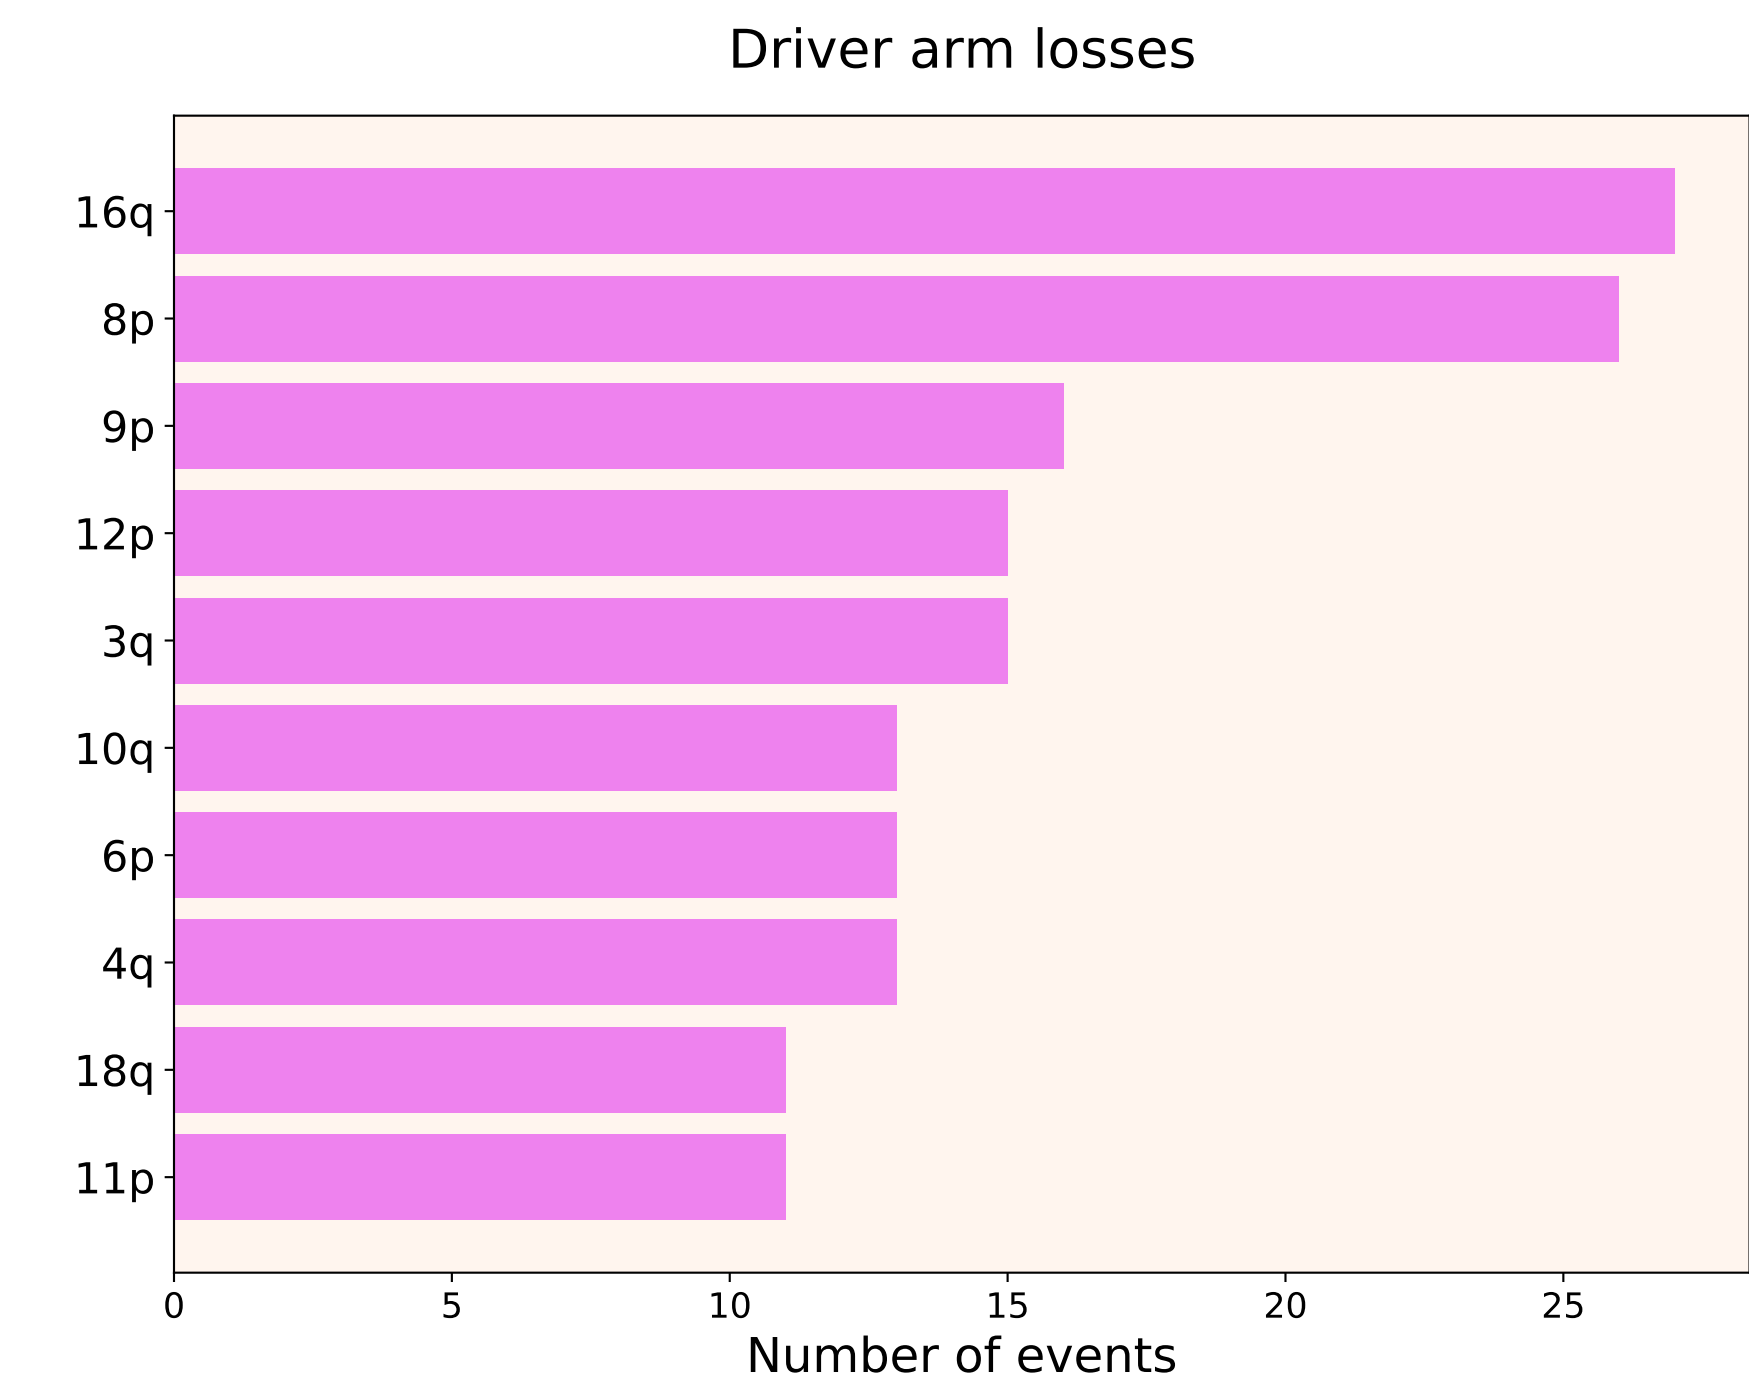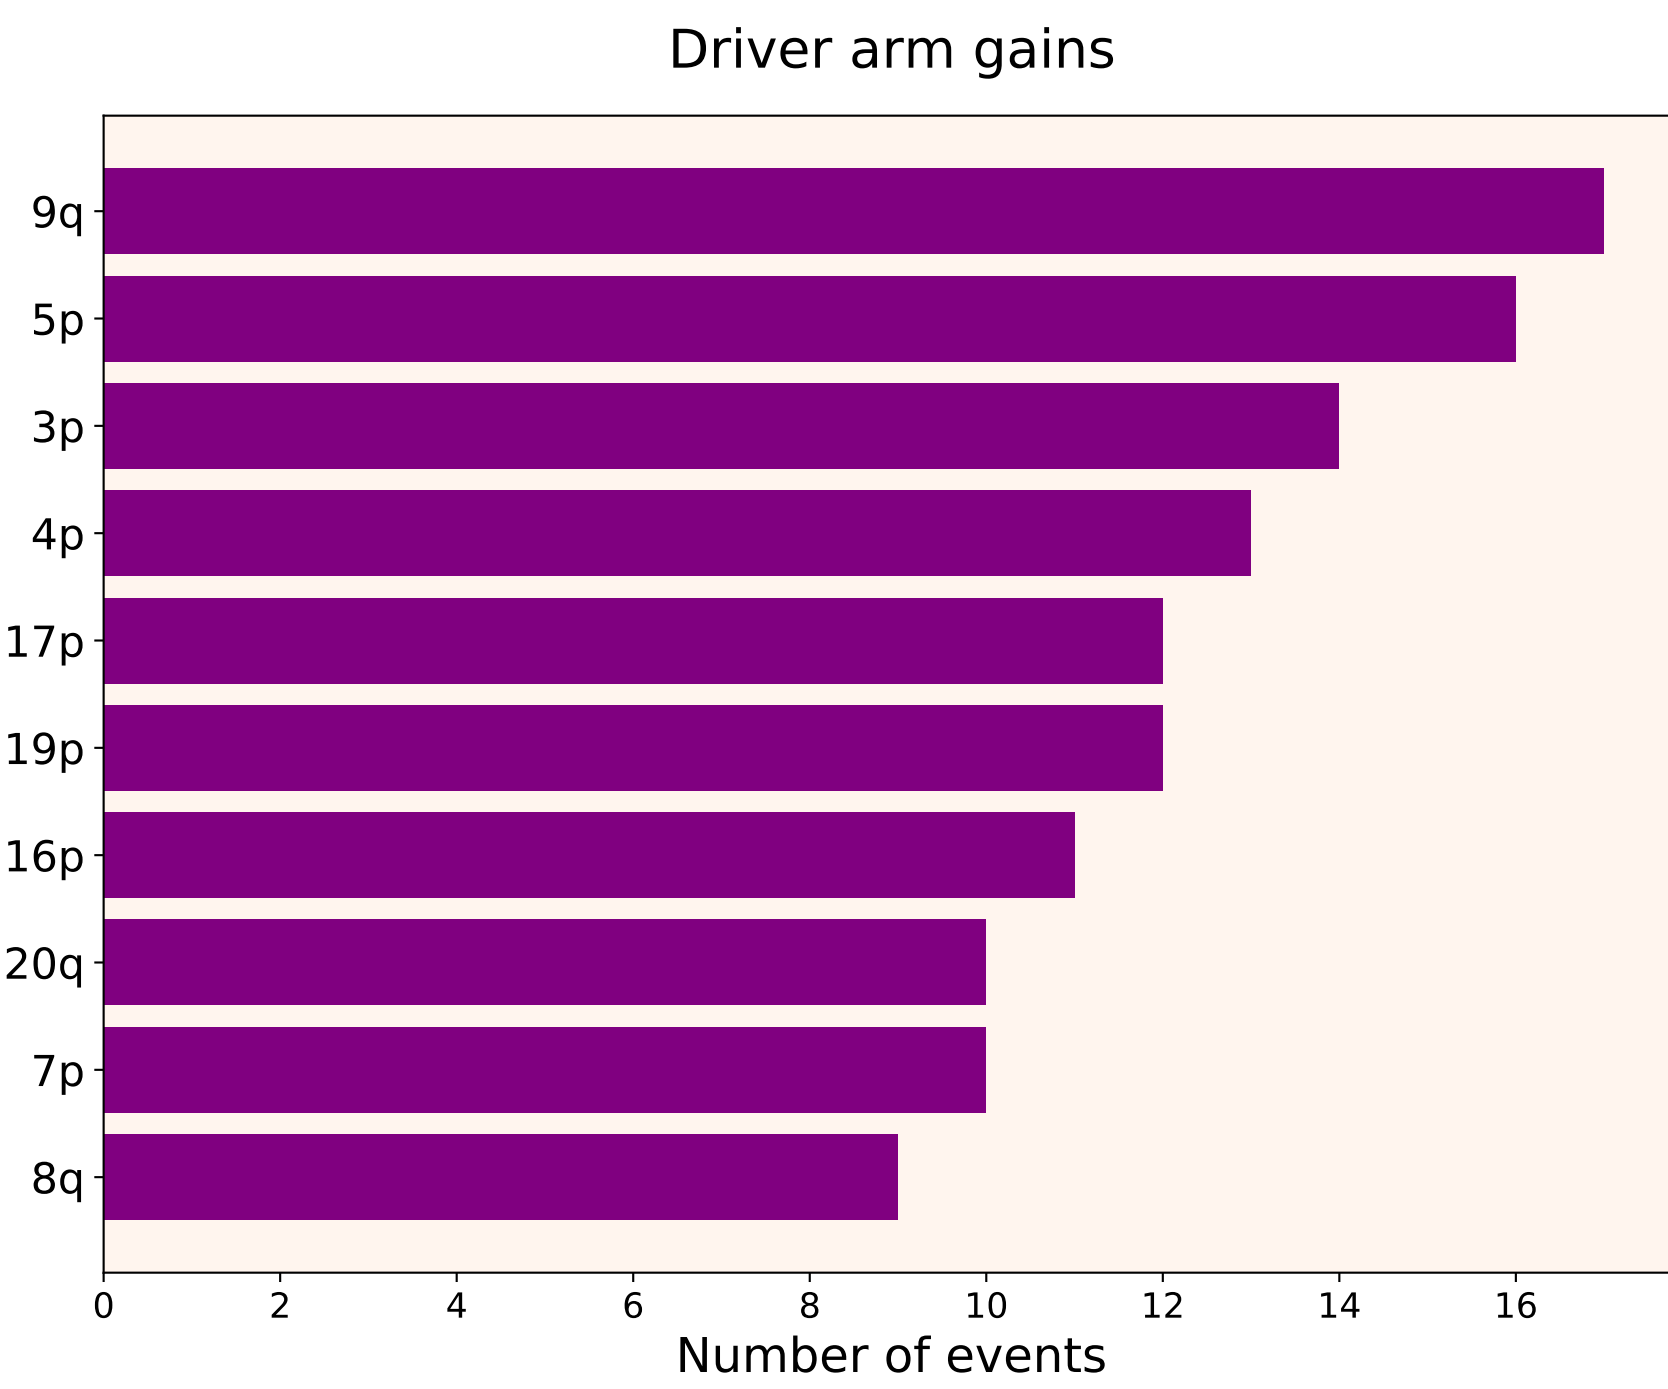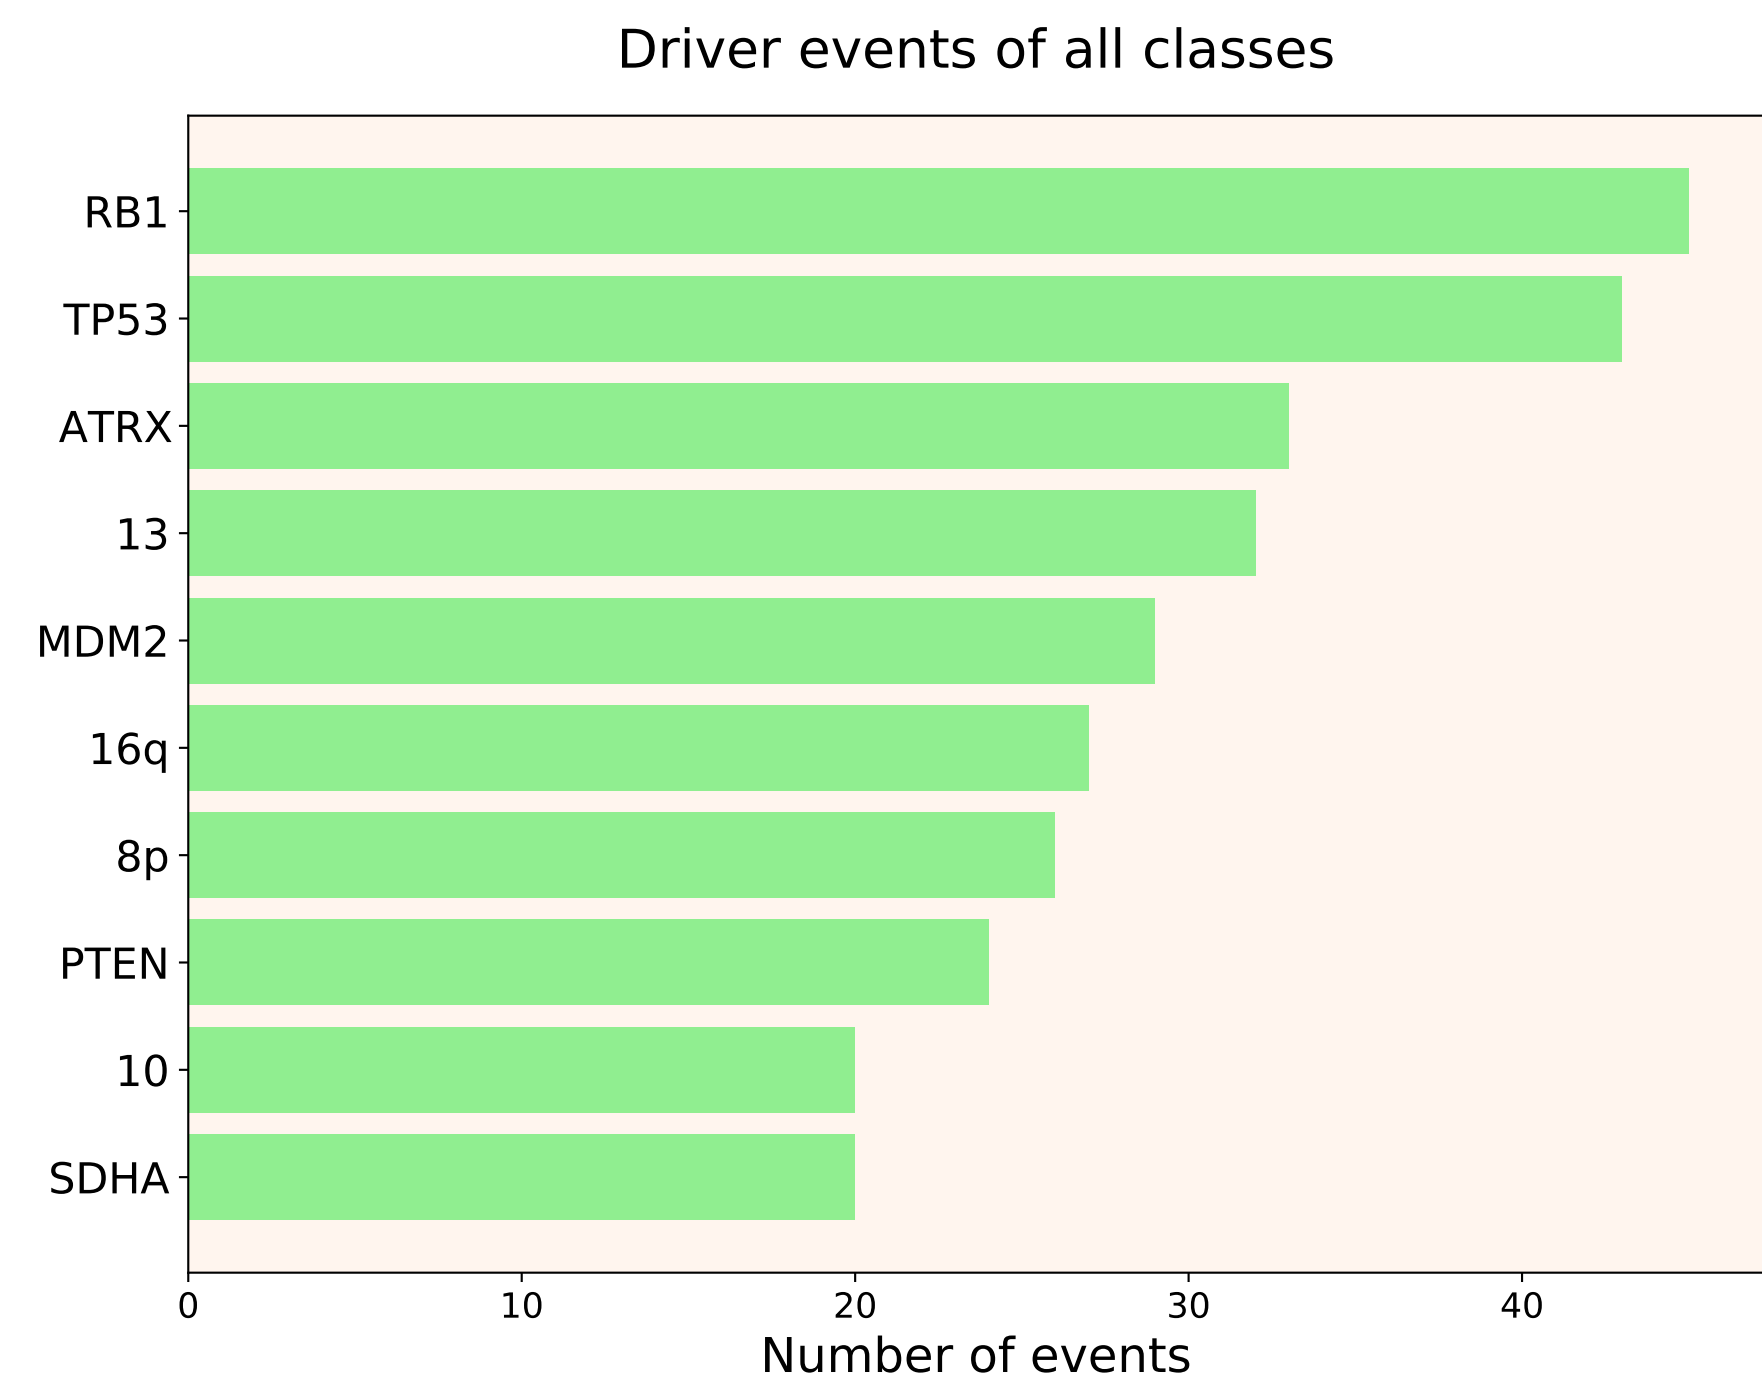

Supplement: Supplemental_Data_S1.zip [file Supplemental_Data_S1.zip]

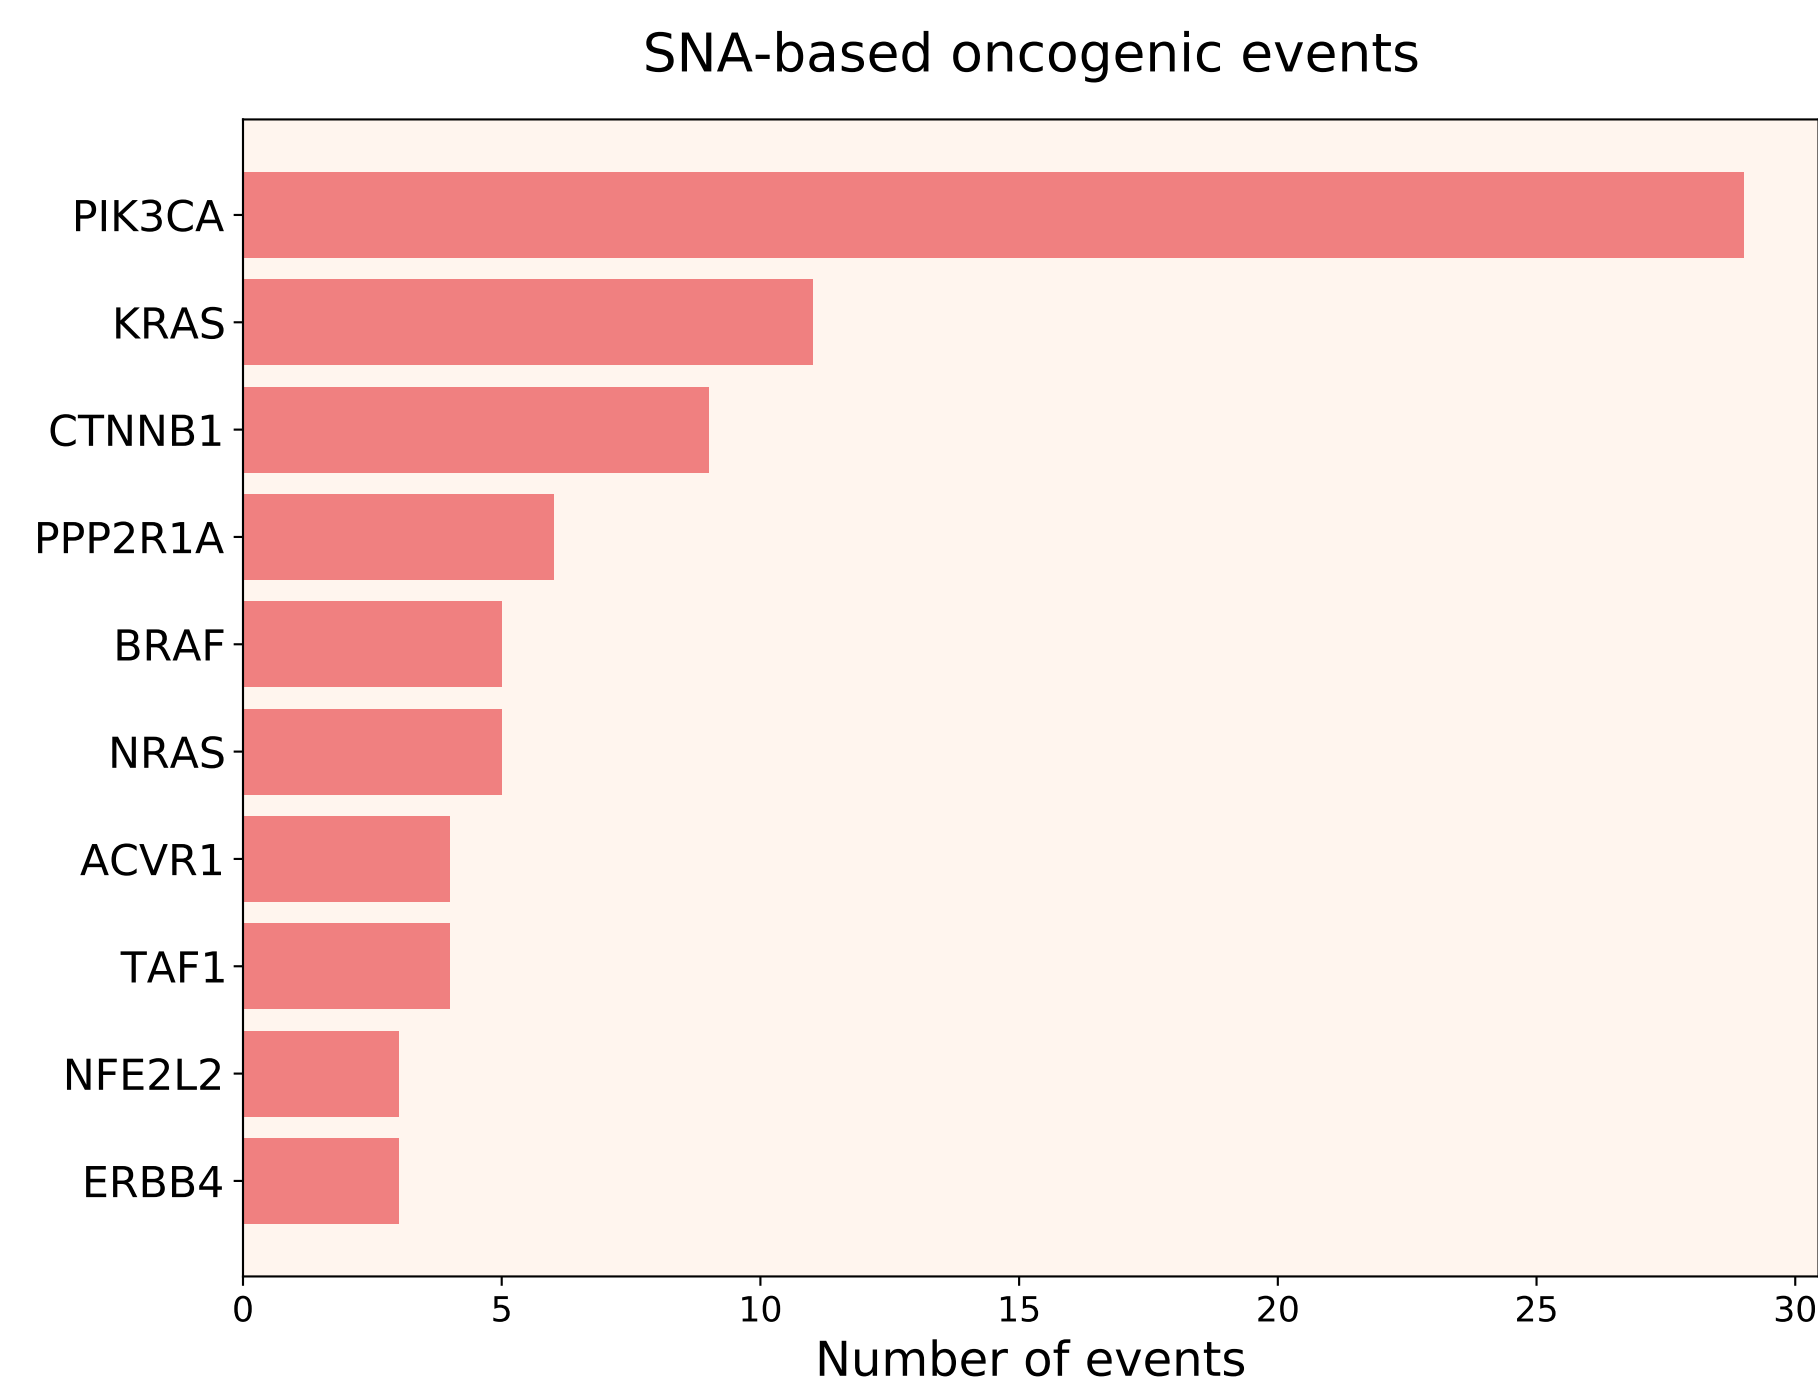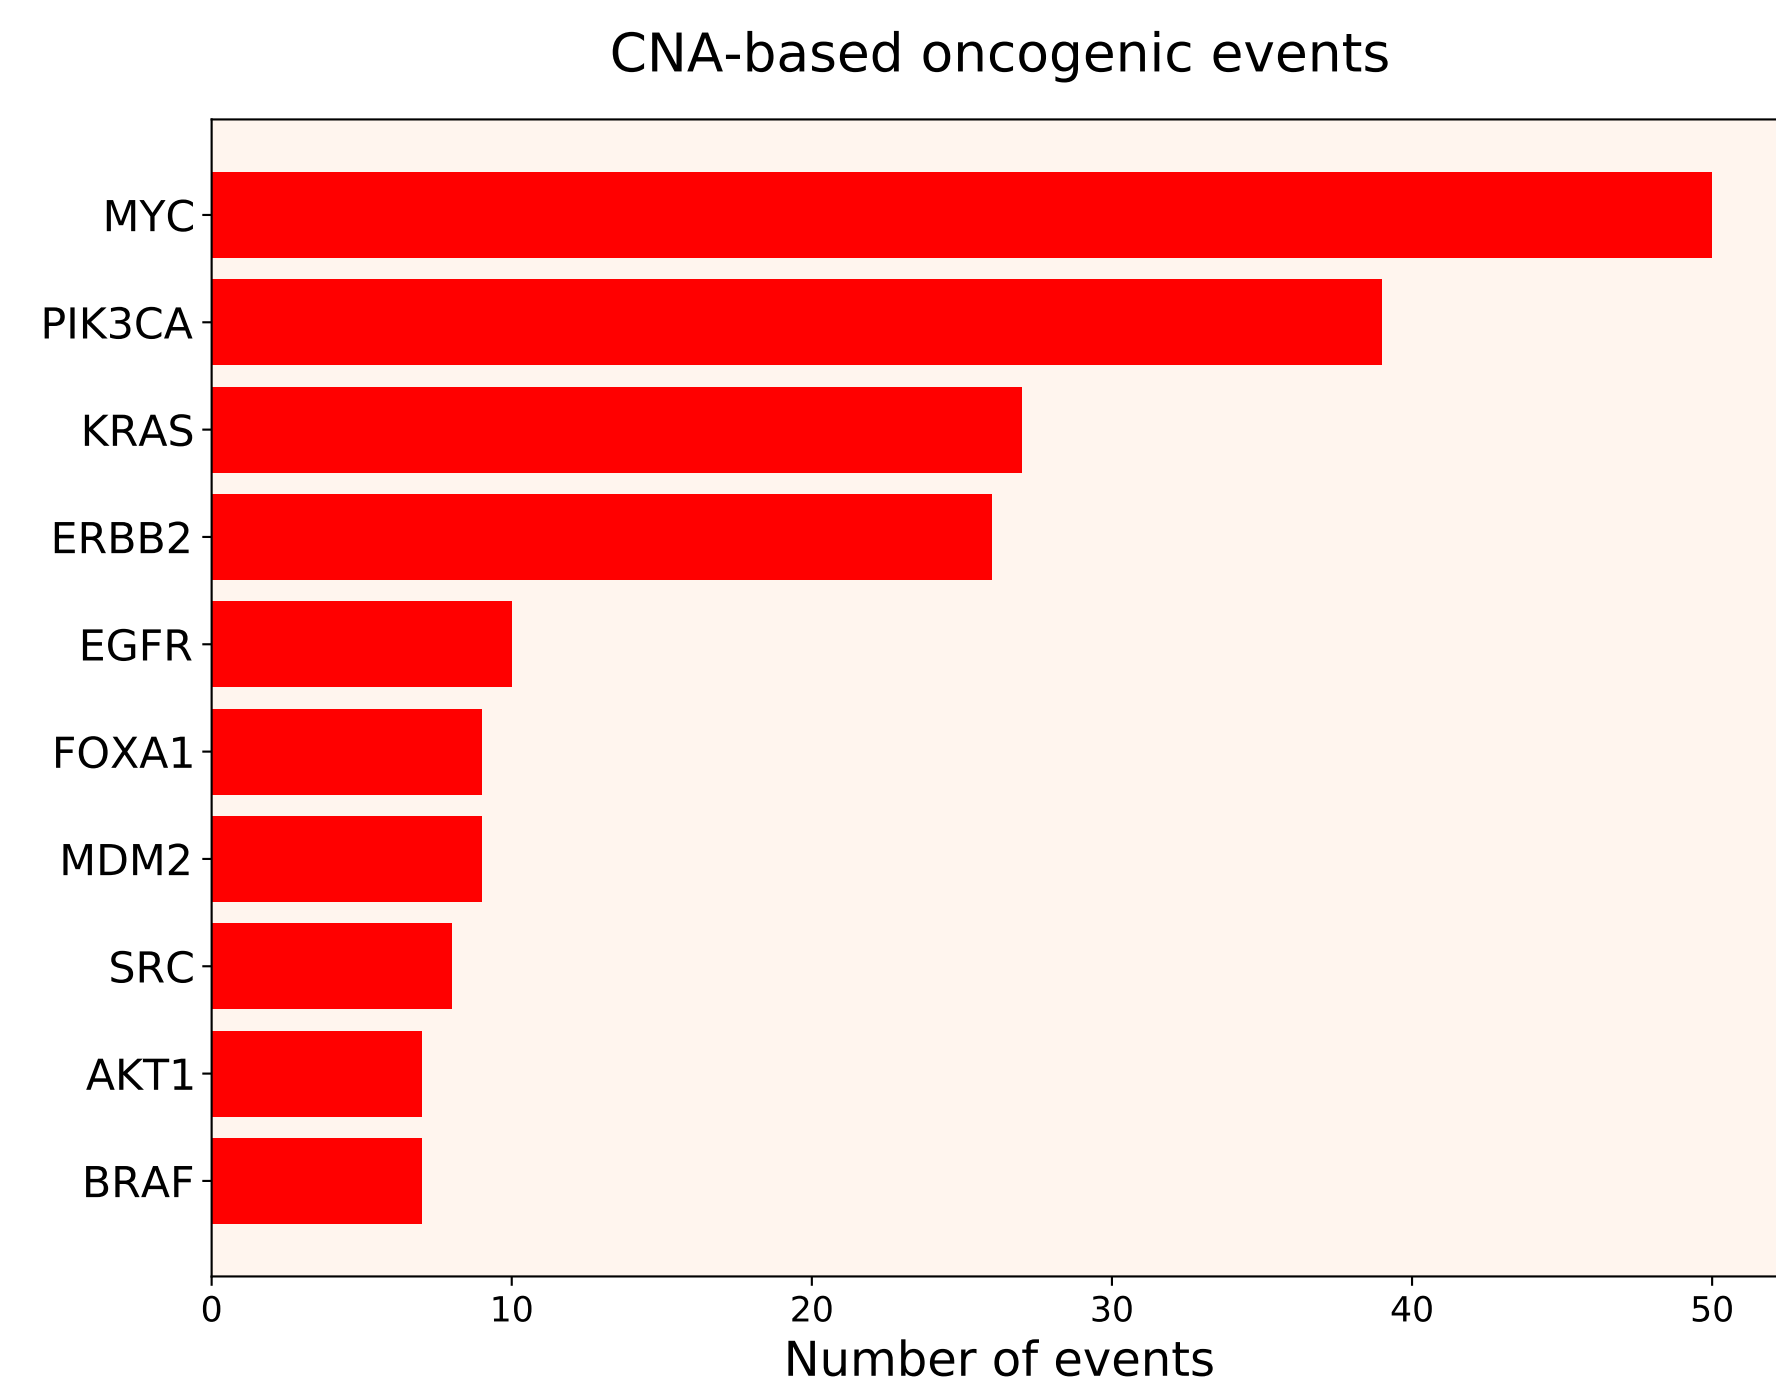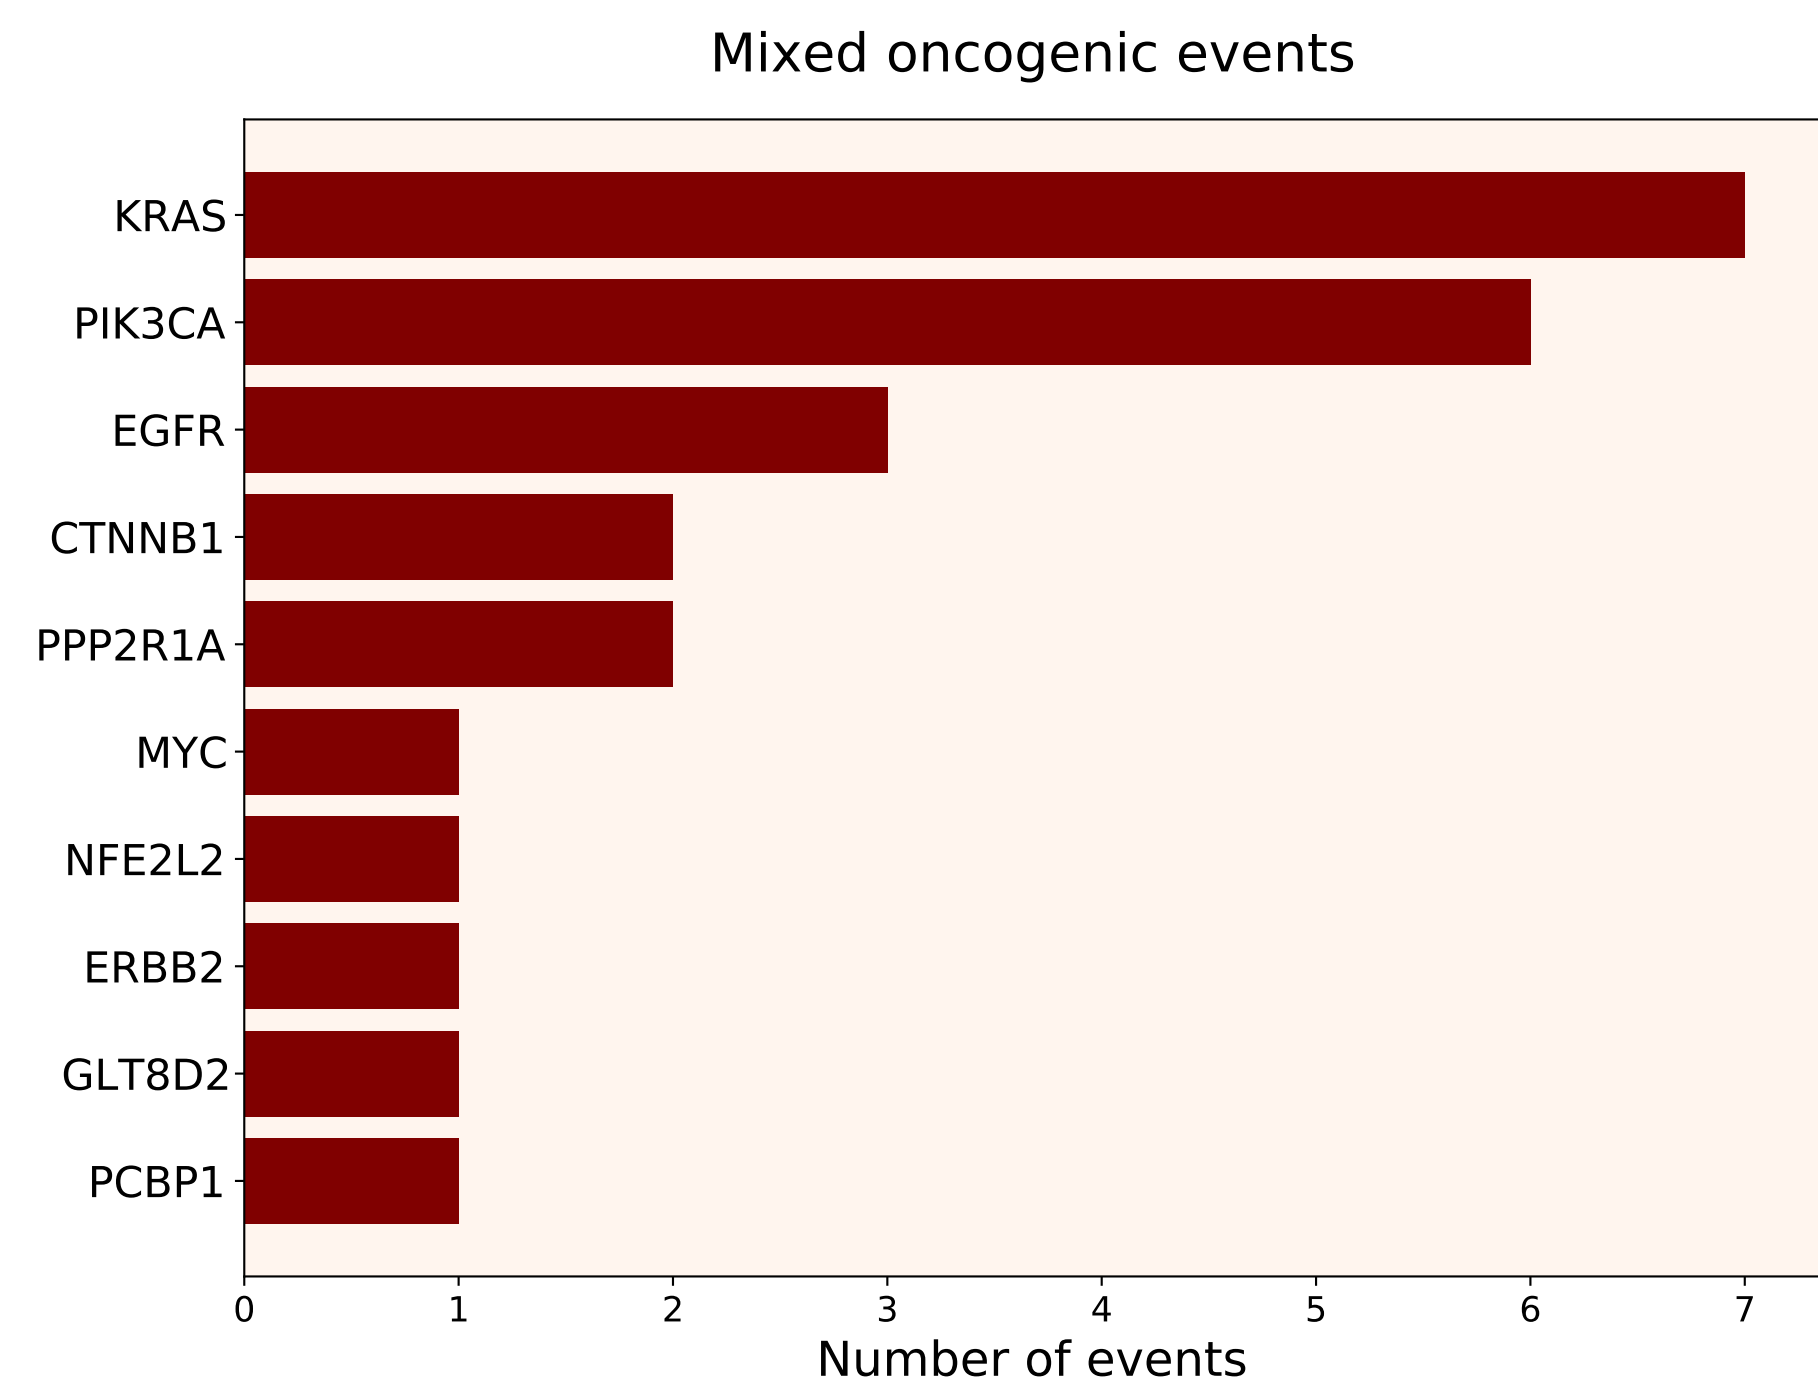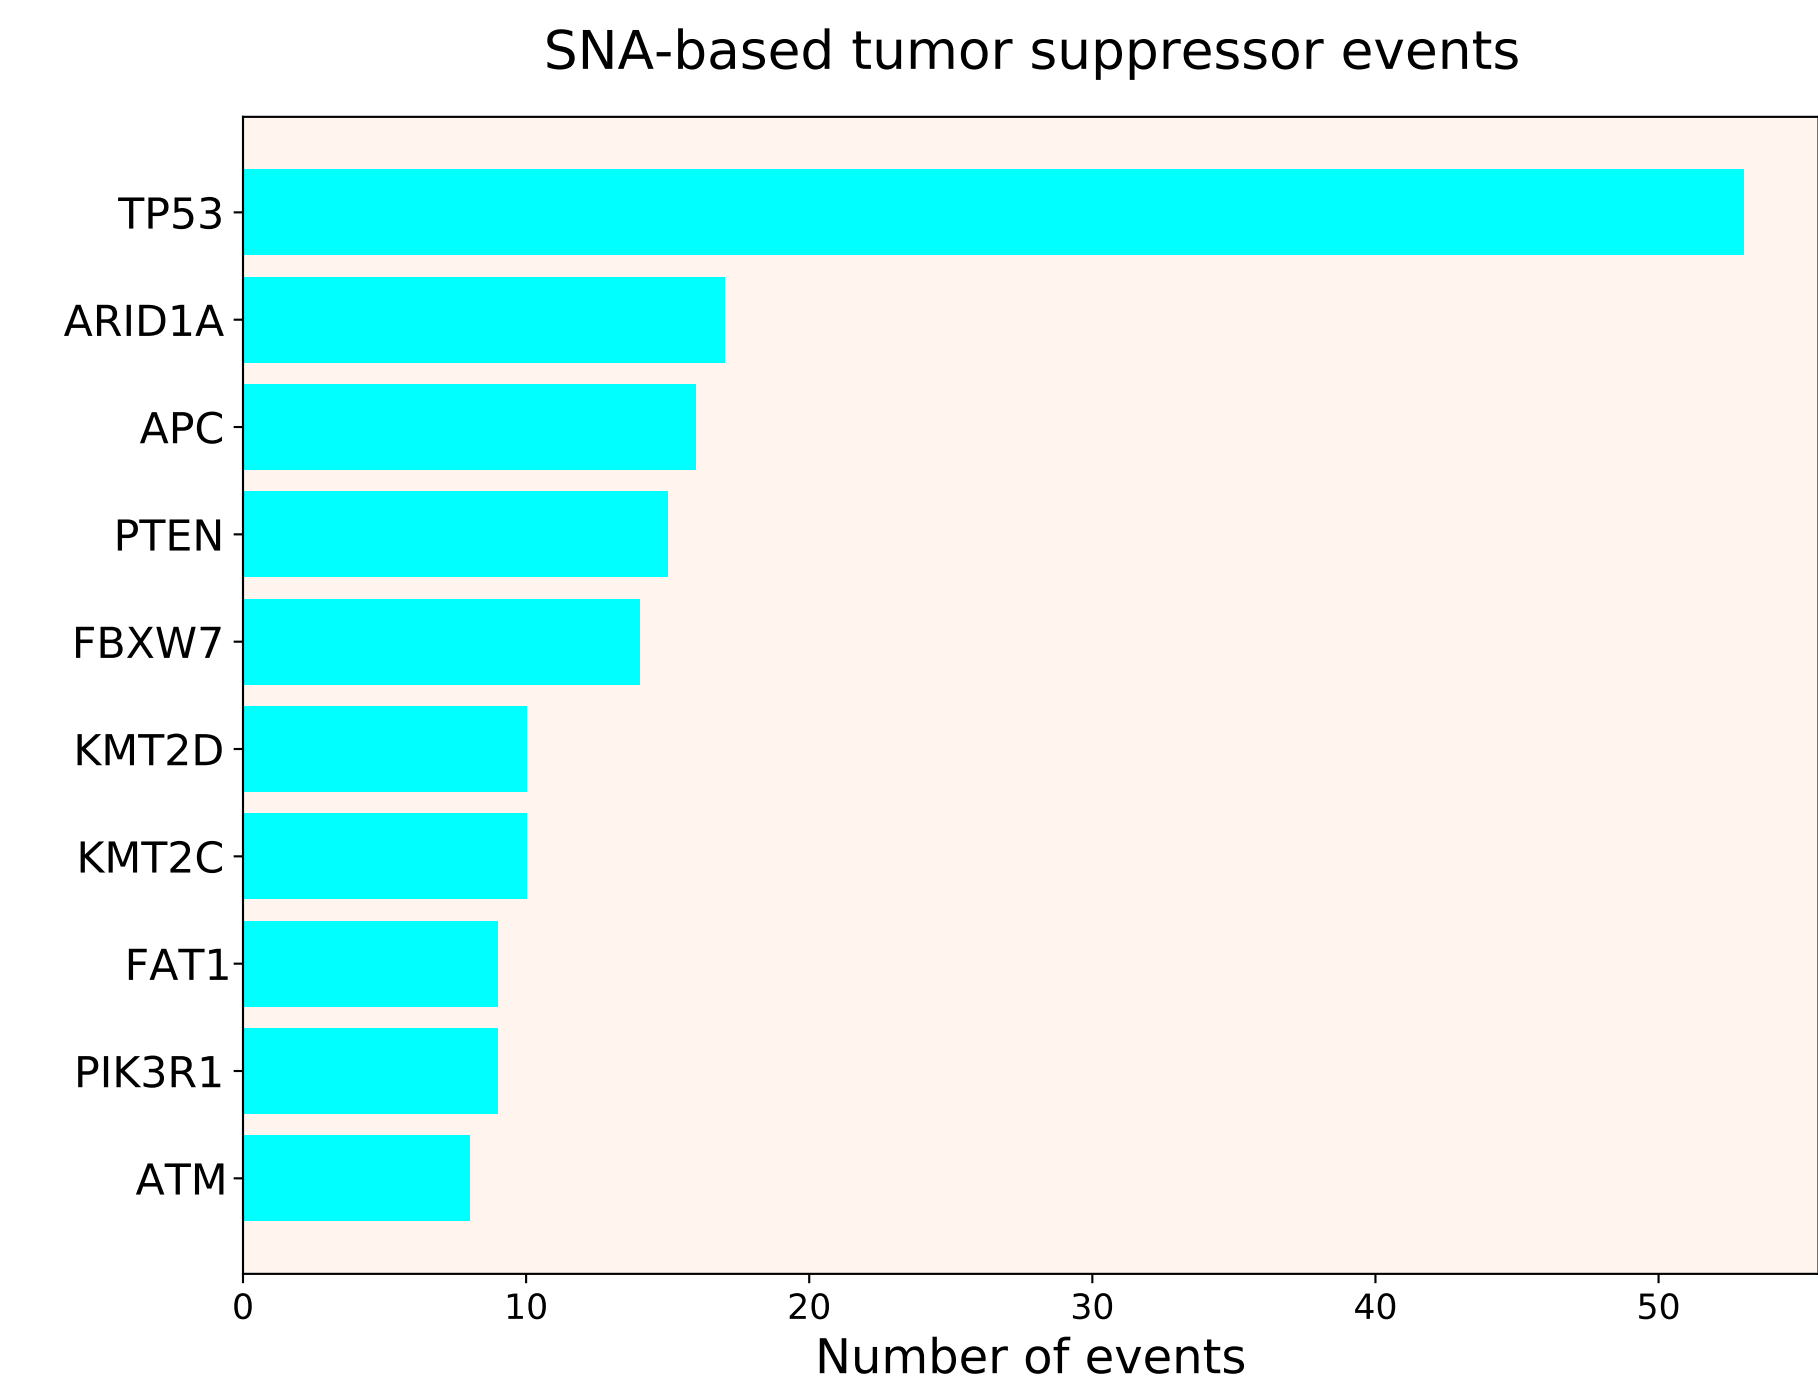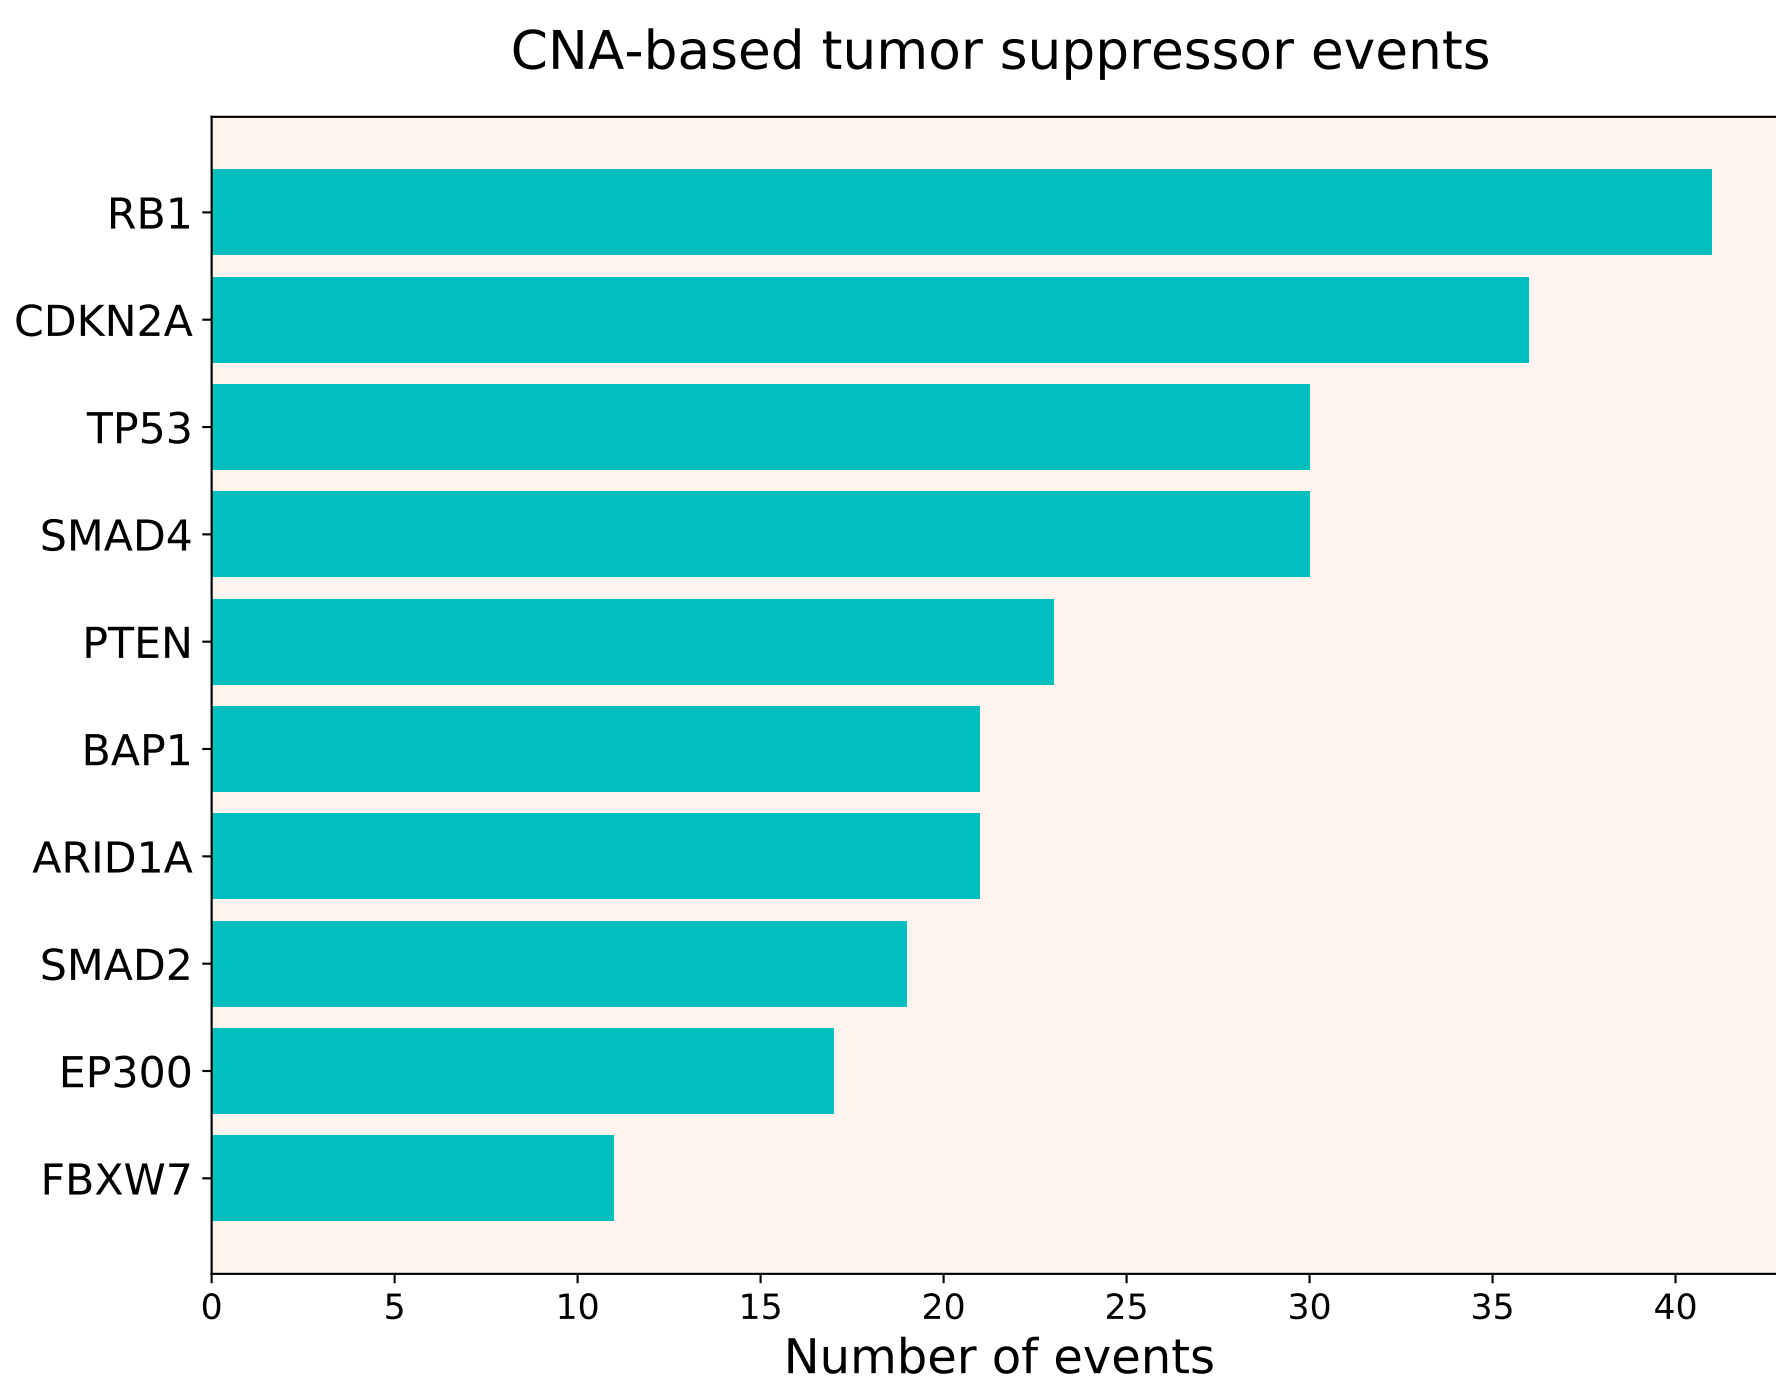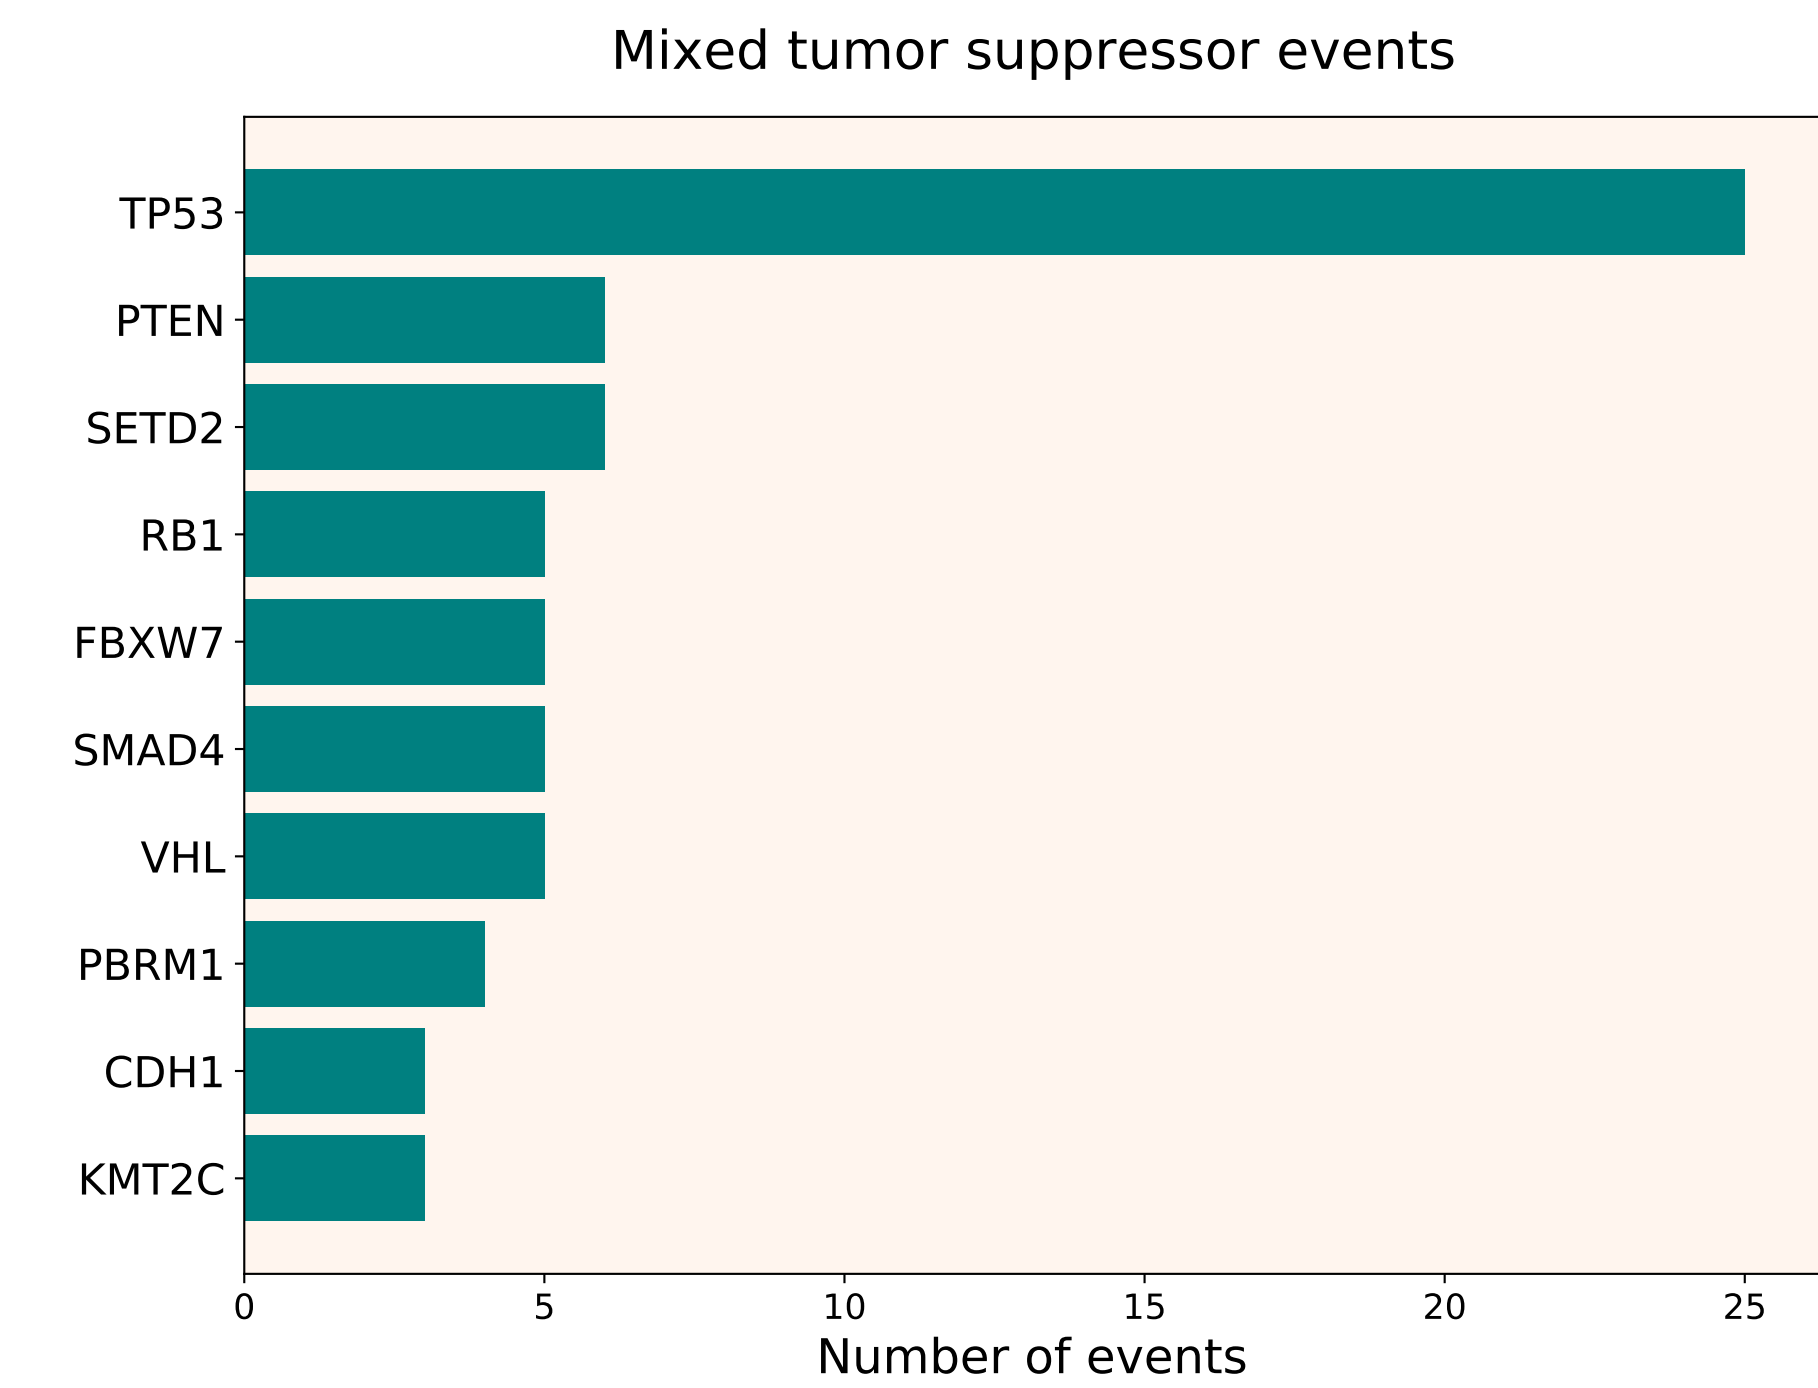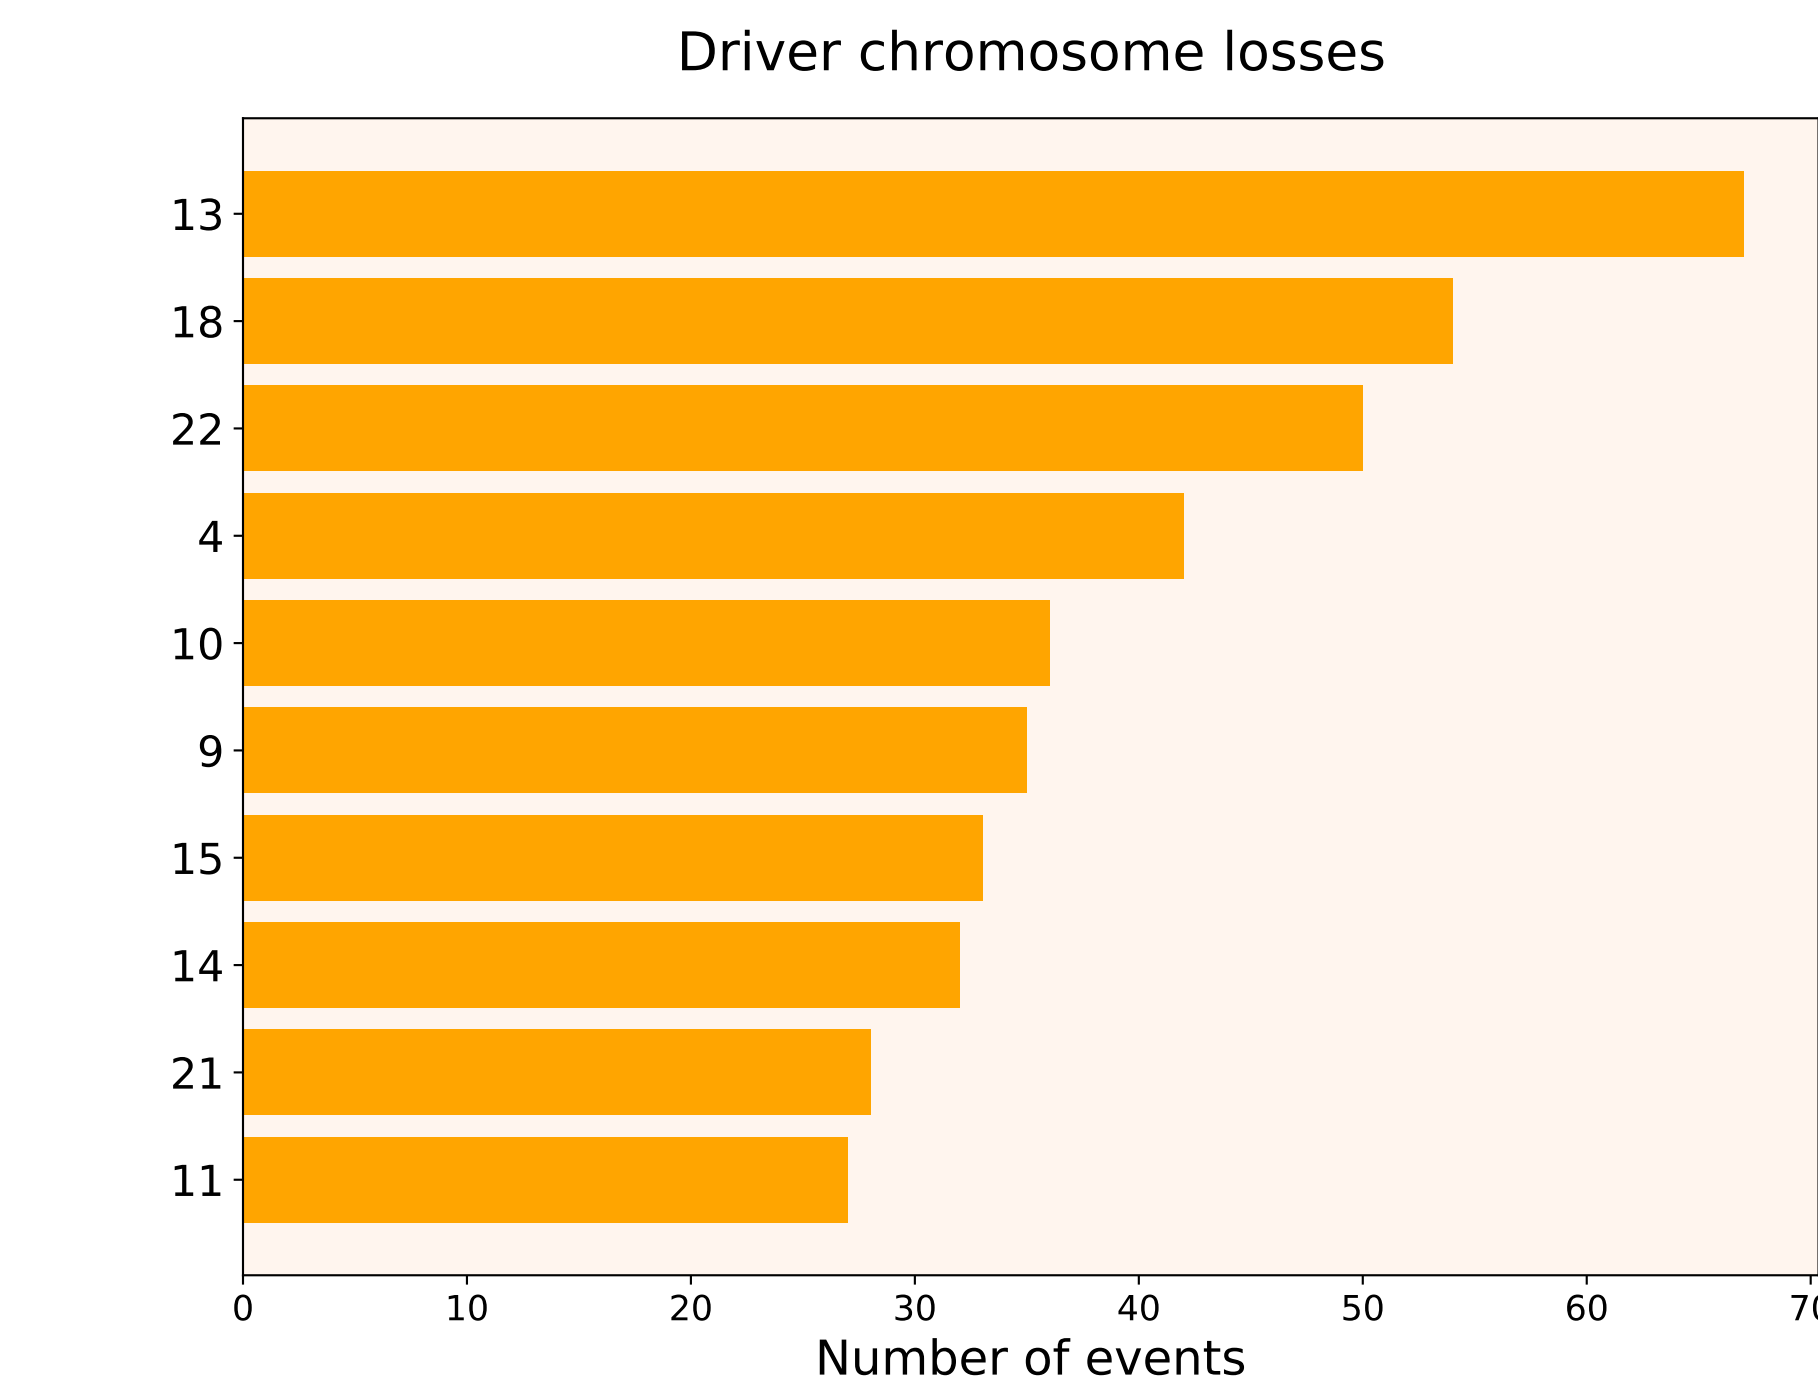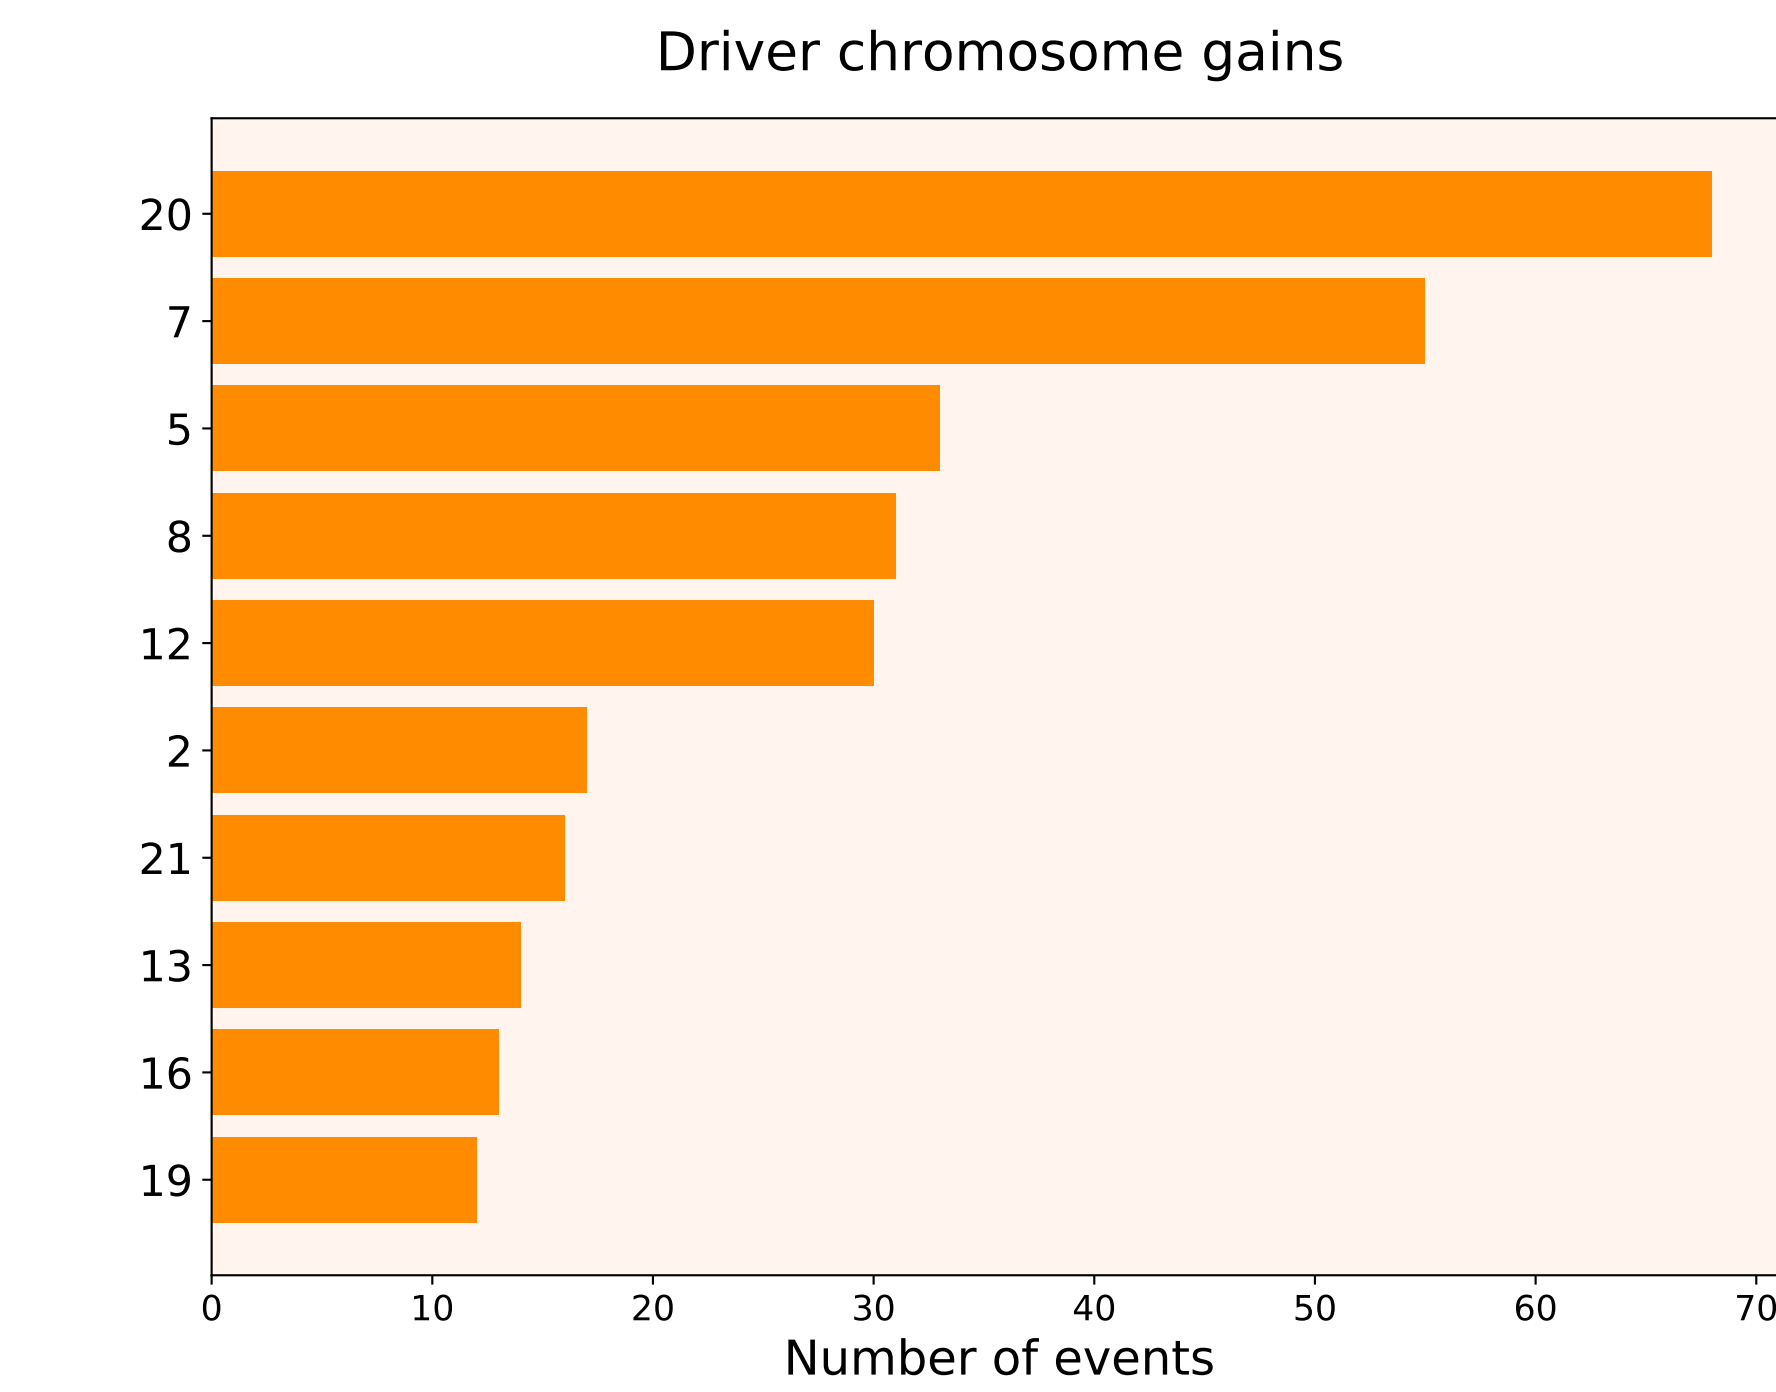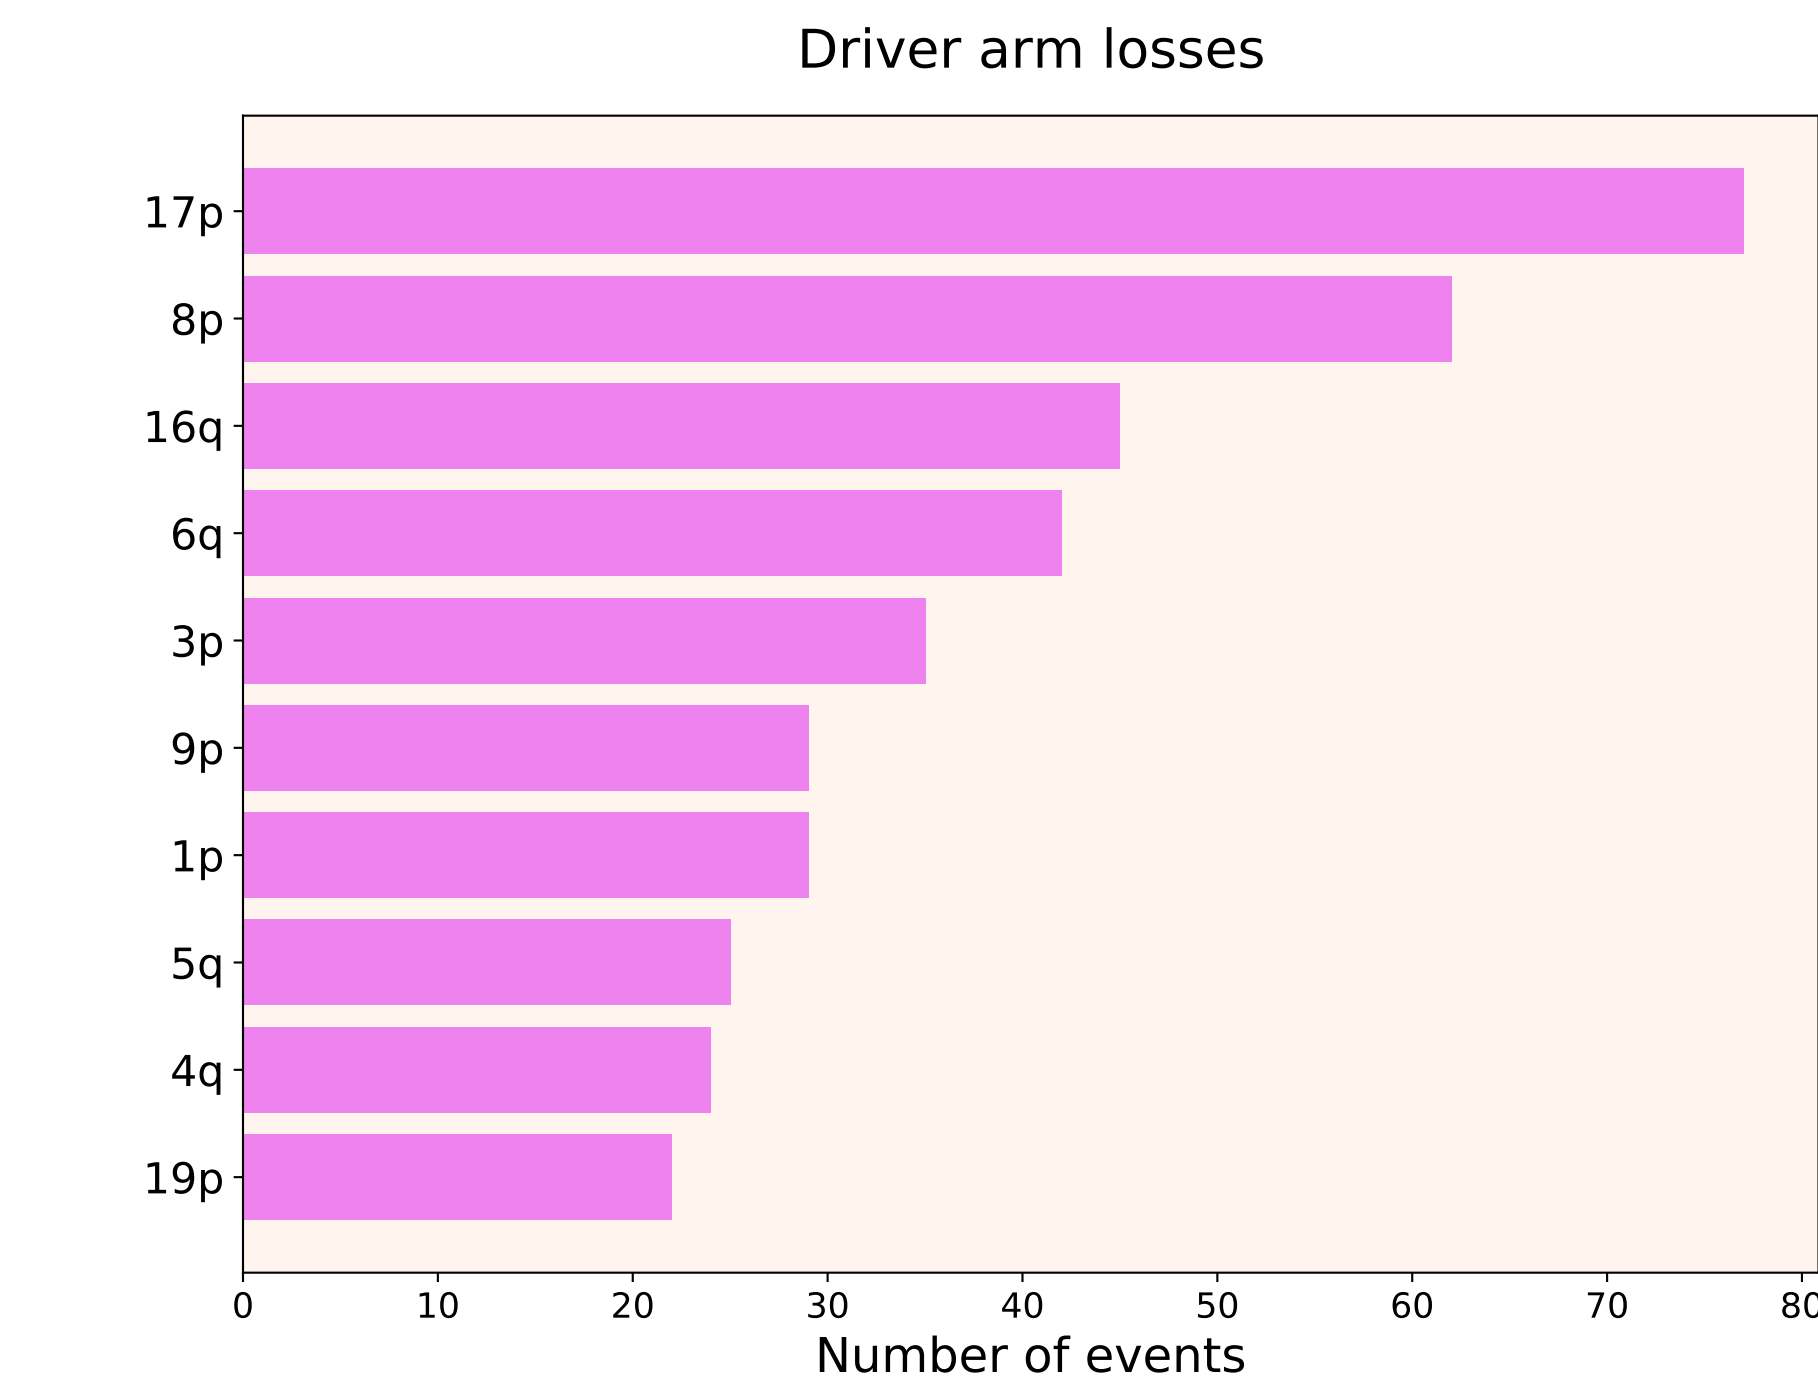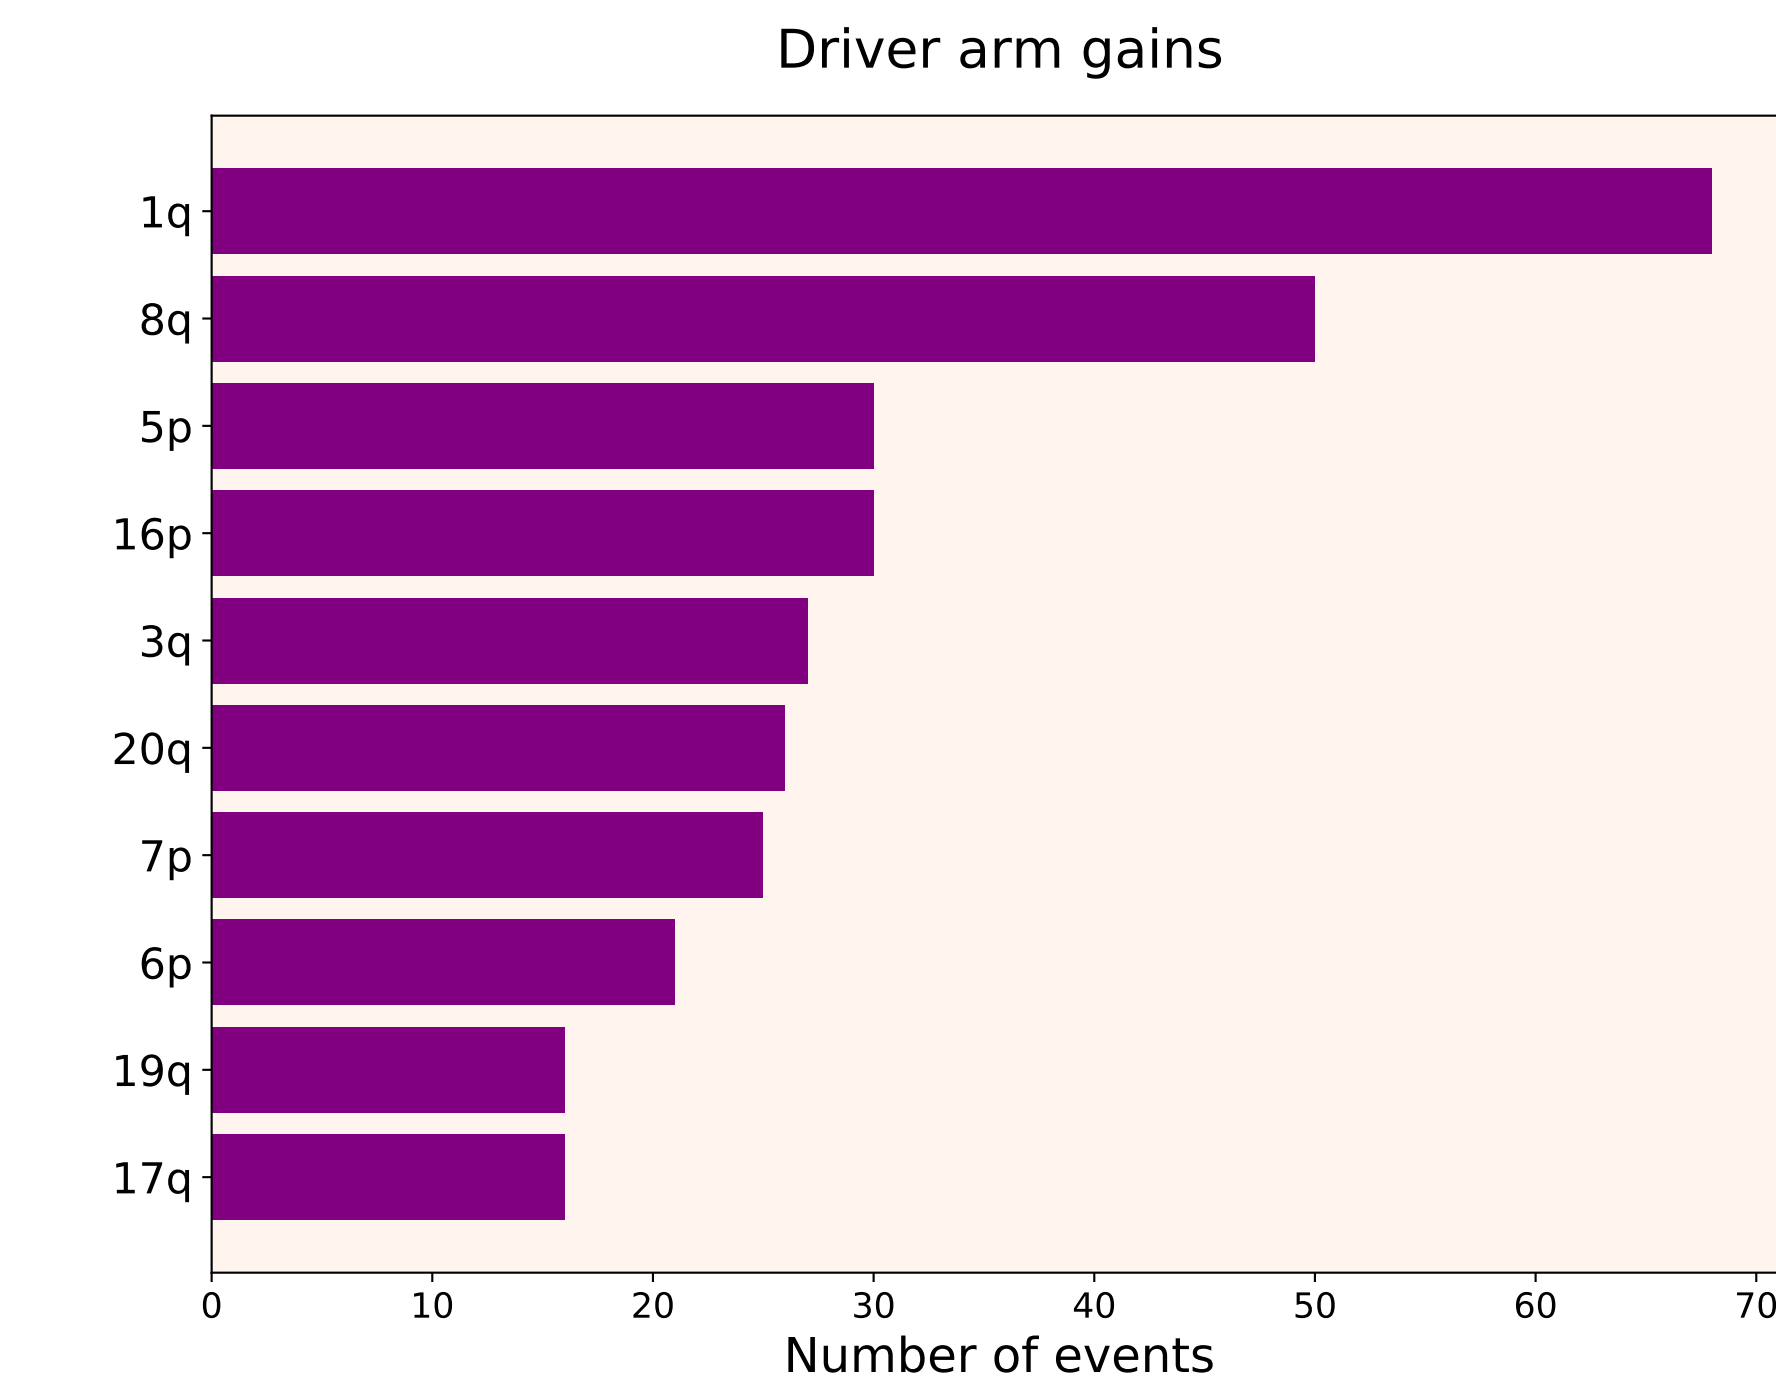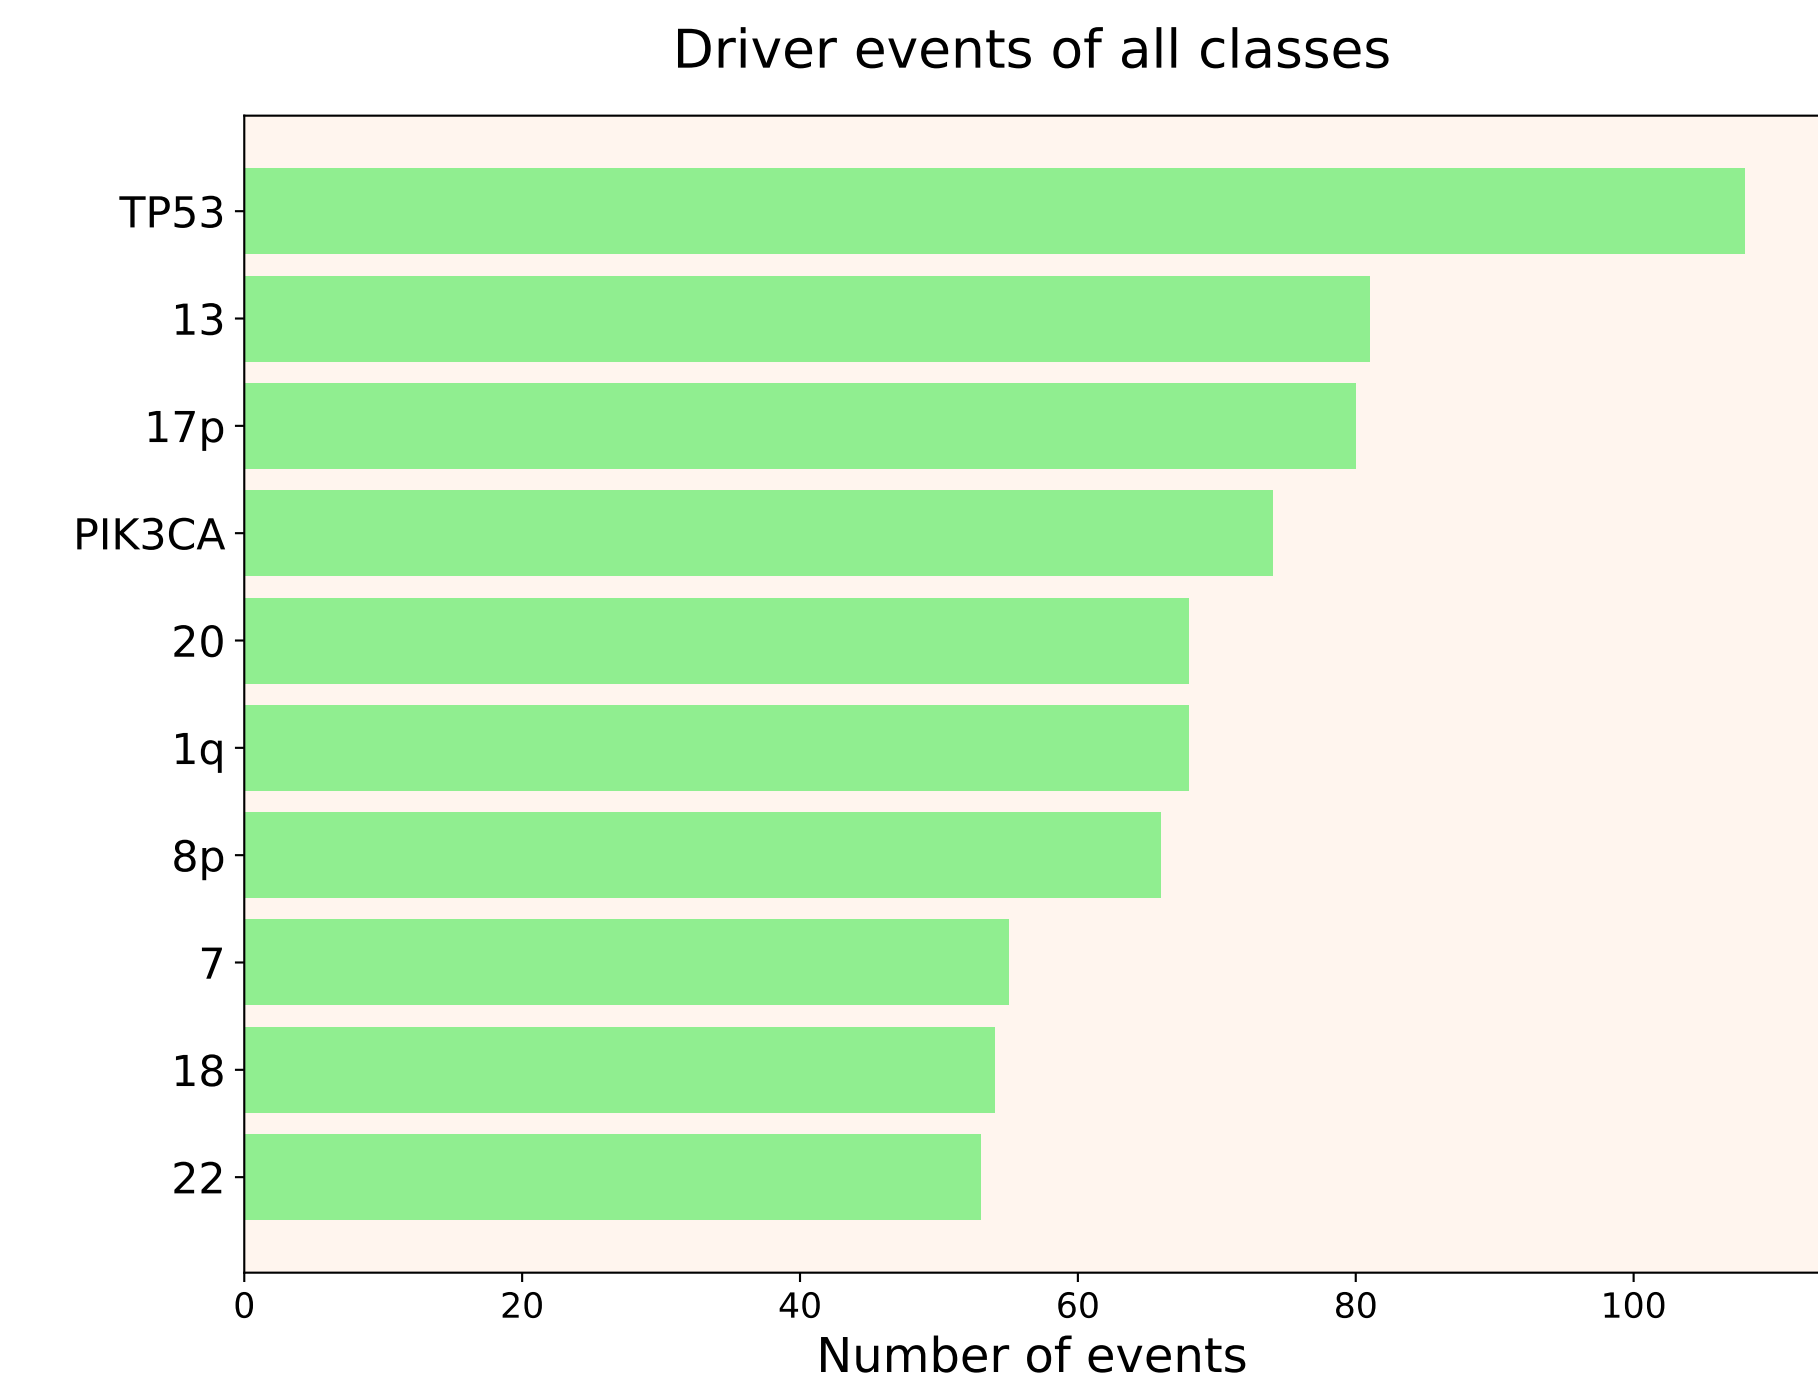

Supplement: Supplemental_Data_S1.zip [file Supplemental_Data_S1.zip]

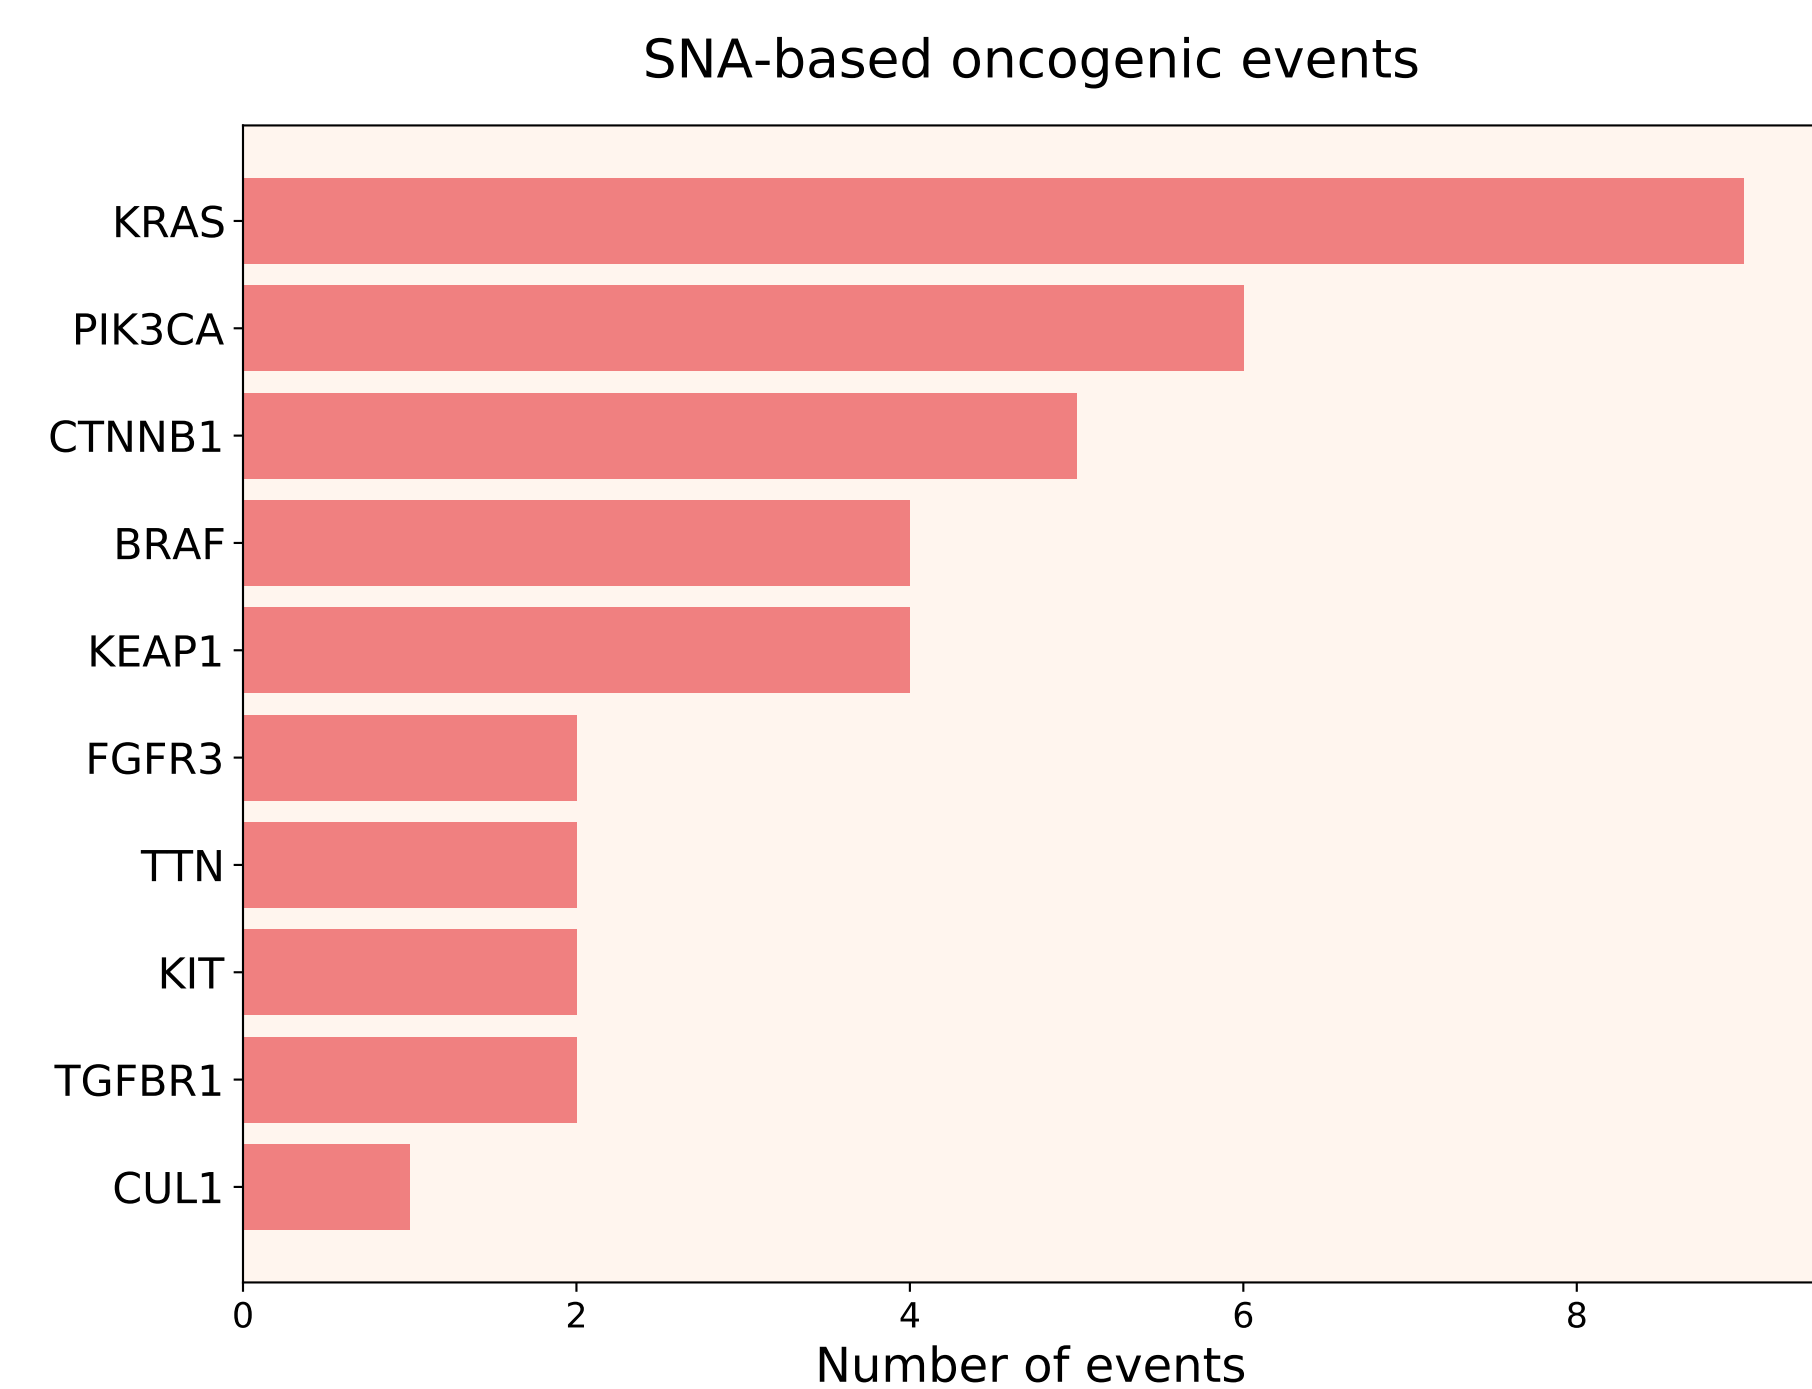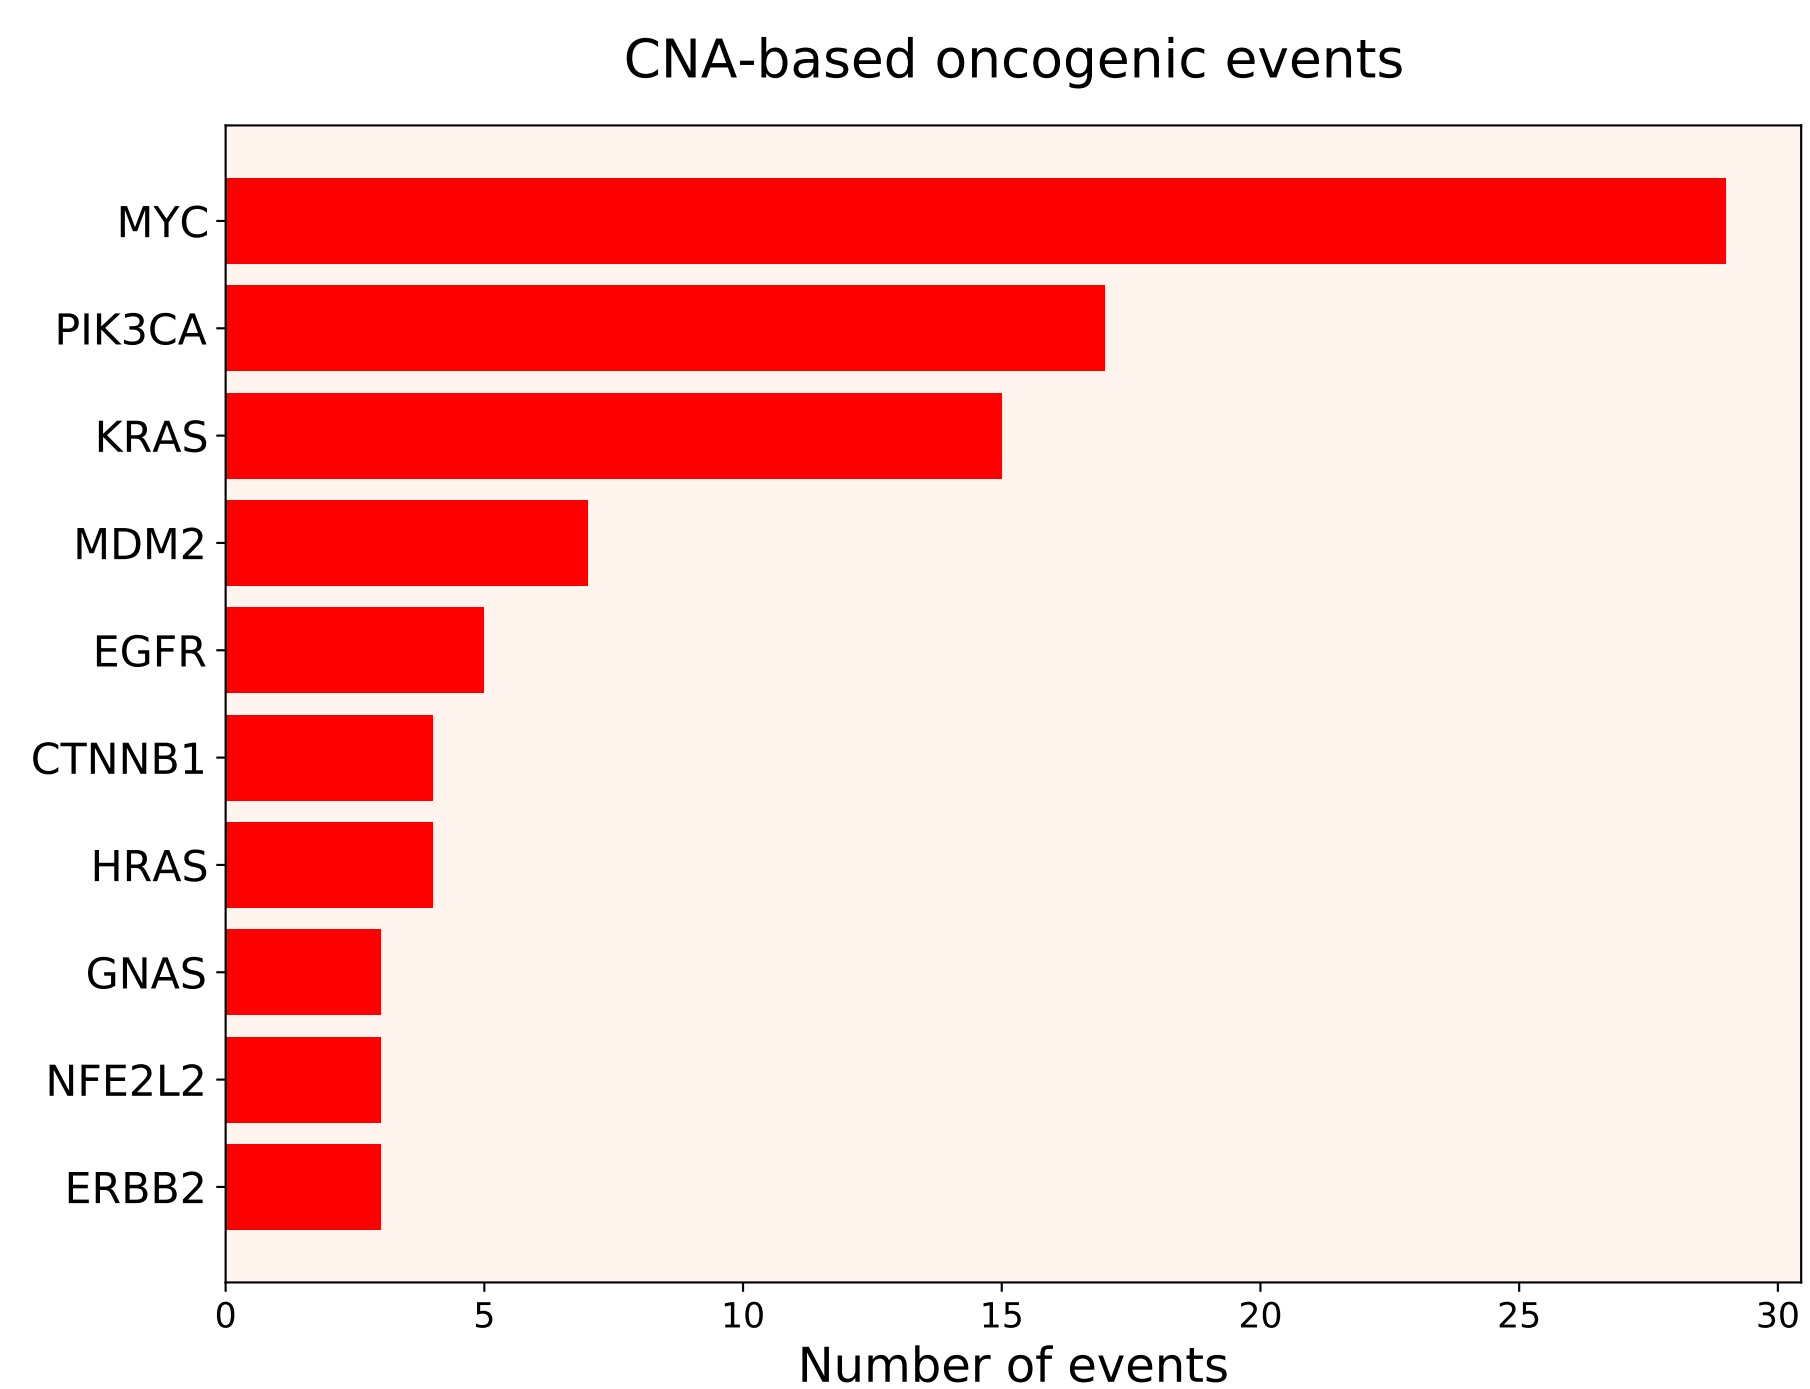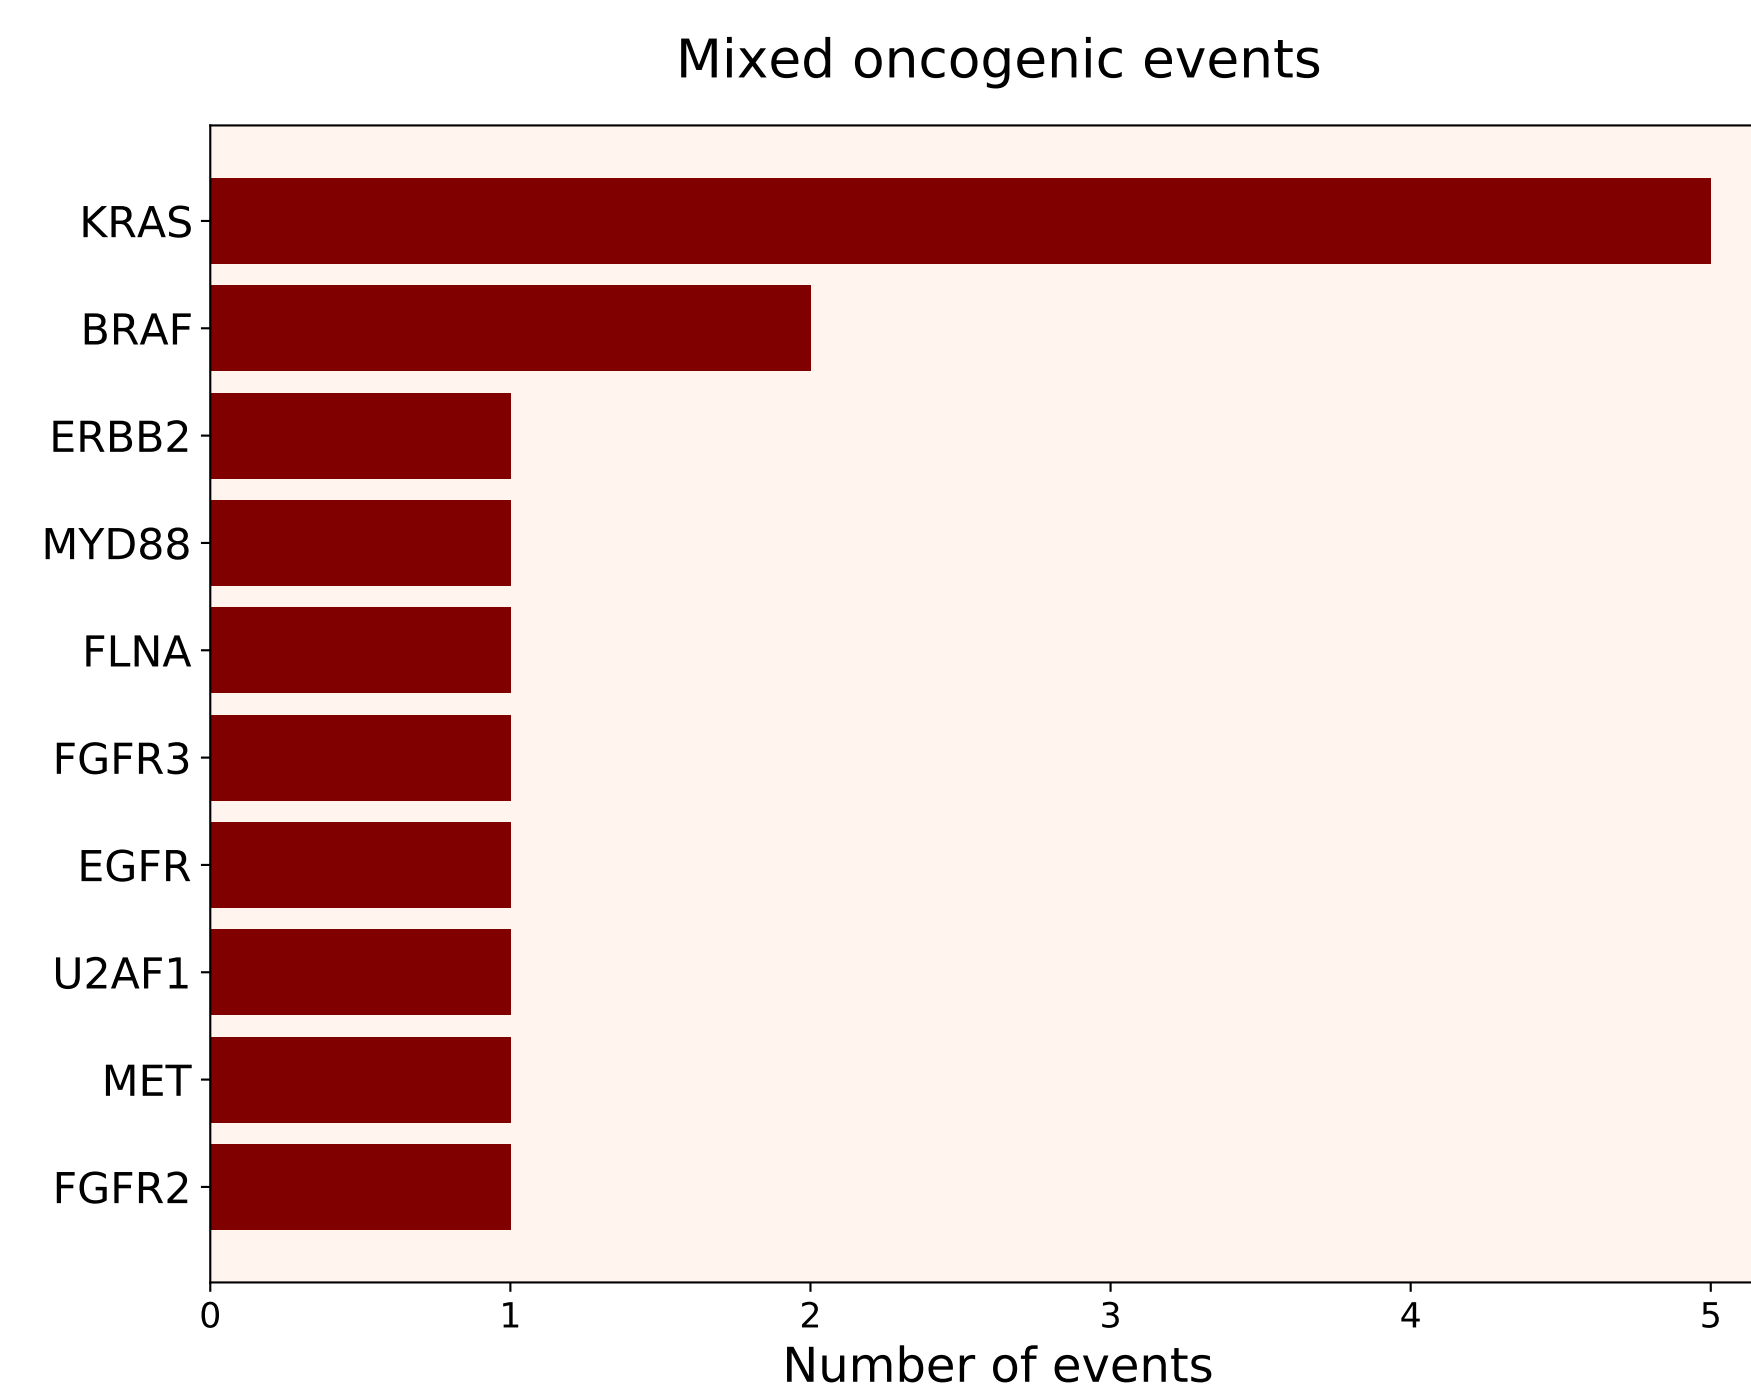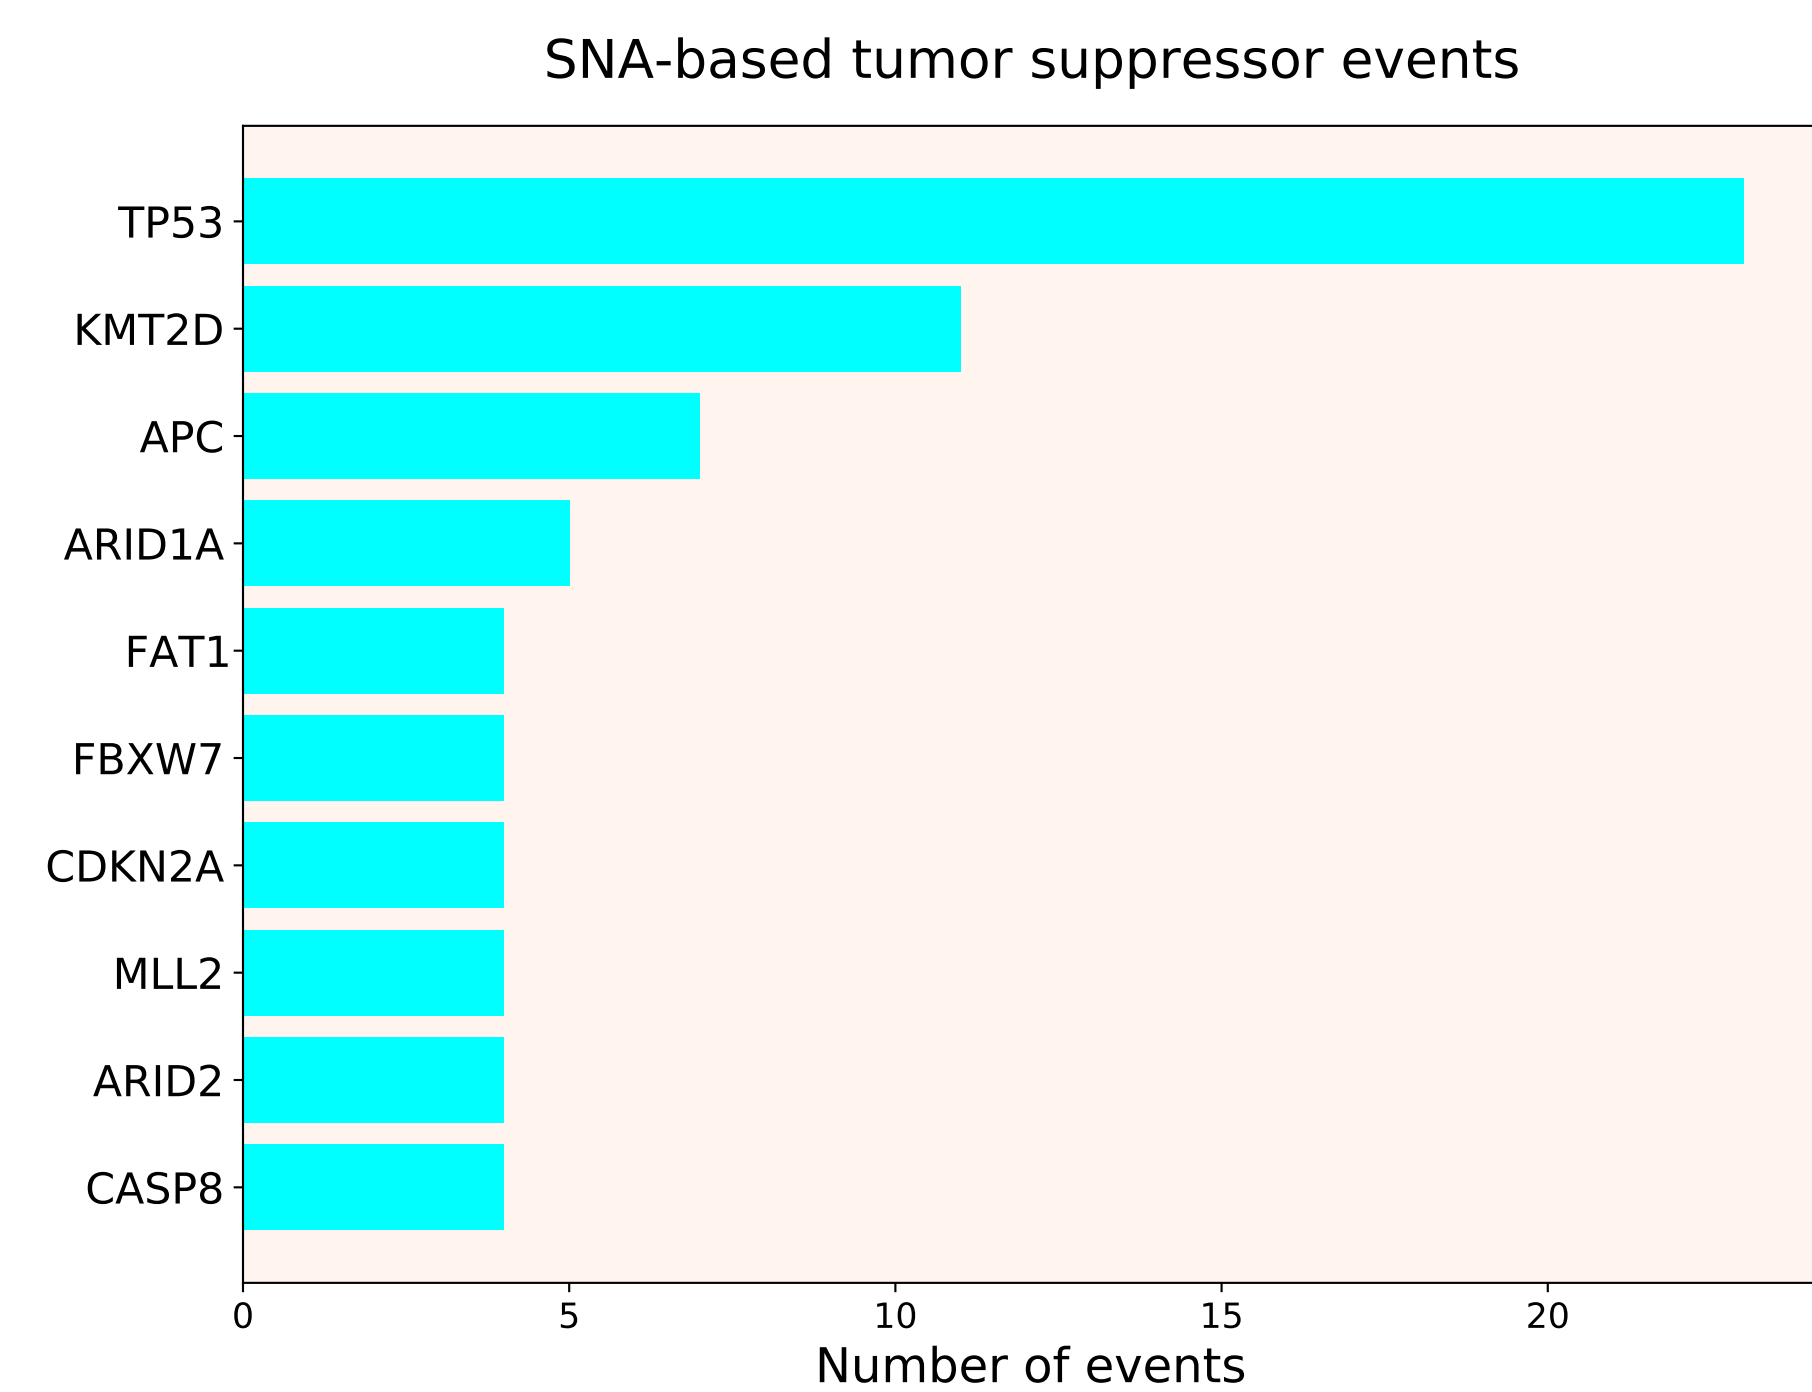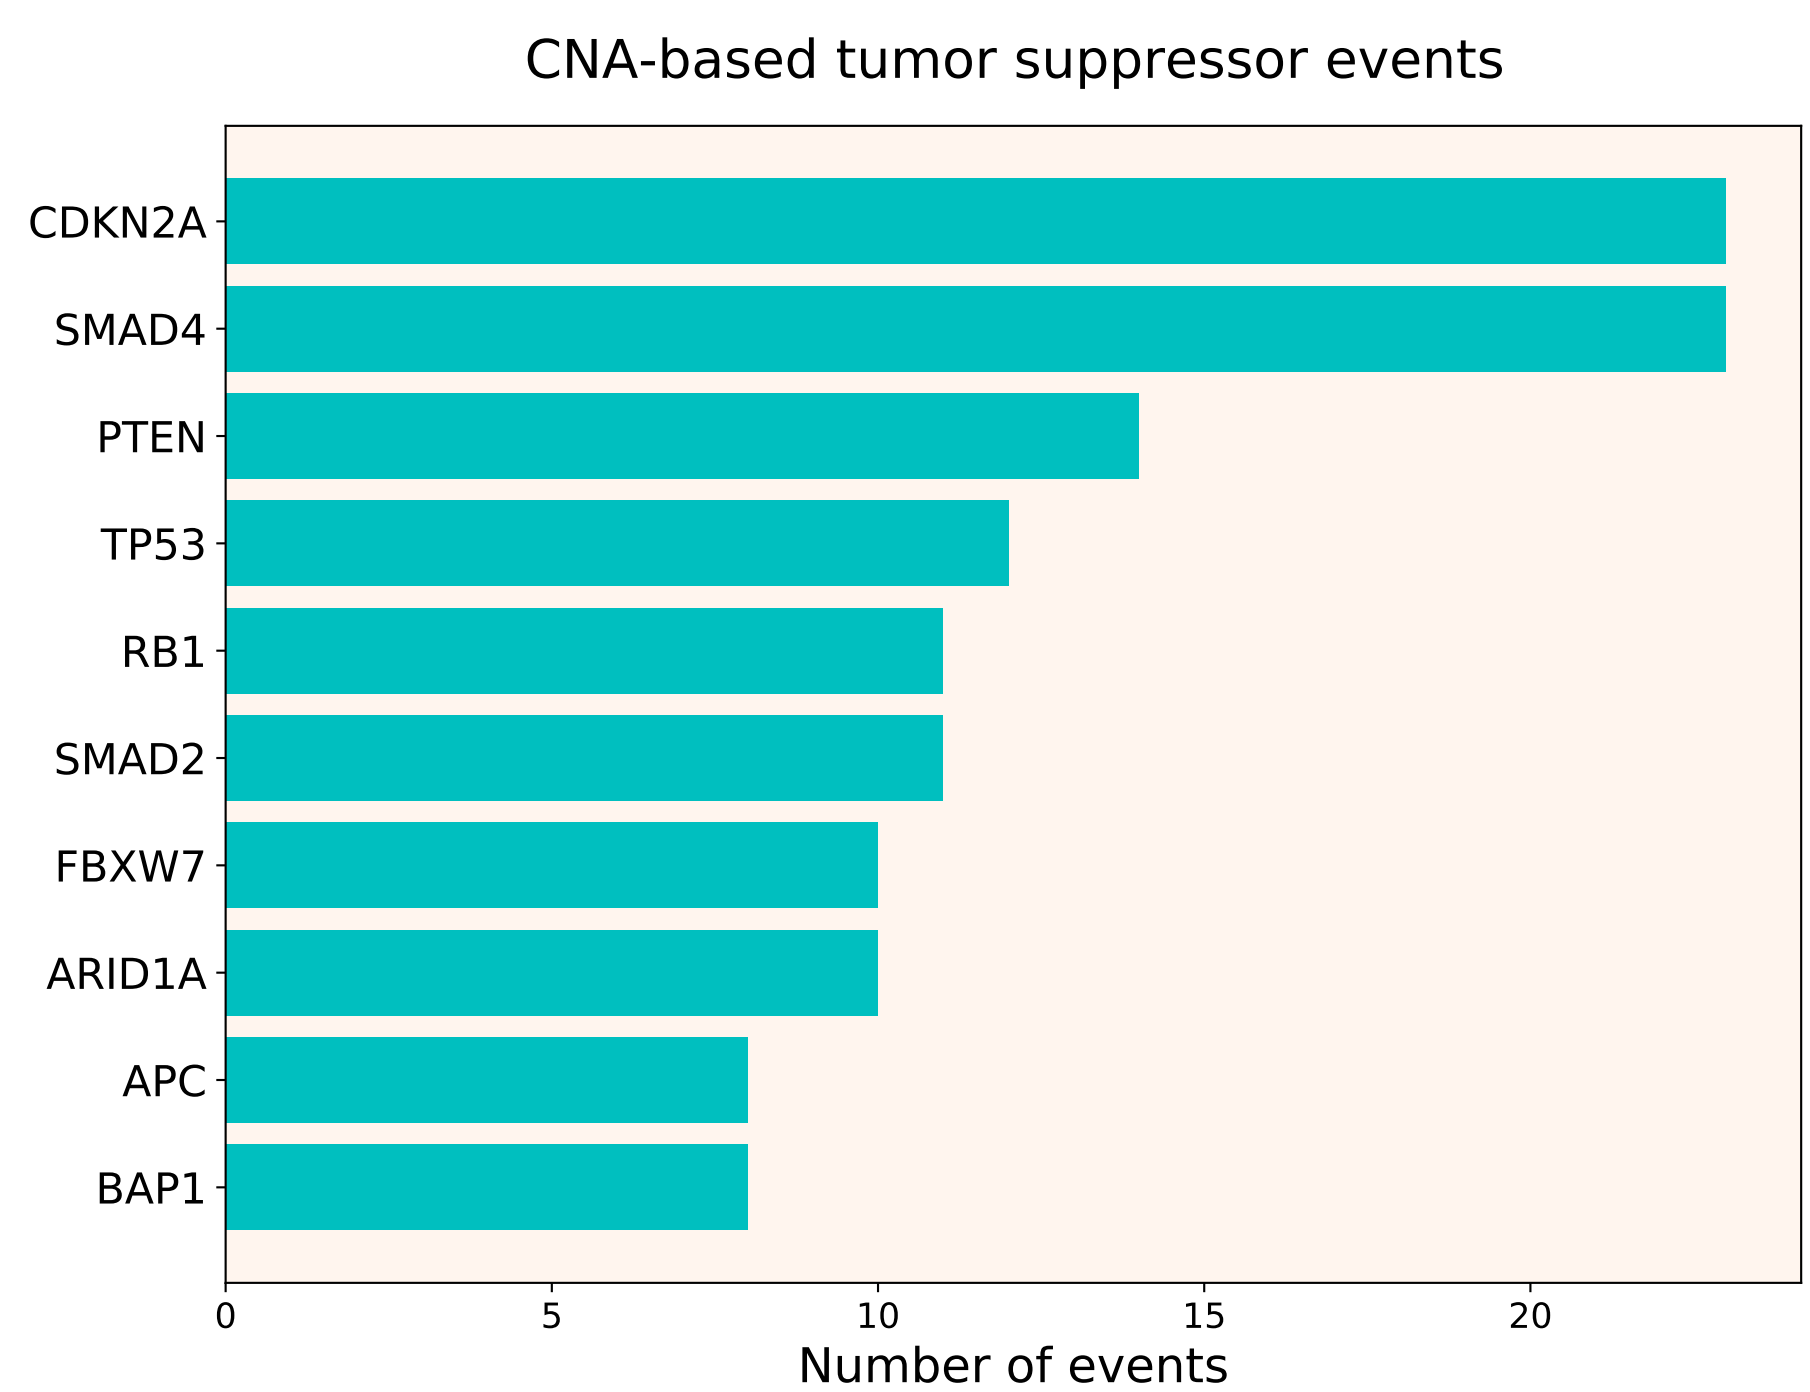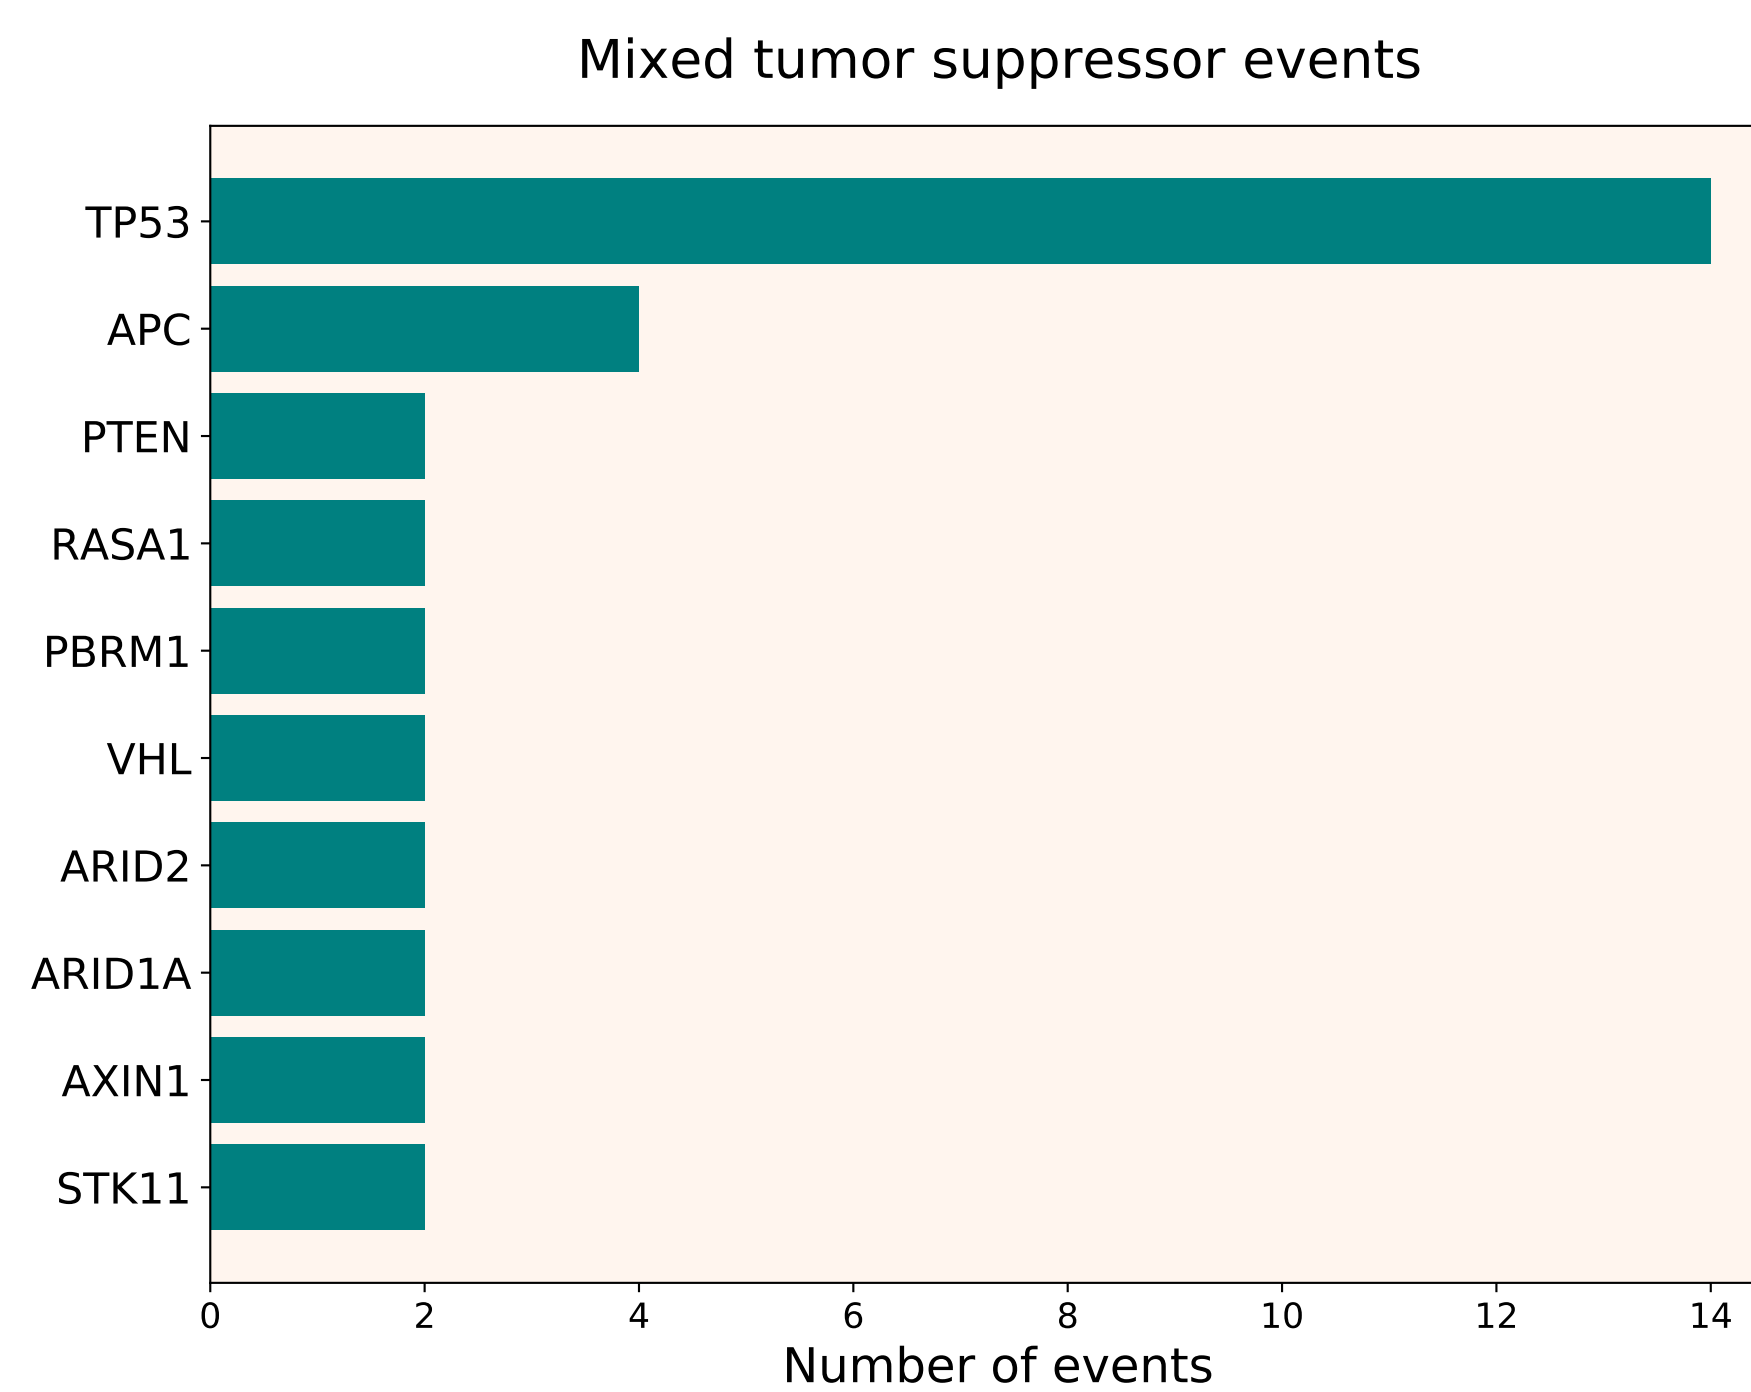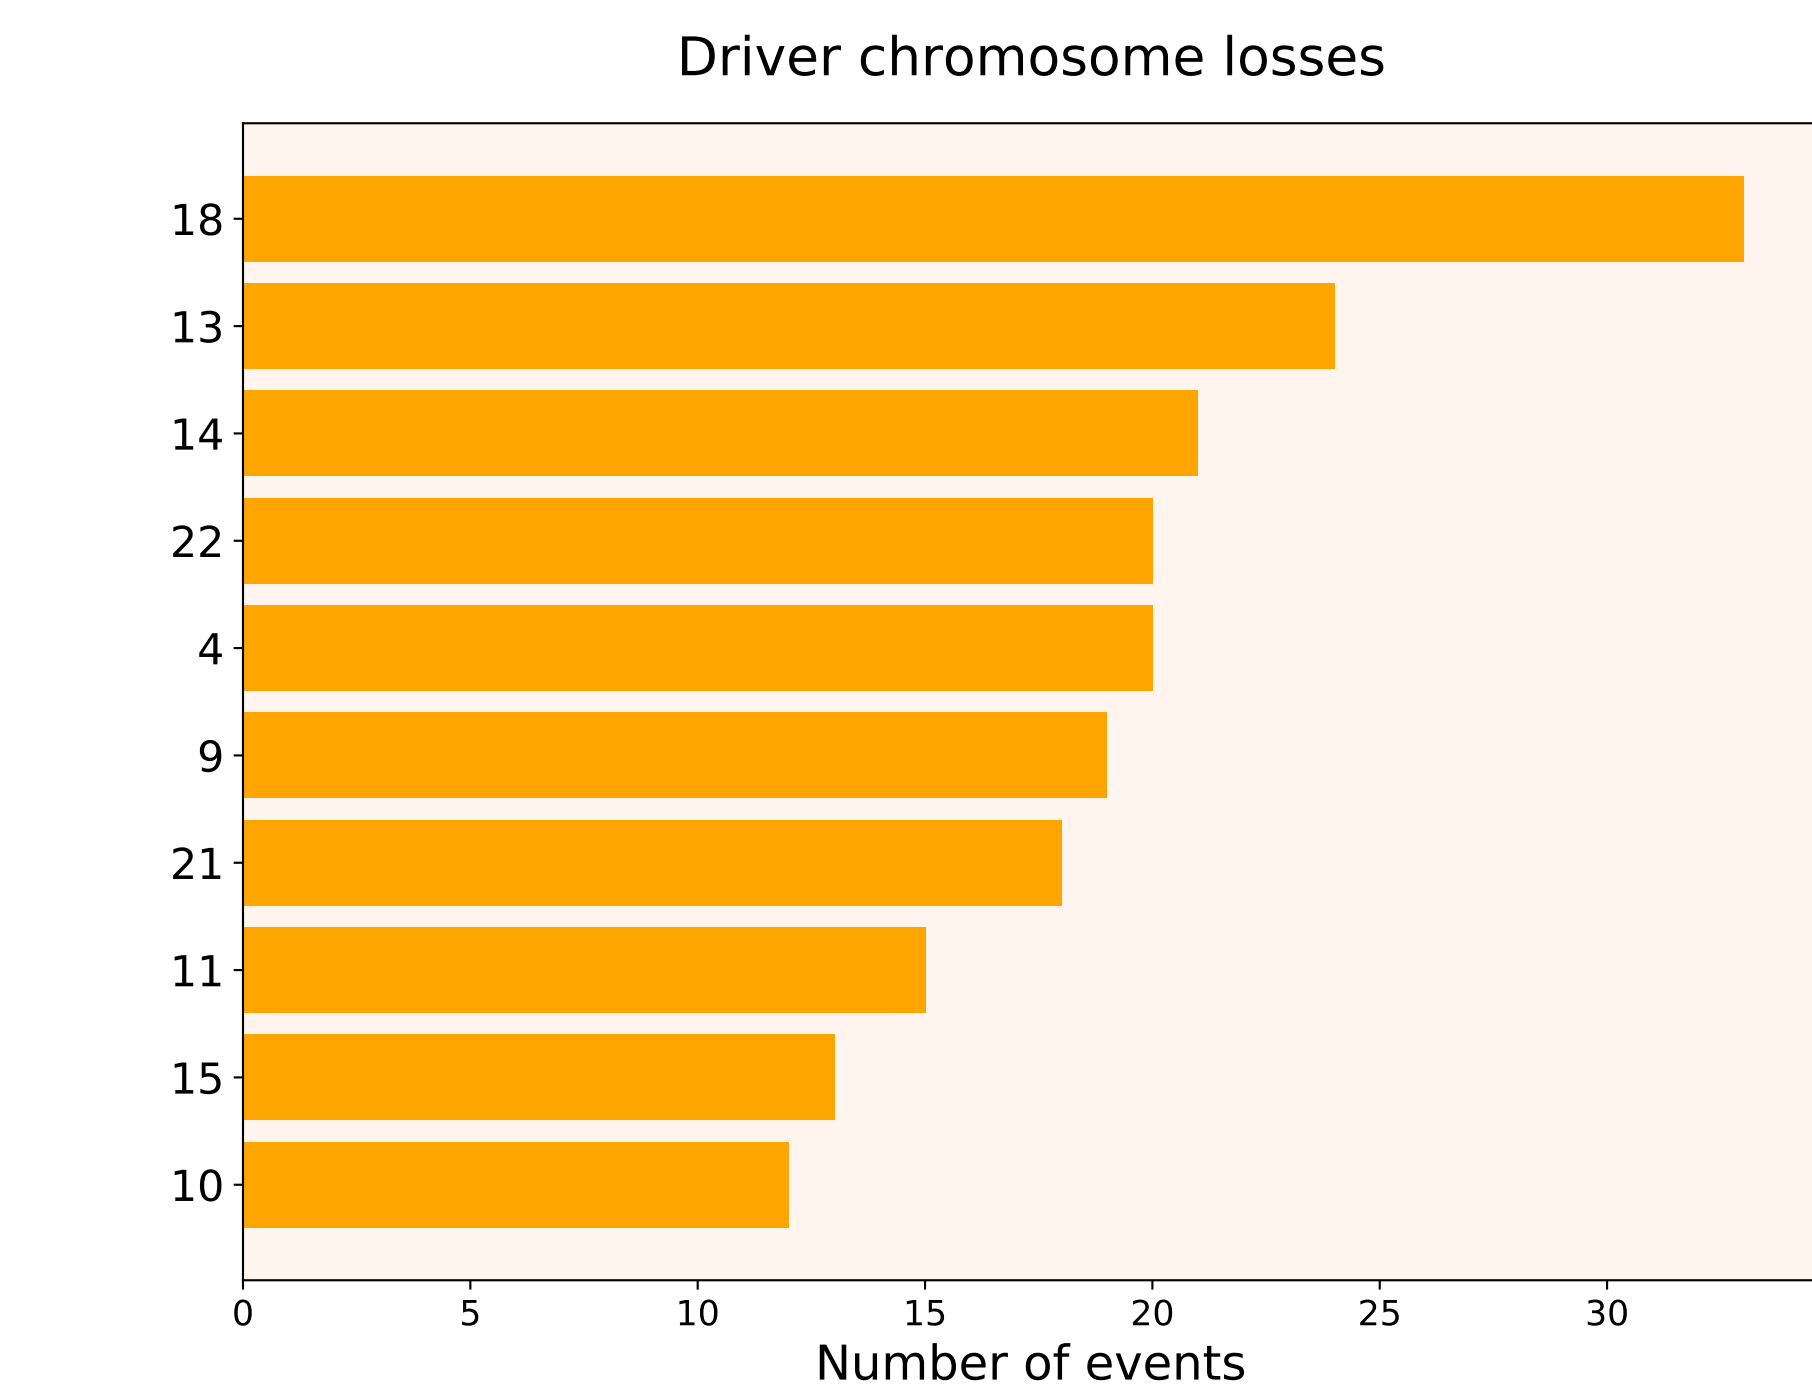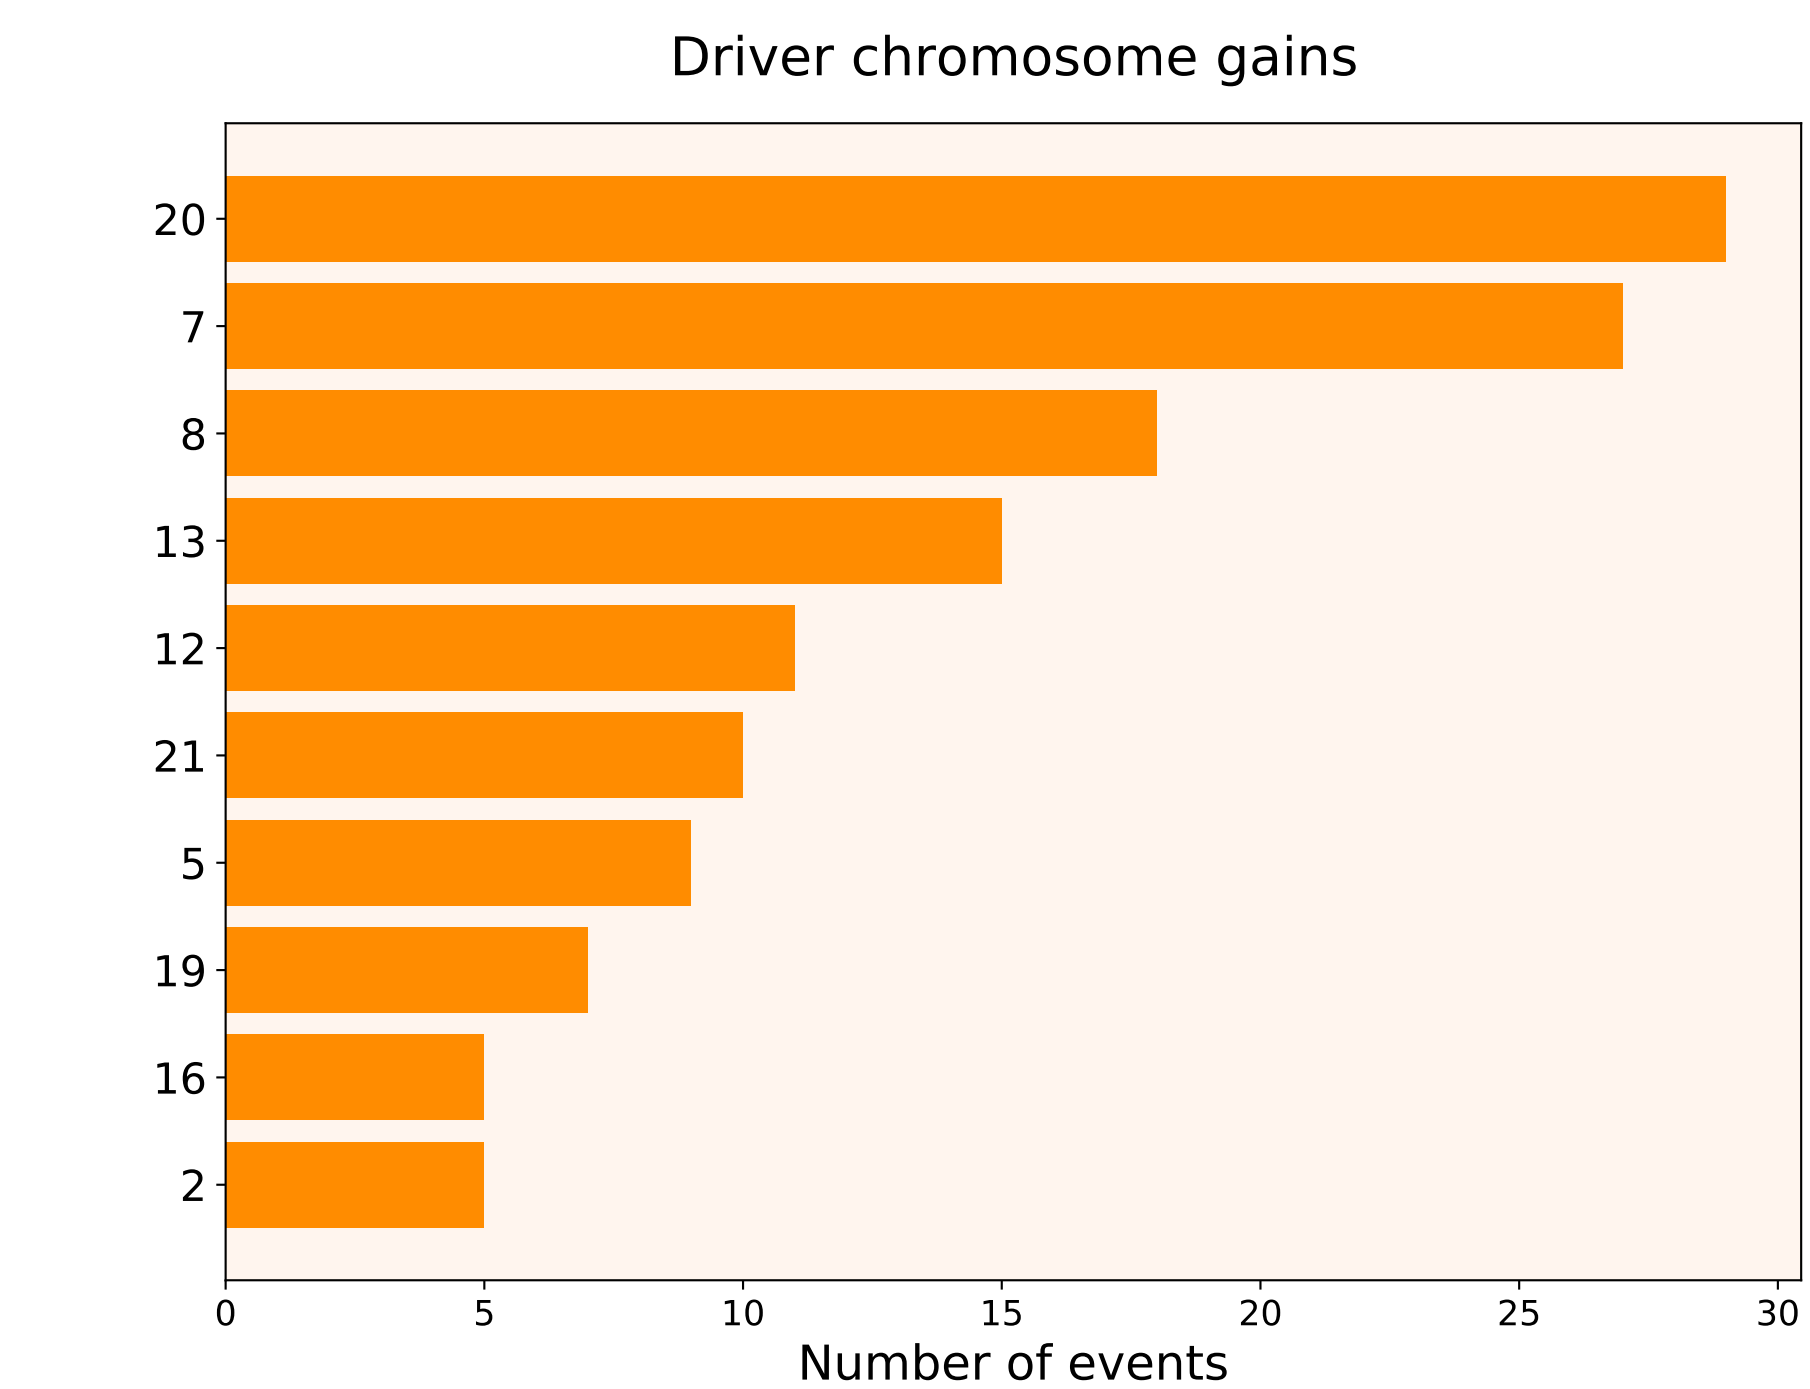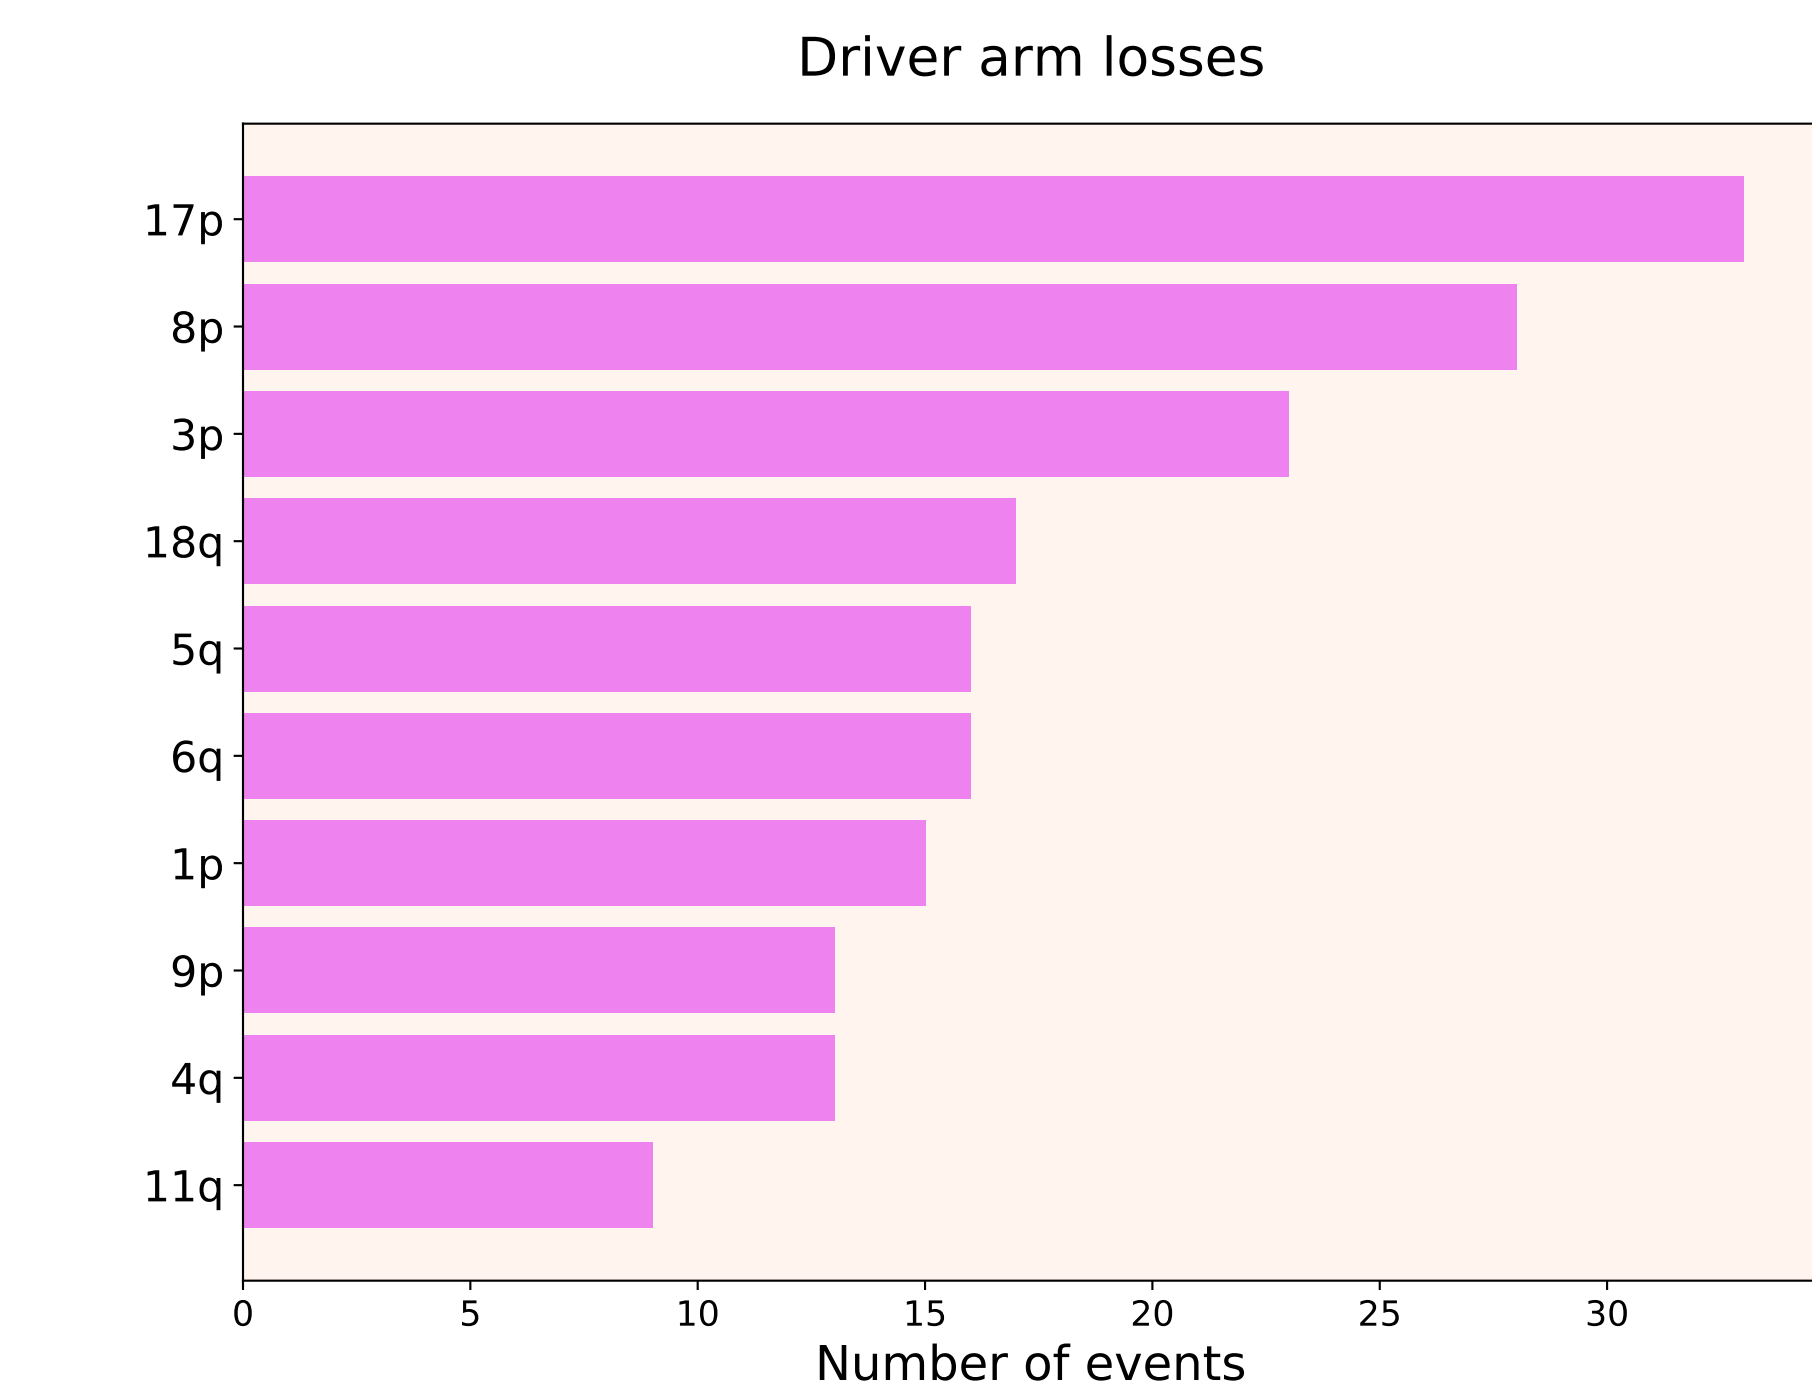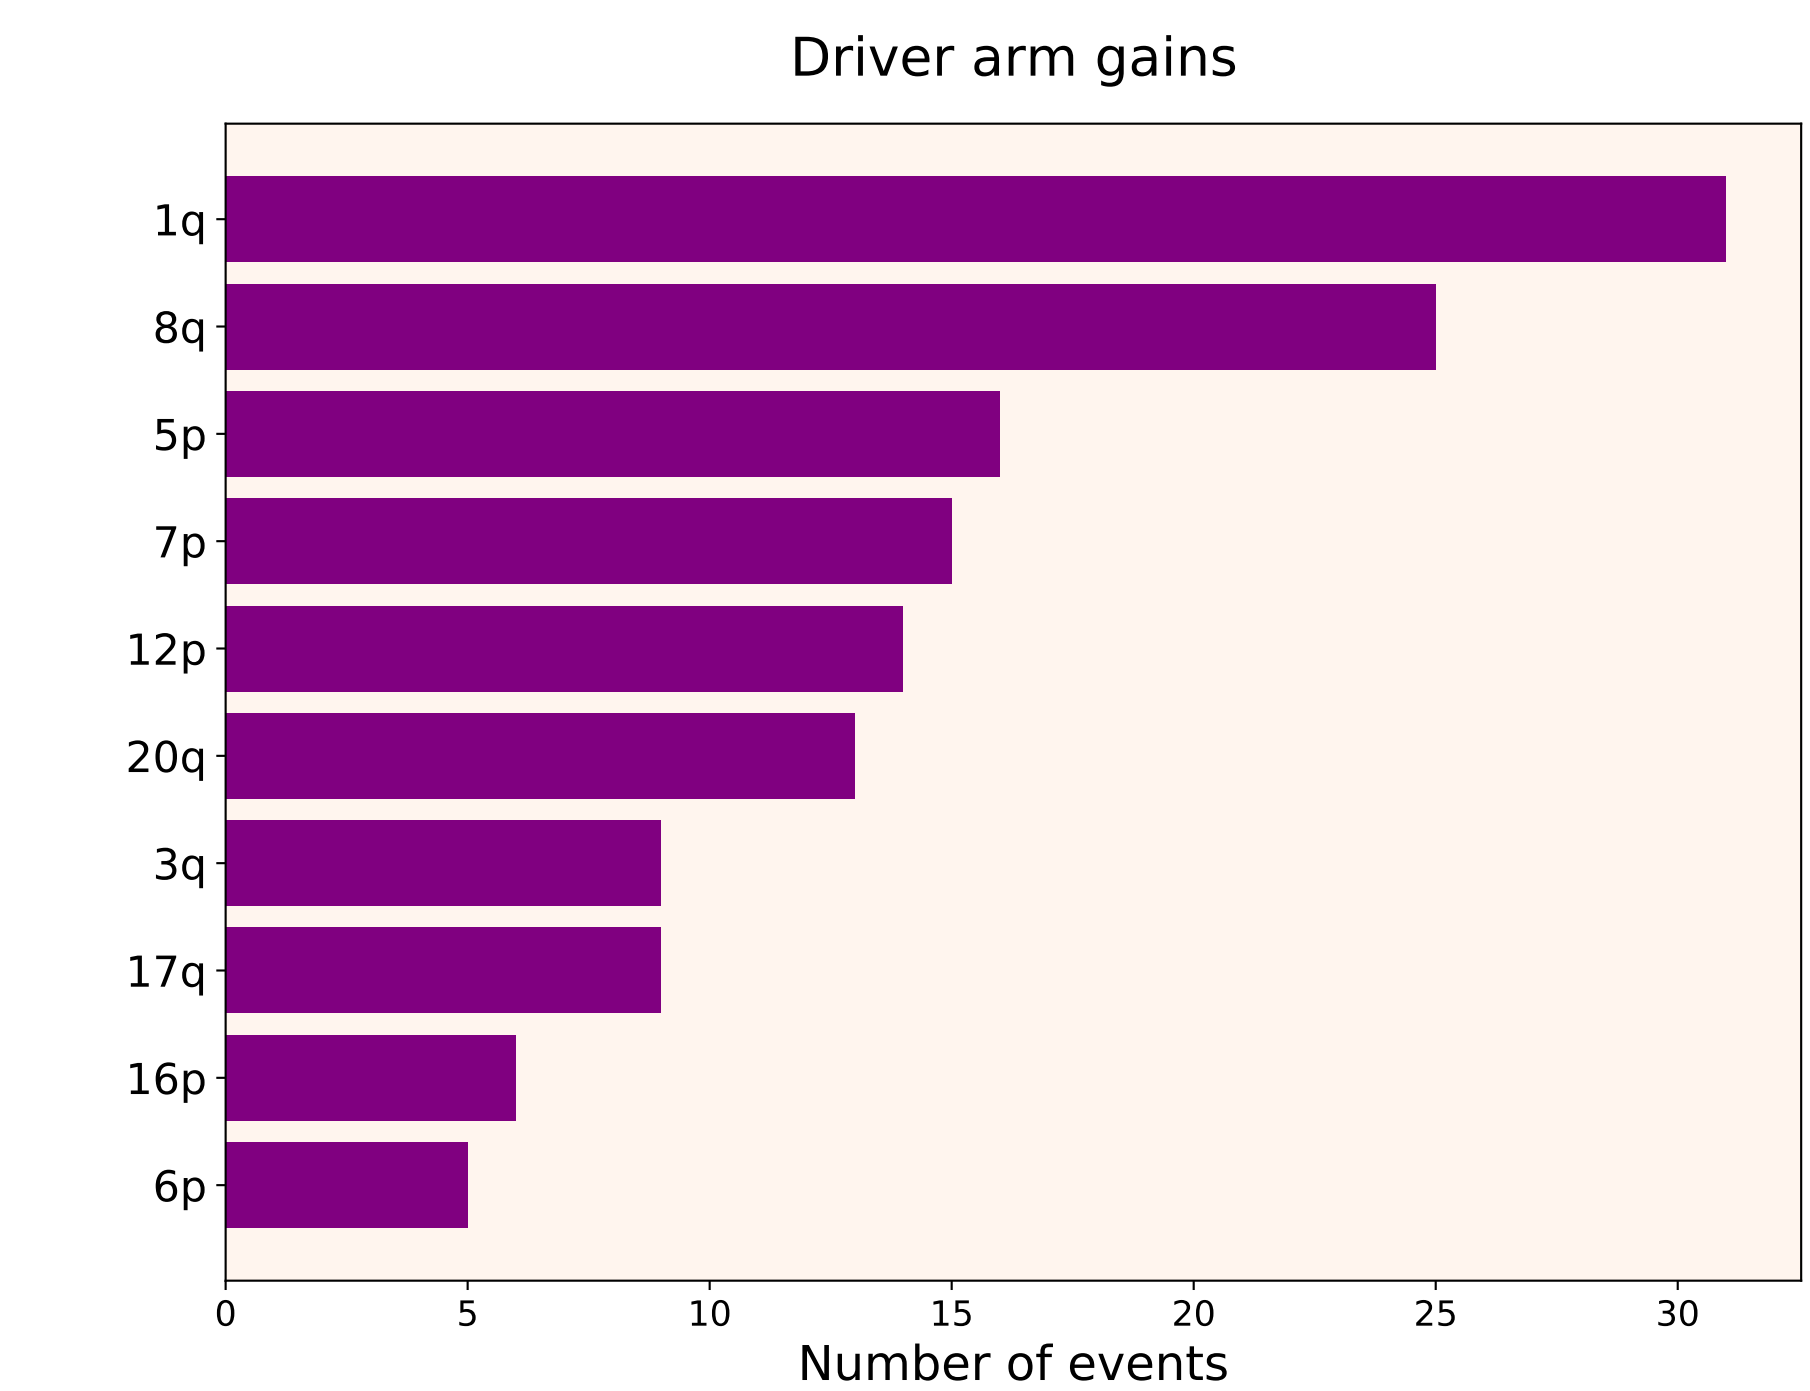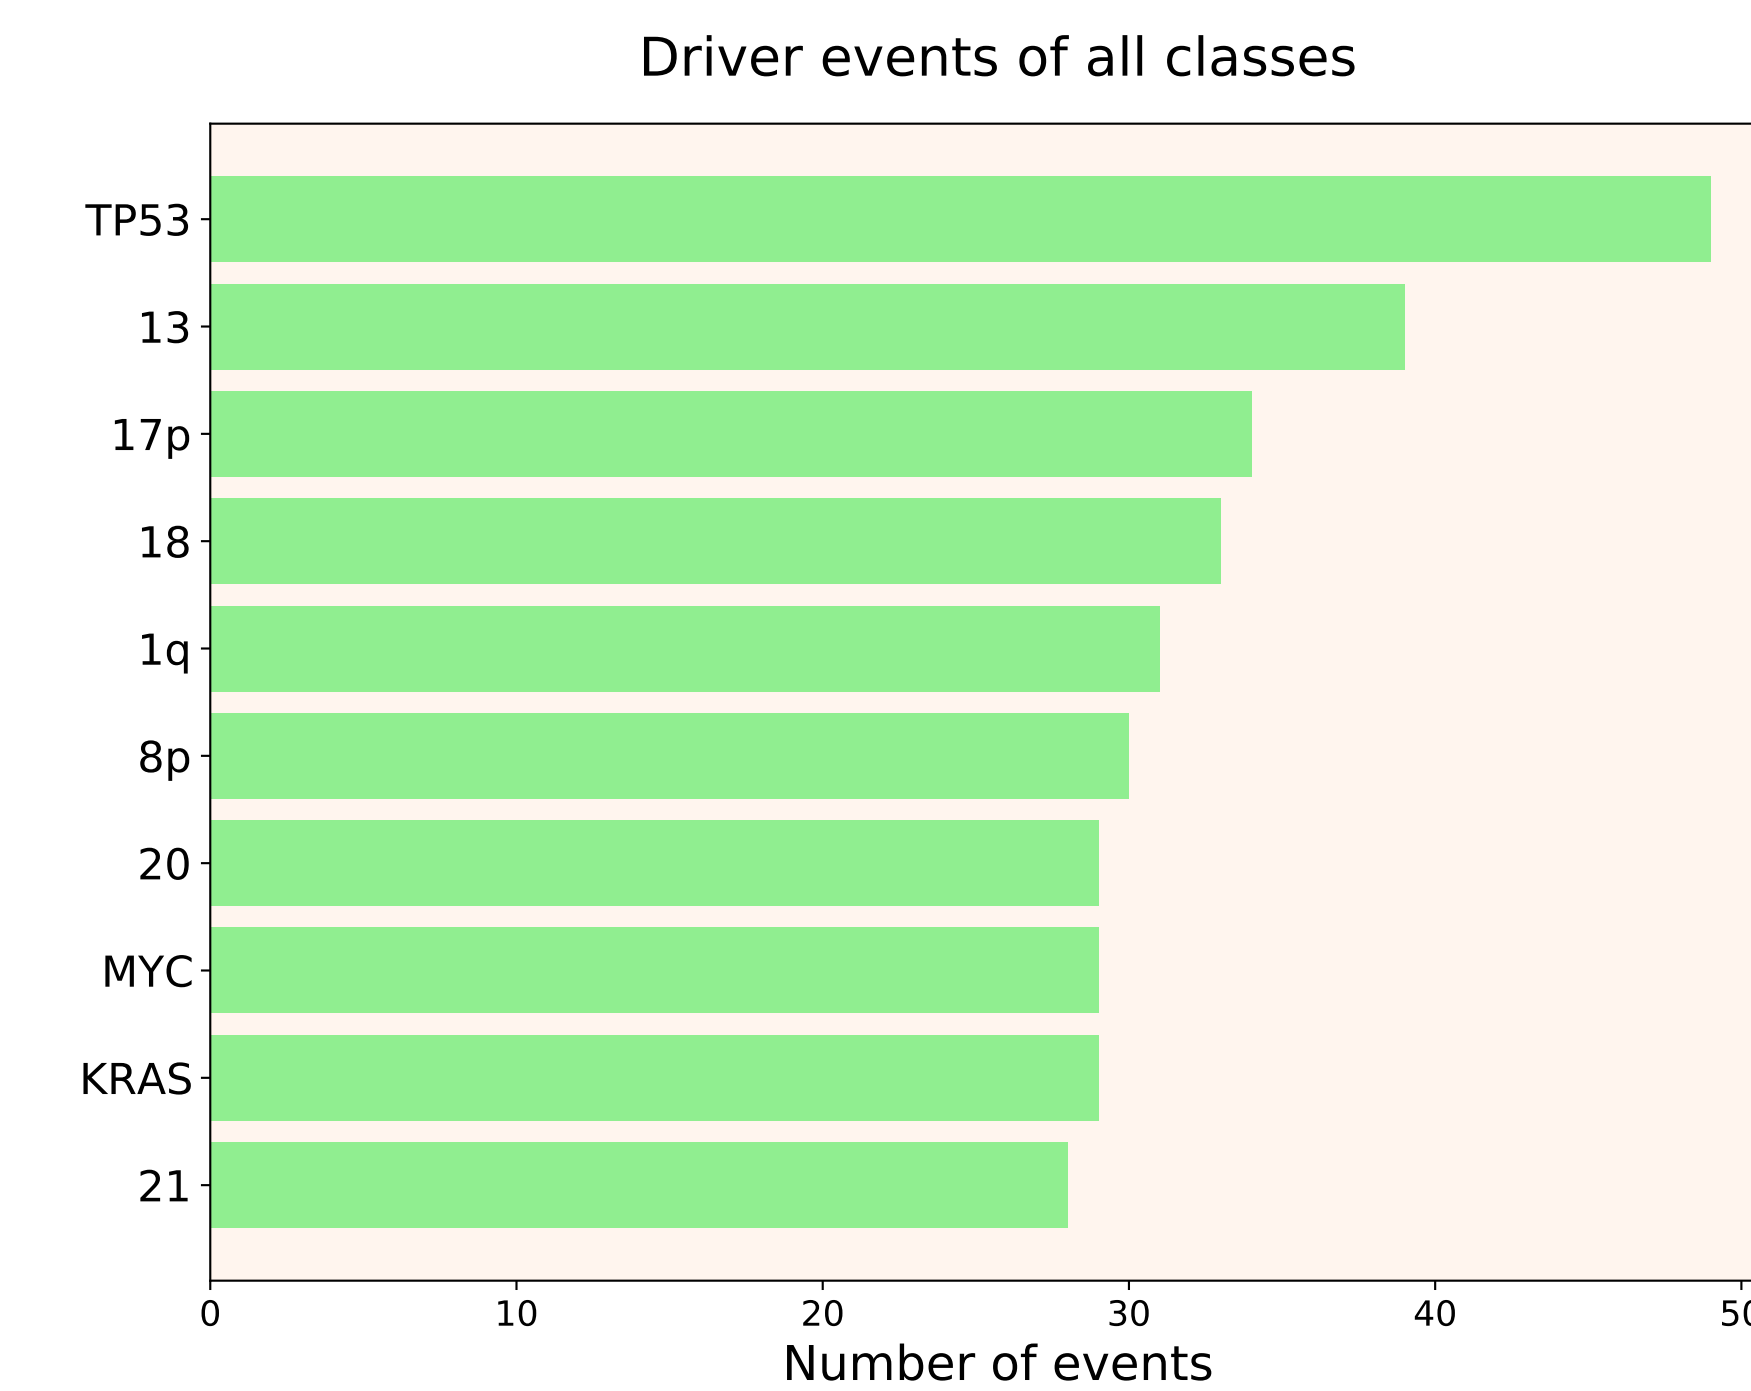

Supplement: Supplemental_Data_S1.zip [file Supplemental_Data_S1.zip]

# LUSC

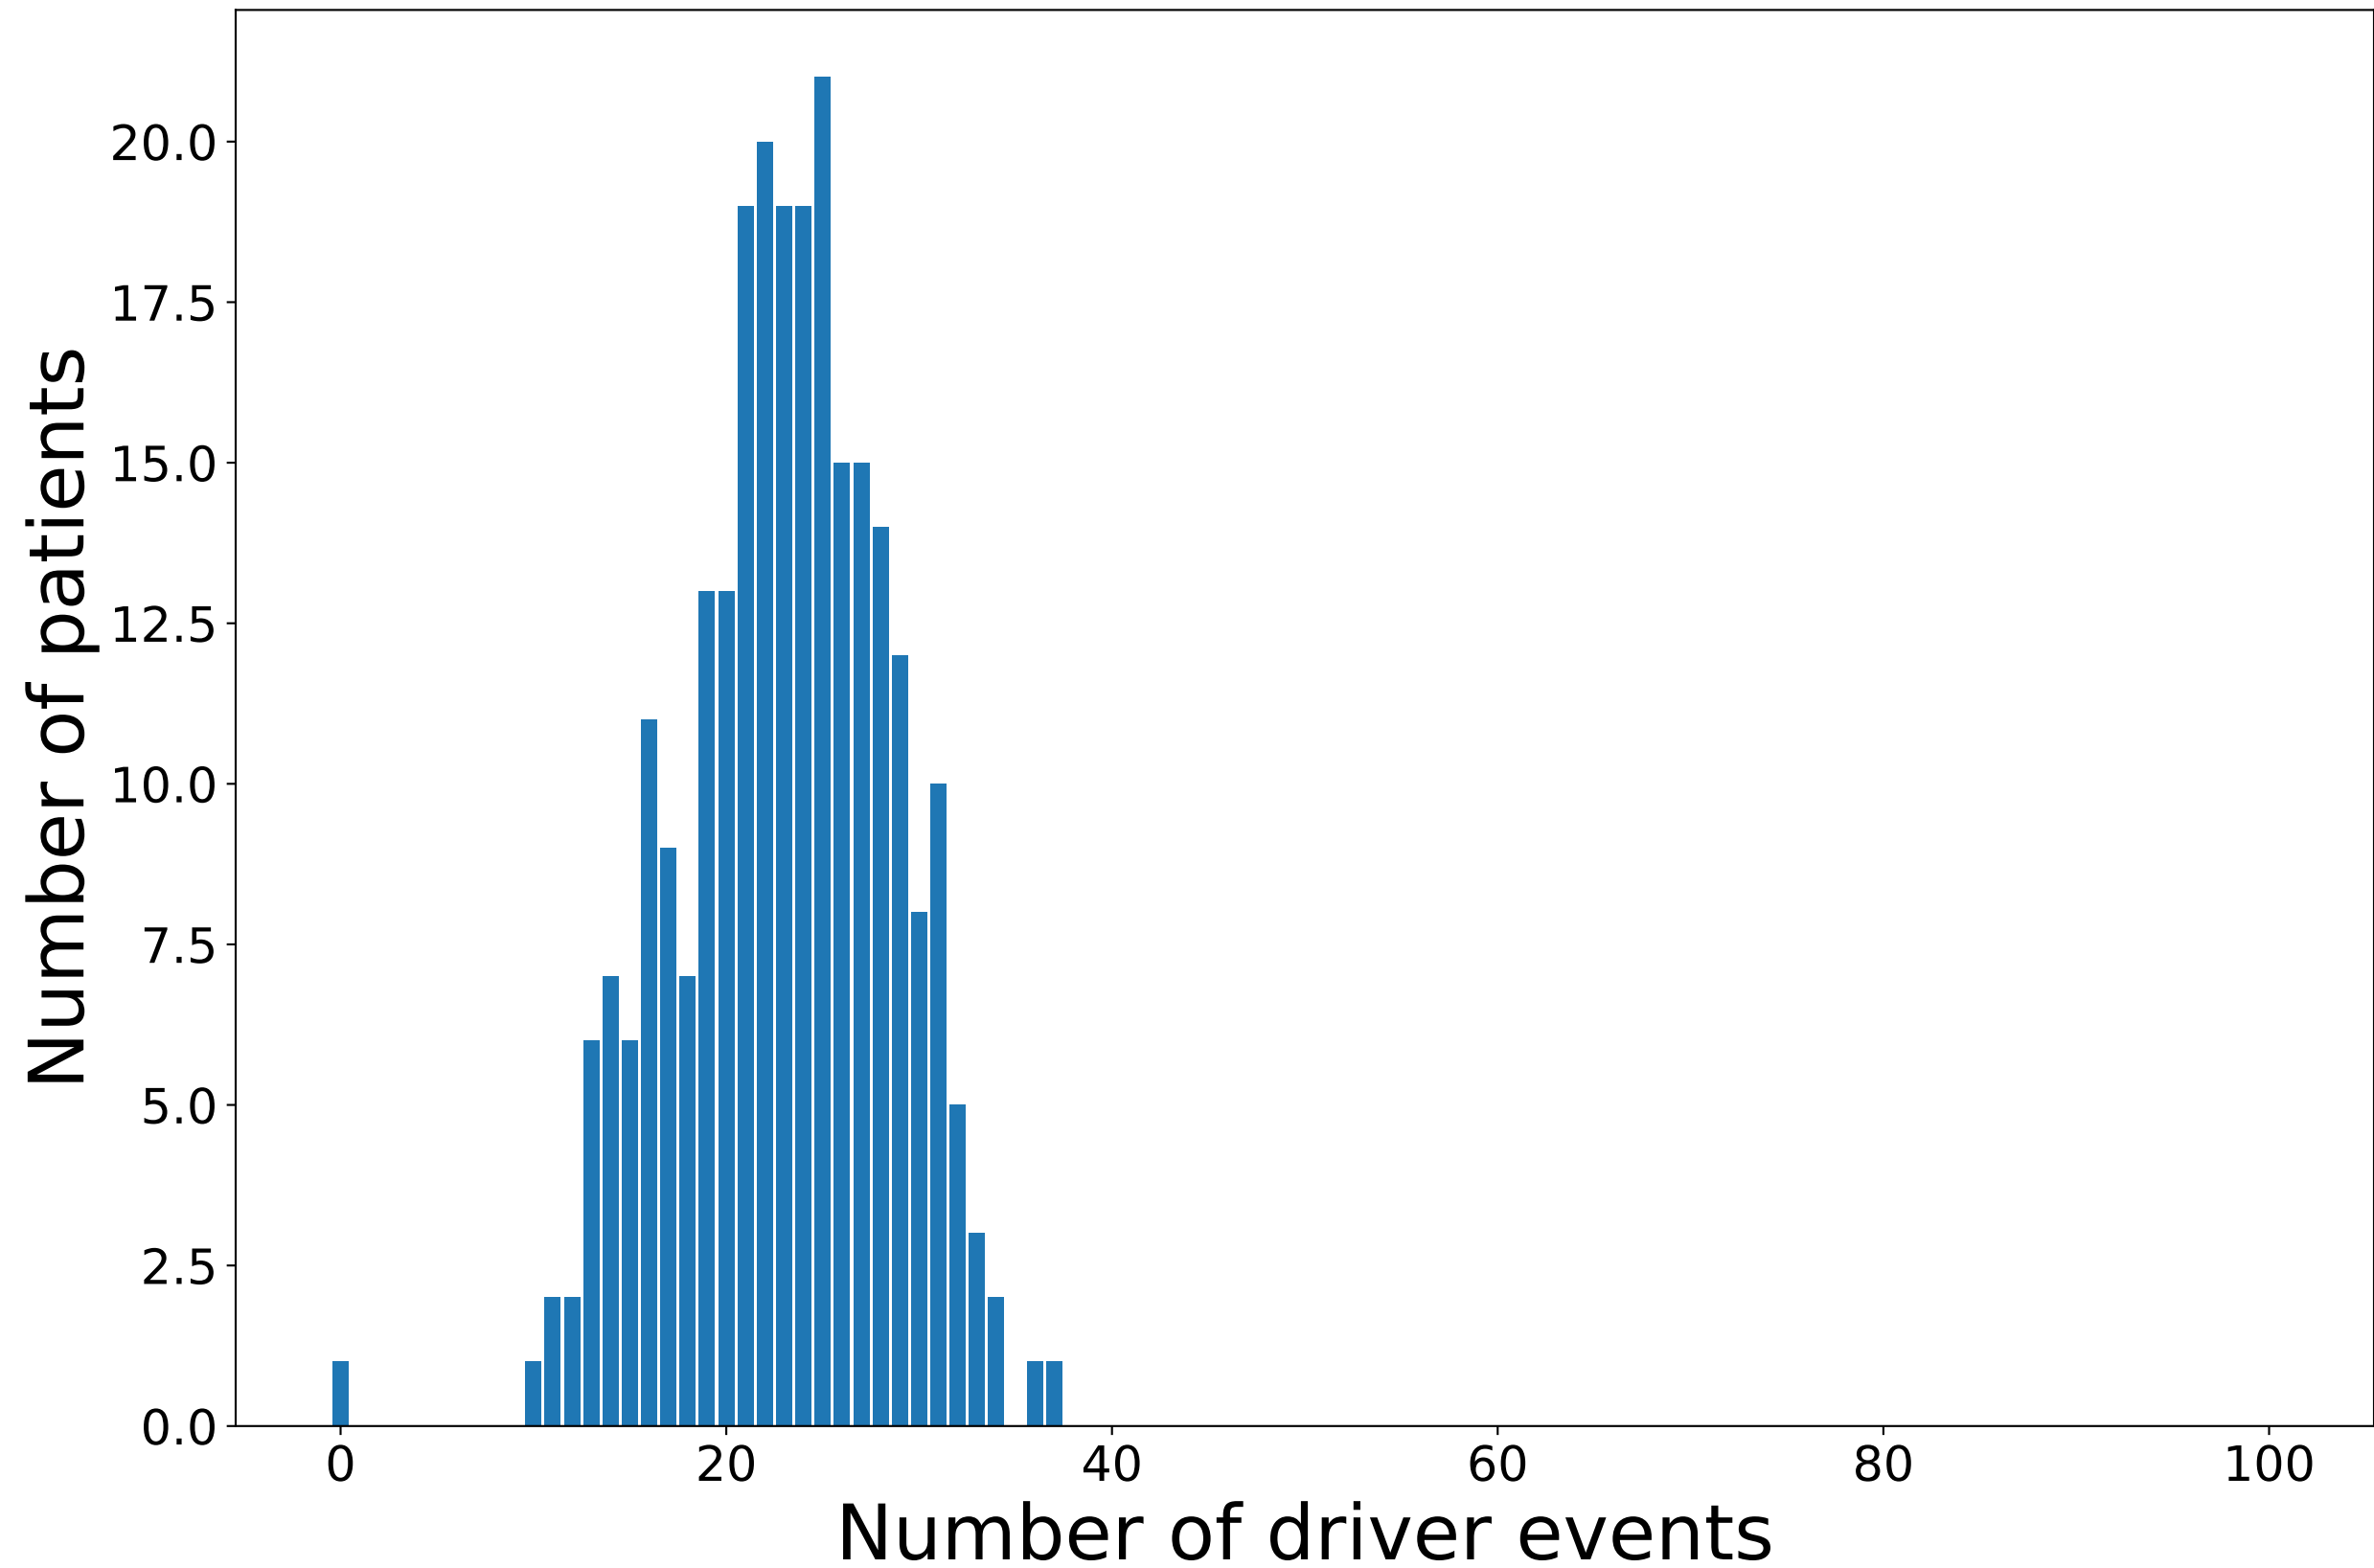

Supplement: Supplemental_Data_S1.zip [file Supplemental_Data_S1.zip]

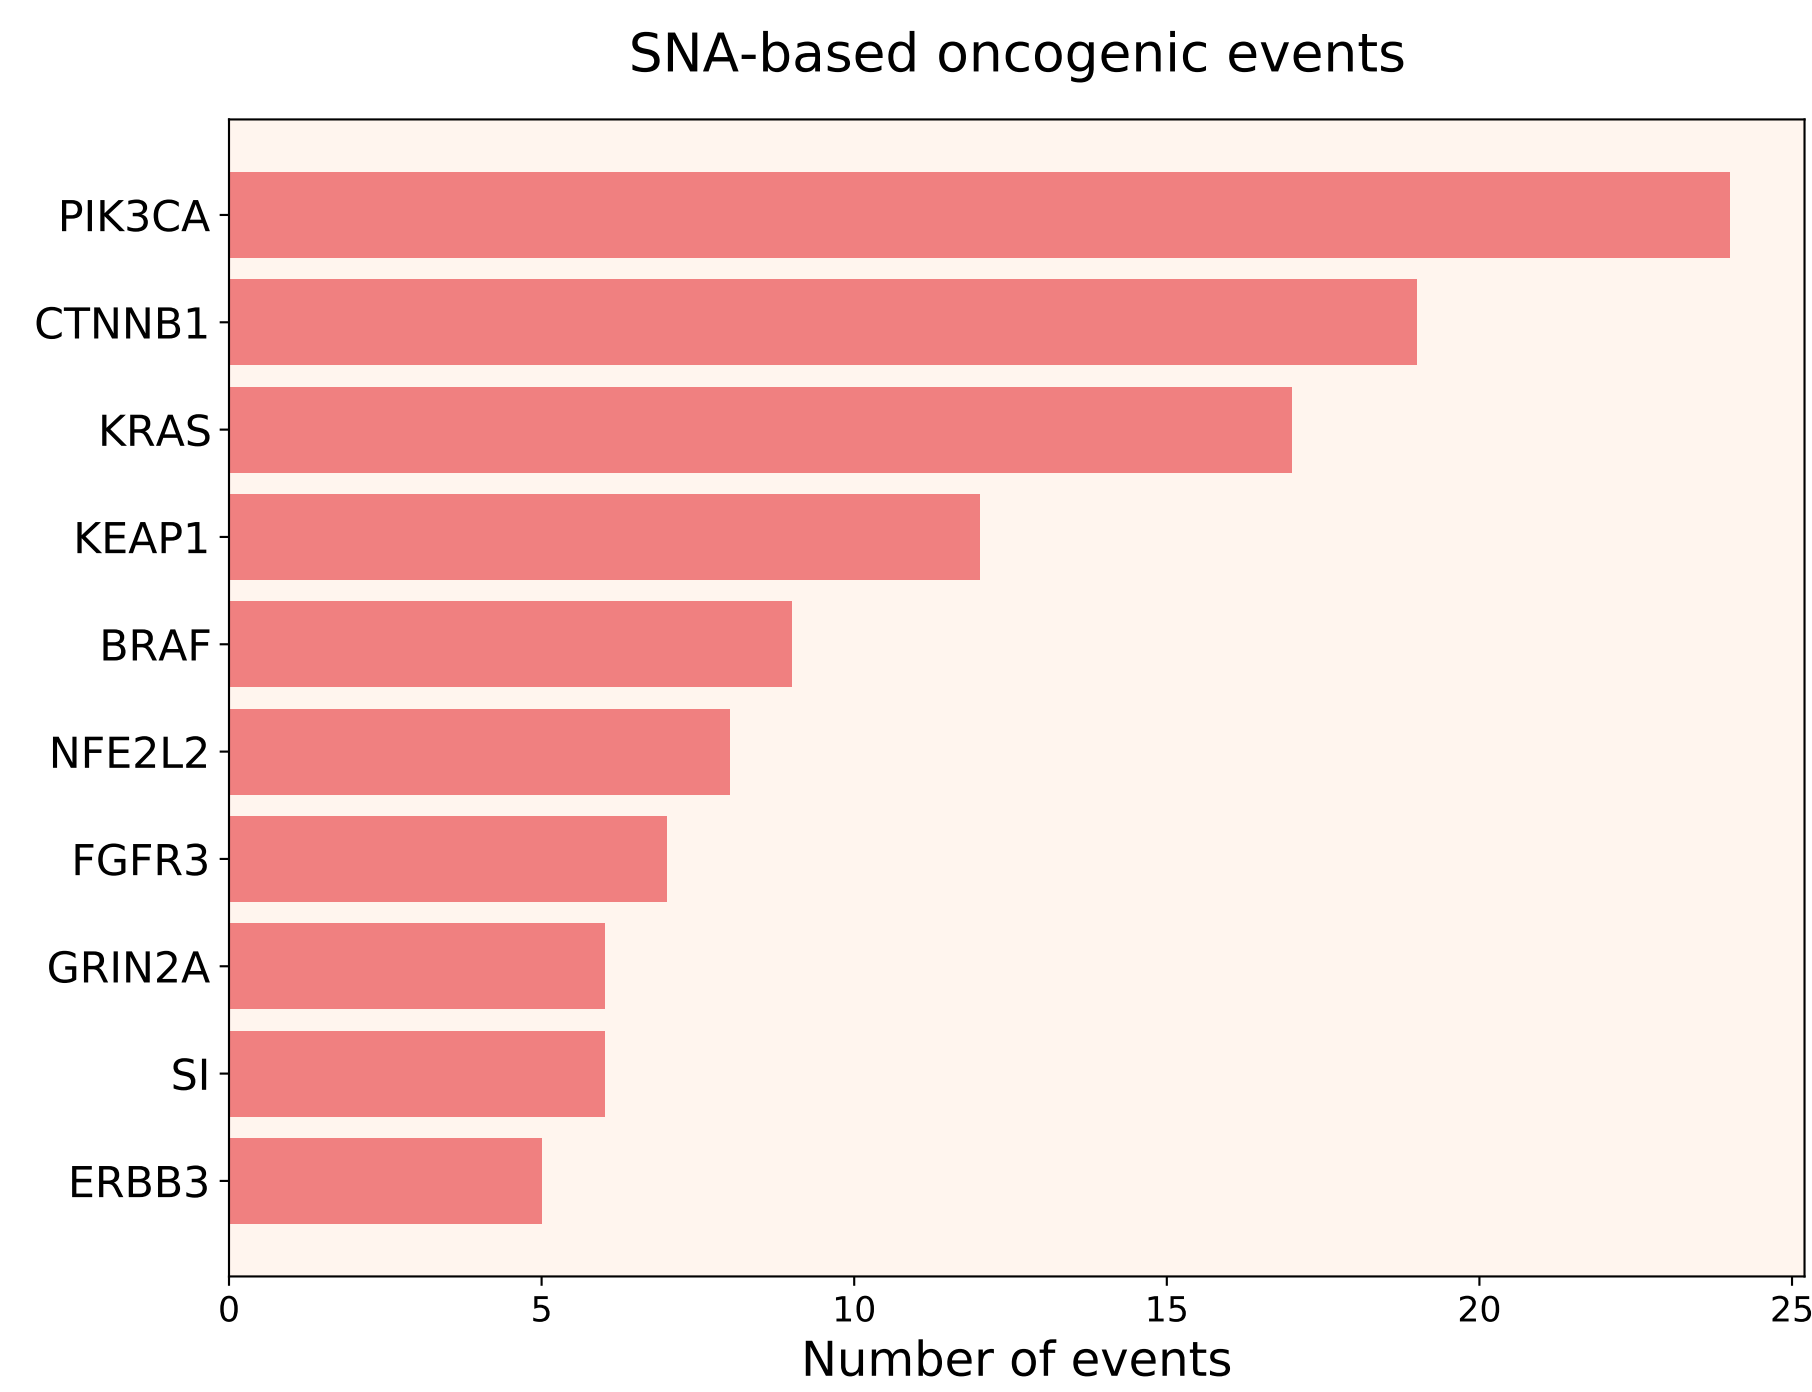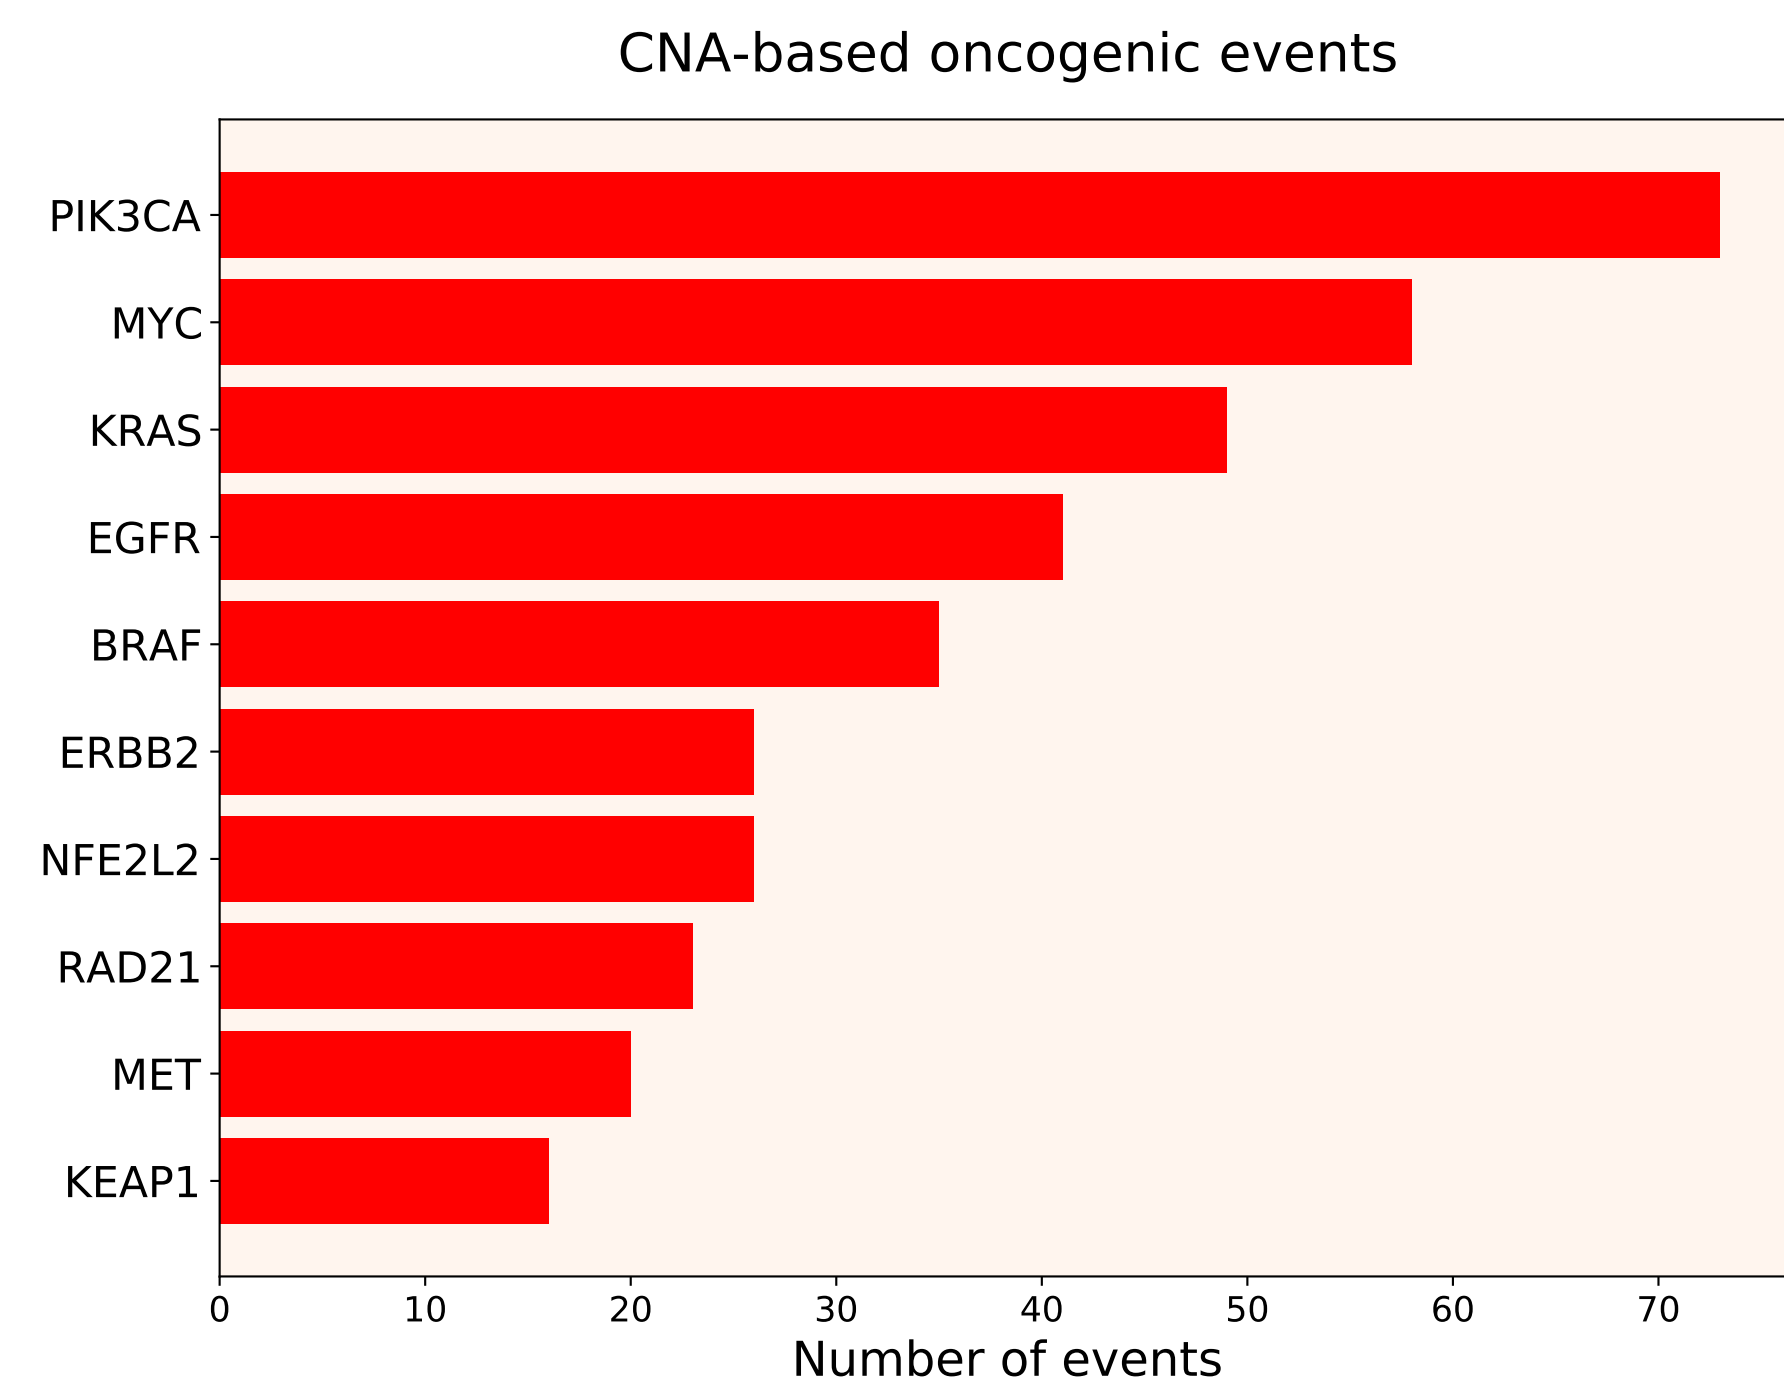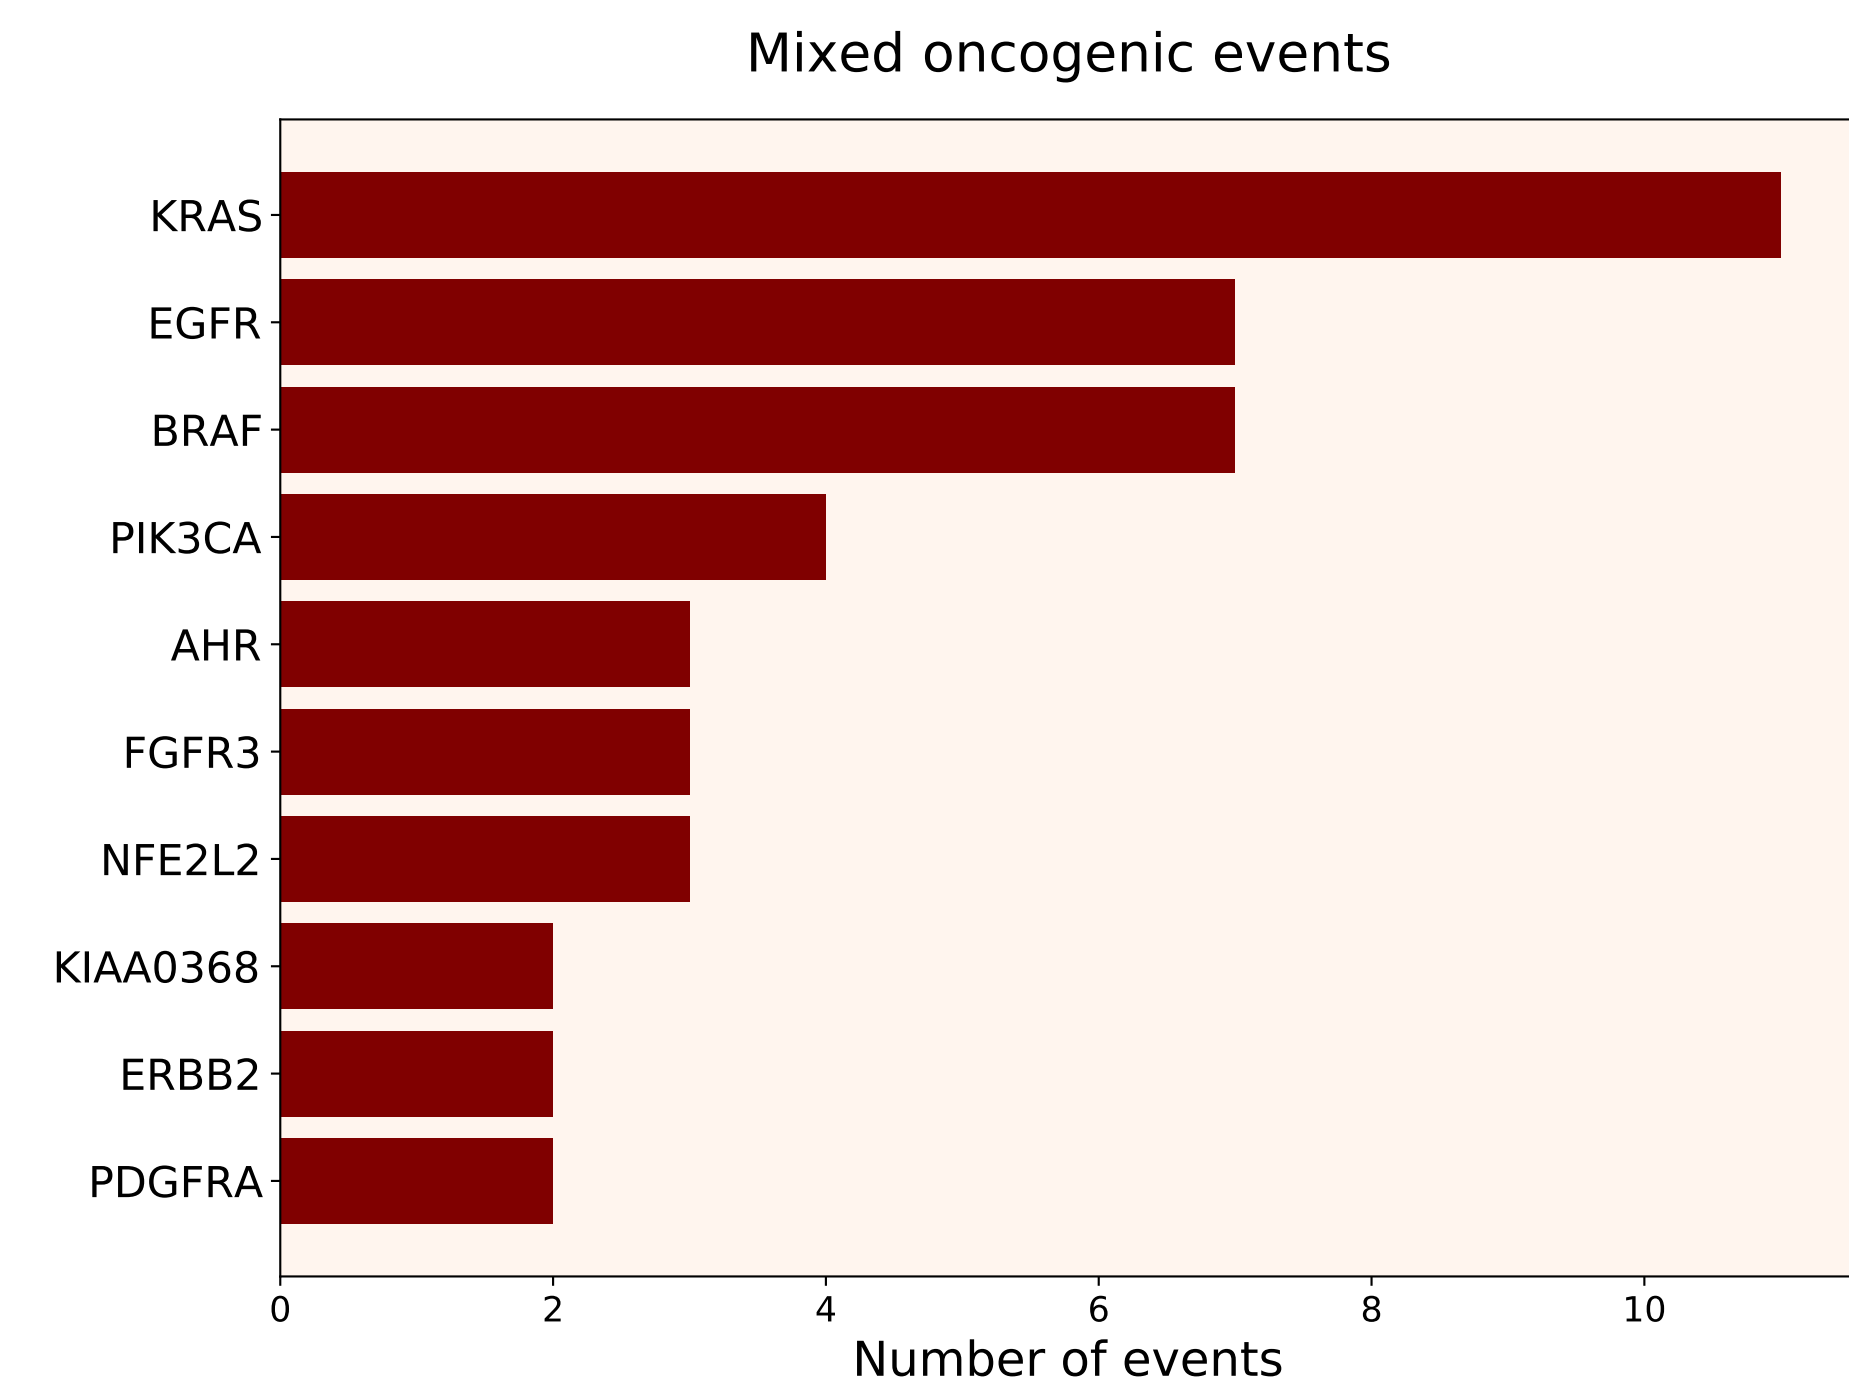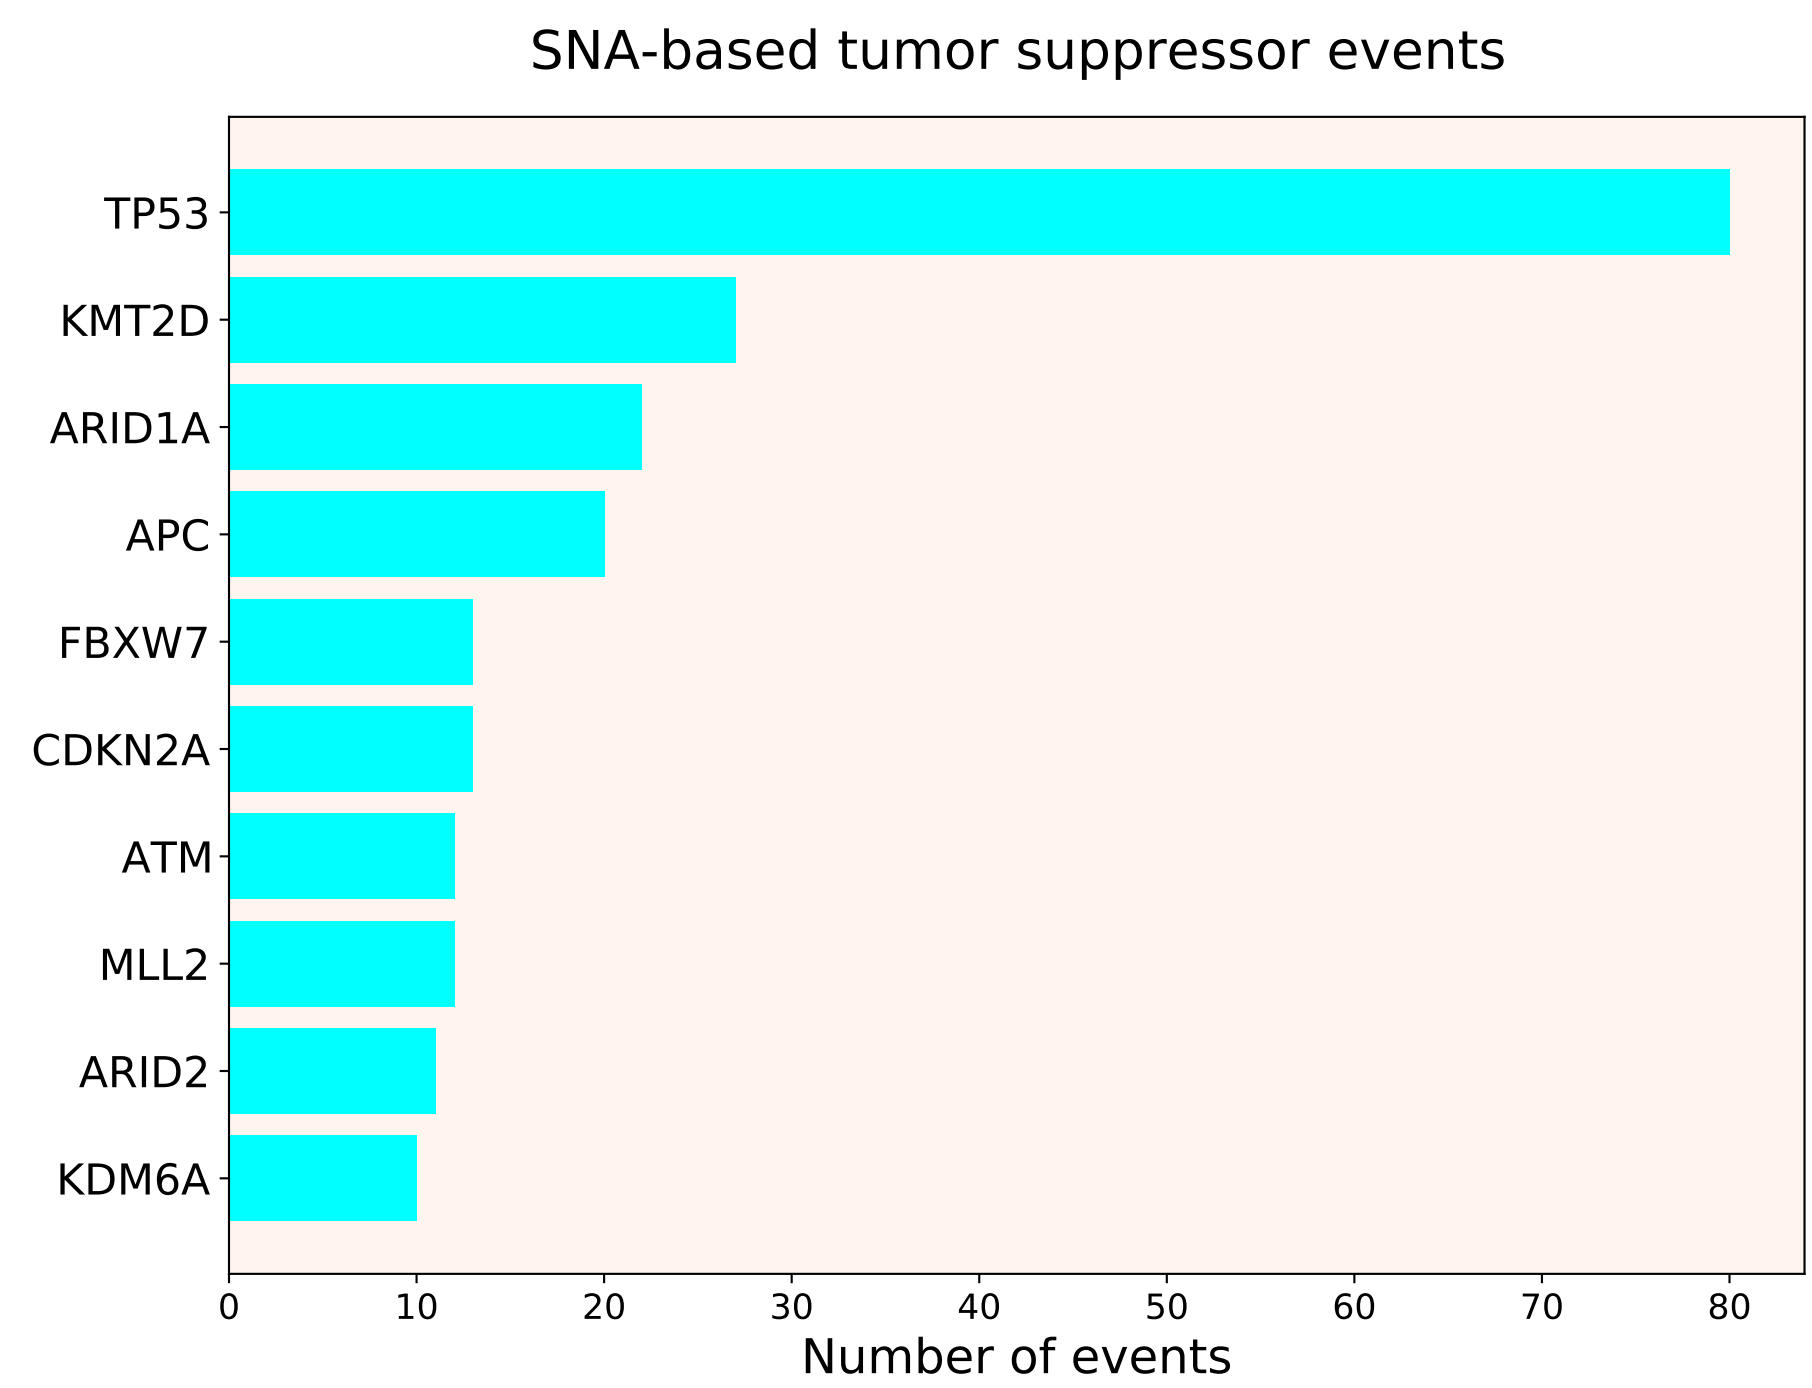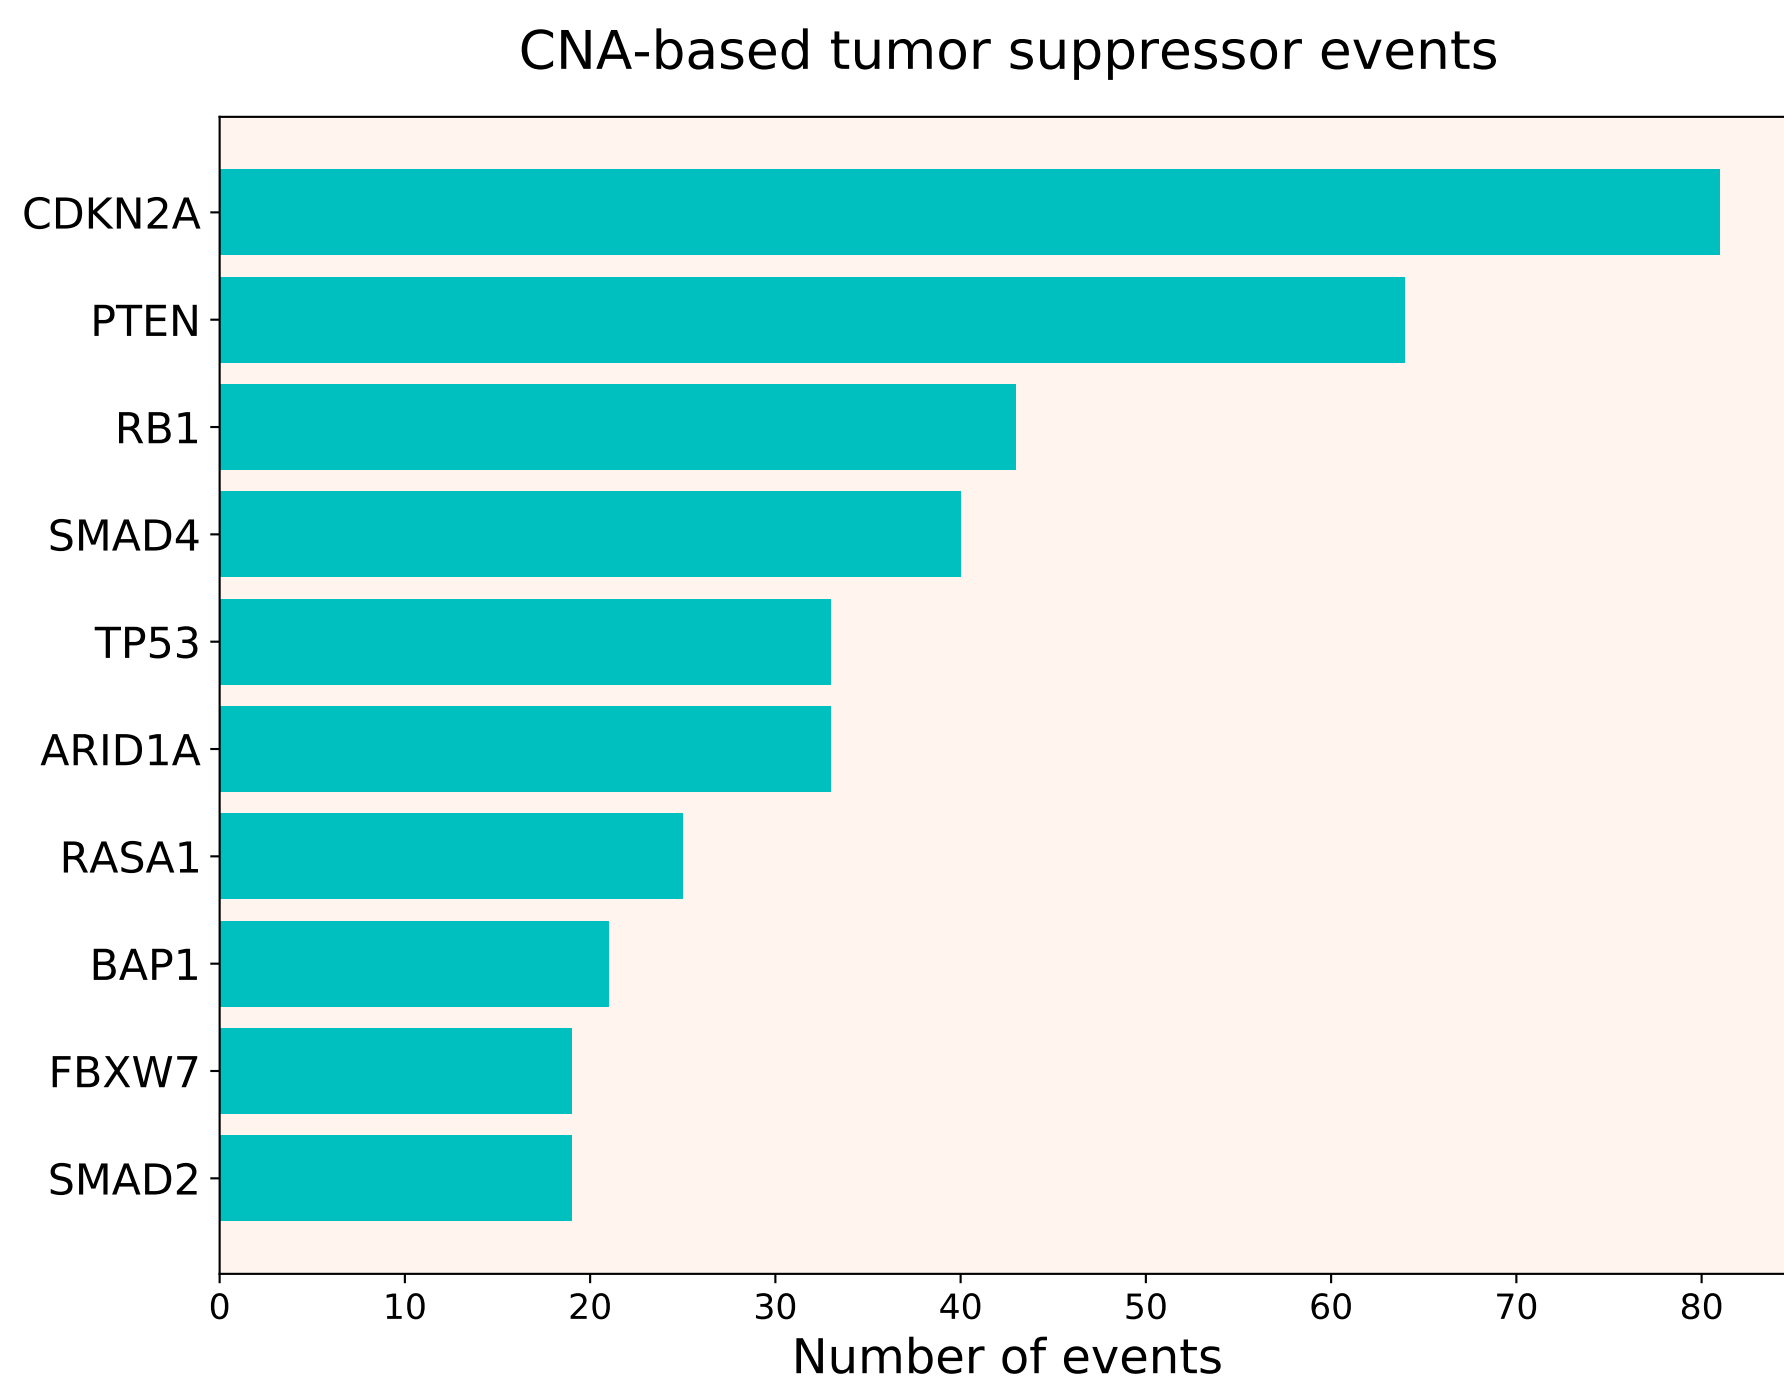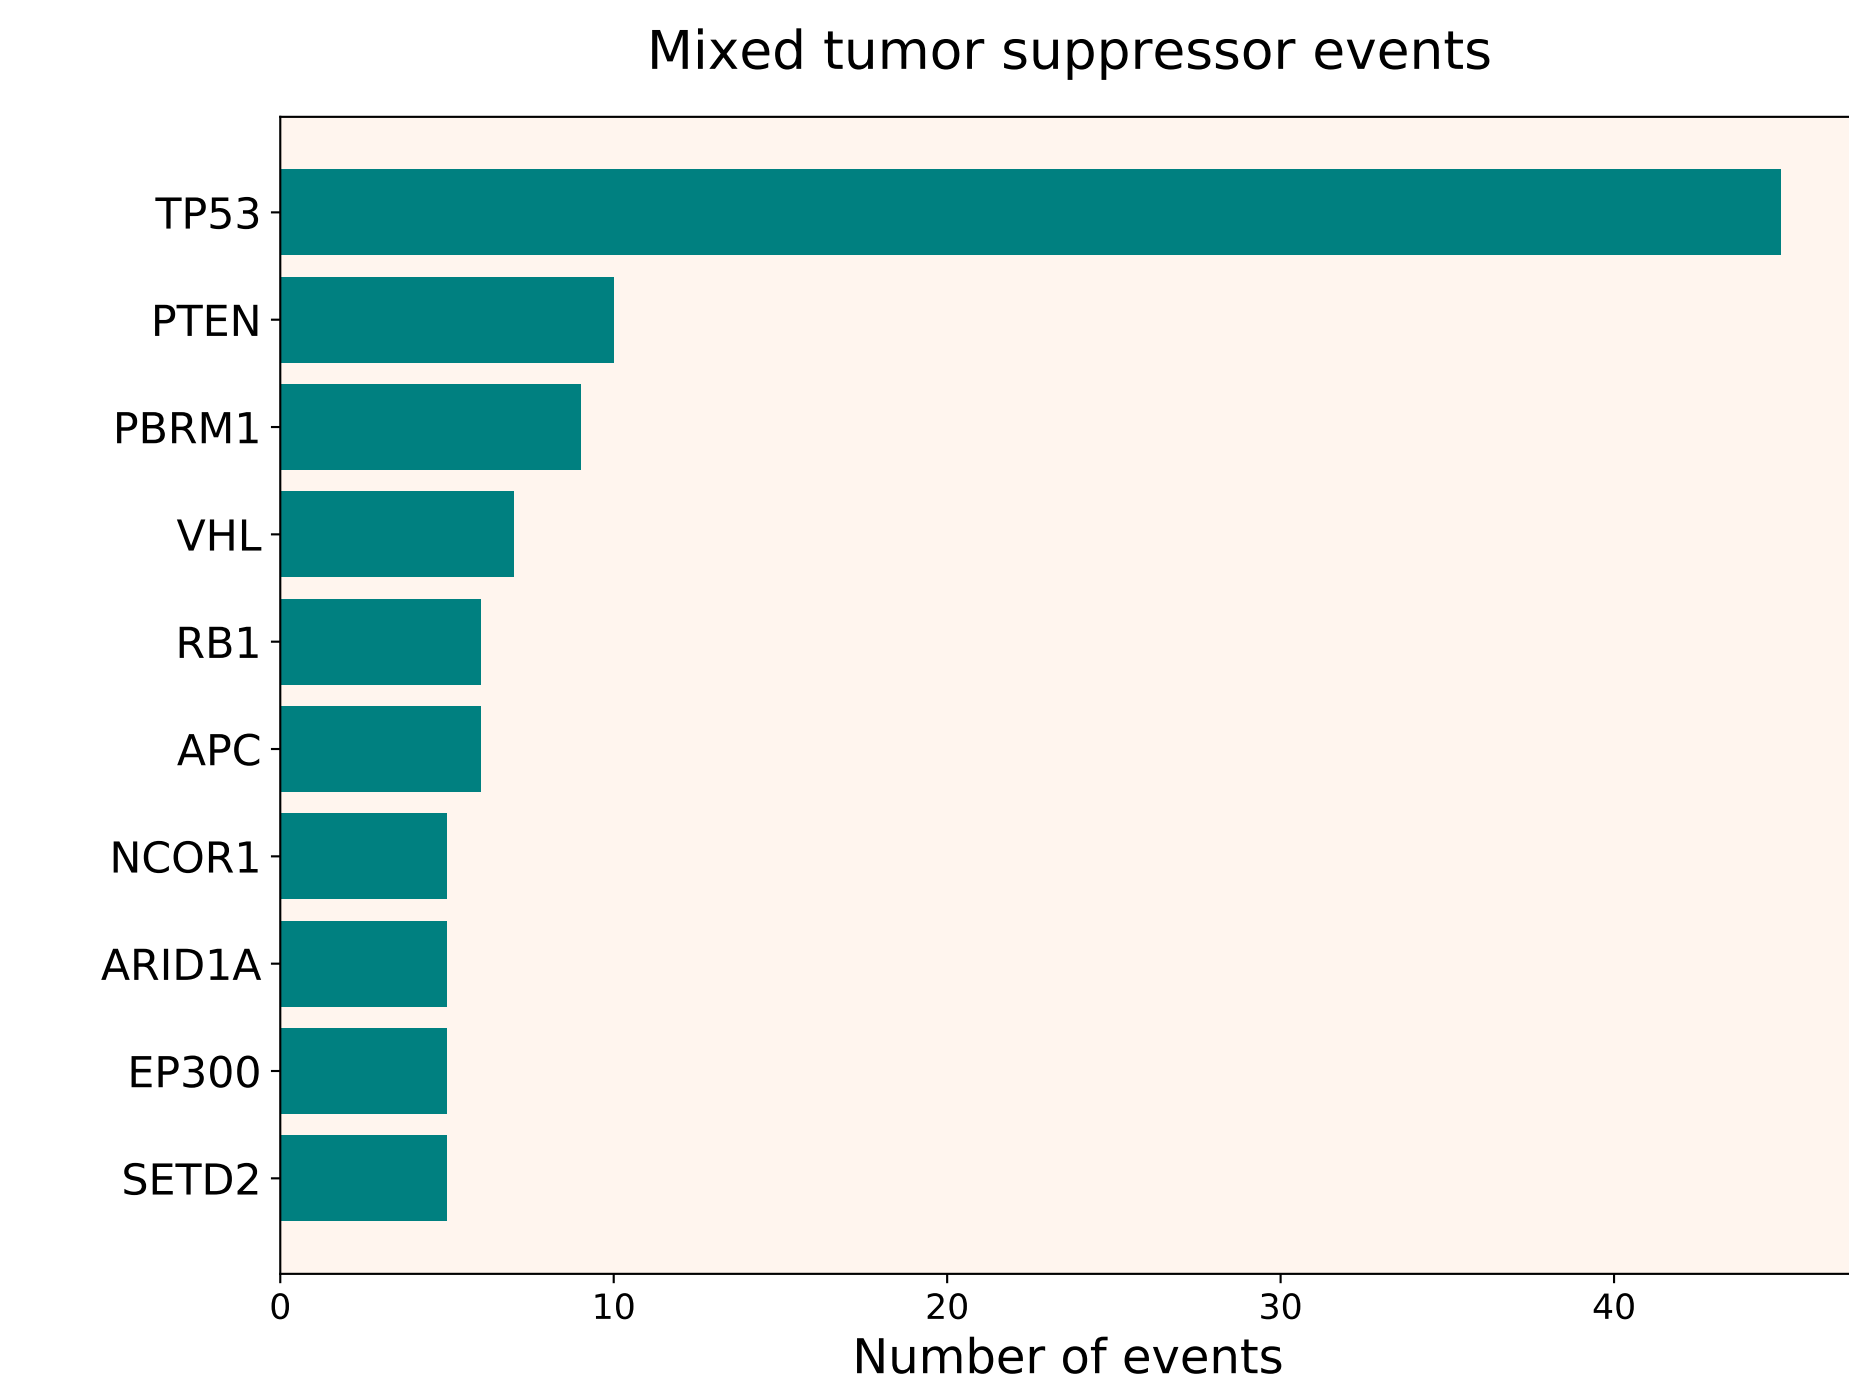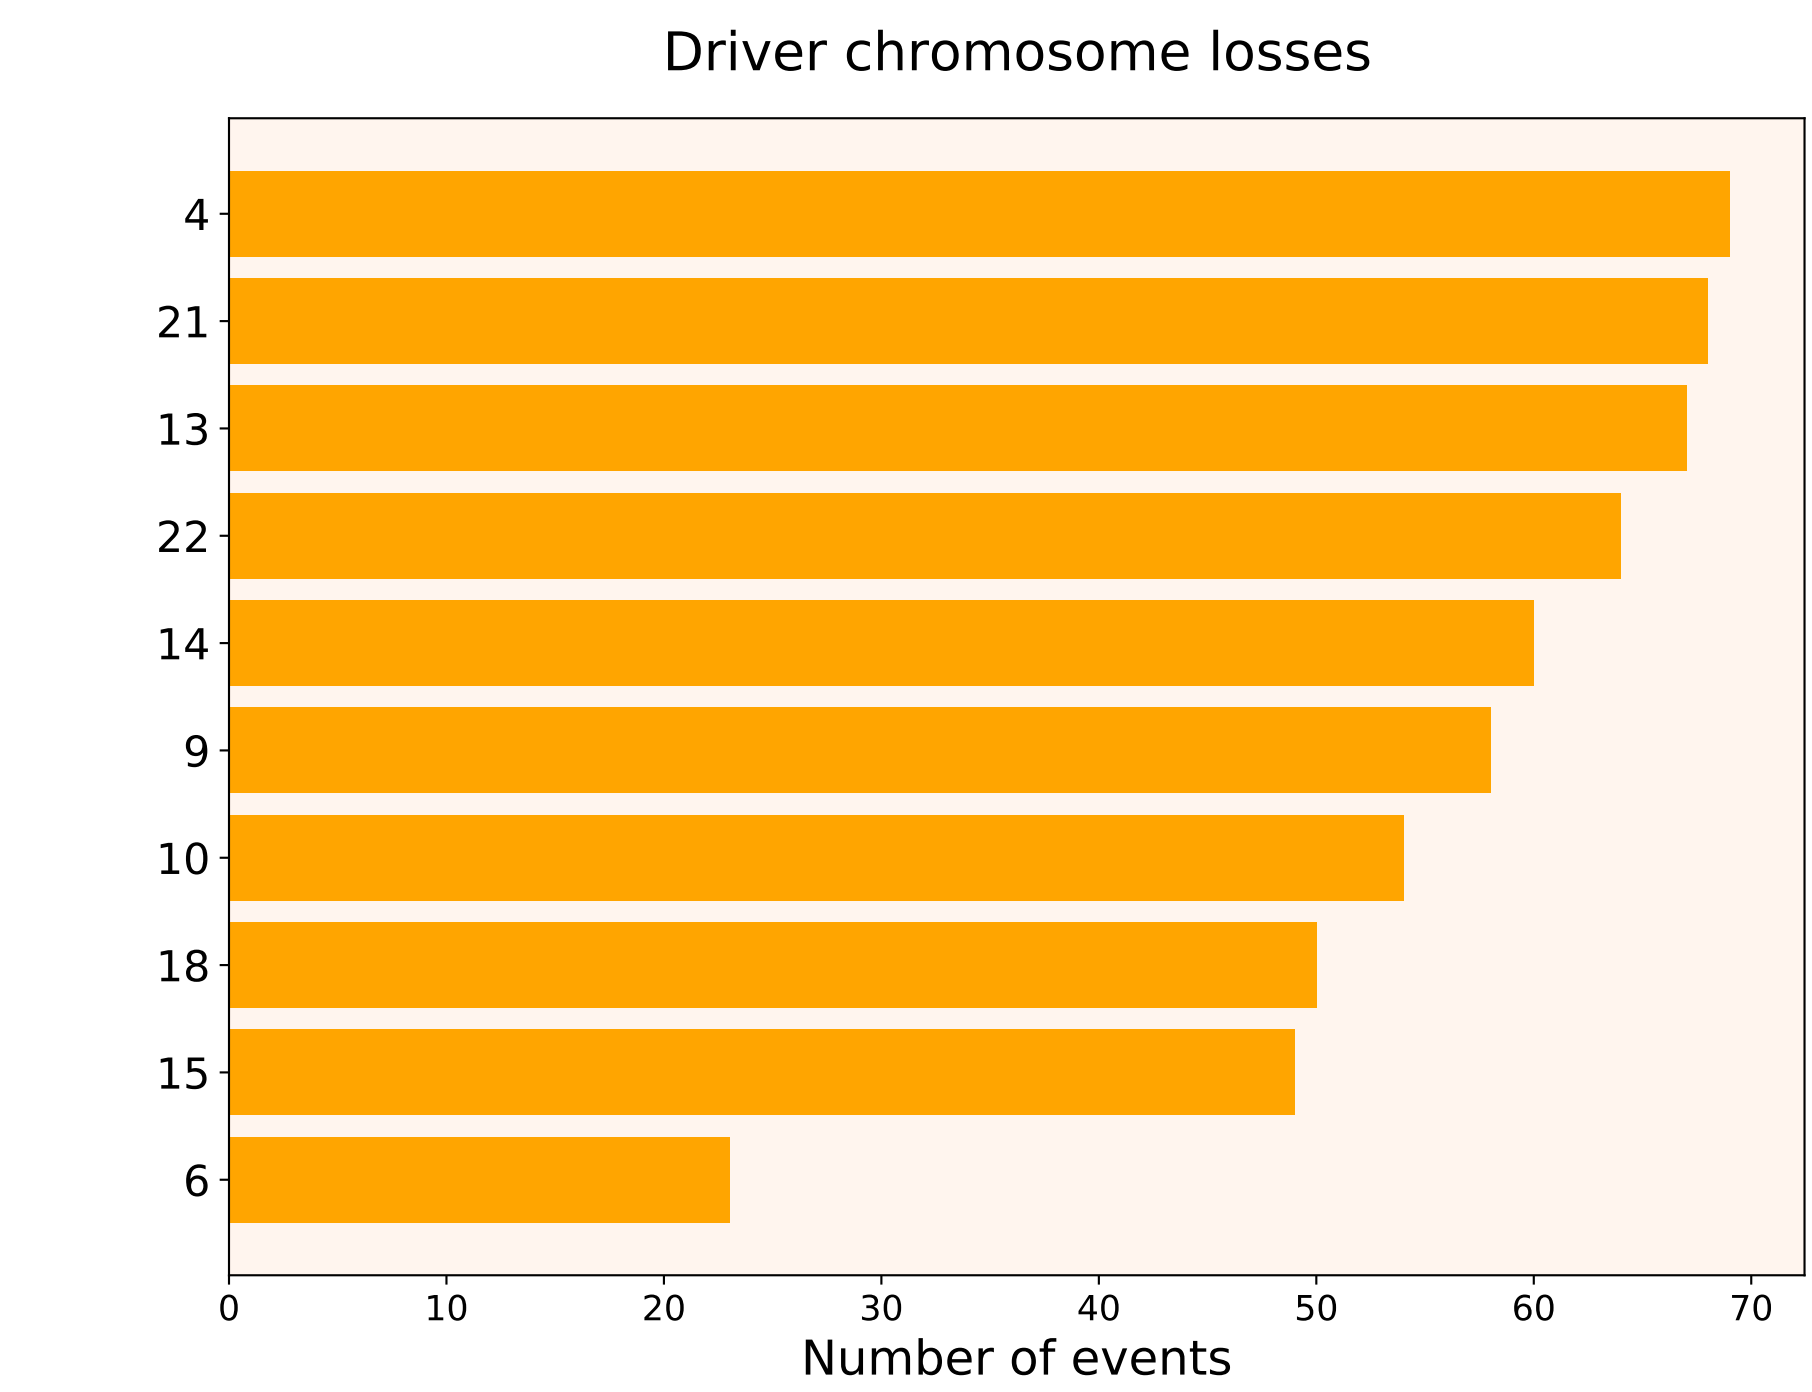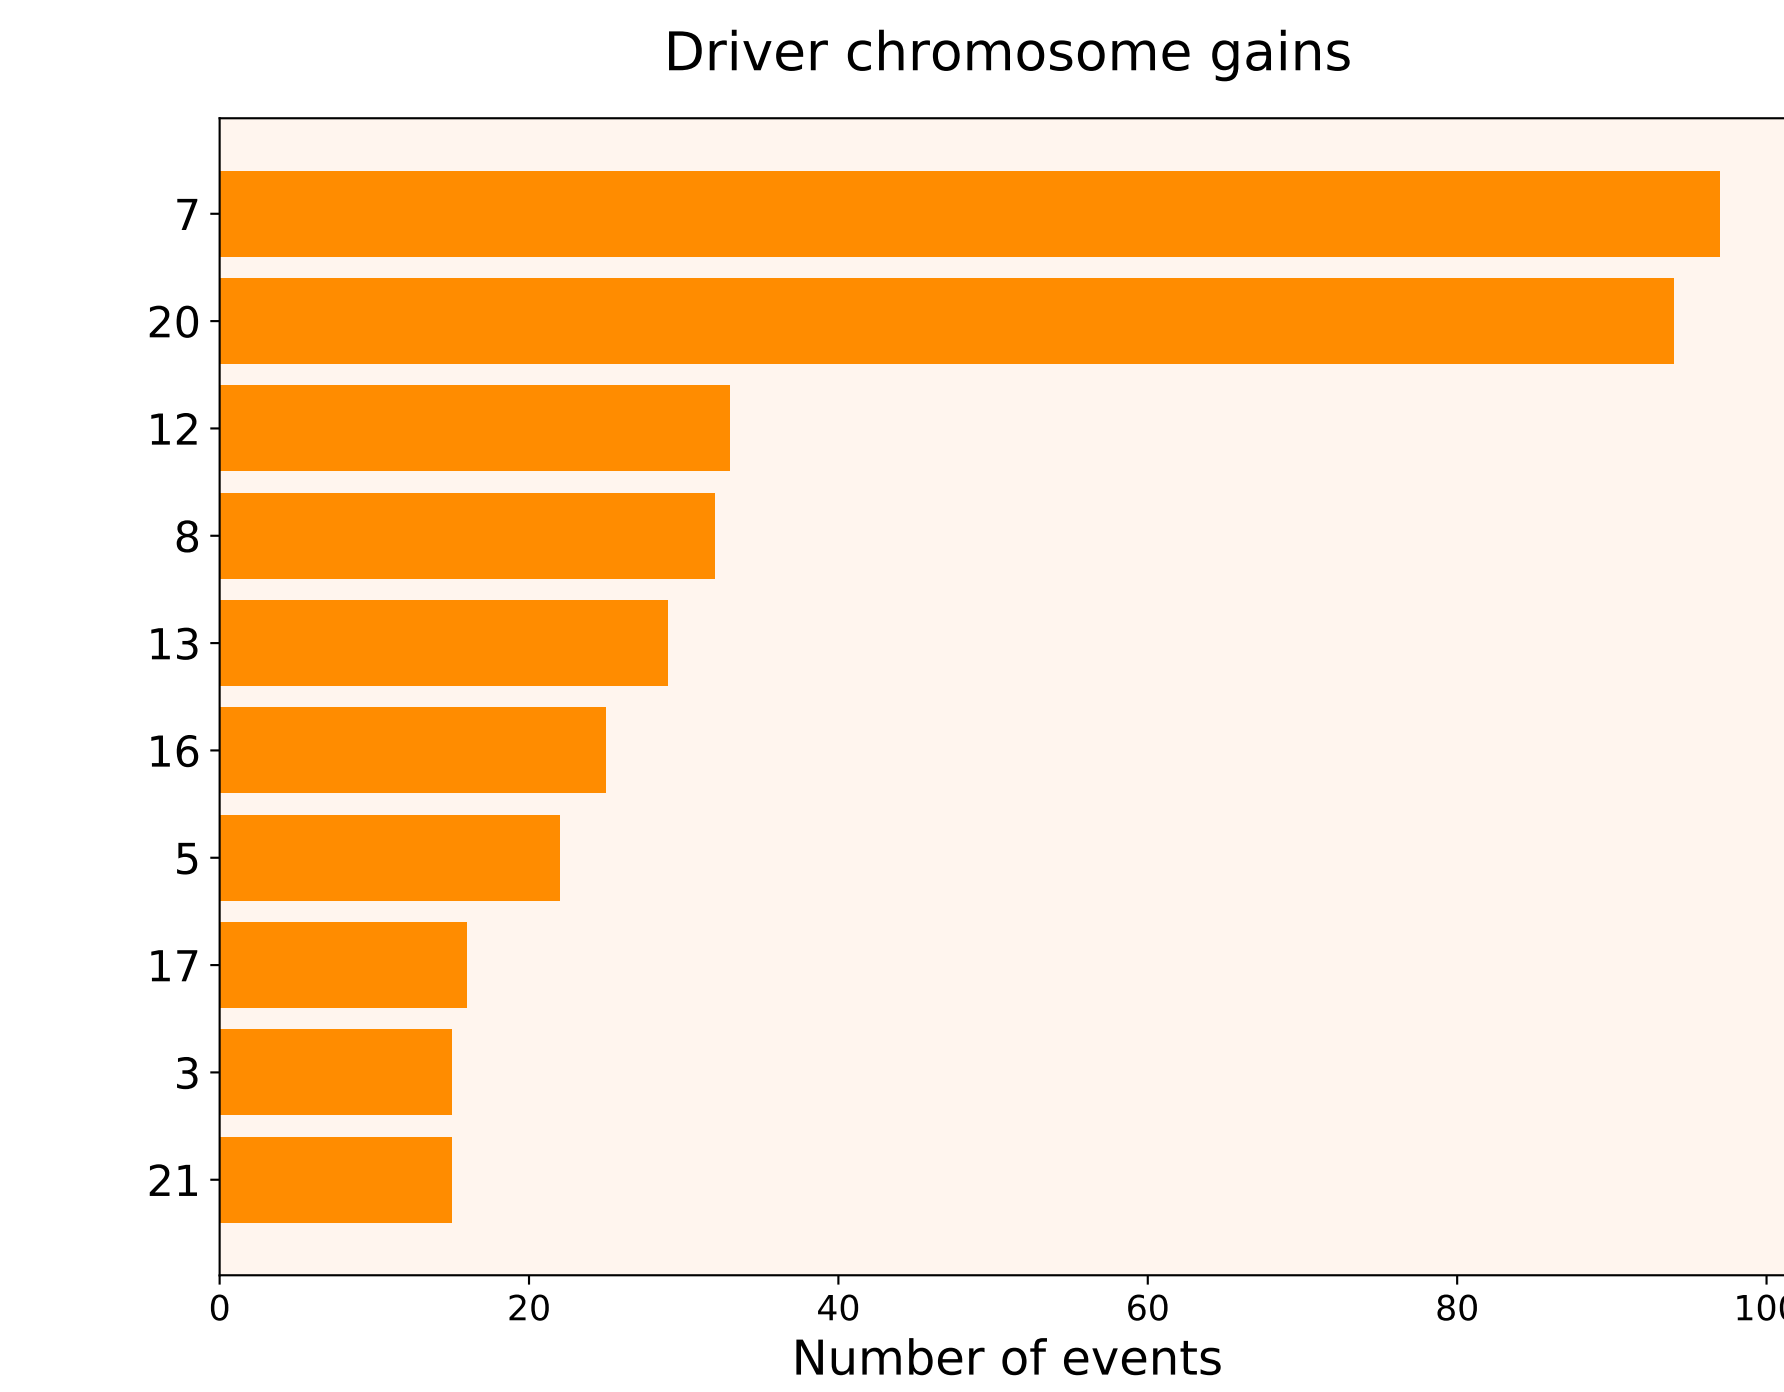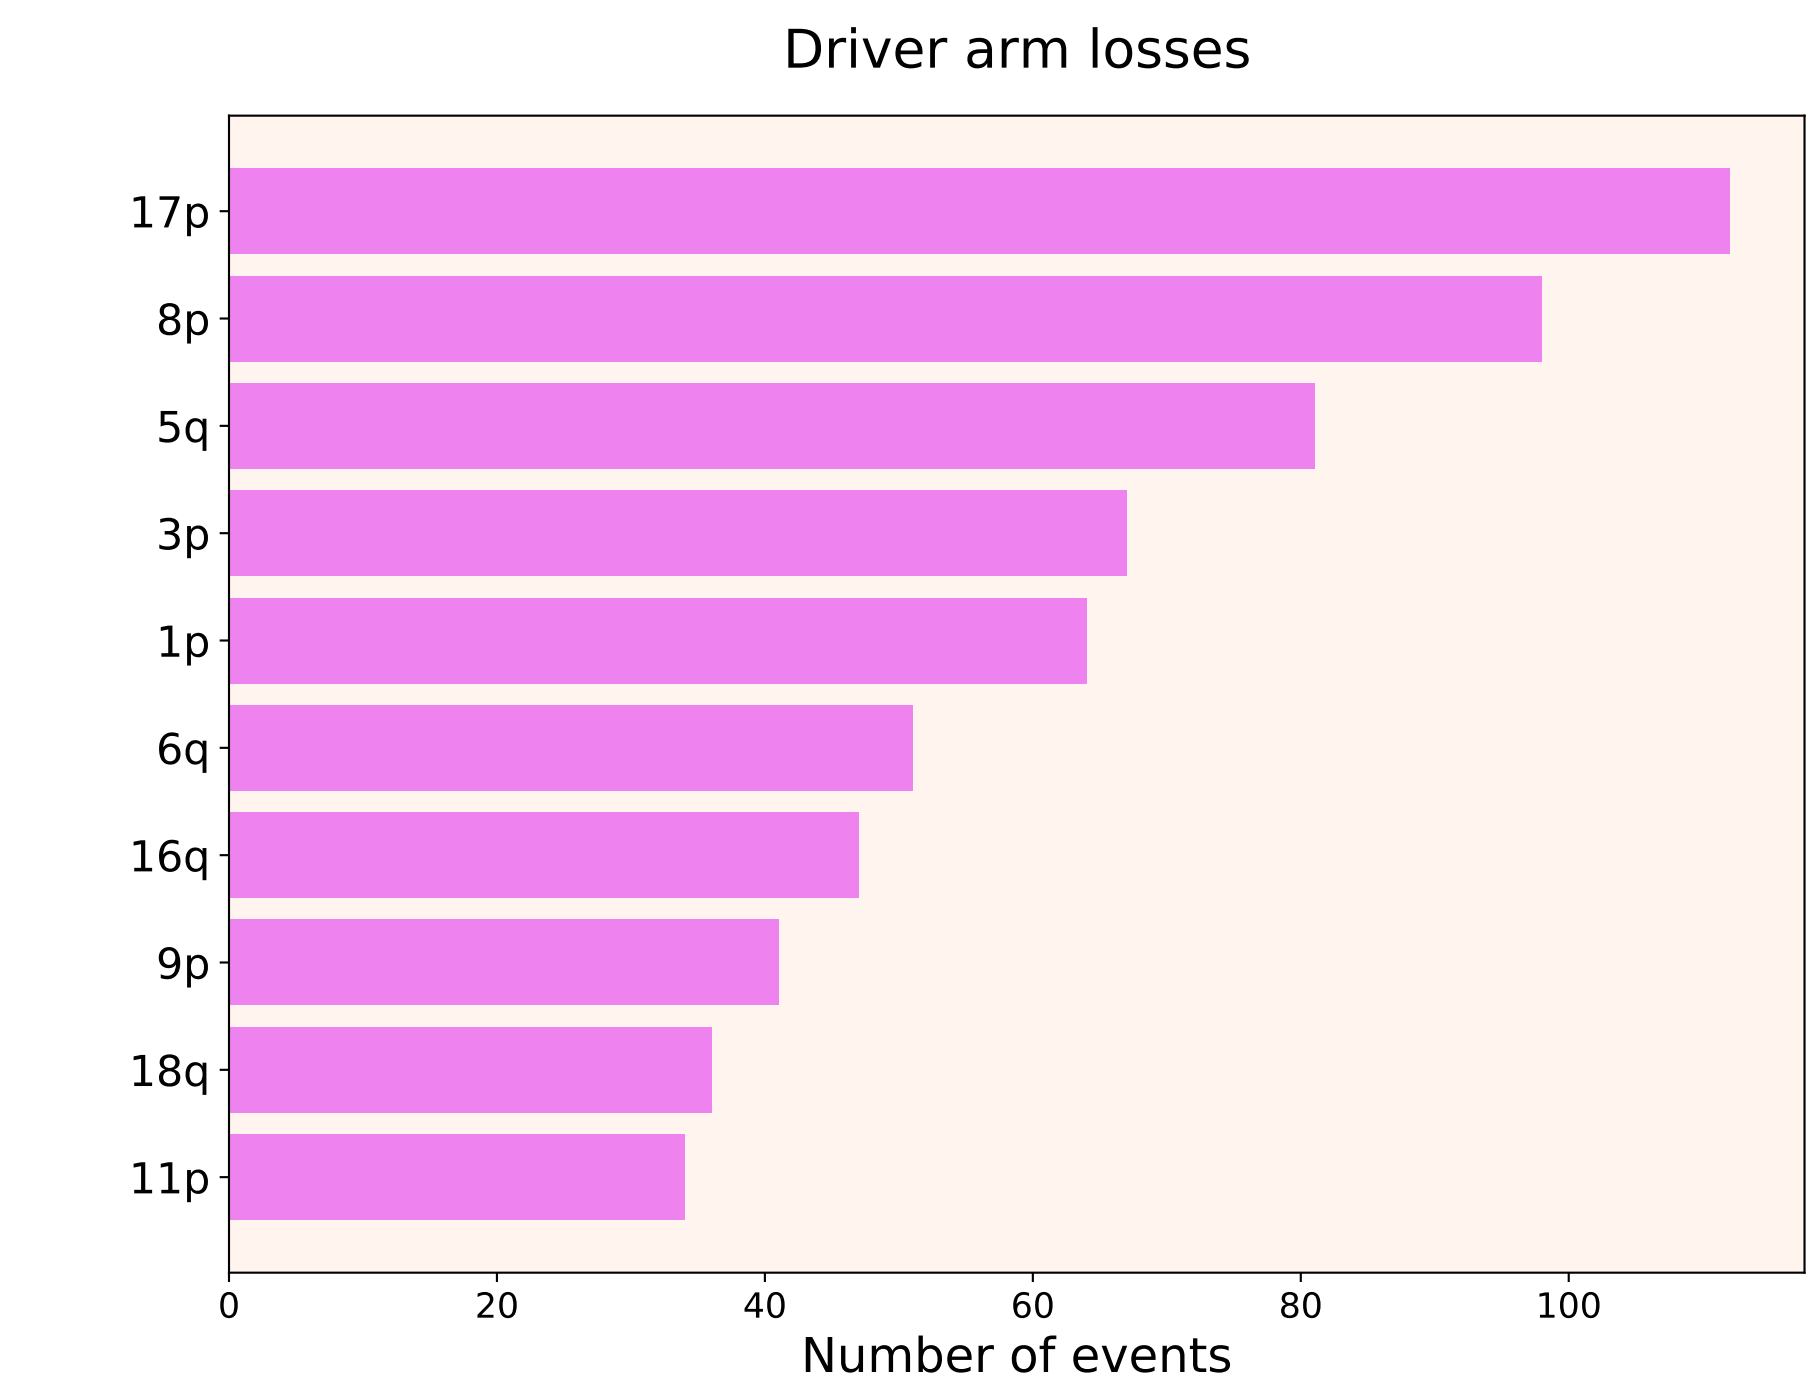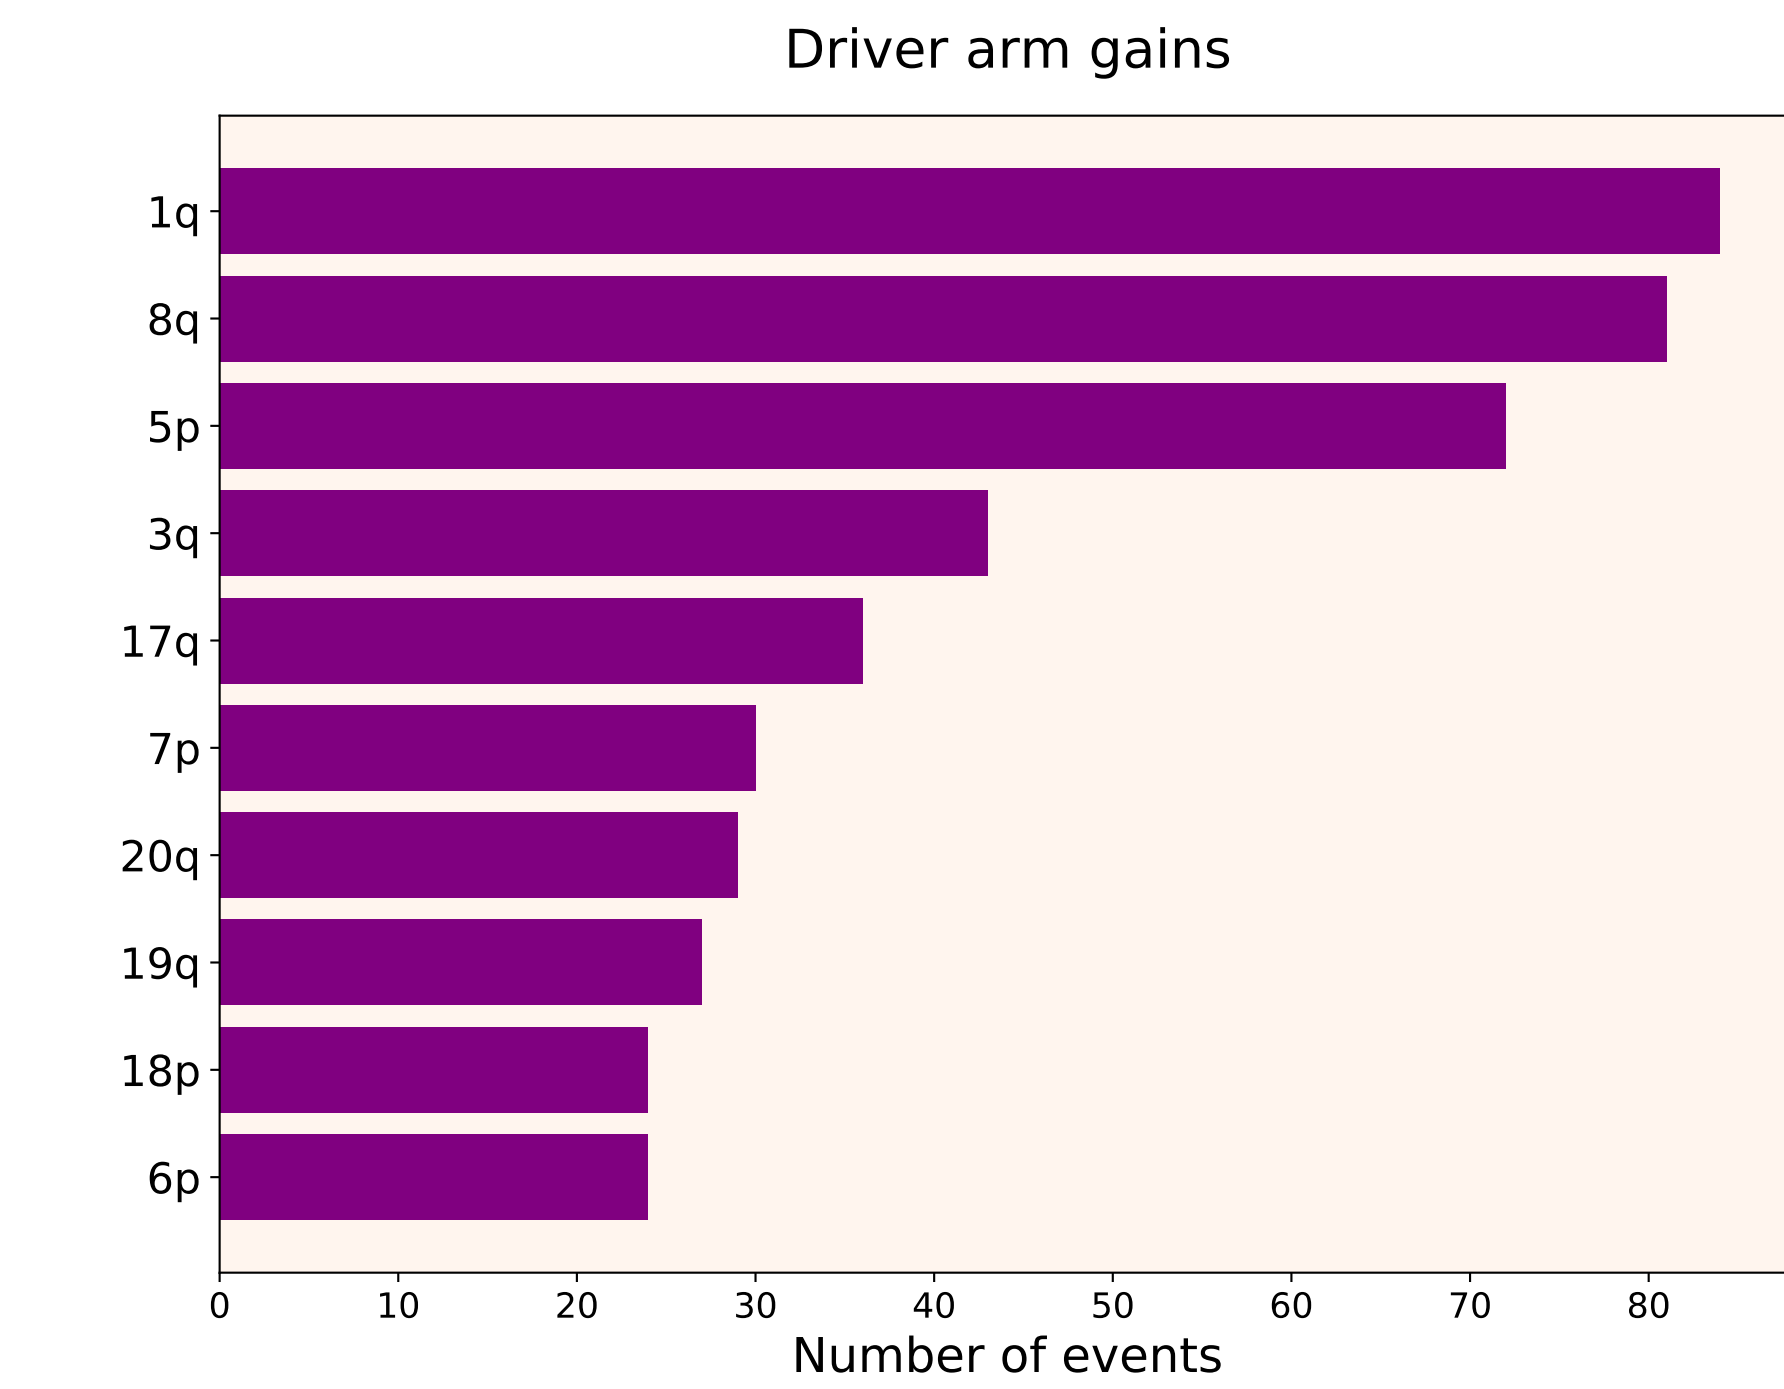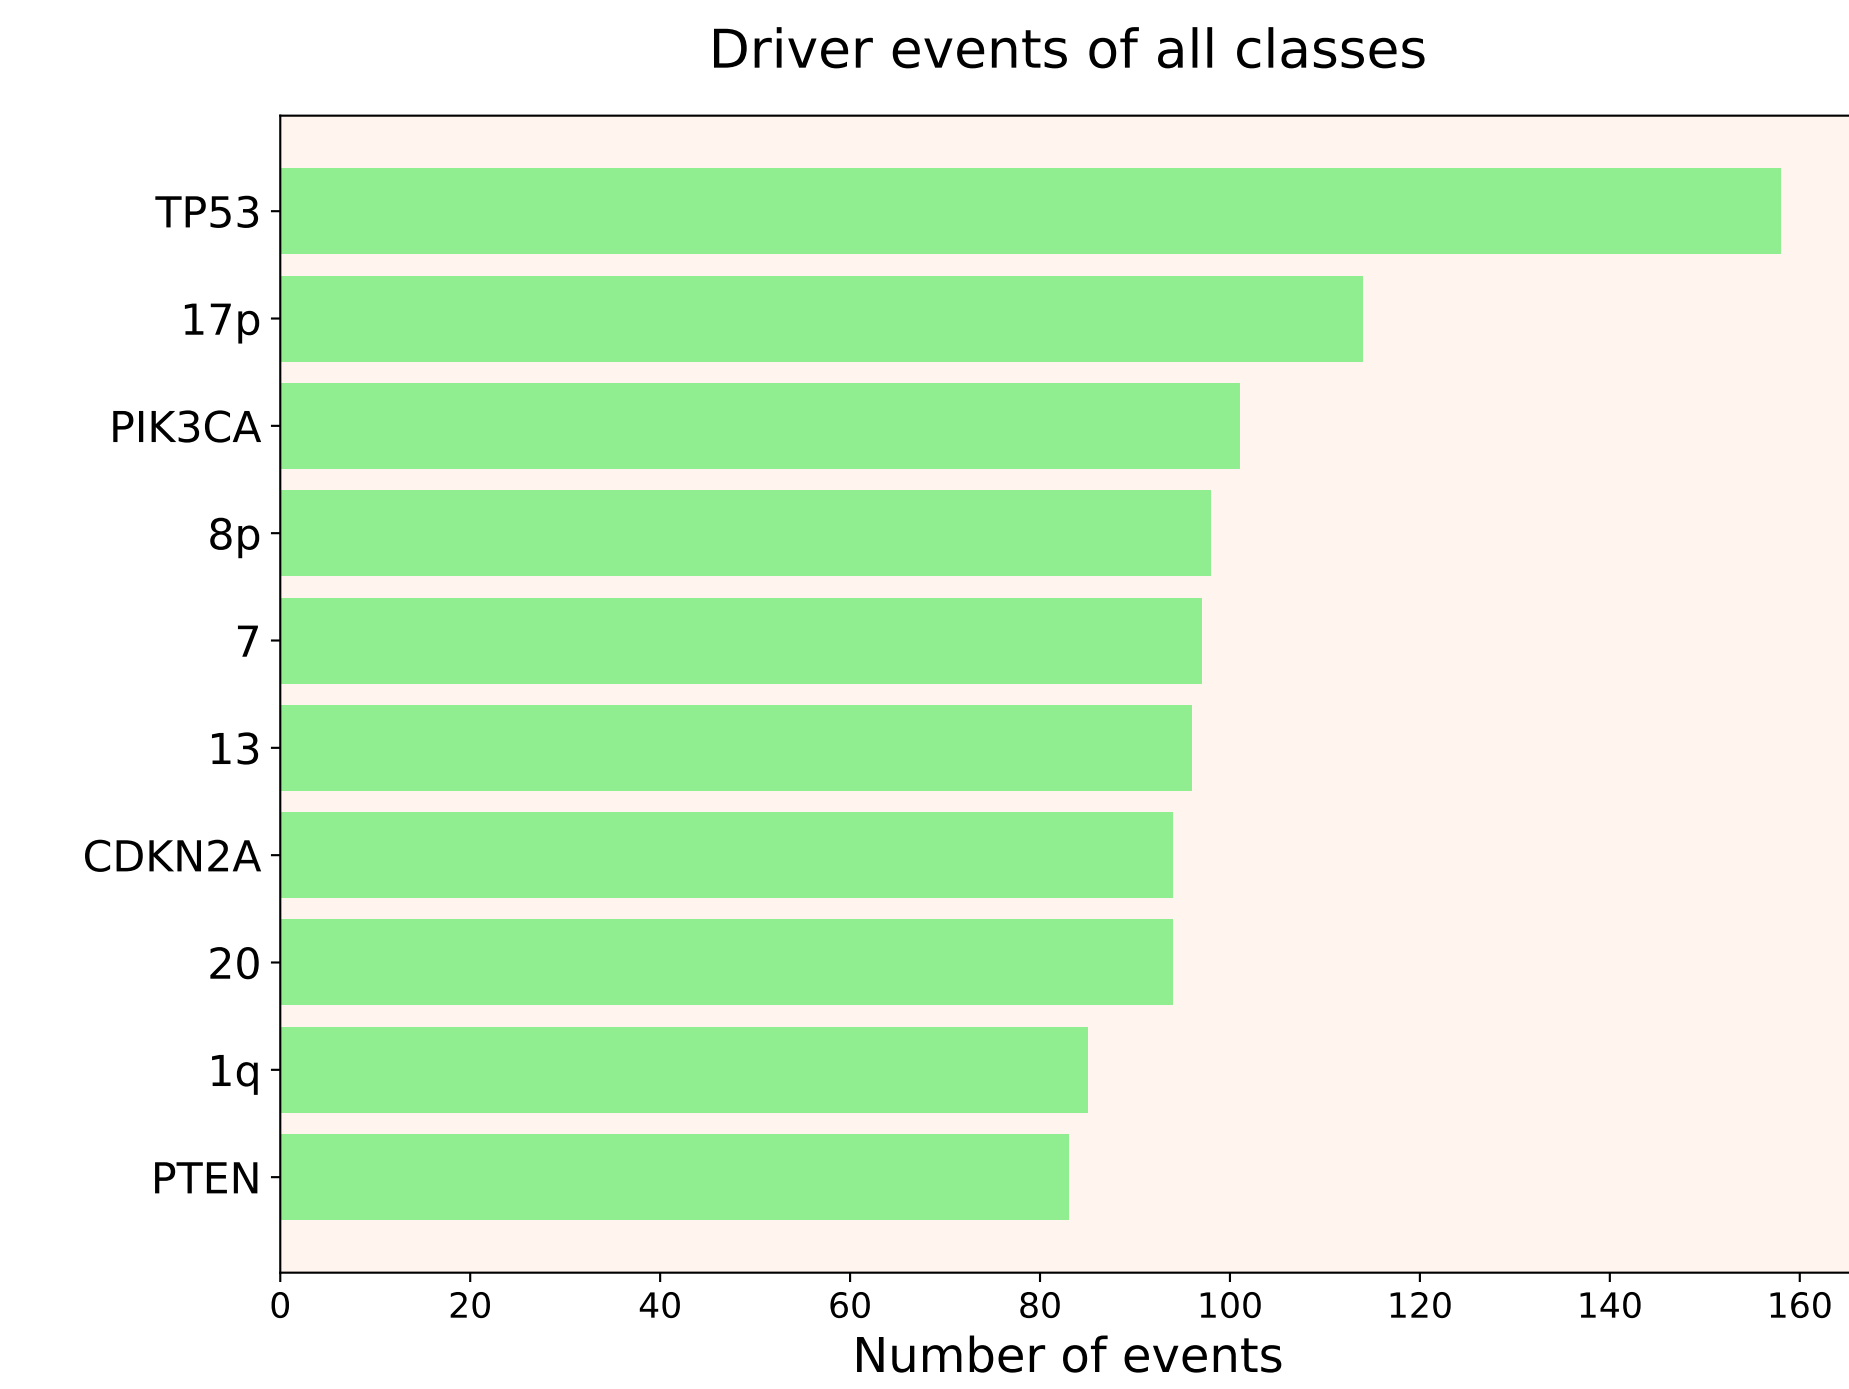

Supplement: Supplemental_Data_S1.zip [file Supplemental_Data_S1.zip]

# LIHC\_MALE

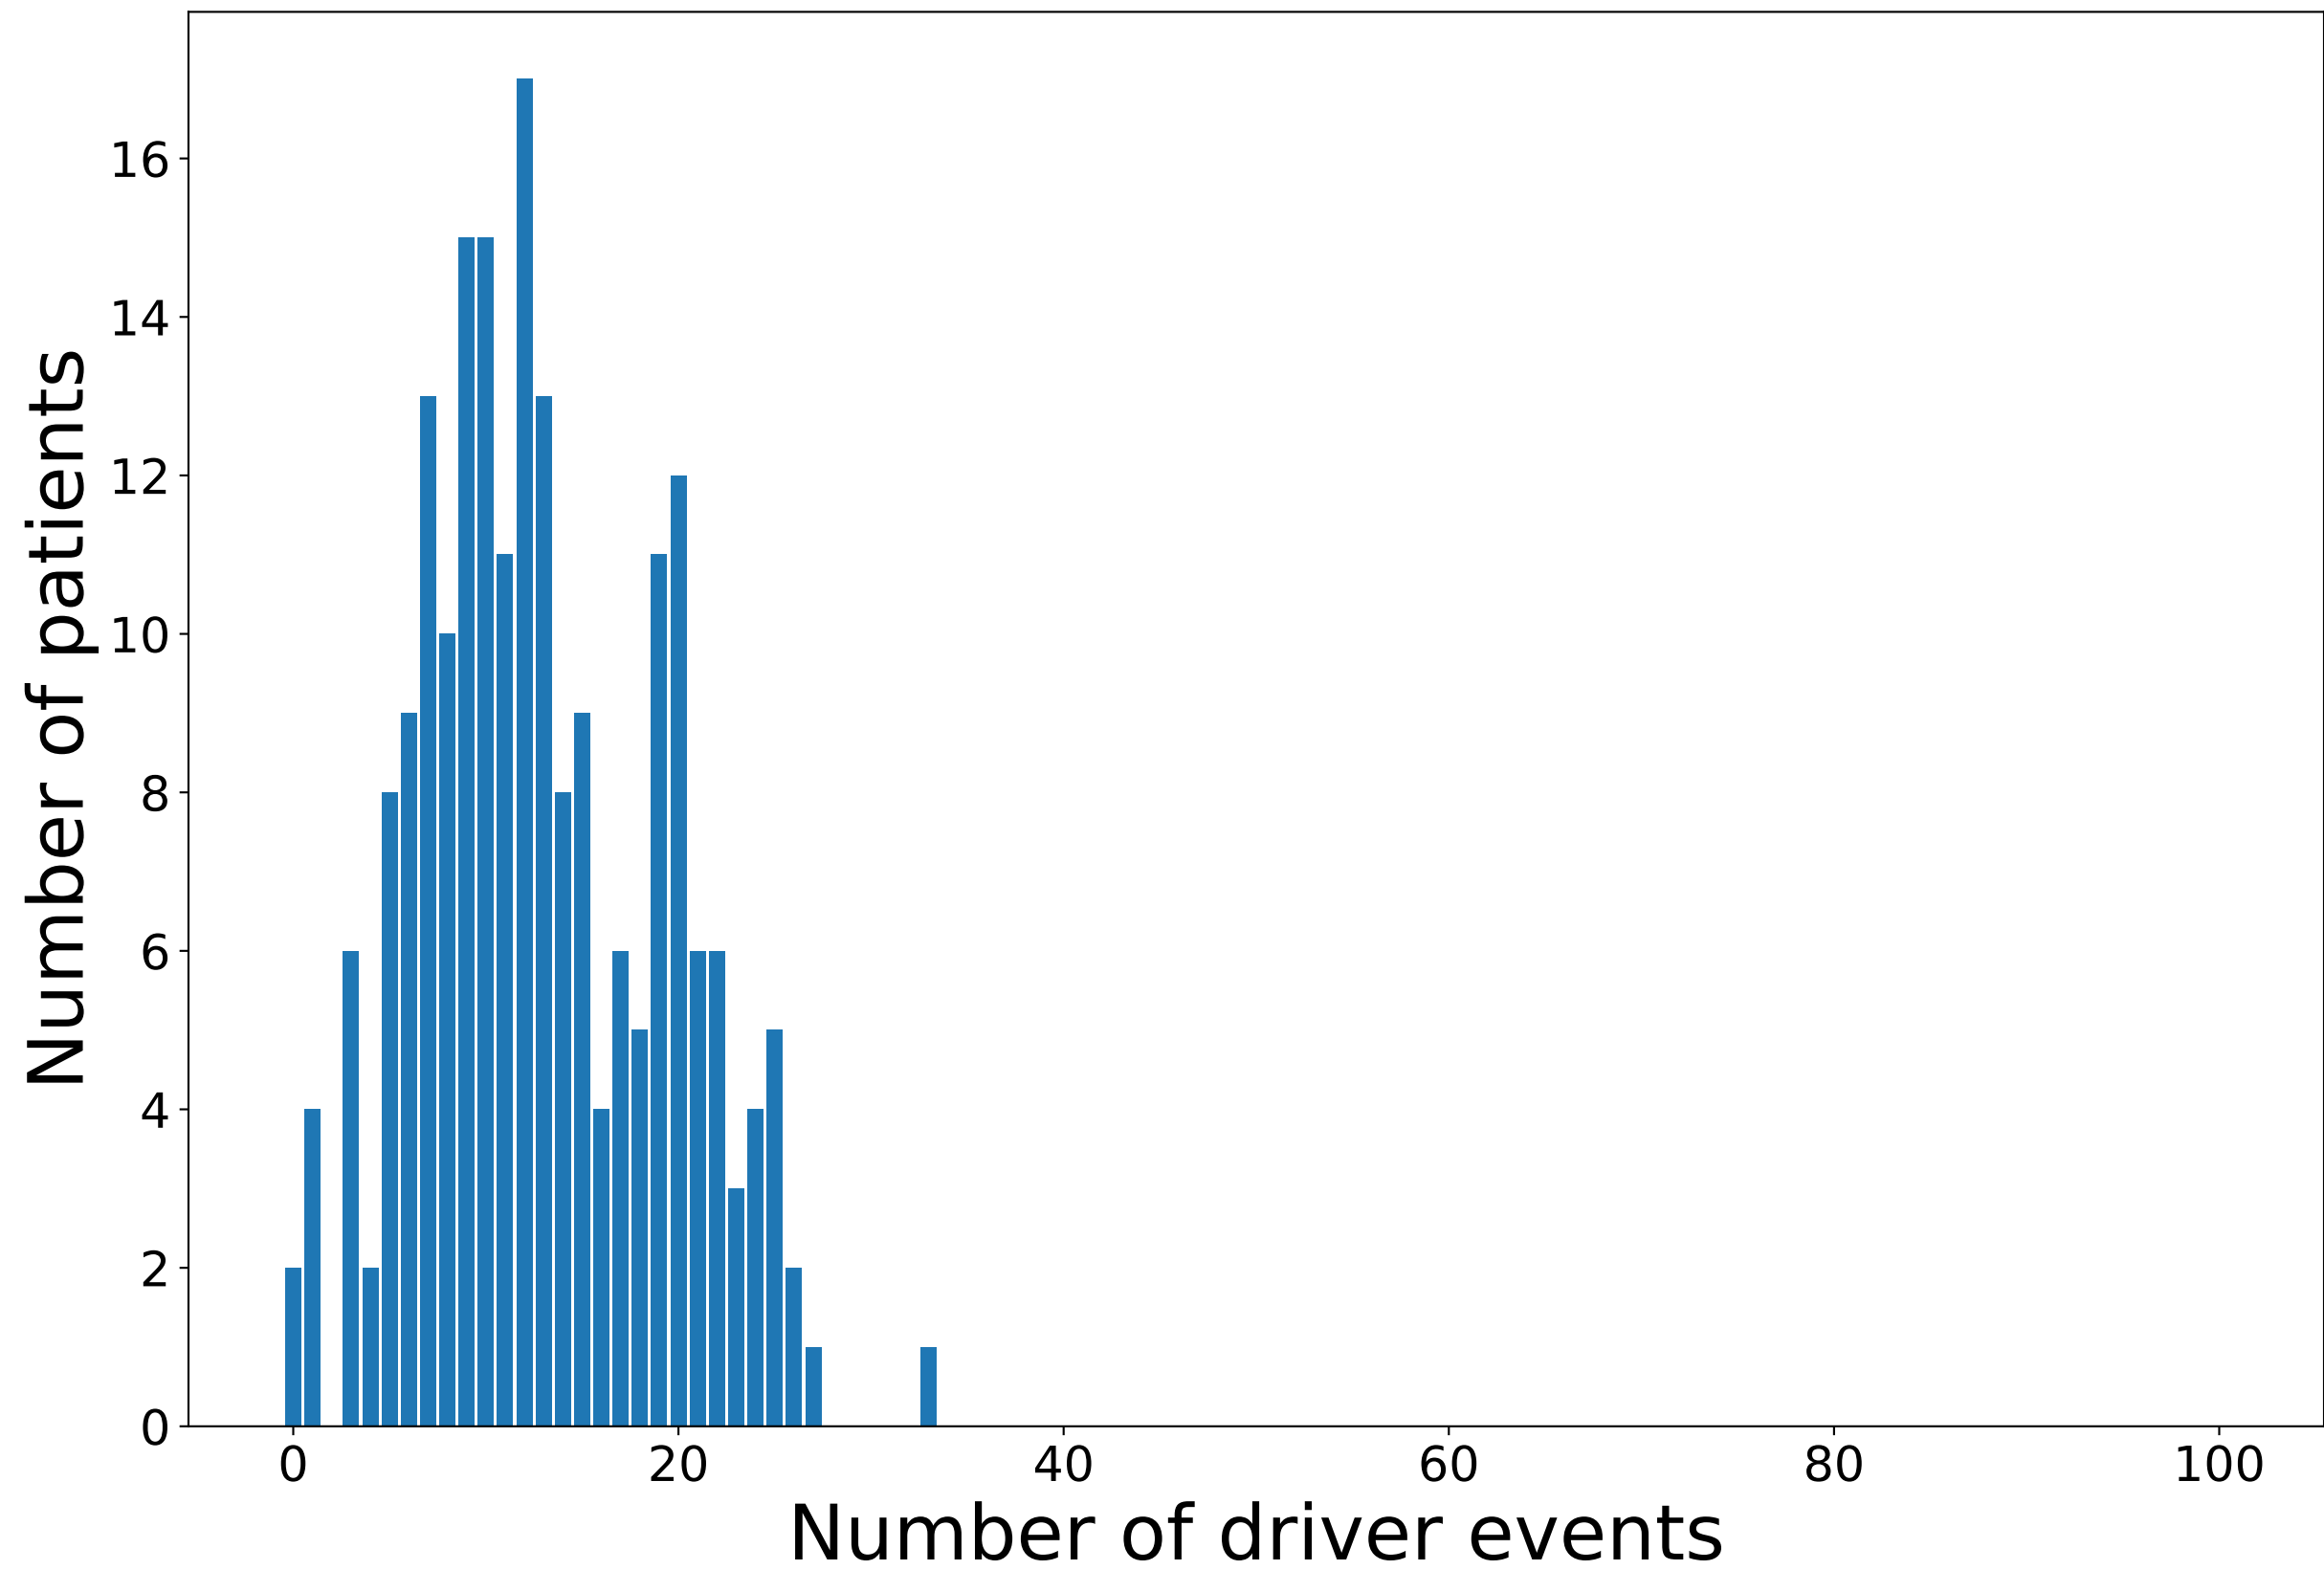

Supplement: Supplemental_Data_S1.zip [file Supplemental_Data_S1.zip]

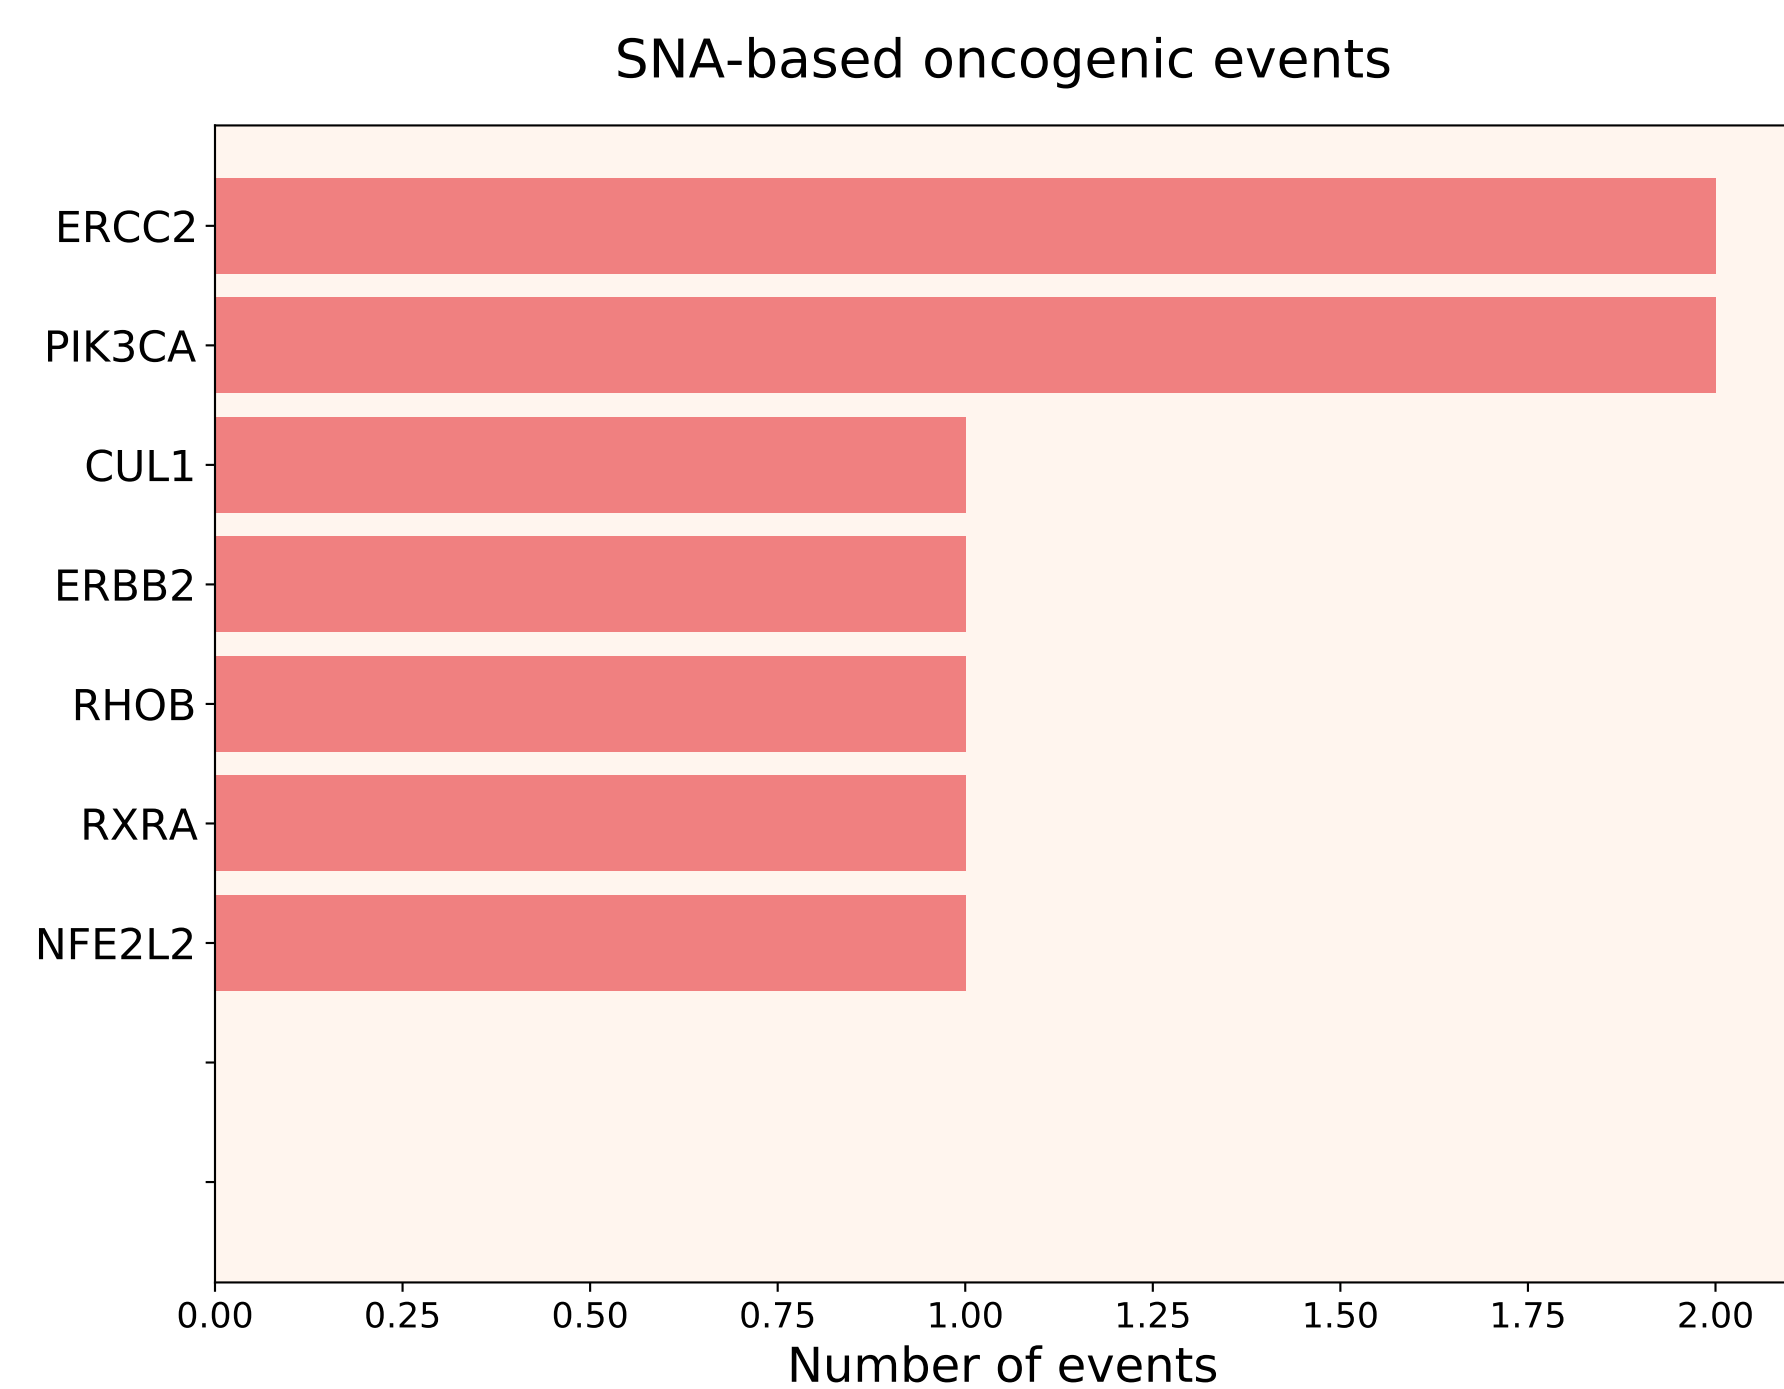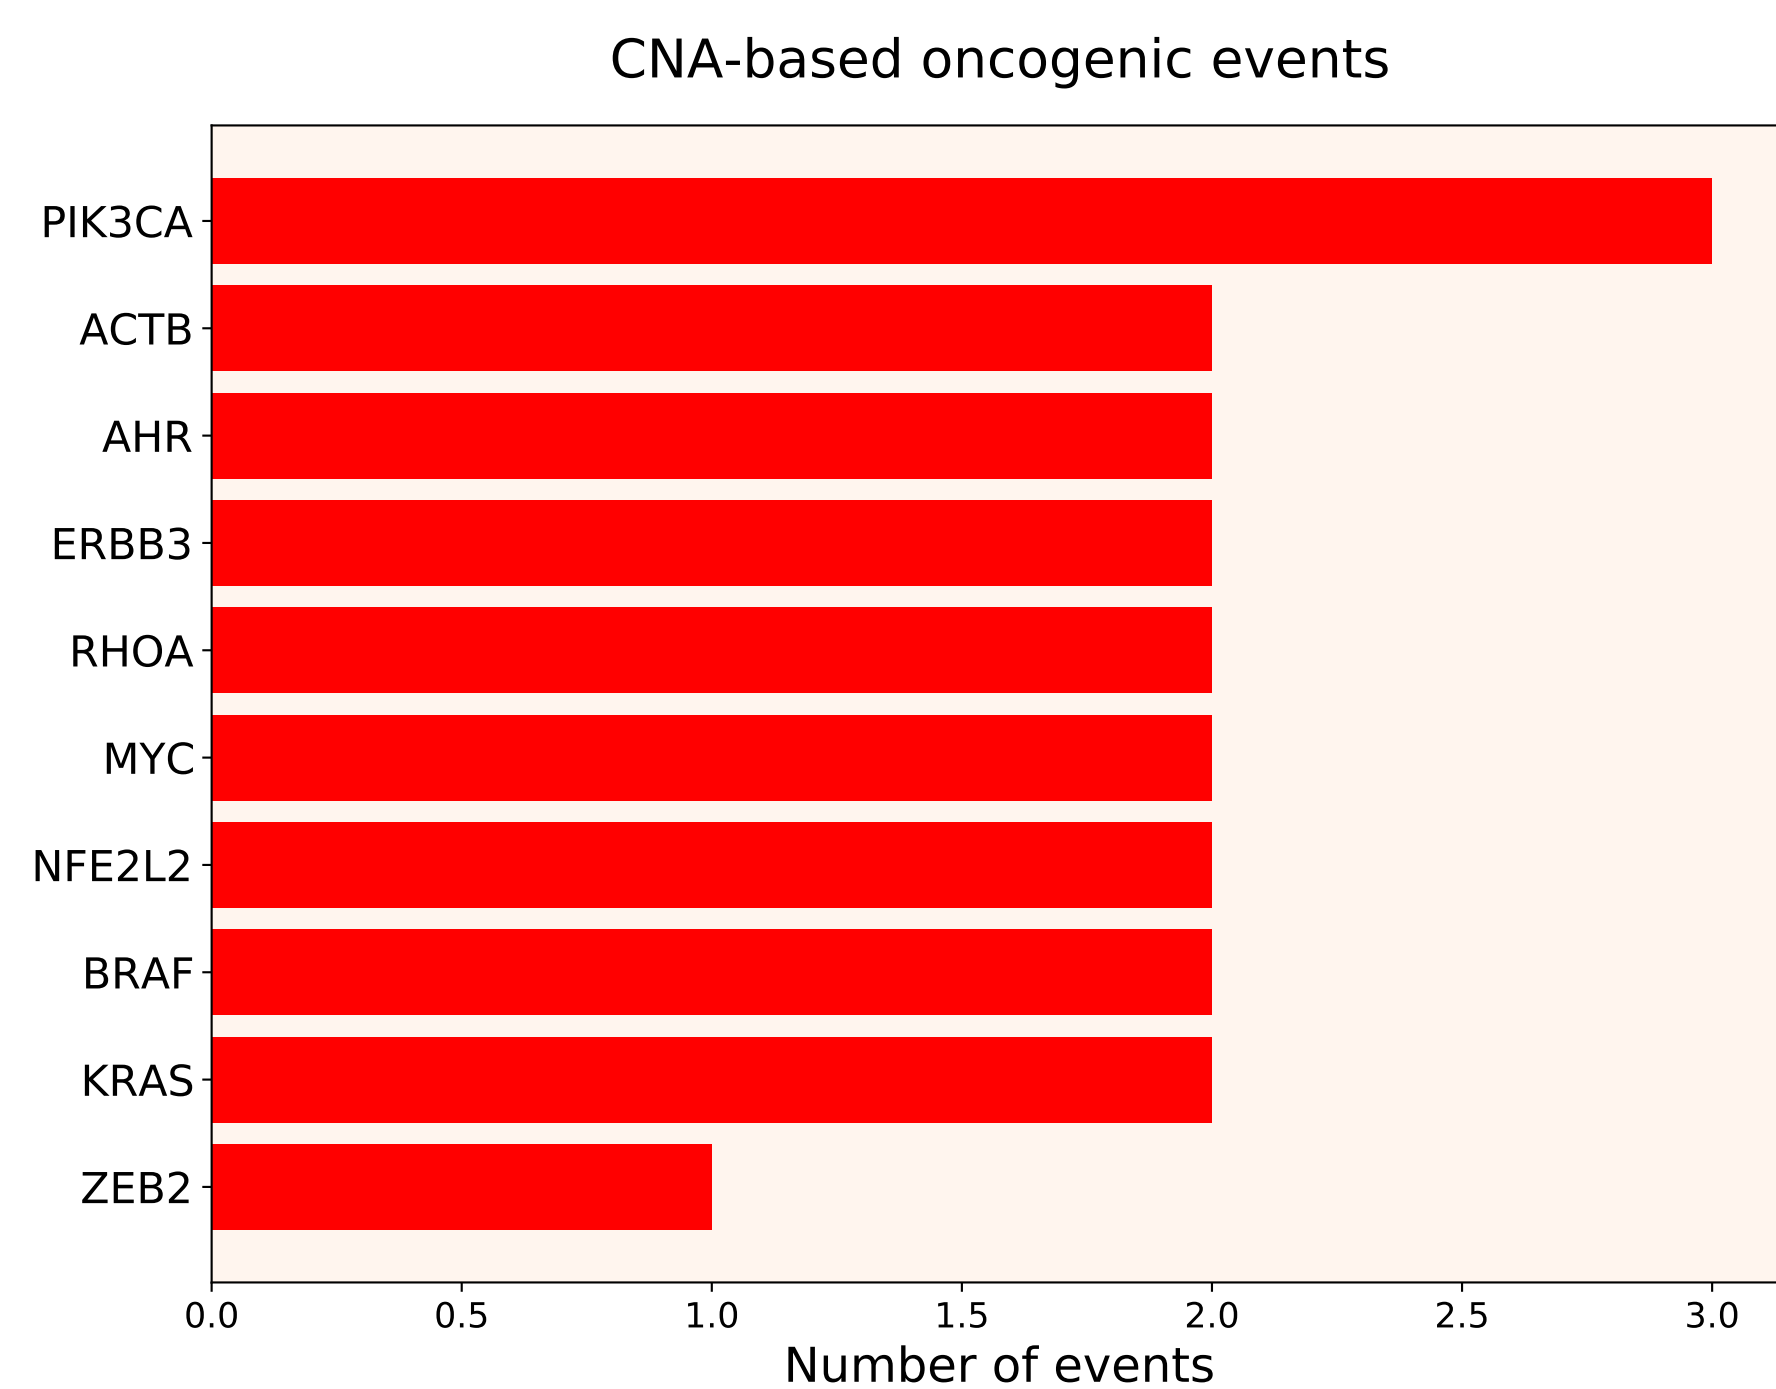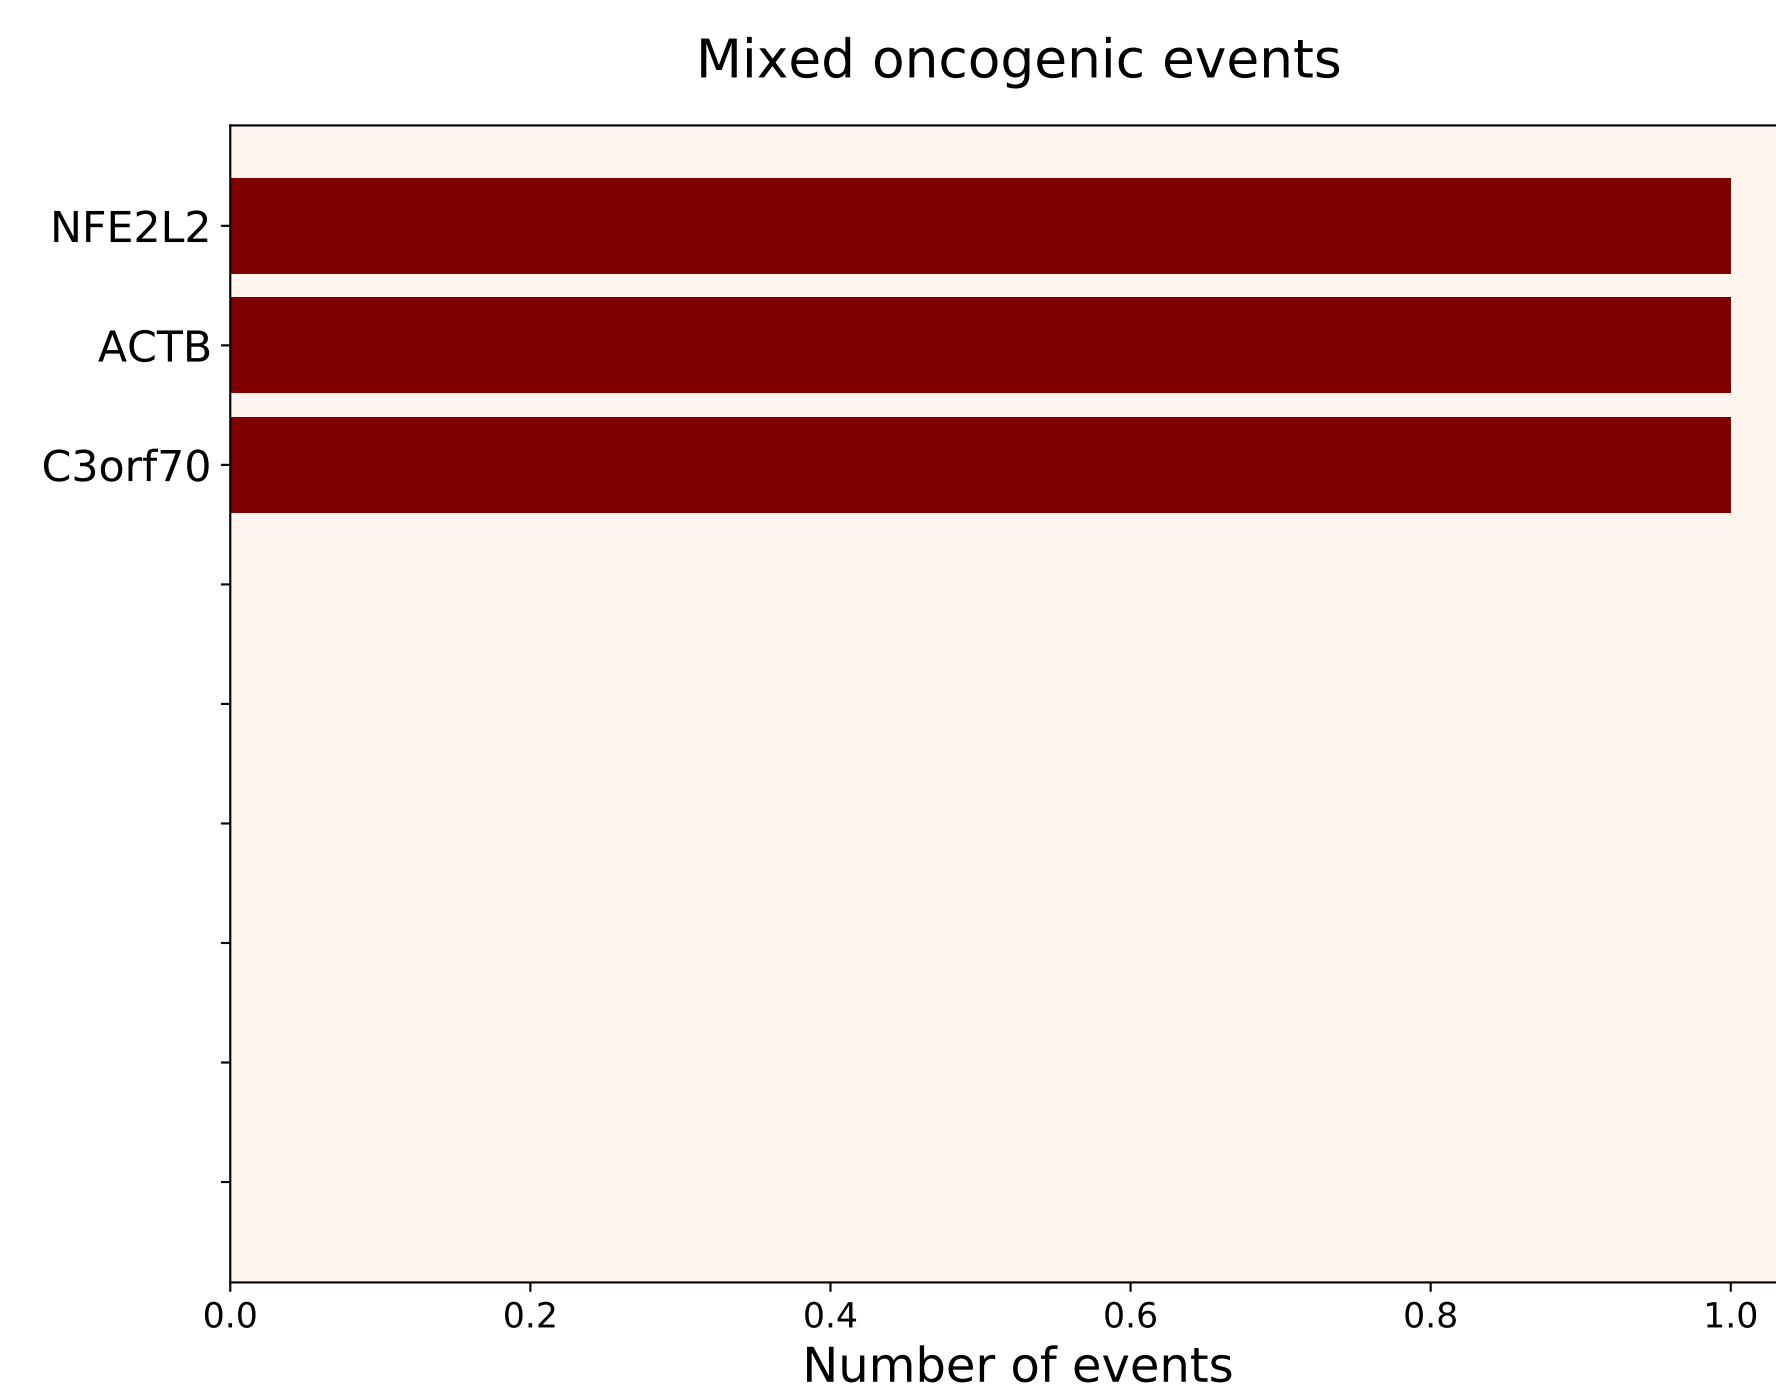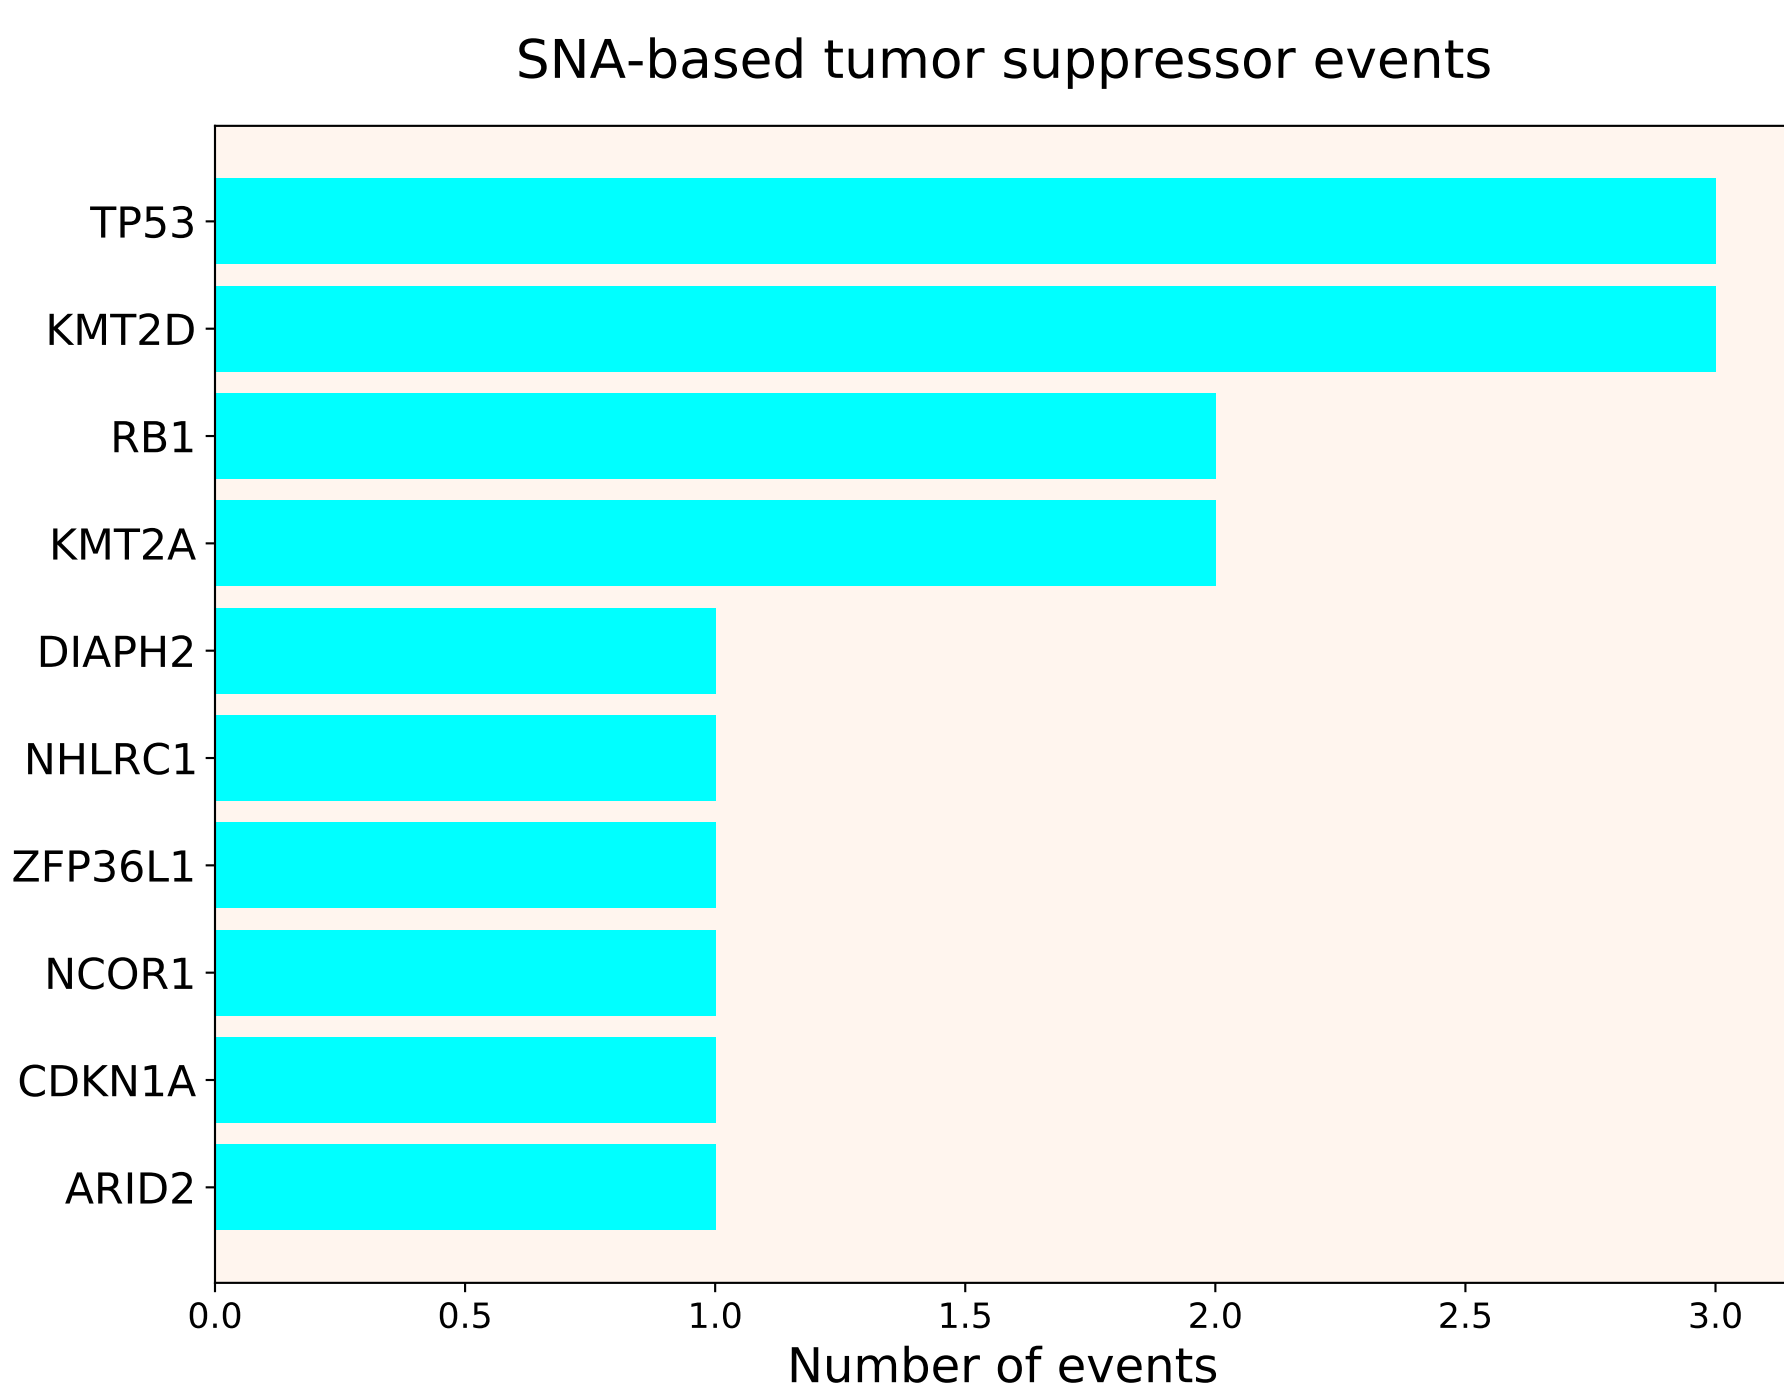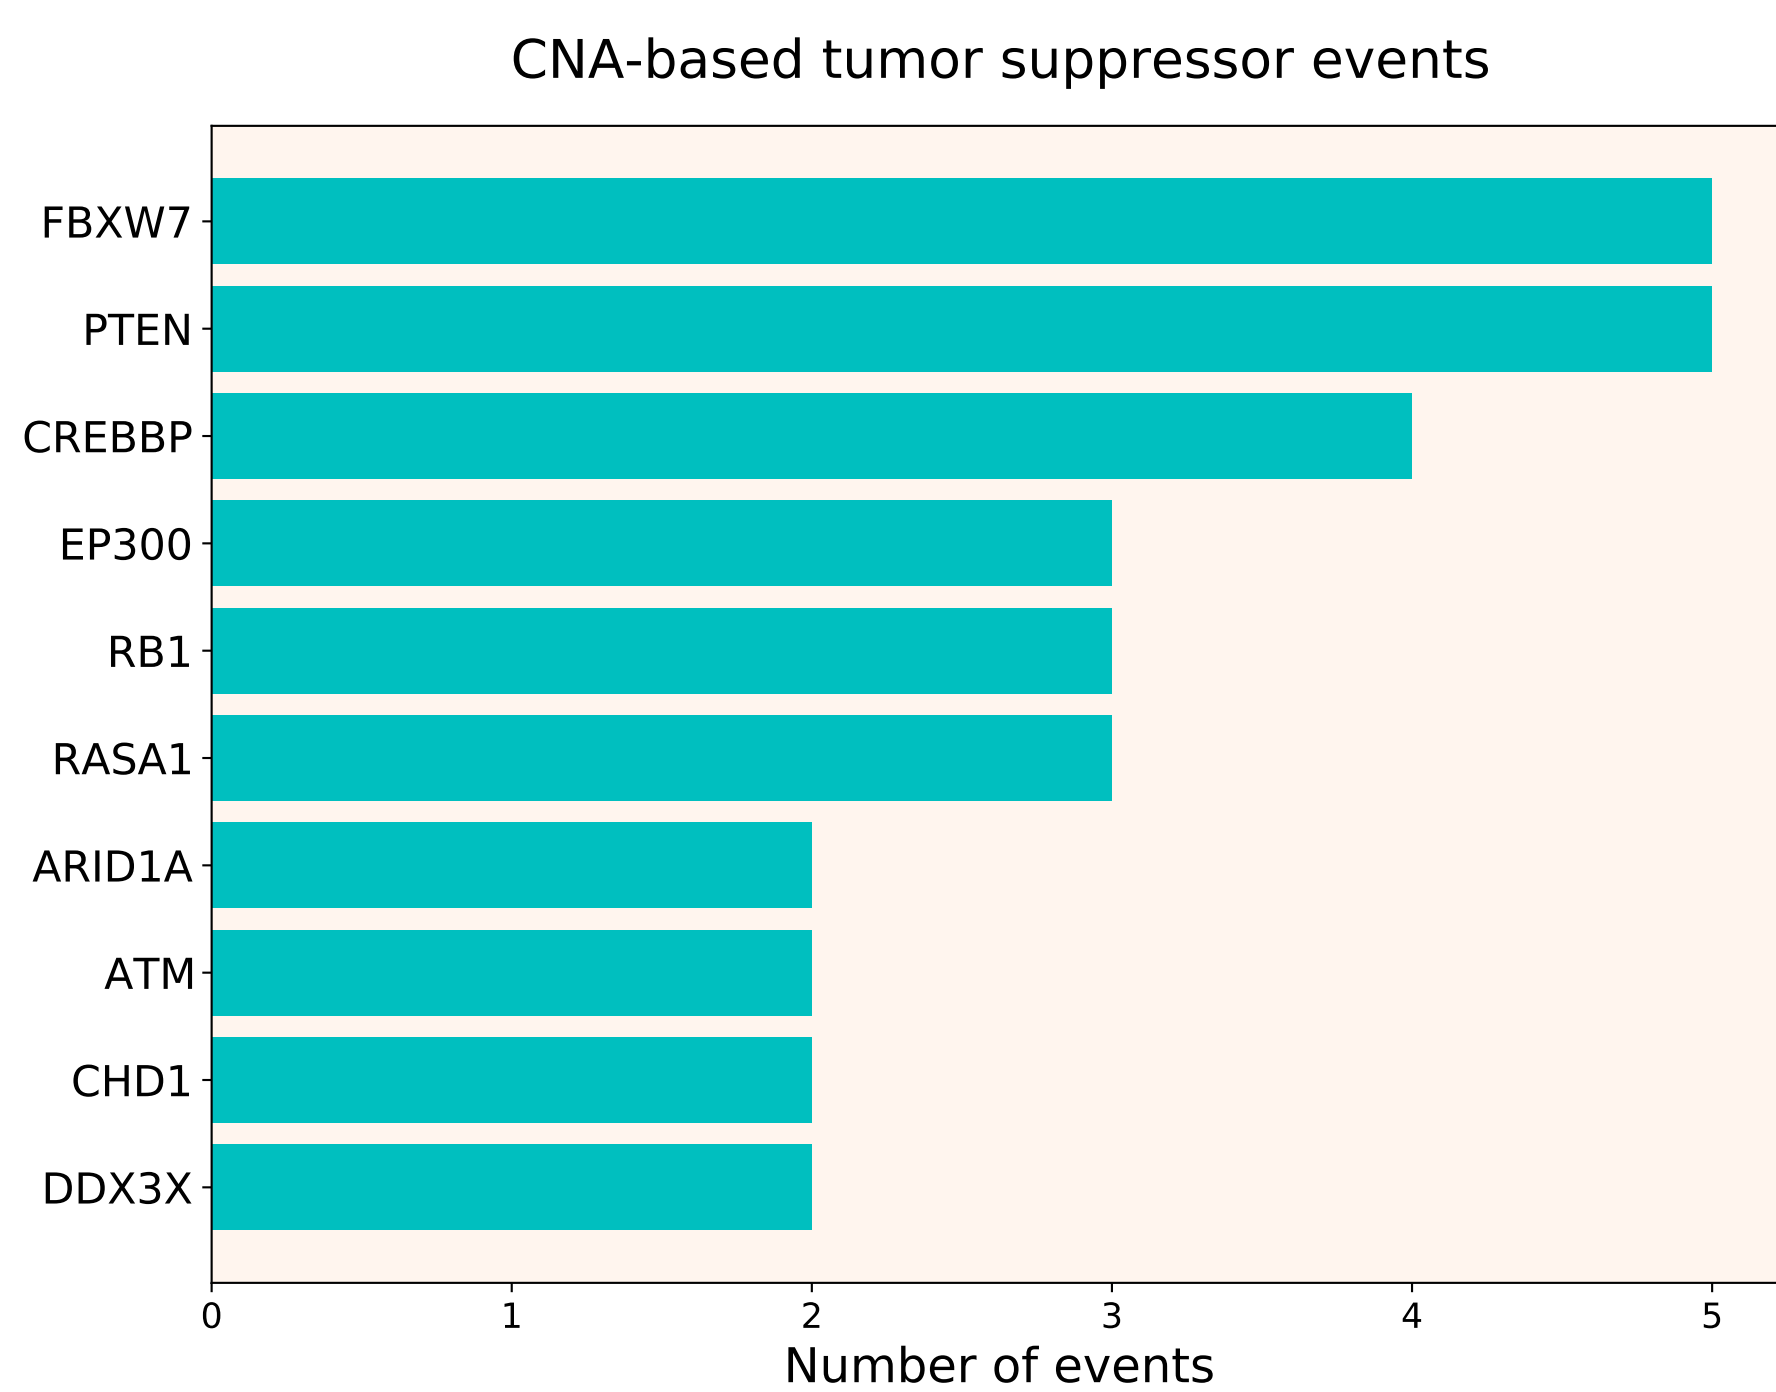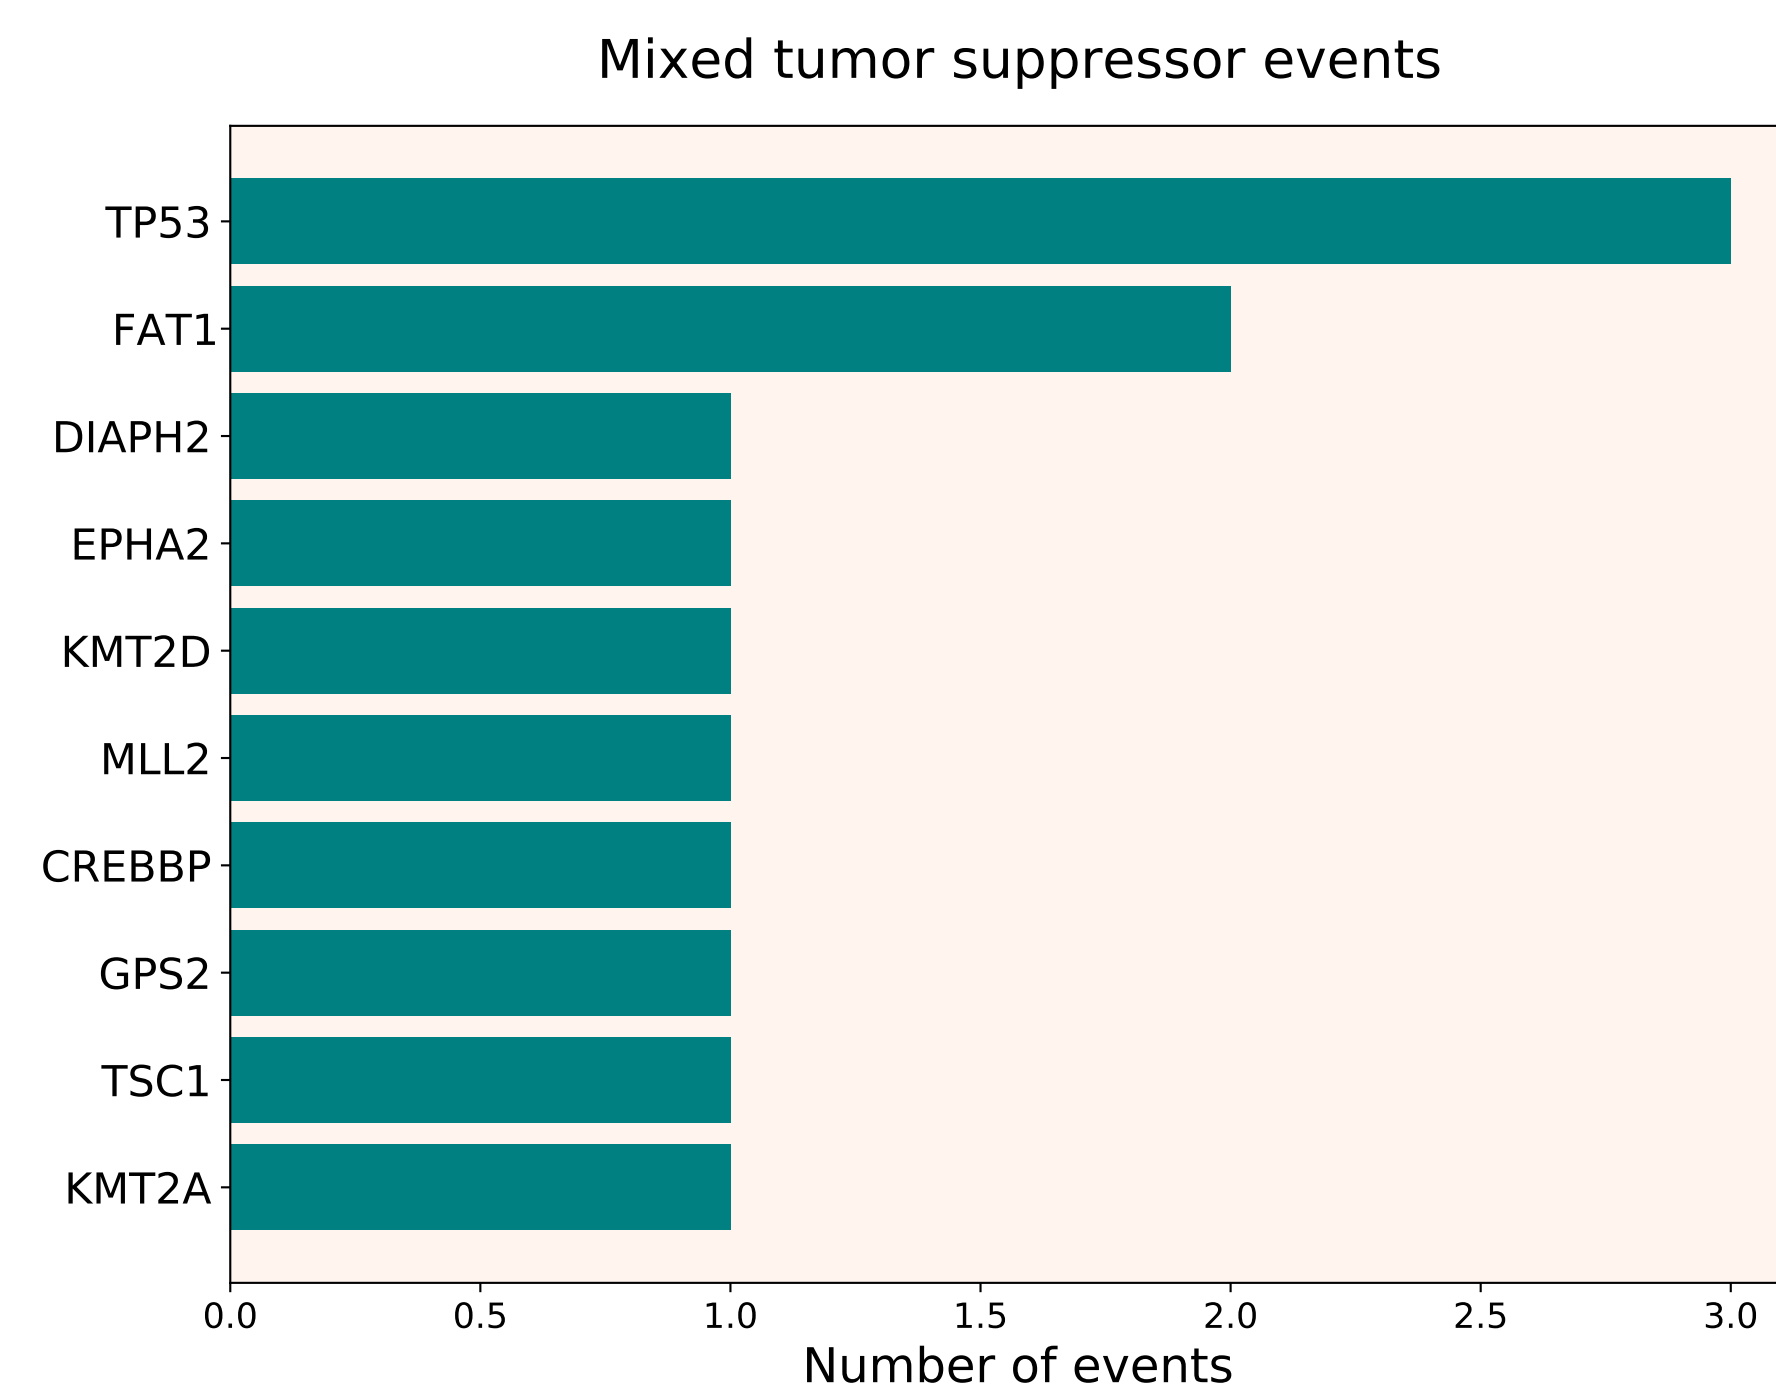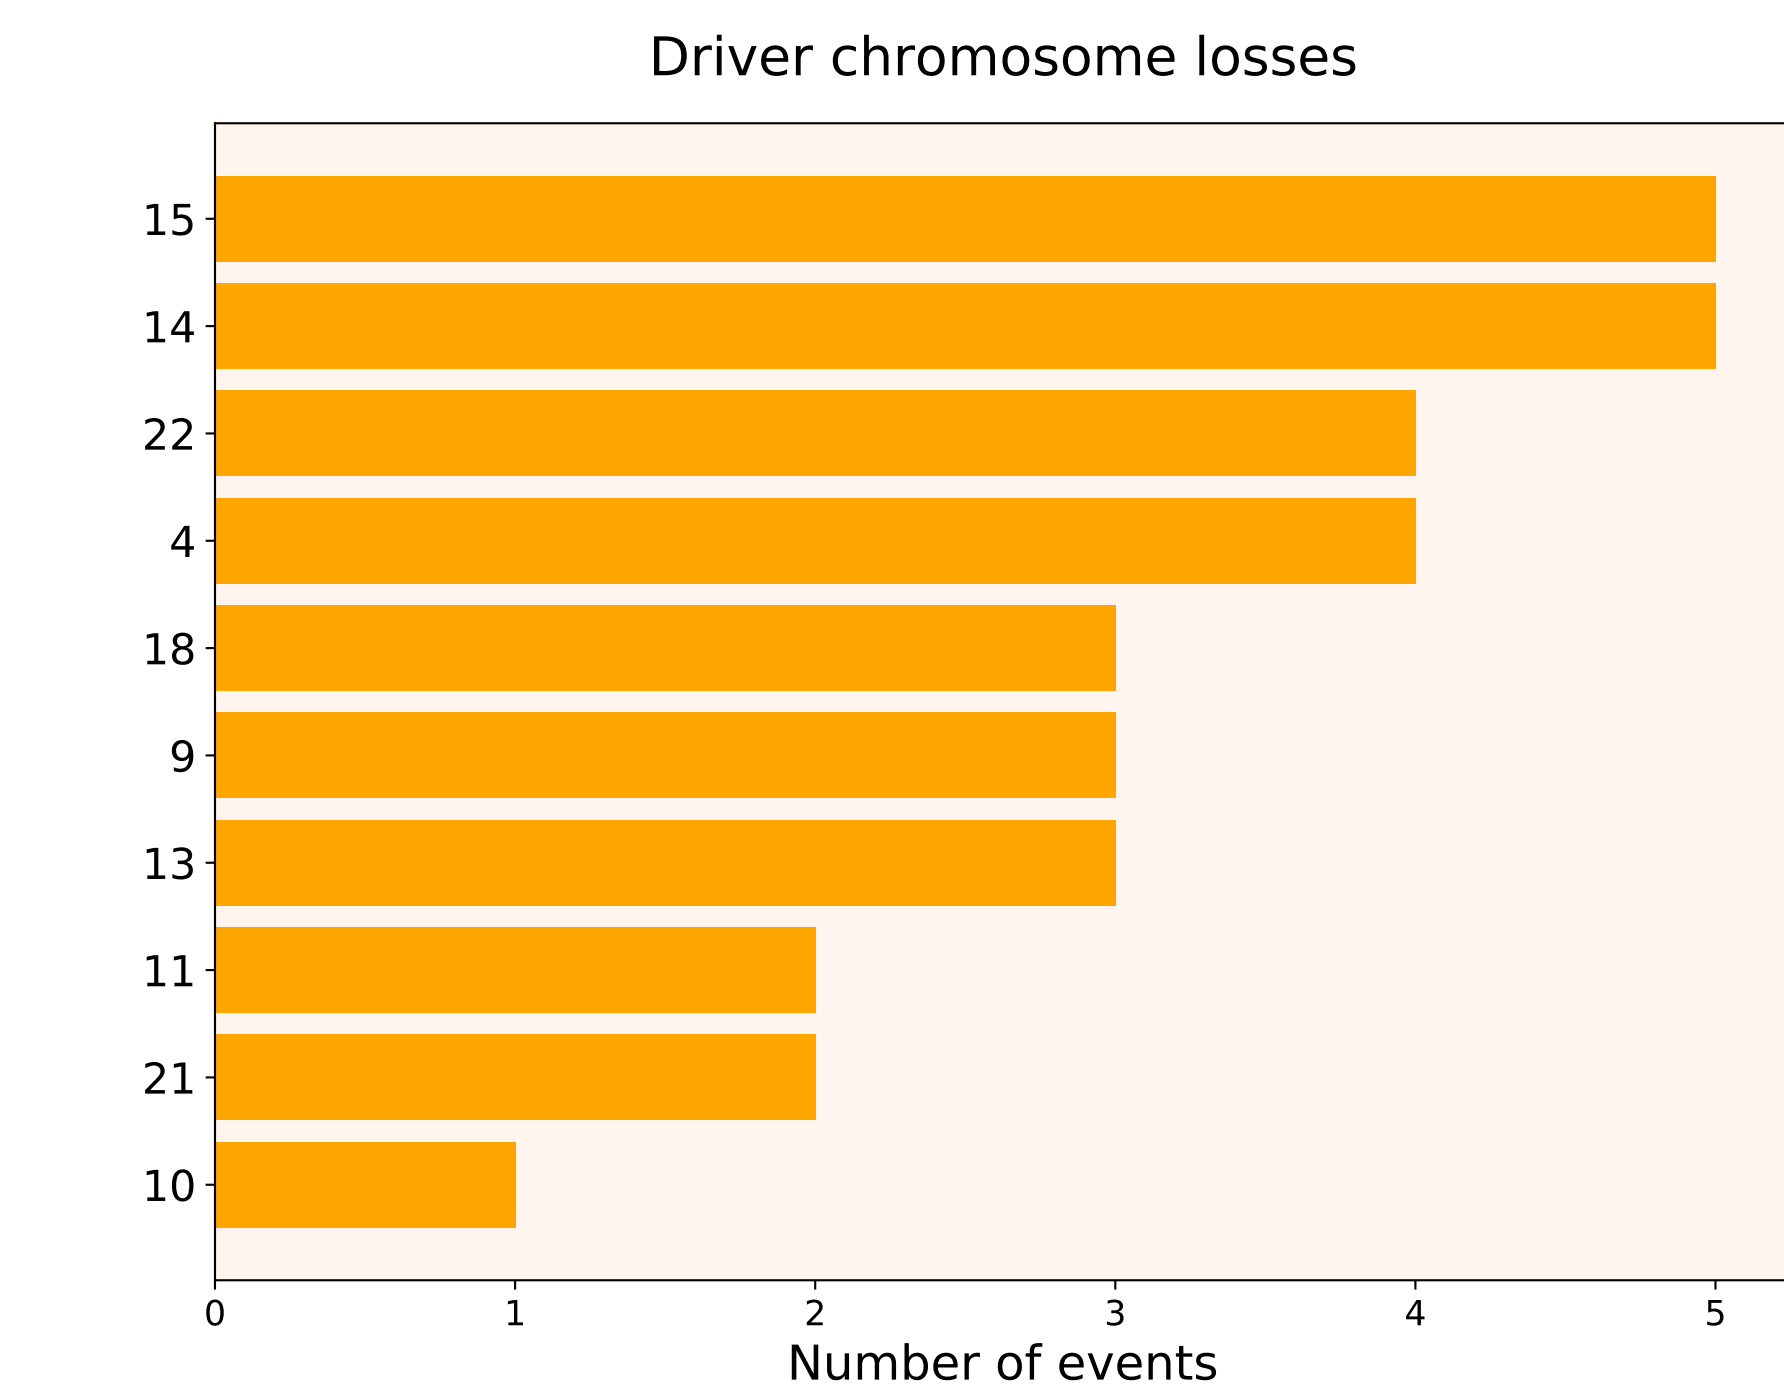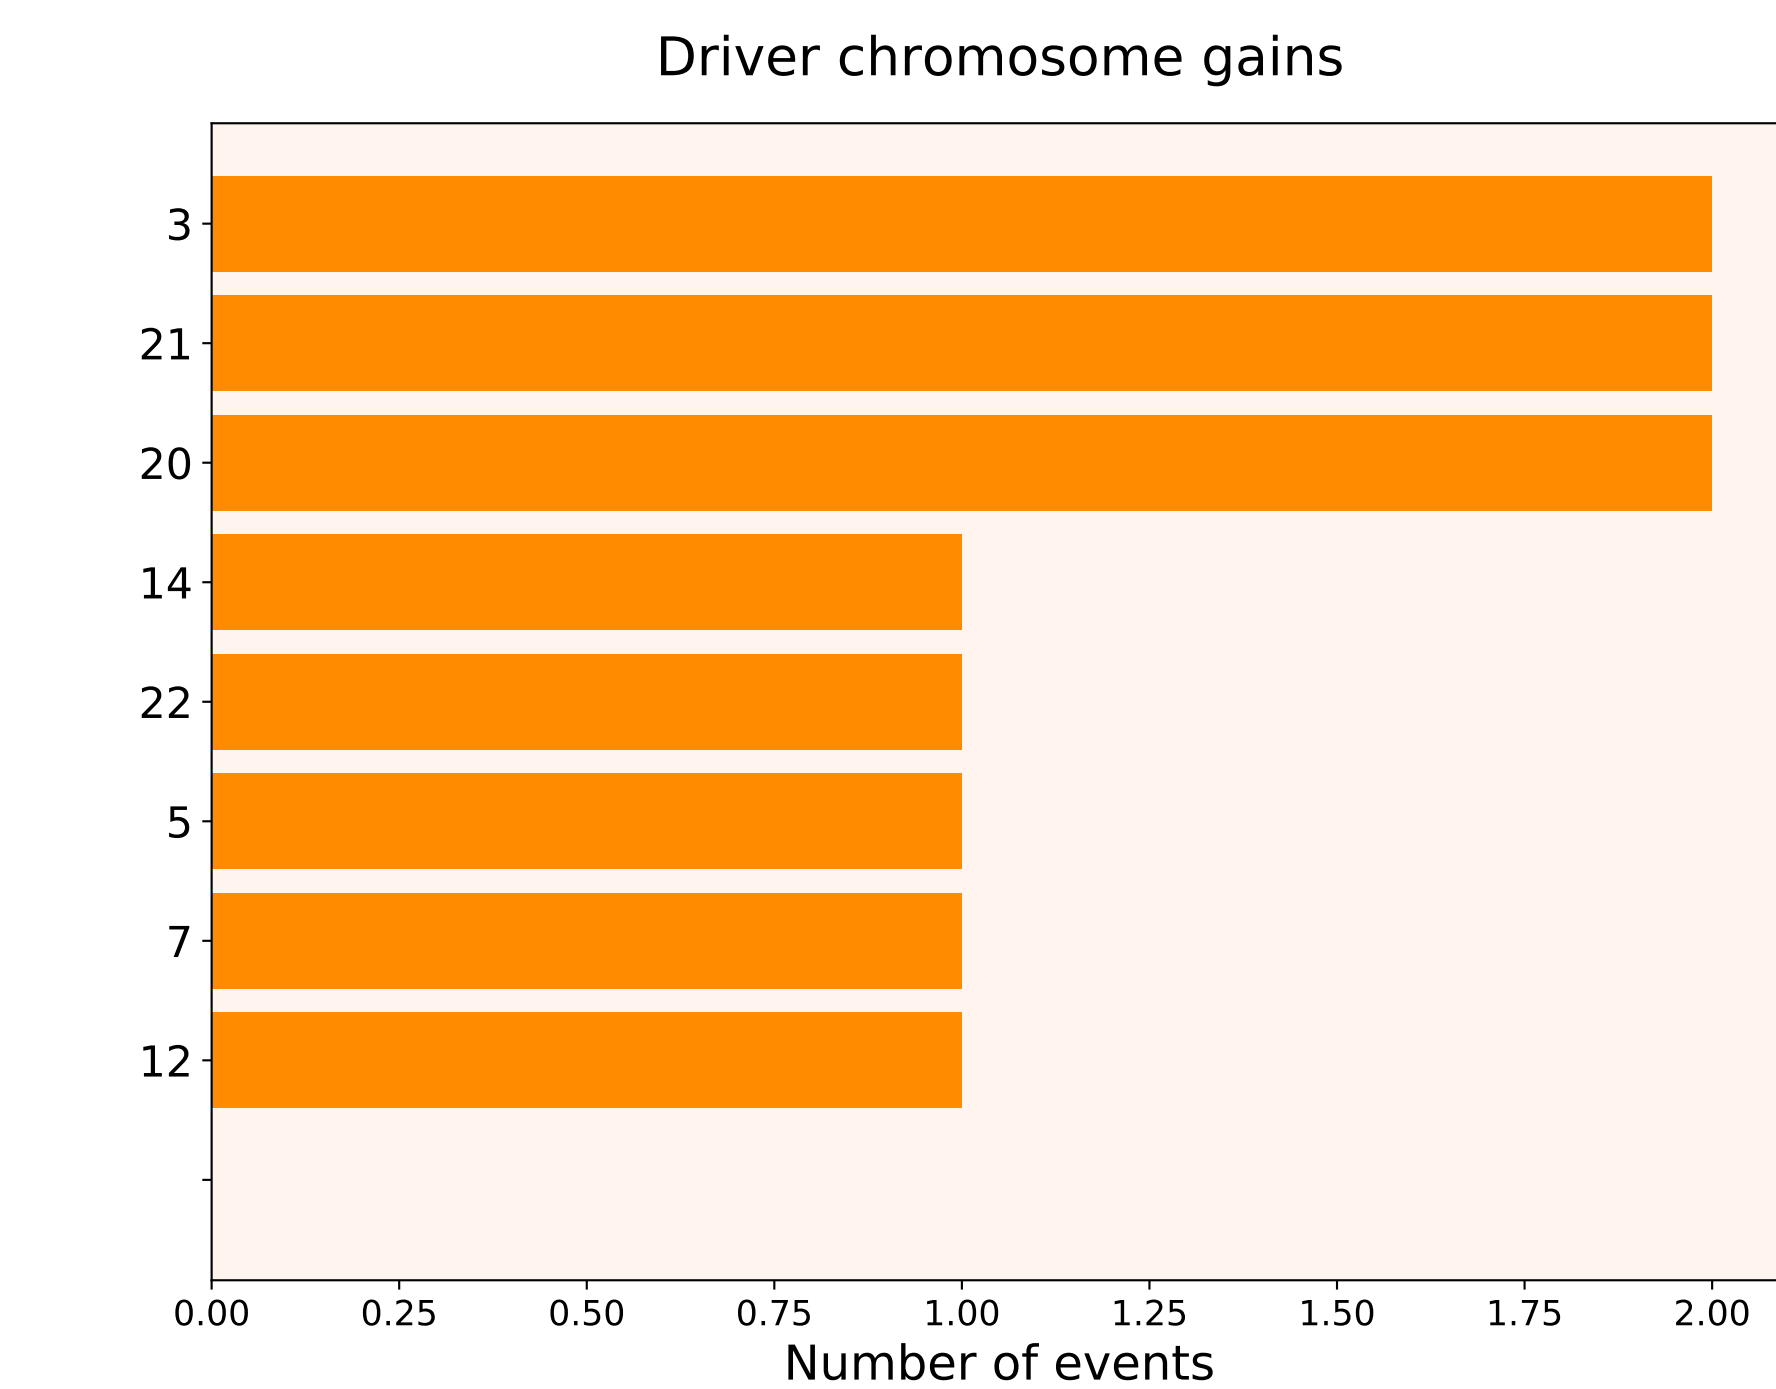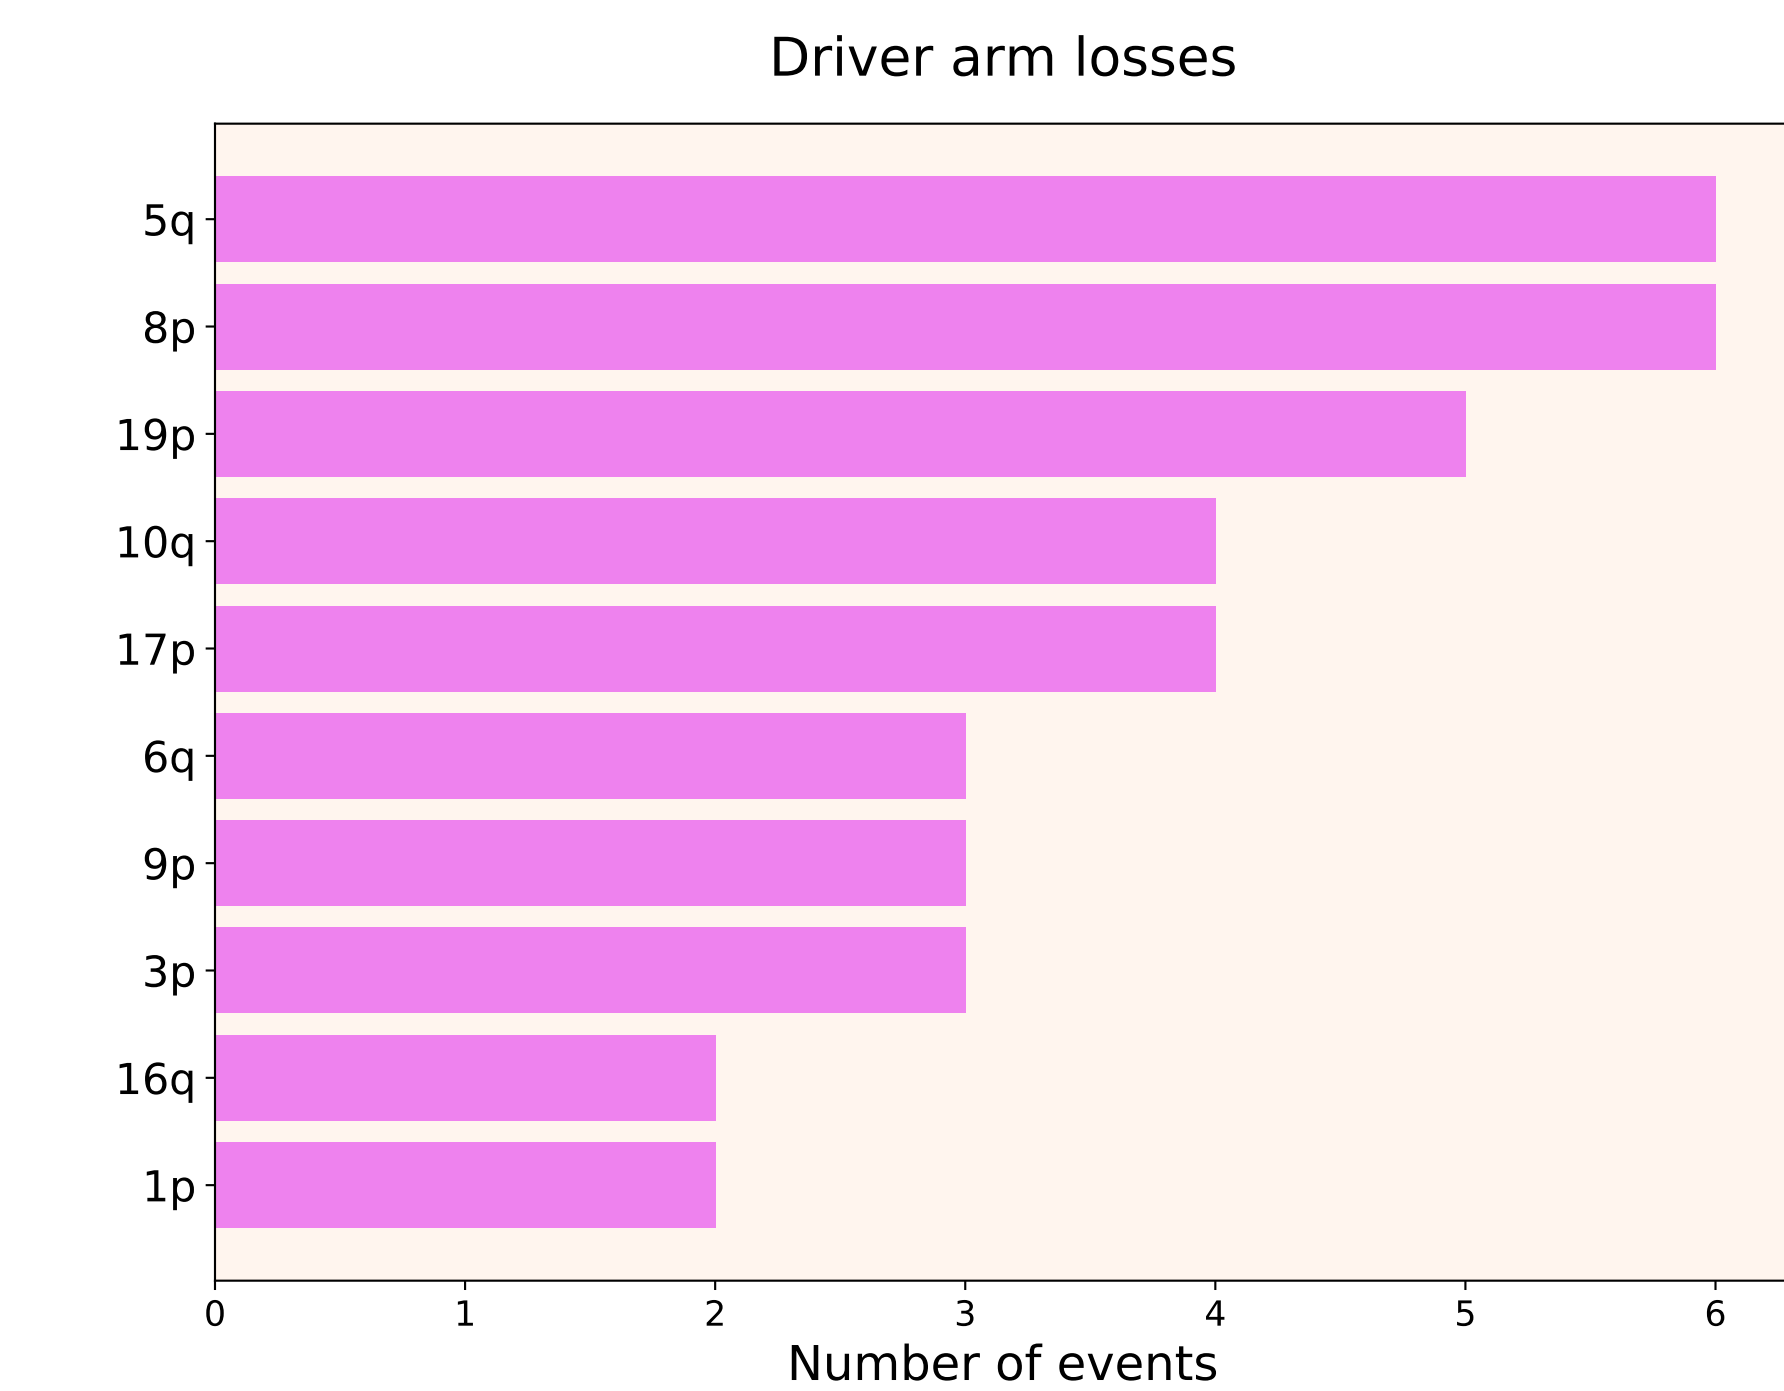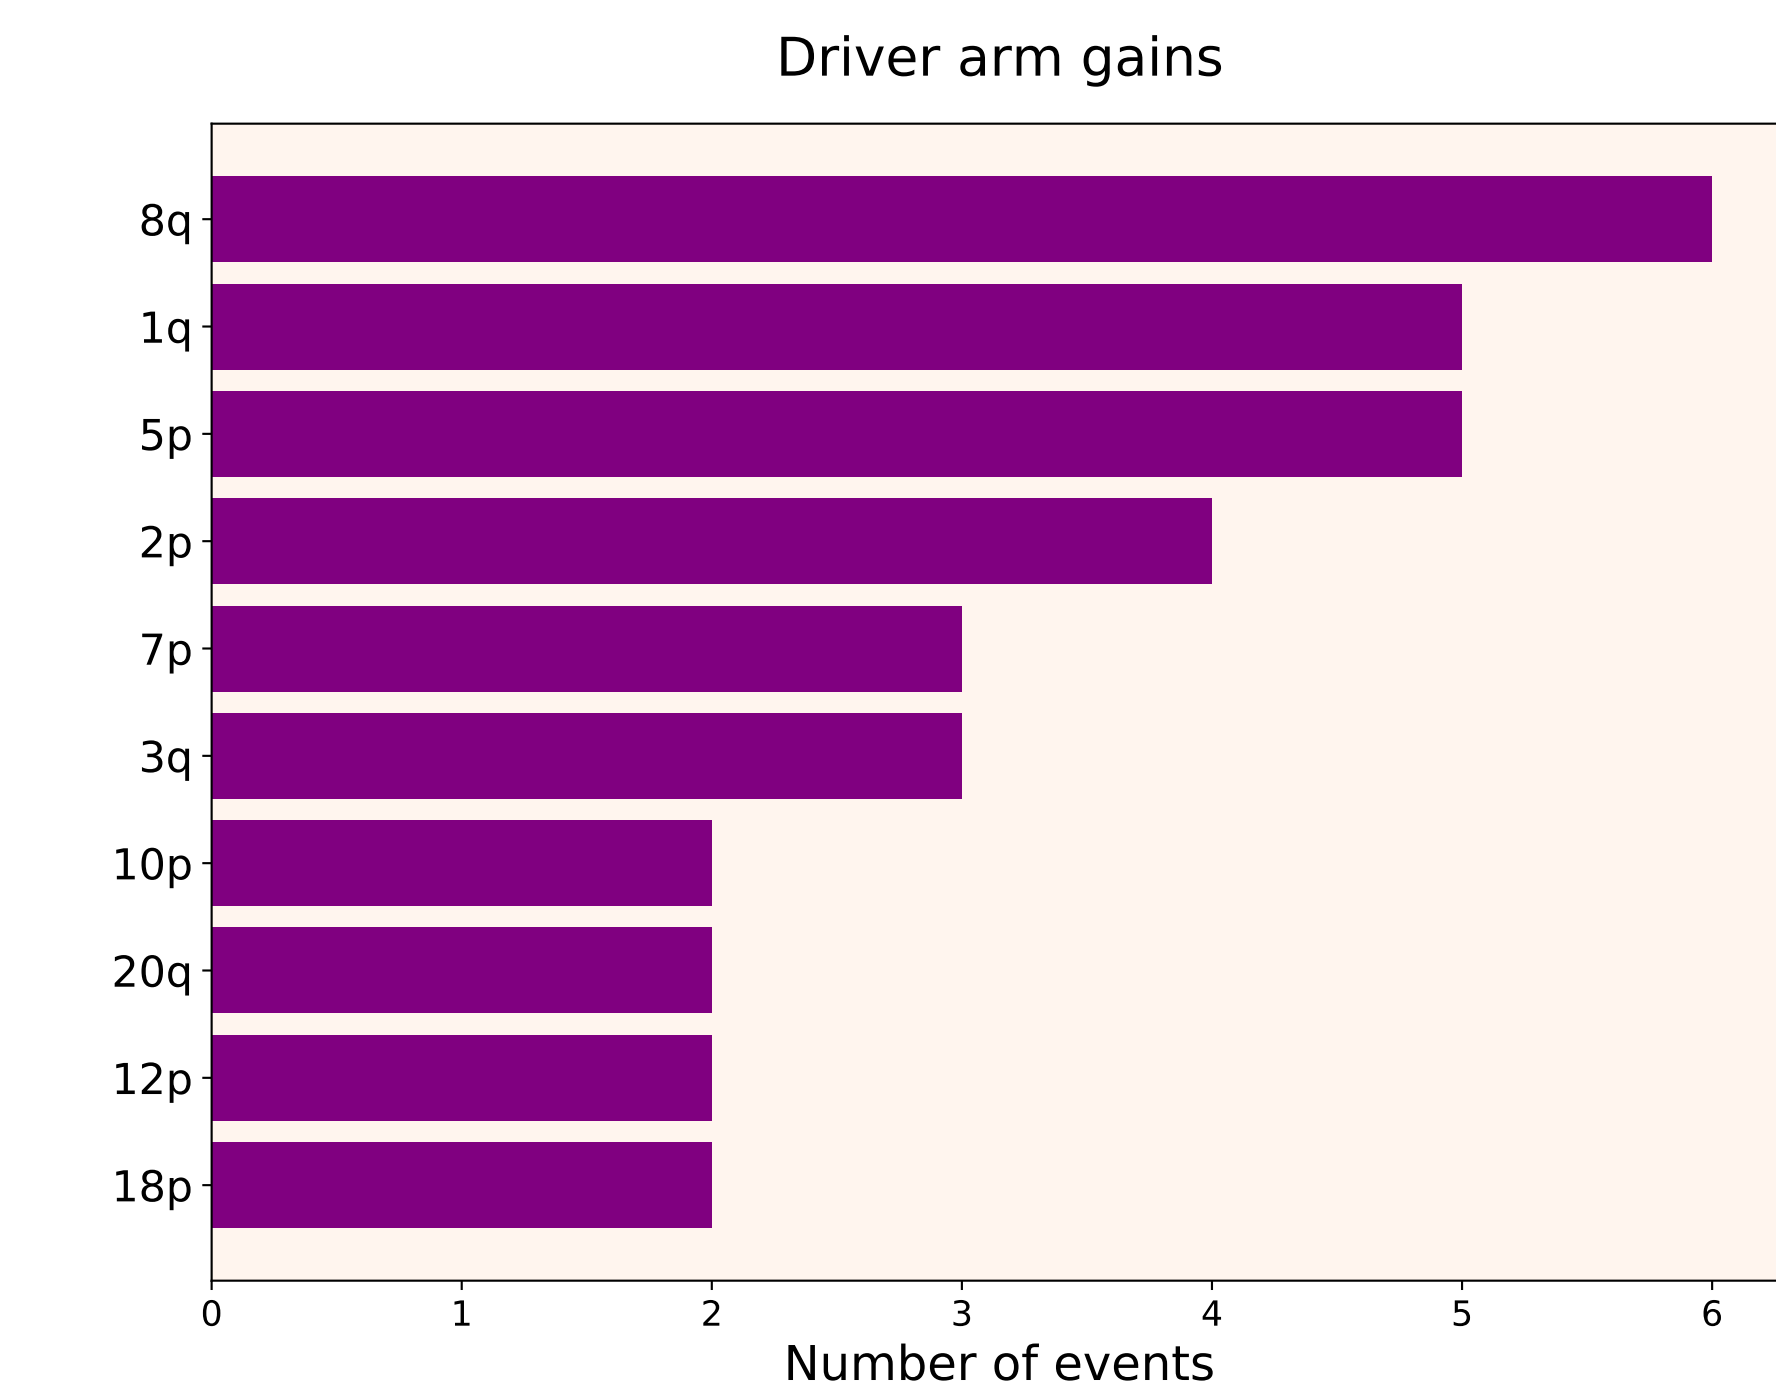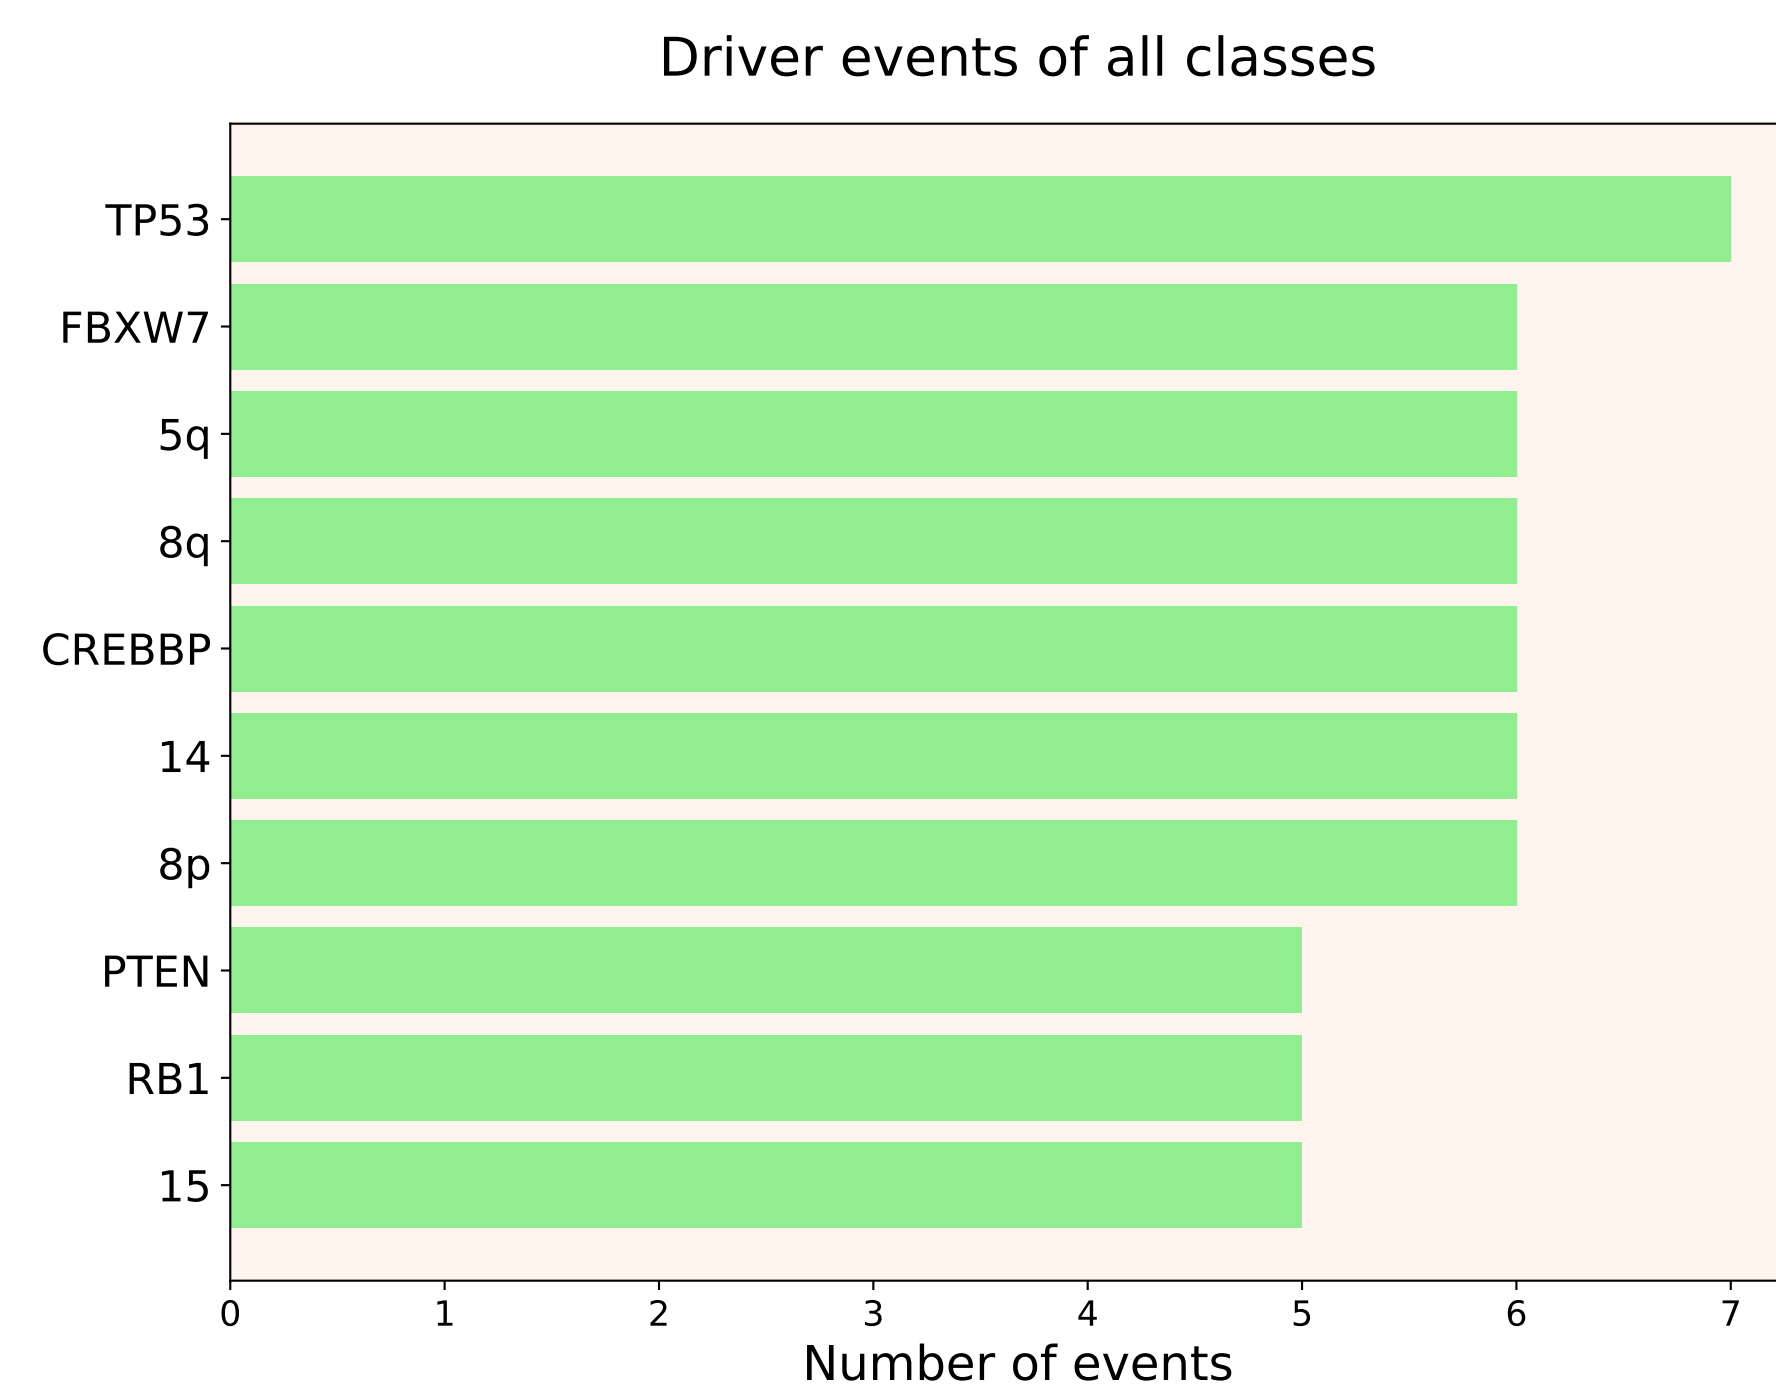

Supplement: Supplemental_Data_S1.zip [file Supplemental_Data_S1.zip]

# ACC\_FEMALE

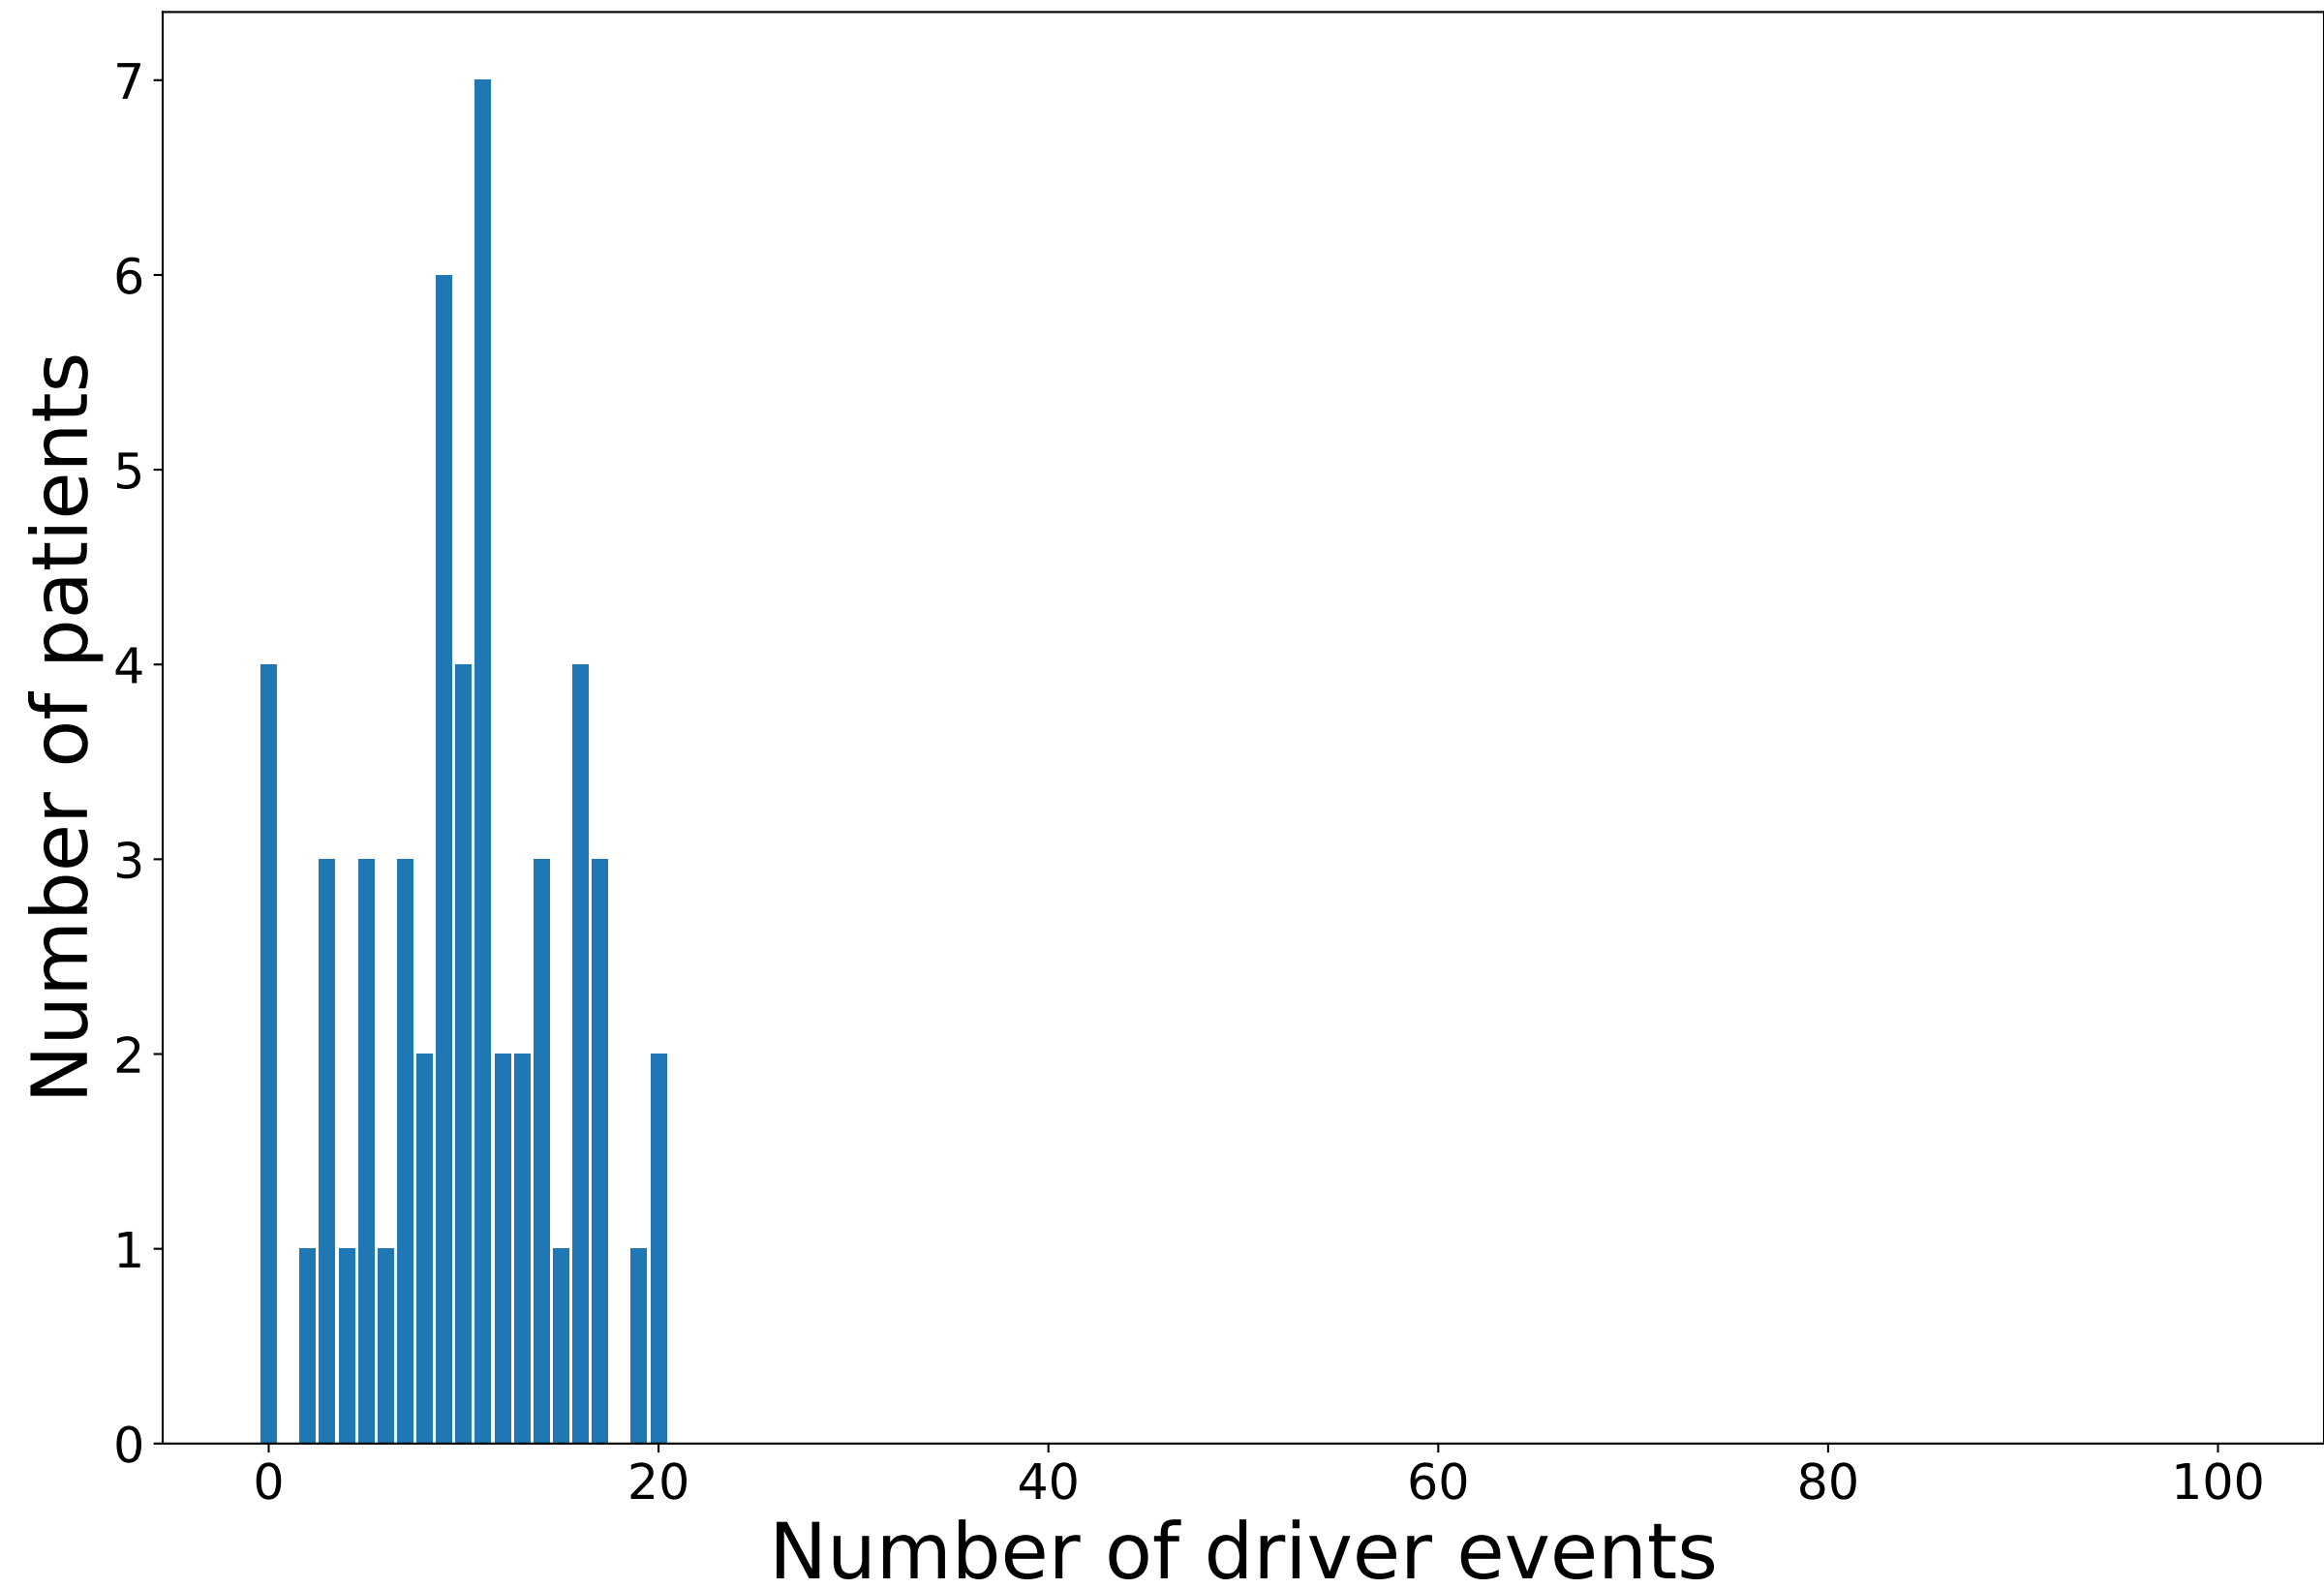

Supplement: Supplemental_Data_S1.zip [file Supplemental_Data_S1.zip]

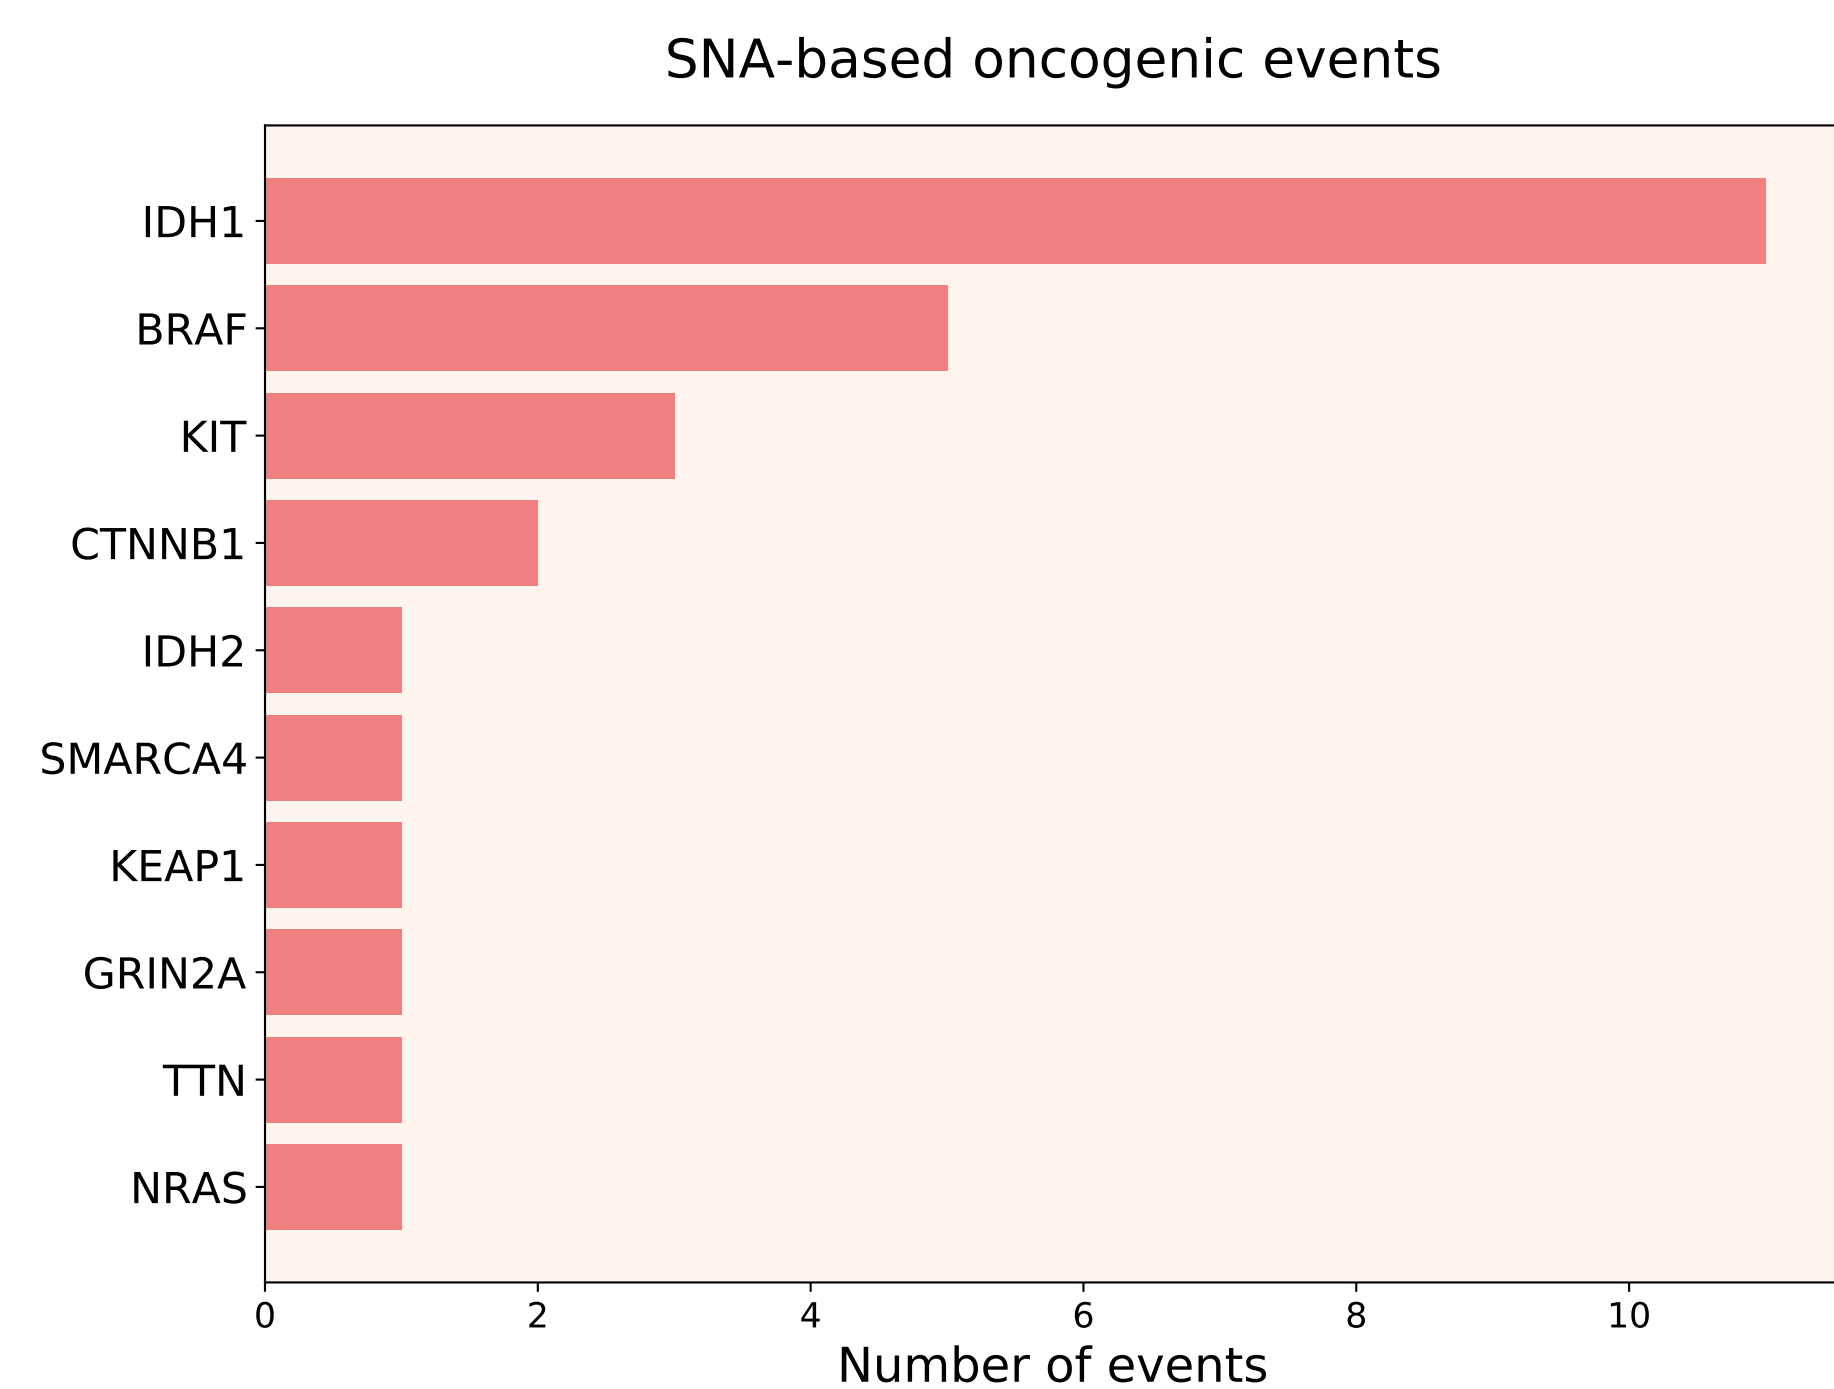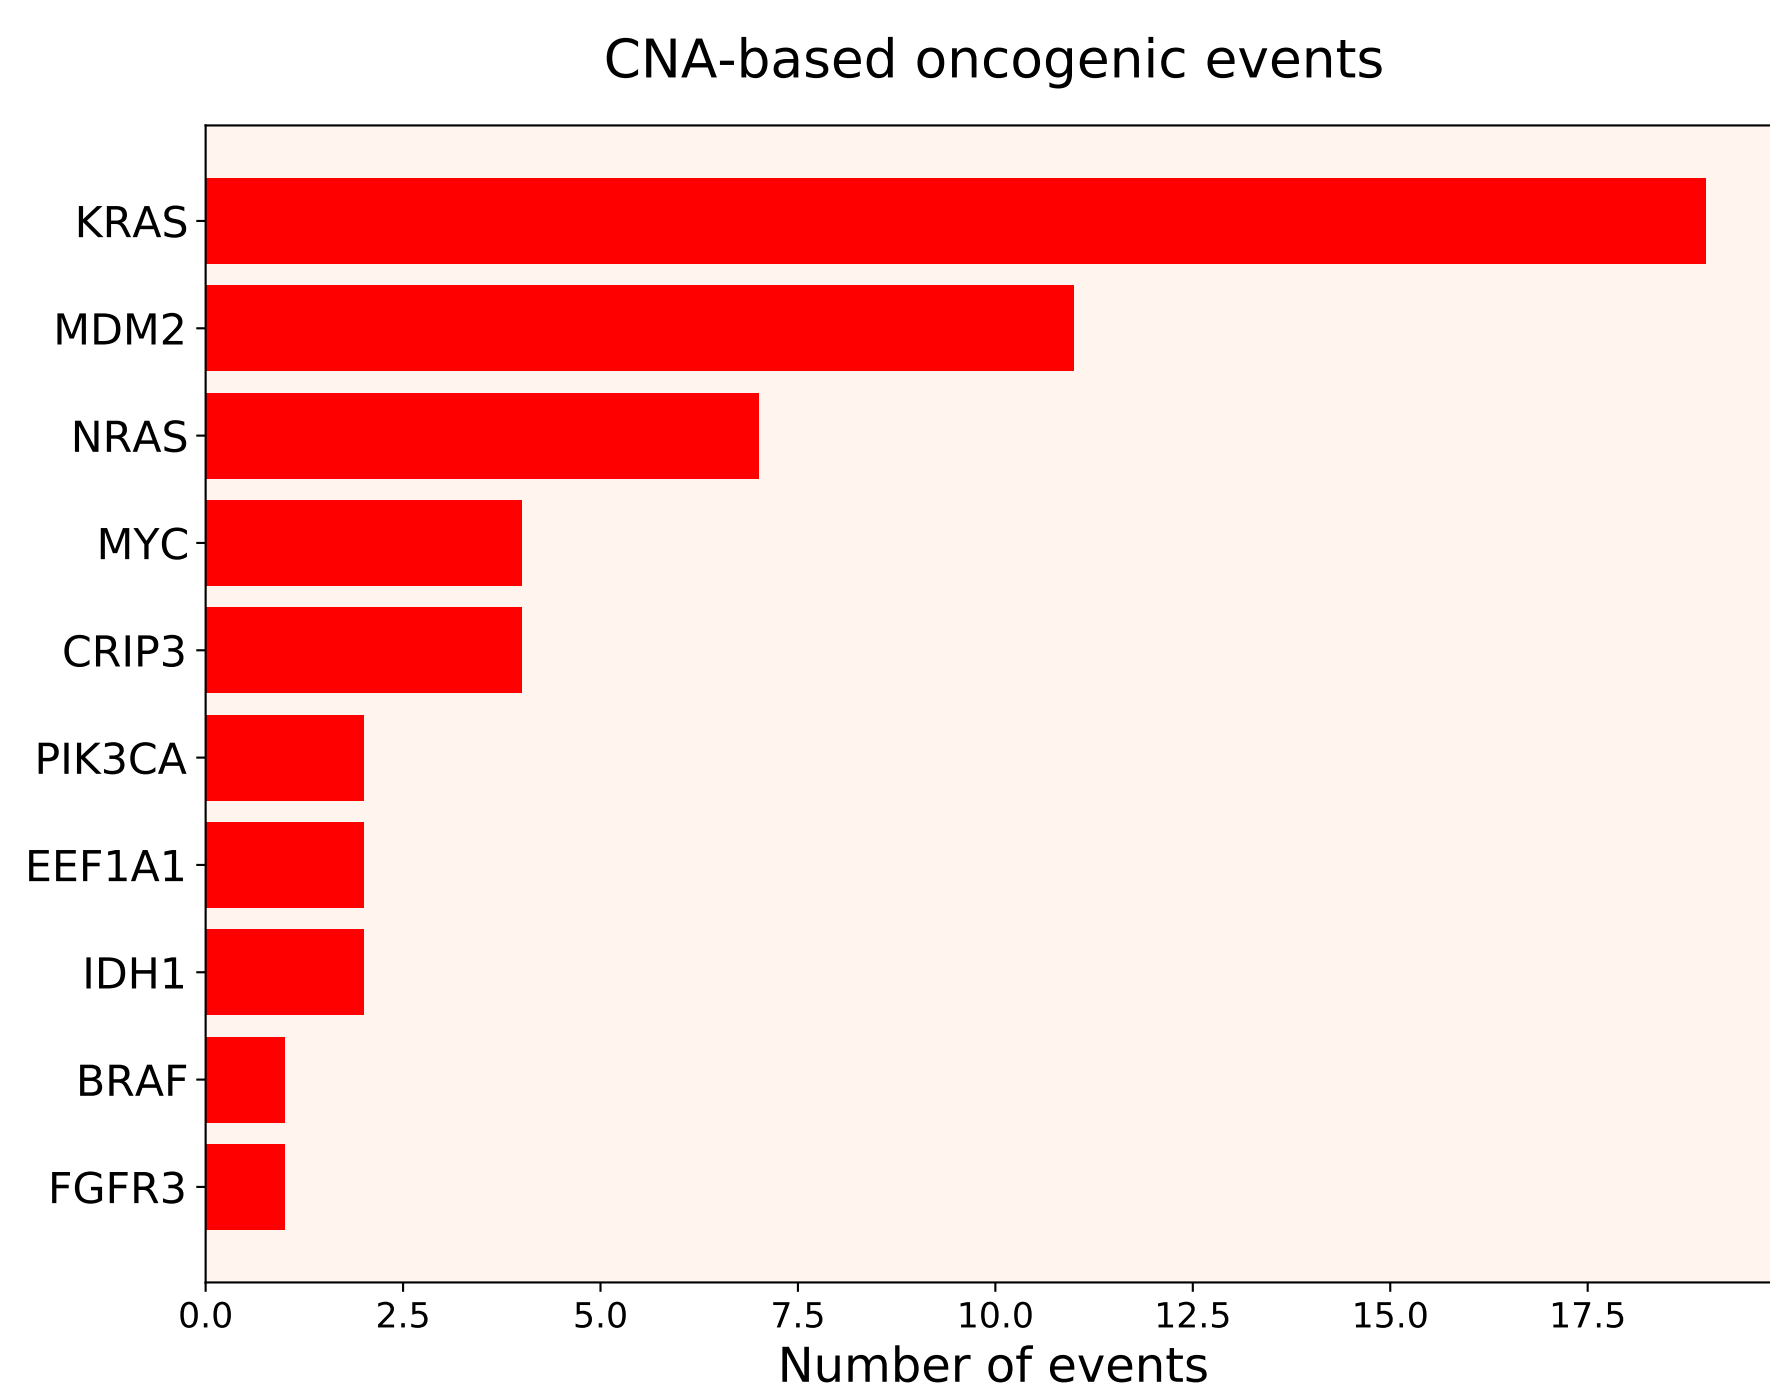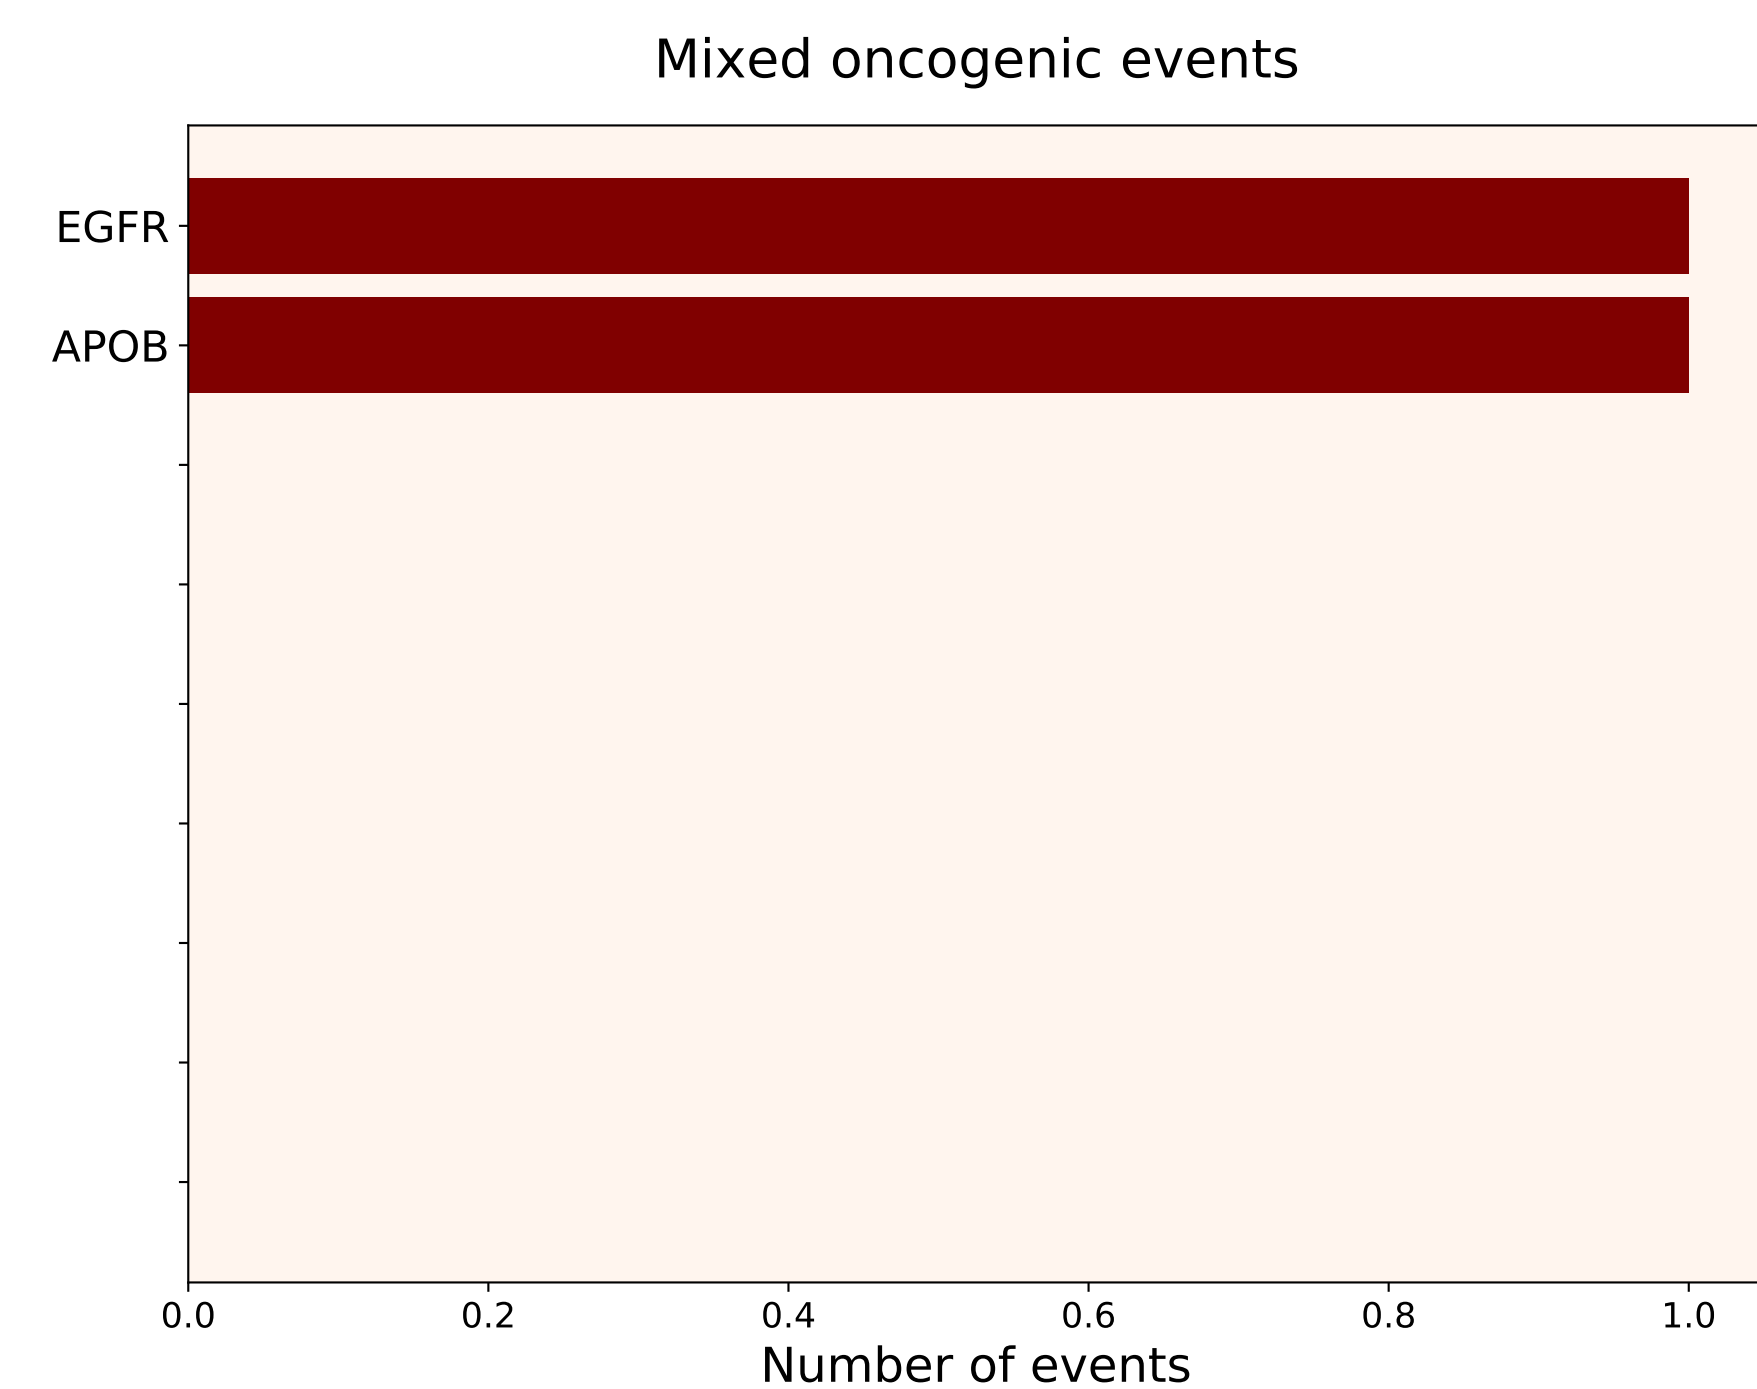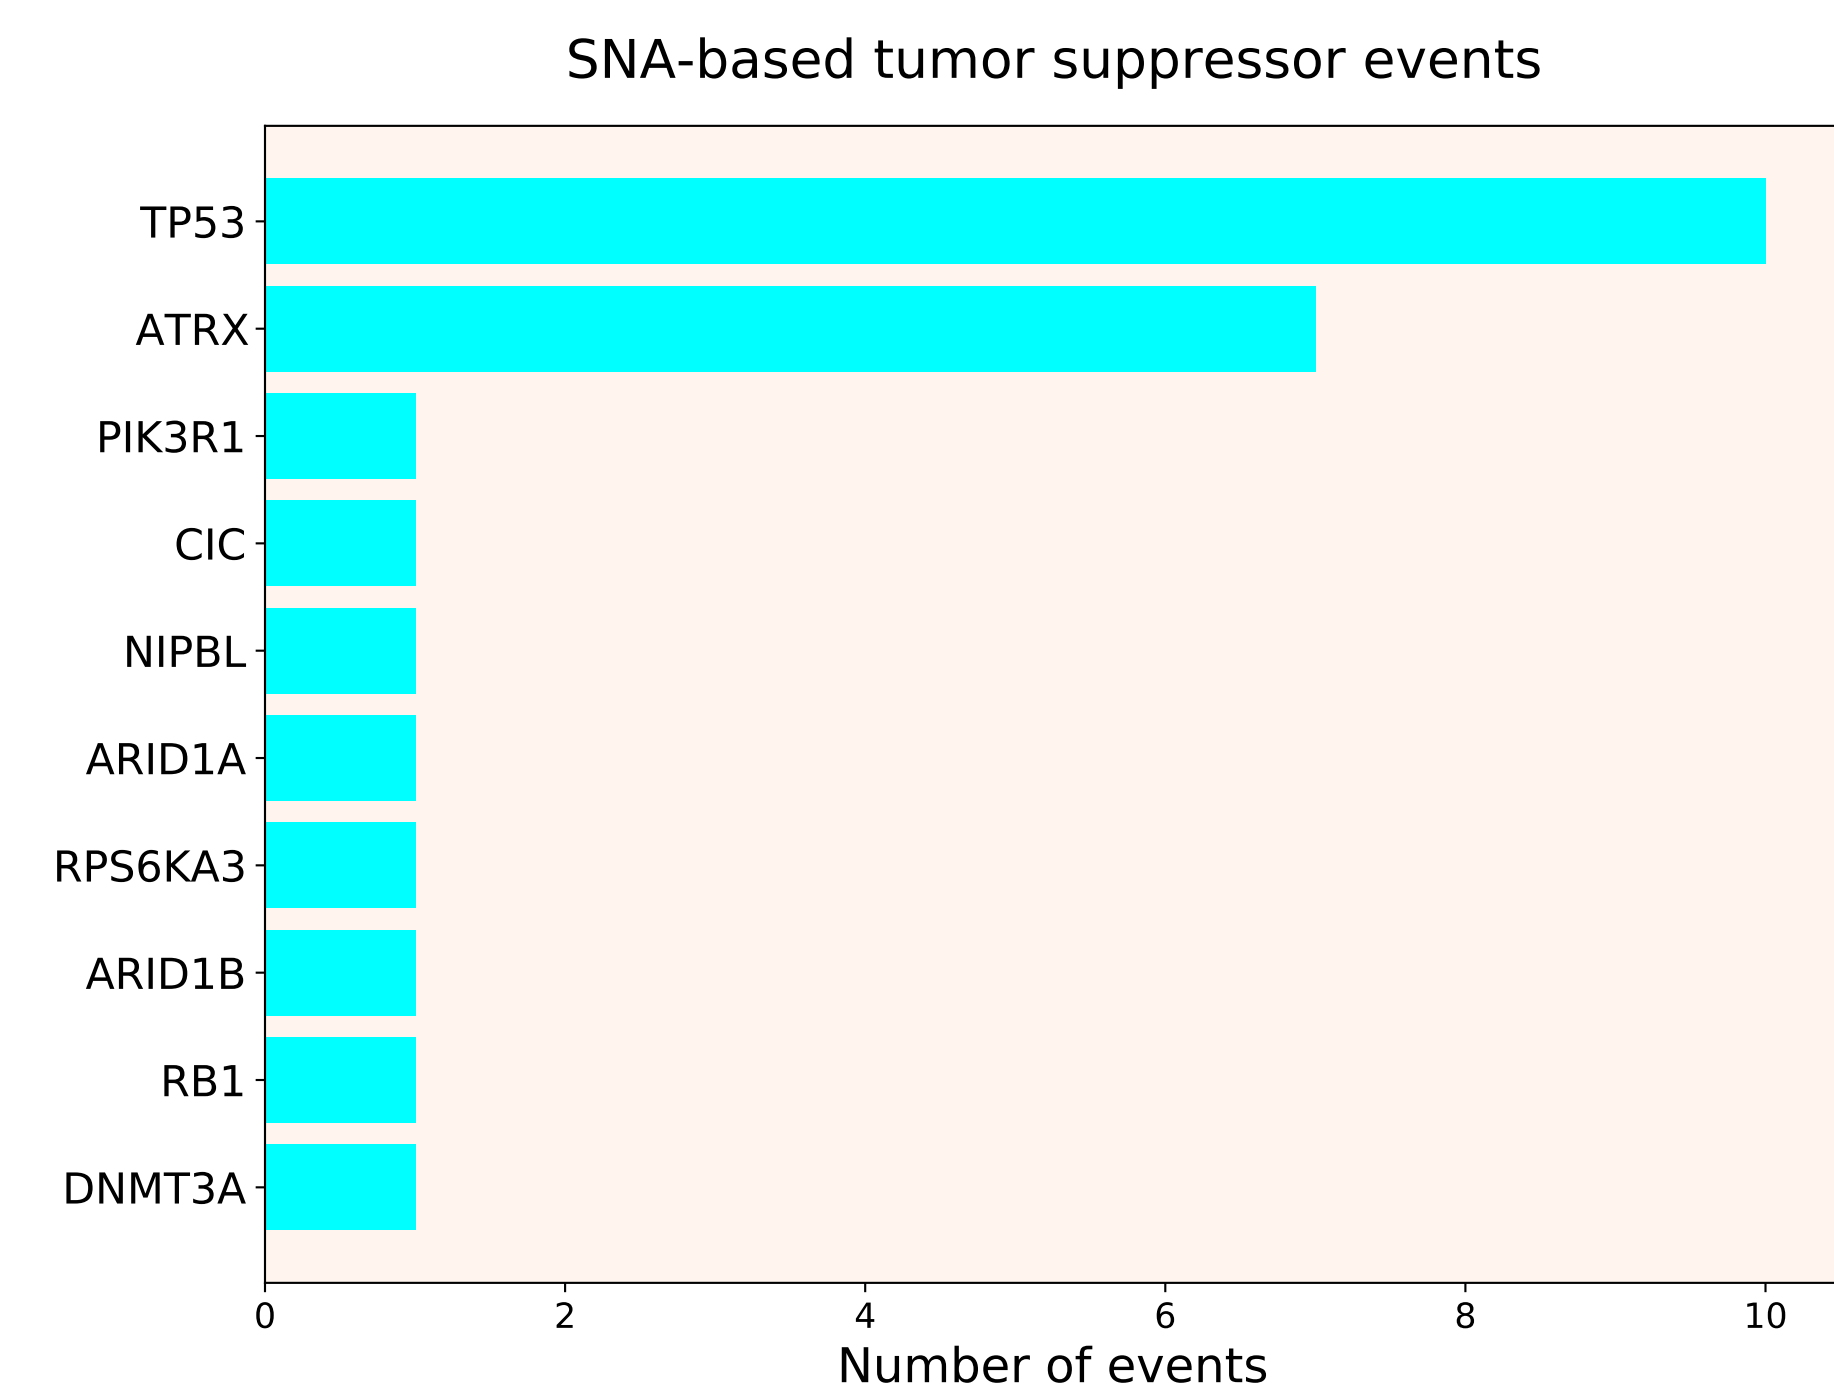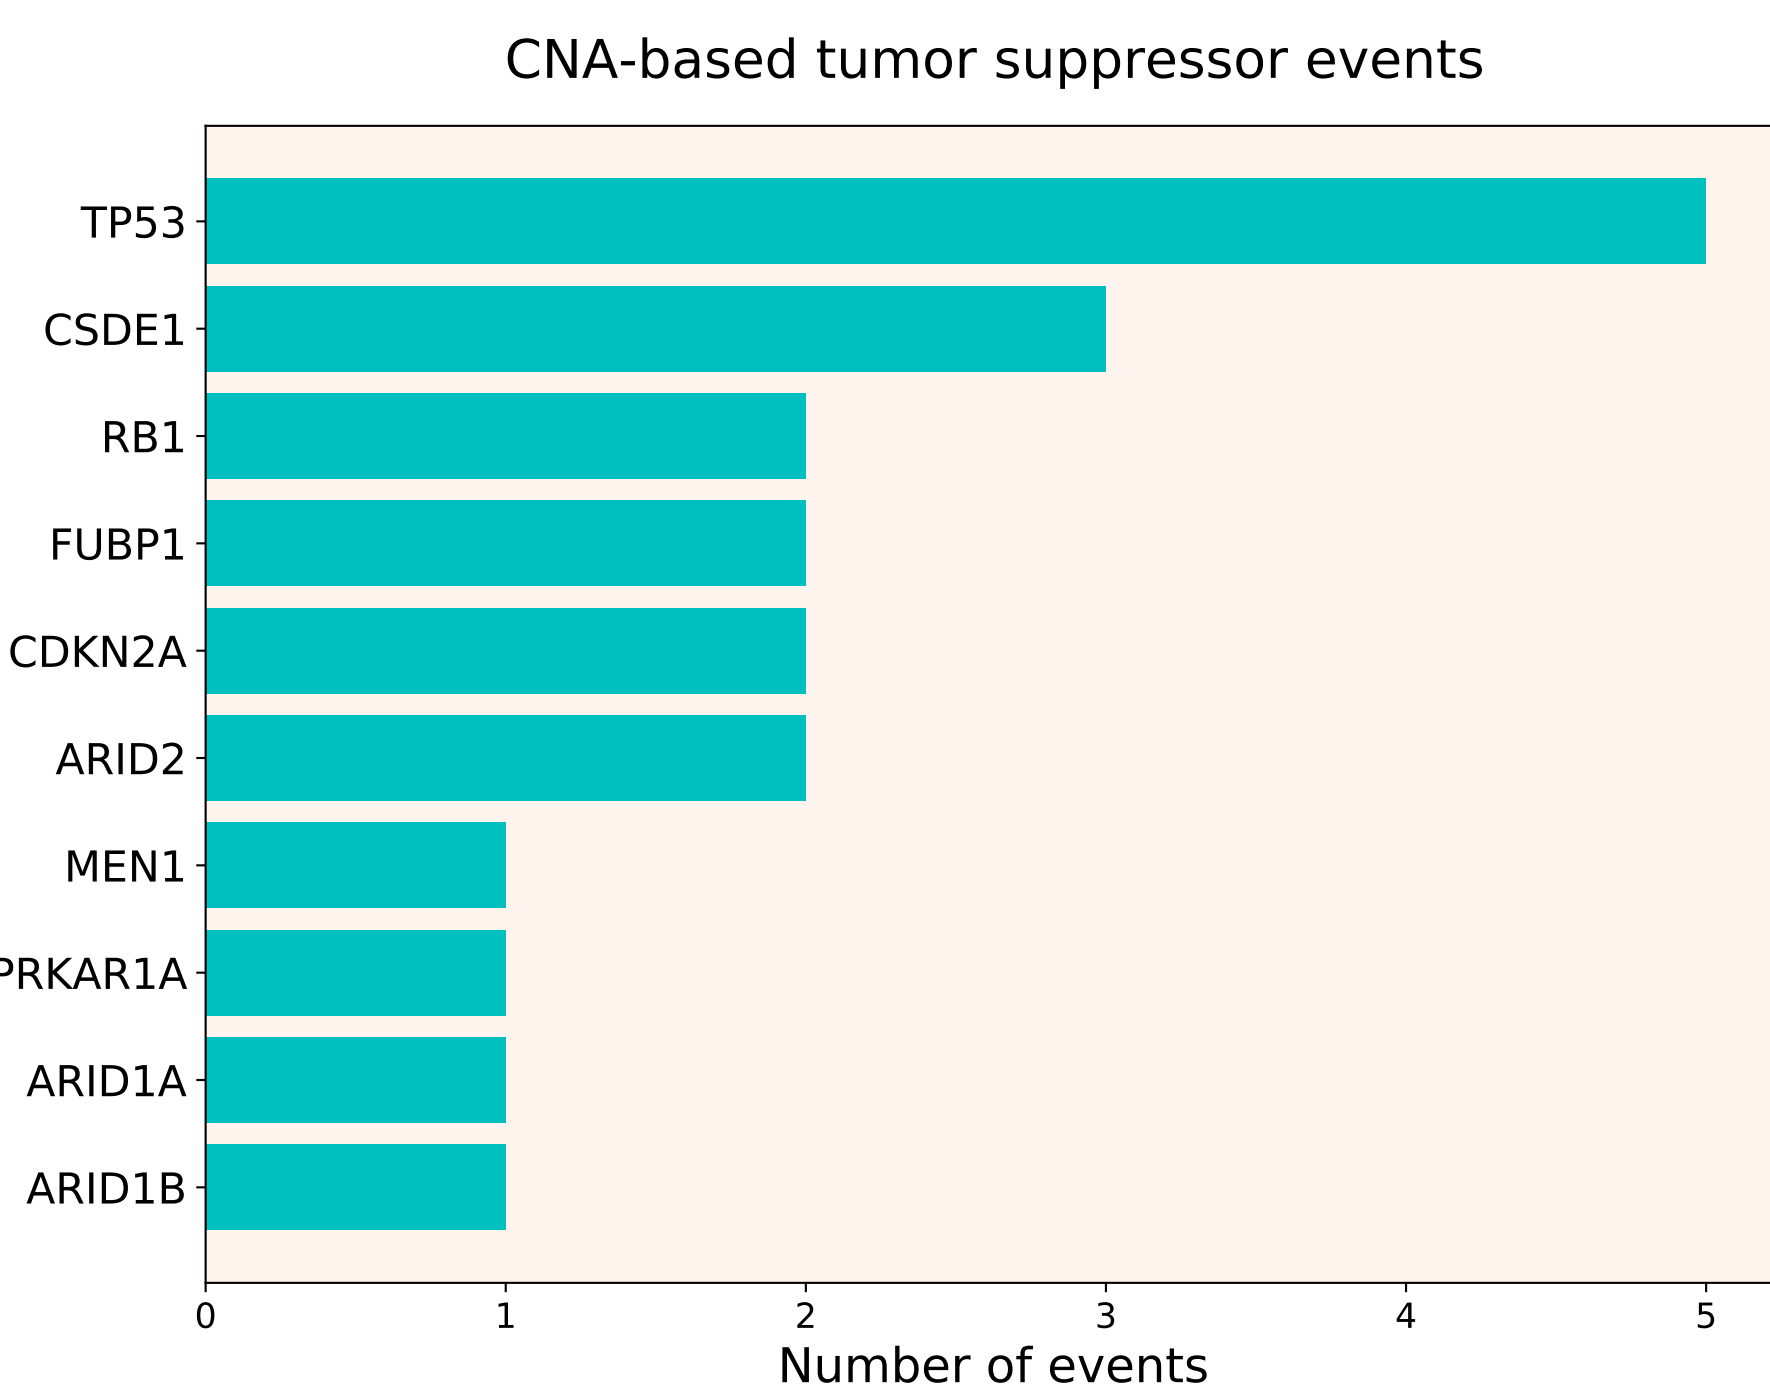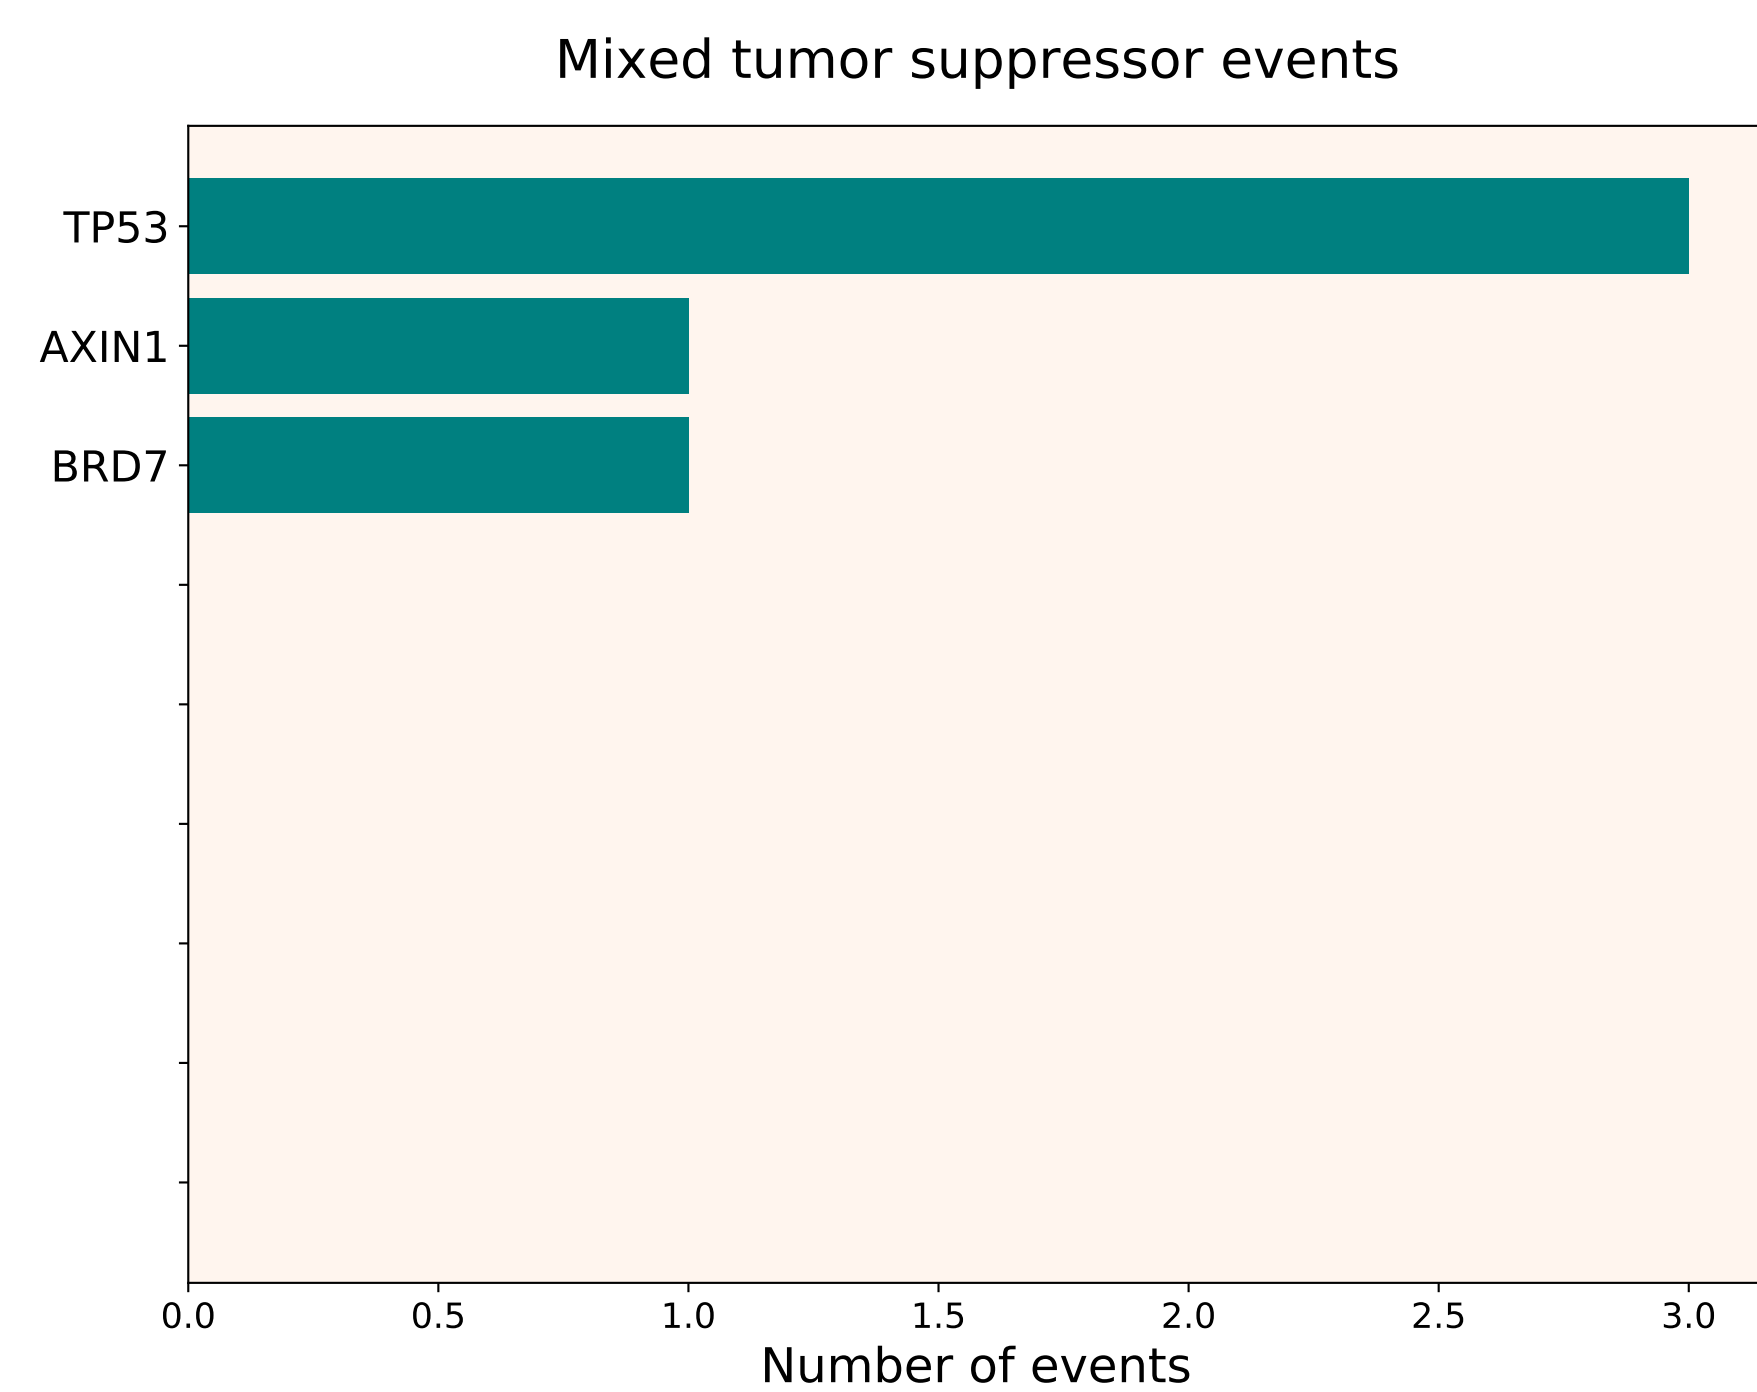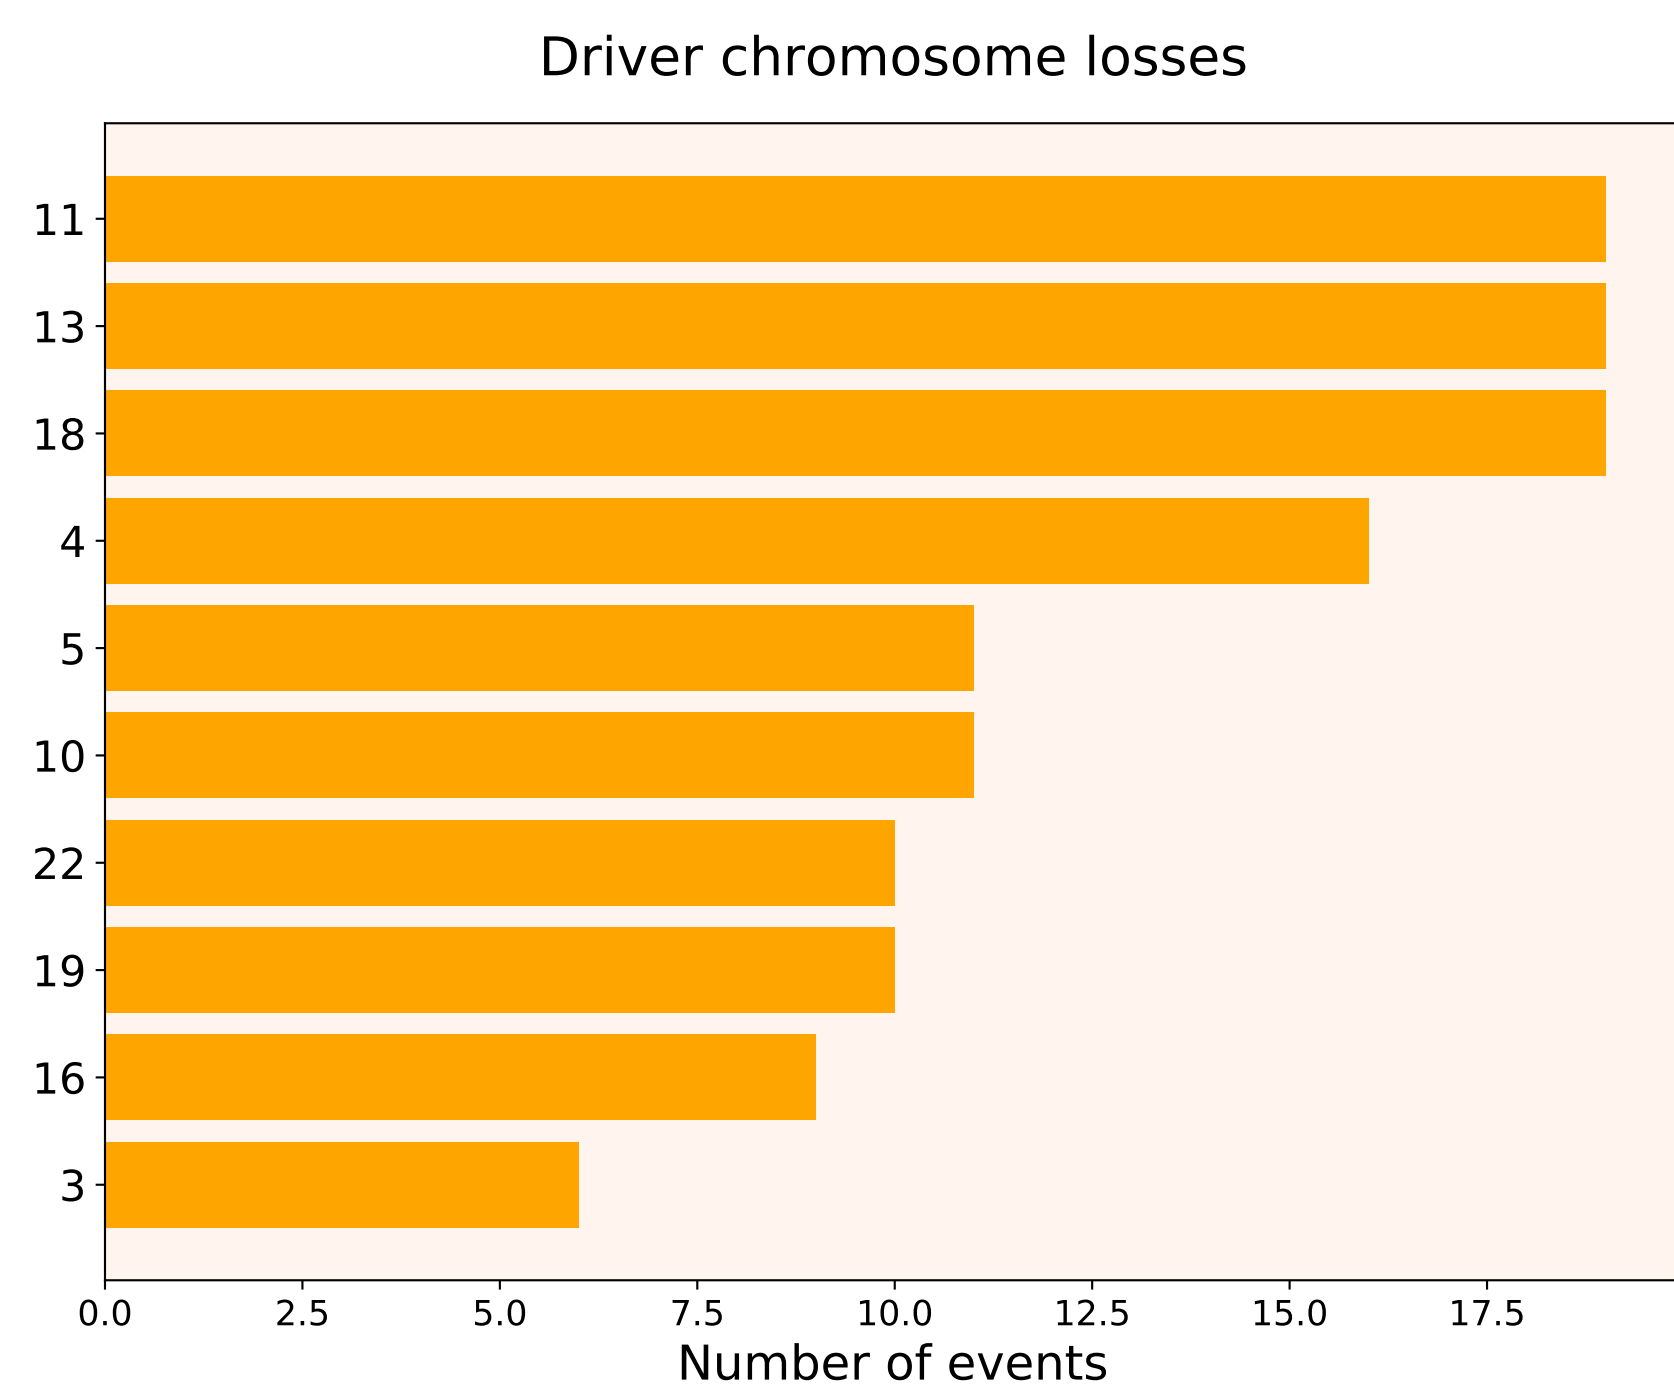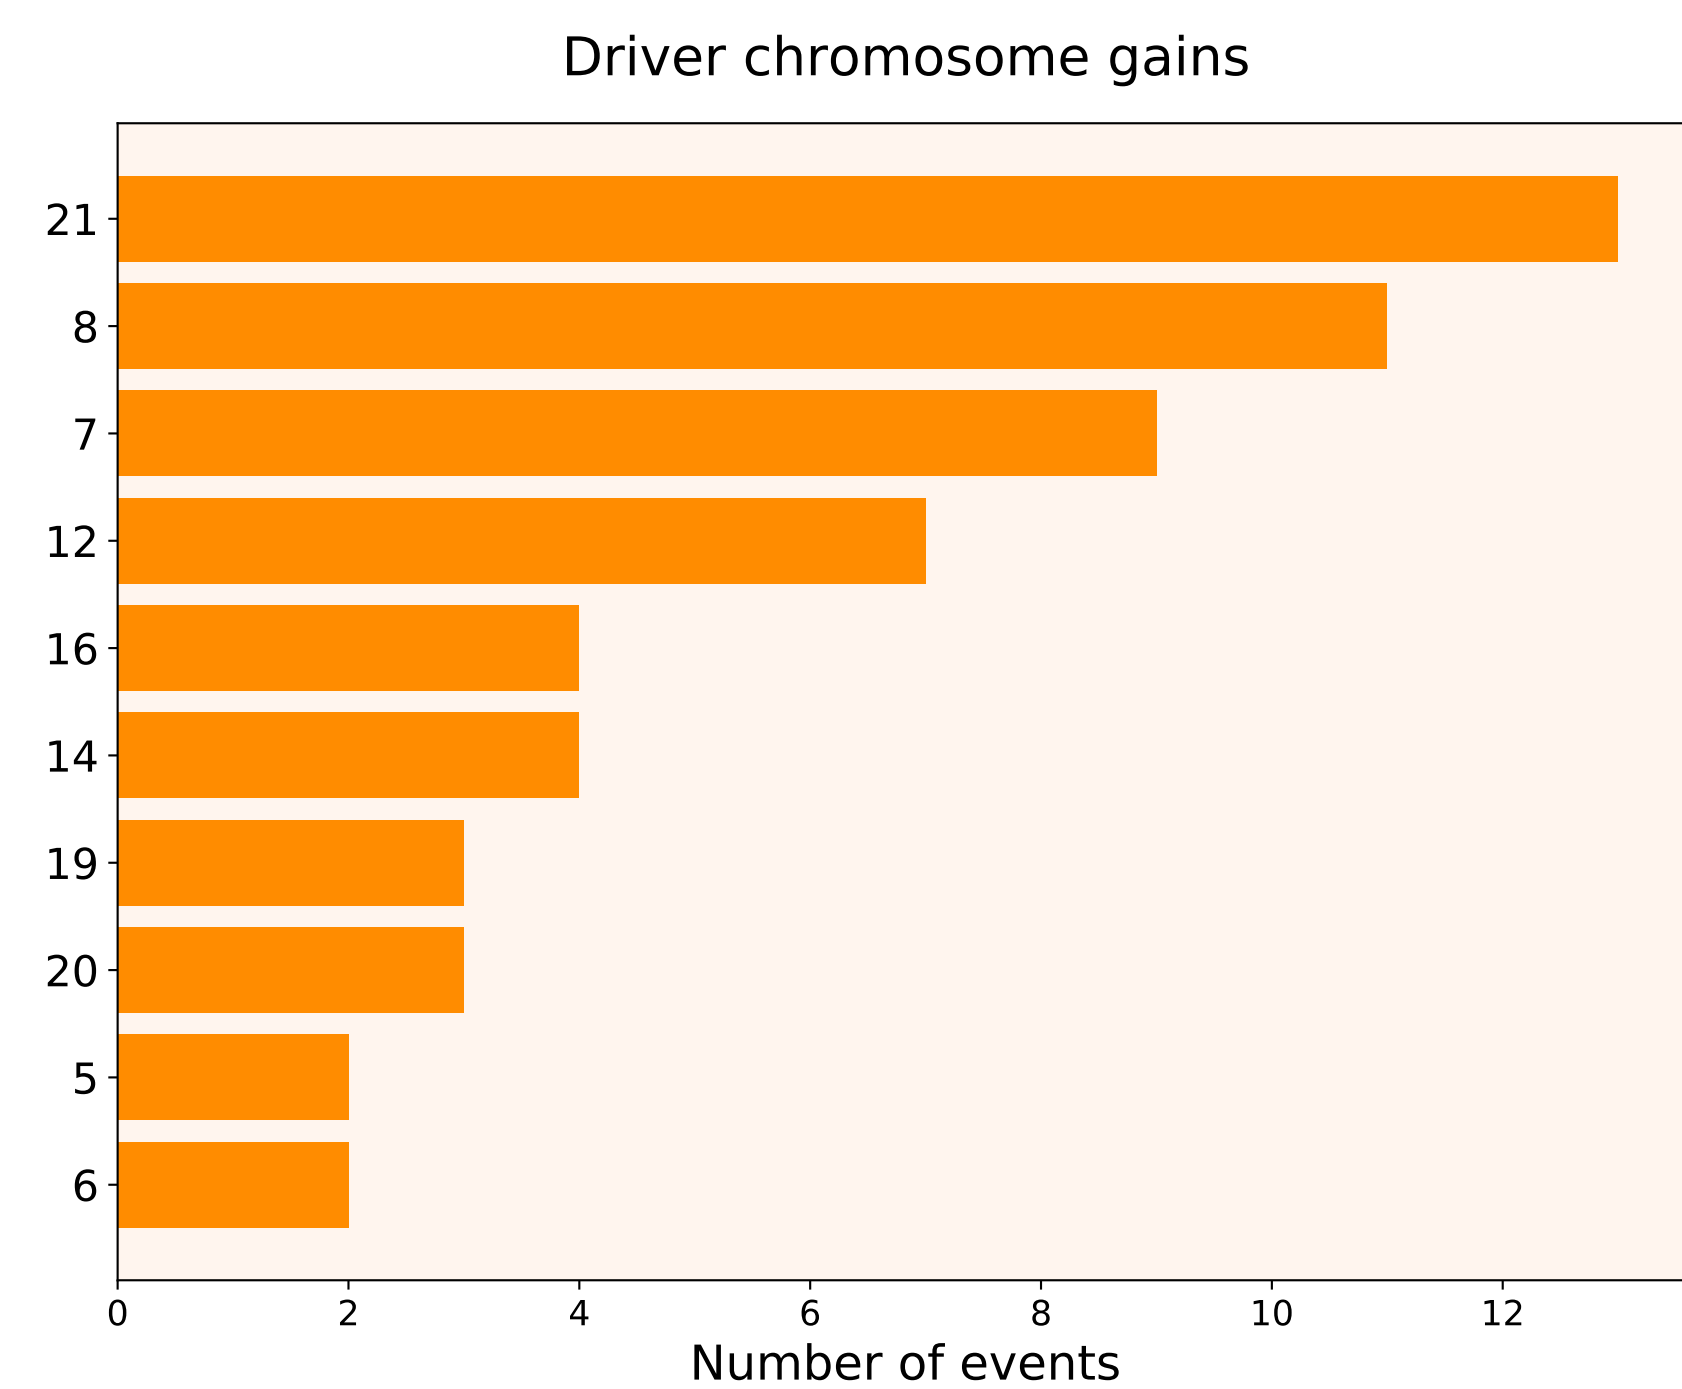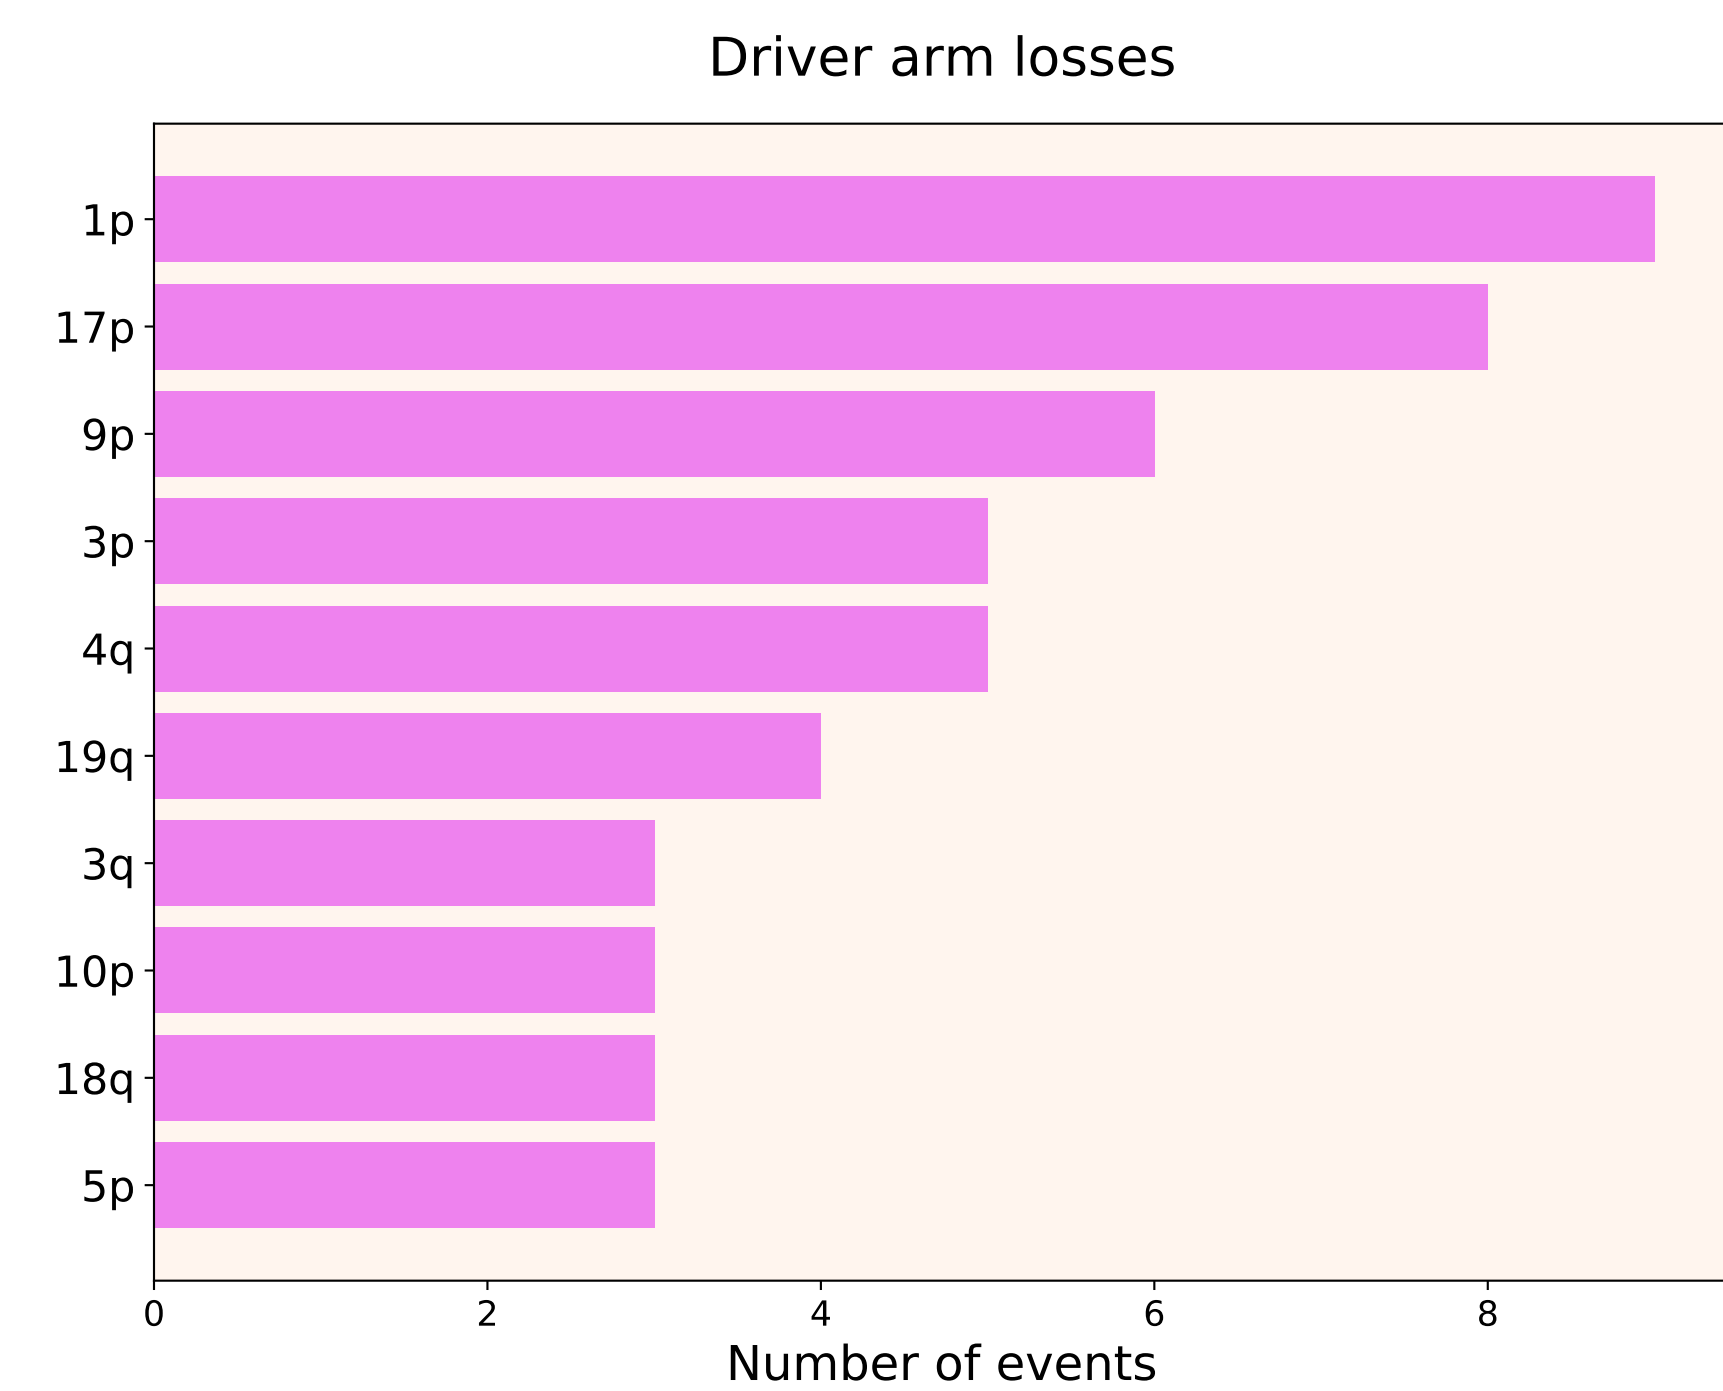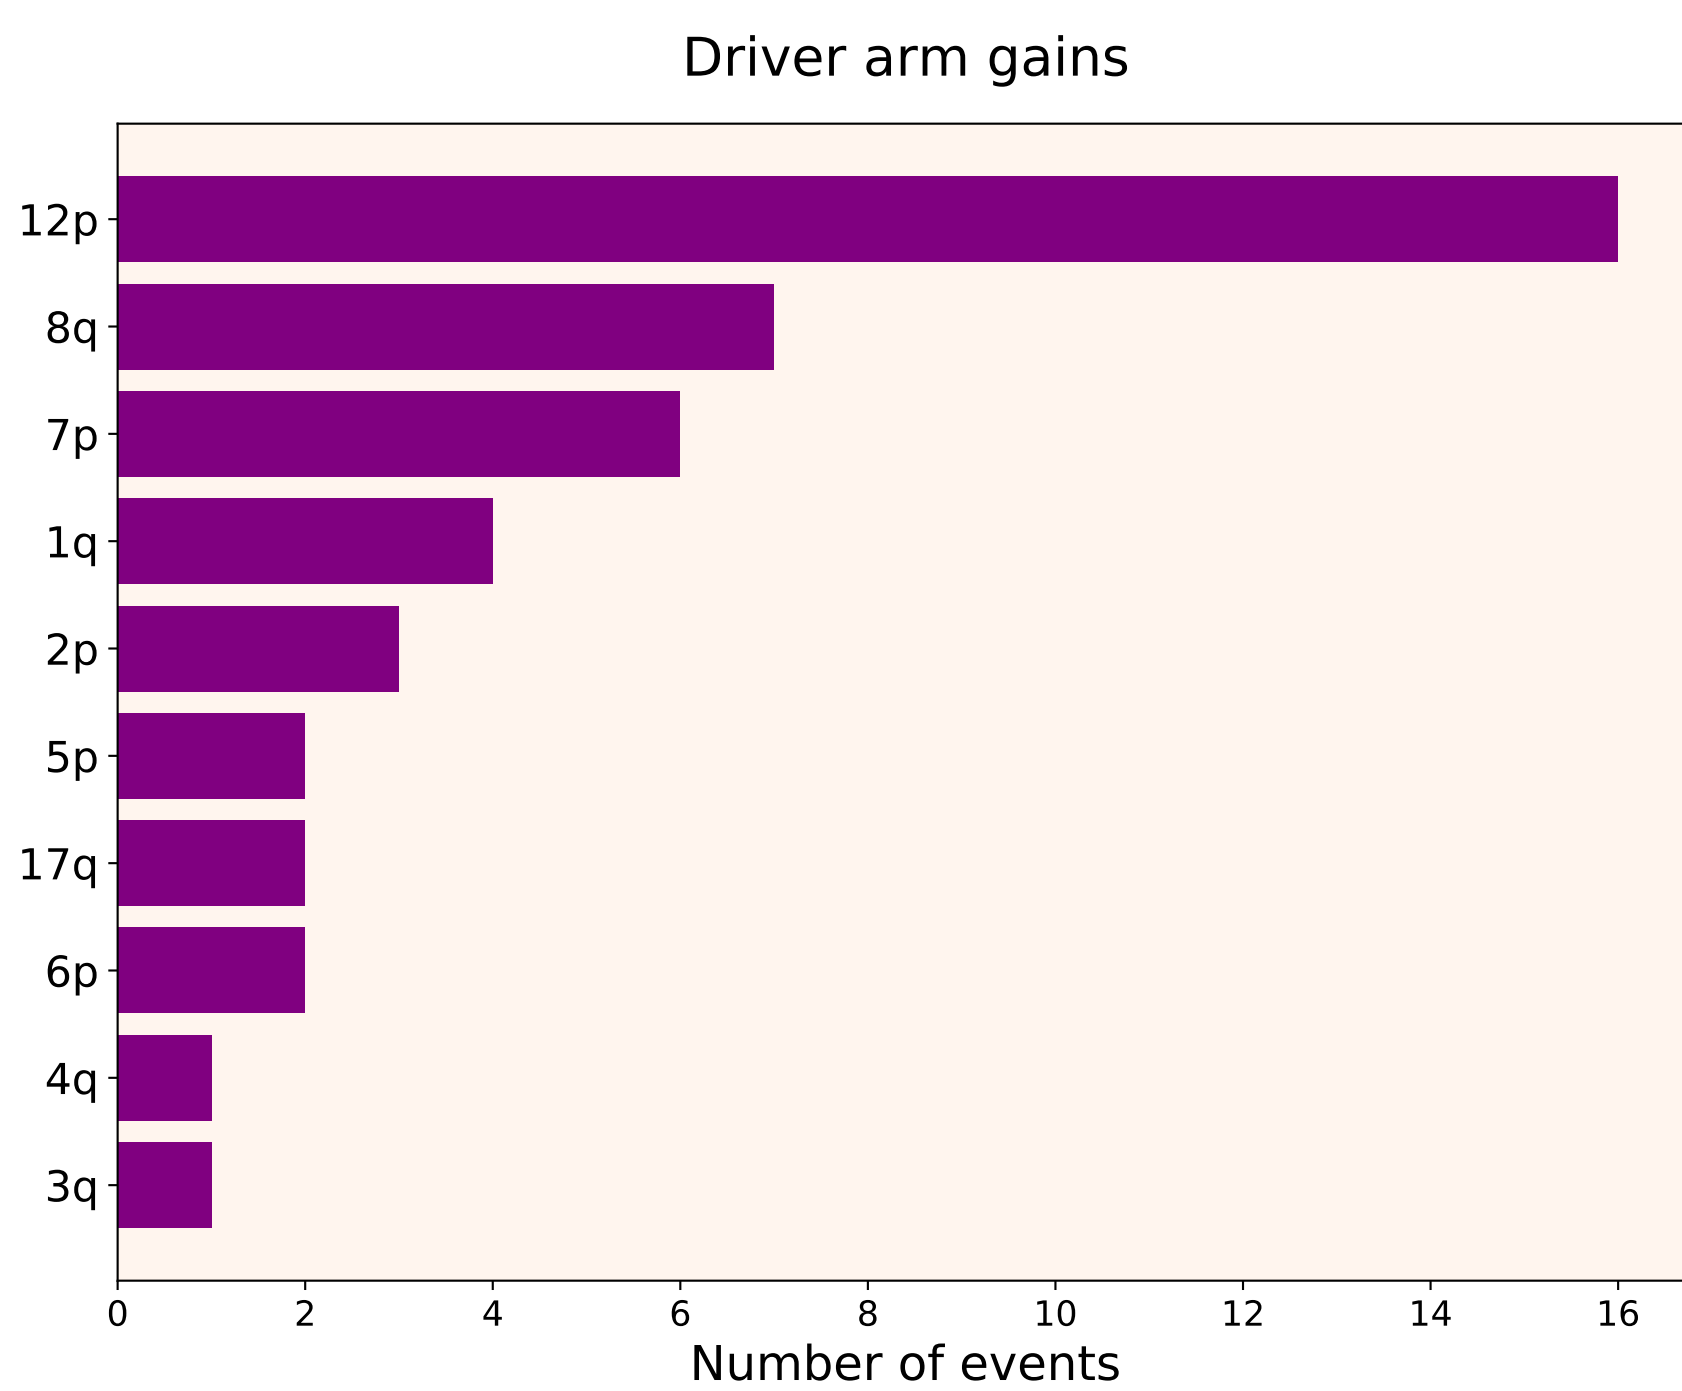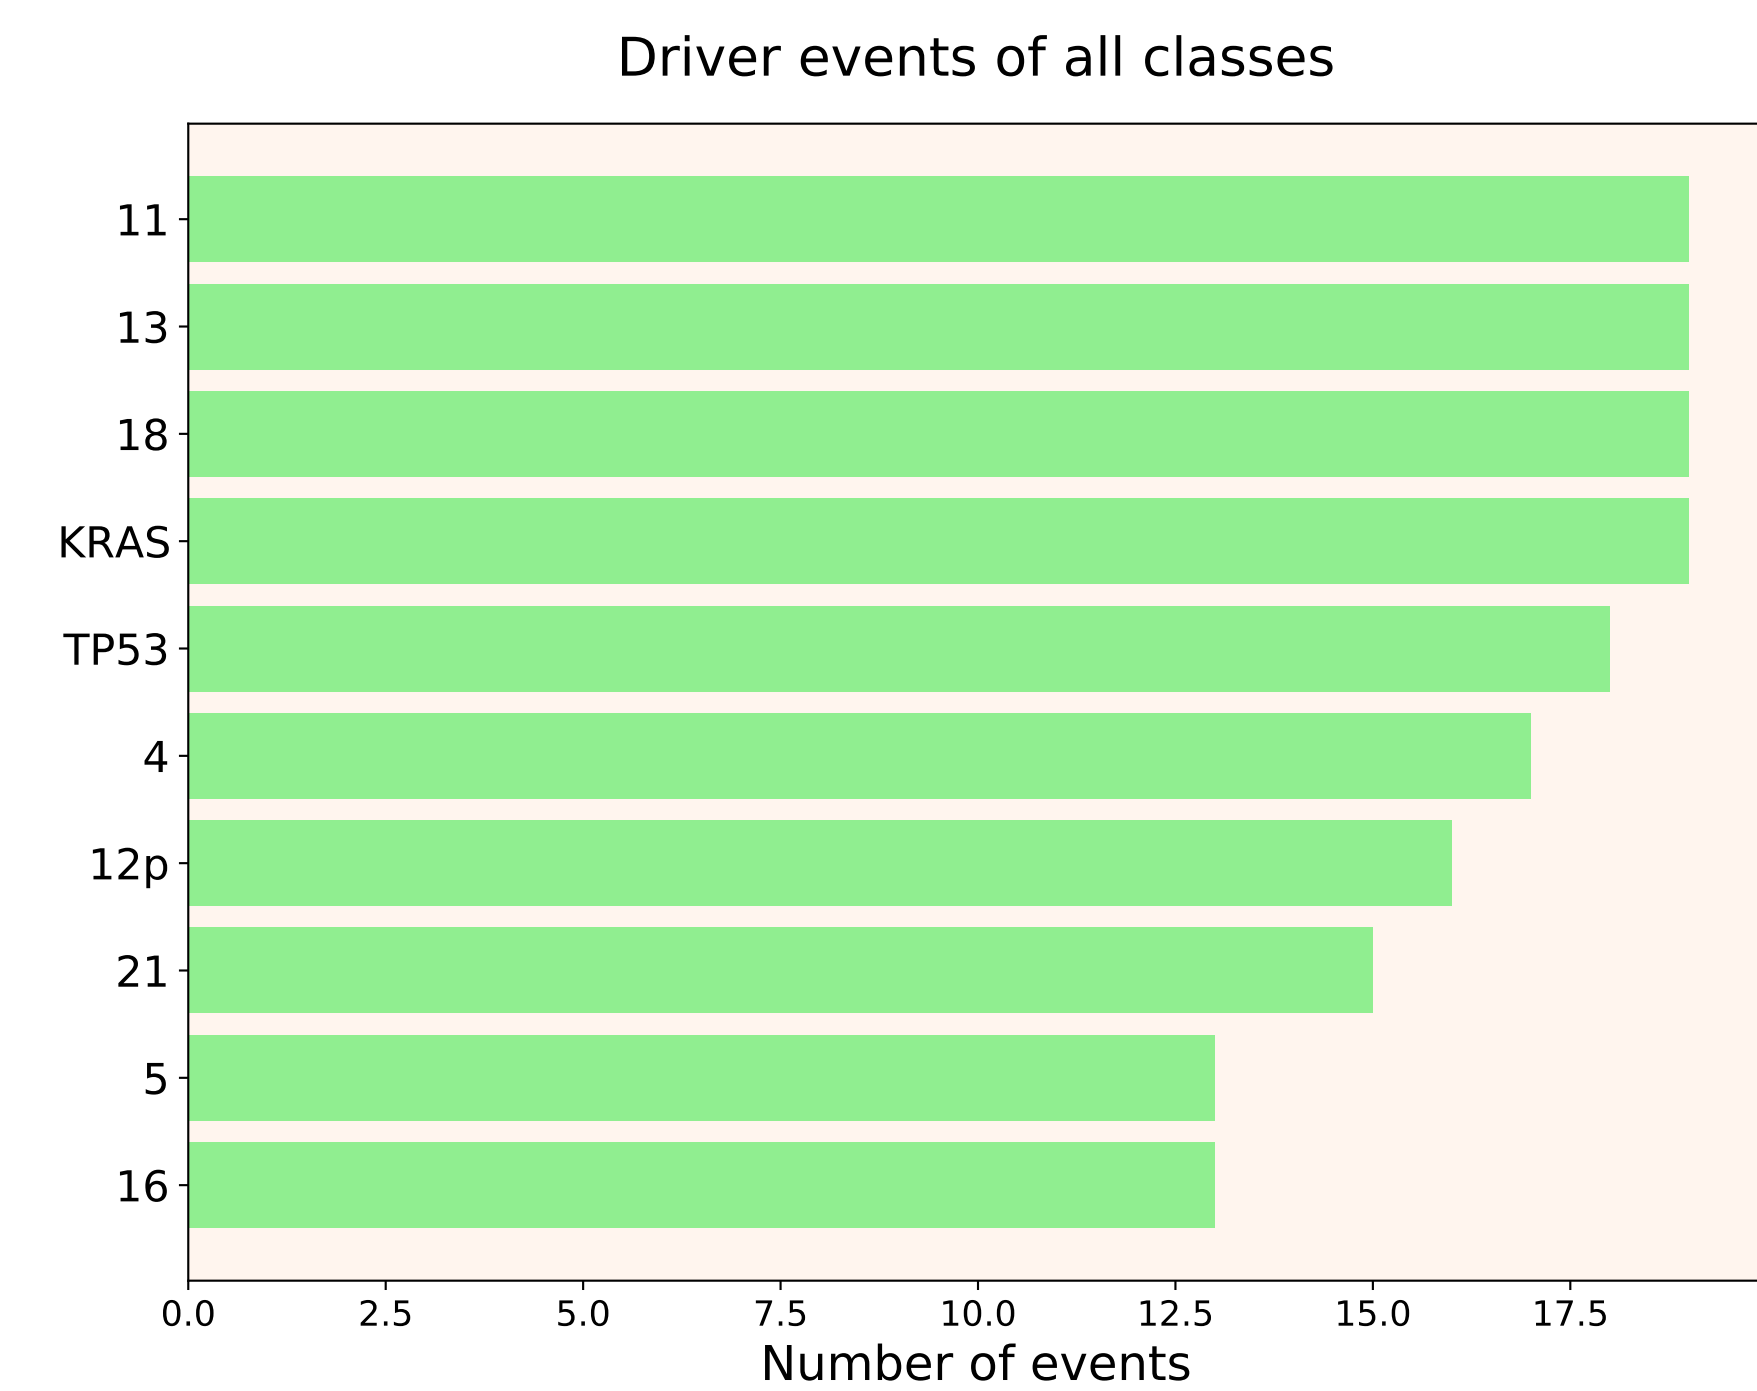

Supplement: Supplemental_Data_S1.zip [file Supplemental_Data_S1.zip]

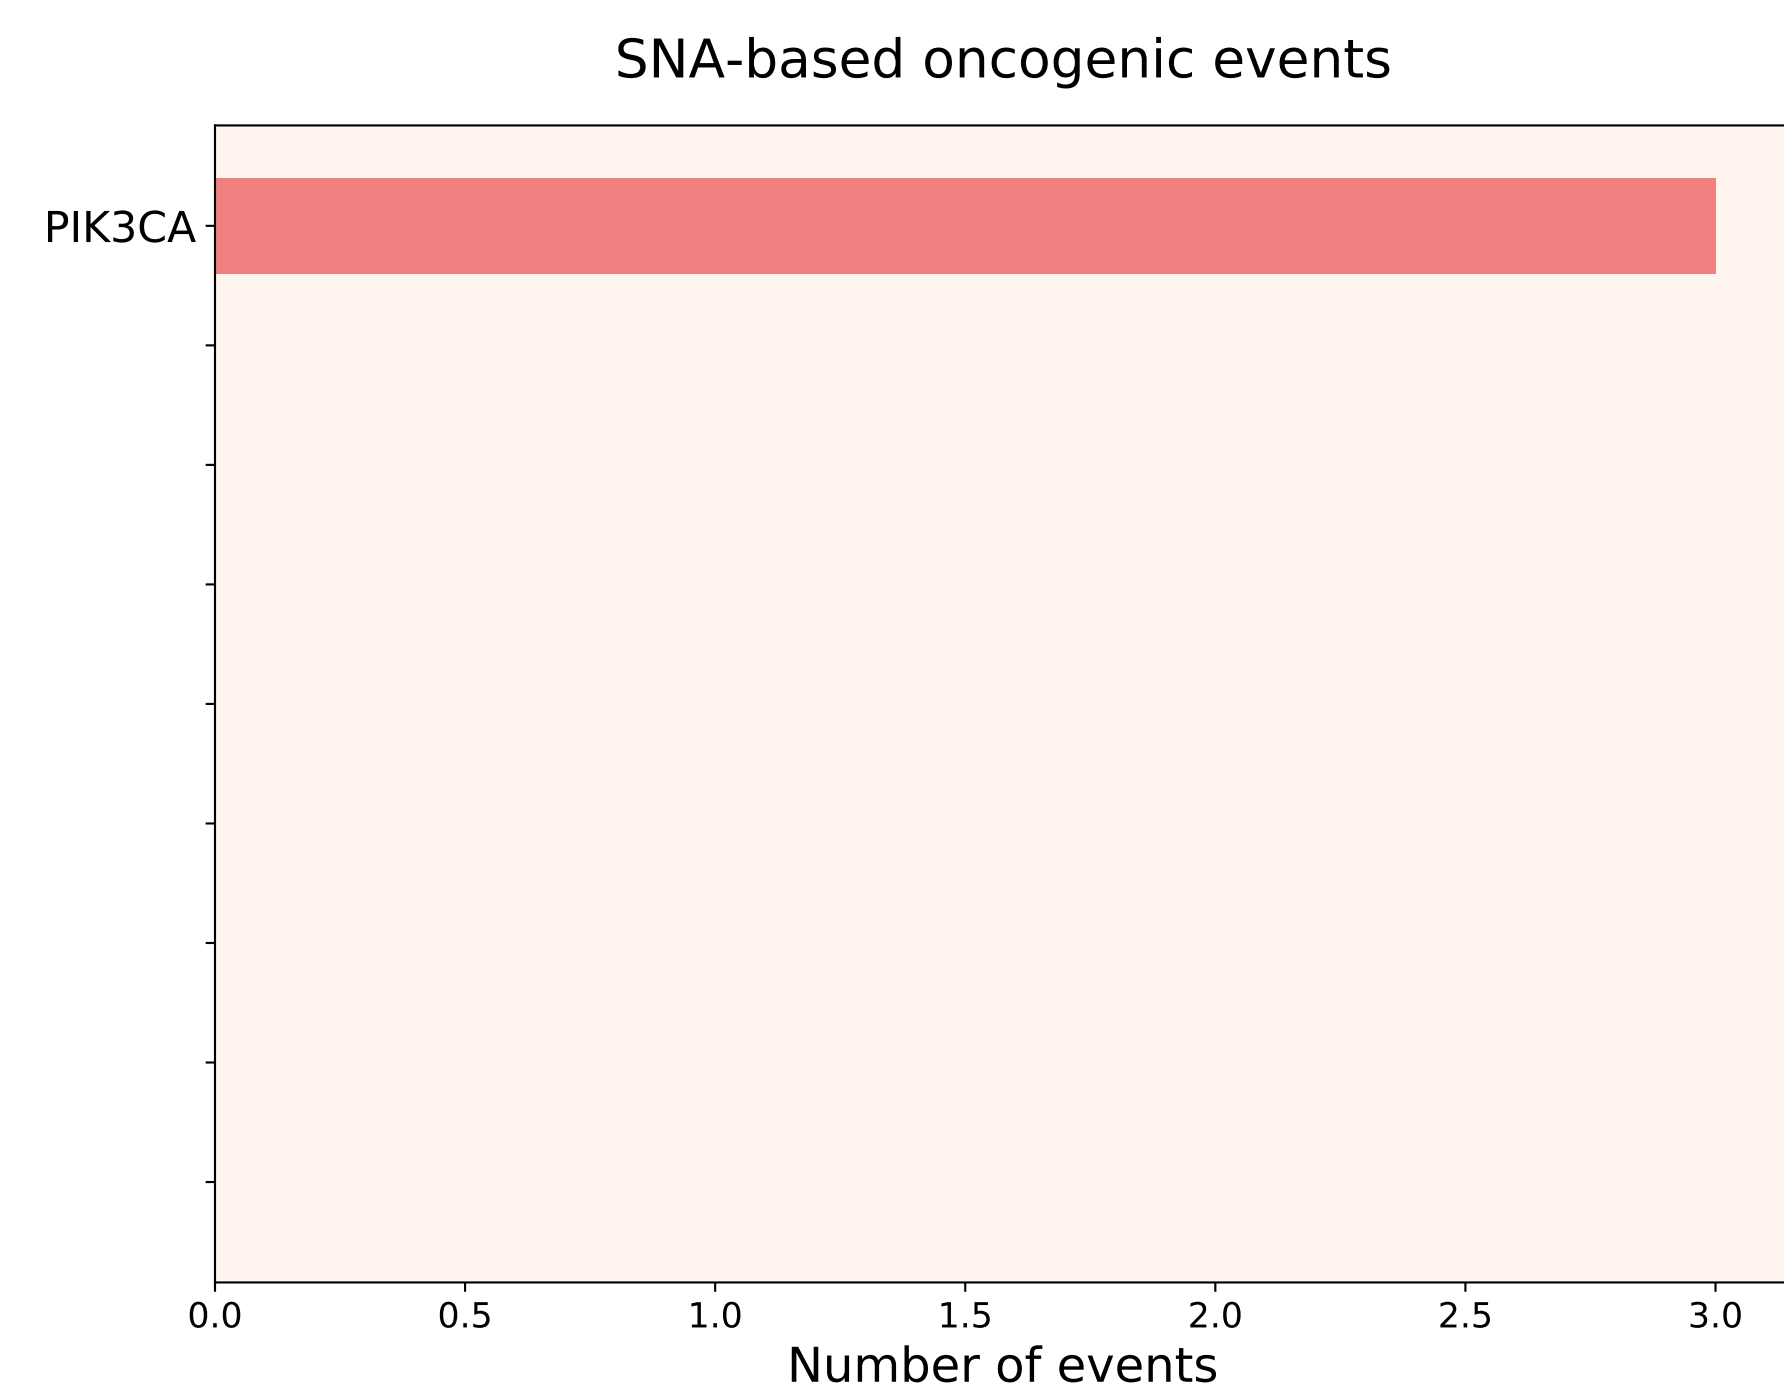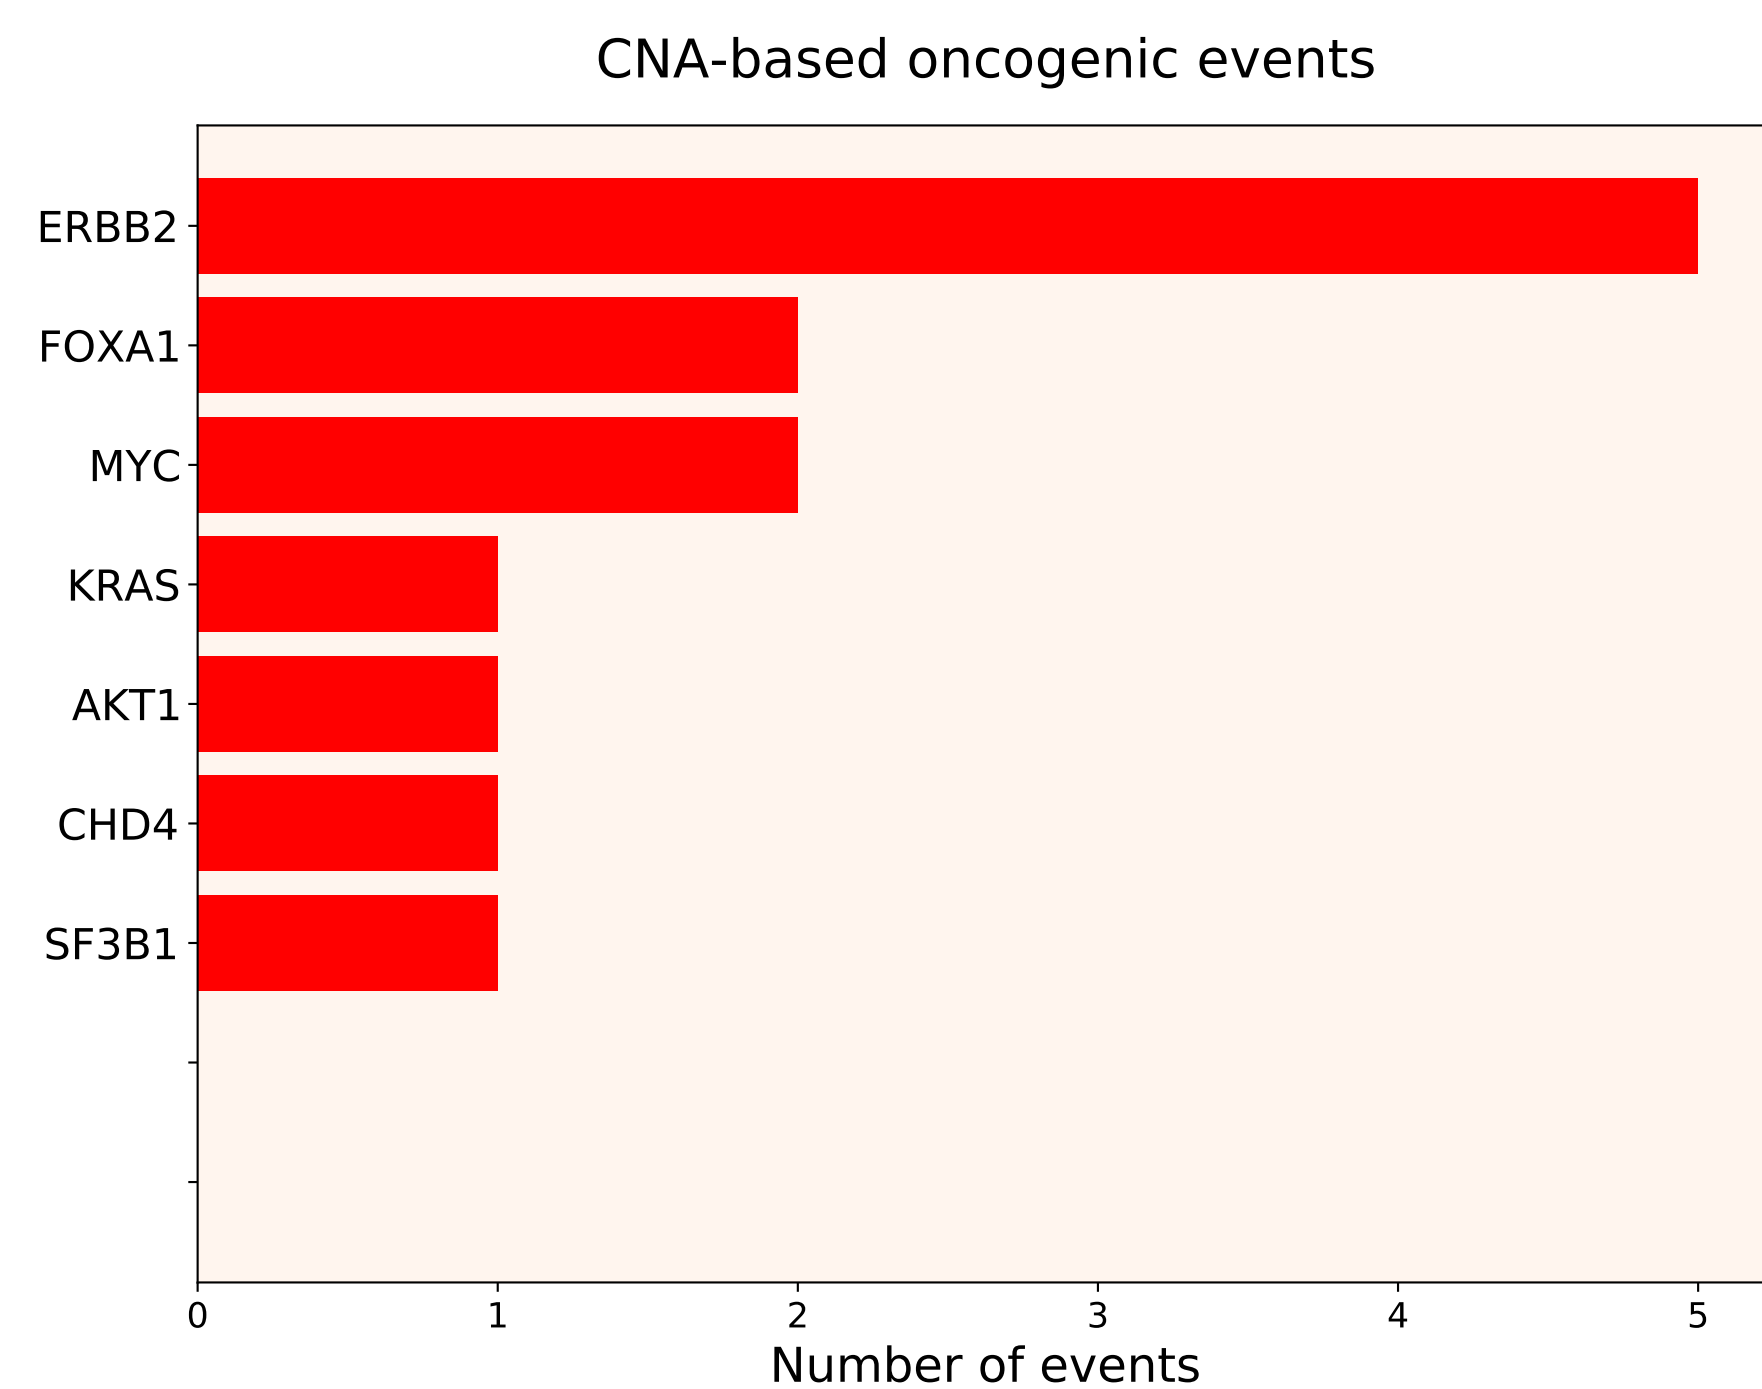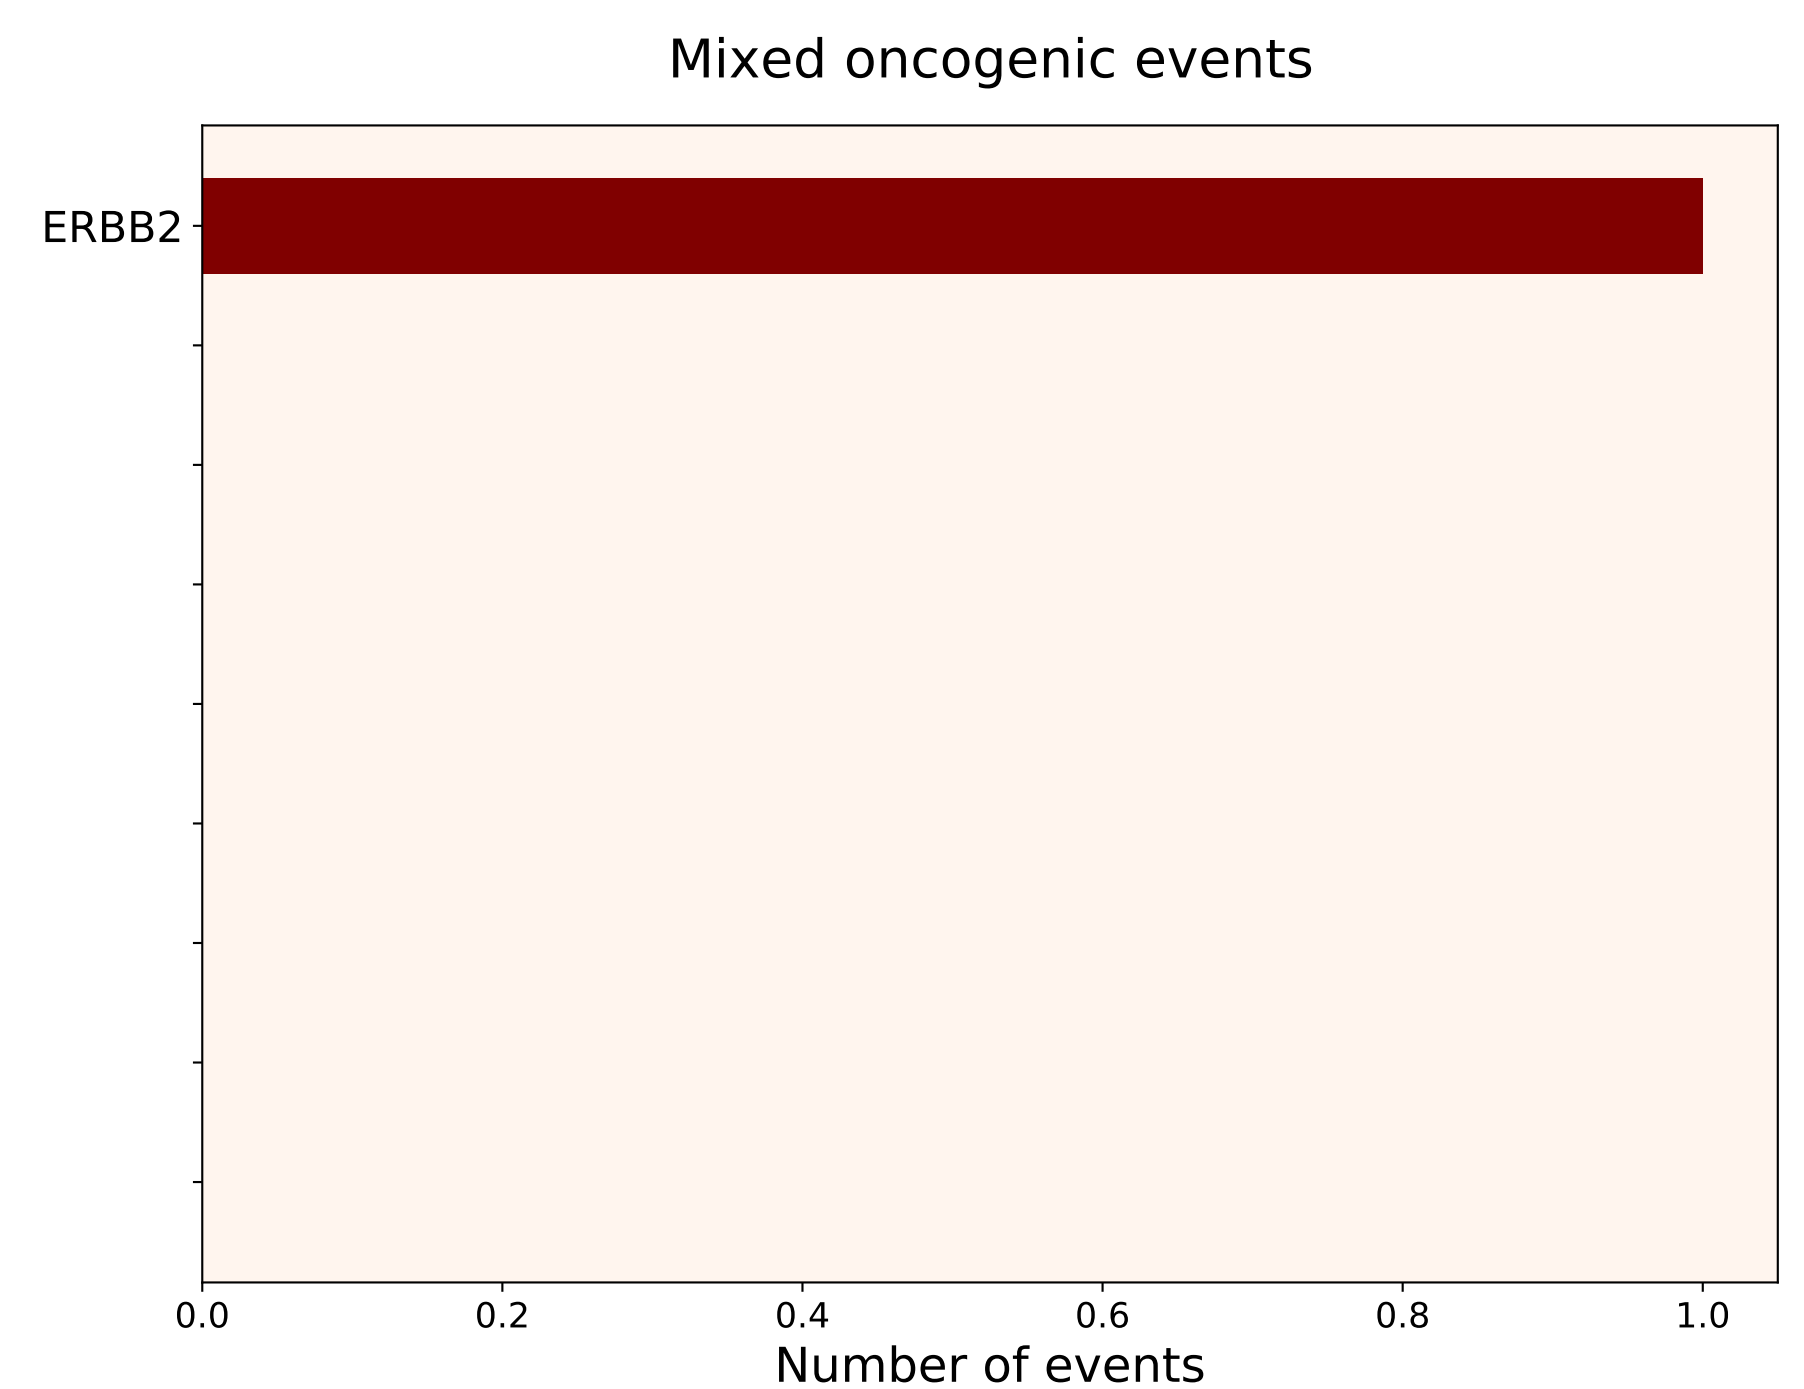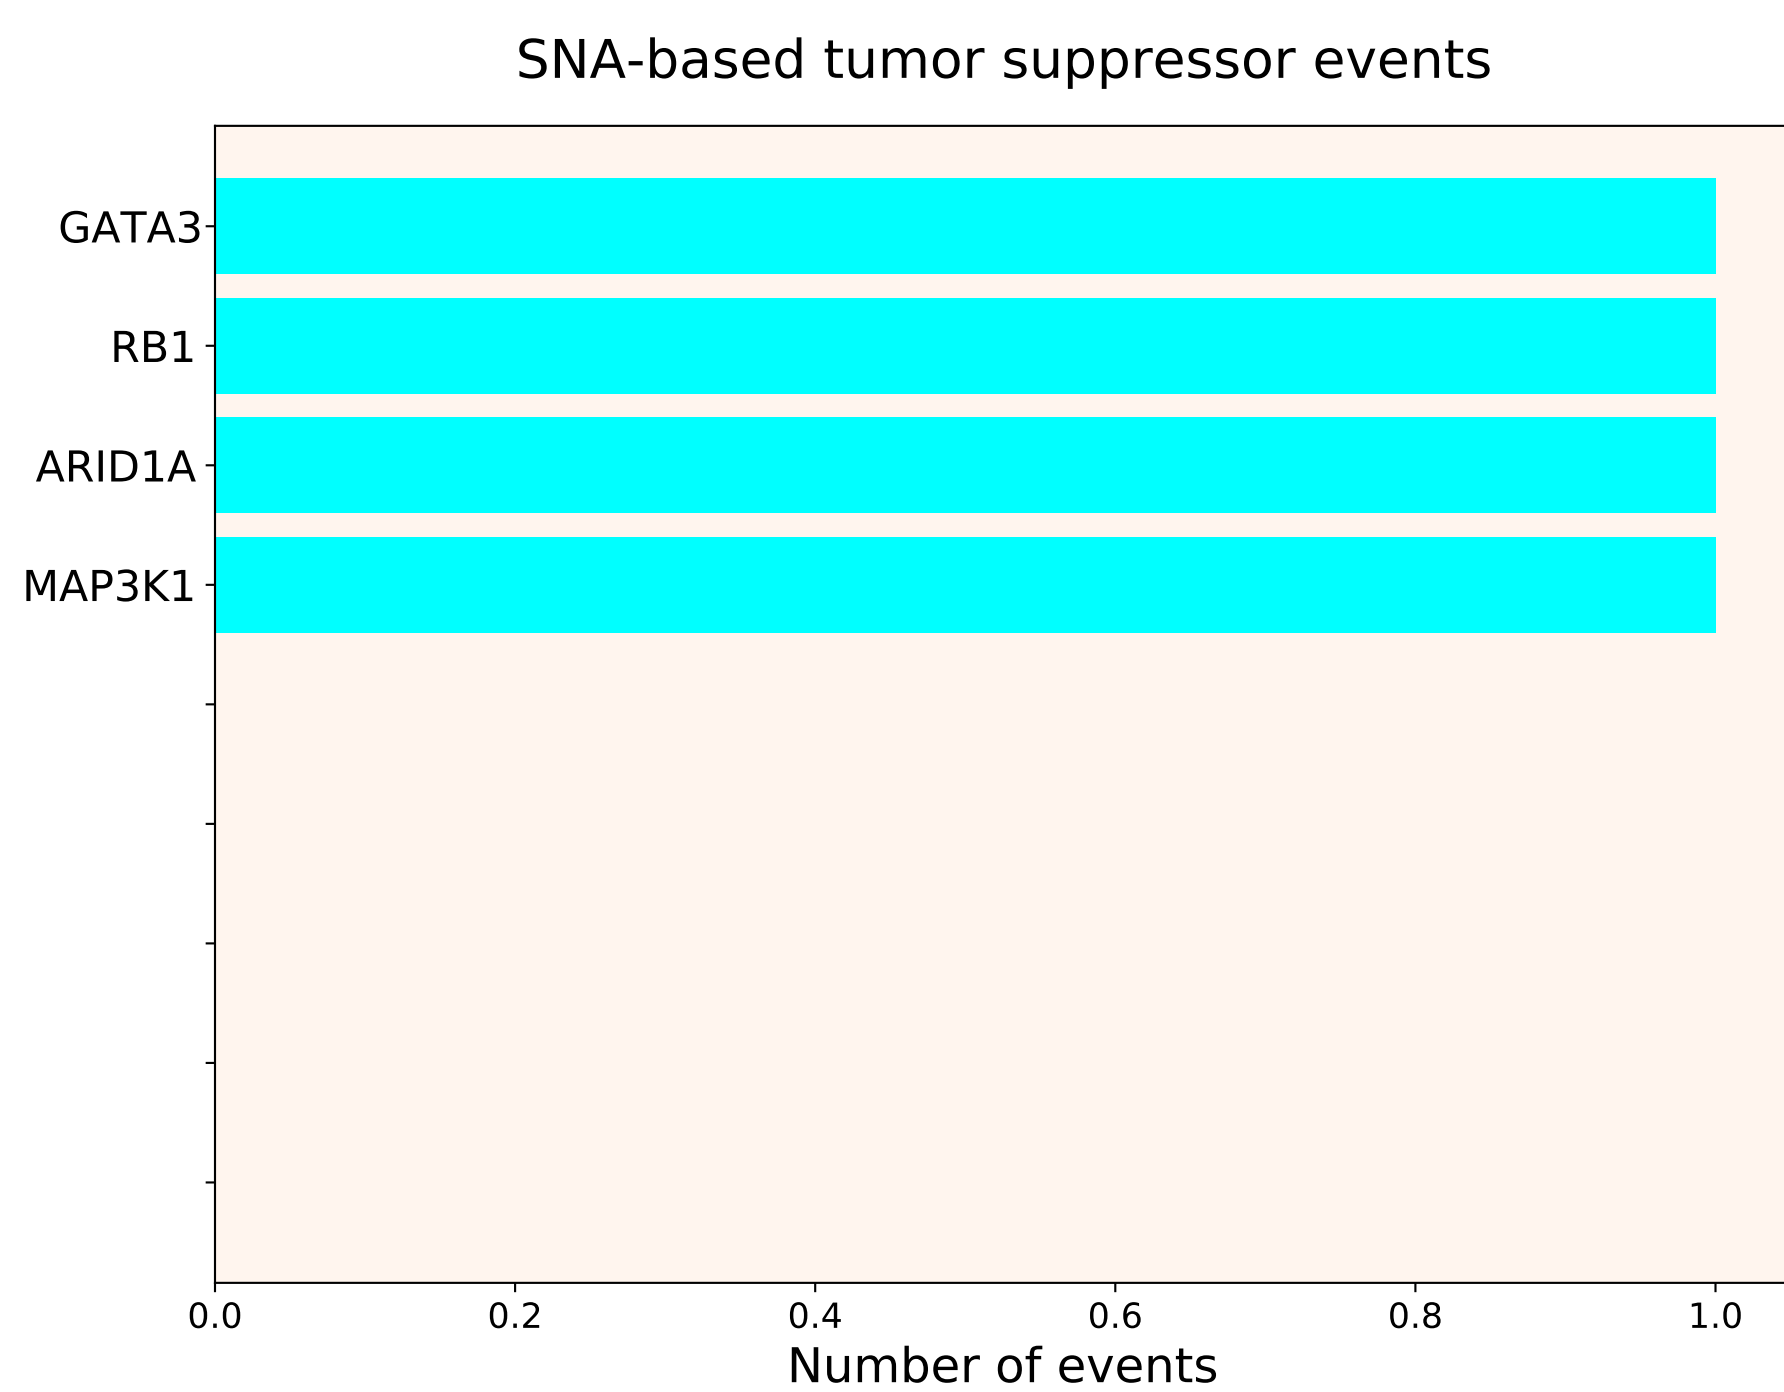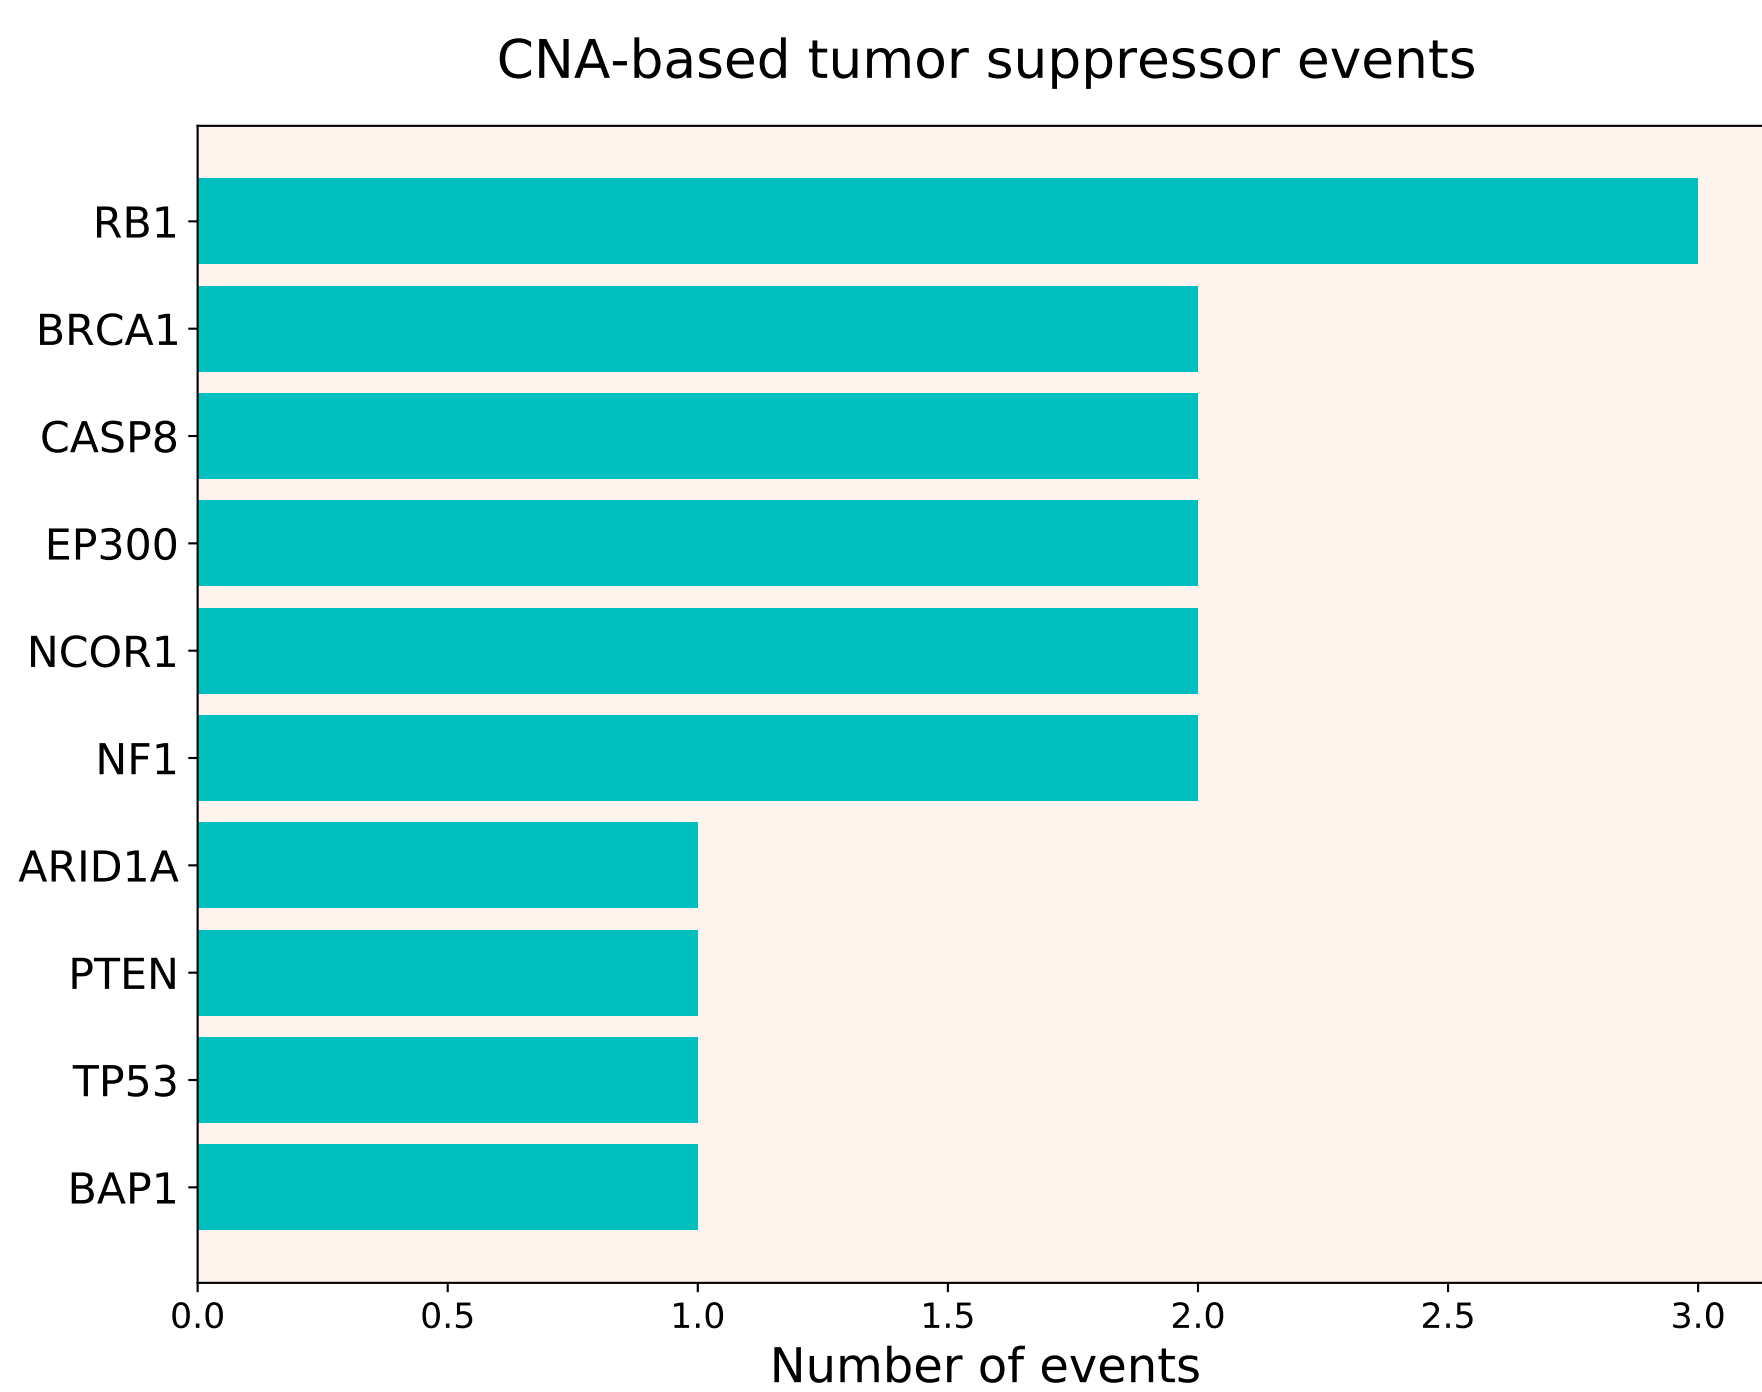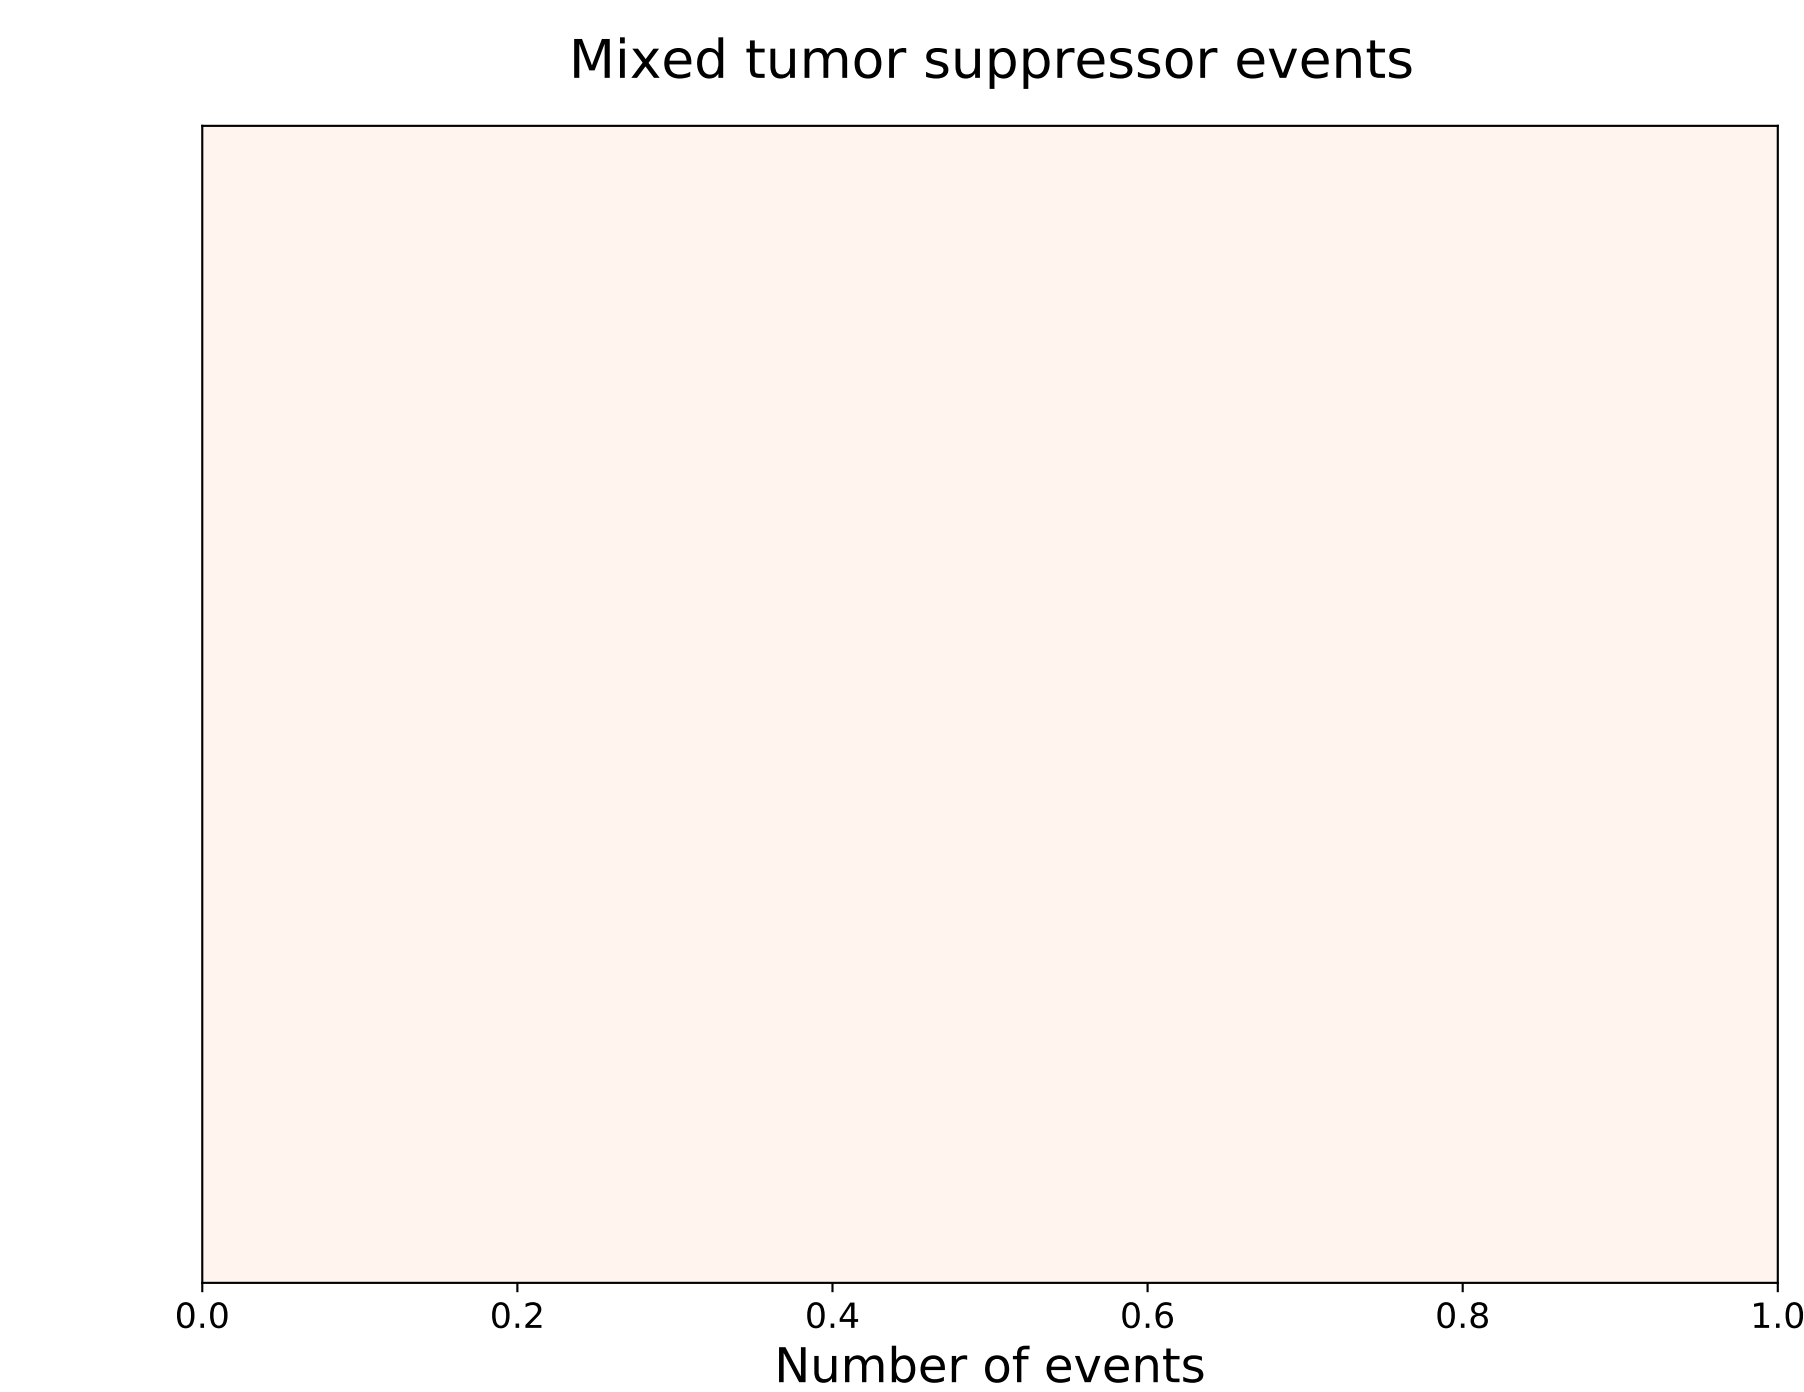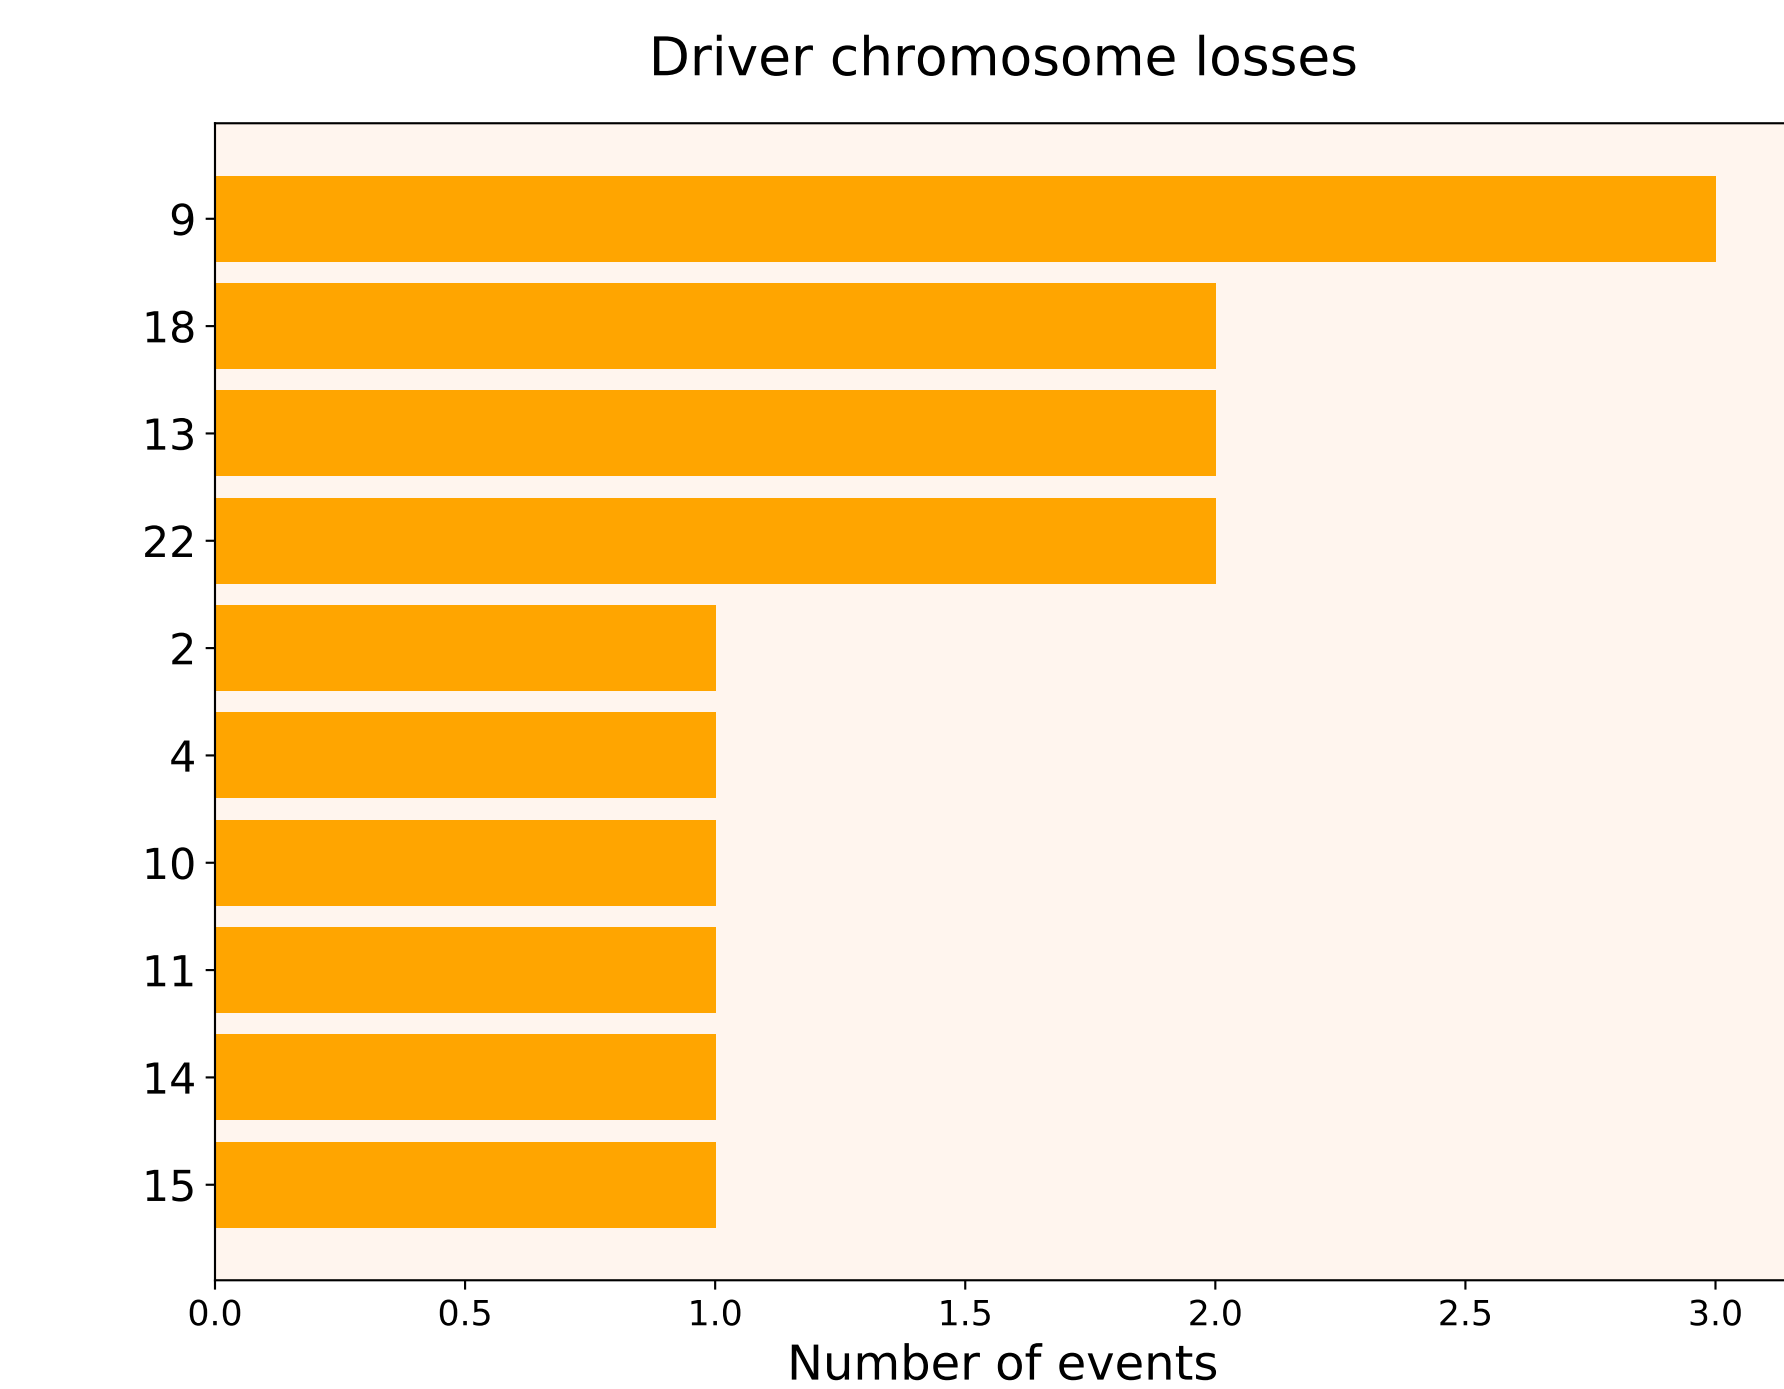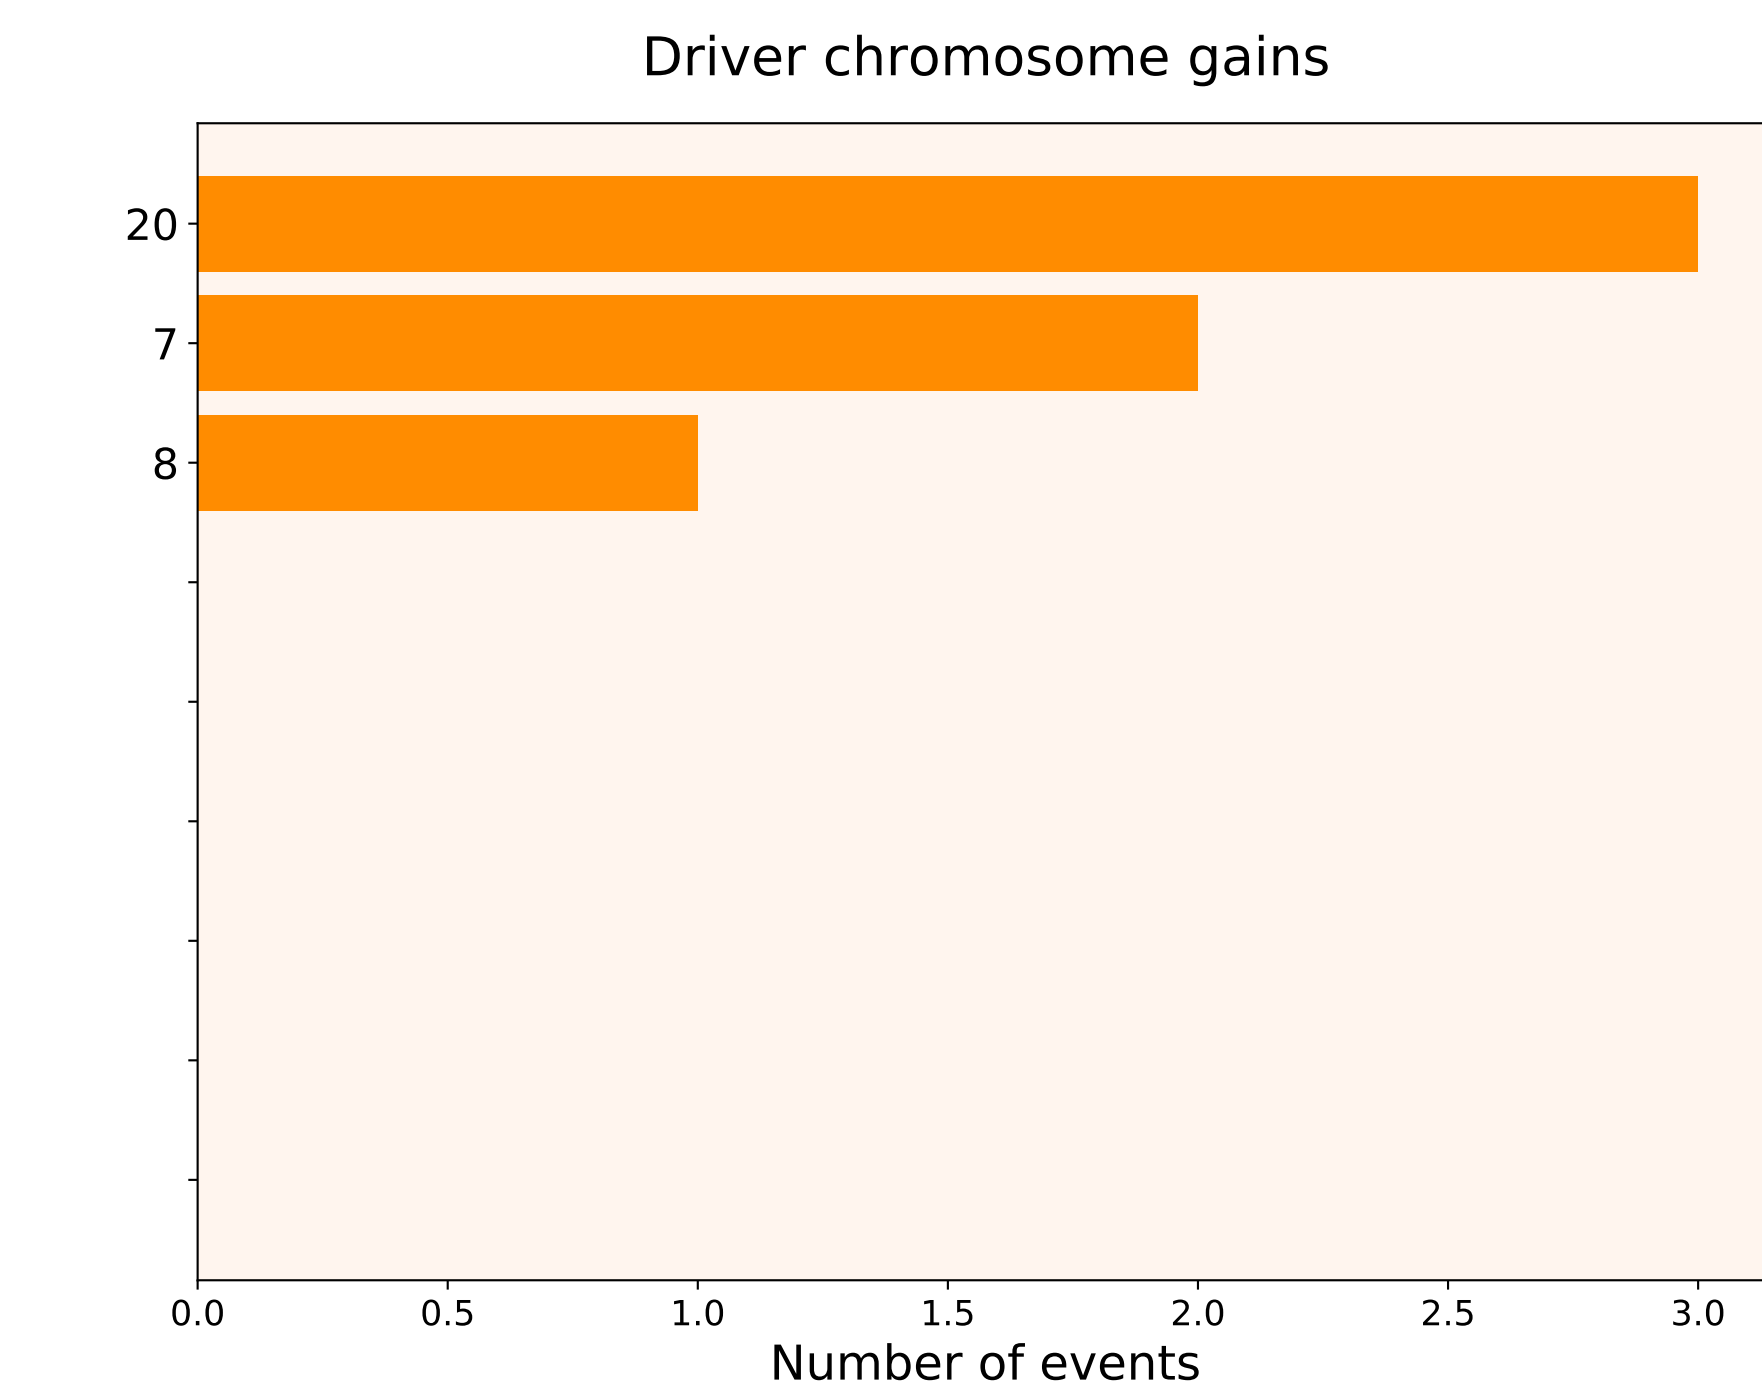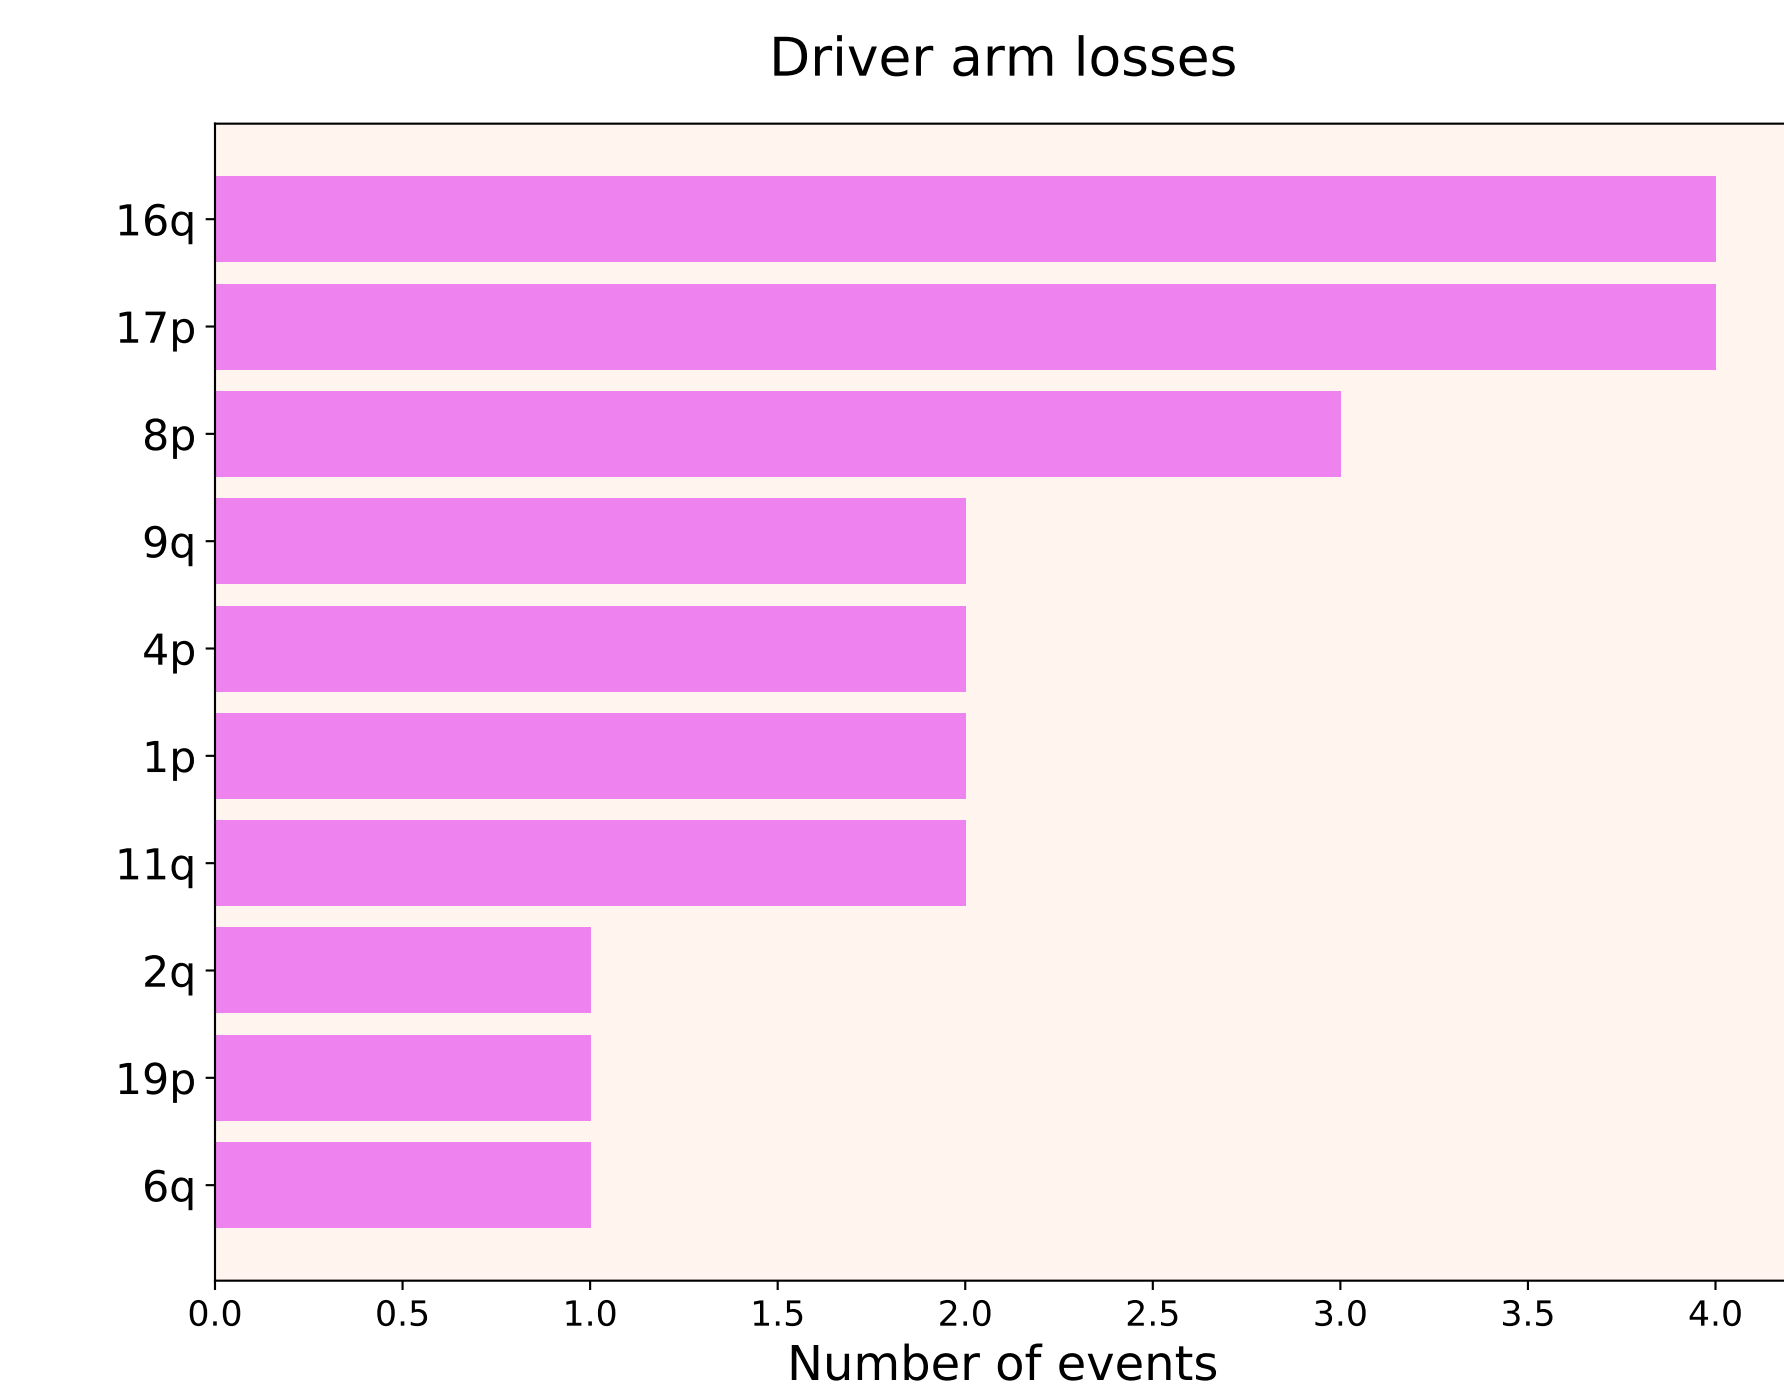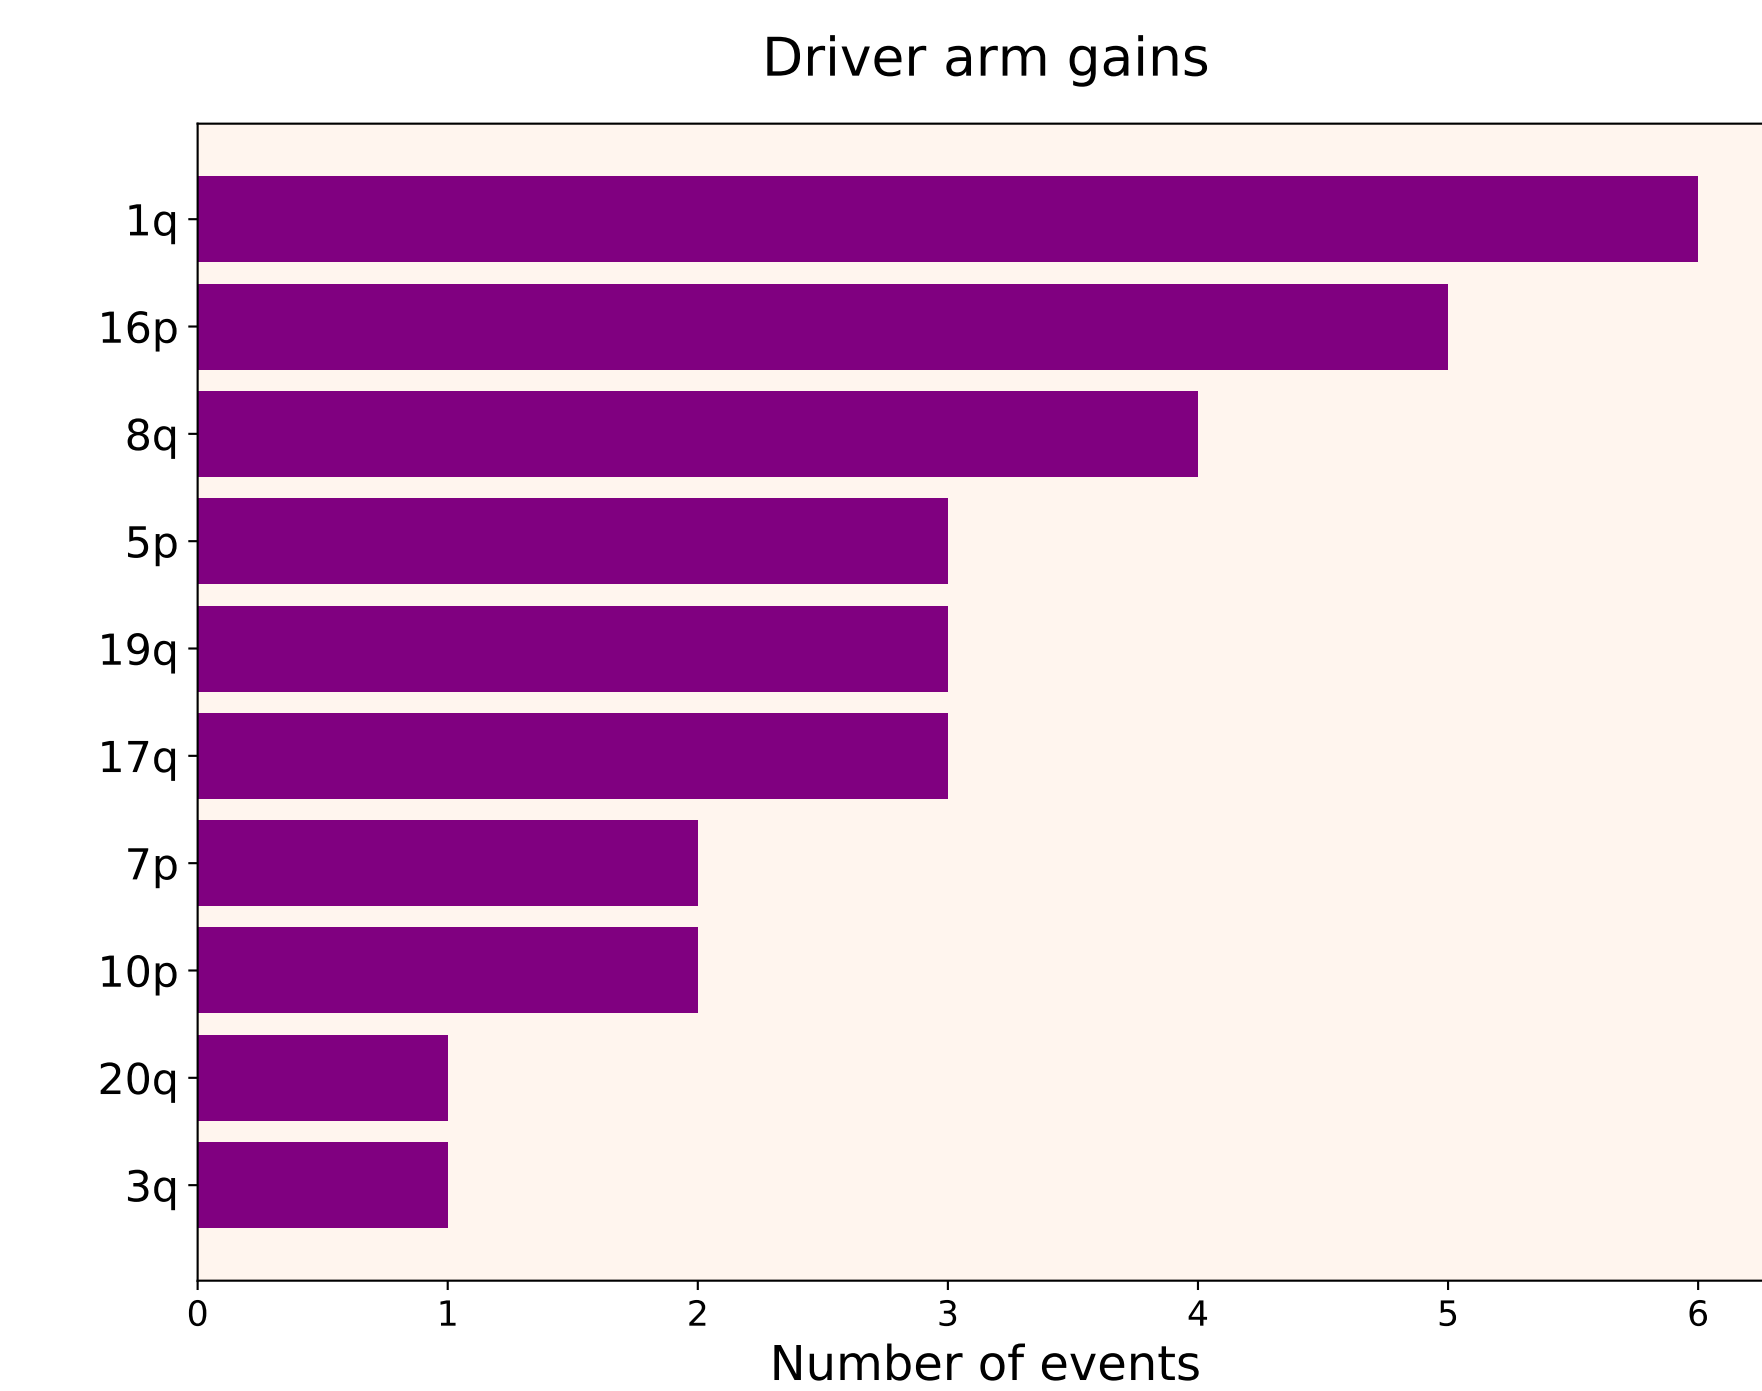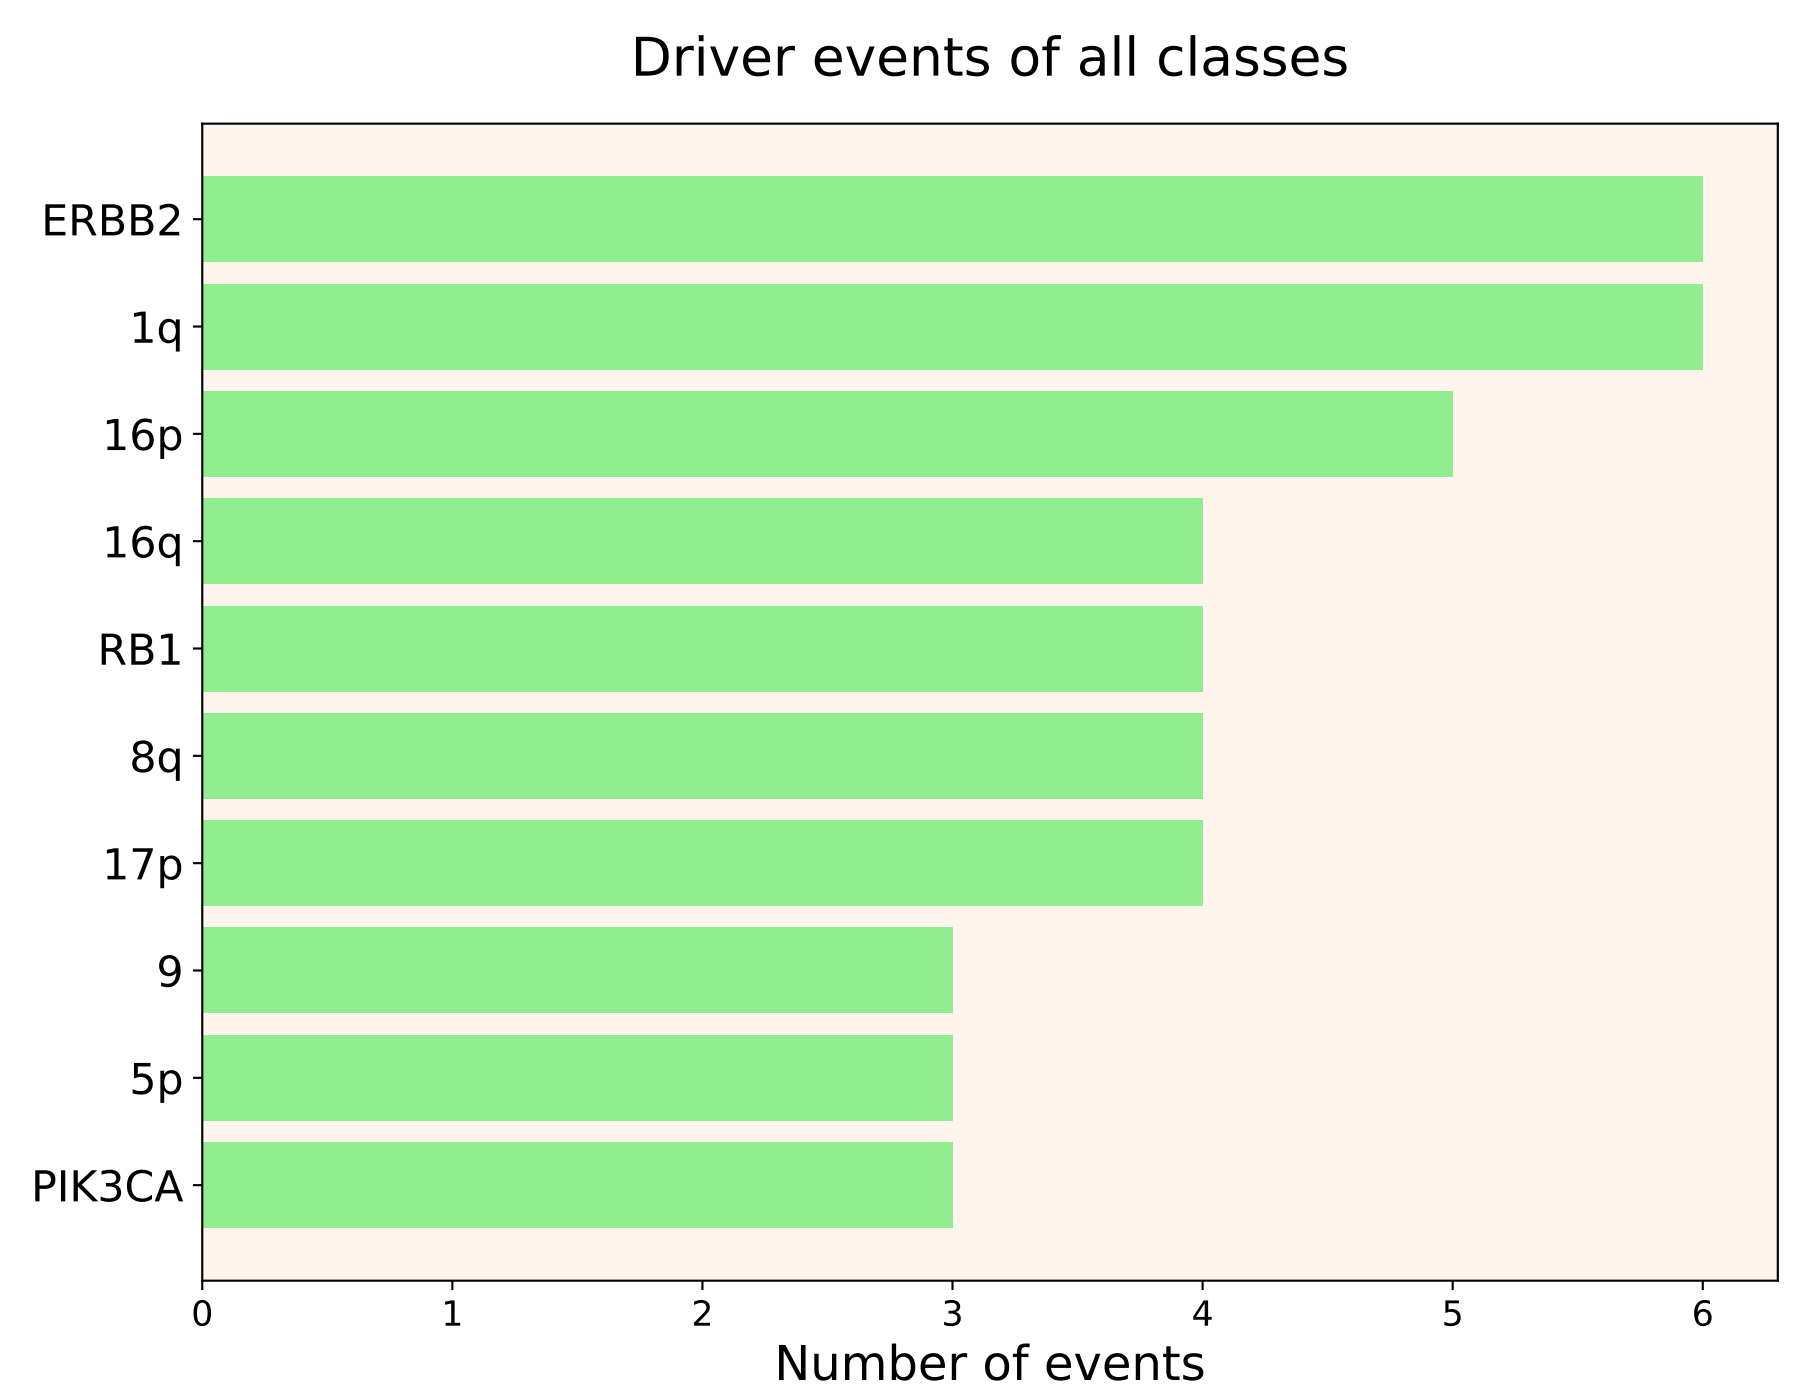

Supplement: Supplemental_Data_S1.zip [file Supplemental_Data_S1.zip]

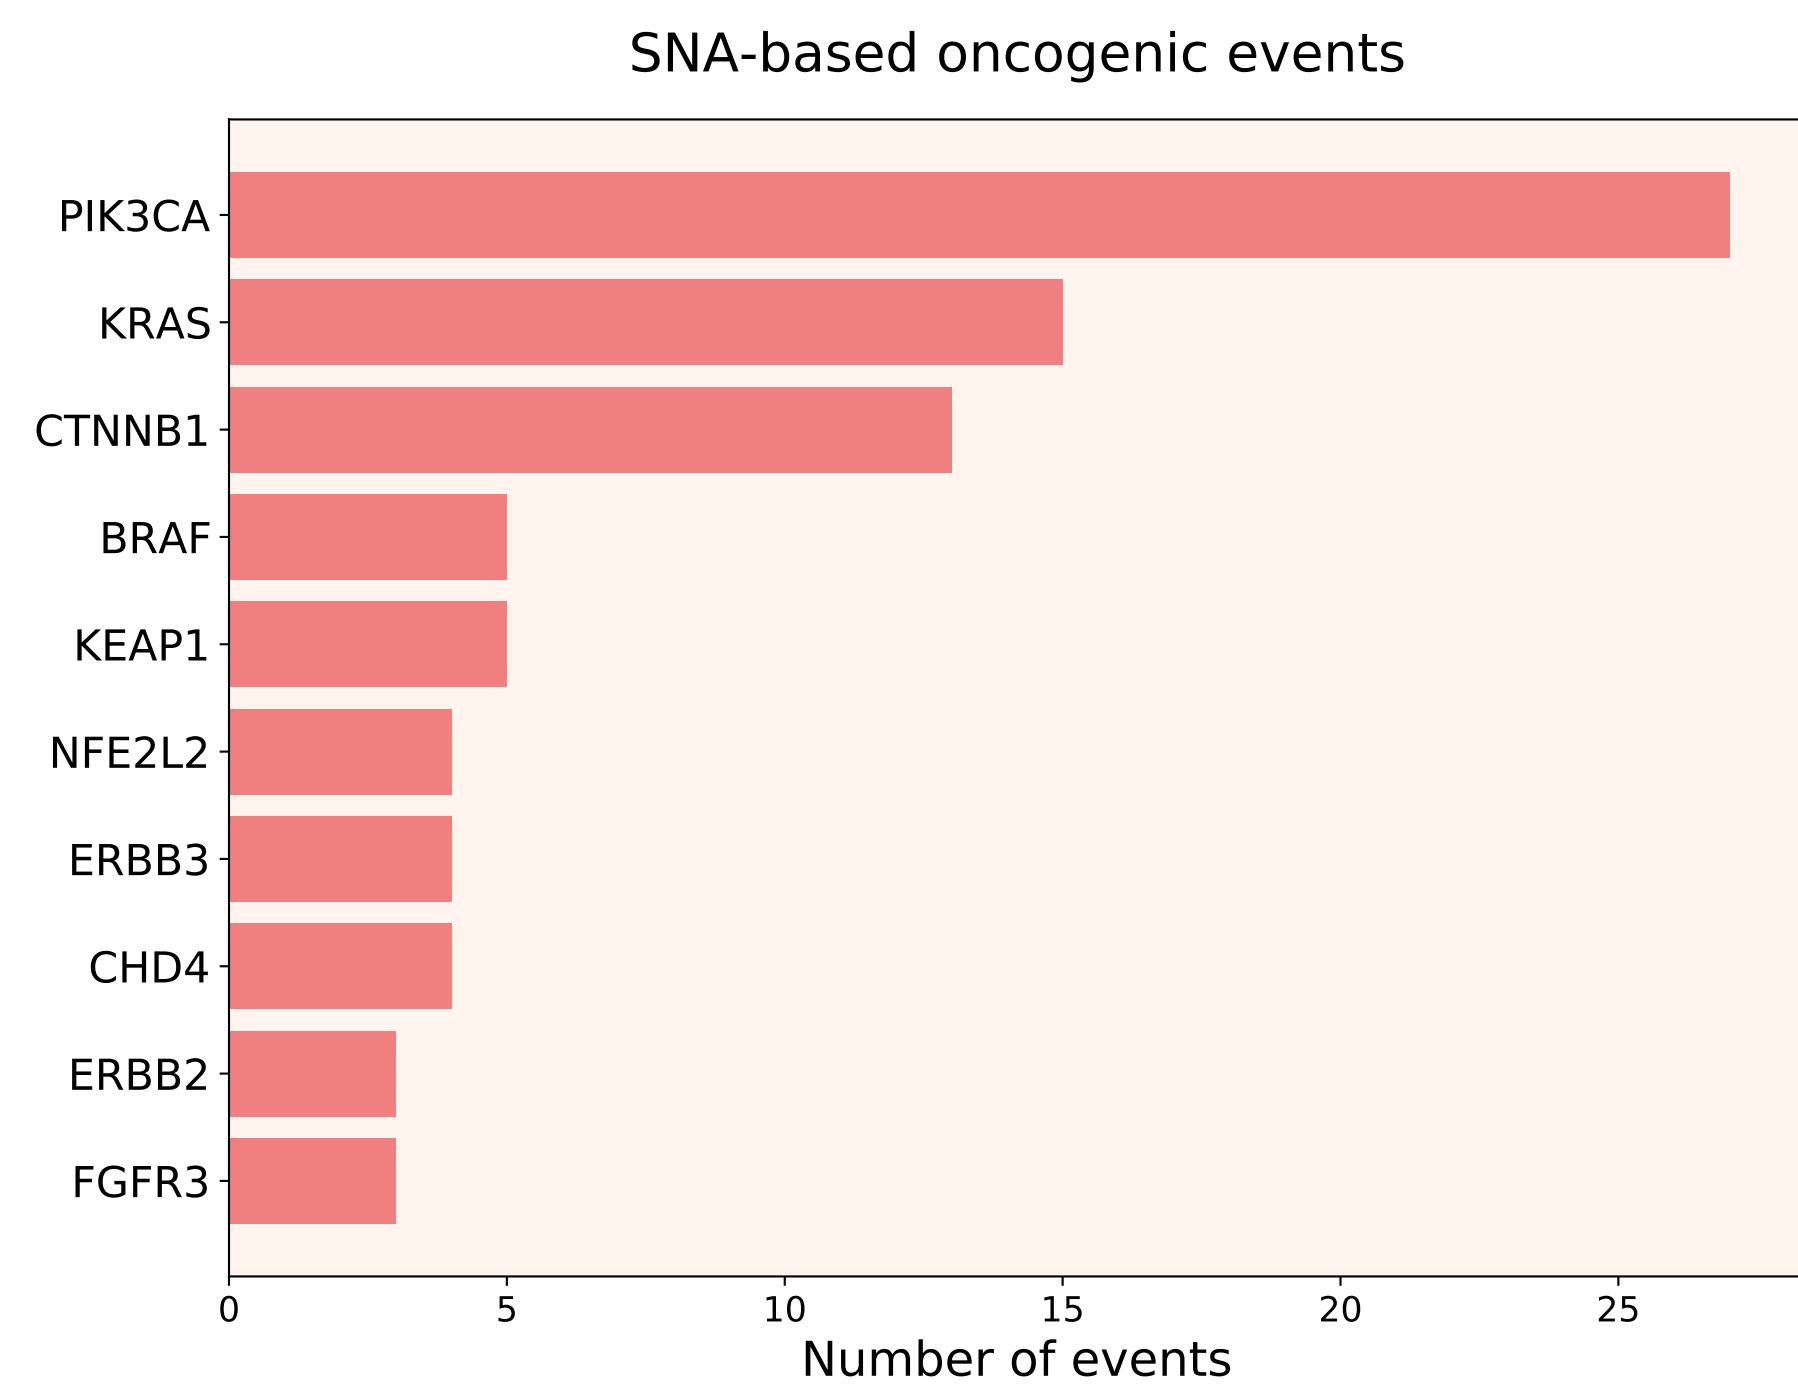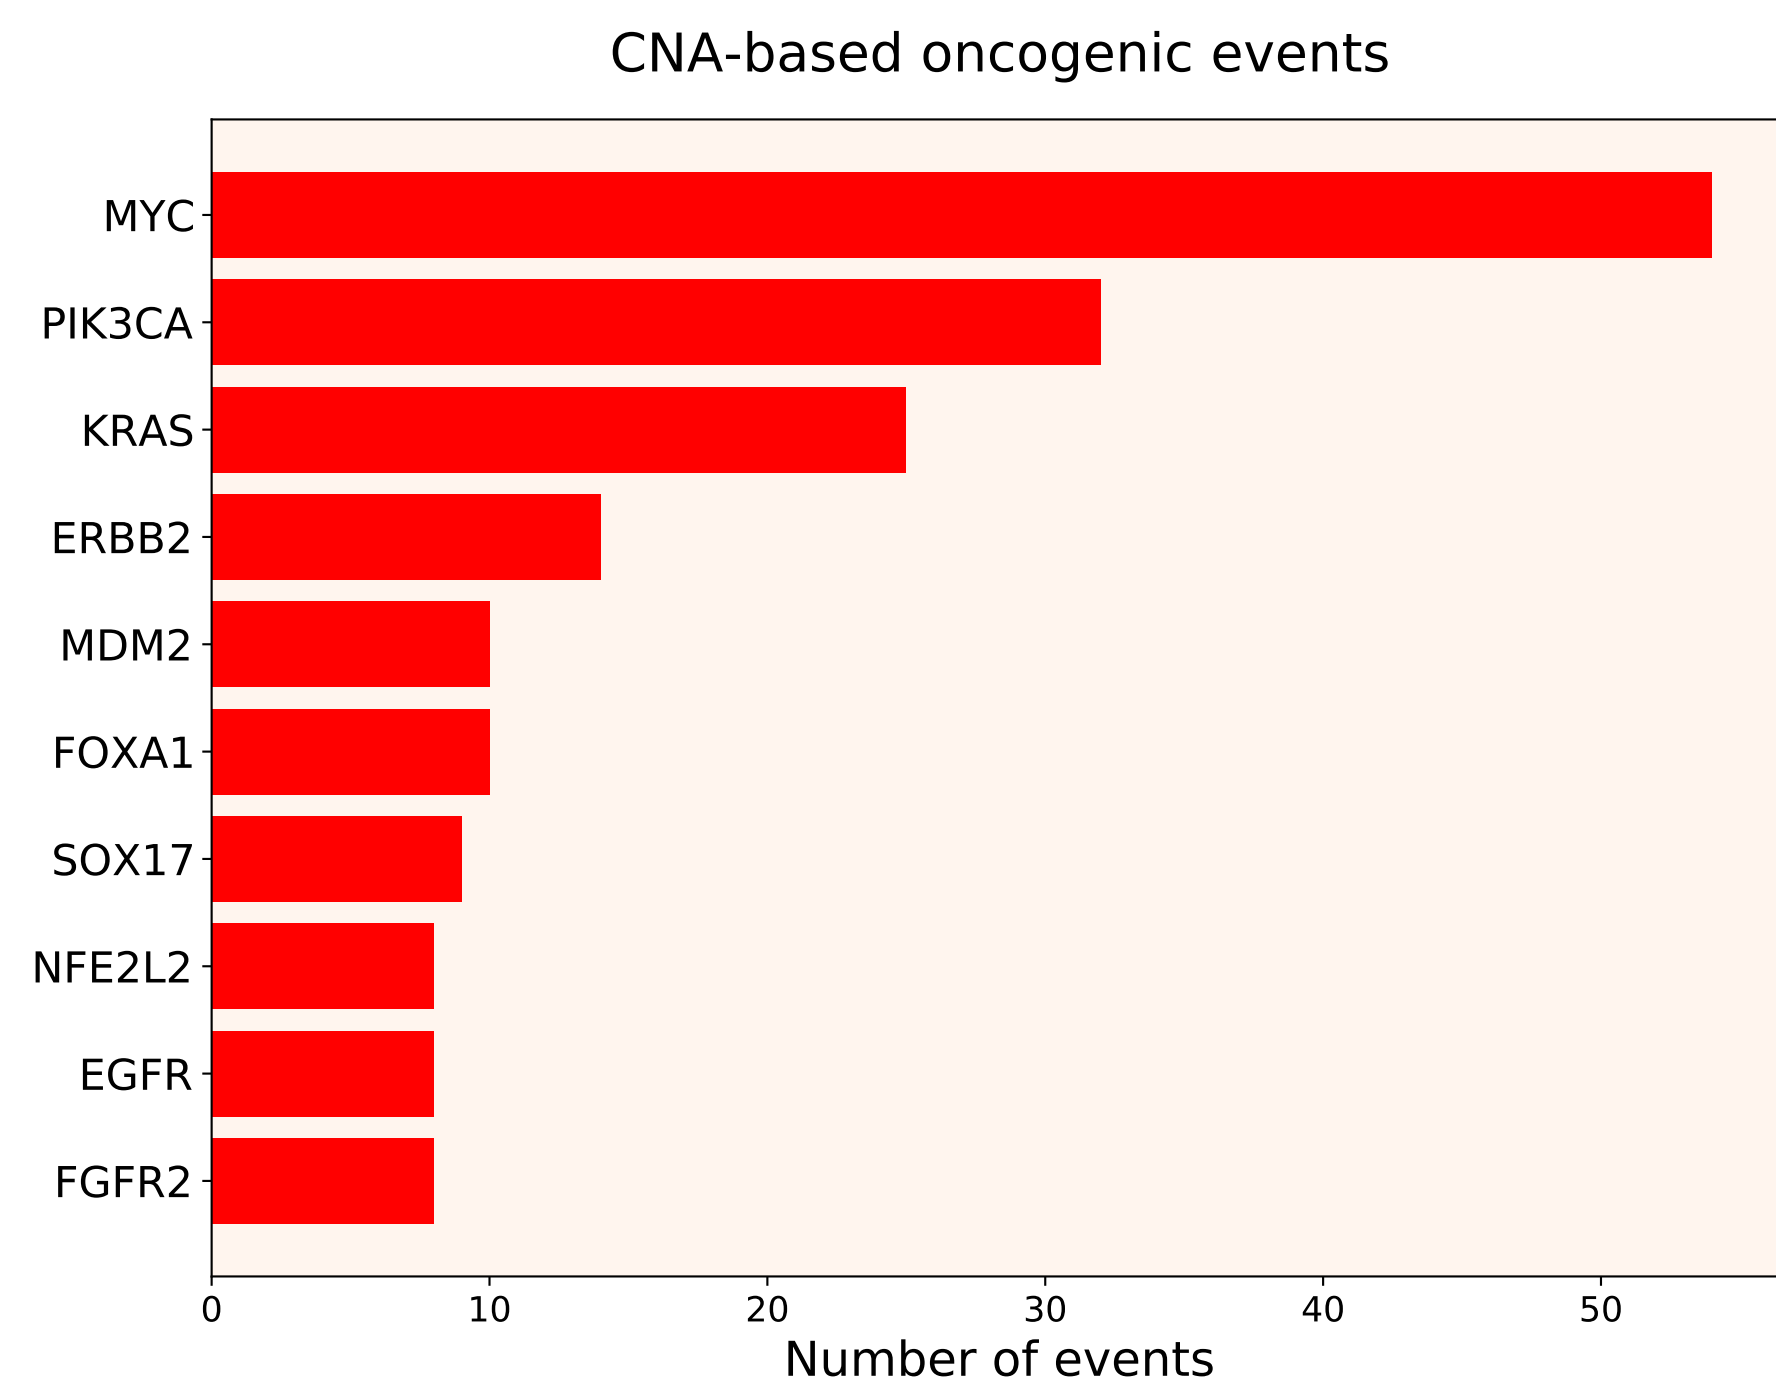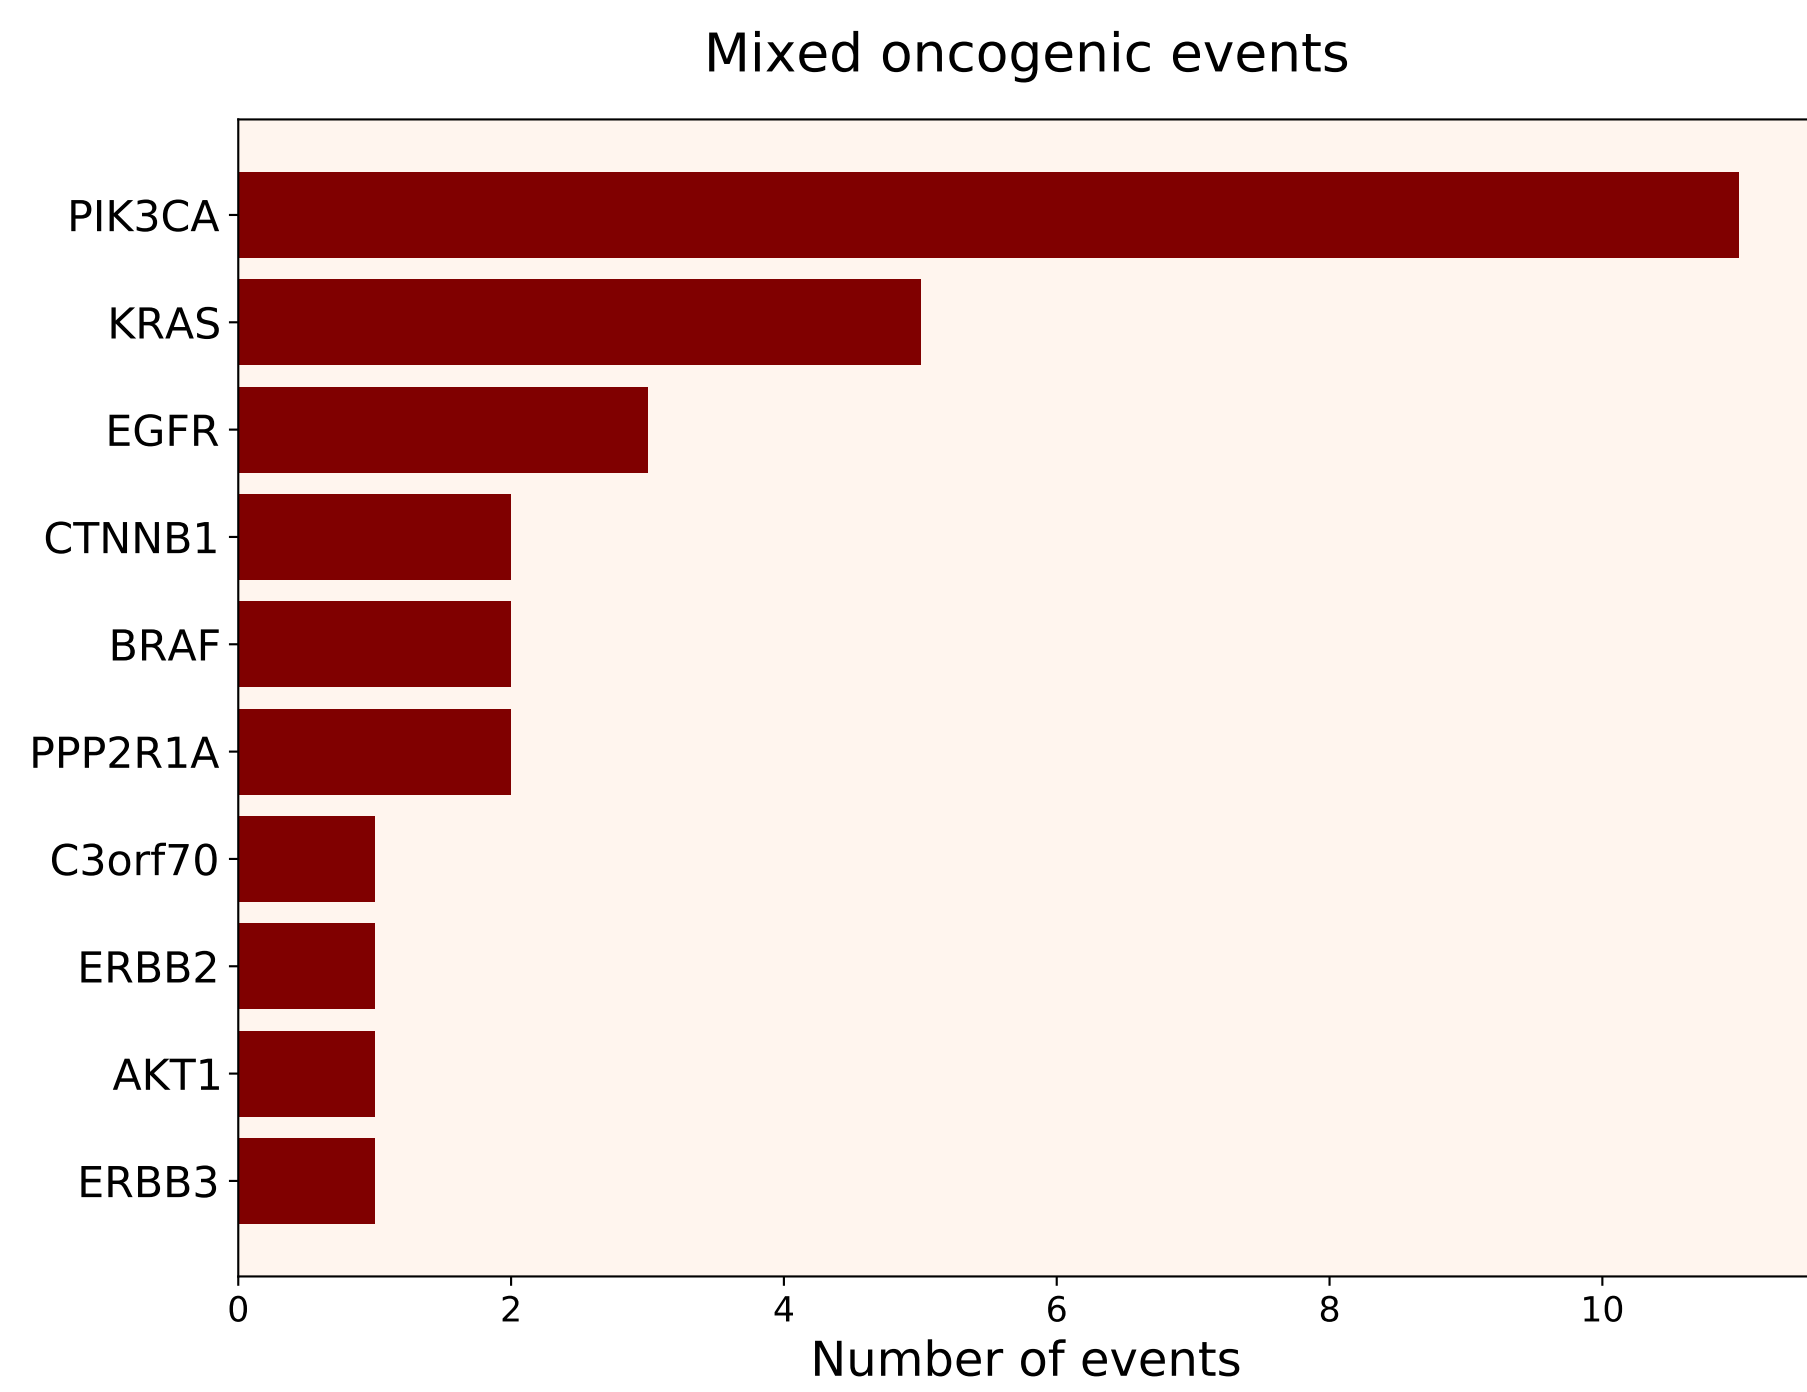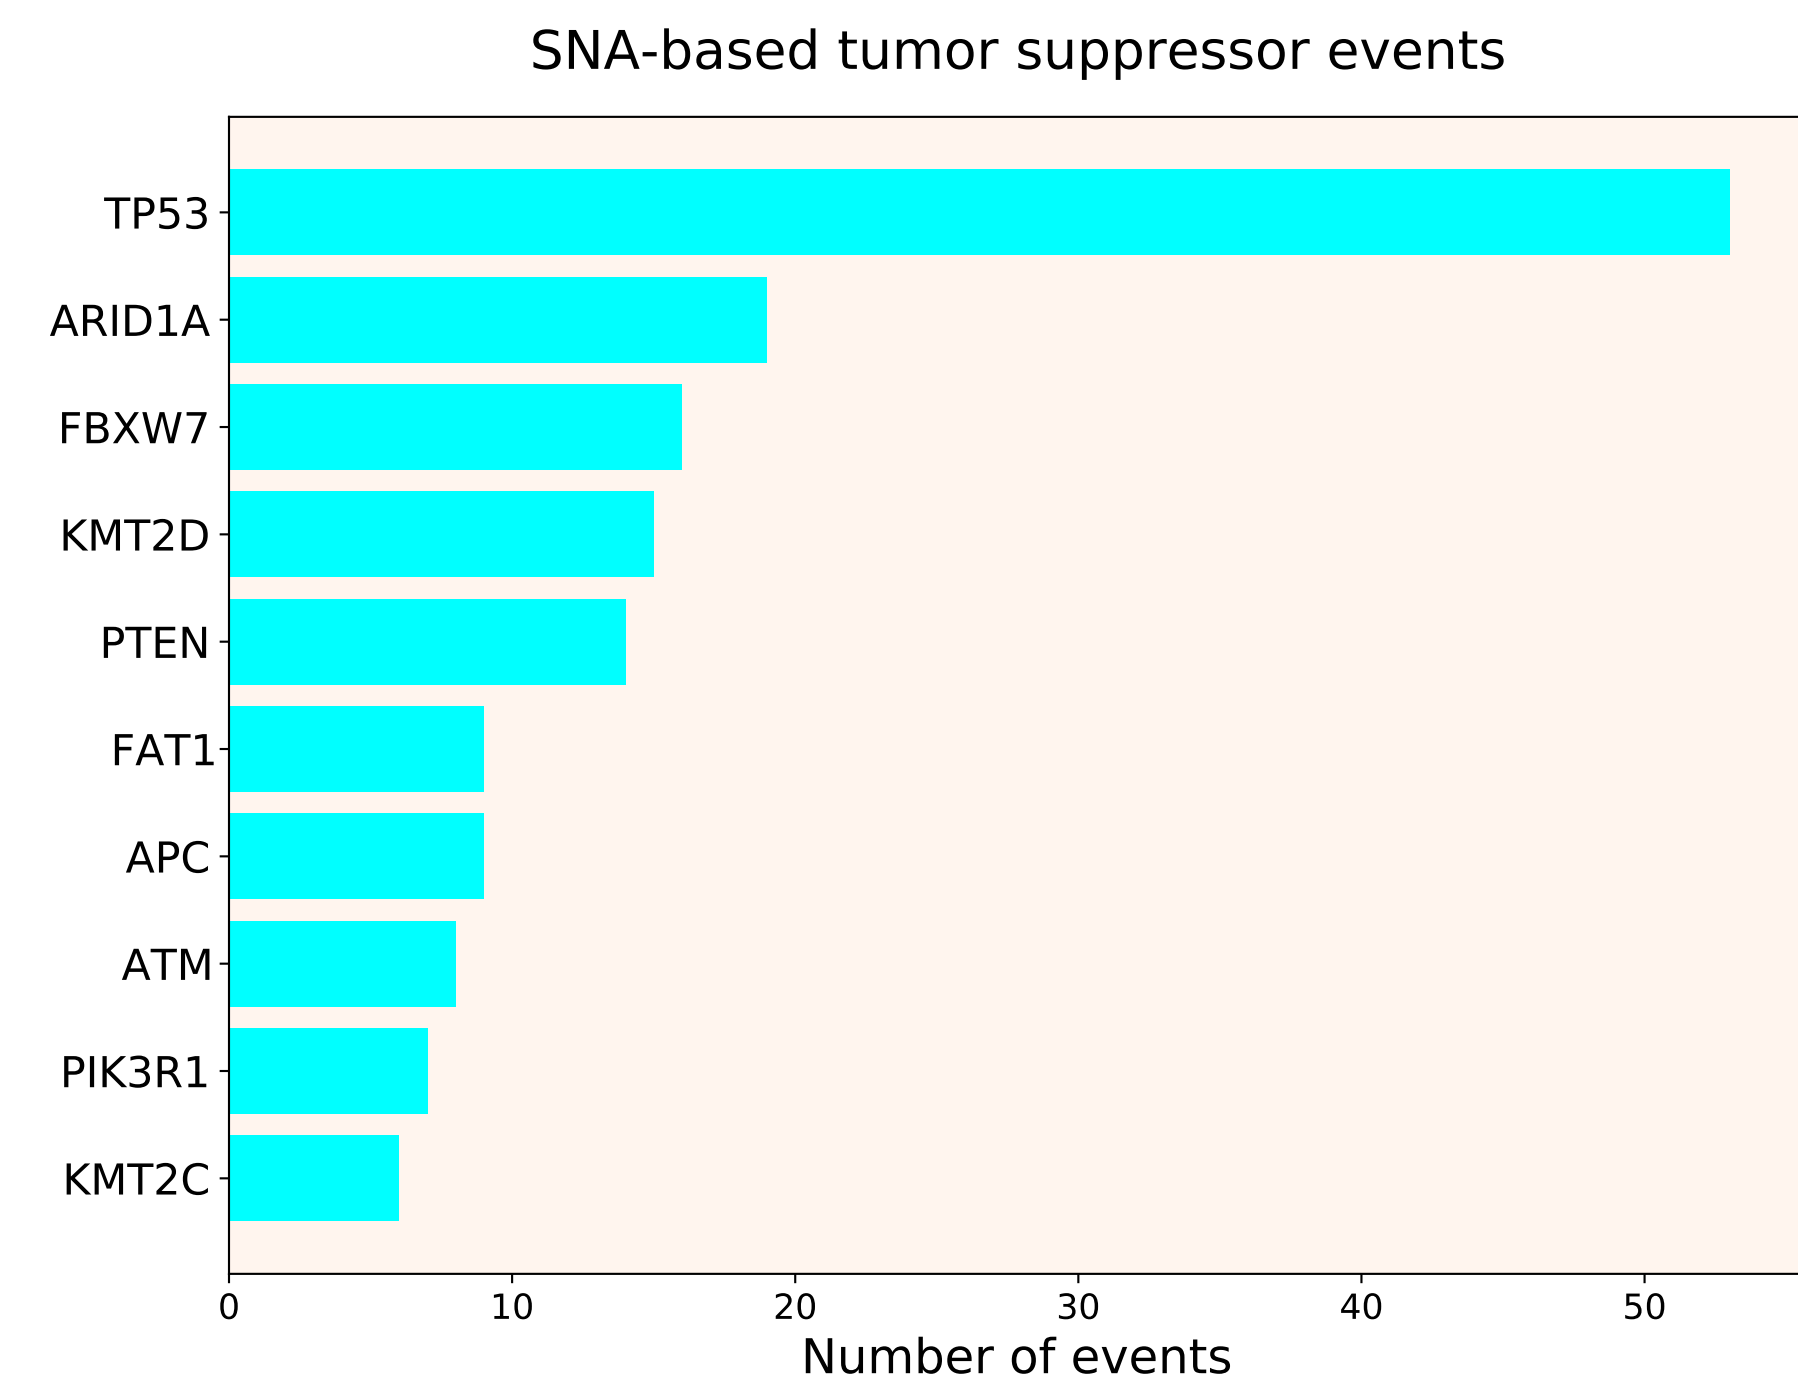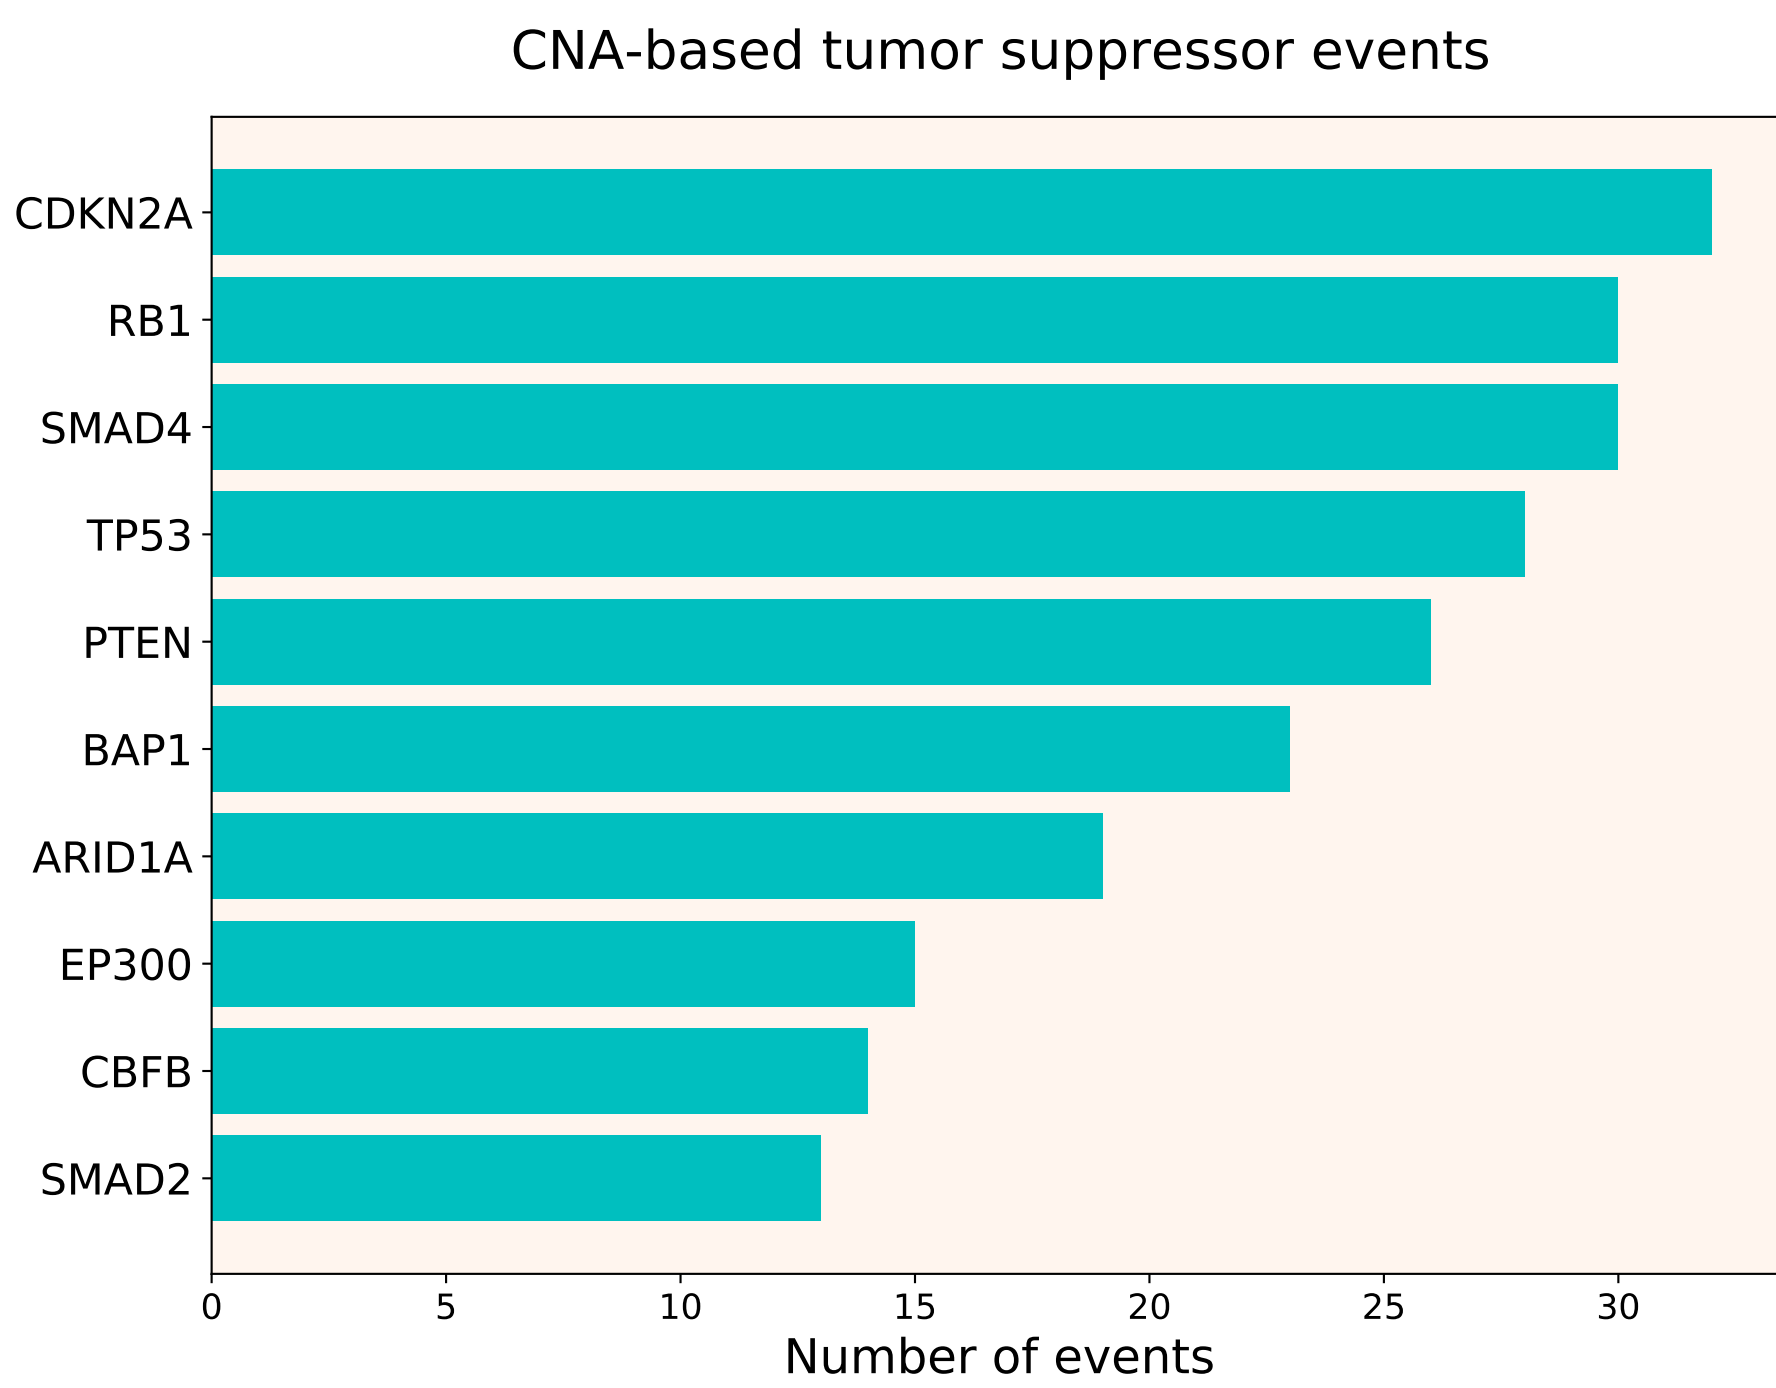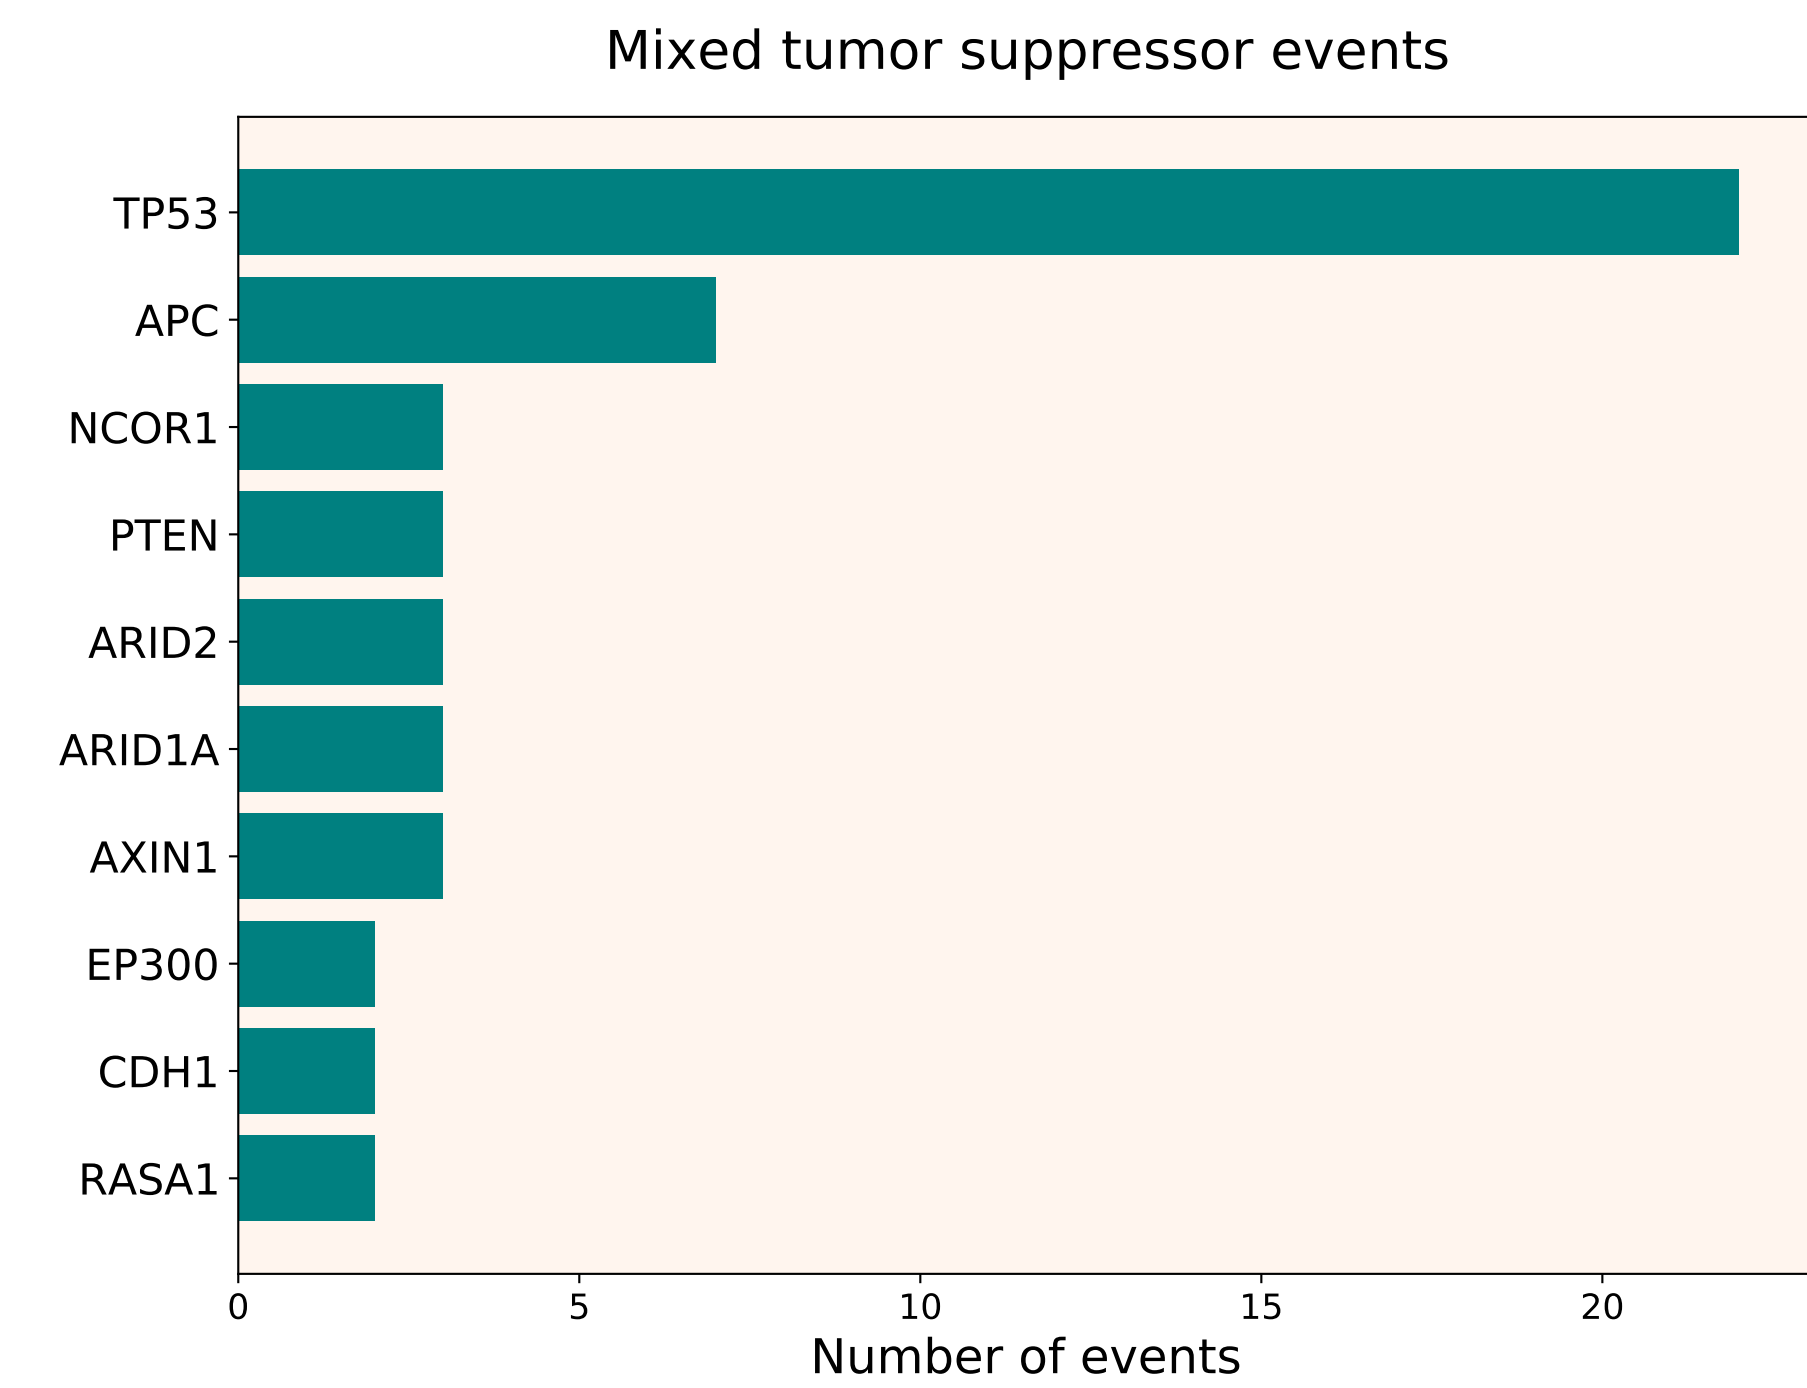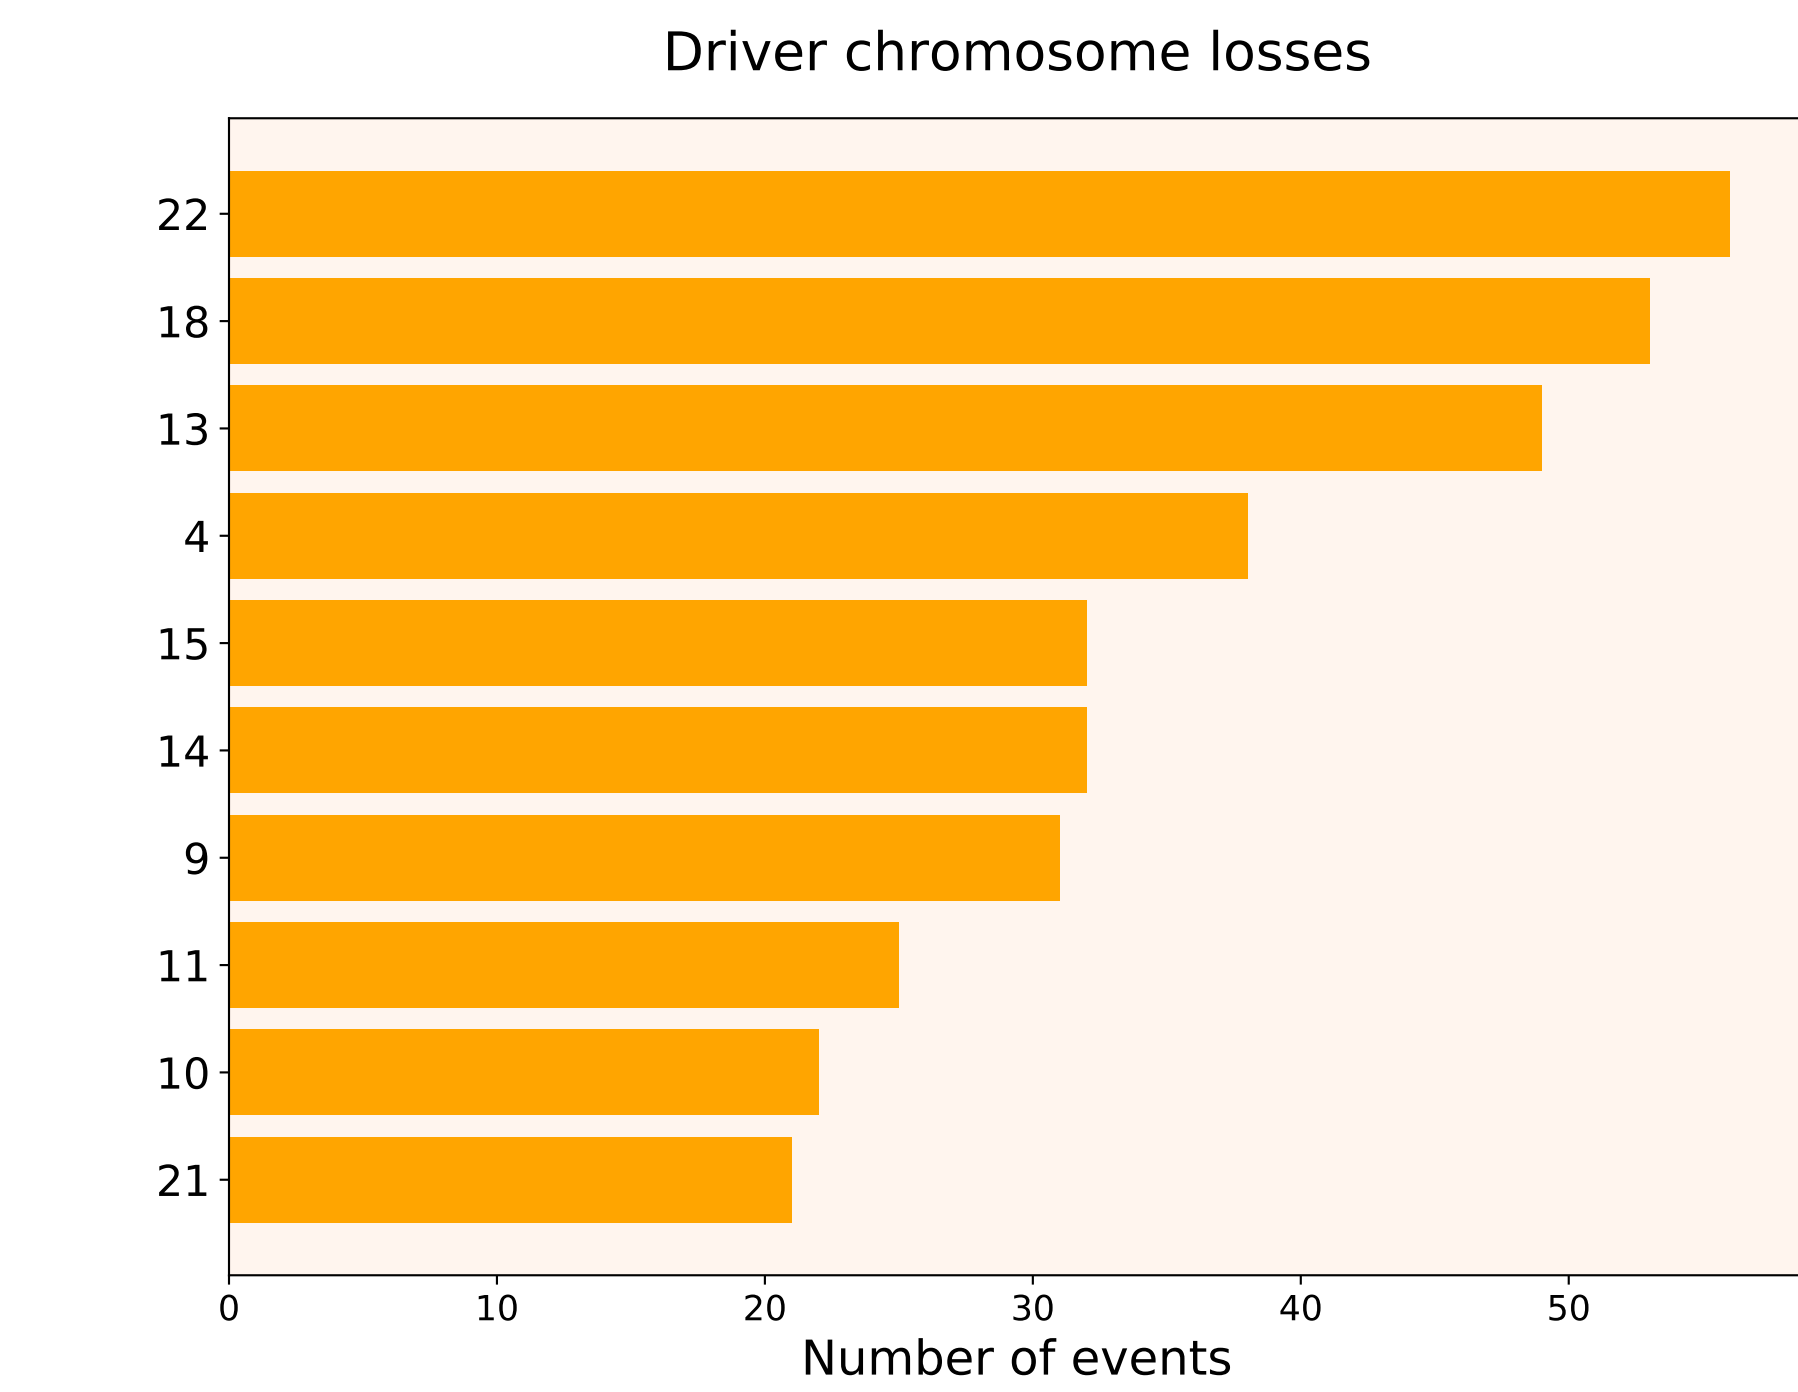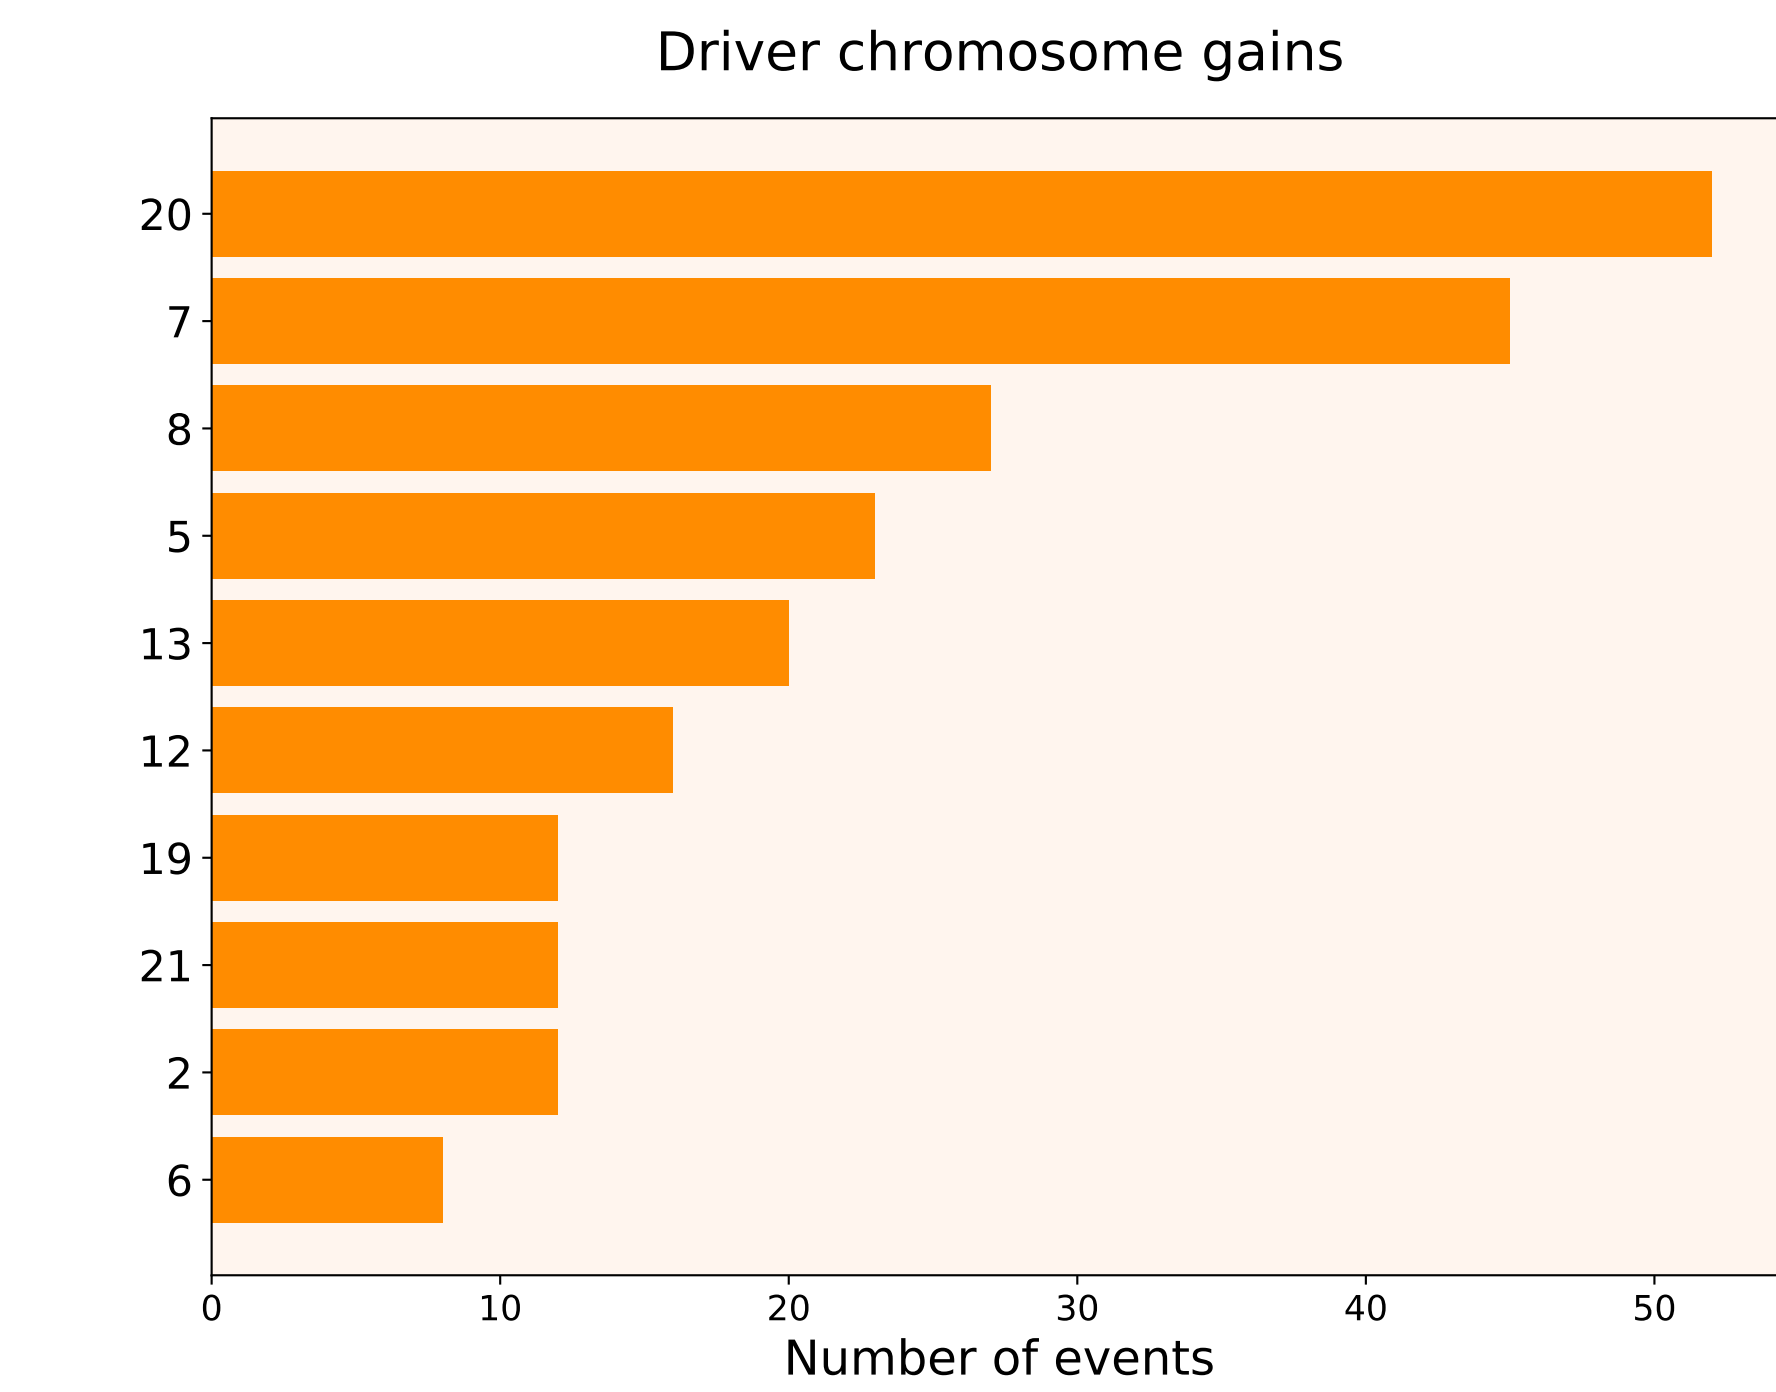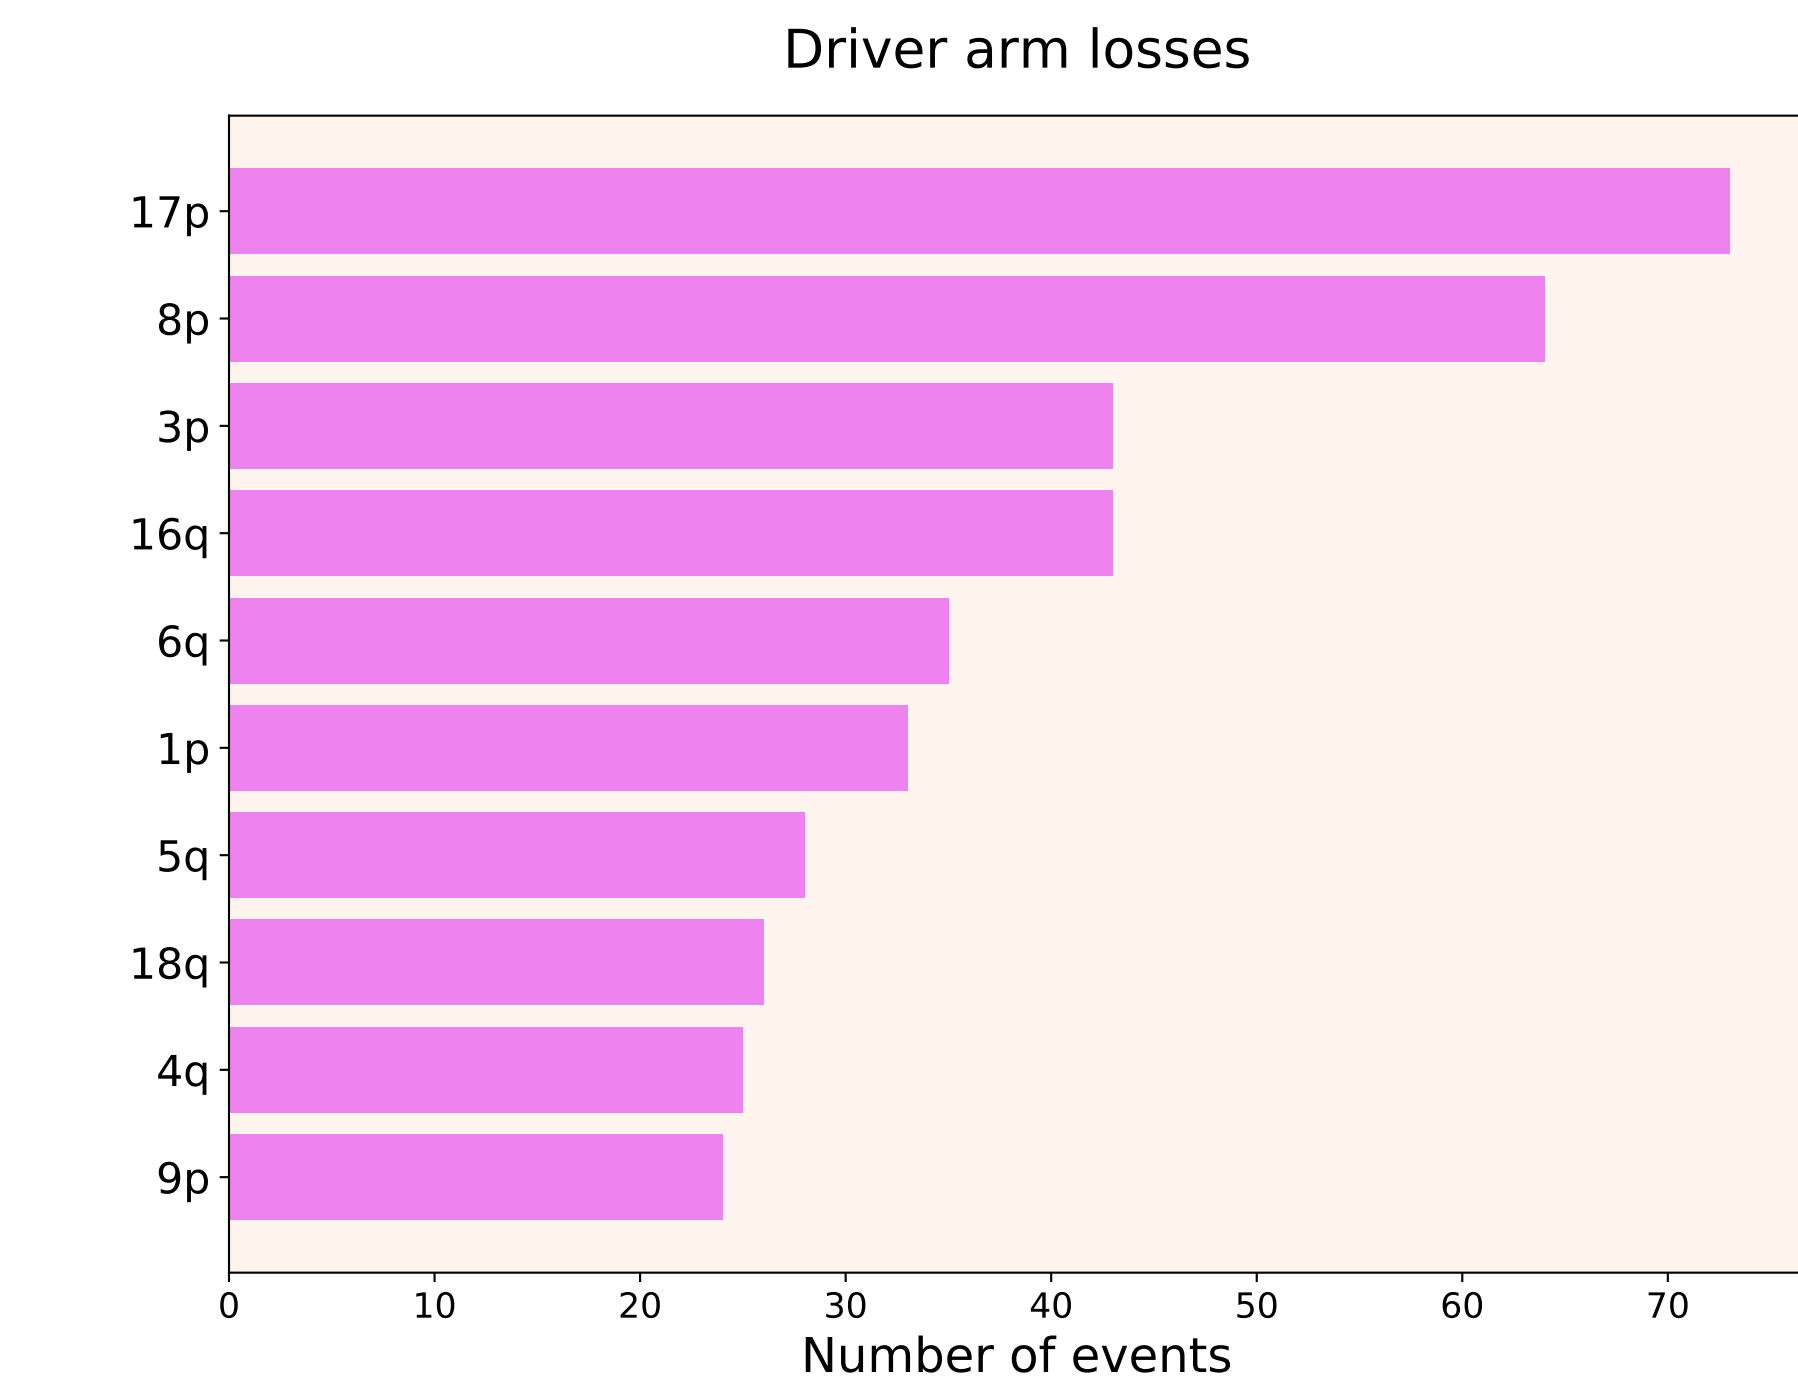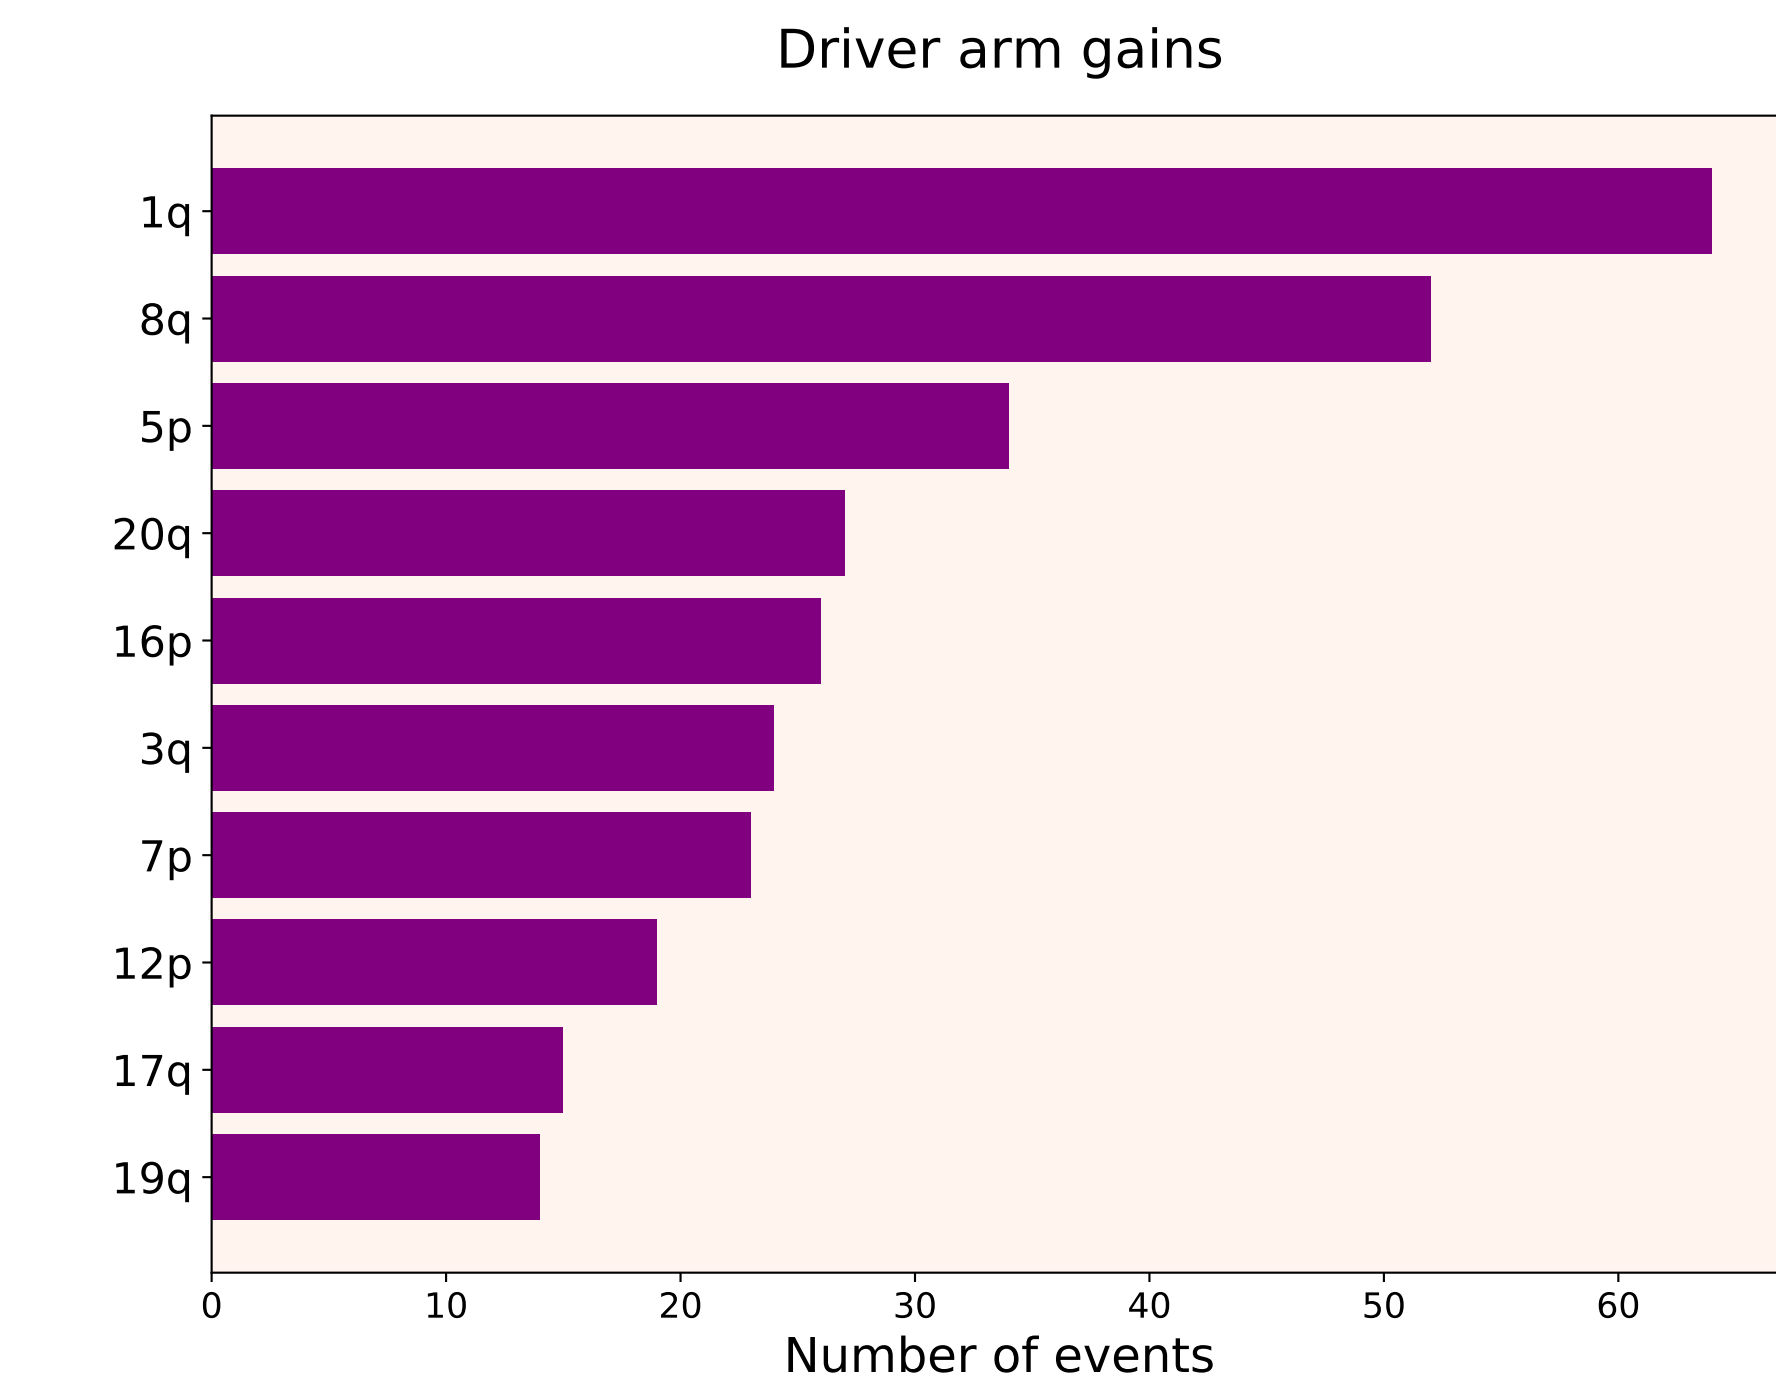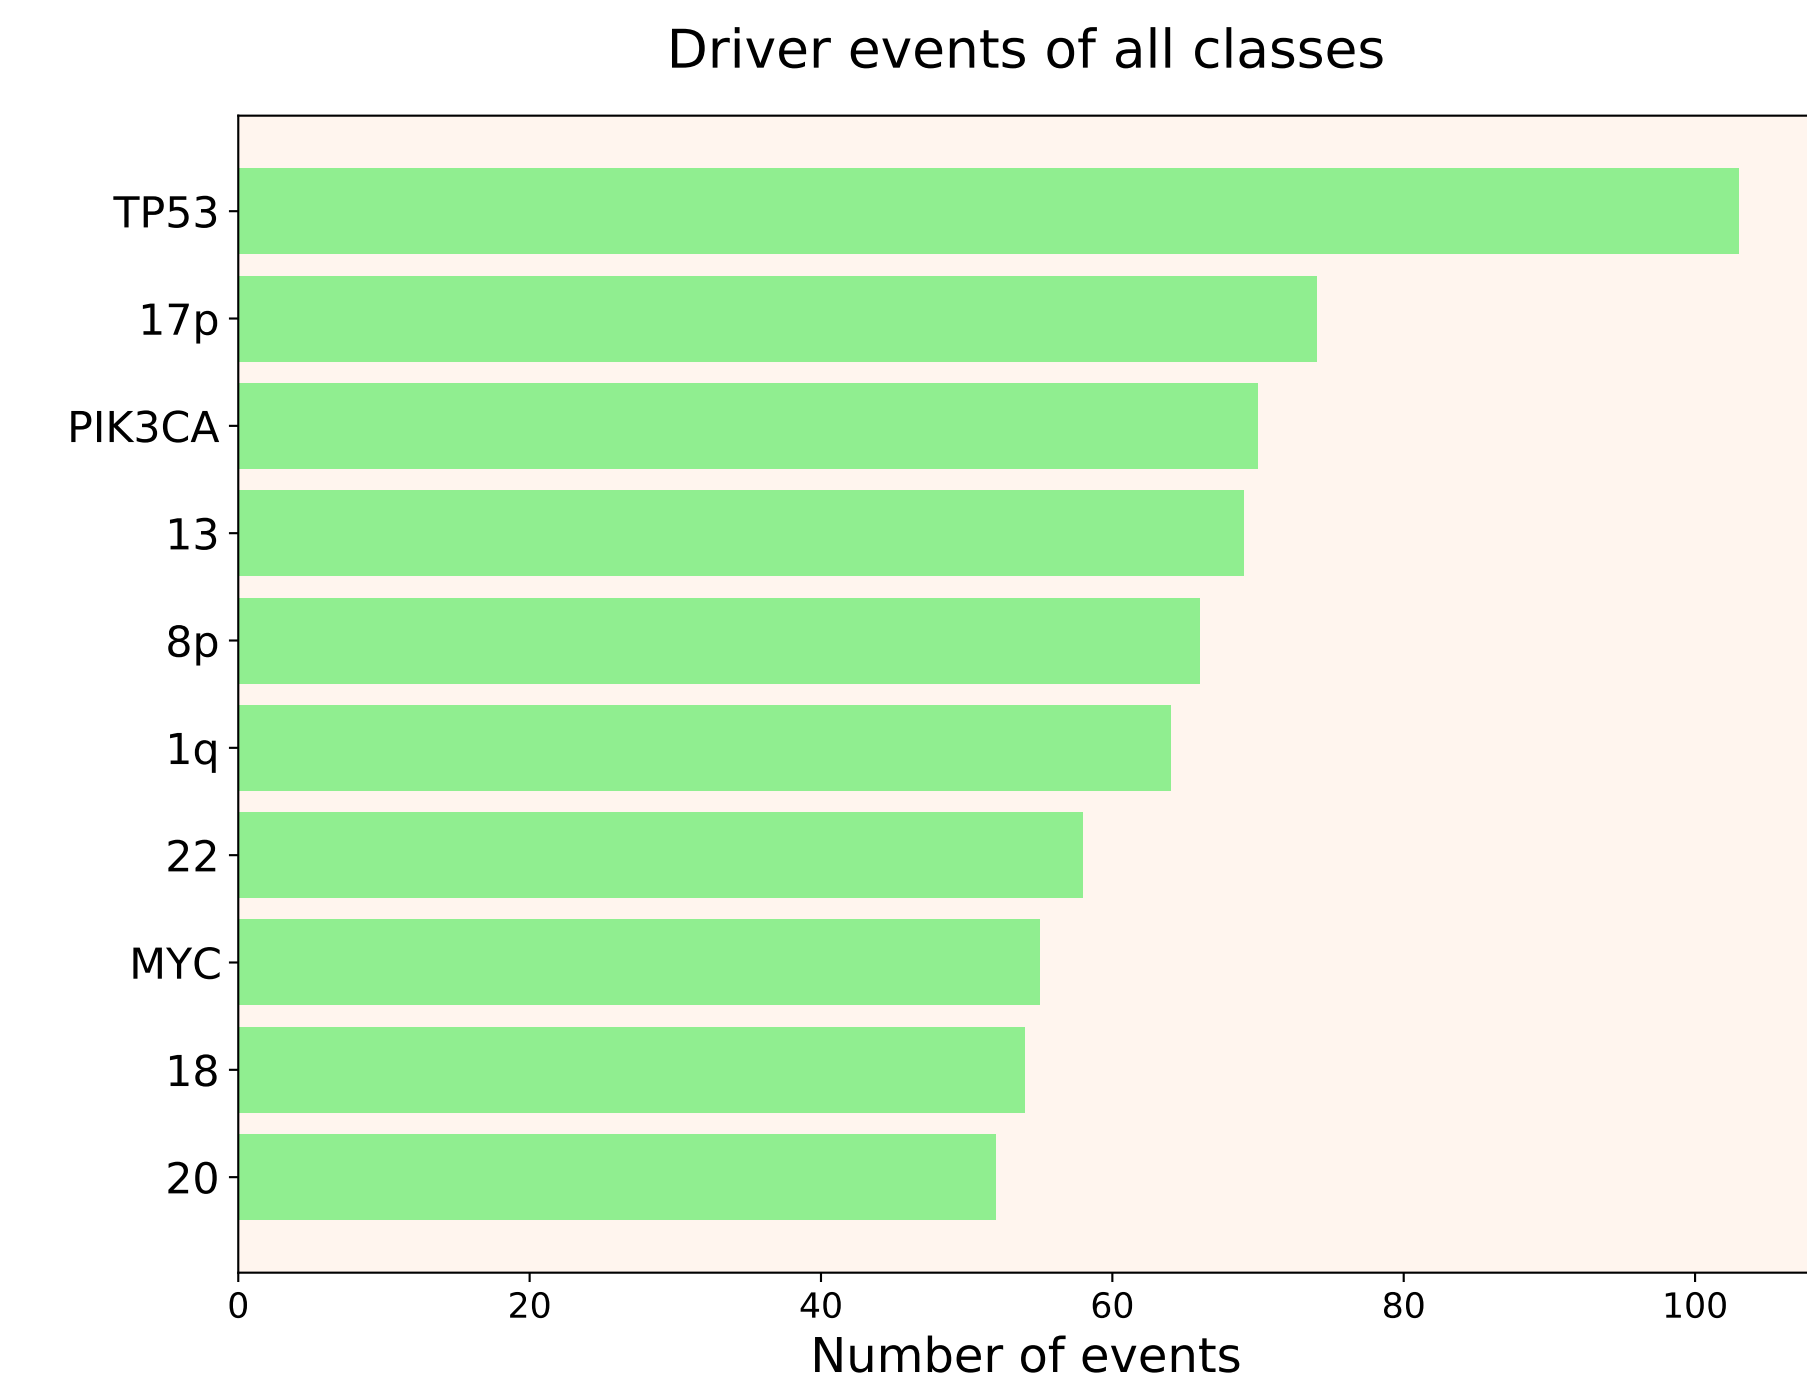

Supplement: Supplemental_Data_S1.zip [file Supplemental_Data_S1.zip]

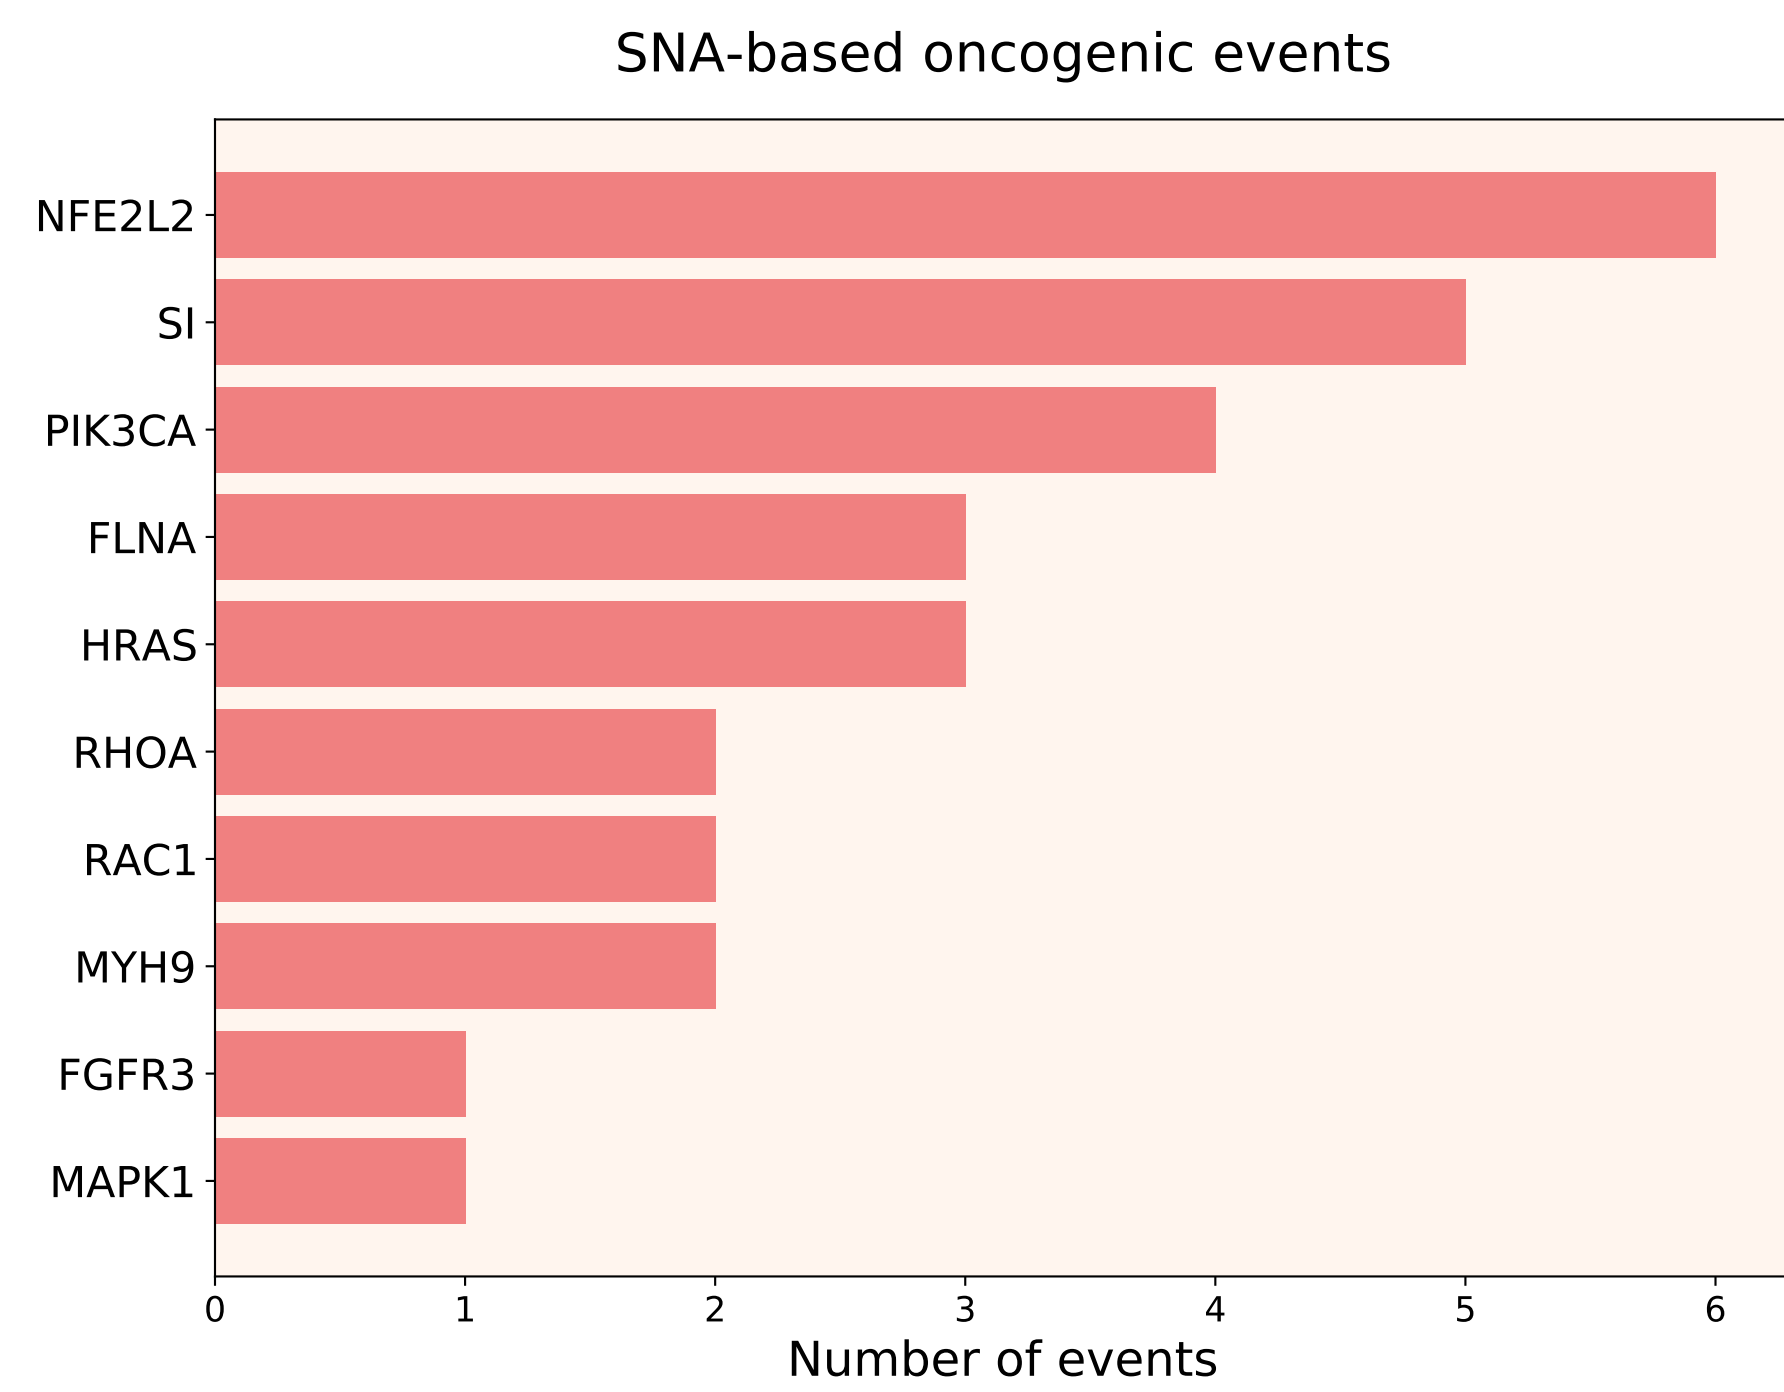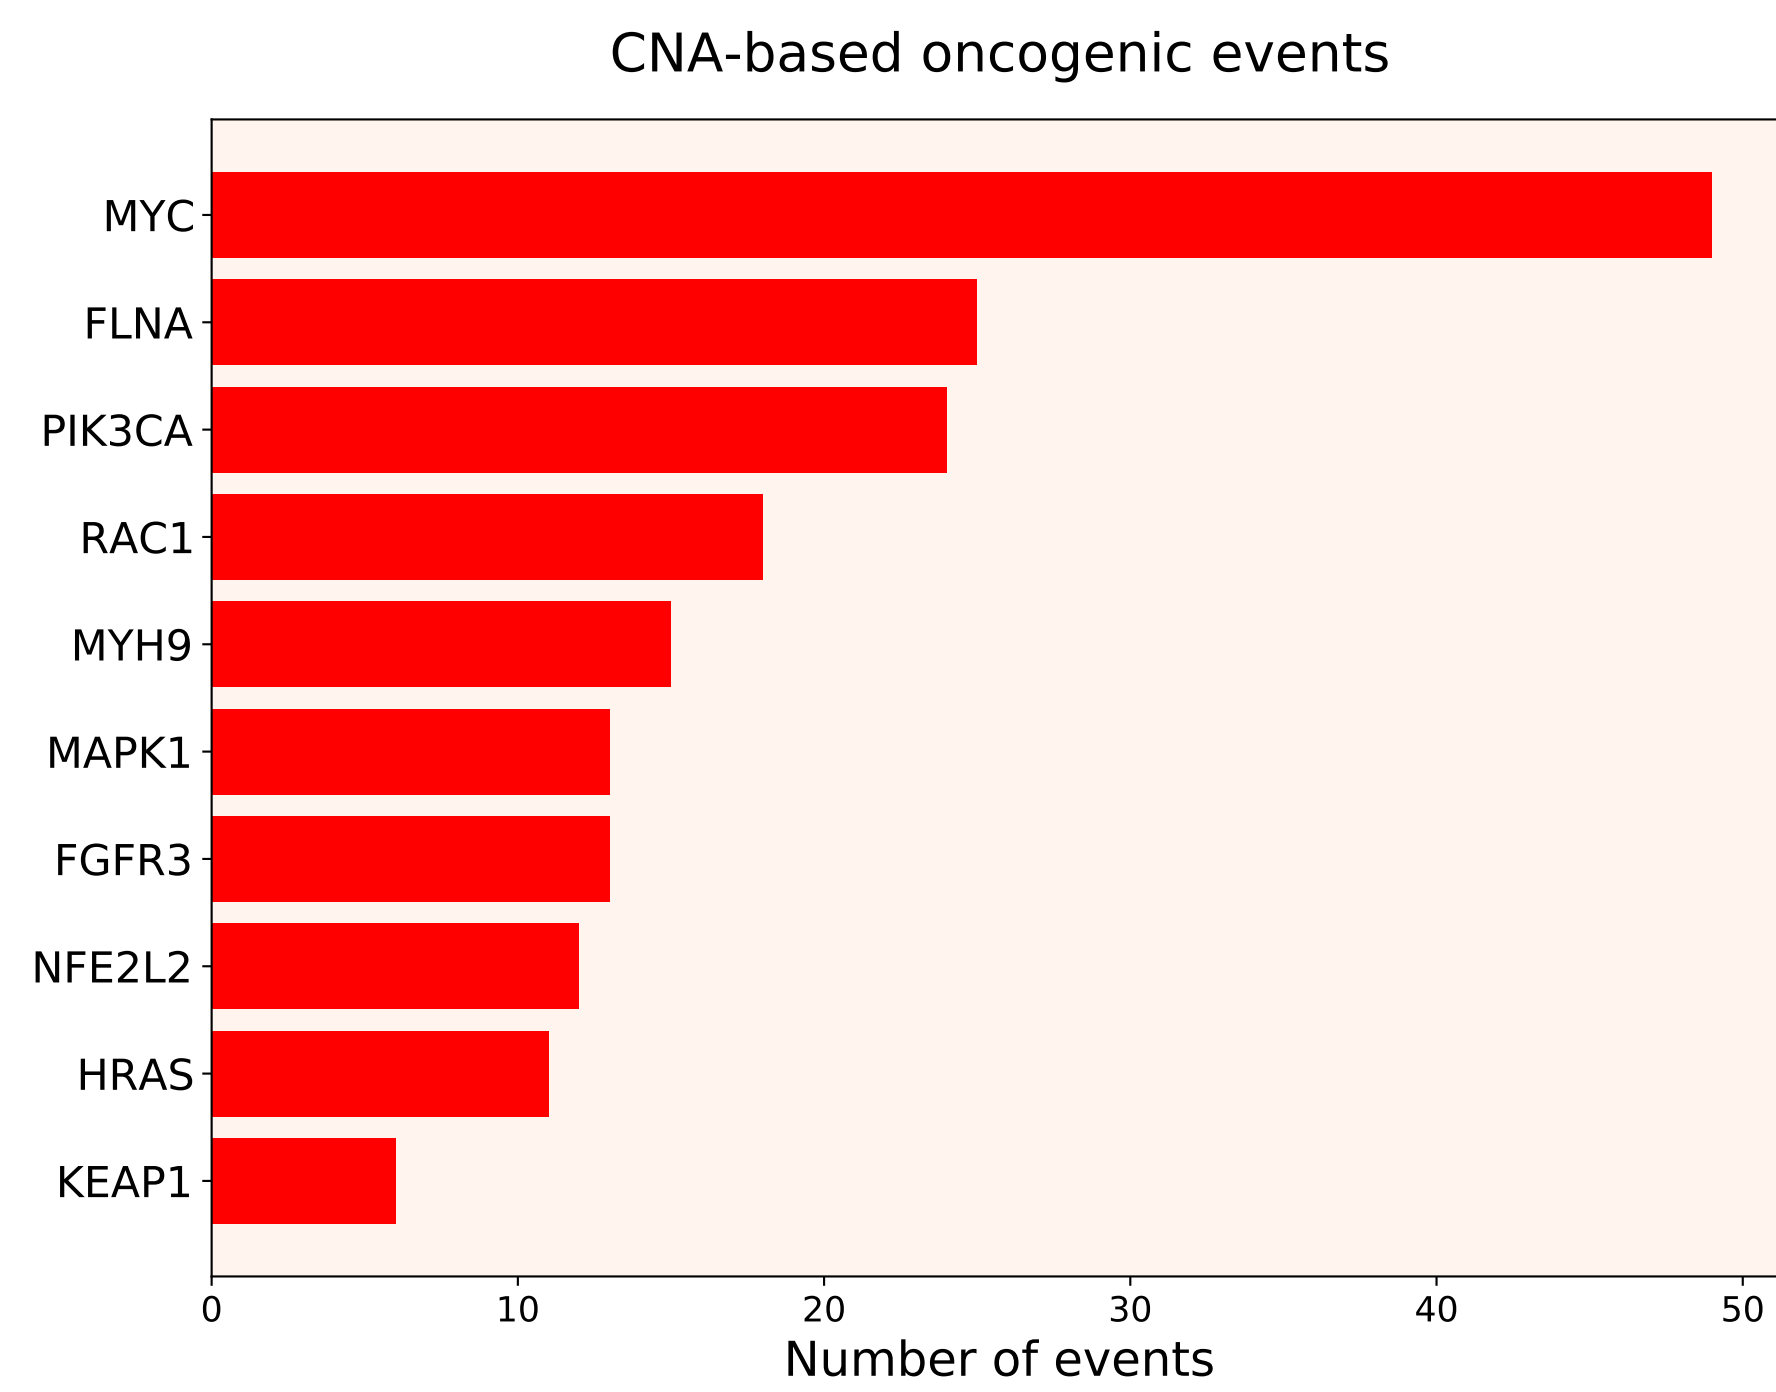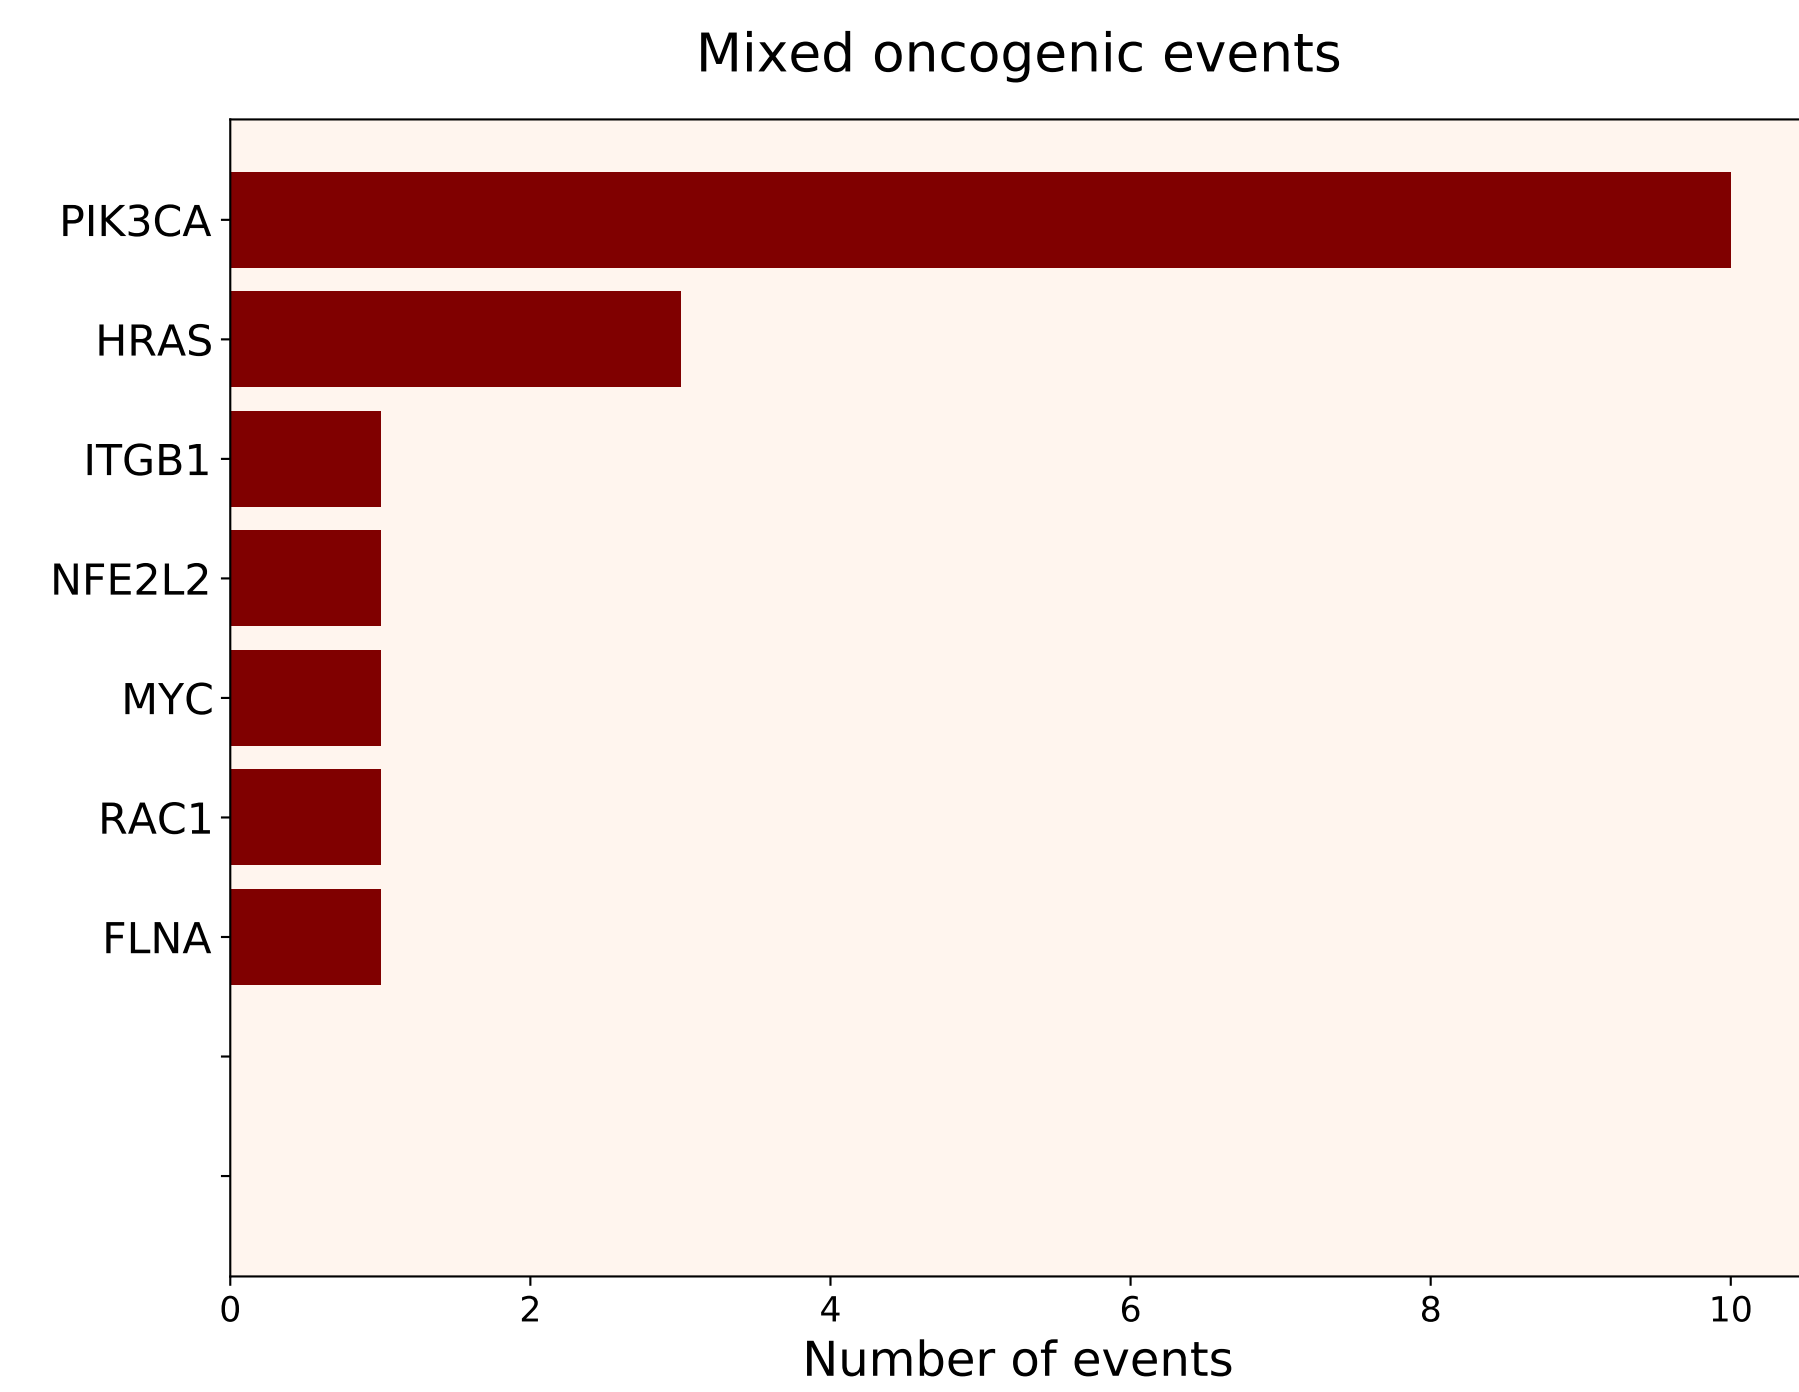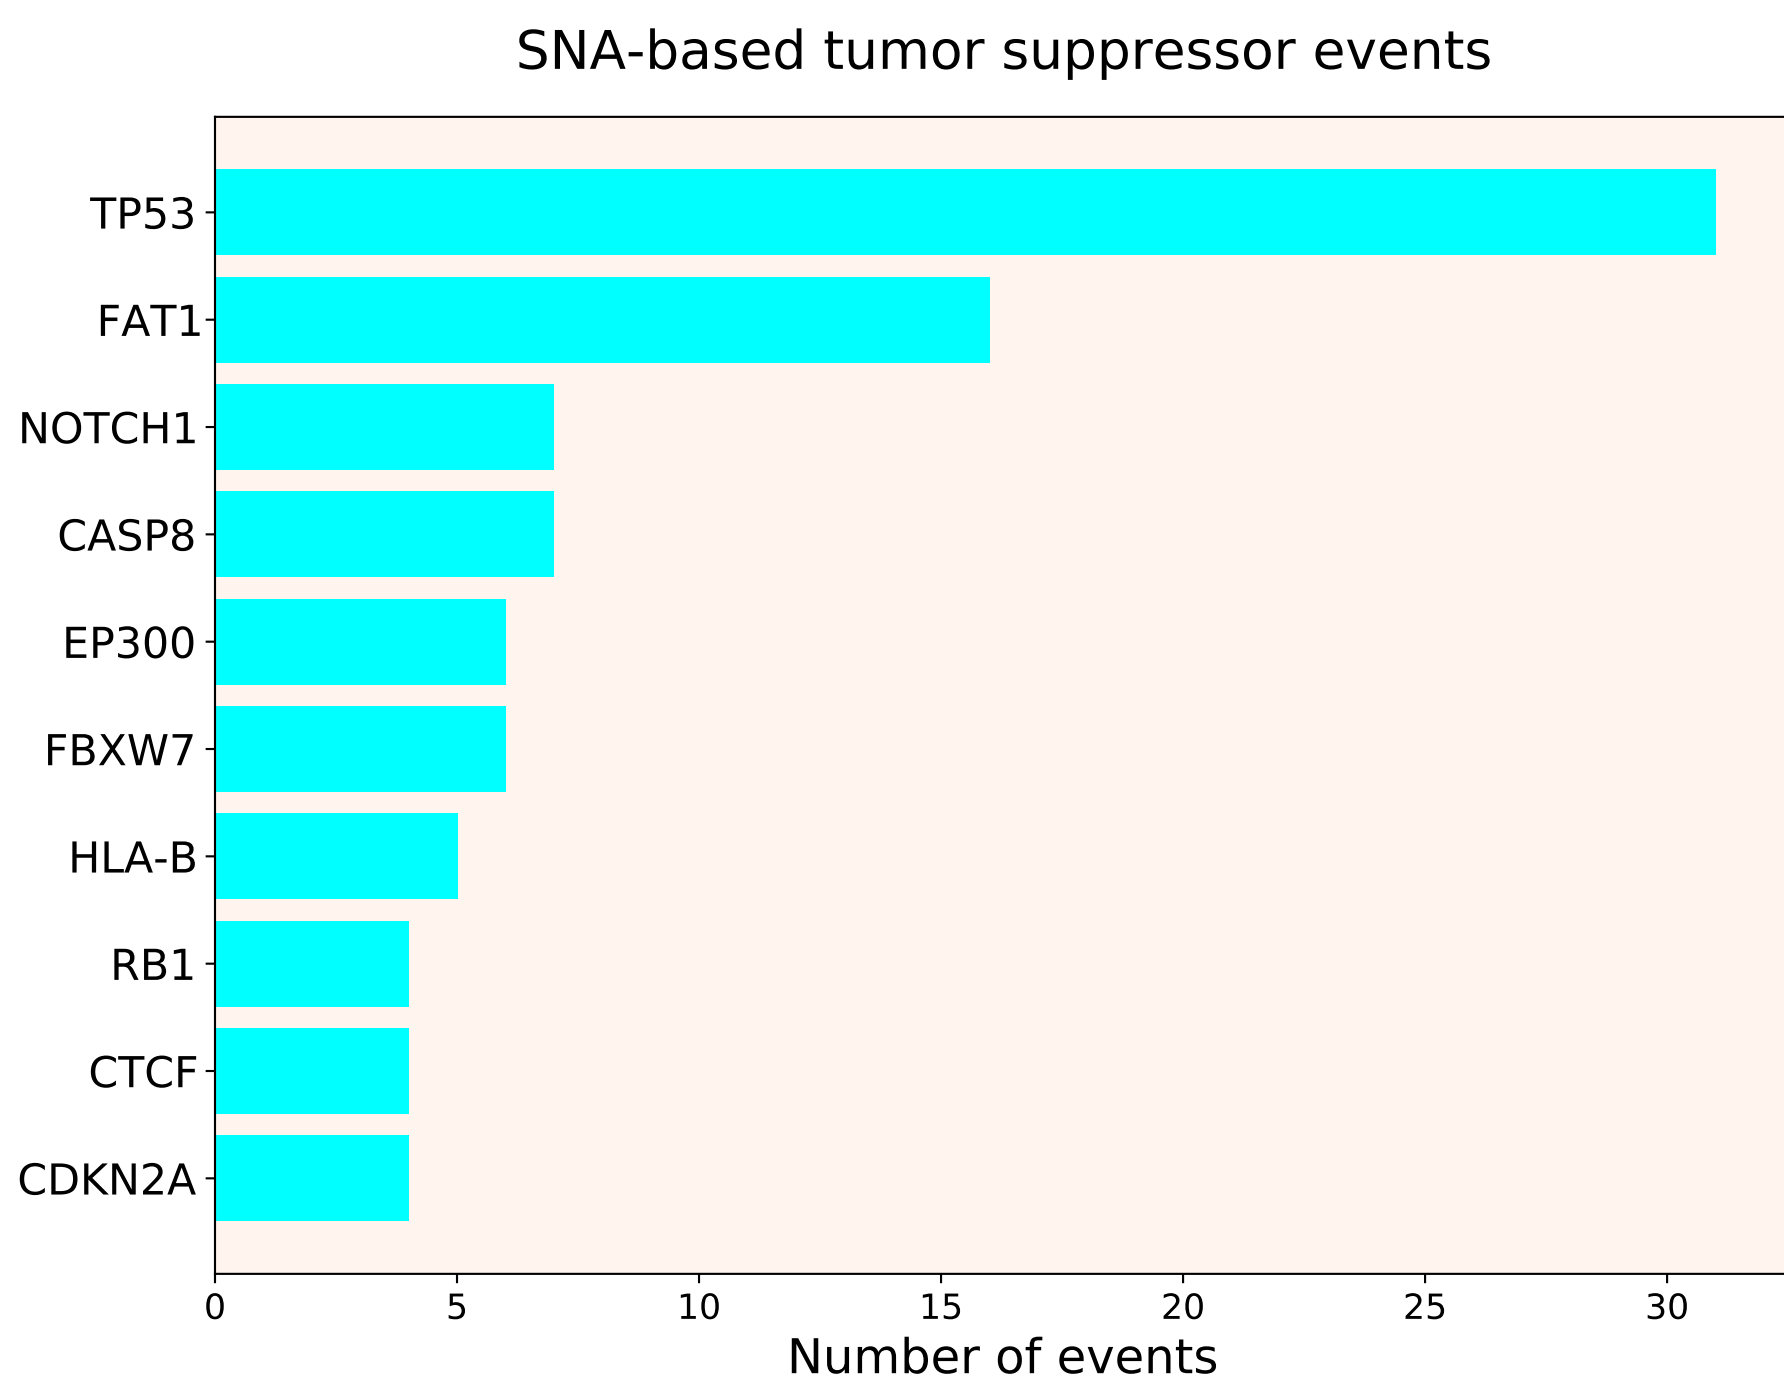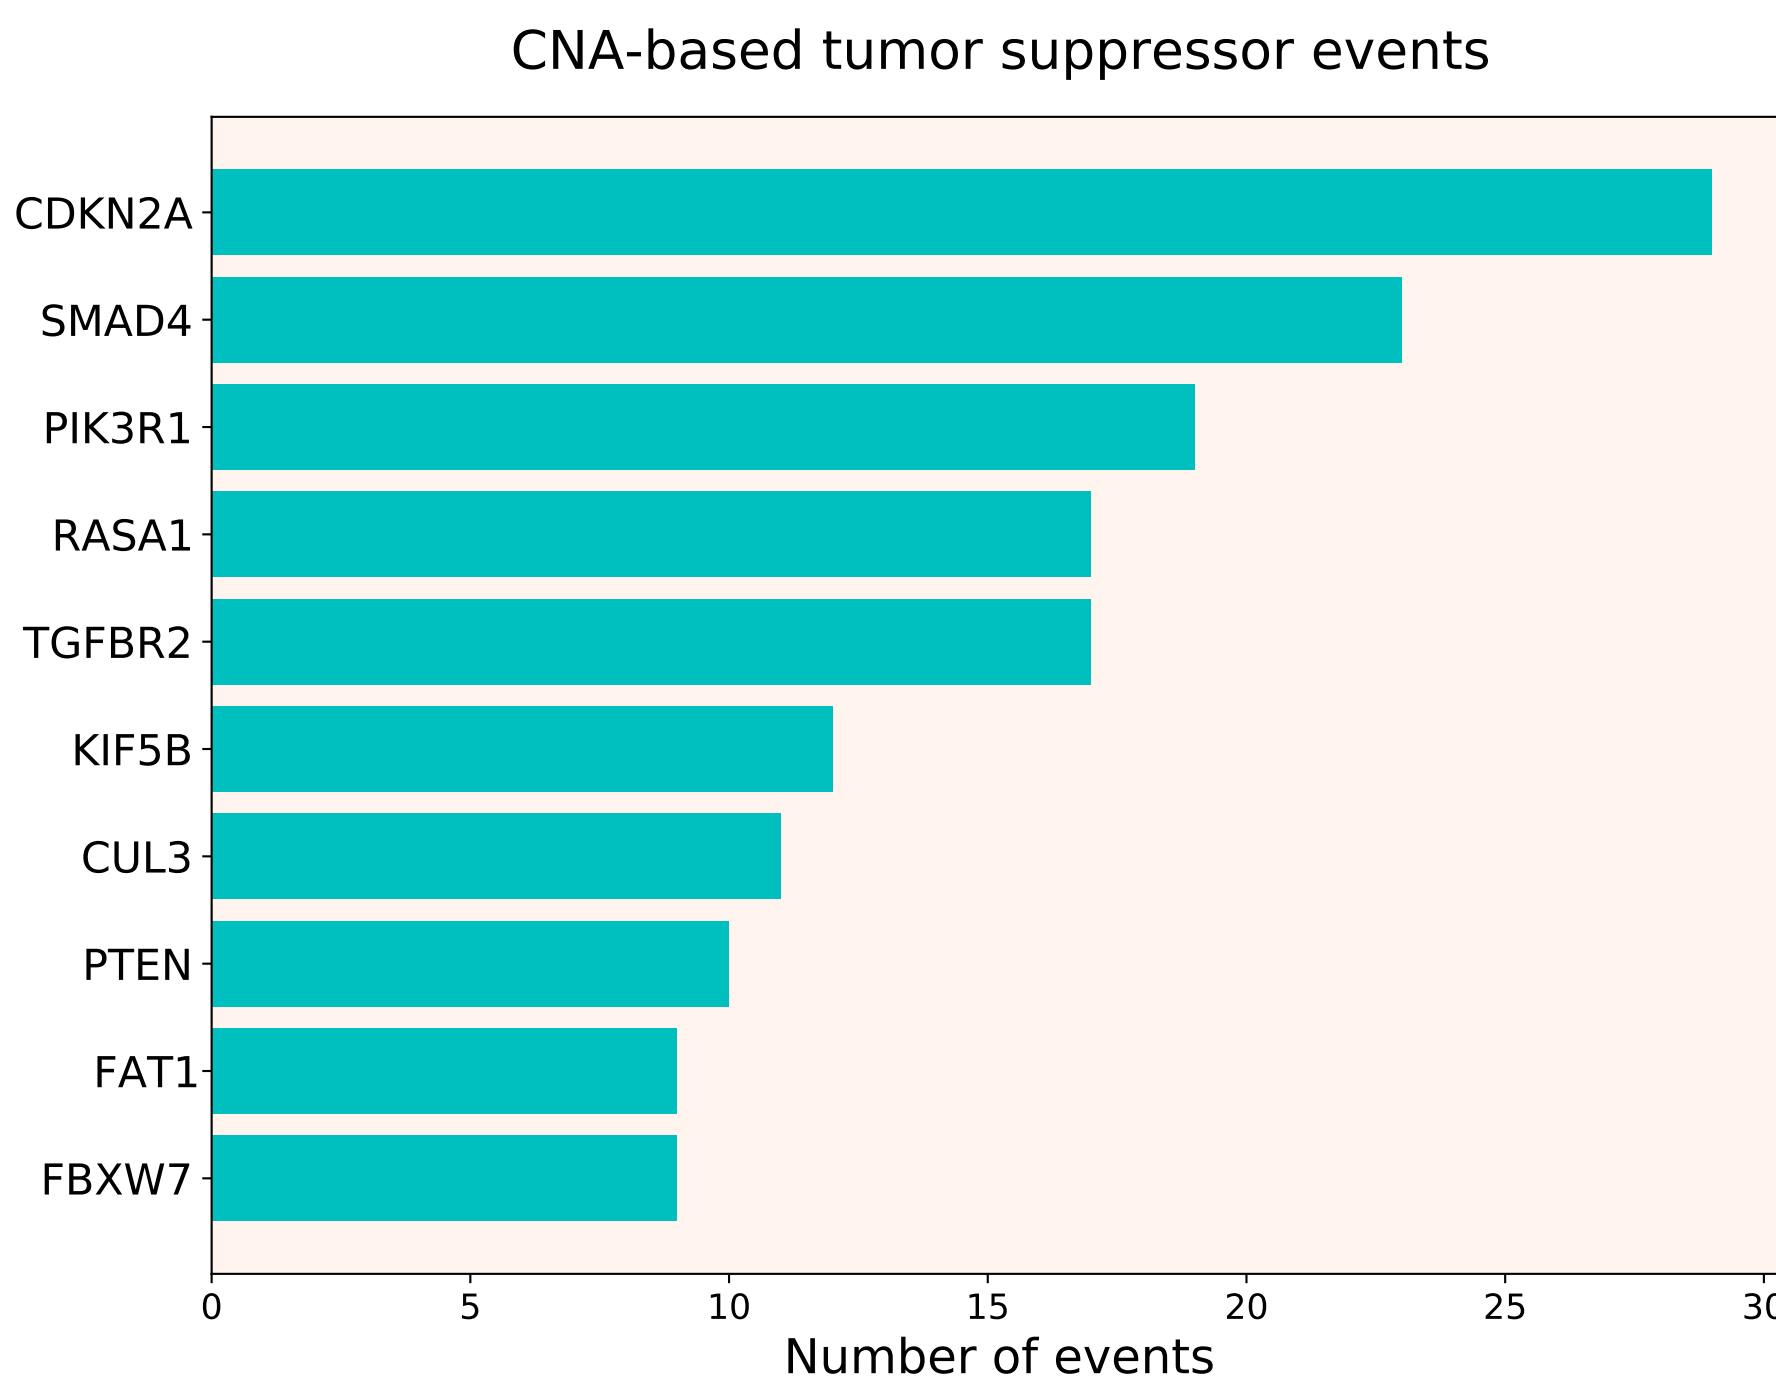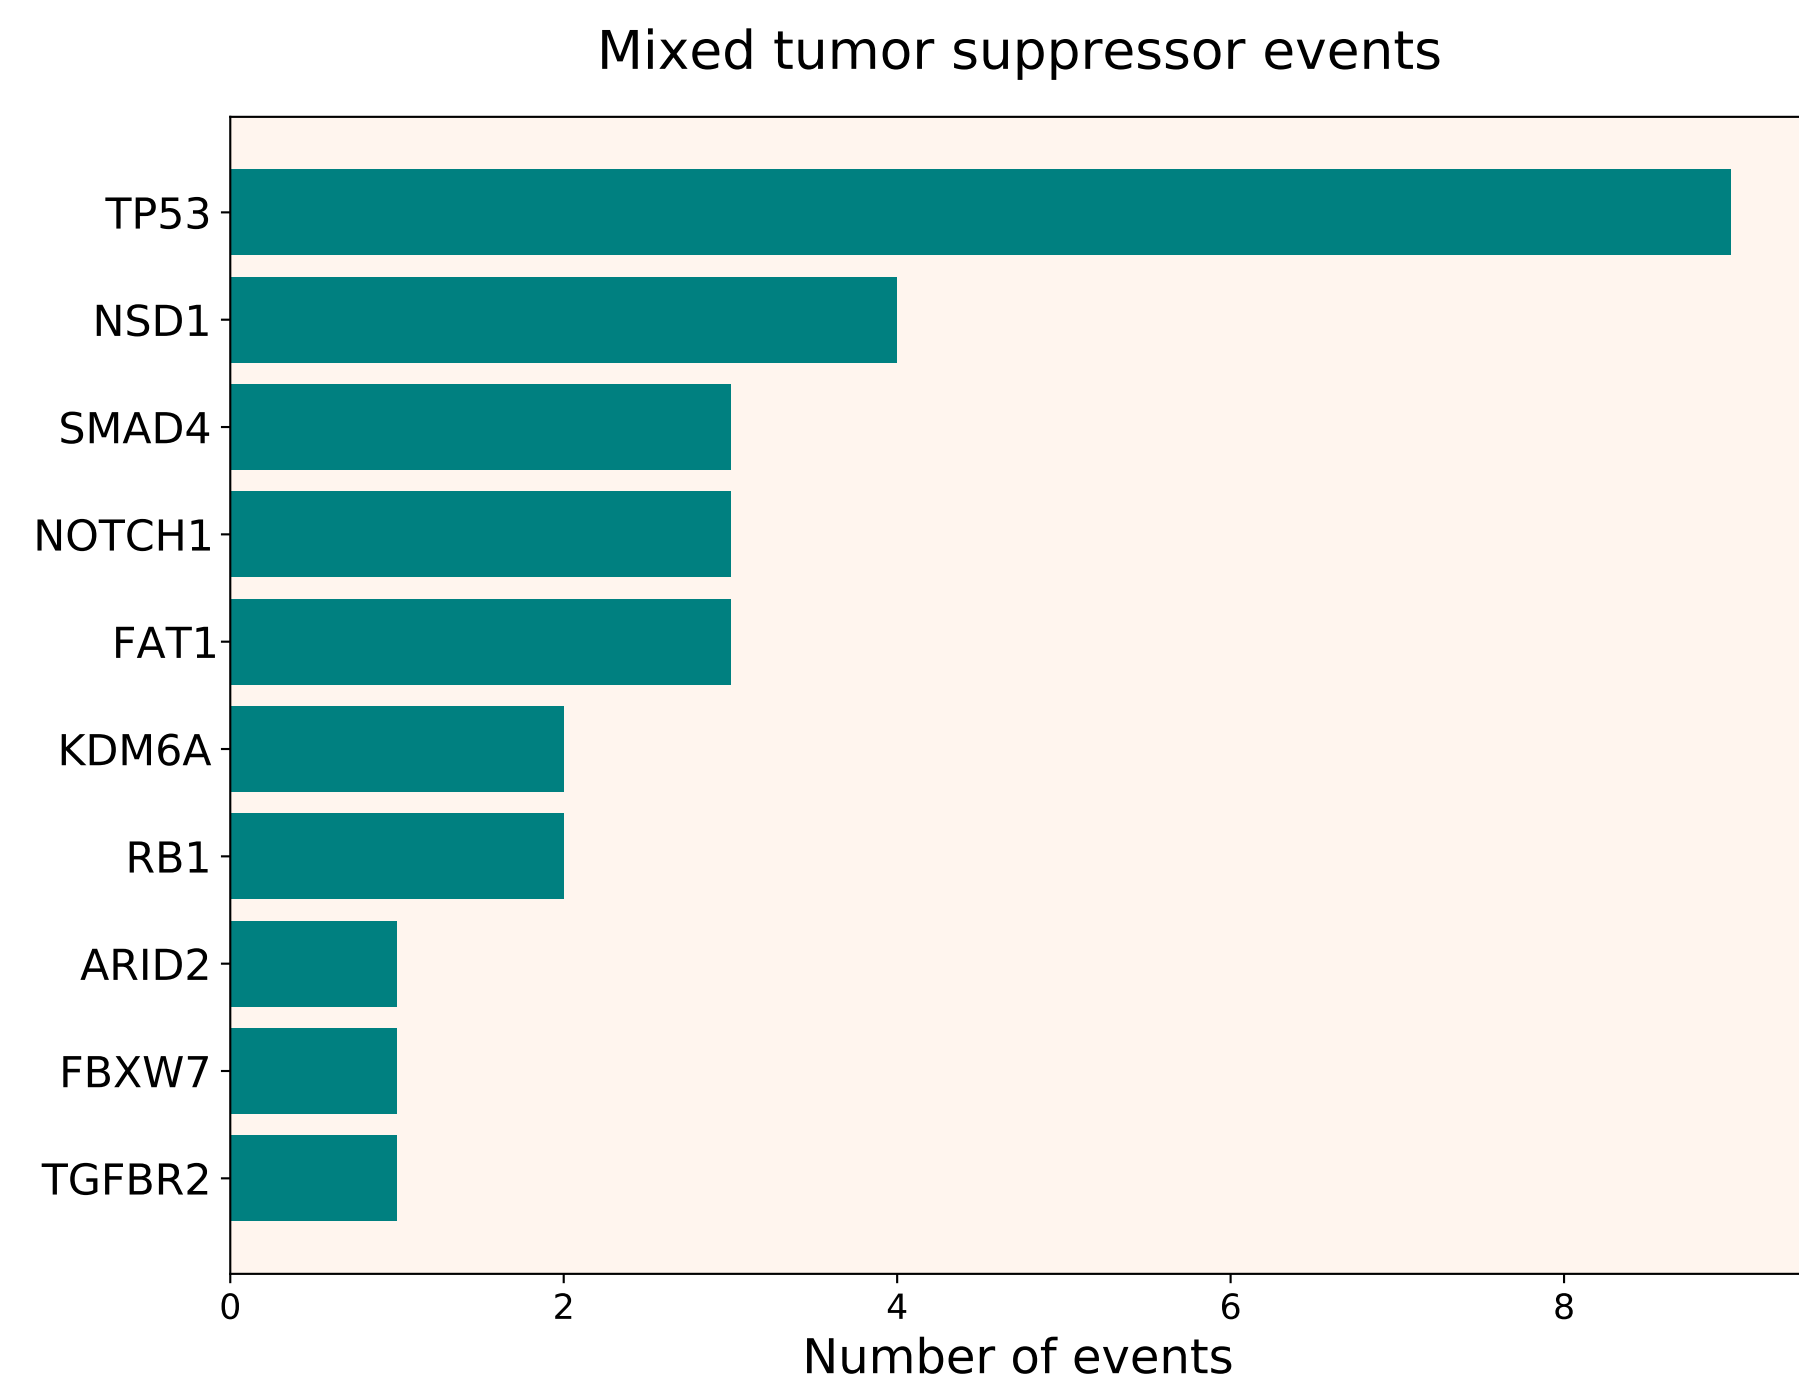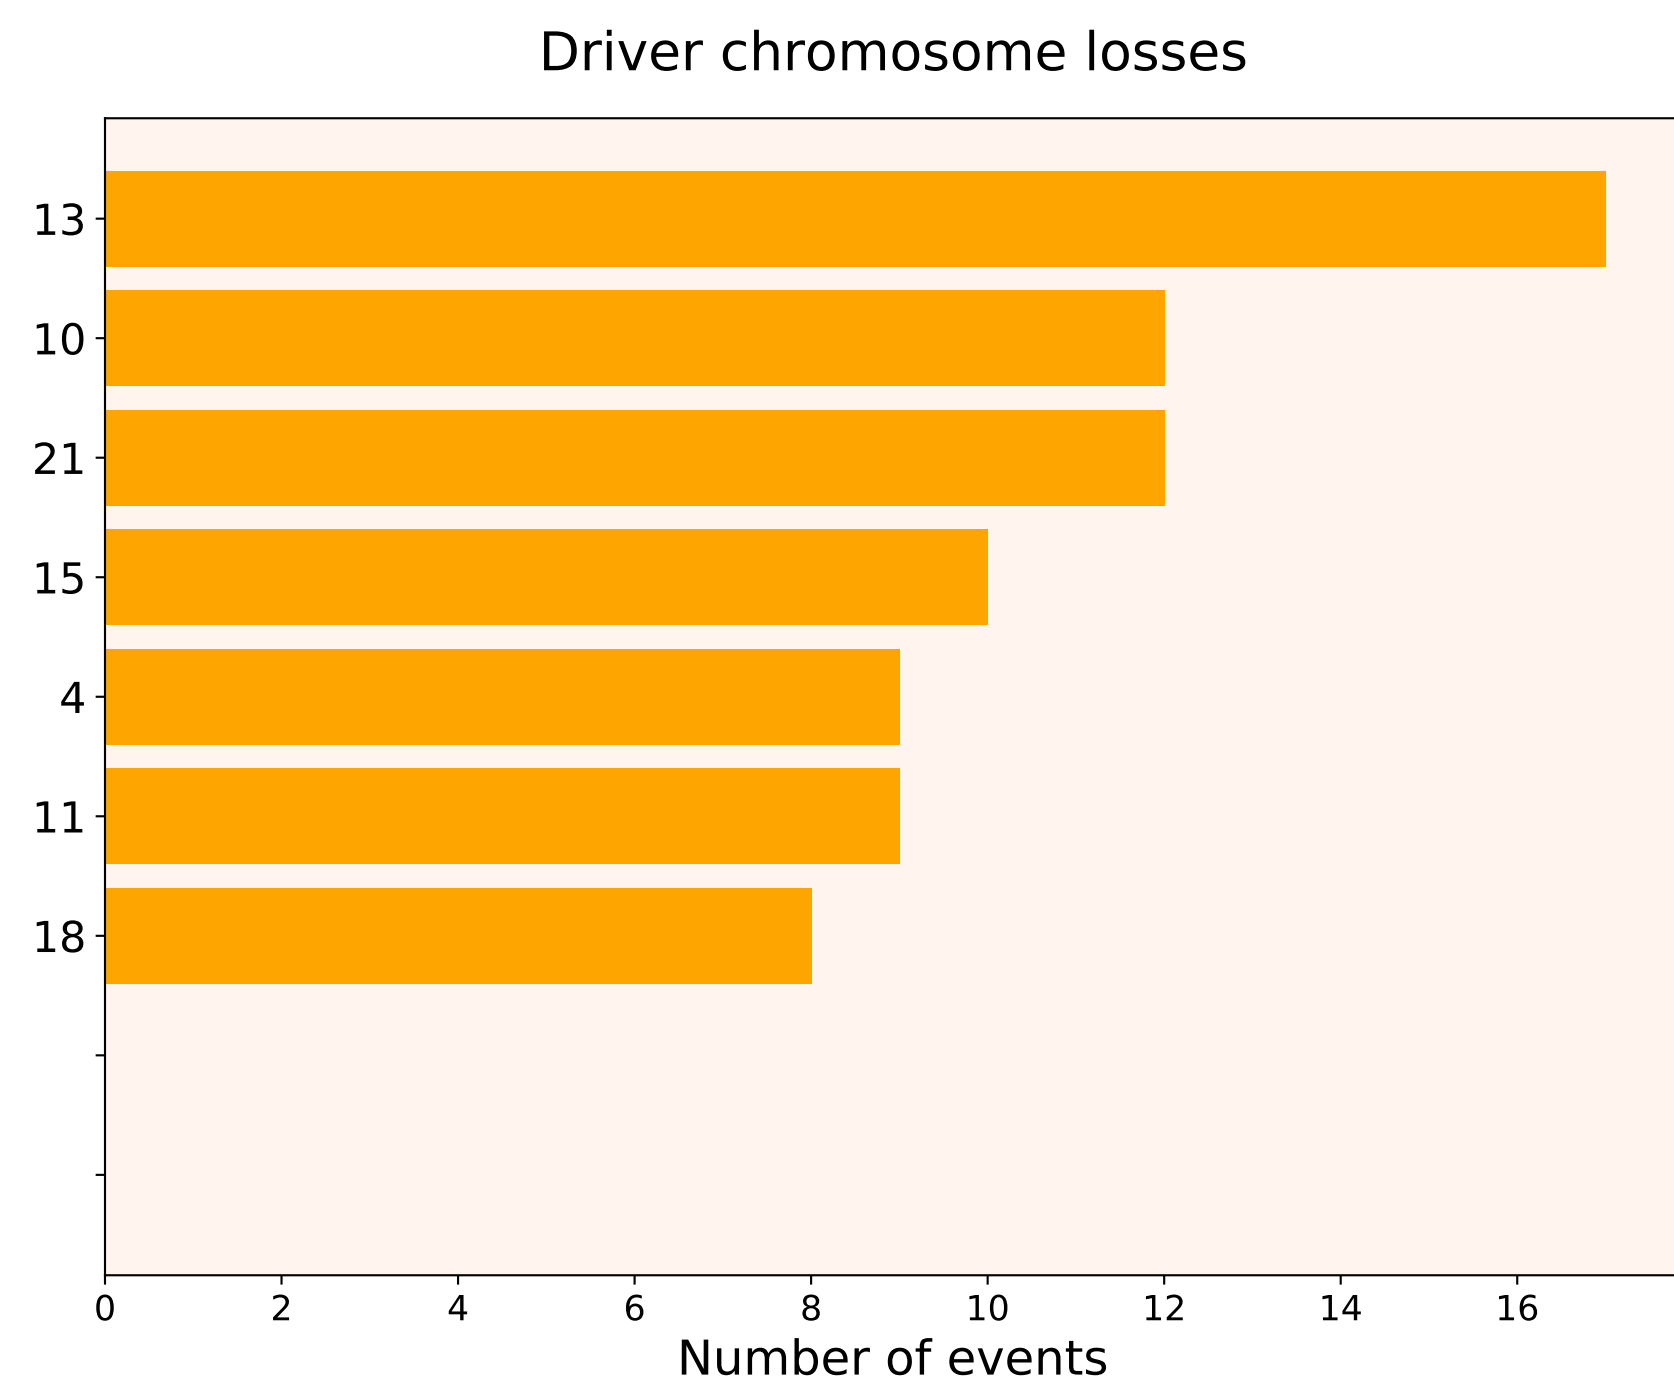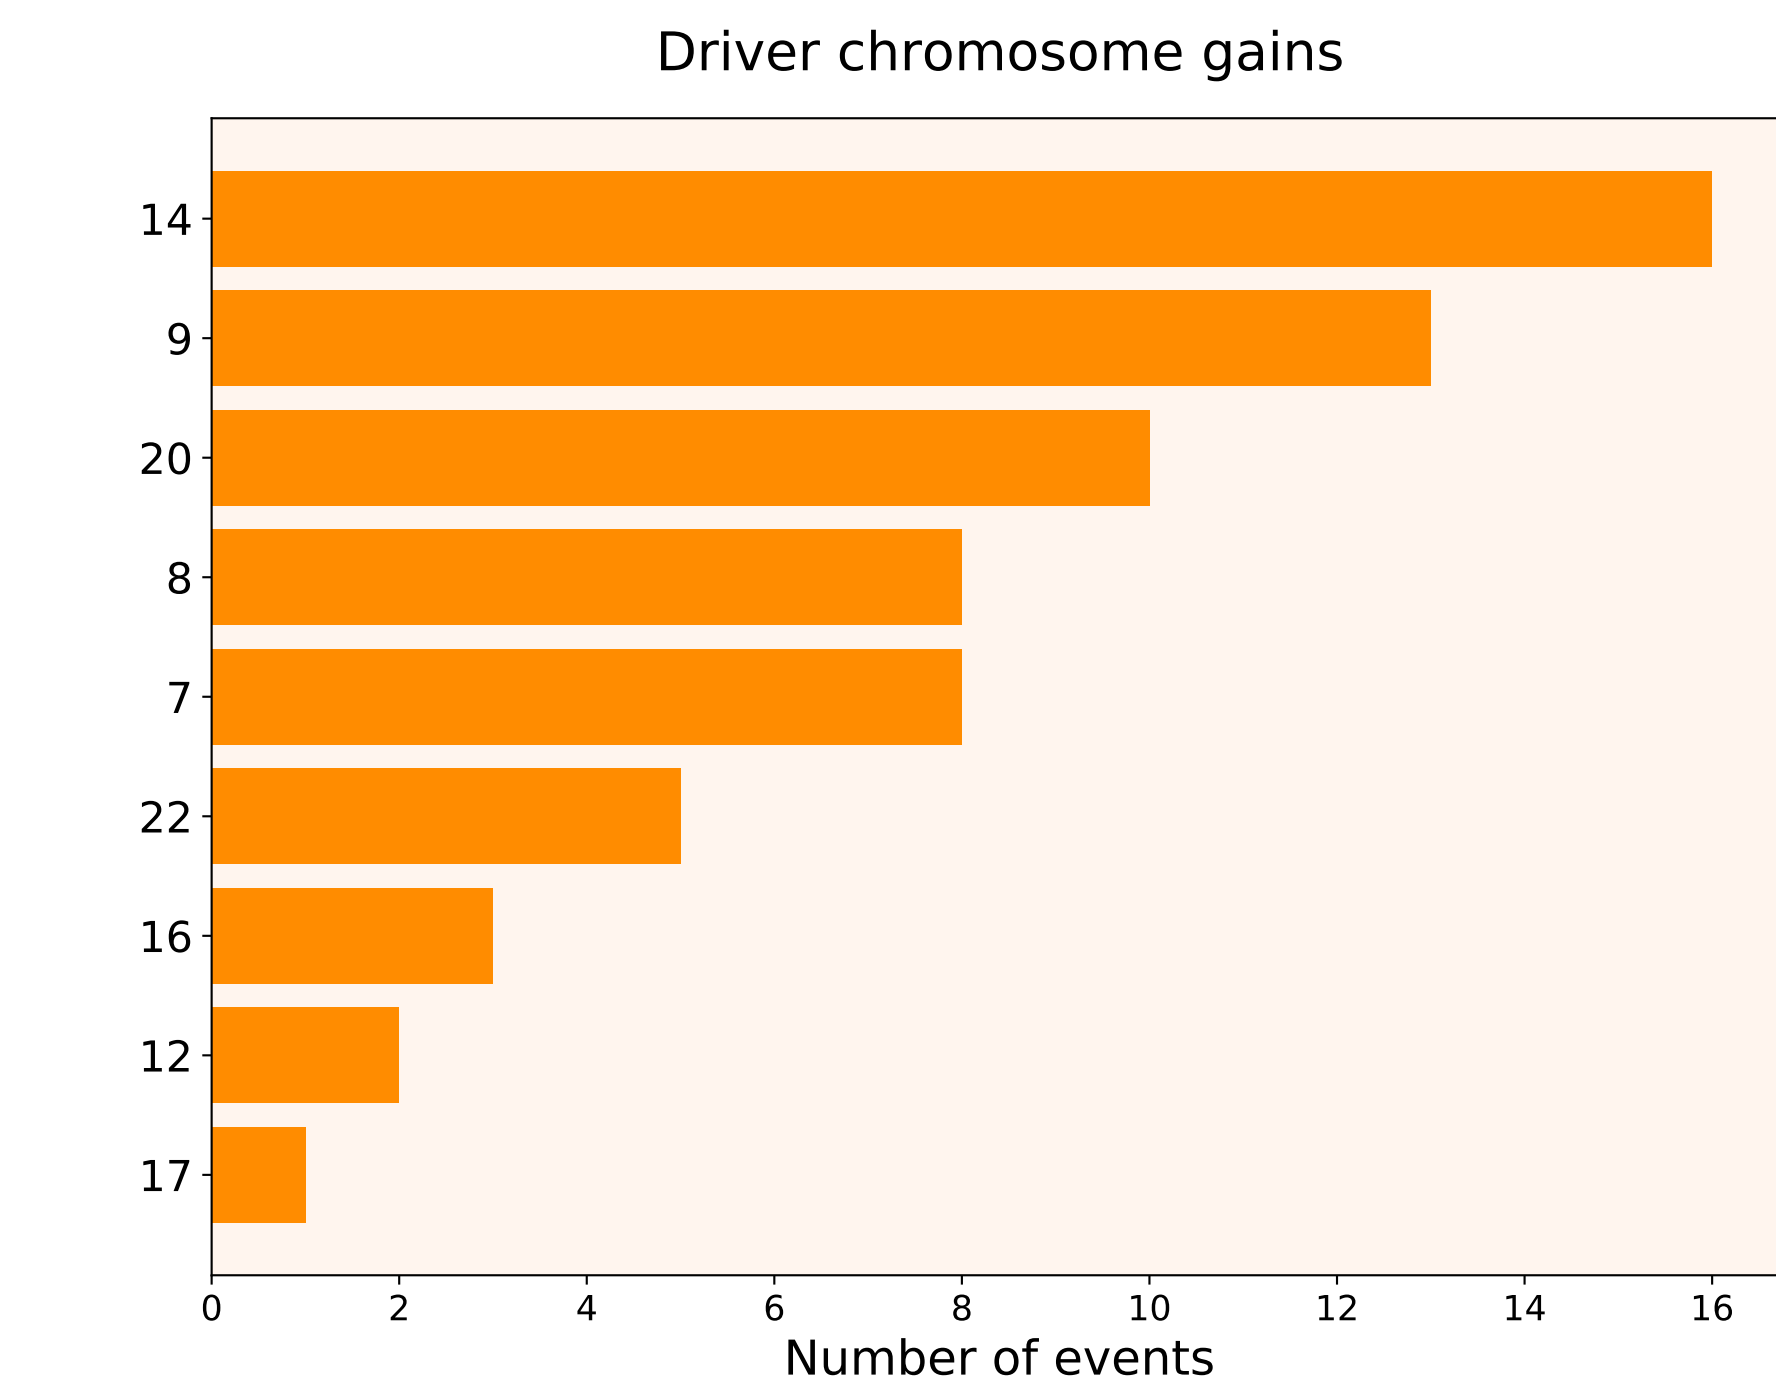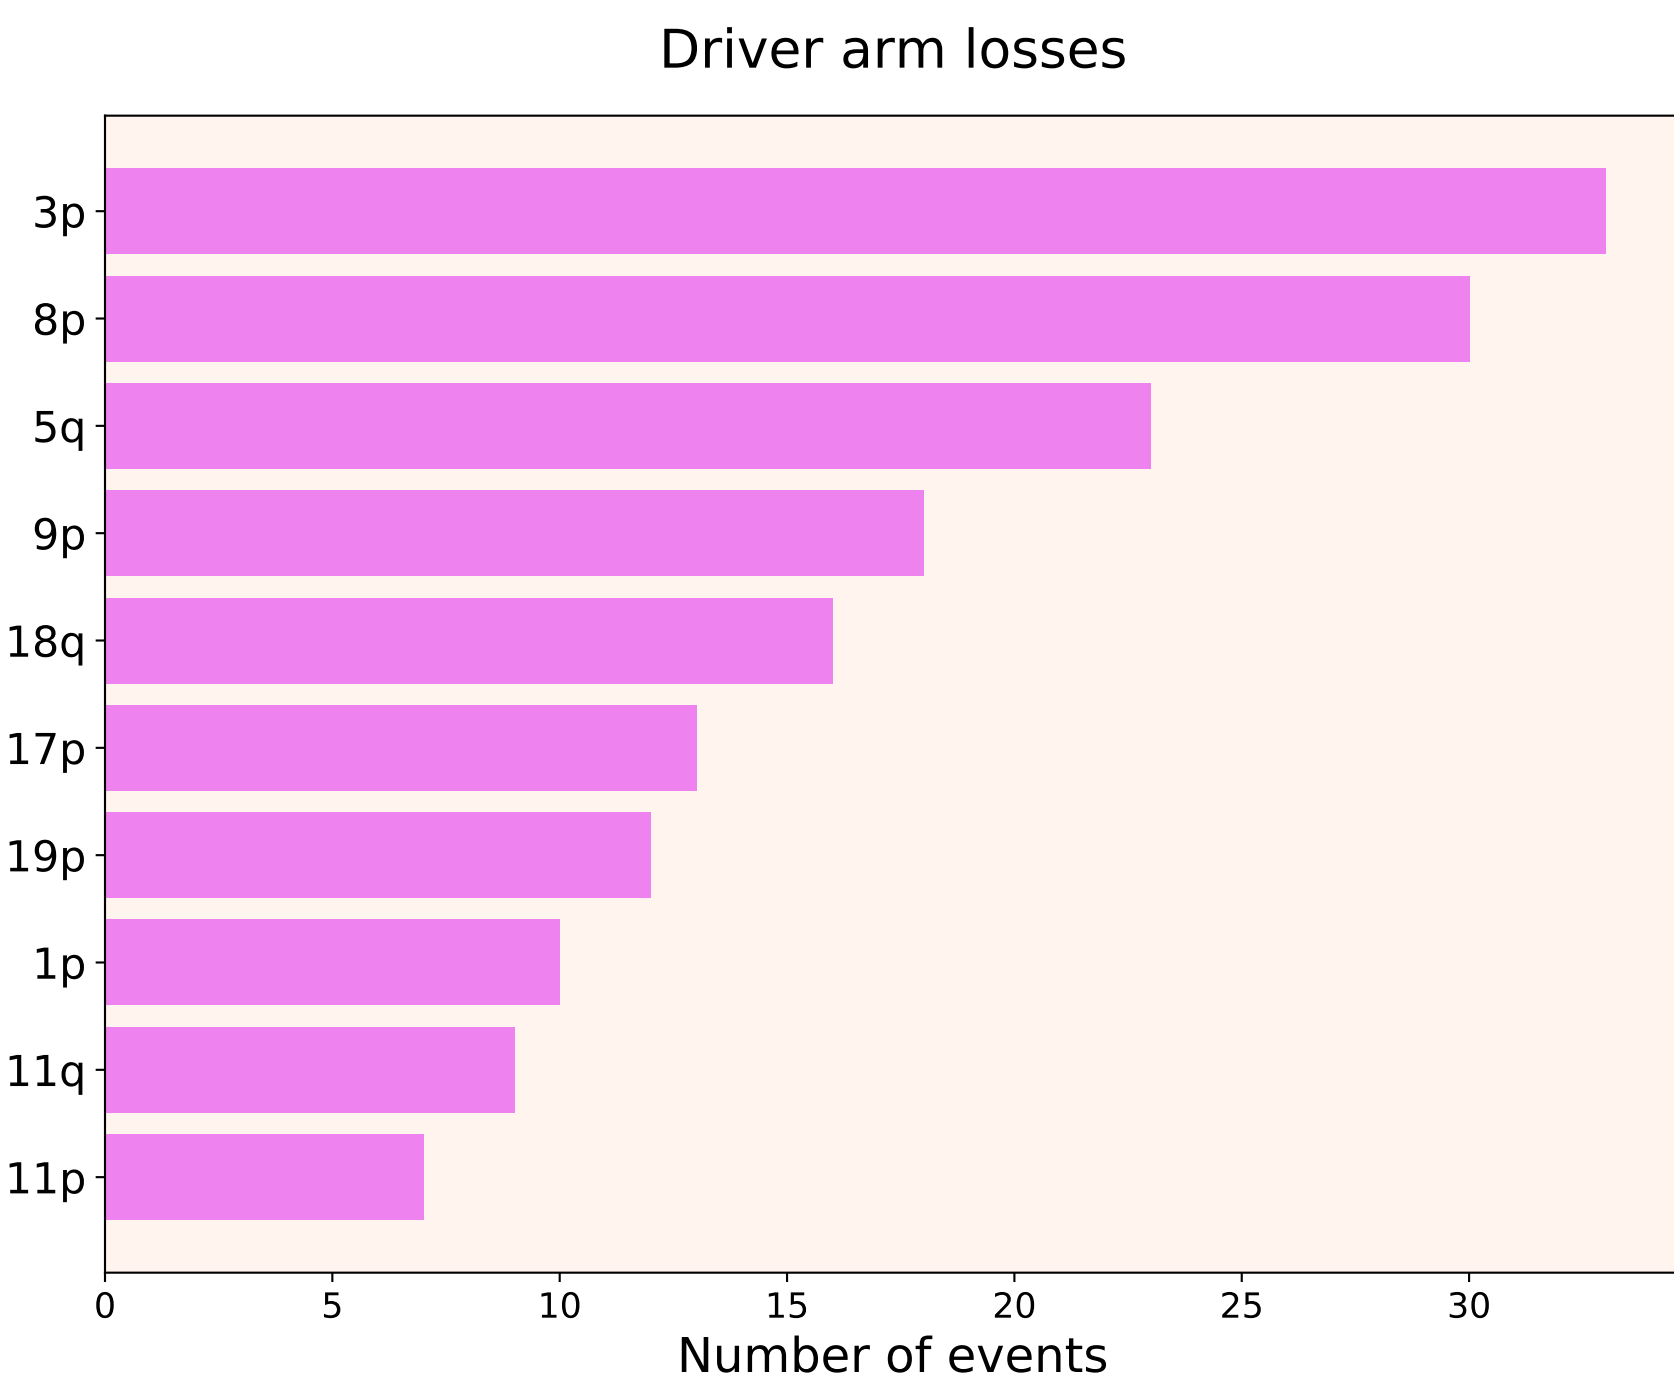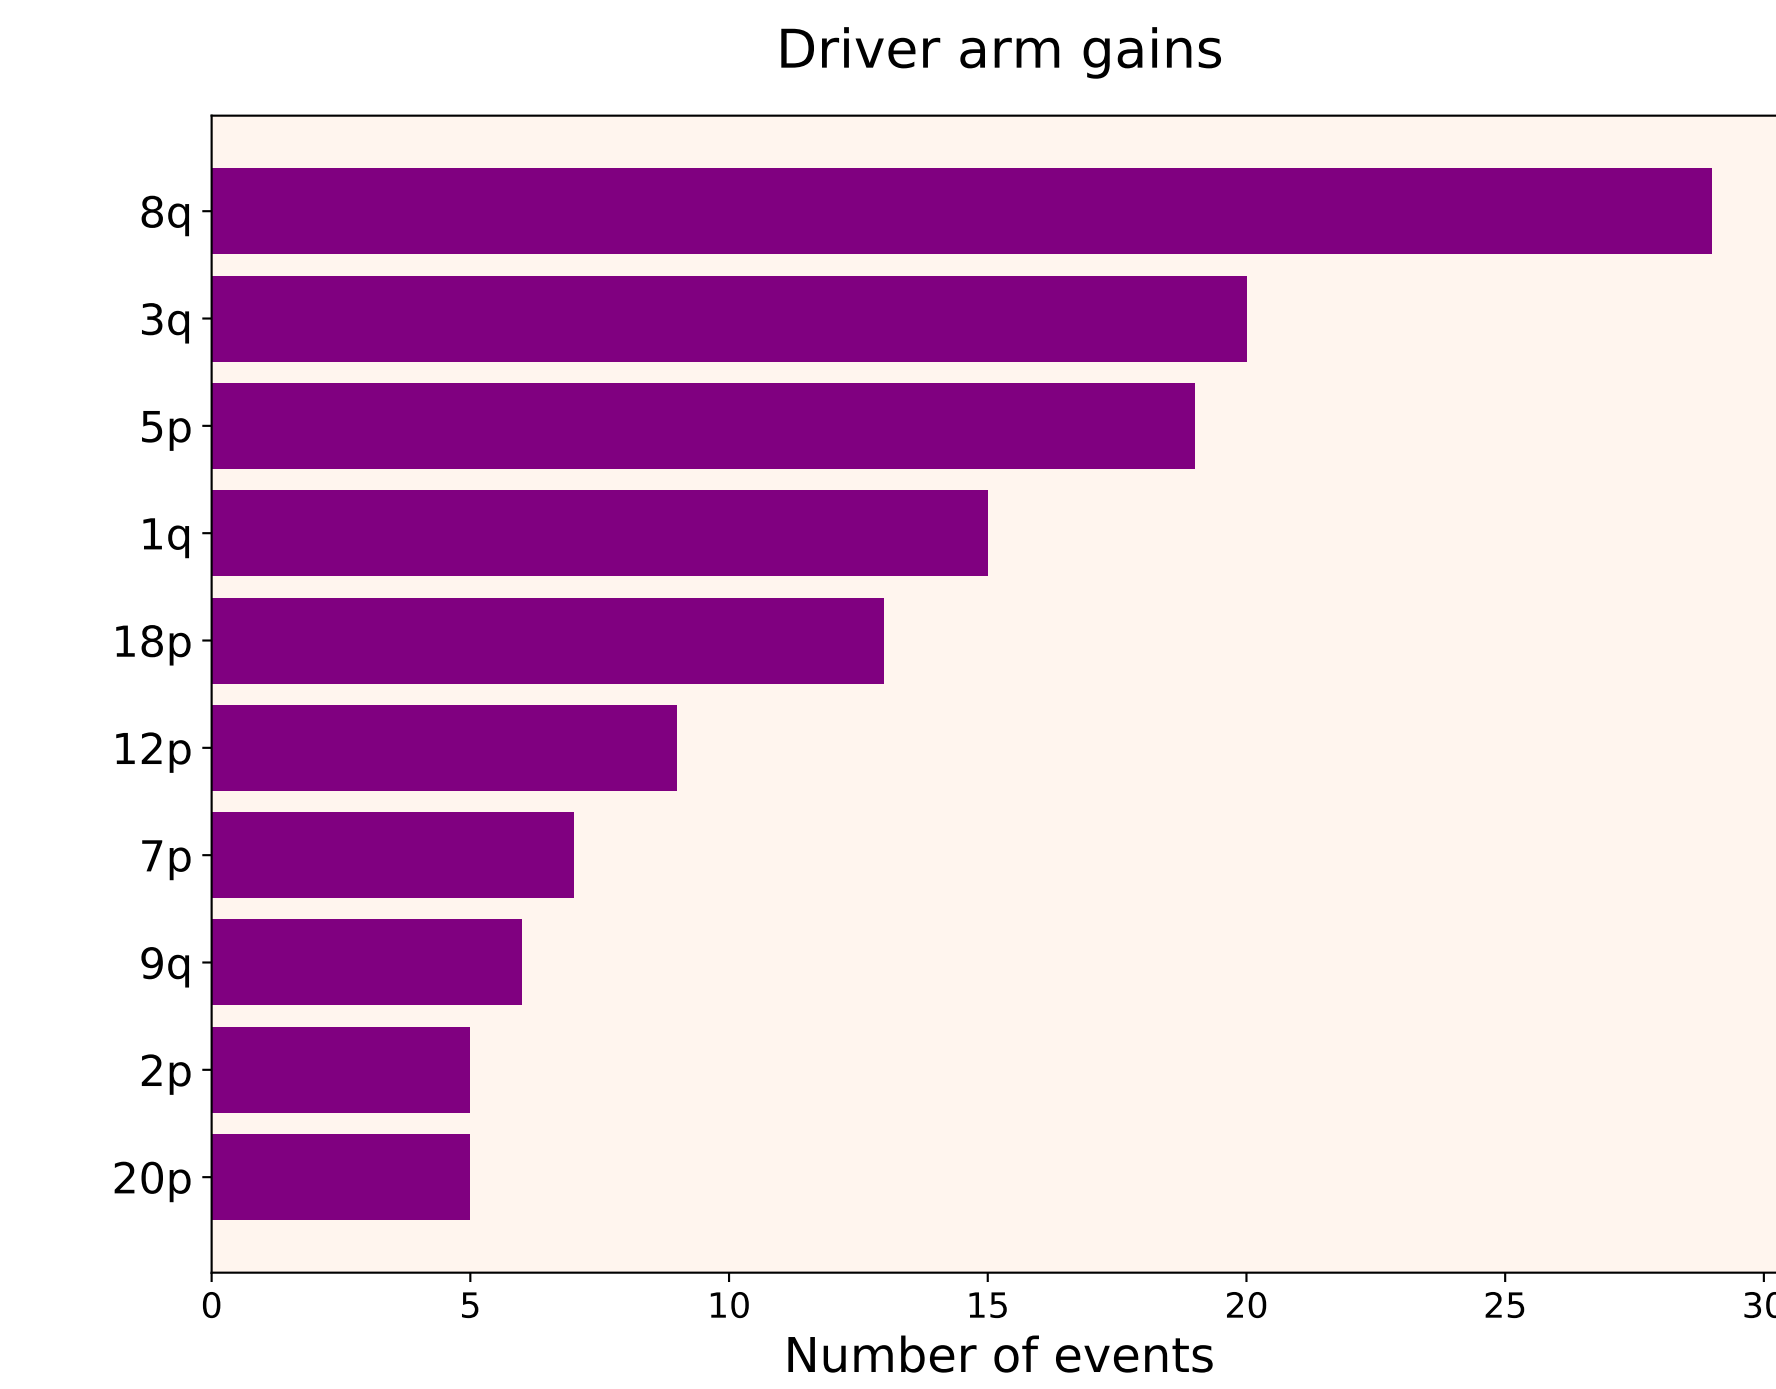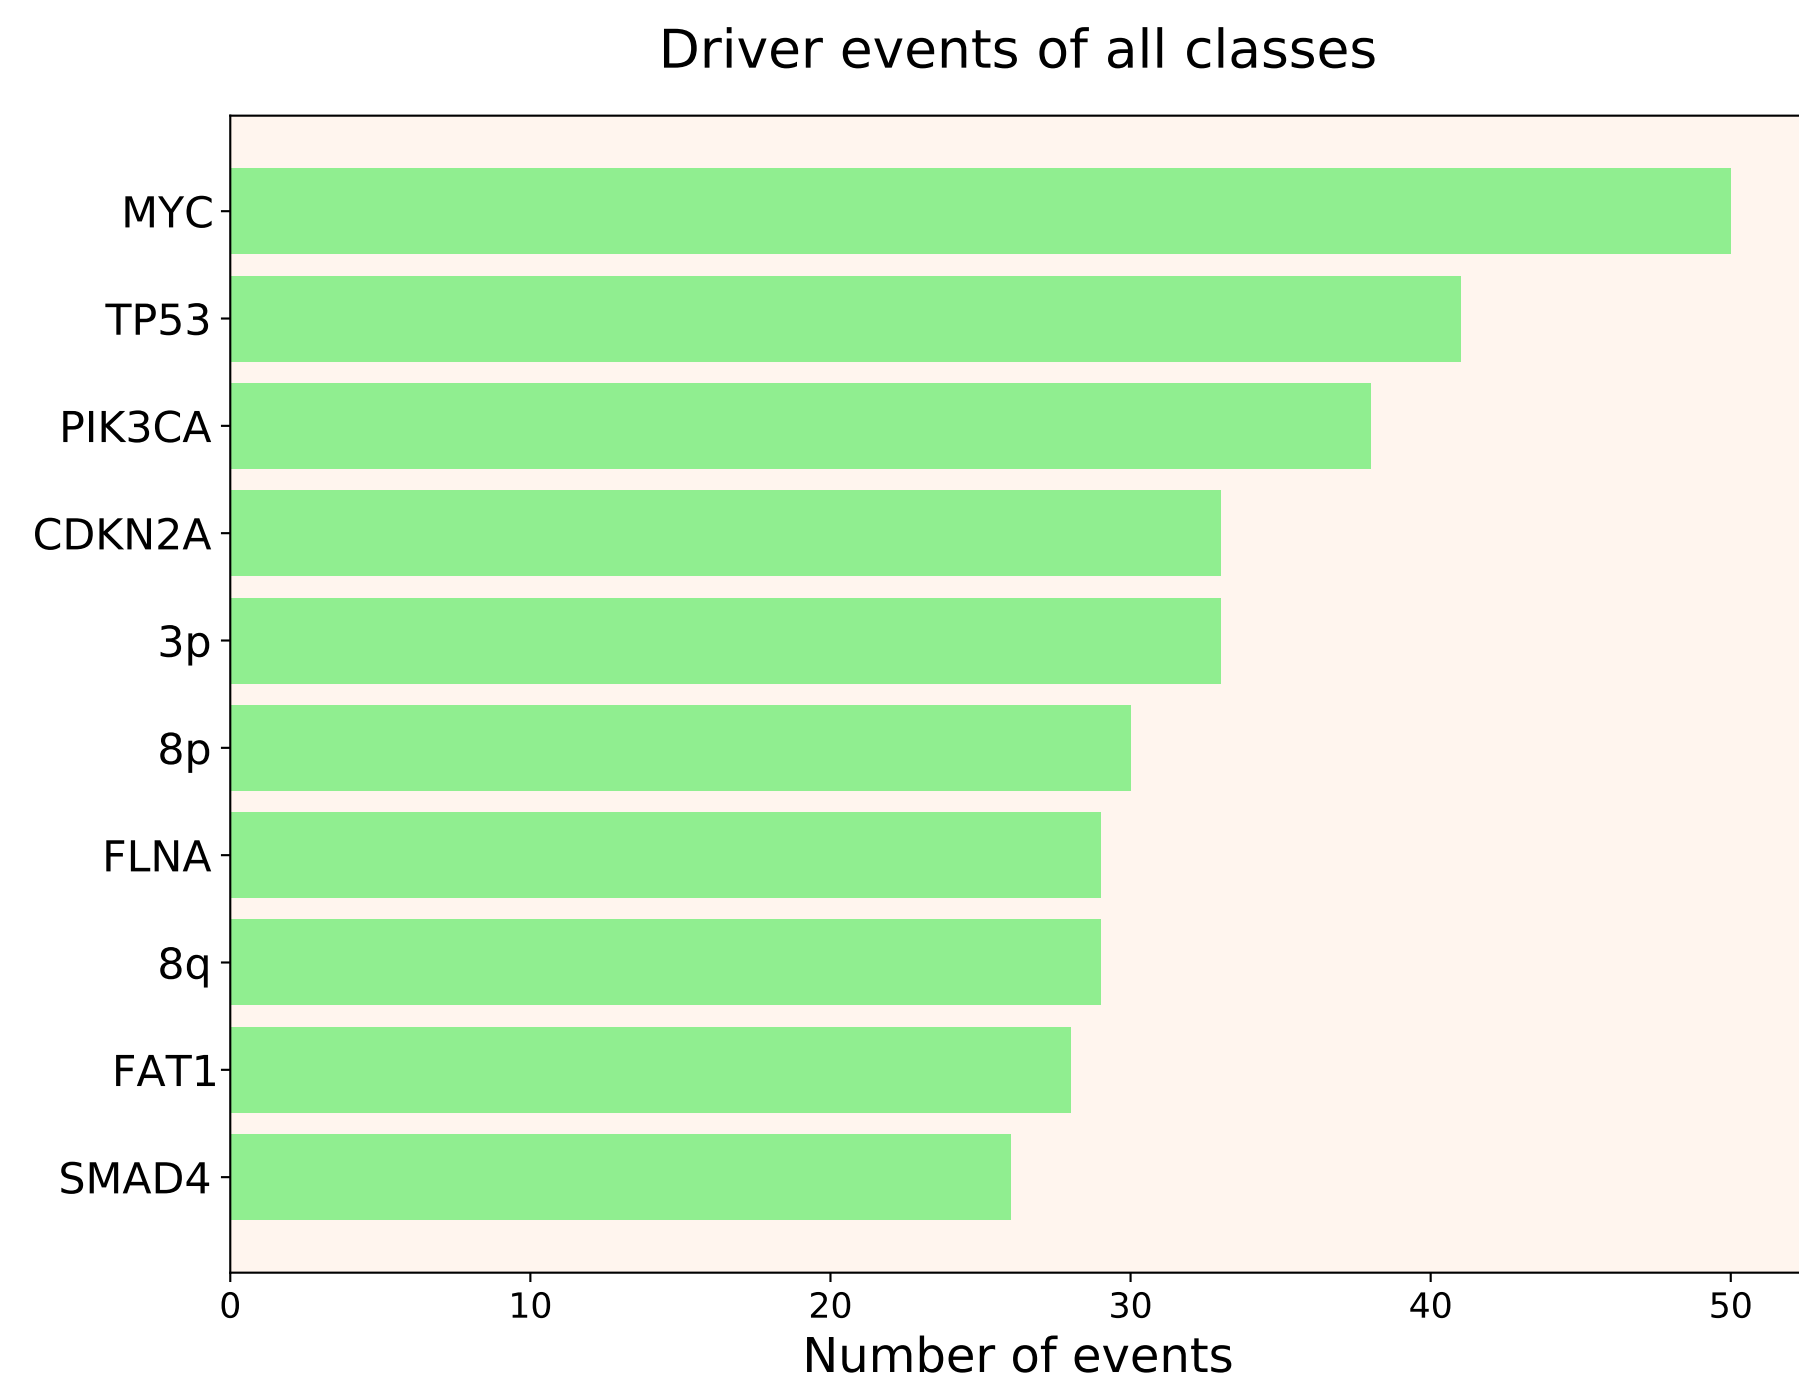

Supplement: Supplemental_Data_S1.zip [file Supplemental_Data_S1.zip]

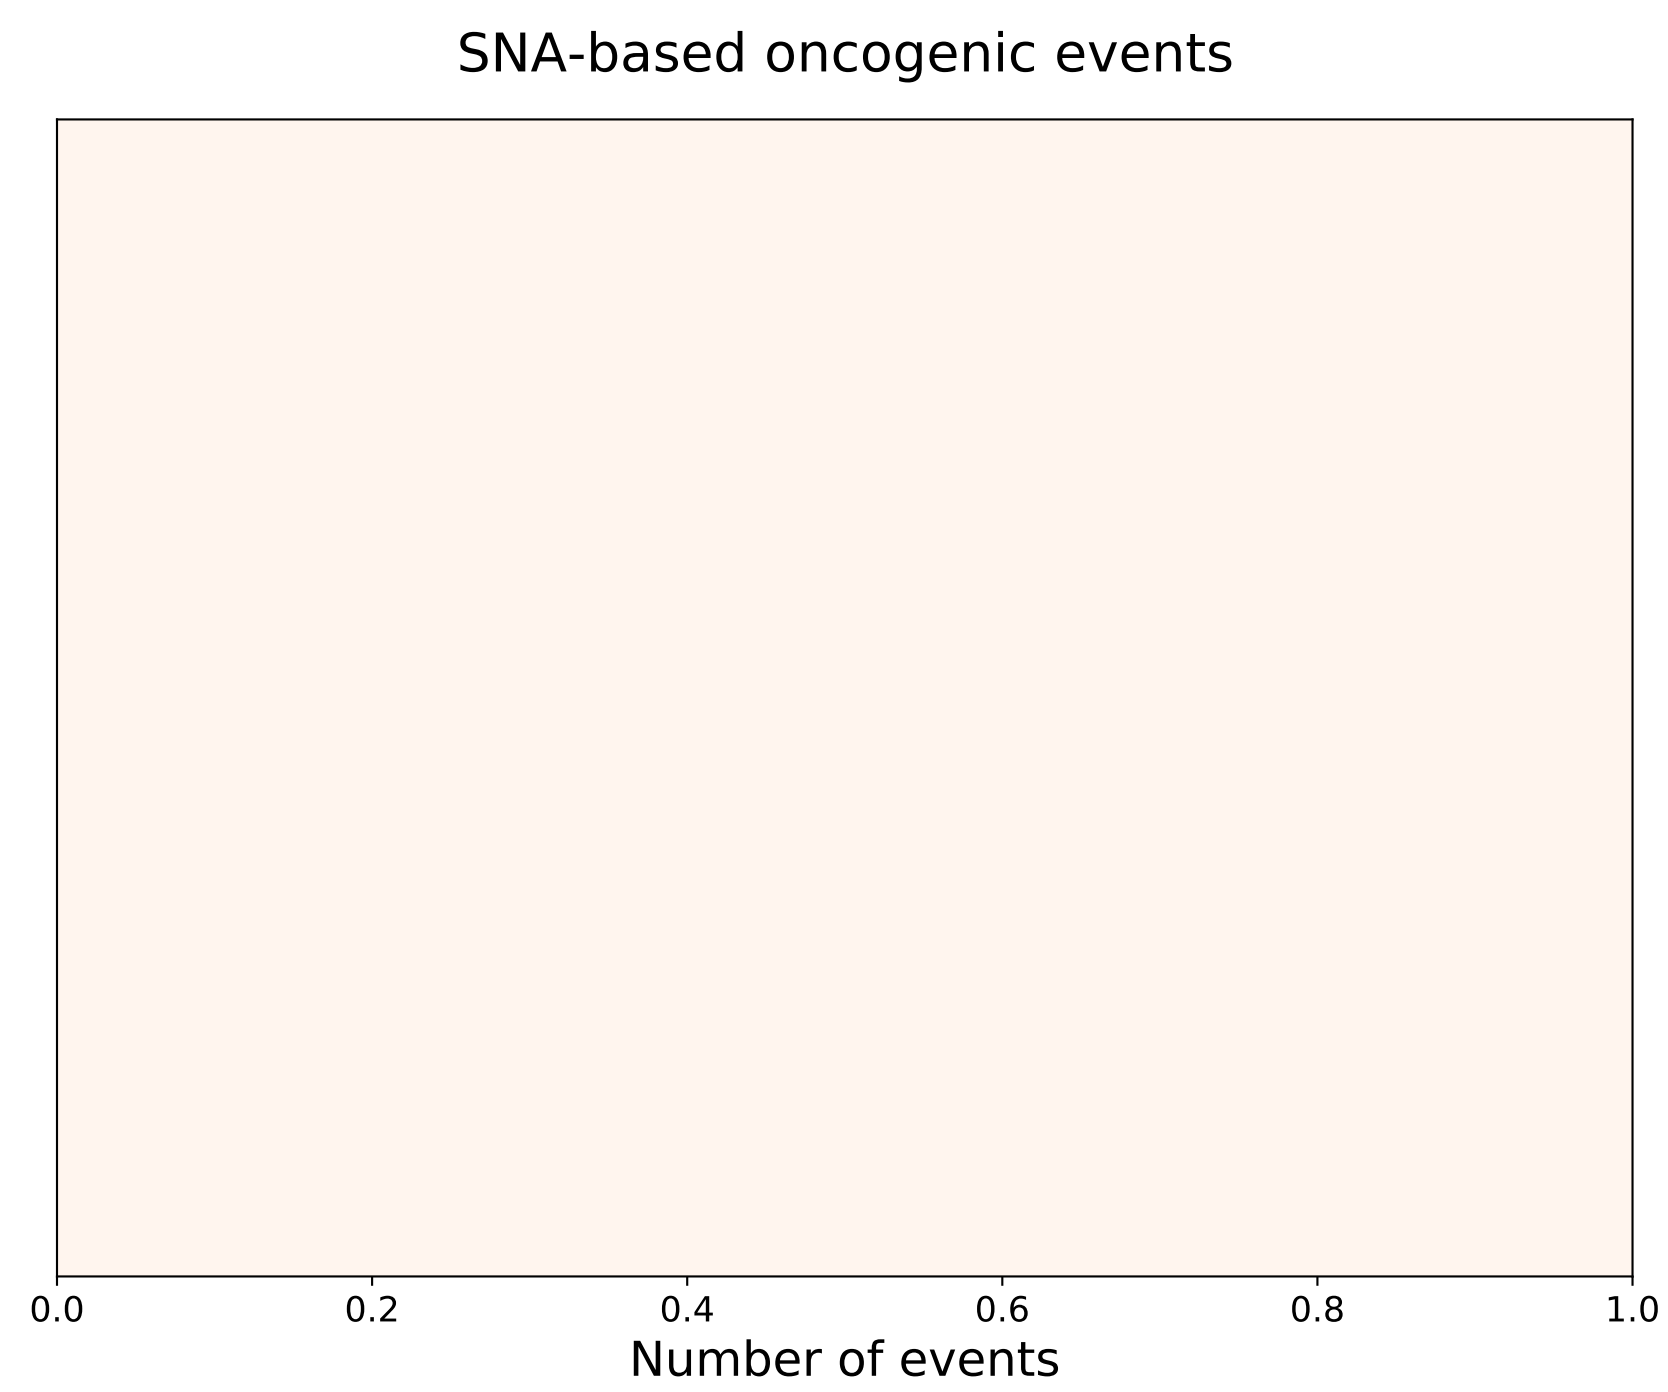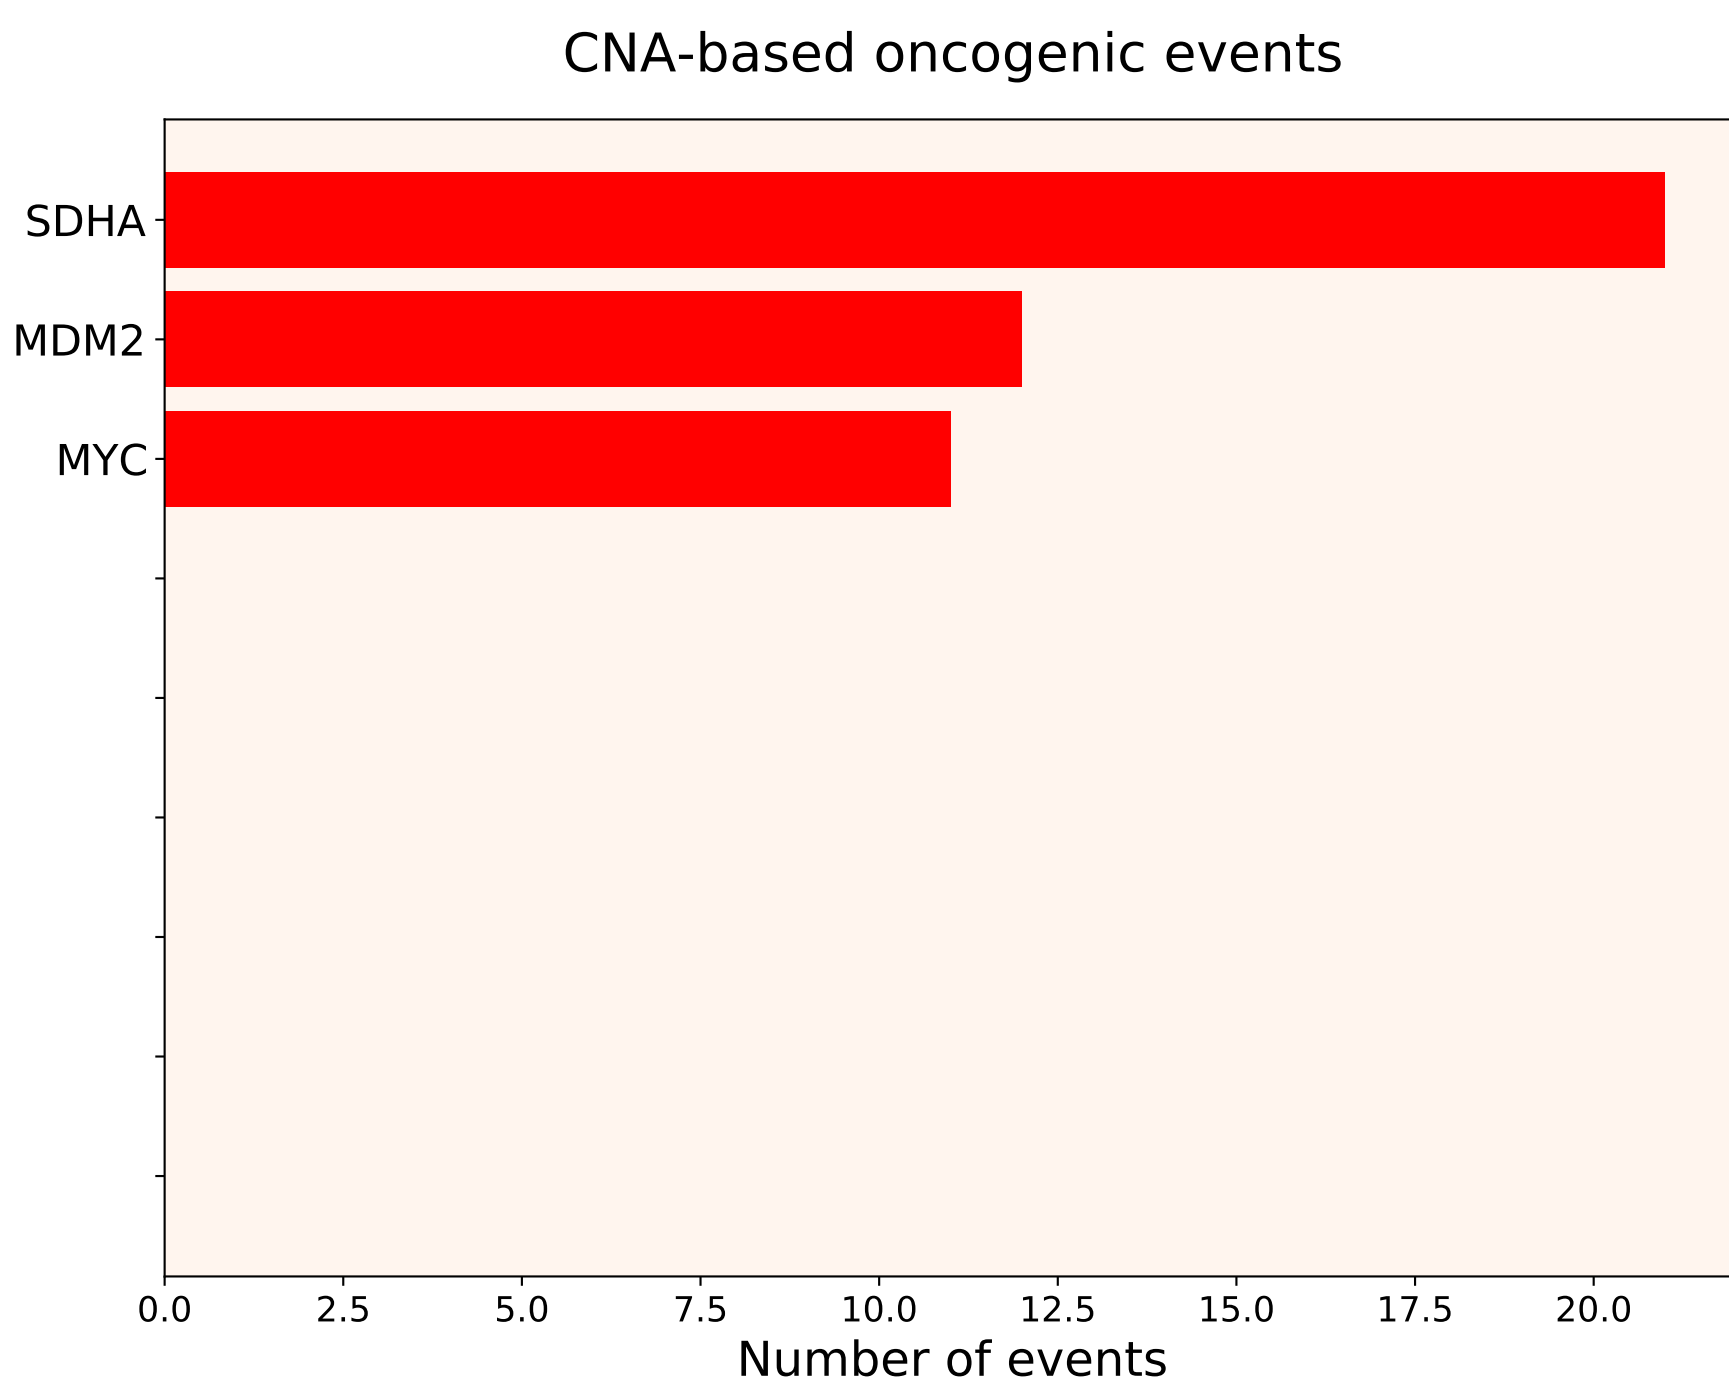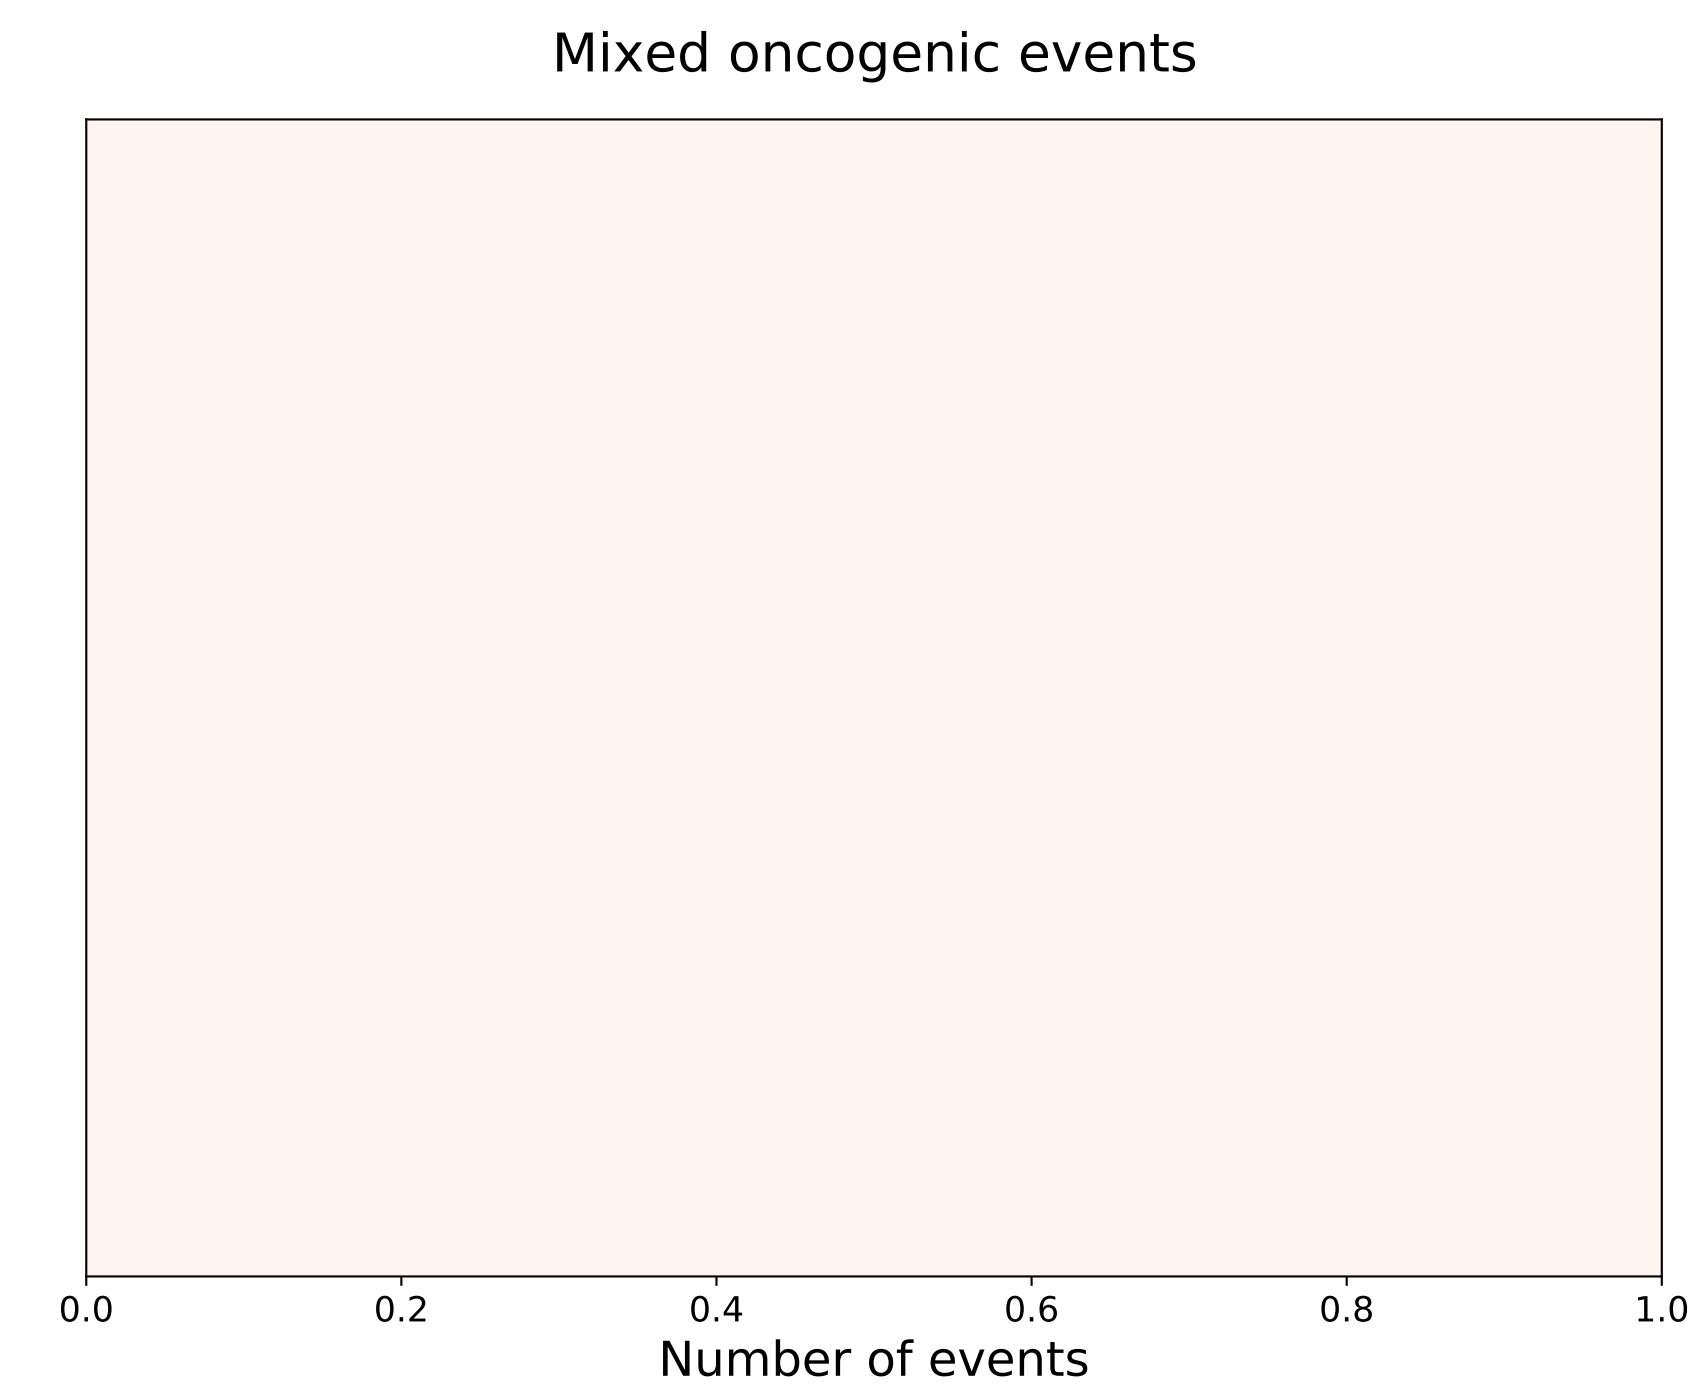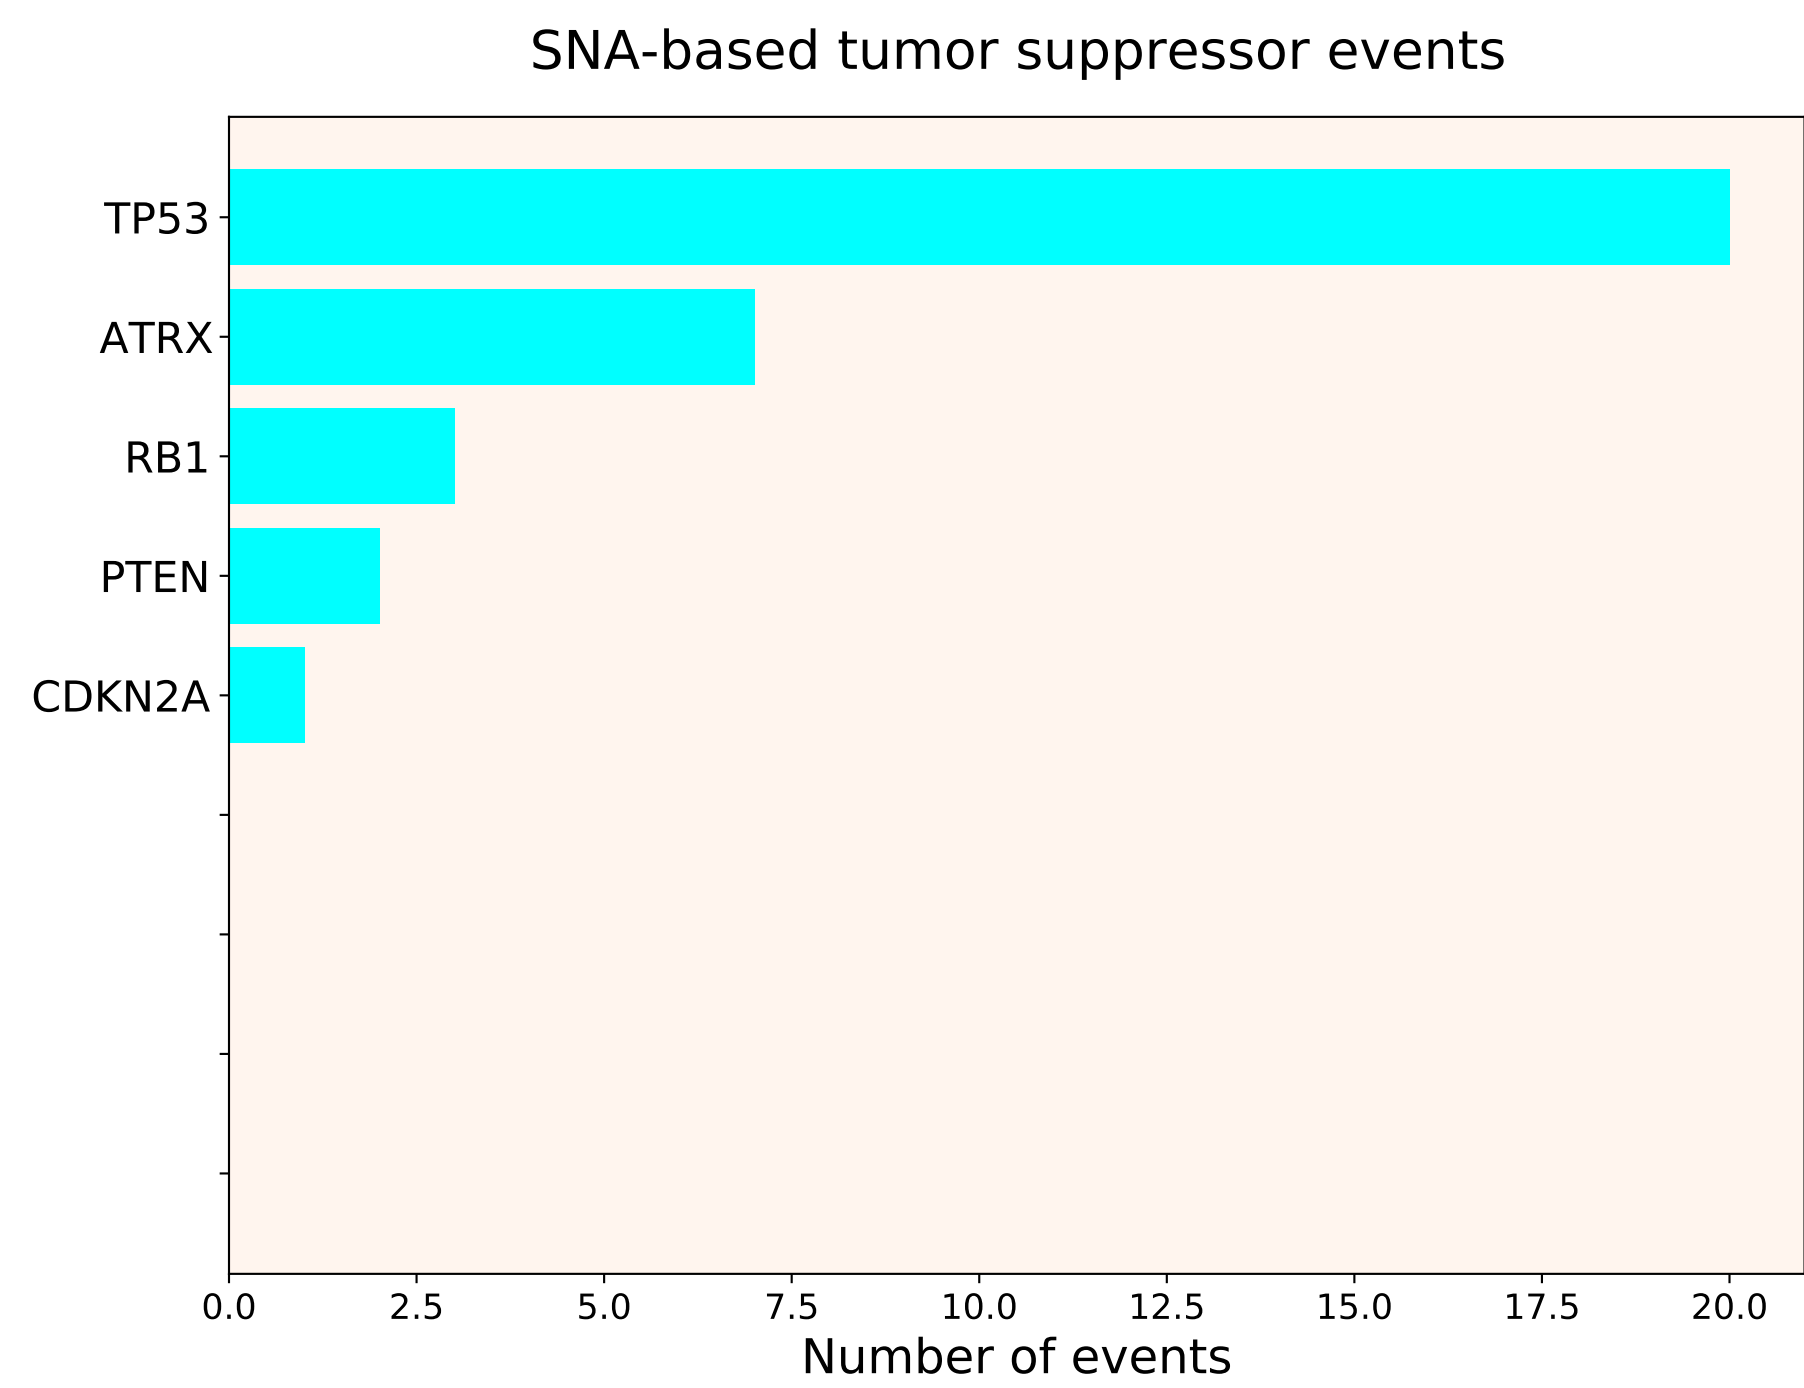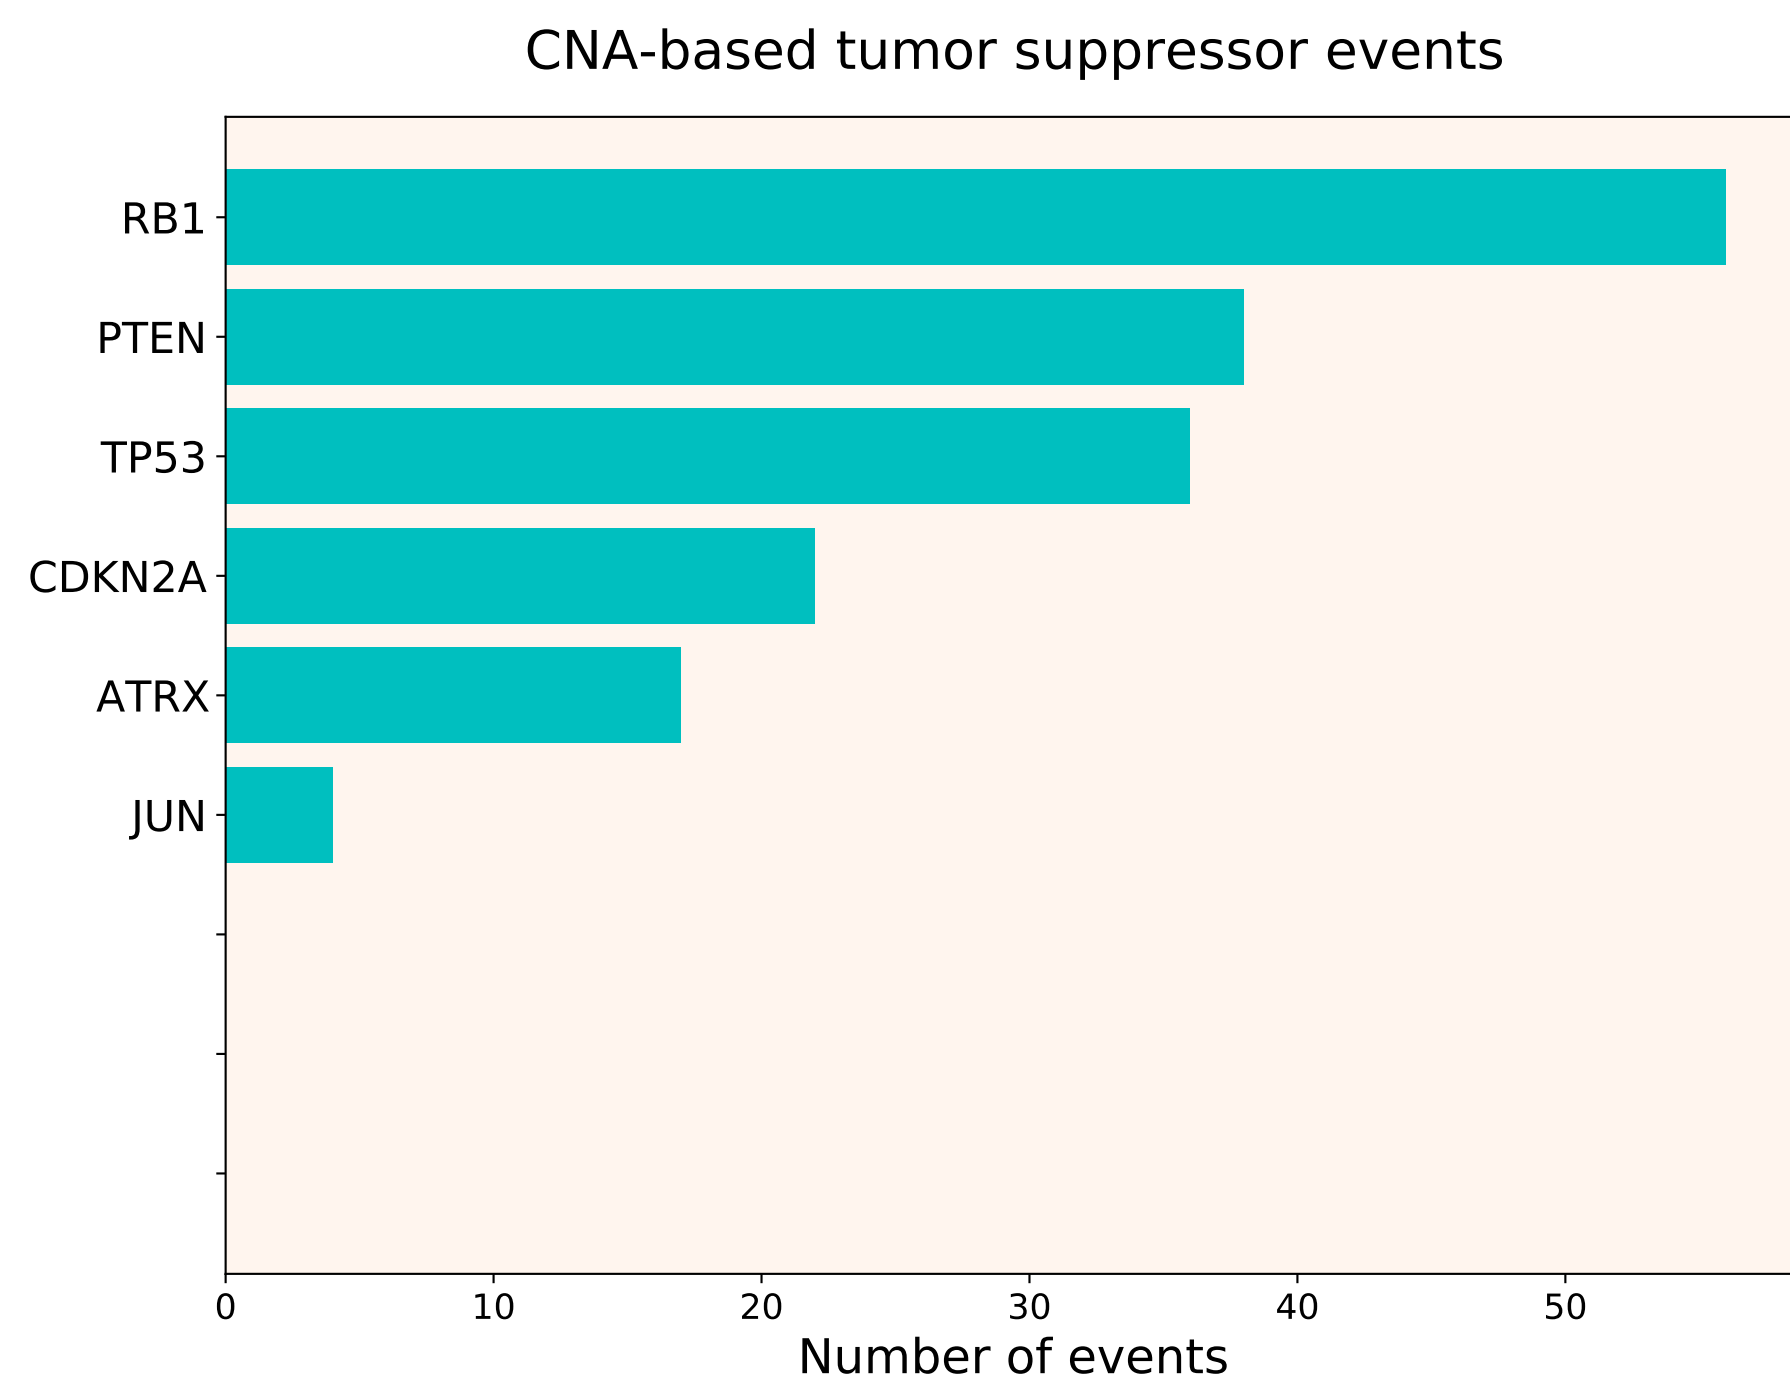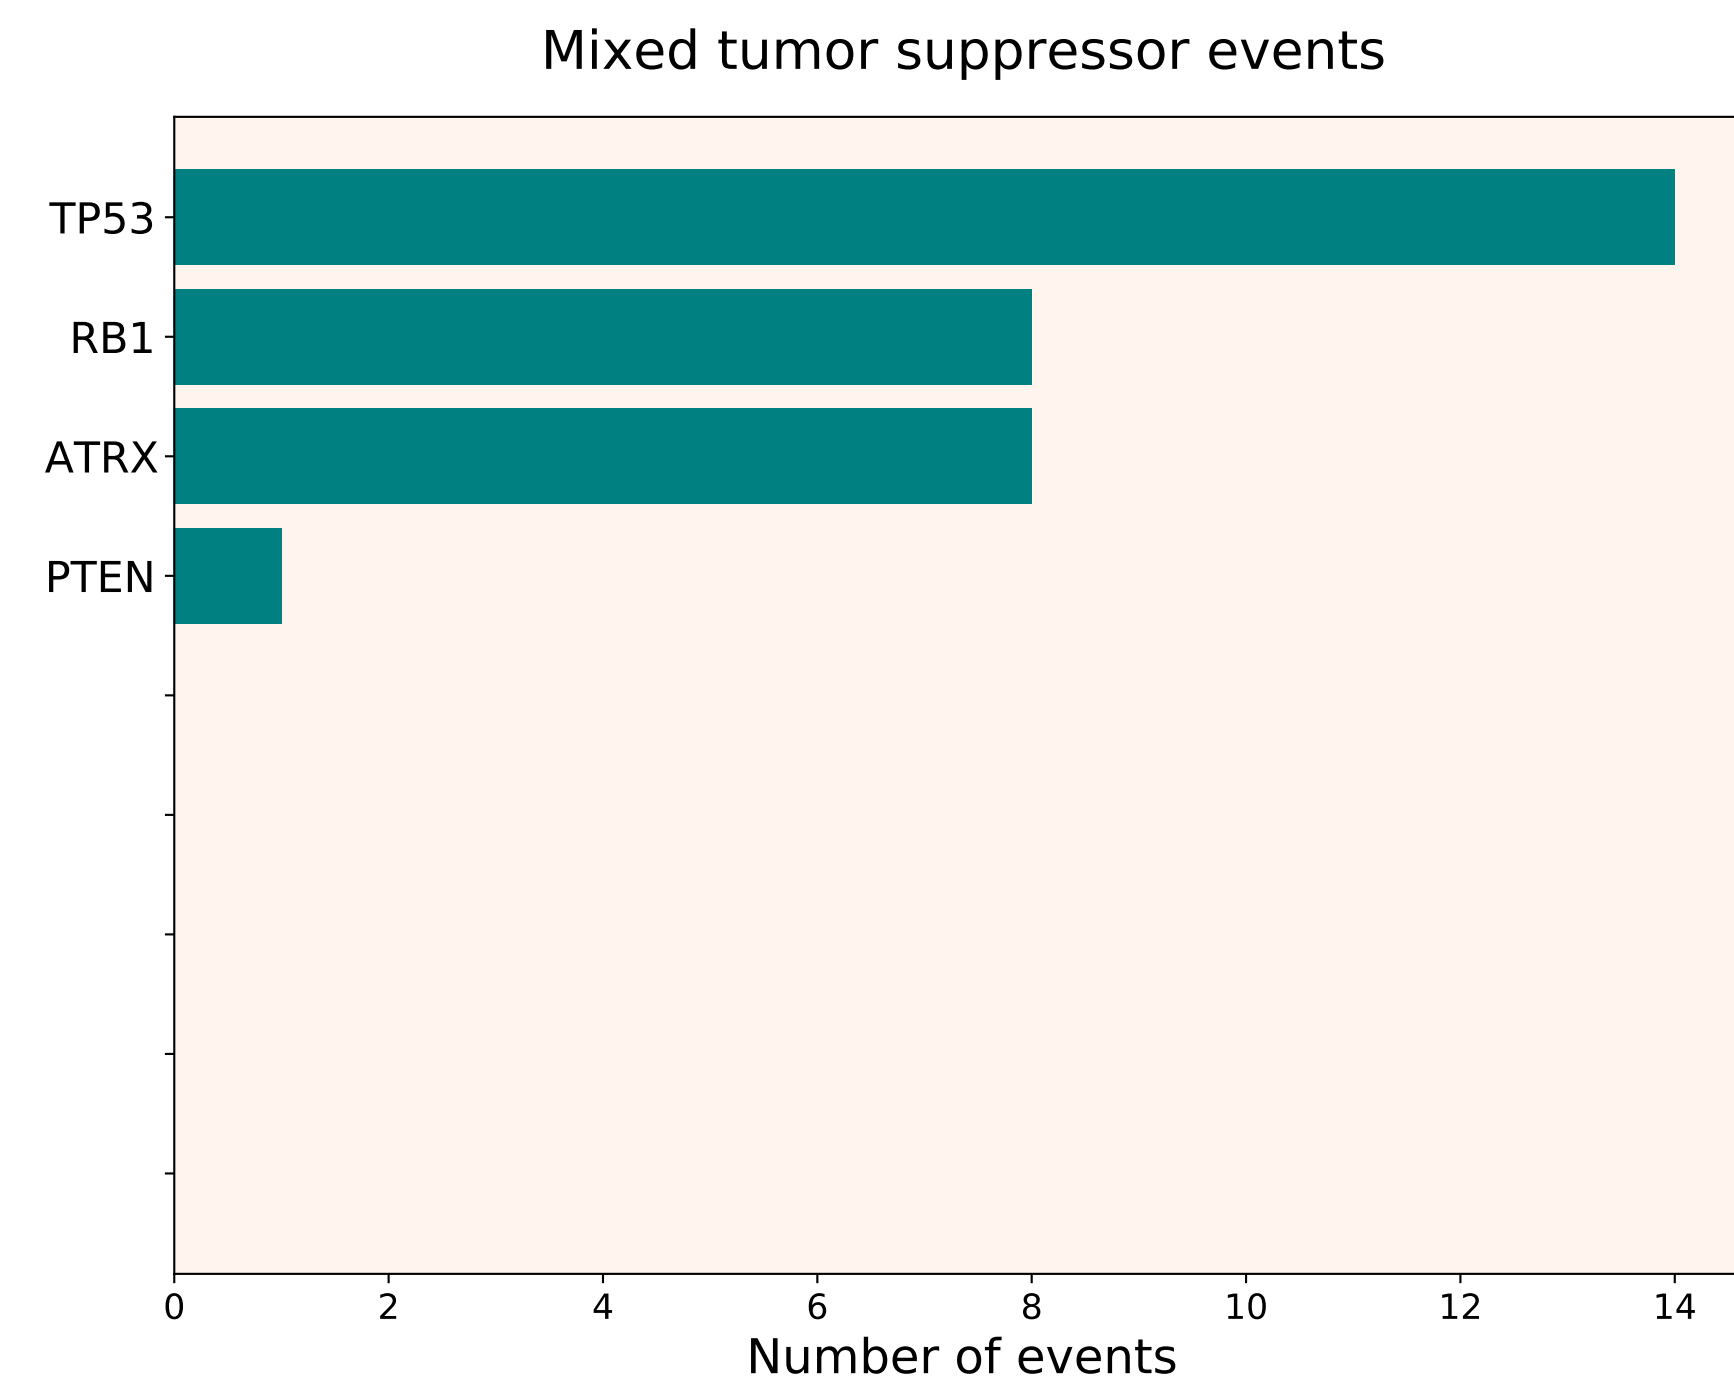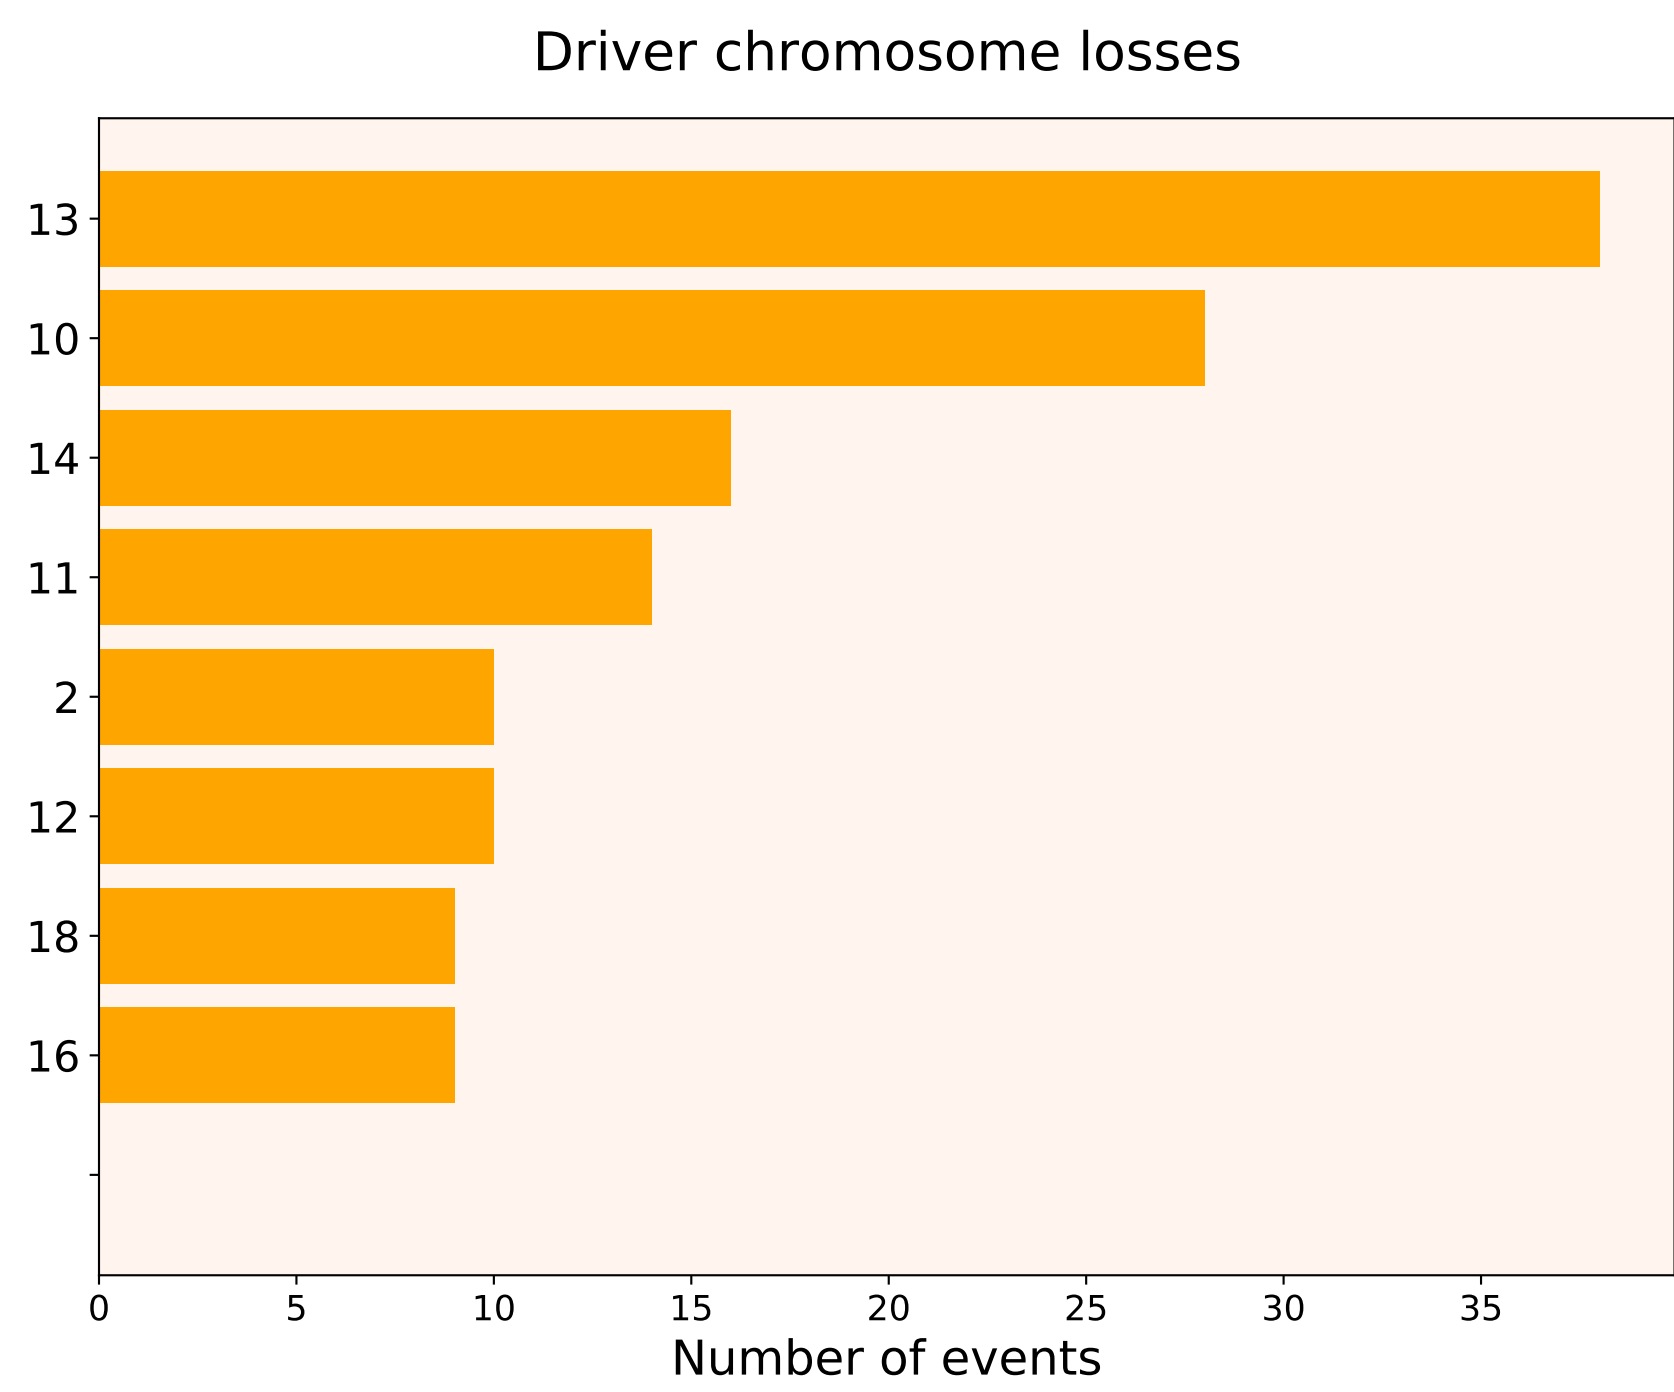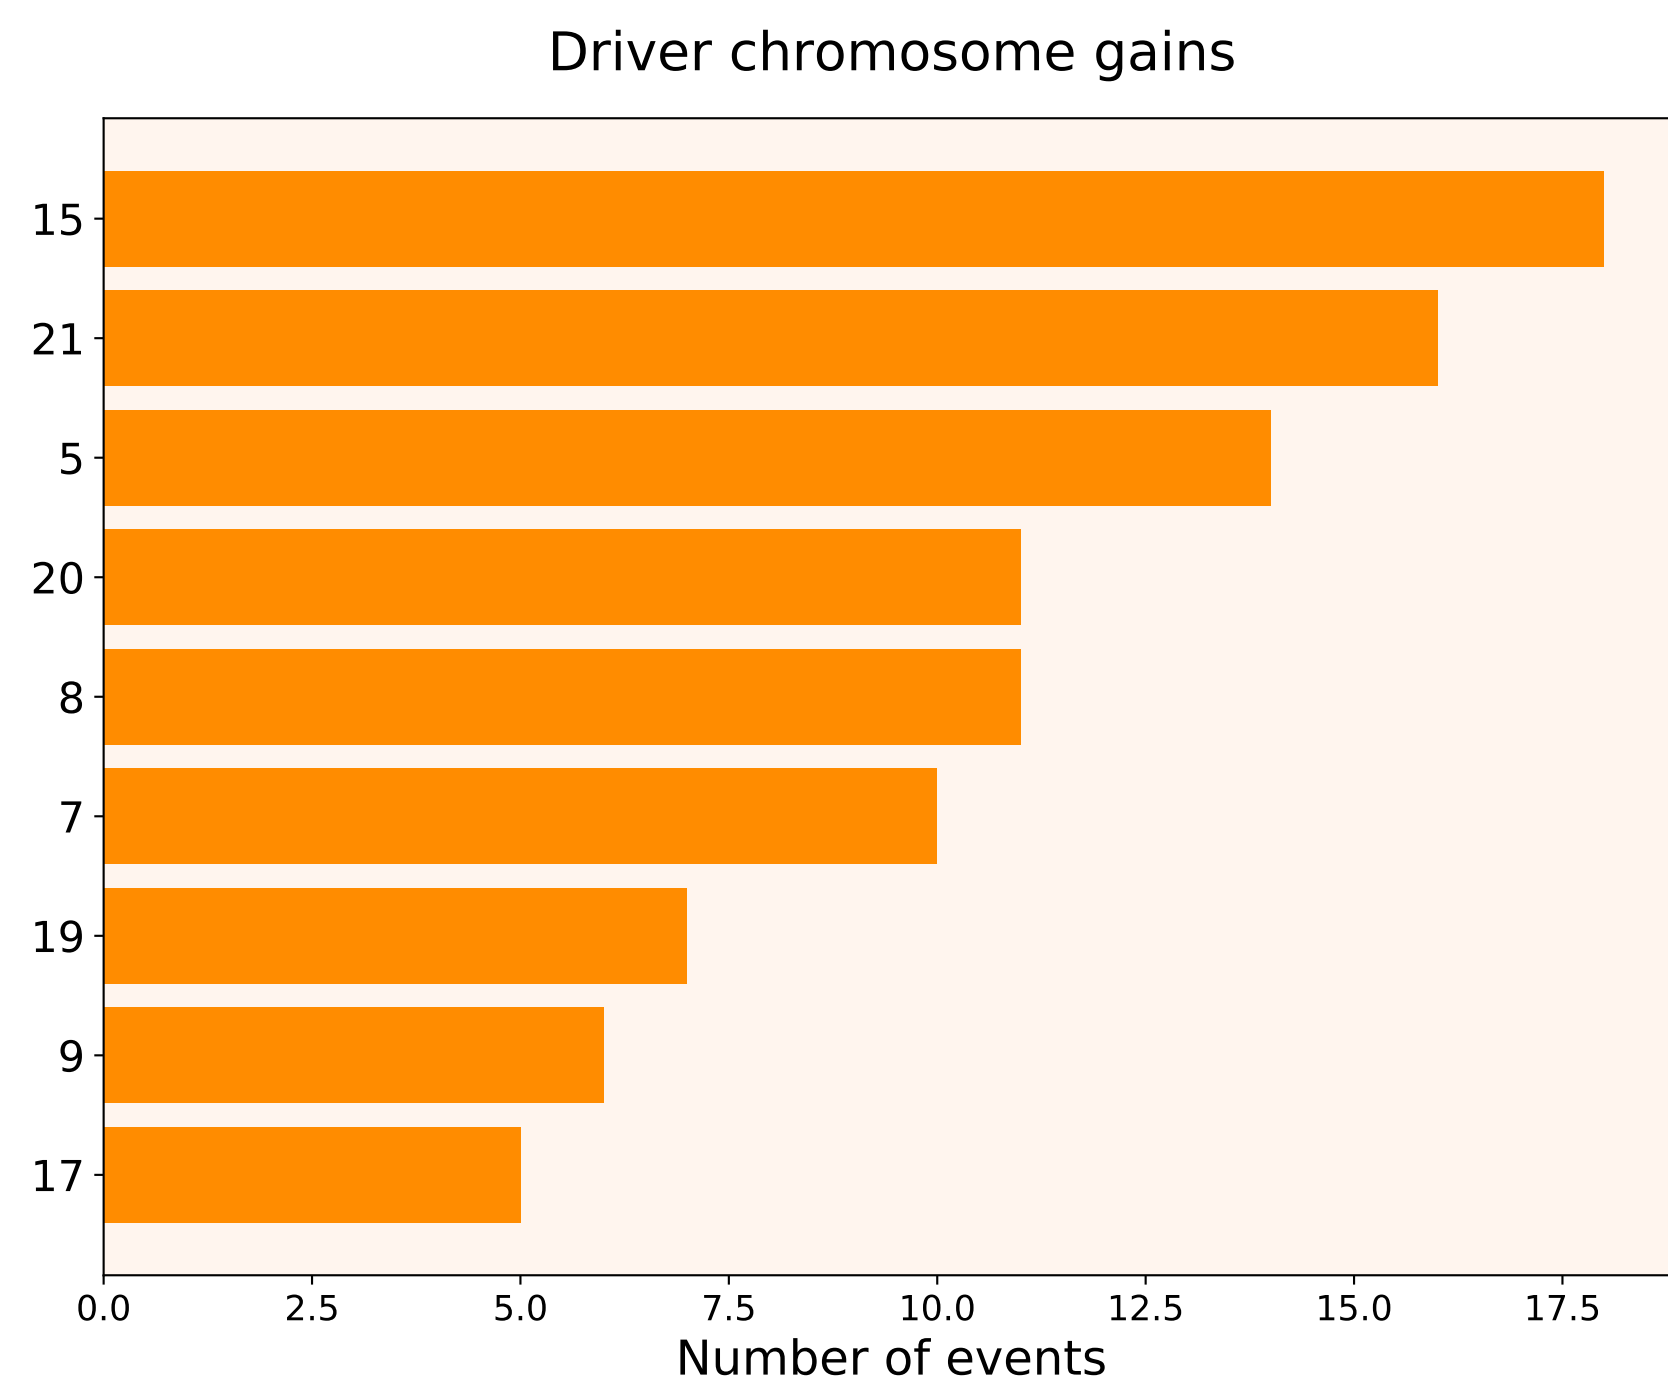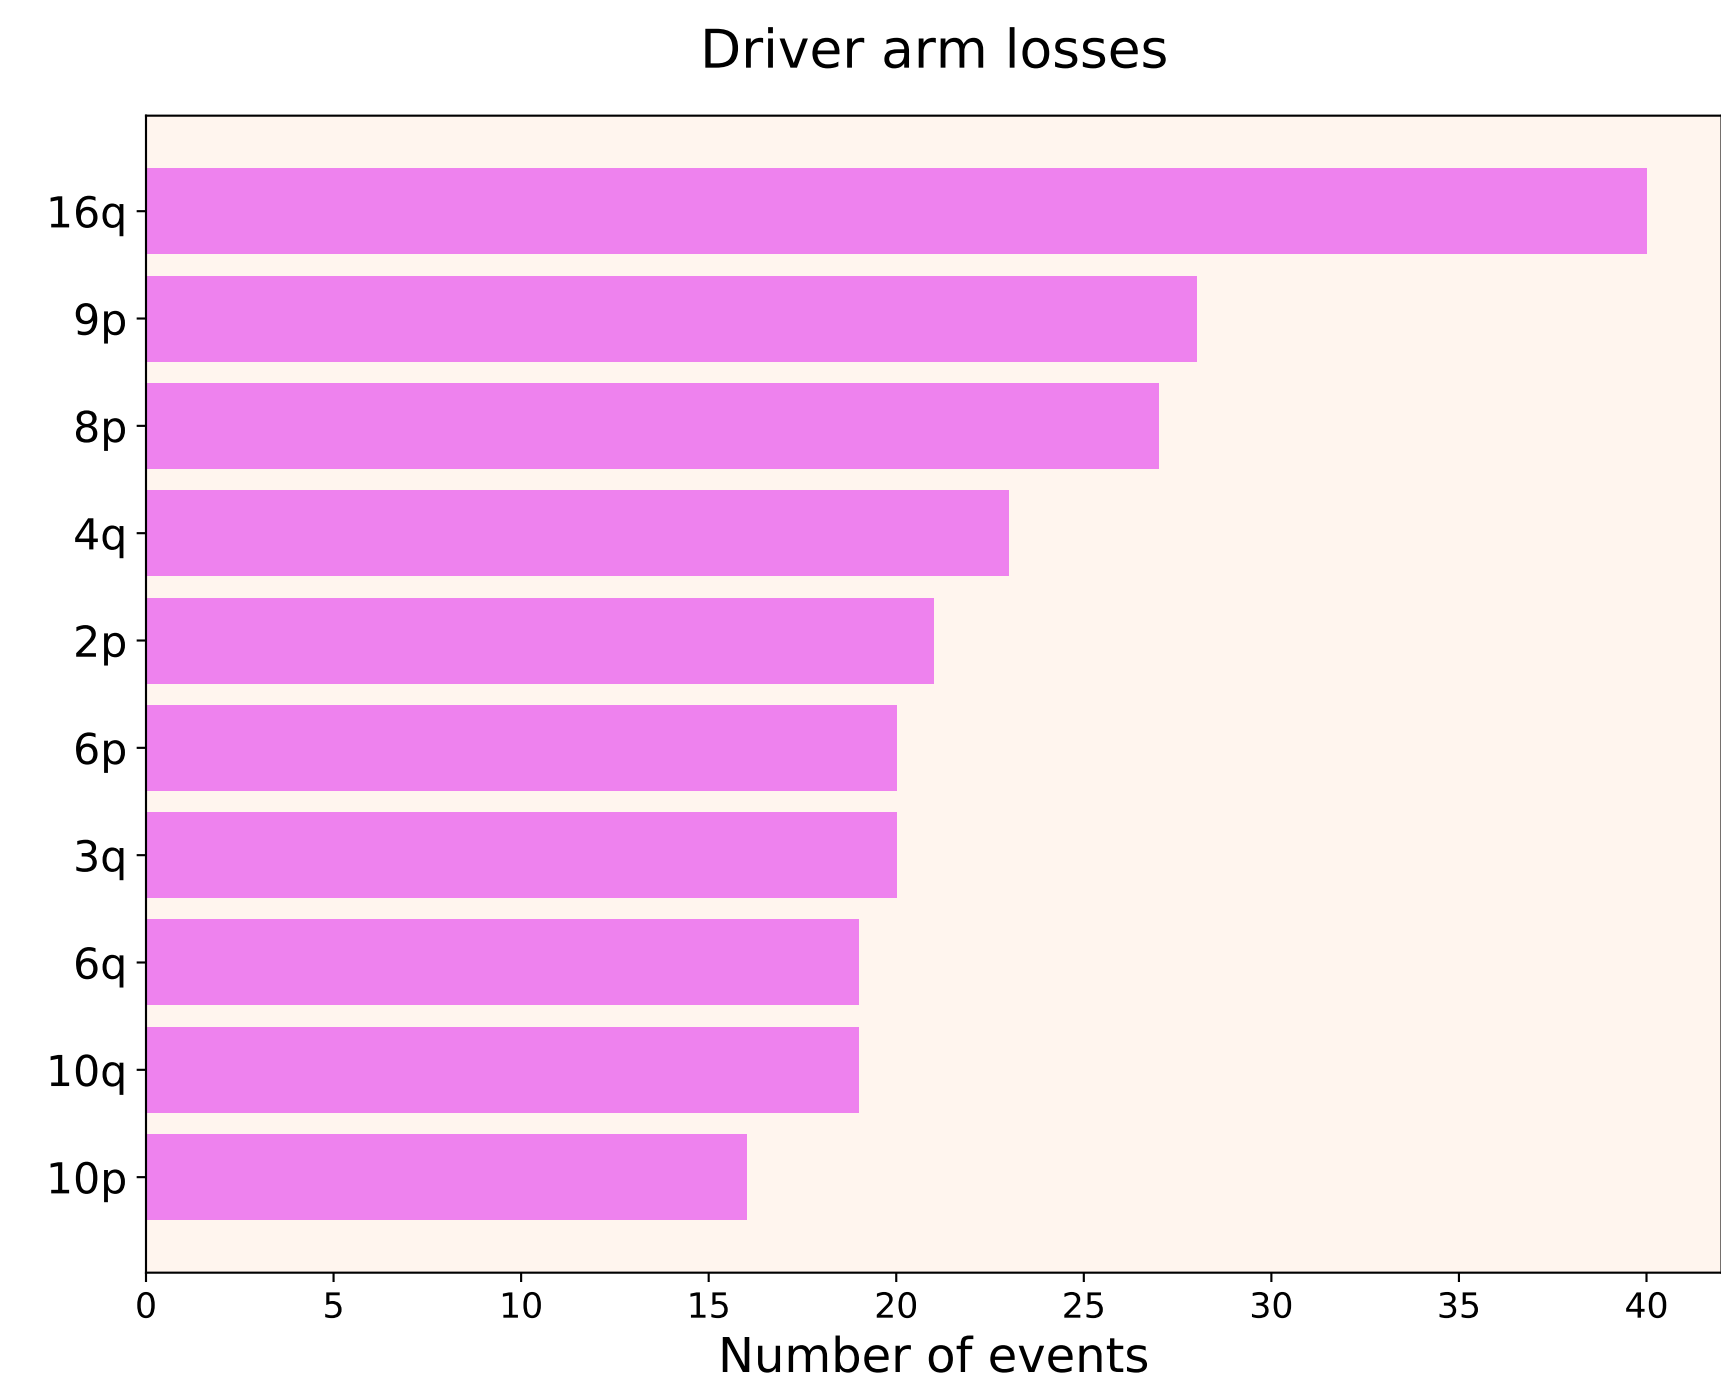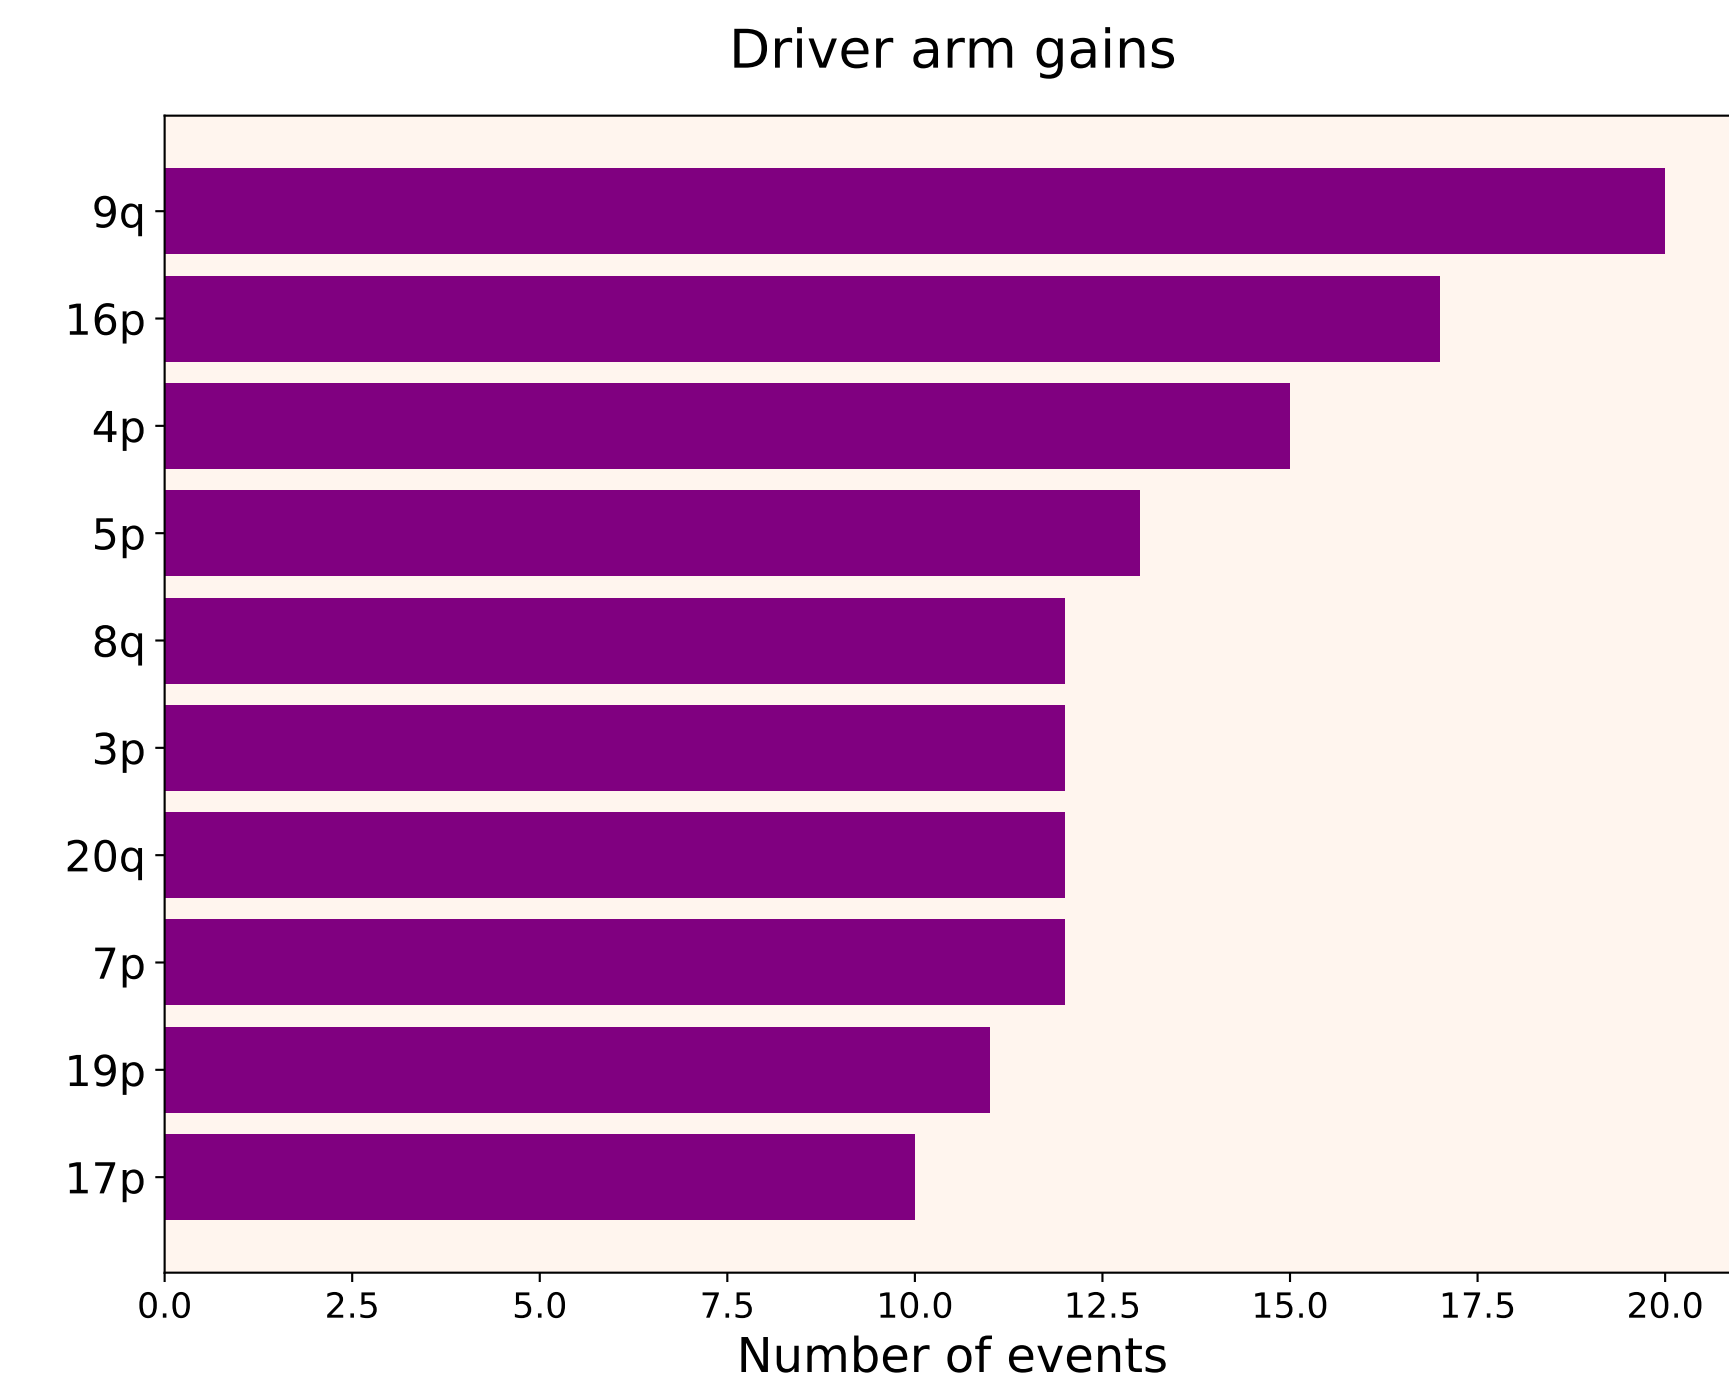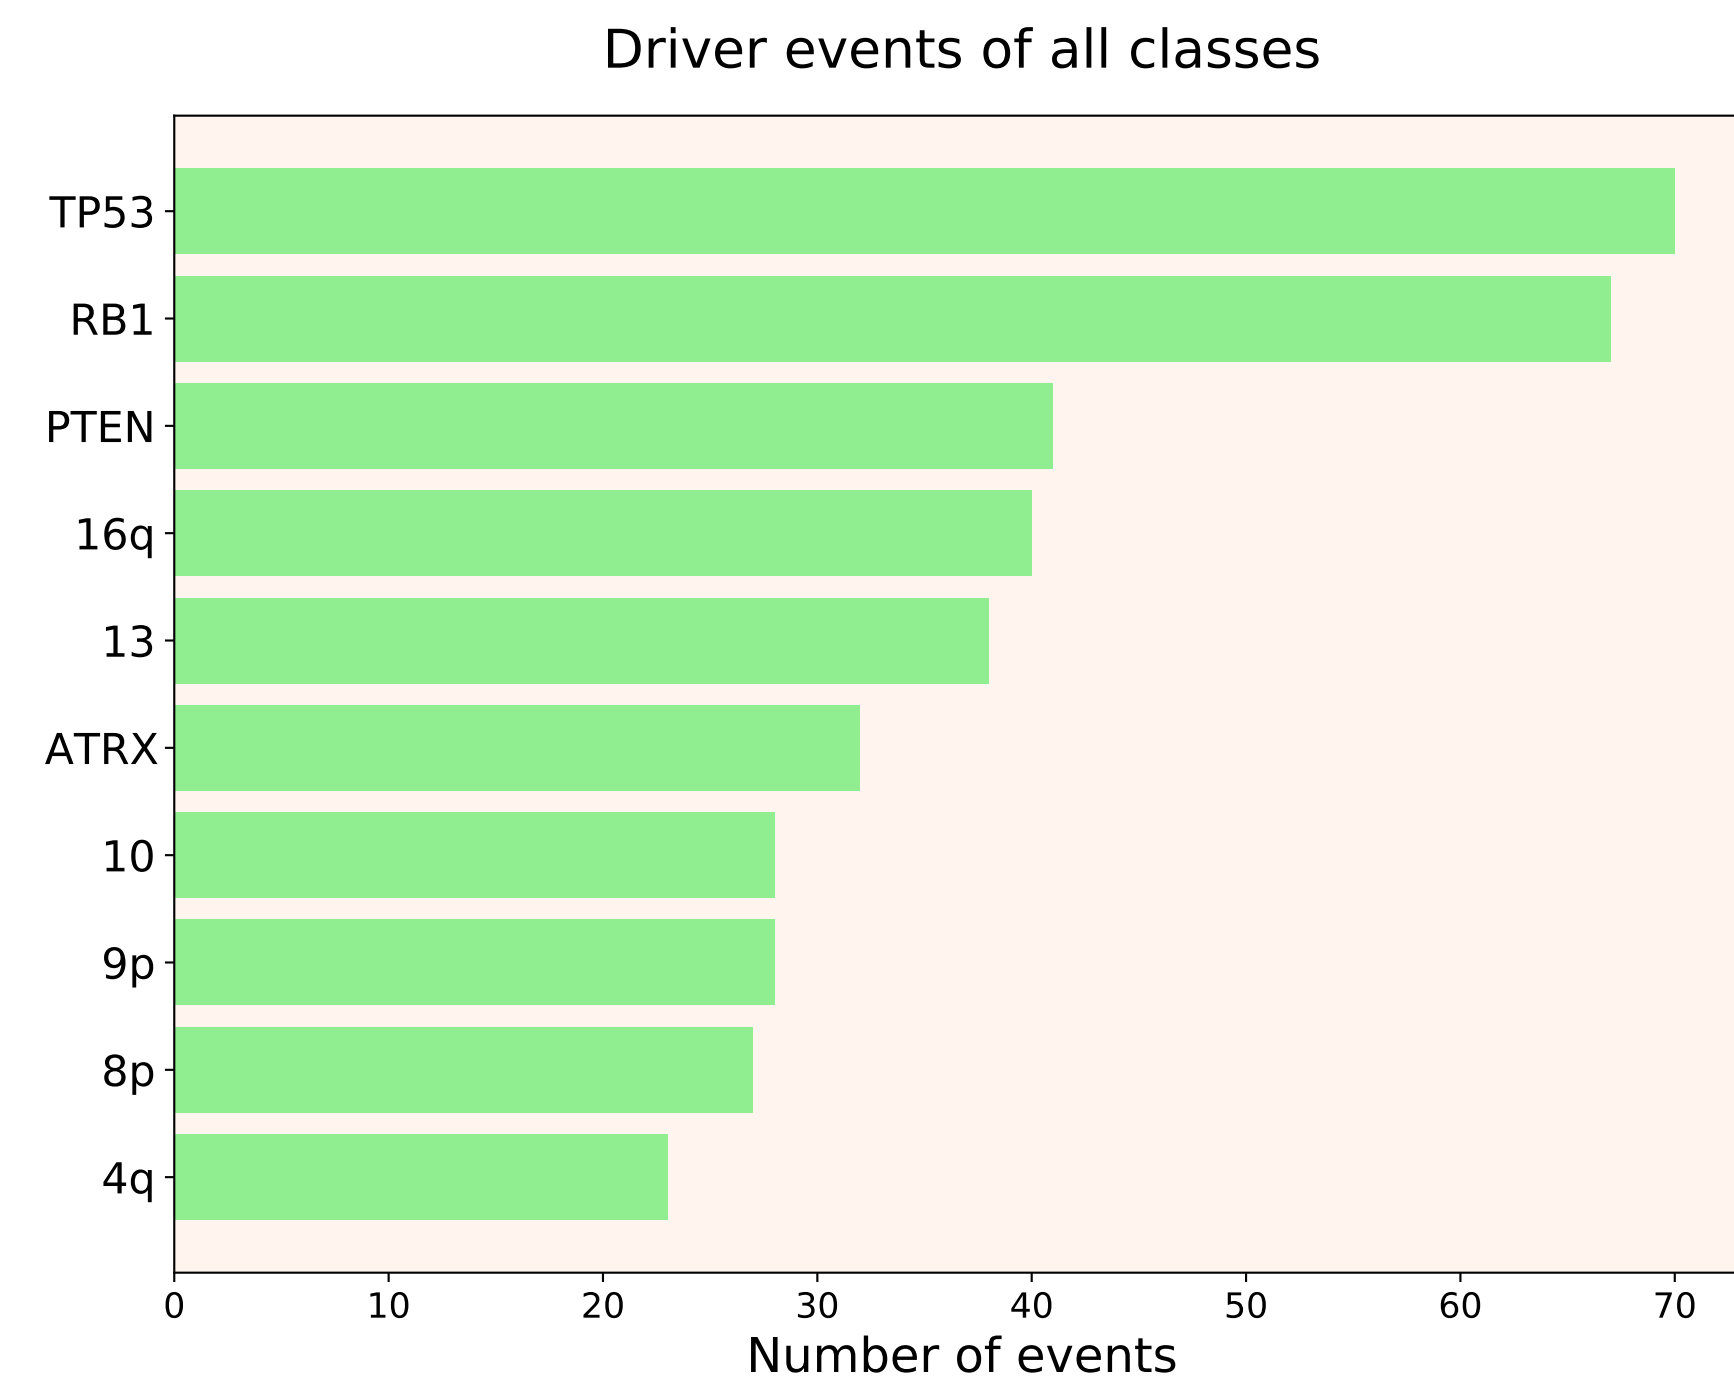

Supplement: Supplemental_Data_S1.zip [file Supplemental_Data_S1.zip]

# LUSC\_FEMALE

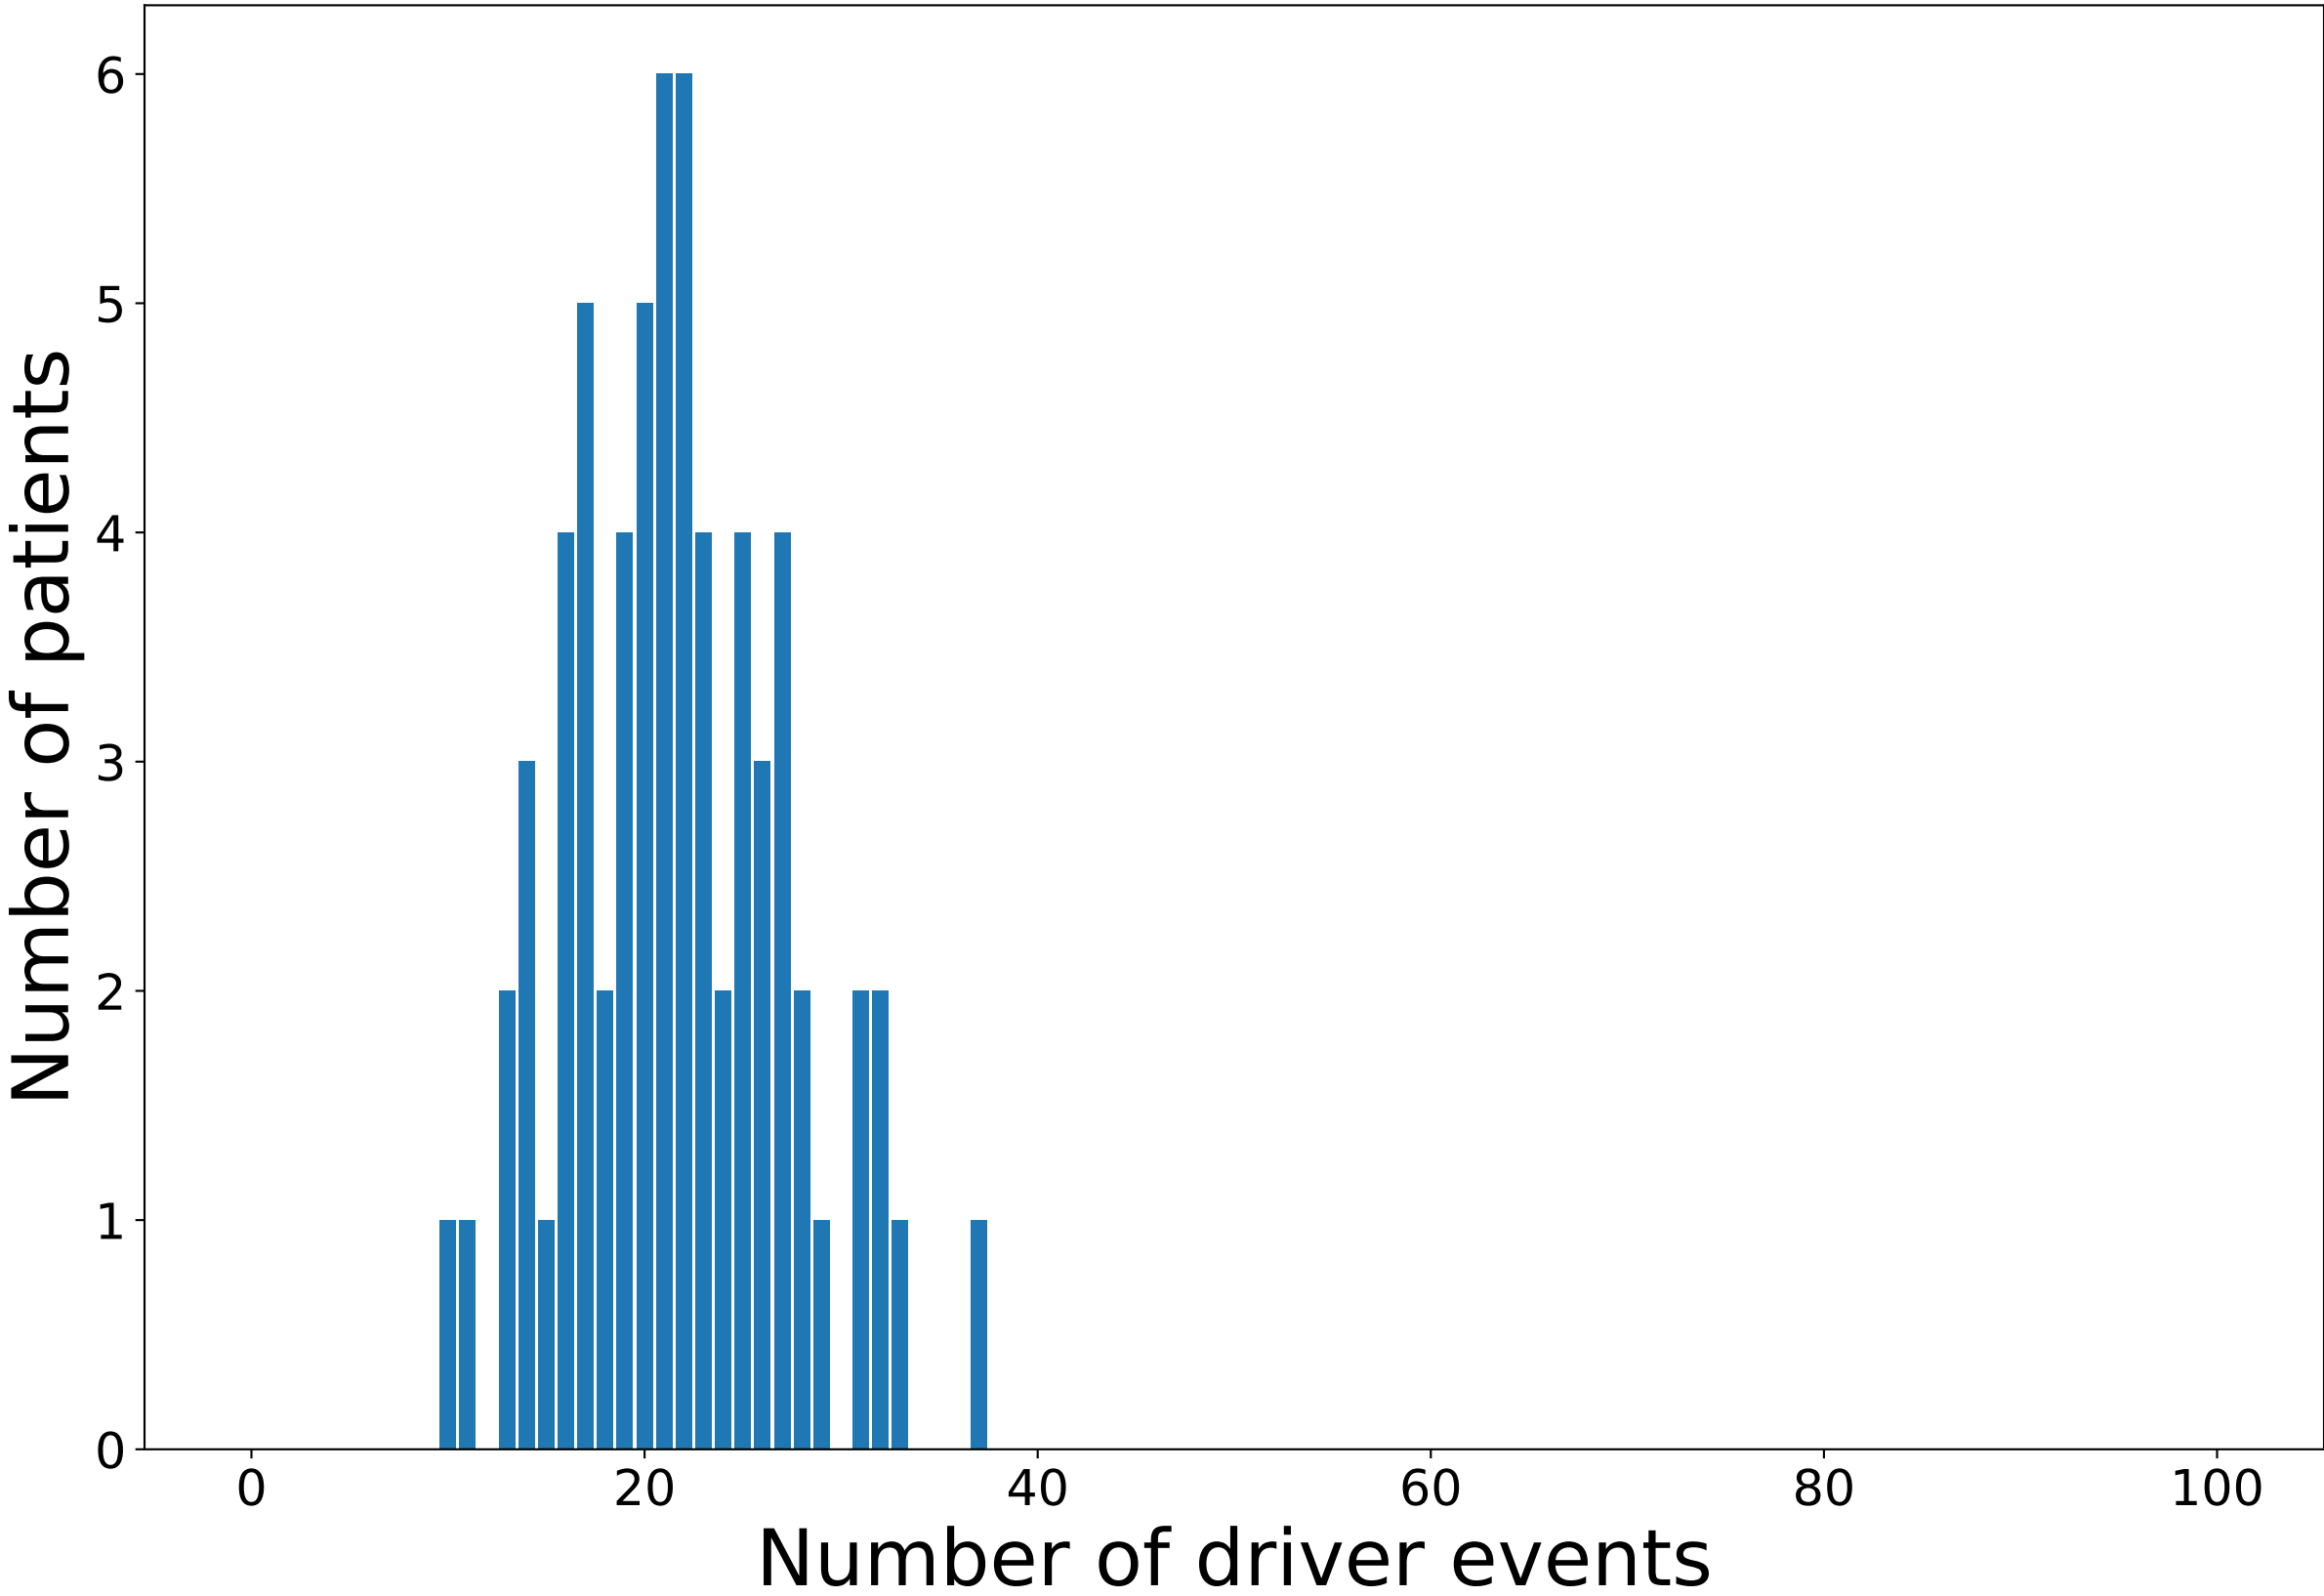

Supplement: Supplemental_Data_S1.zip [file Supplemental_Data_S1.zip]

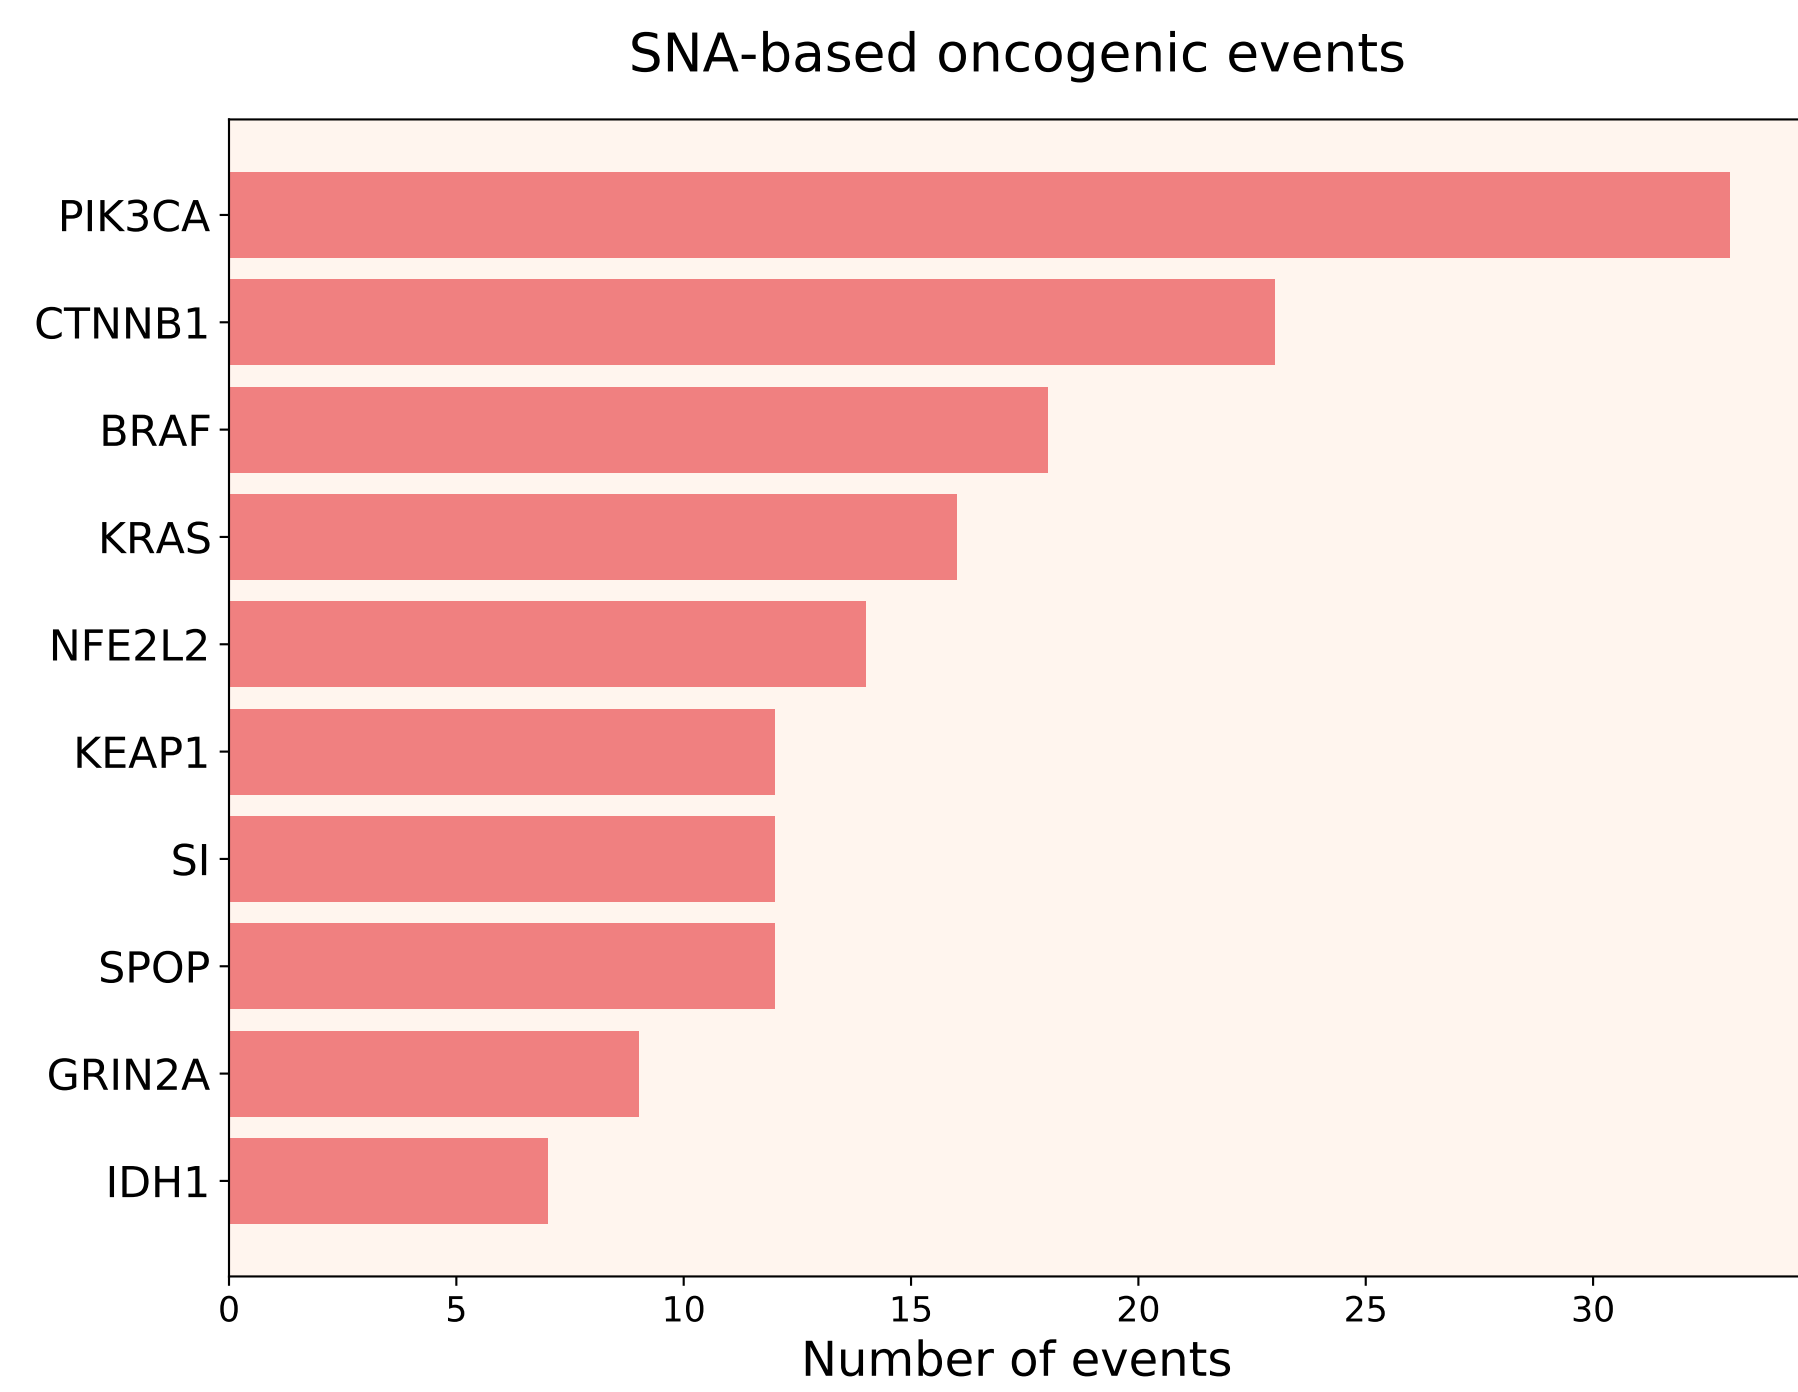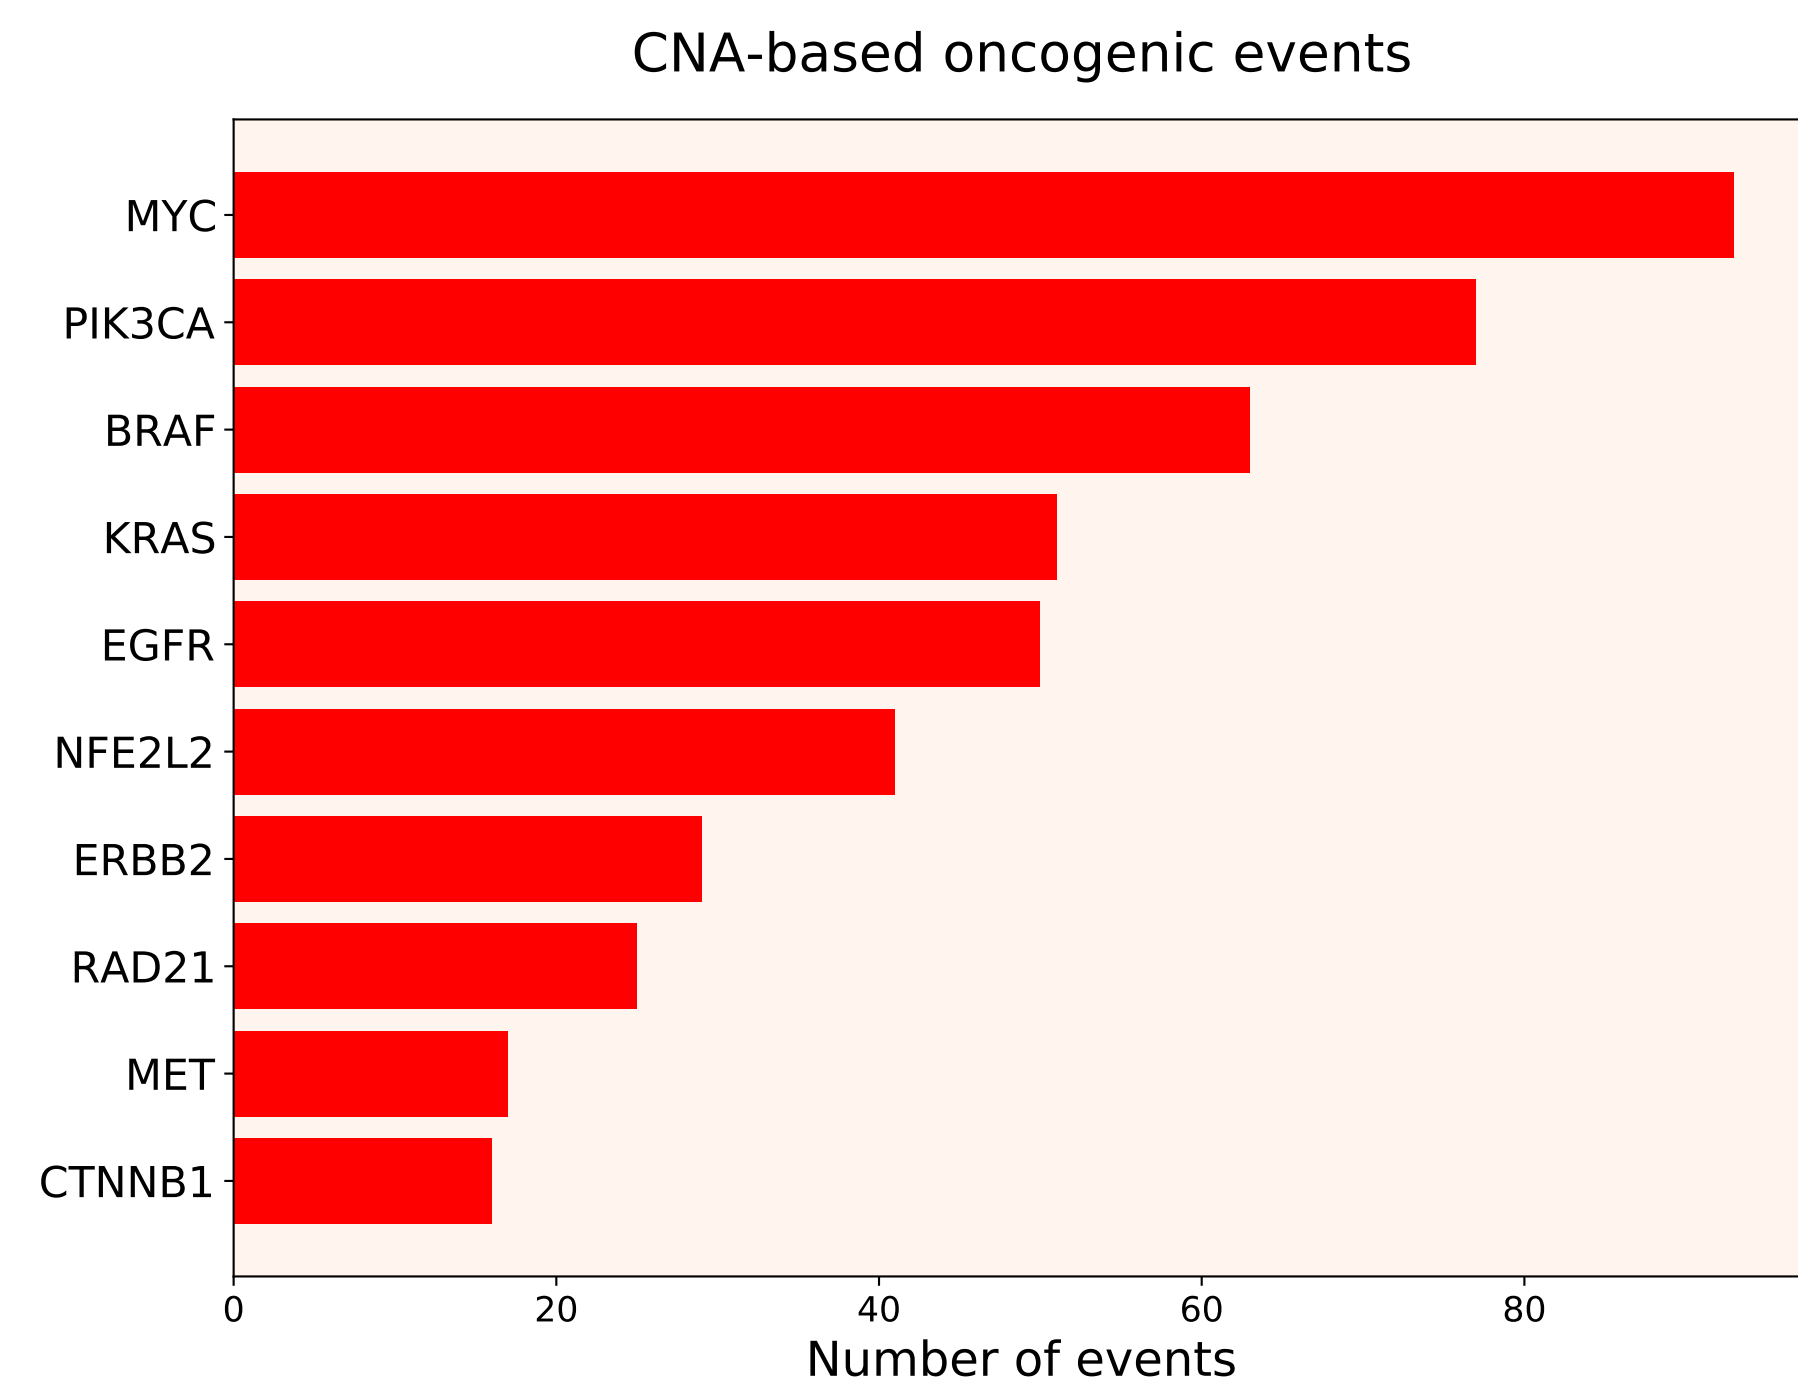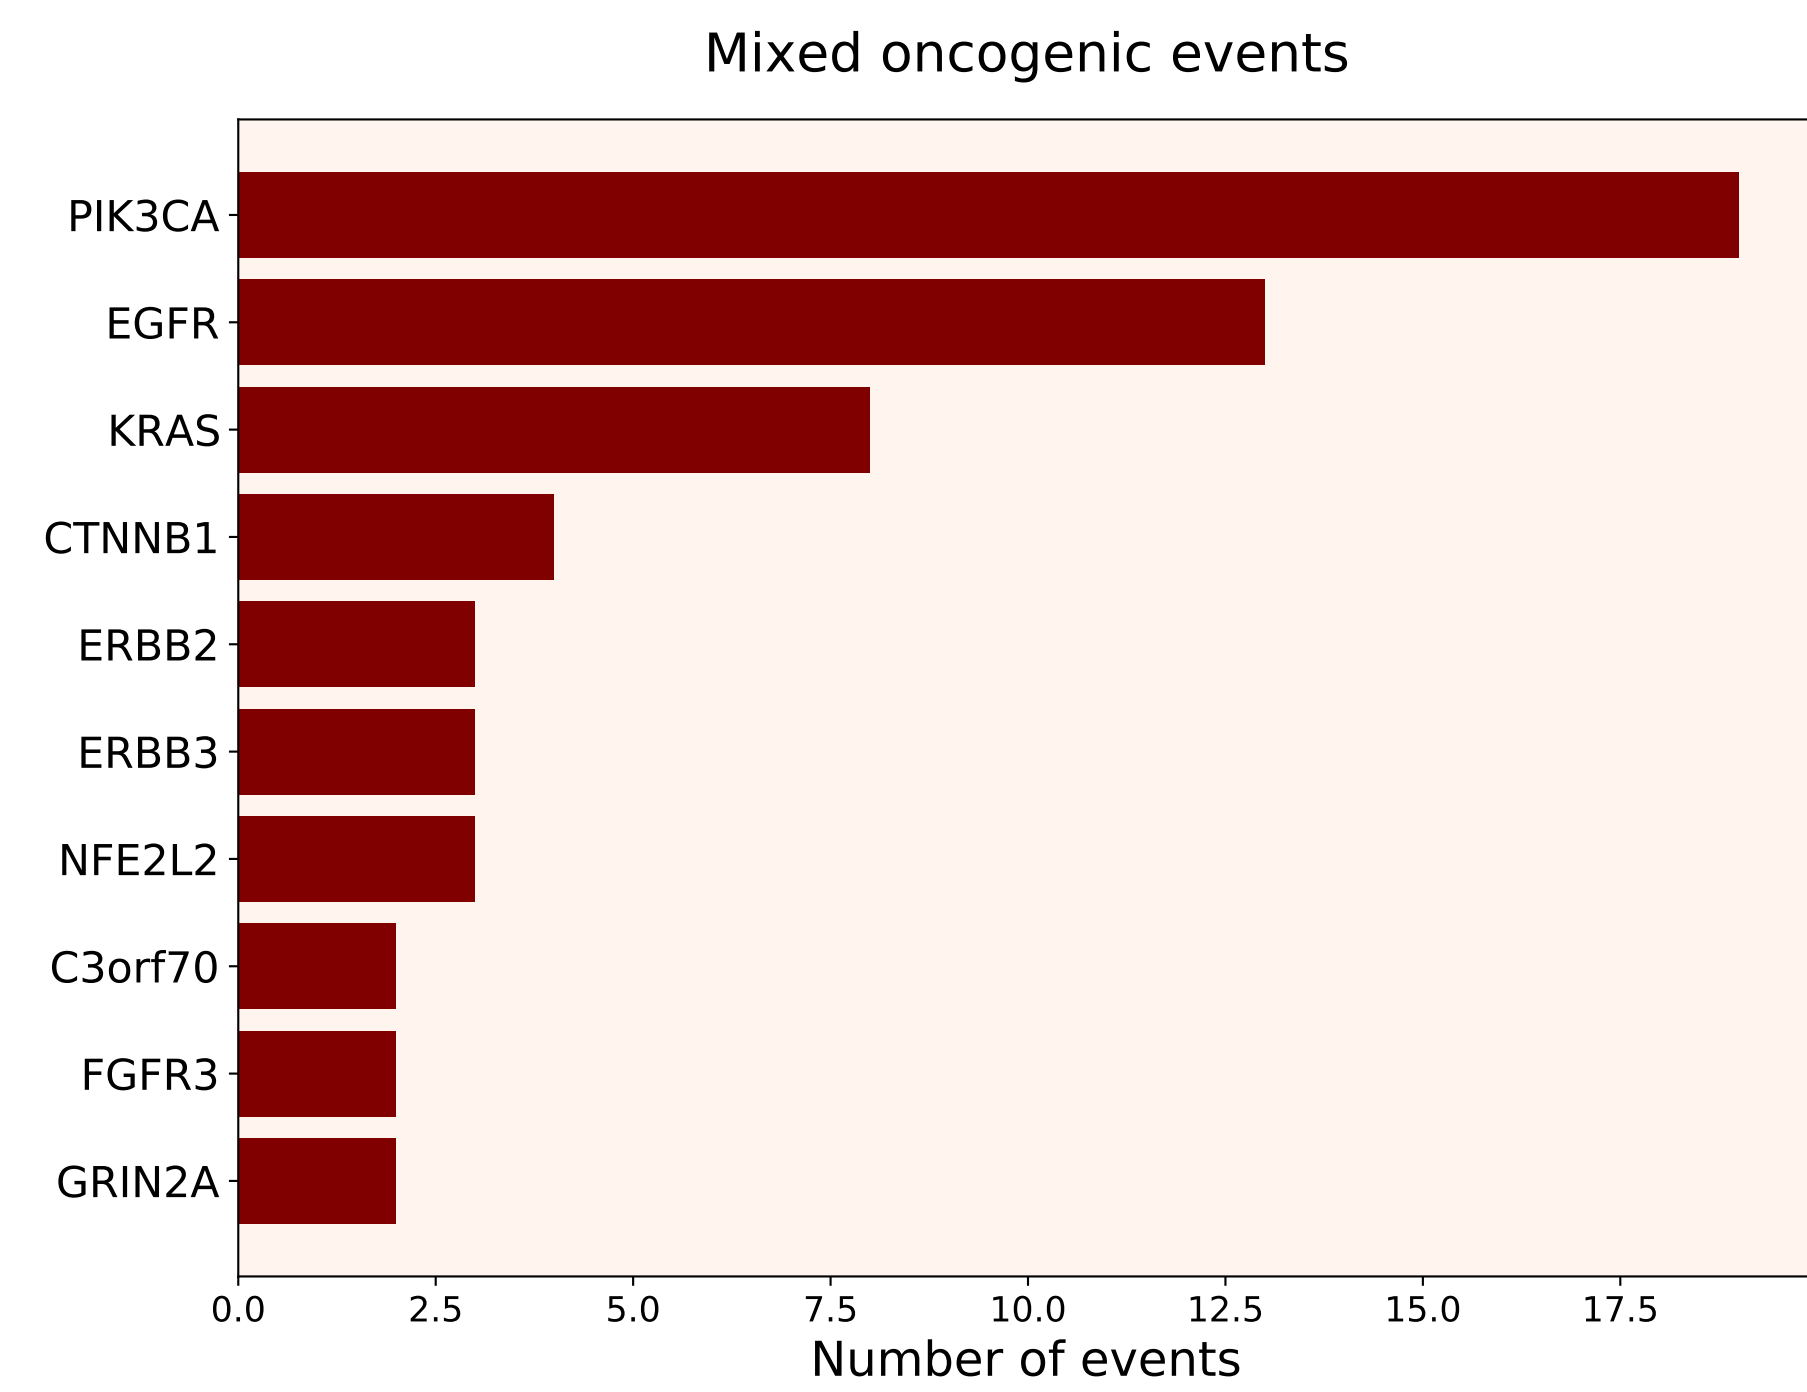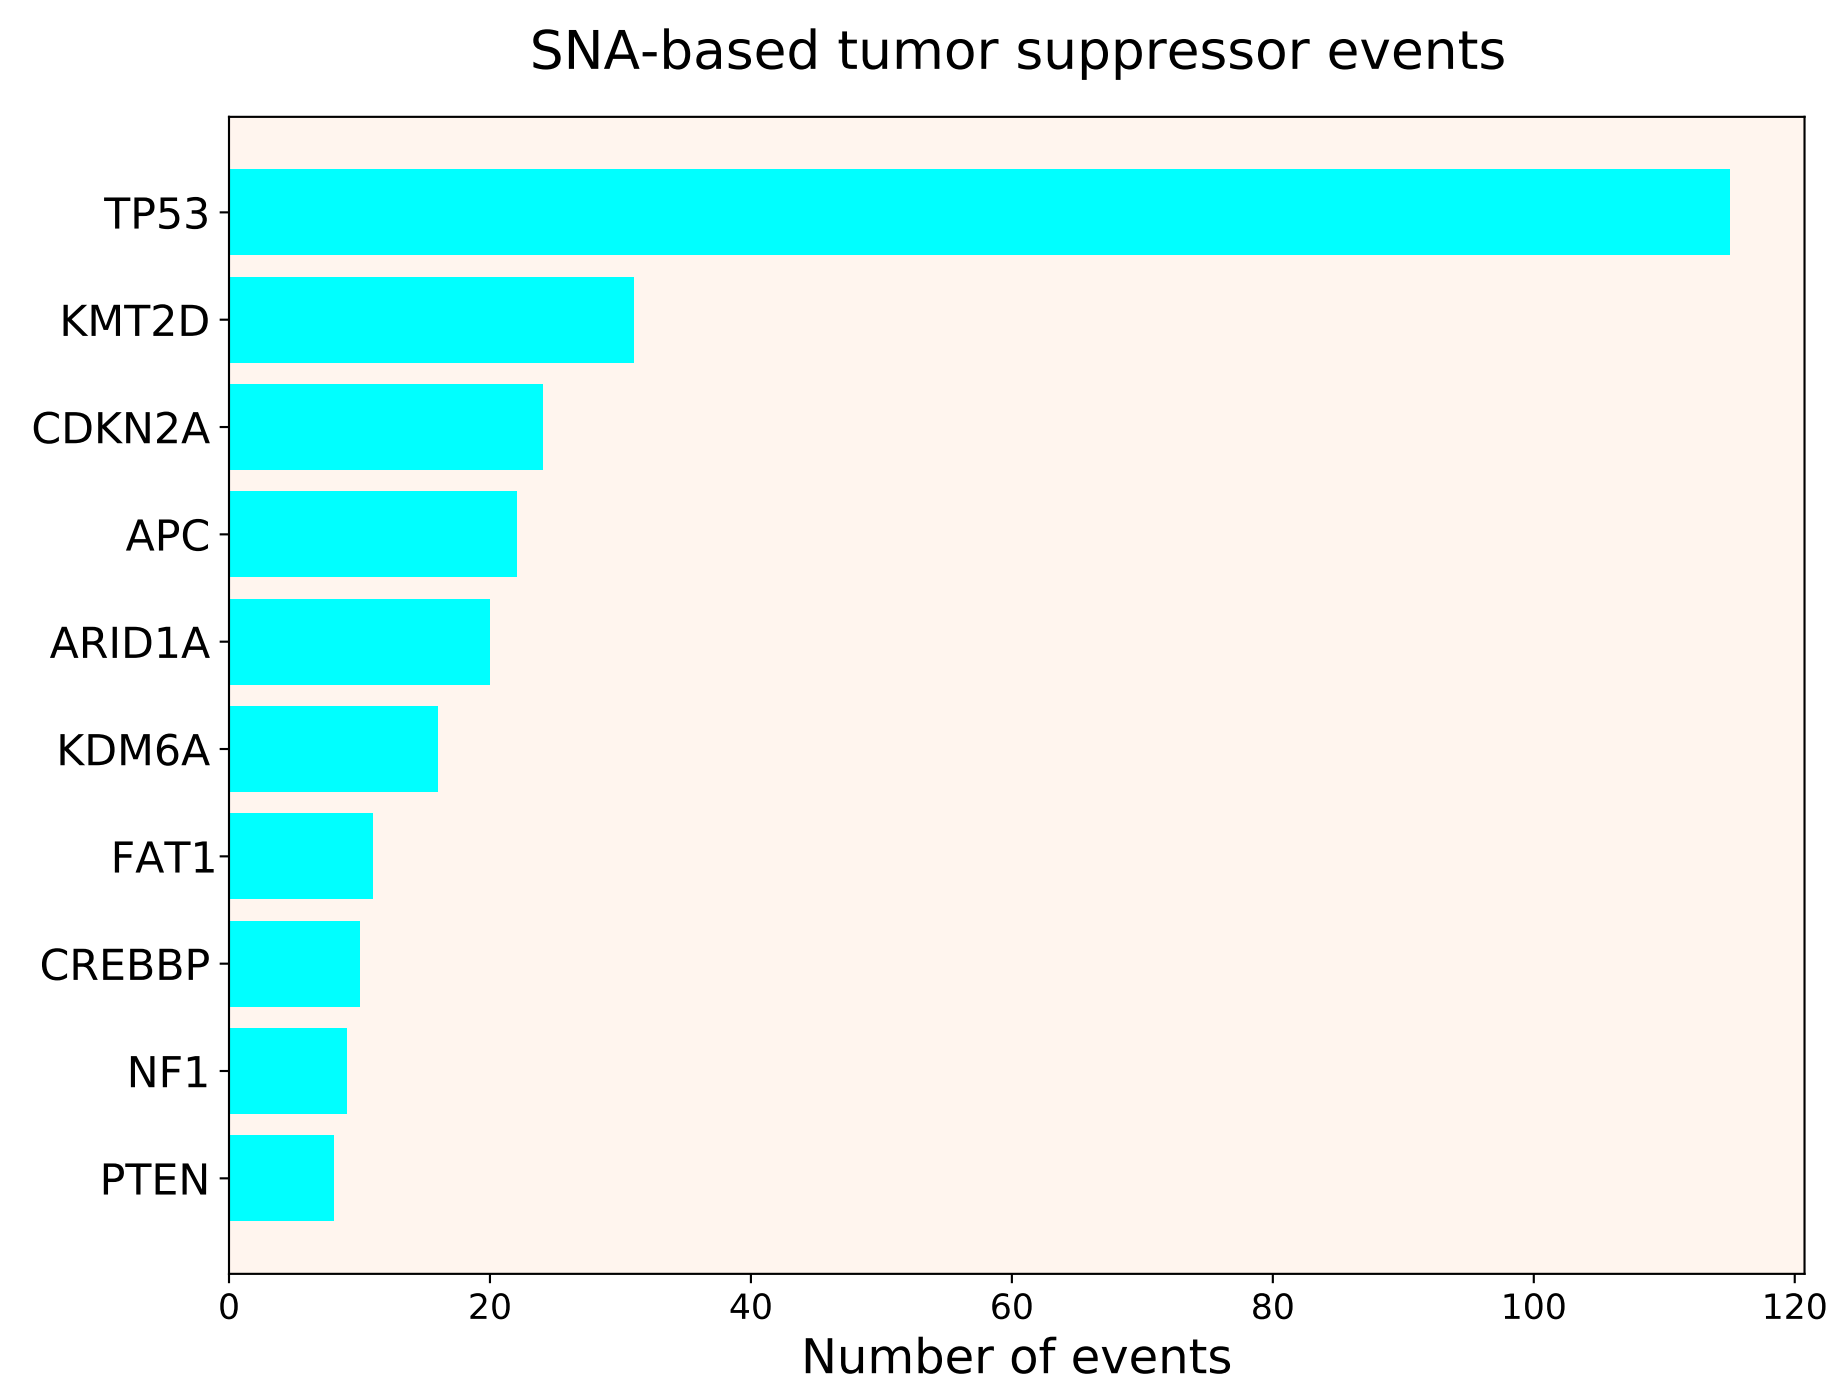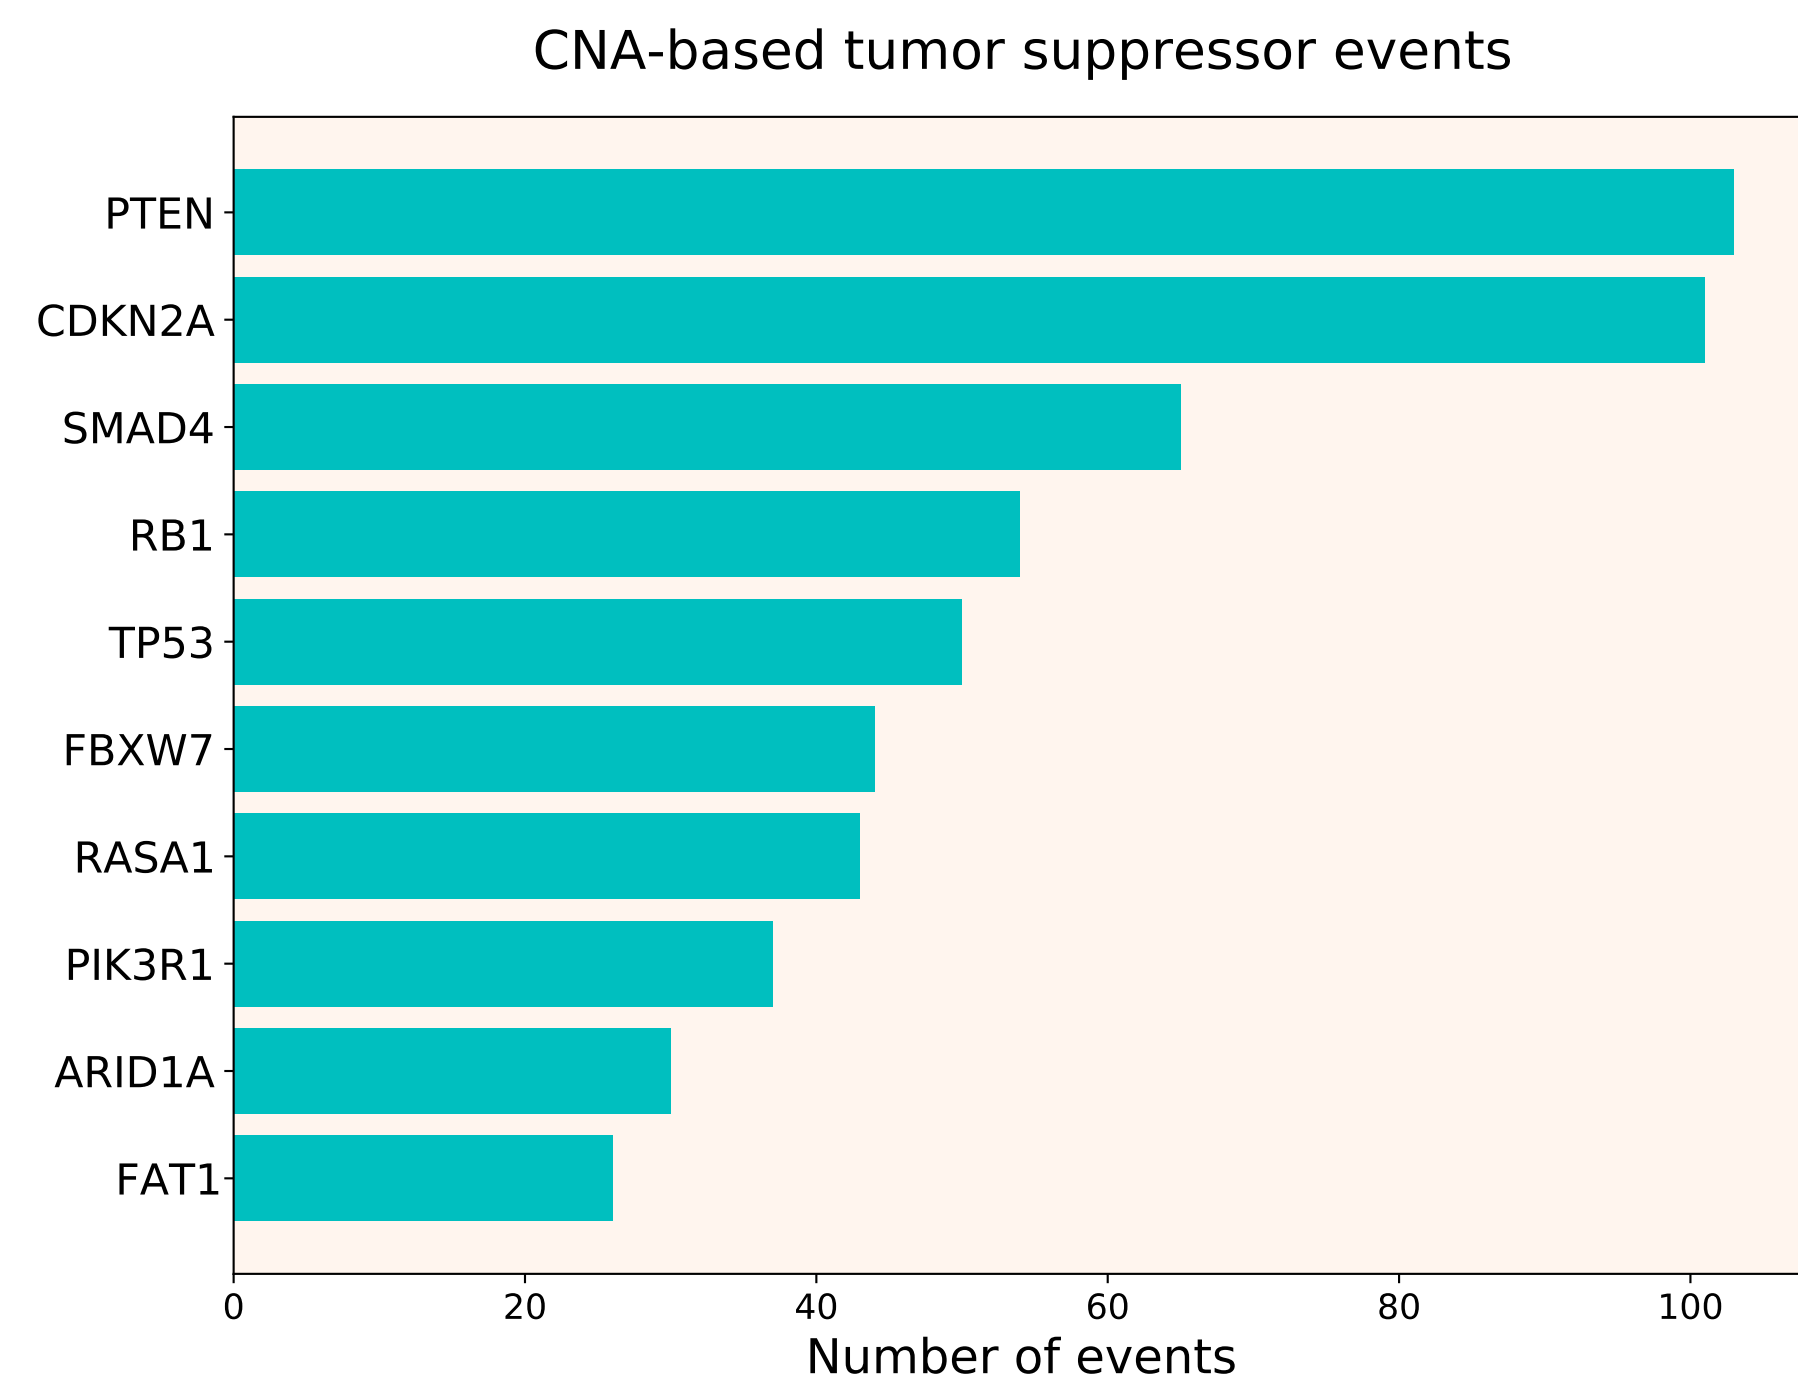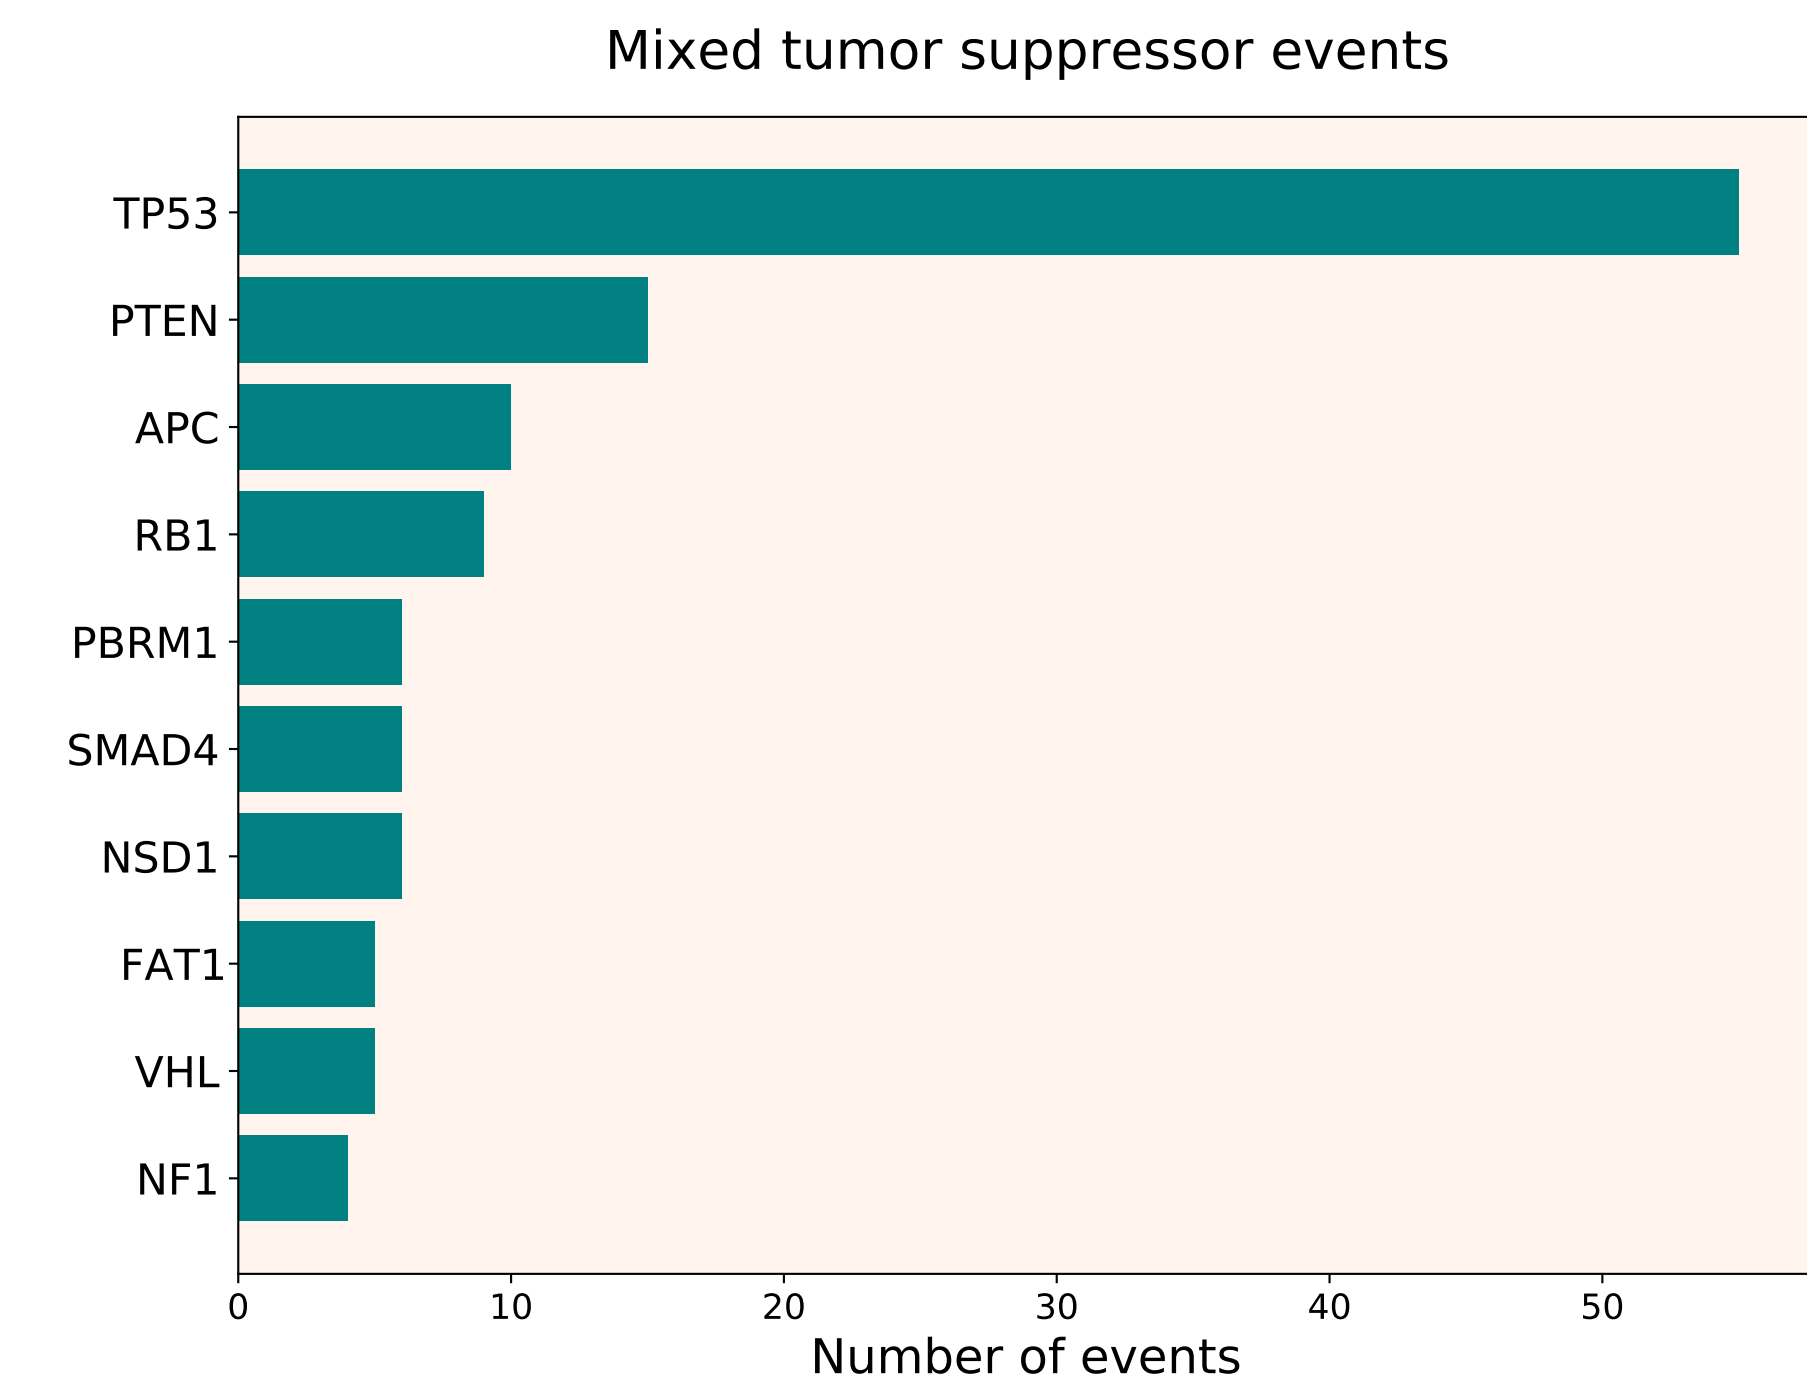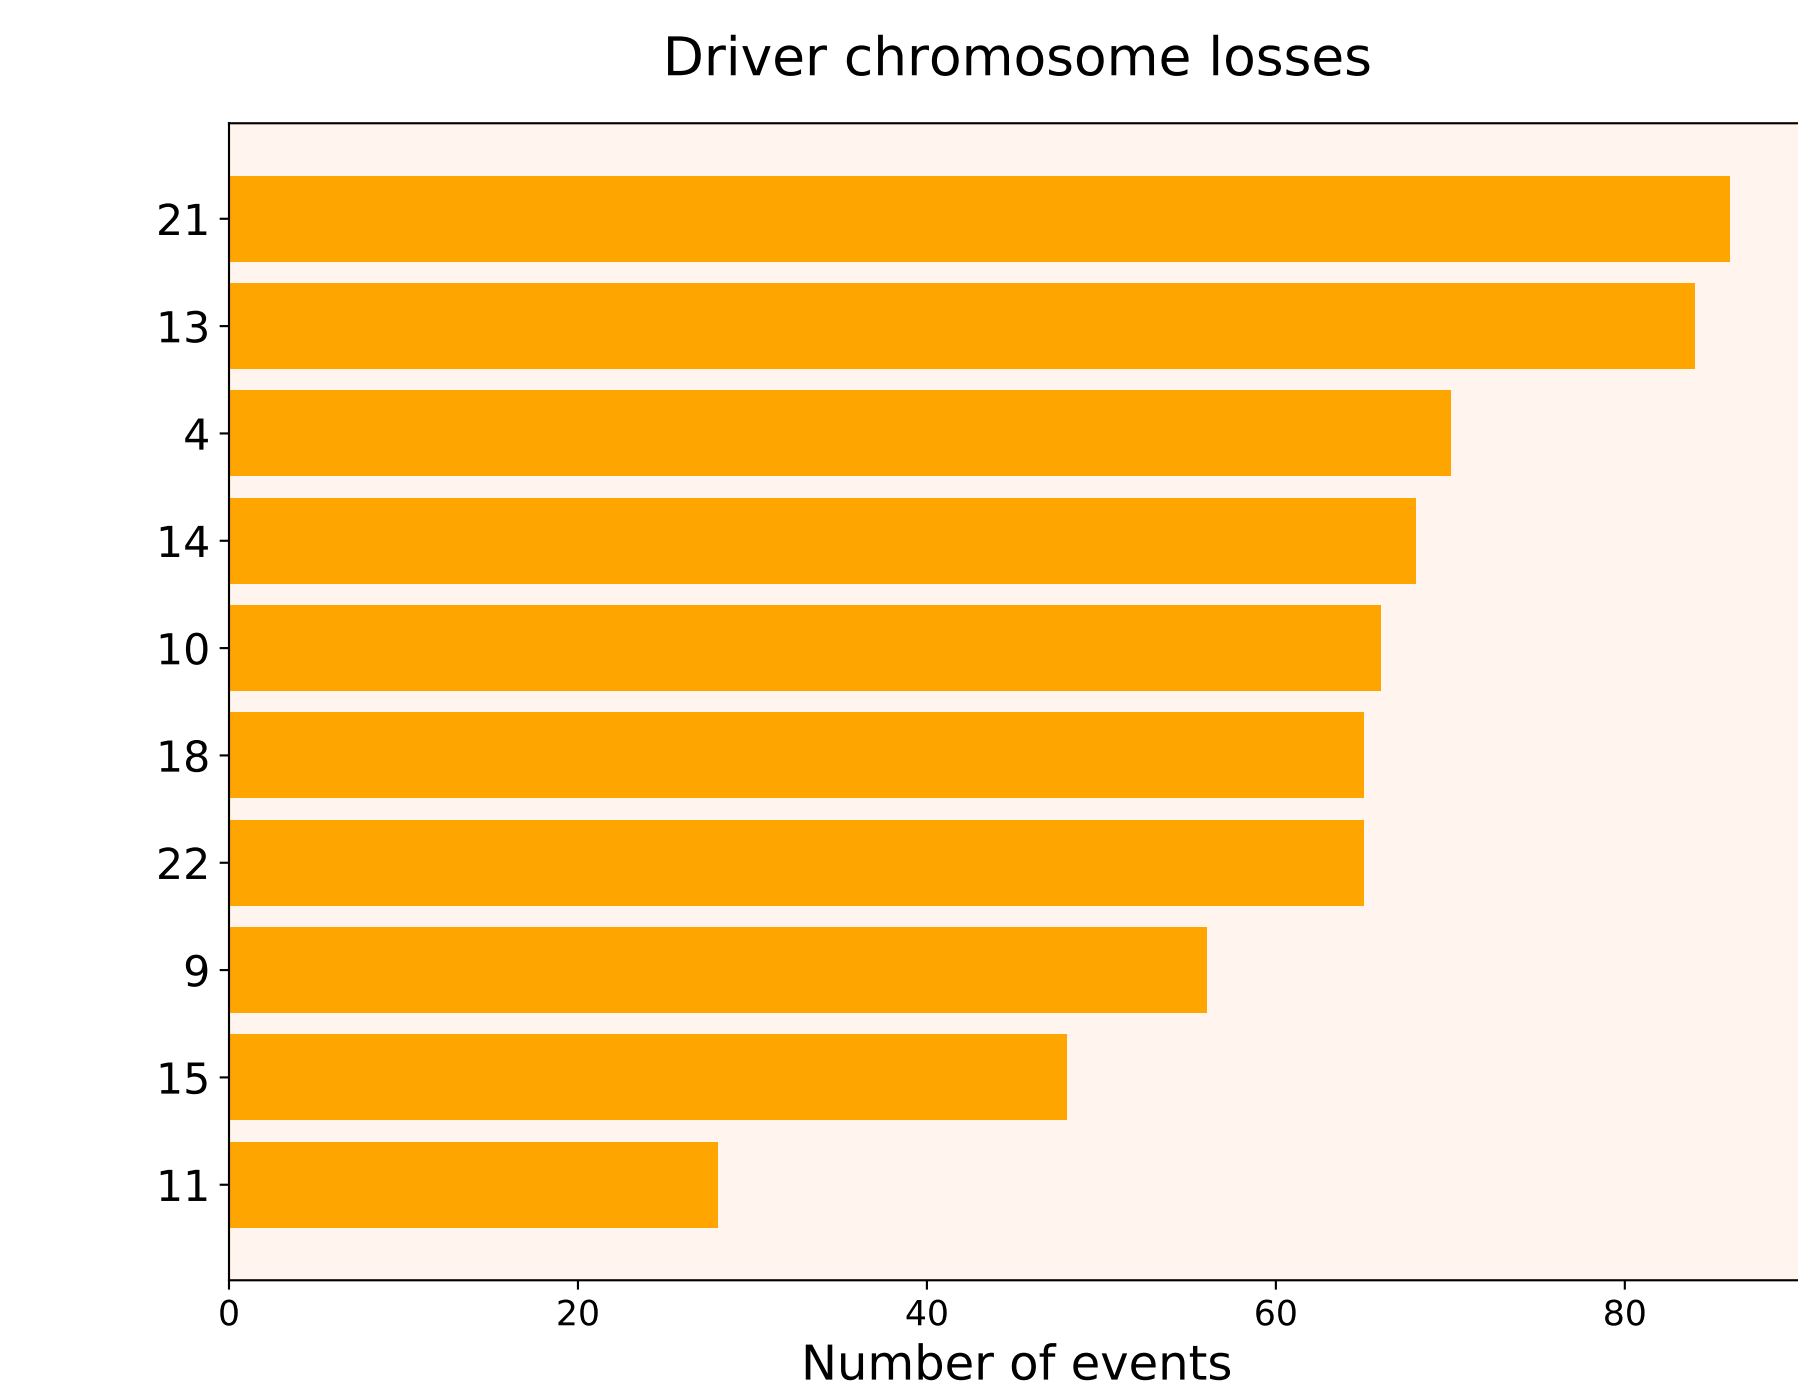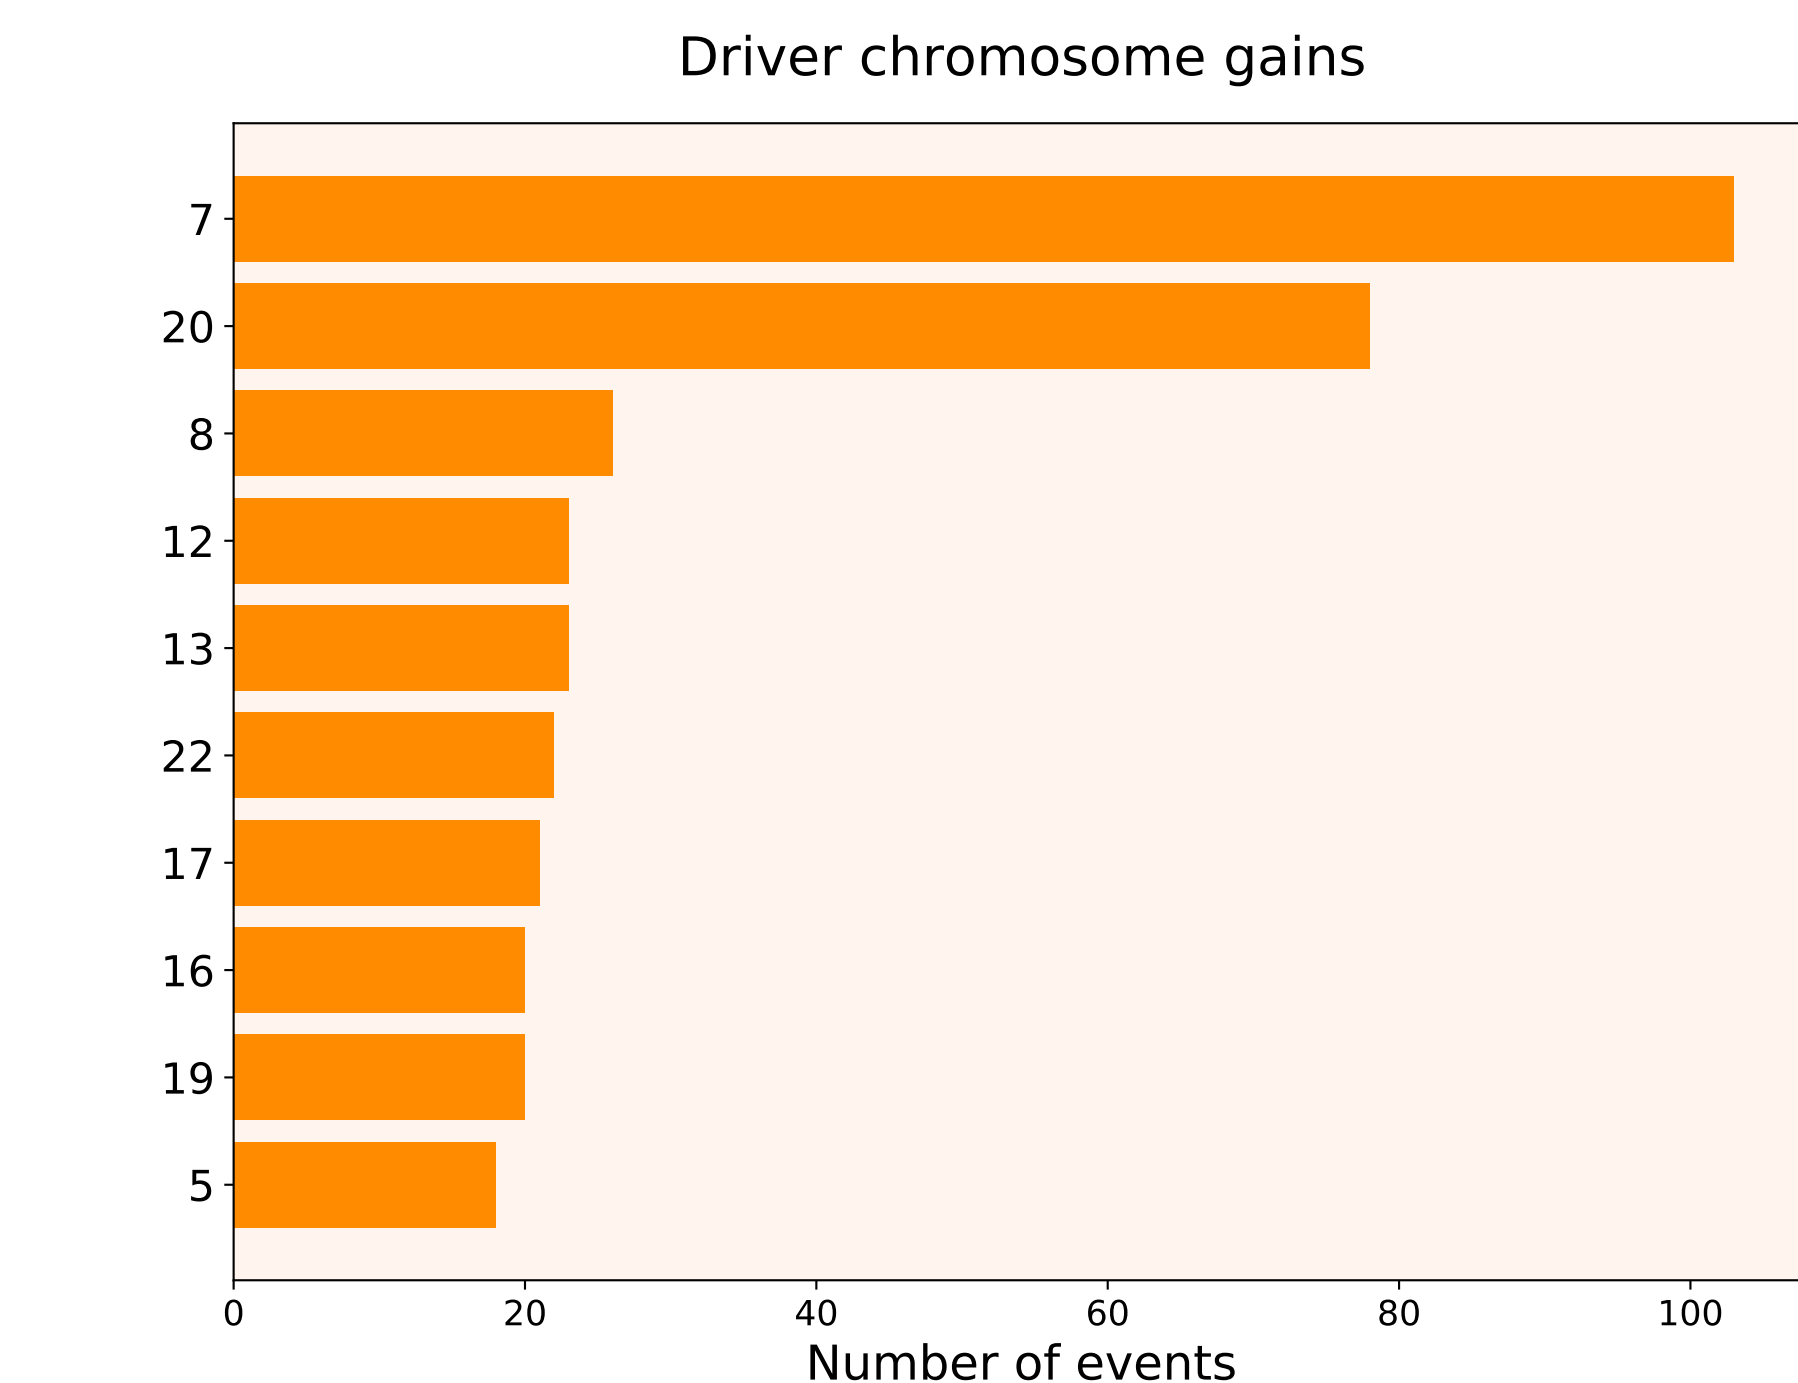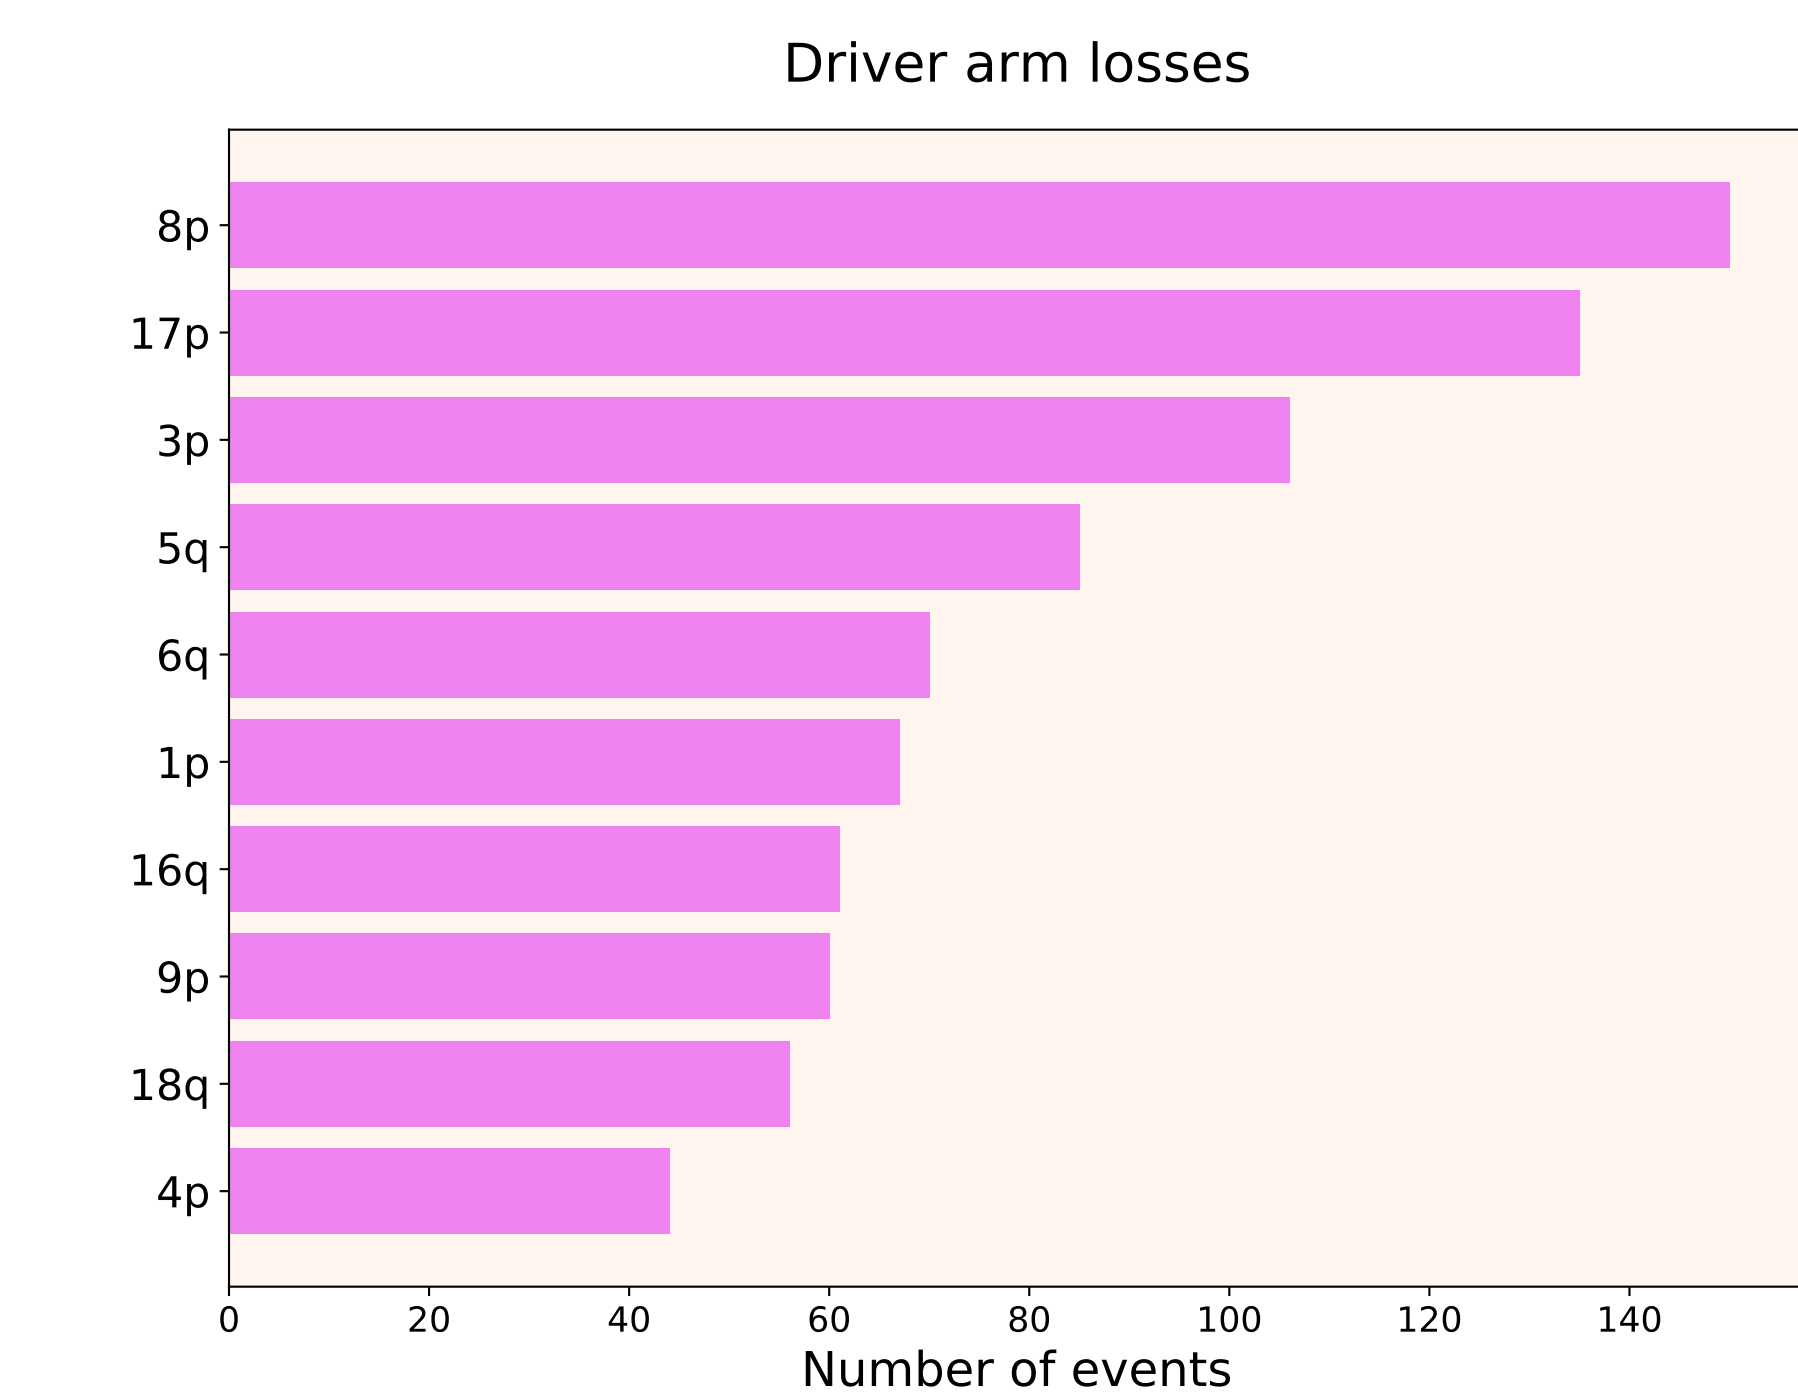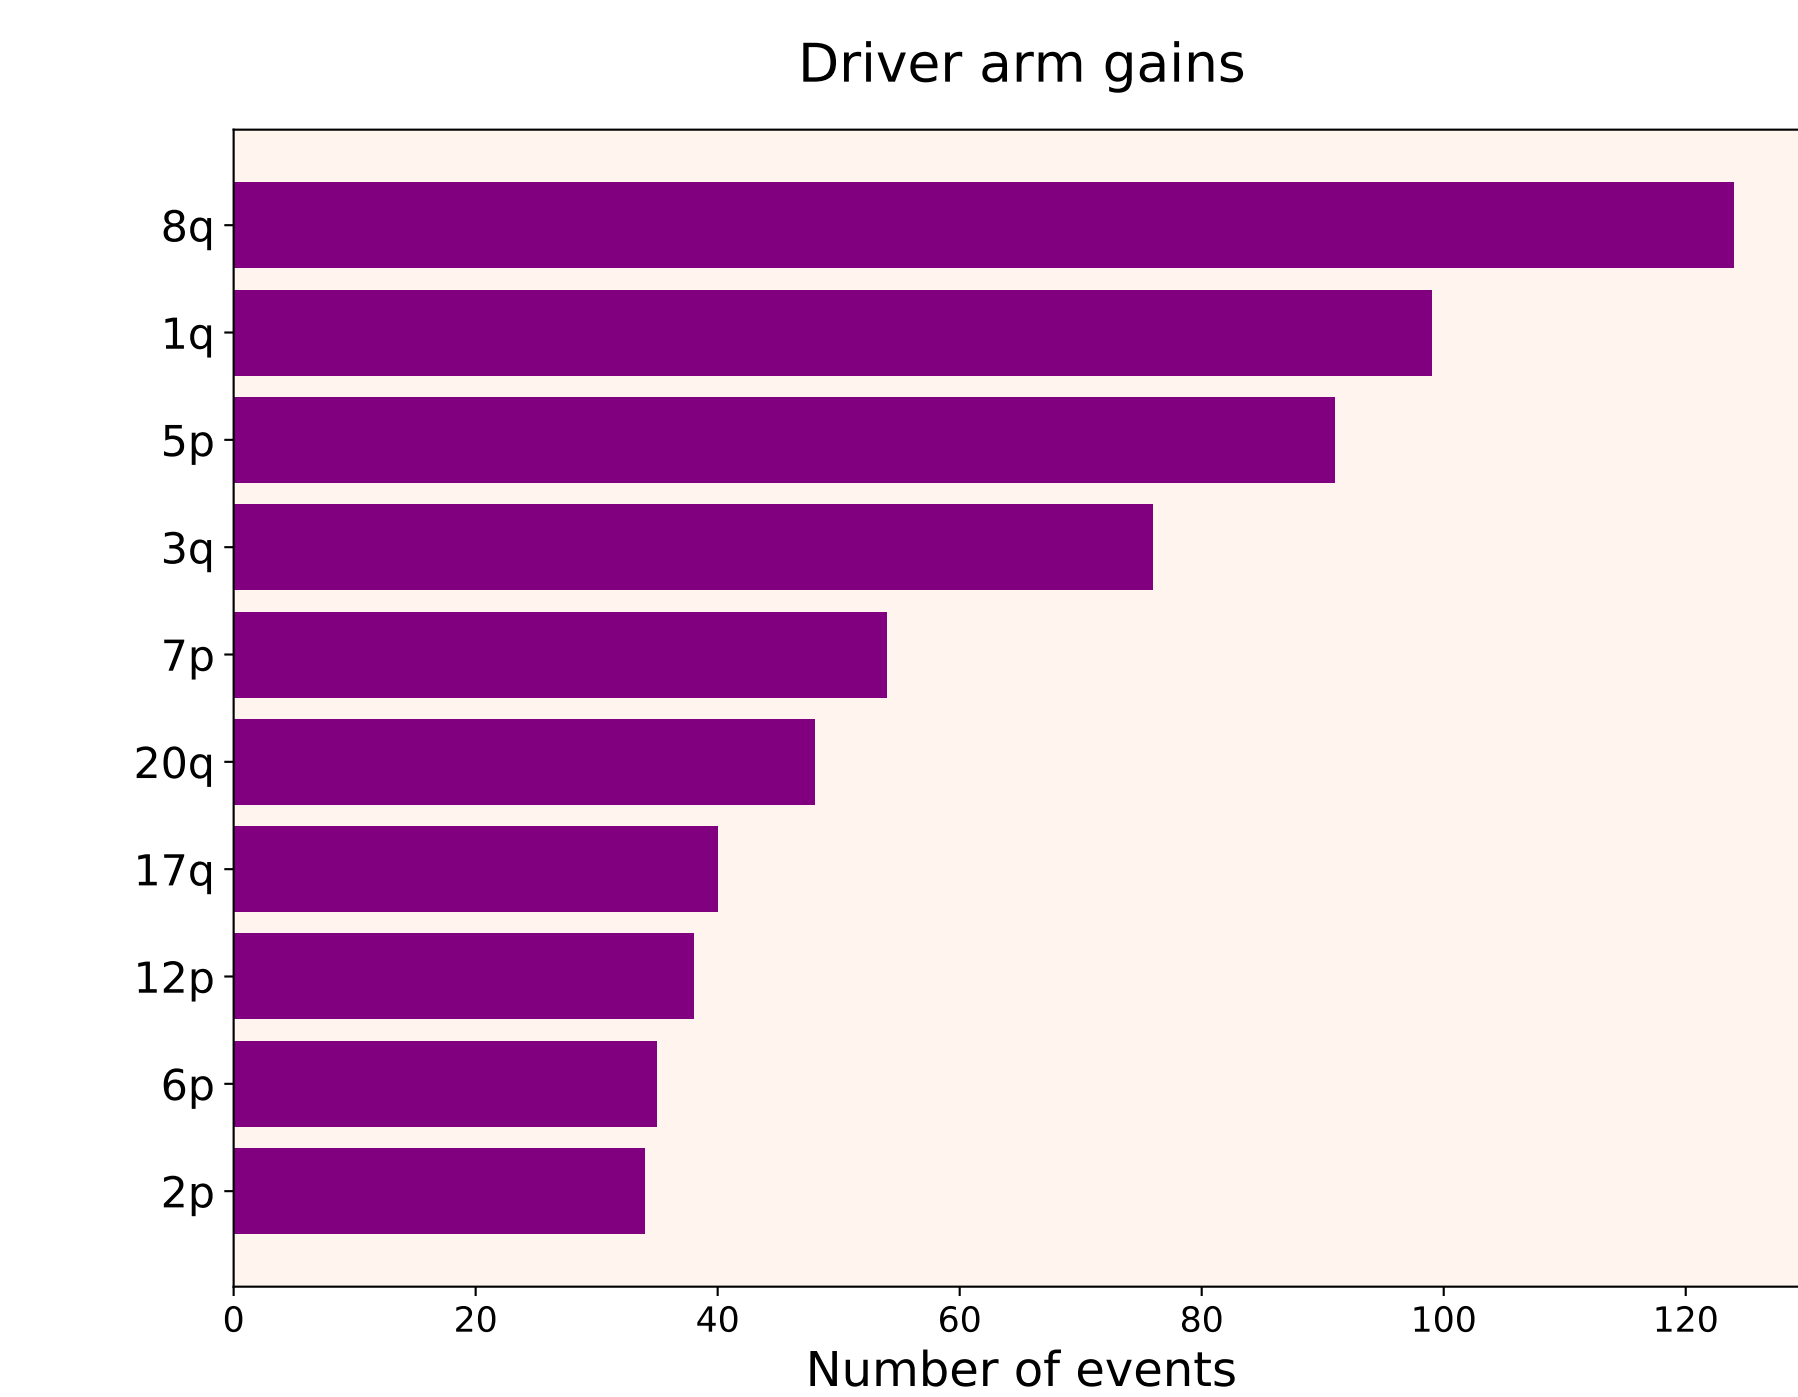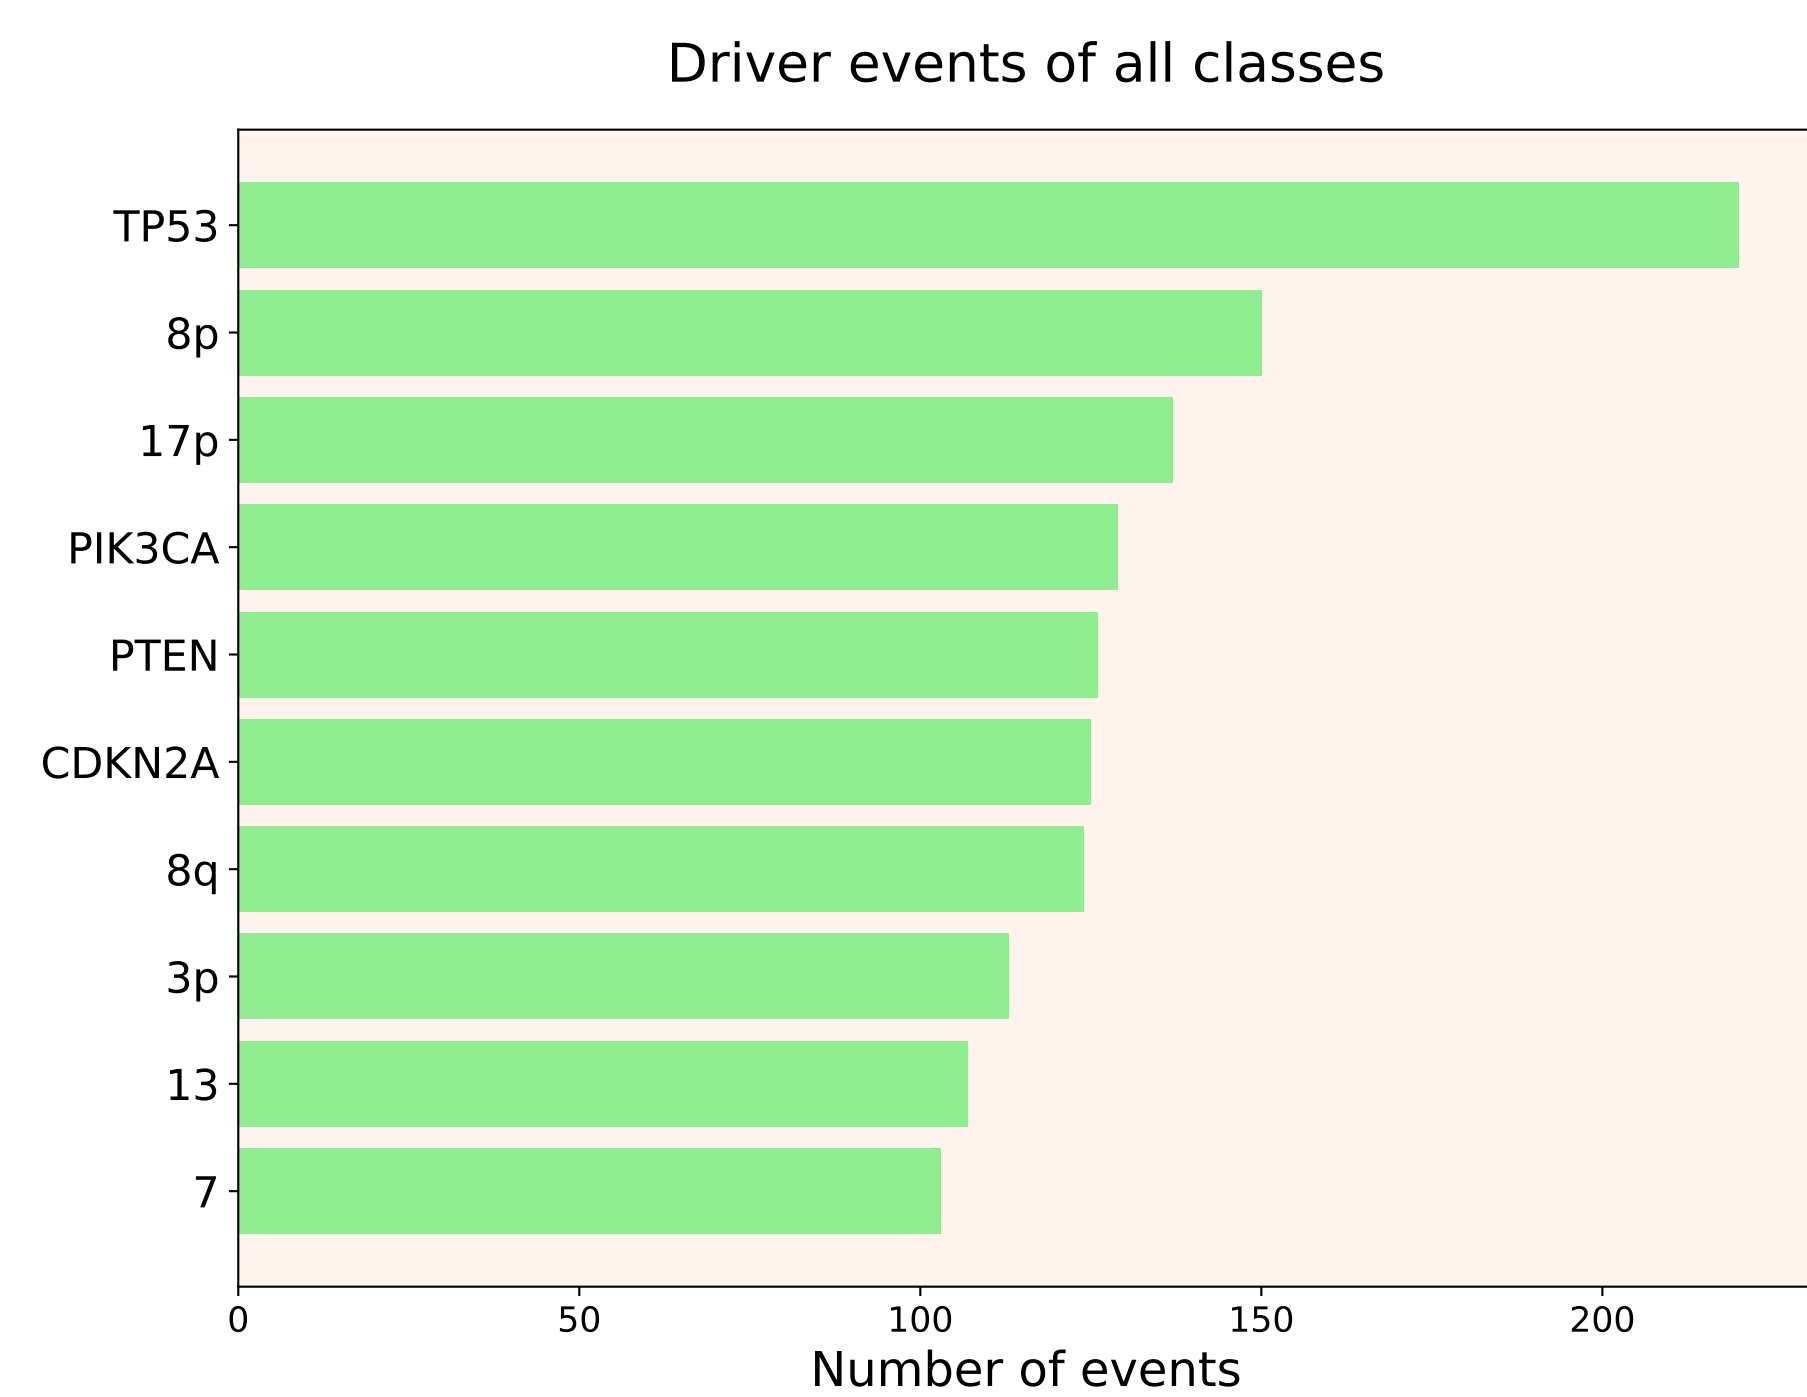

Supplement: Supplemental_Data_S1.zip [file Supplemental_Data_S1.zip]

# MESO\_FEMALE

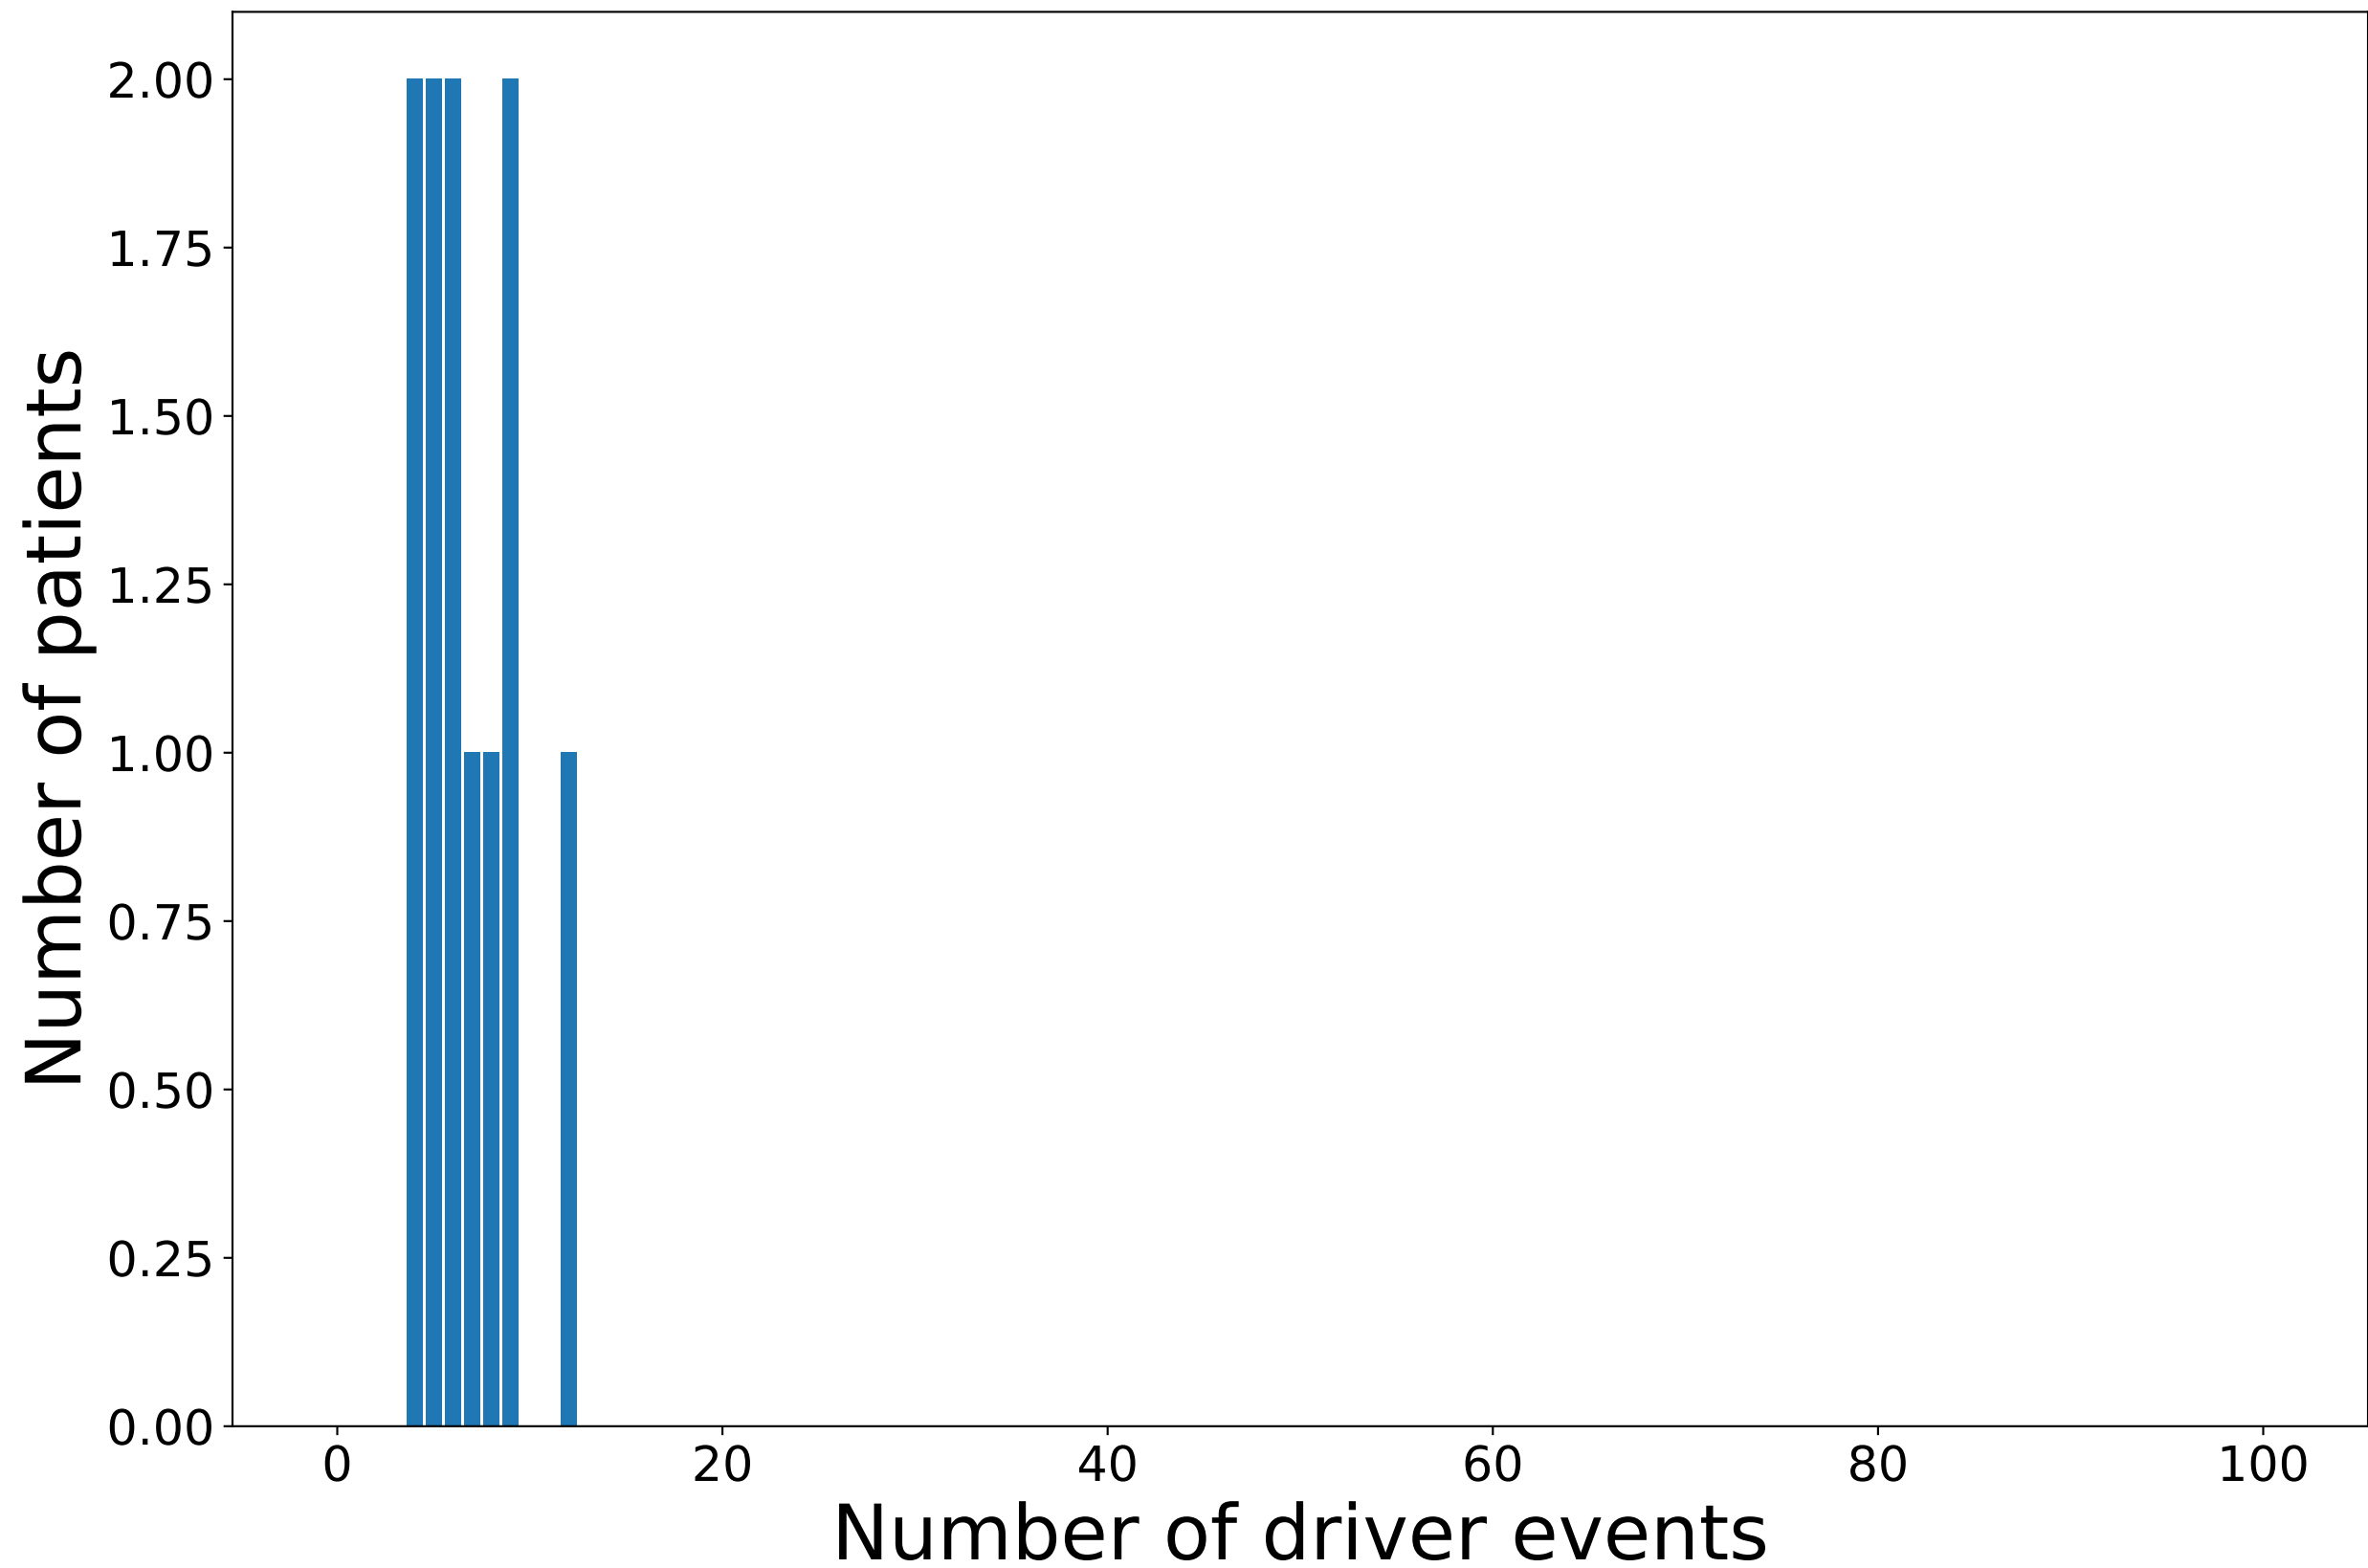

Supplement: Supplemental_Data_S1.zip [file Supplemental_Data_S1.zip]

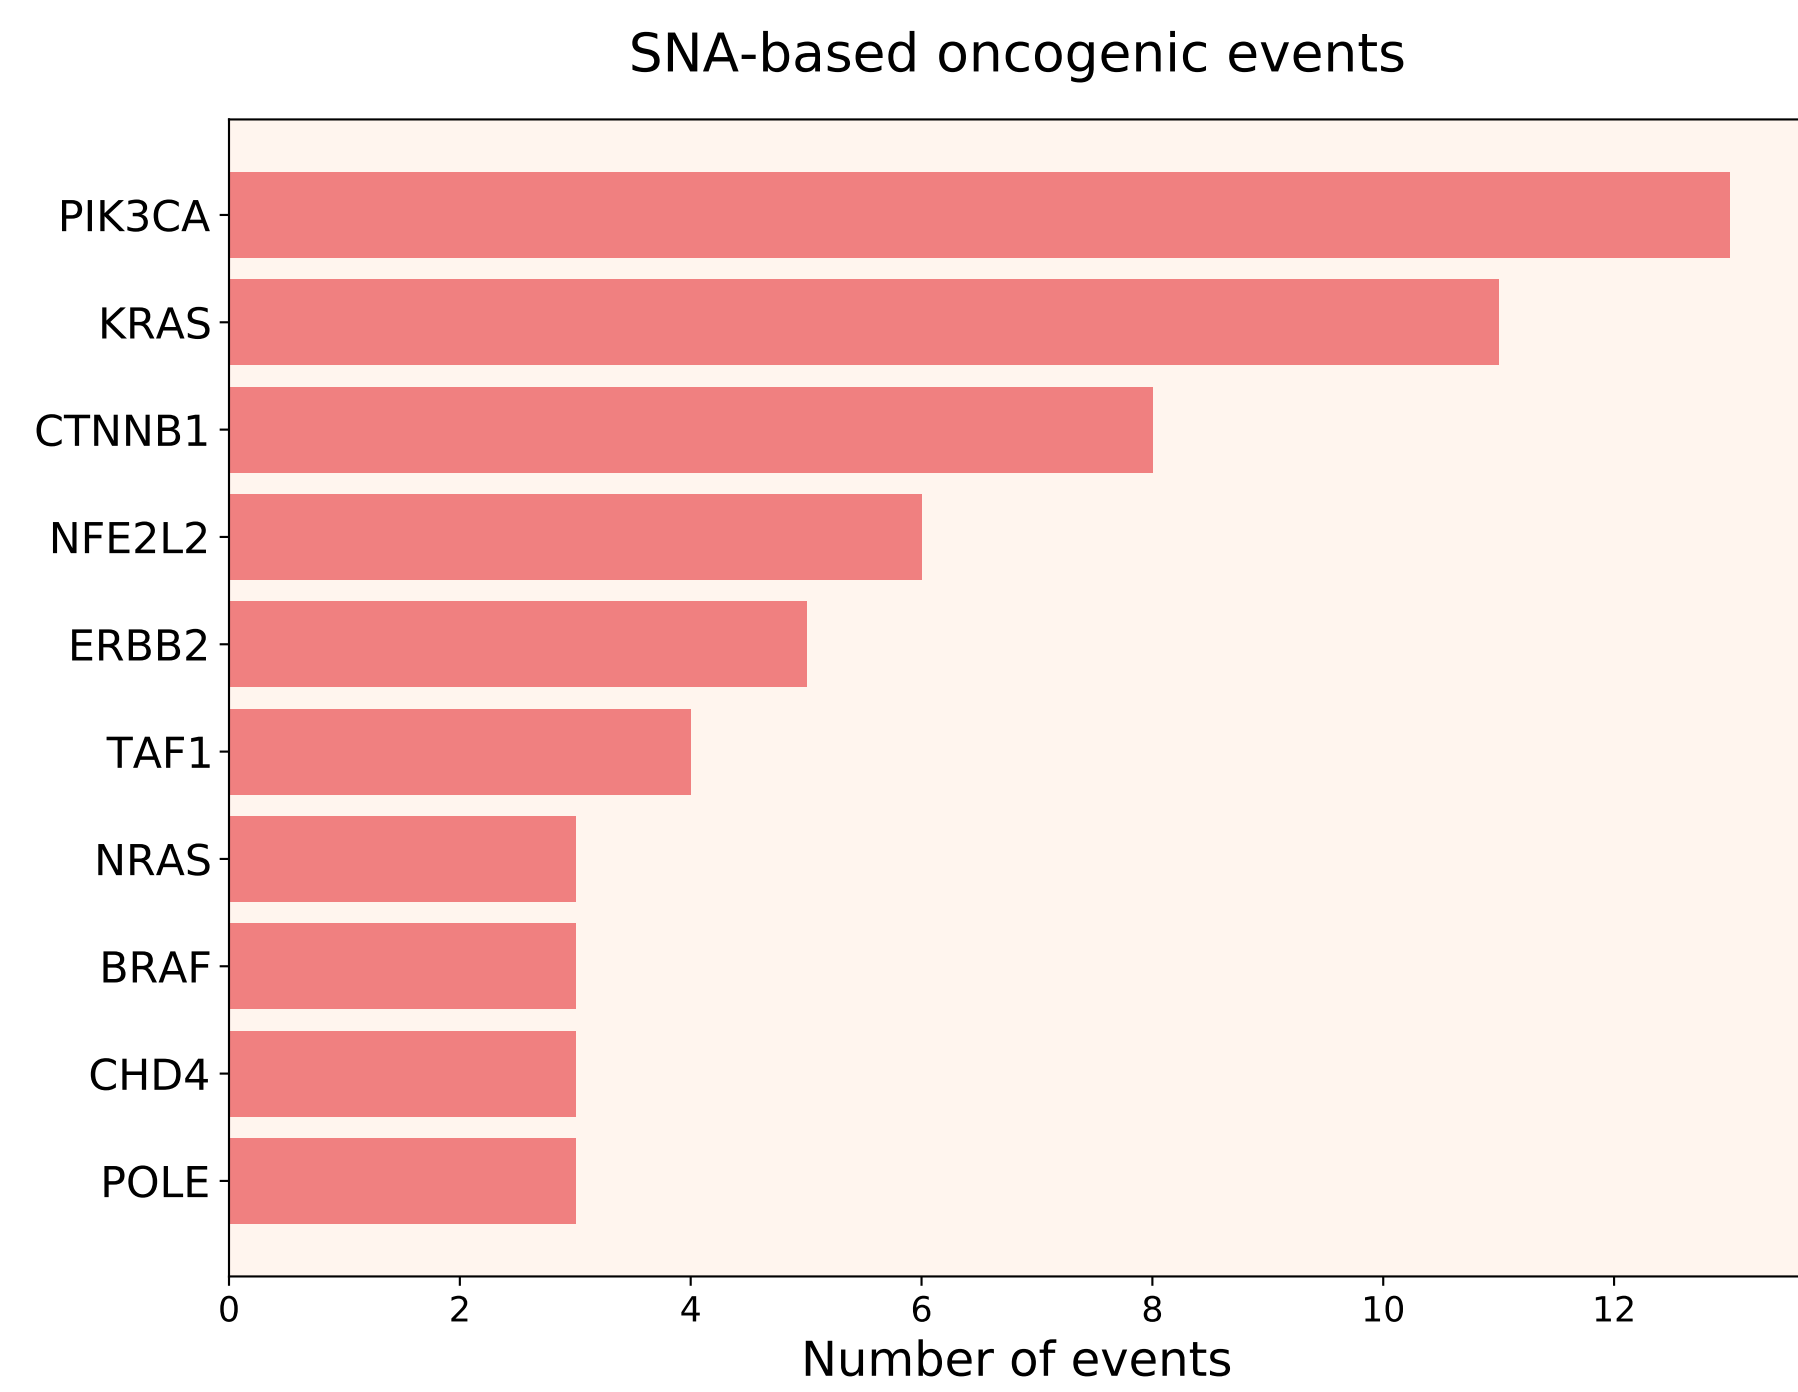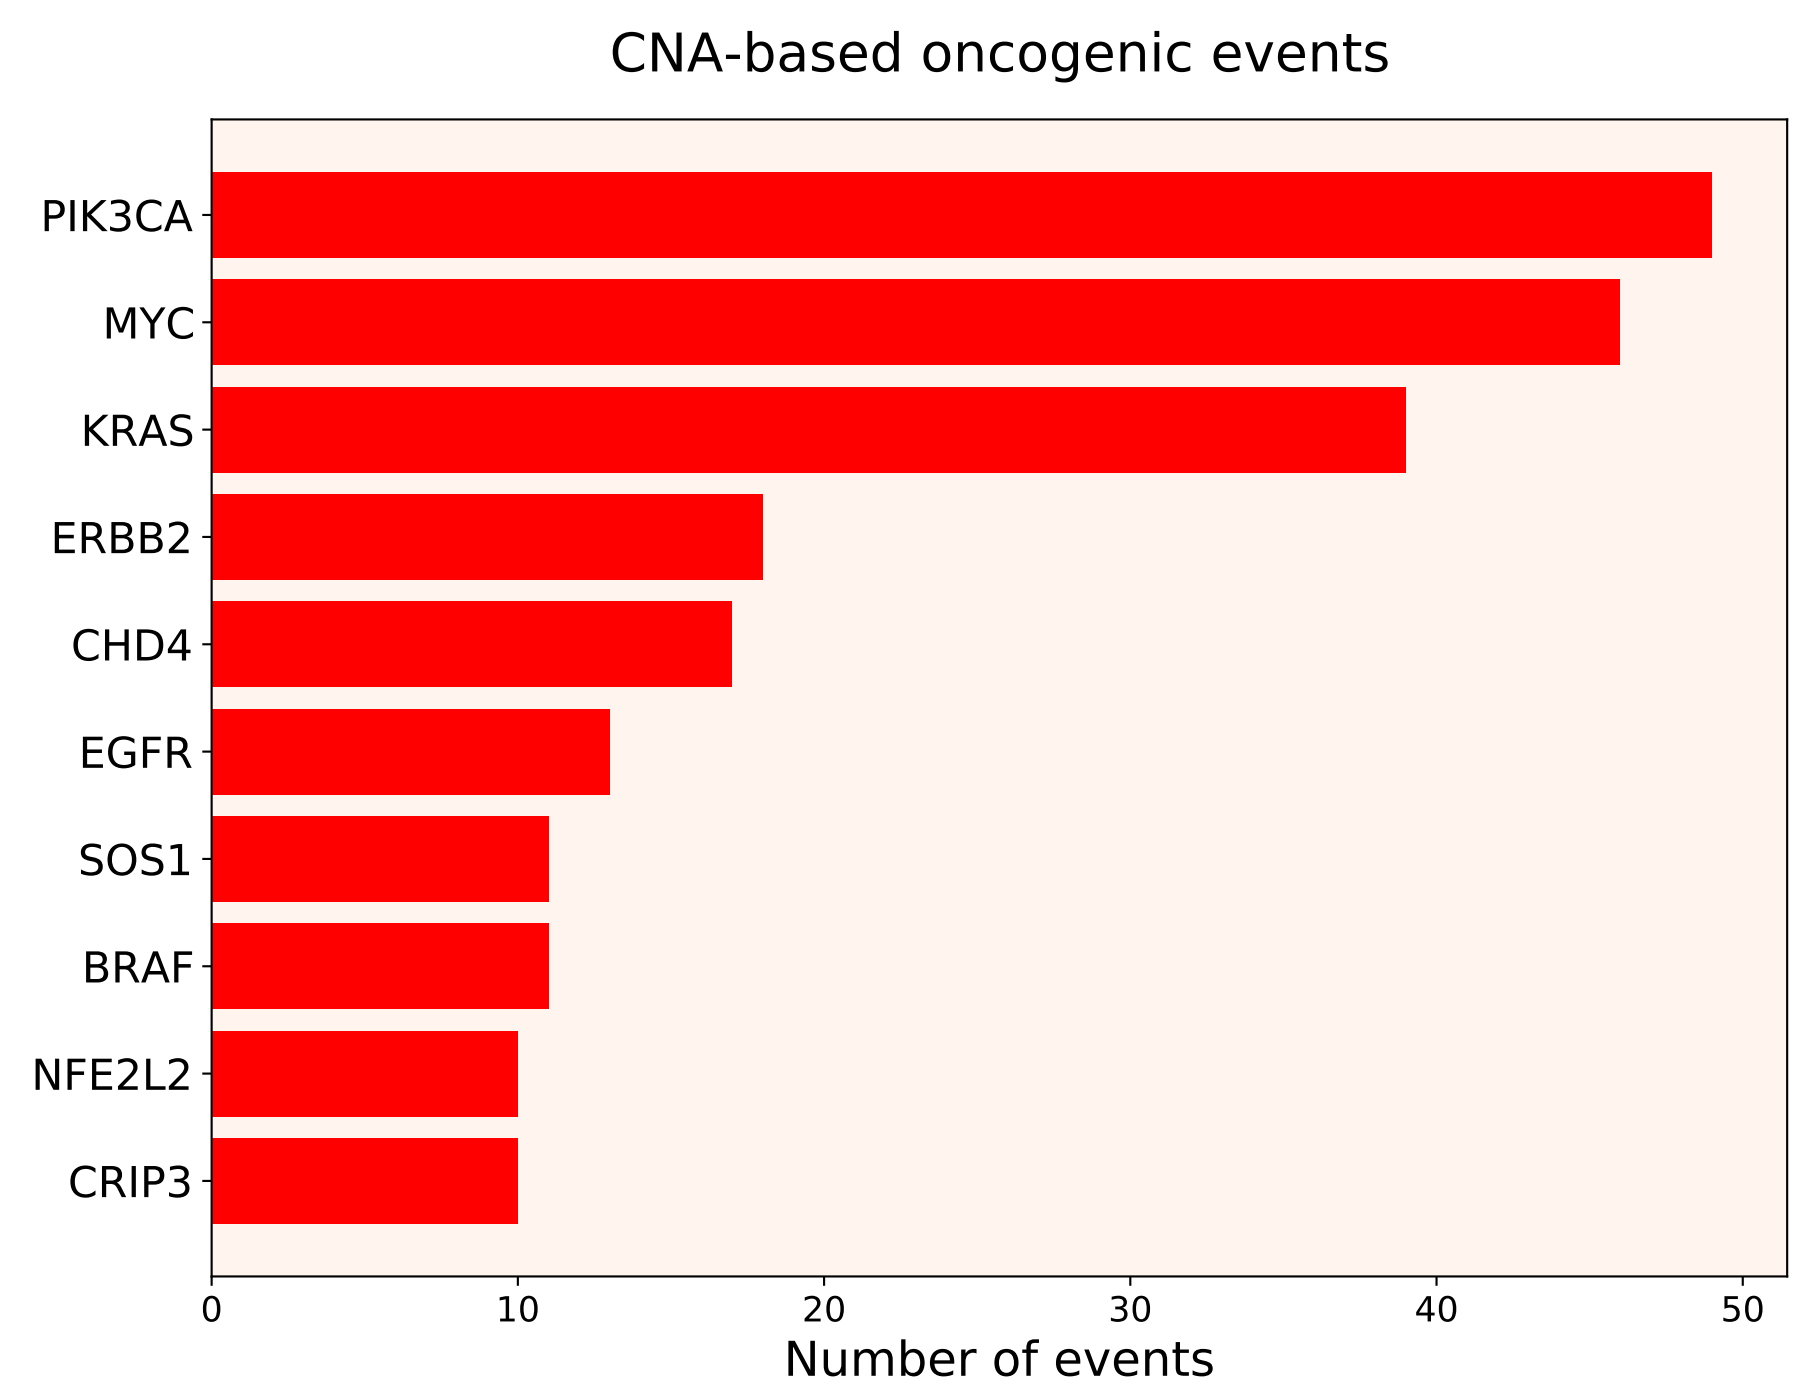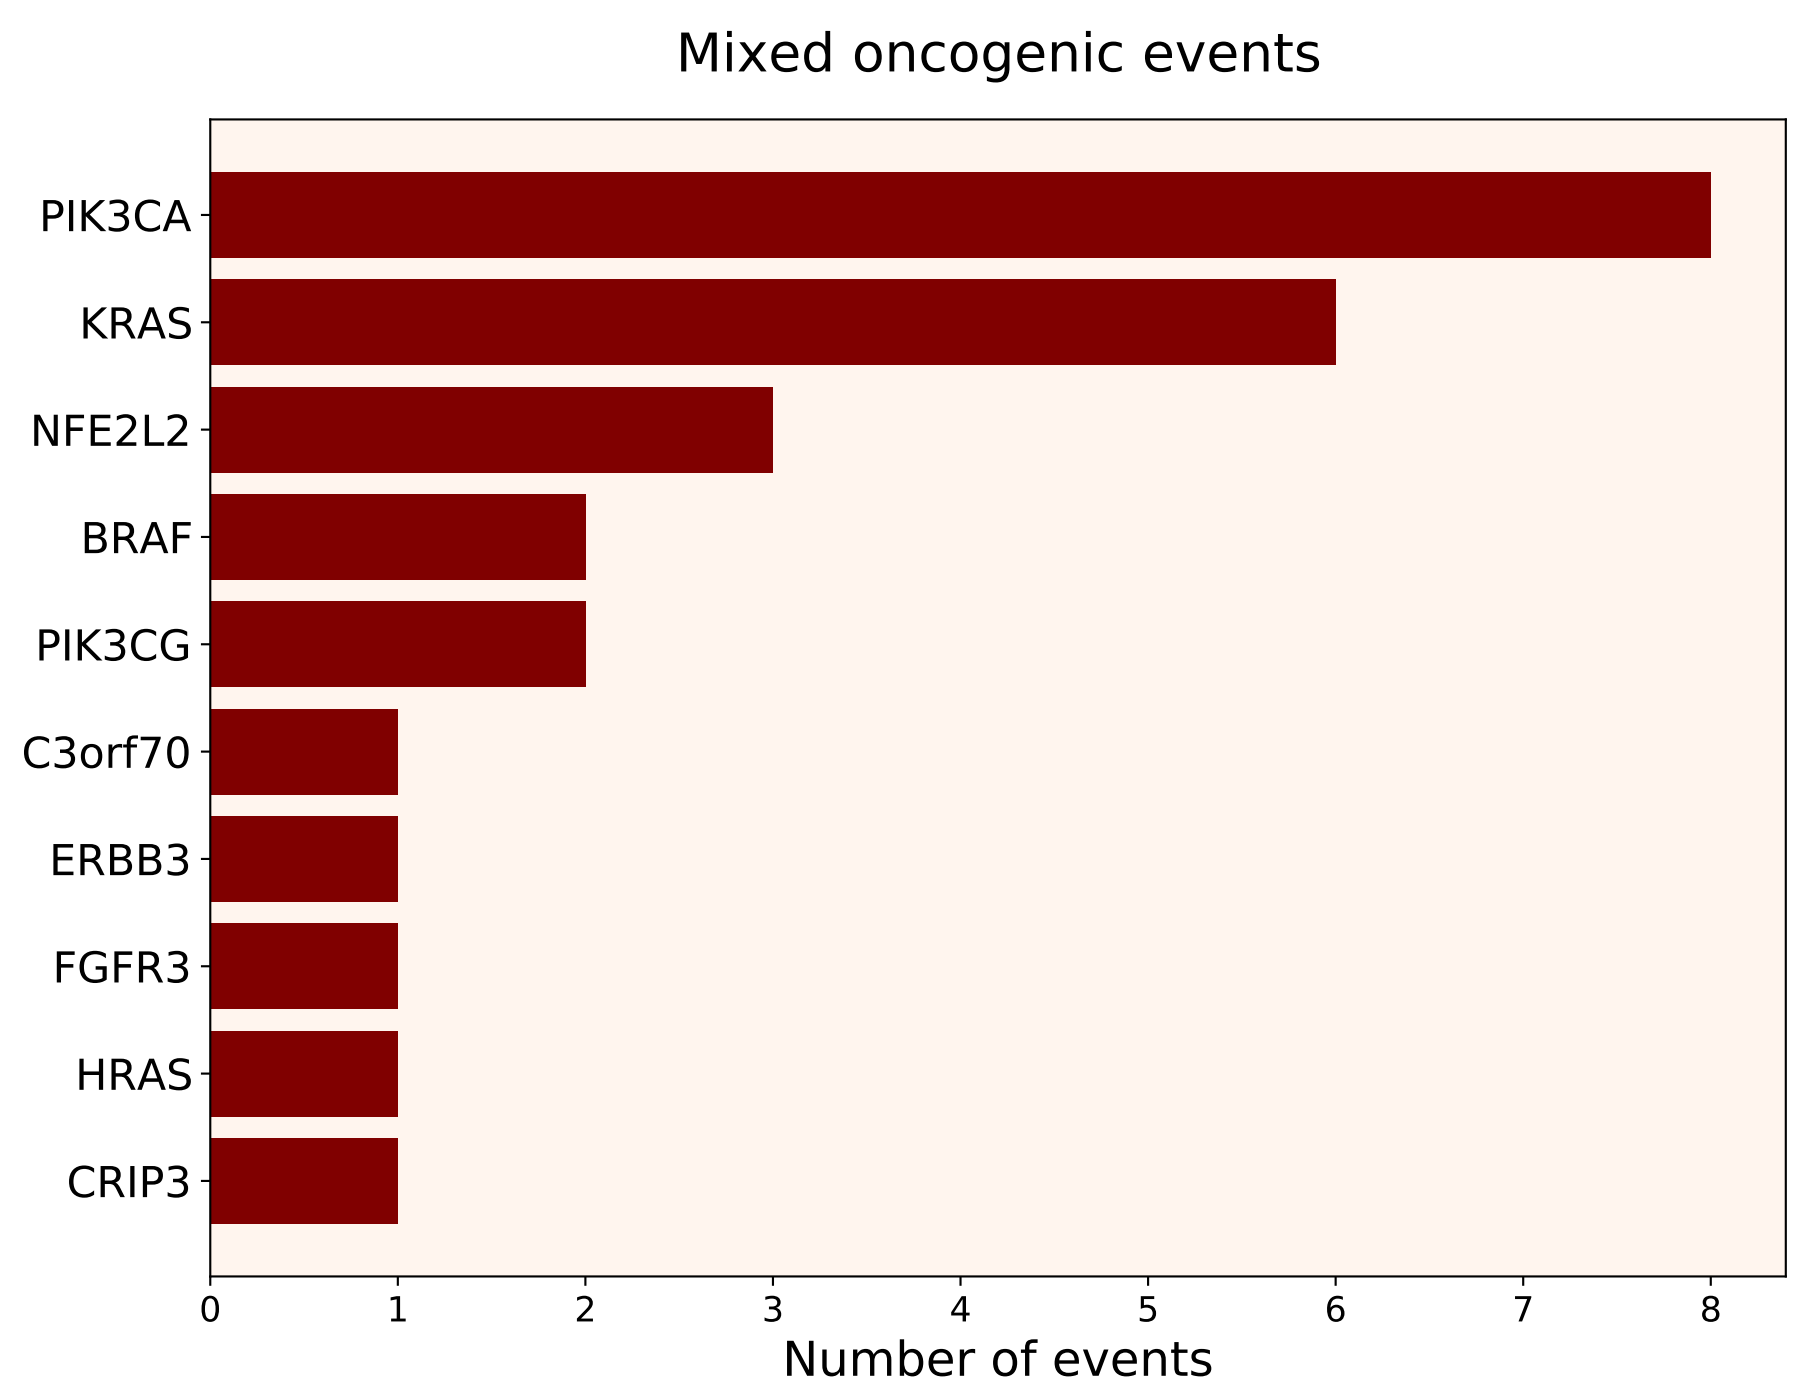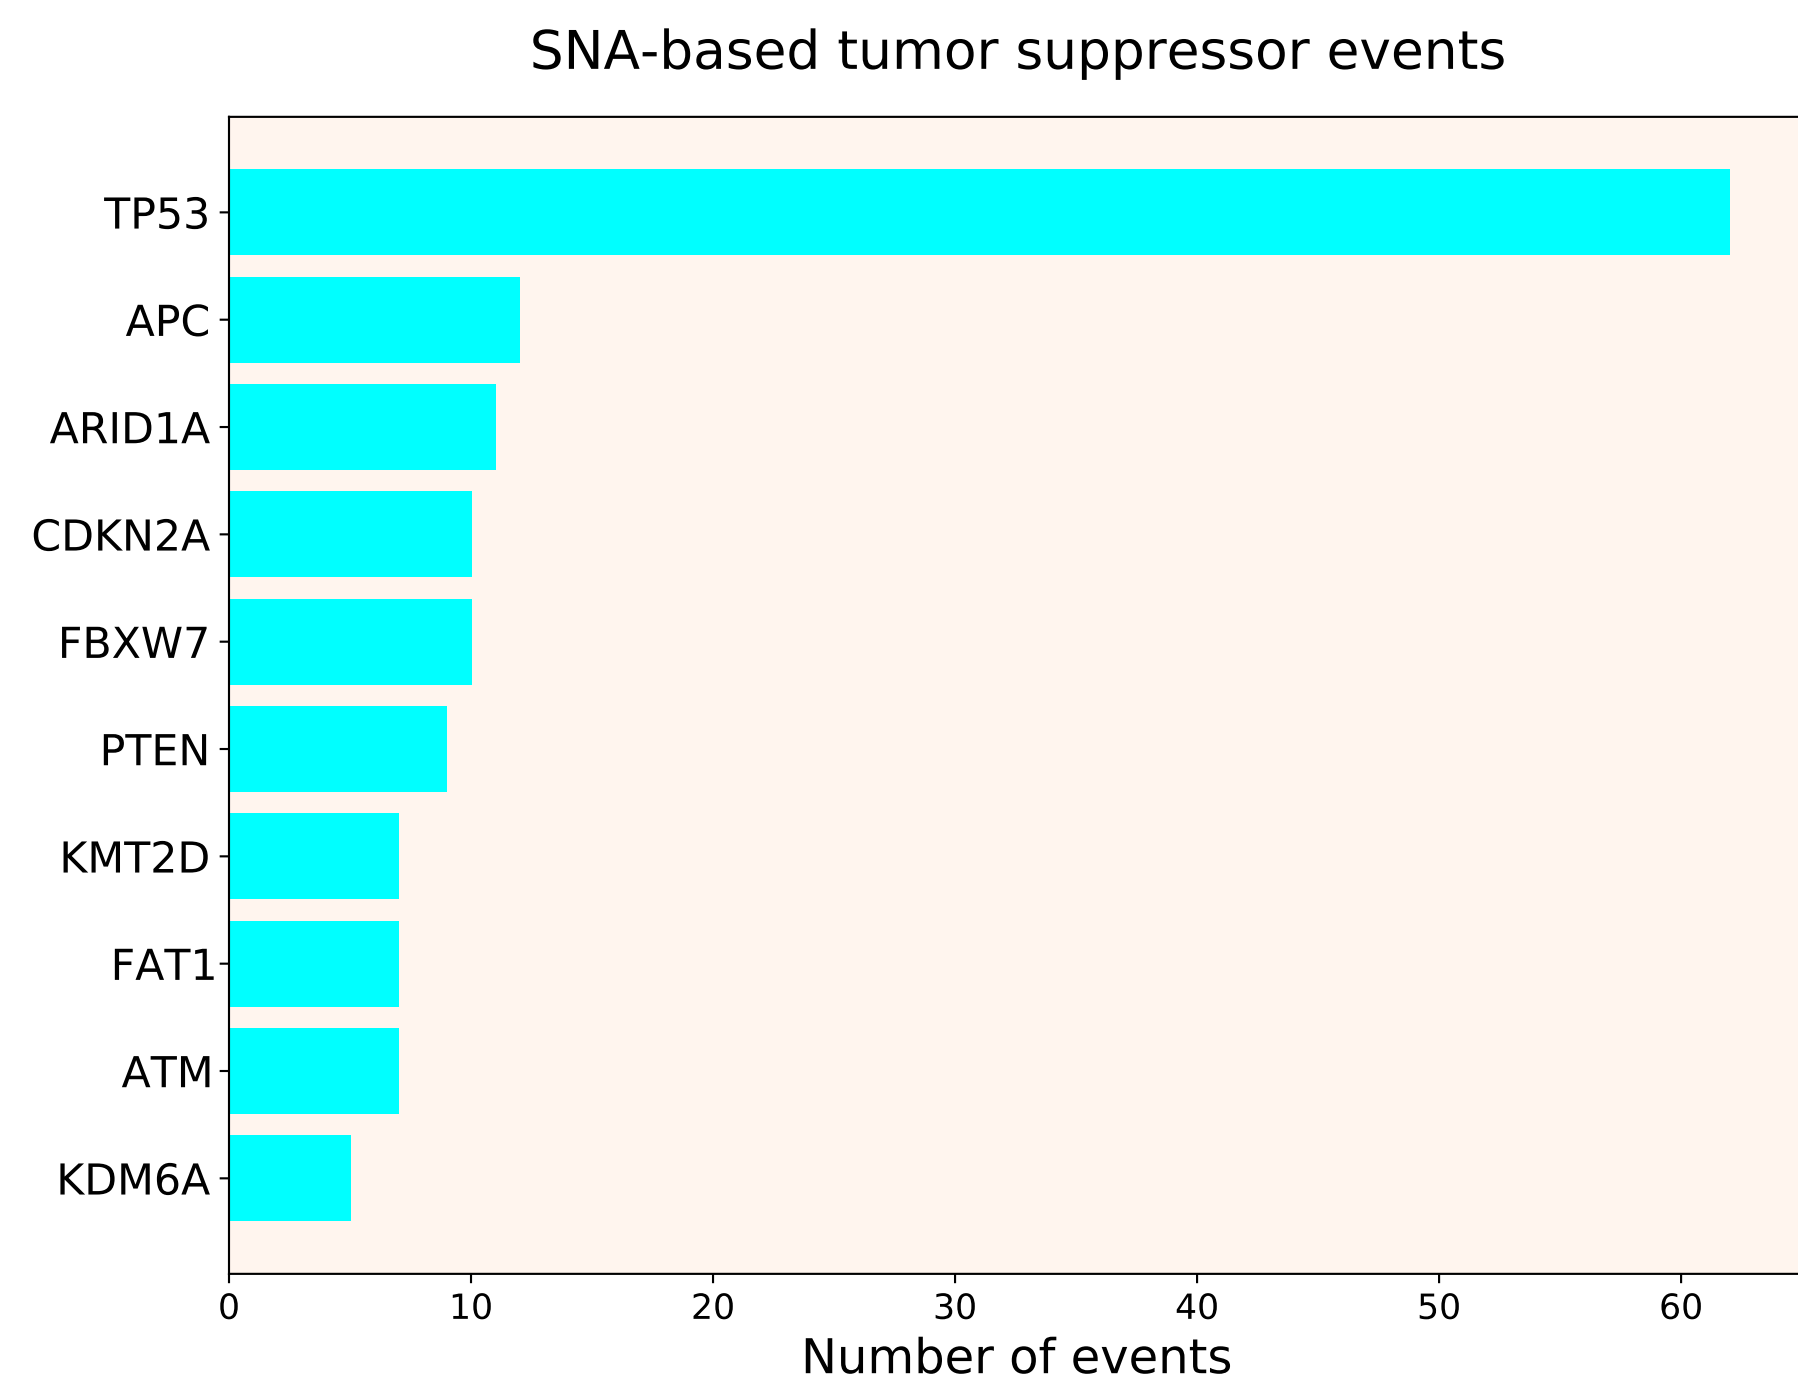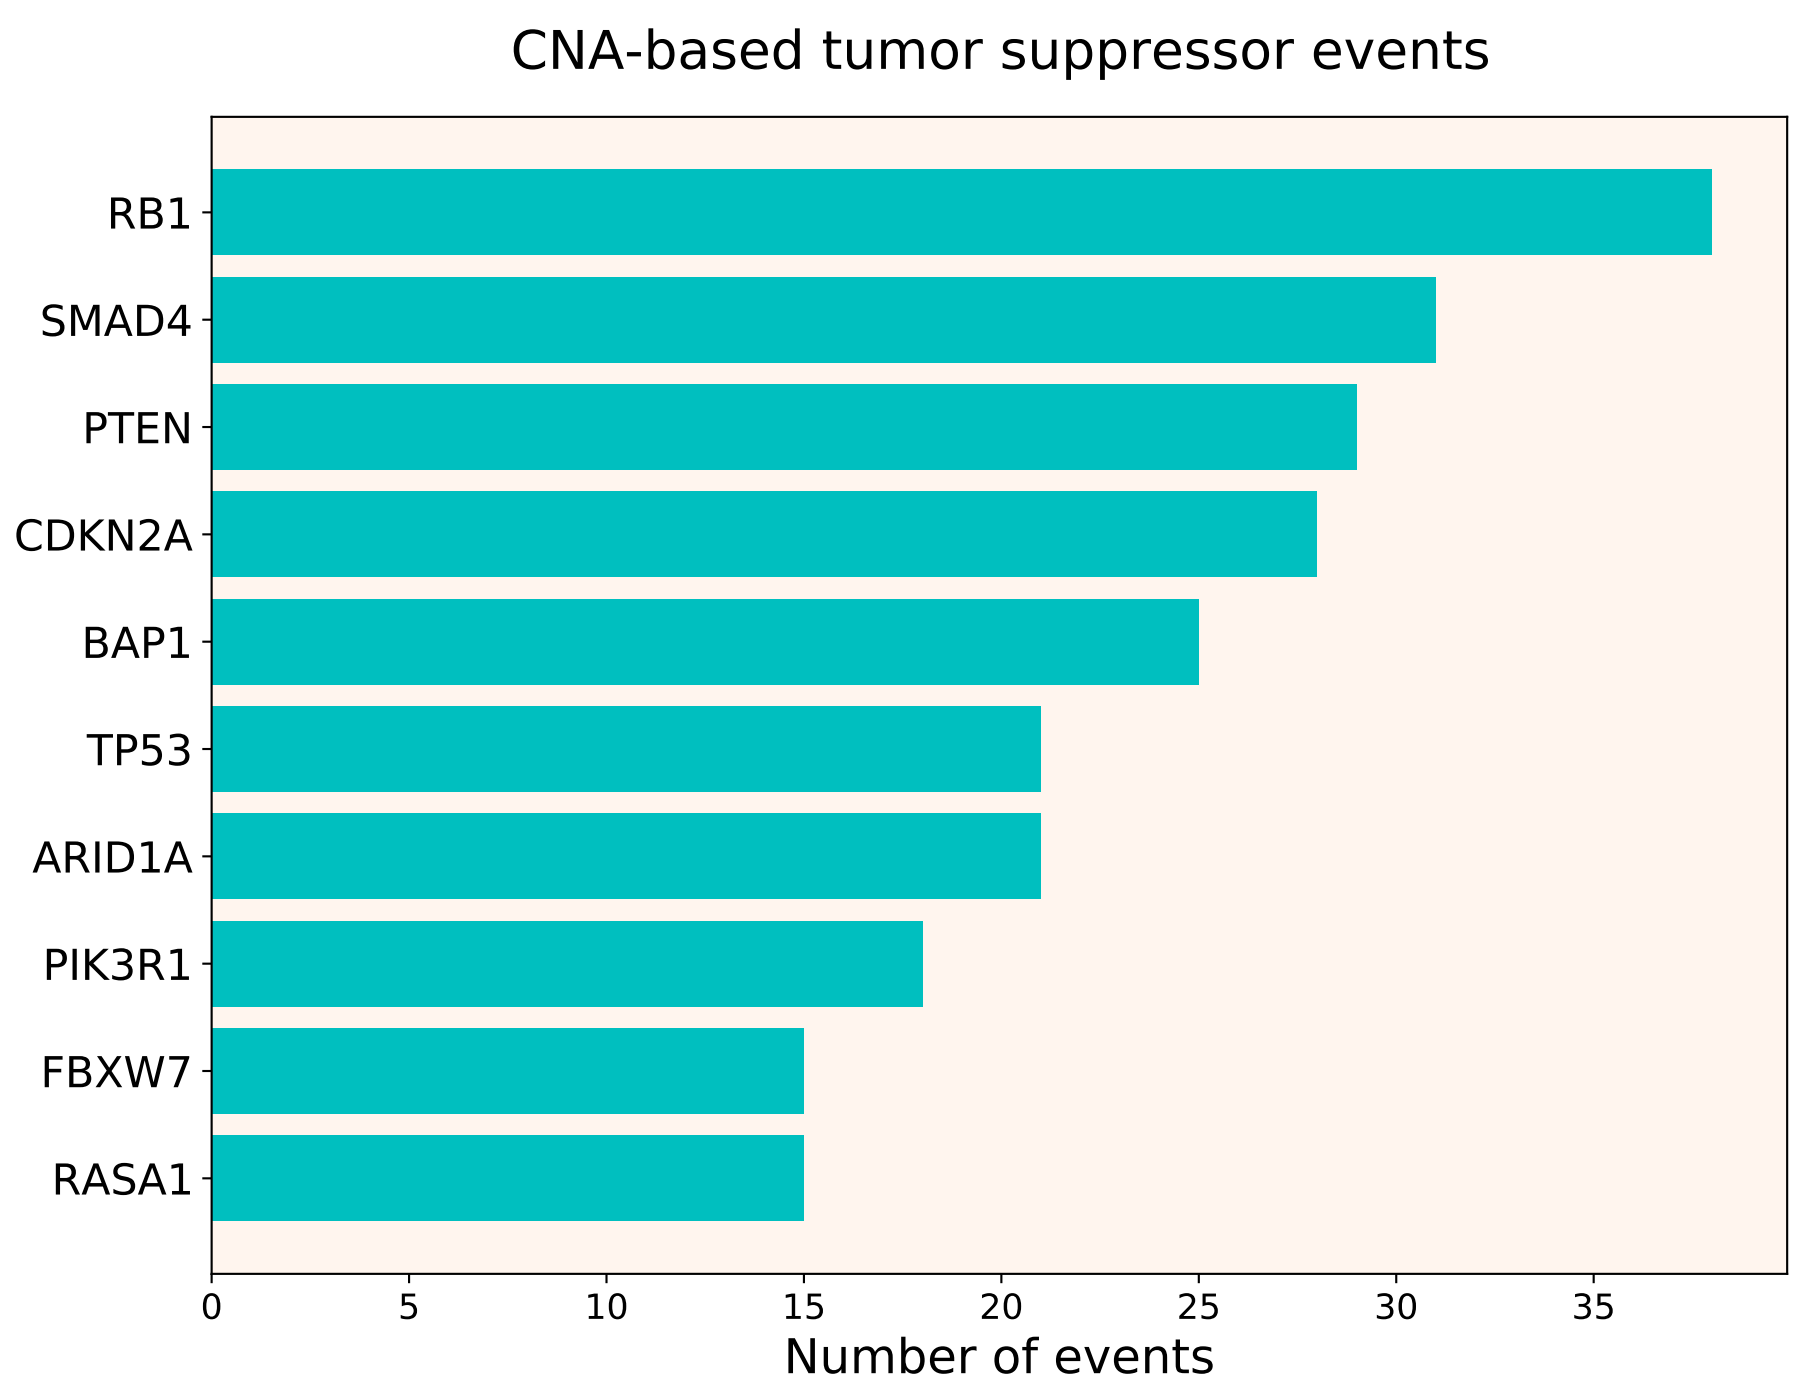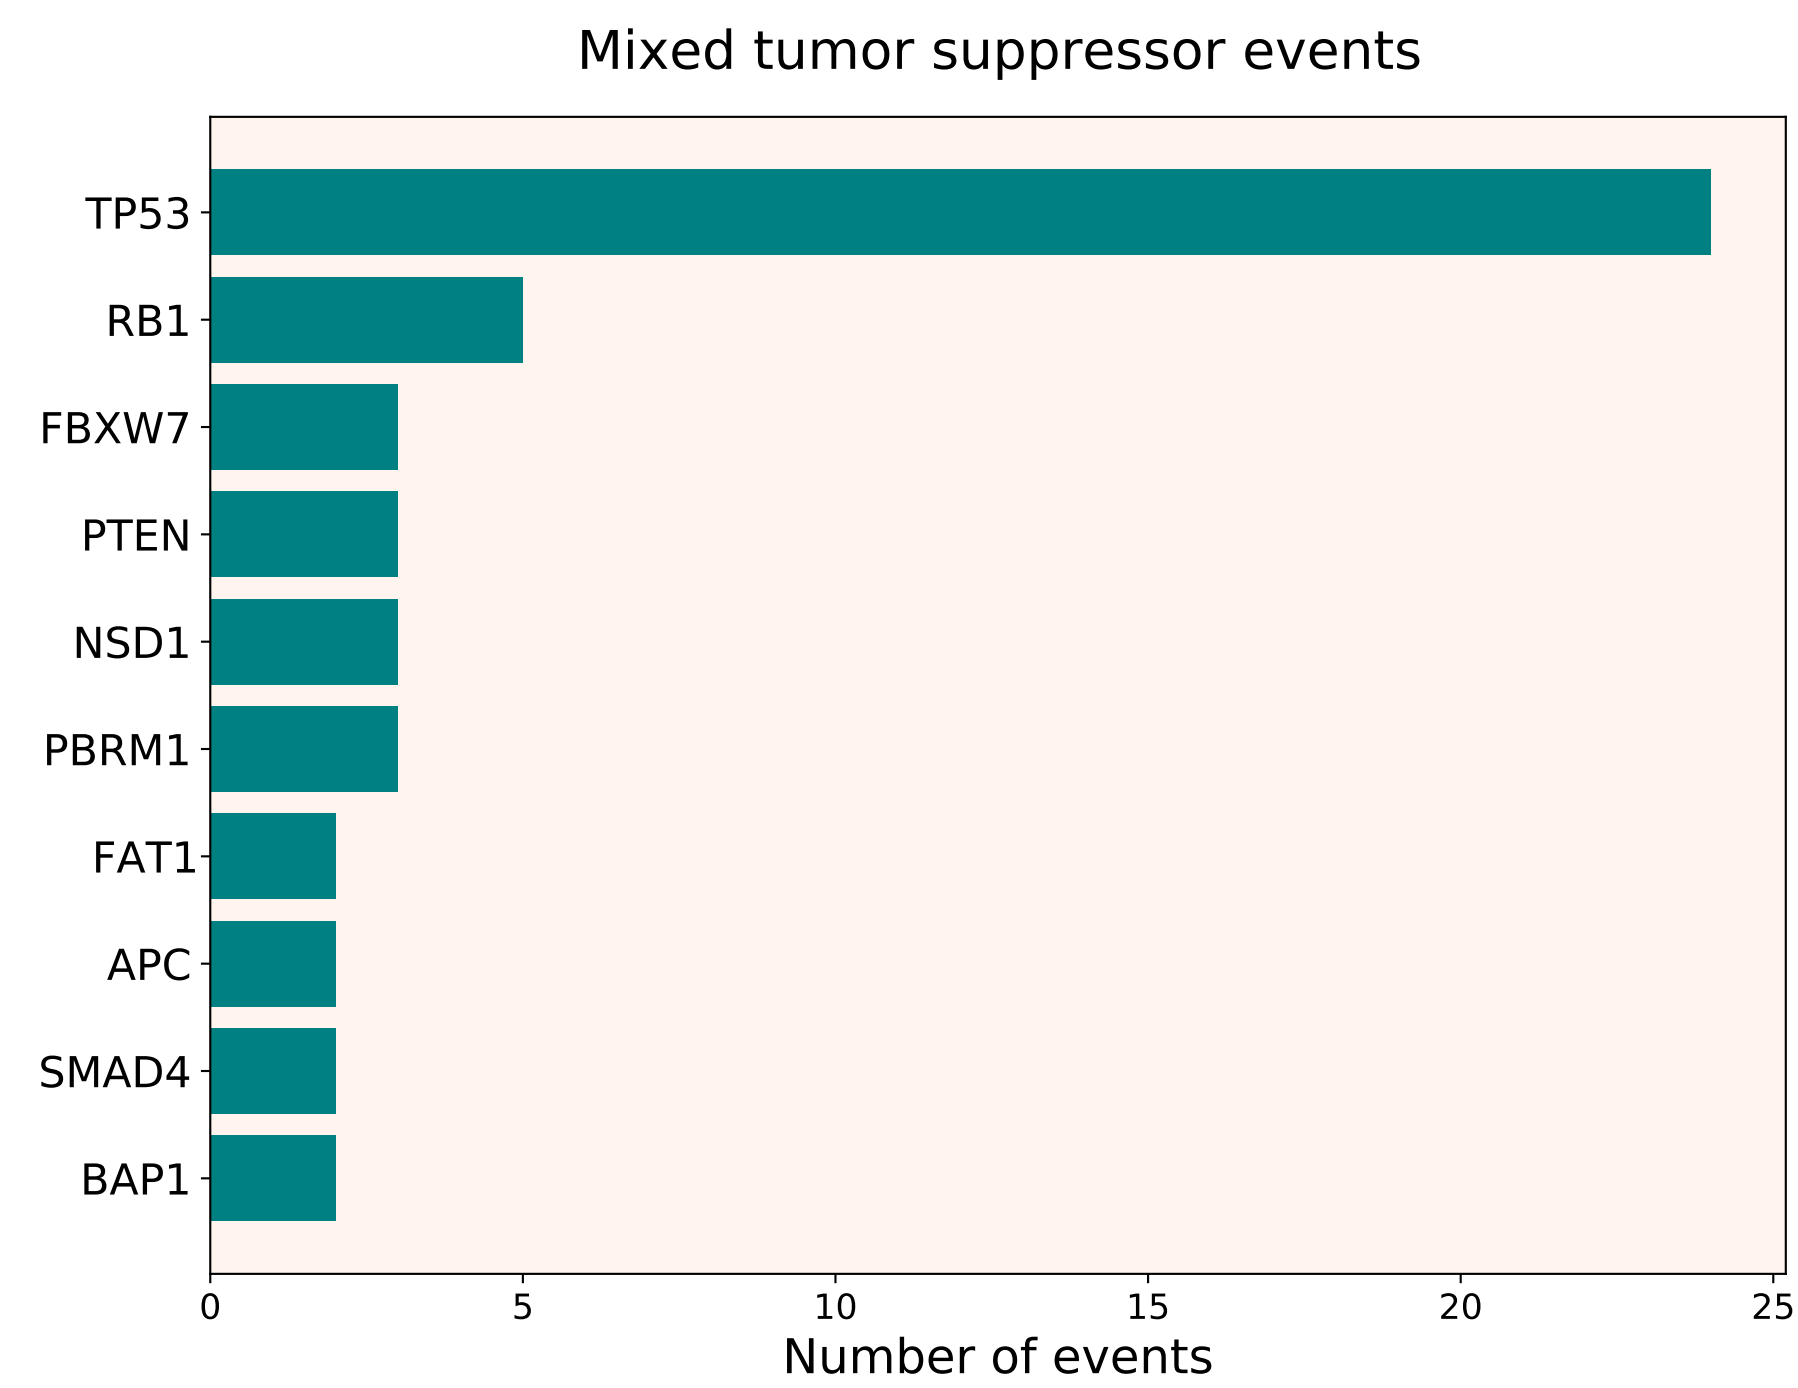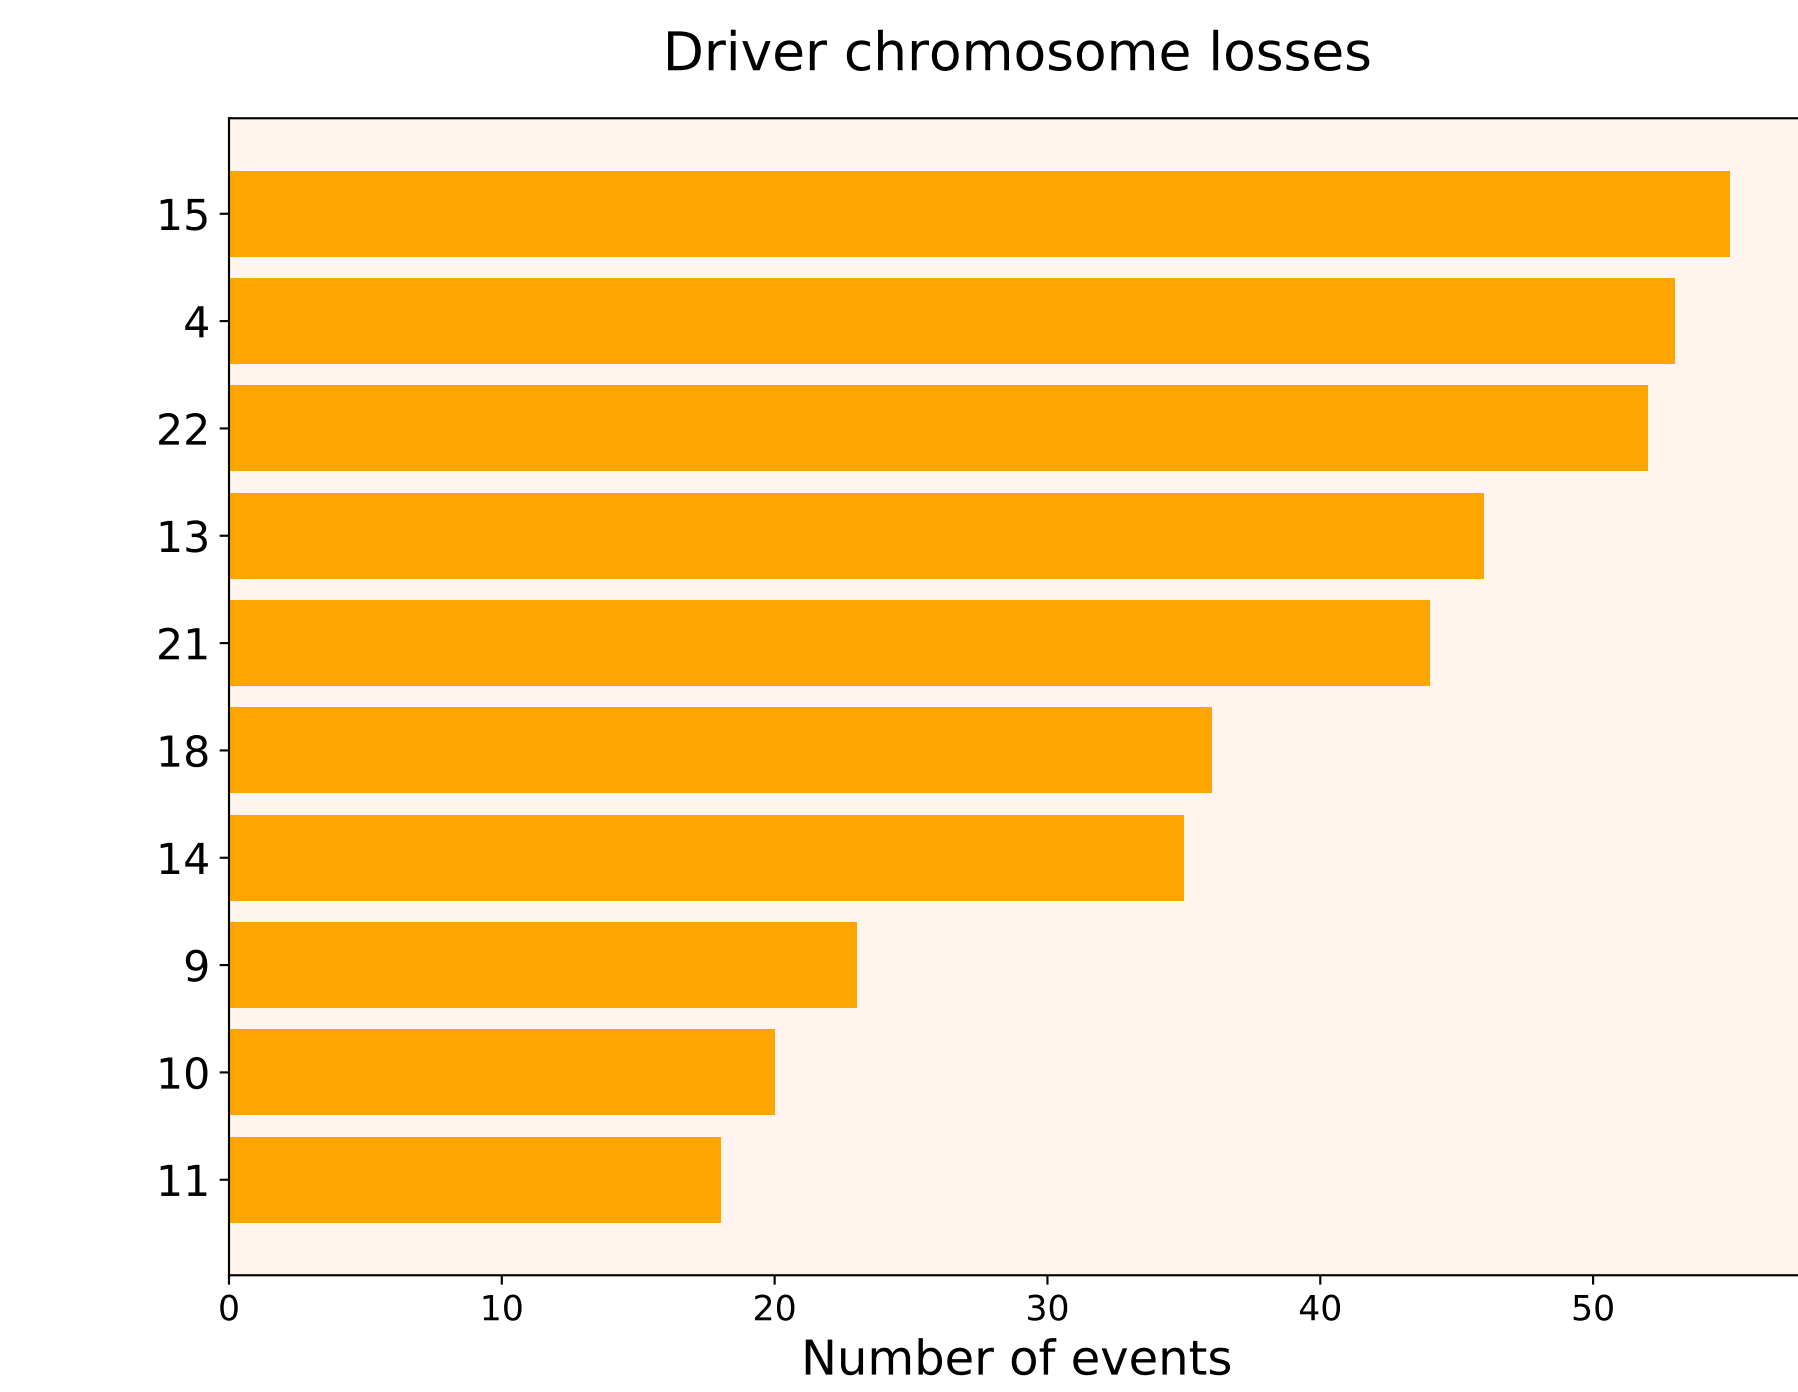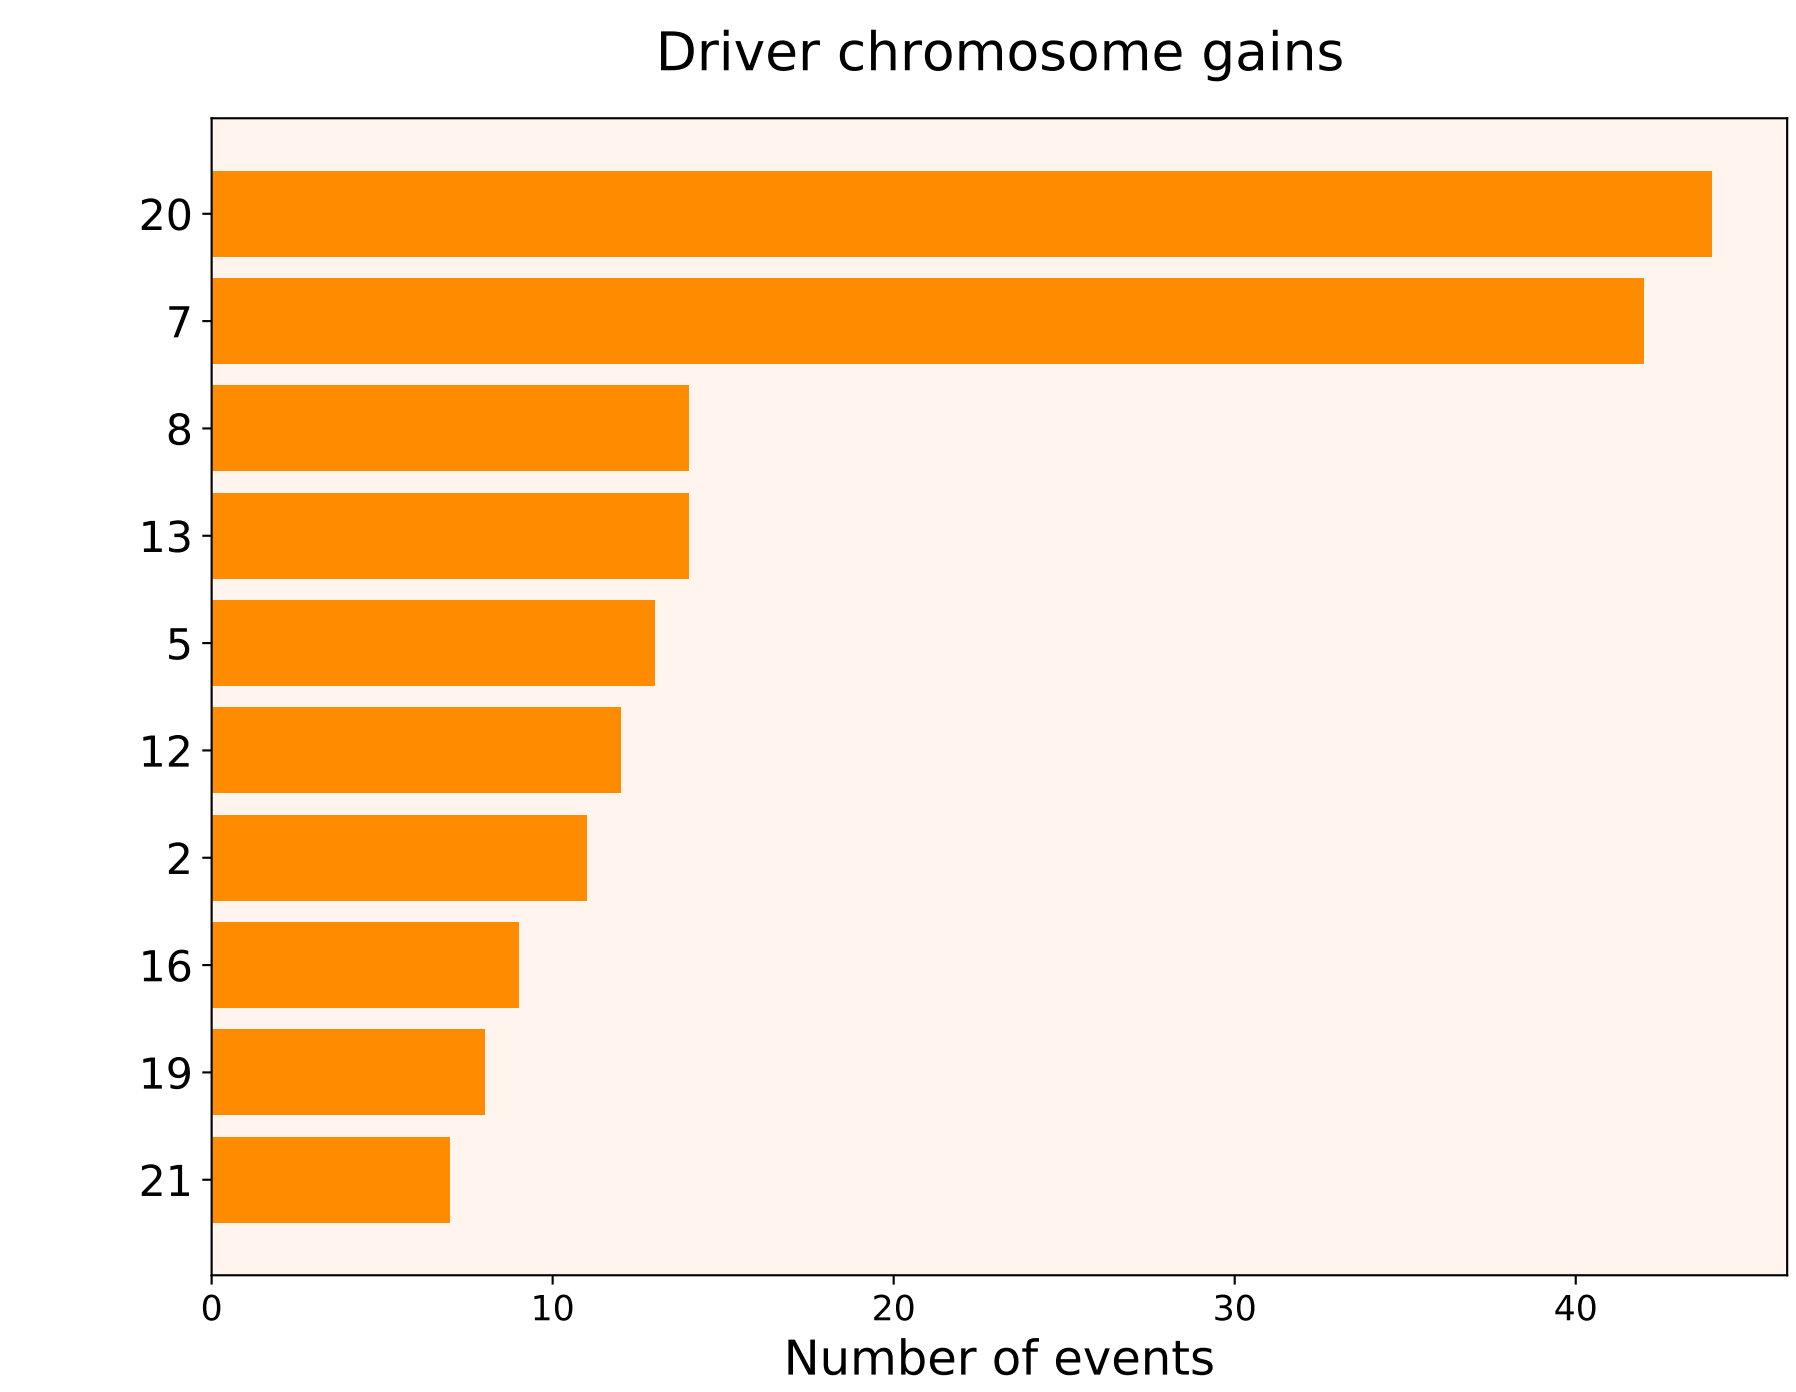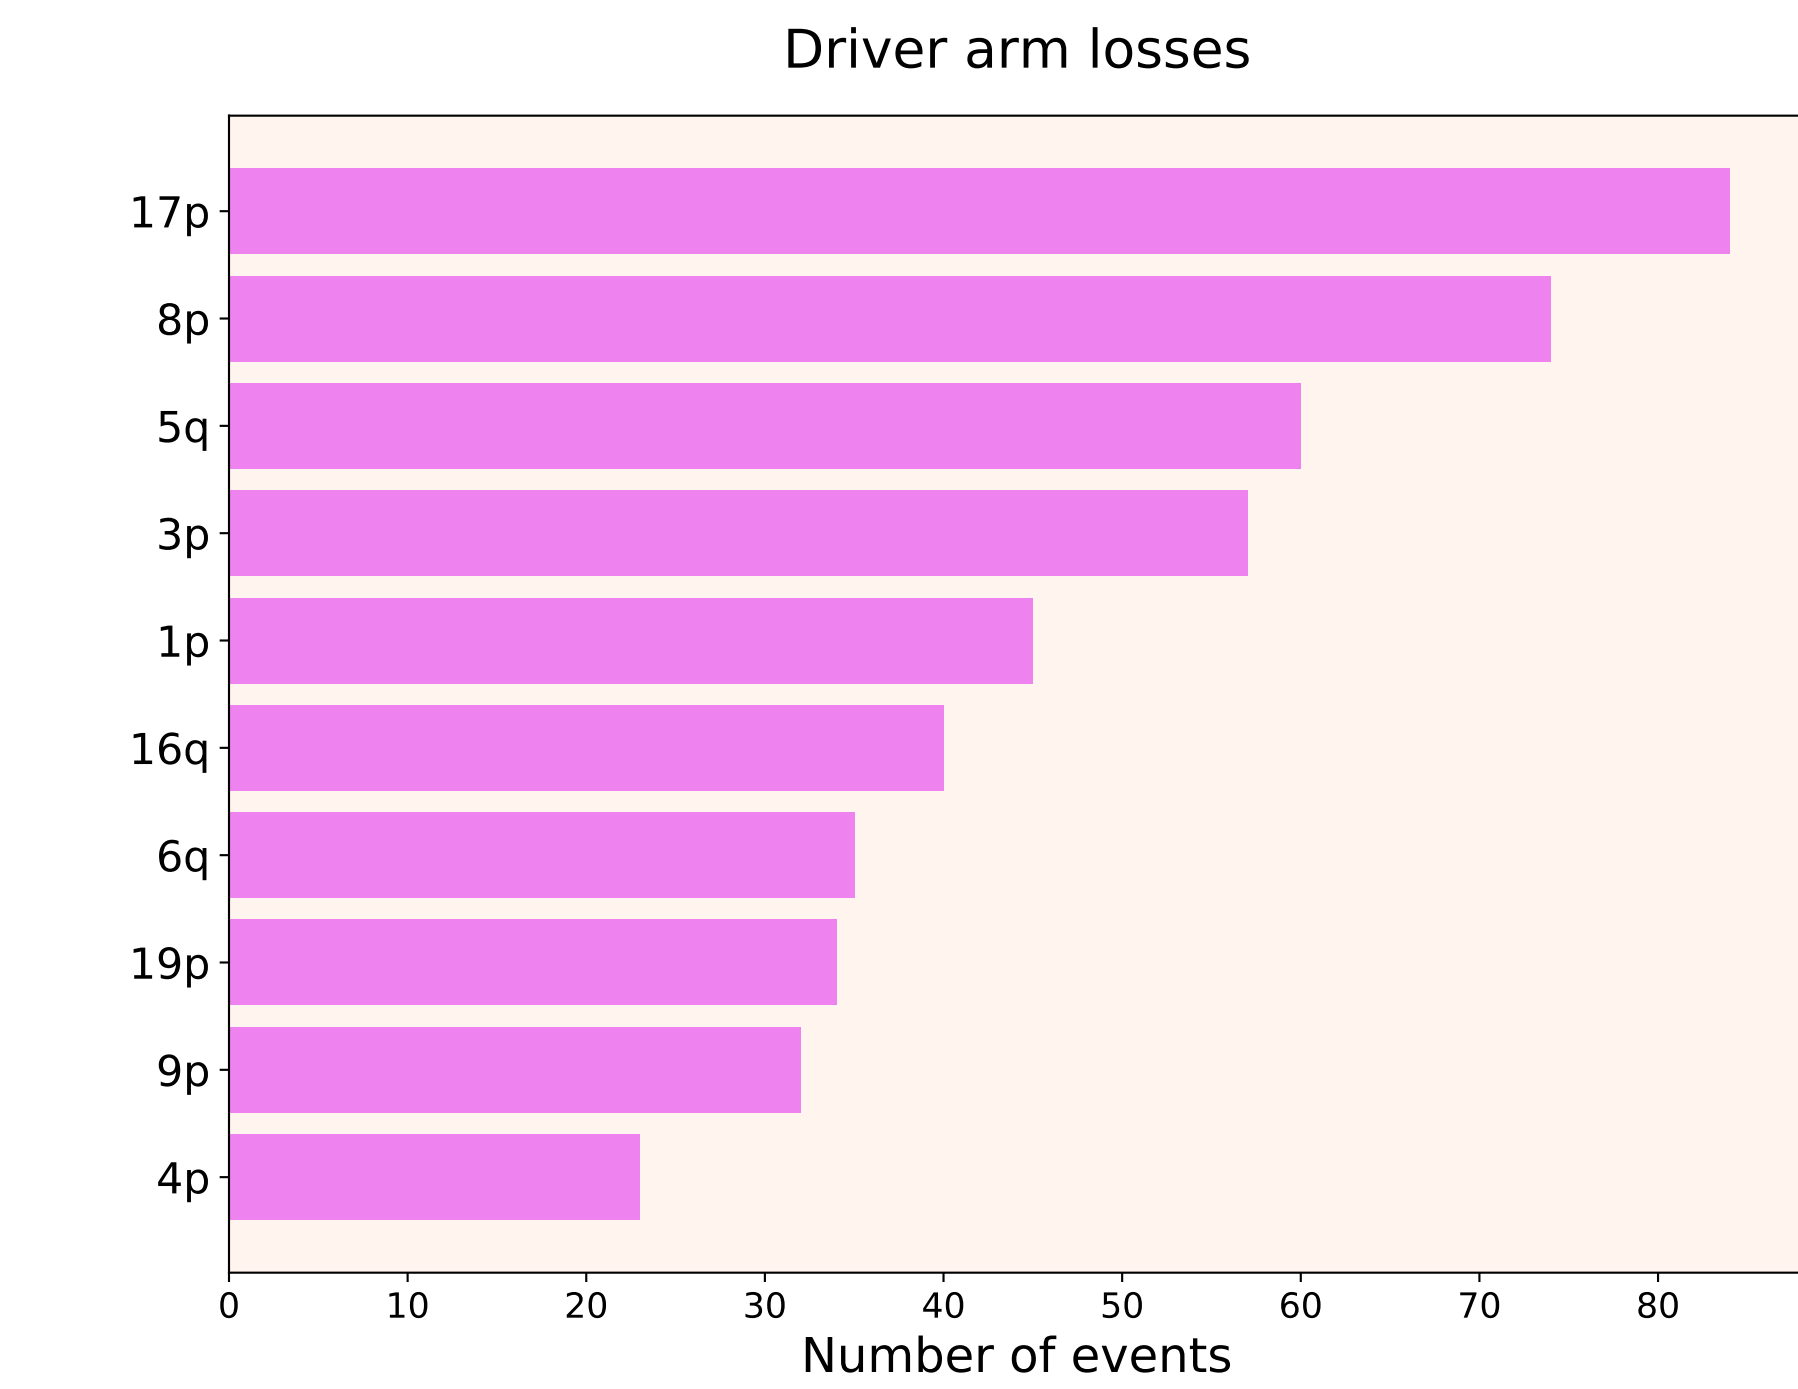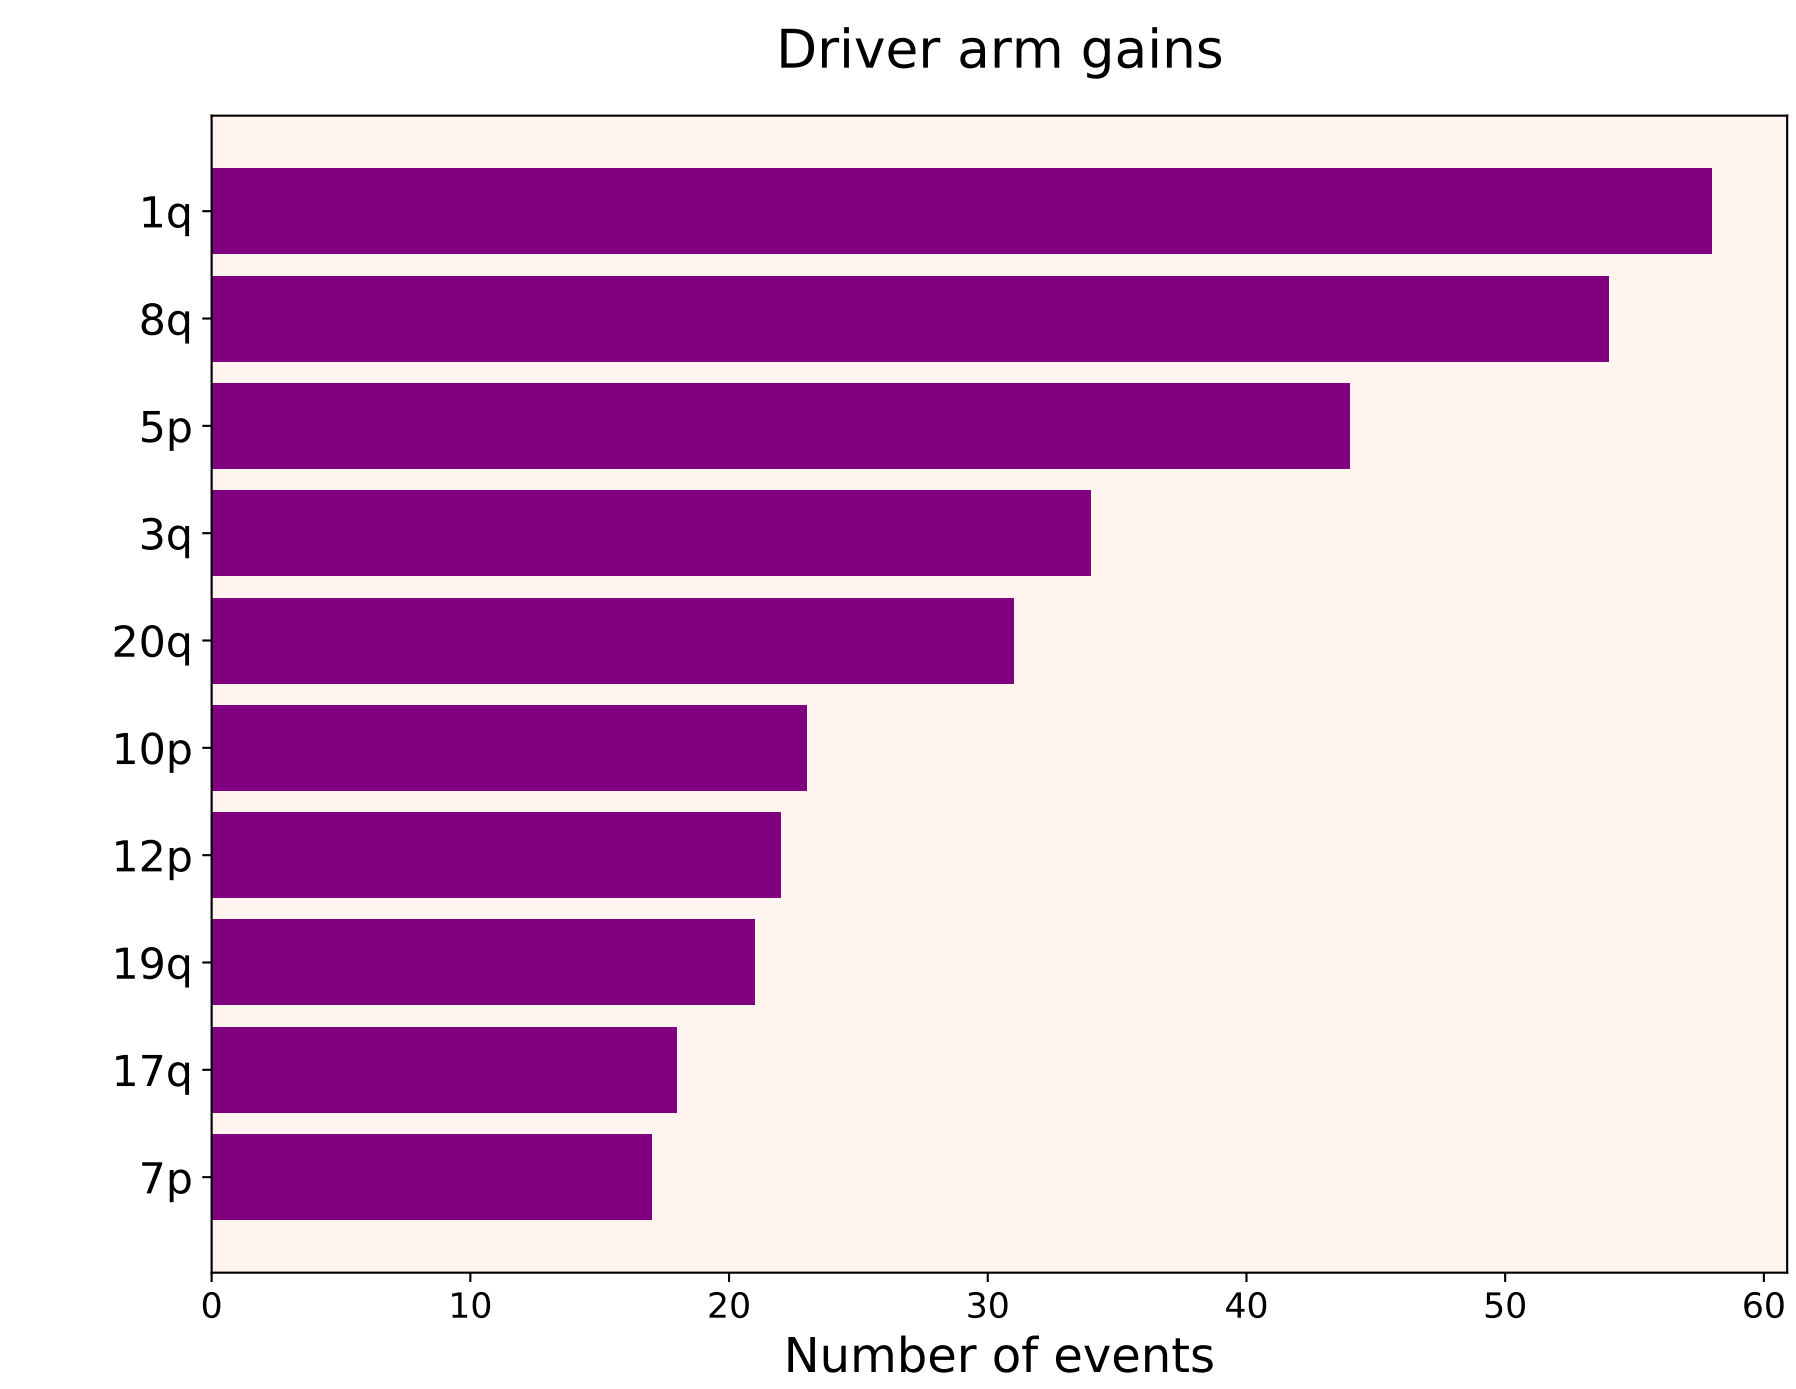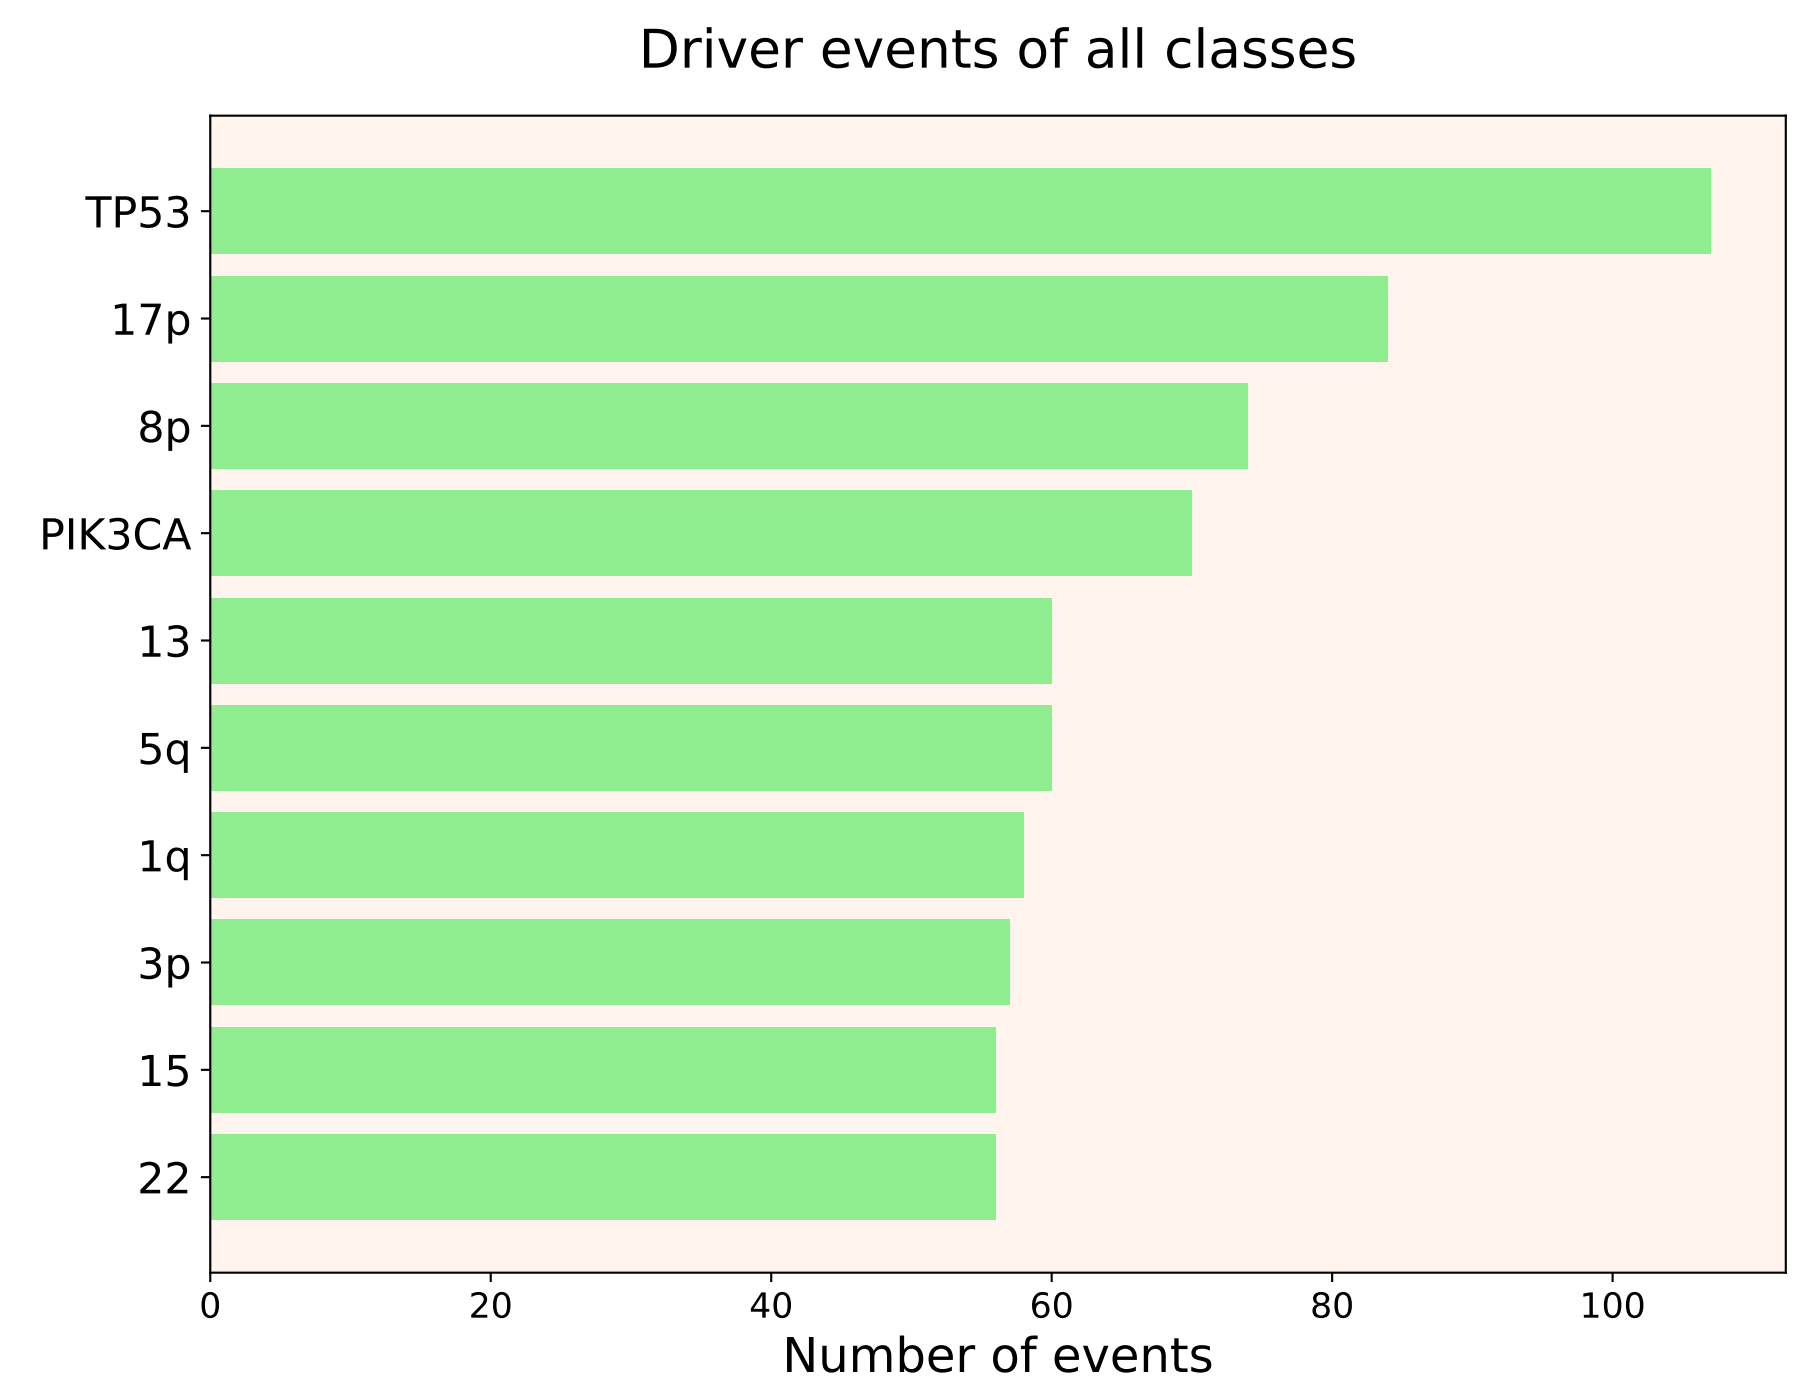

Supplement: Supplemental_Data_S1.zip [file Supplemental_Data_S1.zip]

# DLBC

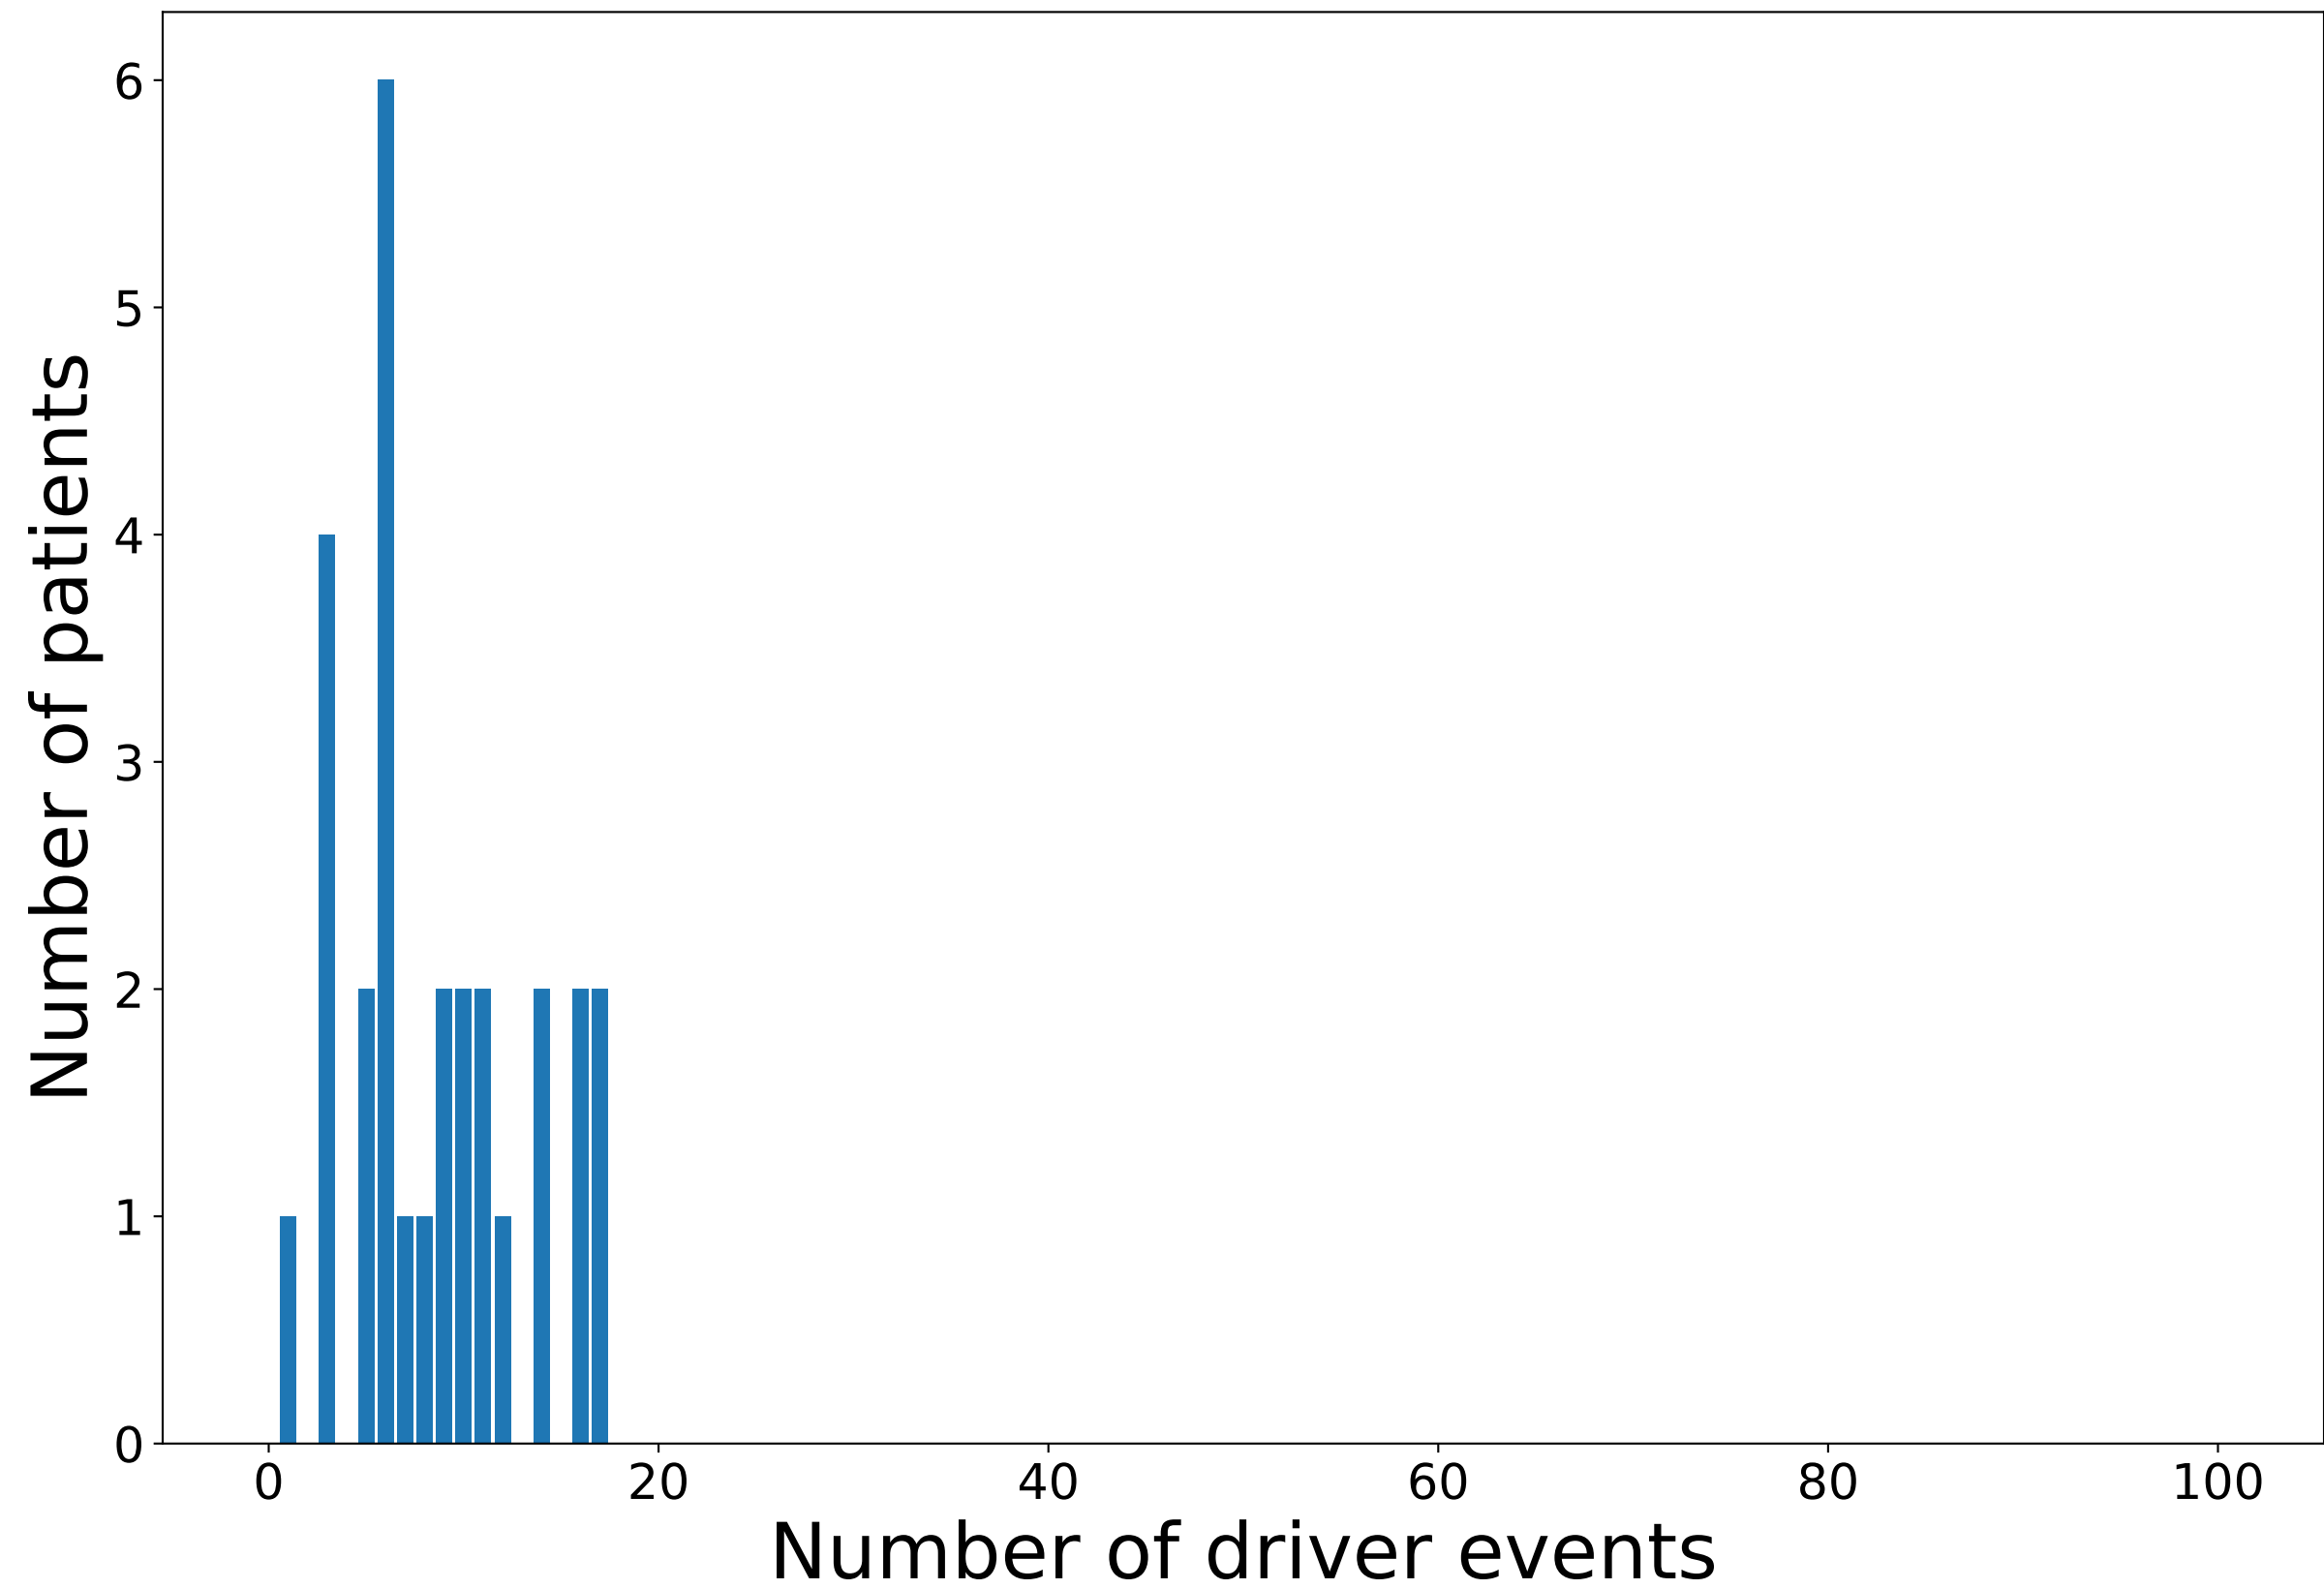

Supplement: Supplemental_Data_S1.zip [file Supplemental_Data_S1.zip]

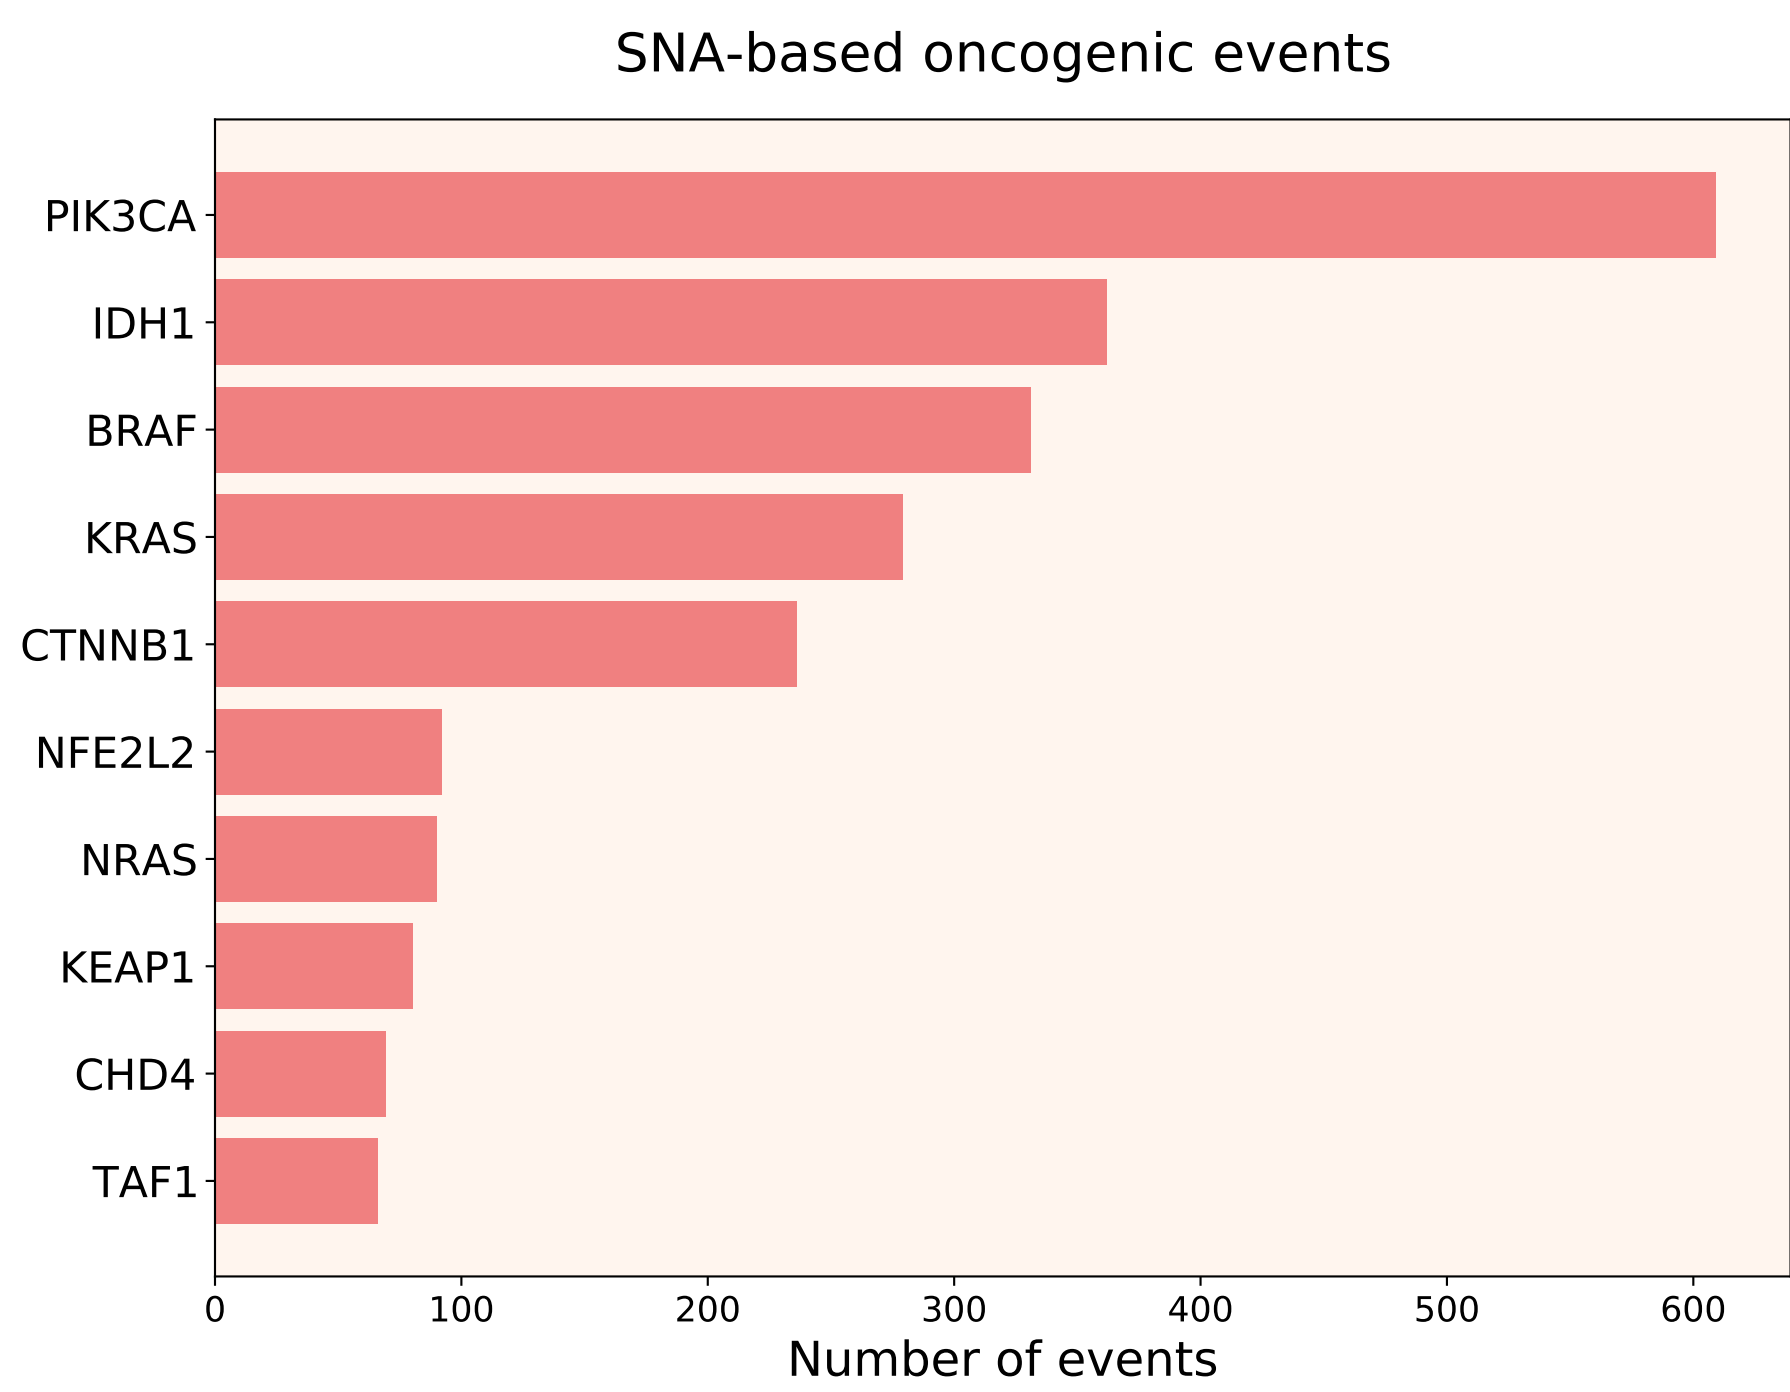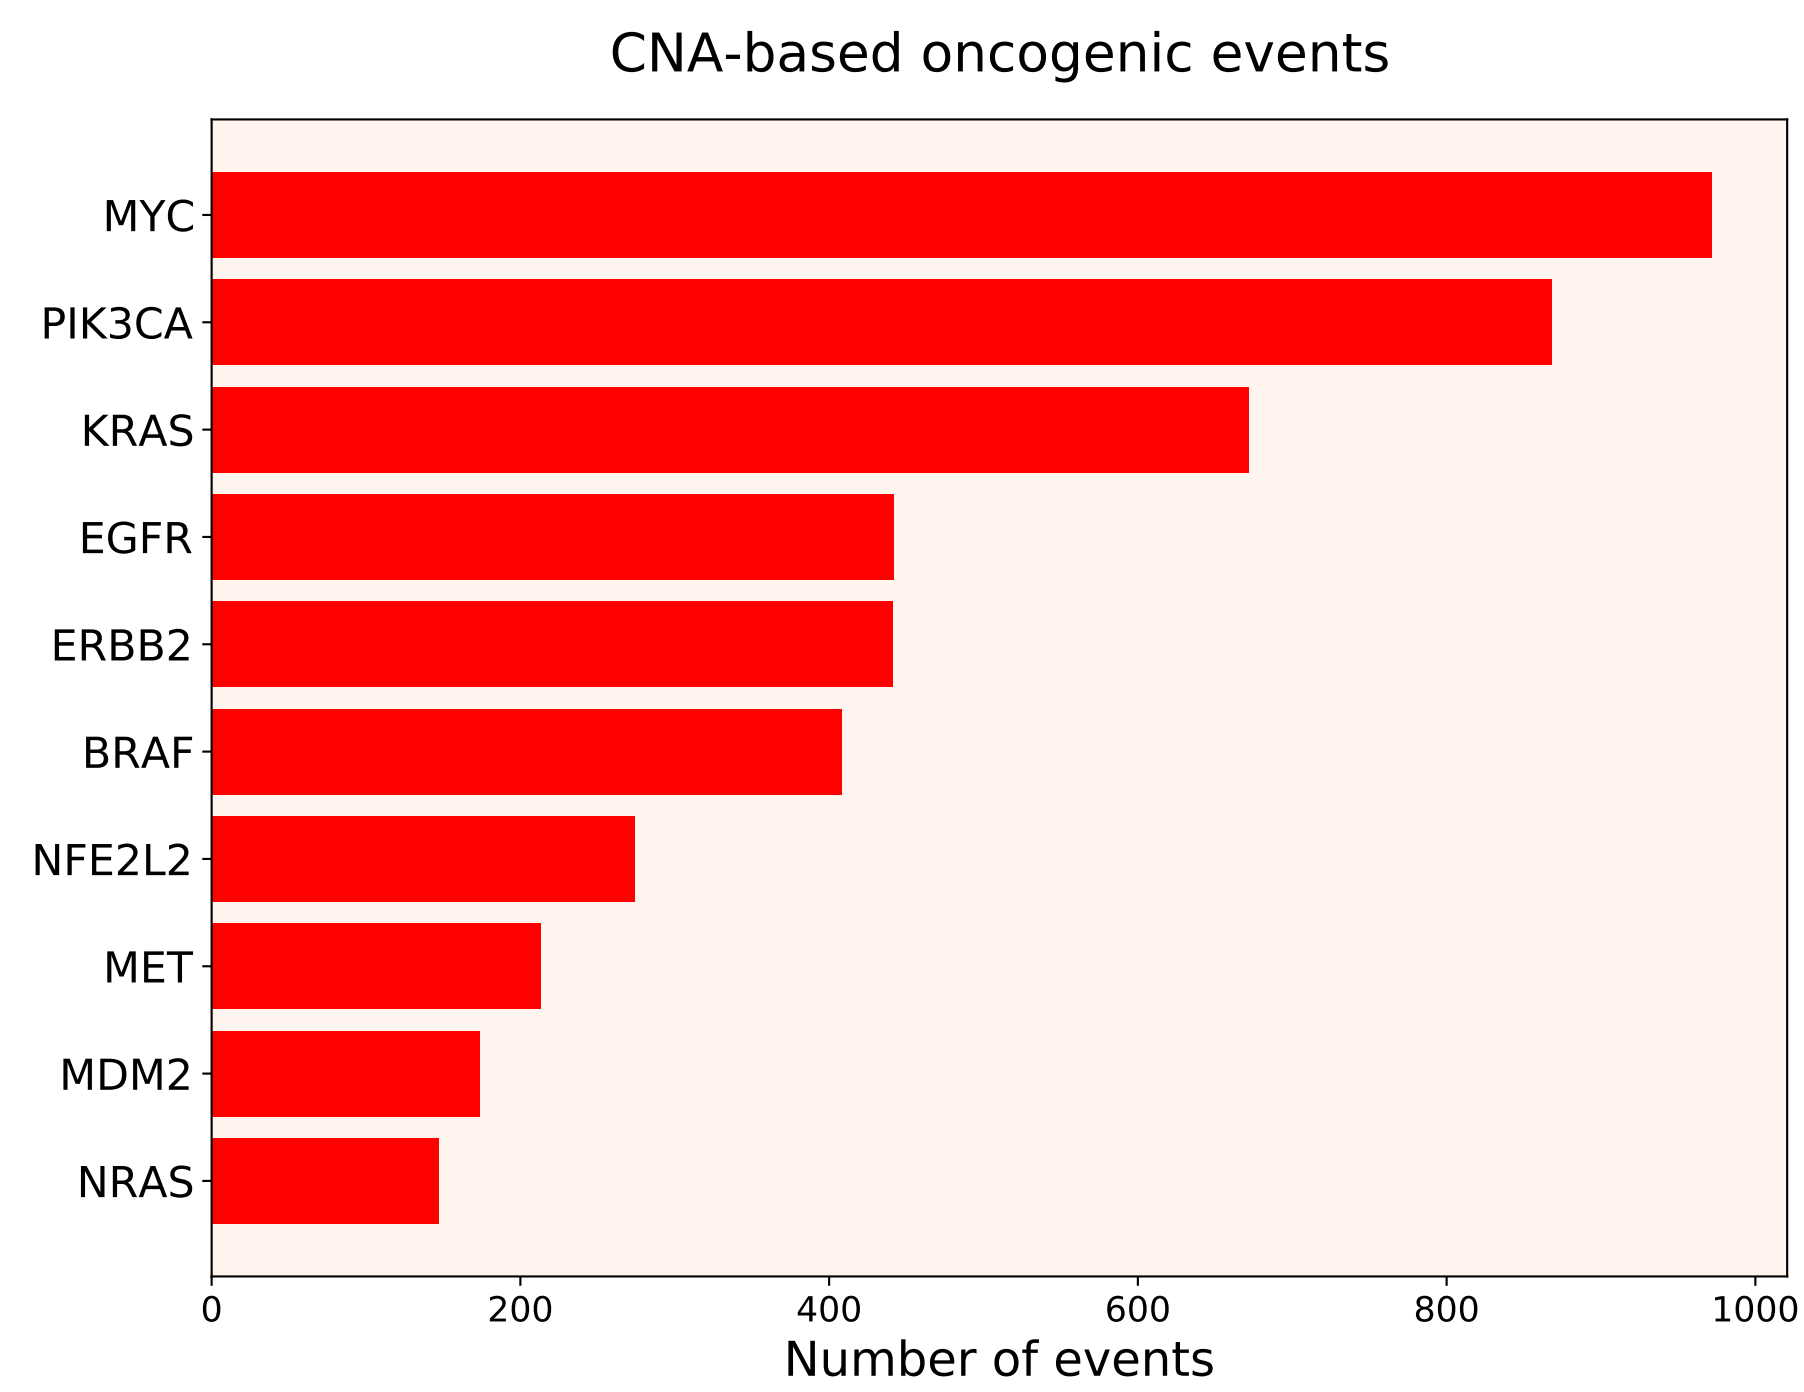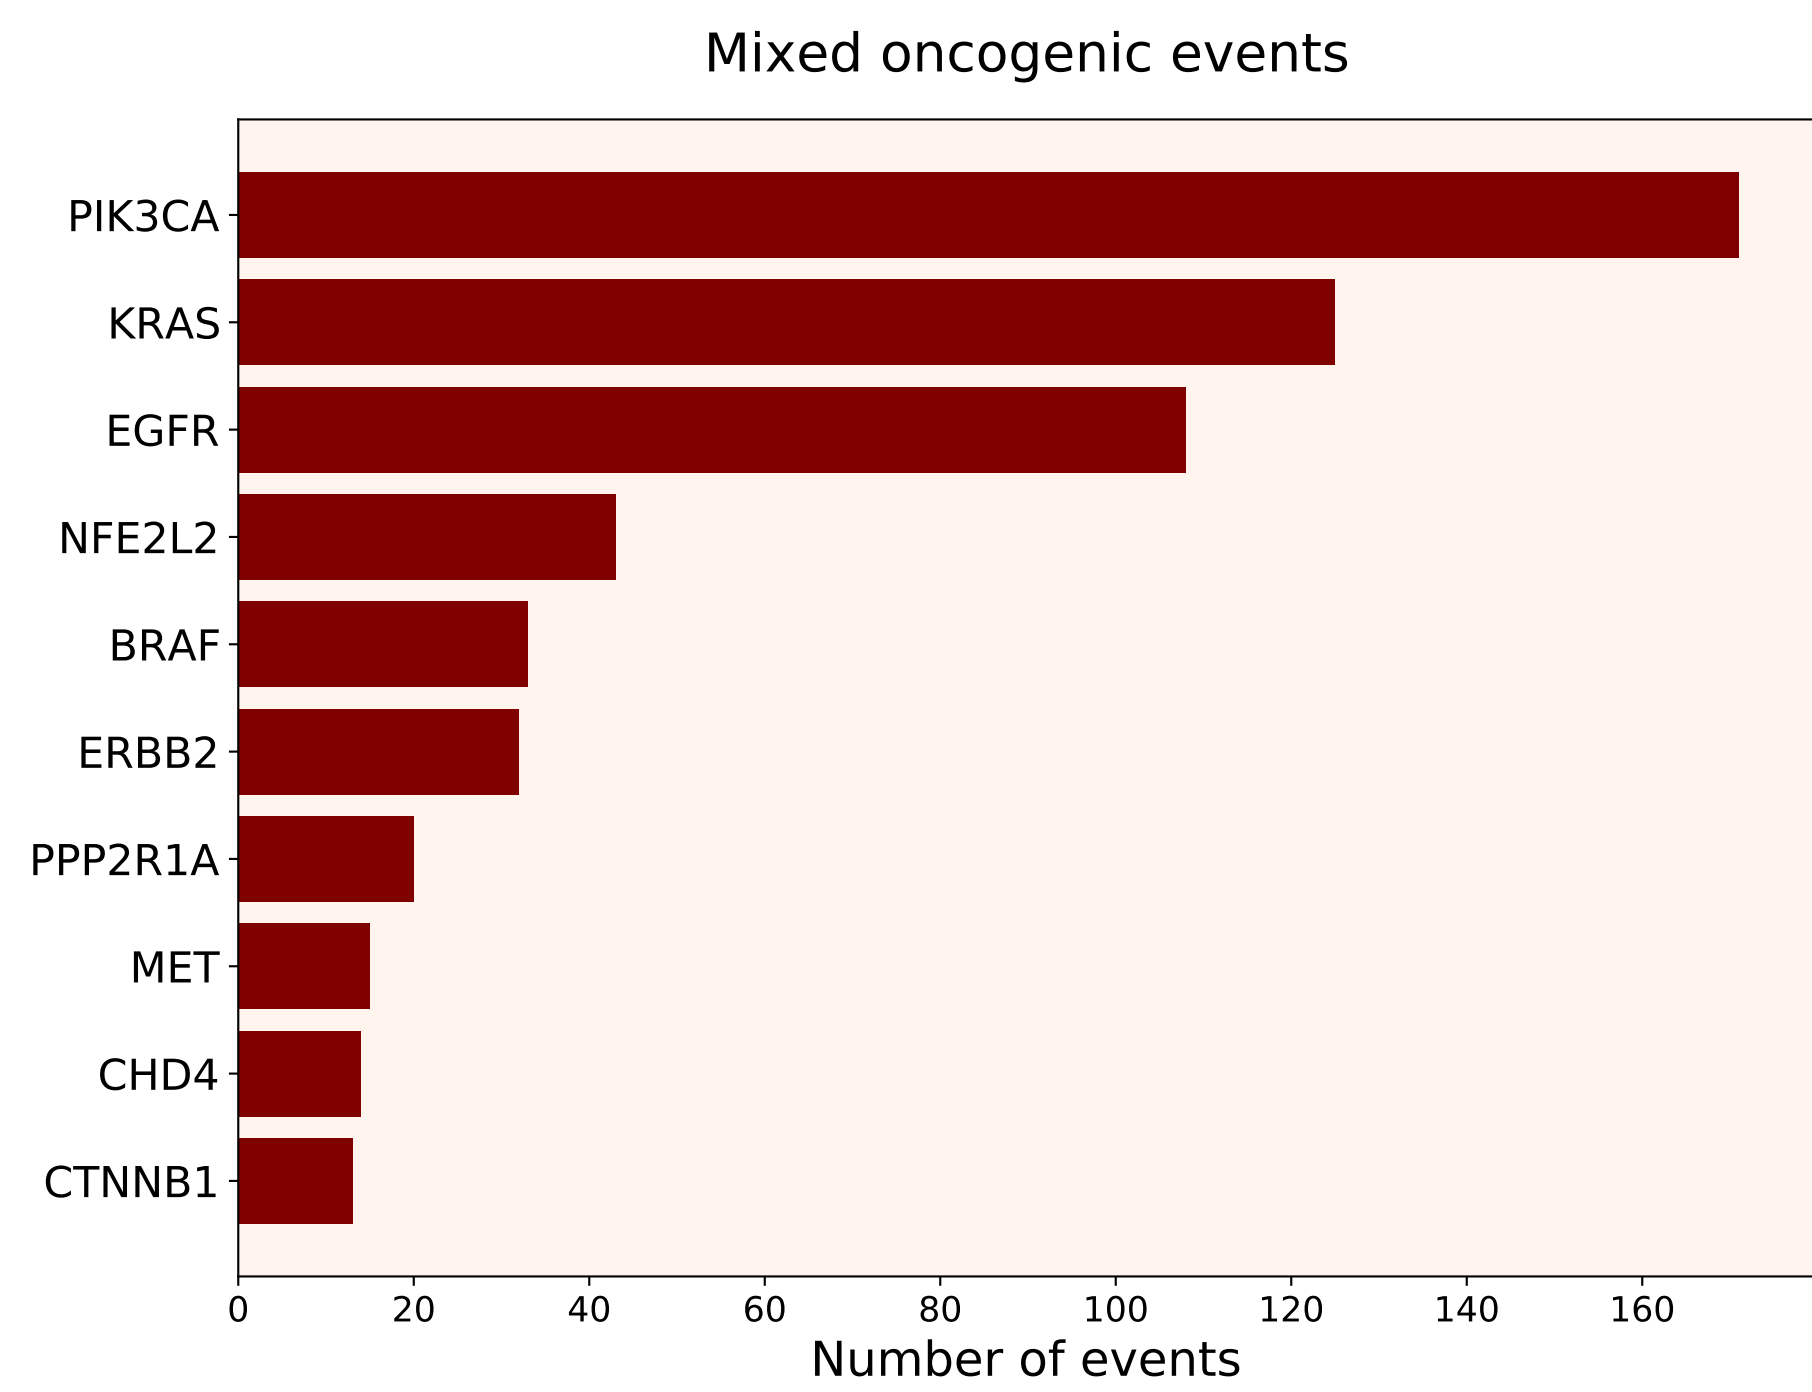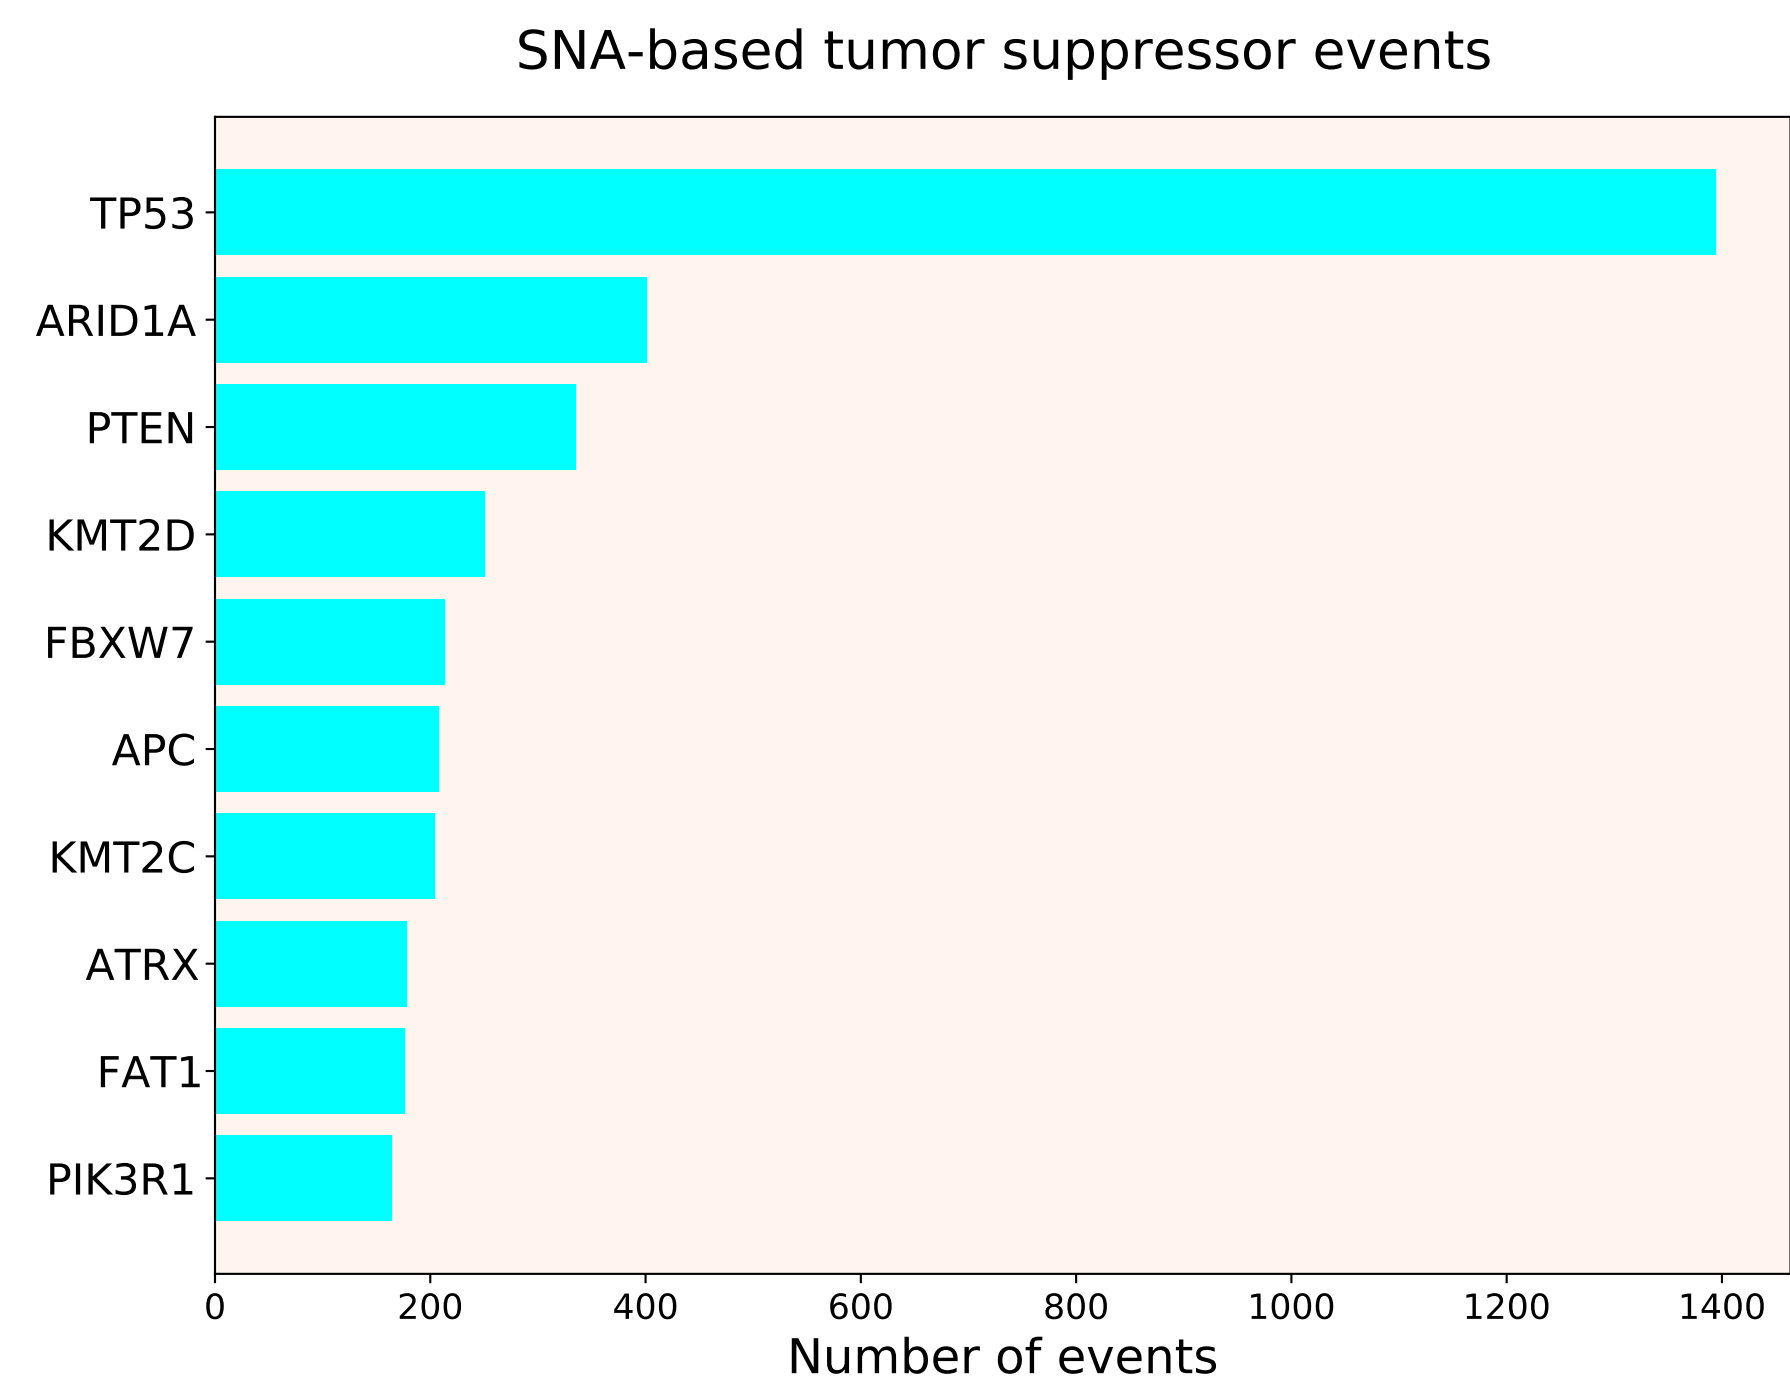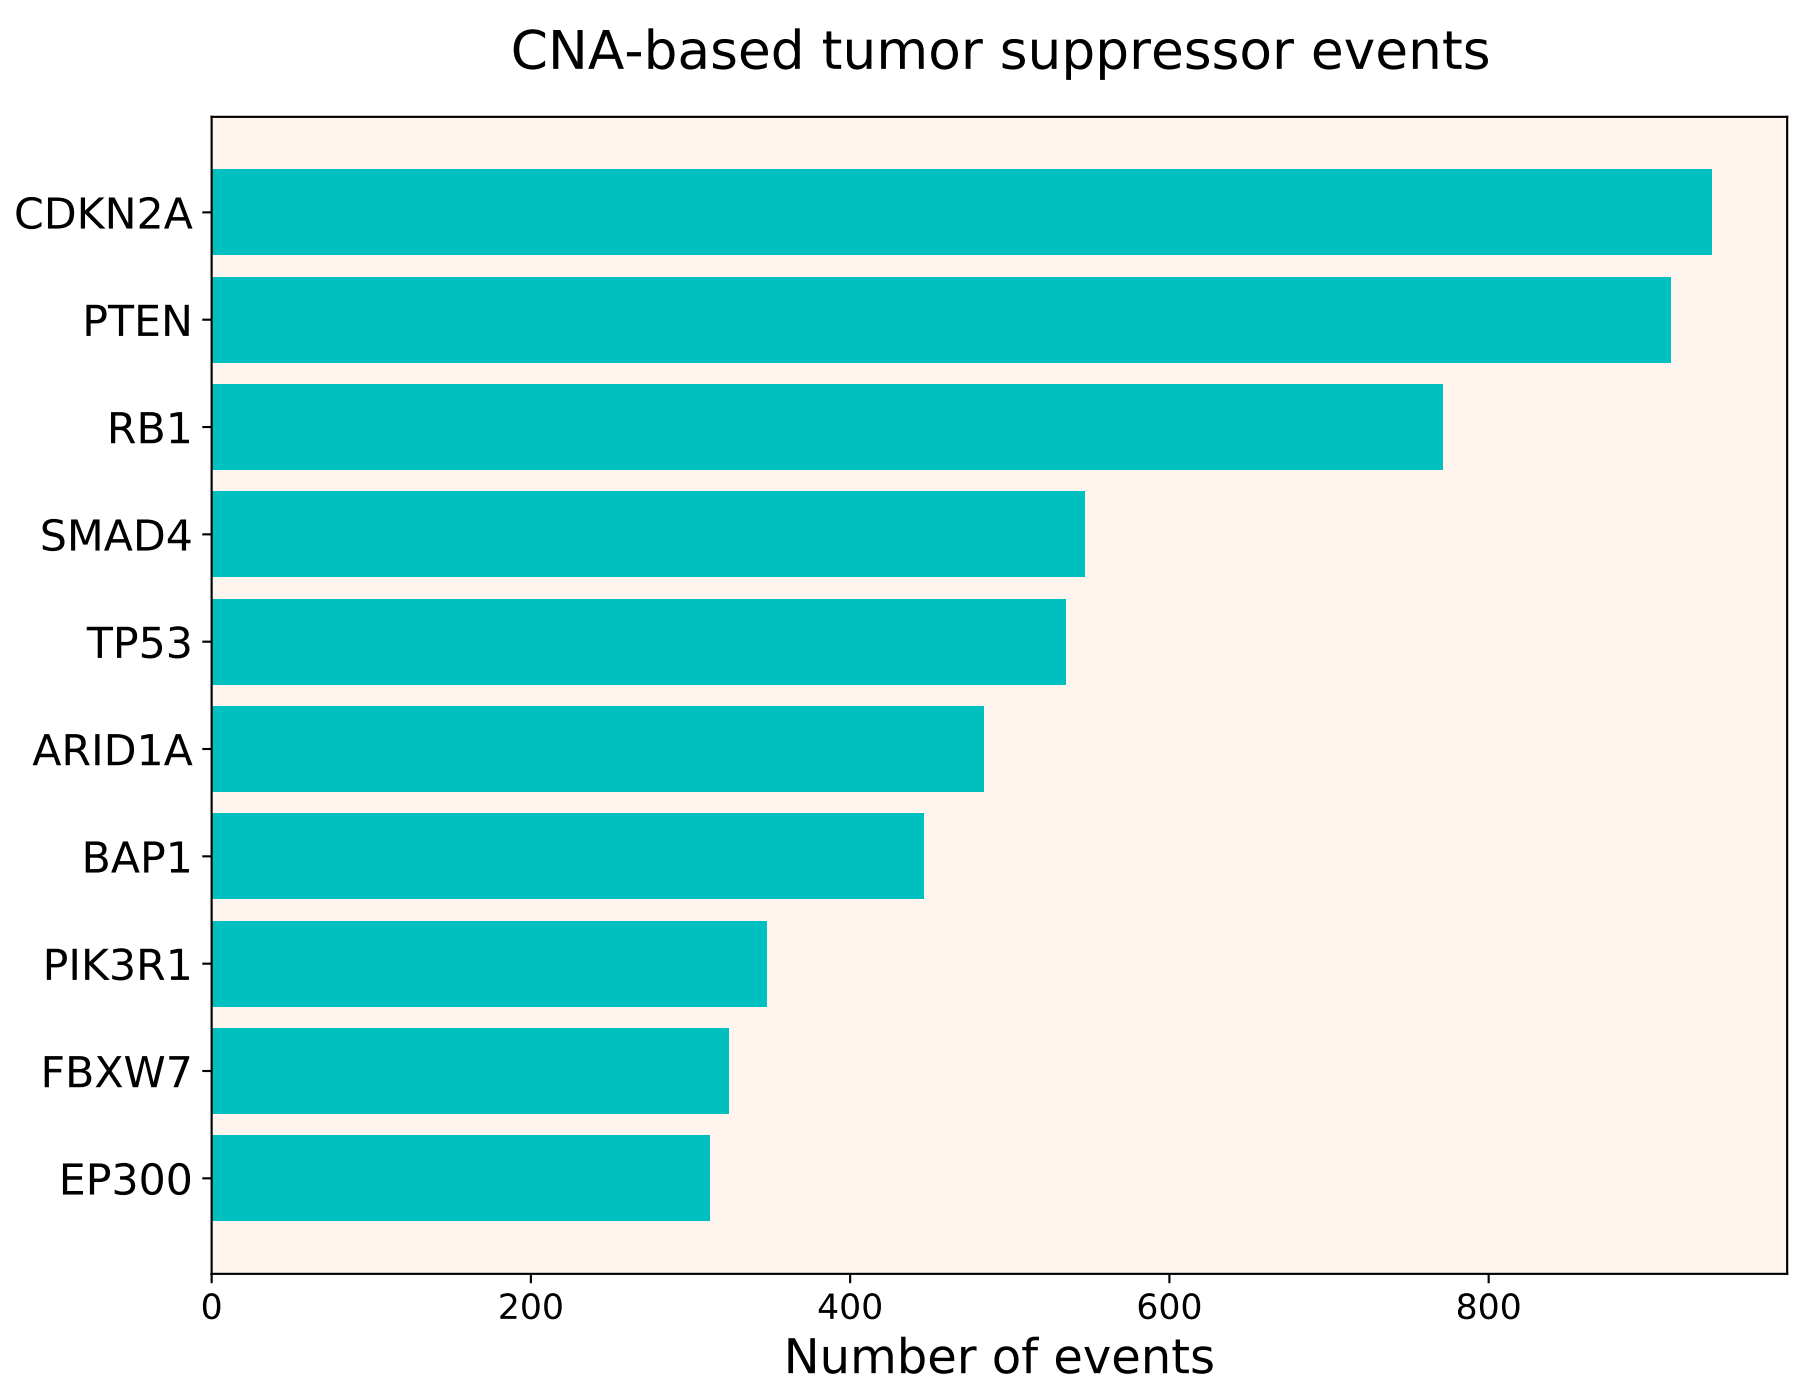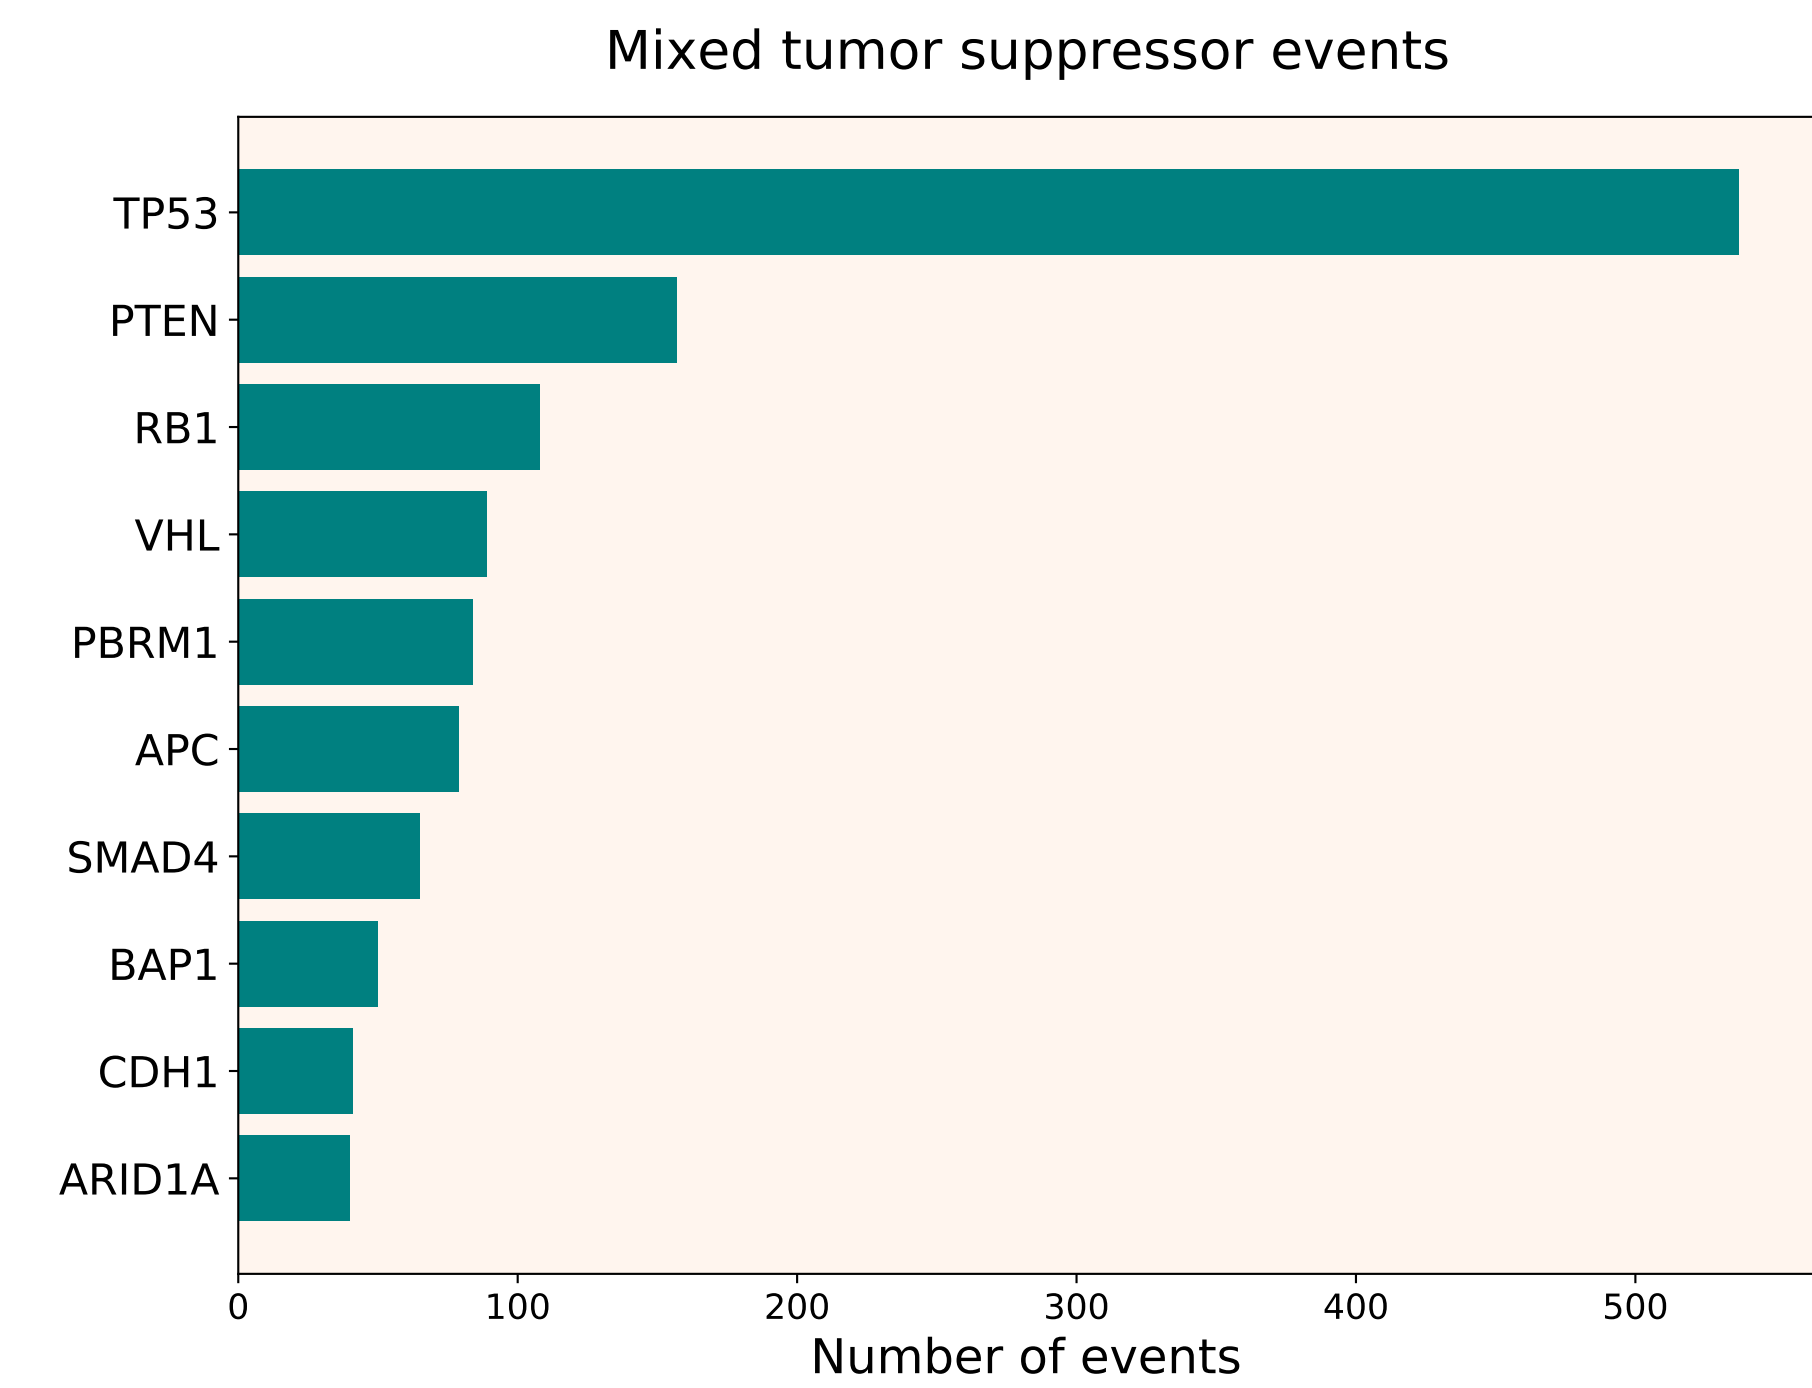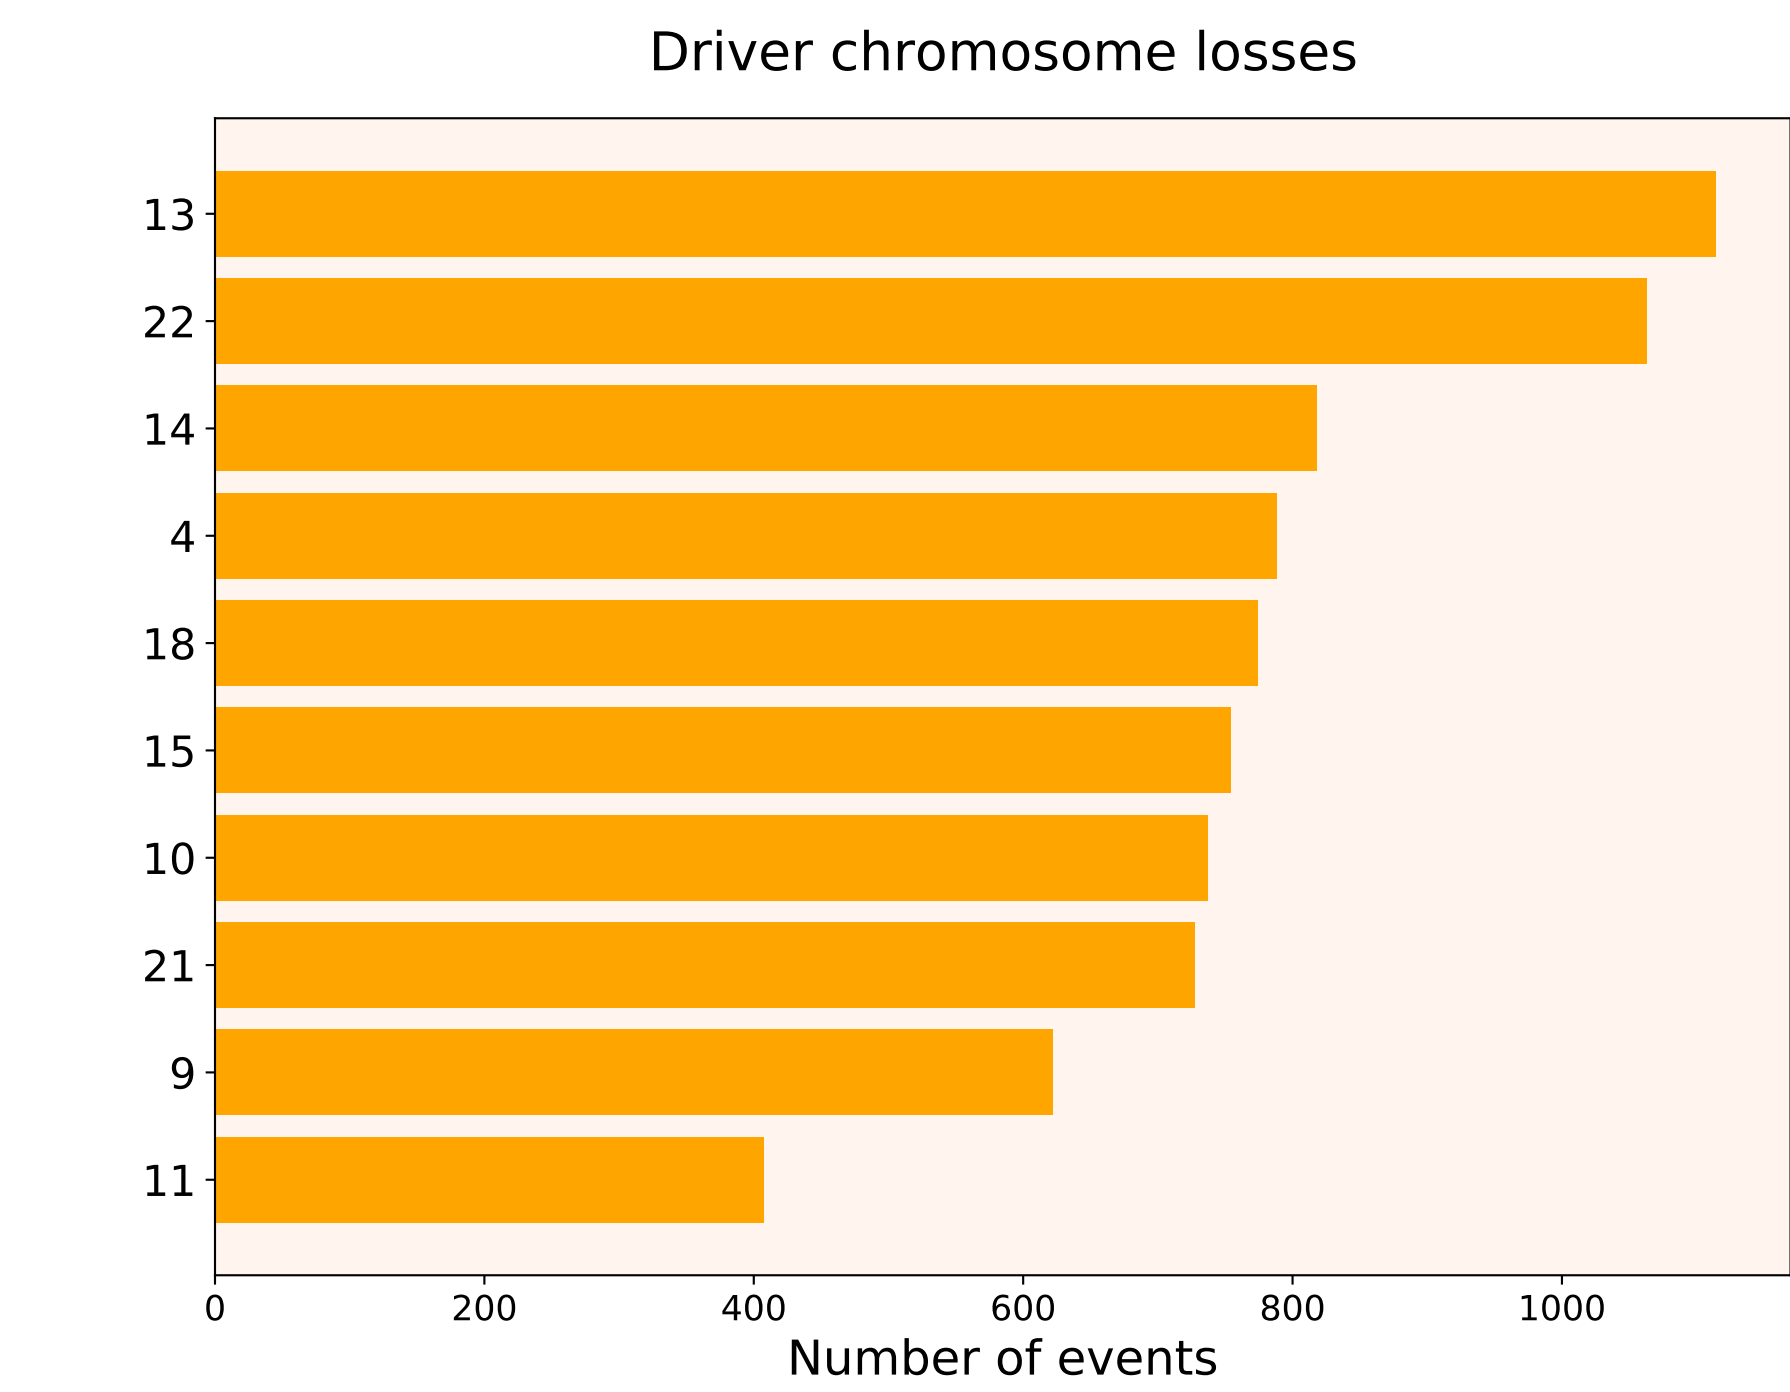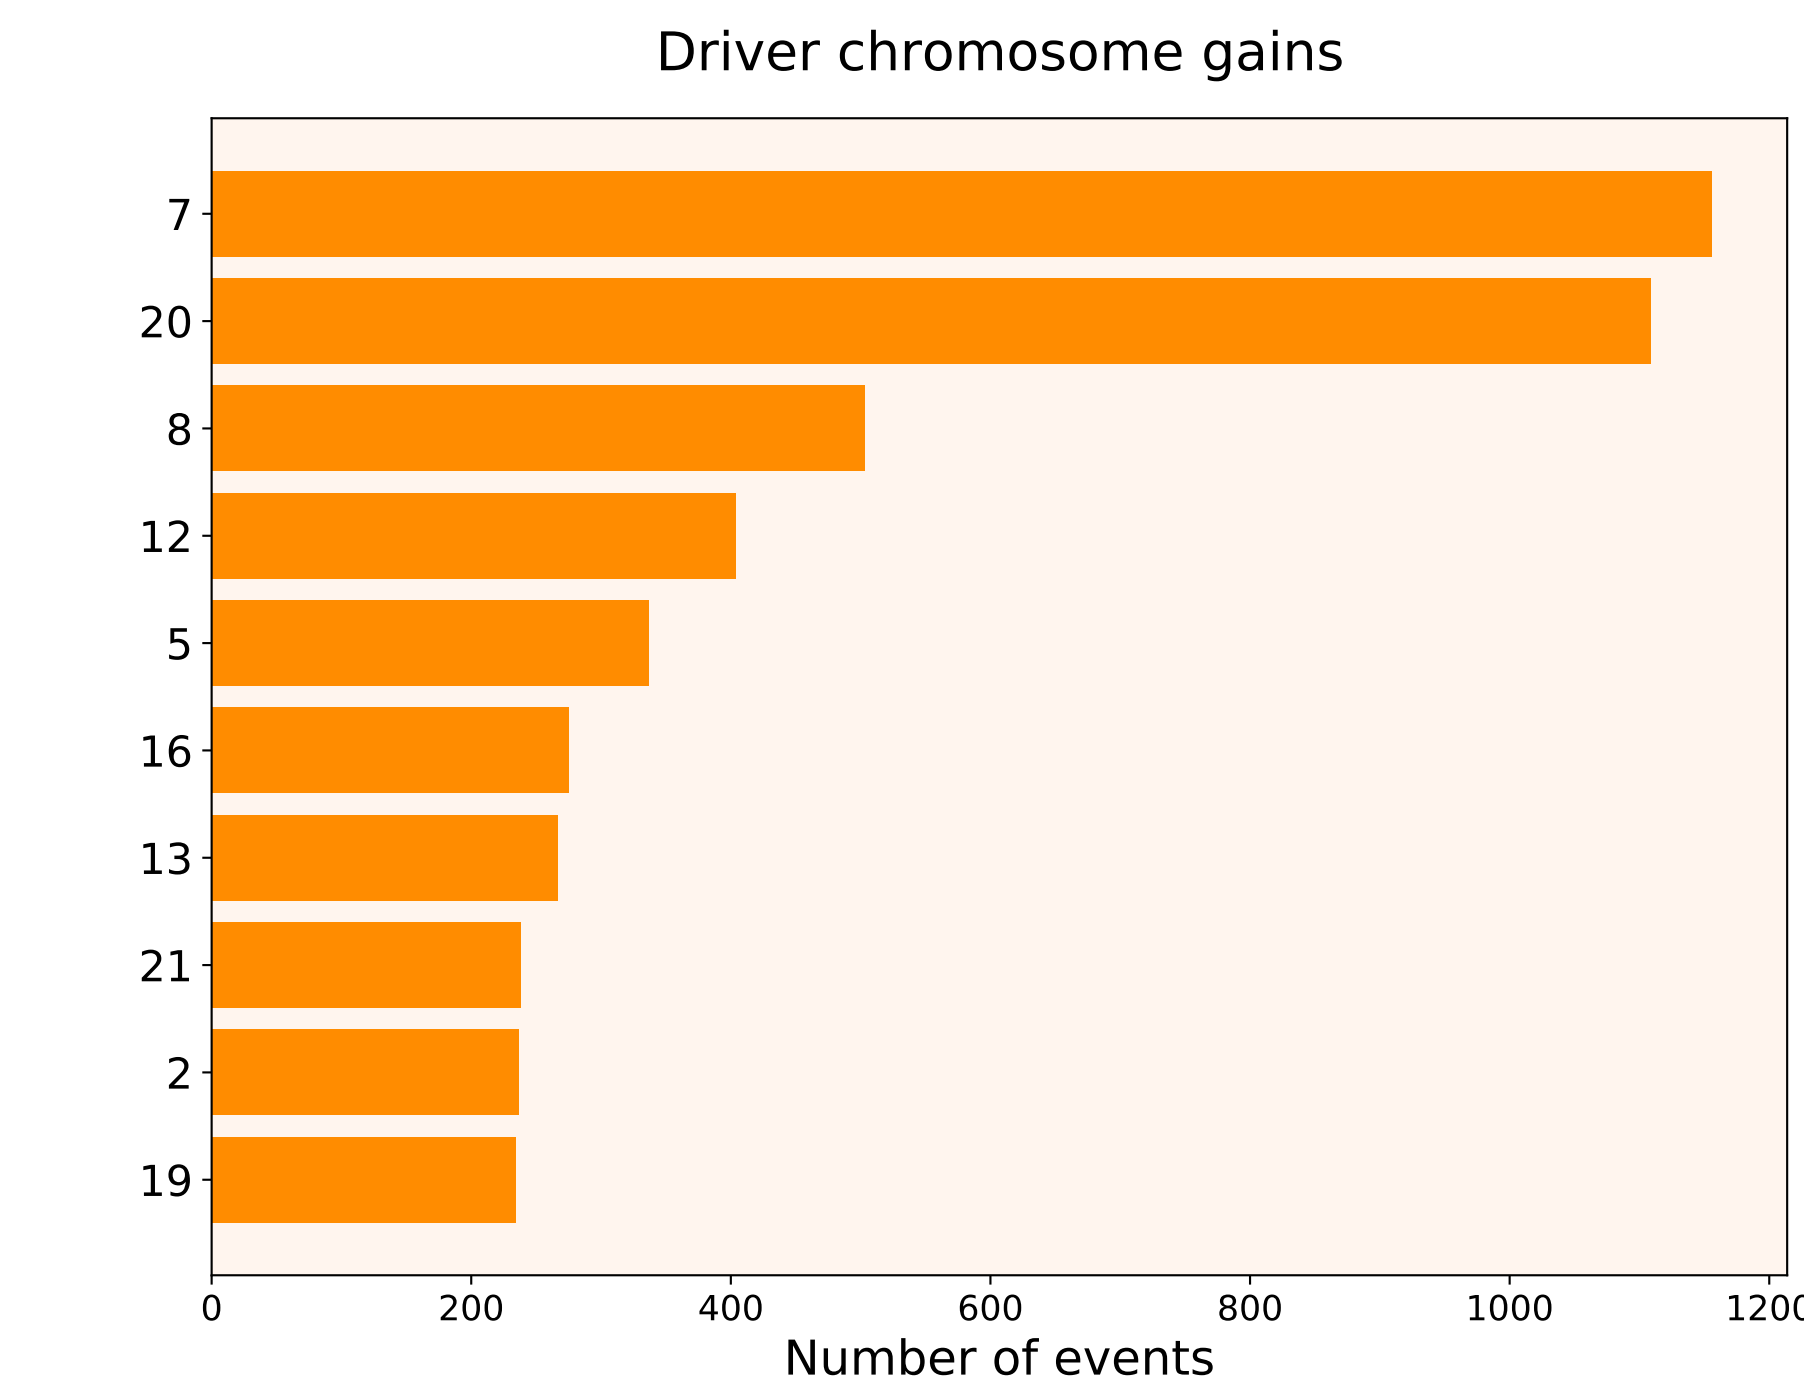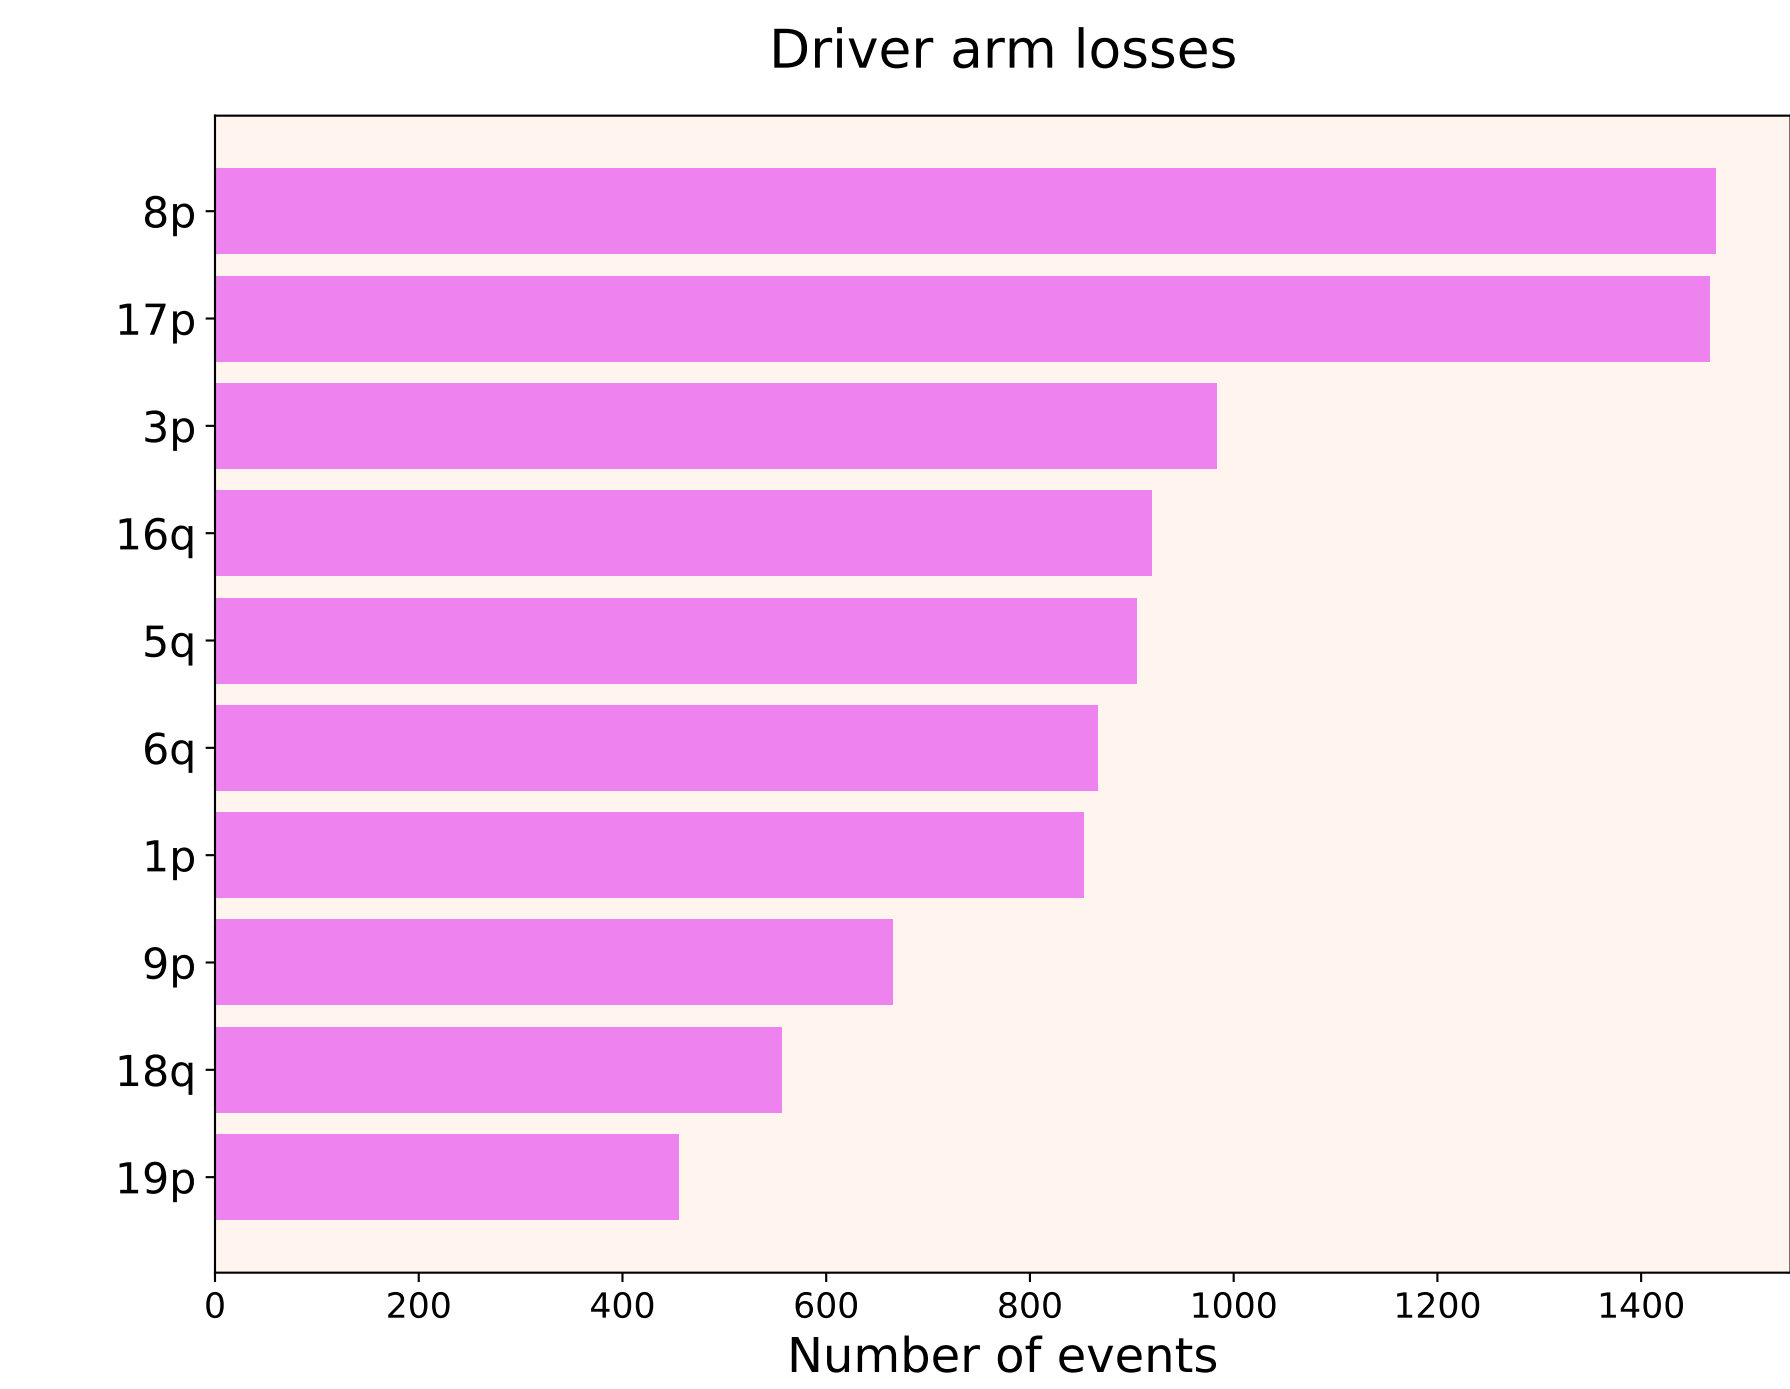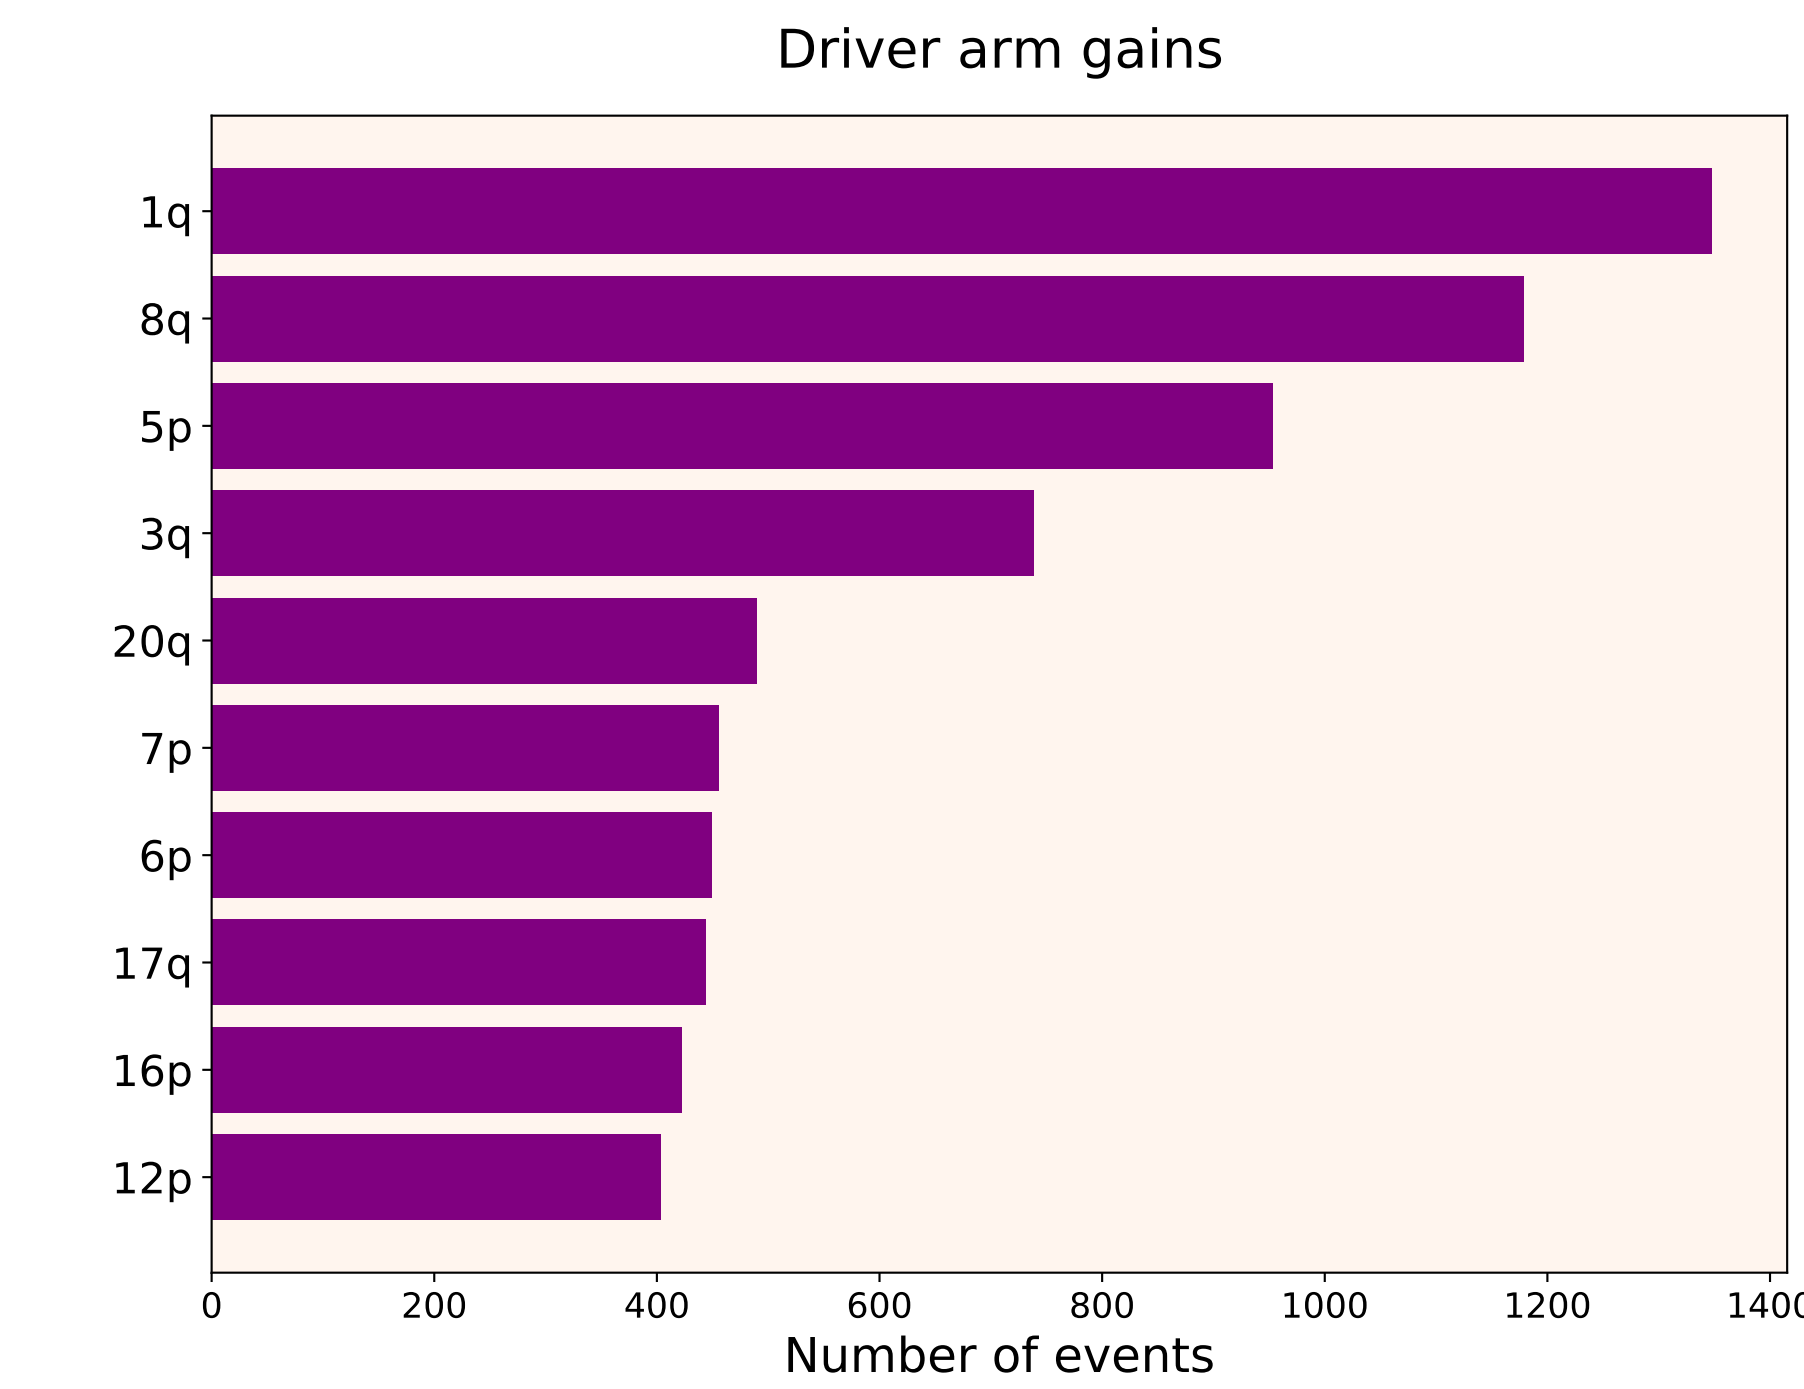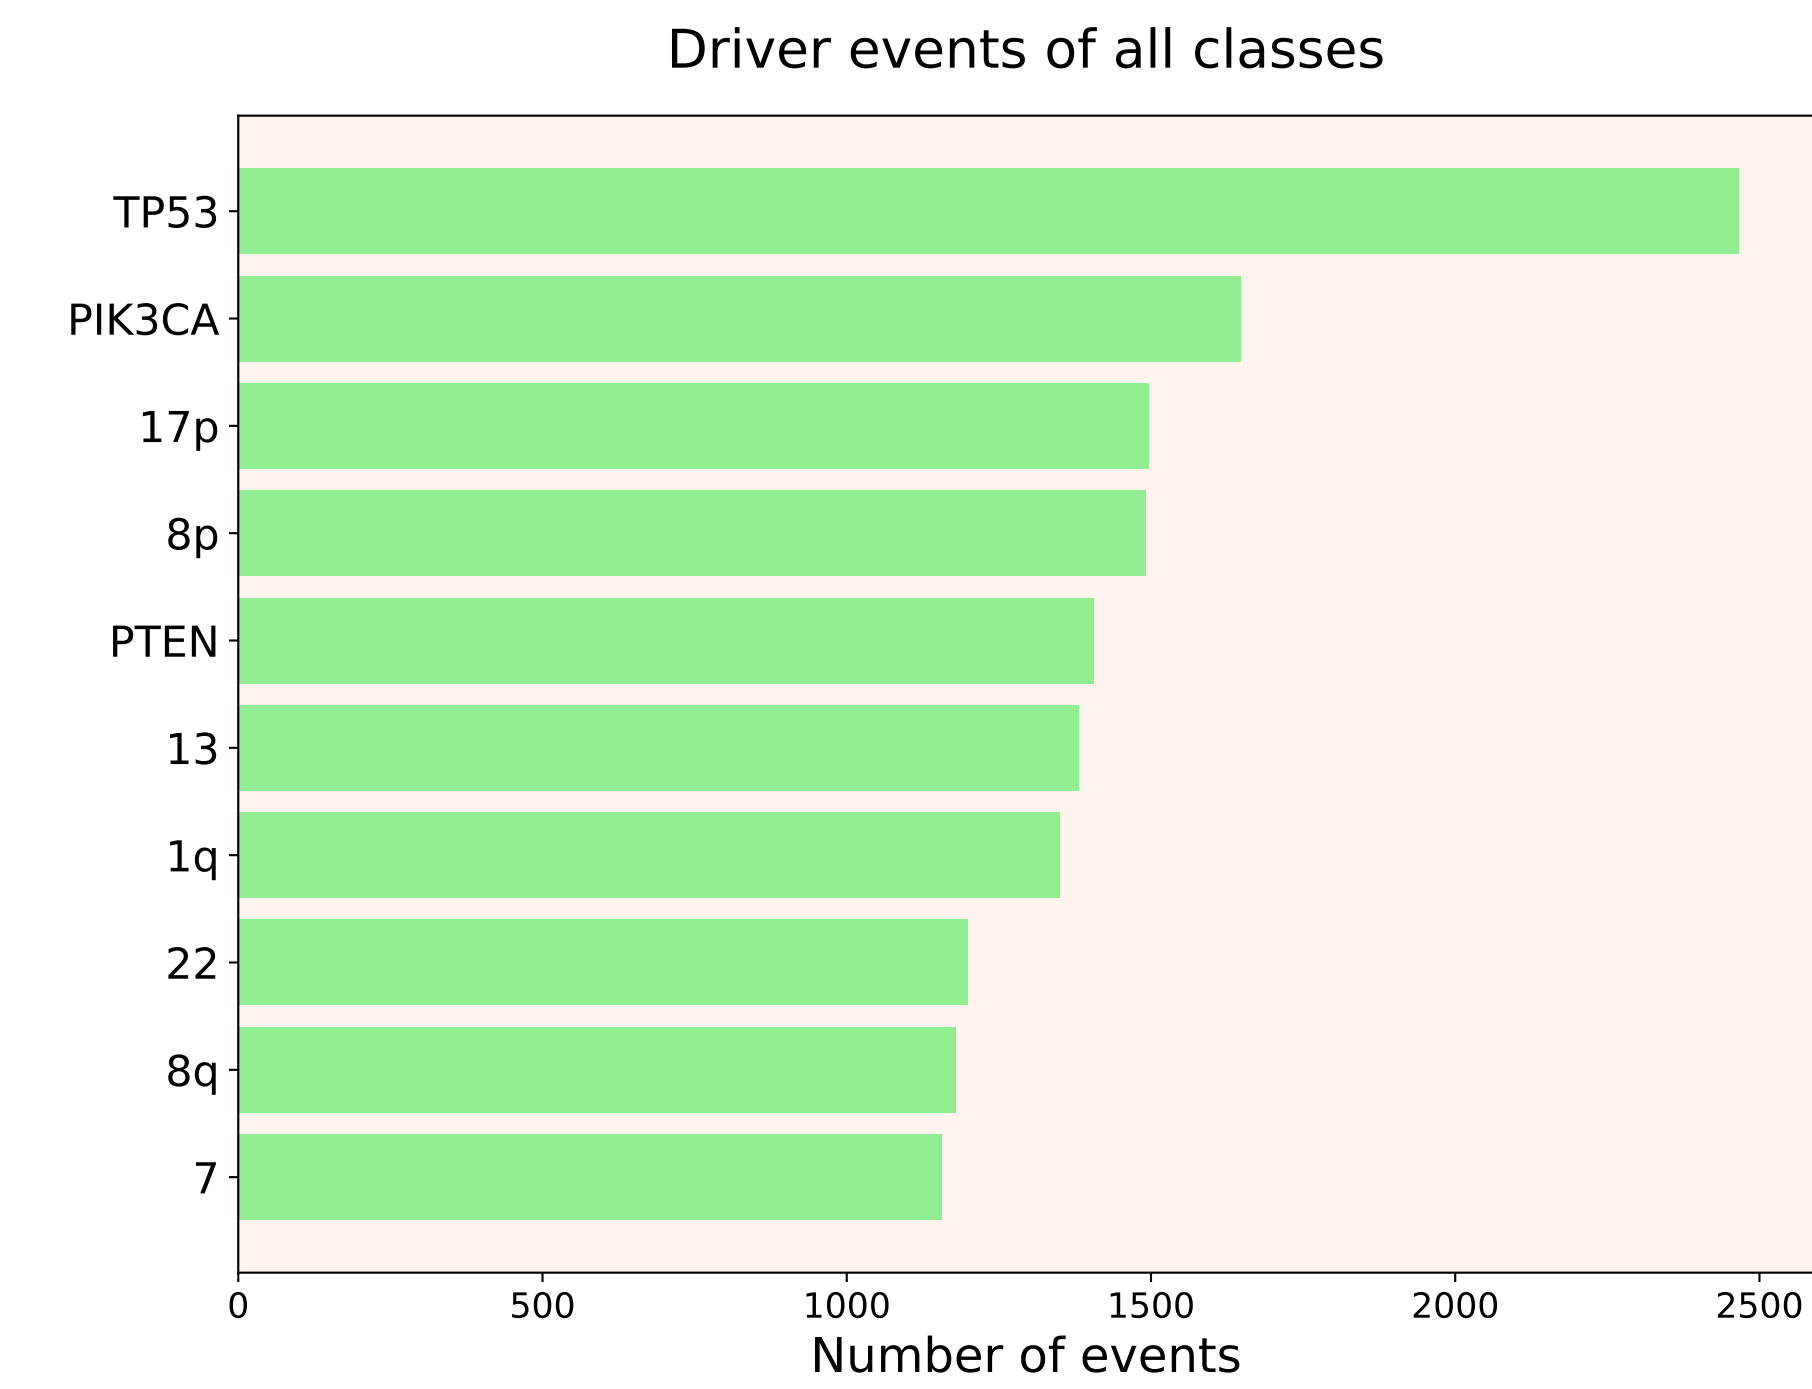

Supplement: Supplemental_Data_S1.zip [file Supplemental_Data_S1.zip]

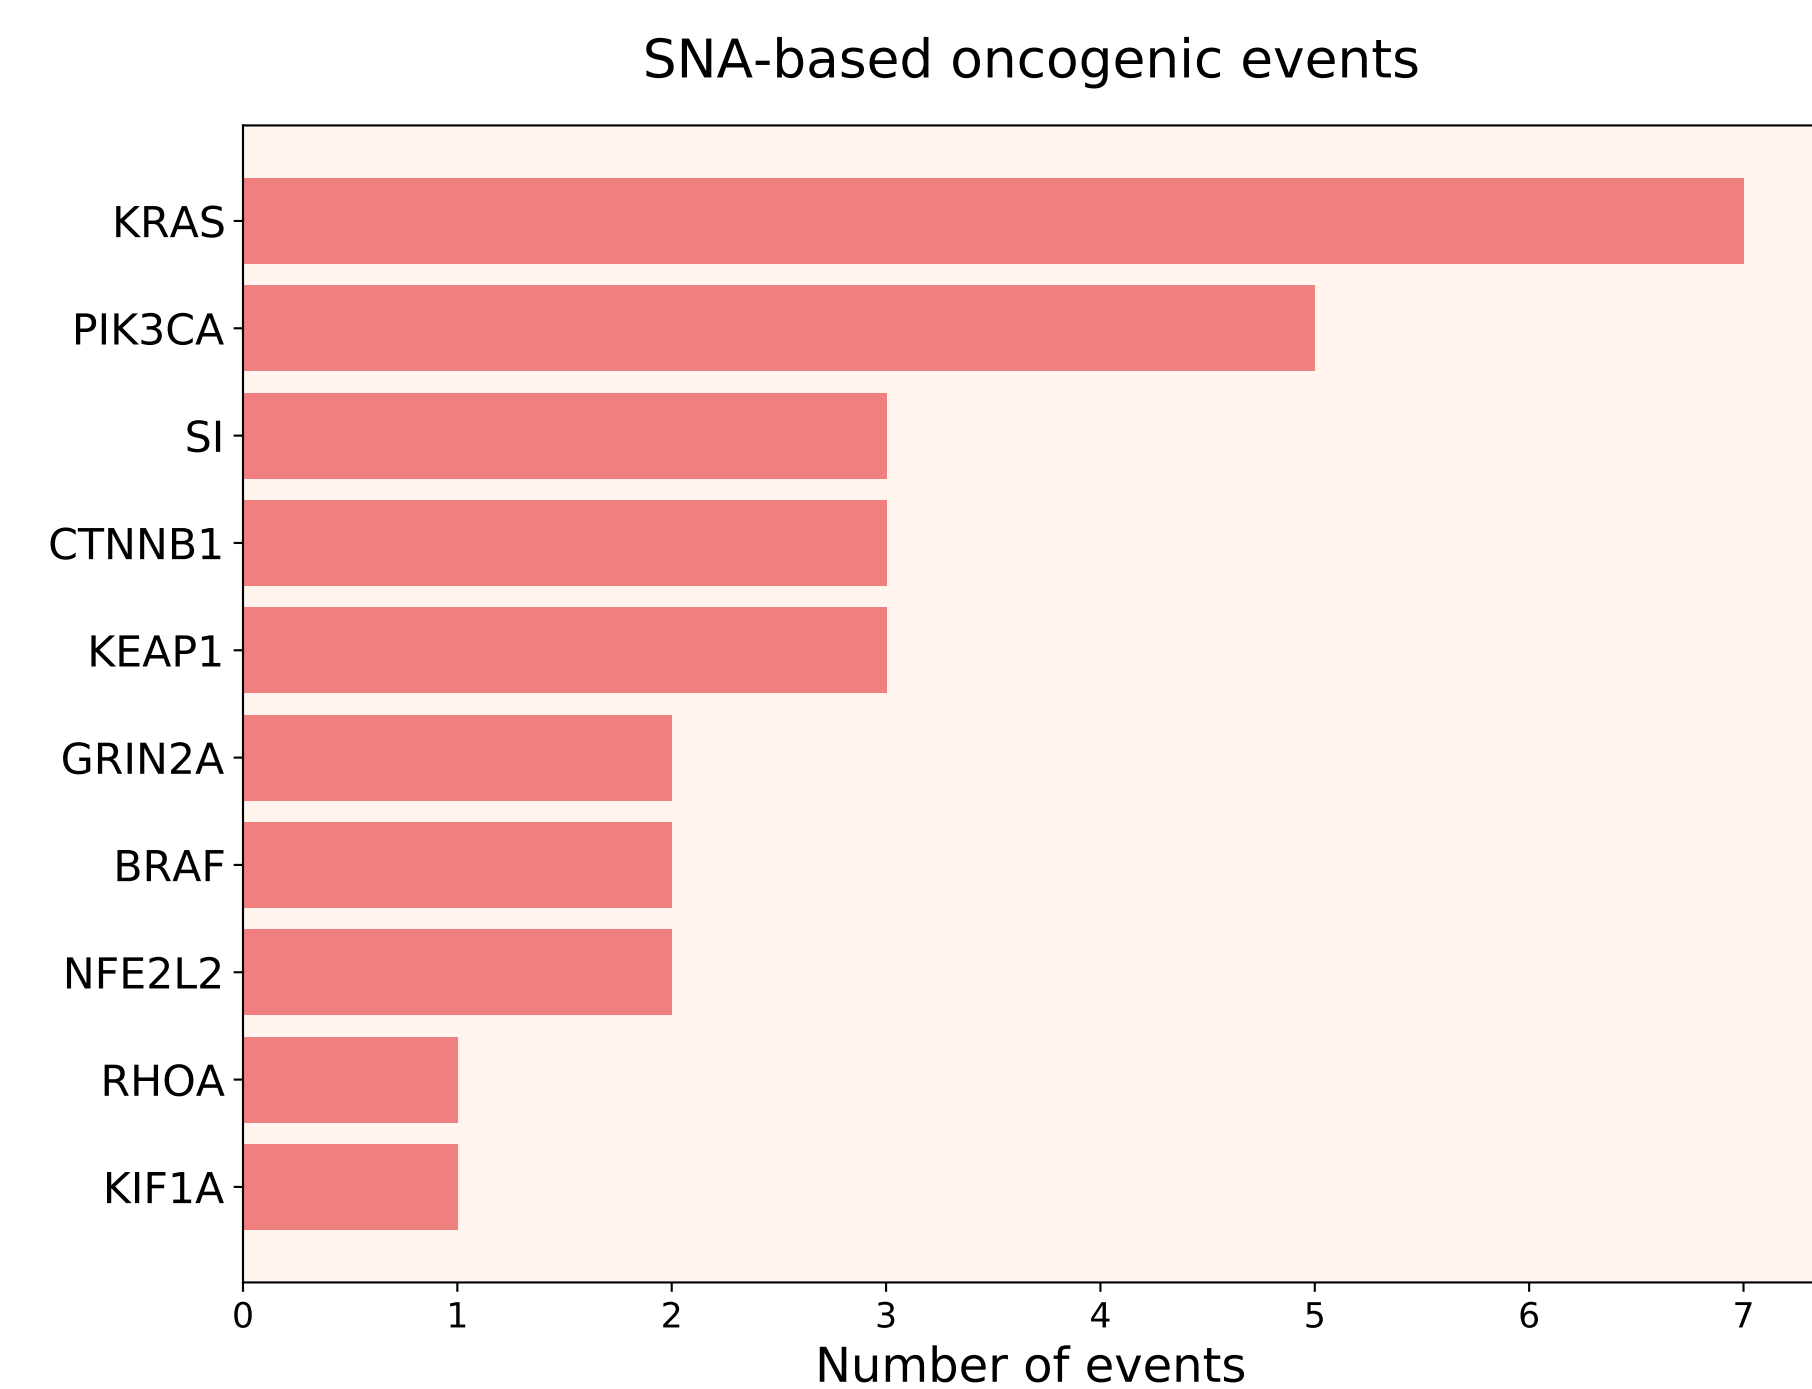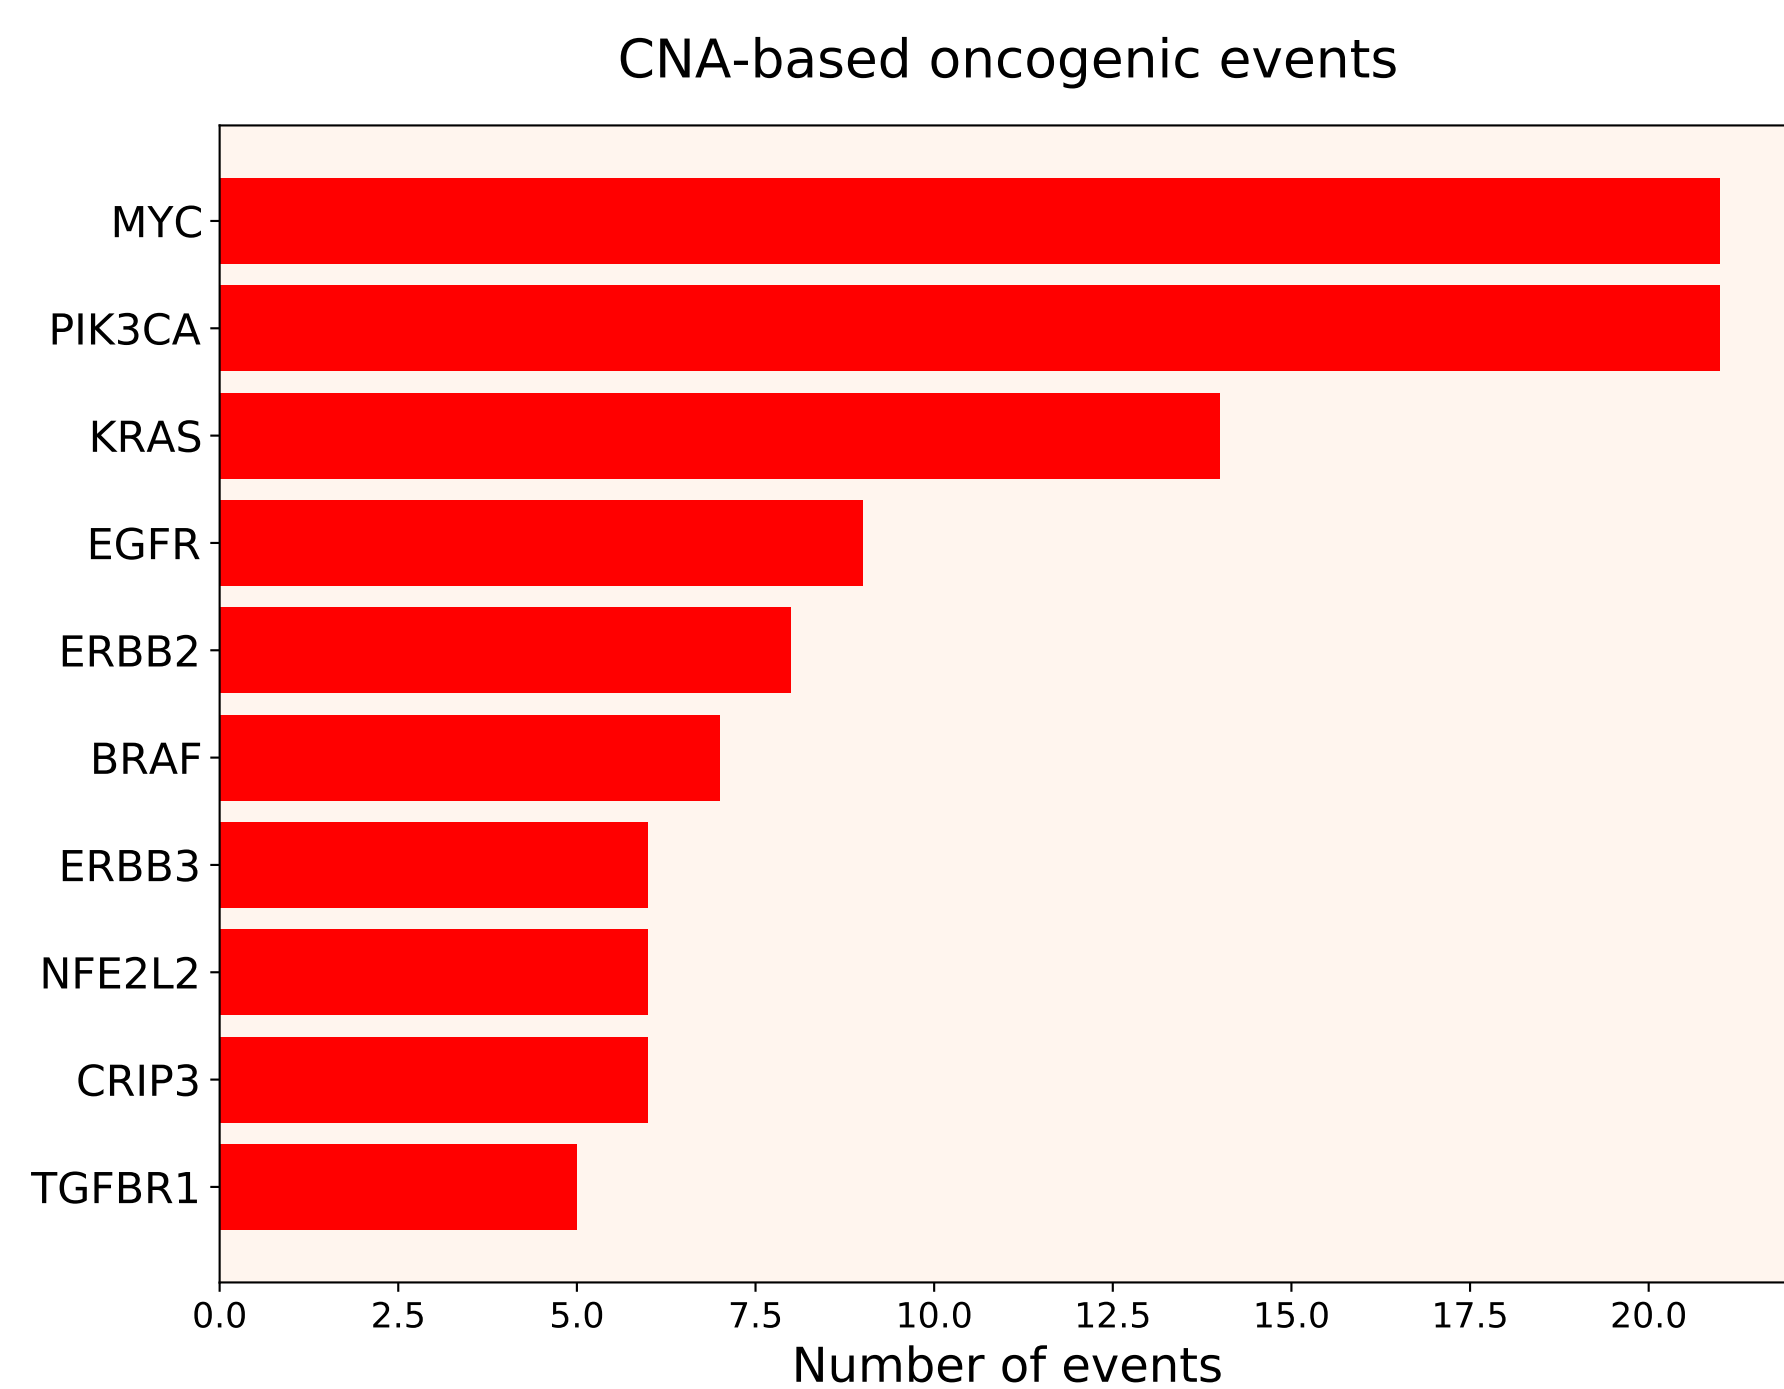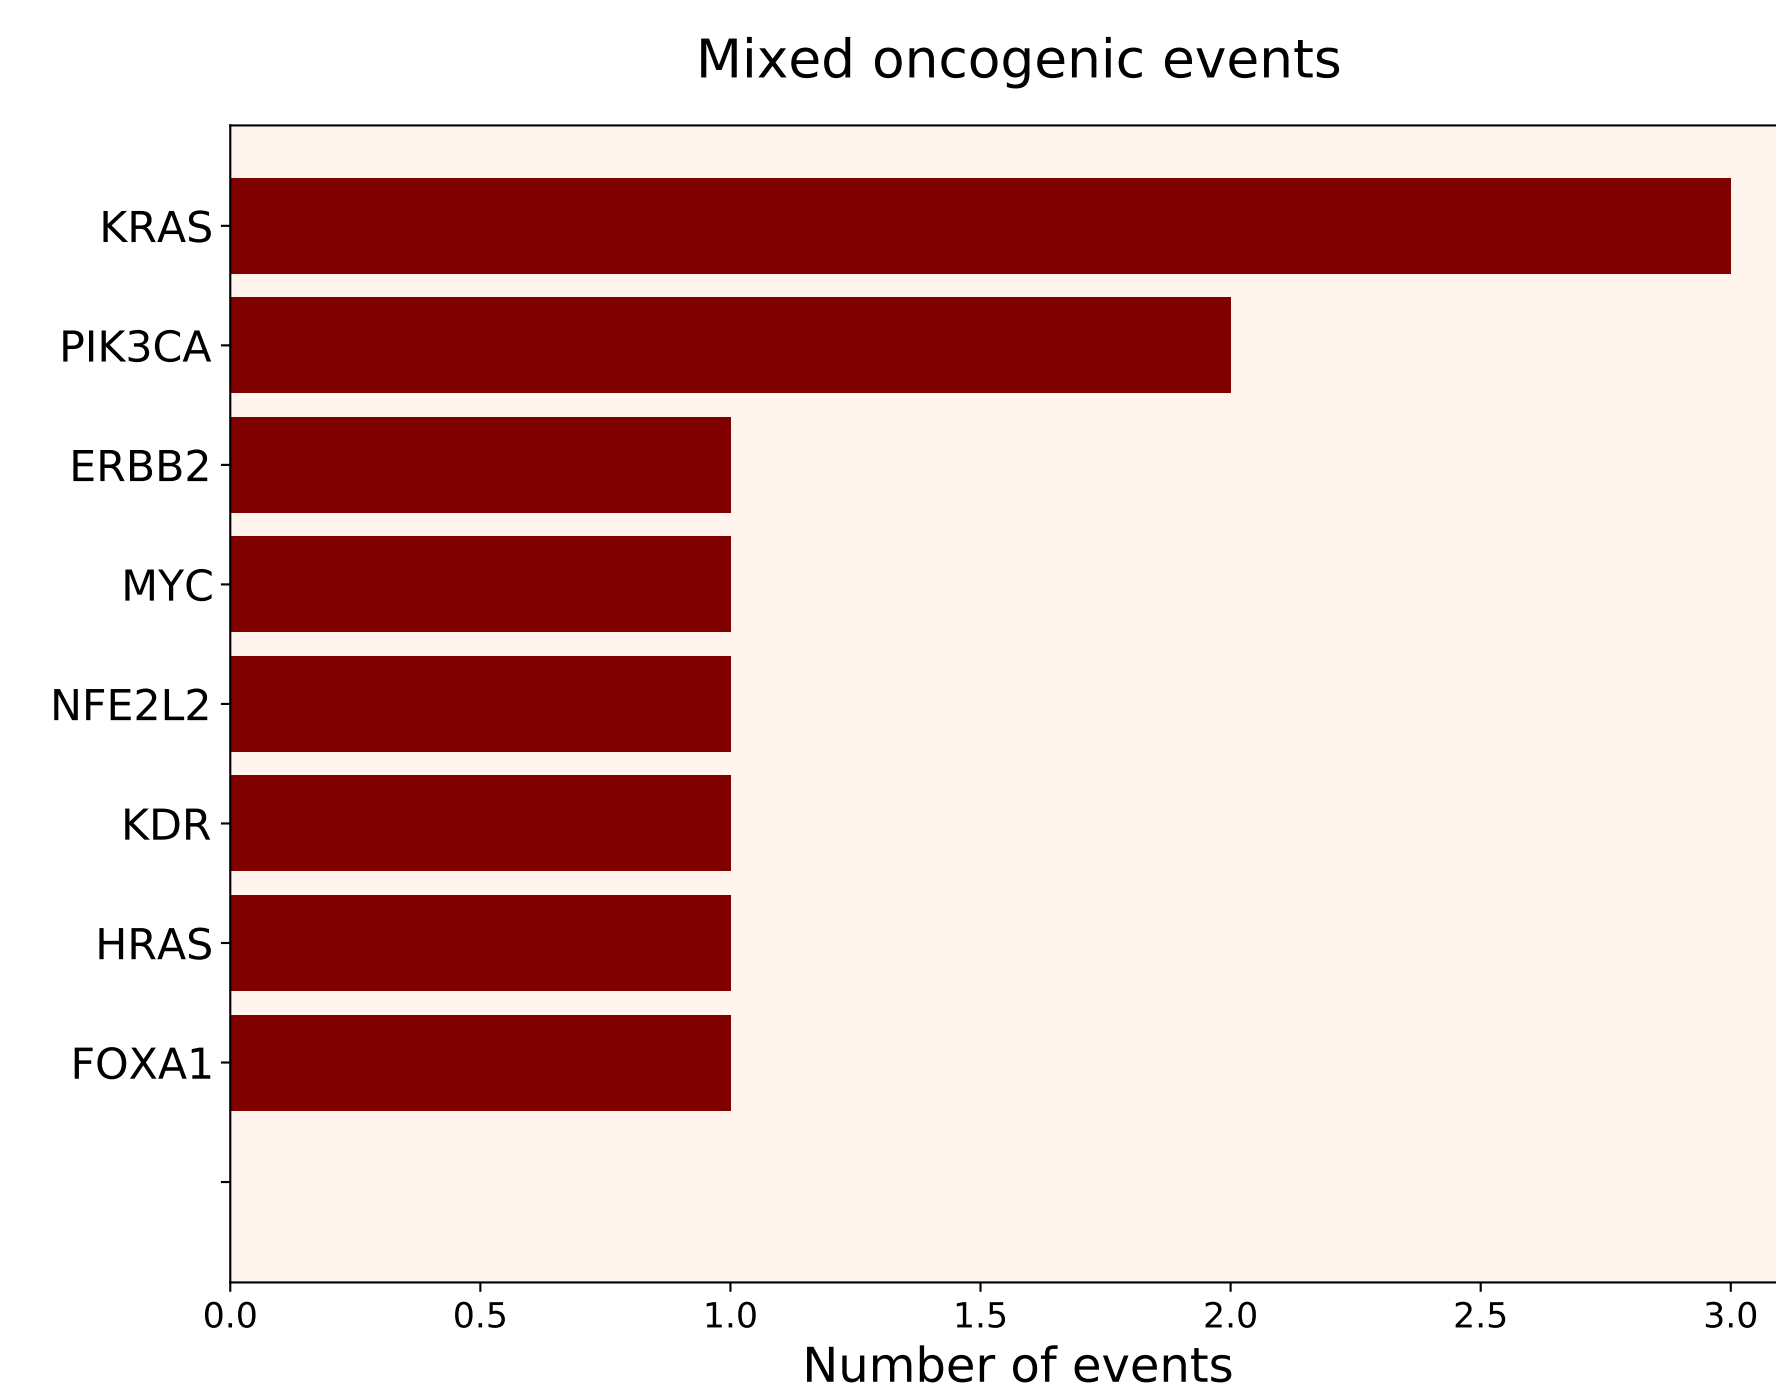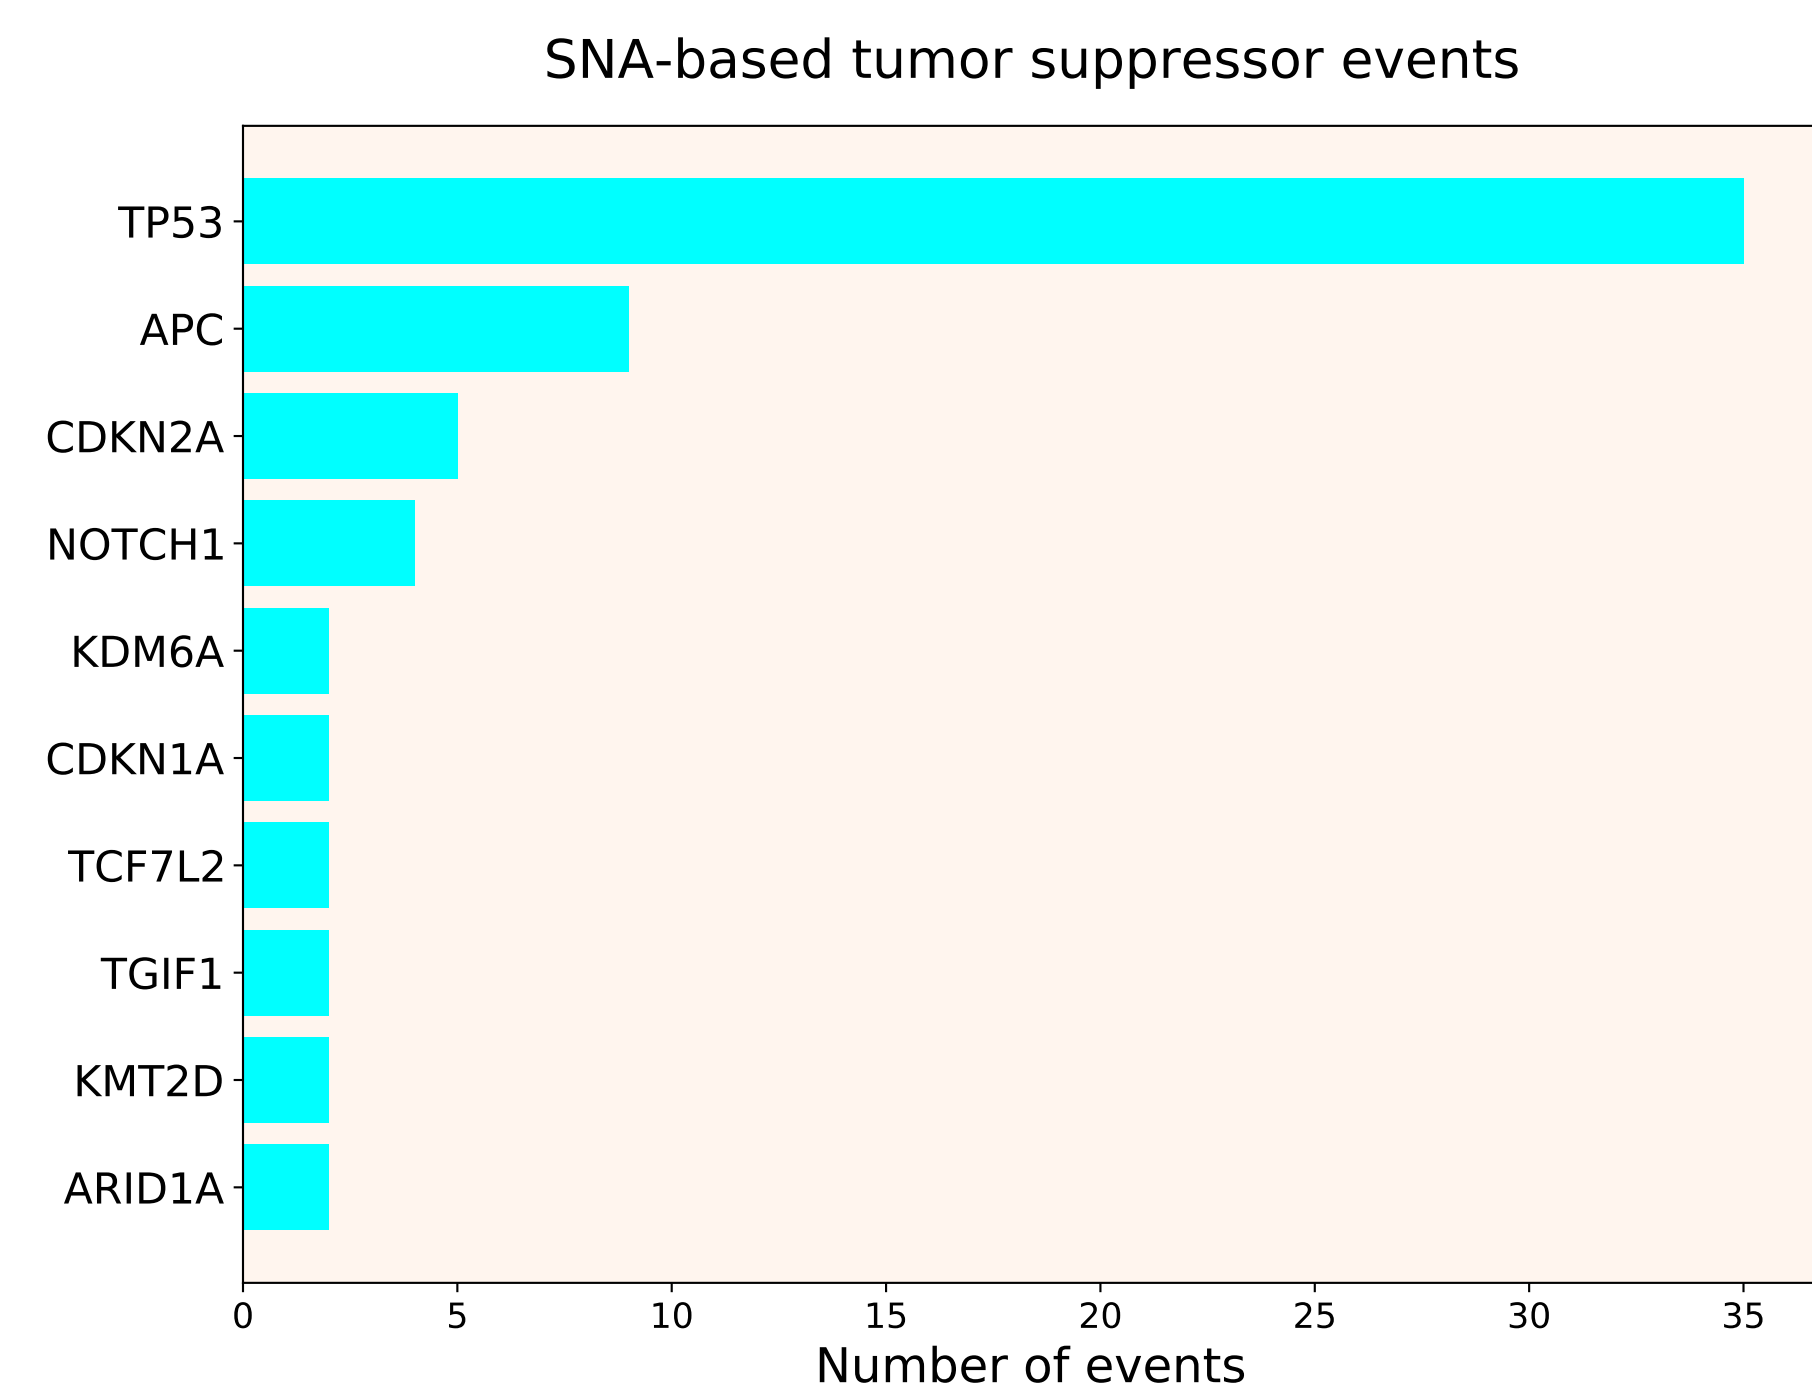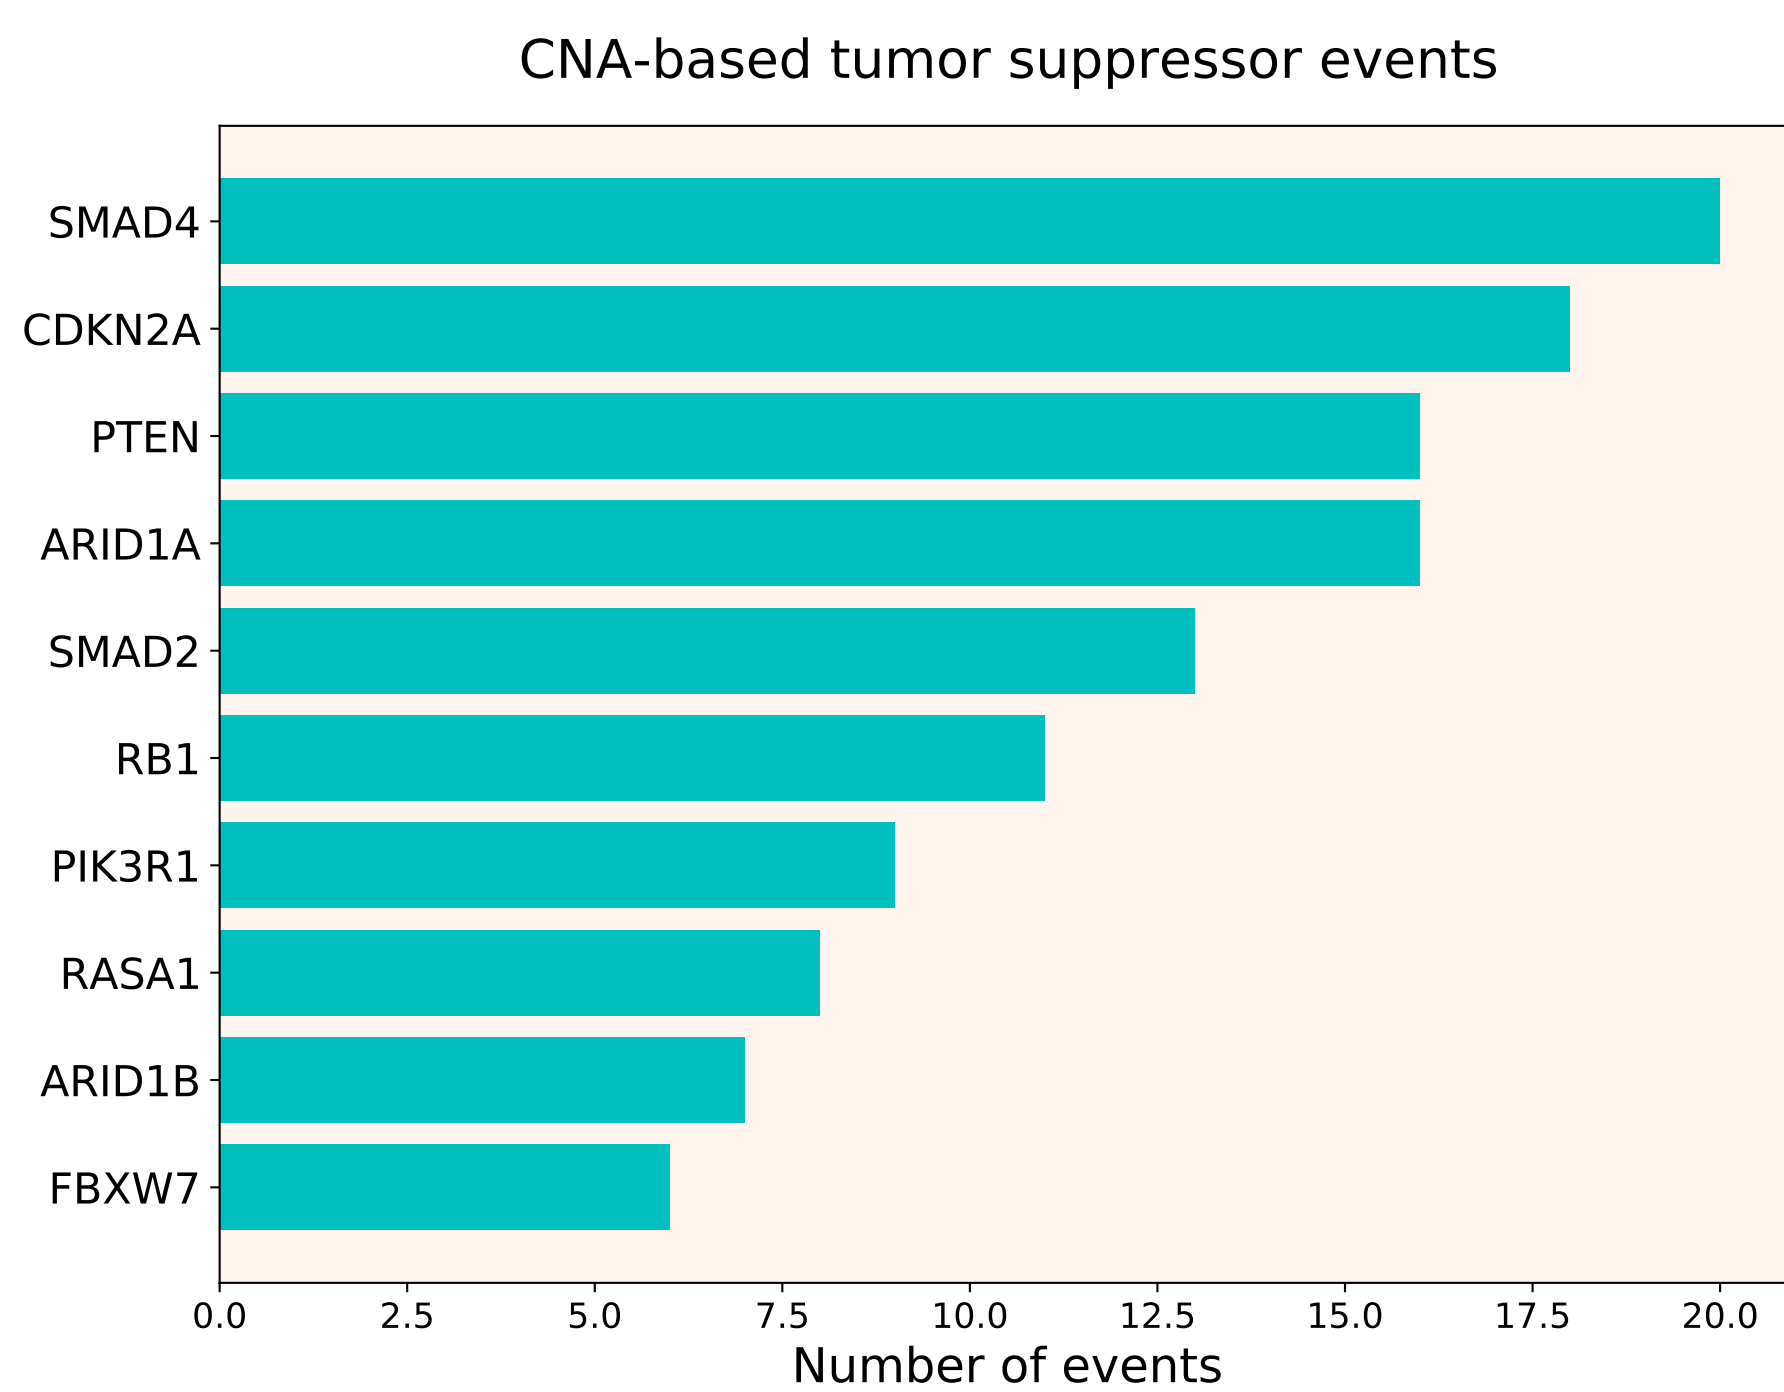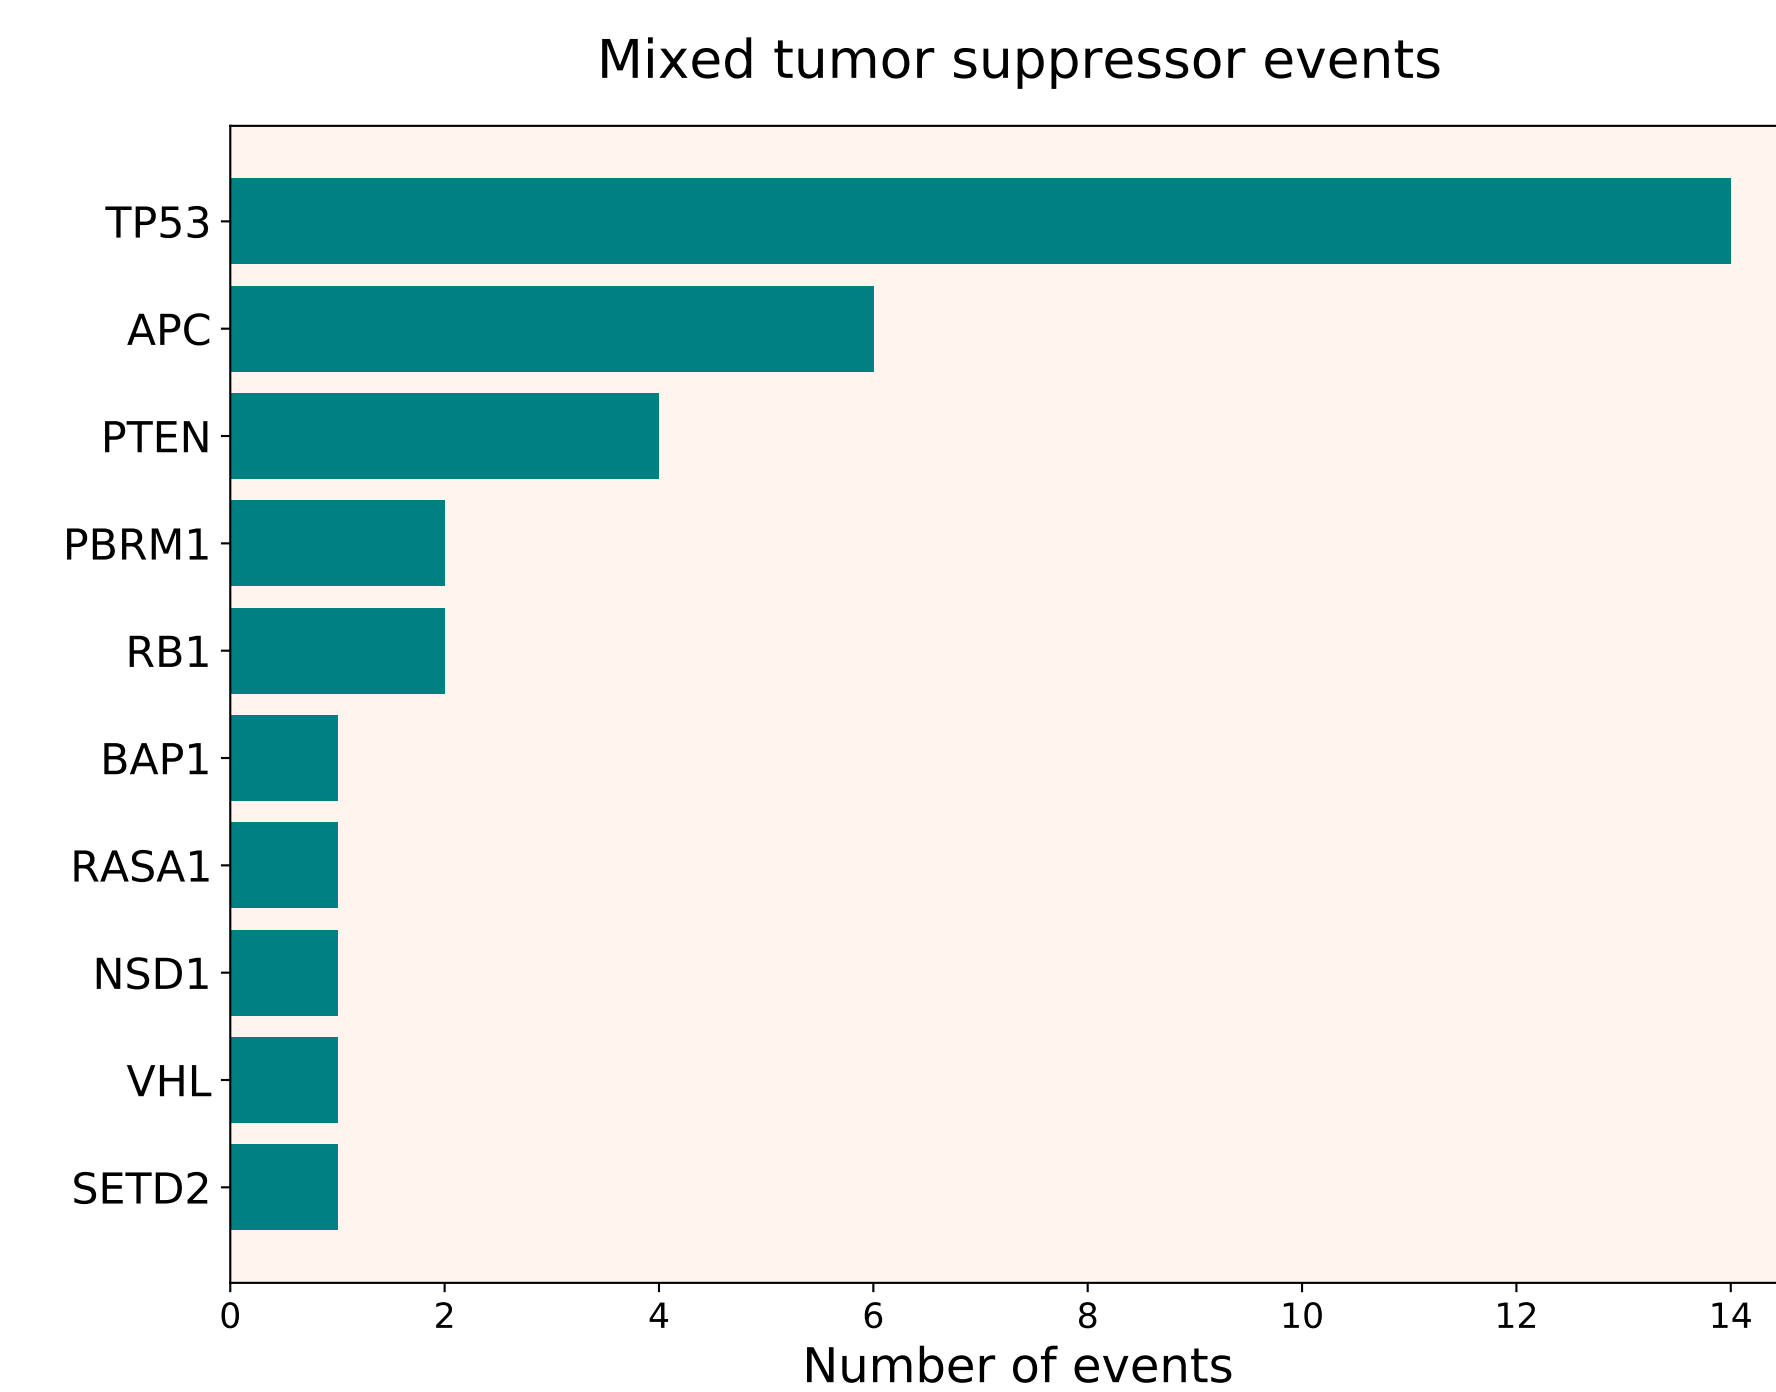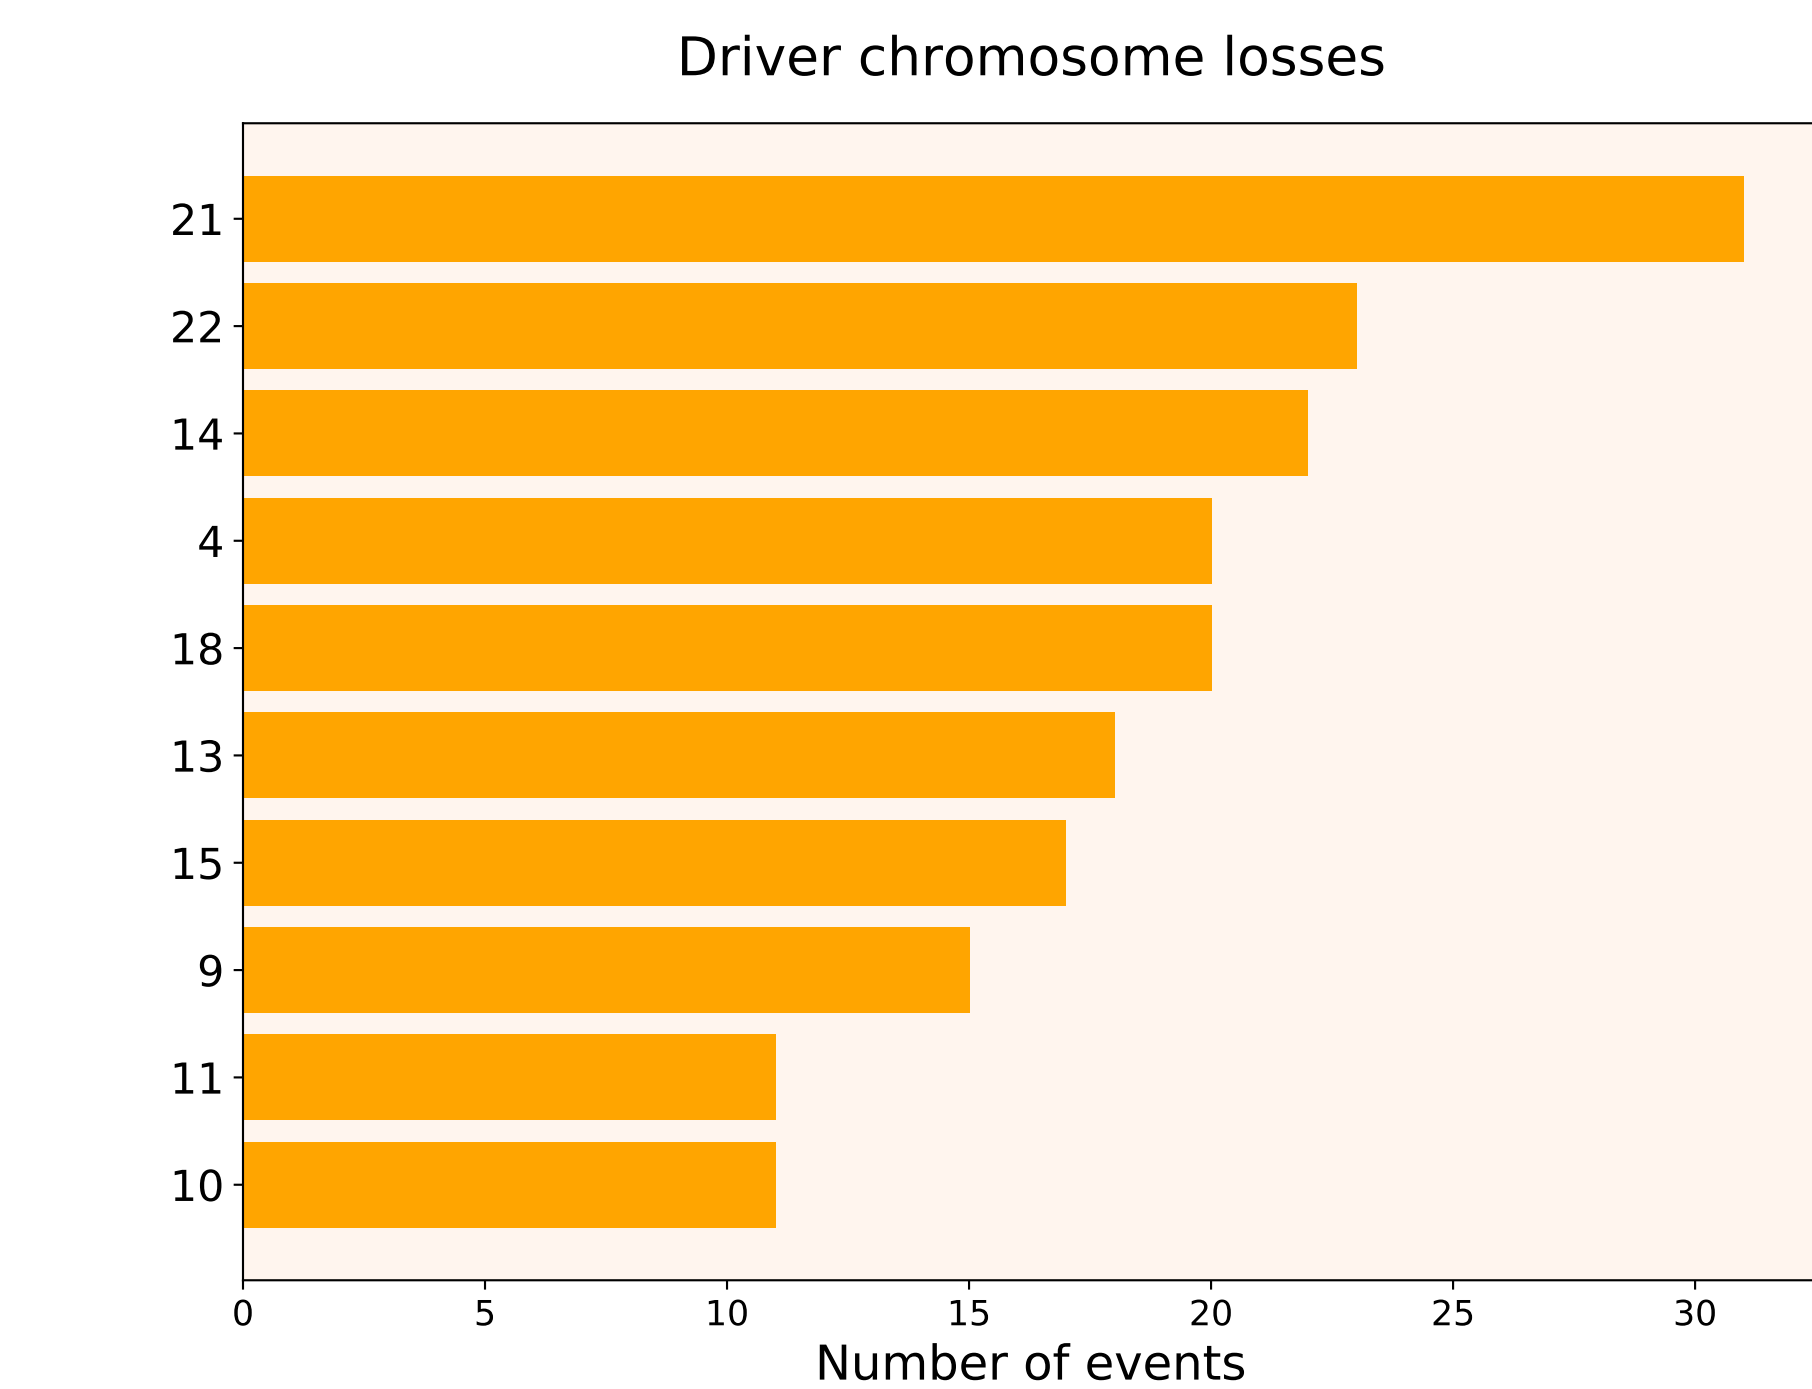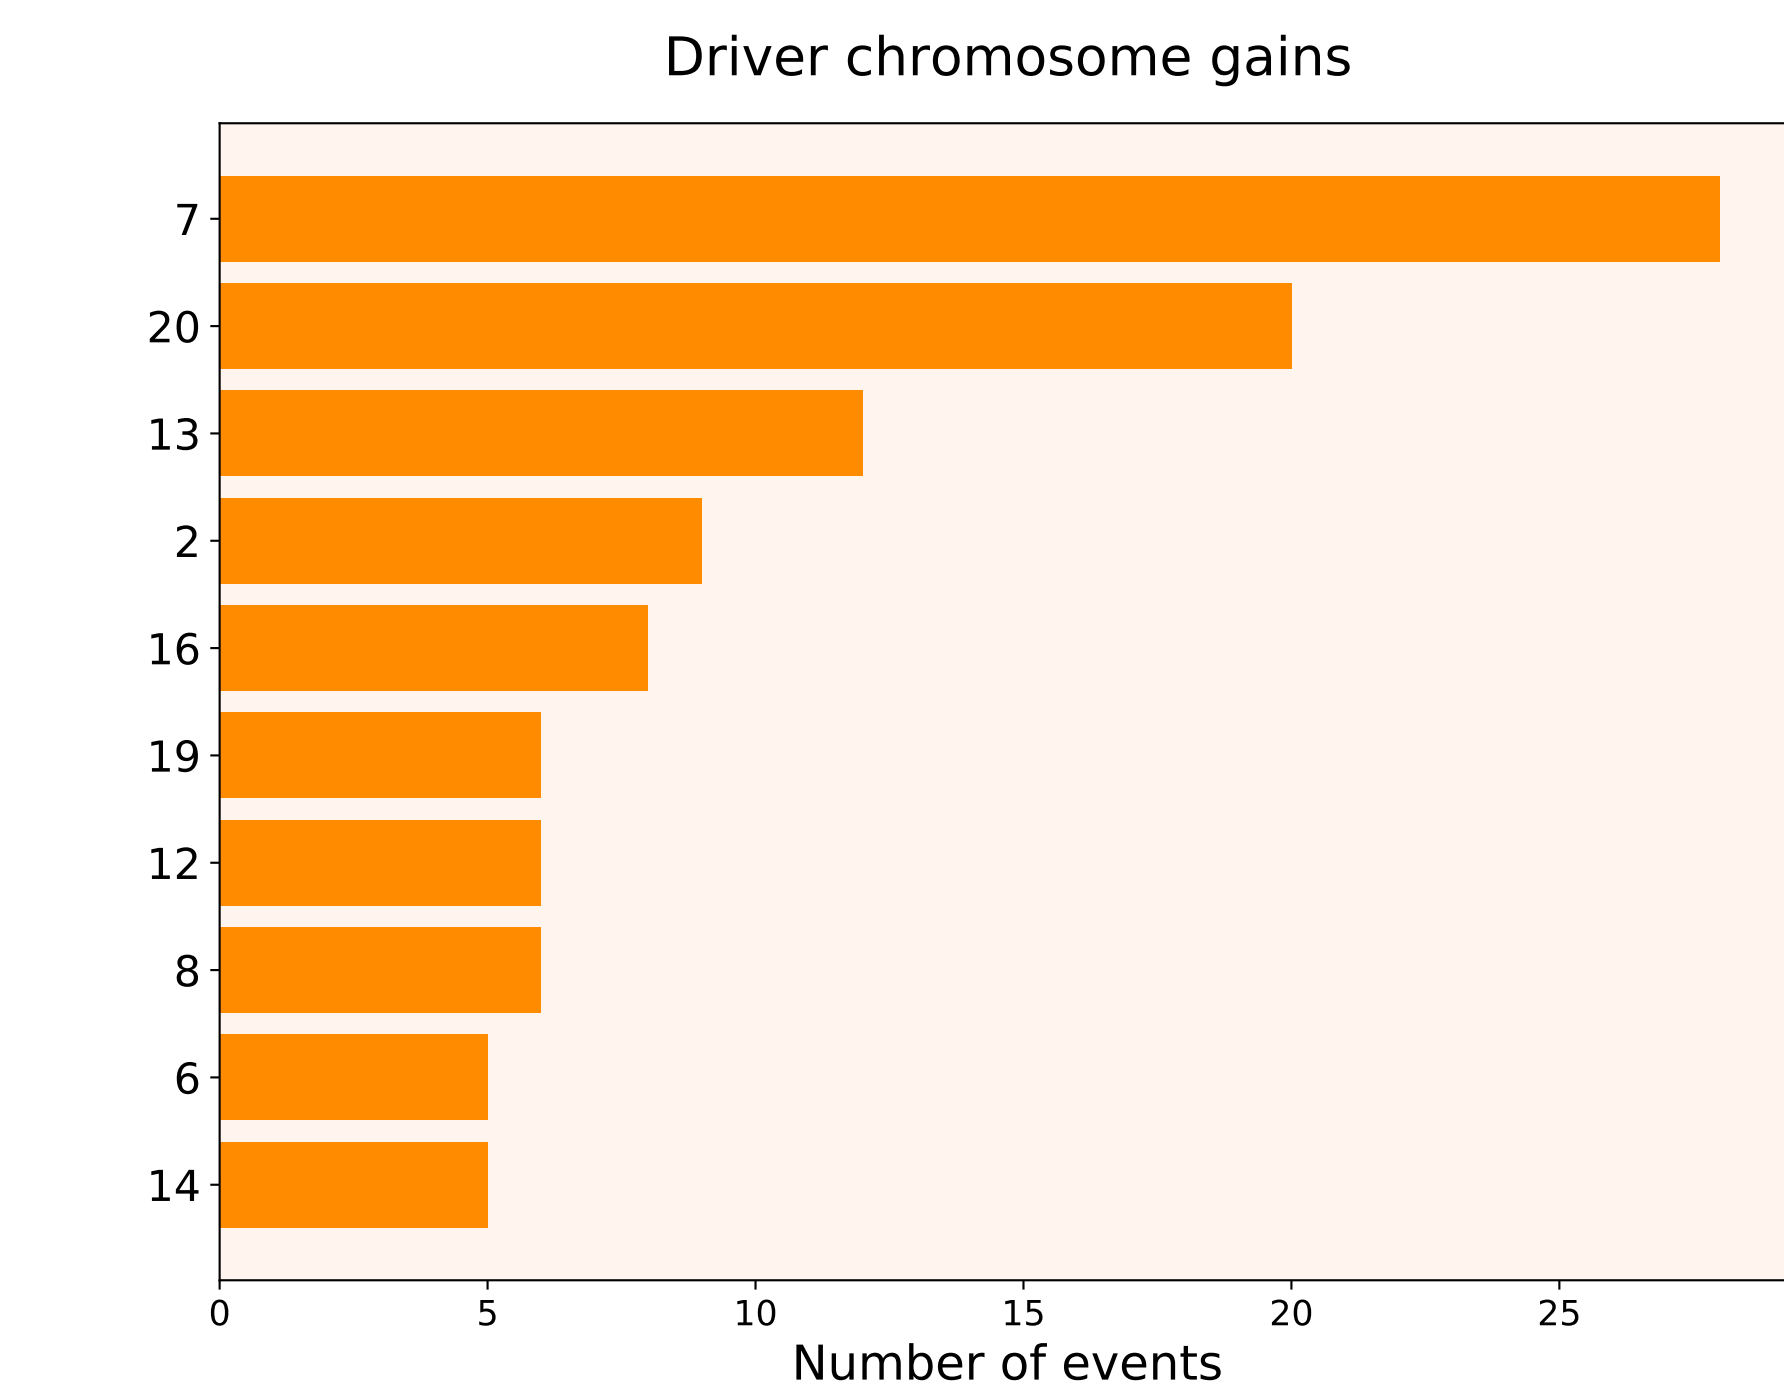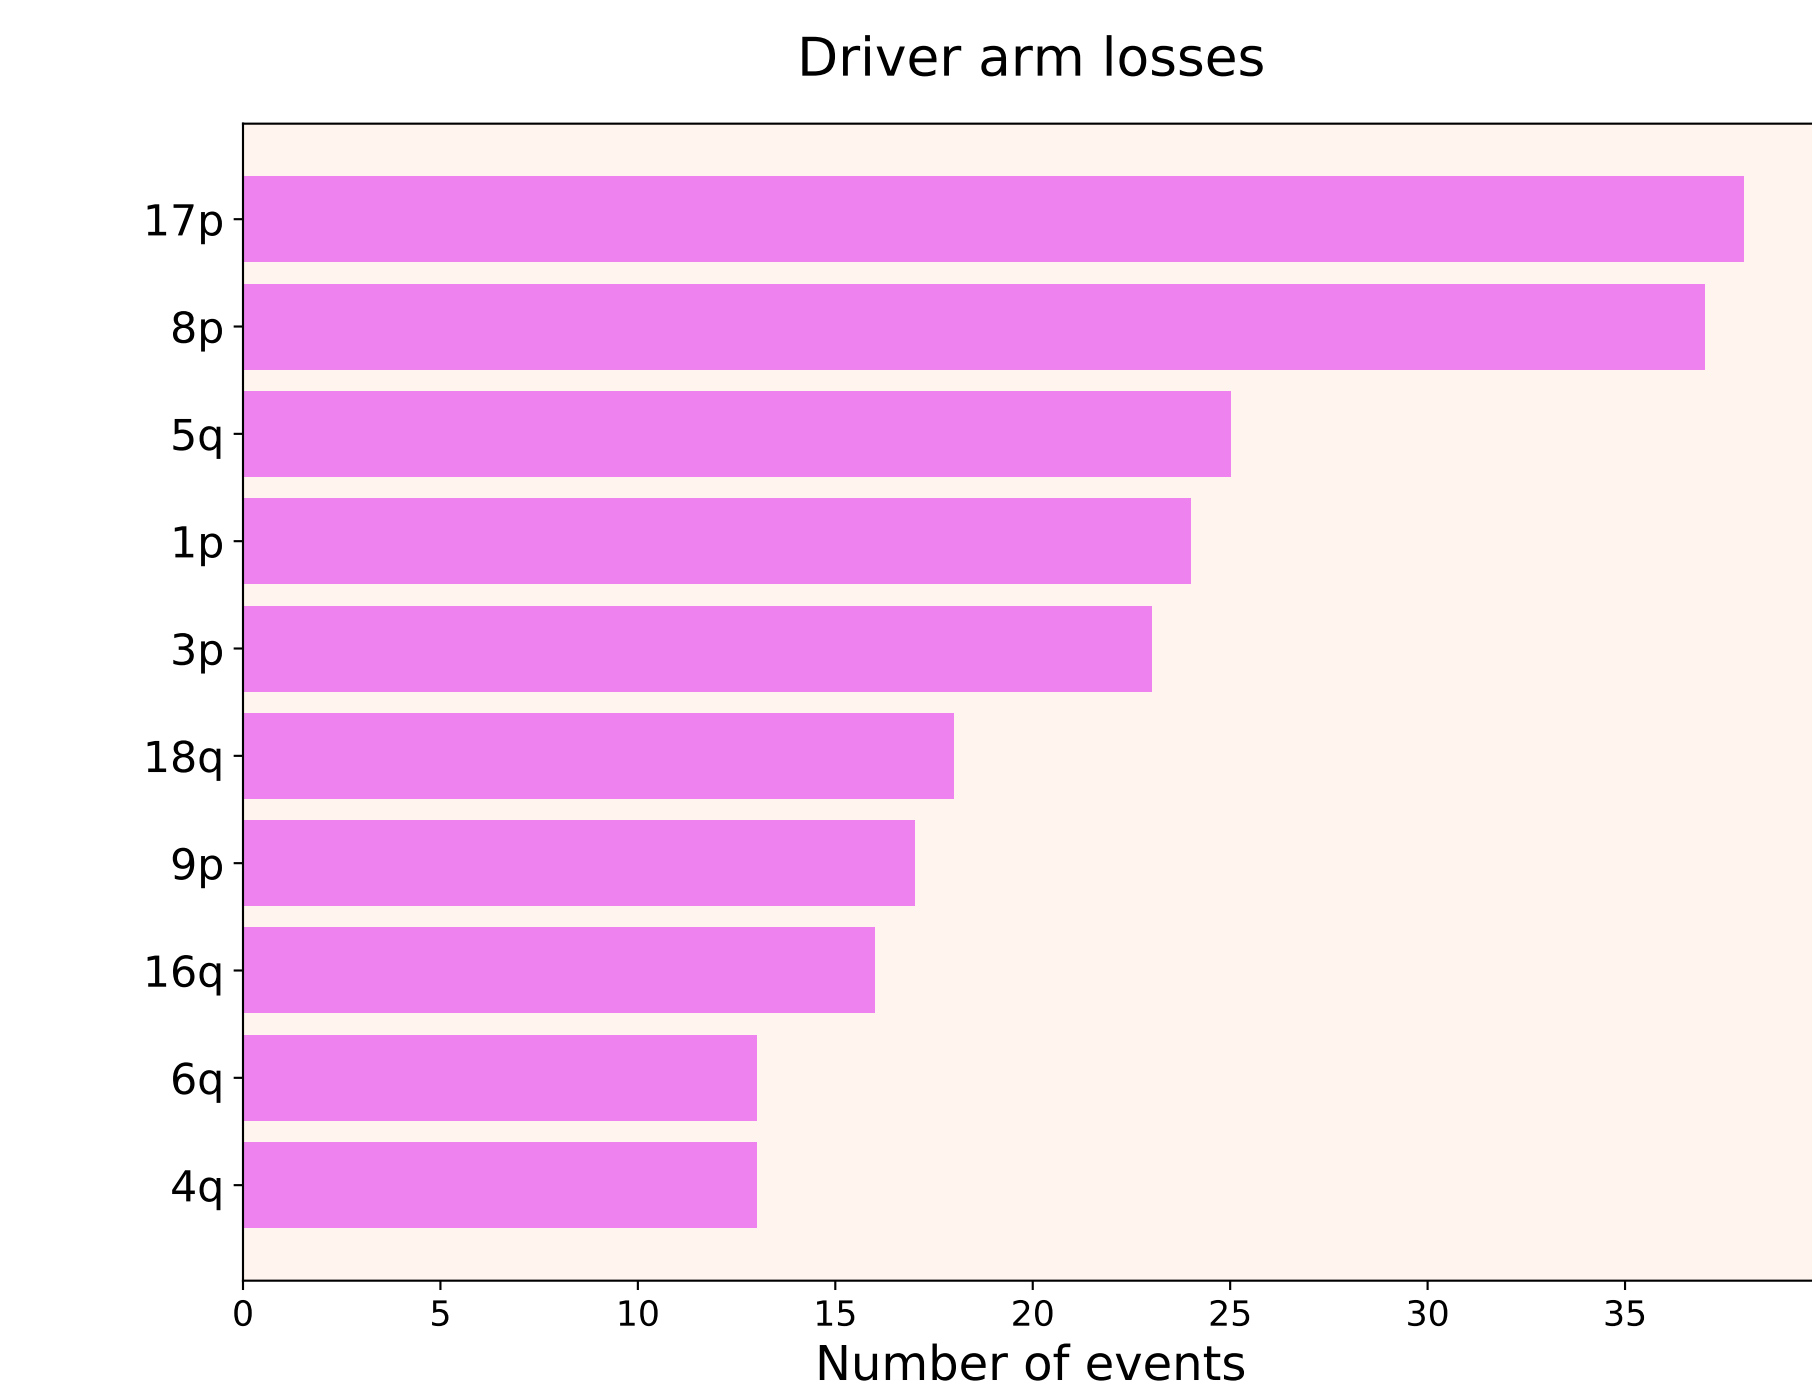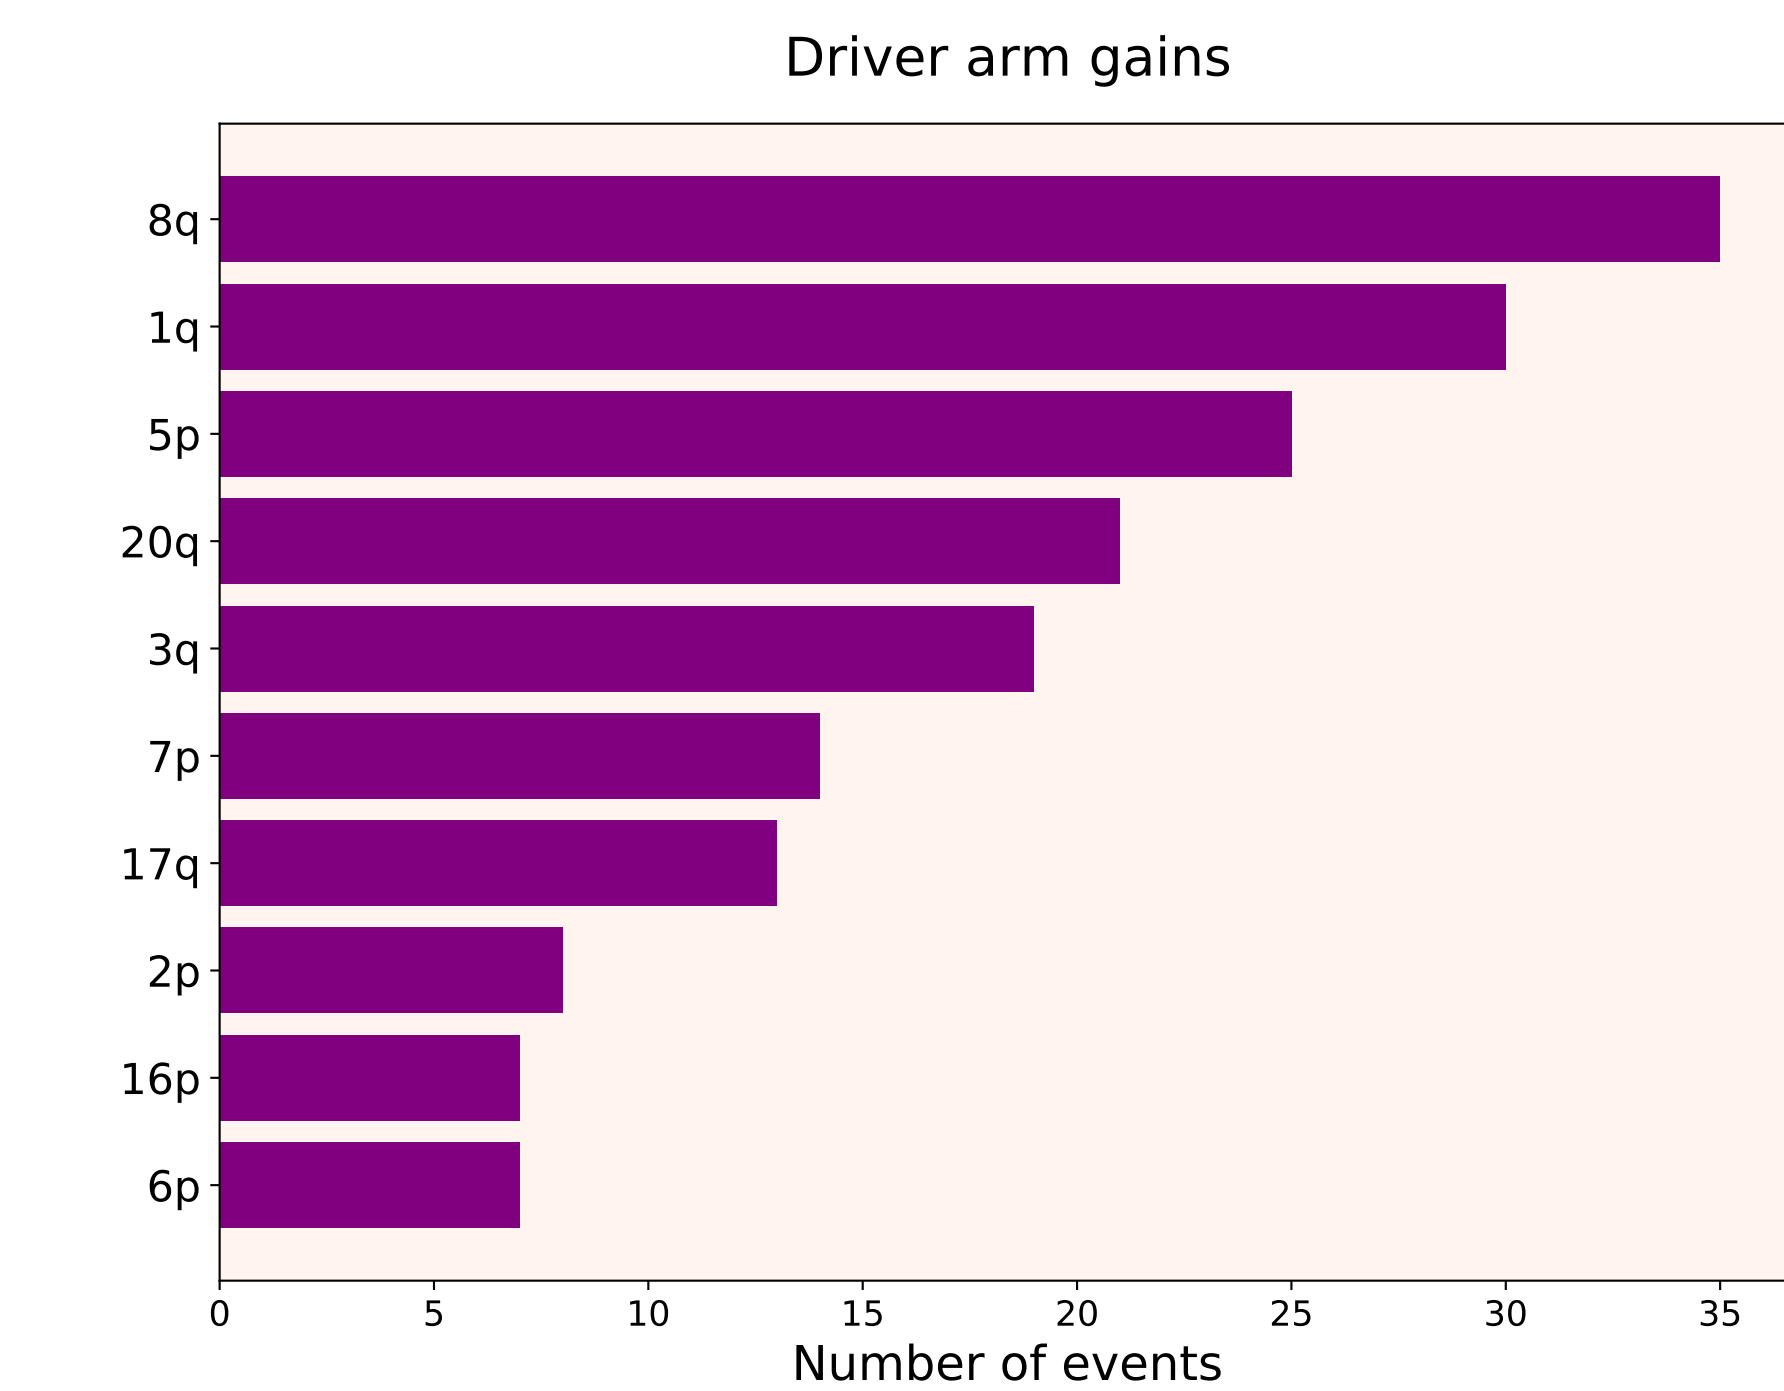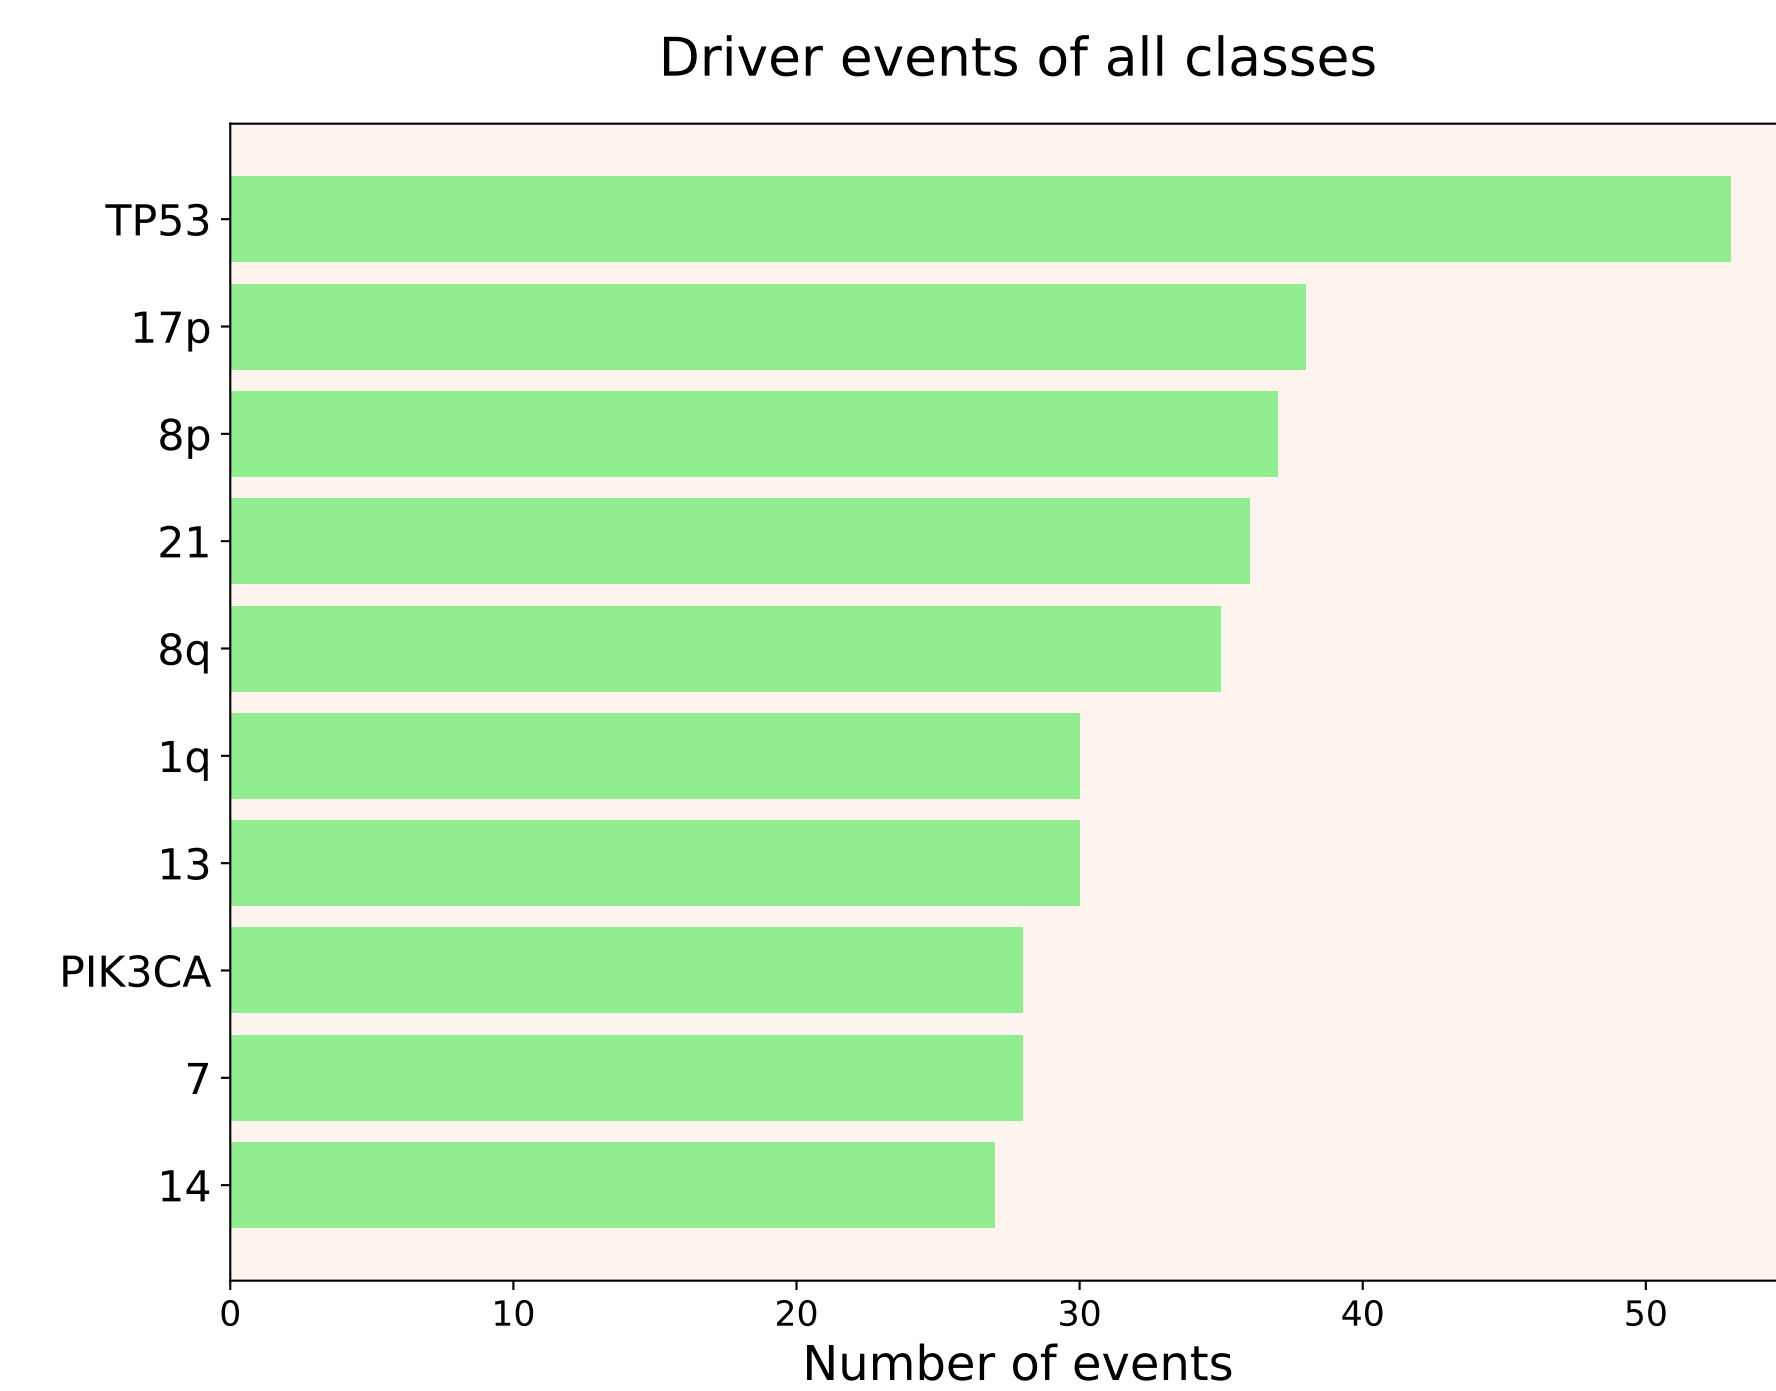

Supplement: Supplemental_Data_S1.zip [file Supplemental_Data_S1.zip]

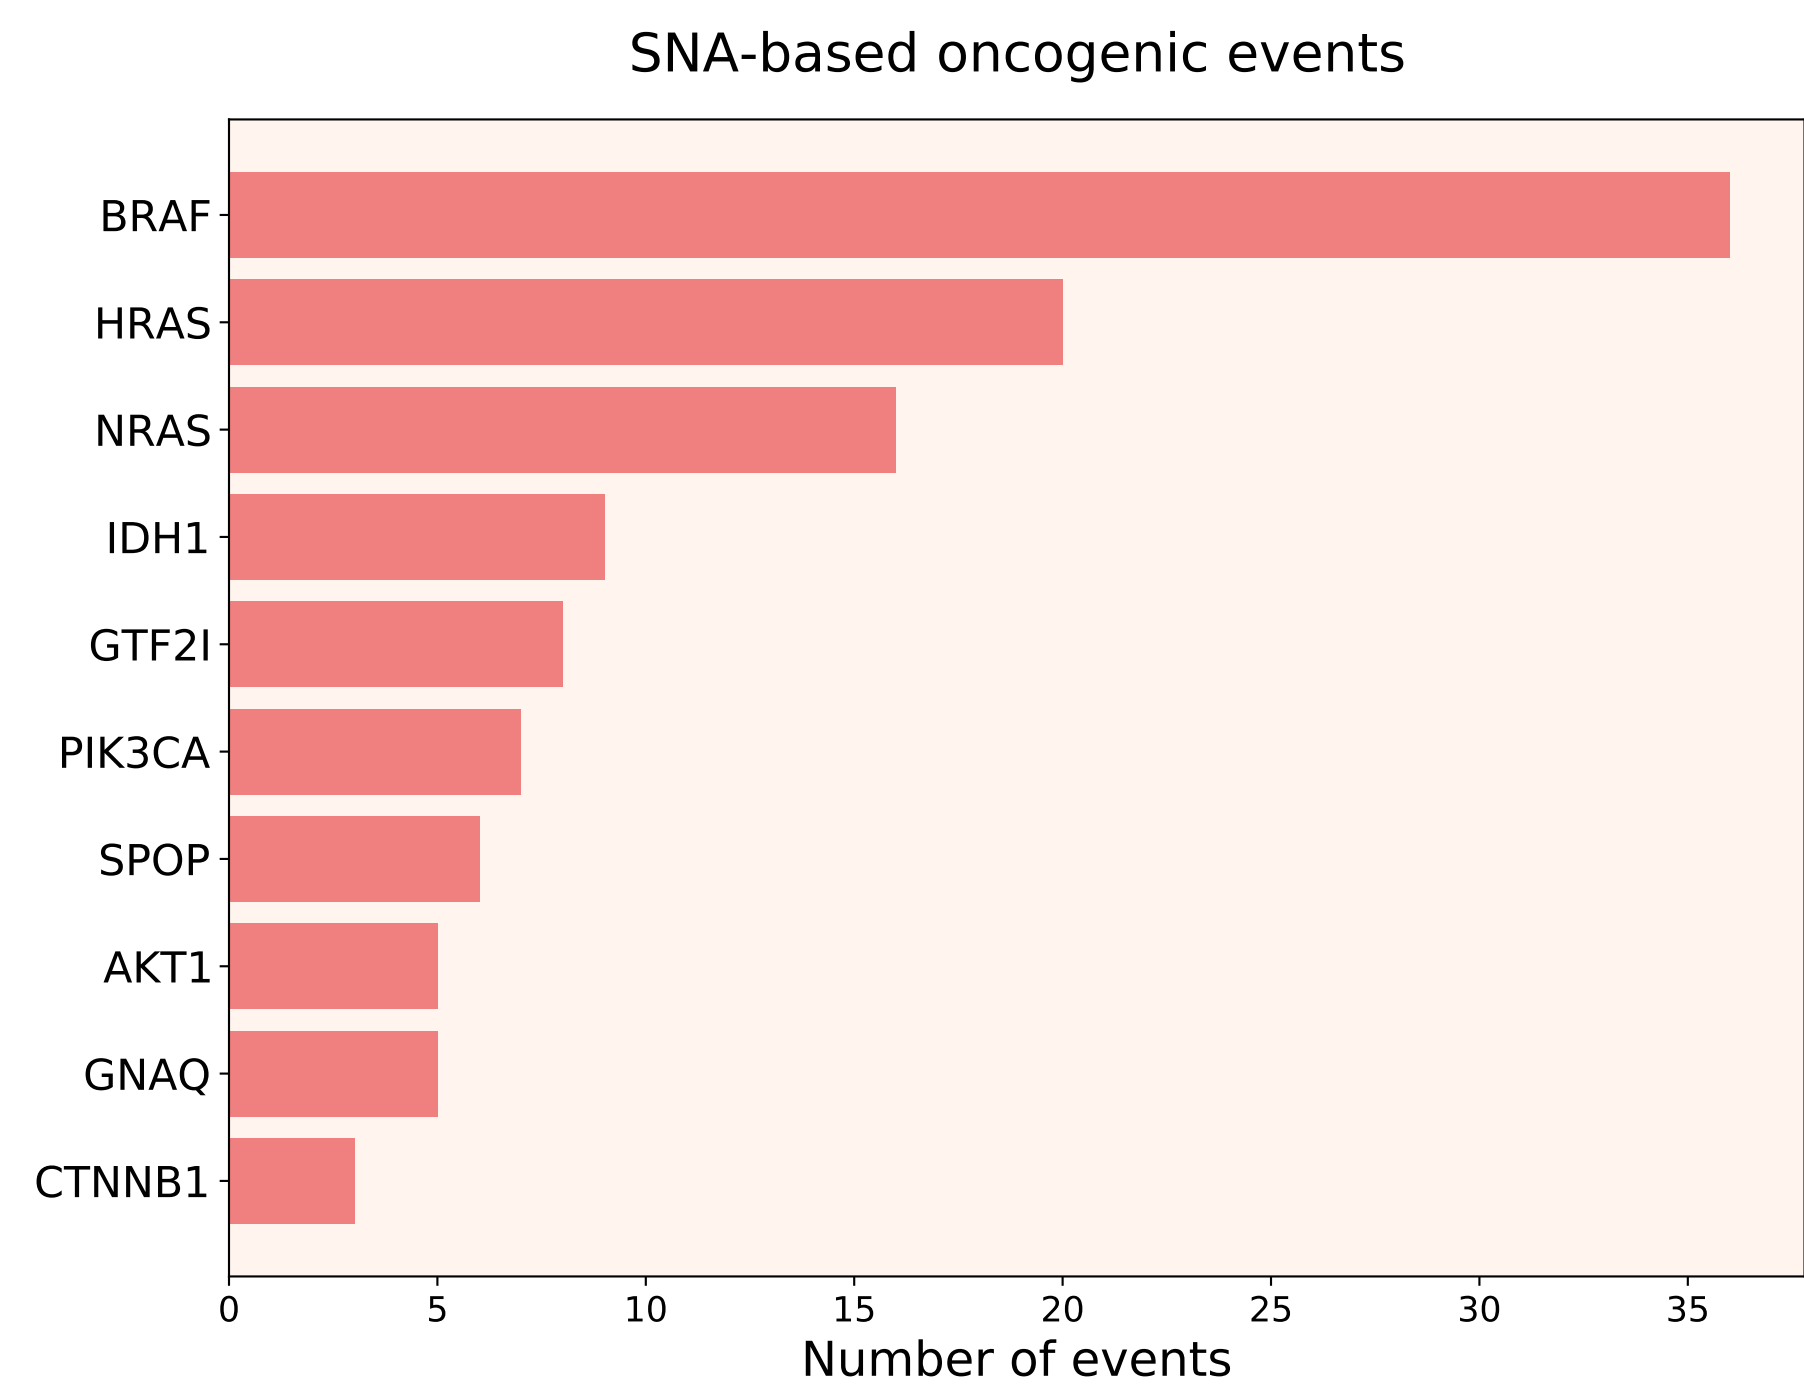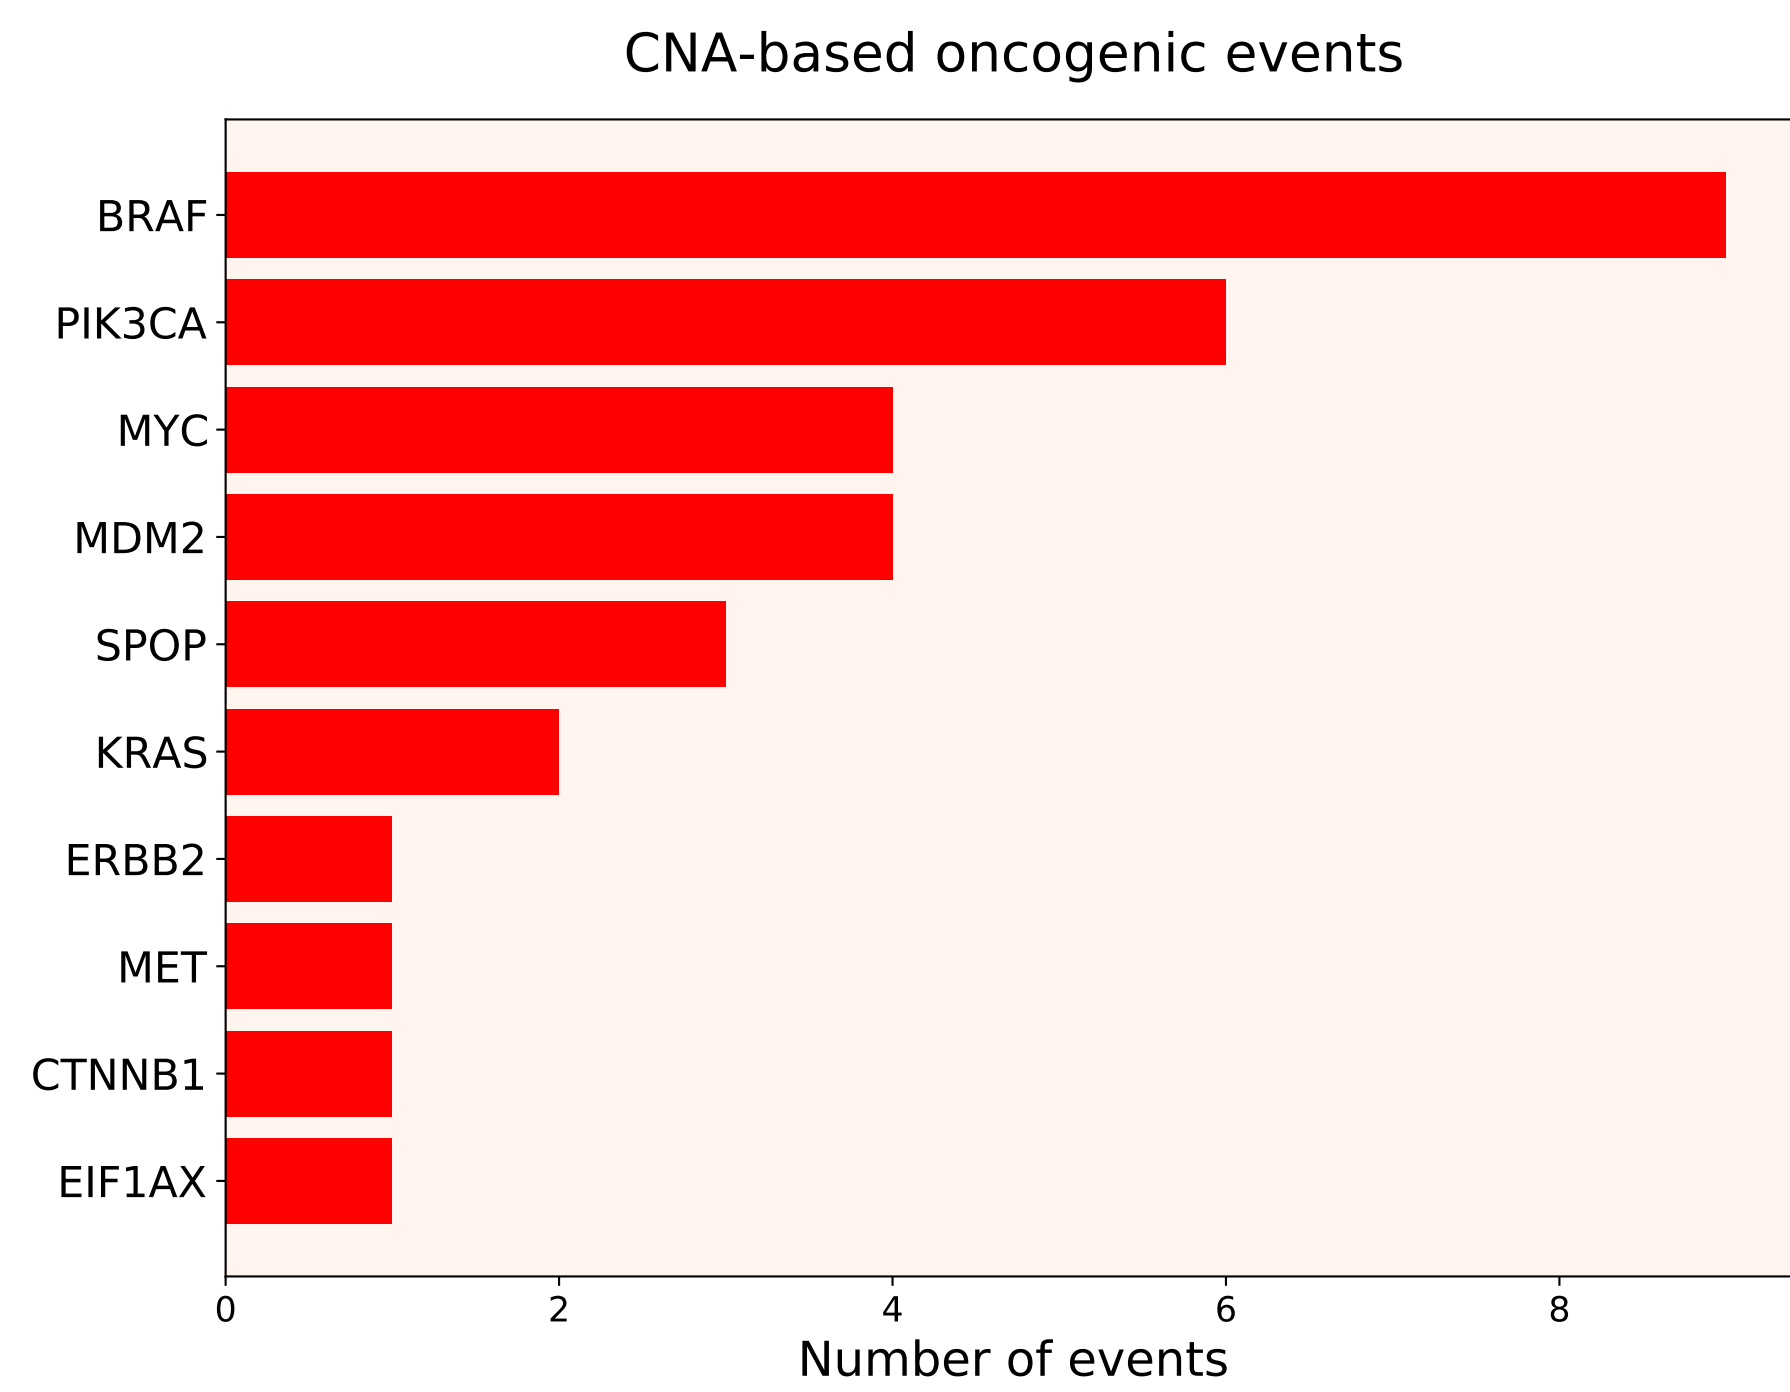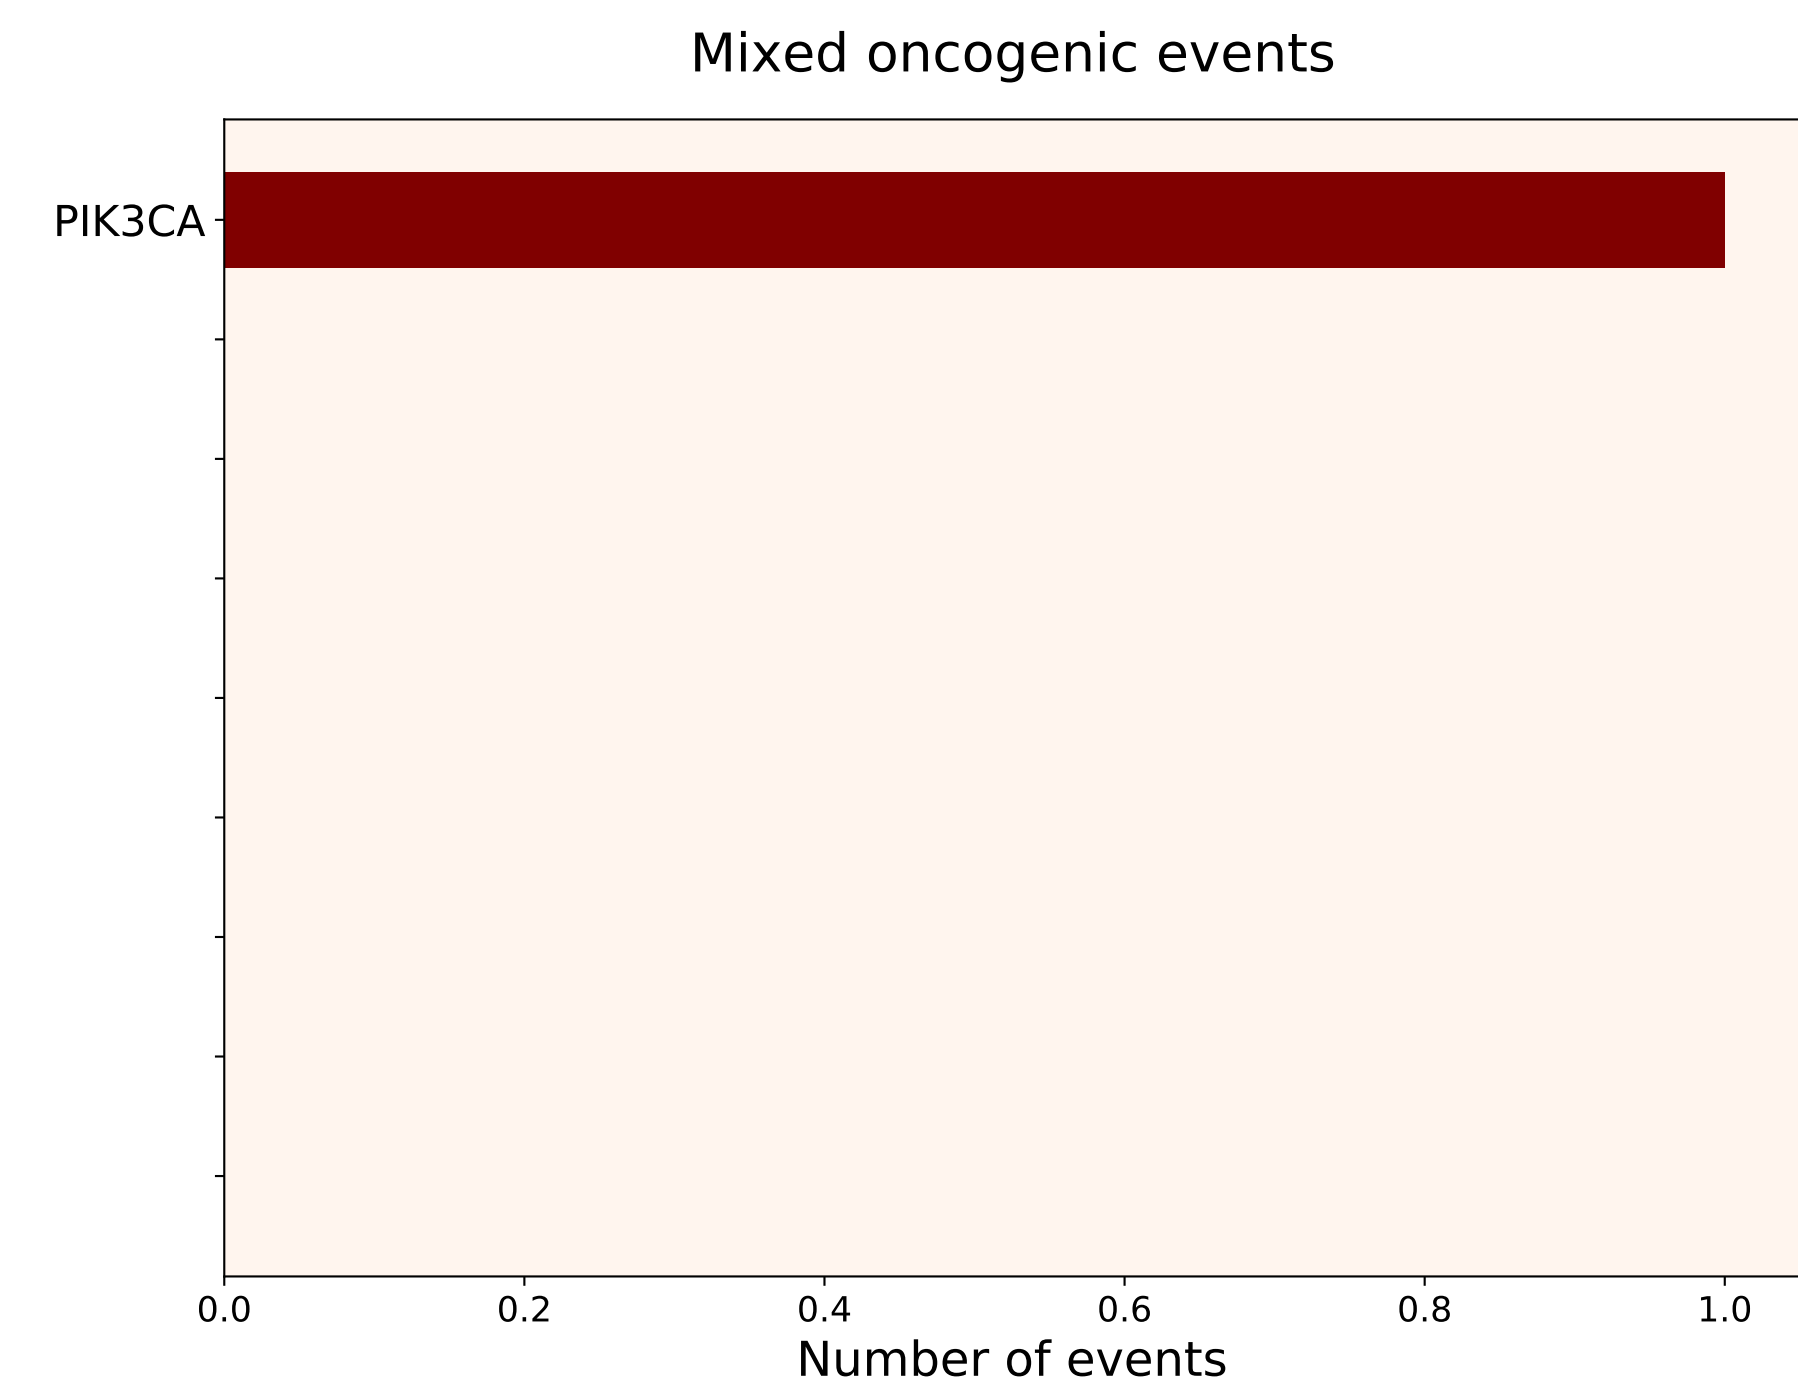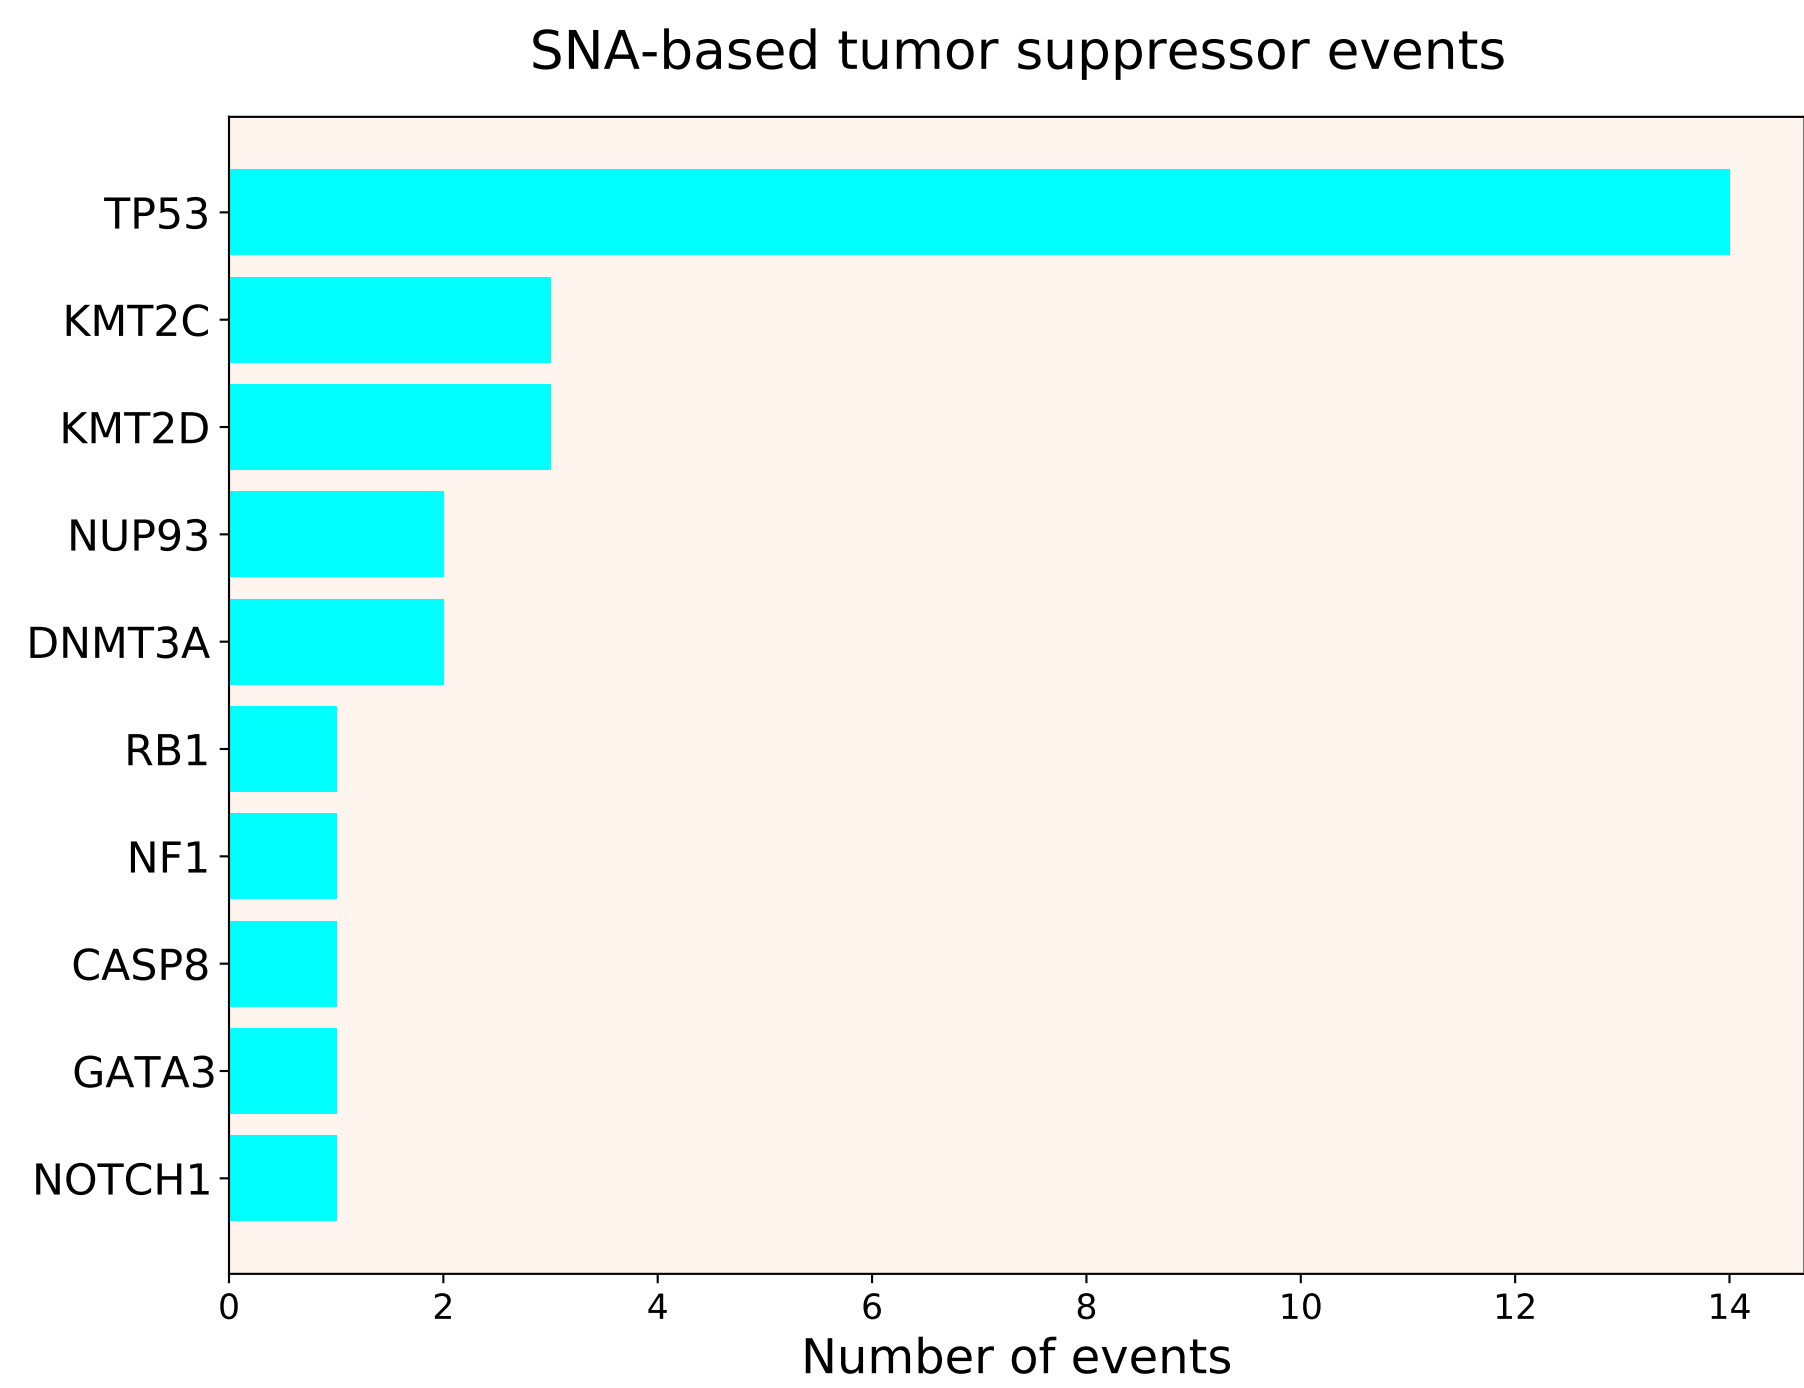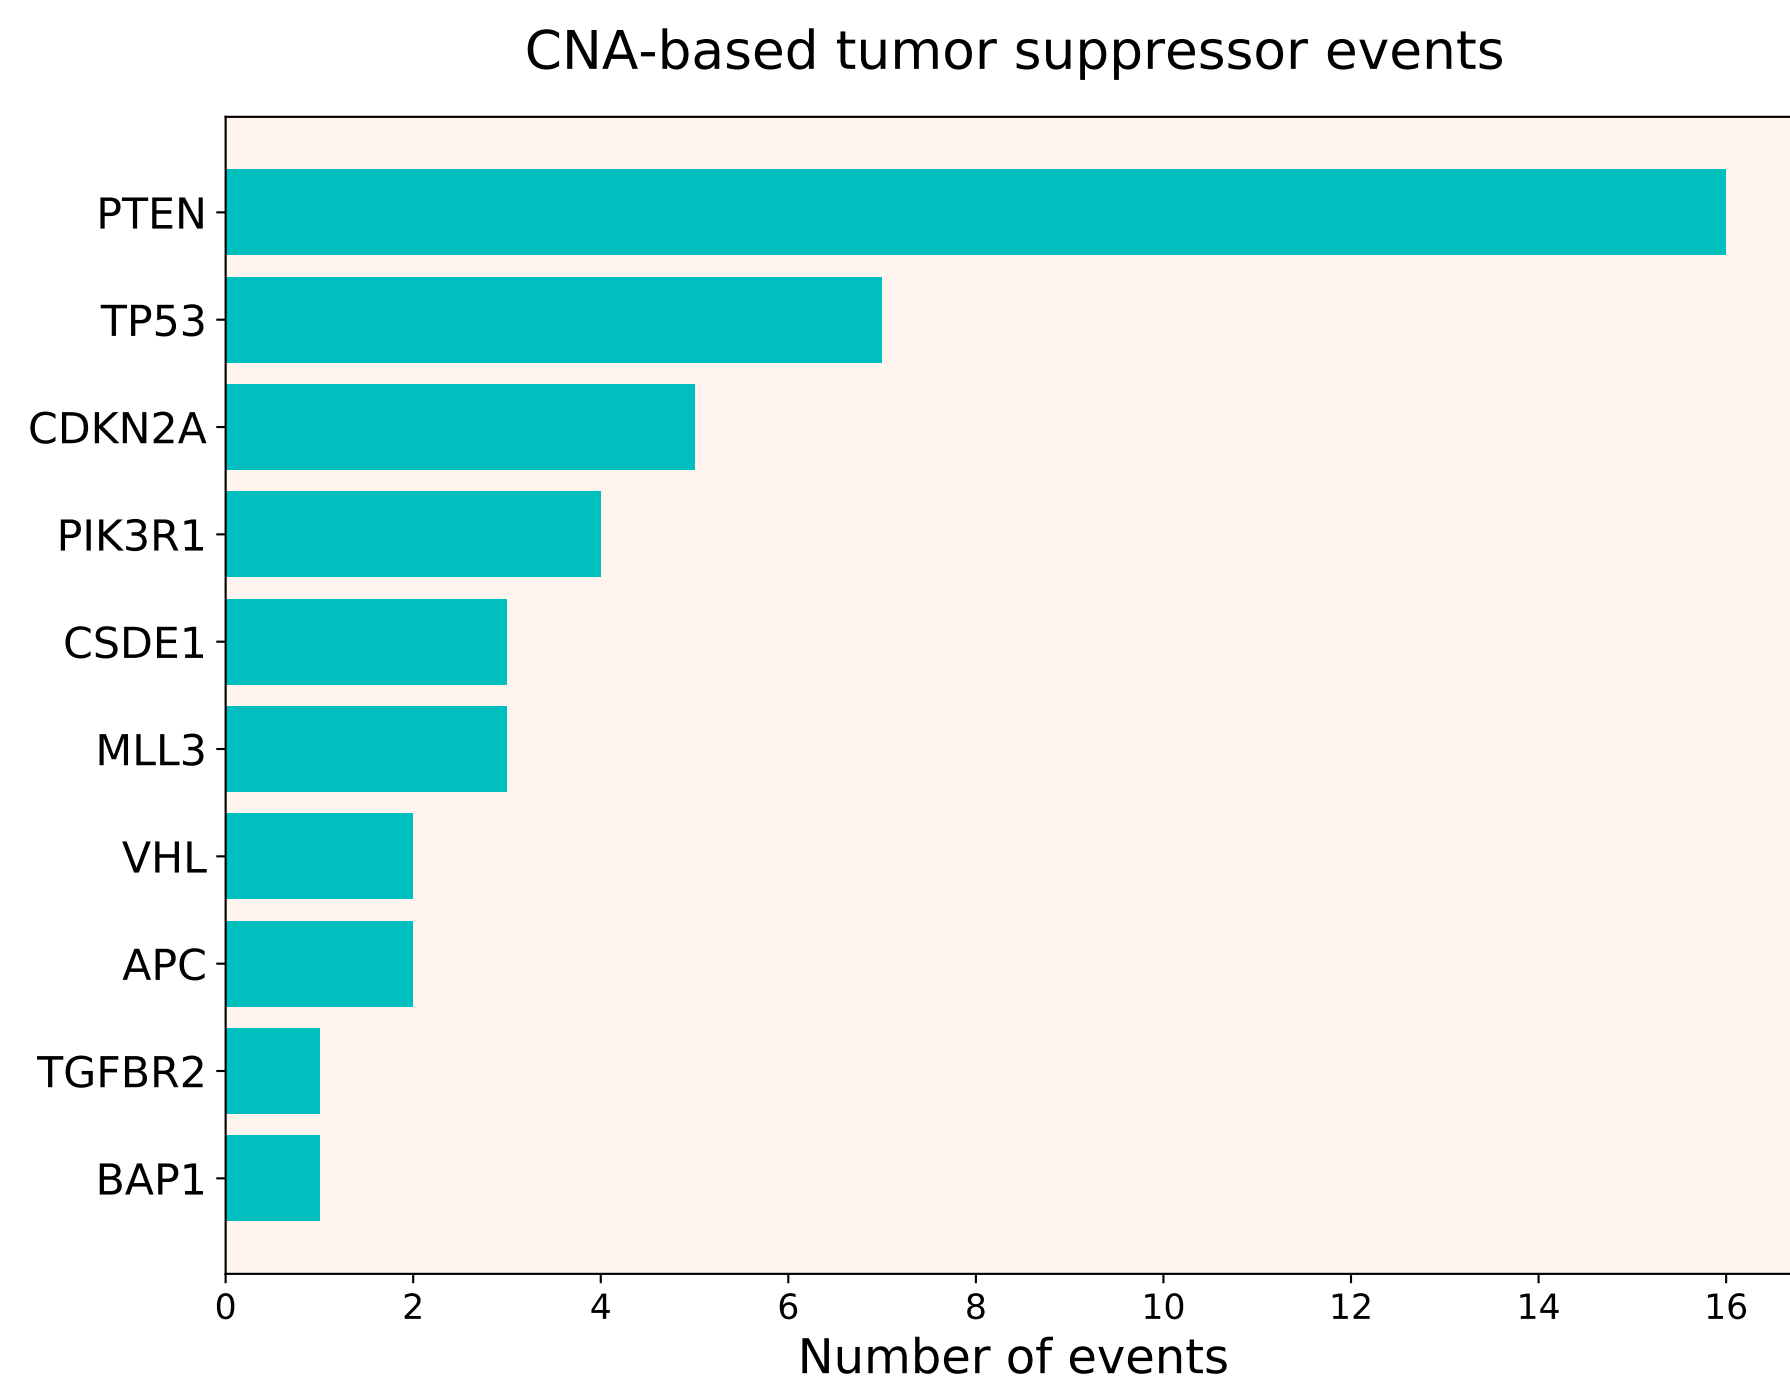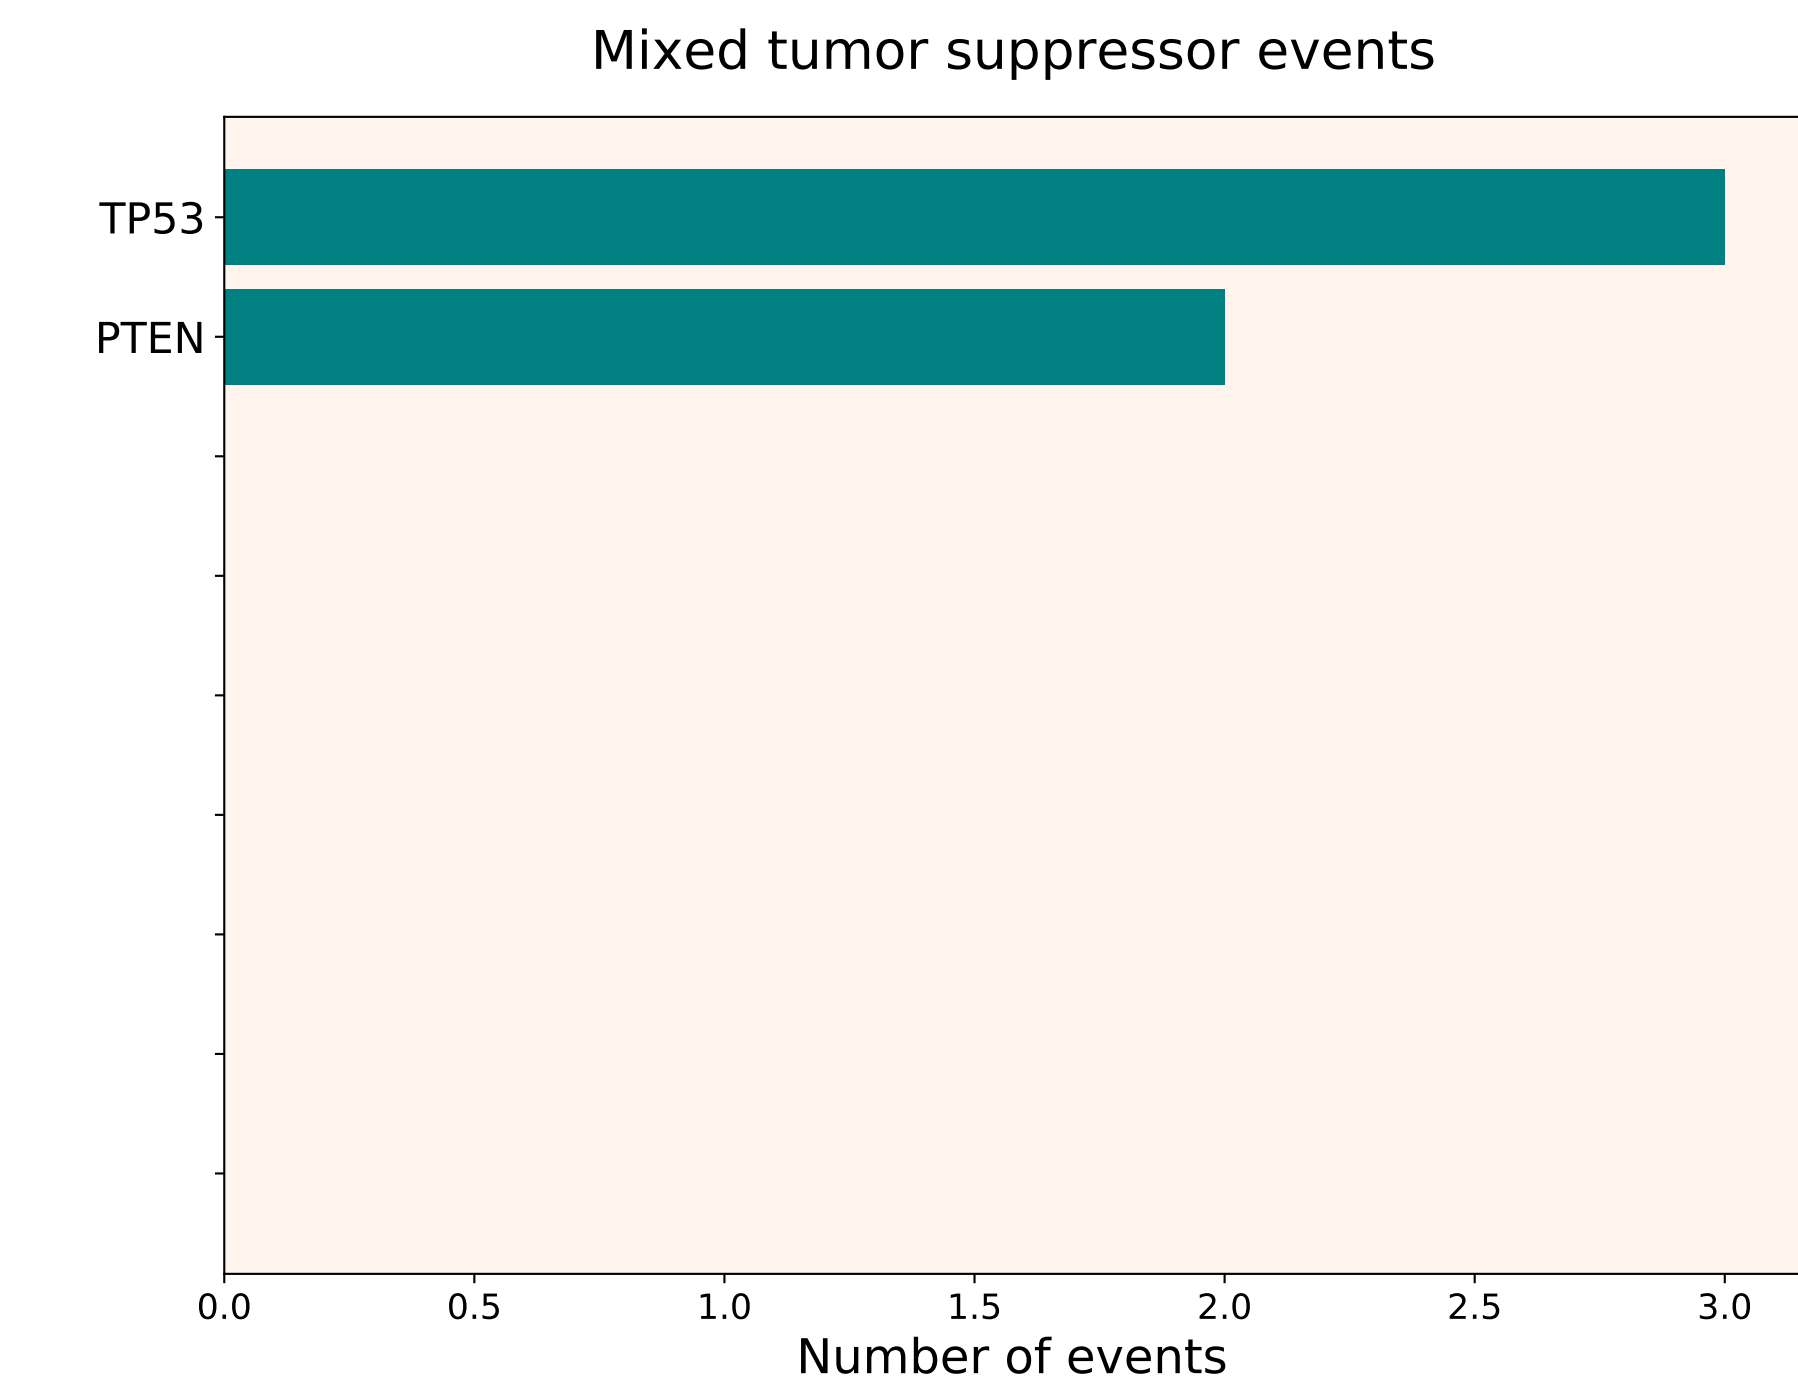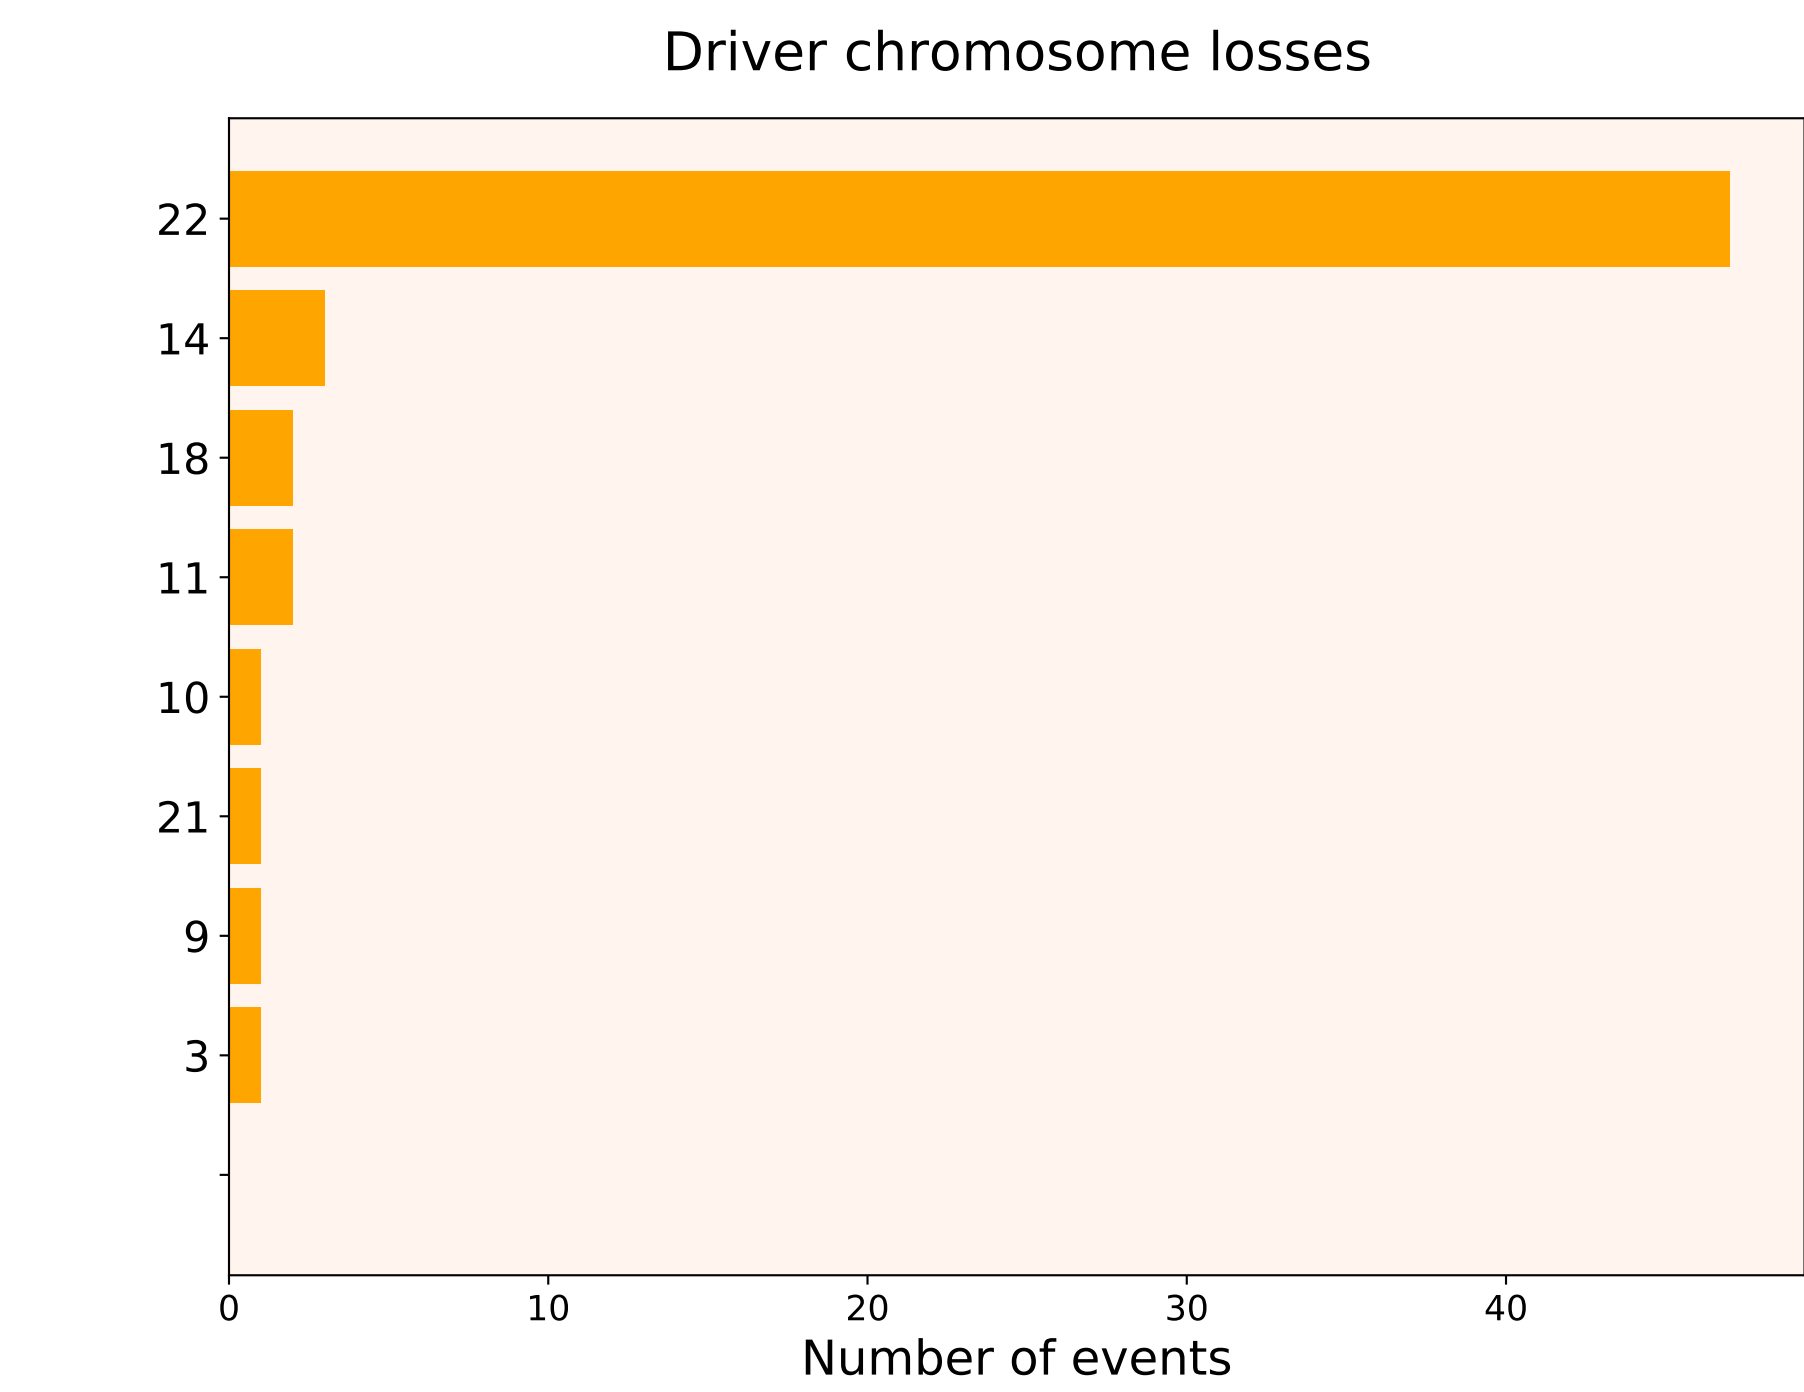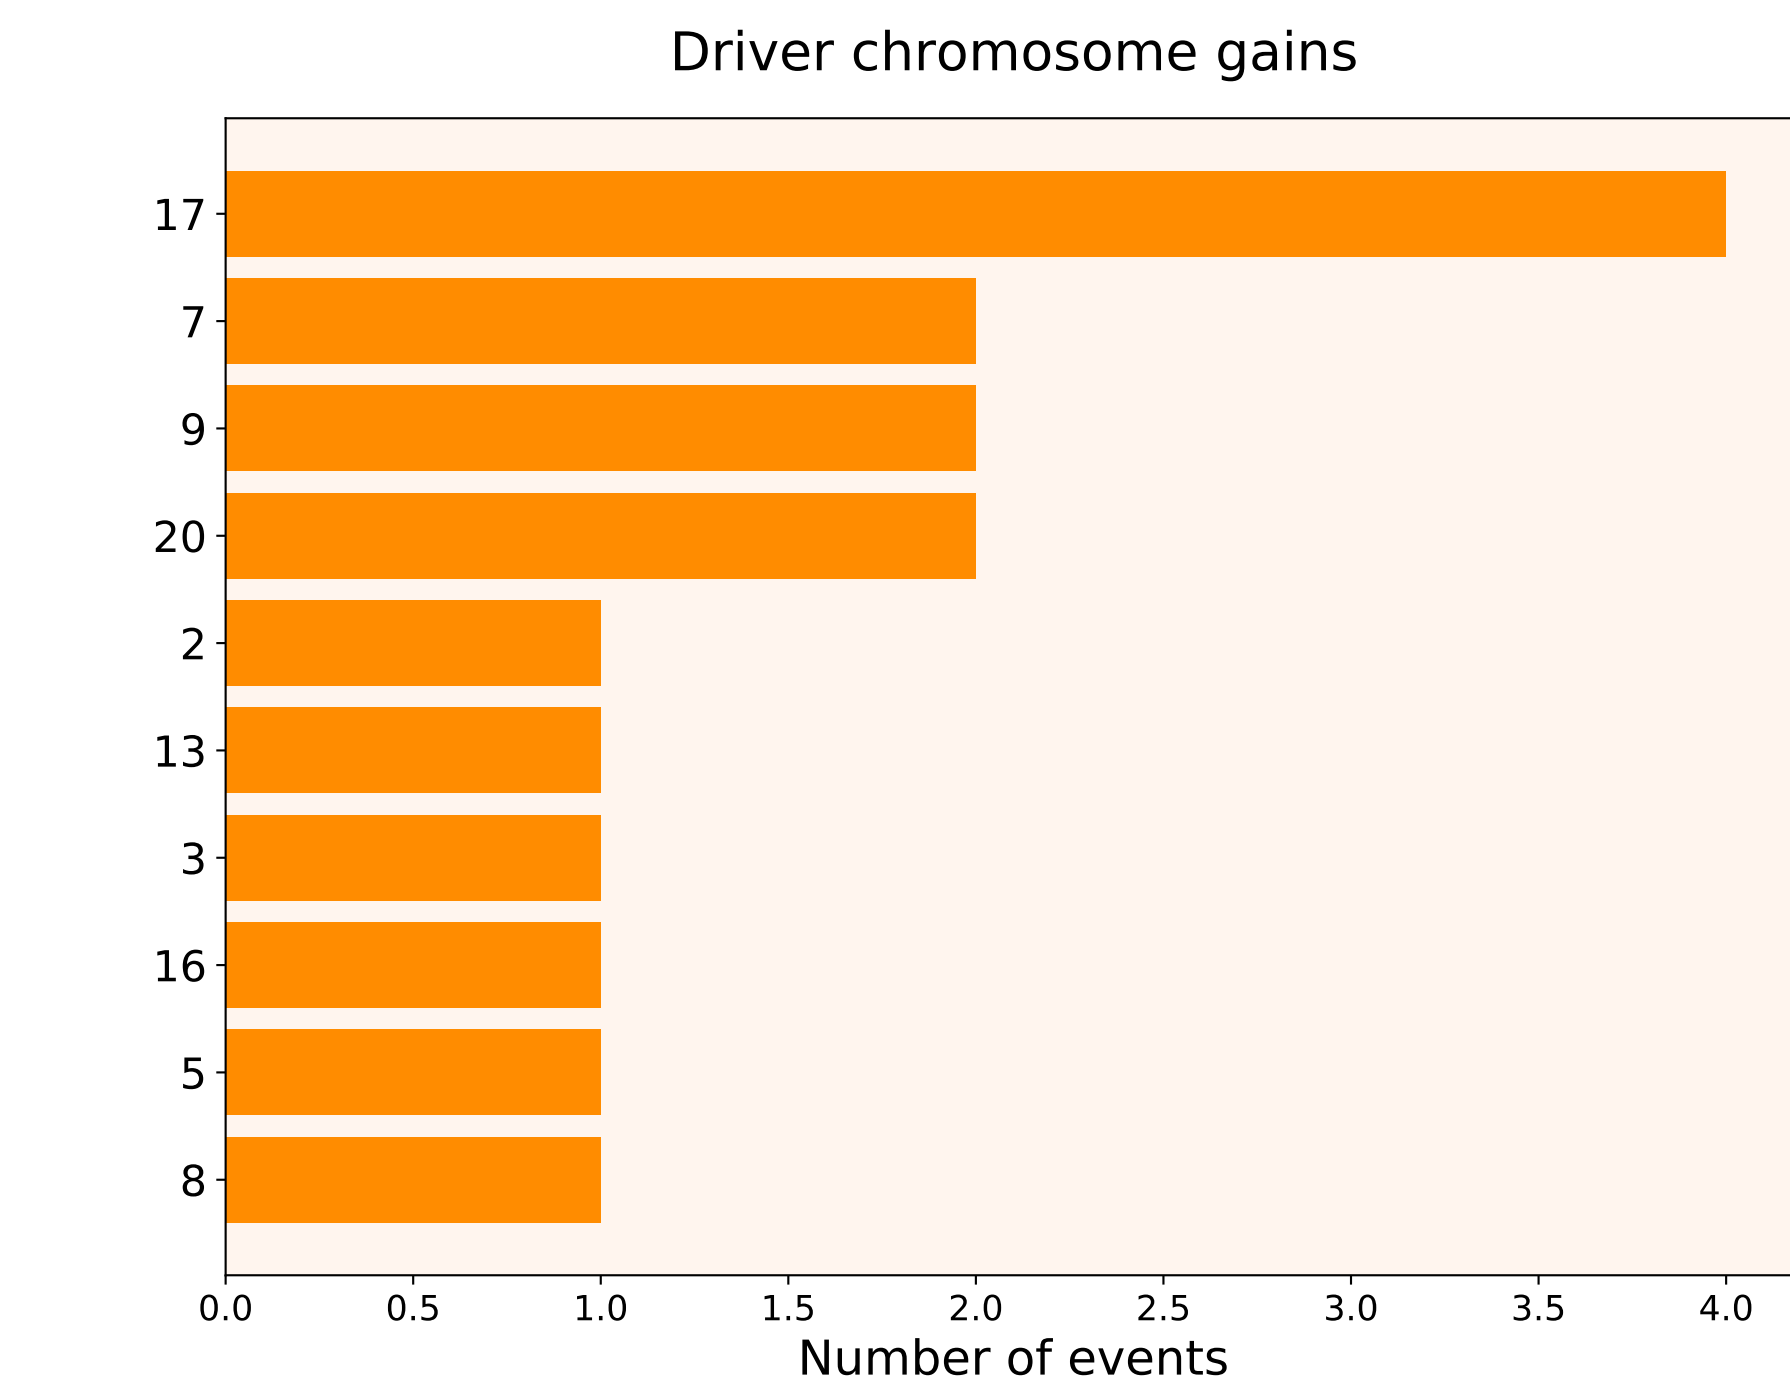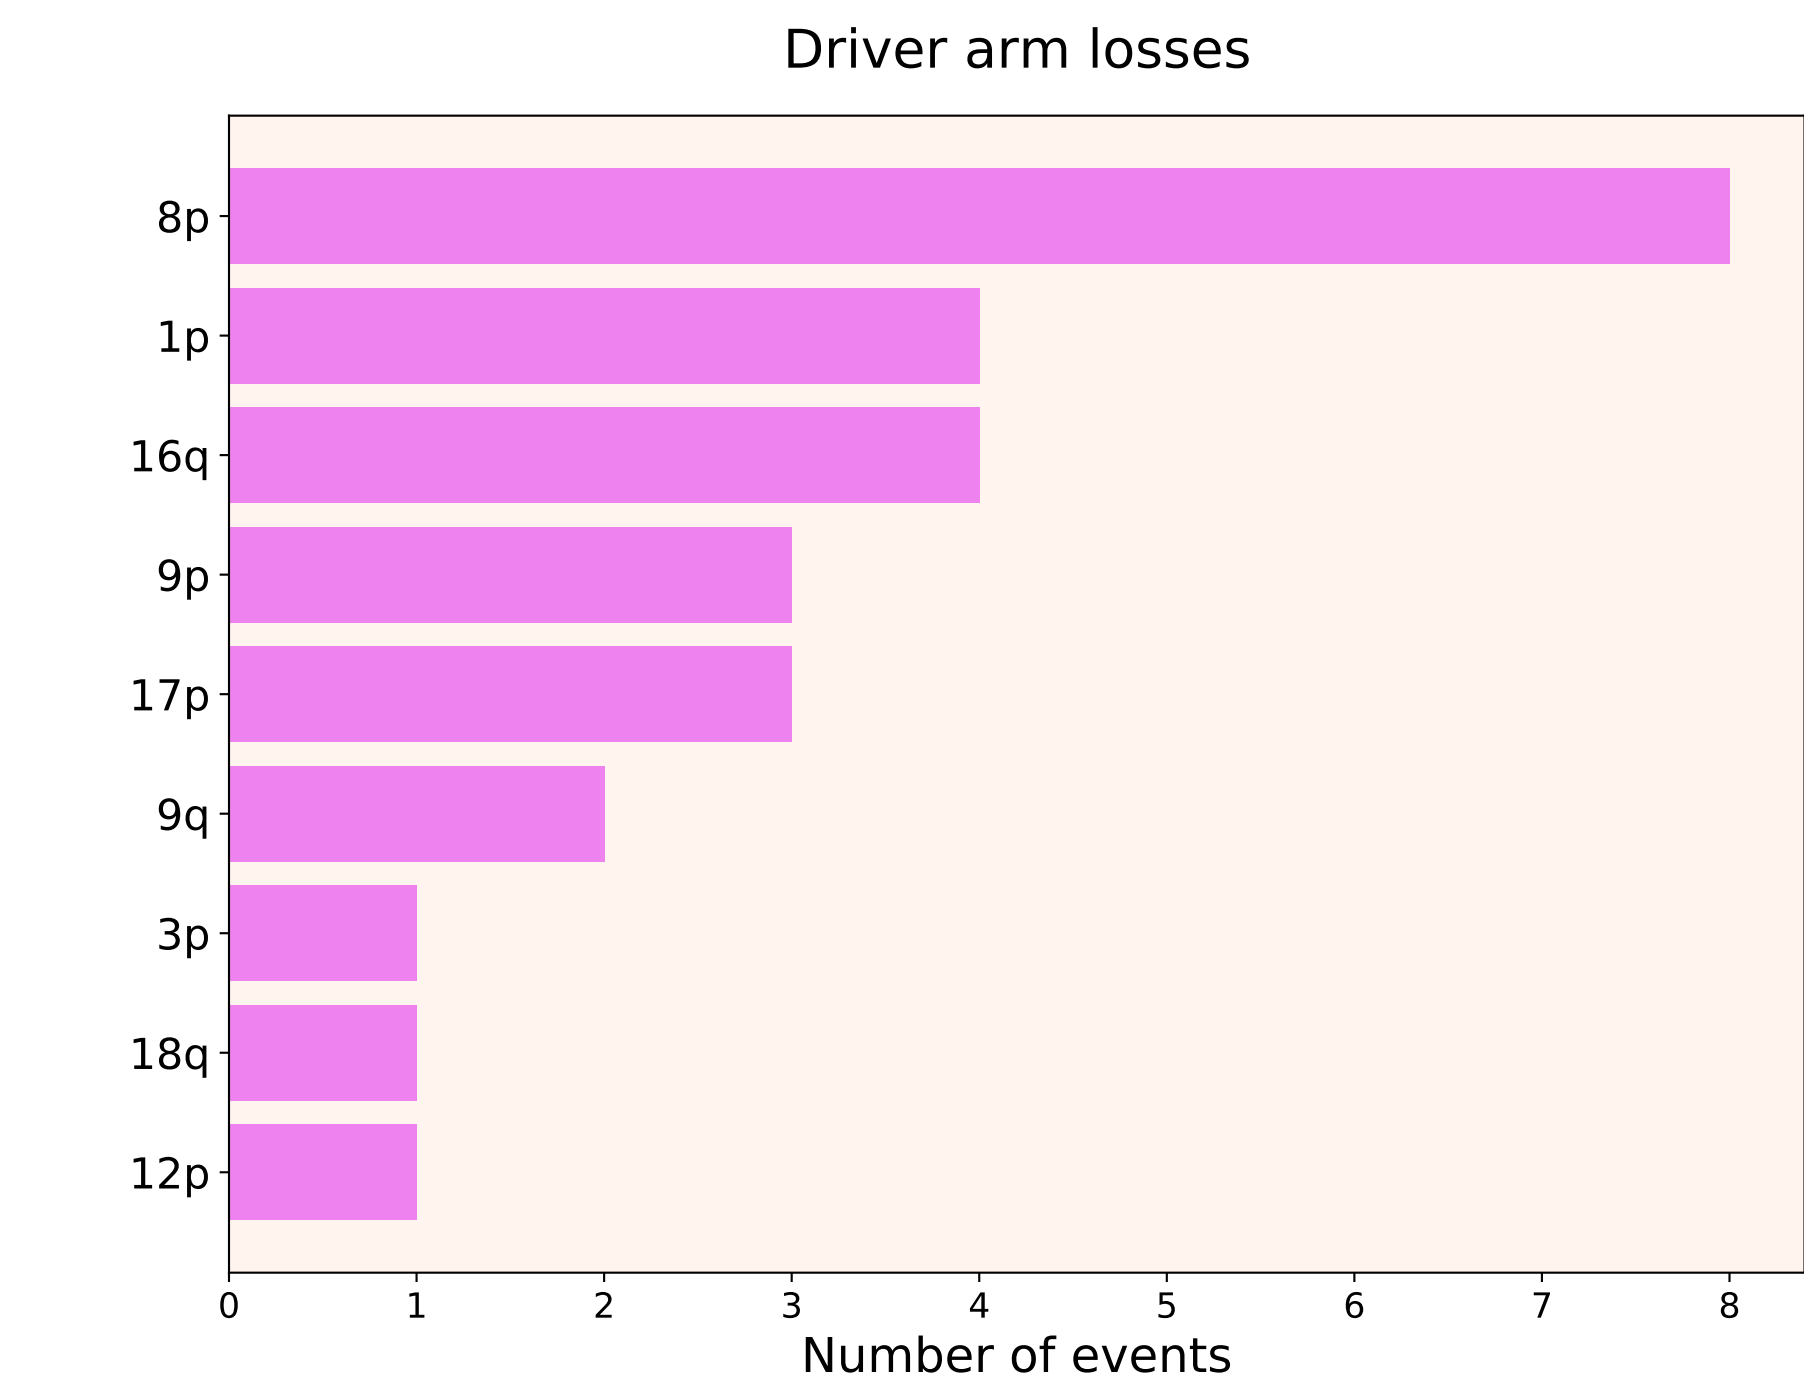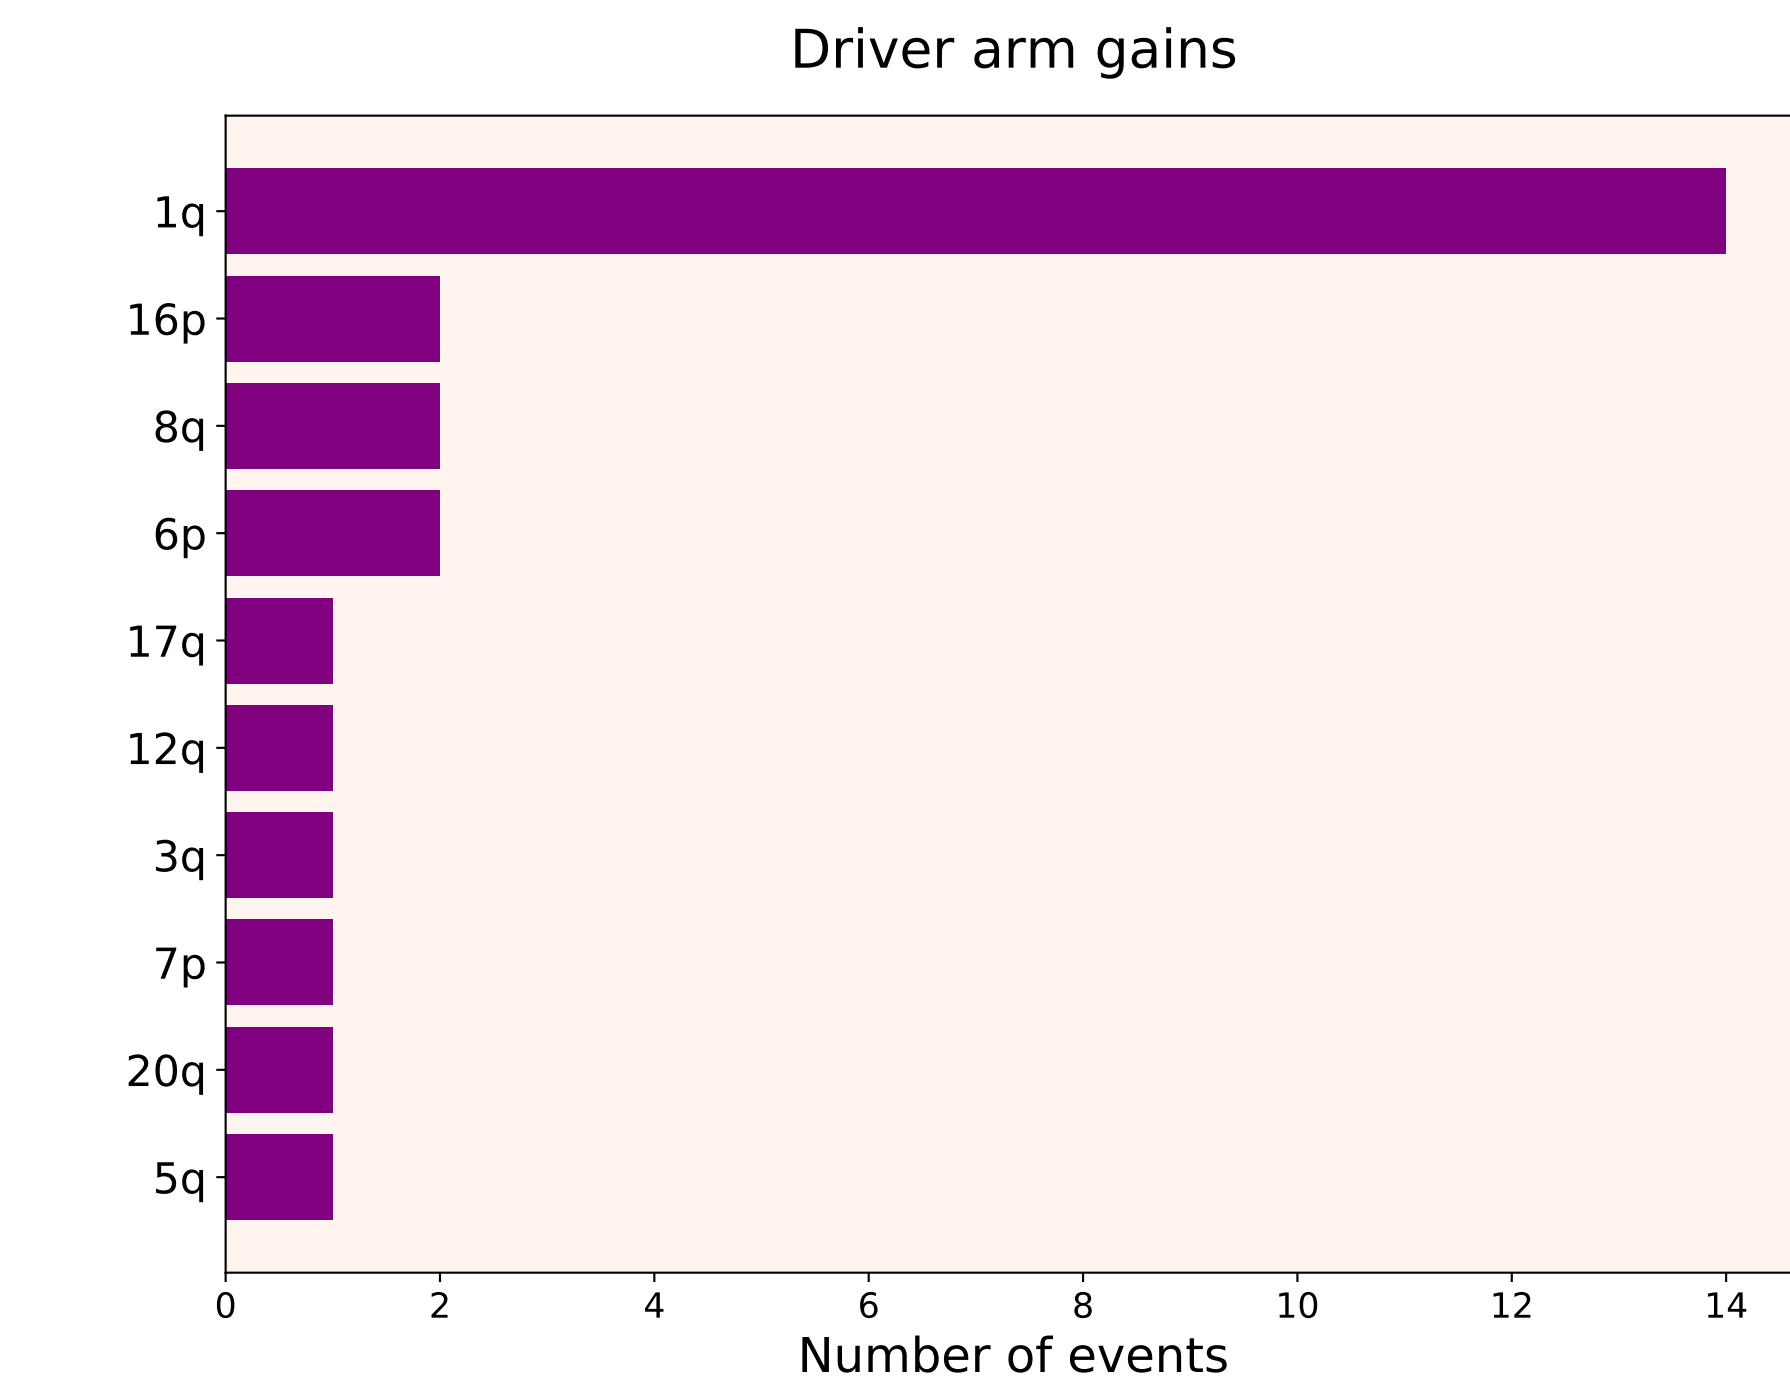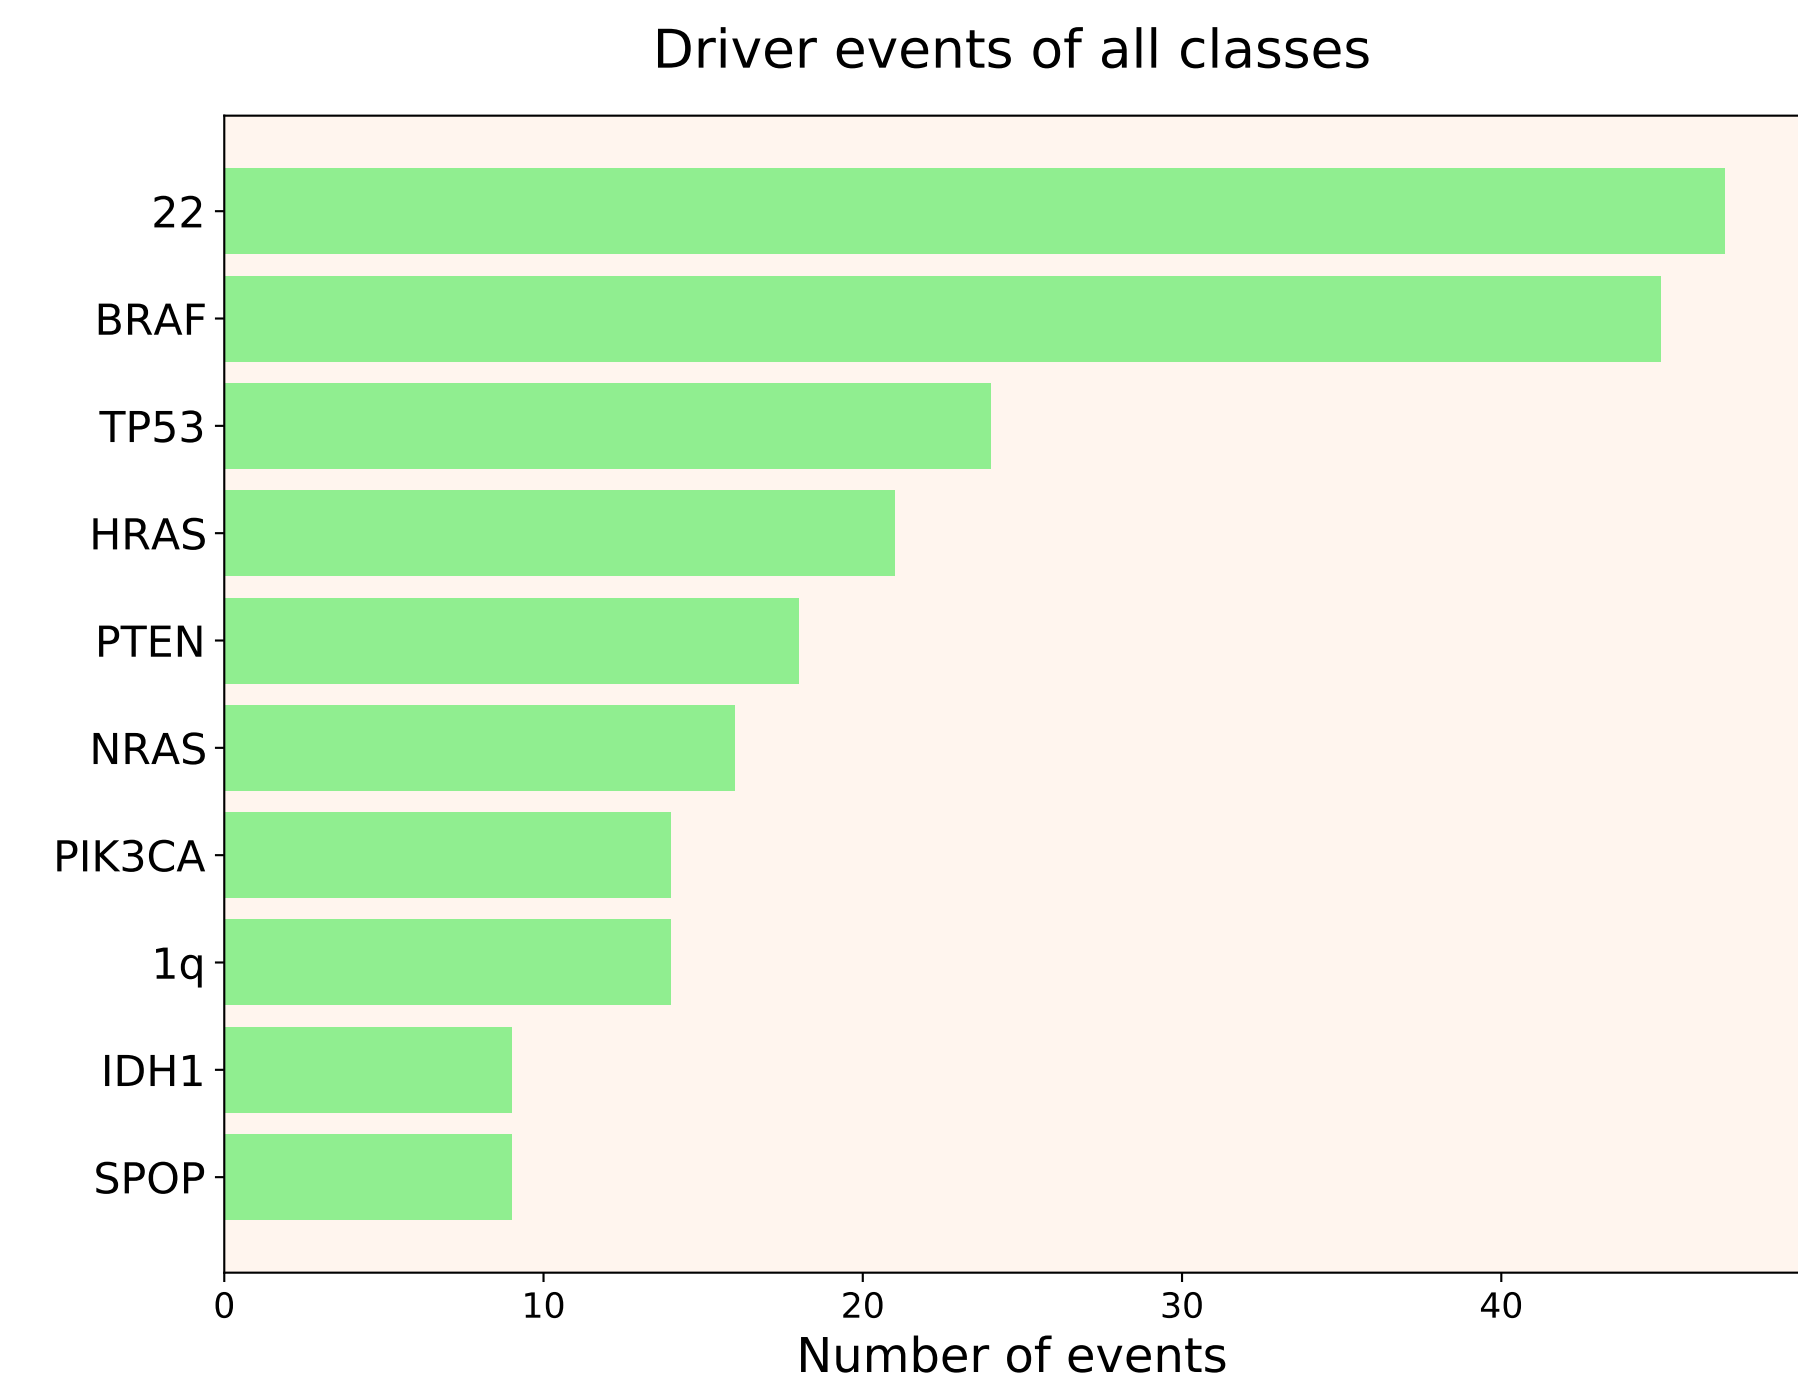

Supplement: Supplemental_Data_S1.zip [file Supplemental_Data_S1.zip]

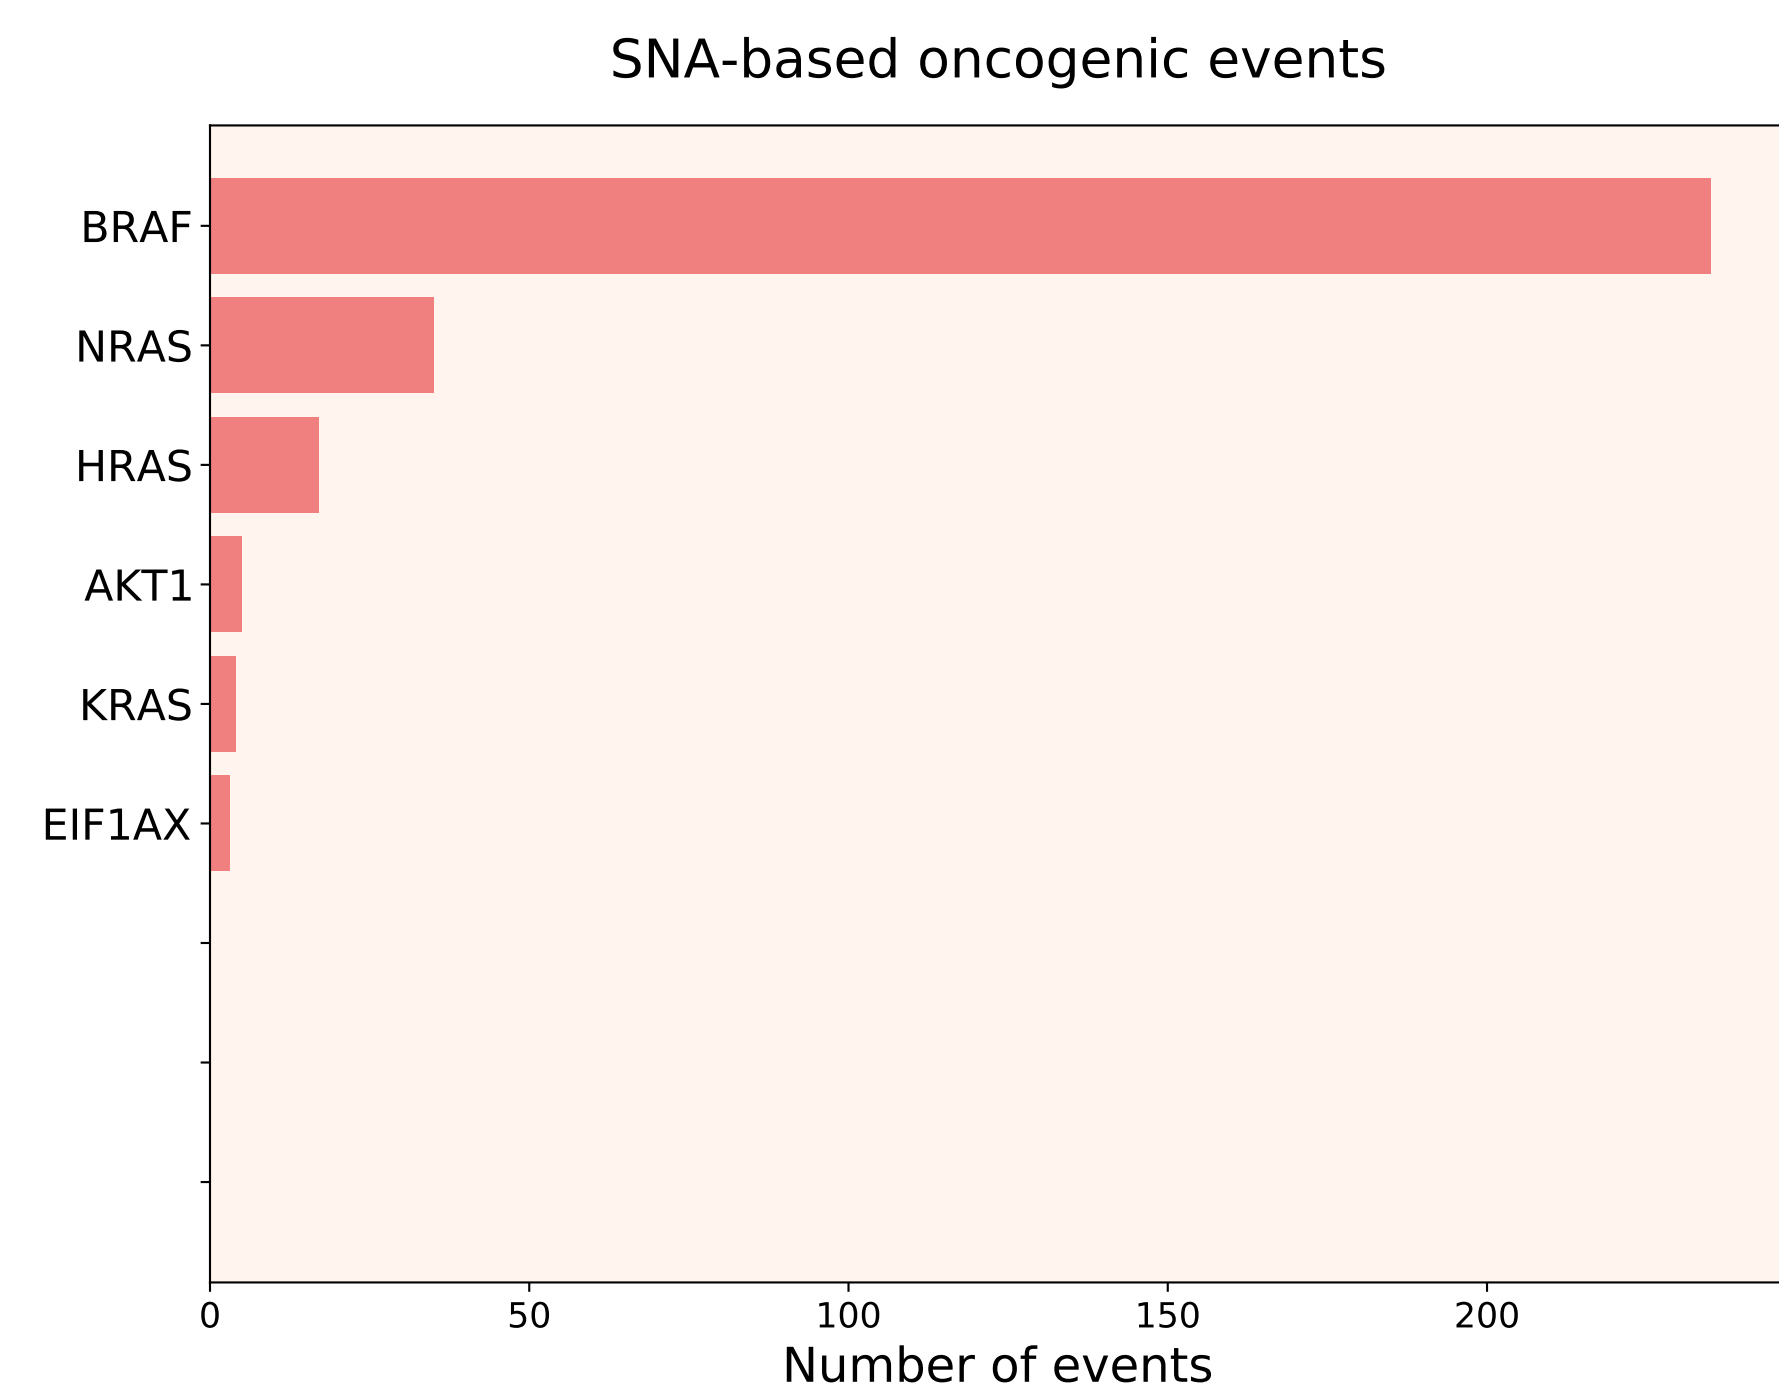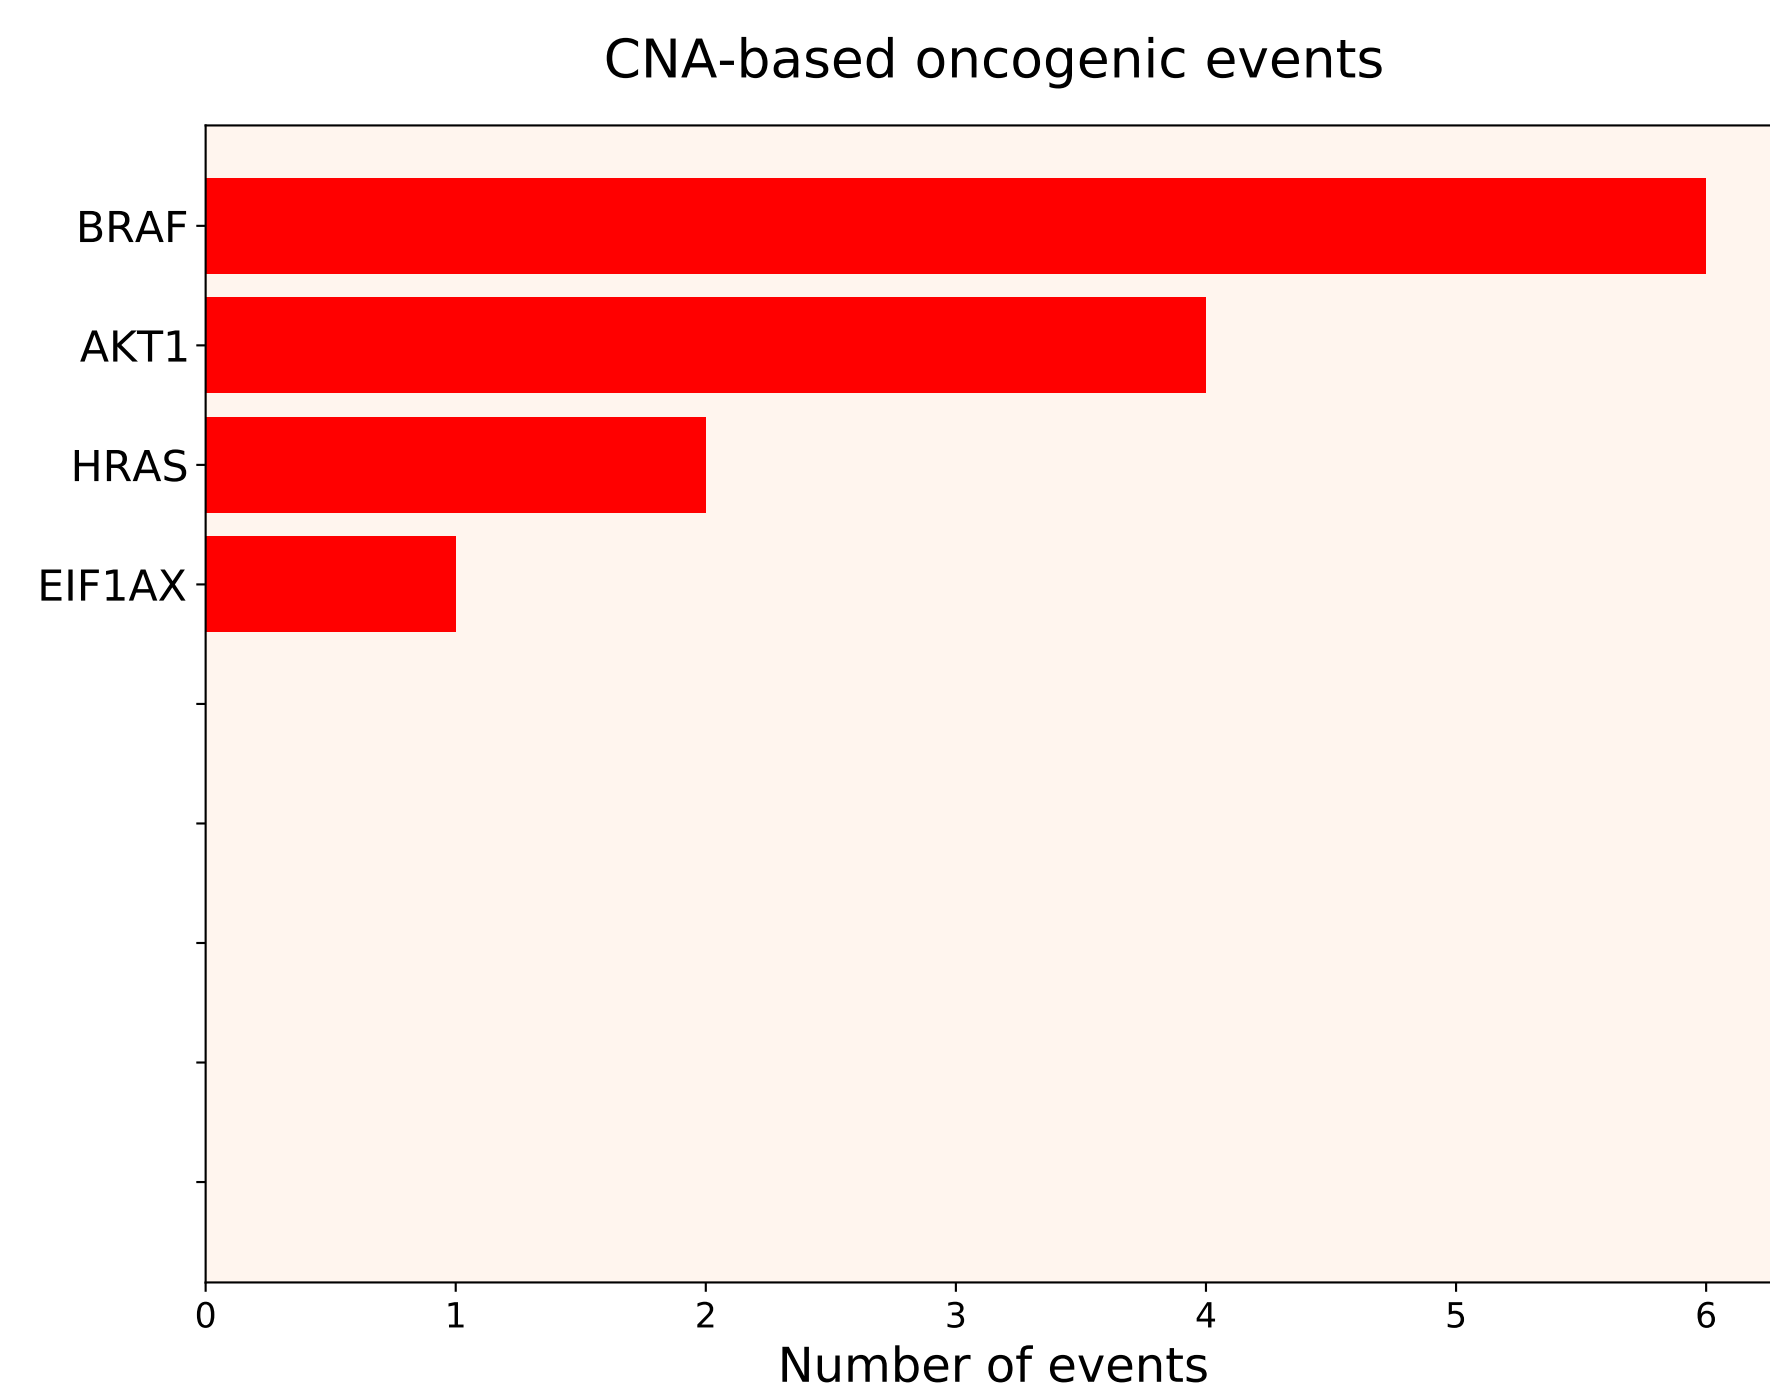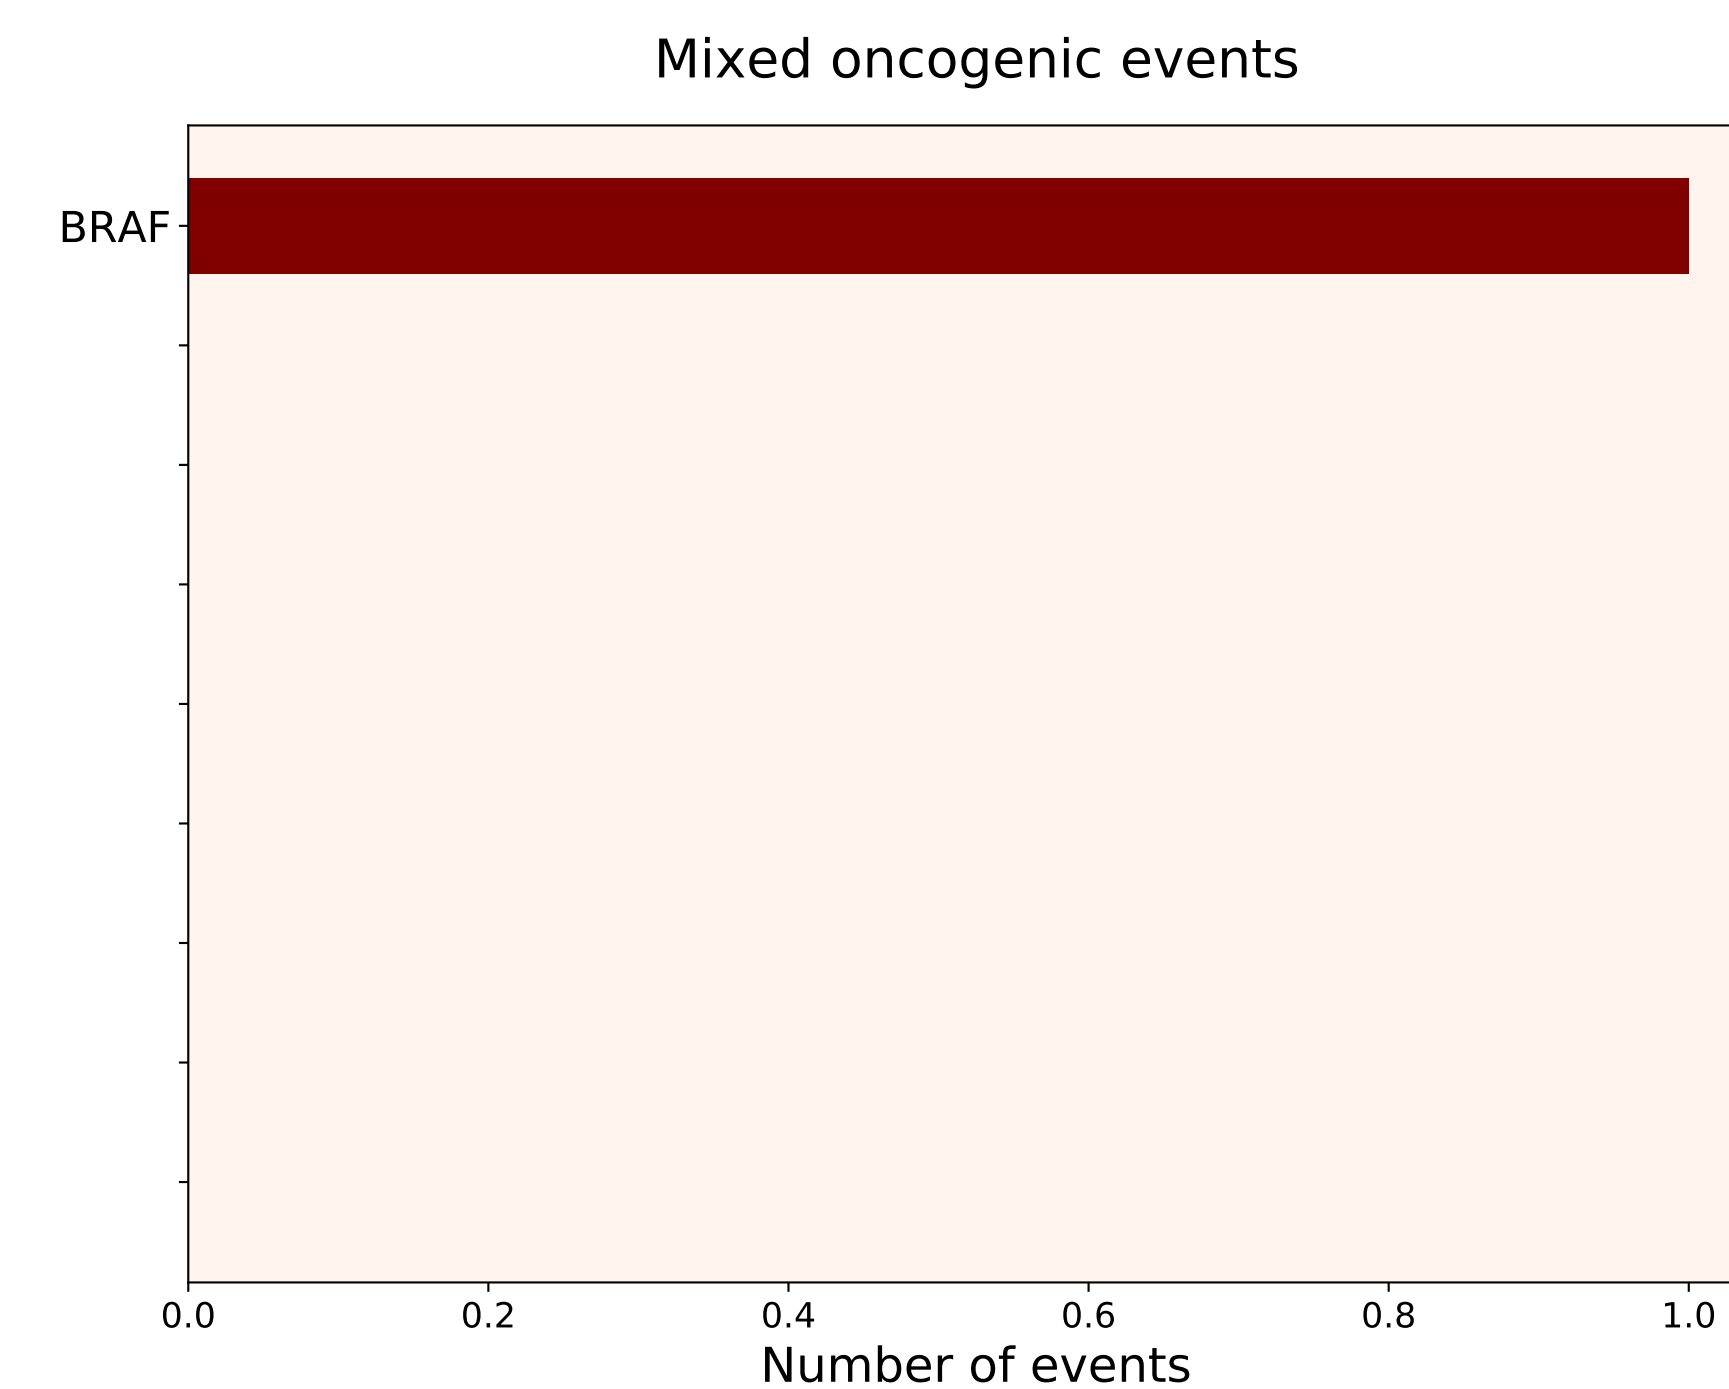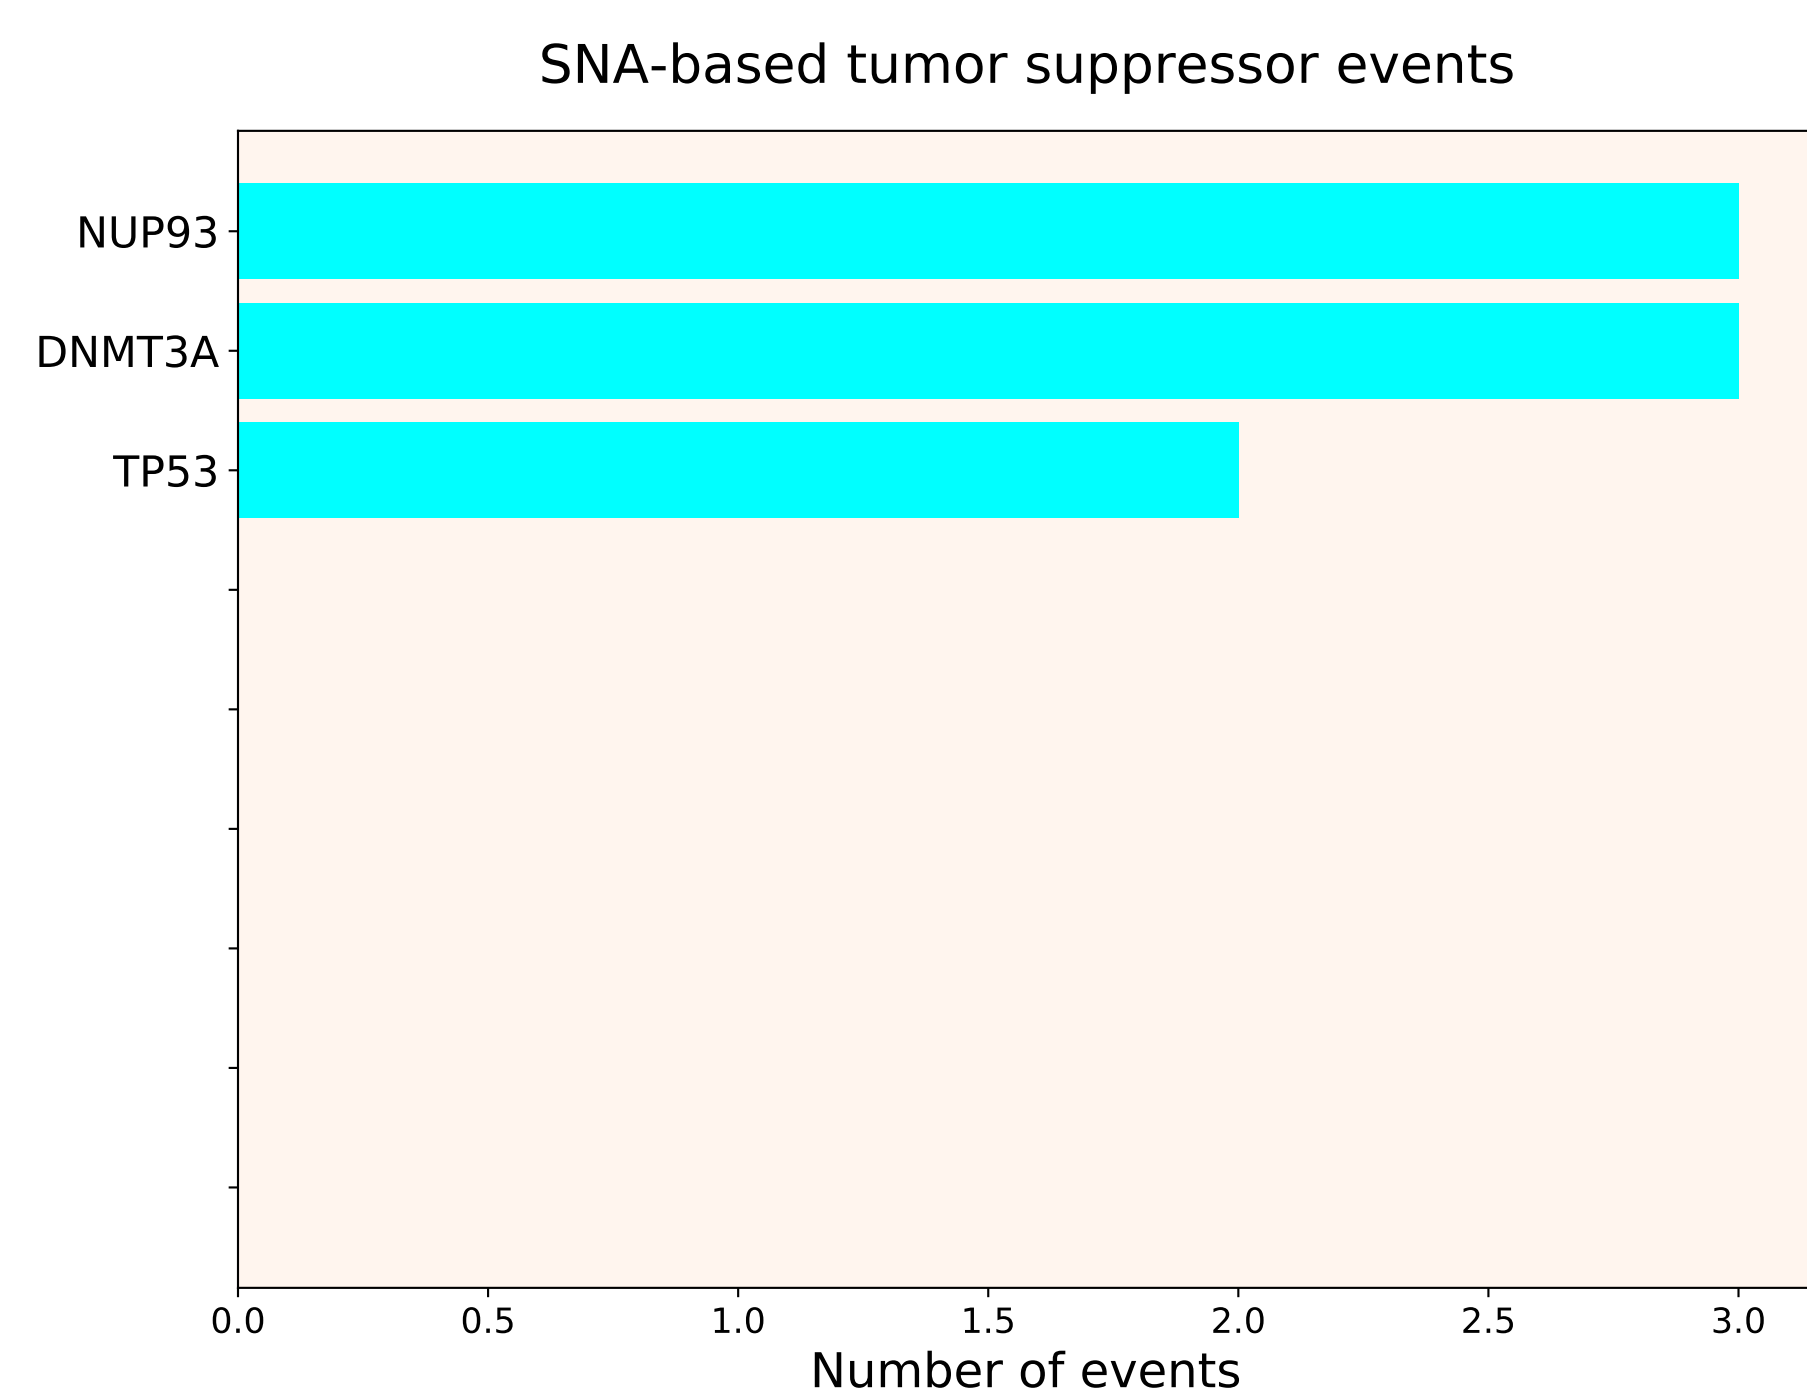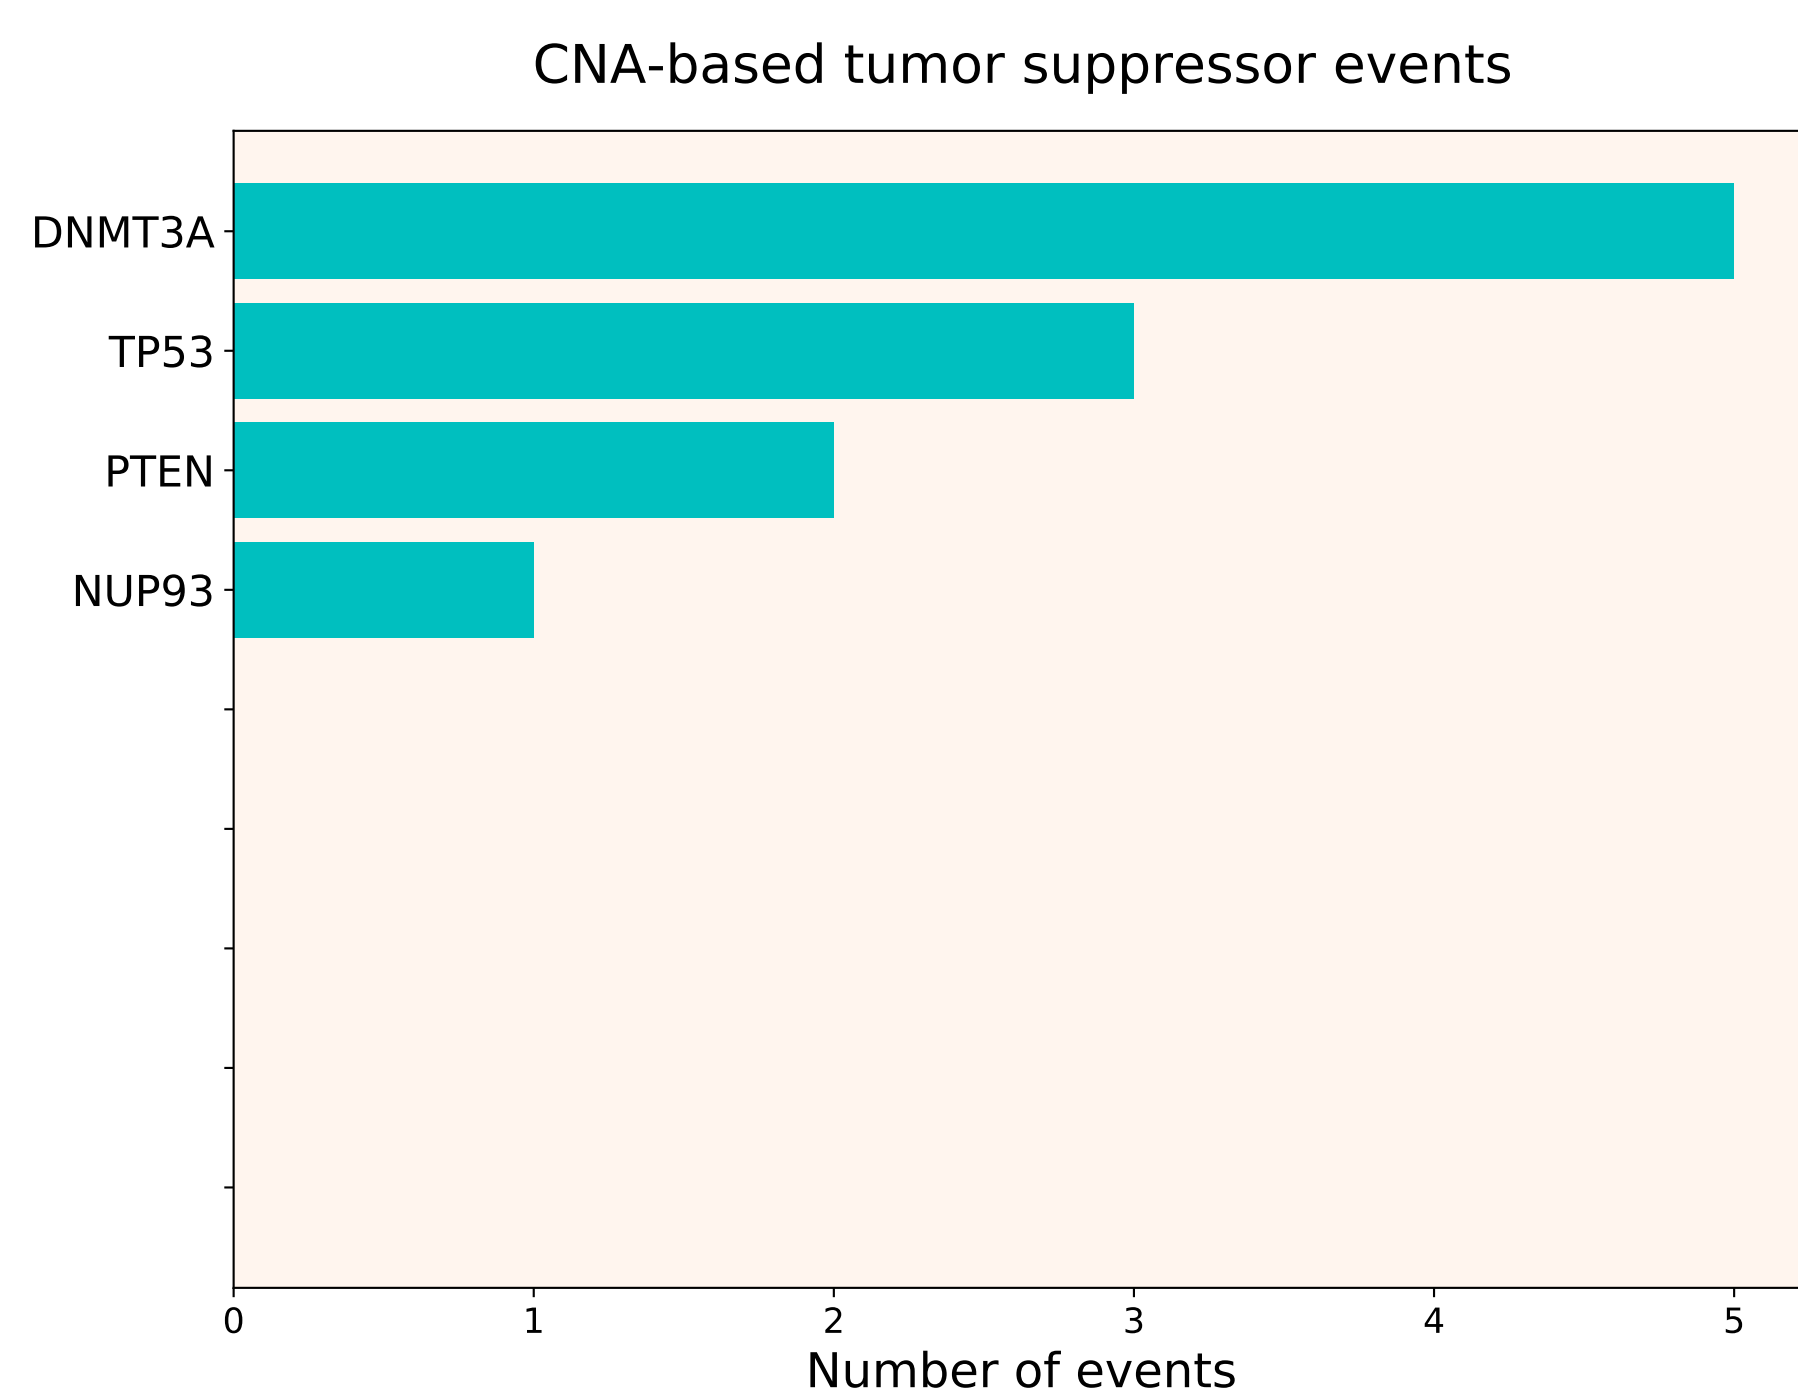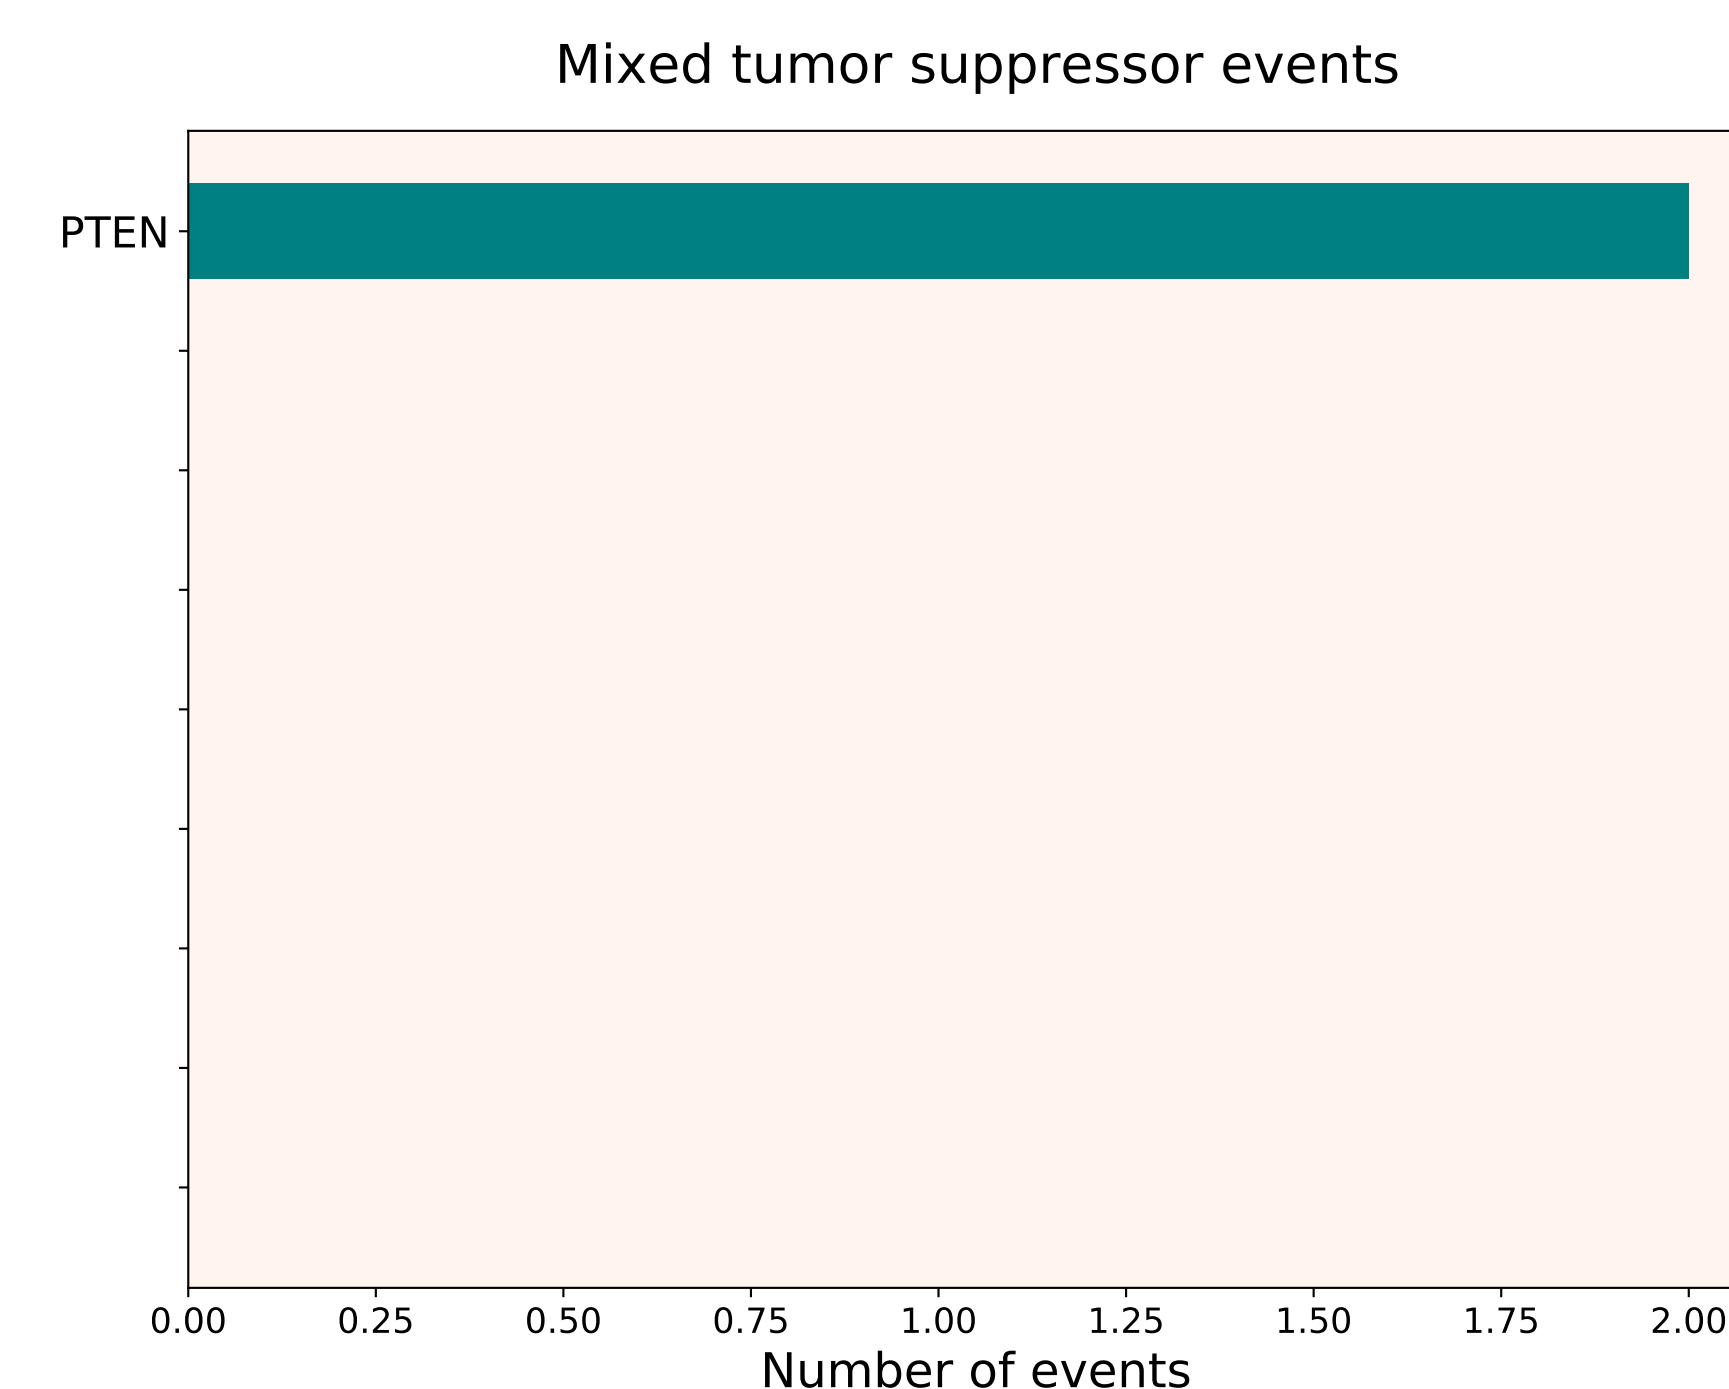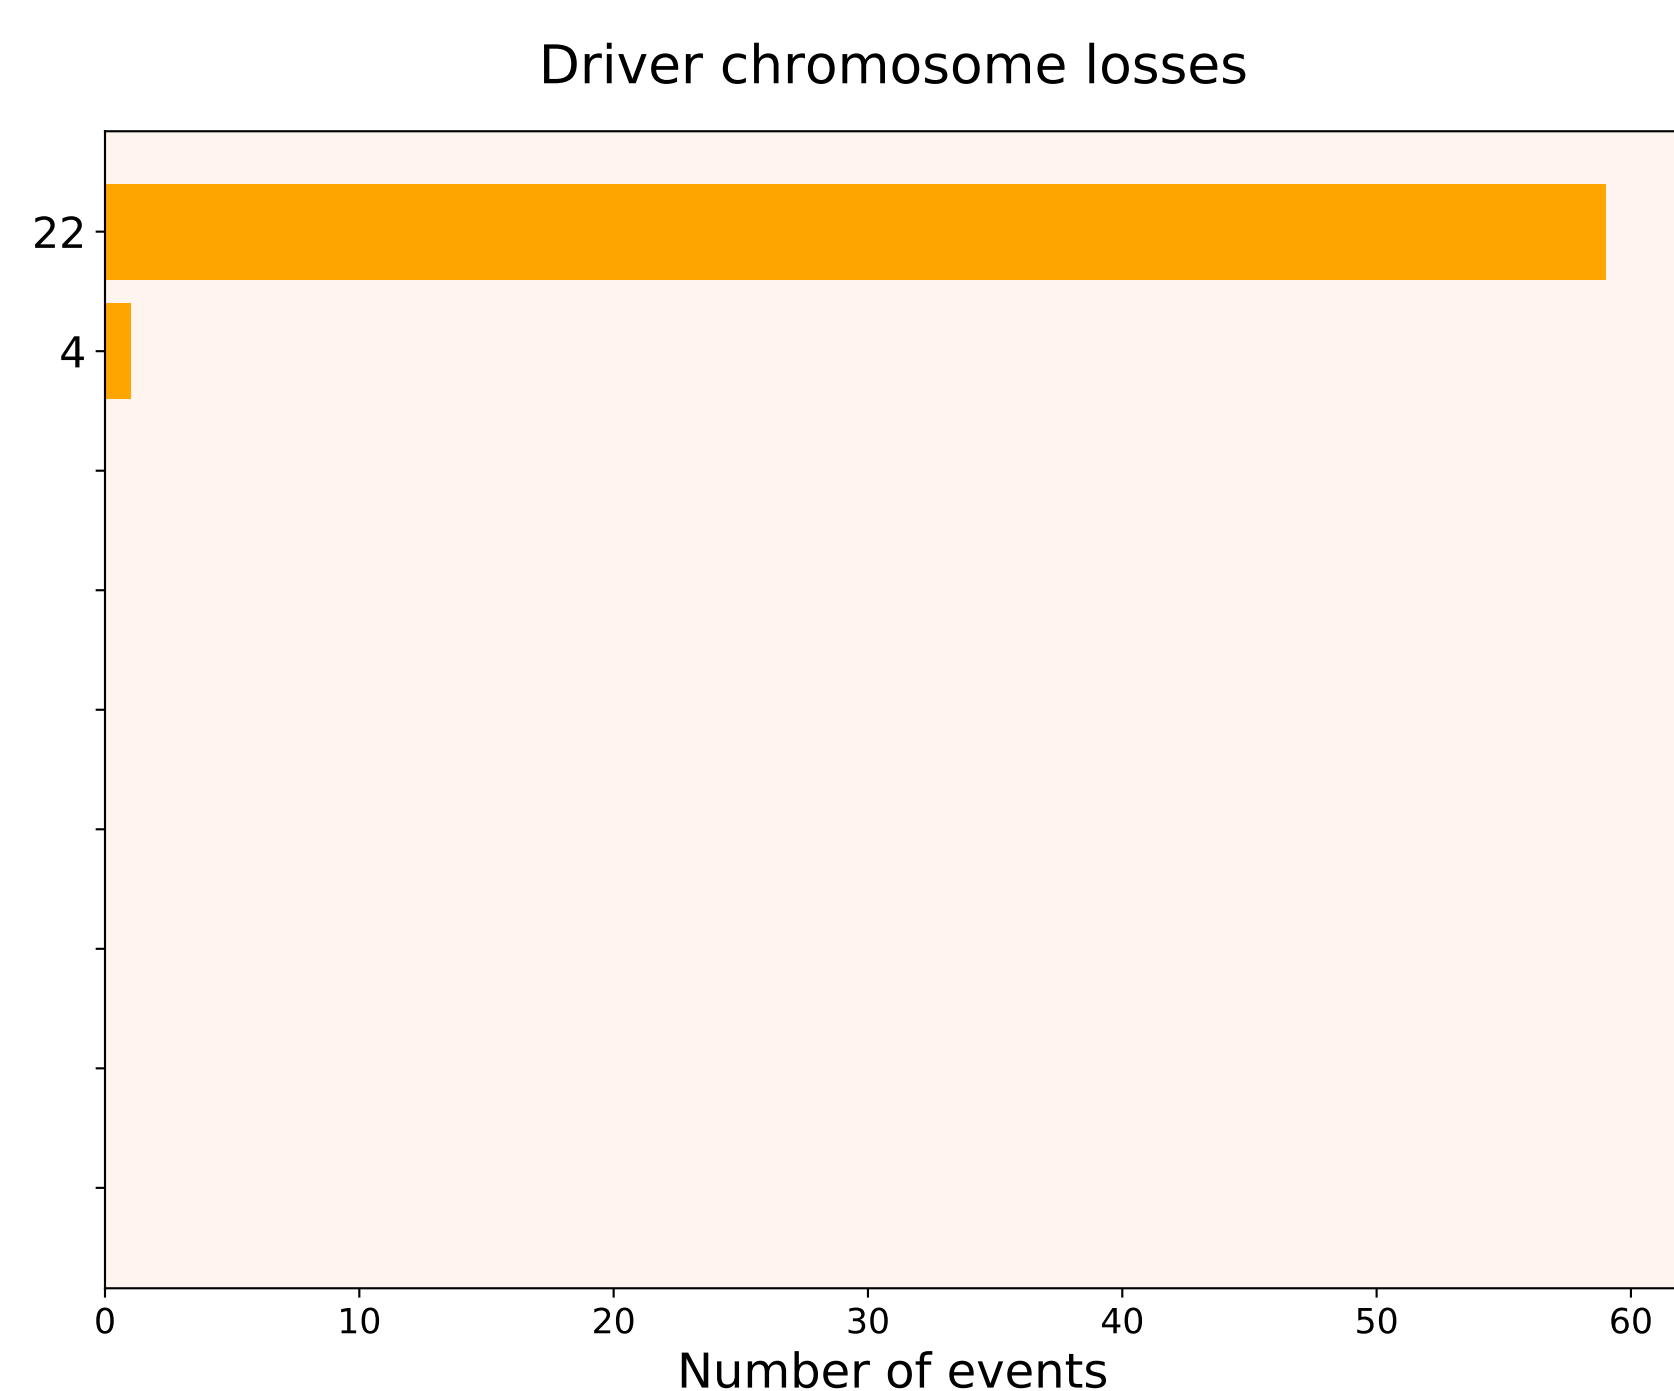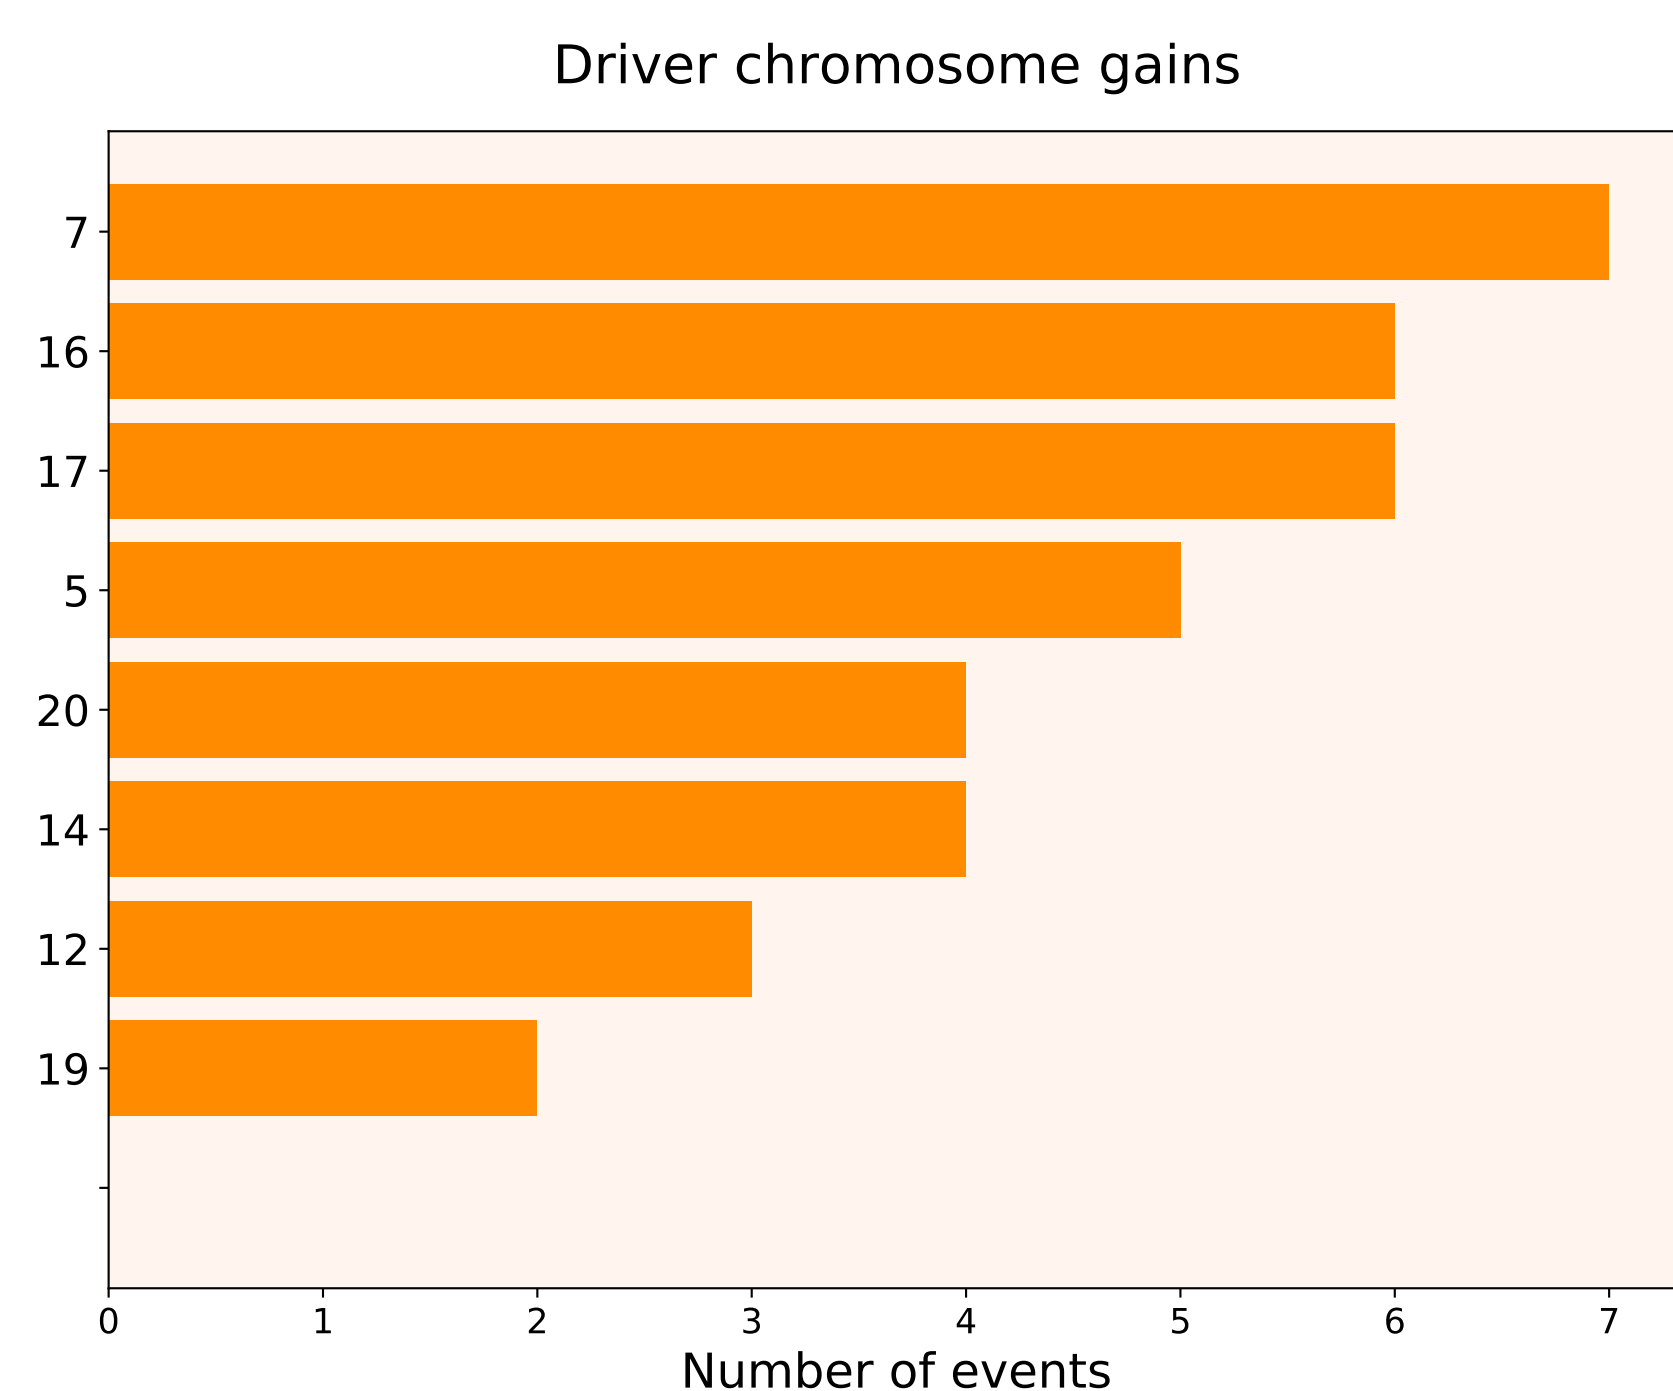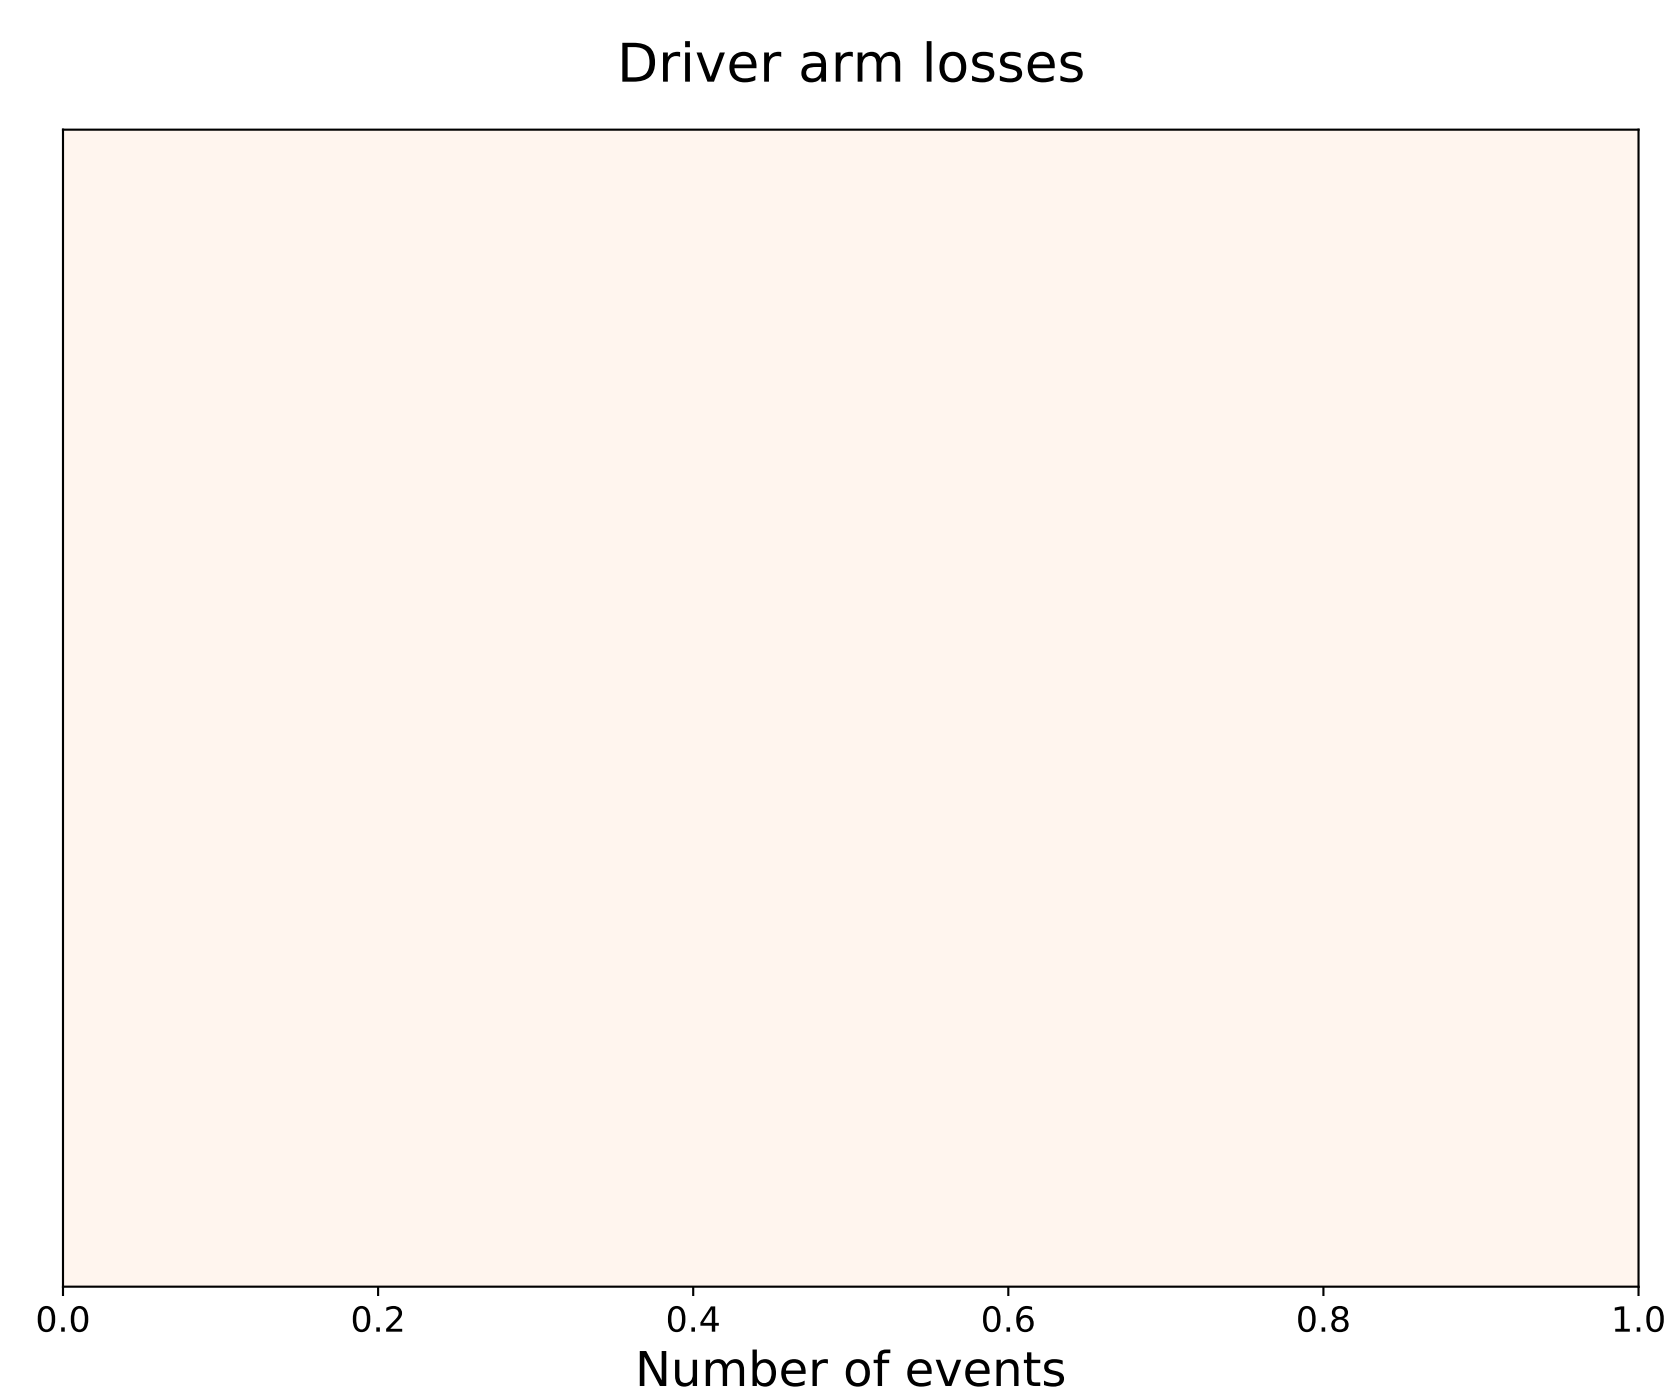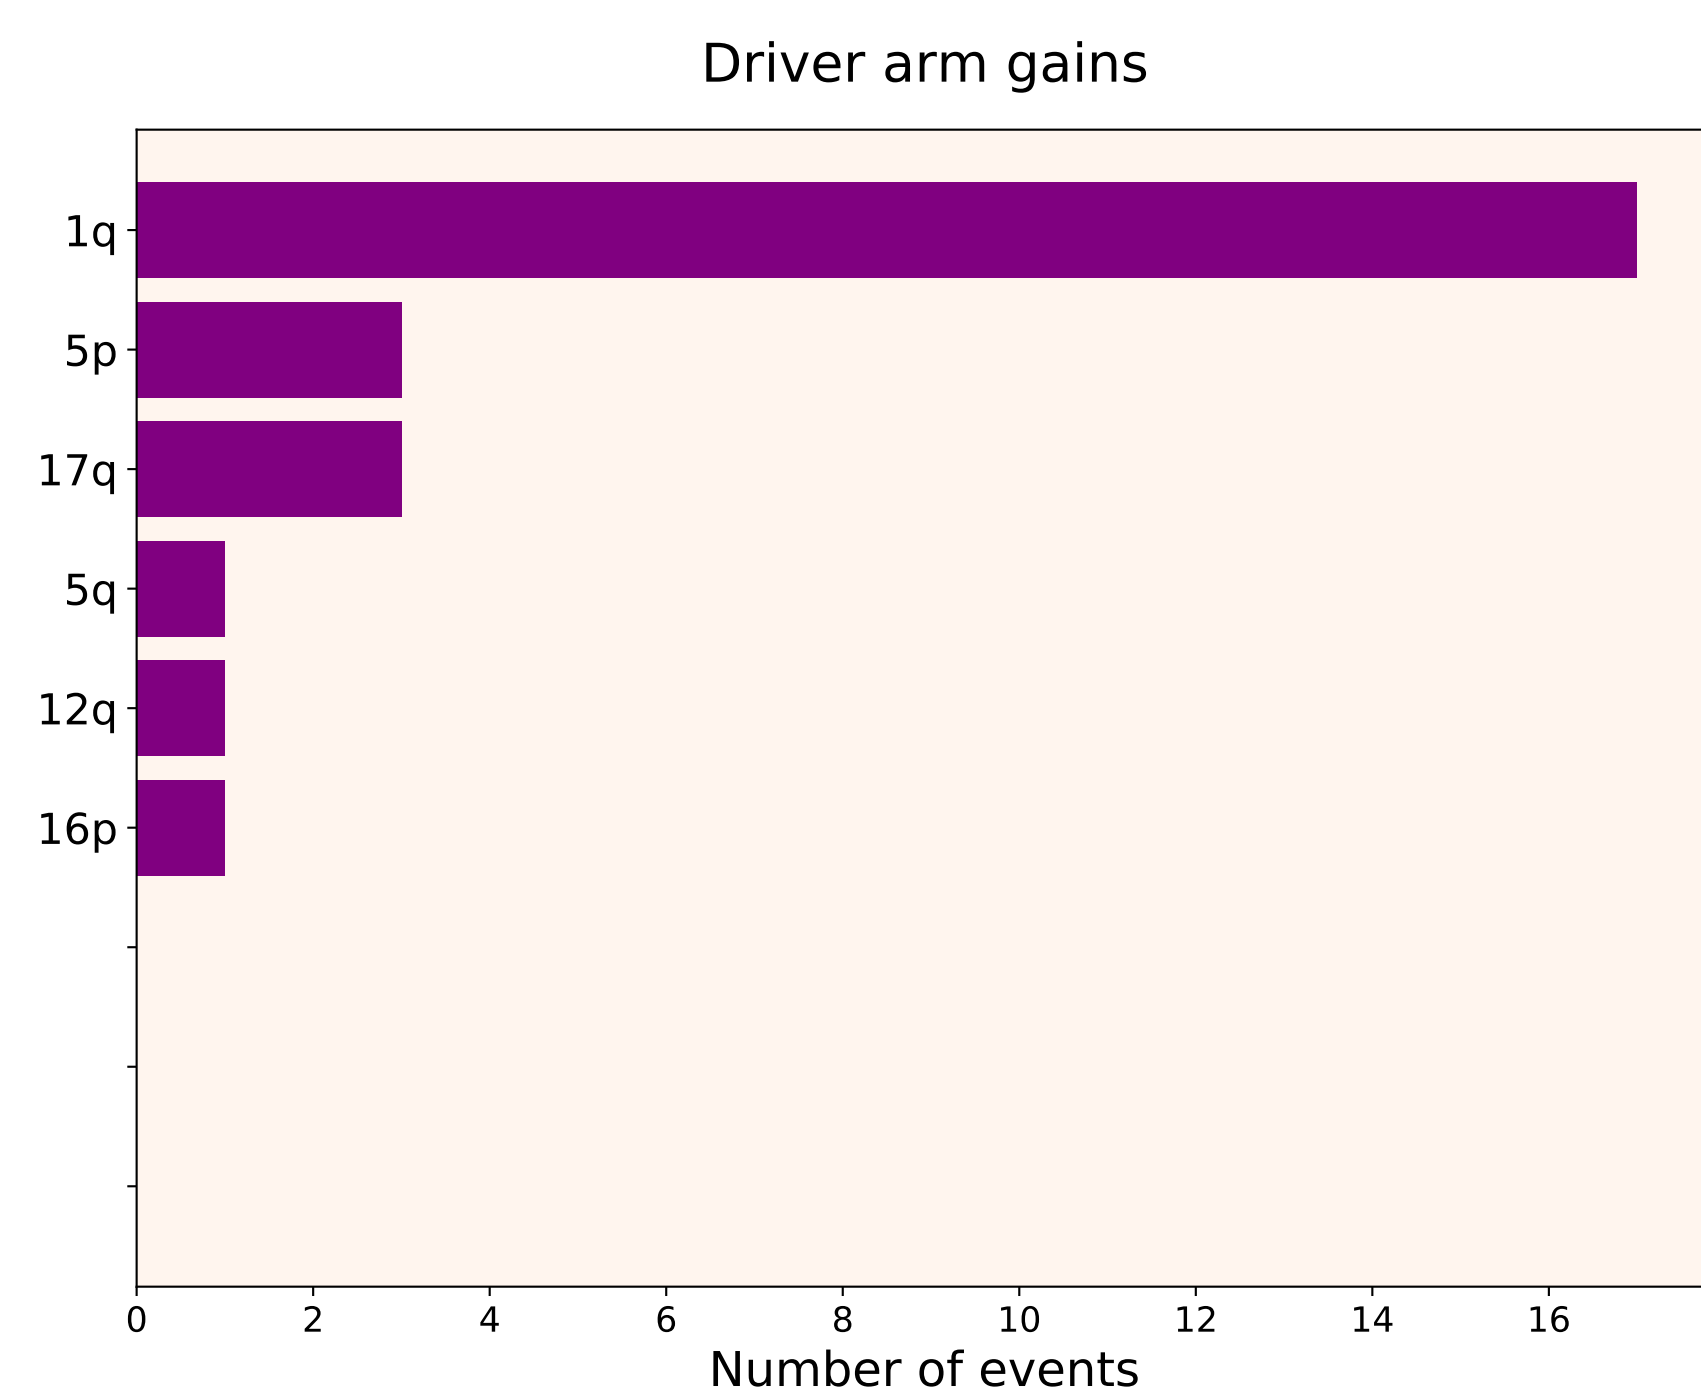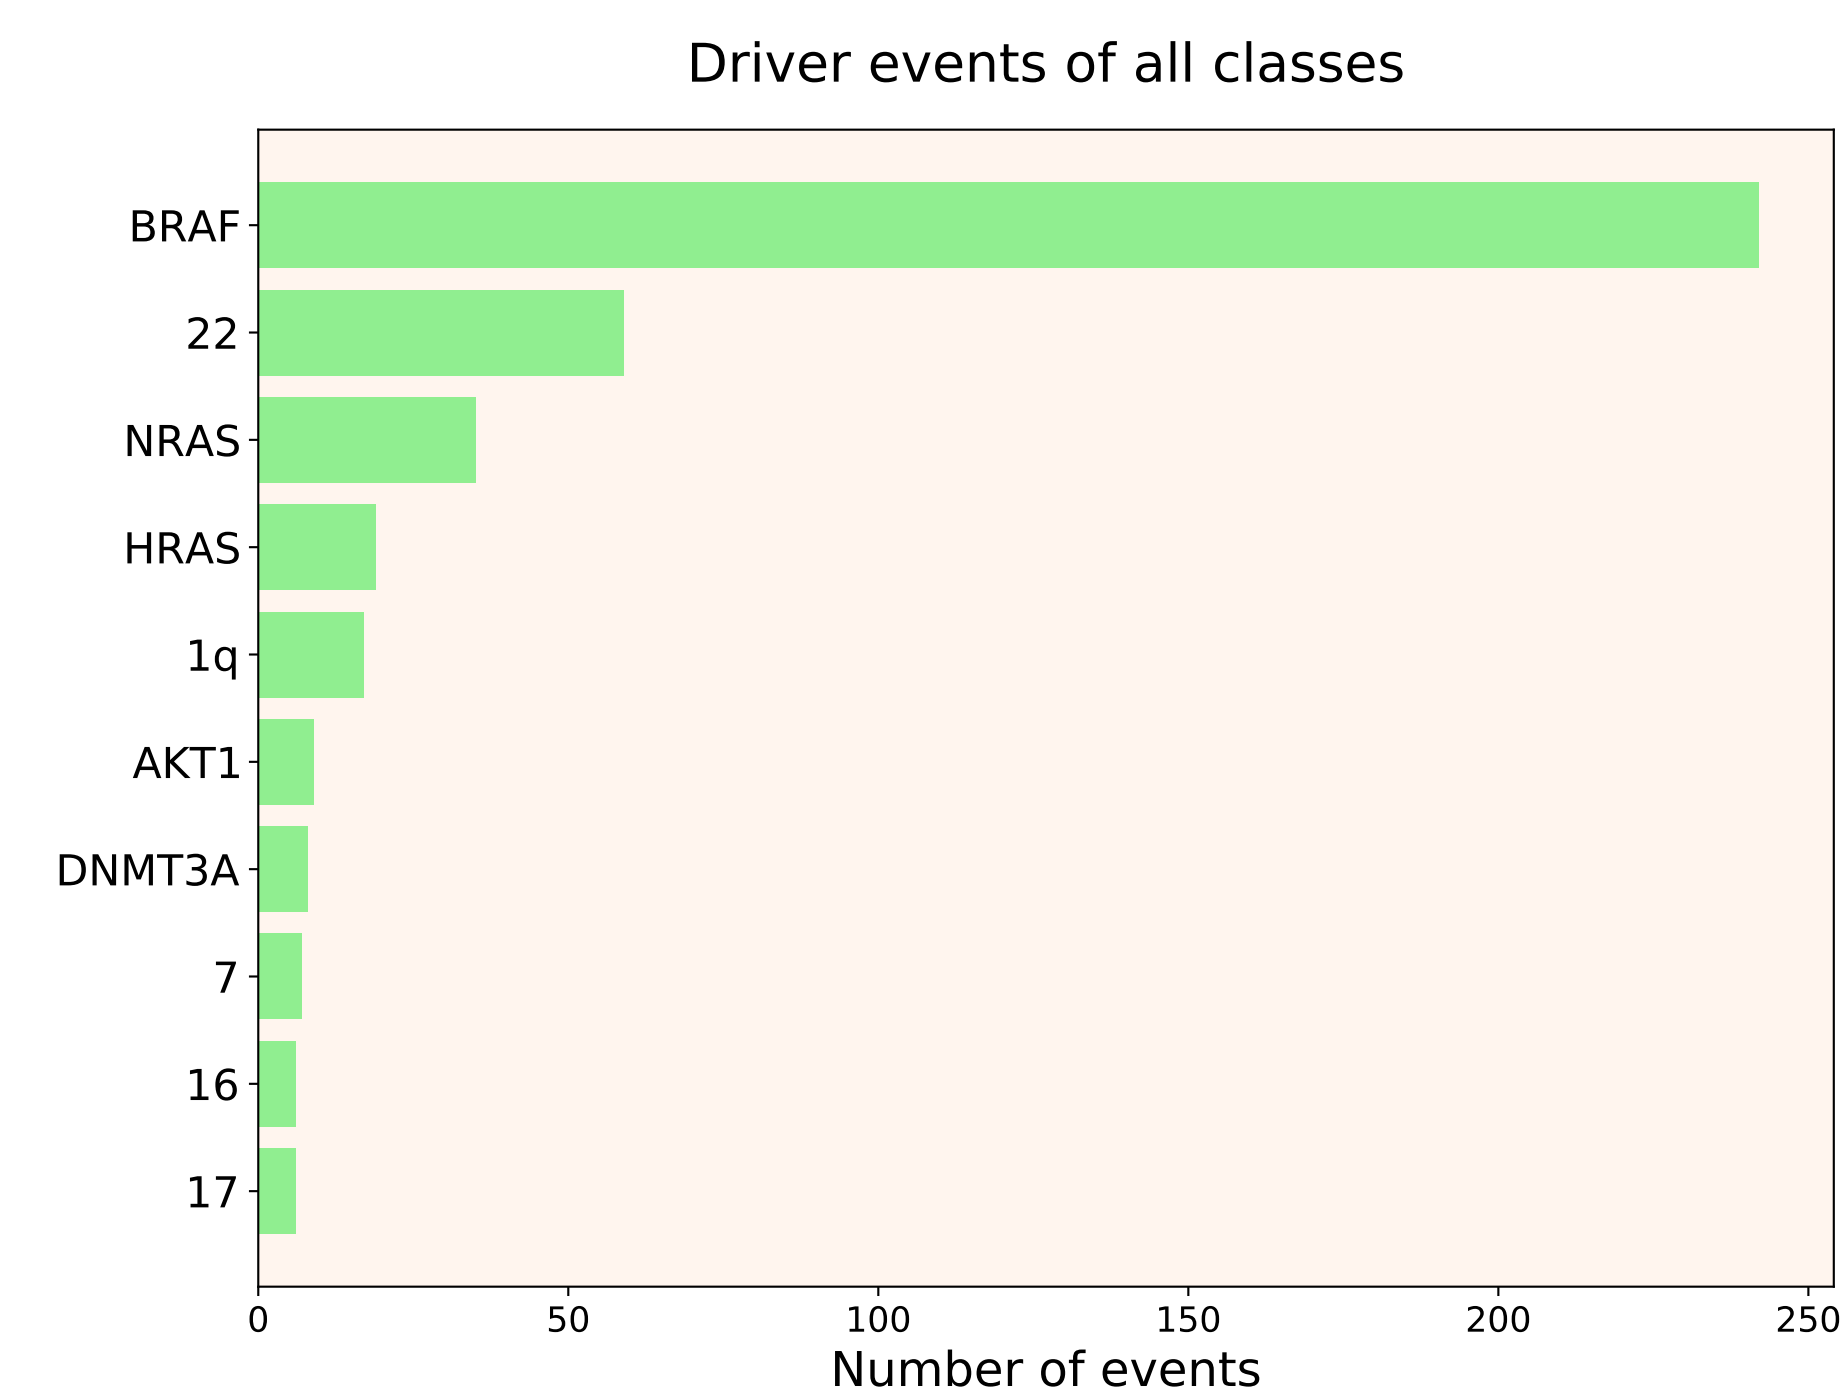

Supplement: Supplemental_Data_S1.zip [file Supplemental_Data_S1.zip]

# CHOL\_MALE

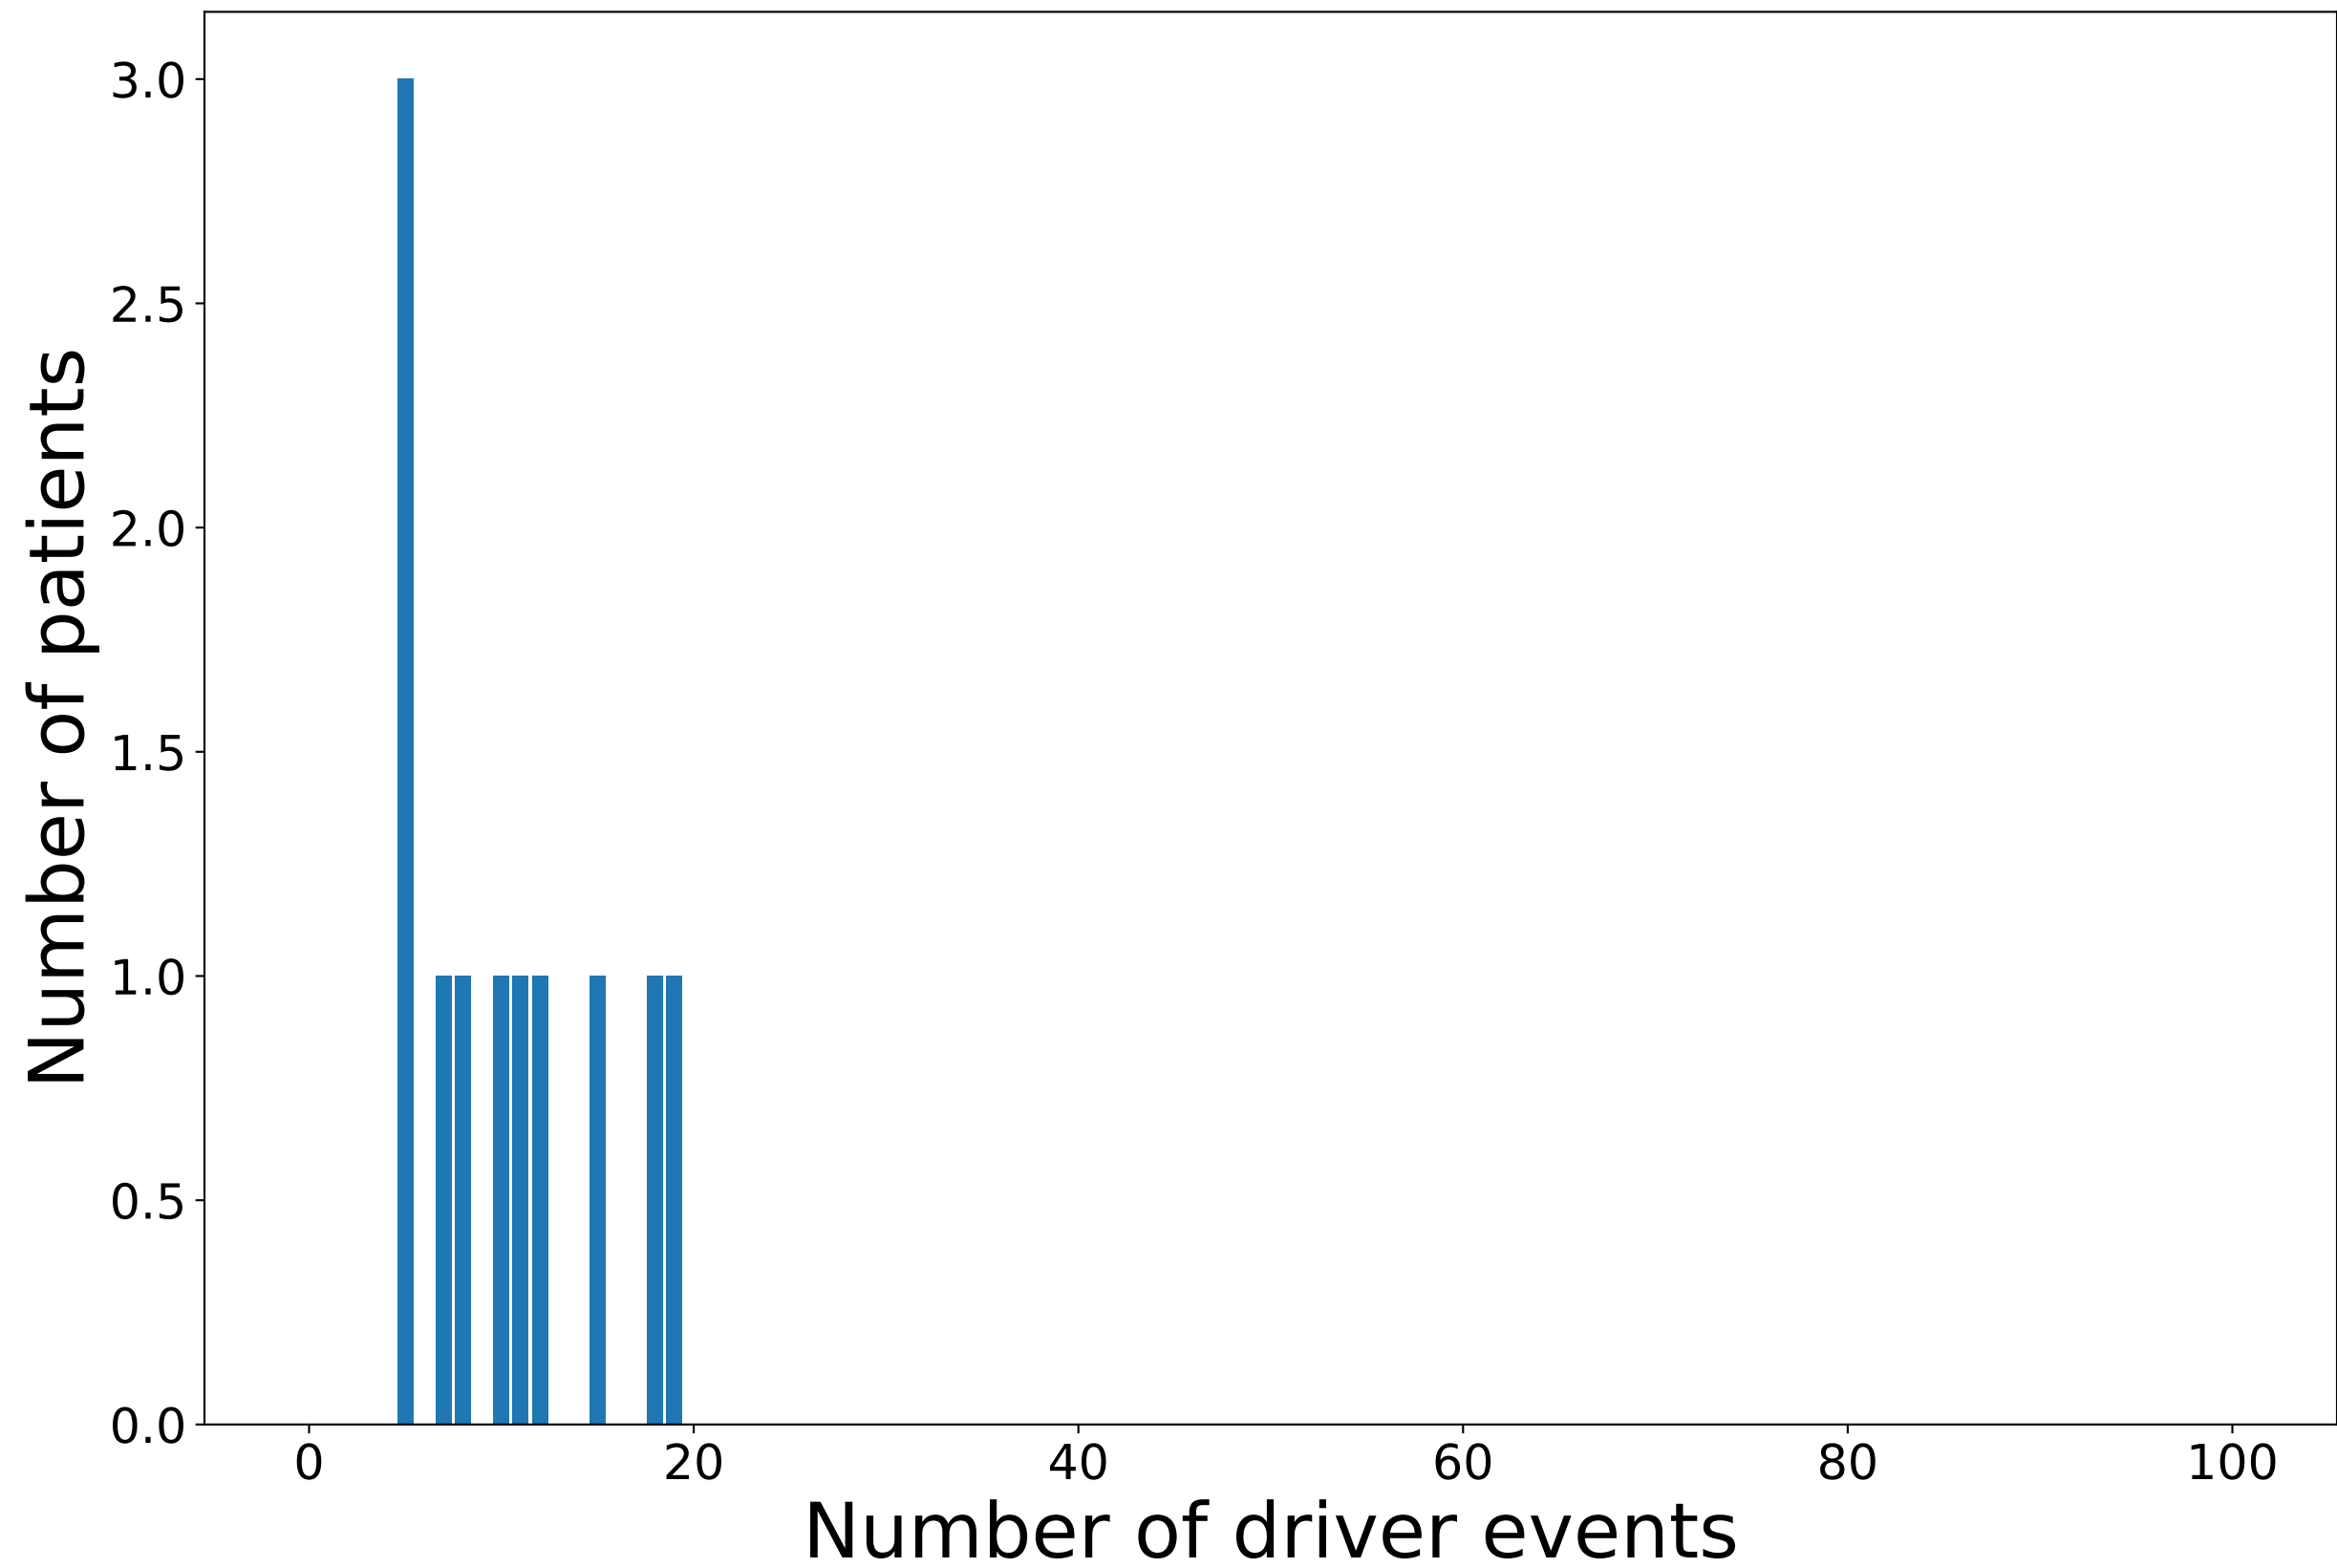

Supplement: Supplemental_Data_S1.zip [file Supplemental_Data_S1.zip]

# CESC\_FEMALE

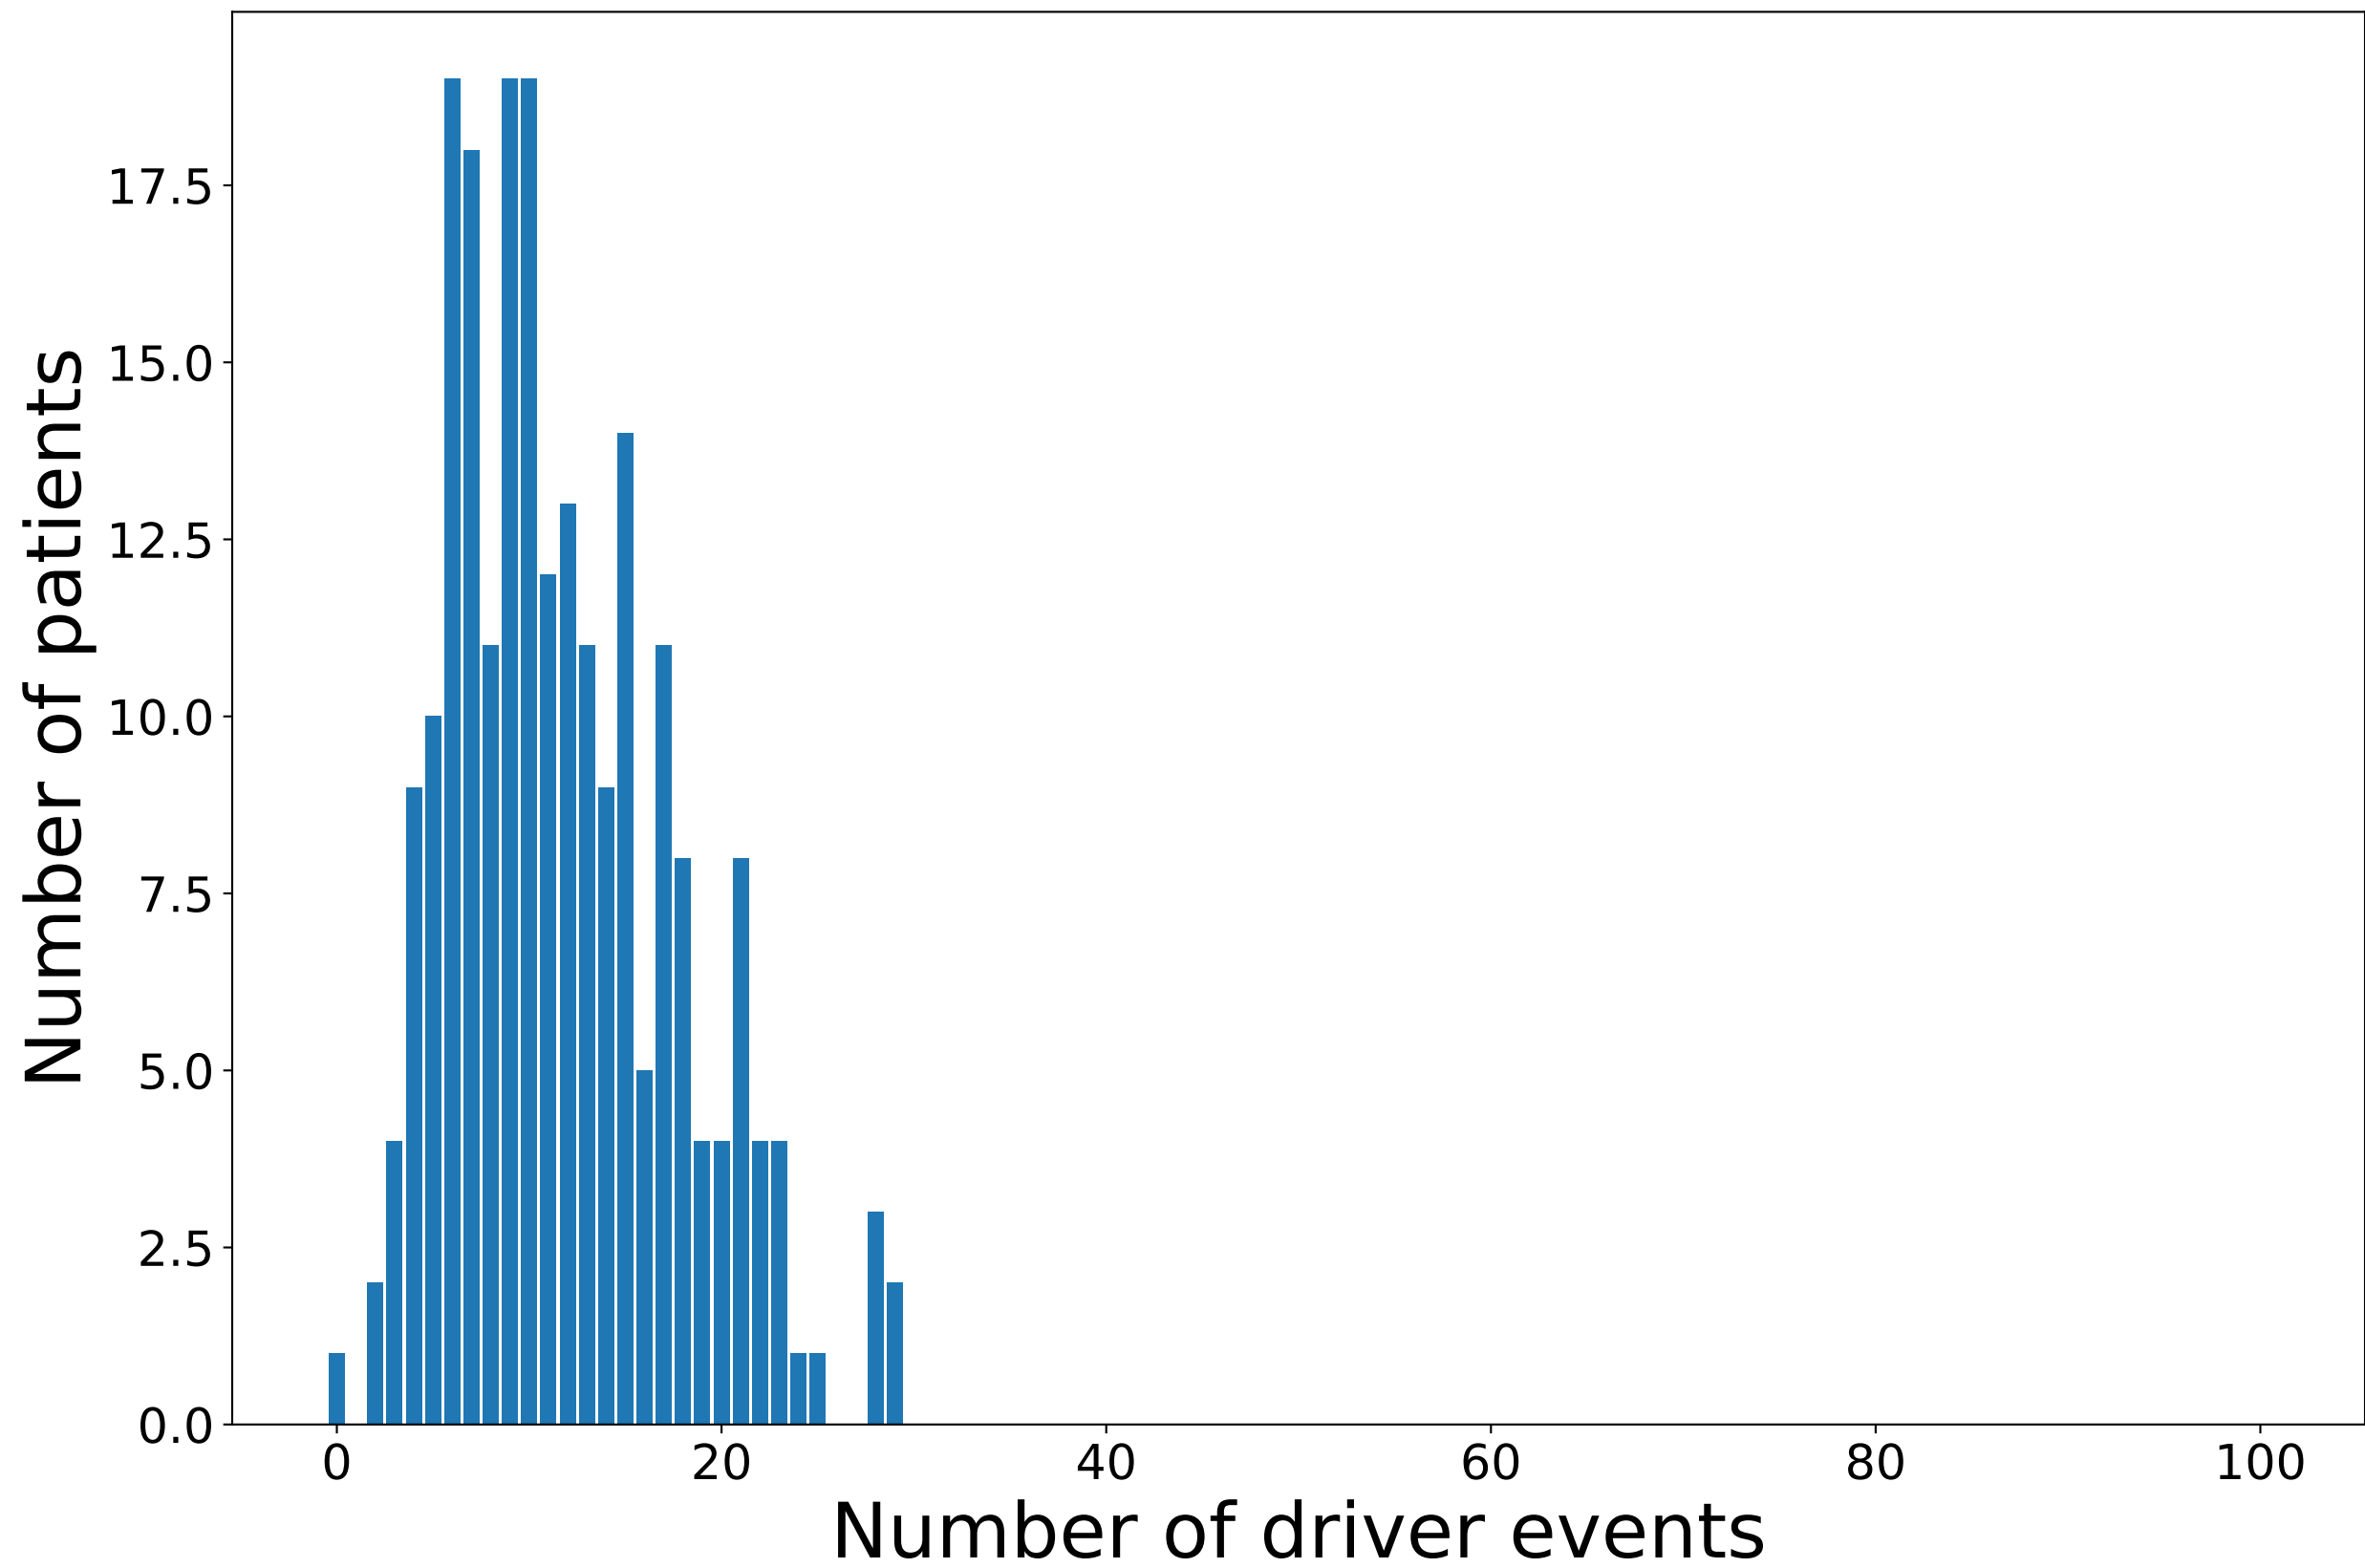

Supplement: Supplemental_Data_S1.zip [file Supplemental_Data_S1.zip]

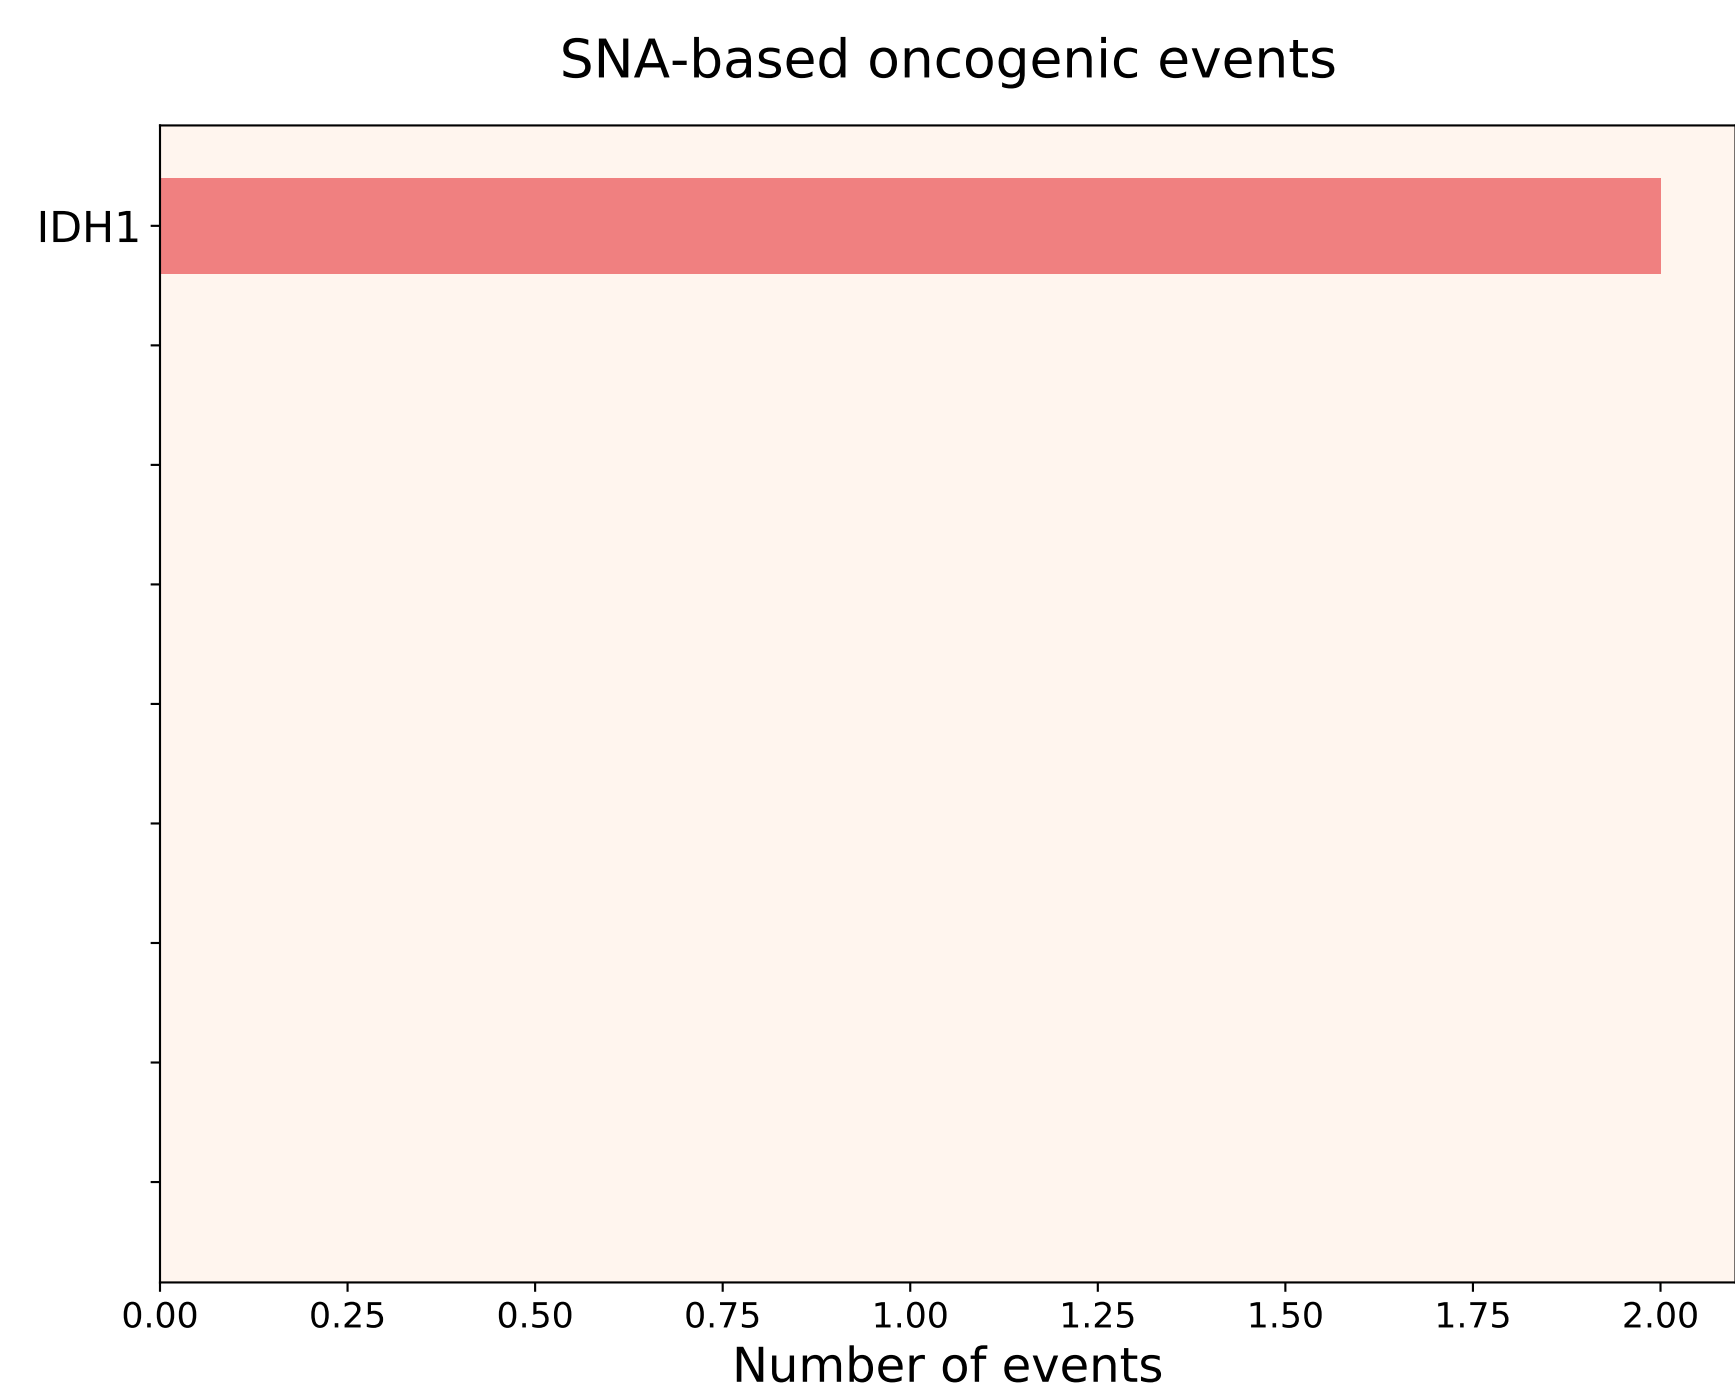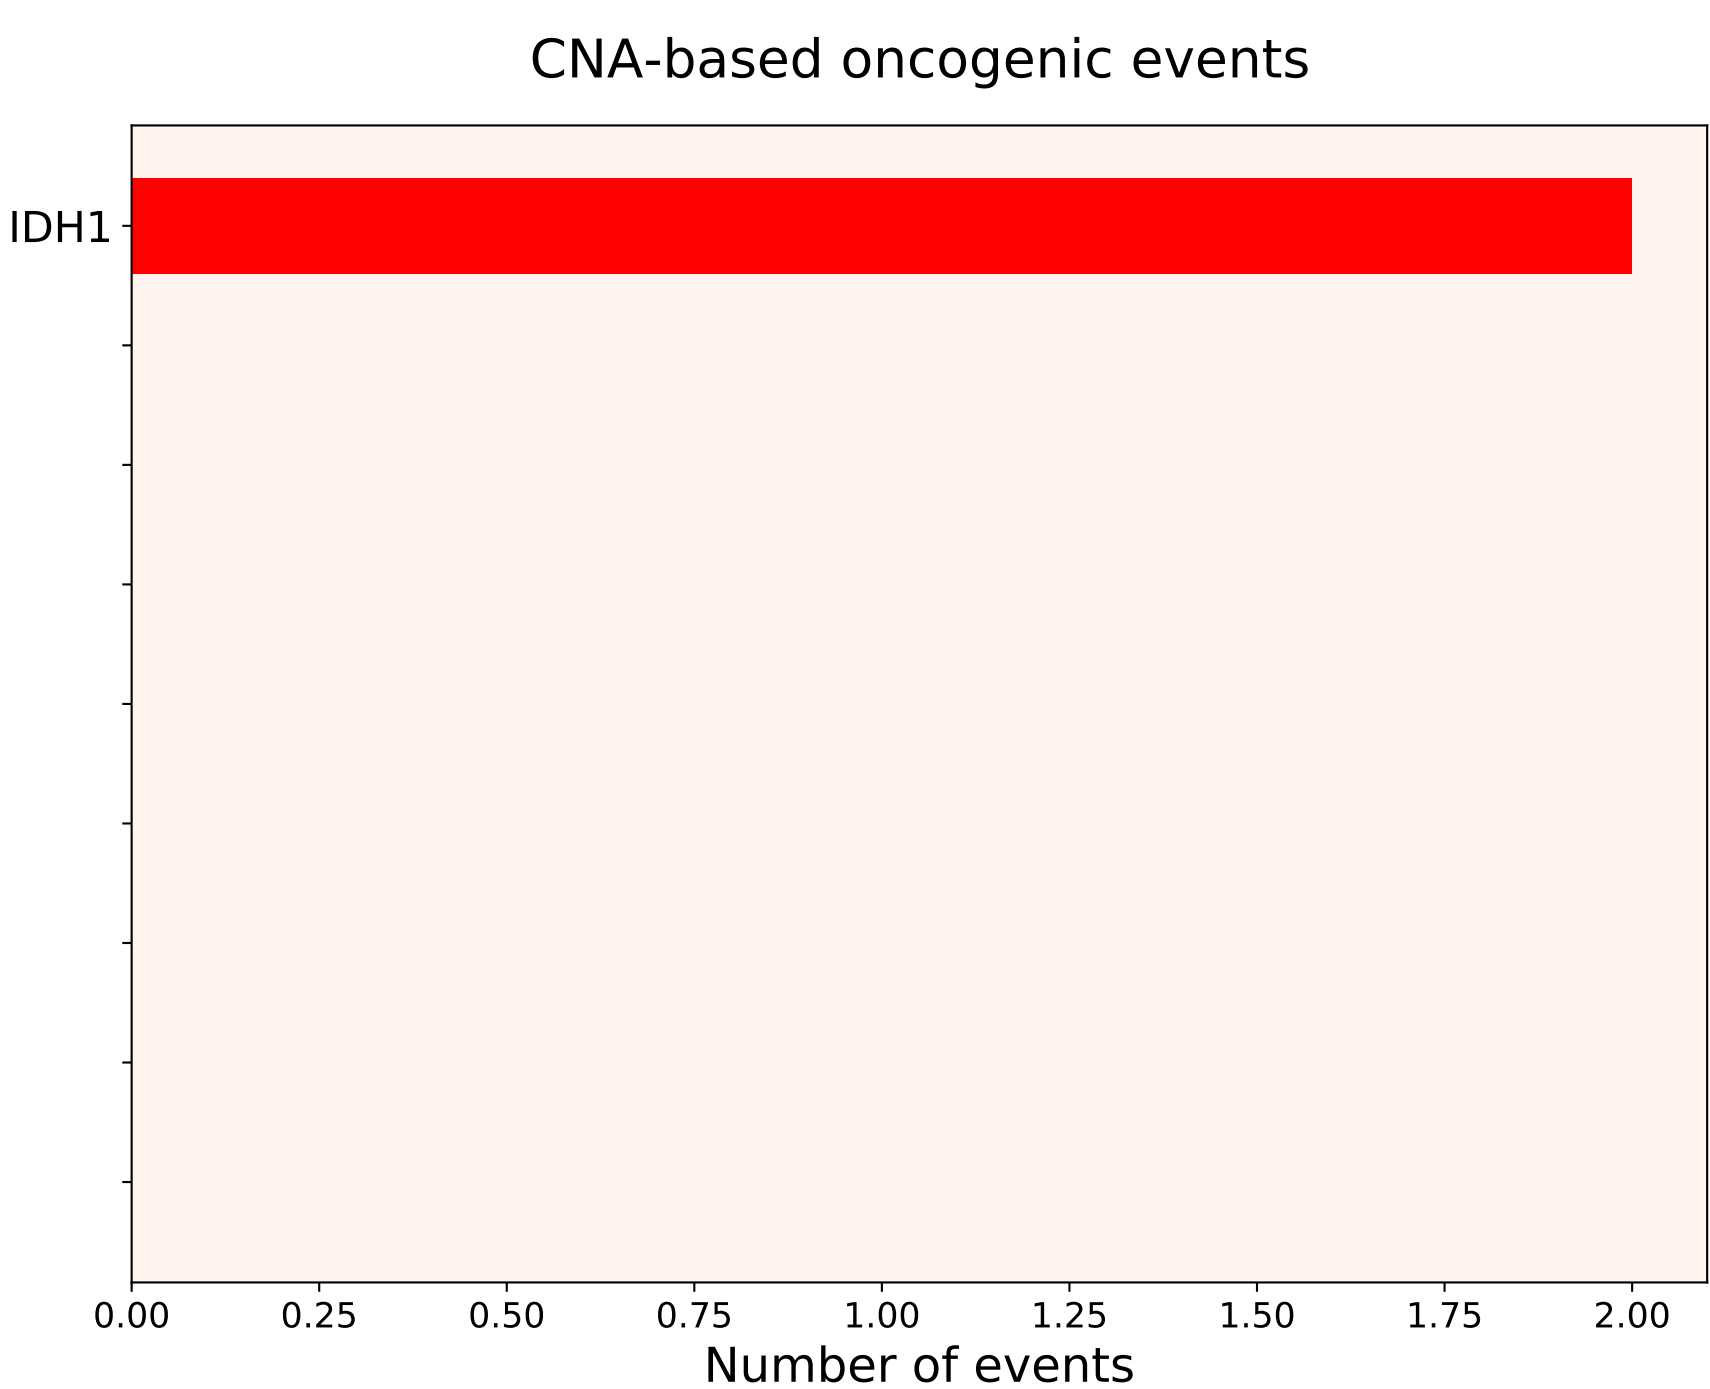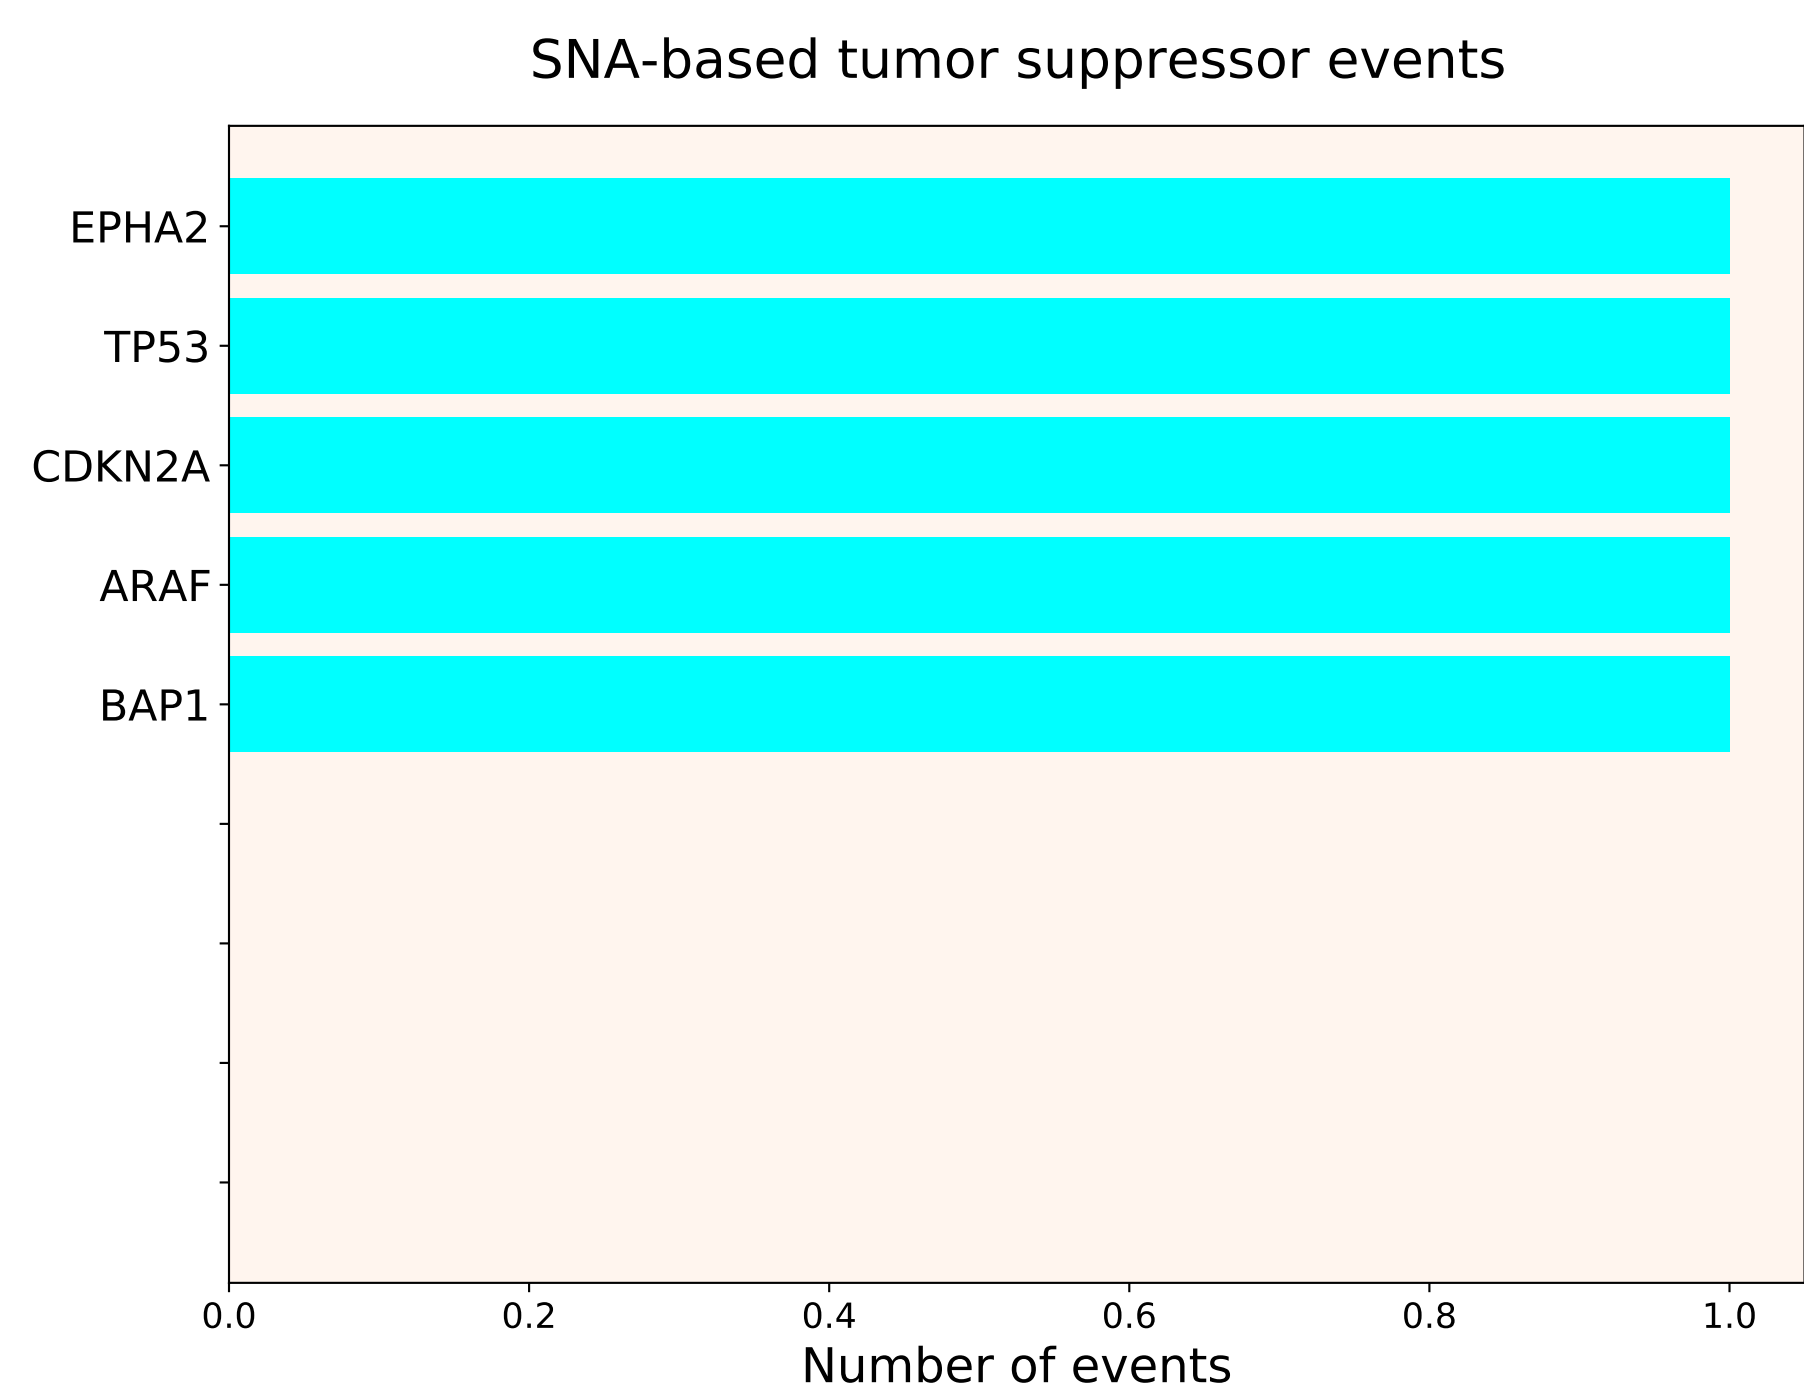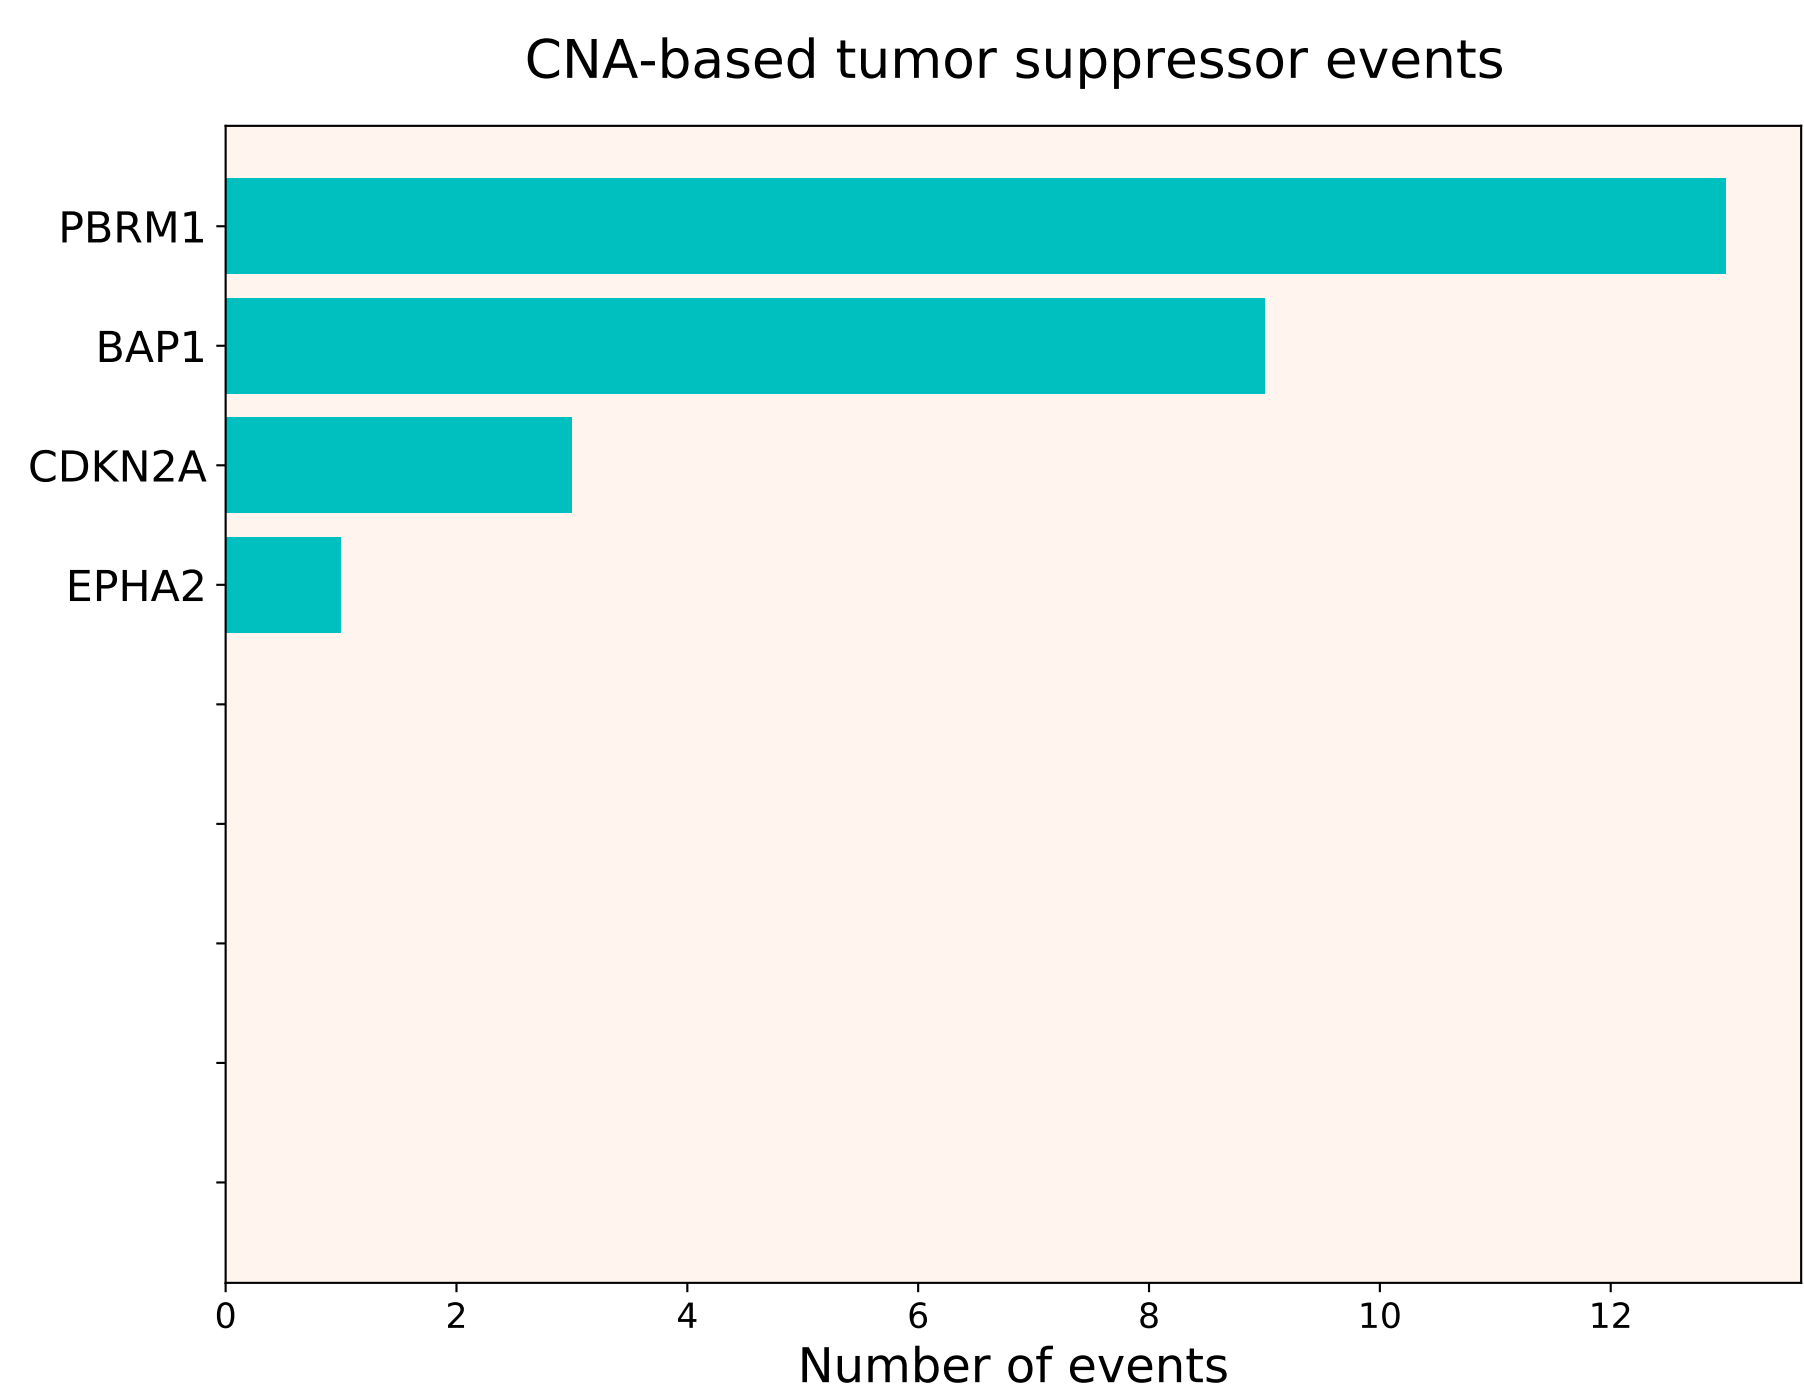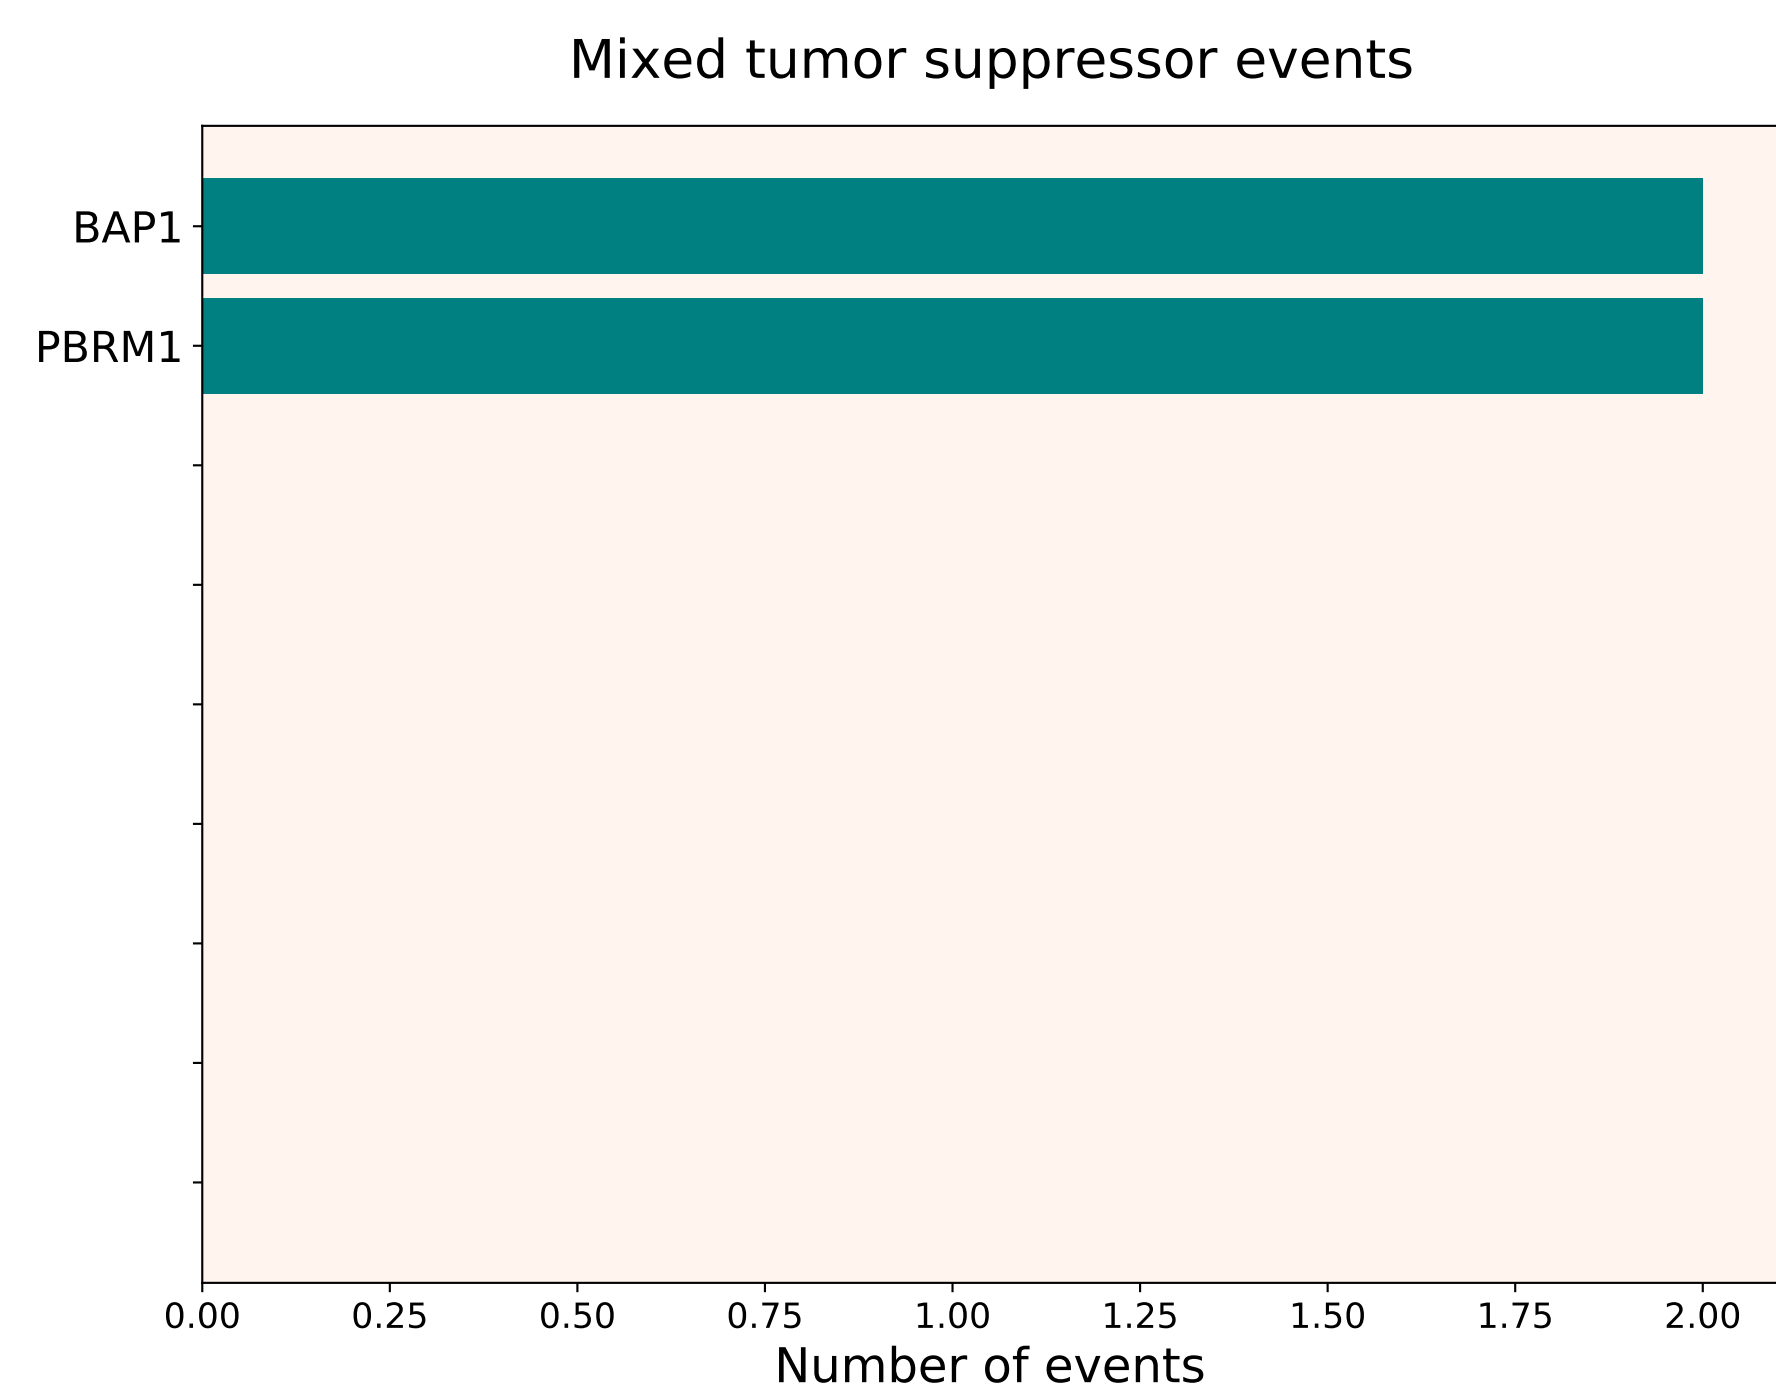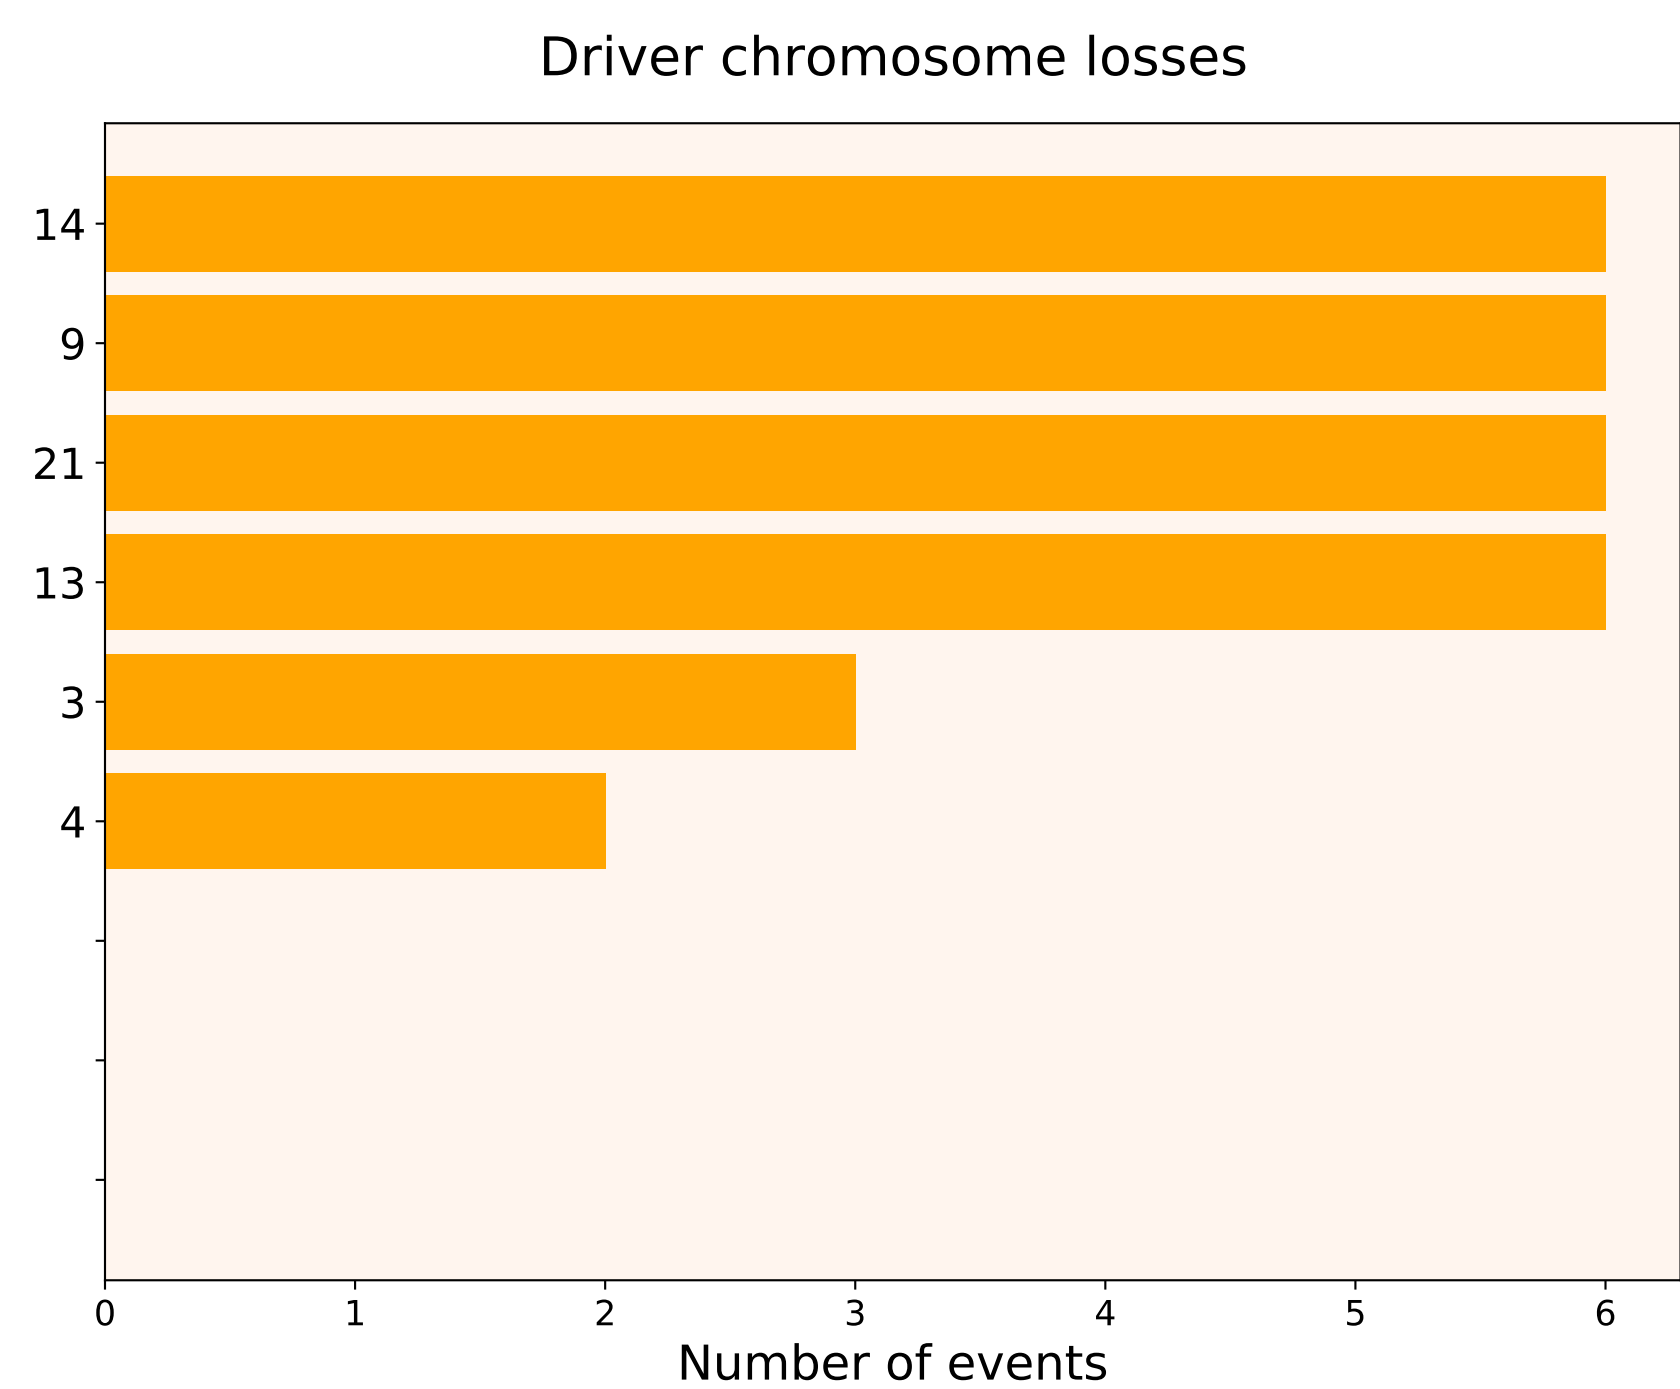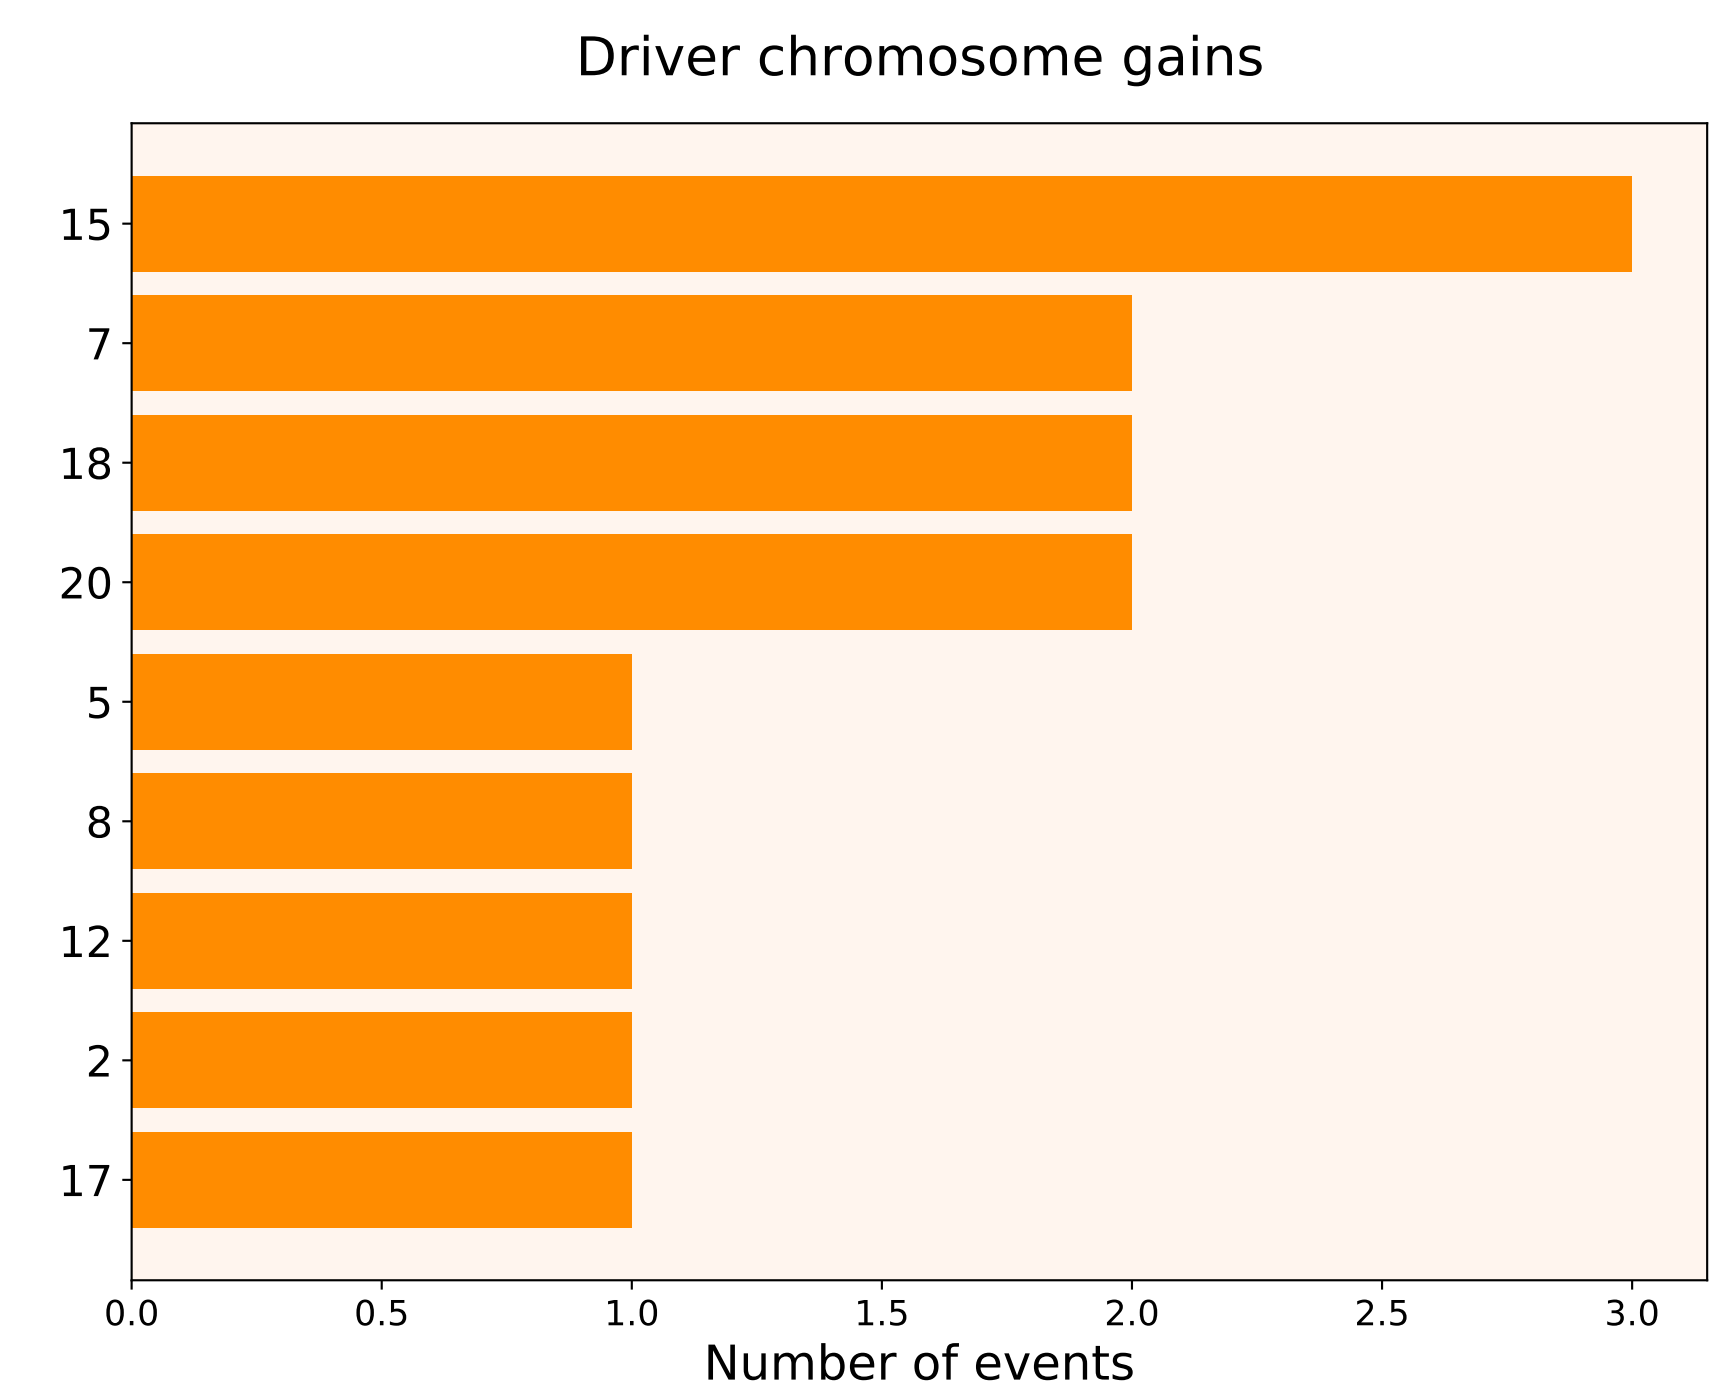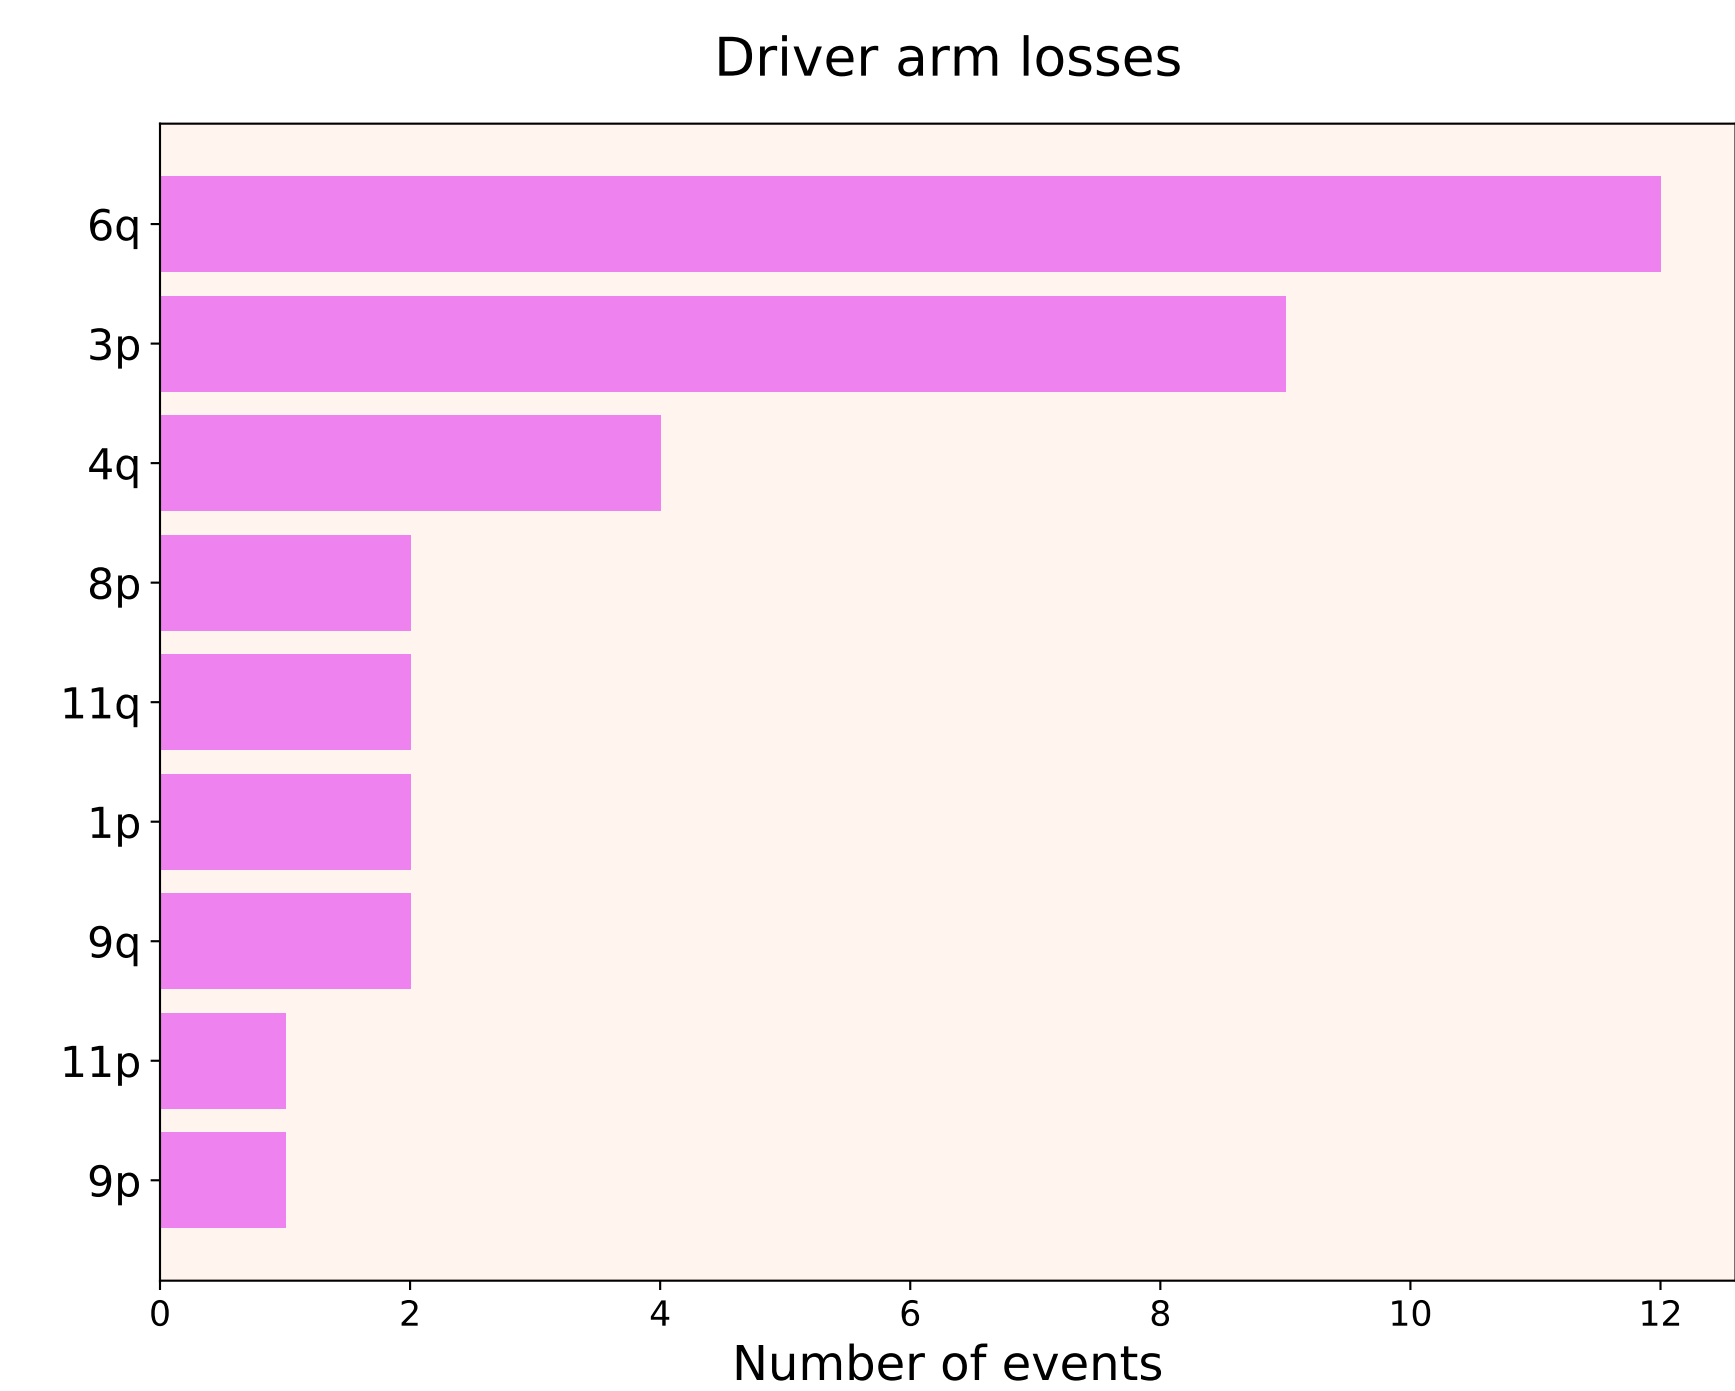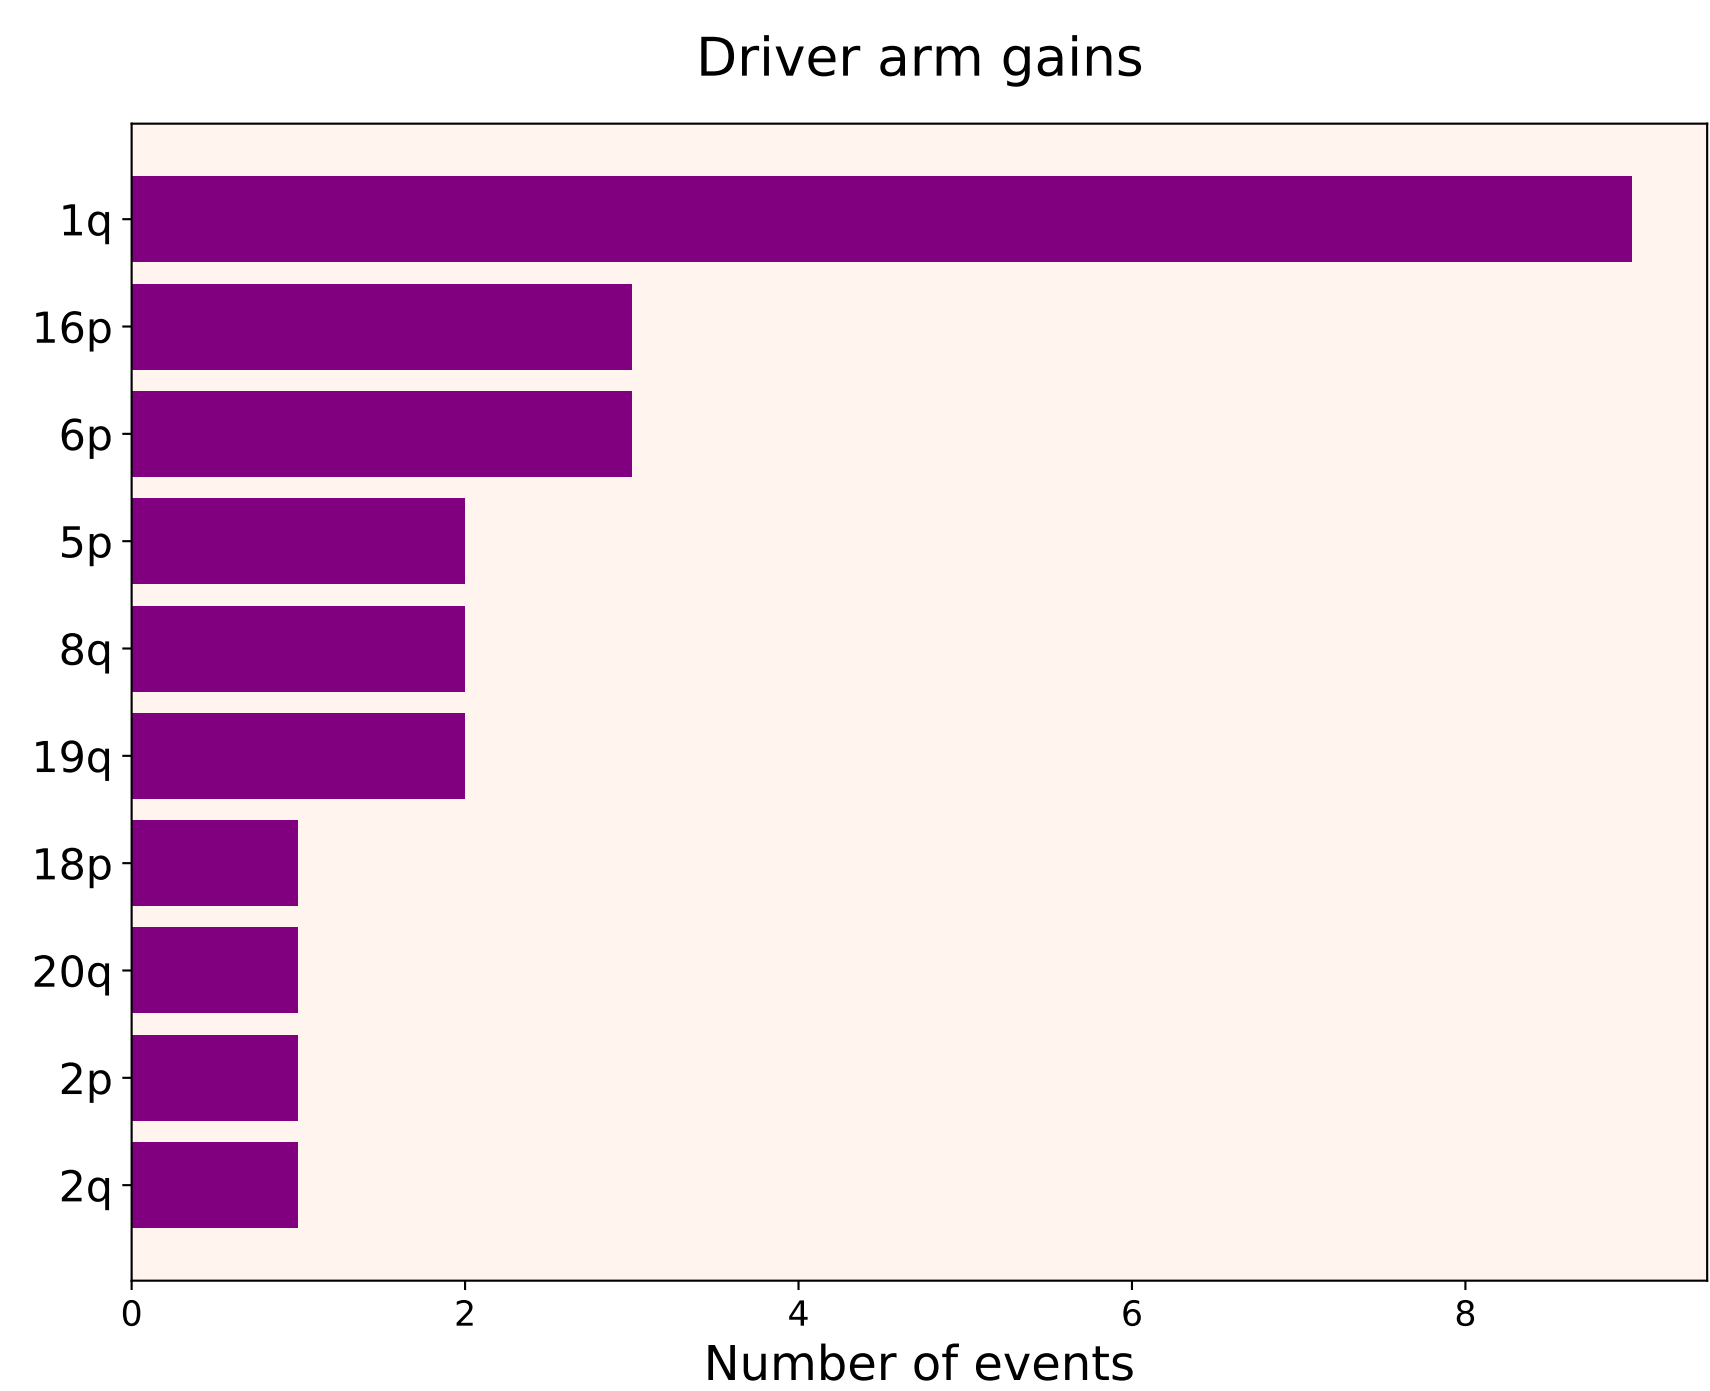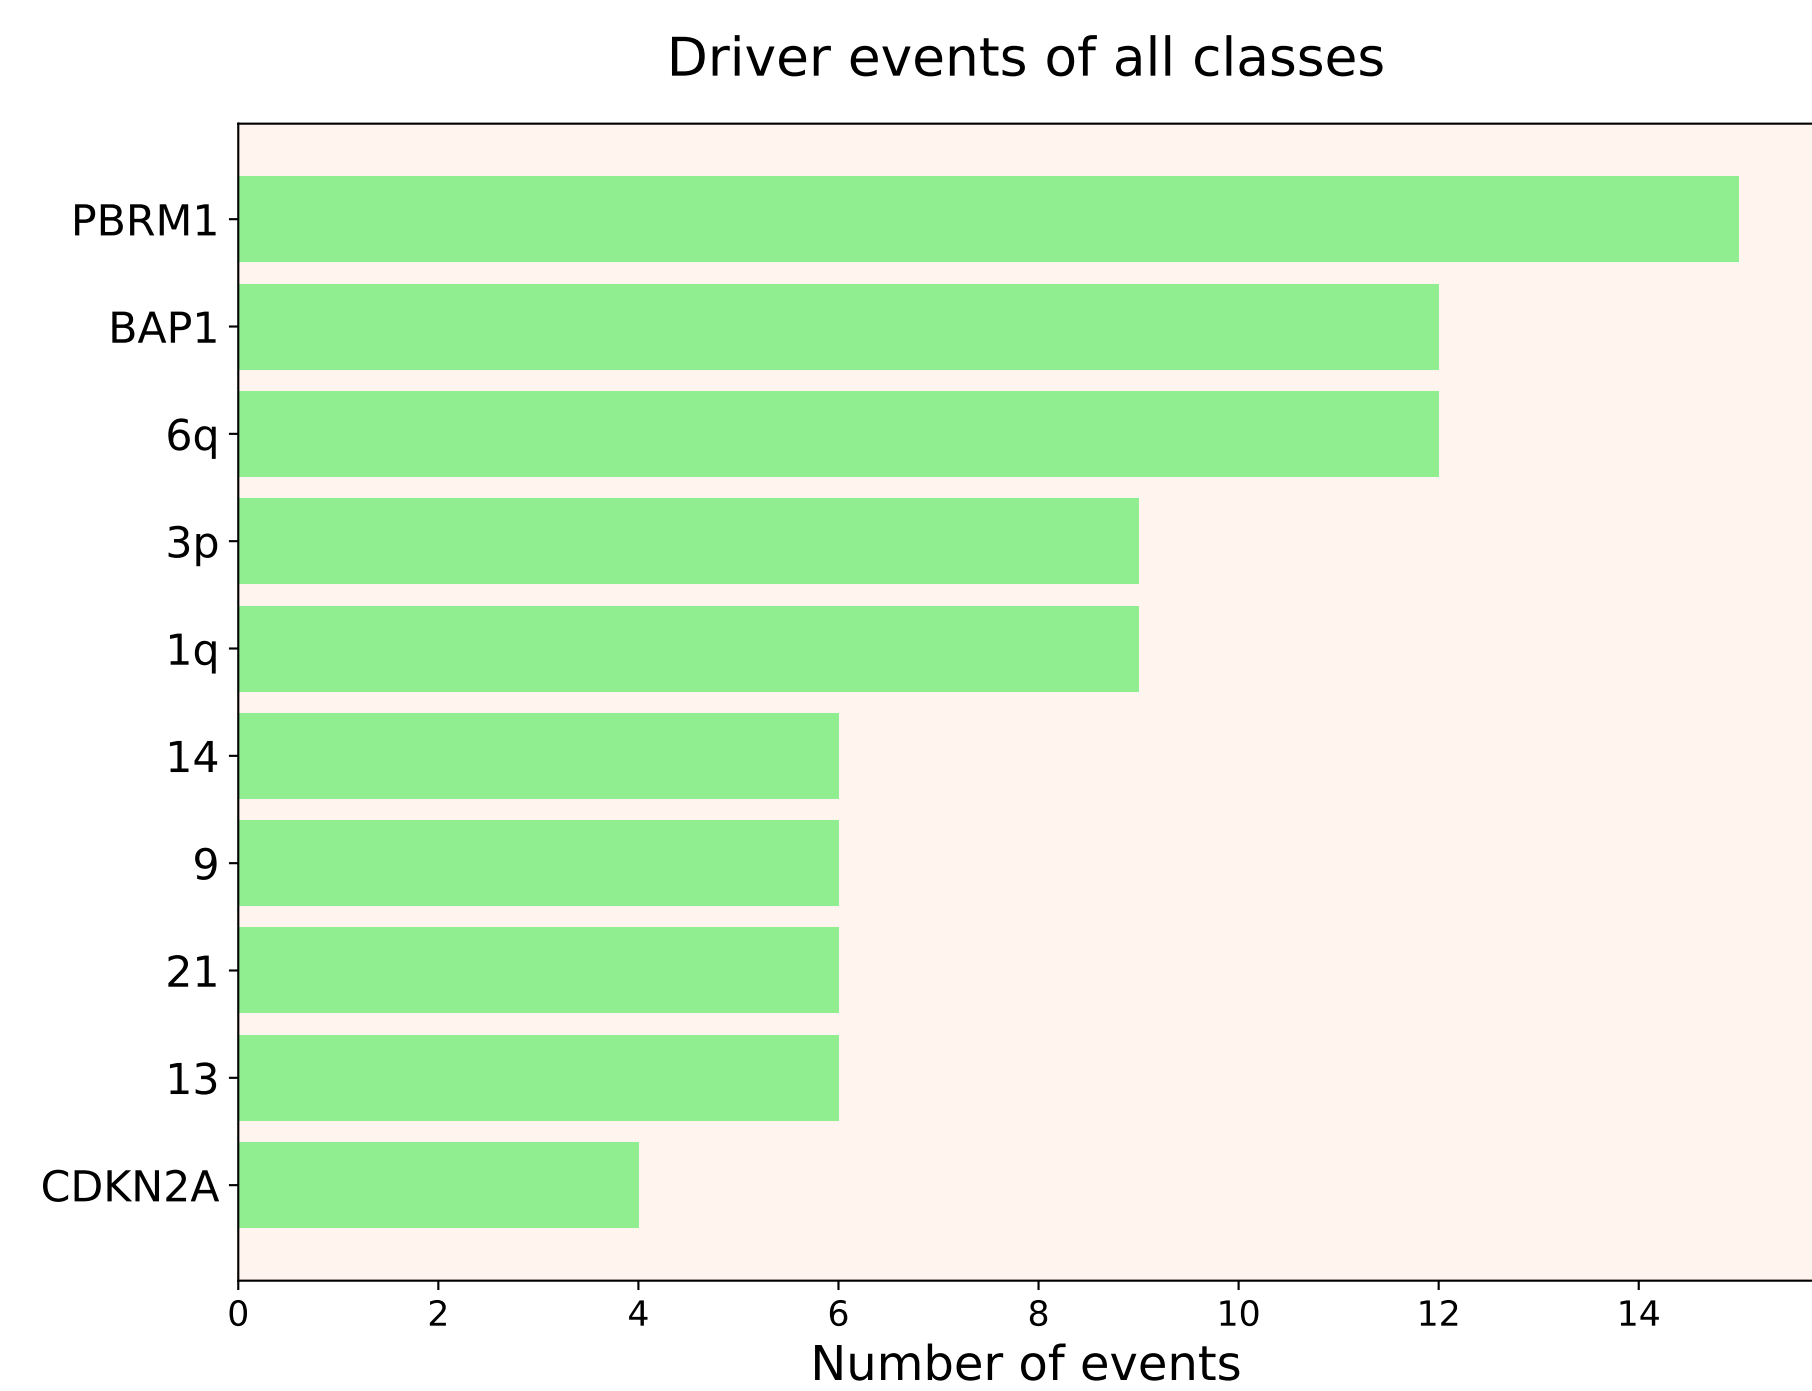

Supplement: Supplemental_Data_S1.zip [file Supplemental_Data_S1.zip]

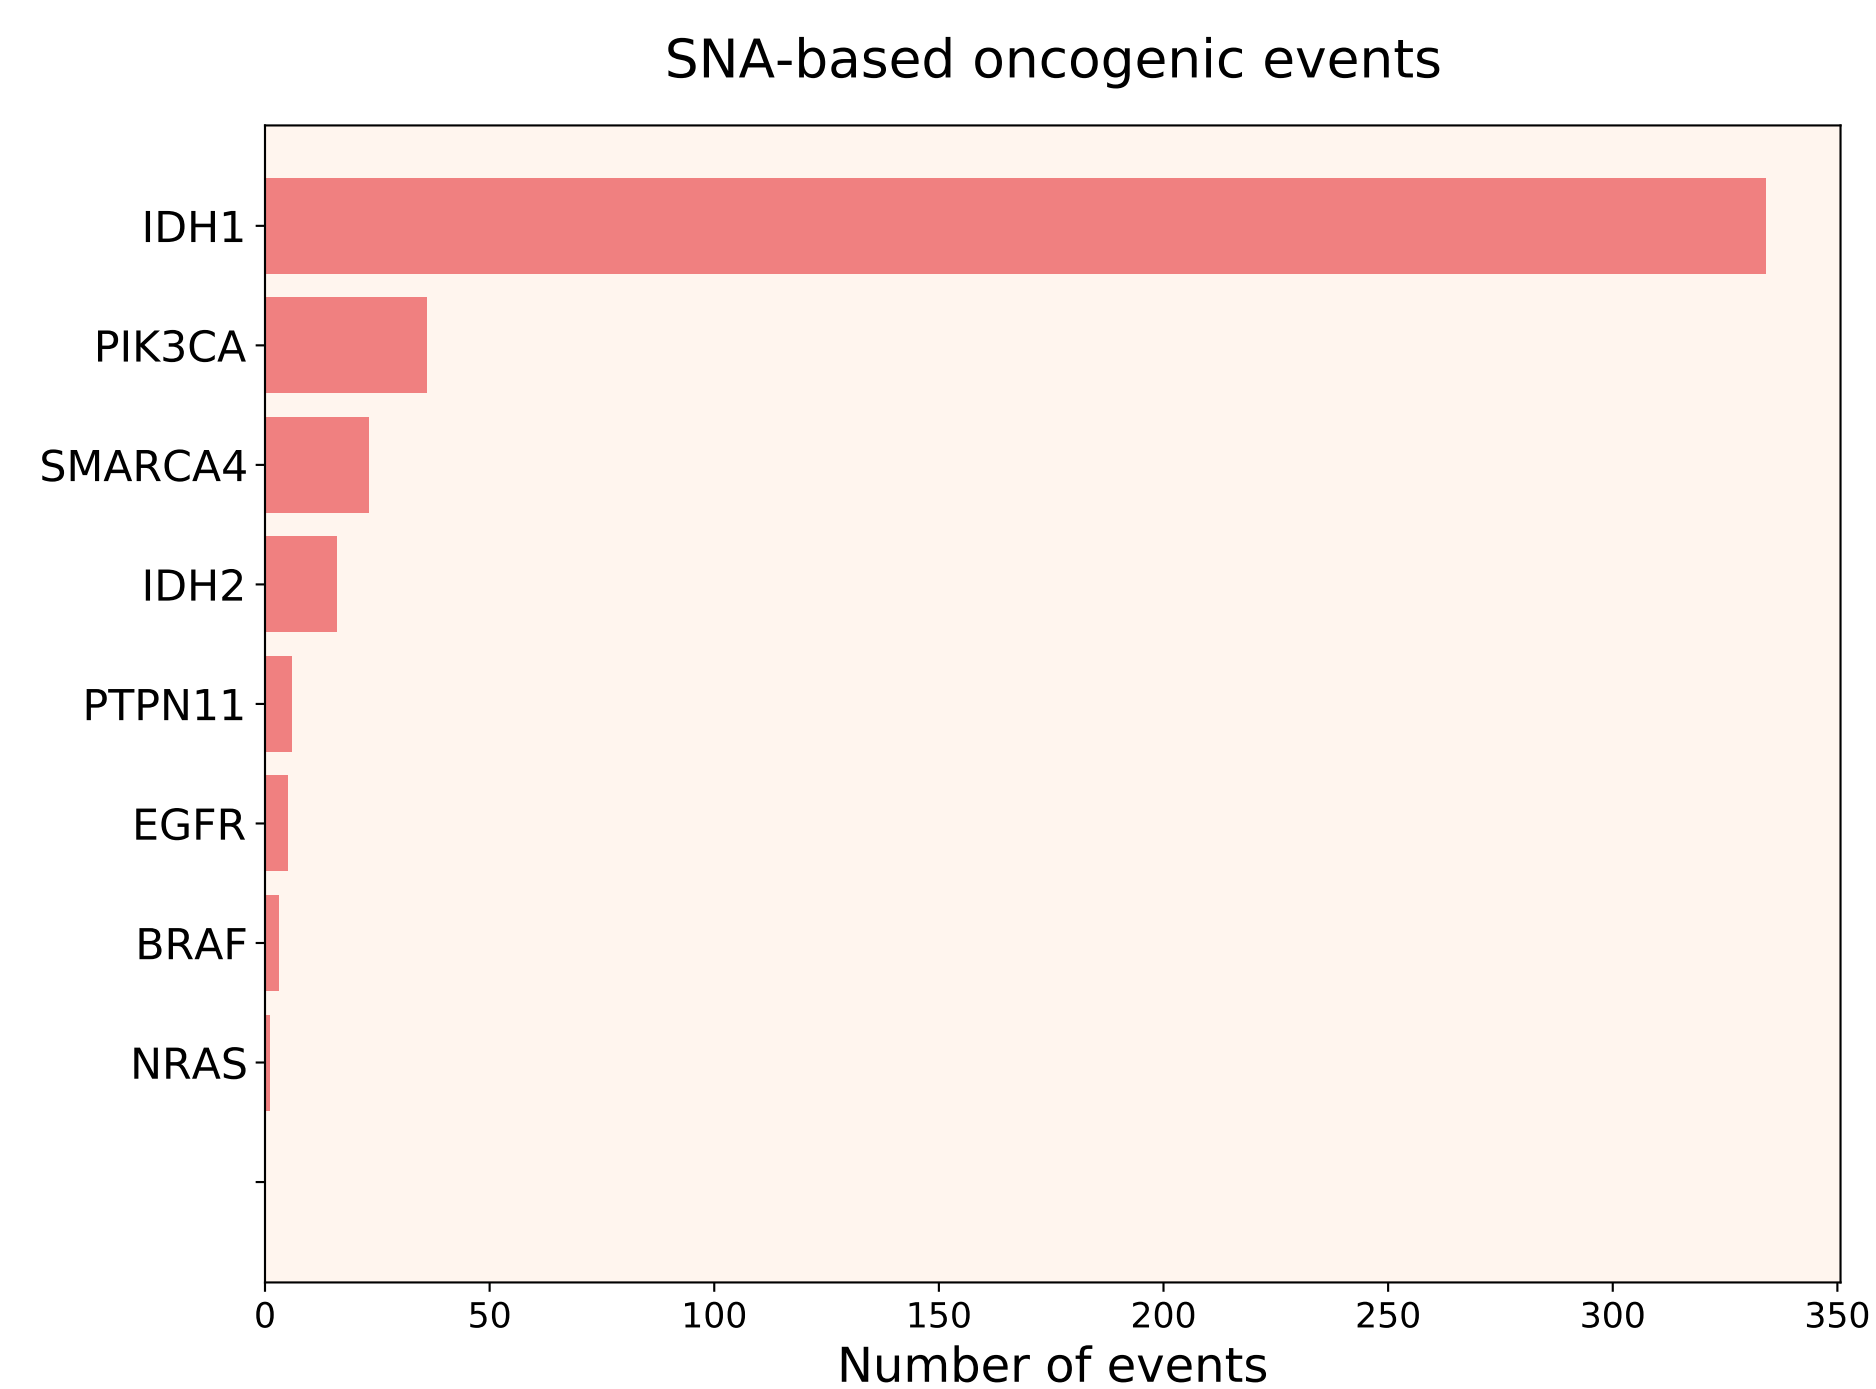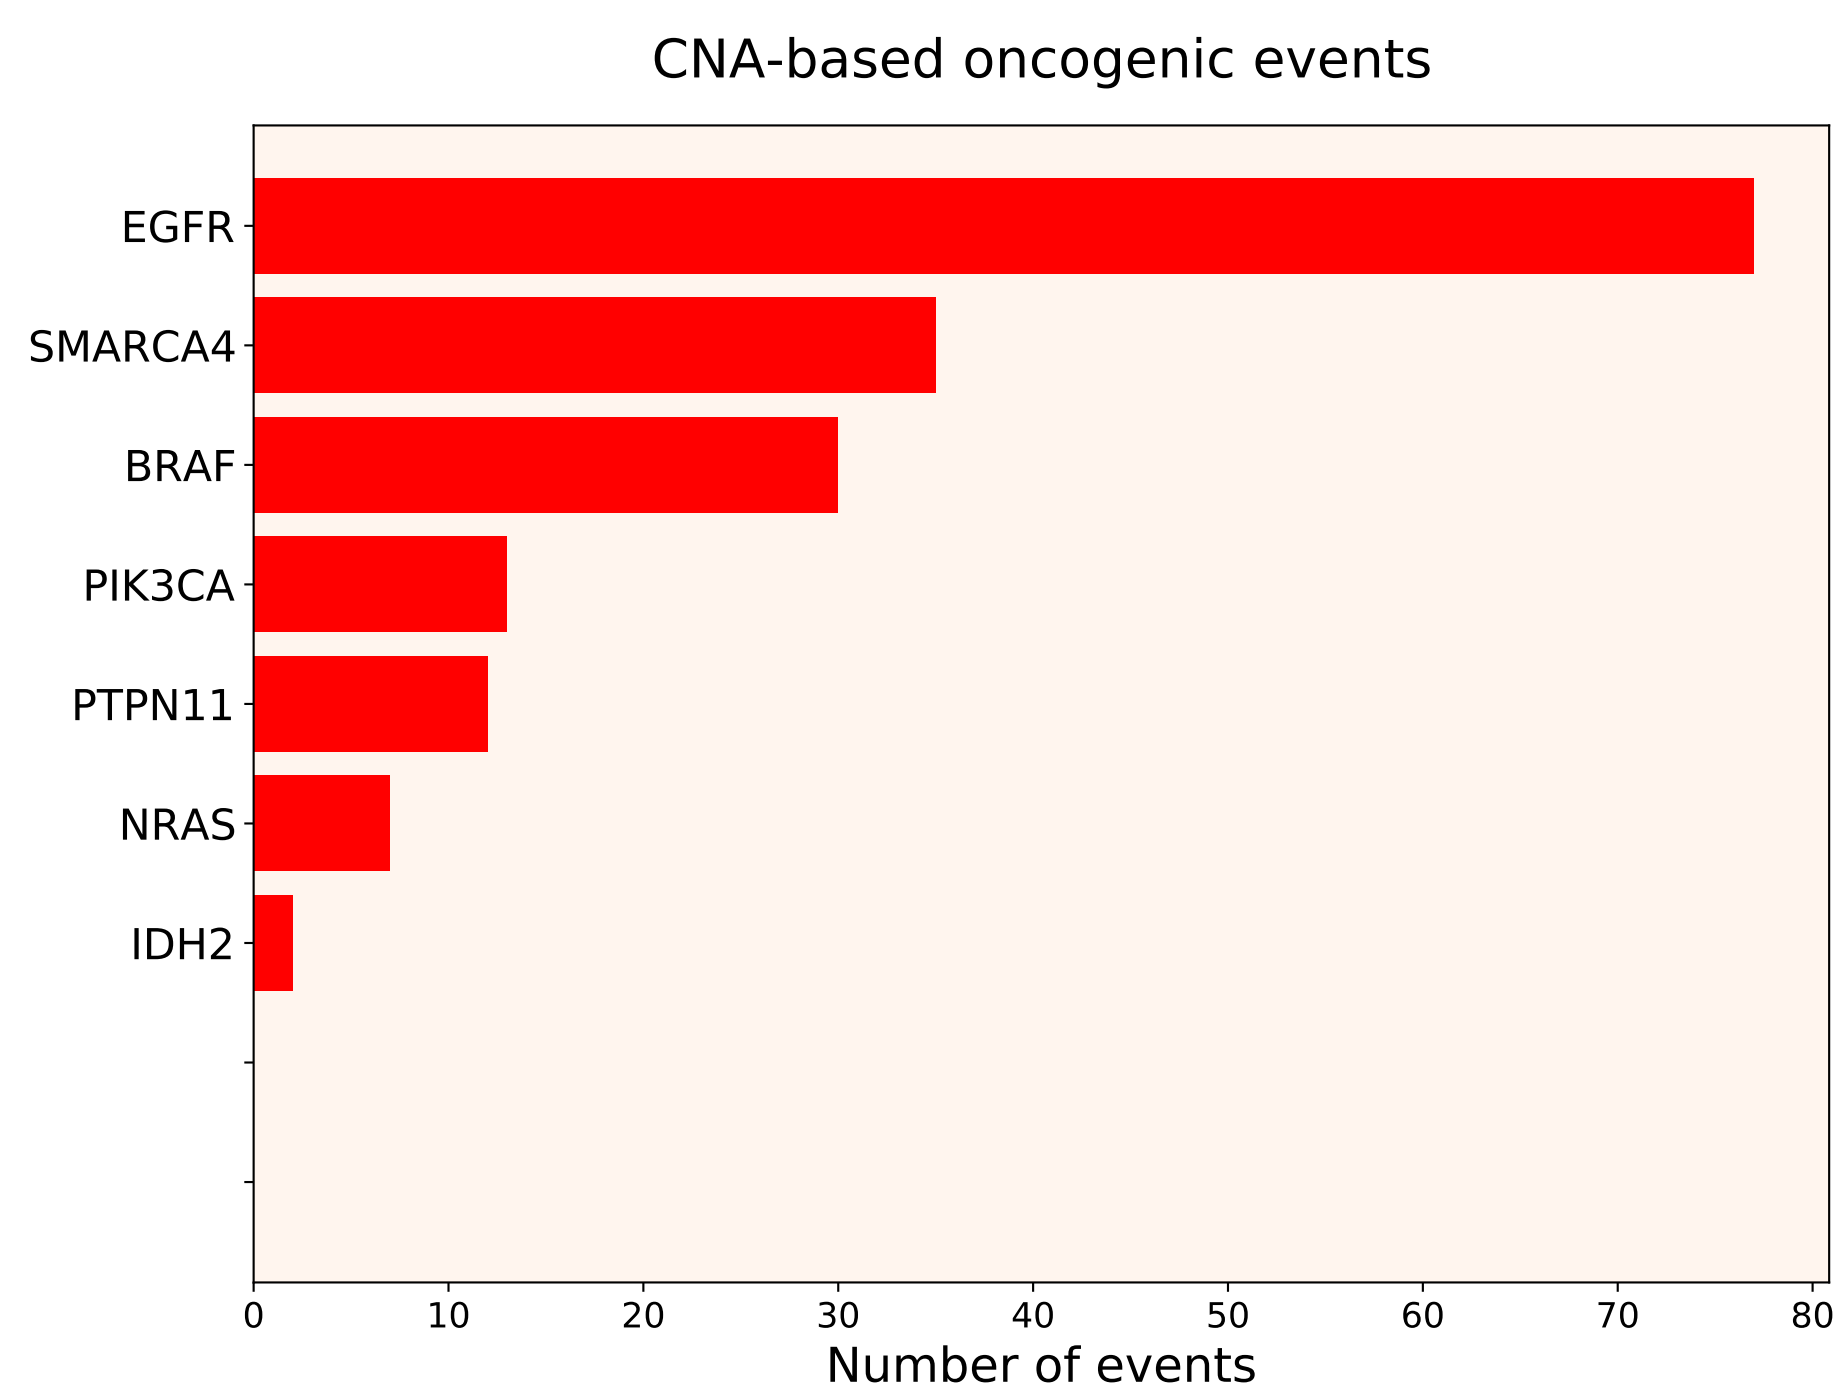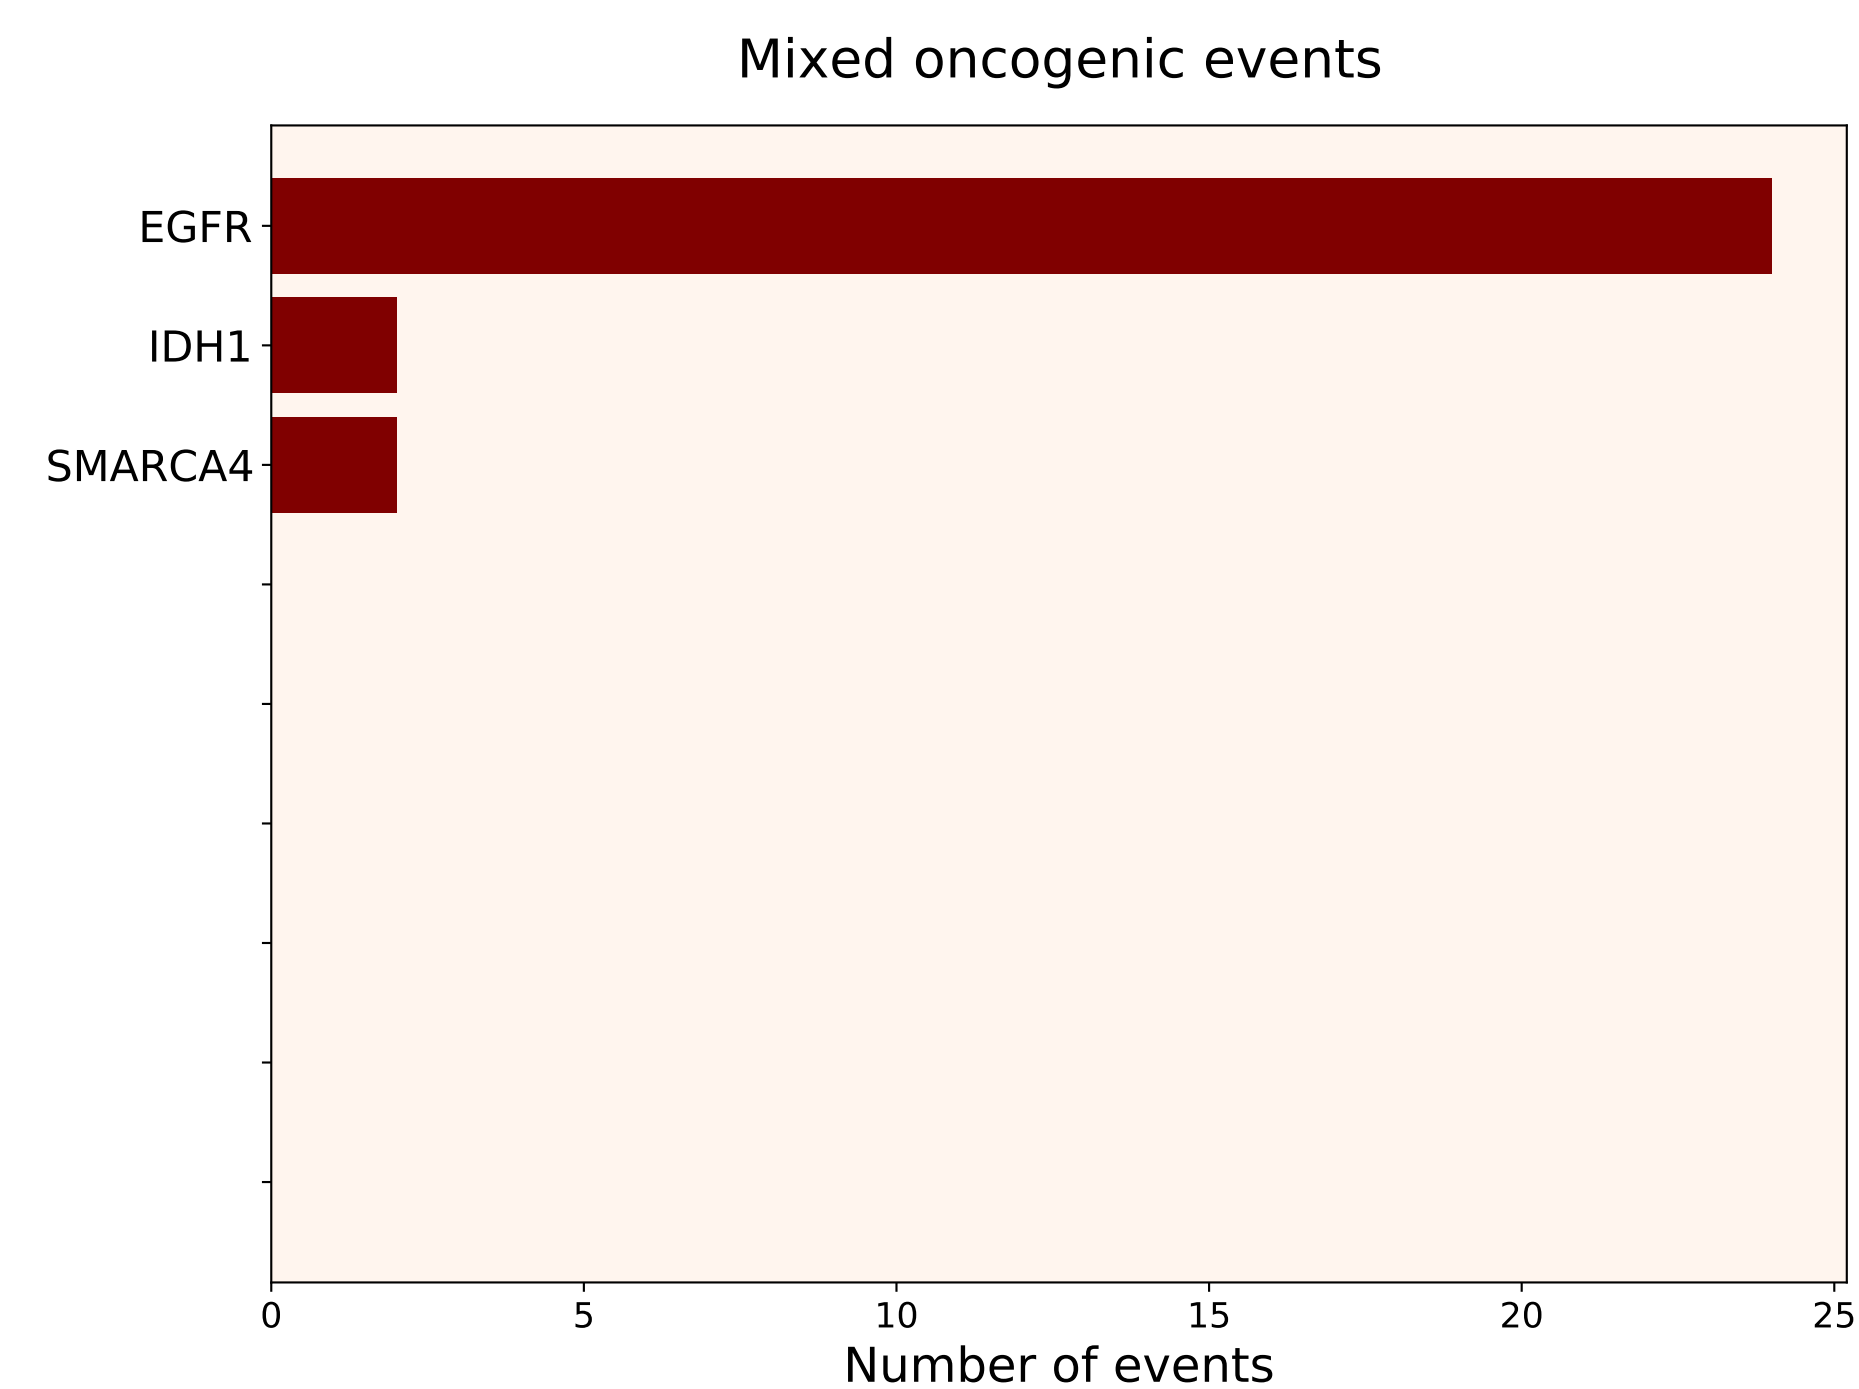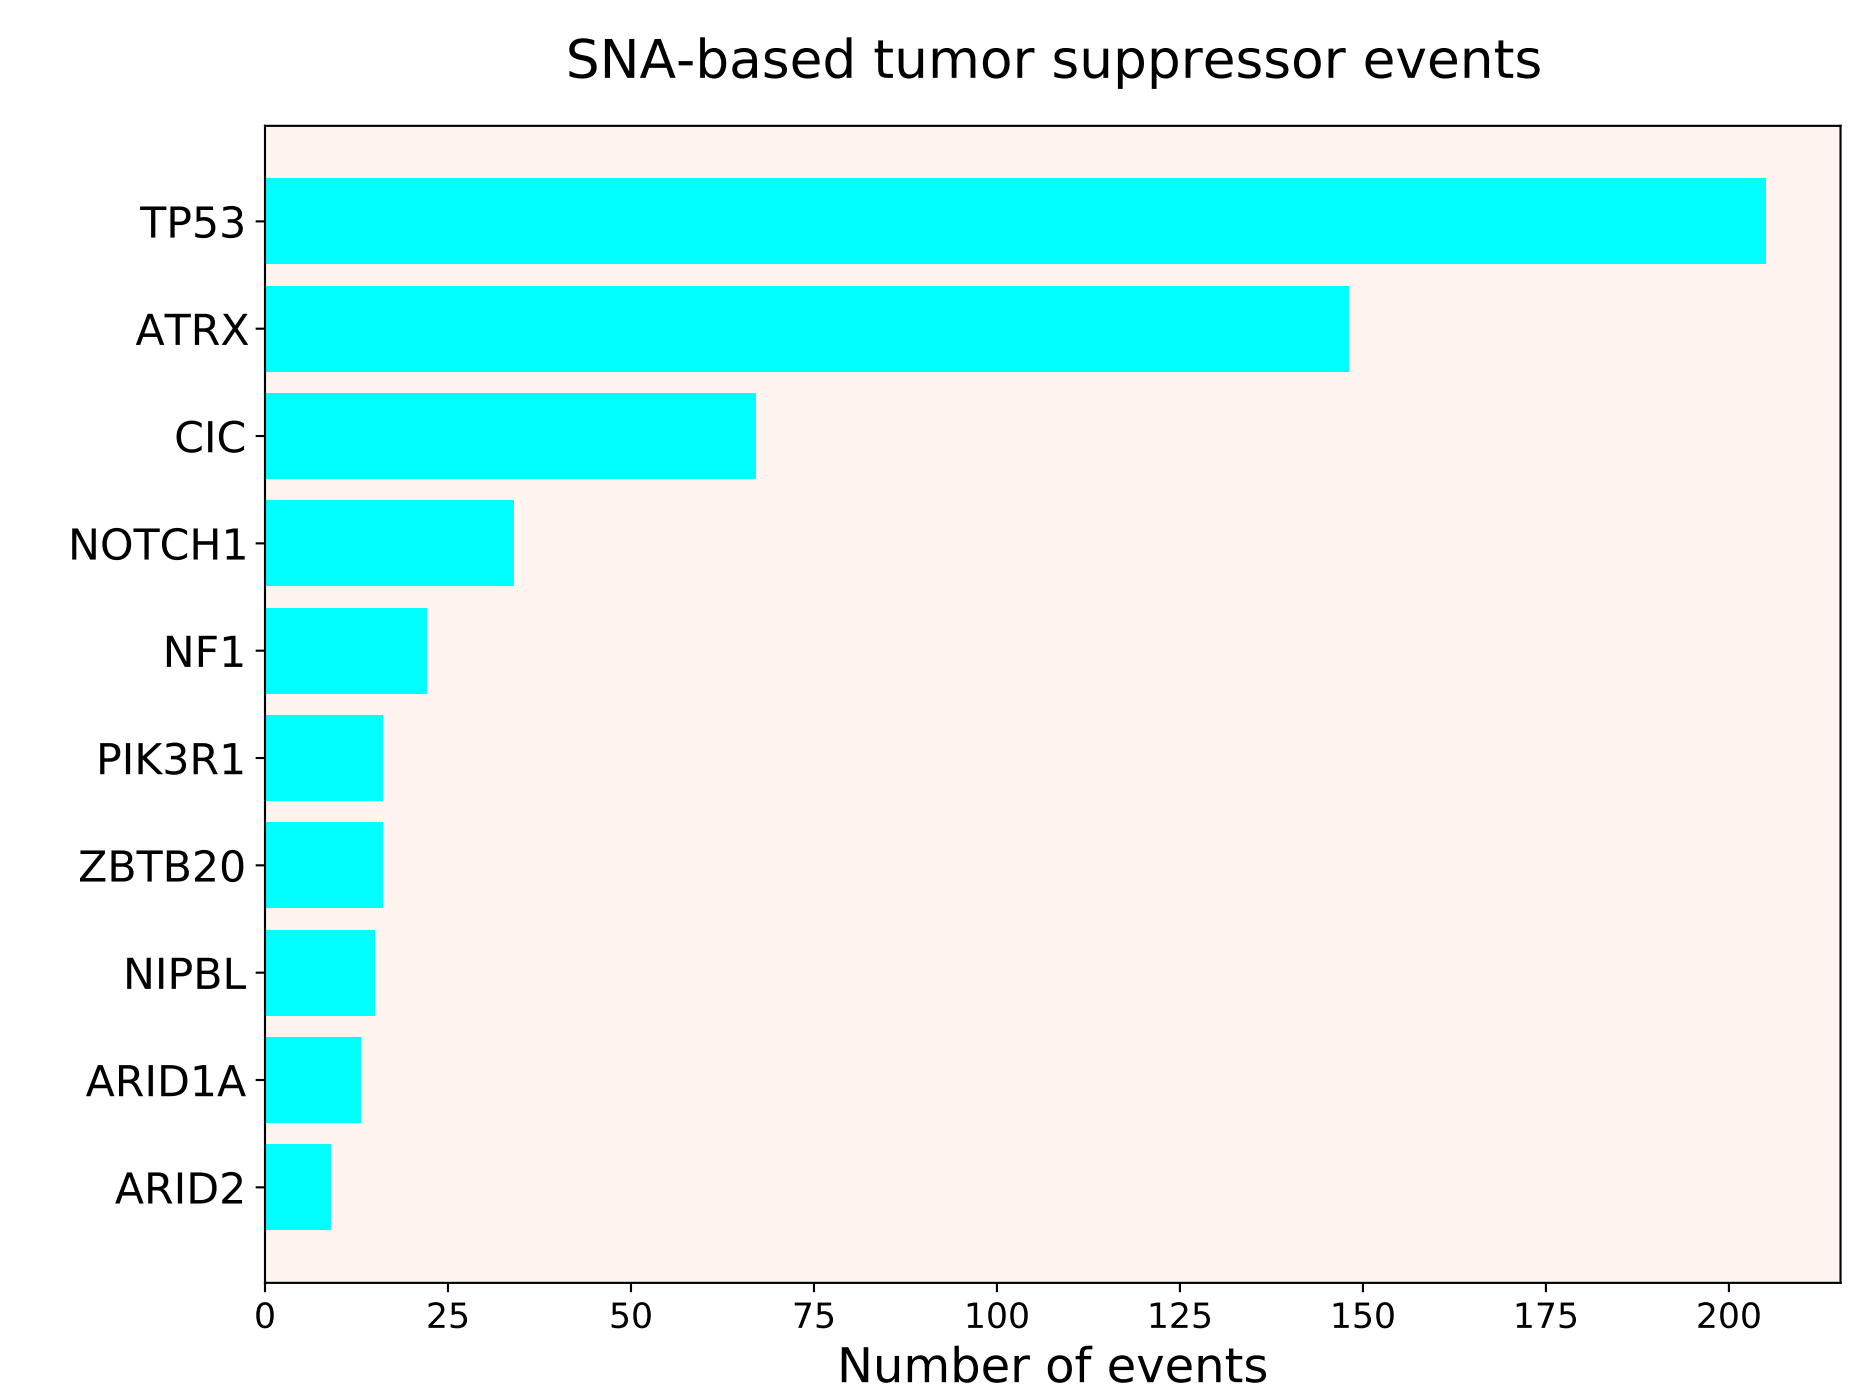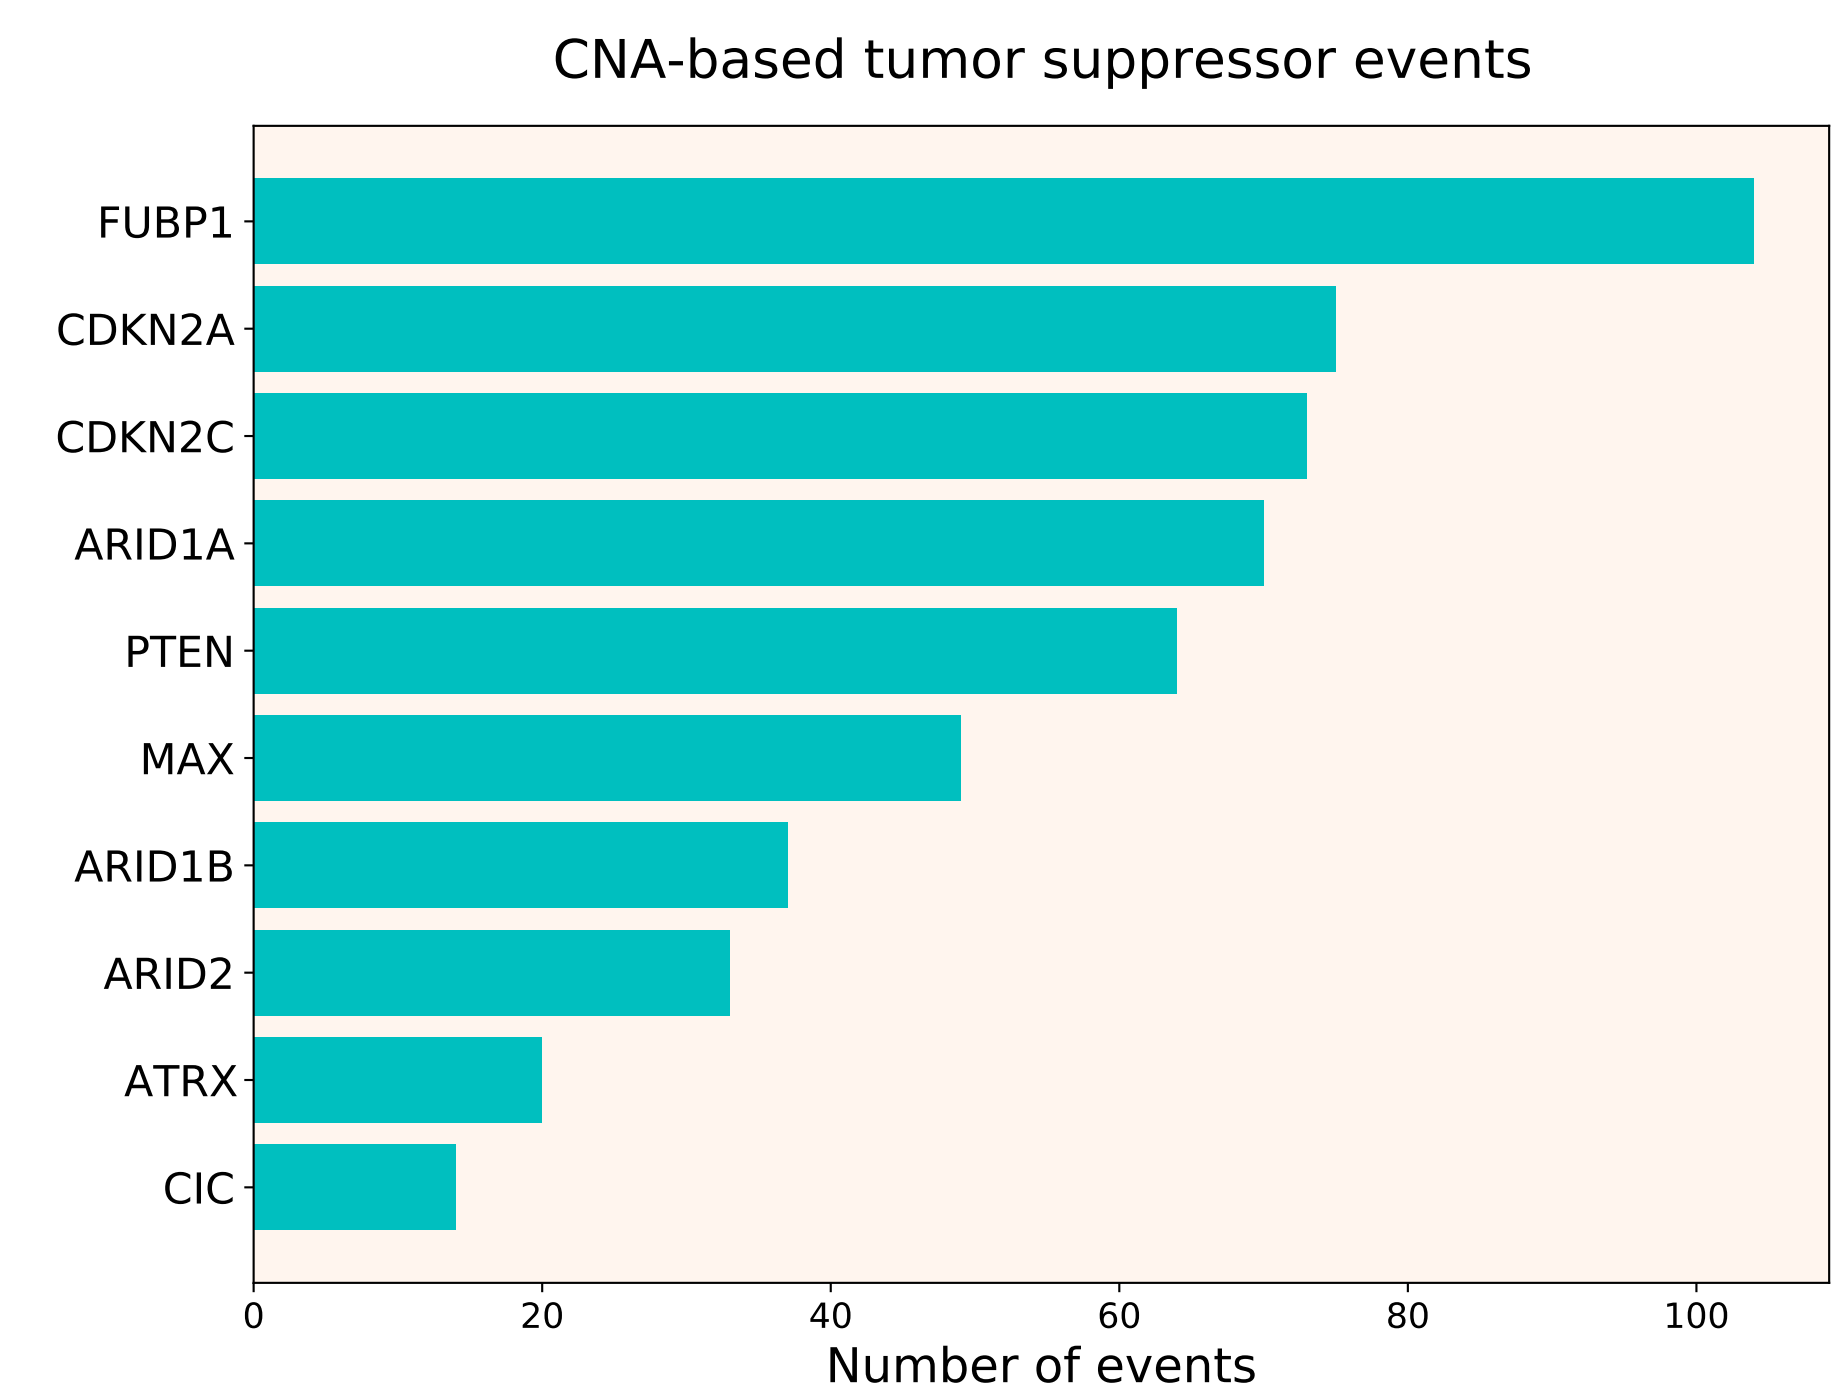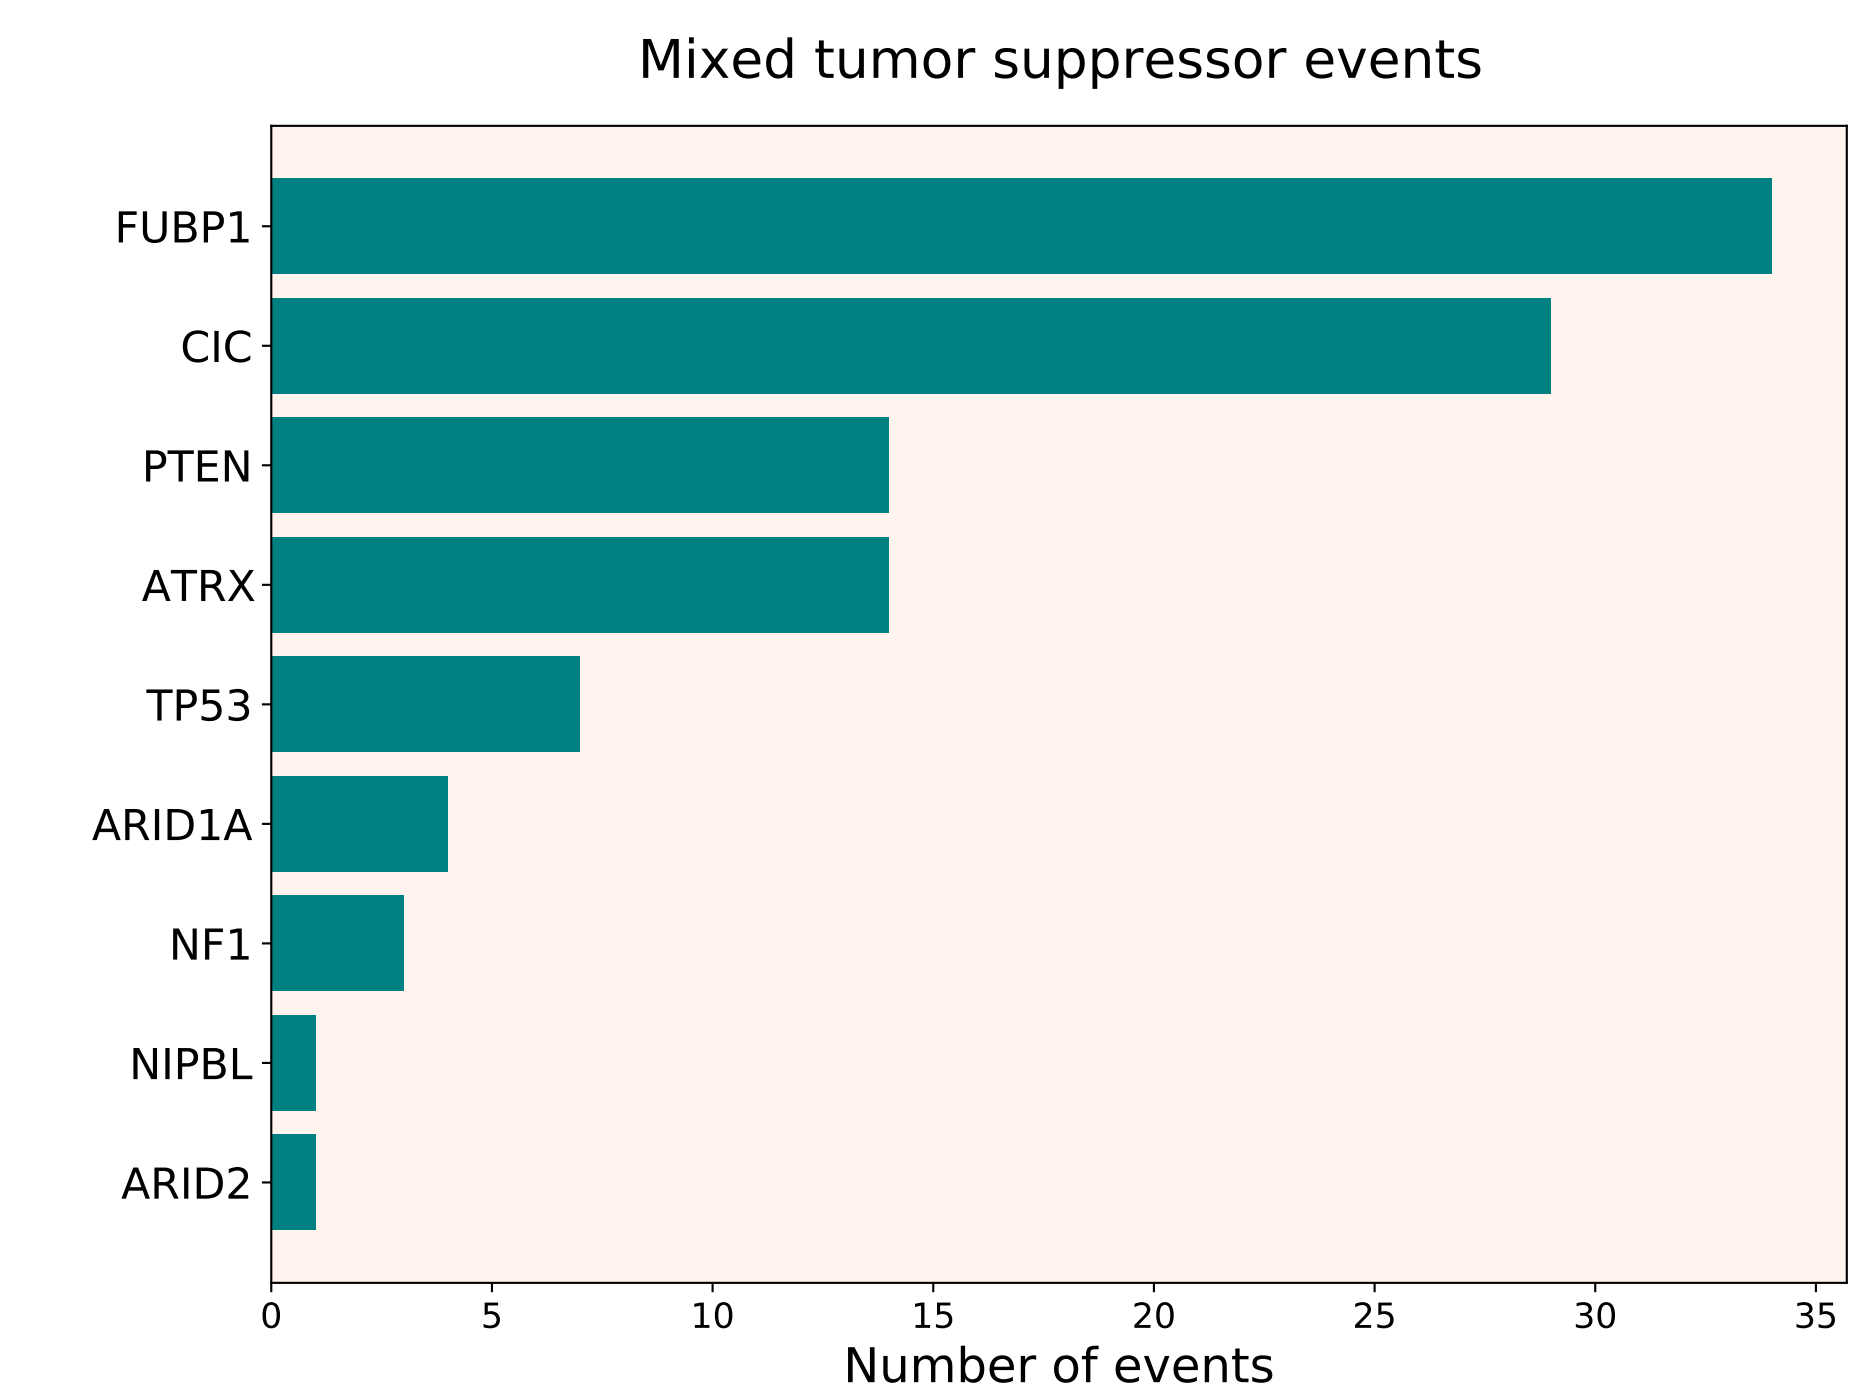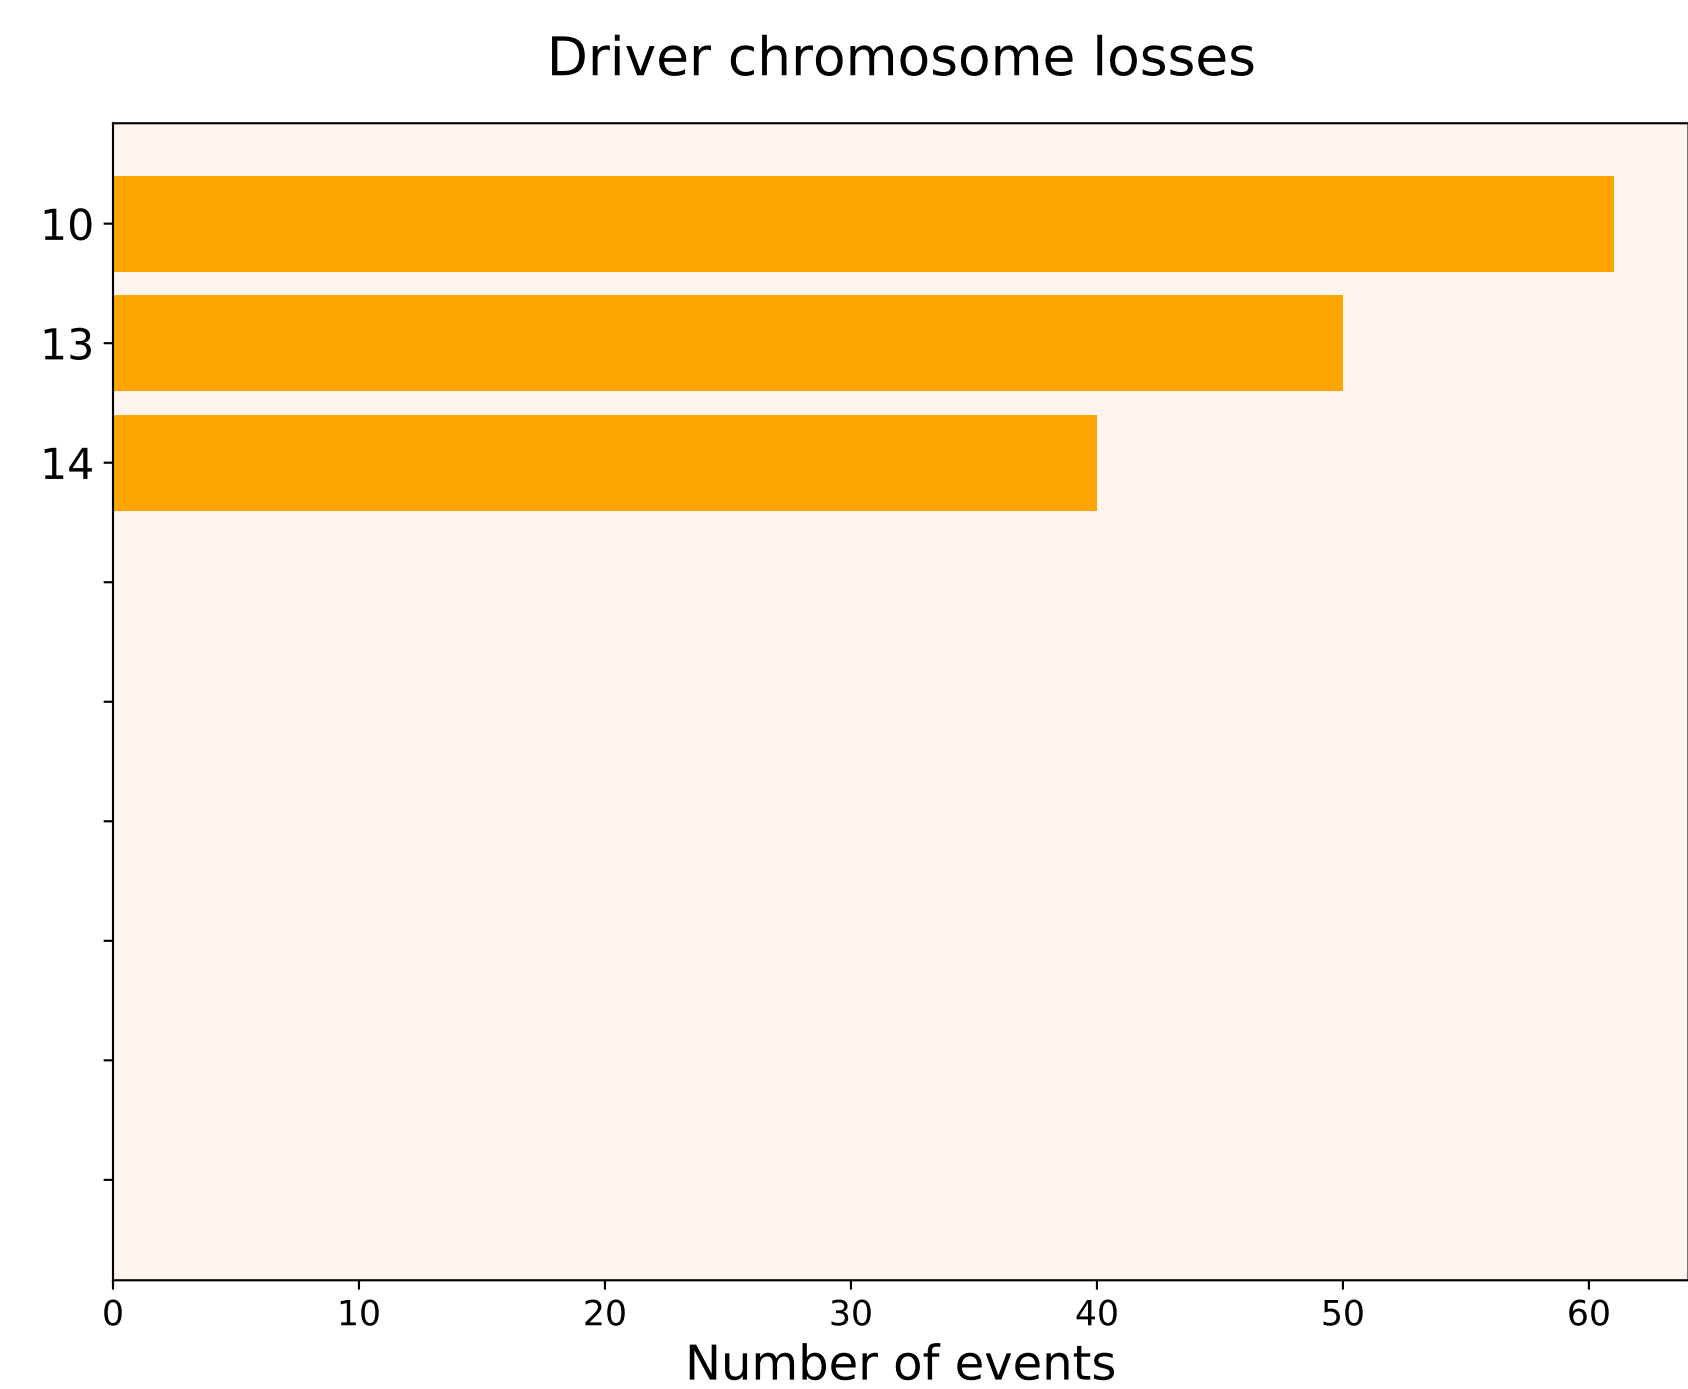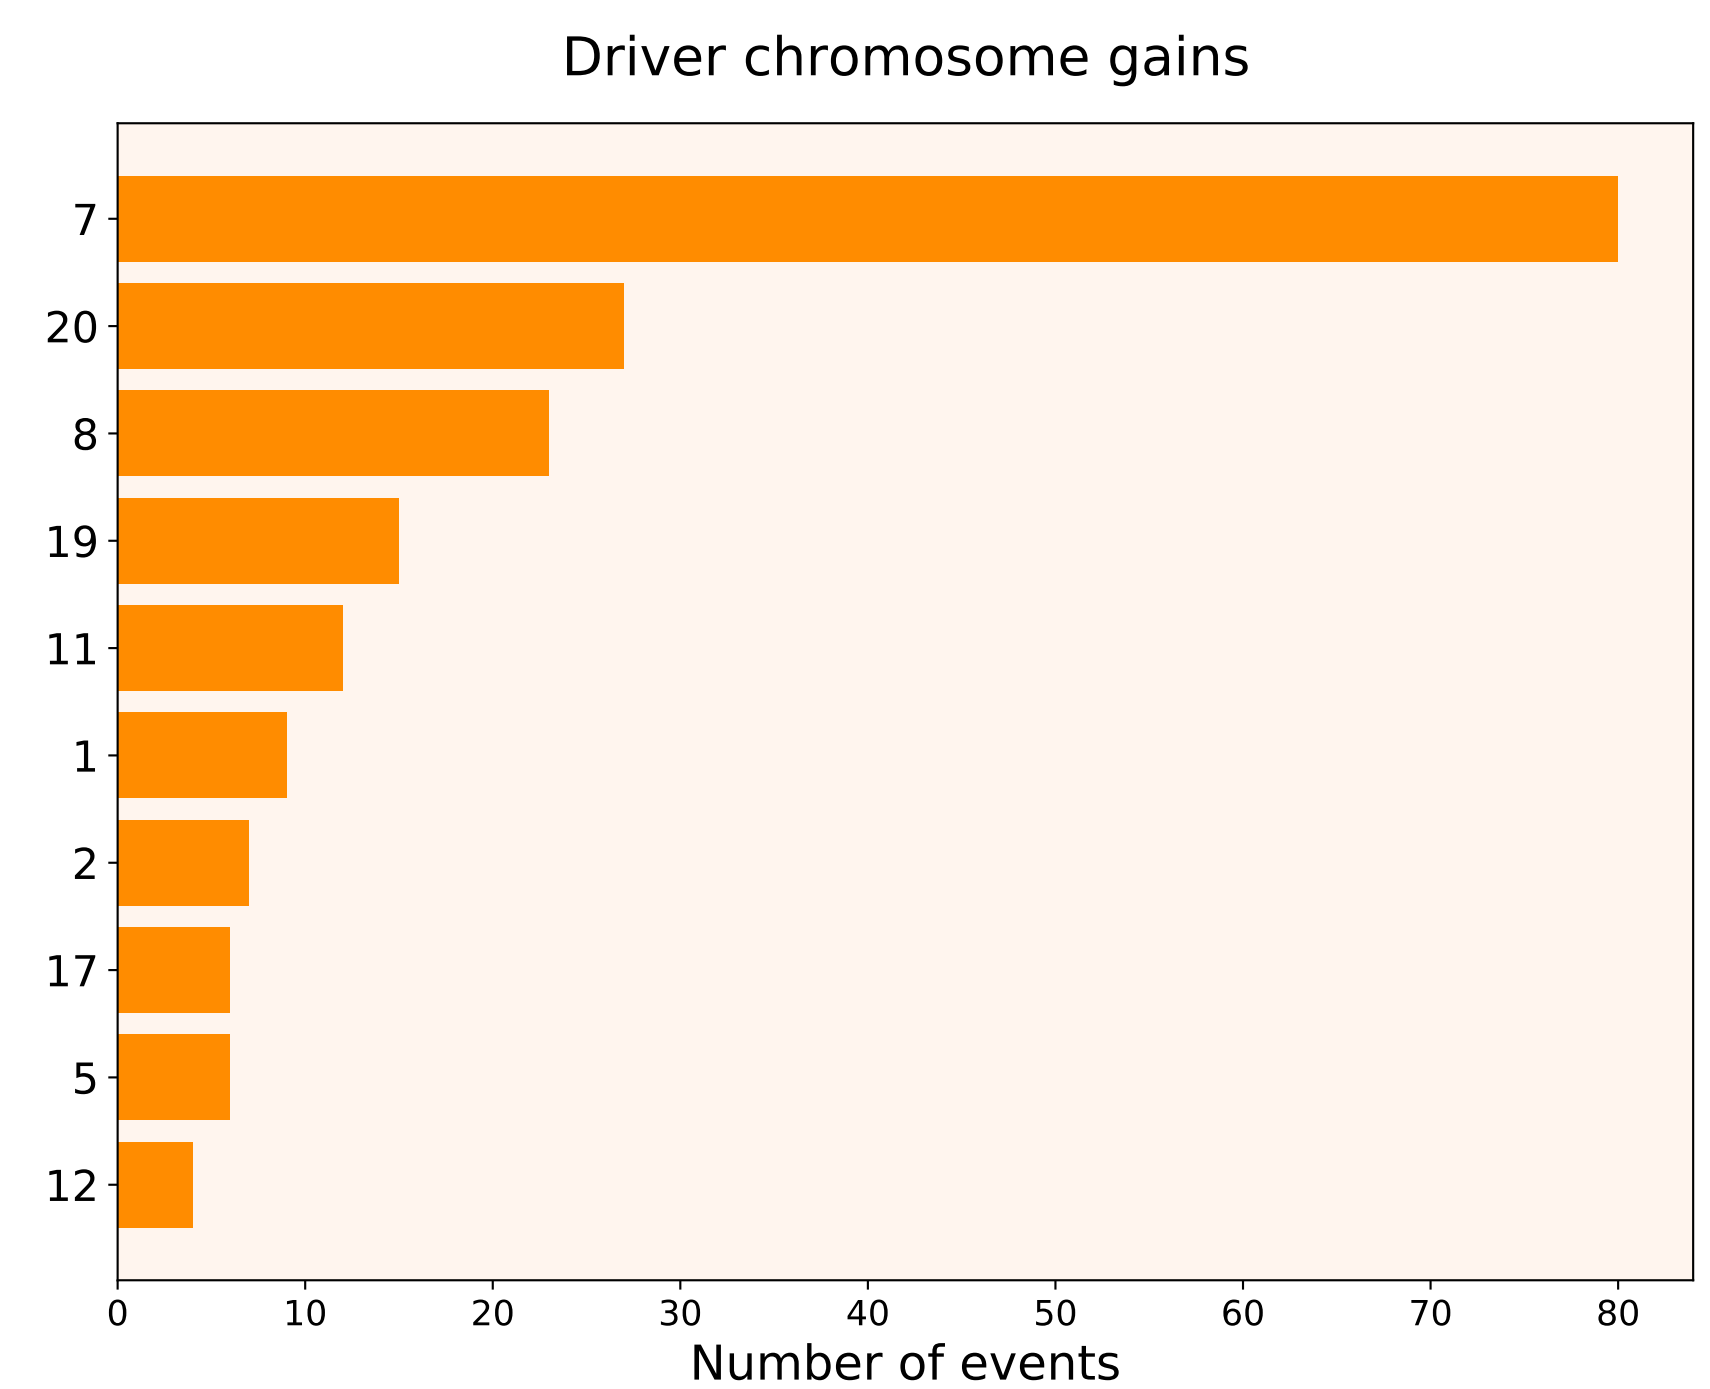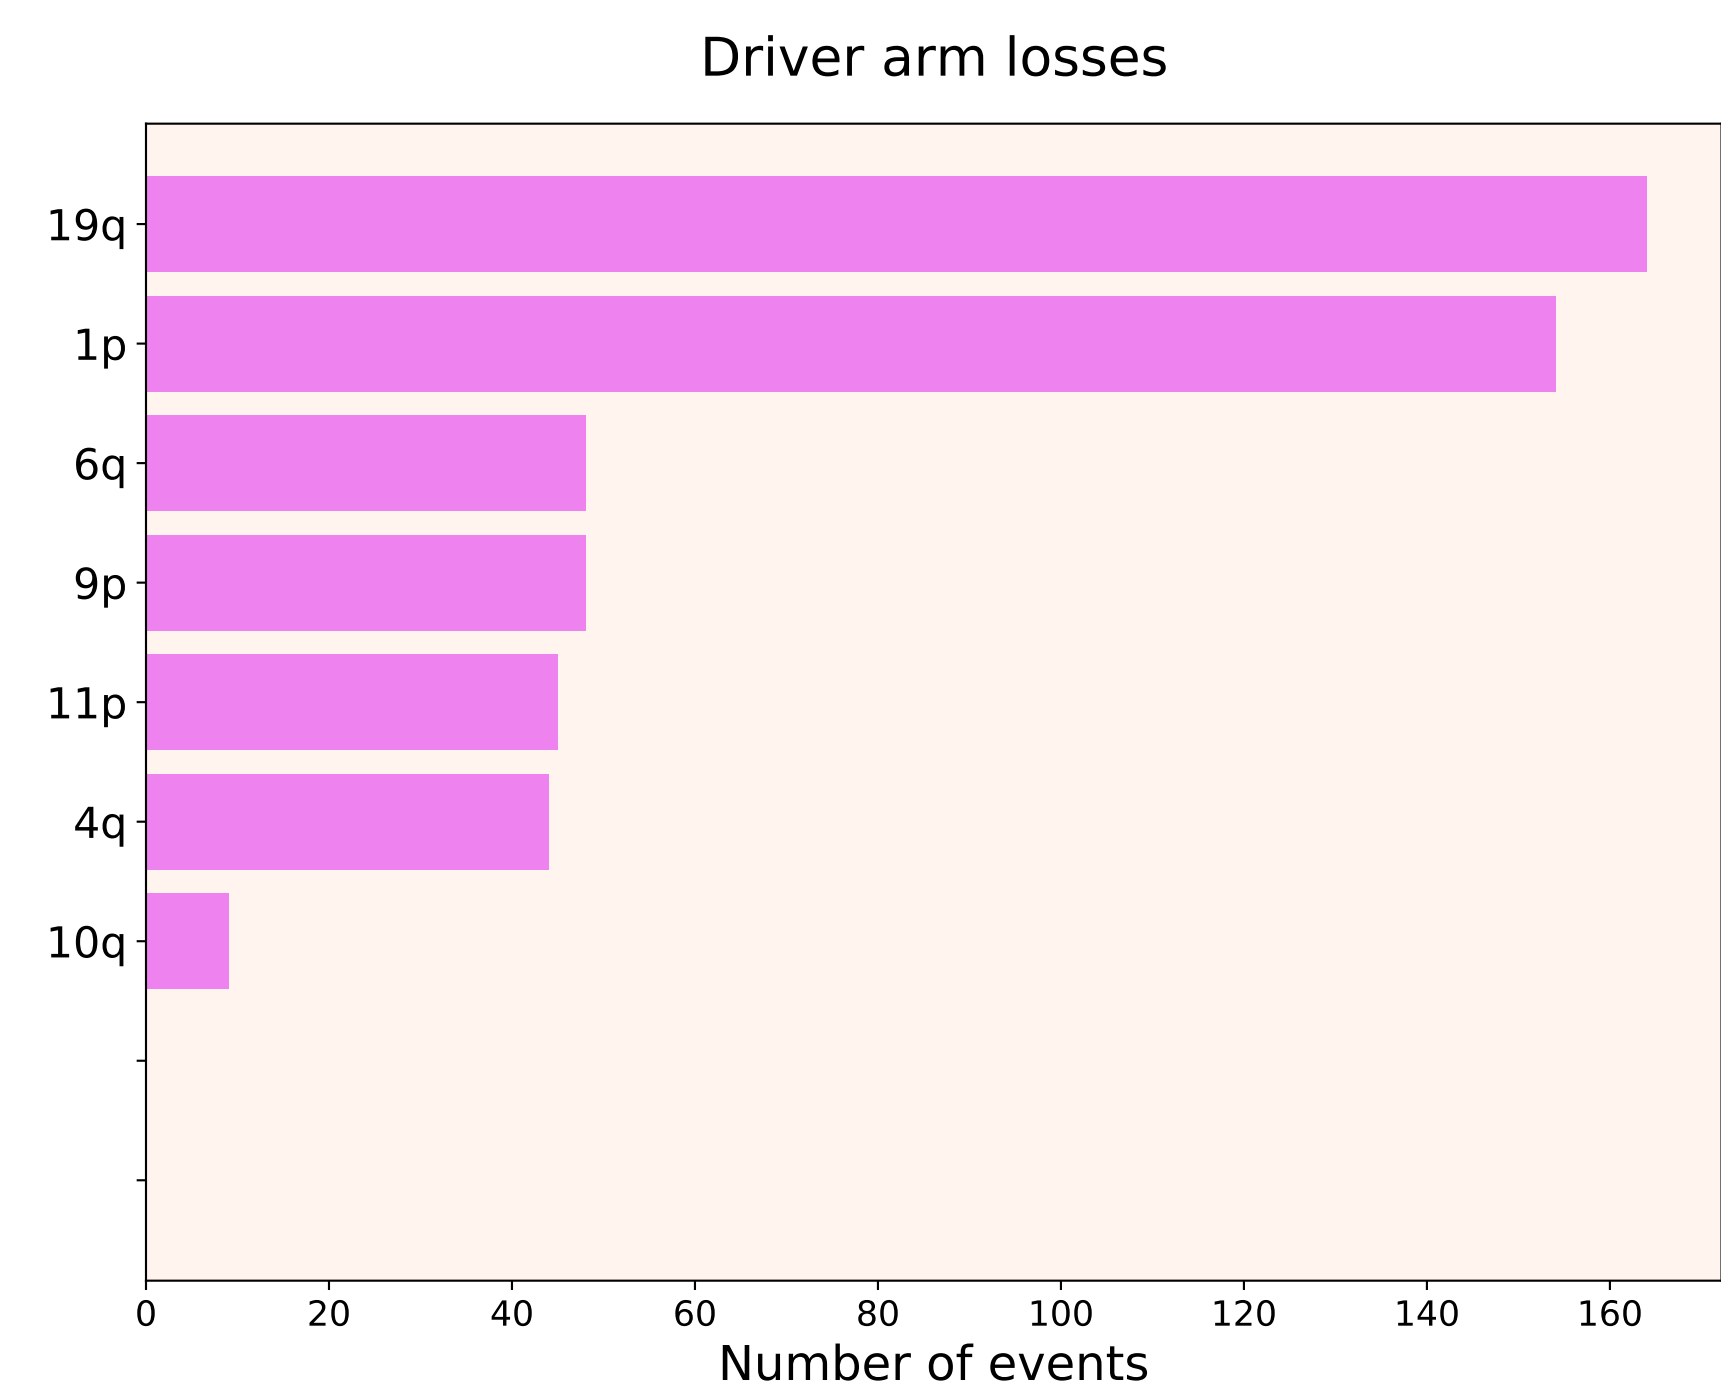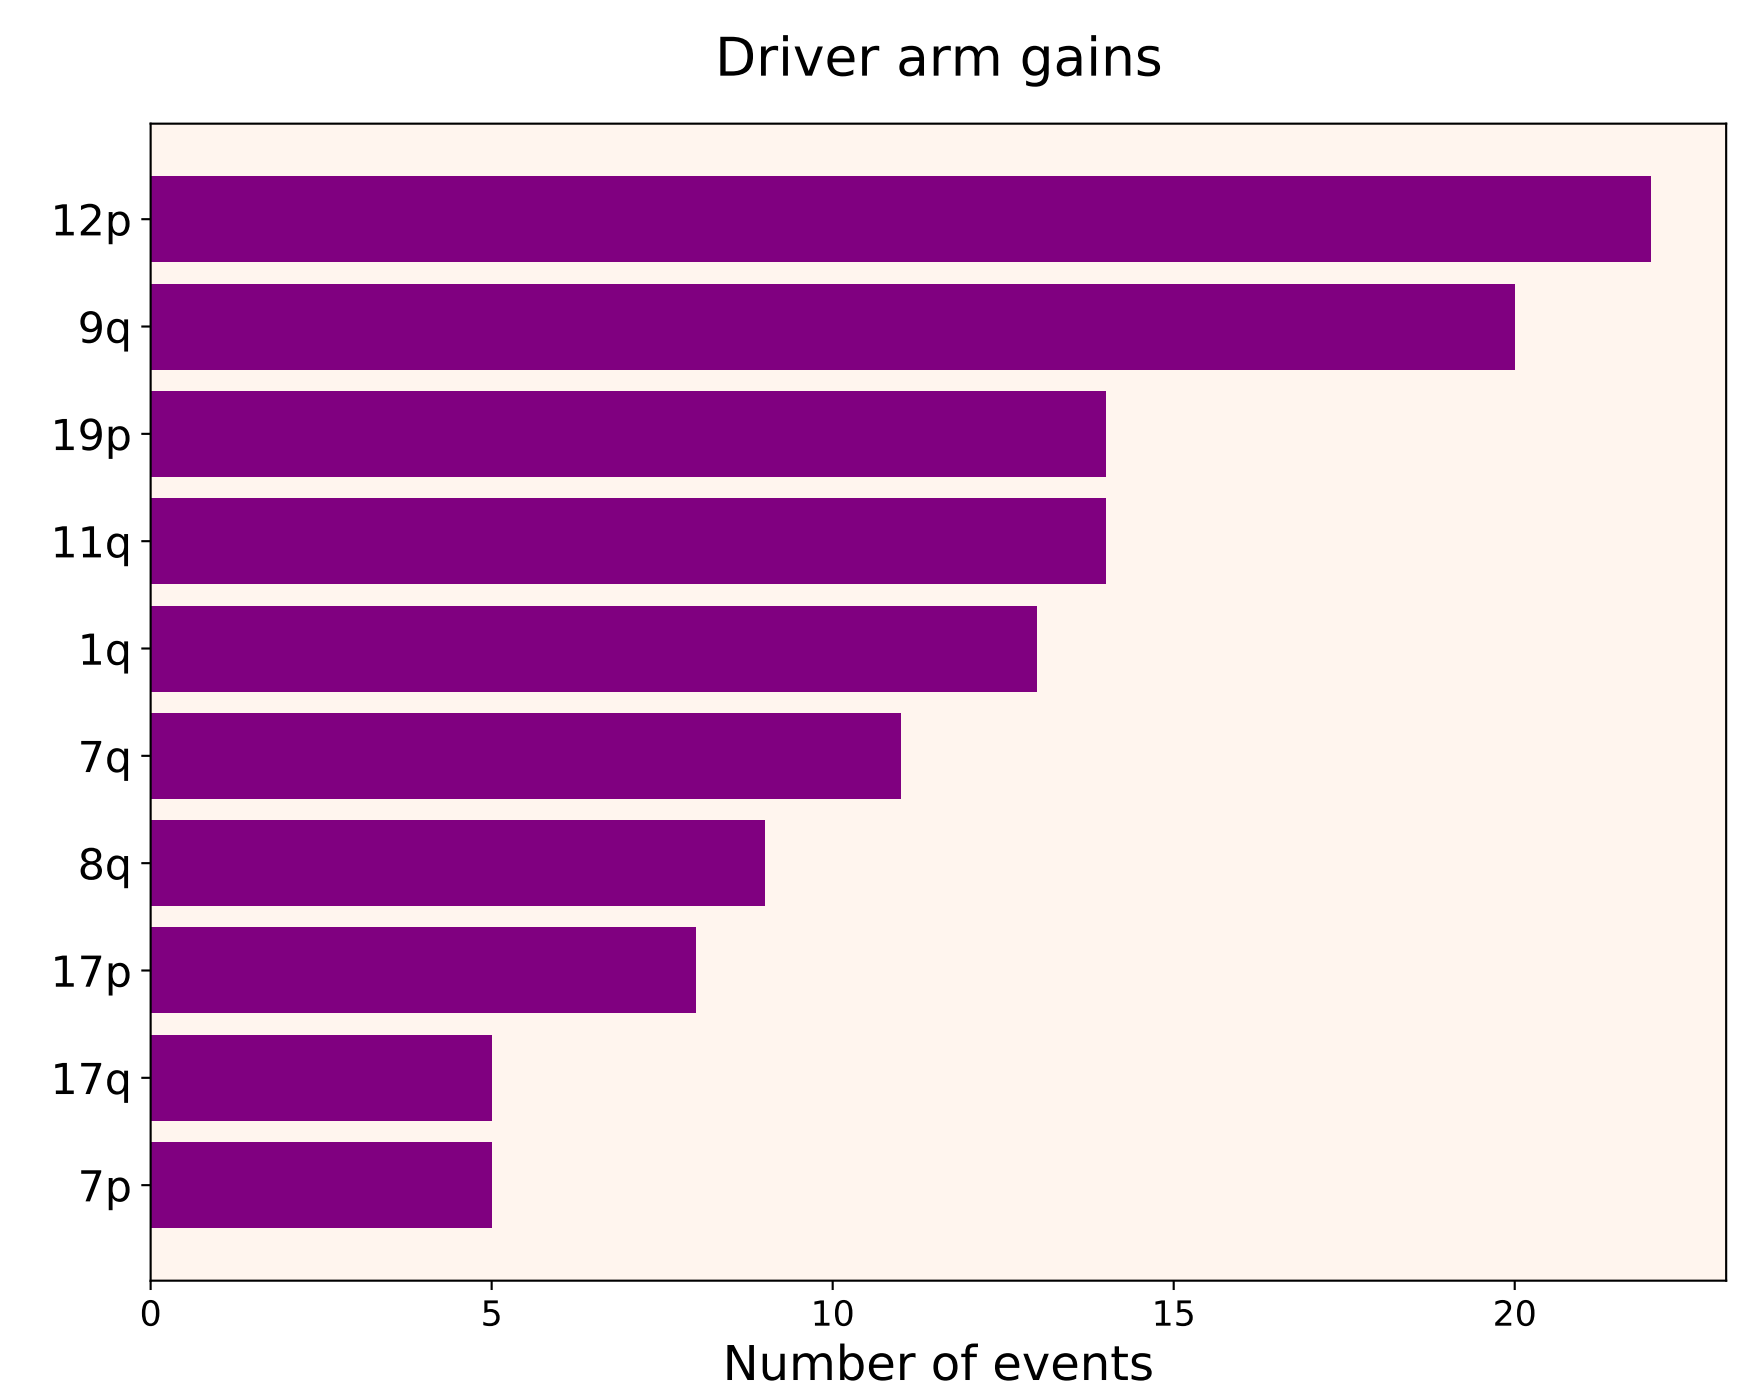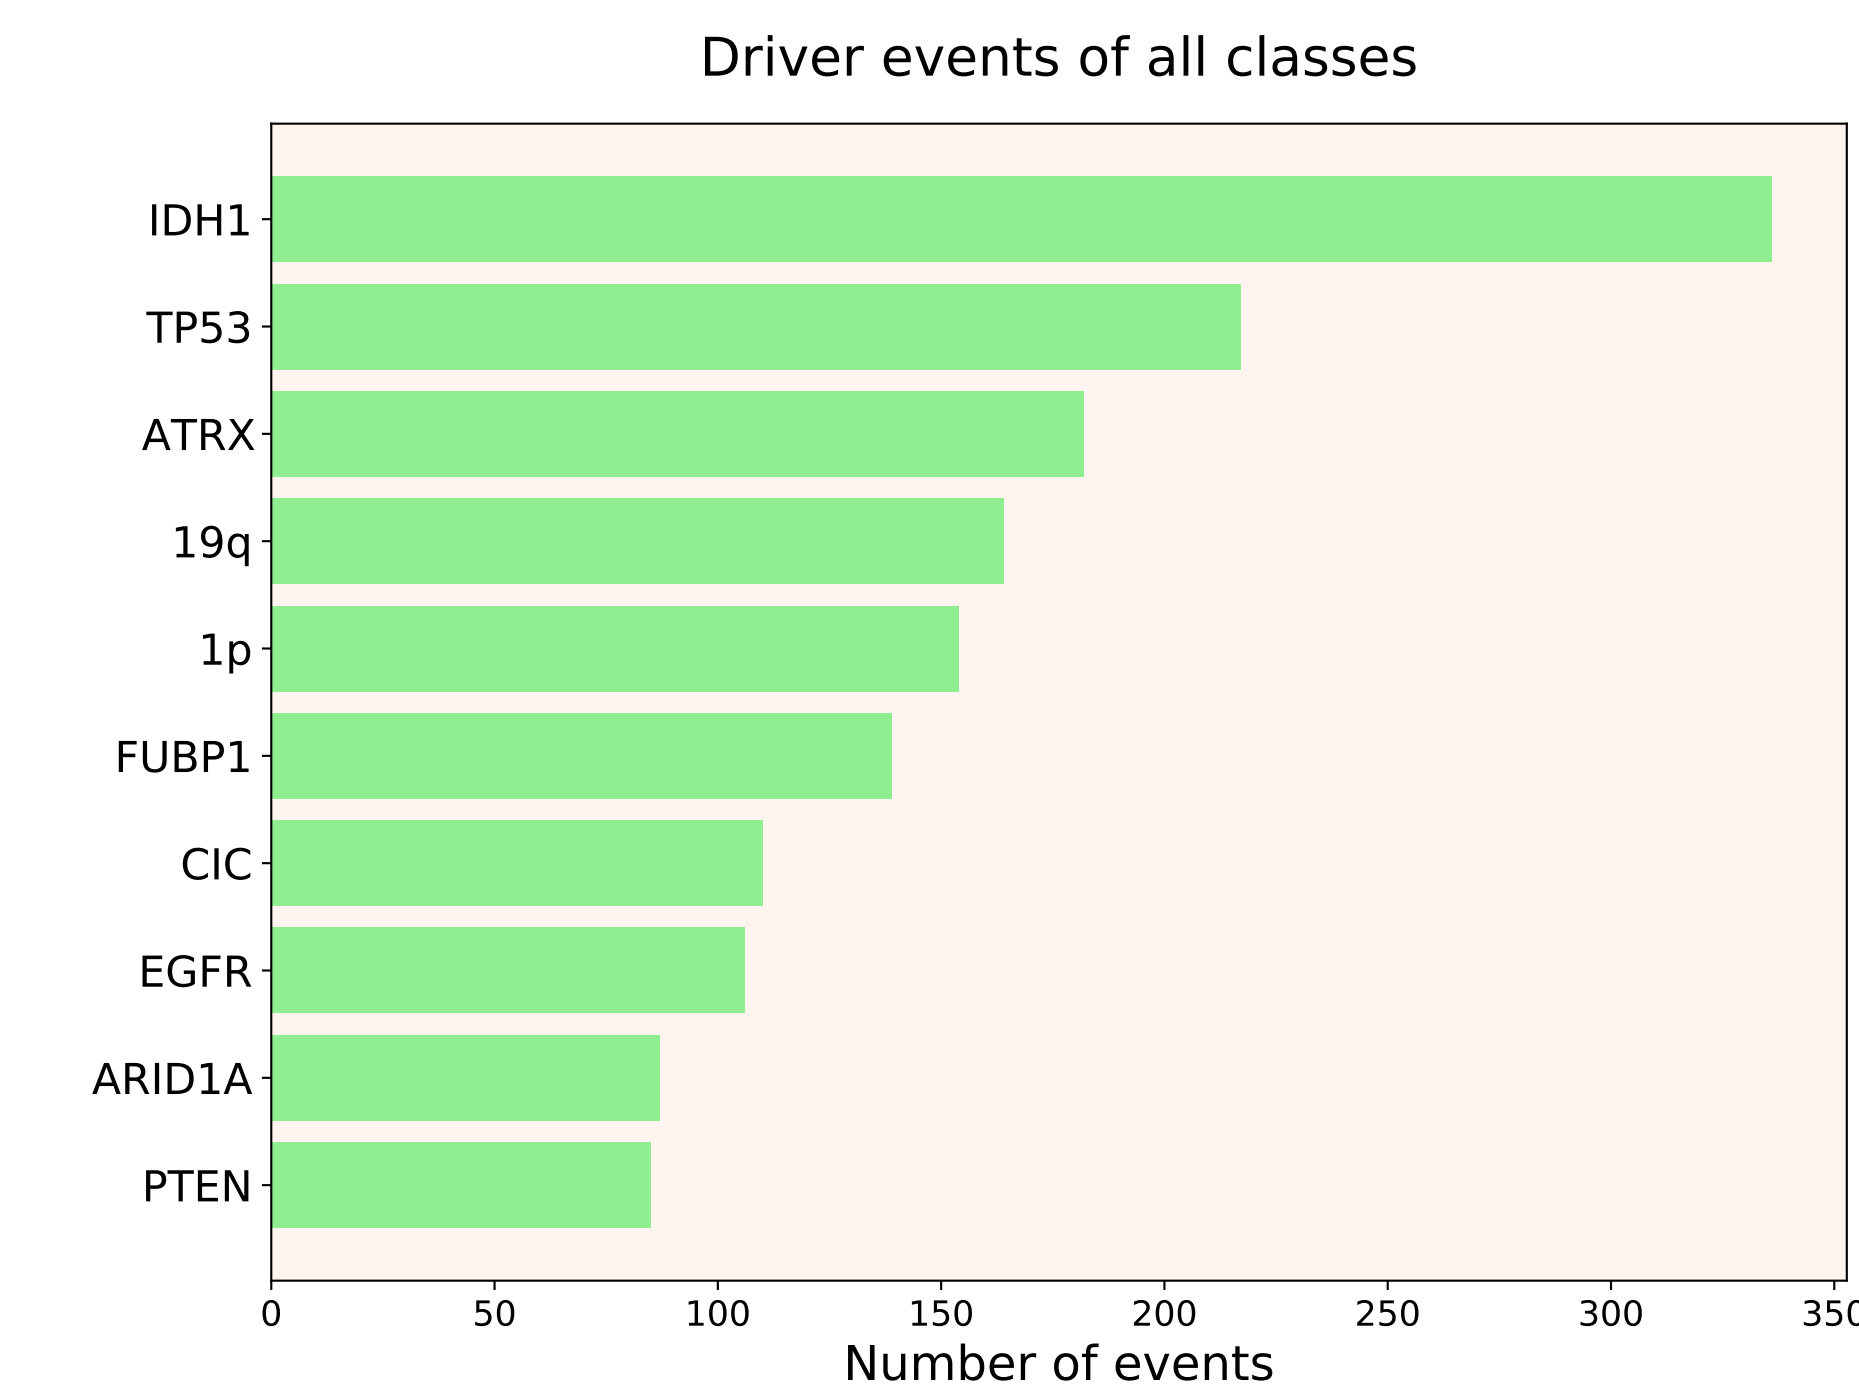

Supplement: Supplemental_Data_S1.zip [file Supplemental_Data_S1.zip]

# STAD\_MALE

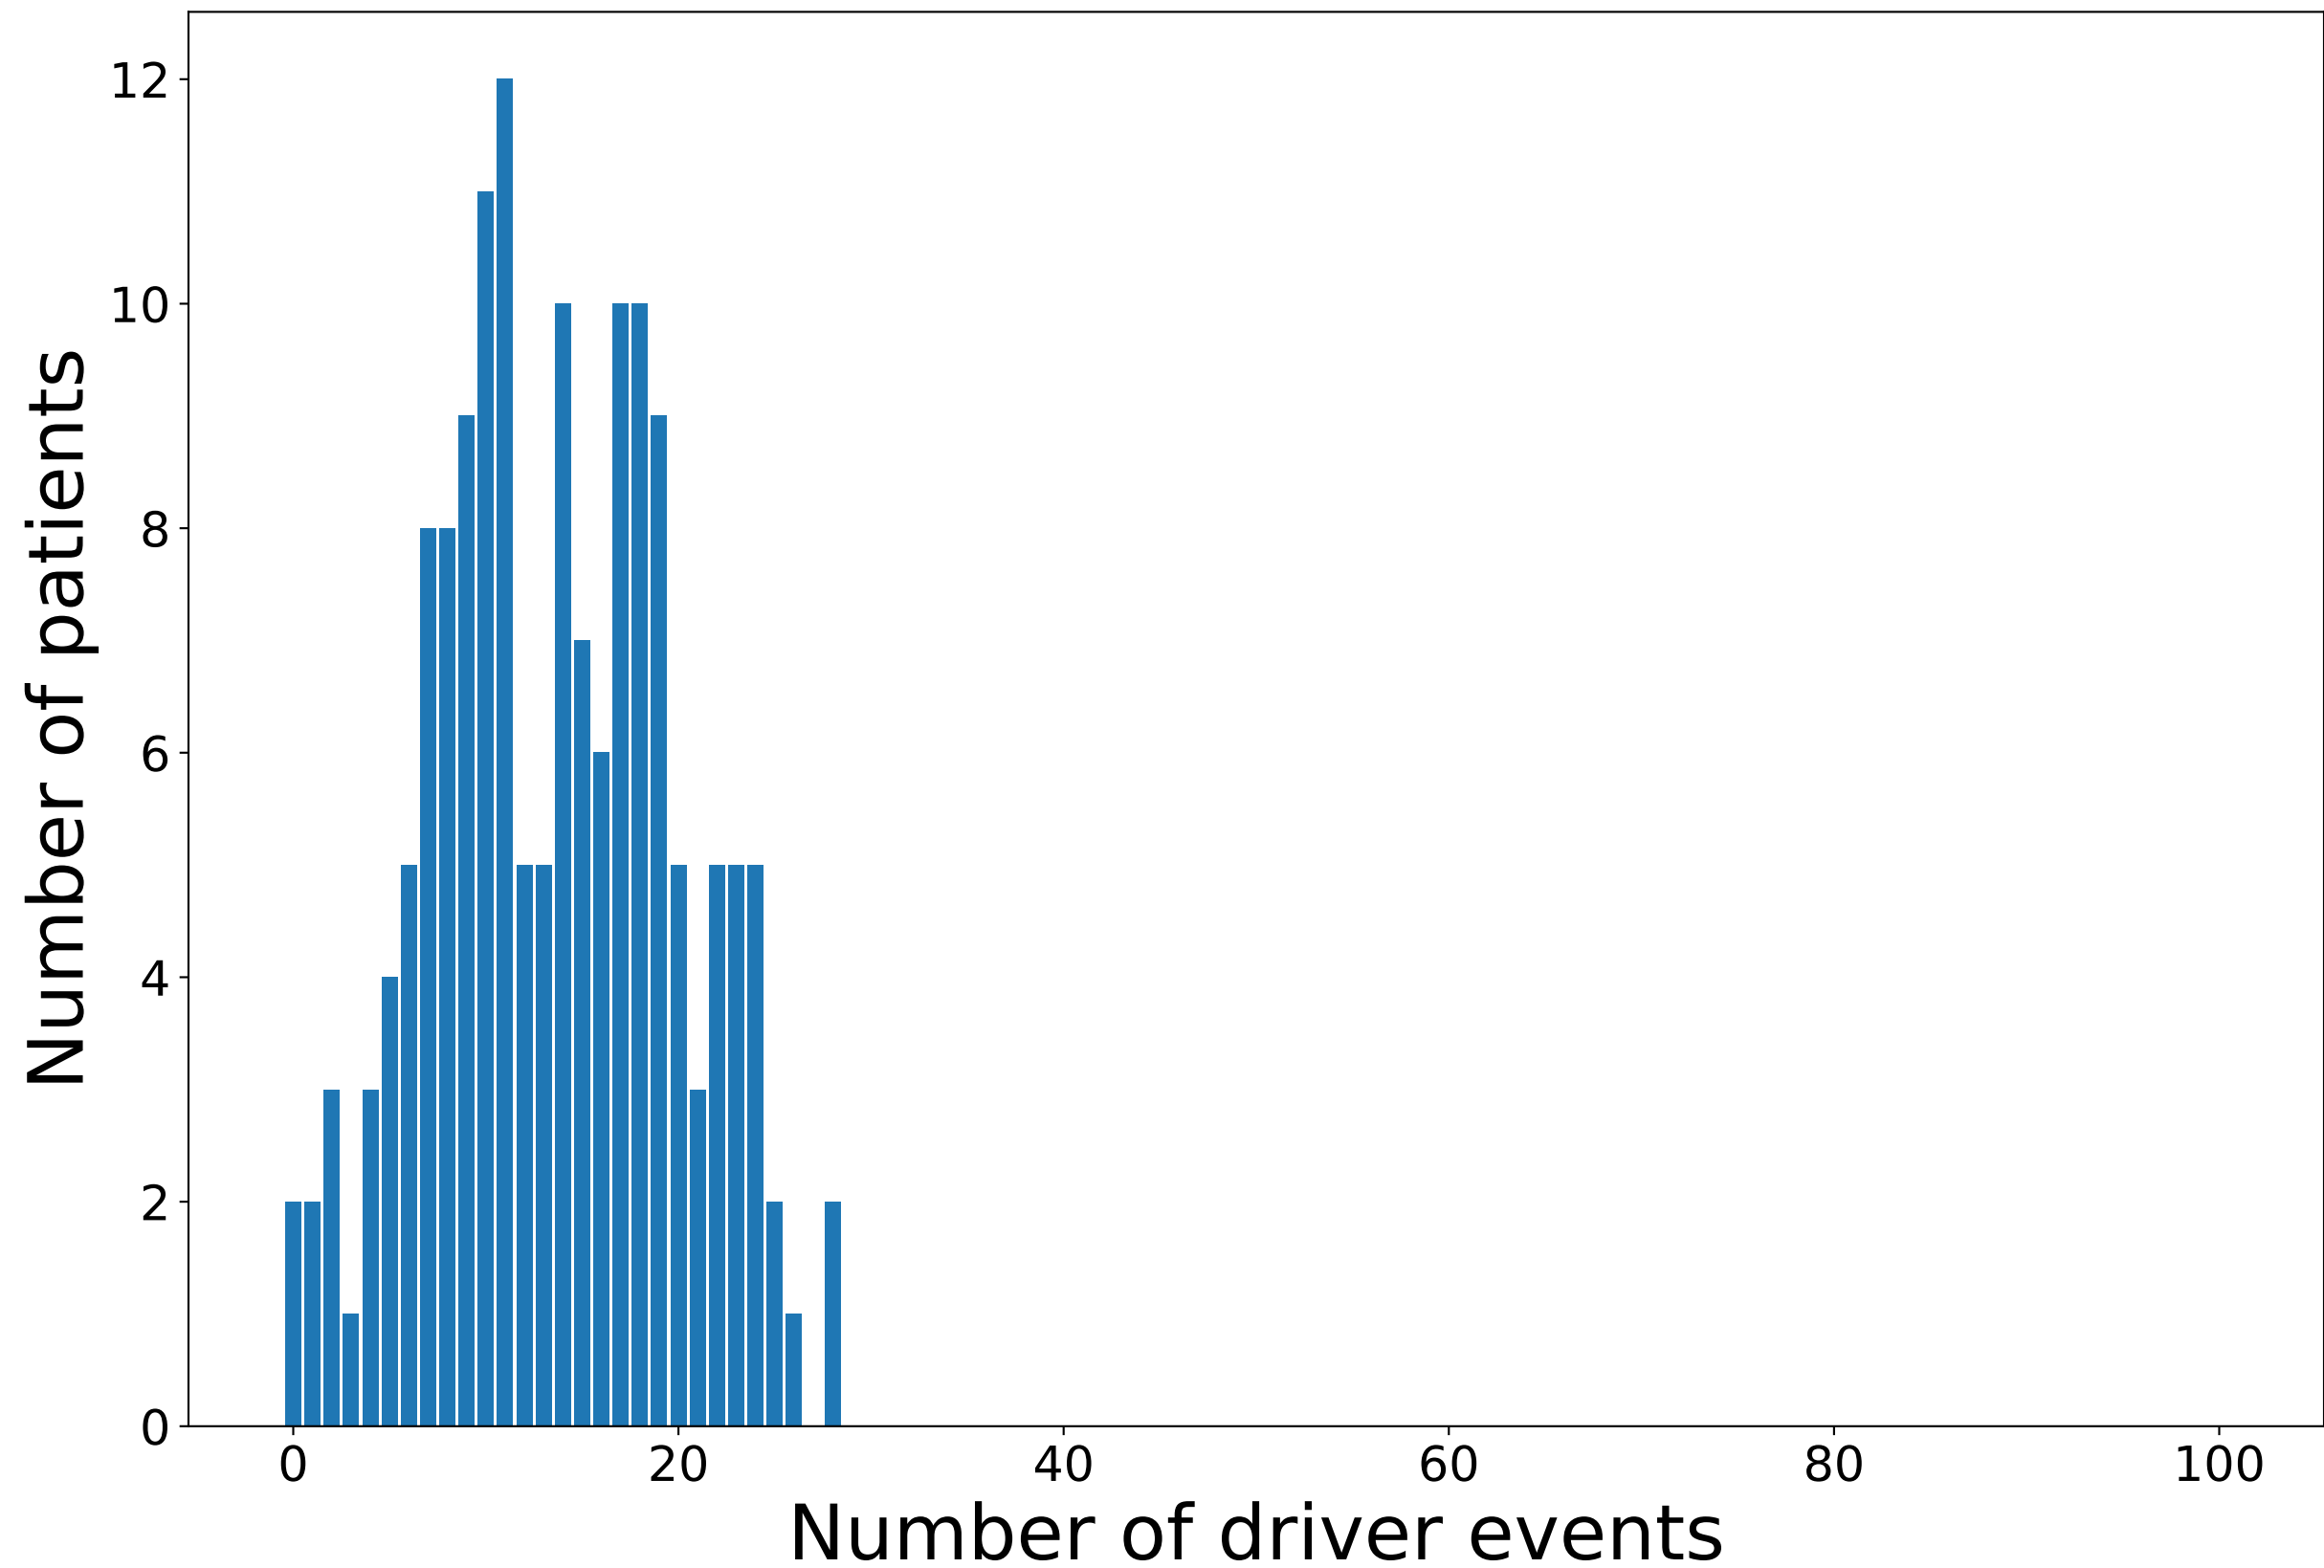

Supplement: Supplemental_Data_S1.zip [file Supplemental_Data_S1.zip]

# PANCAN\_MALE

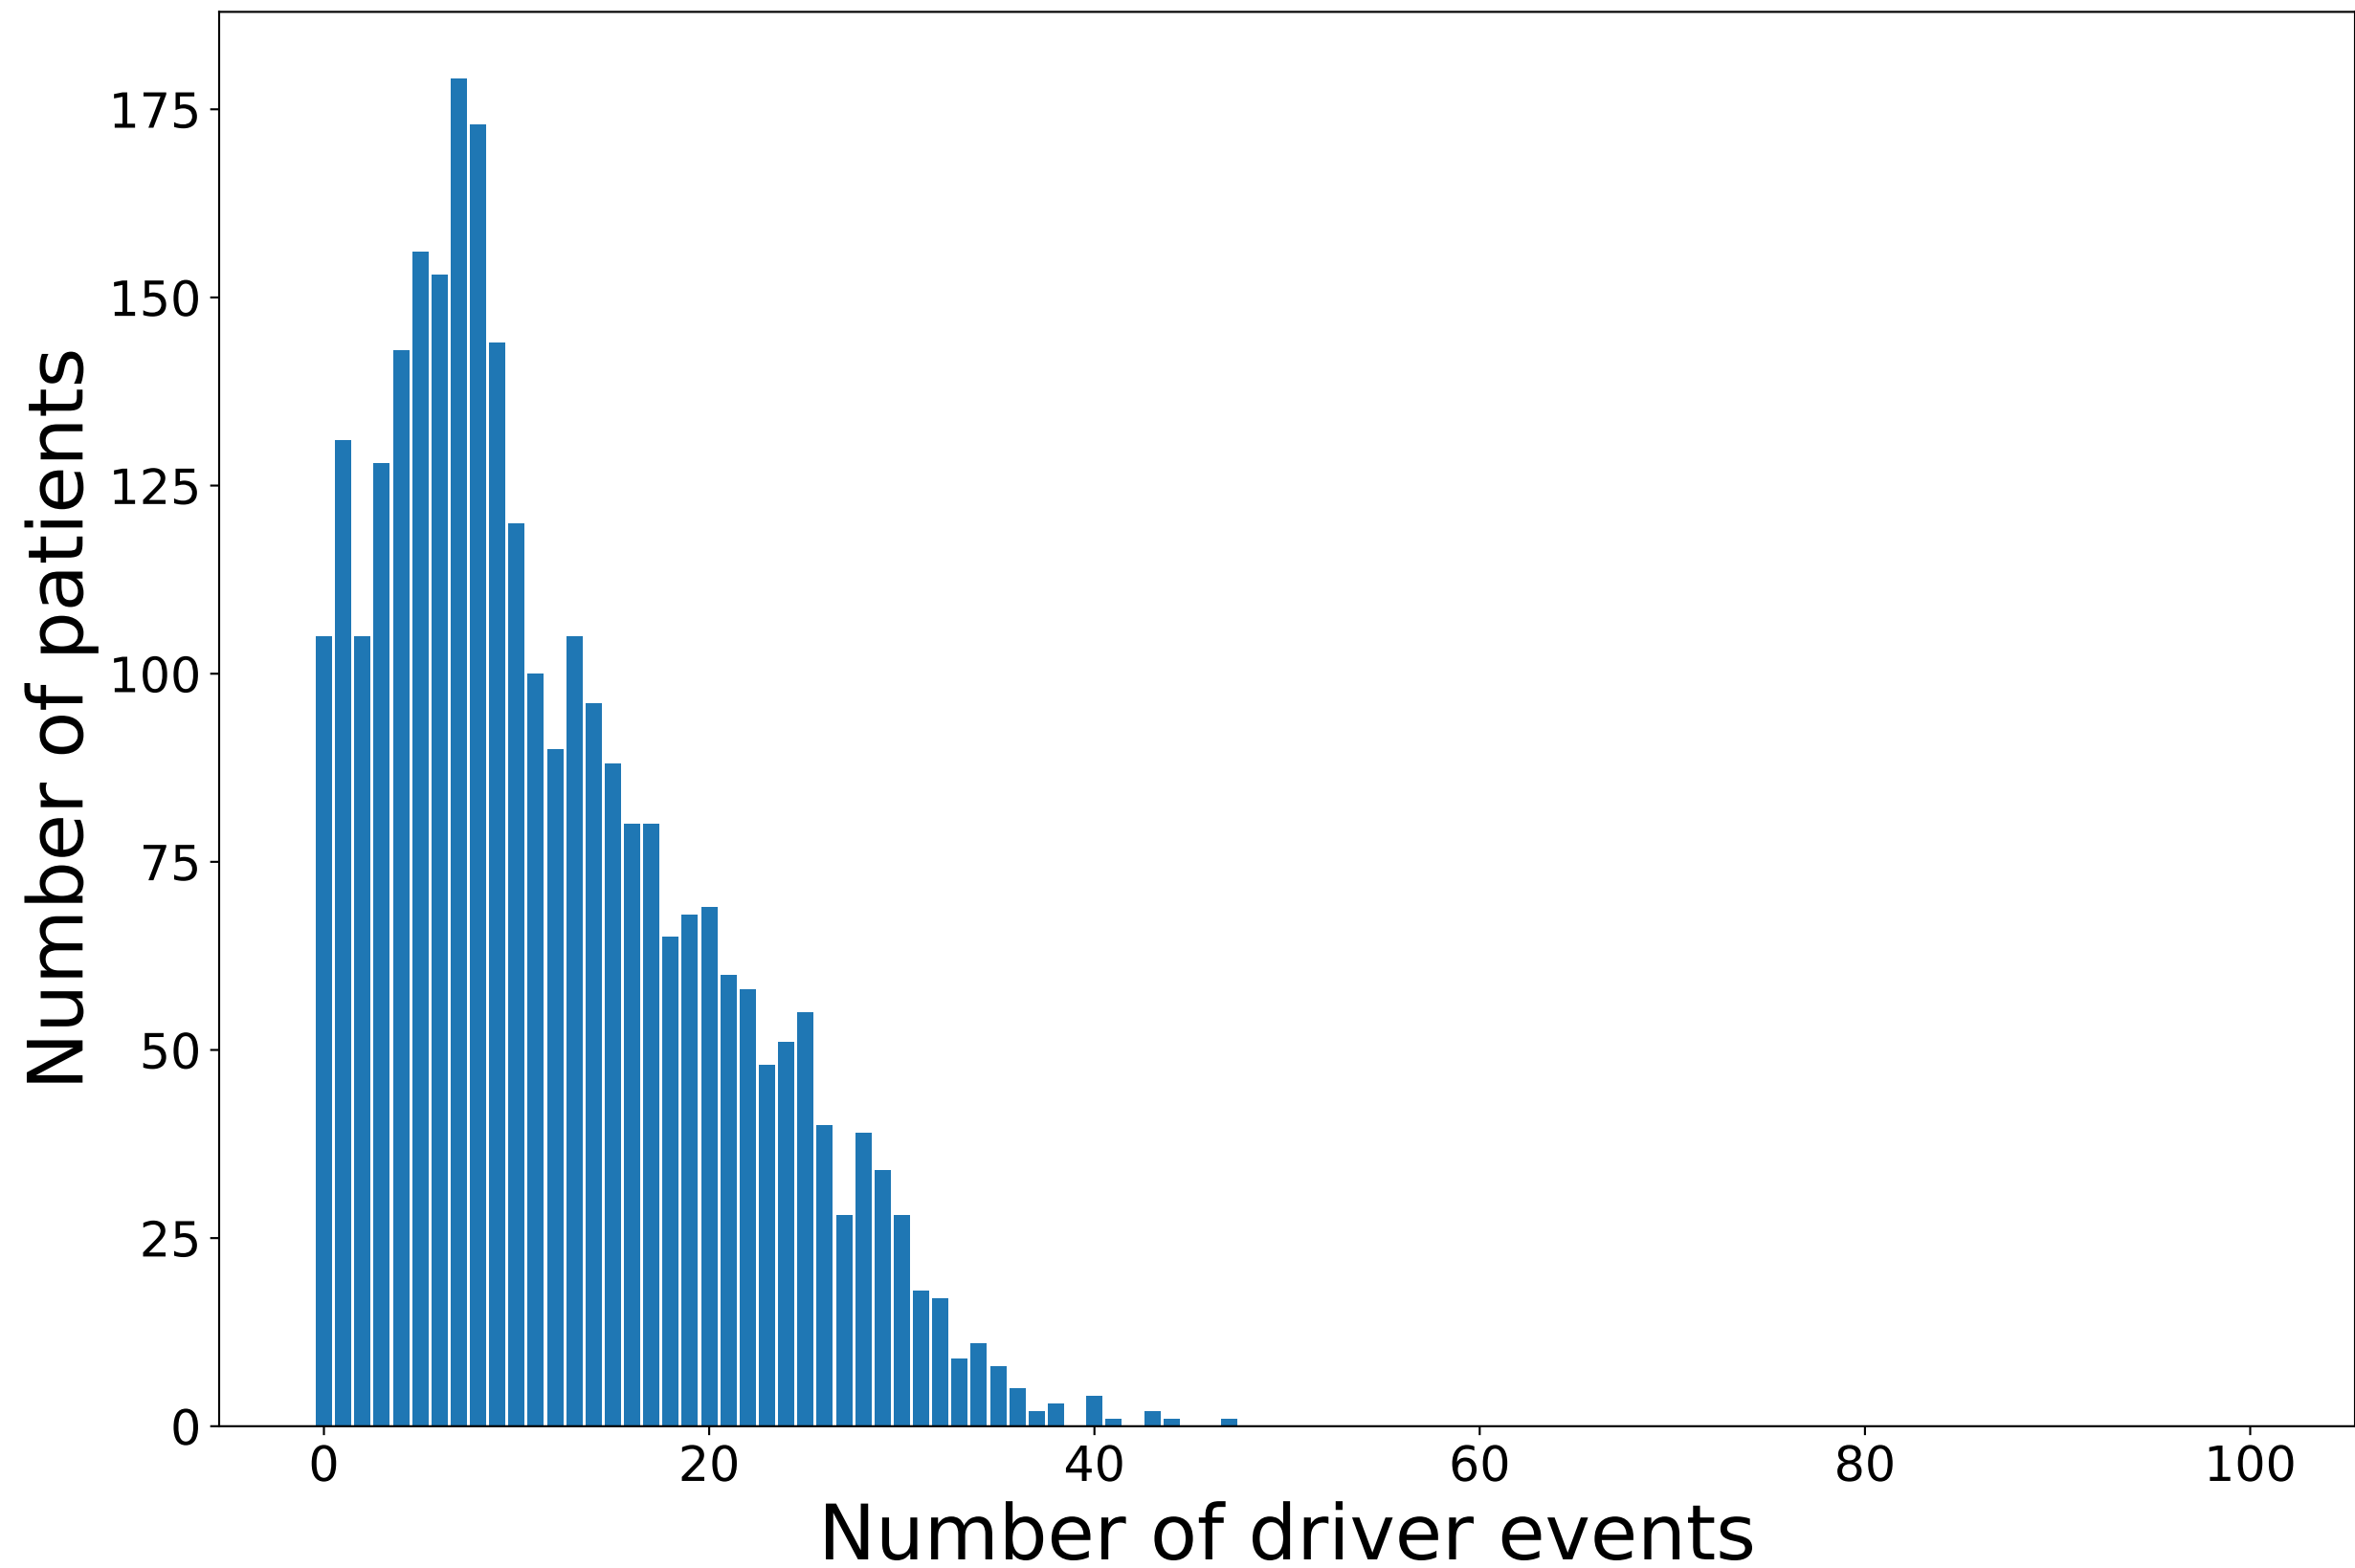

Supplement: Supplemental_Data_S1.zip [file Supplemental_Data_S1.zip]

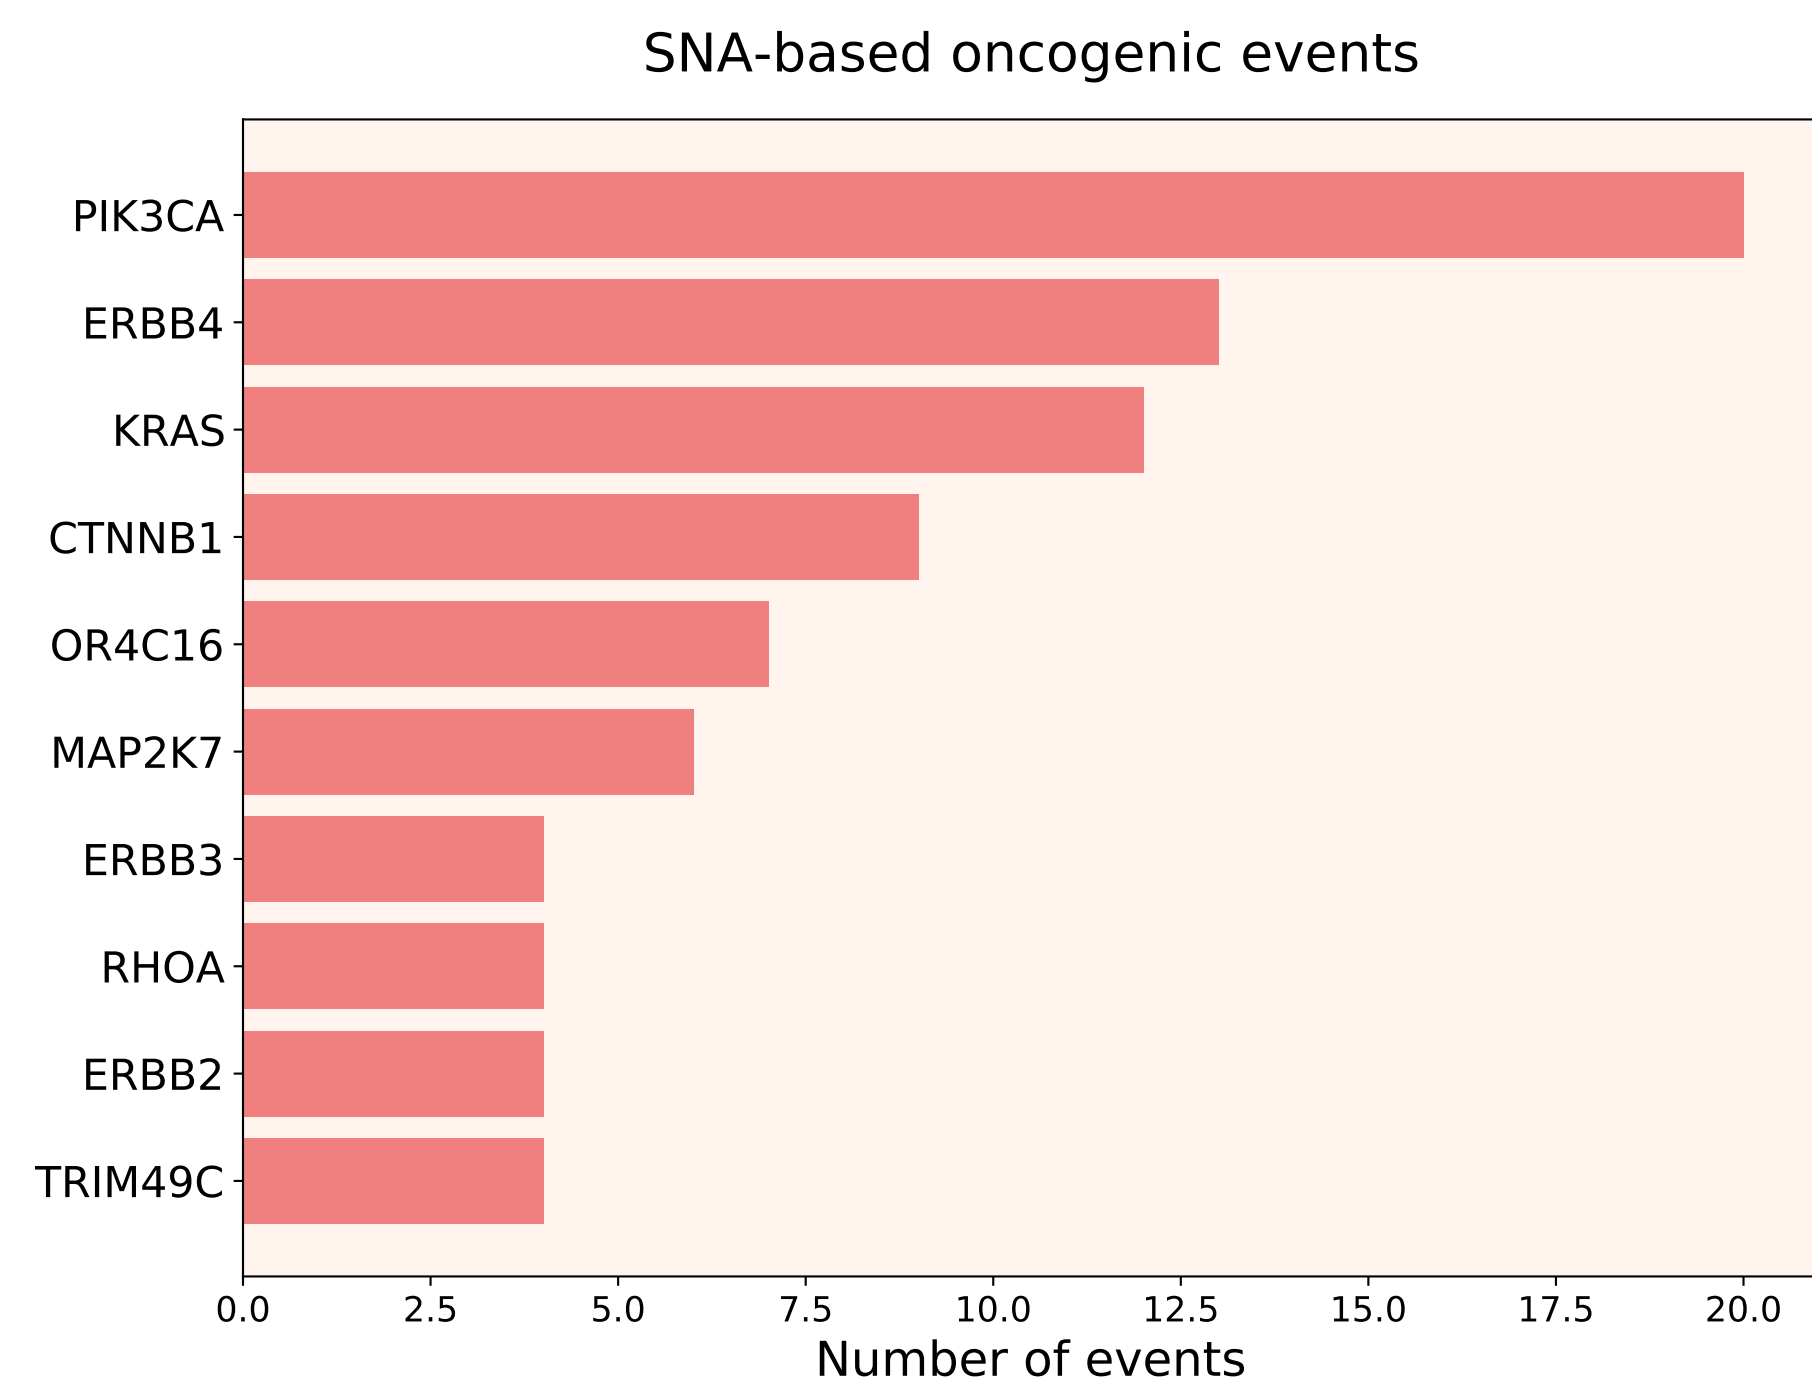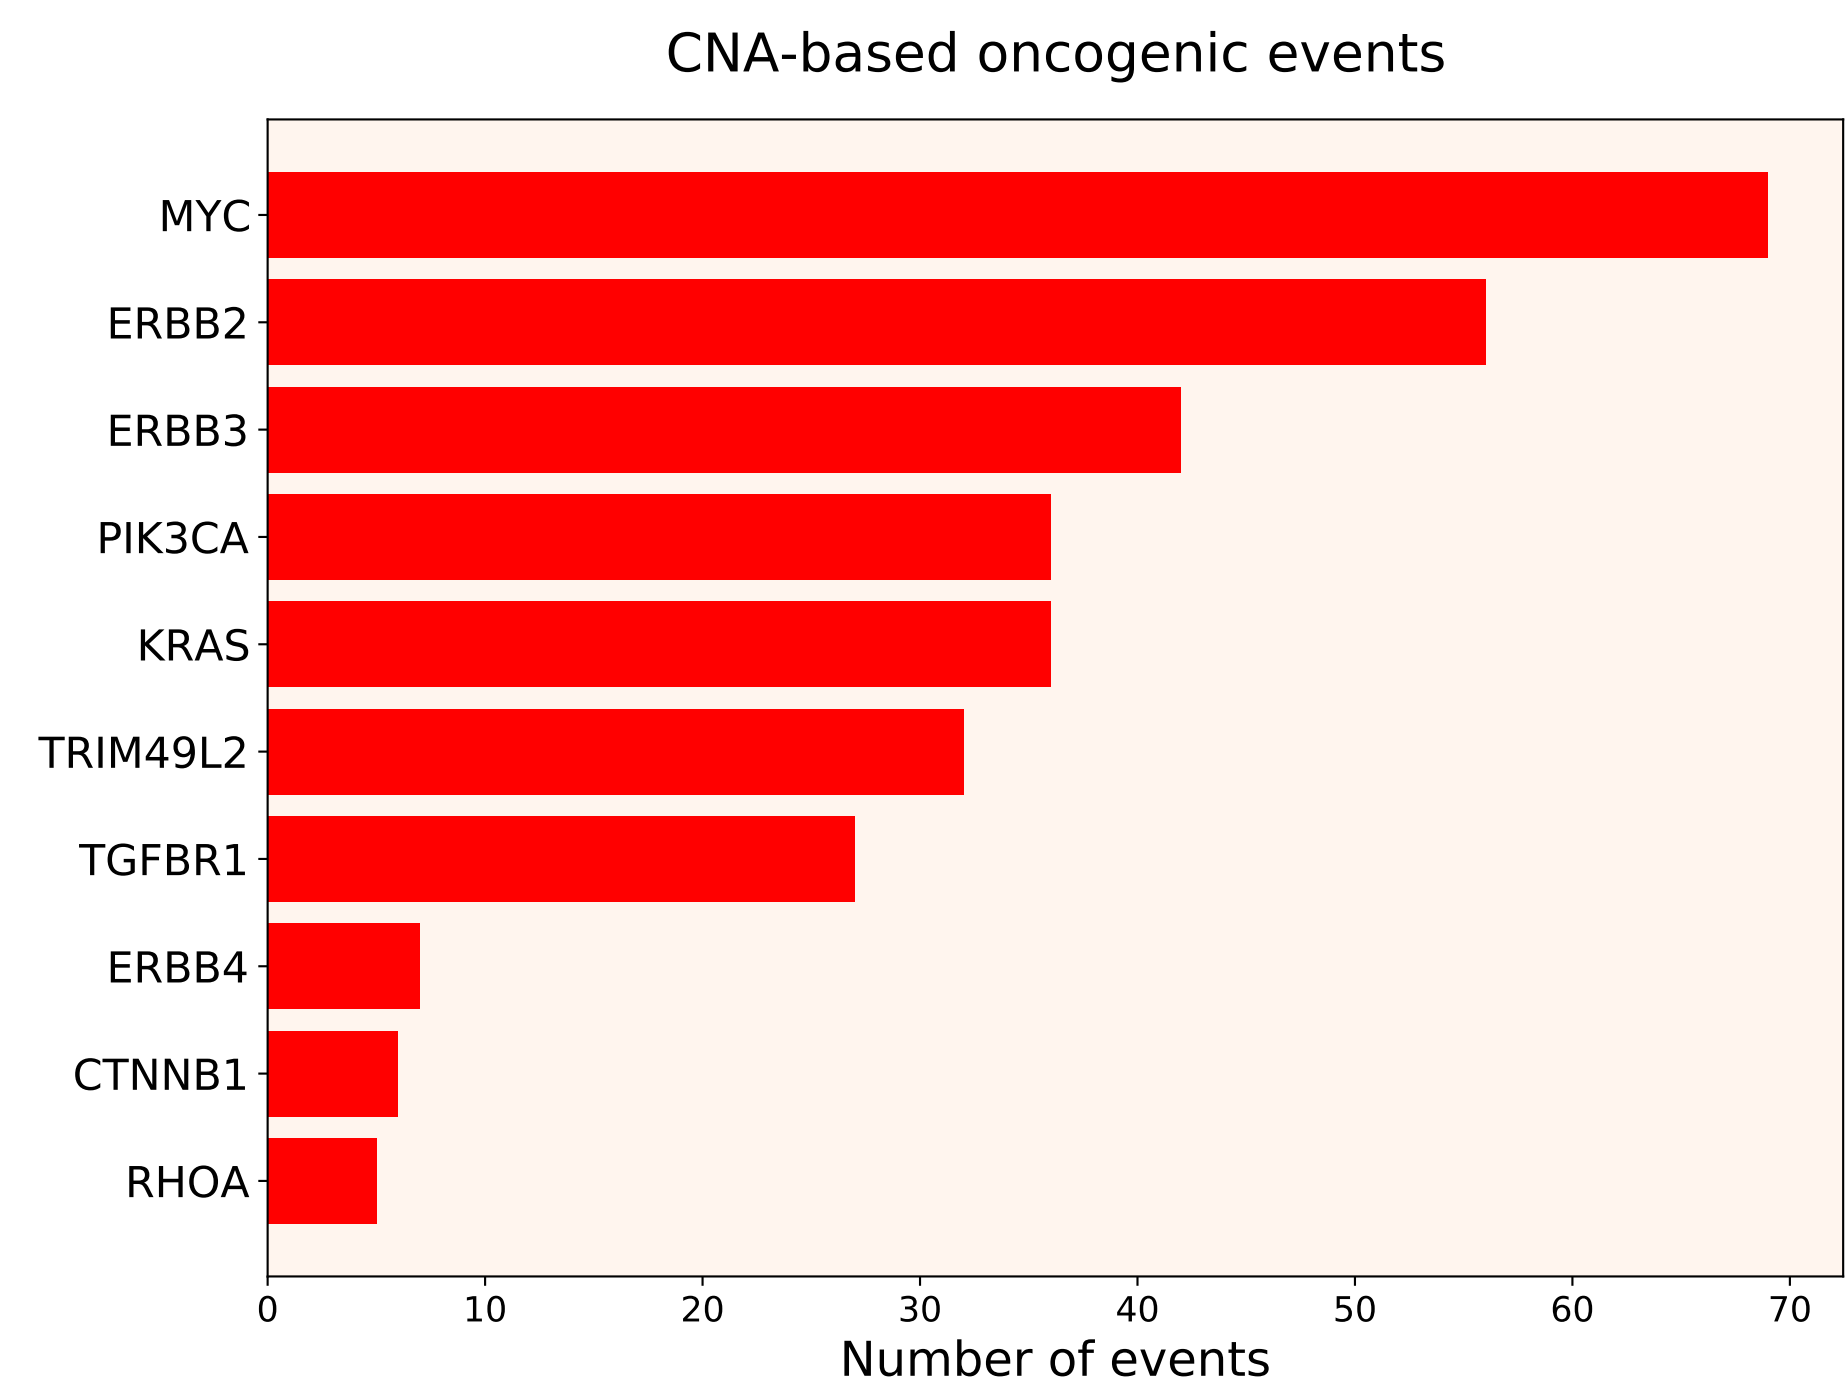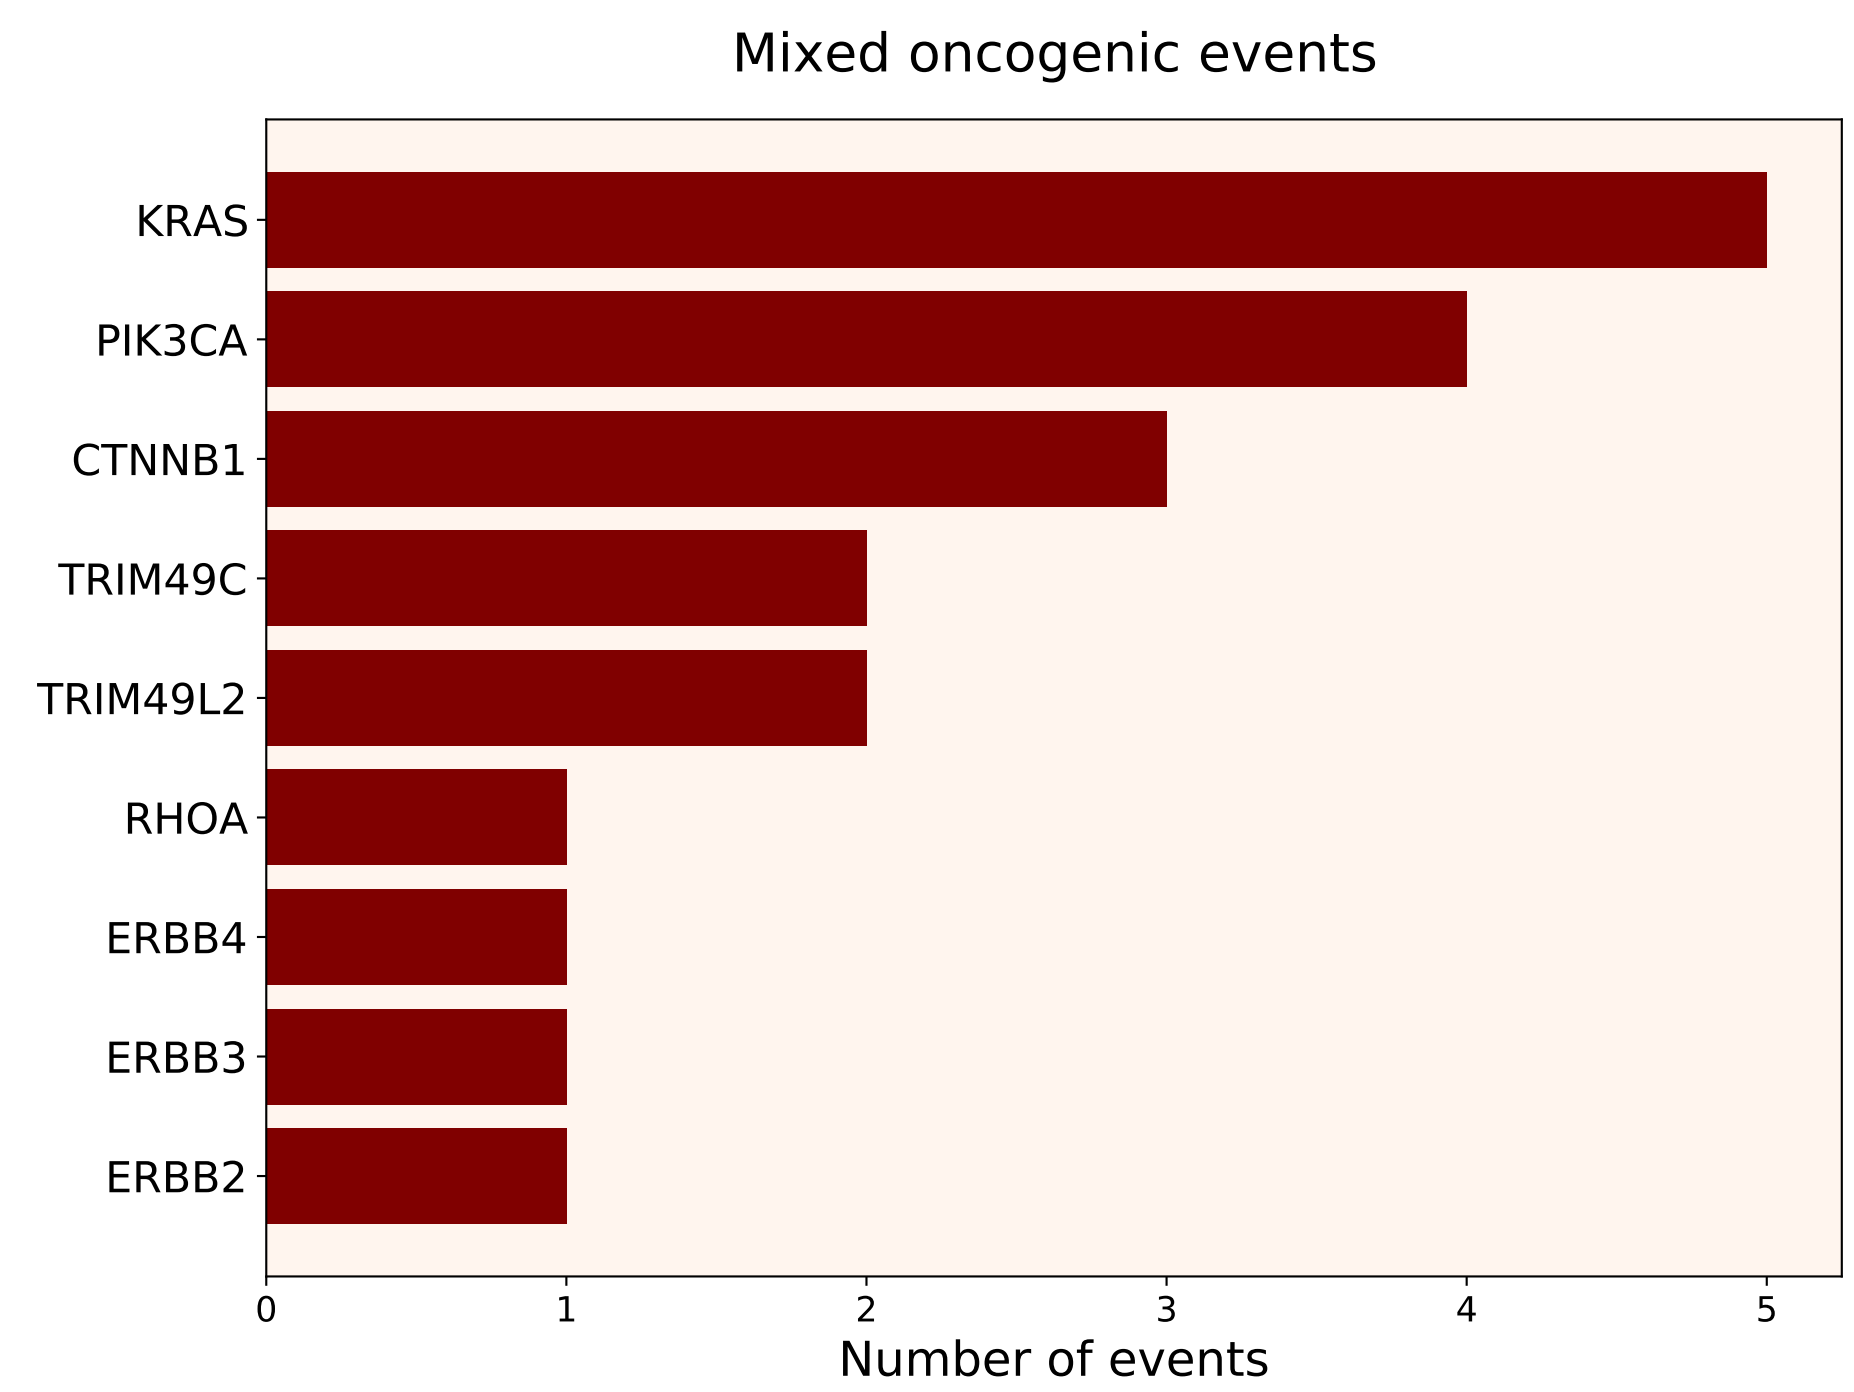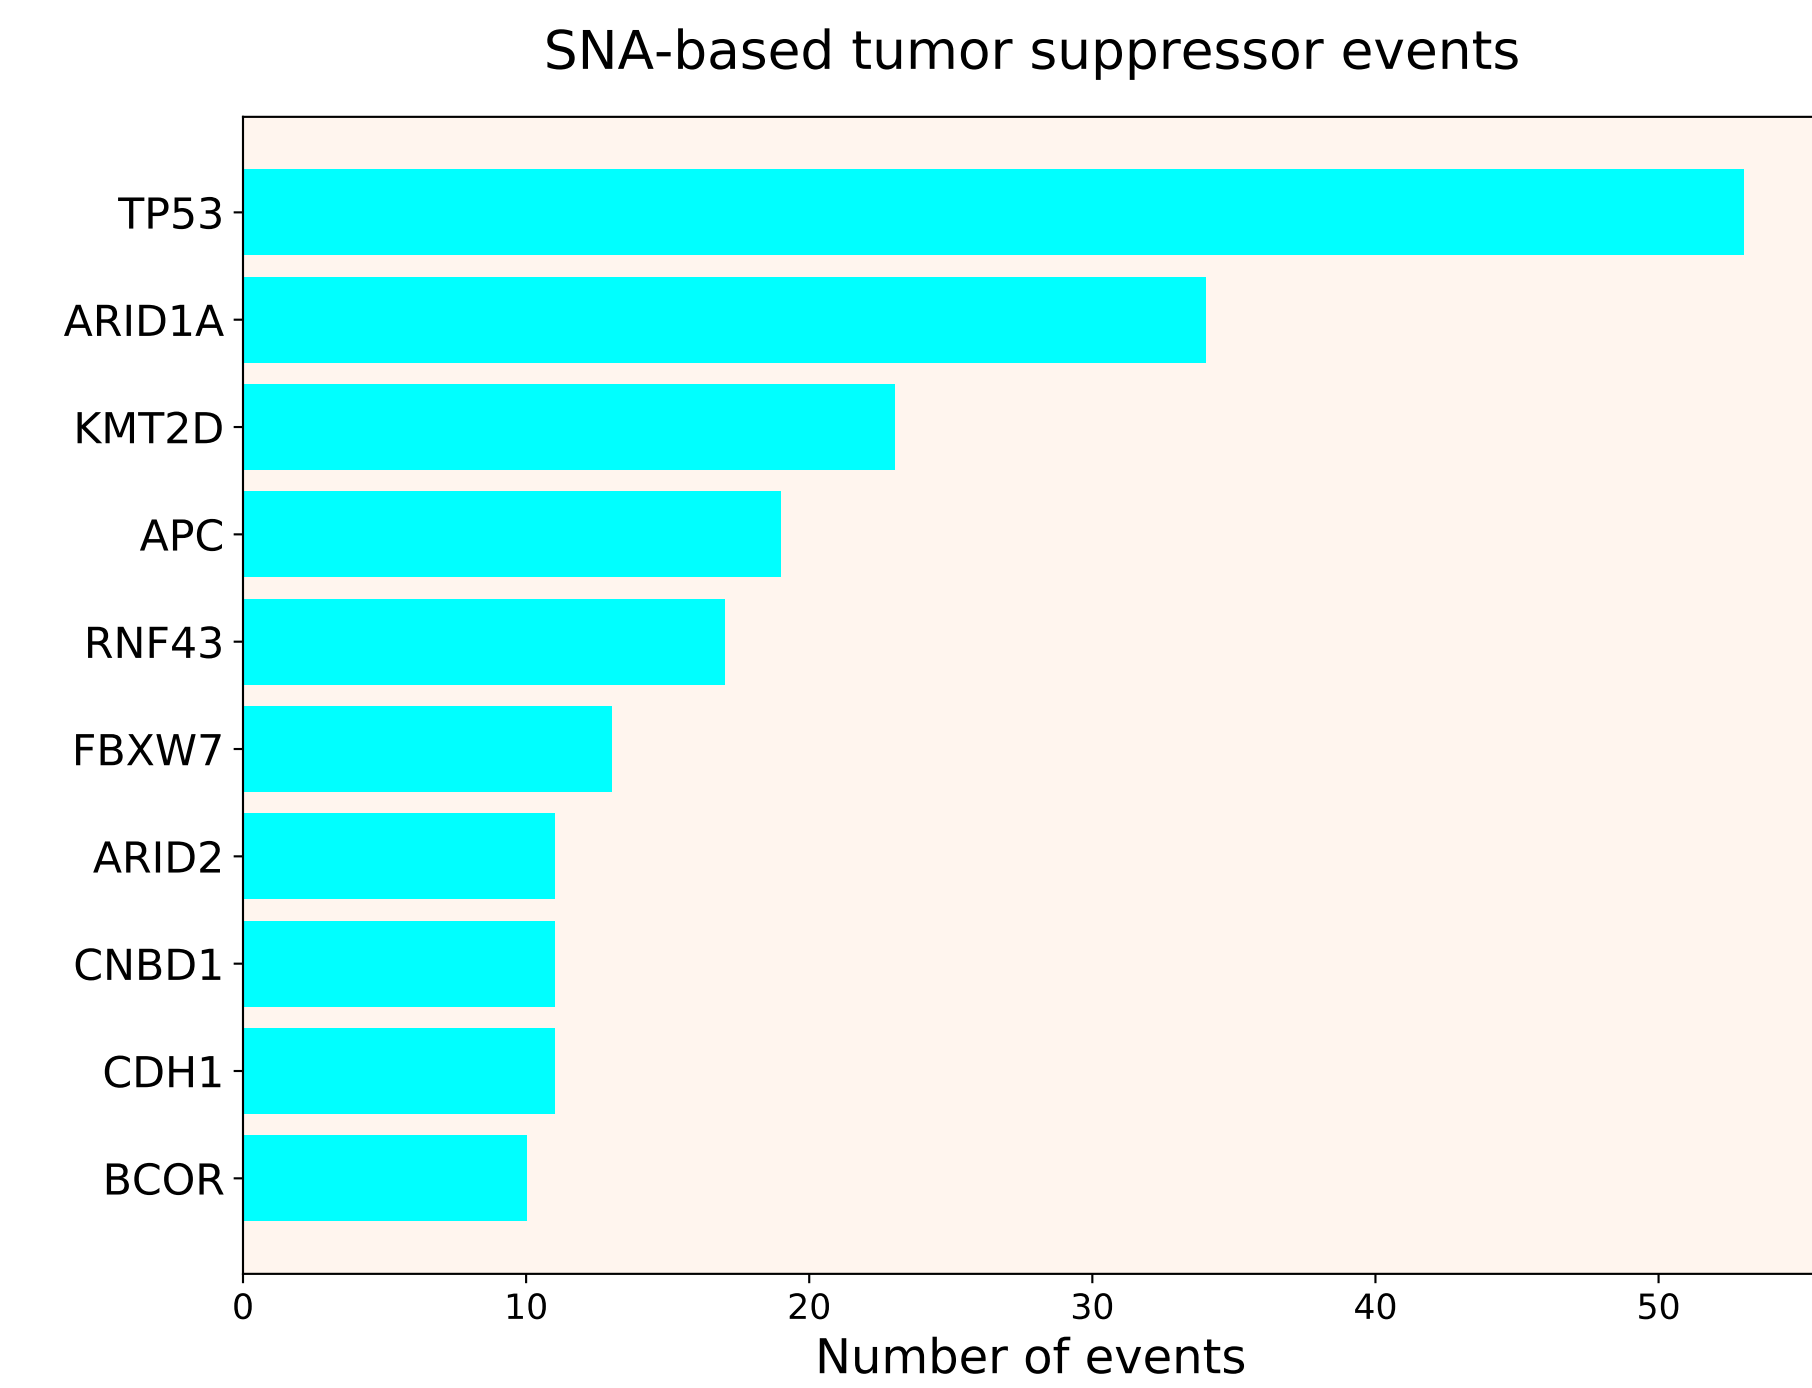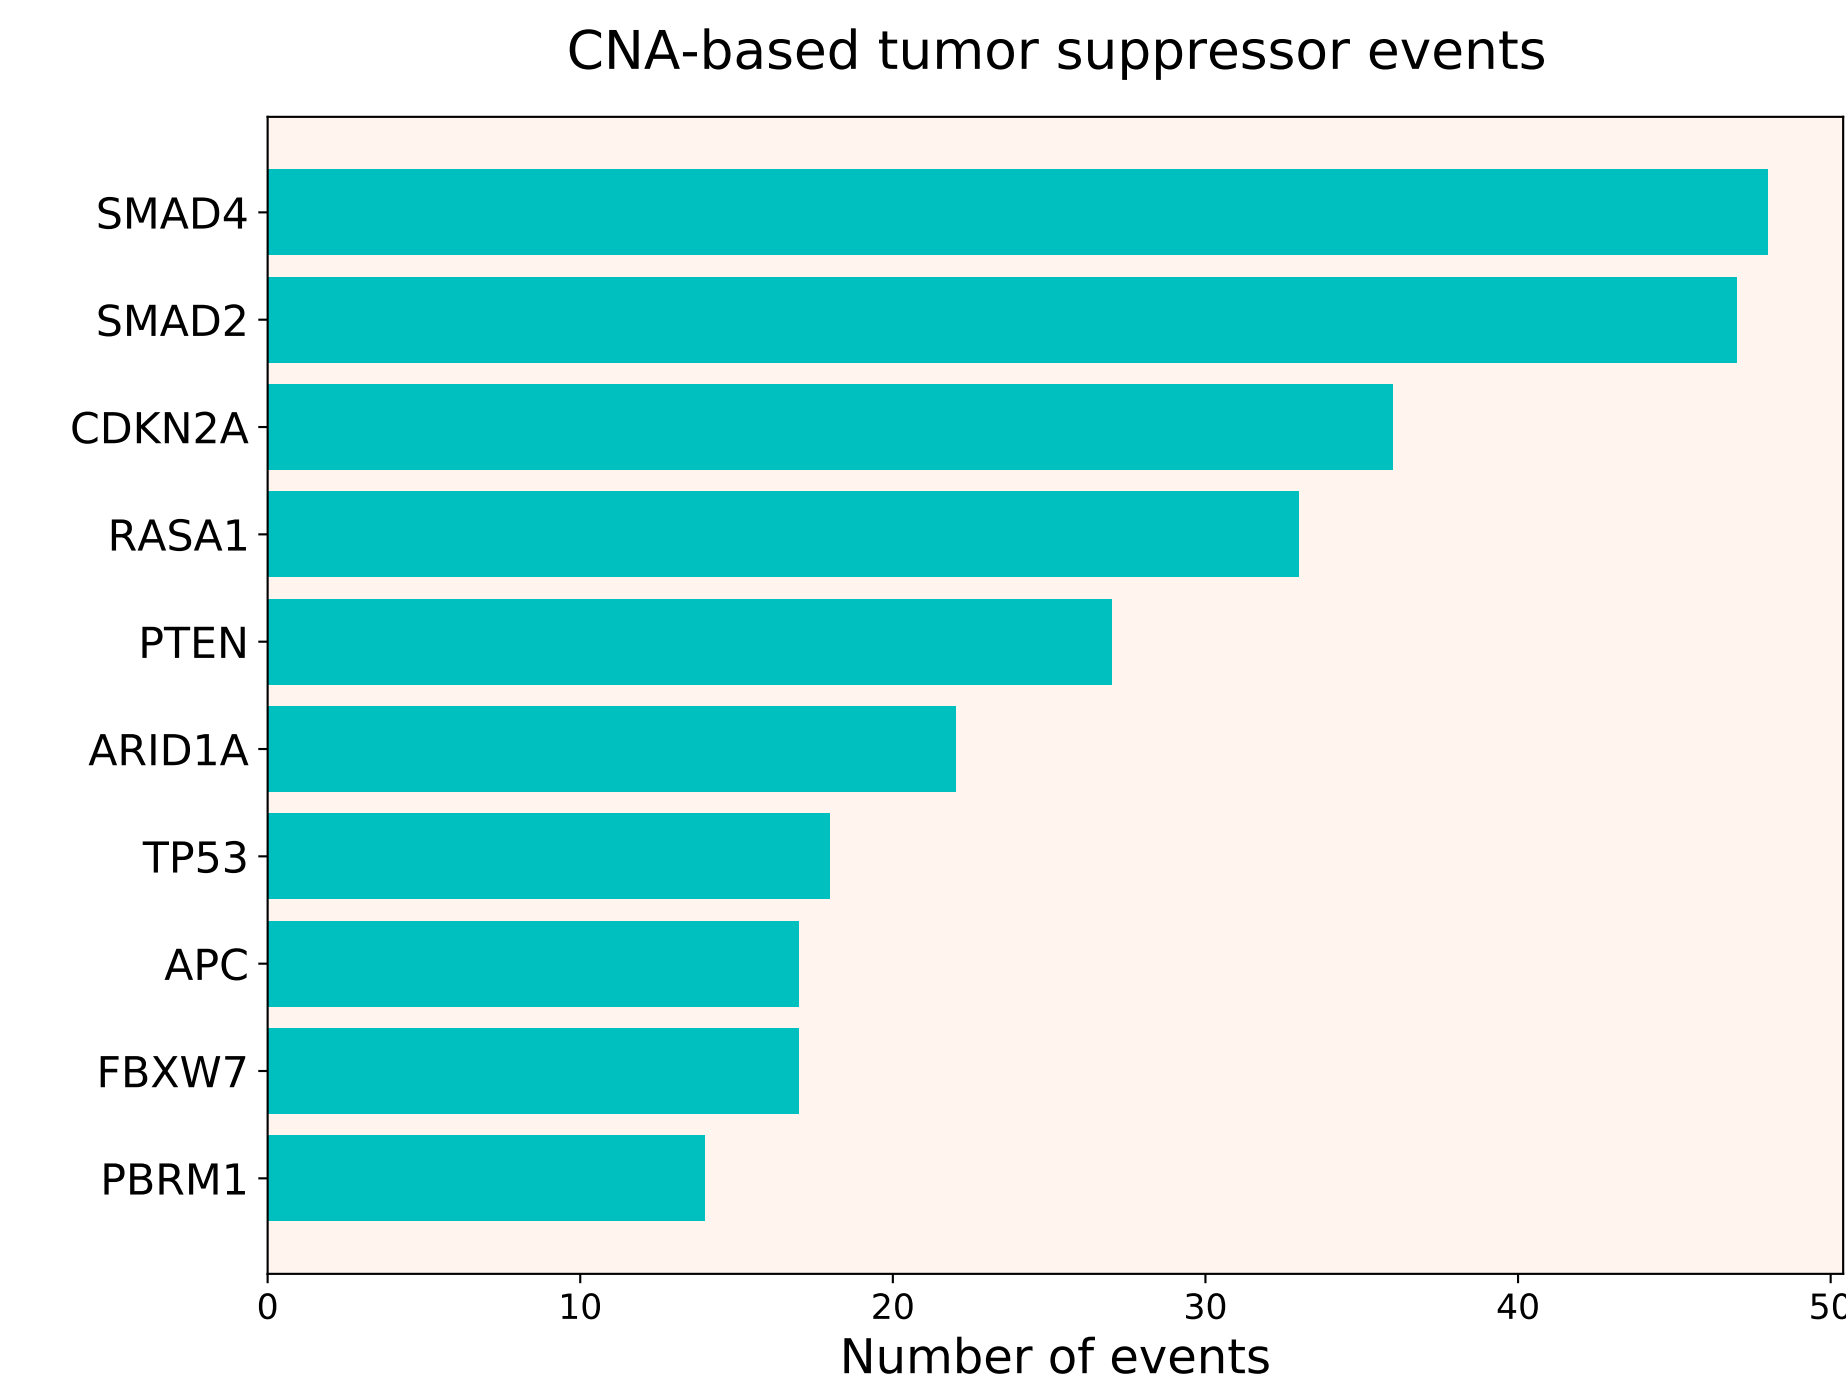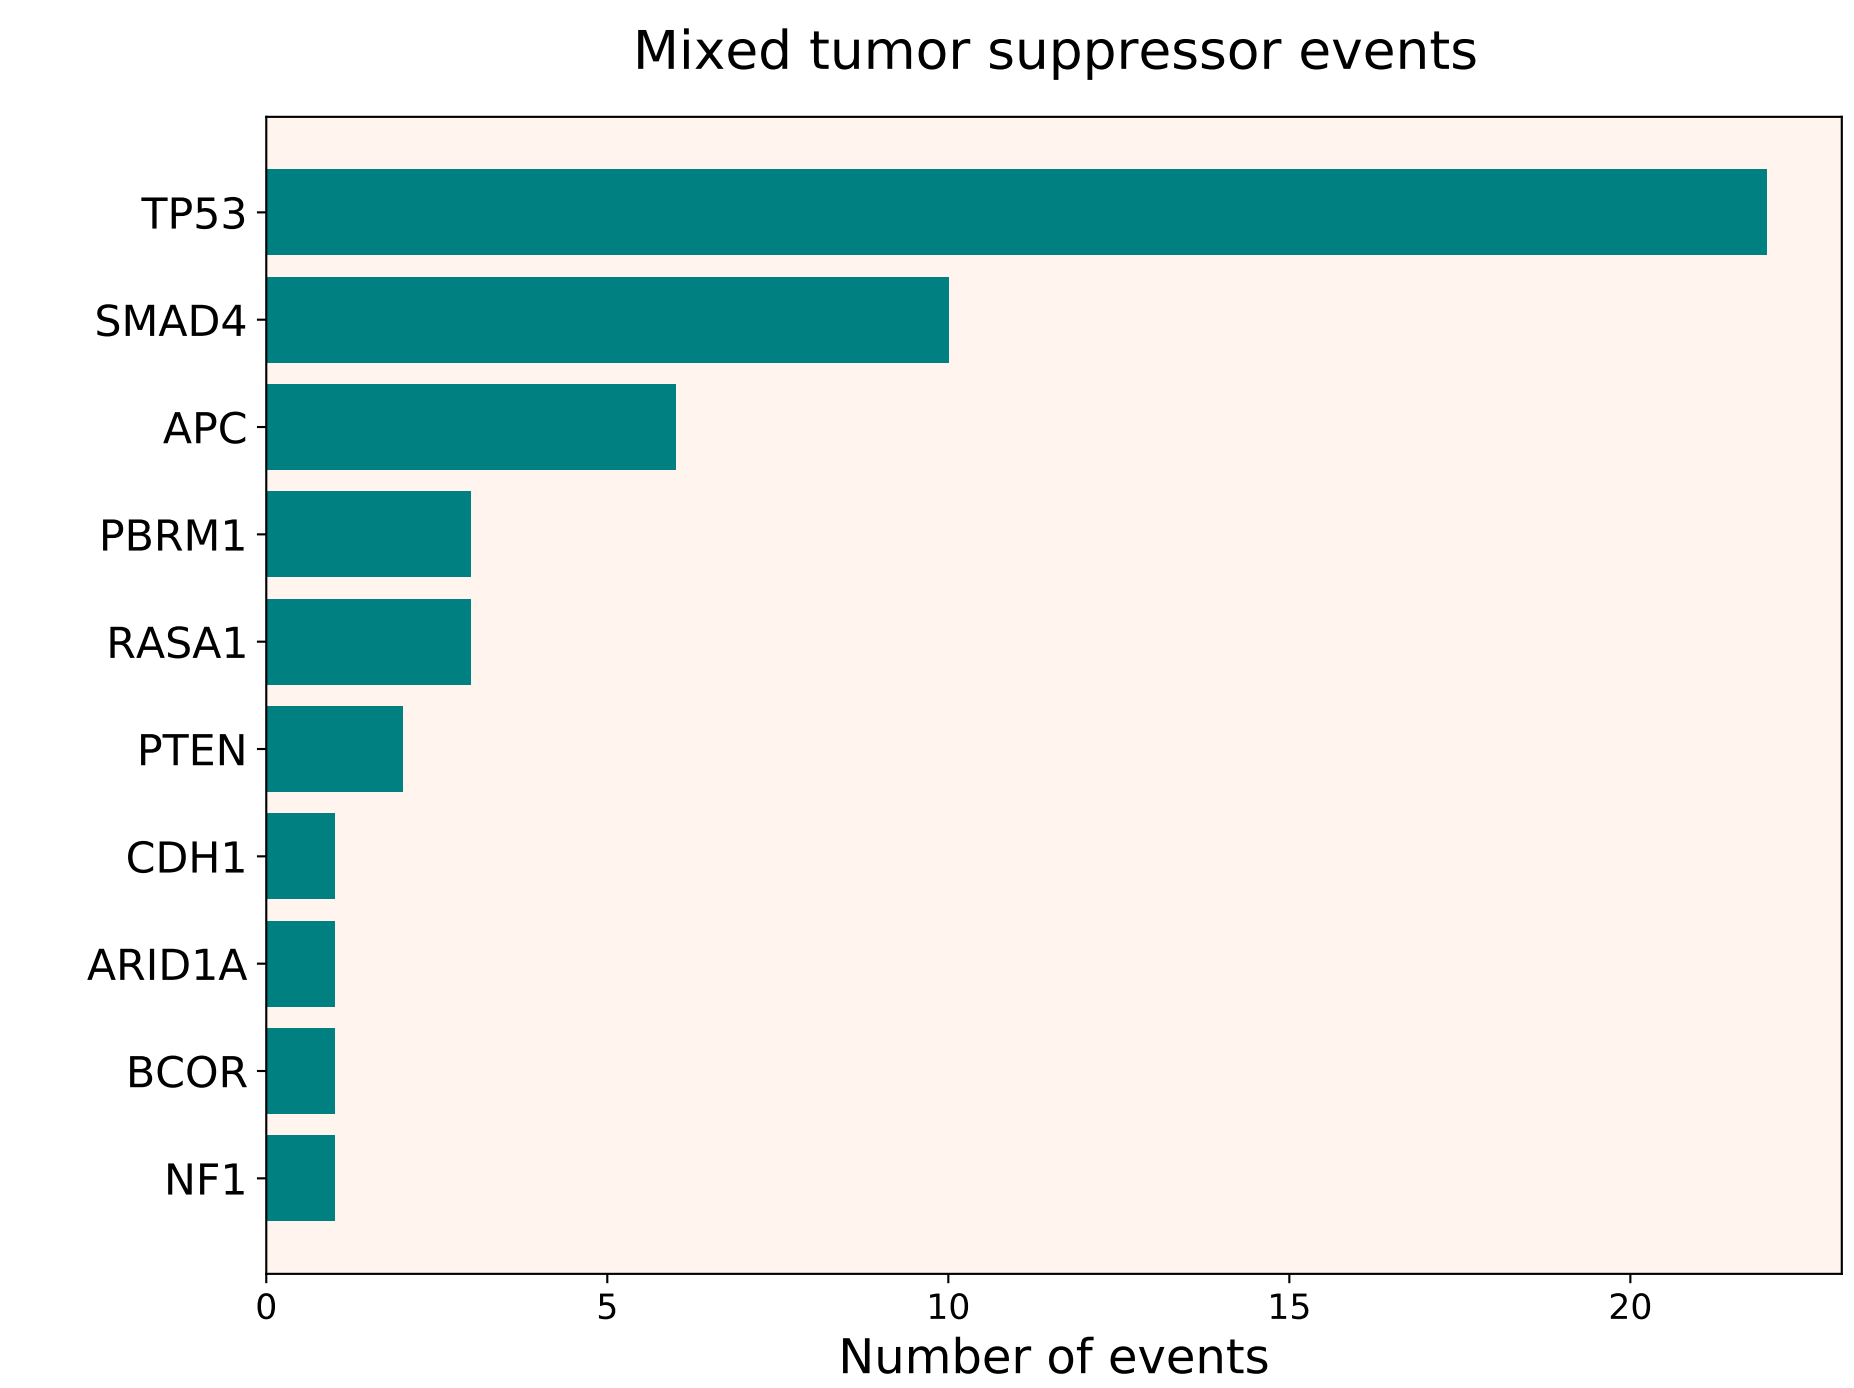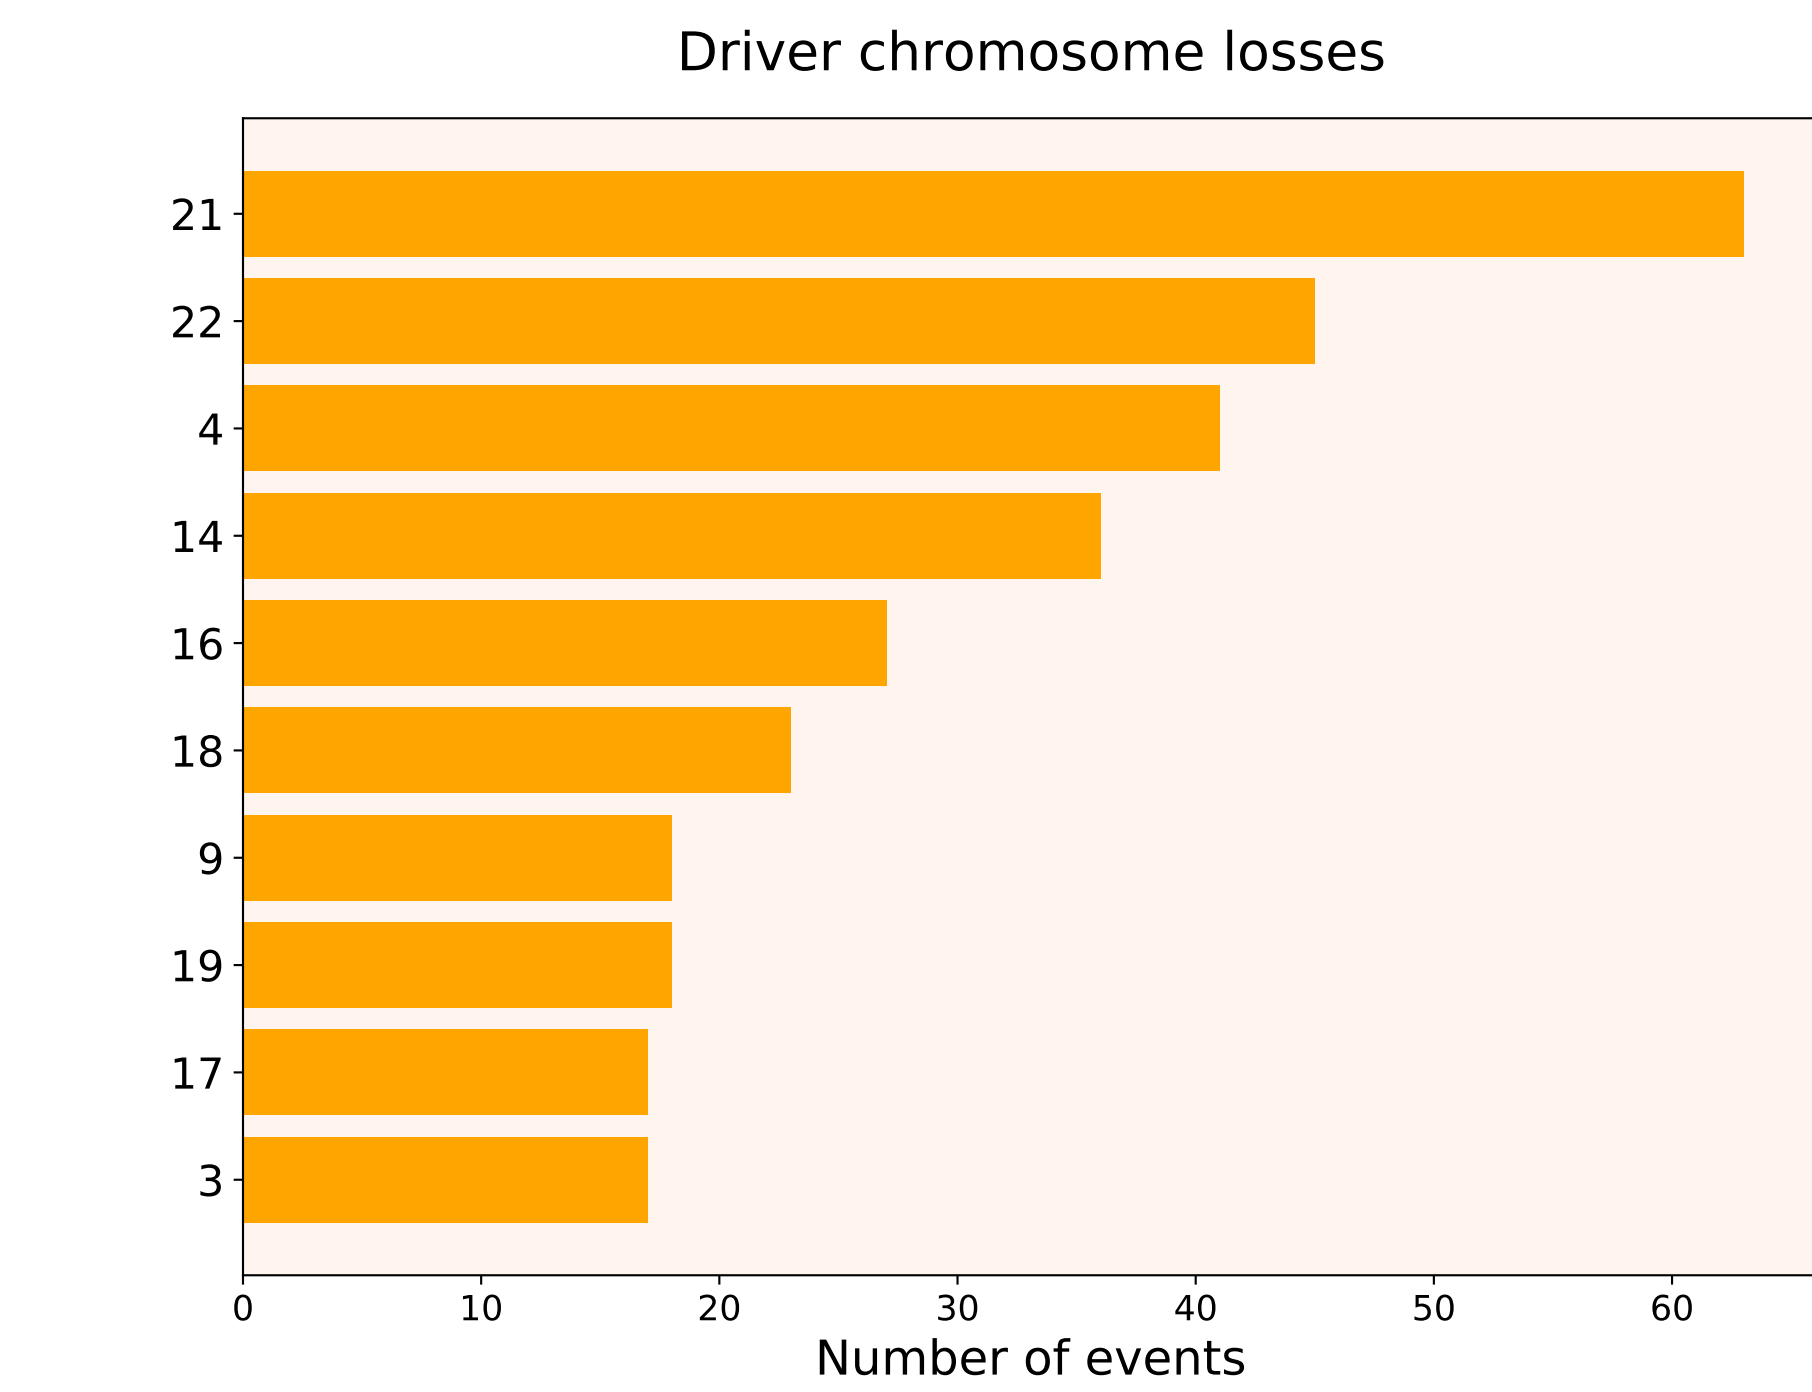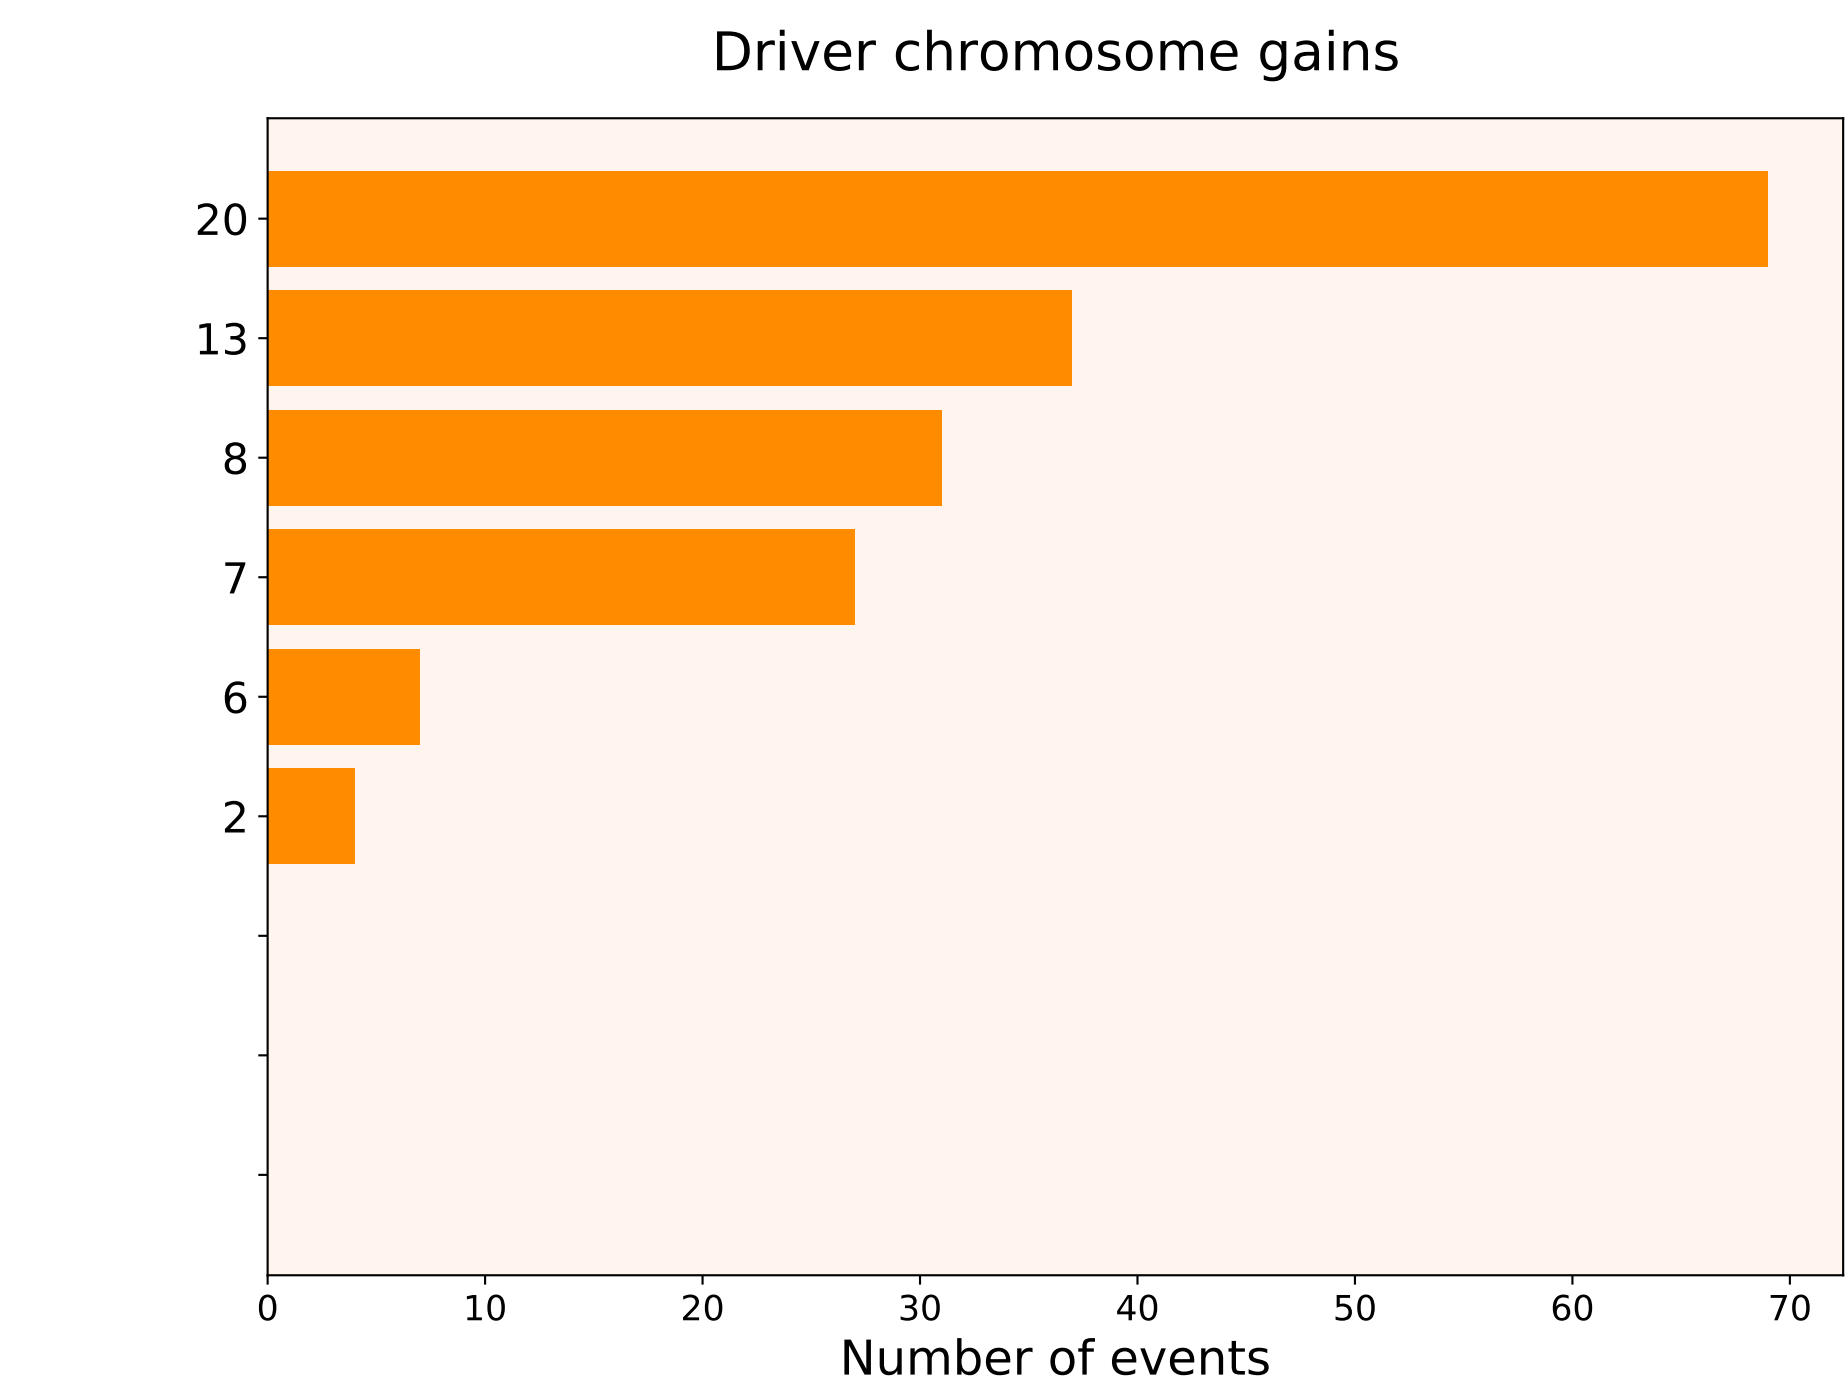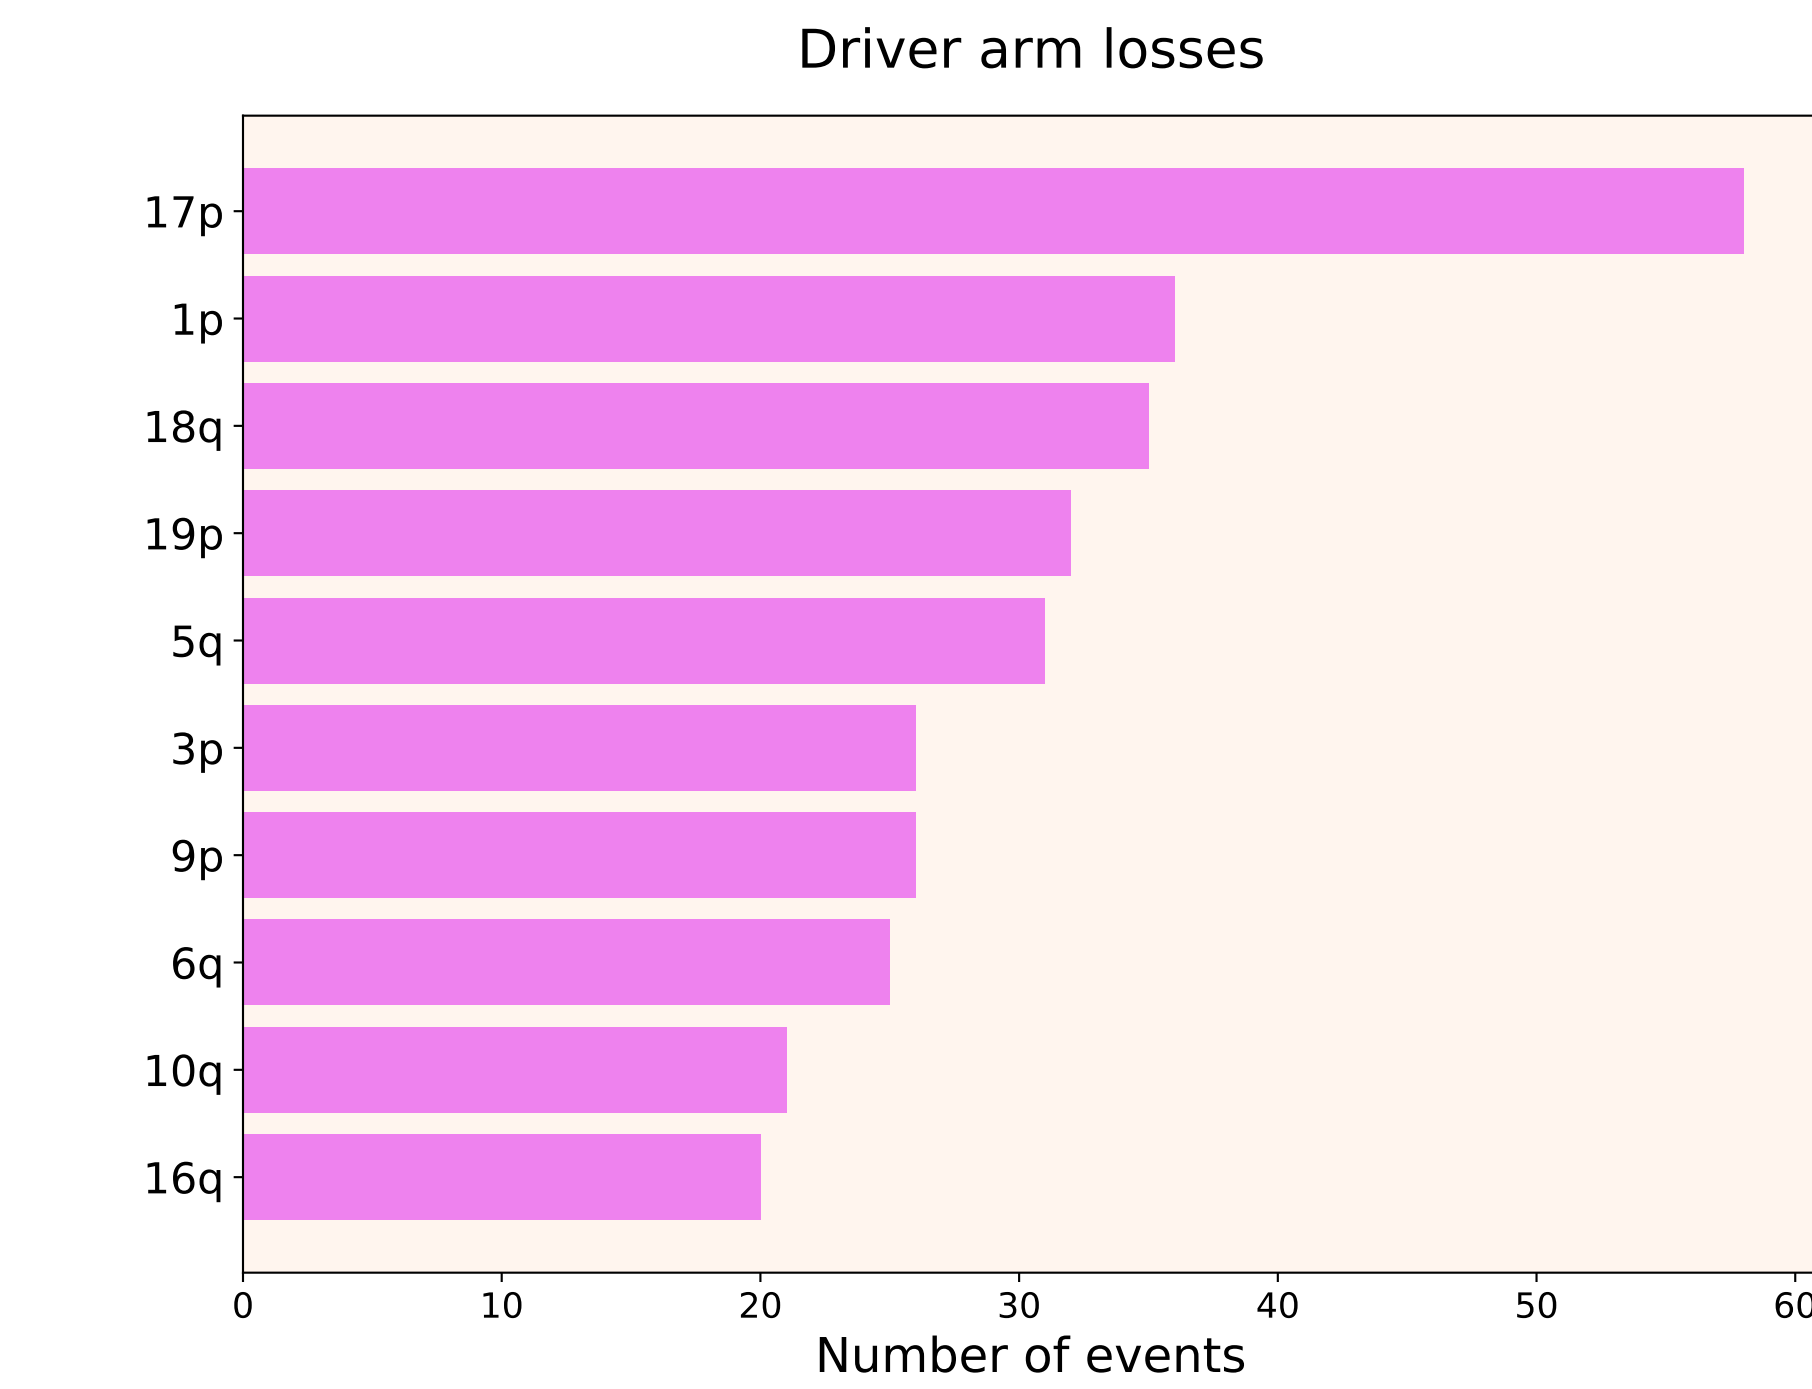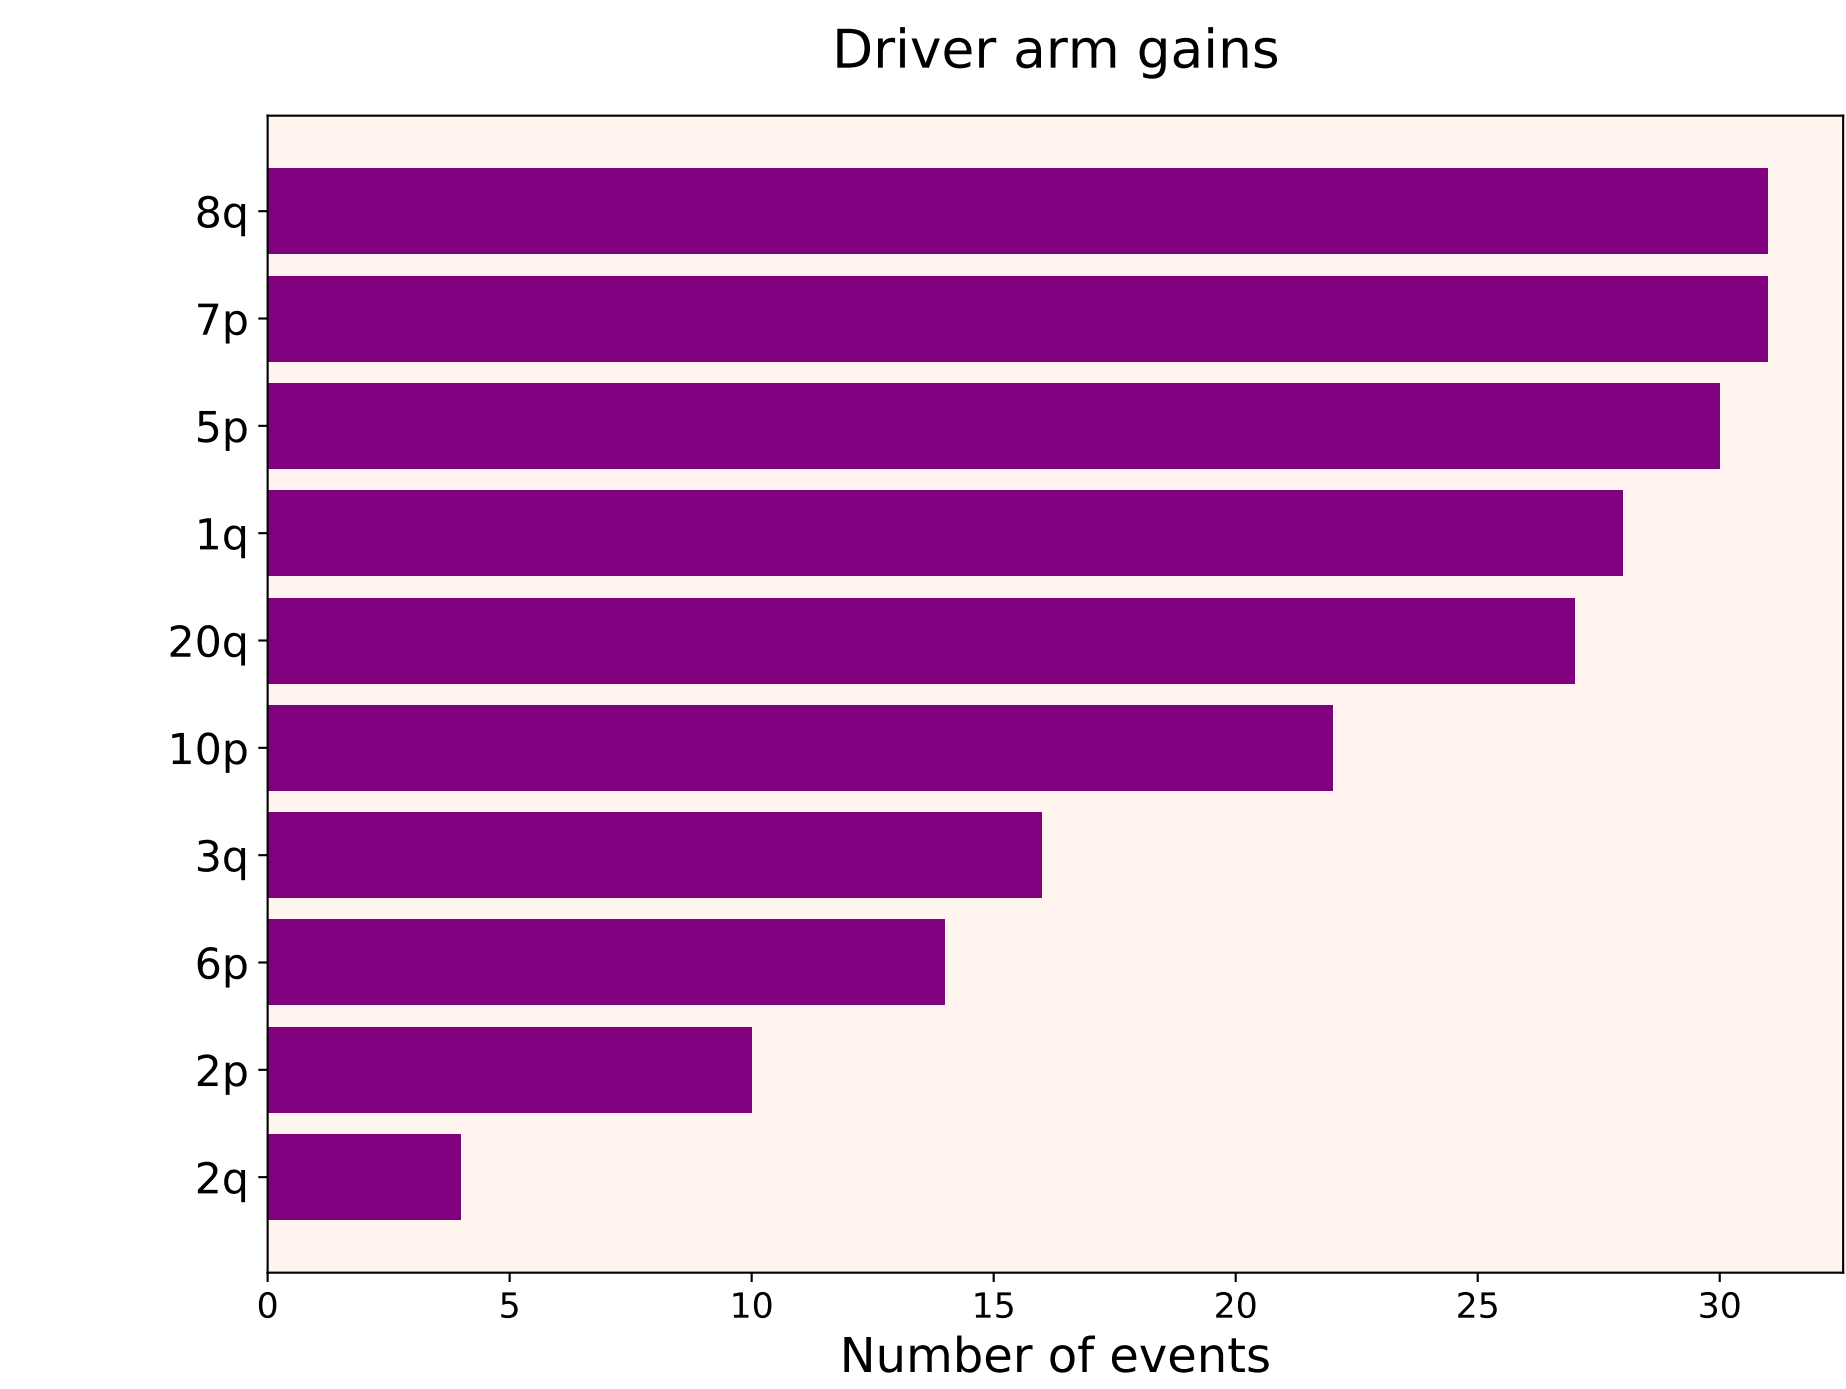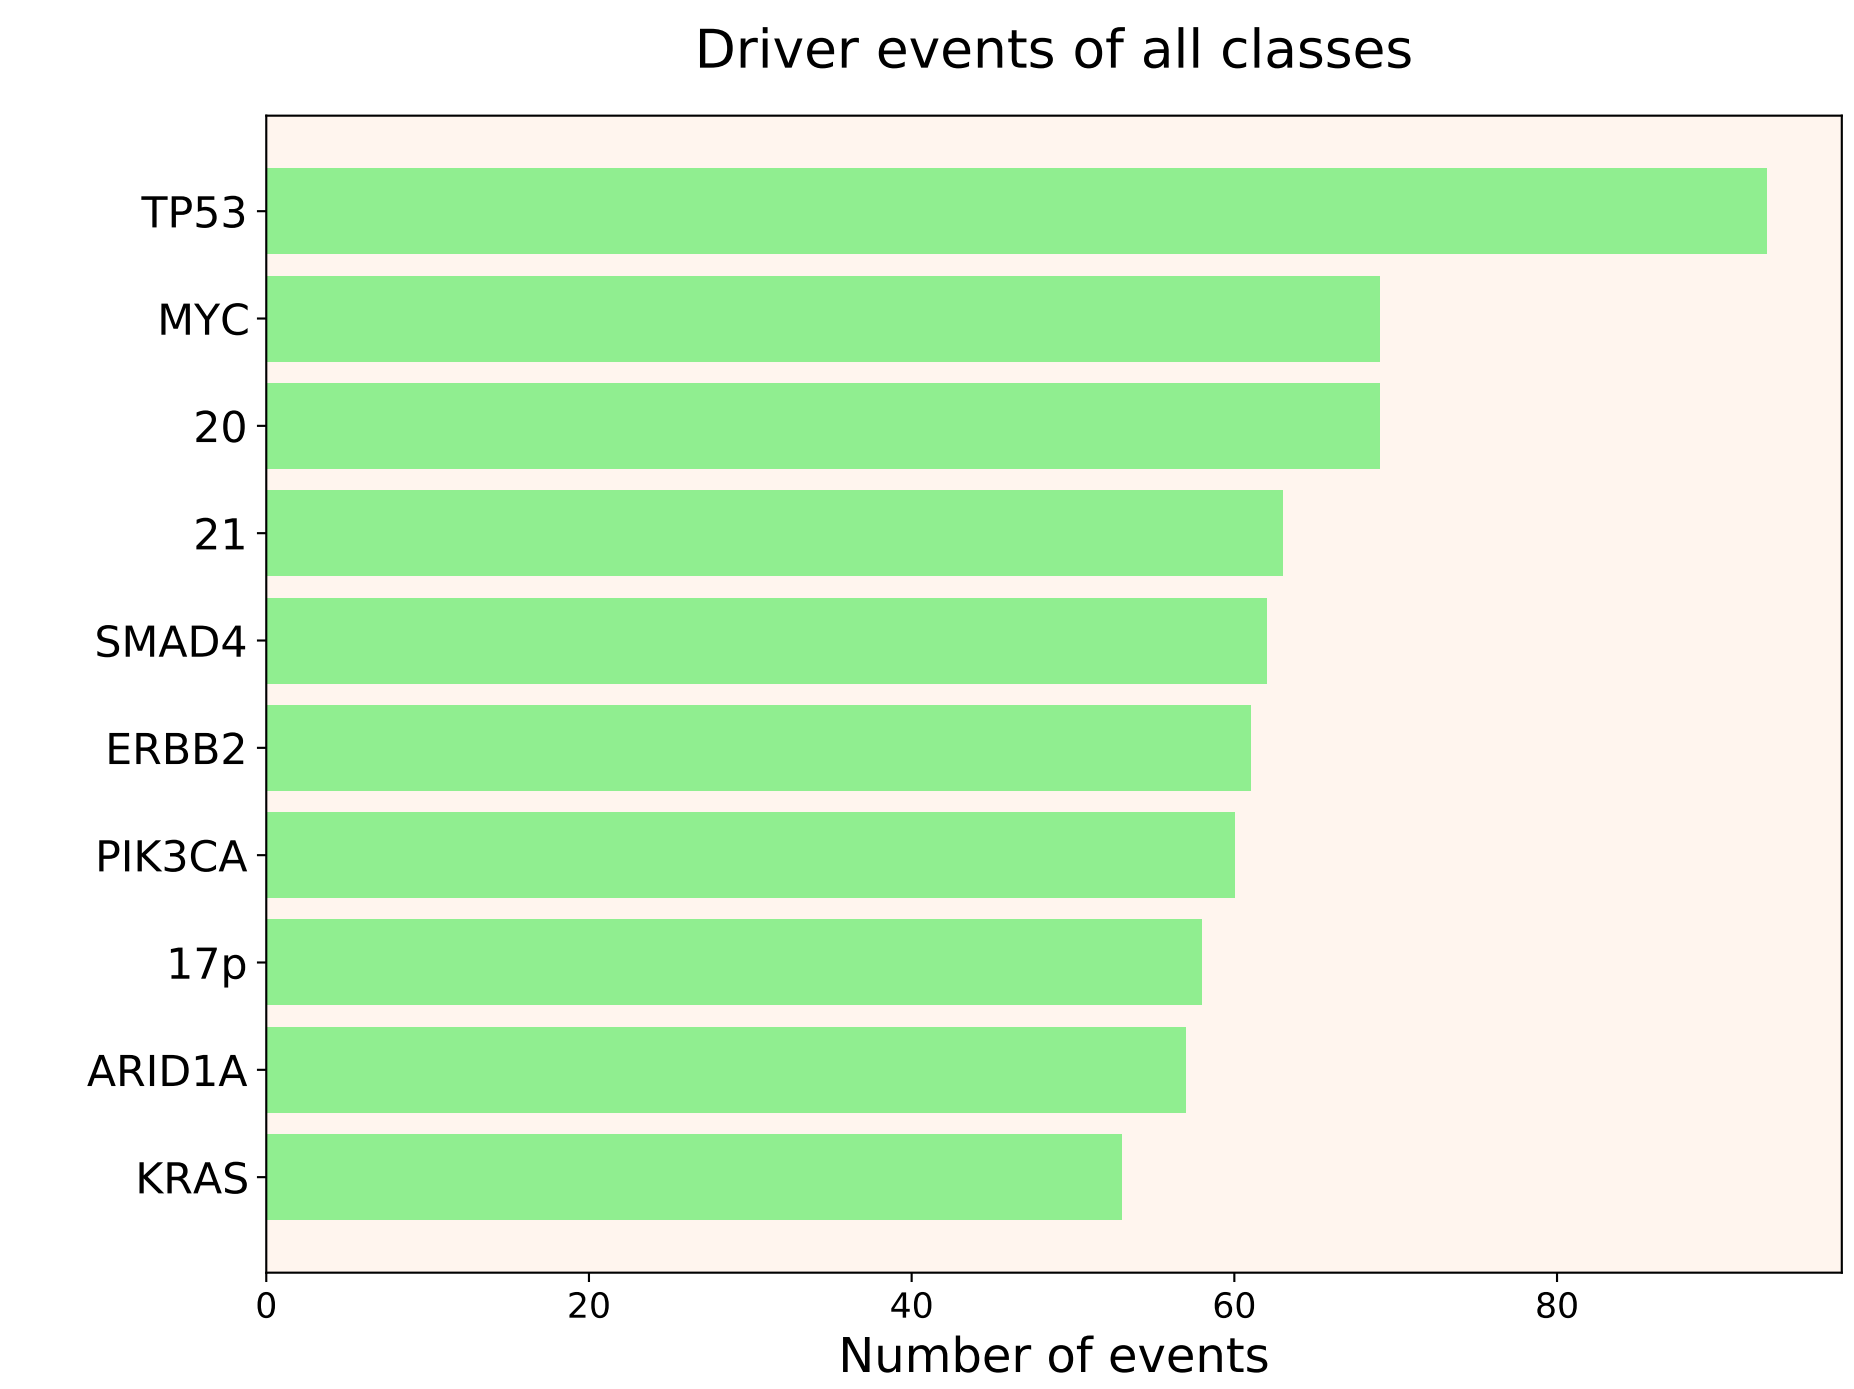

Supplement: Supplemental_Data_S1.zip [file Supplemental_Data_S1.zip]

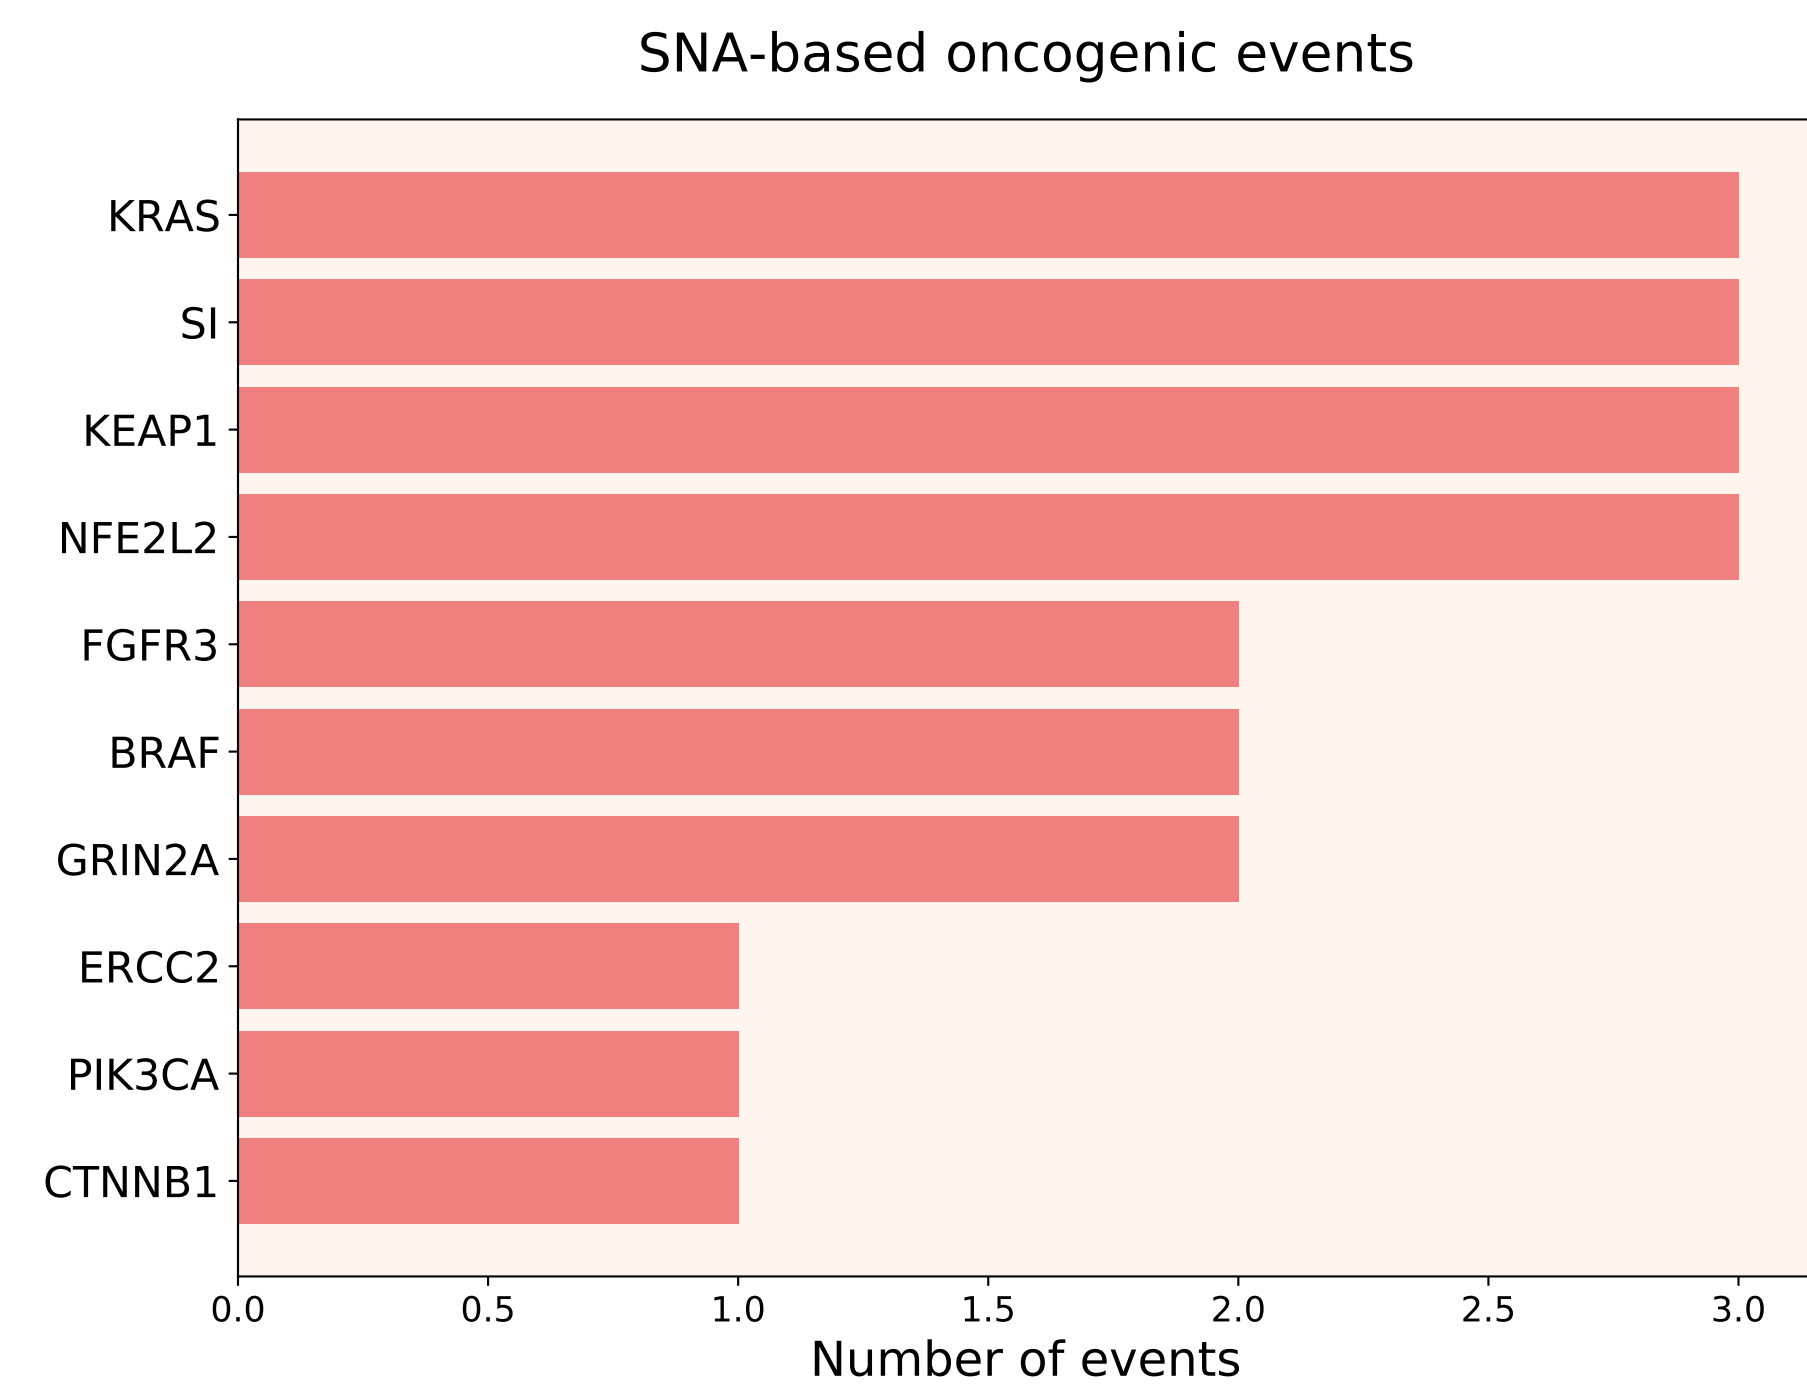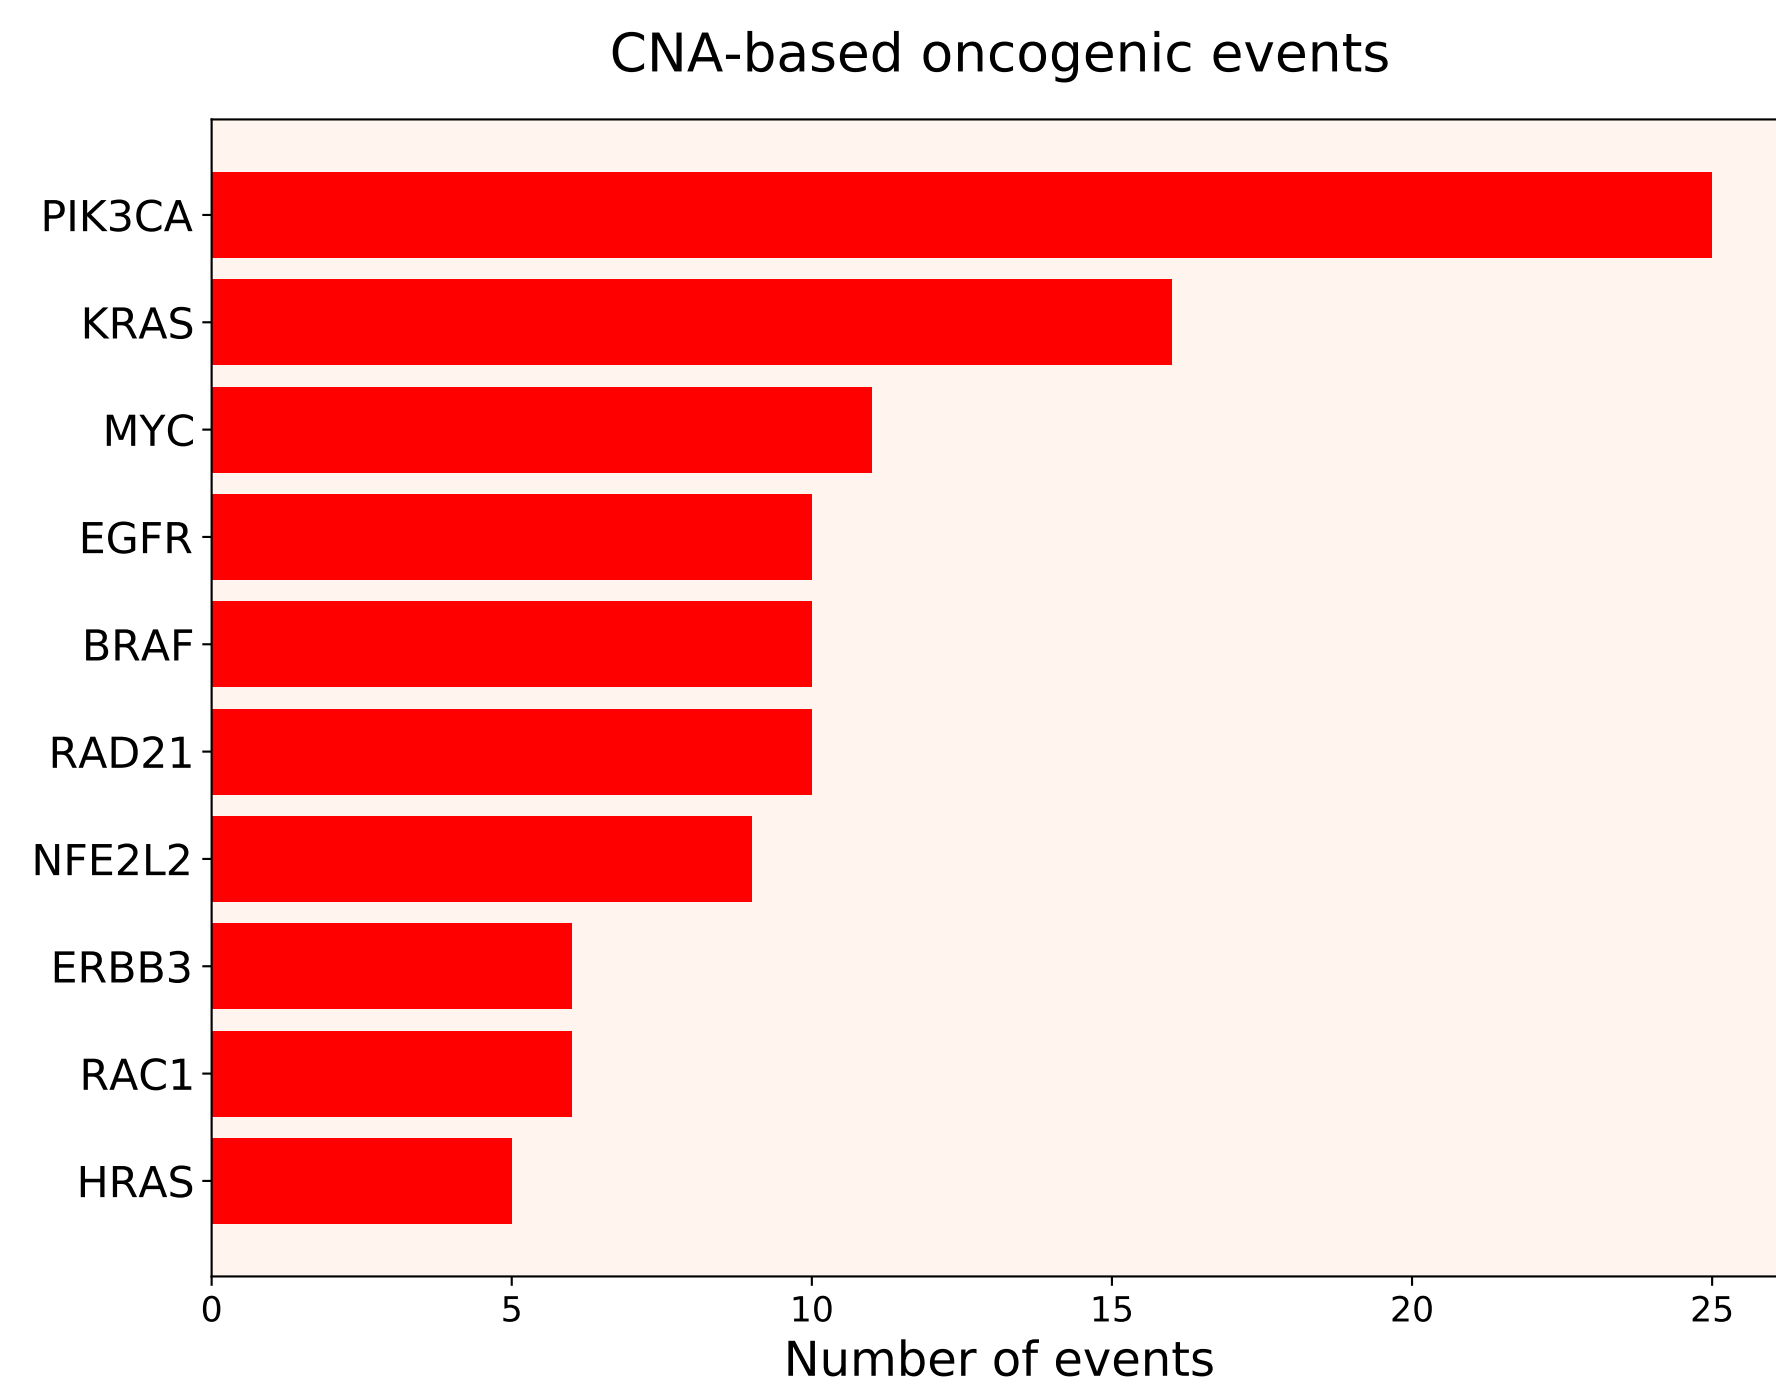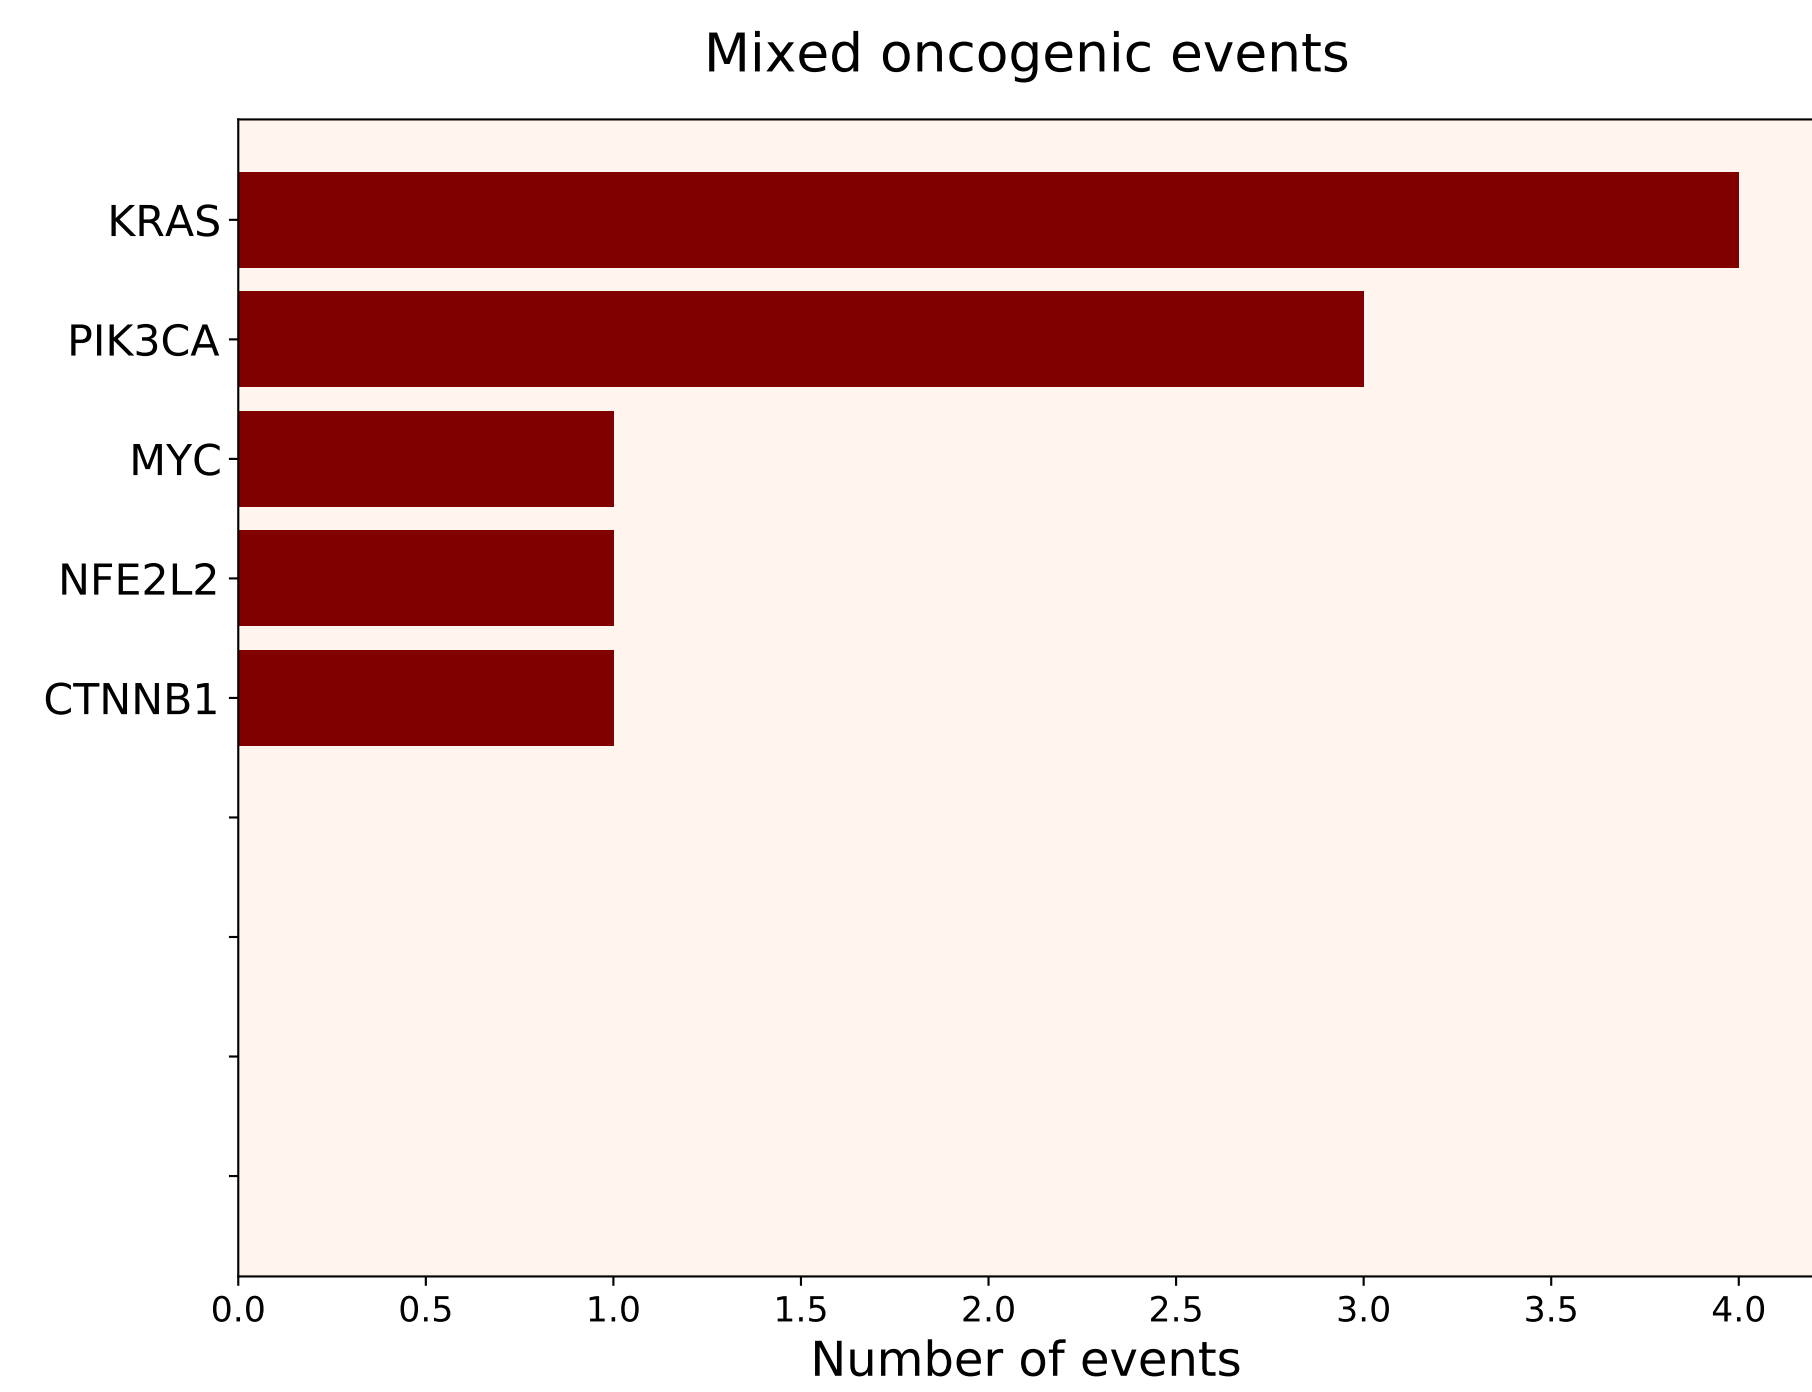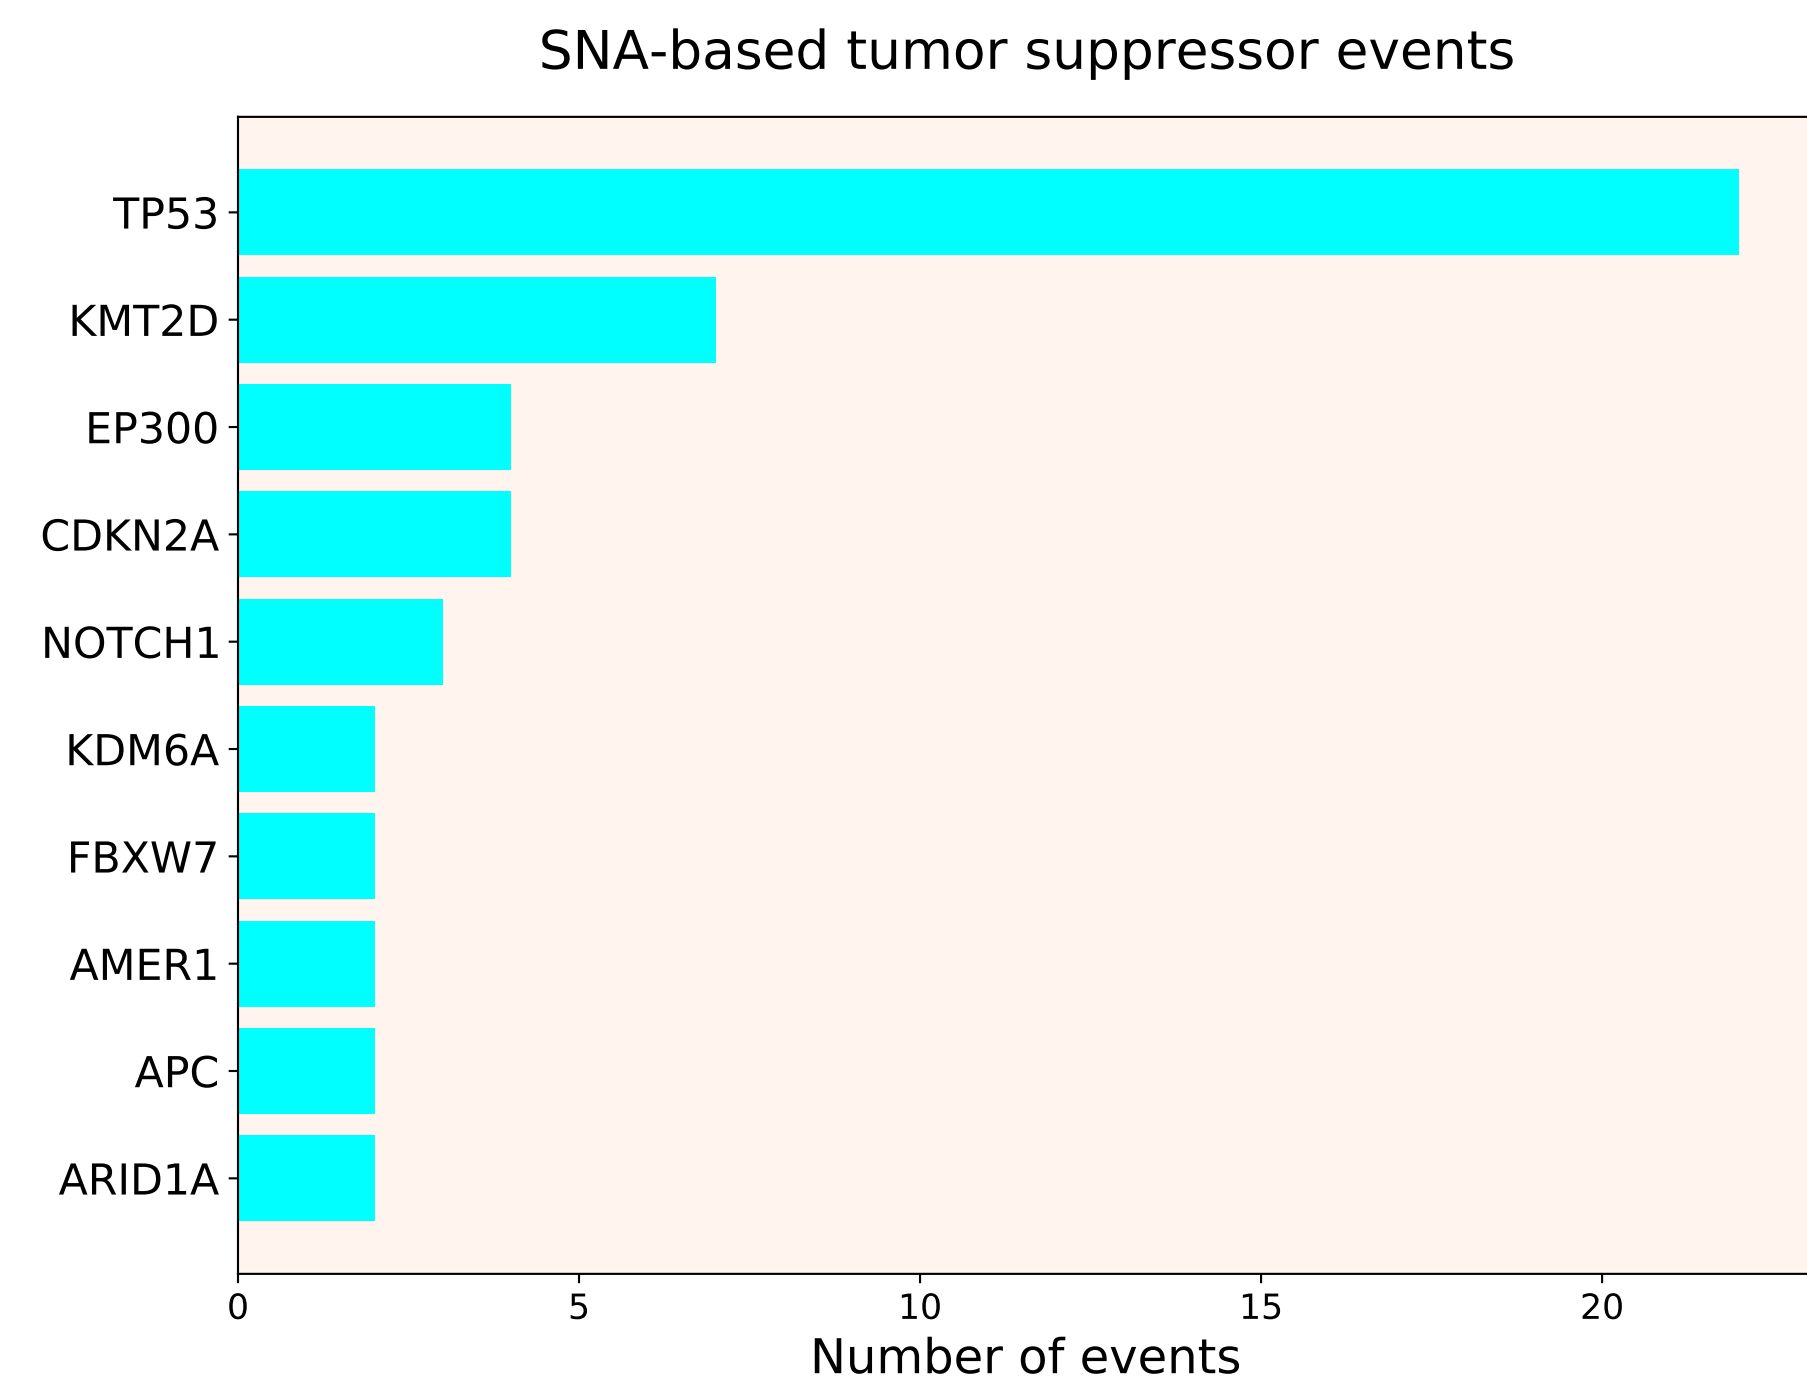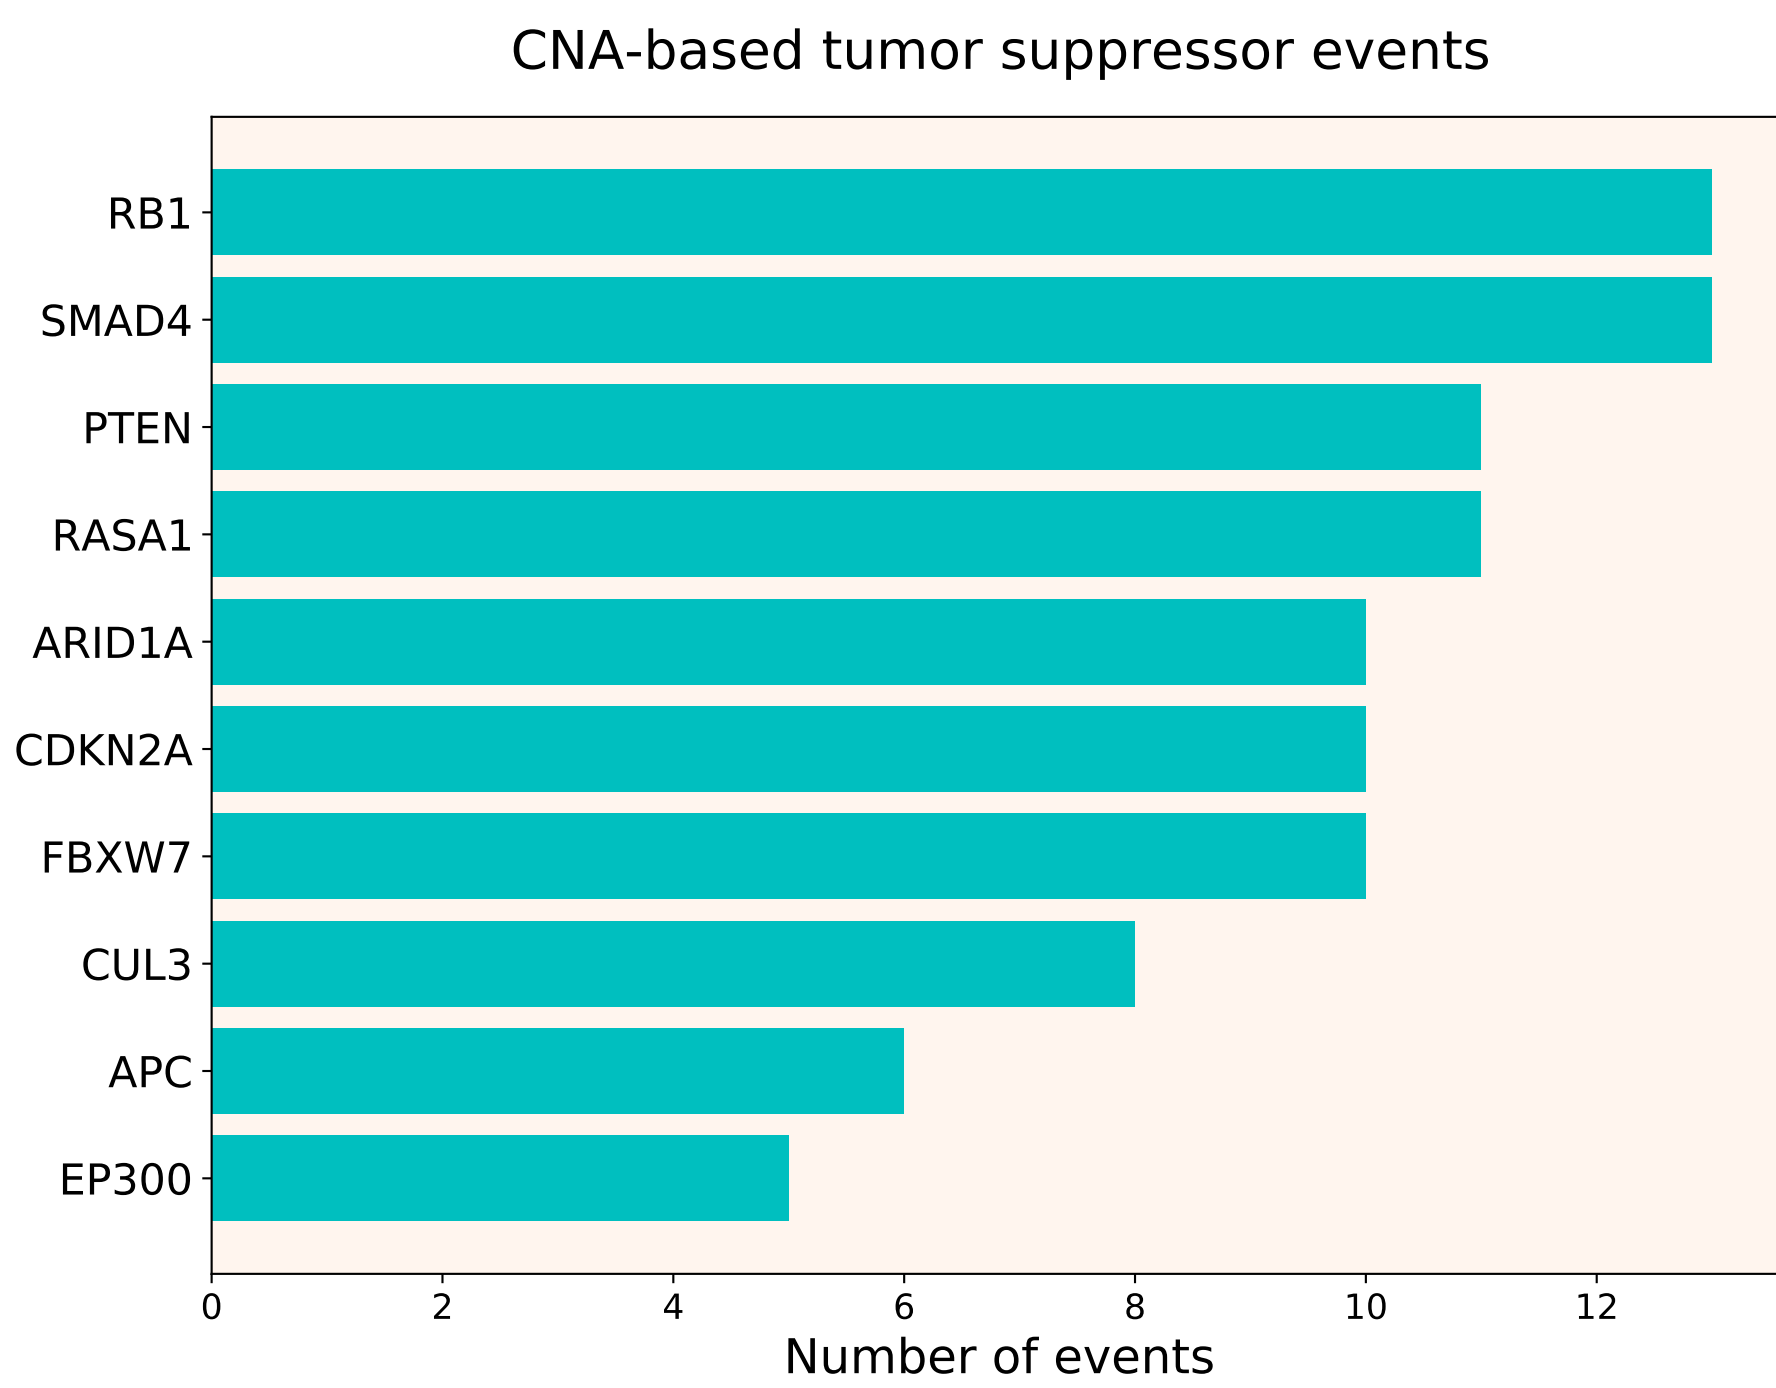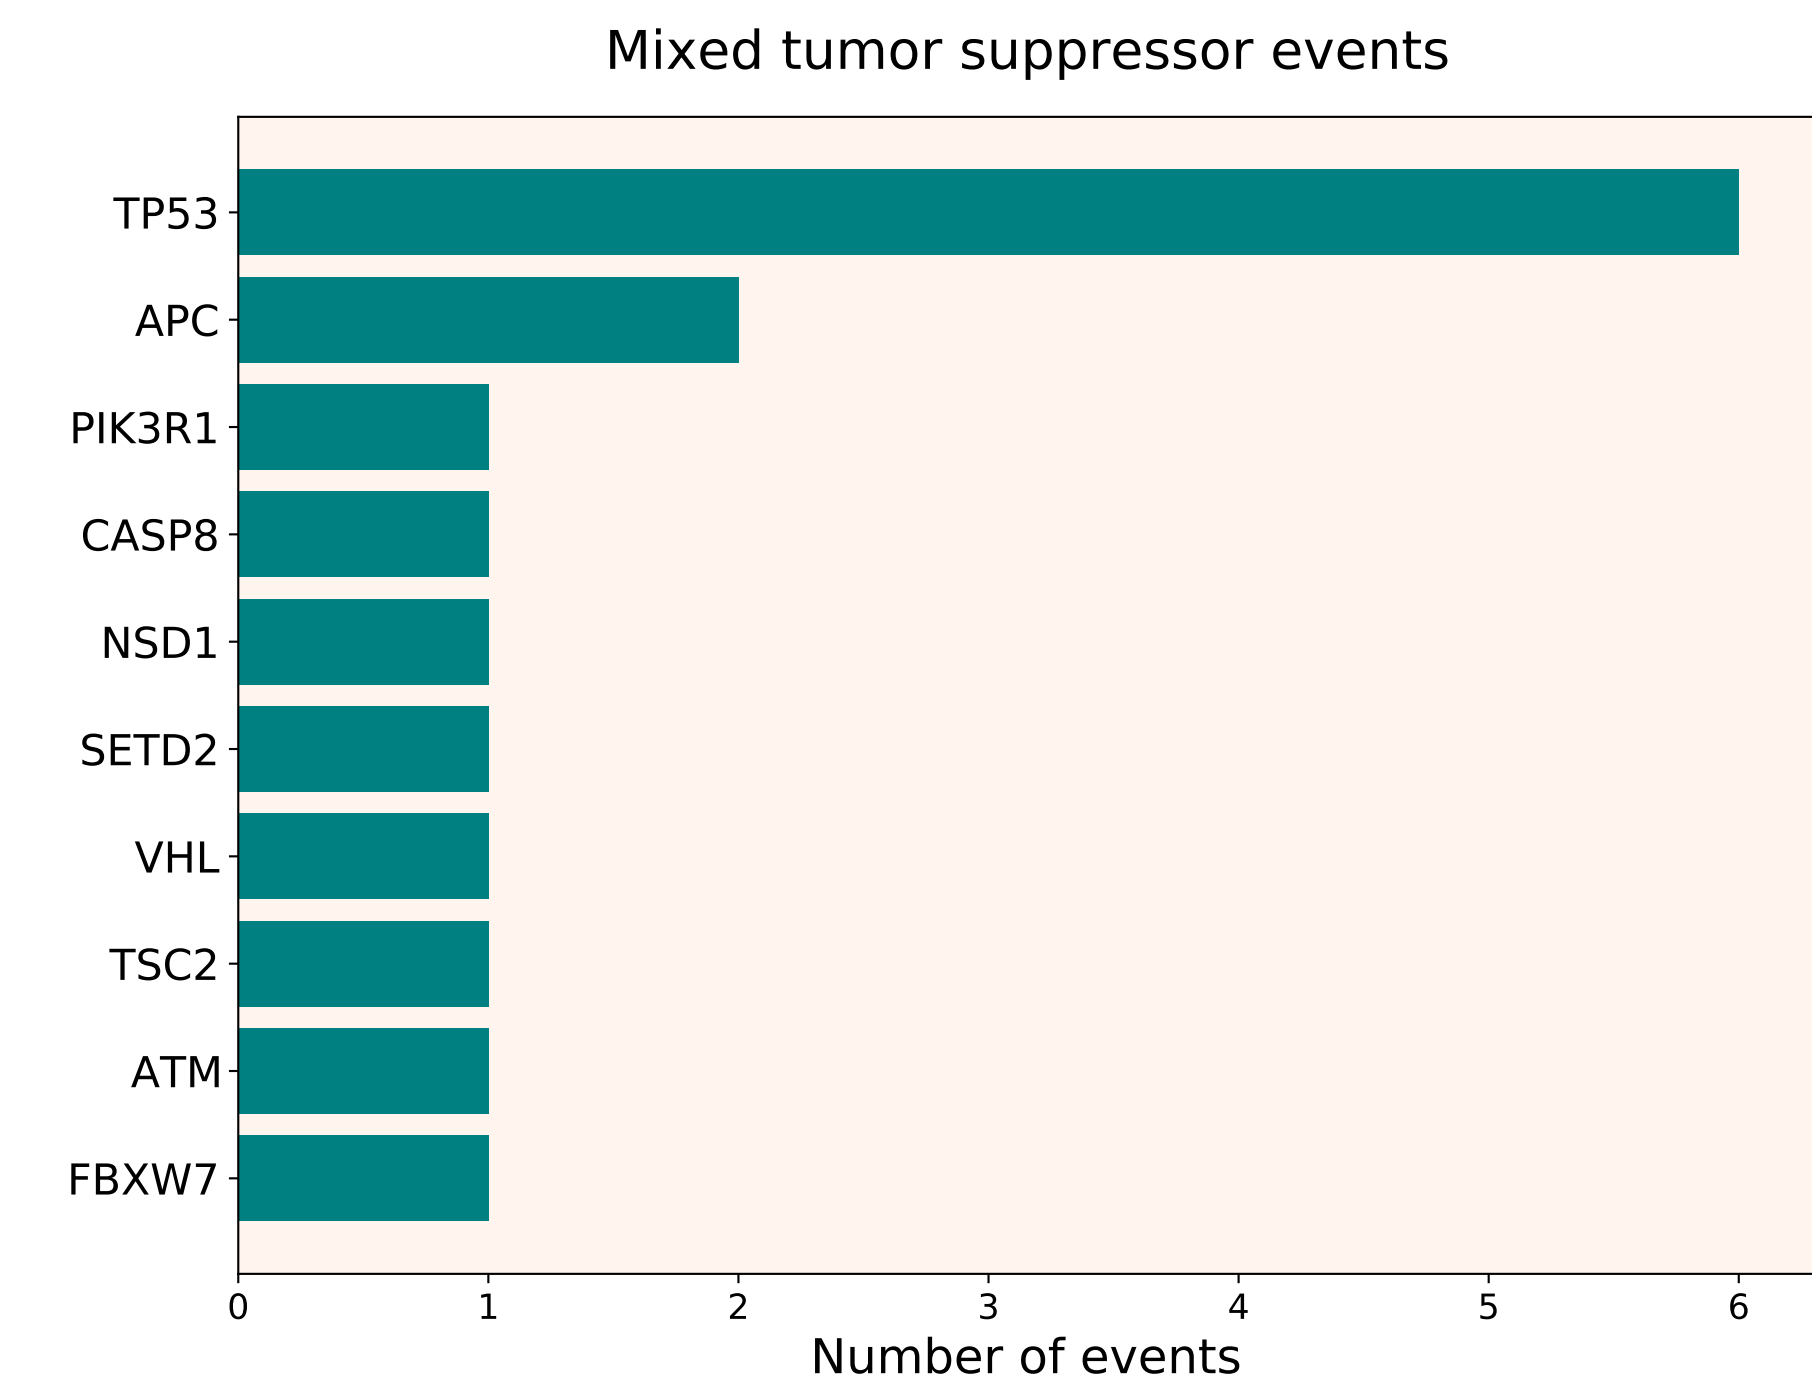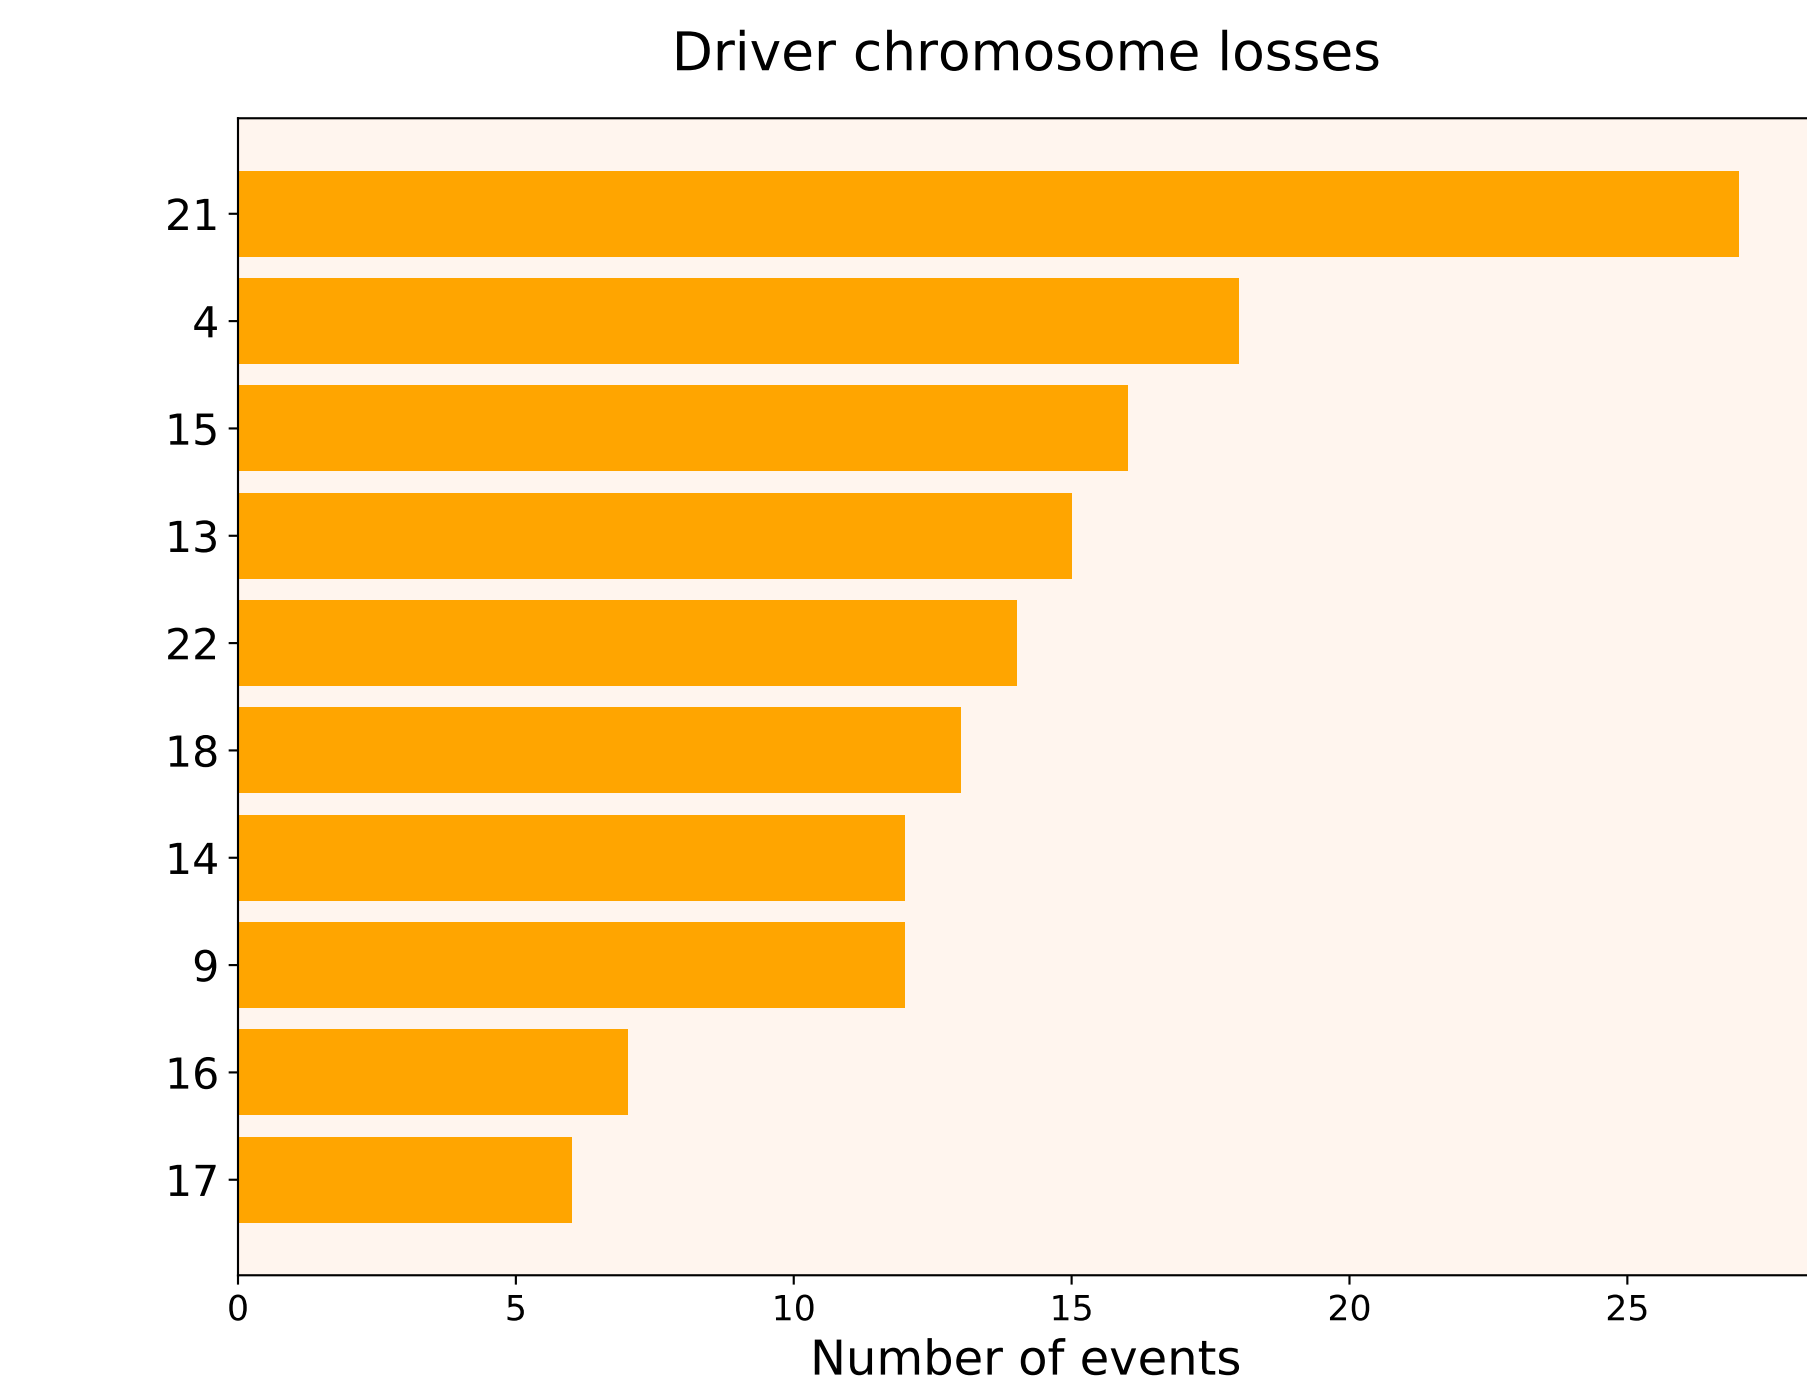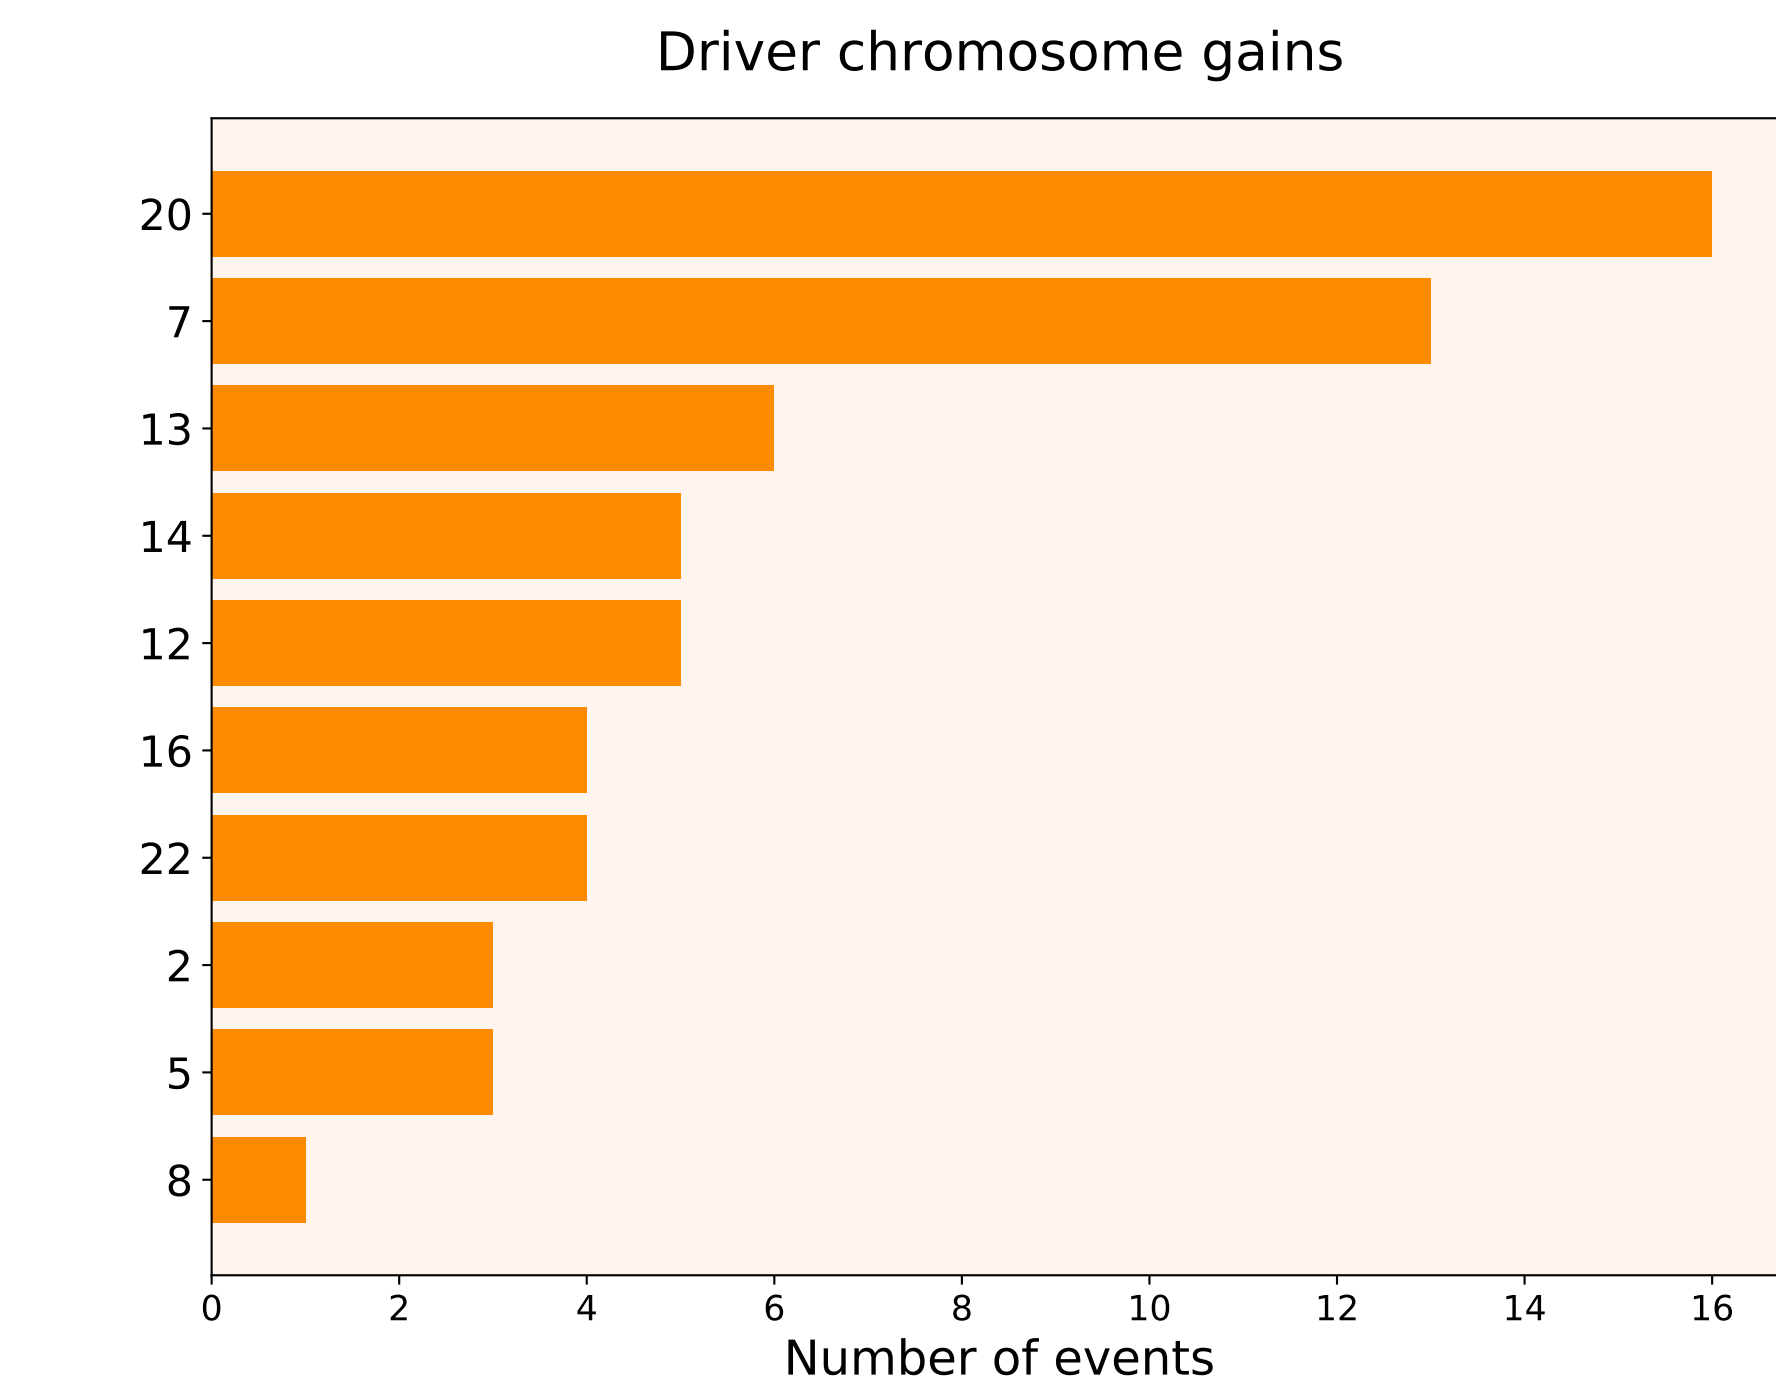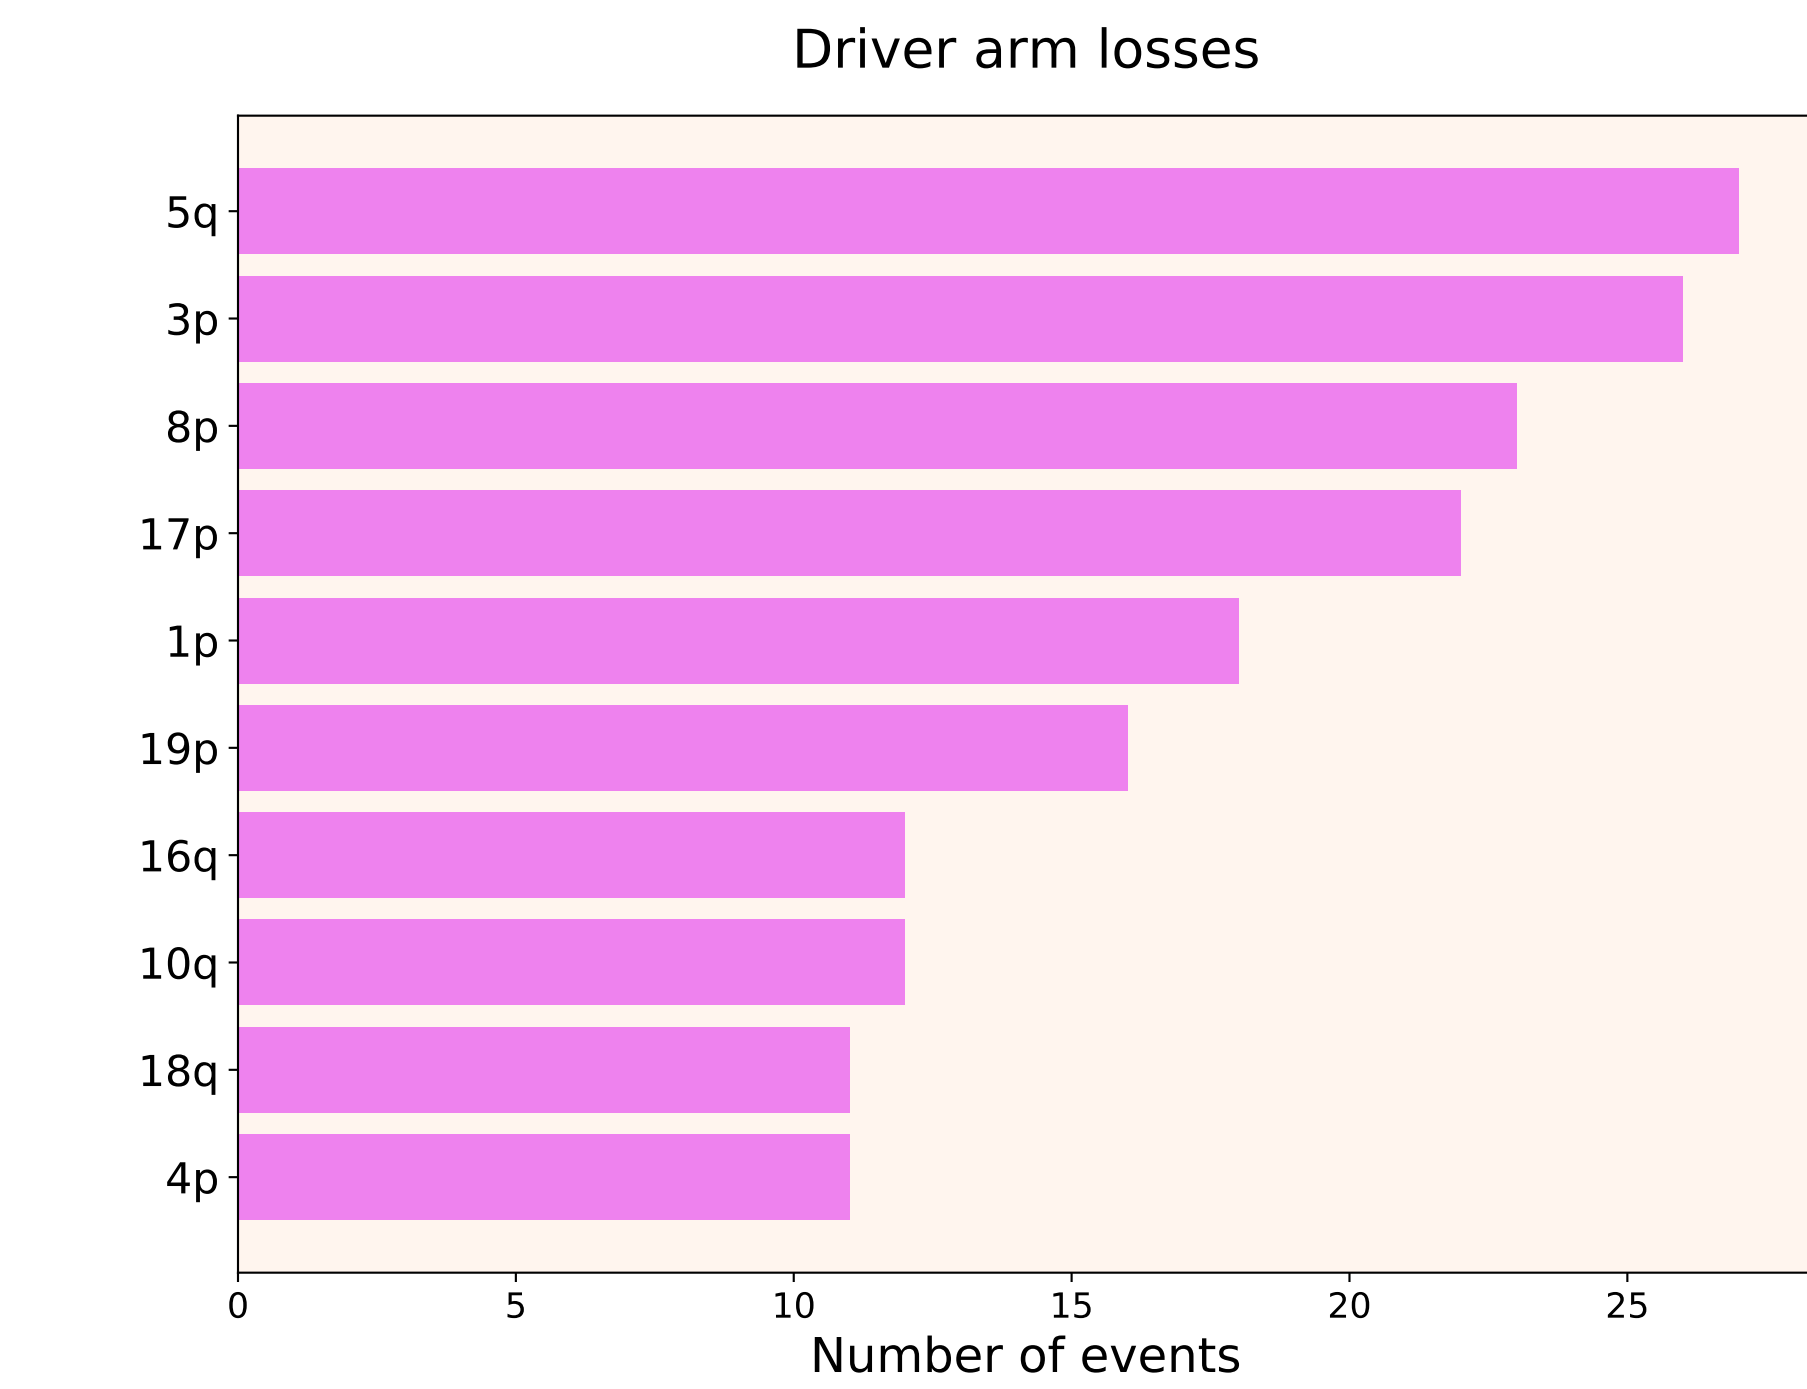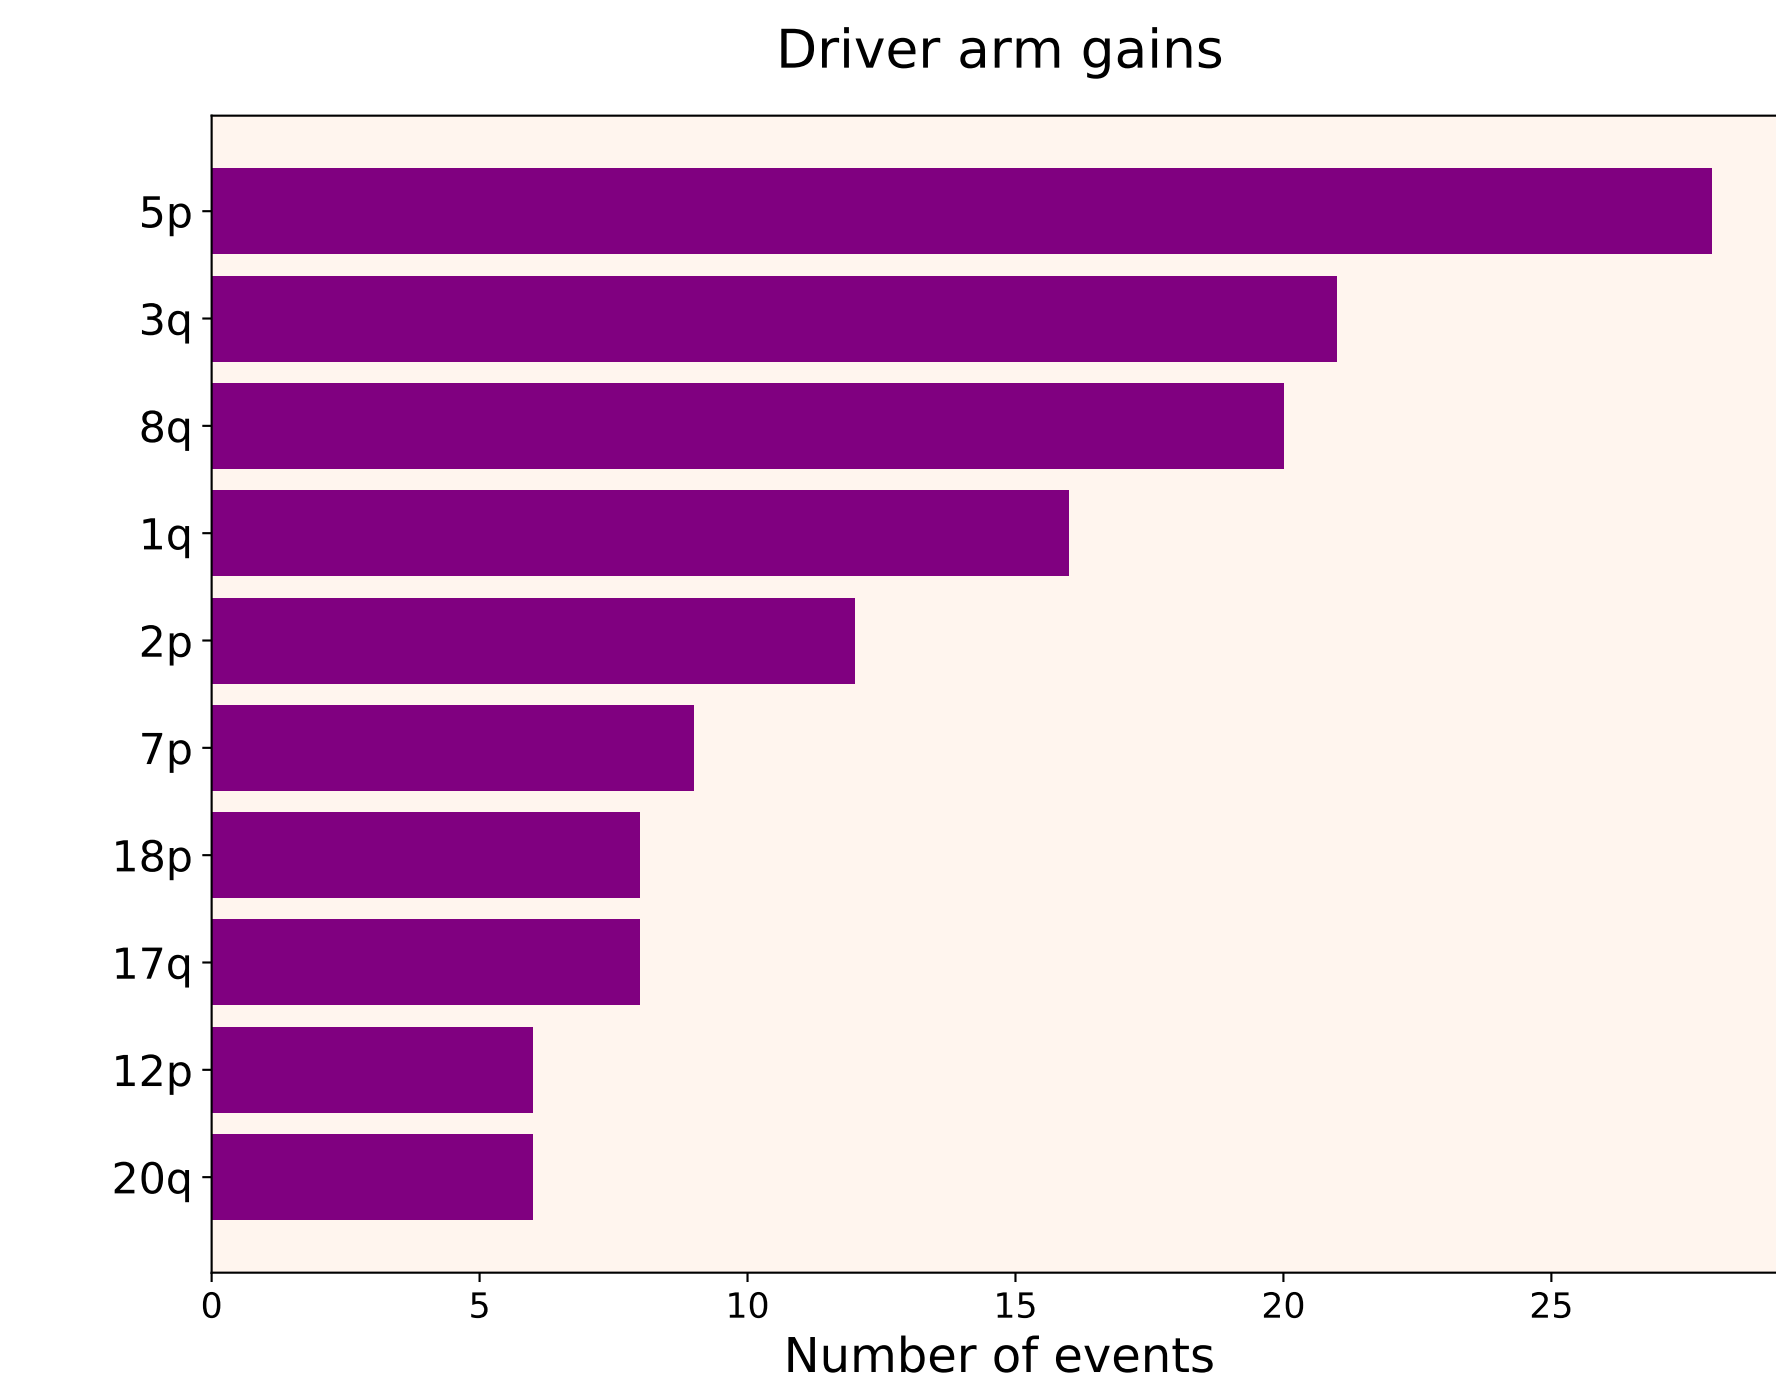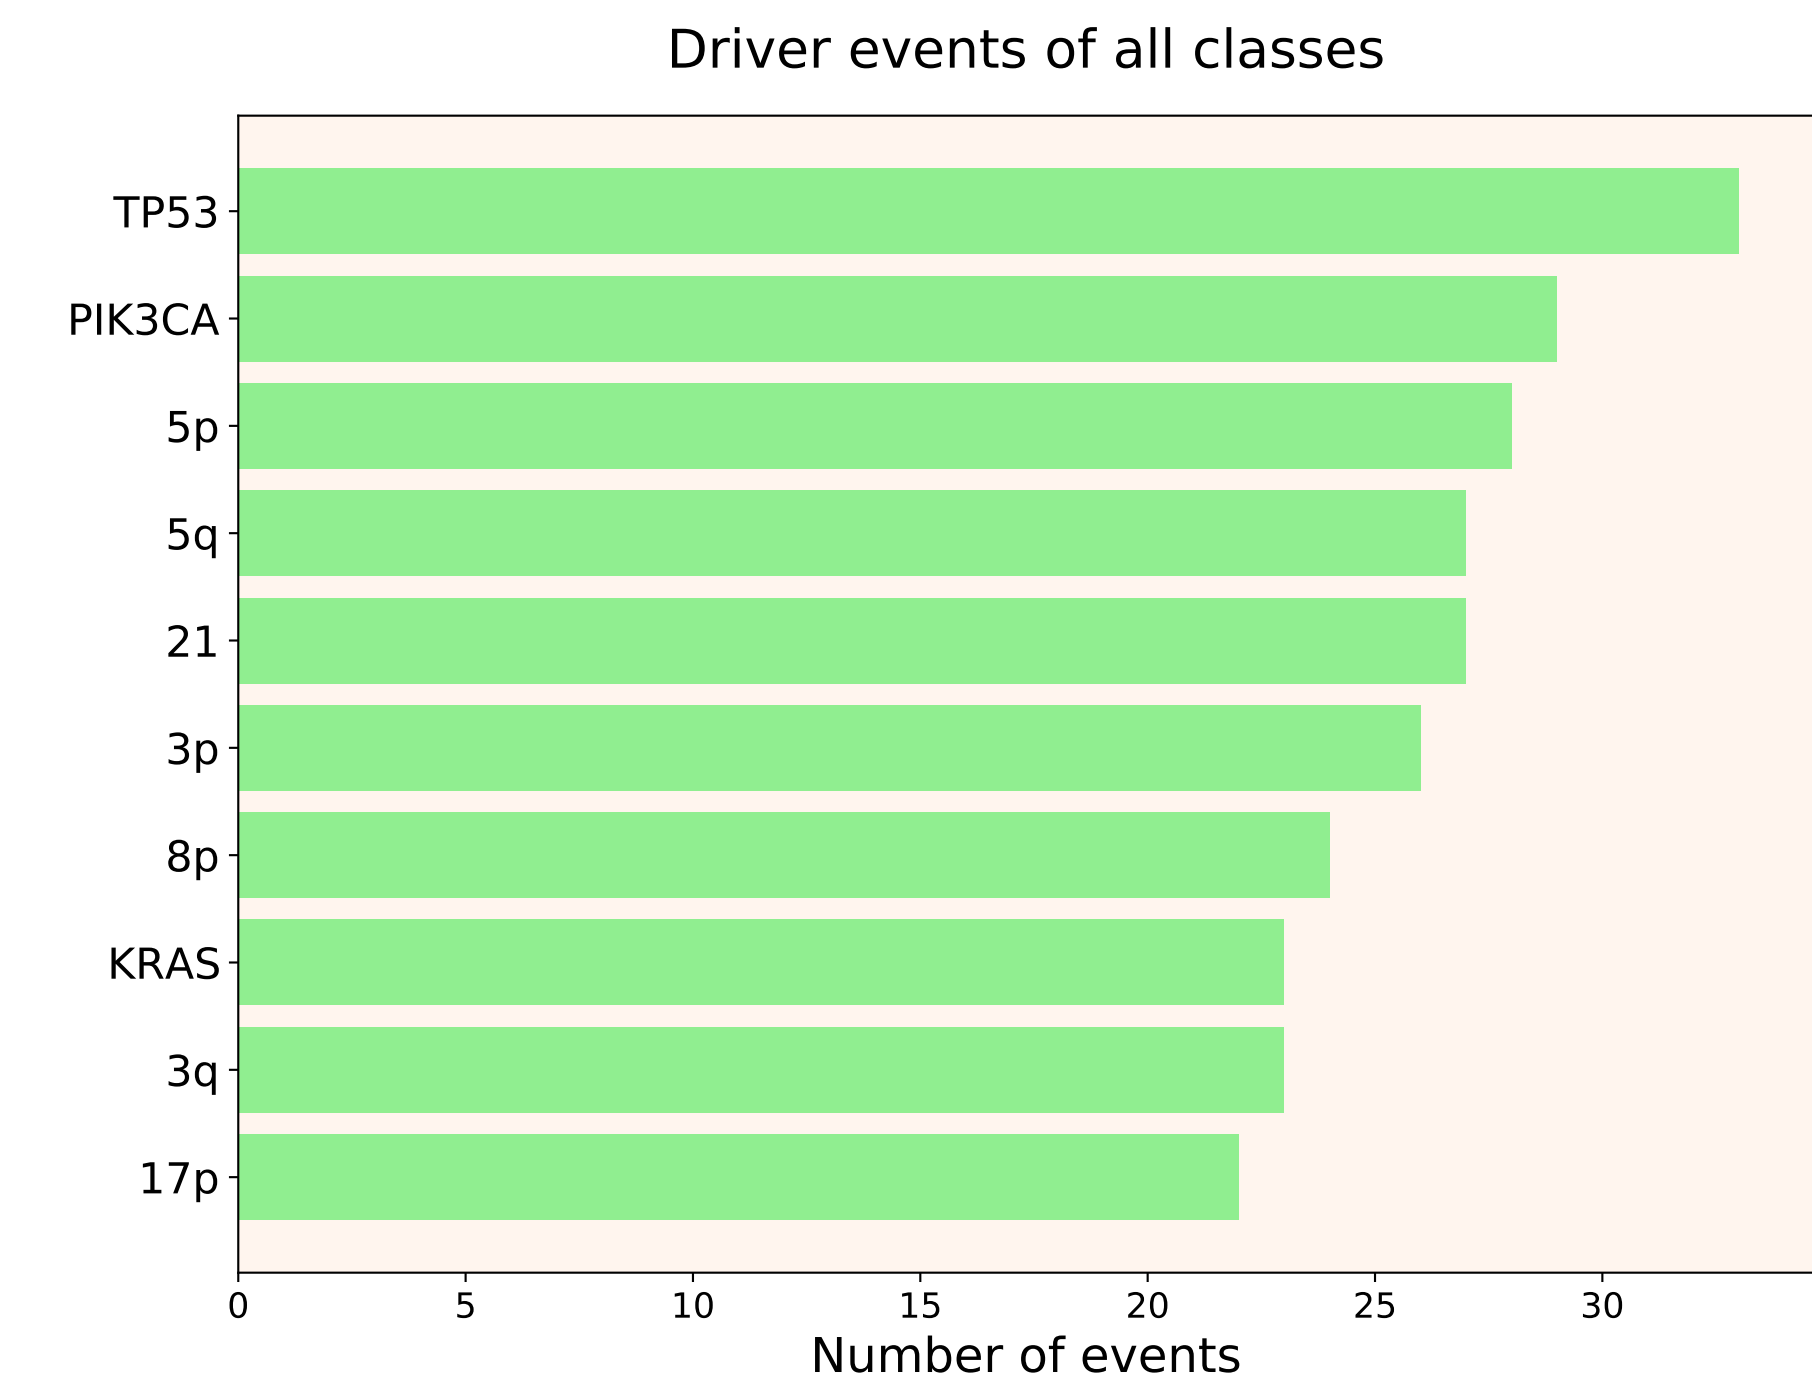

Supplement: Supplemental_Data_S1.zip [file Supplemental_Data_S1.zip]

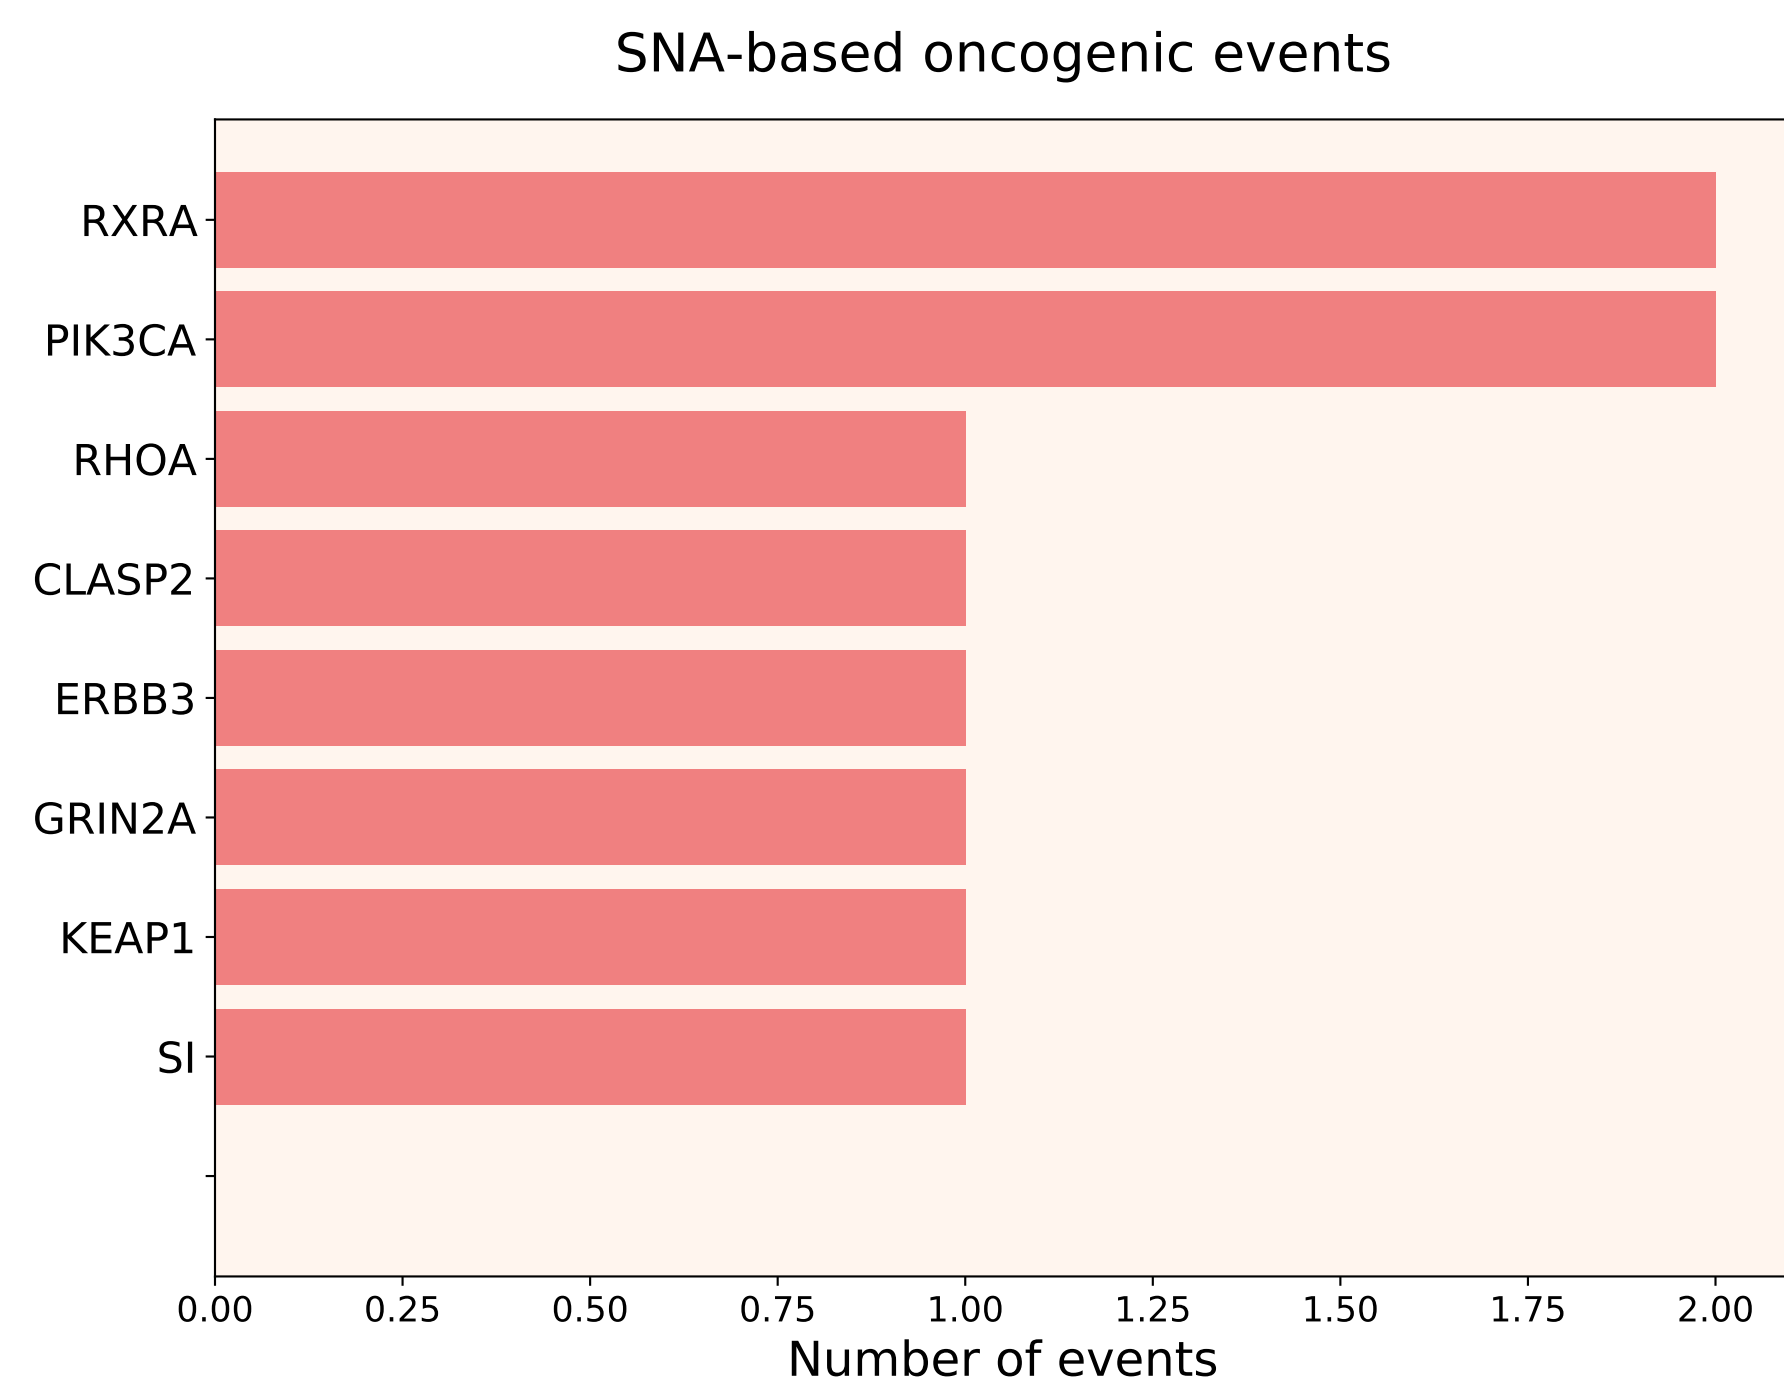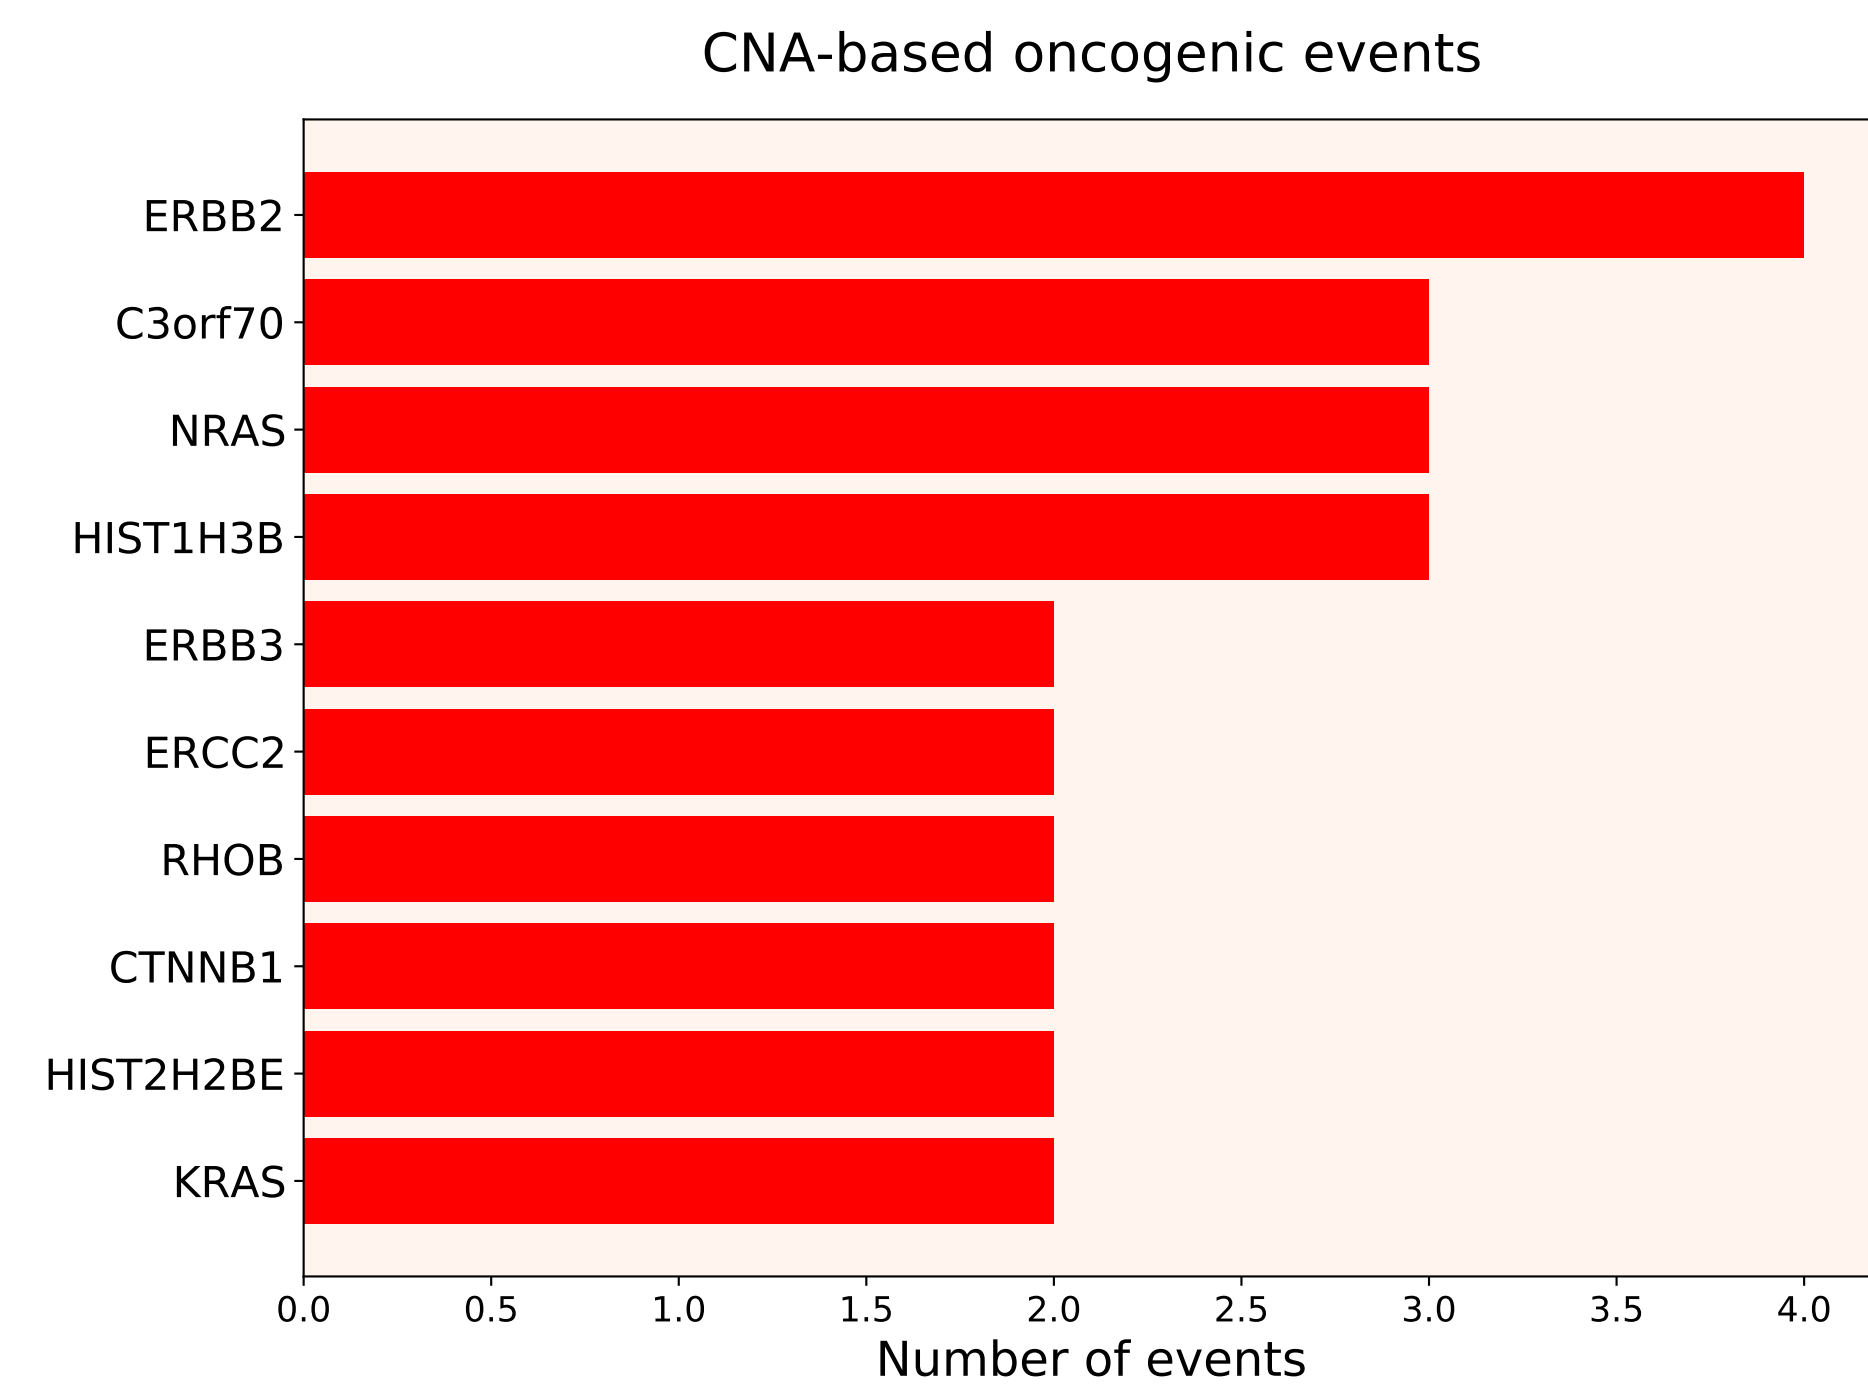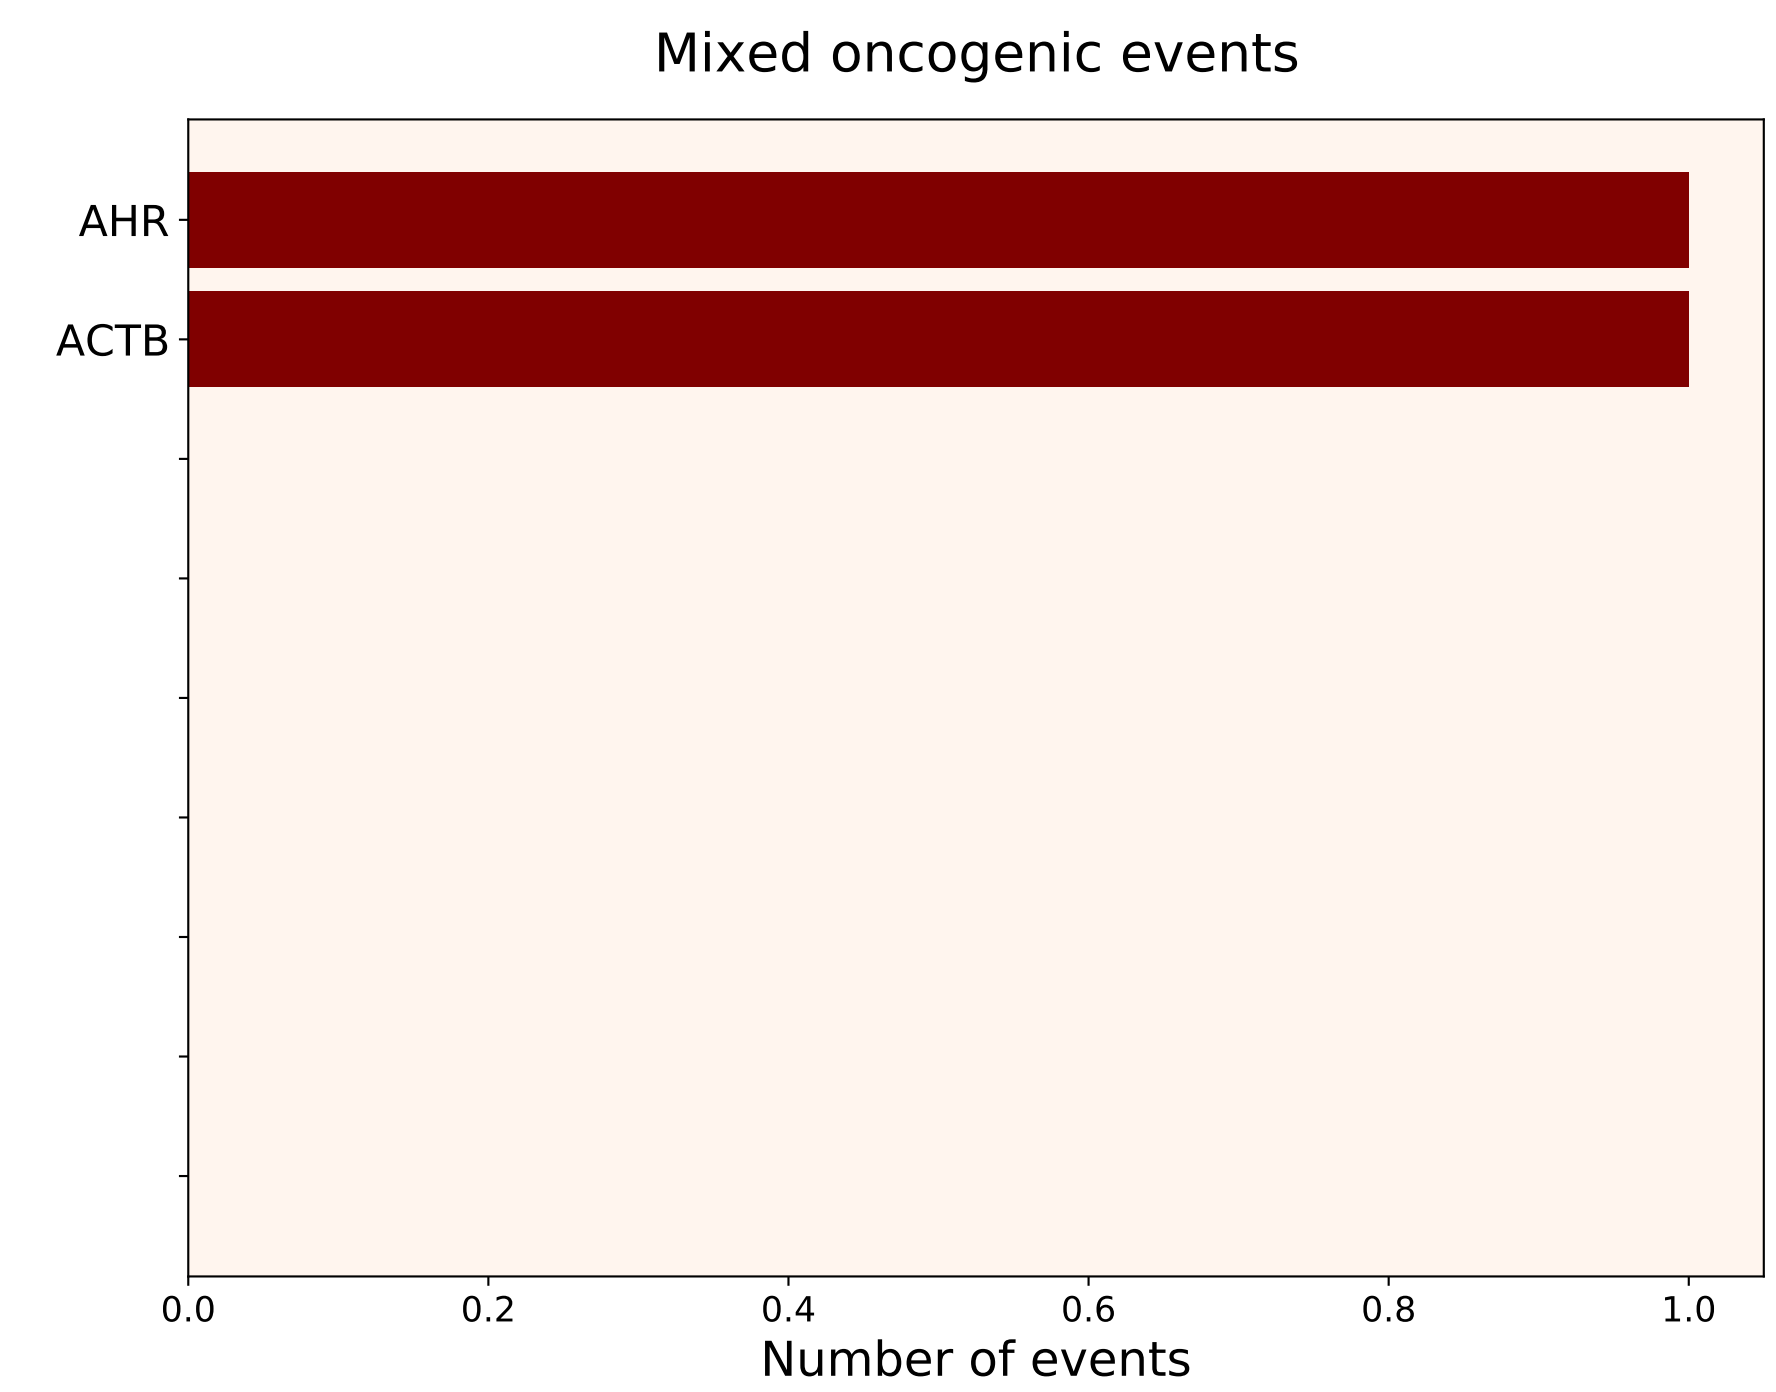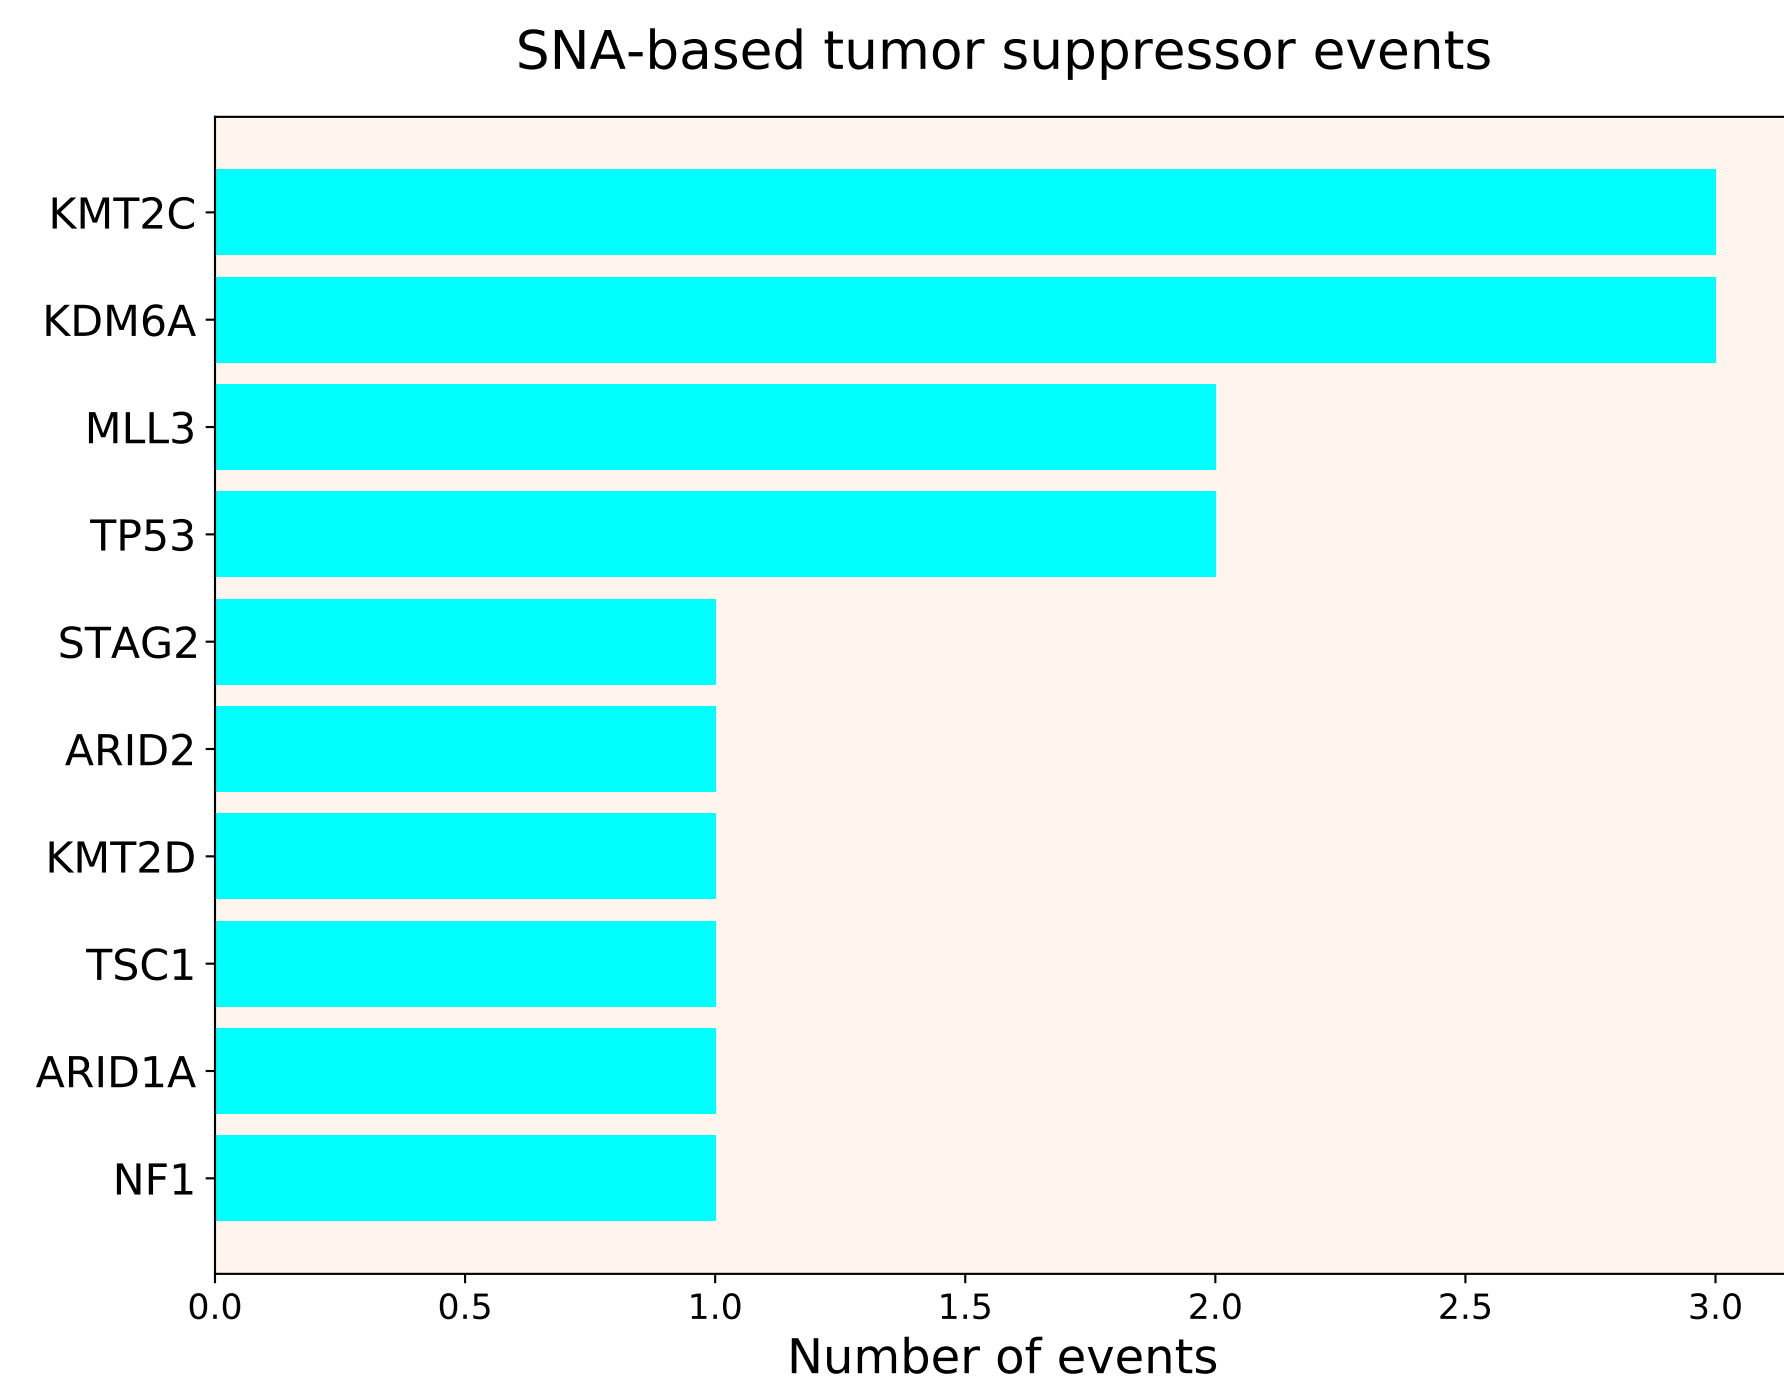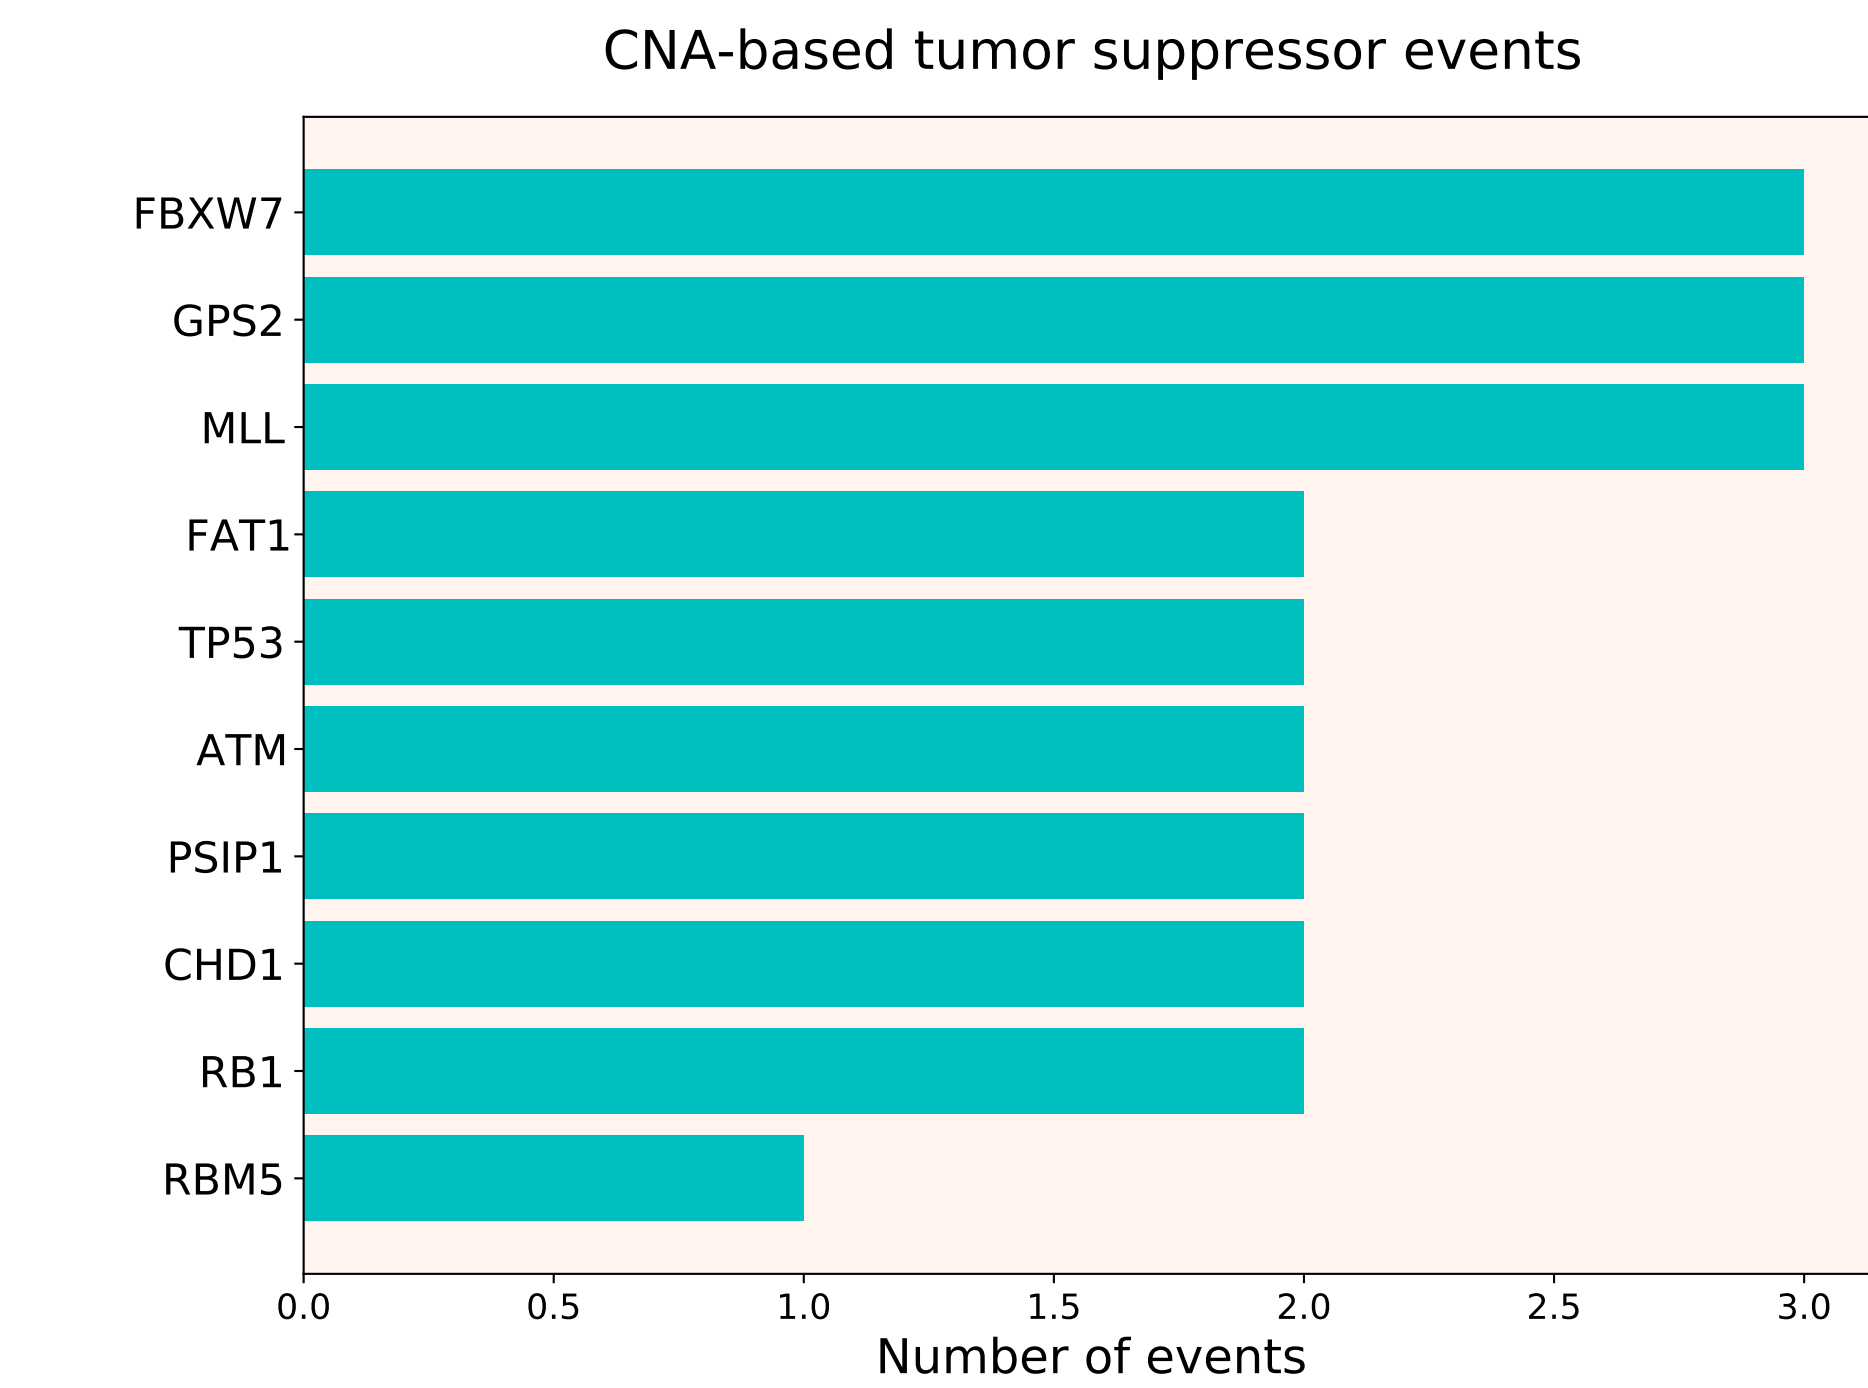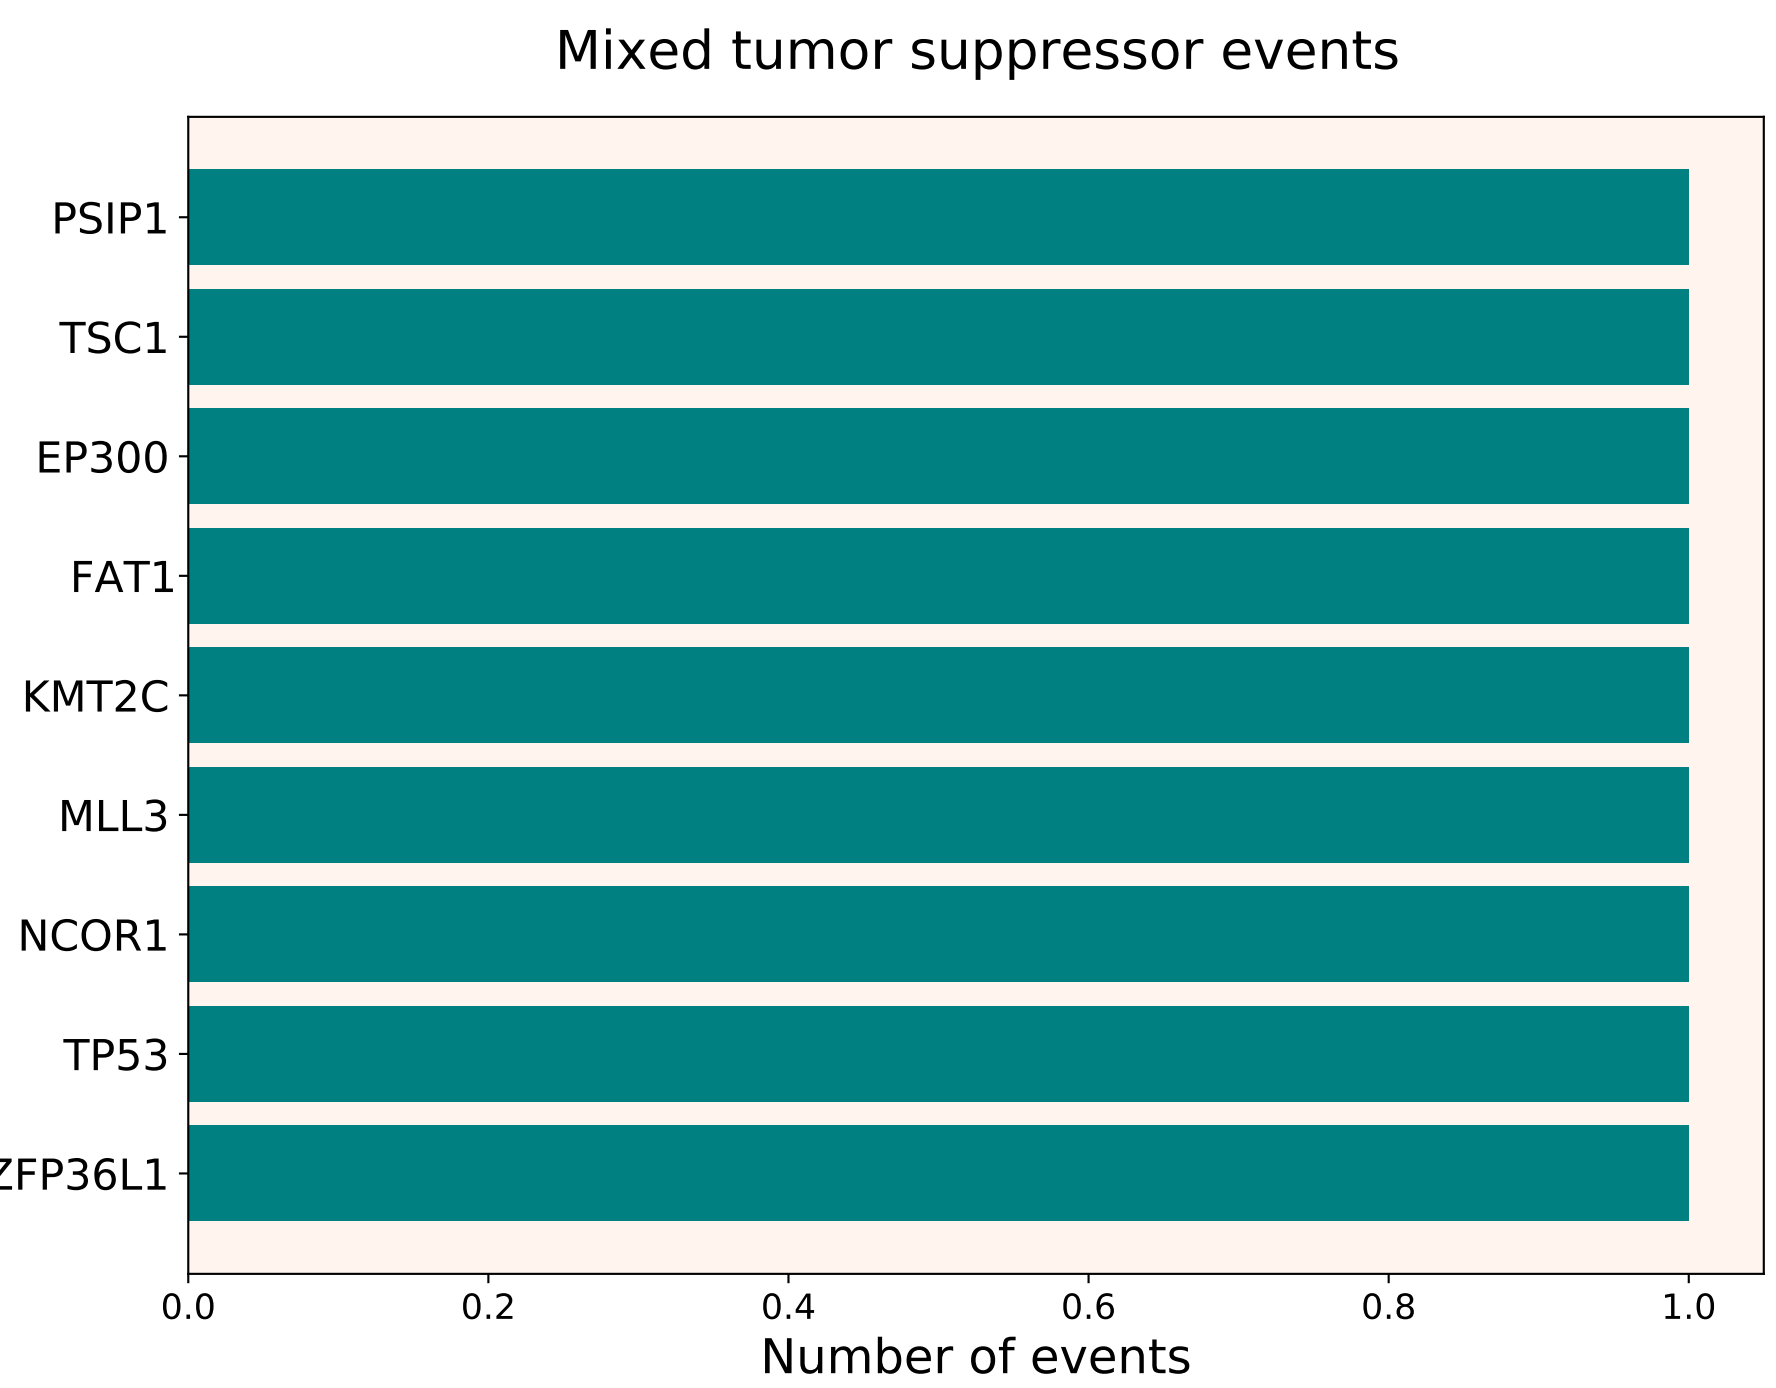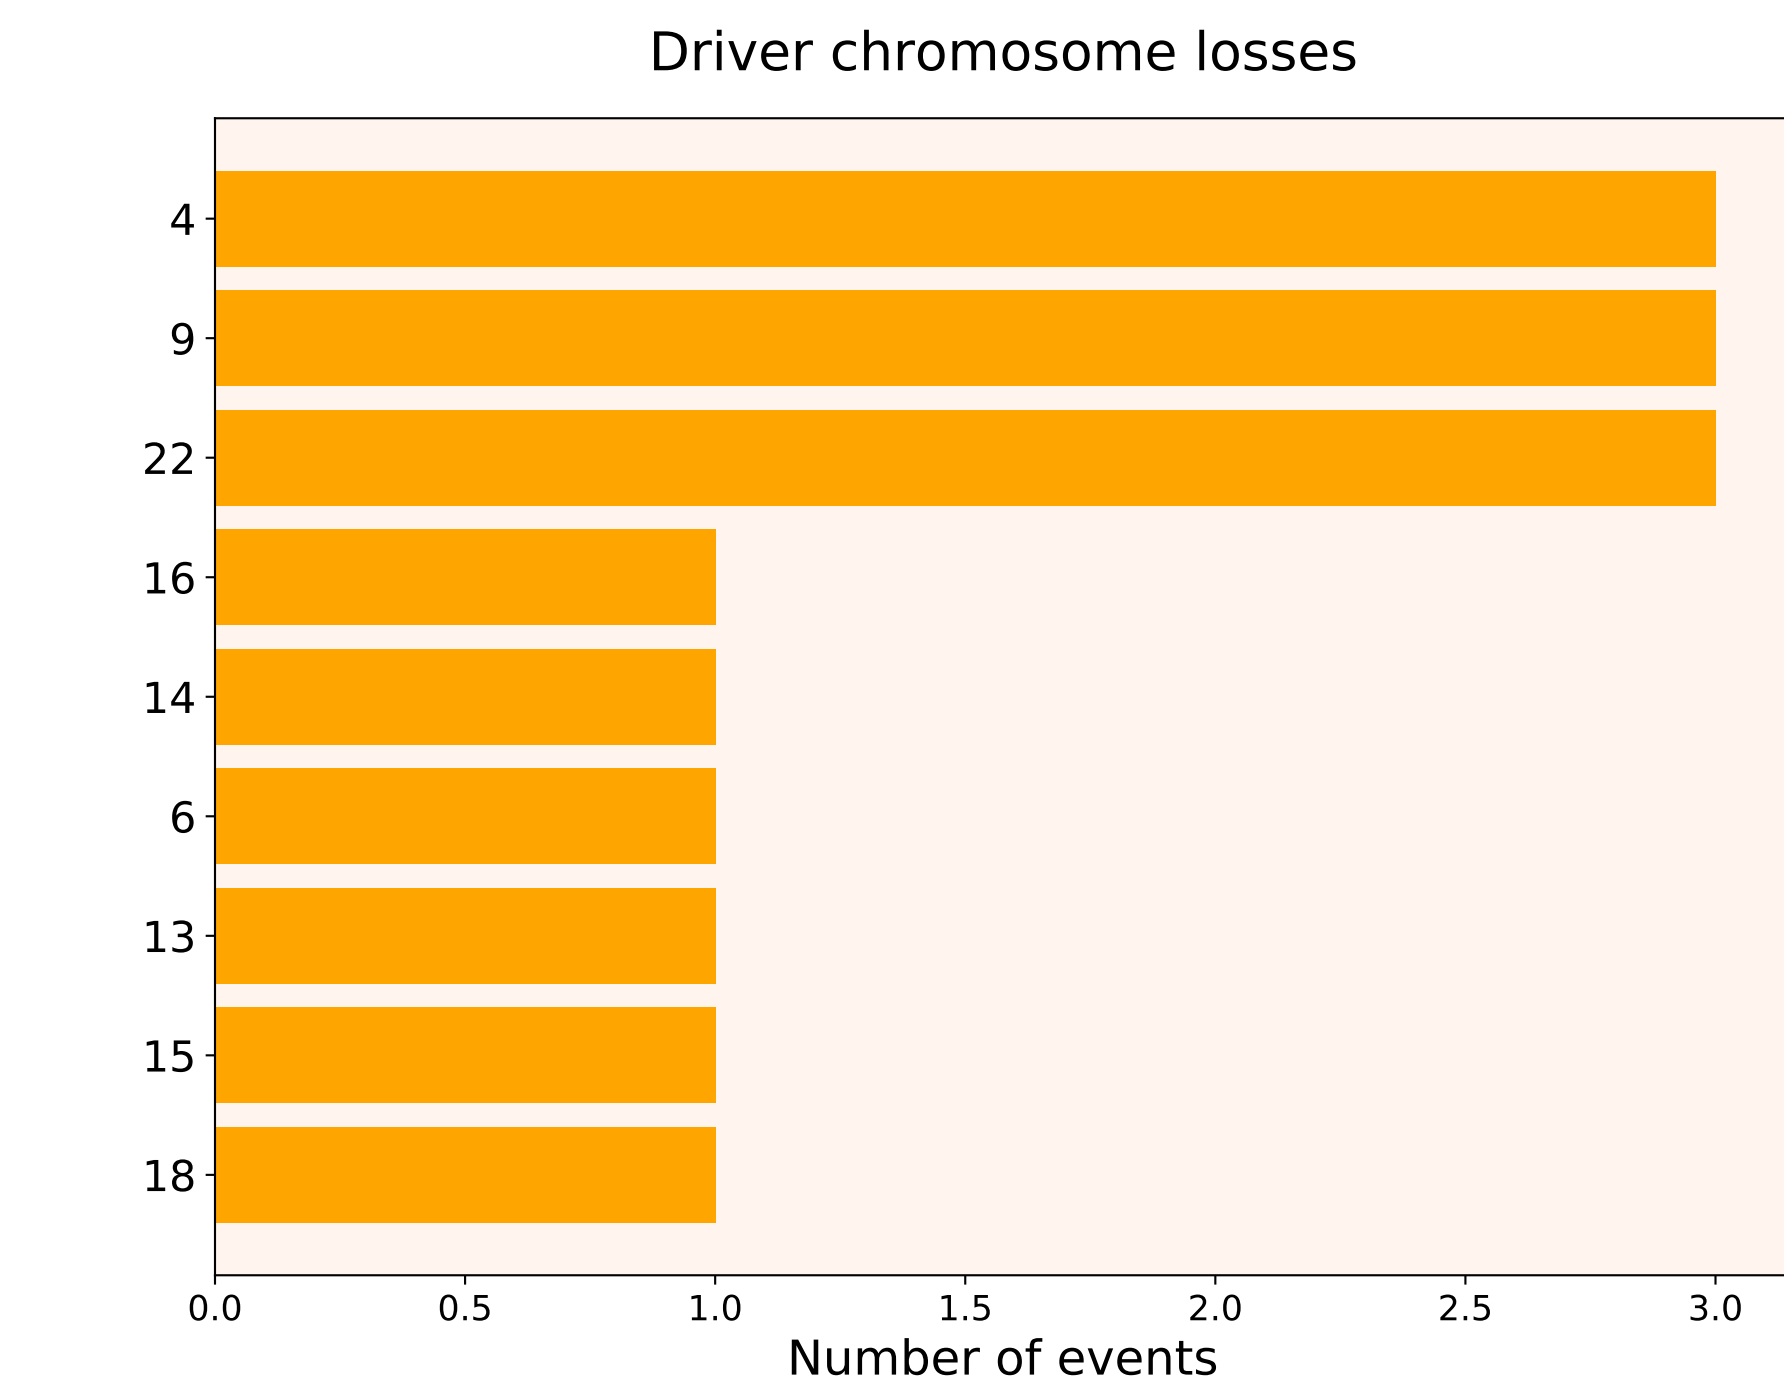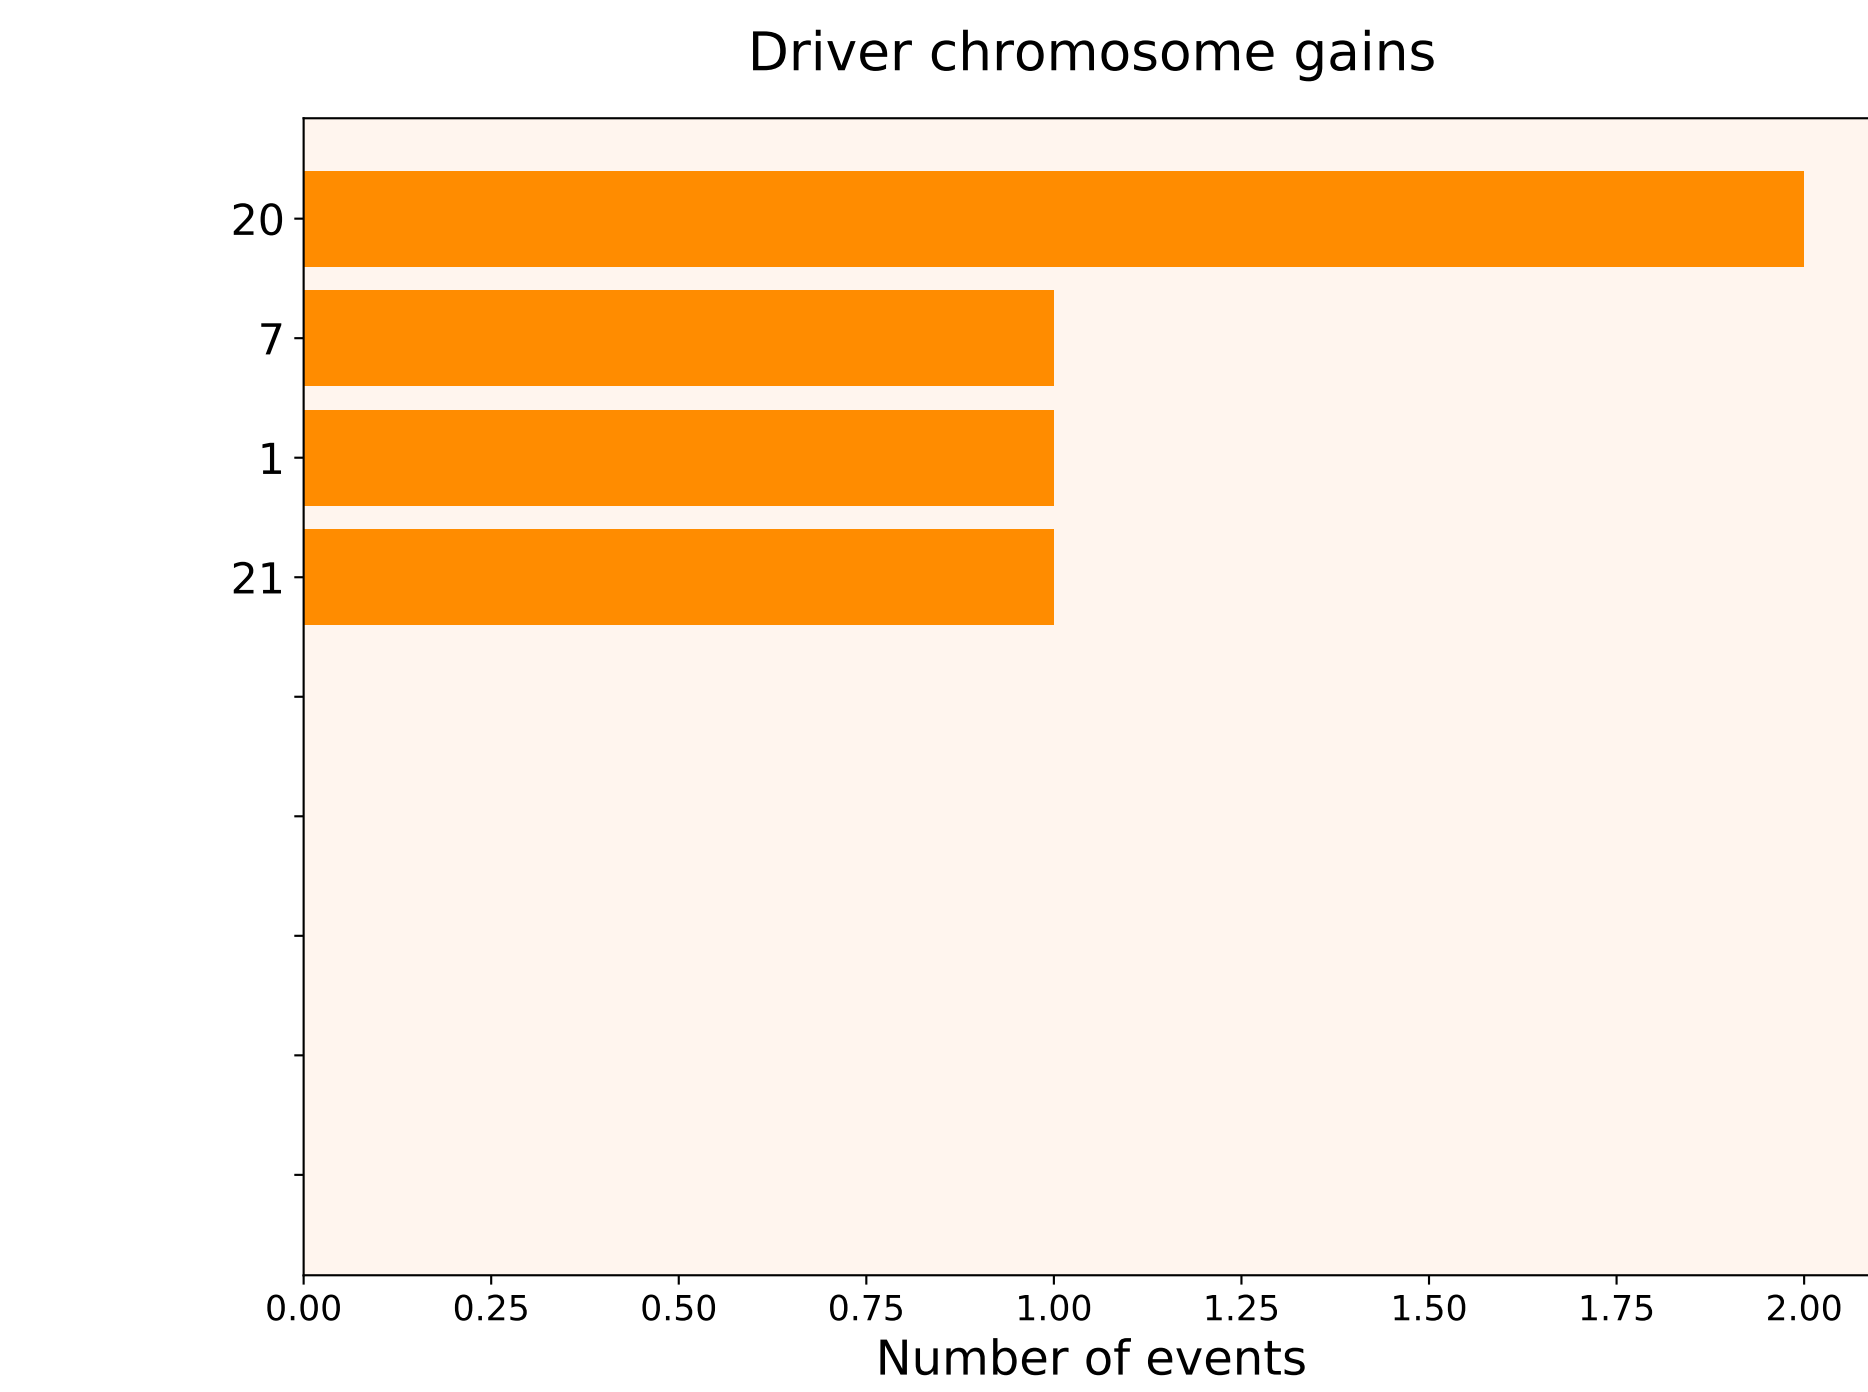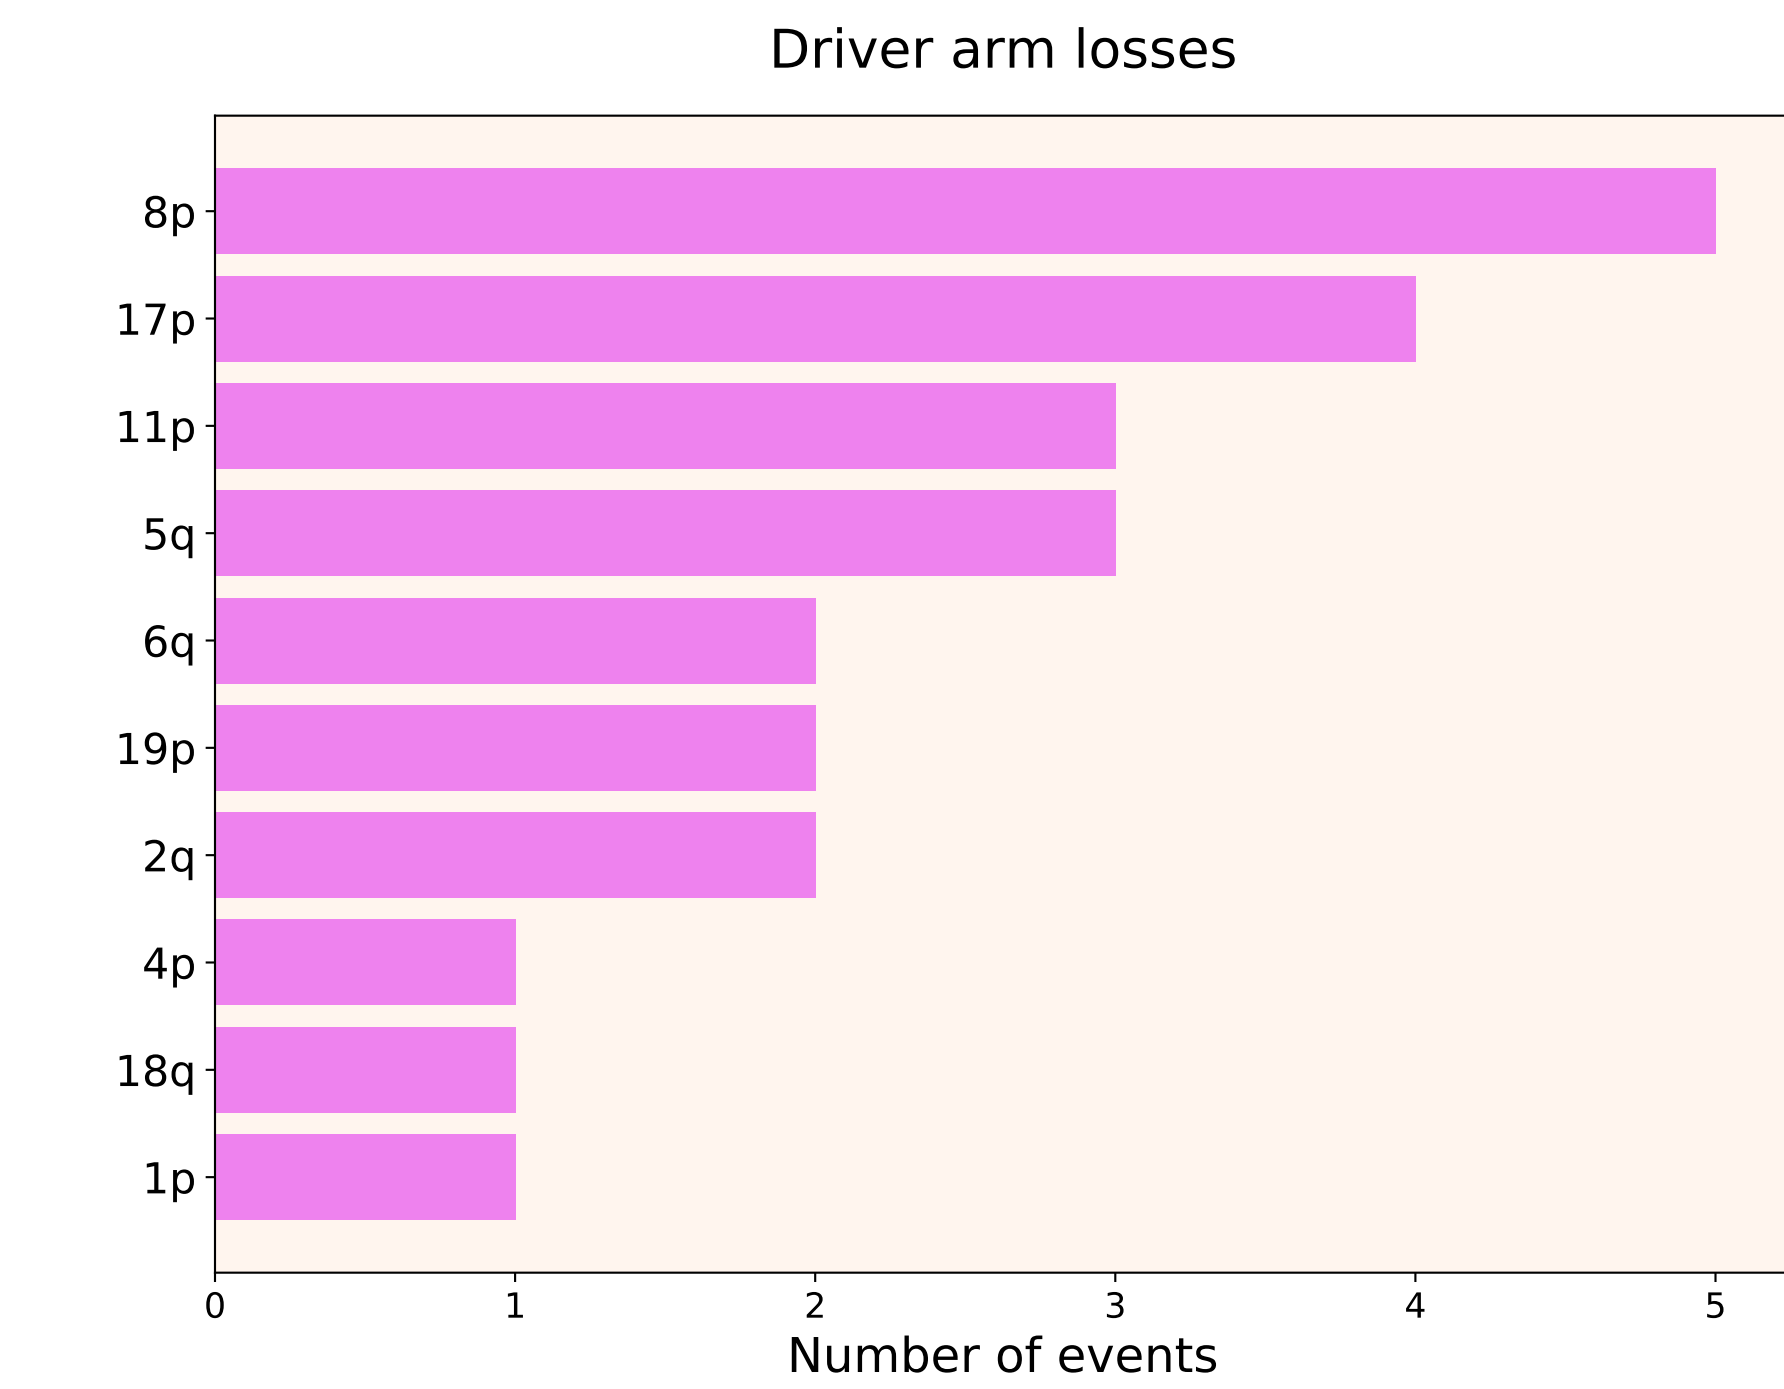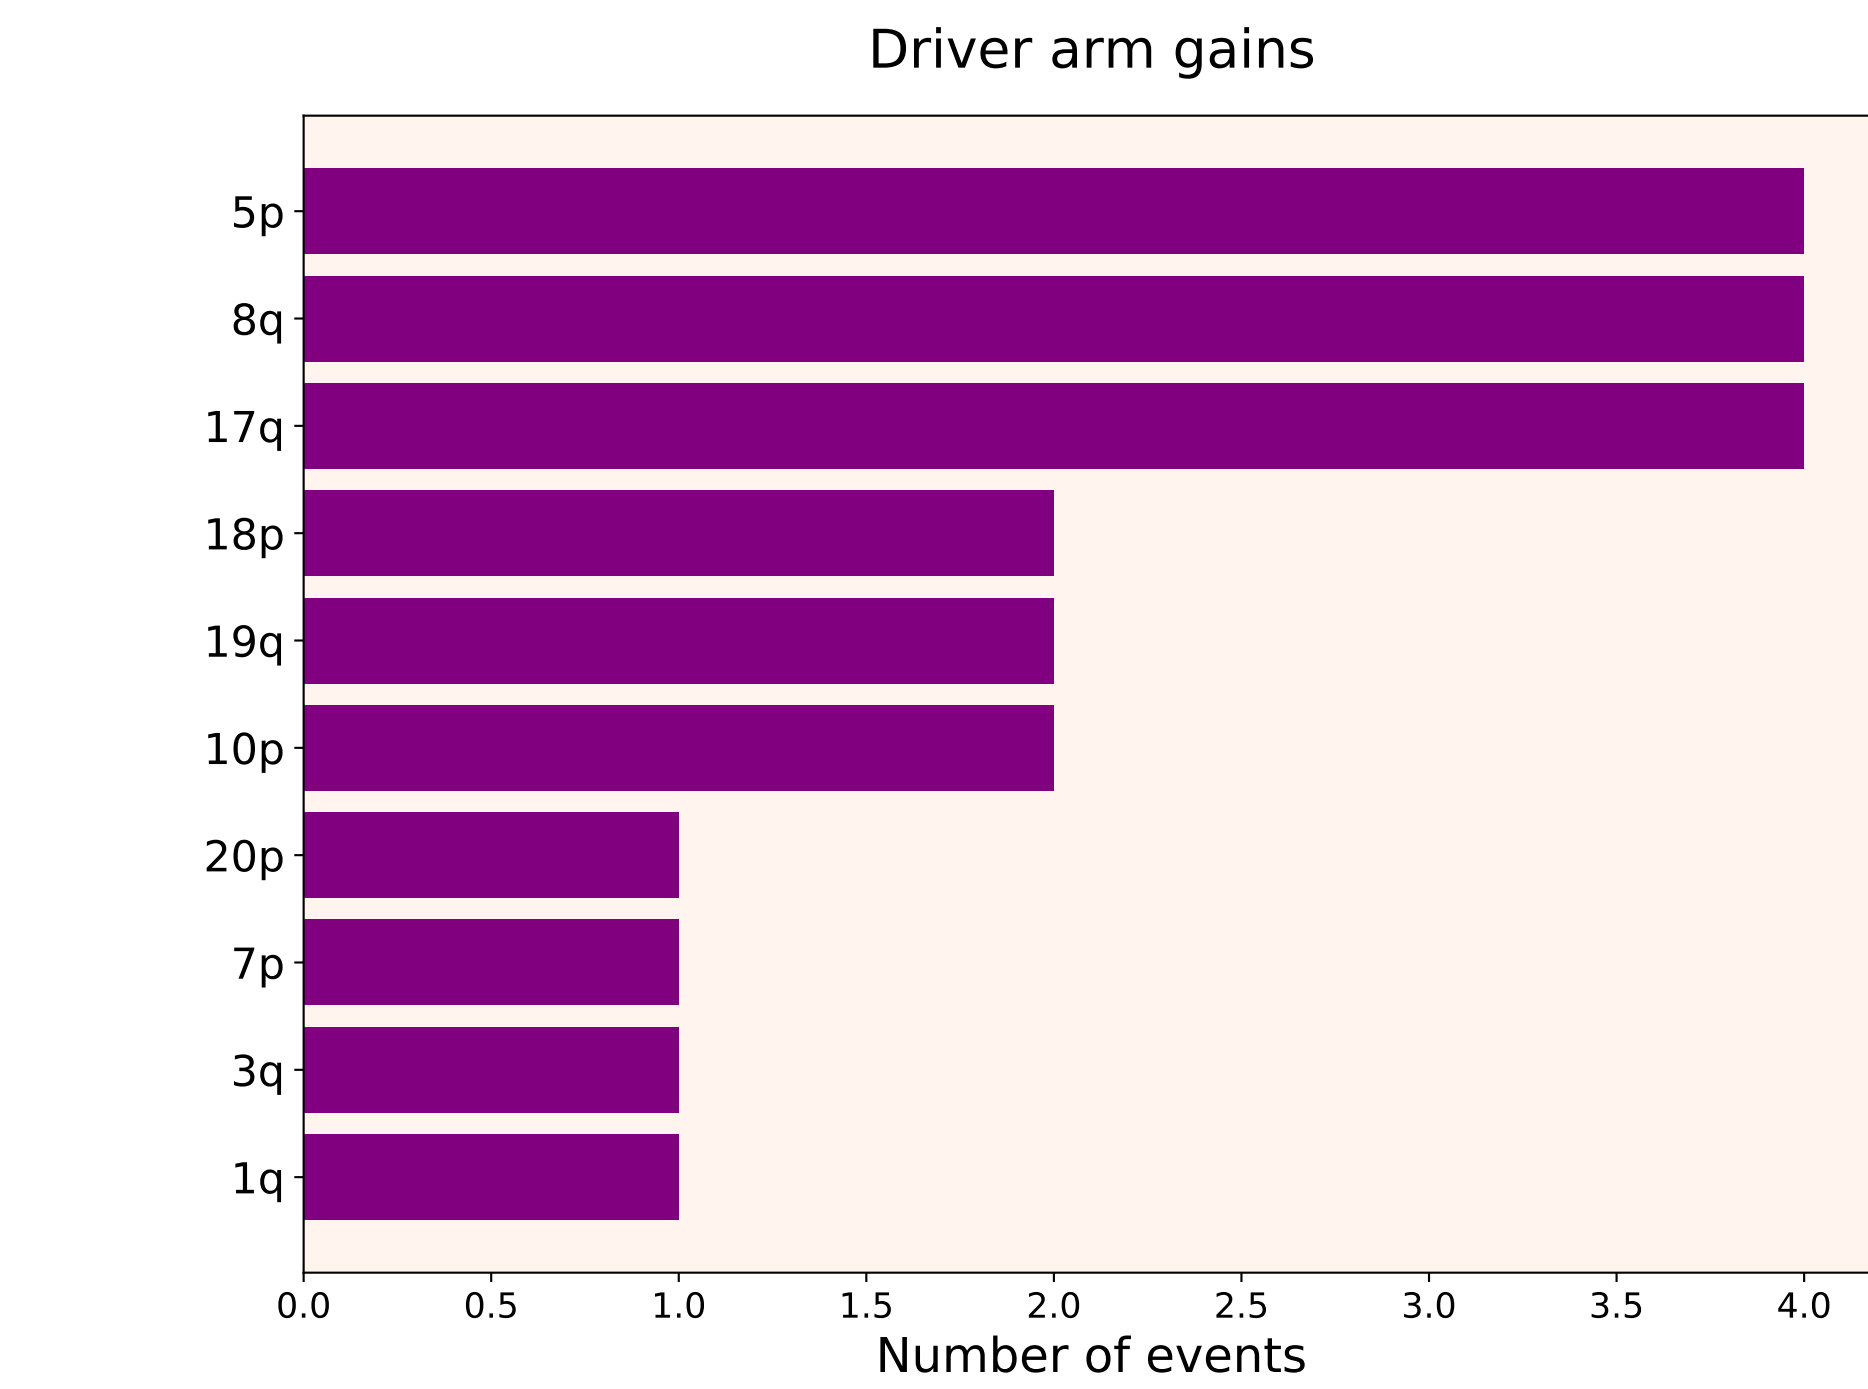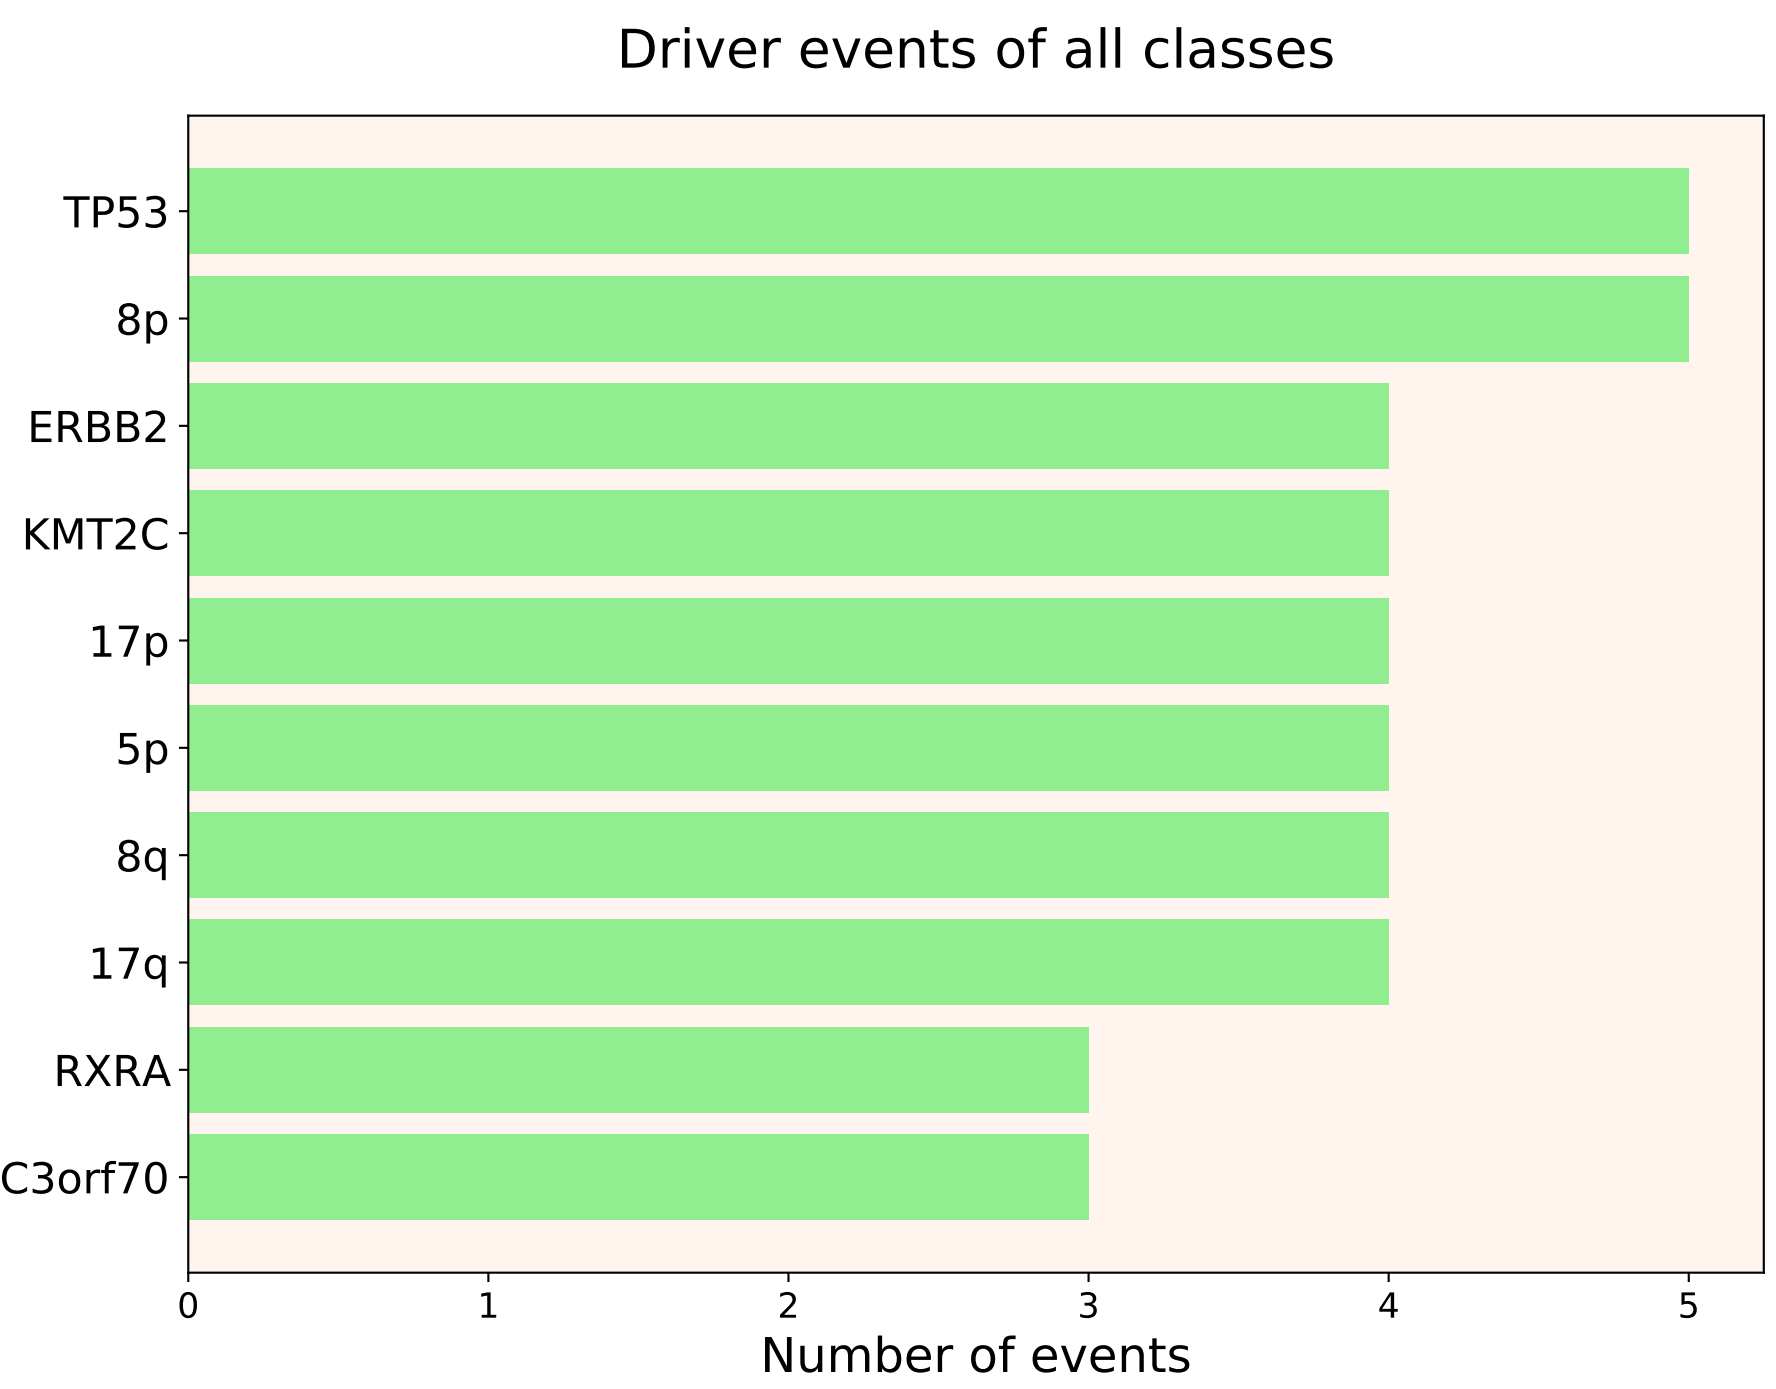

Supplement: Supplemental_Data_S1.zip [file Supplemental_Data_S1.zip]

# THYM

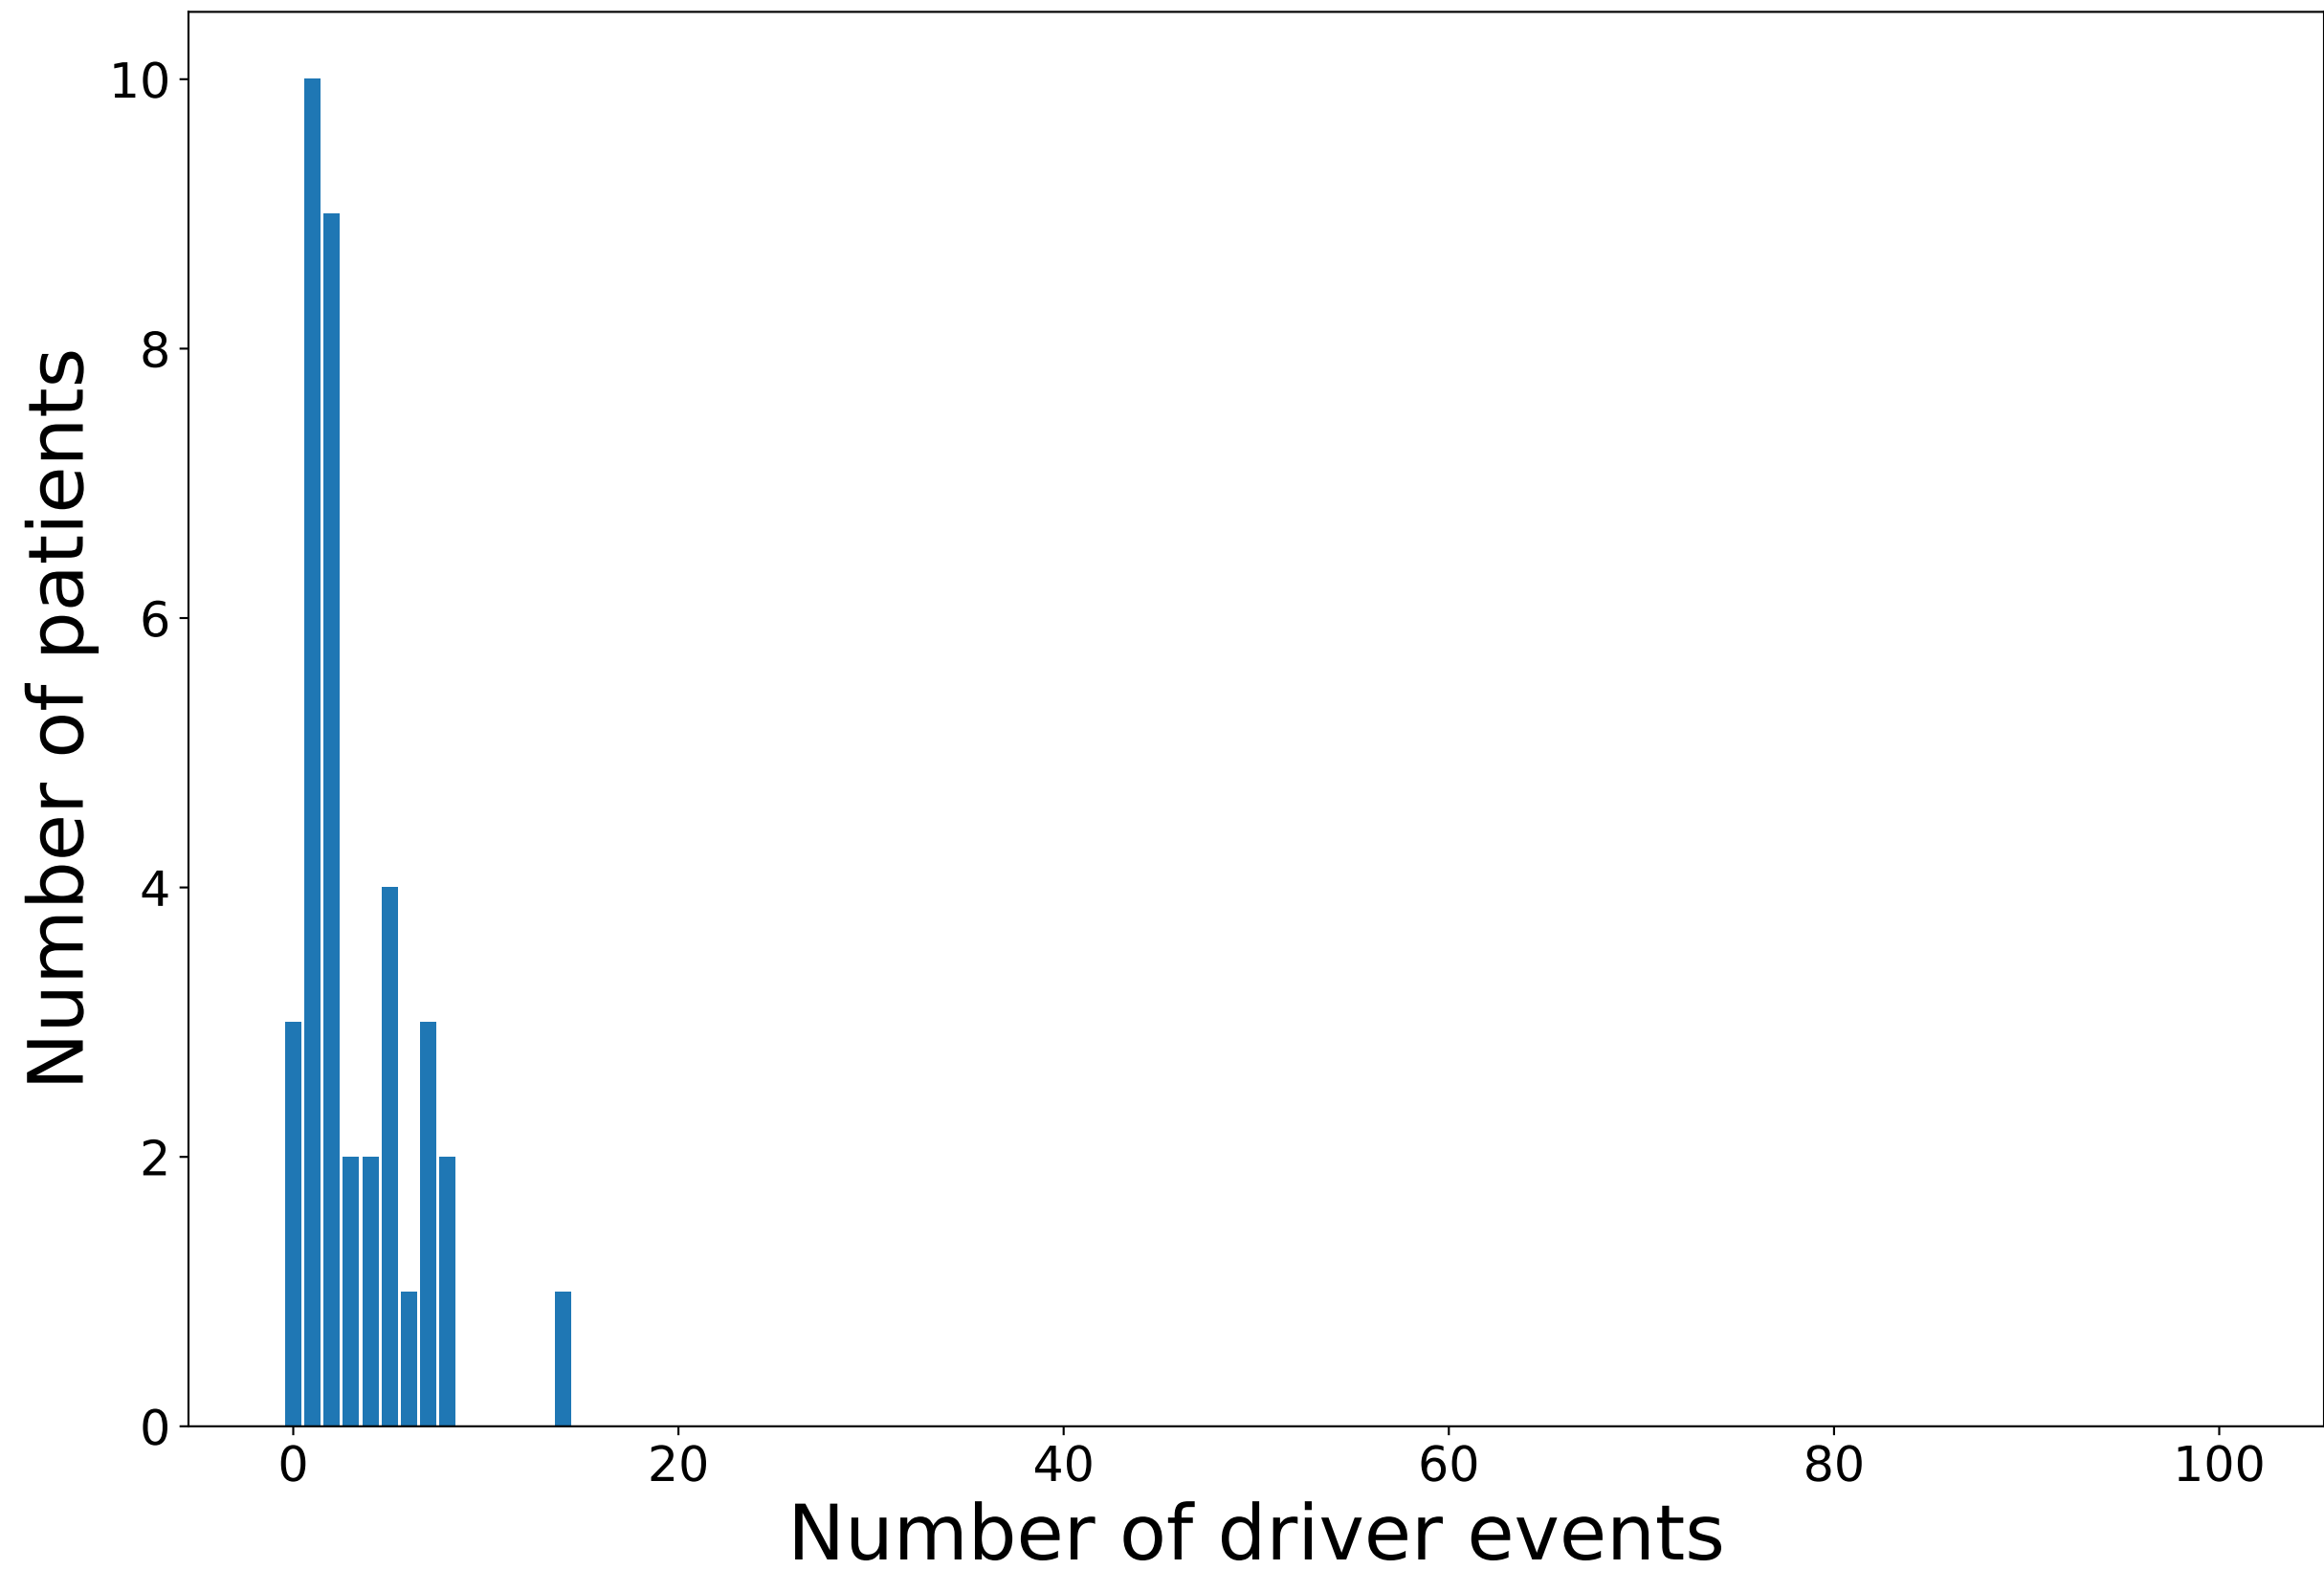

Supplement: Supplemental_Data_S1.zip [file Supplemental_Data_S1.zip]

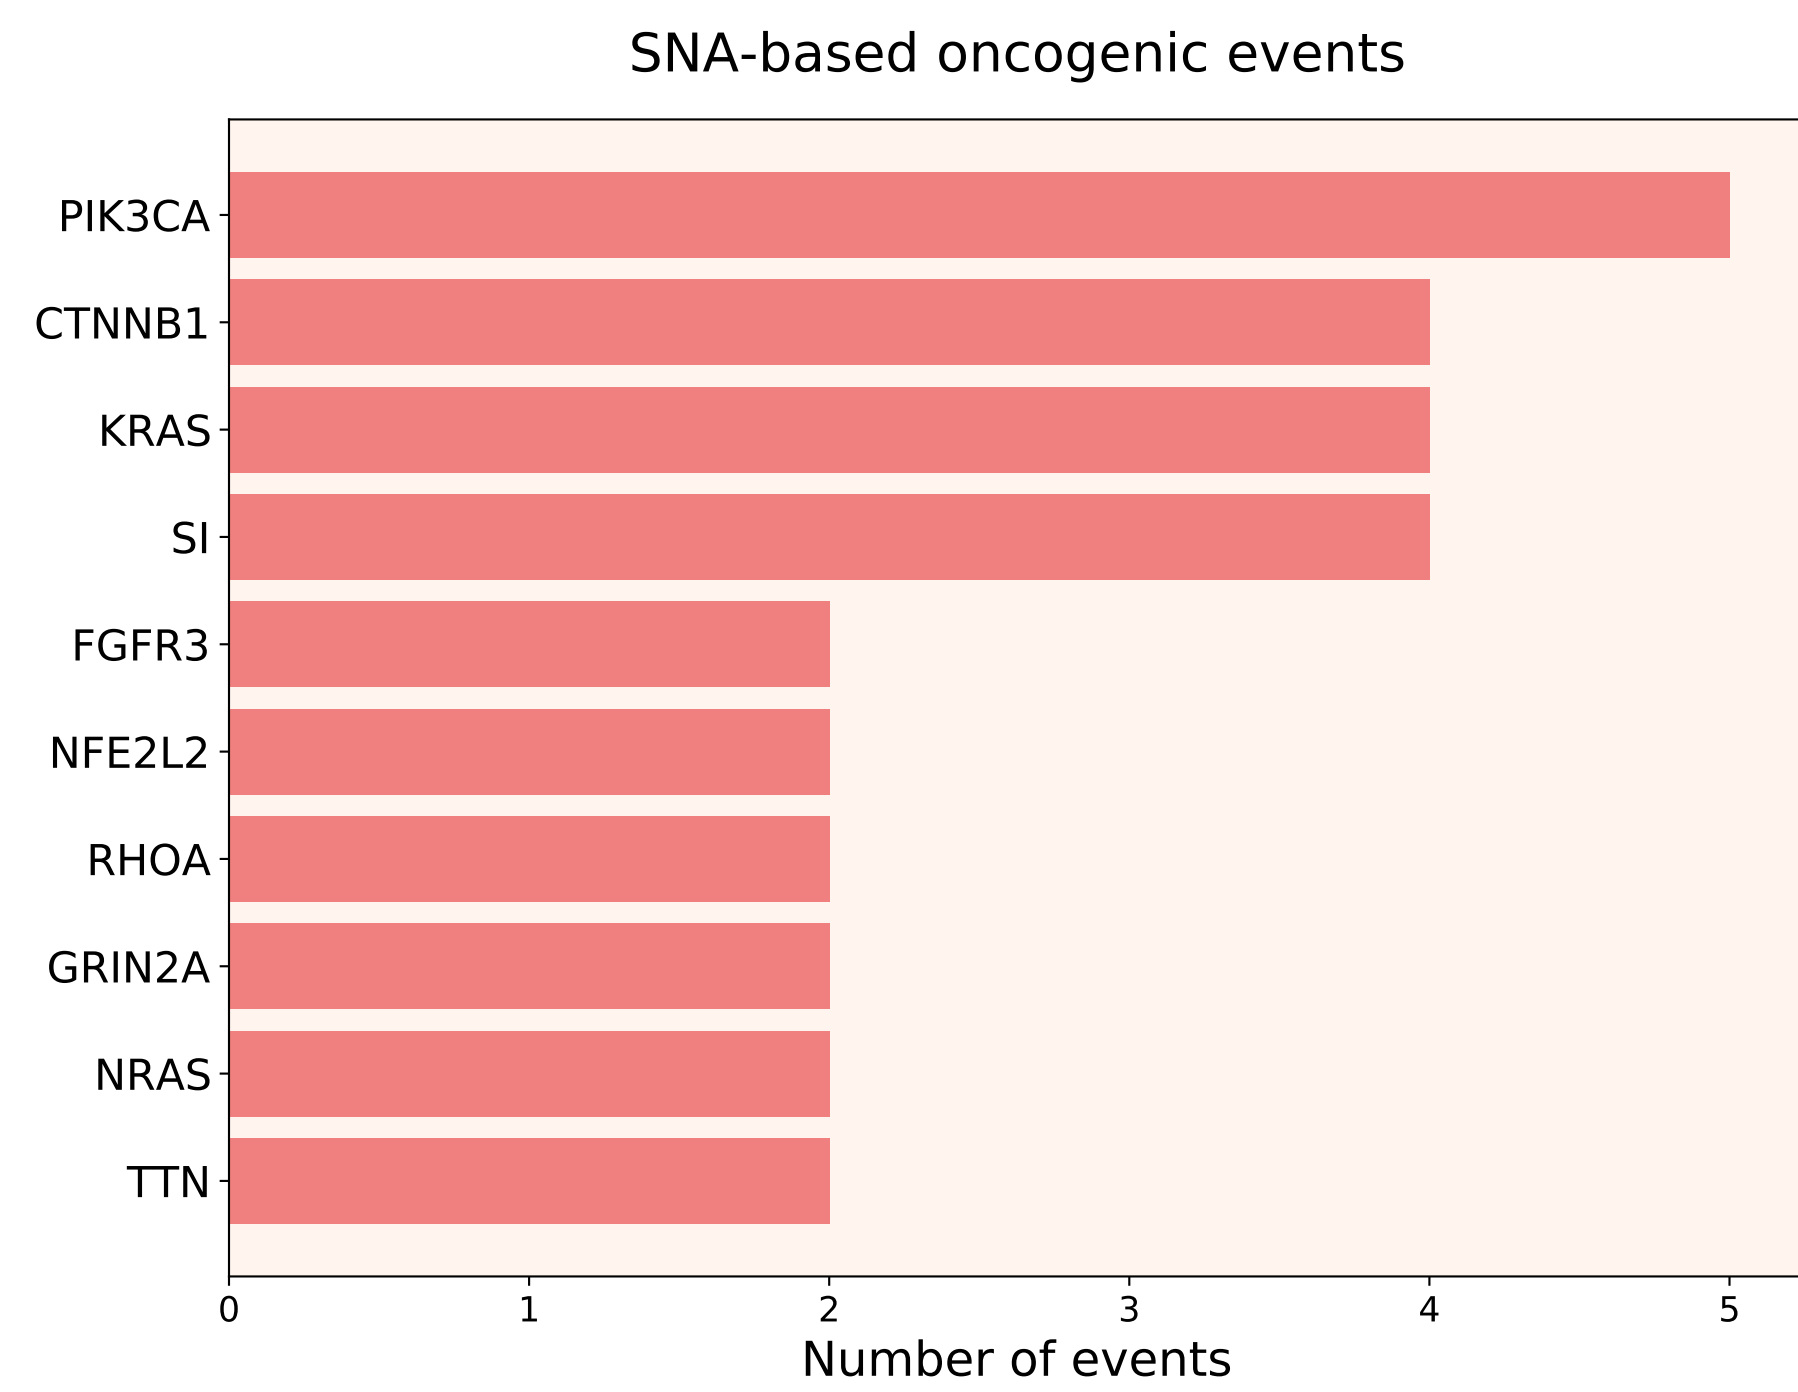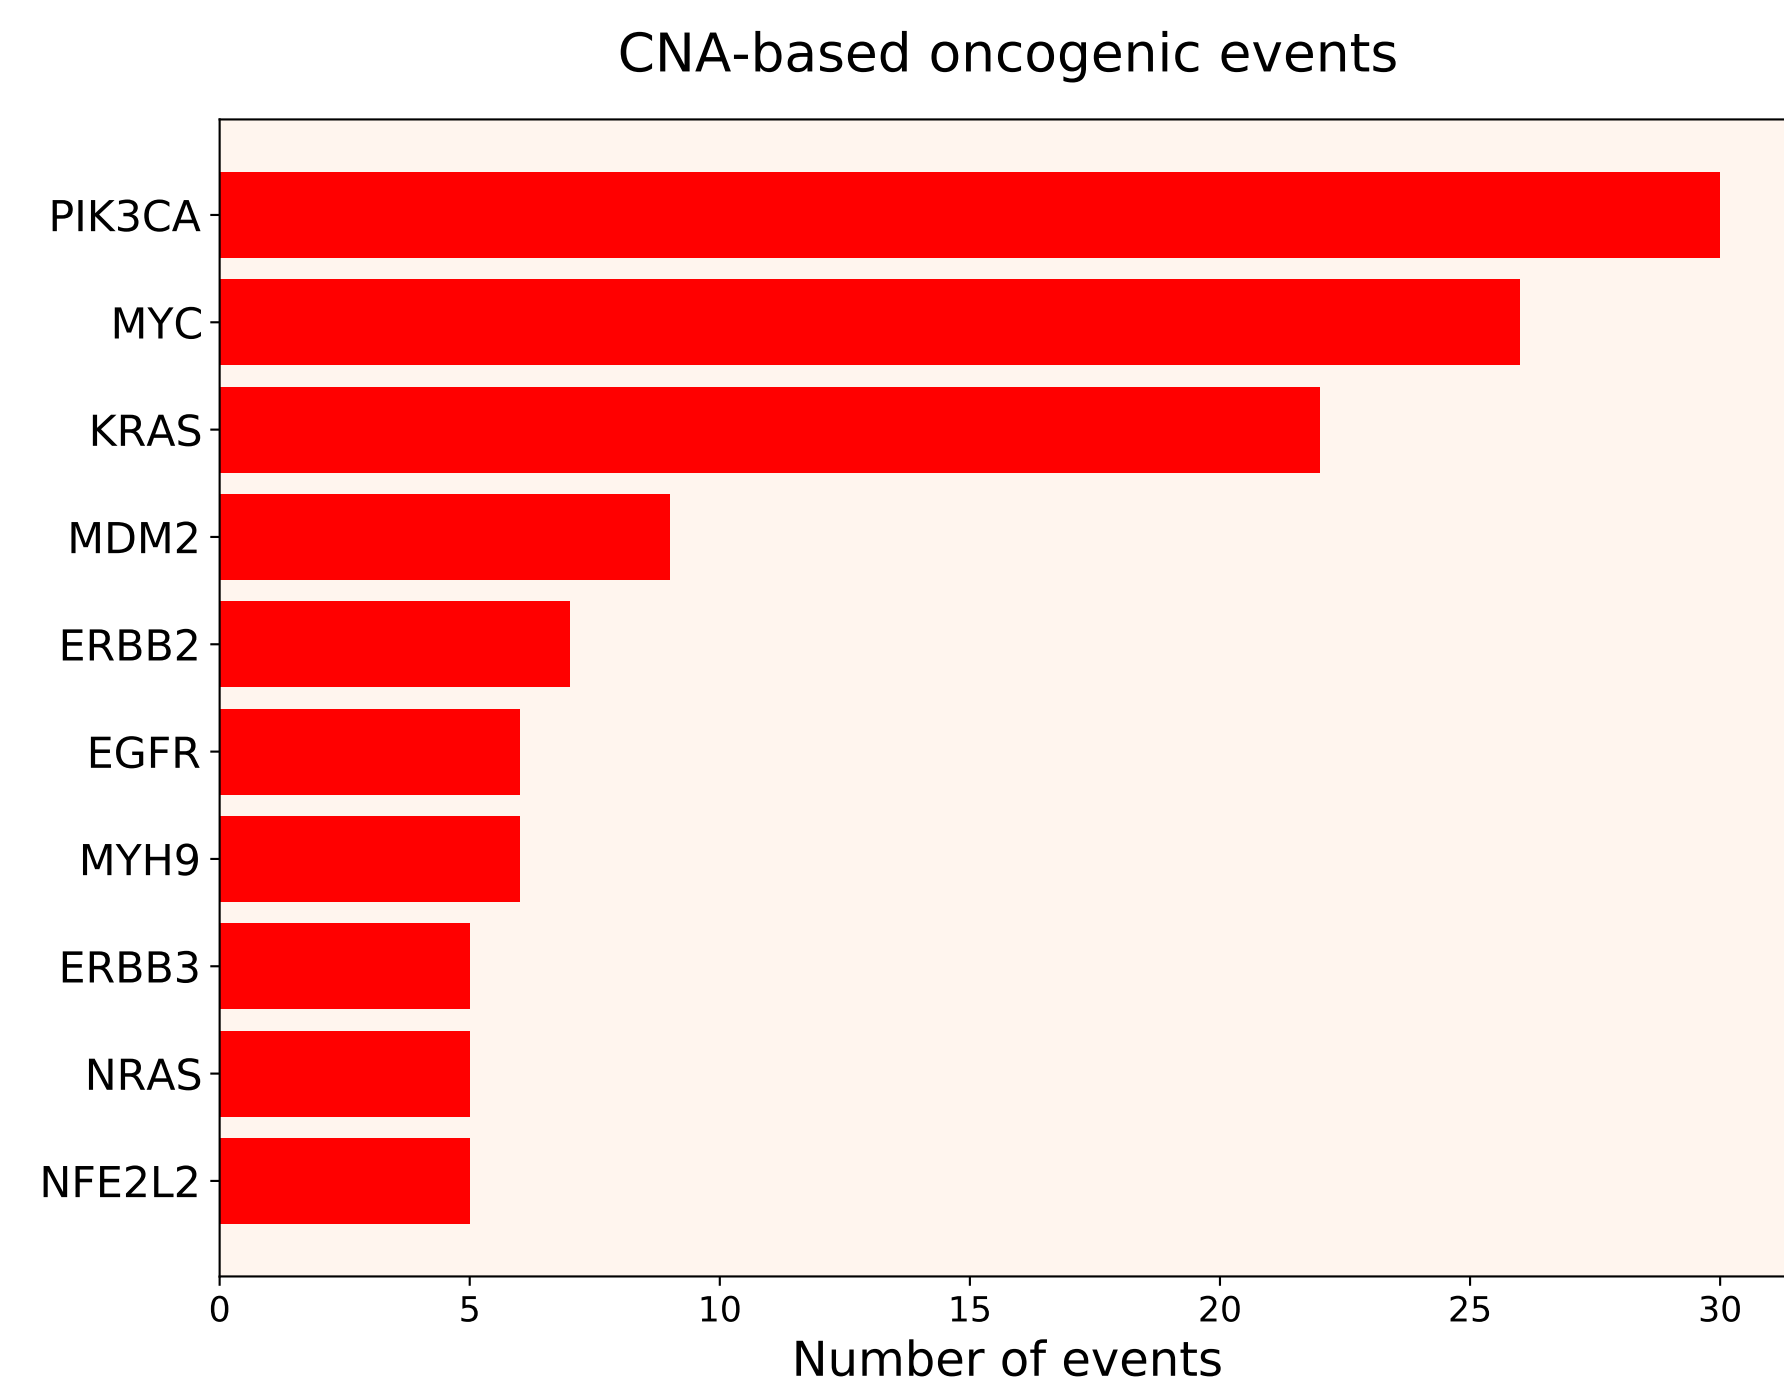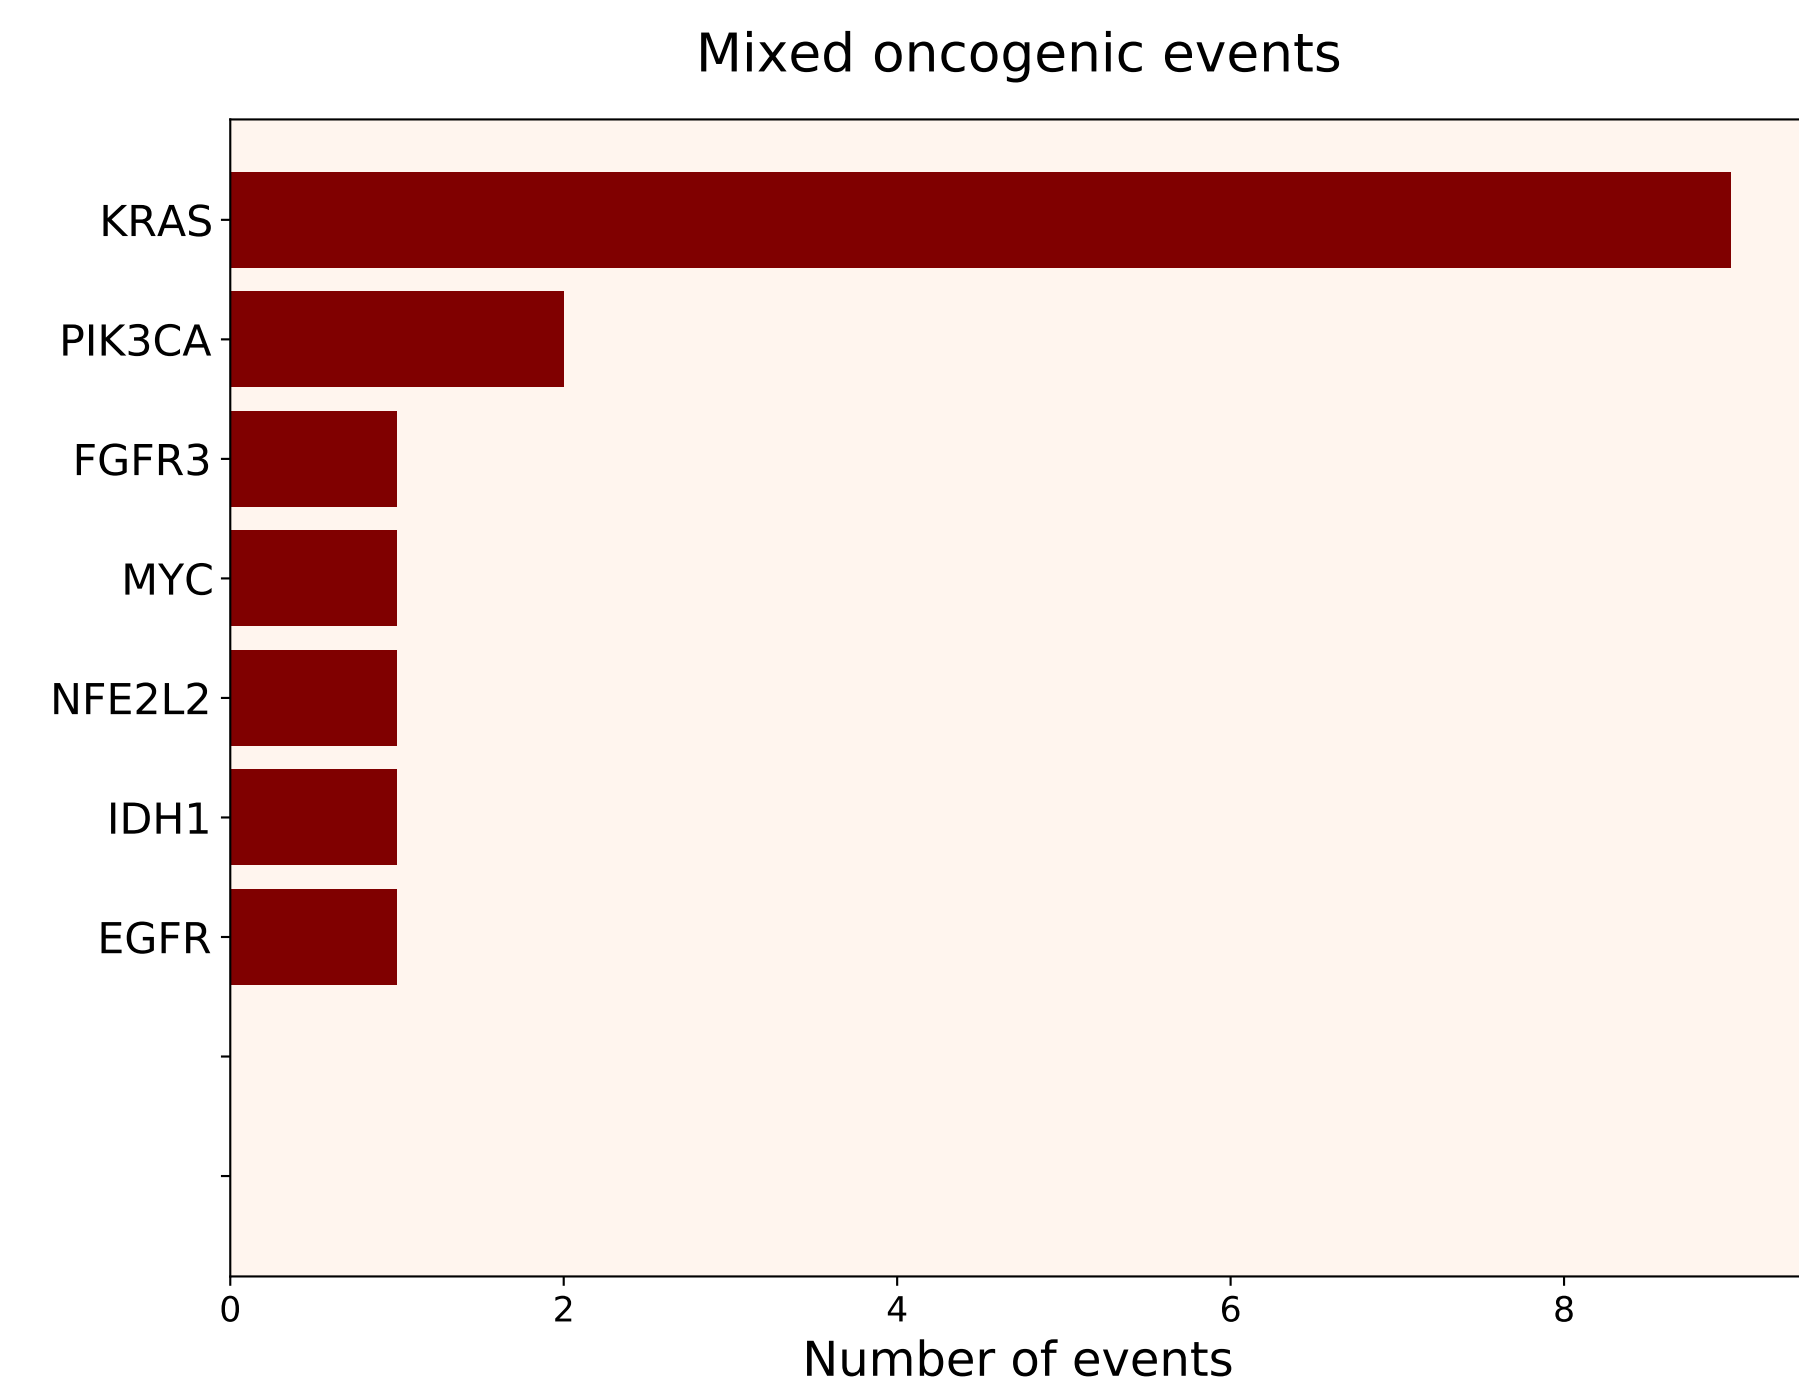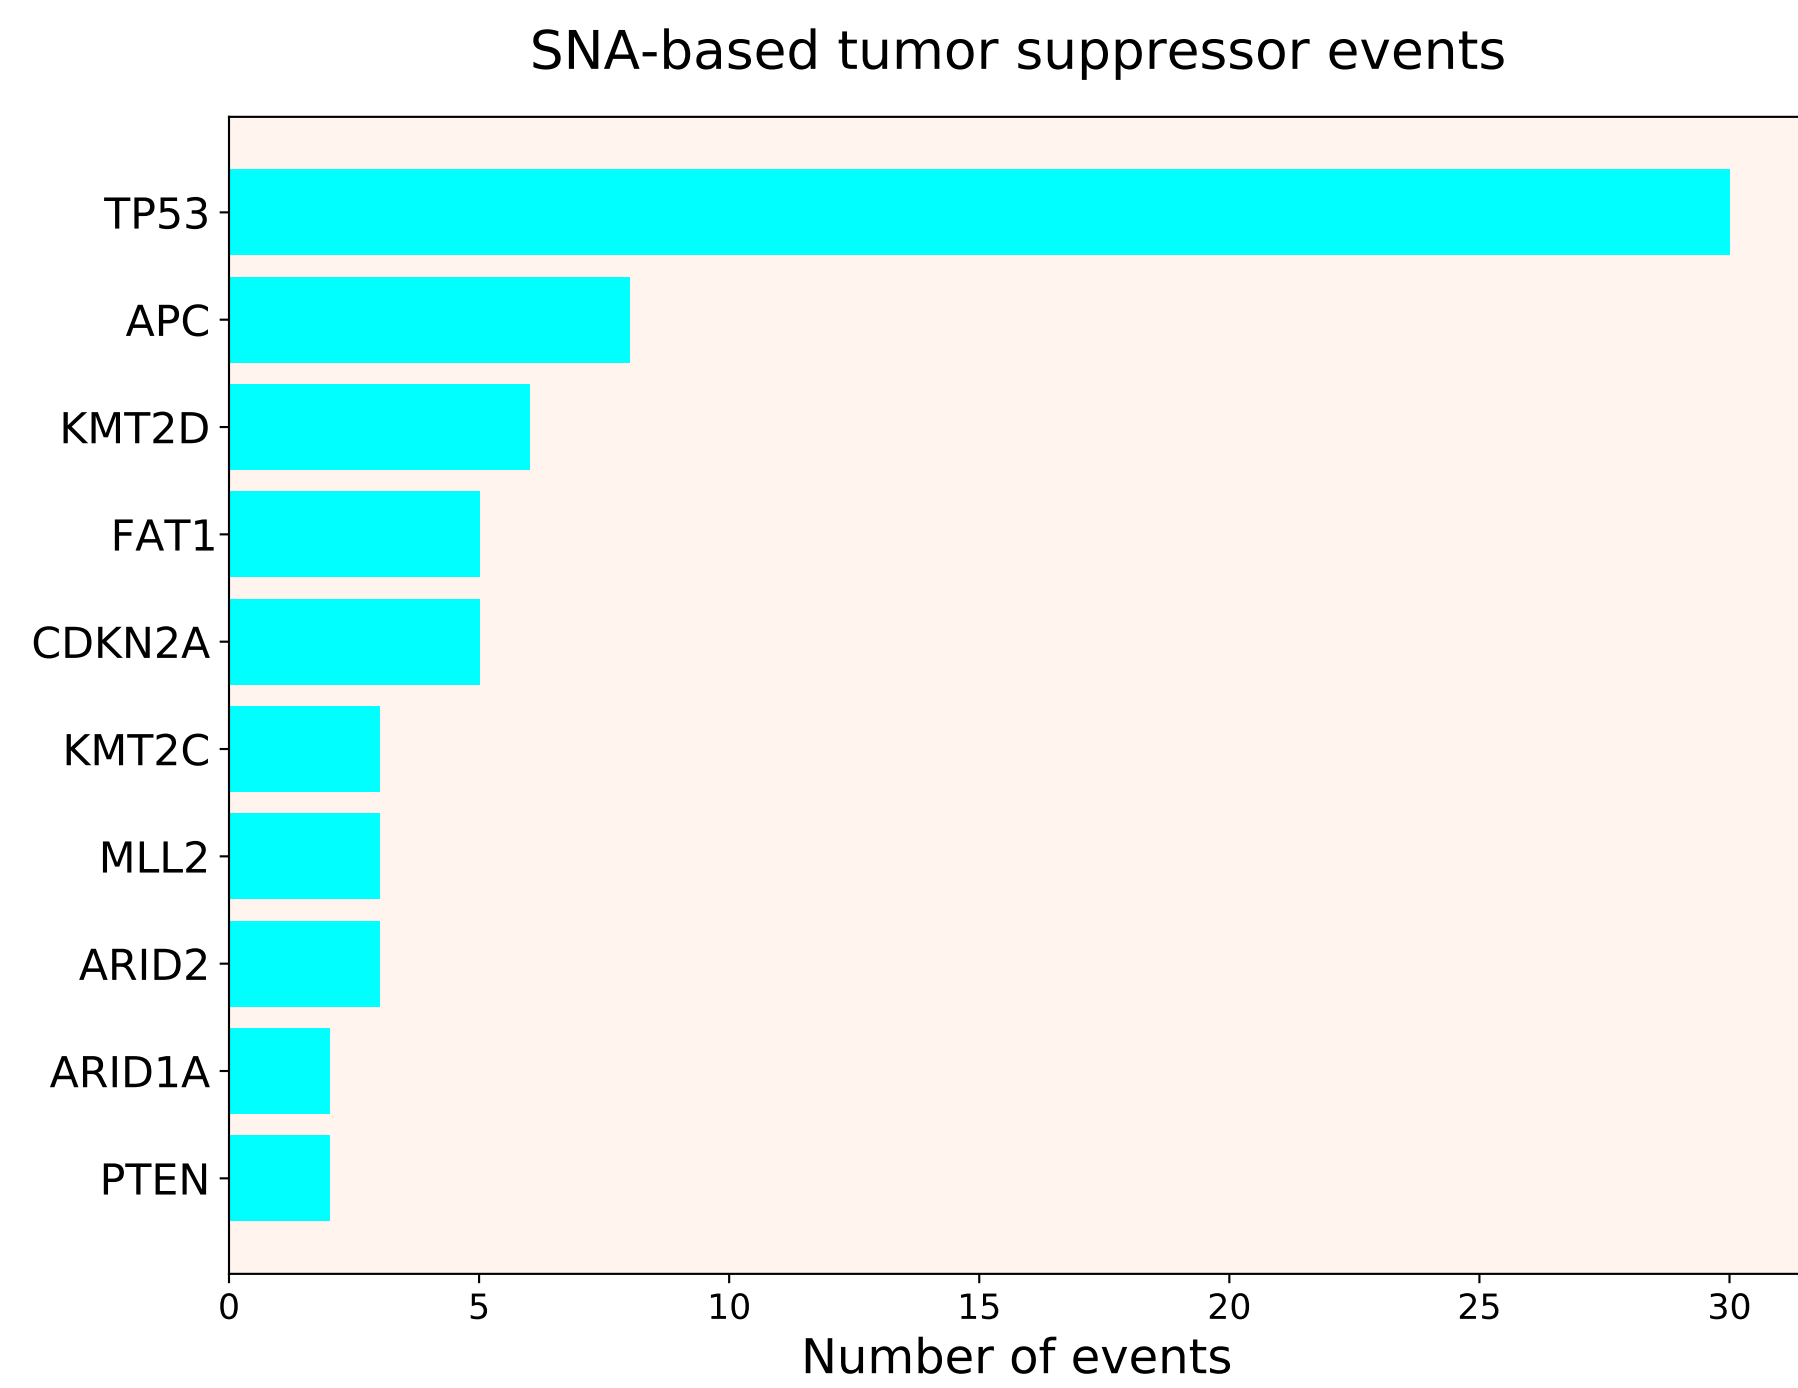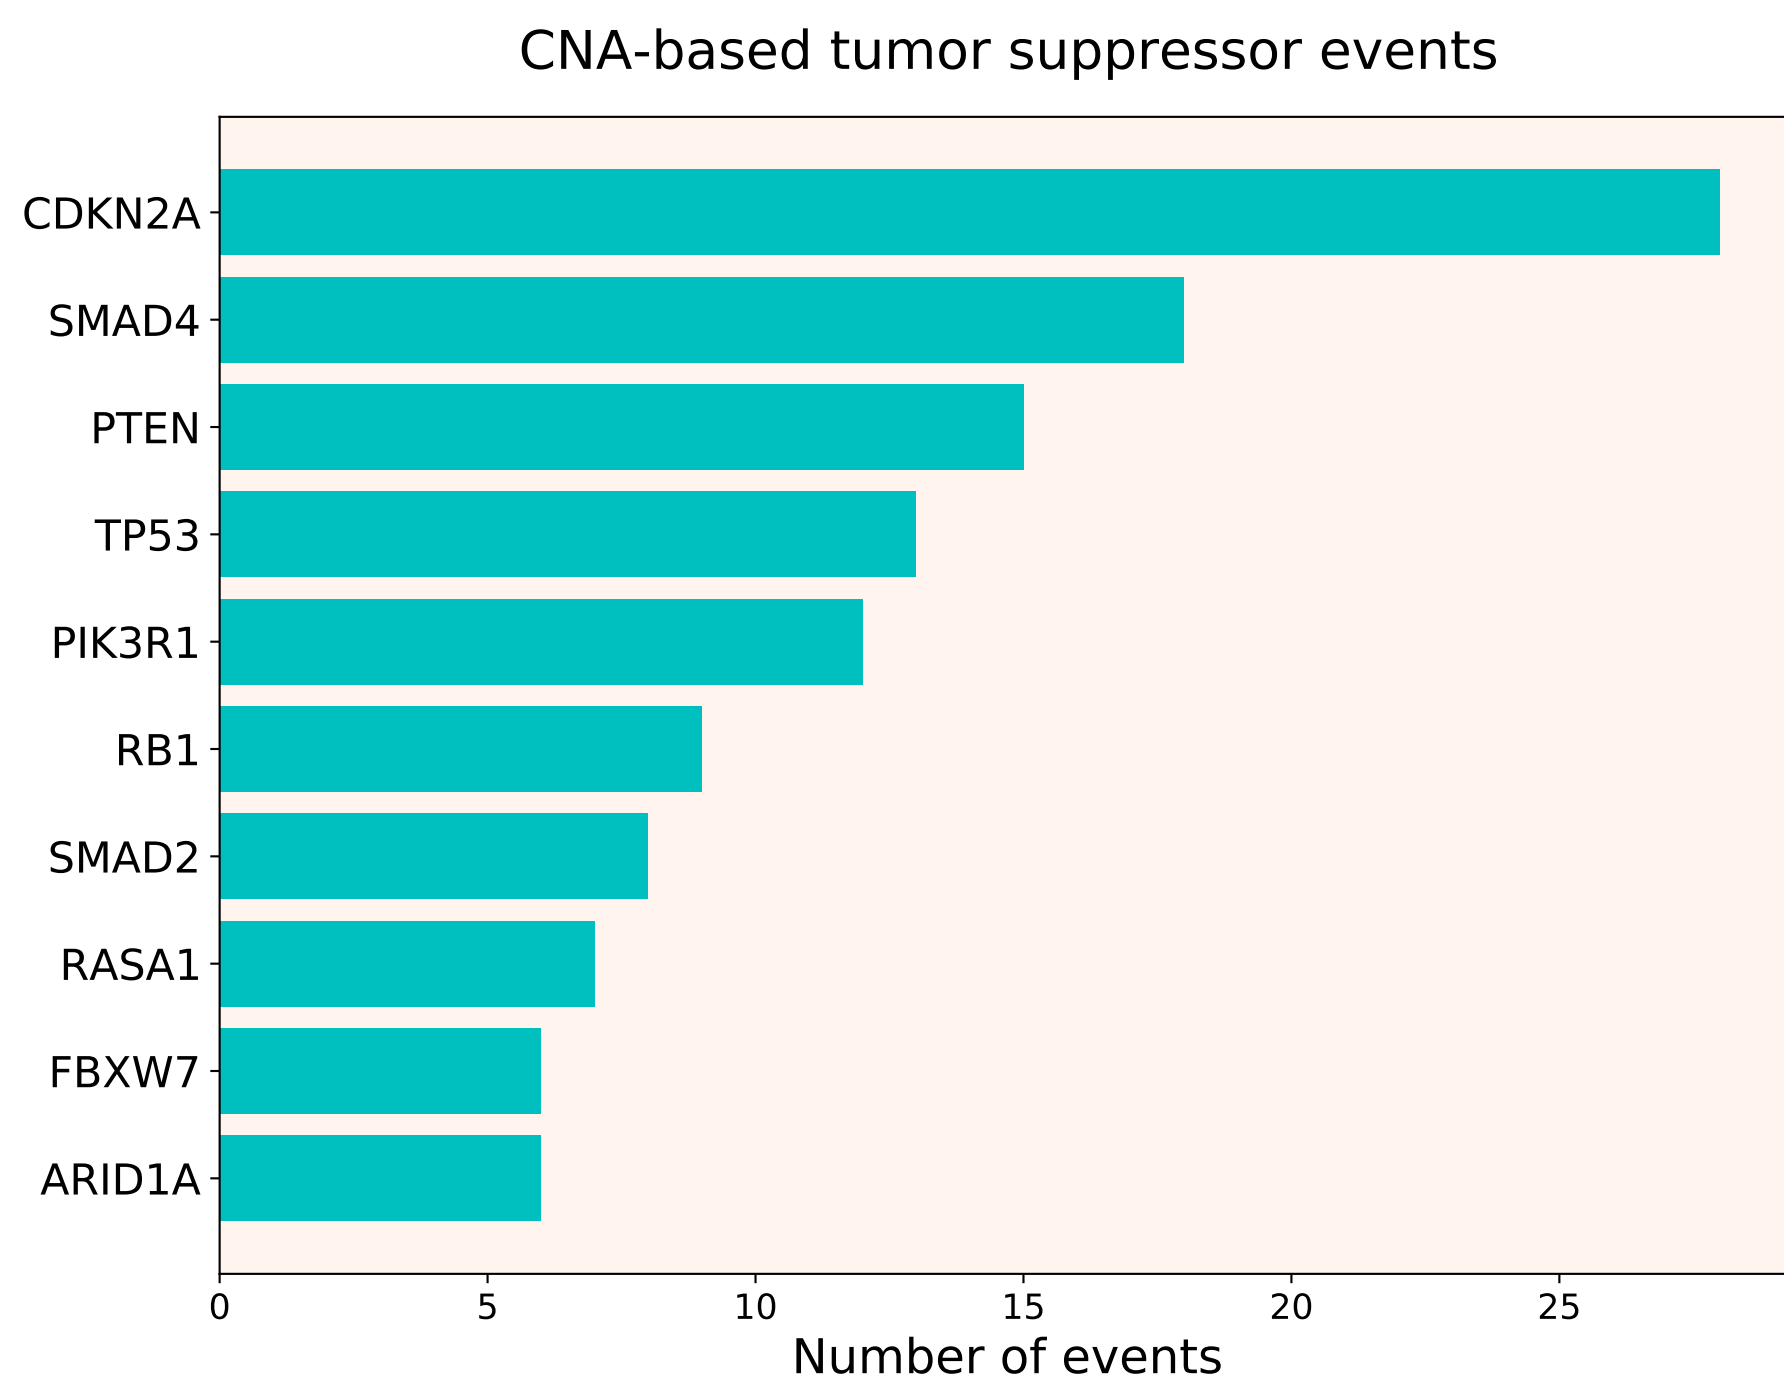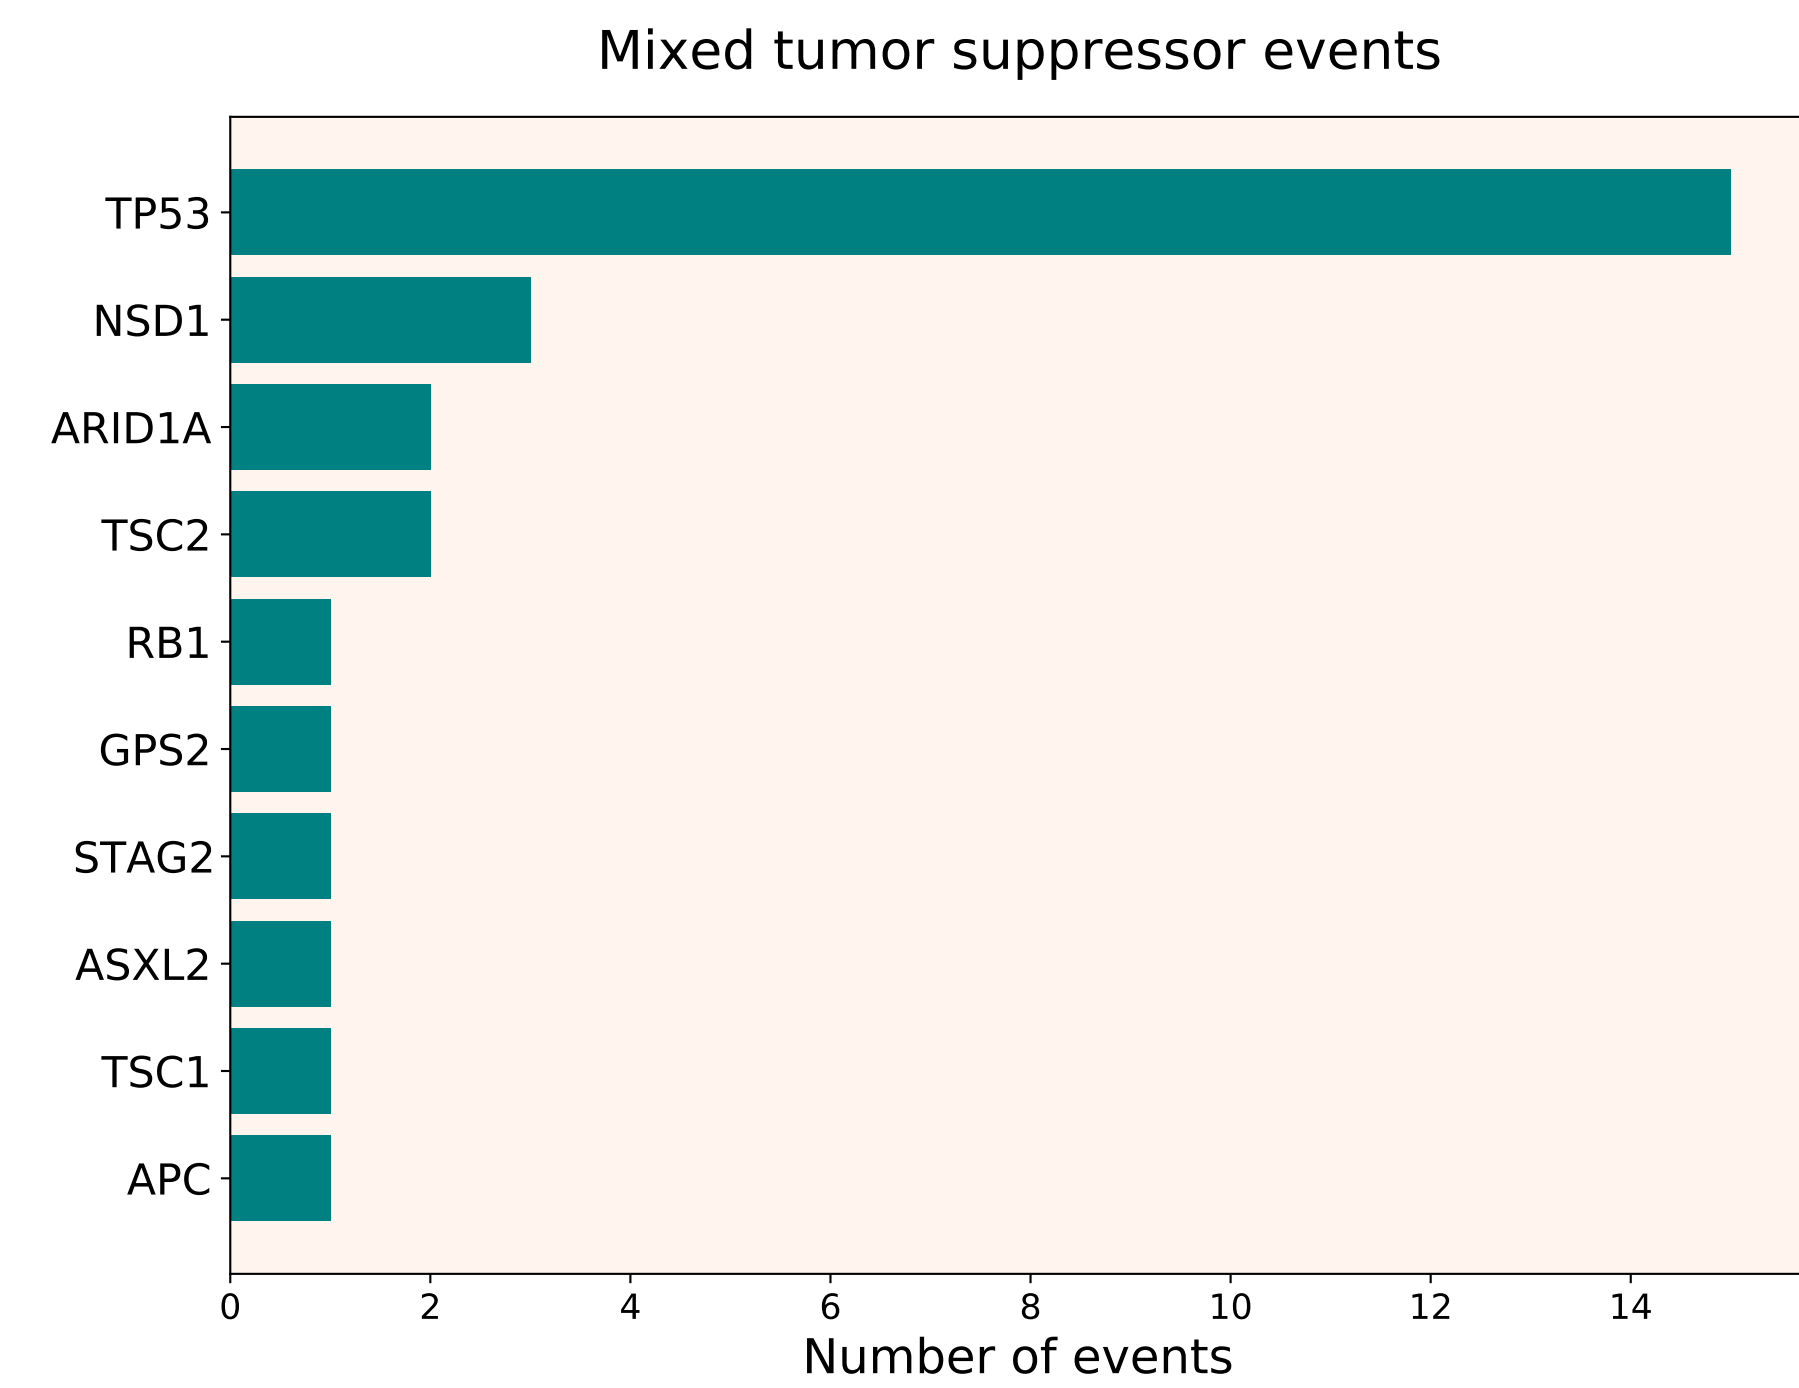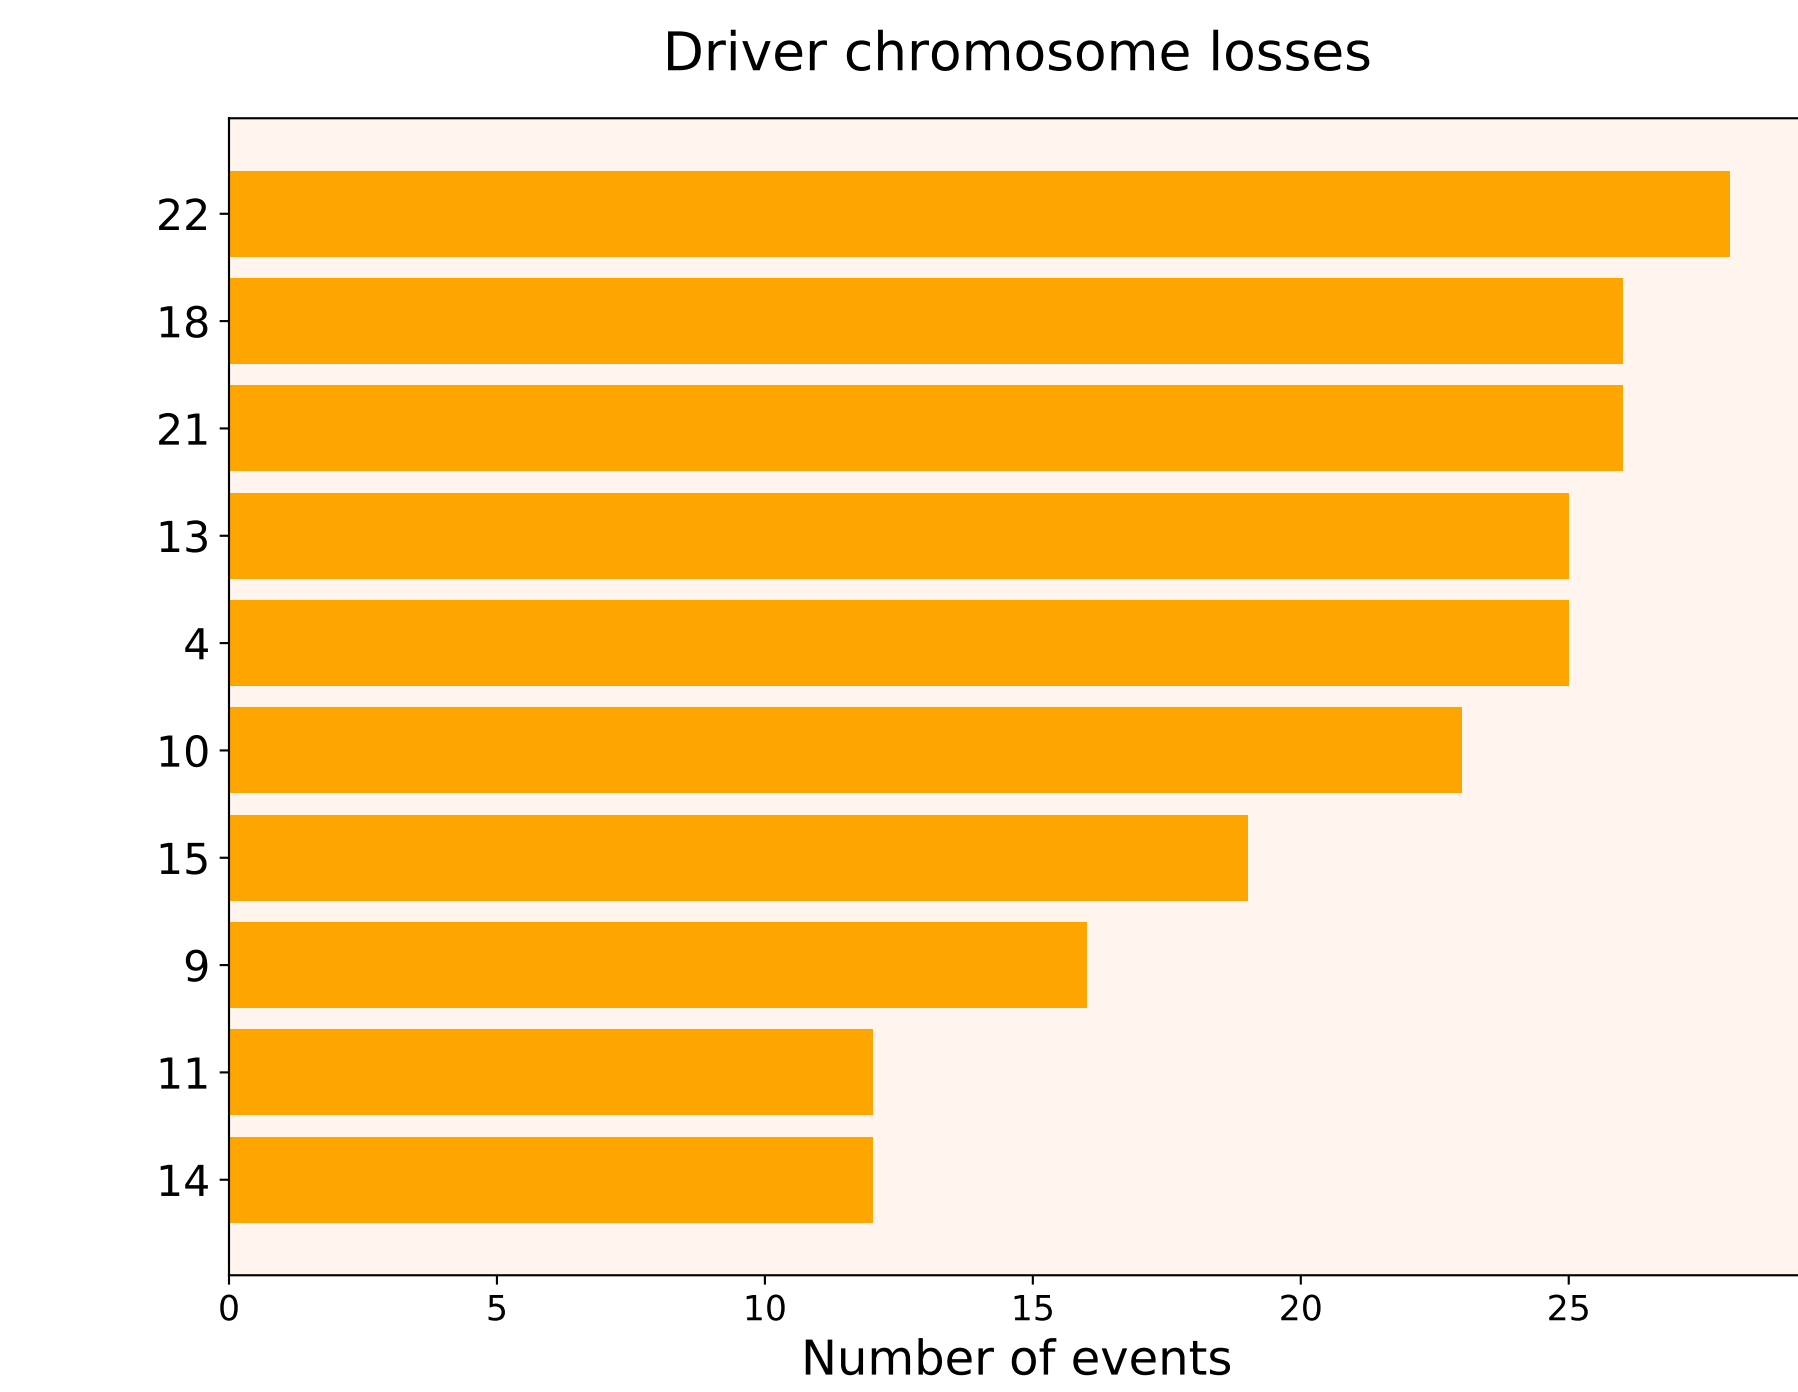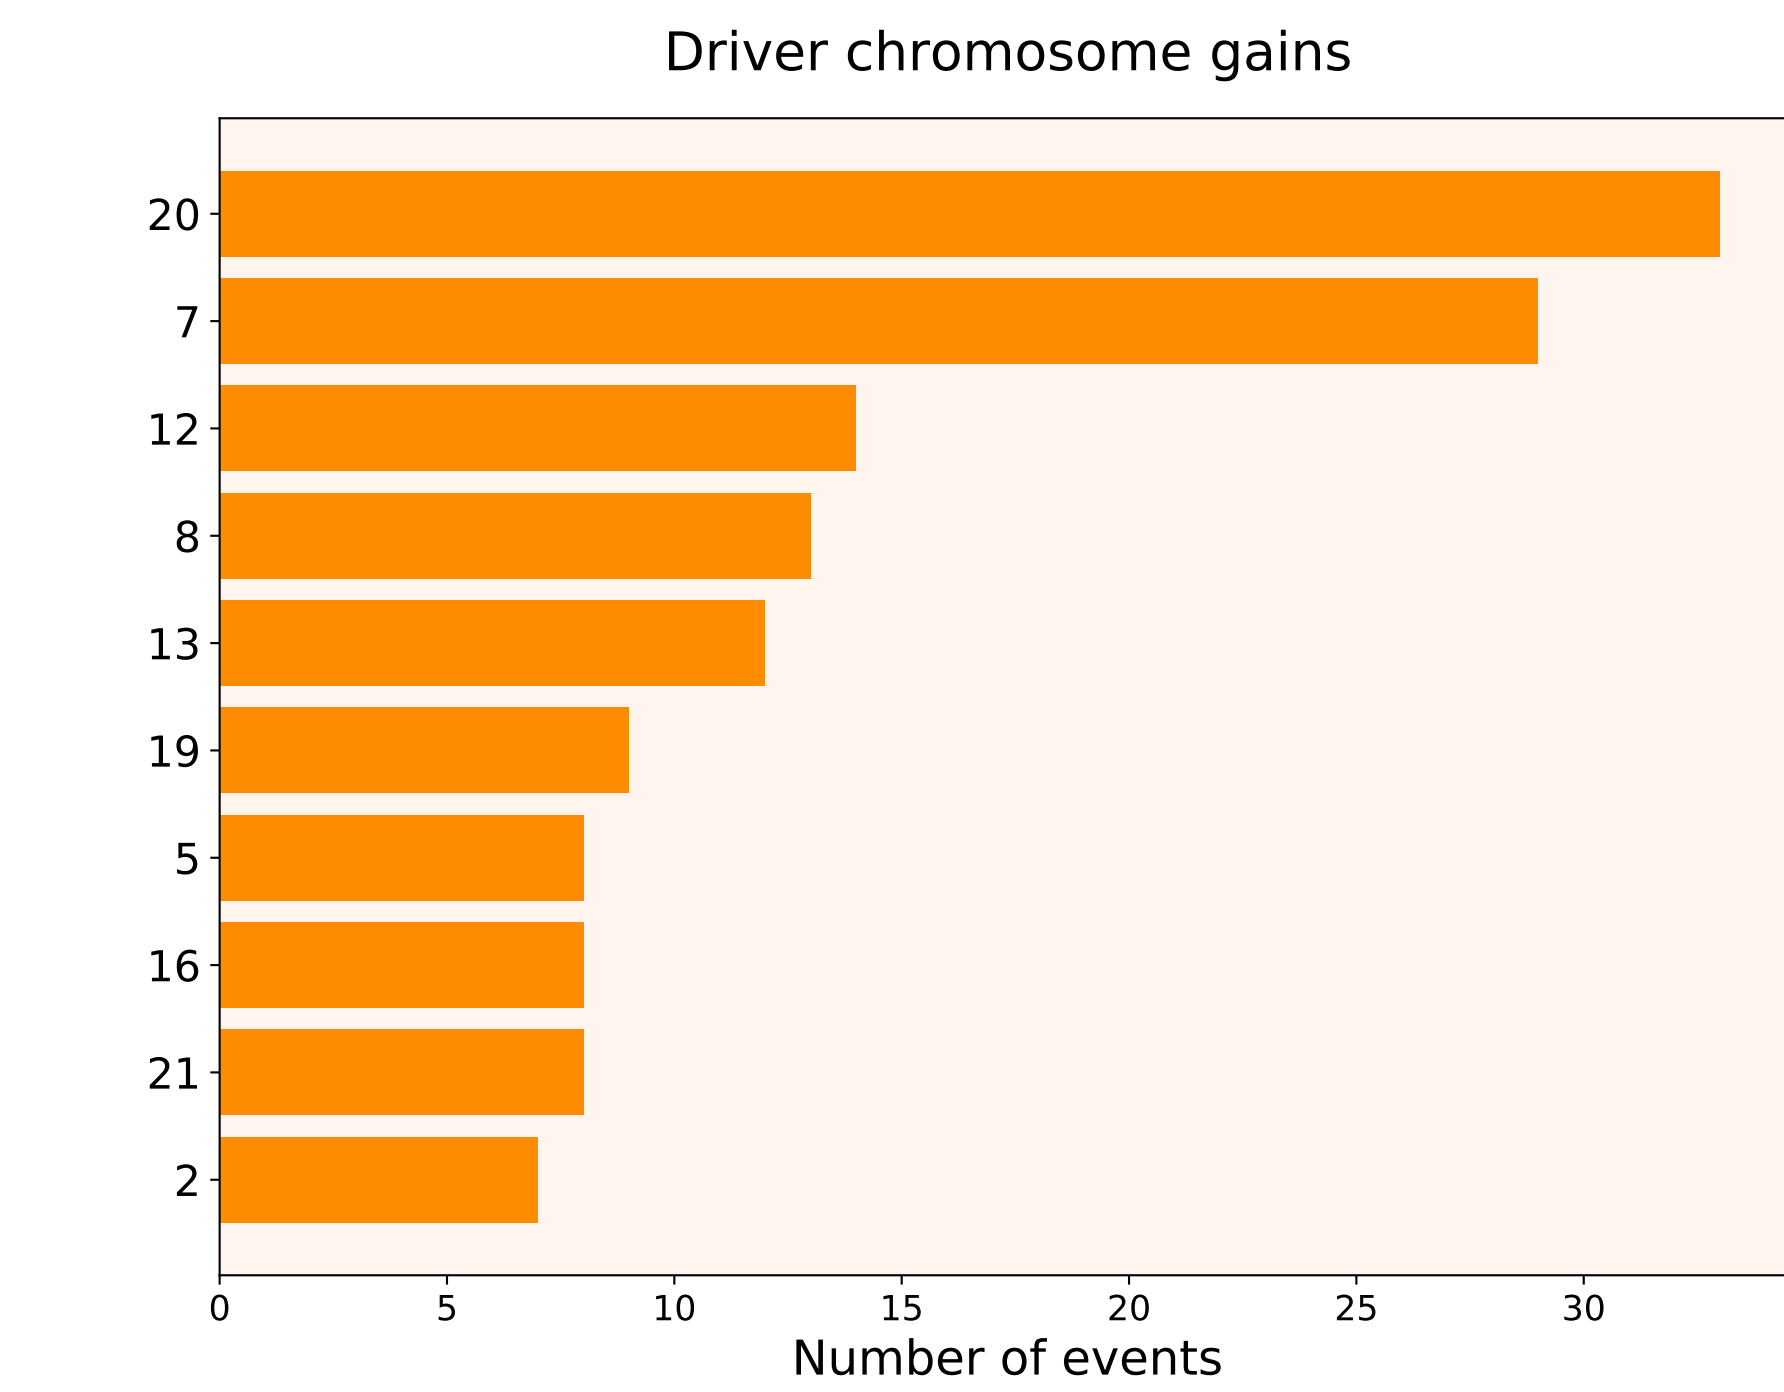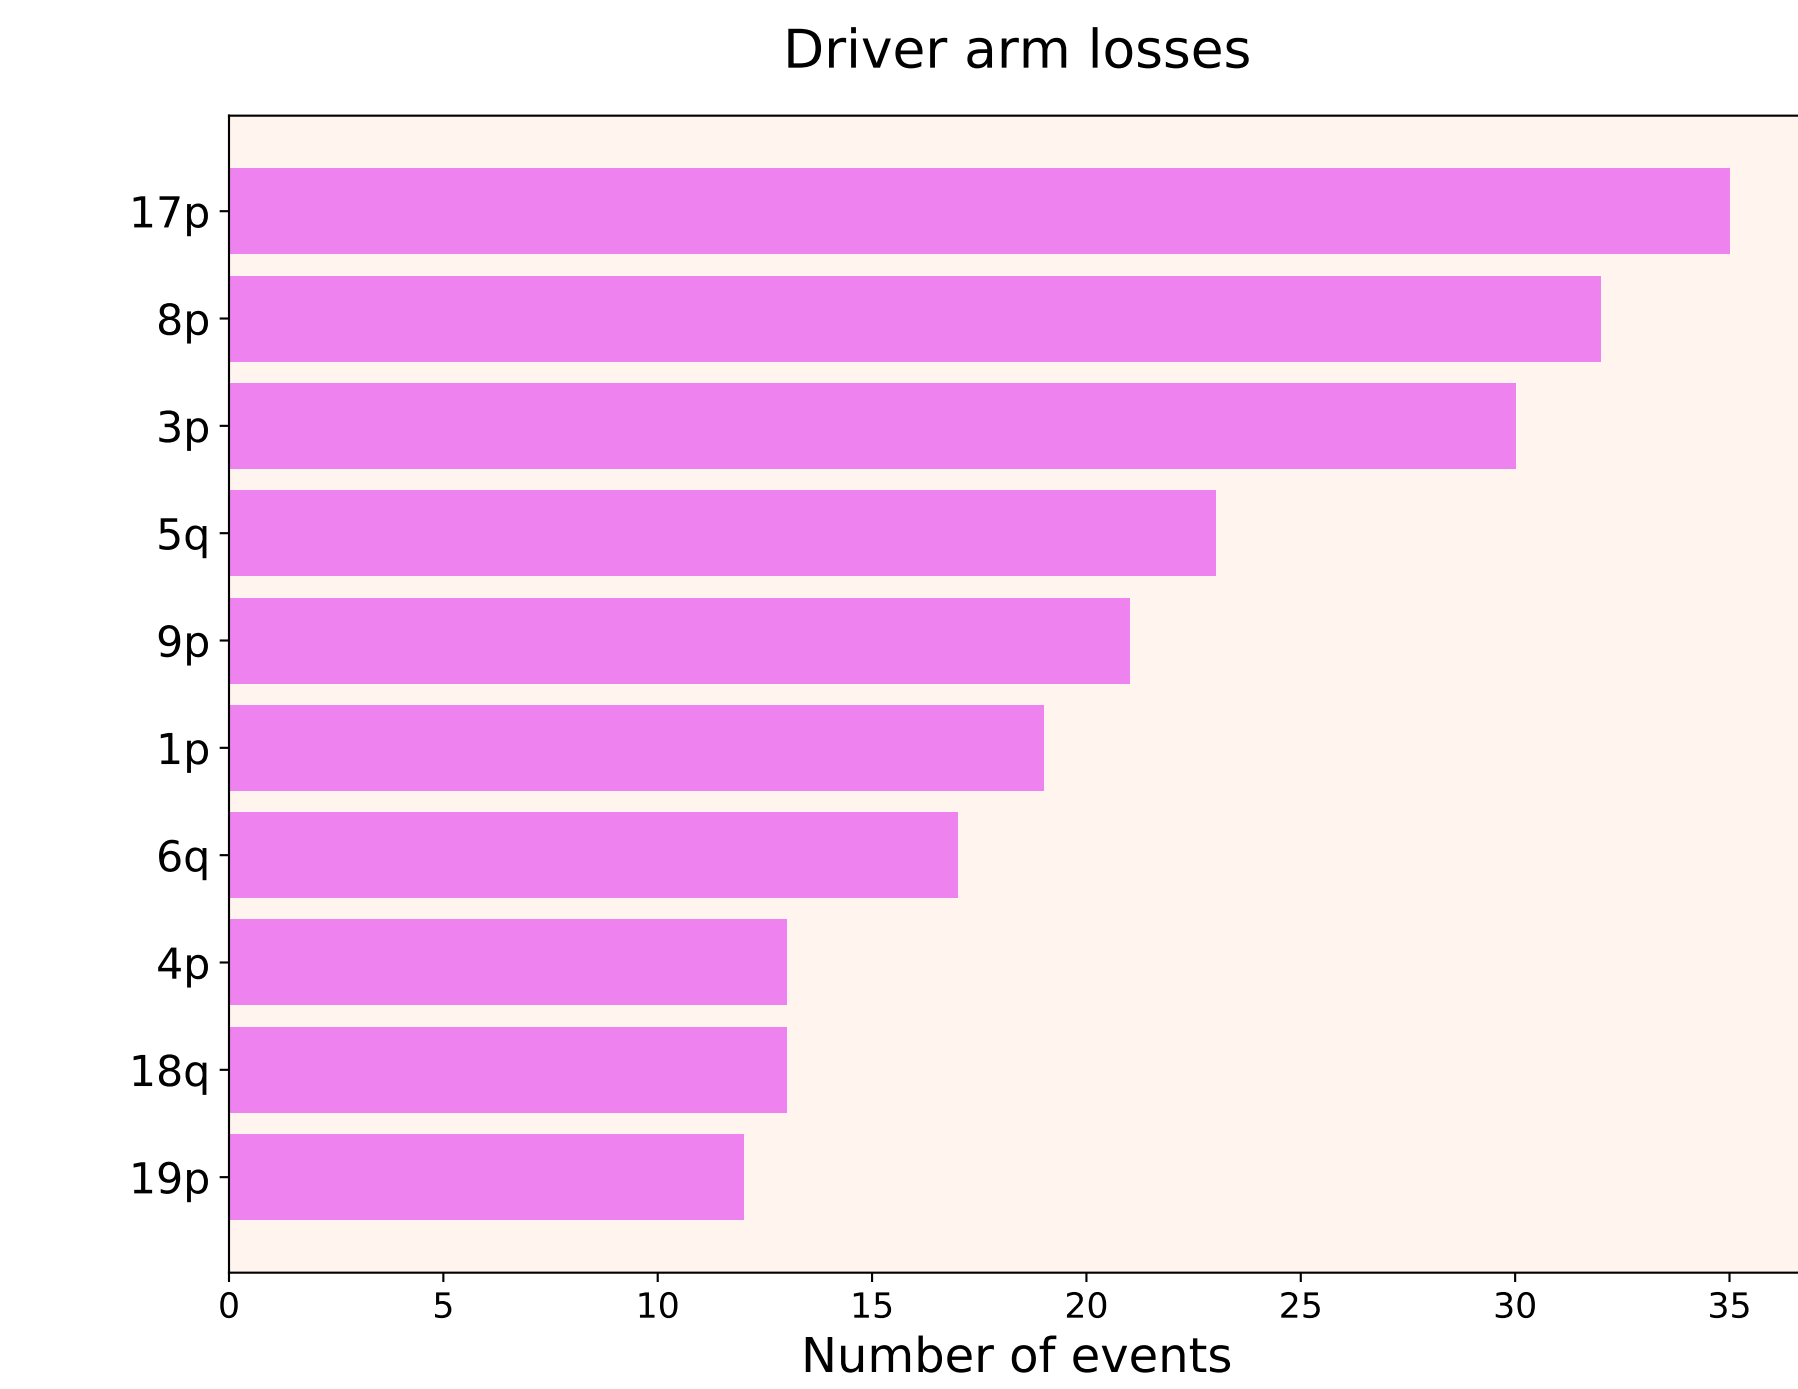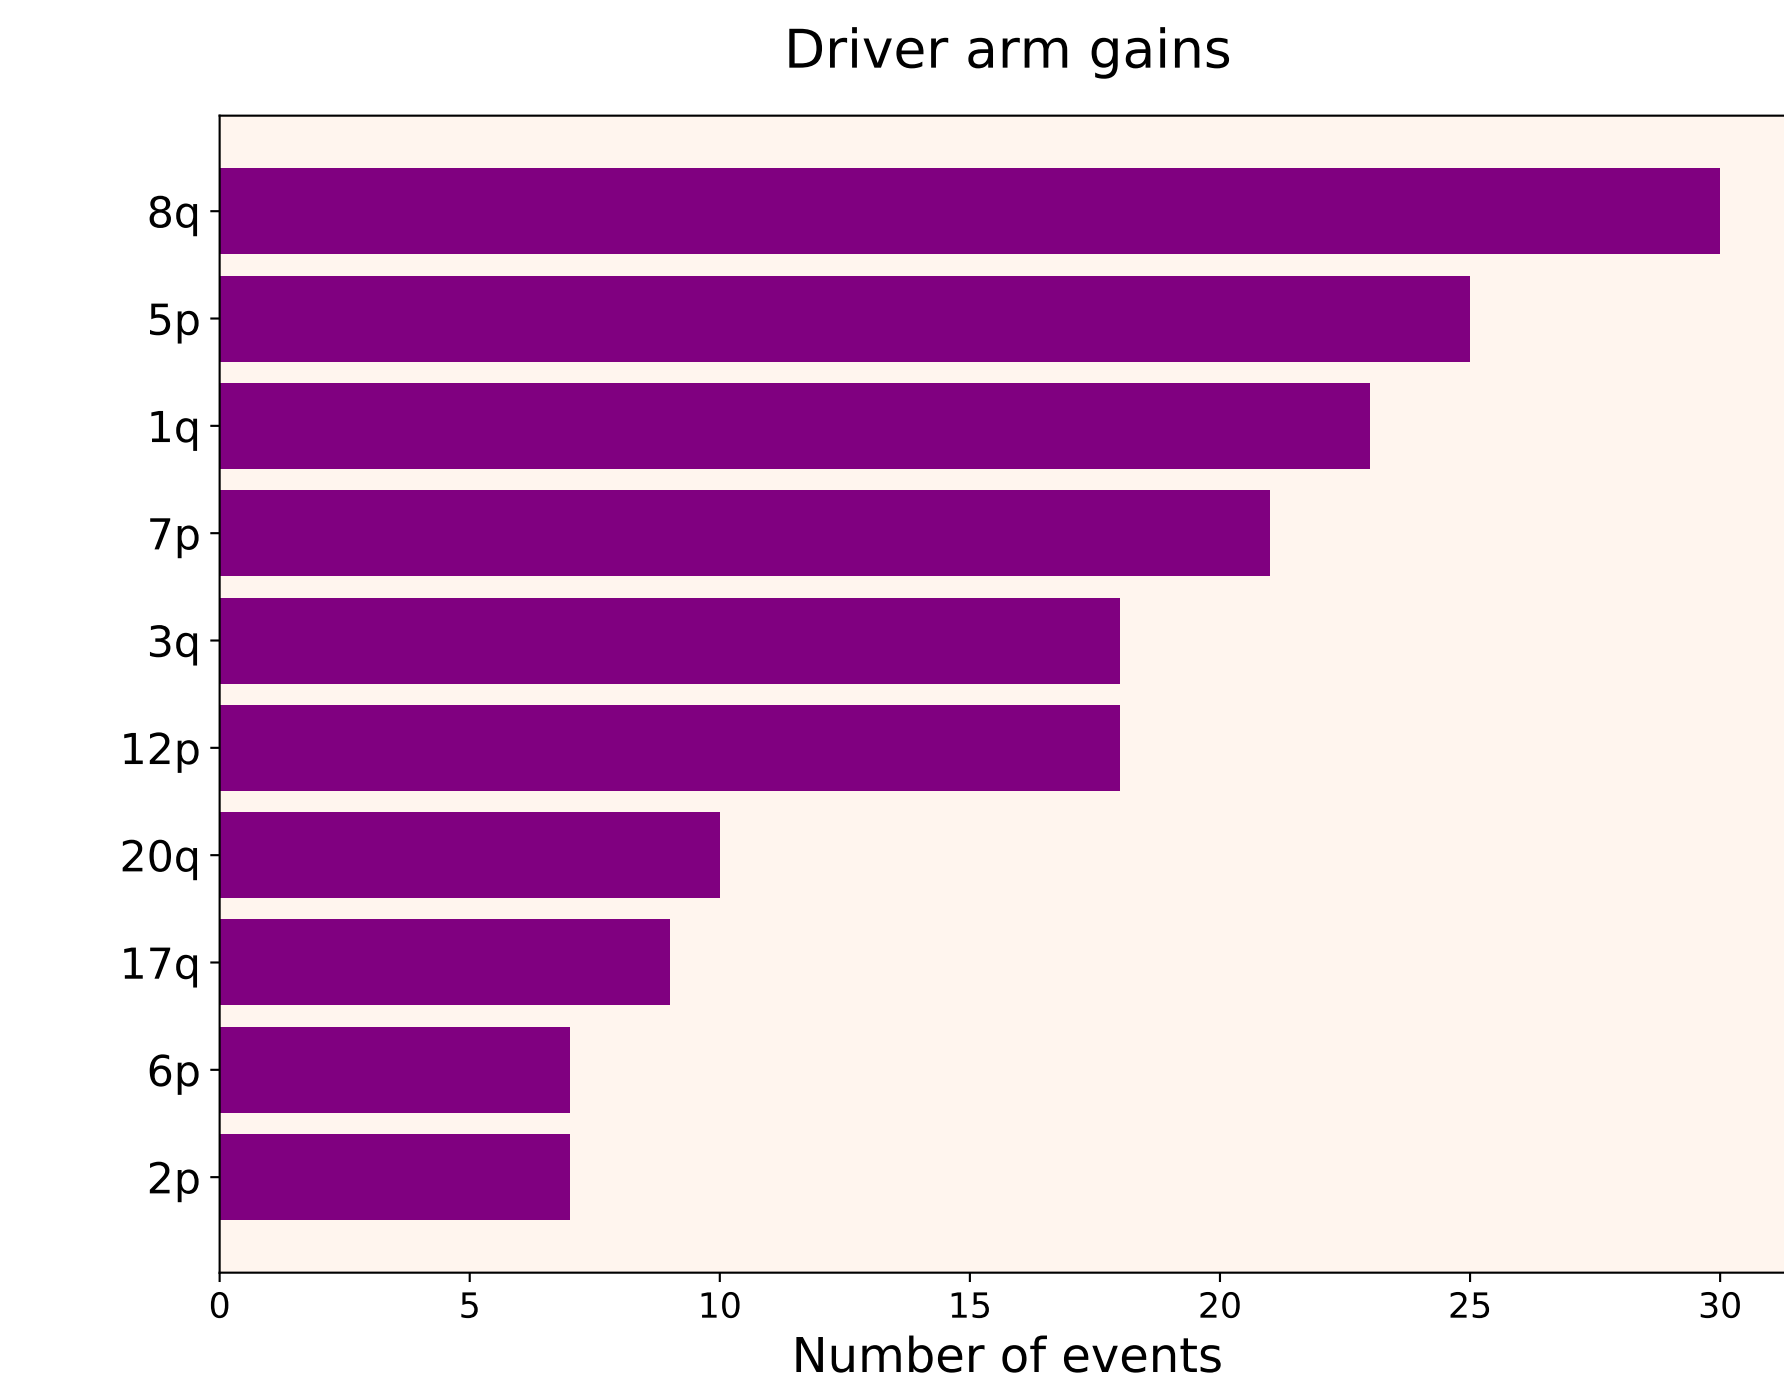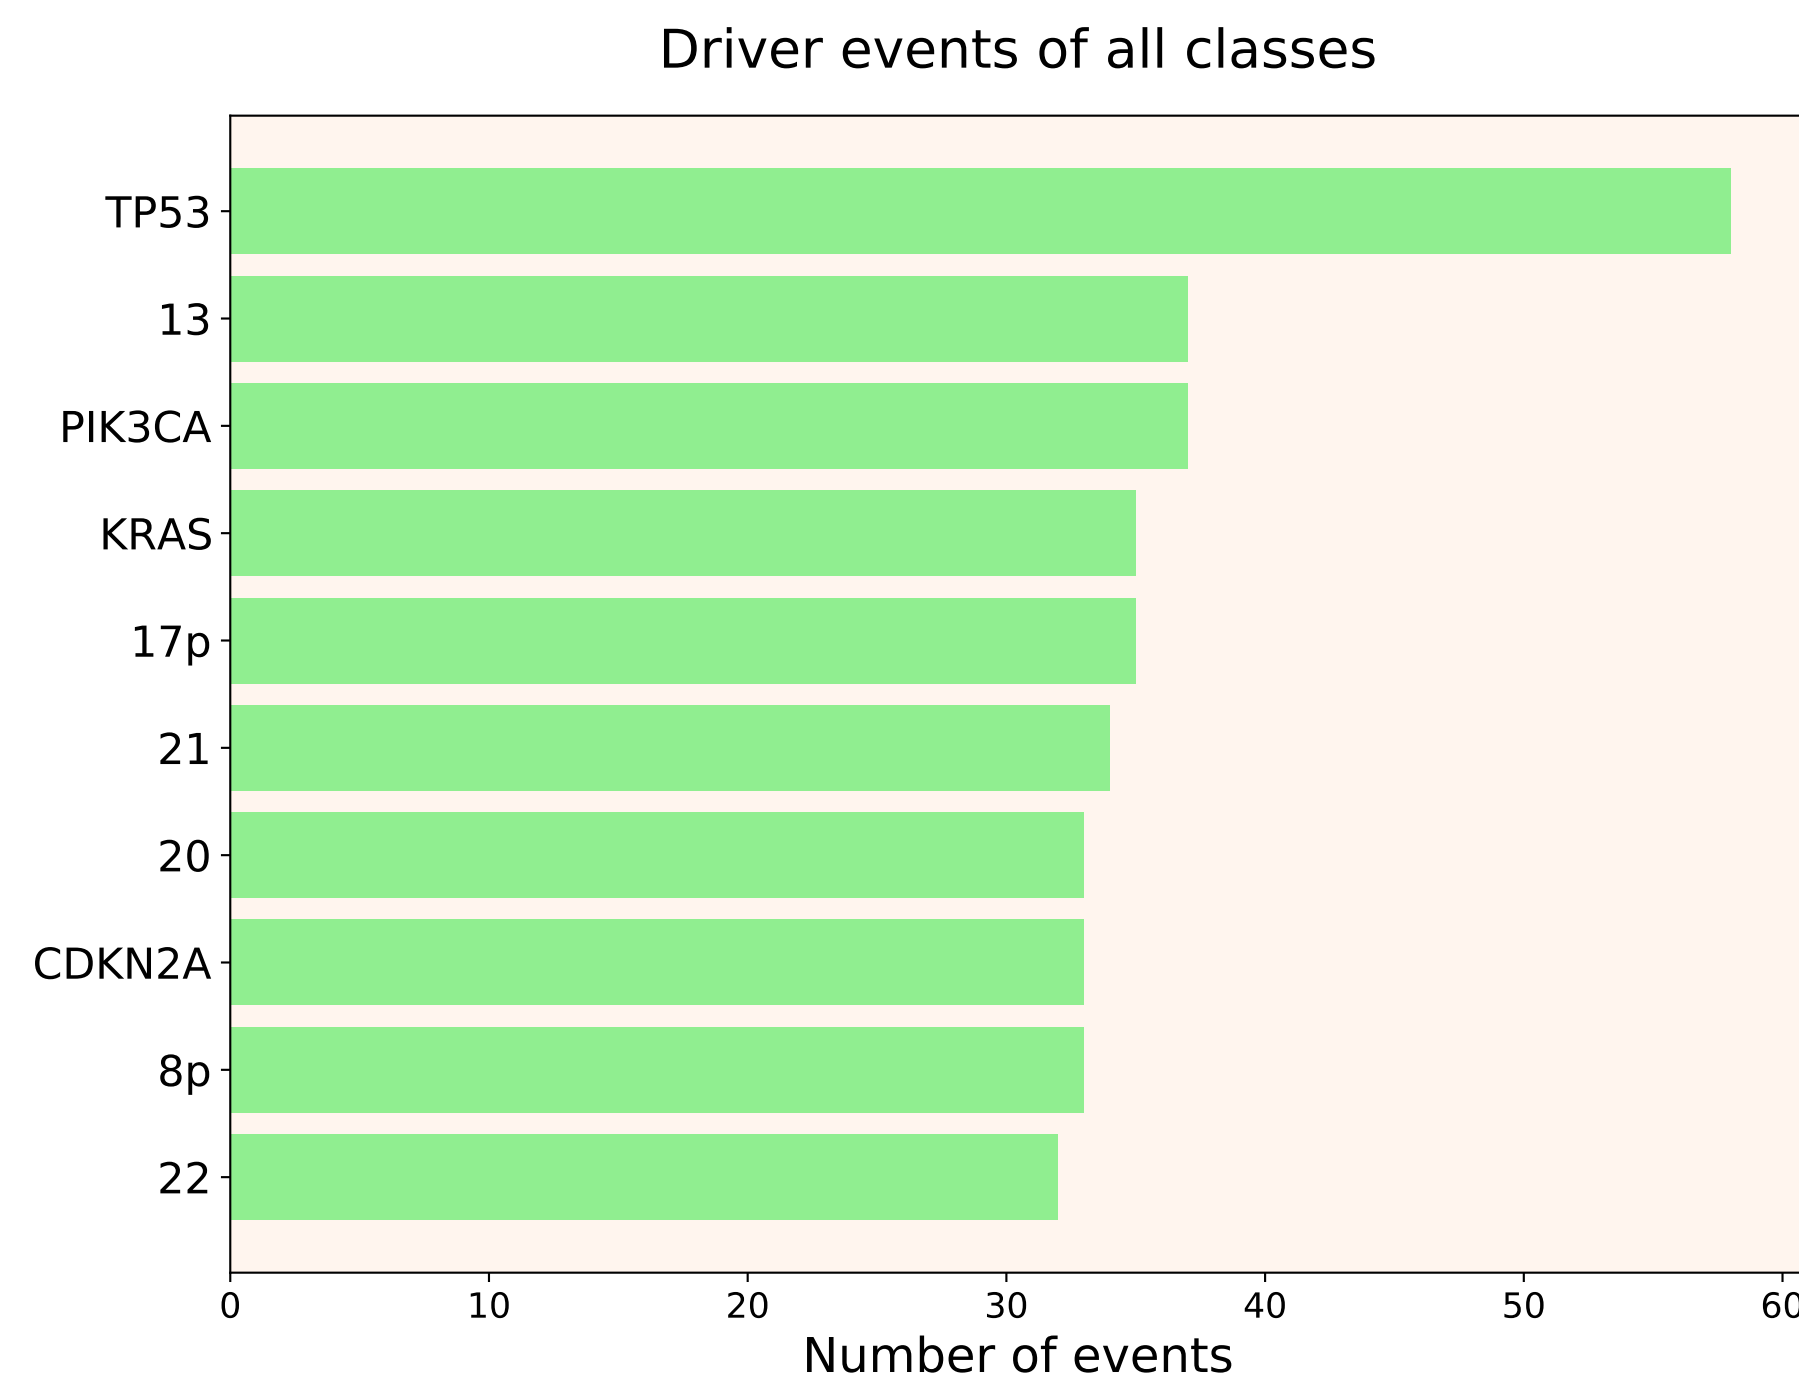

Supplement: Supplemental_Data_S1.zip [file Supplemental_Data_S1.zip]

# SARC

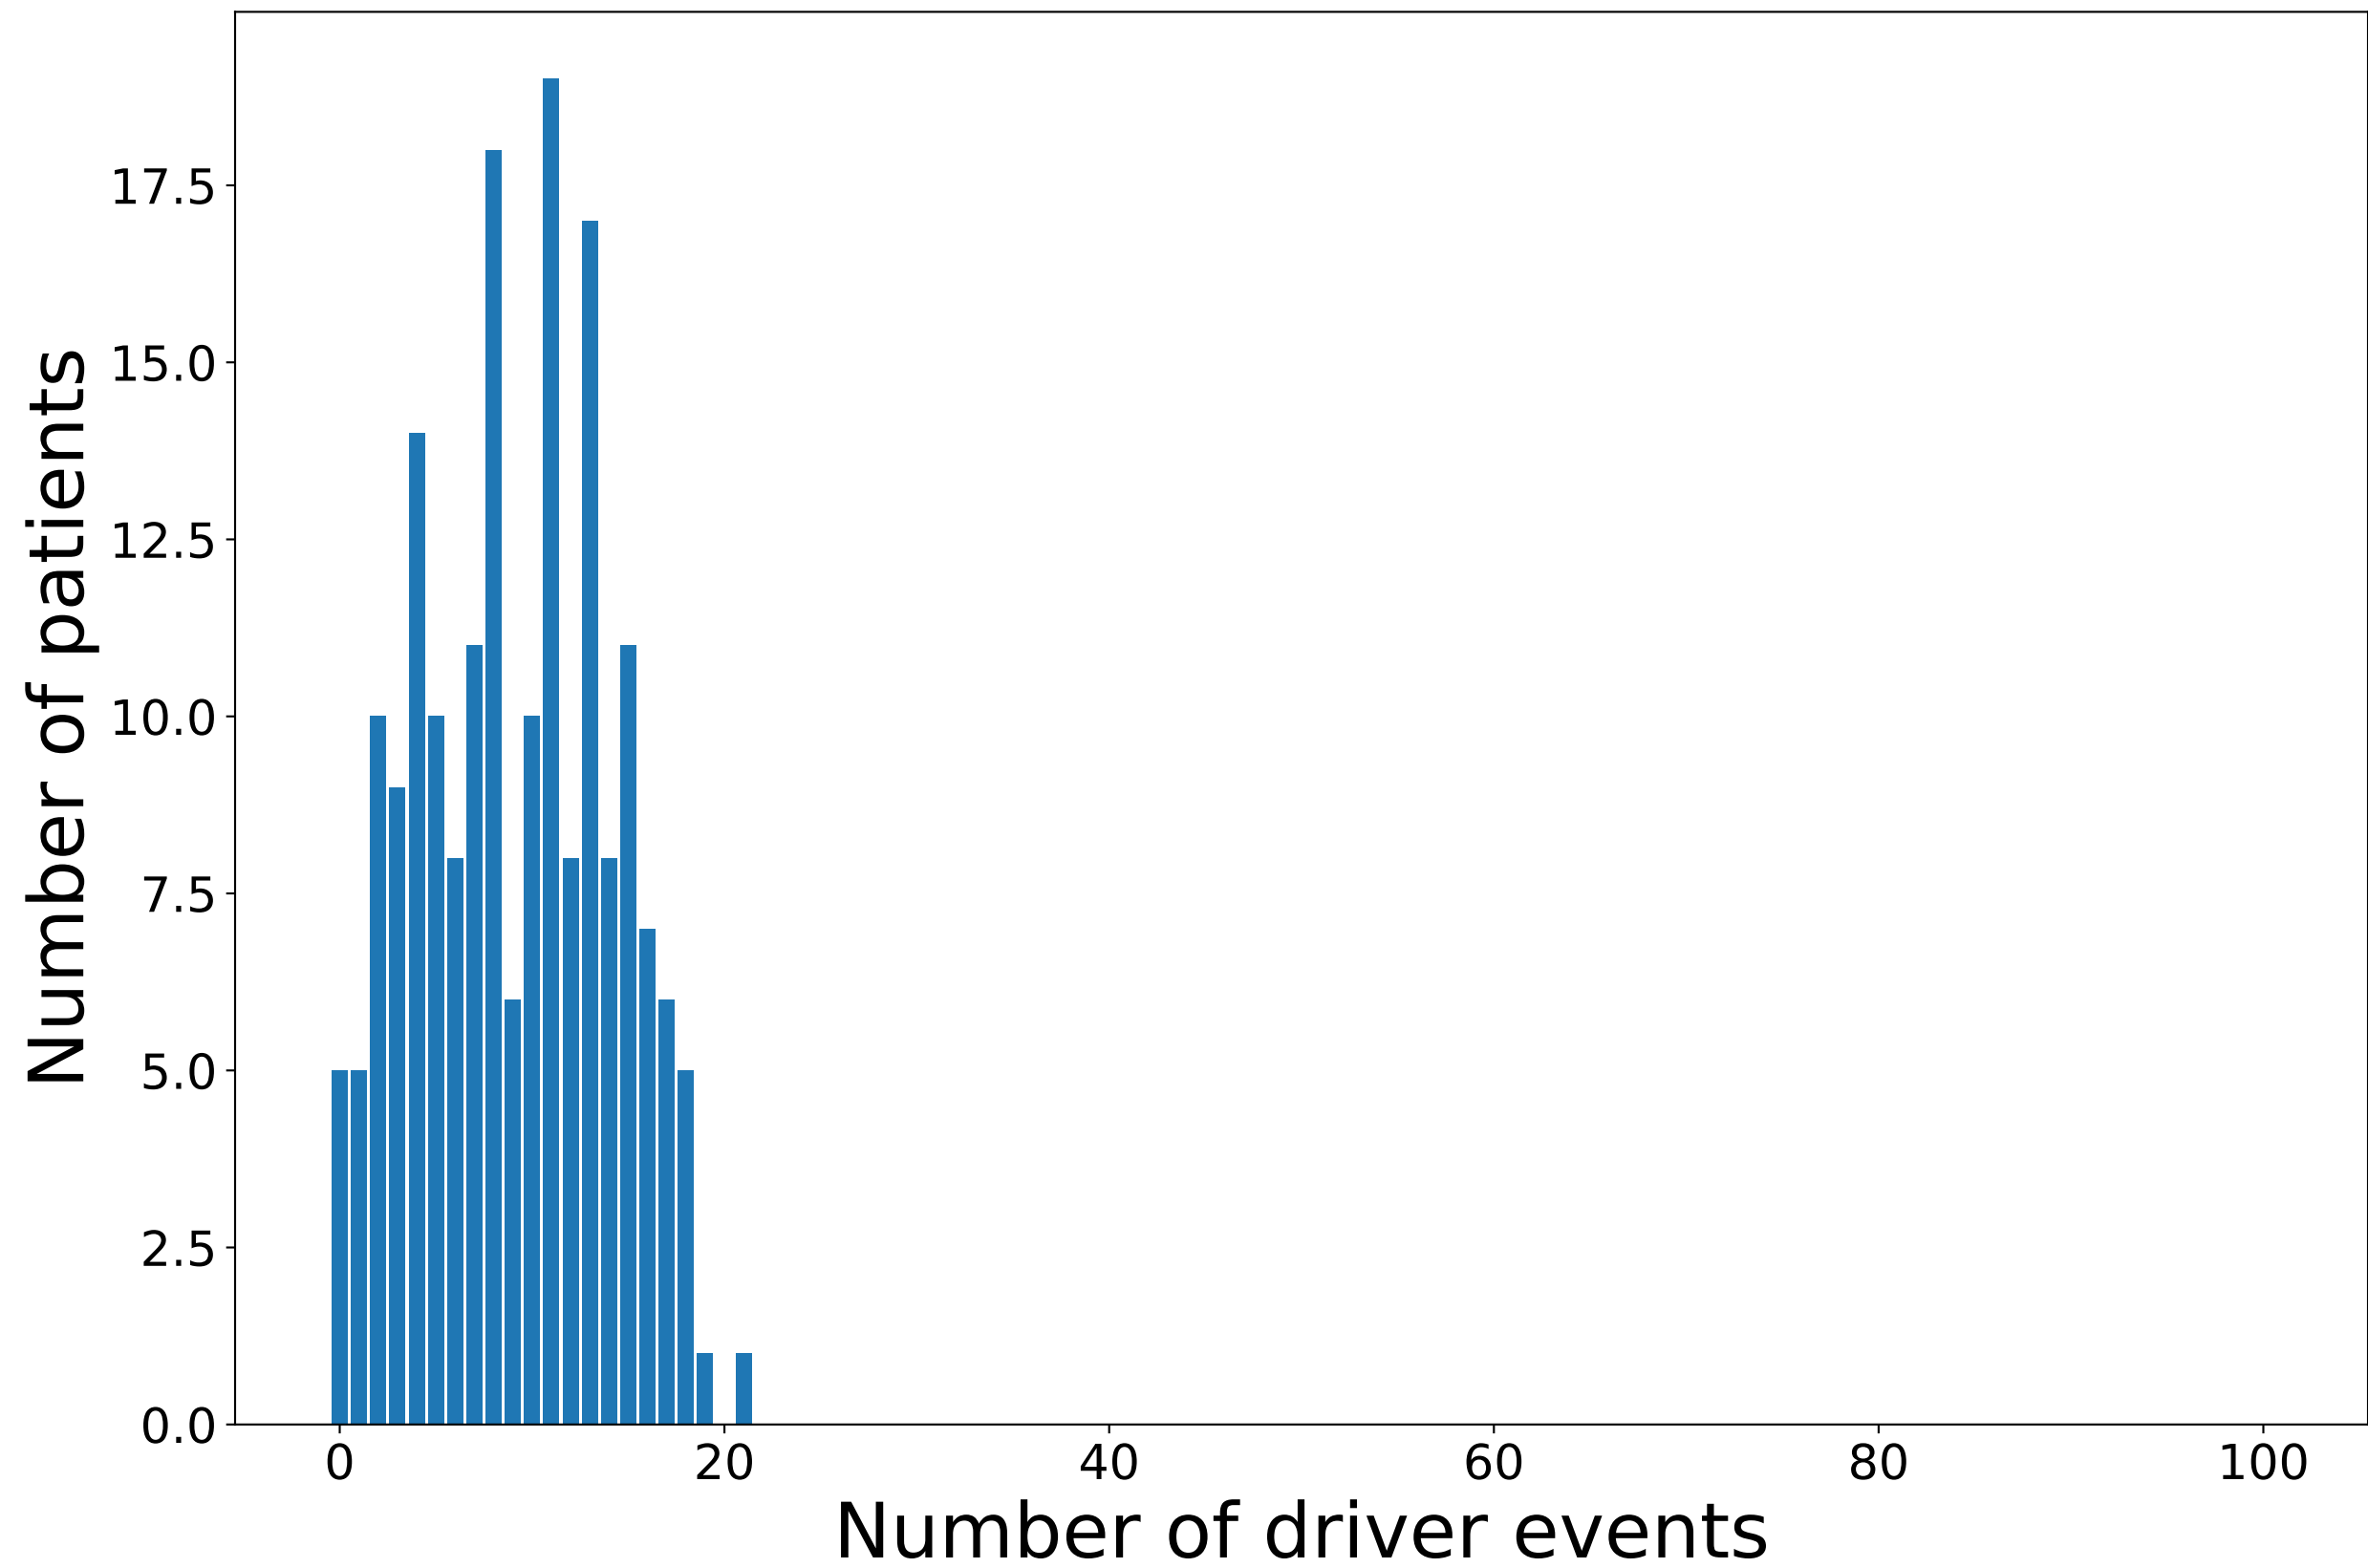

Supplement: Supplemental_Data_S1.zip [file Supplemental_Data_S1.zip]

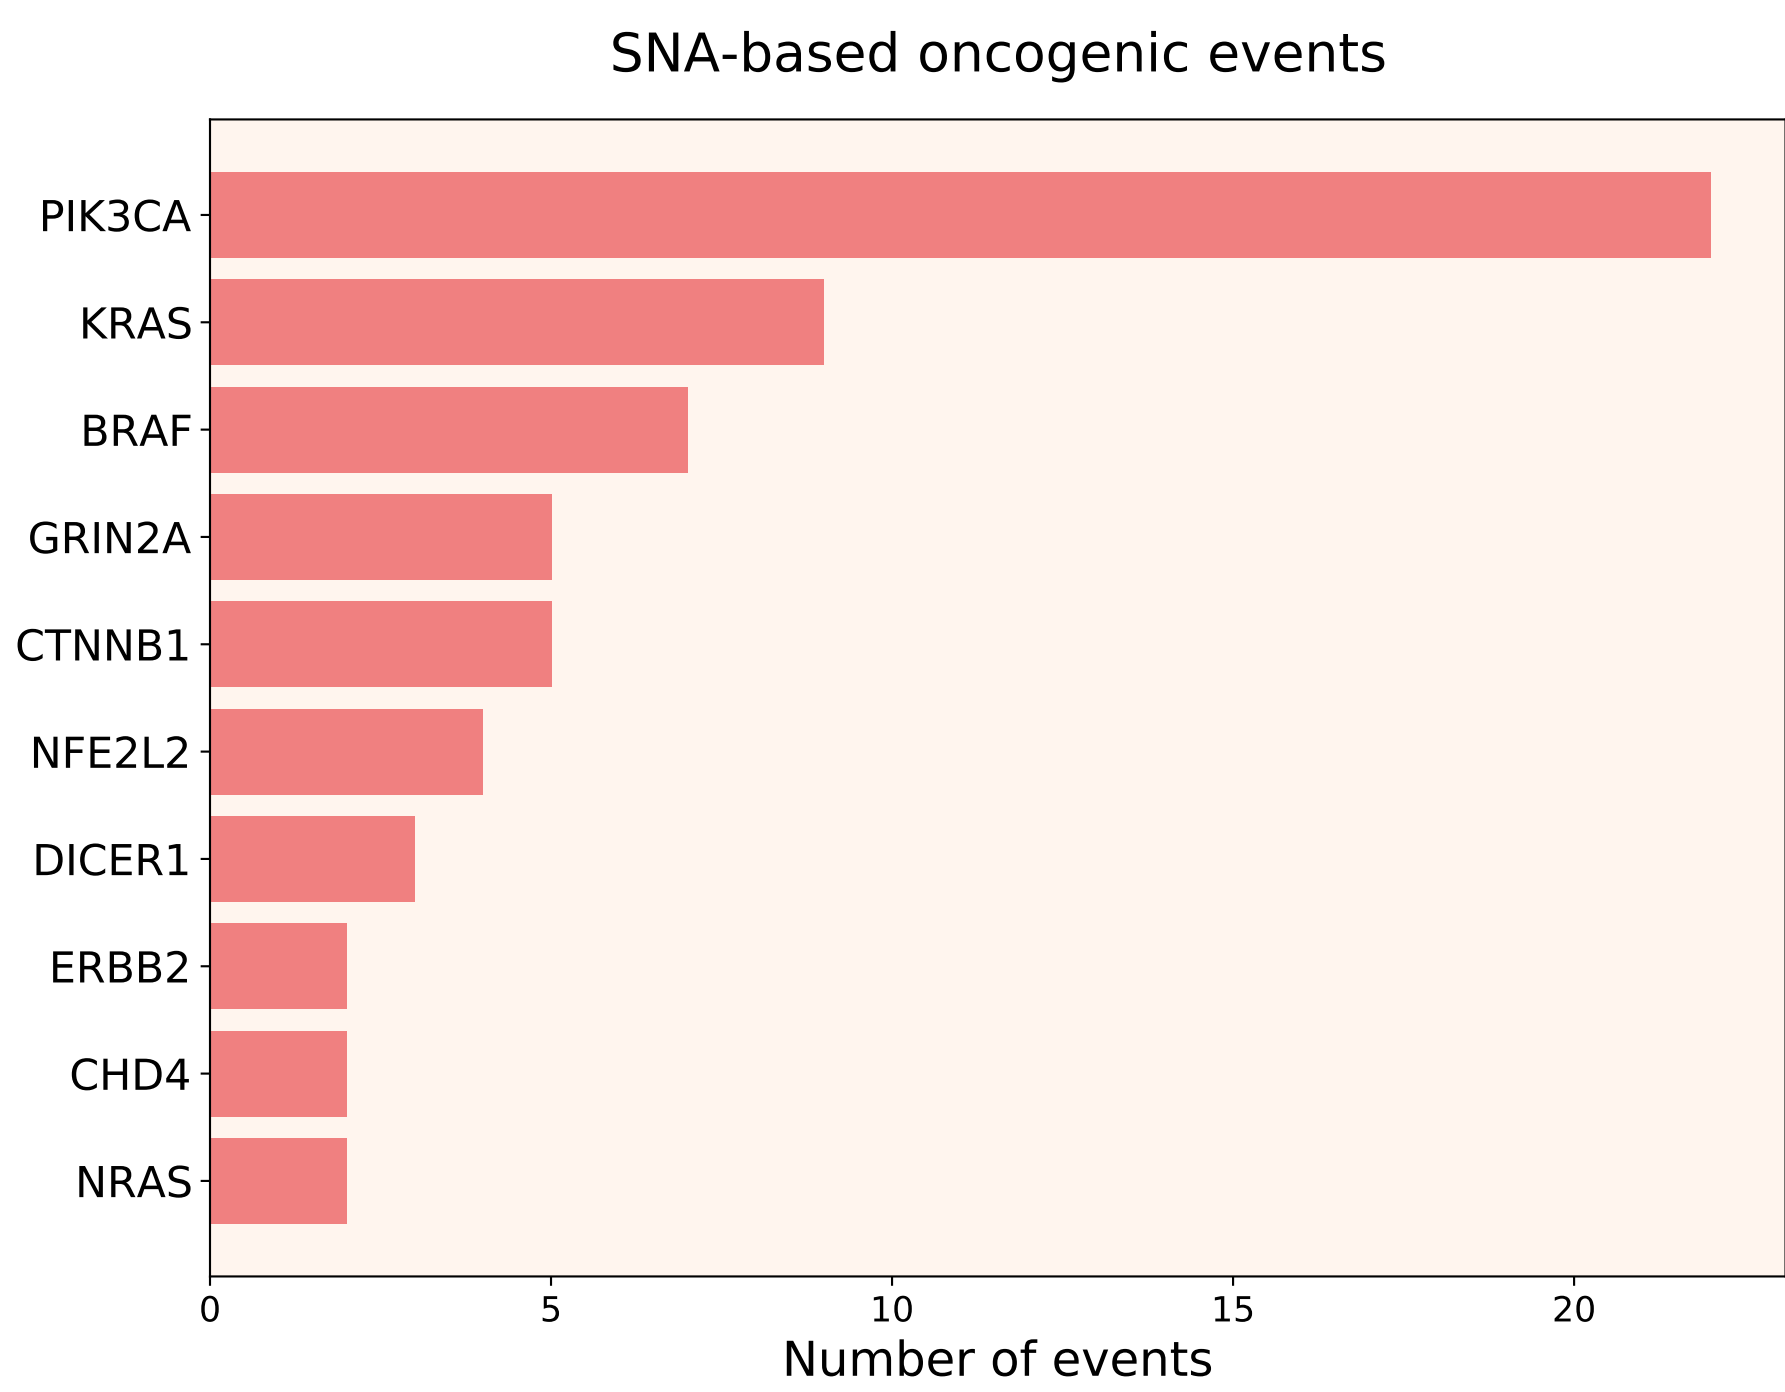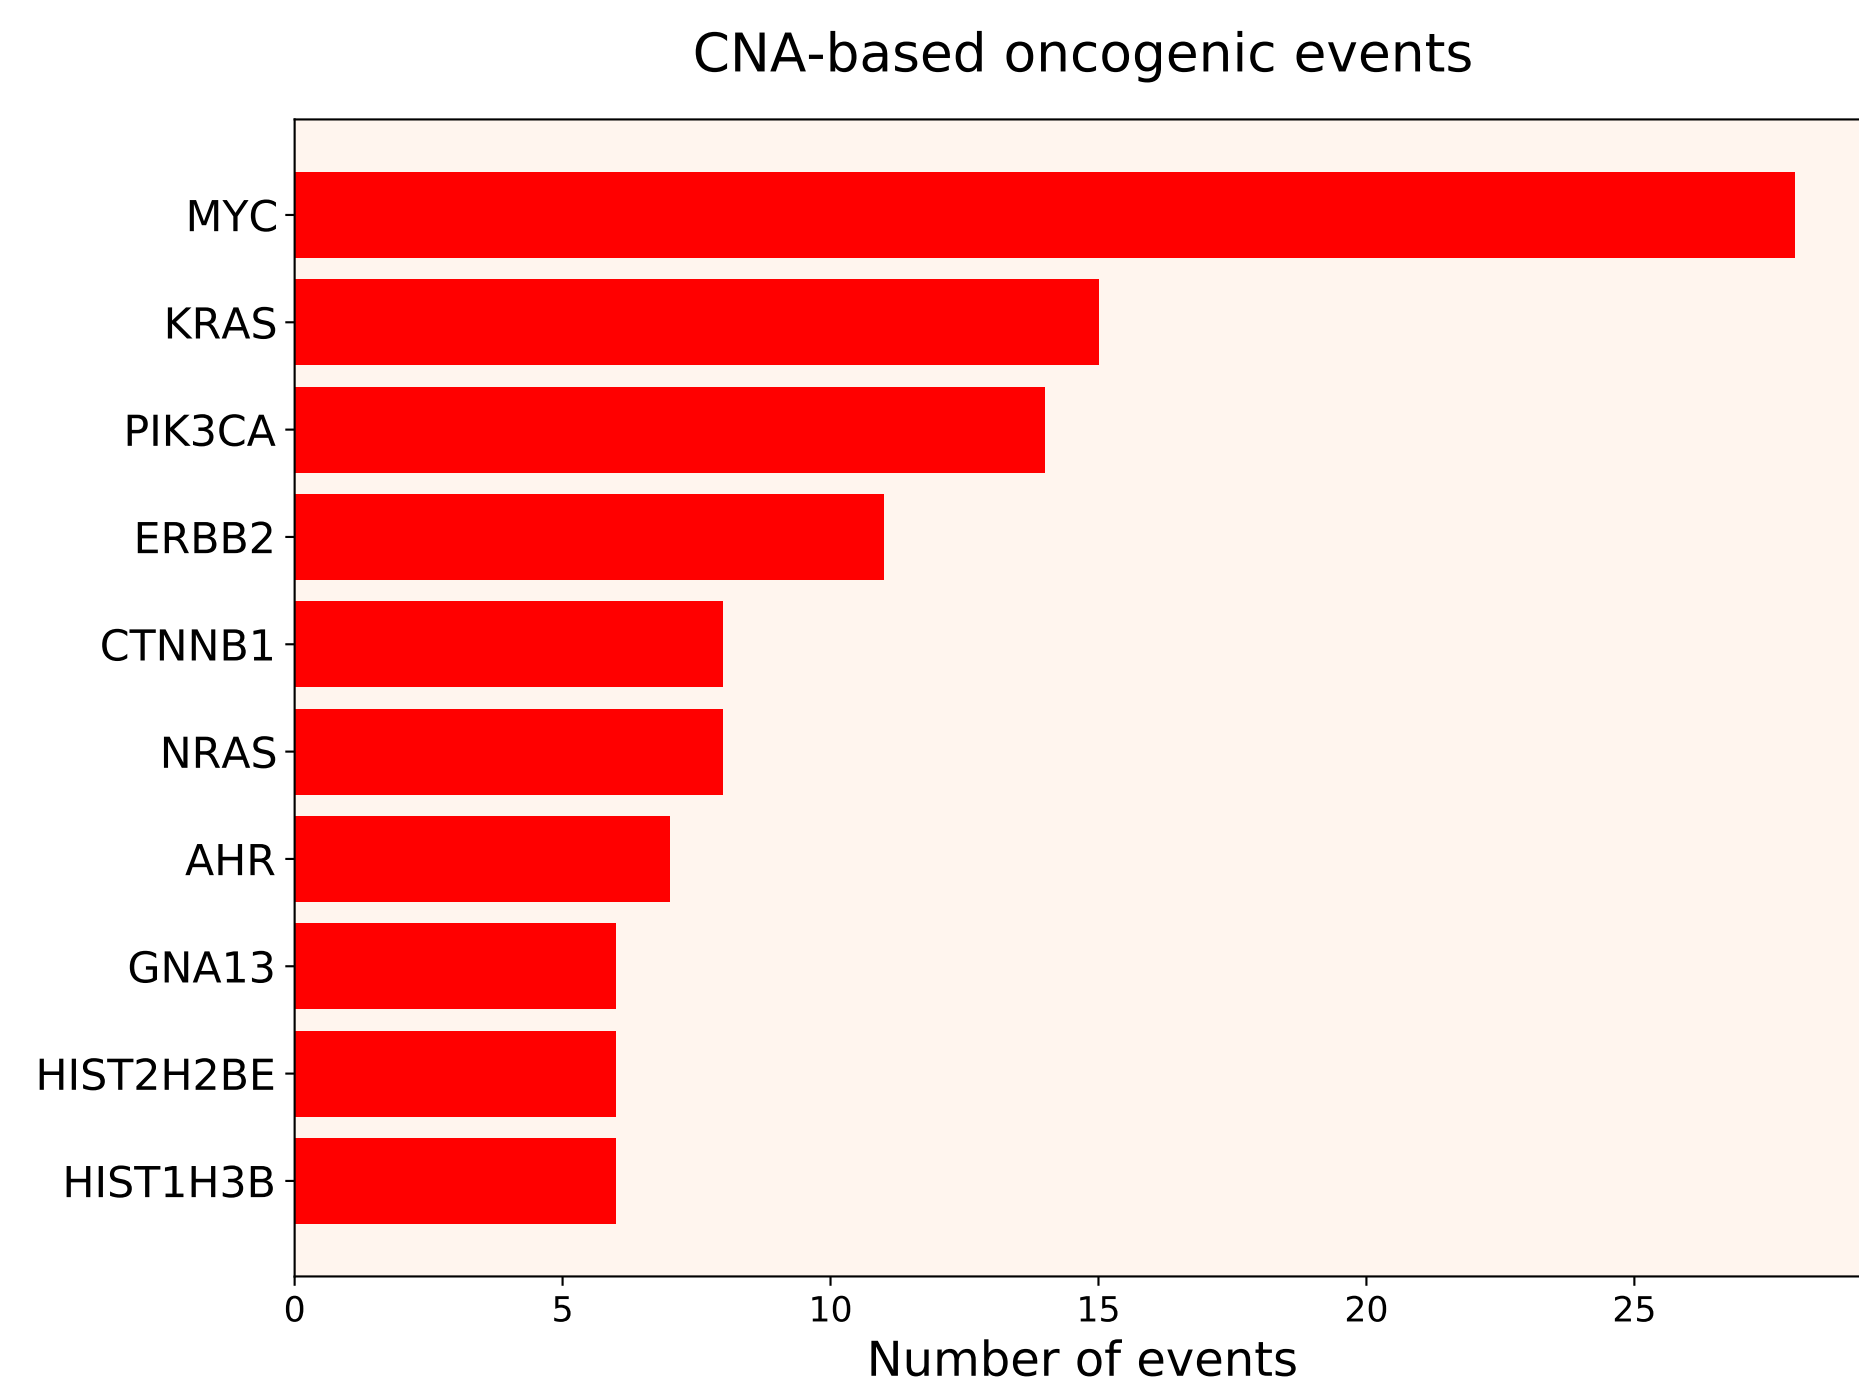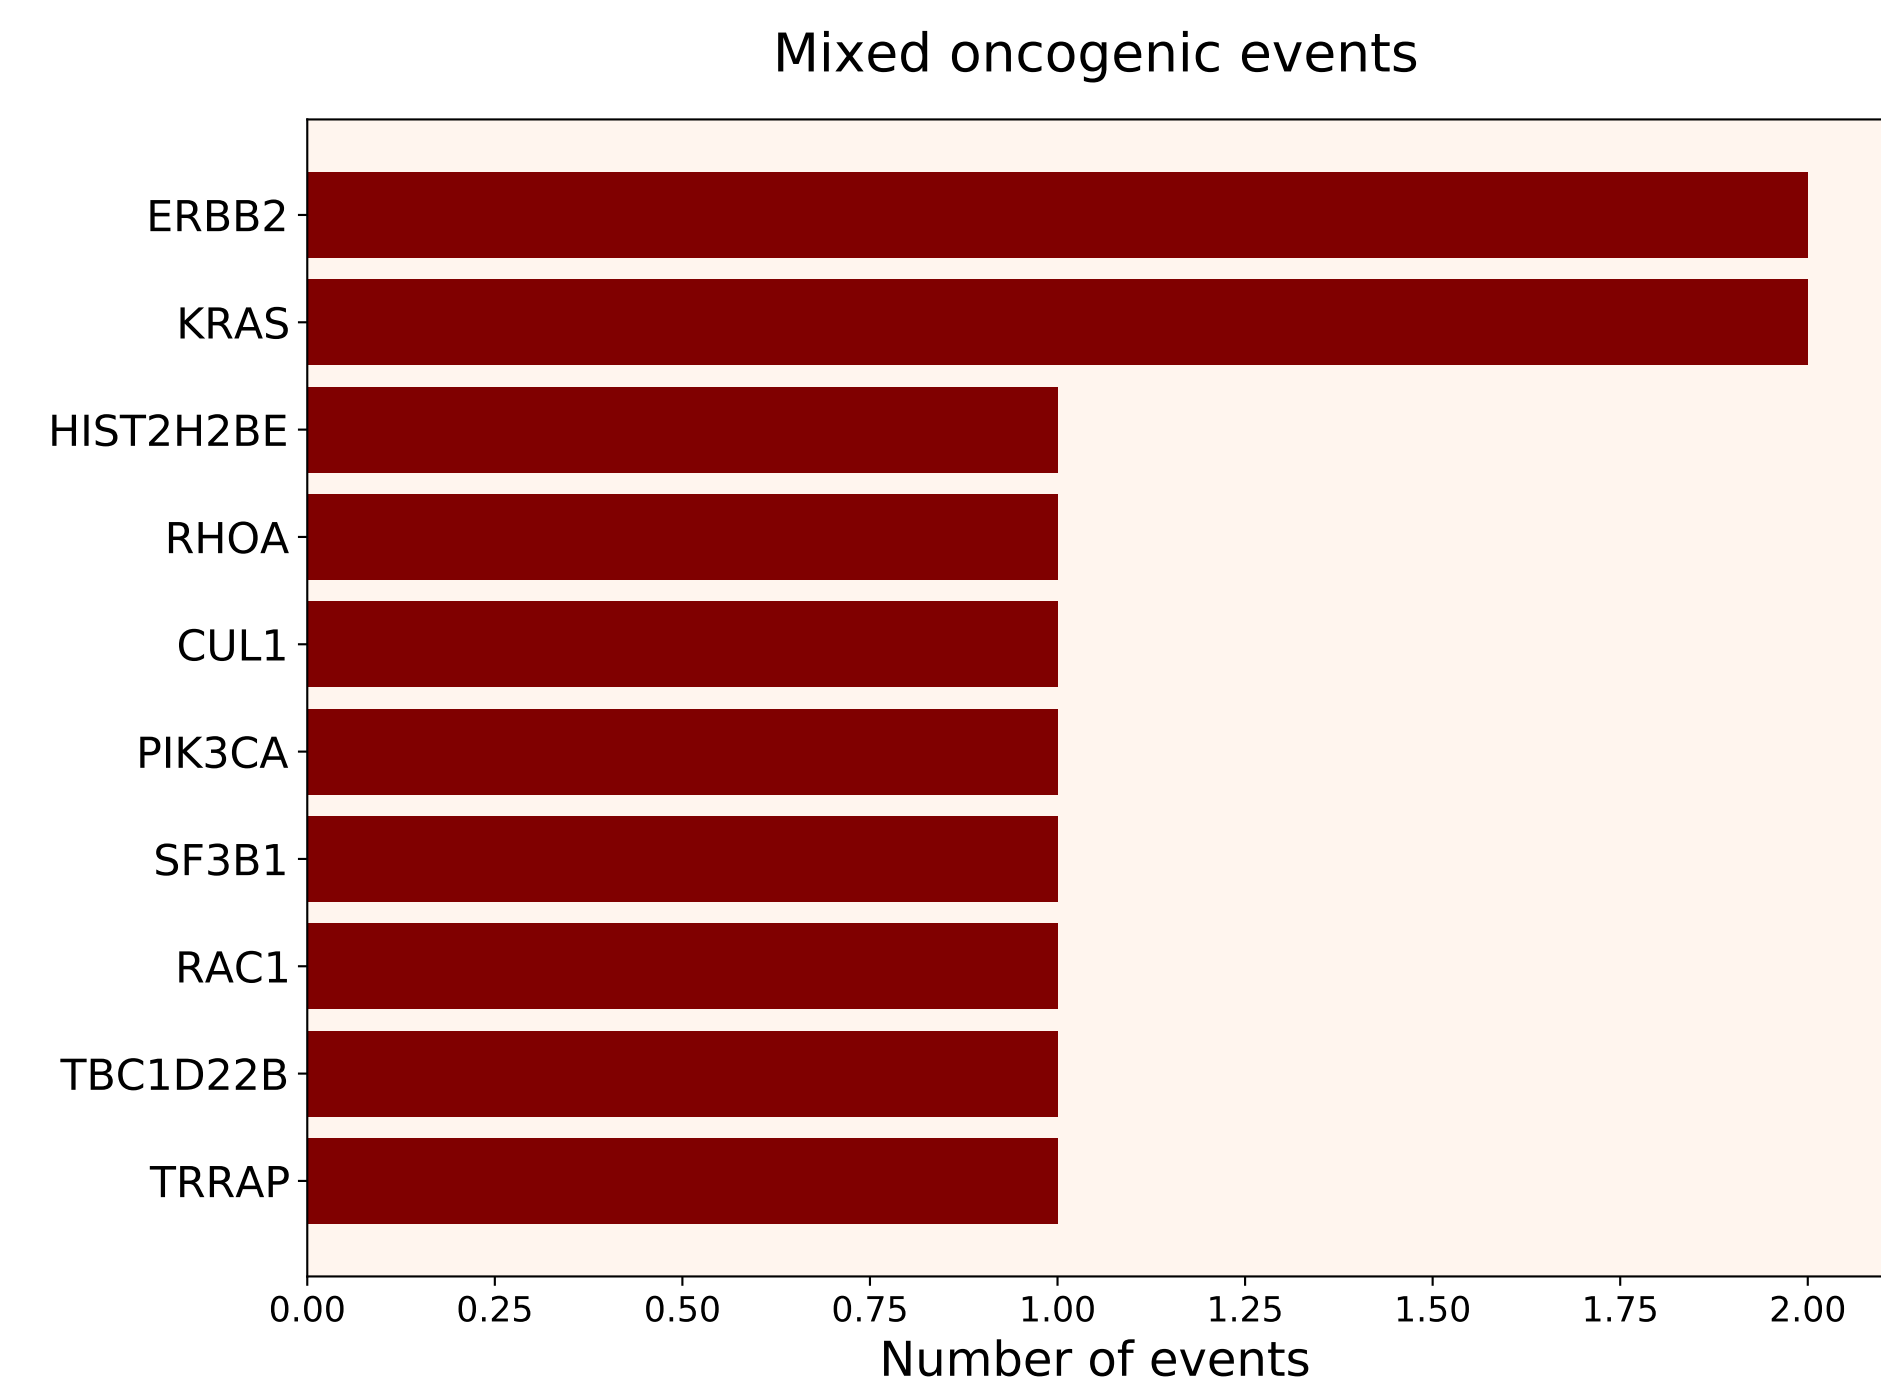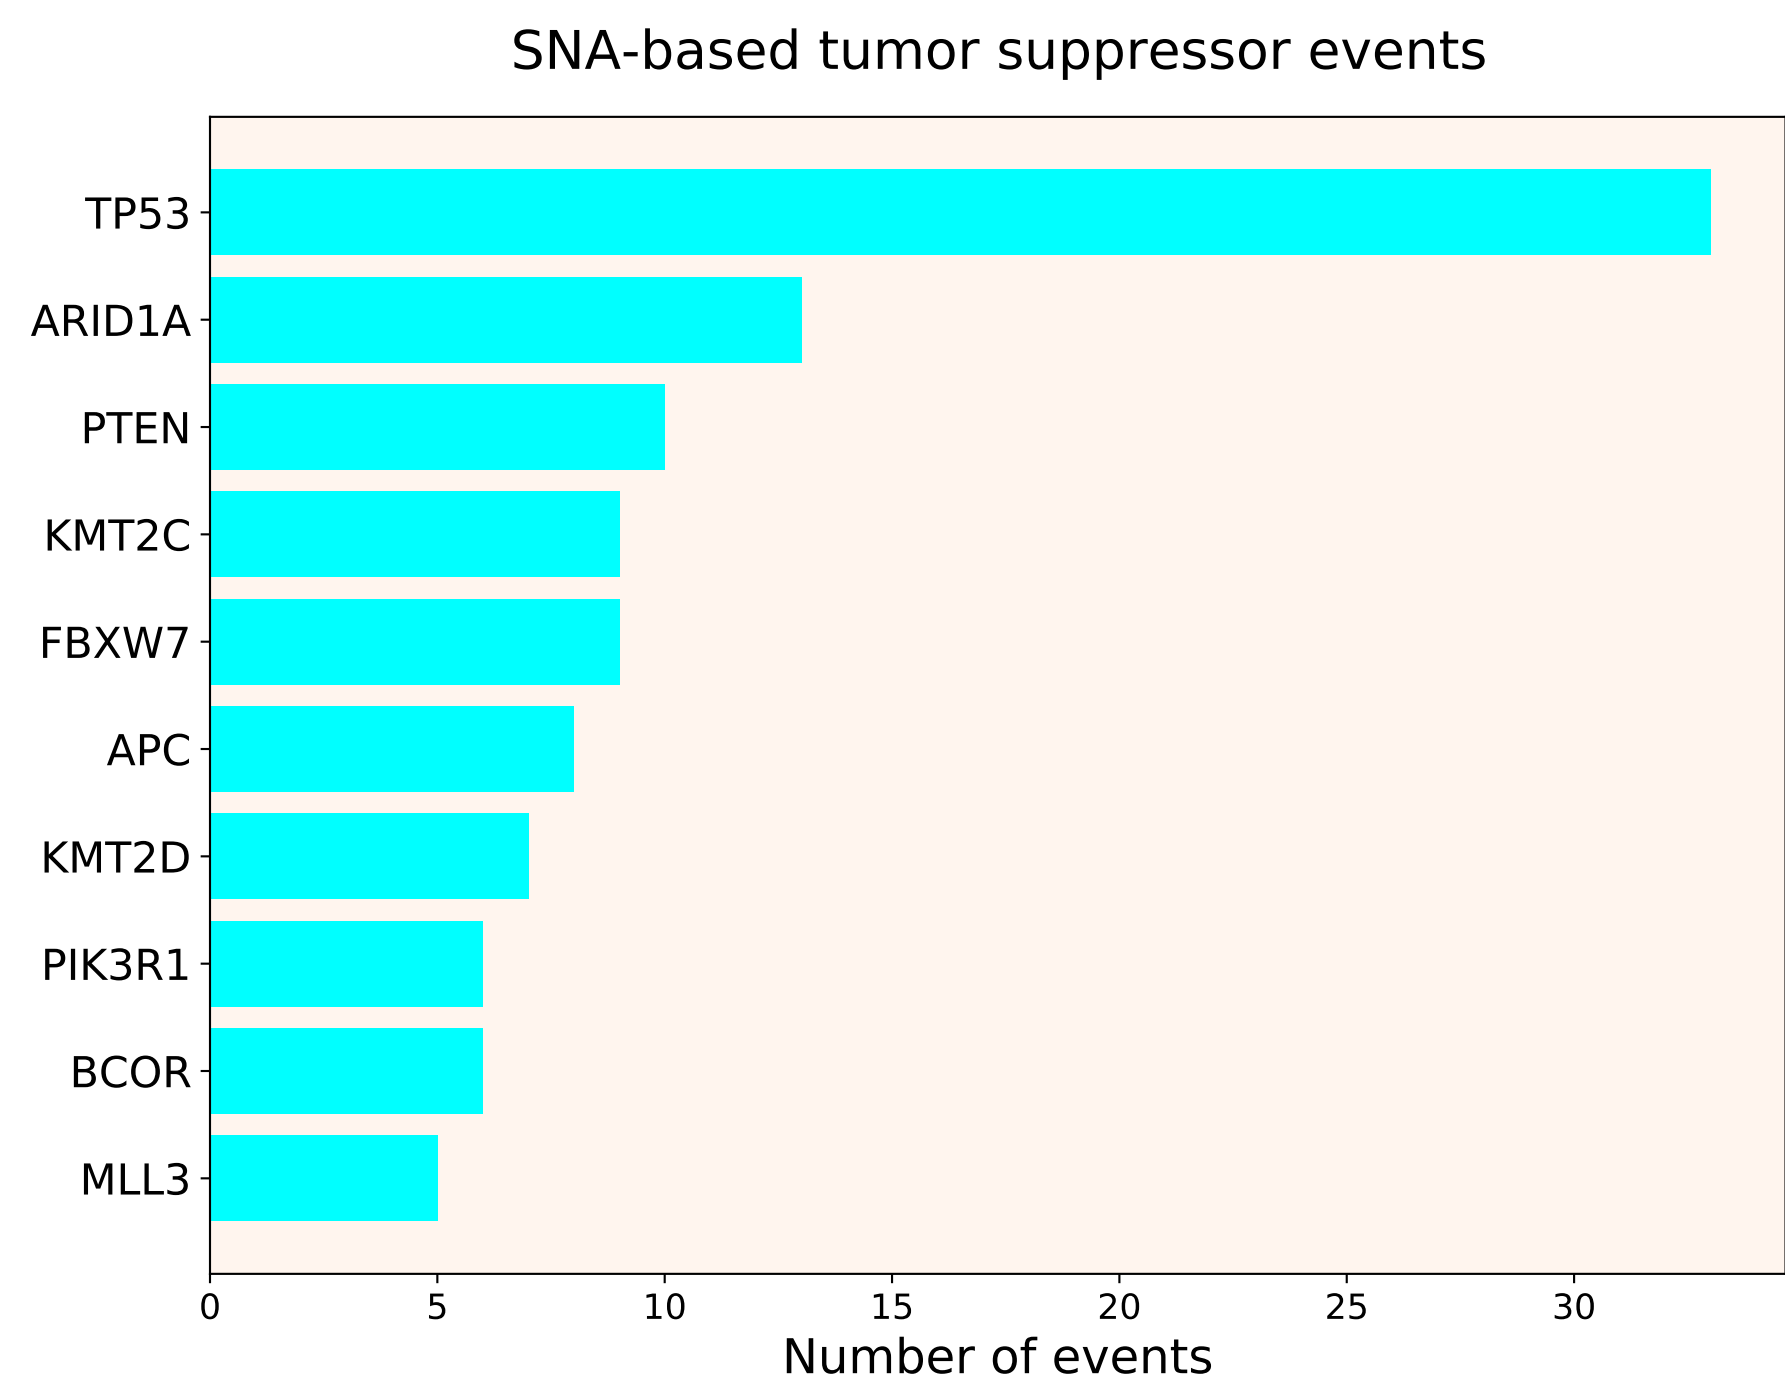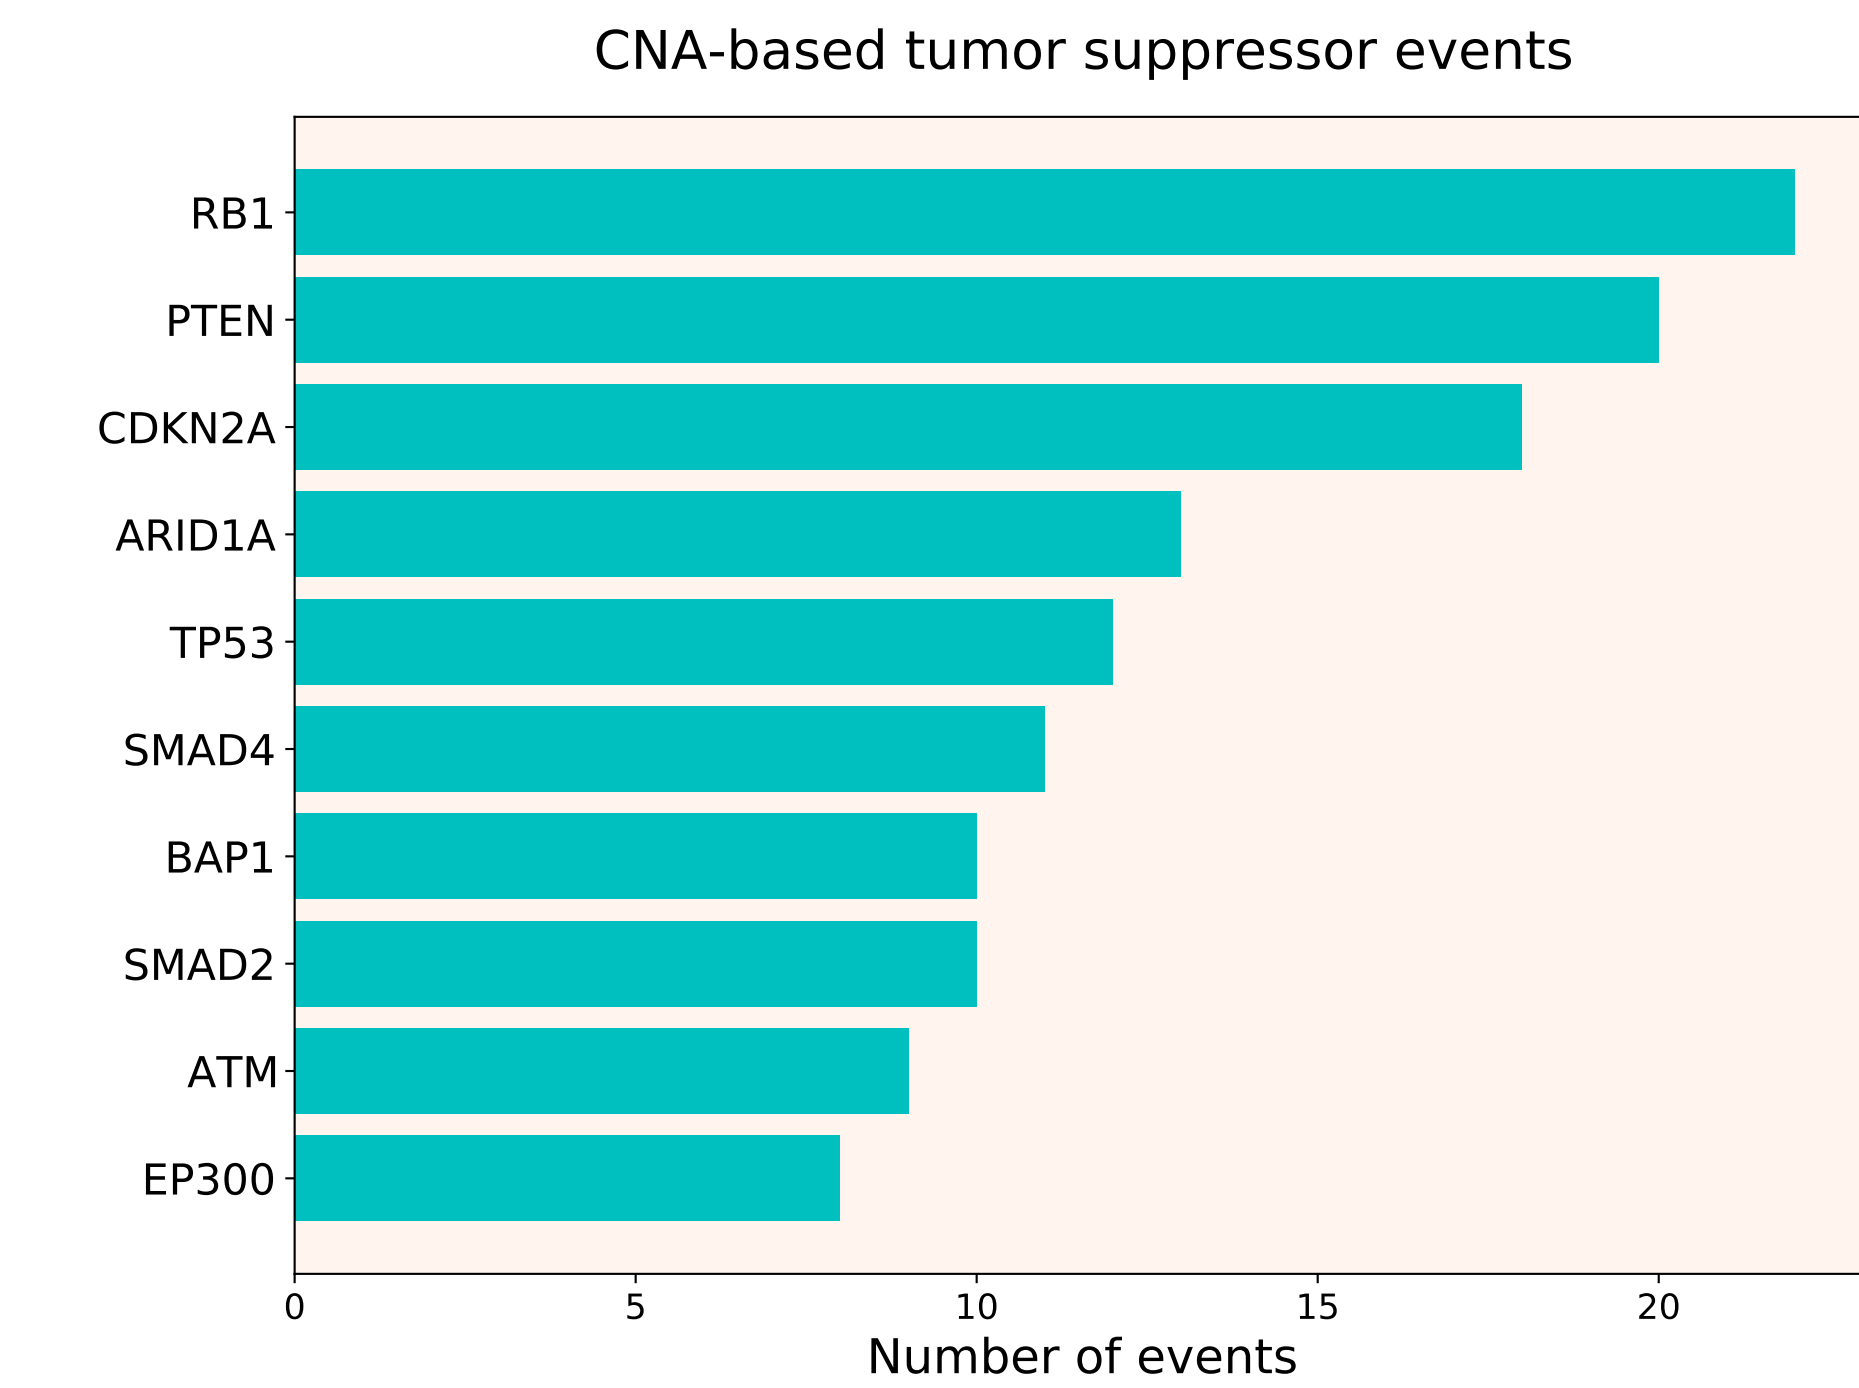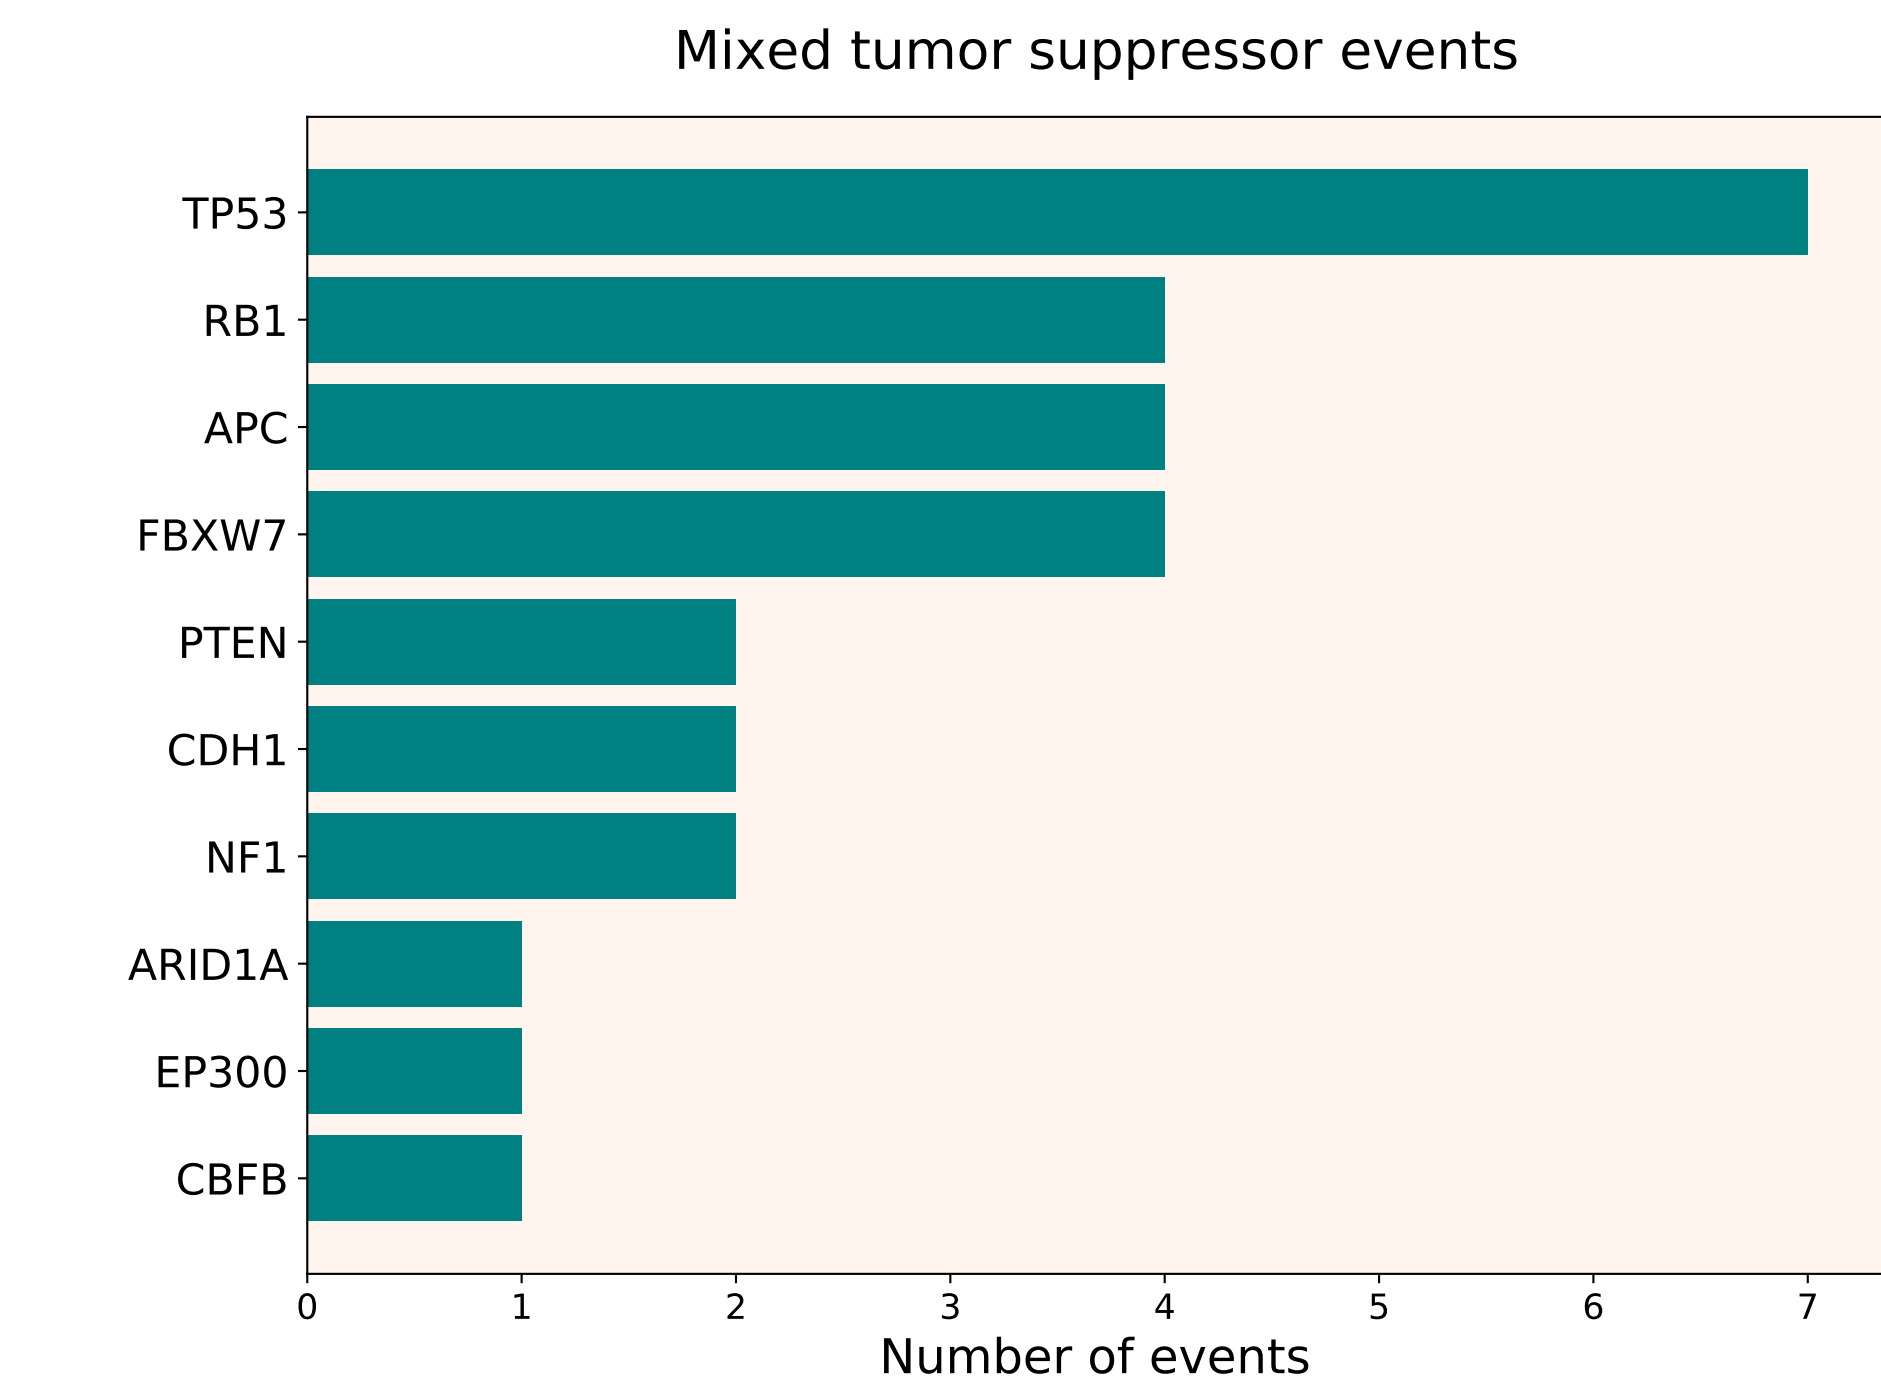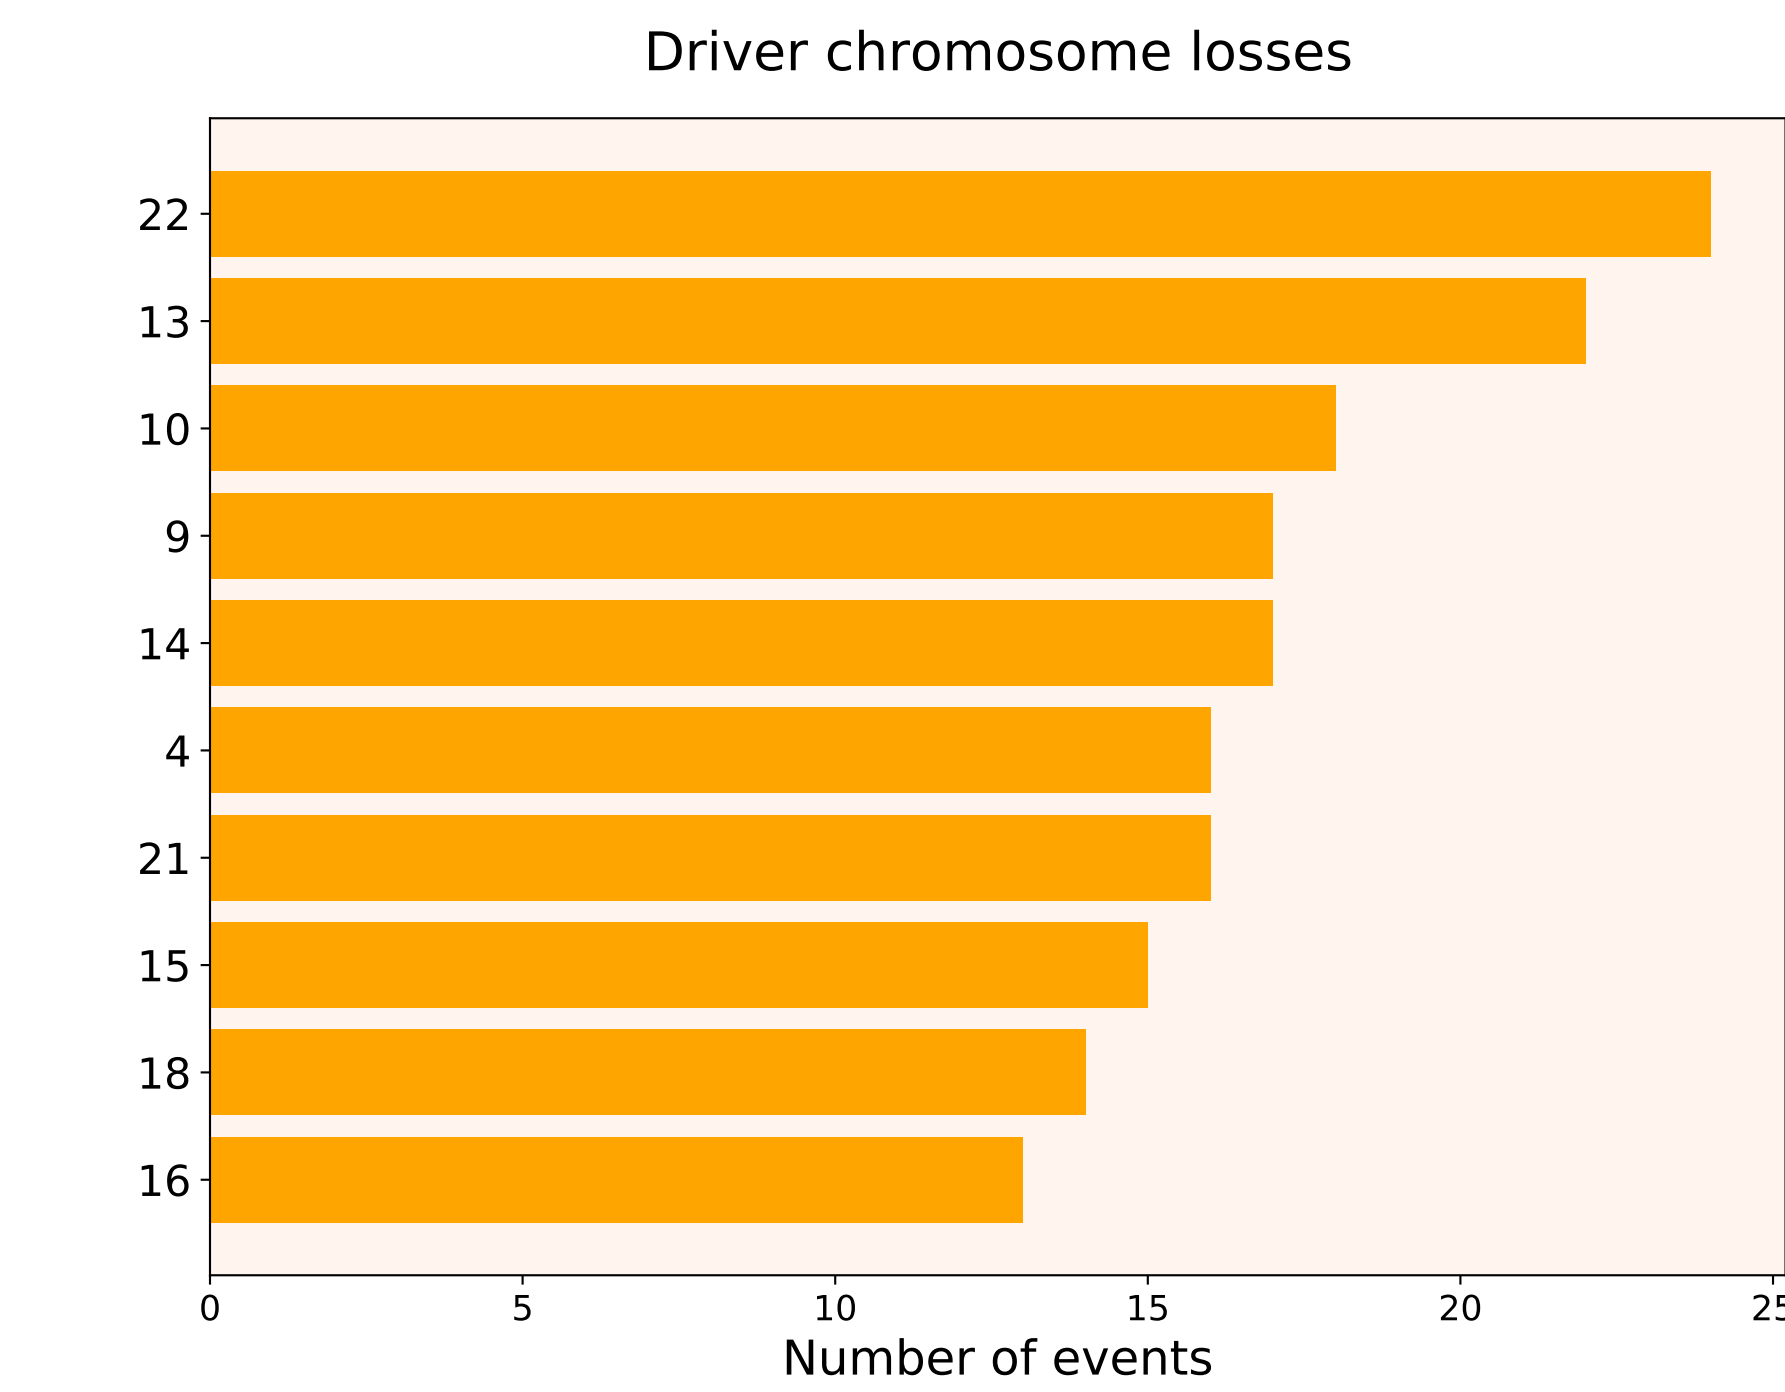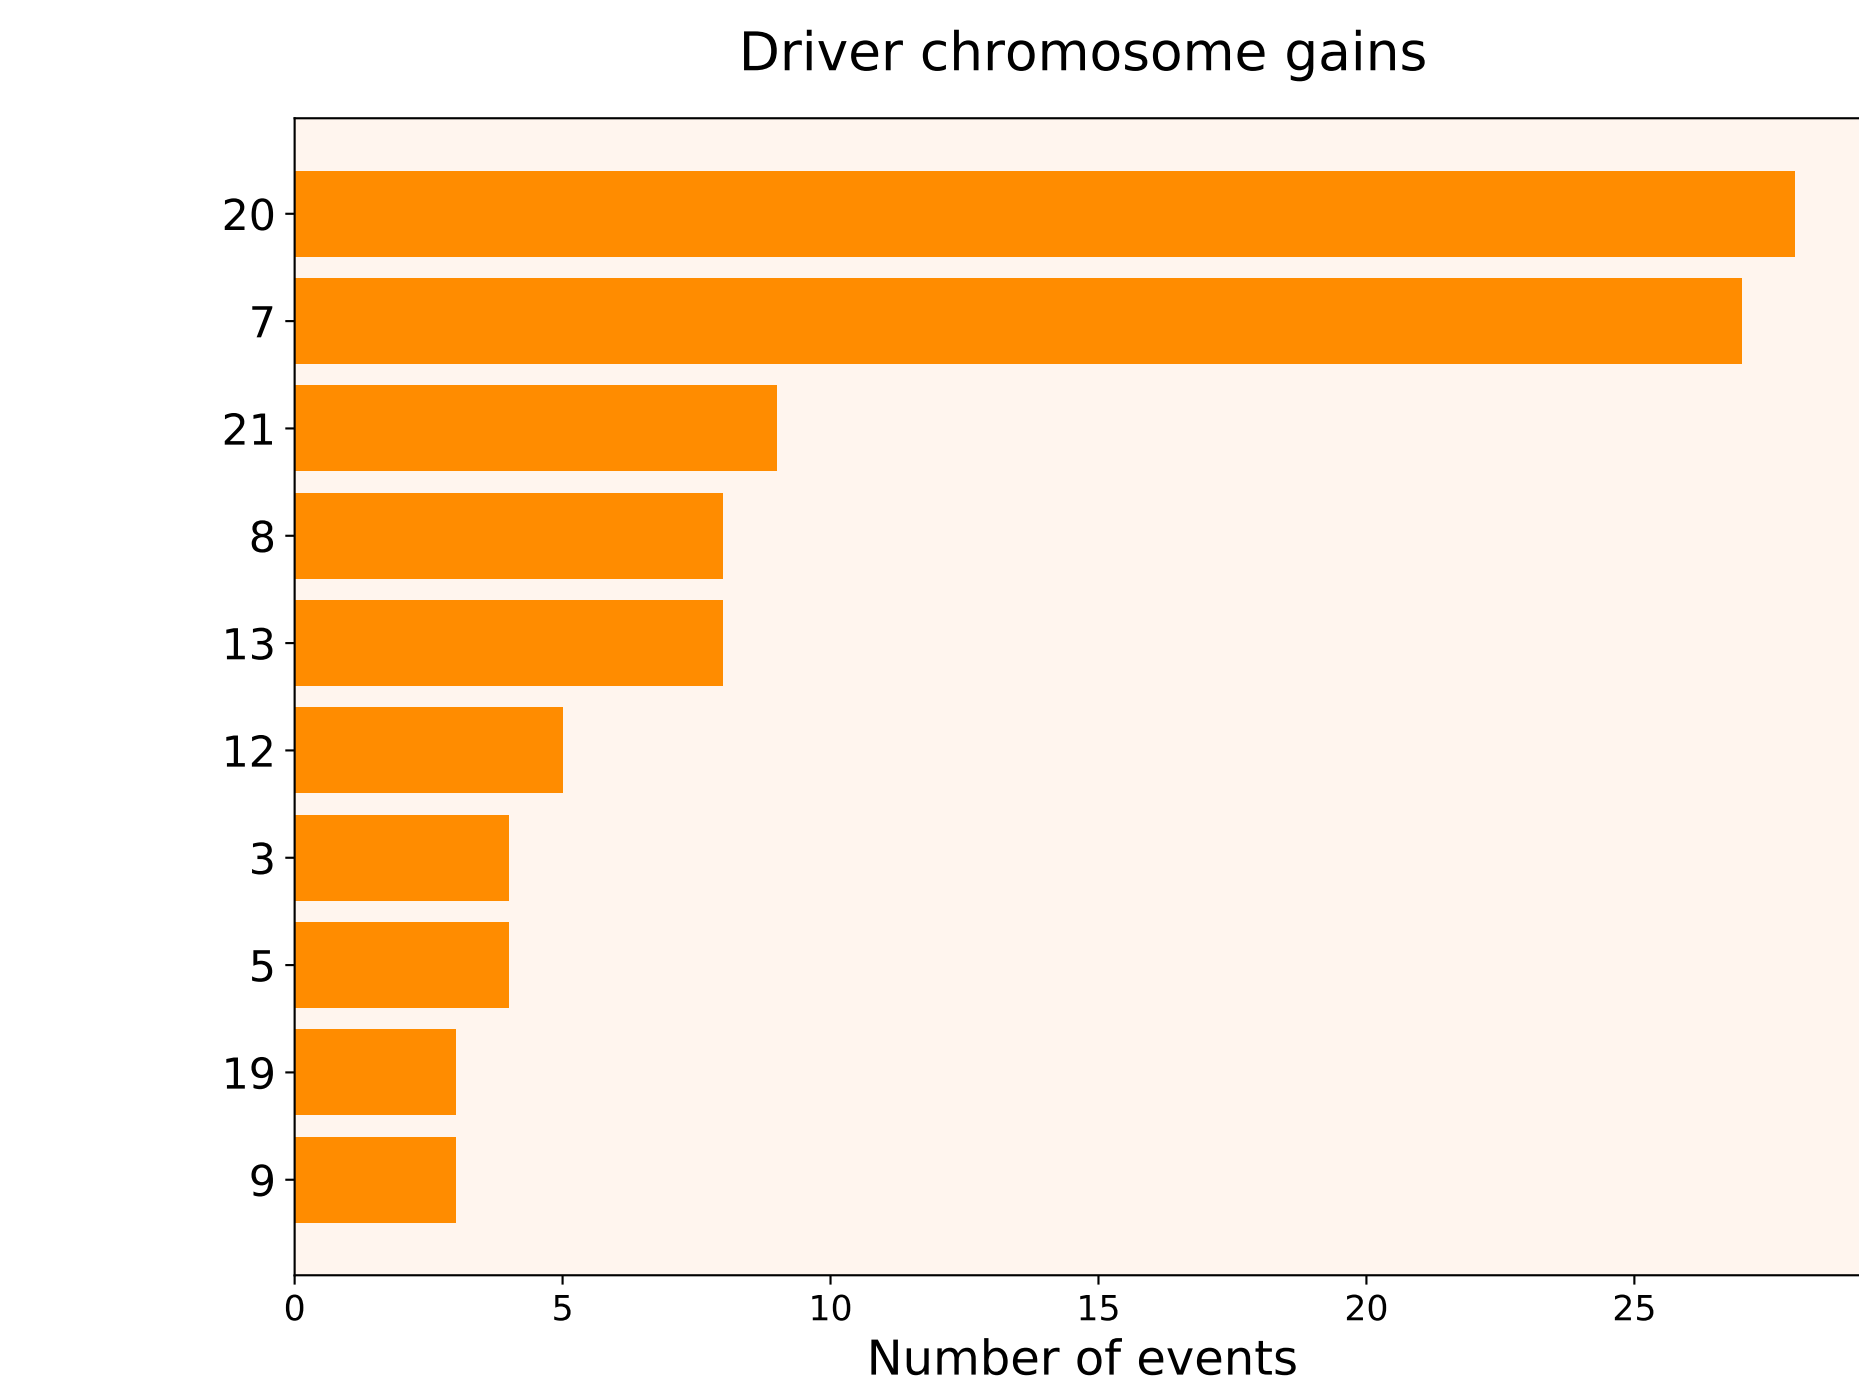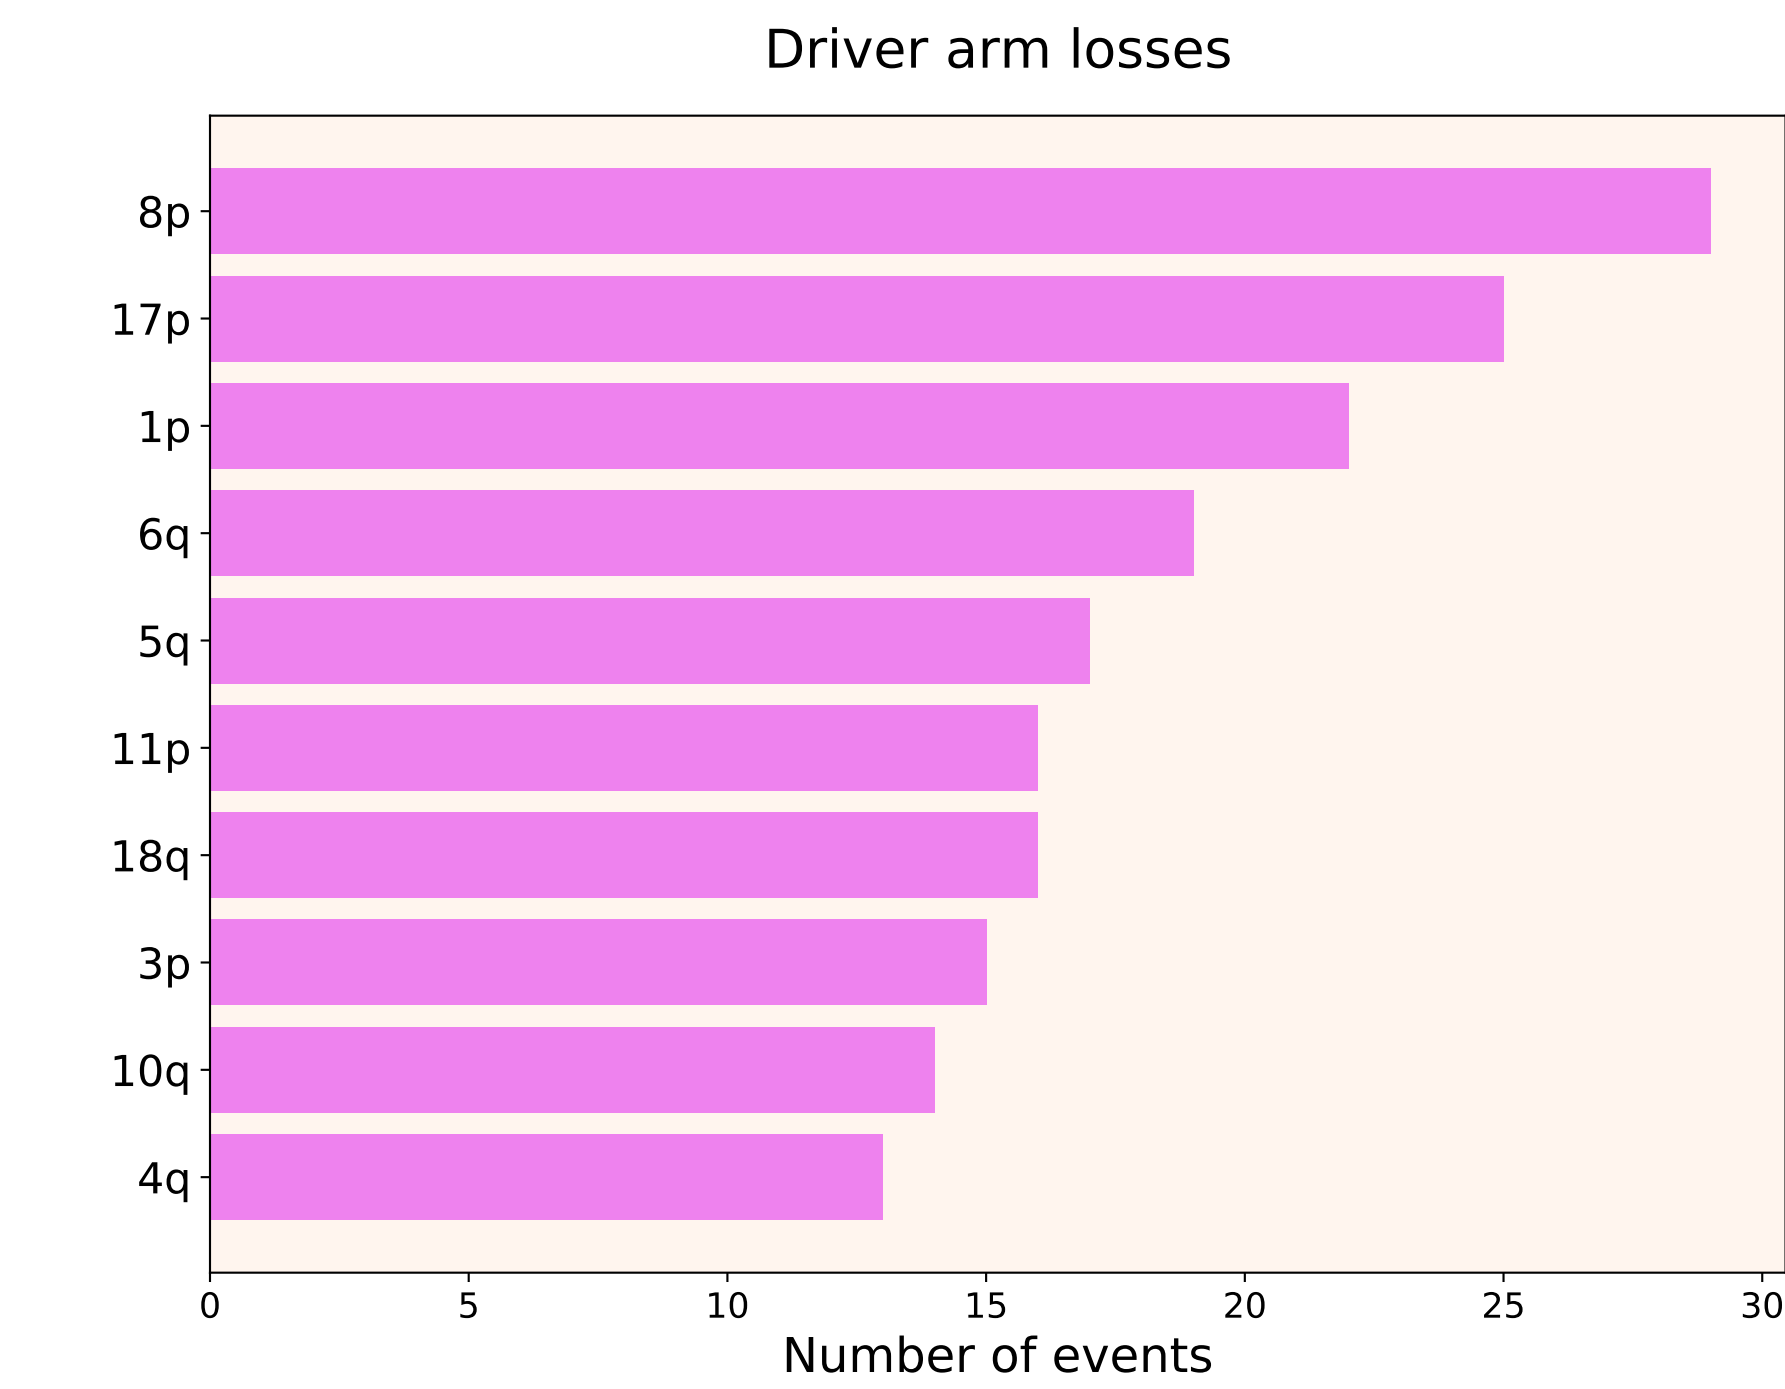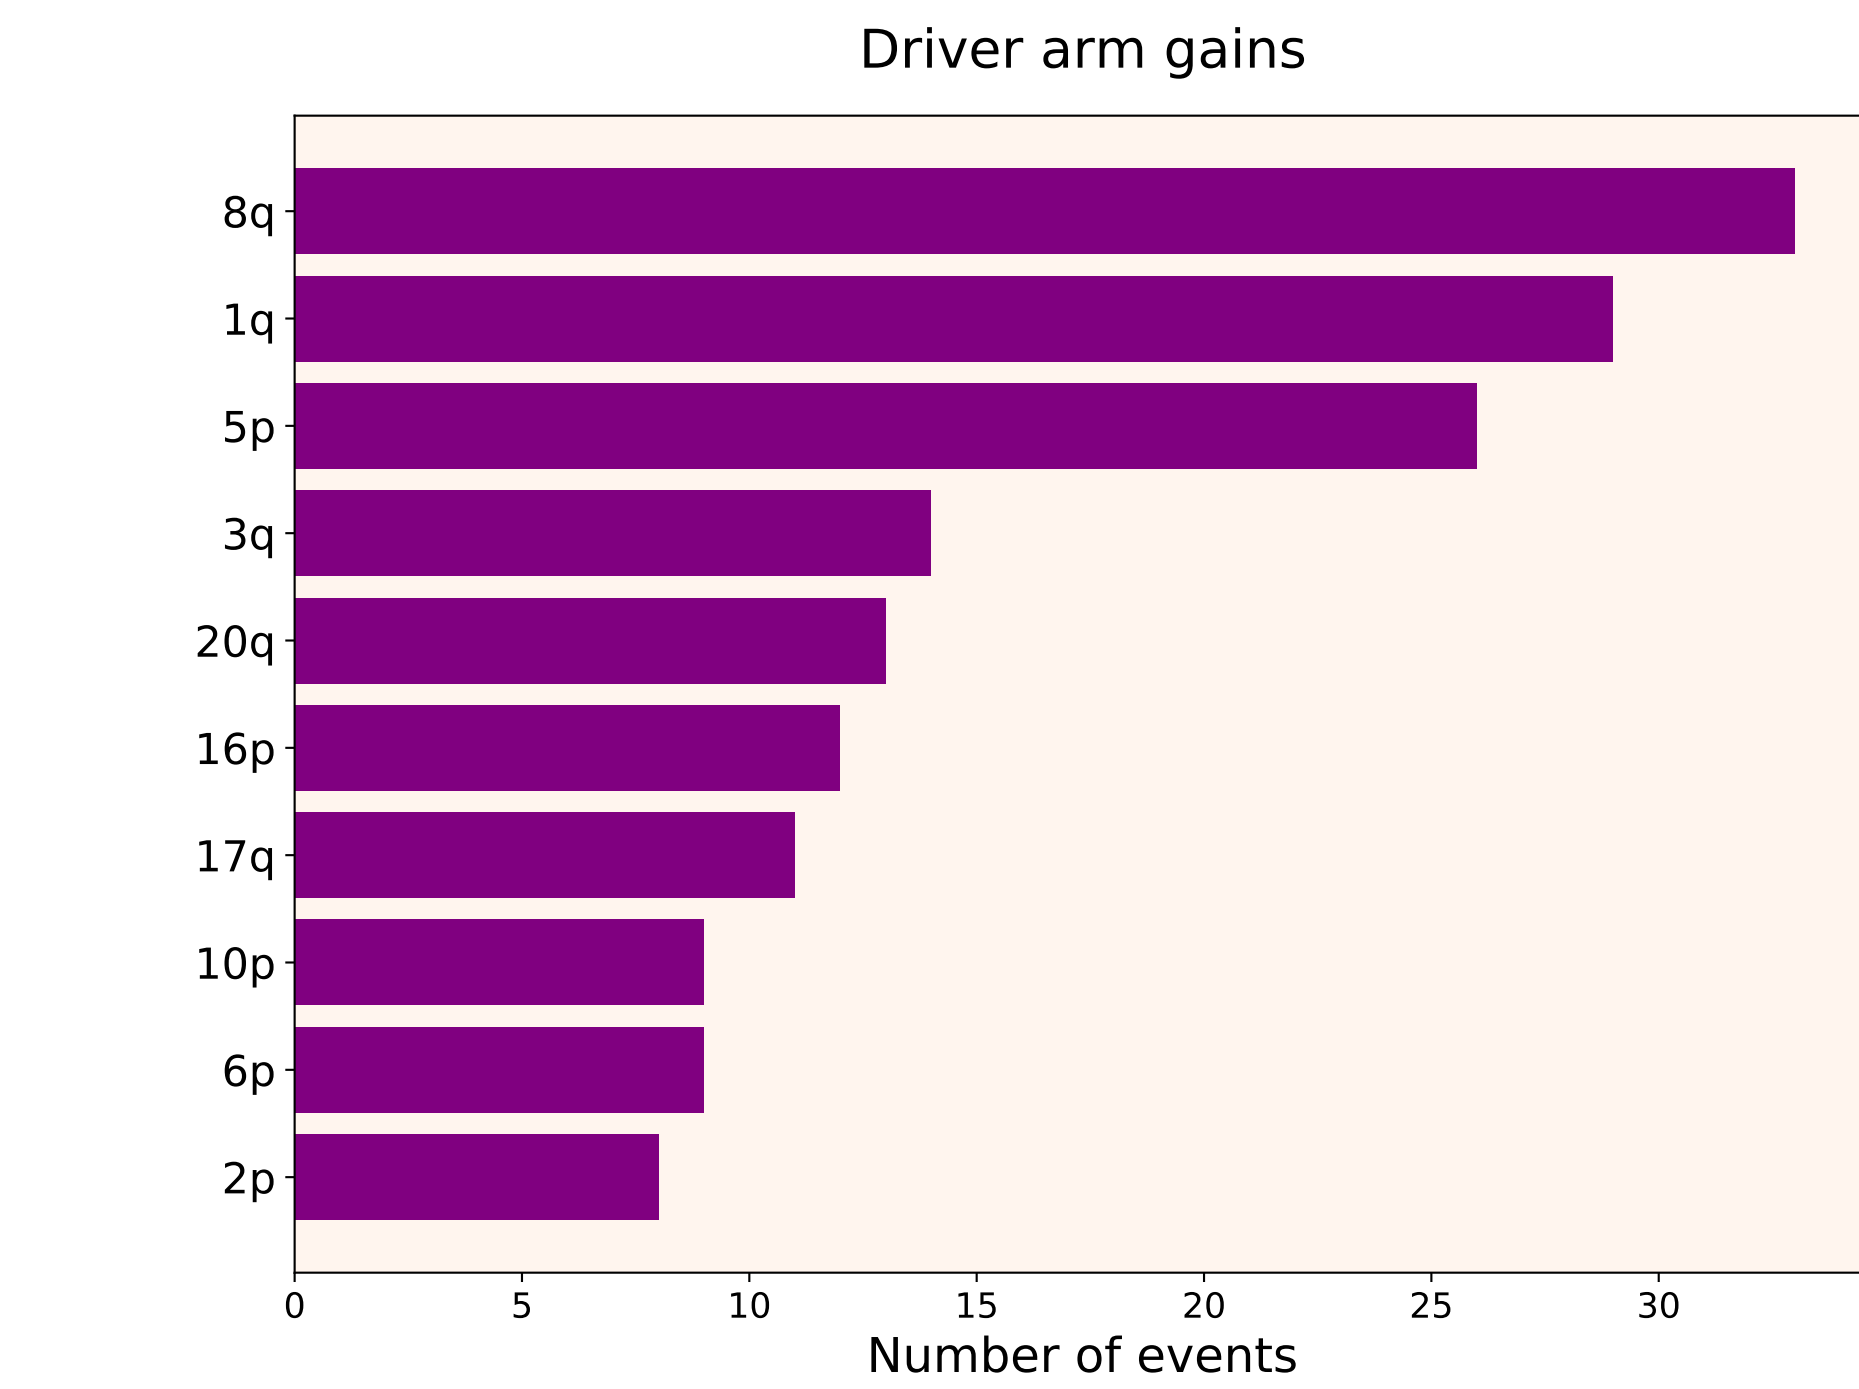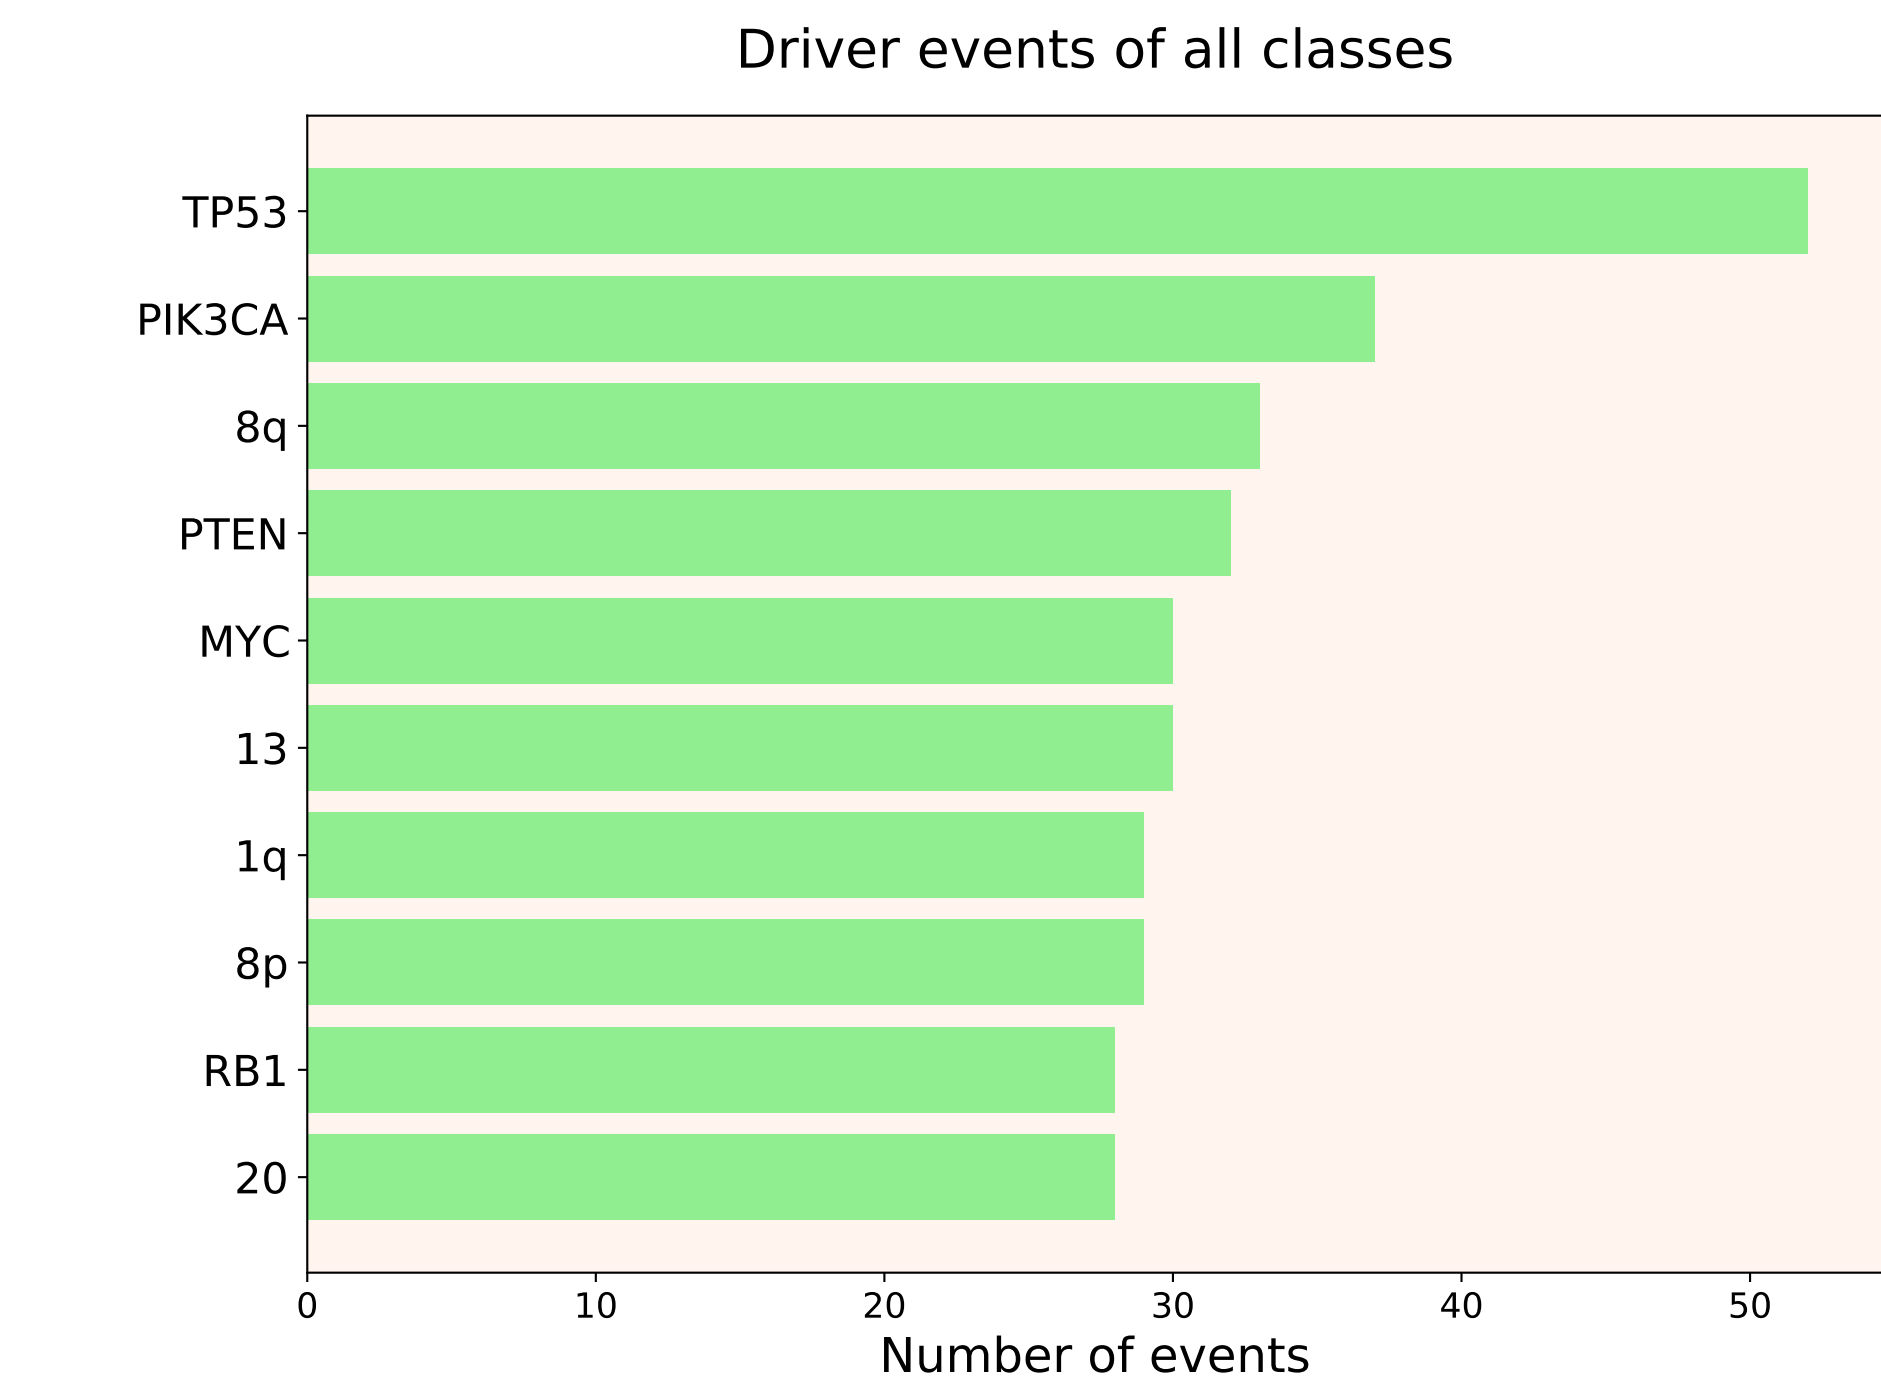

Supplement: Supplemental_Data_S1.zip [file Supplemental_Data_S1.zip]

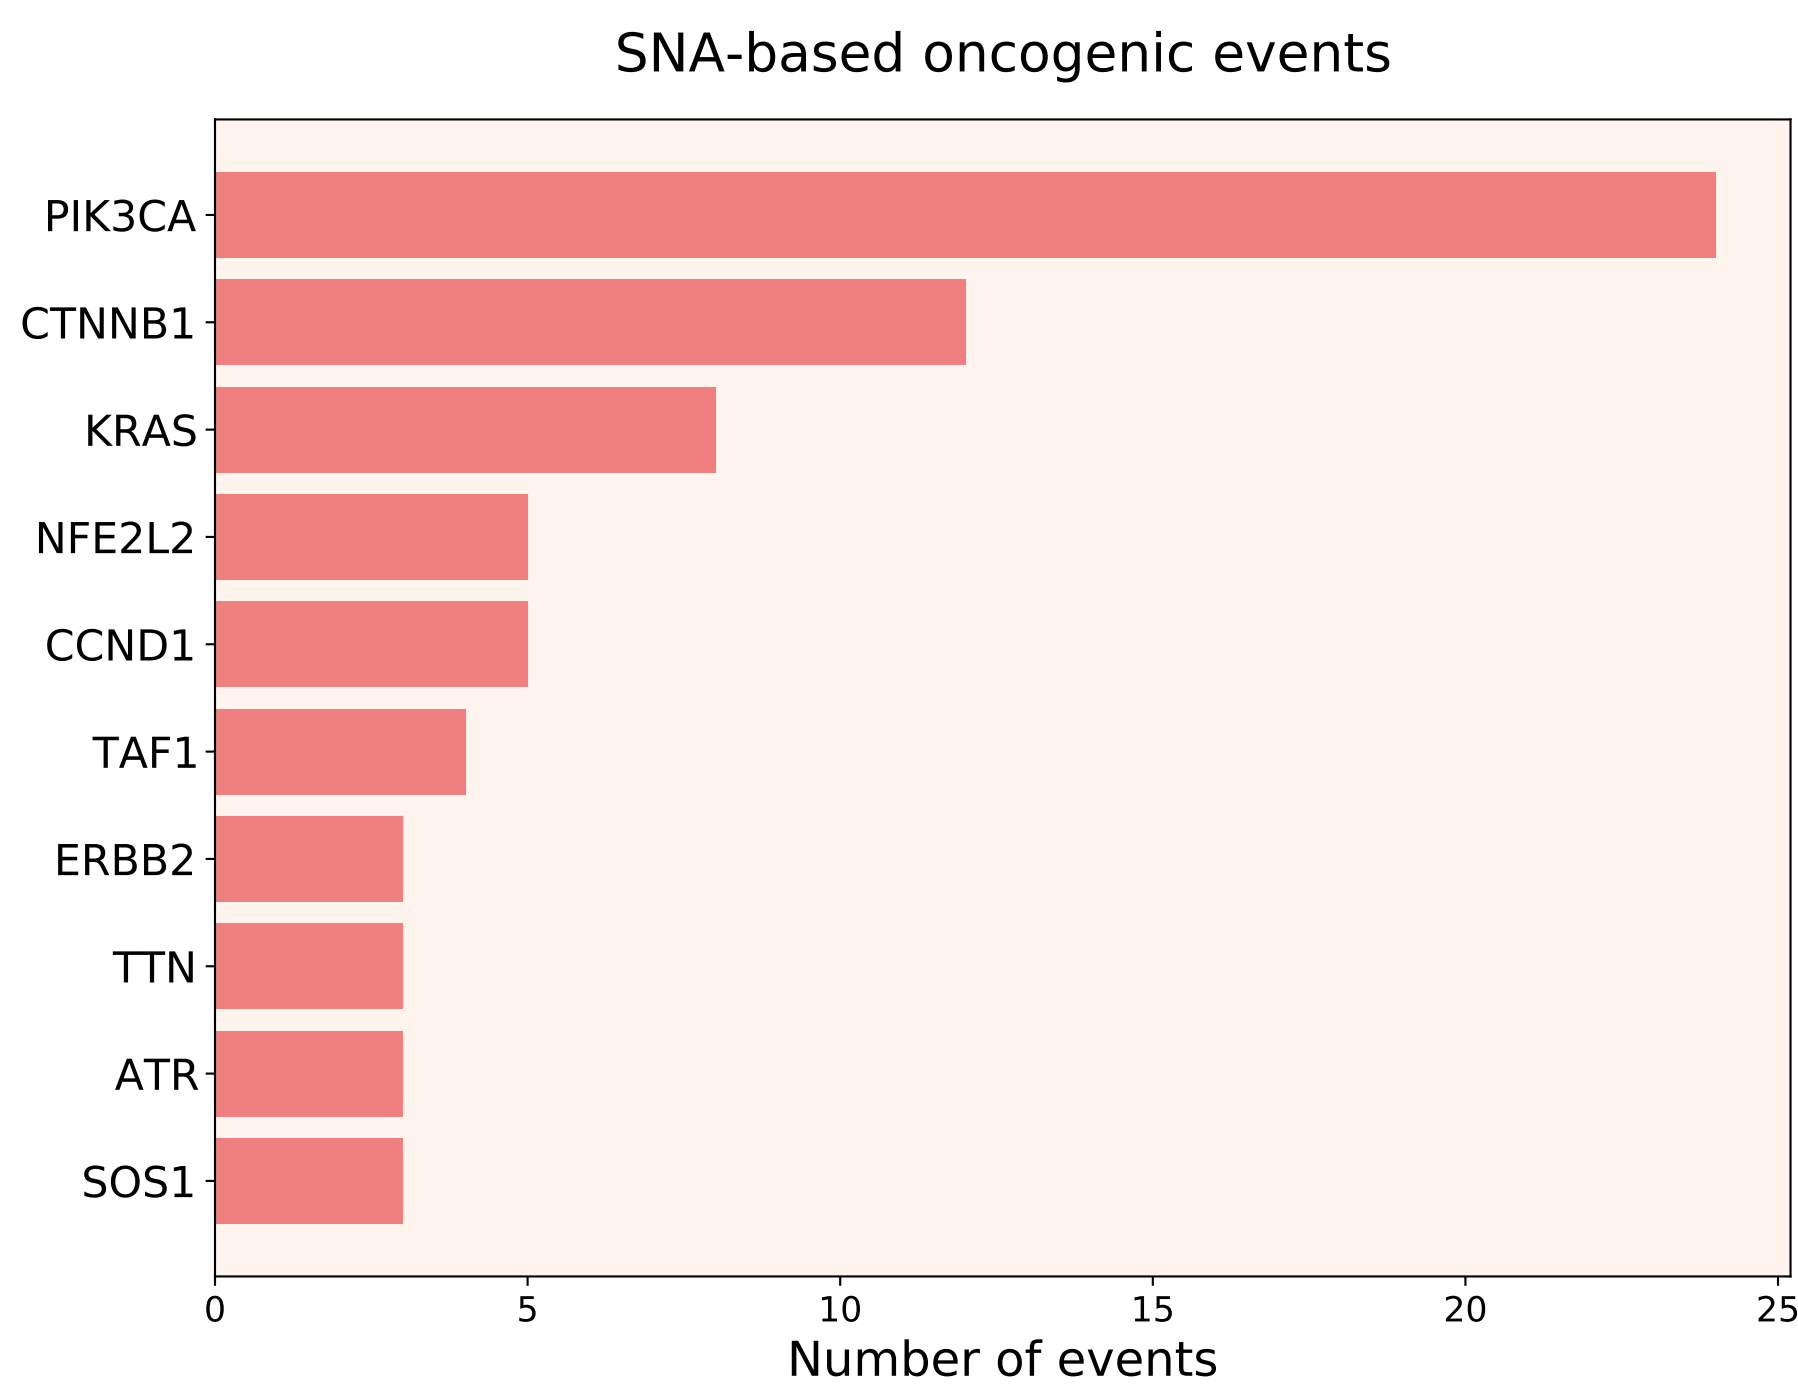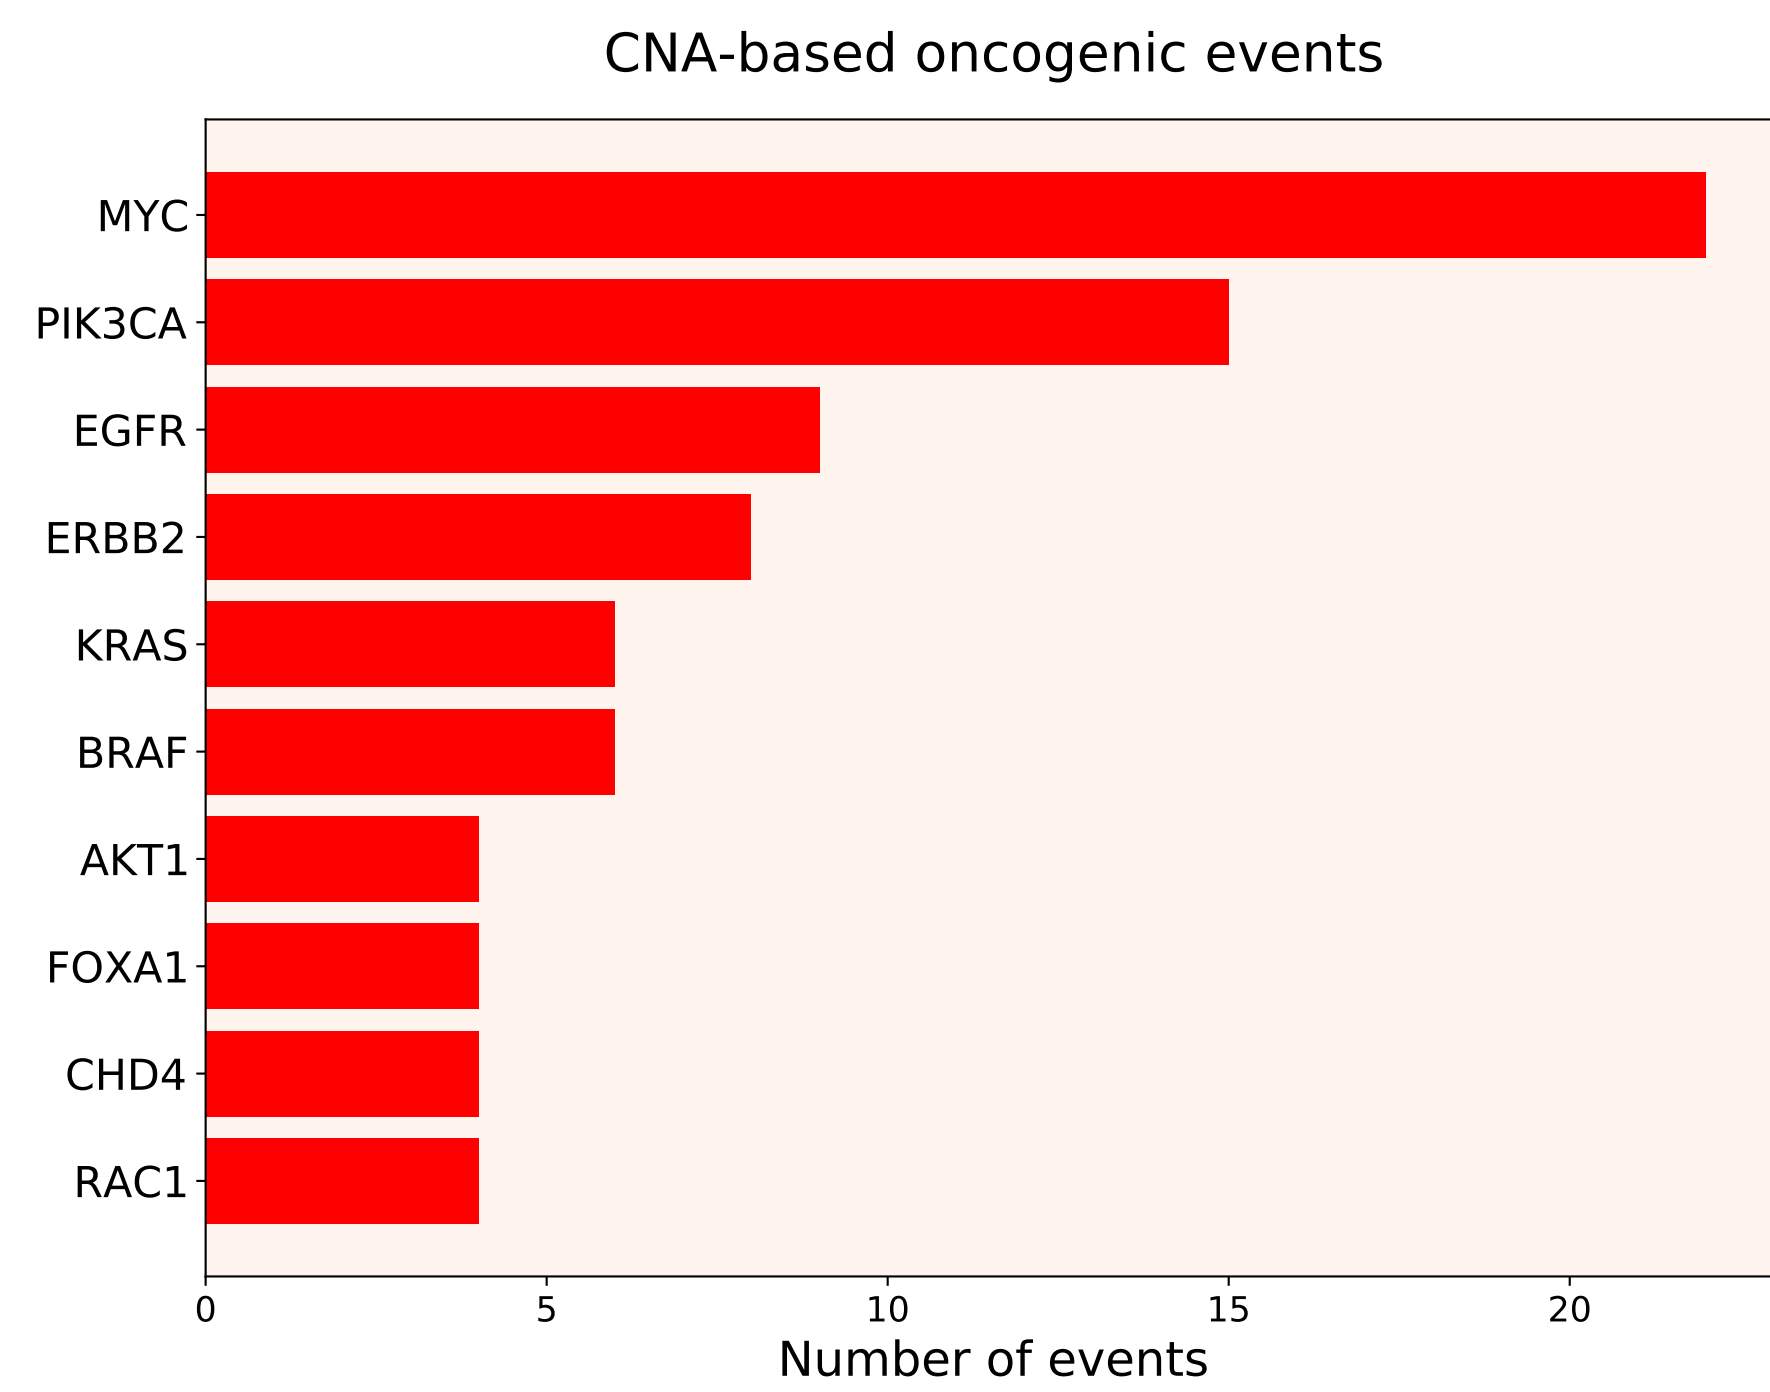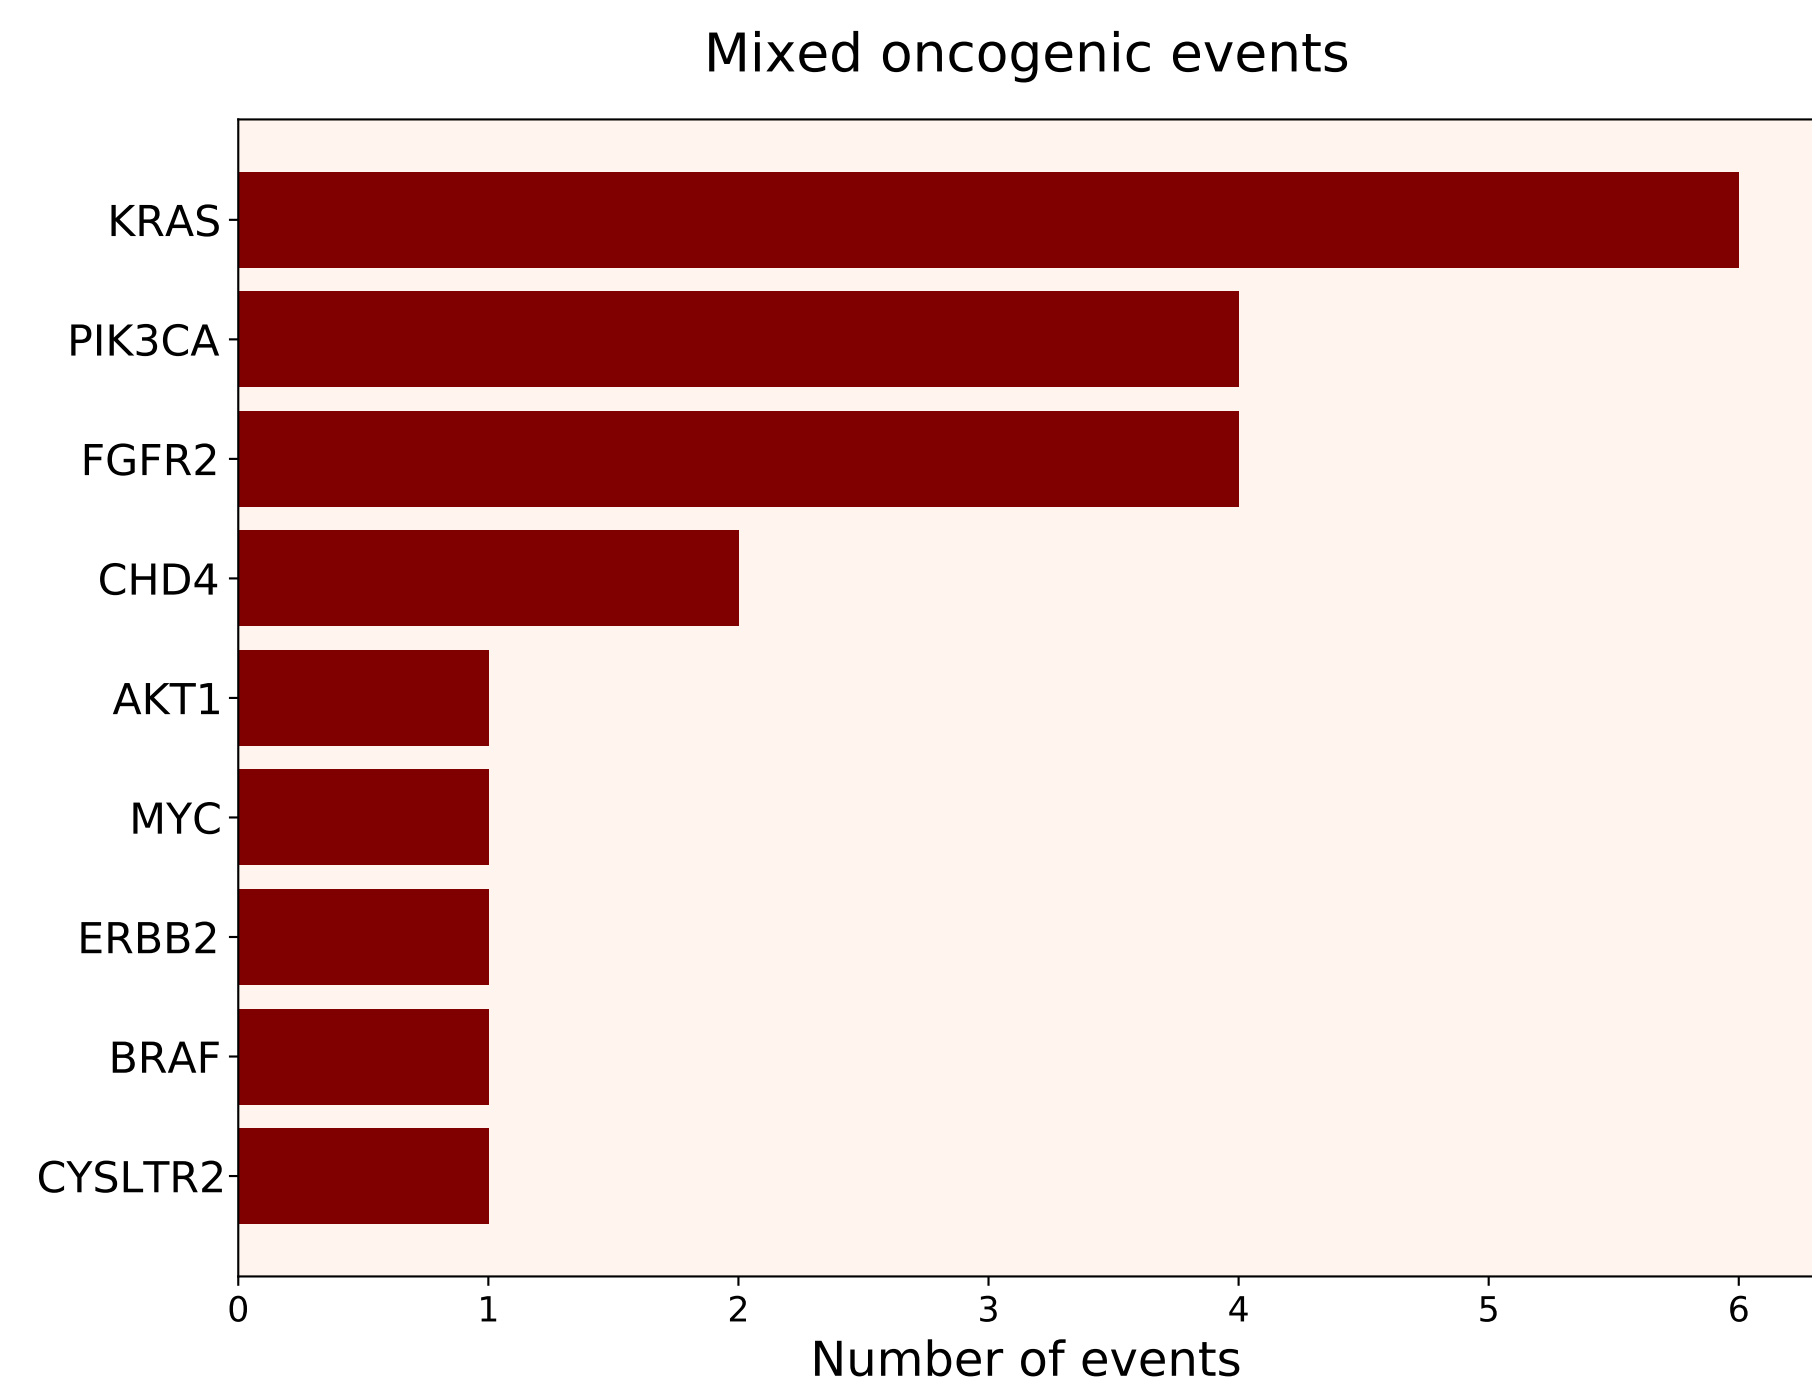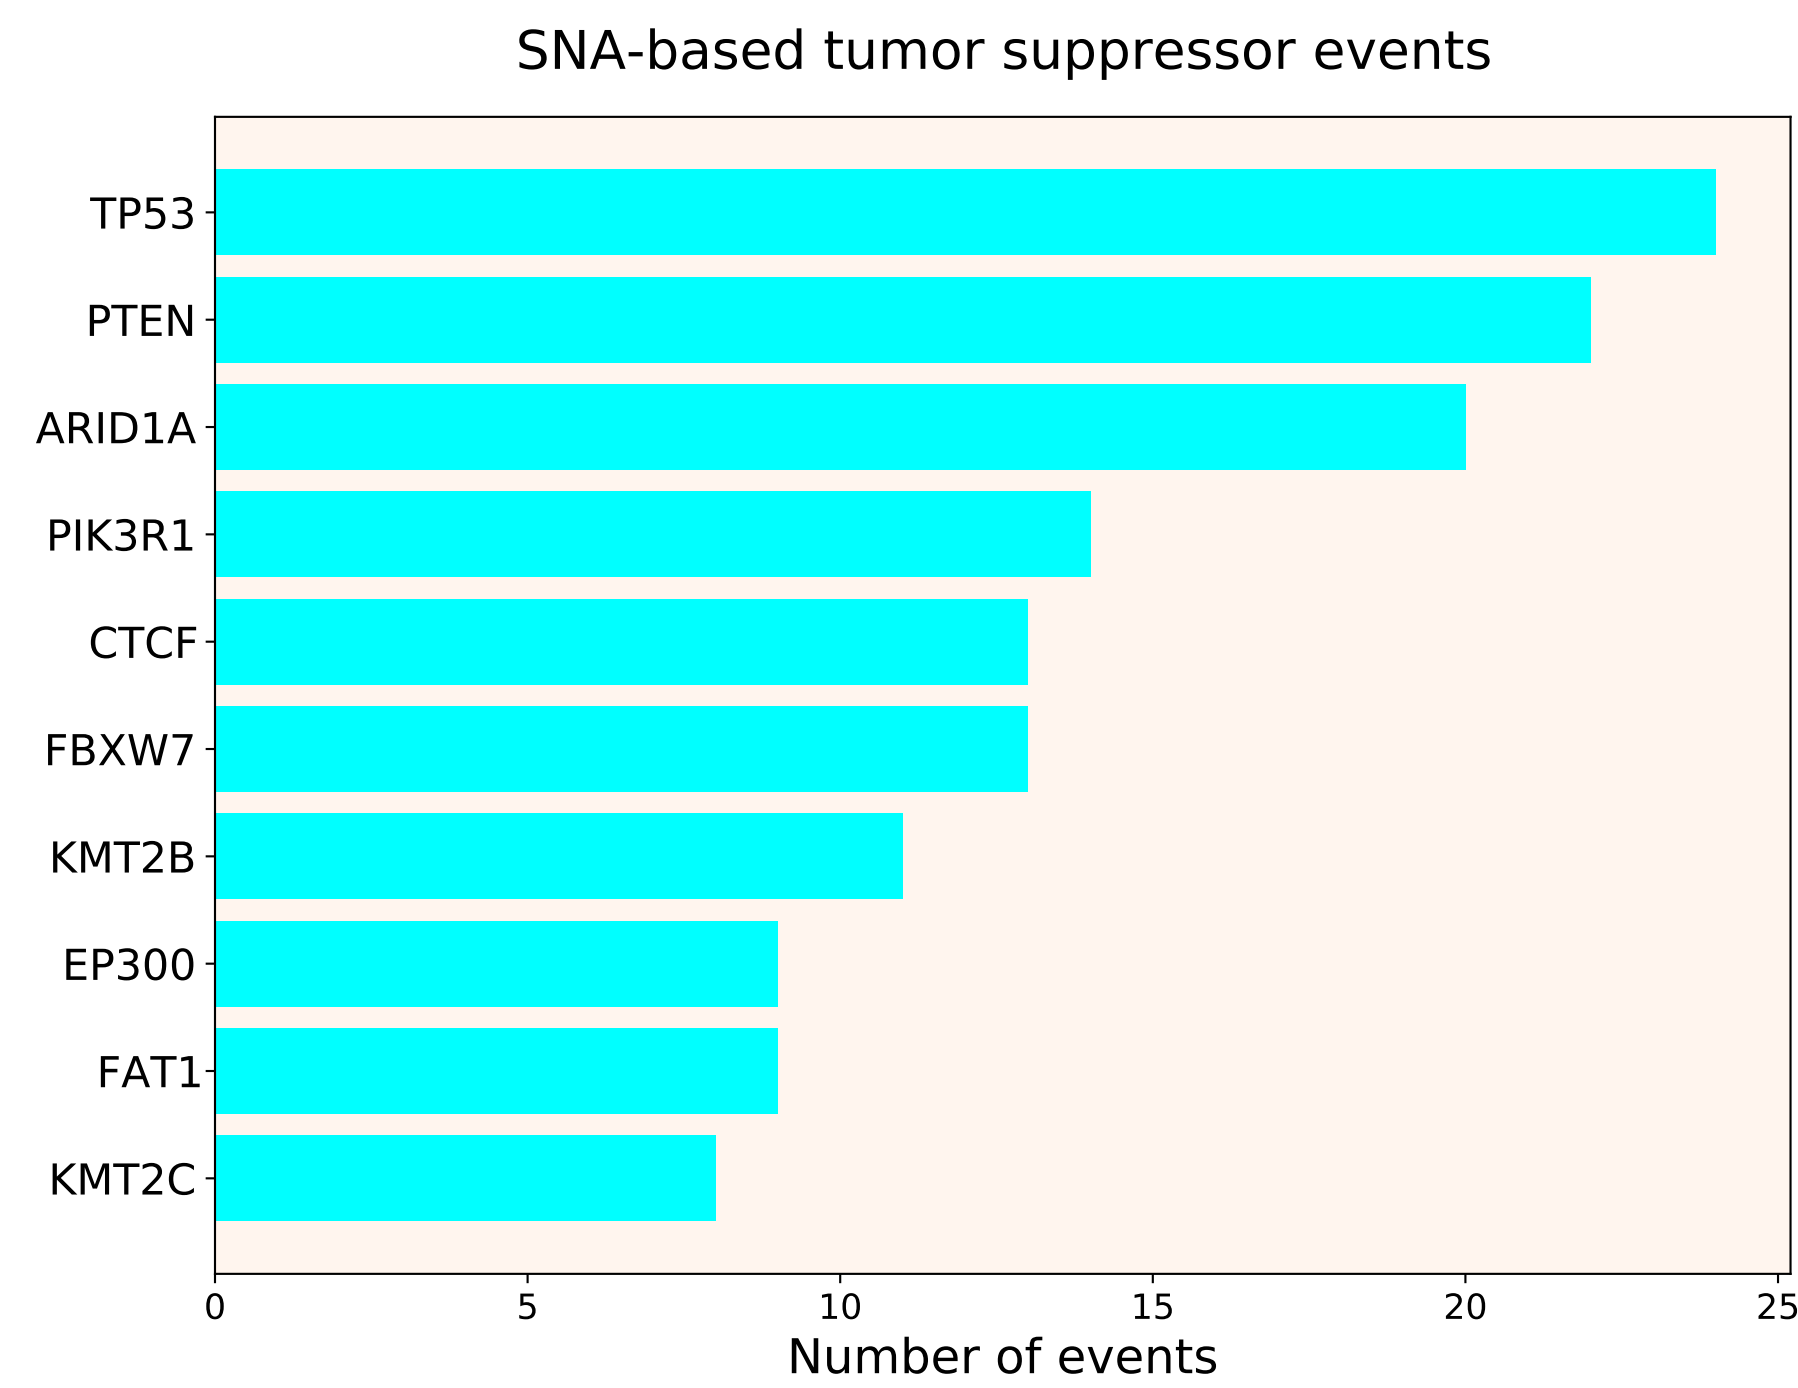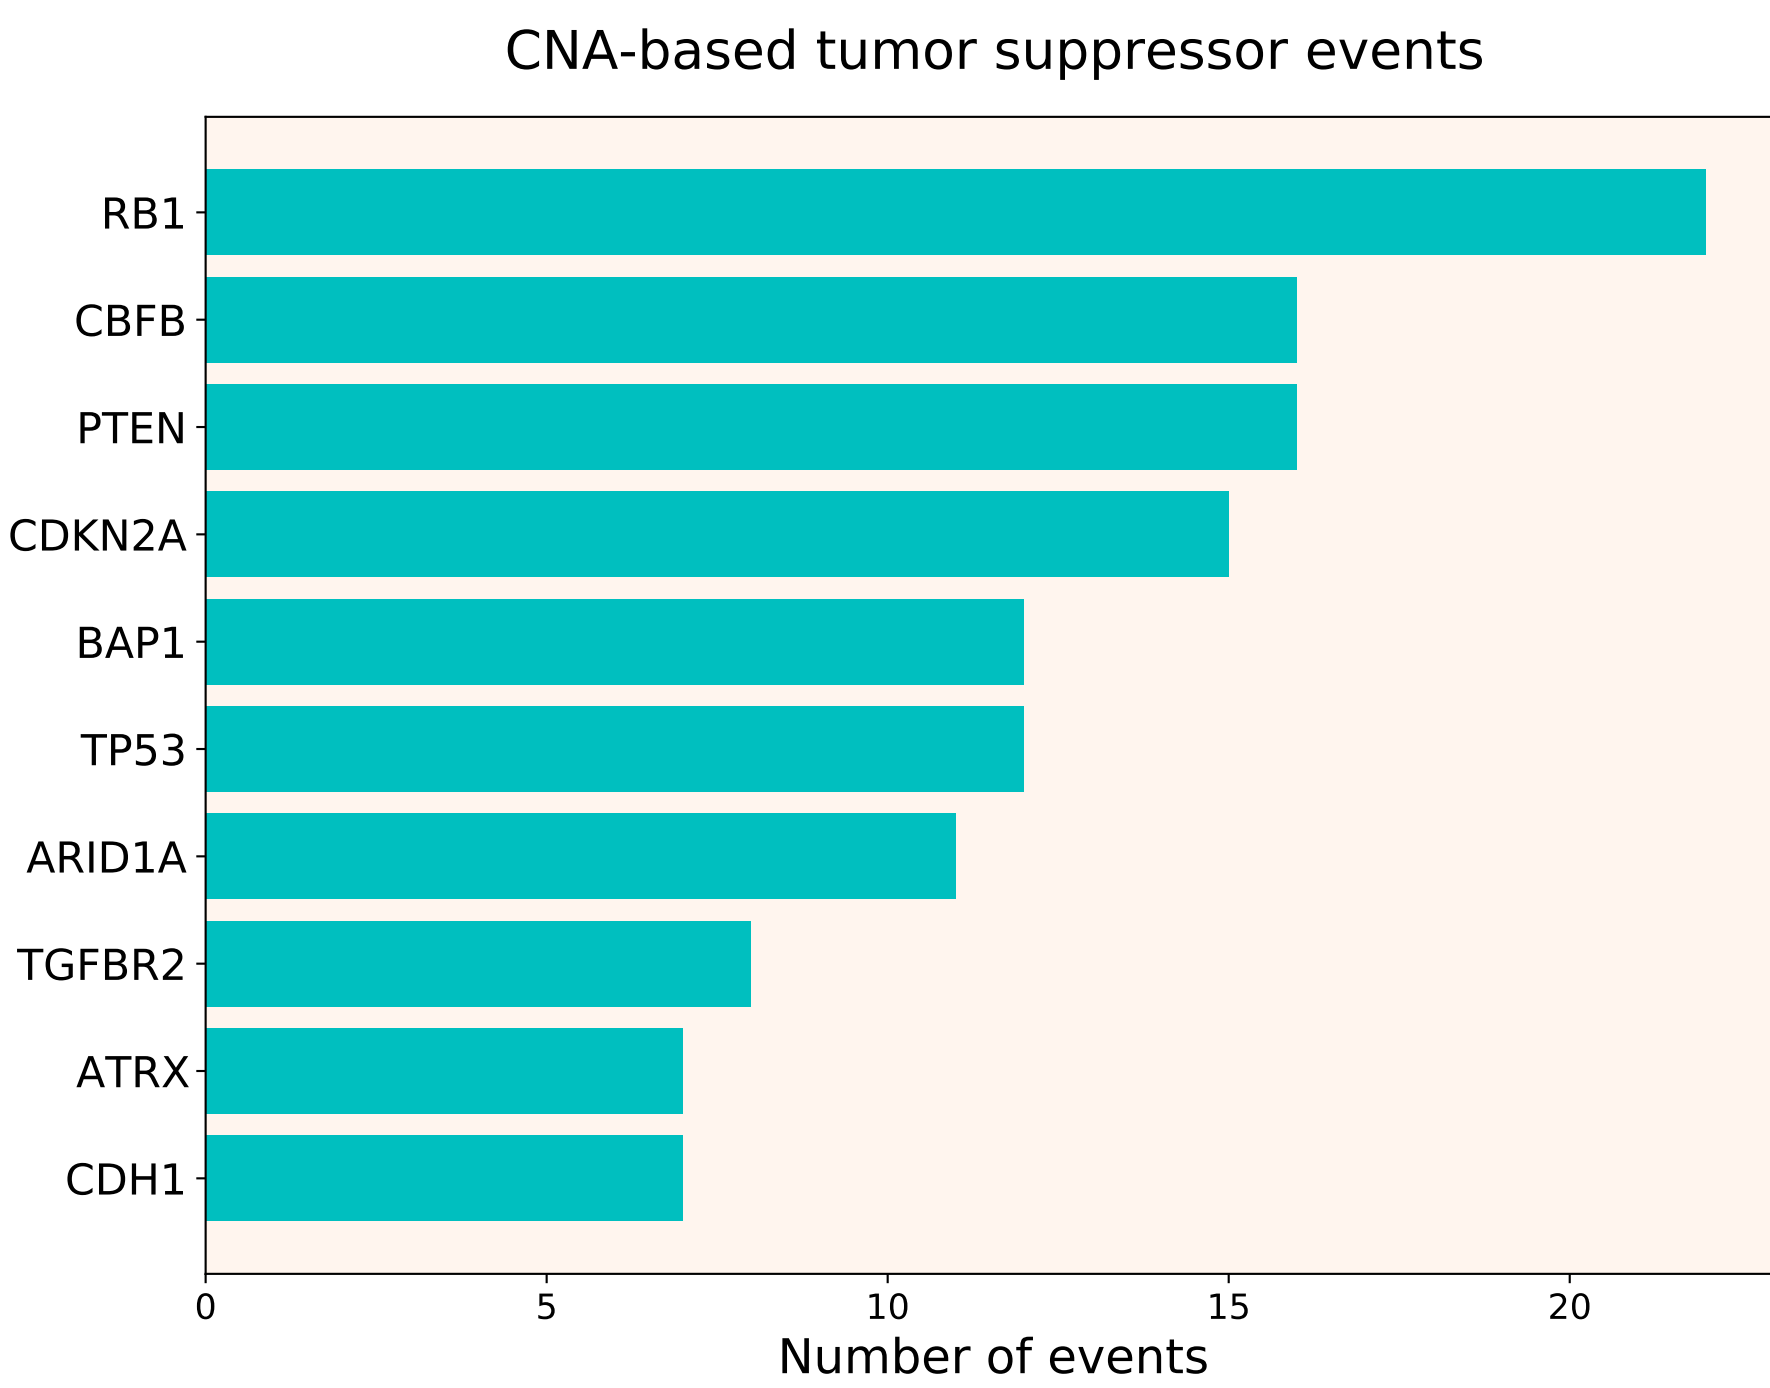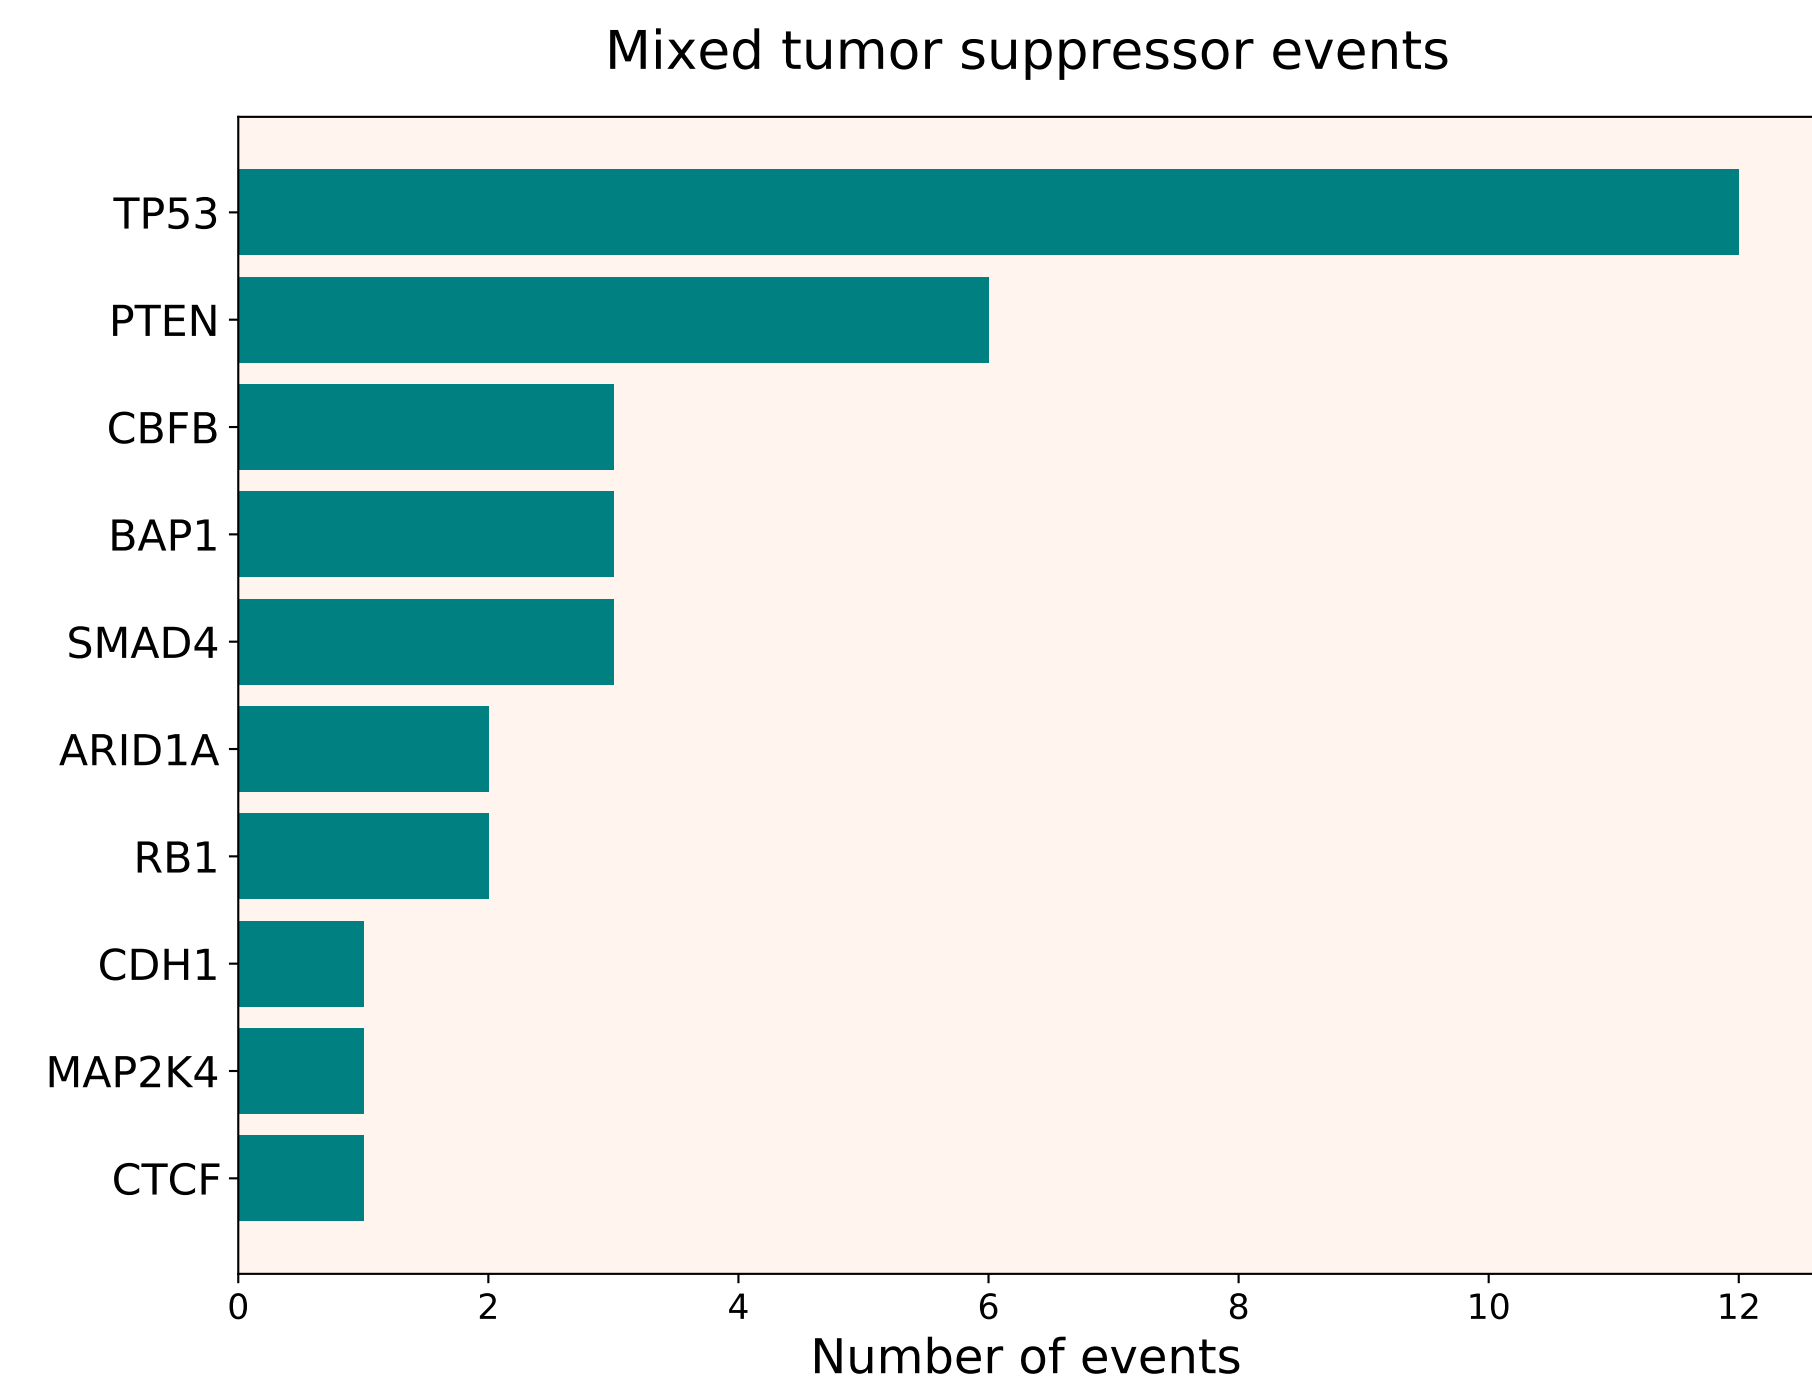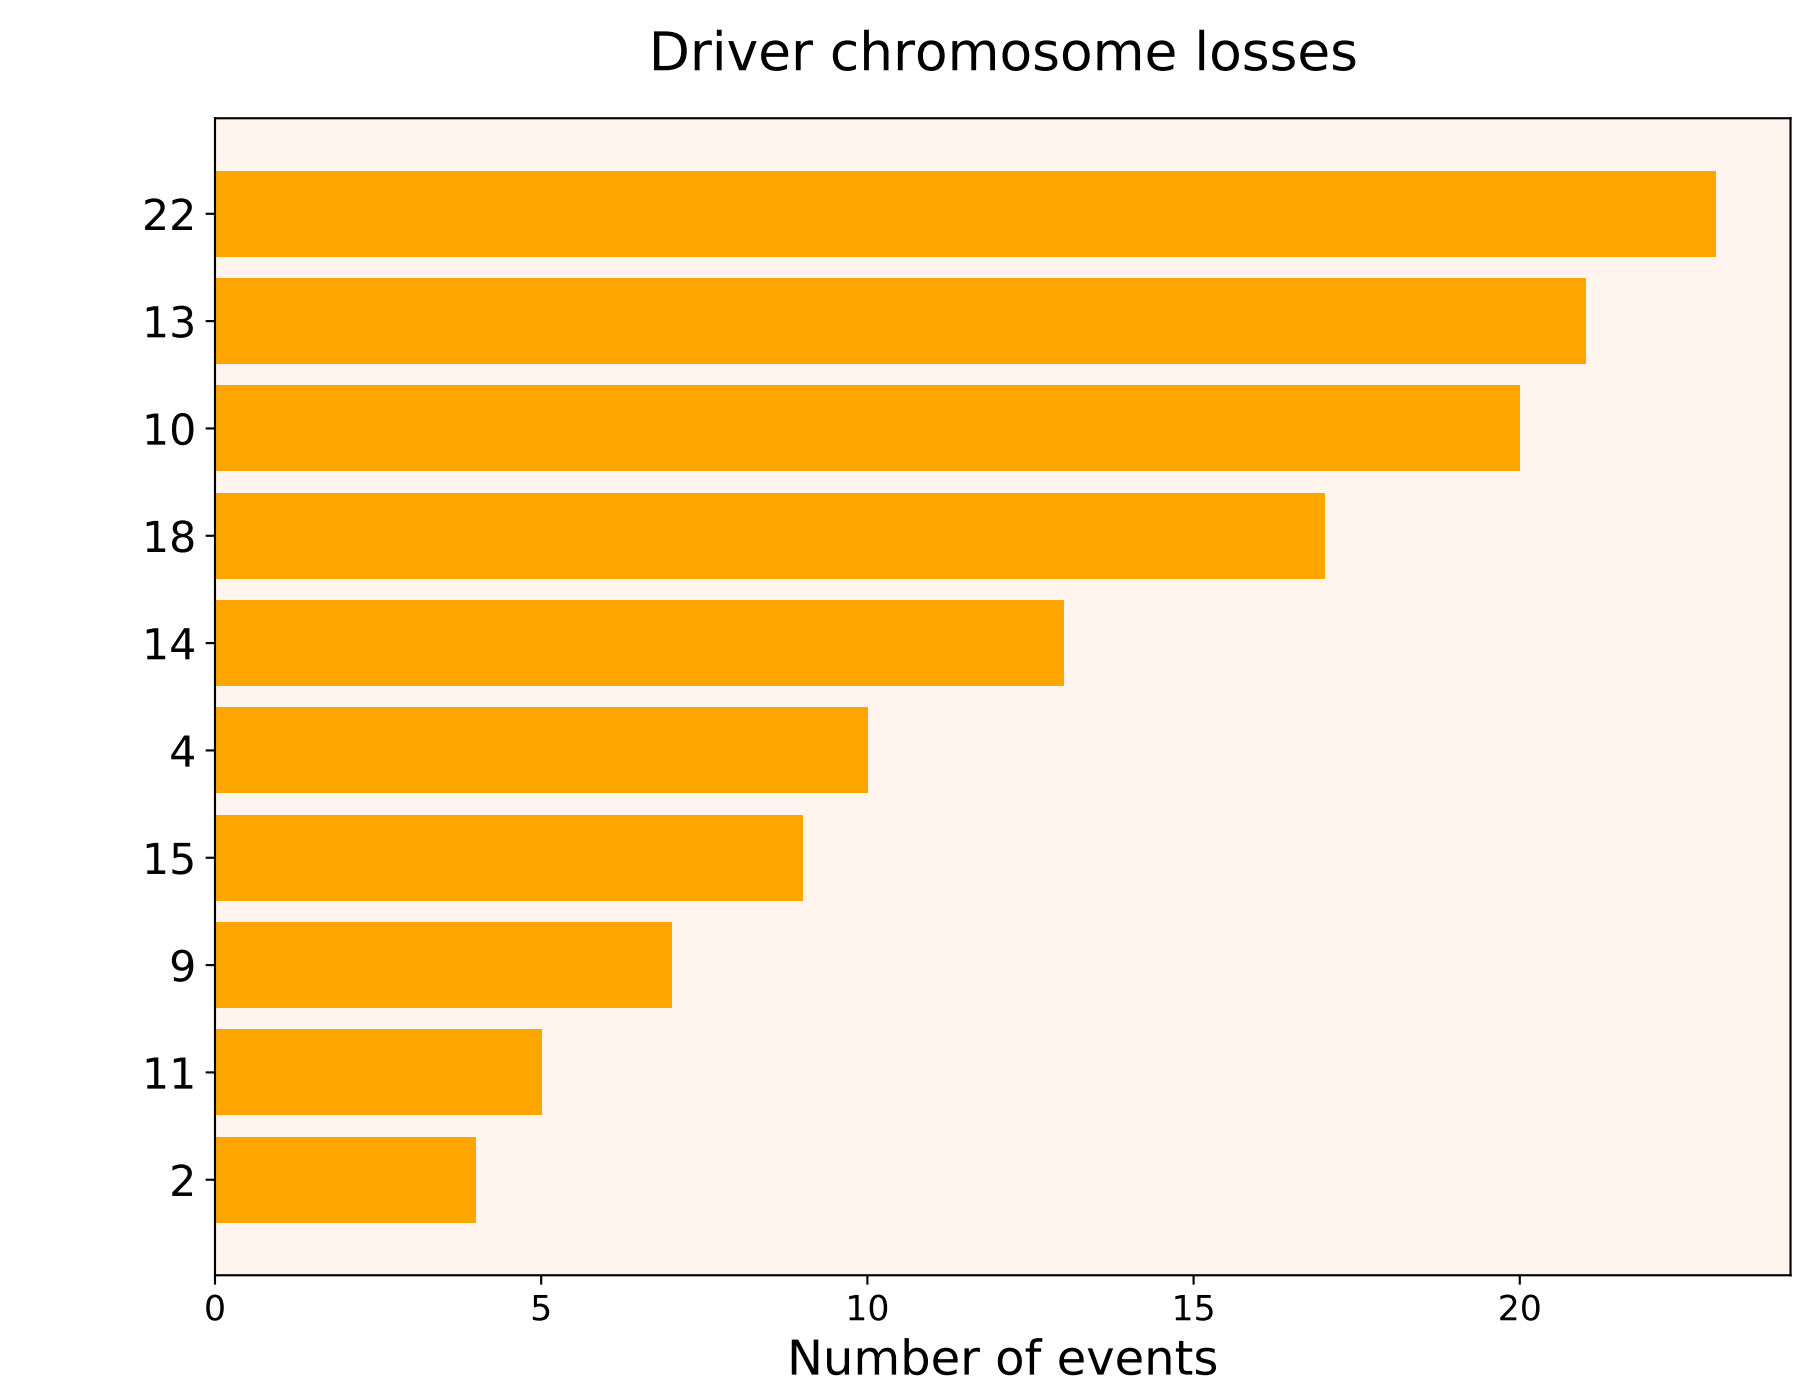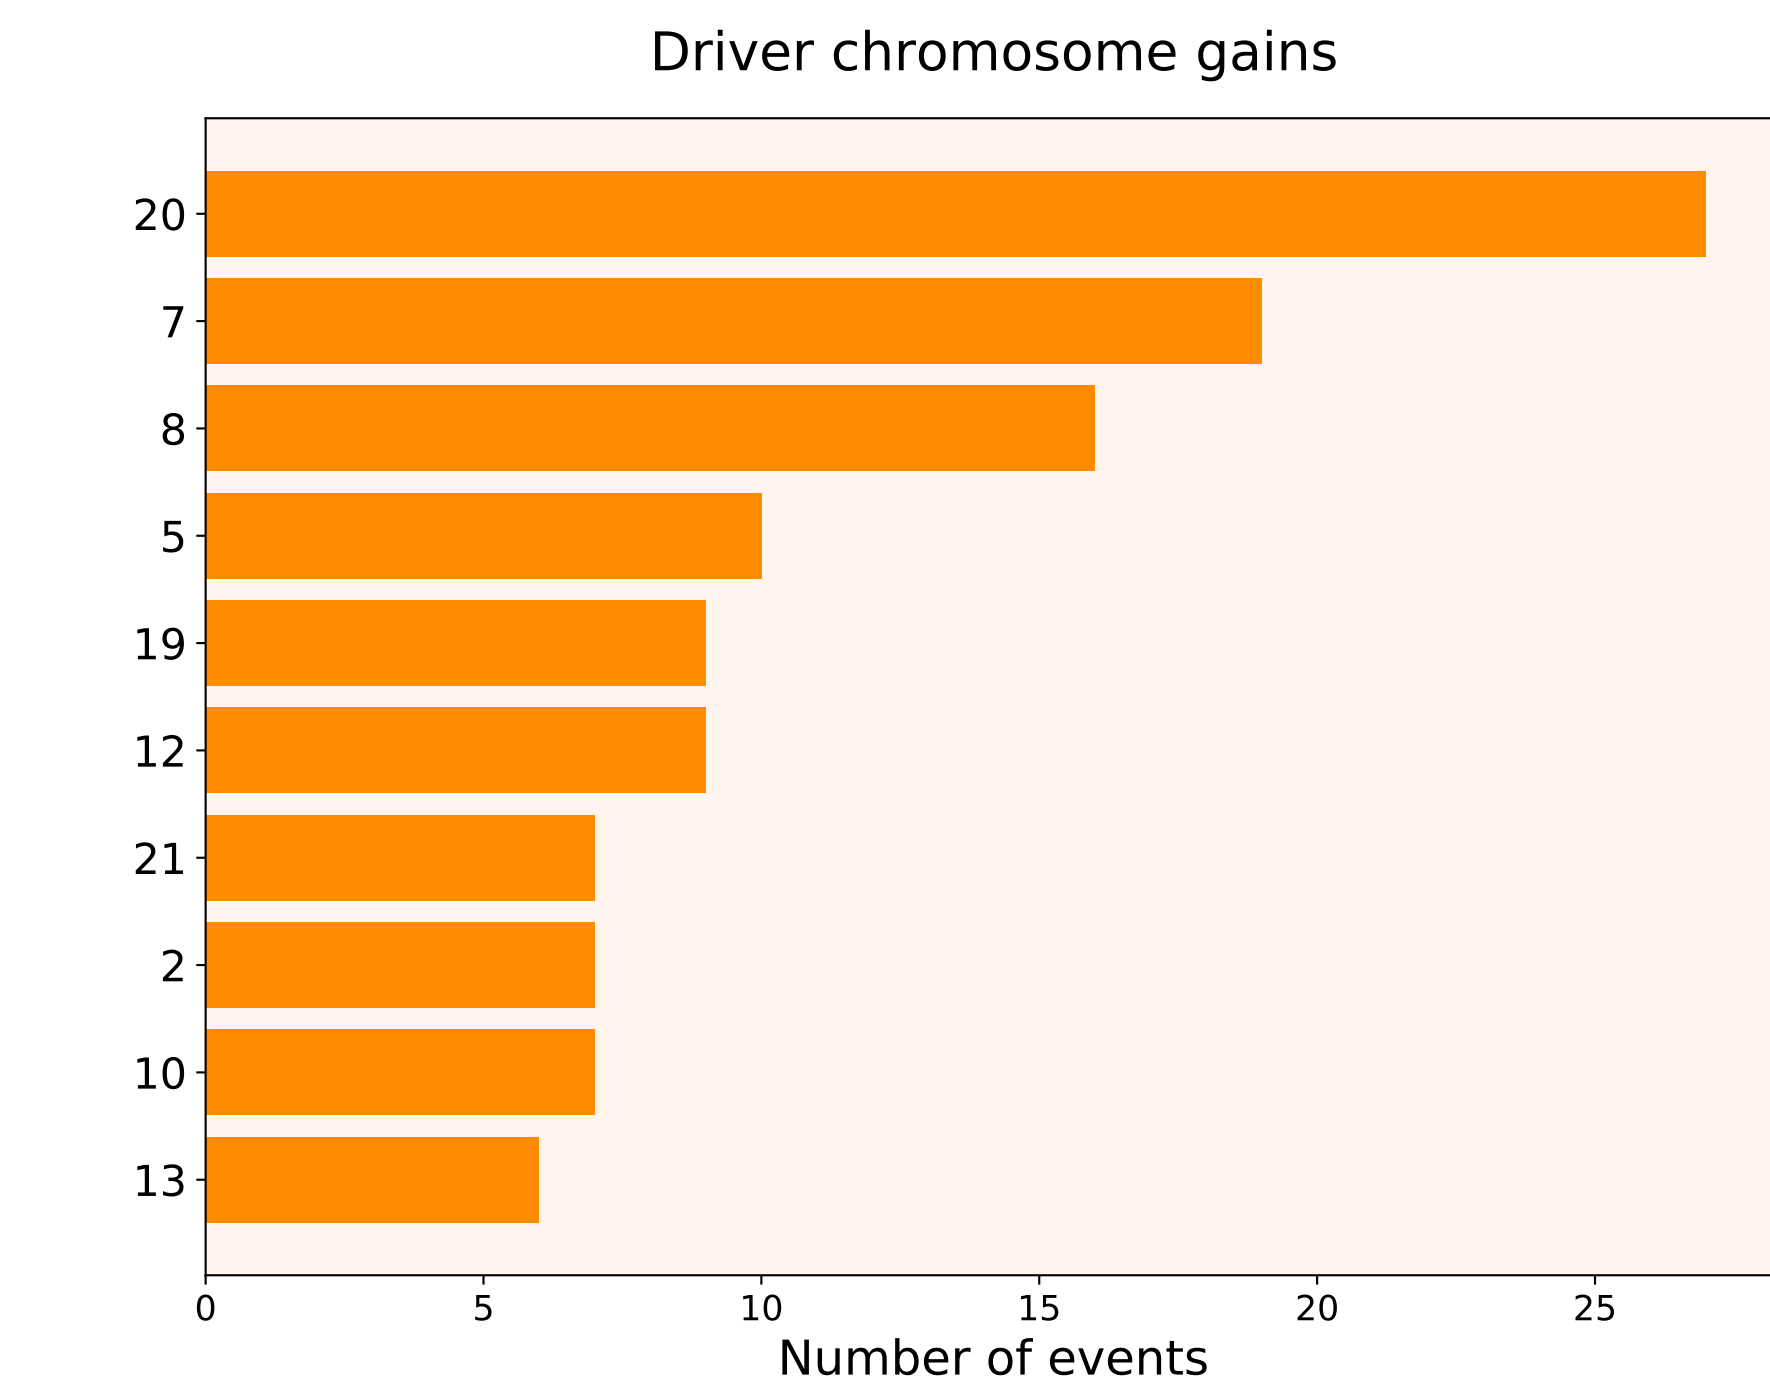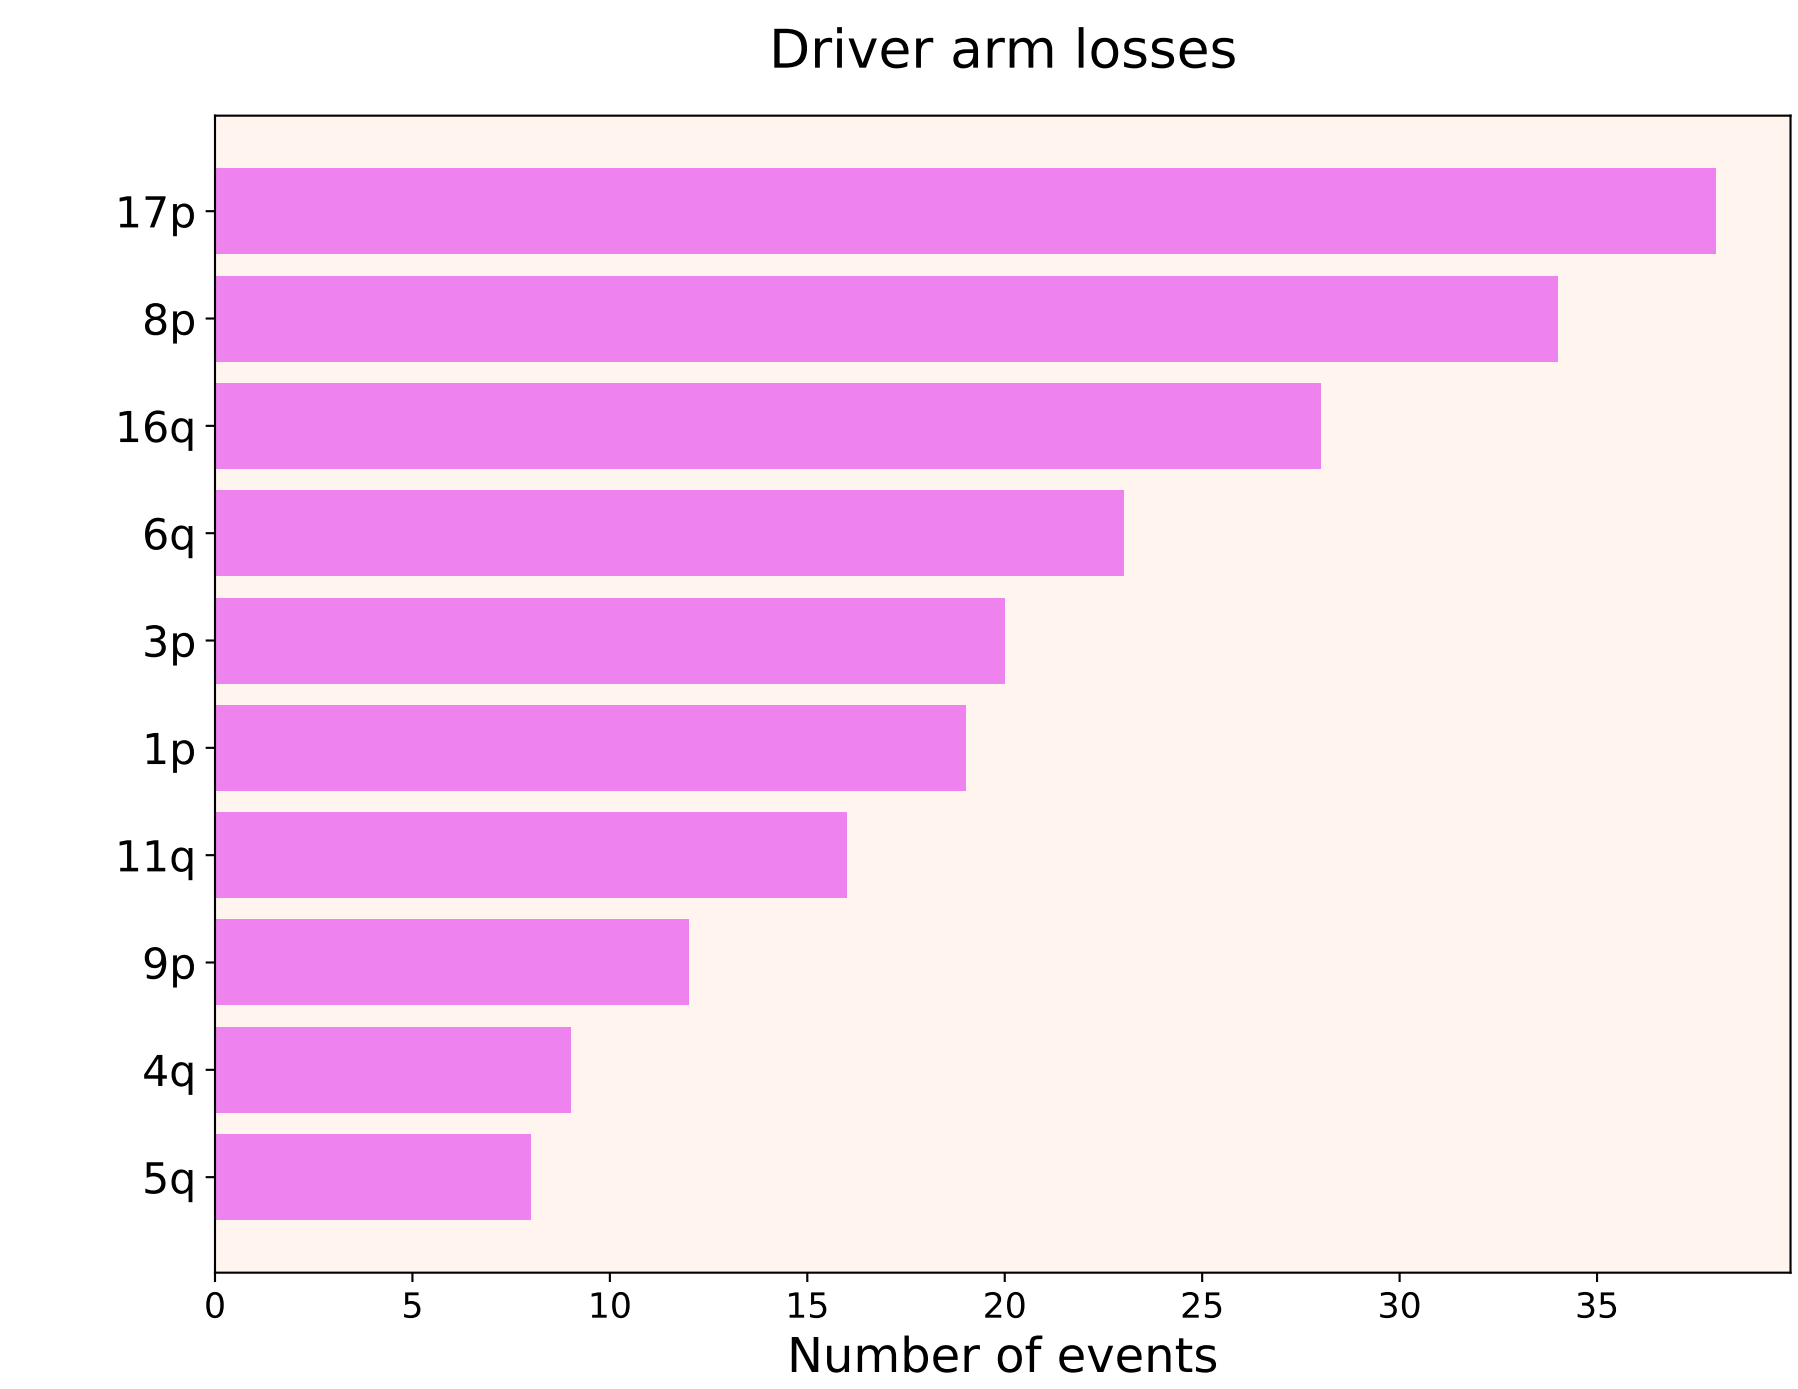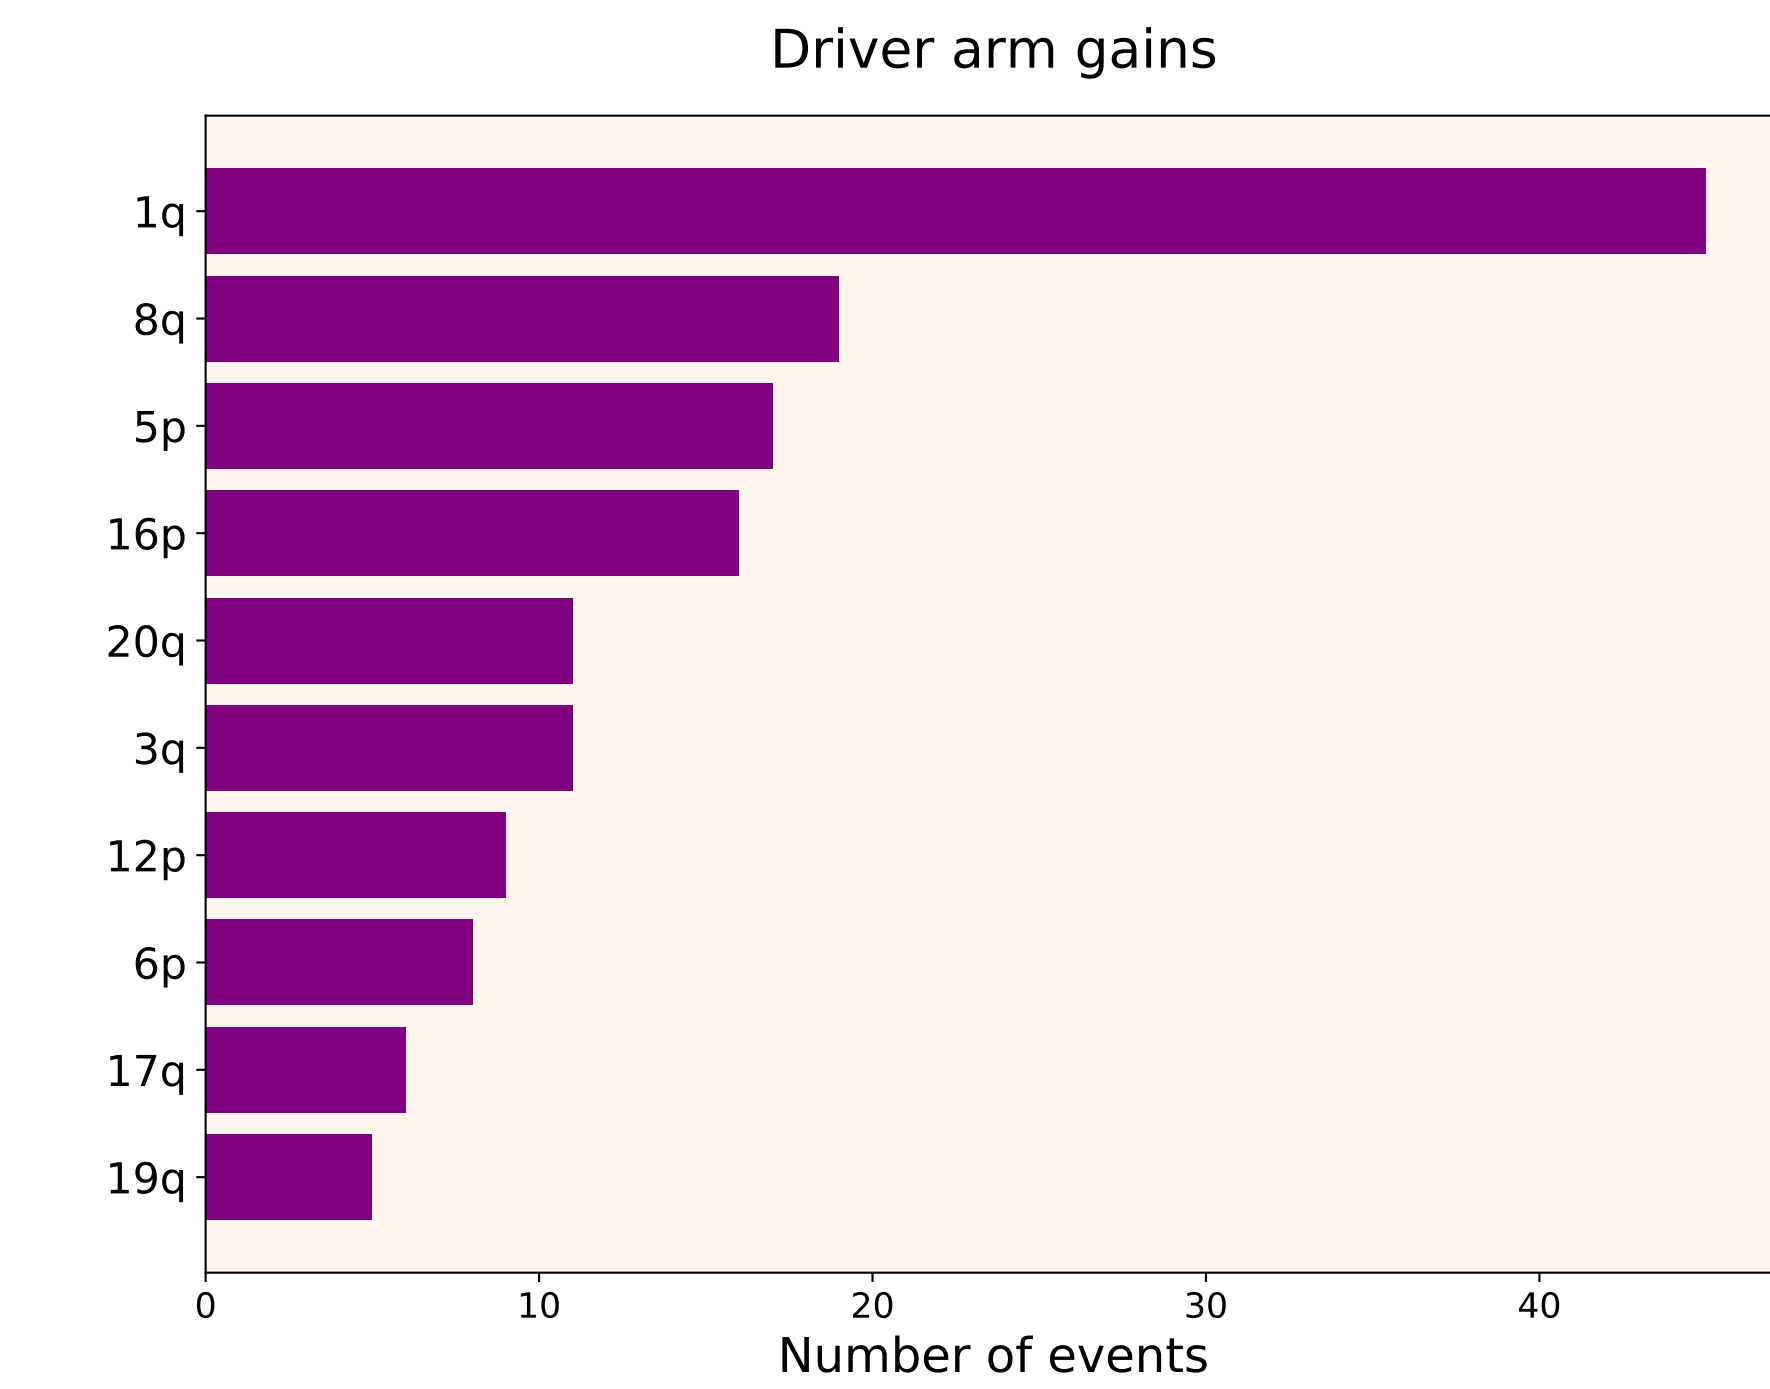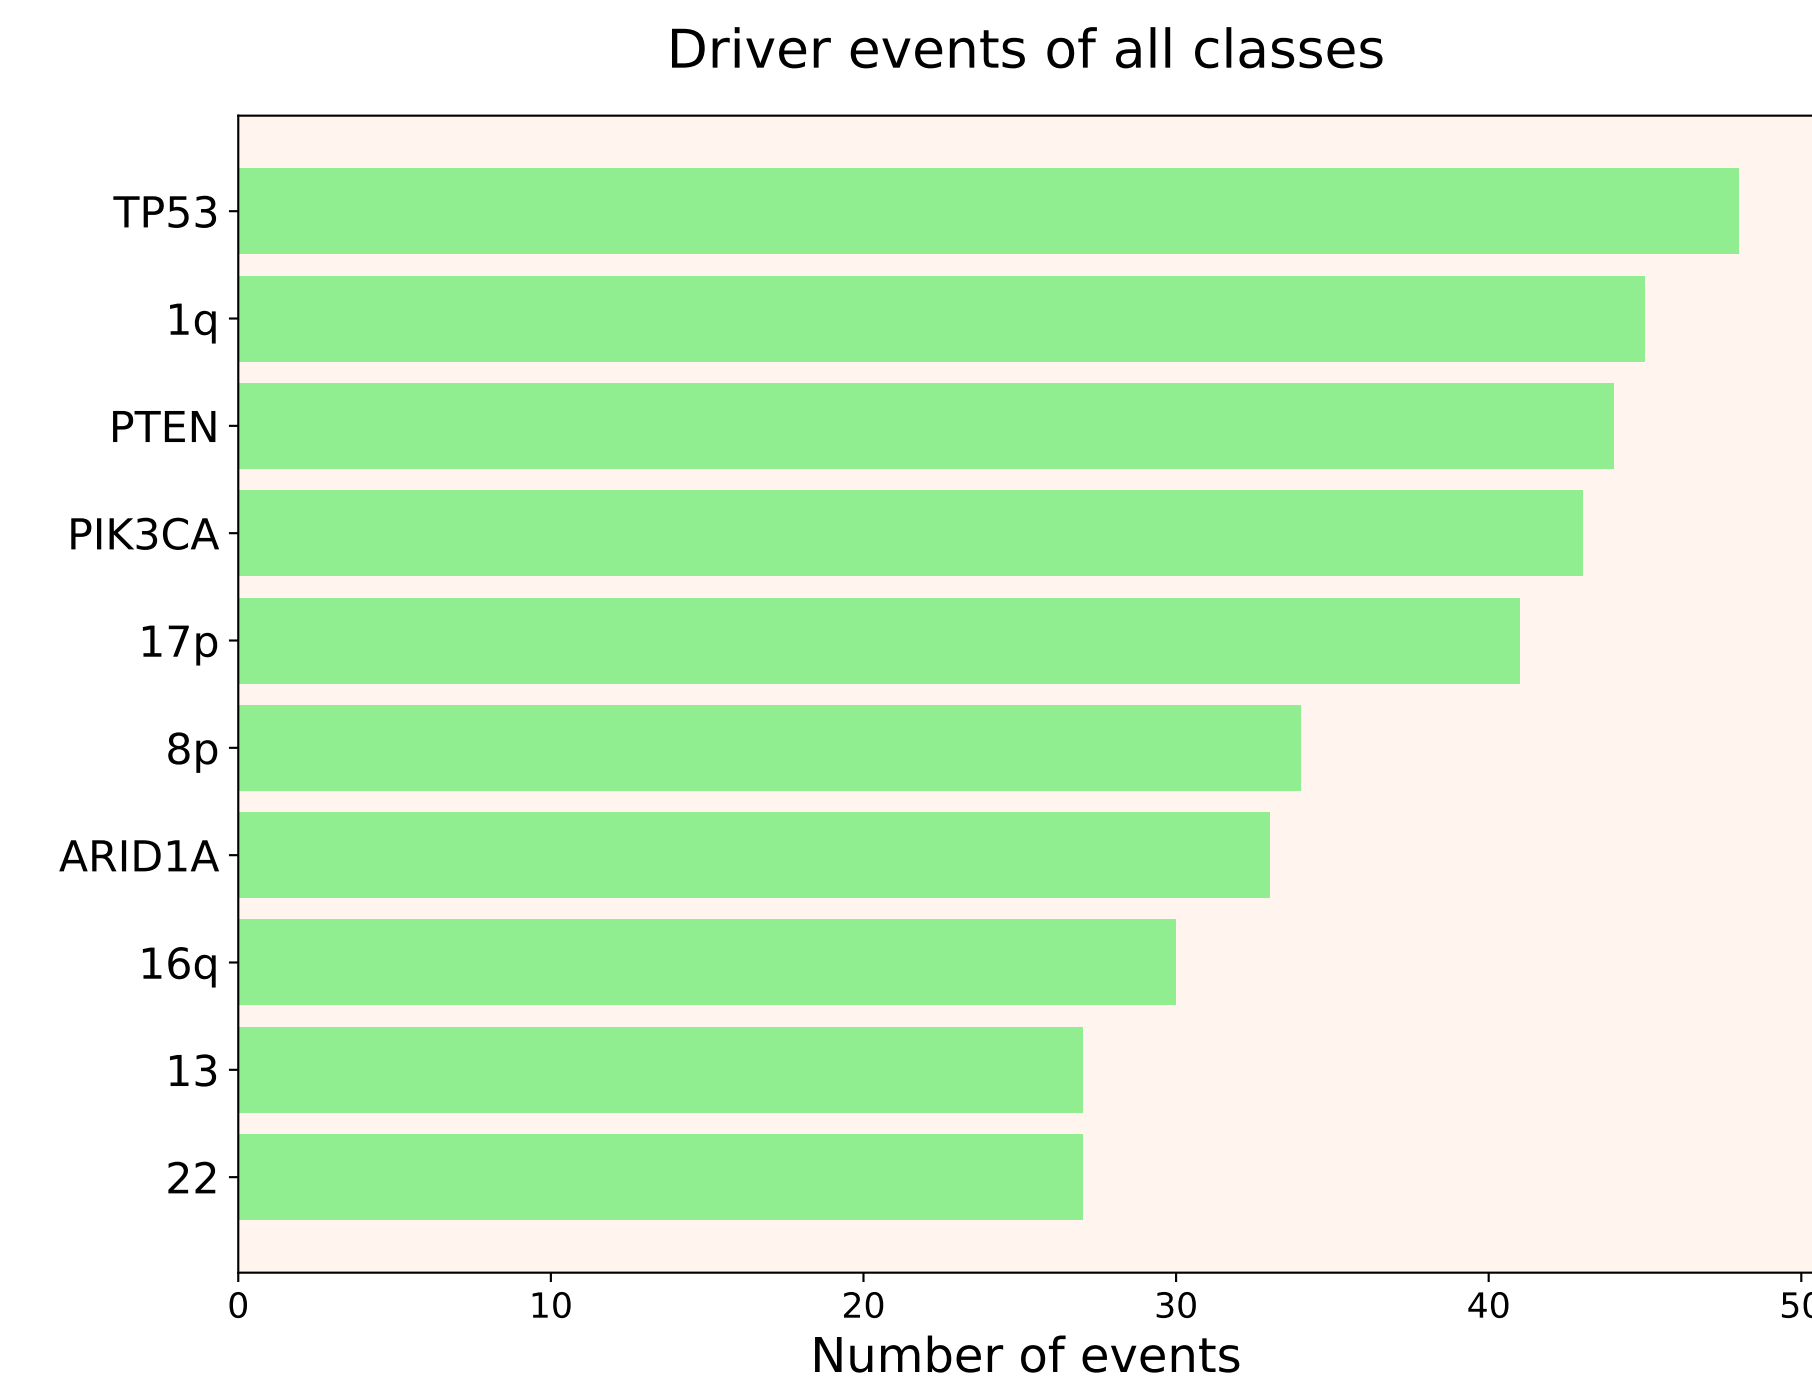

Supplement: Supplemental_Data_S1.zip [file Supplemental_Data_S1.zip]

# ESCA\_FEMALE

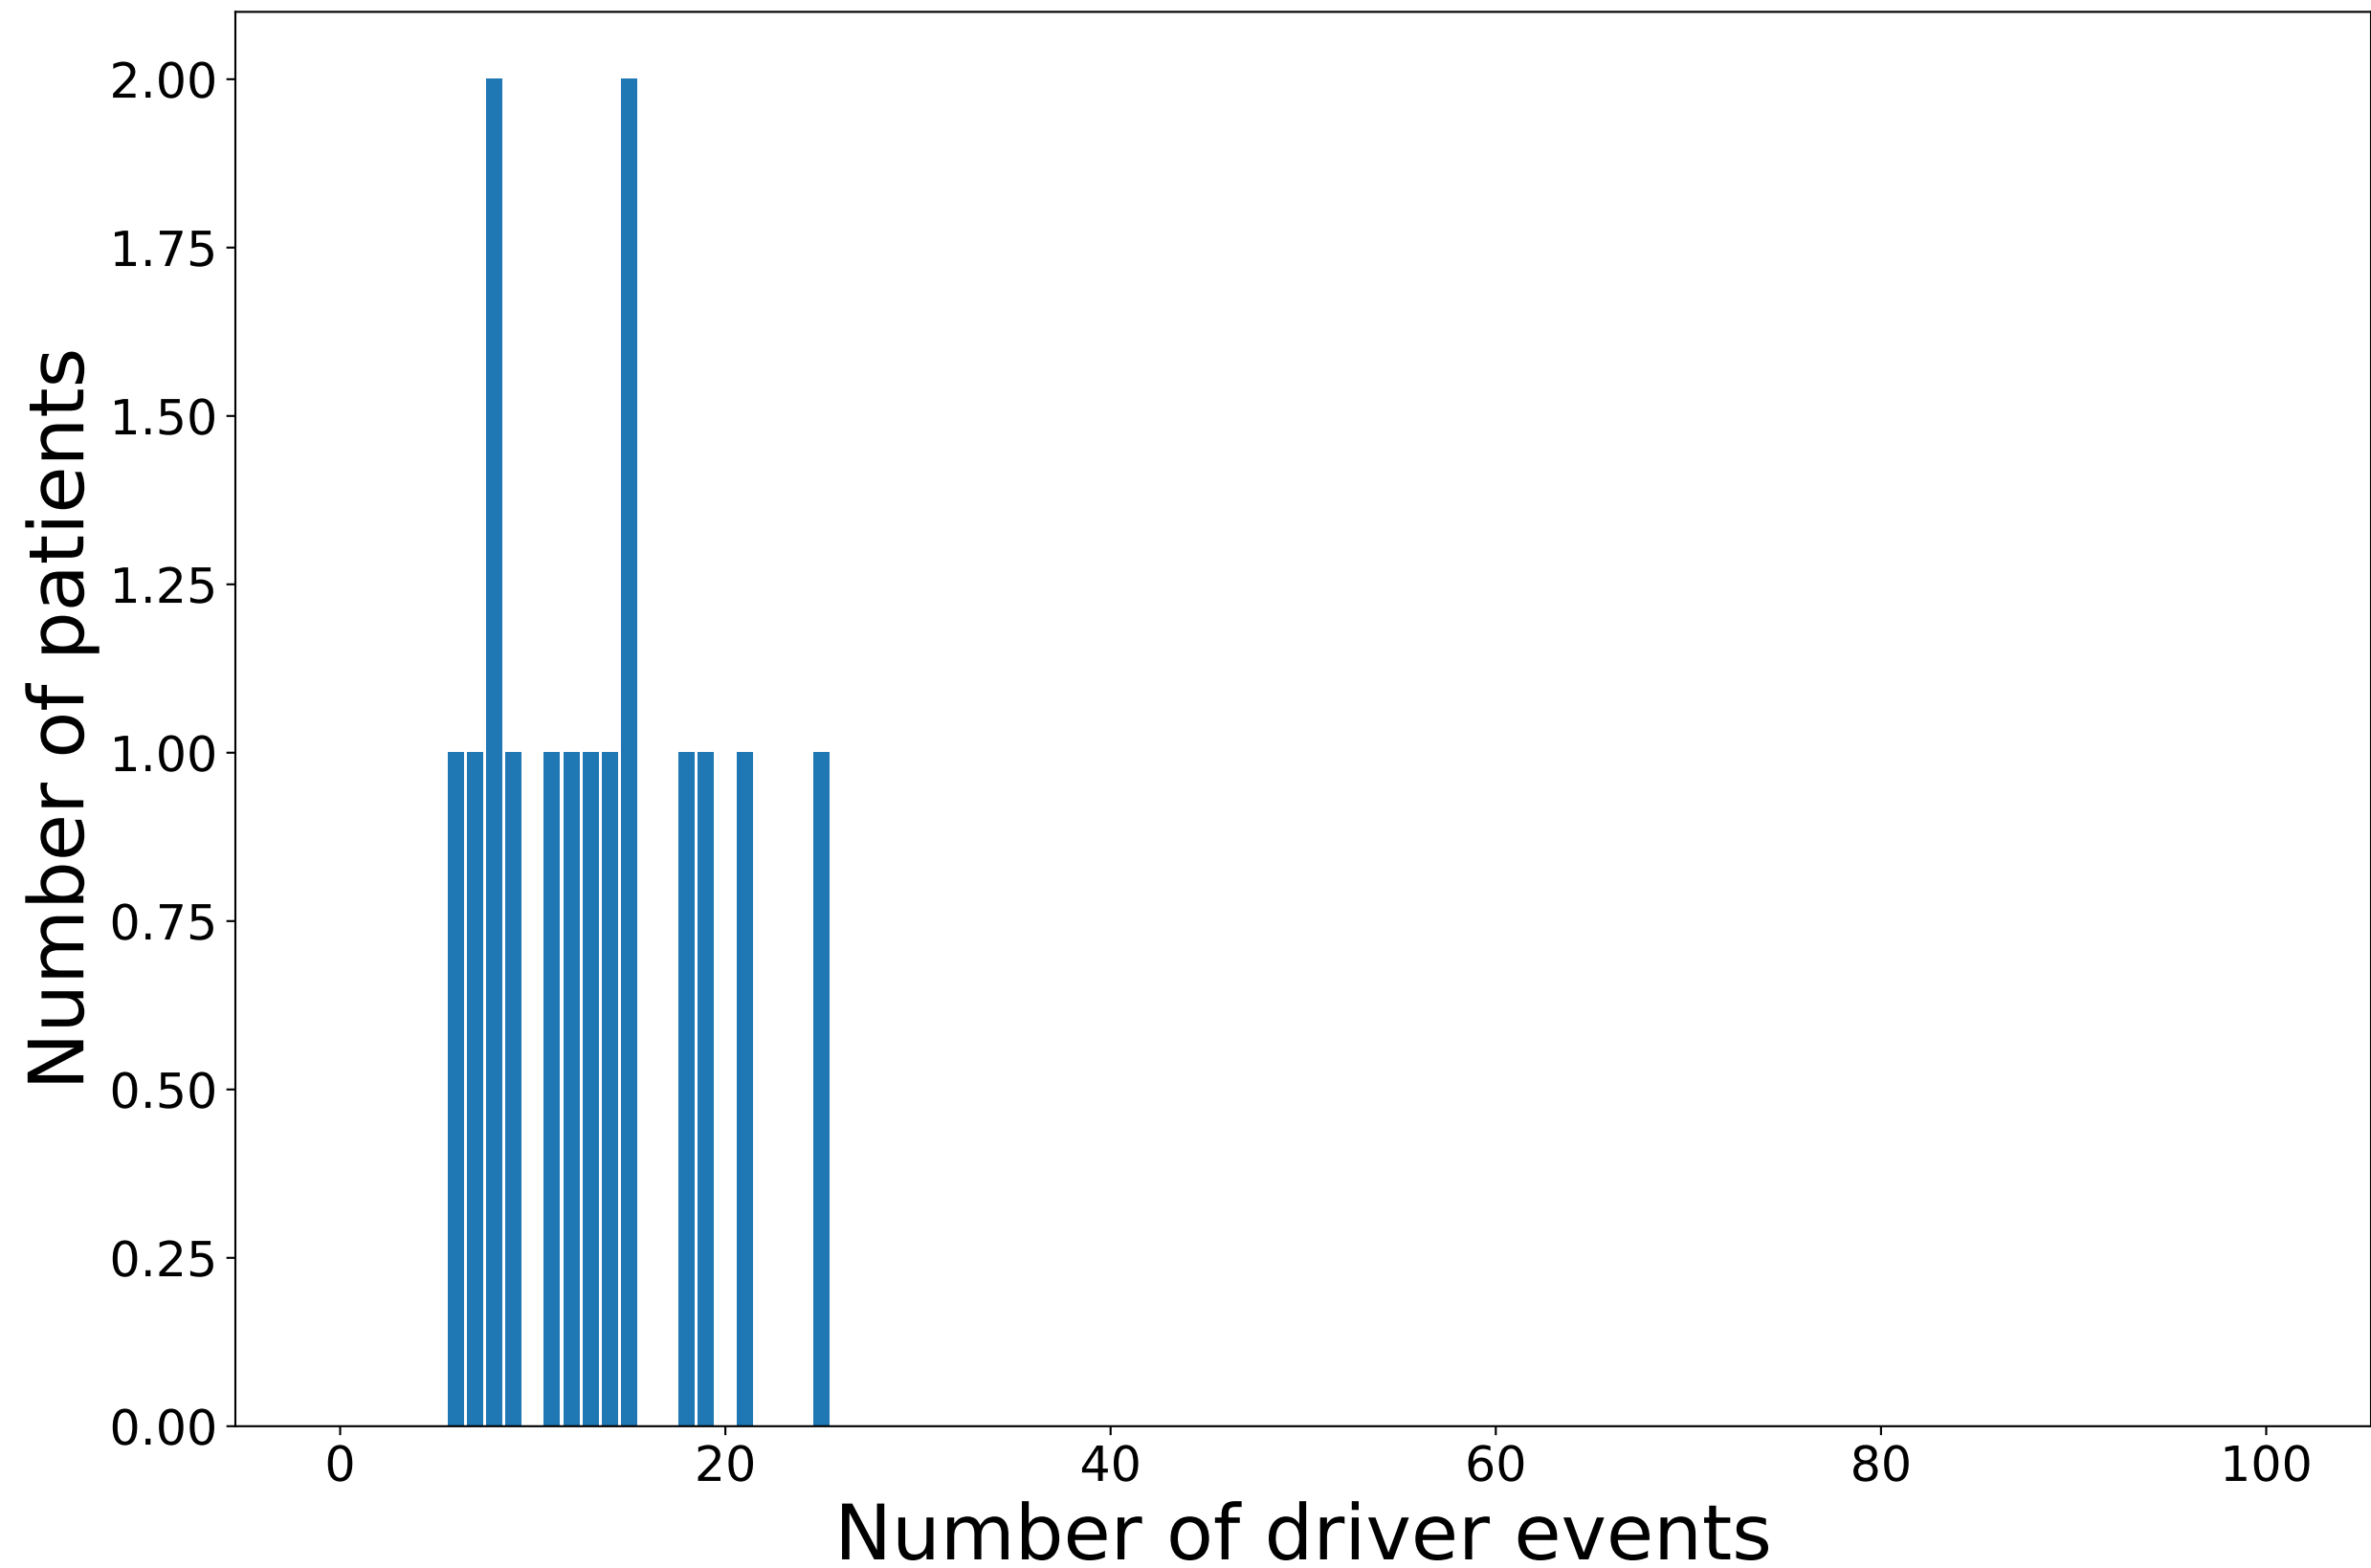

Supplement: Supplemental_Data_S1.zip [file Supplemental_Data_S1.zip]

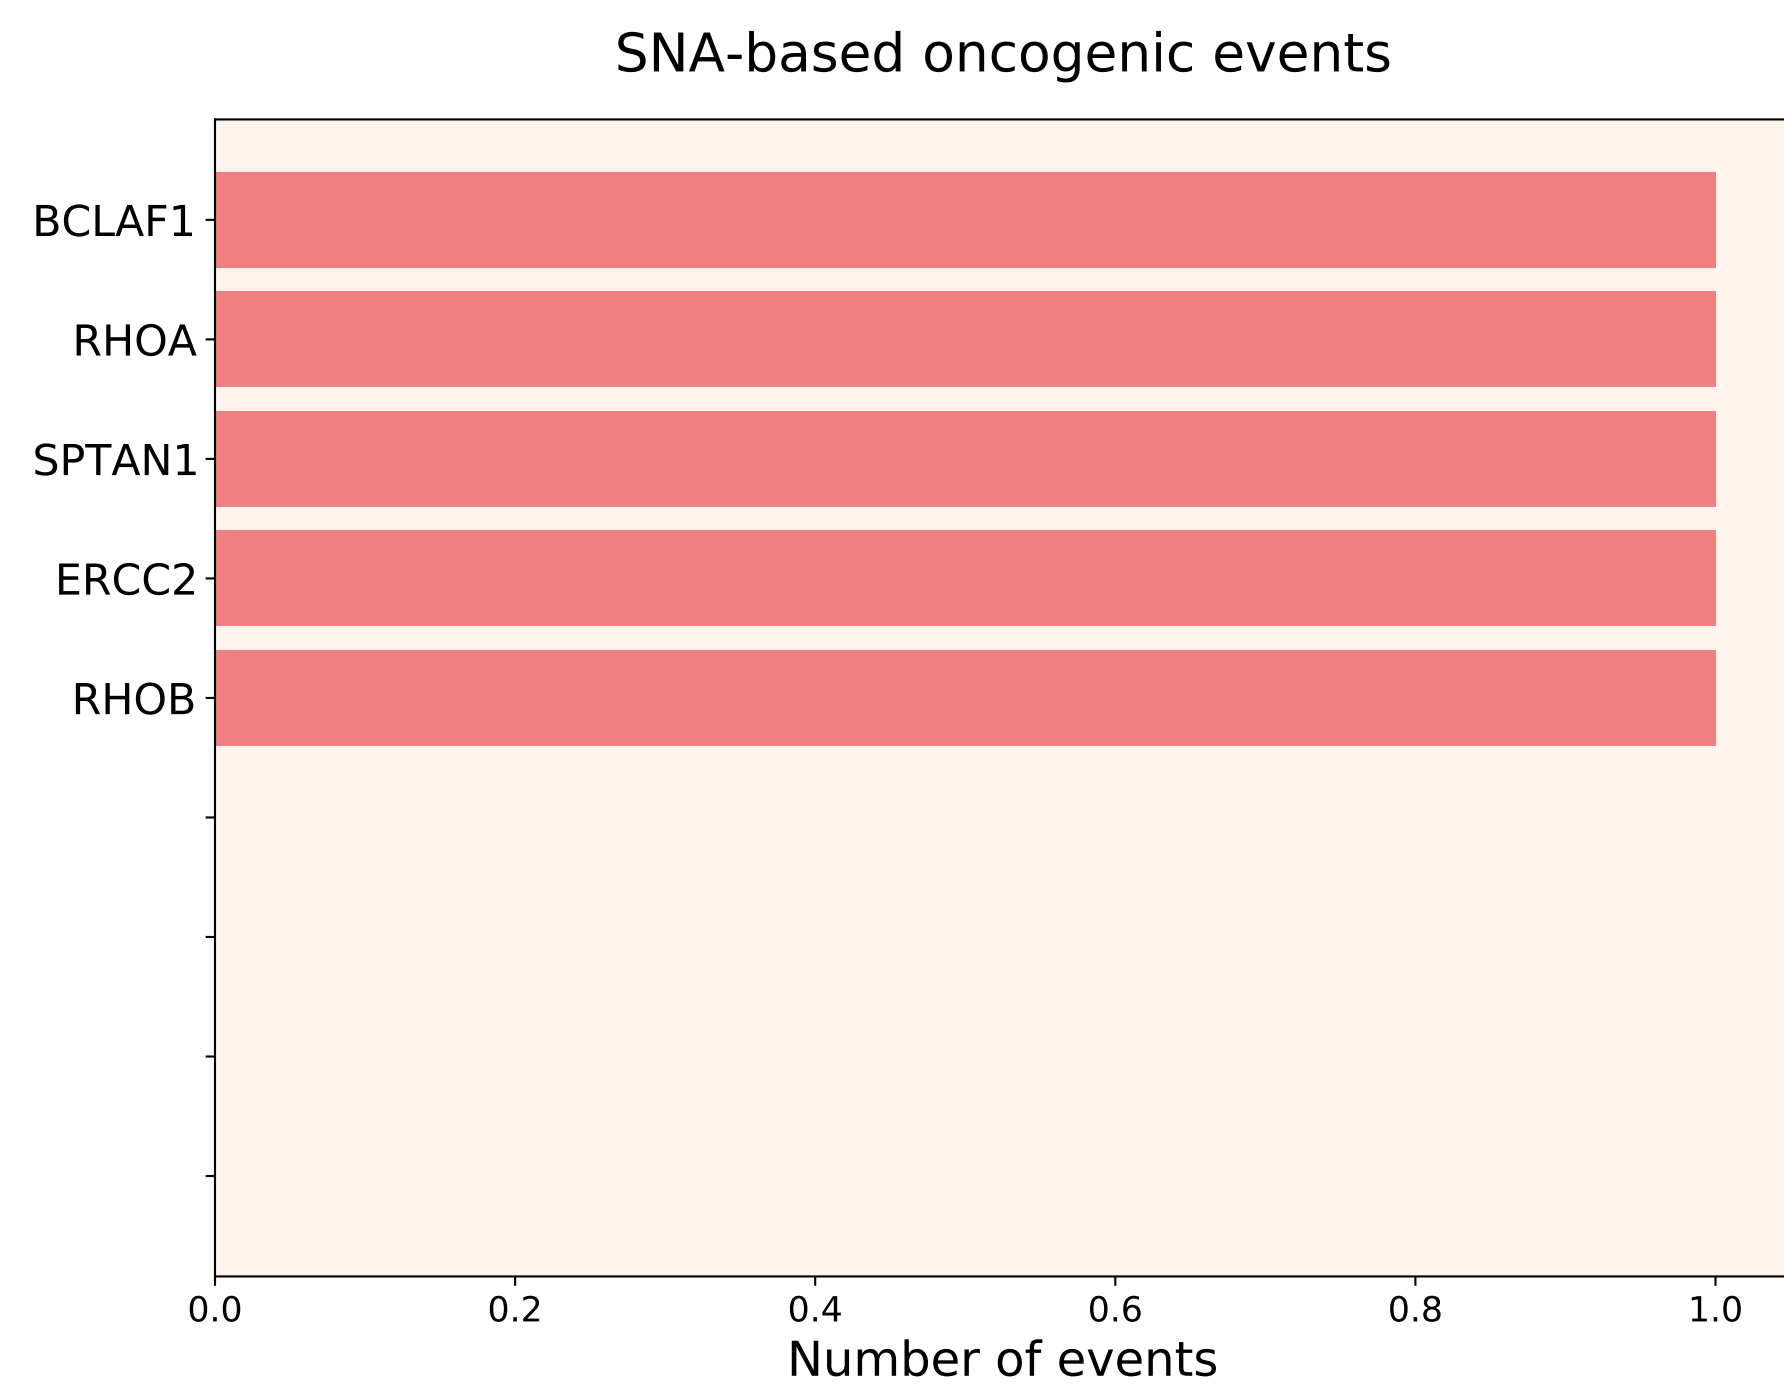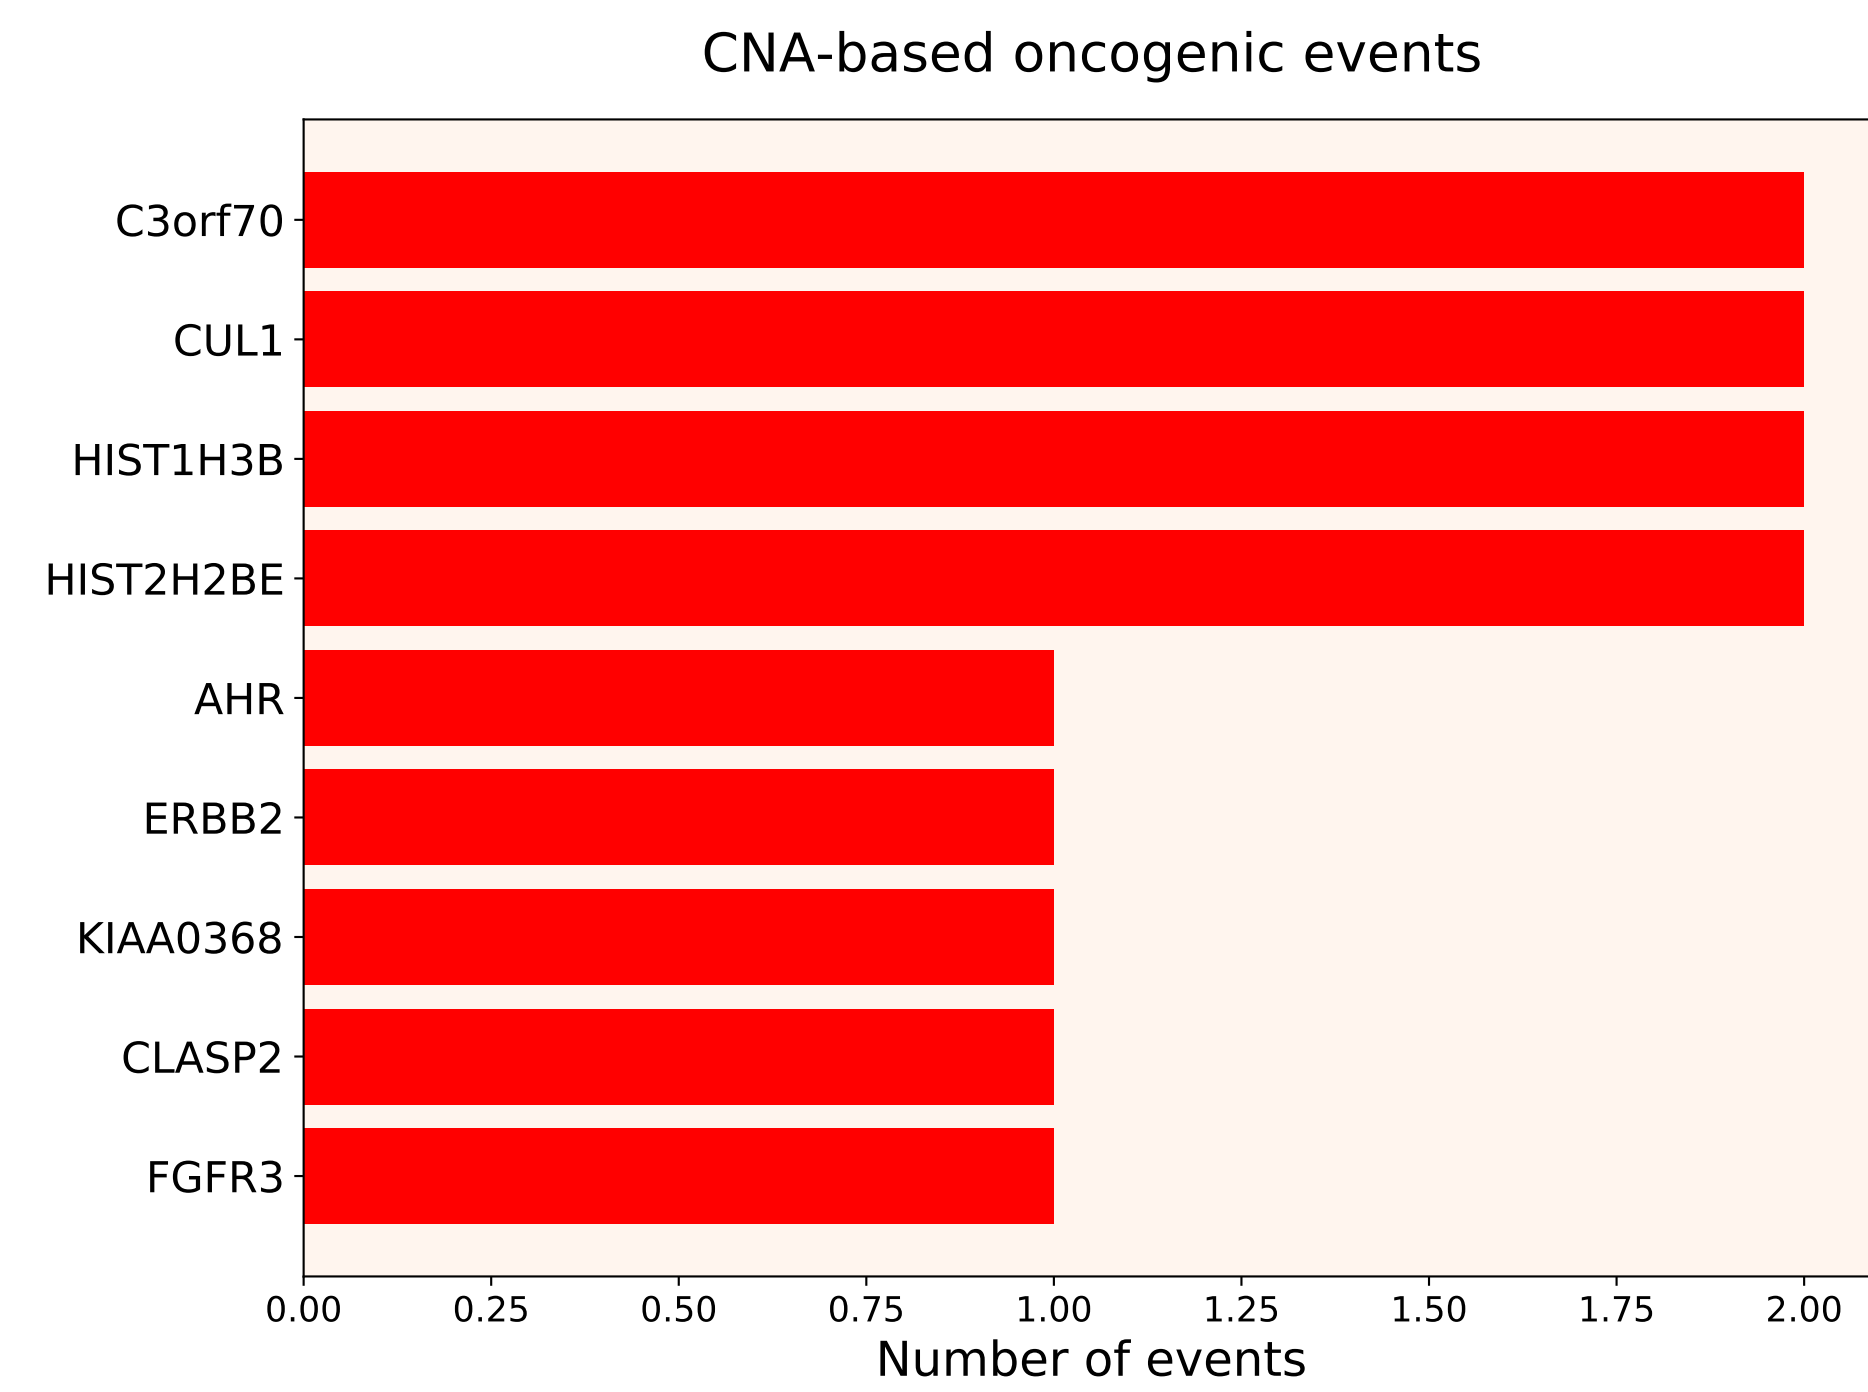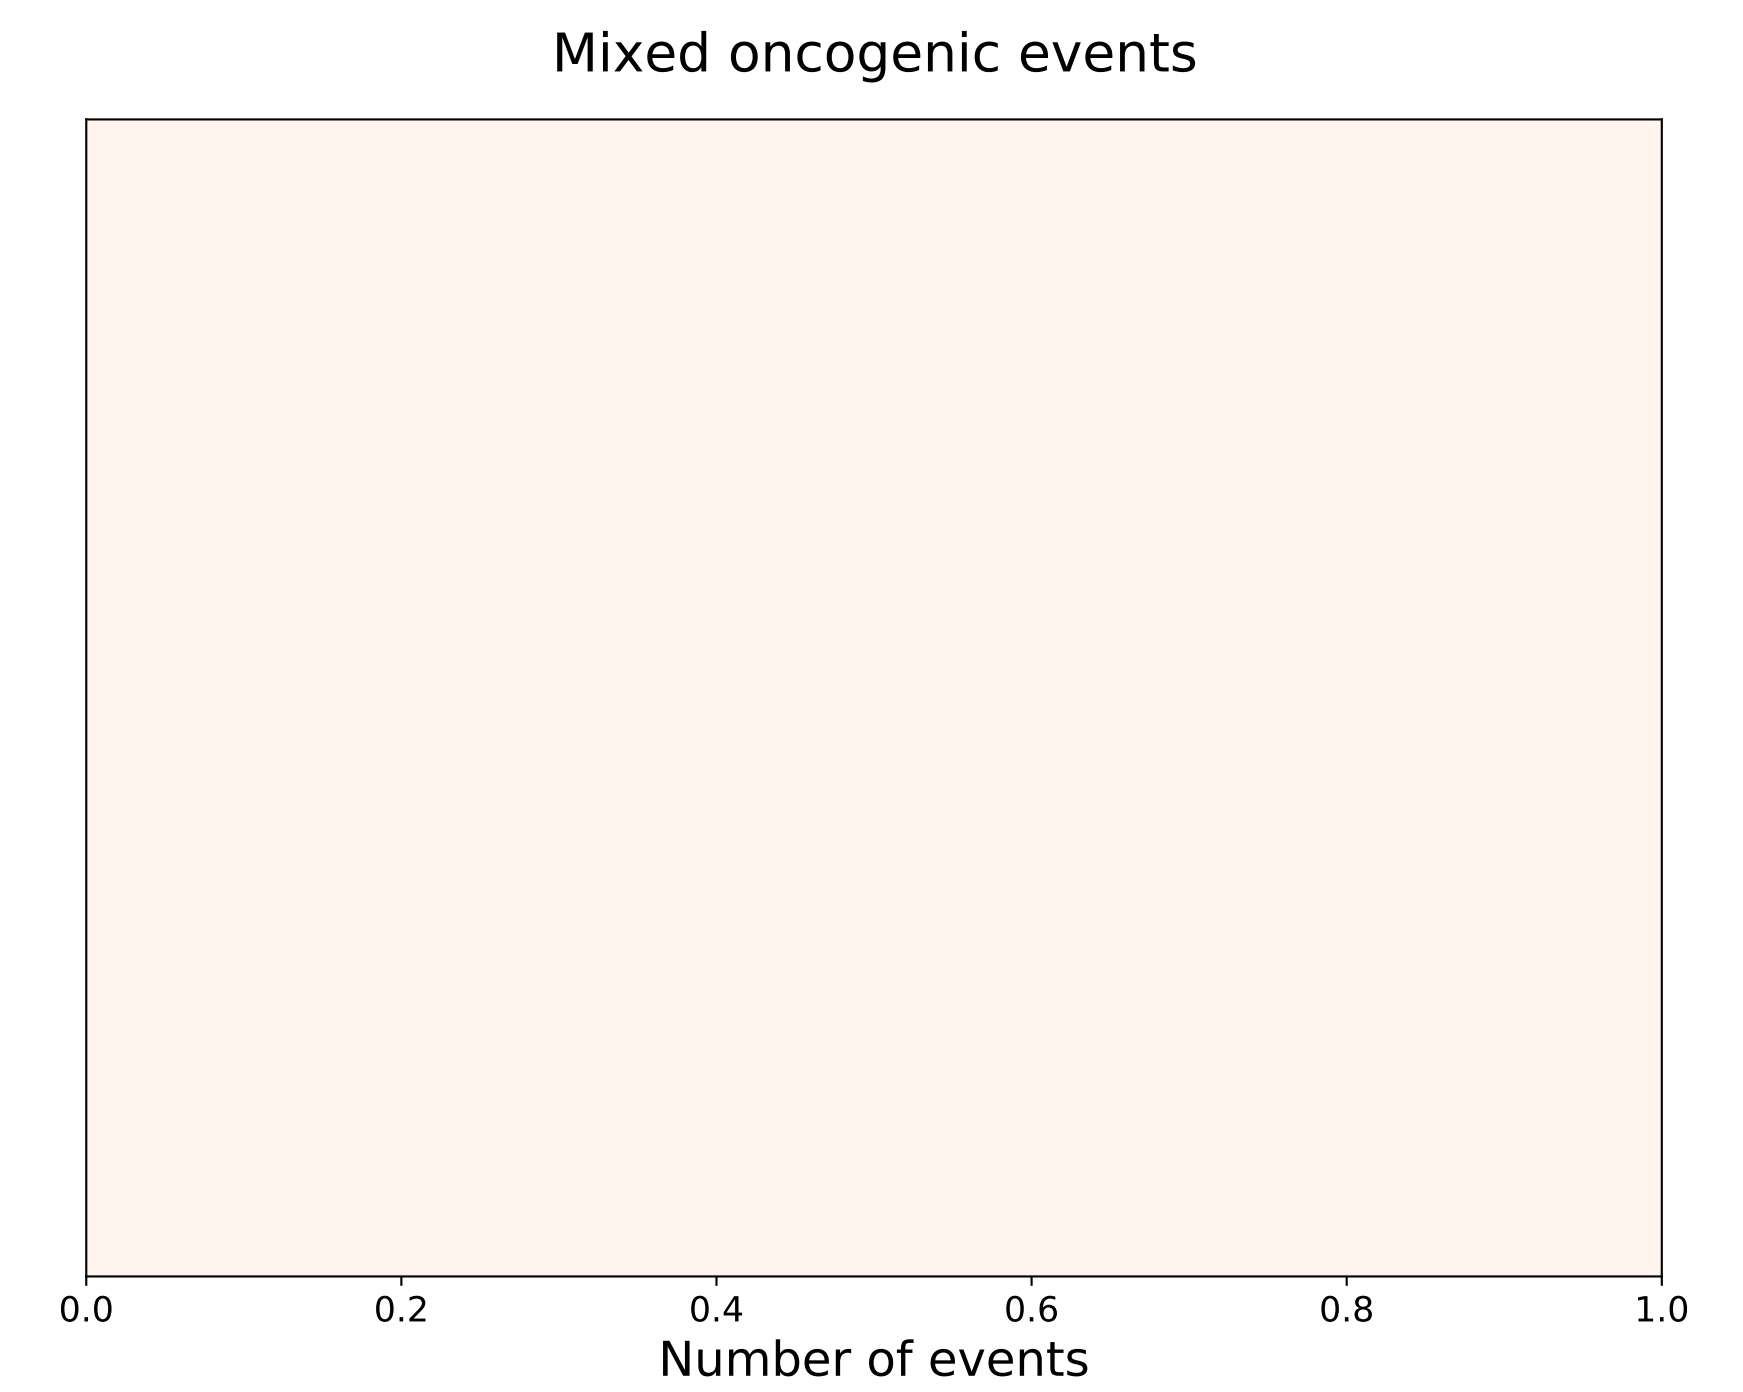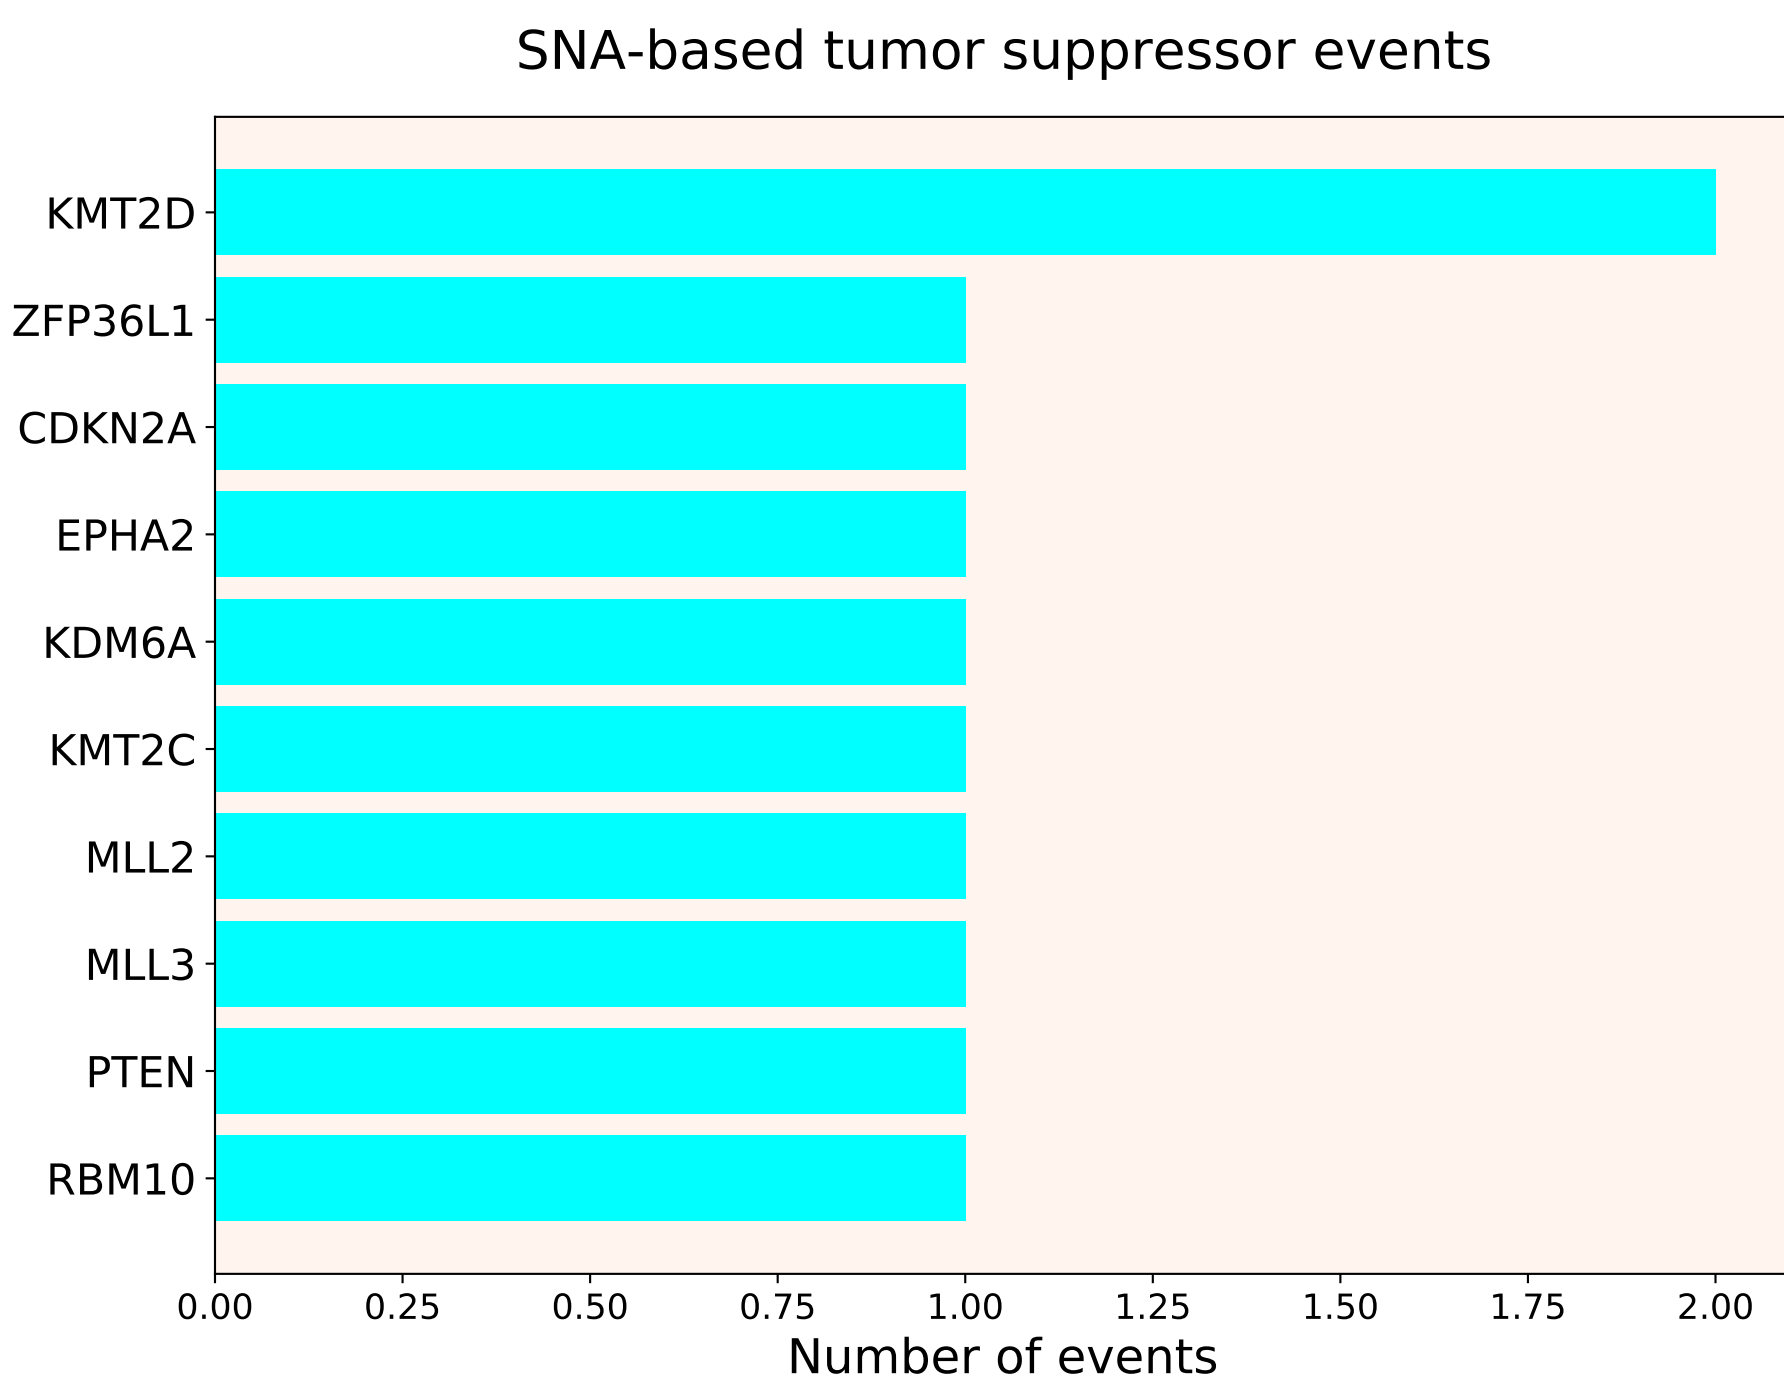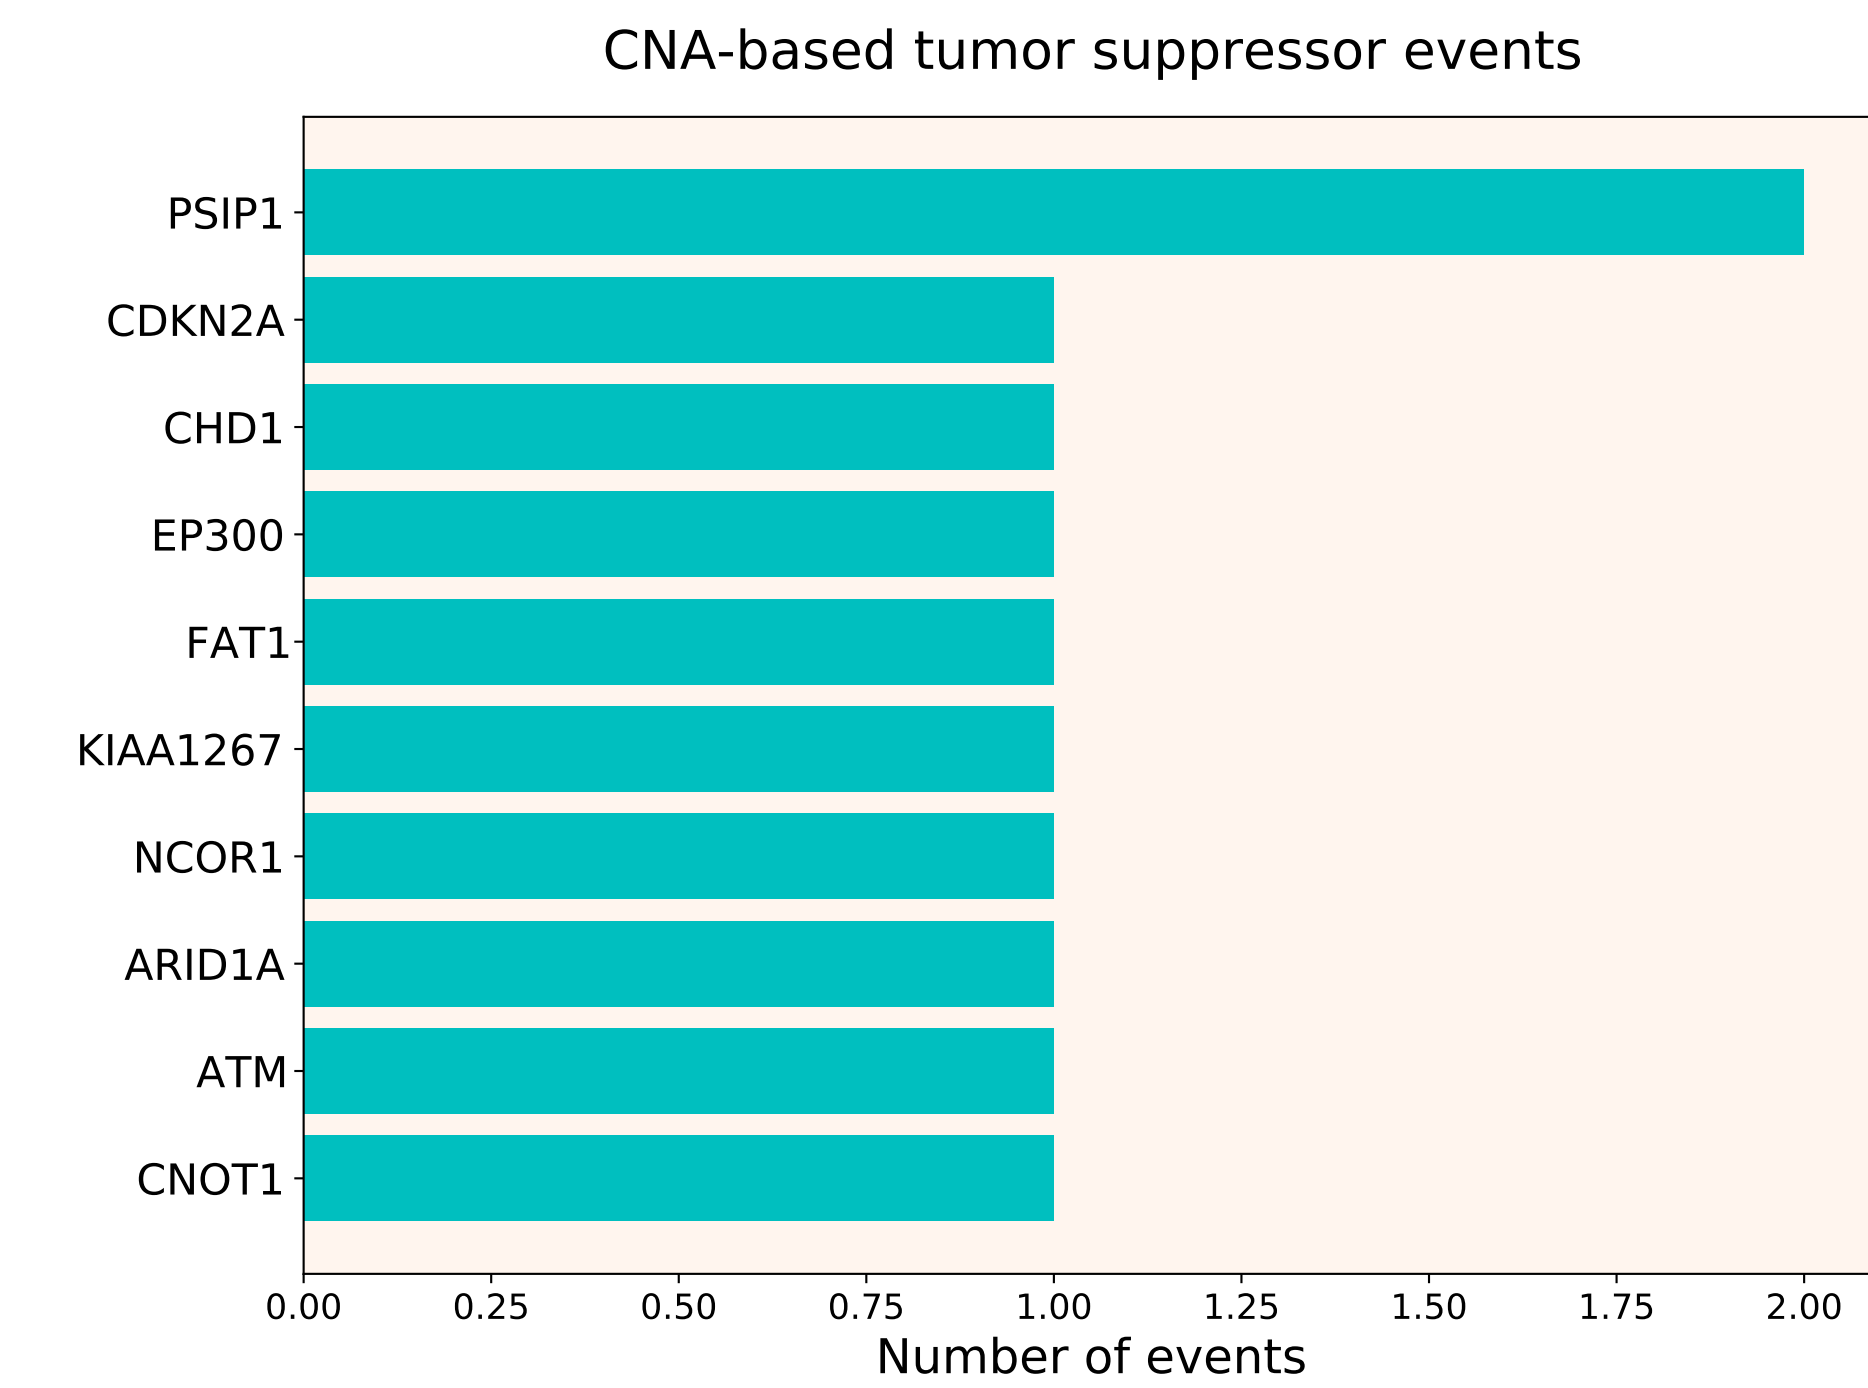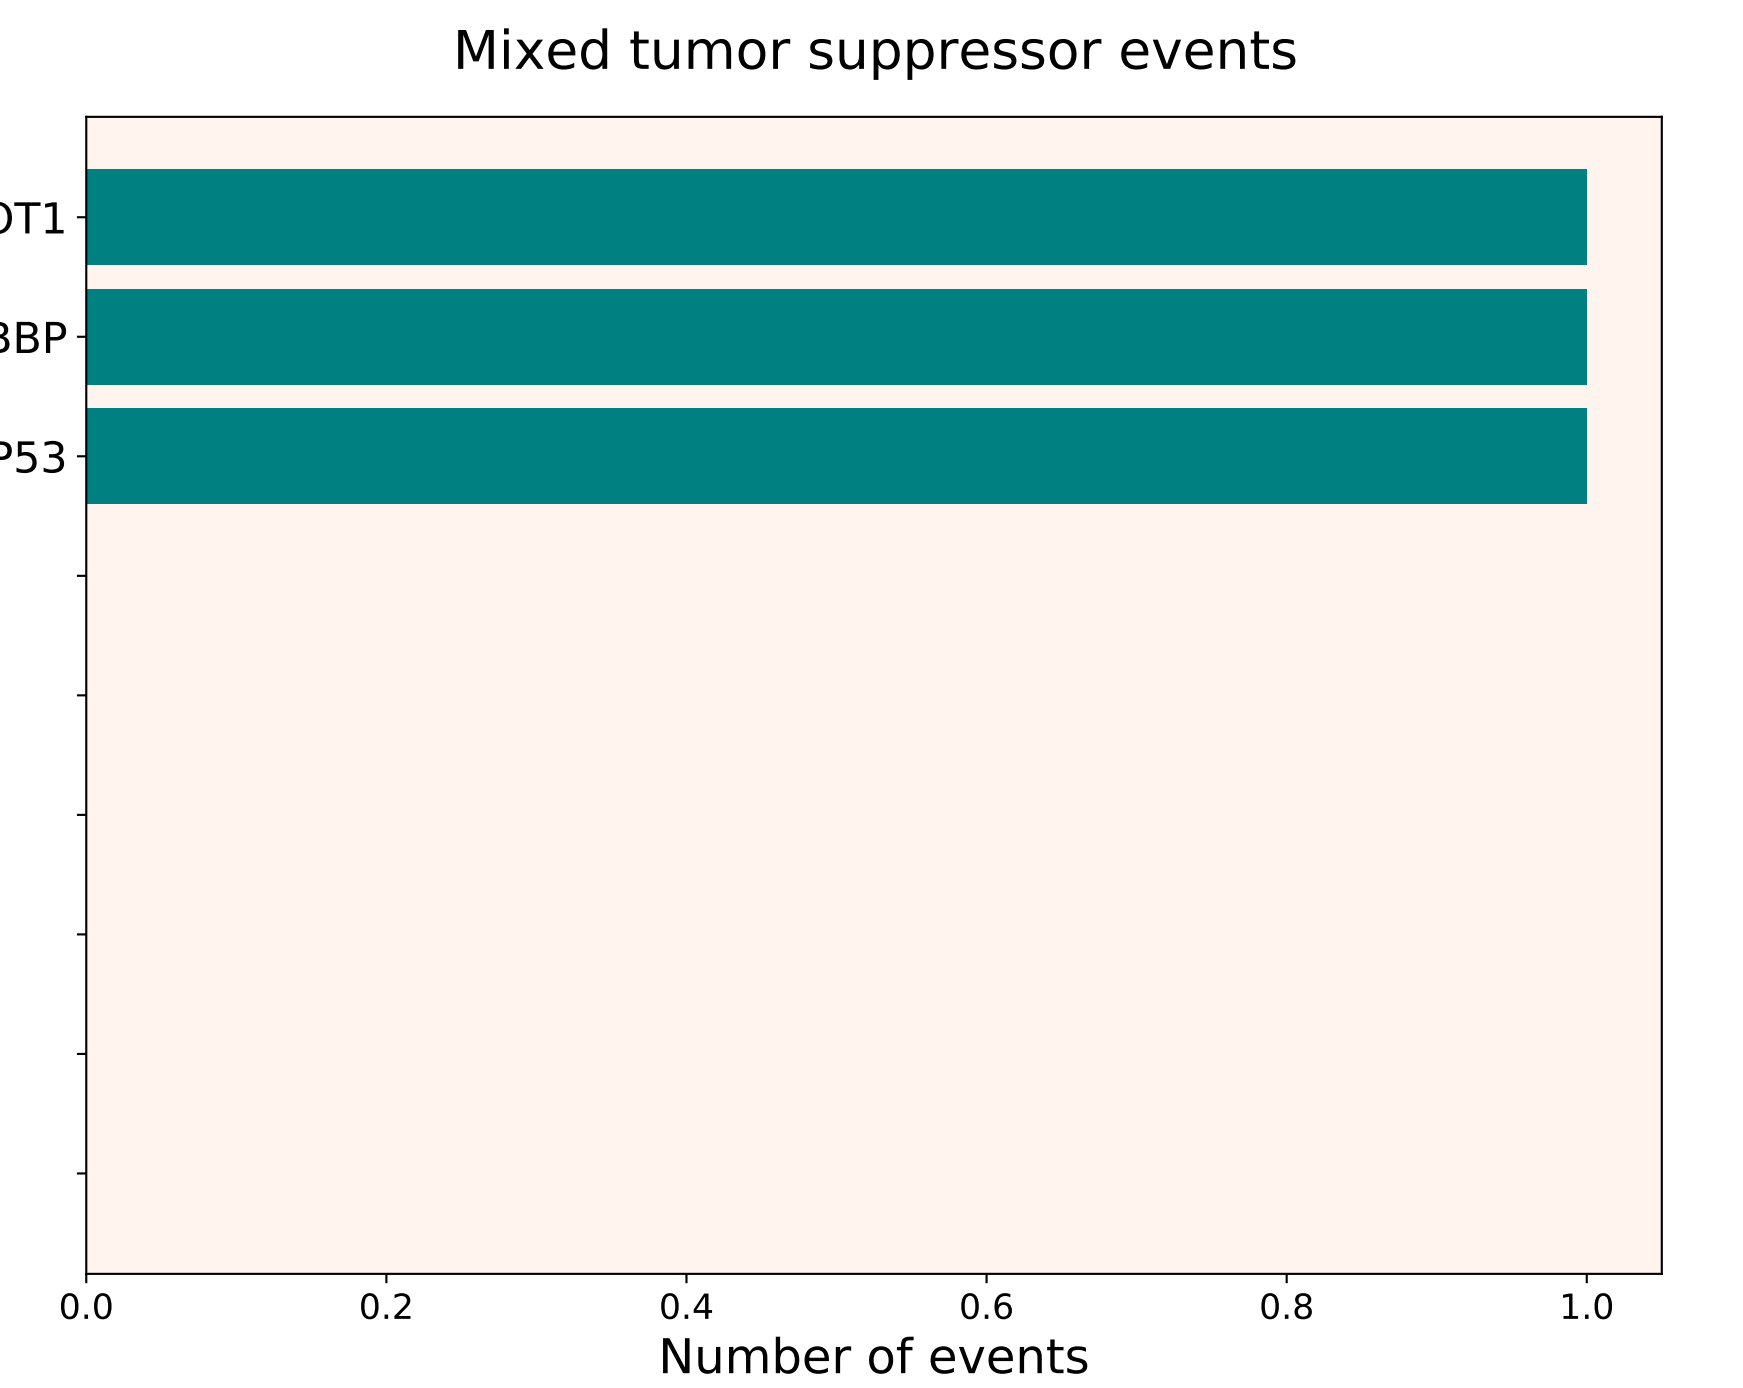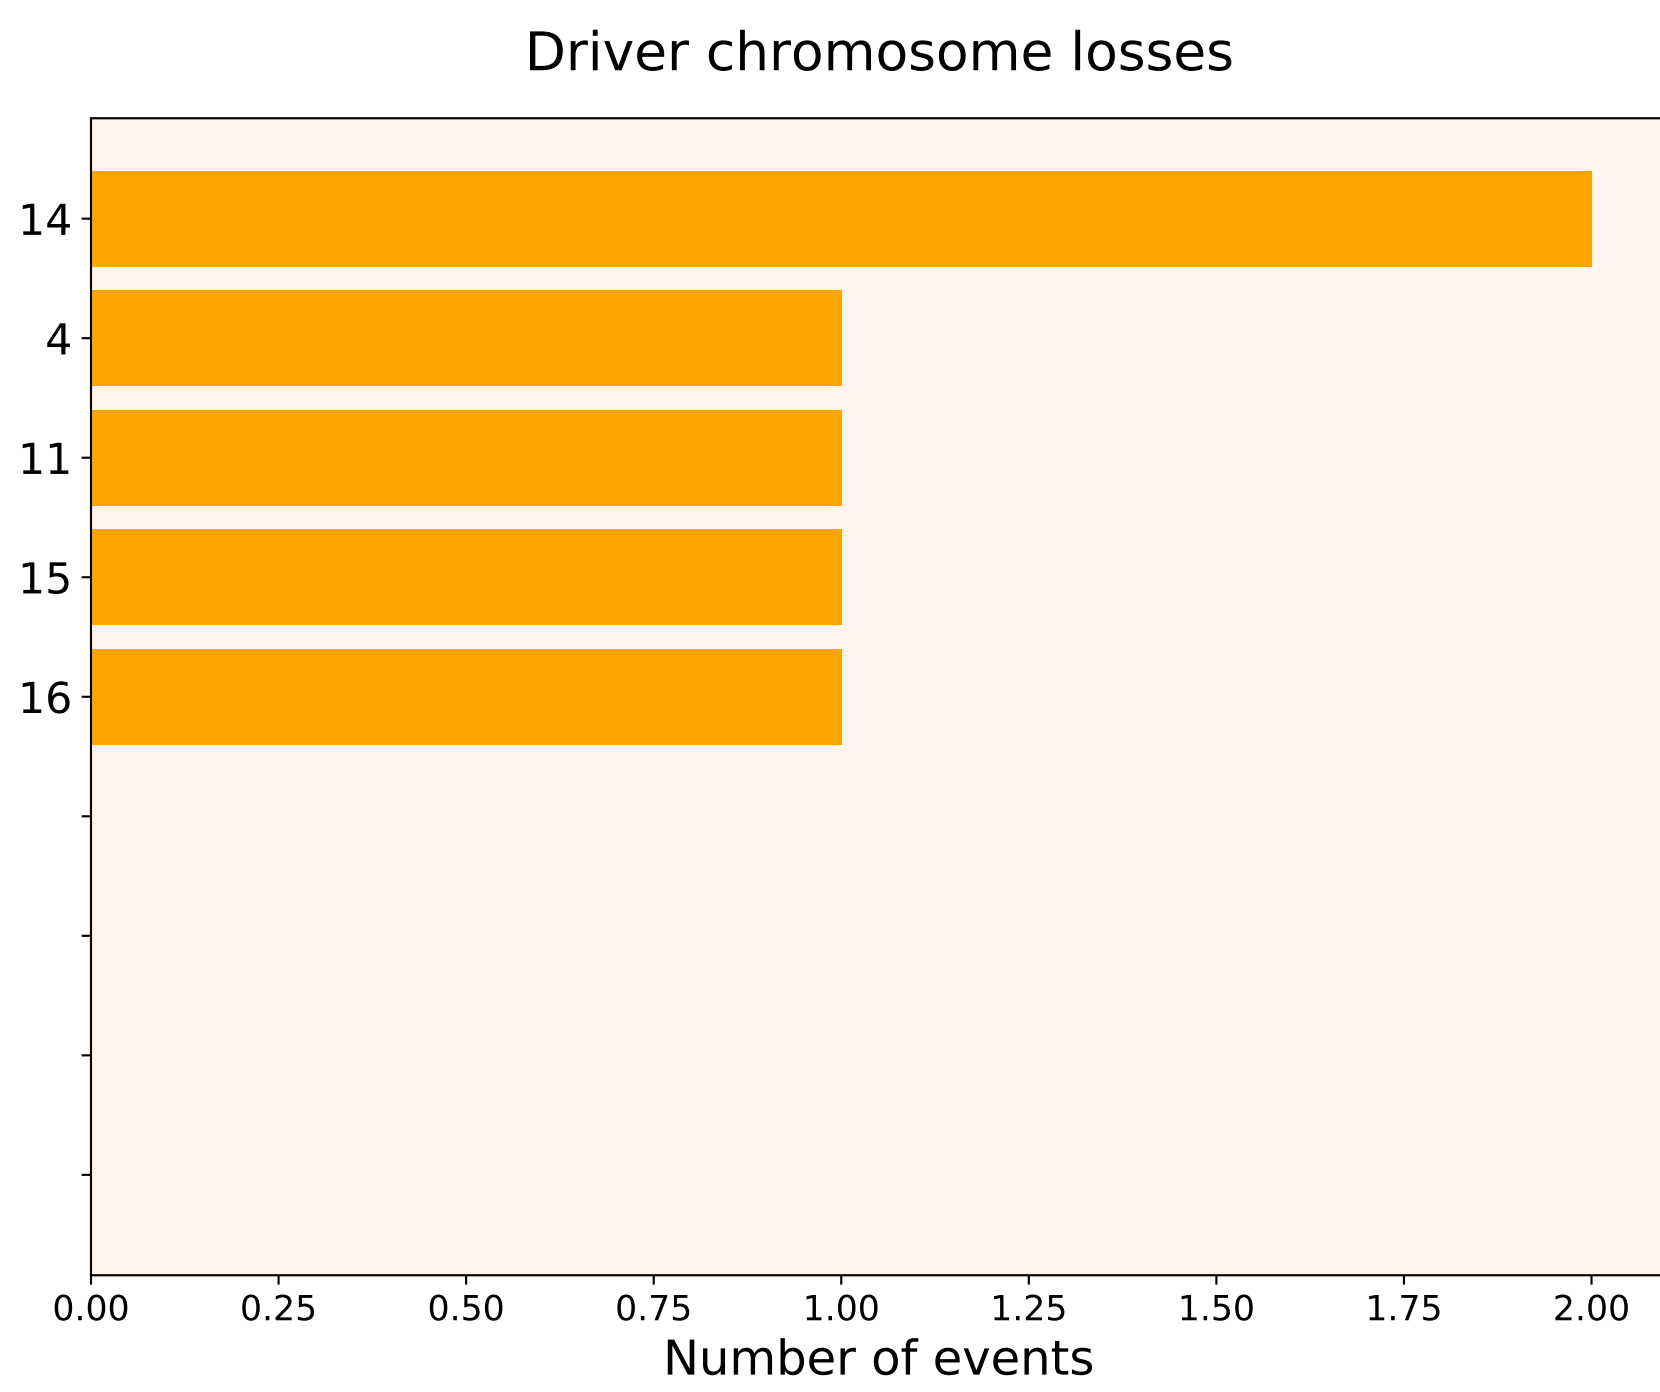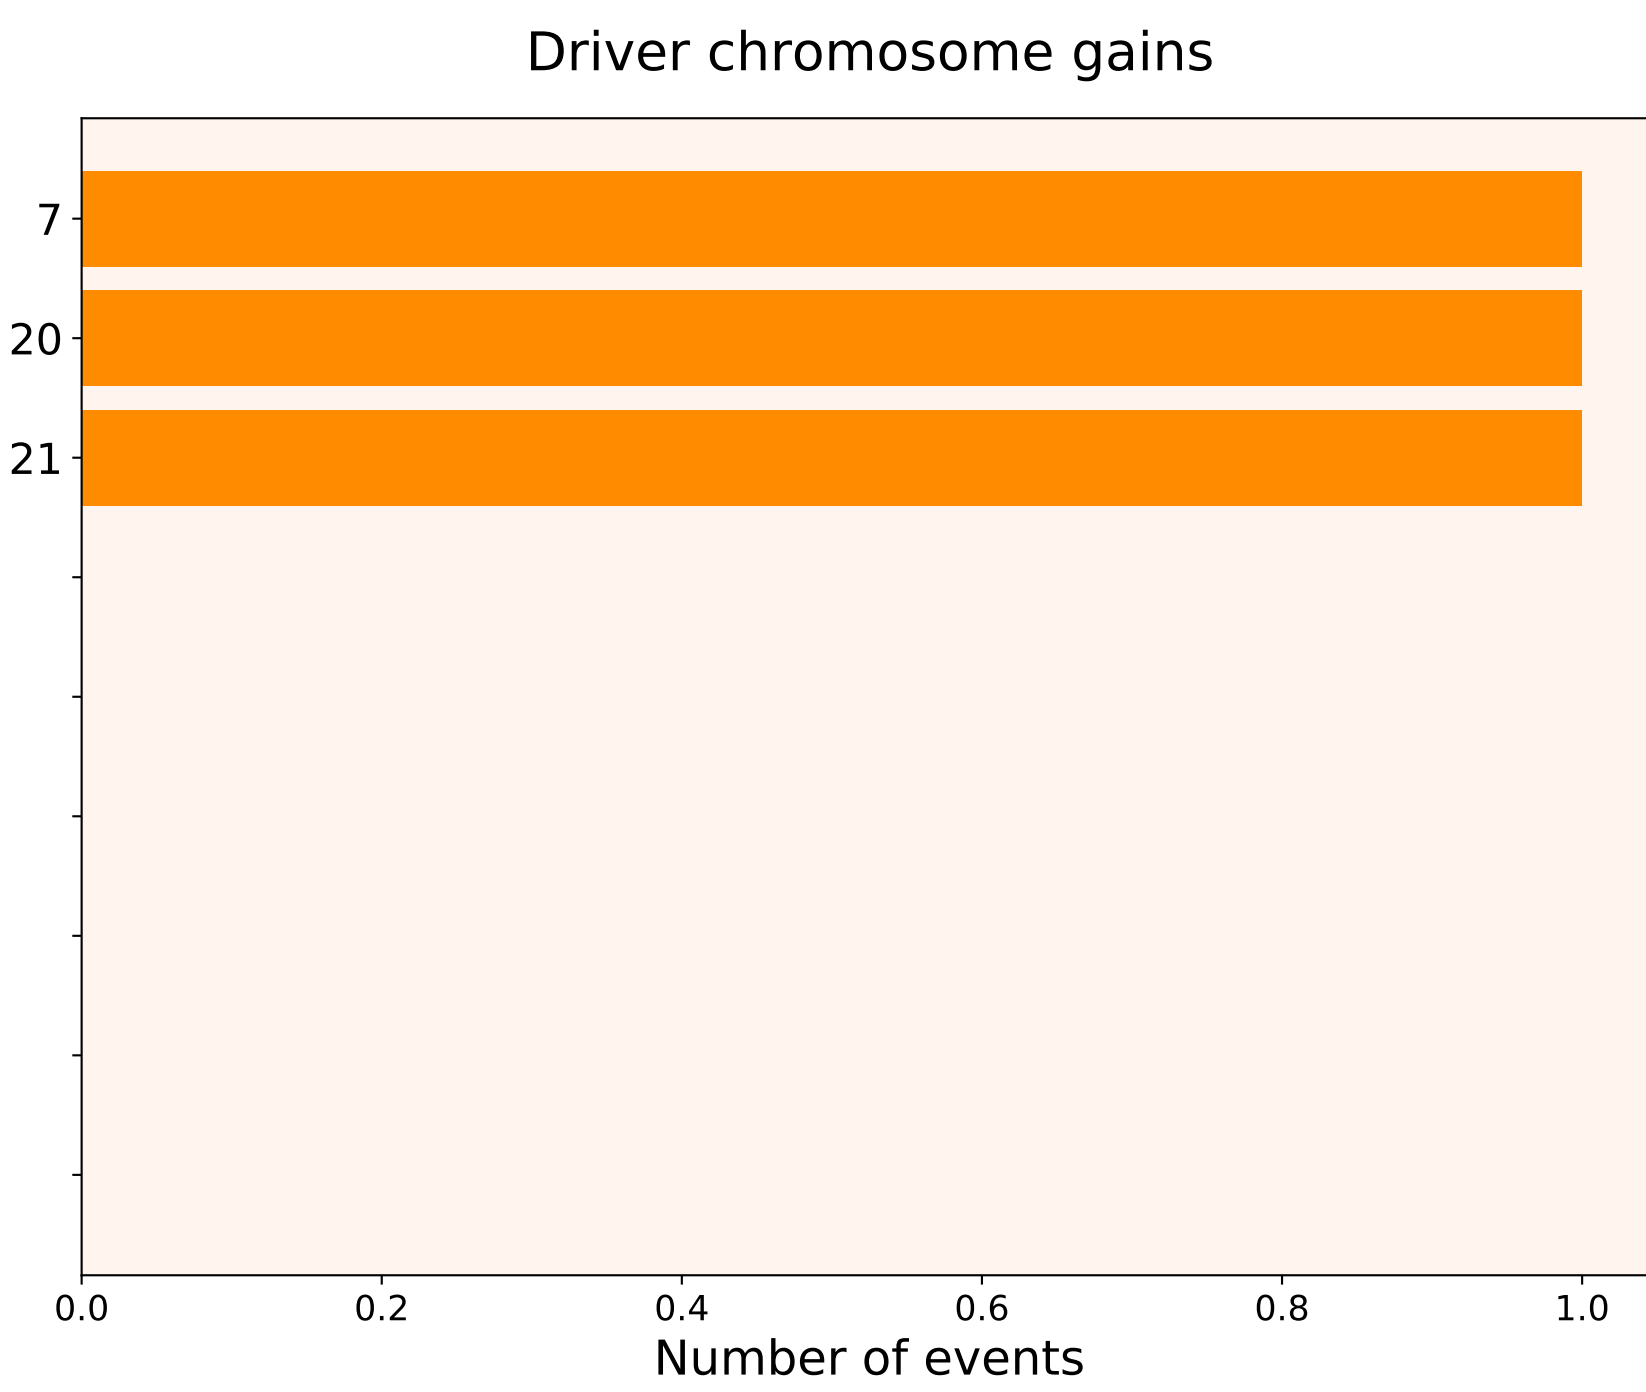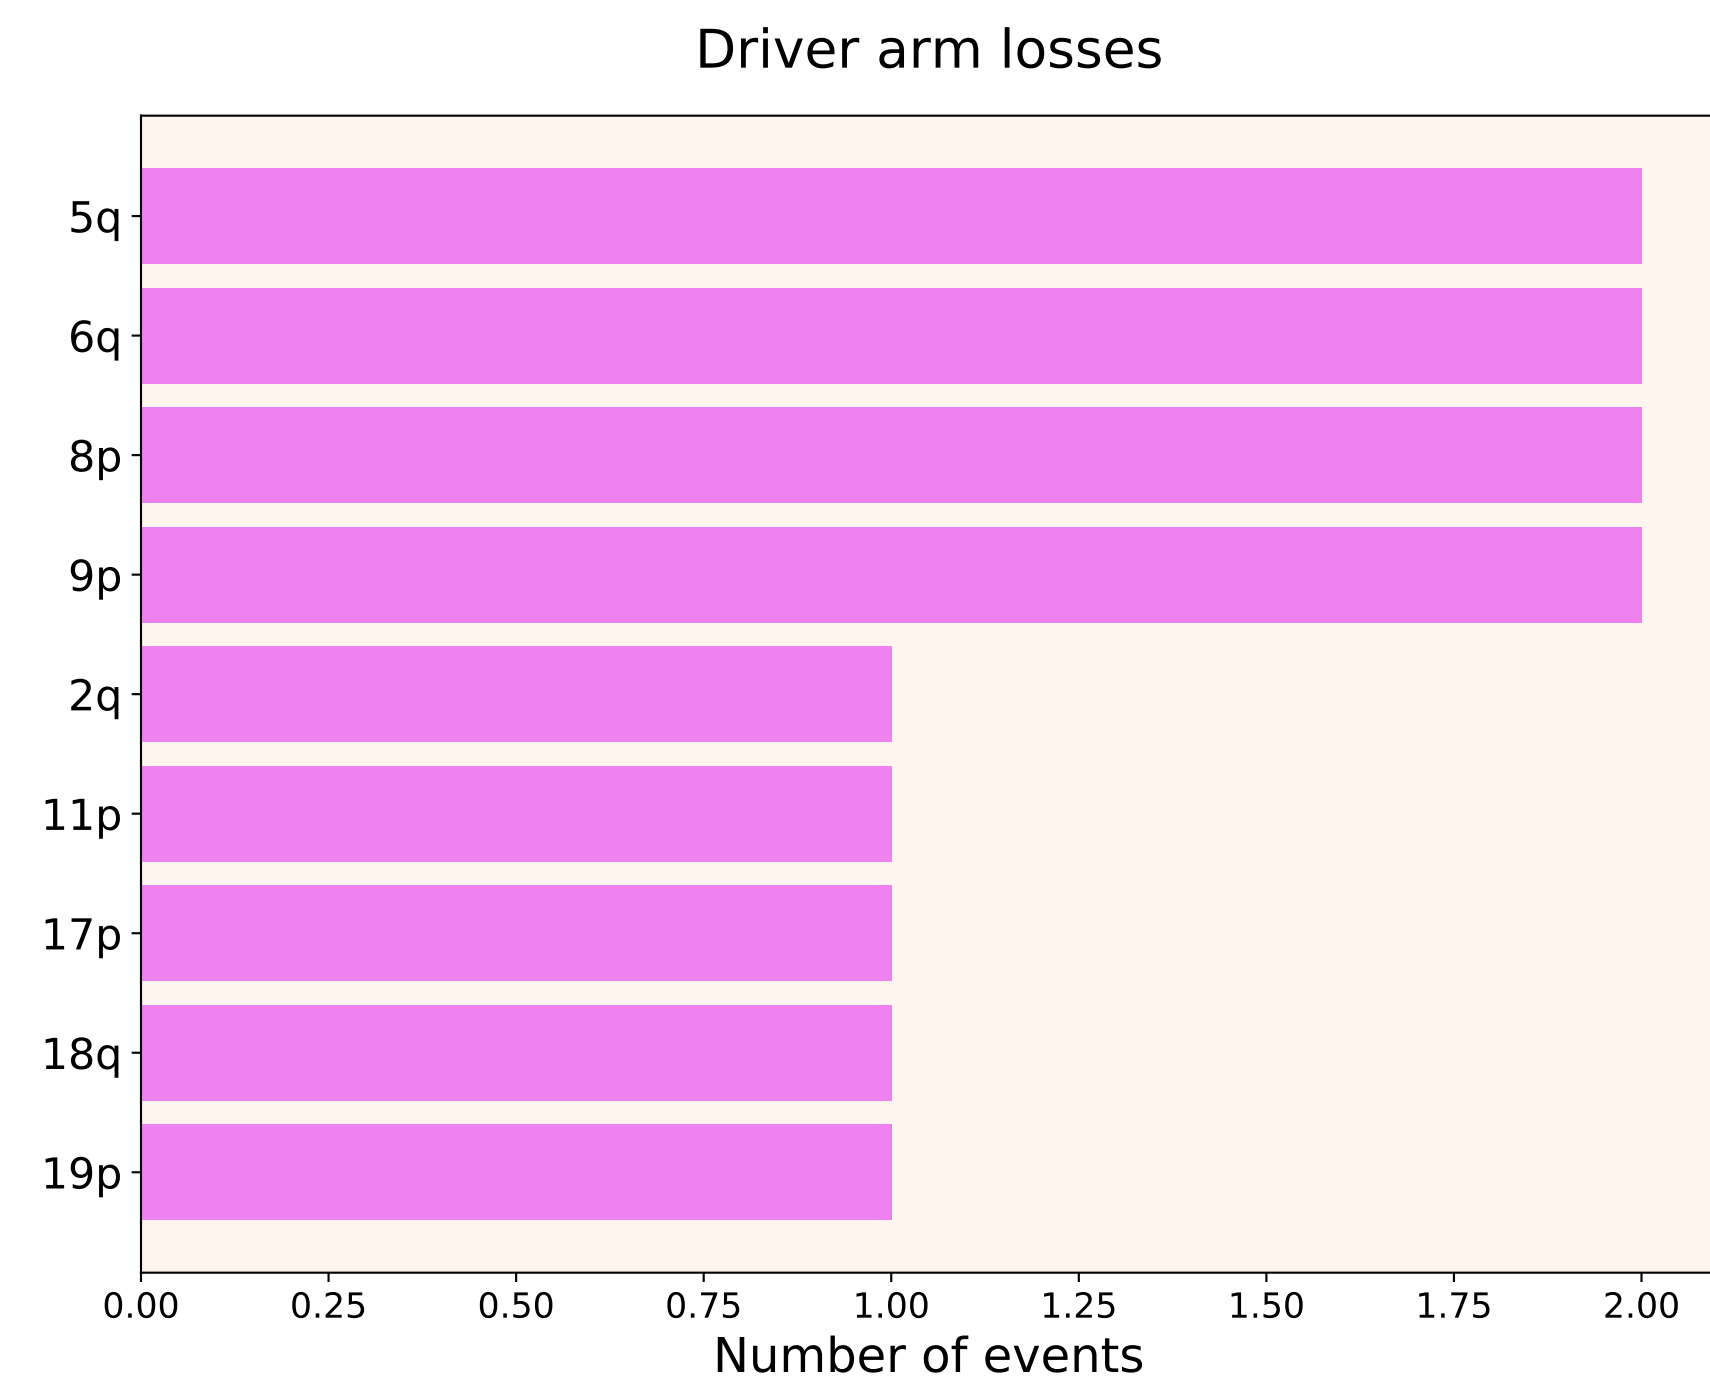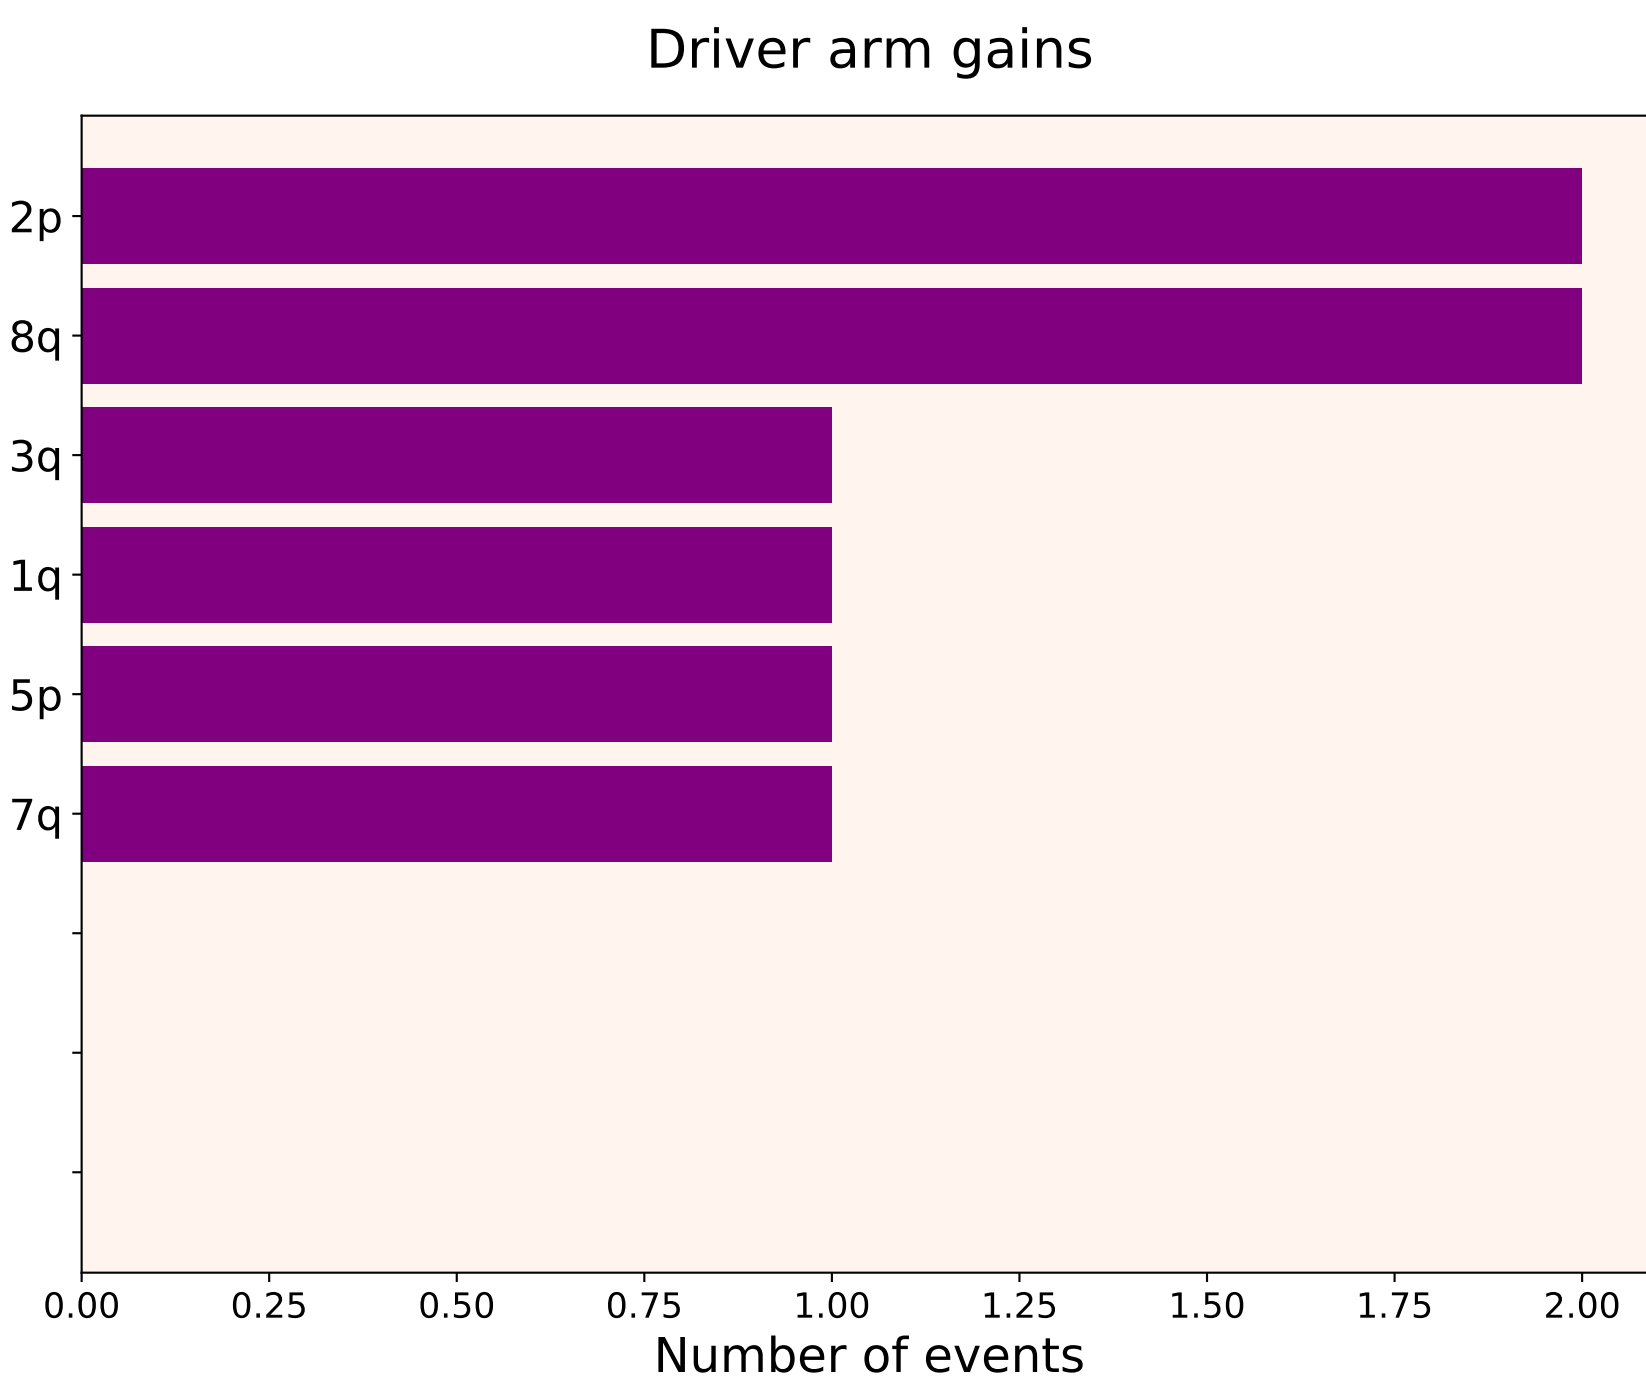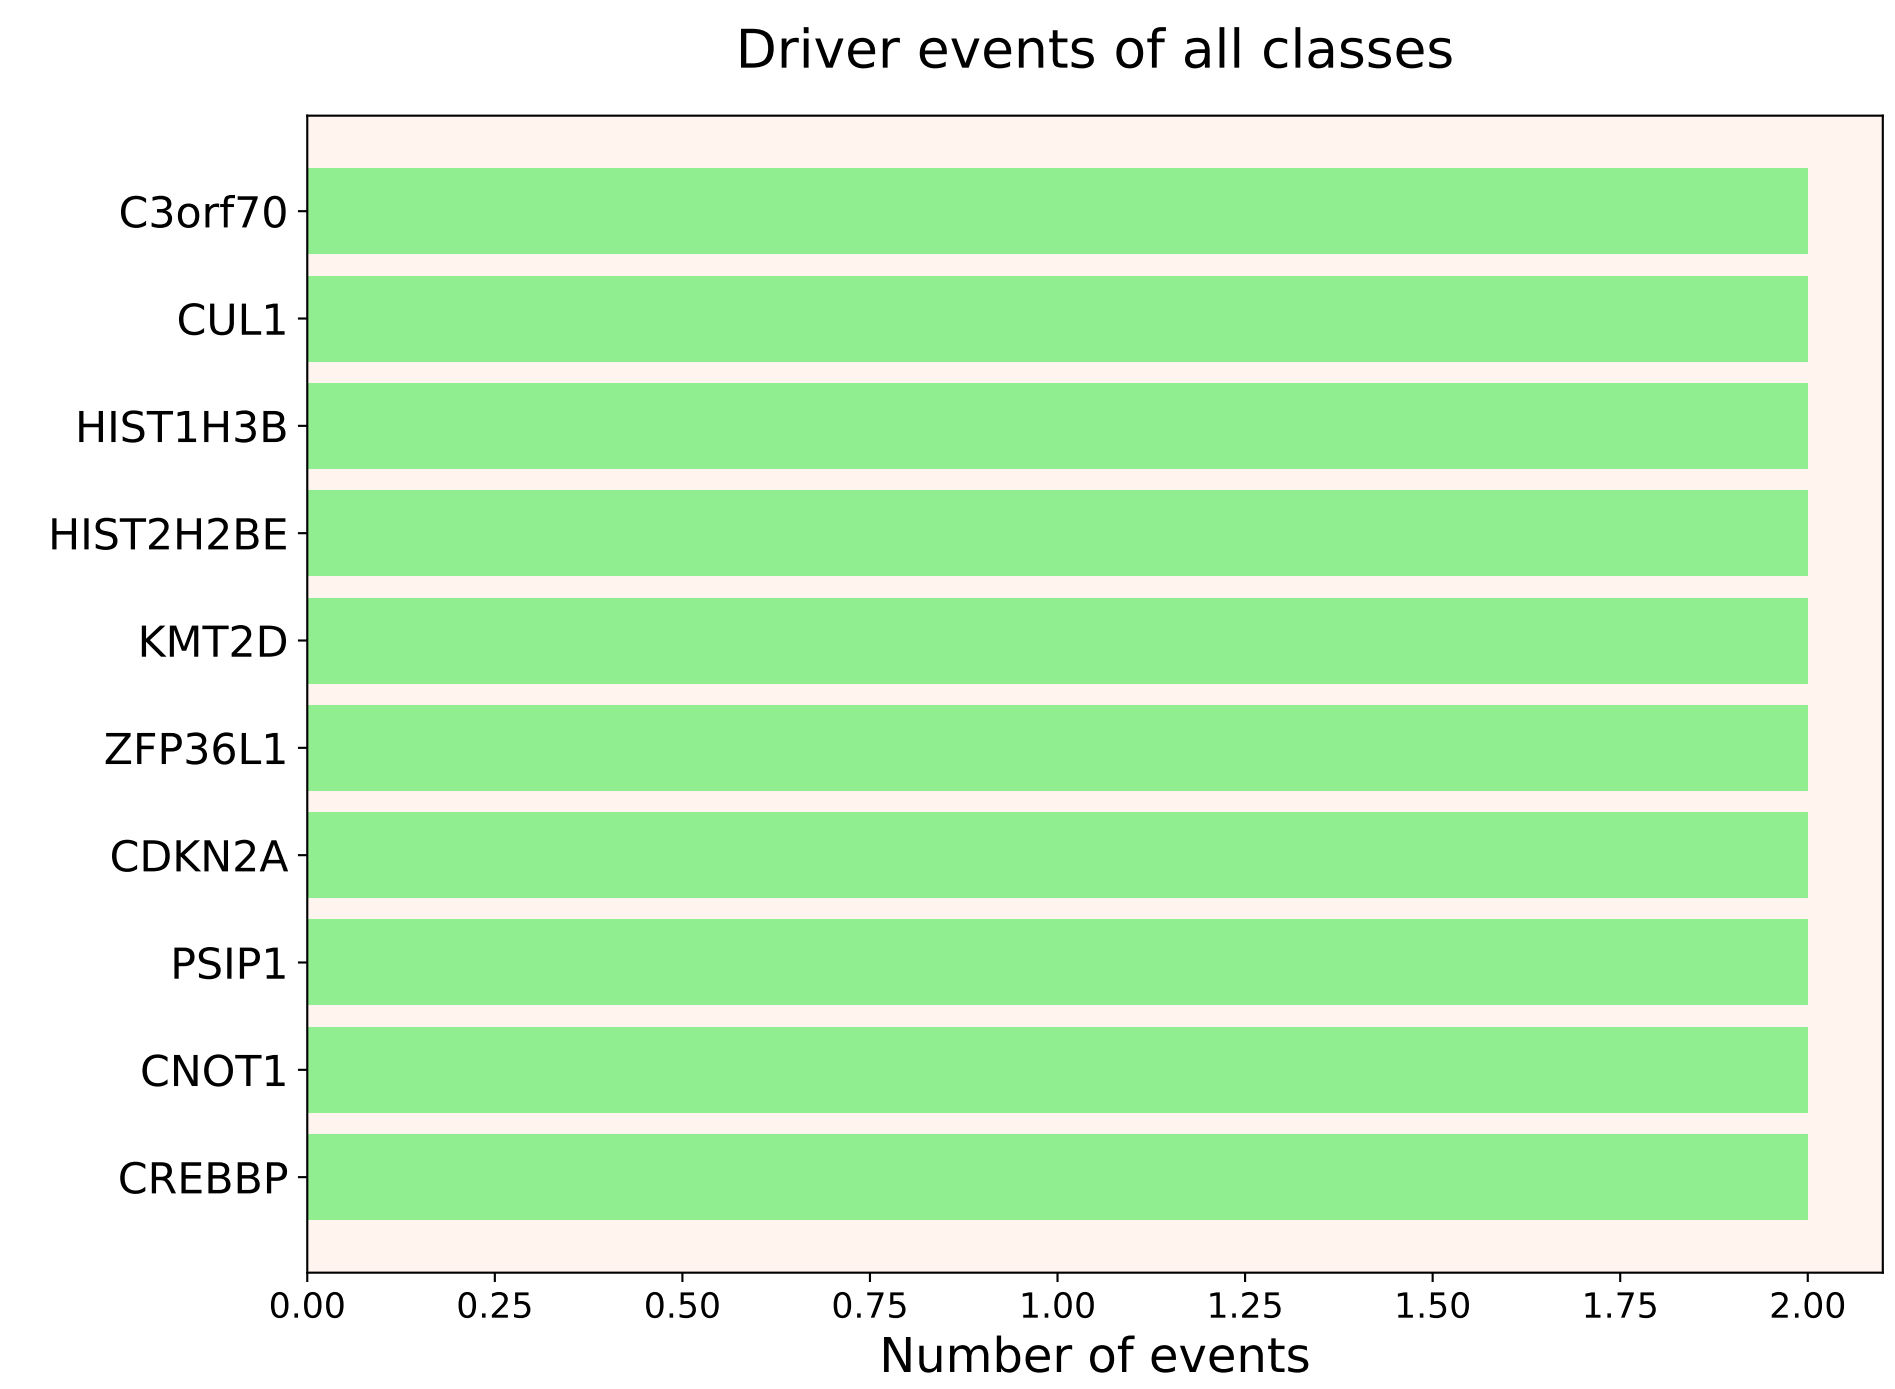

Supplement: Supplemental_Data_S1.zip [file Supplemental_Data_S1.zip]

# LGG

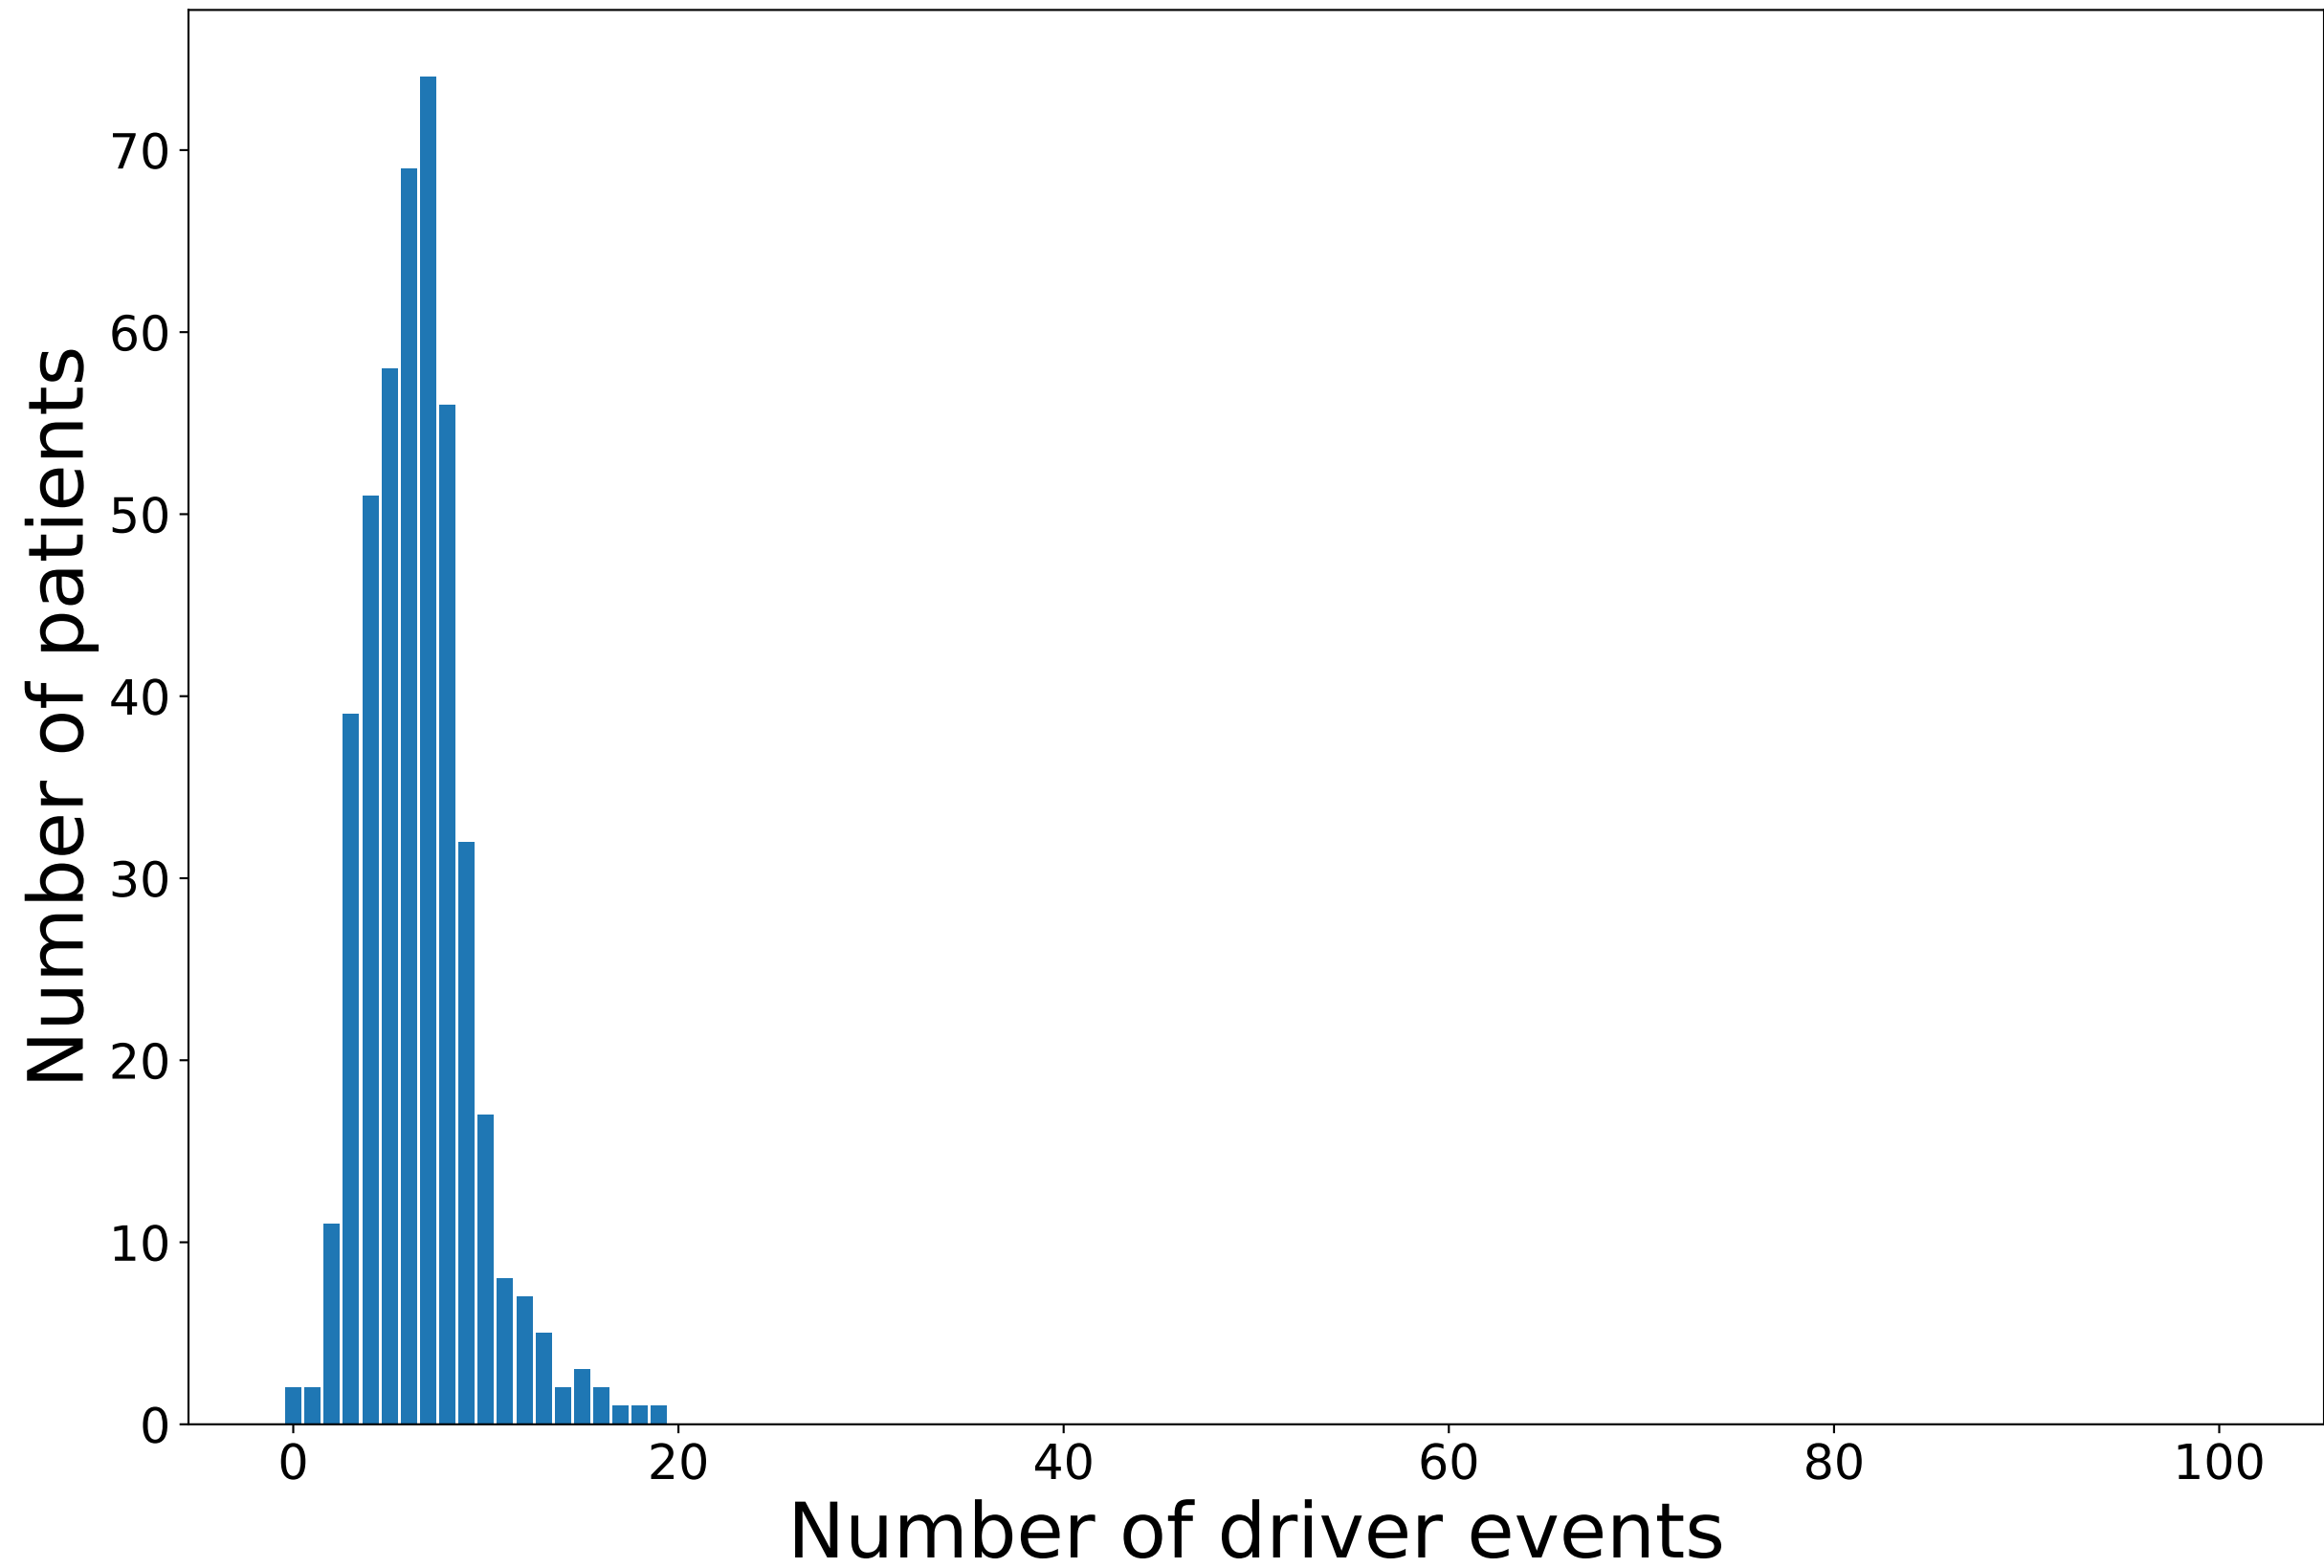

Supplement: Supplemental_Data_S1.zip [file Supplemental_Data_S1.zip]

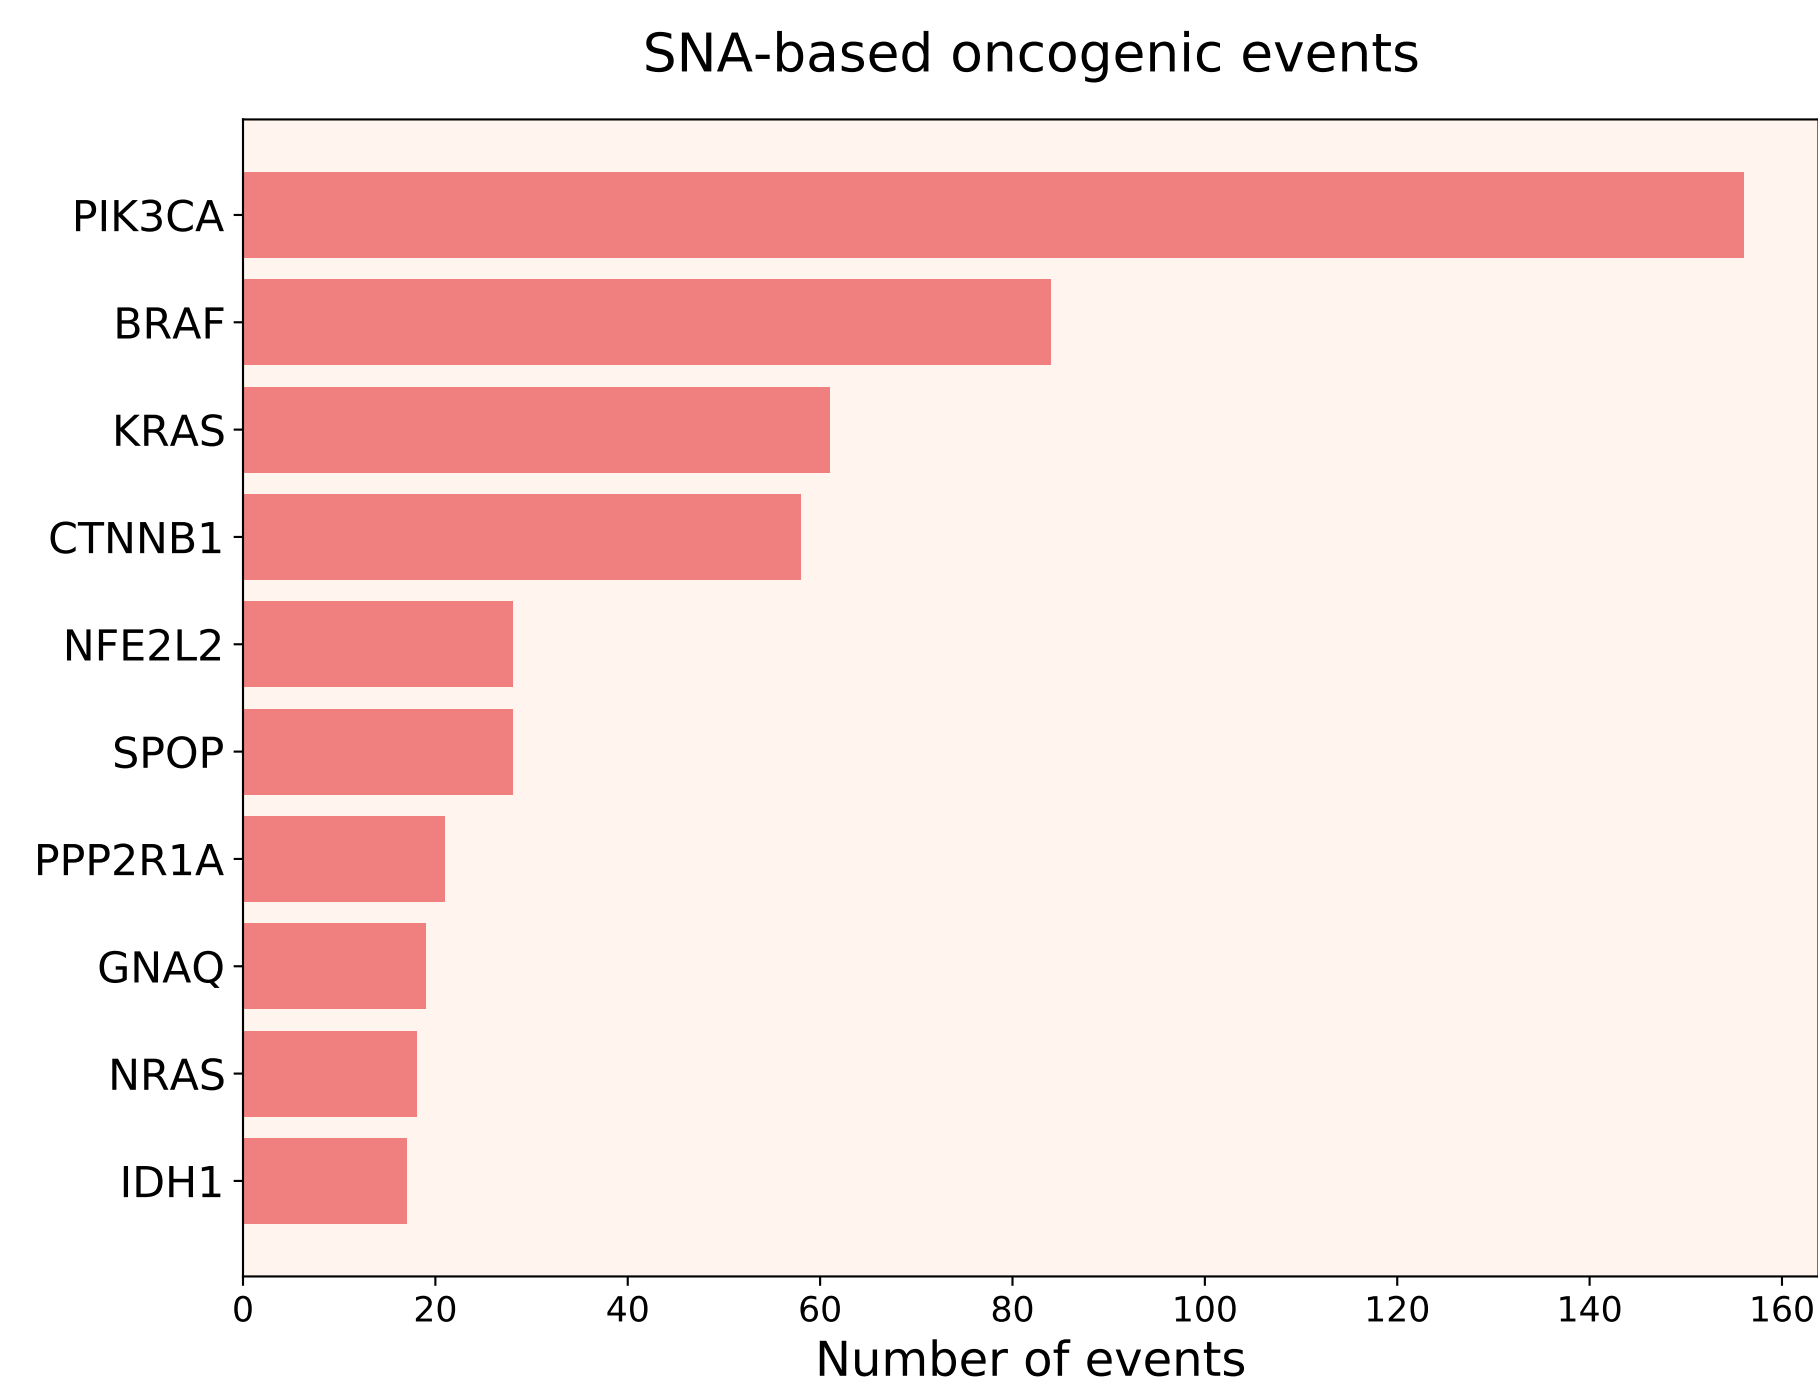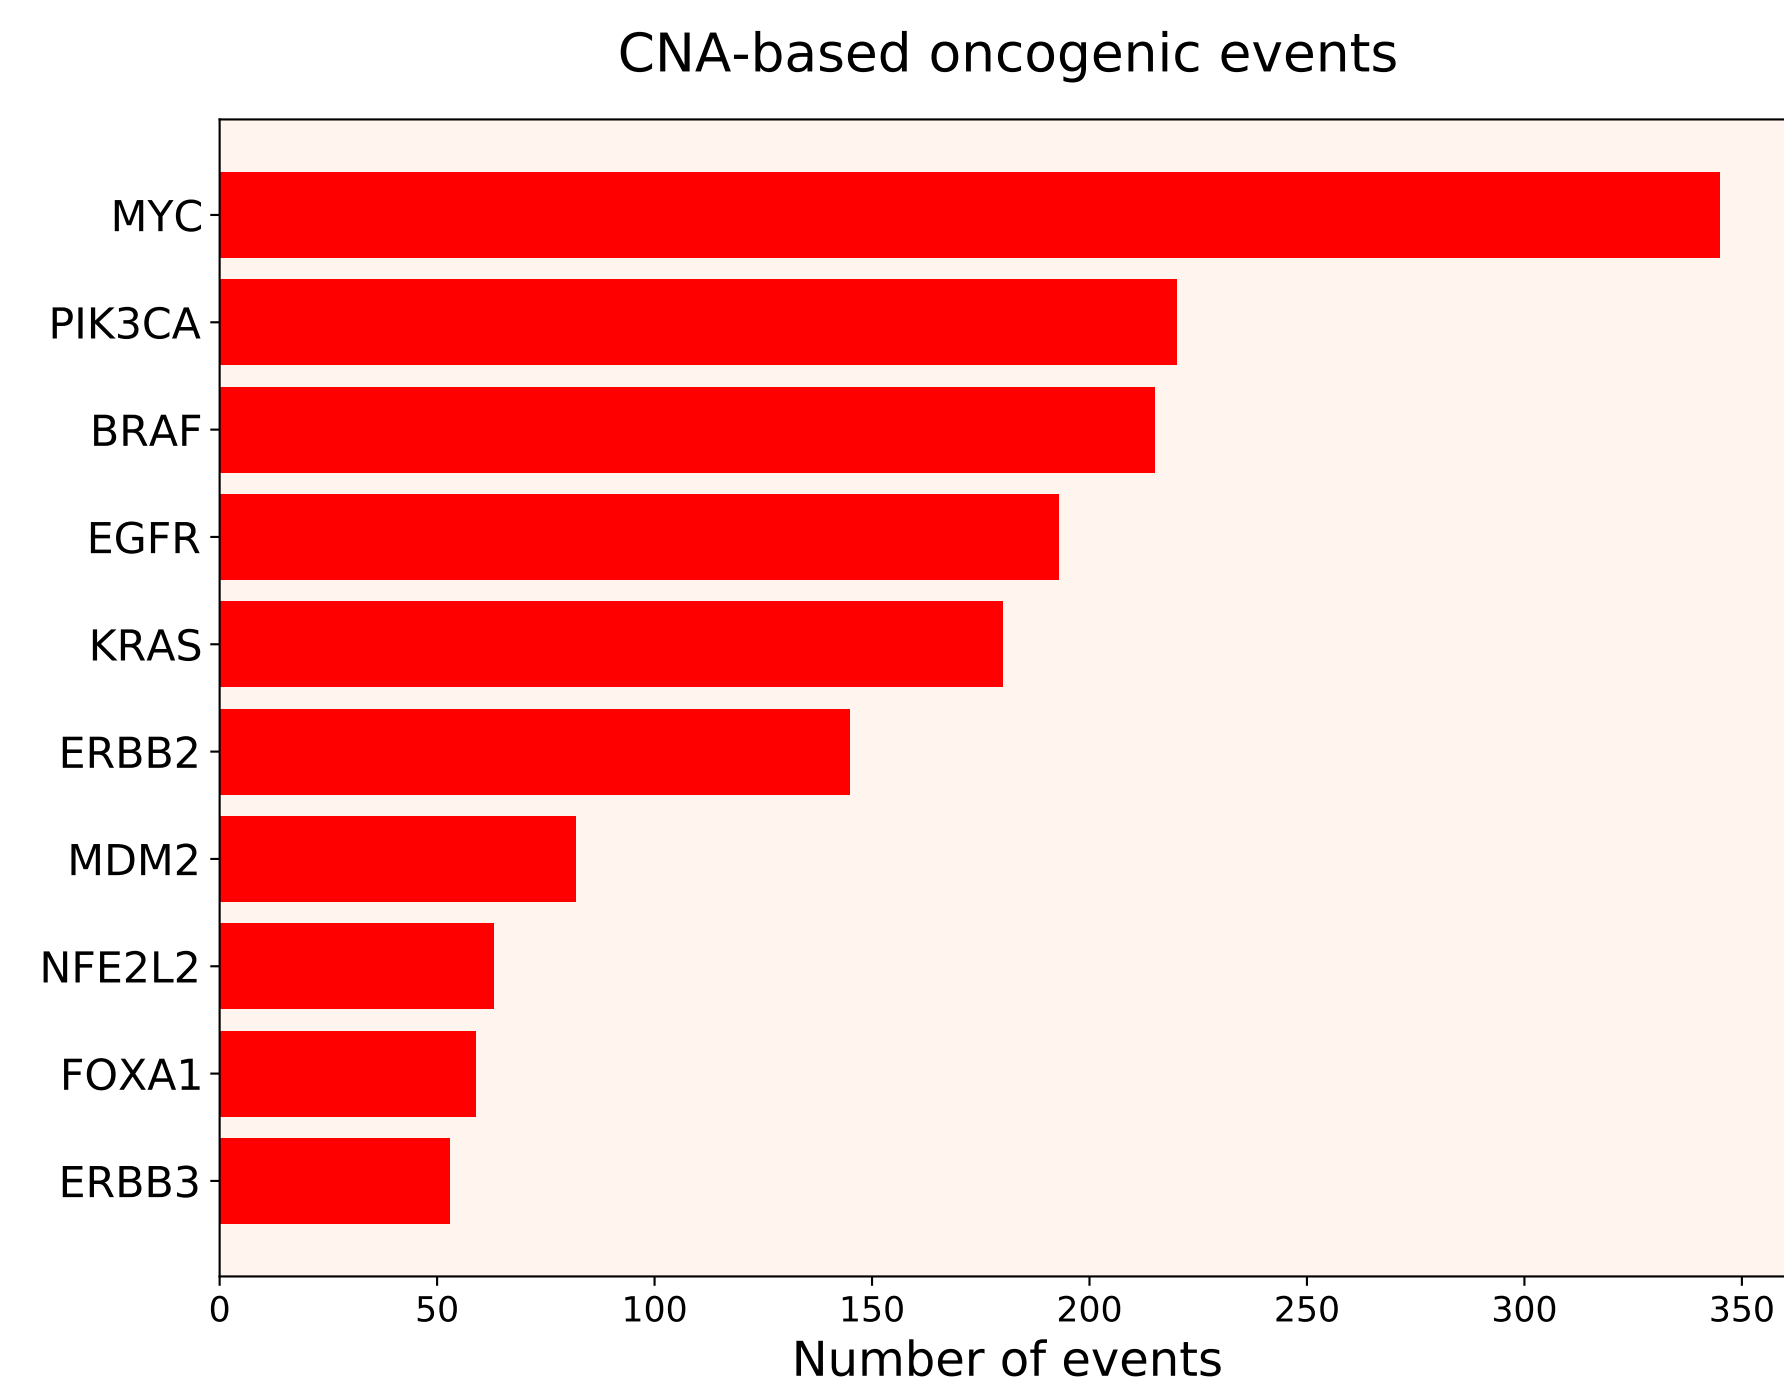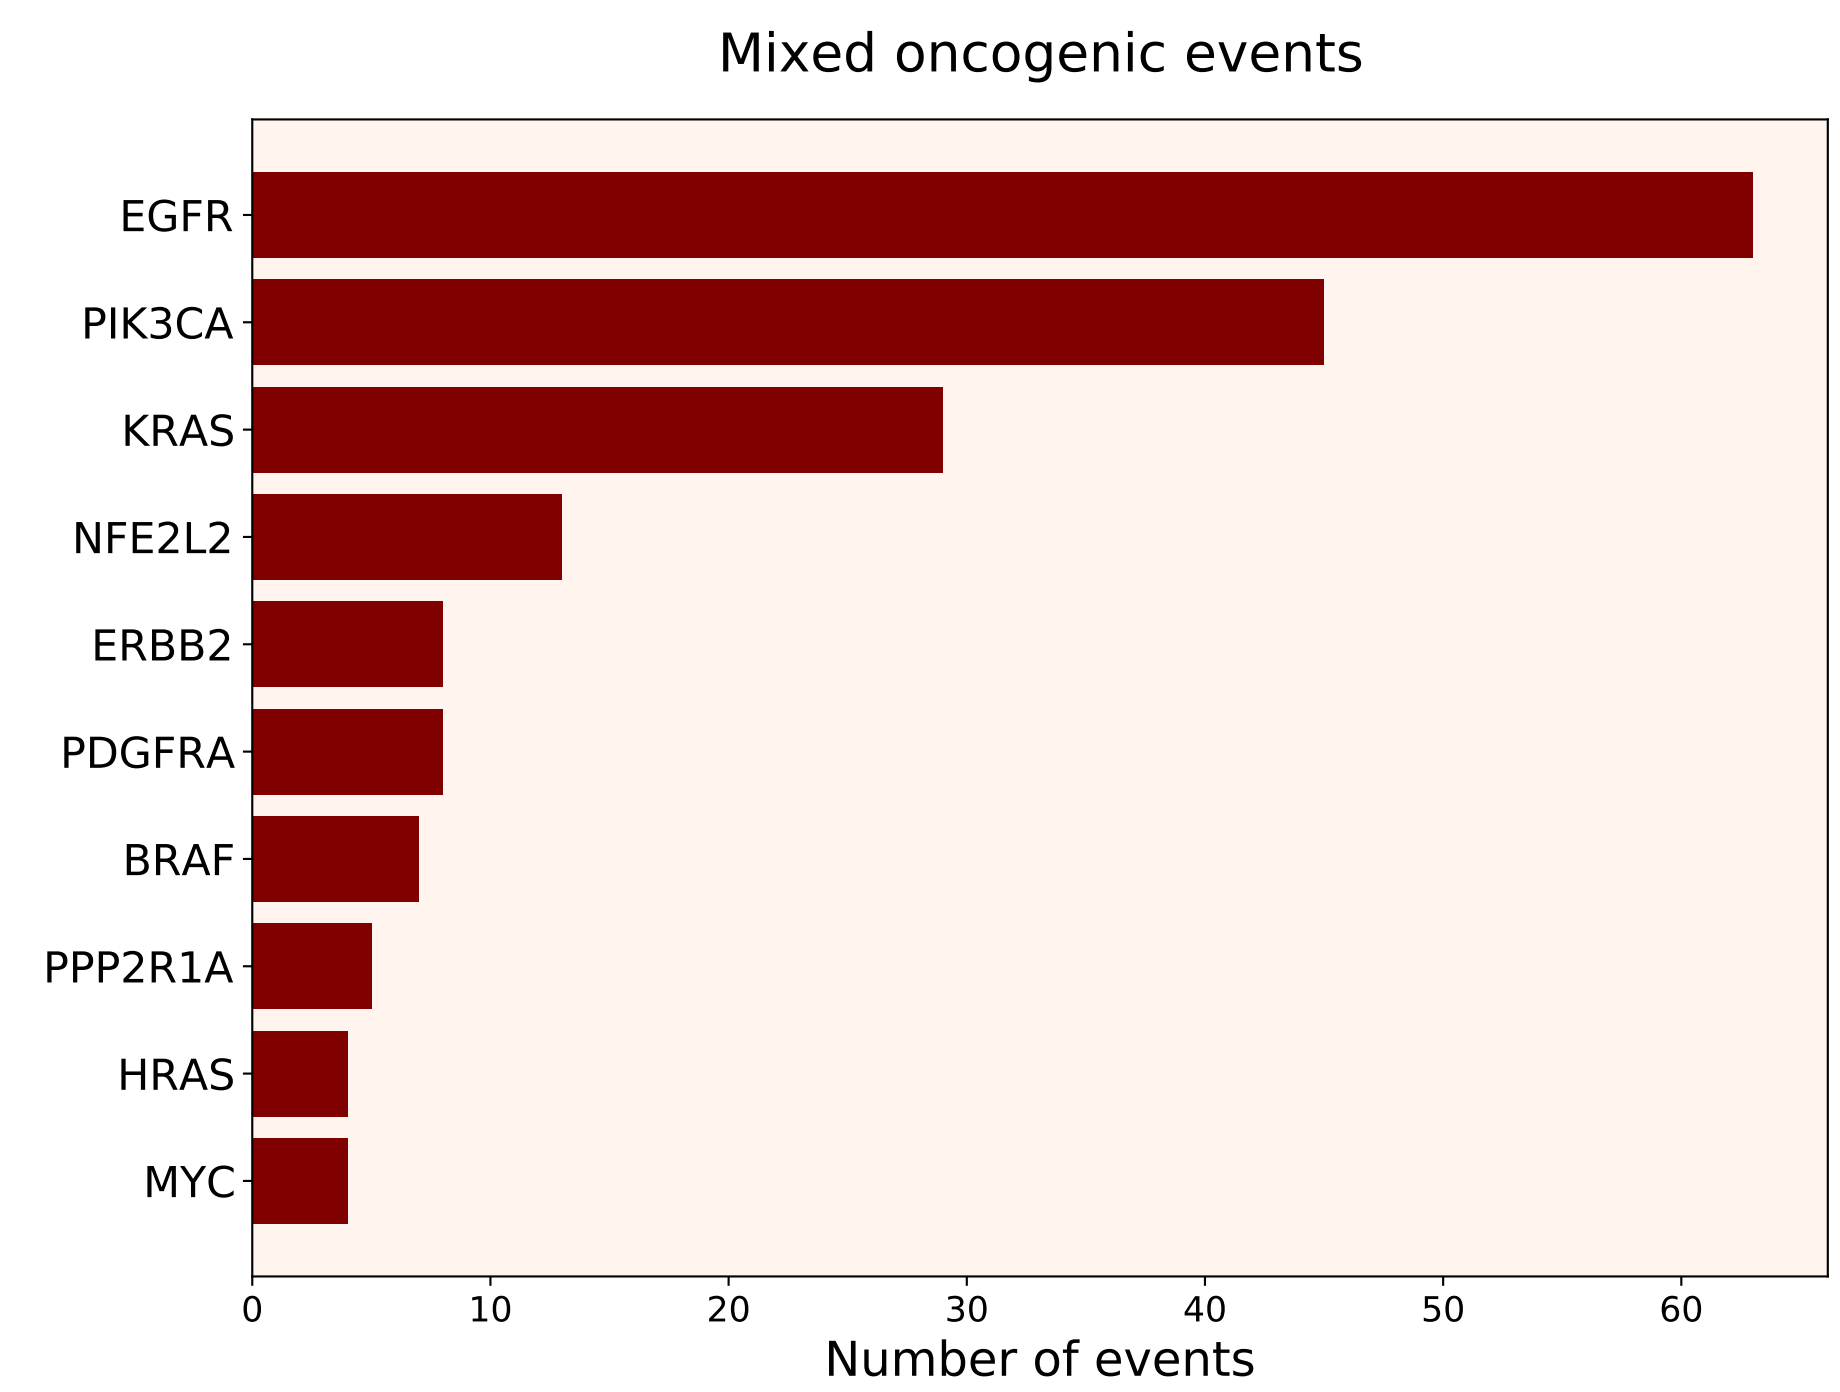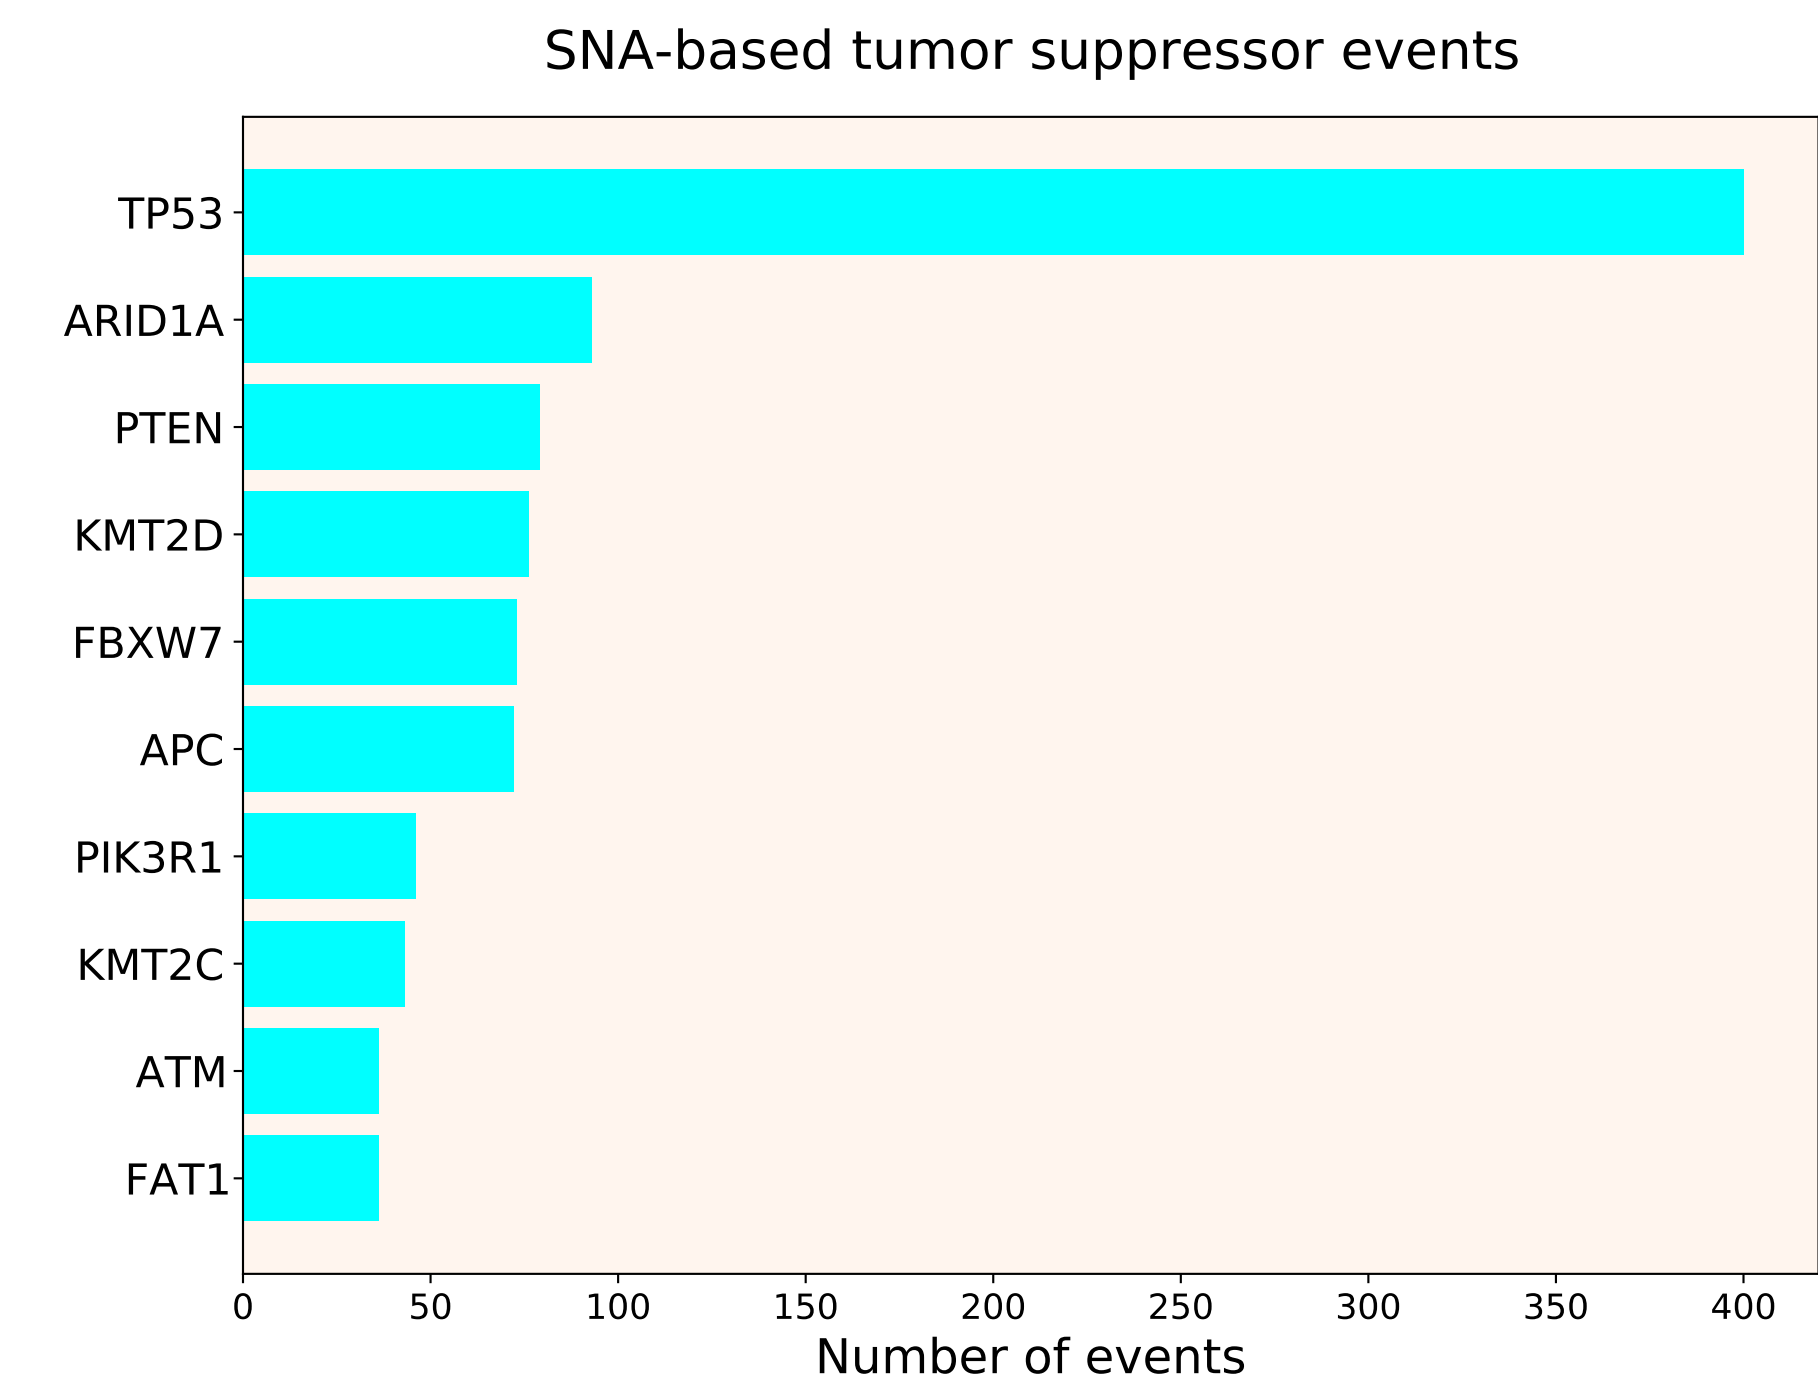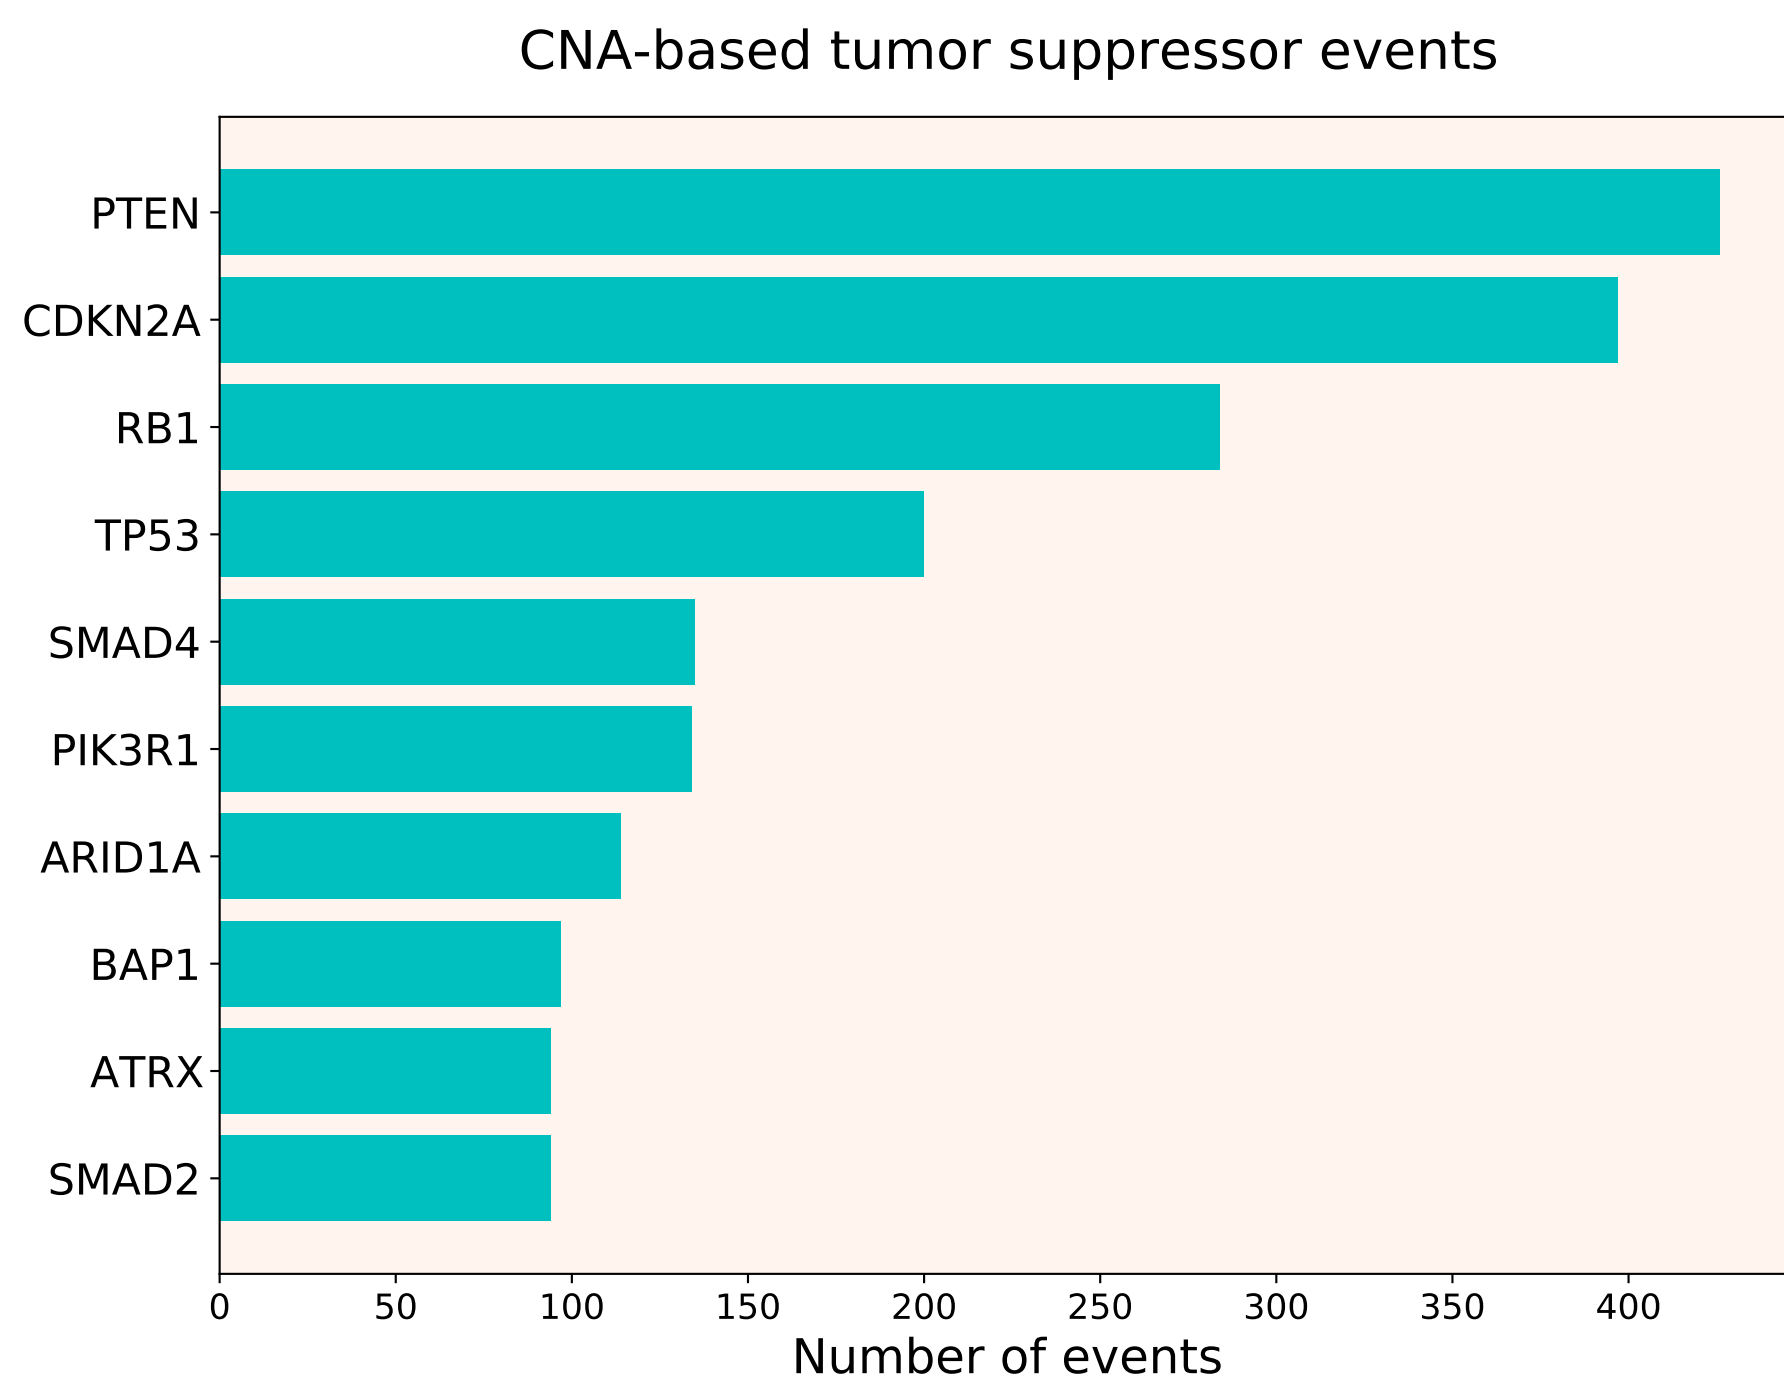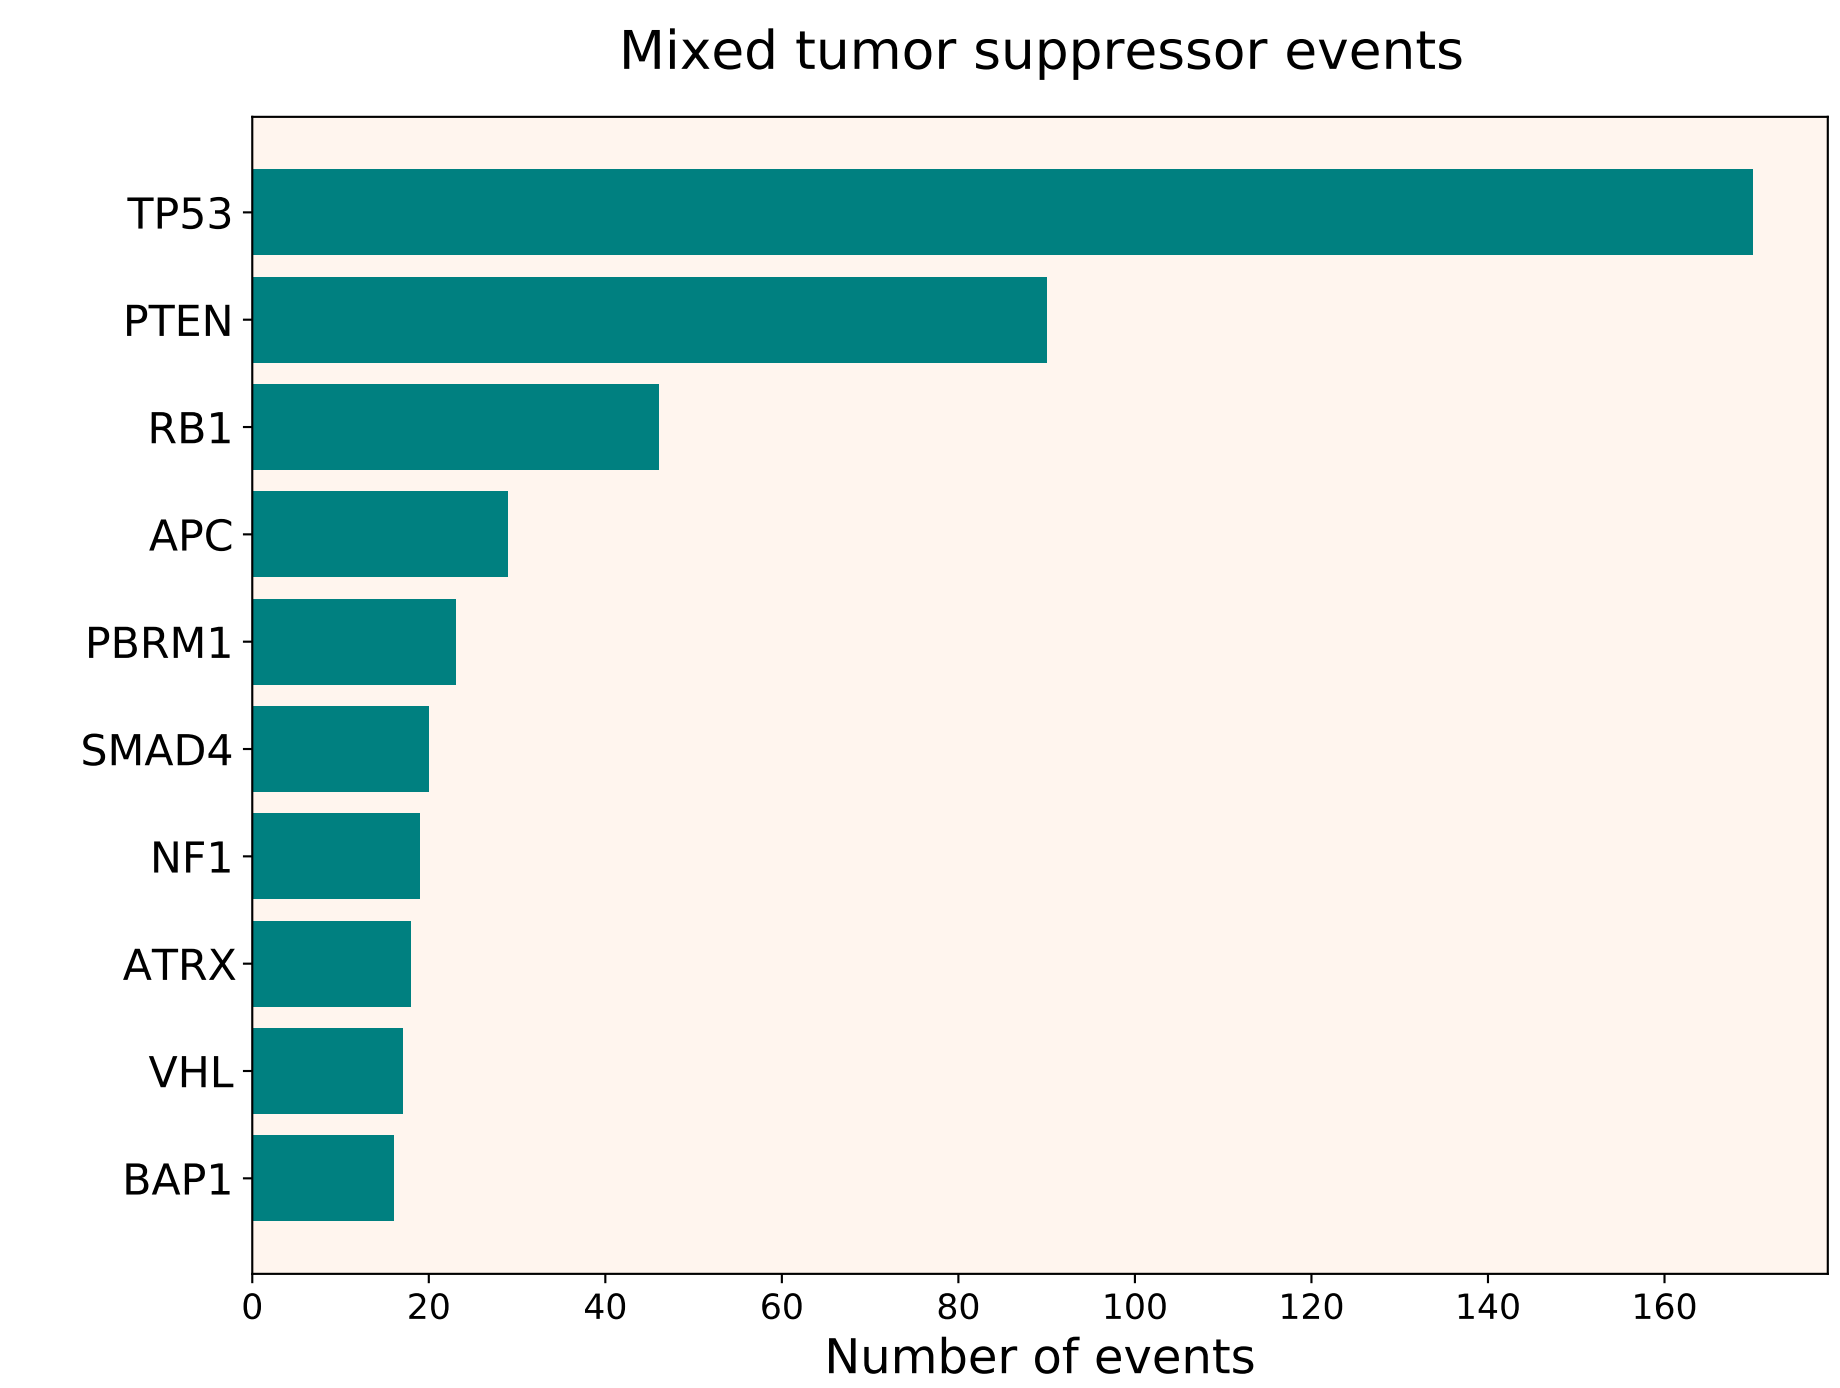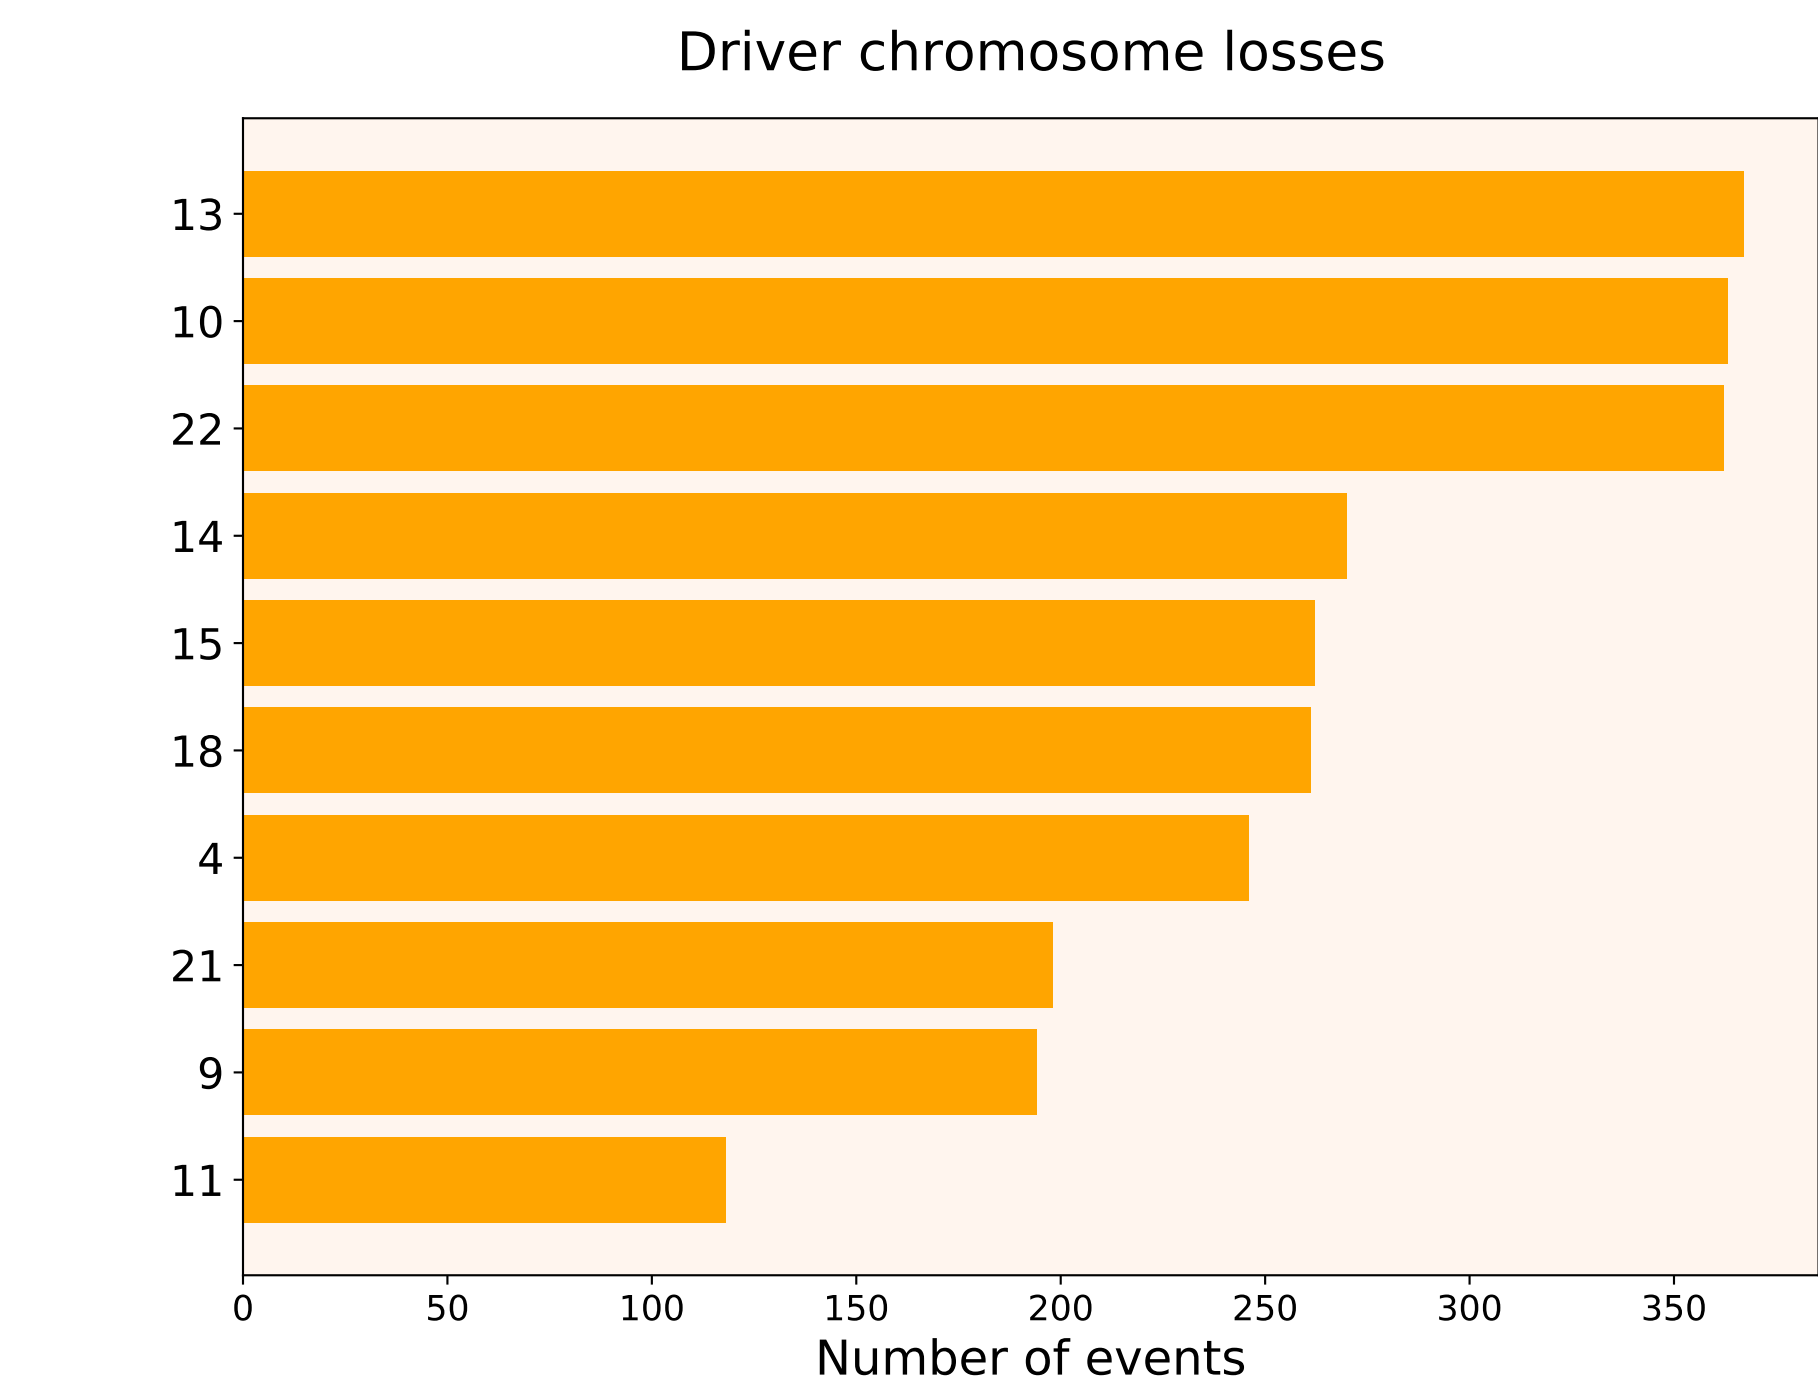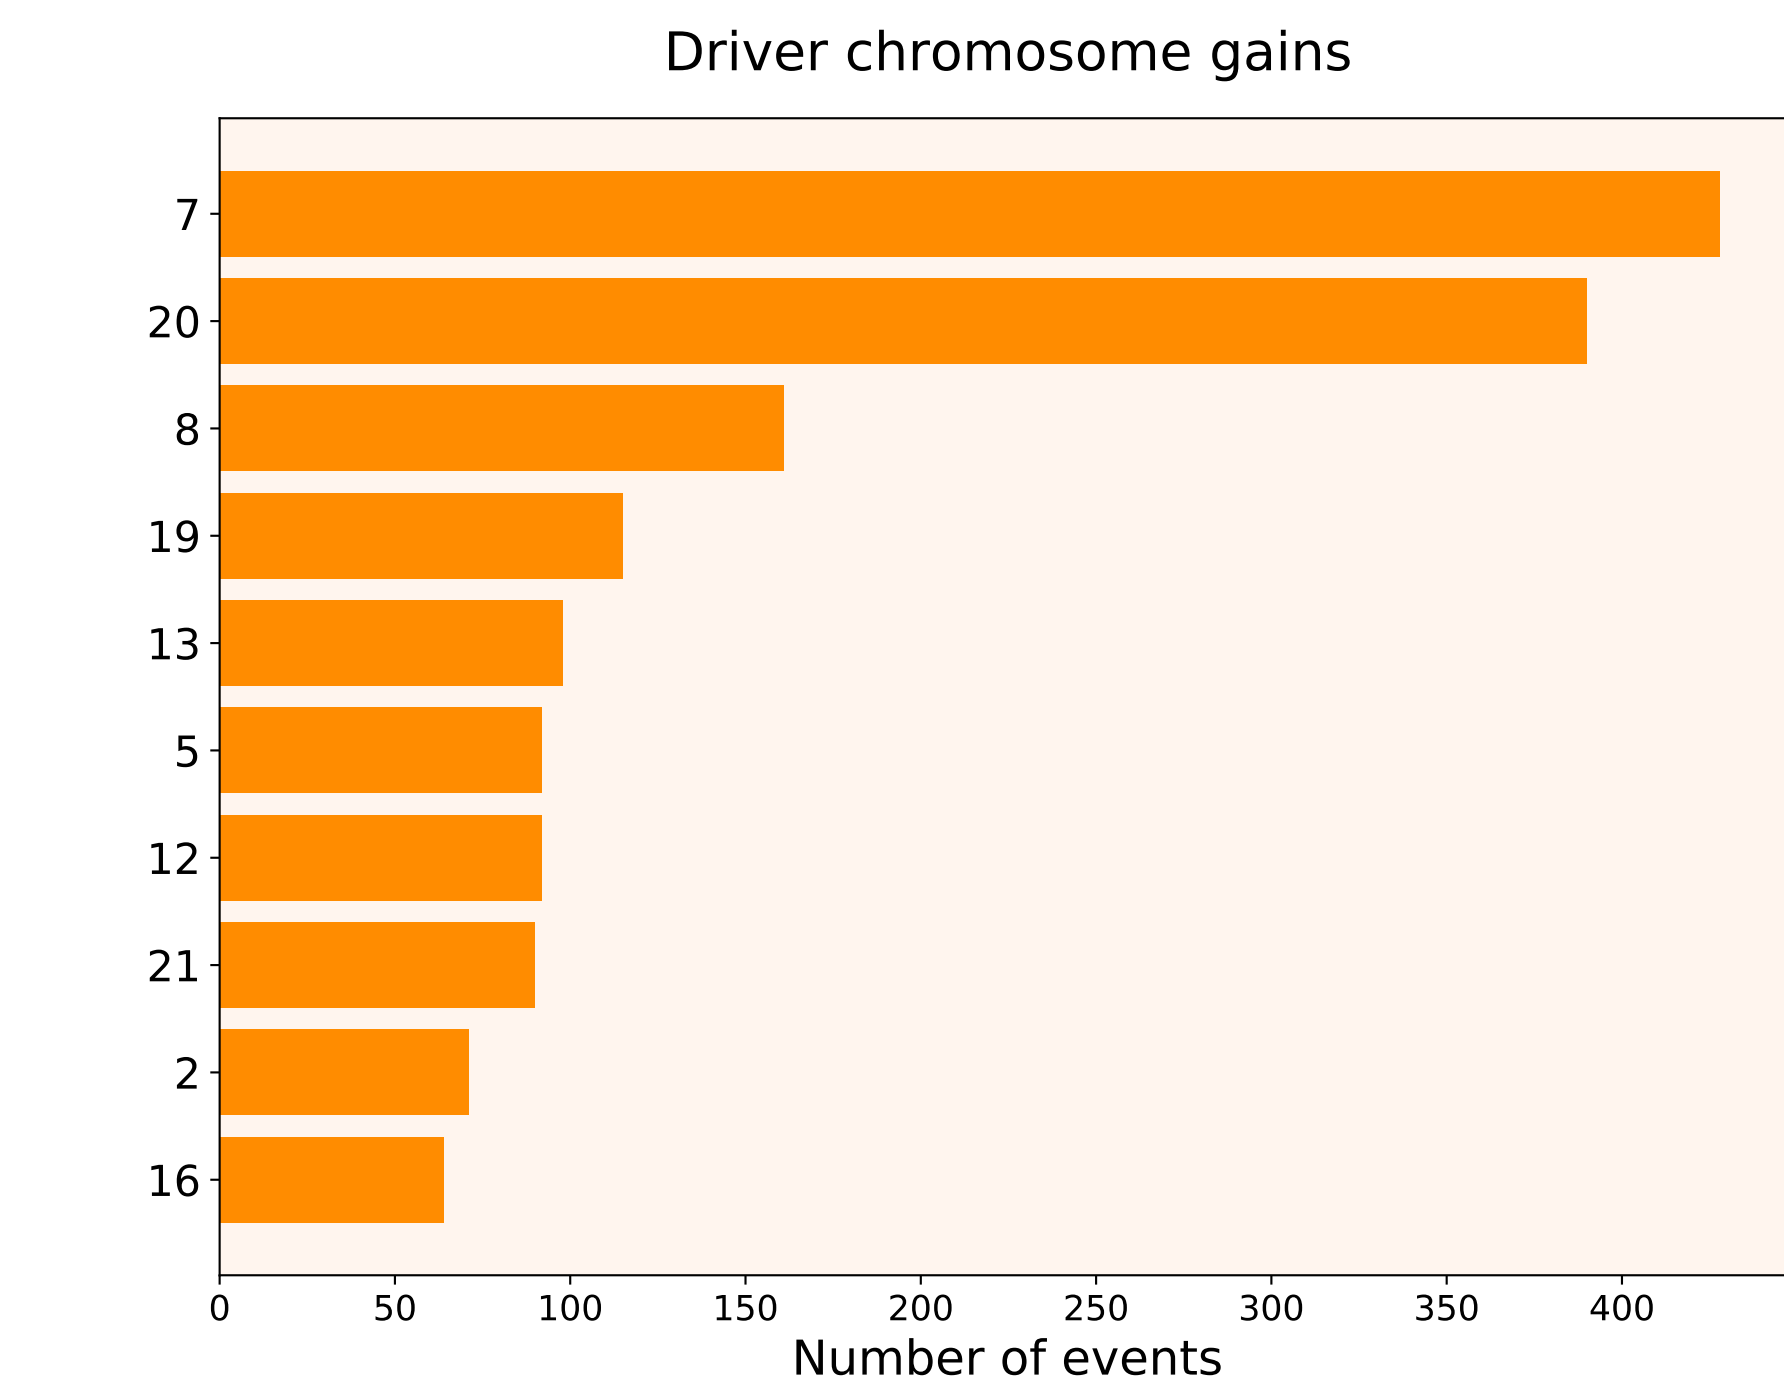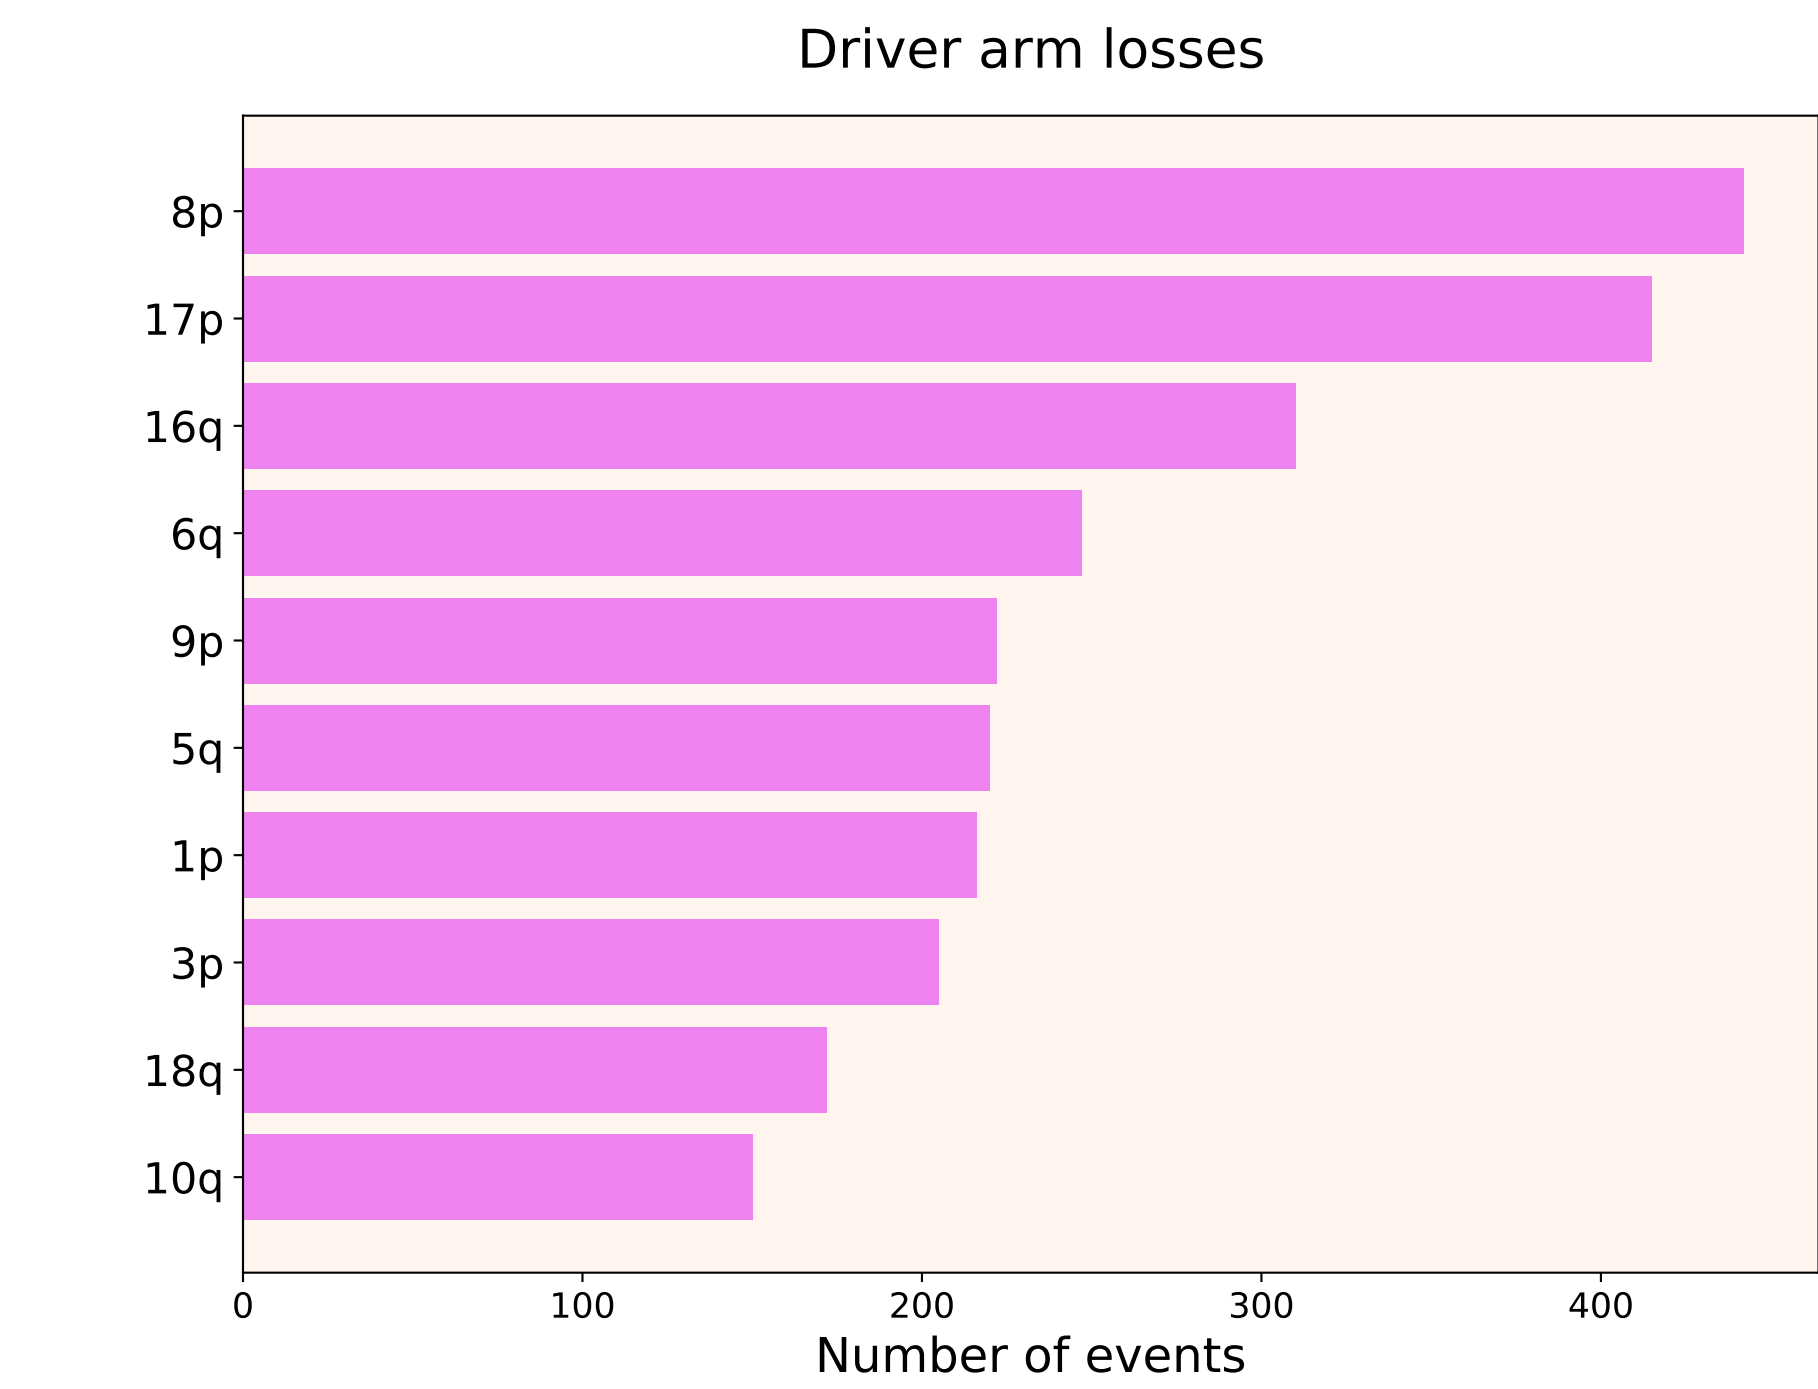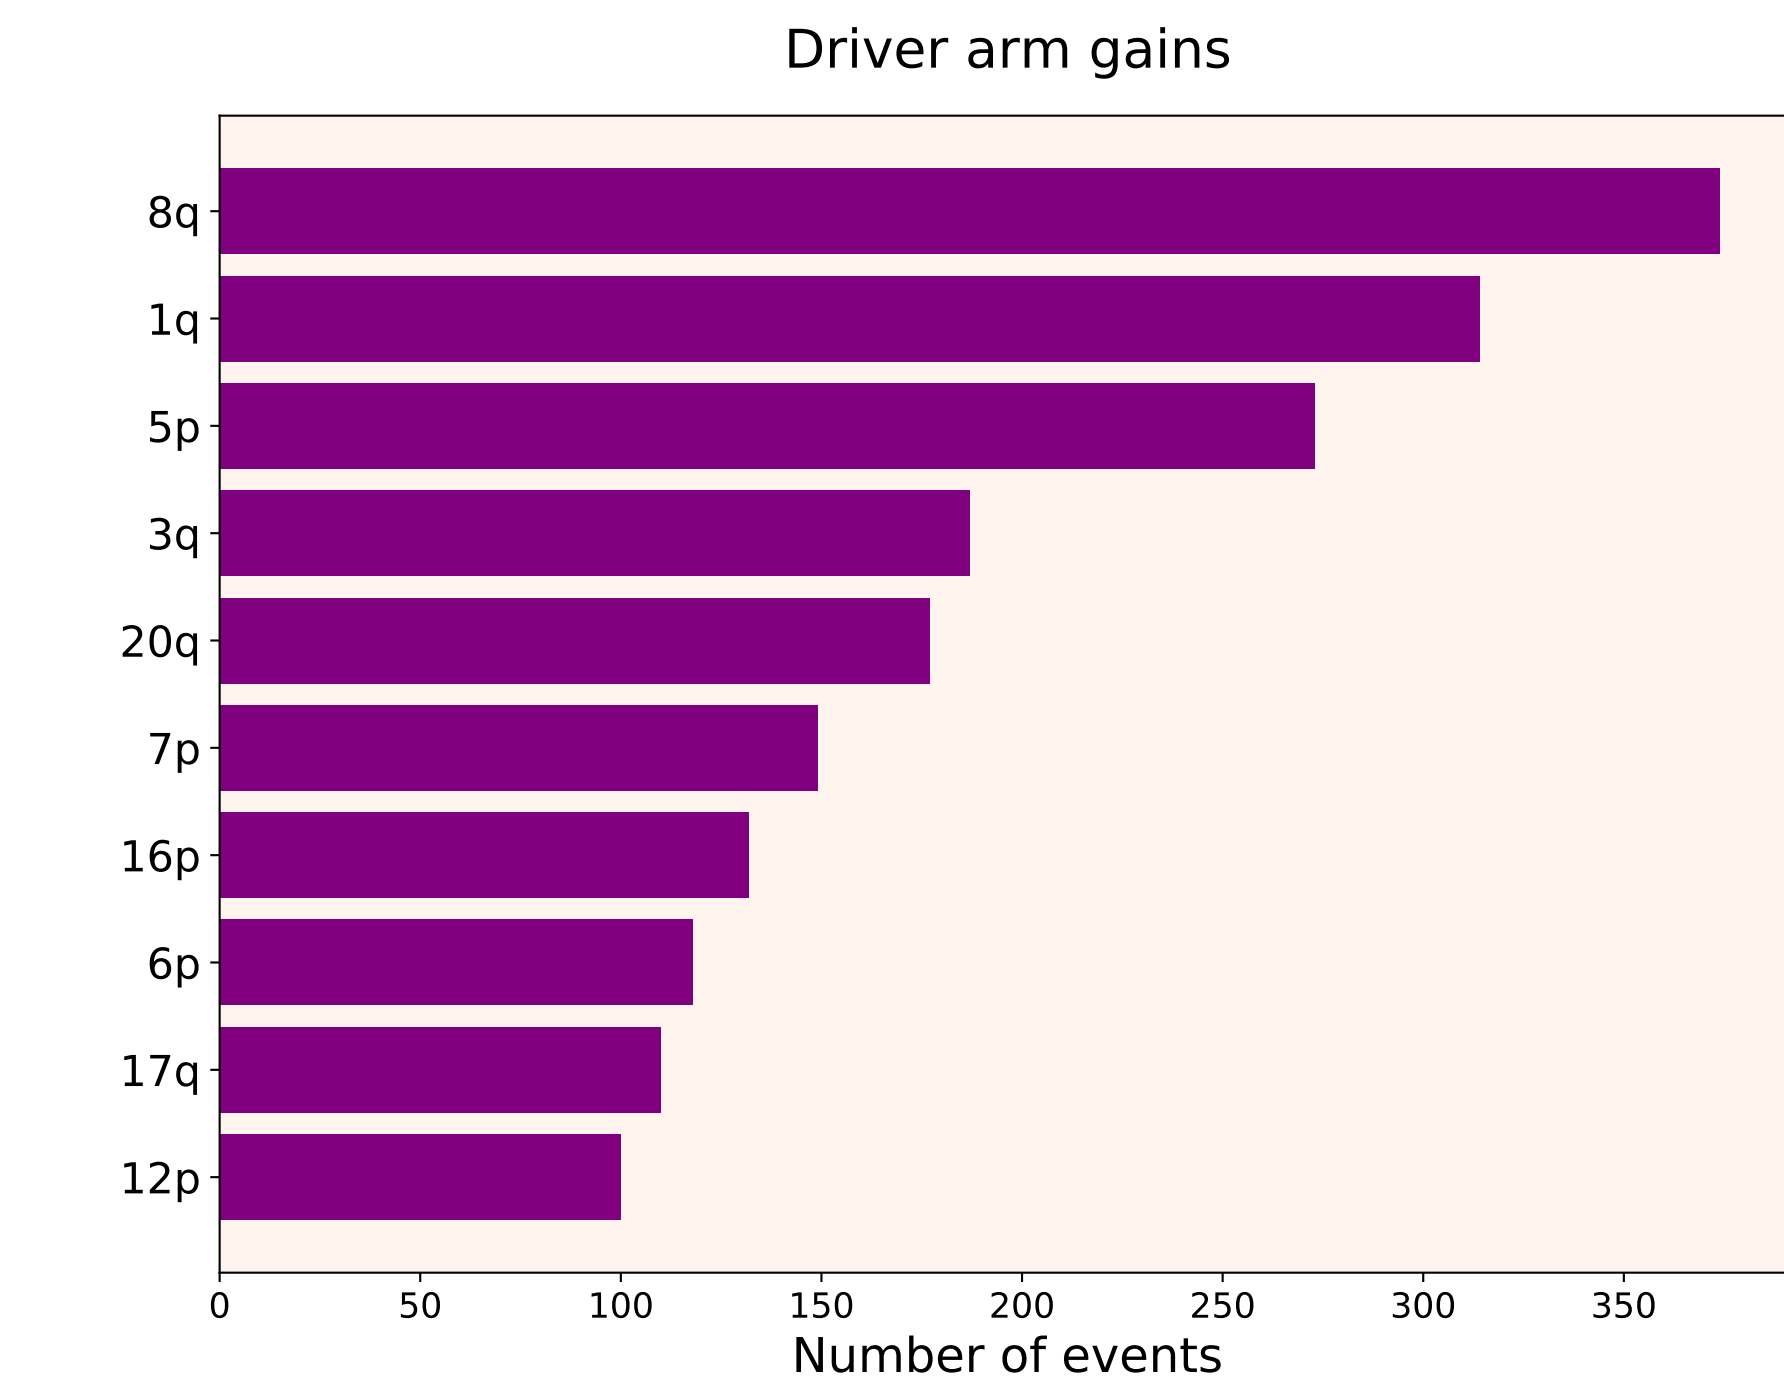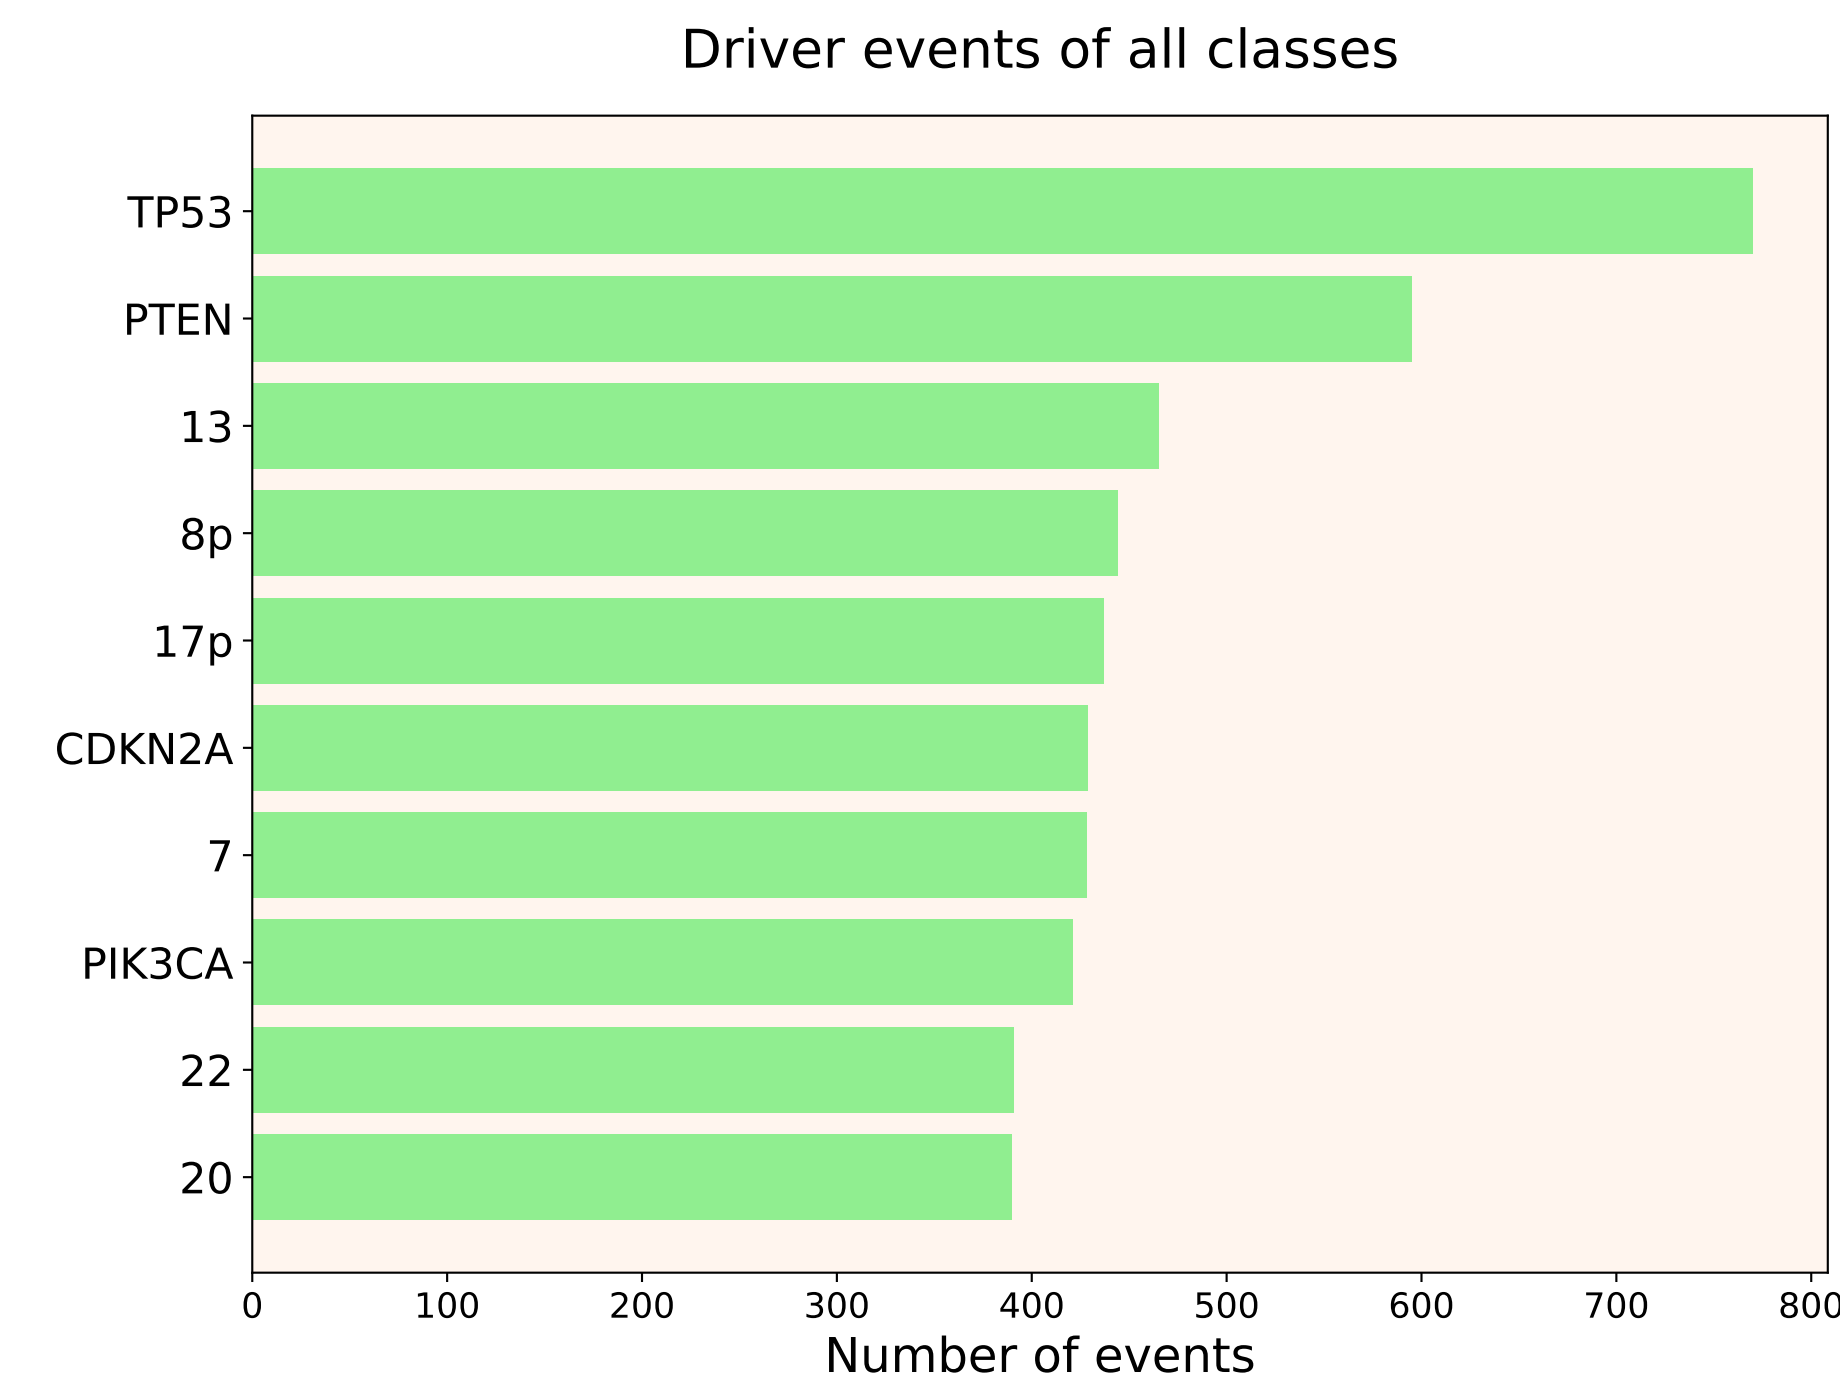

Supplement: Supplemental_Data_S1.zip [file Supplemental_Data_S1.zip]

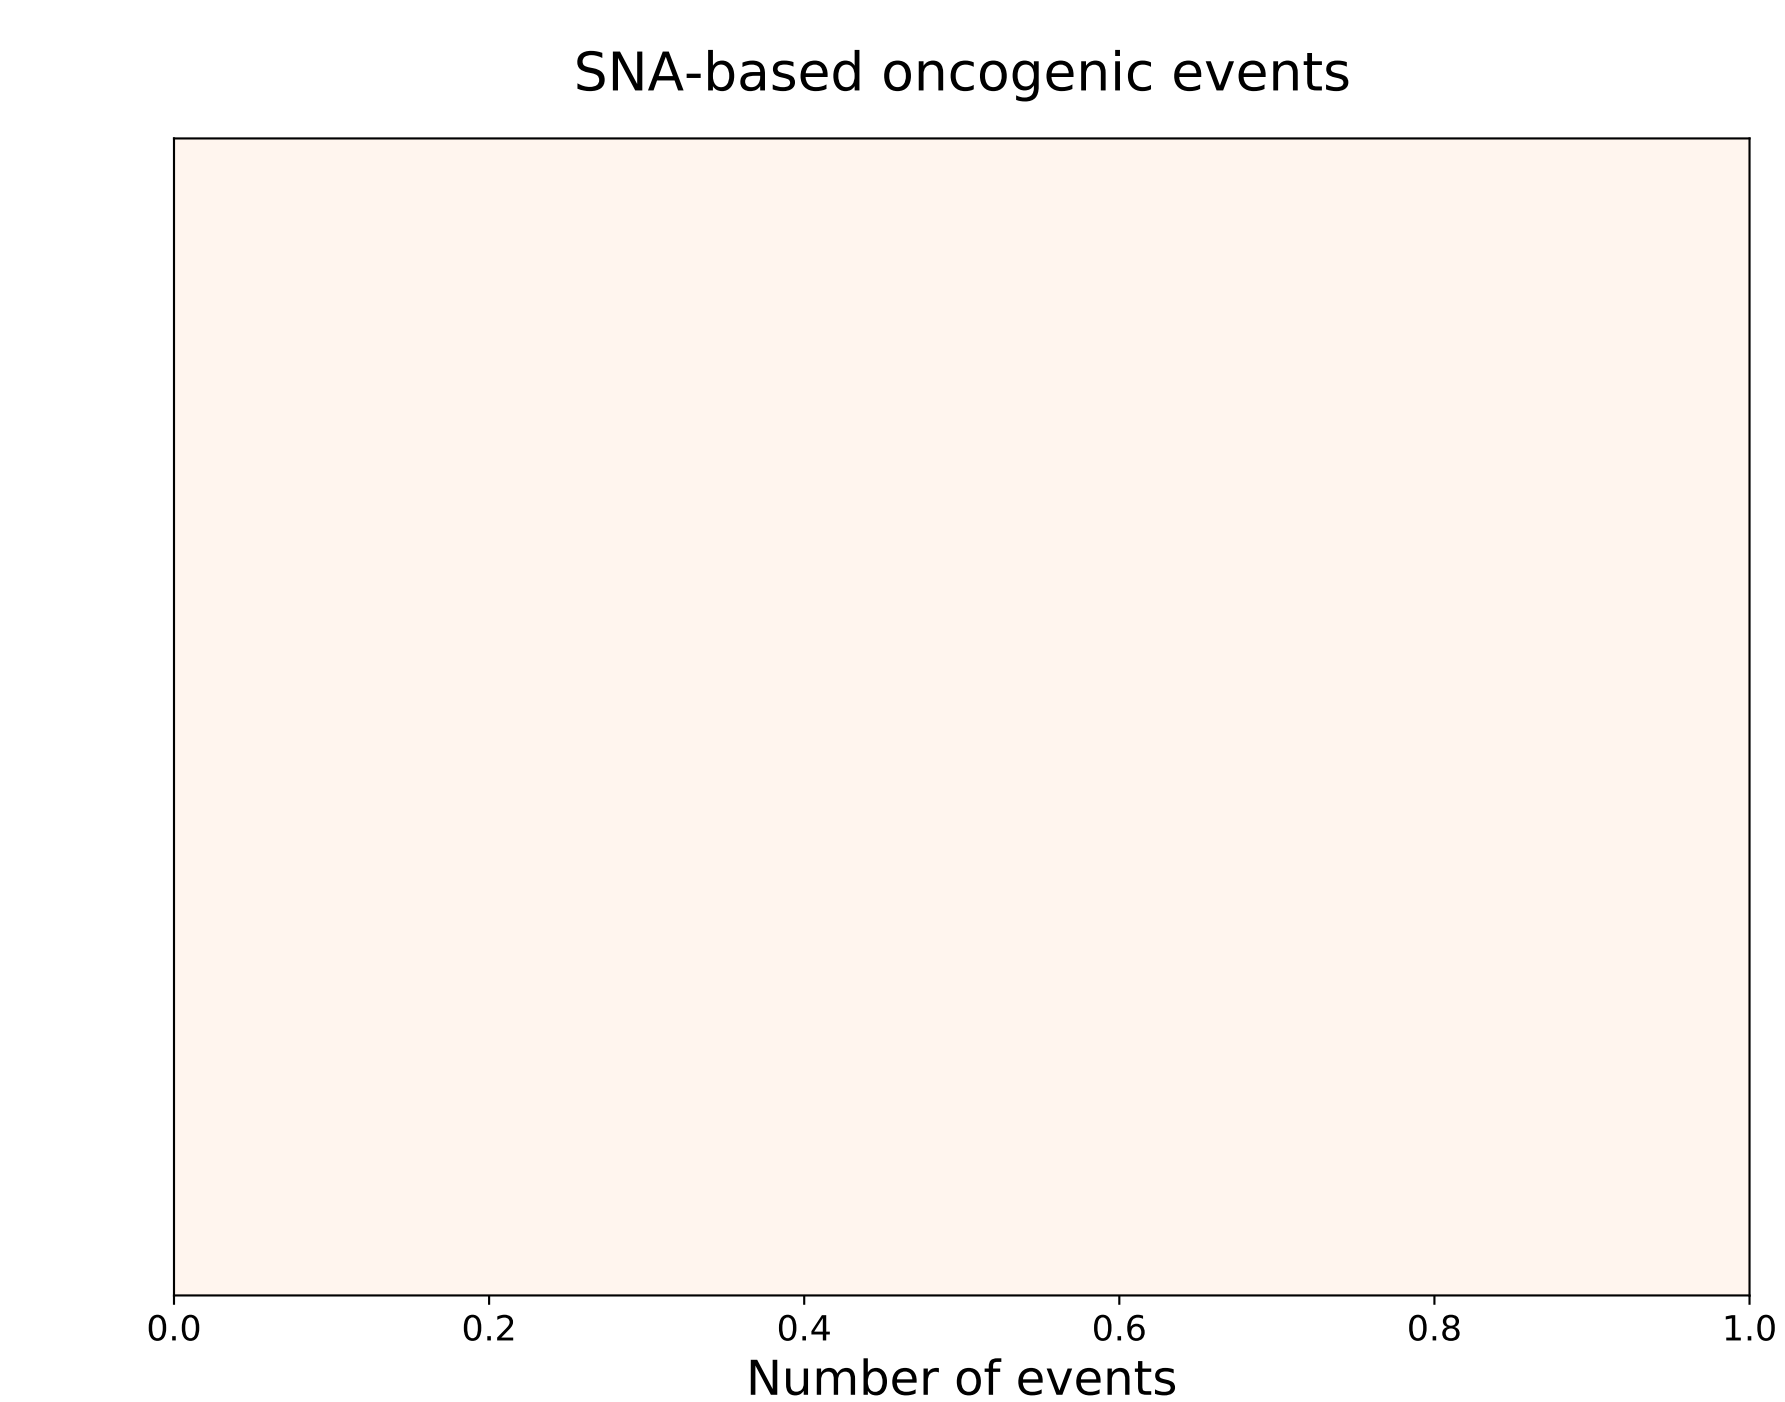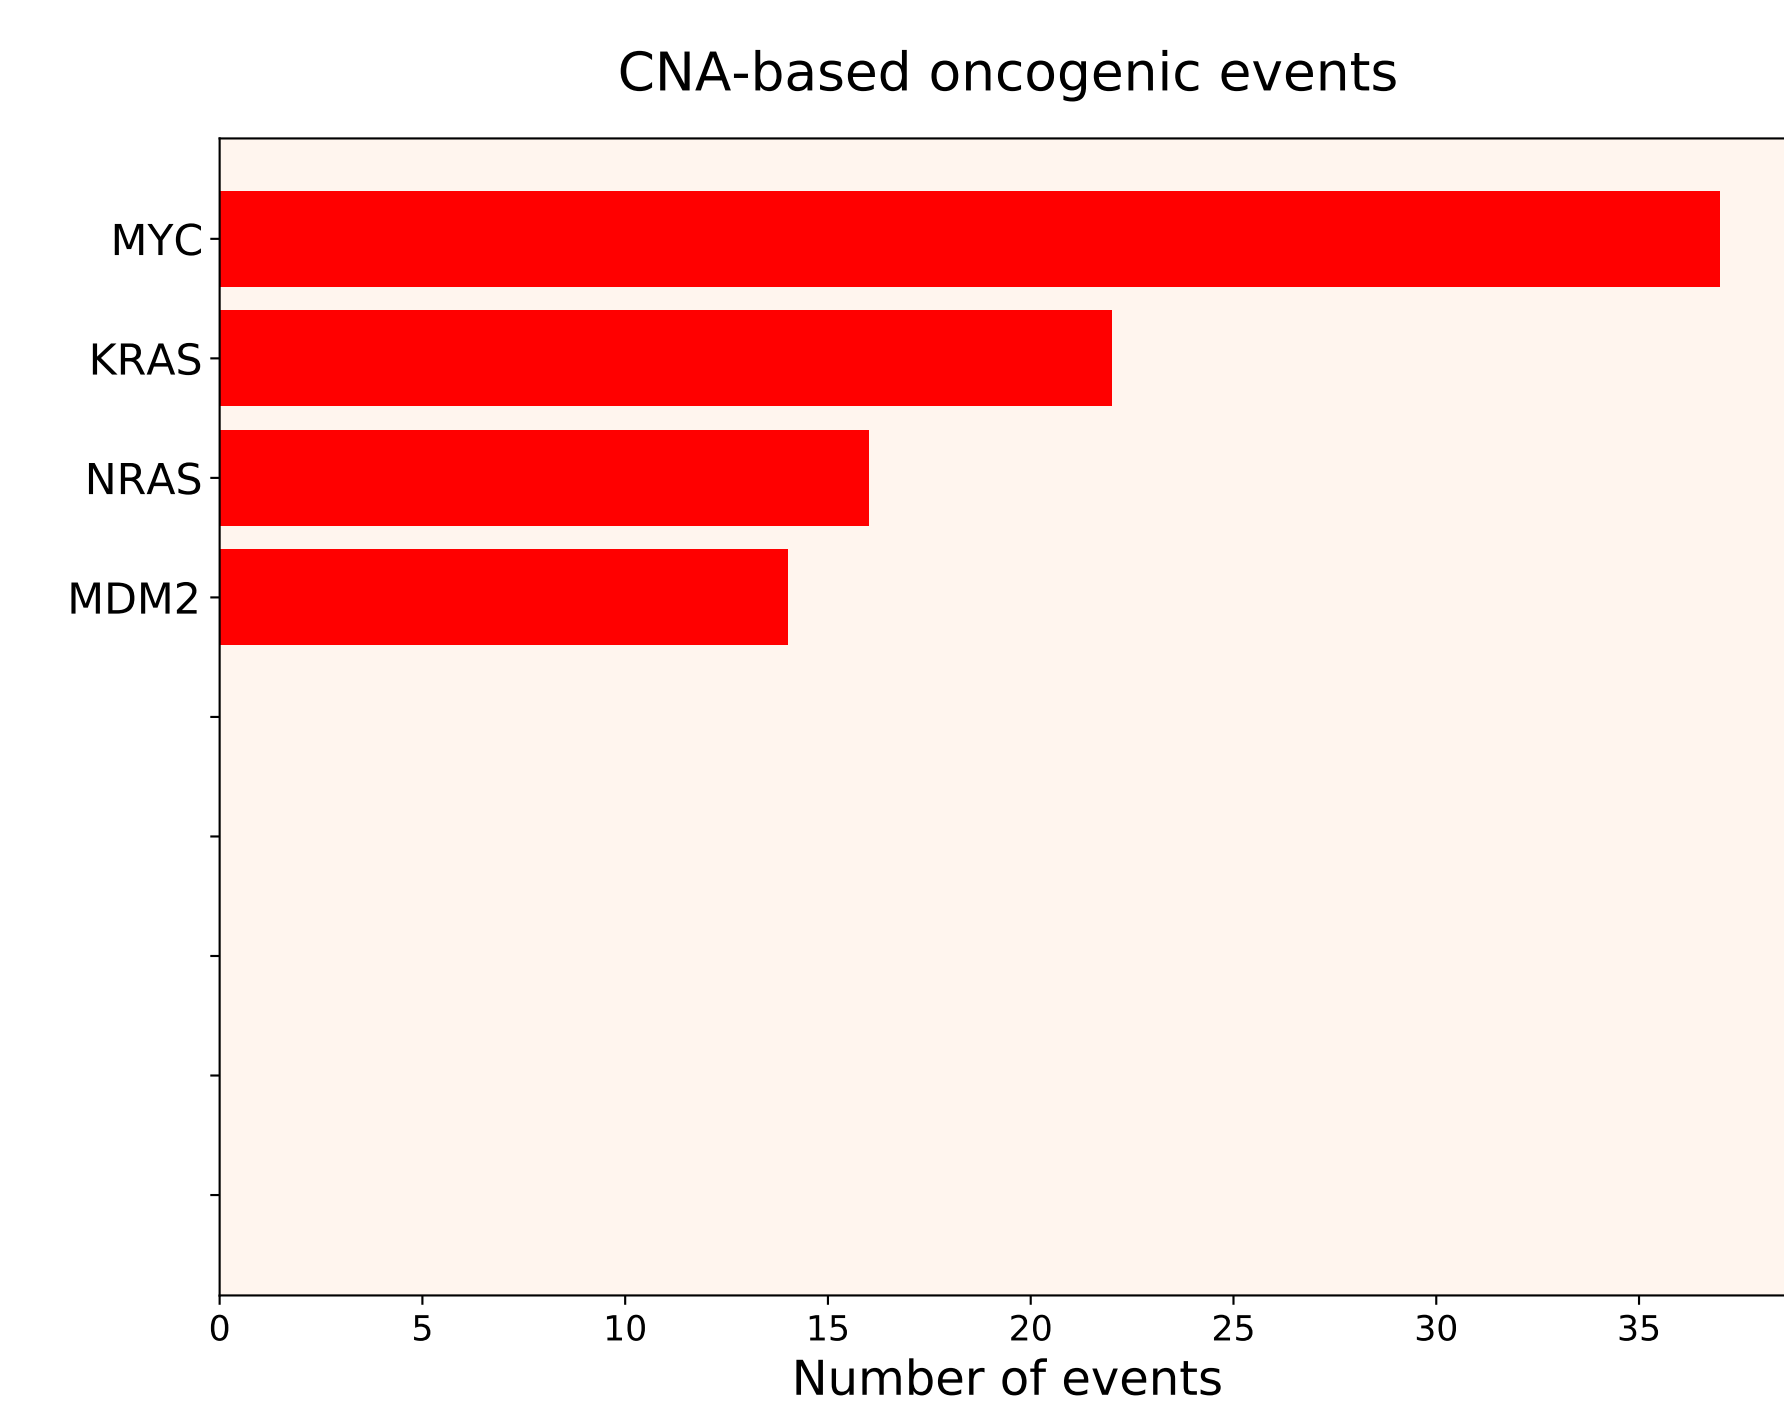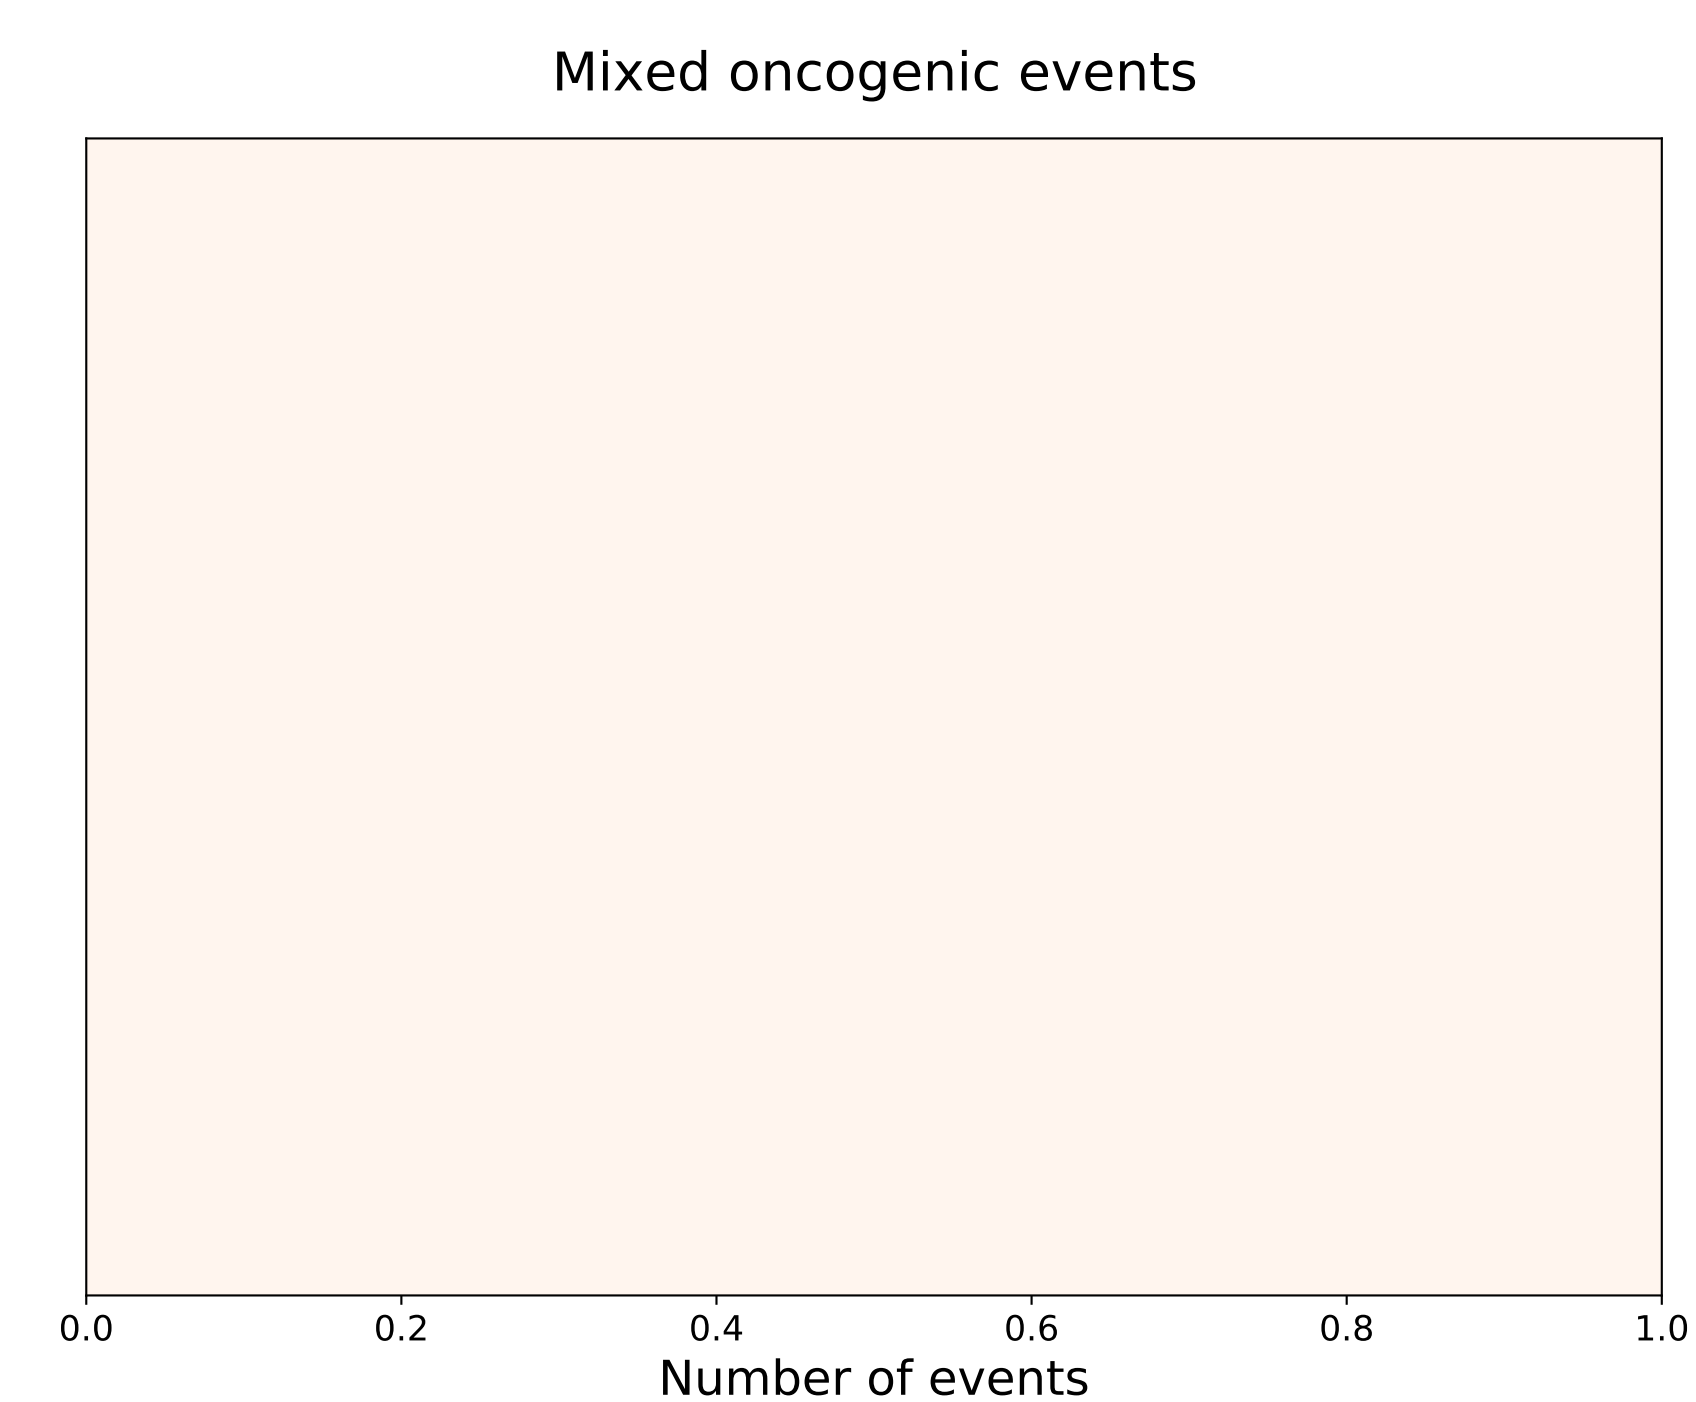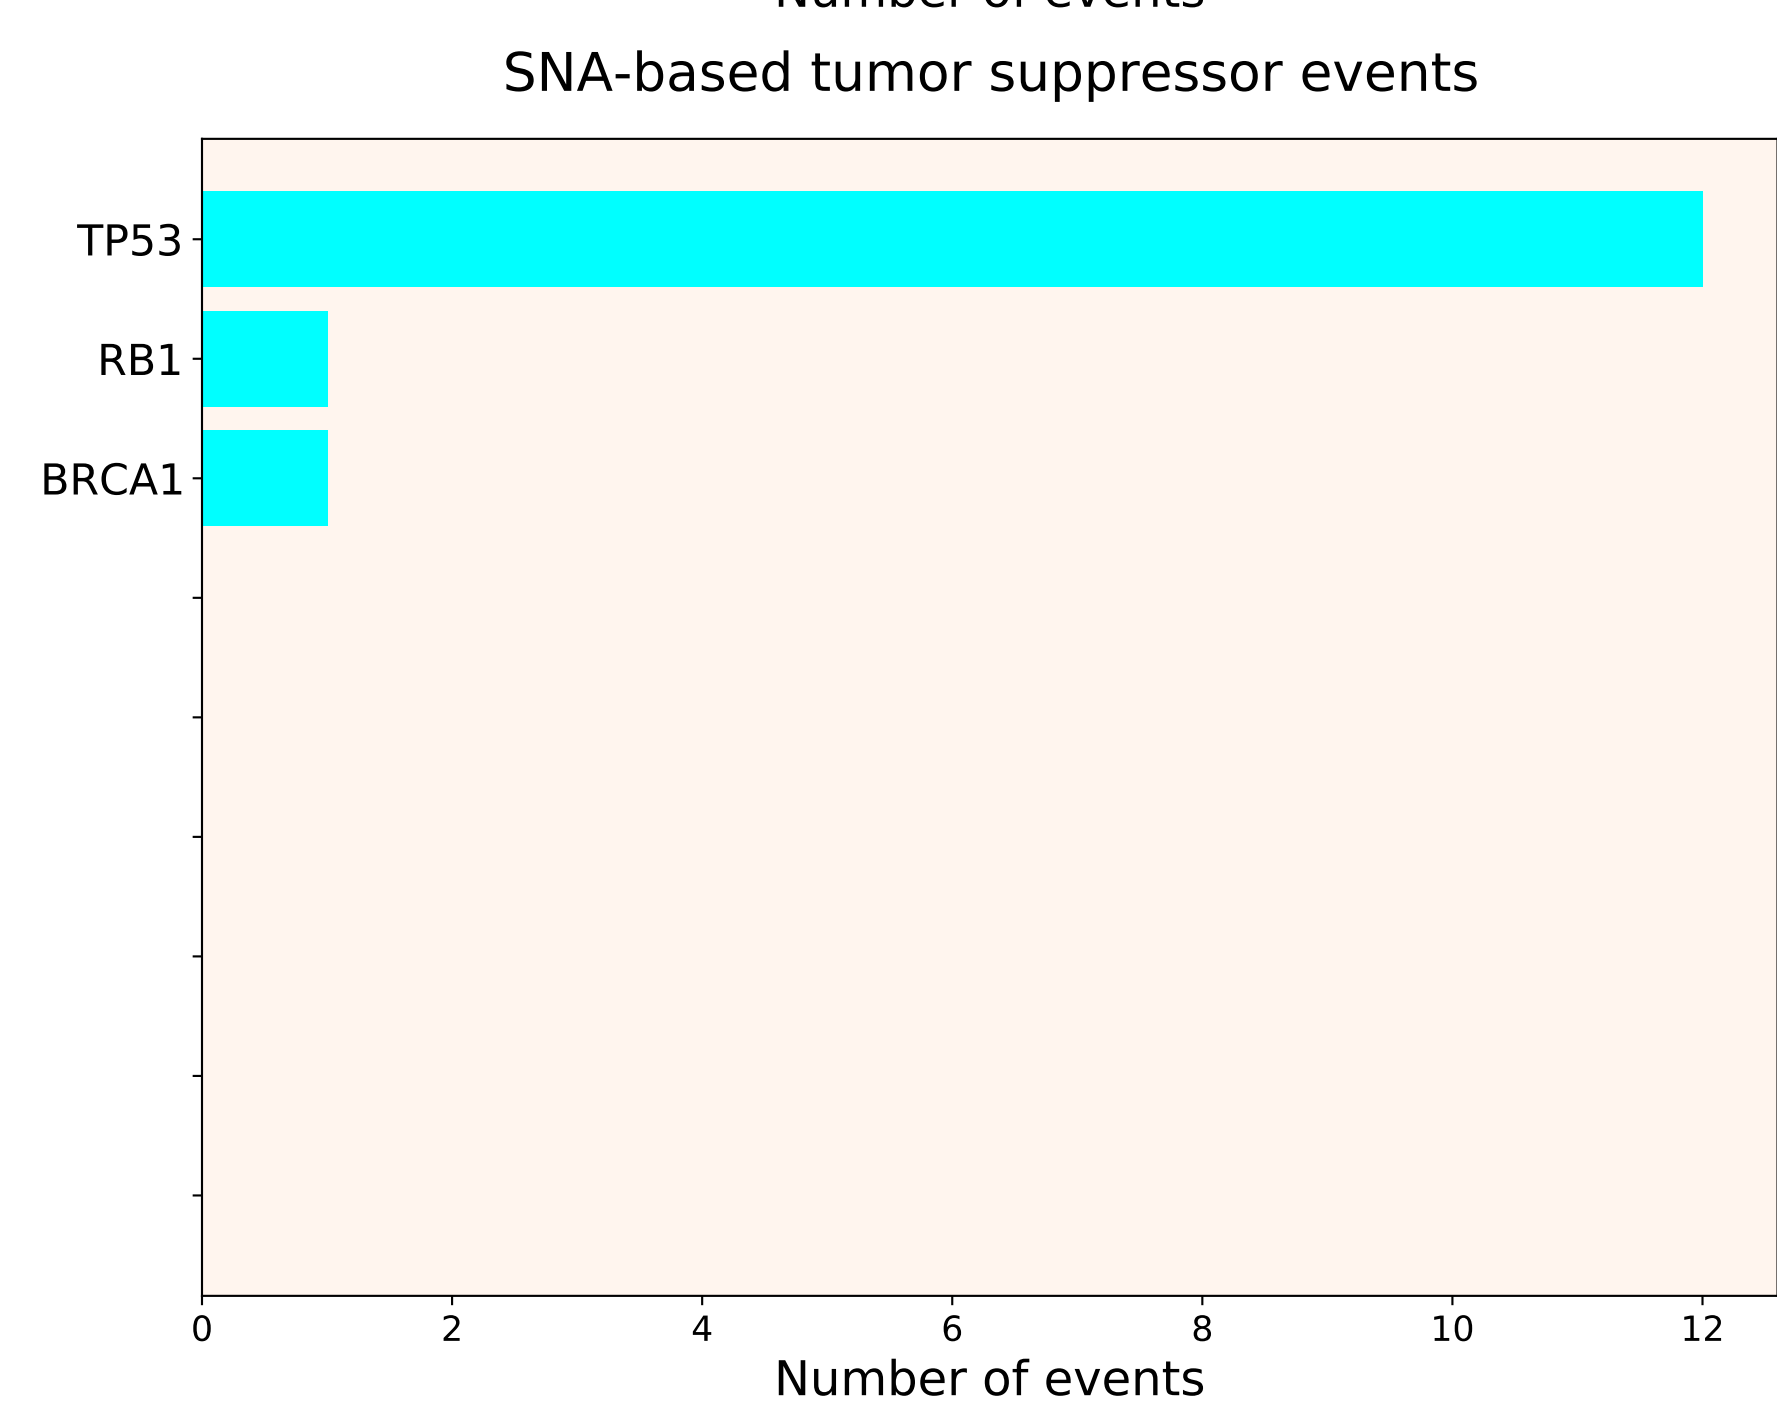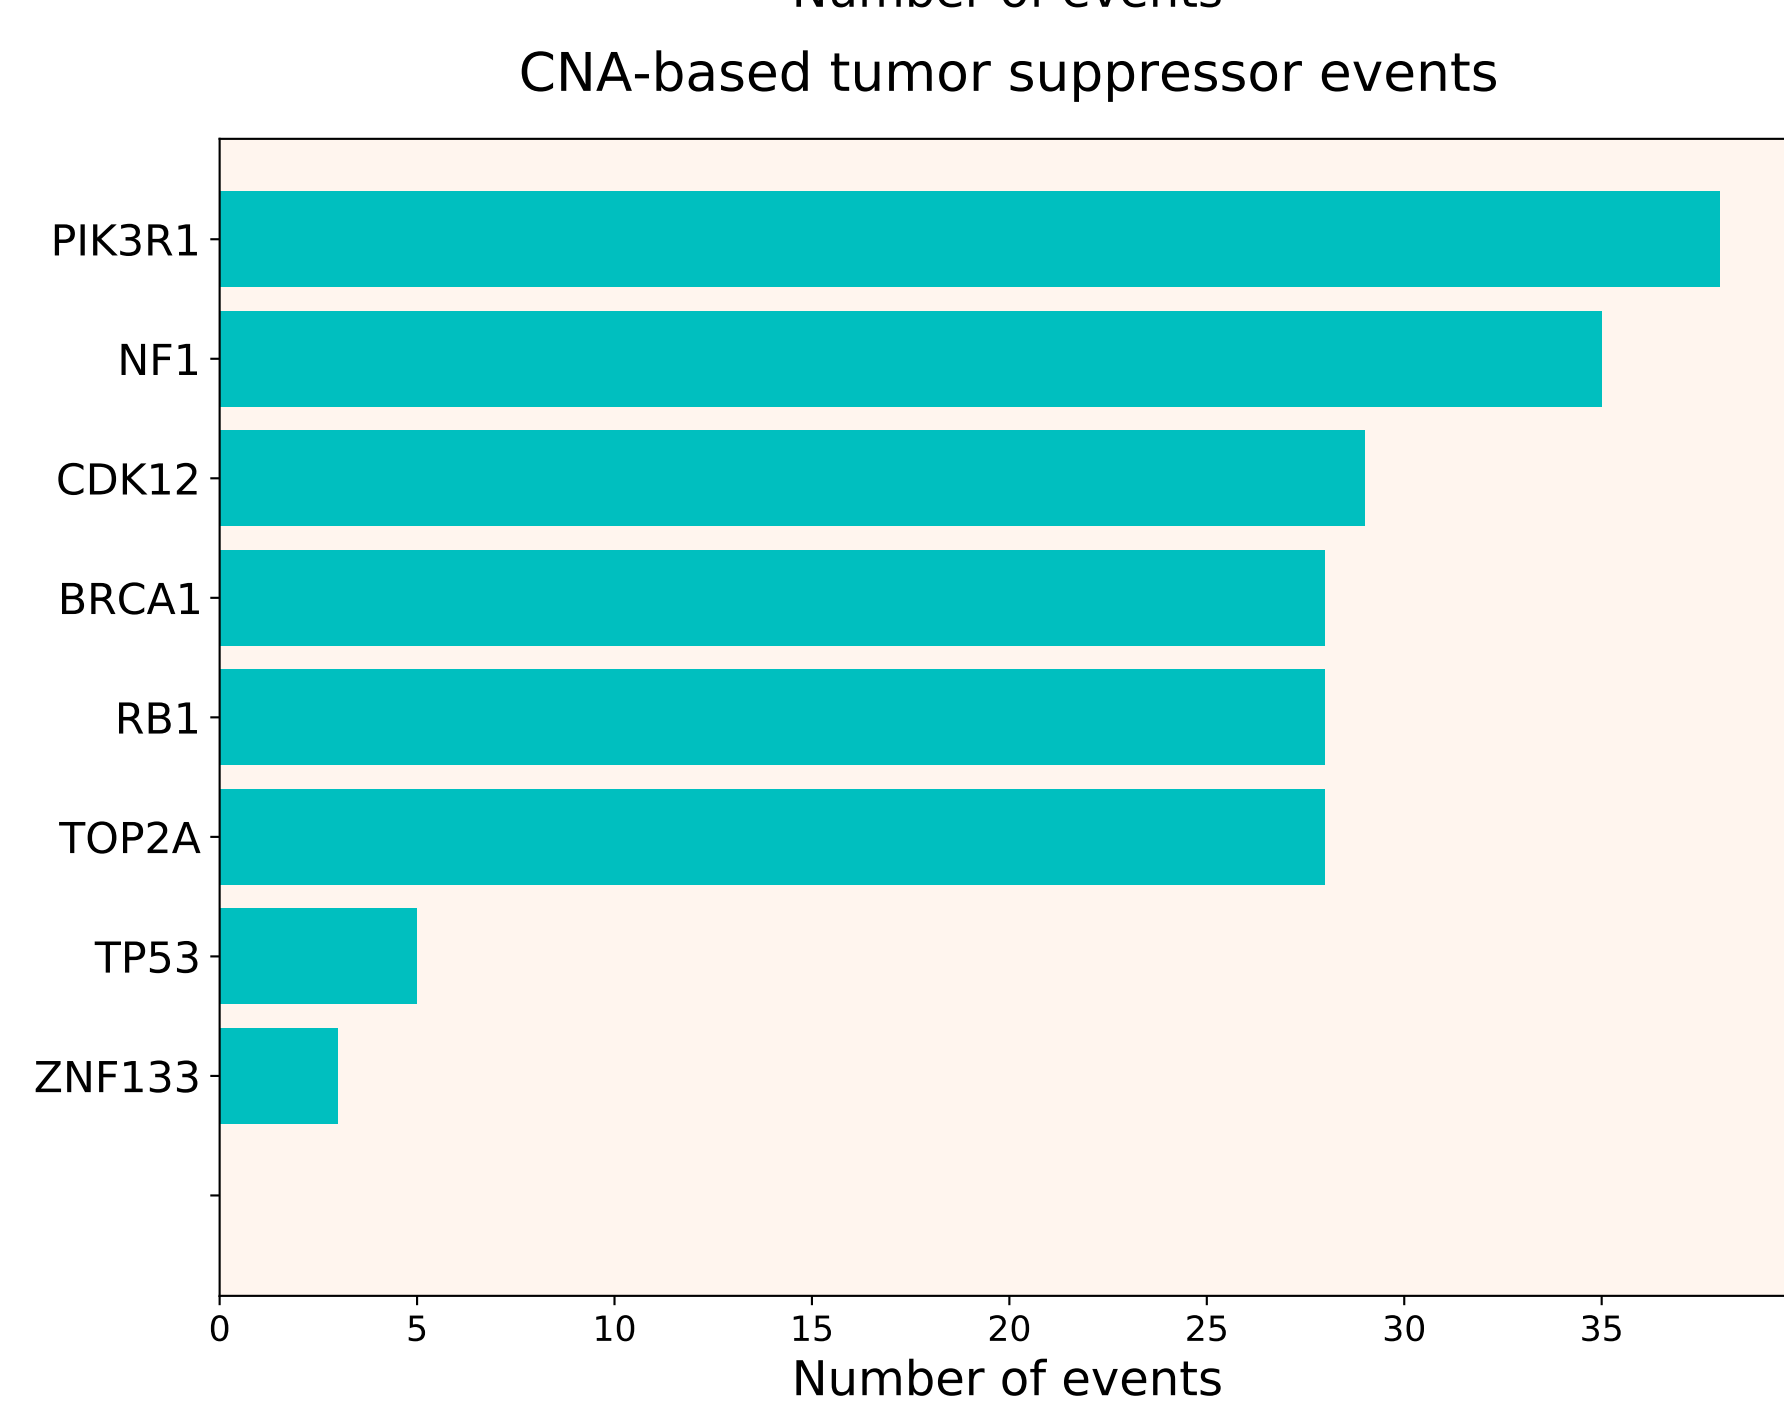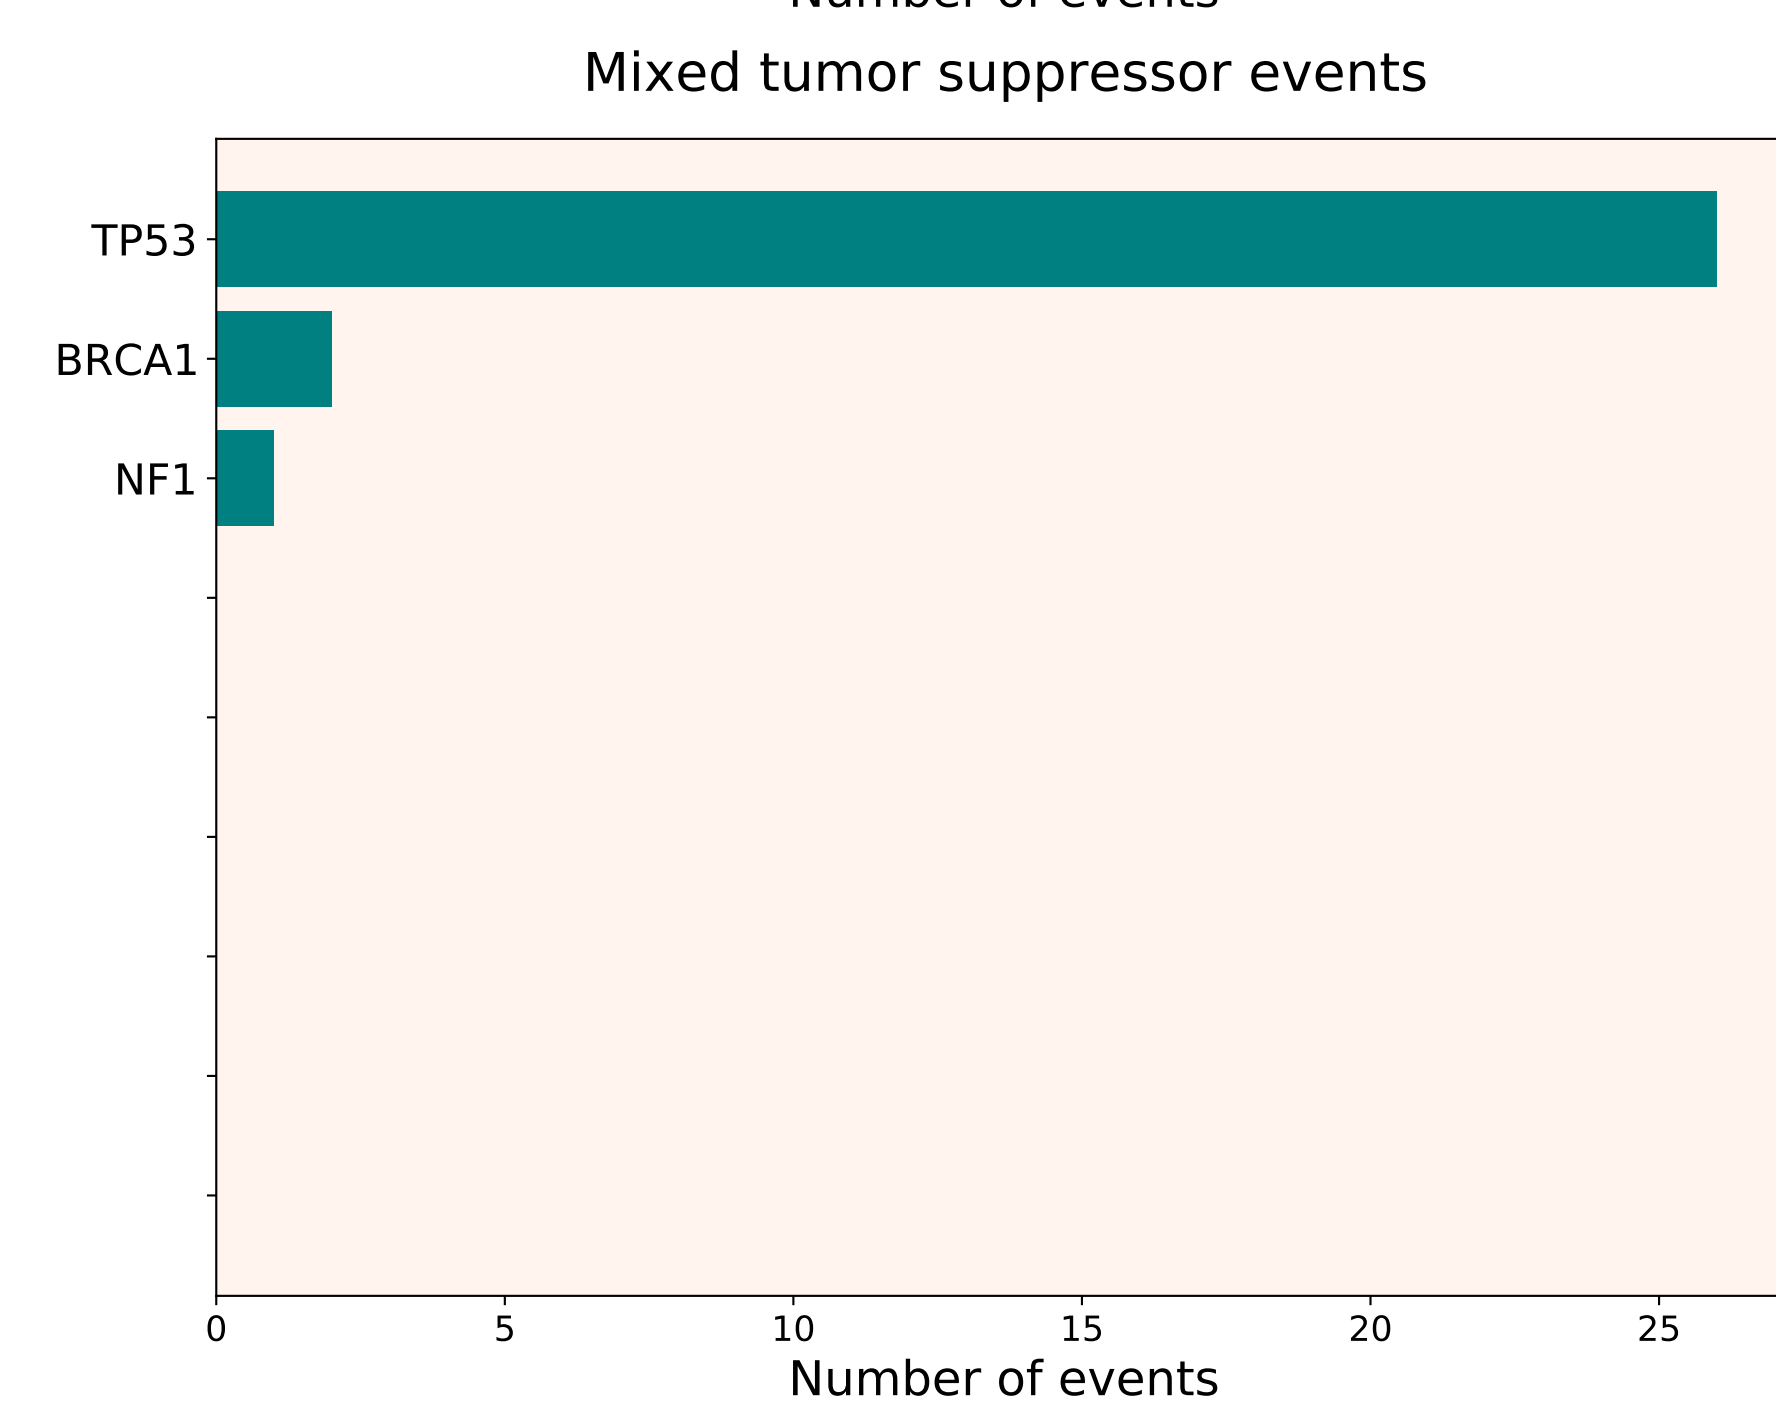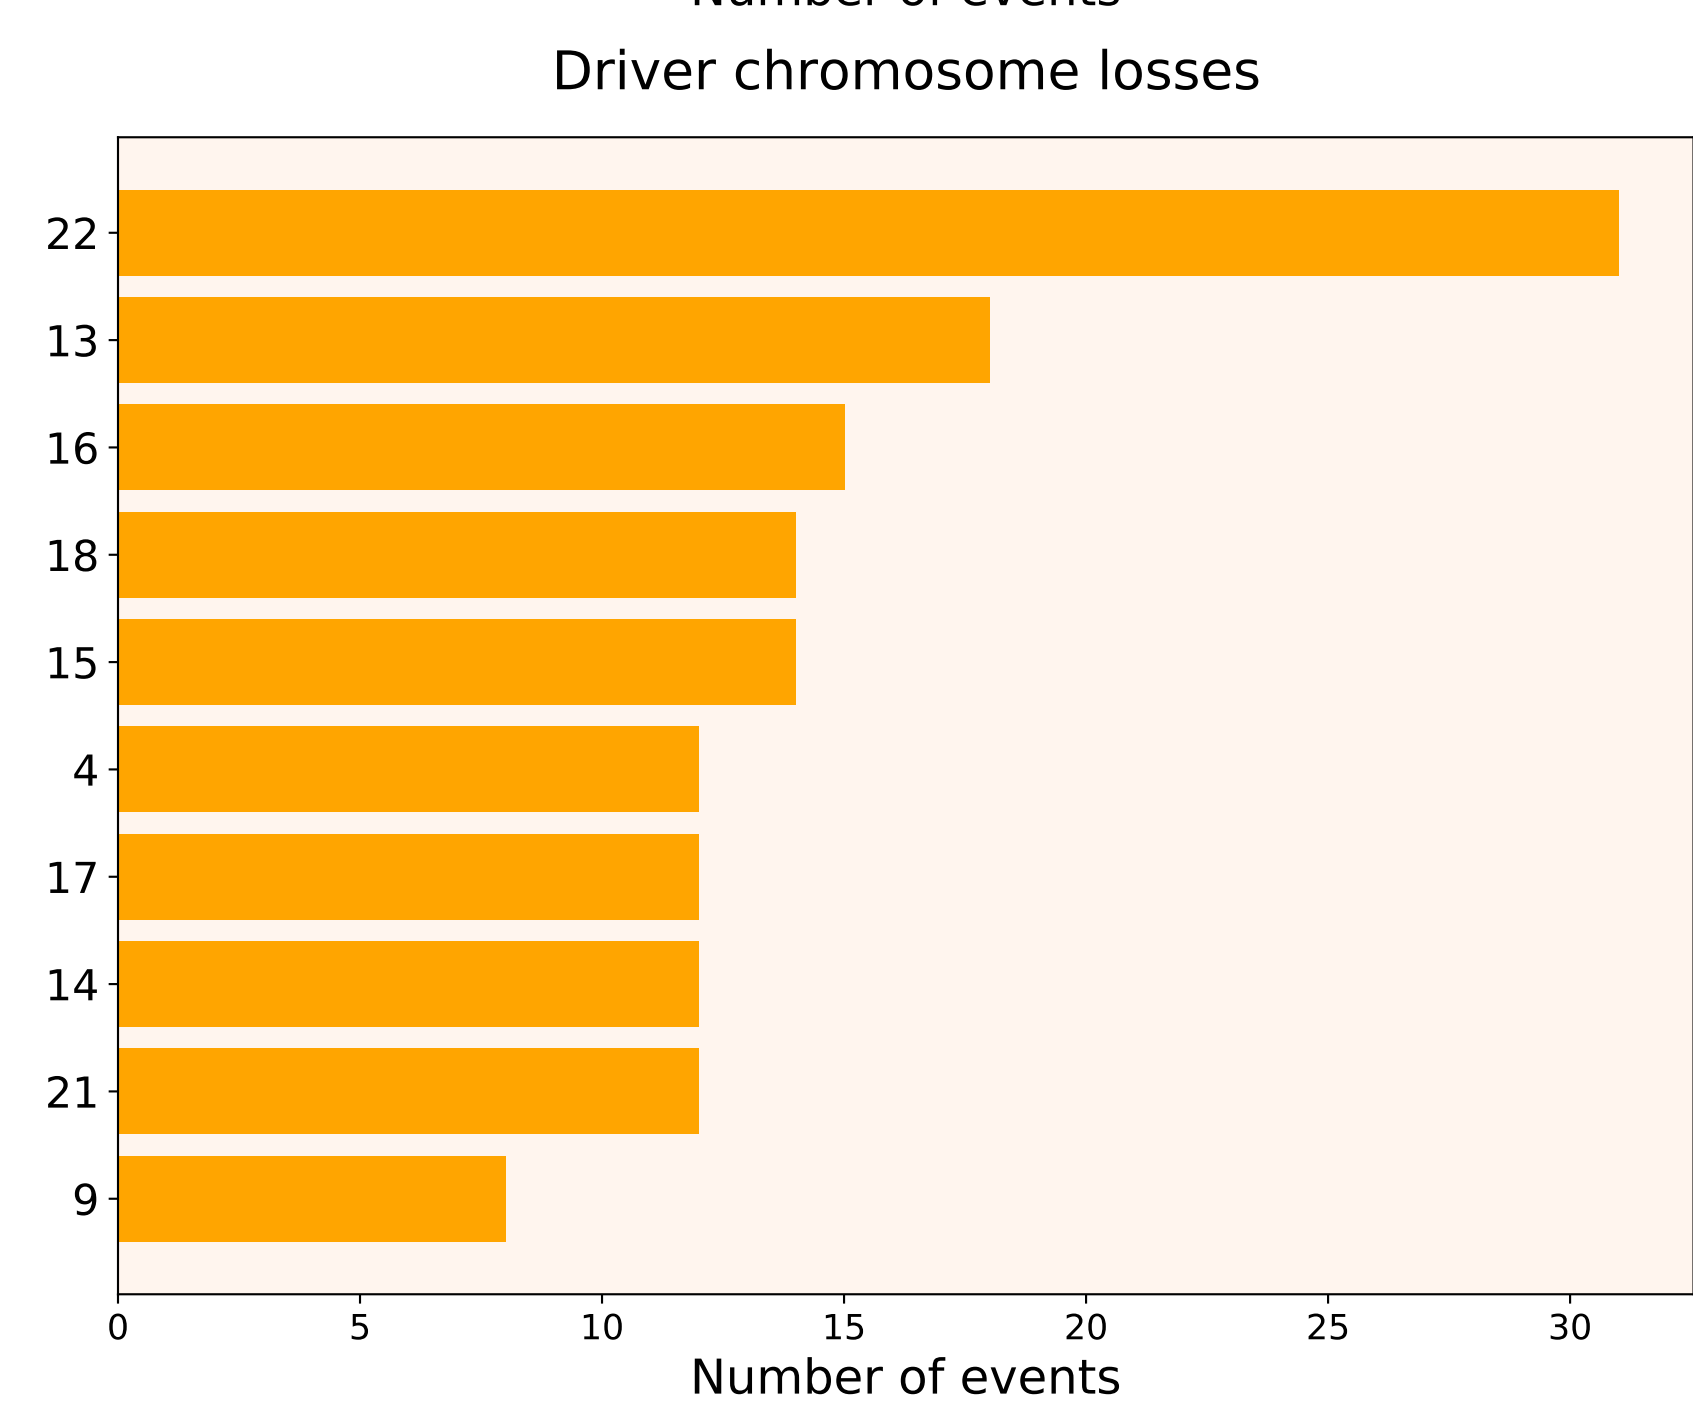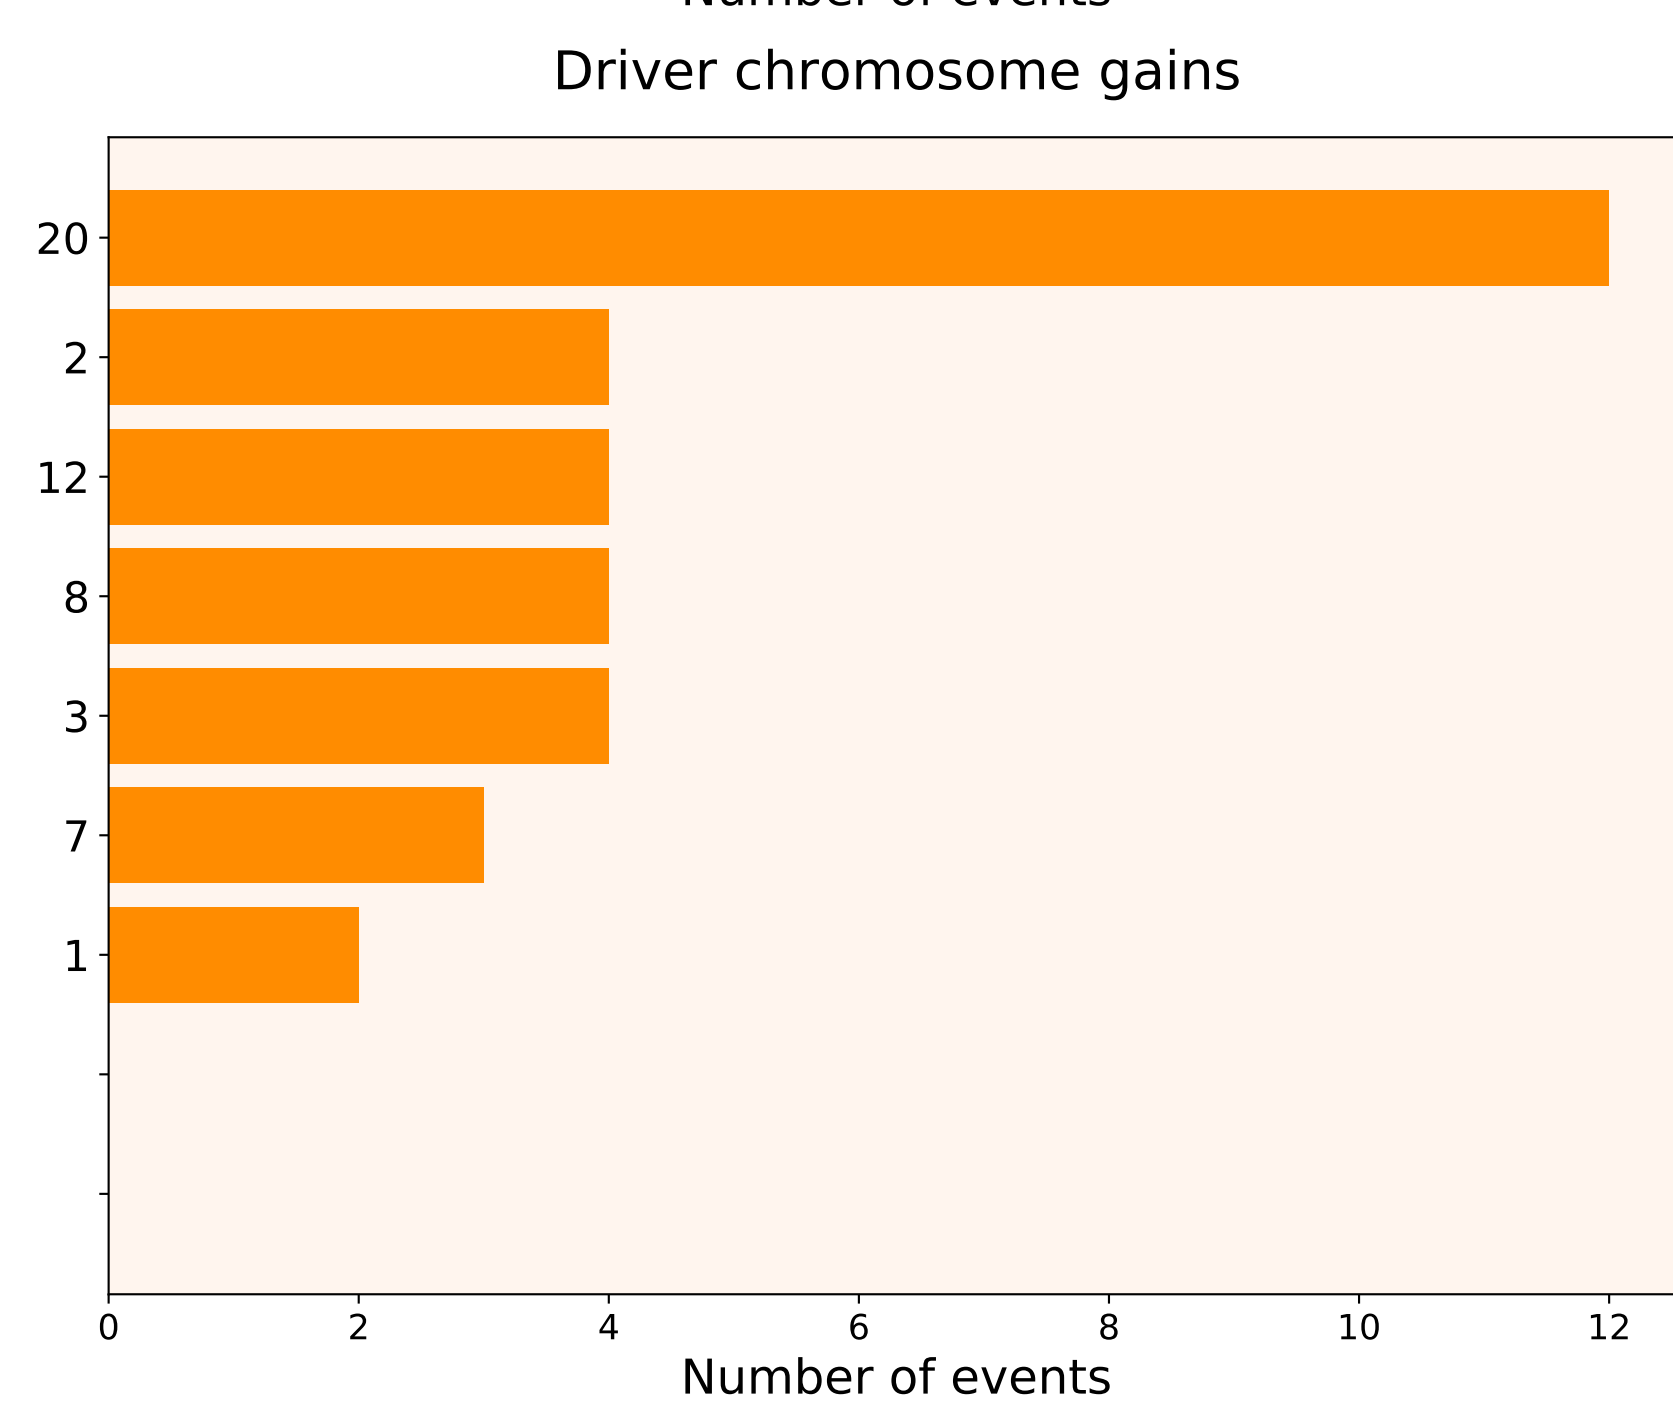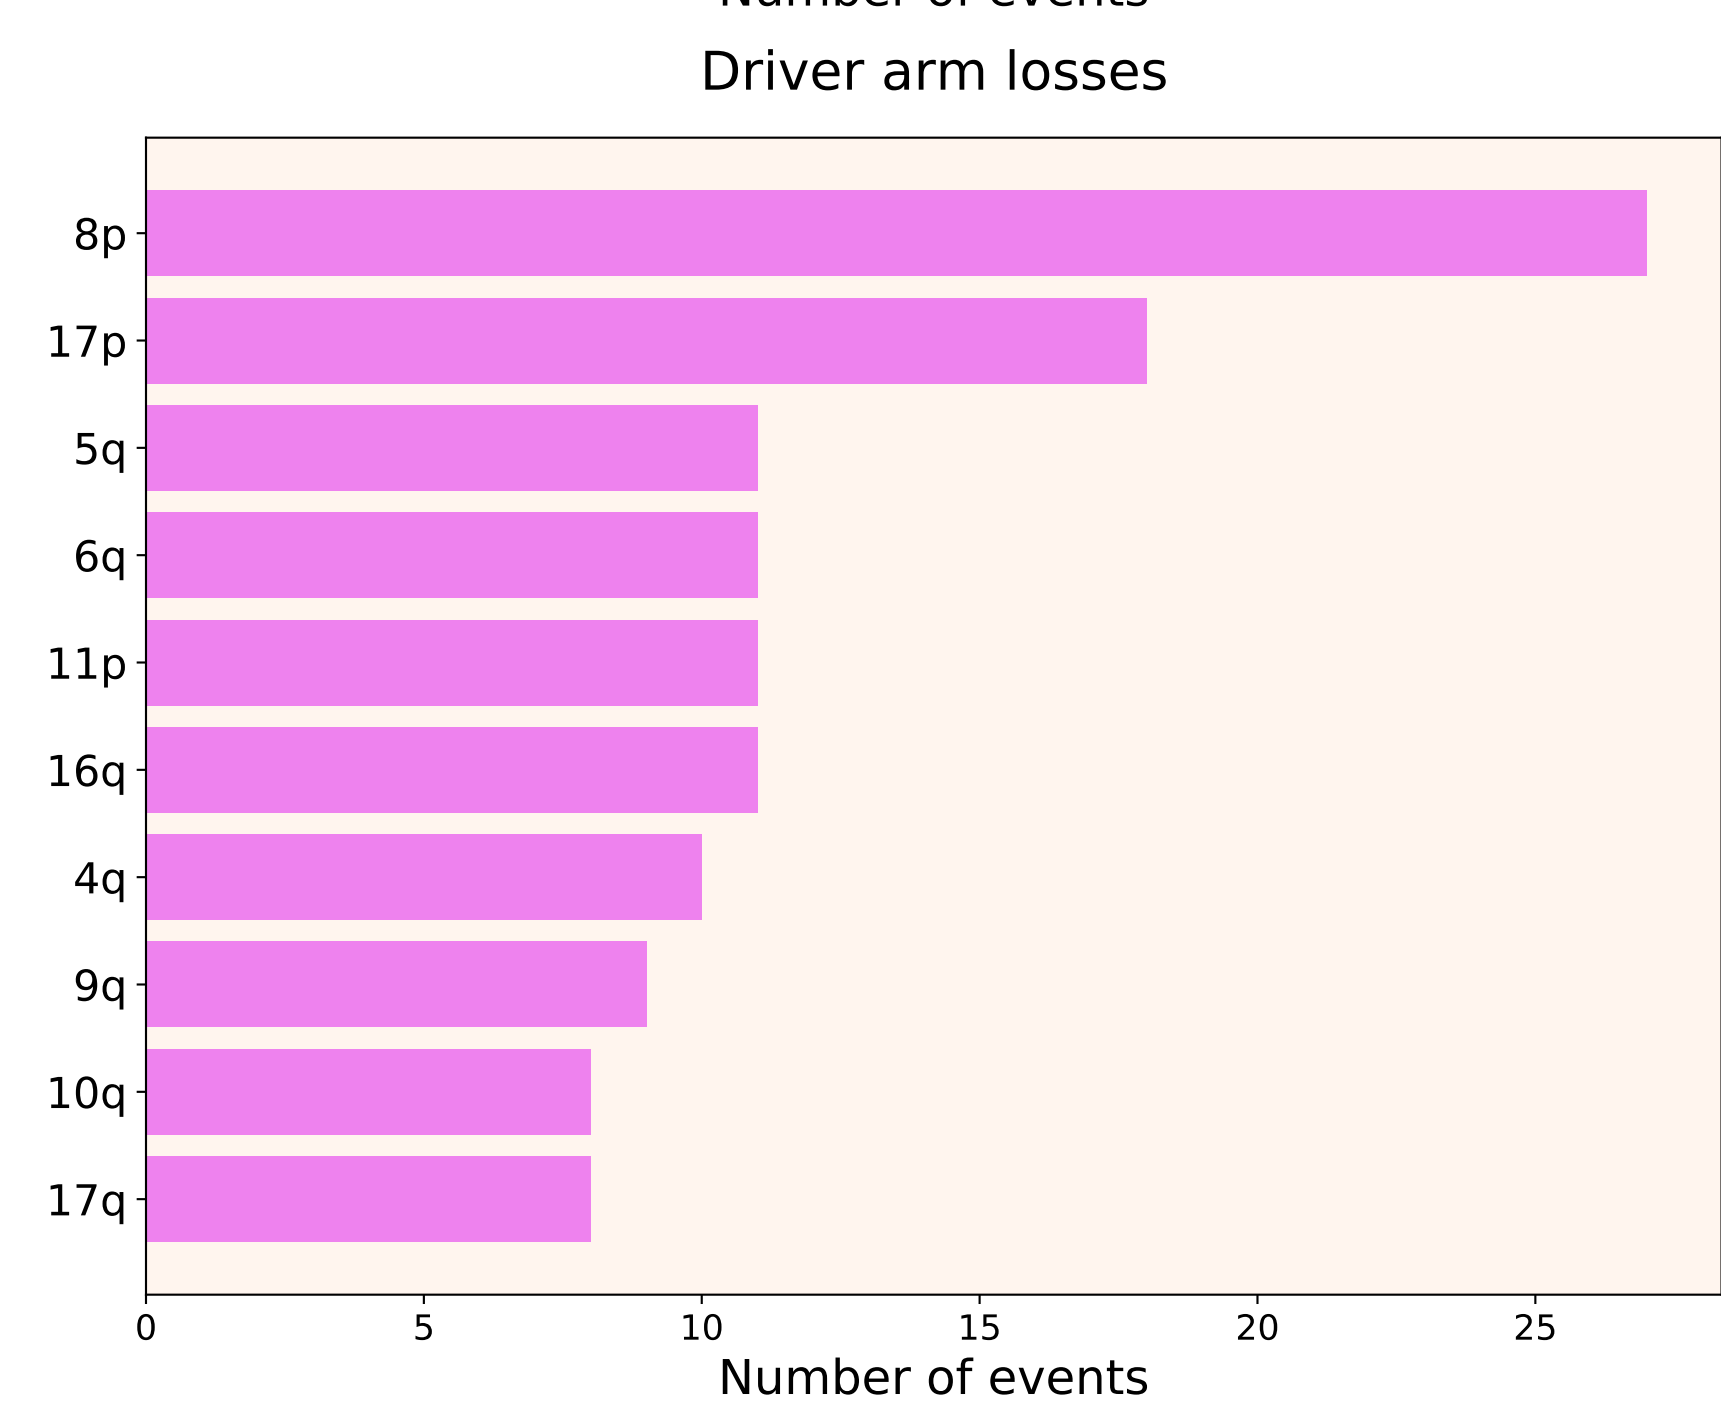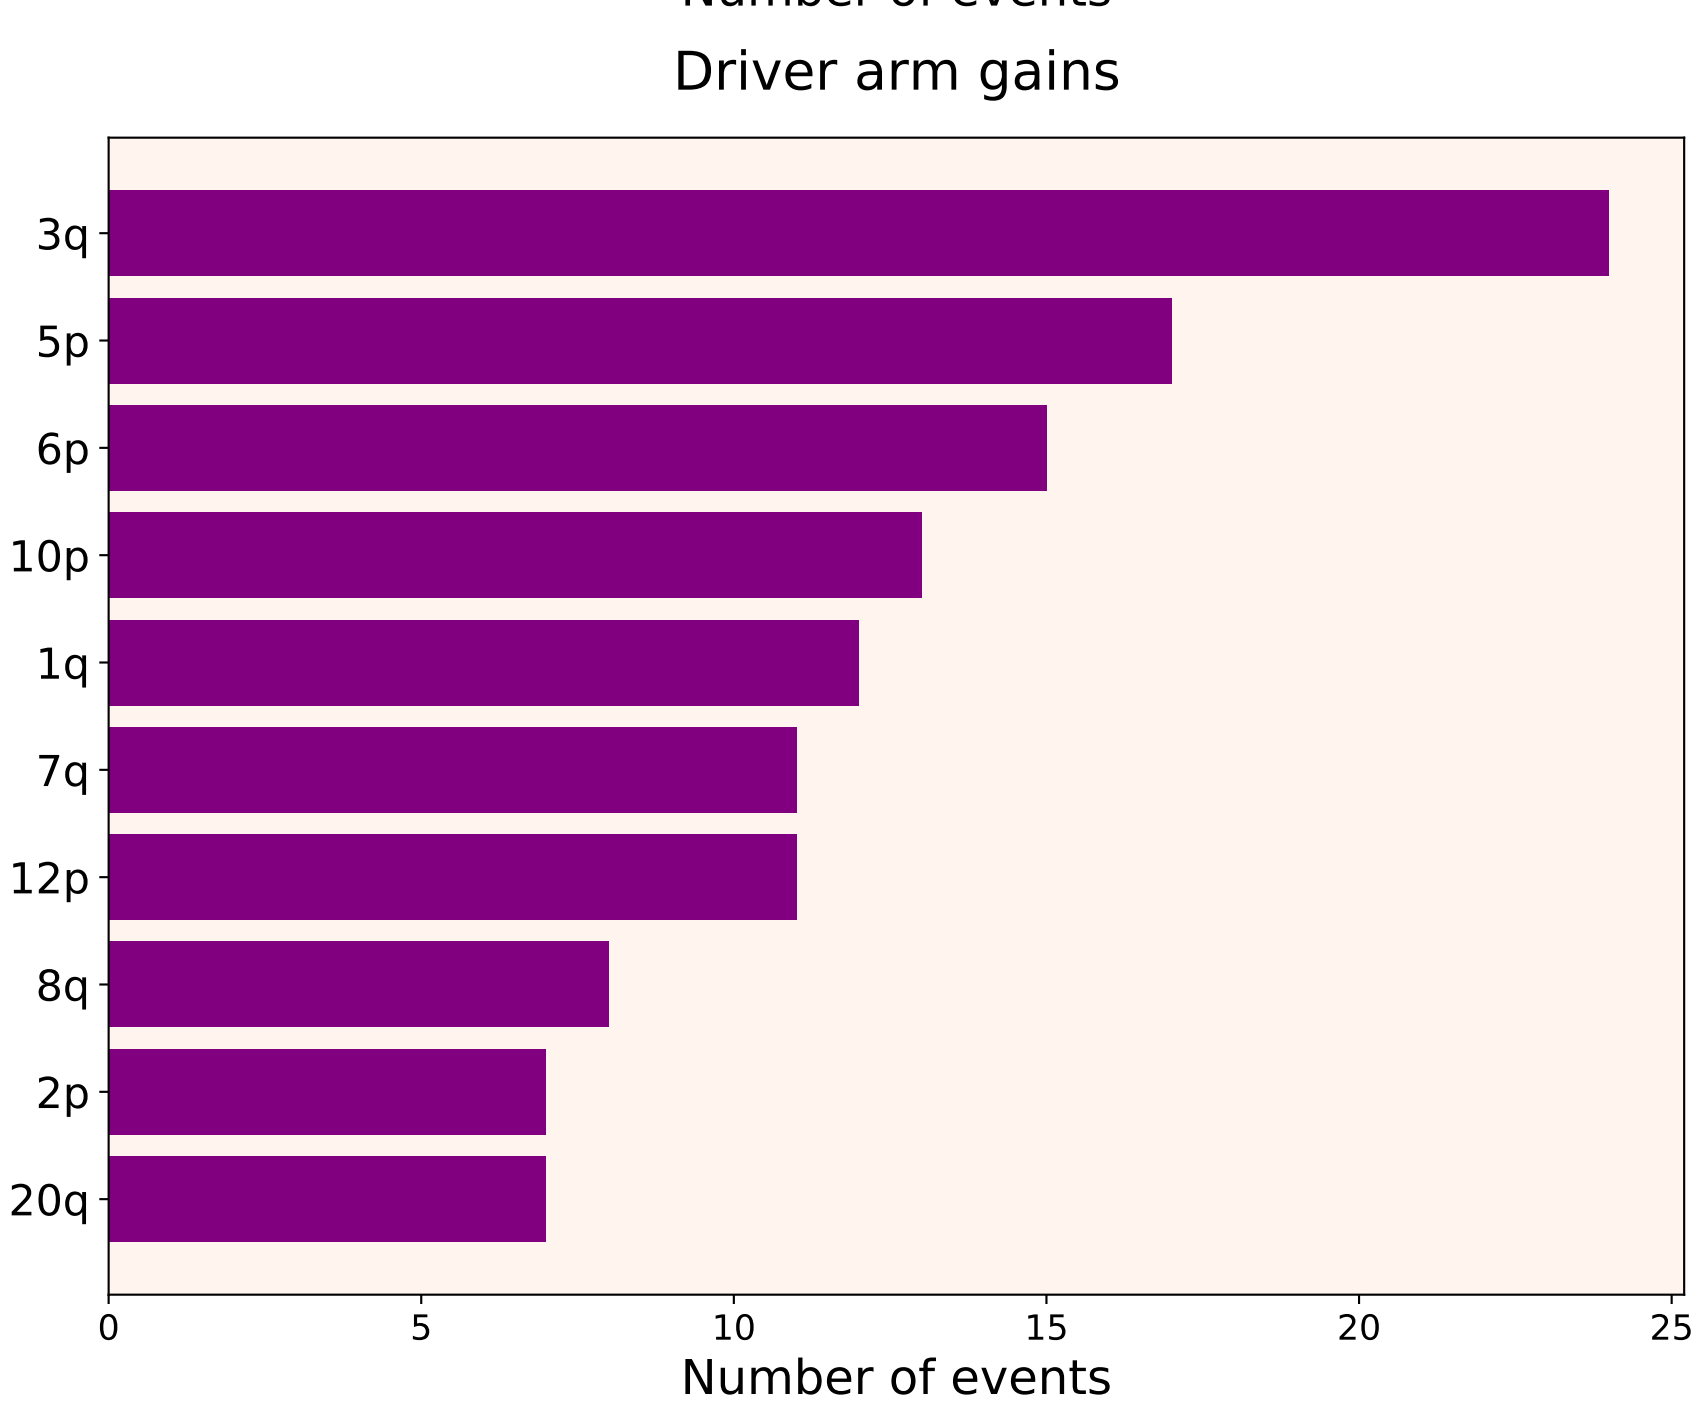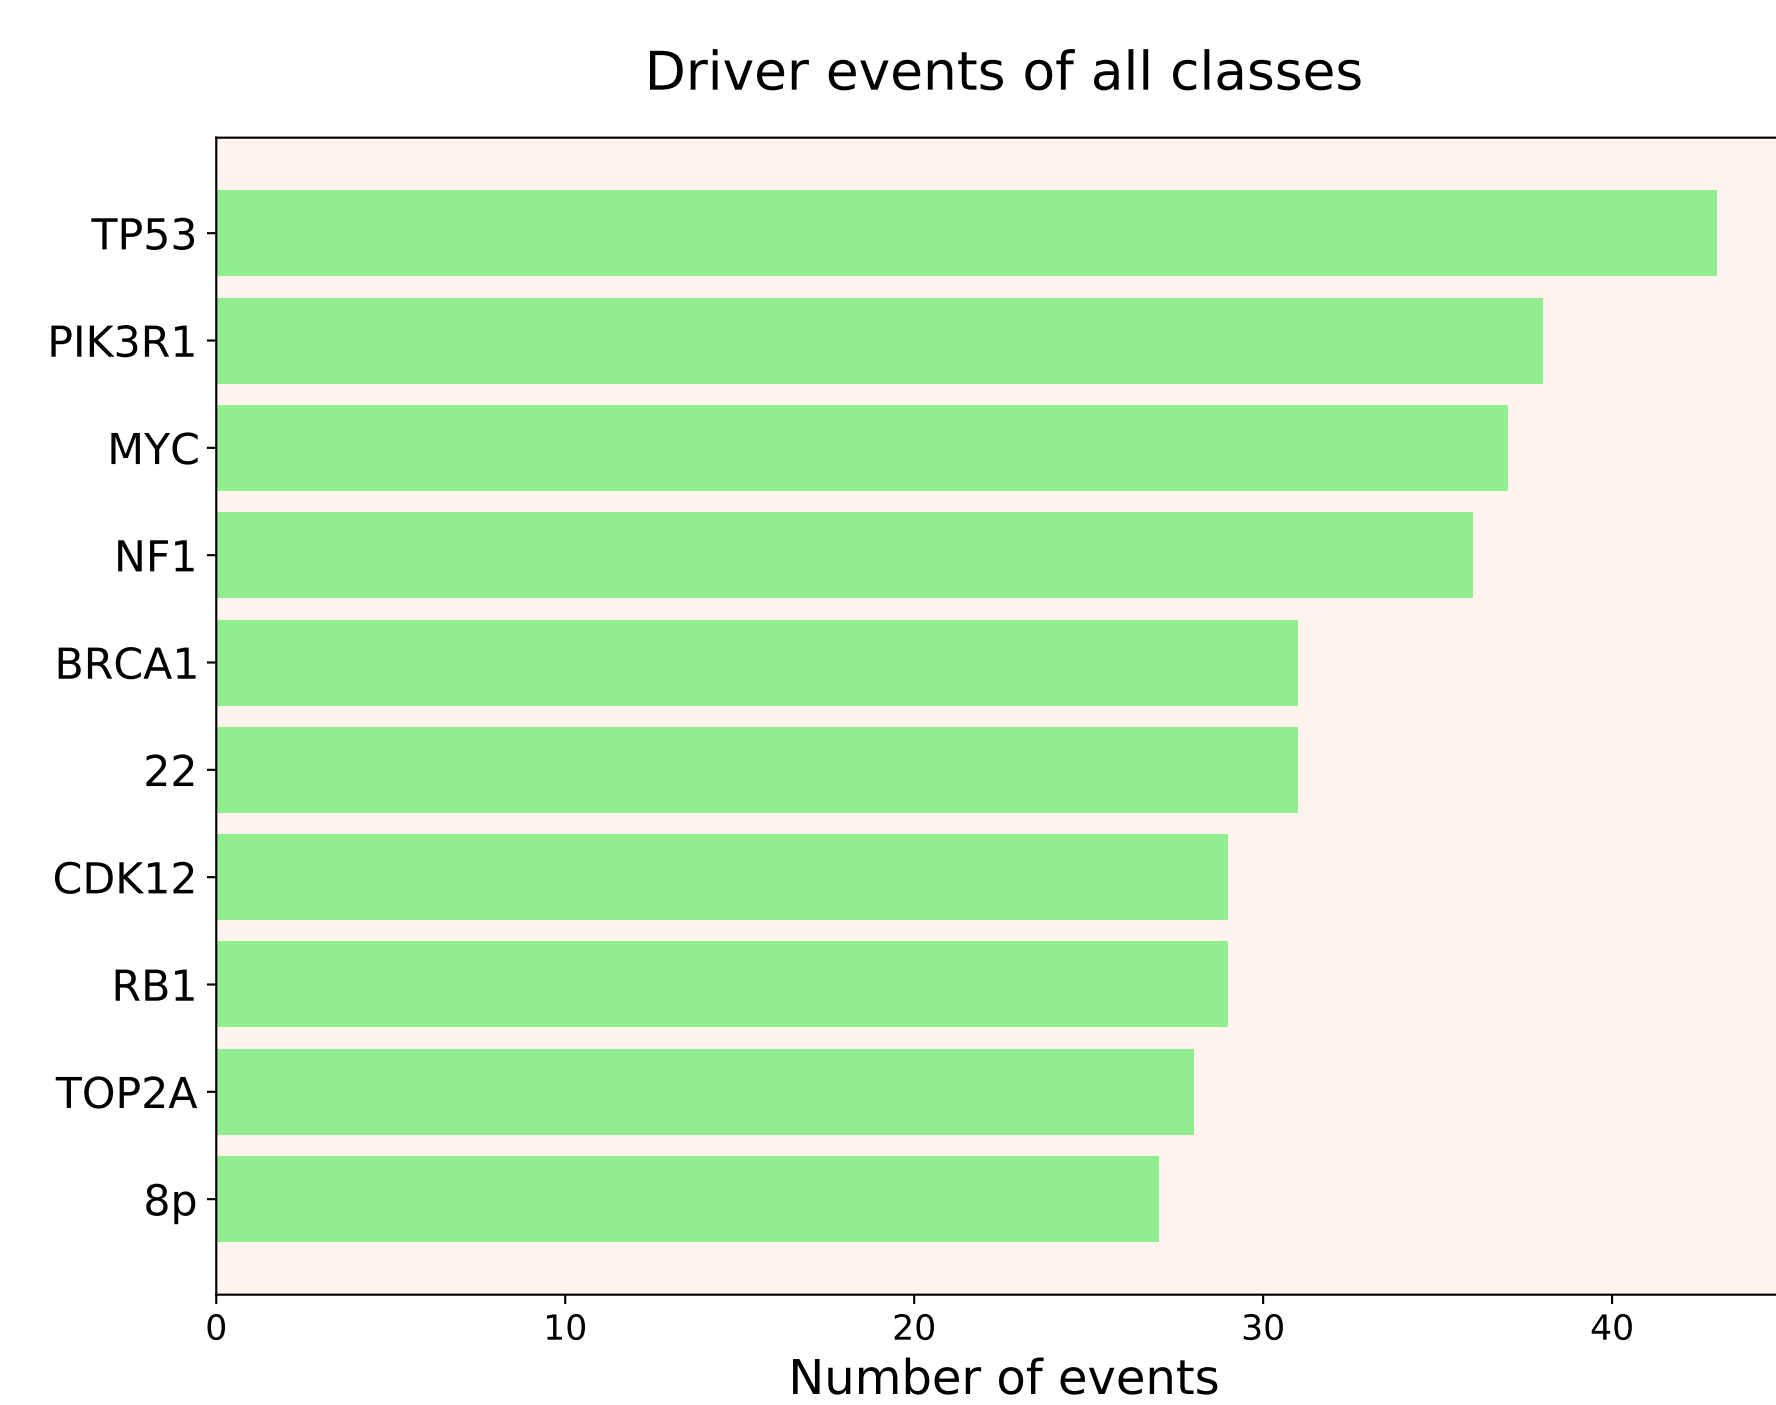

Supplement: Supplemental_Data_S1.zip [file Supplemental_Data_S1.zip]

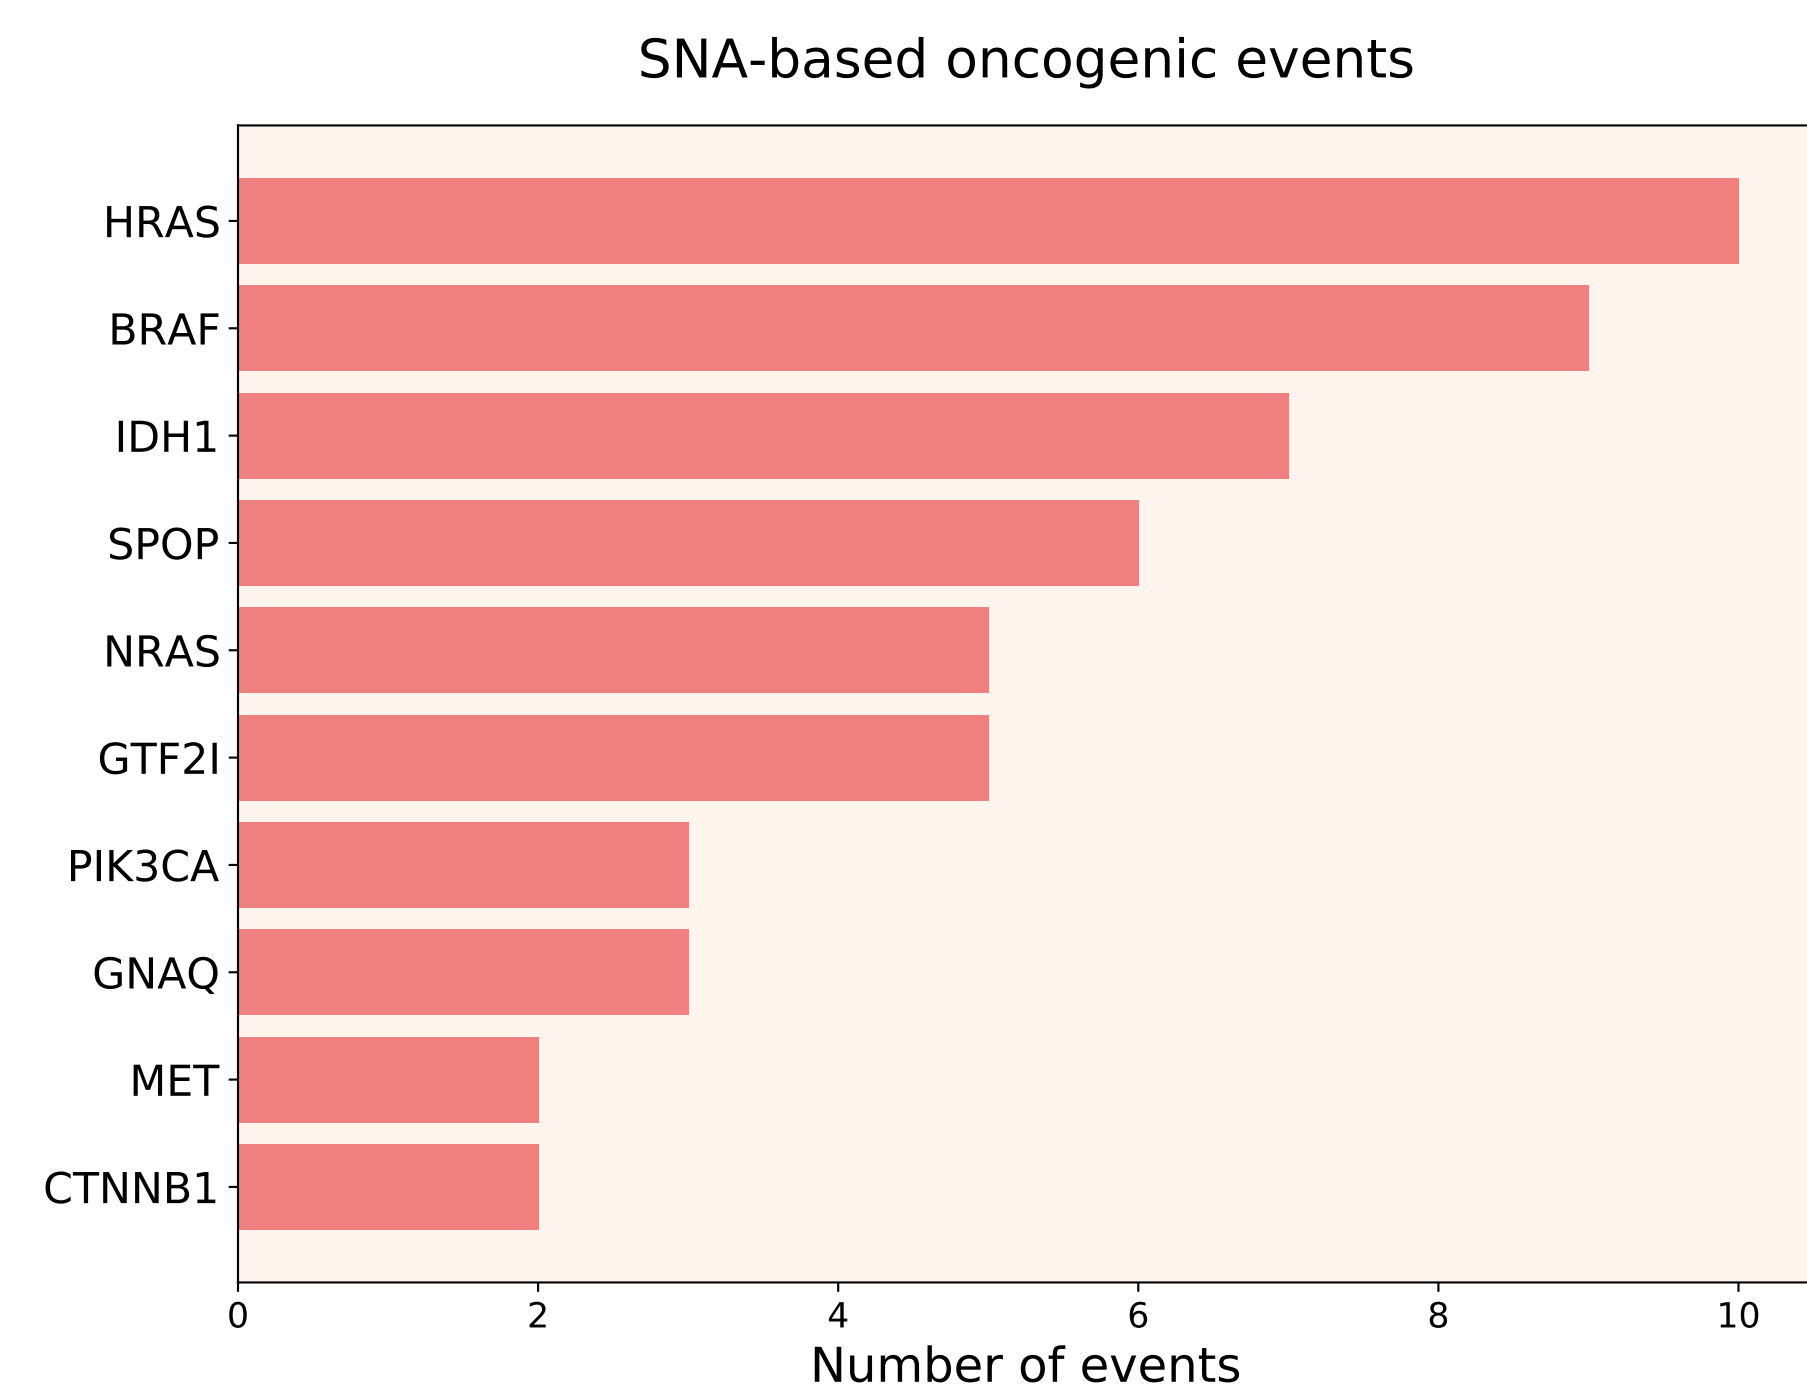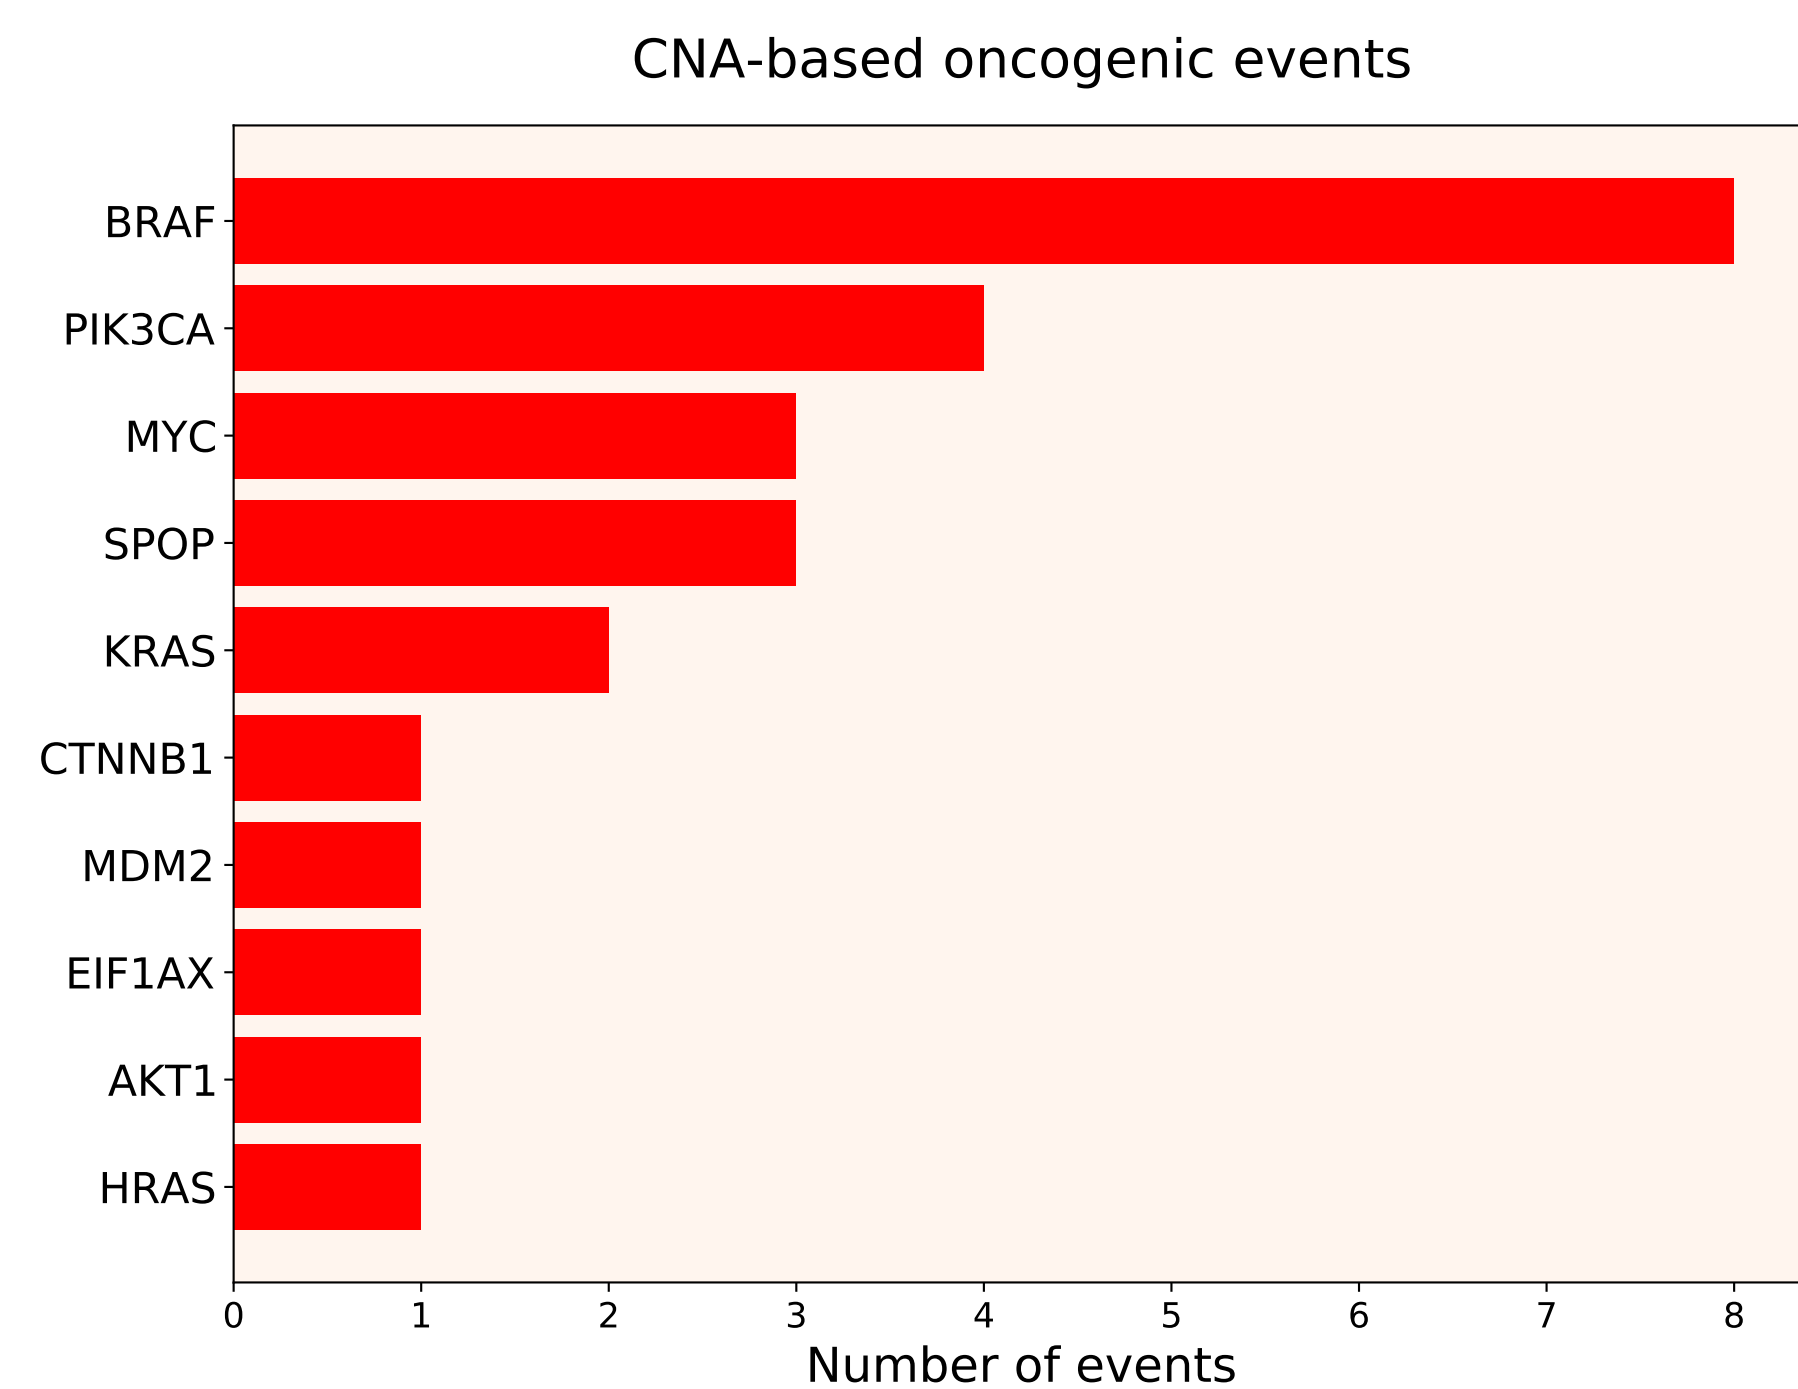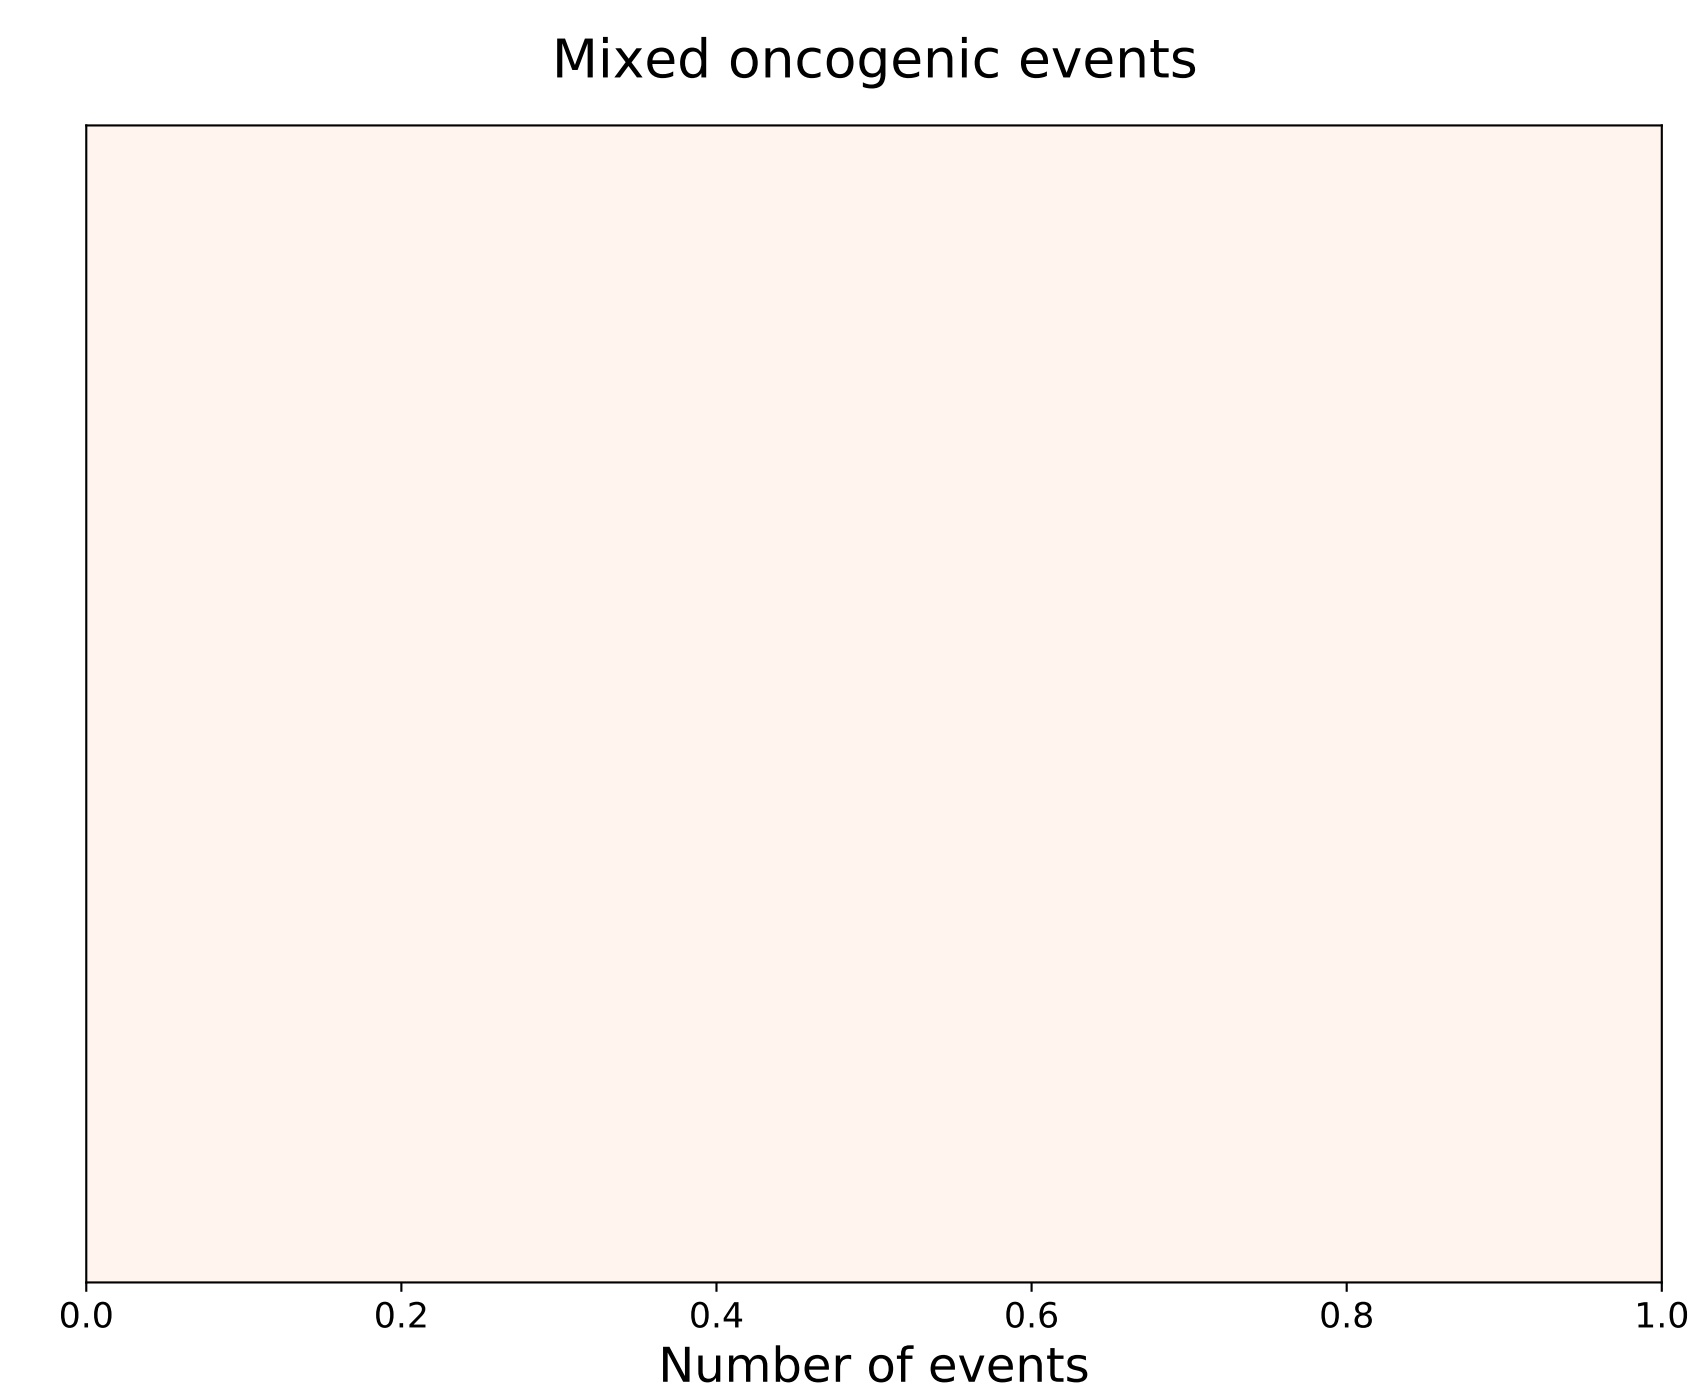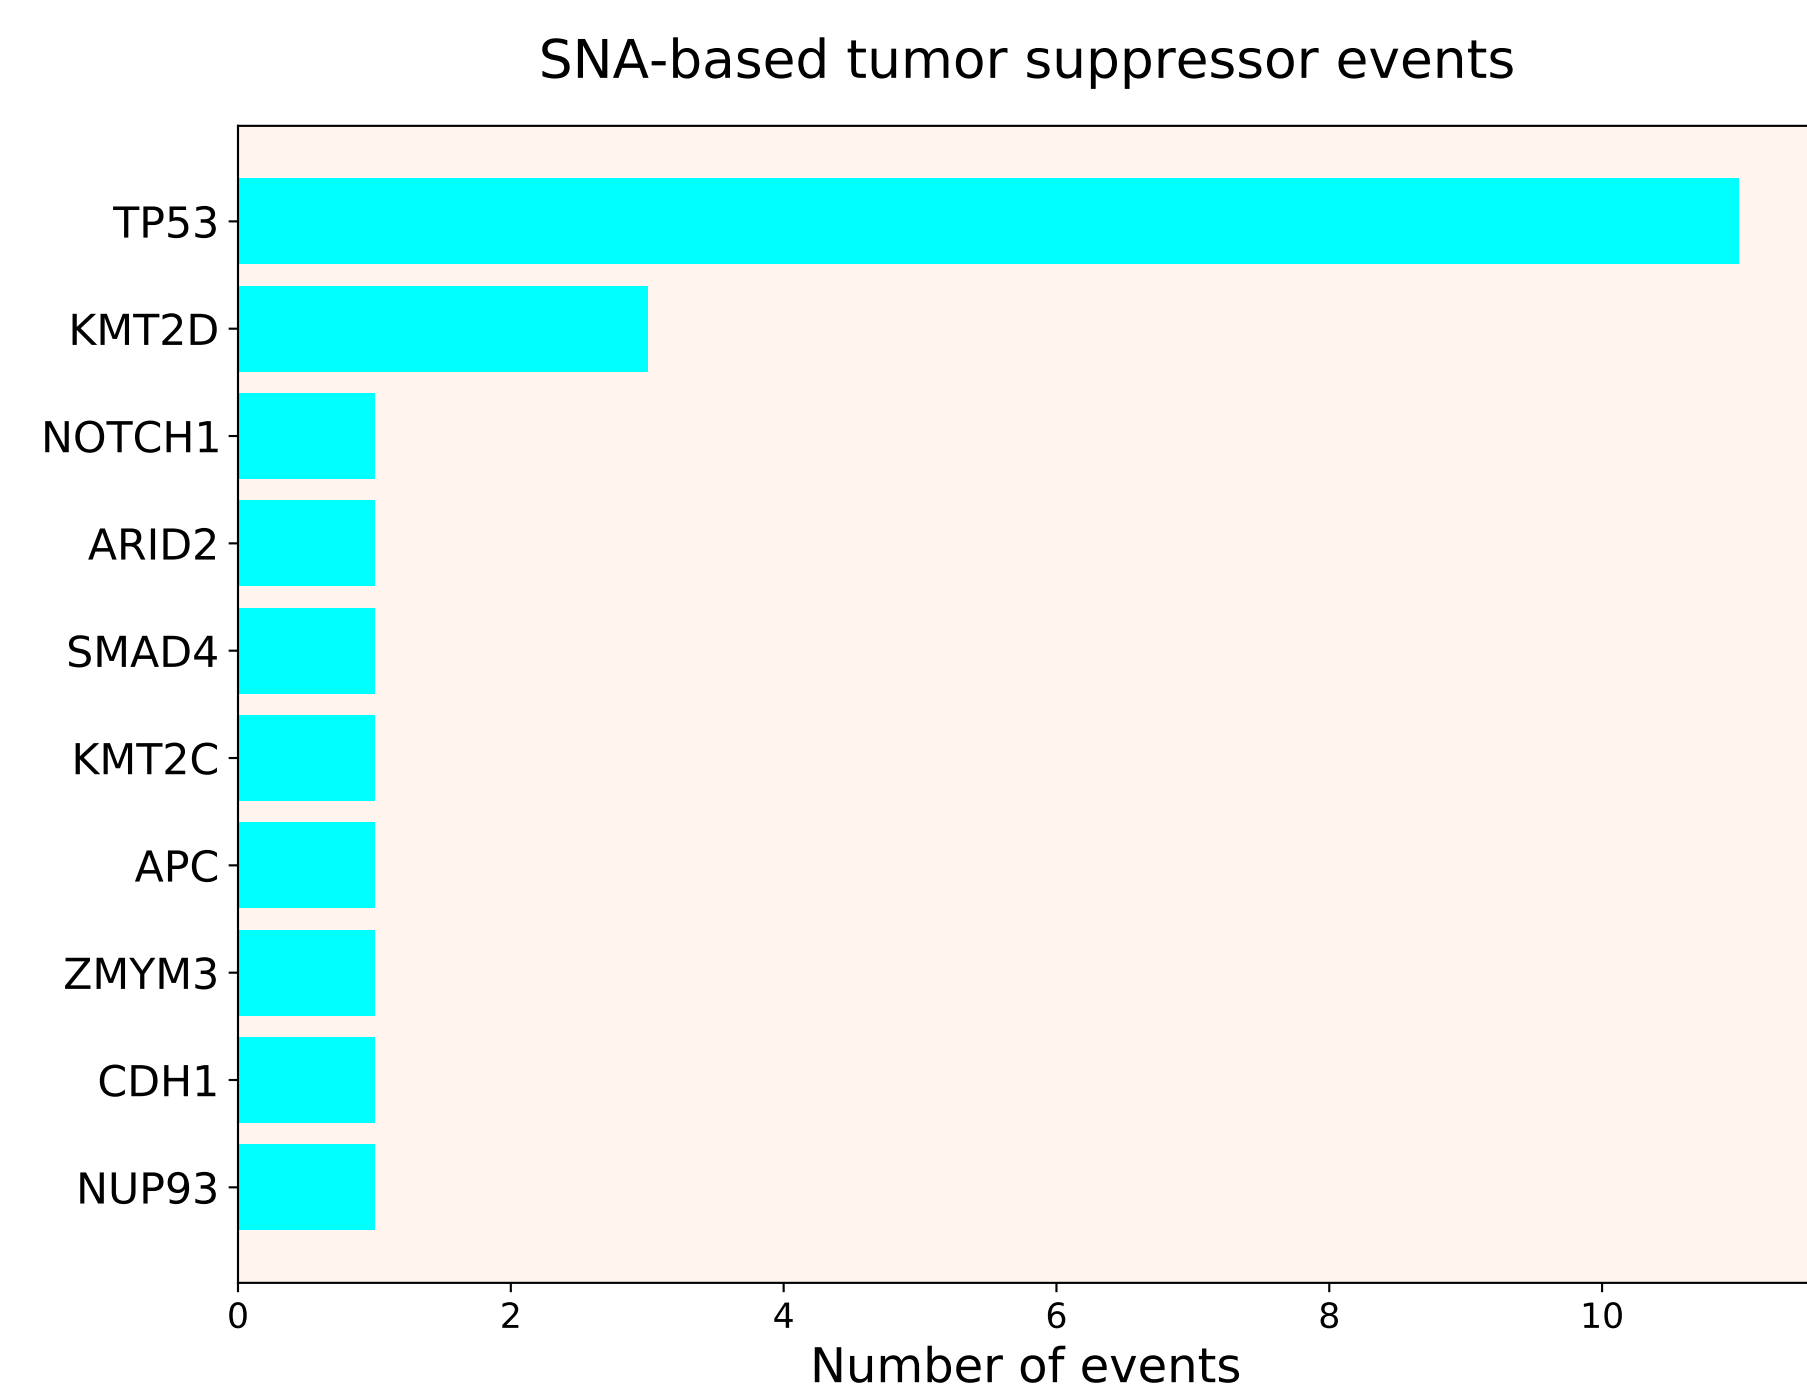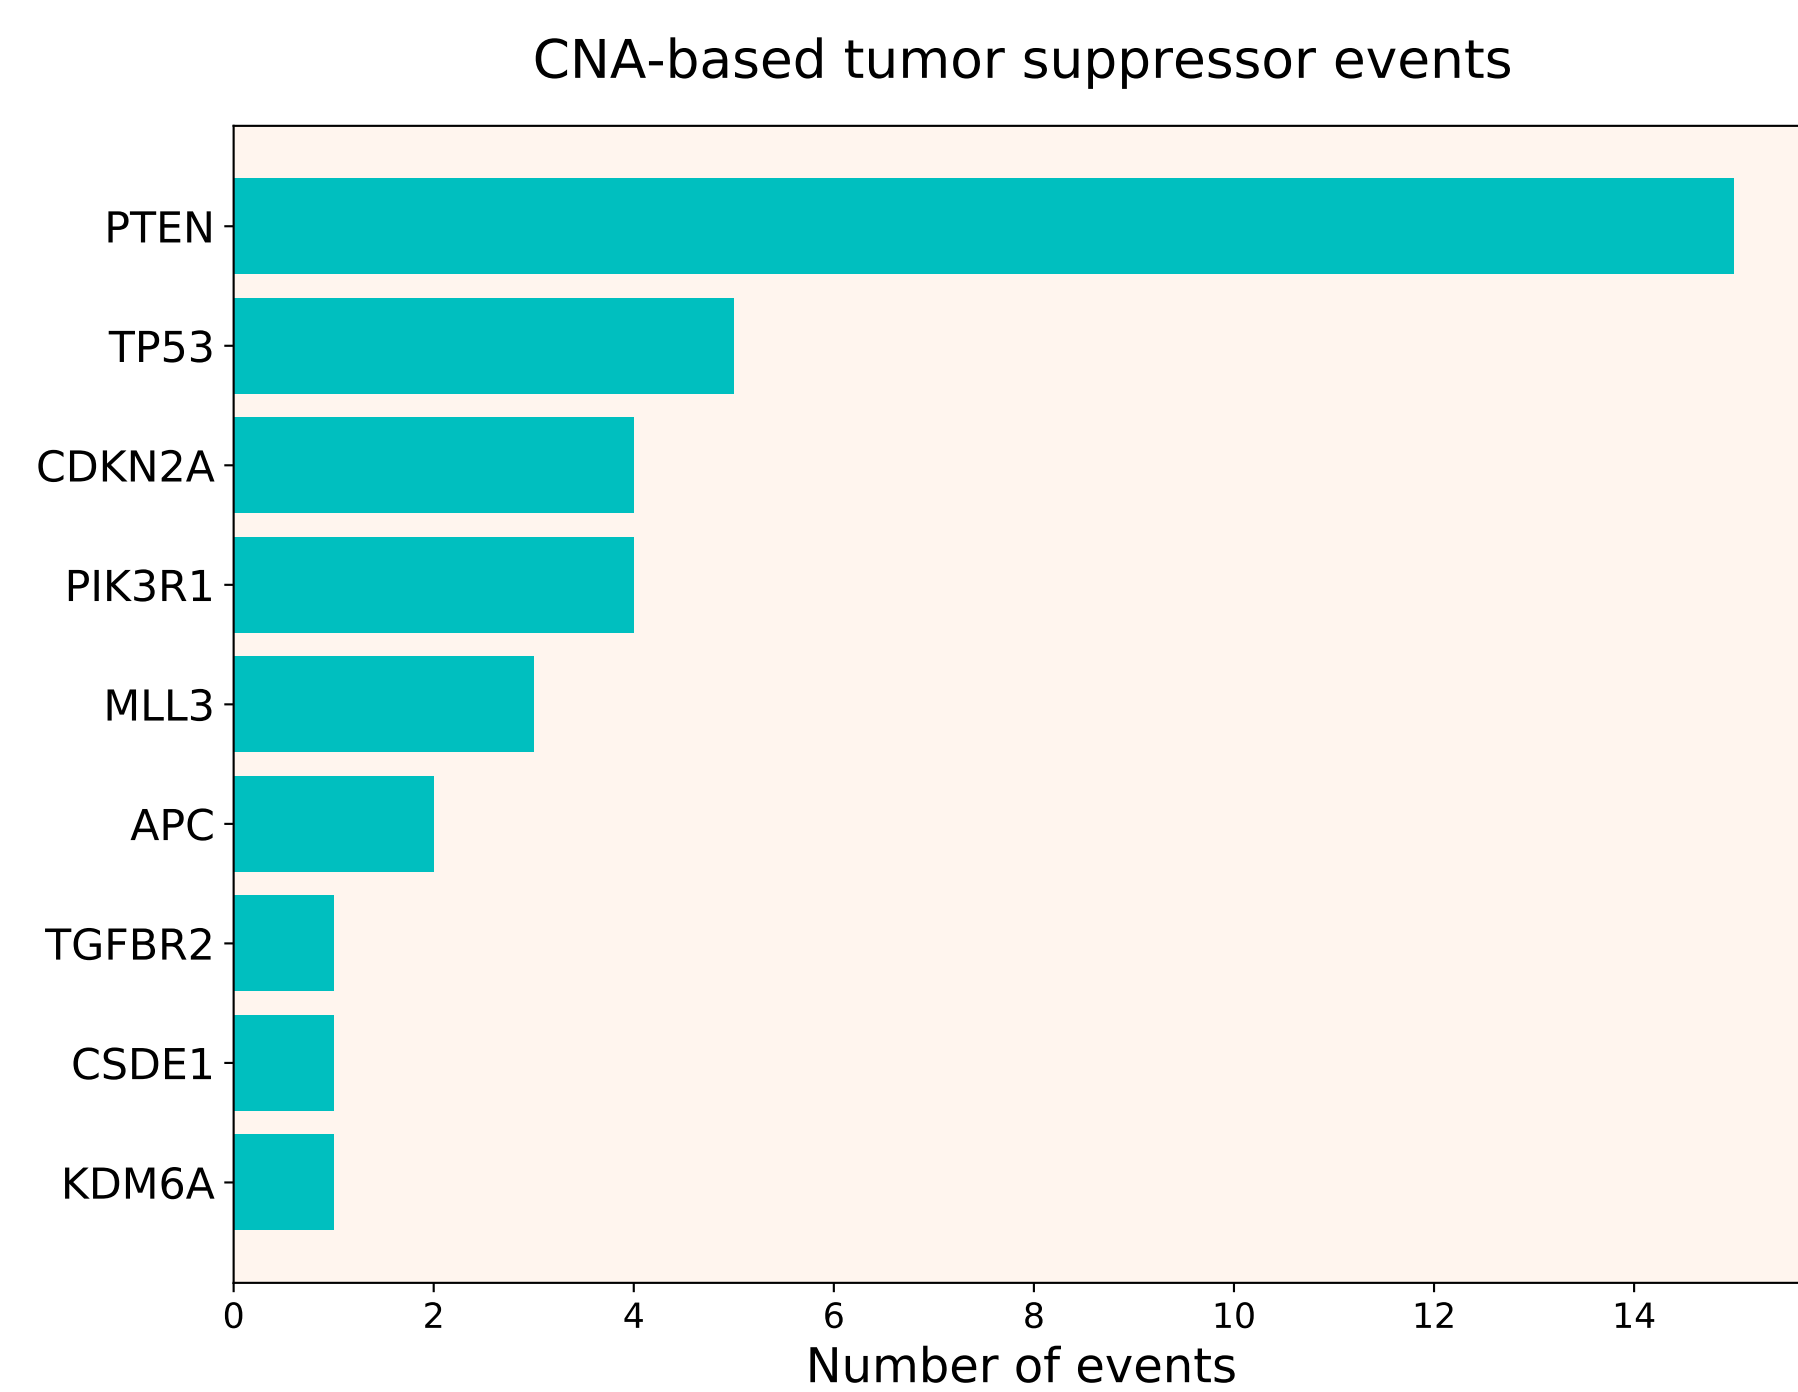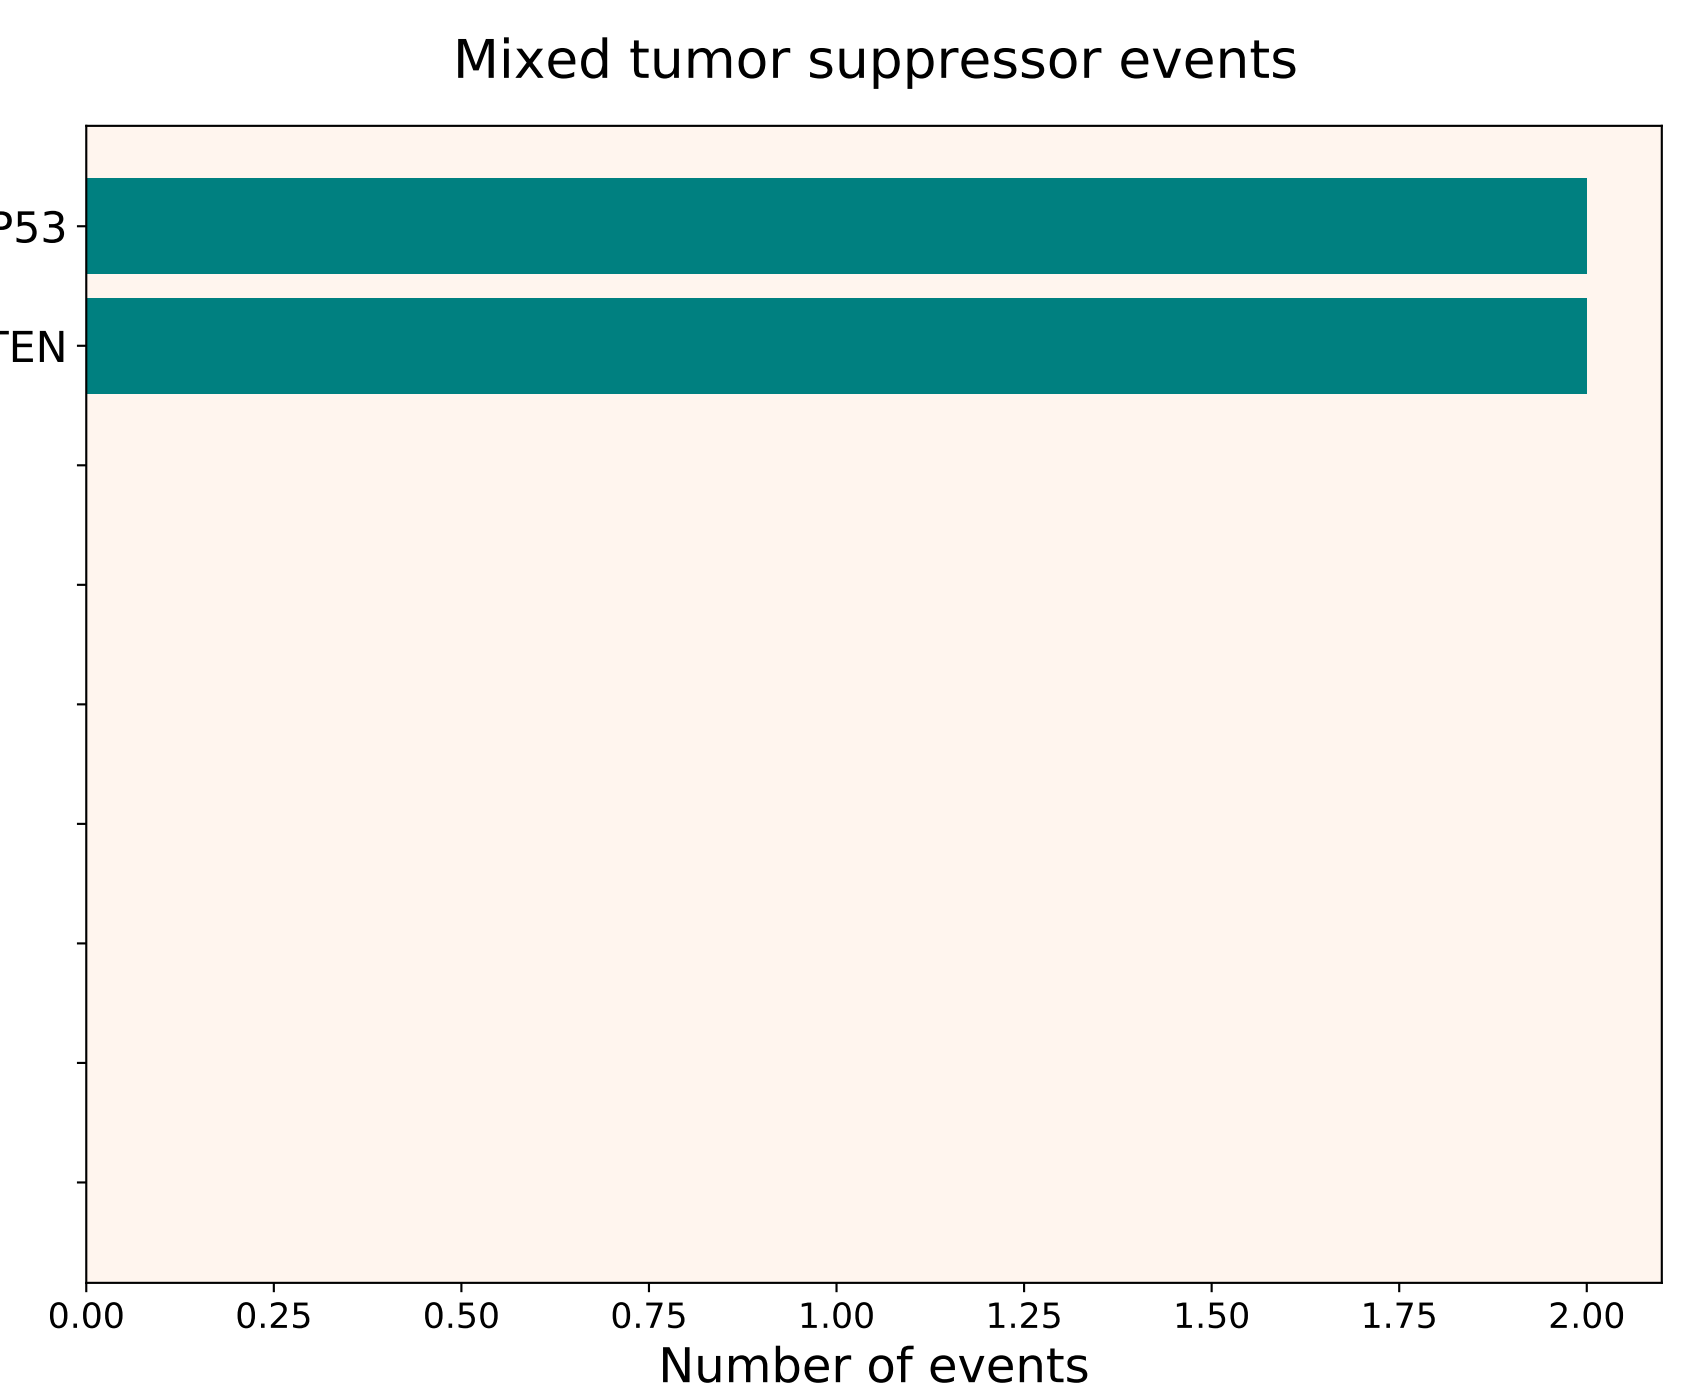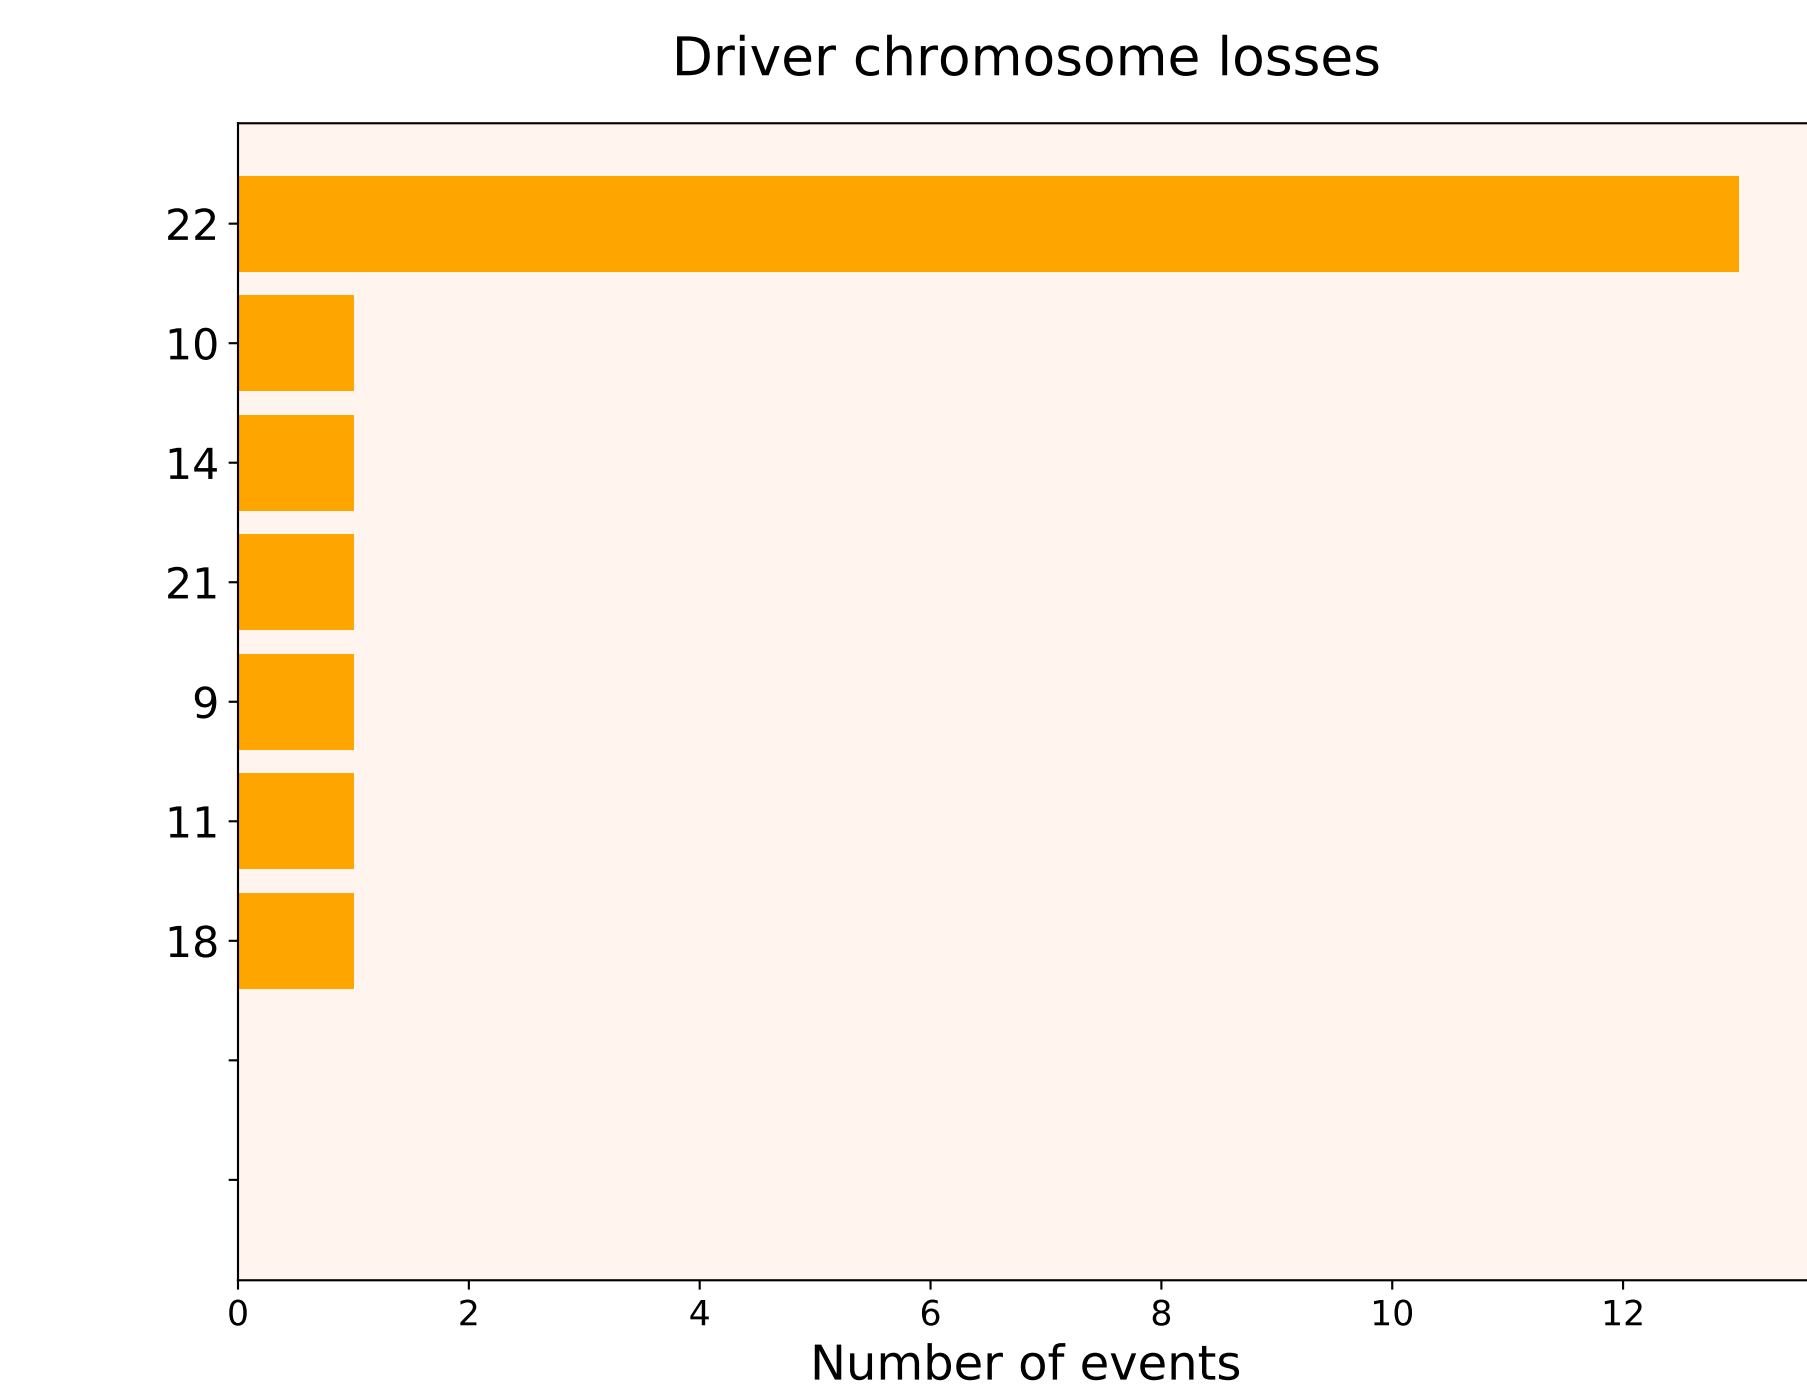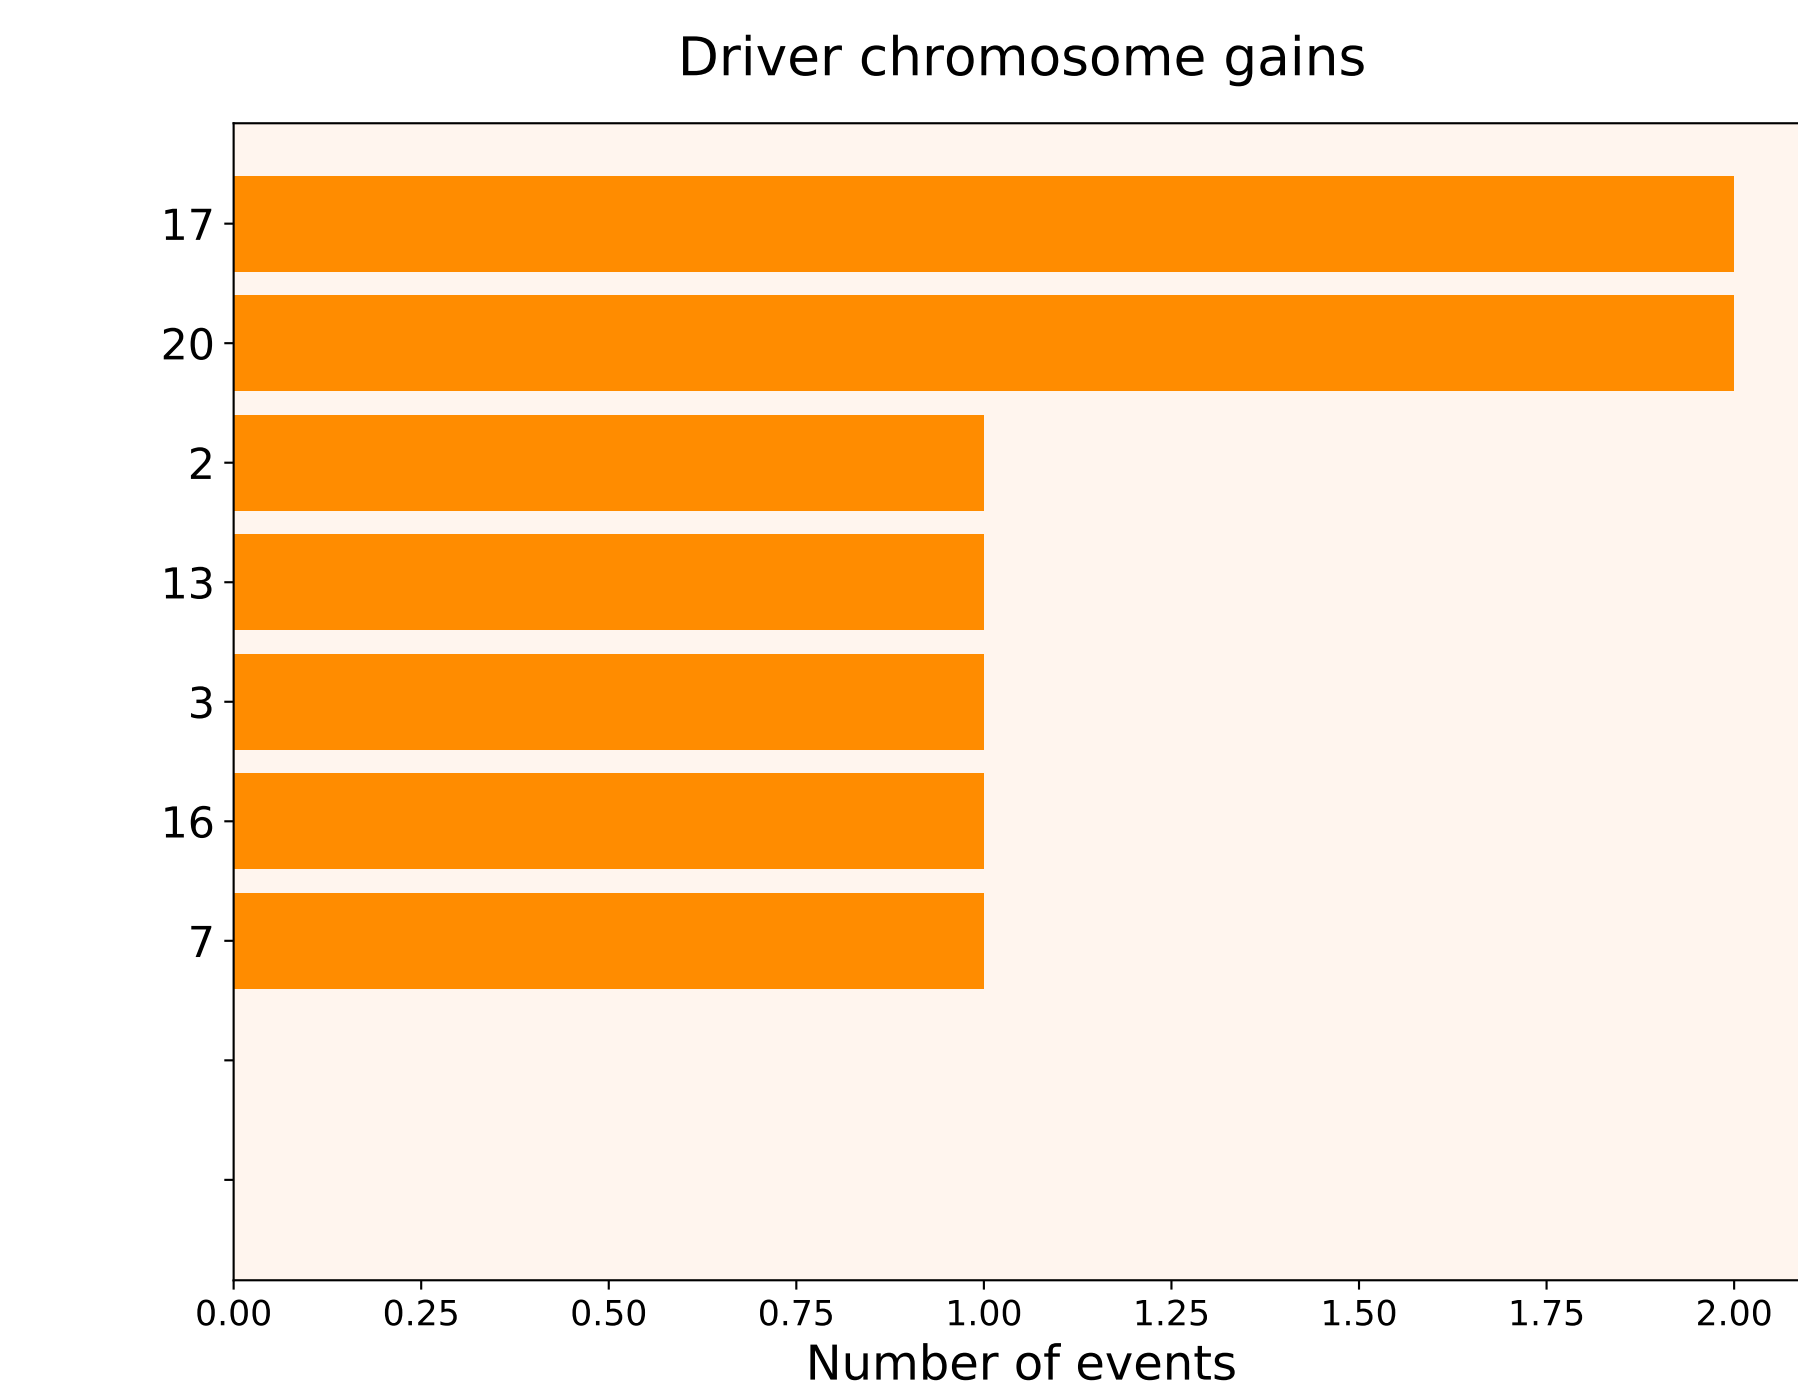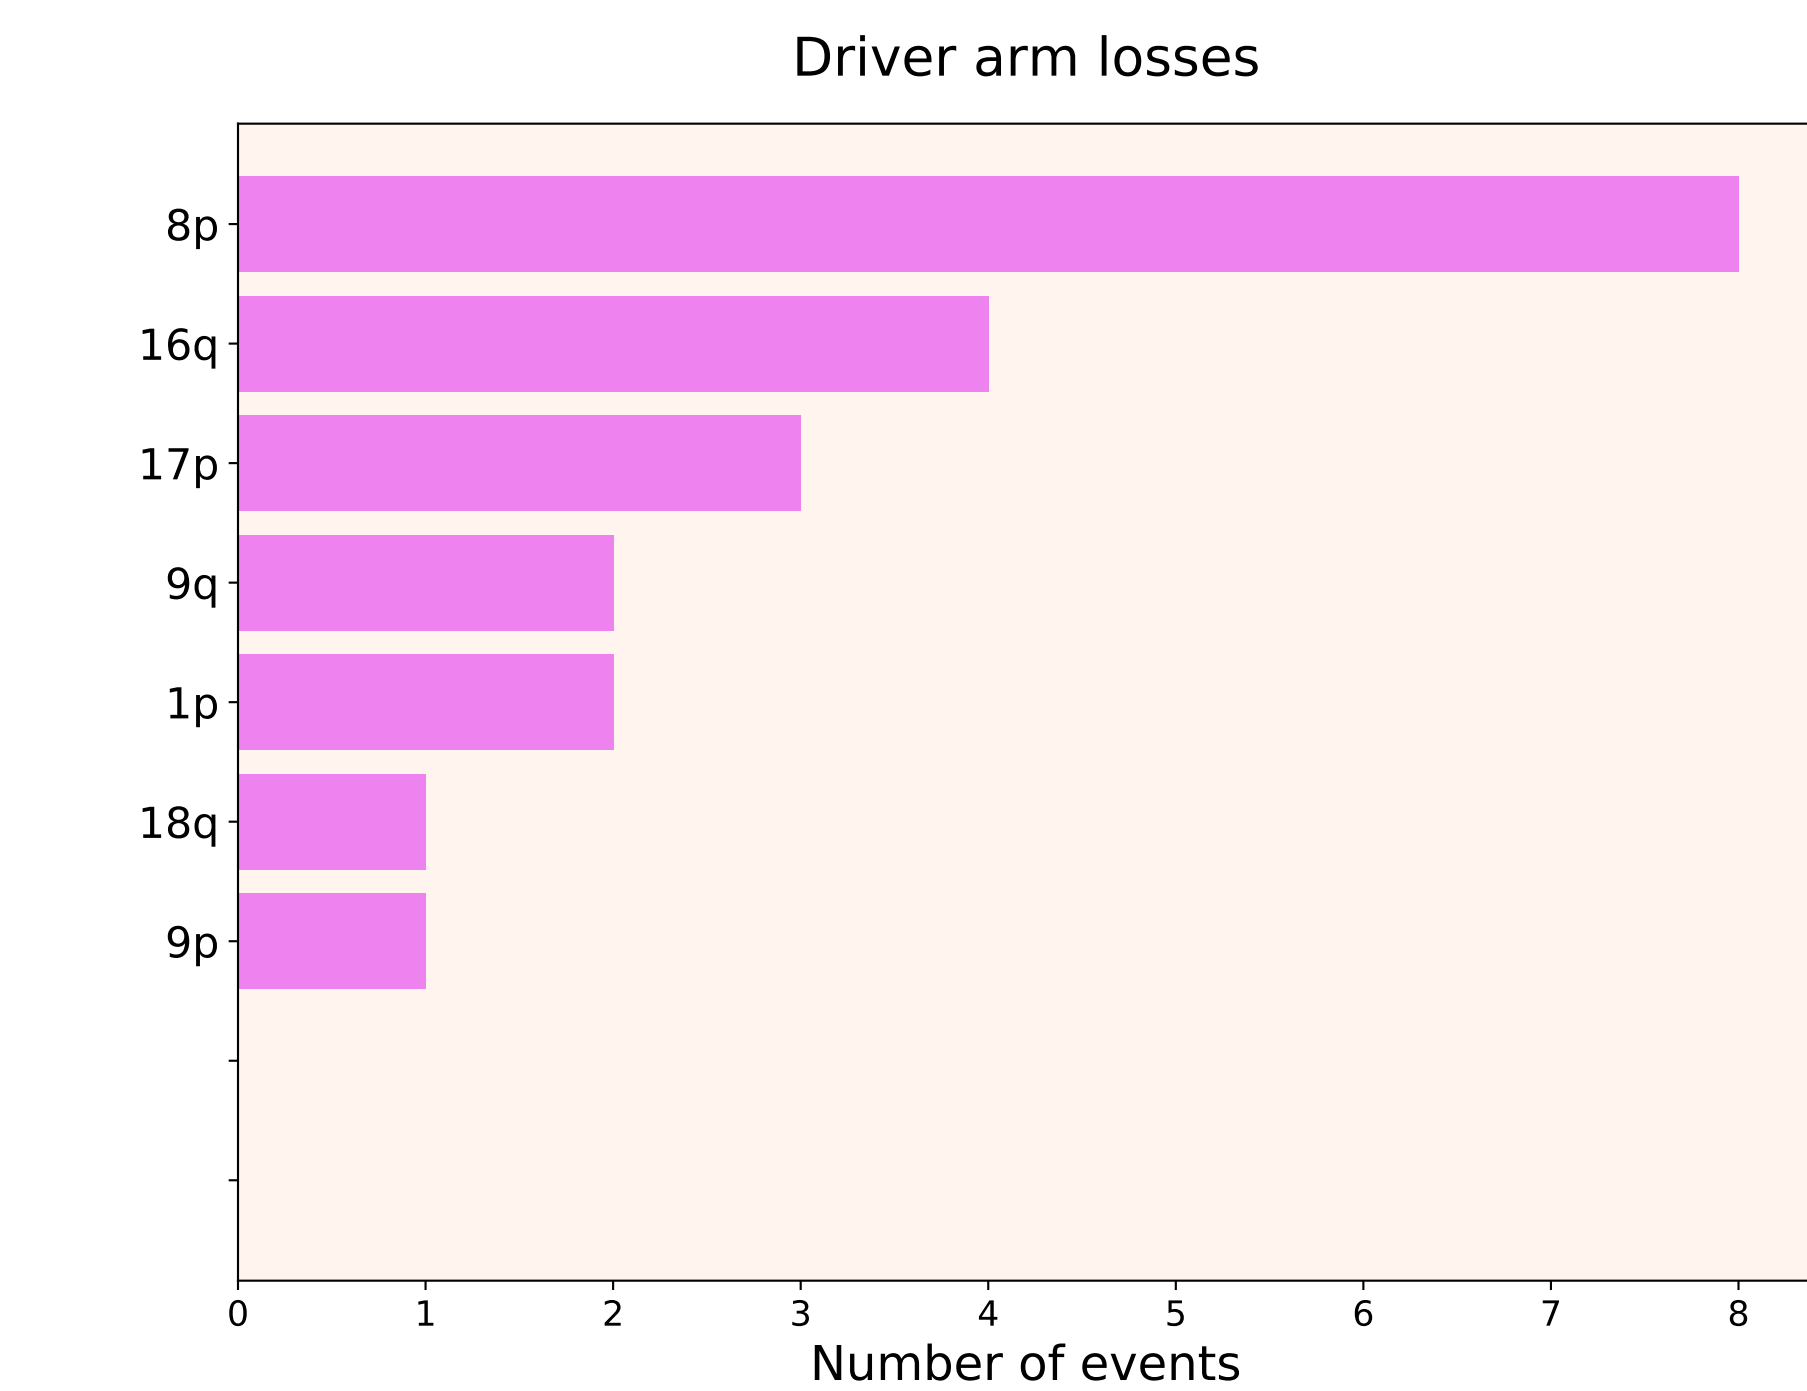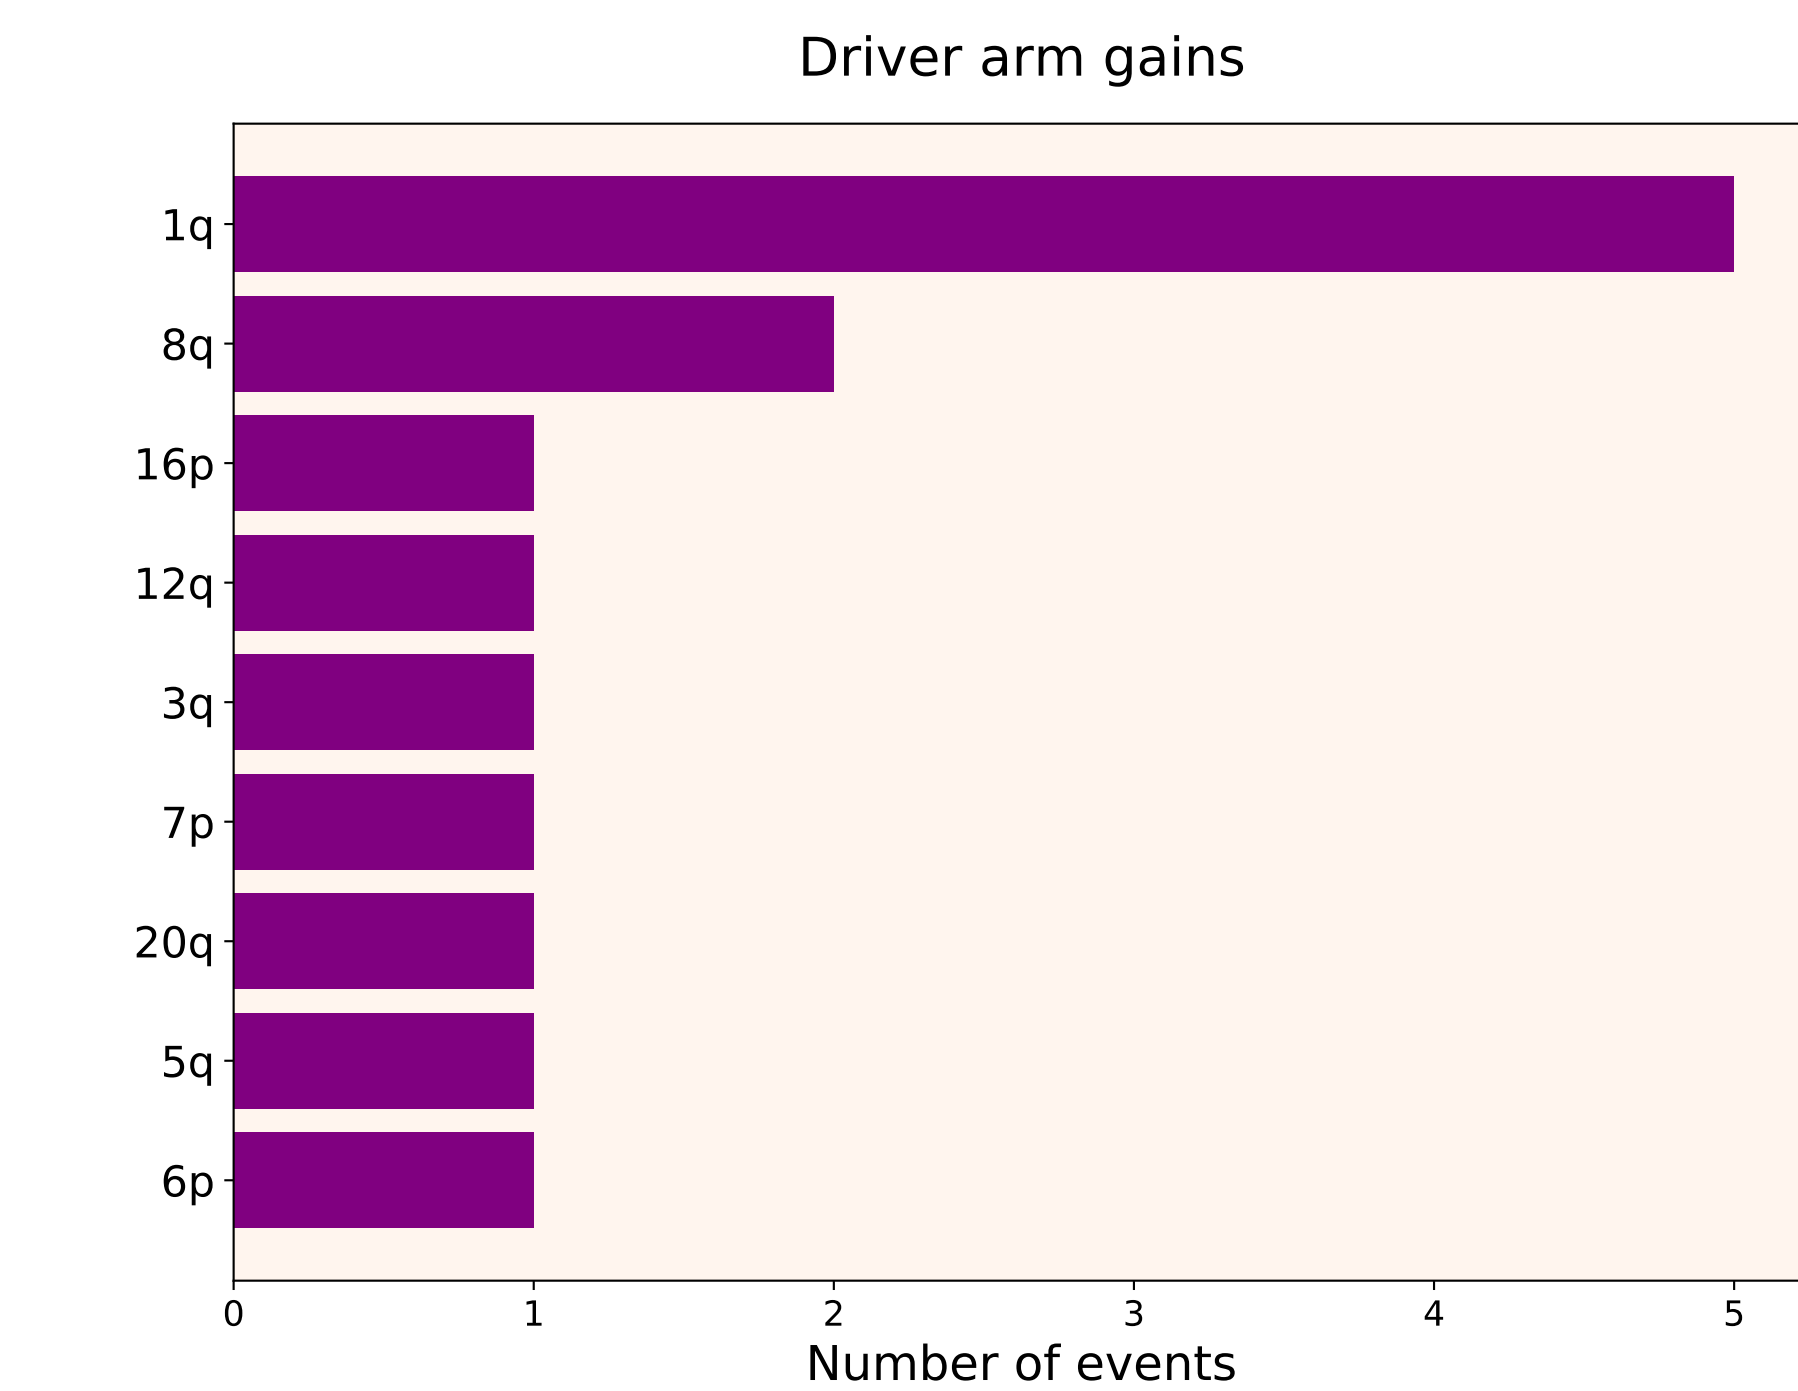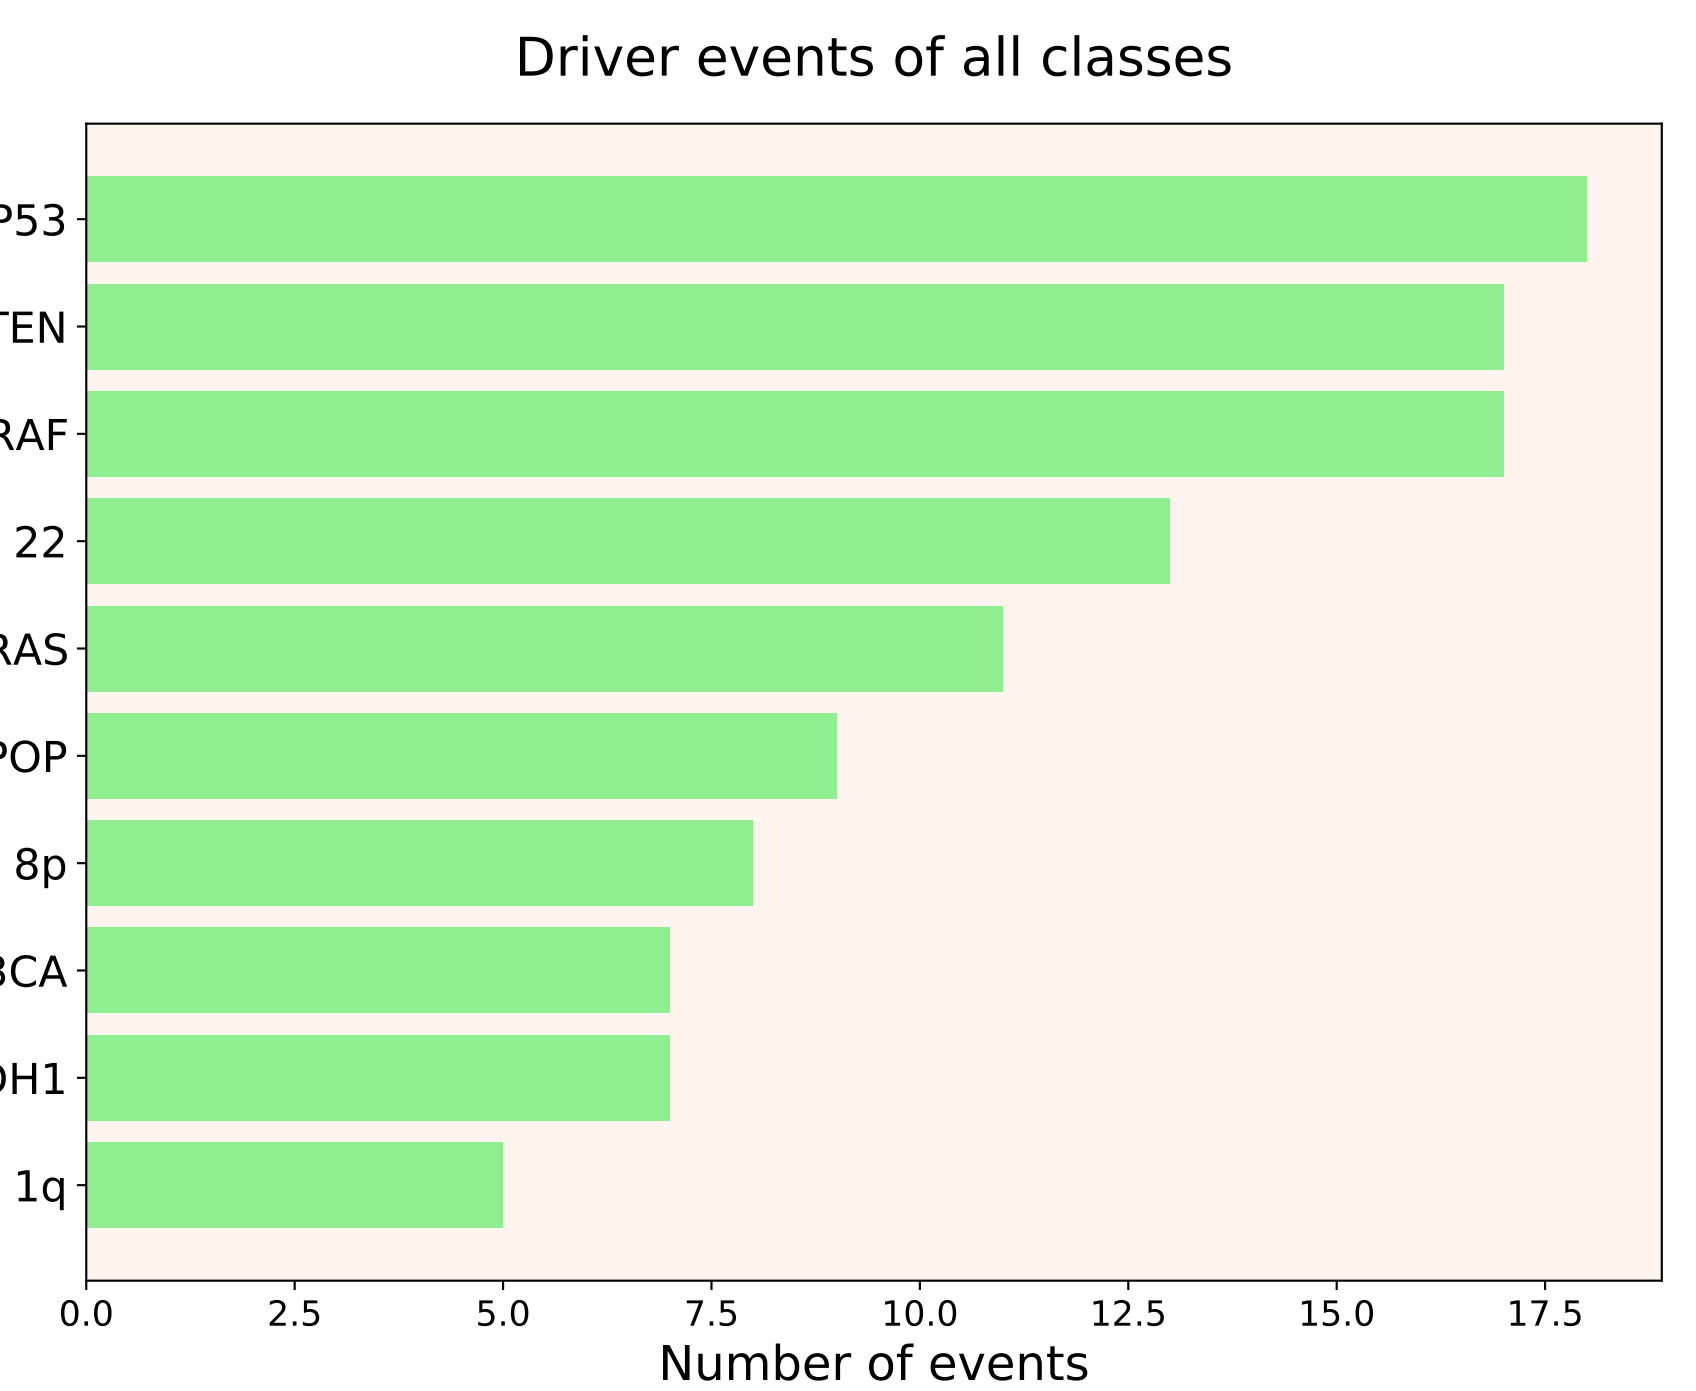

Supplement: Supplemental_Data_S1.zip [file Supplemental_Data_S1.zip]

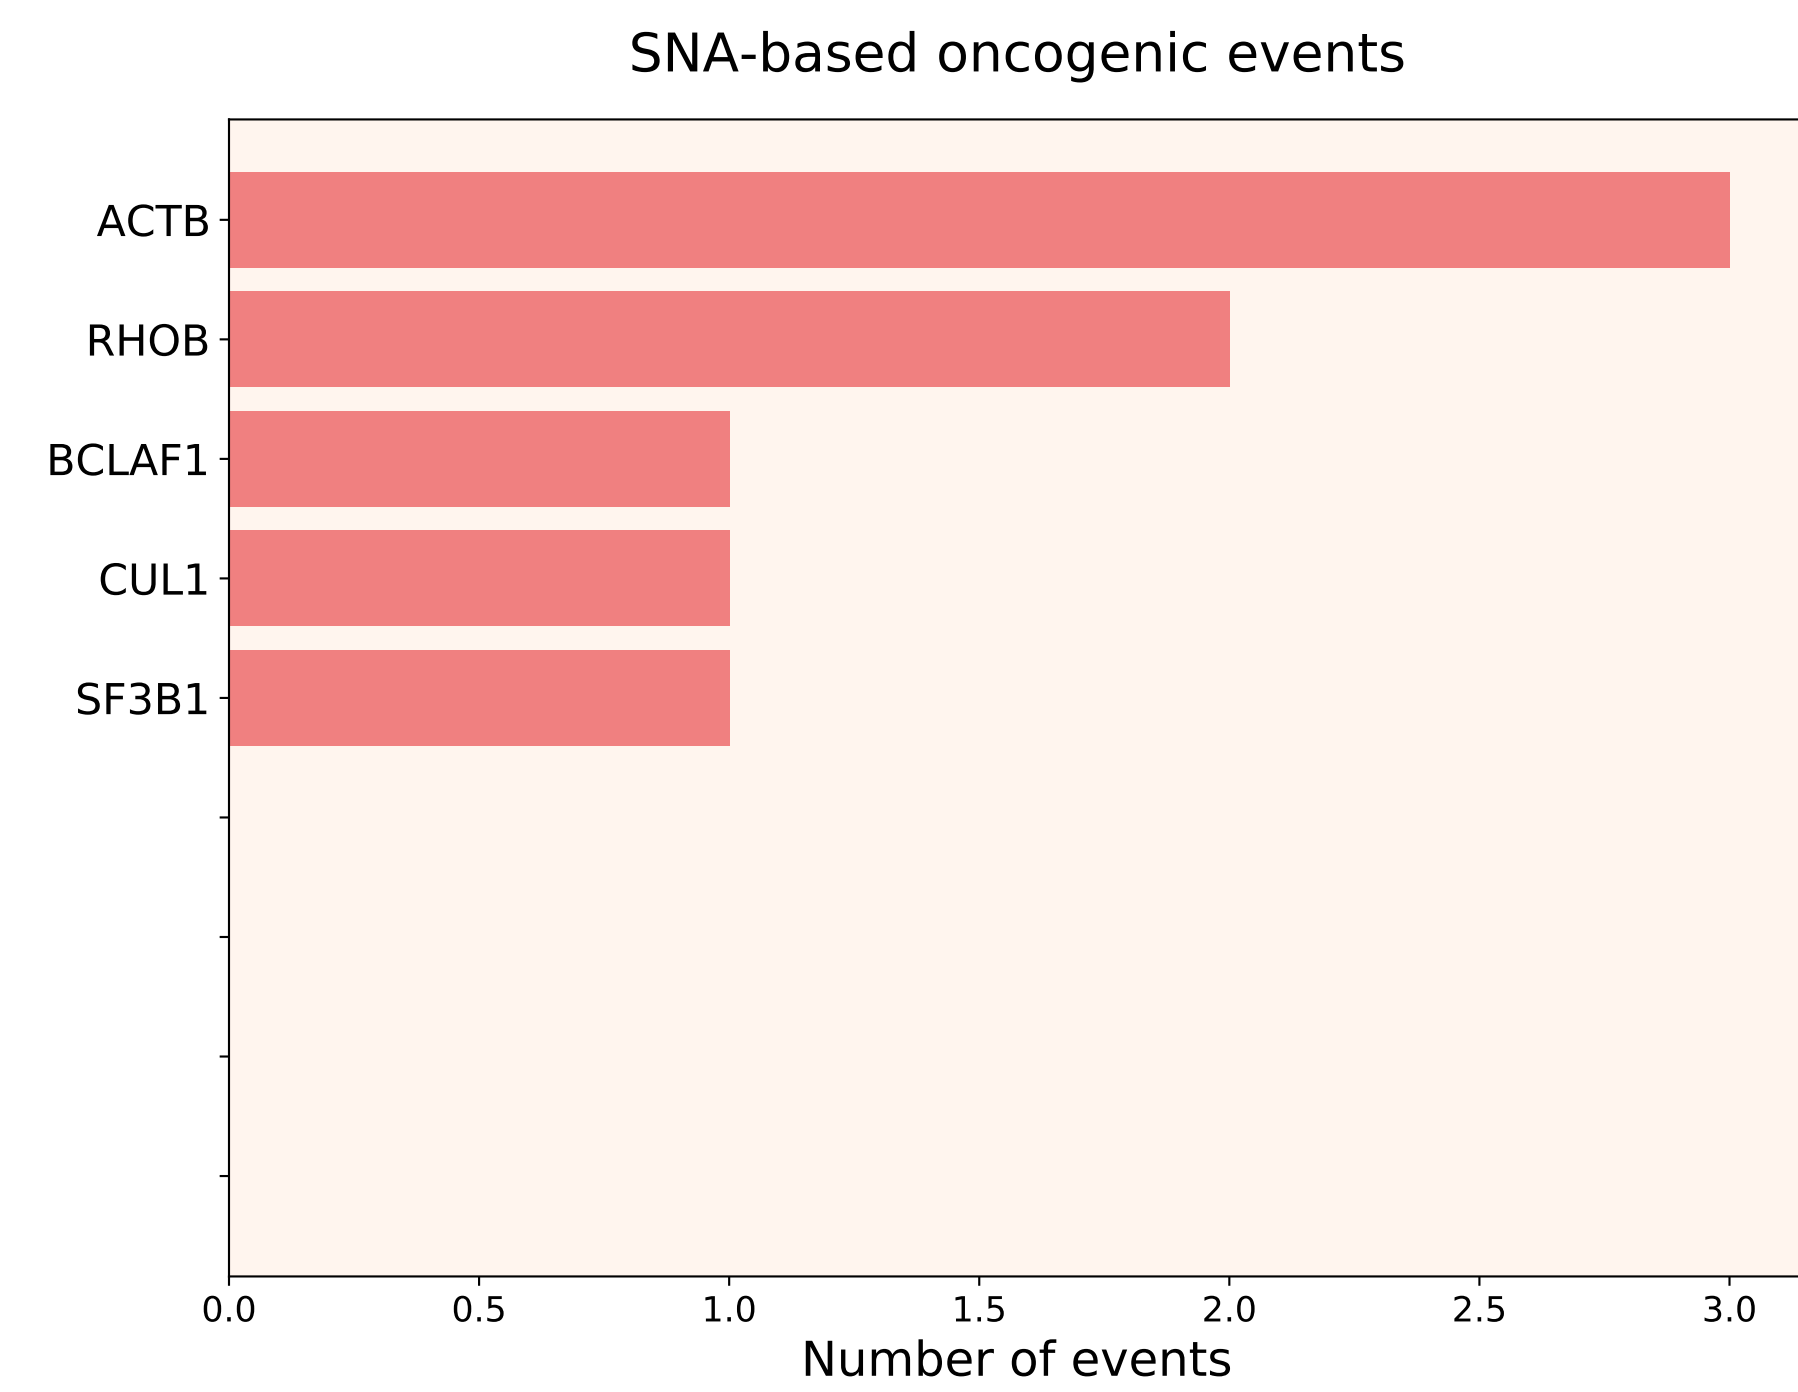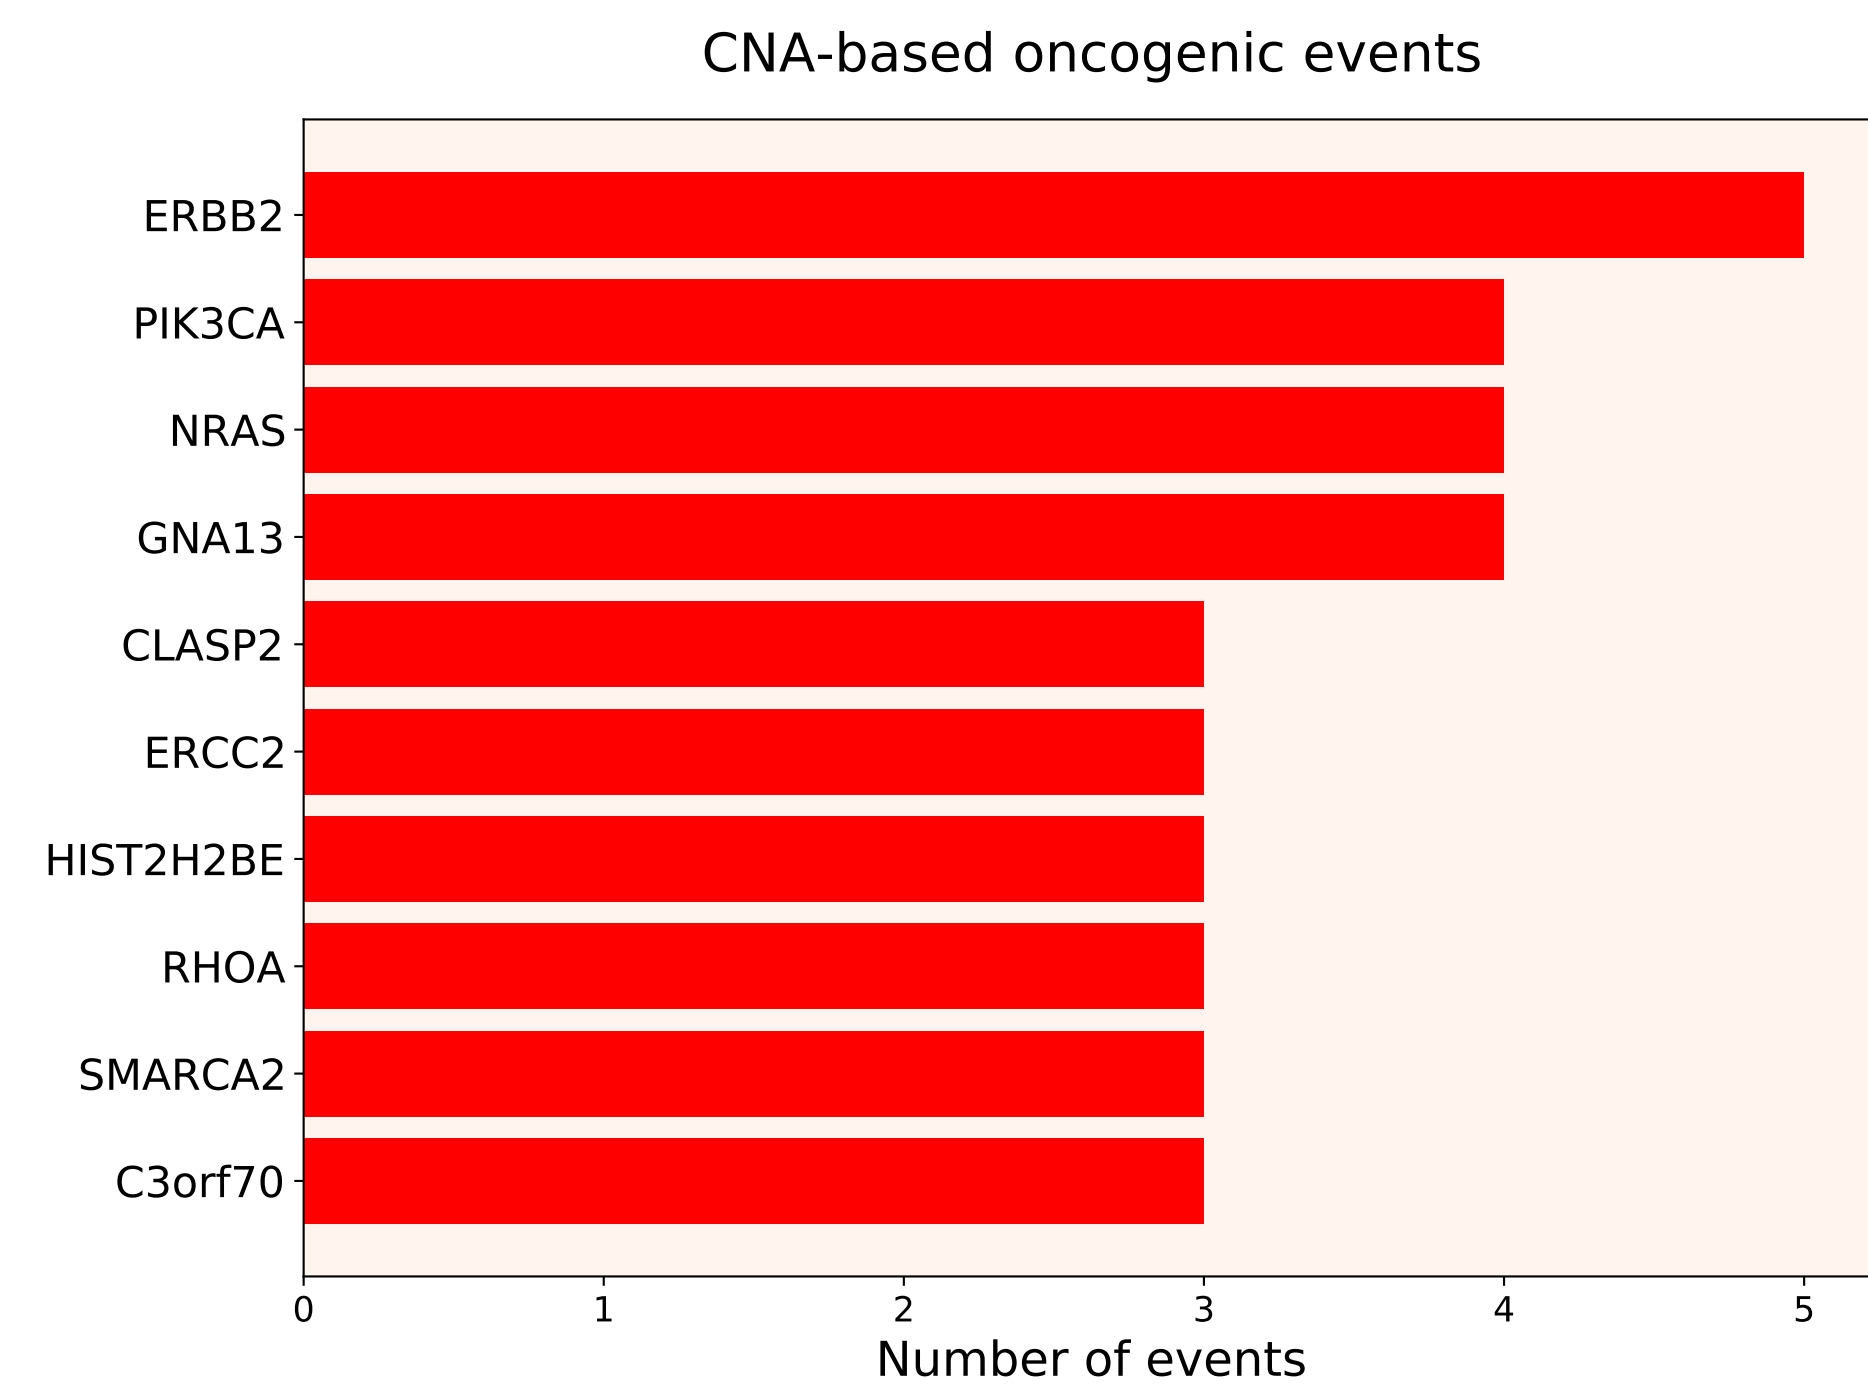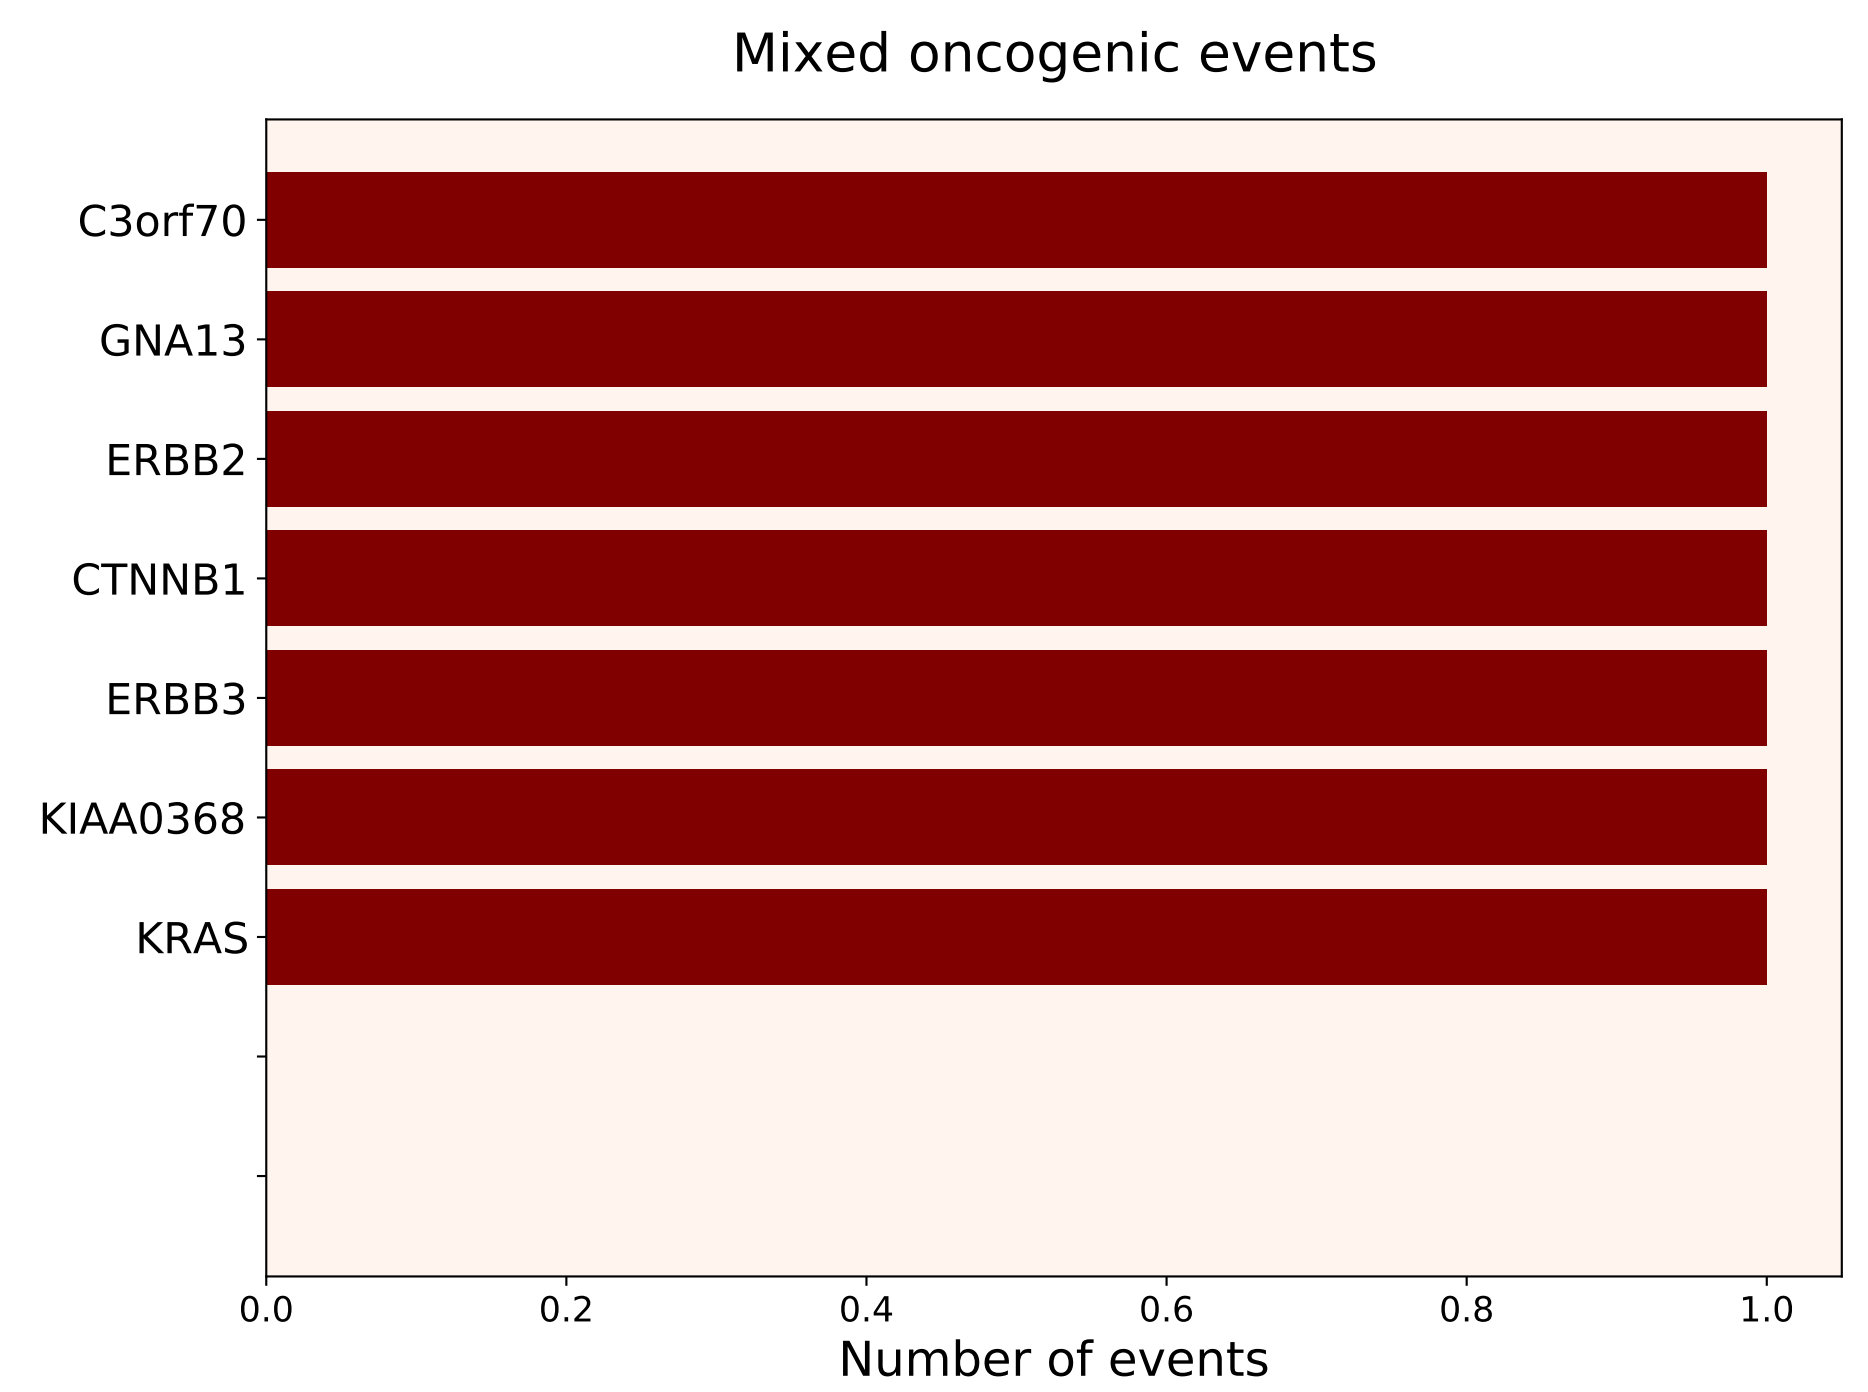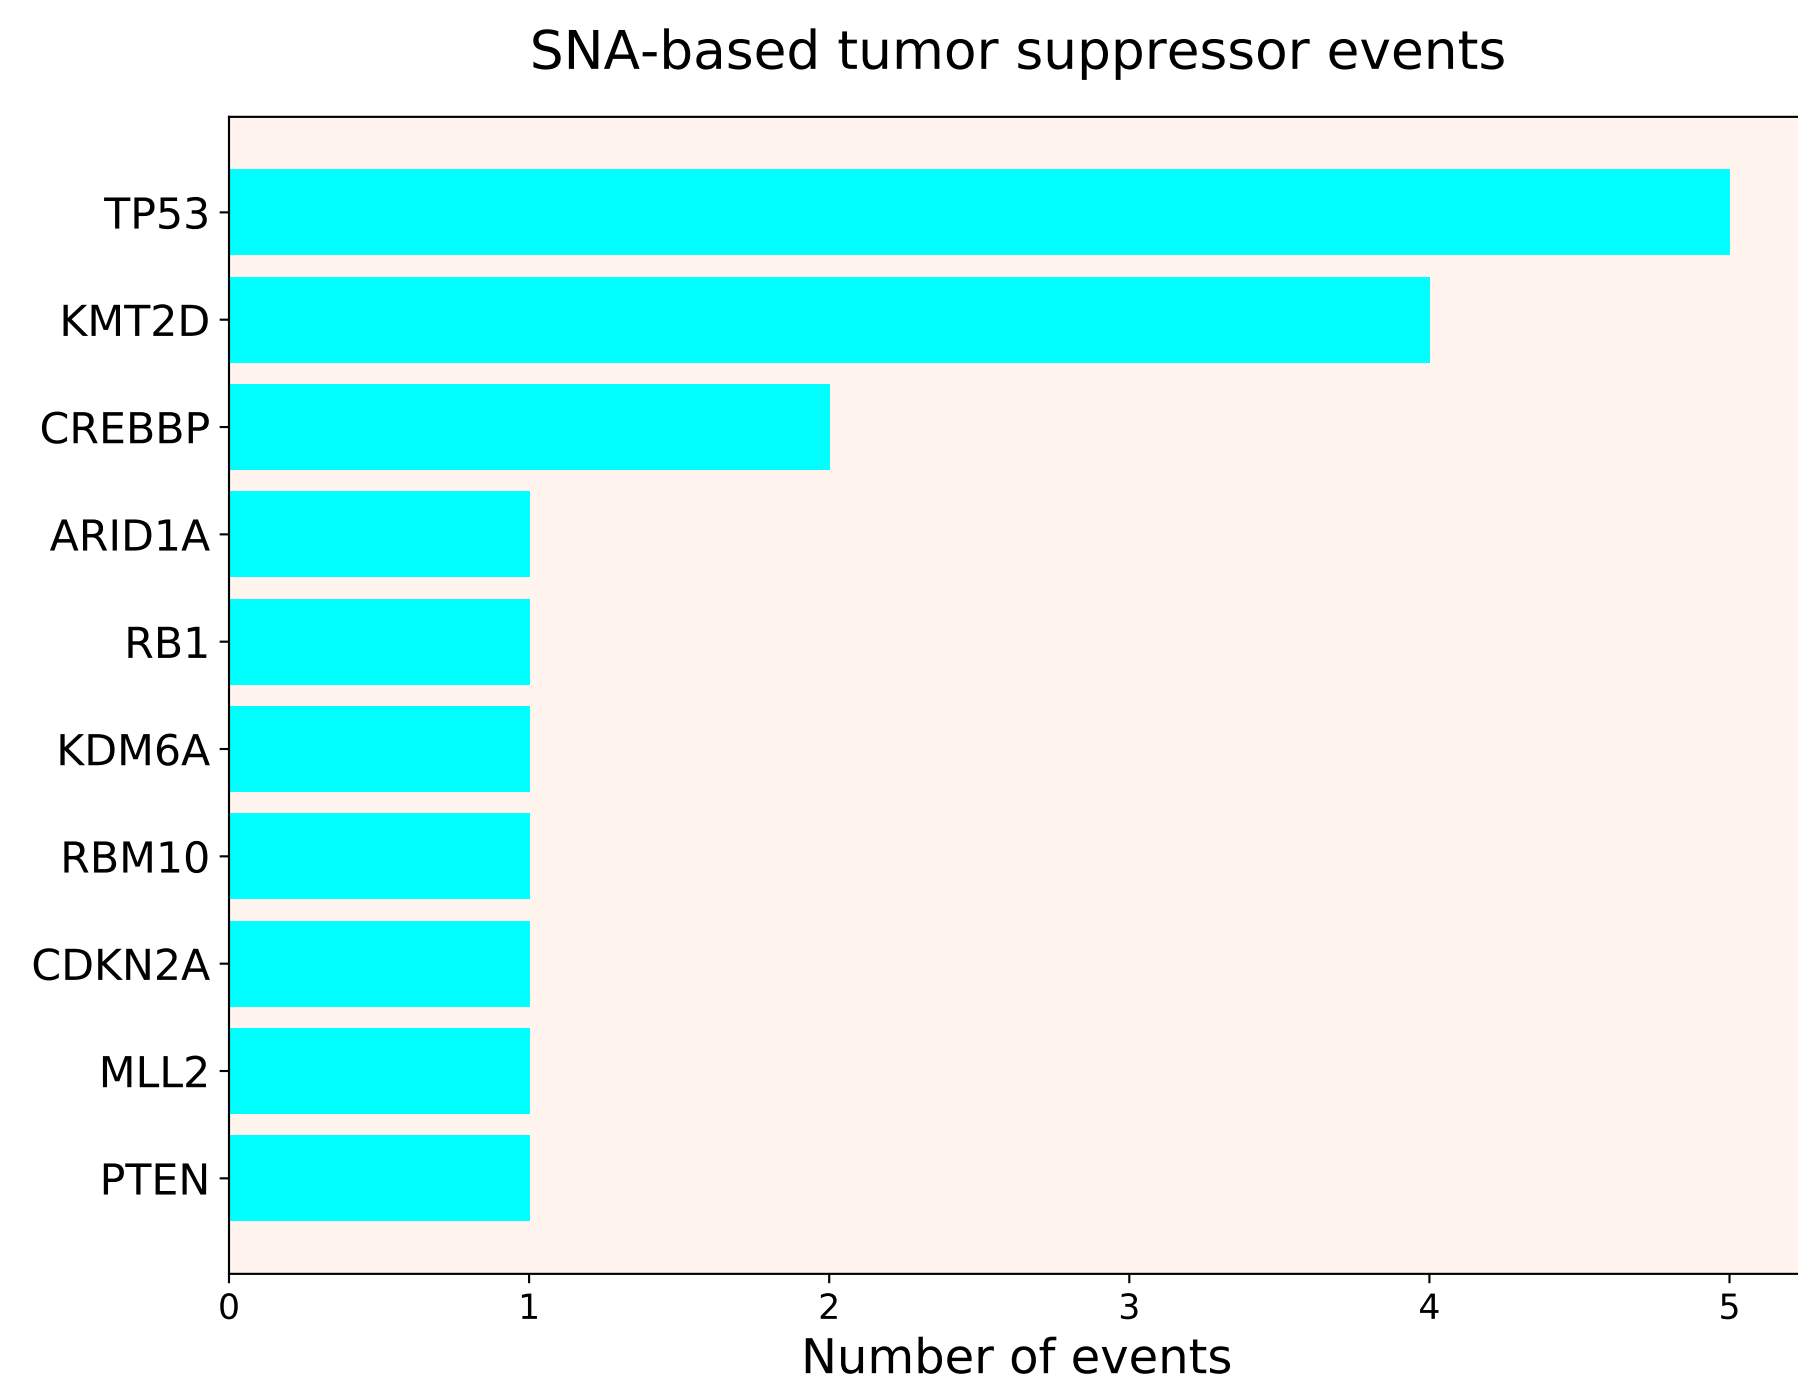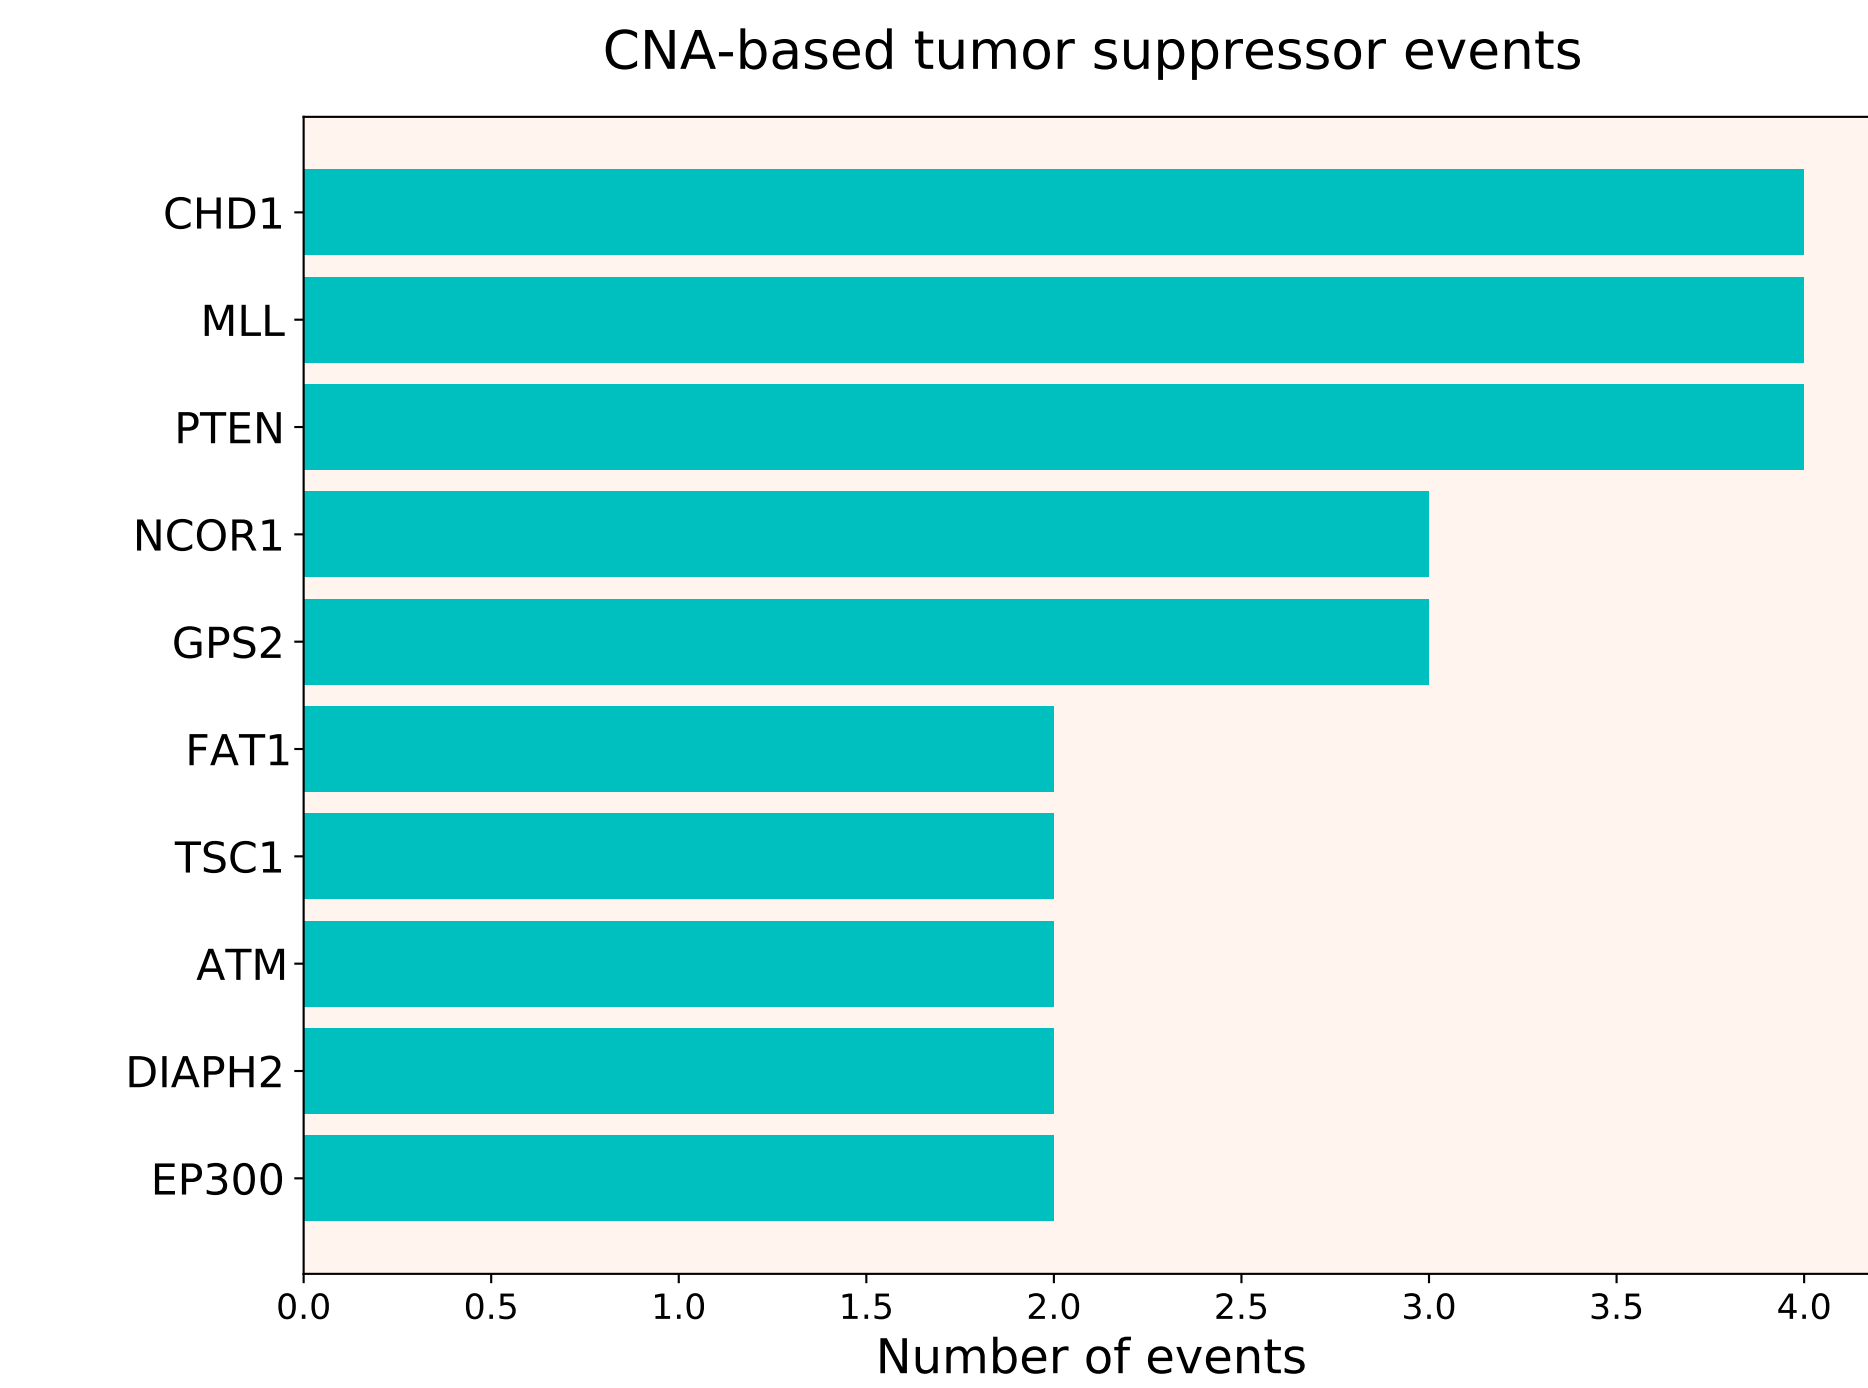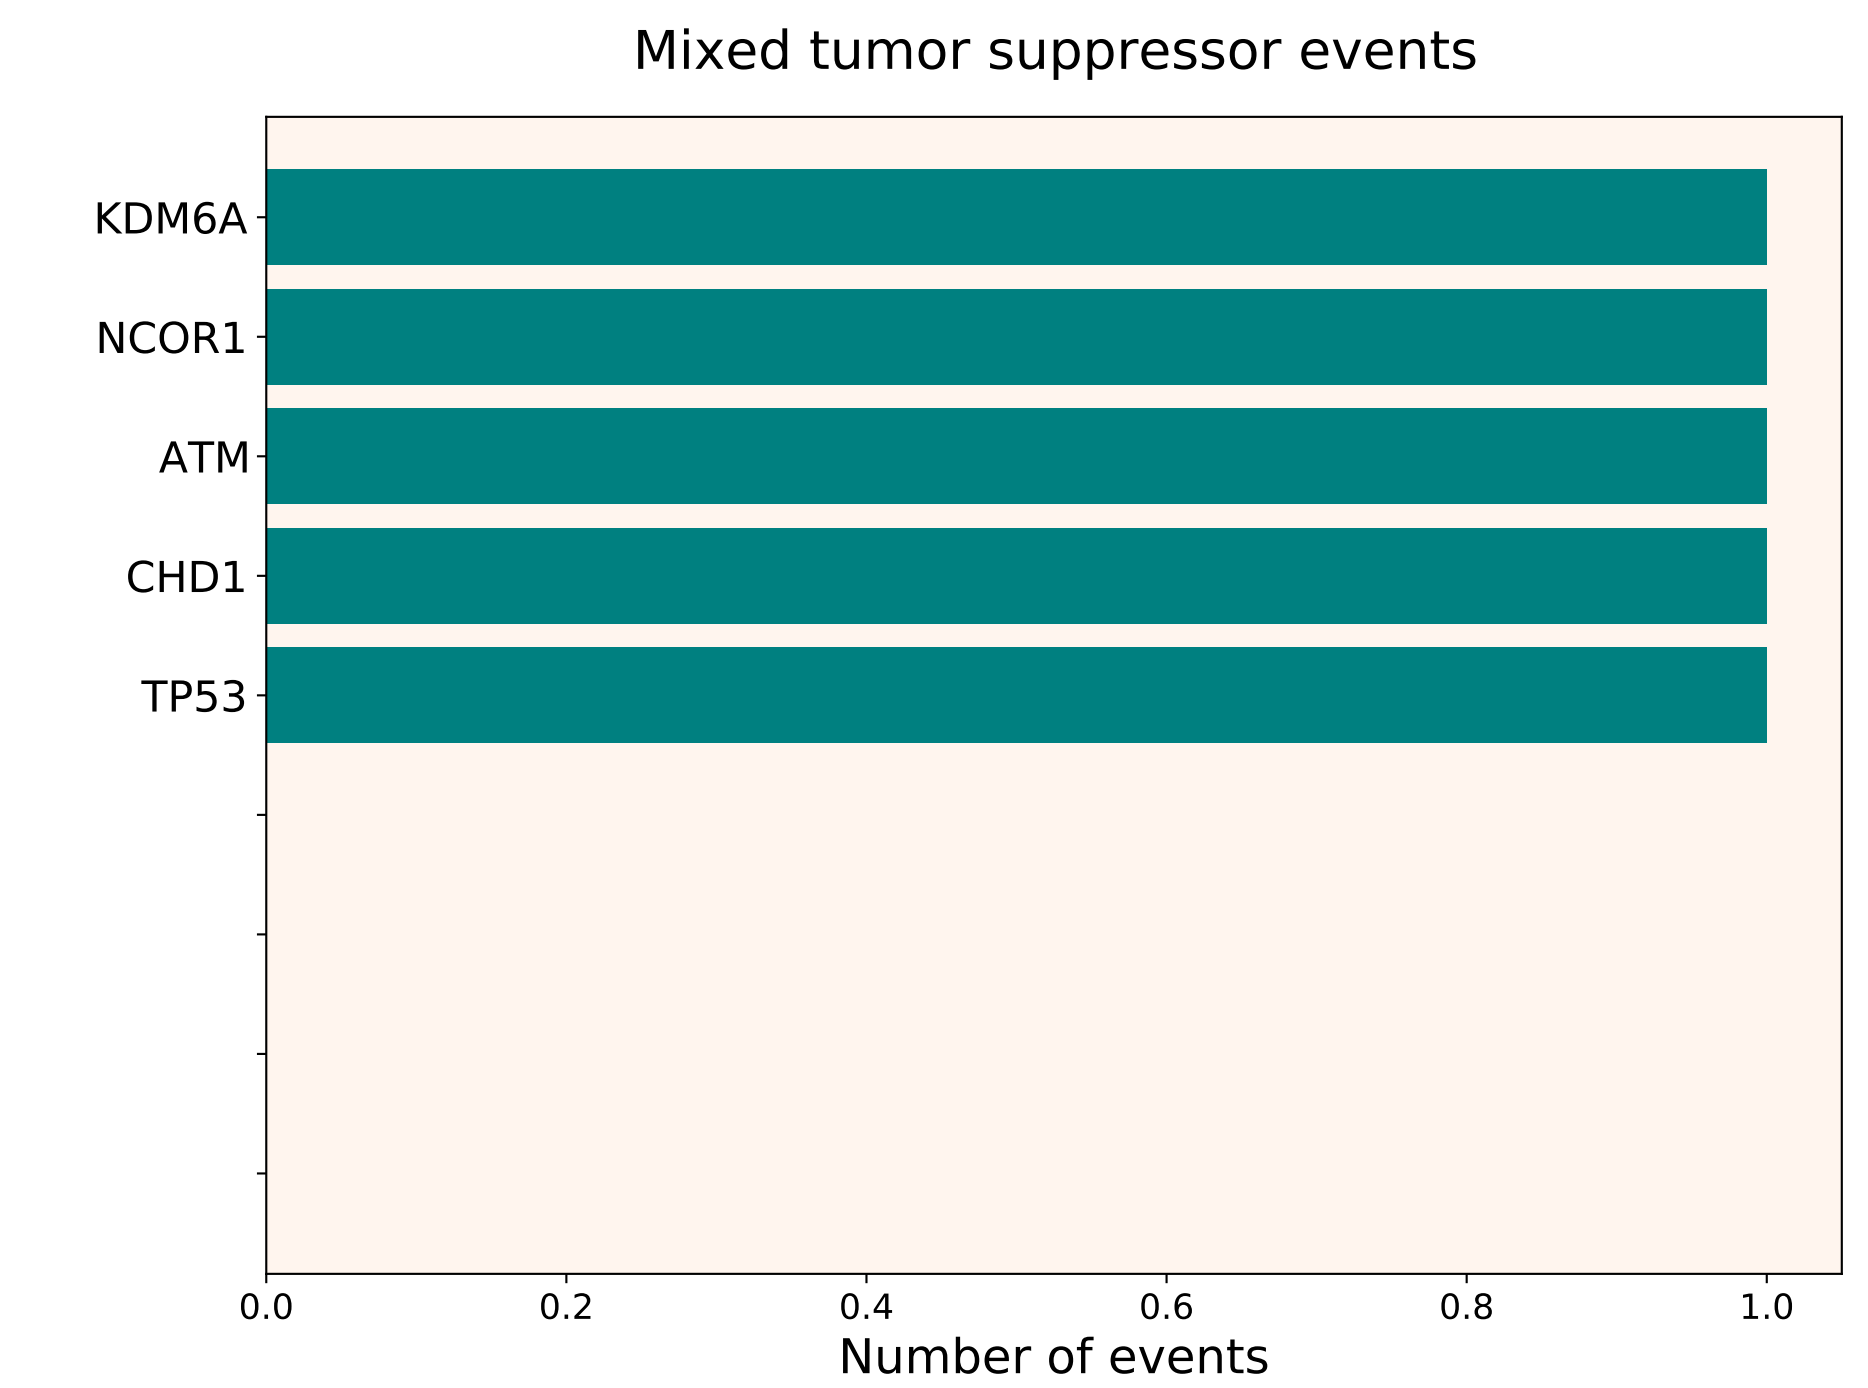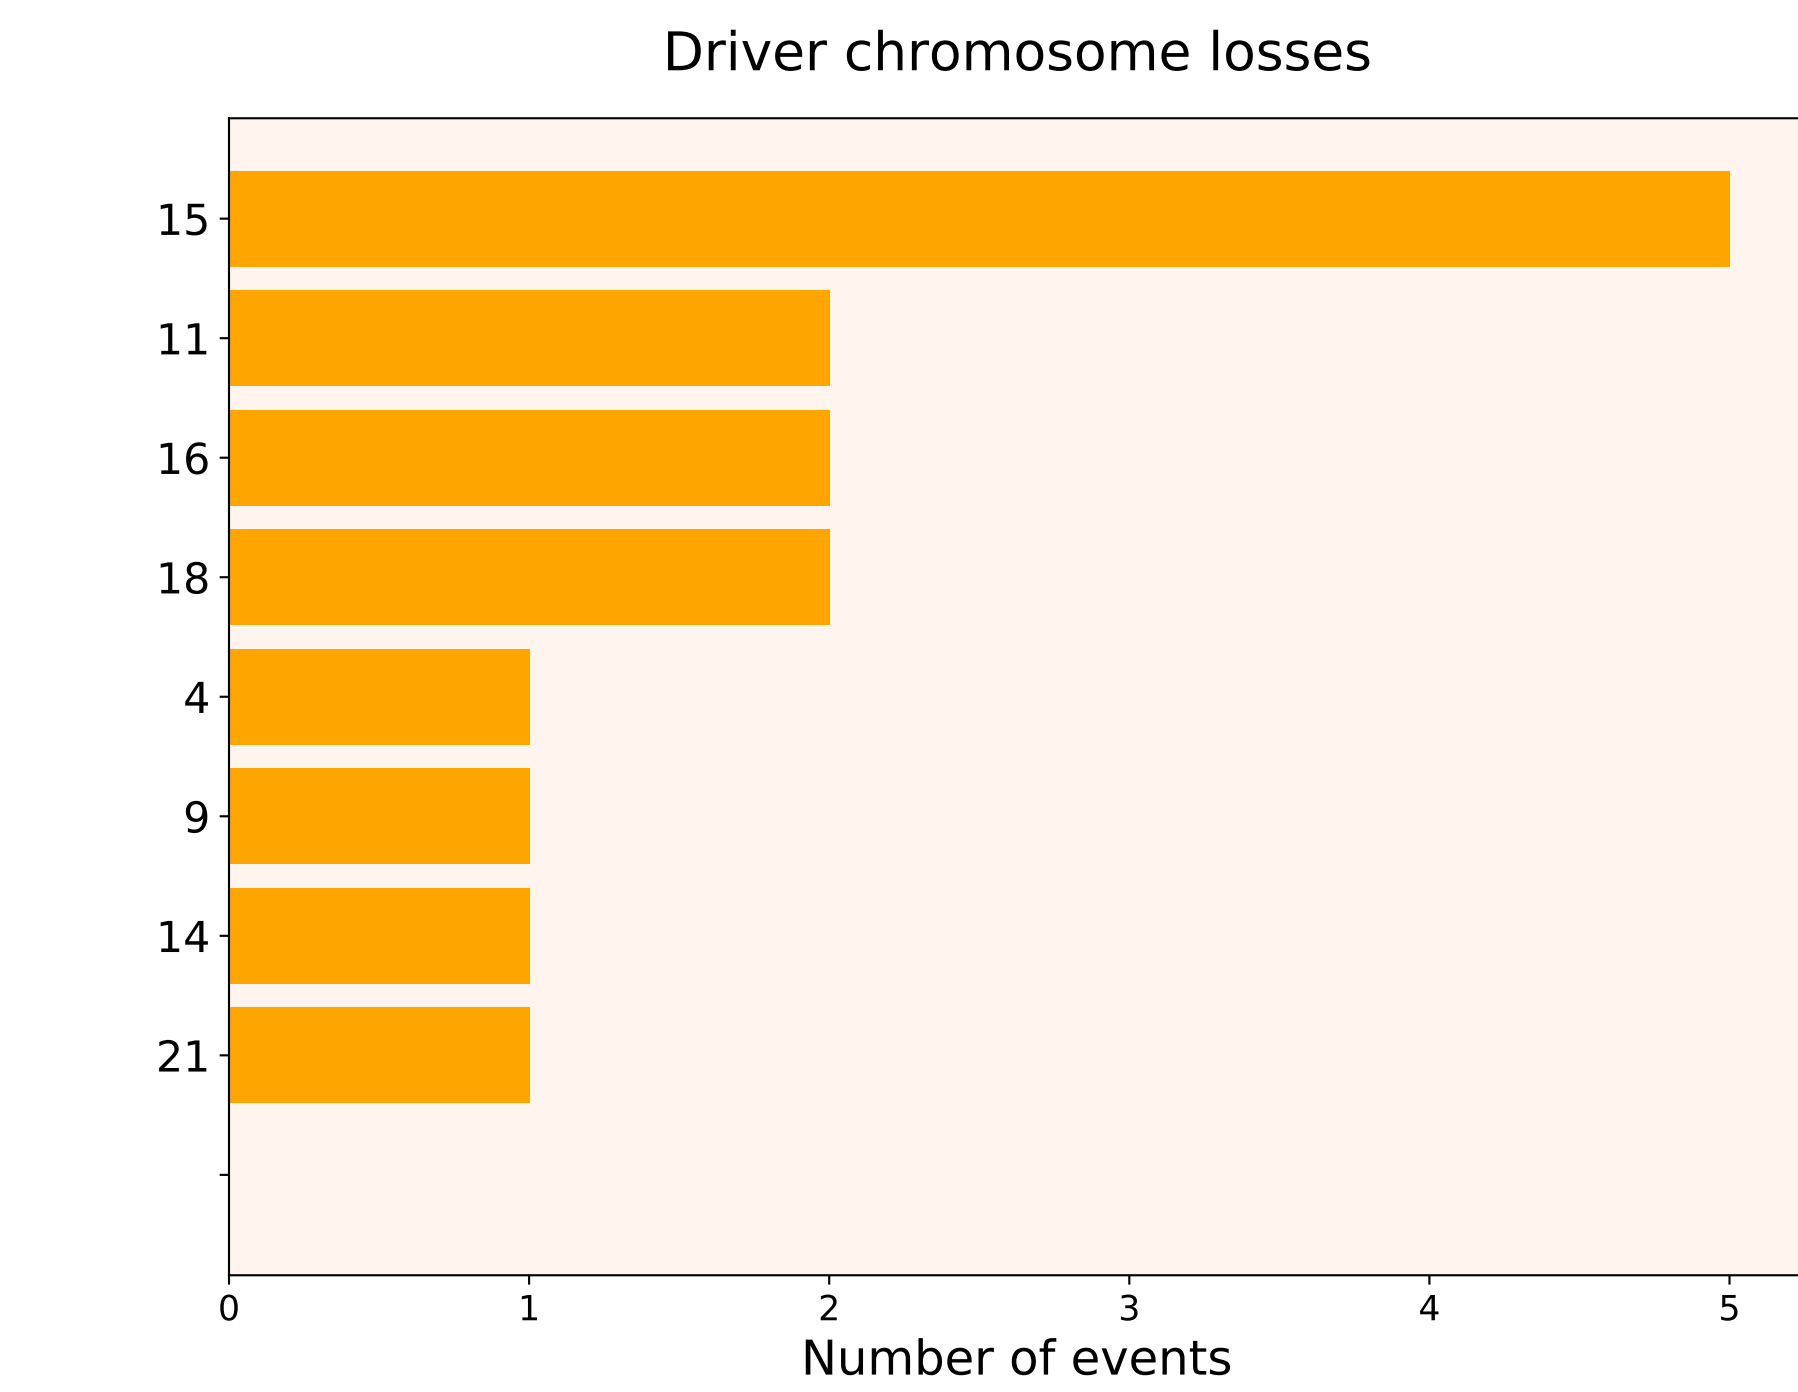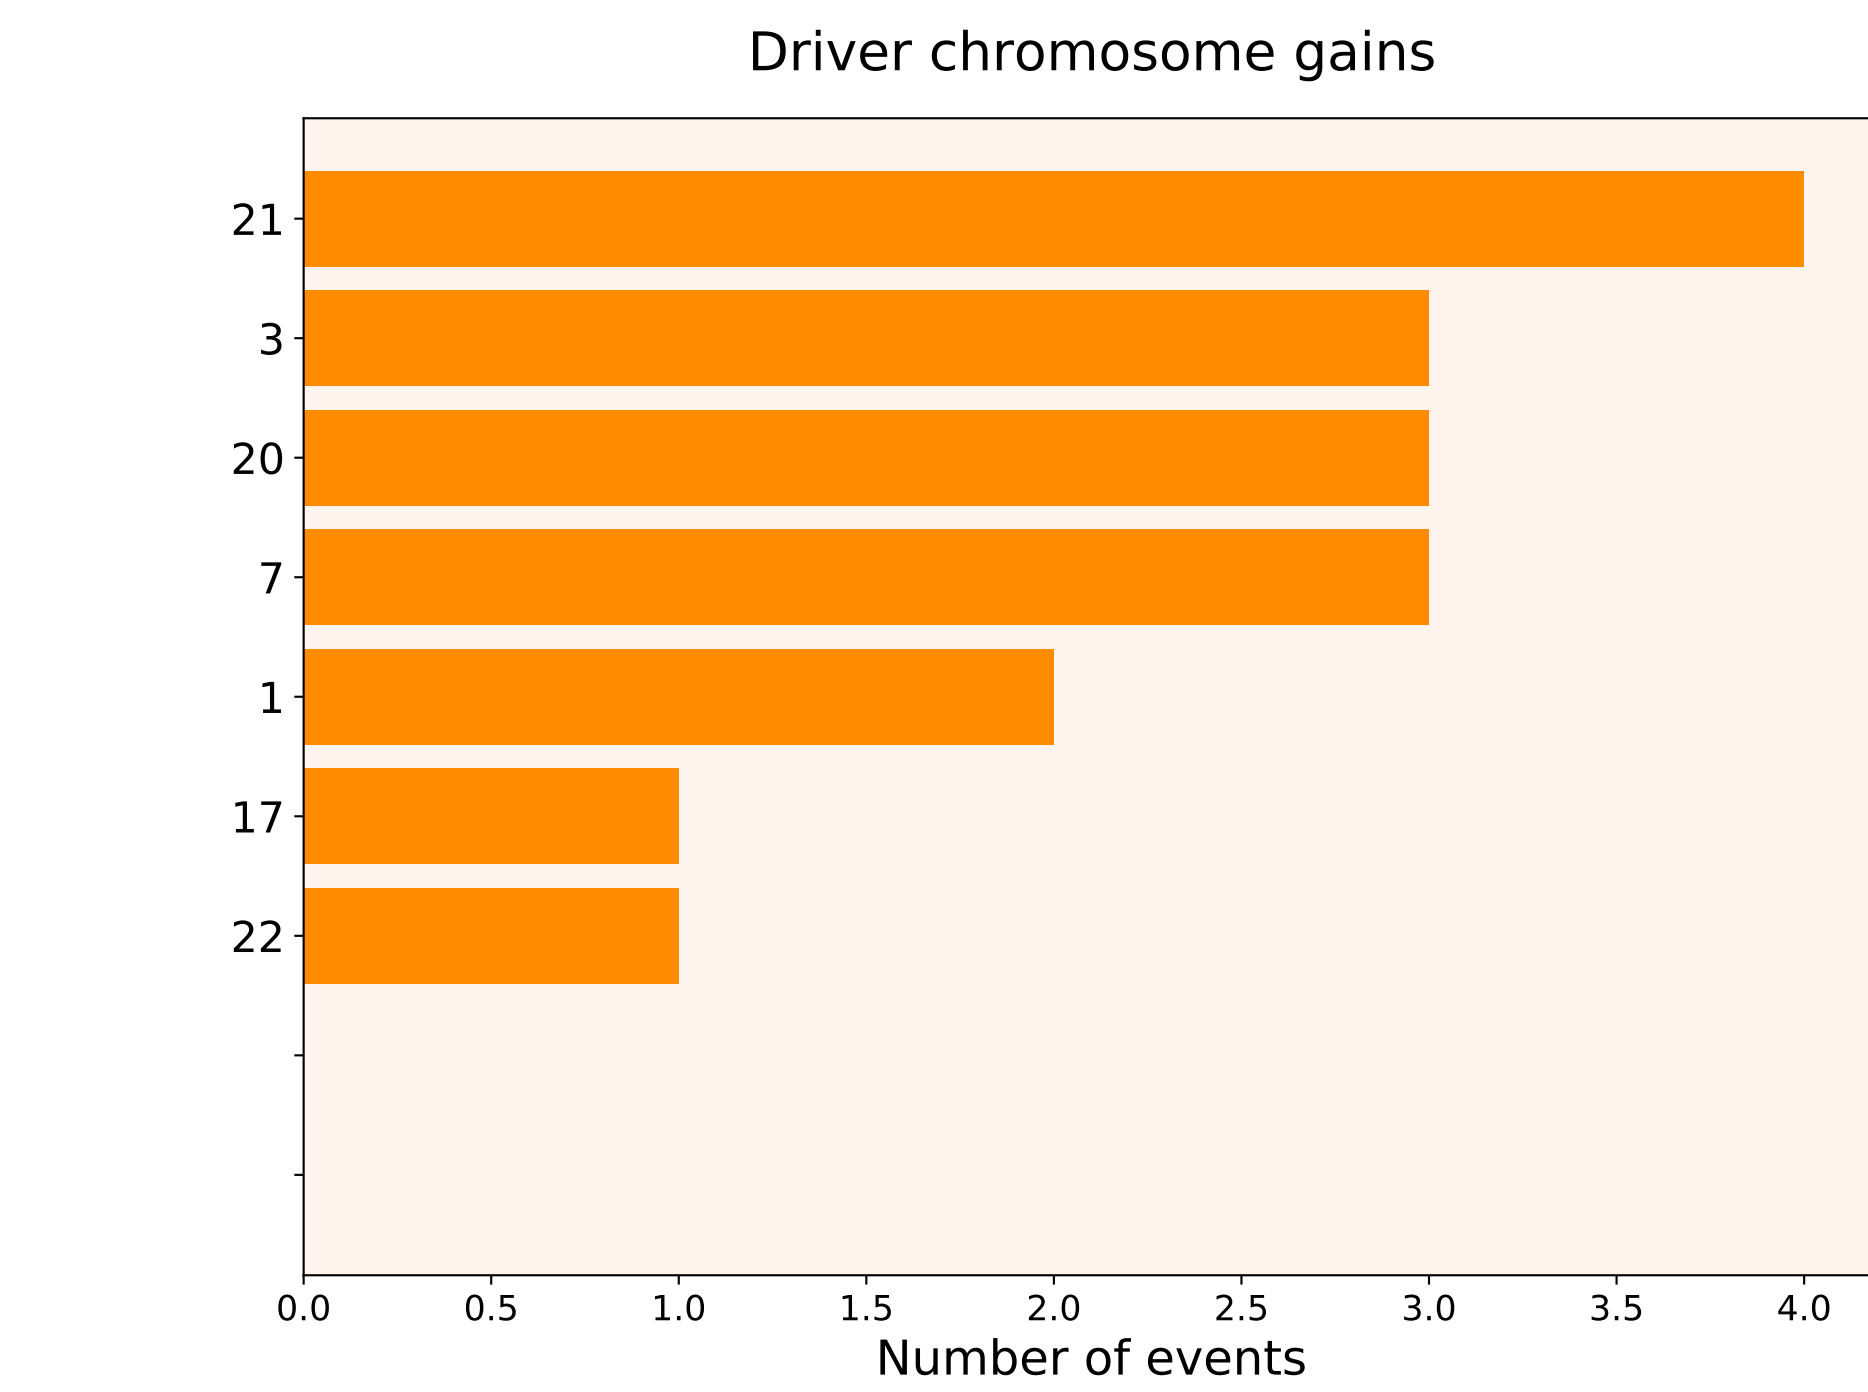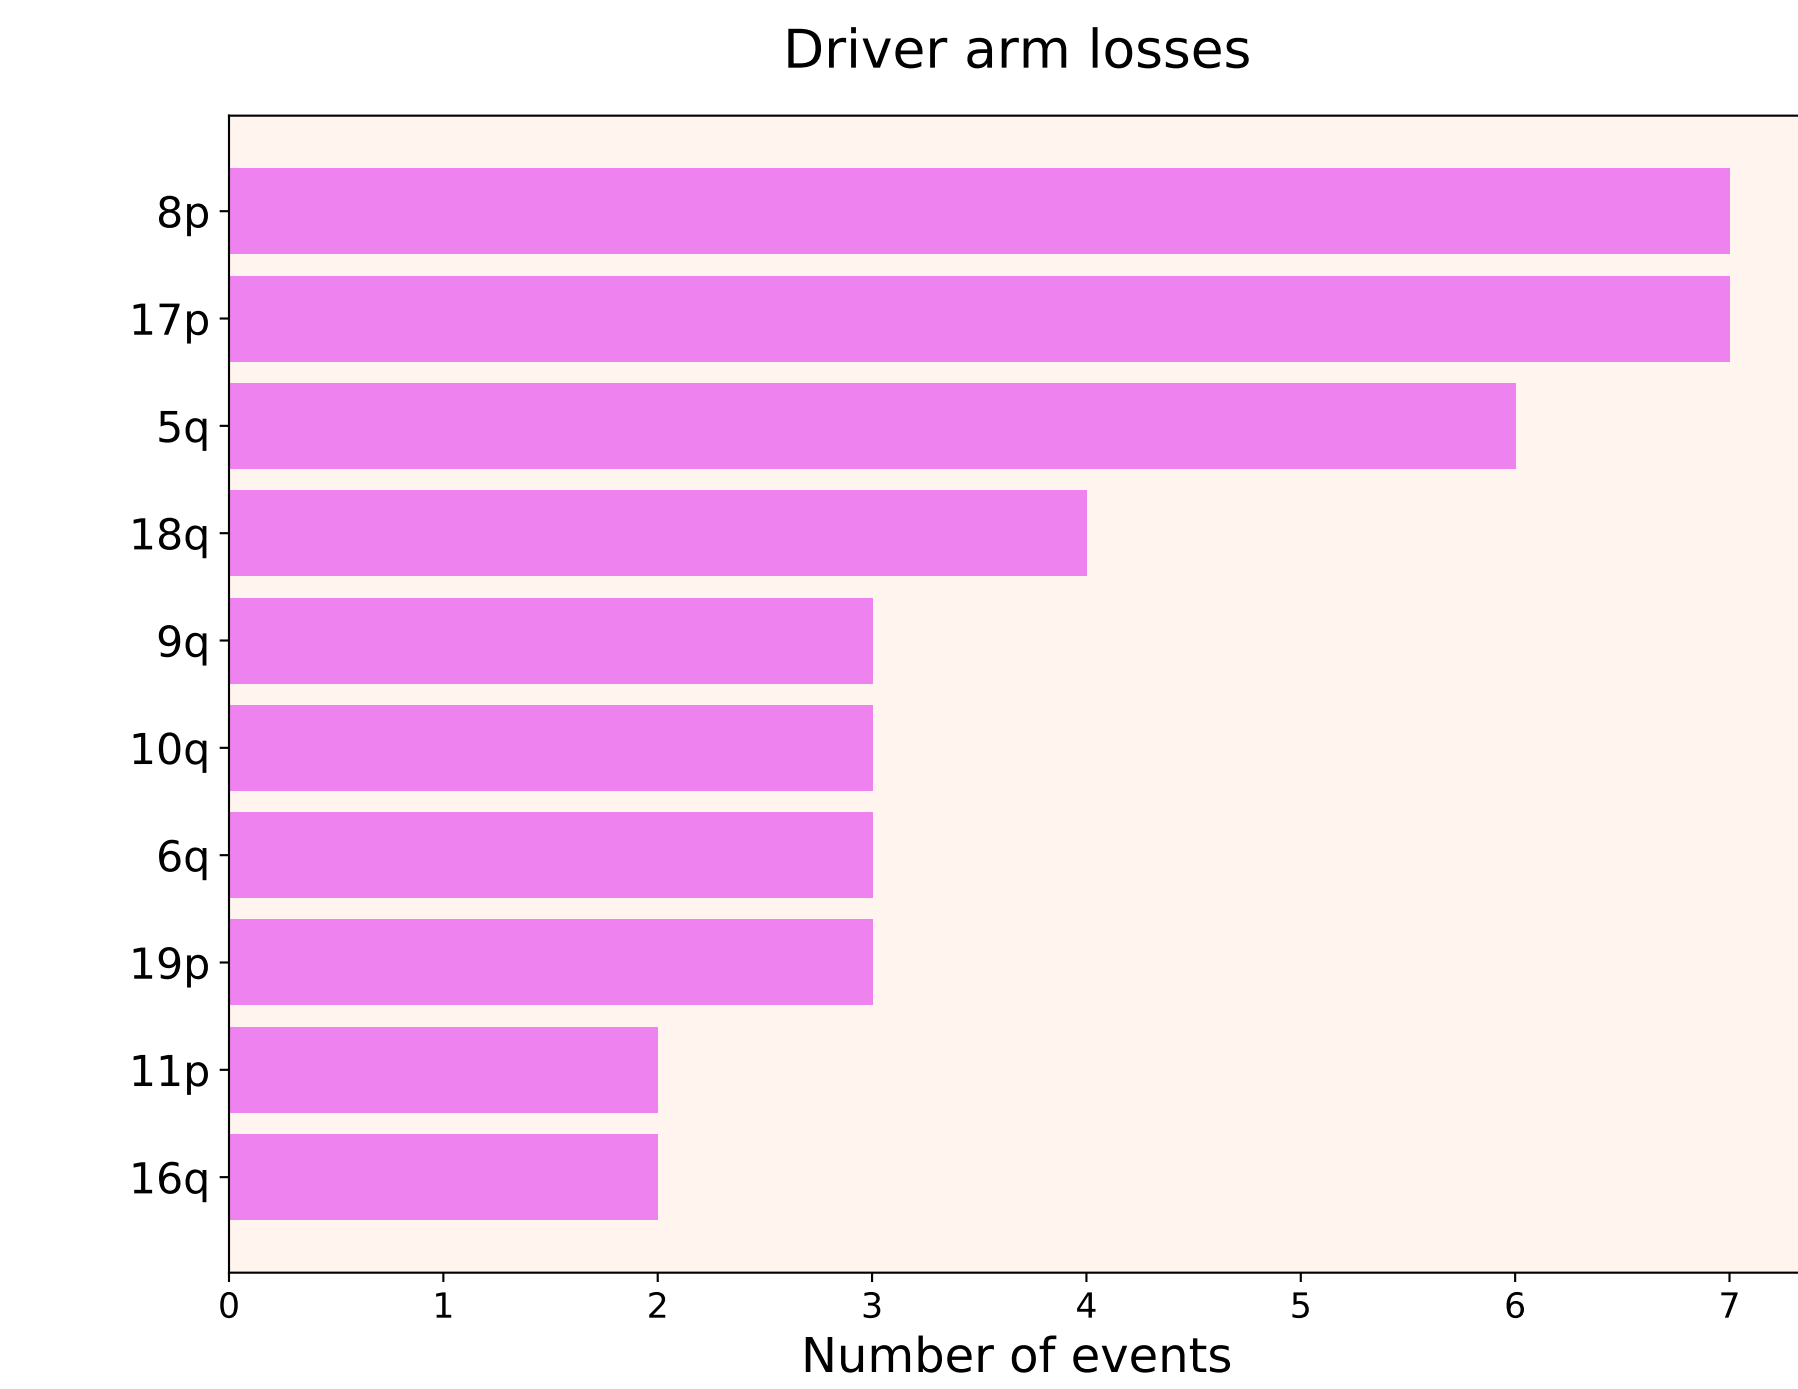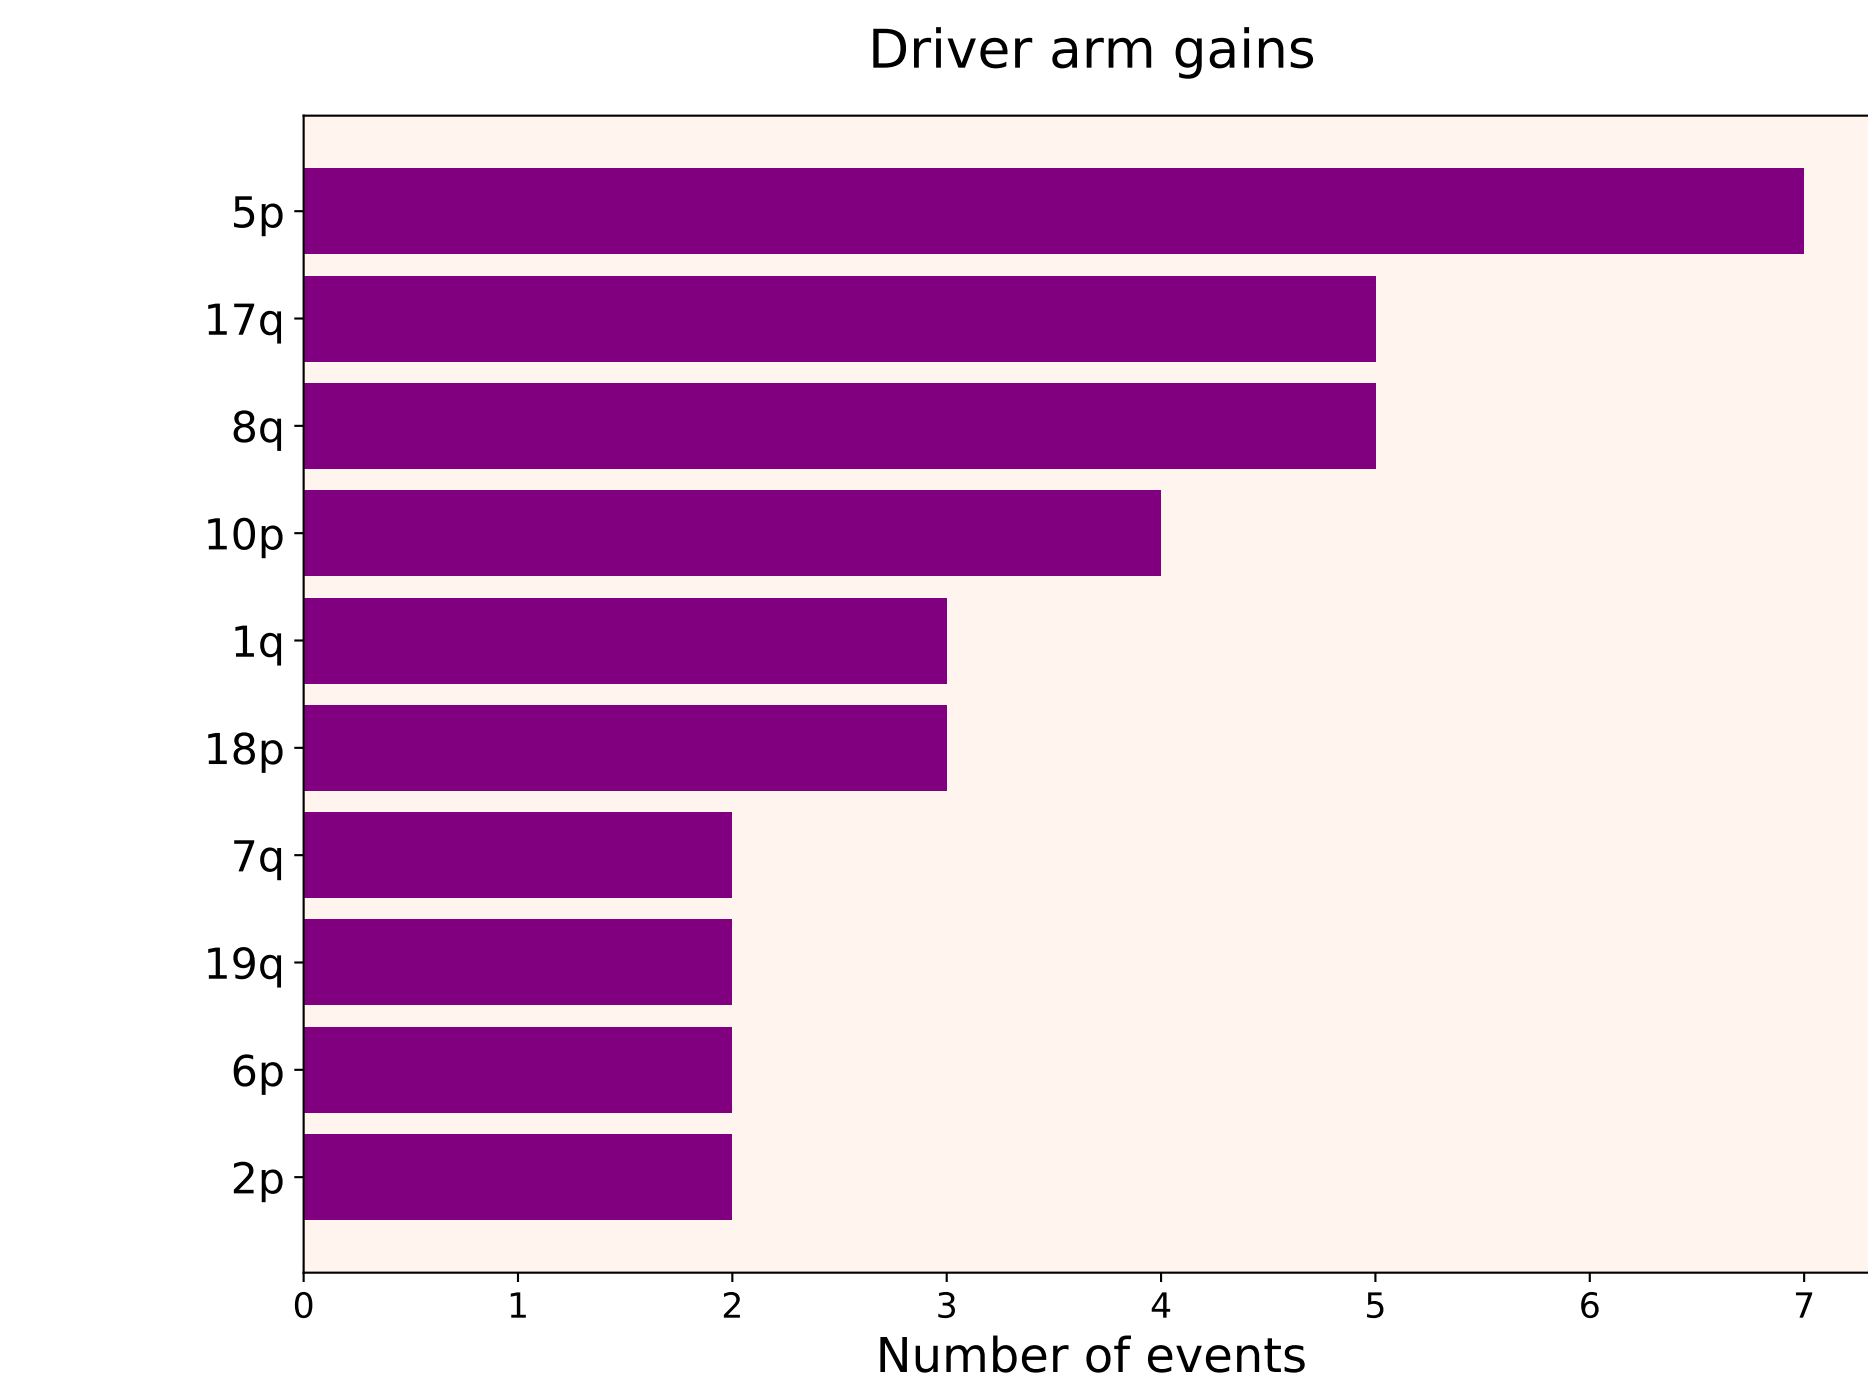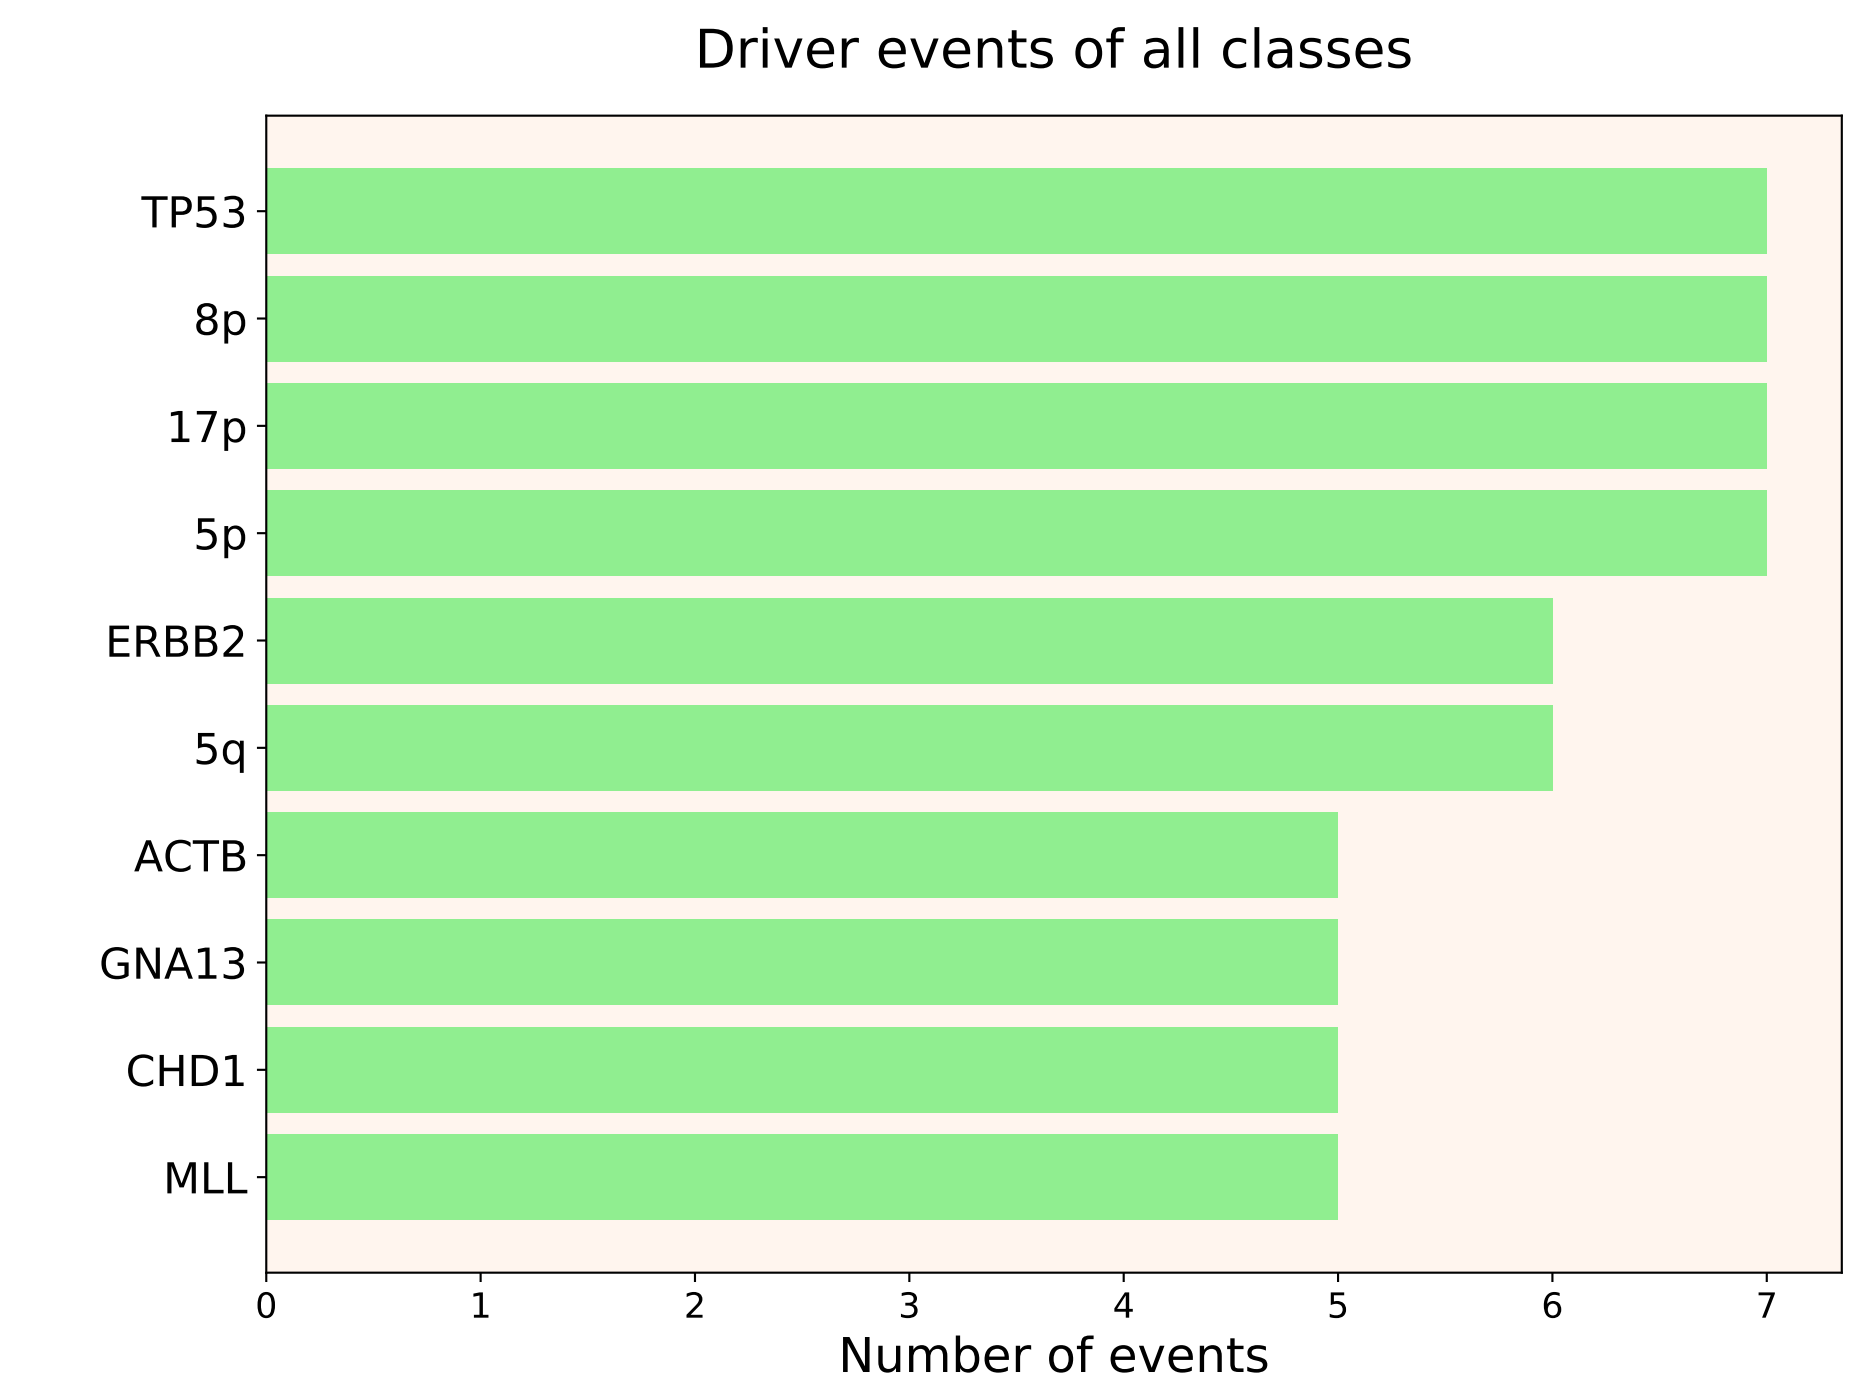

Supplement: Supplemental_Data_S1.zip [file Supplemental_Data_S1.zip]

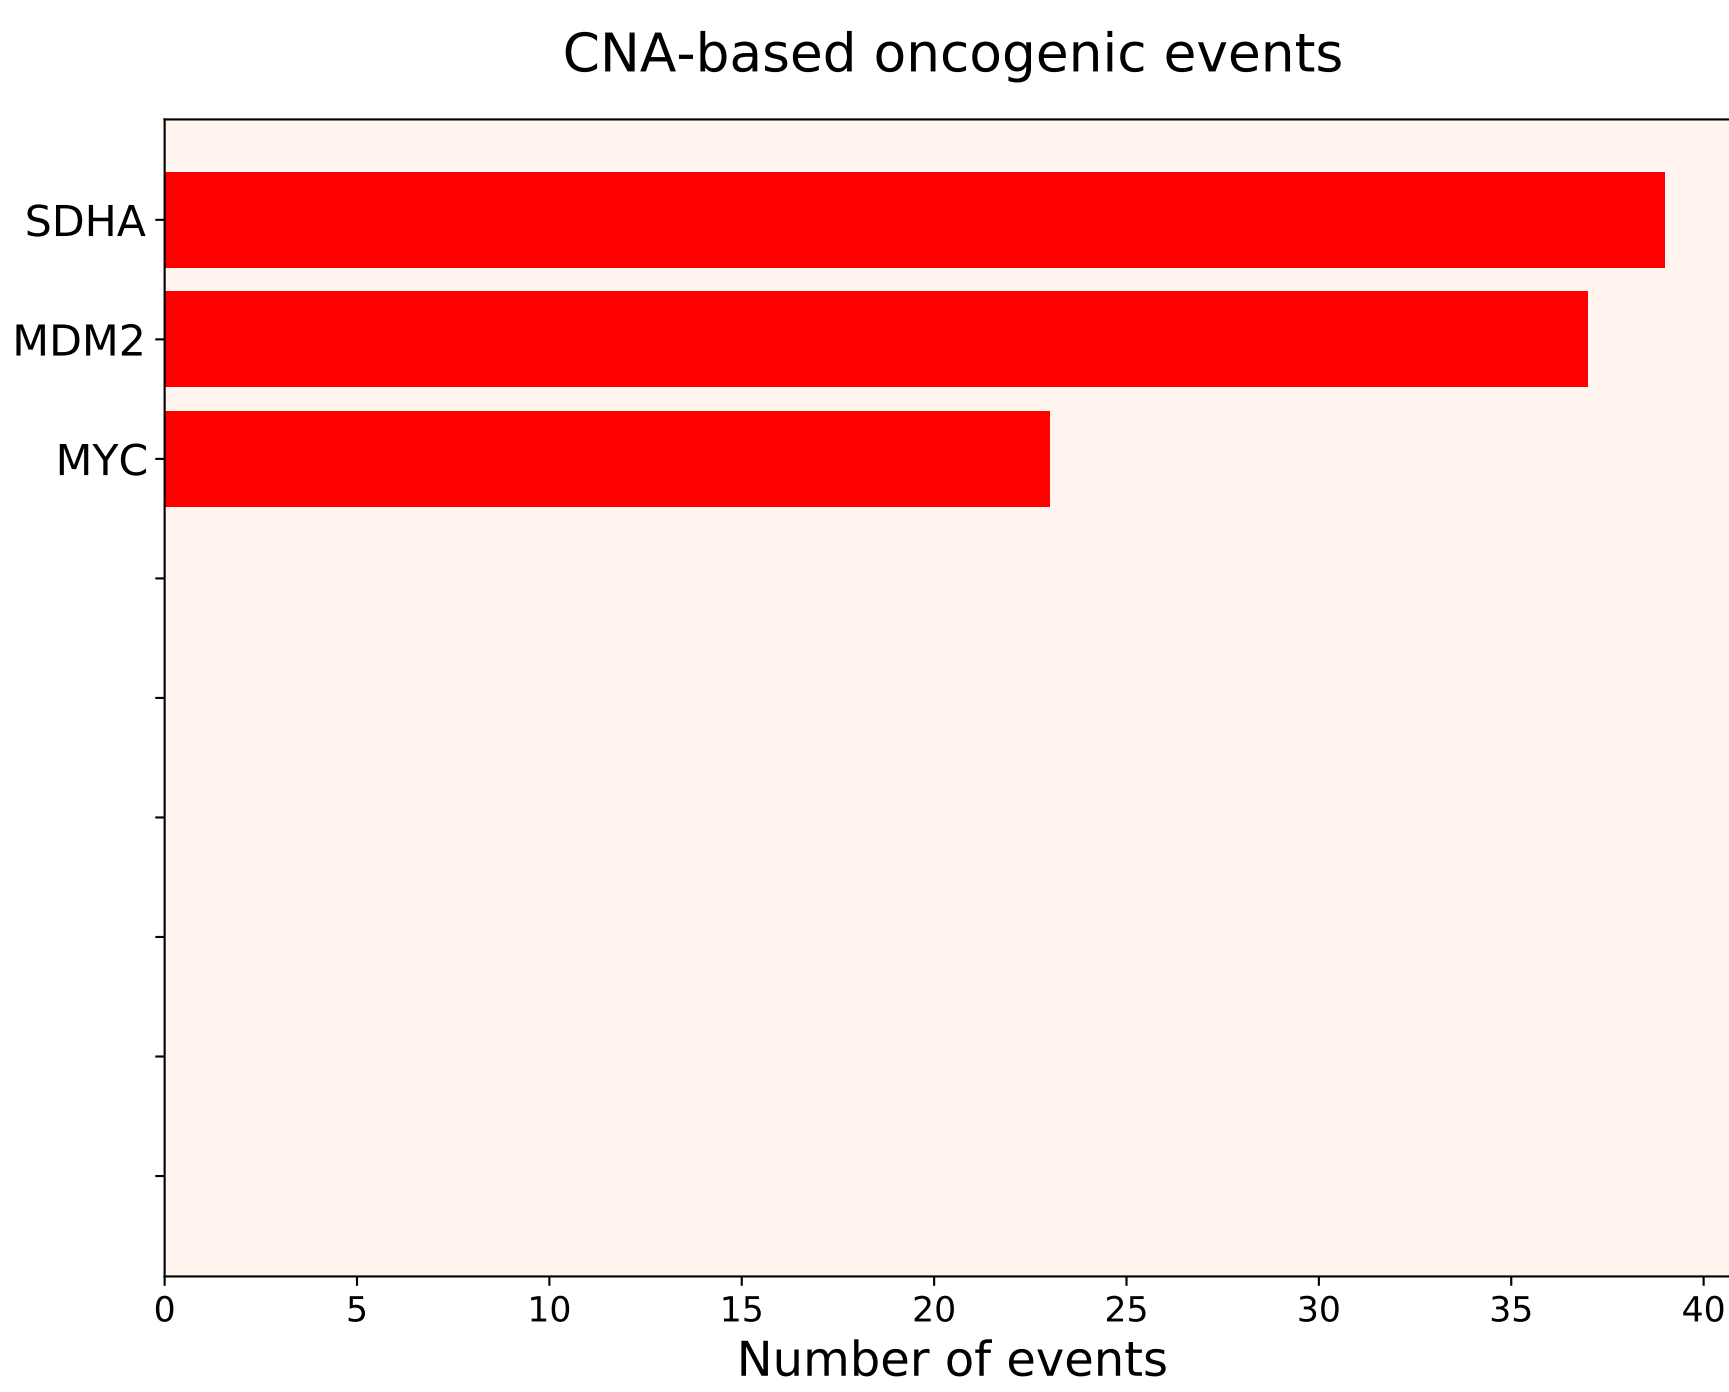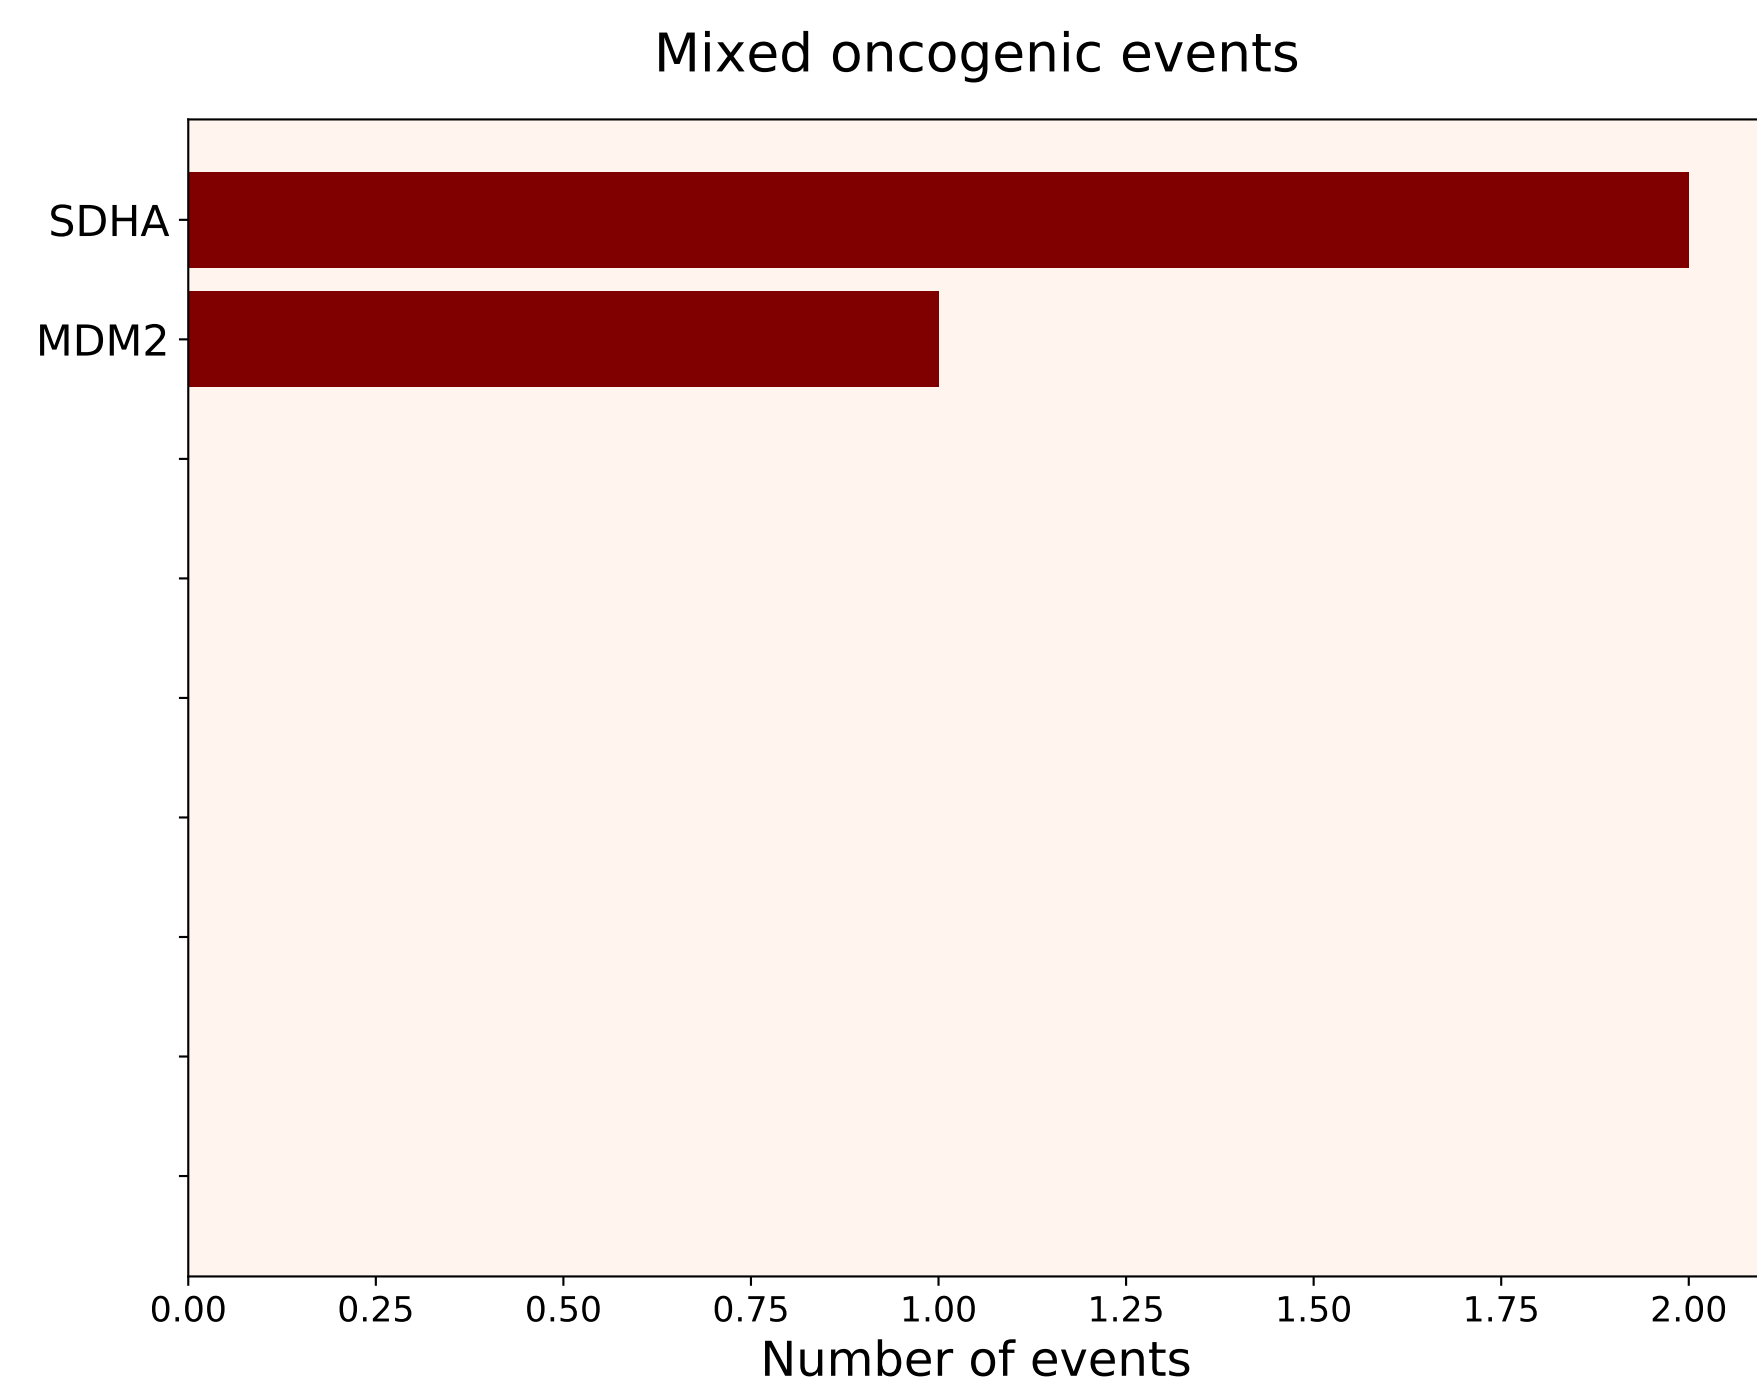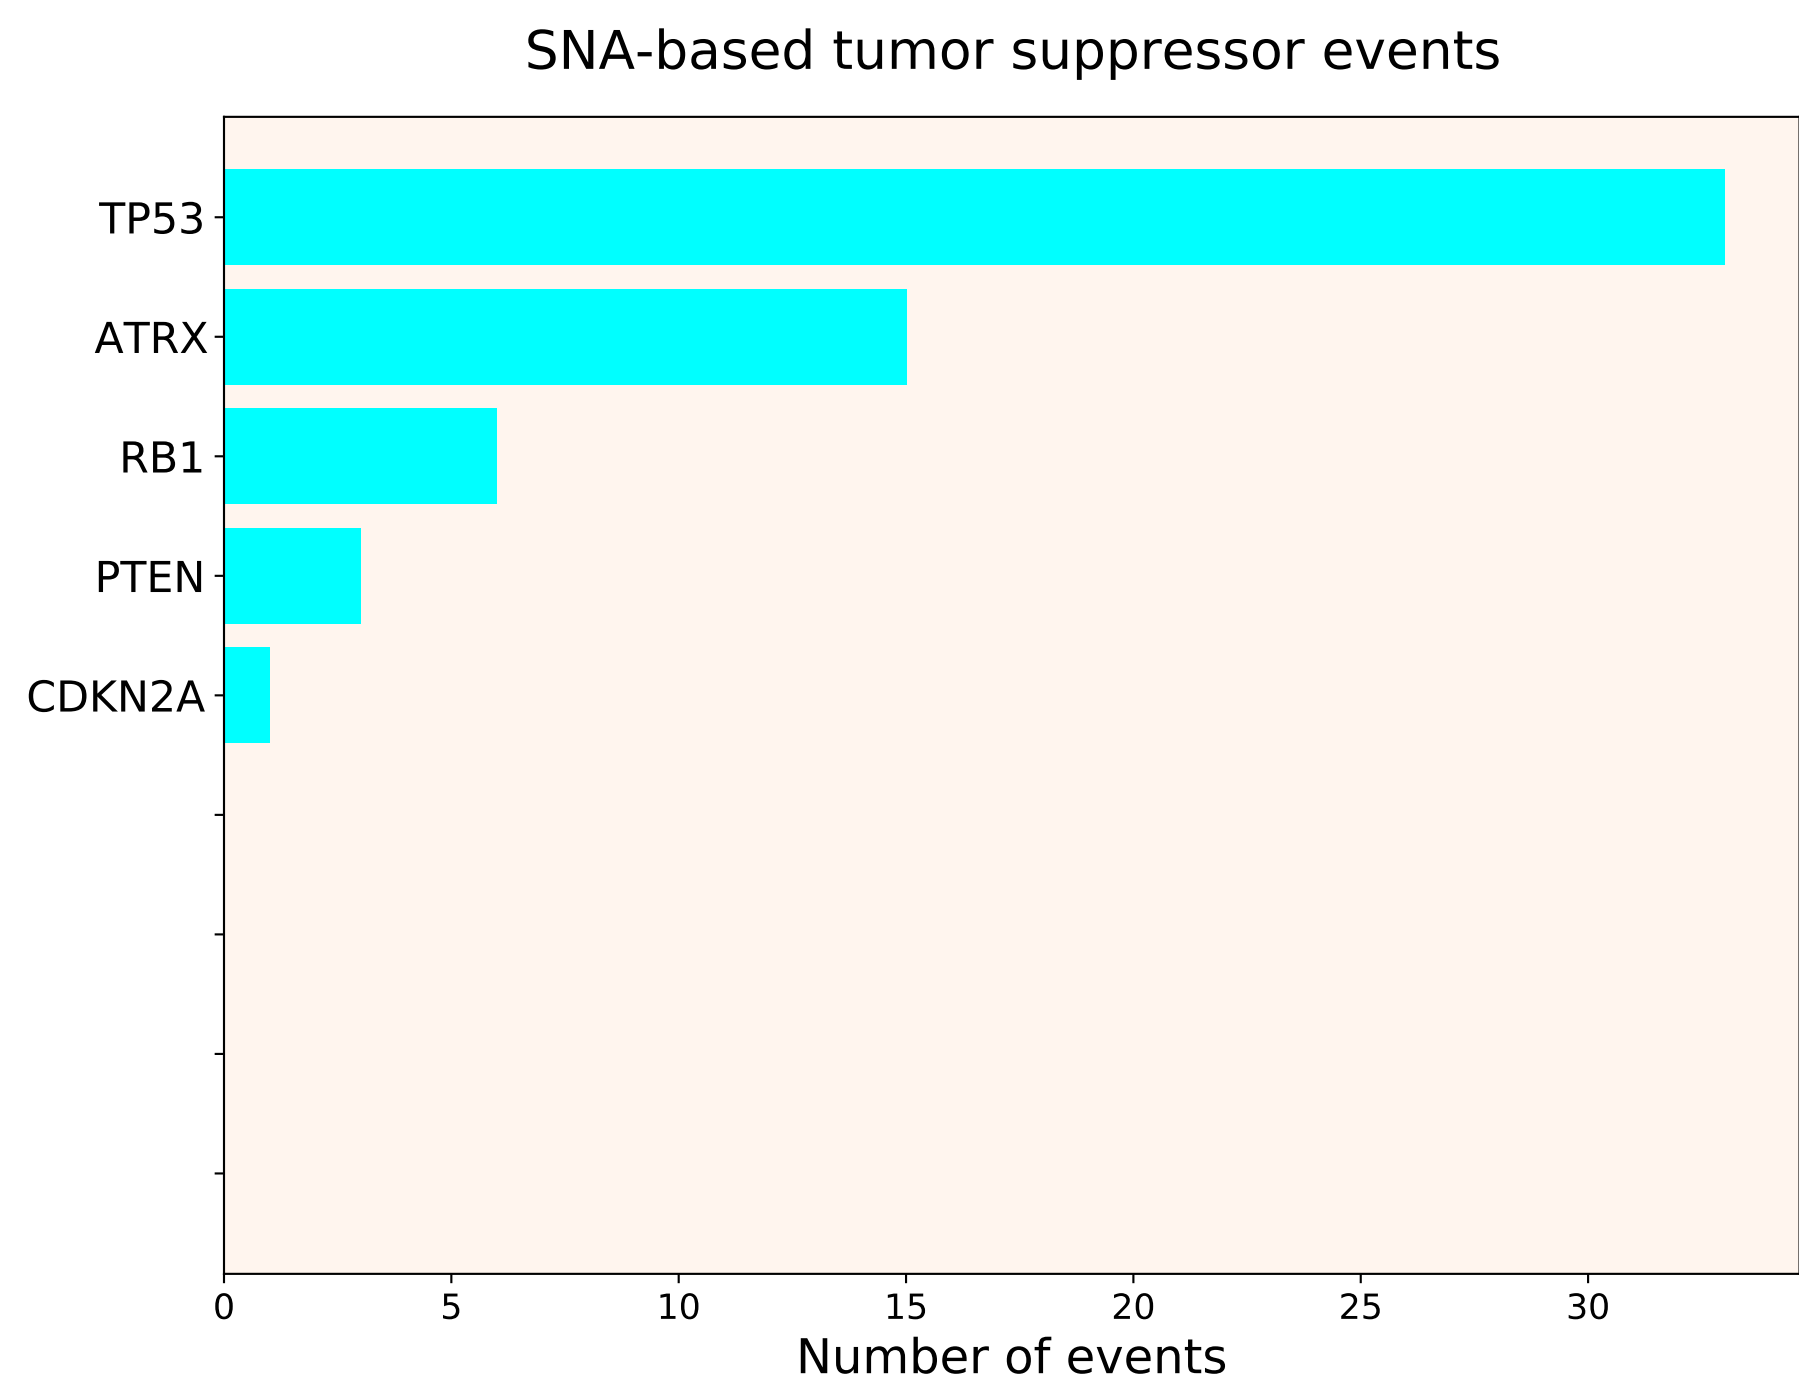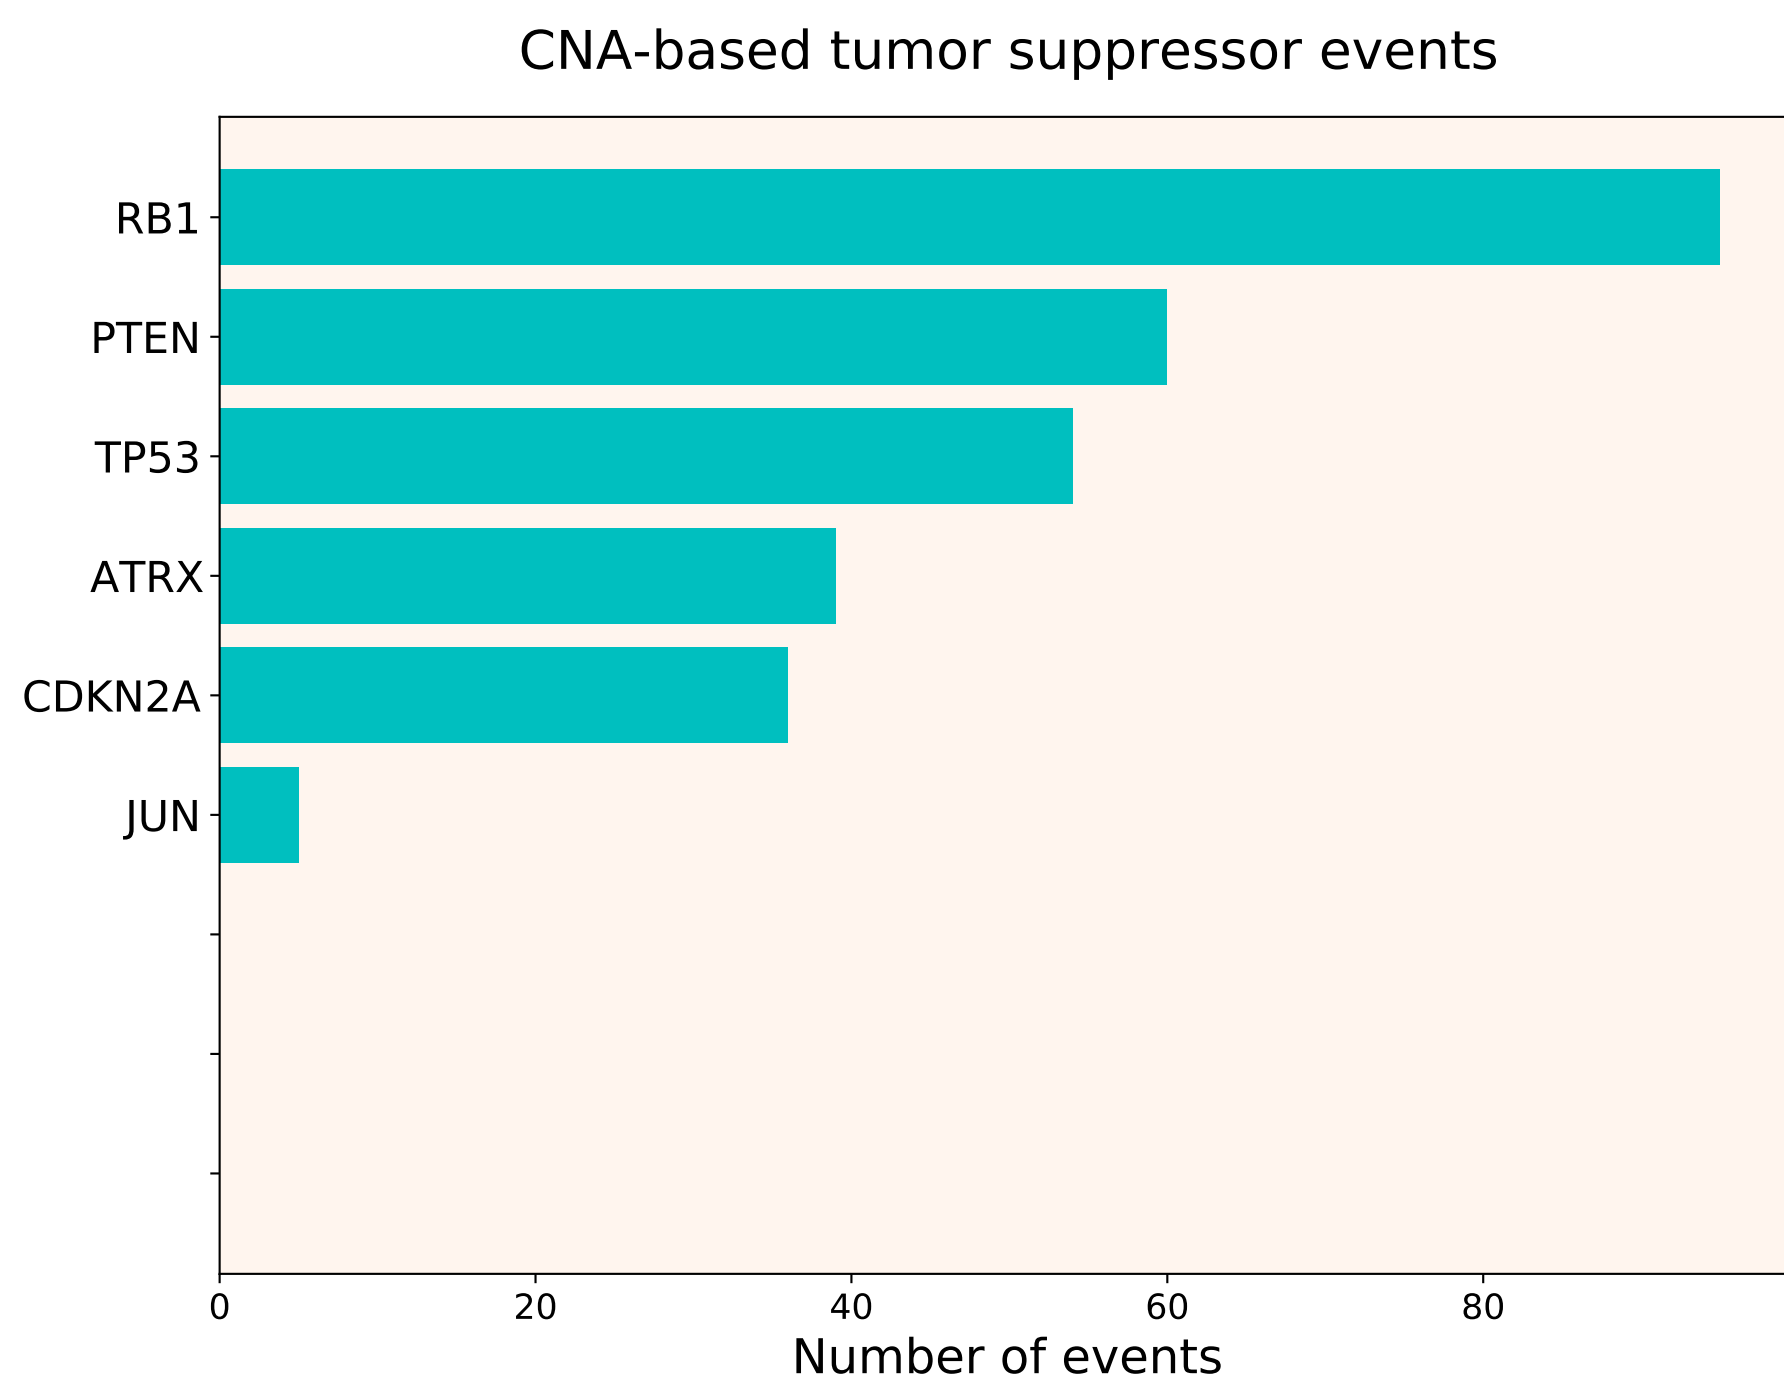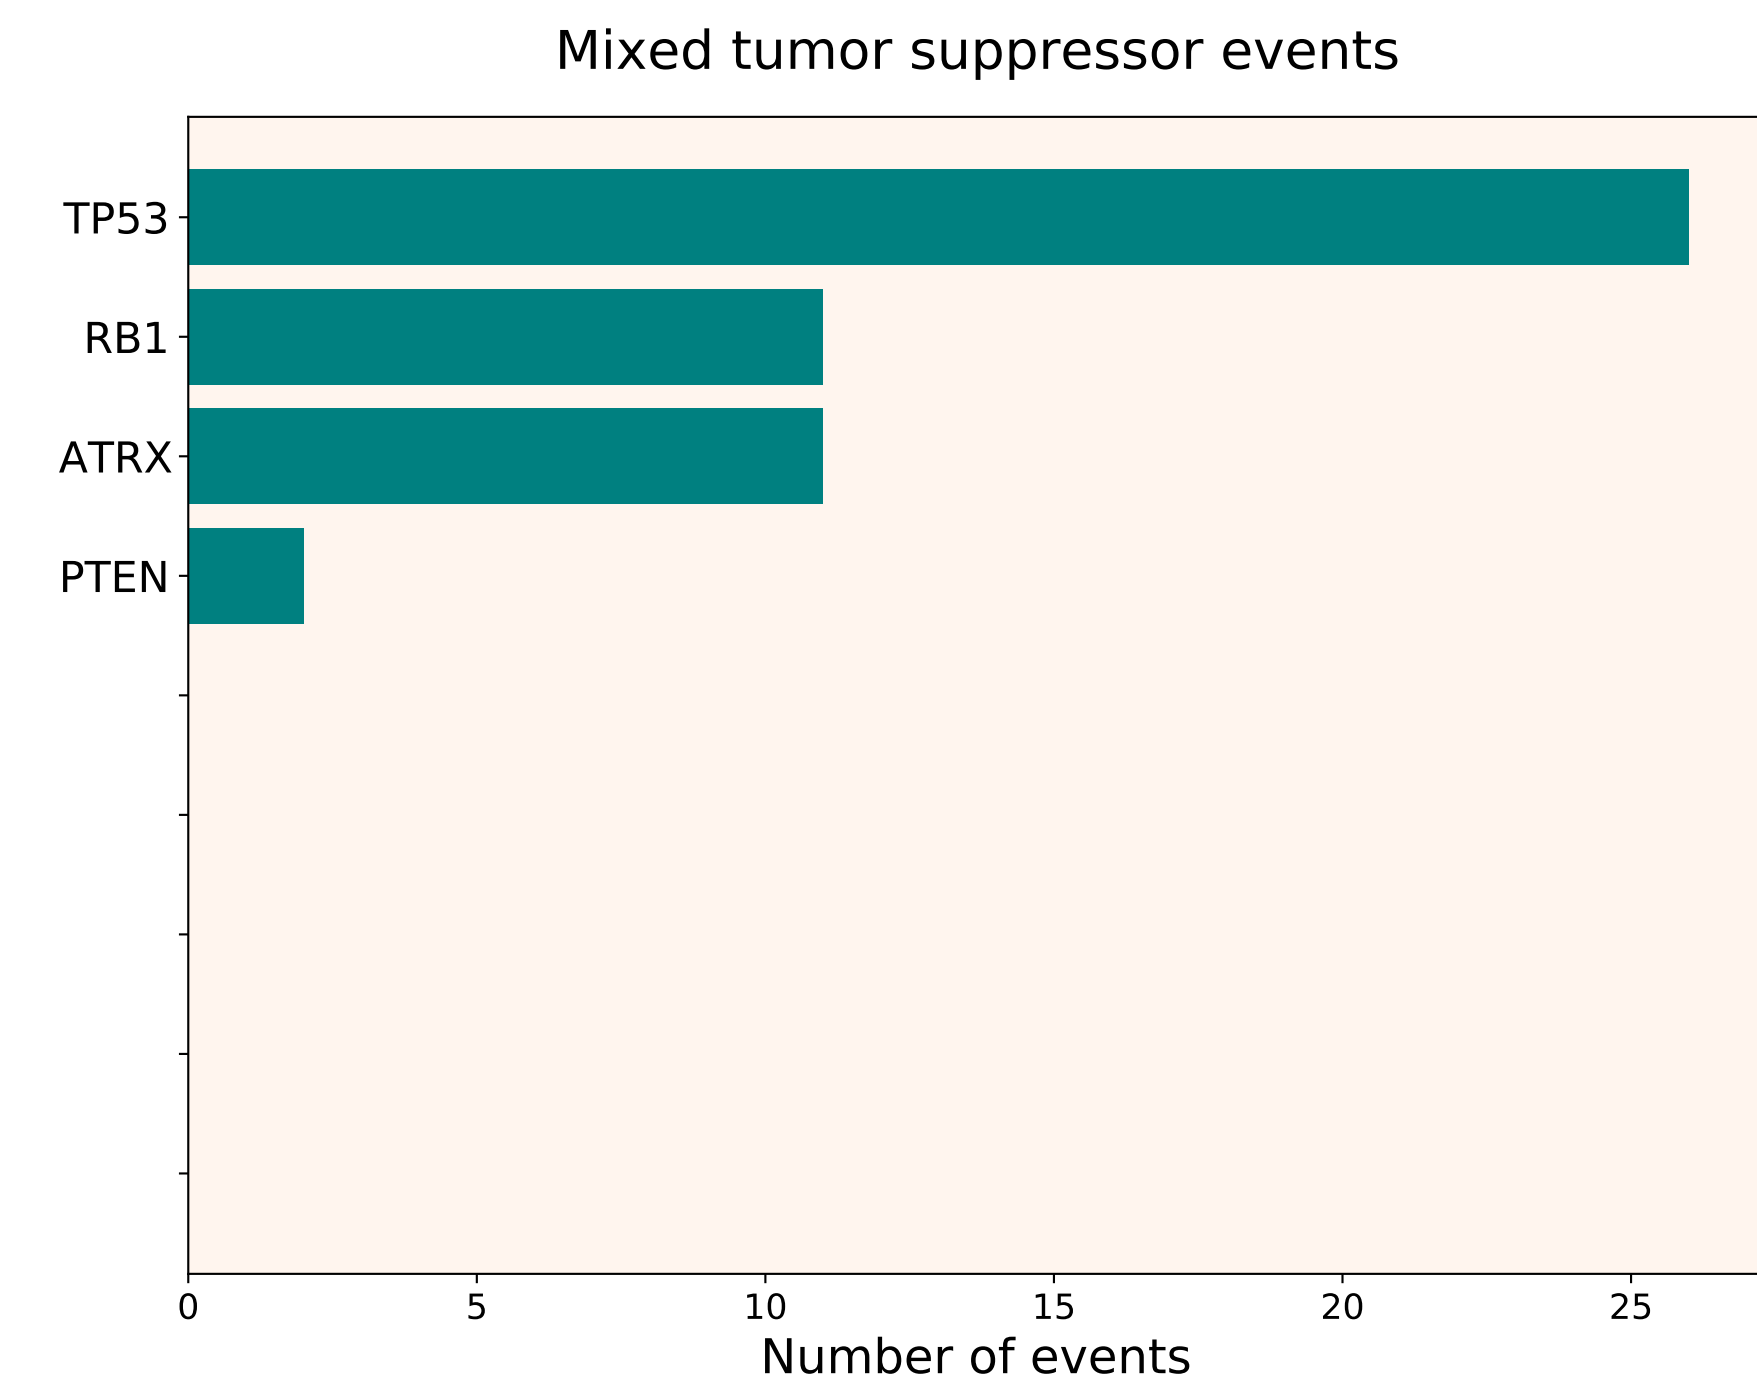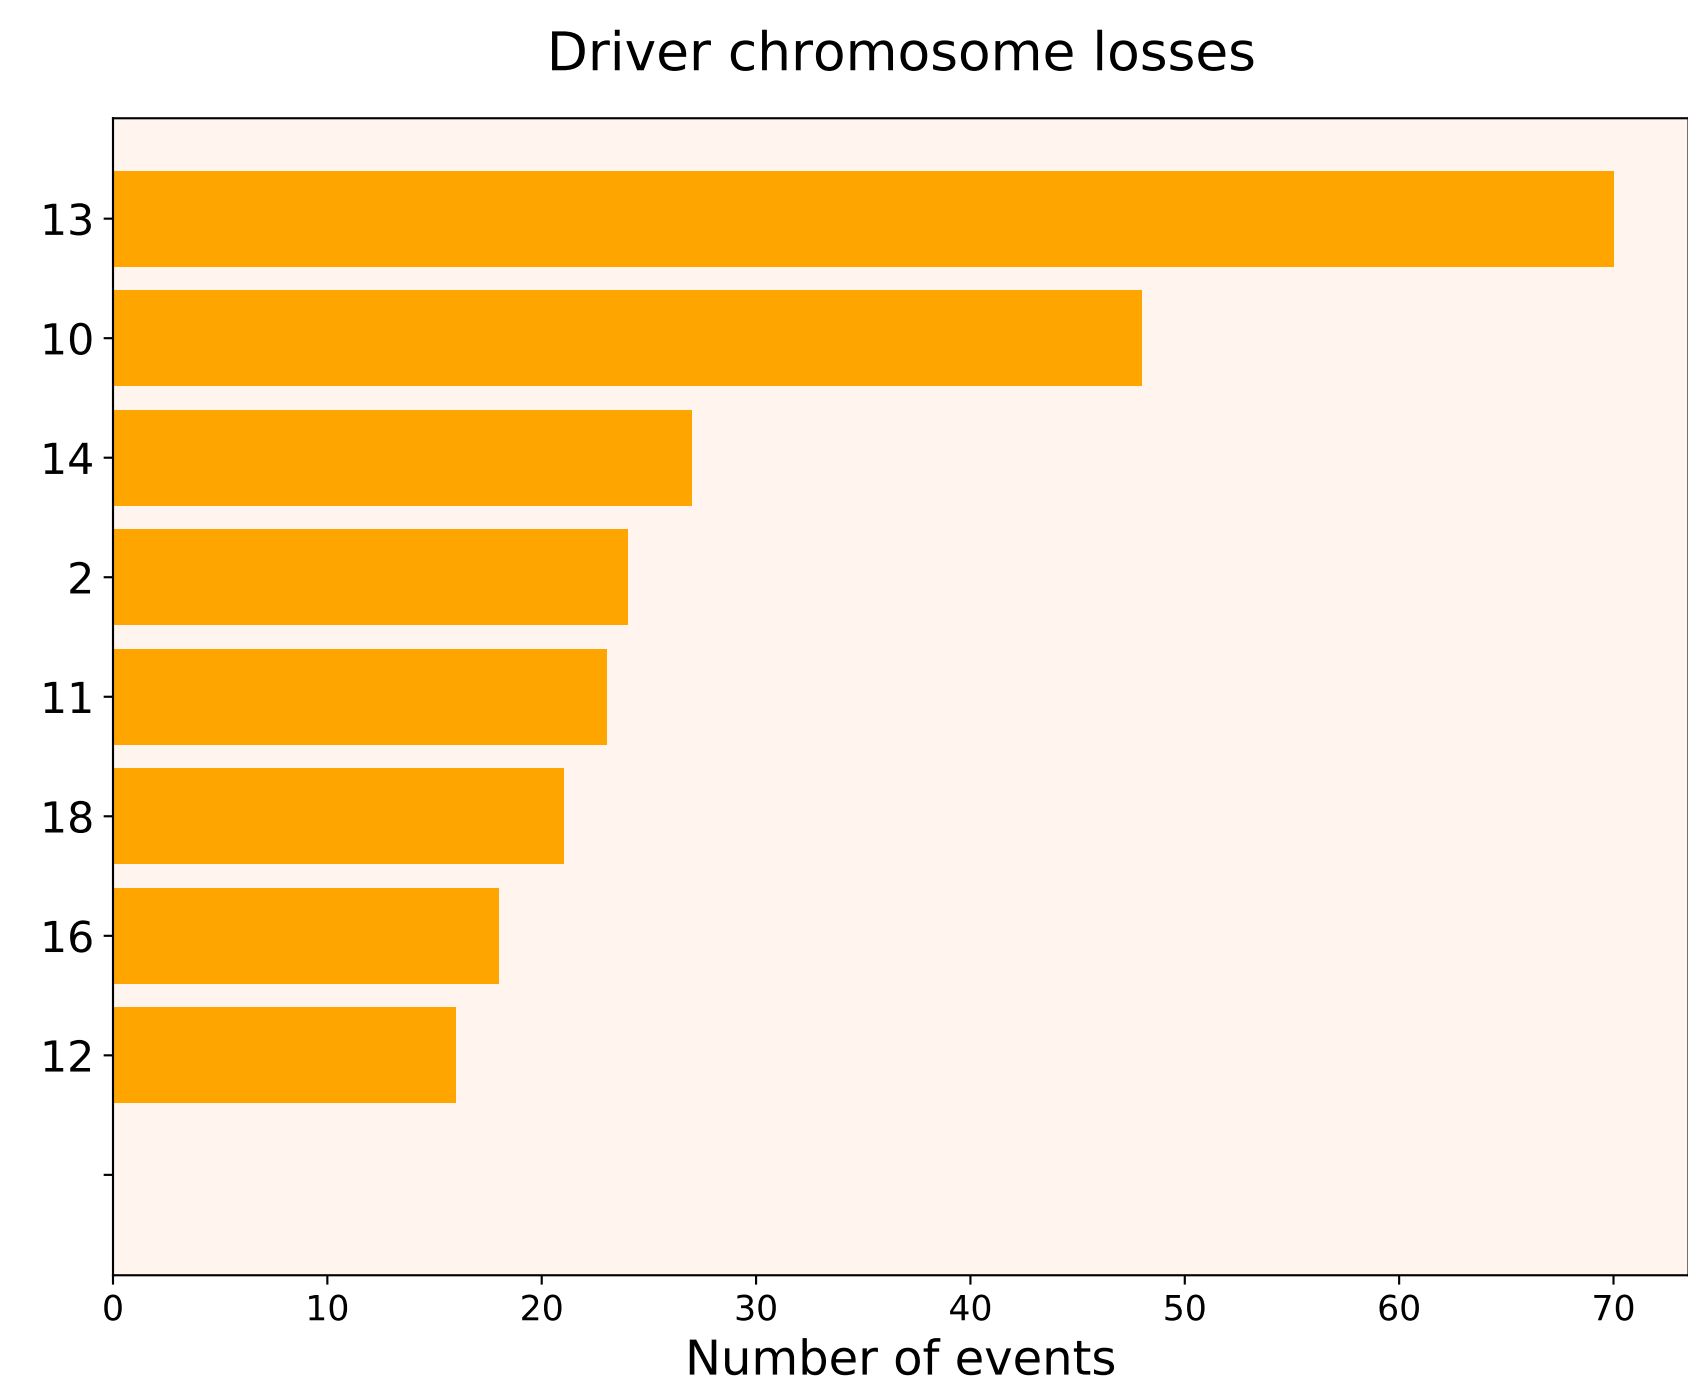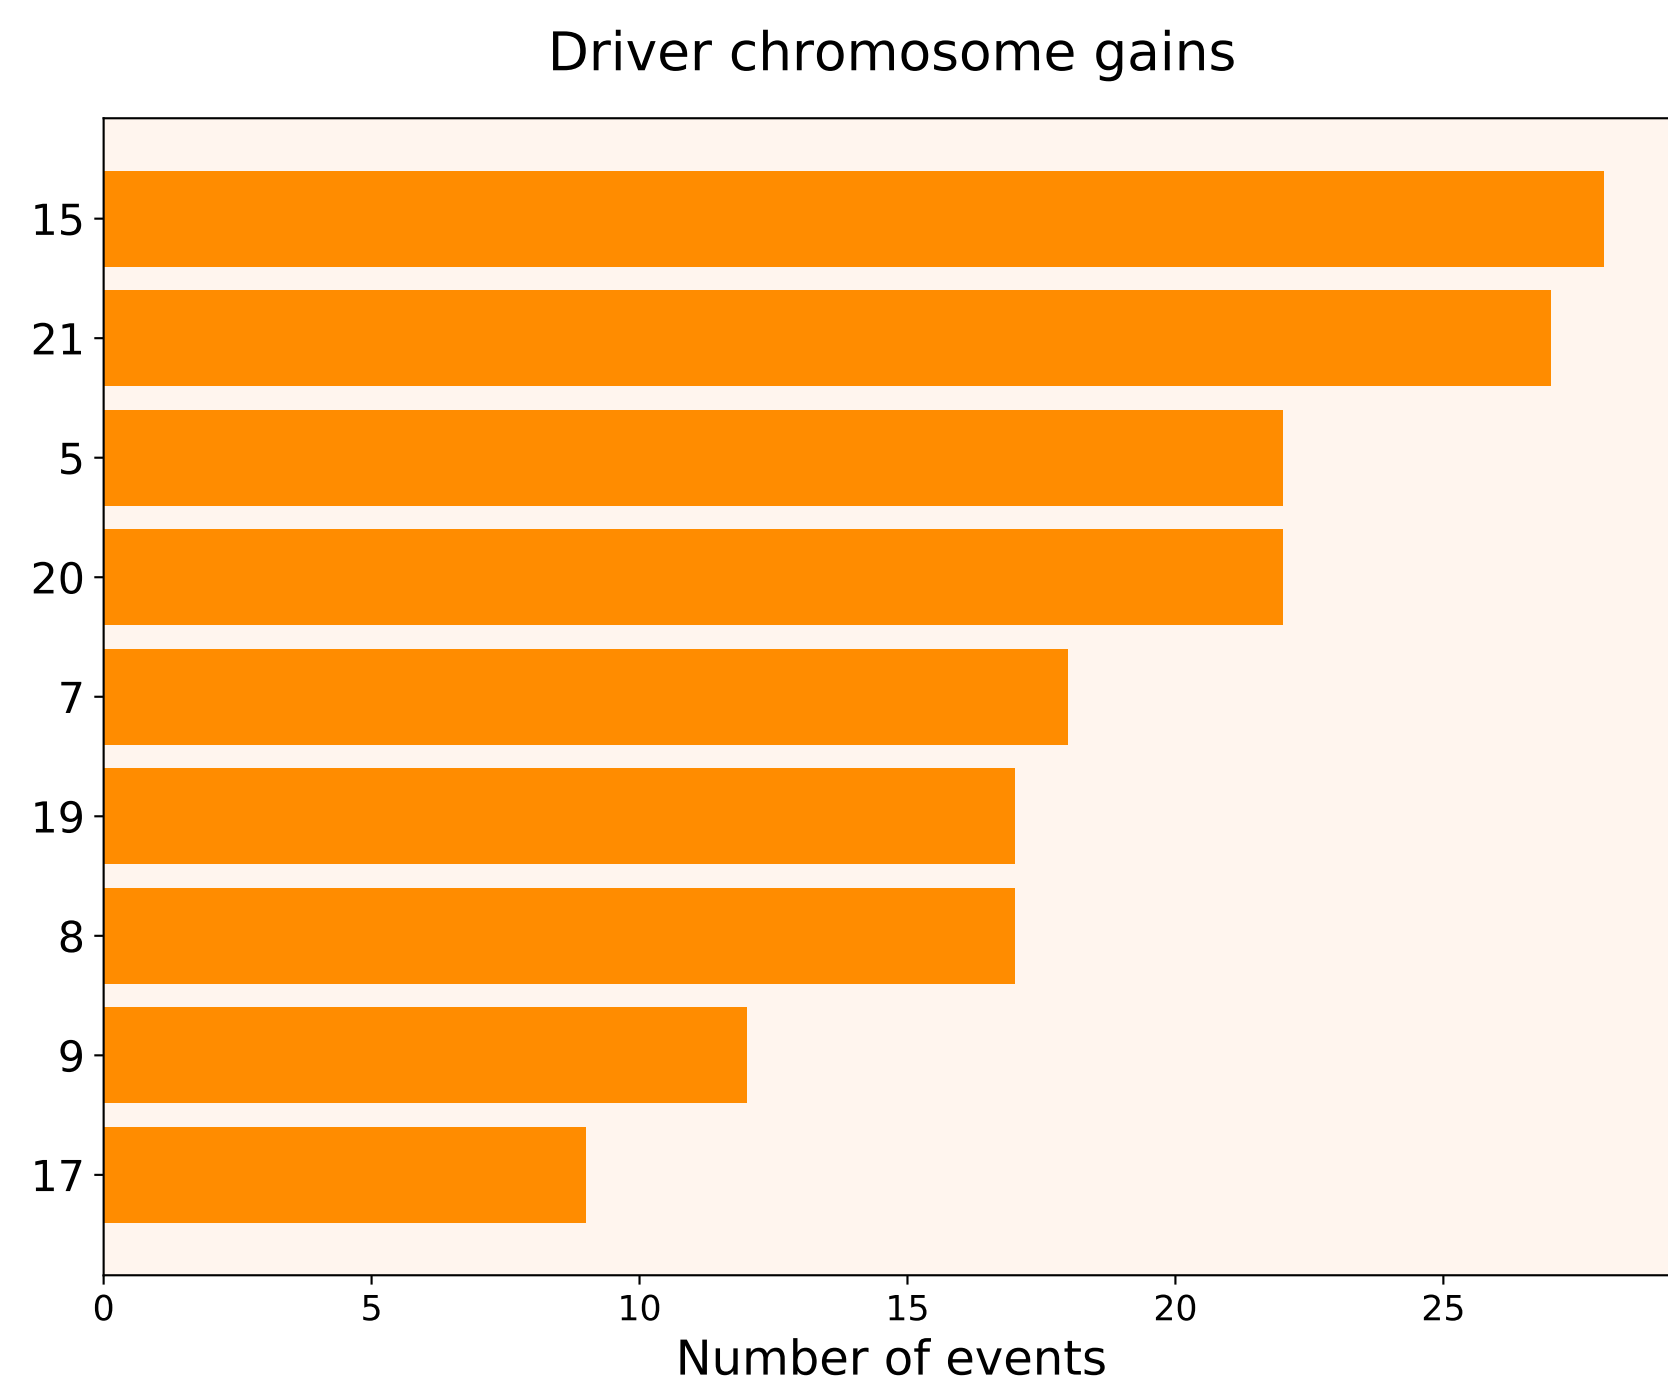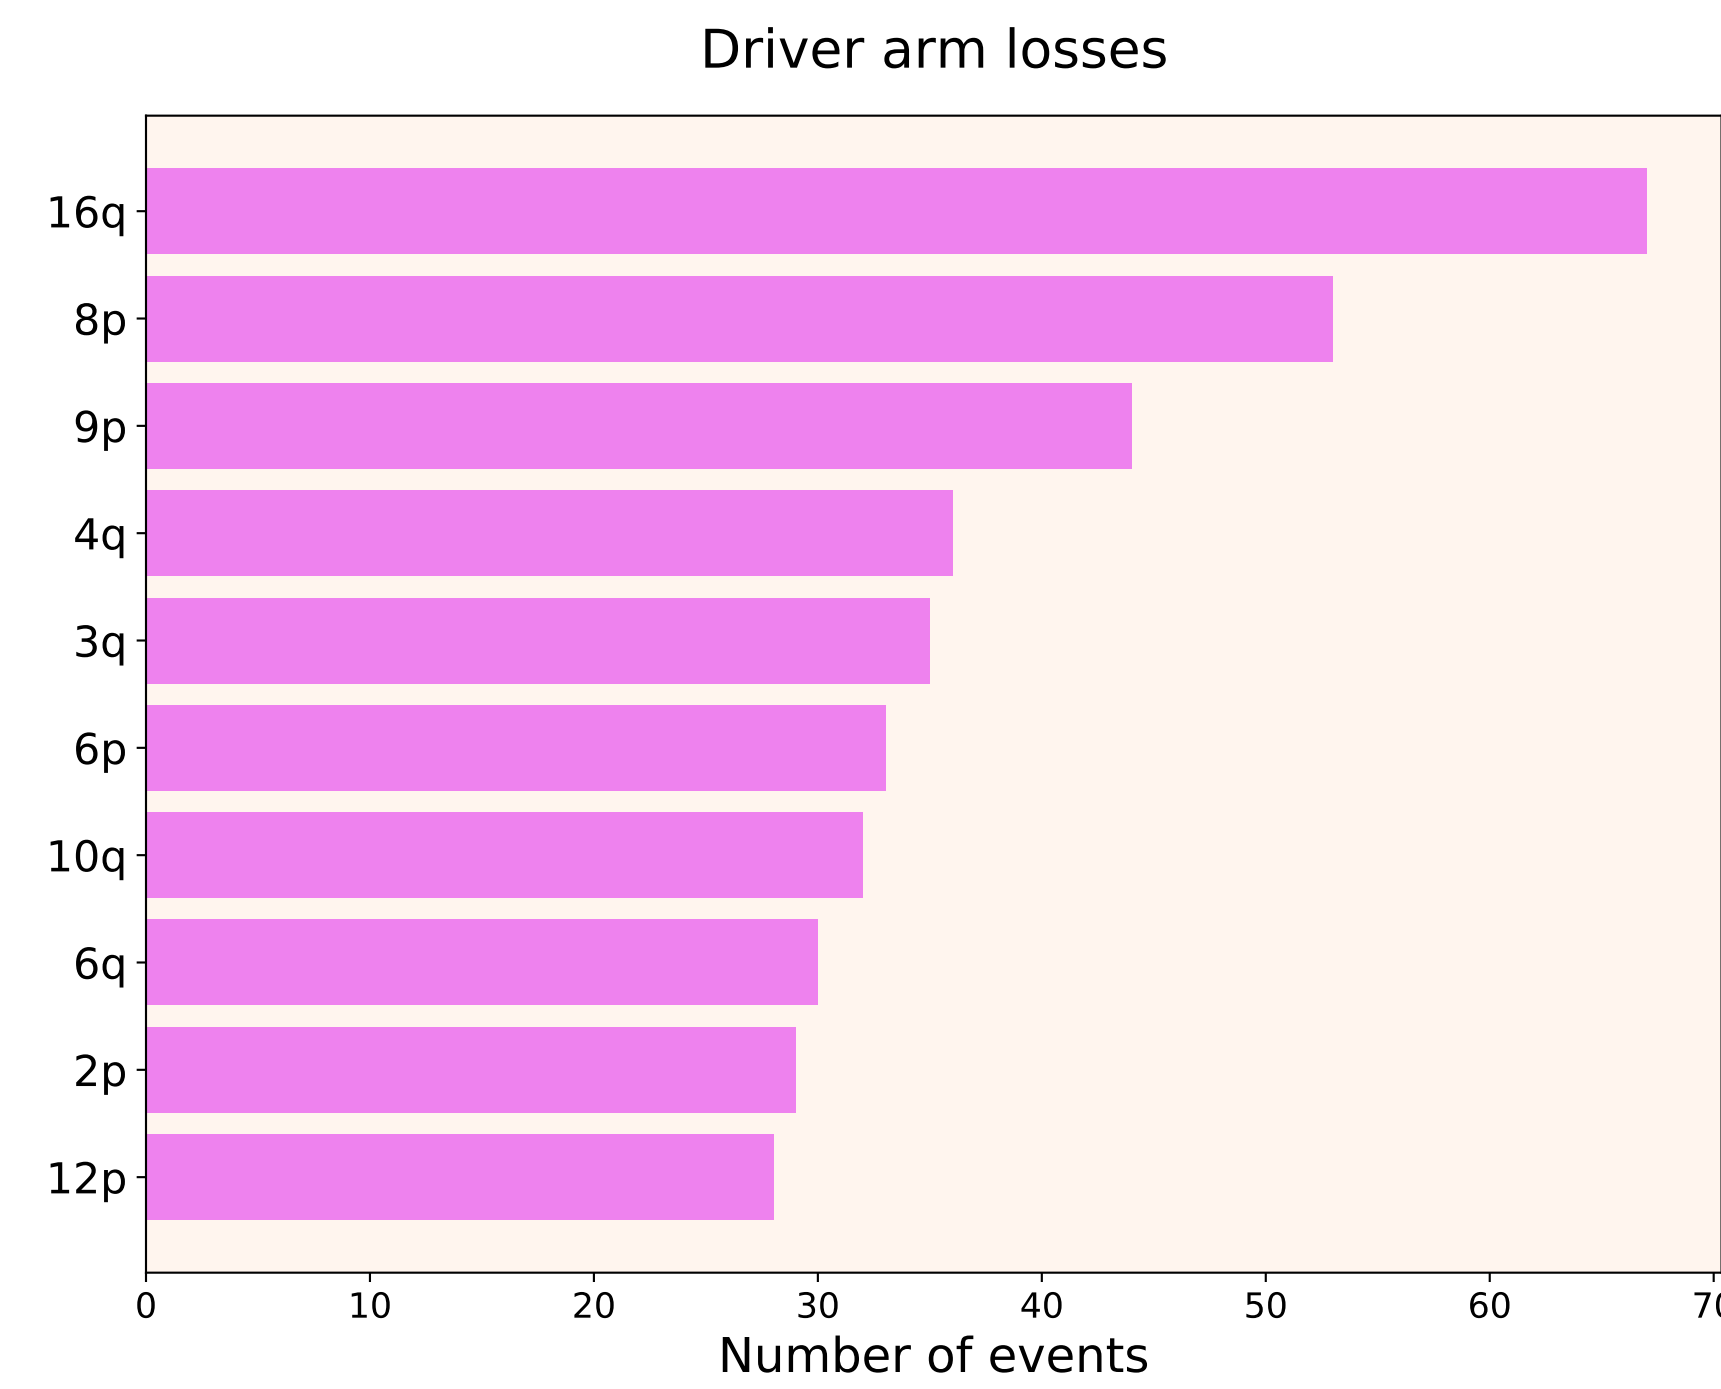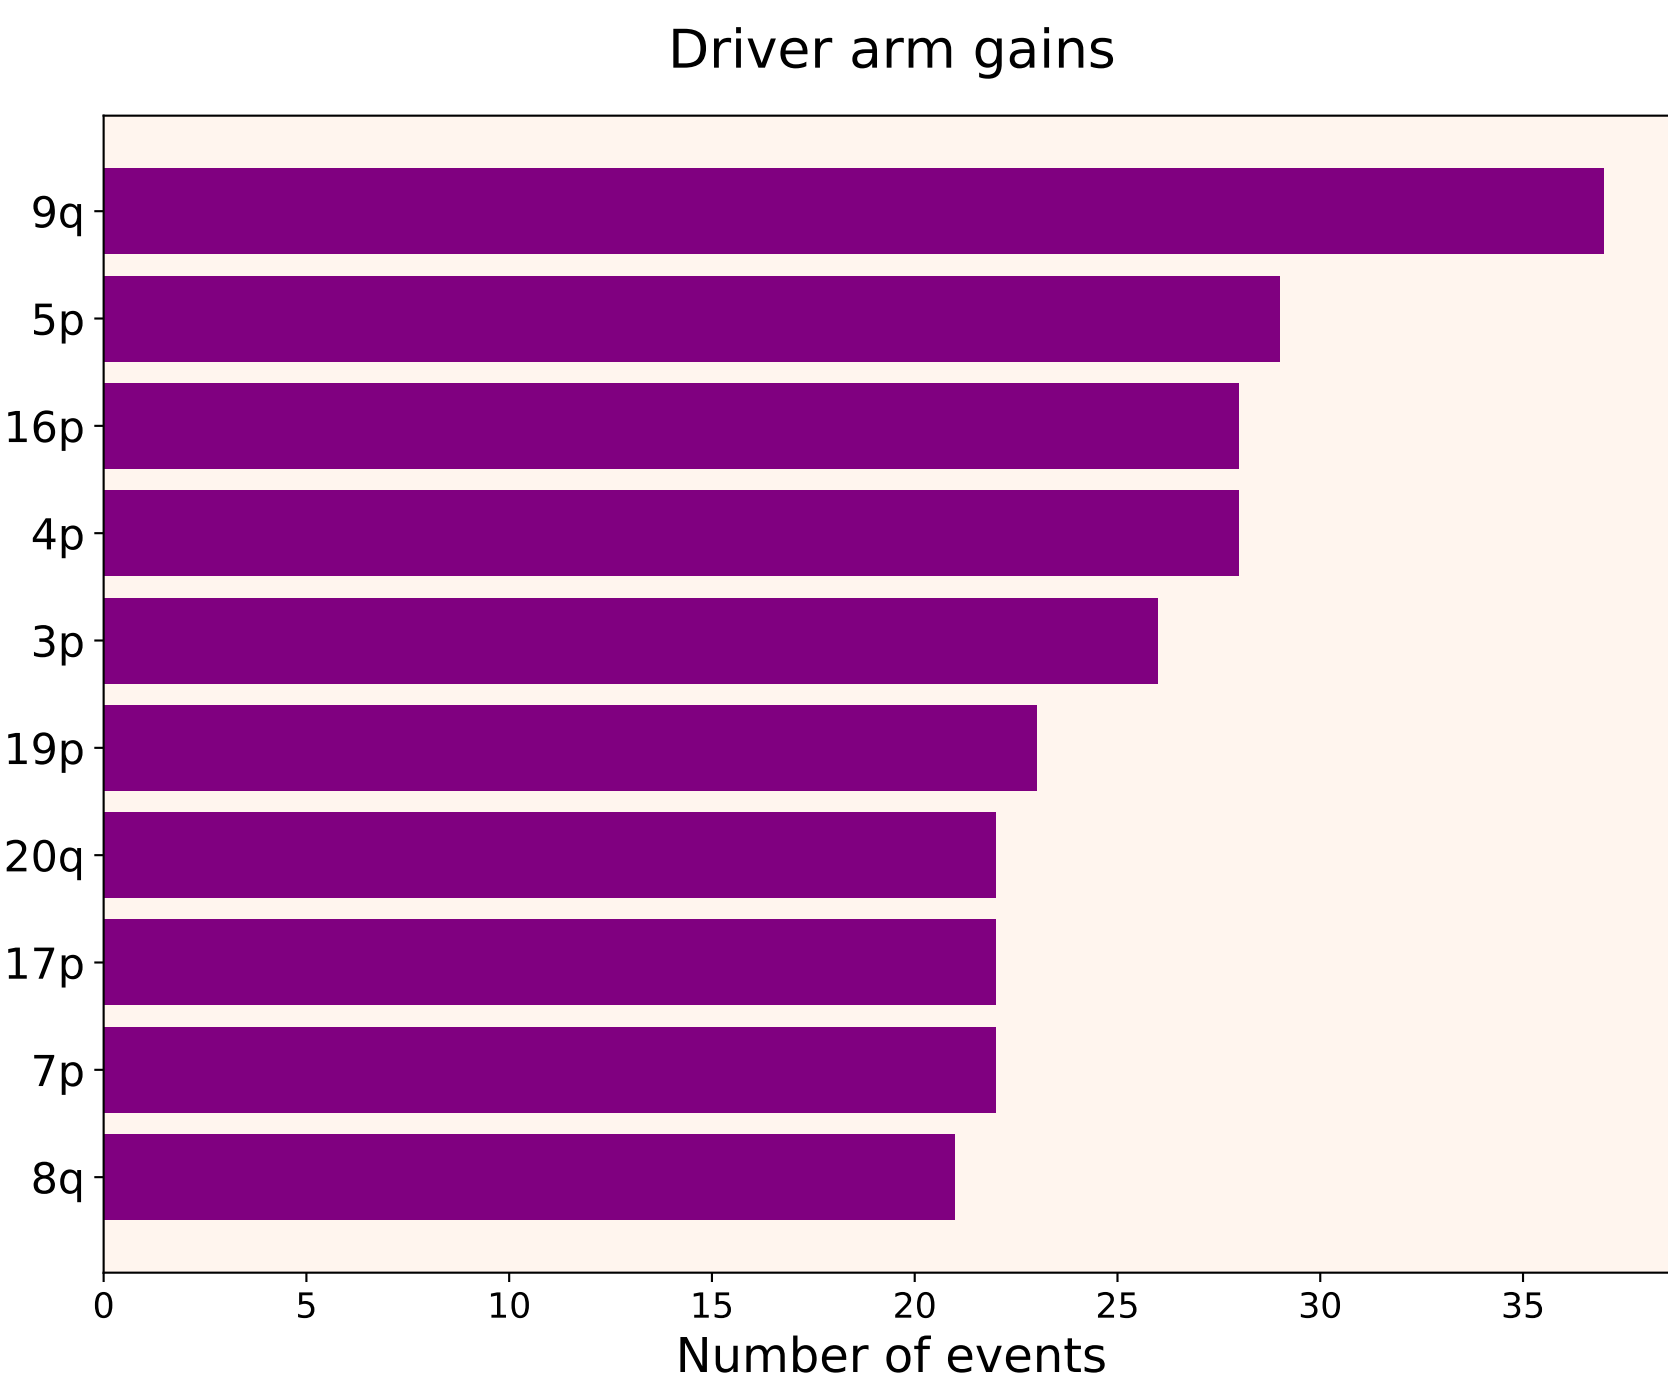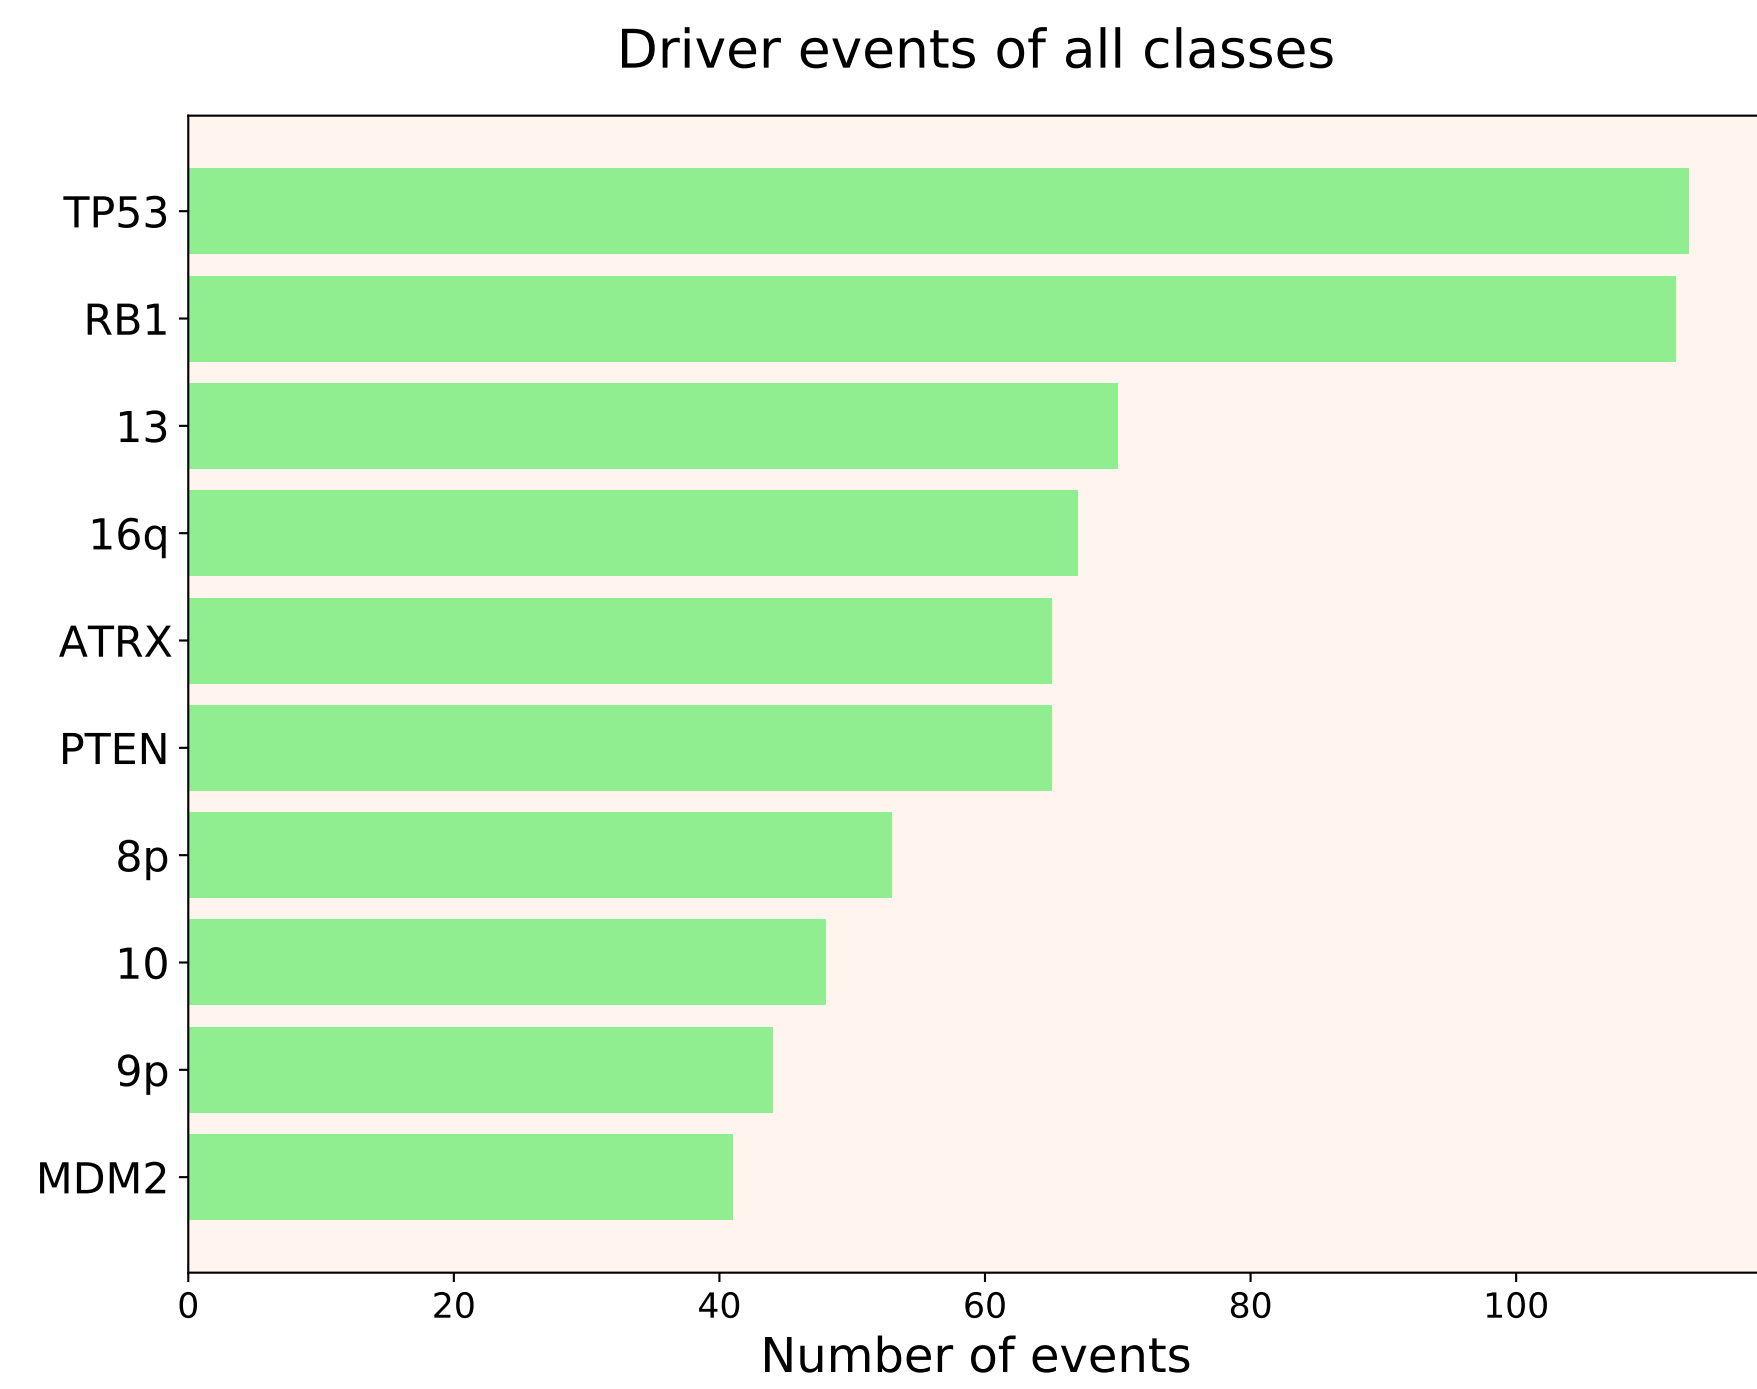

Supplement: Supplemental_Data_S1.zip [file Supplemental_Data_S1.zip]

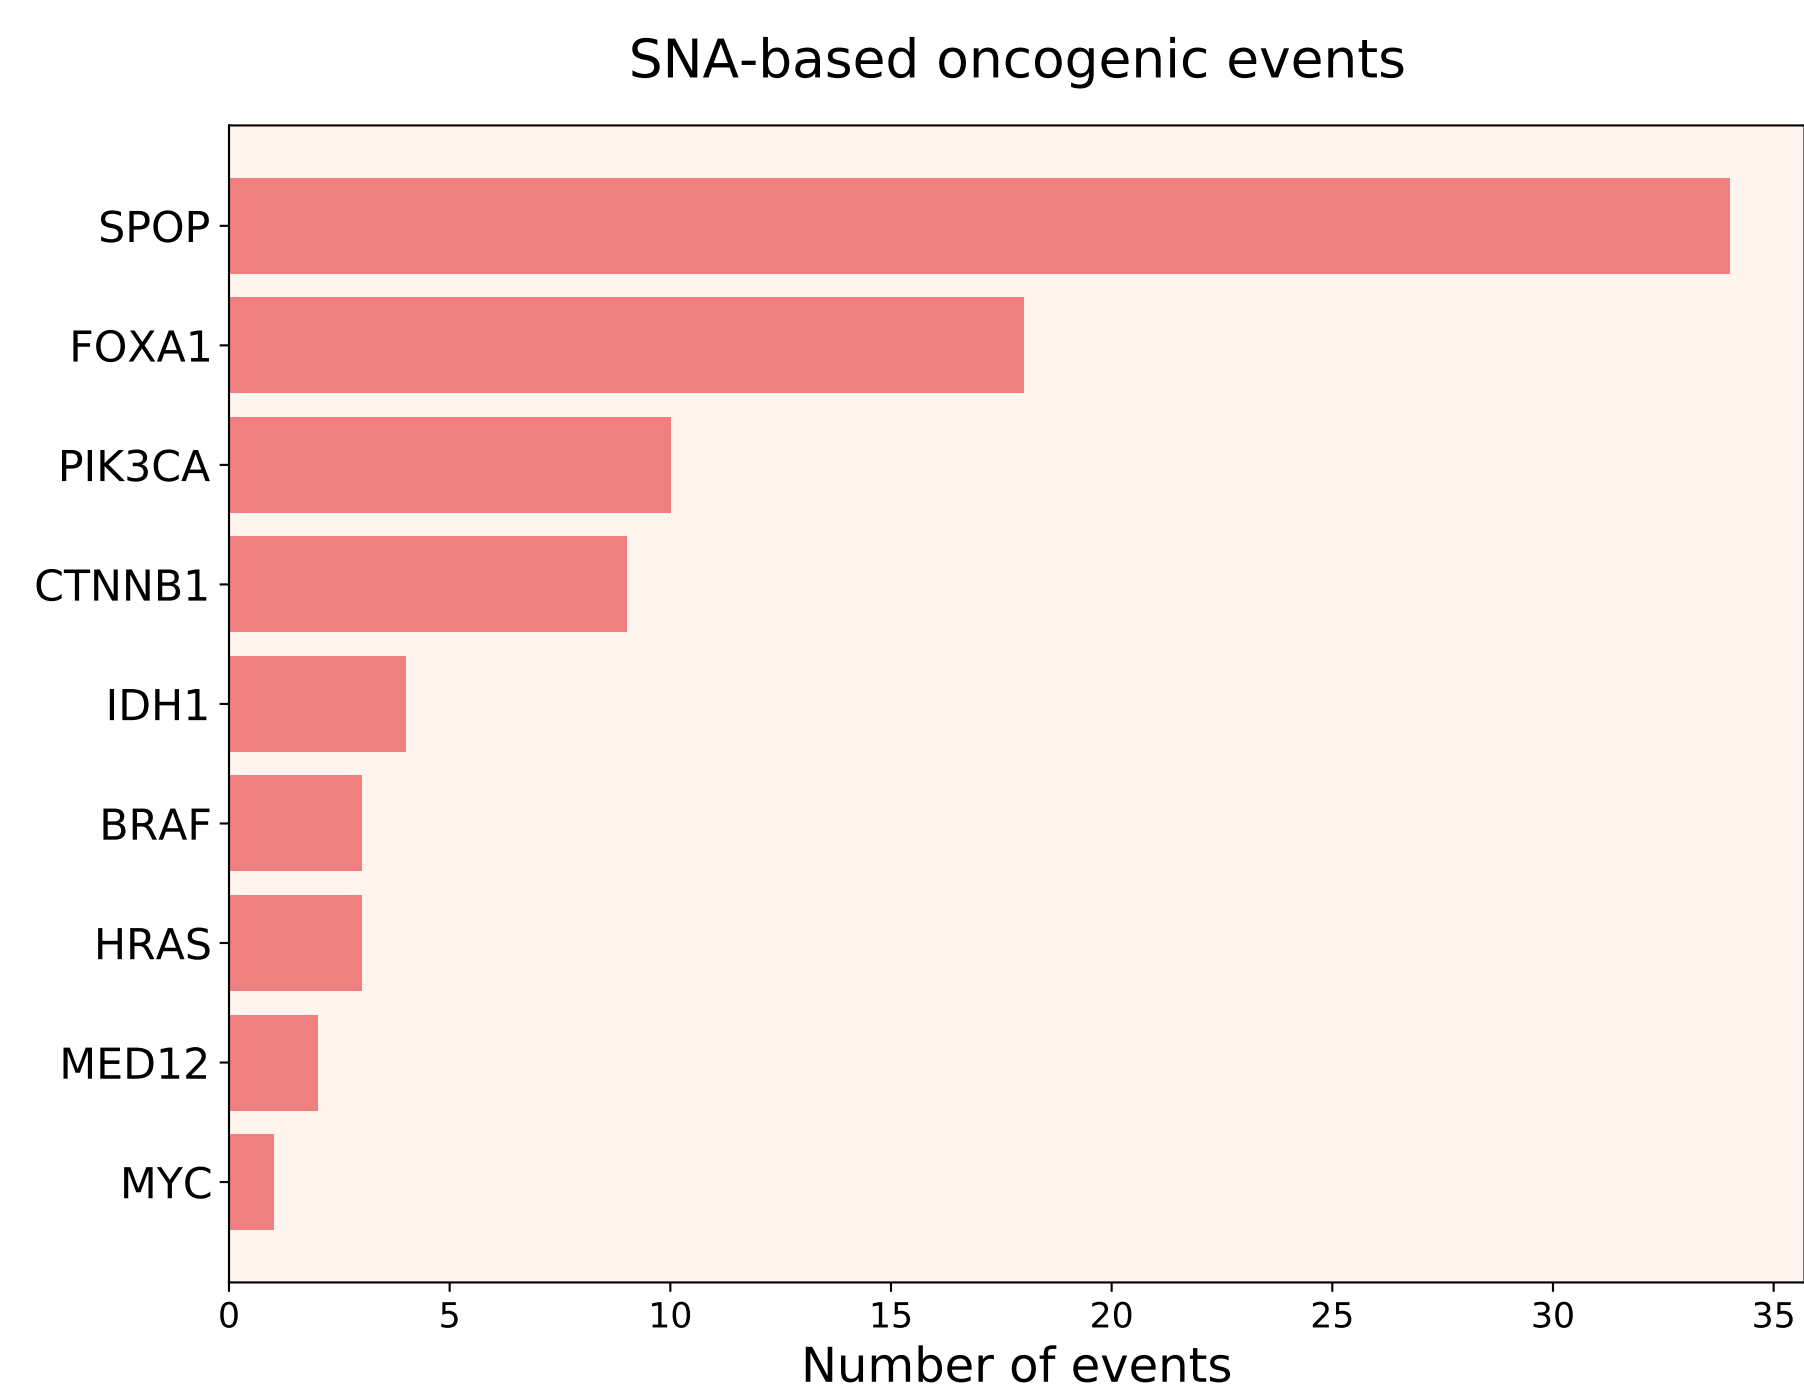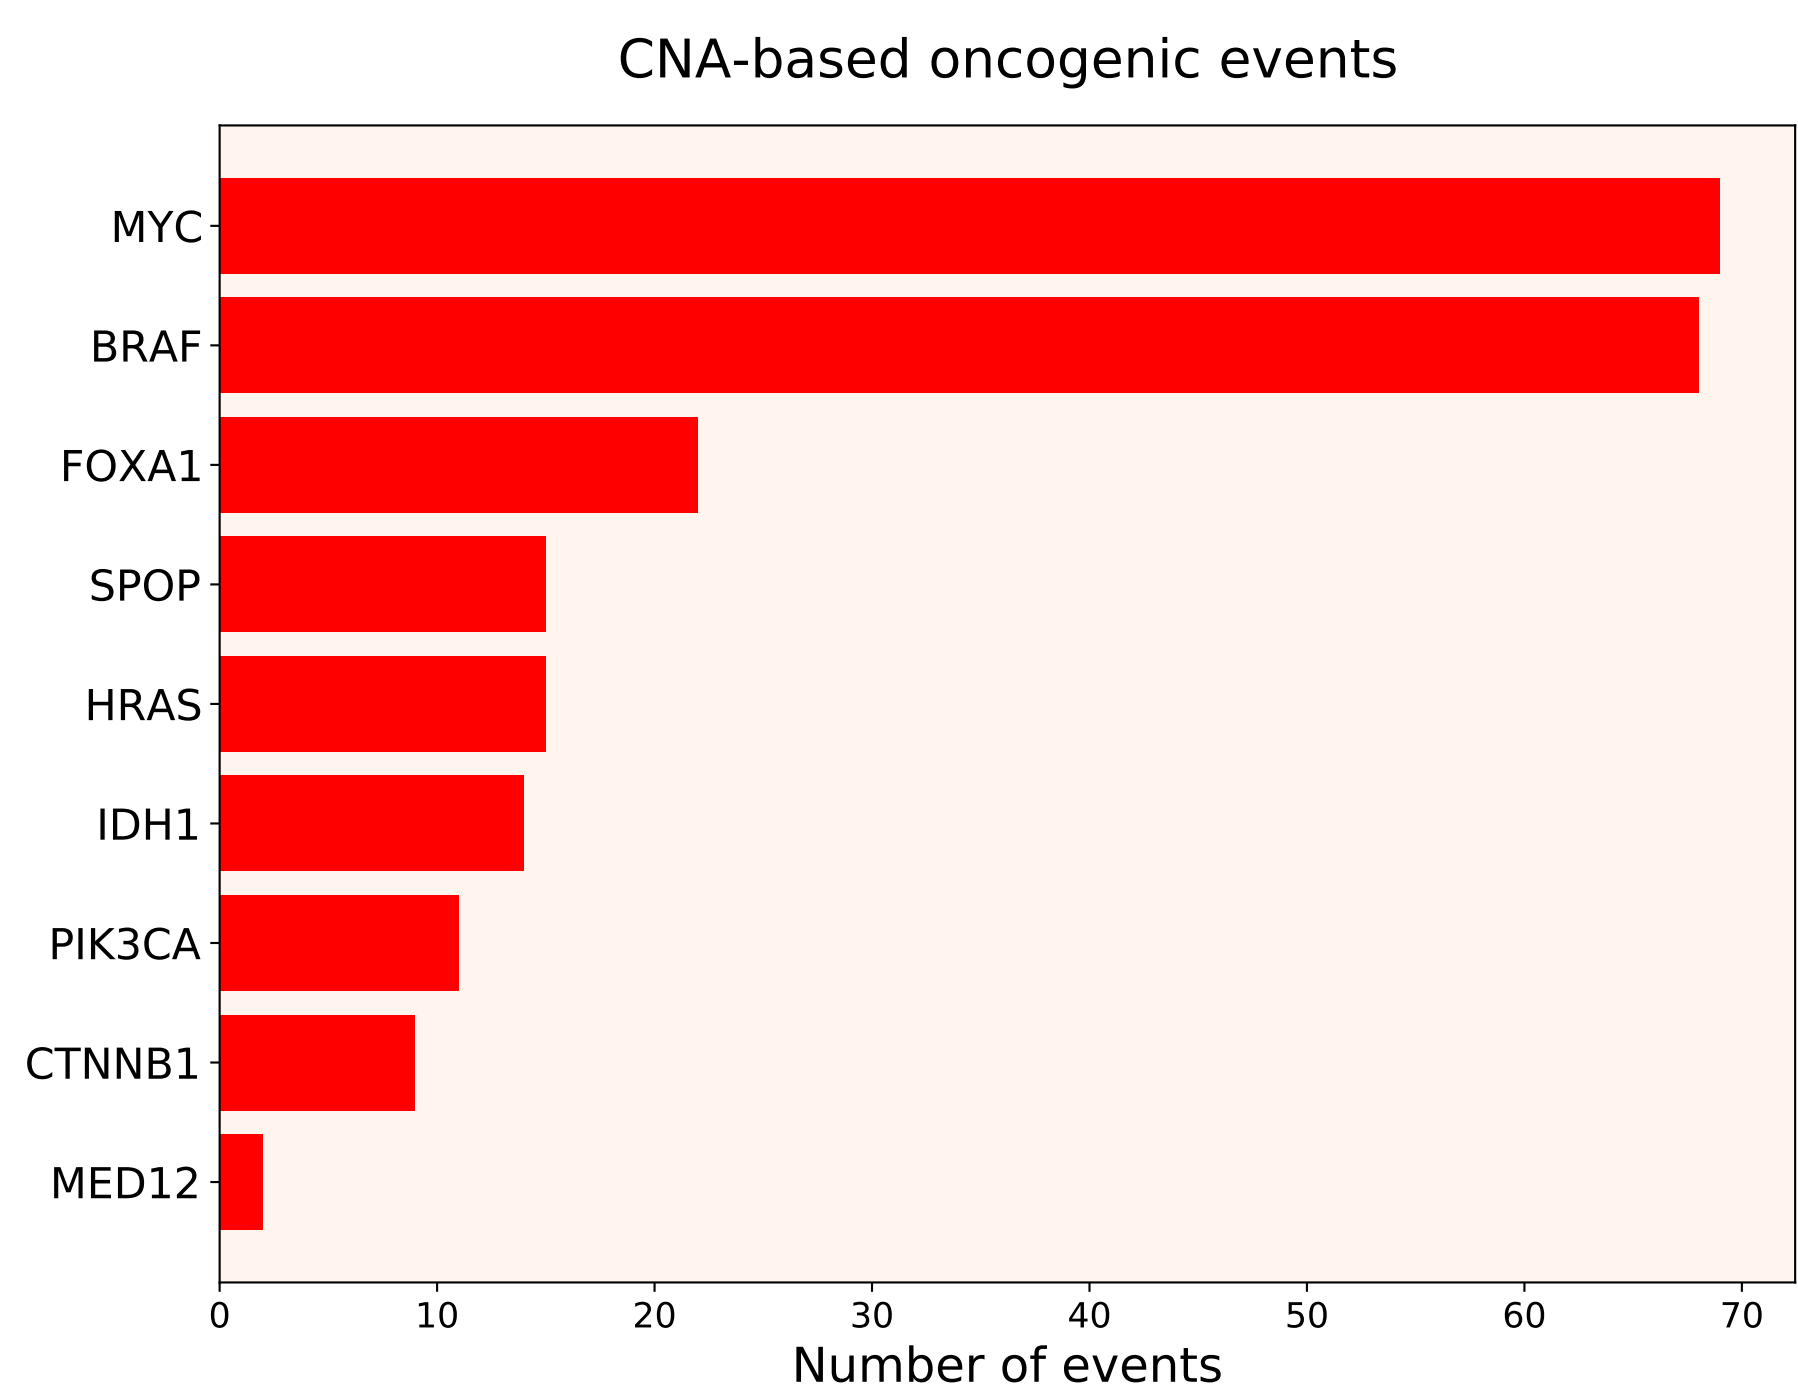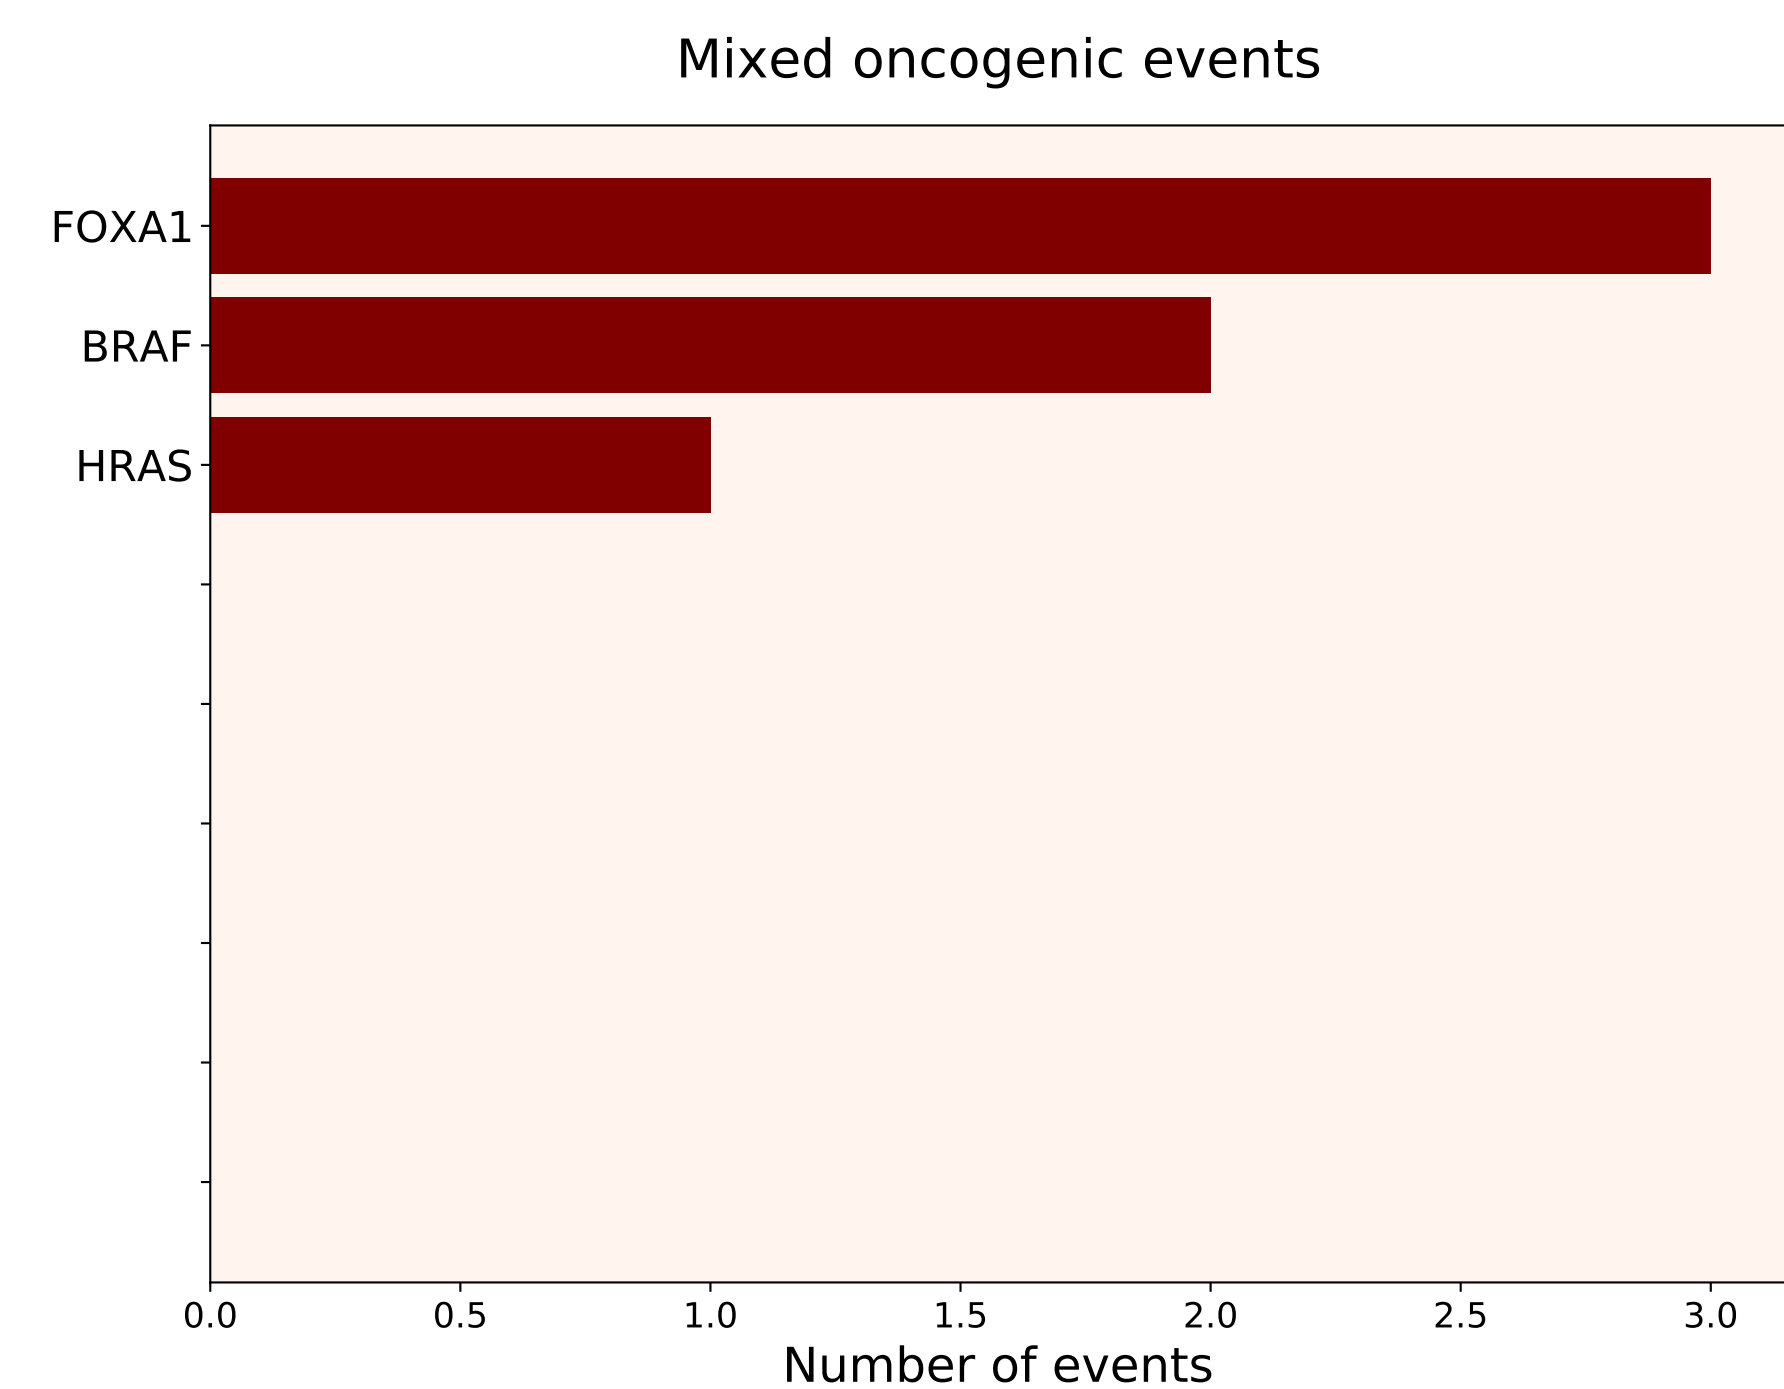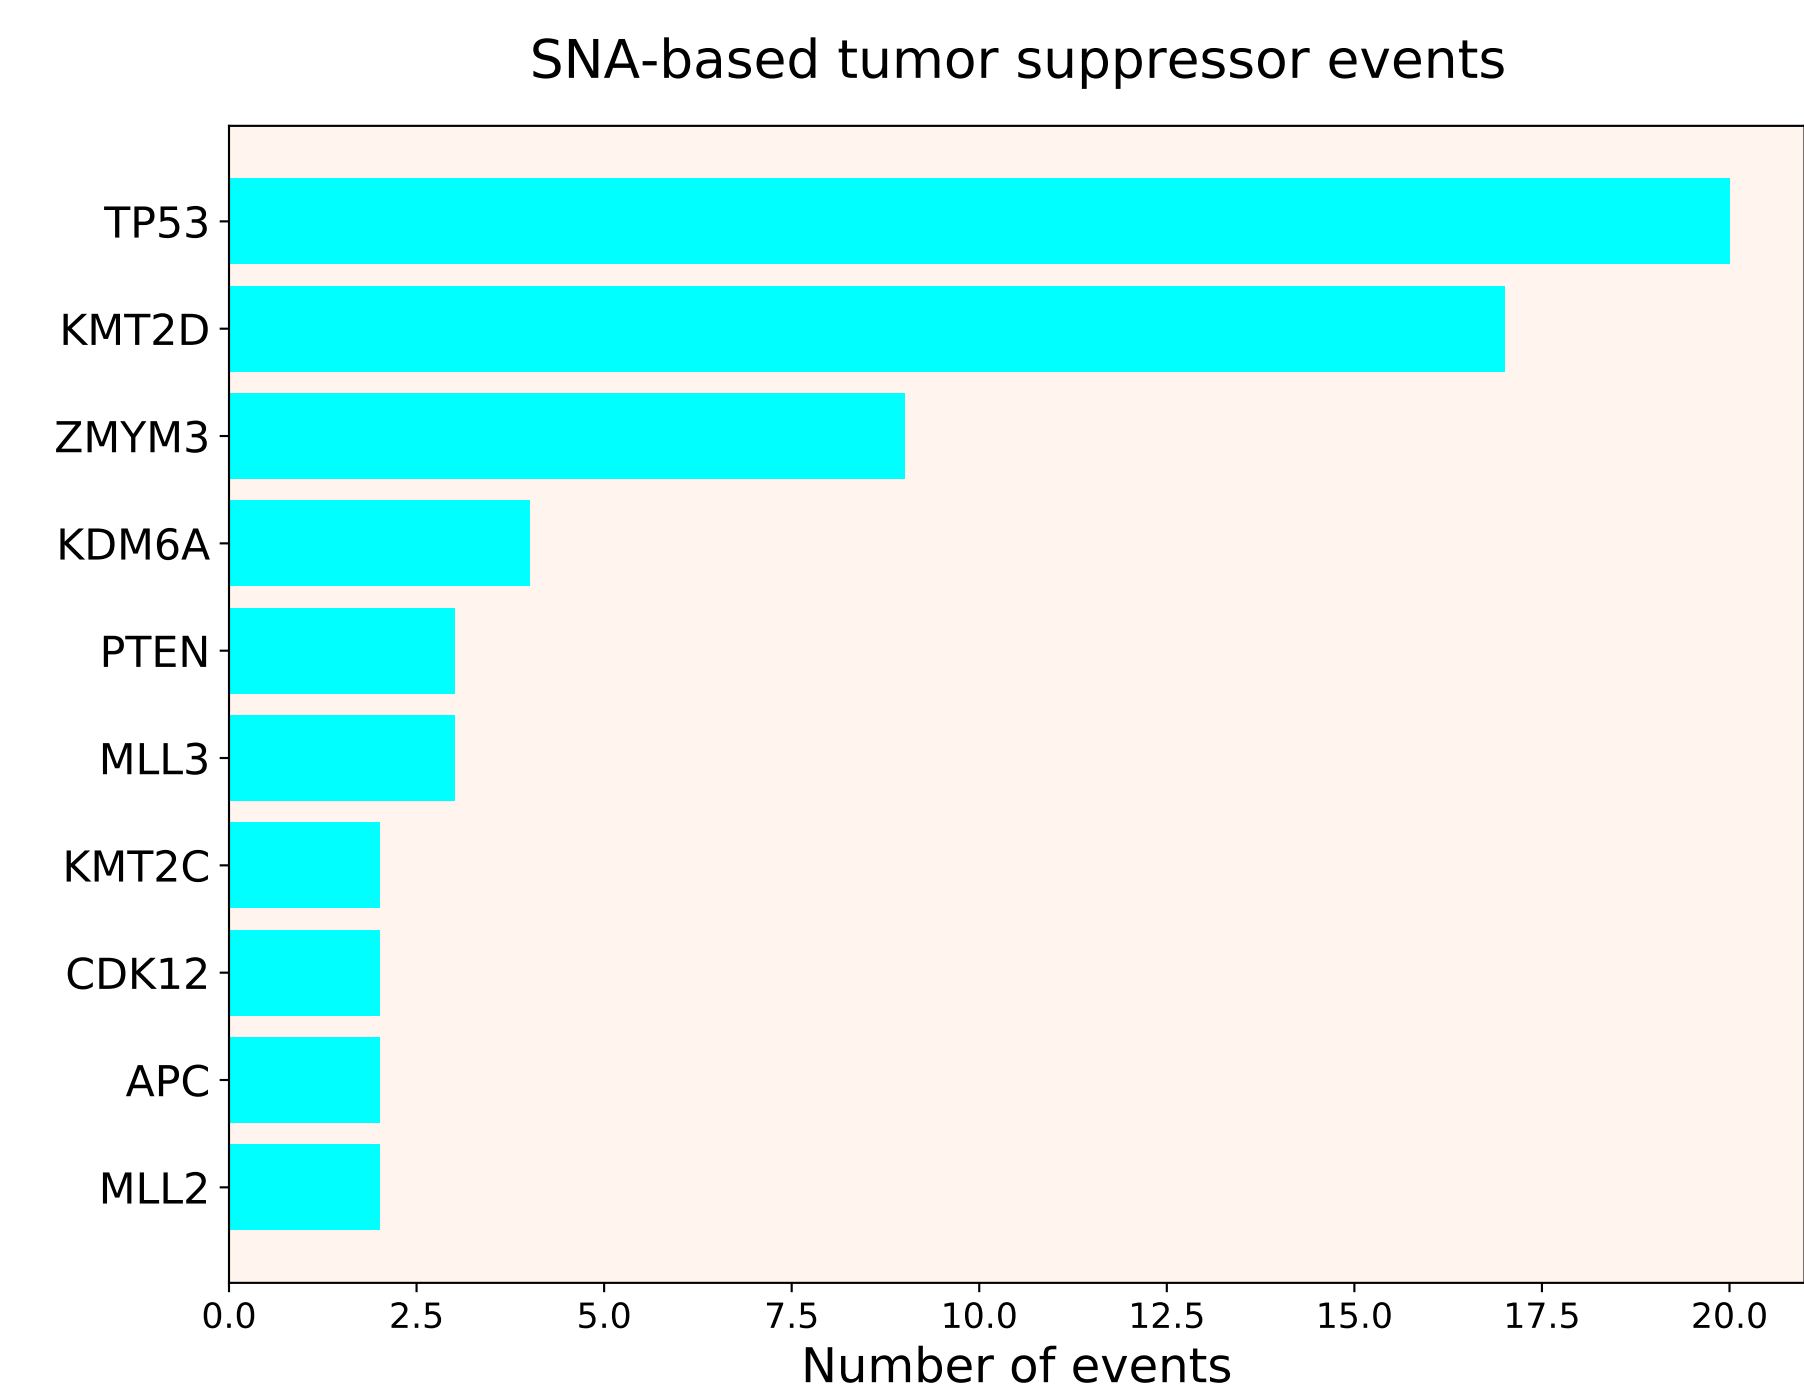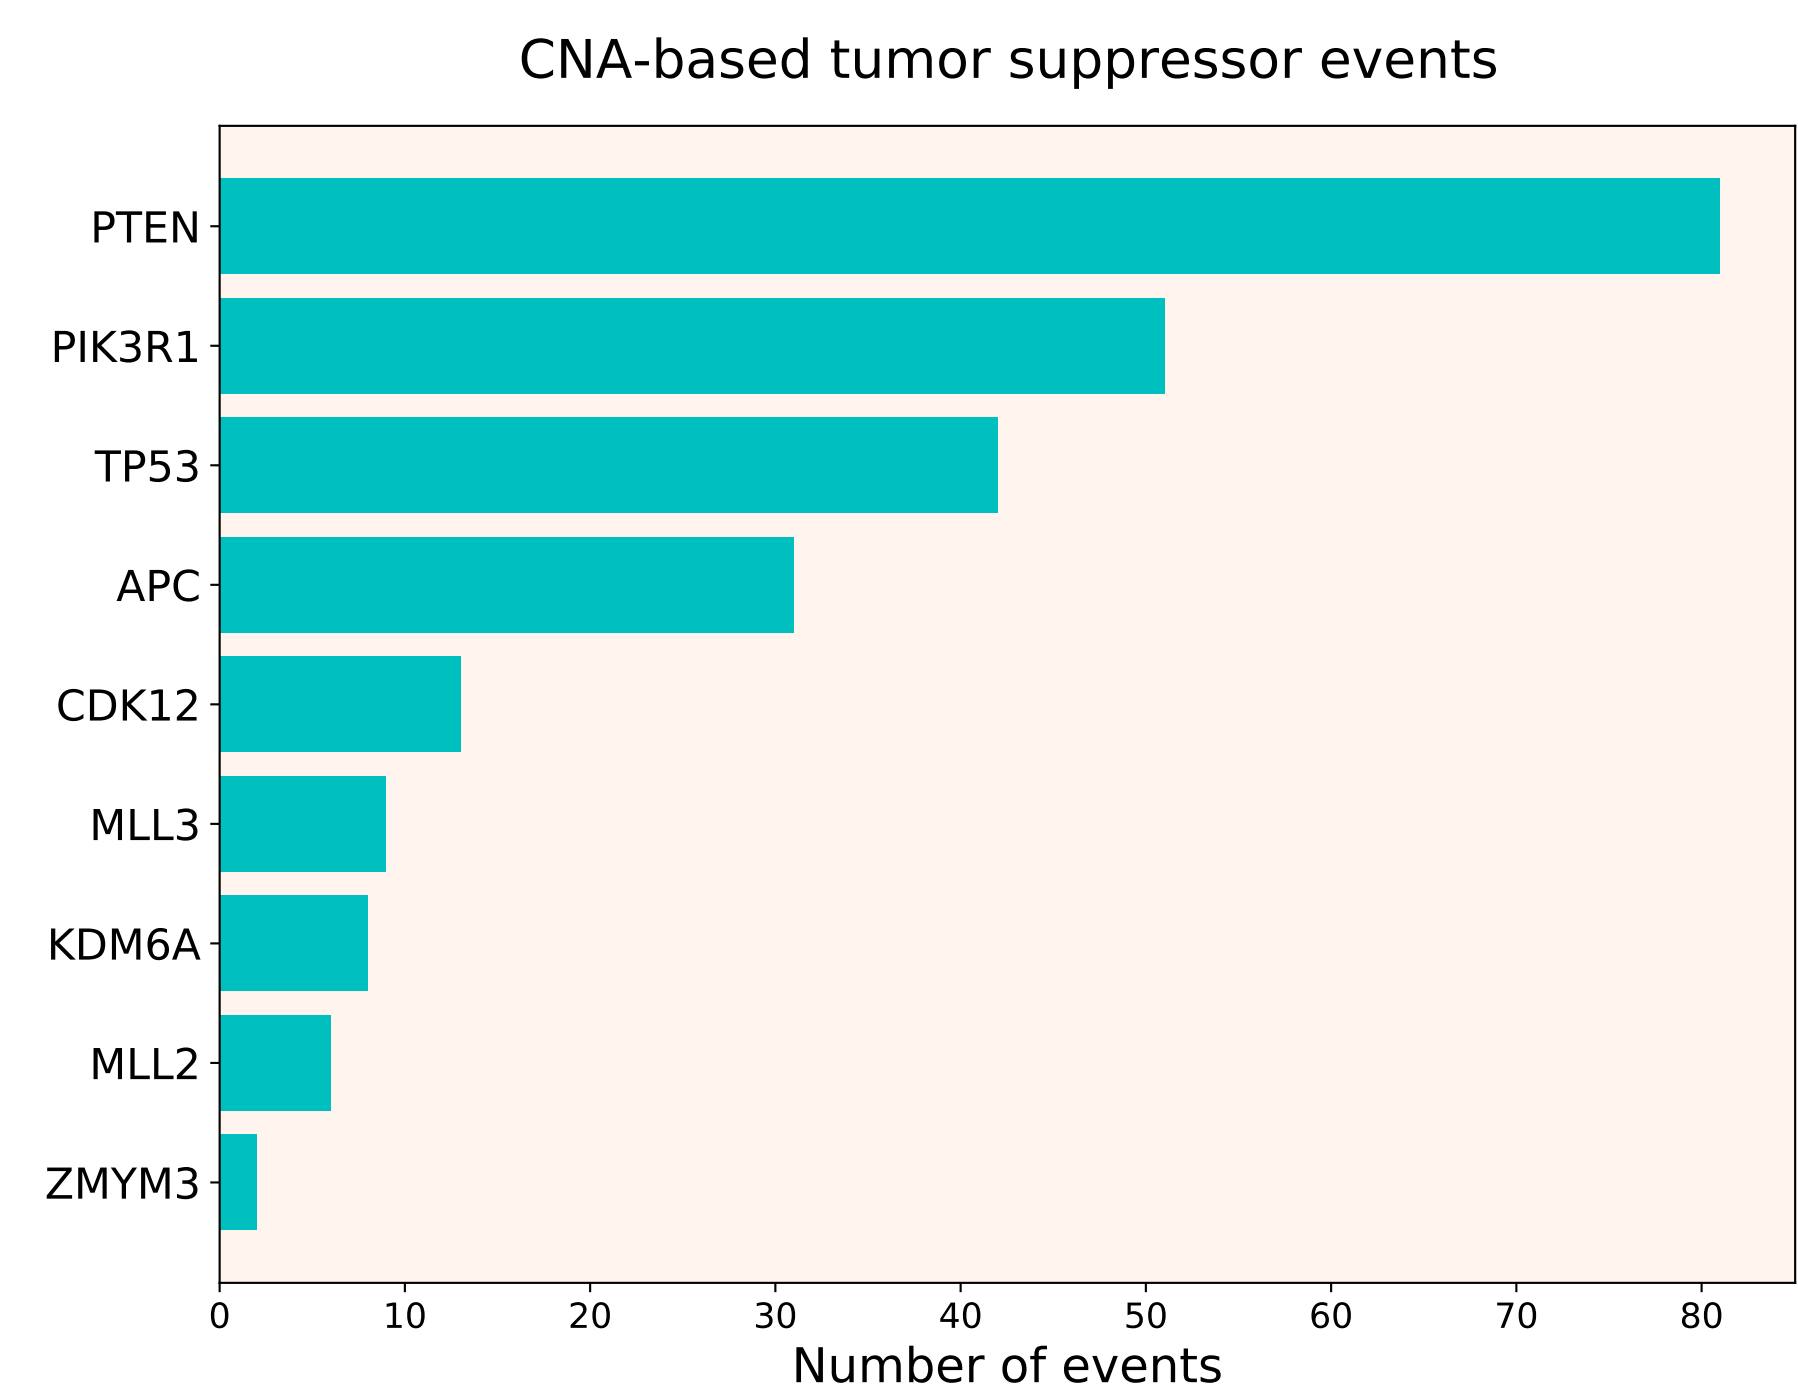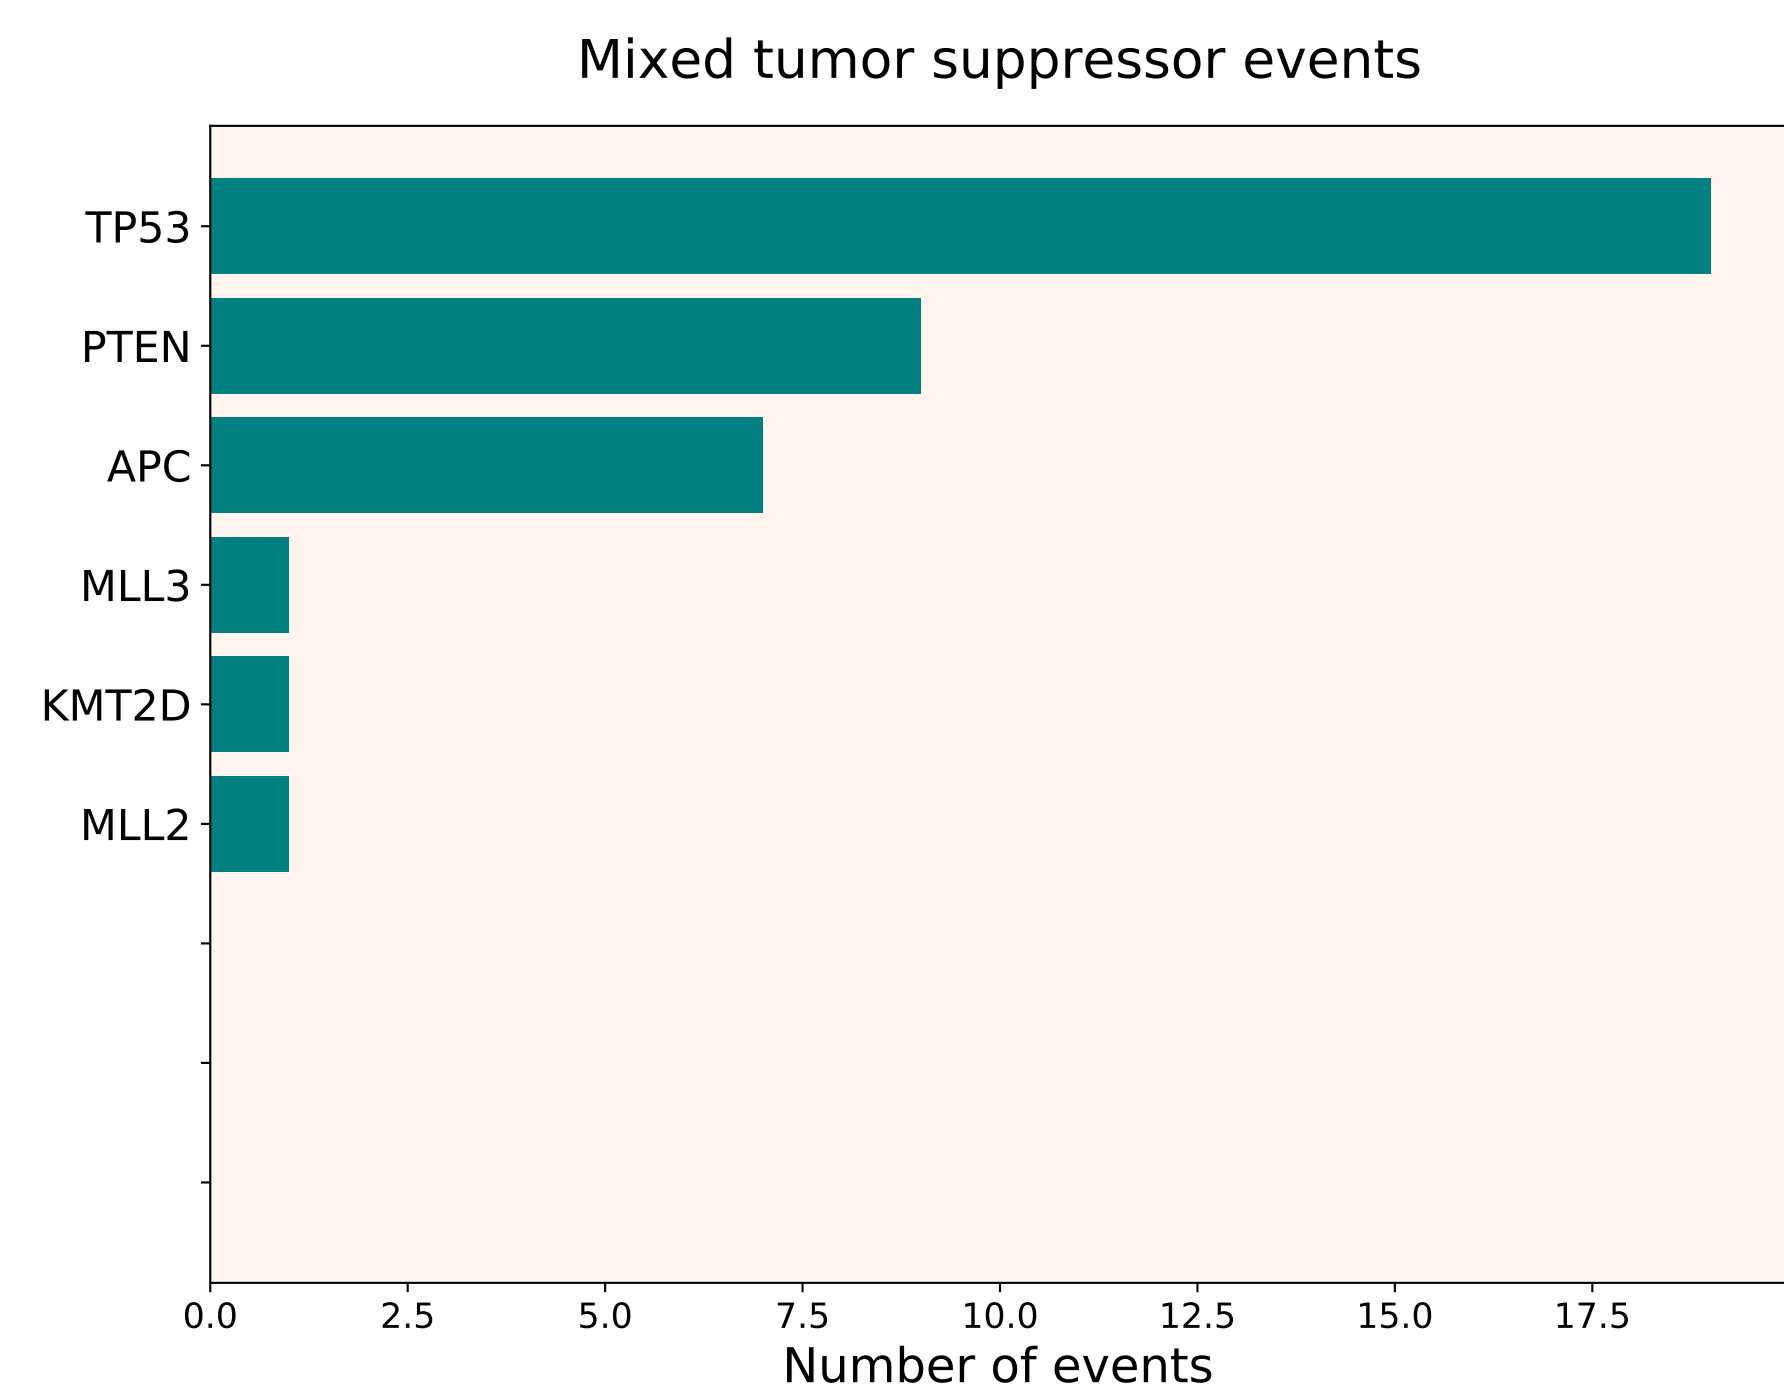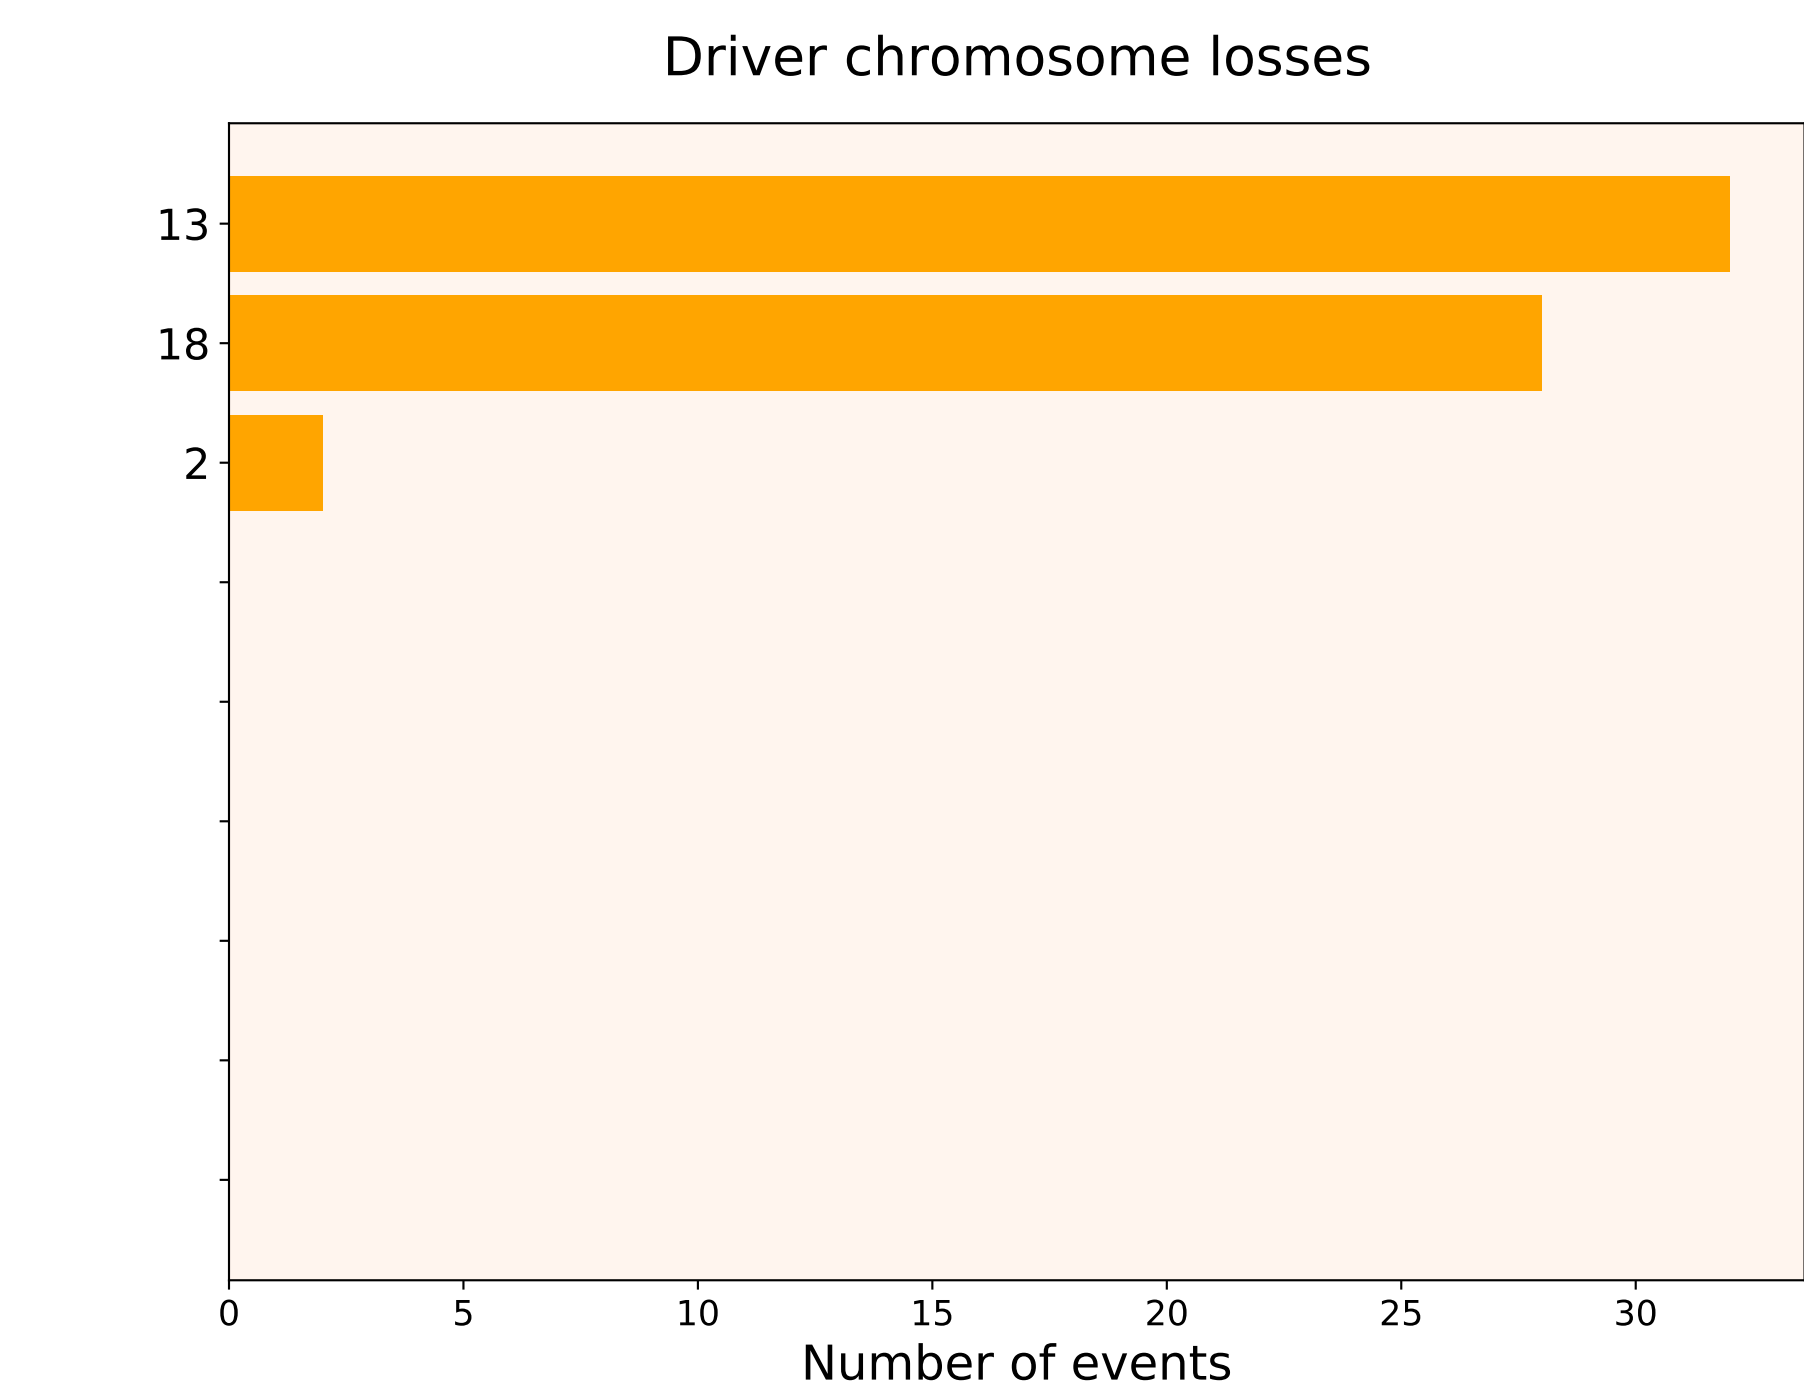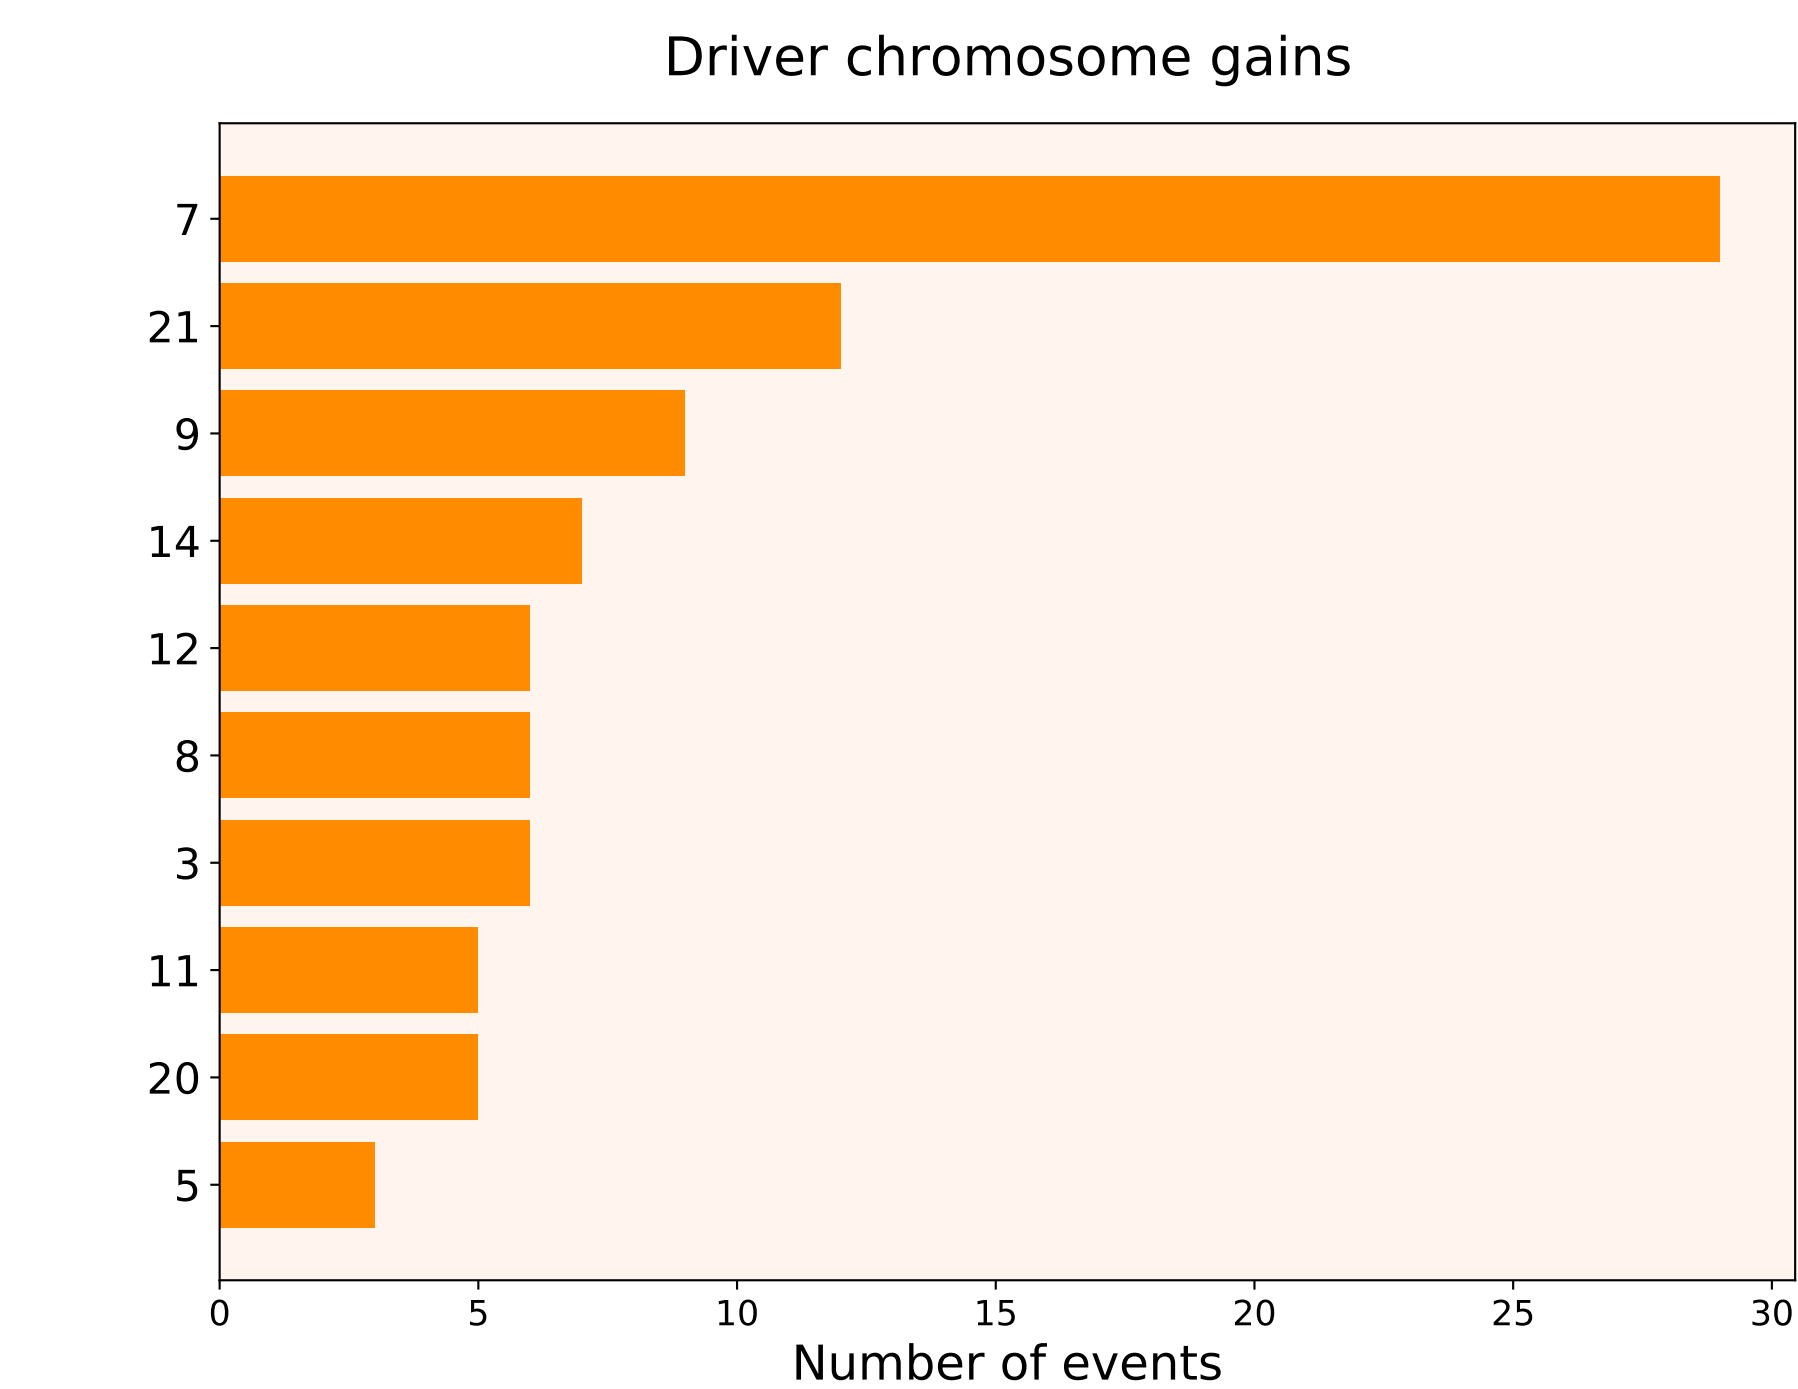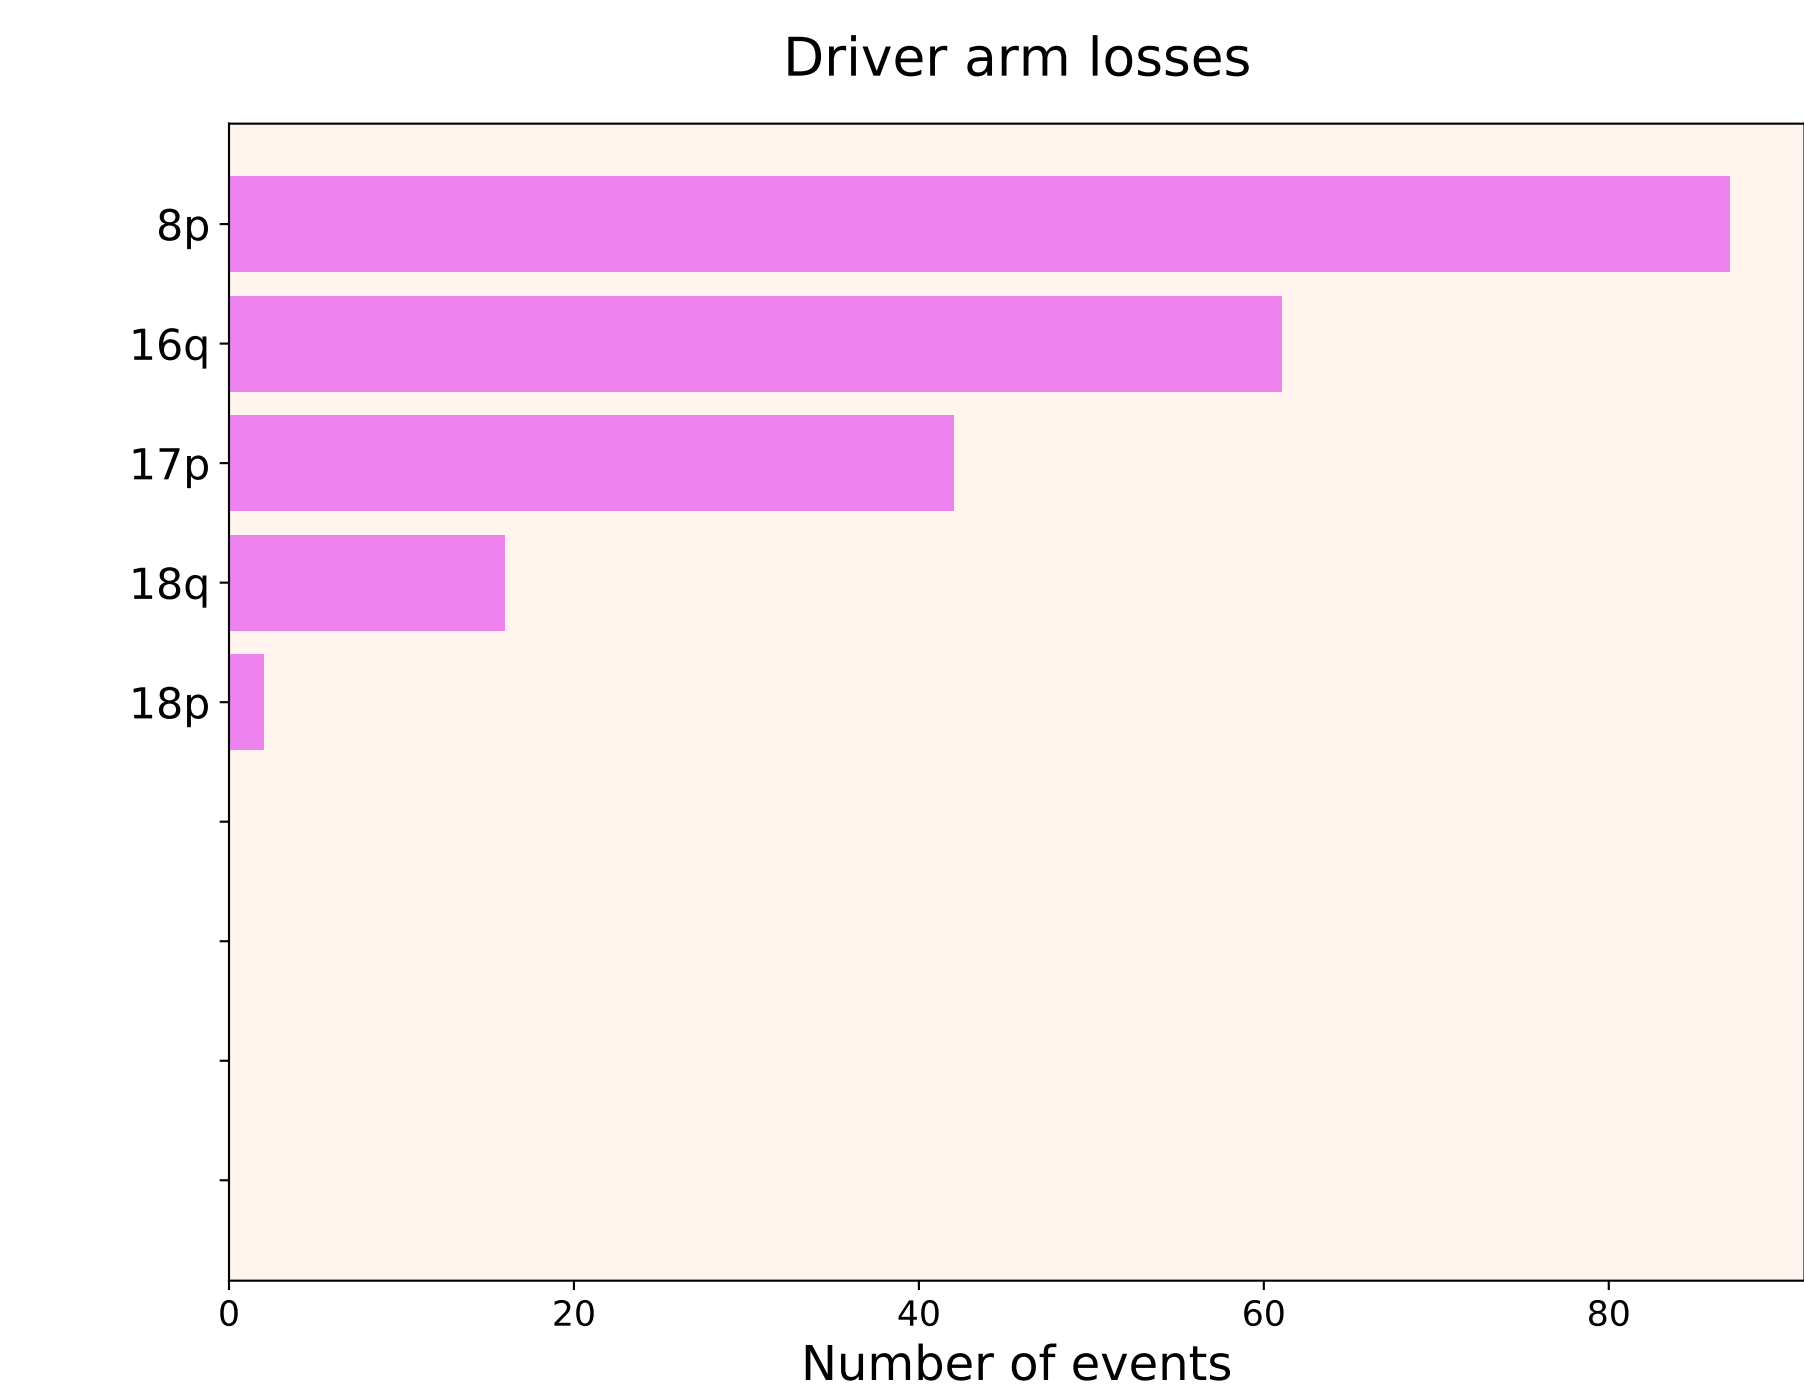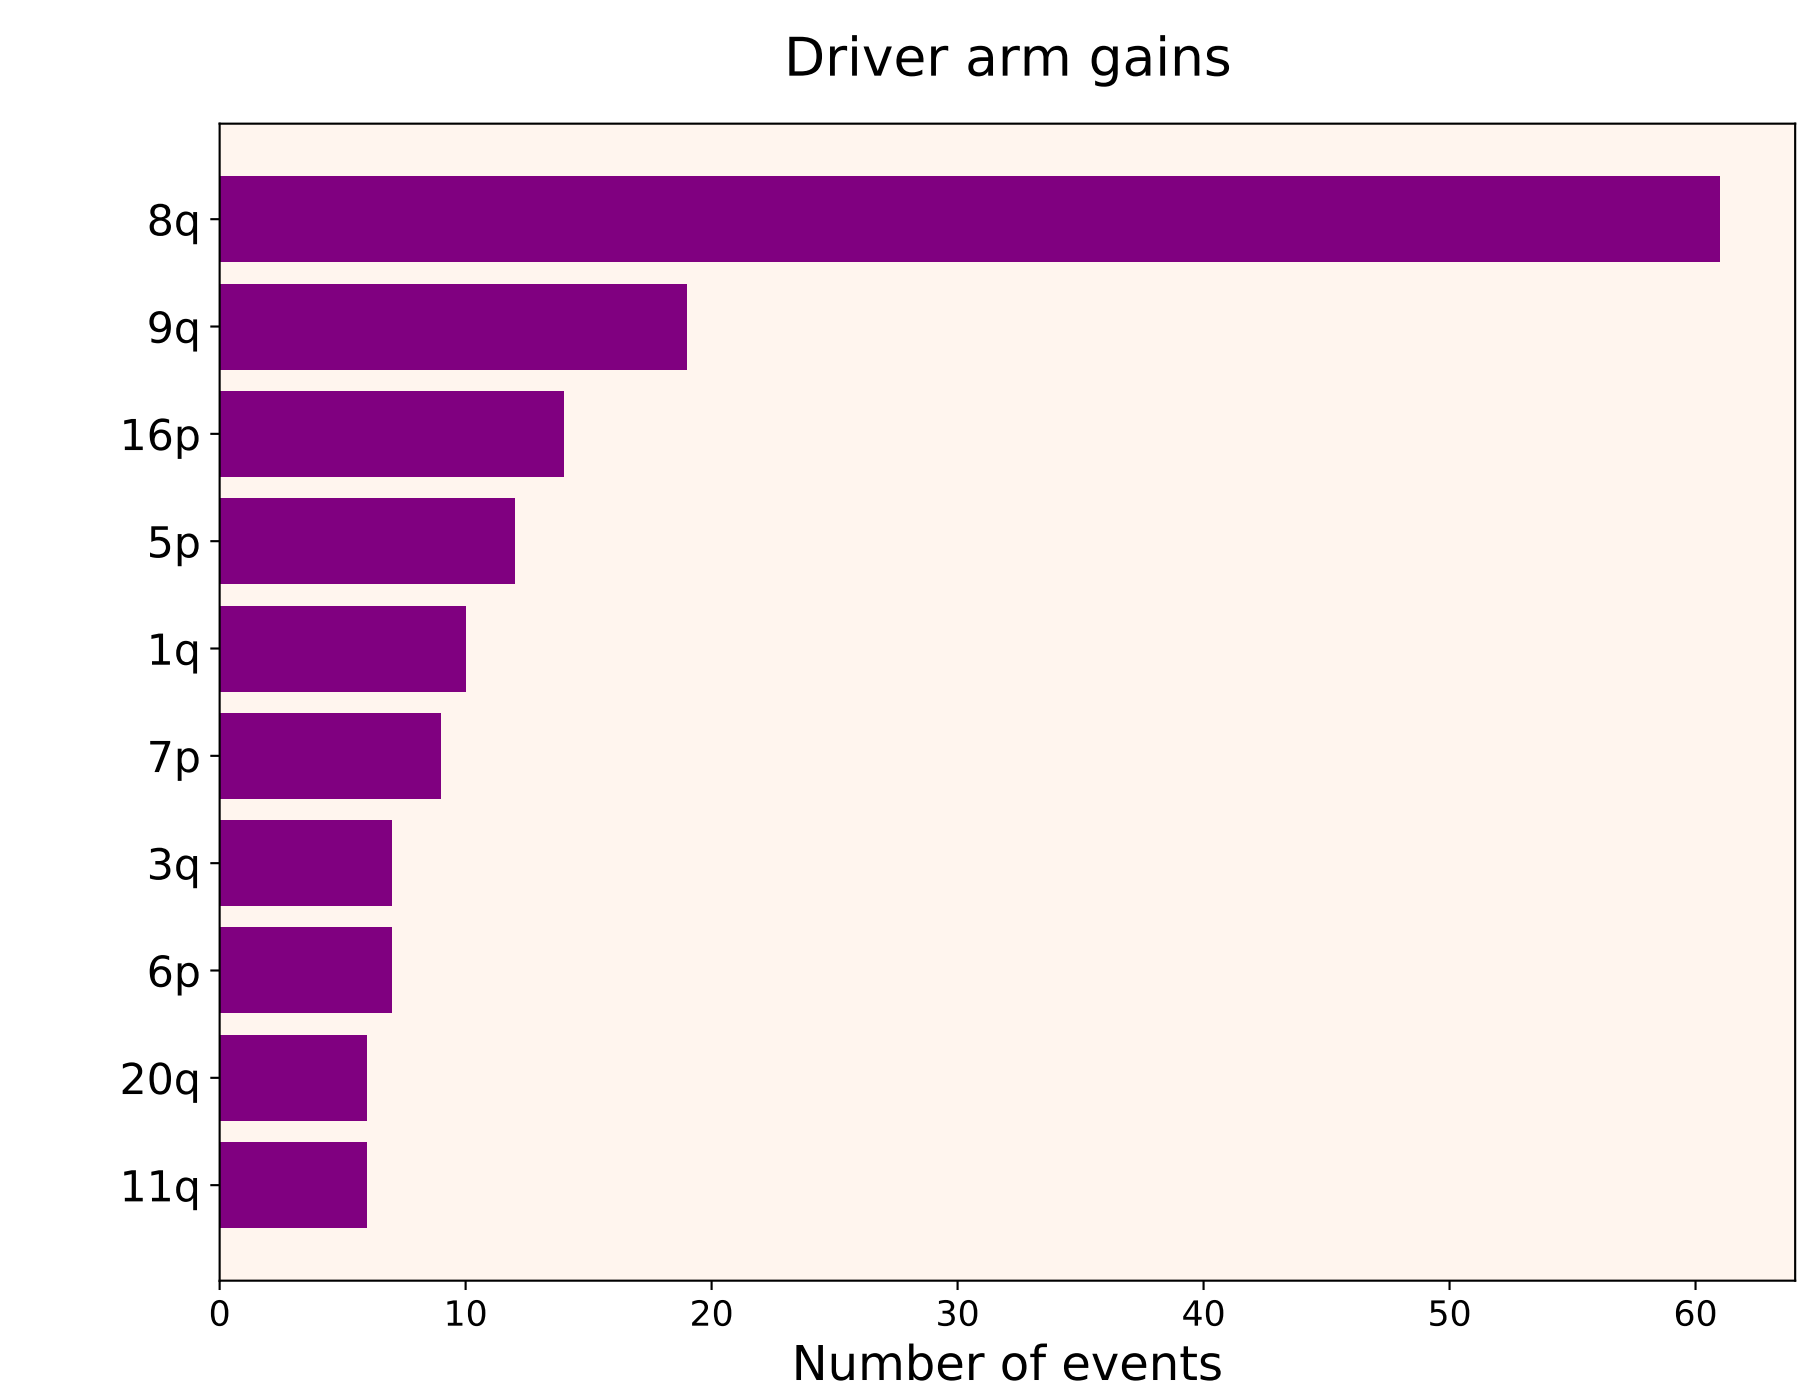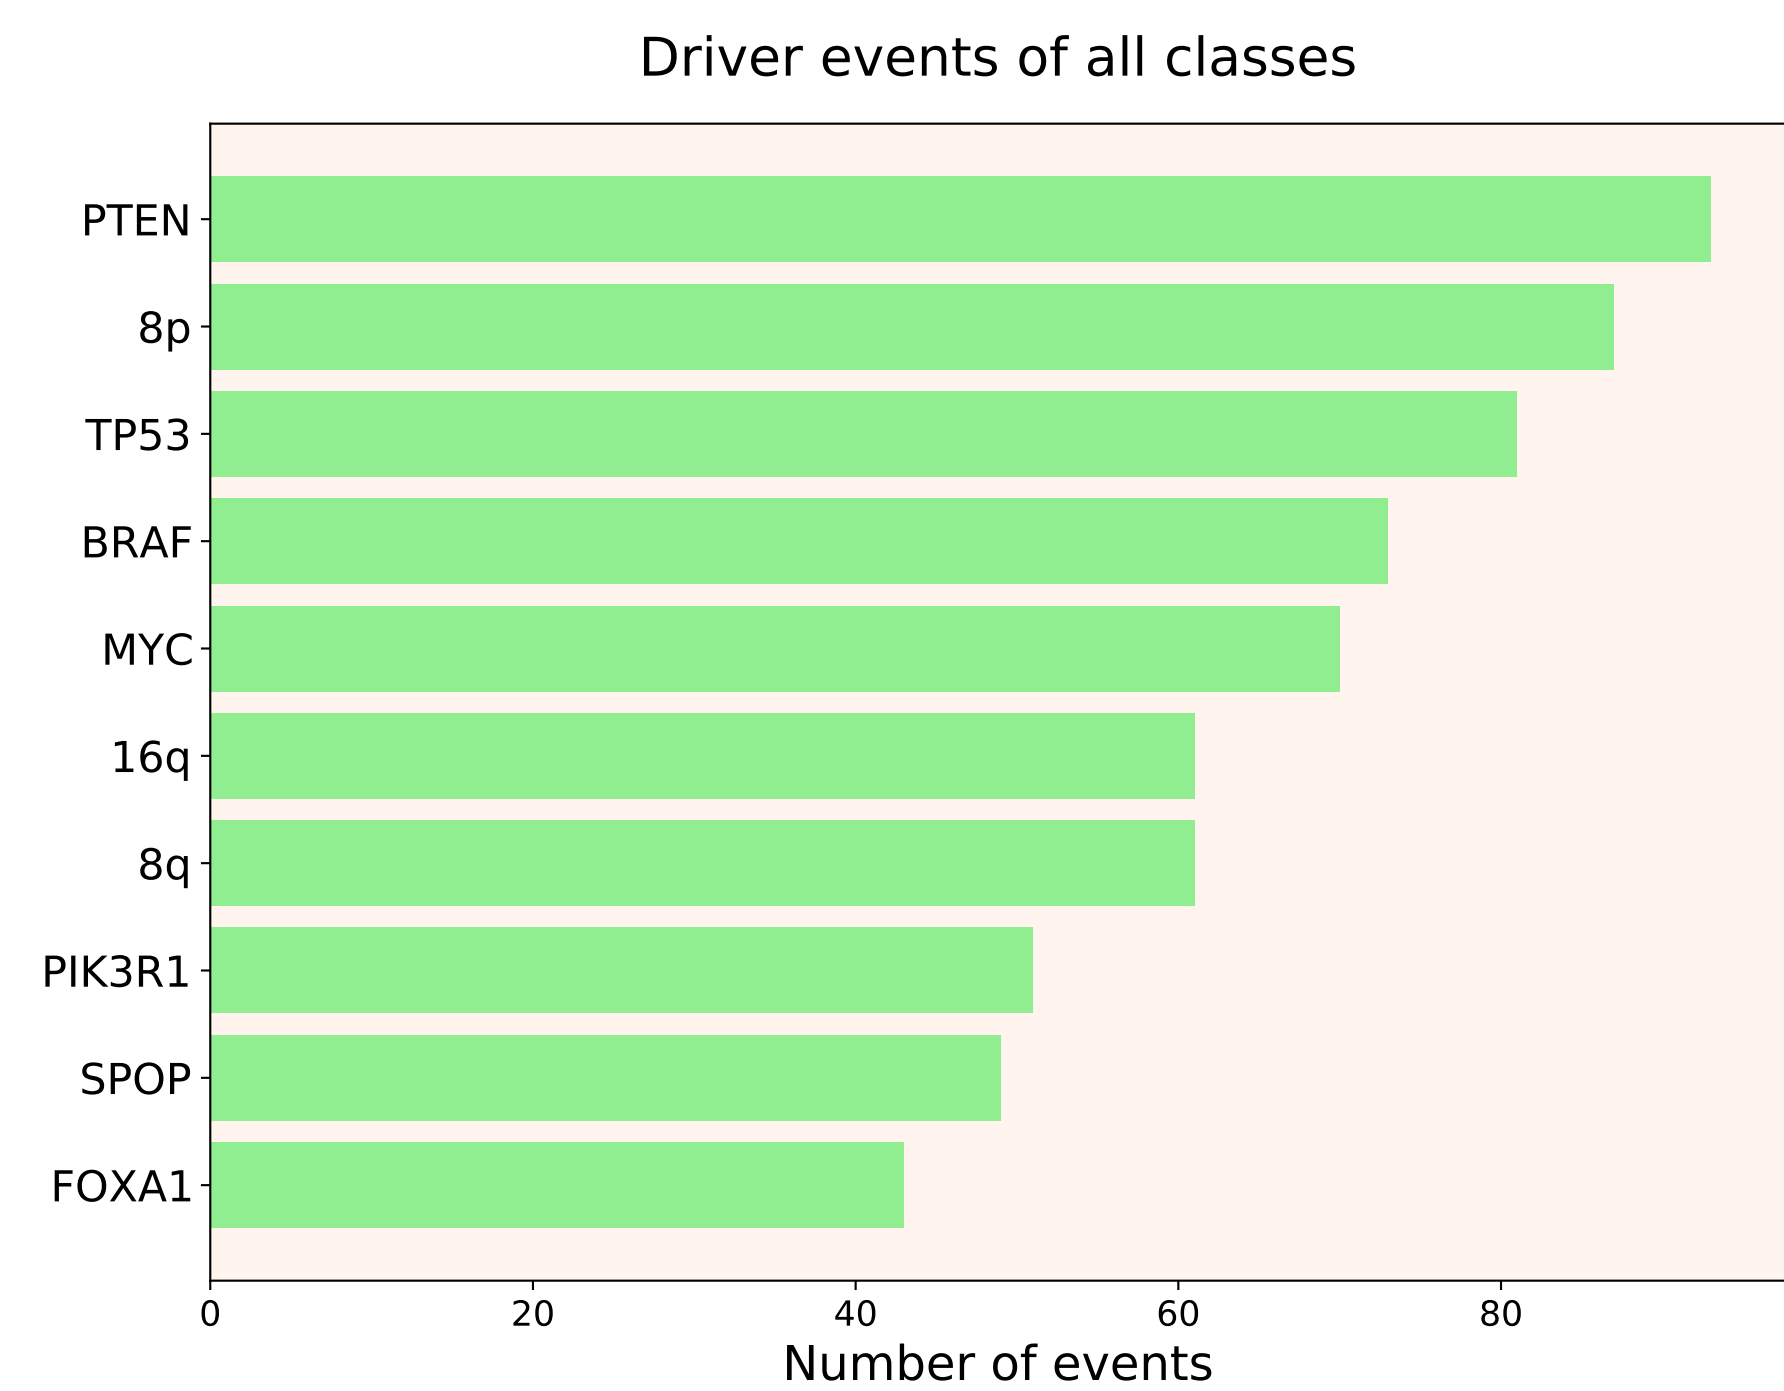

Supplement: Supplemental_Data_S1.zip [file Supplemental_Data_S1.zip]

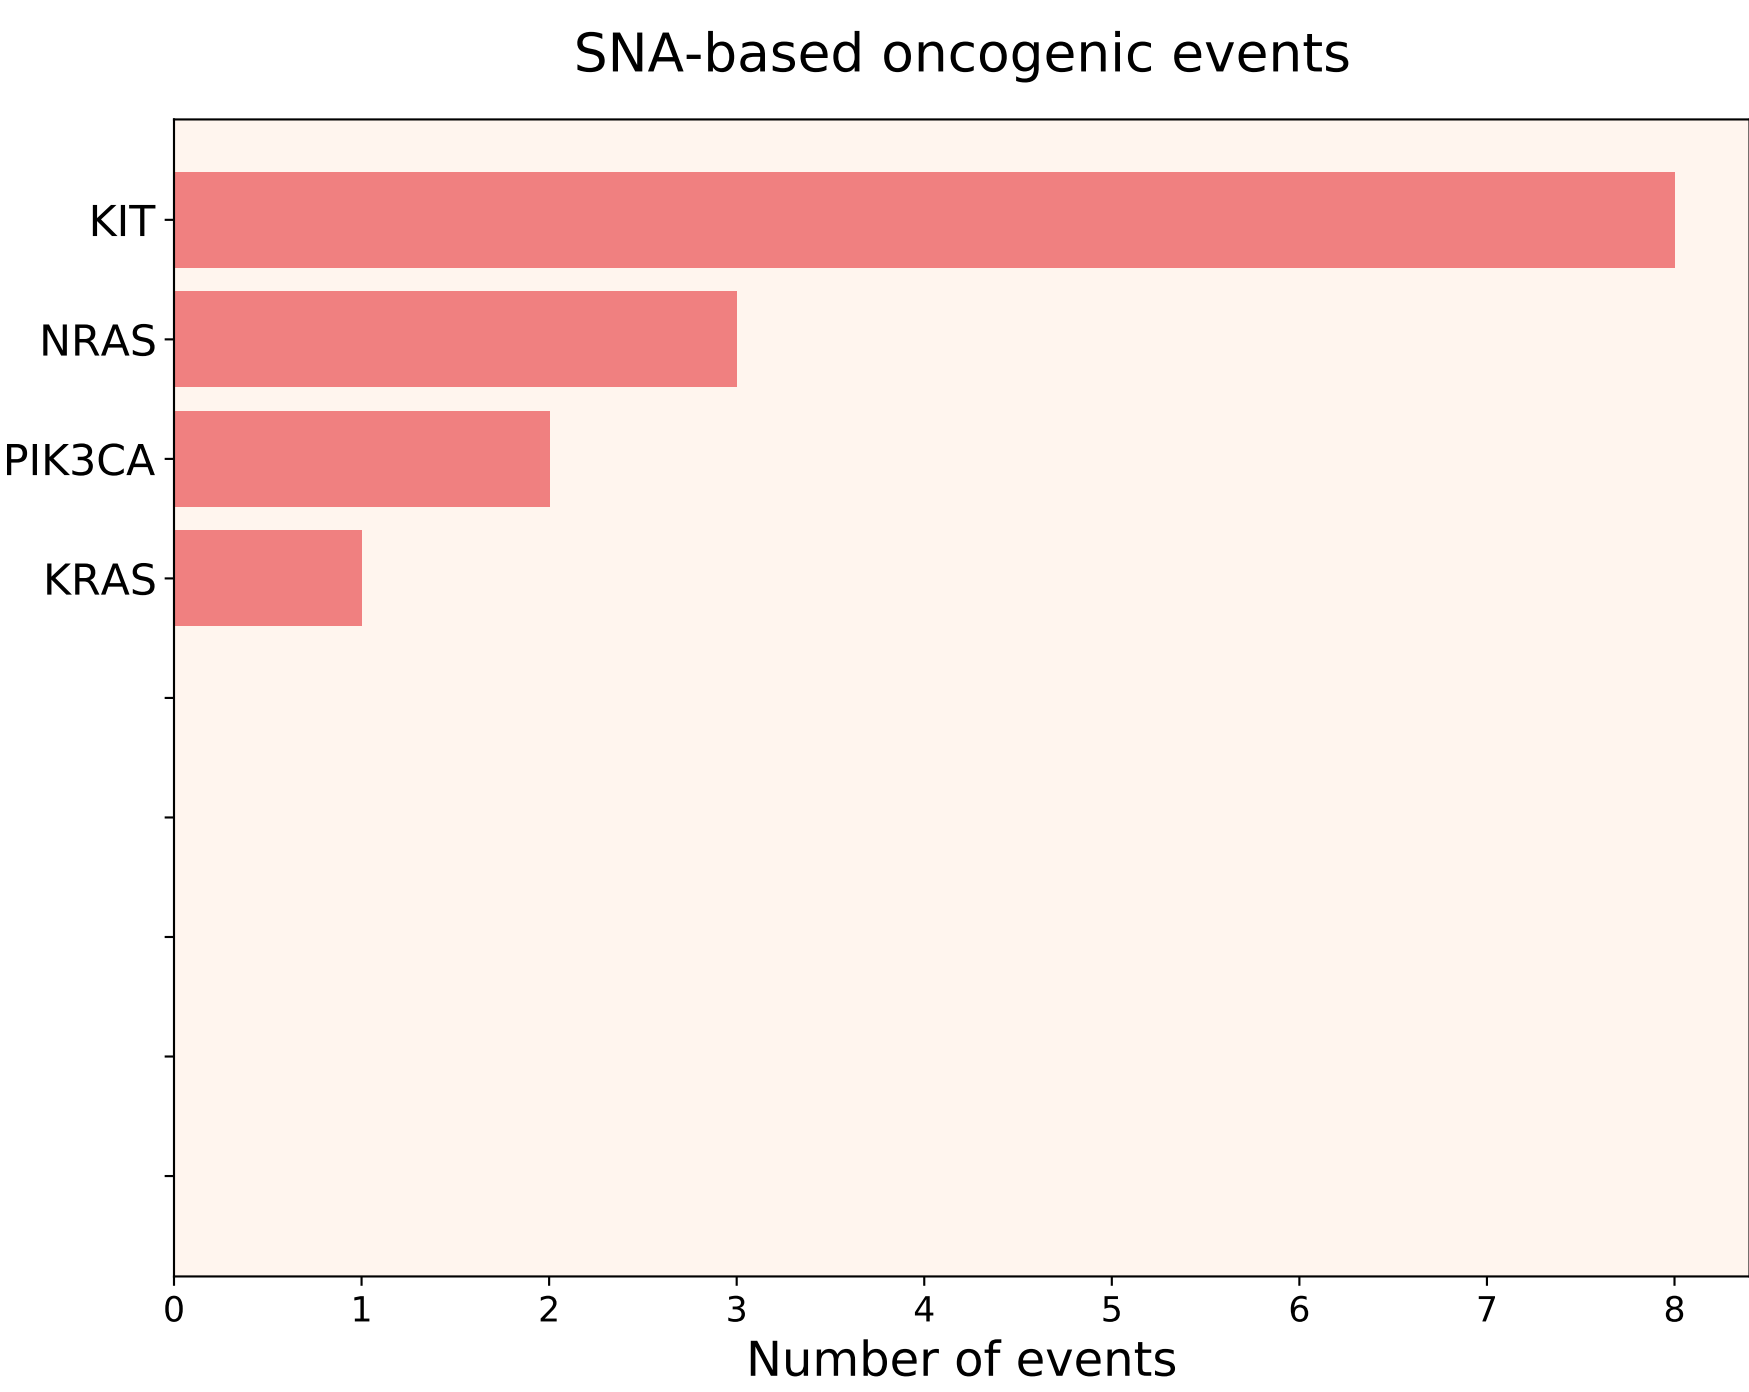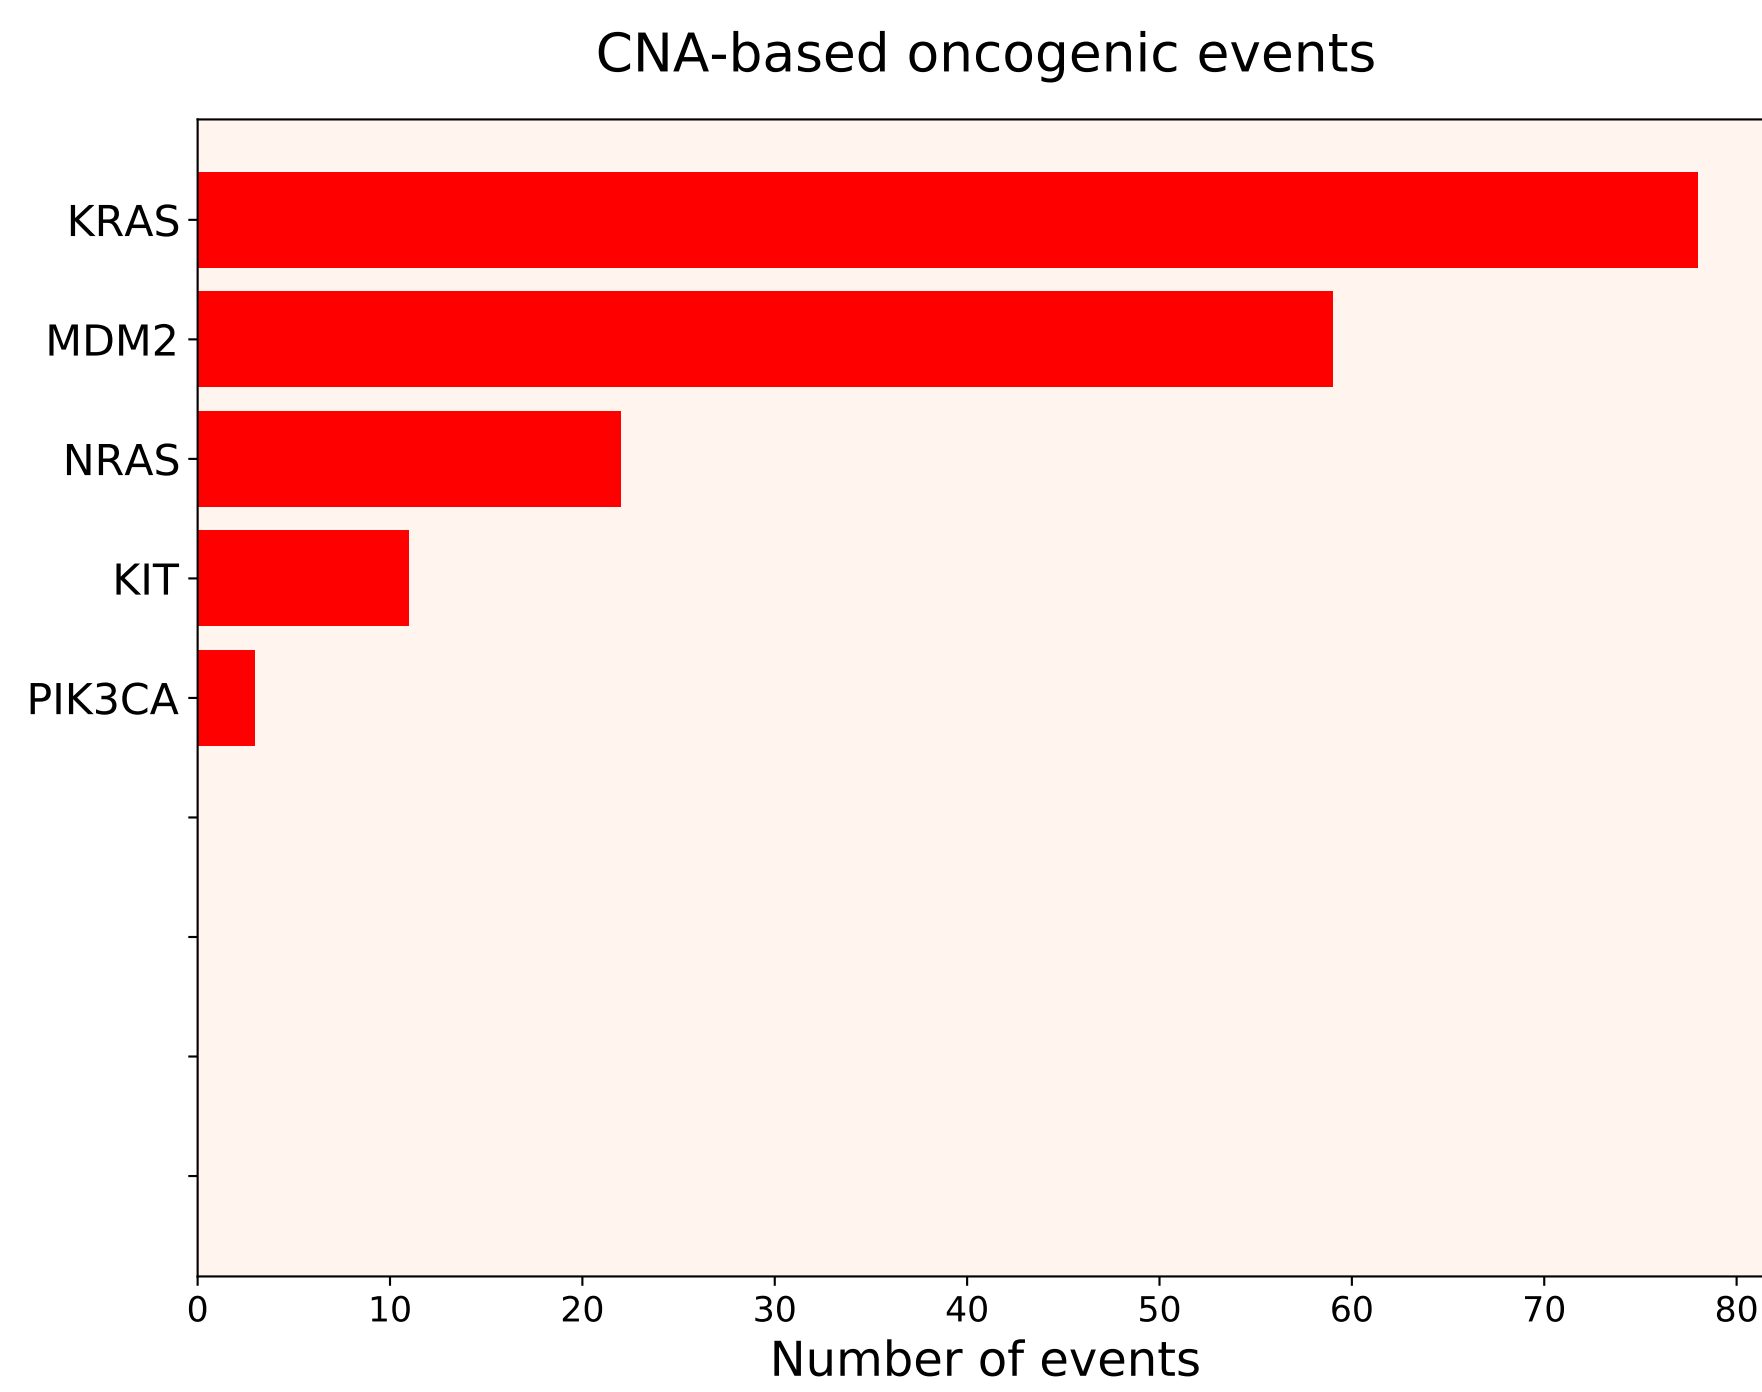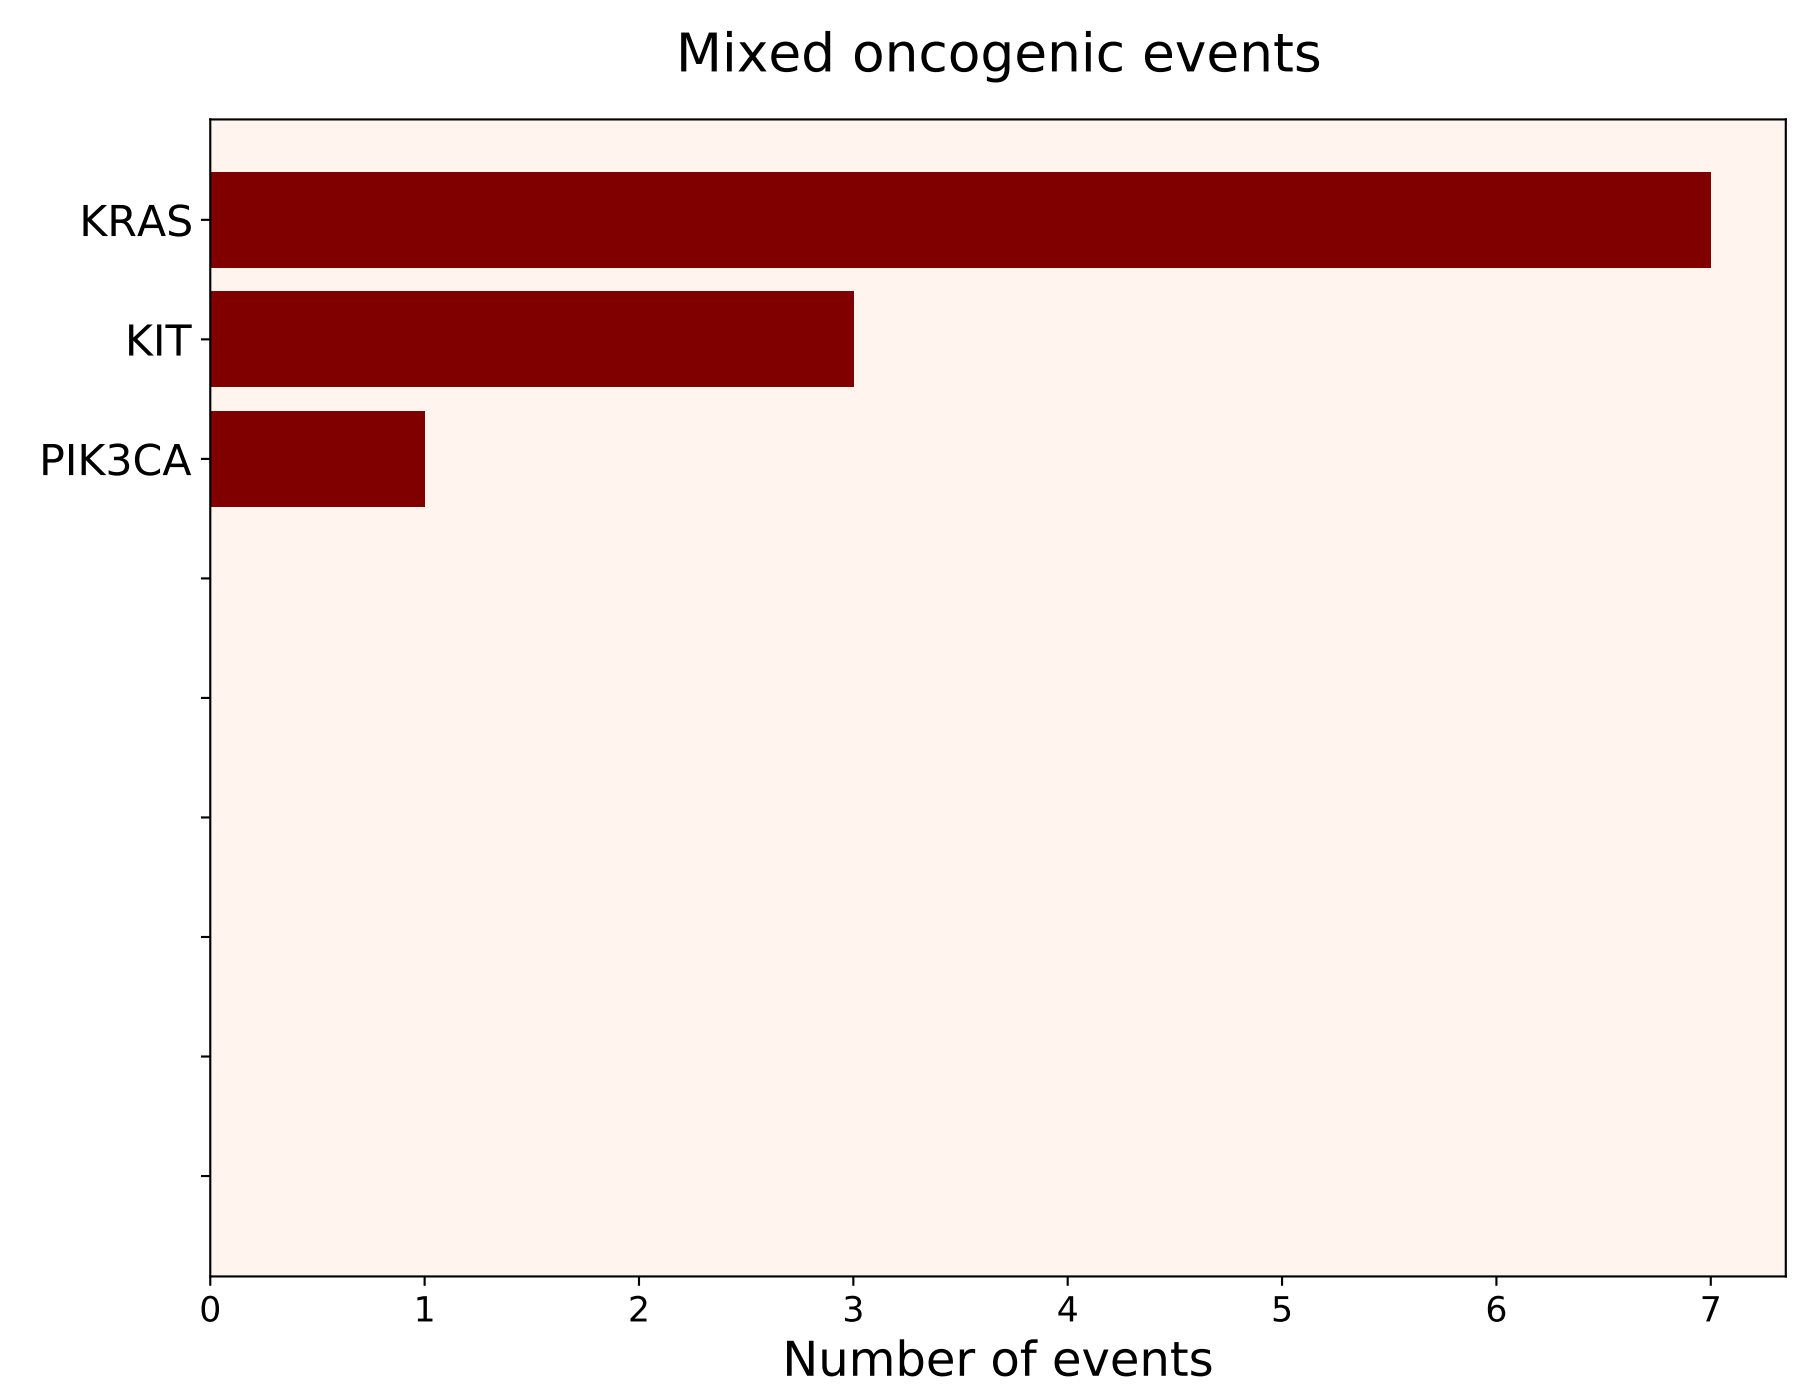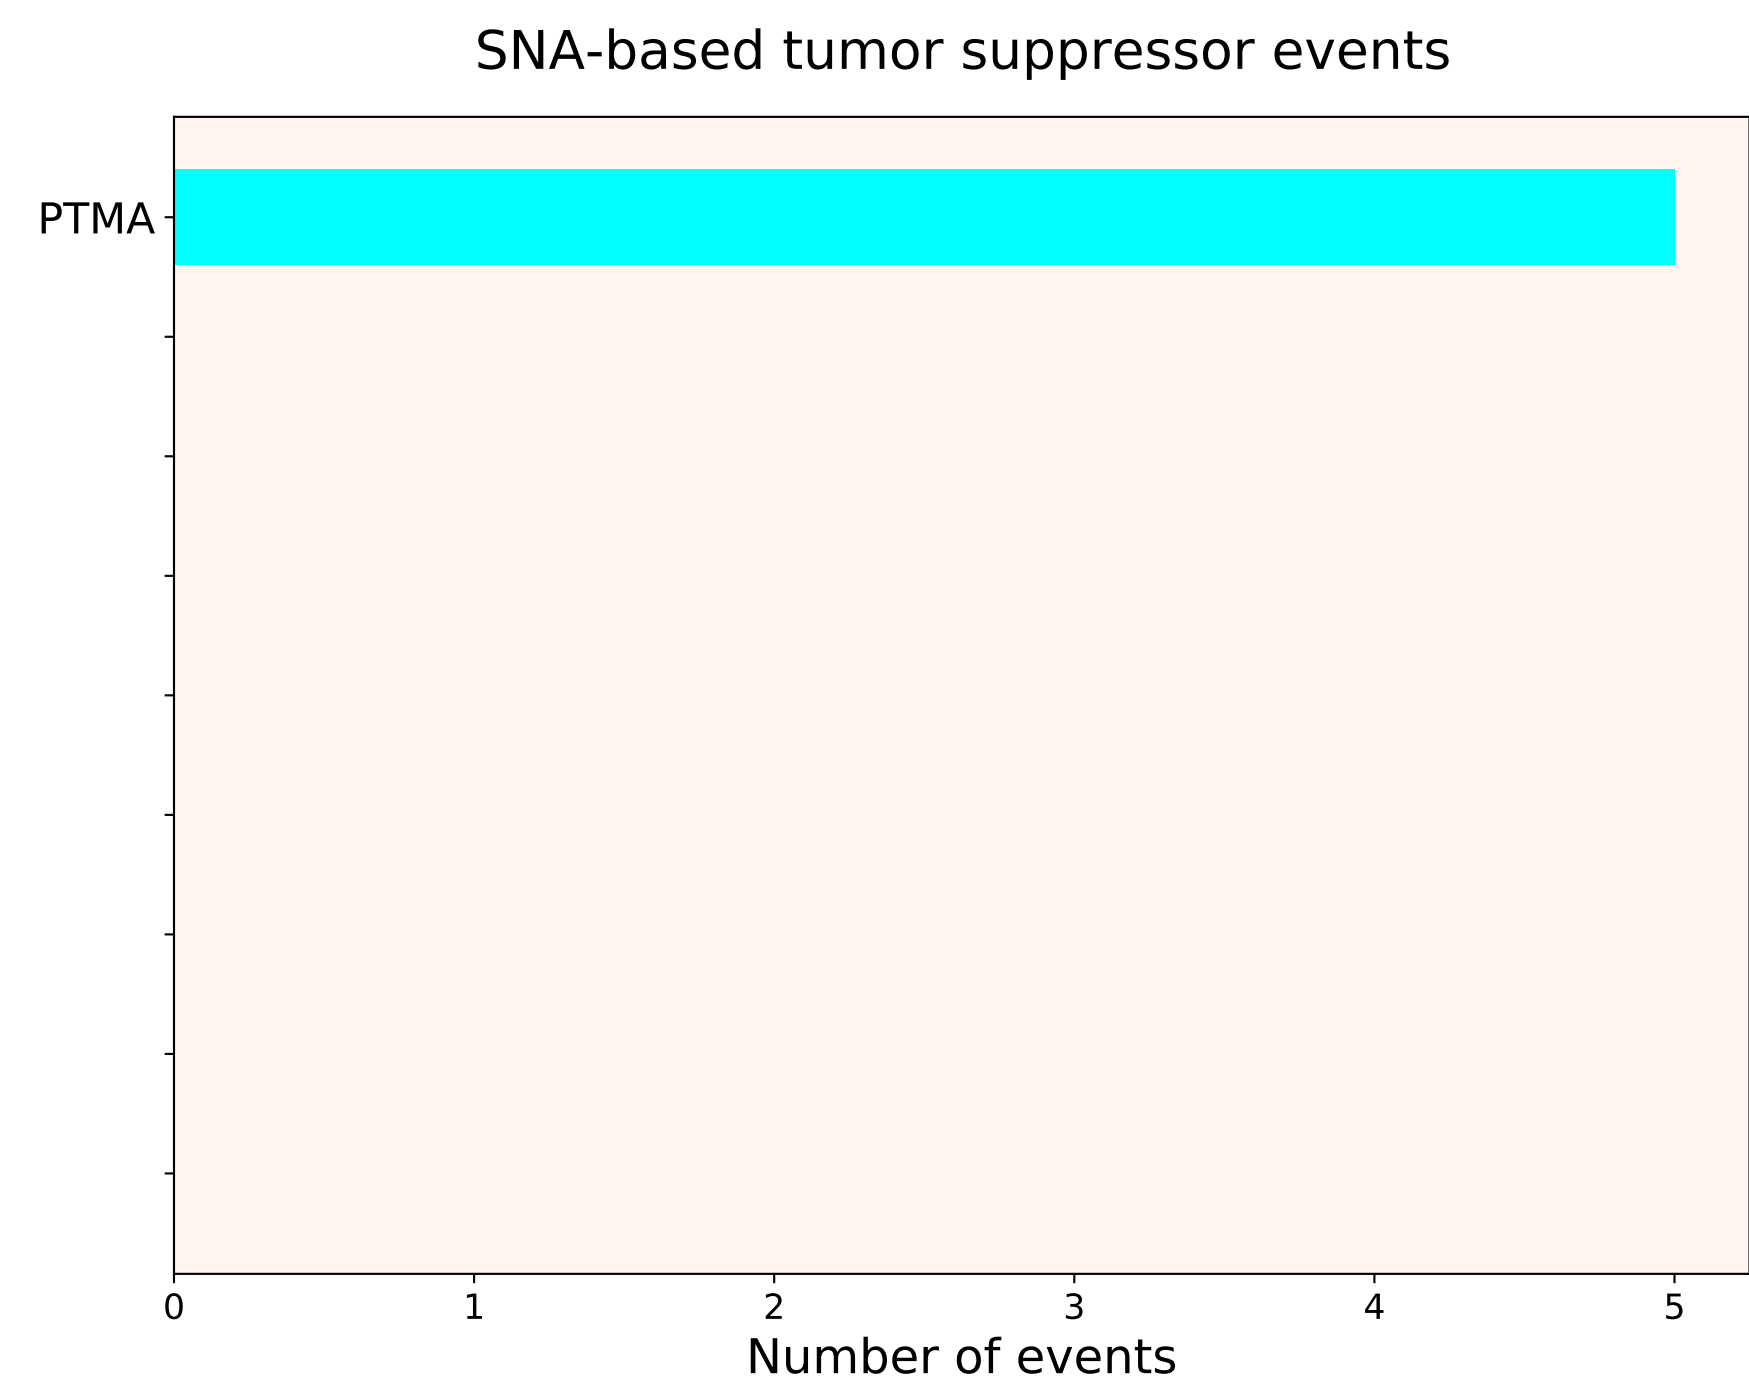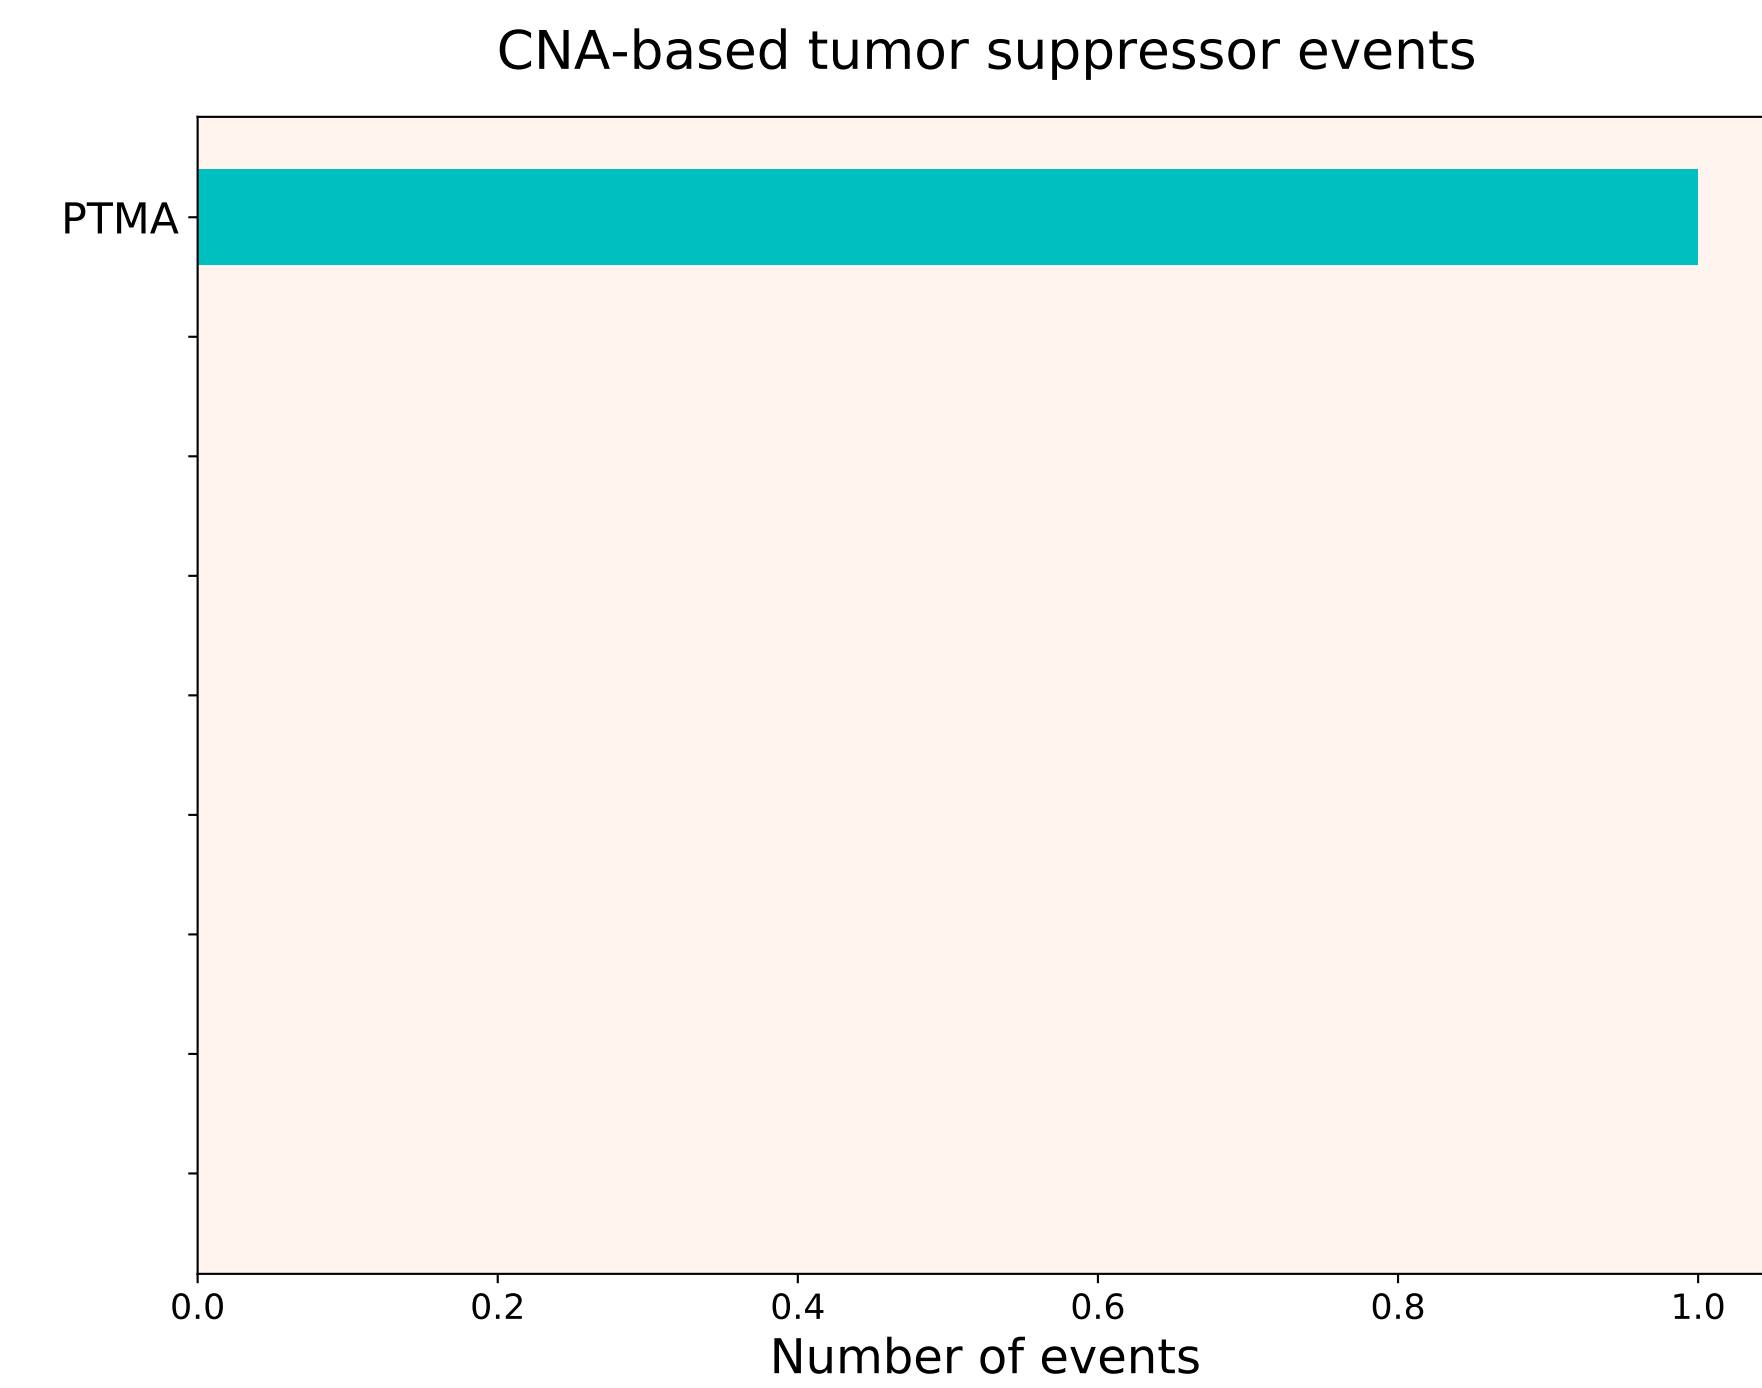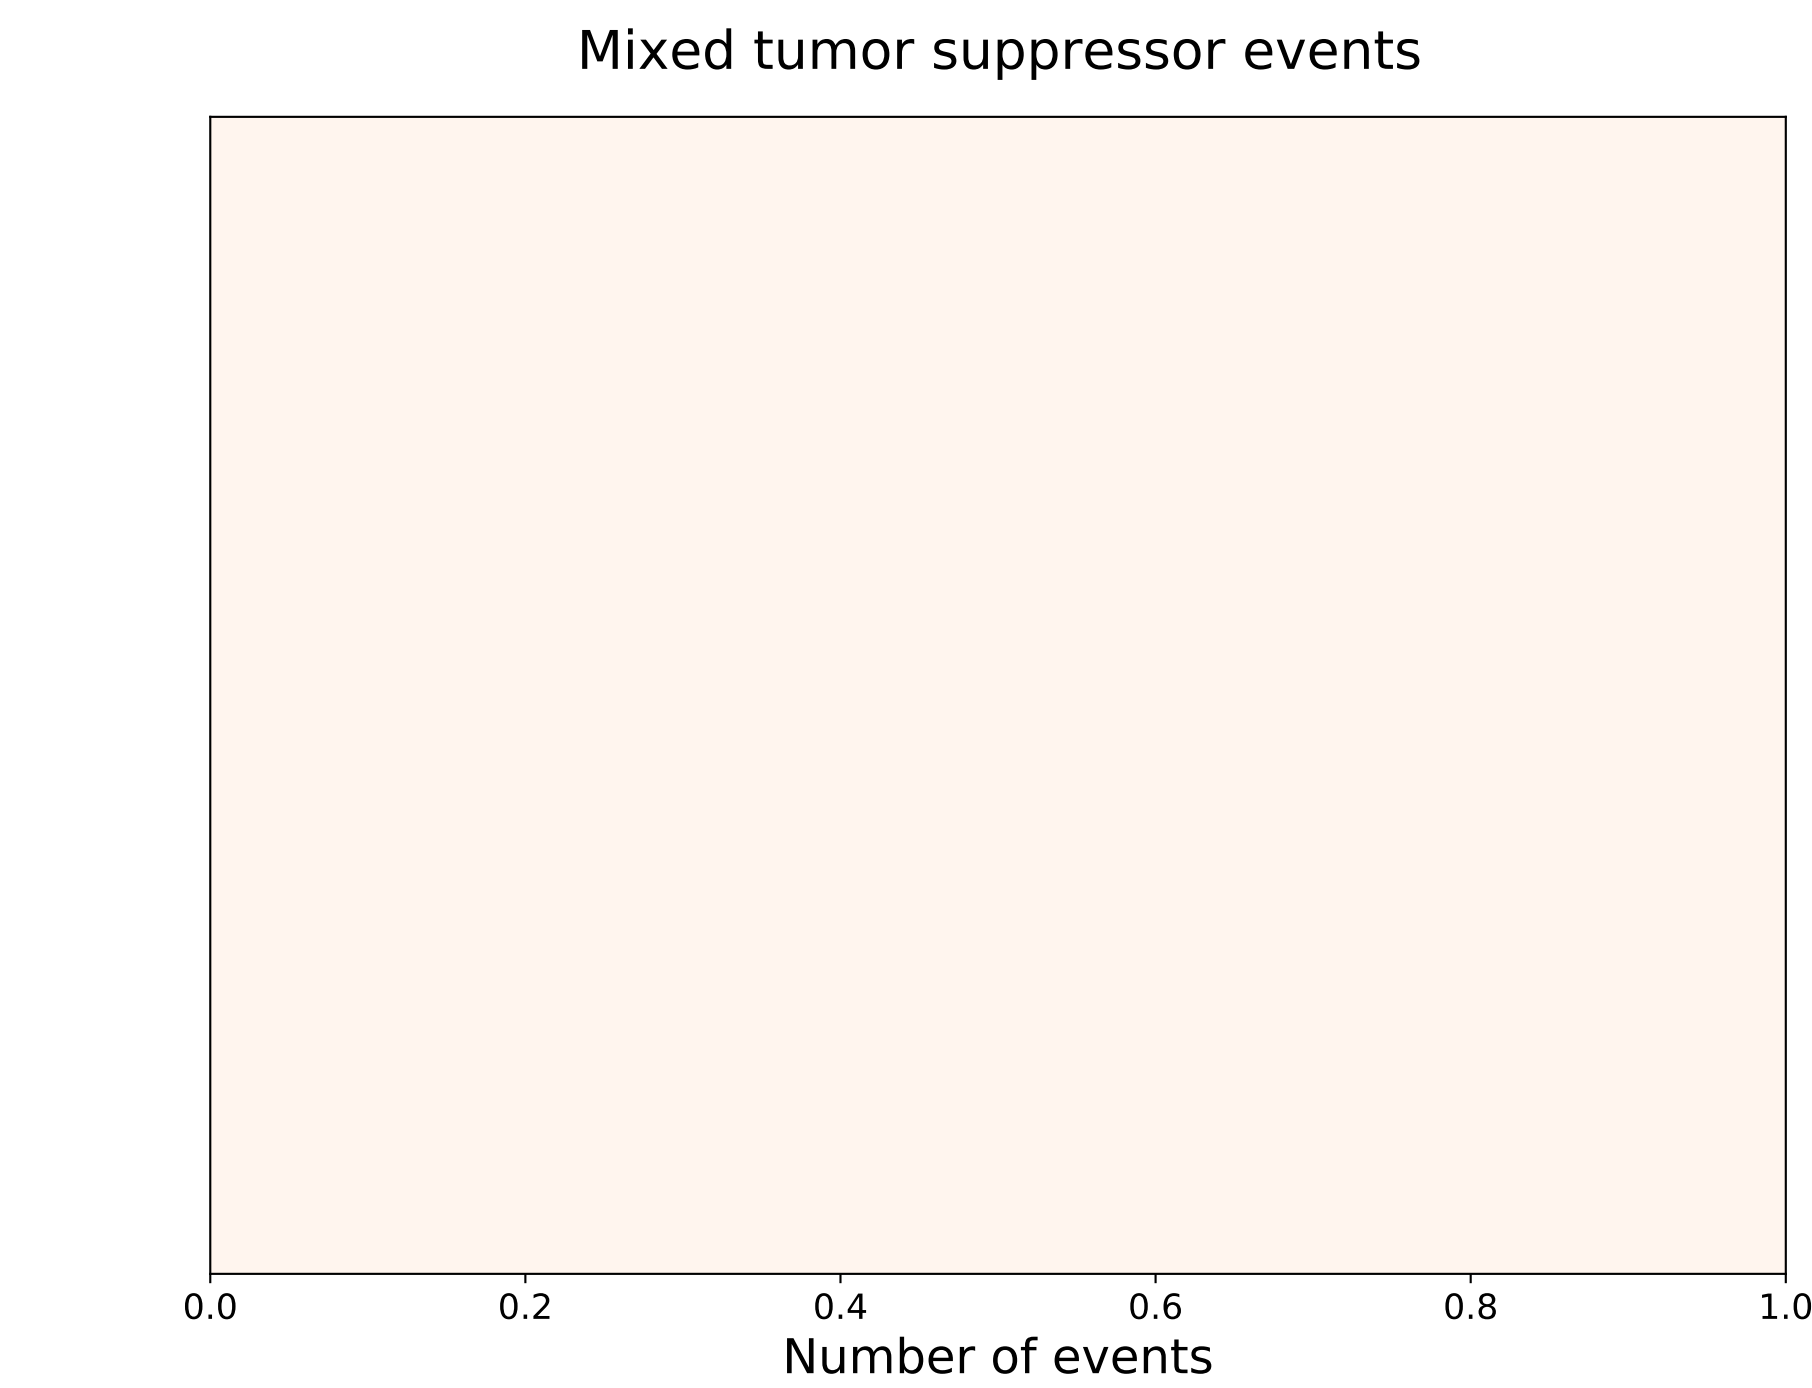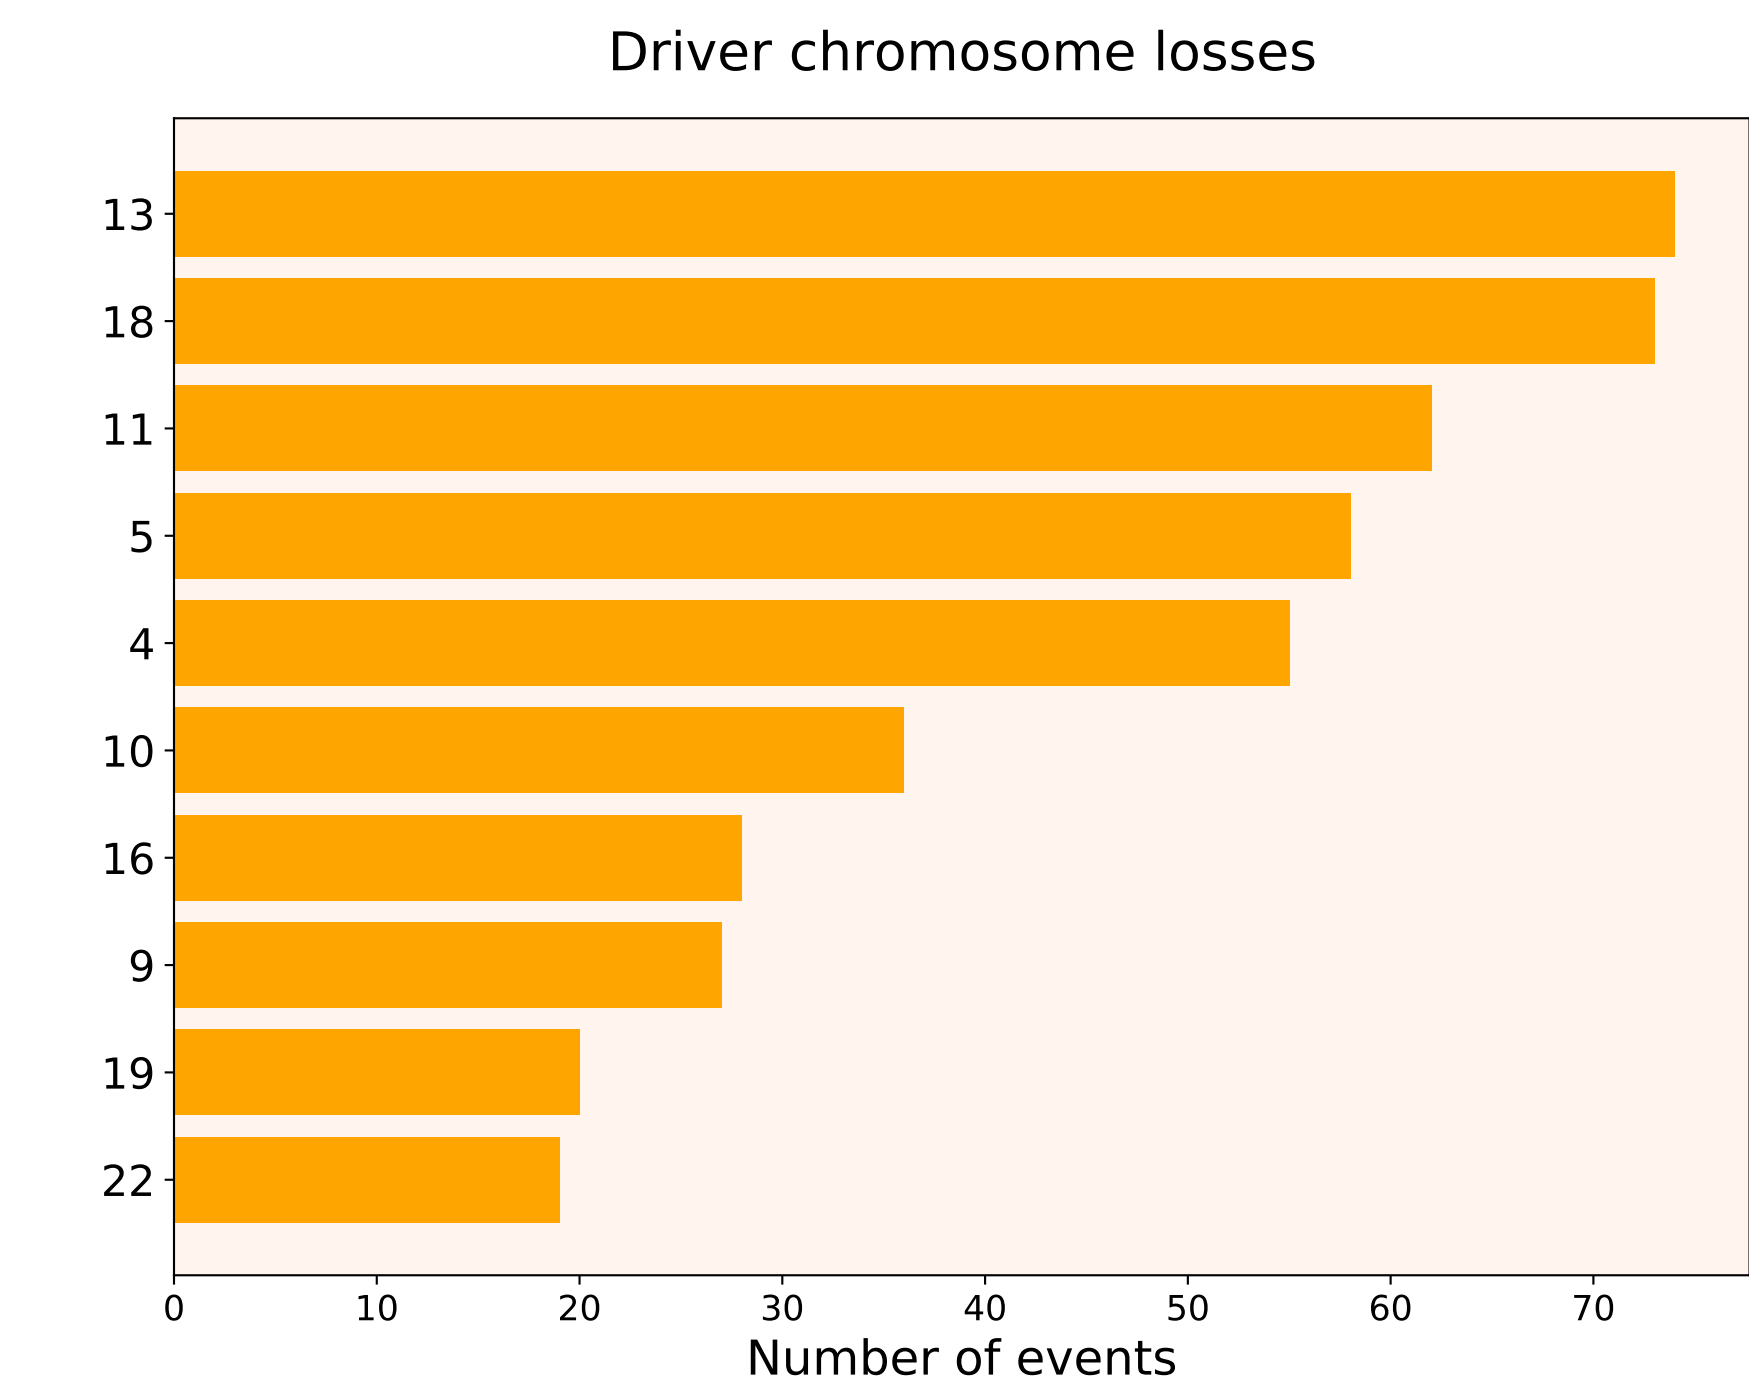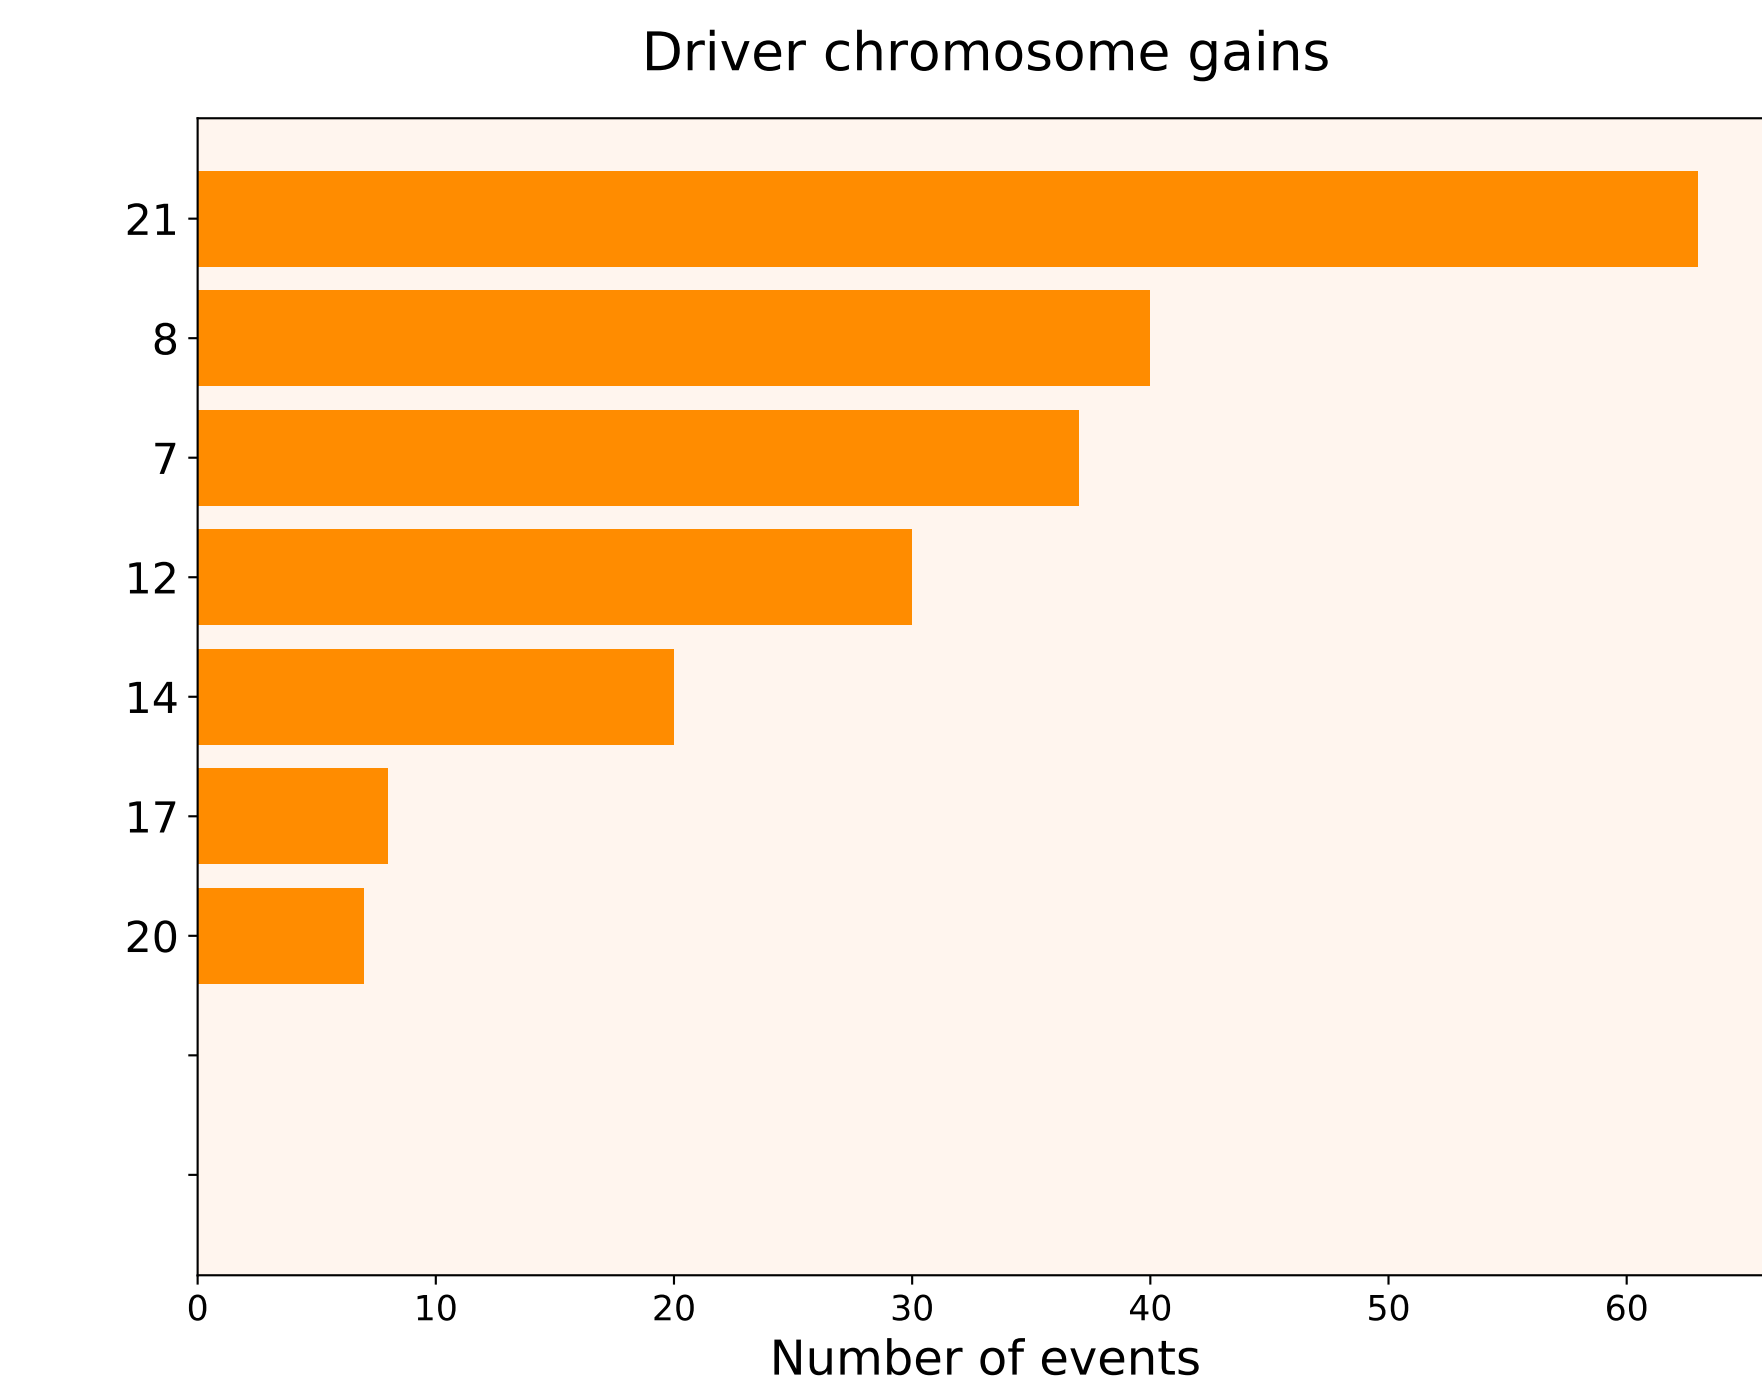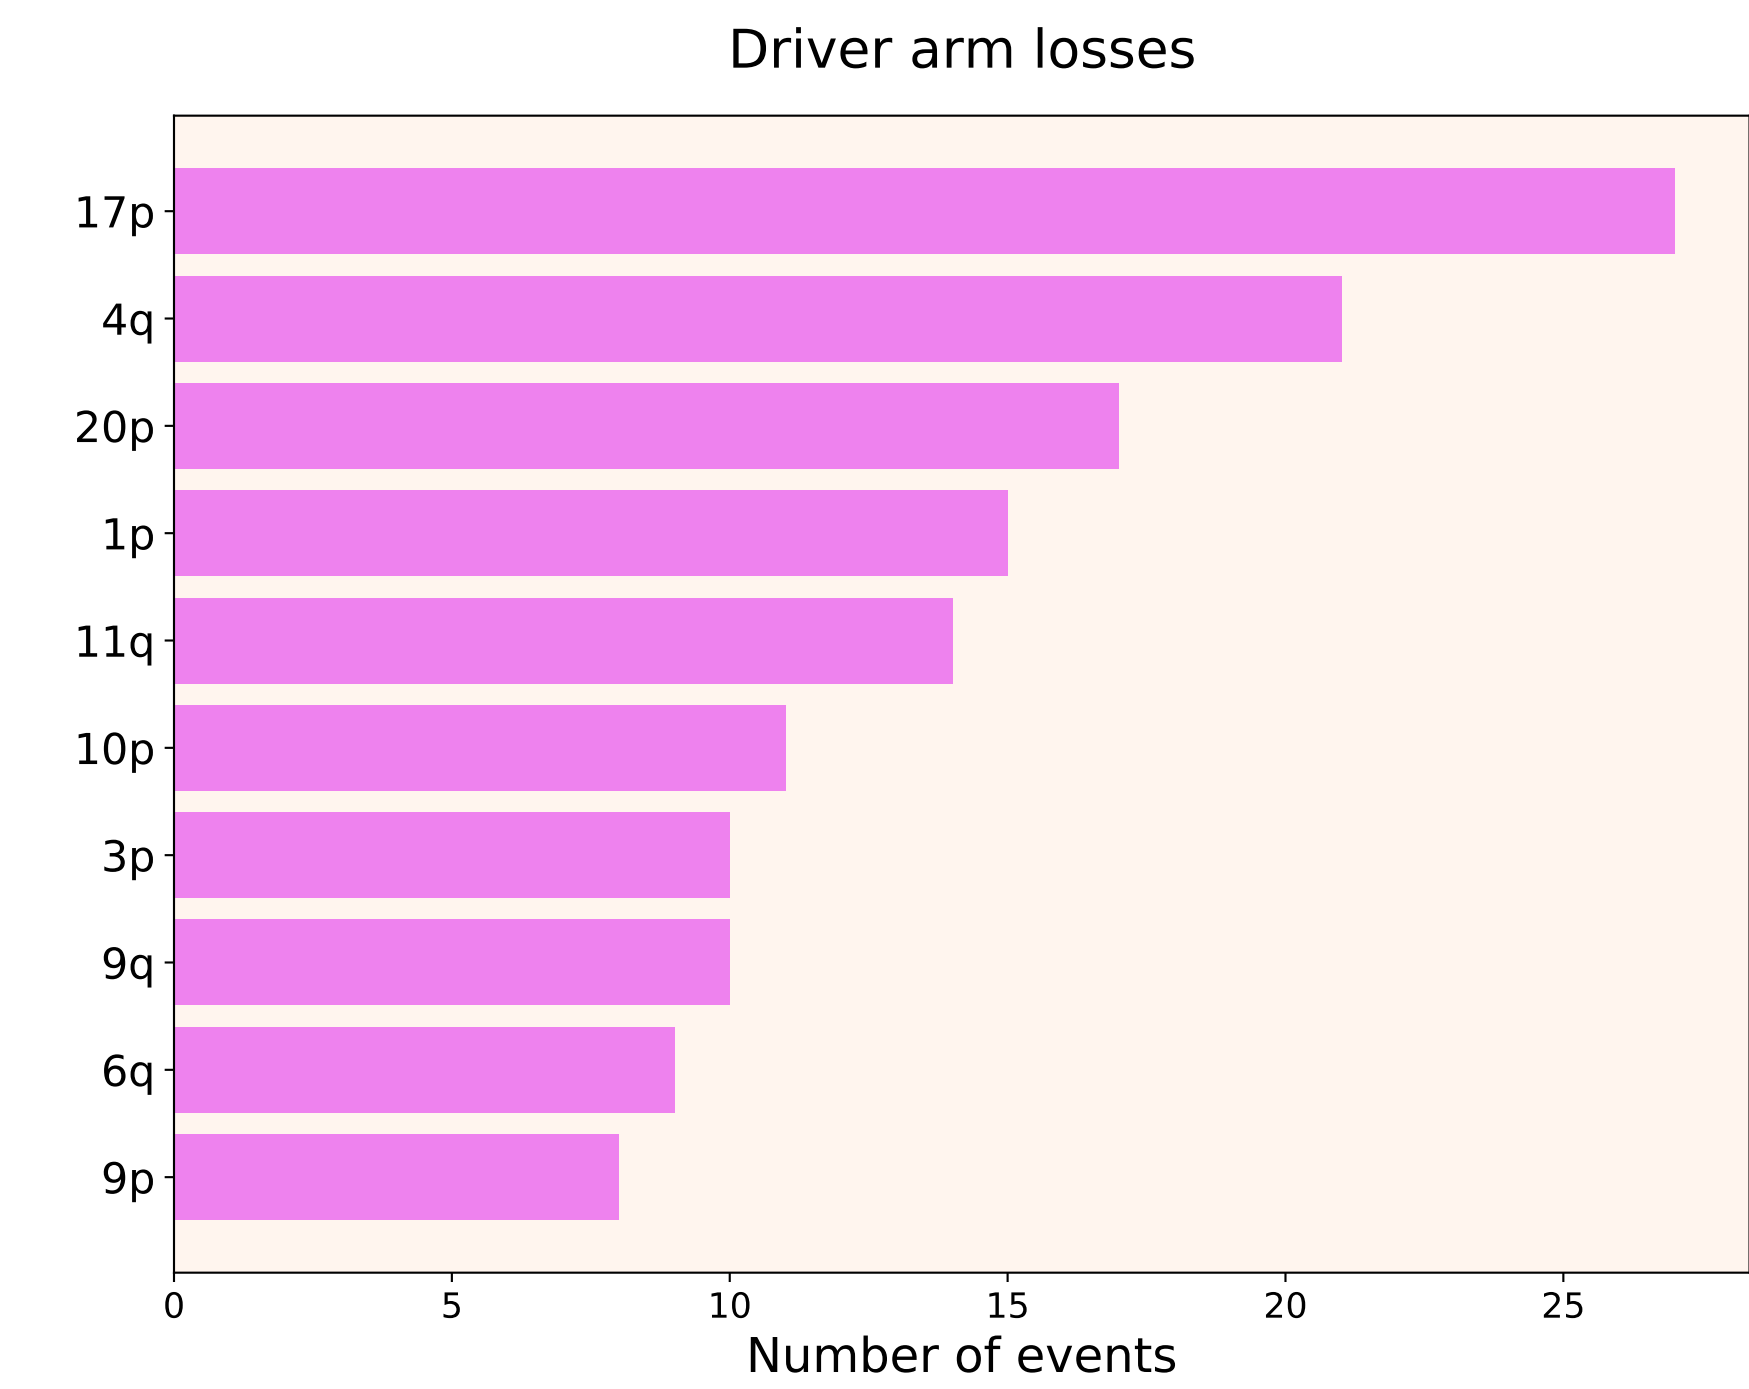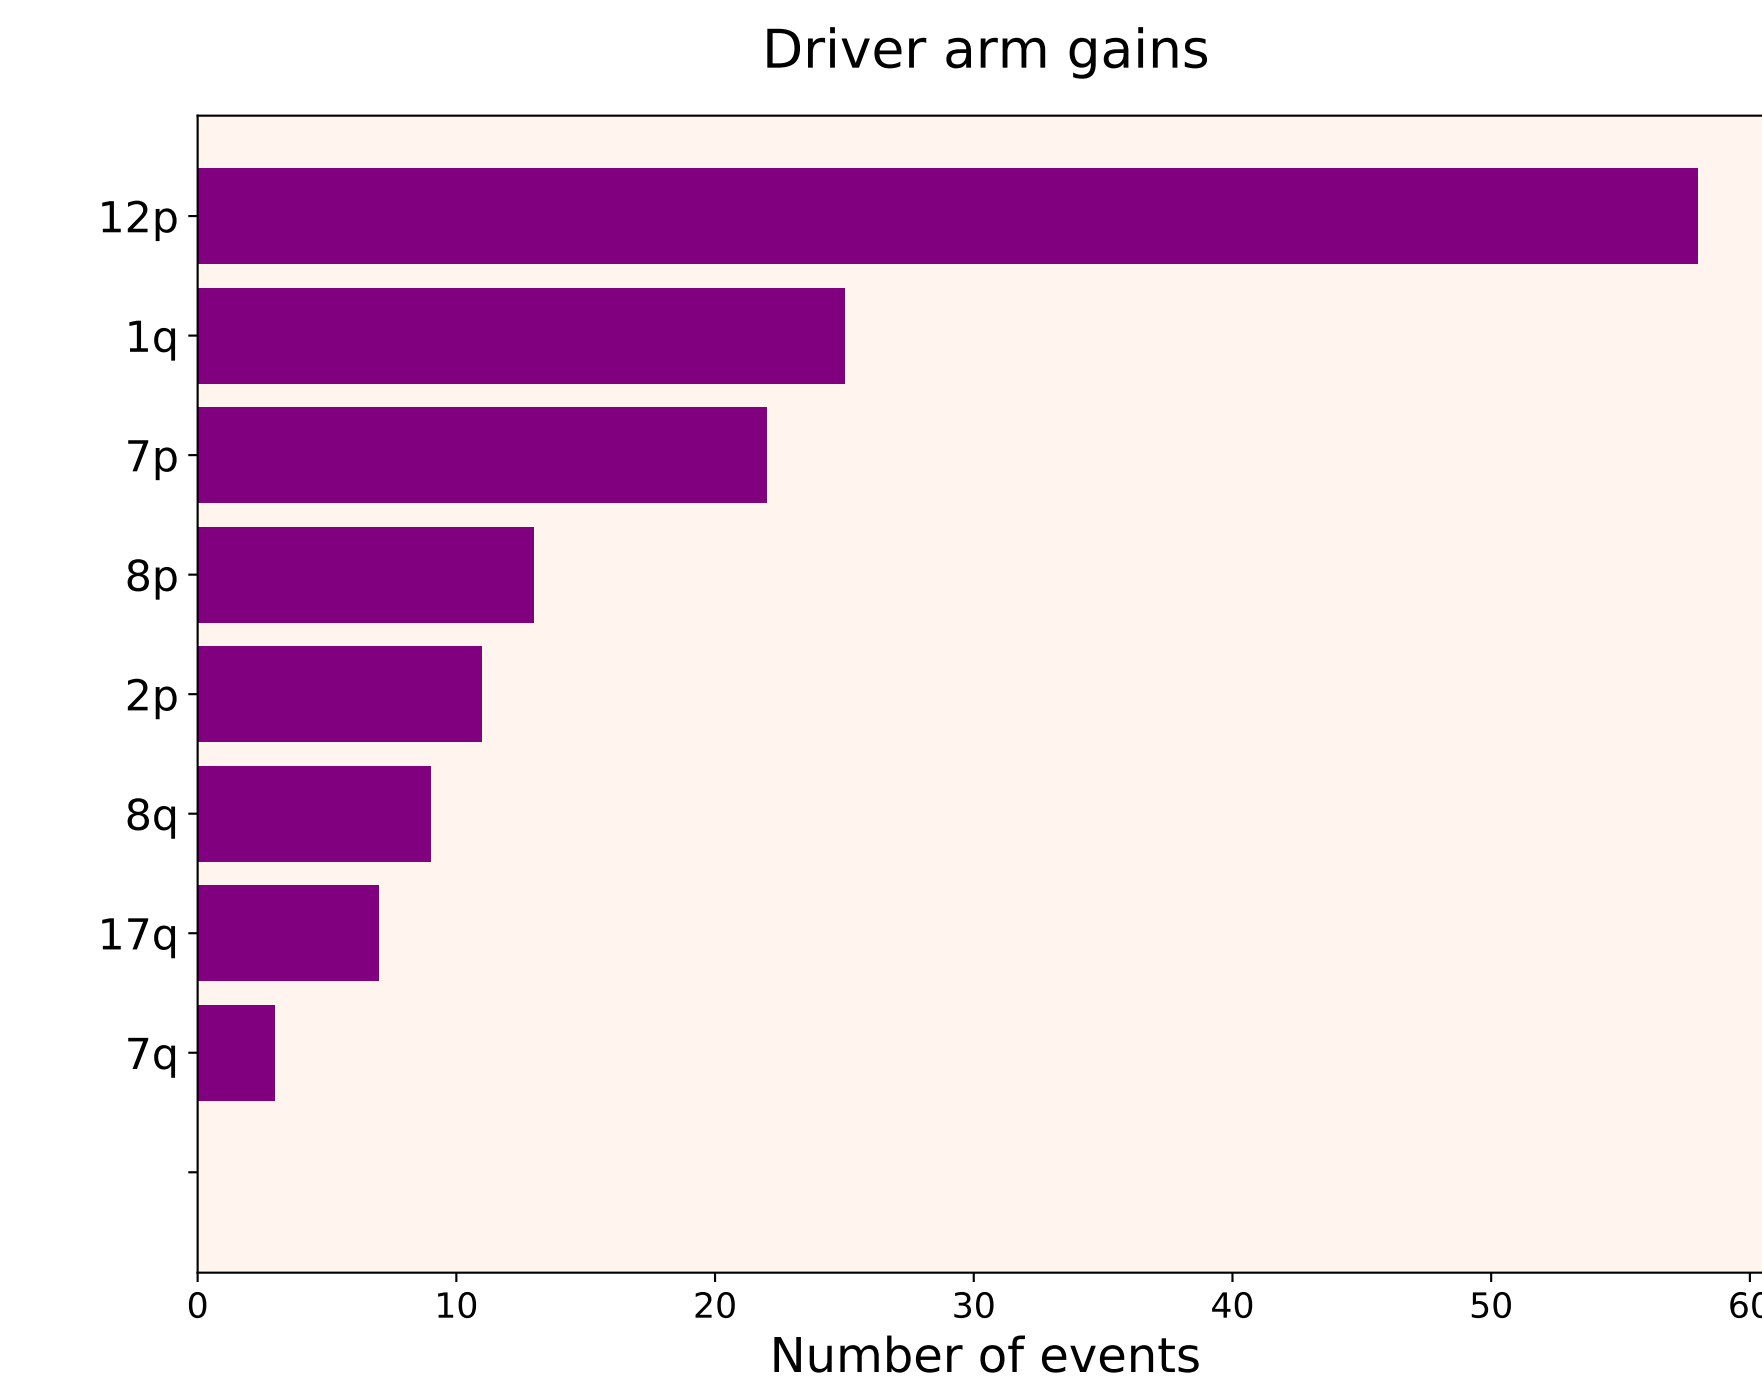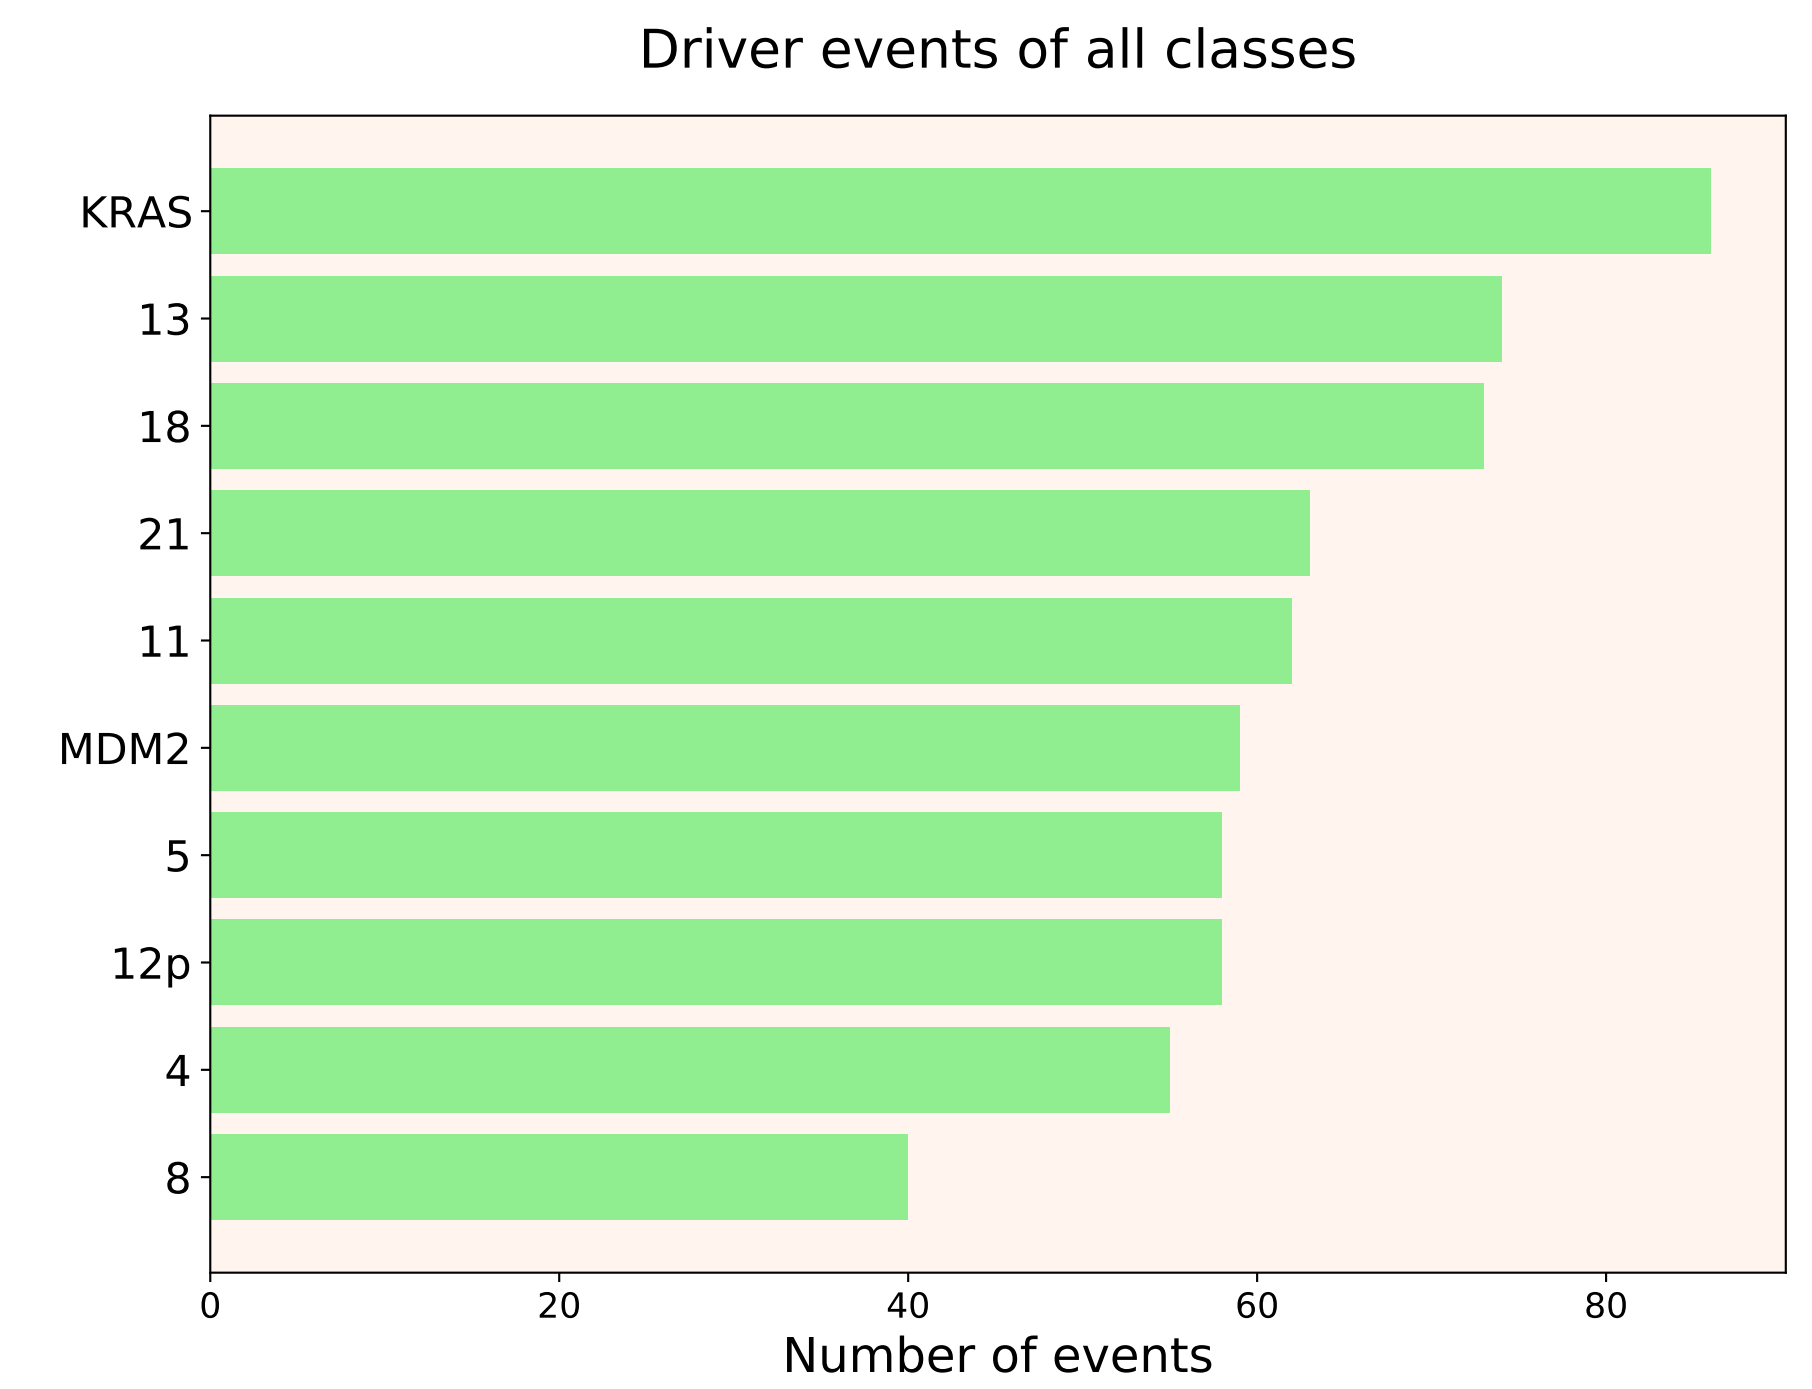

Supplement: Supplemental_Data_S1.zip [file Supplemental_Data_S1.zip]

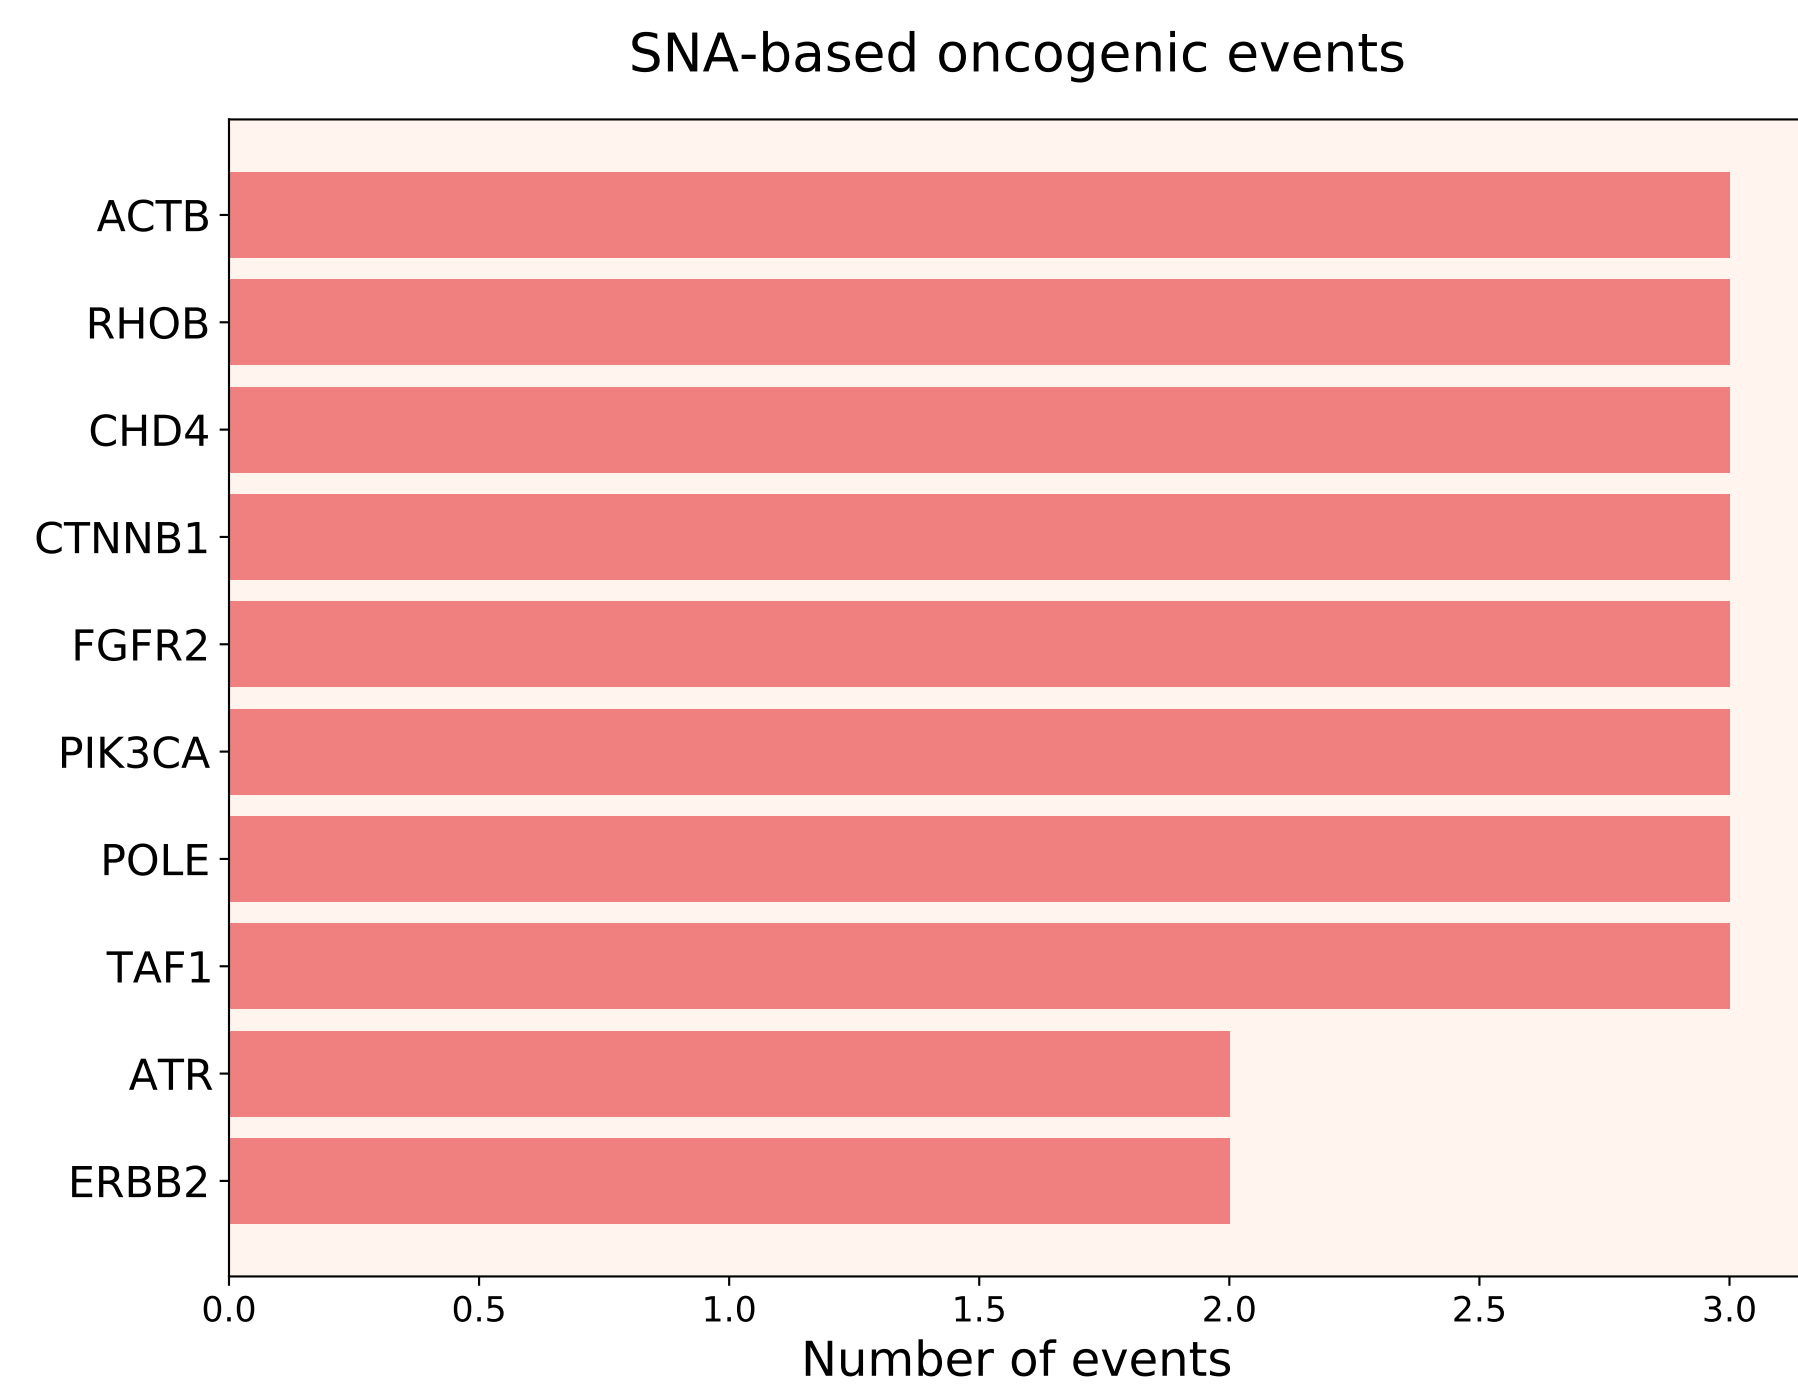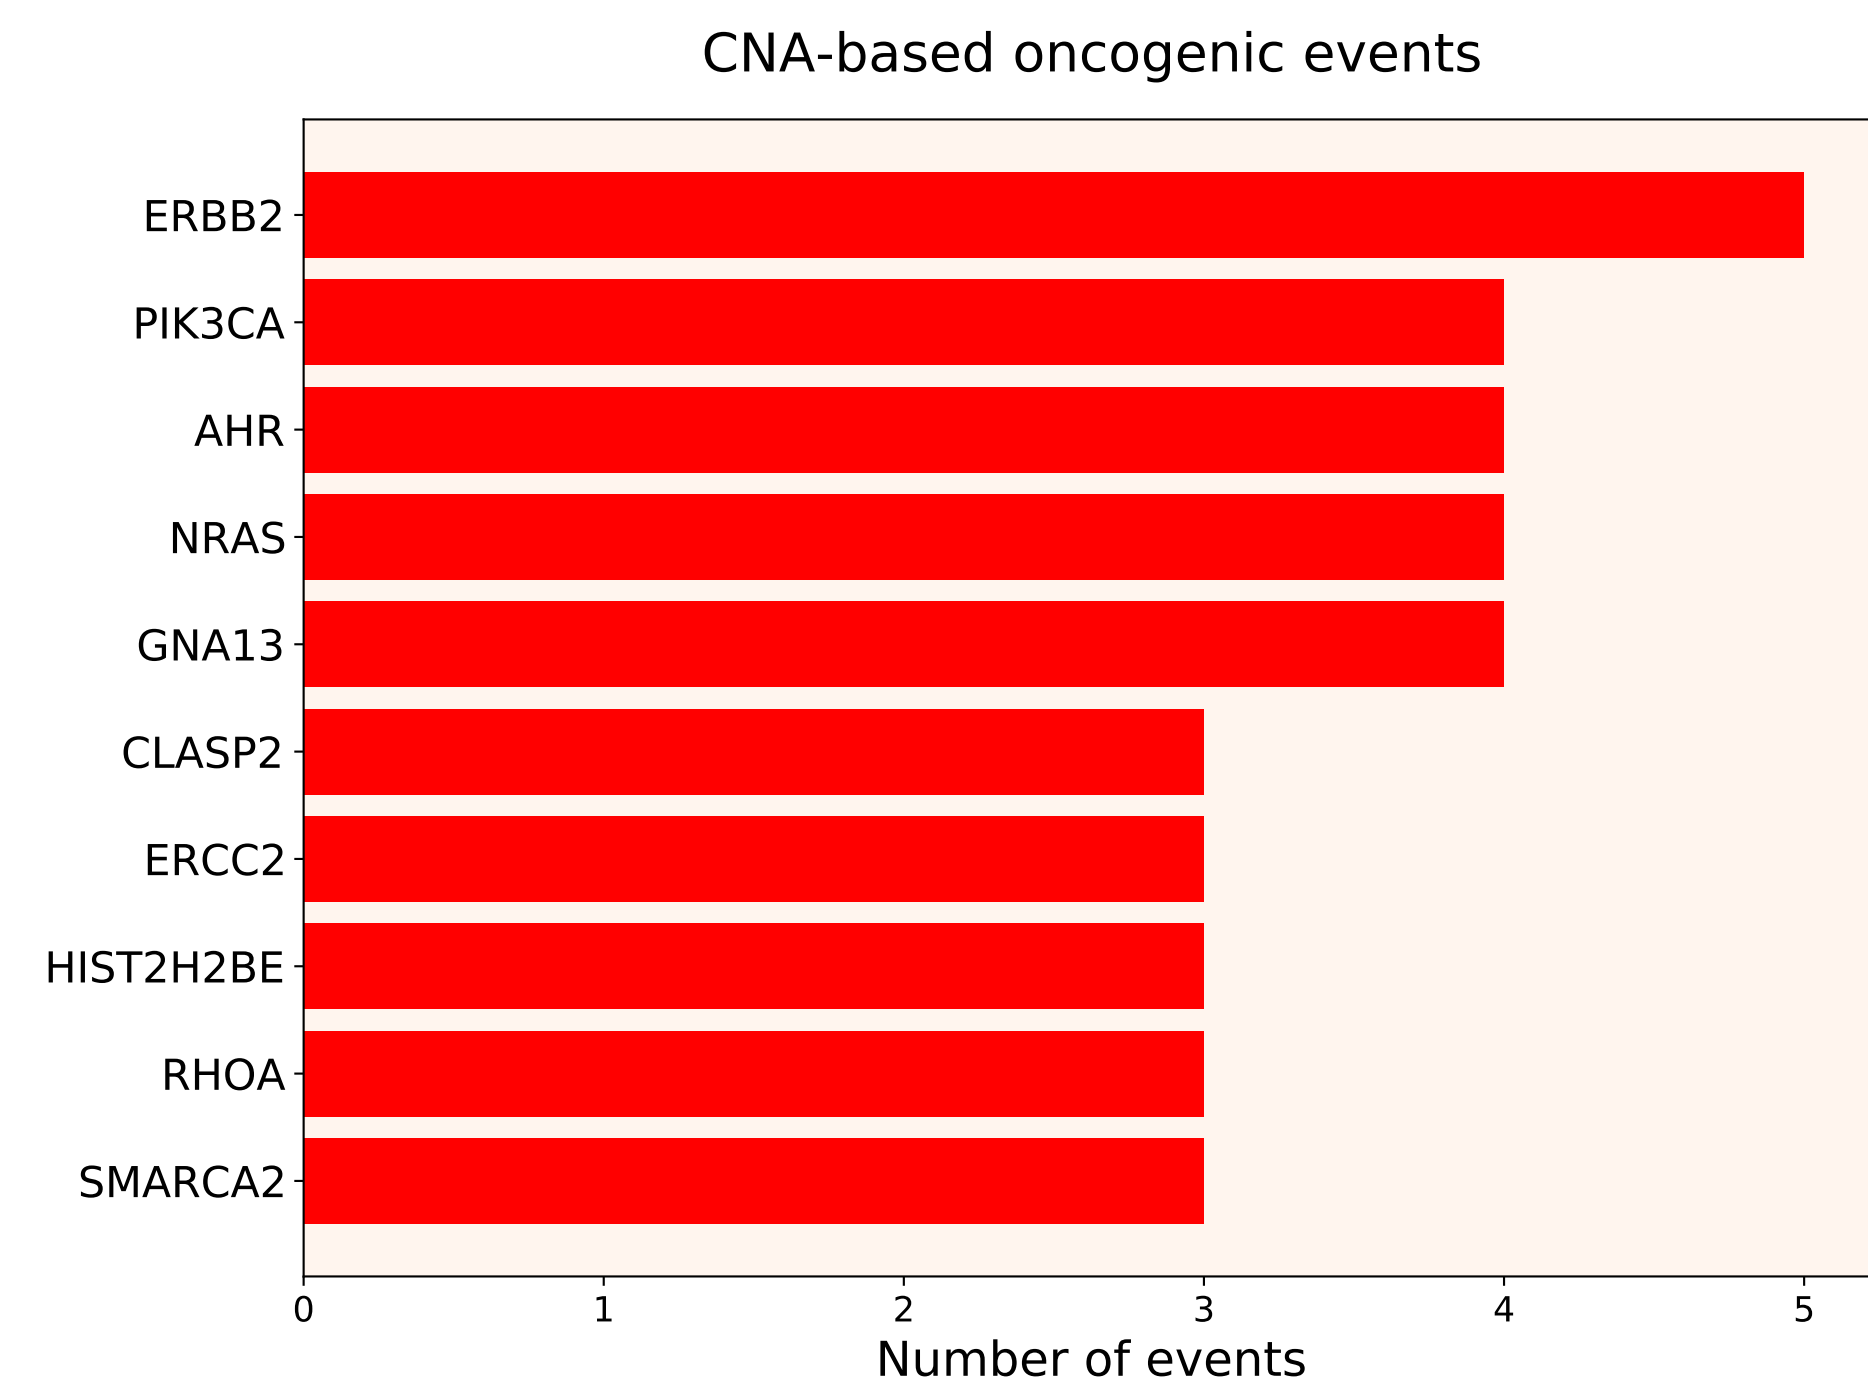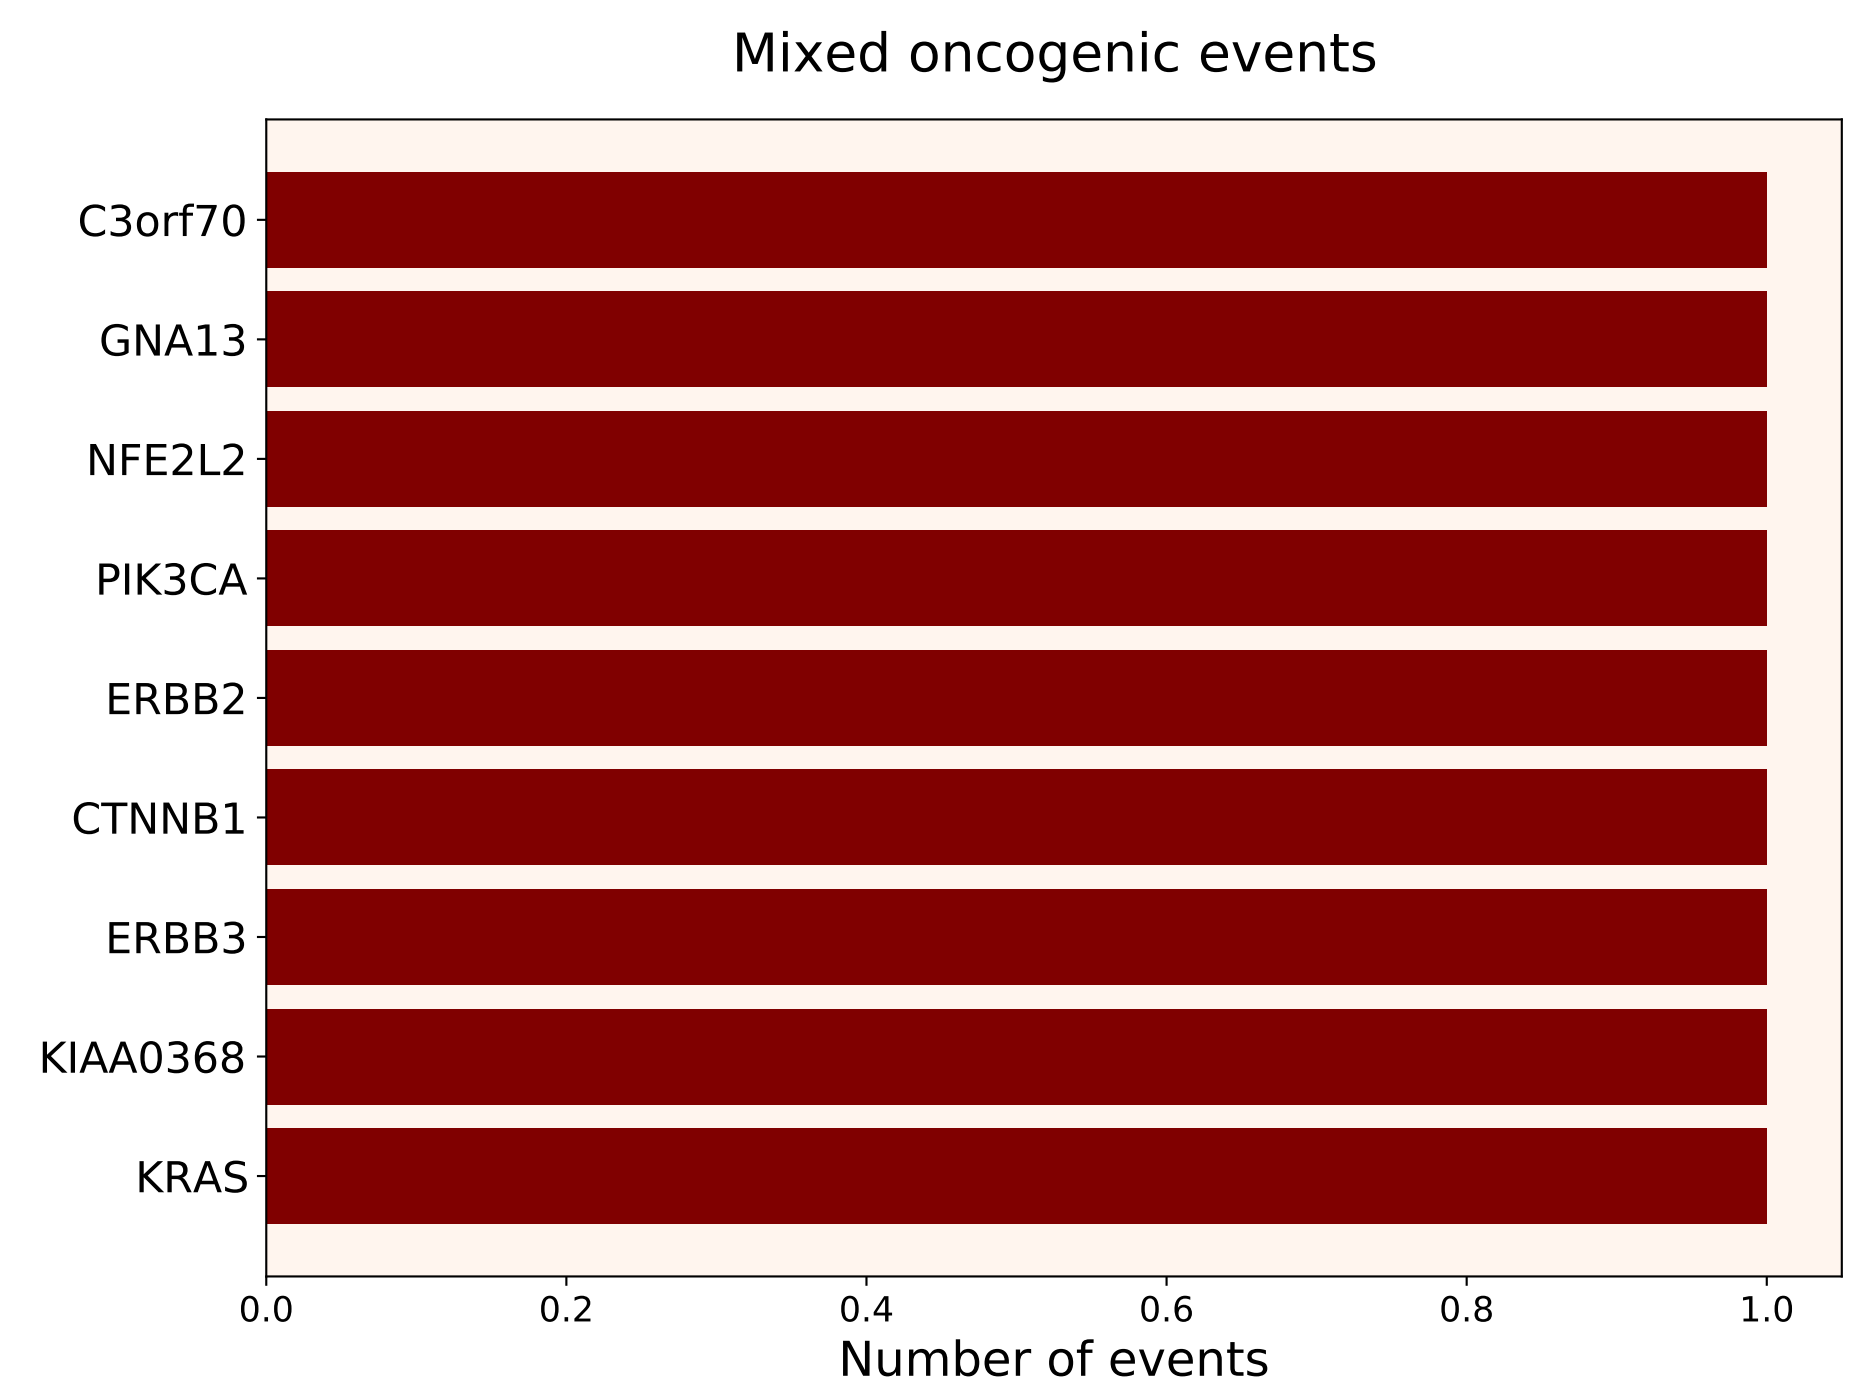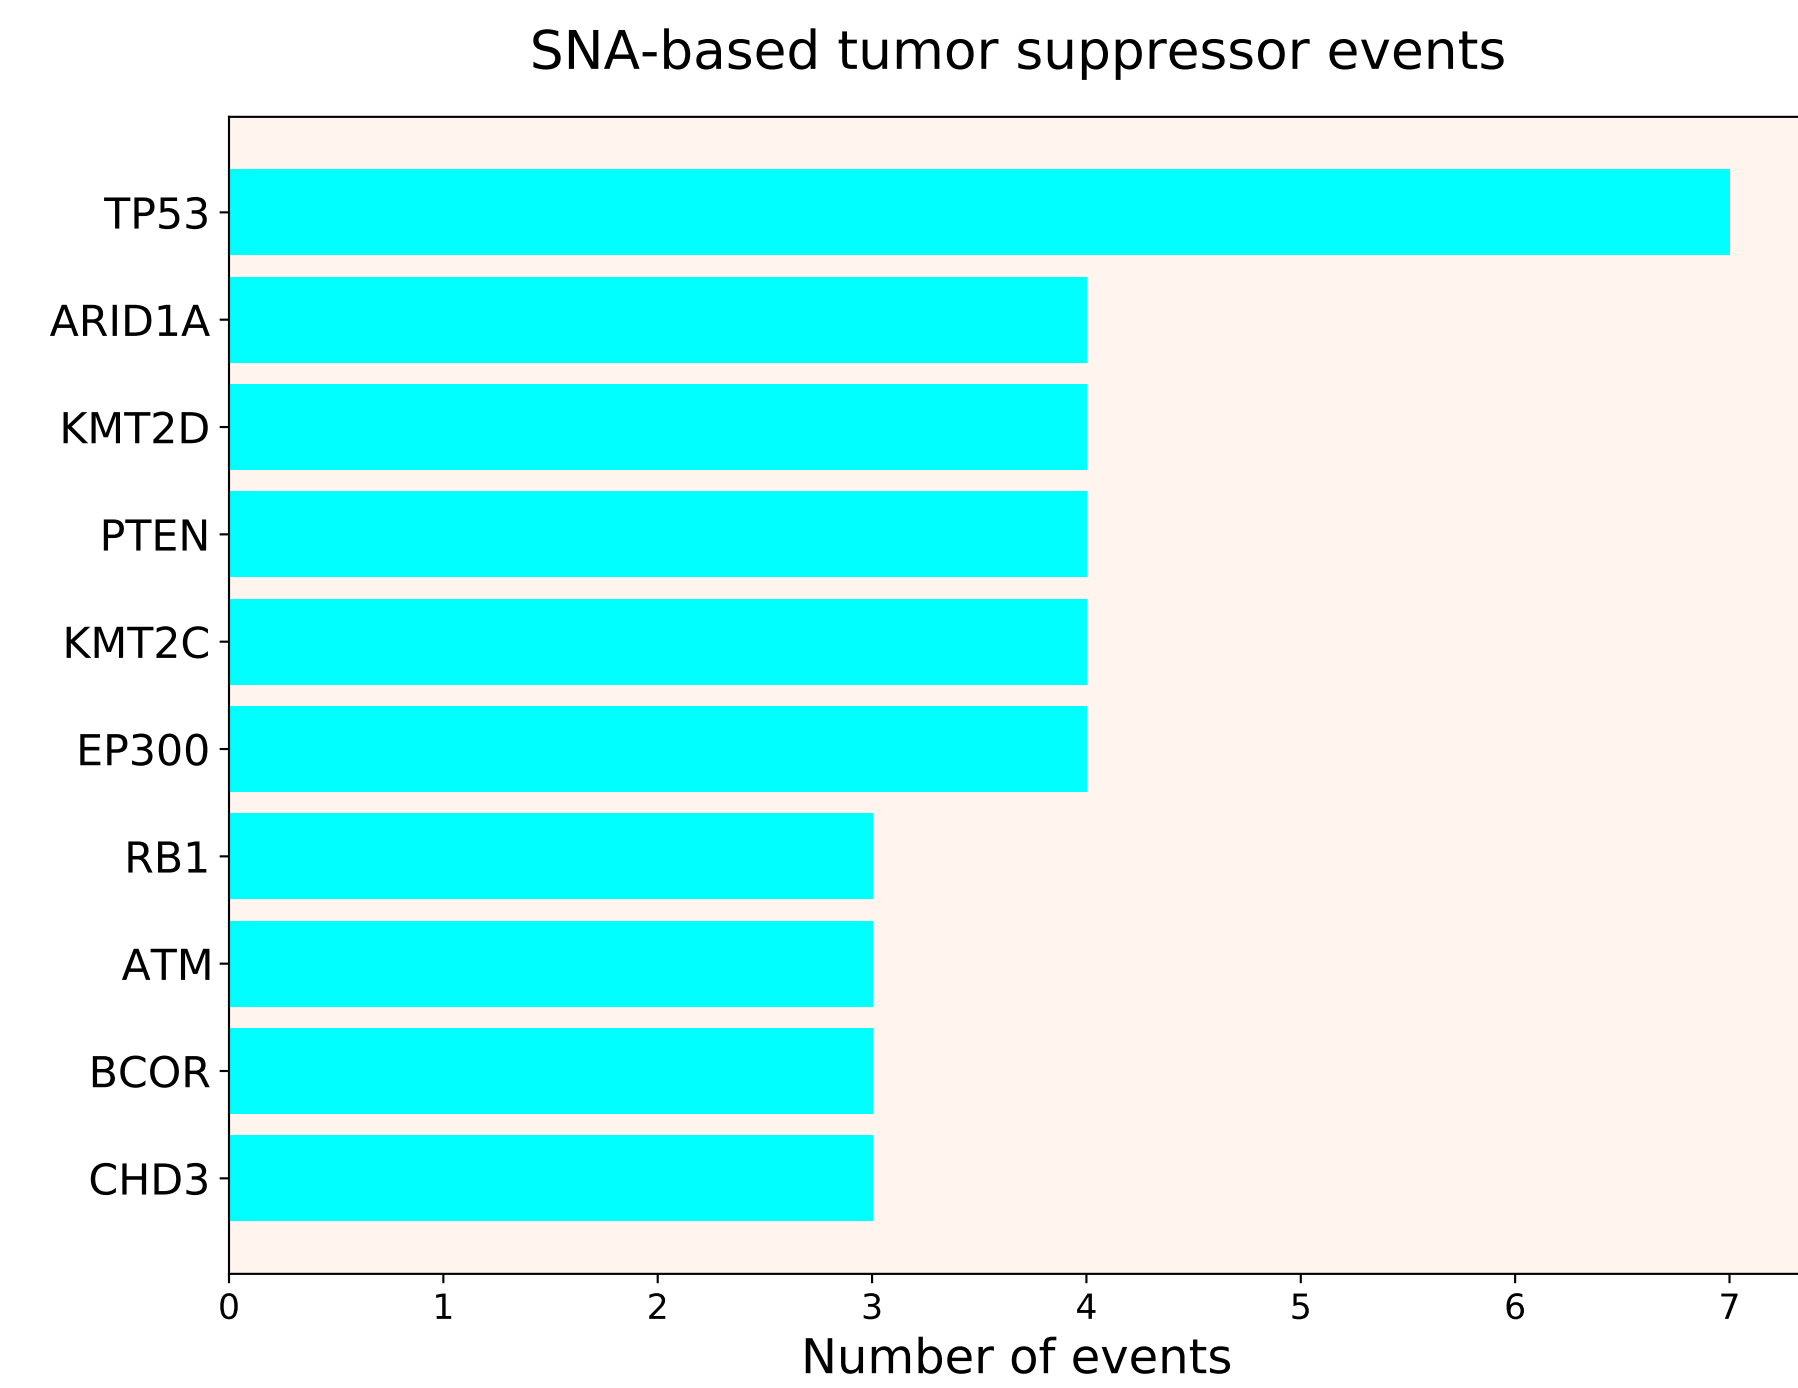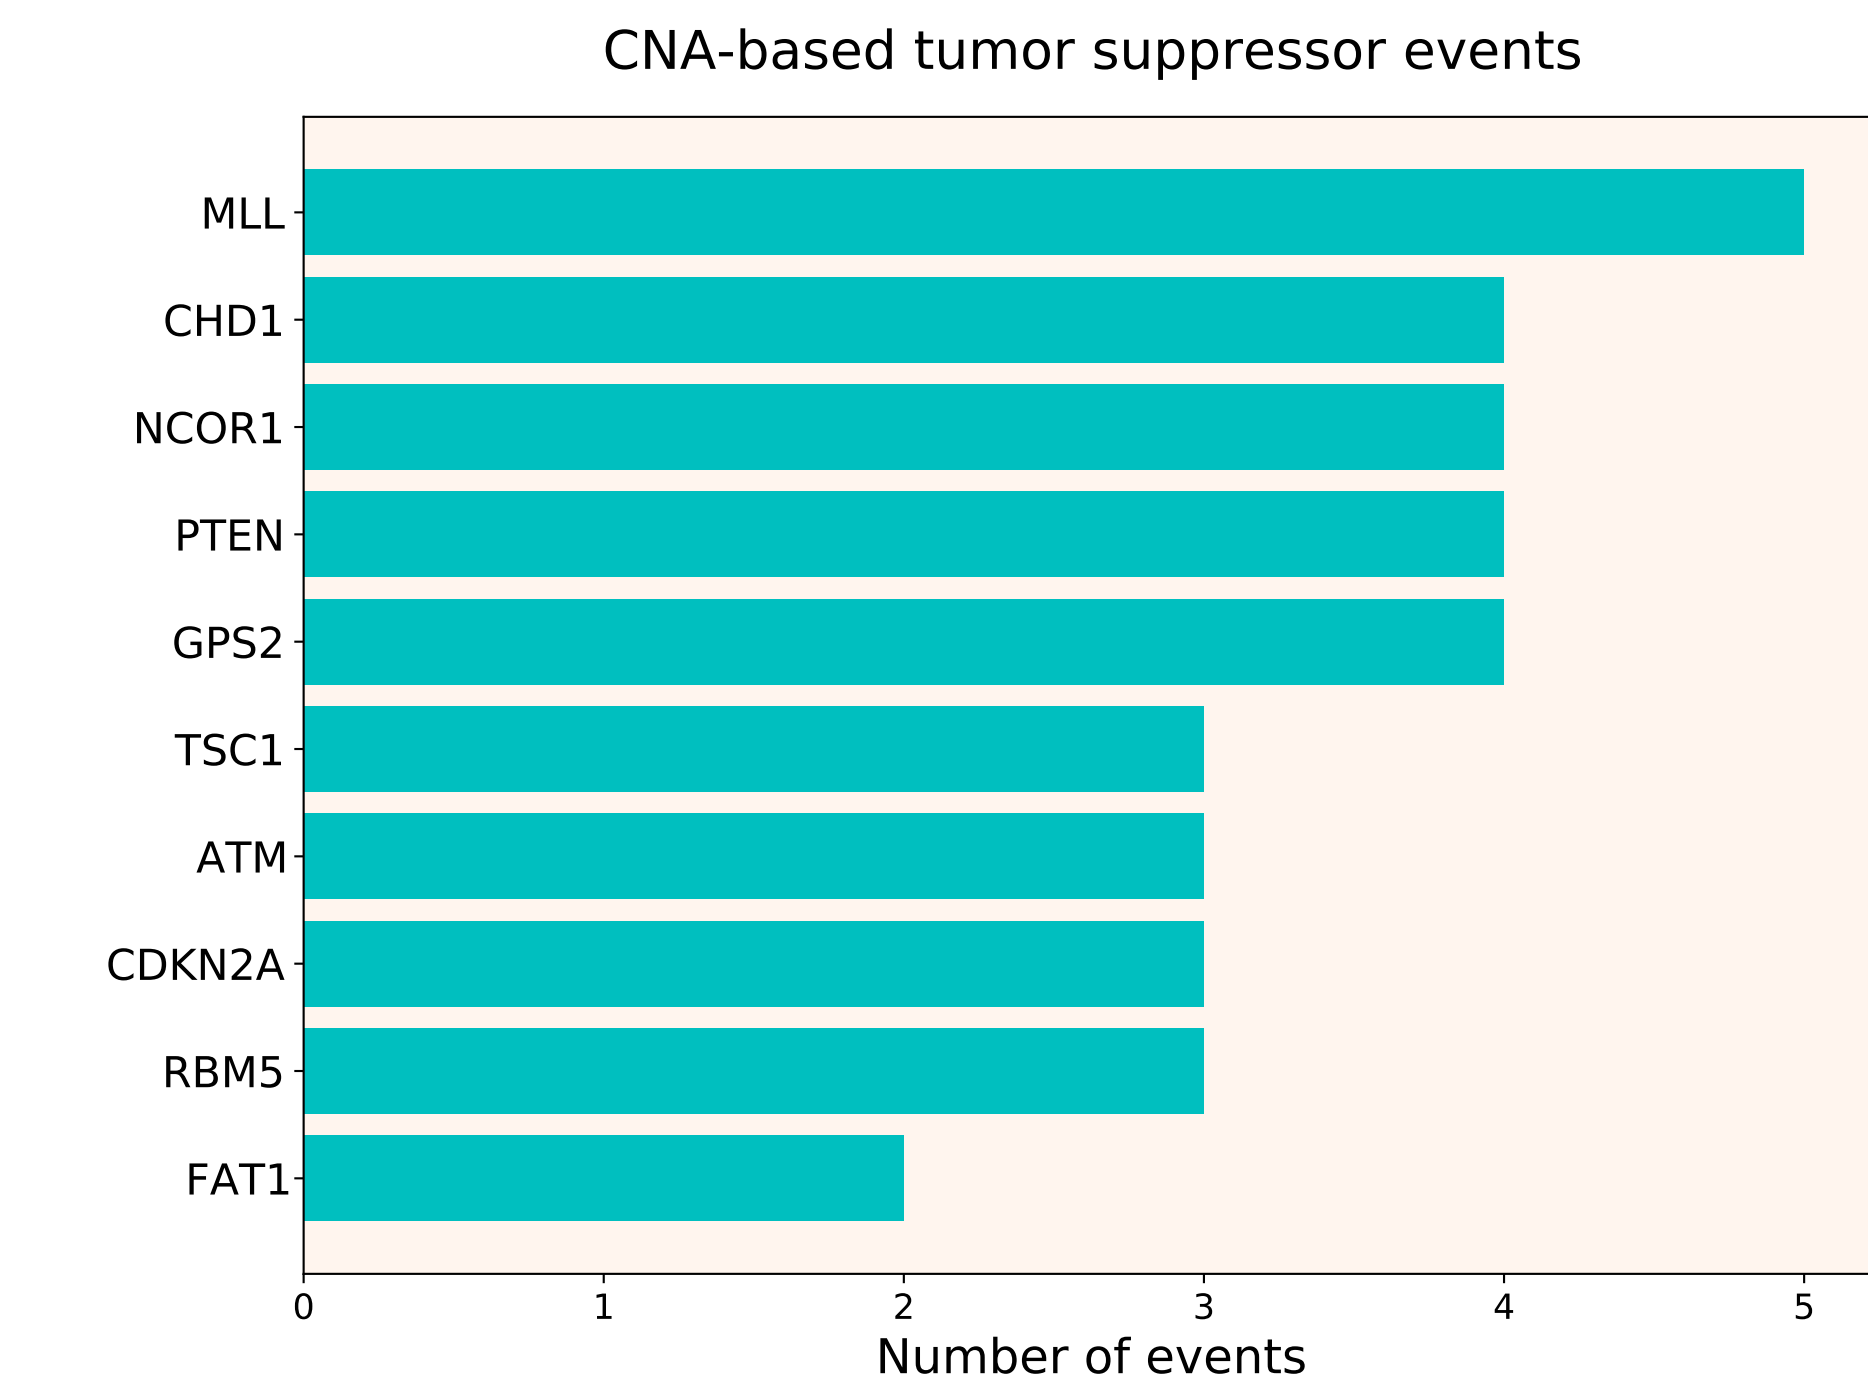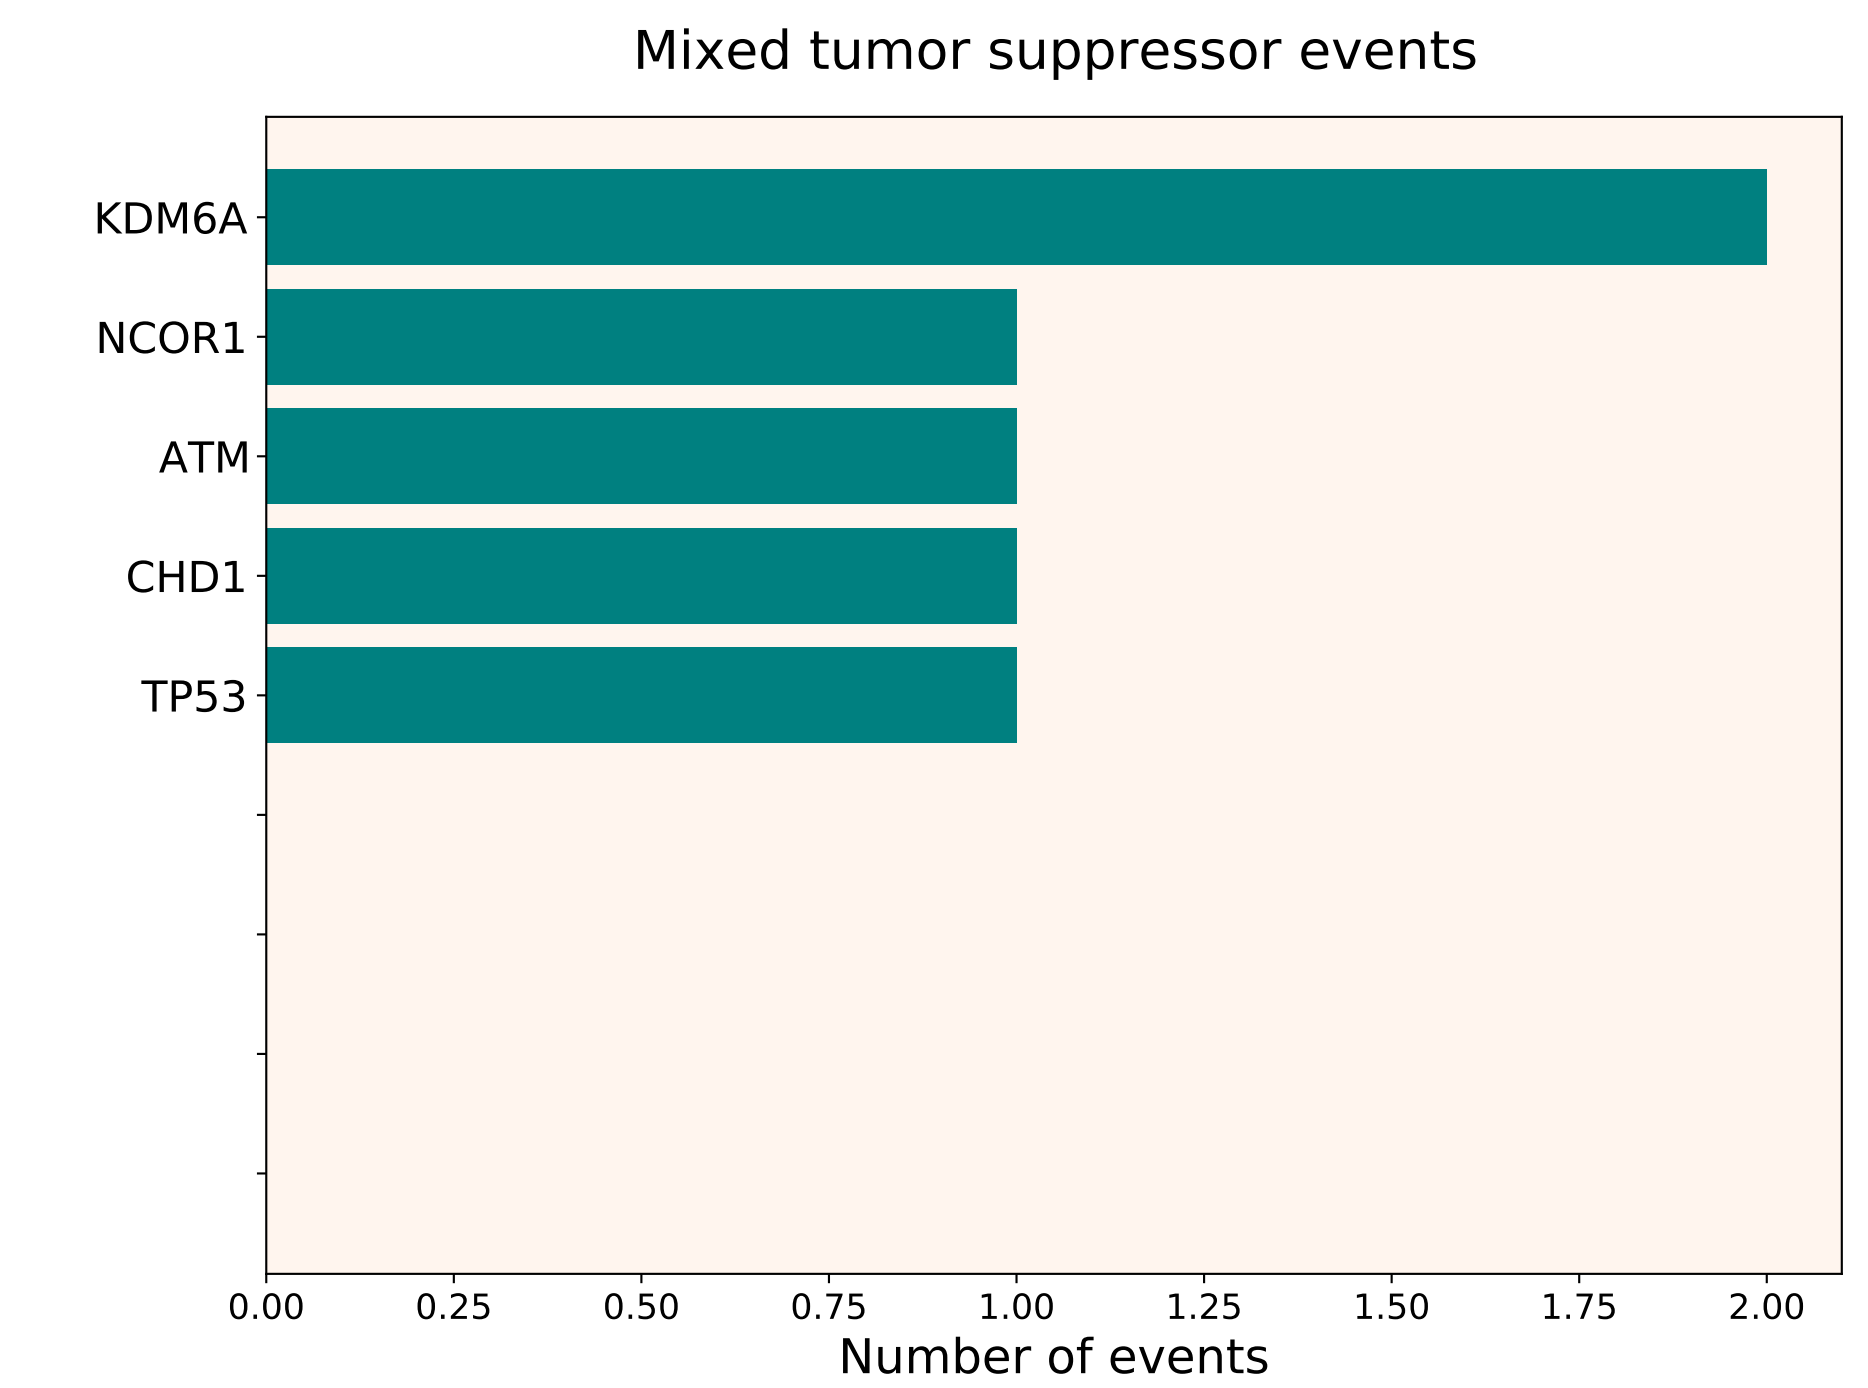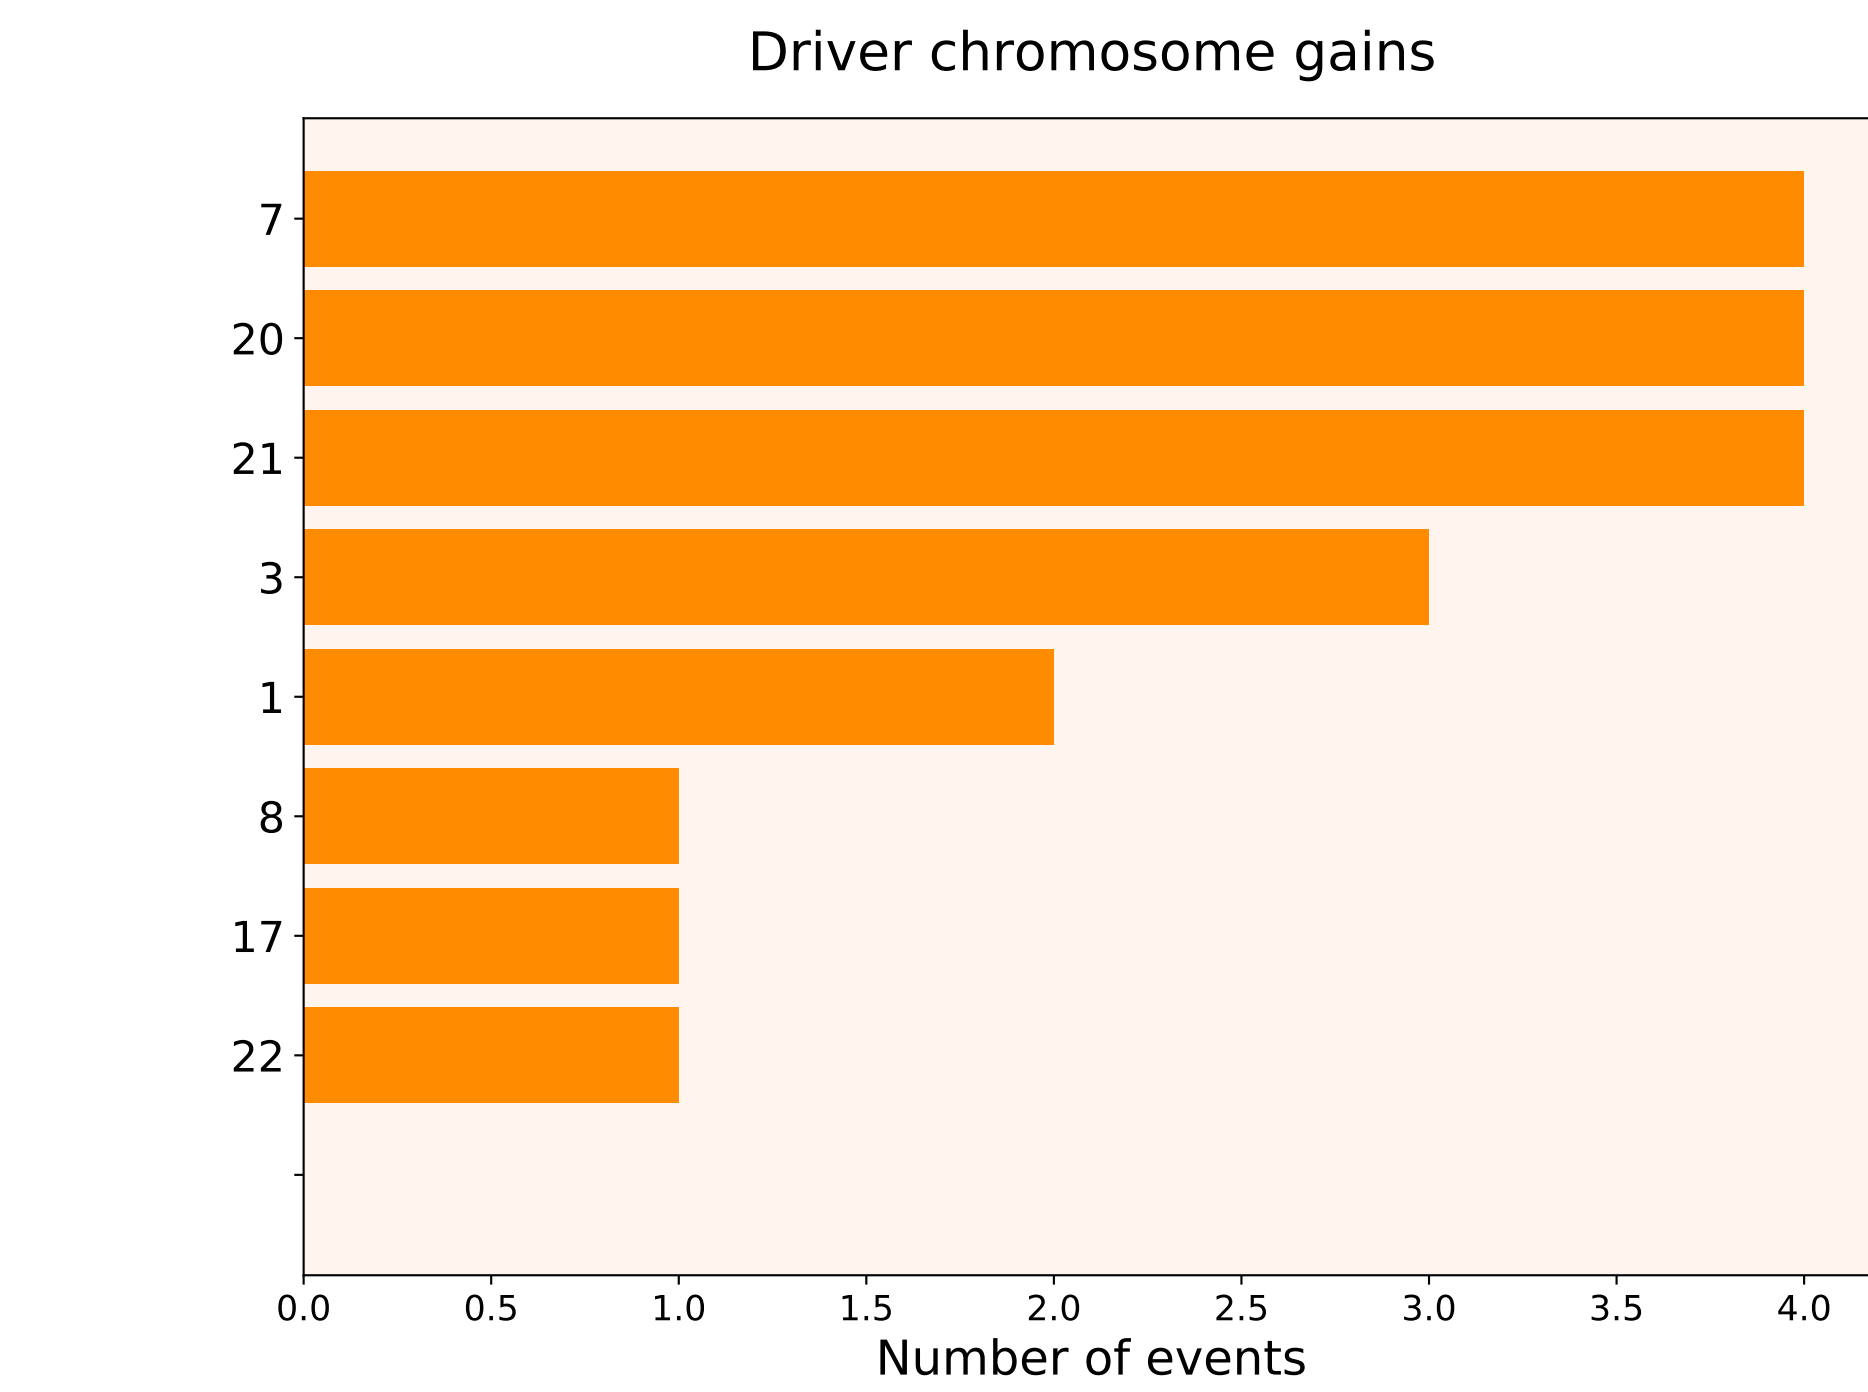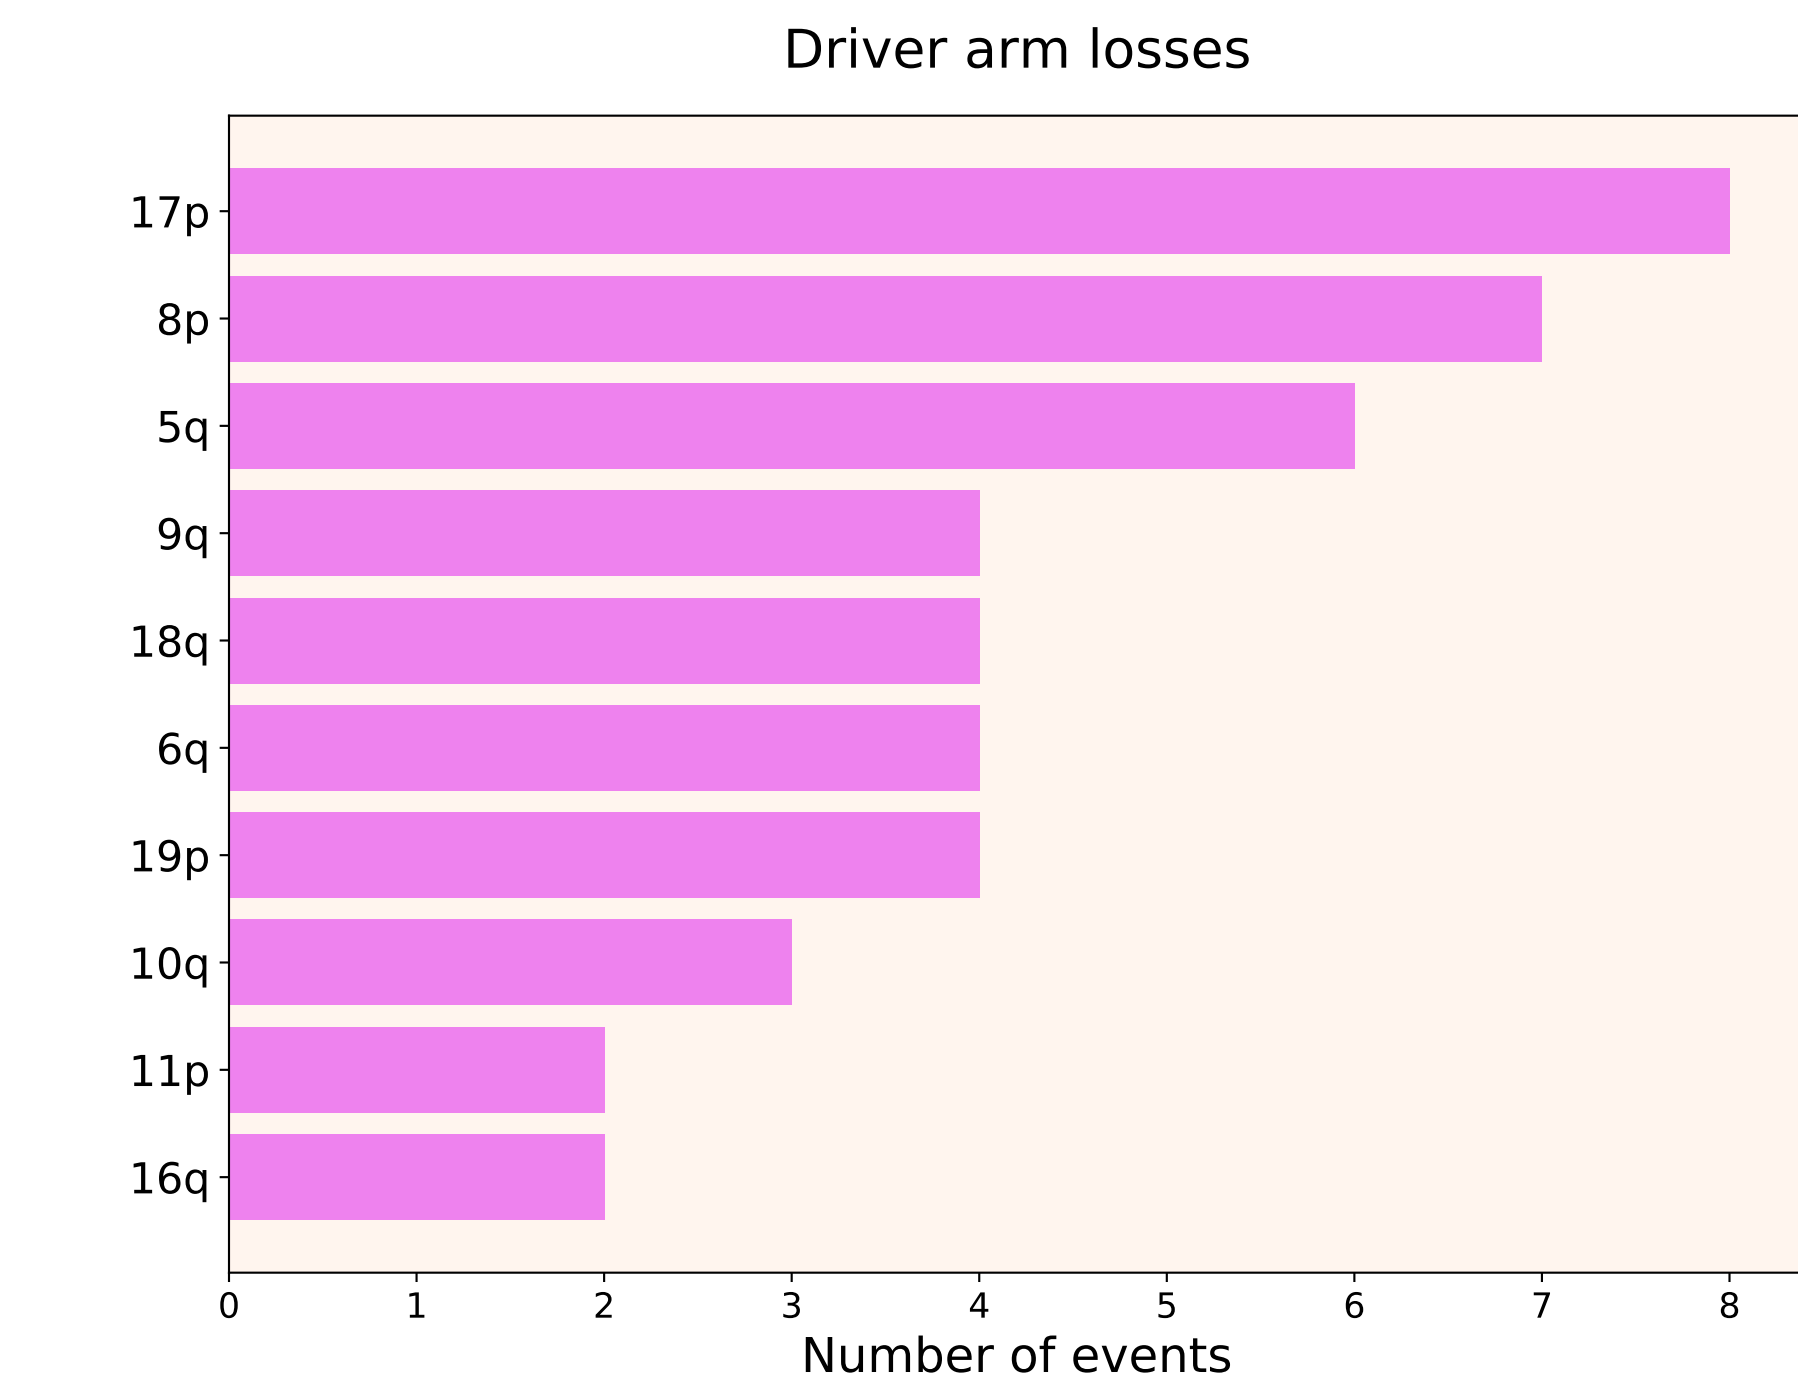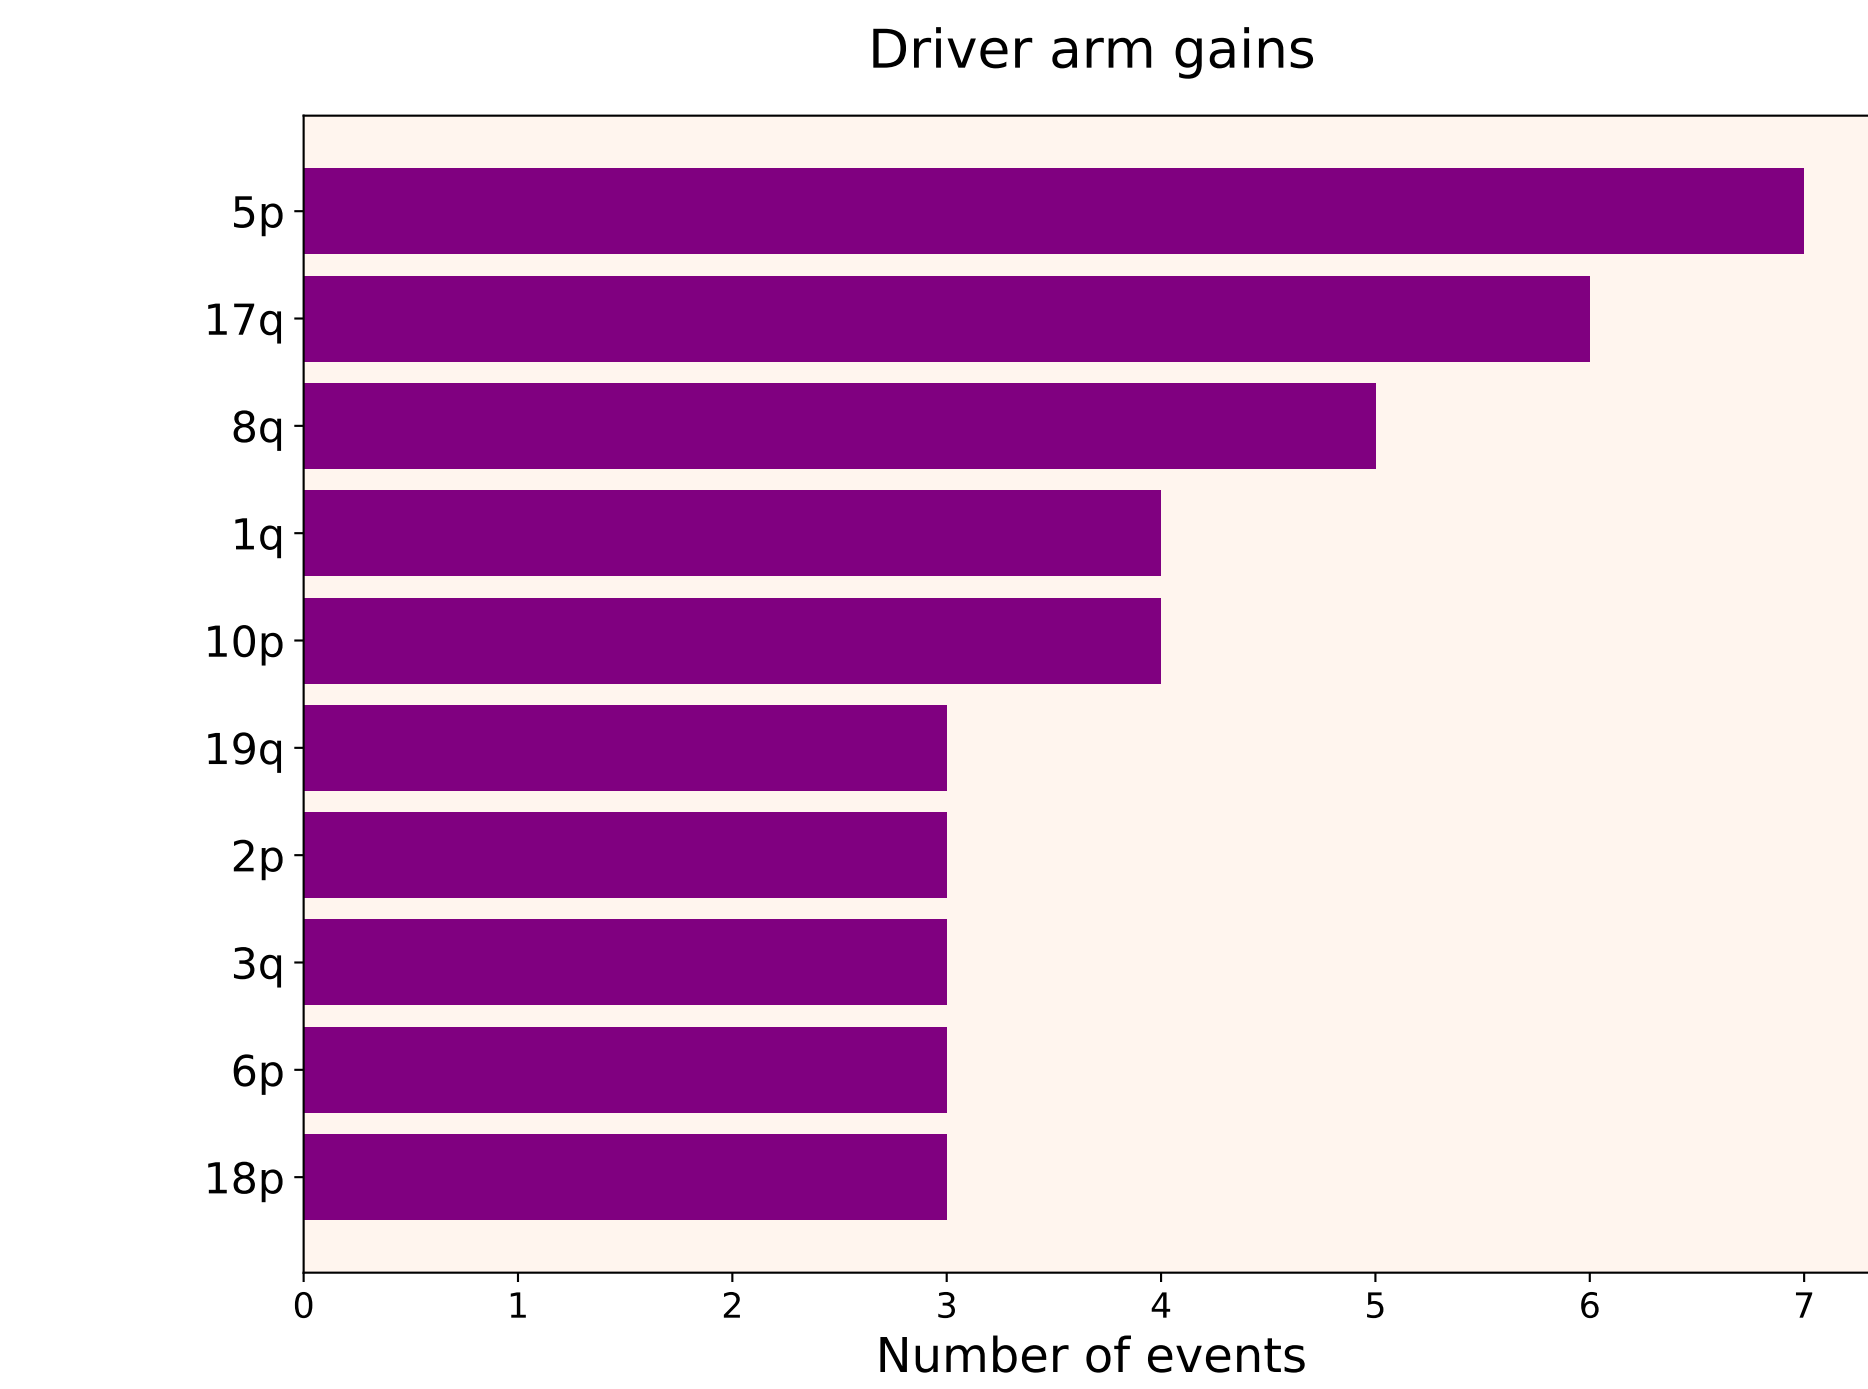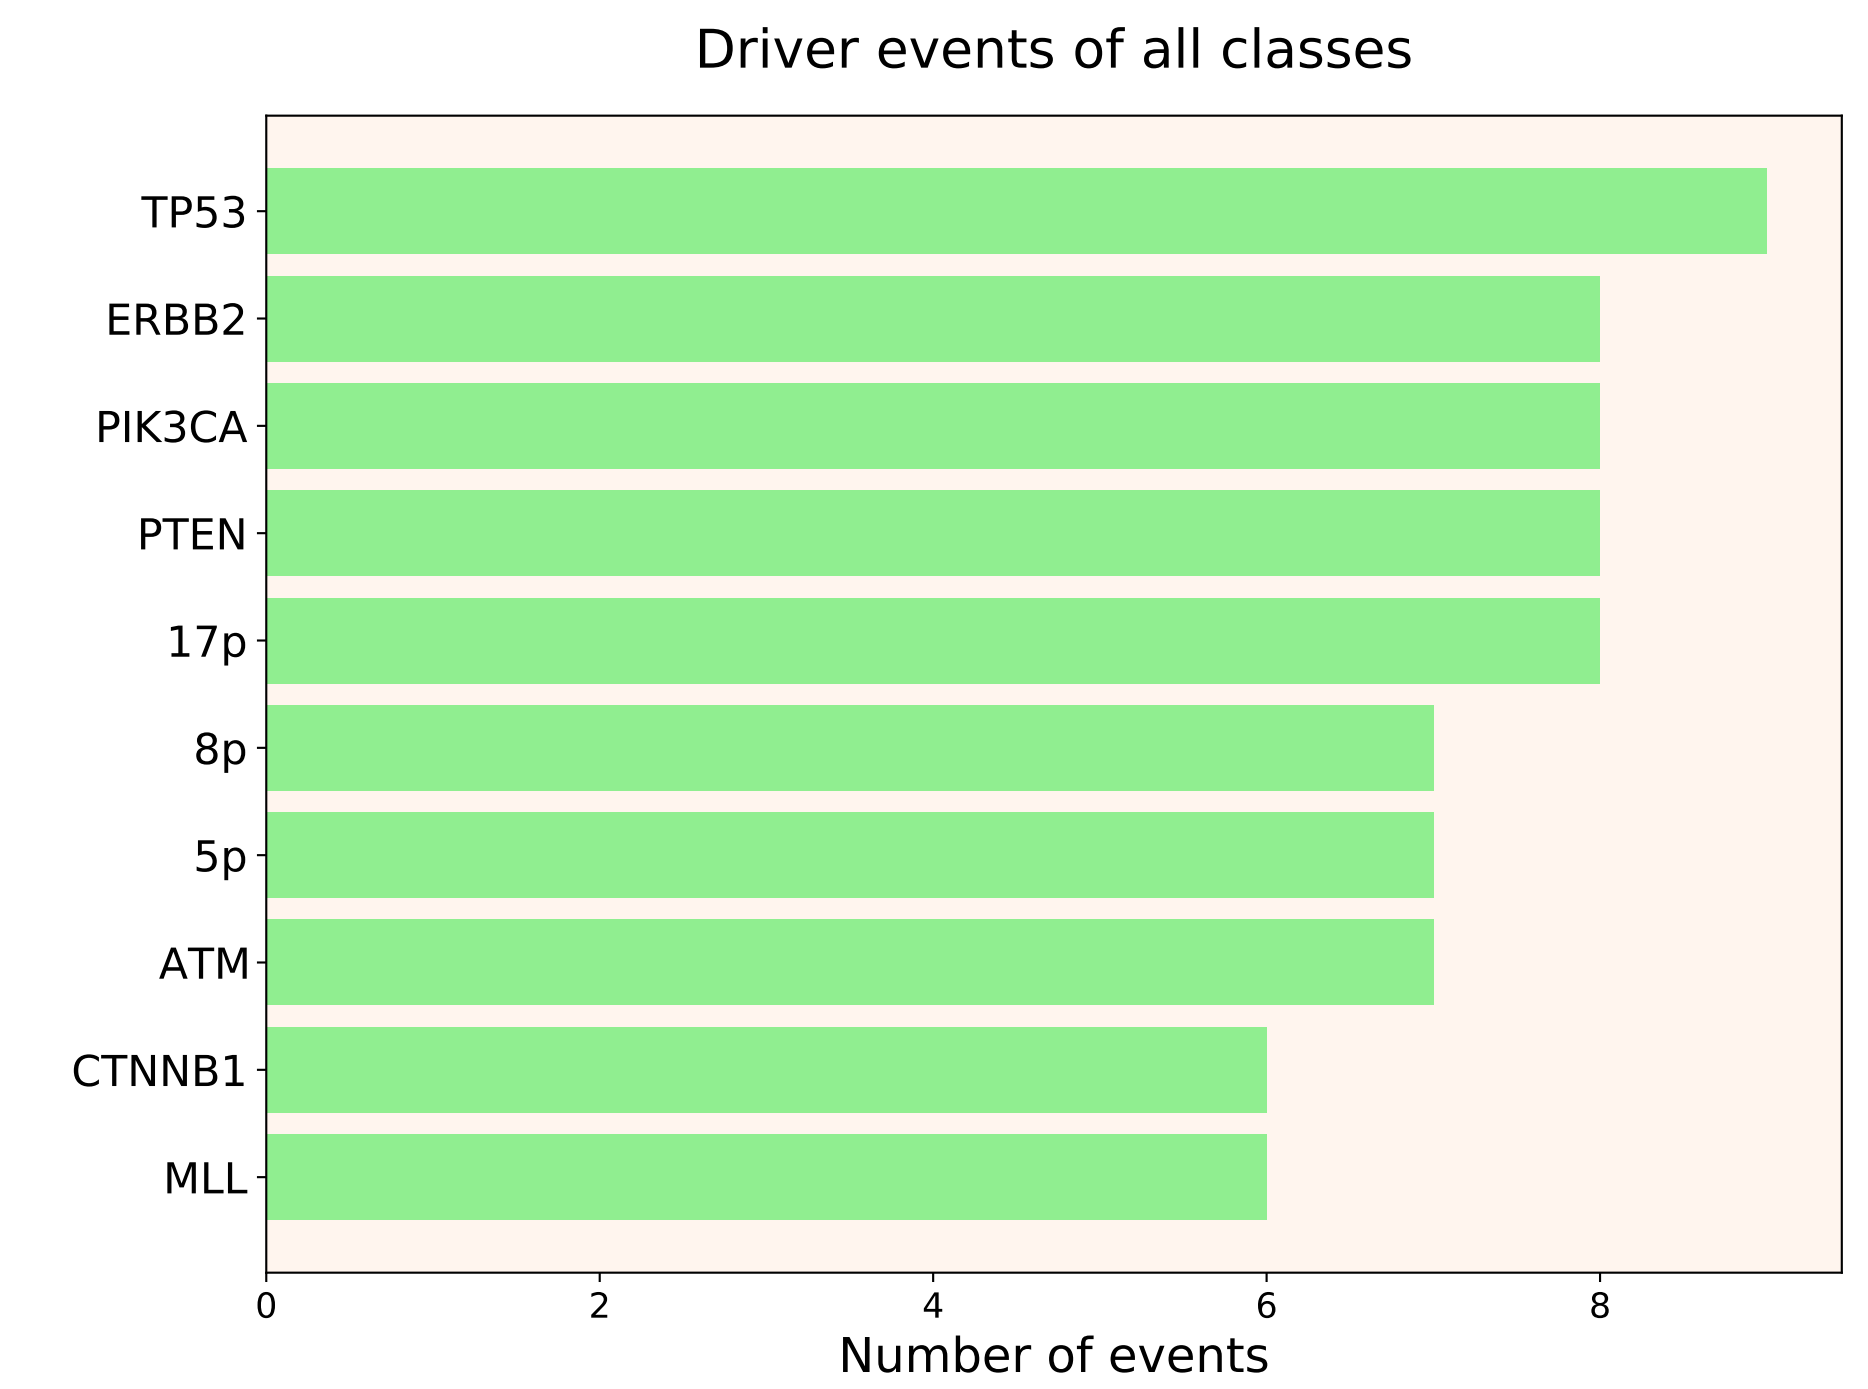

Supplement: Supplemental_Data_S1.zip [file Supplemental_Data_S1.zip]

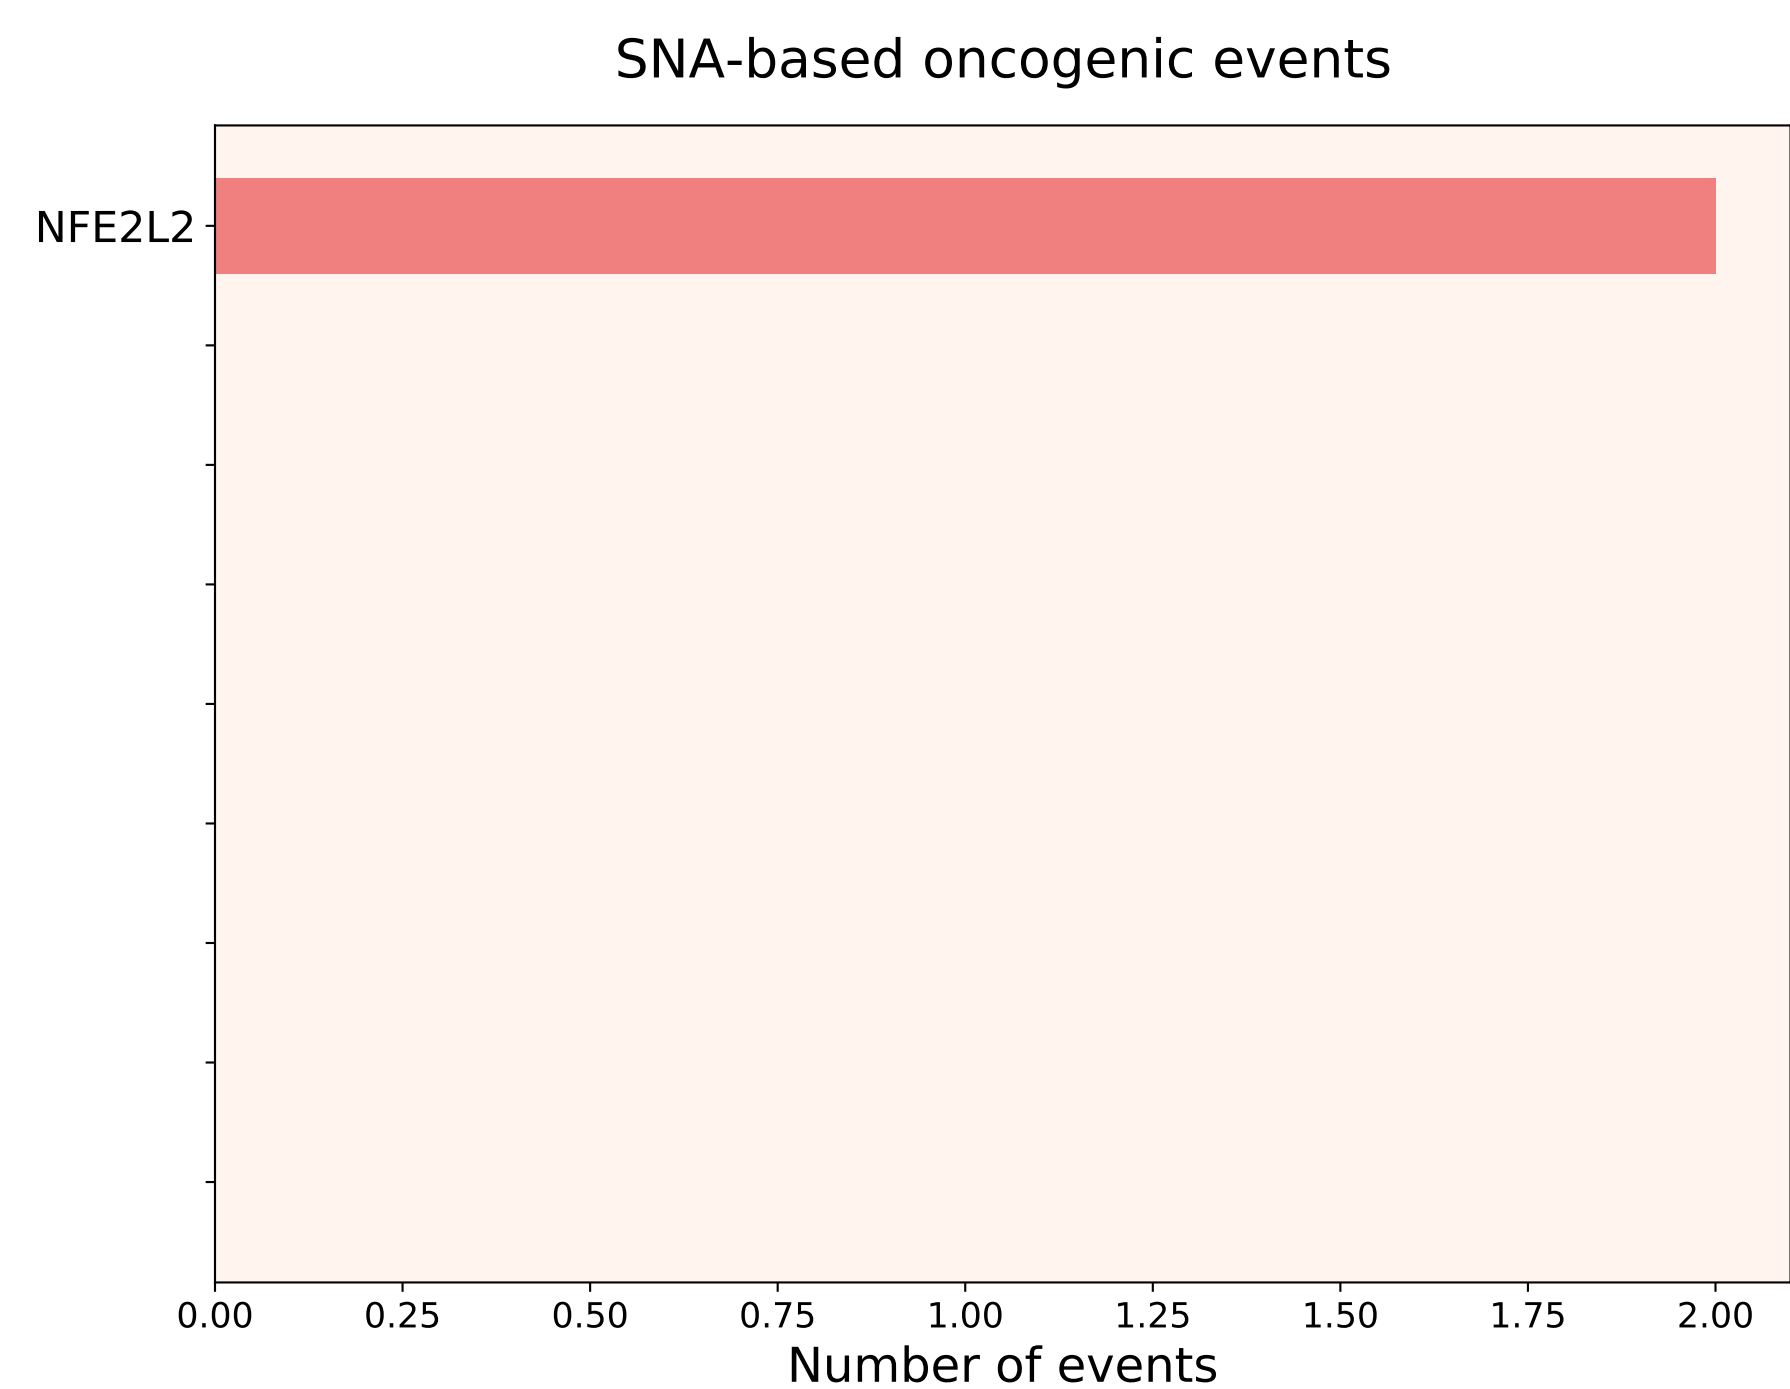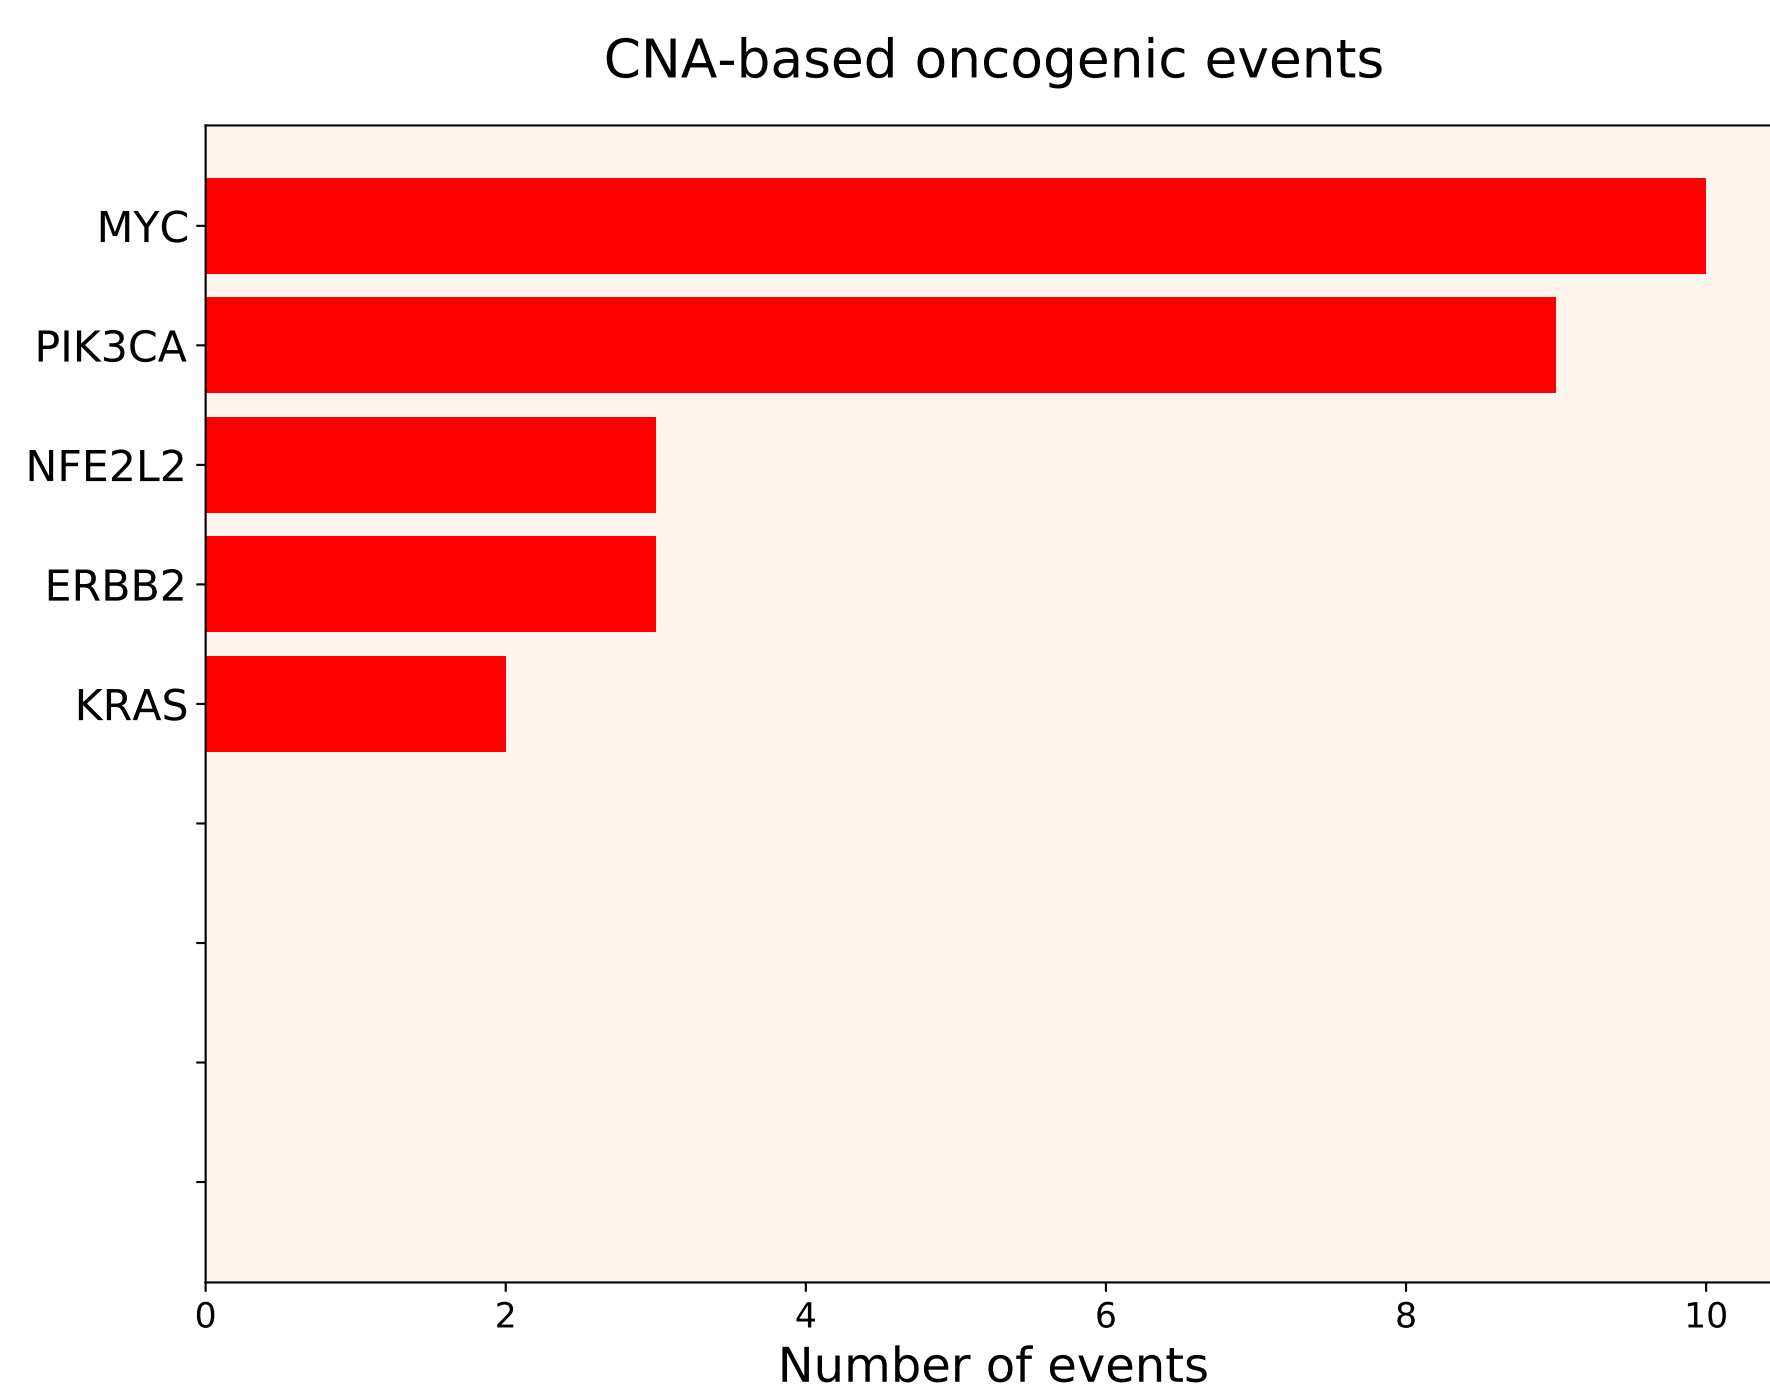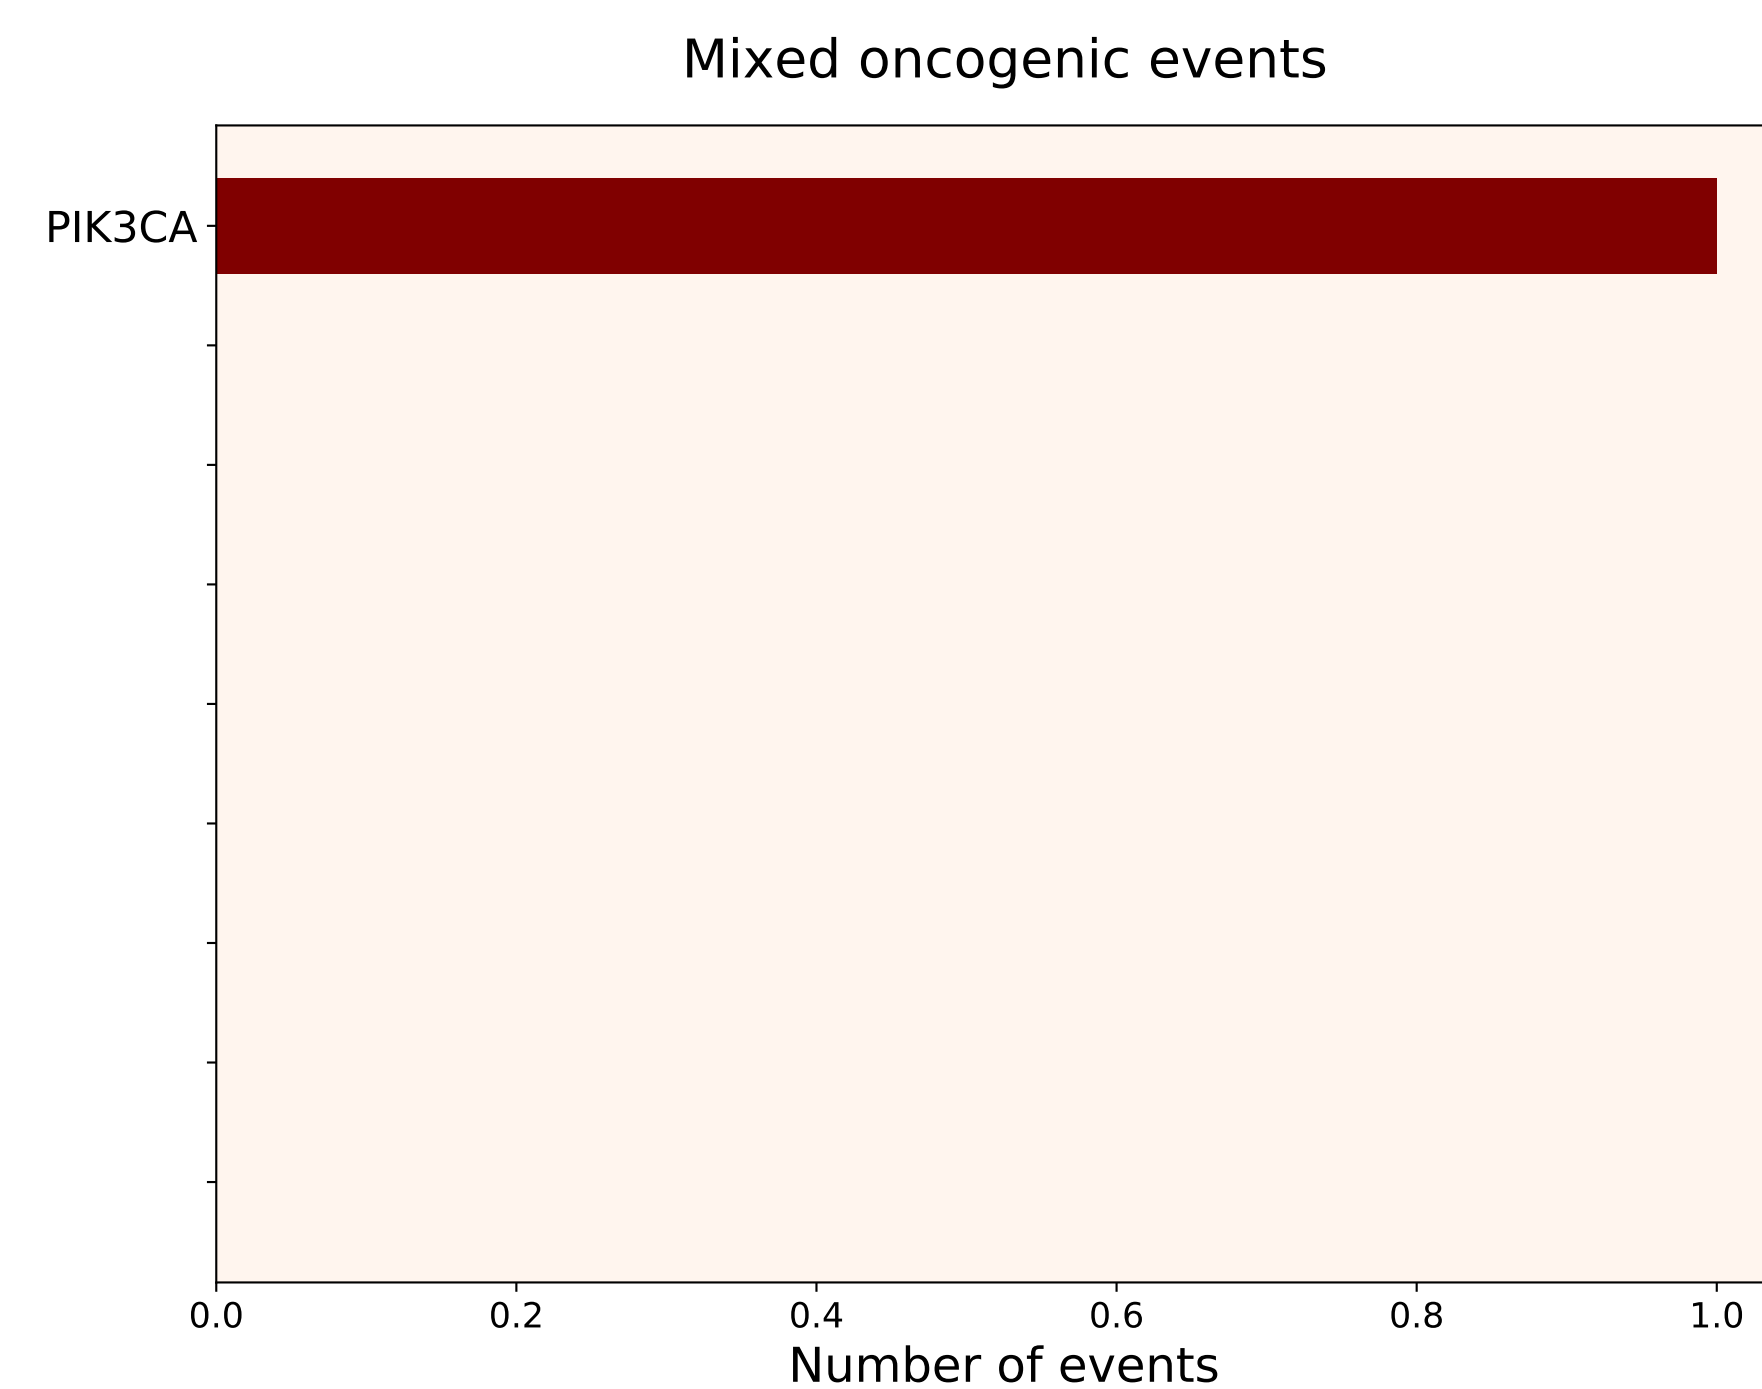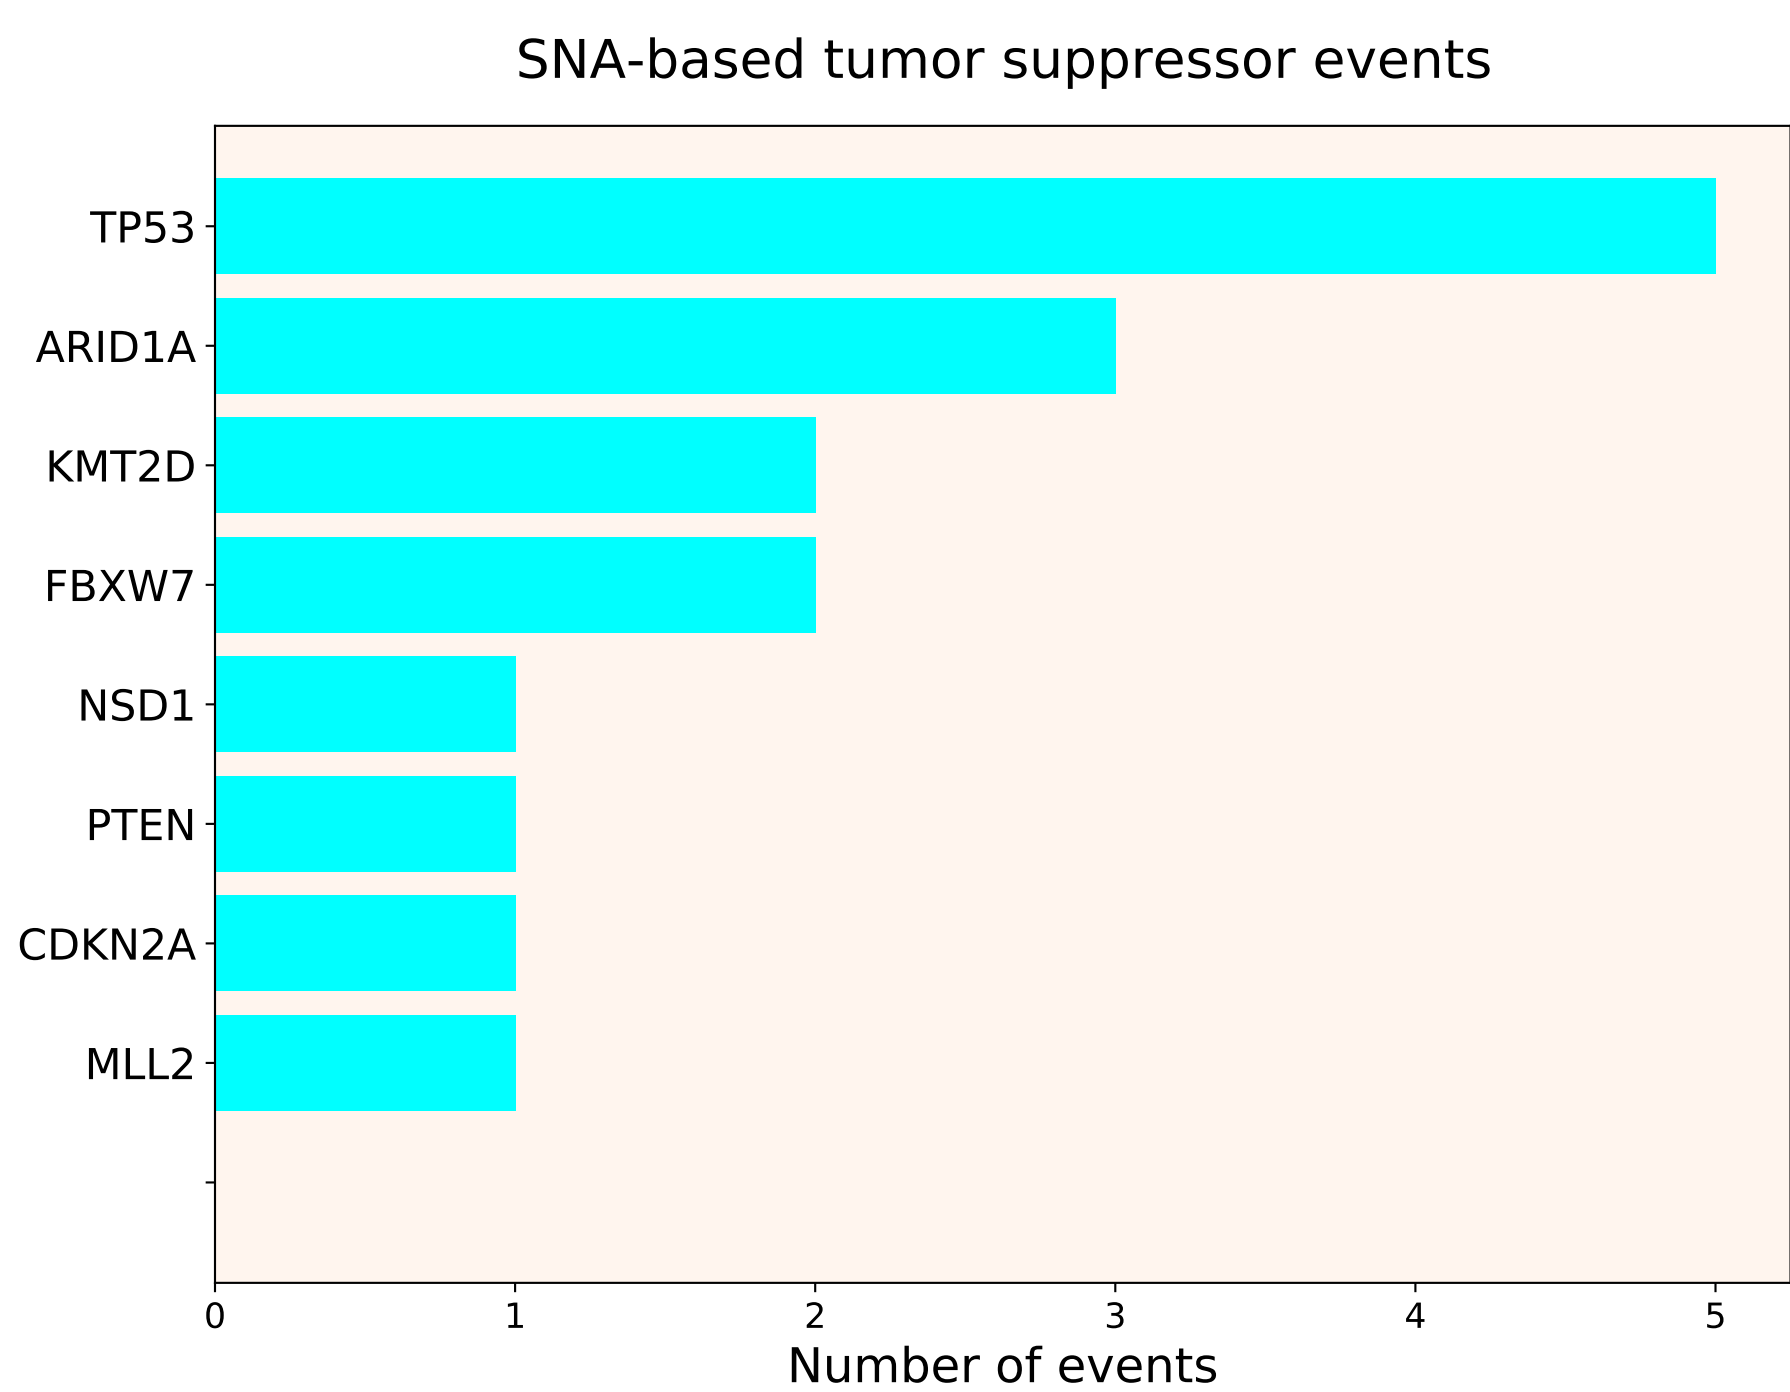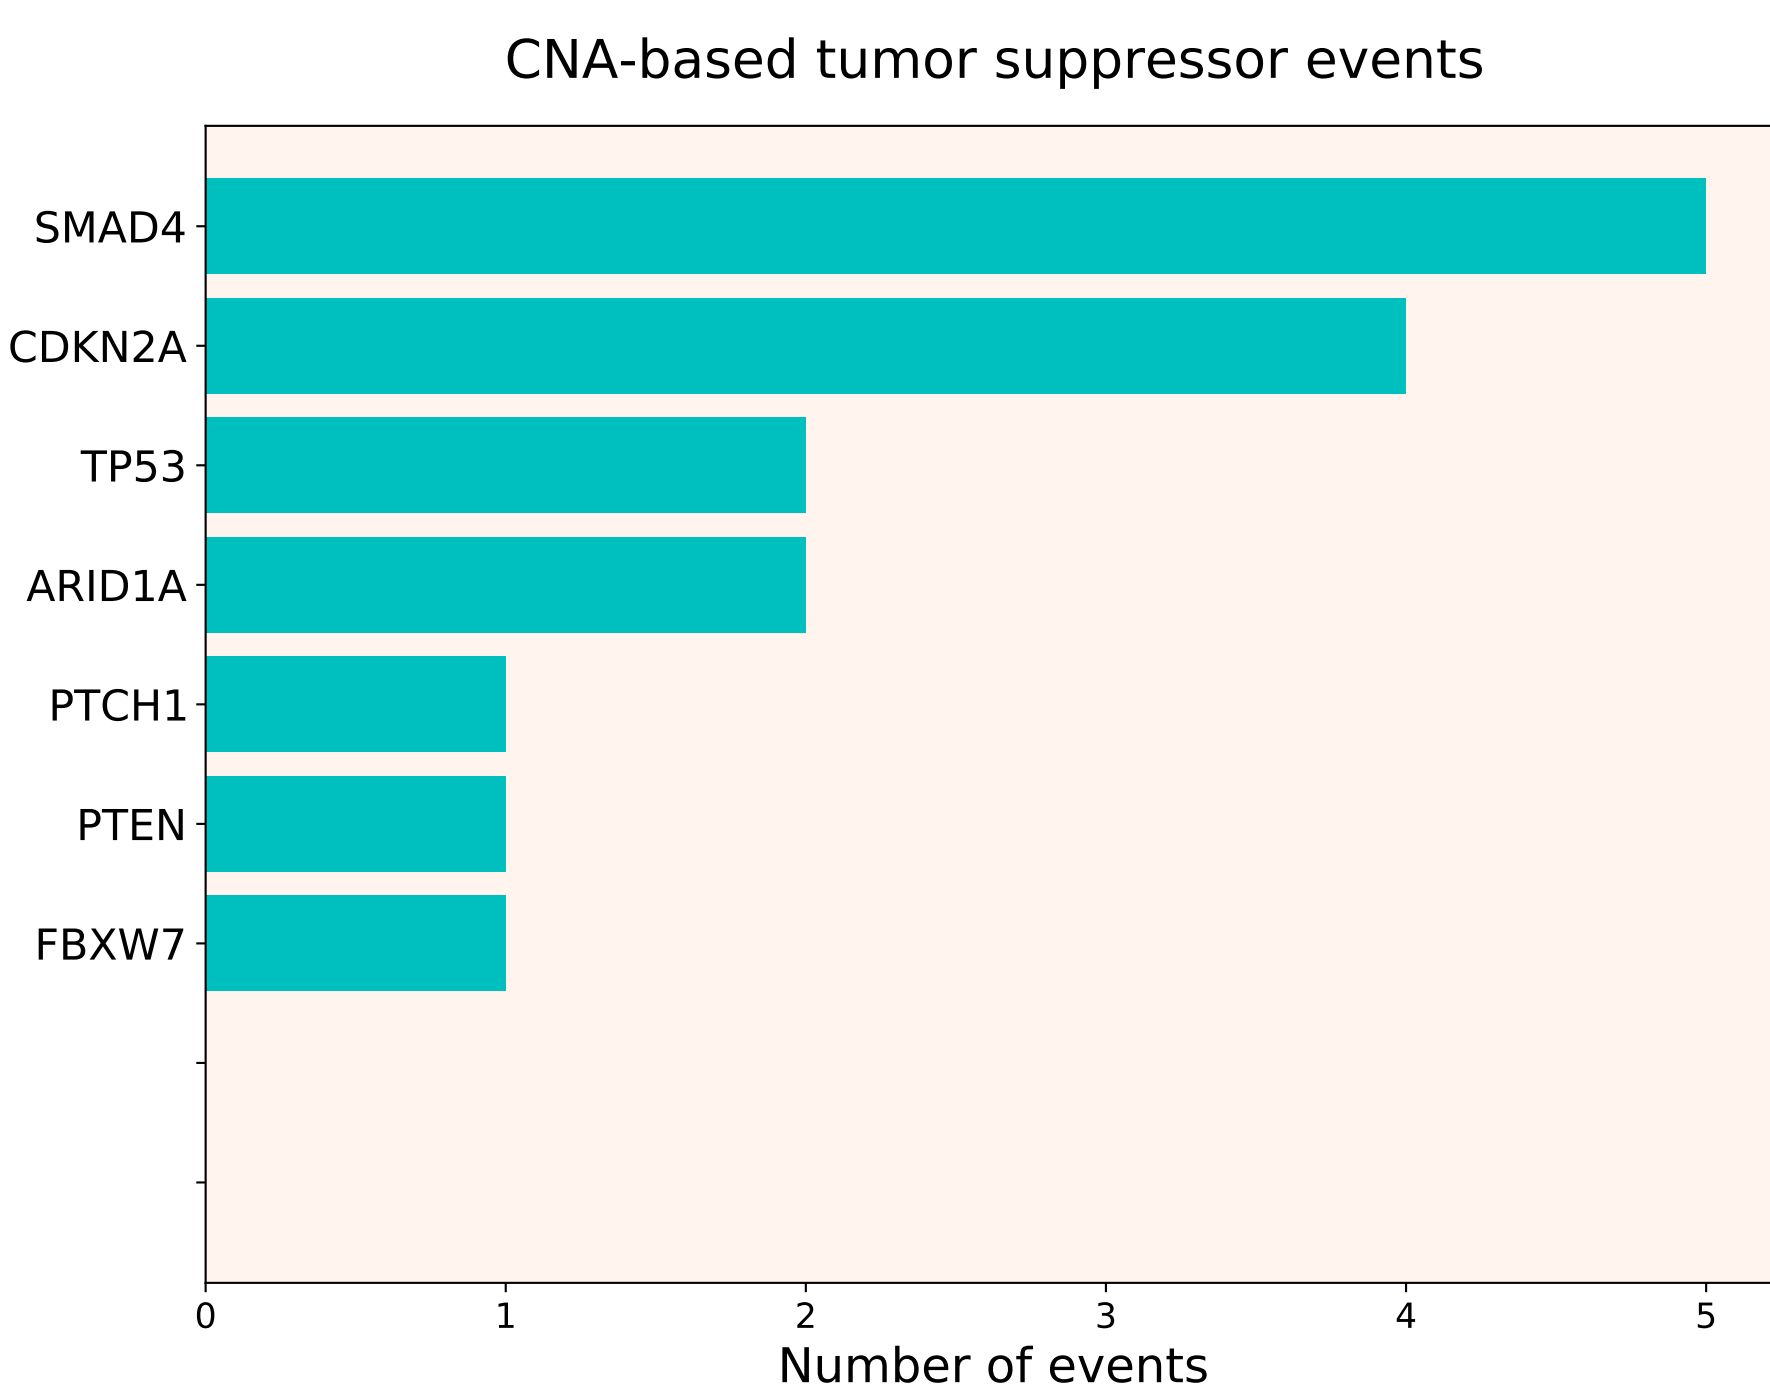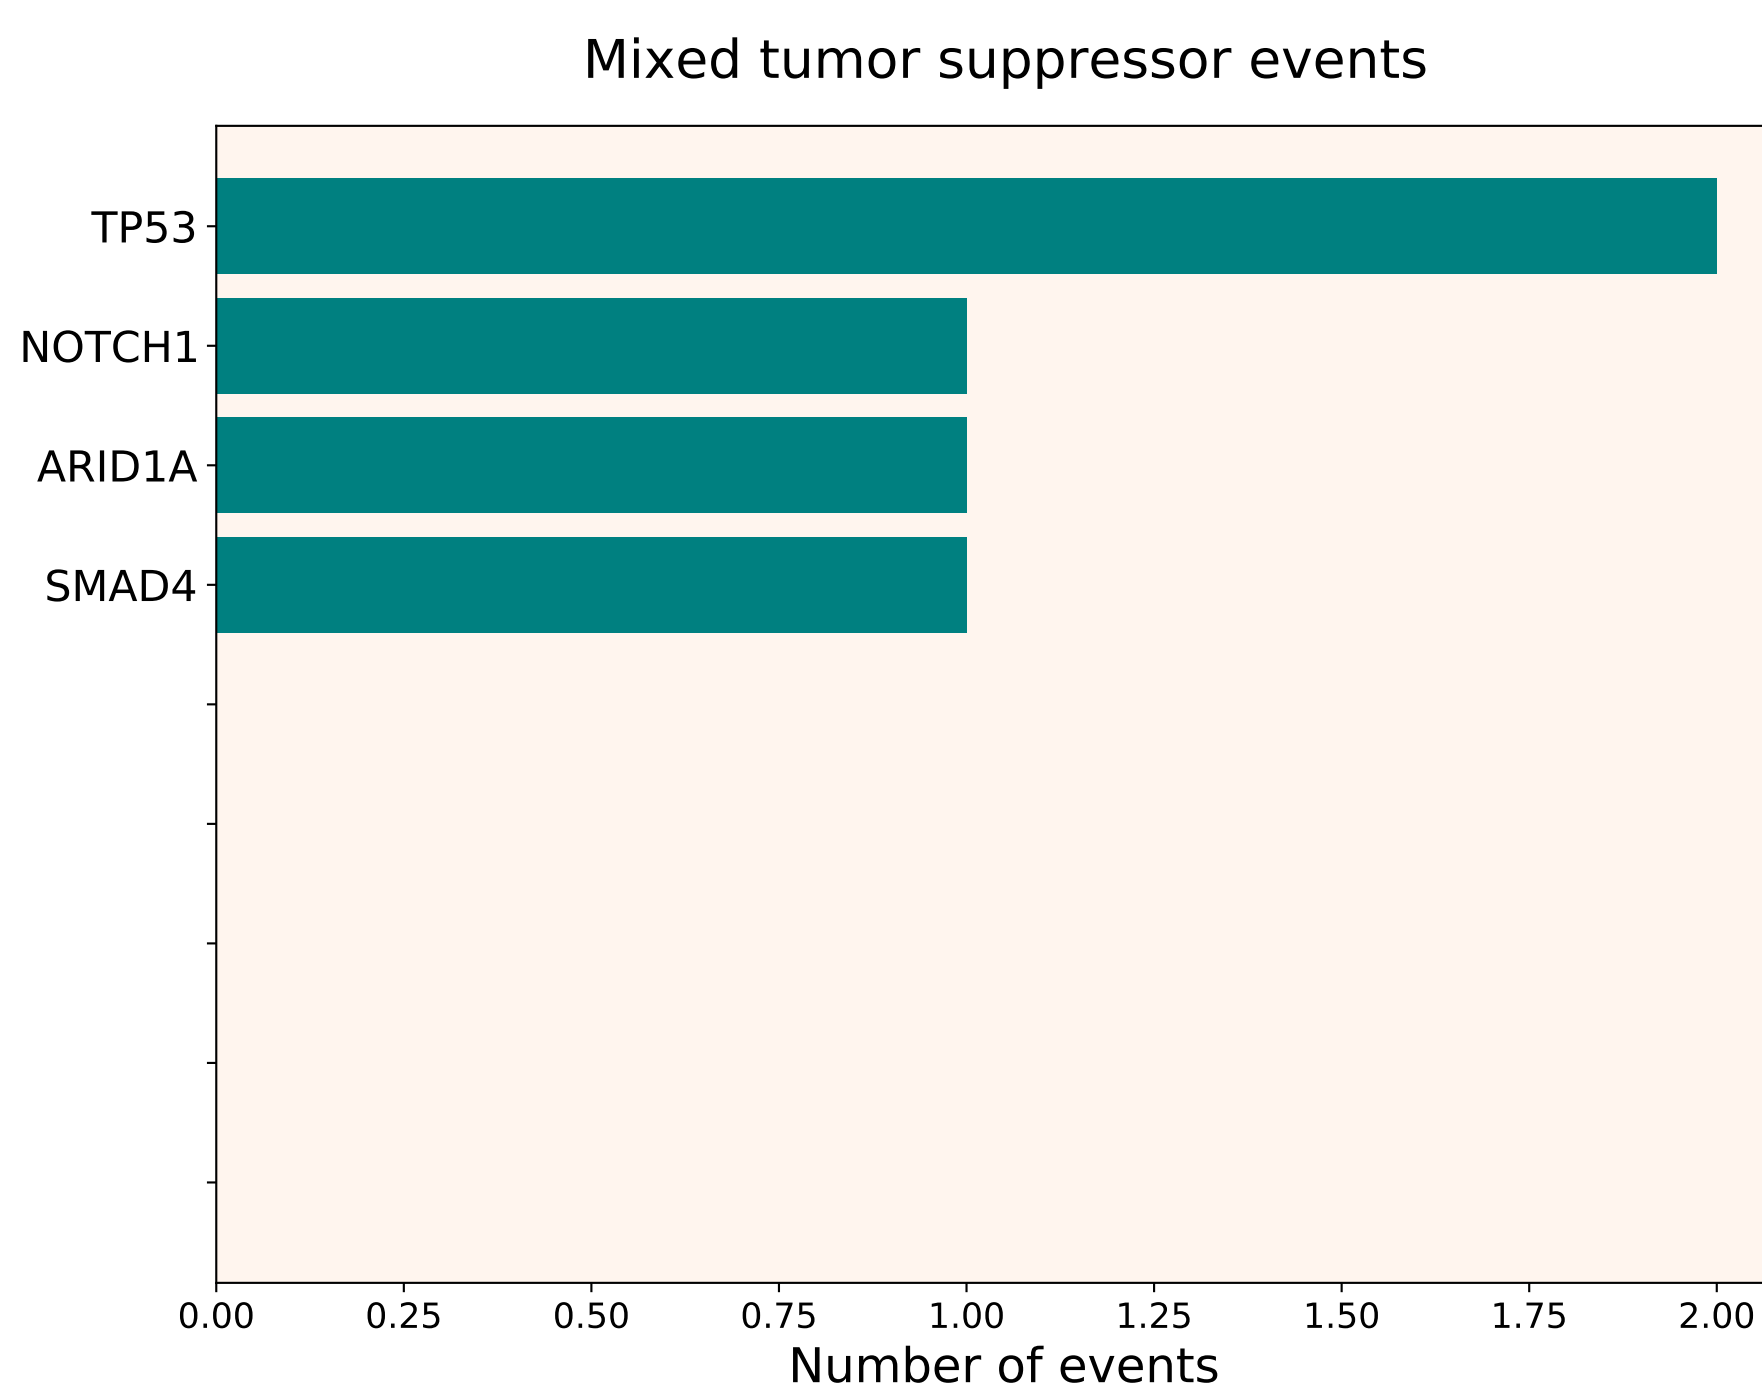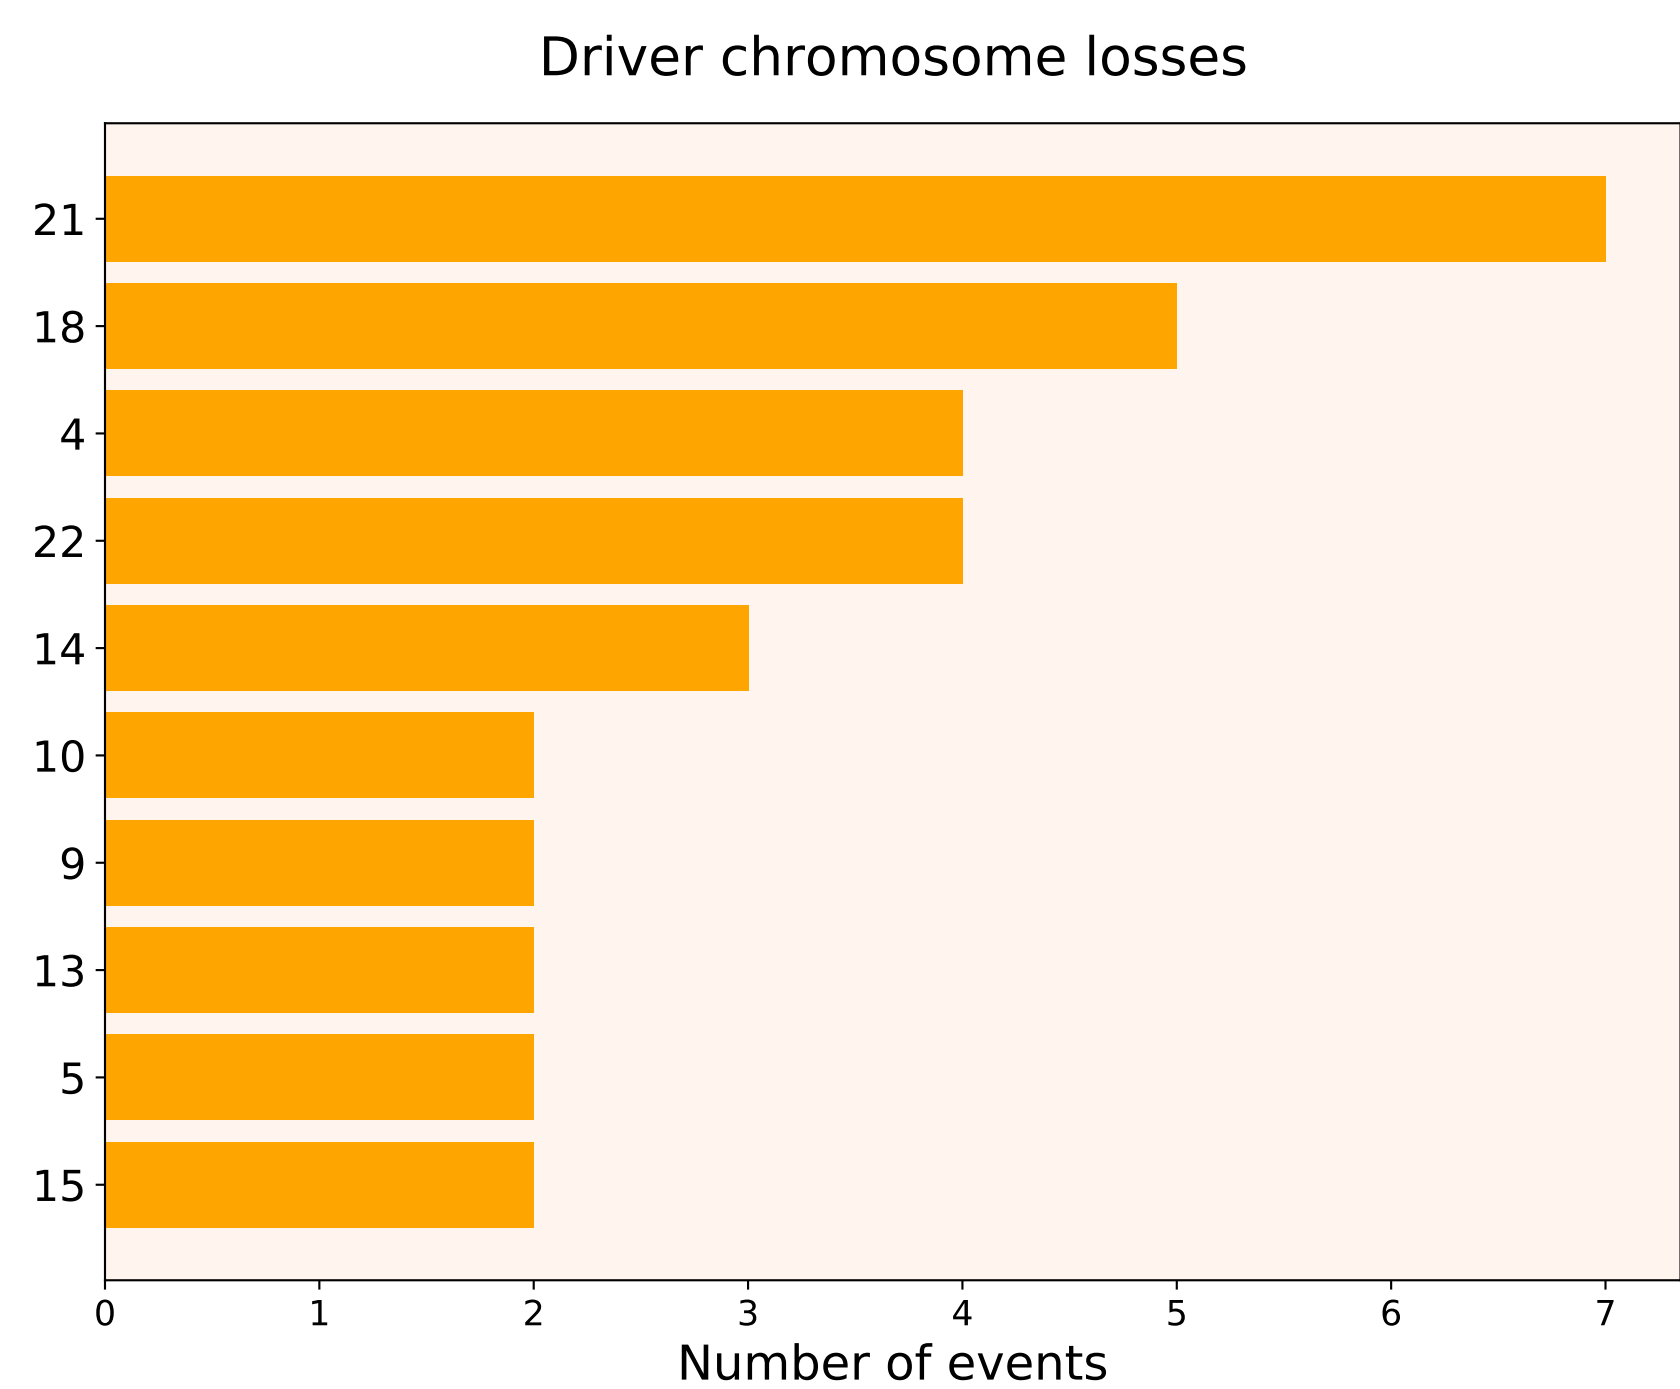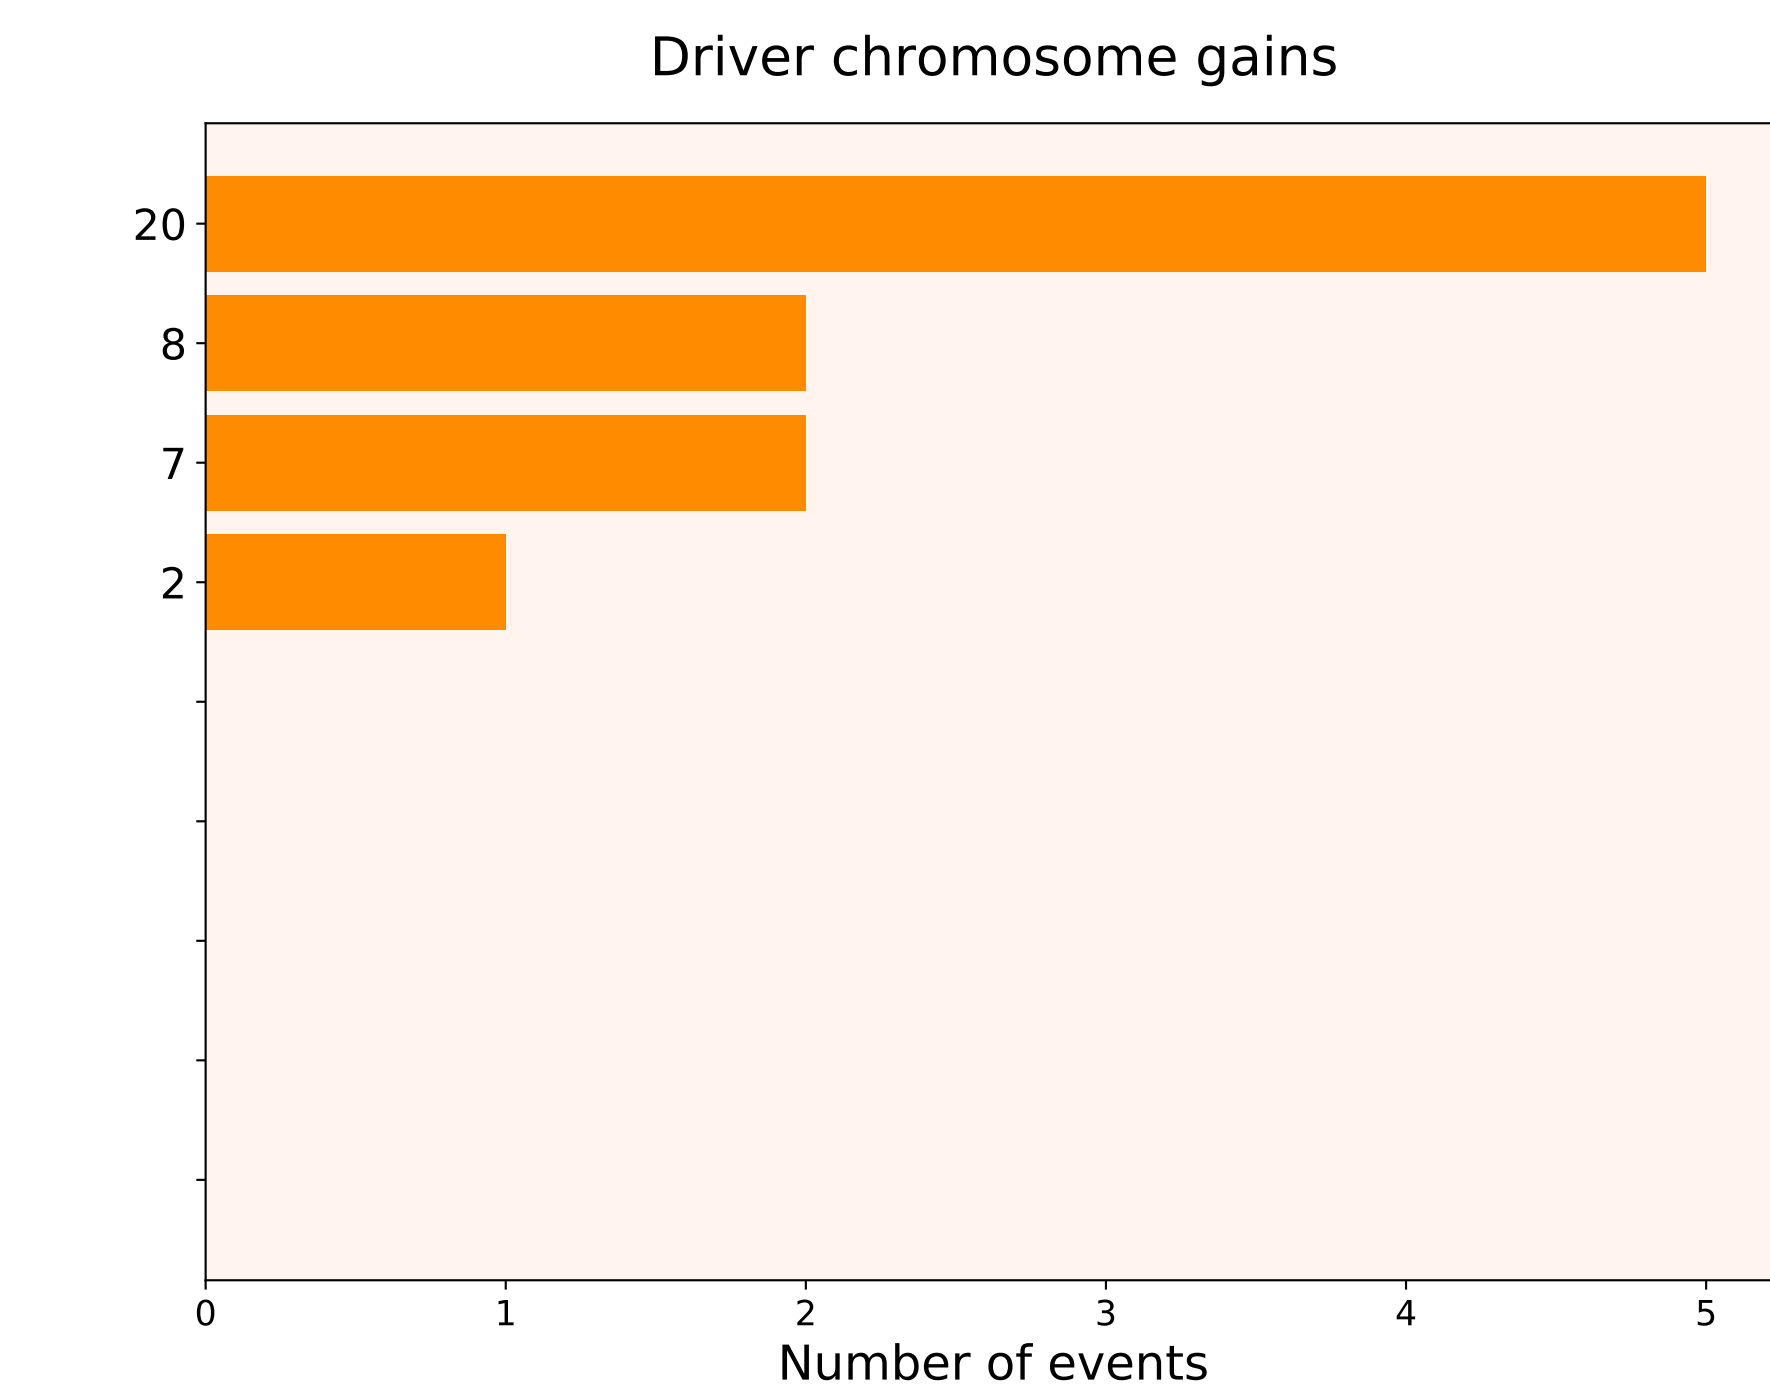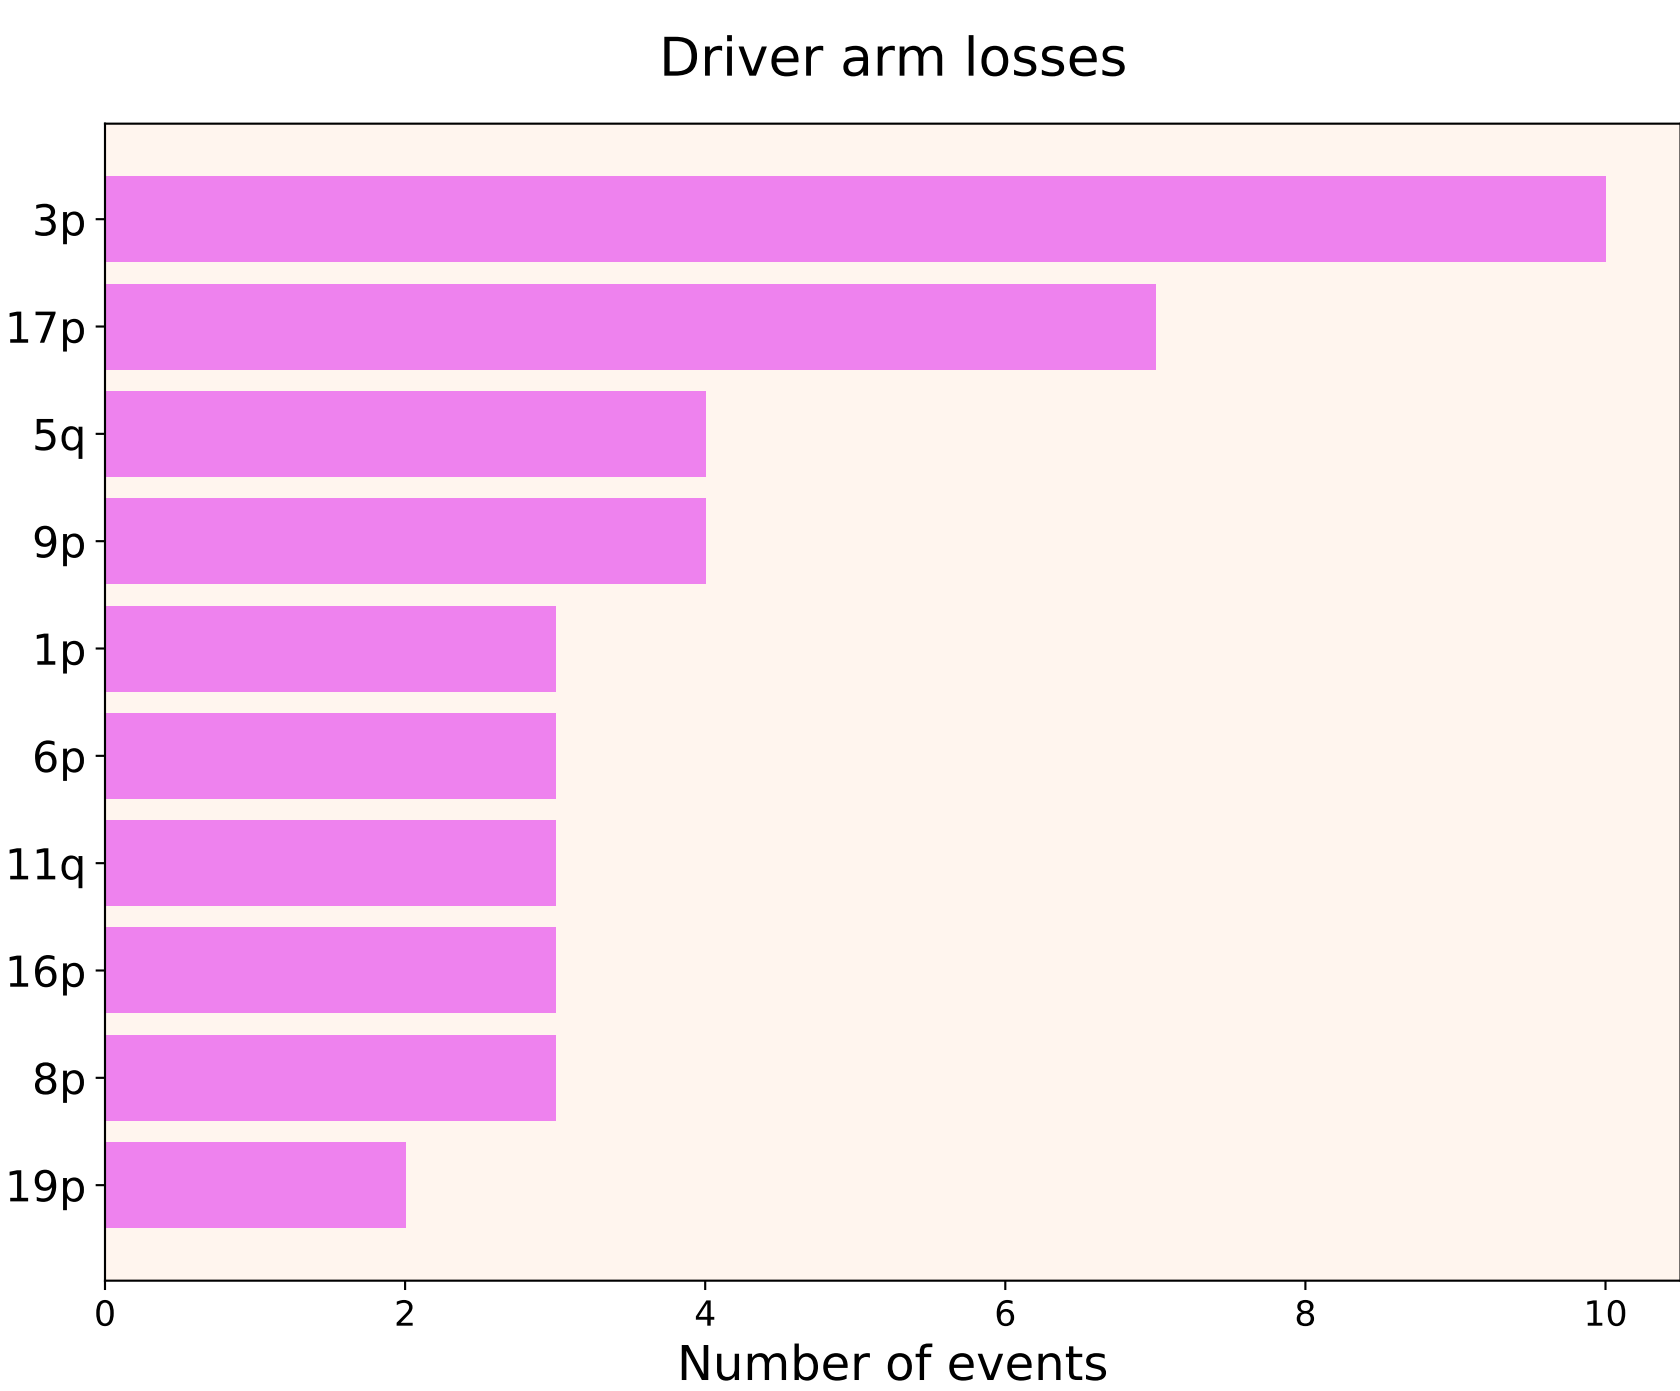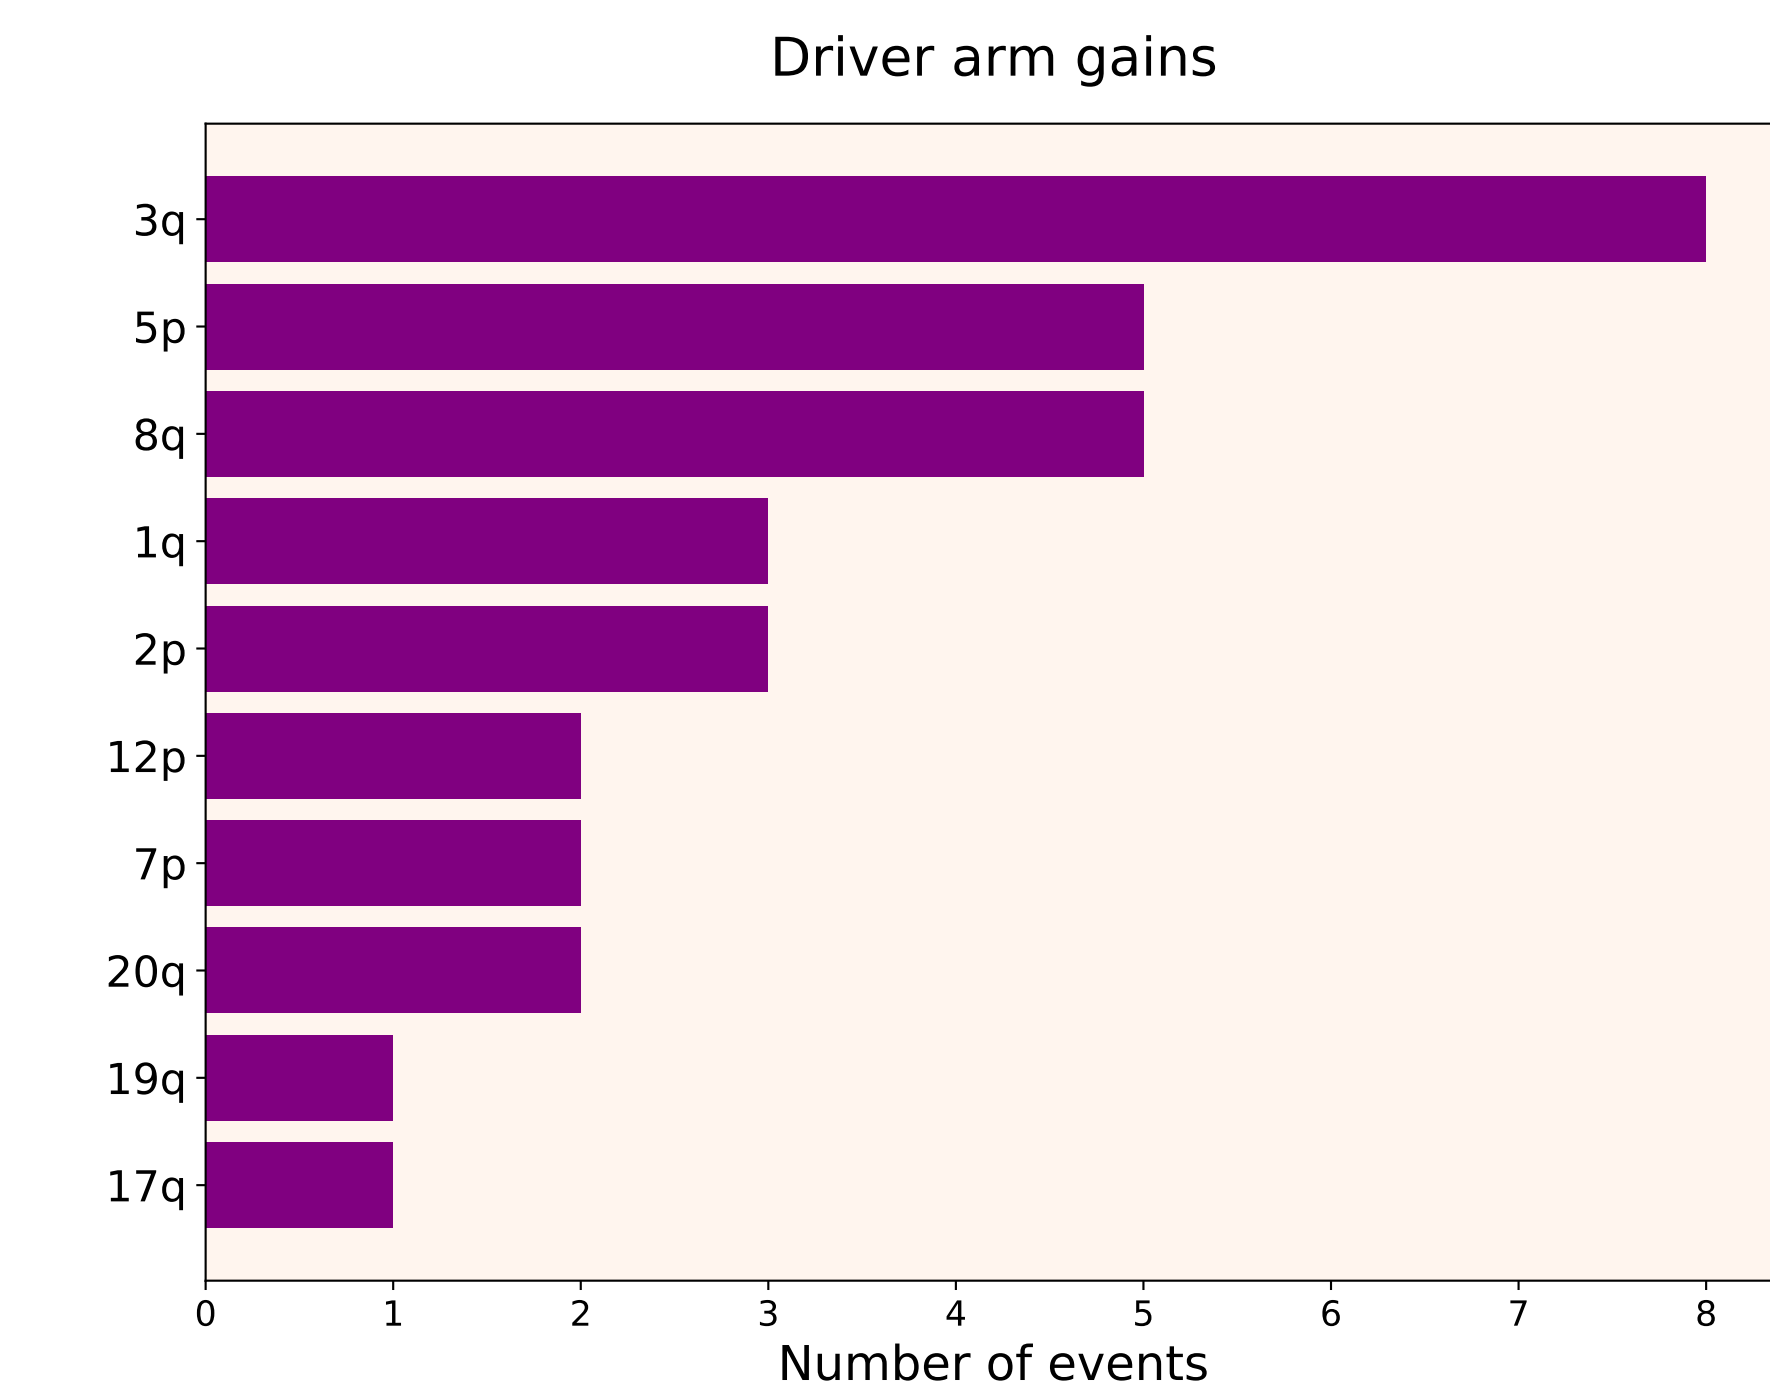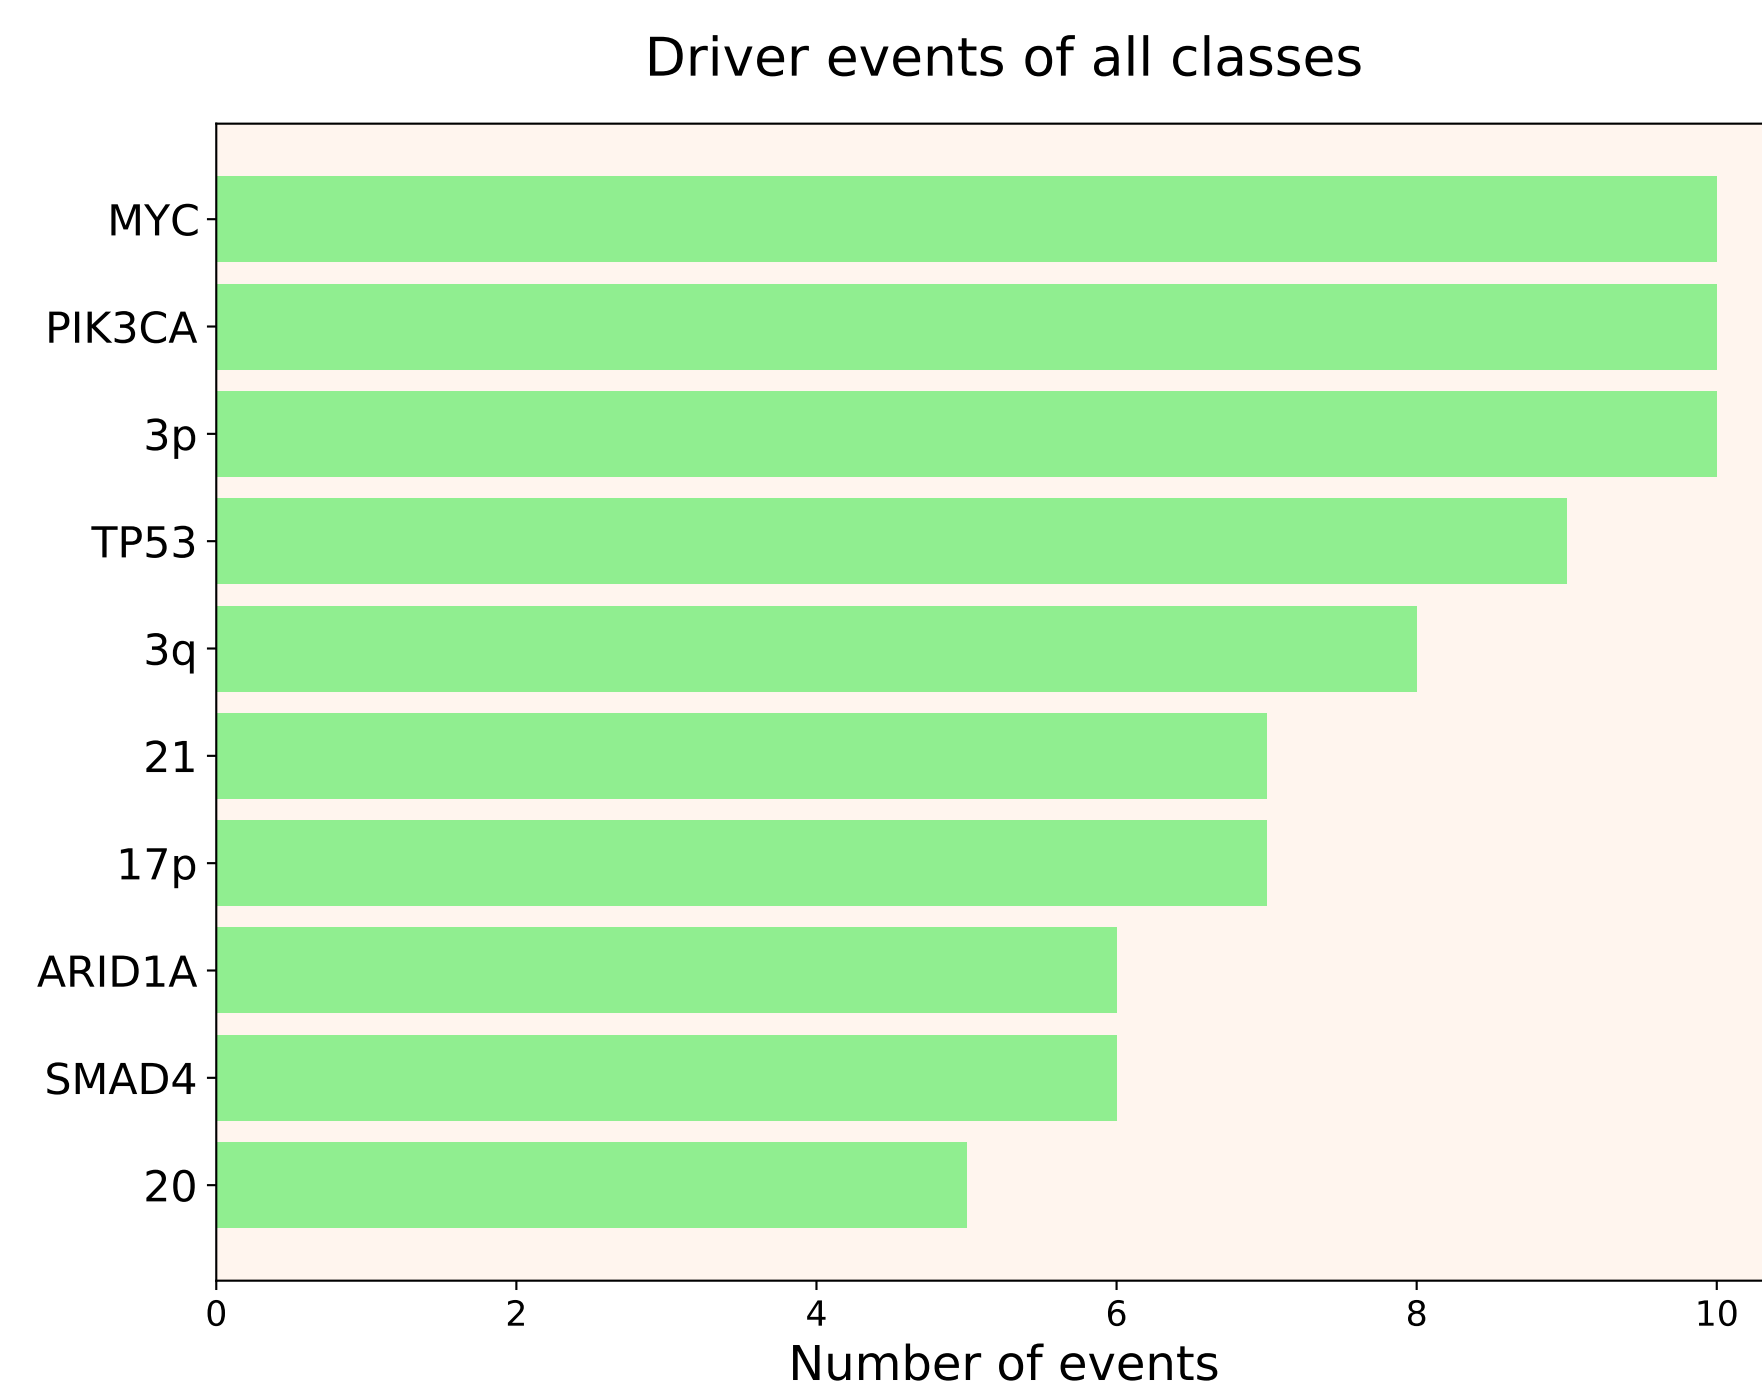

Supplement: Supplemental_Data_S1.zip [file Supplemental_Data_S1.zip]

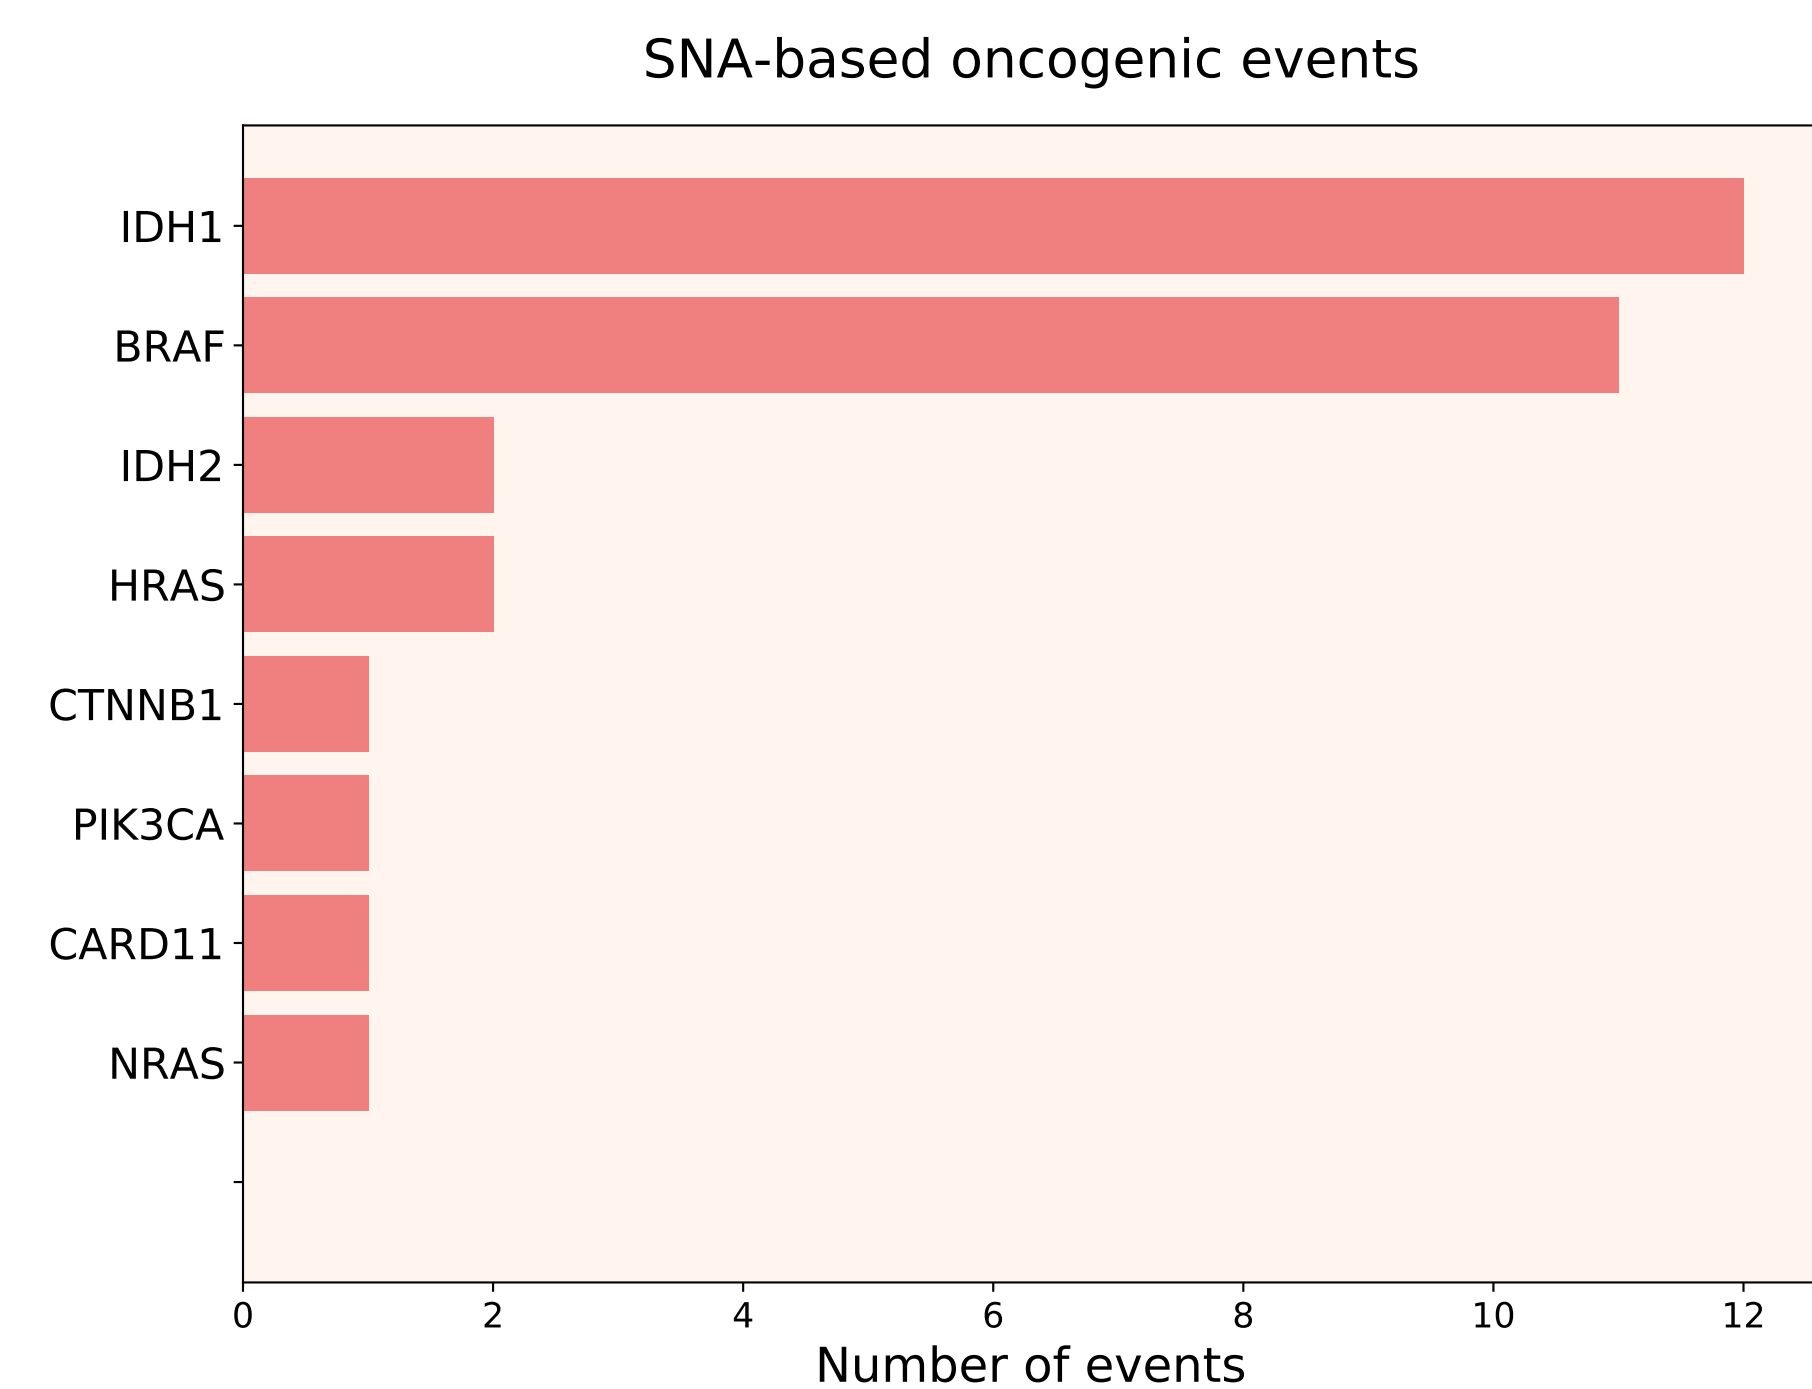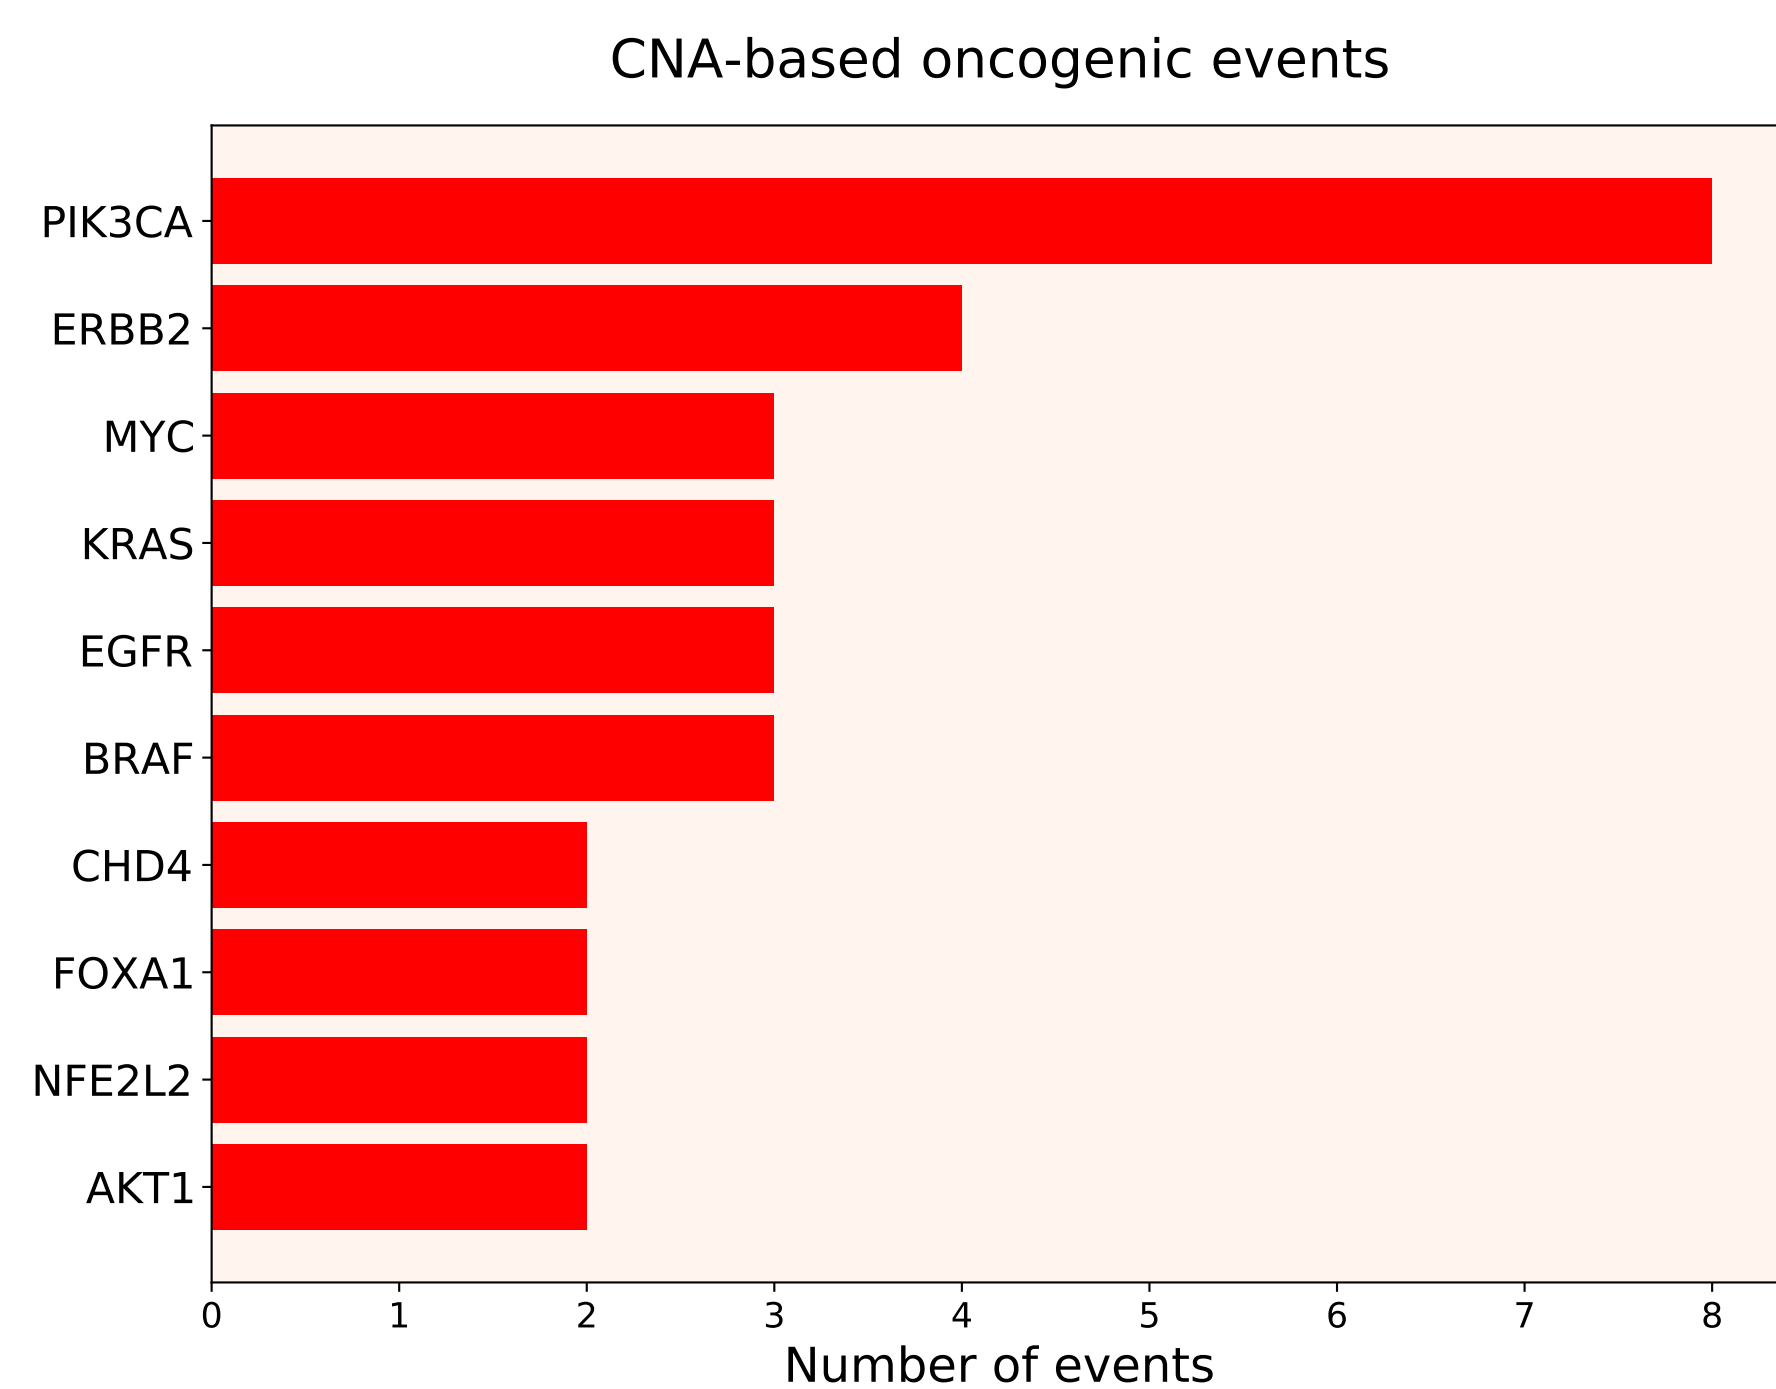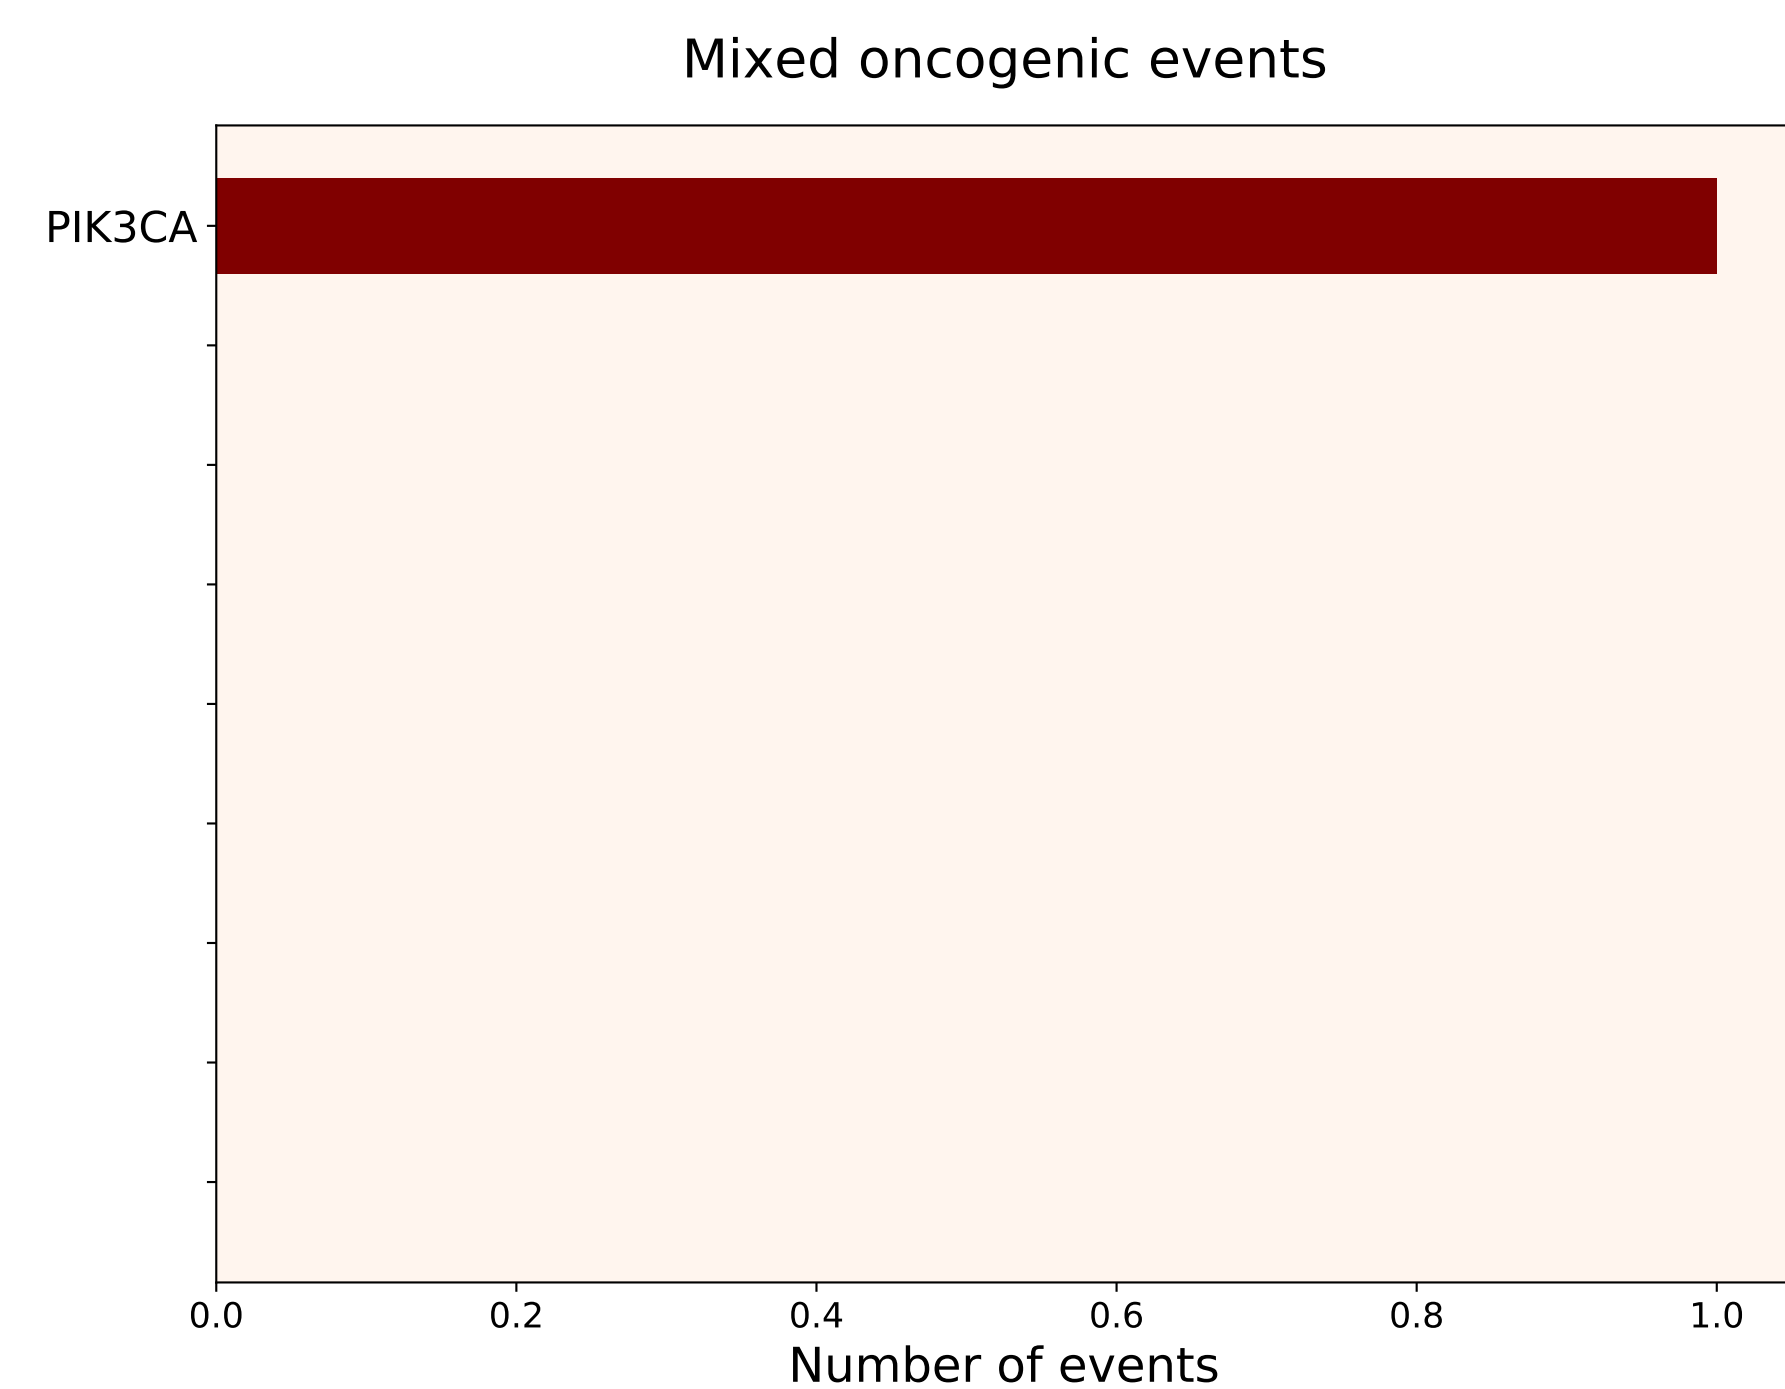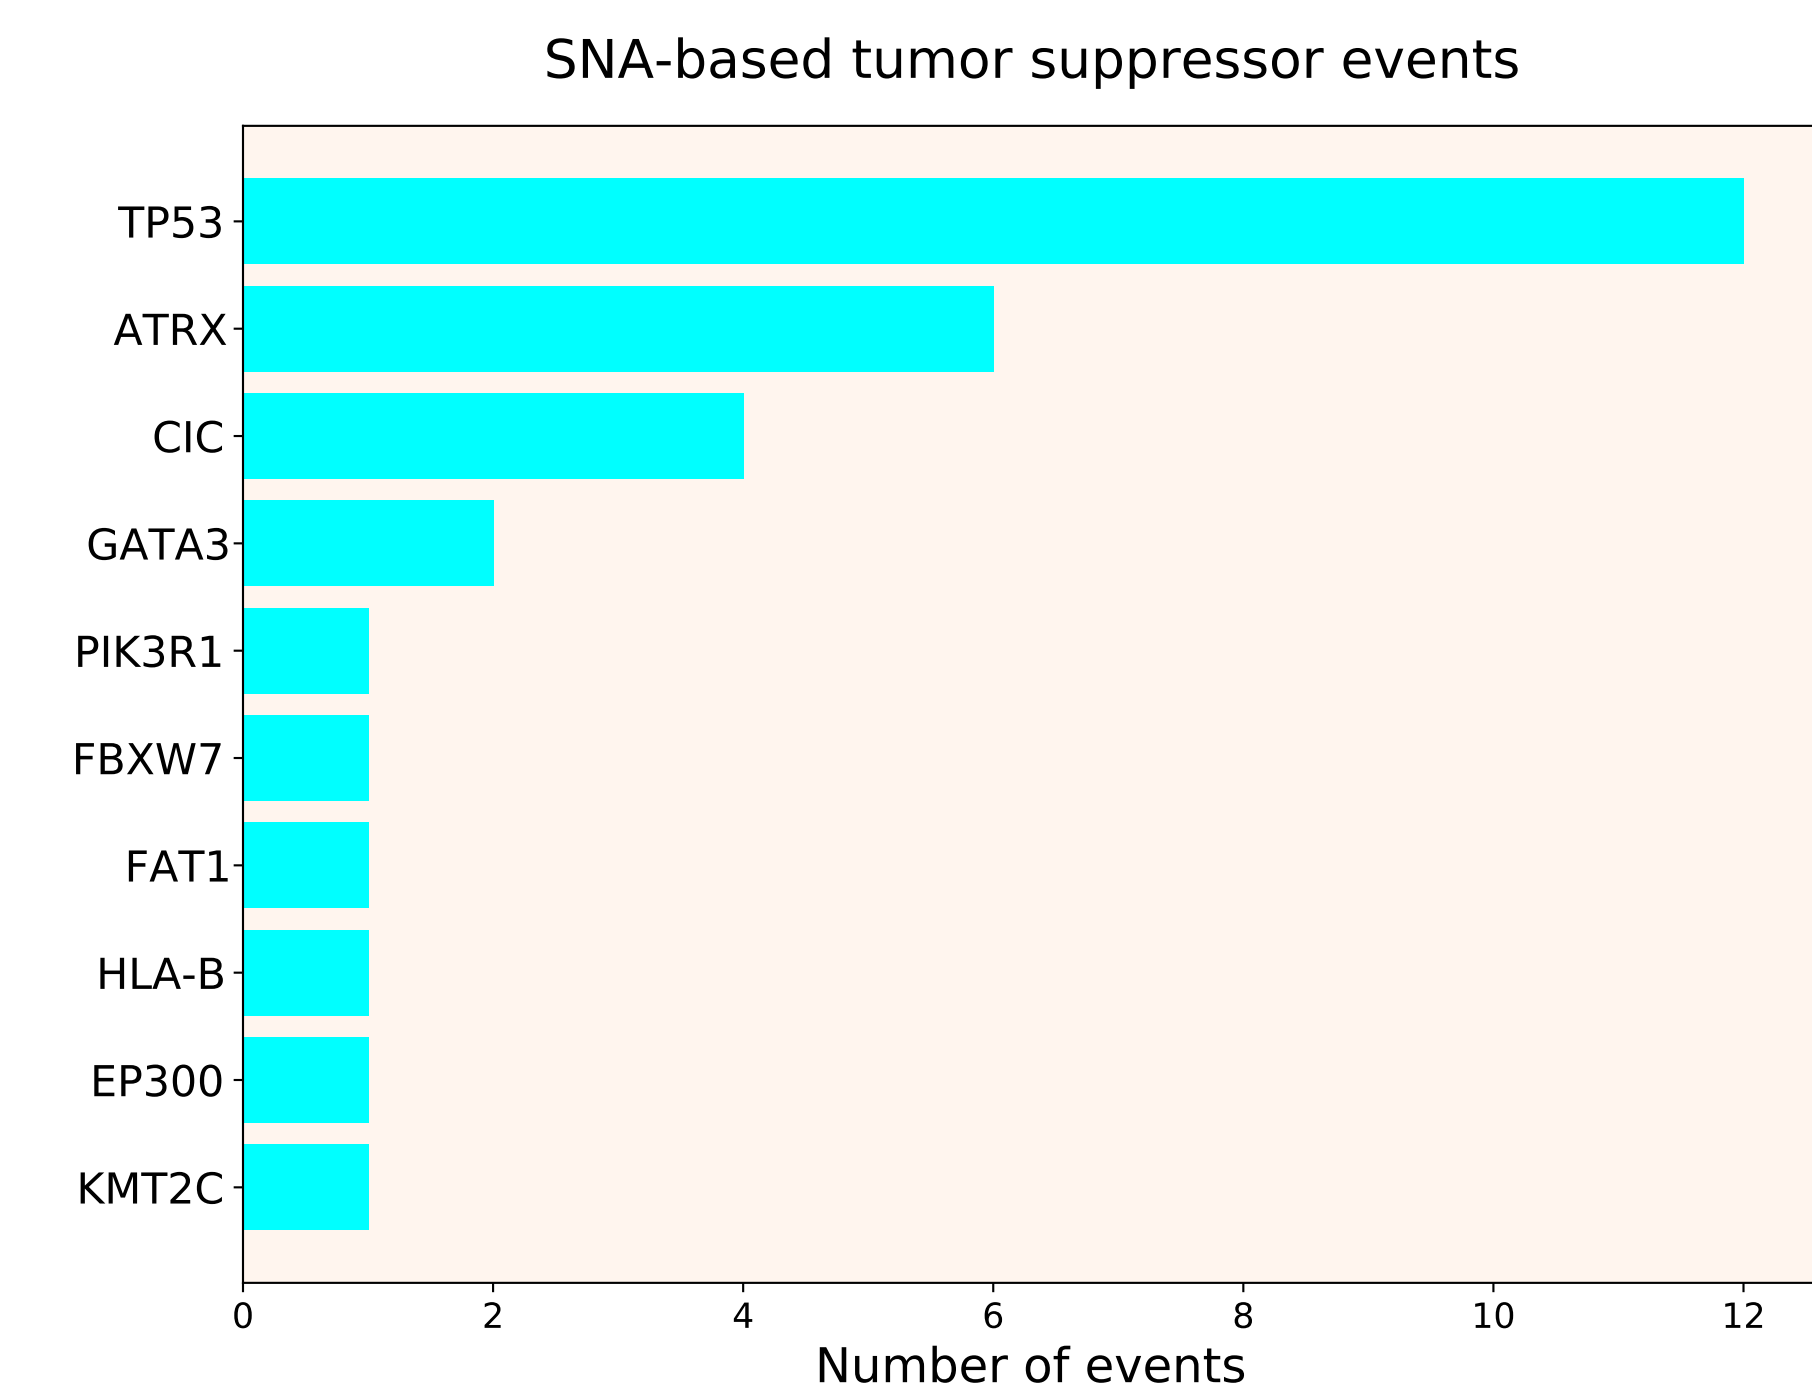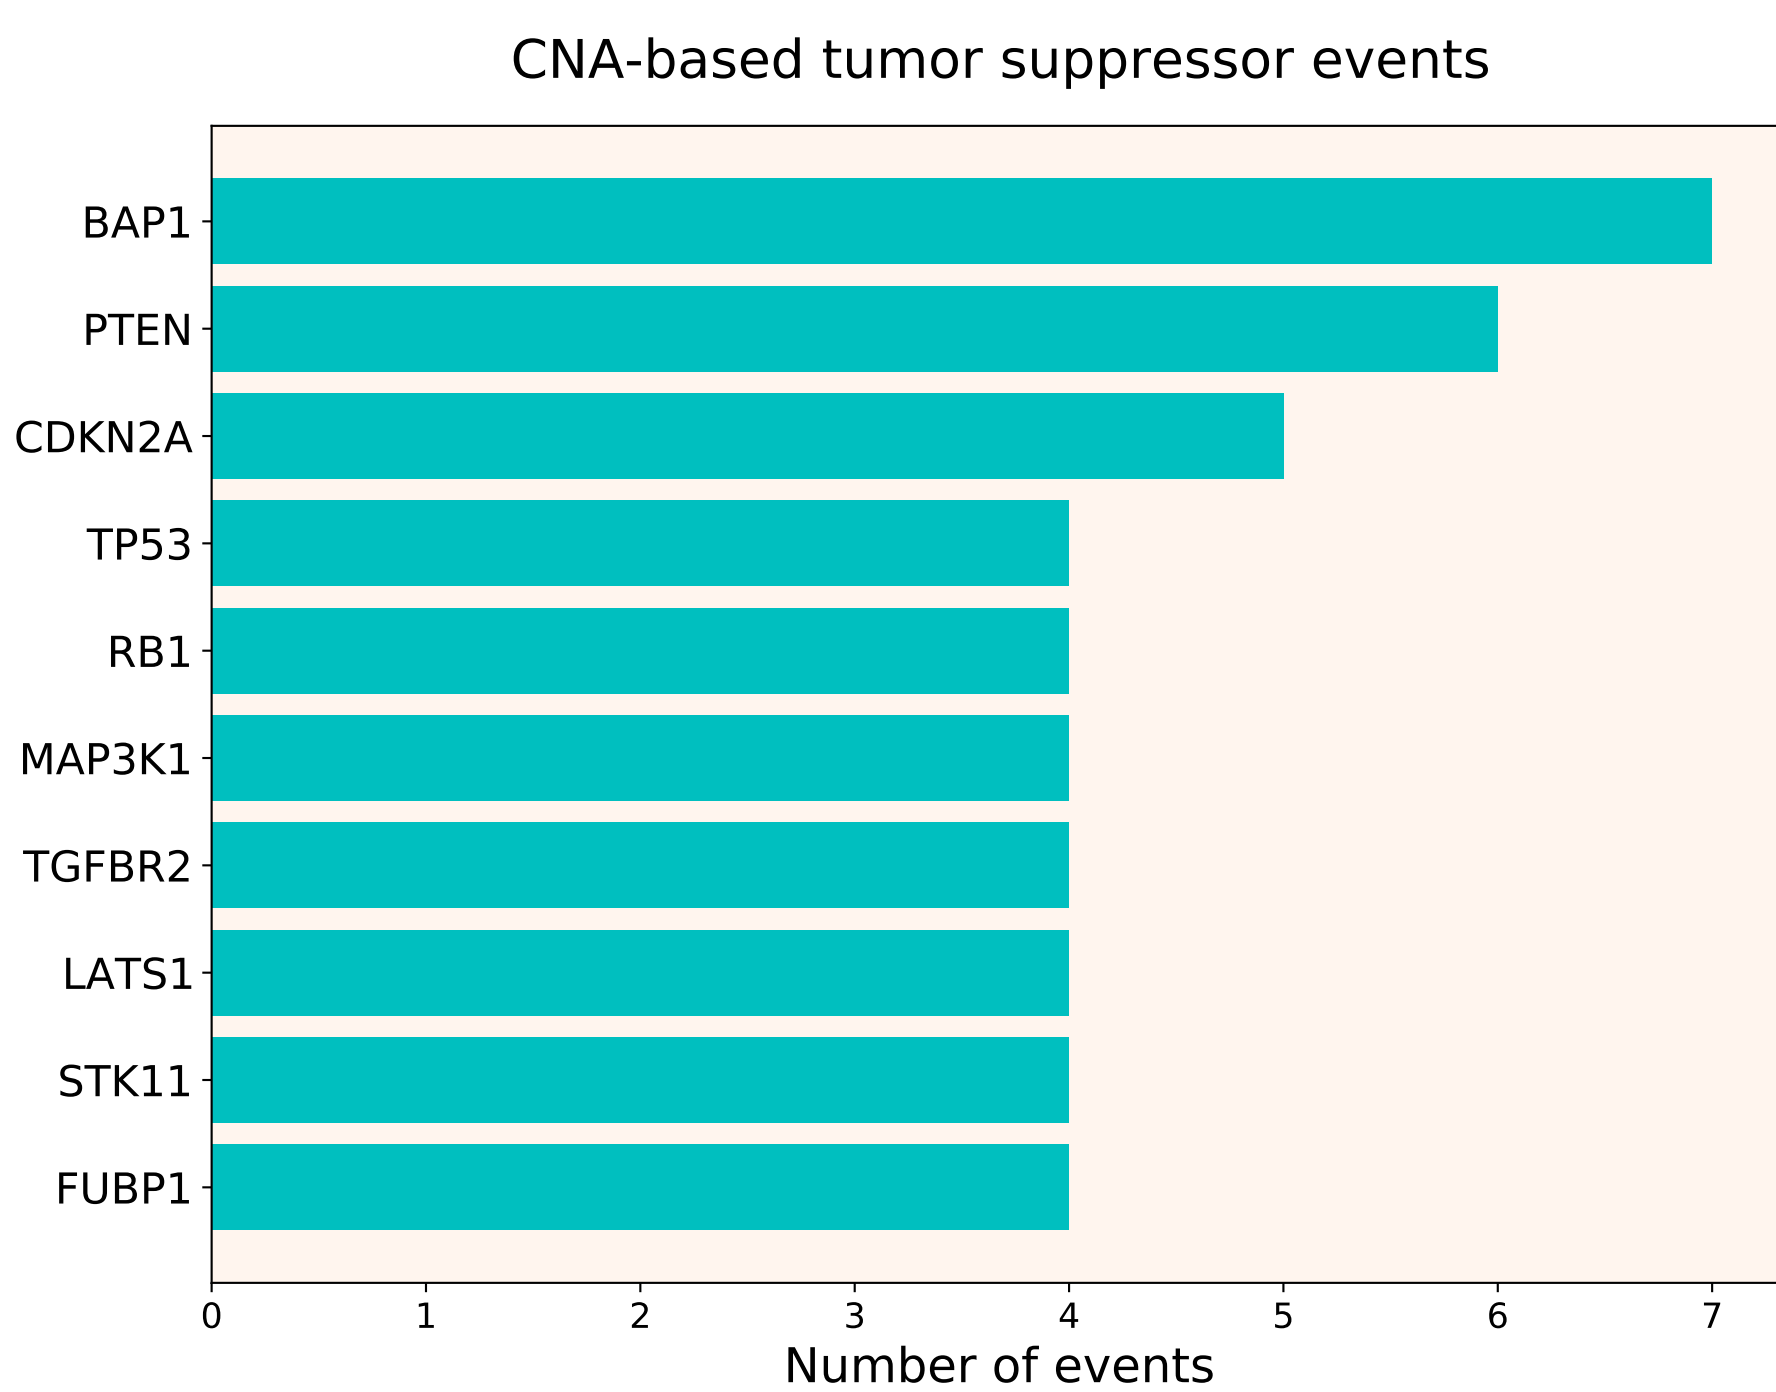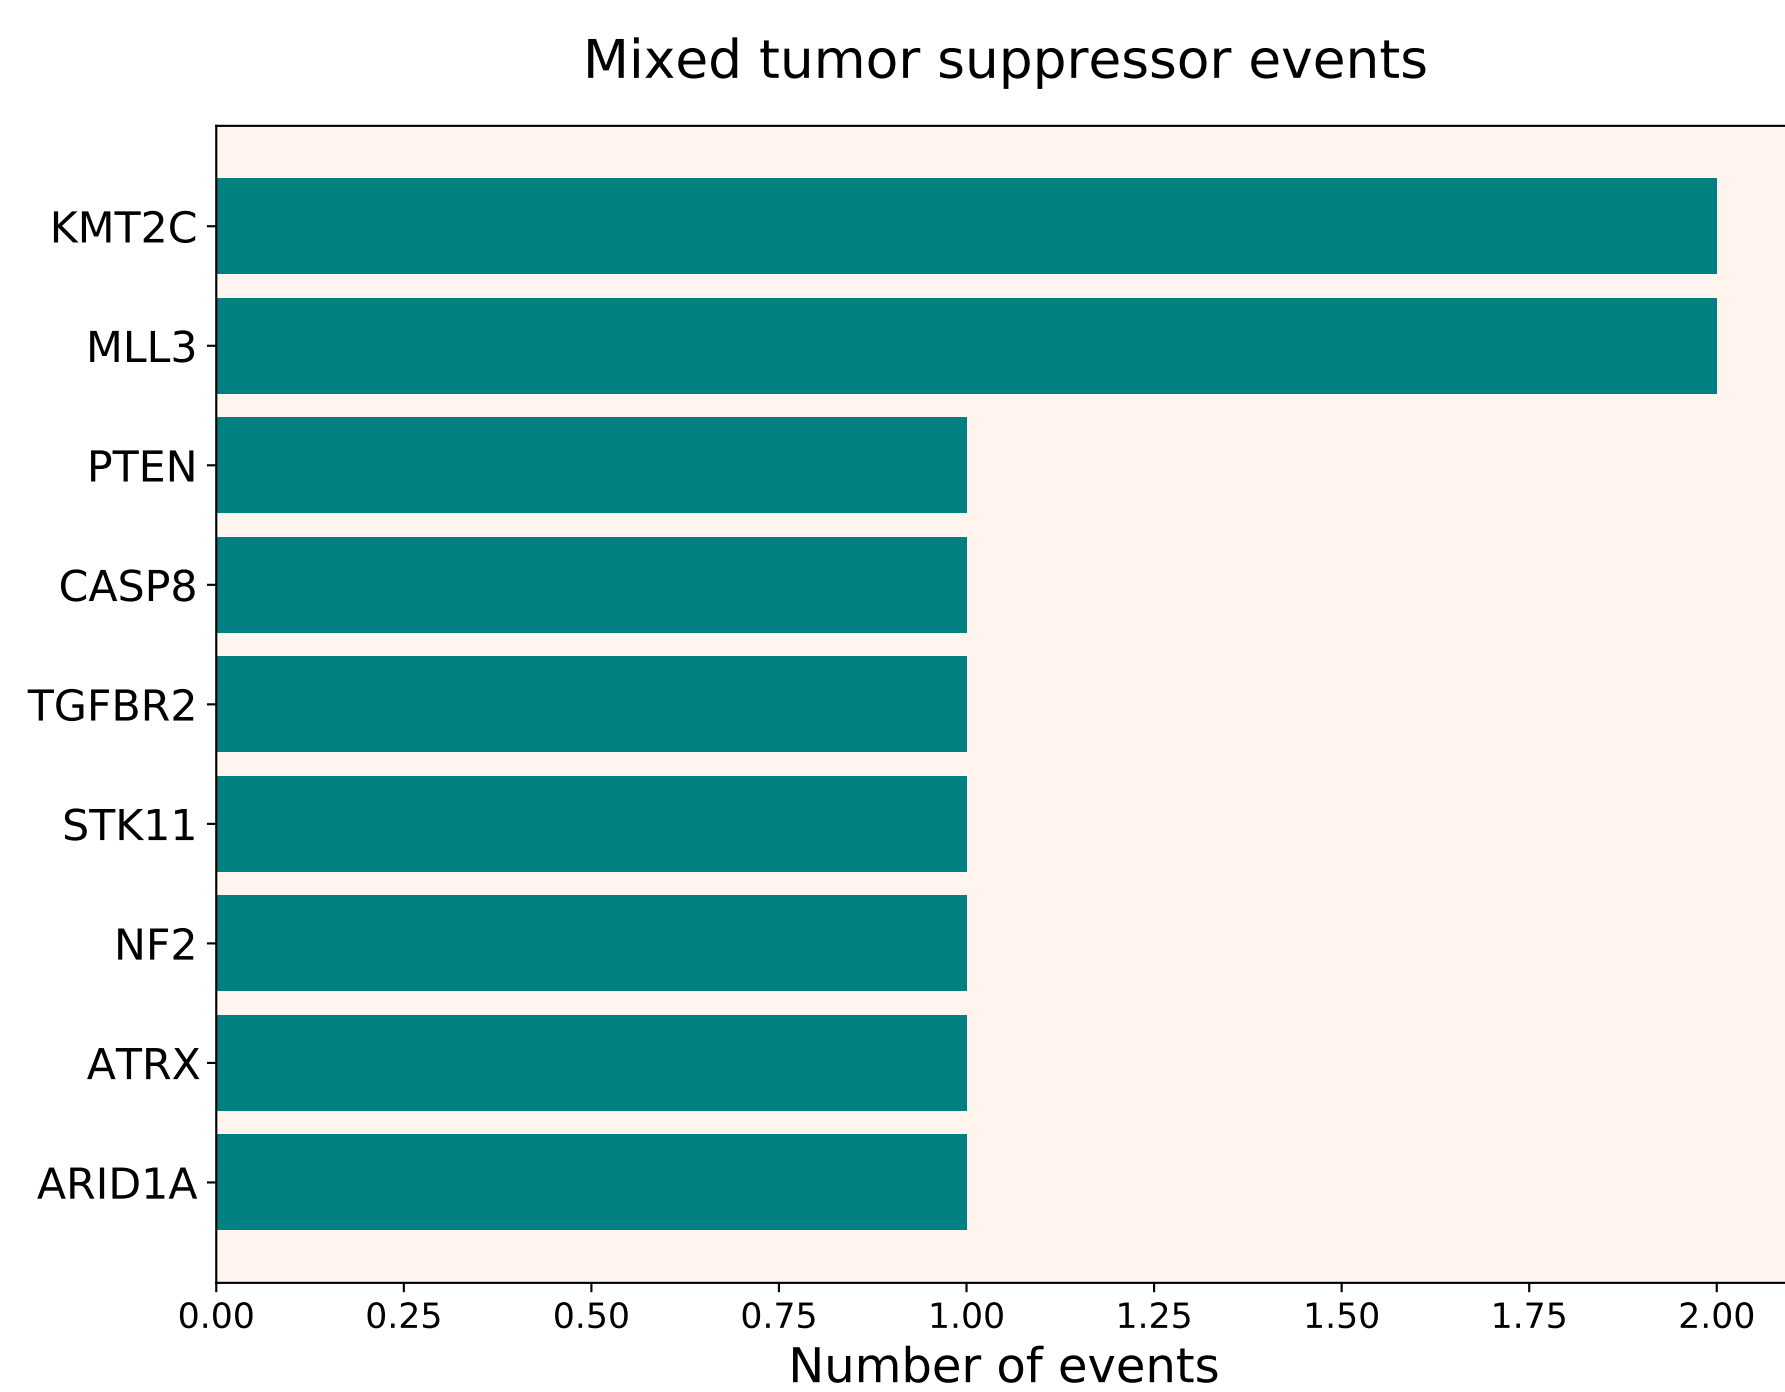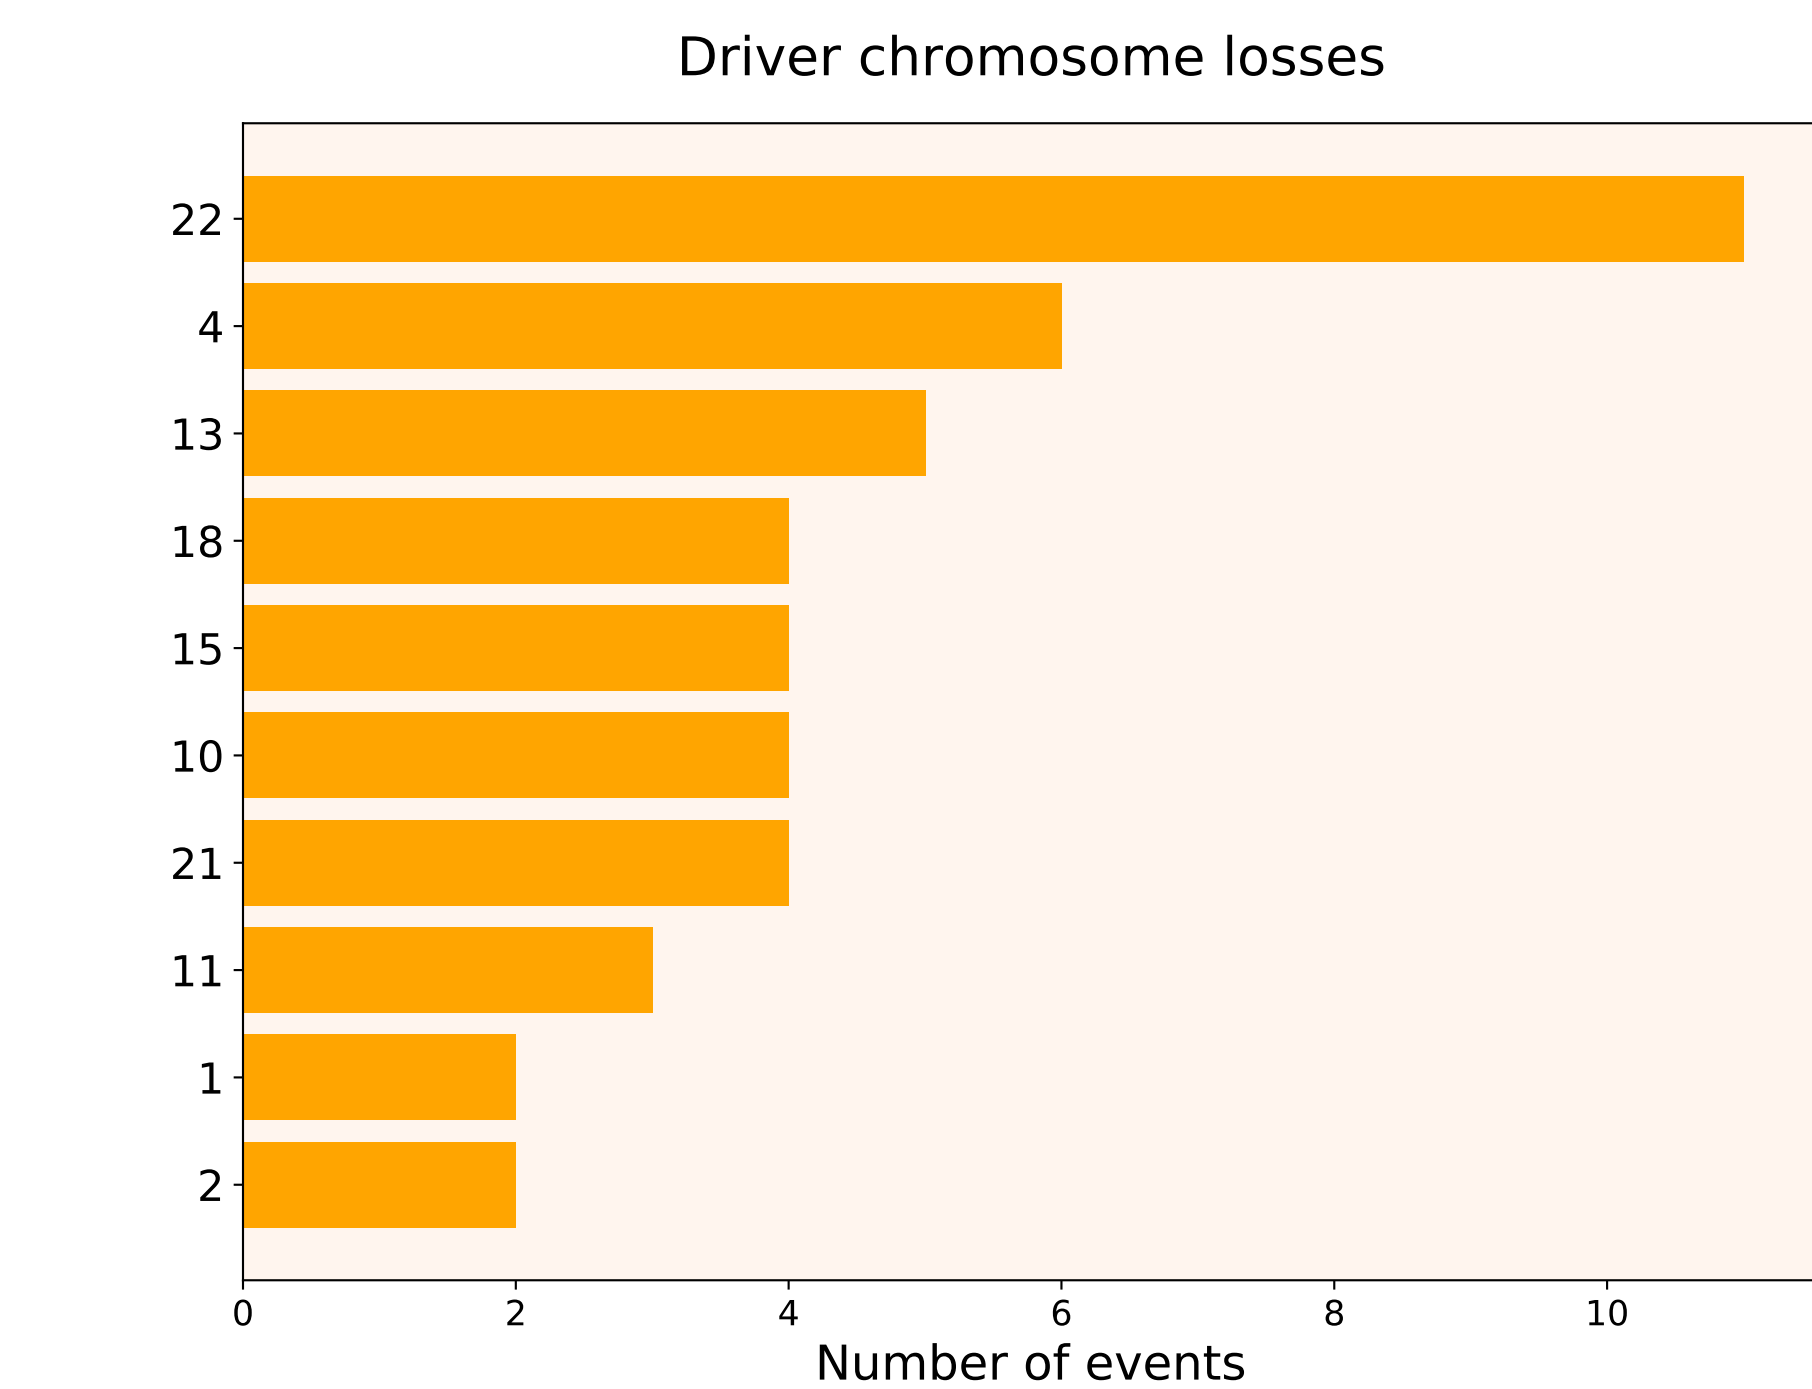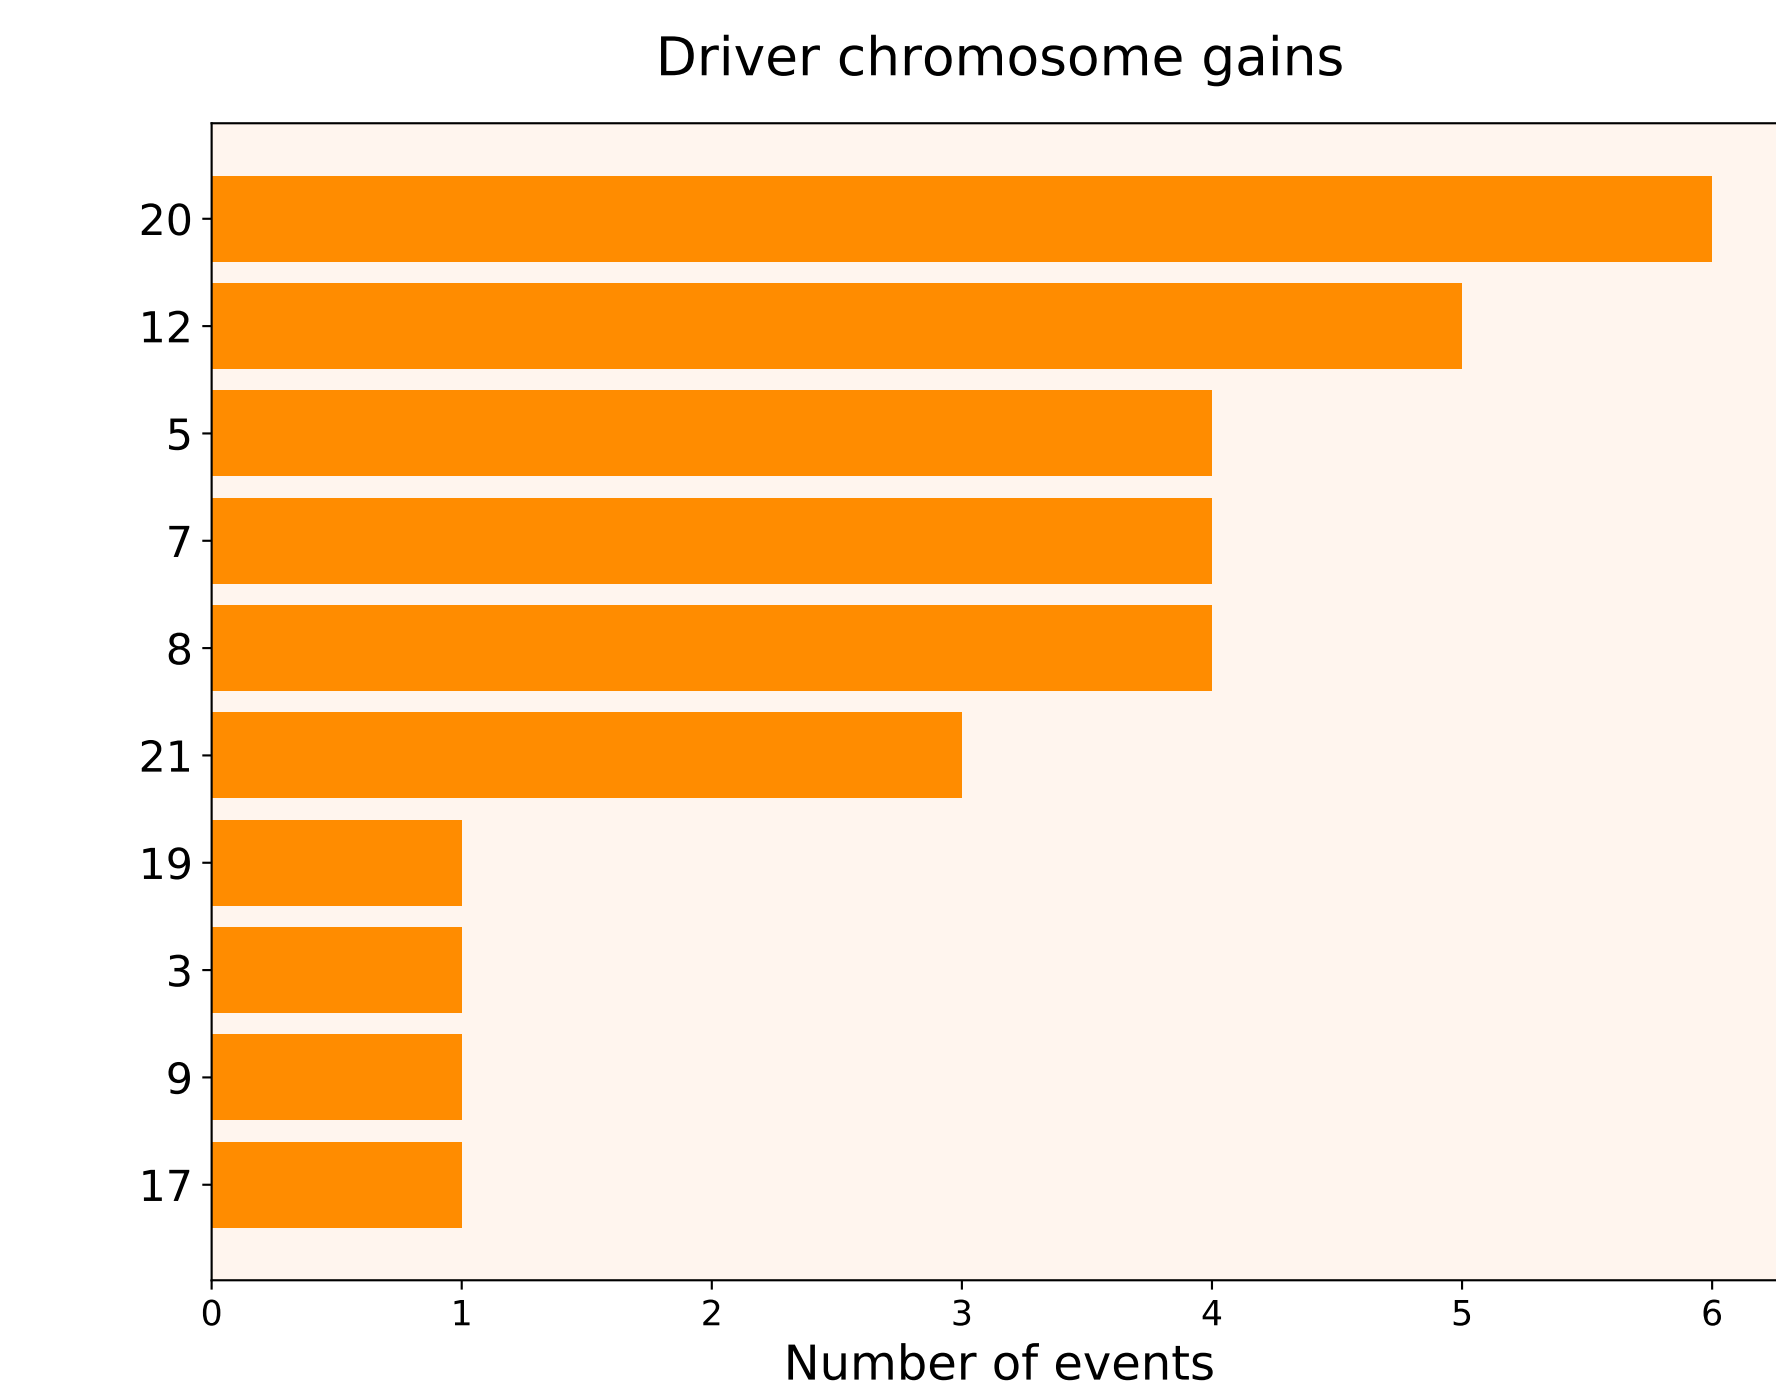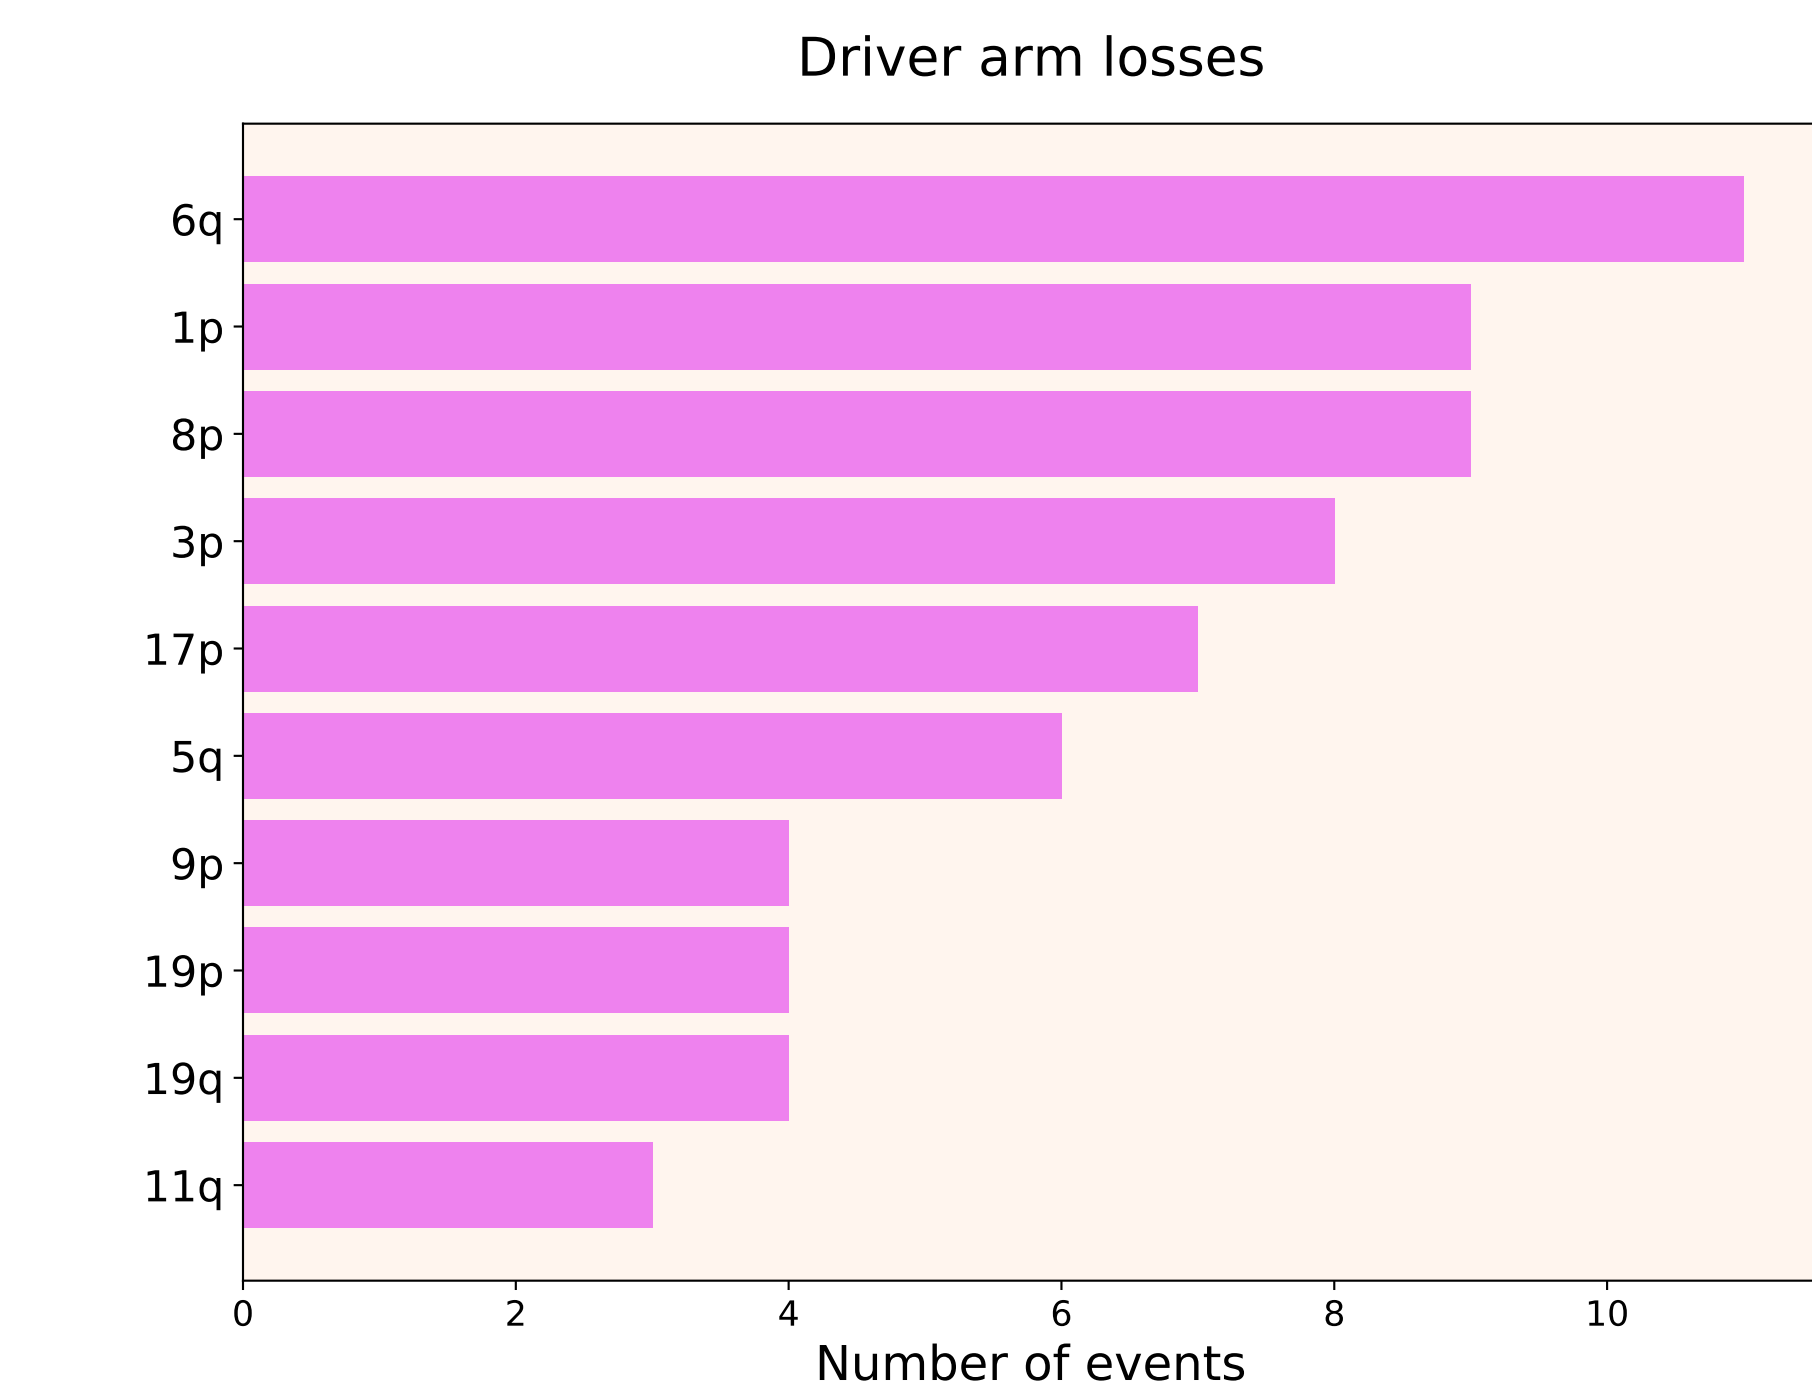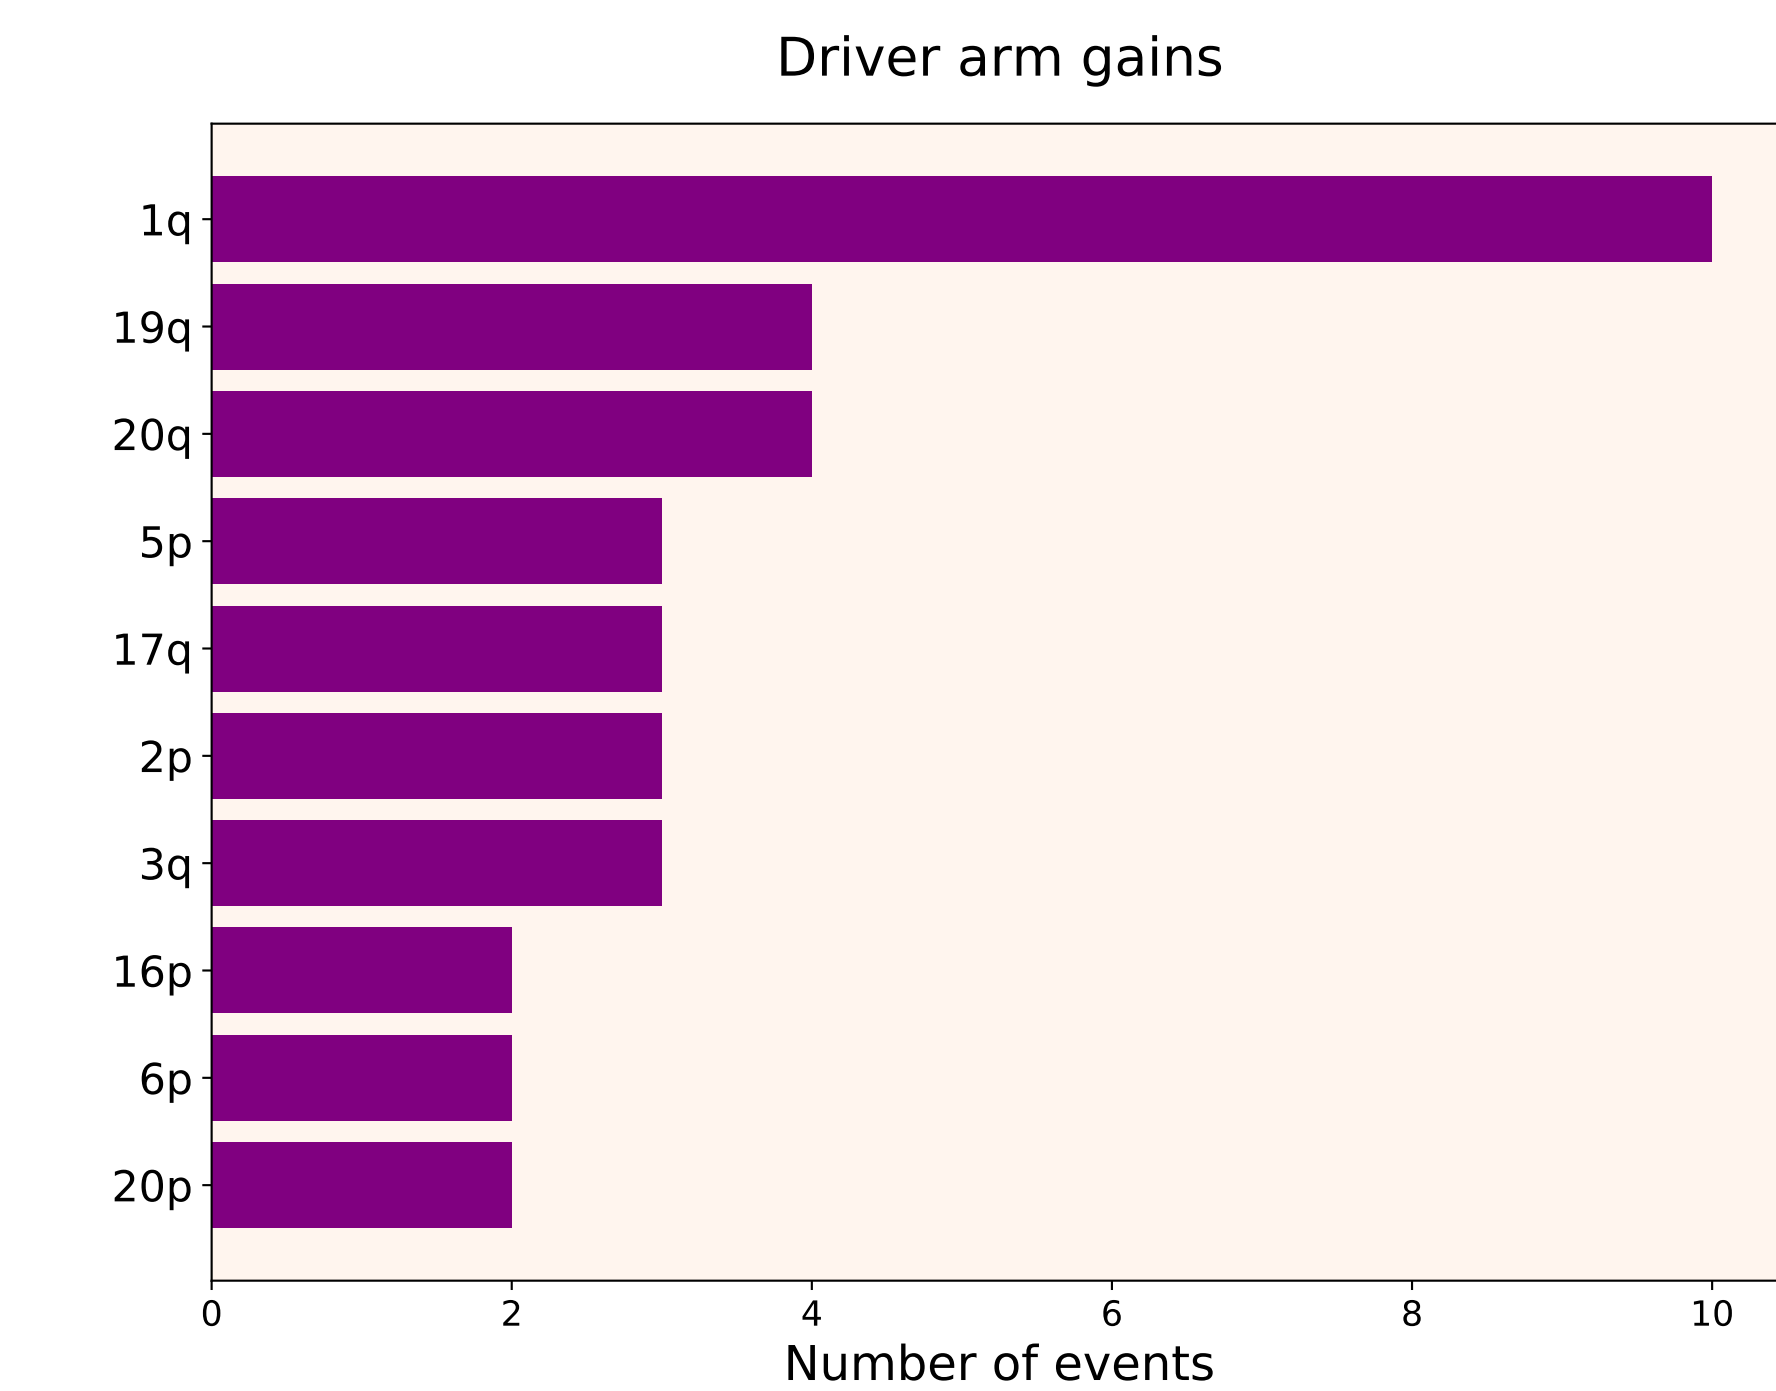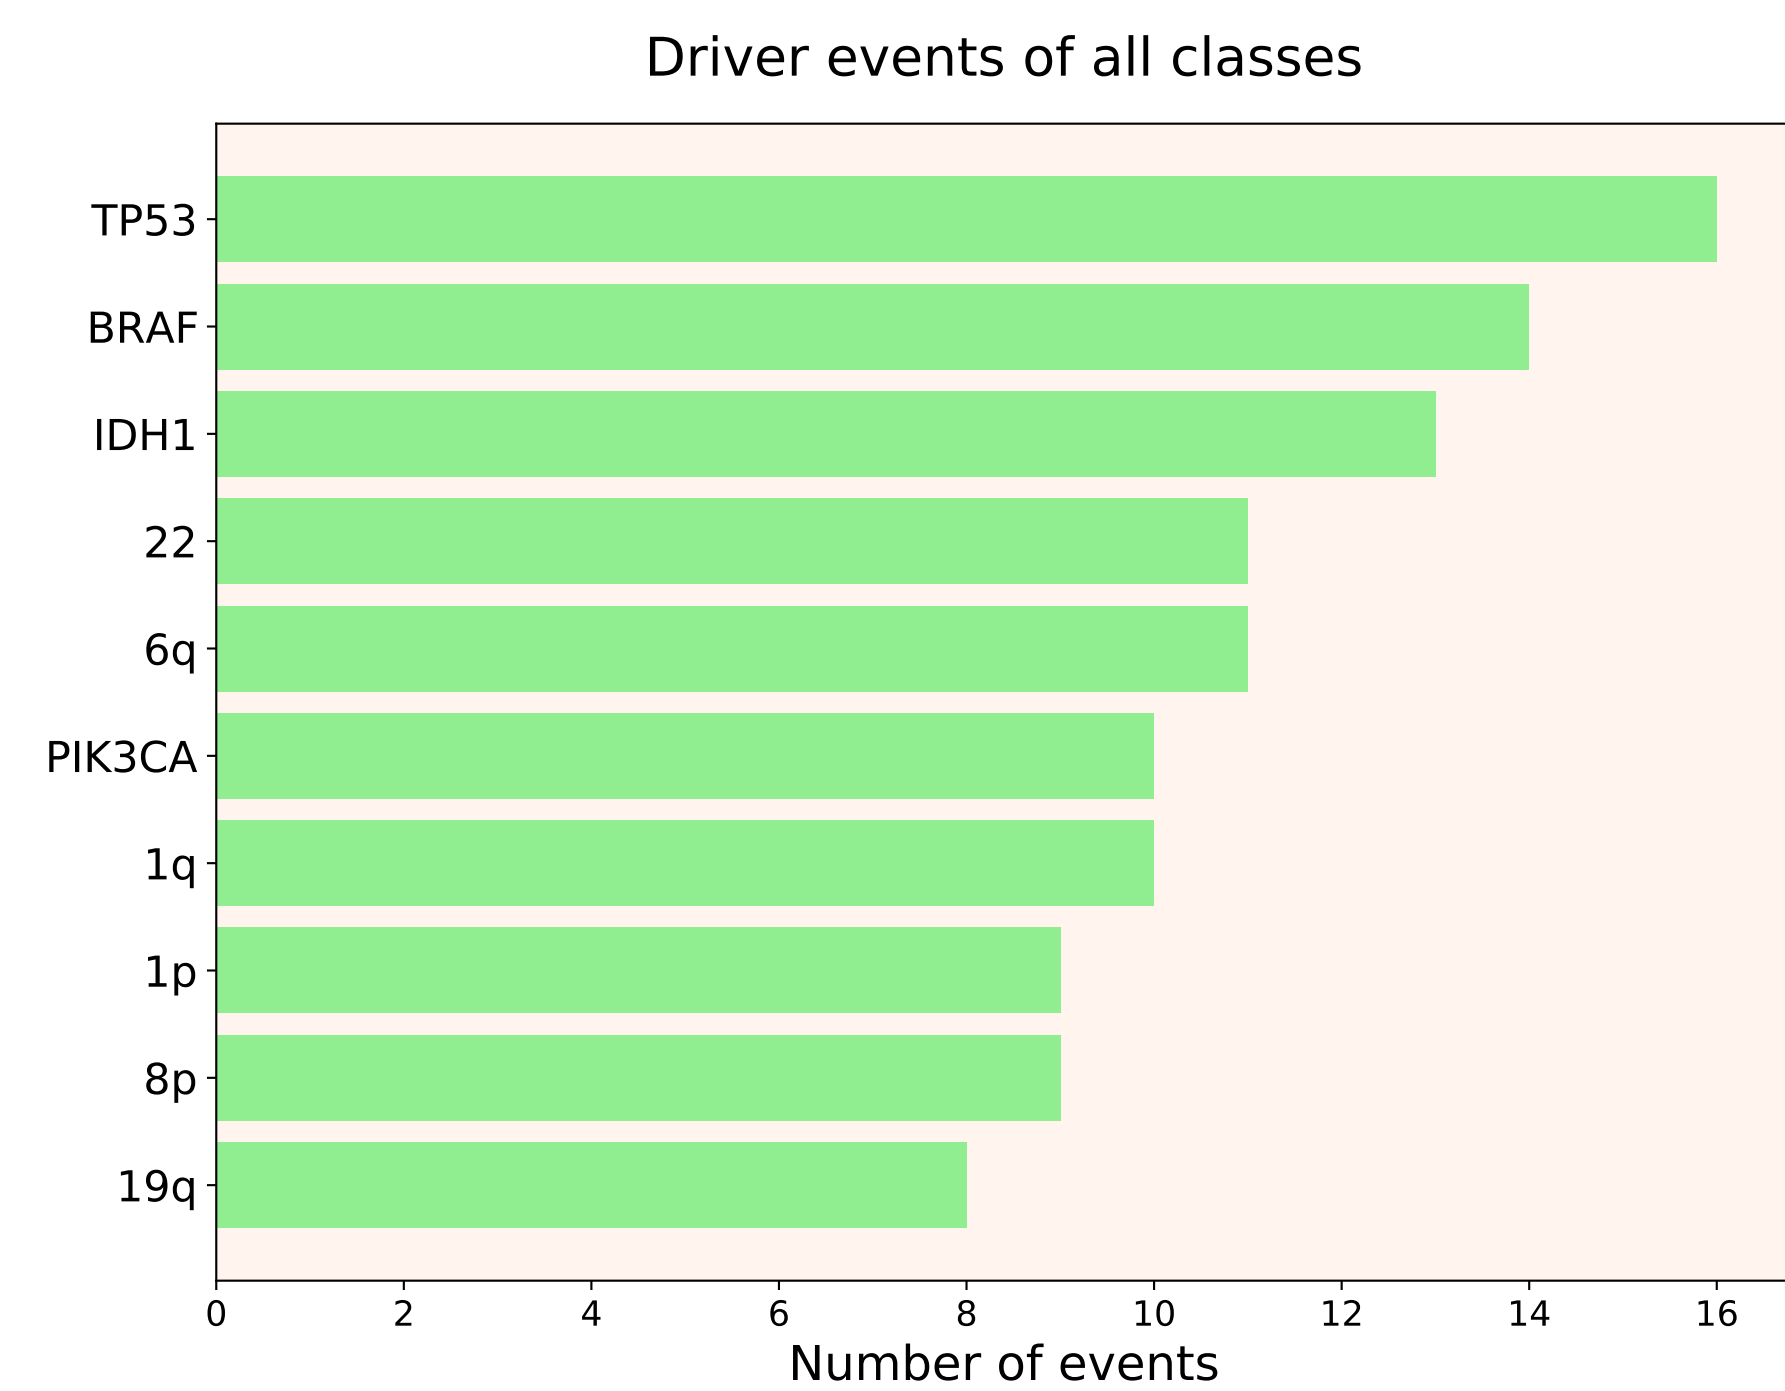

Supplement: Supplemental_Data_S1.zip [file Supplemental_Data_S1.zip]

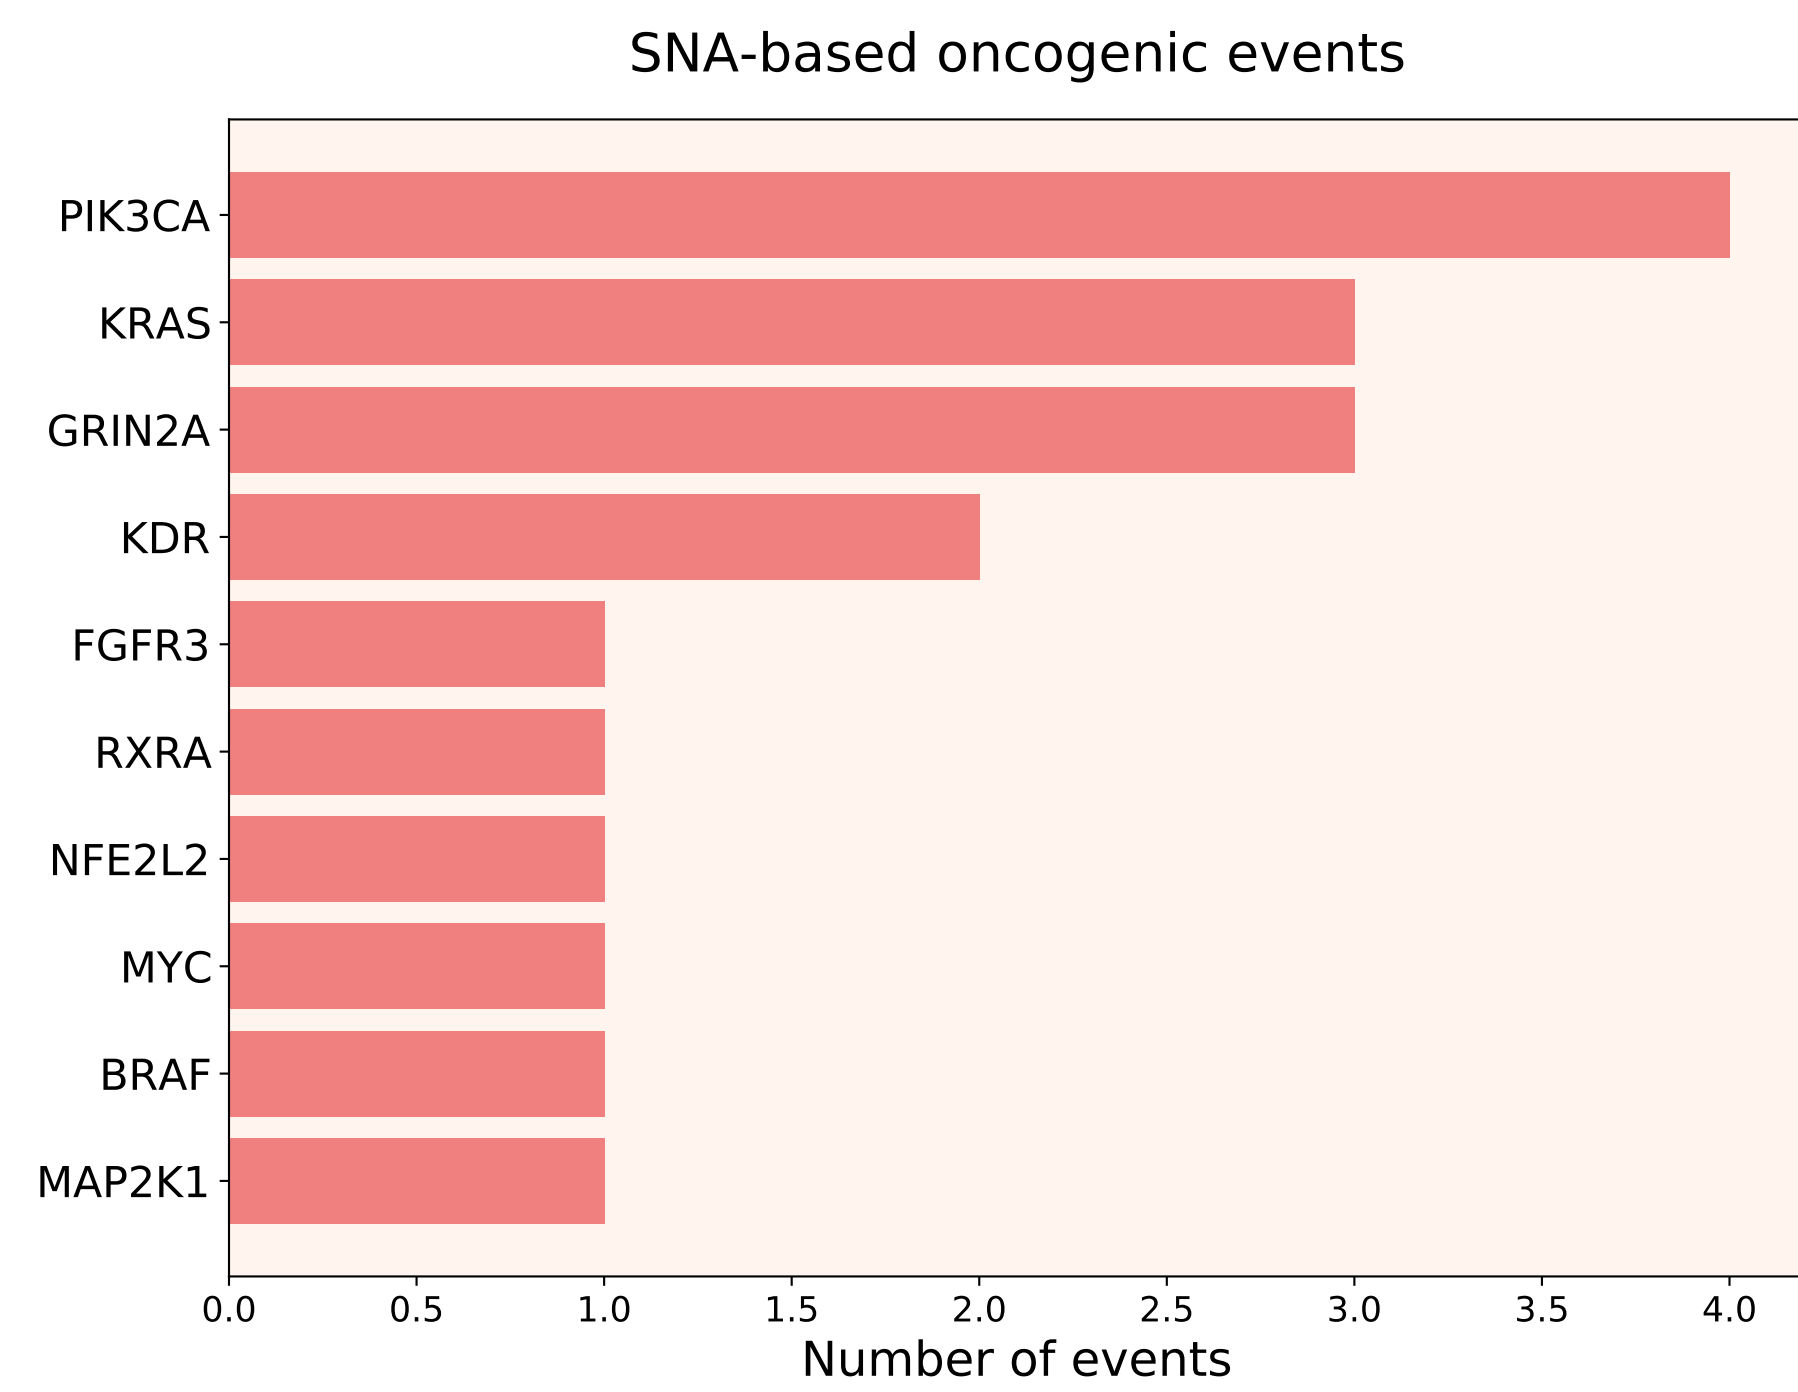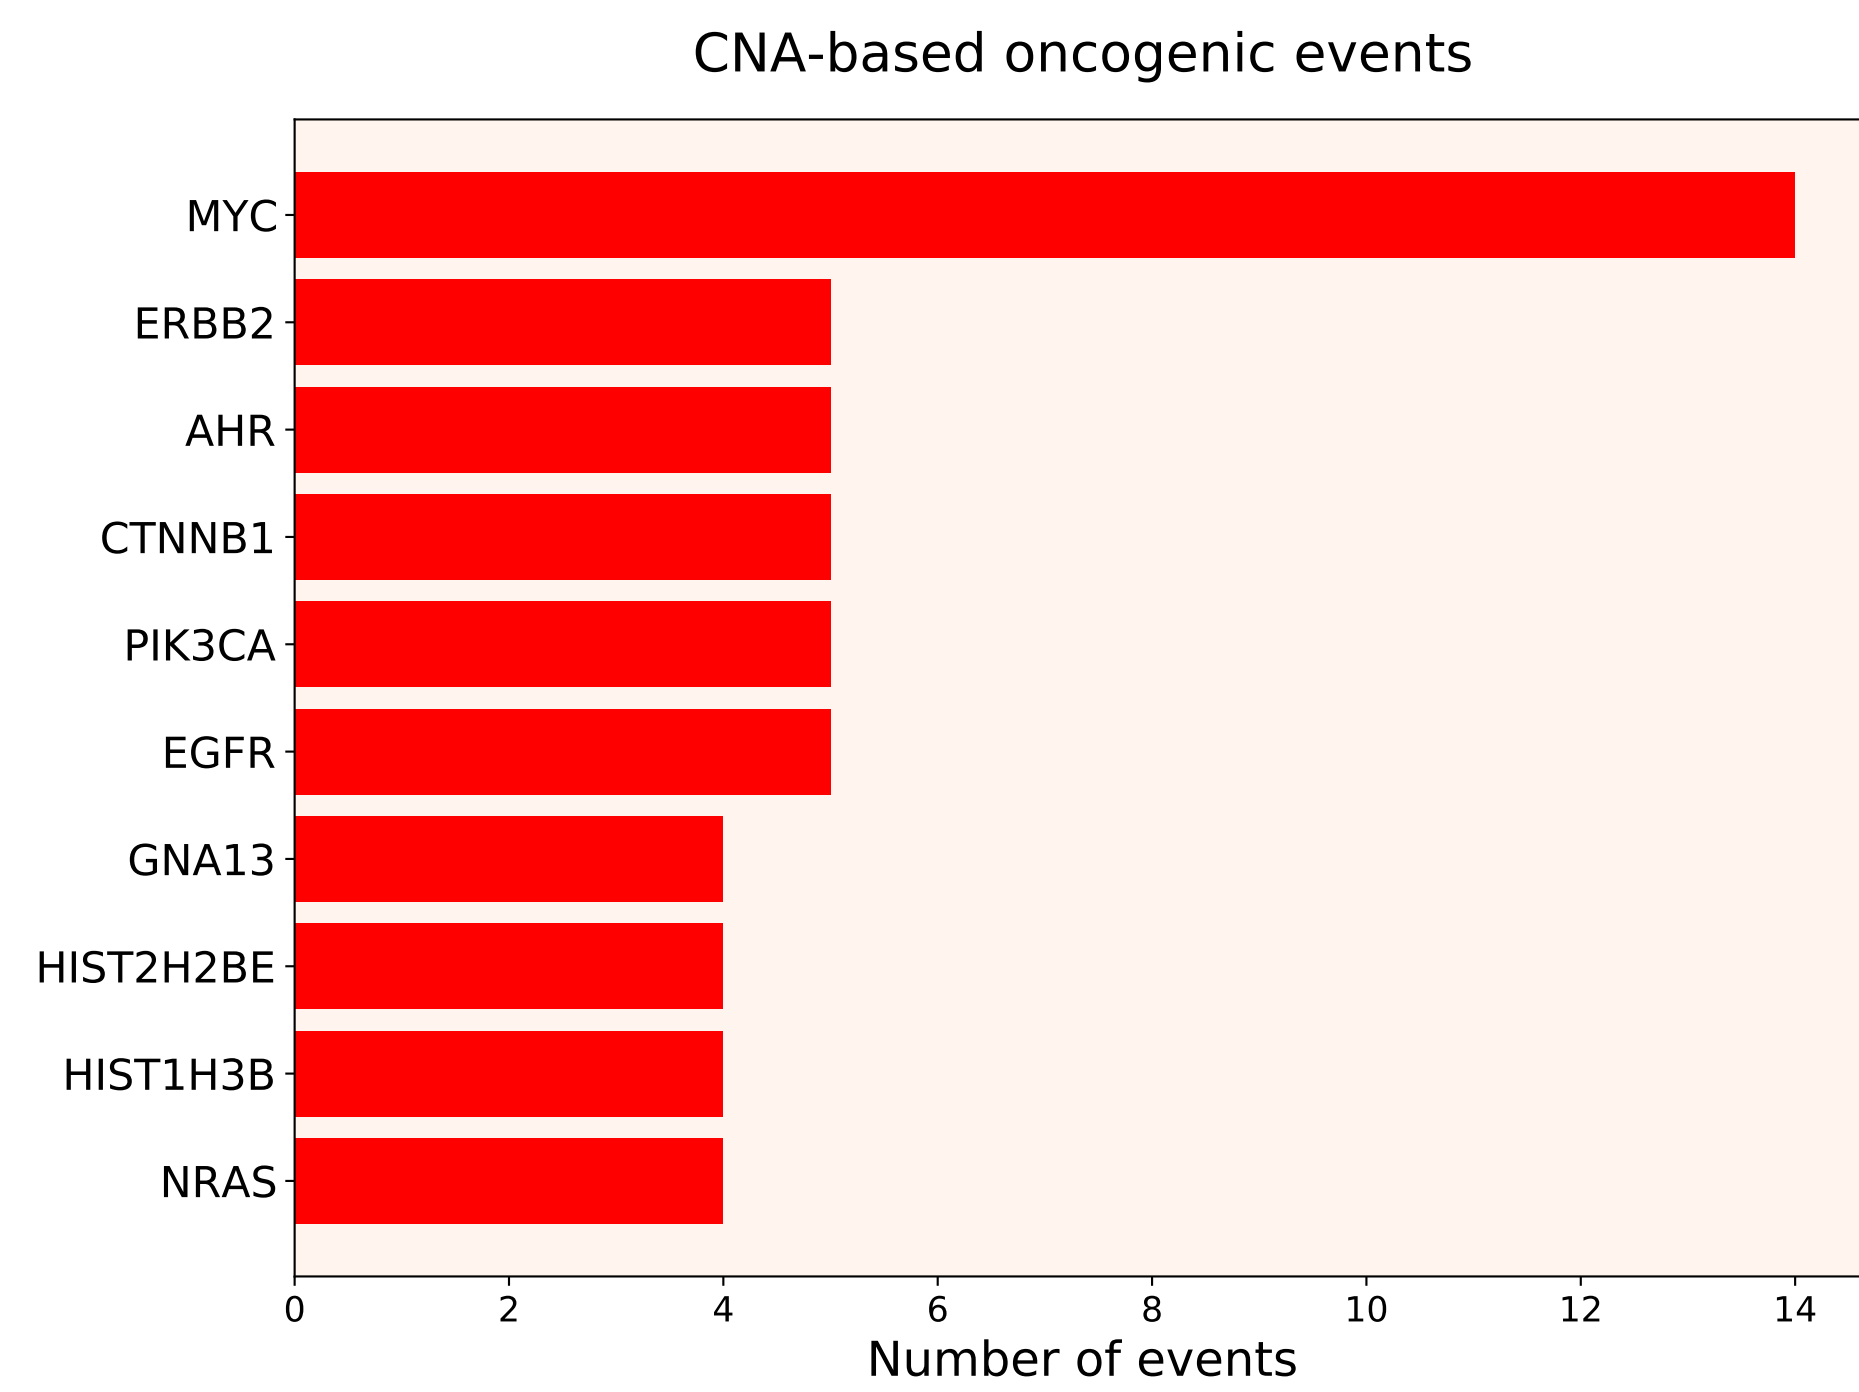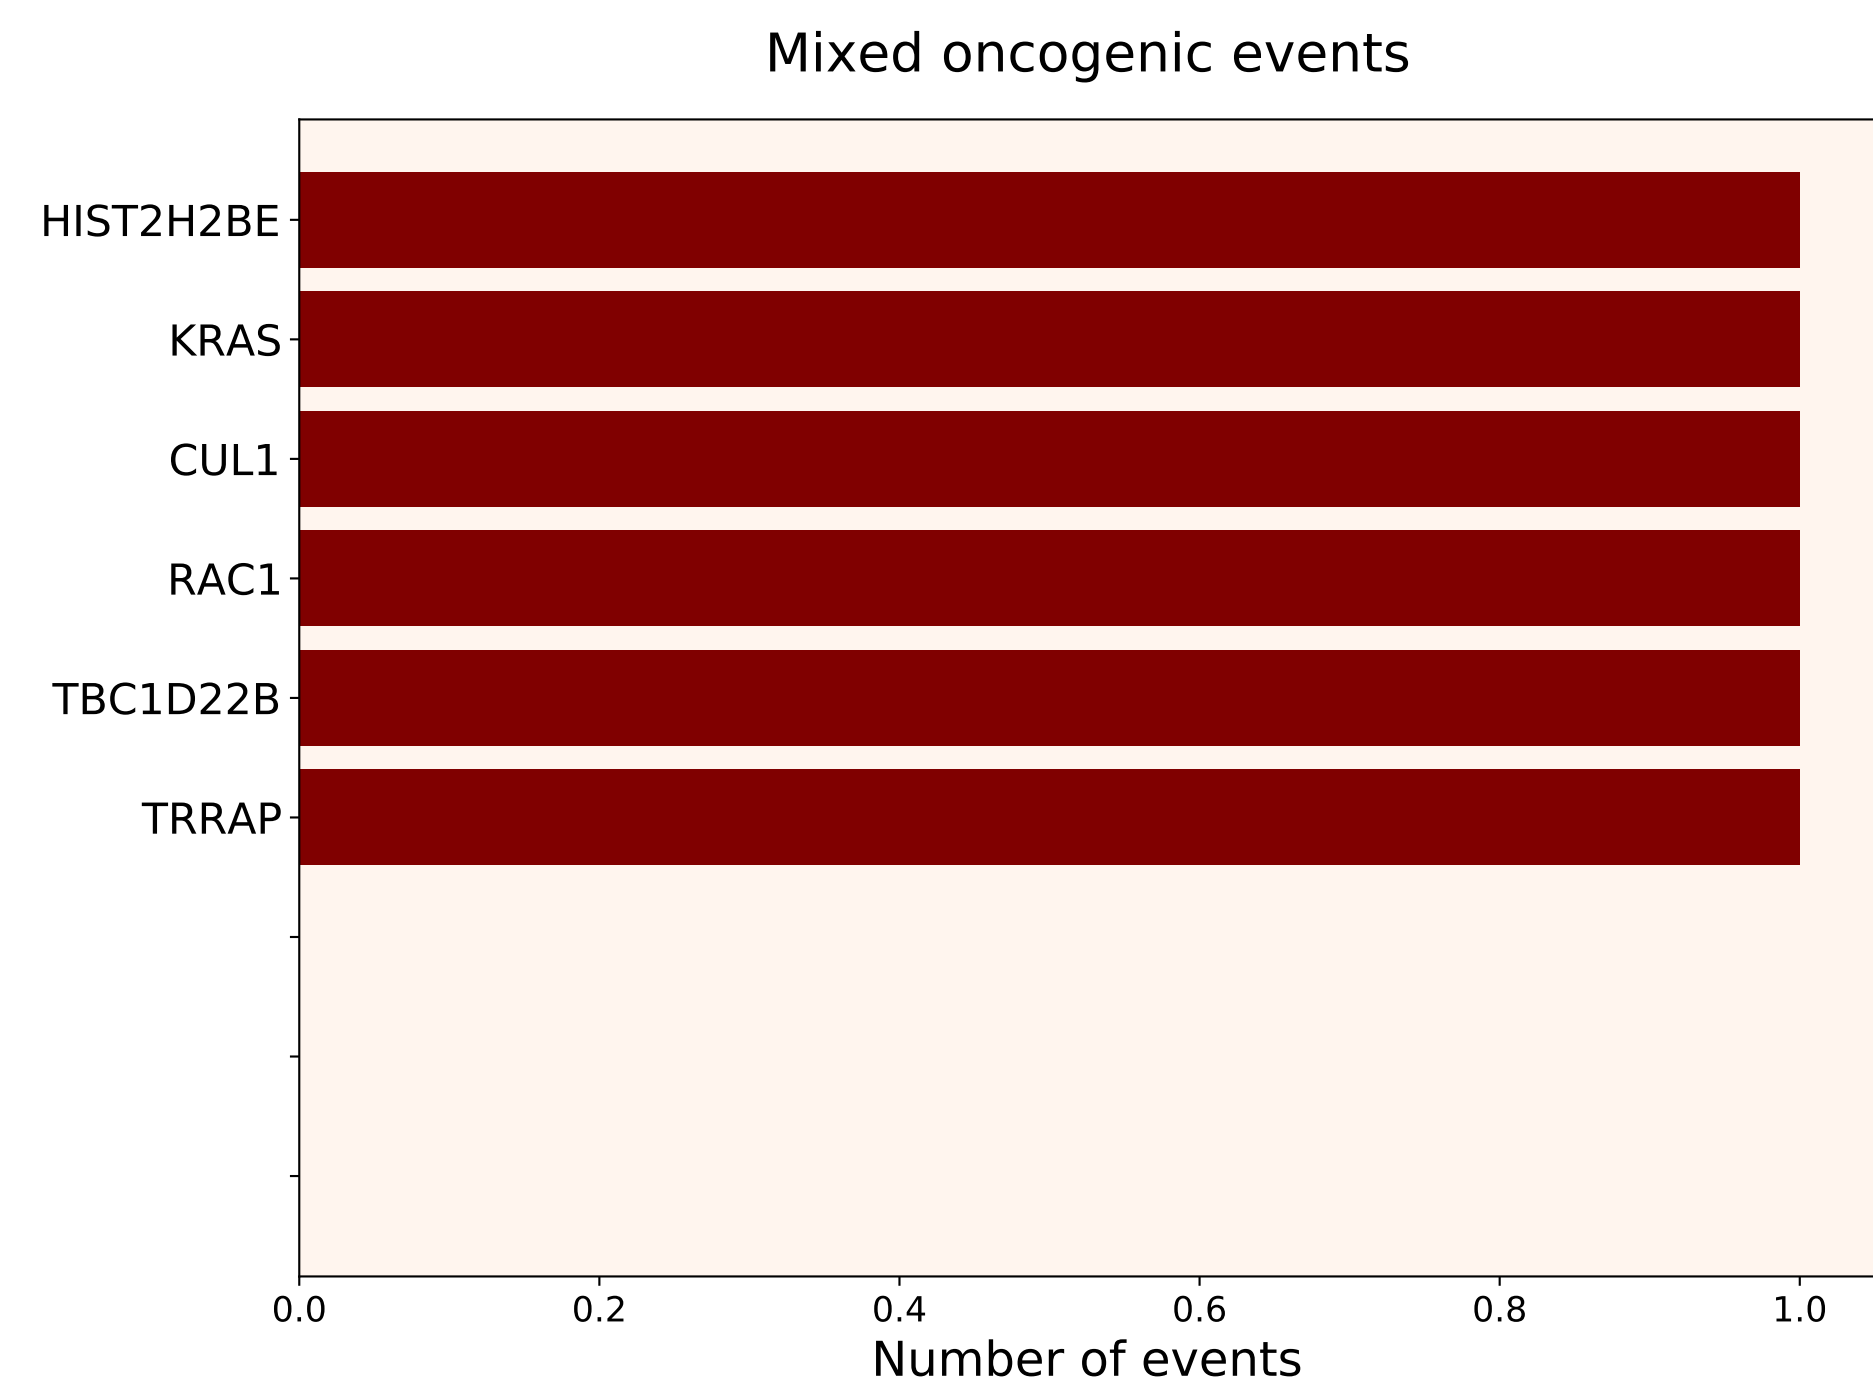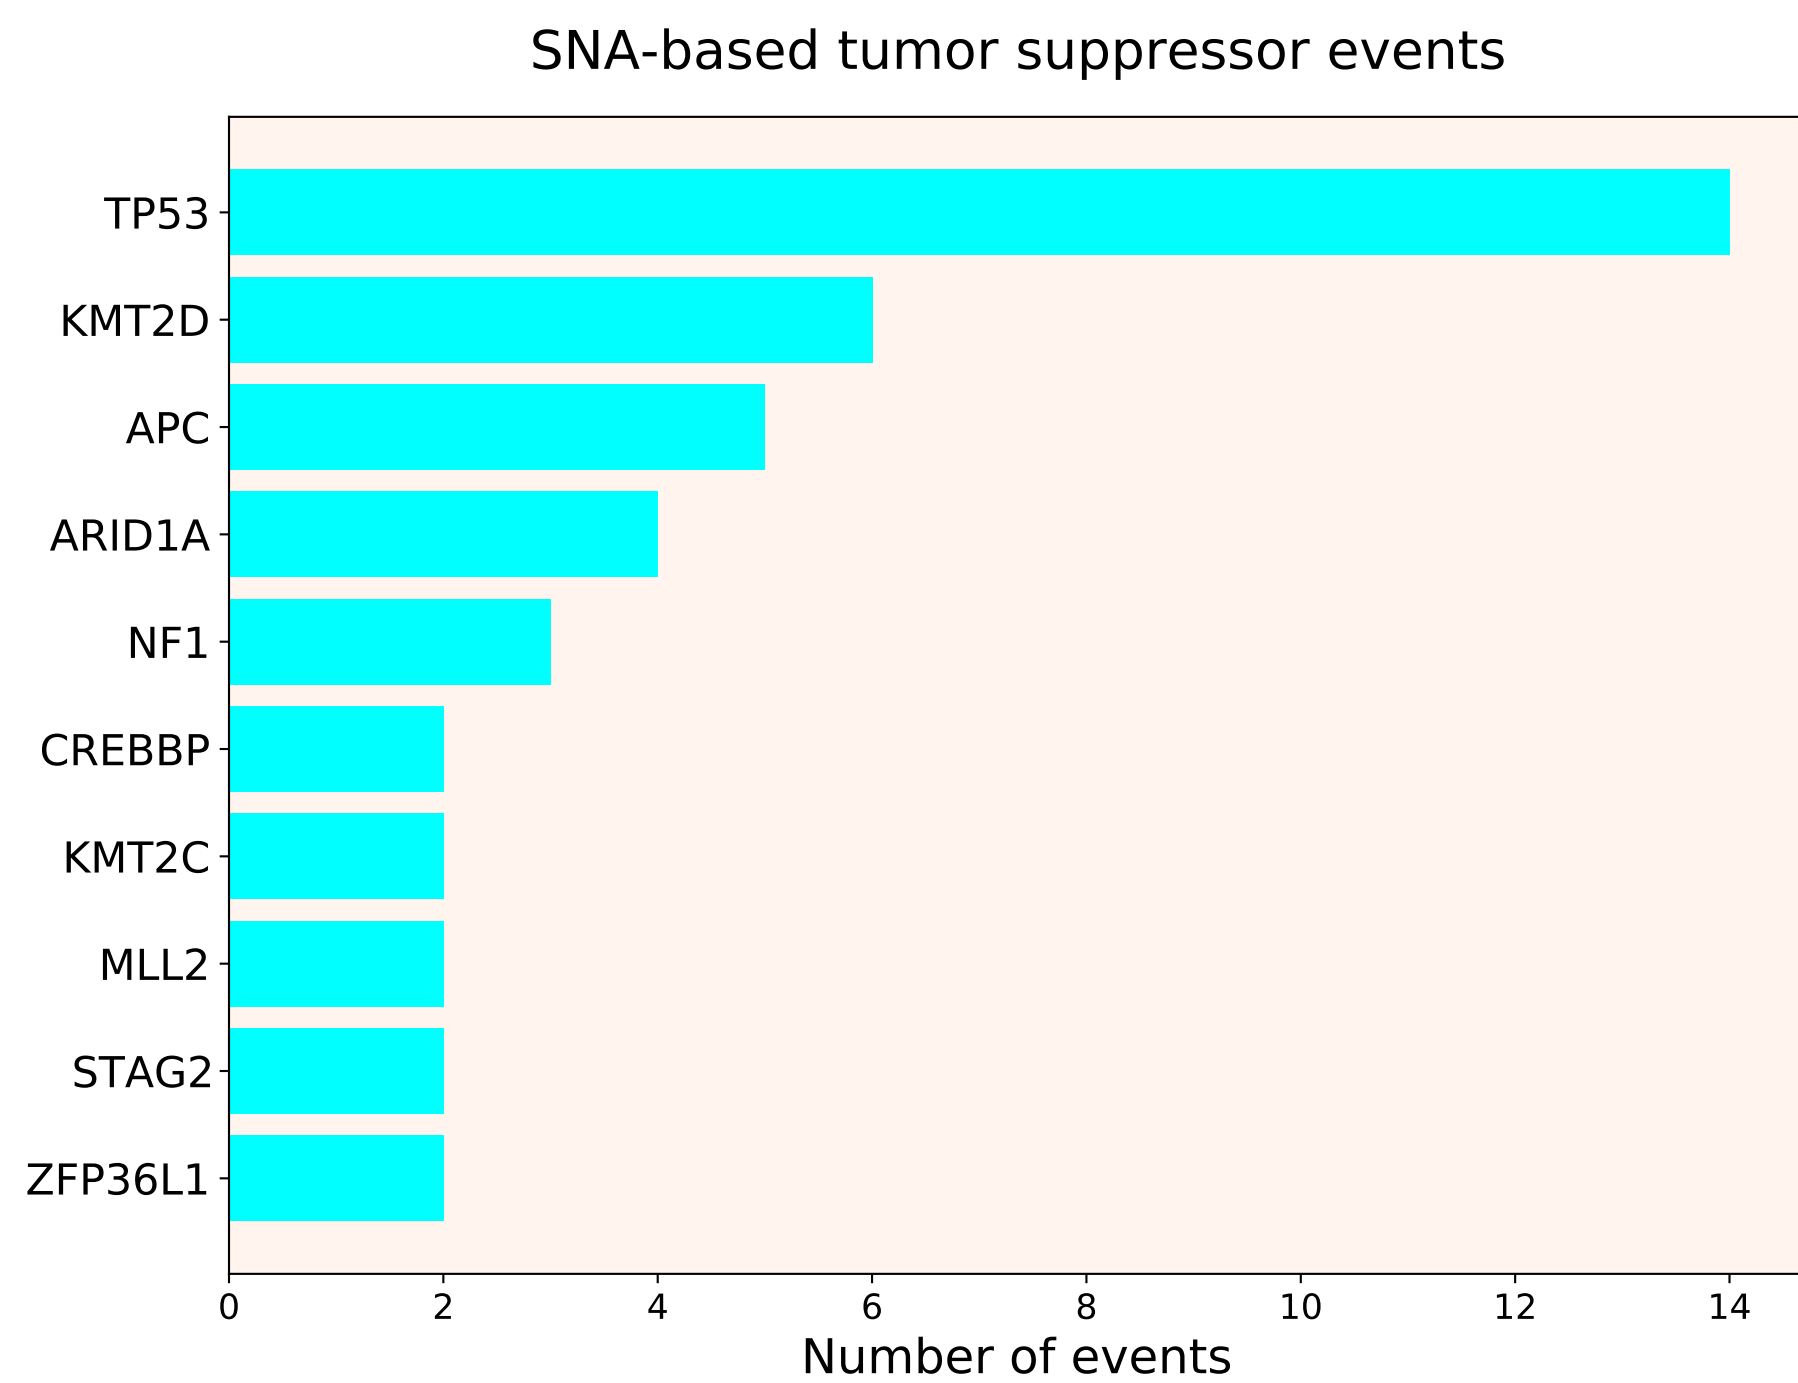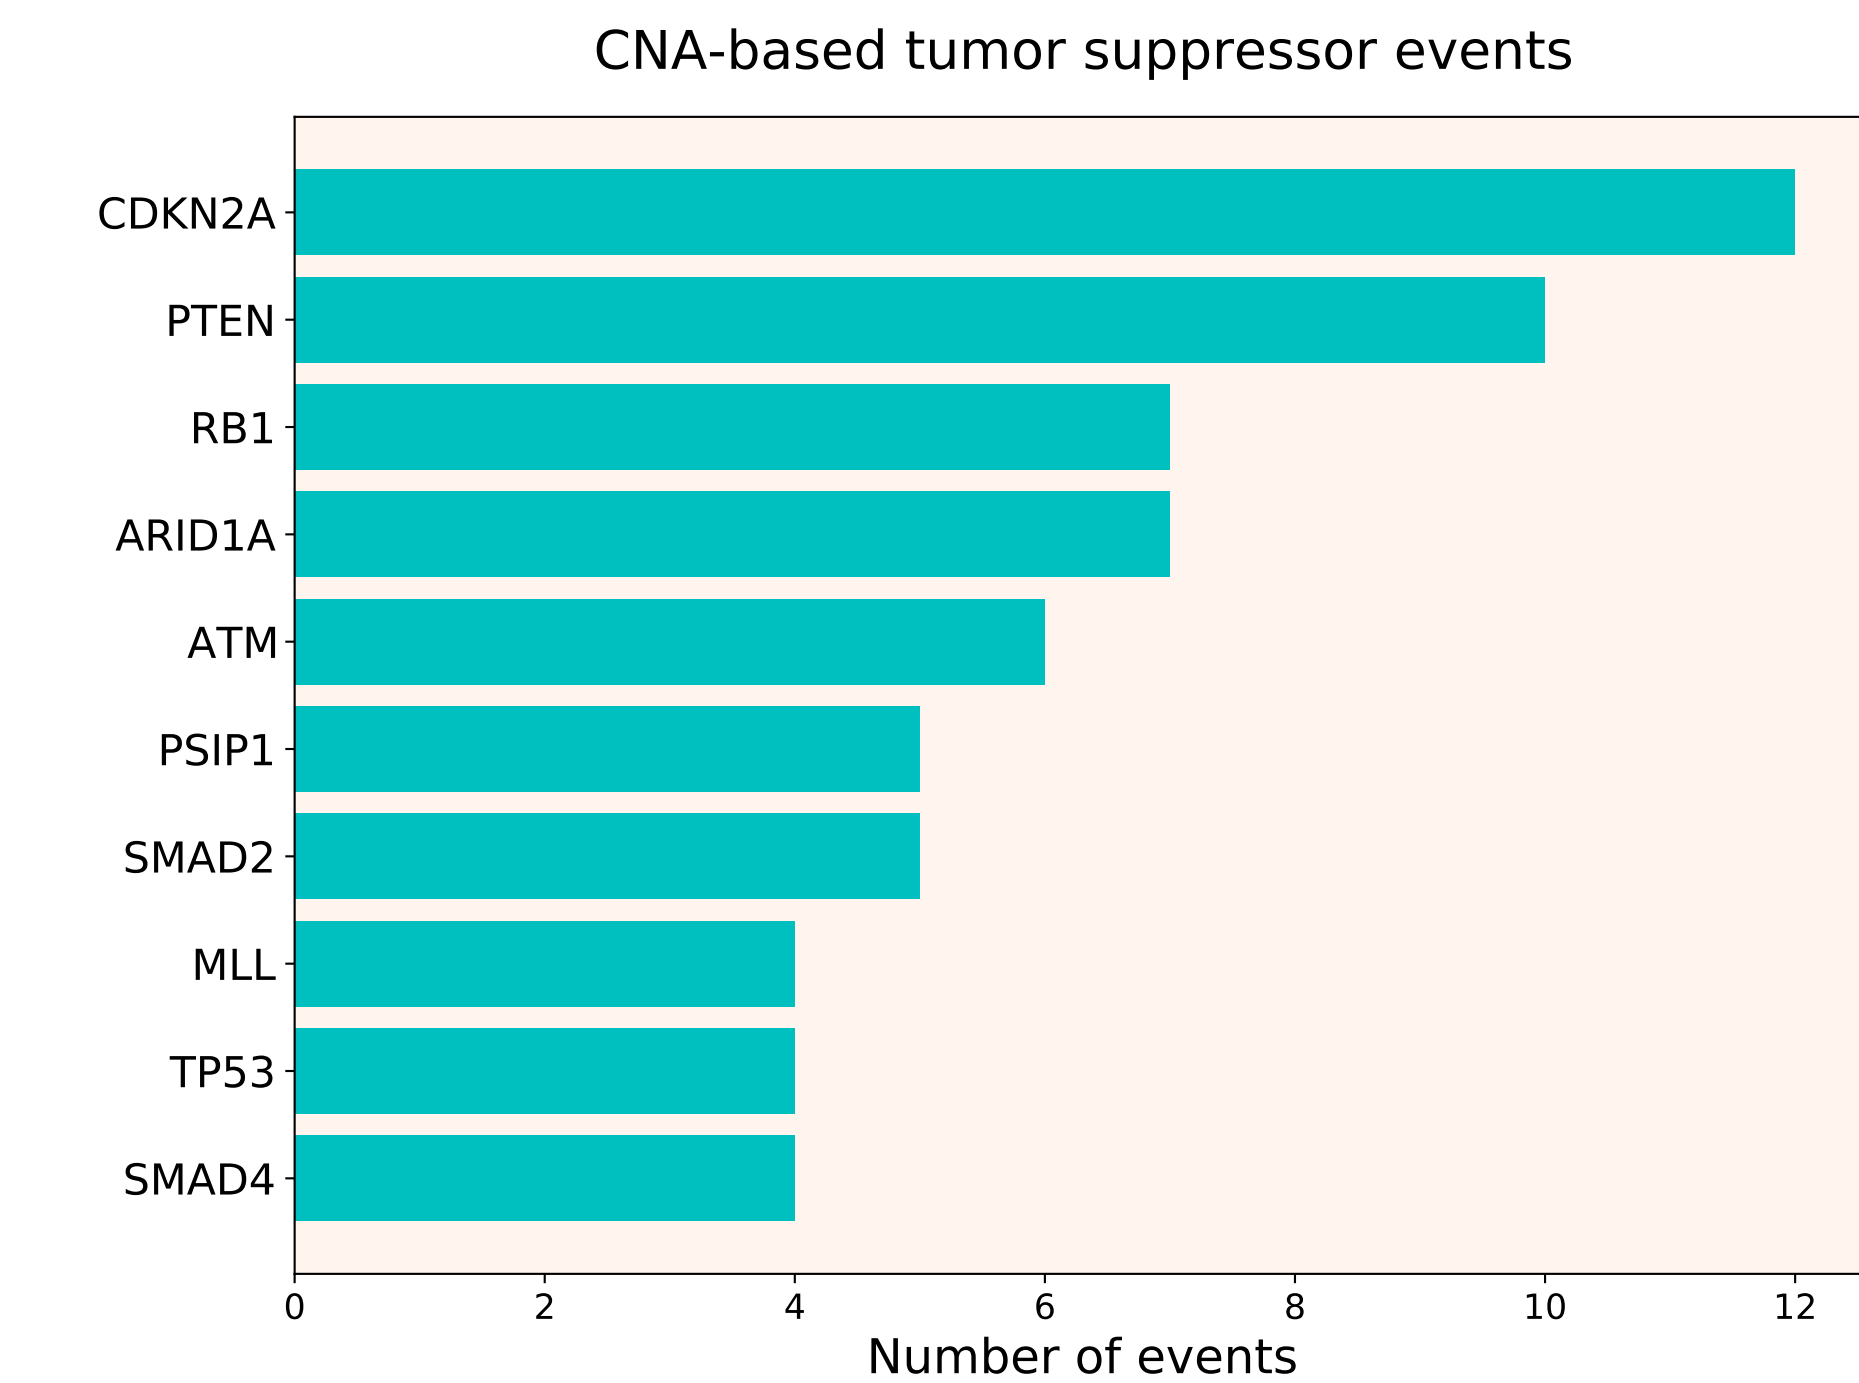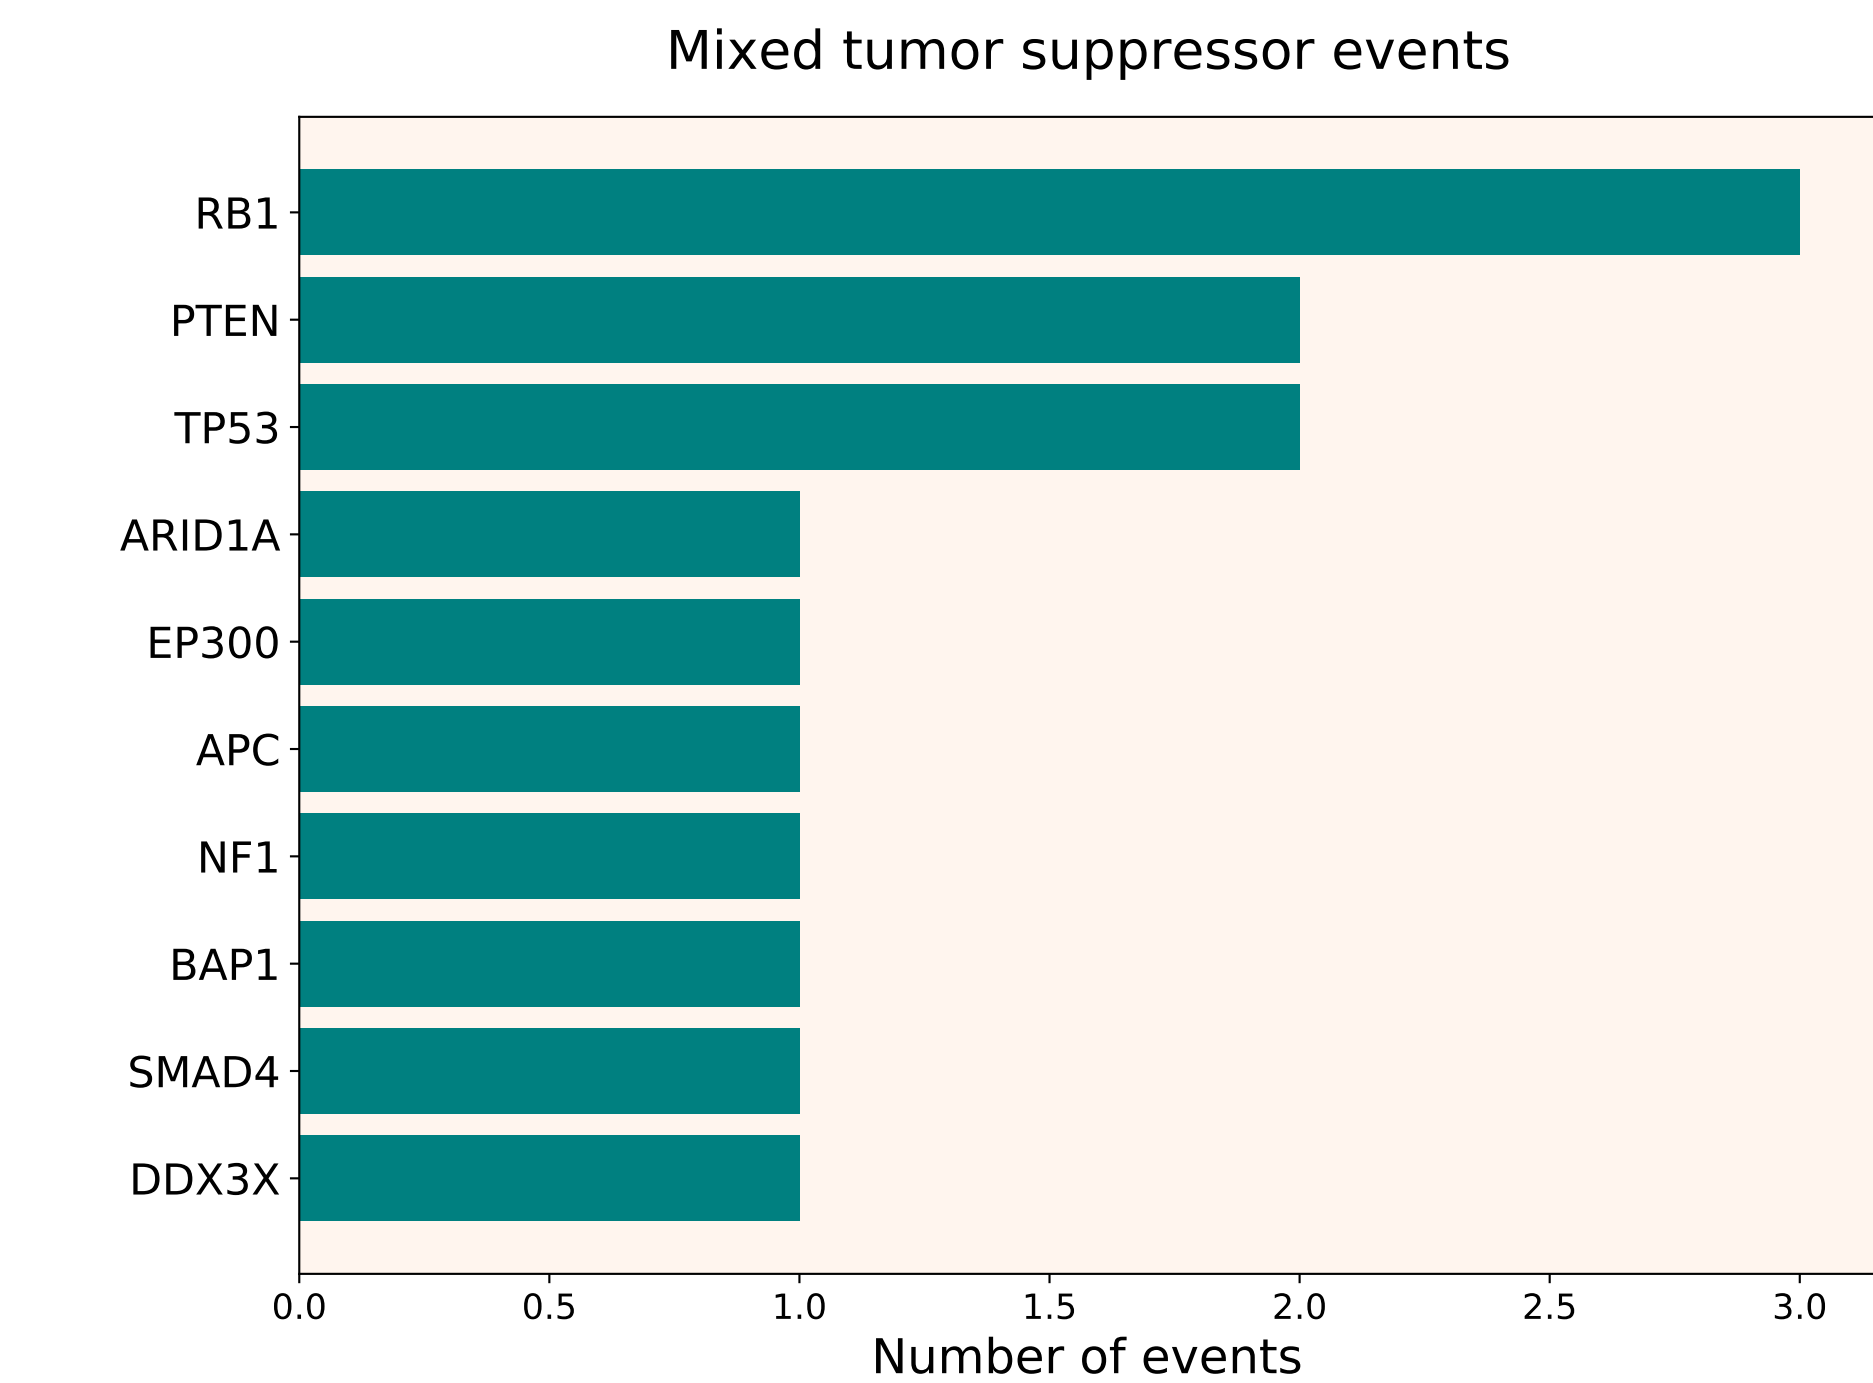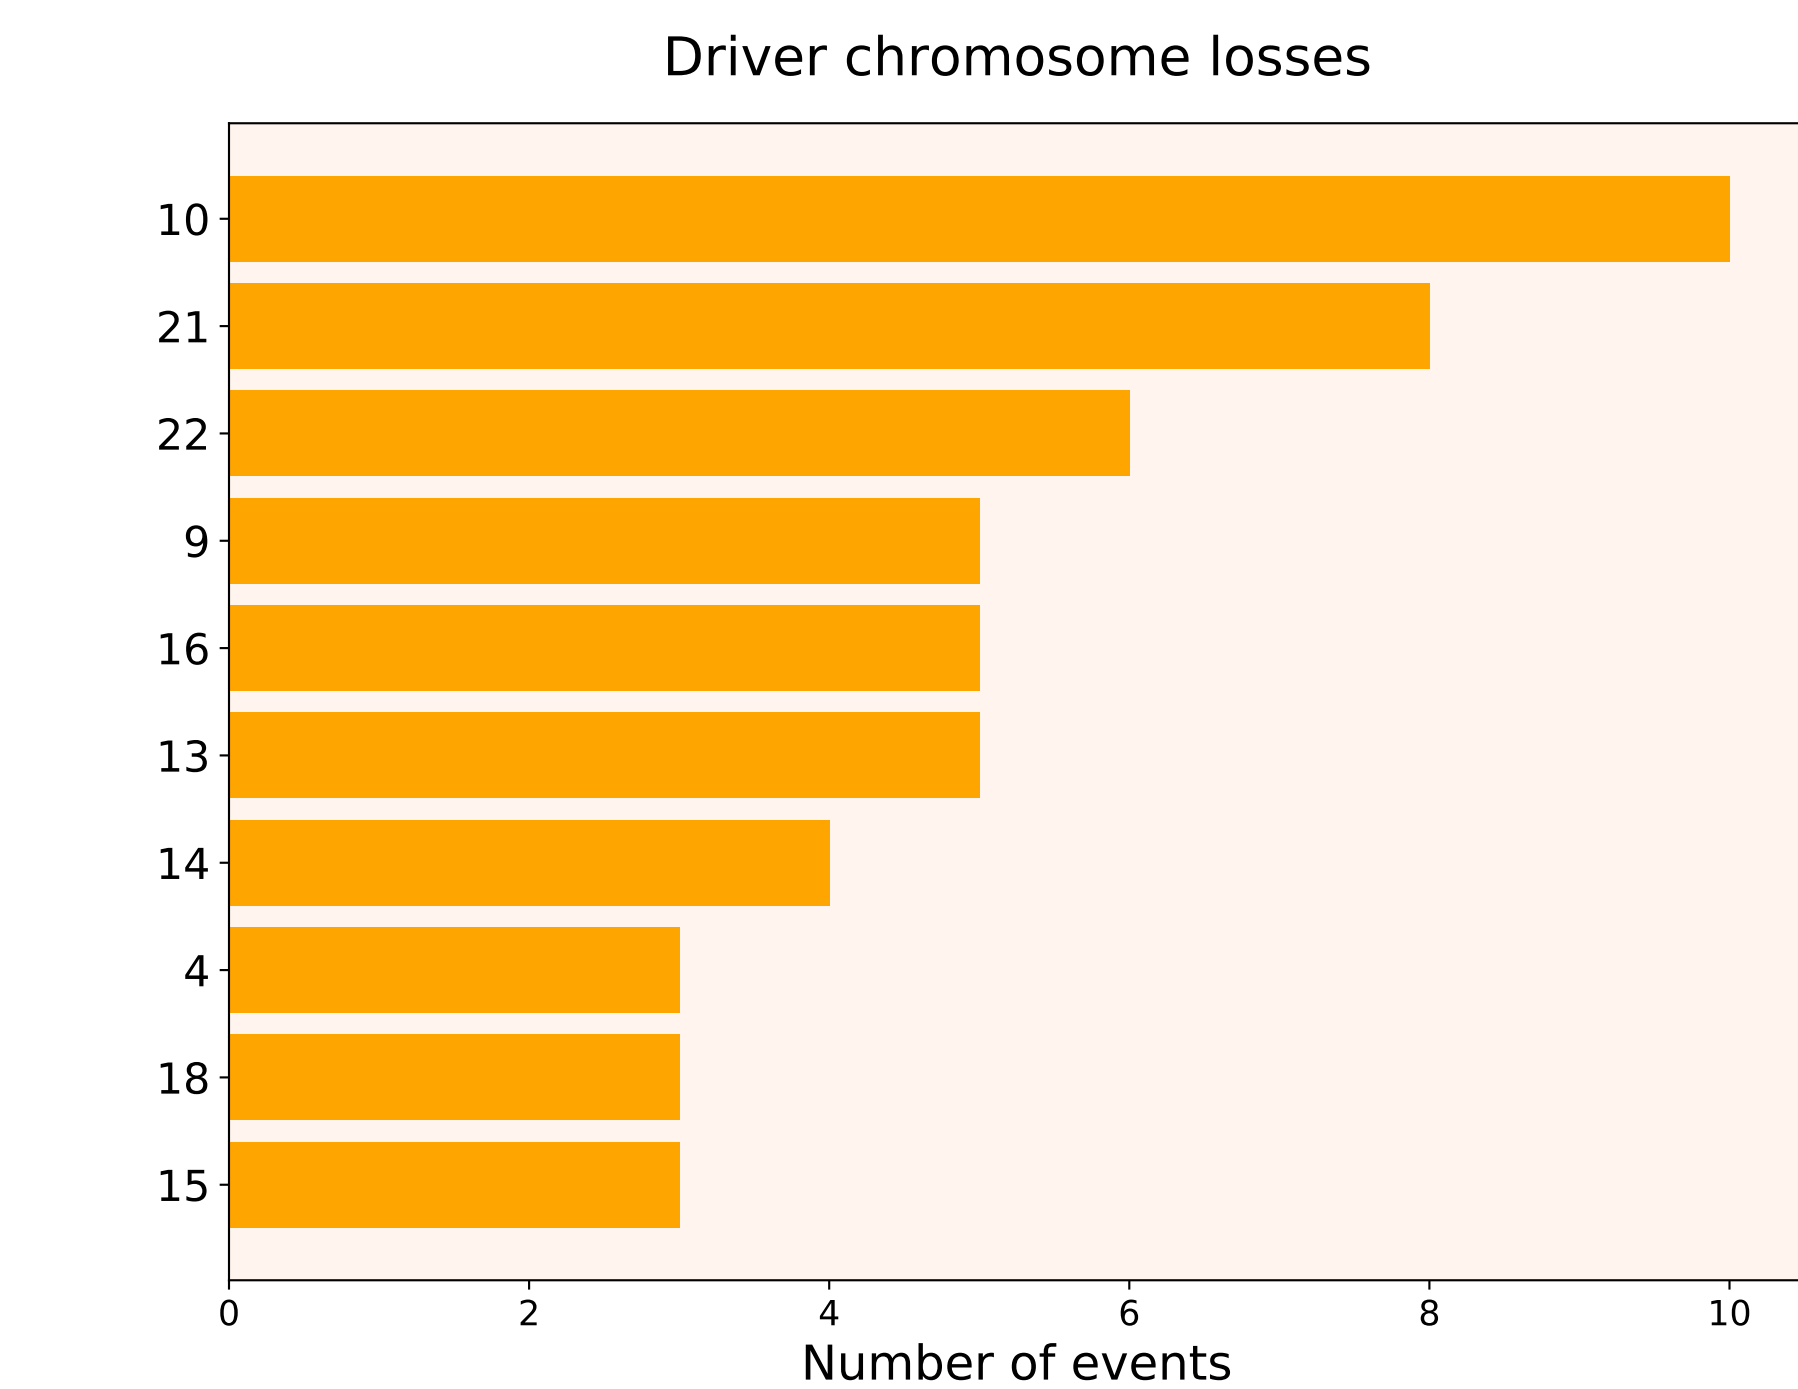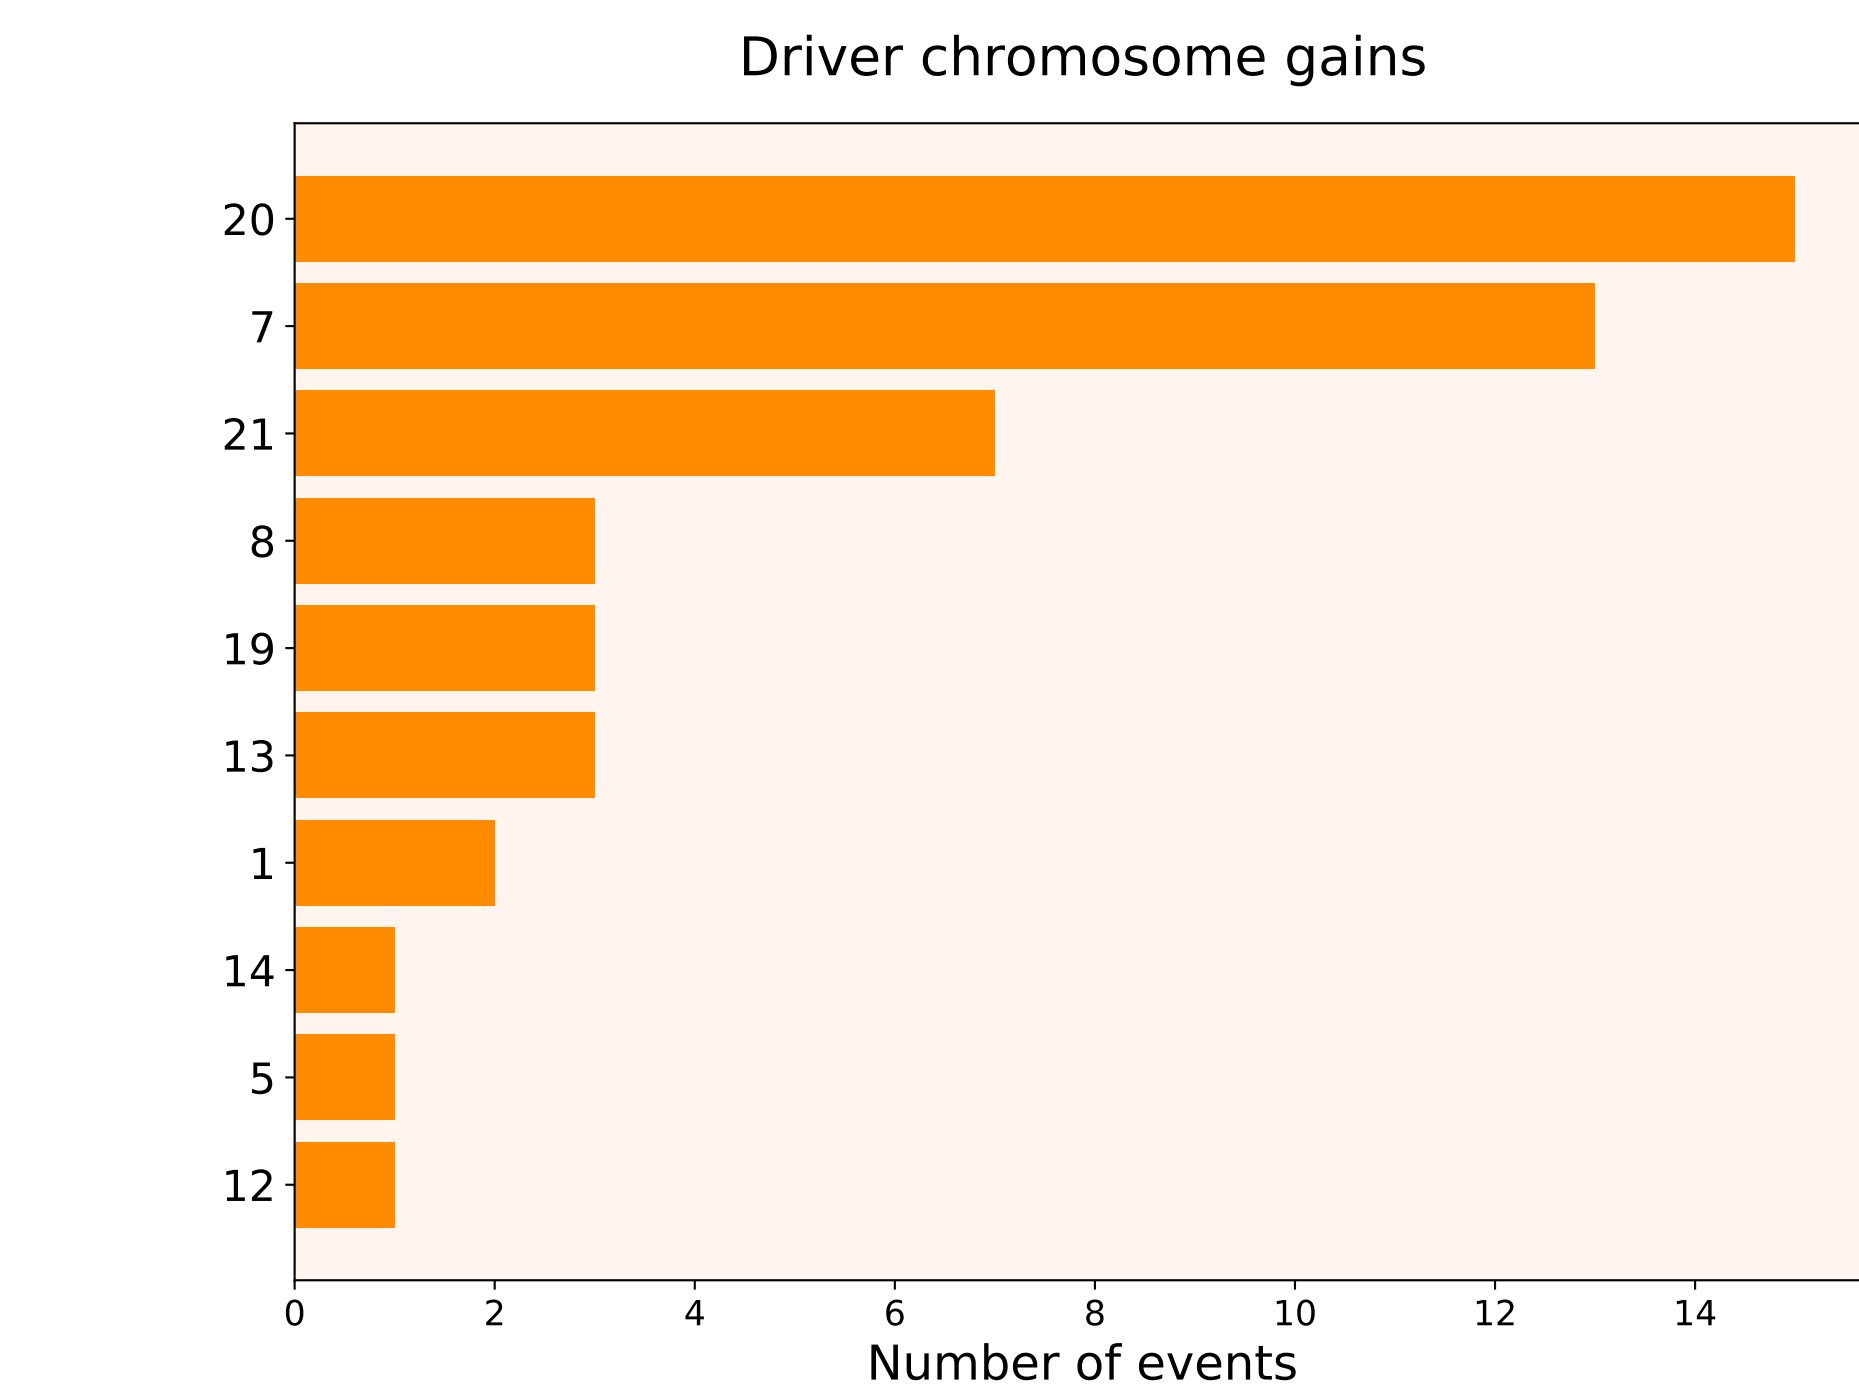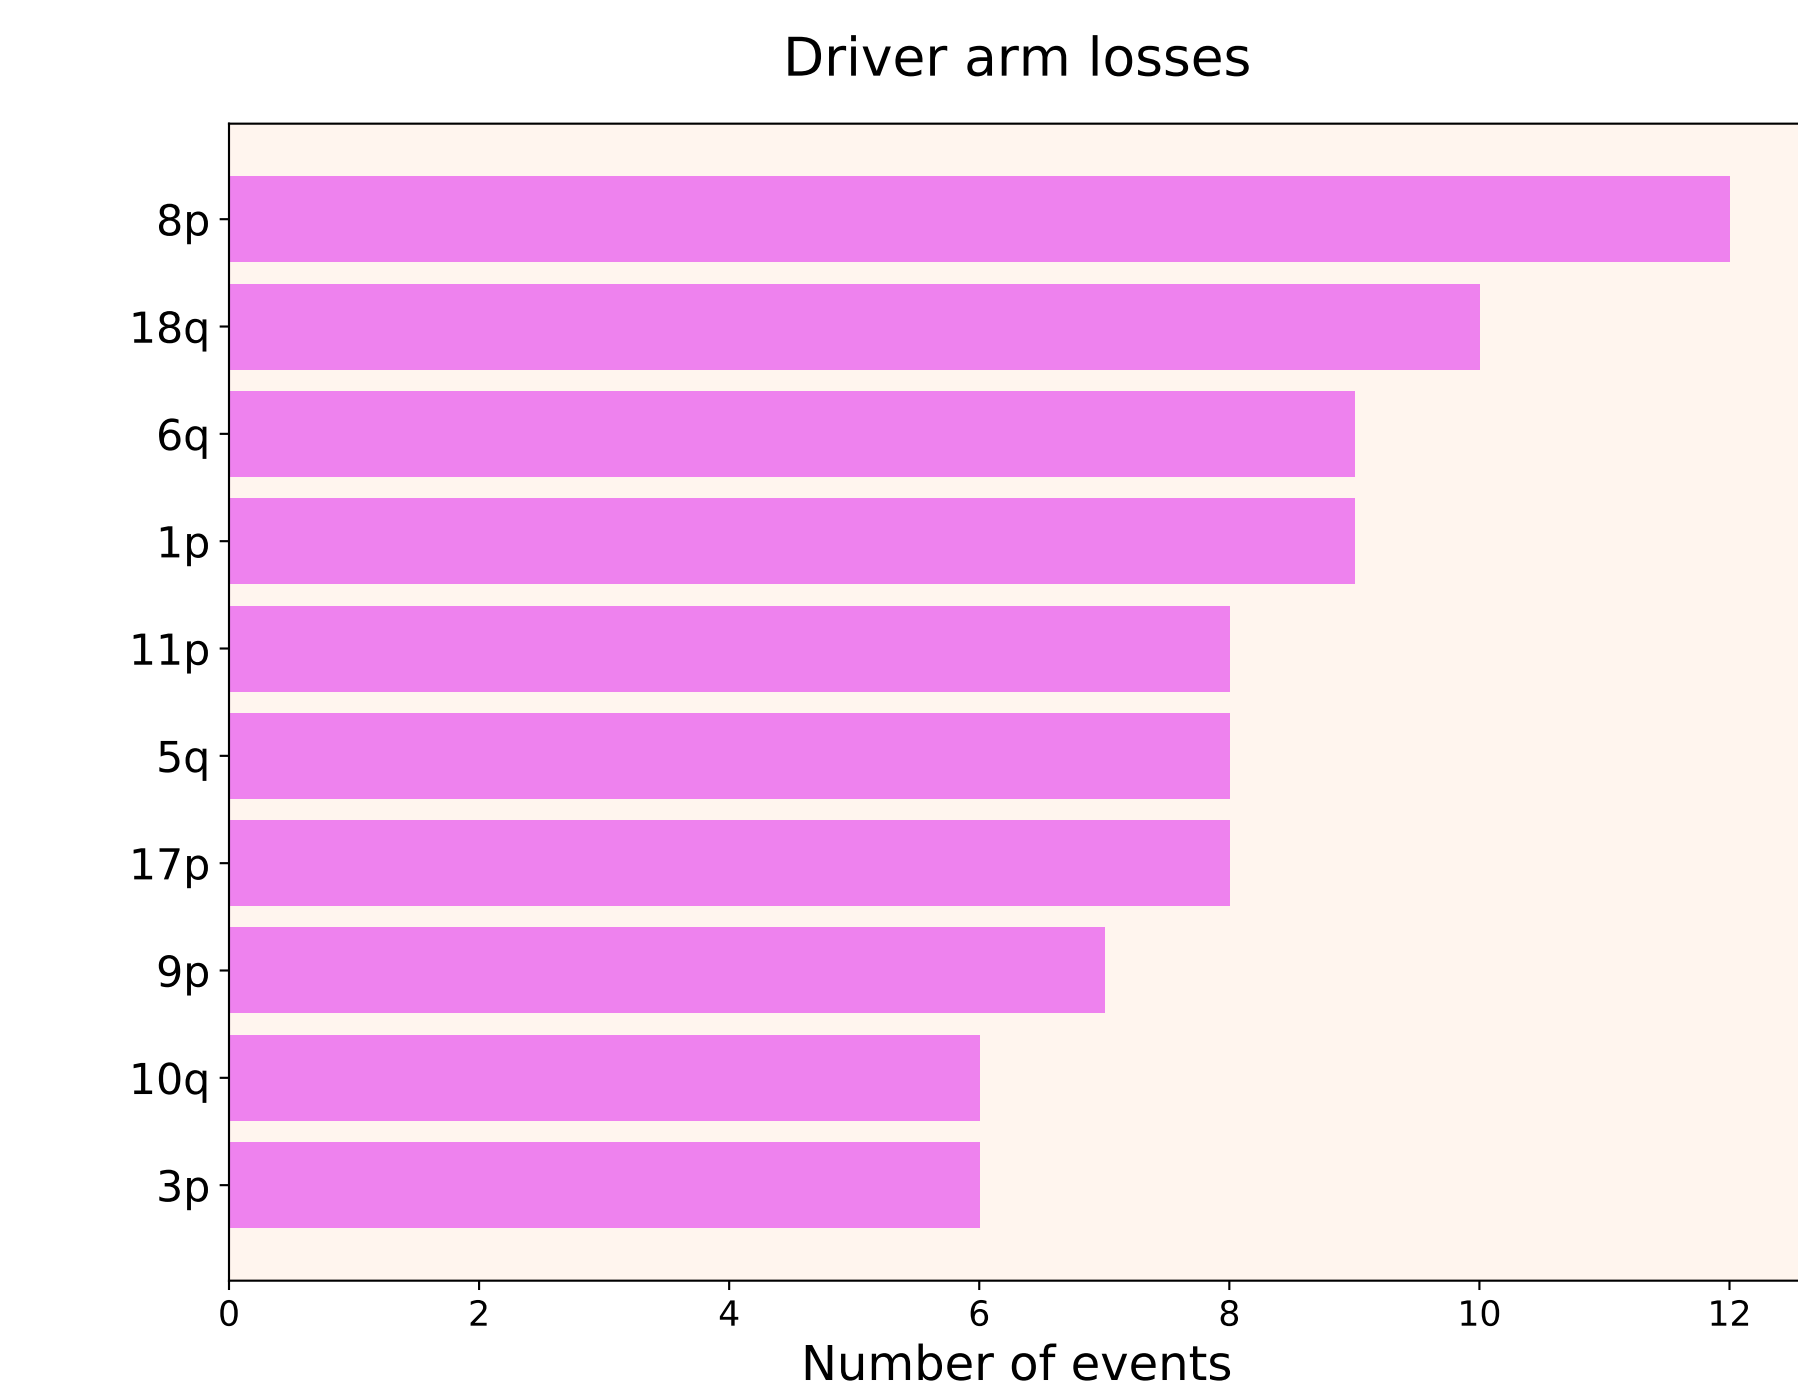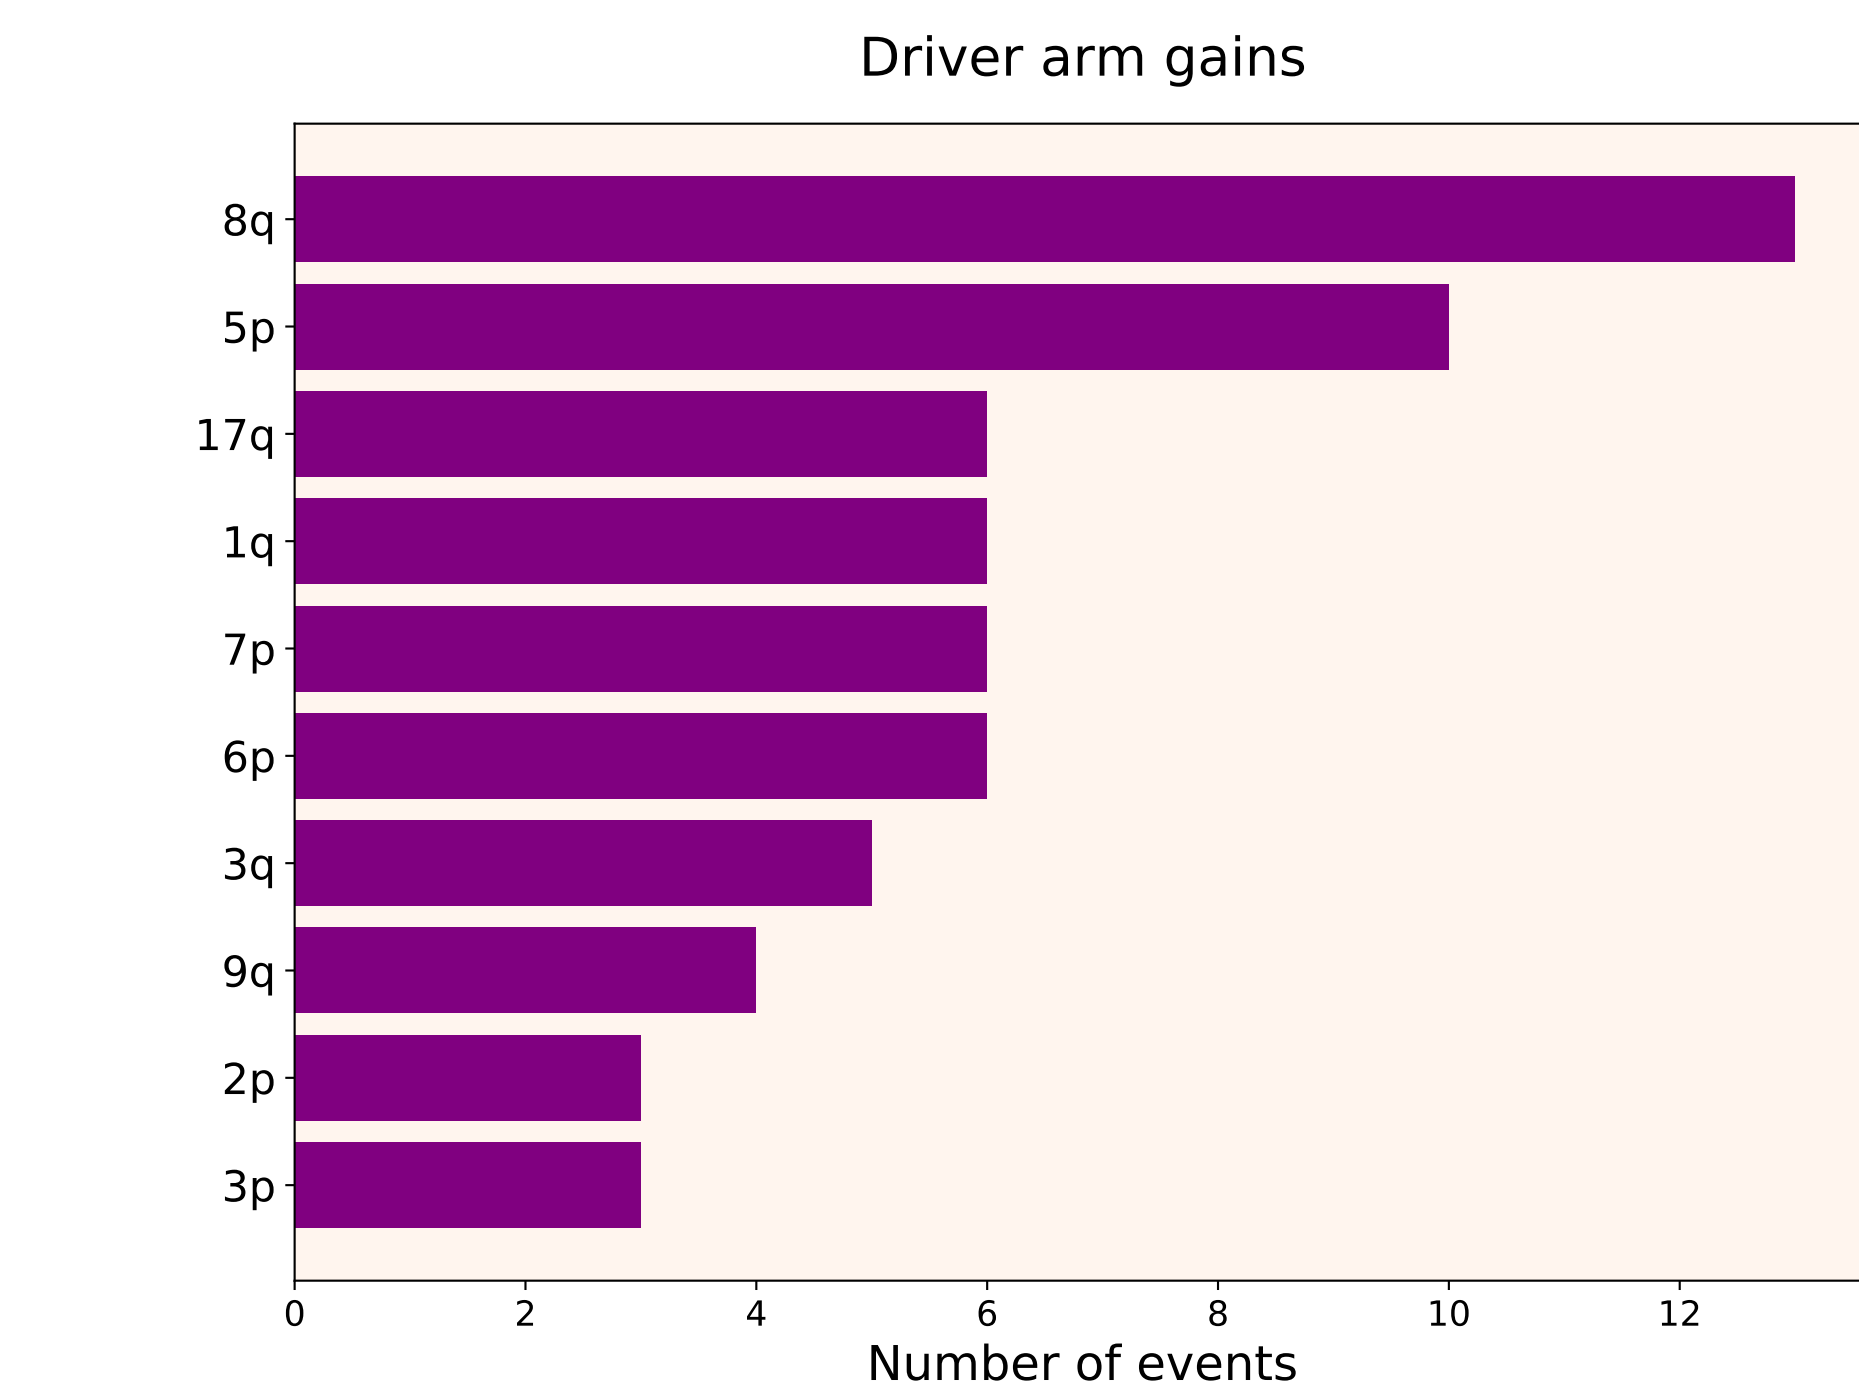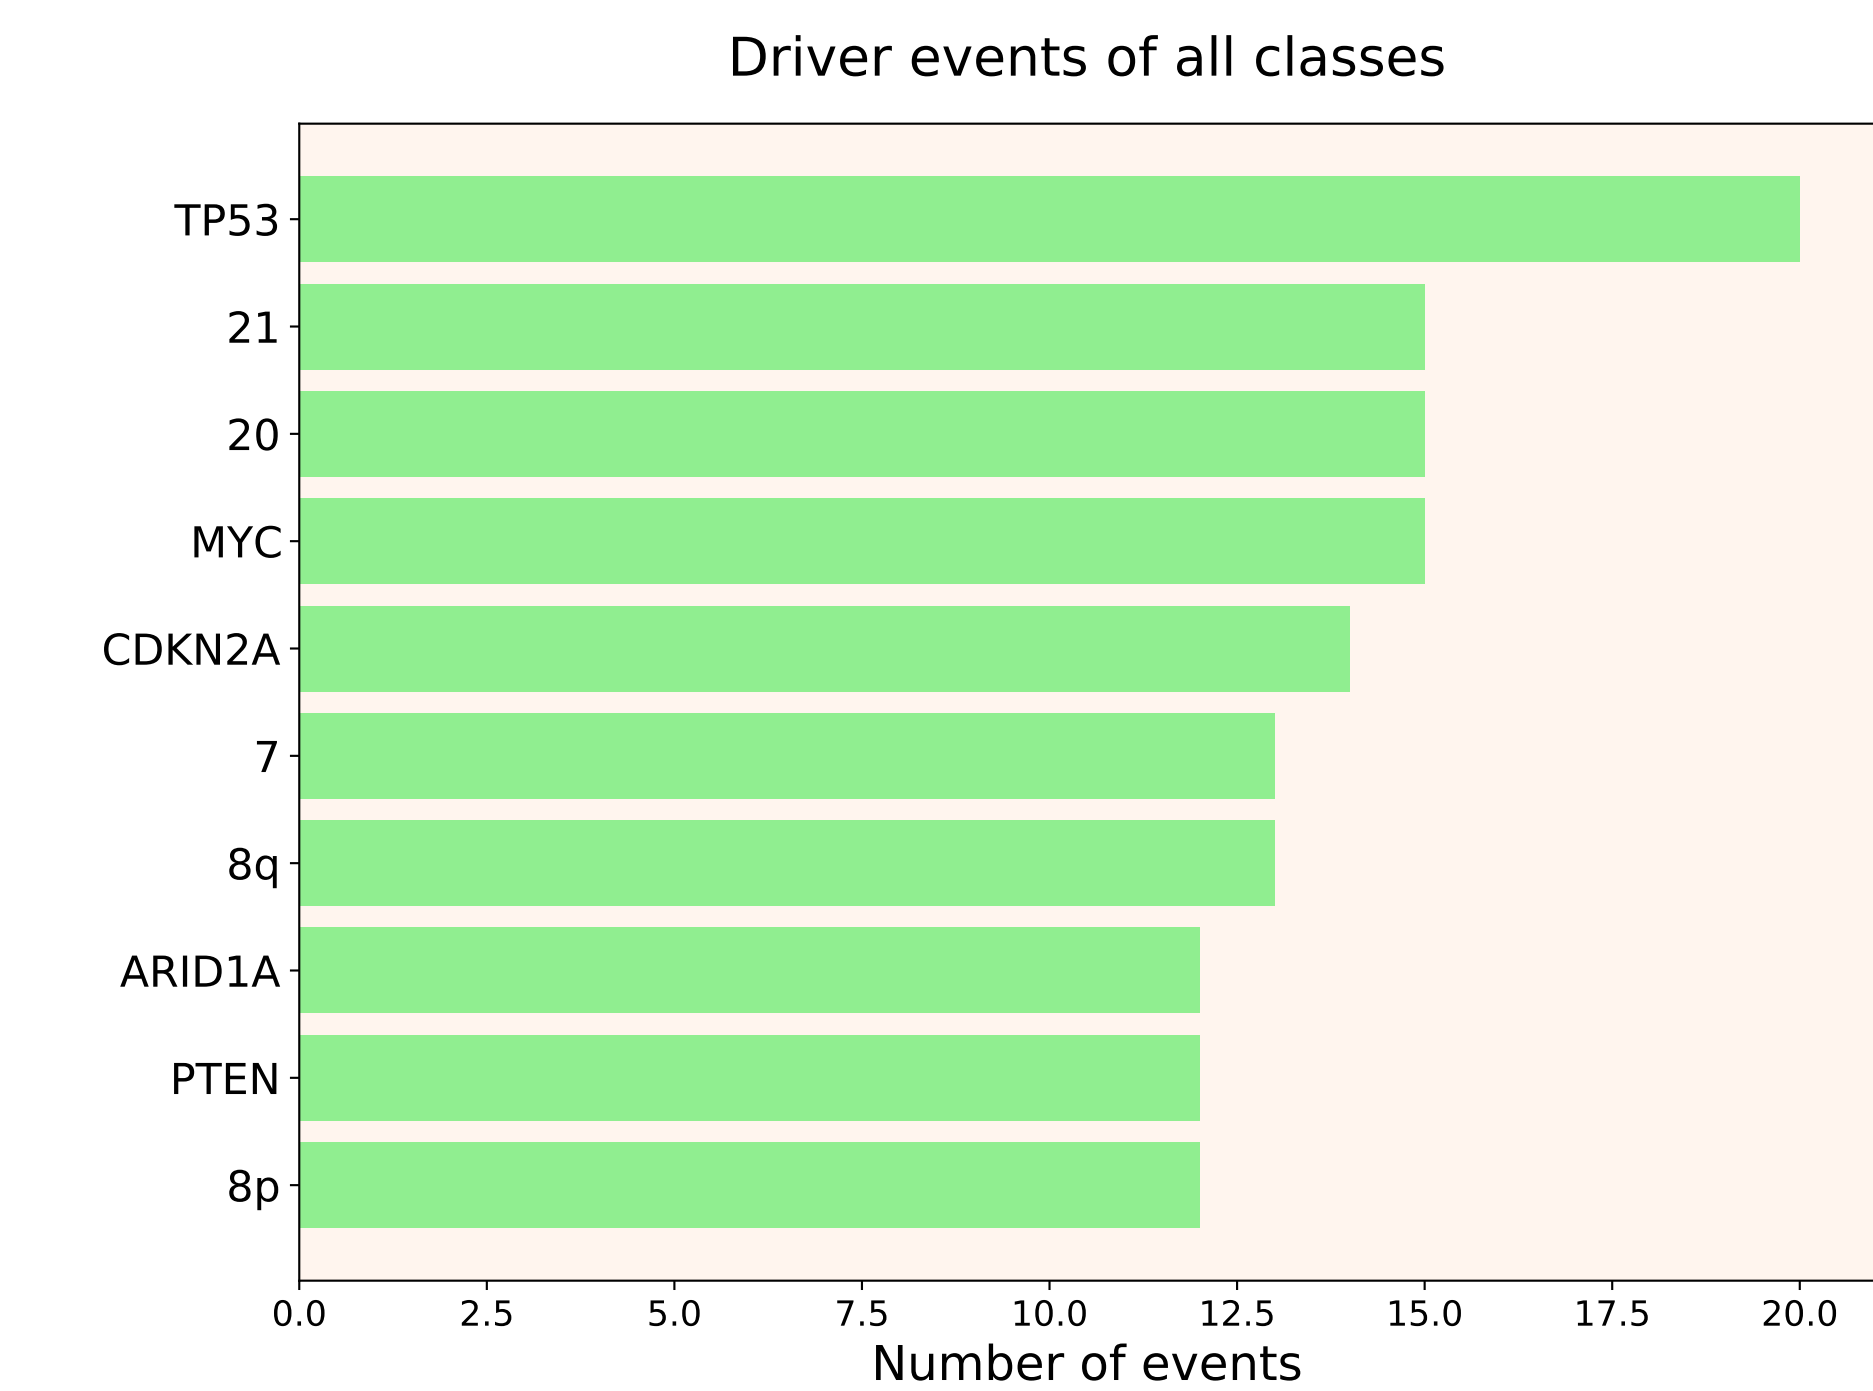

Supplement: Supplemental_Data_S1.zip [file Supplemental_Data_S1.zip]

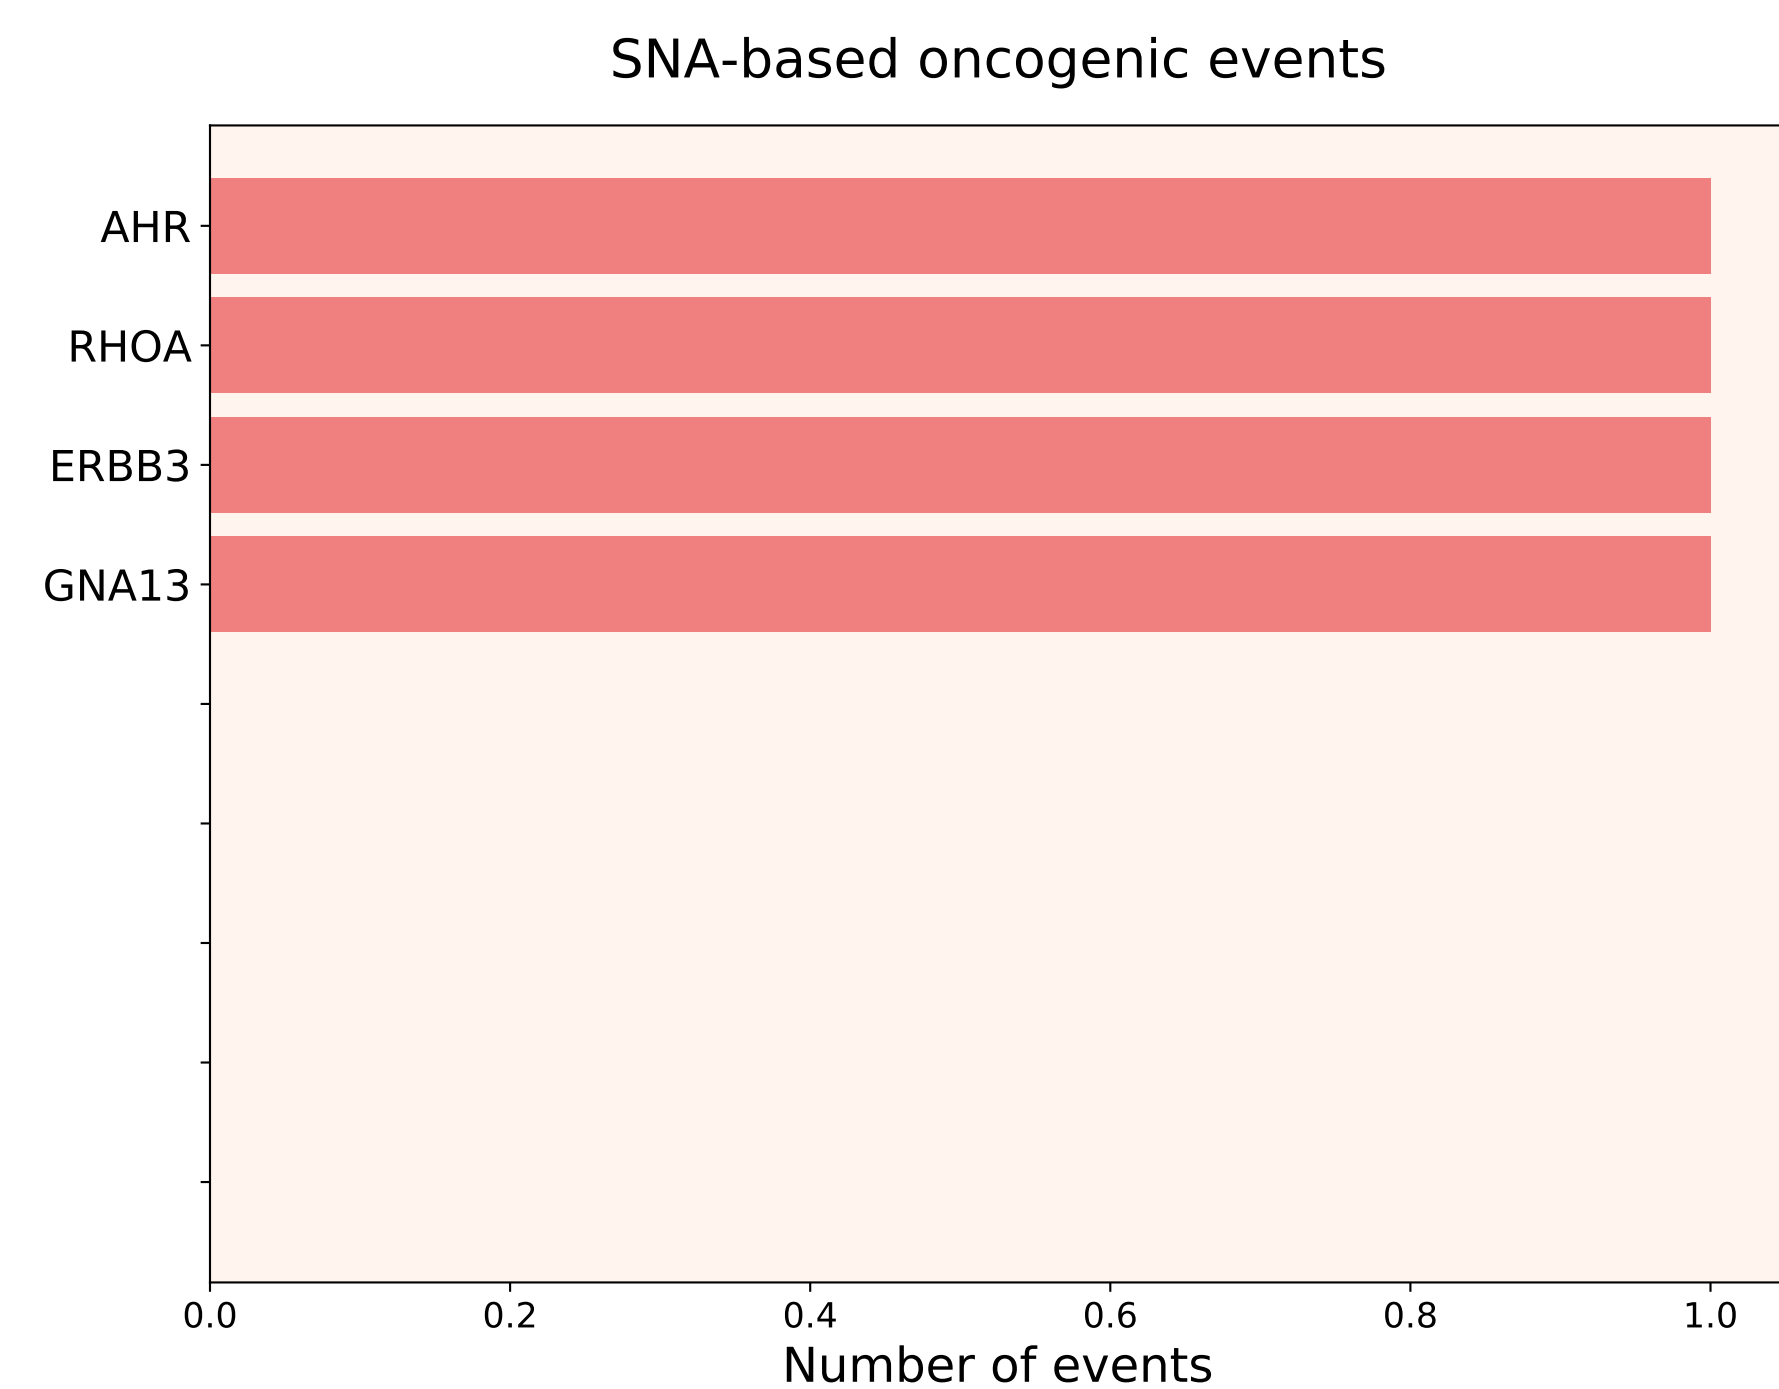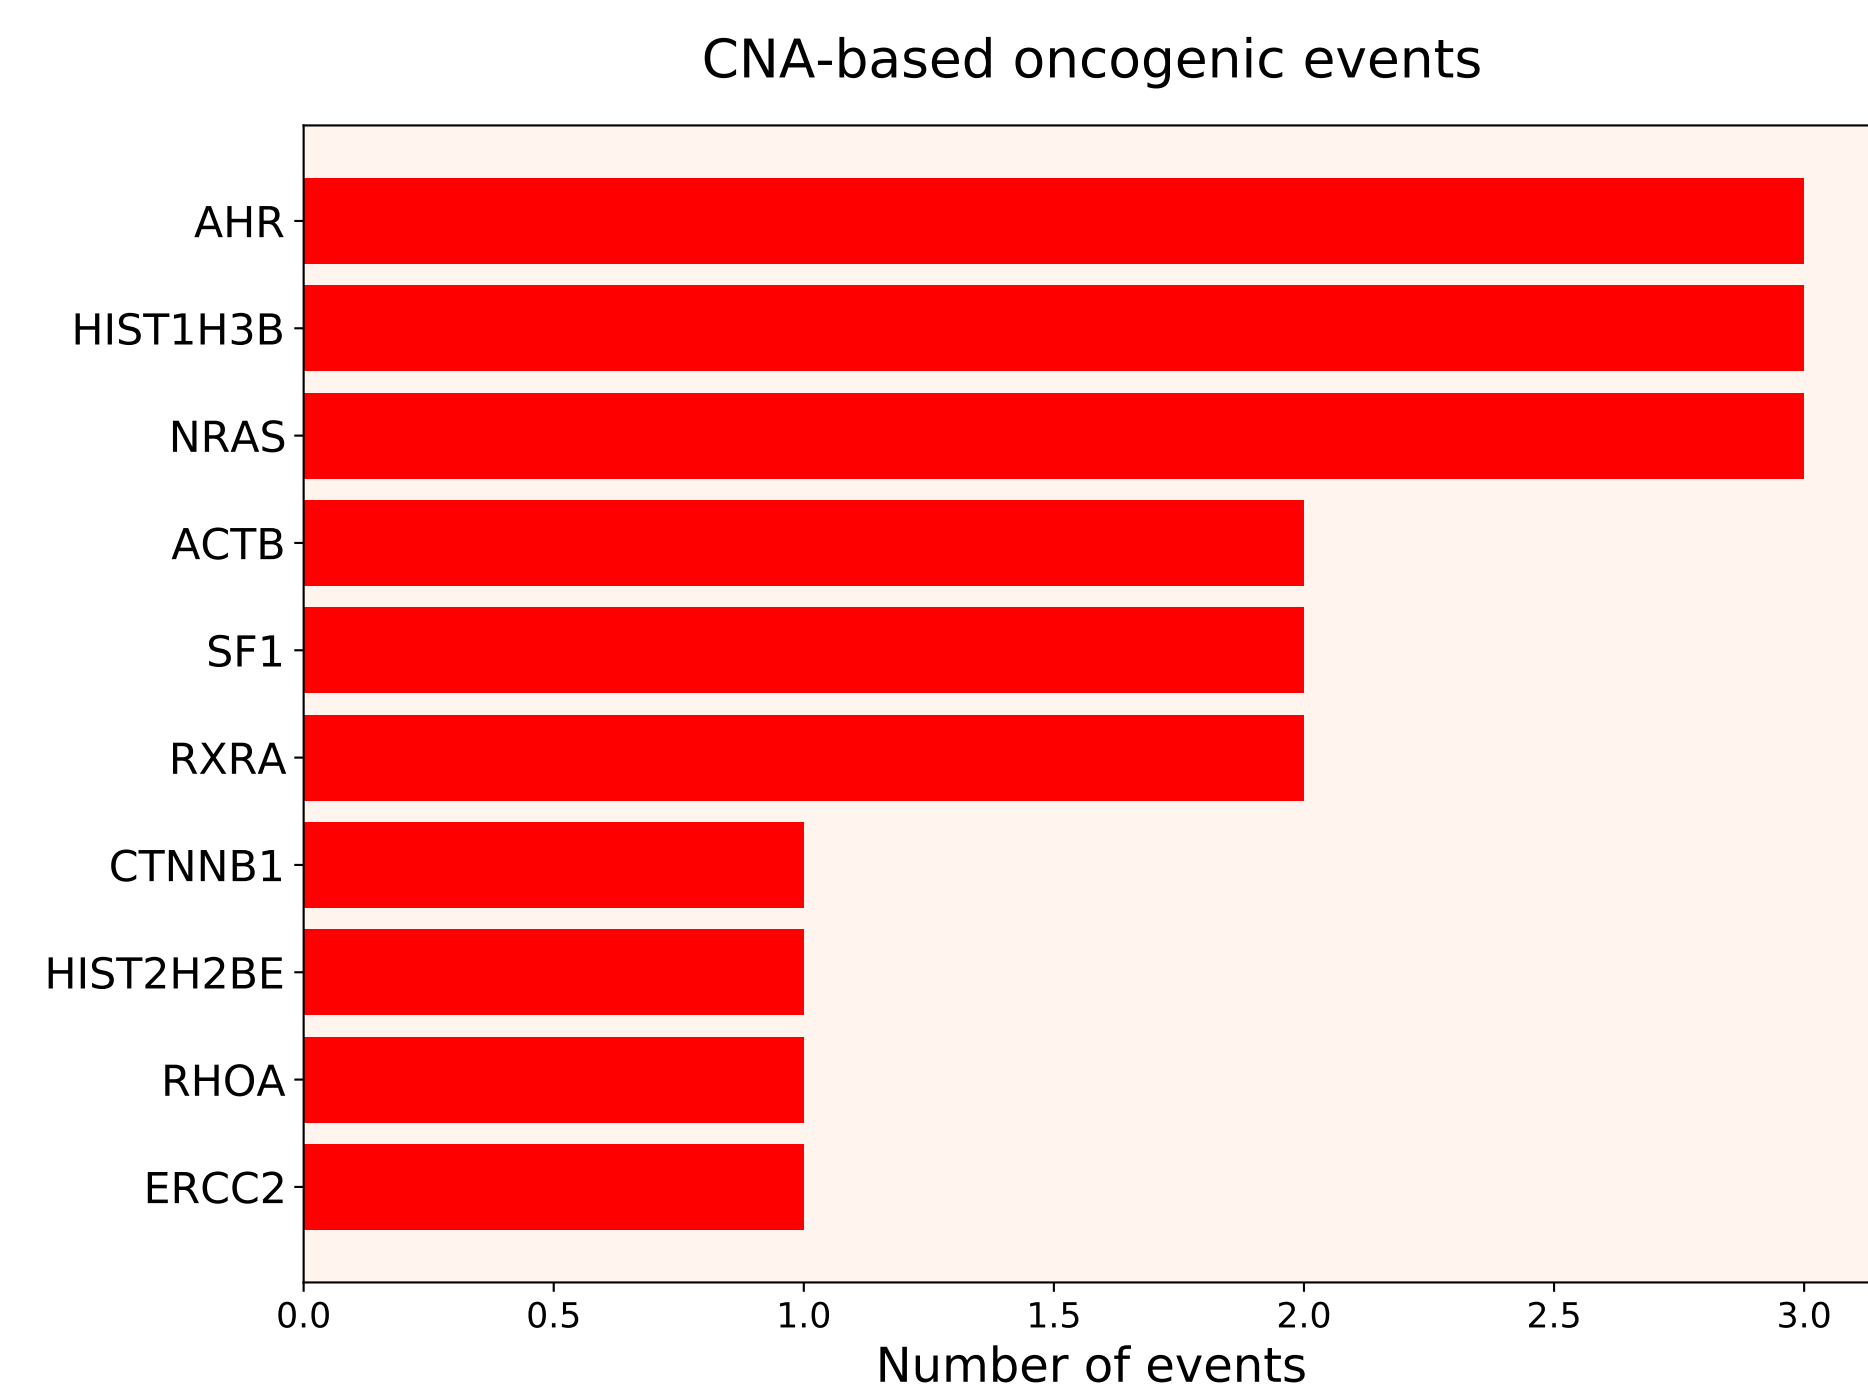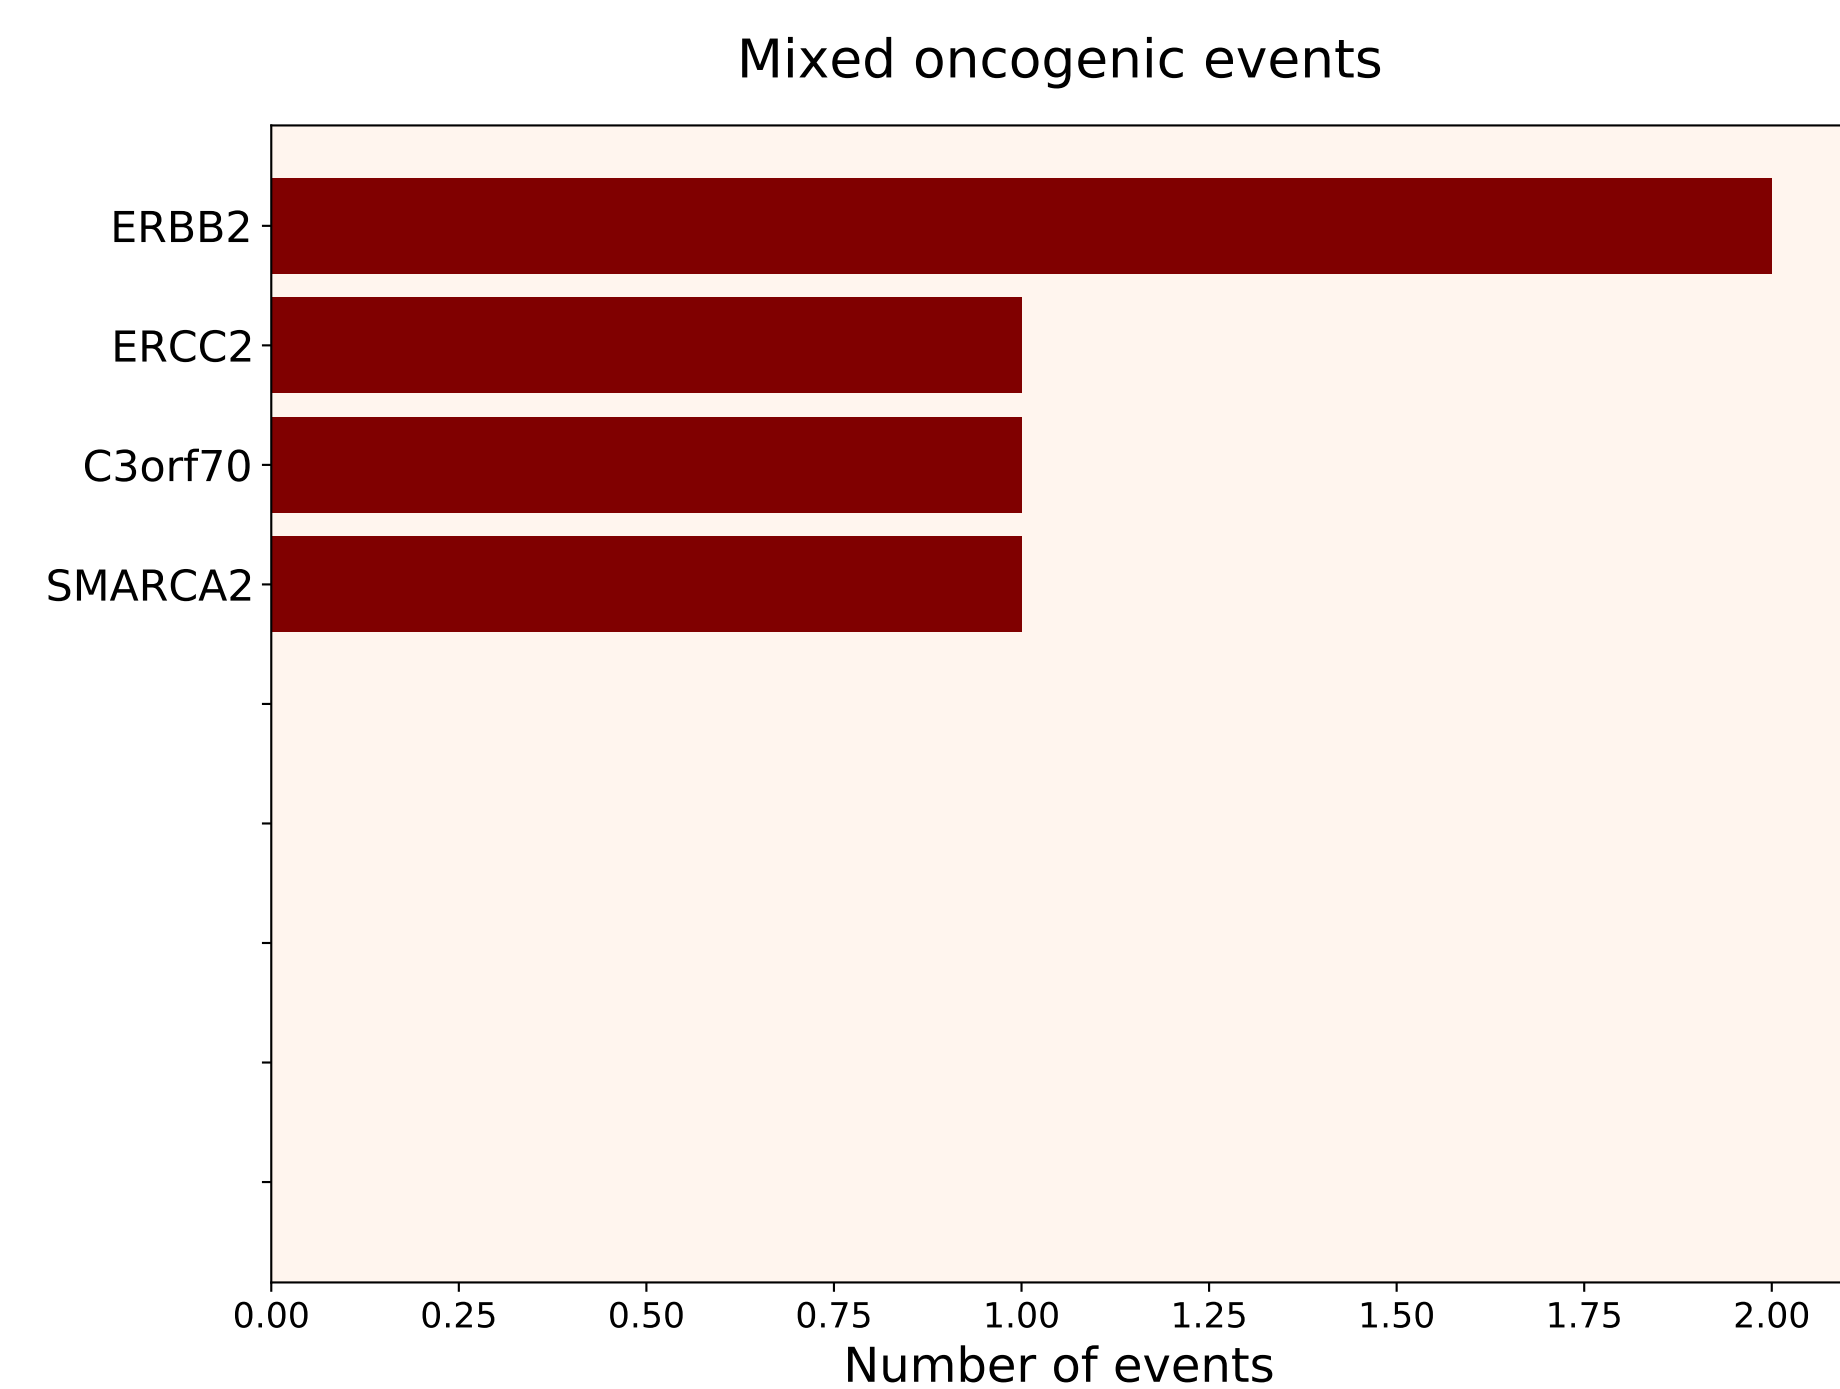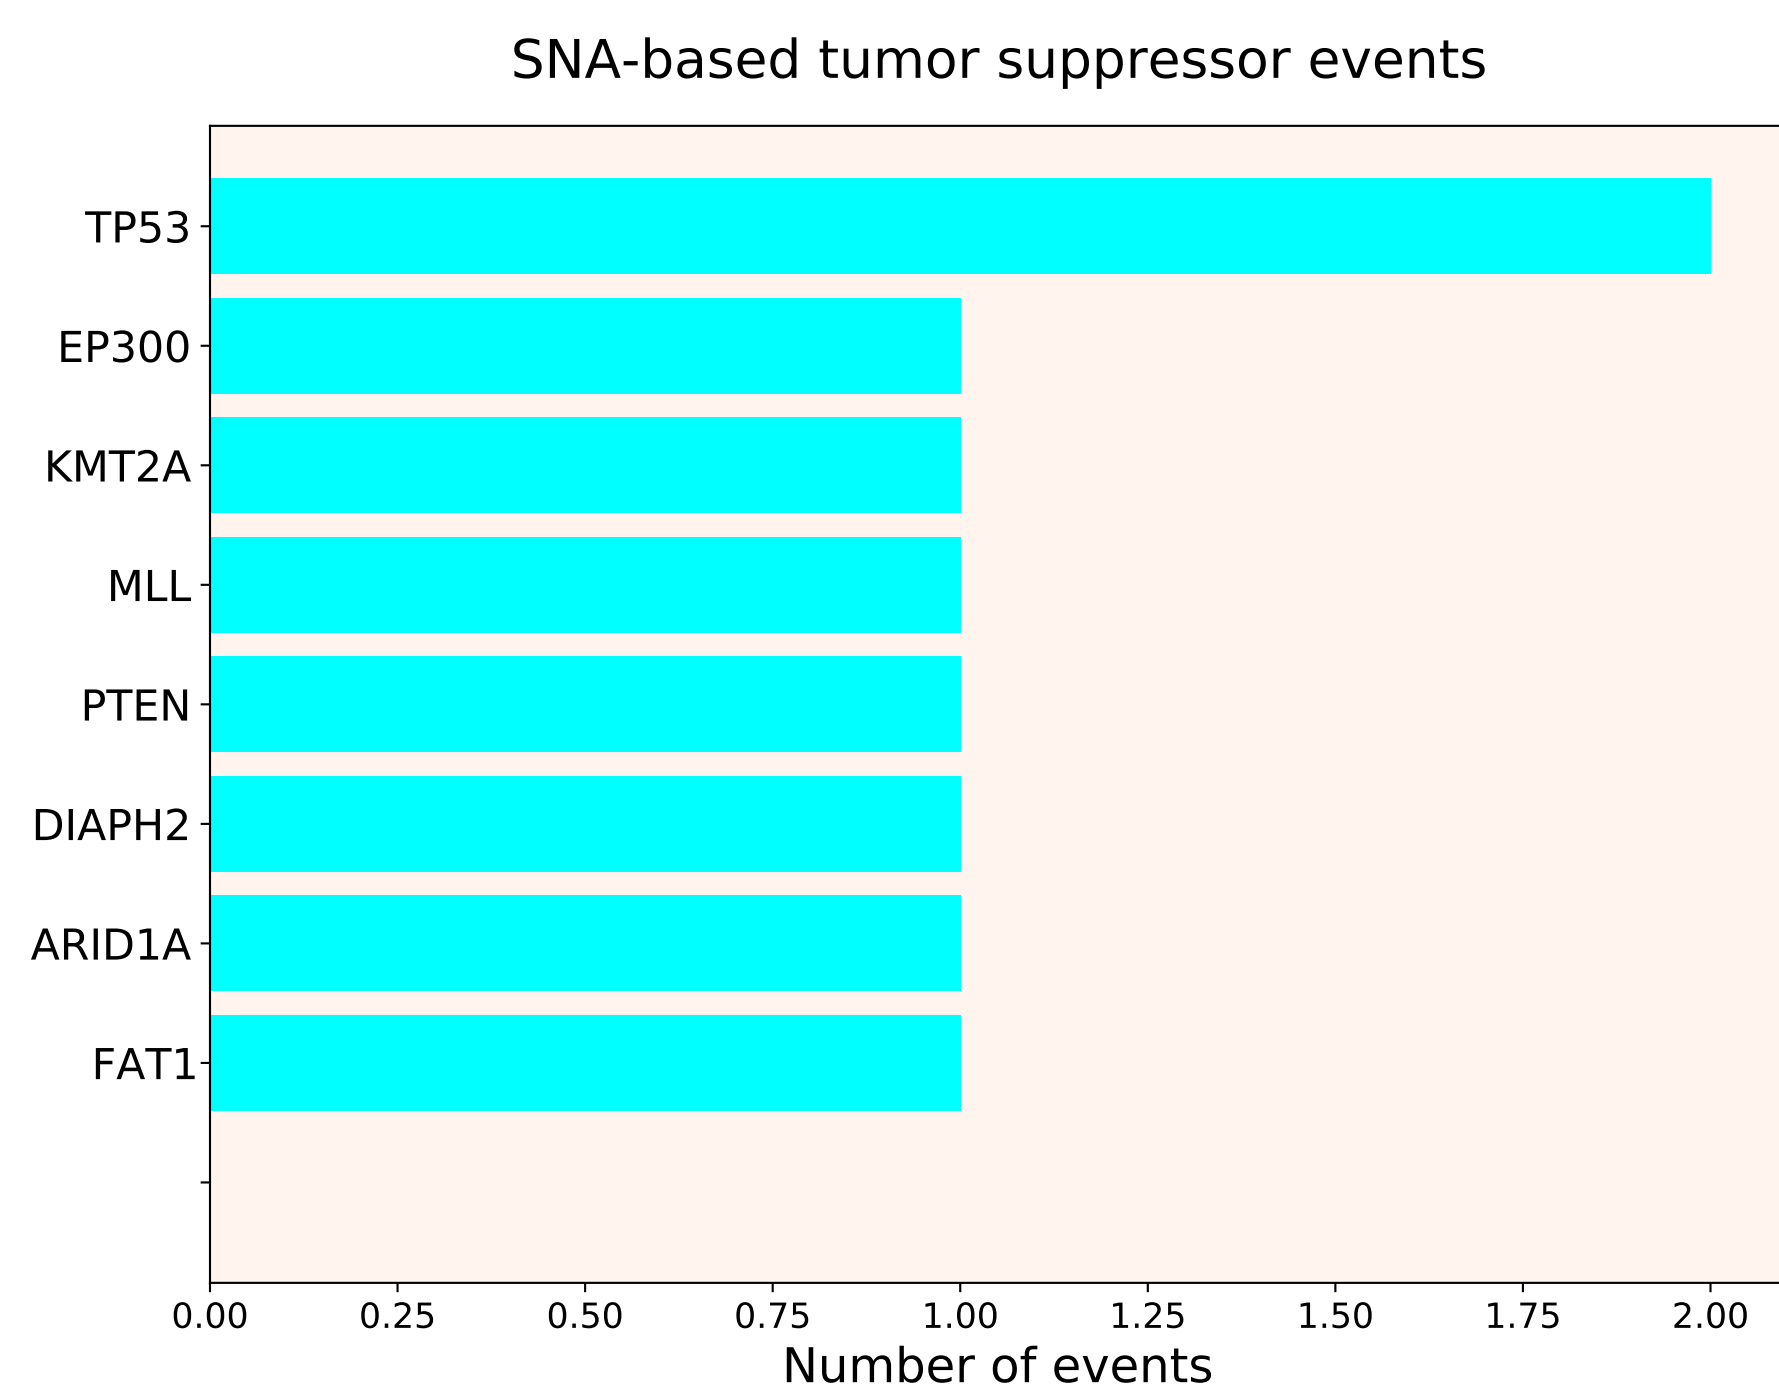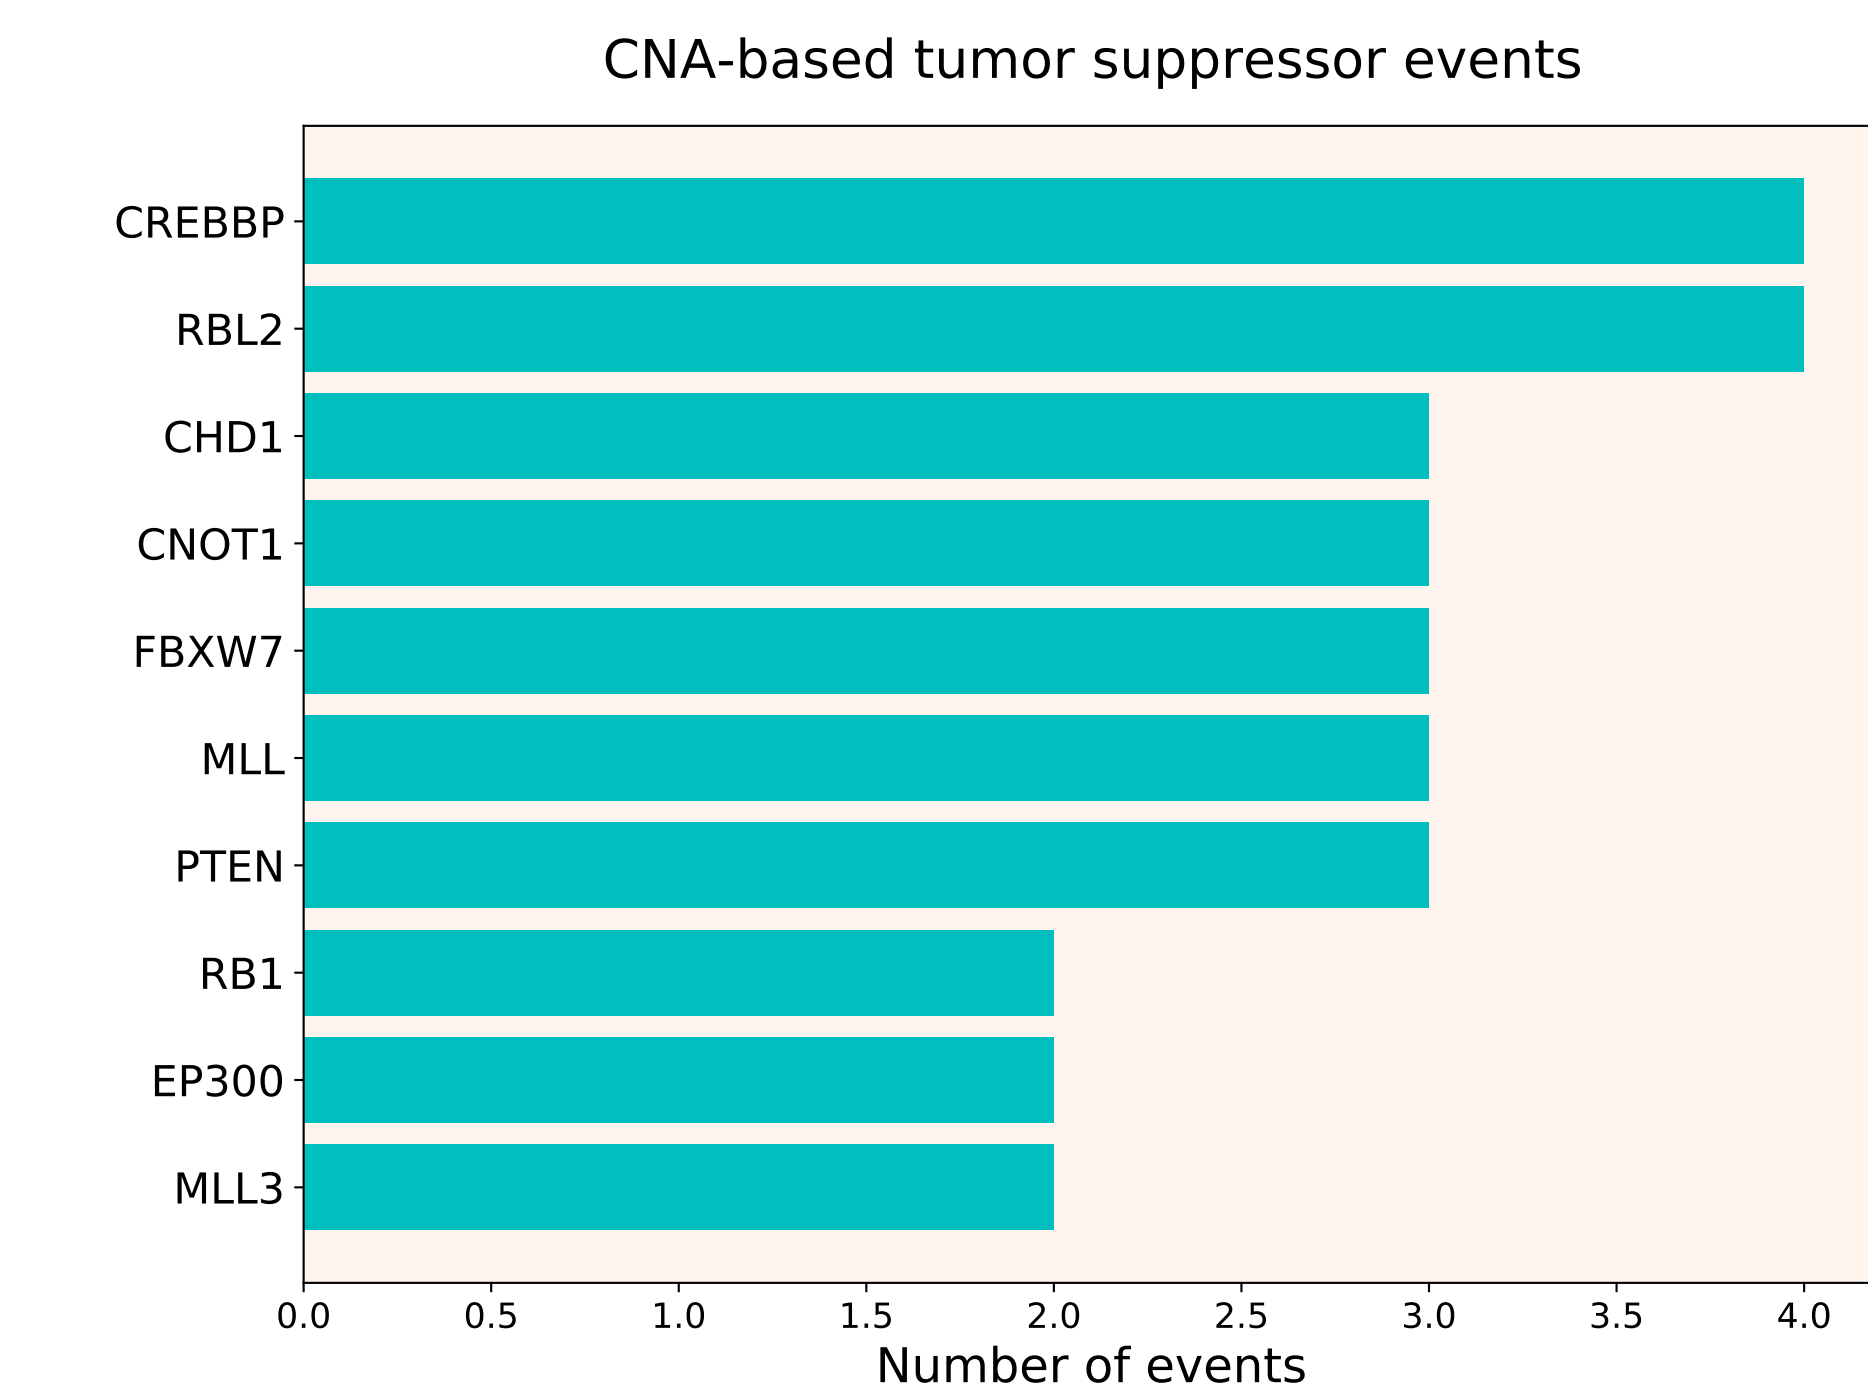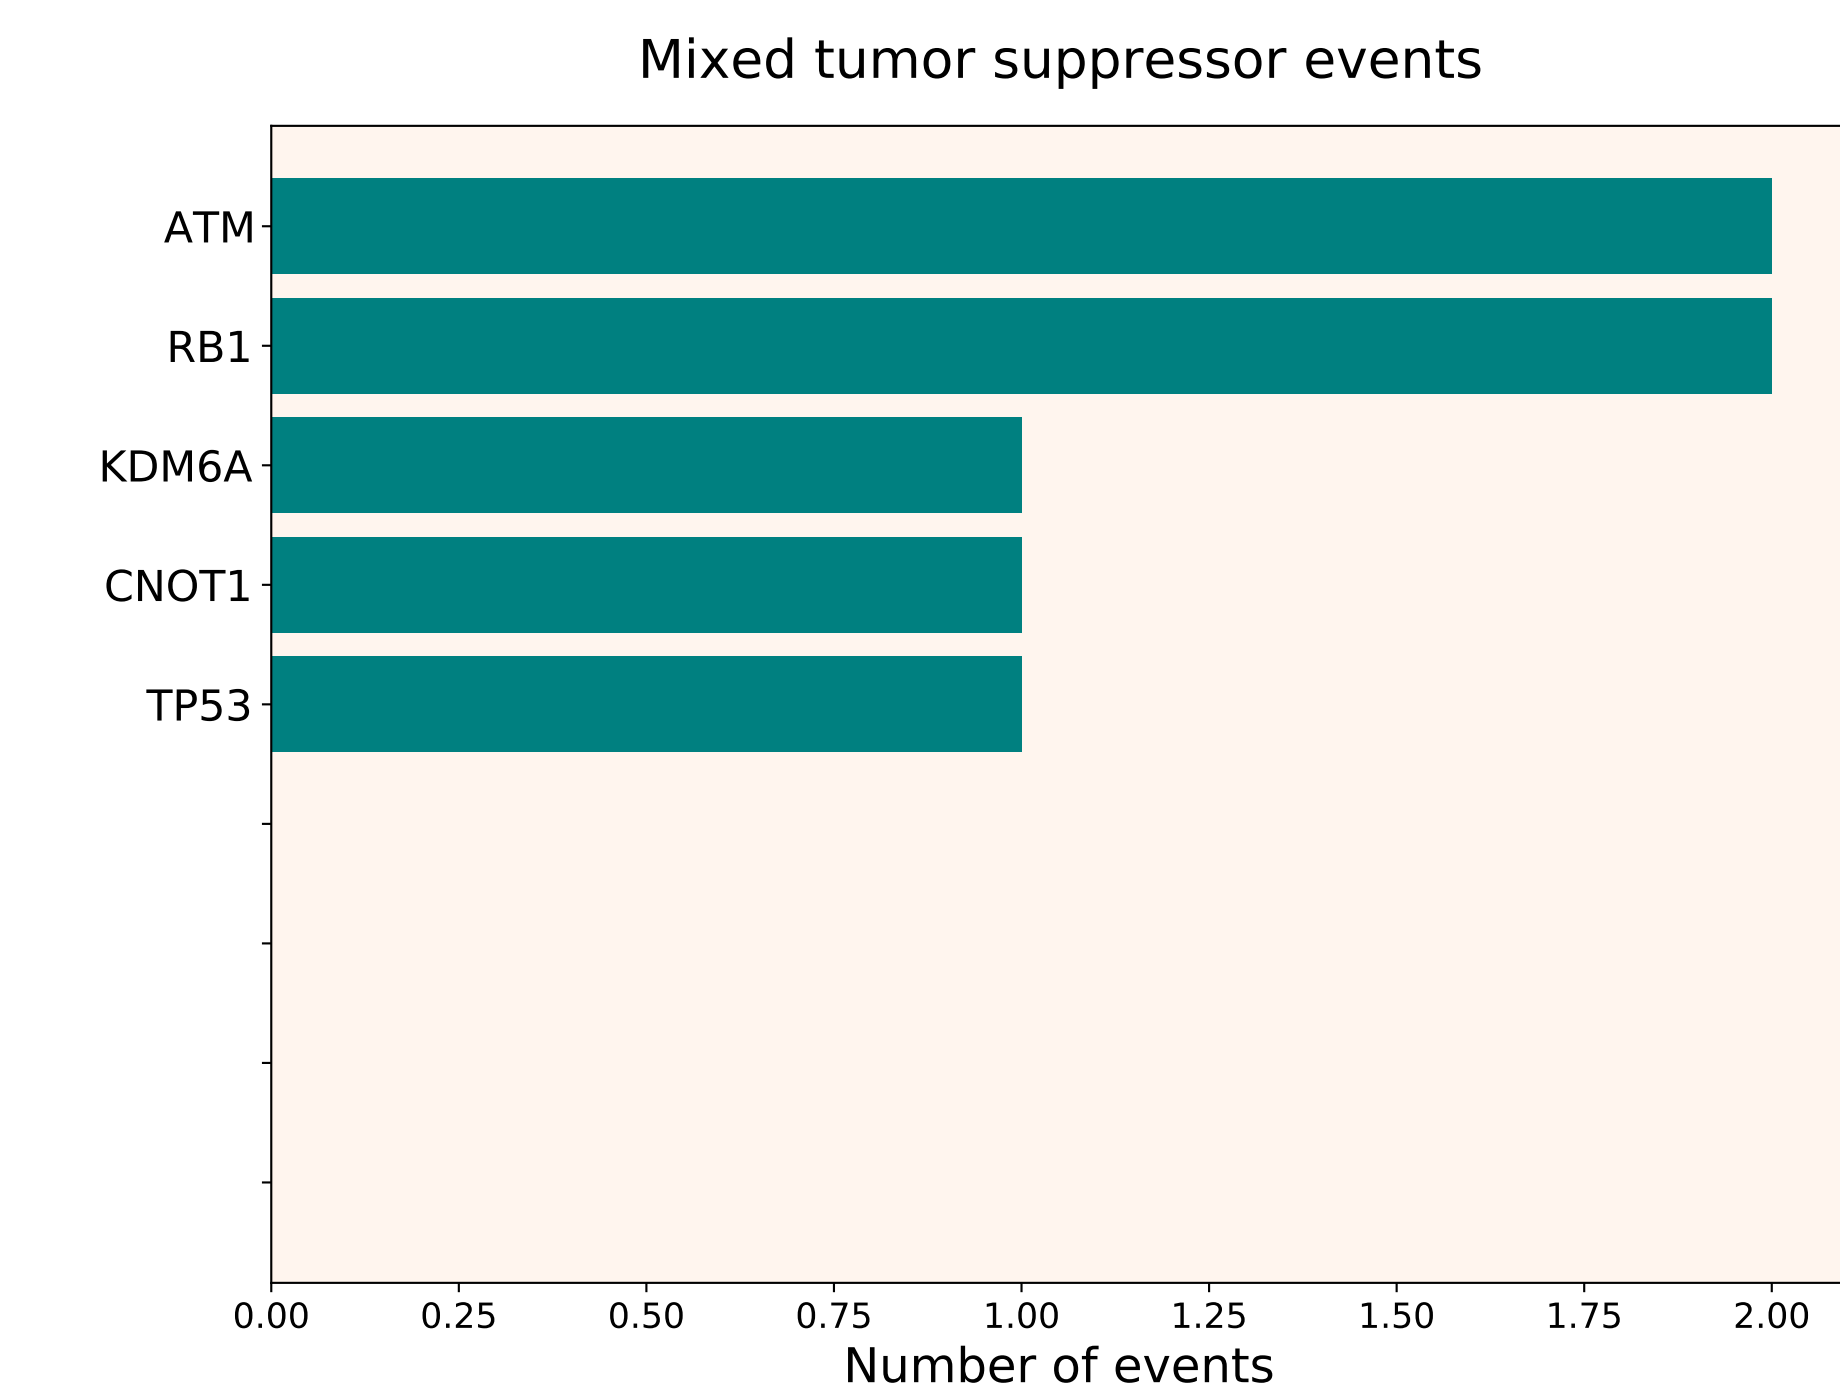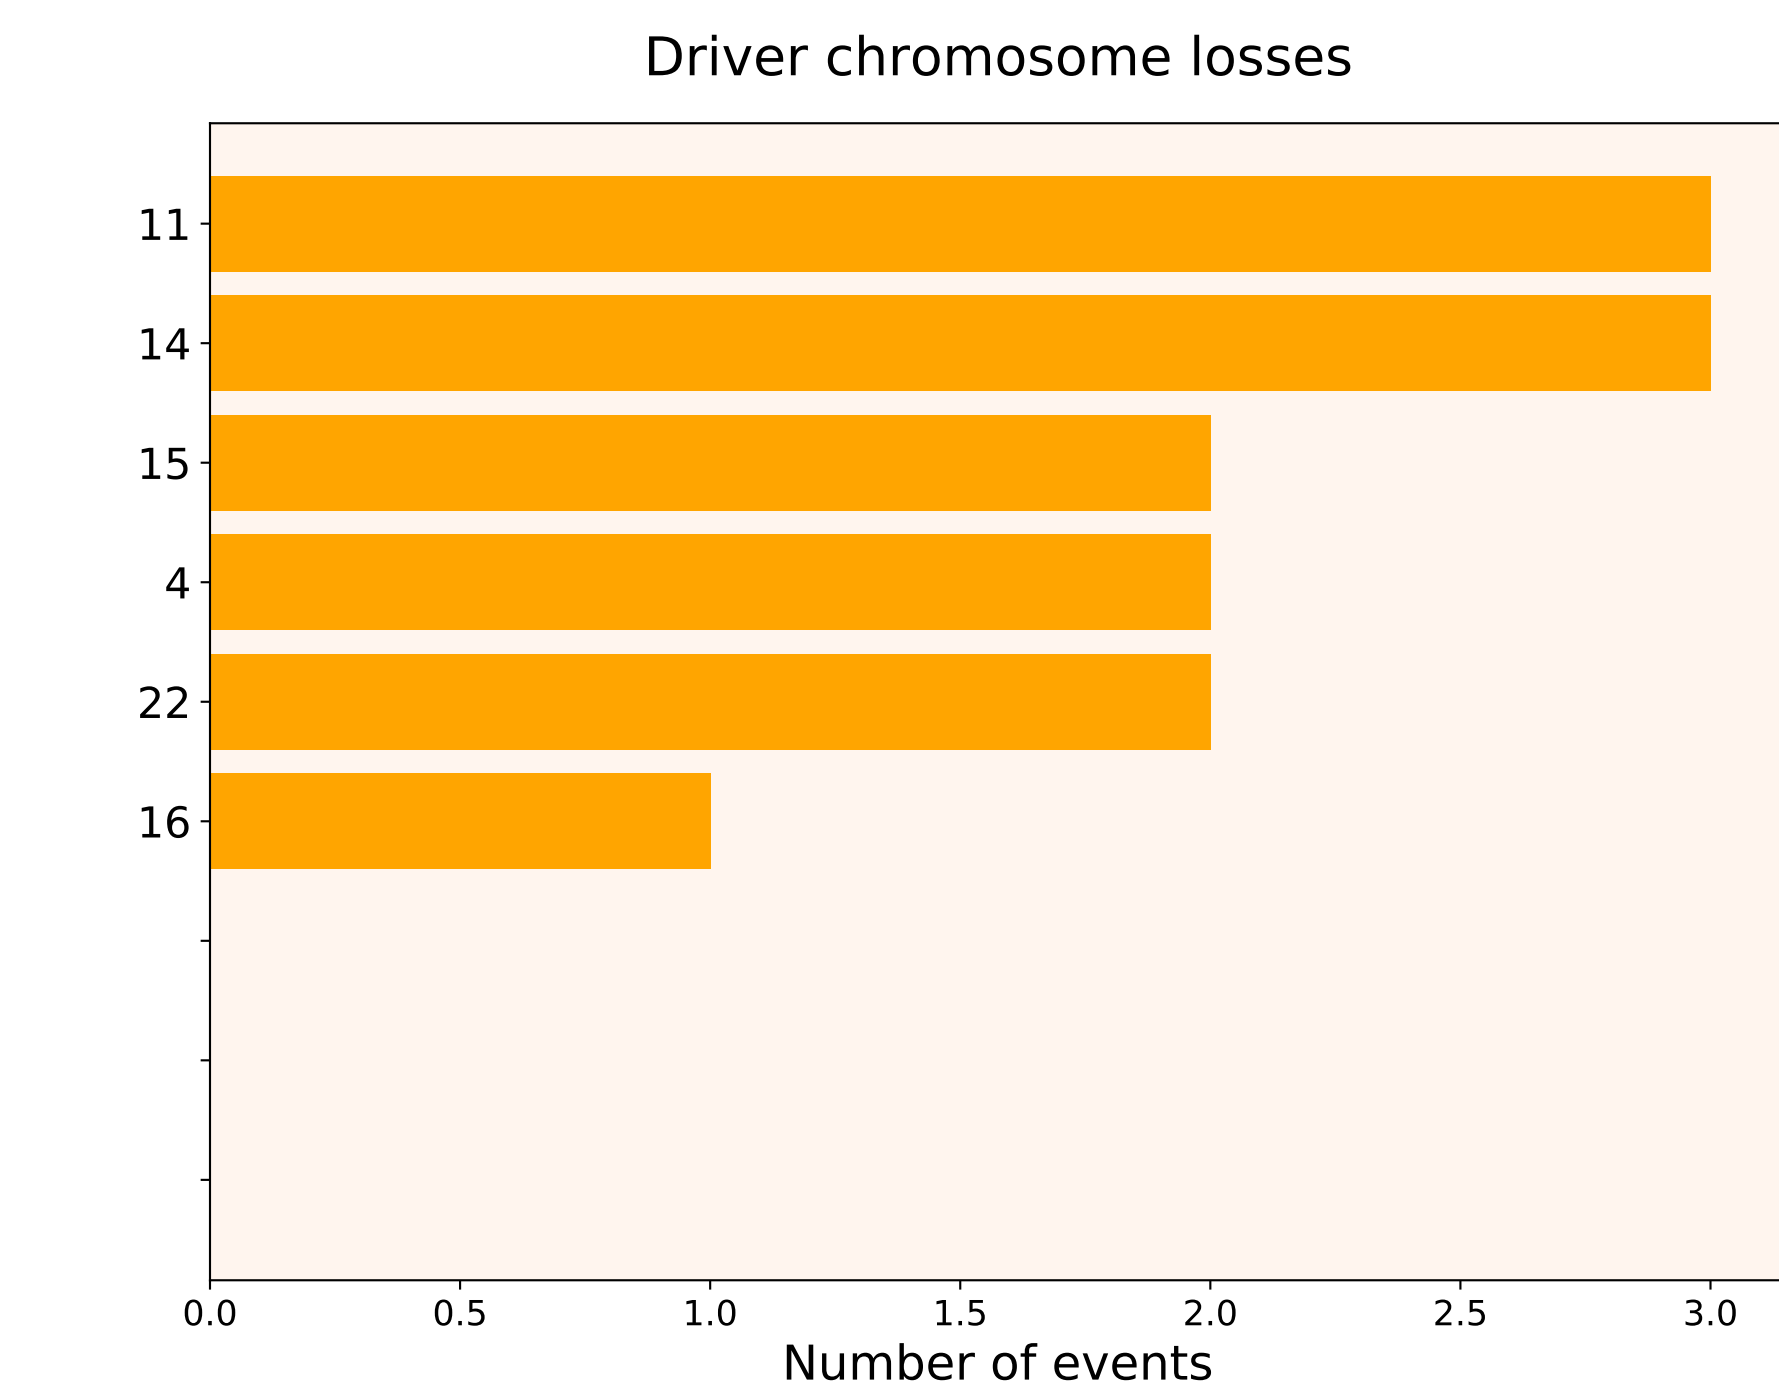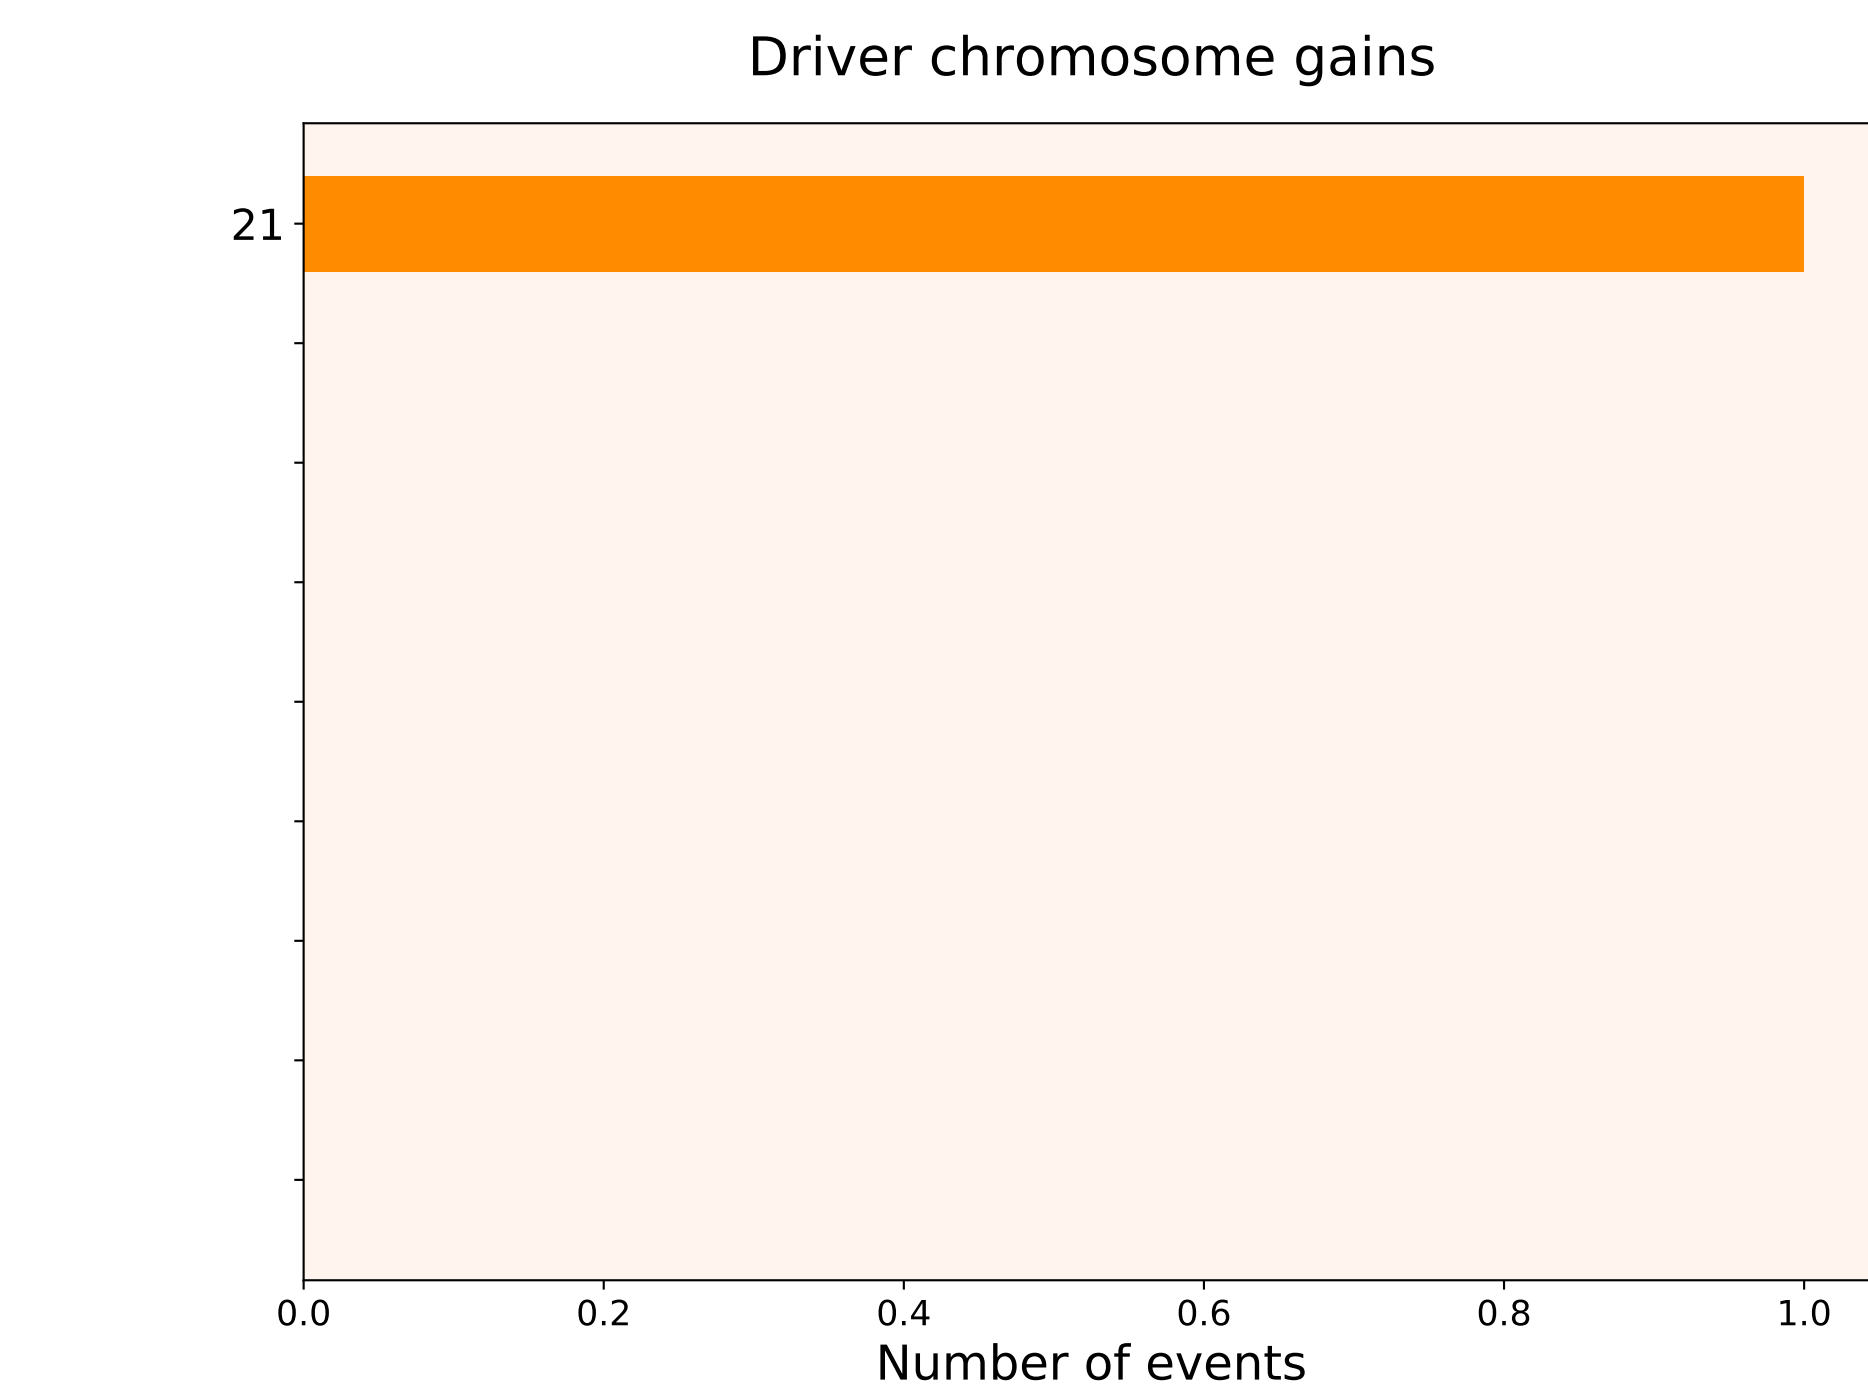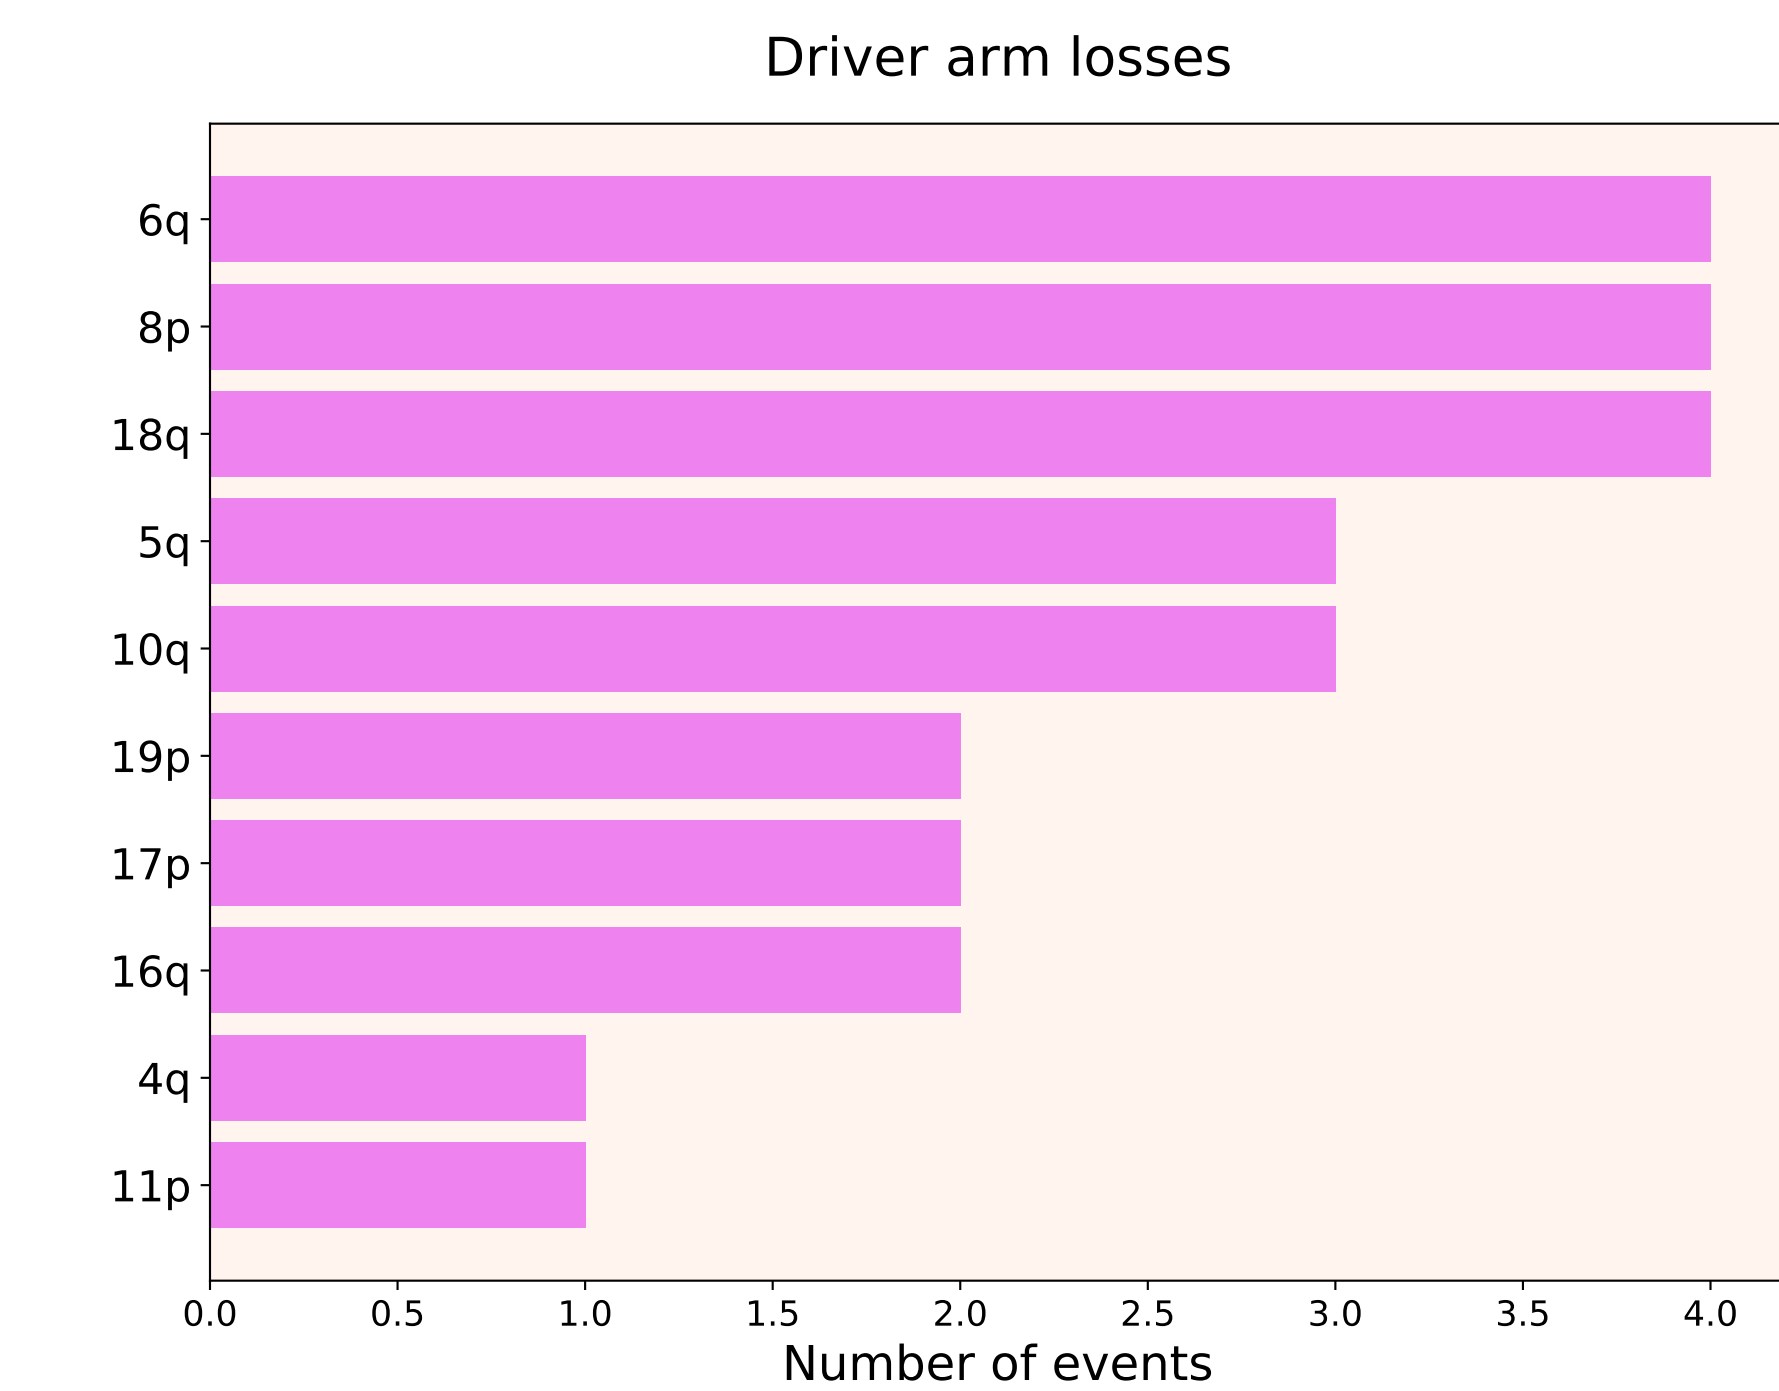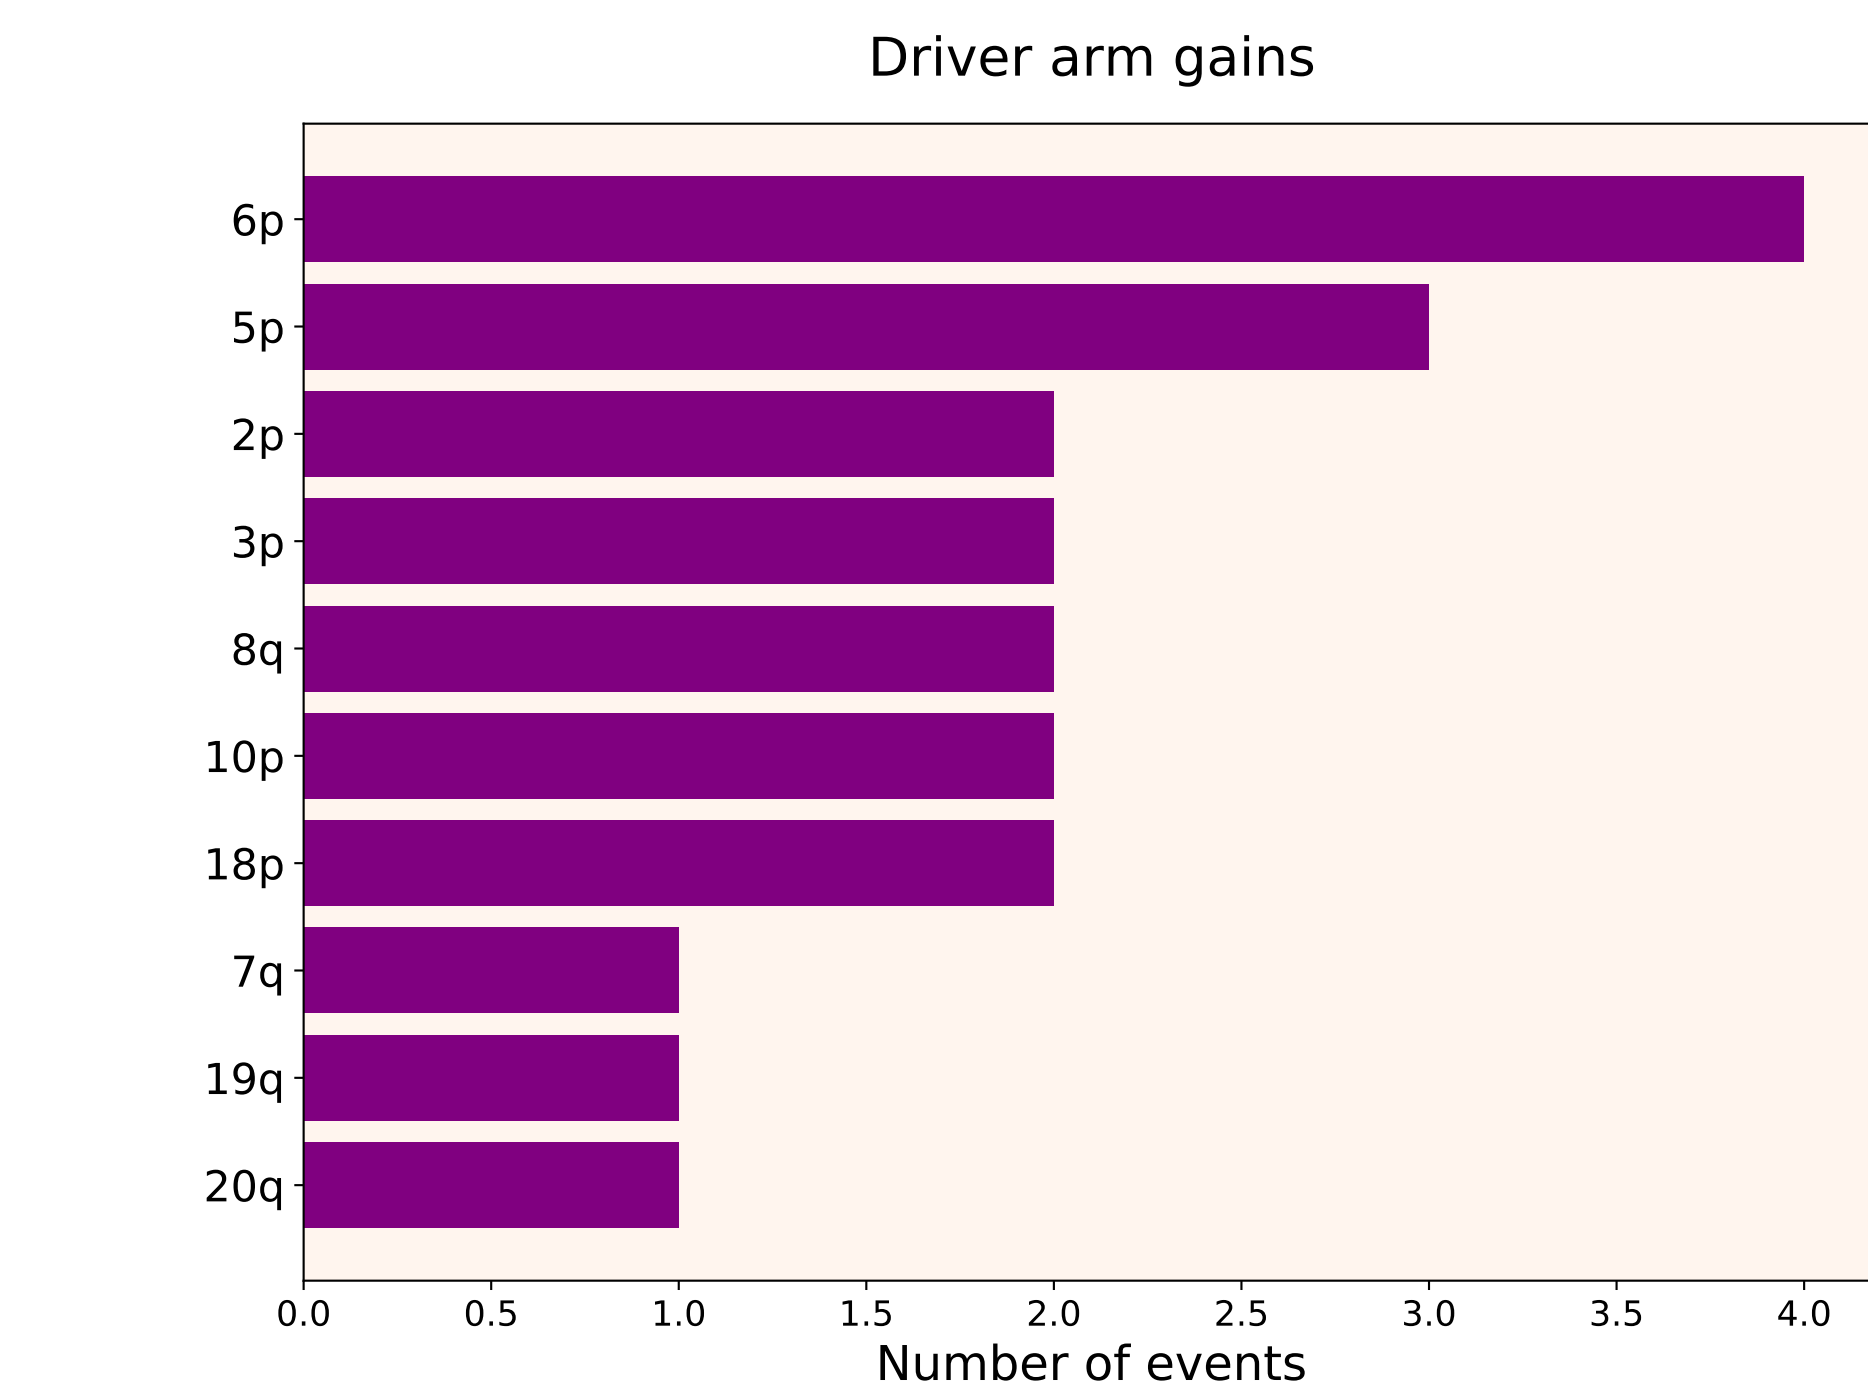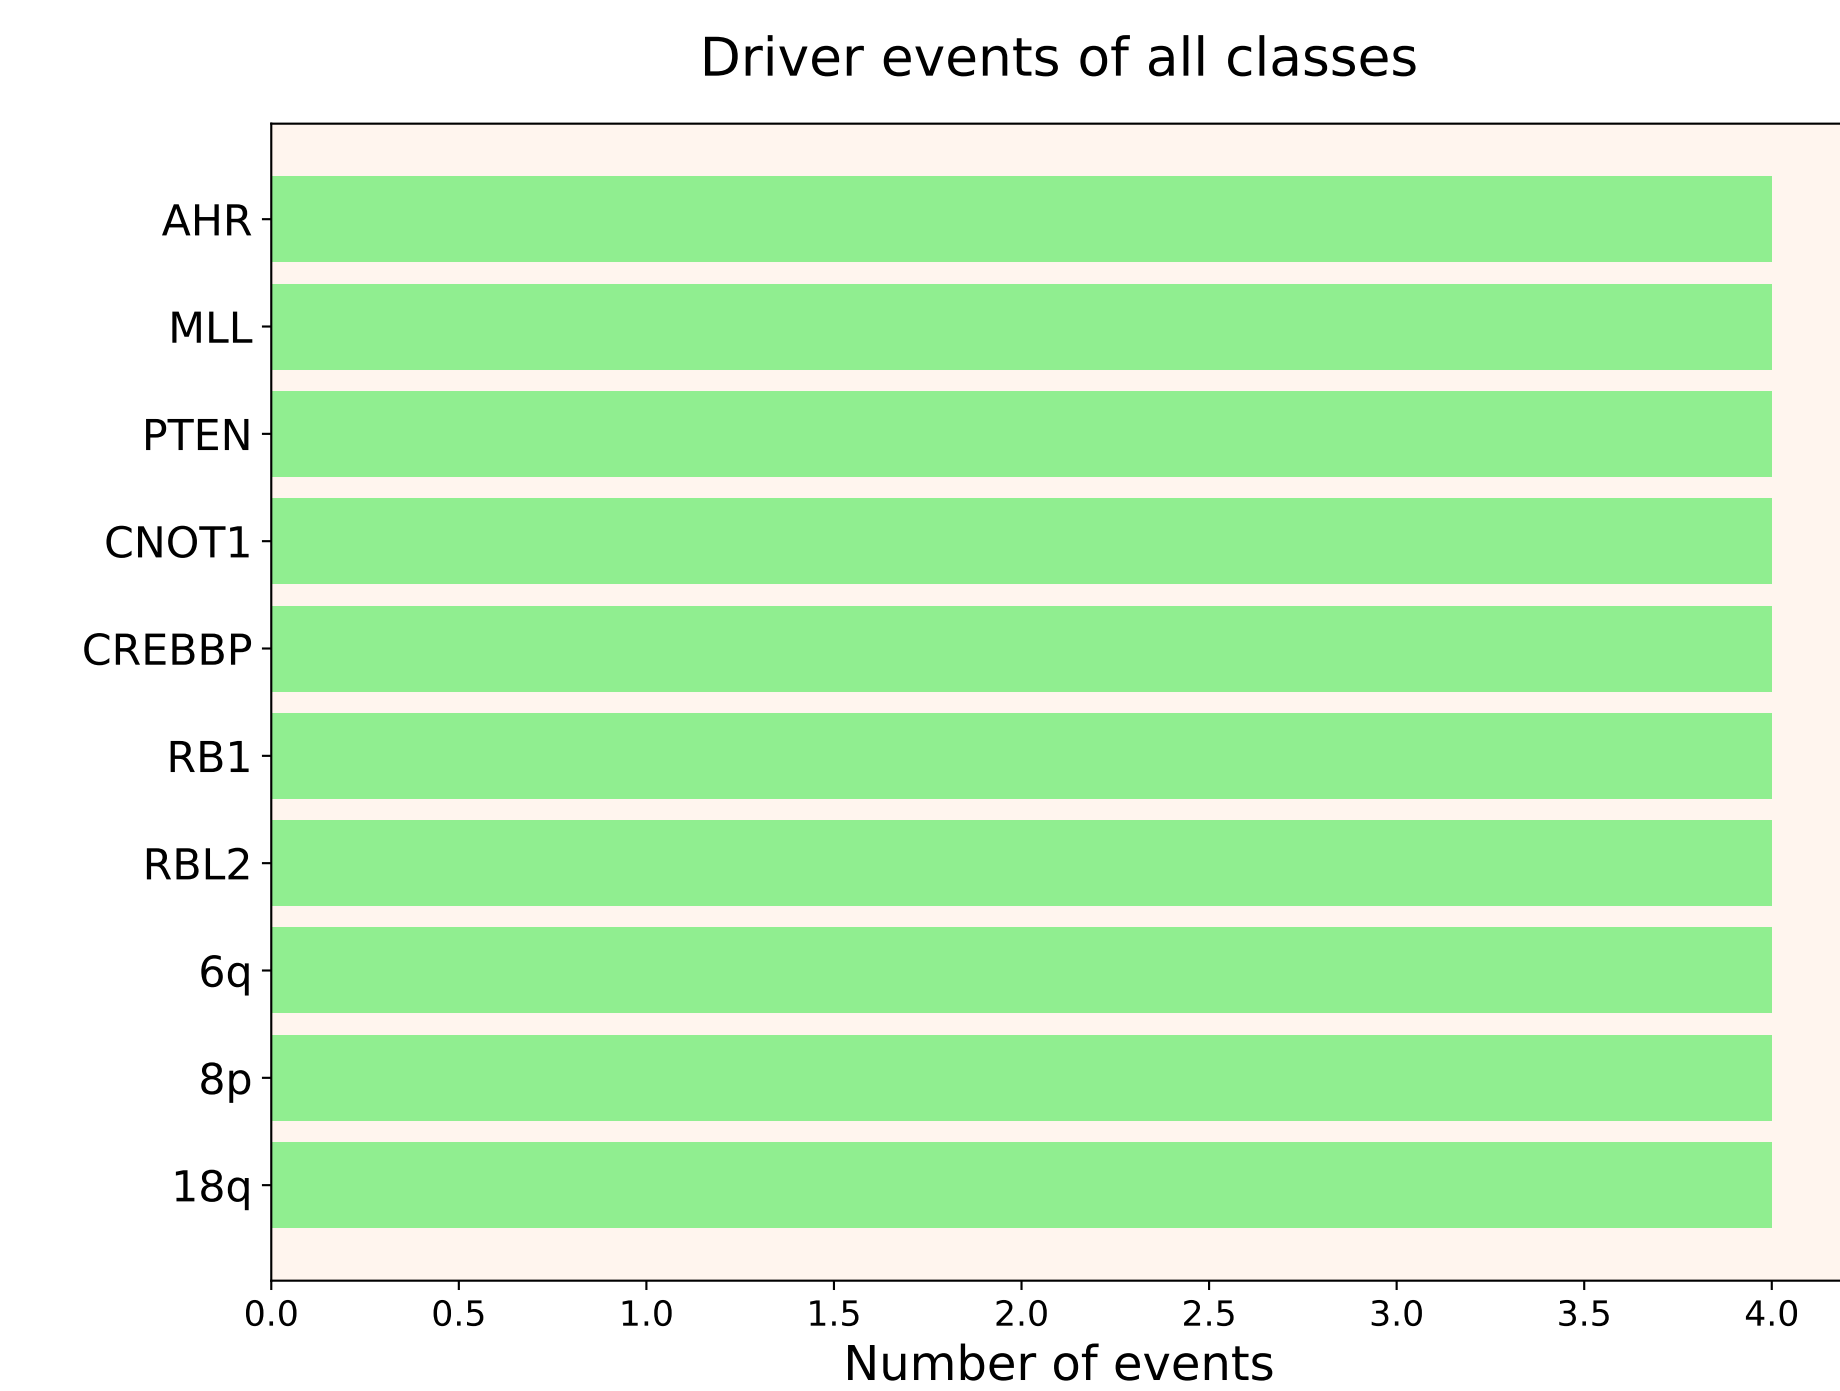

Supplement: Supplemental_Data_S1.zip [file Supplemental_Data_S1.zip]

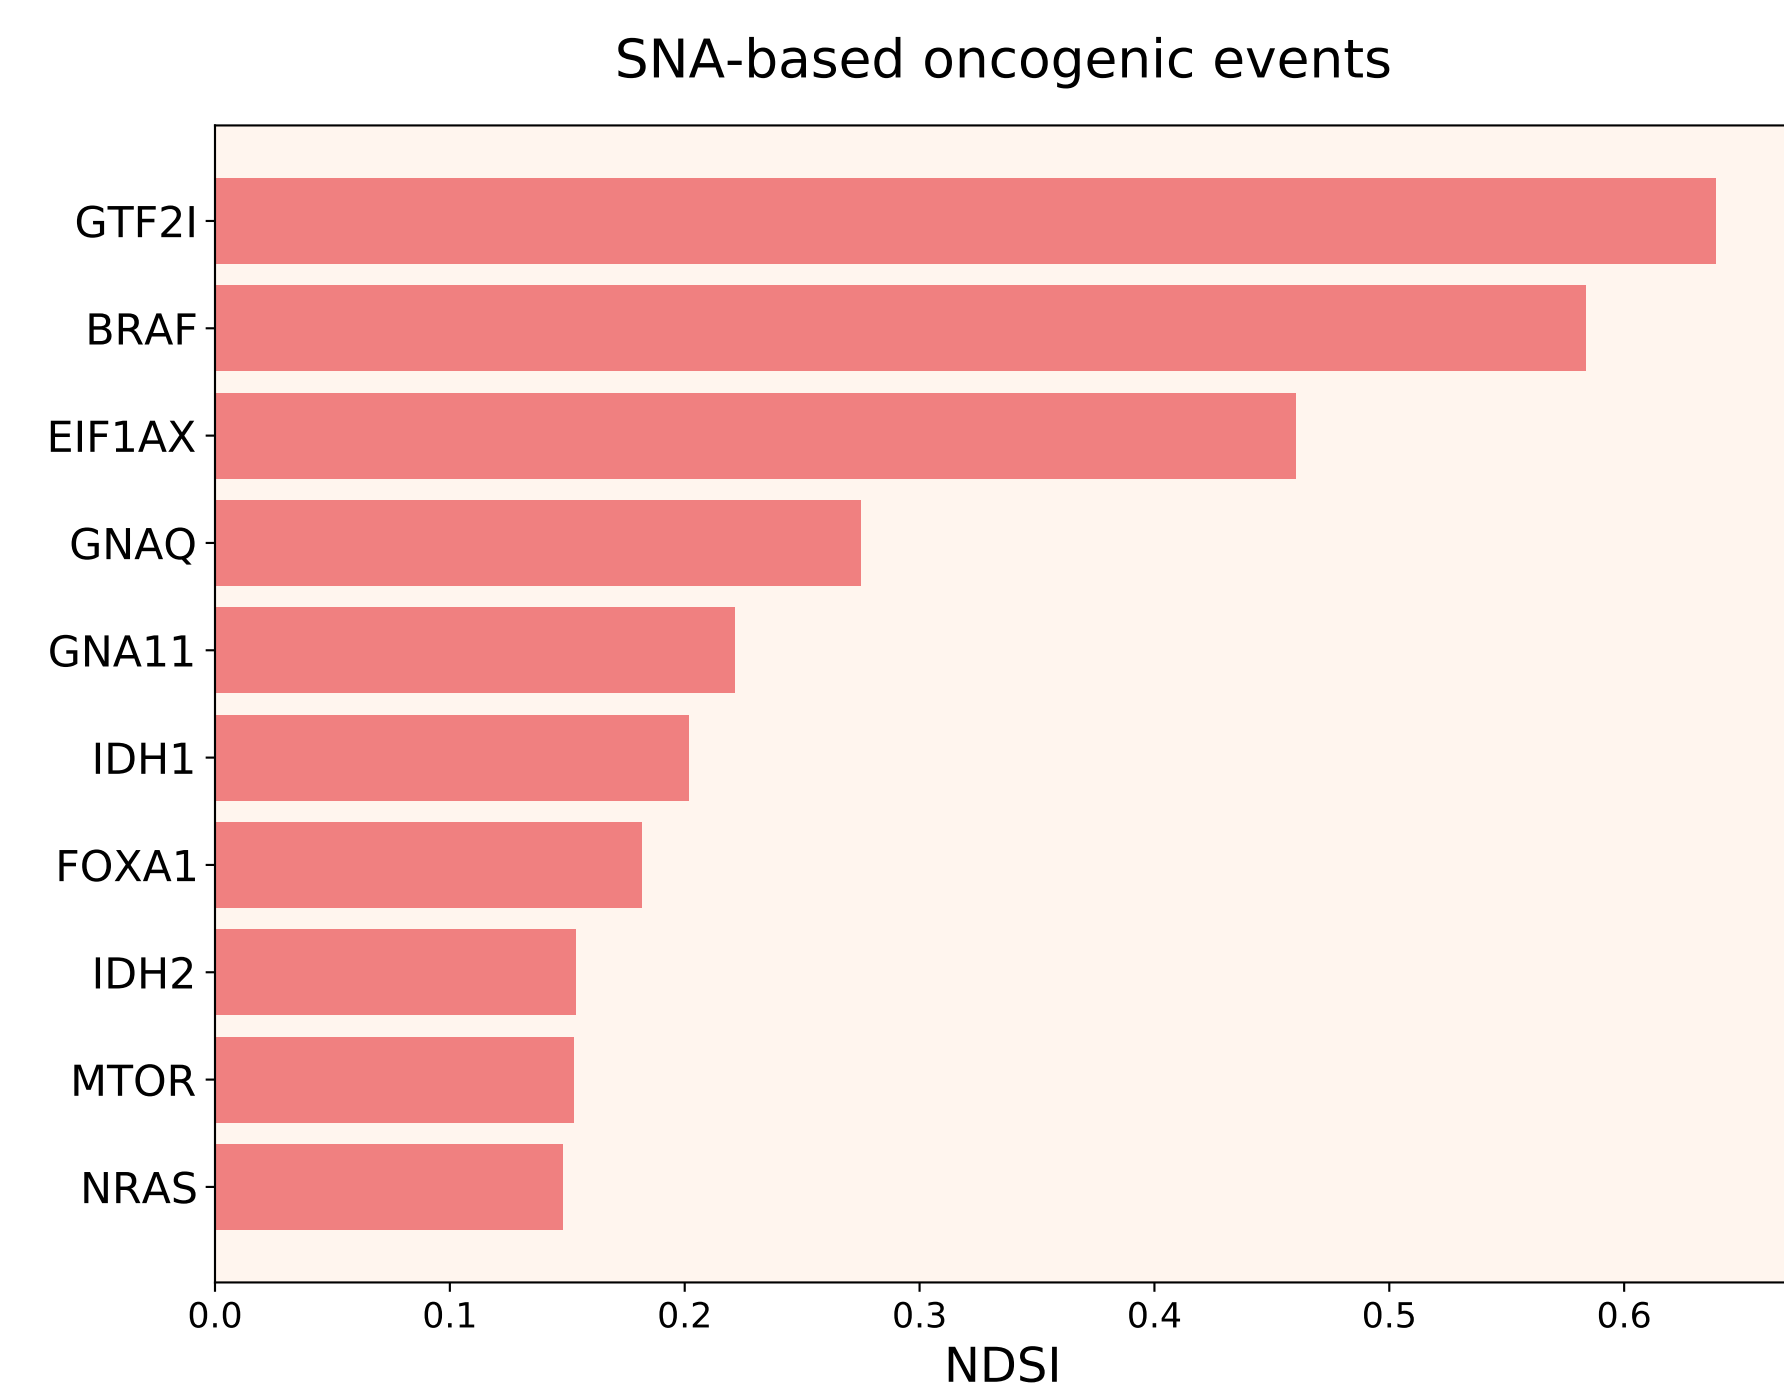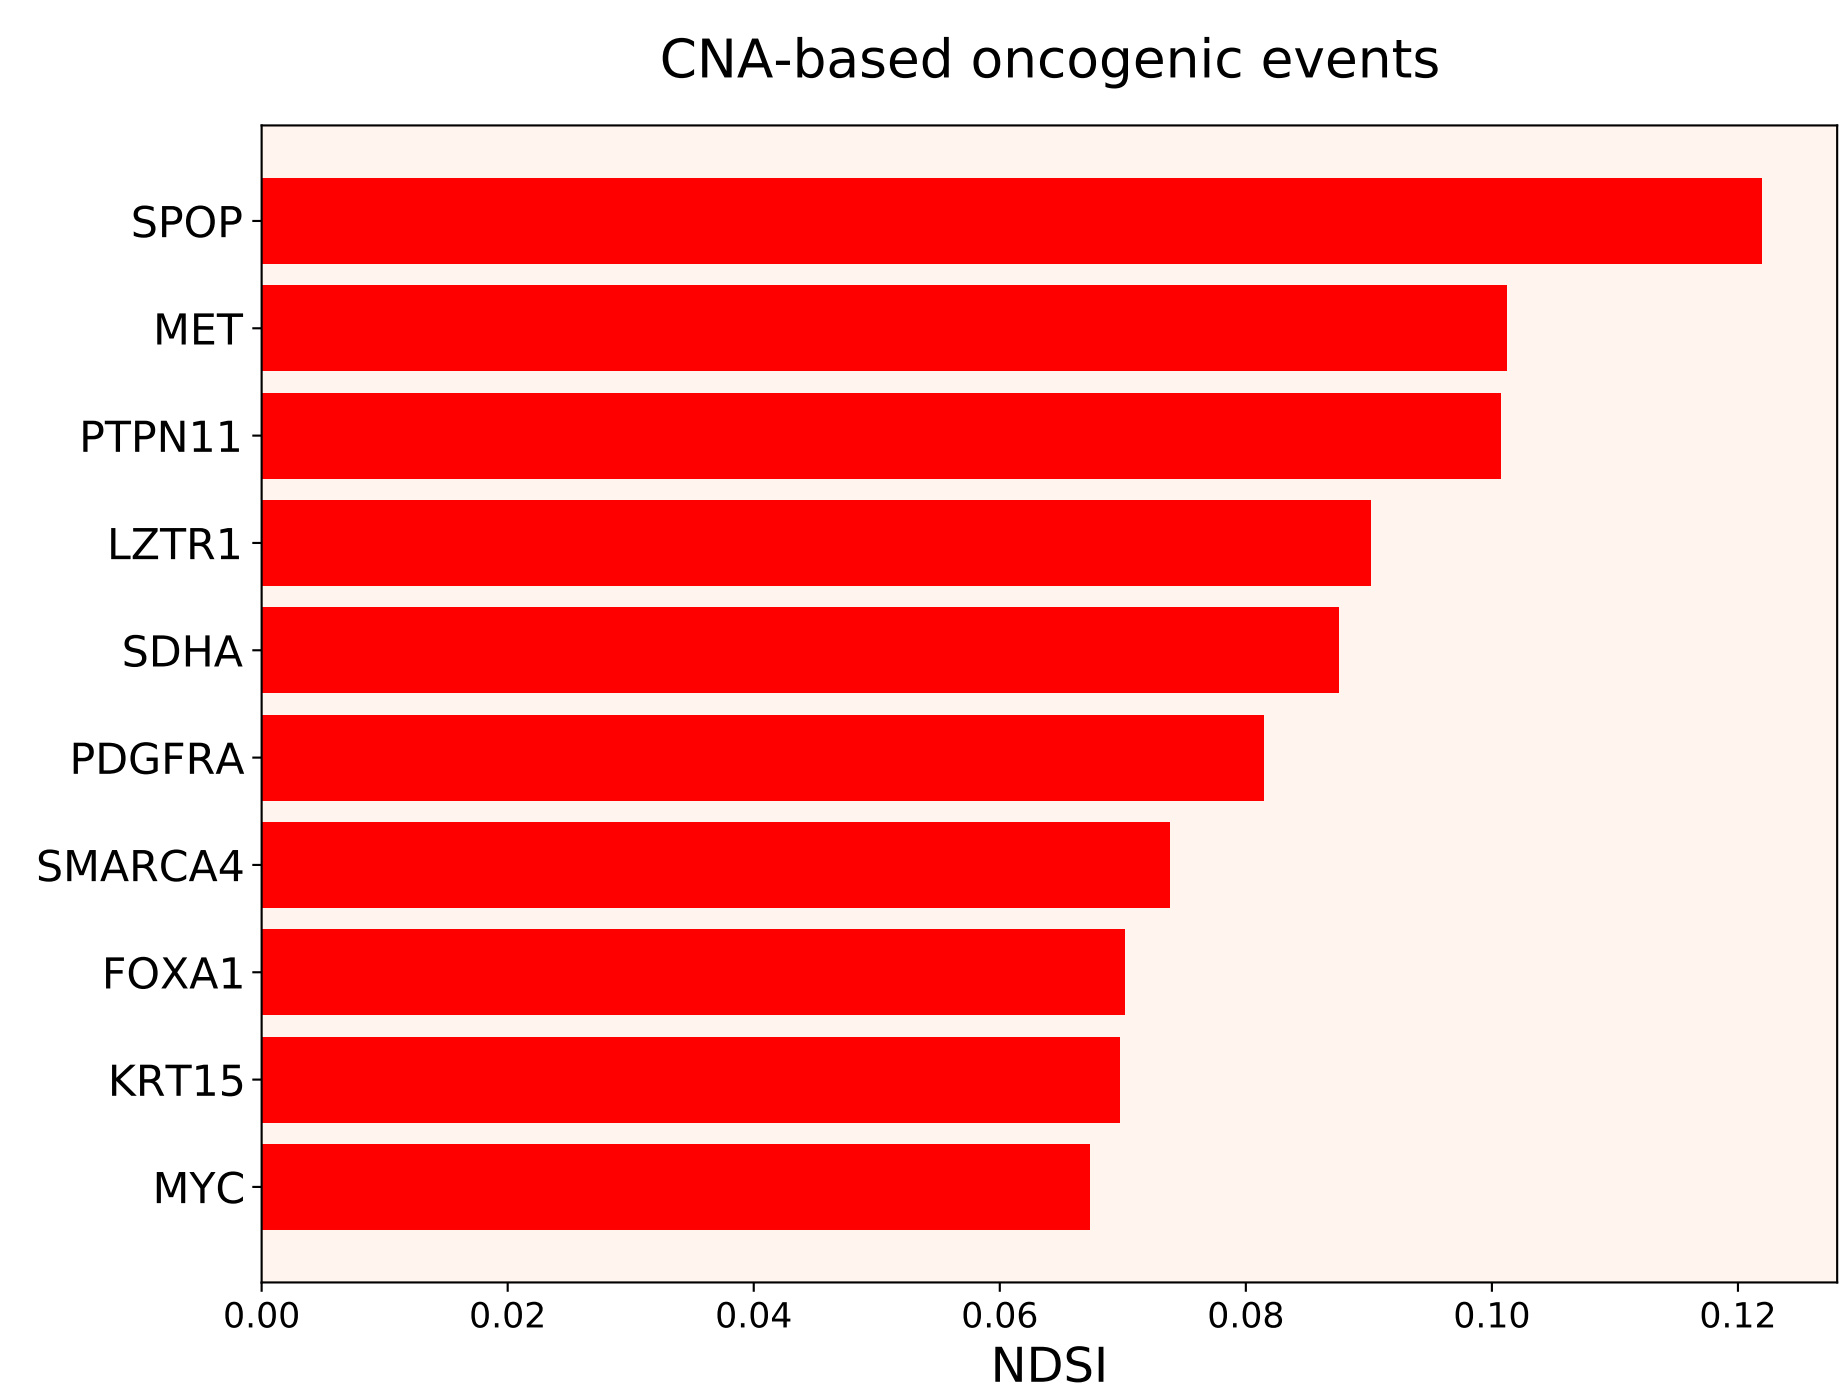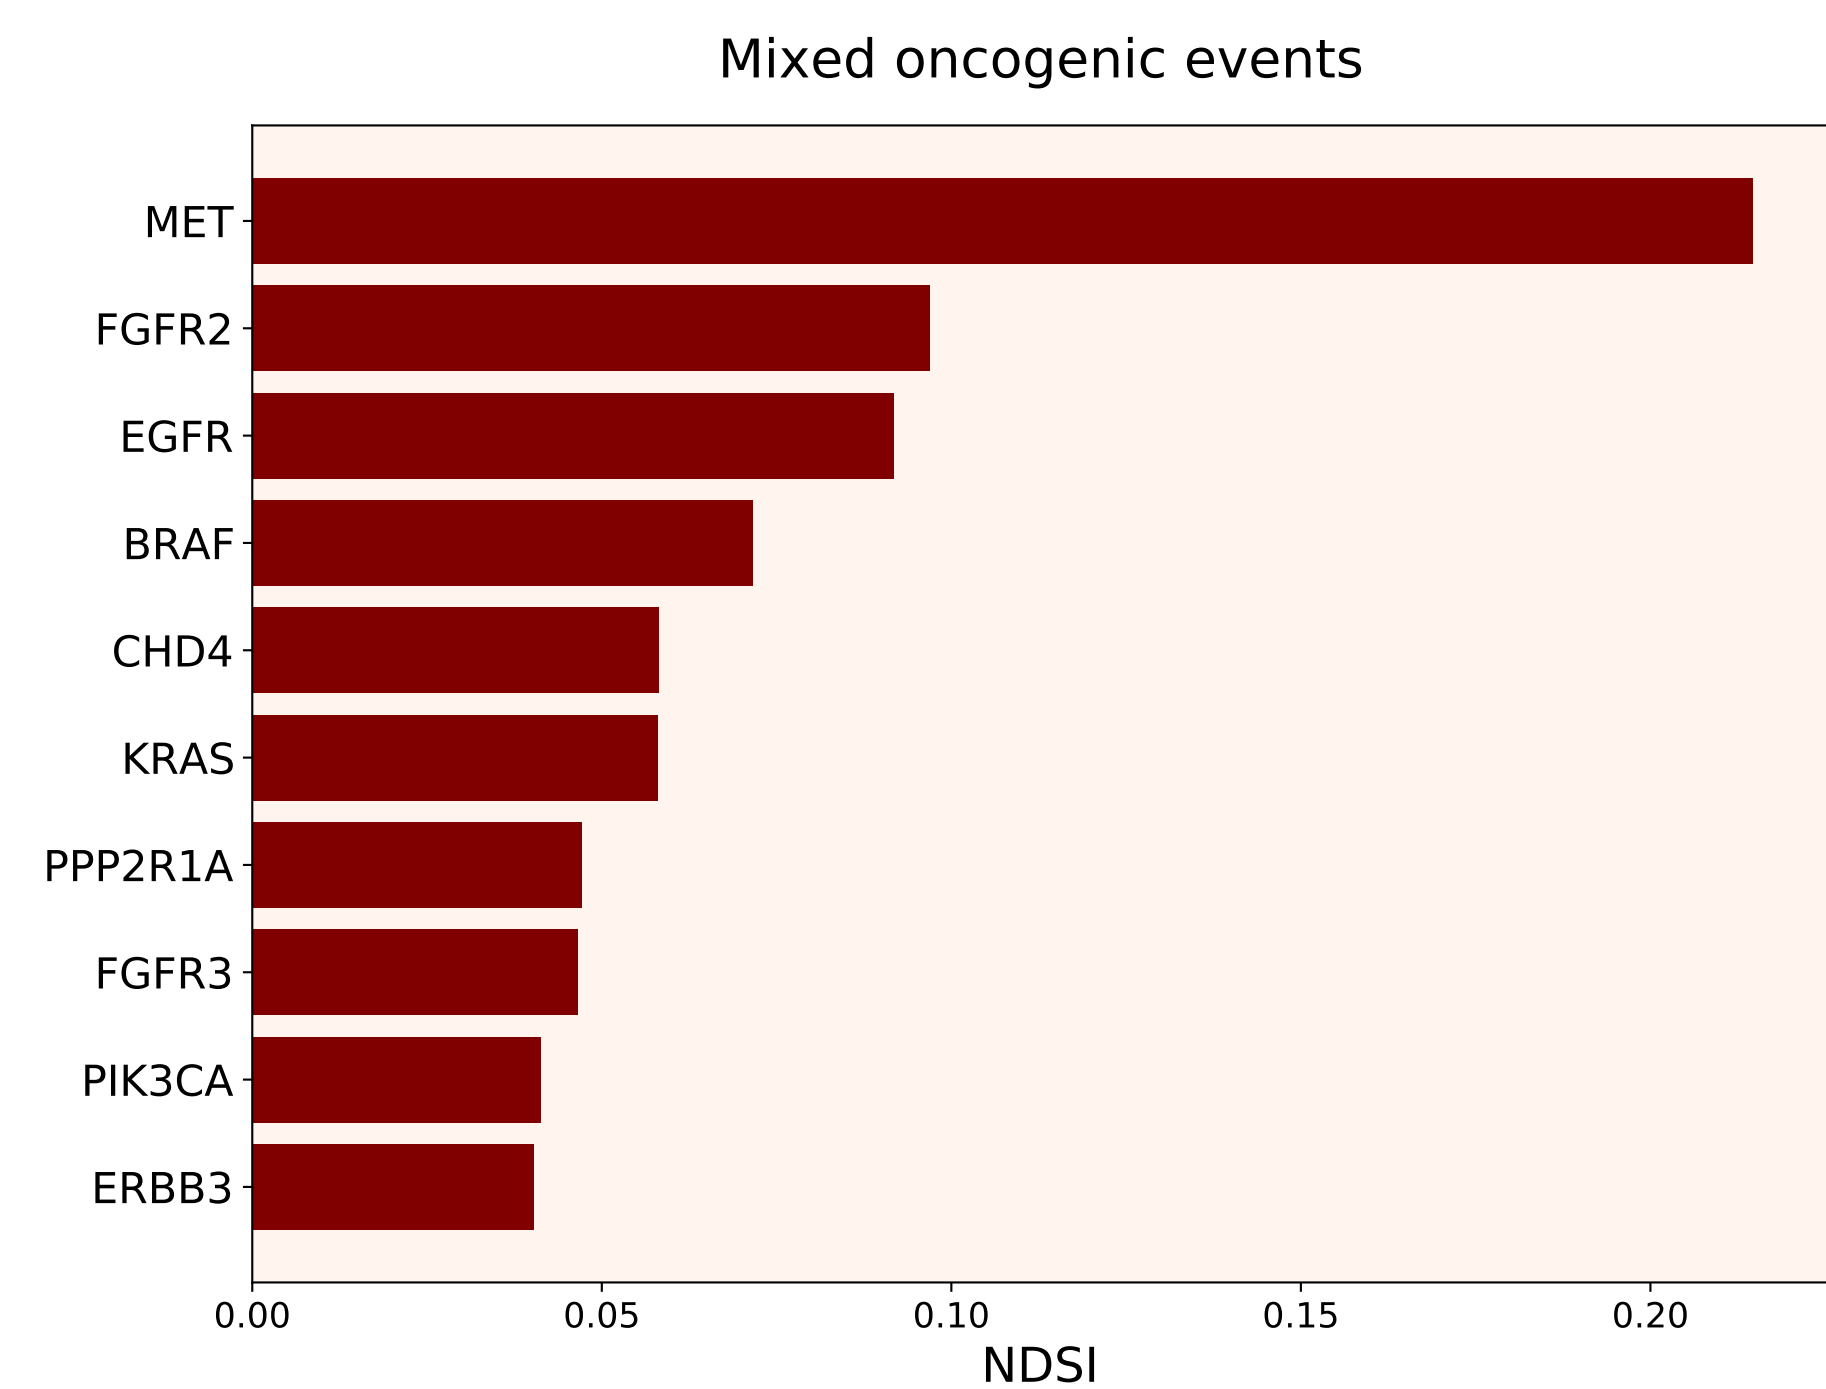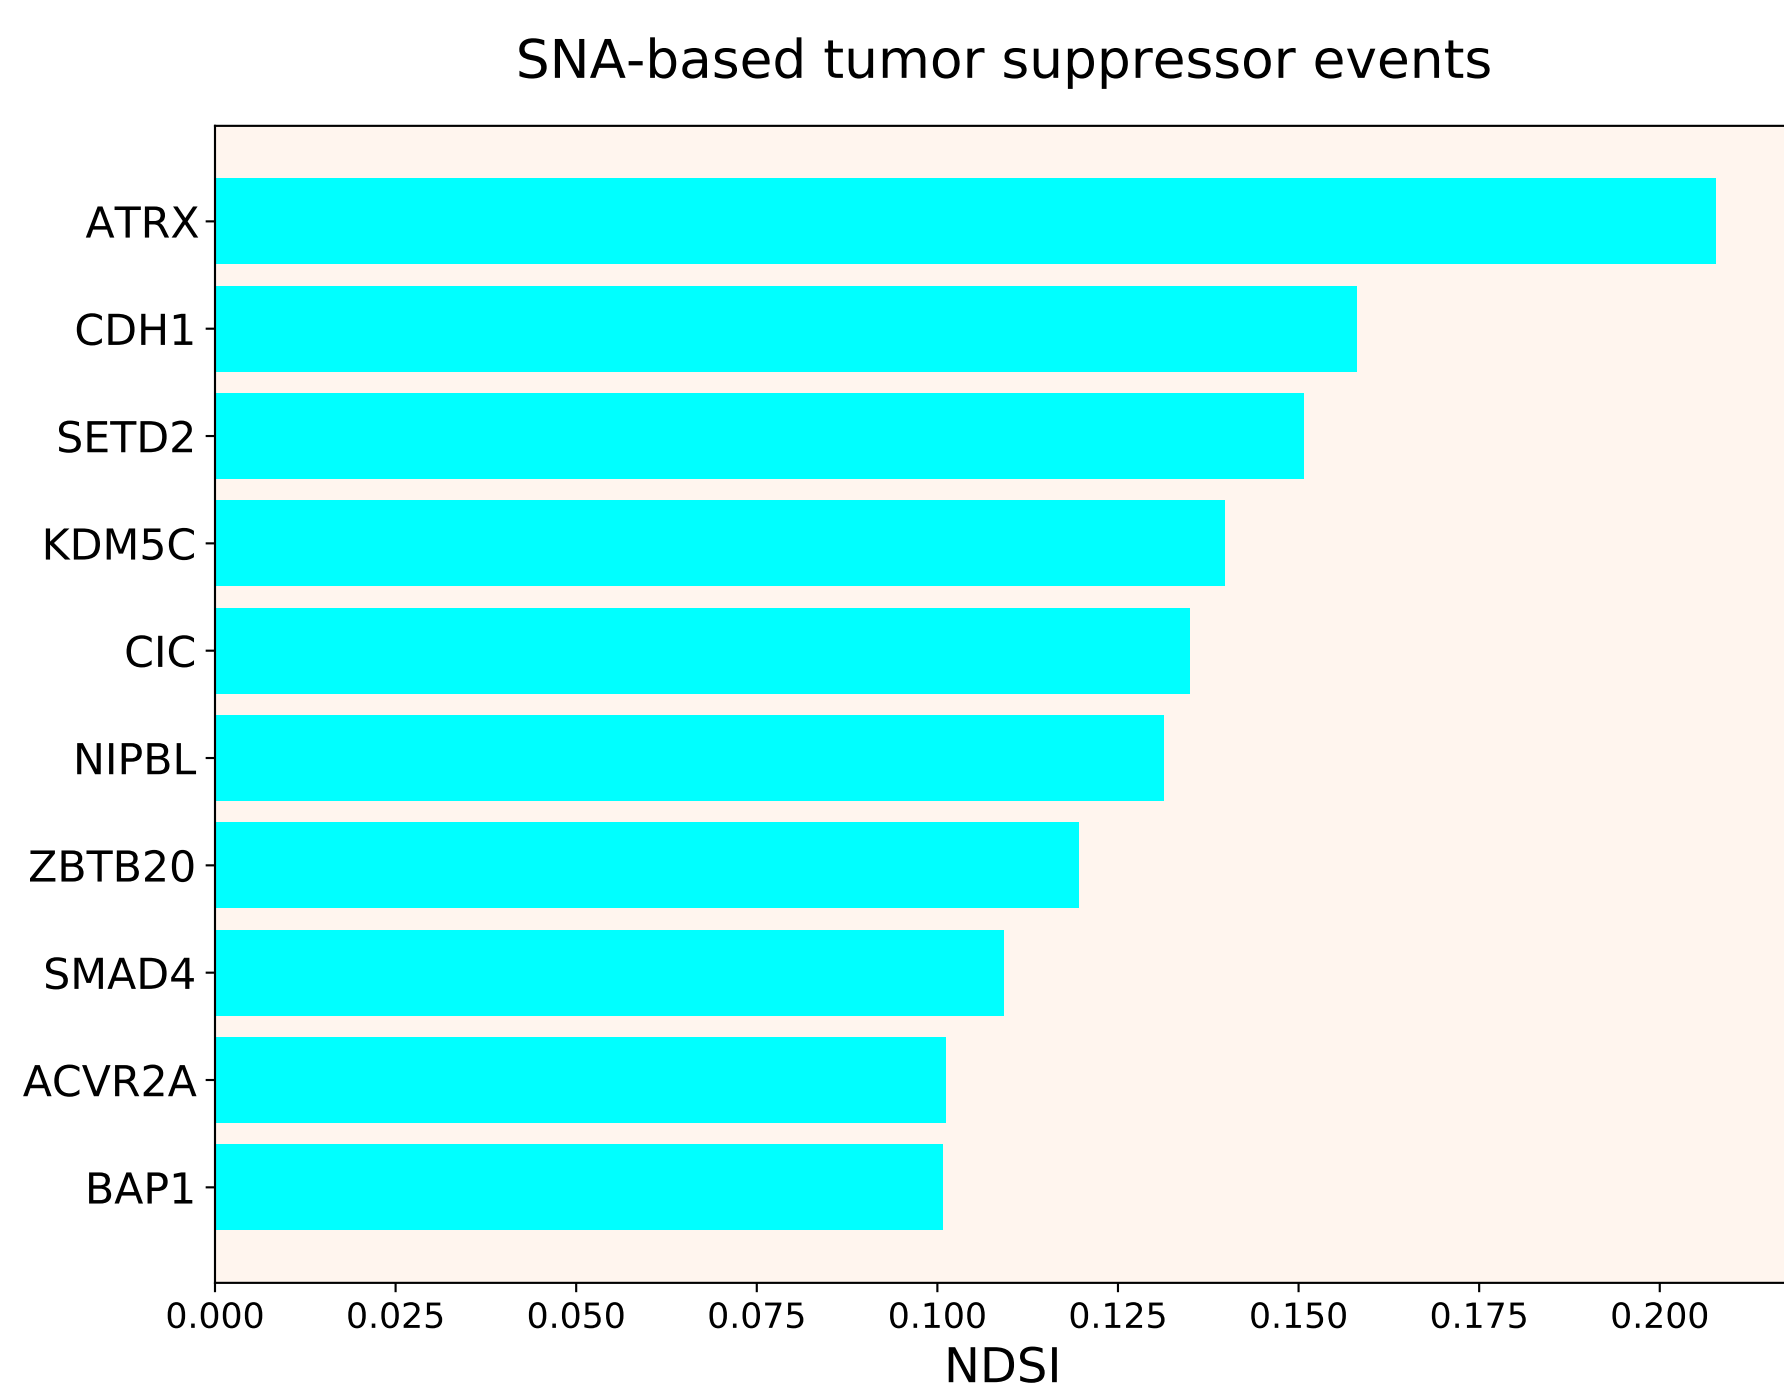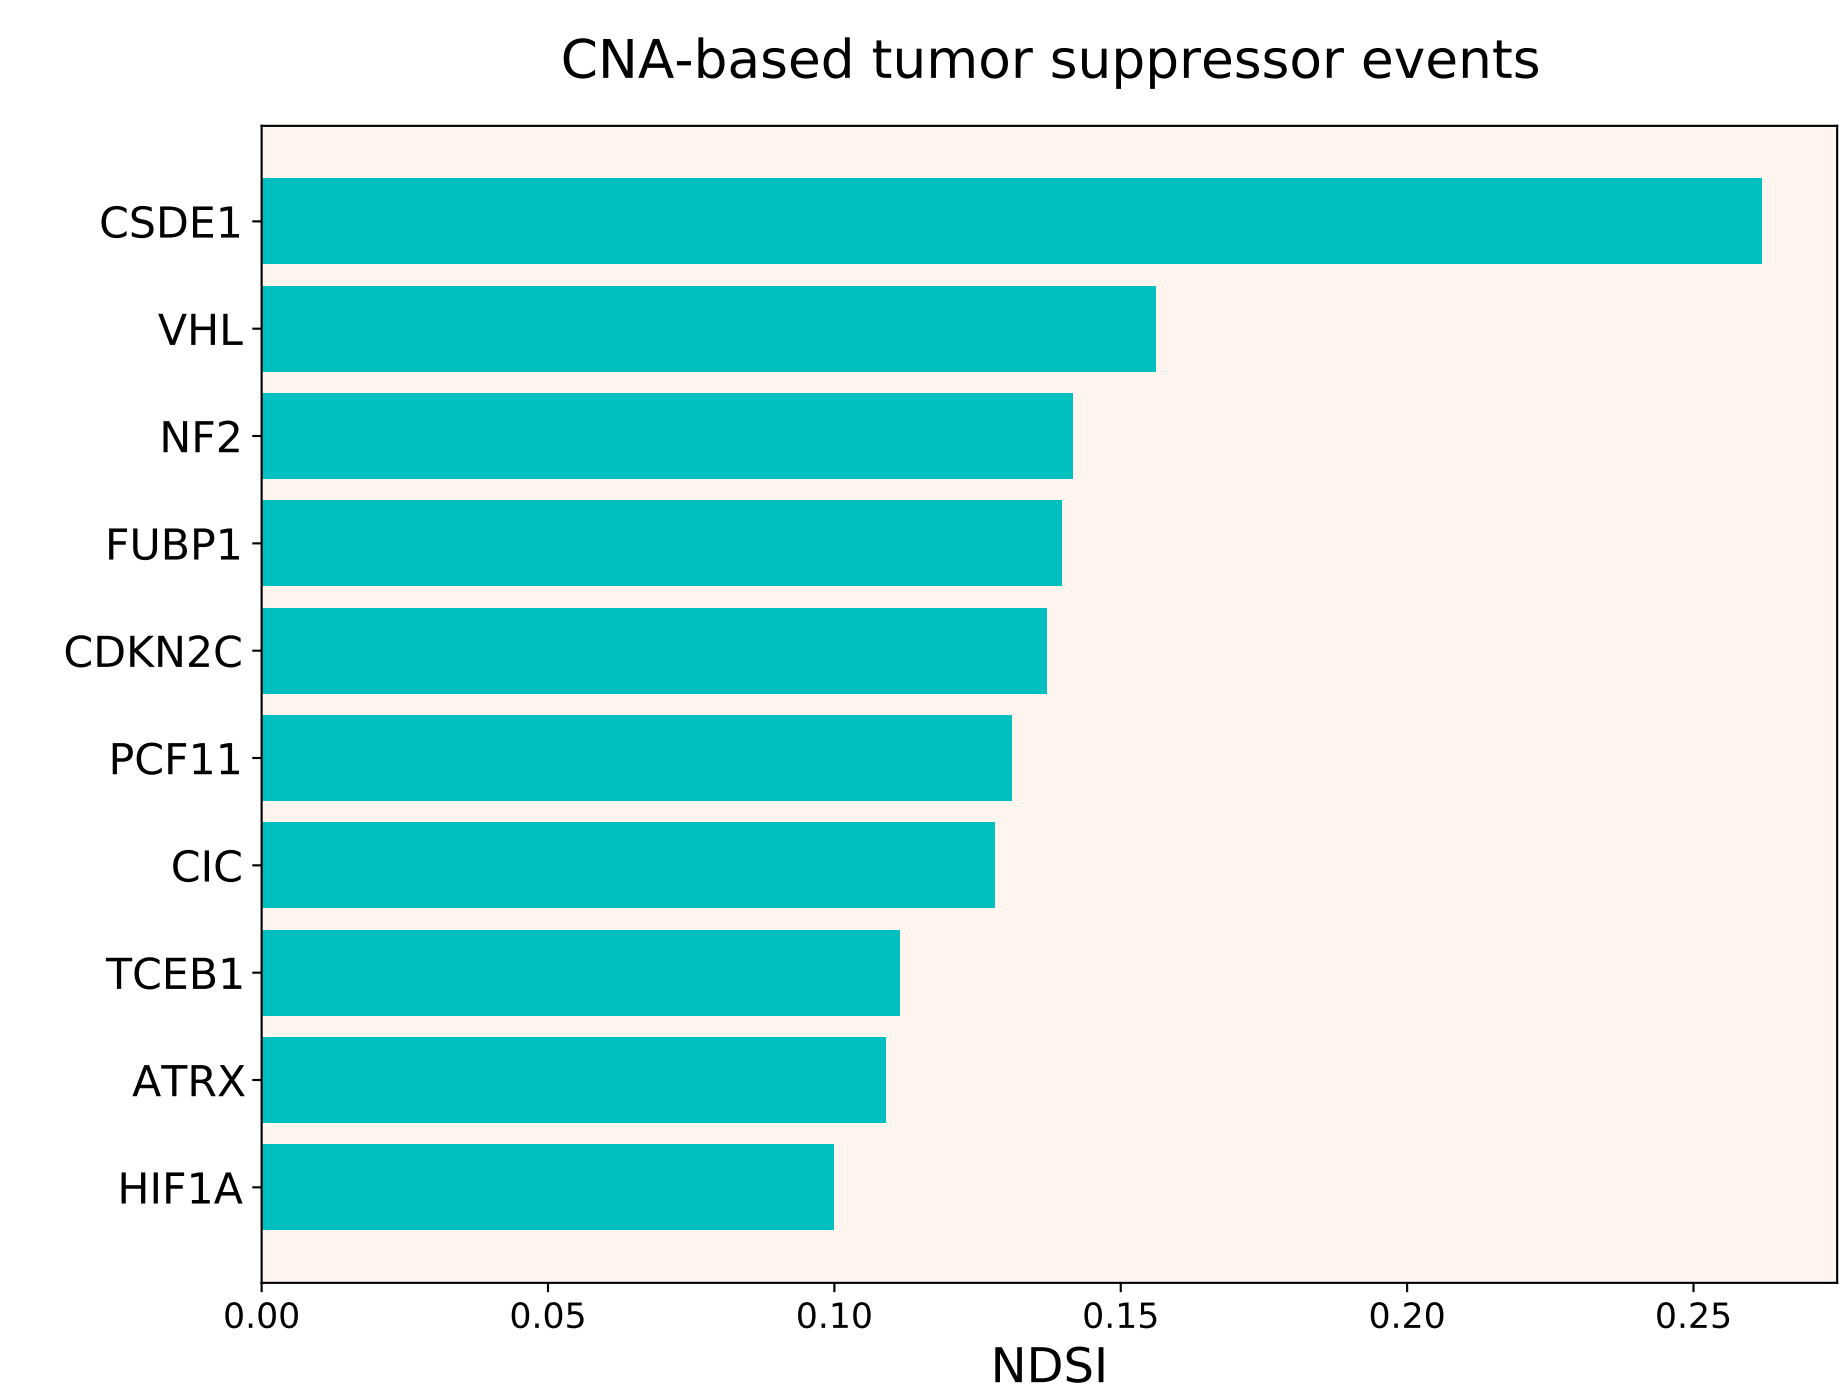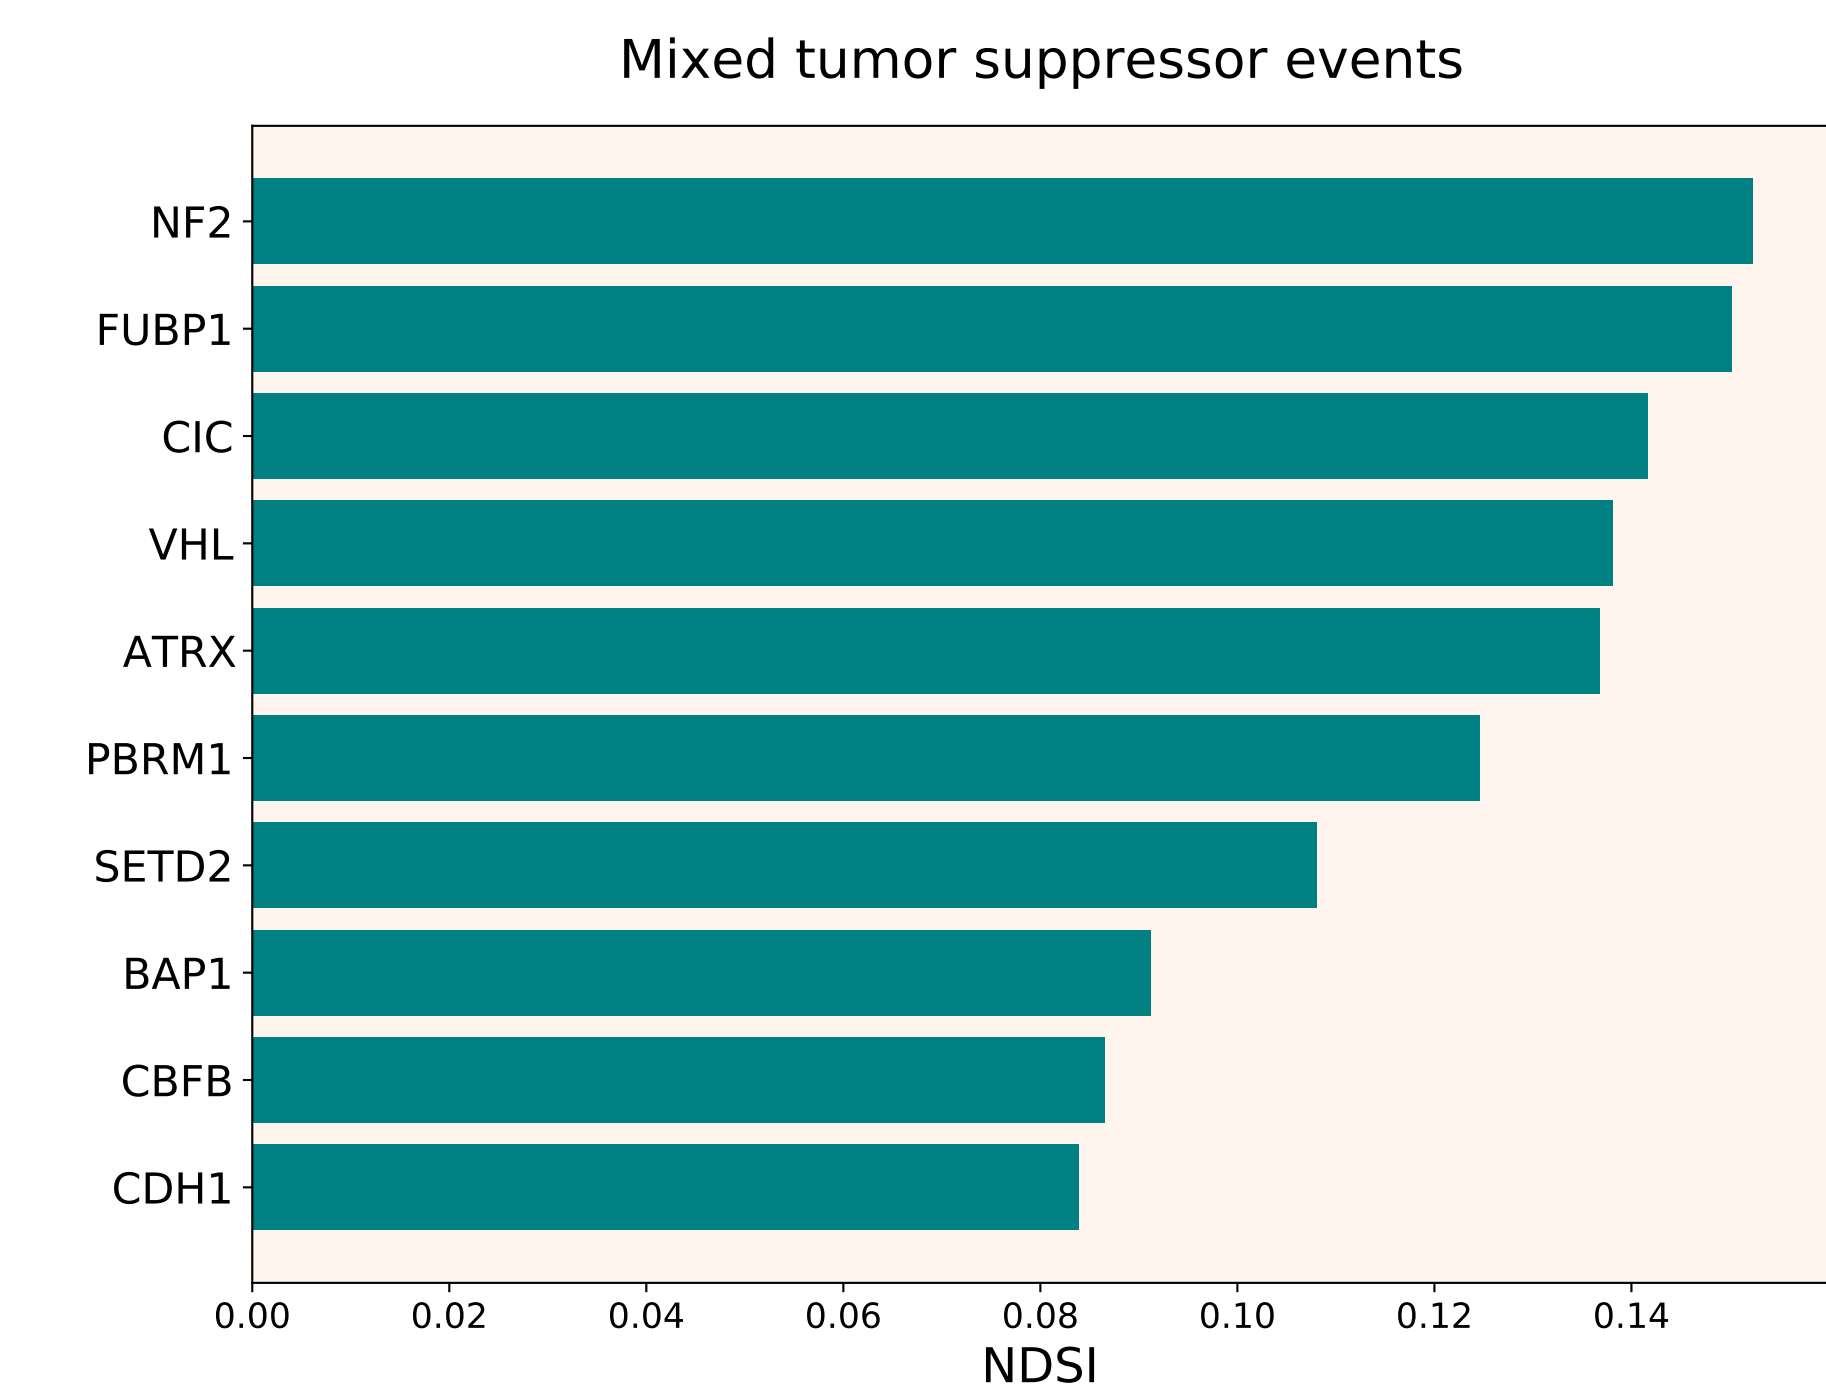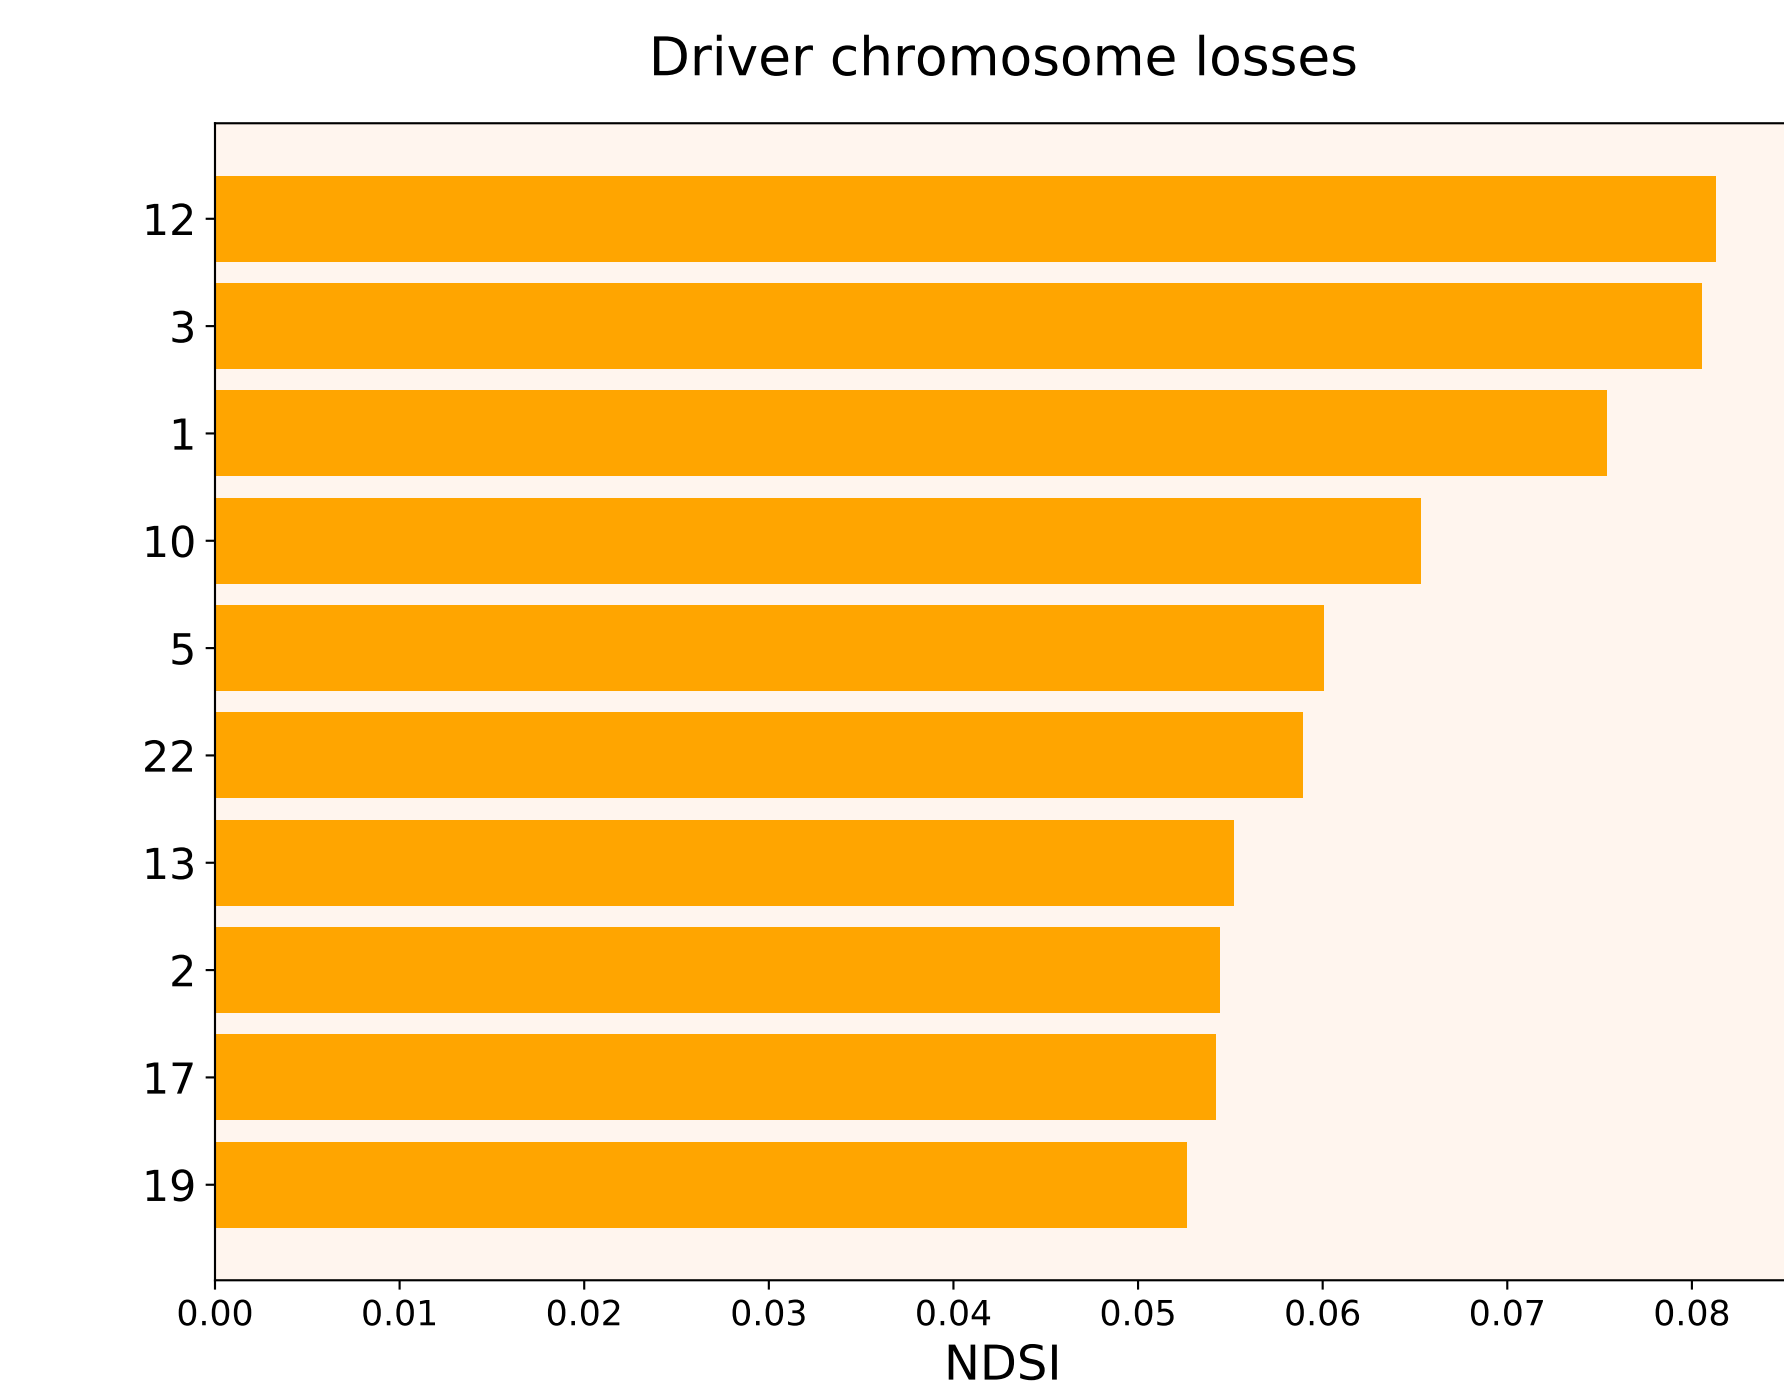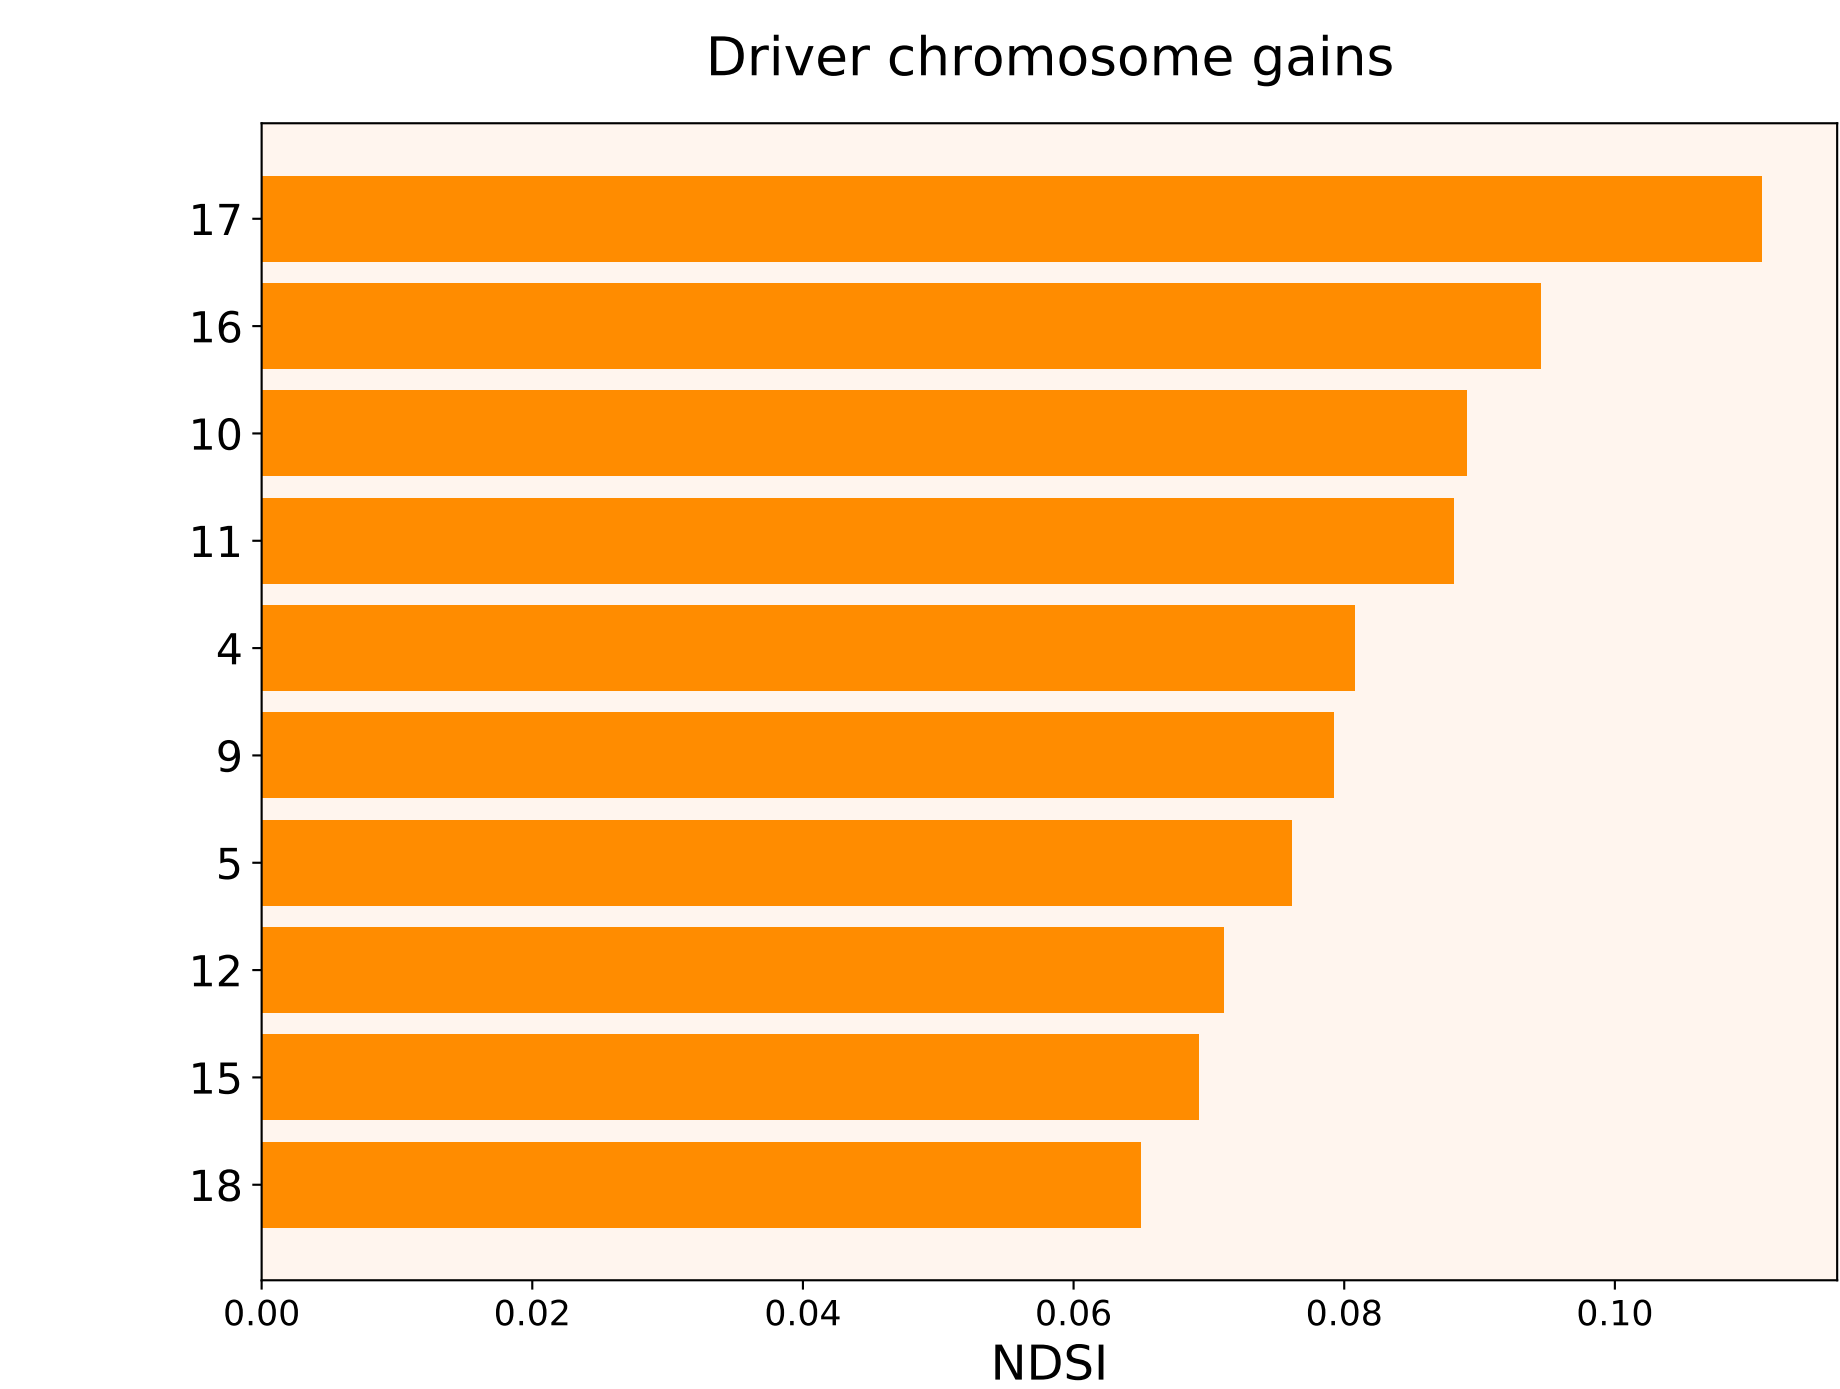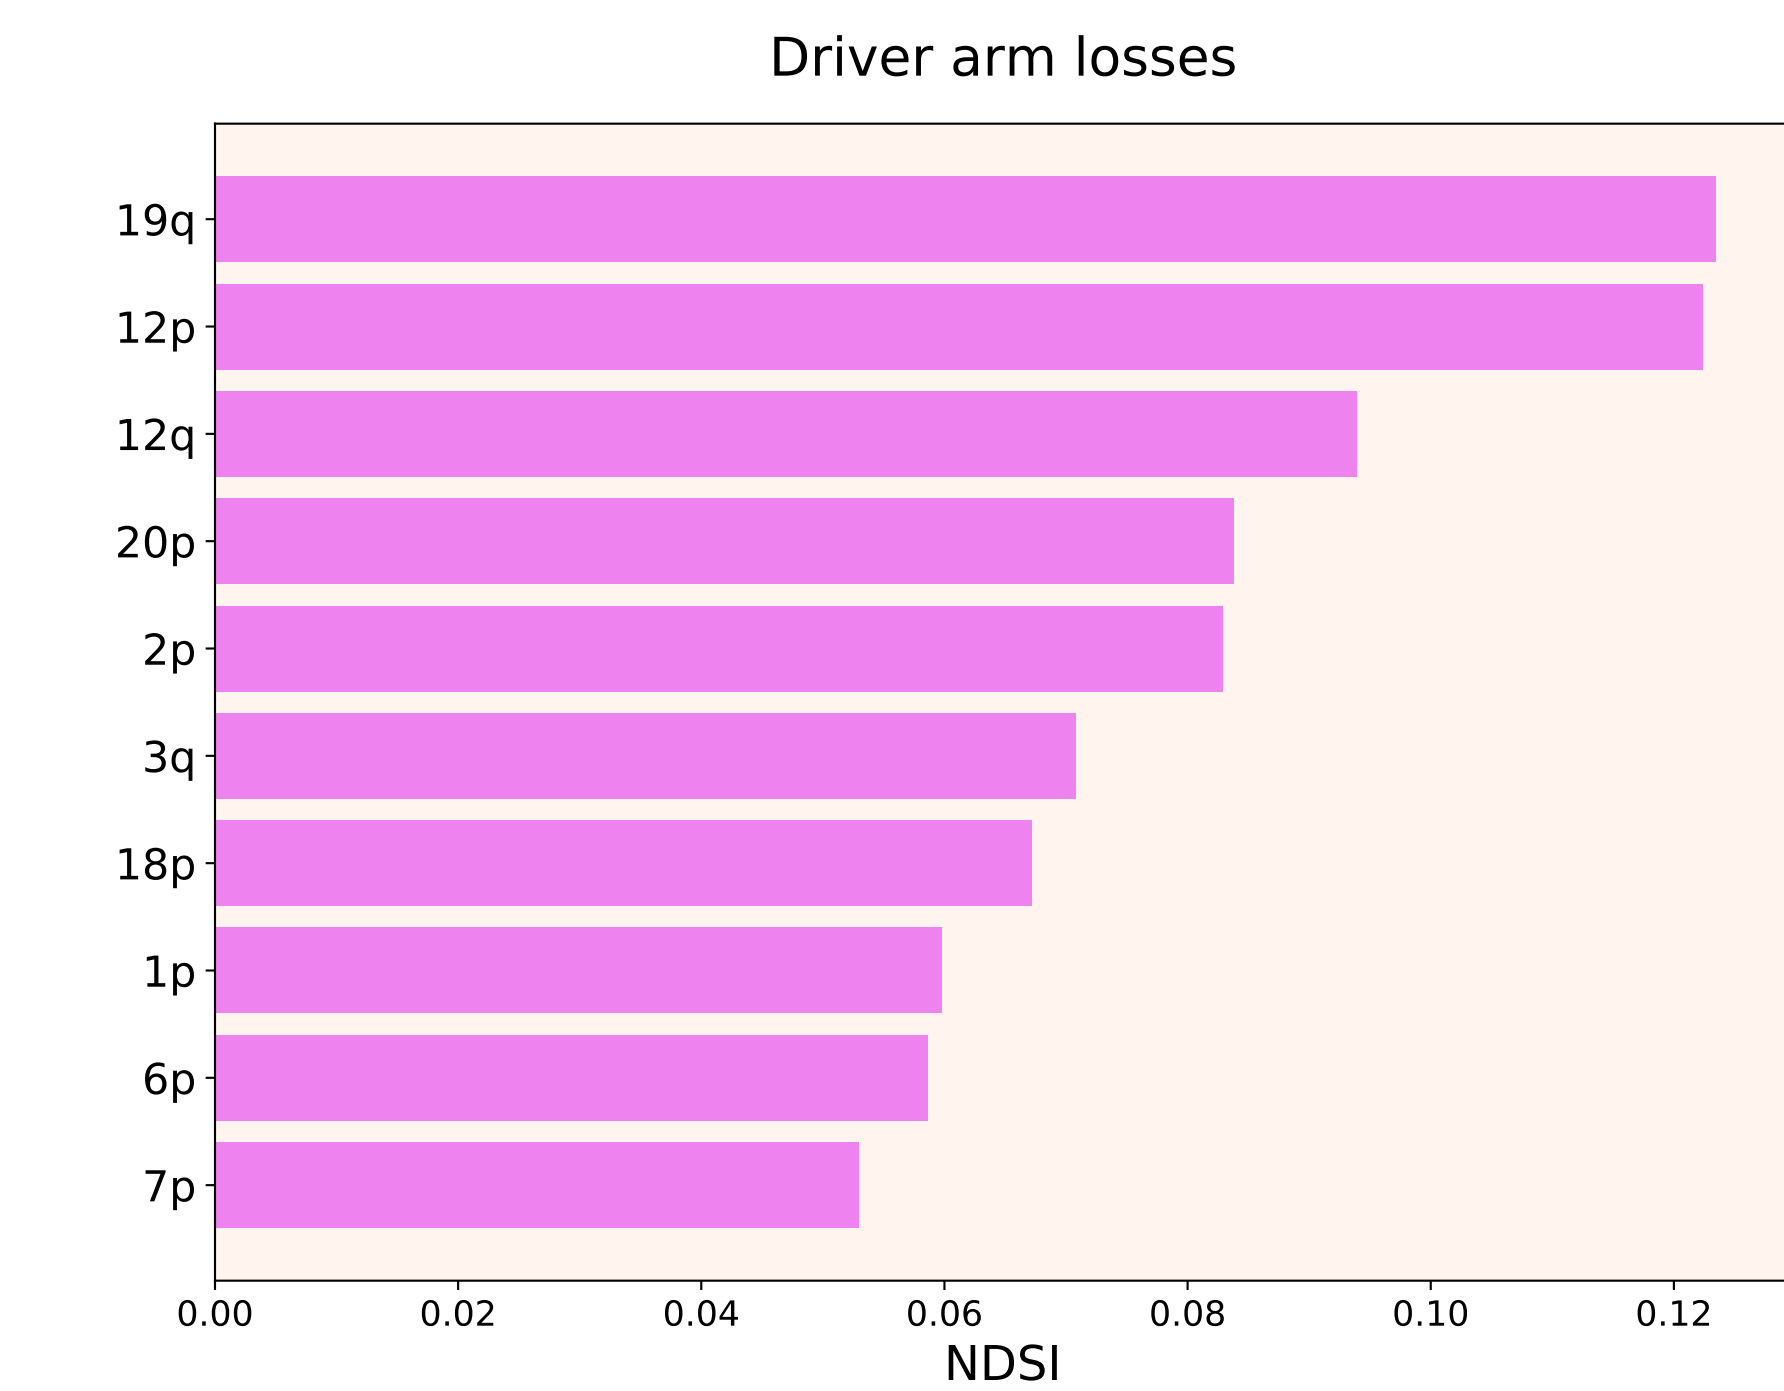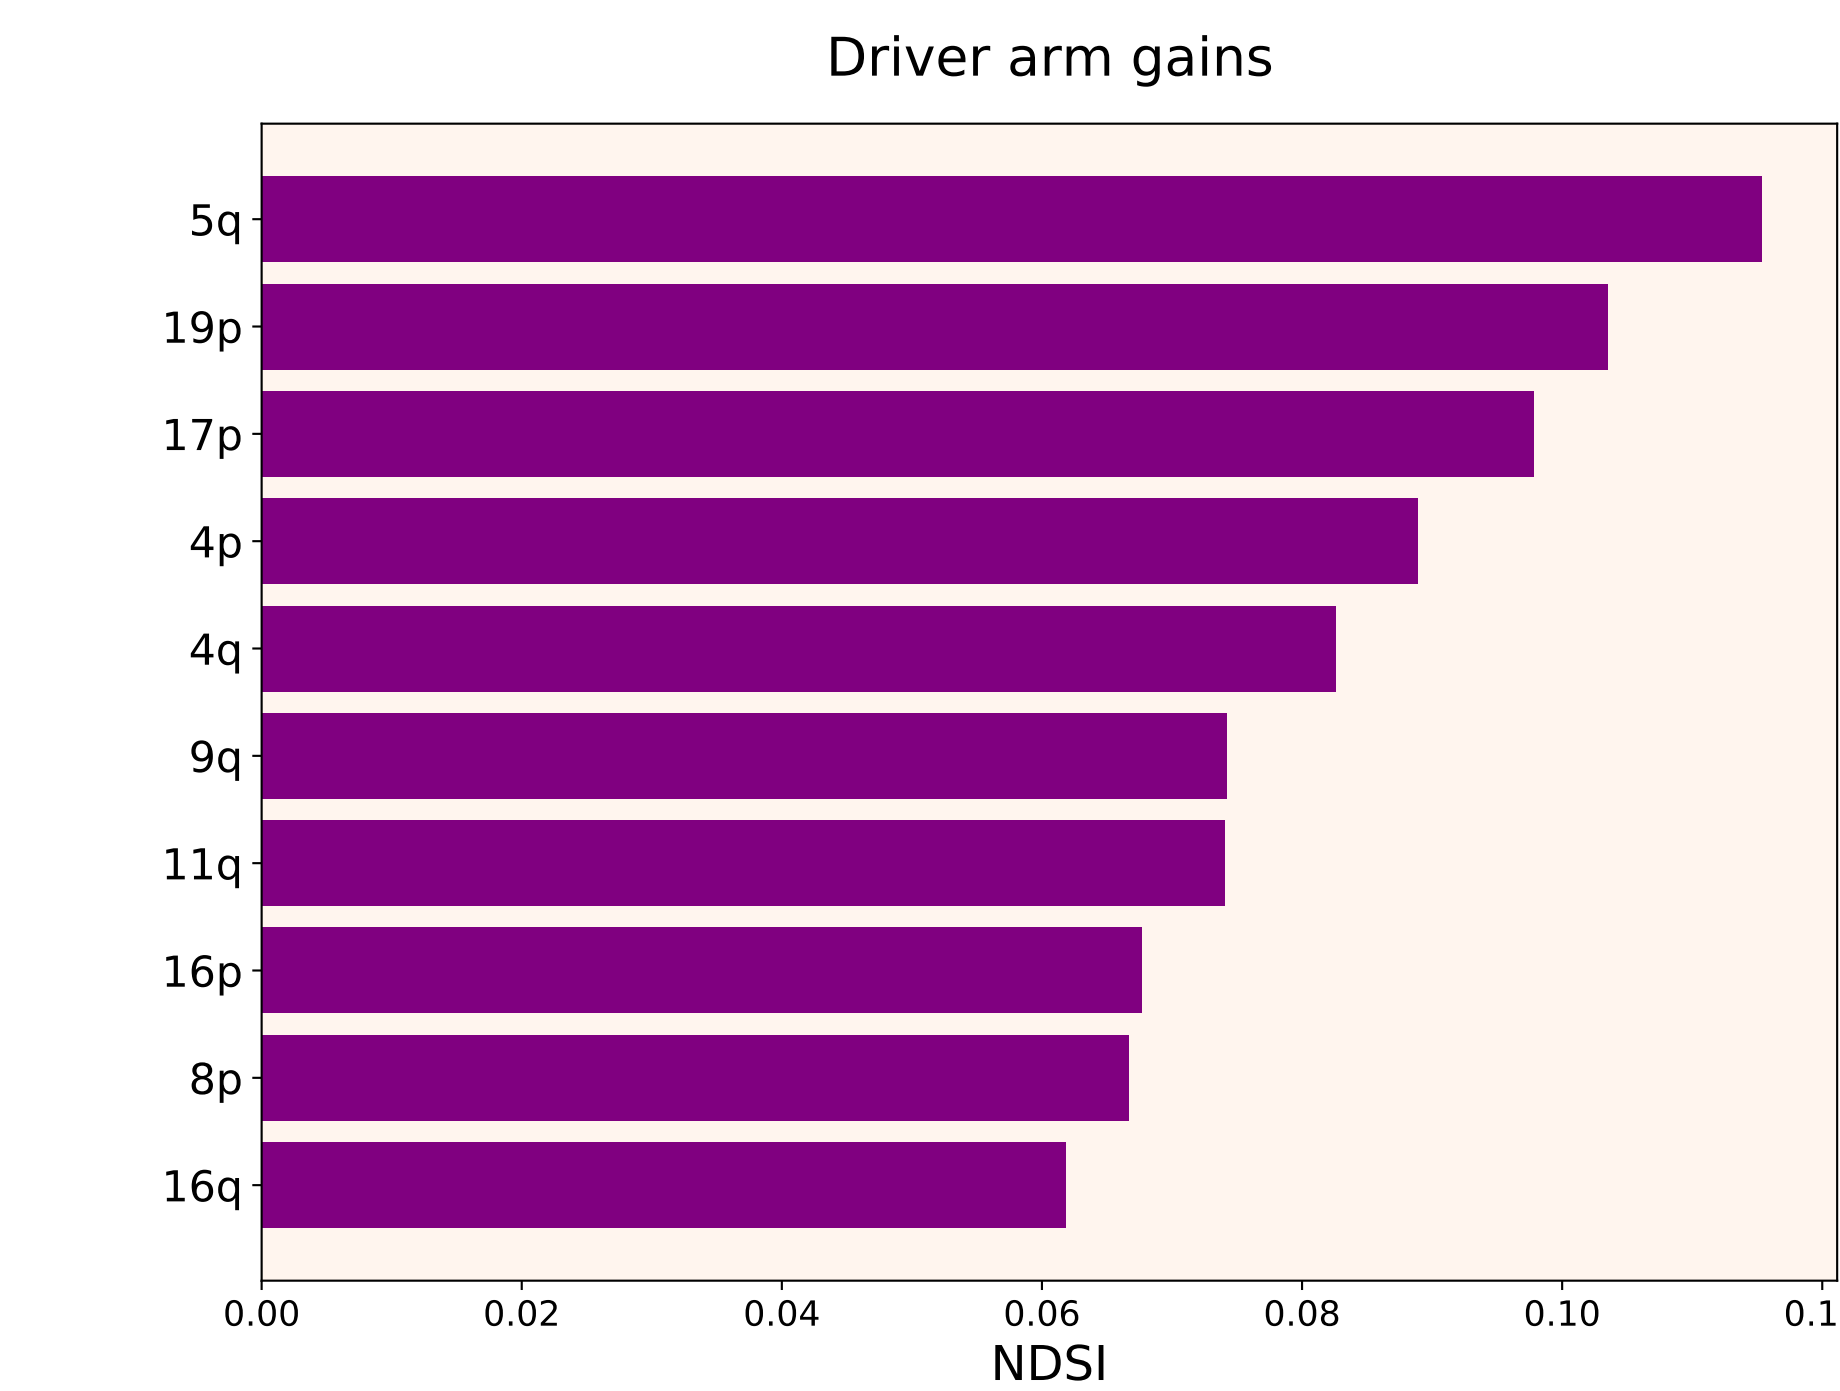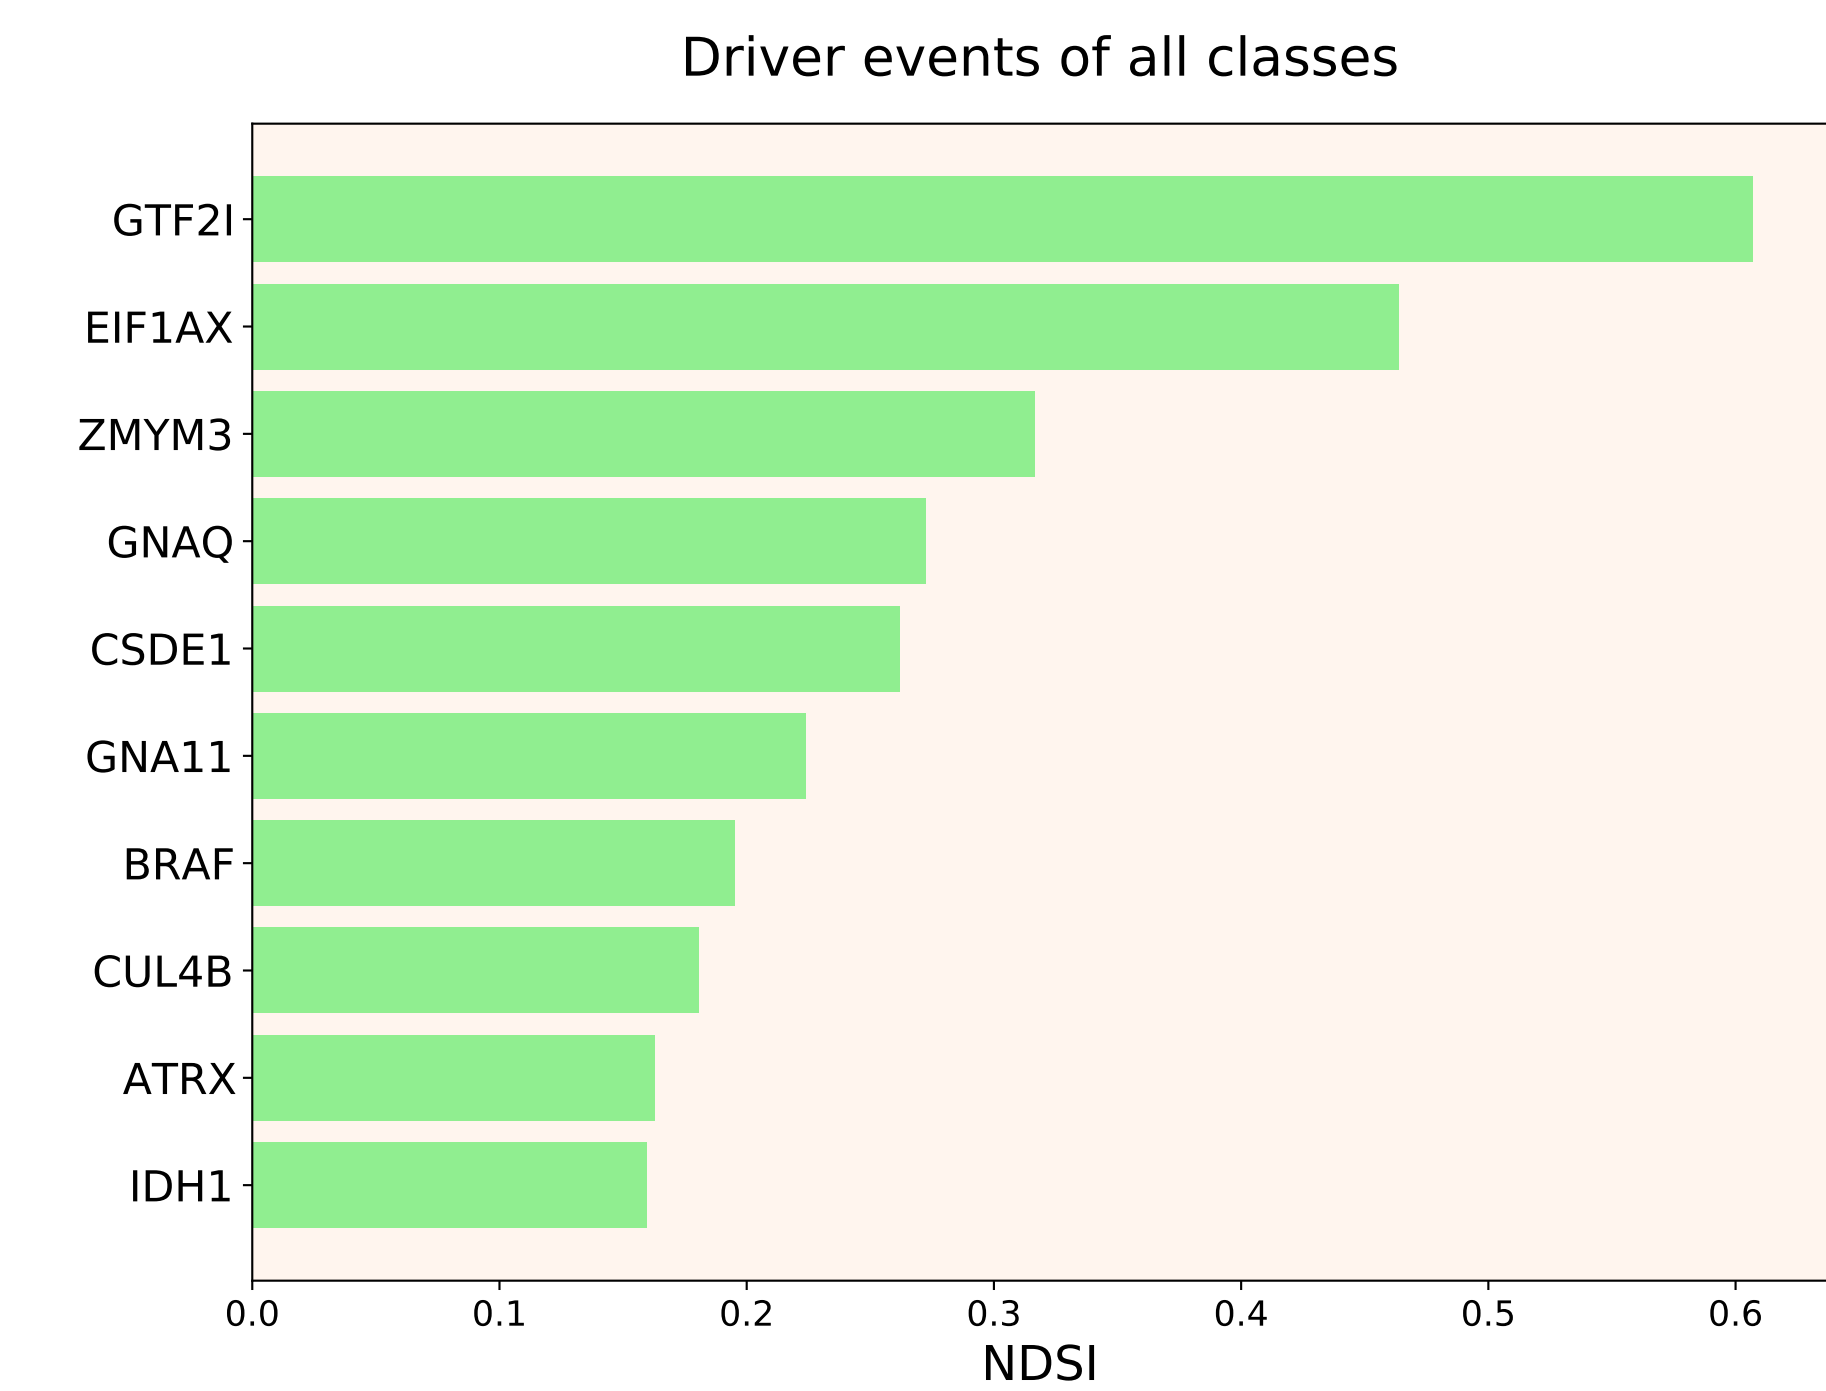

Supplement: Supplemental_Data_S1.zip [file Supplemental_Data_S1.zip]

# UCS\_FEMALE

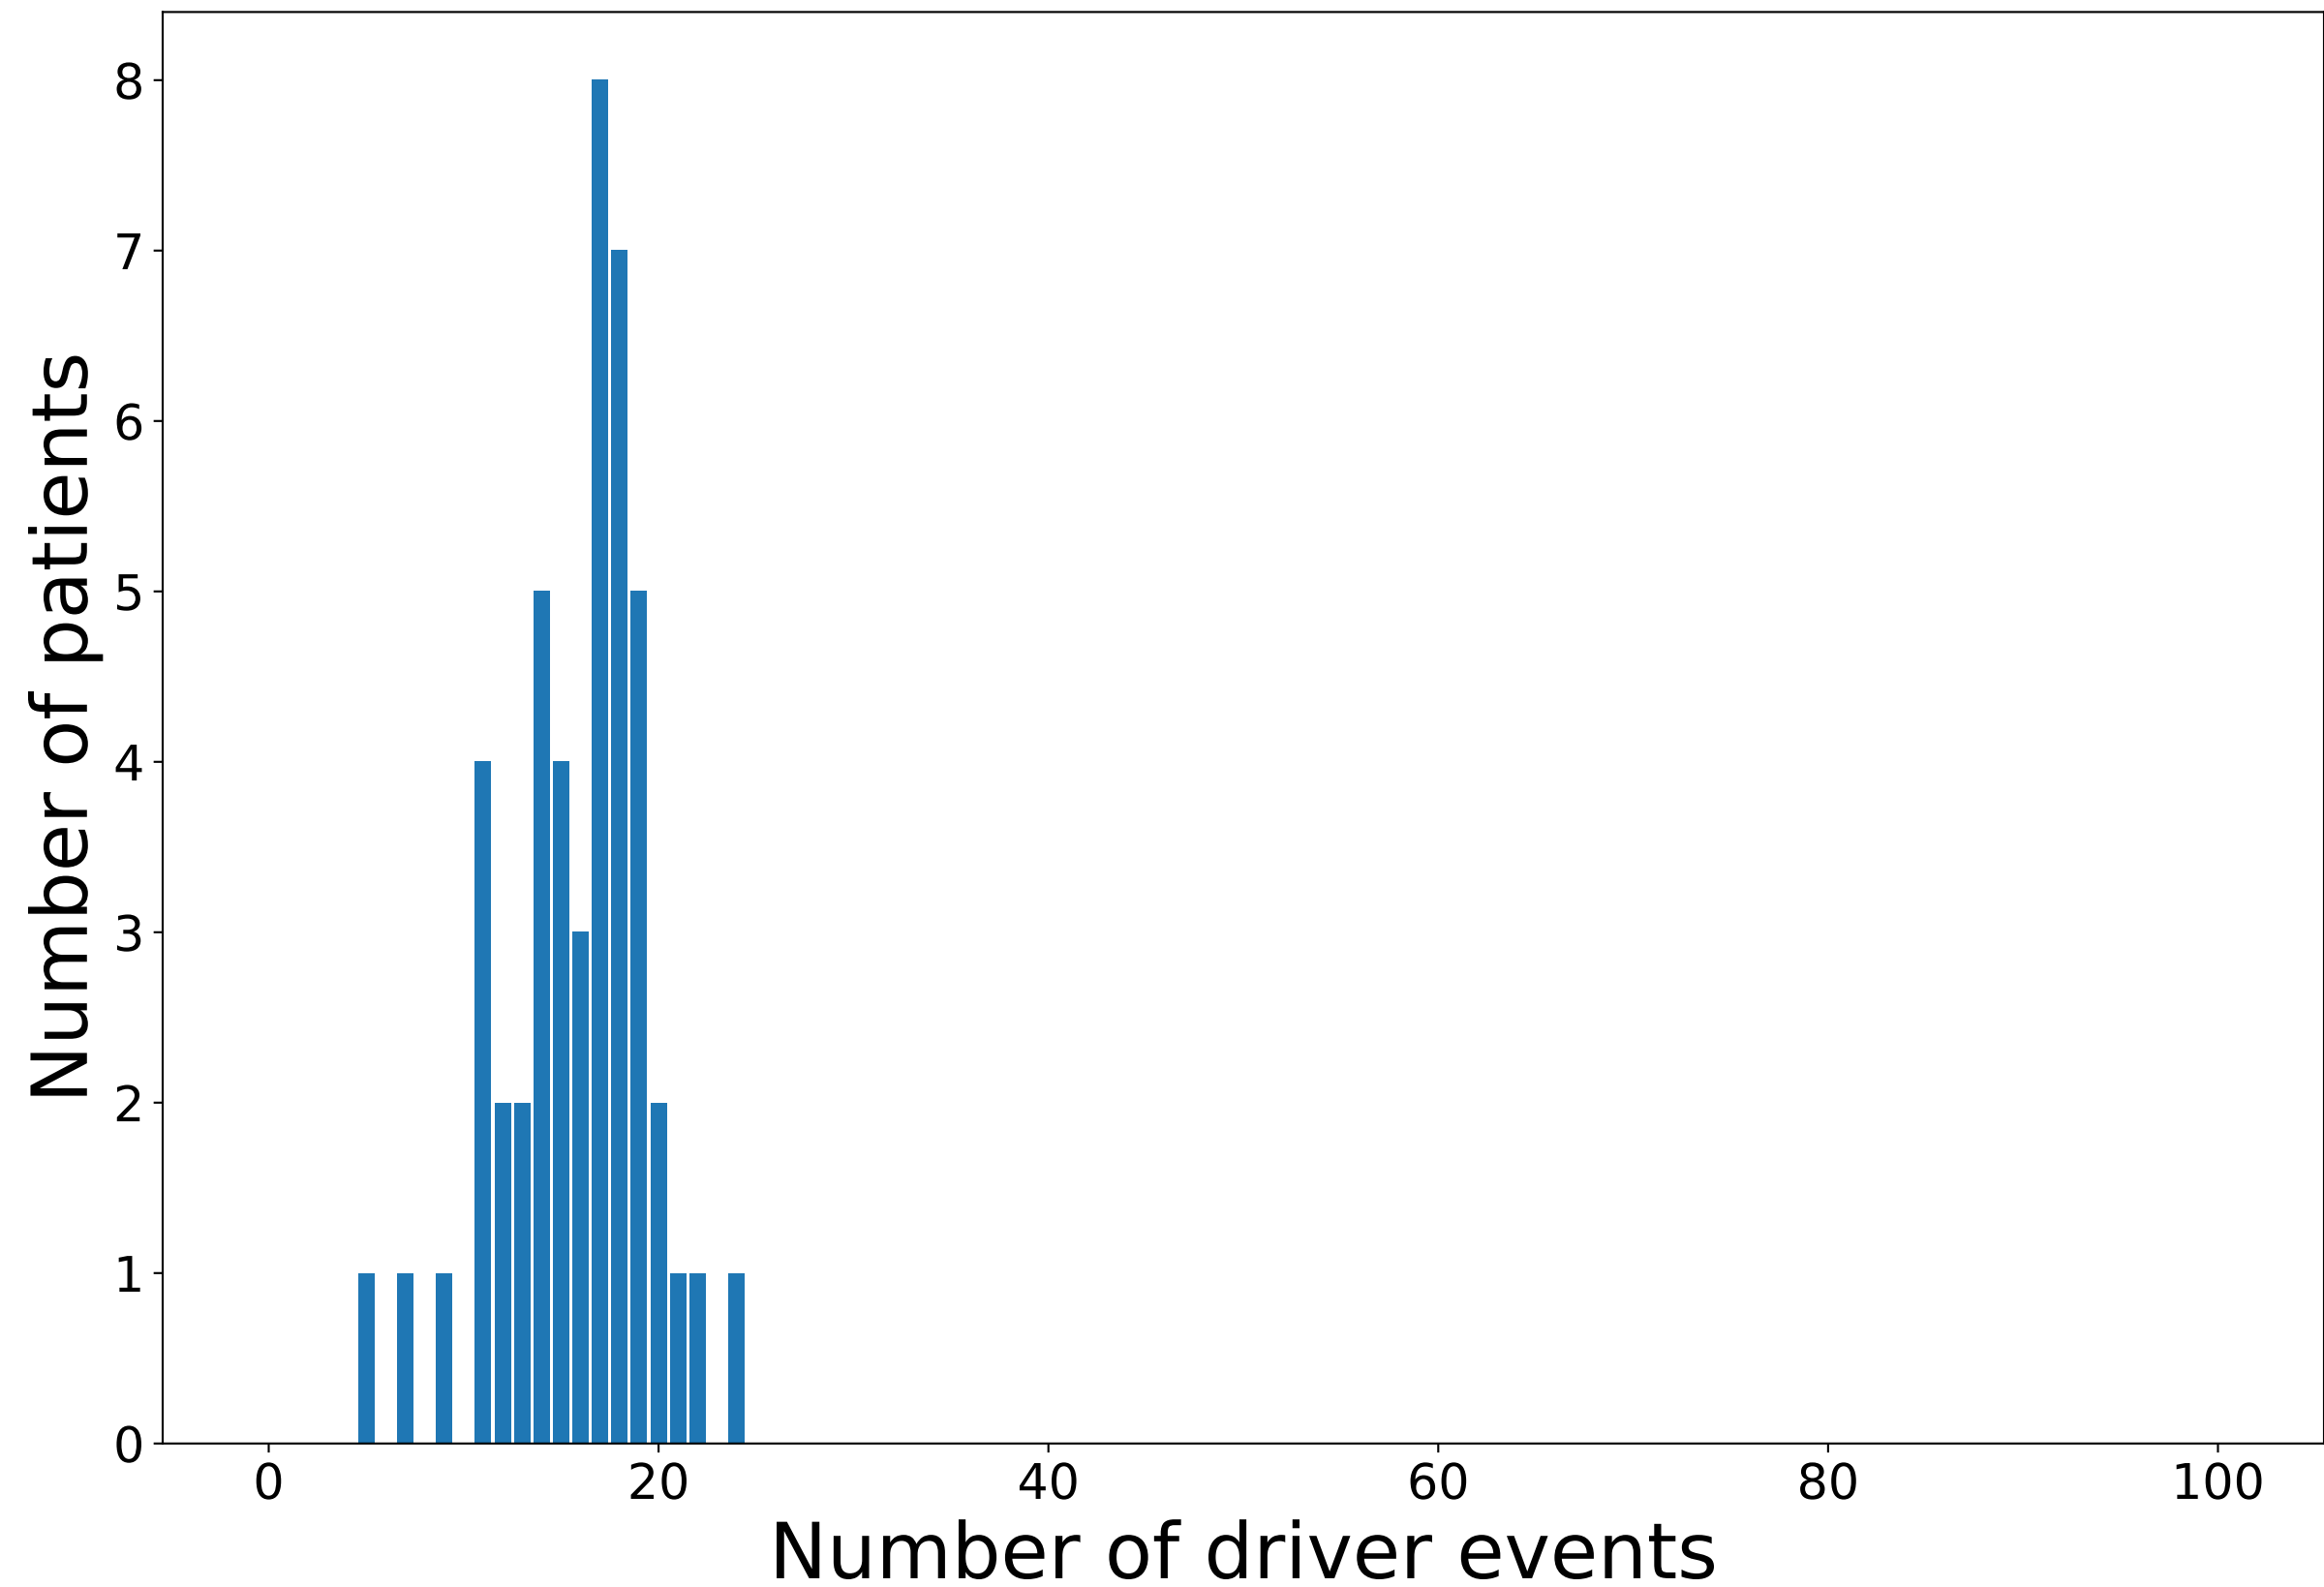

Supplement: Supplemental_Data_S1.zip [file Supplemental_Data_S1.zip]

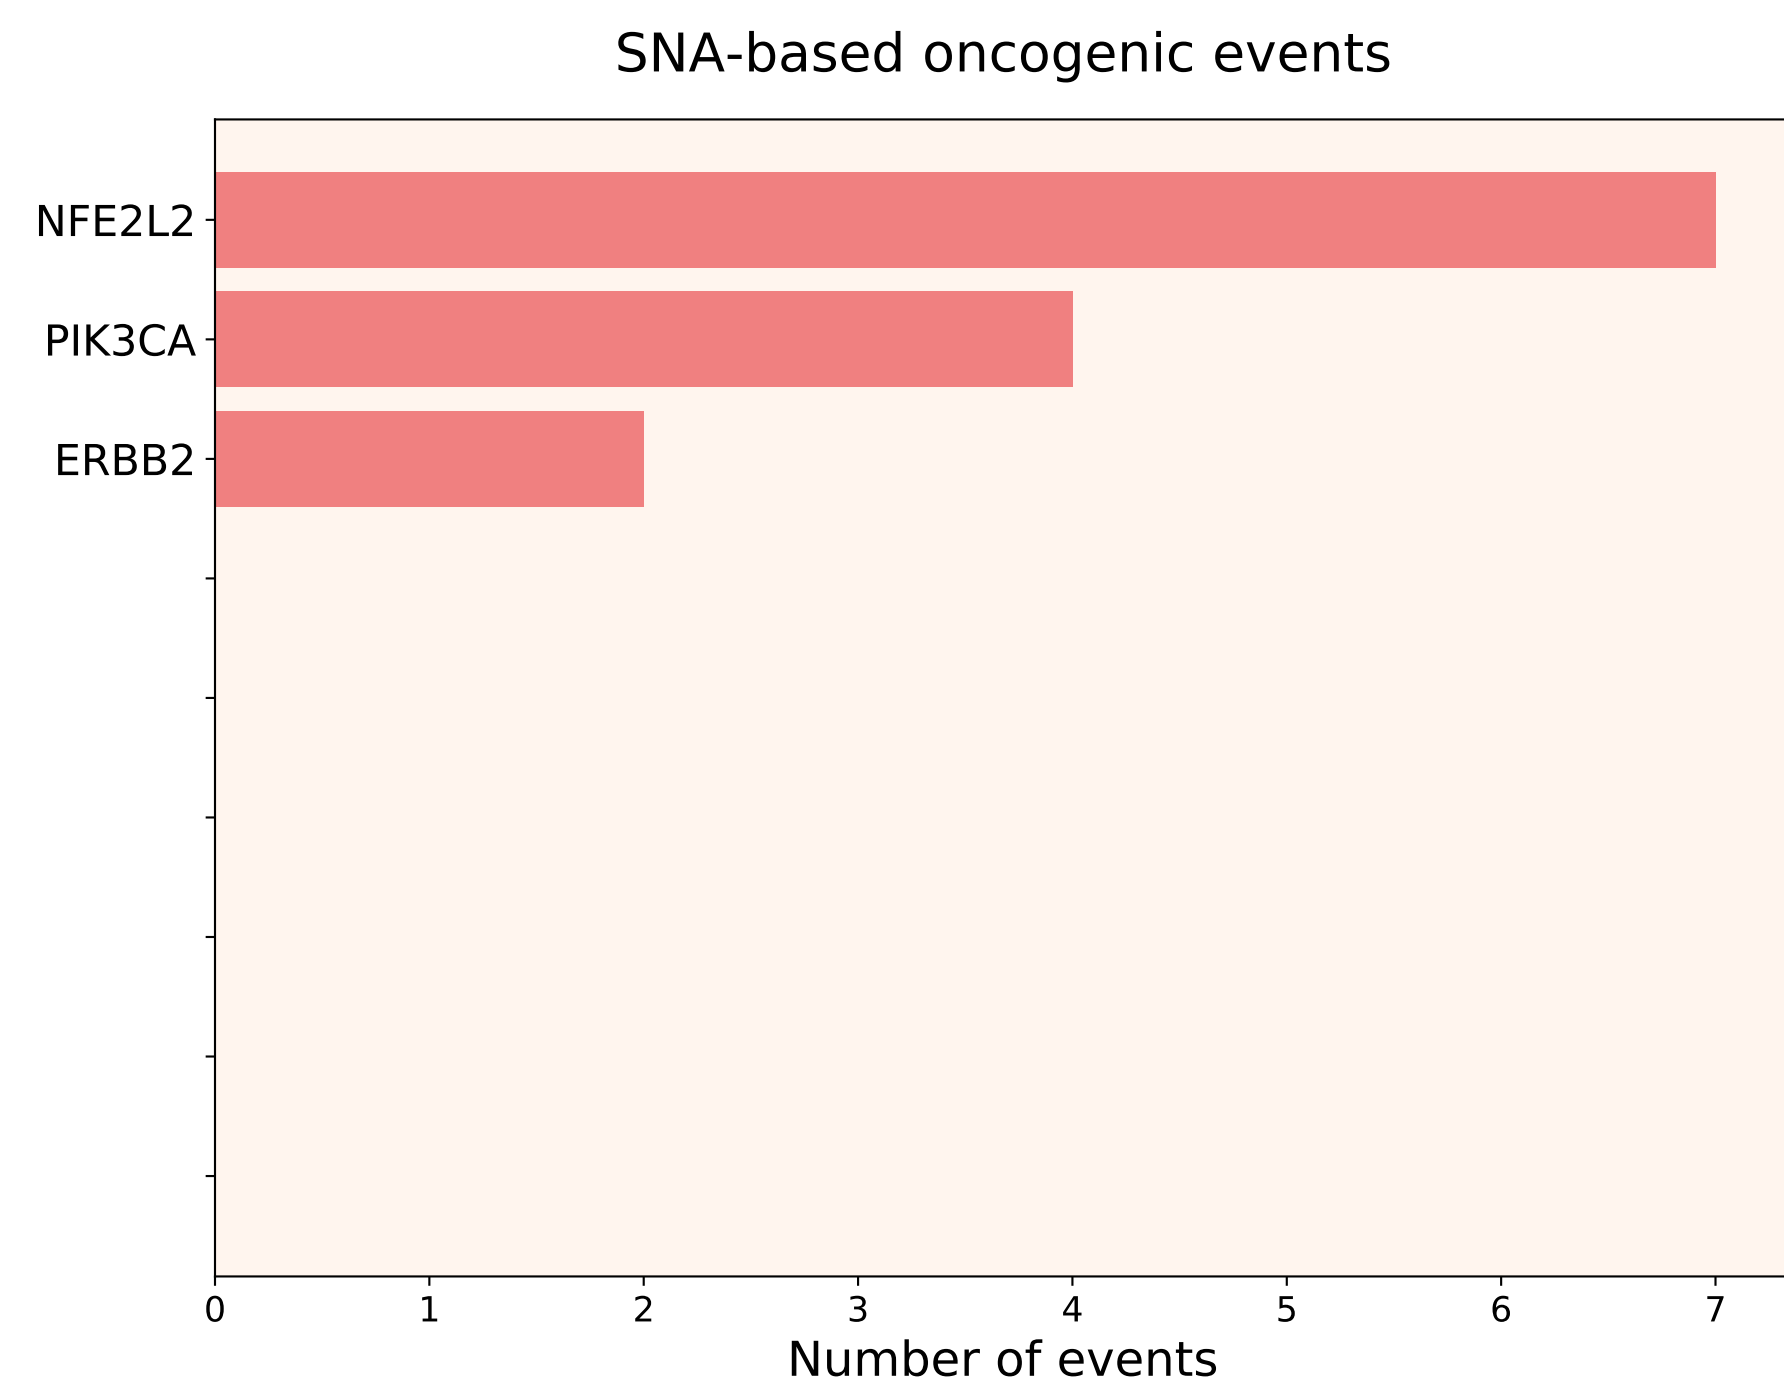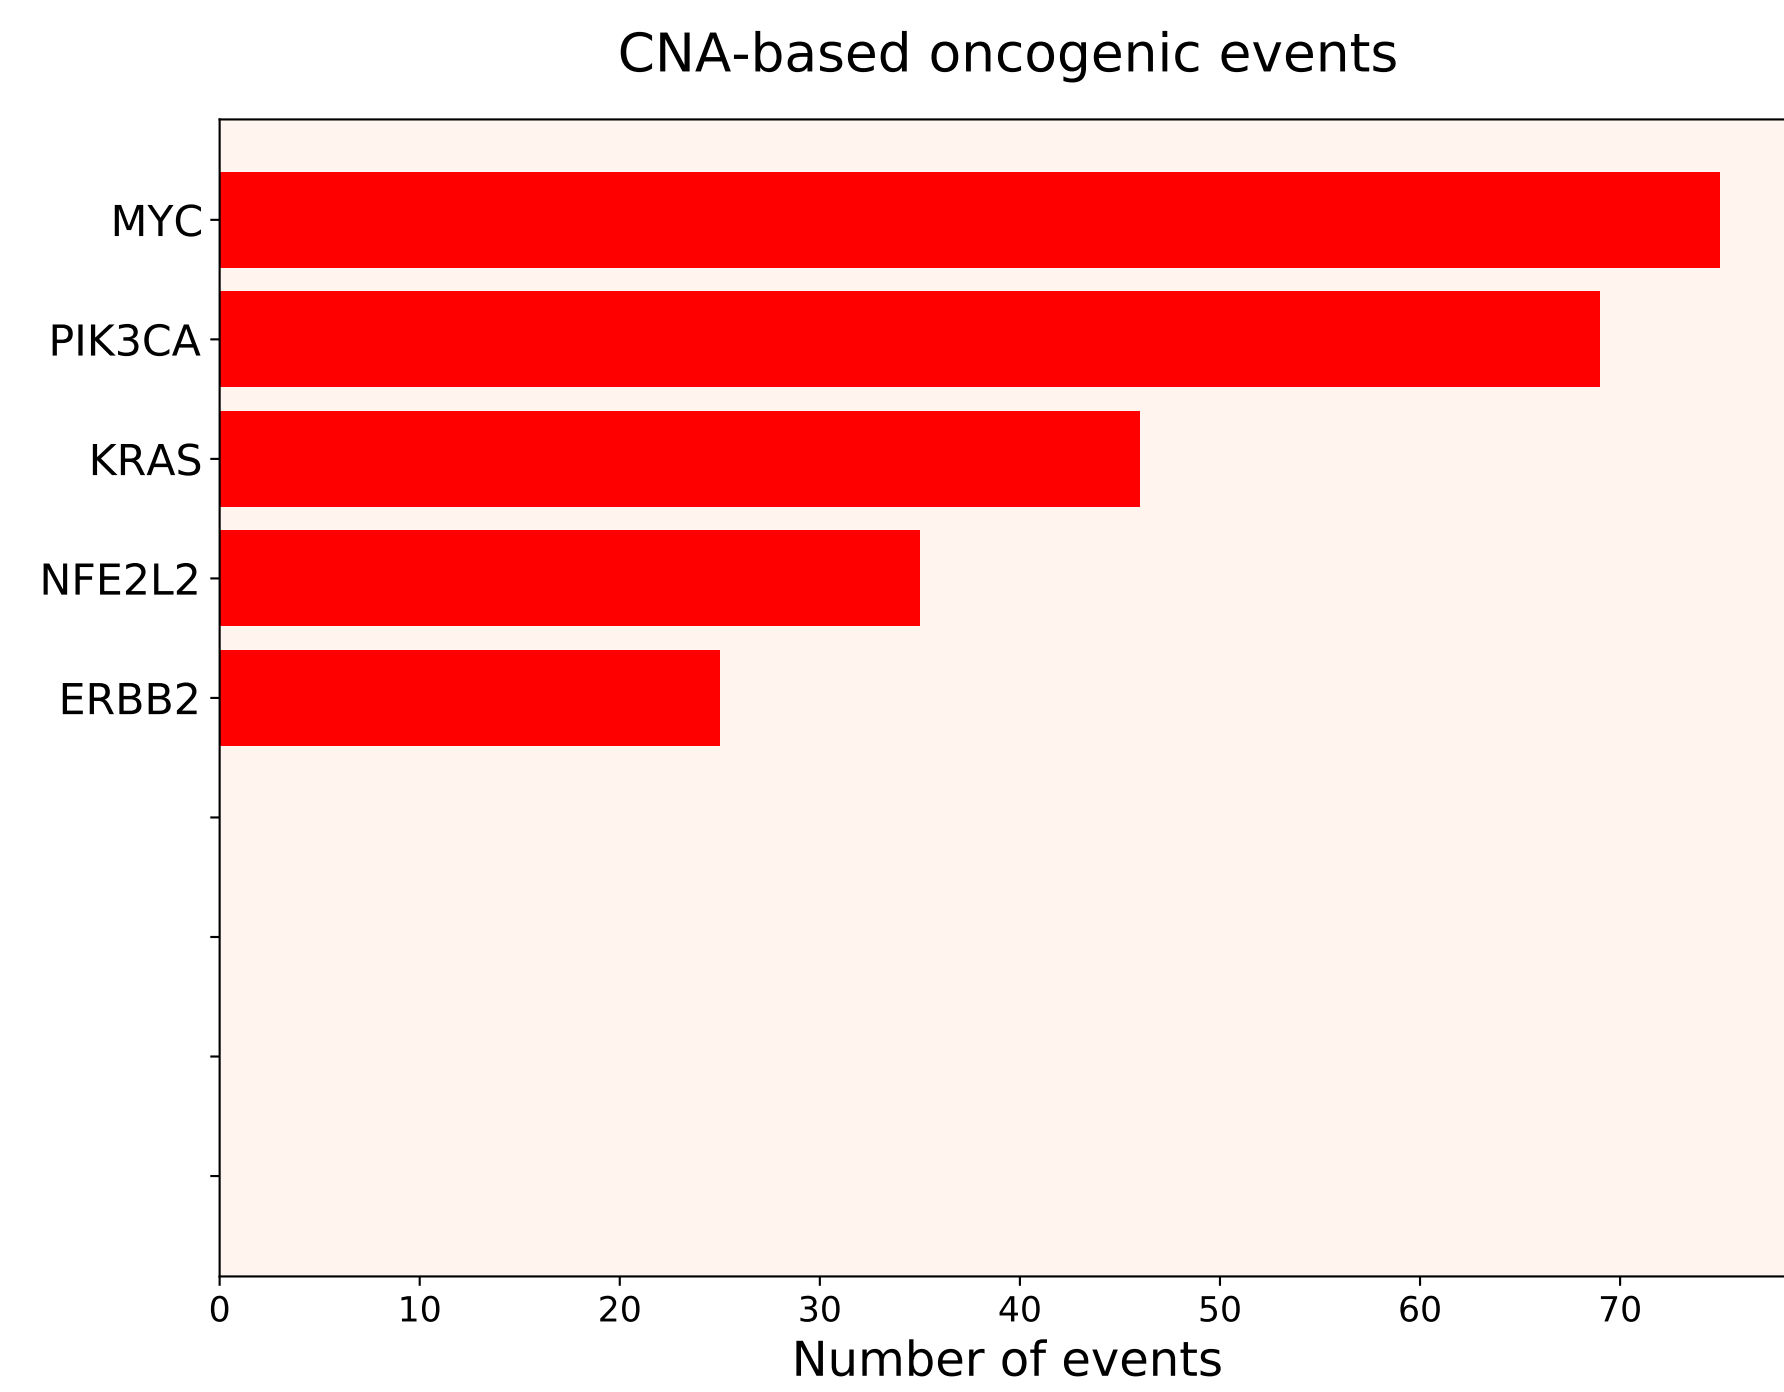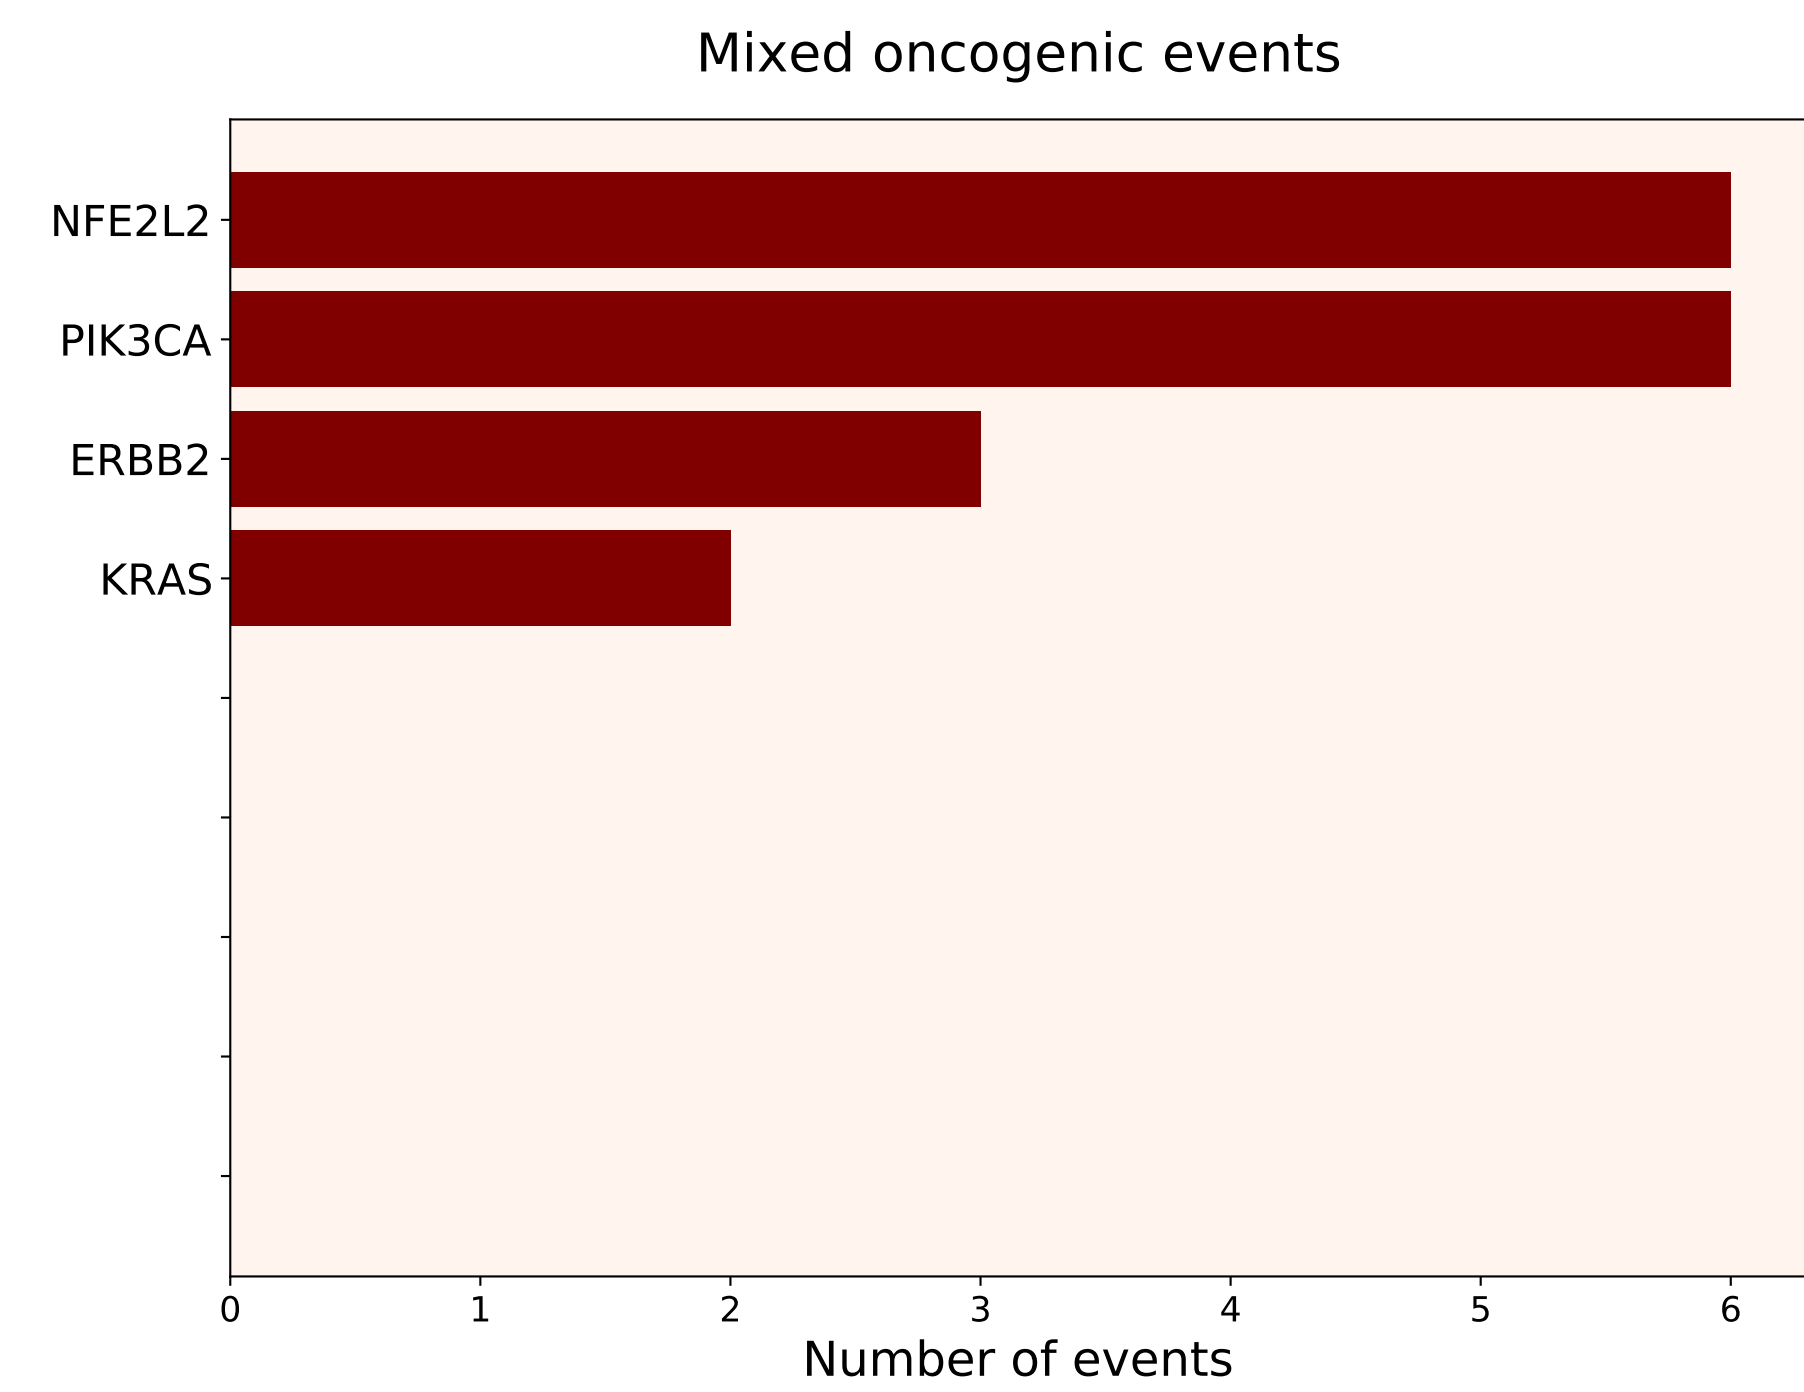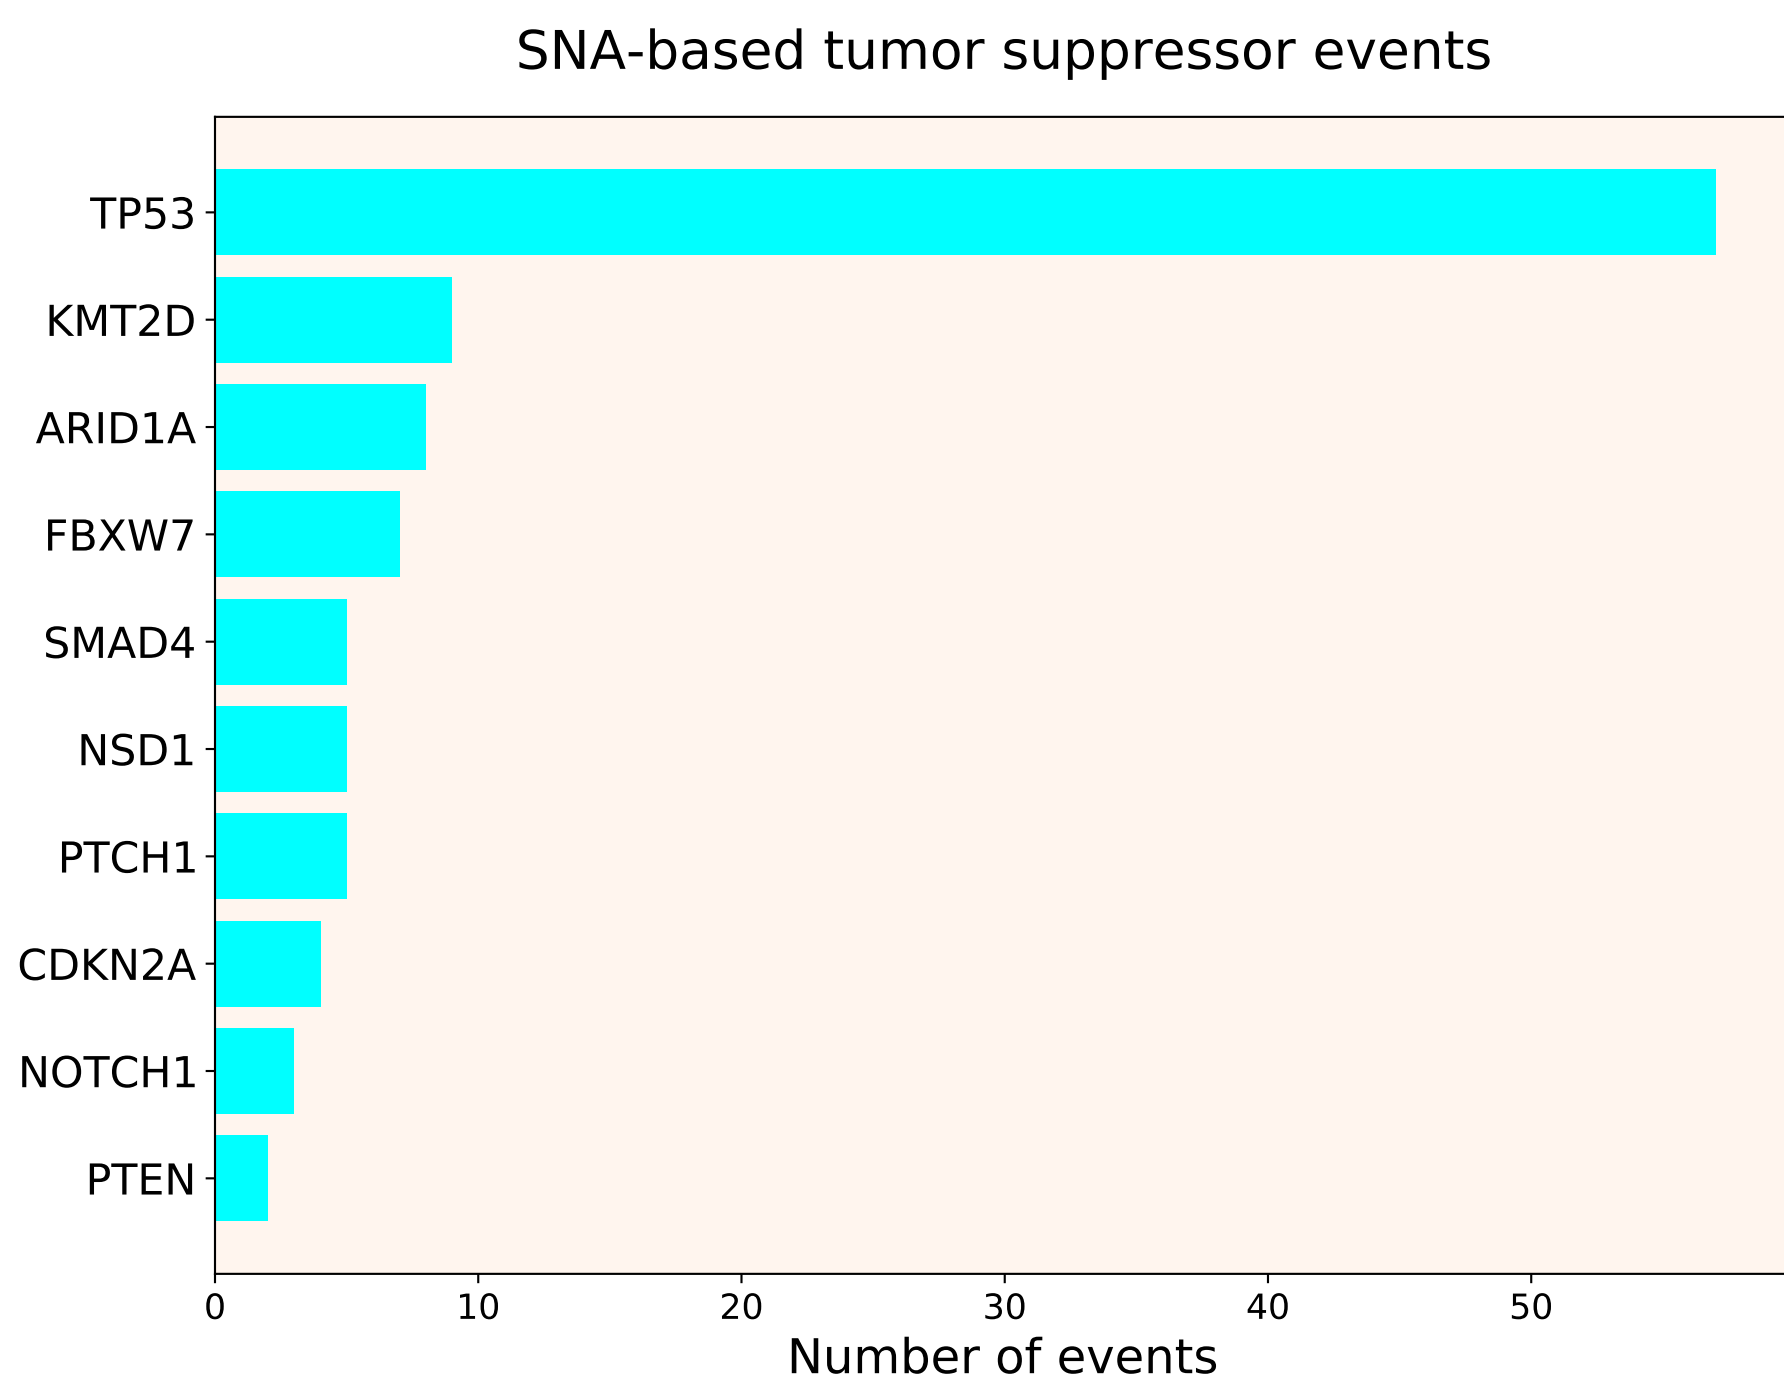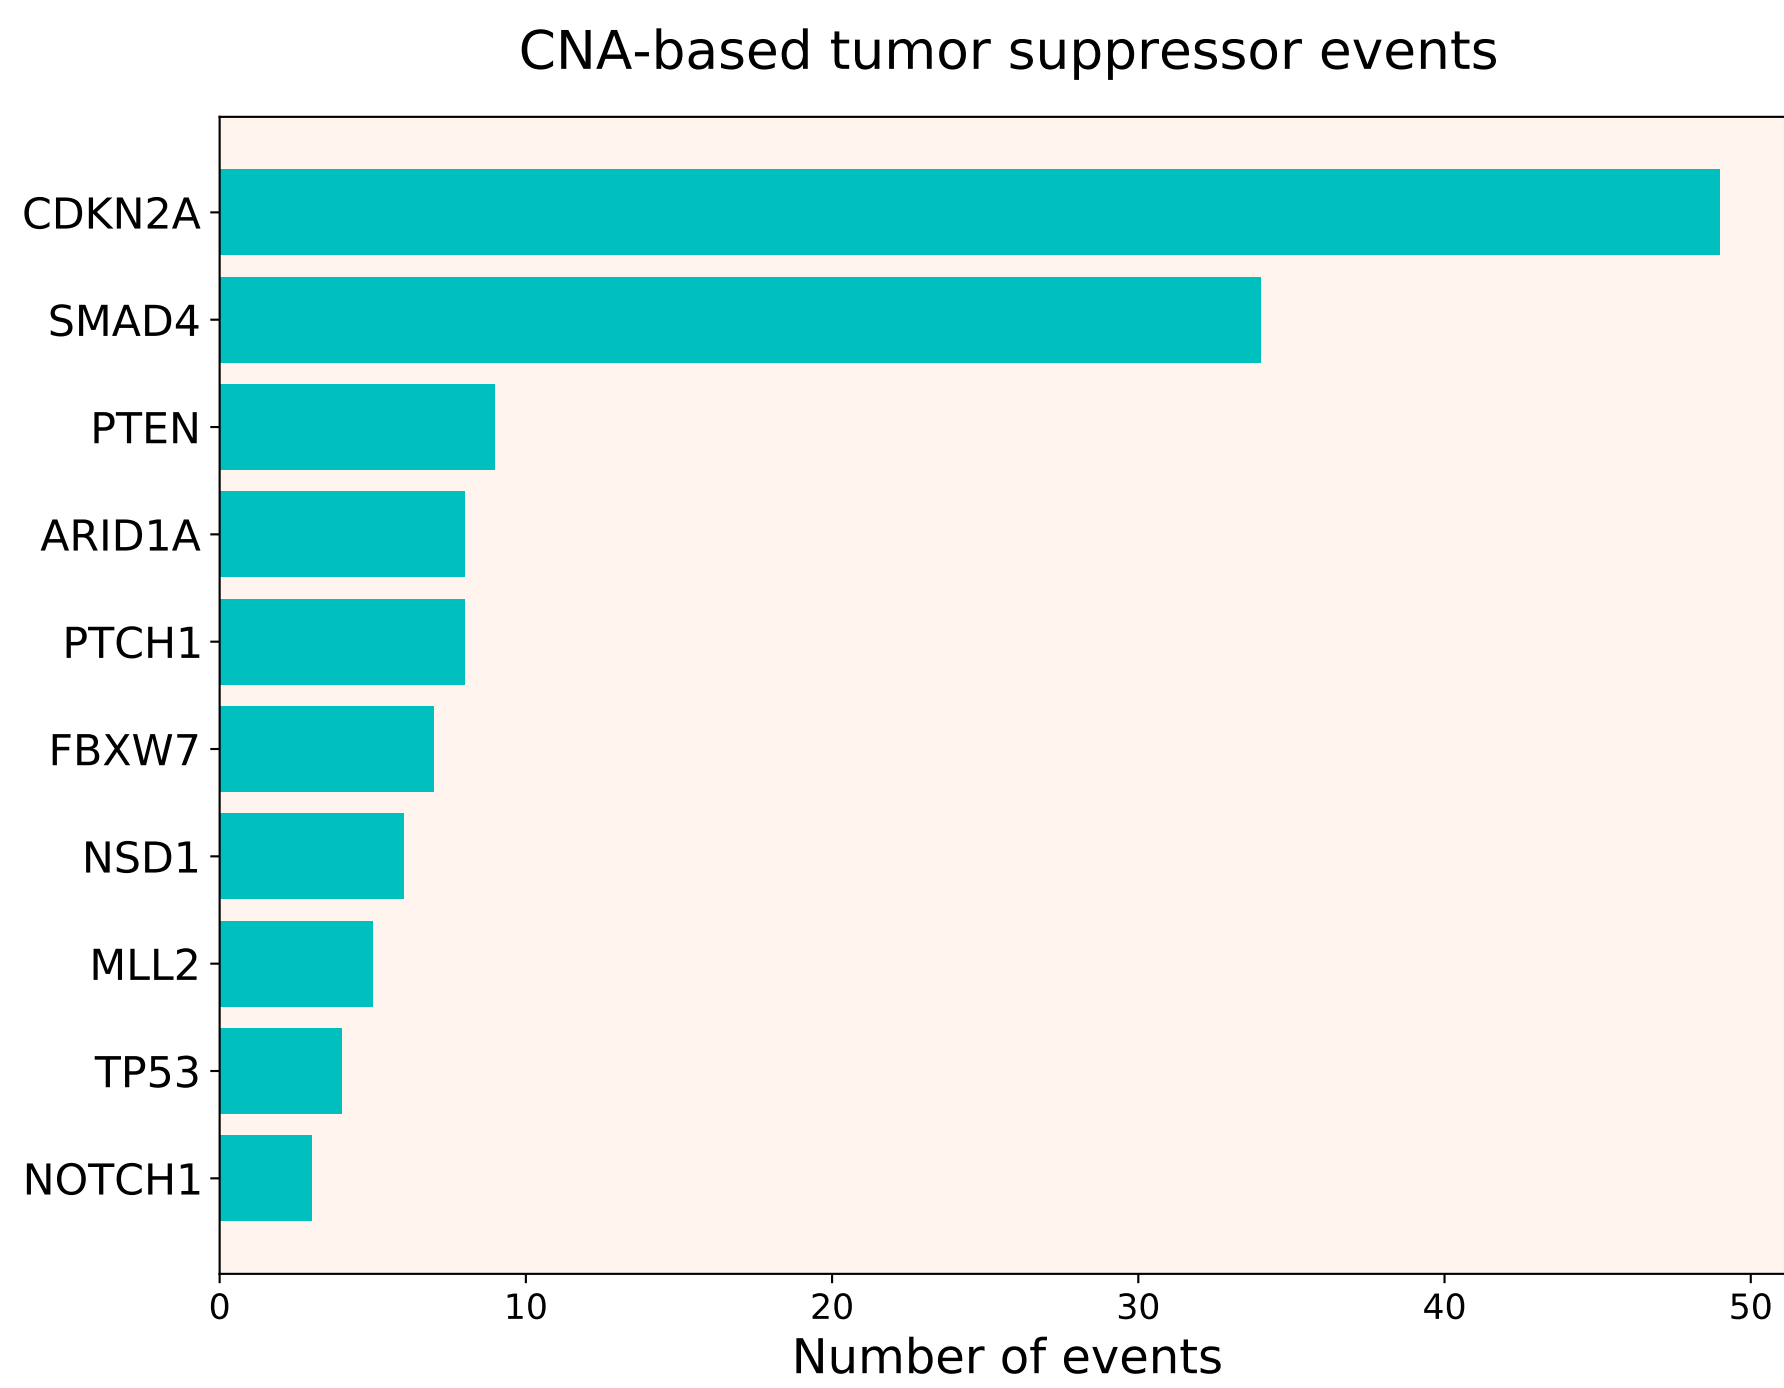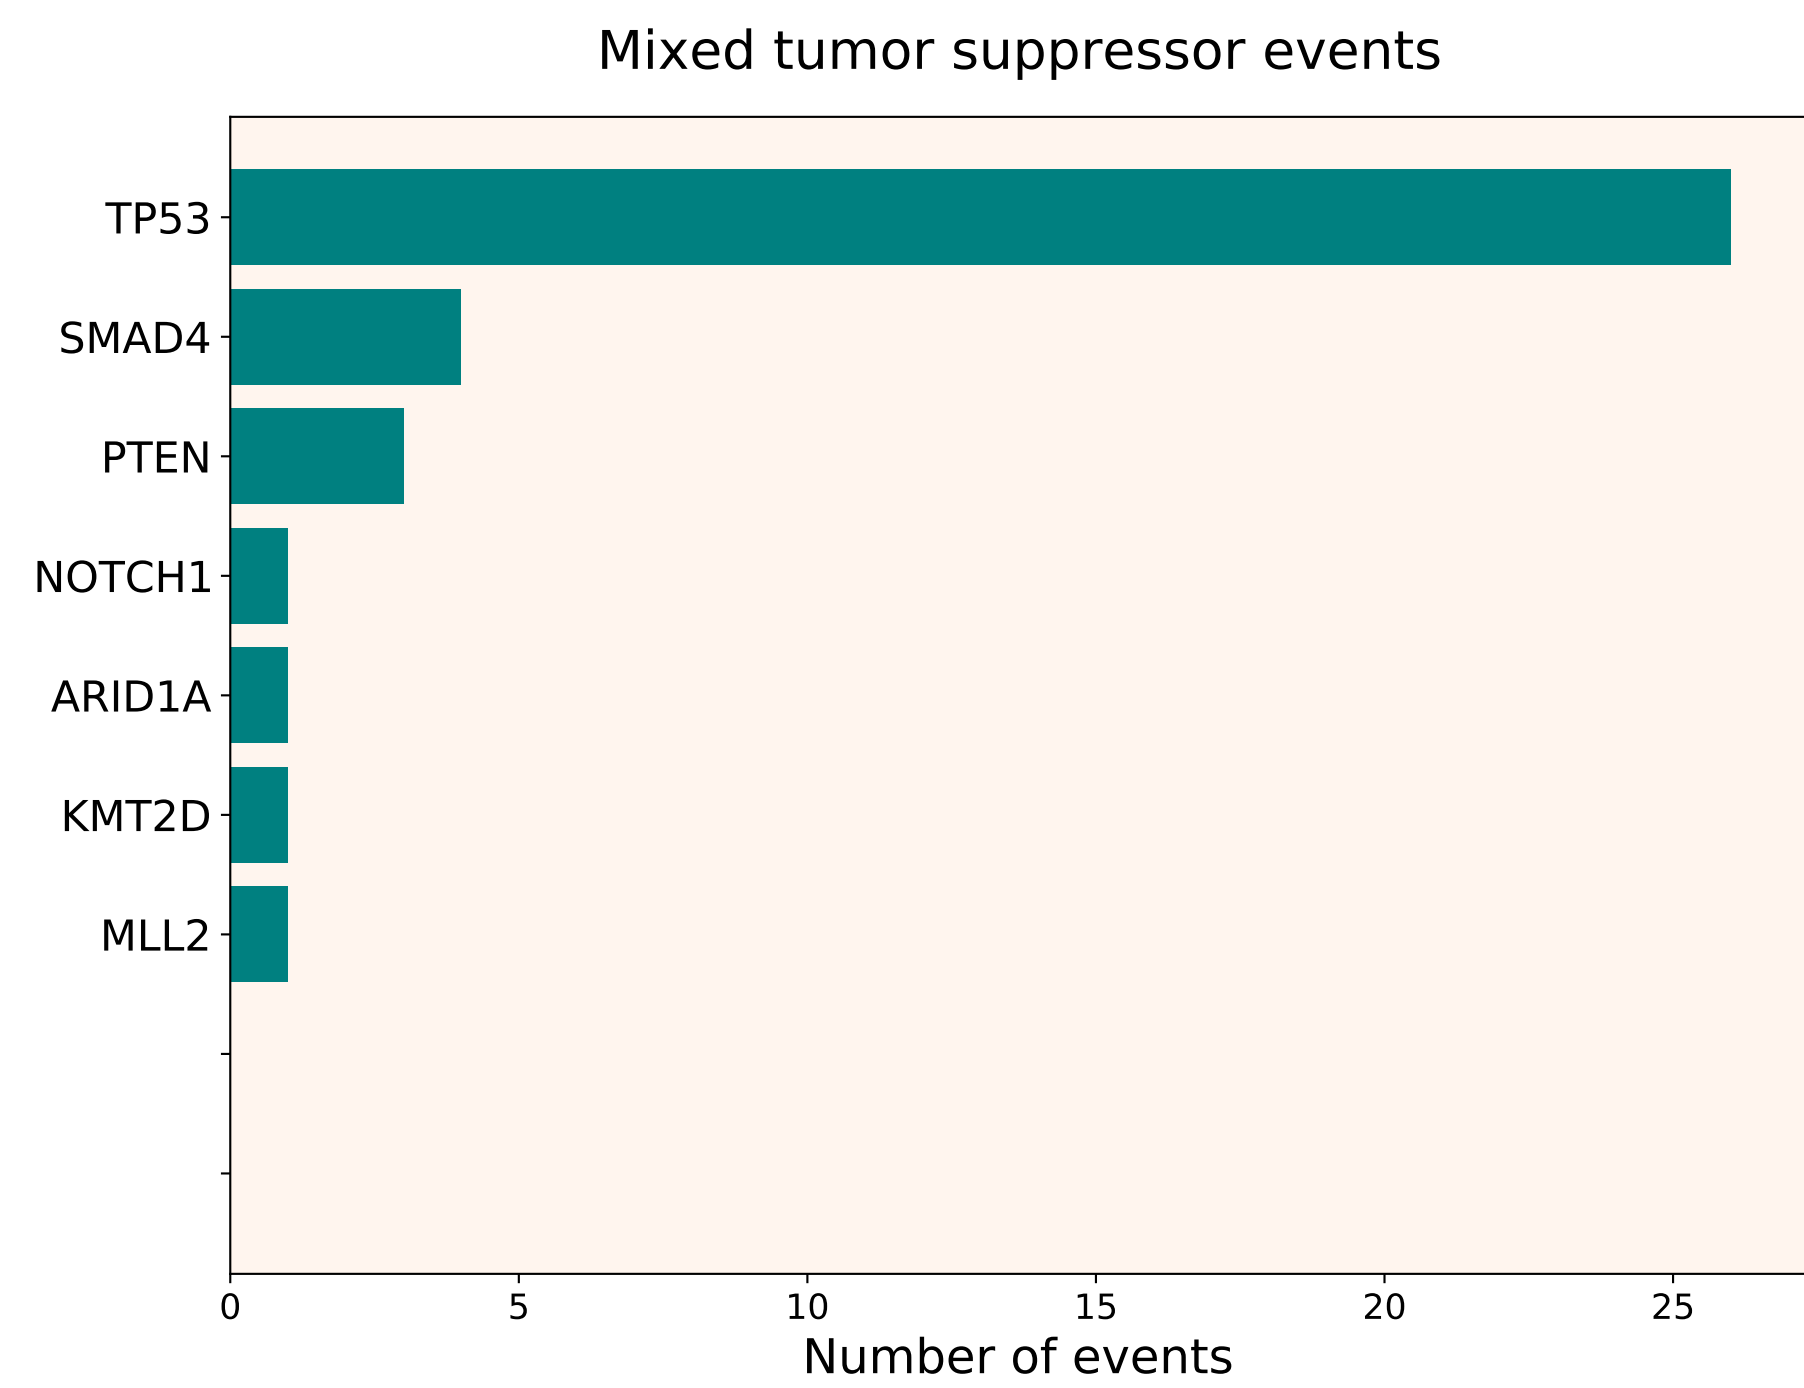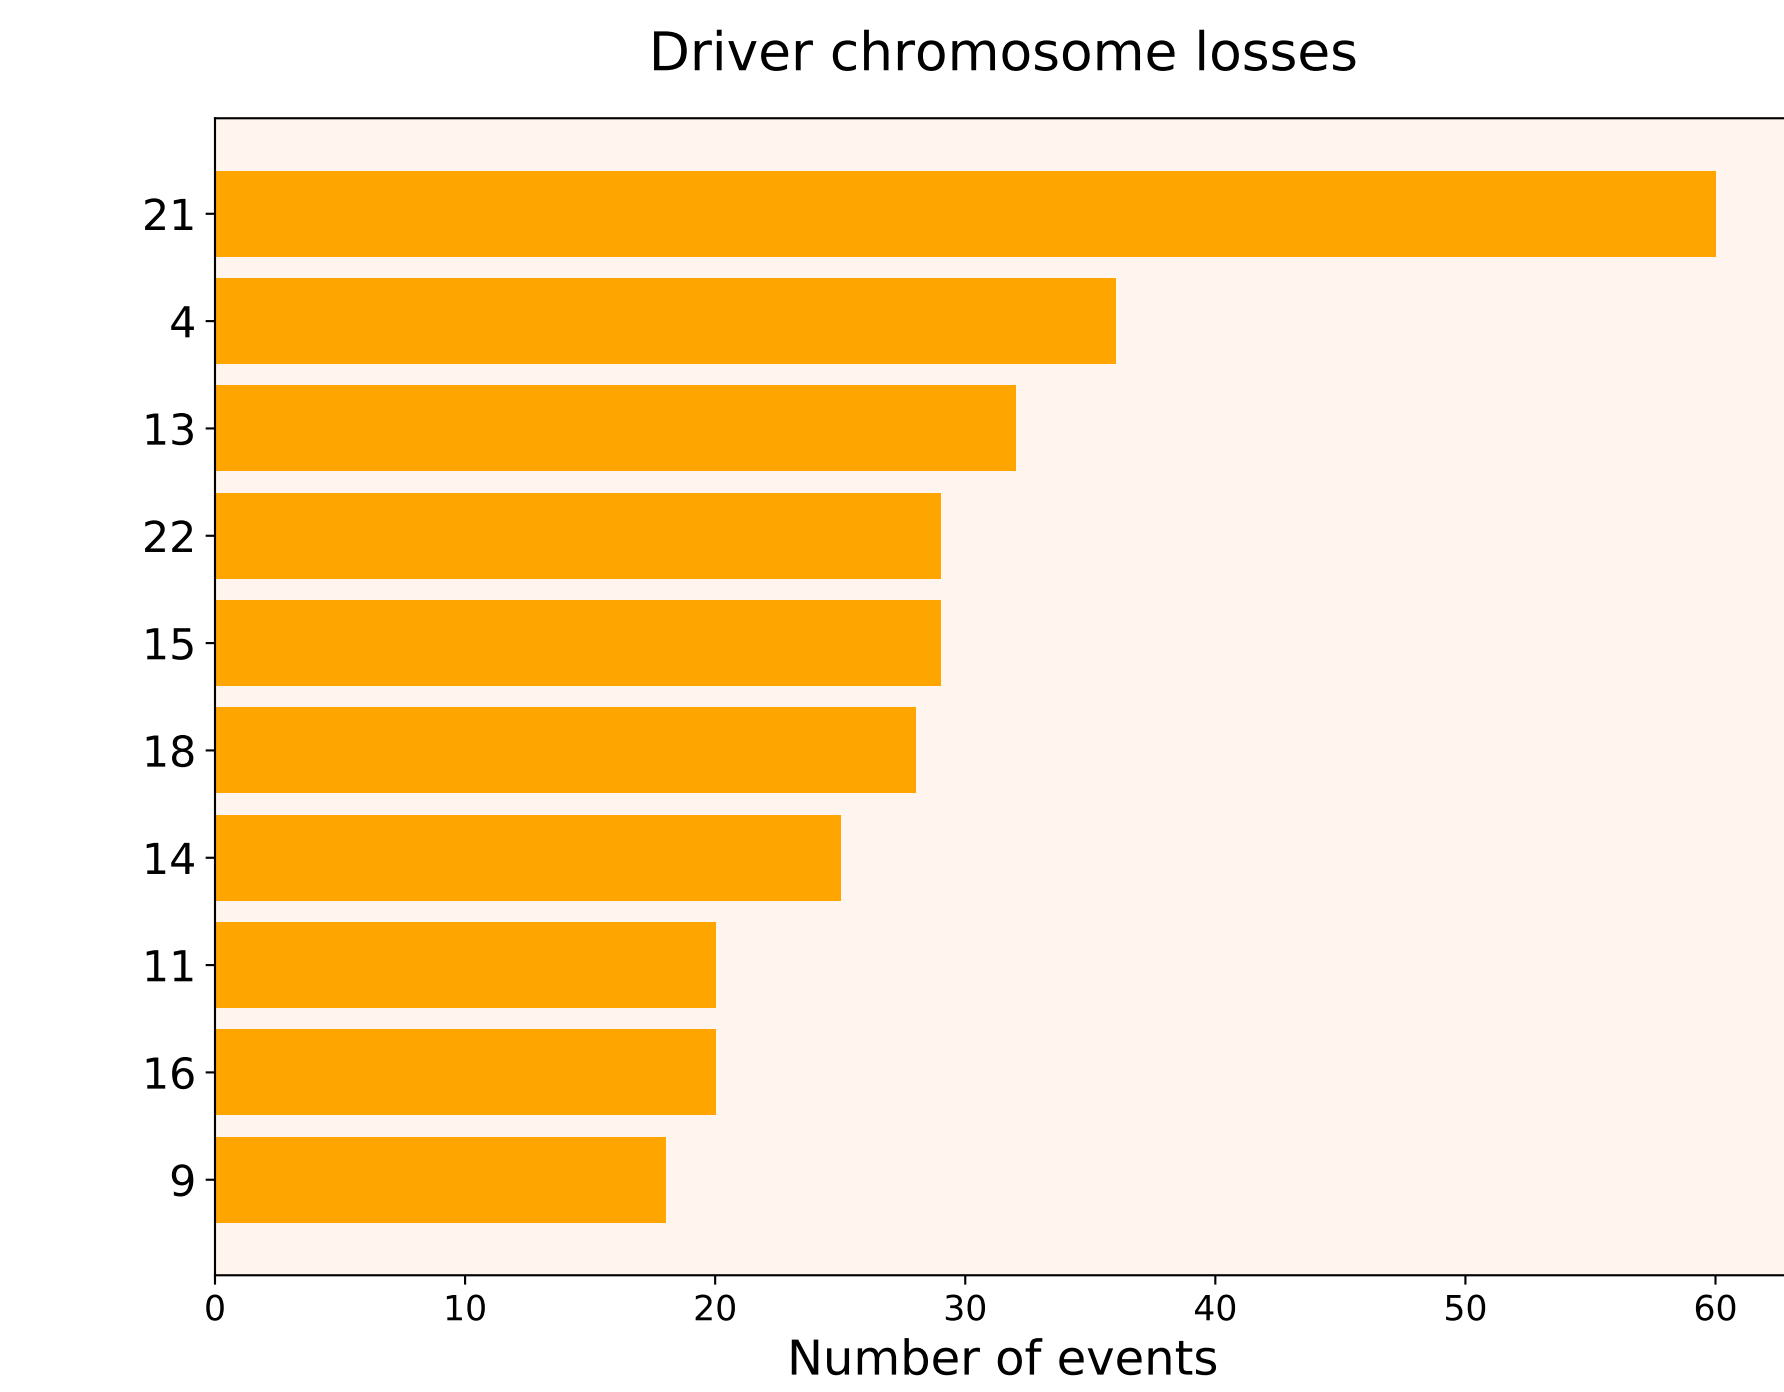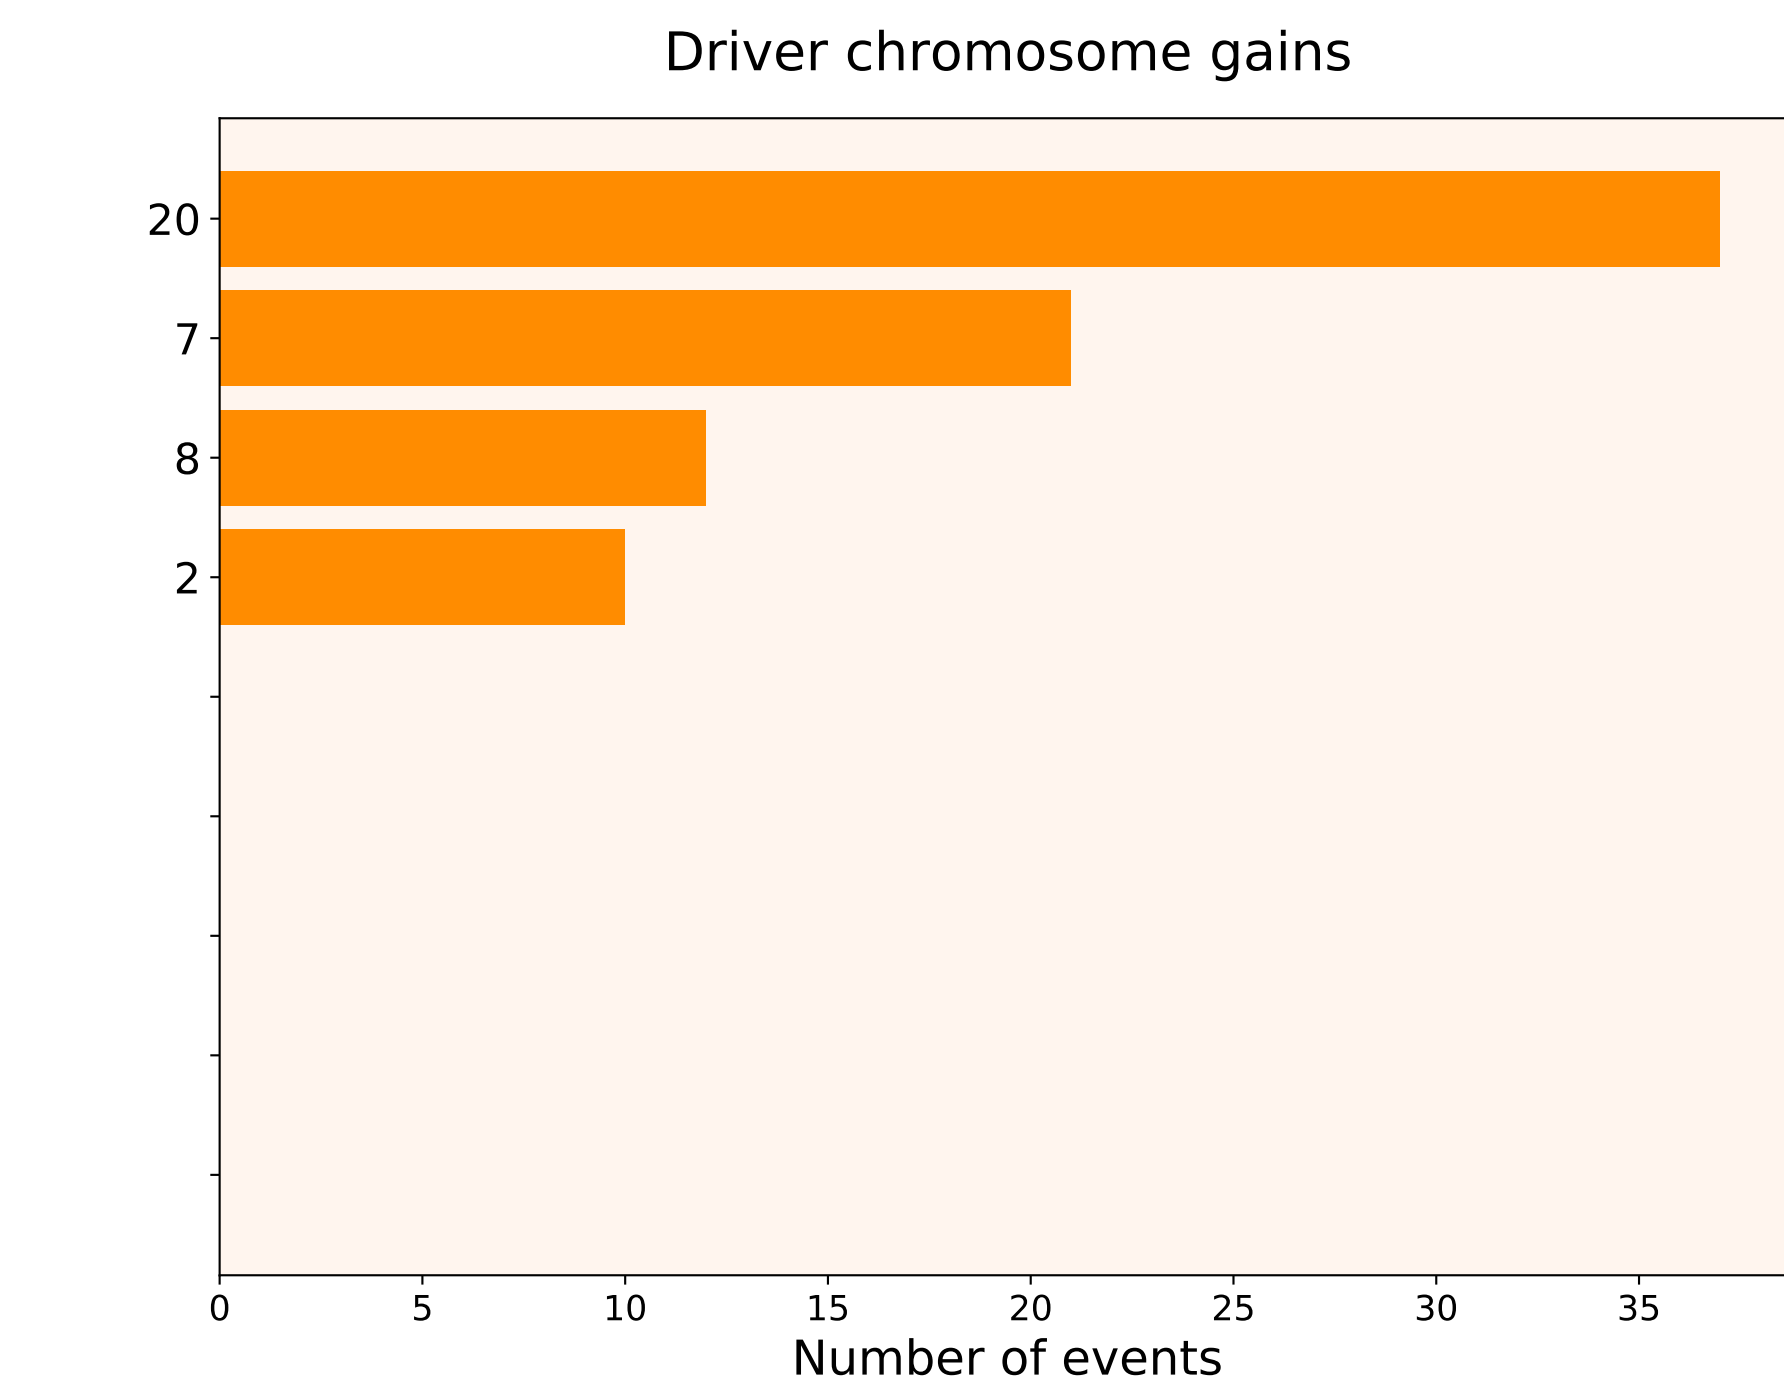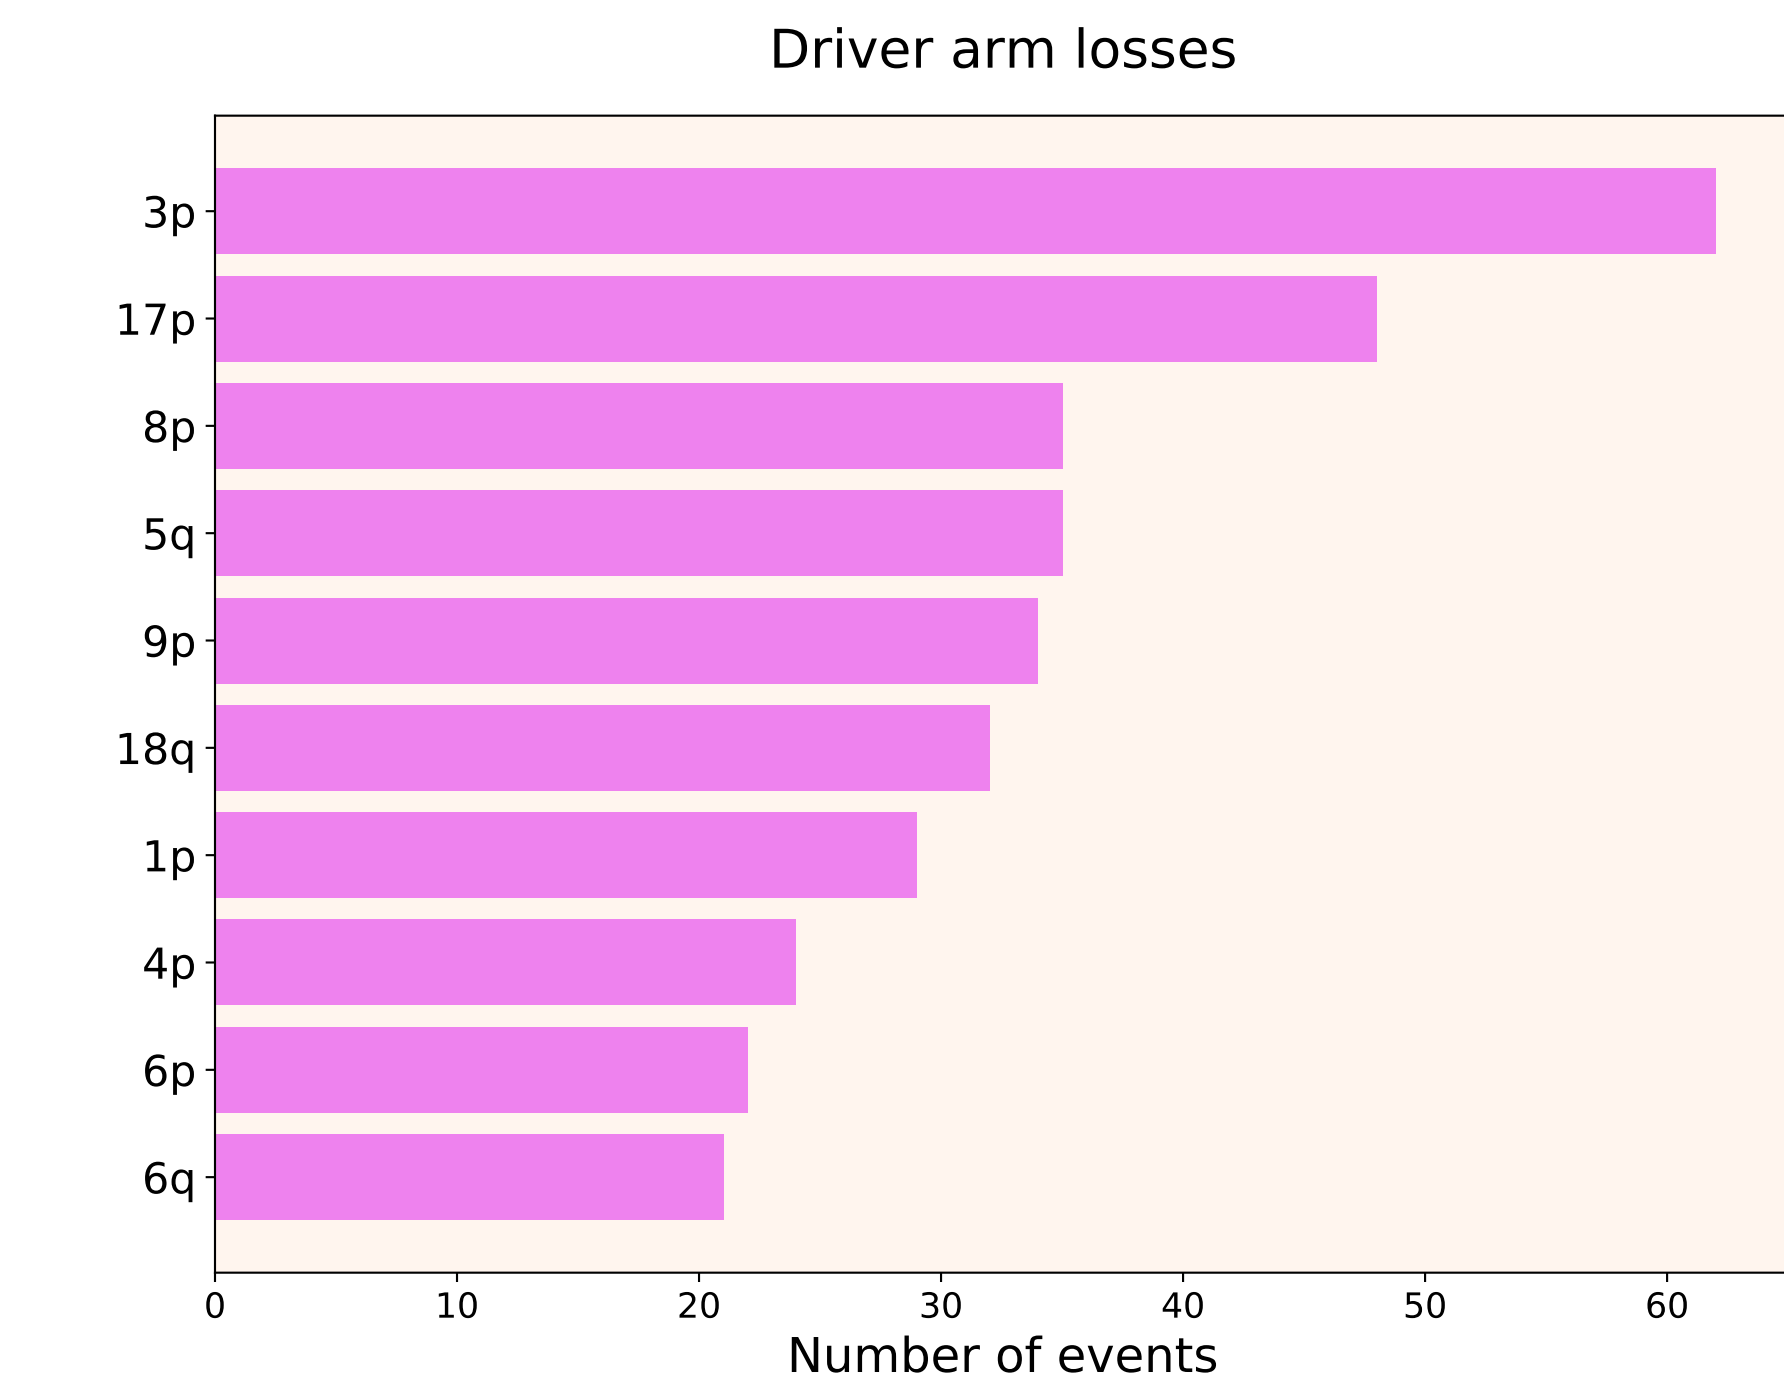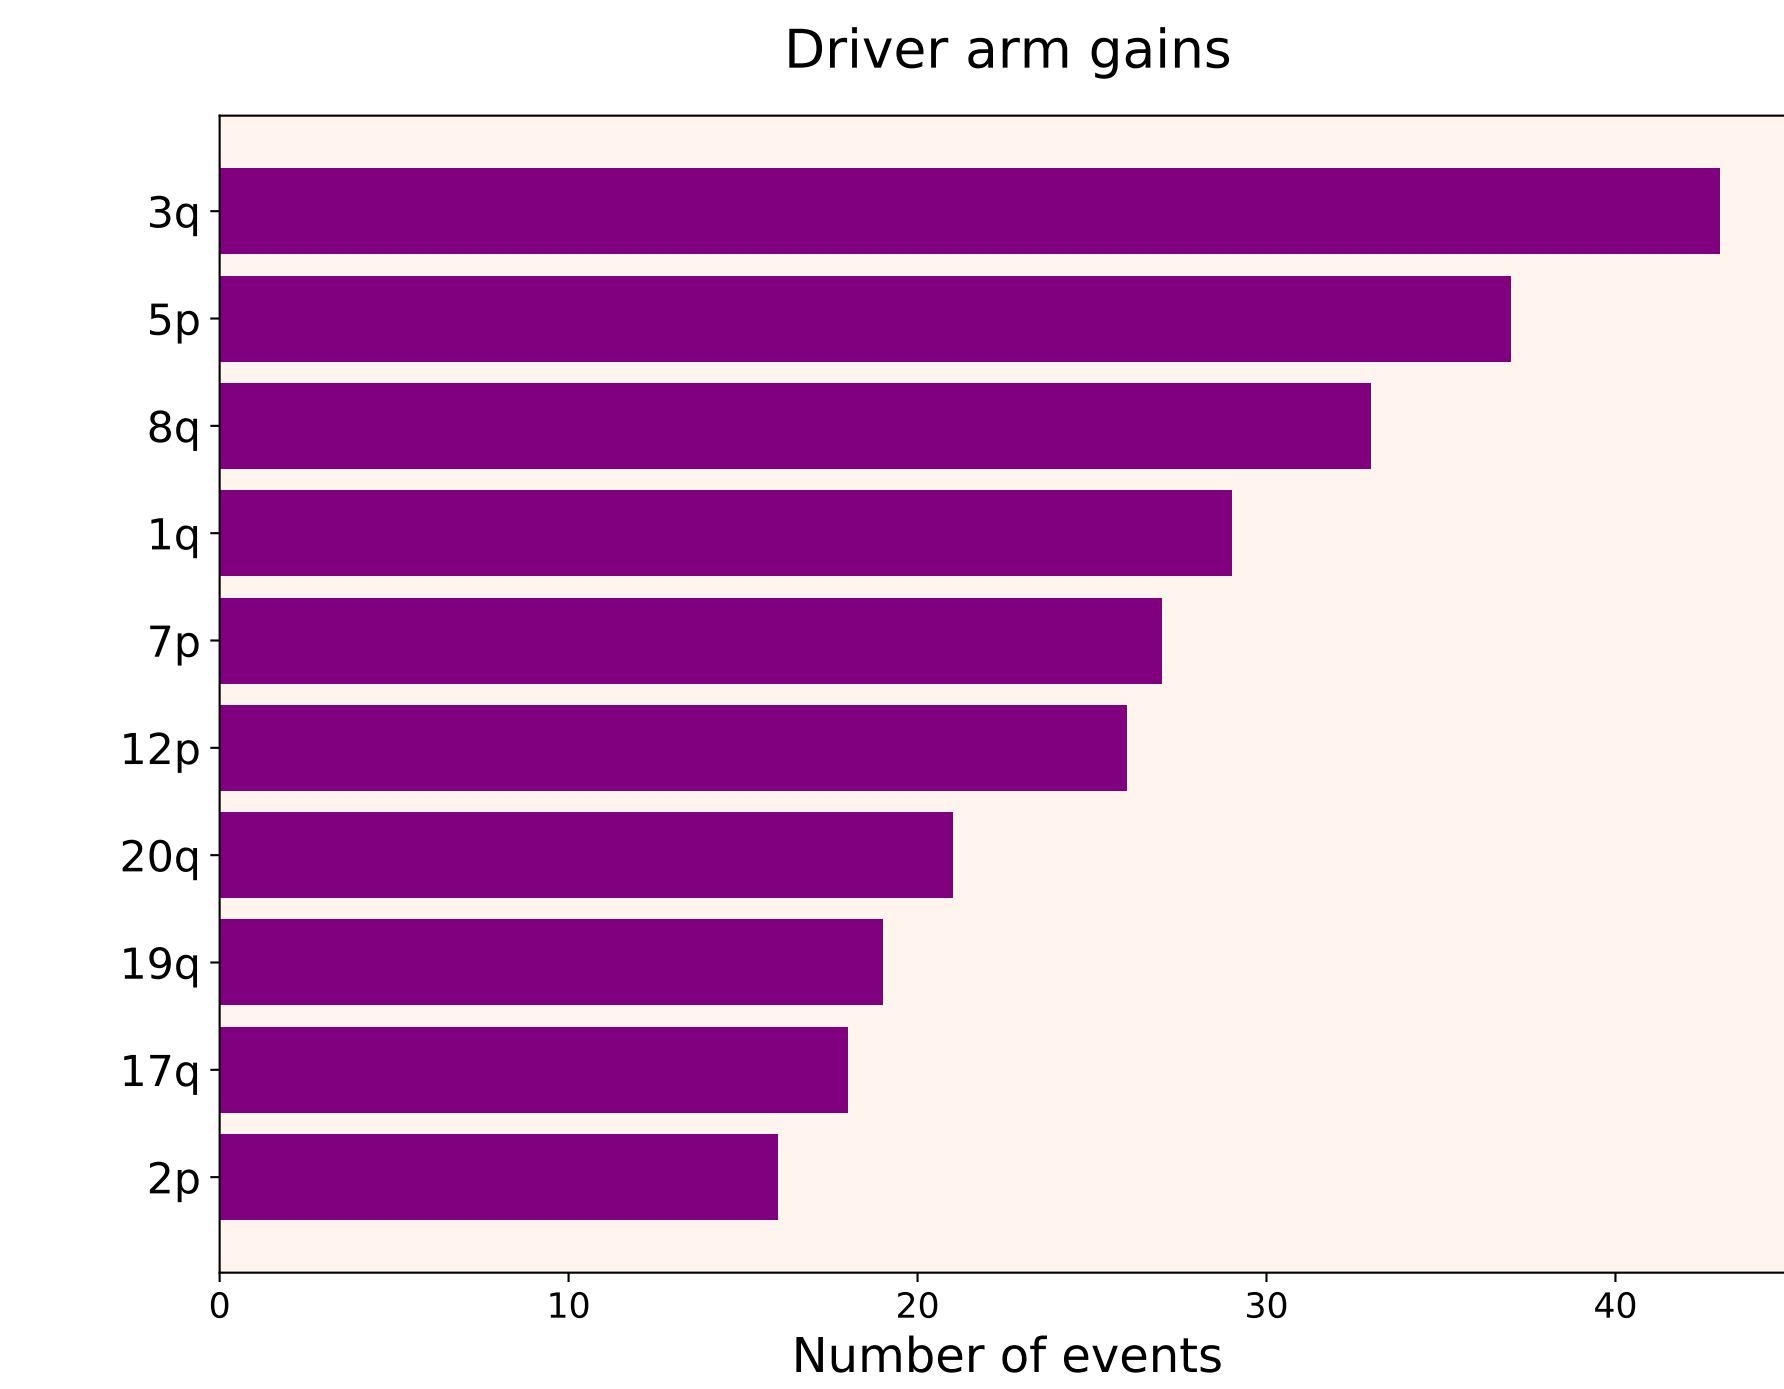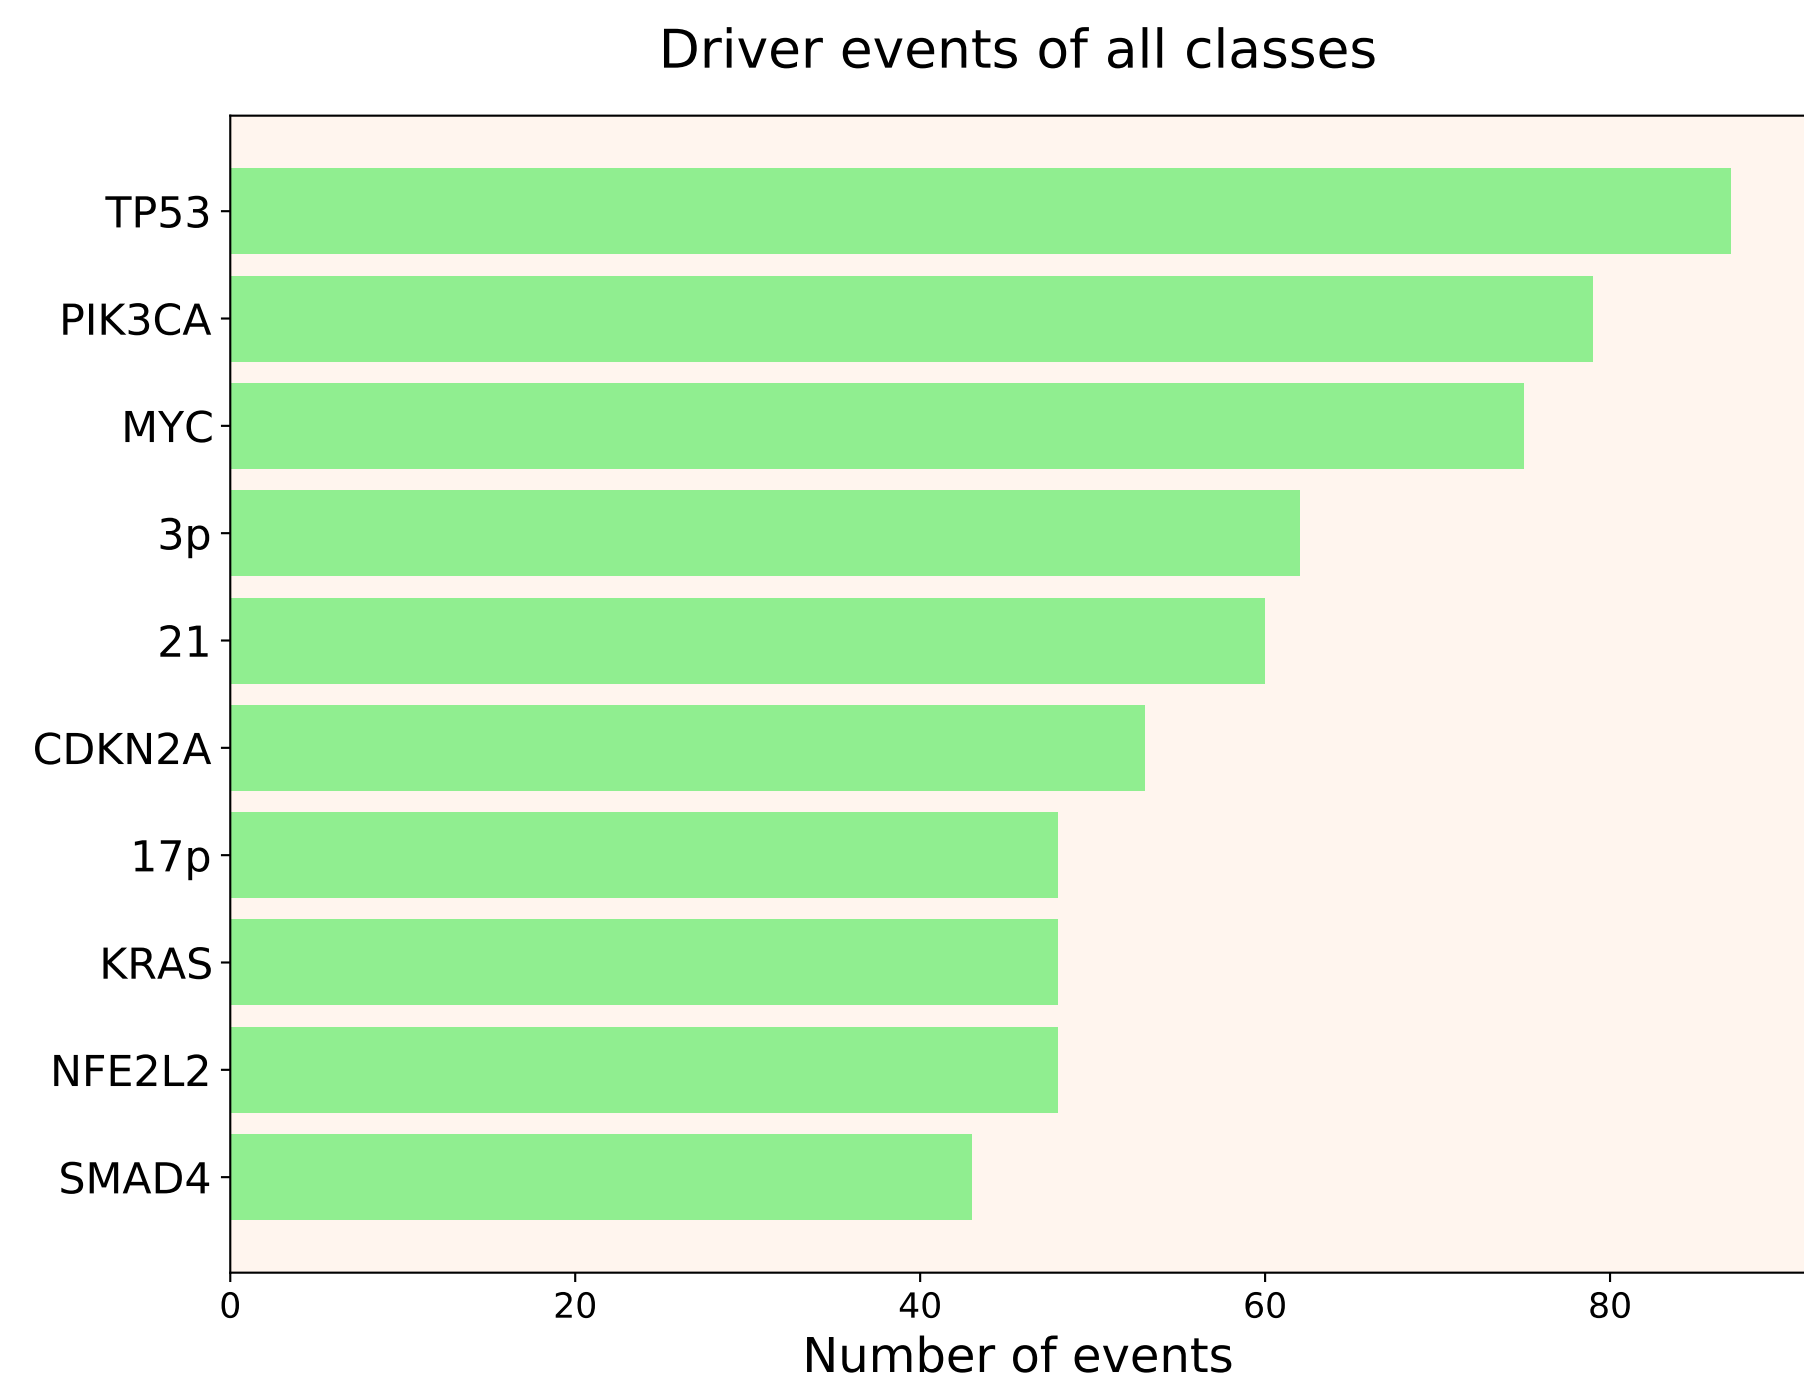

Supplement: Supplemental_Data_S1.zip [file Supplemental_Data_S1.zip]

# PANCAN\_FEMALE

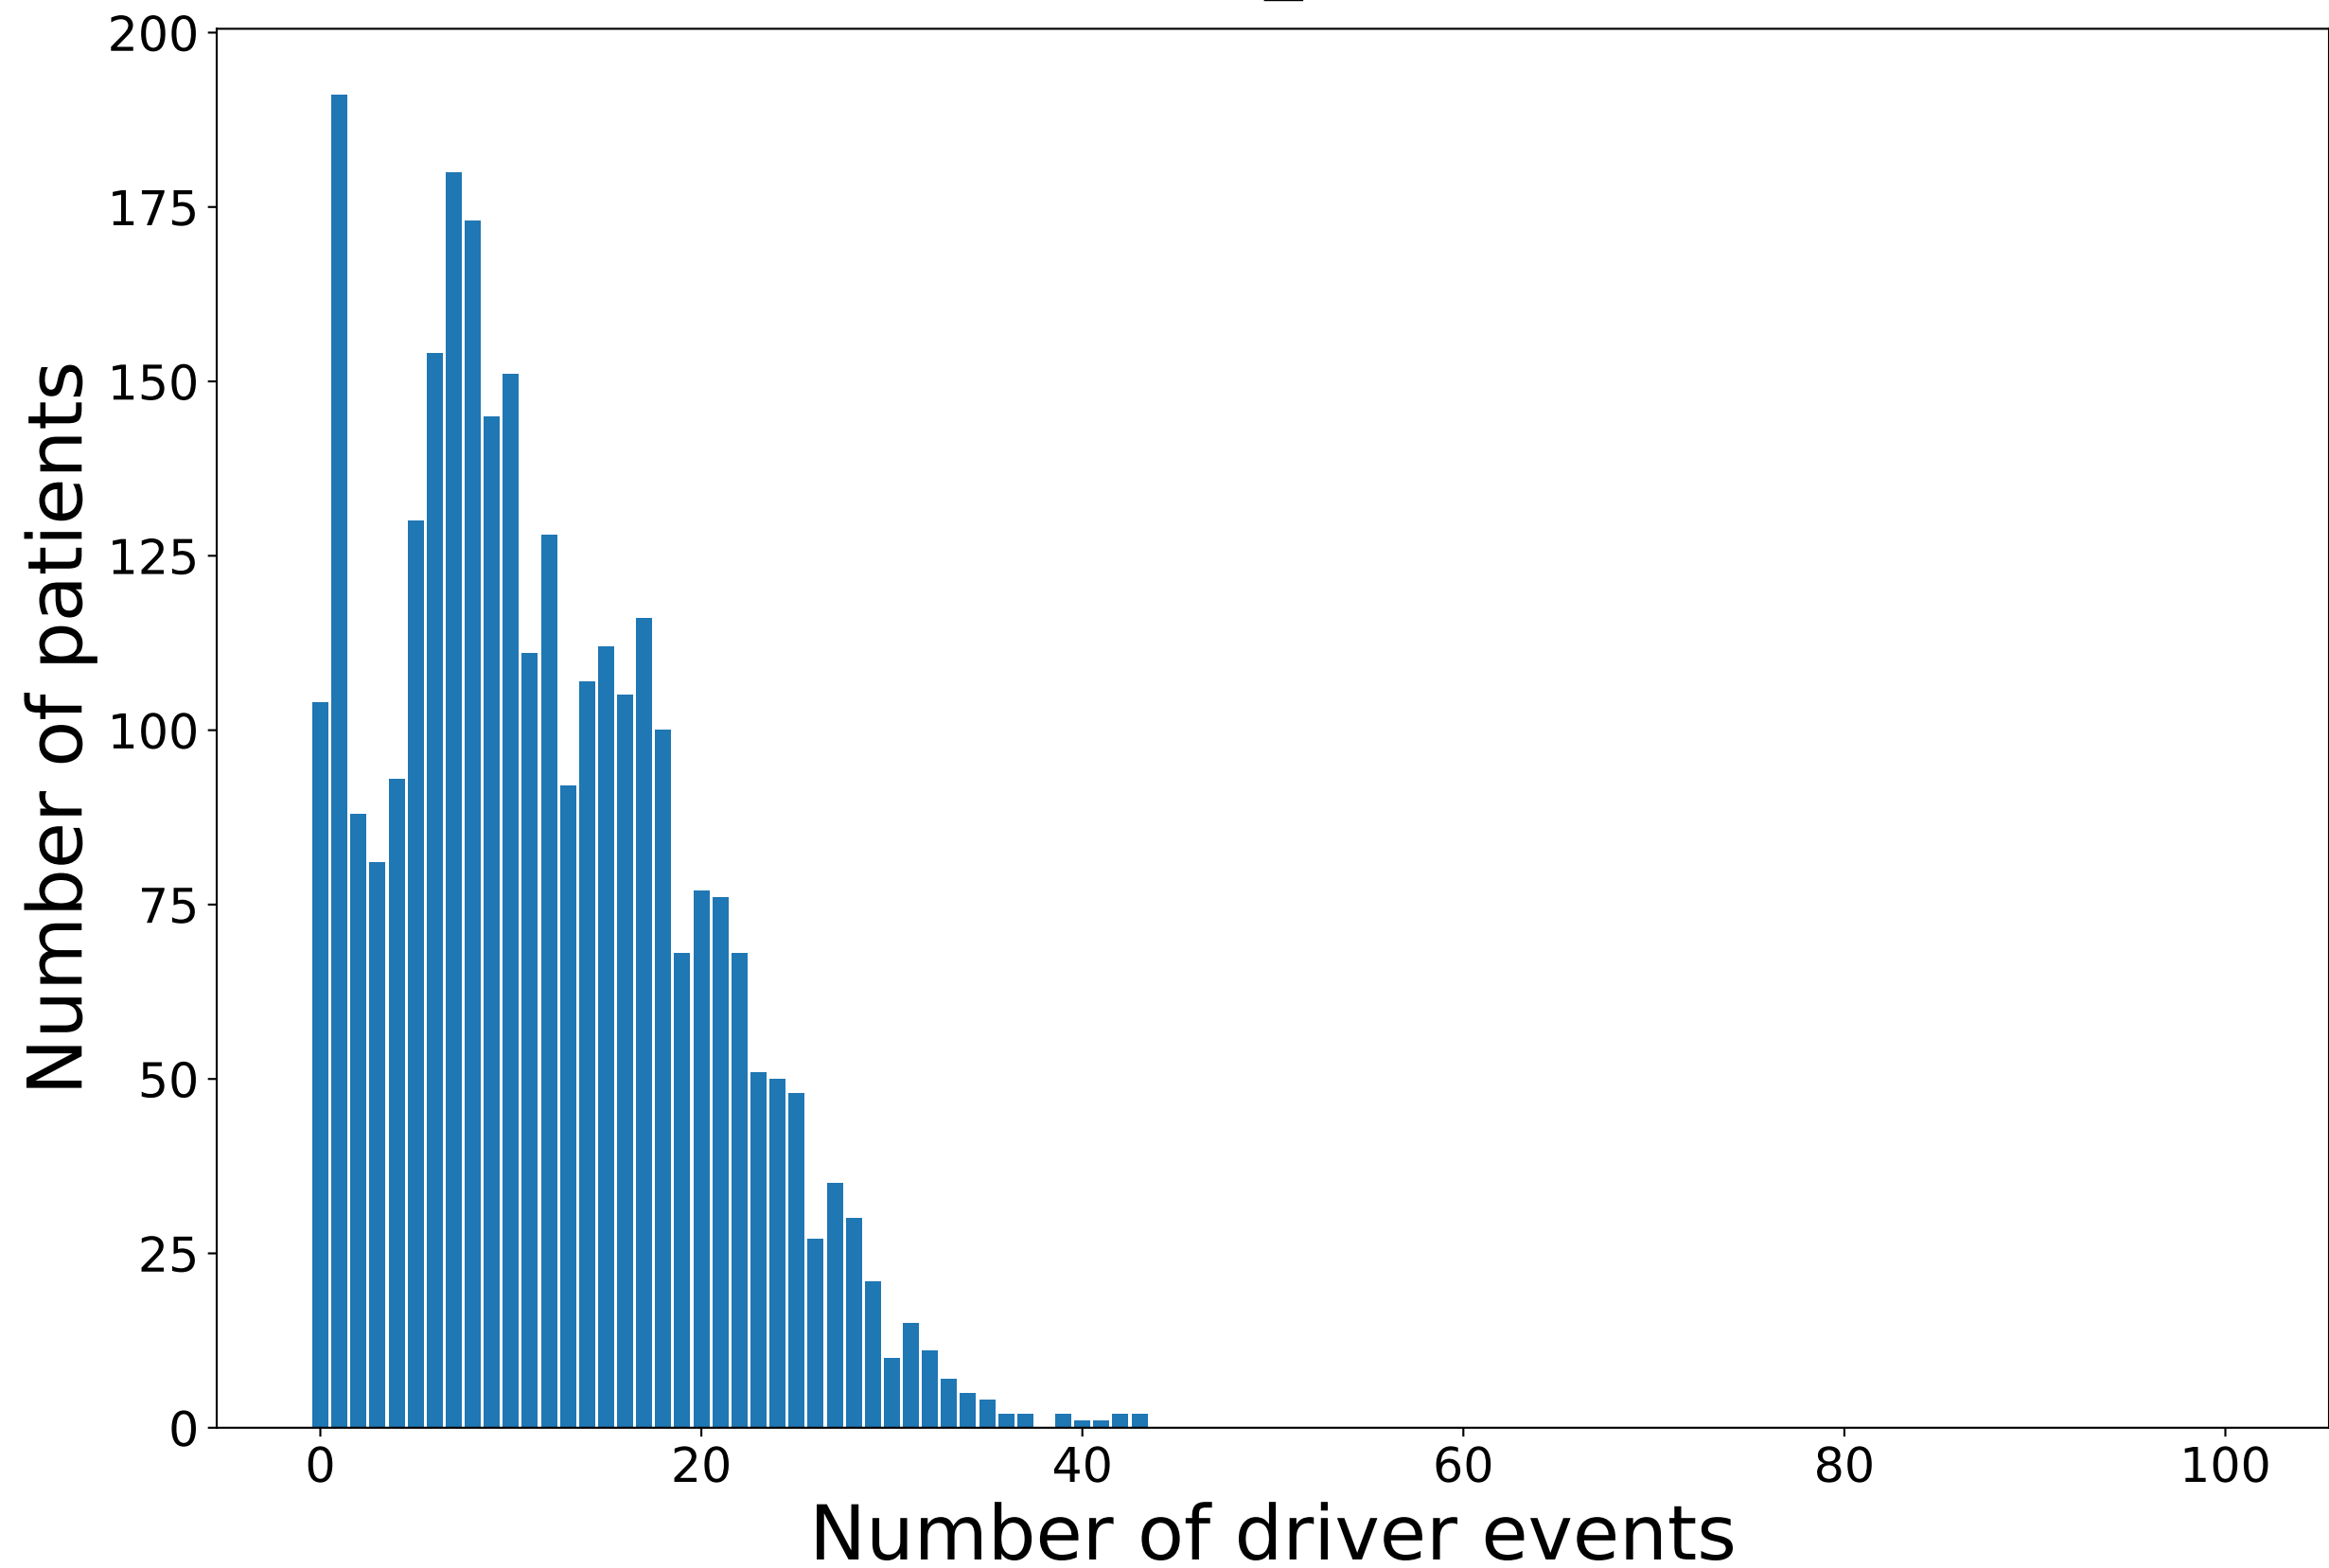

Supplement: Supplemental_Data_S1.zip [file Supplemental_Data_S1.zip]

# LUAD

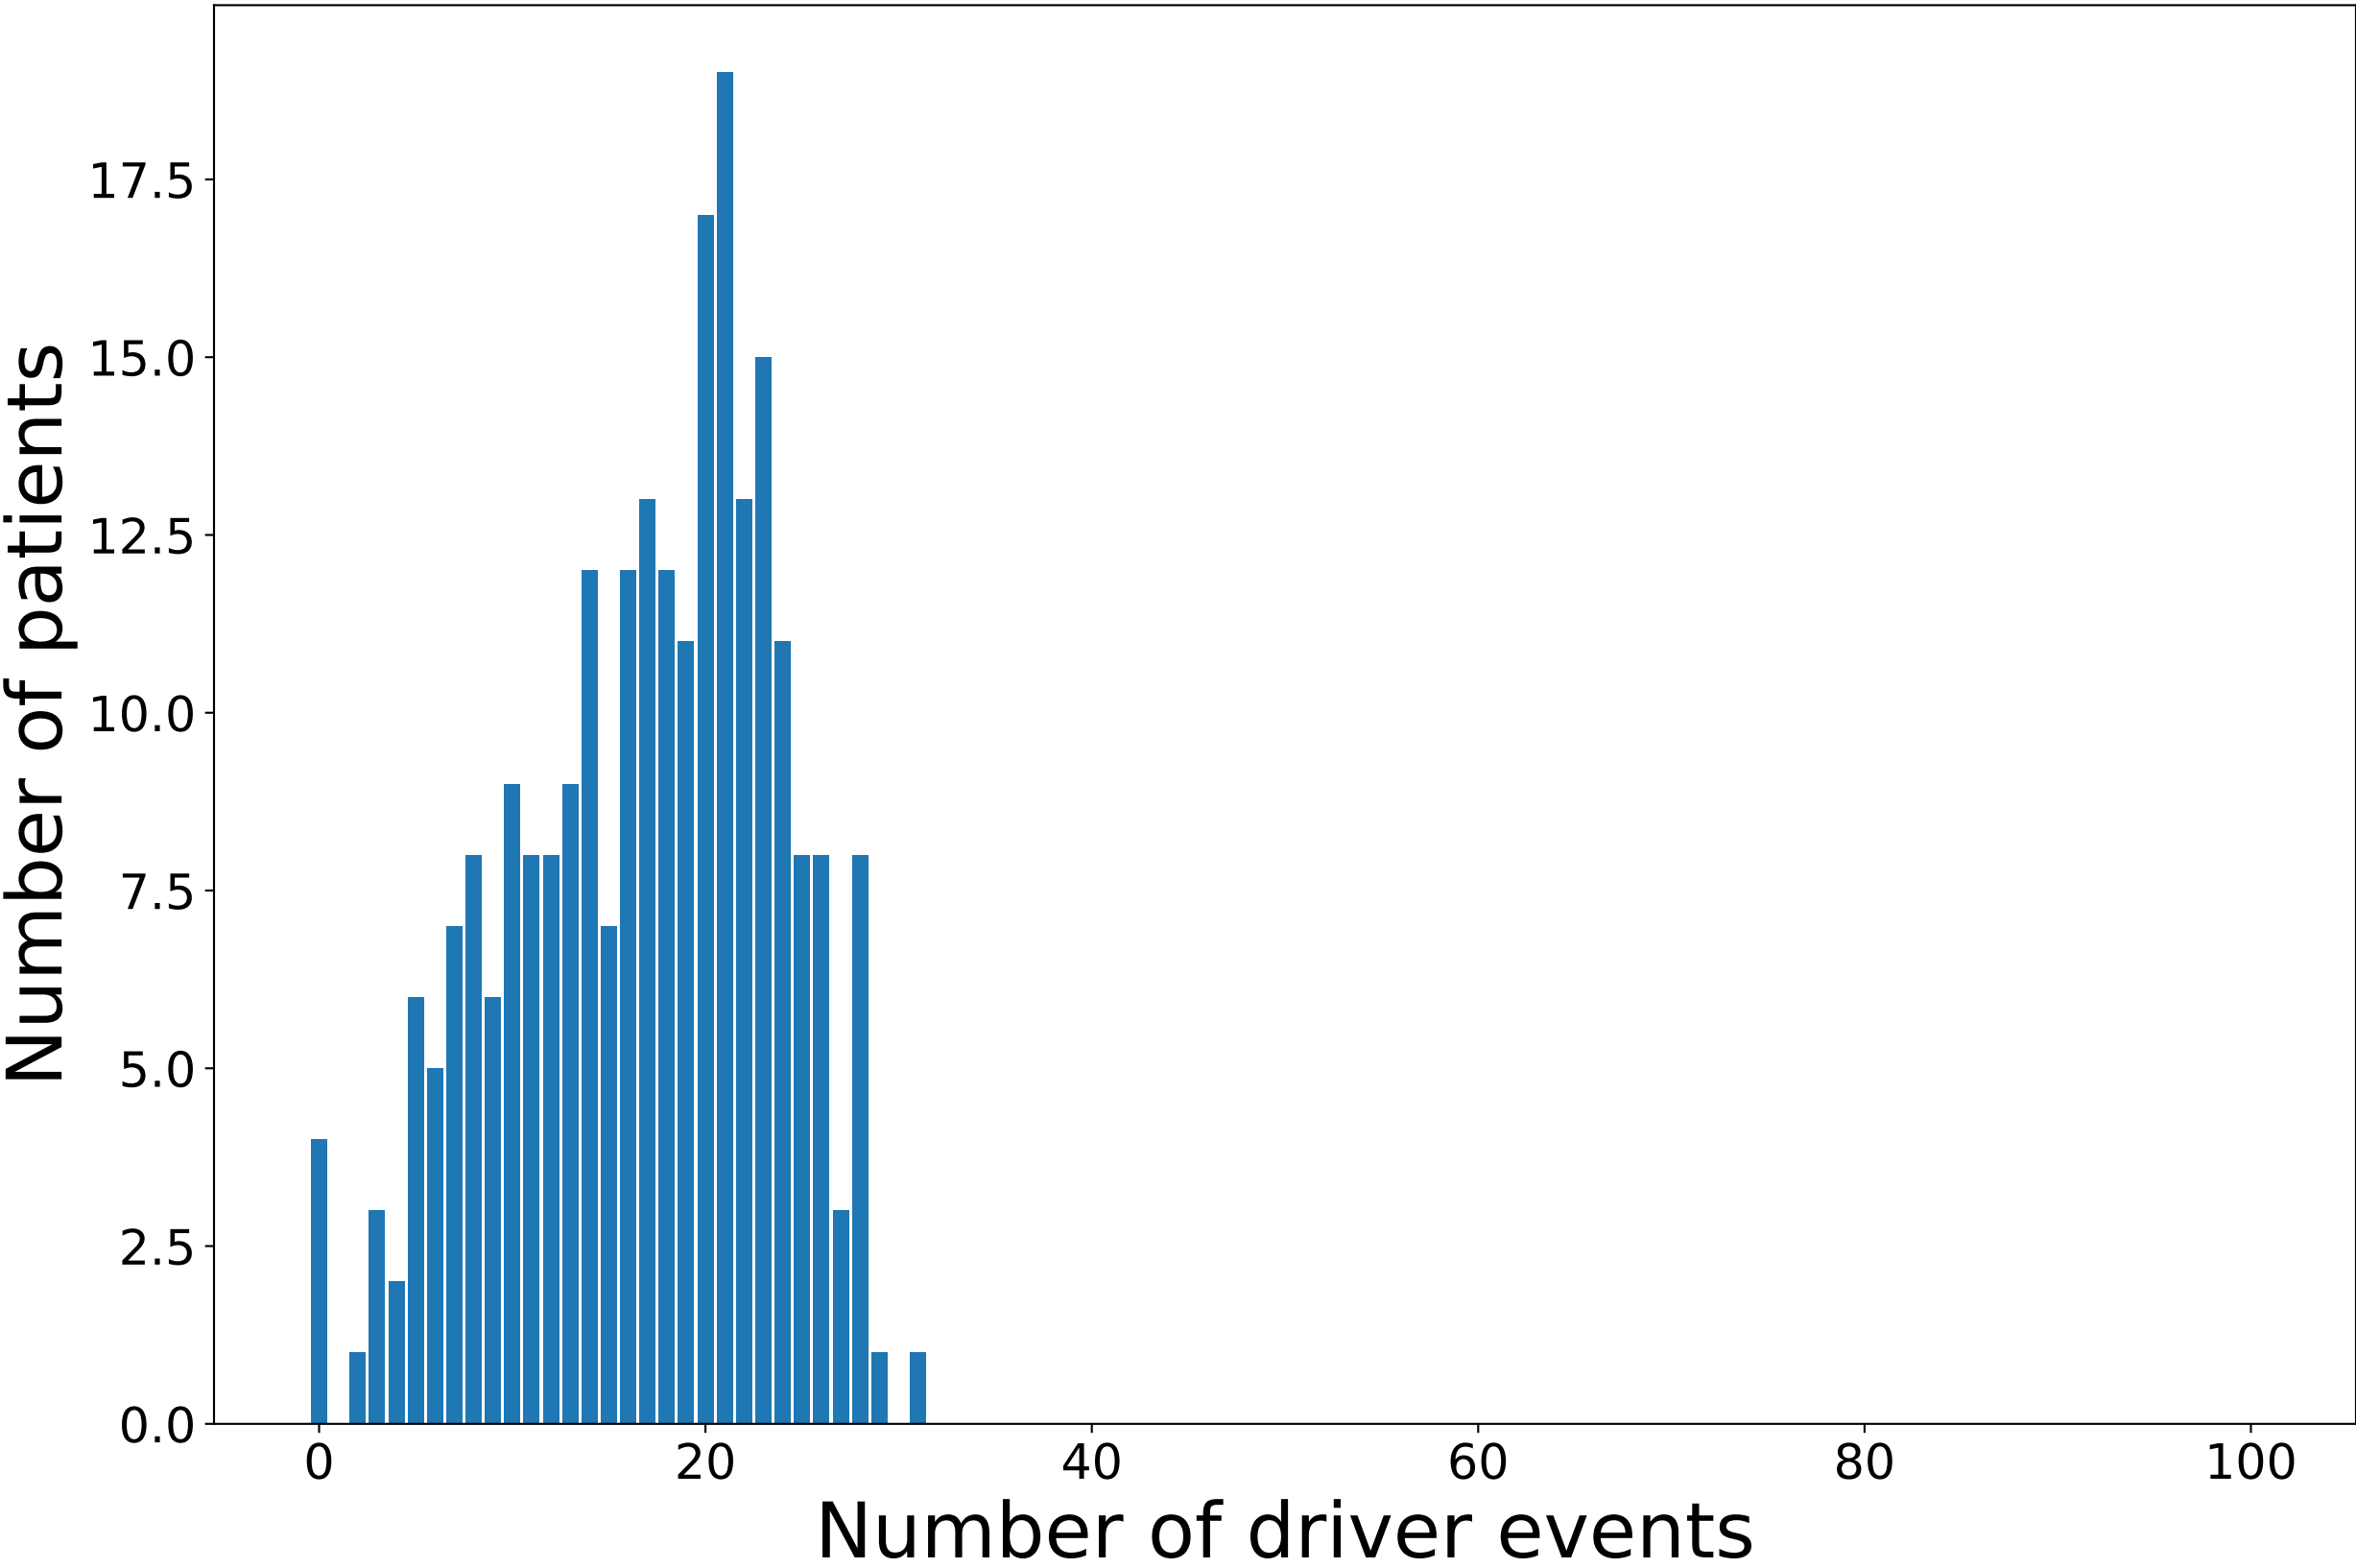

Supplement: Supplemental_Data_S1.zip [file Supplemental_Data_S1.zip]

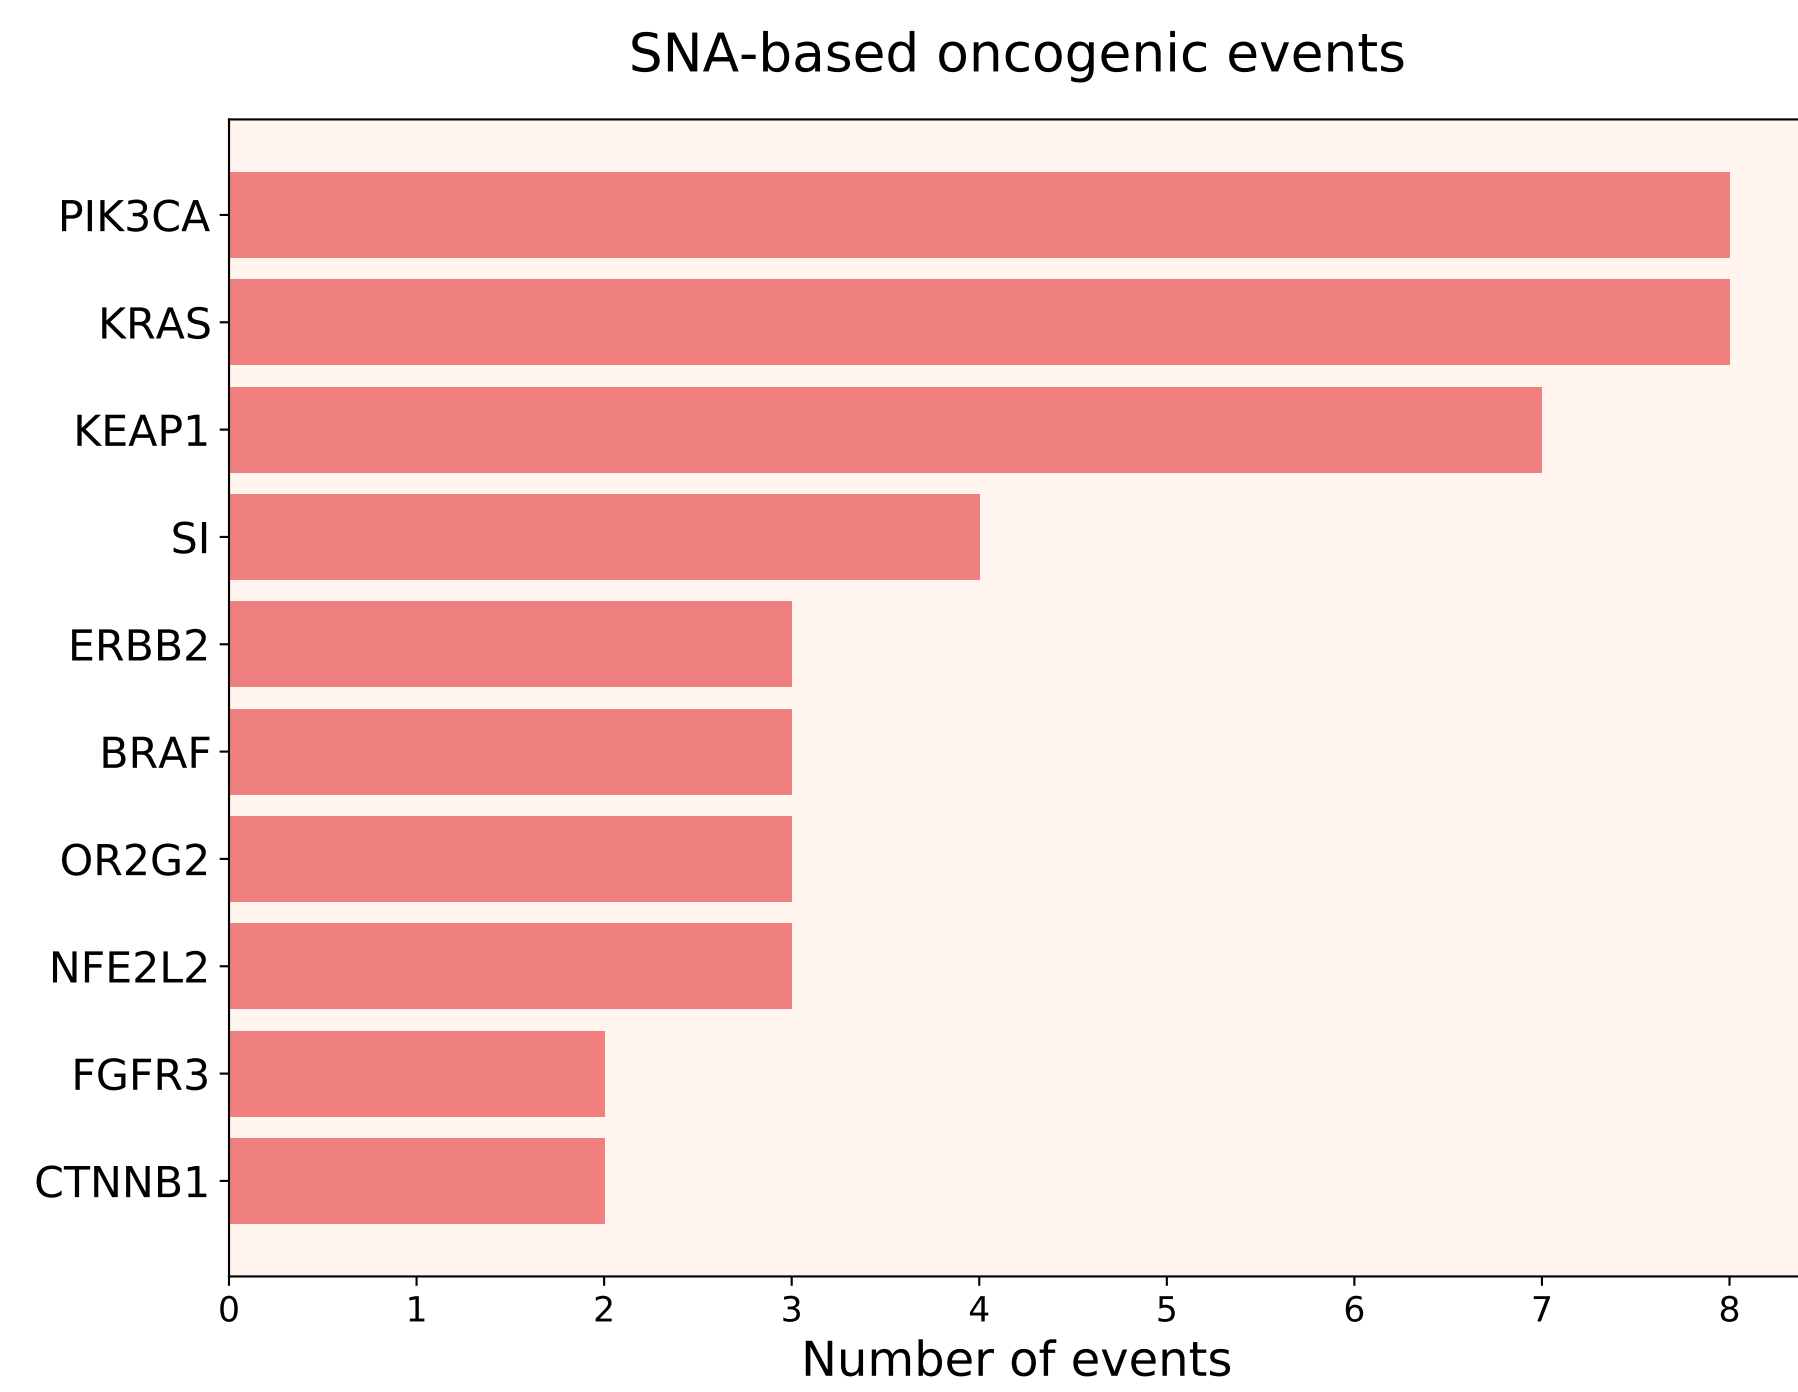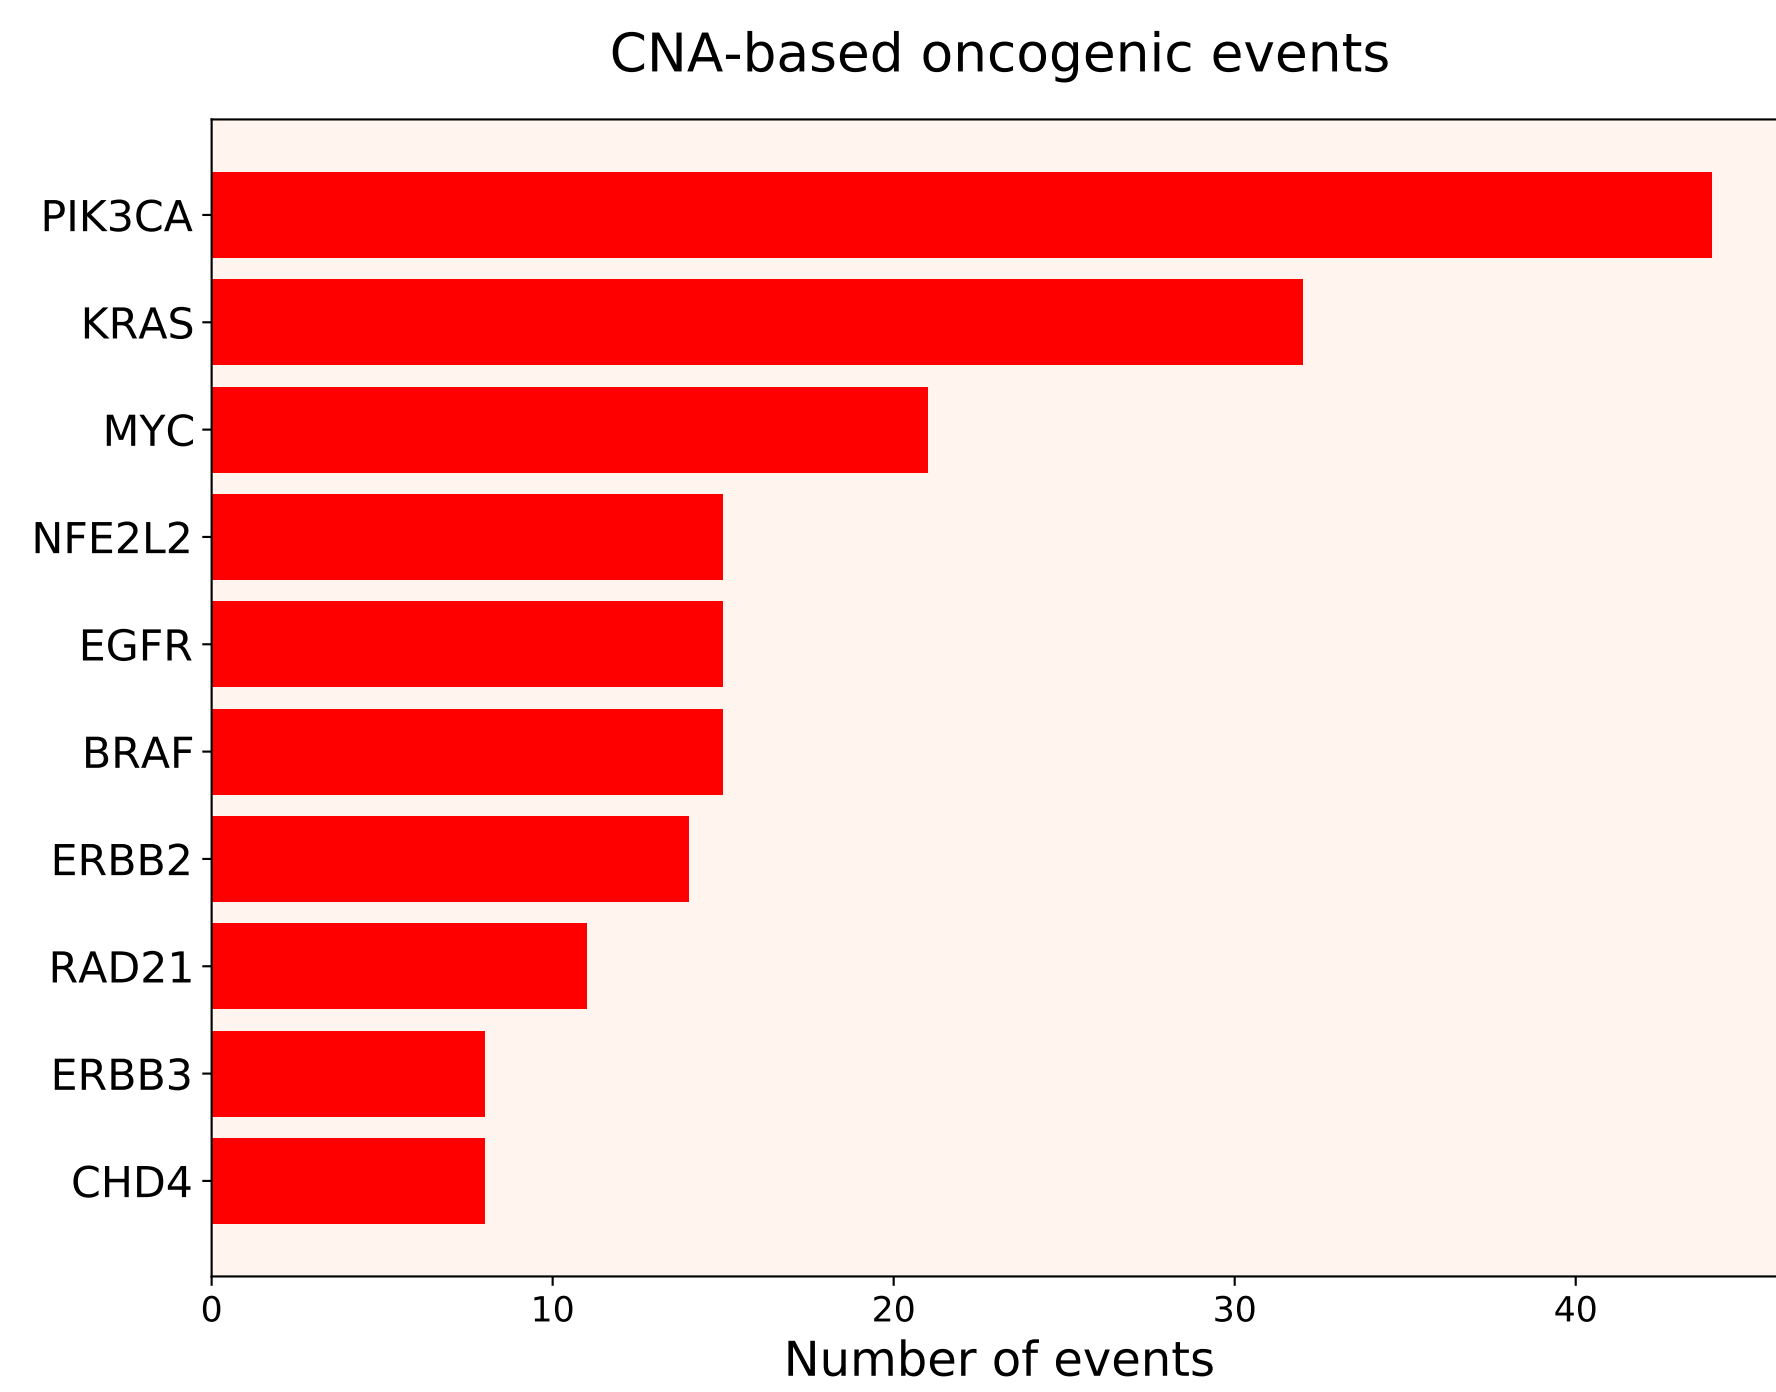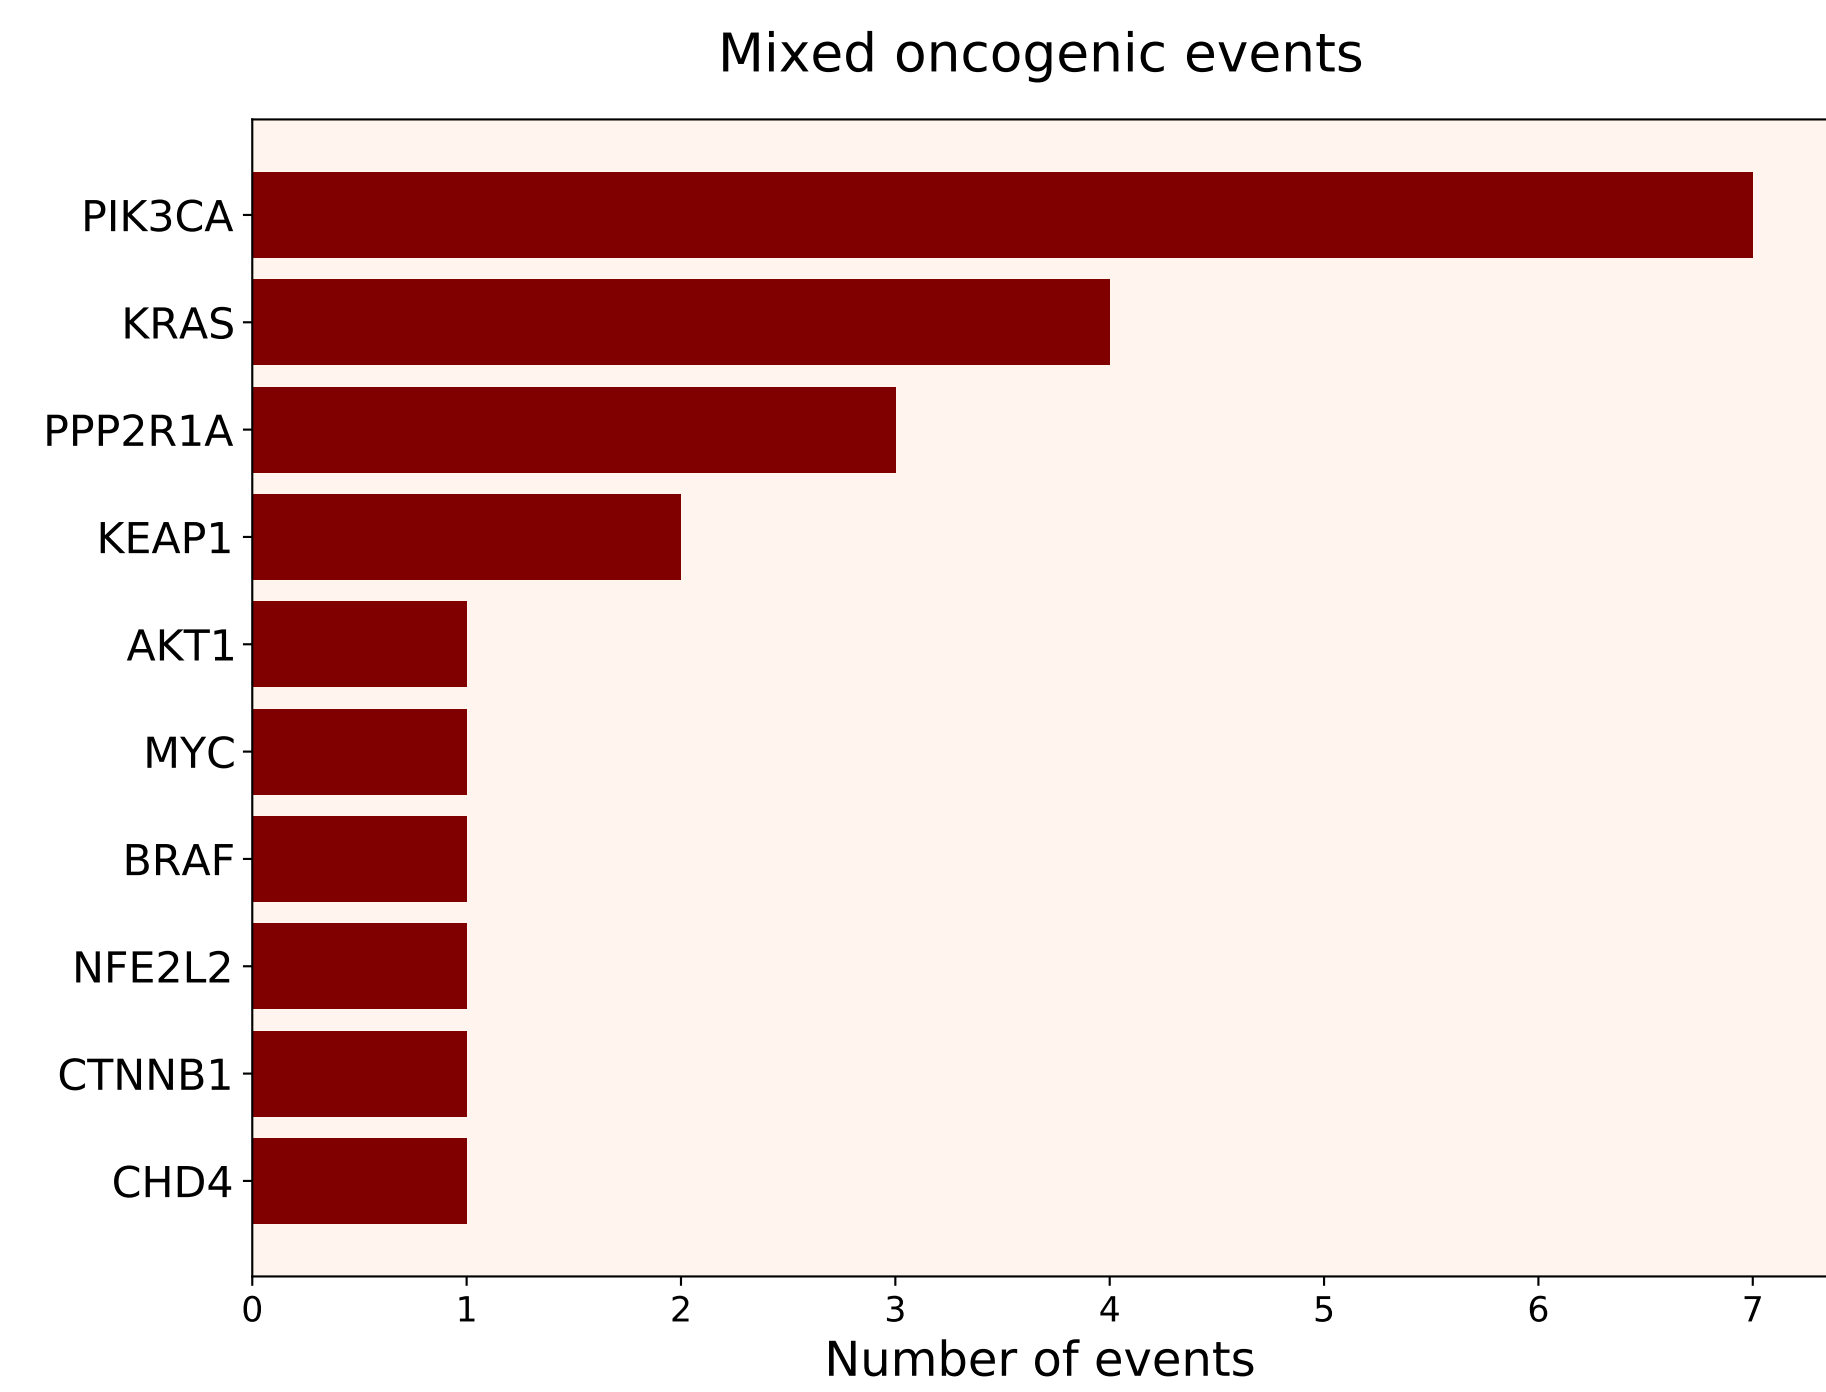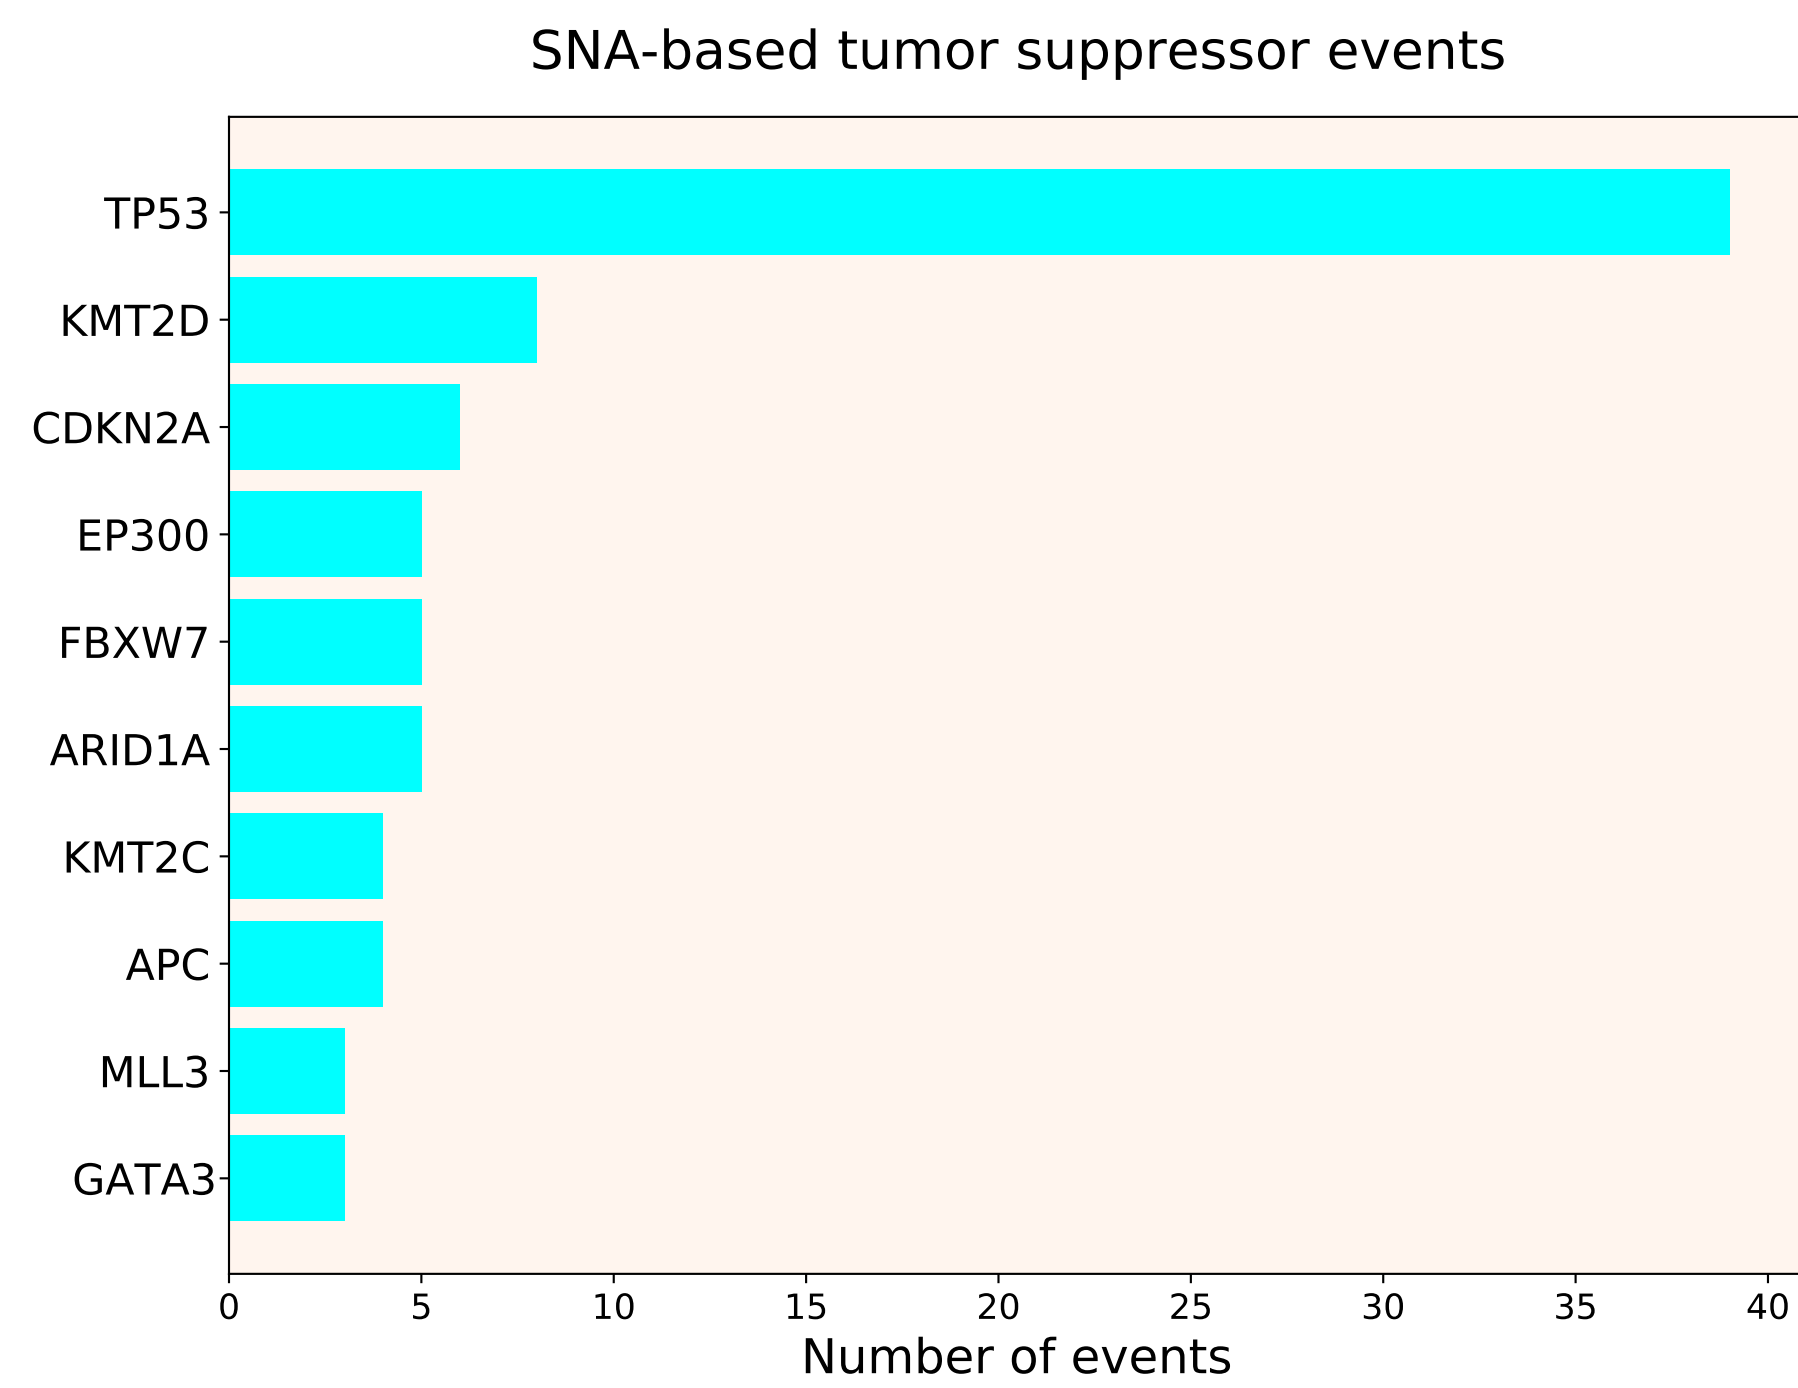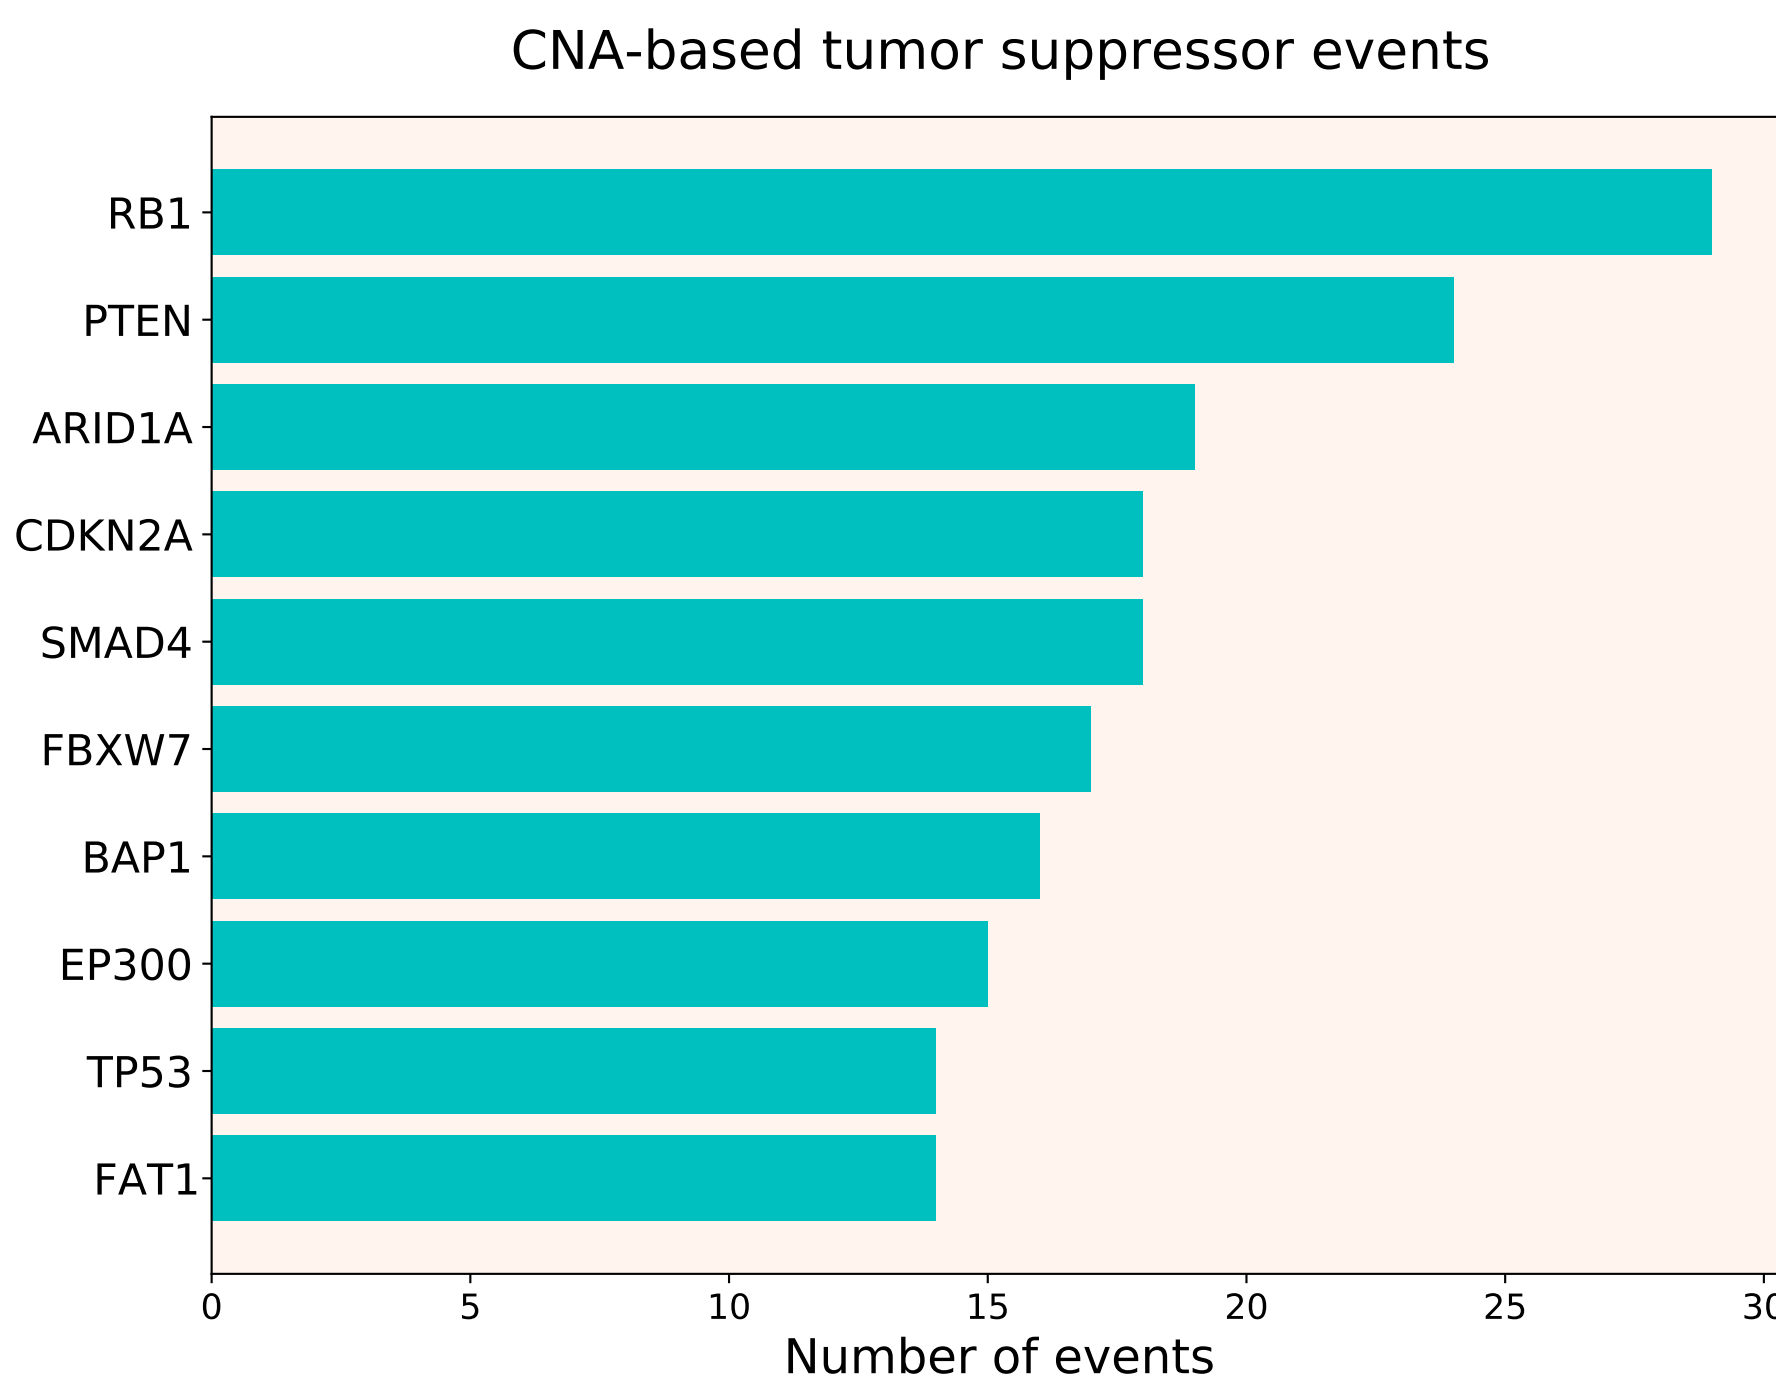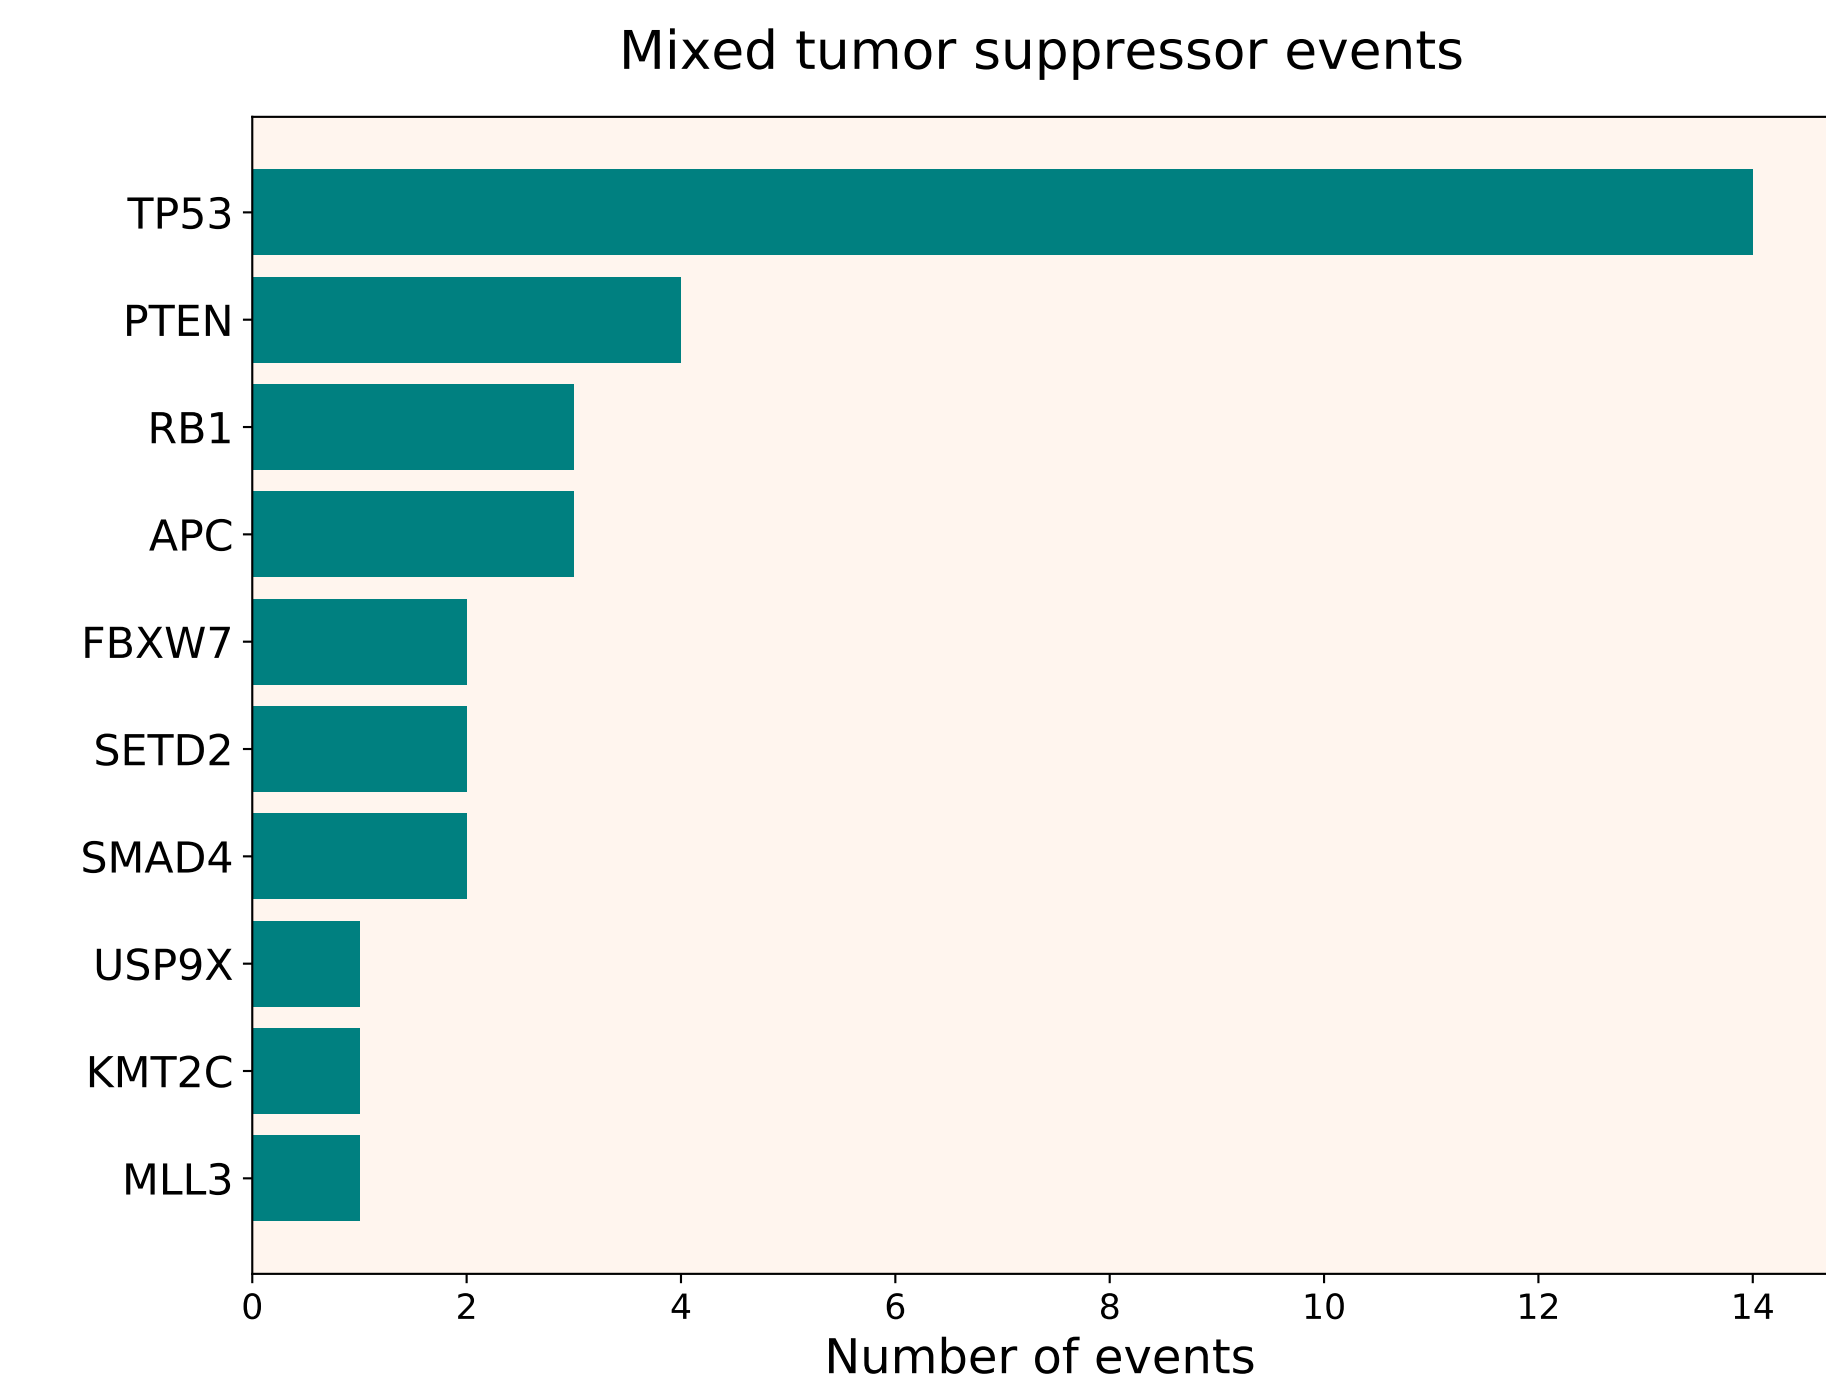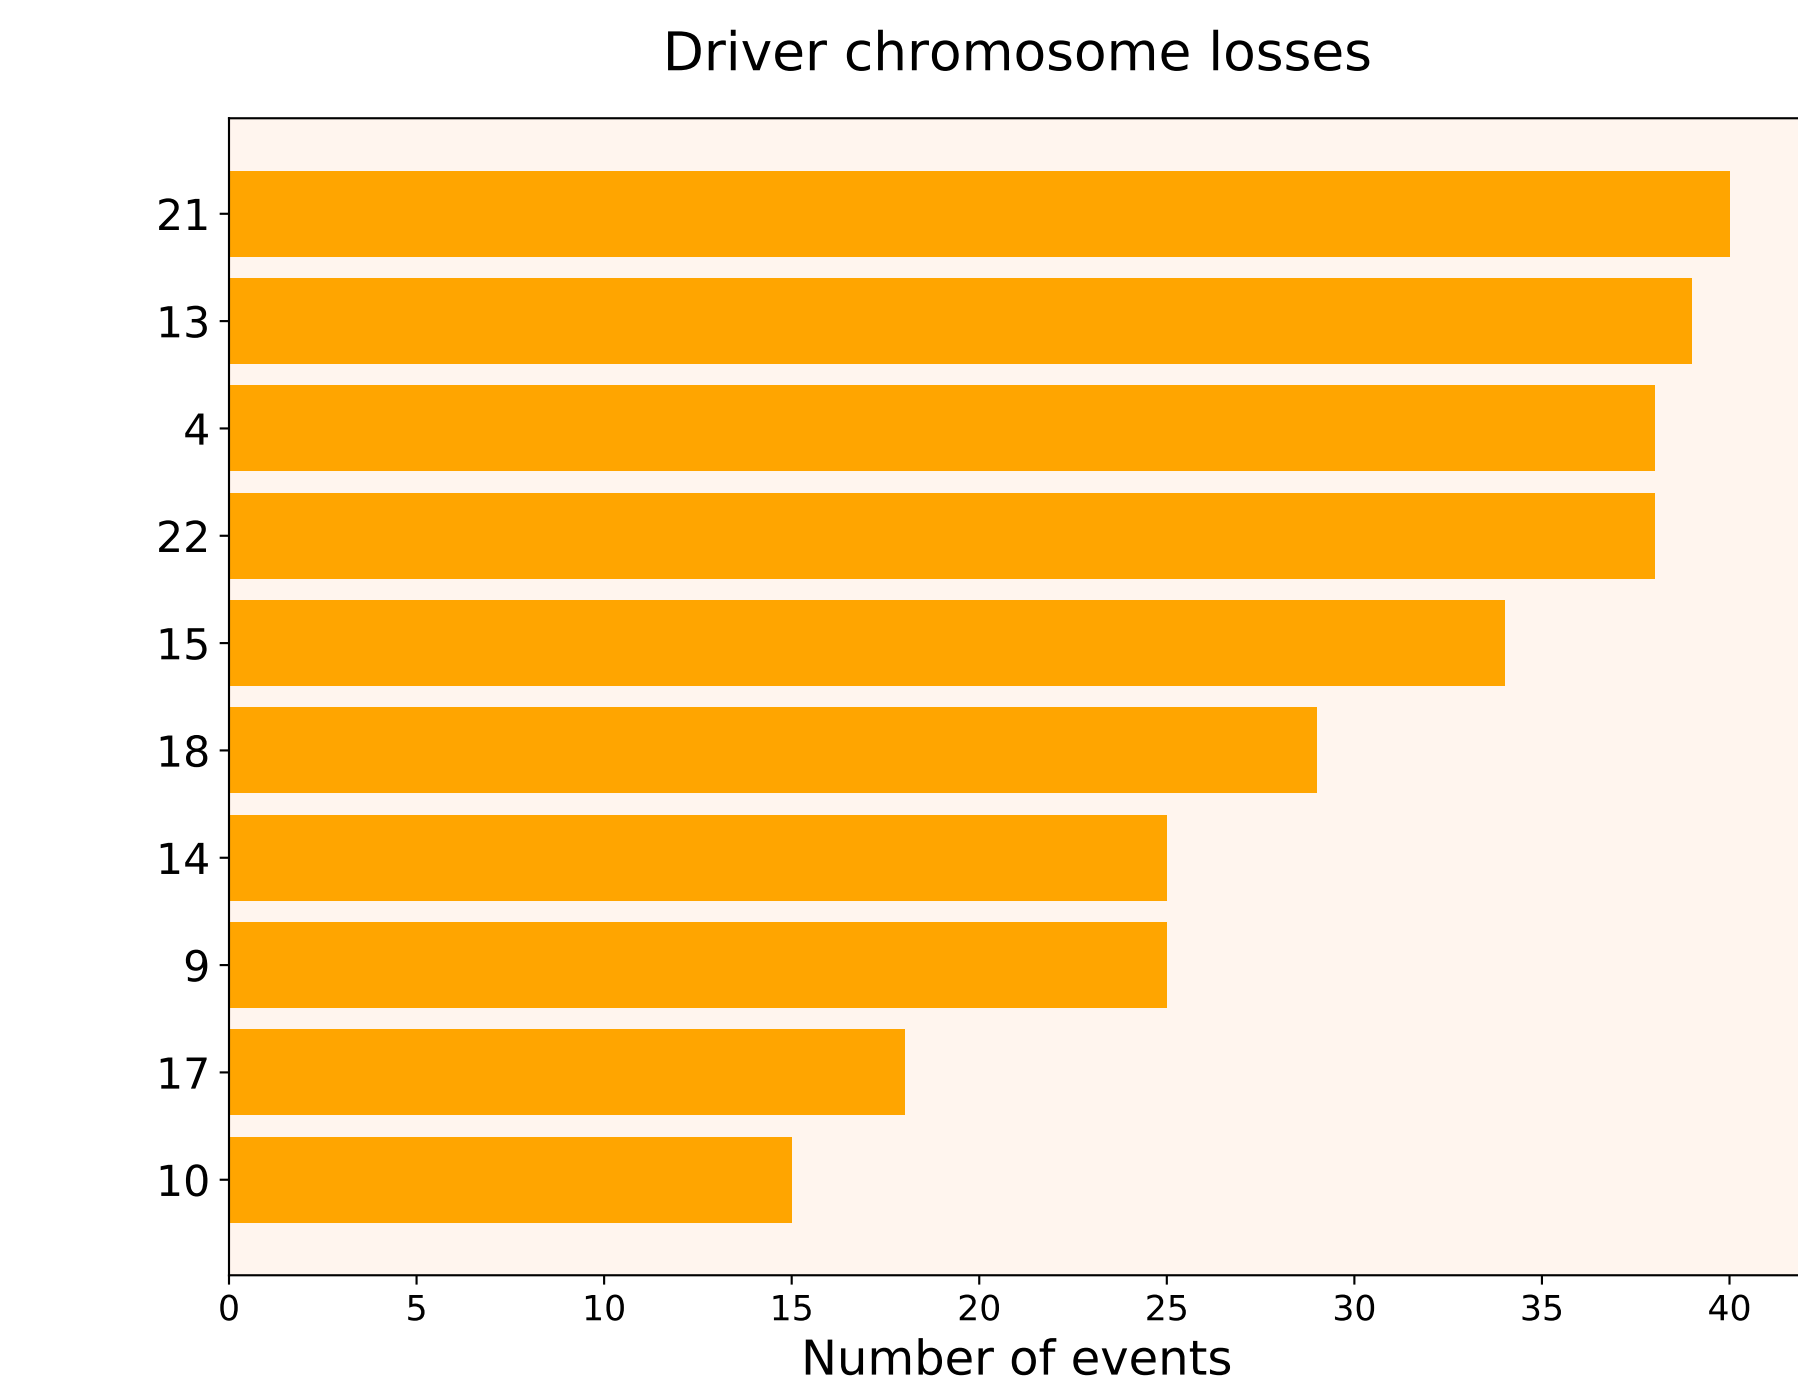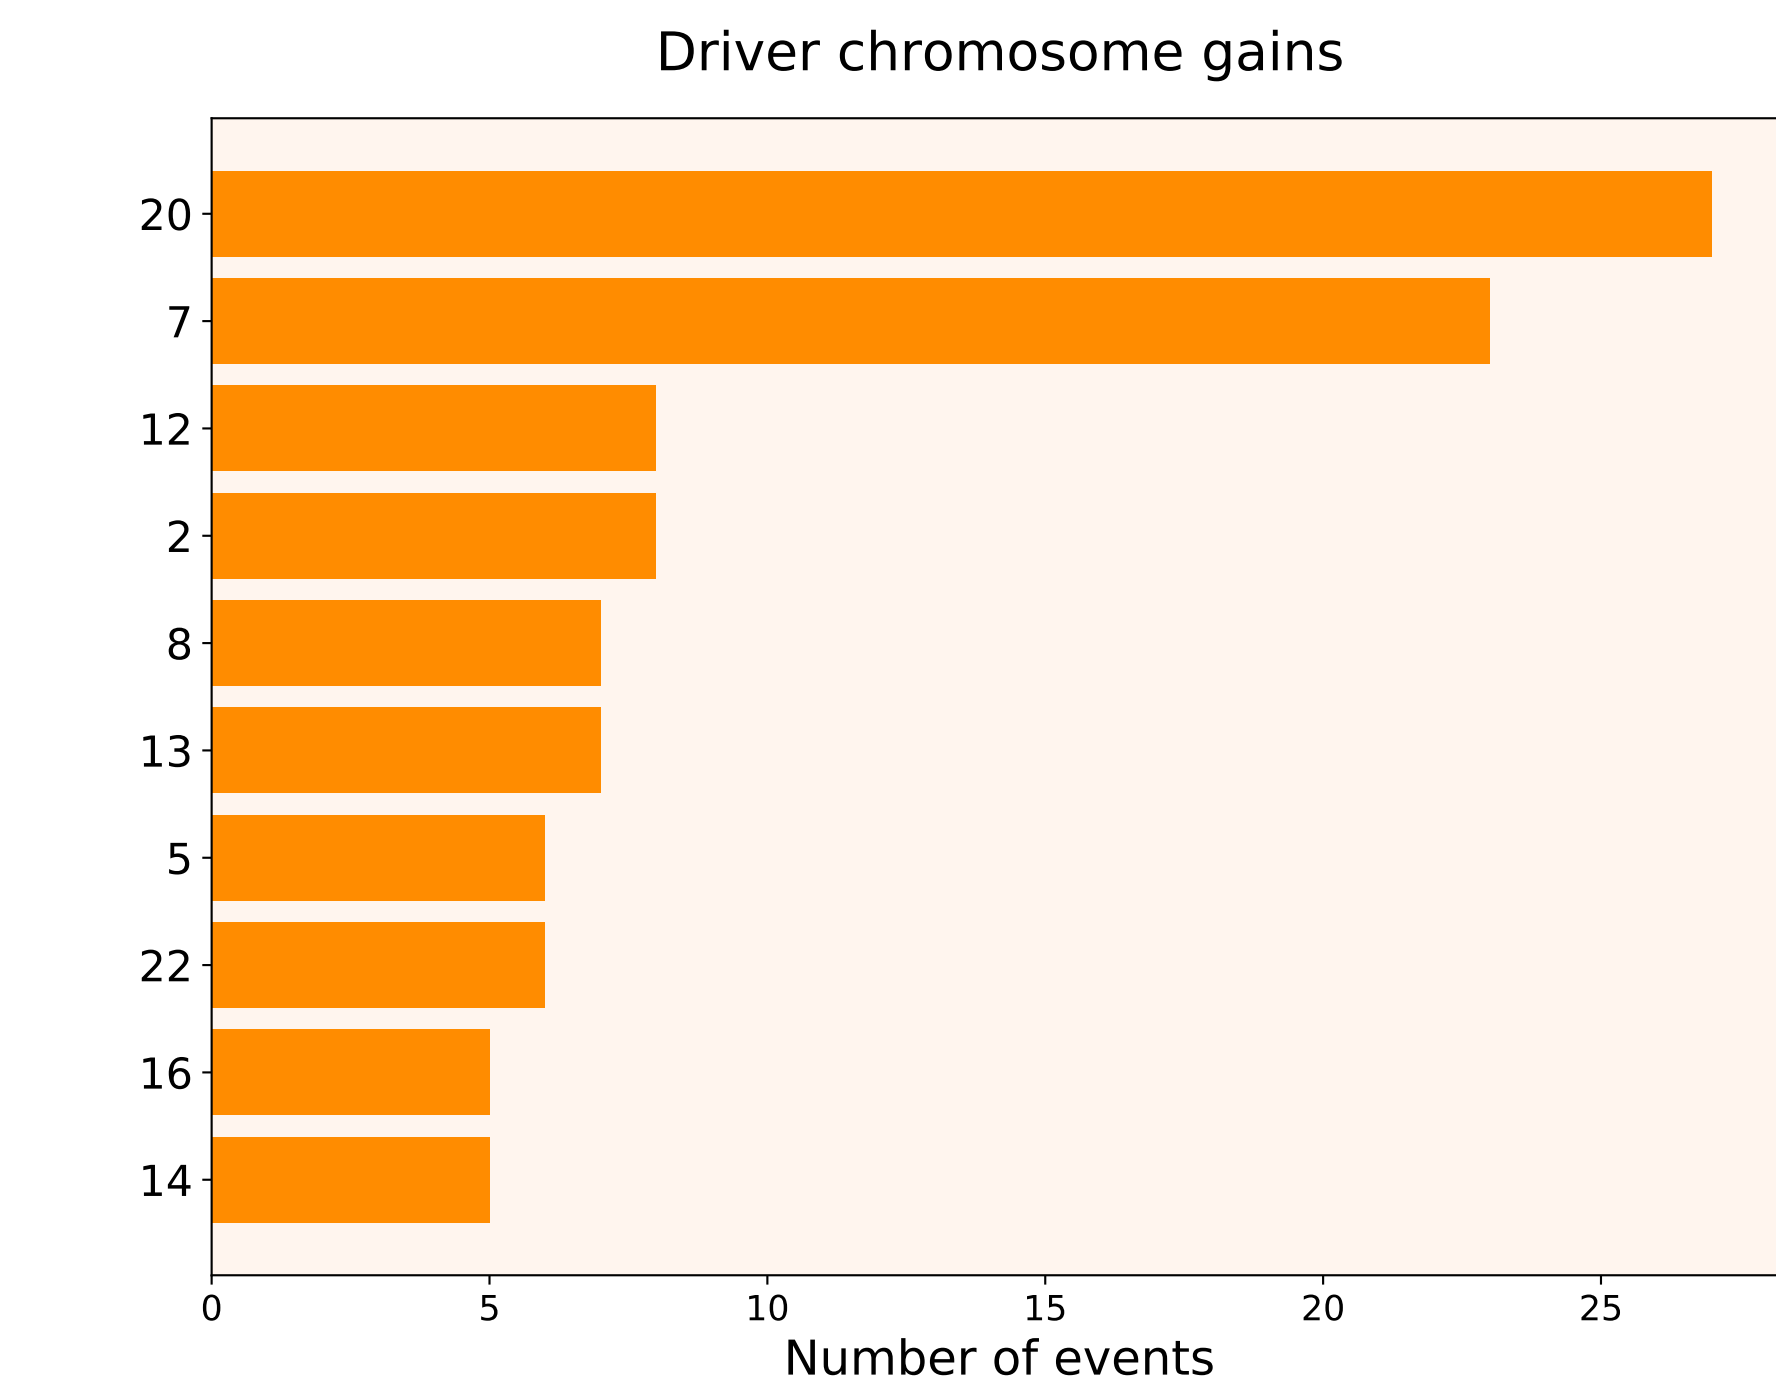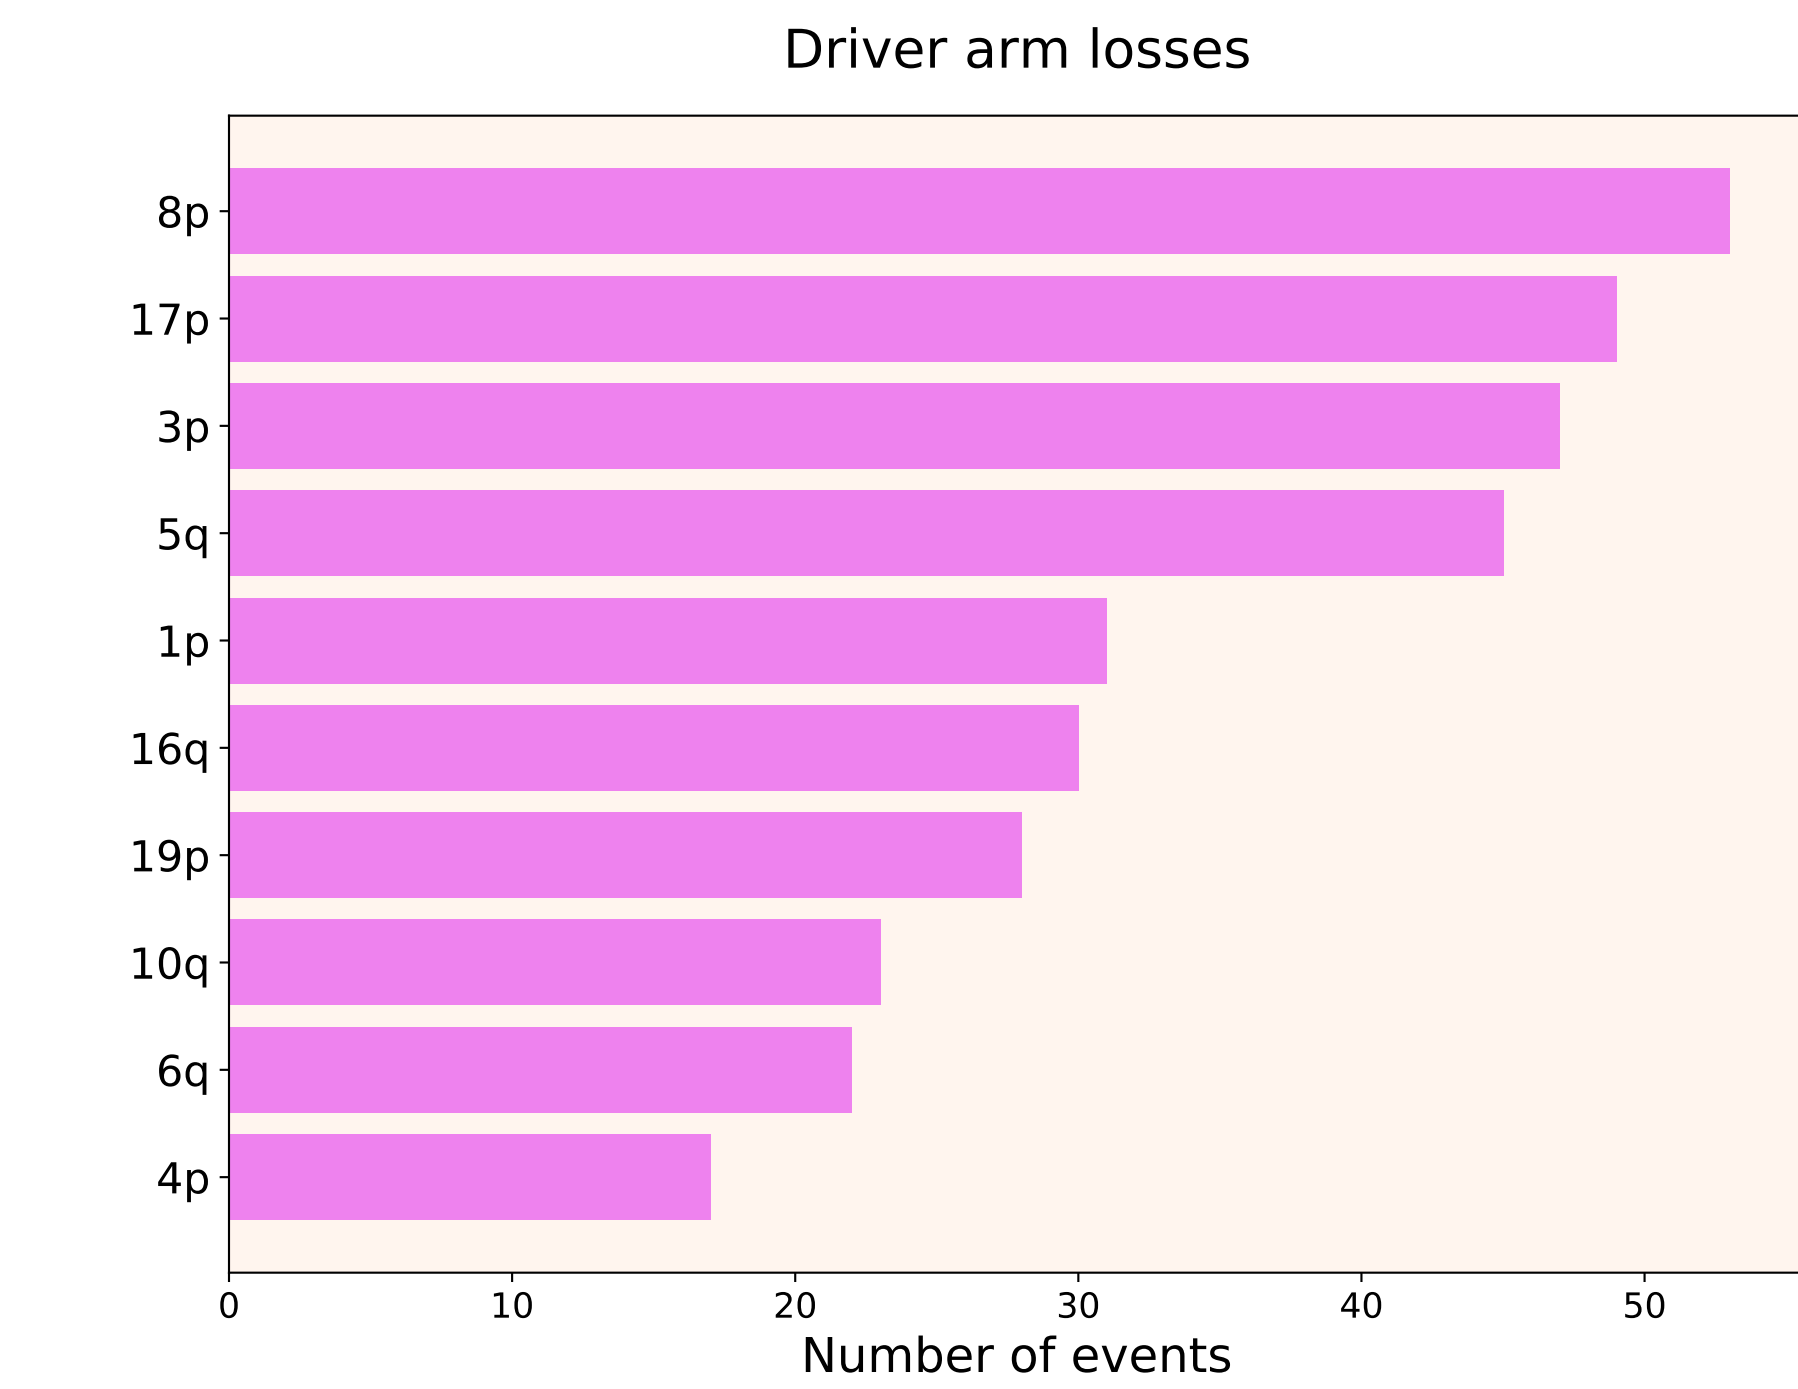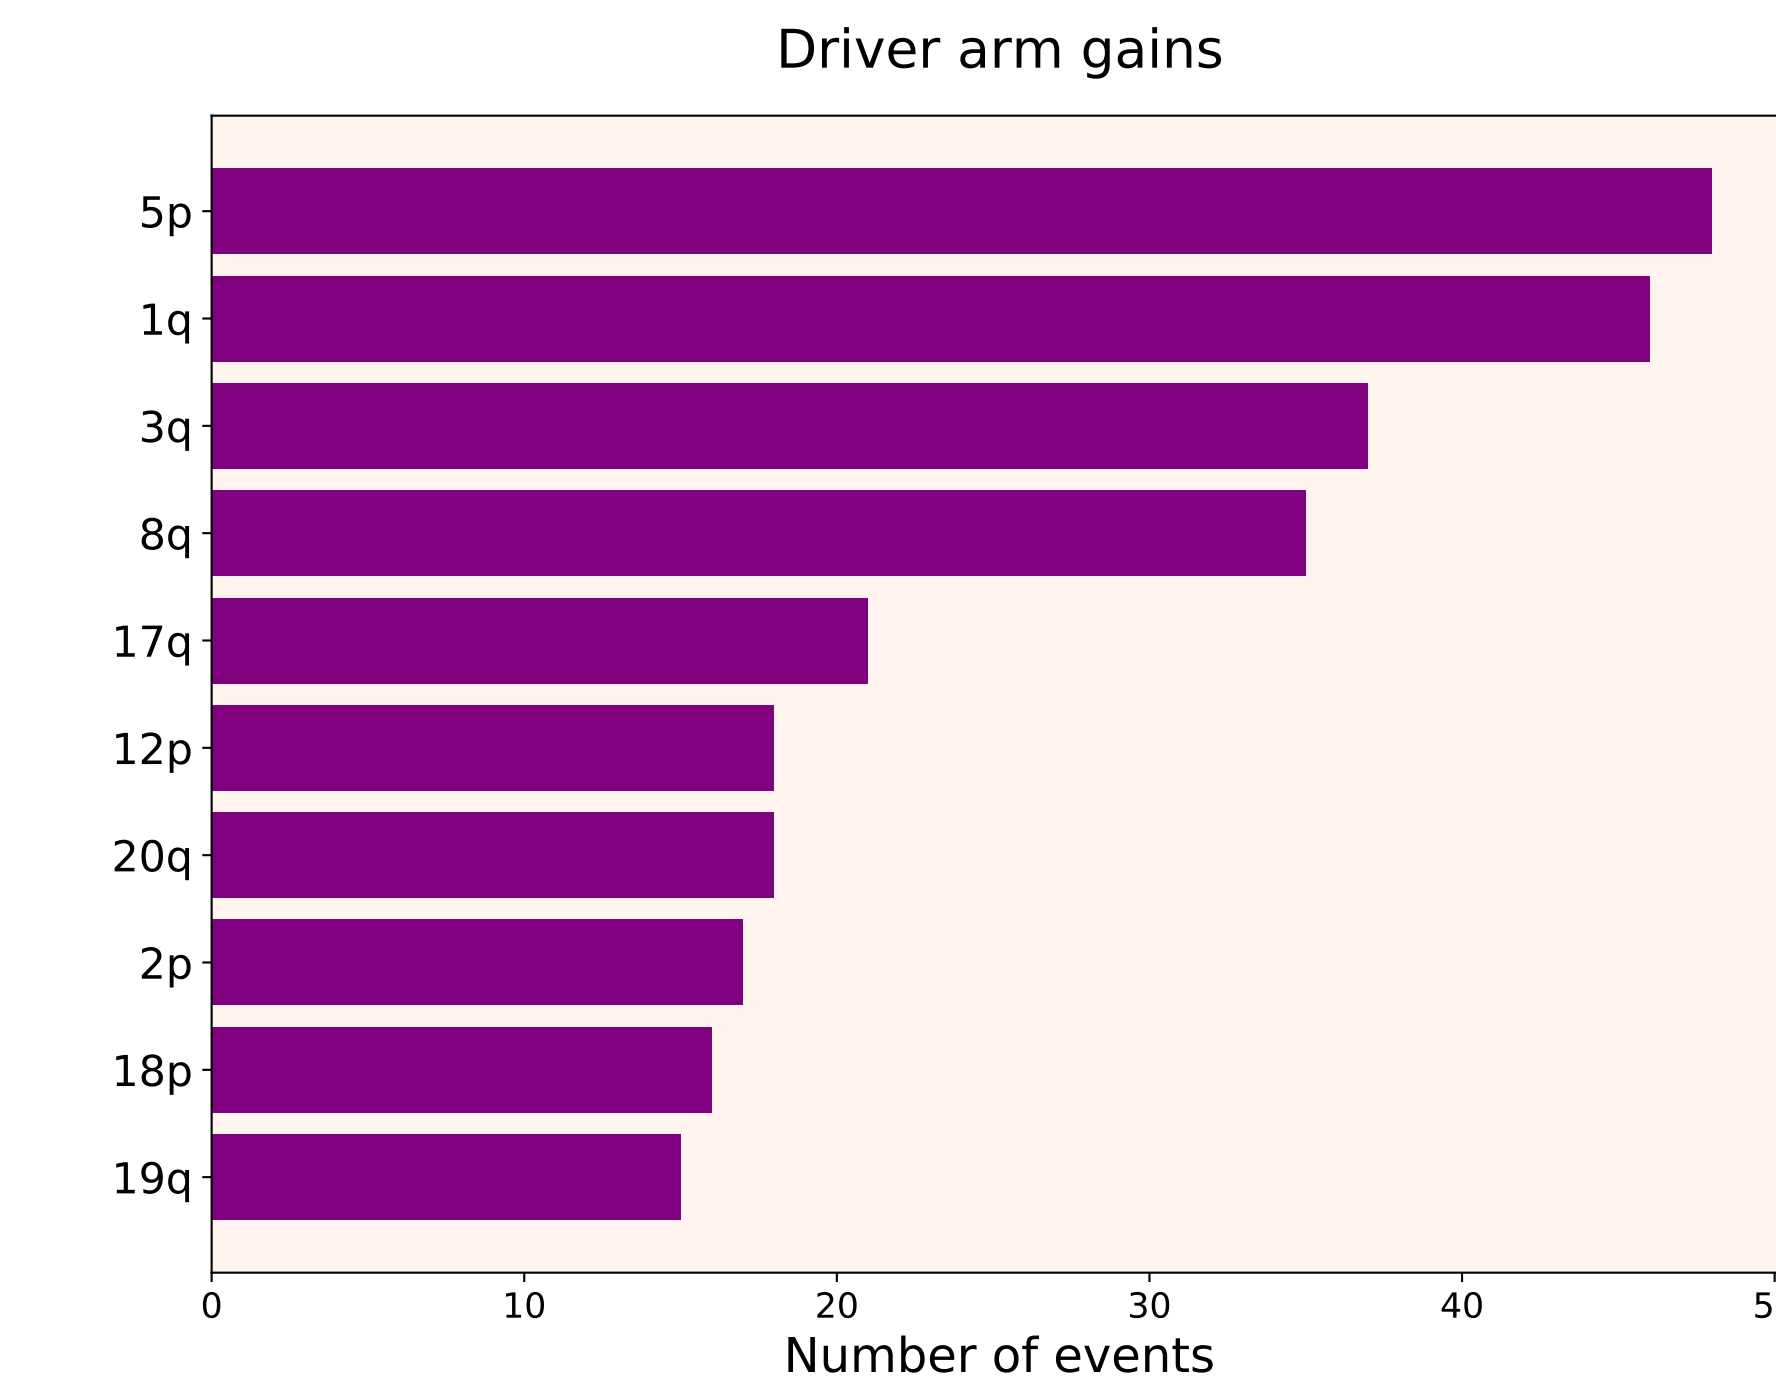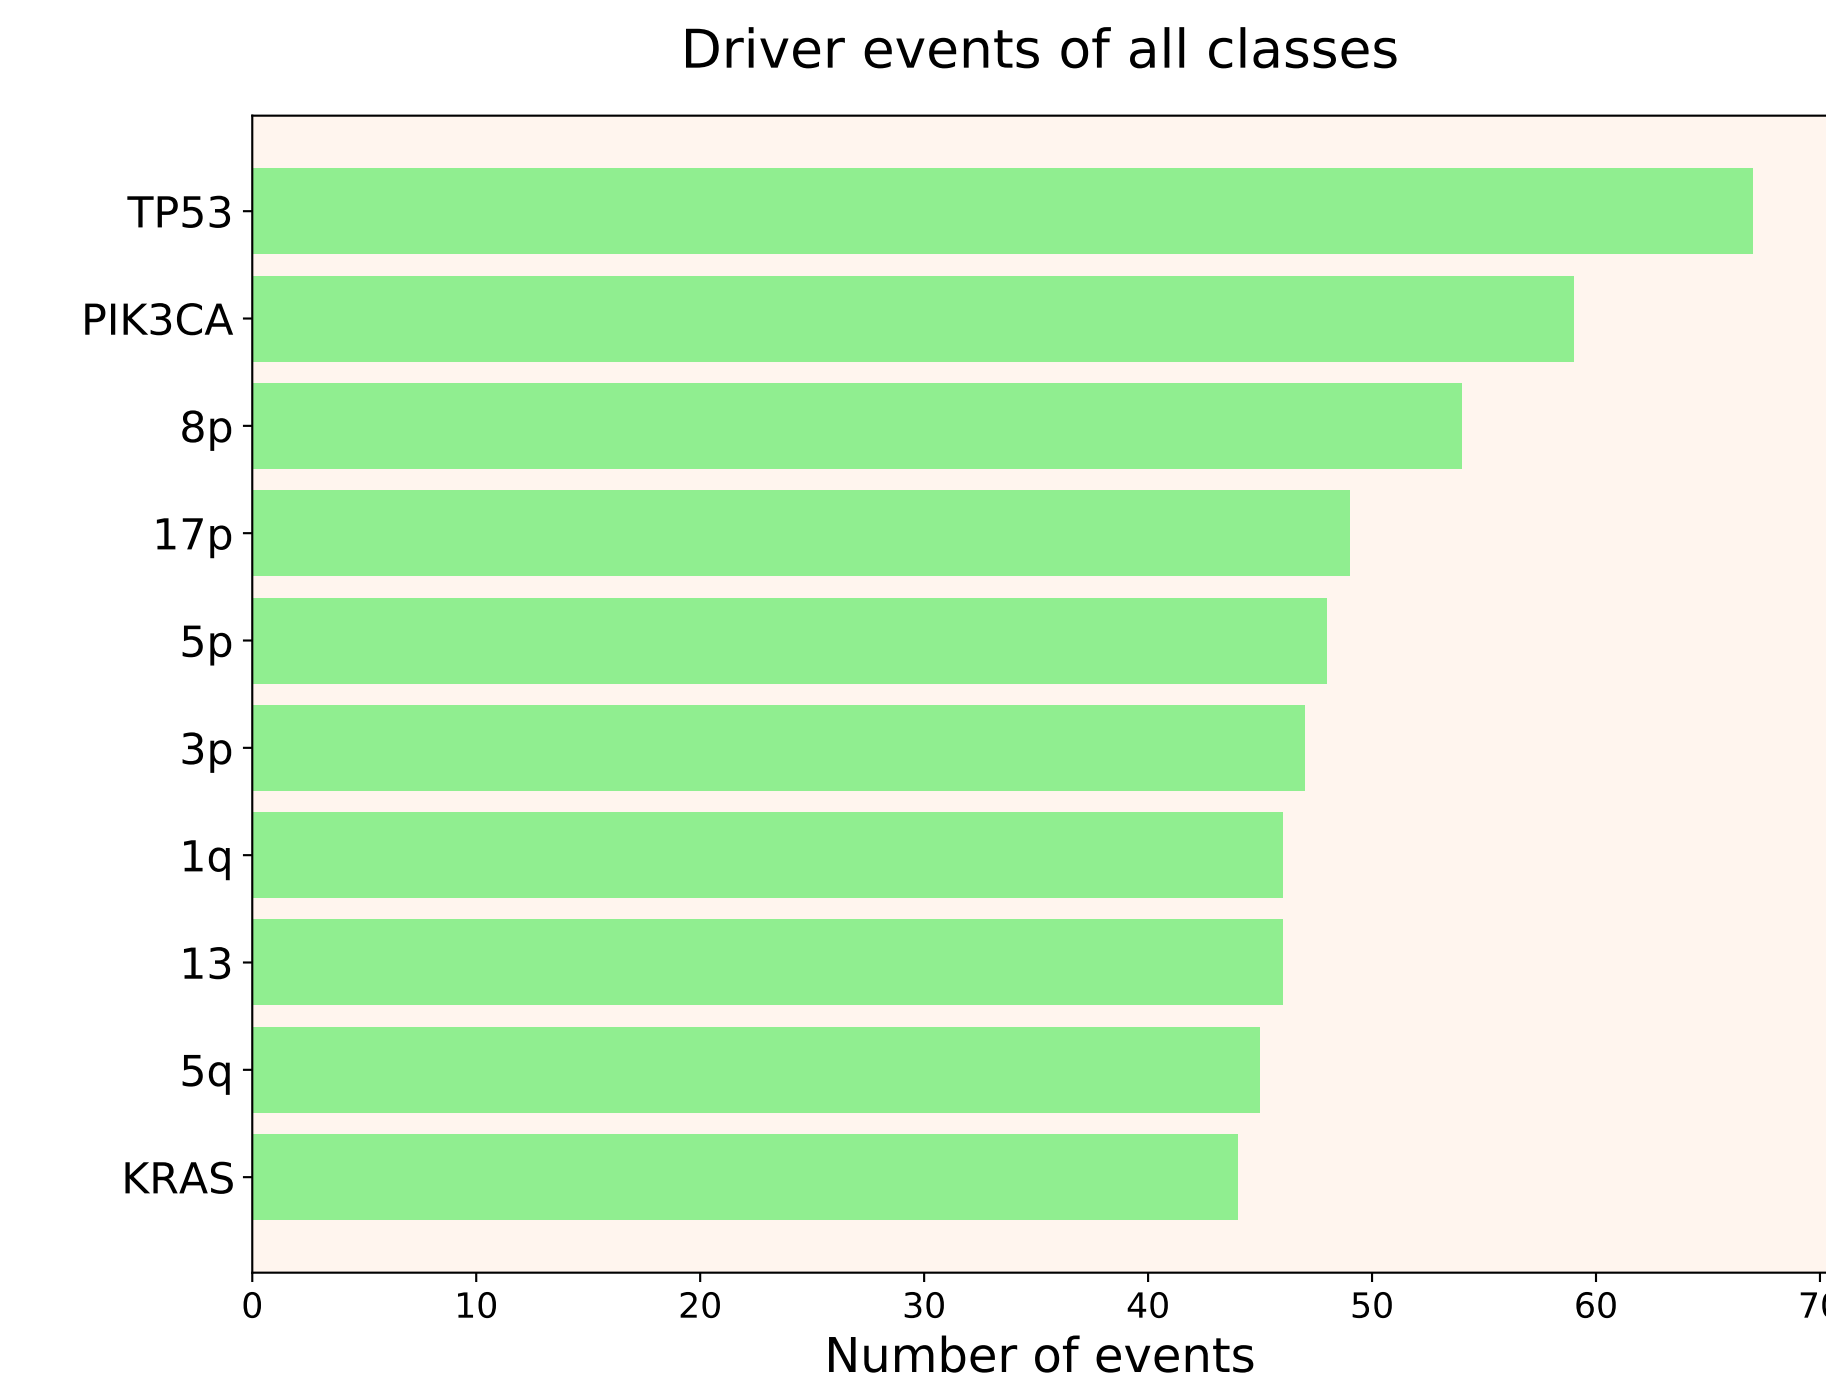

Supplement: Supplemental_Data_S1.zip [file Supplemental_Data_S1.zip]

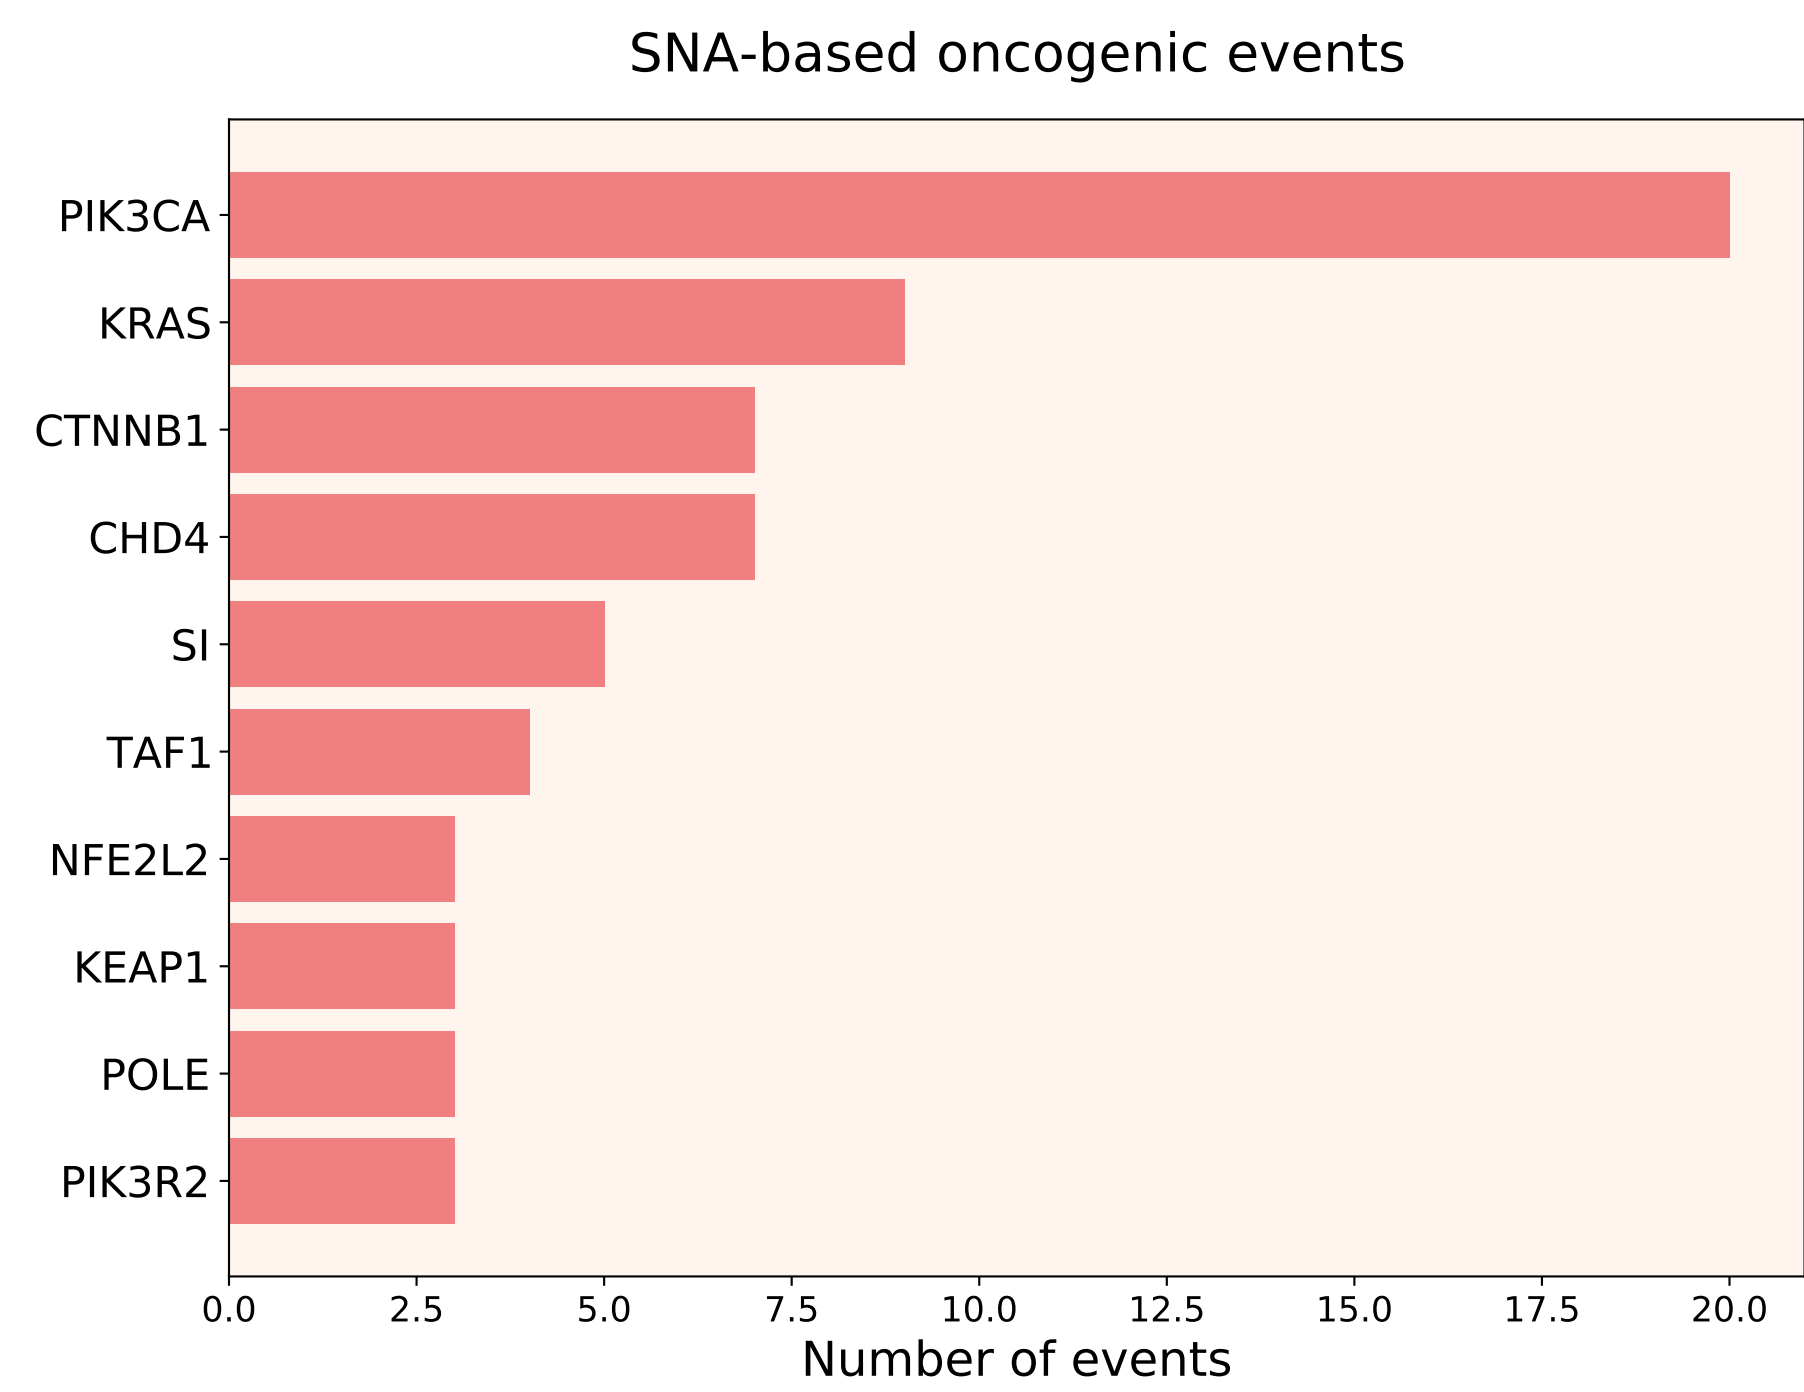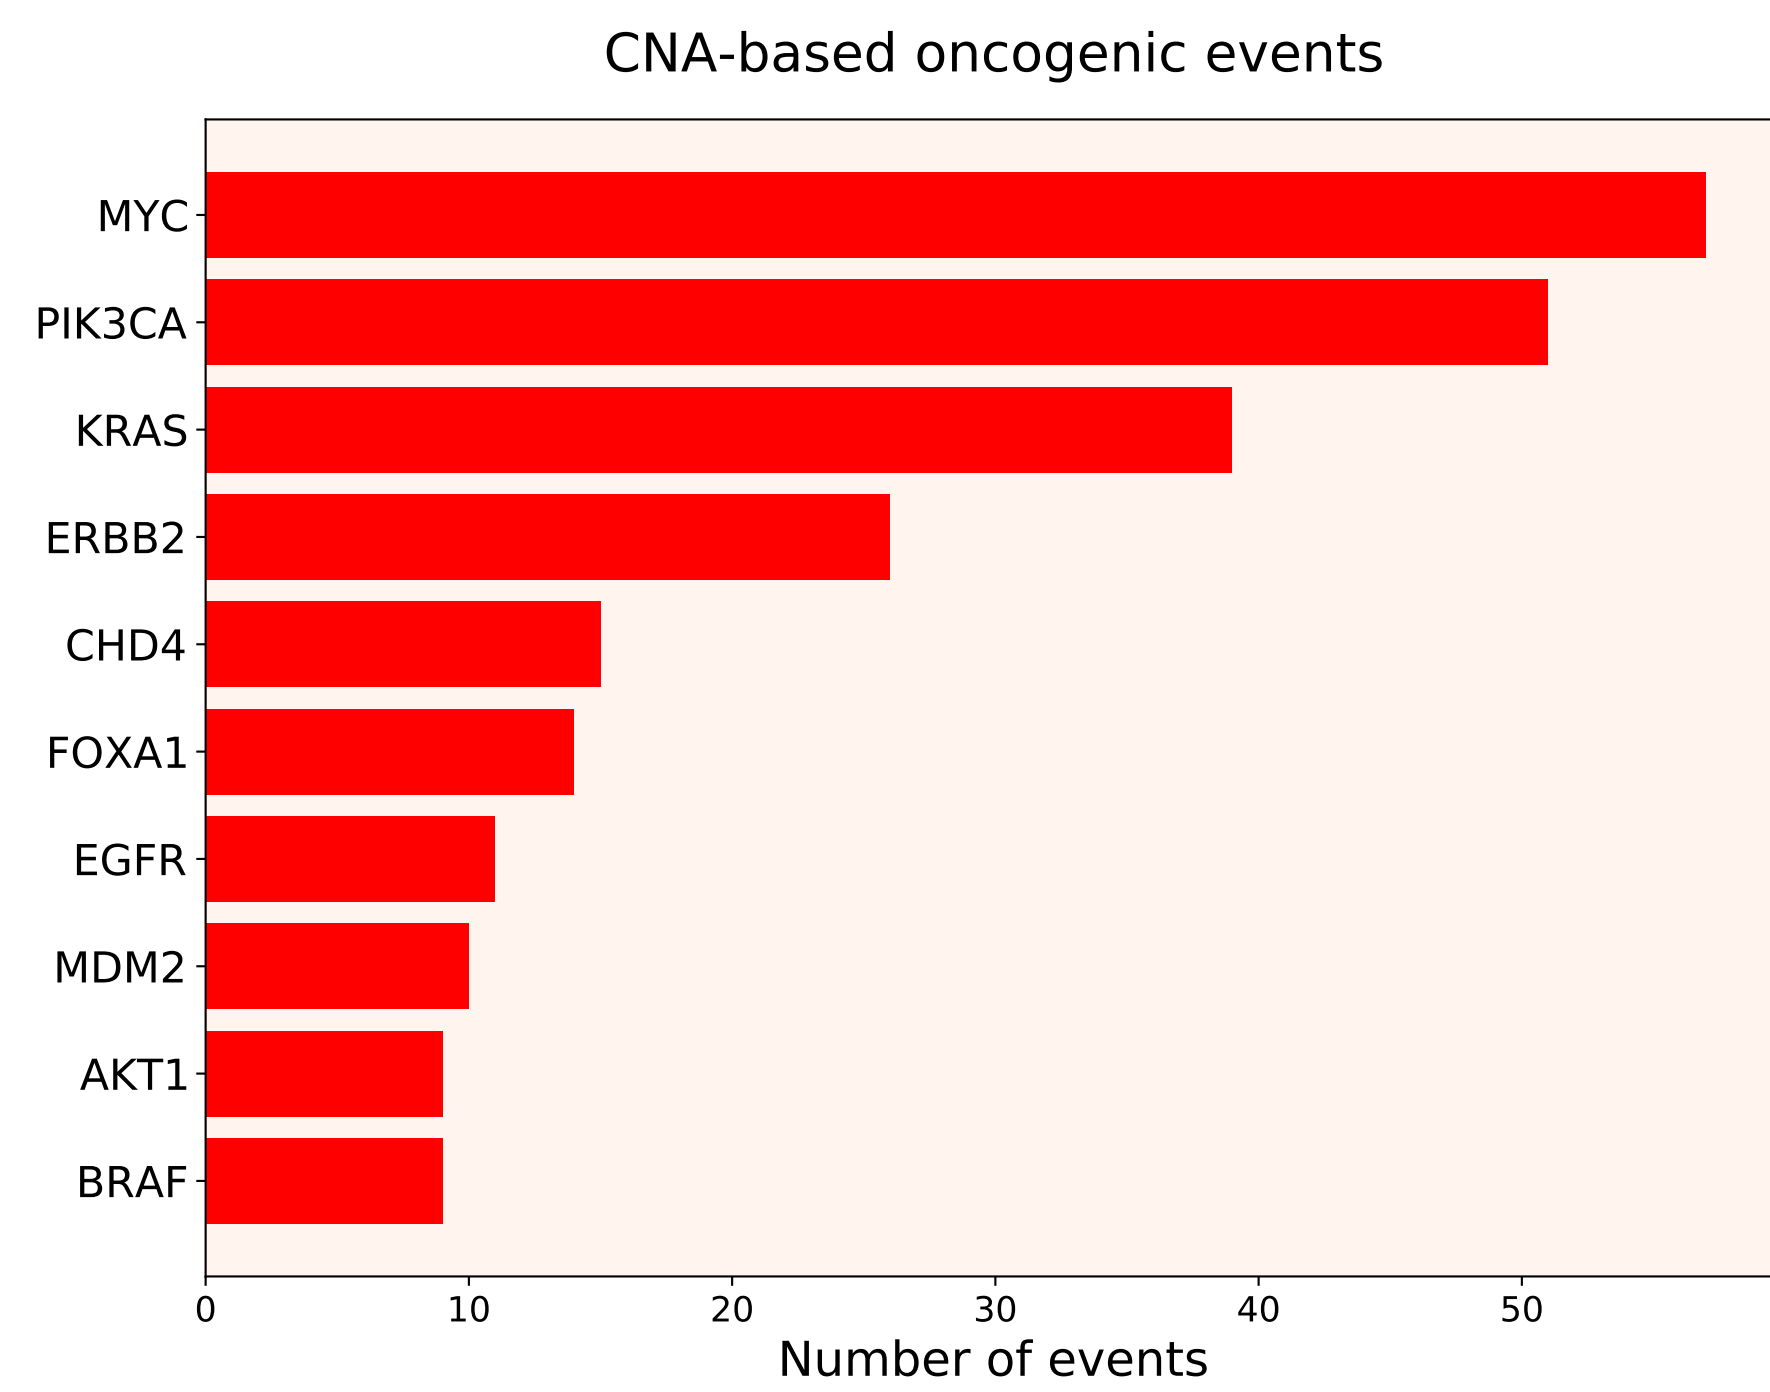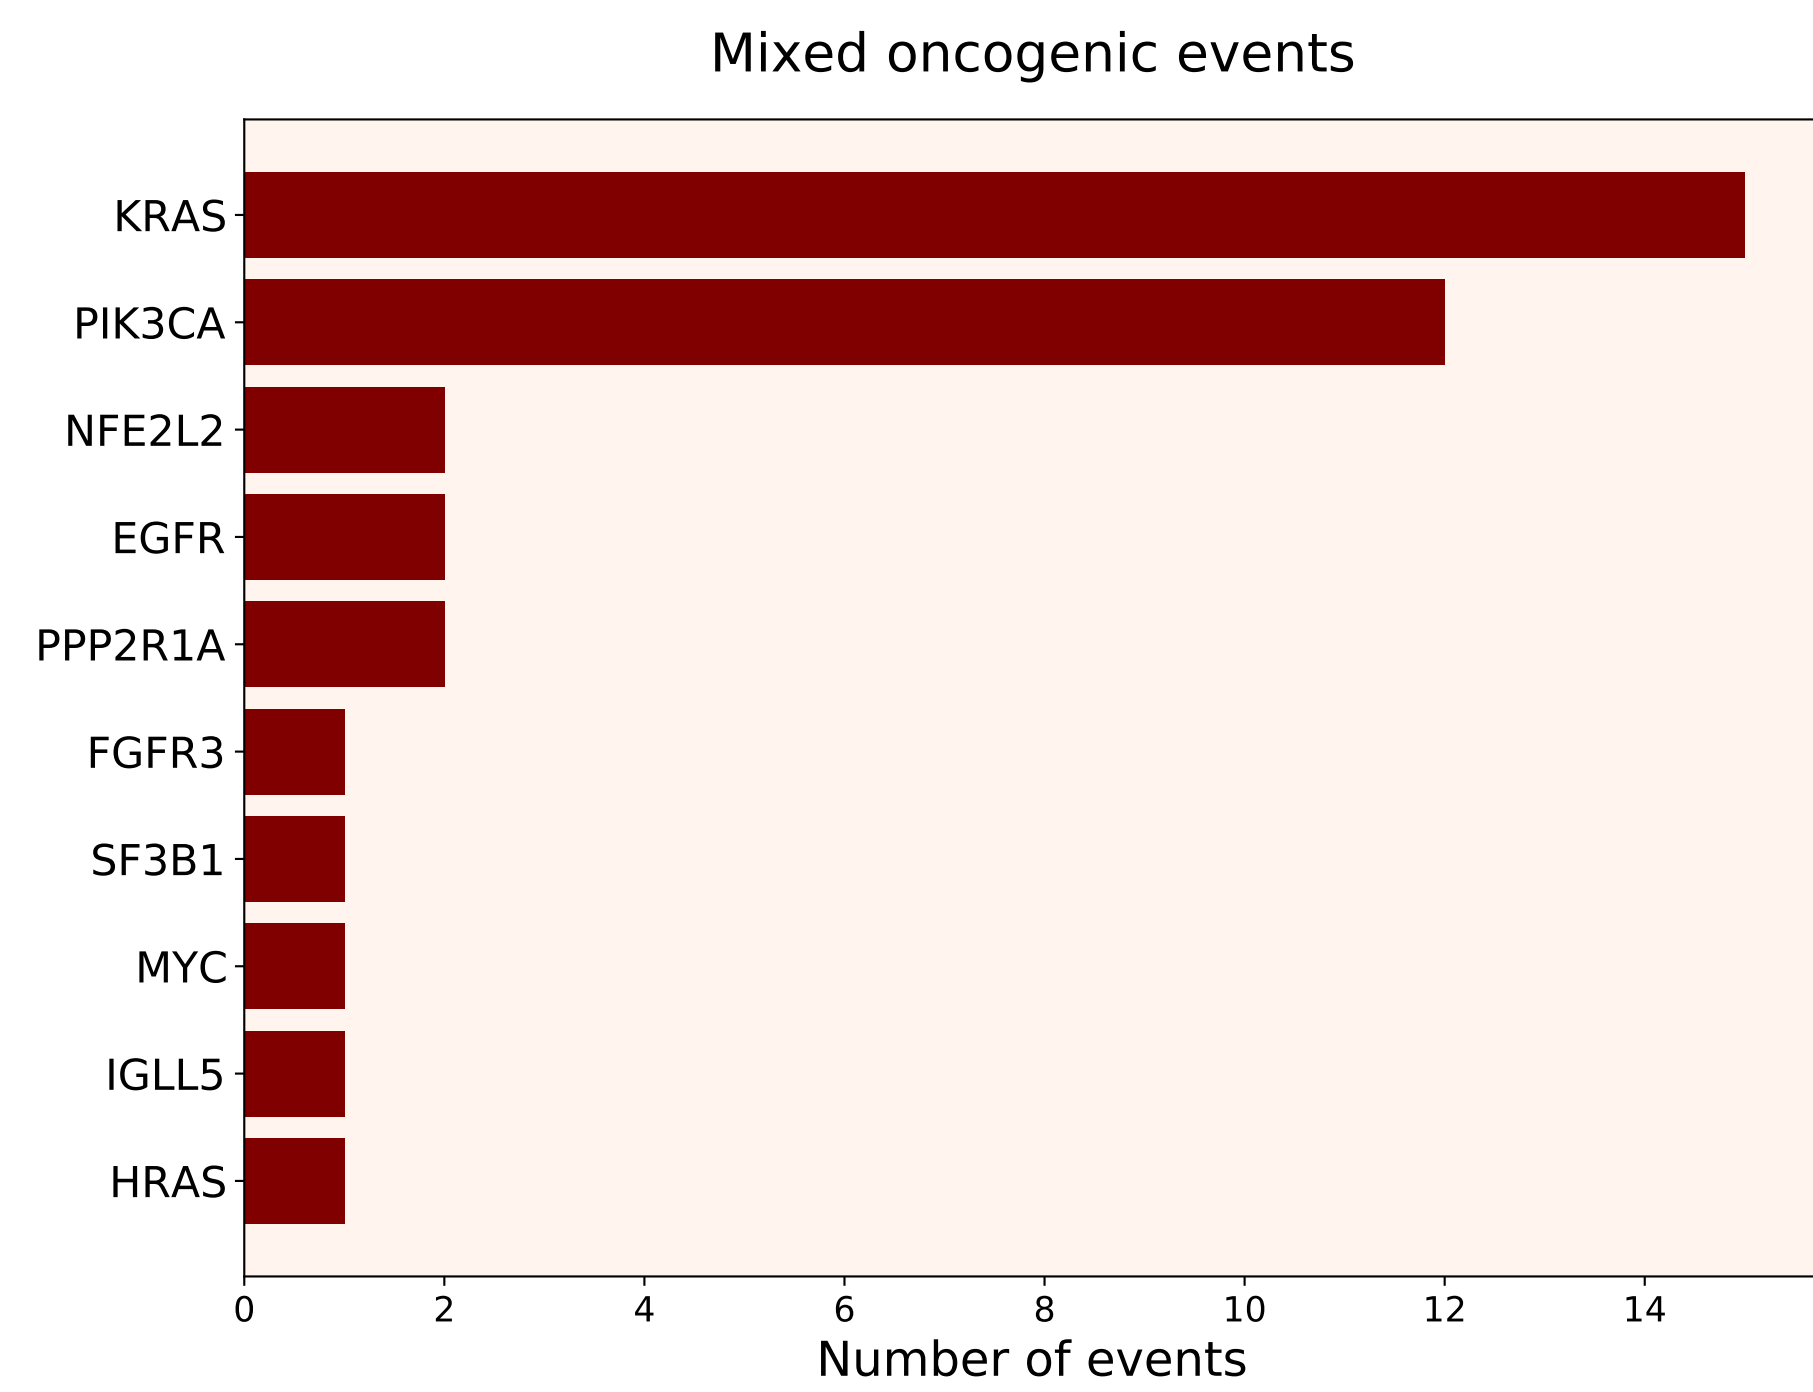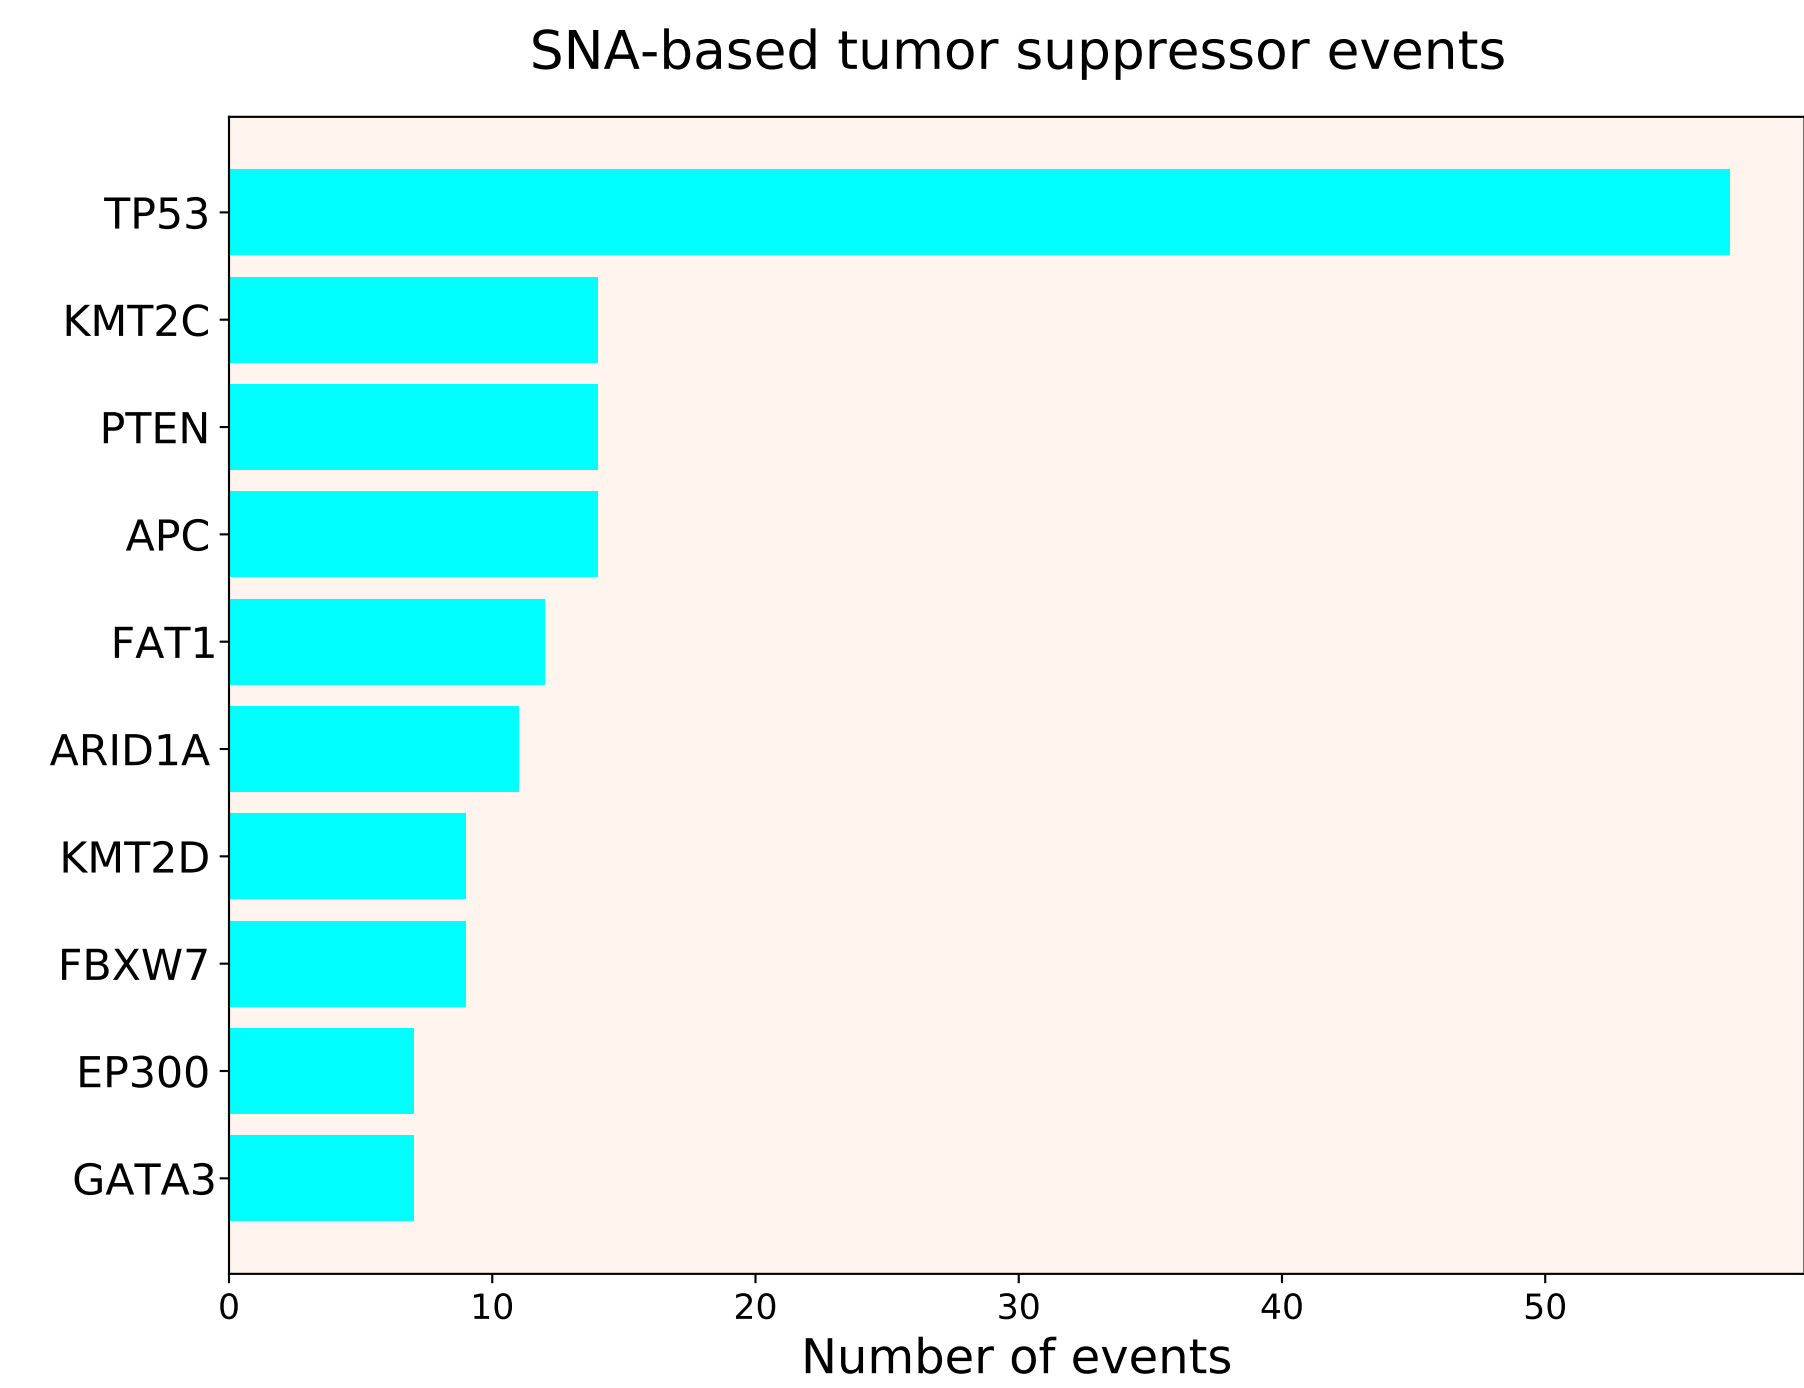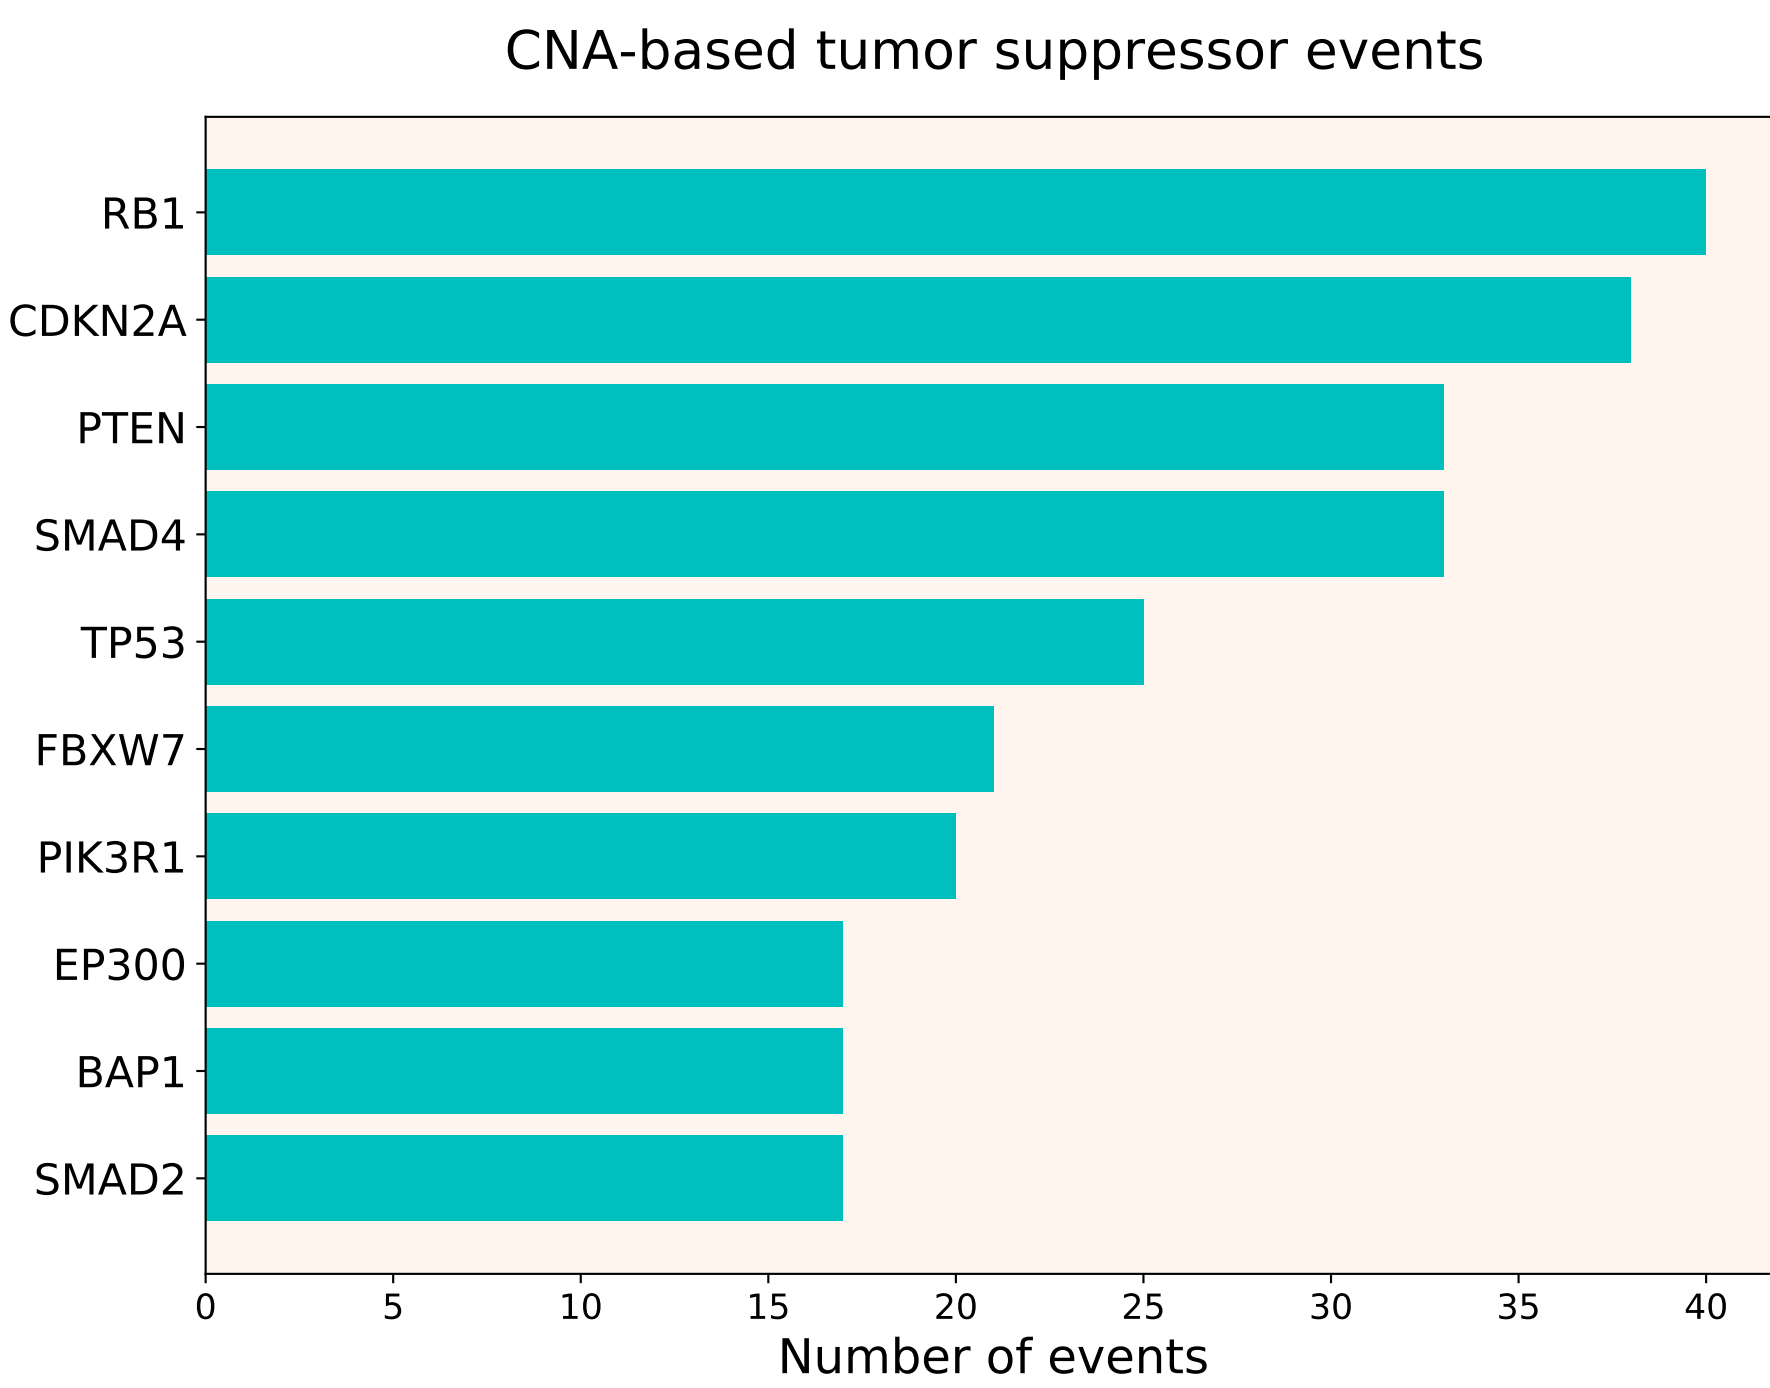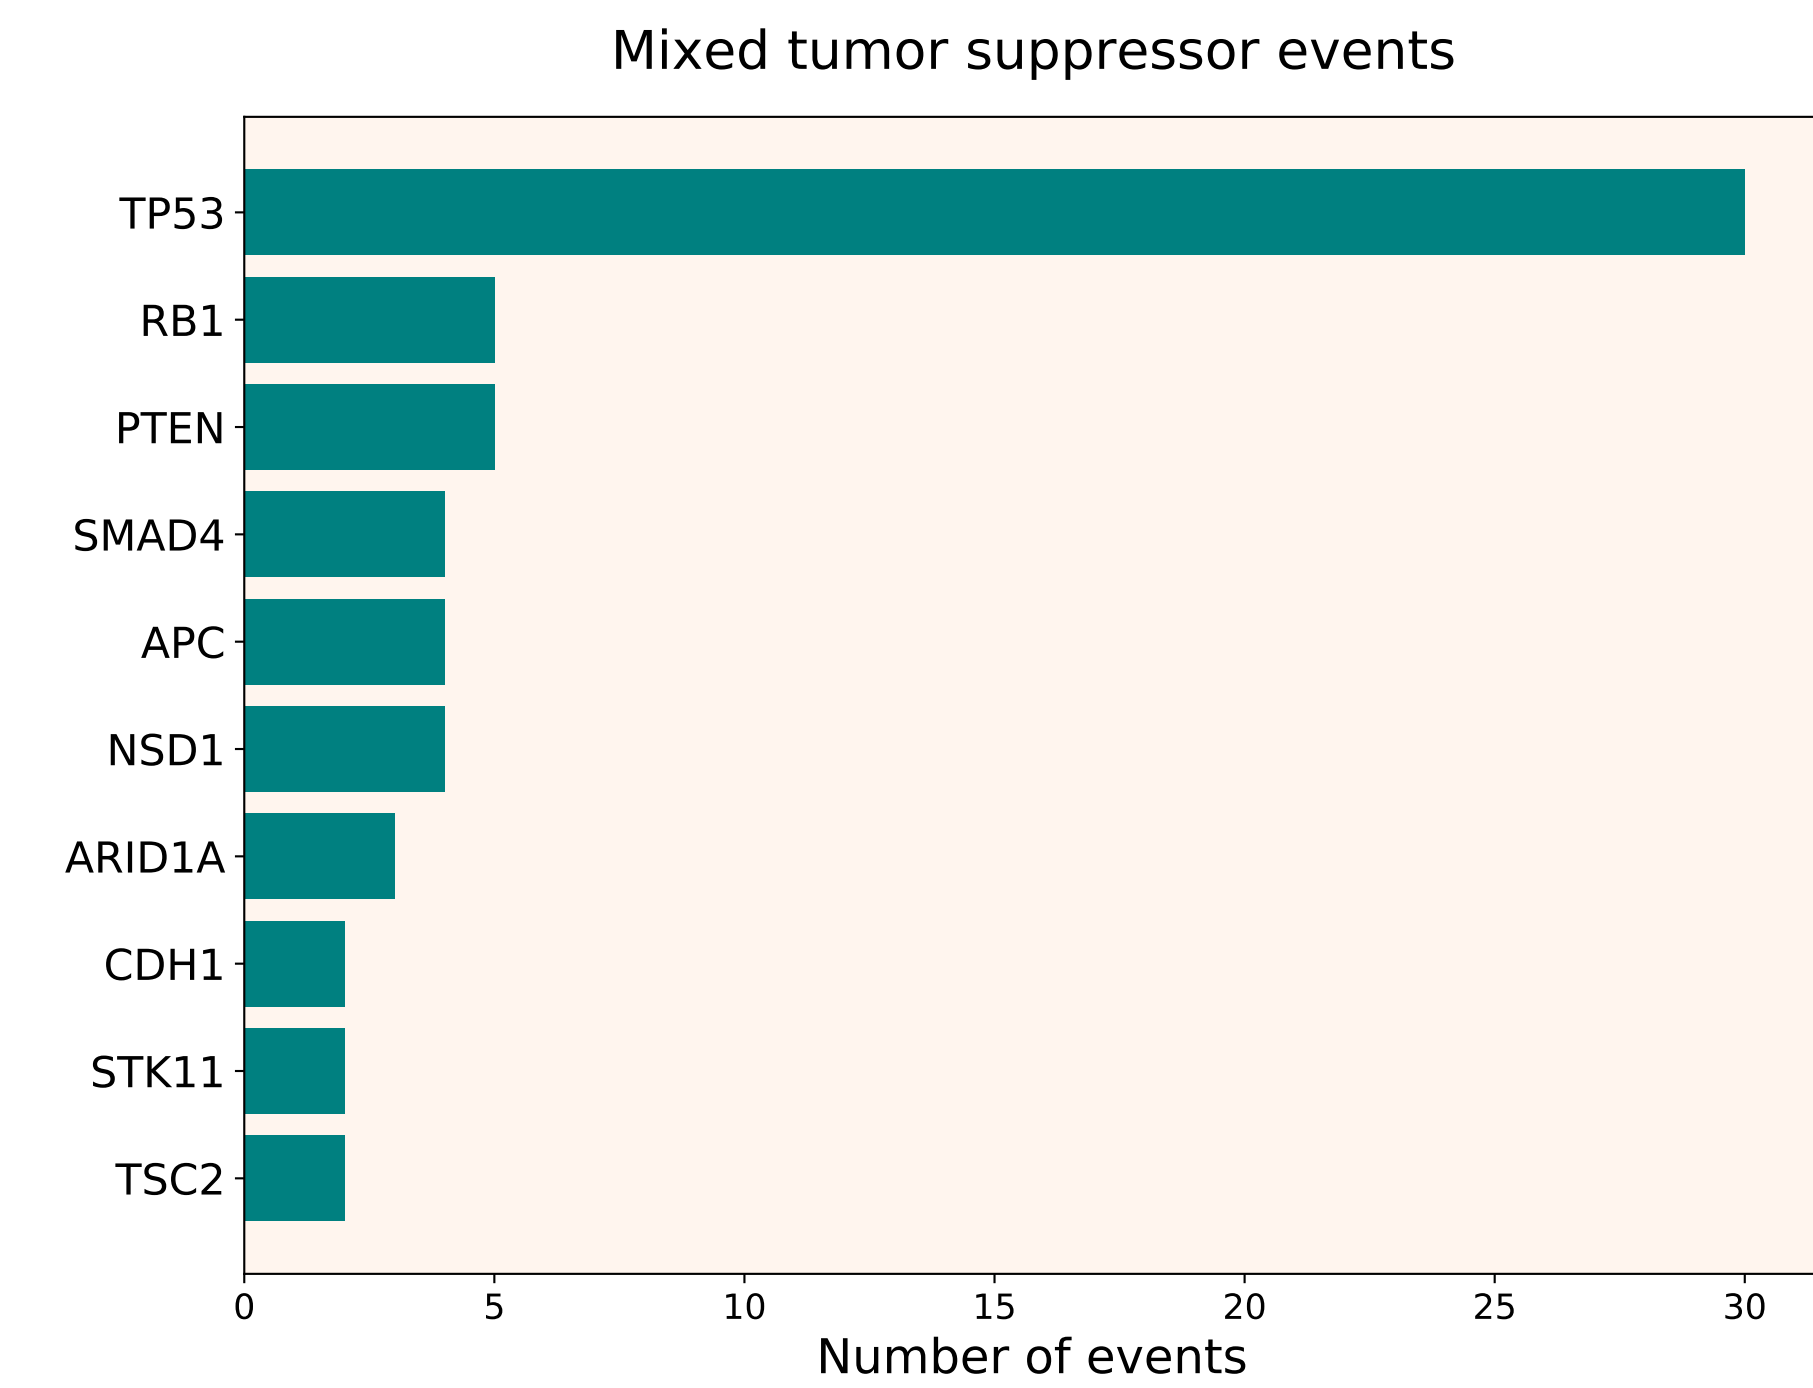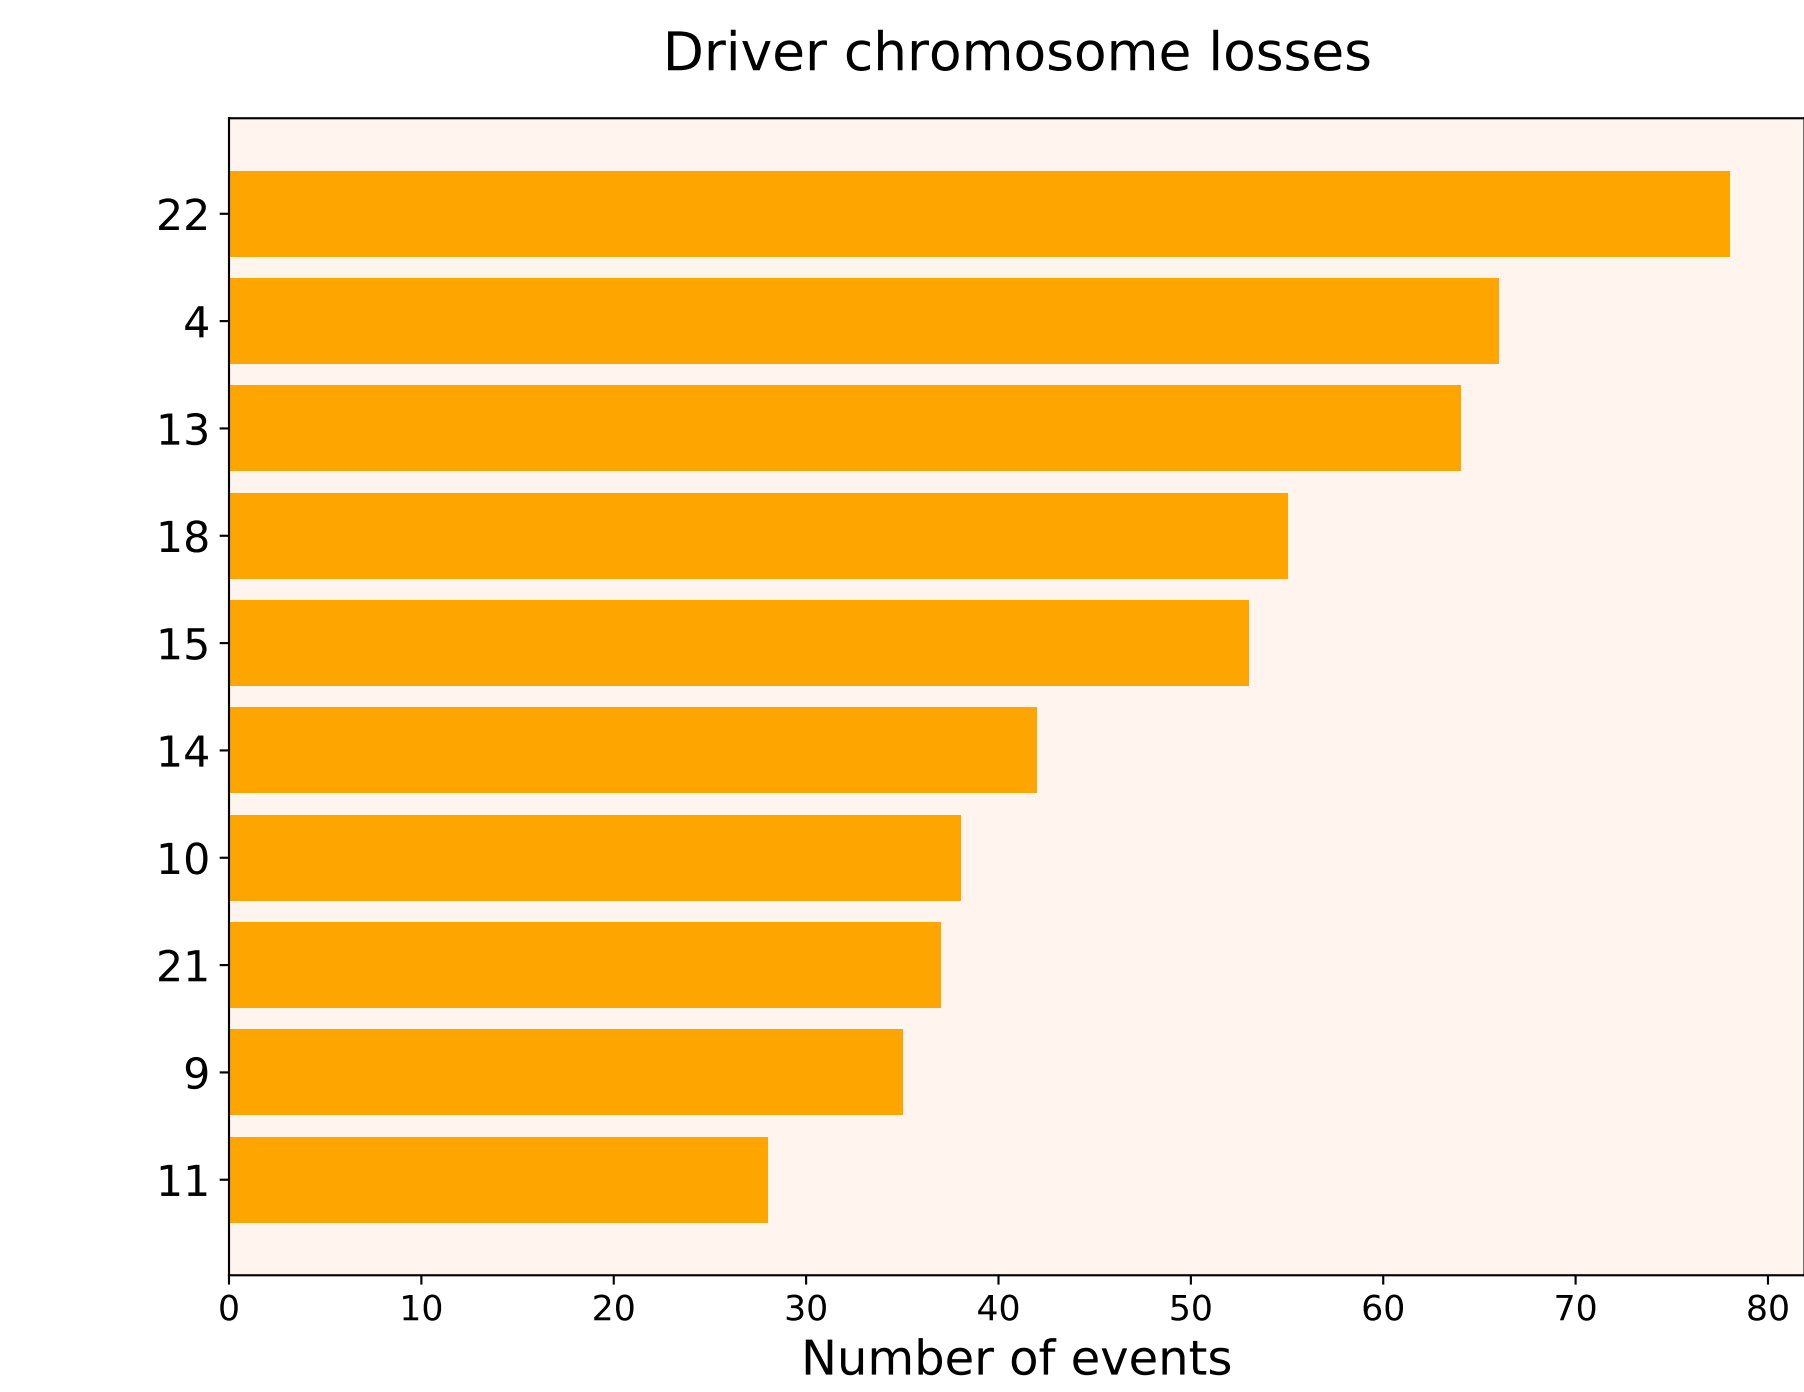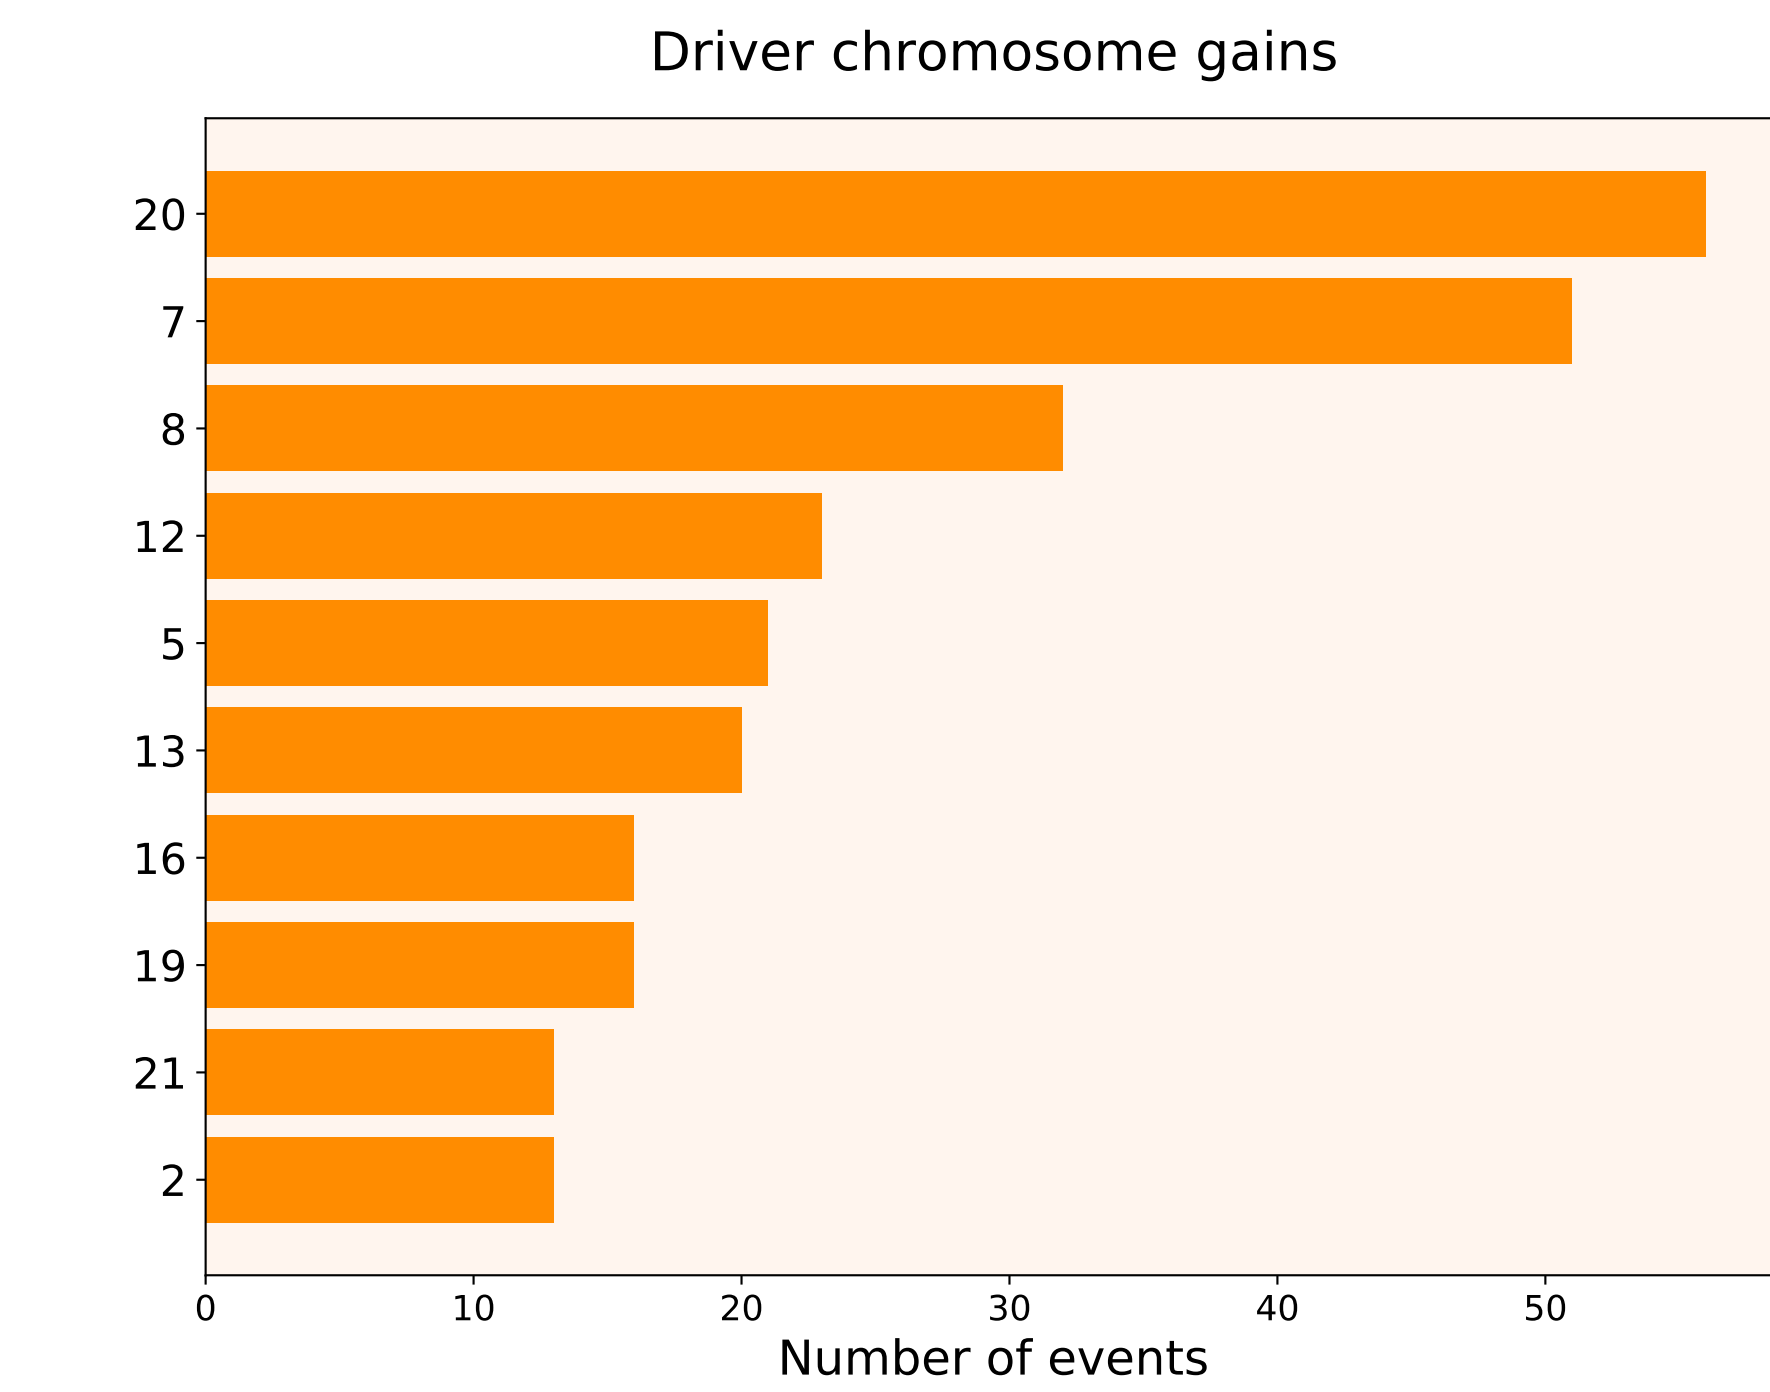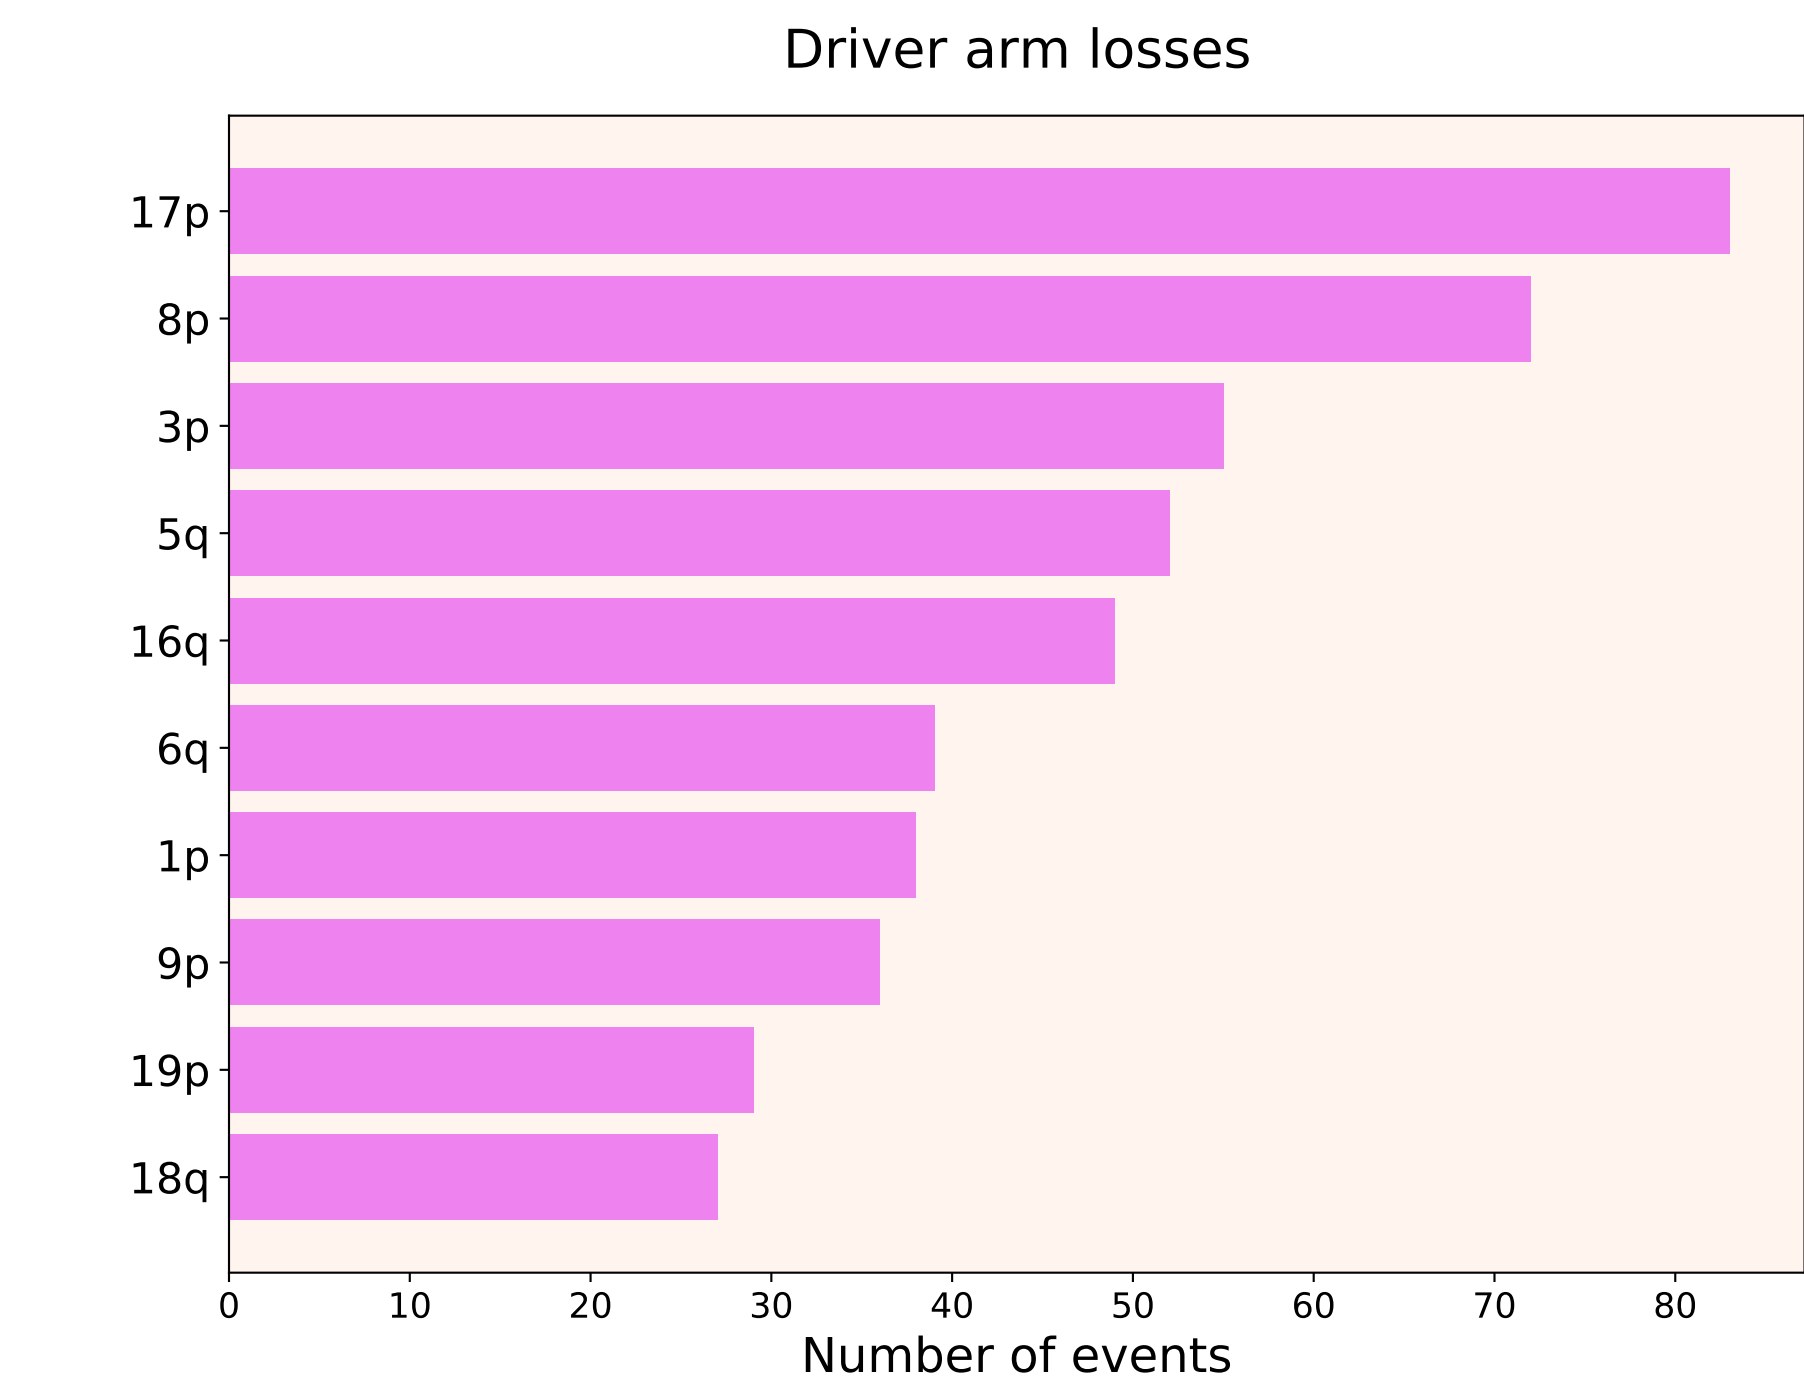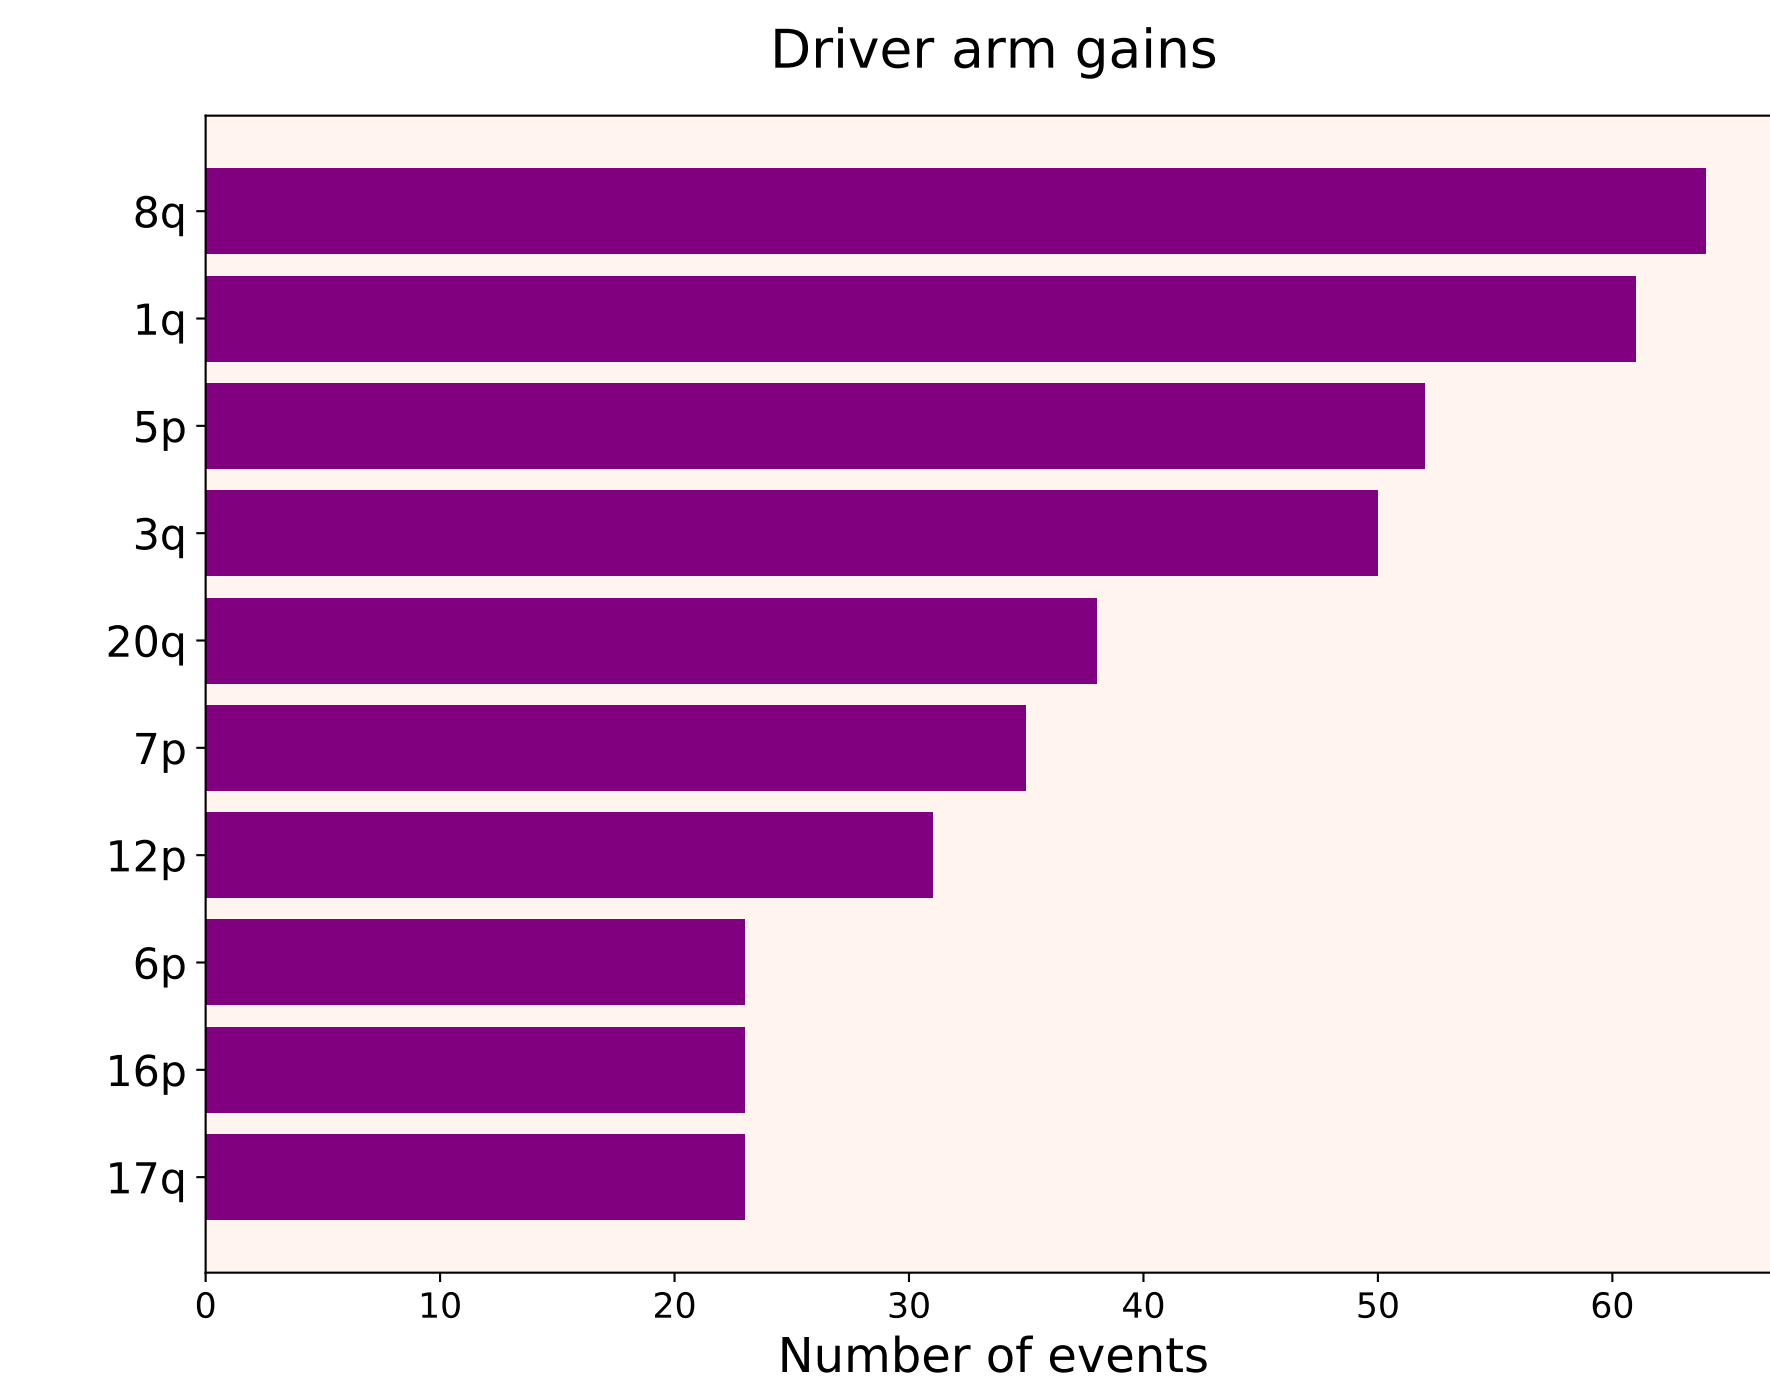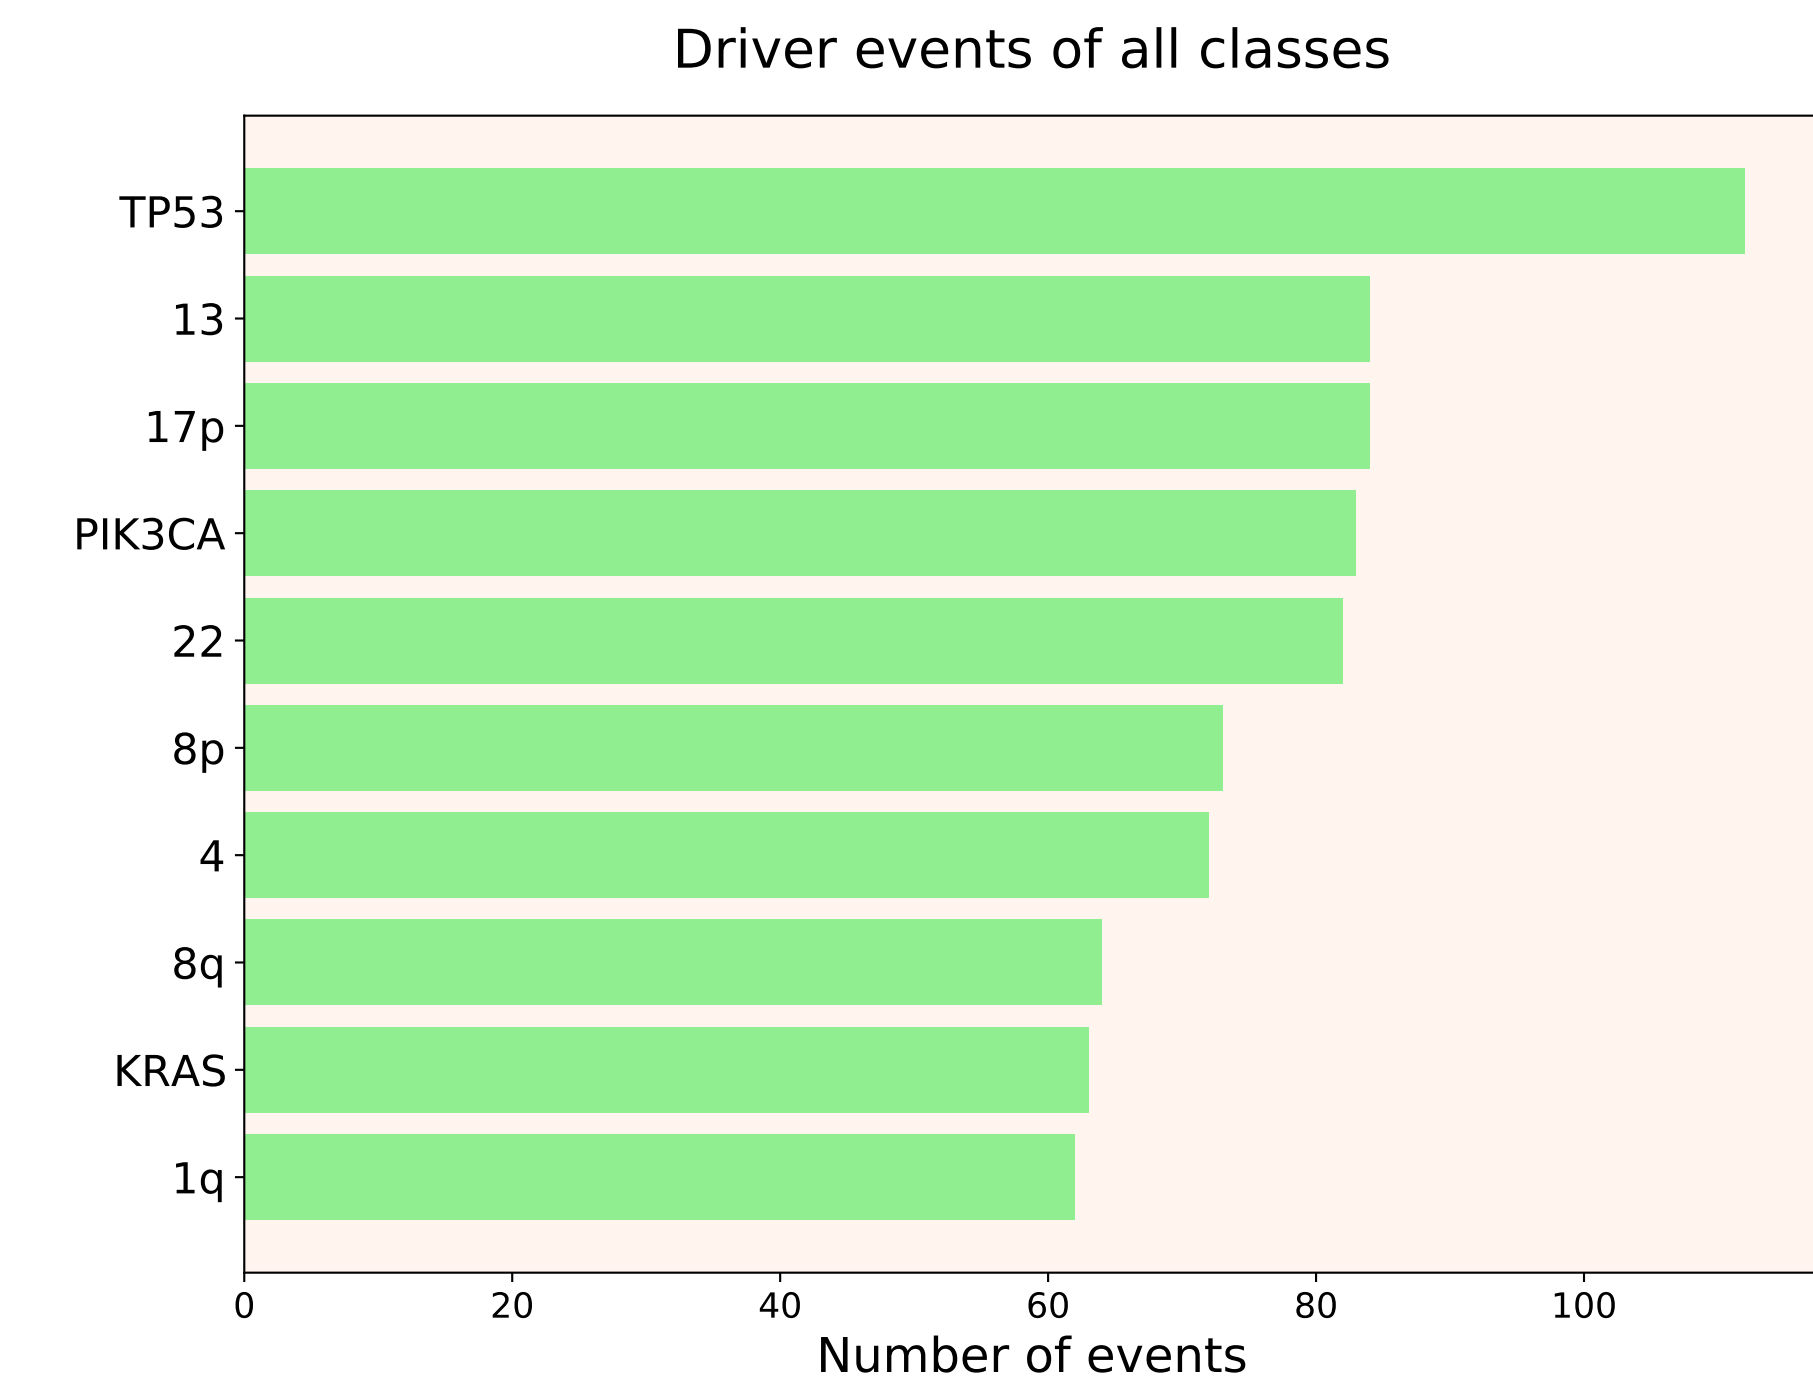

Supplement: Supplemental_Data_S1.zip [file Supplemental_Data_S1.zip]

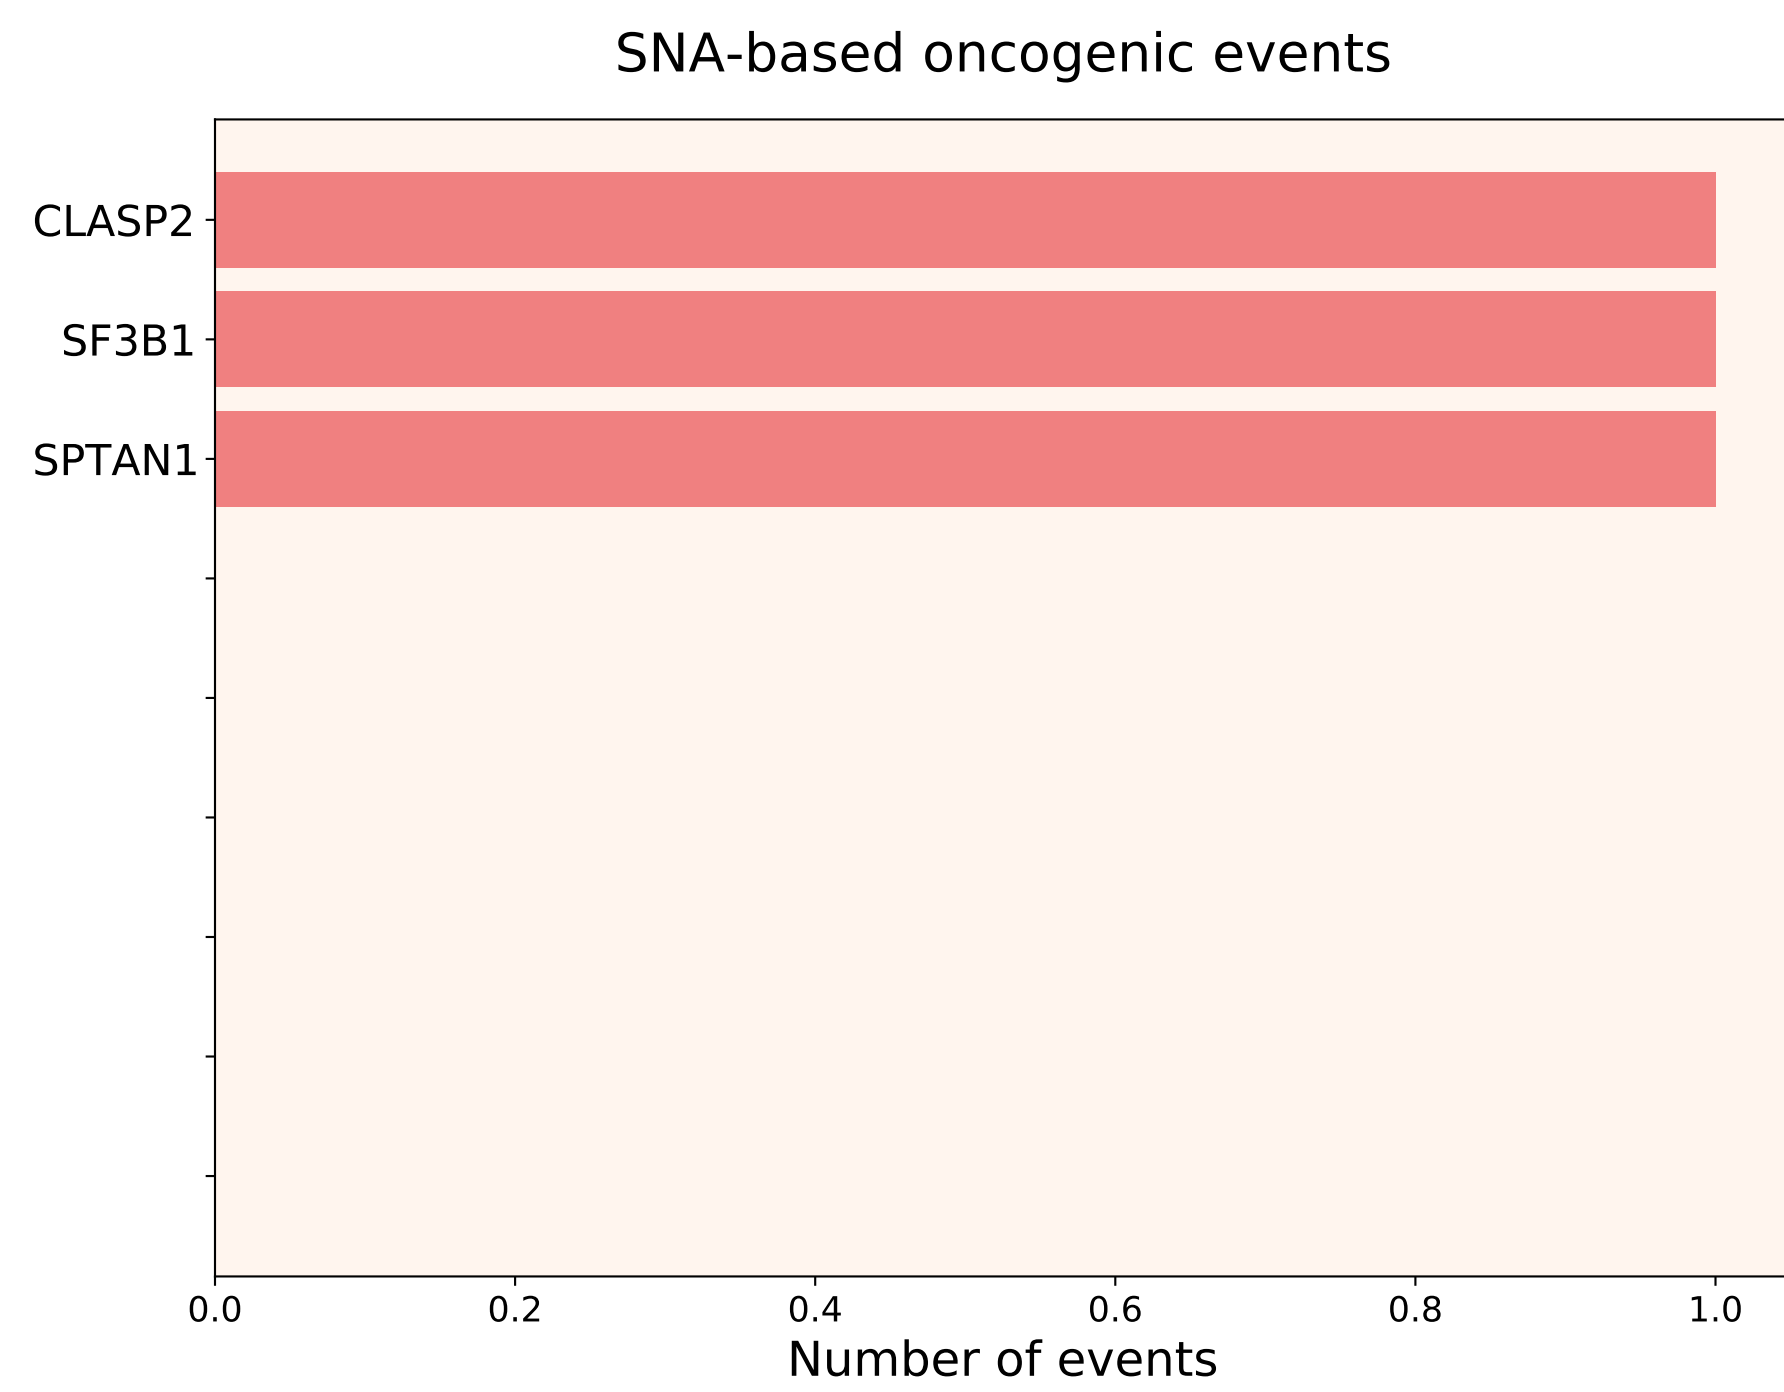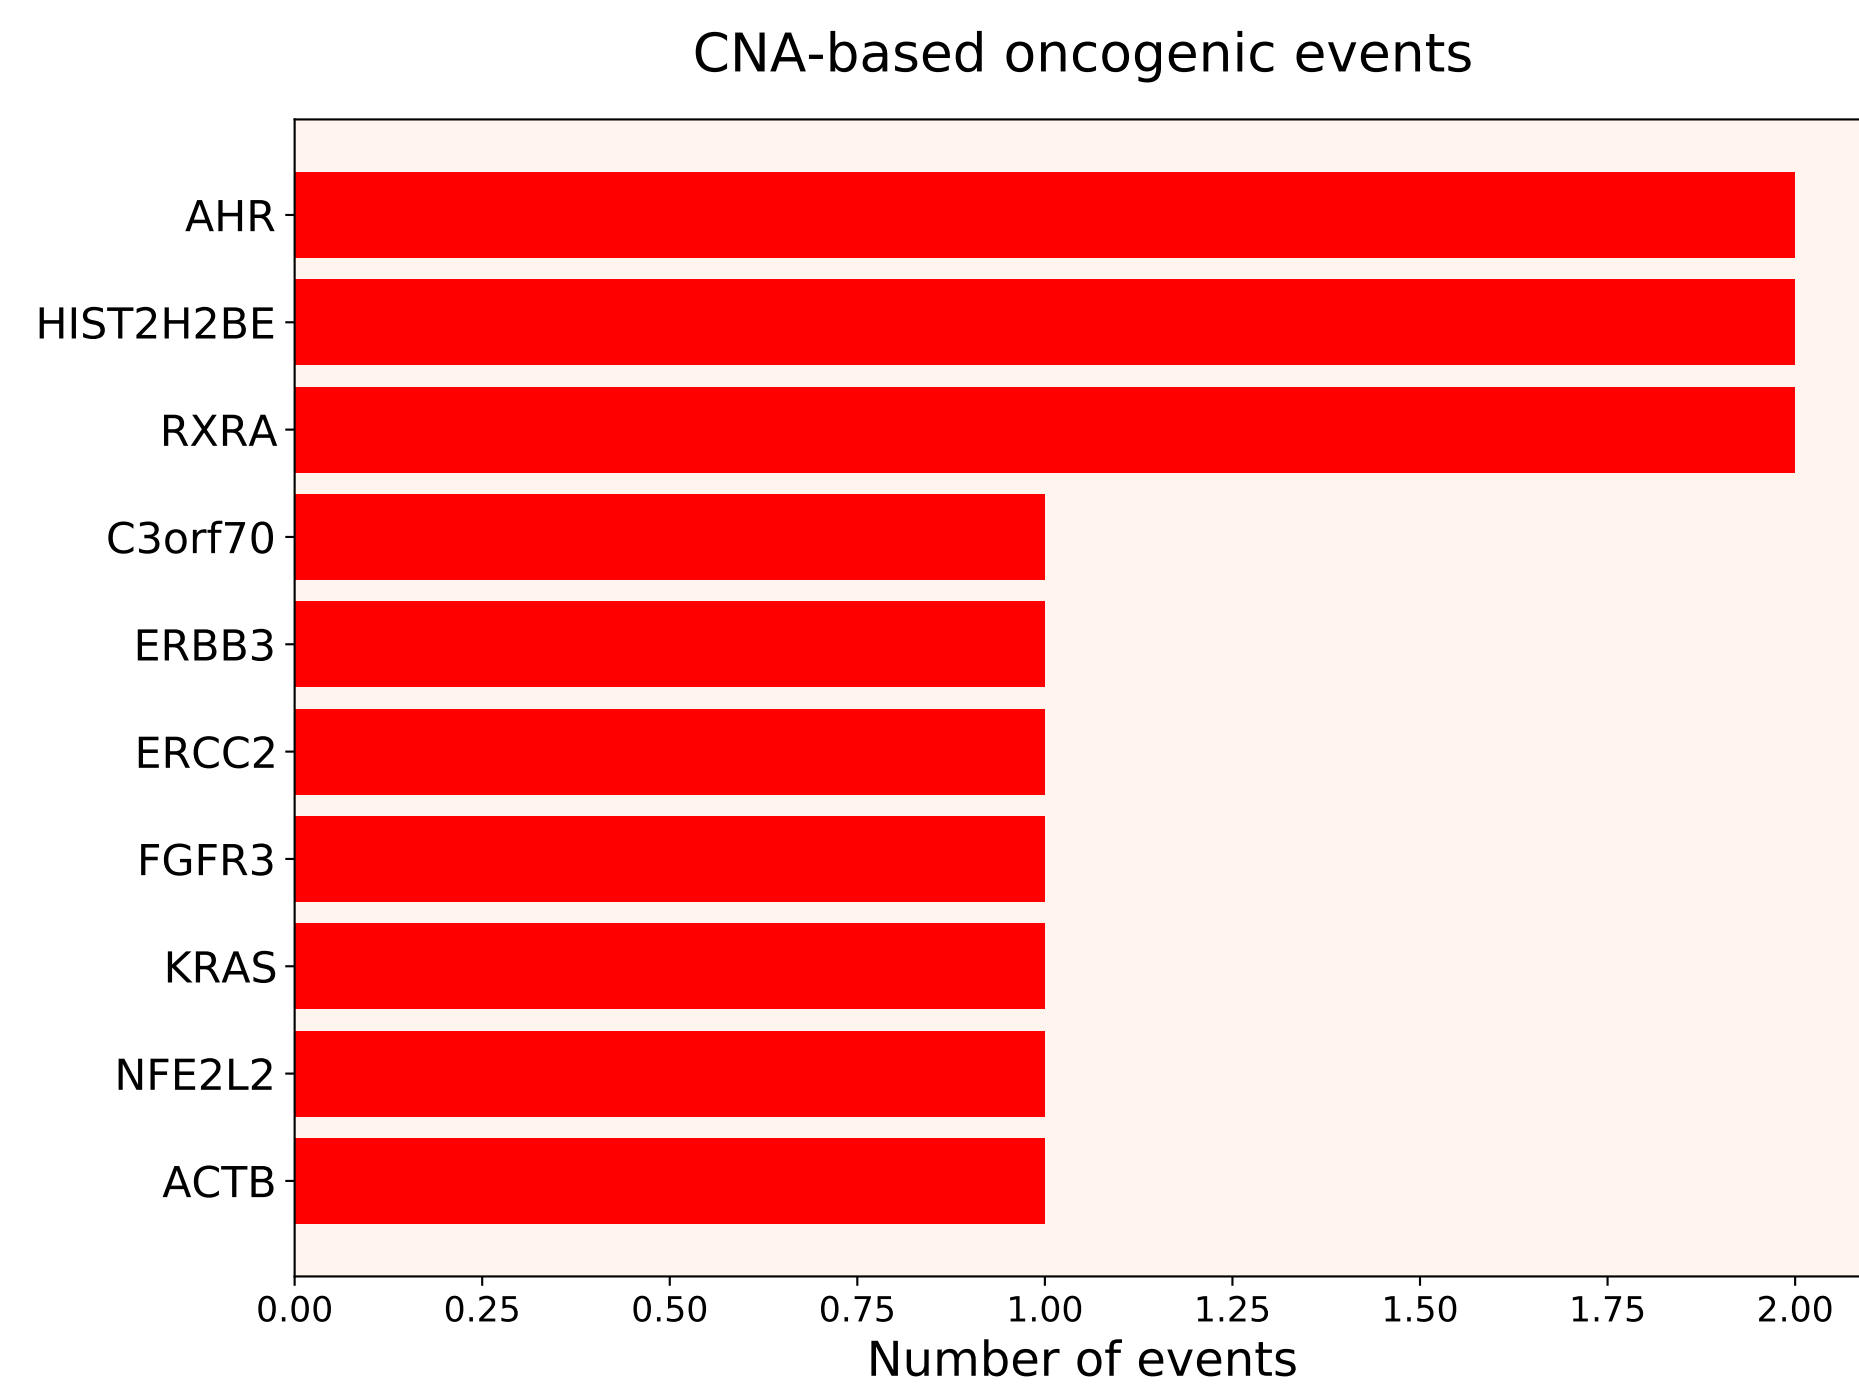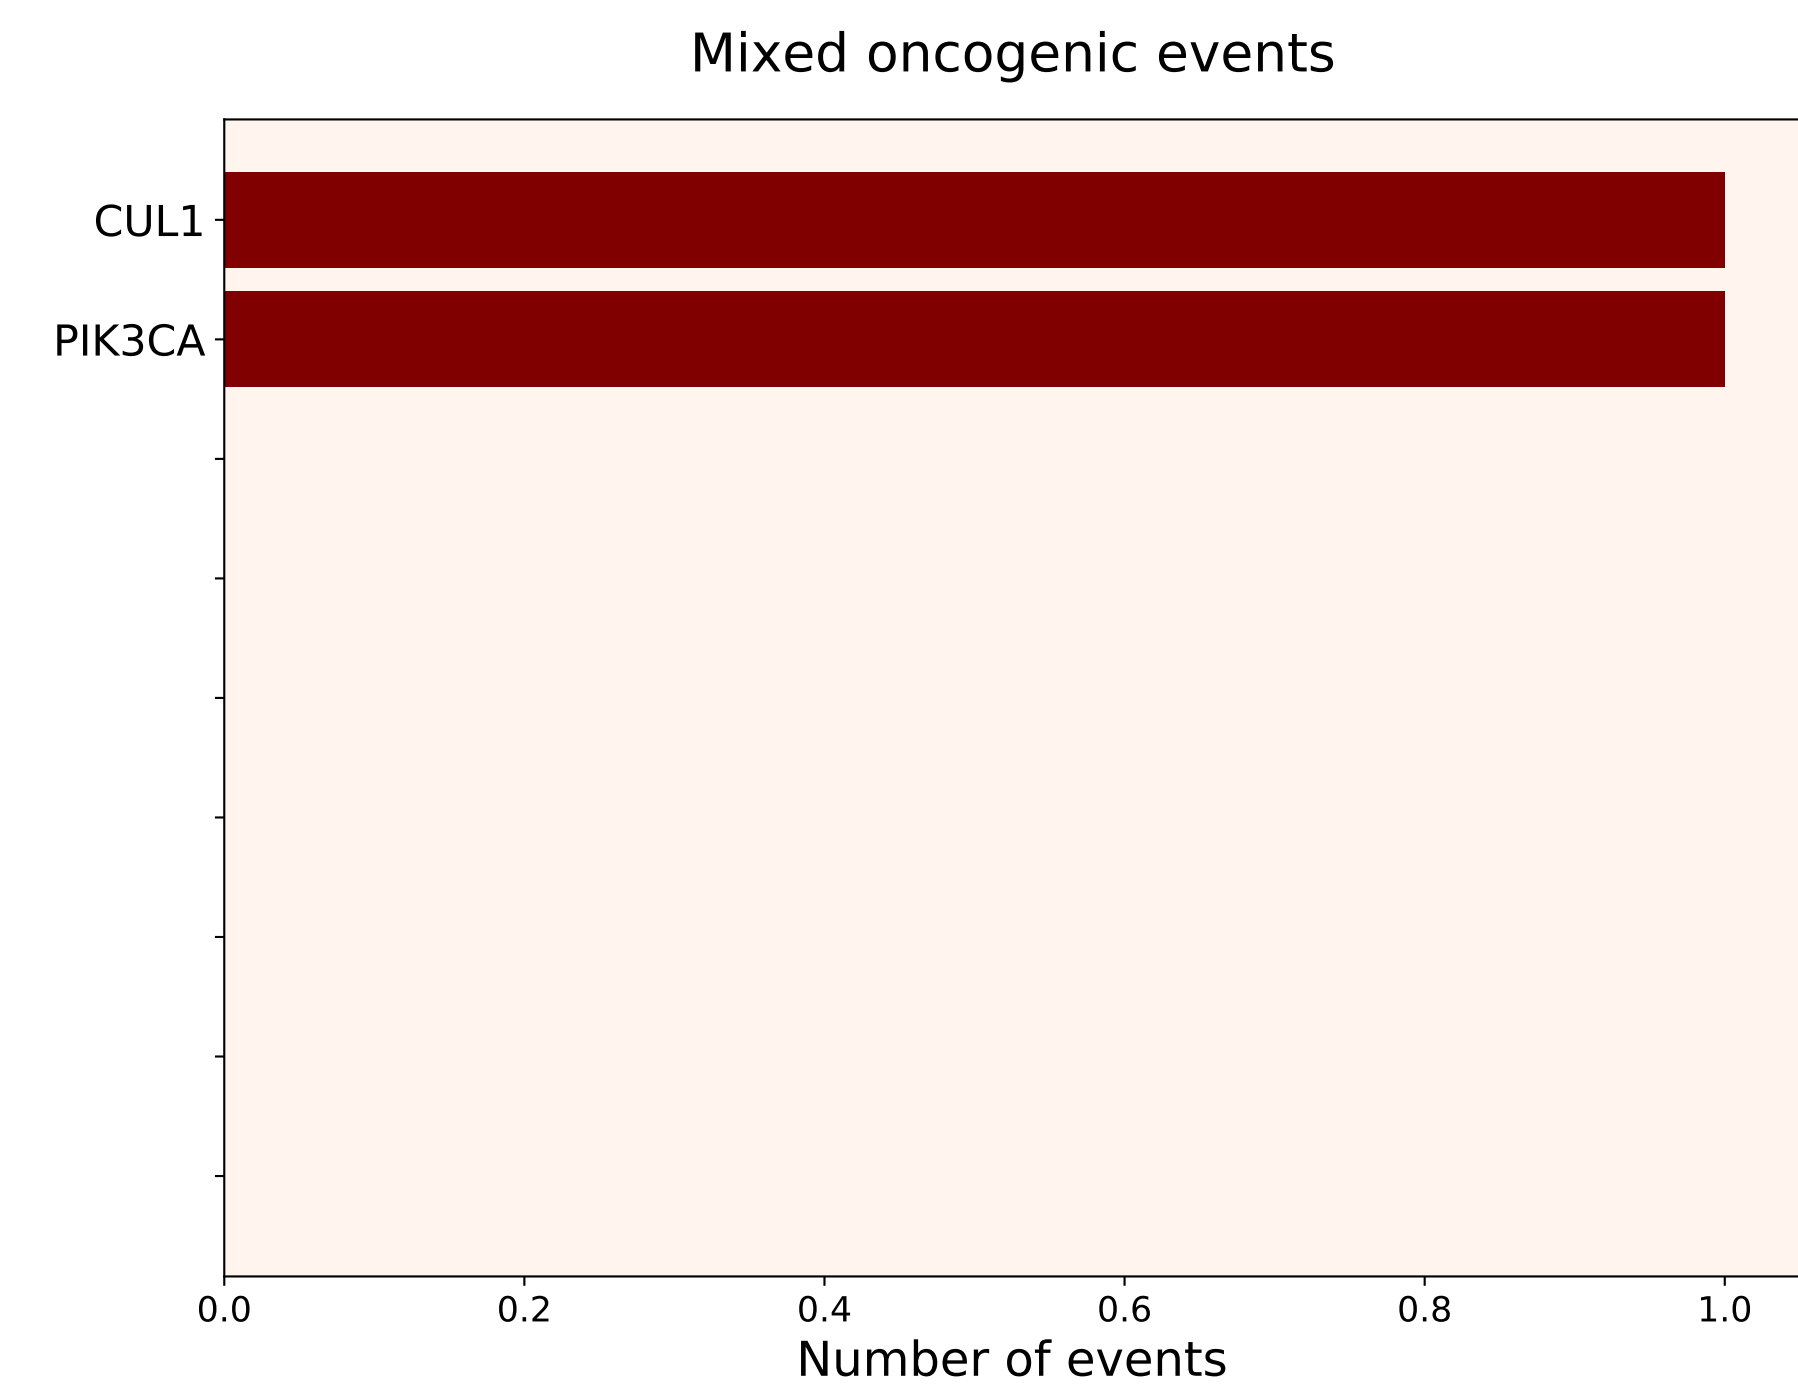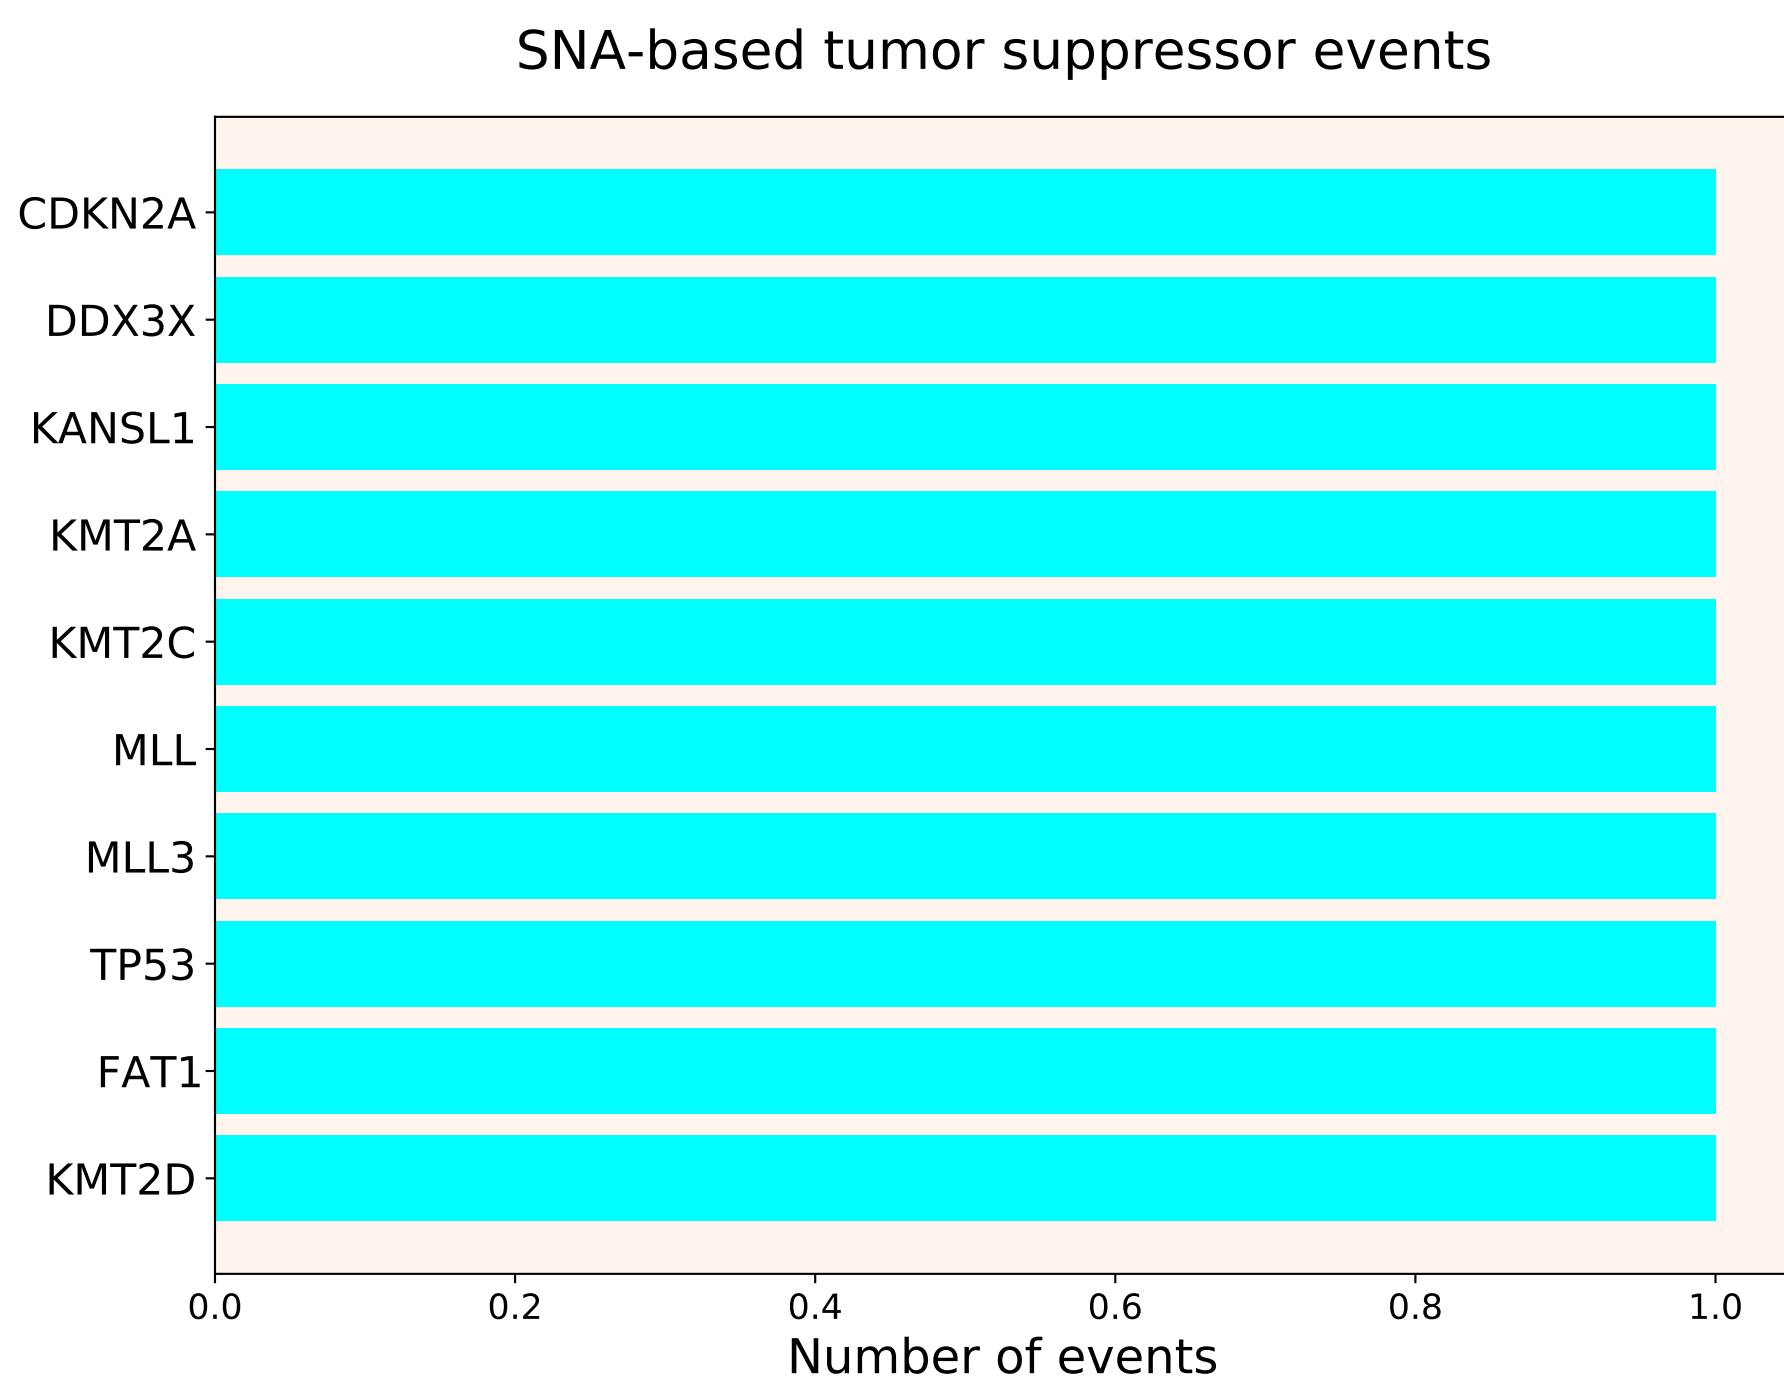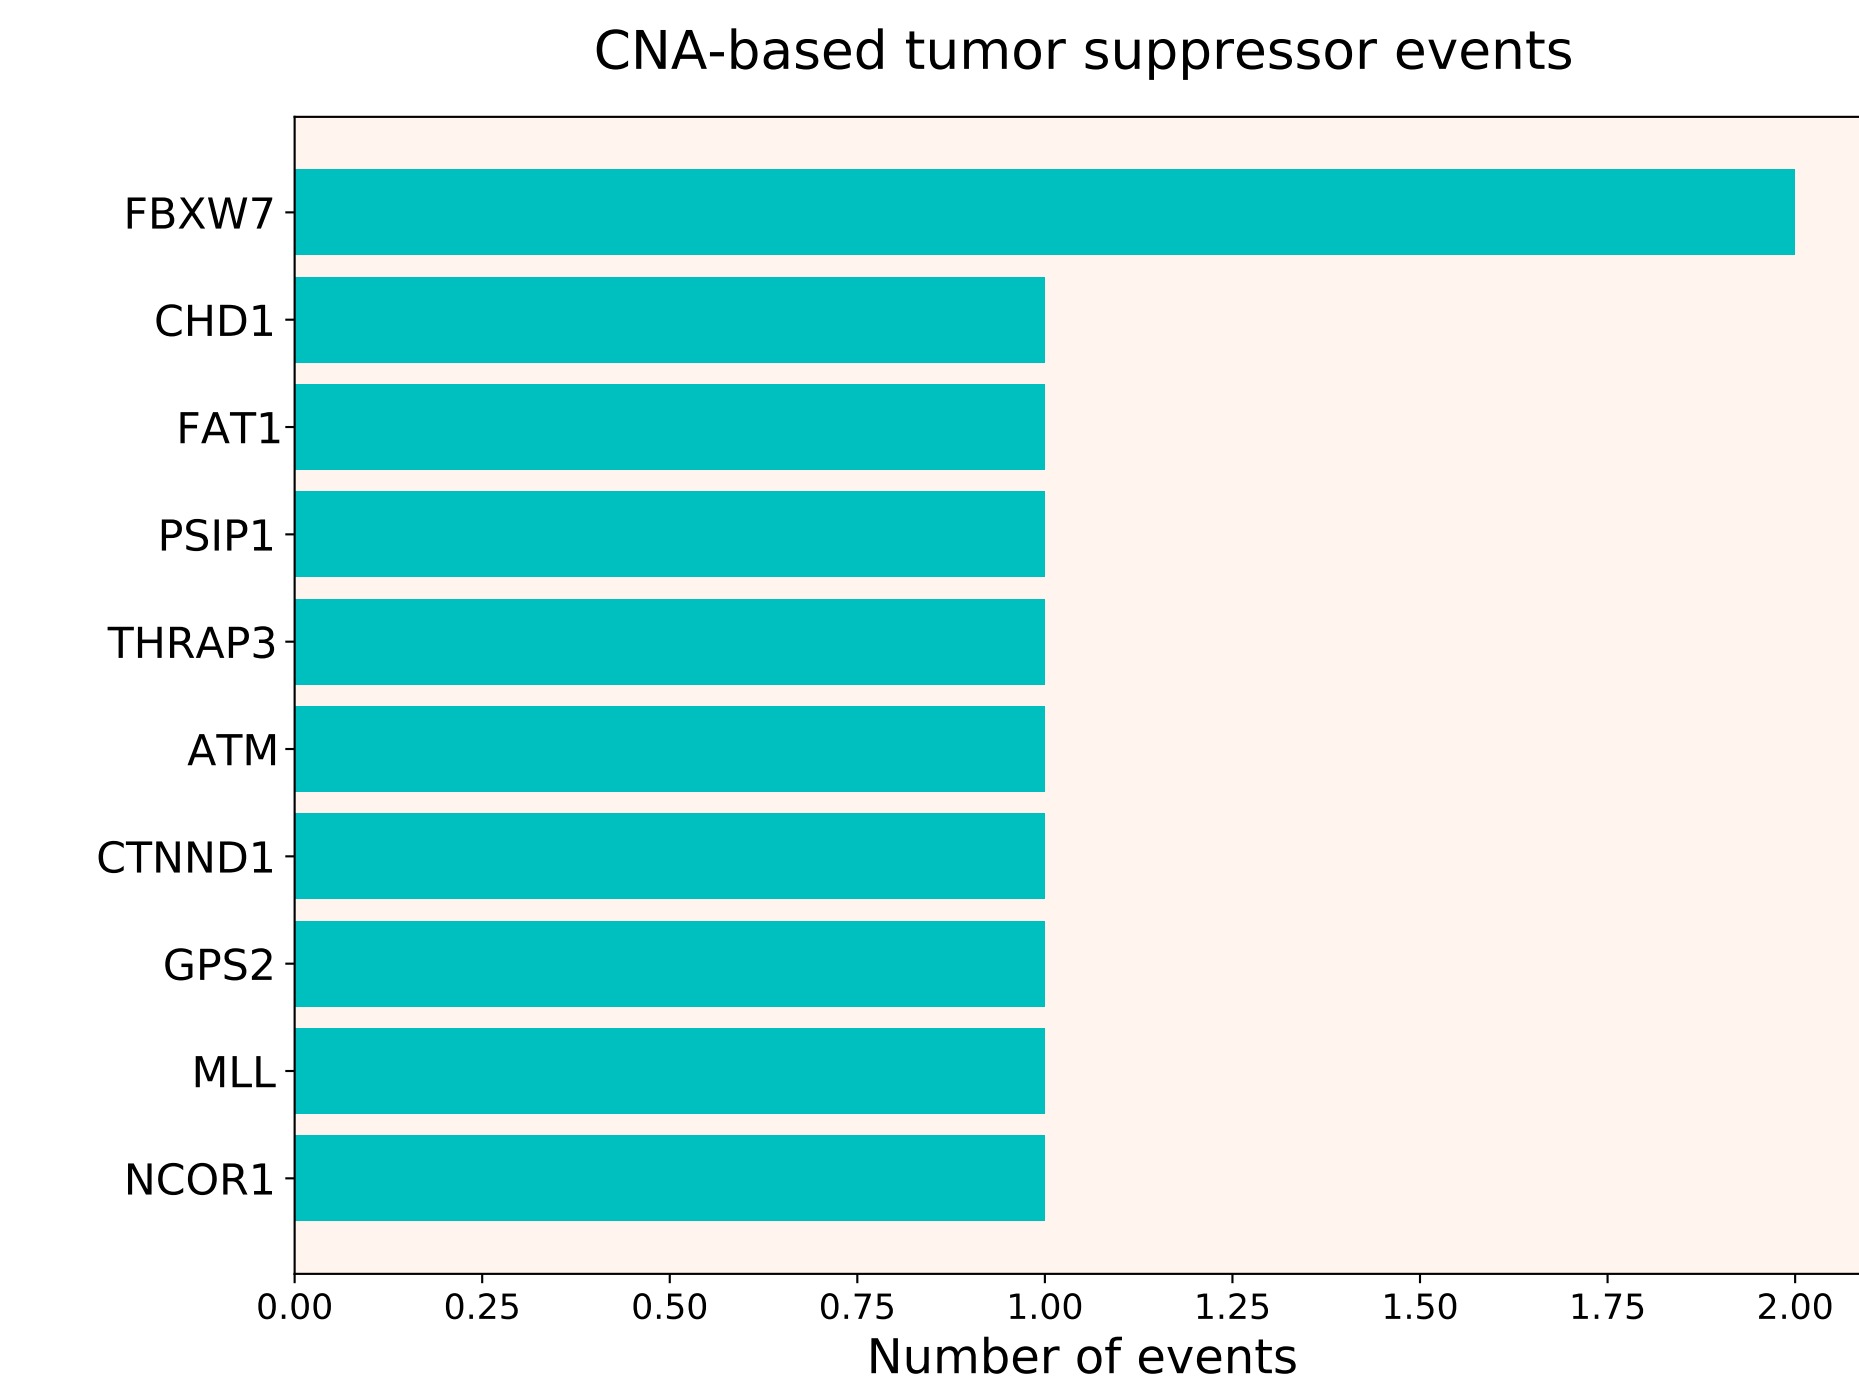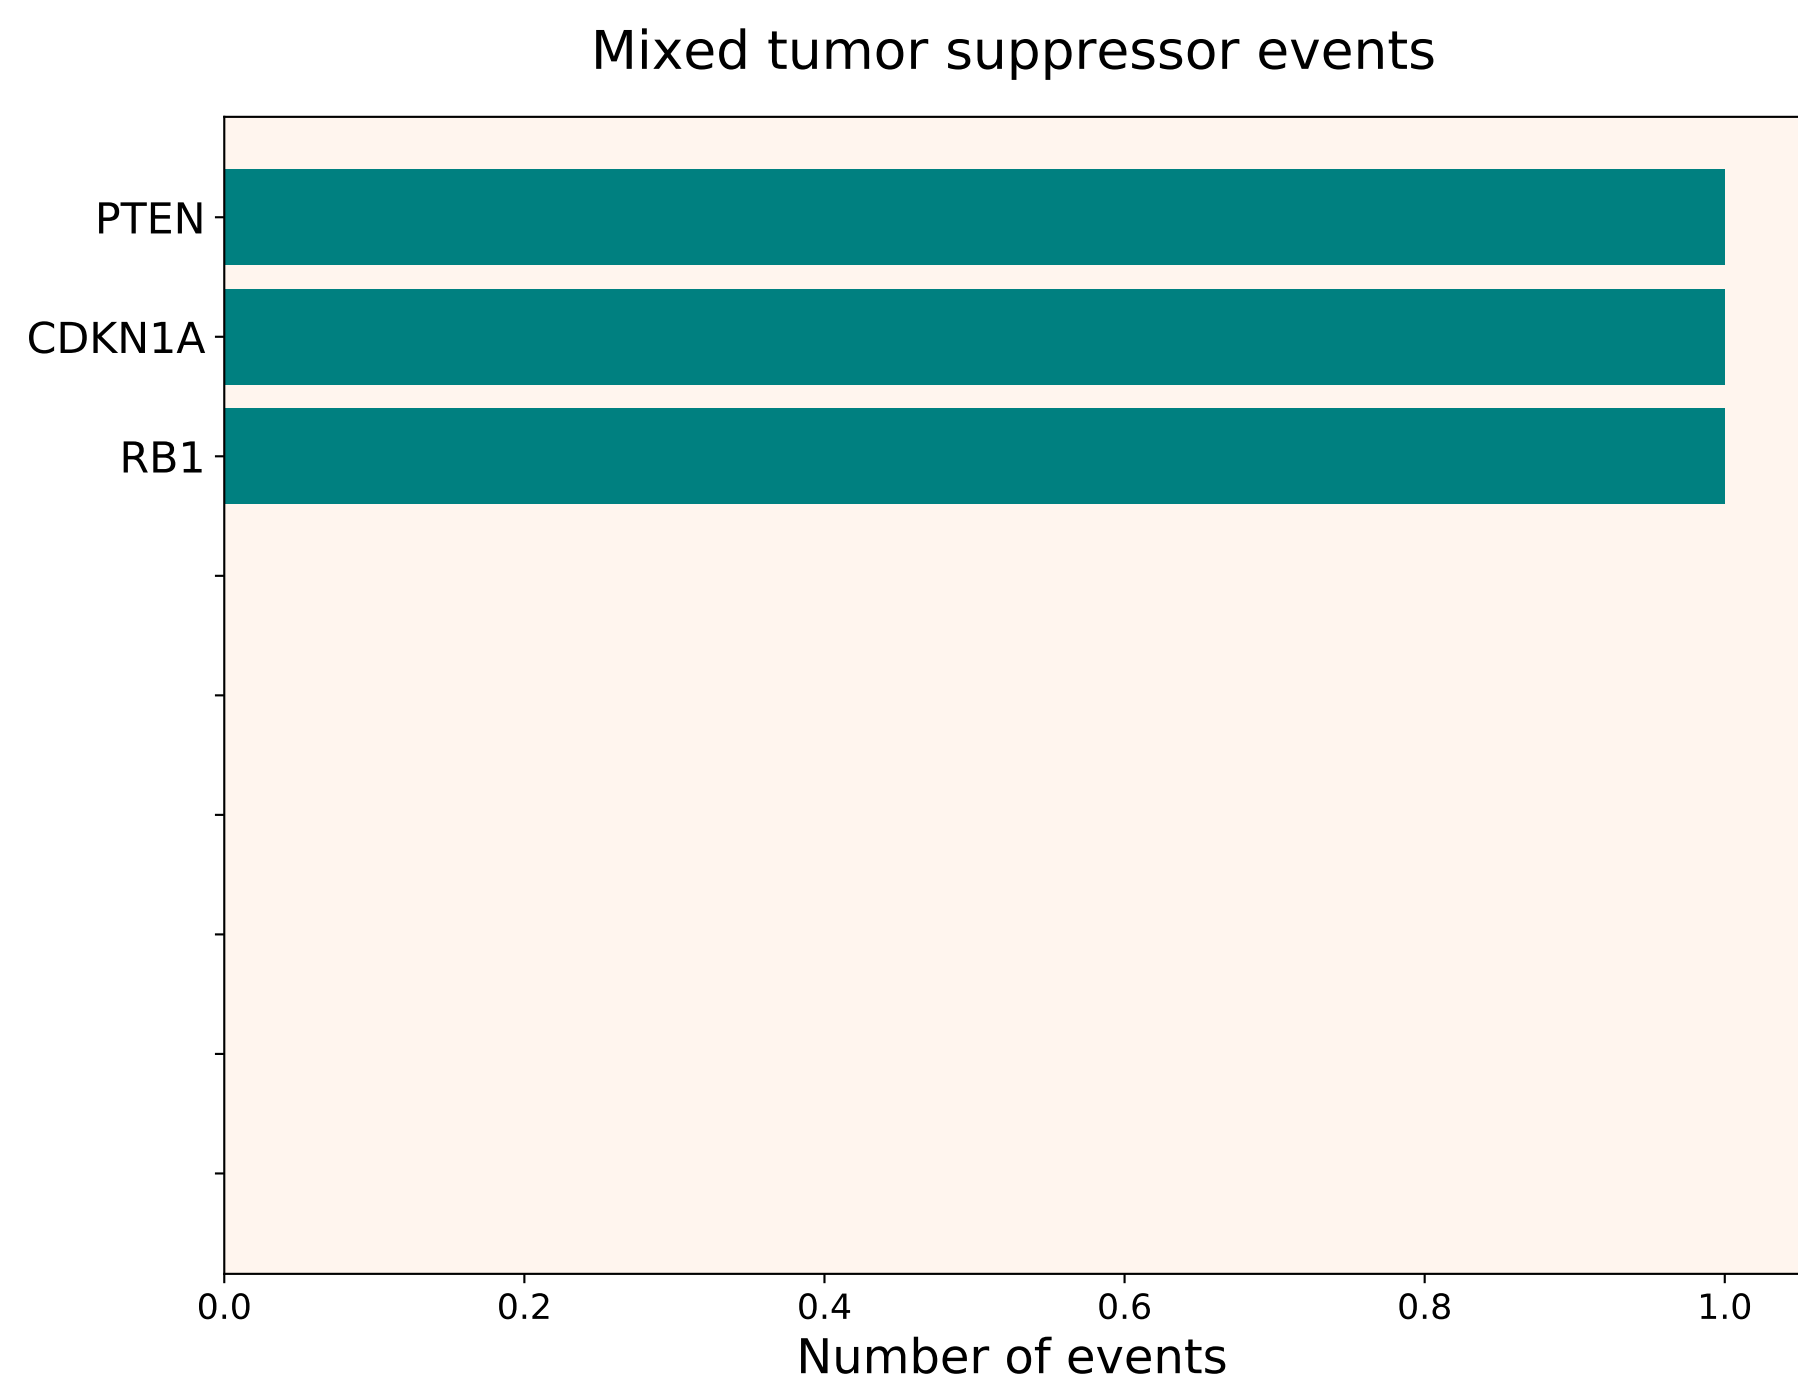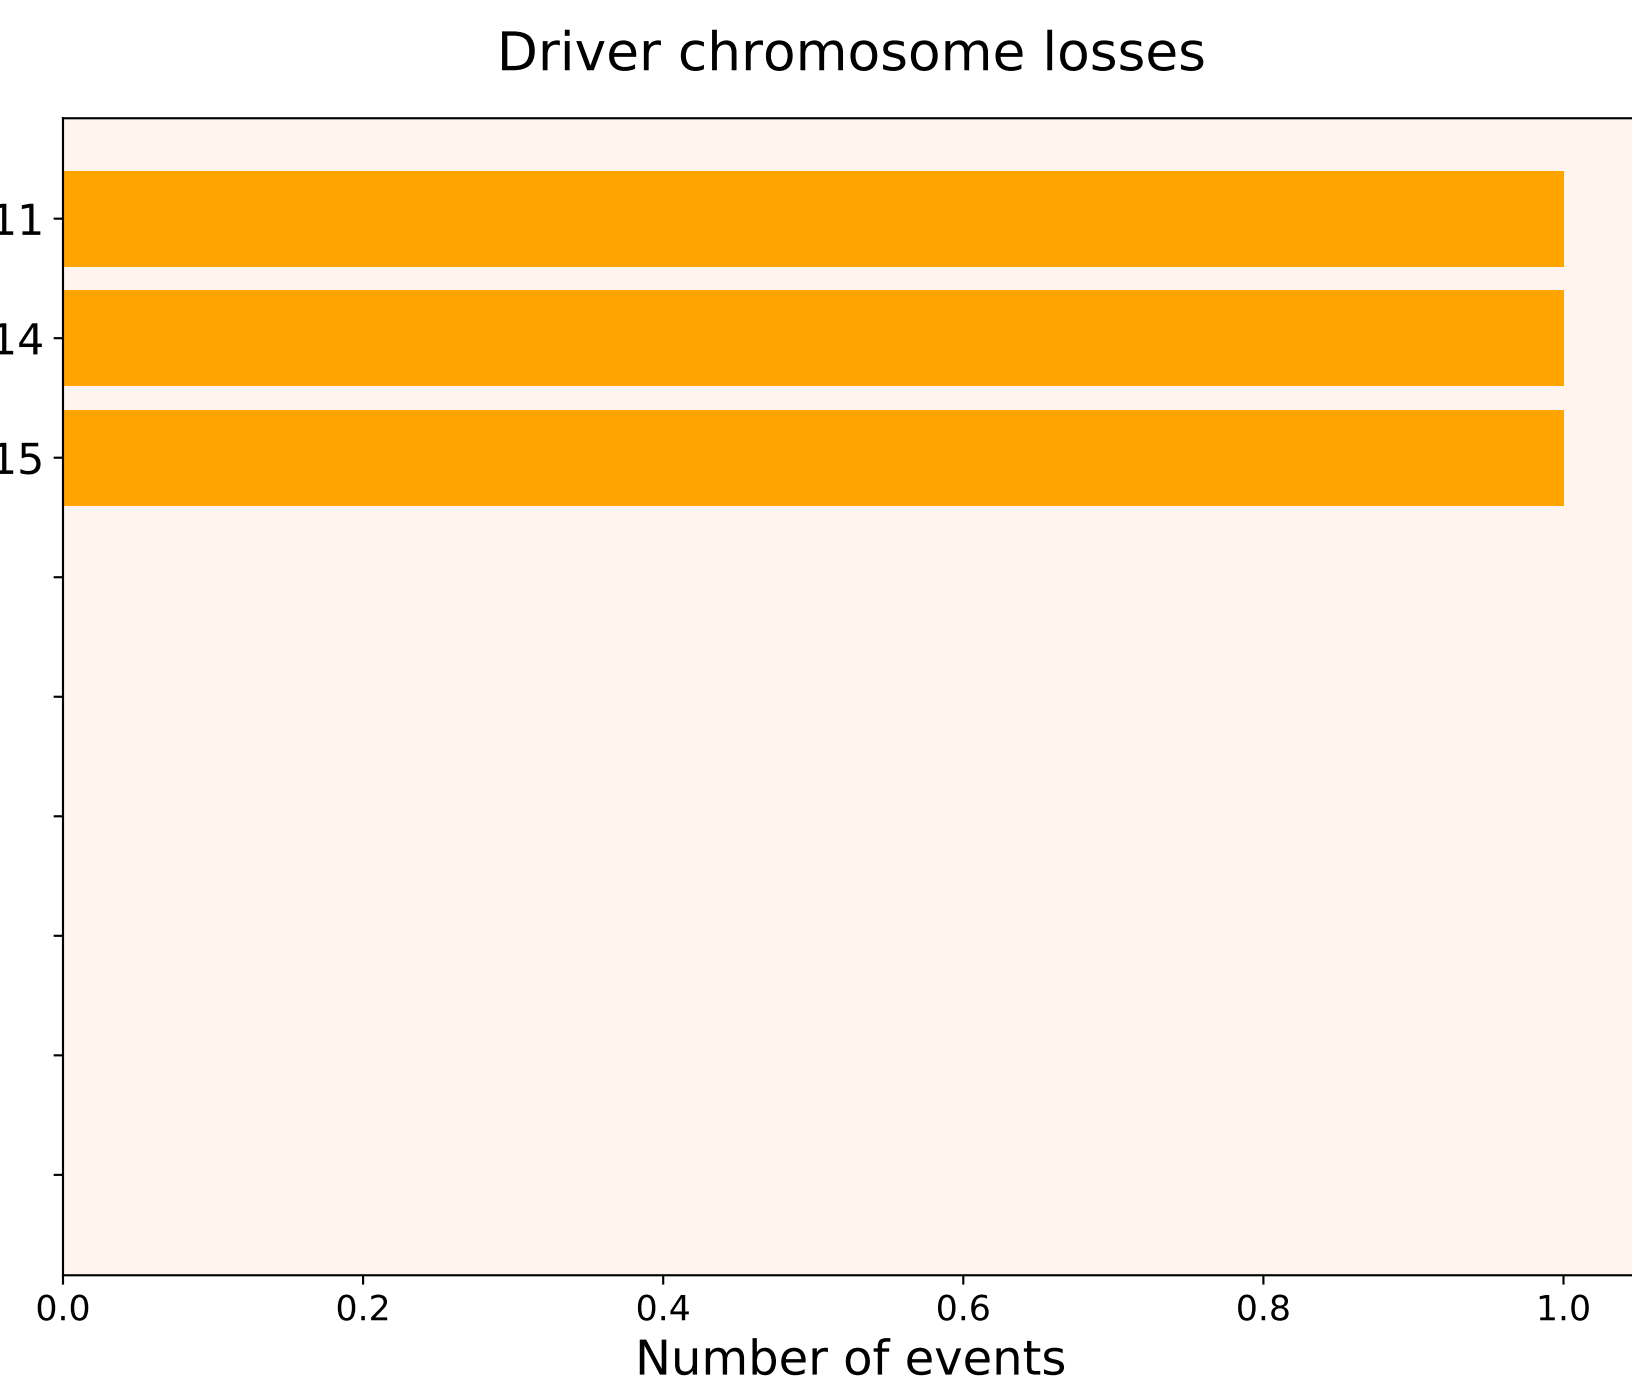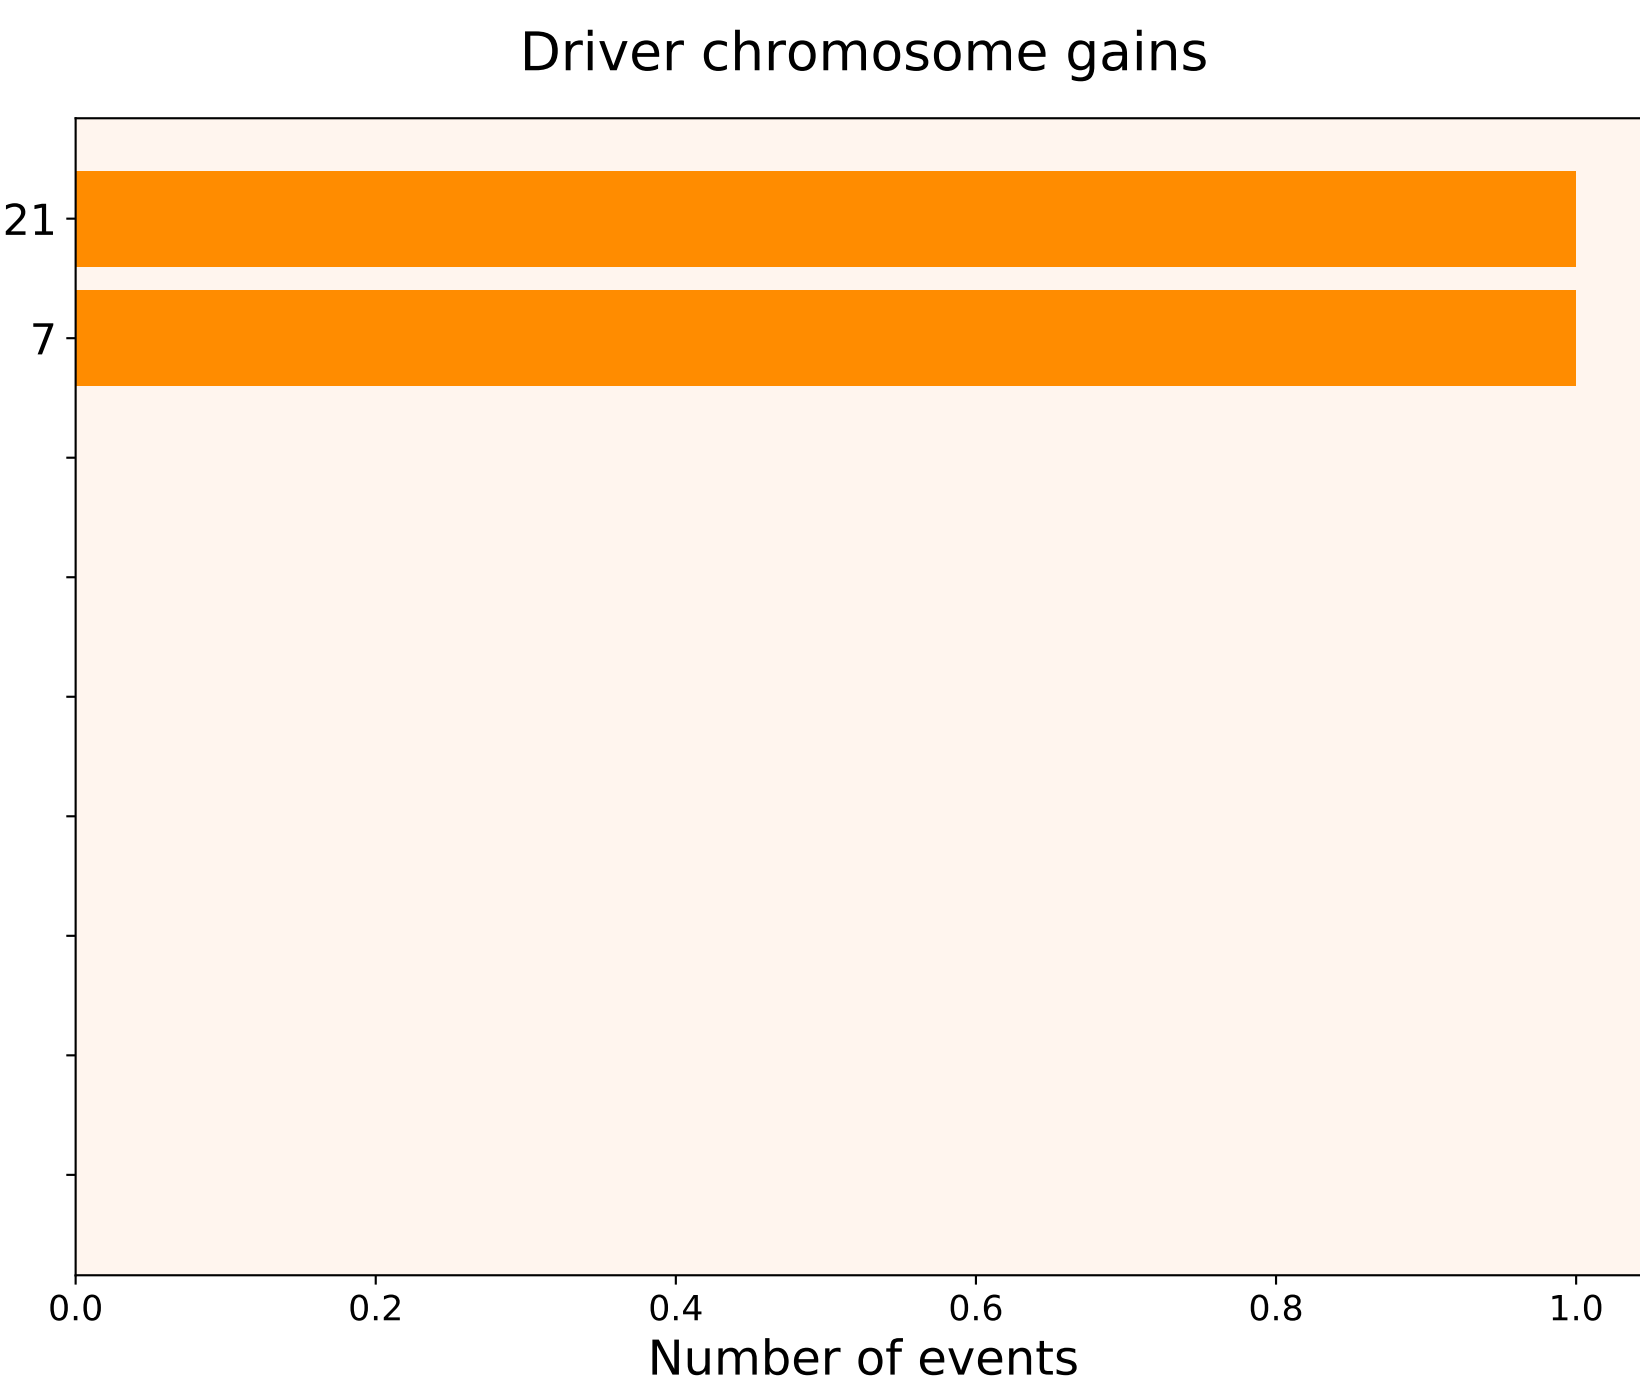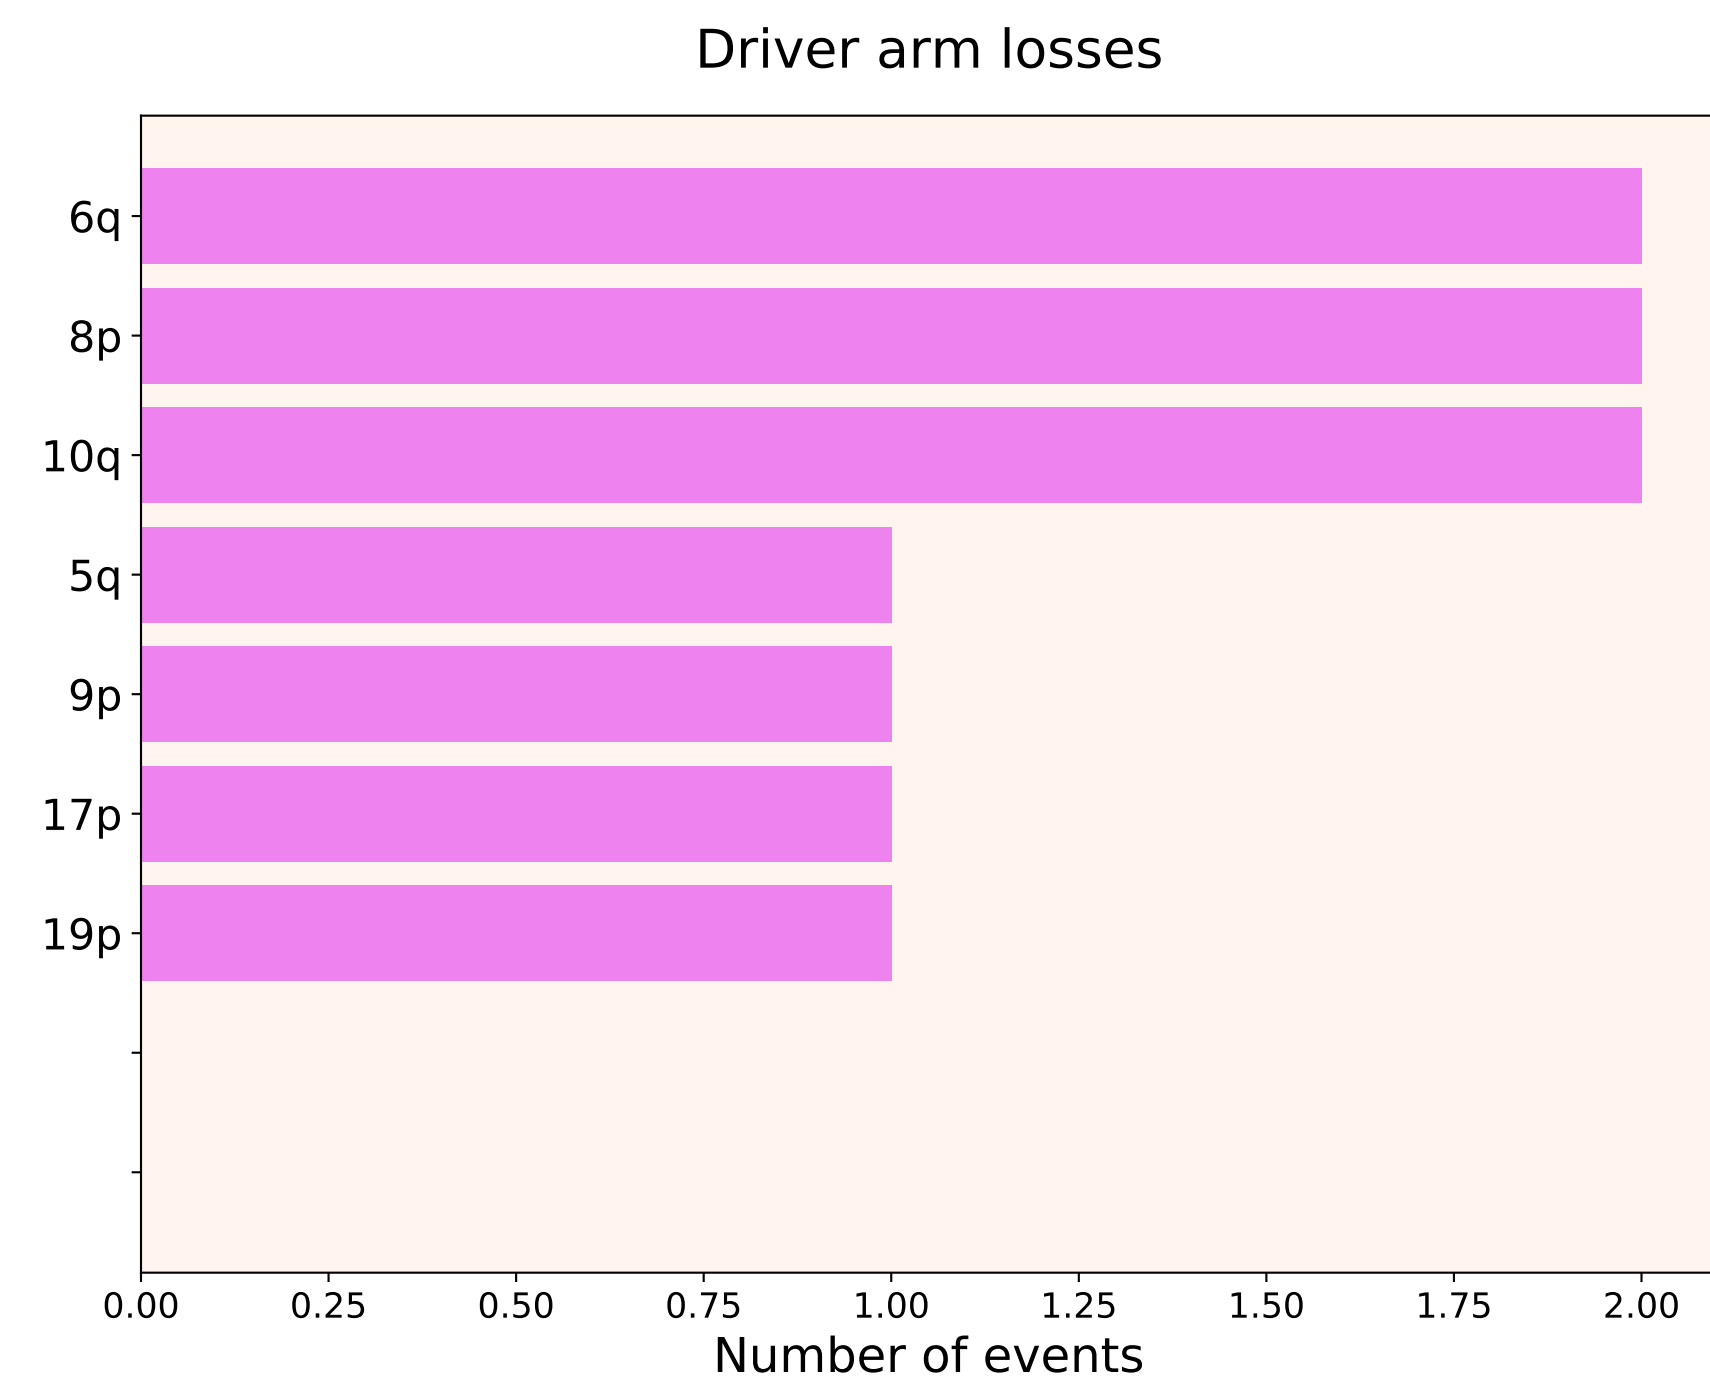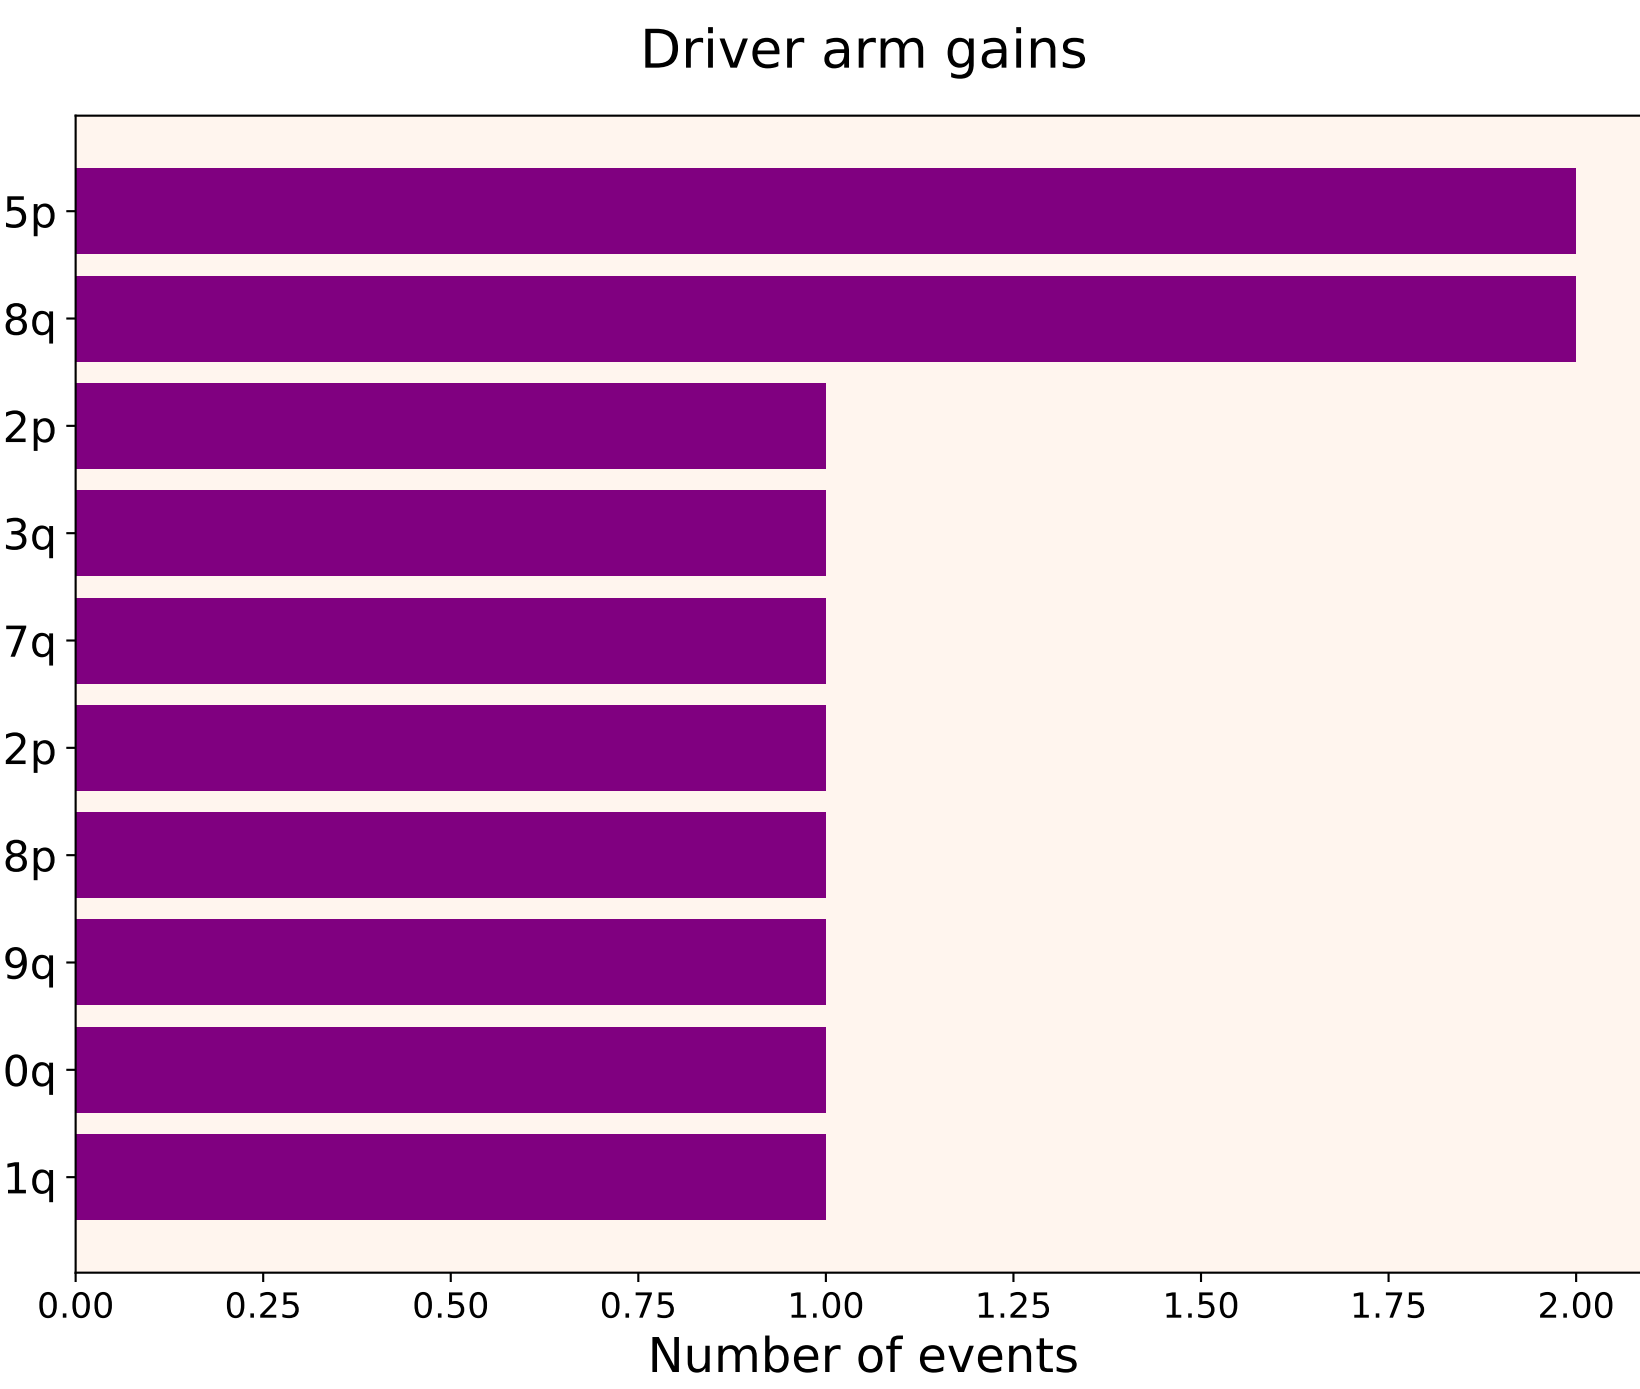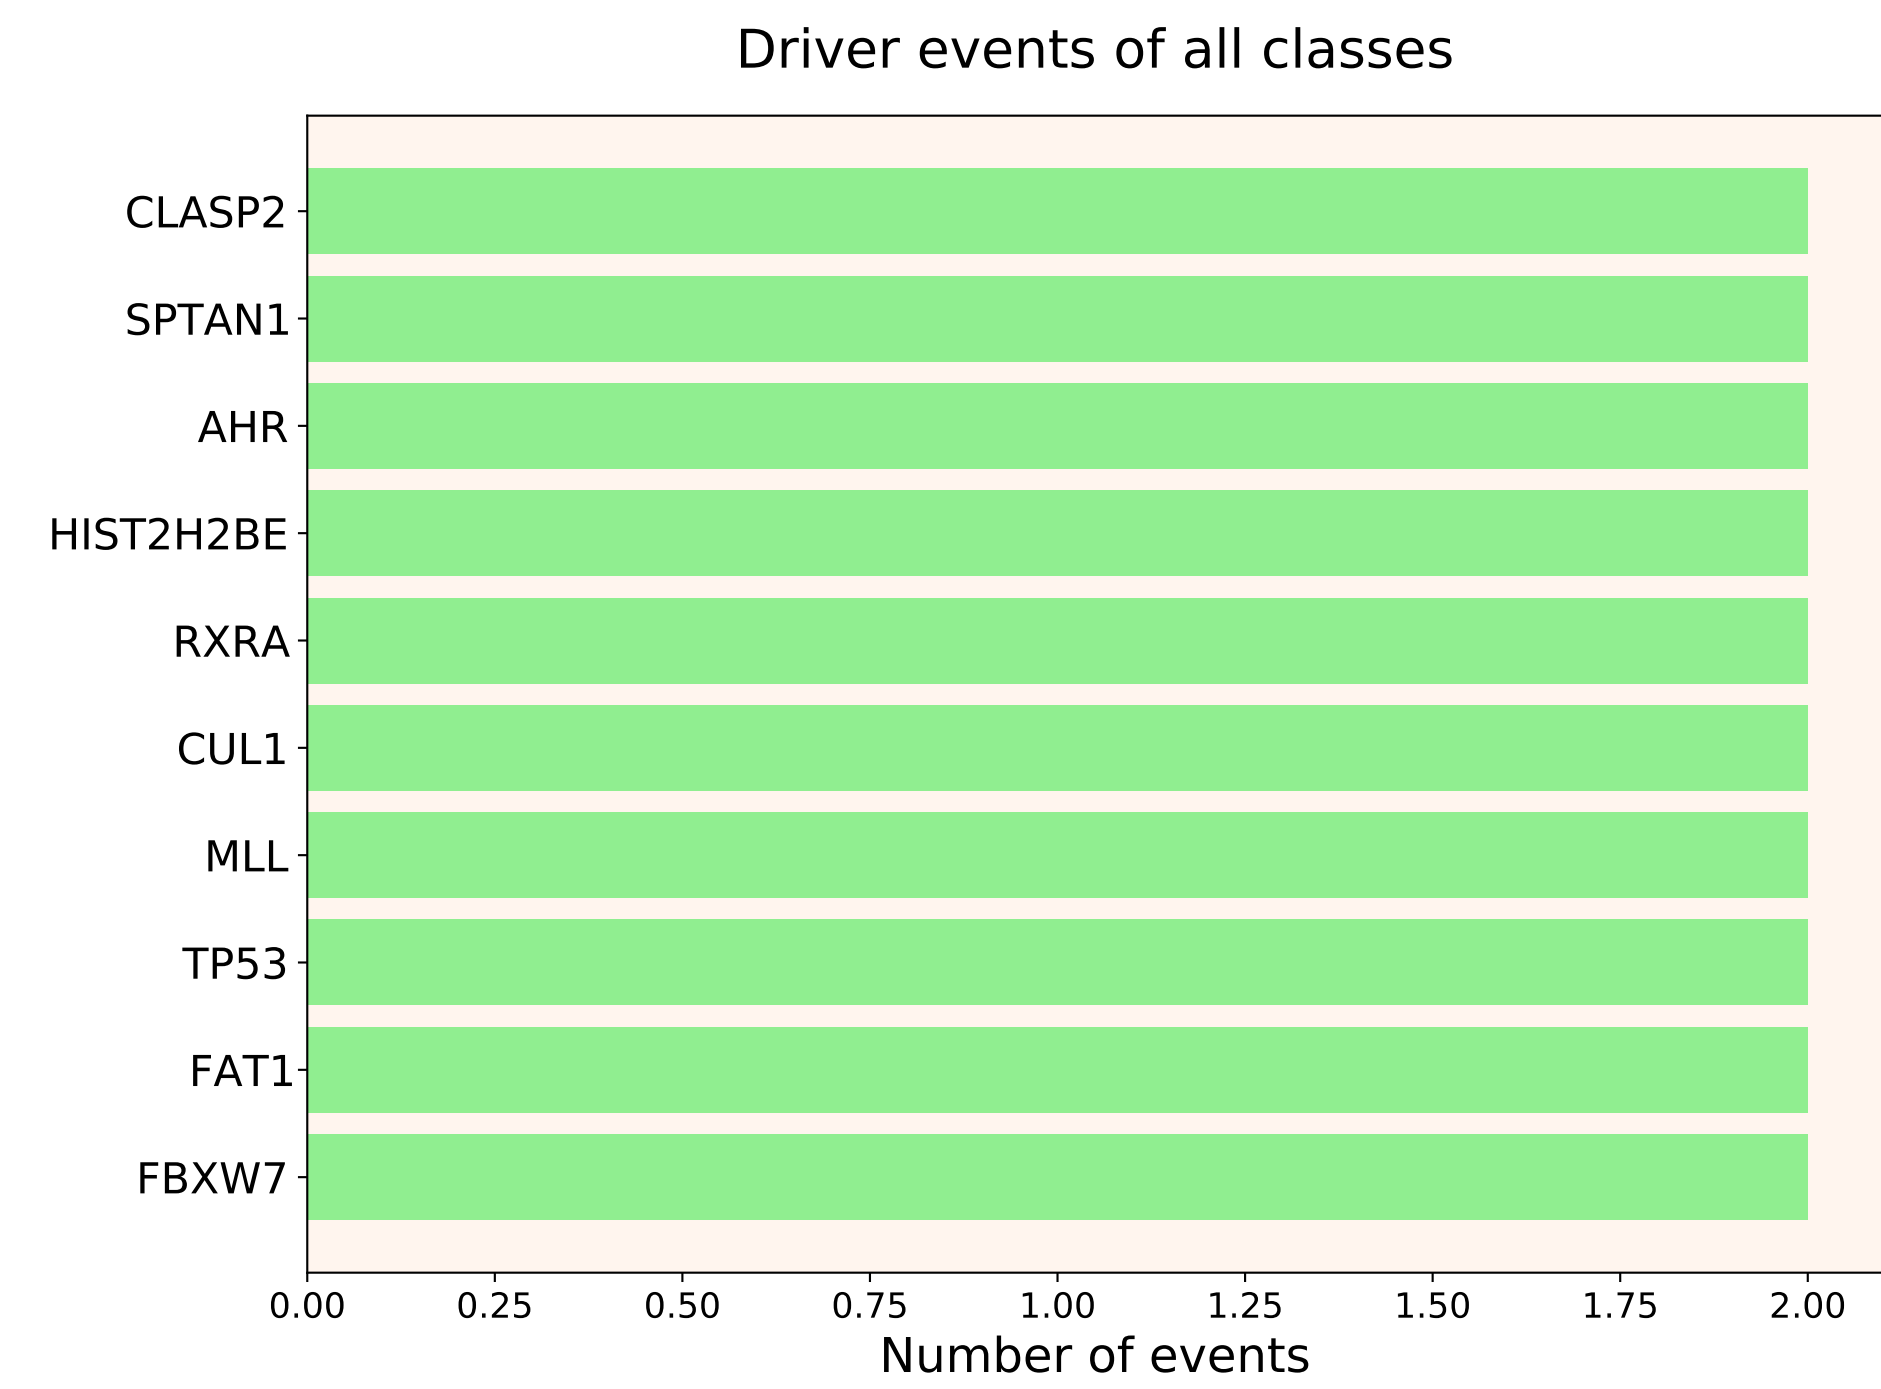

Supplement: Supplemental_Data_S1.zip [file Supplemental_Data_S1.zip]

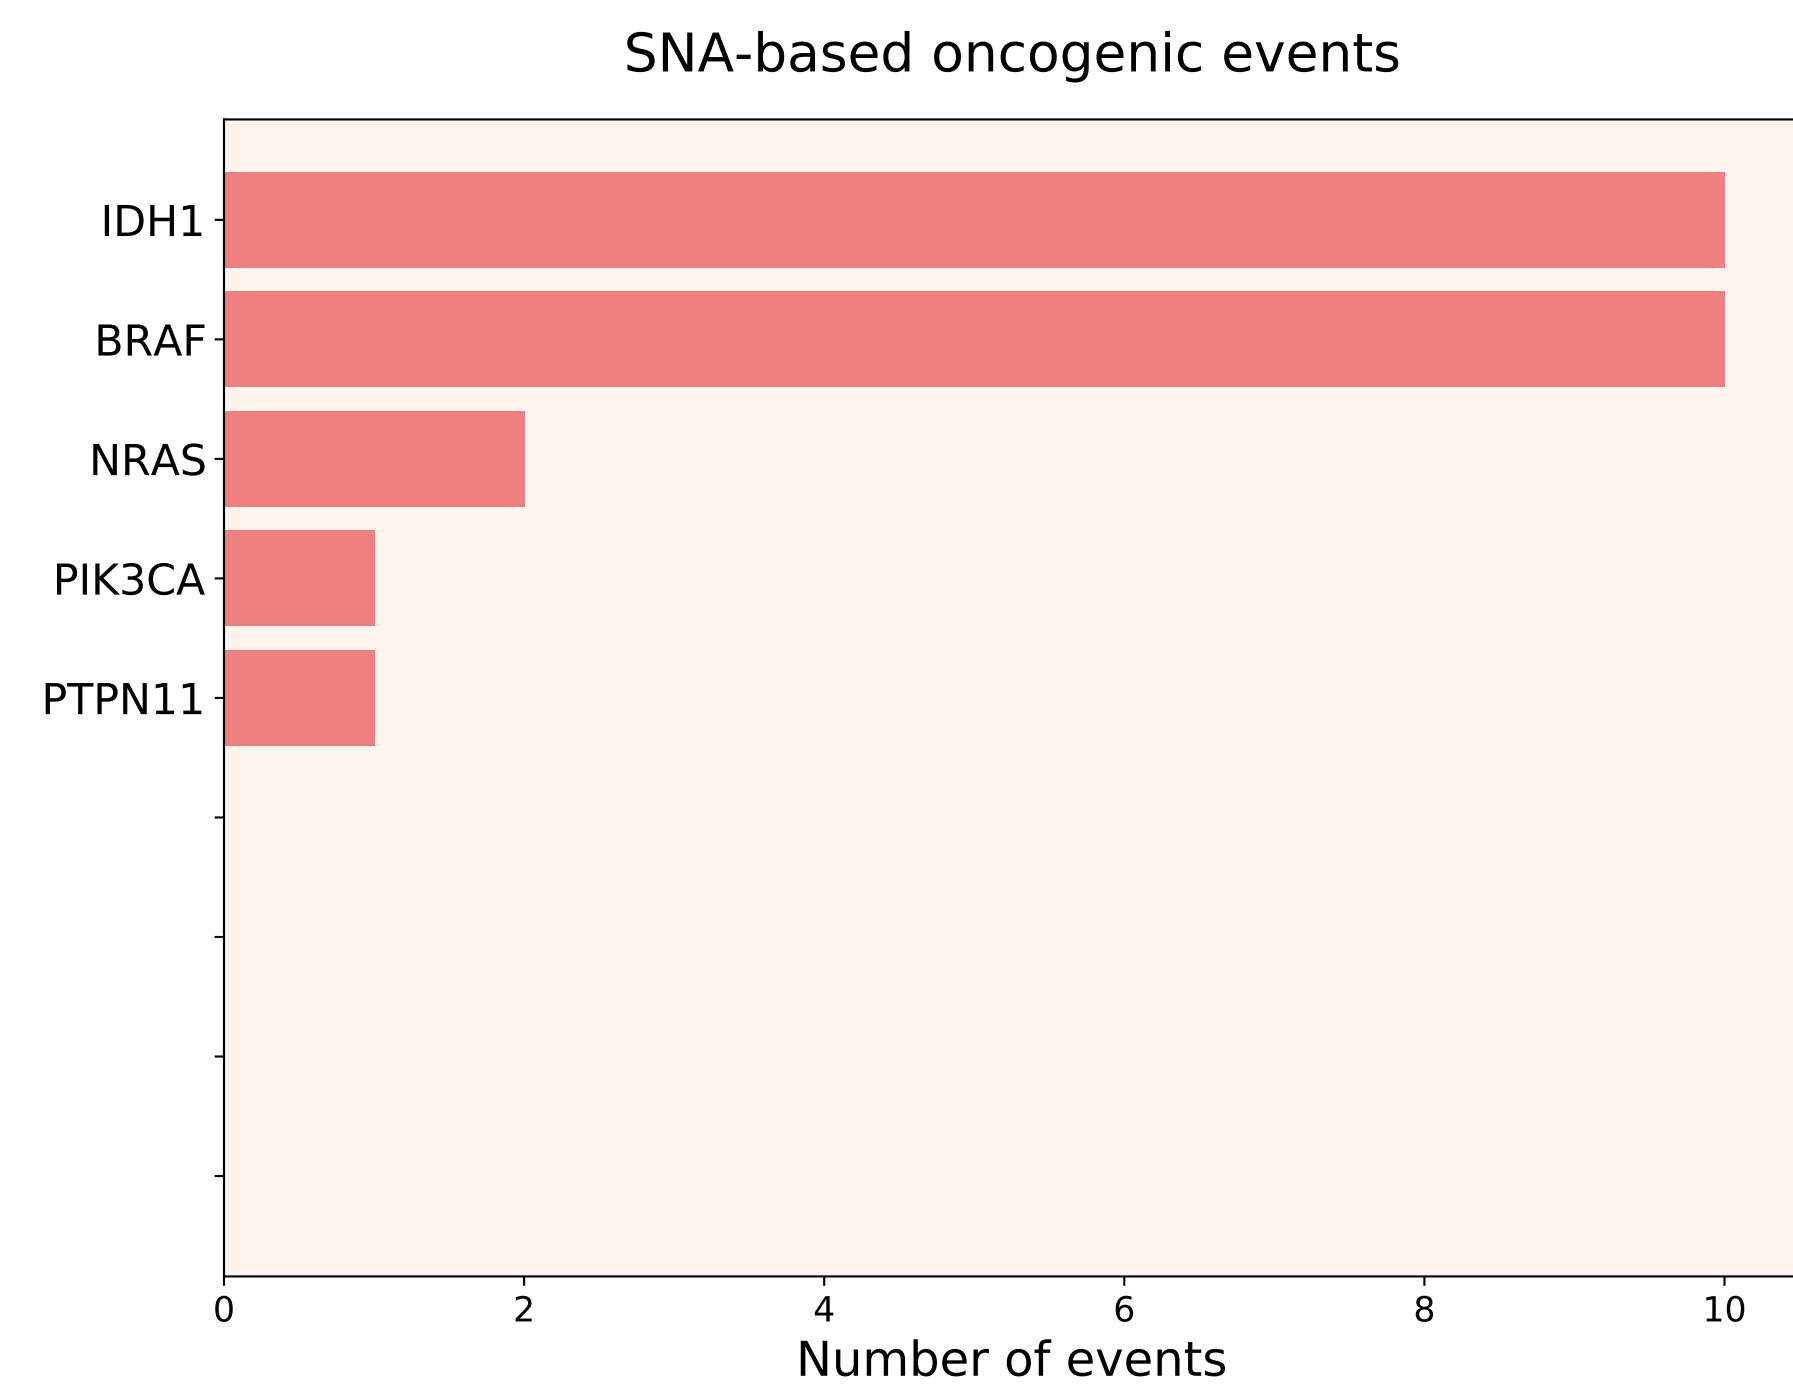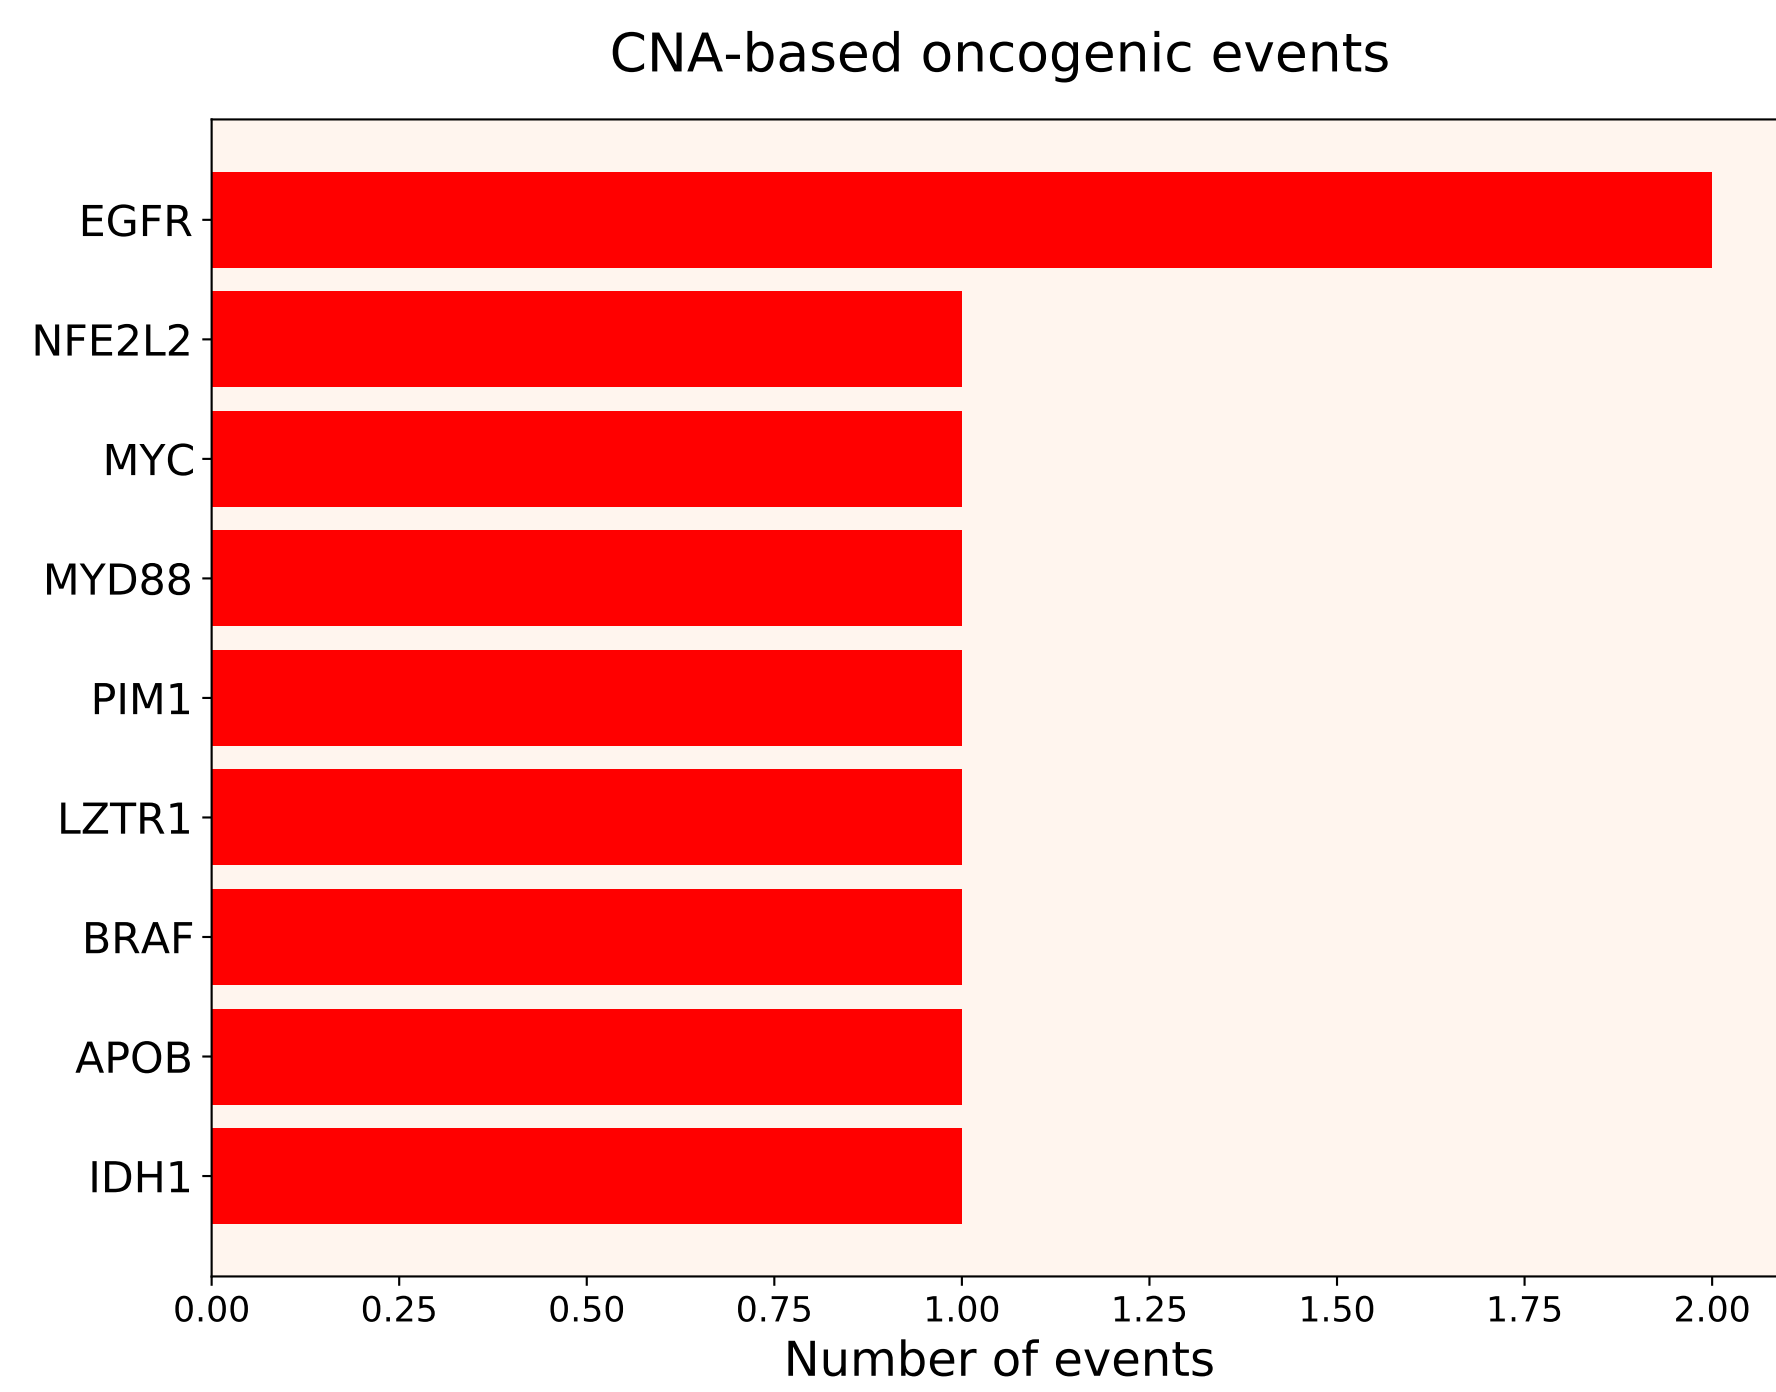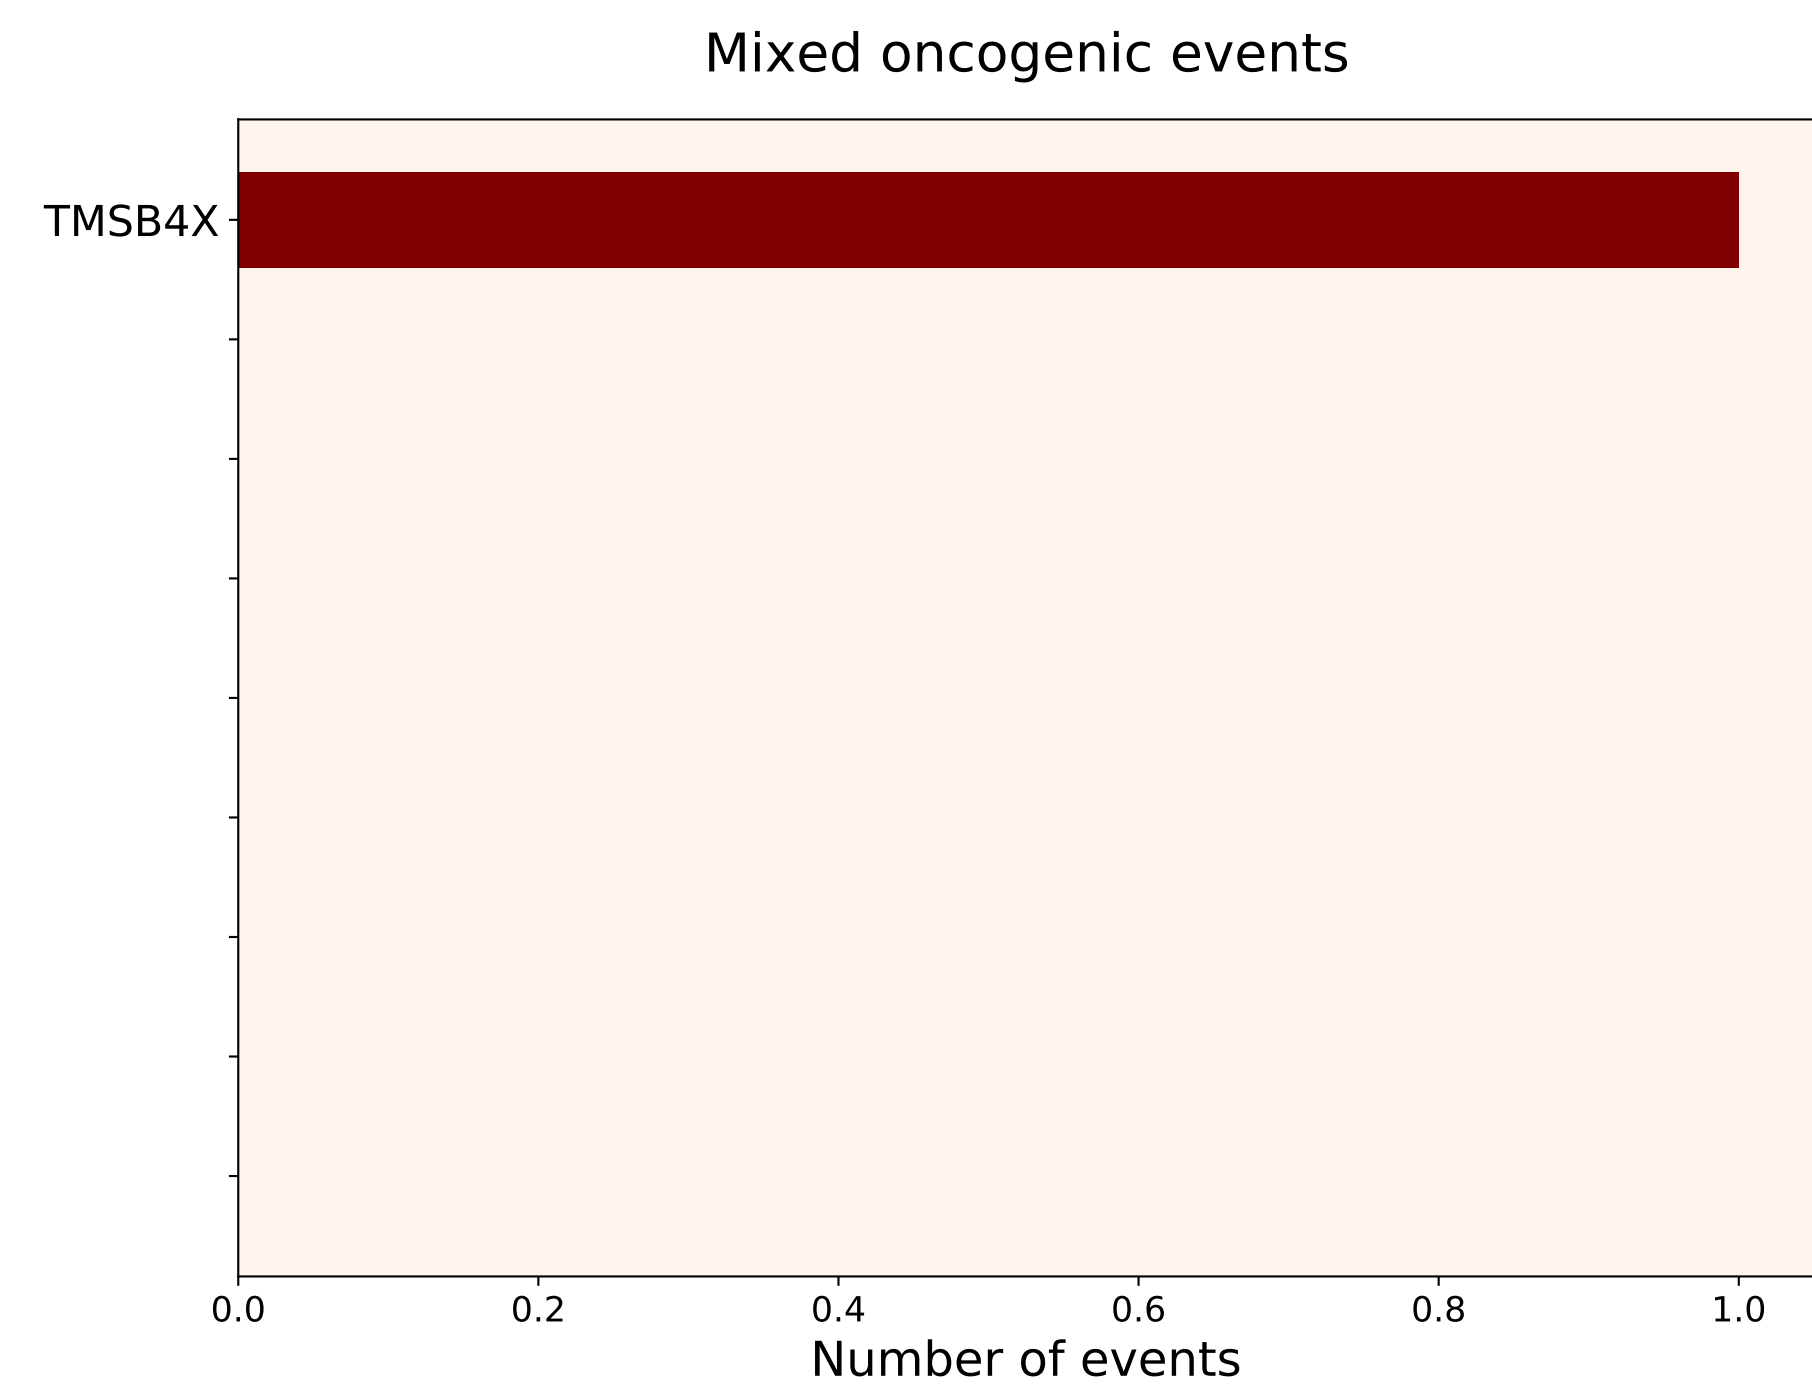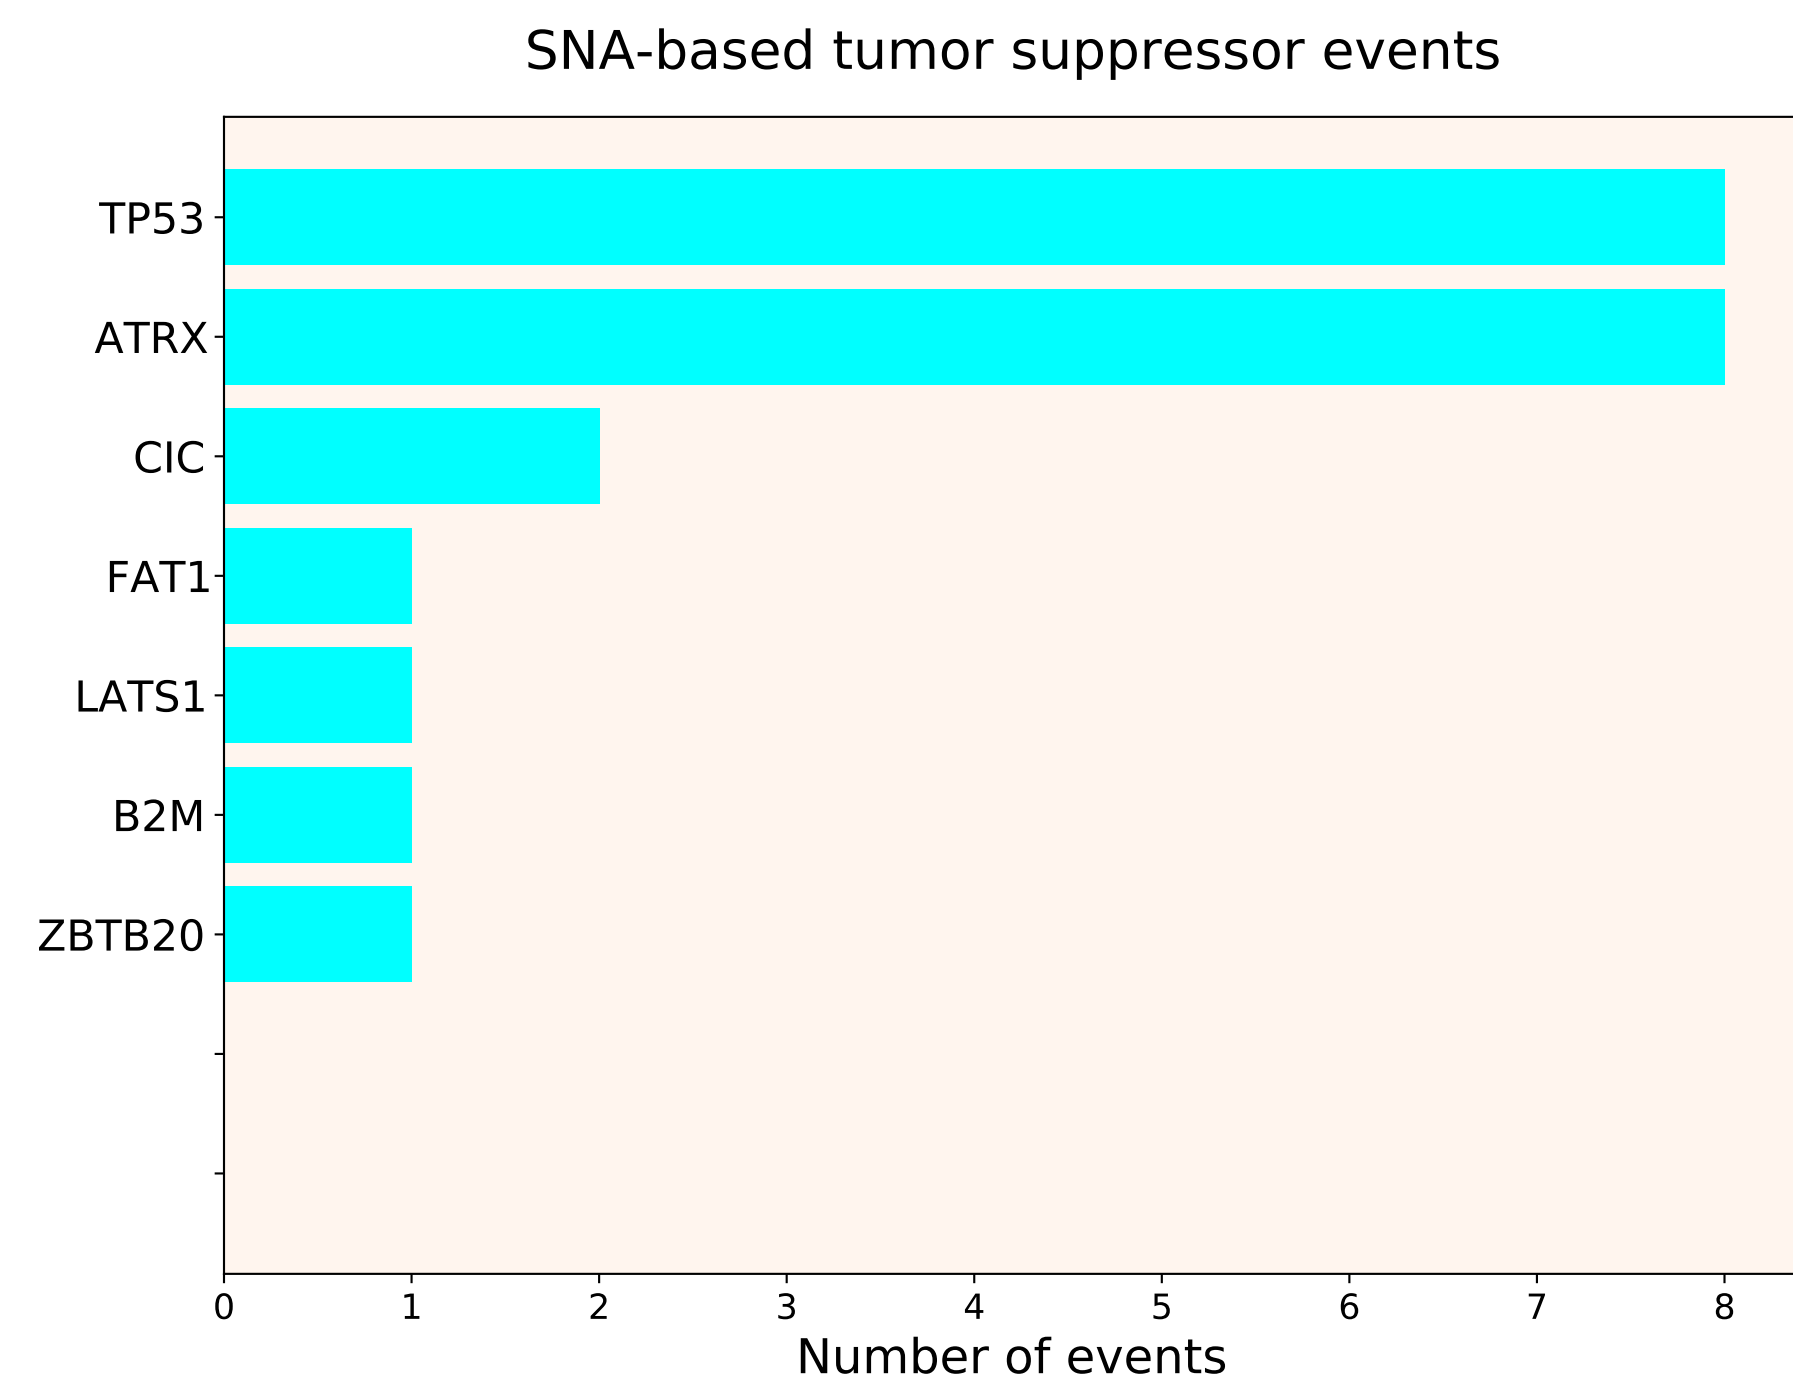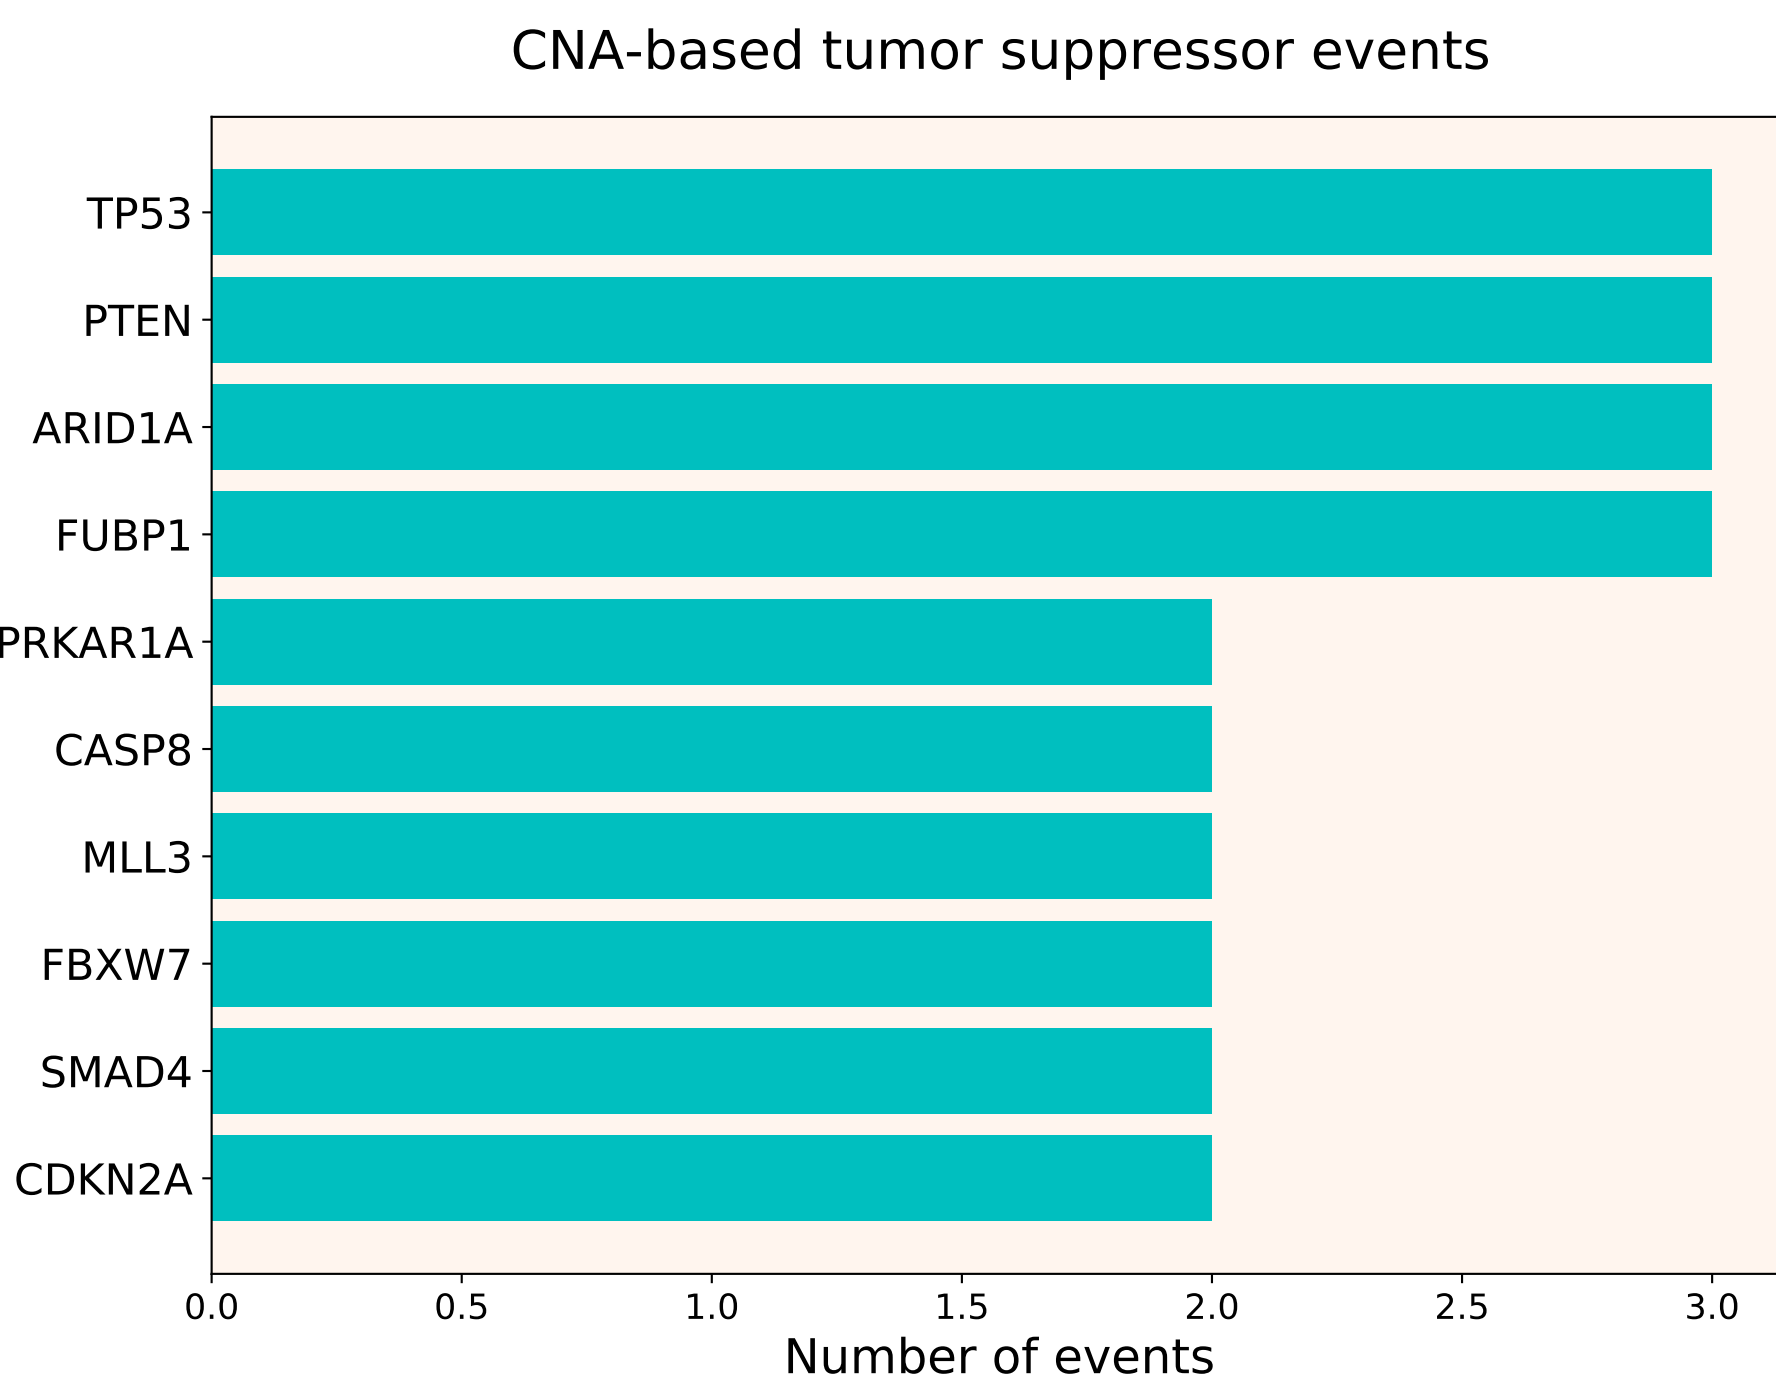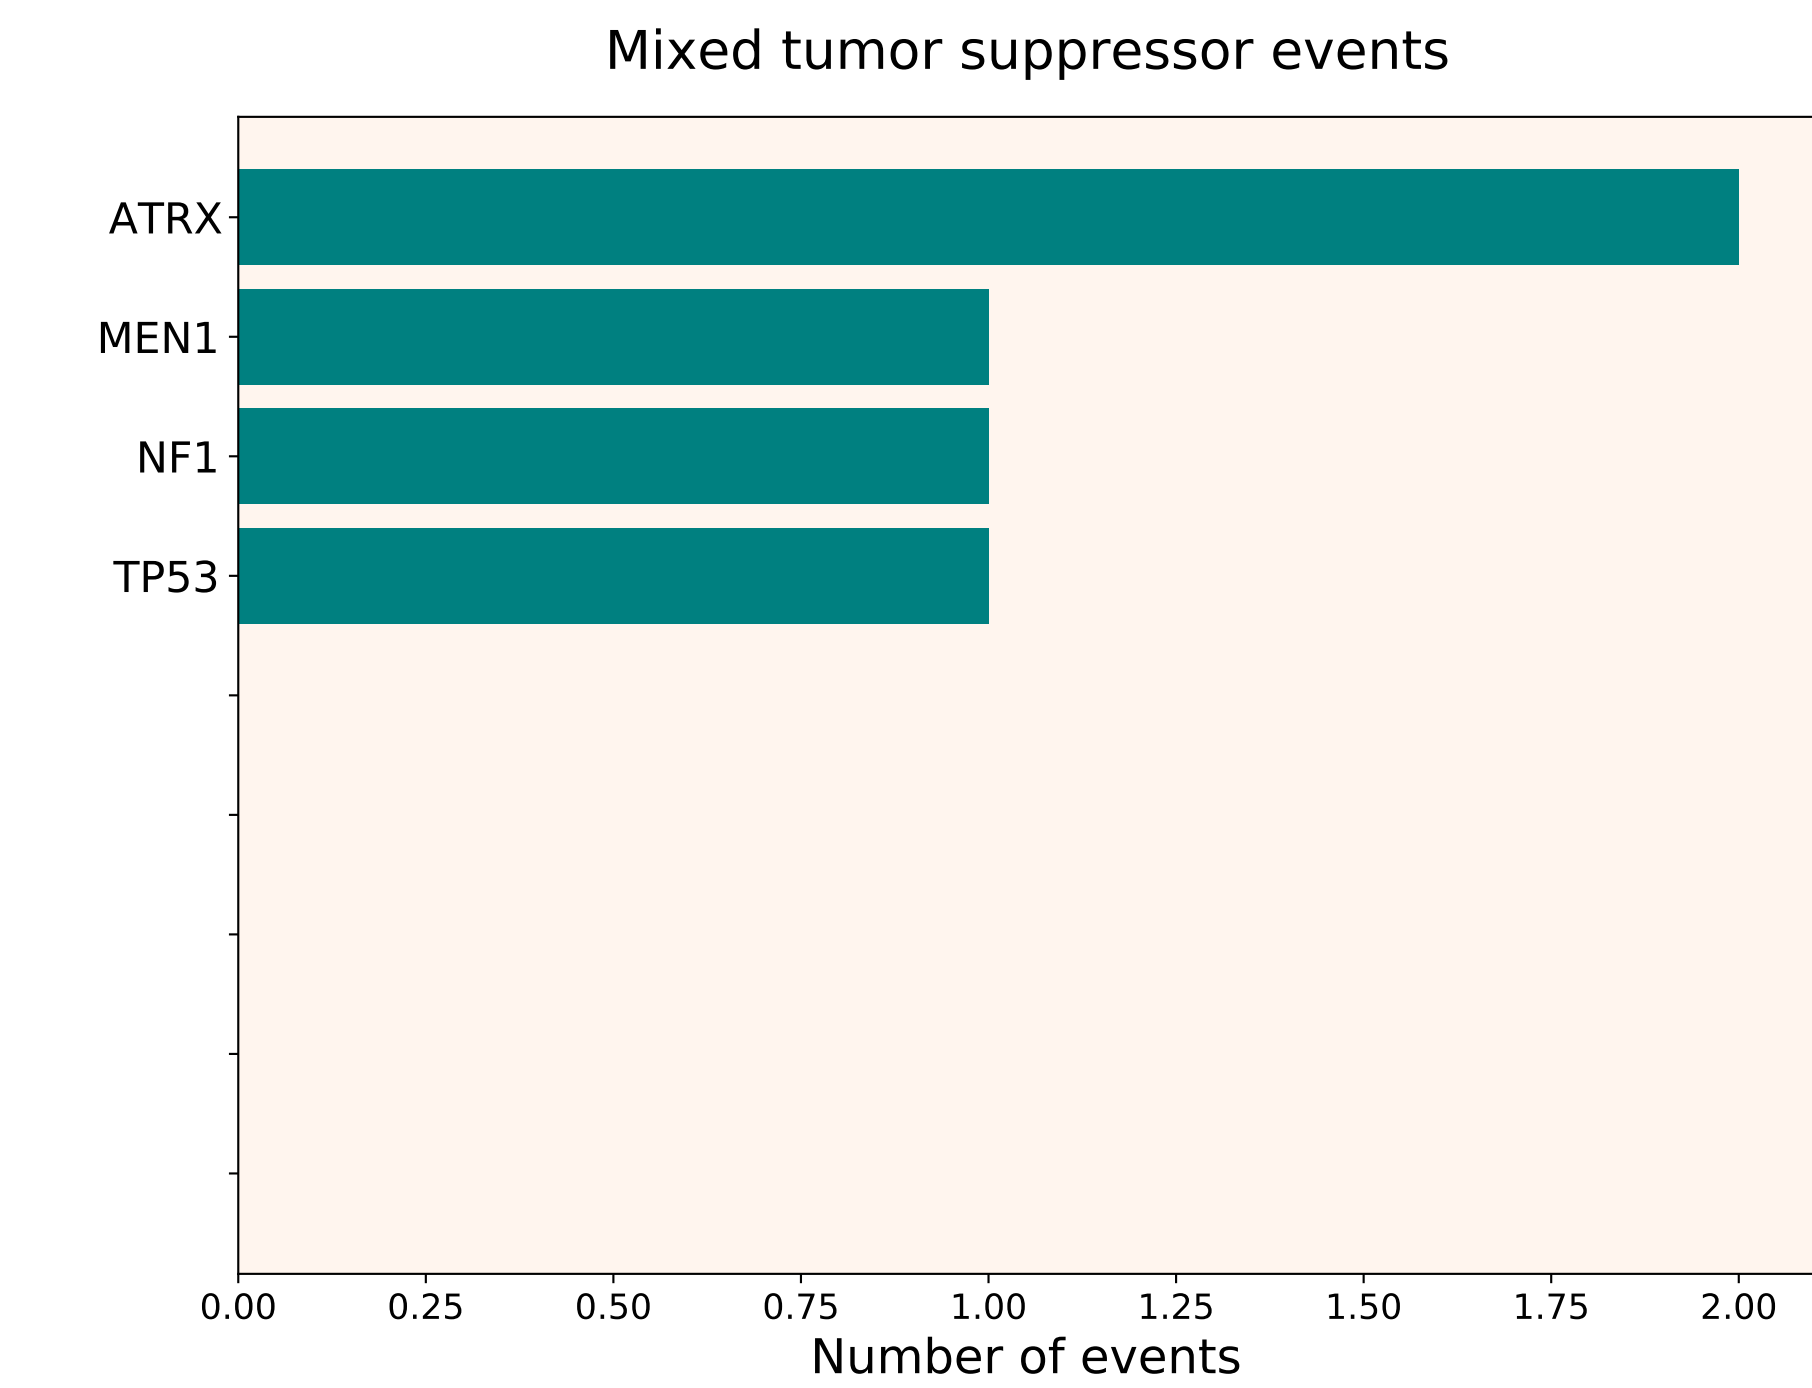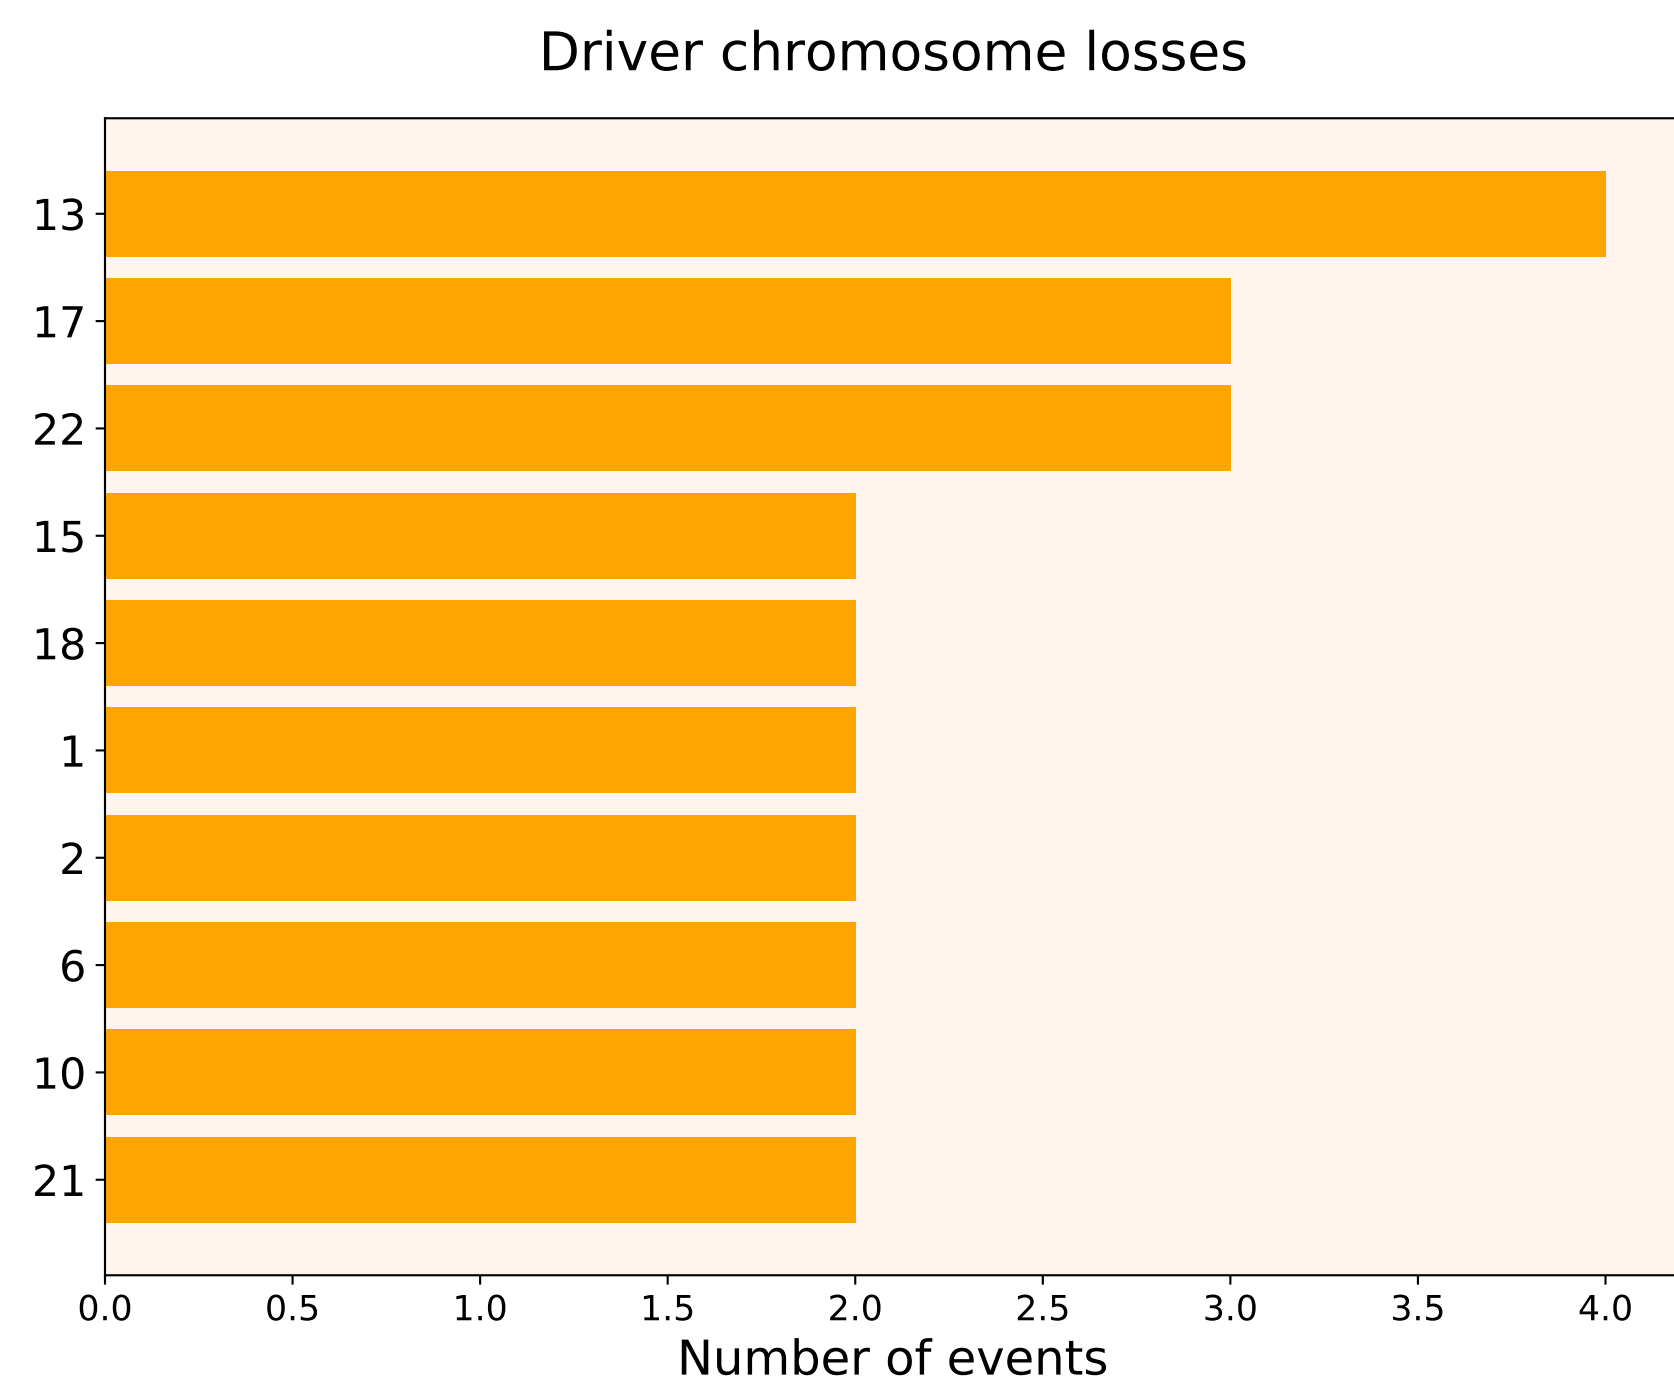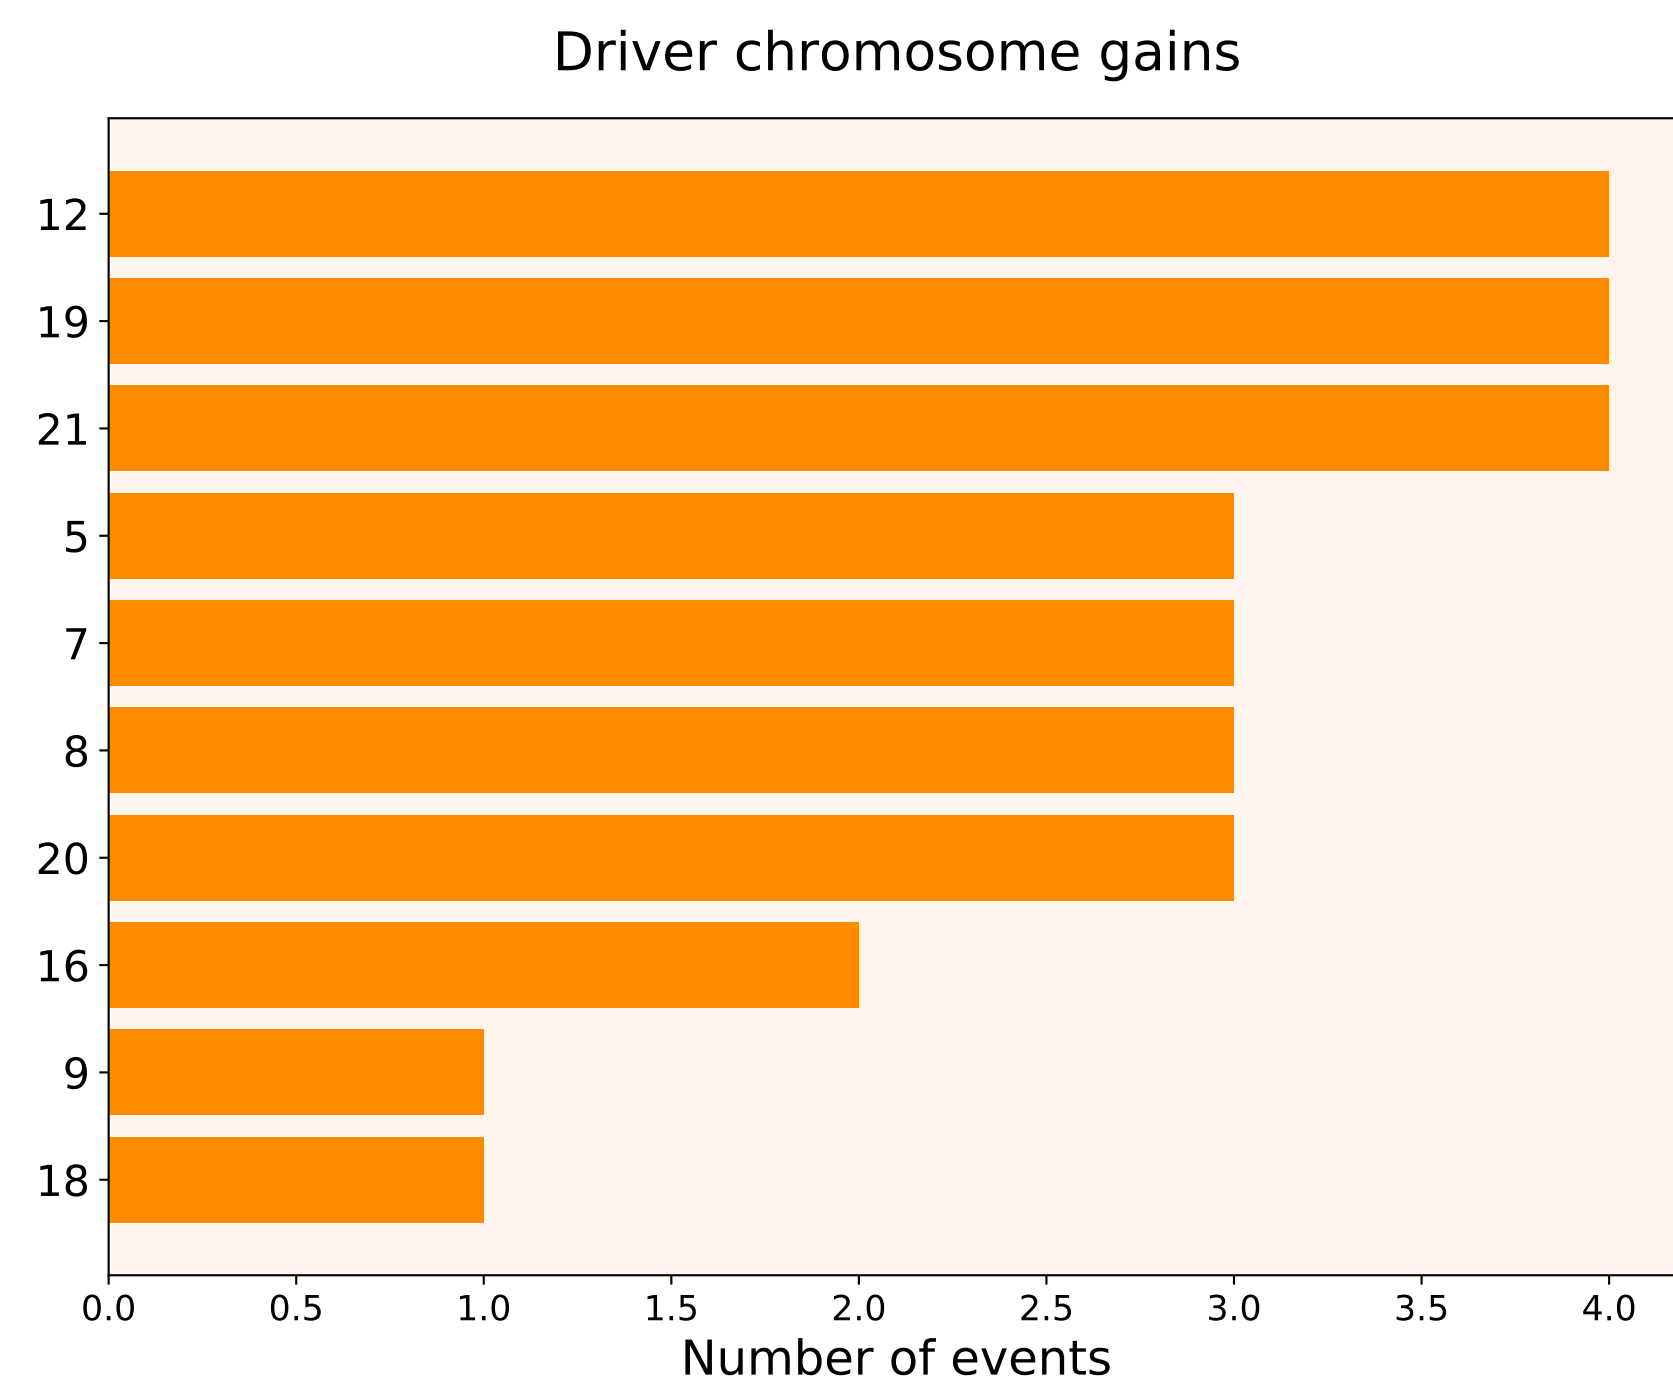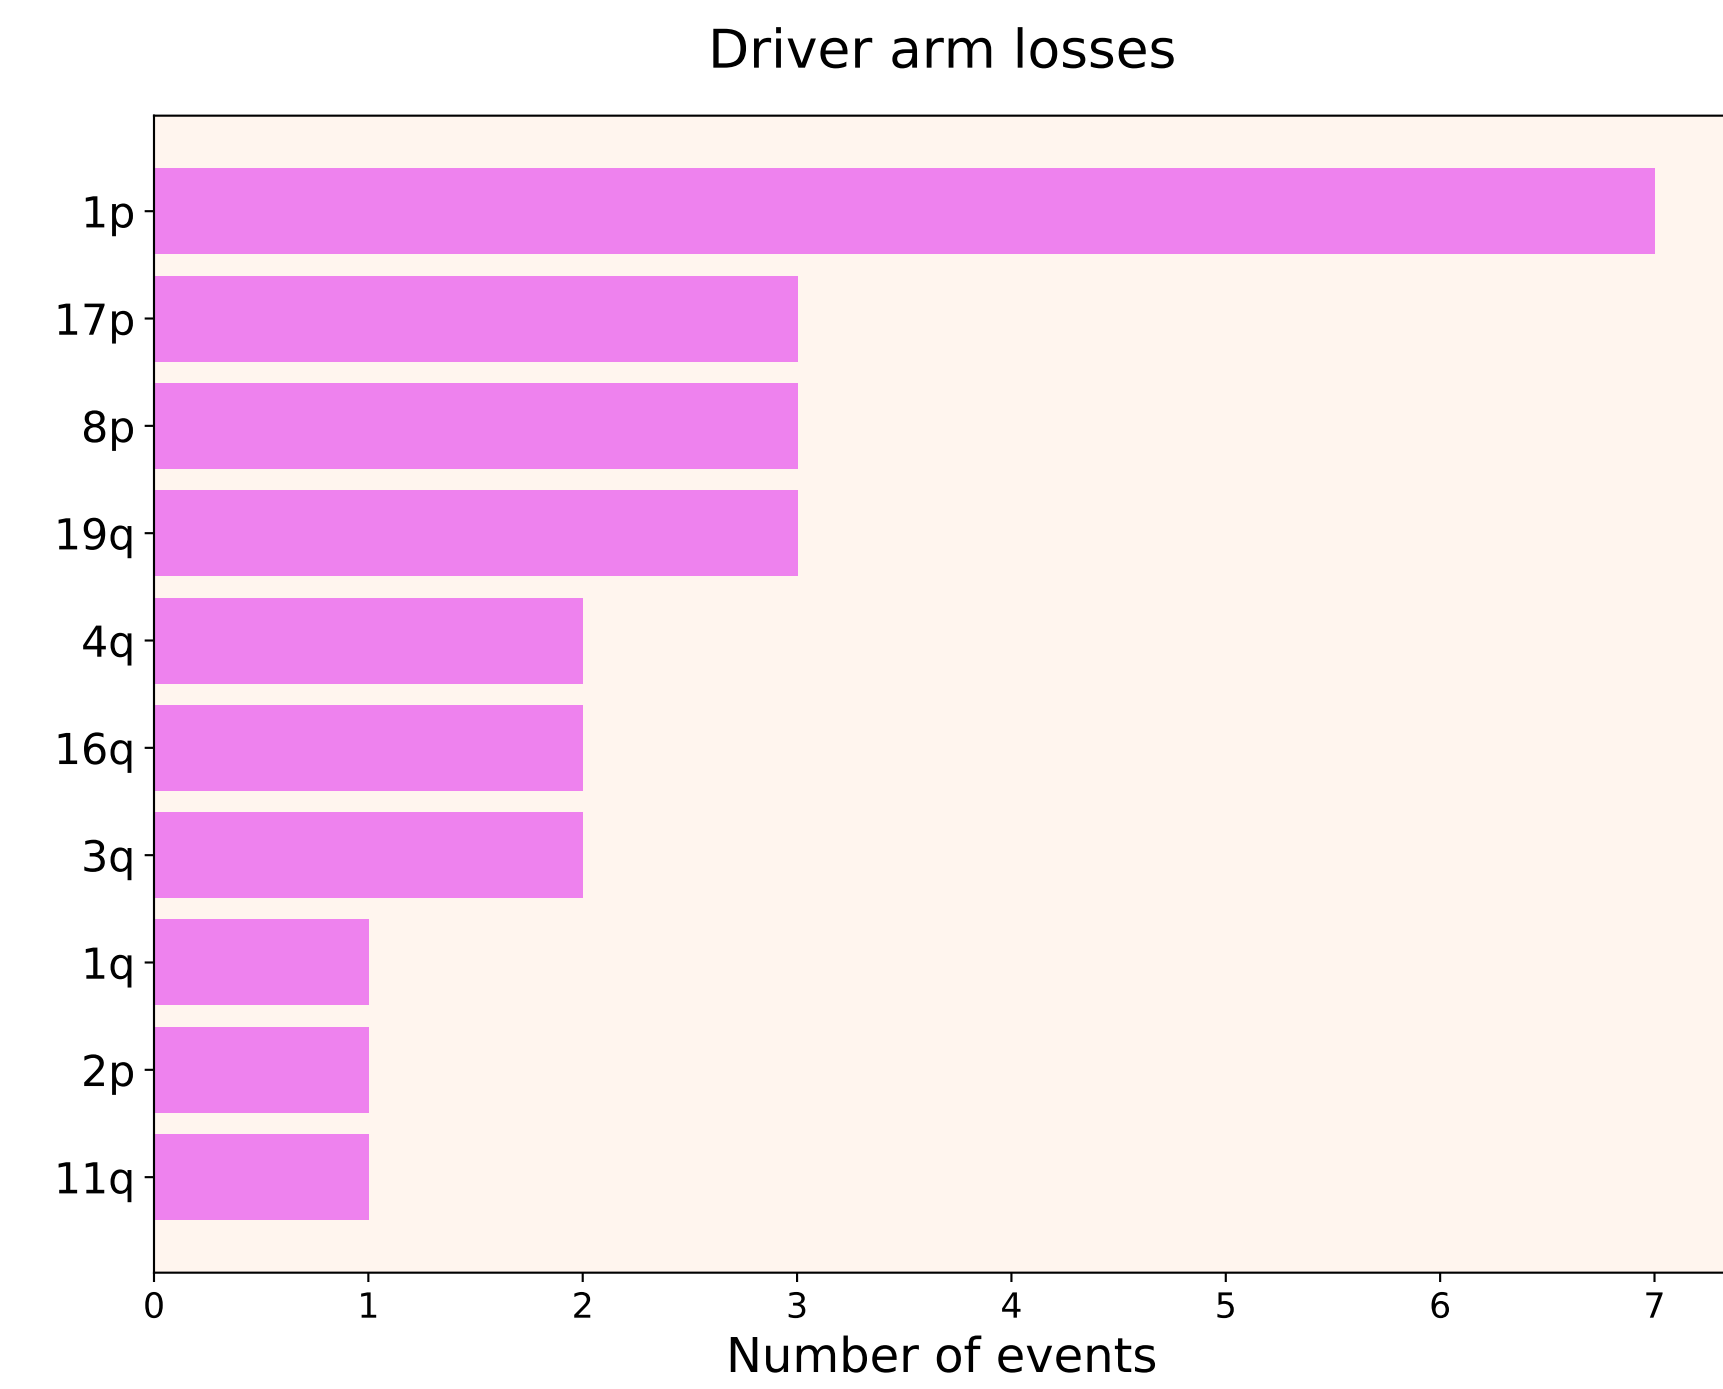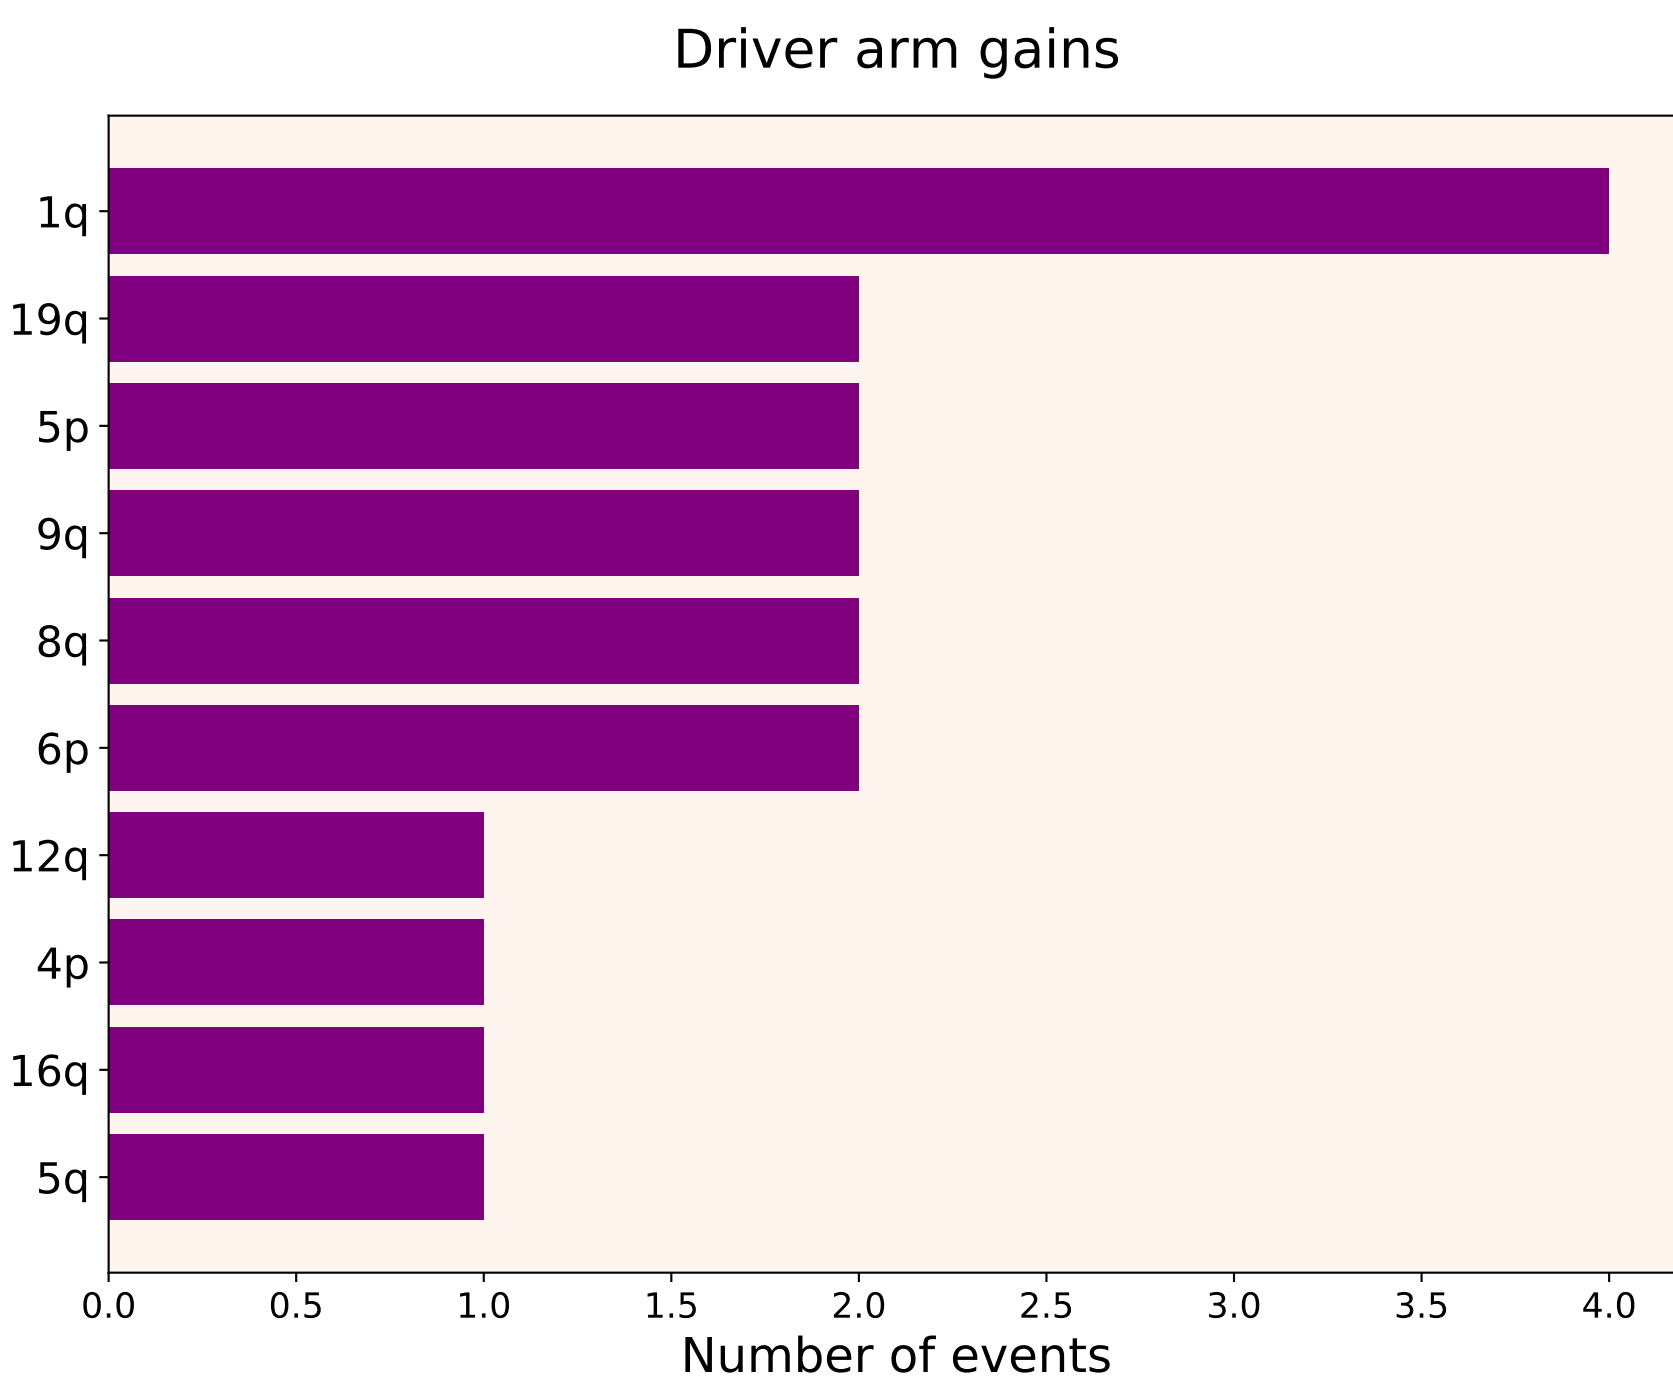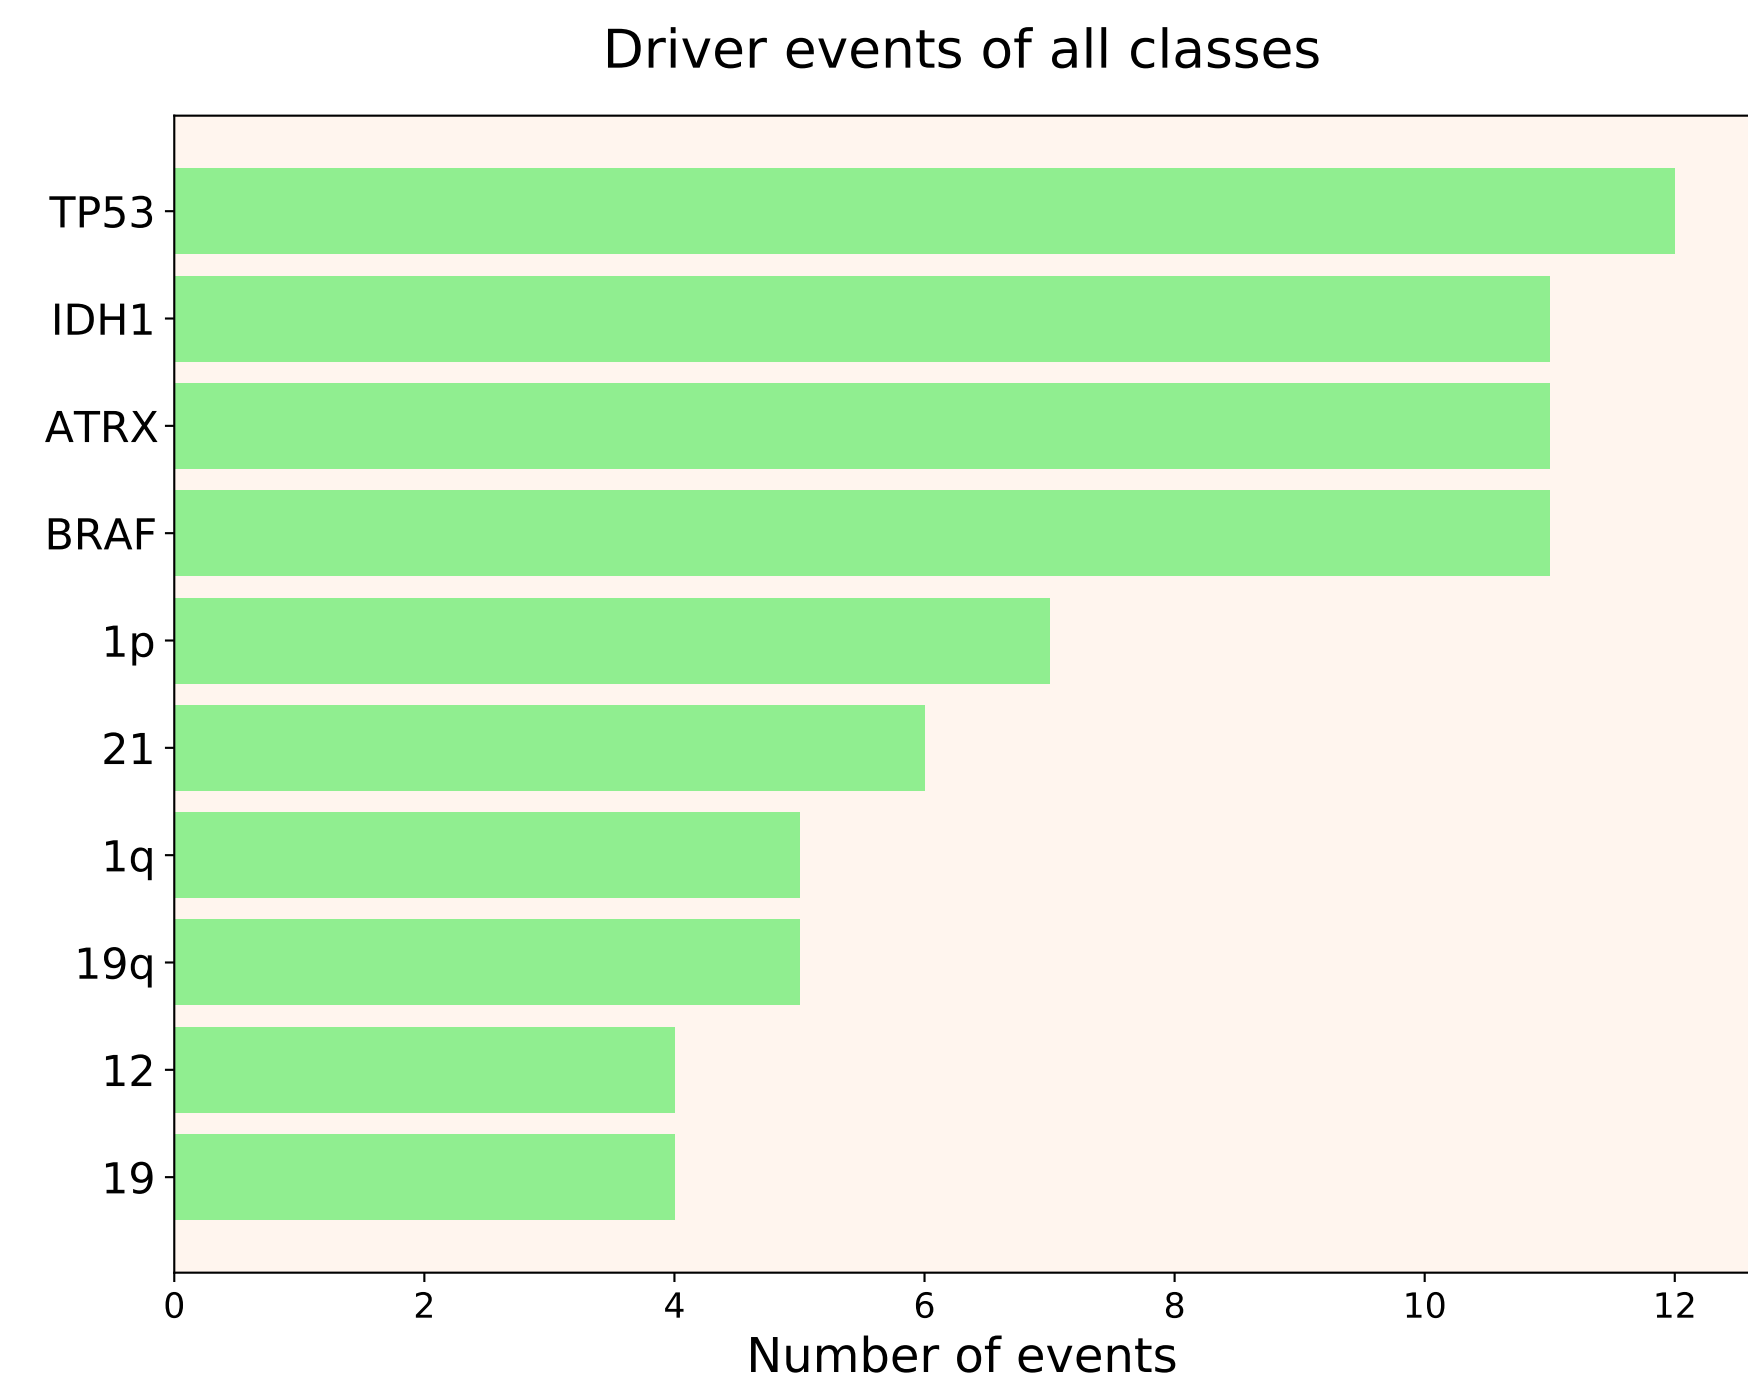

Supplement: Supplemental_Data_S1.zip [file Supplemental_Data_S1.zip]

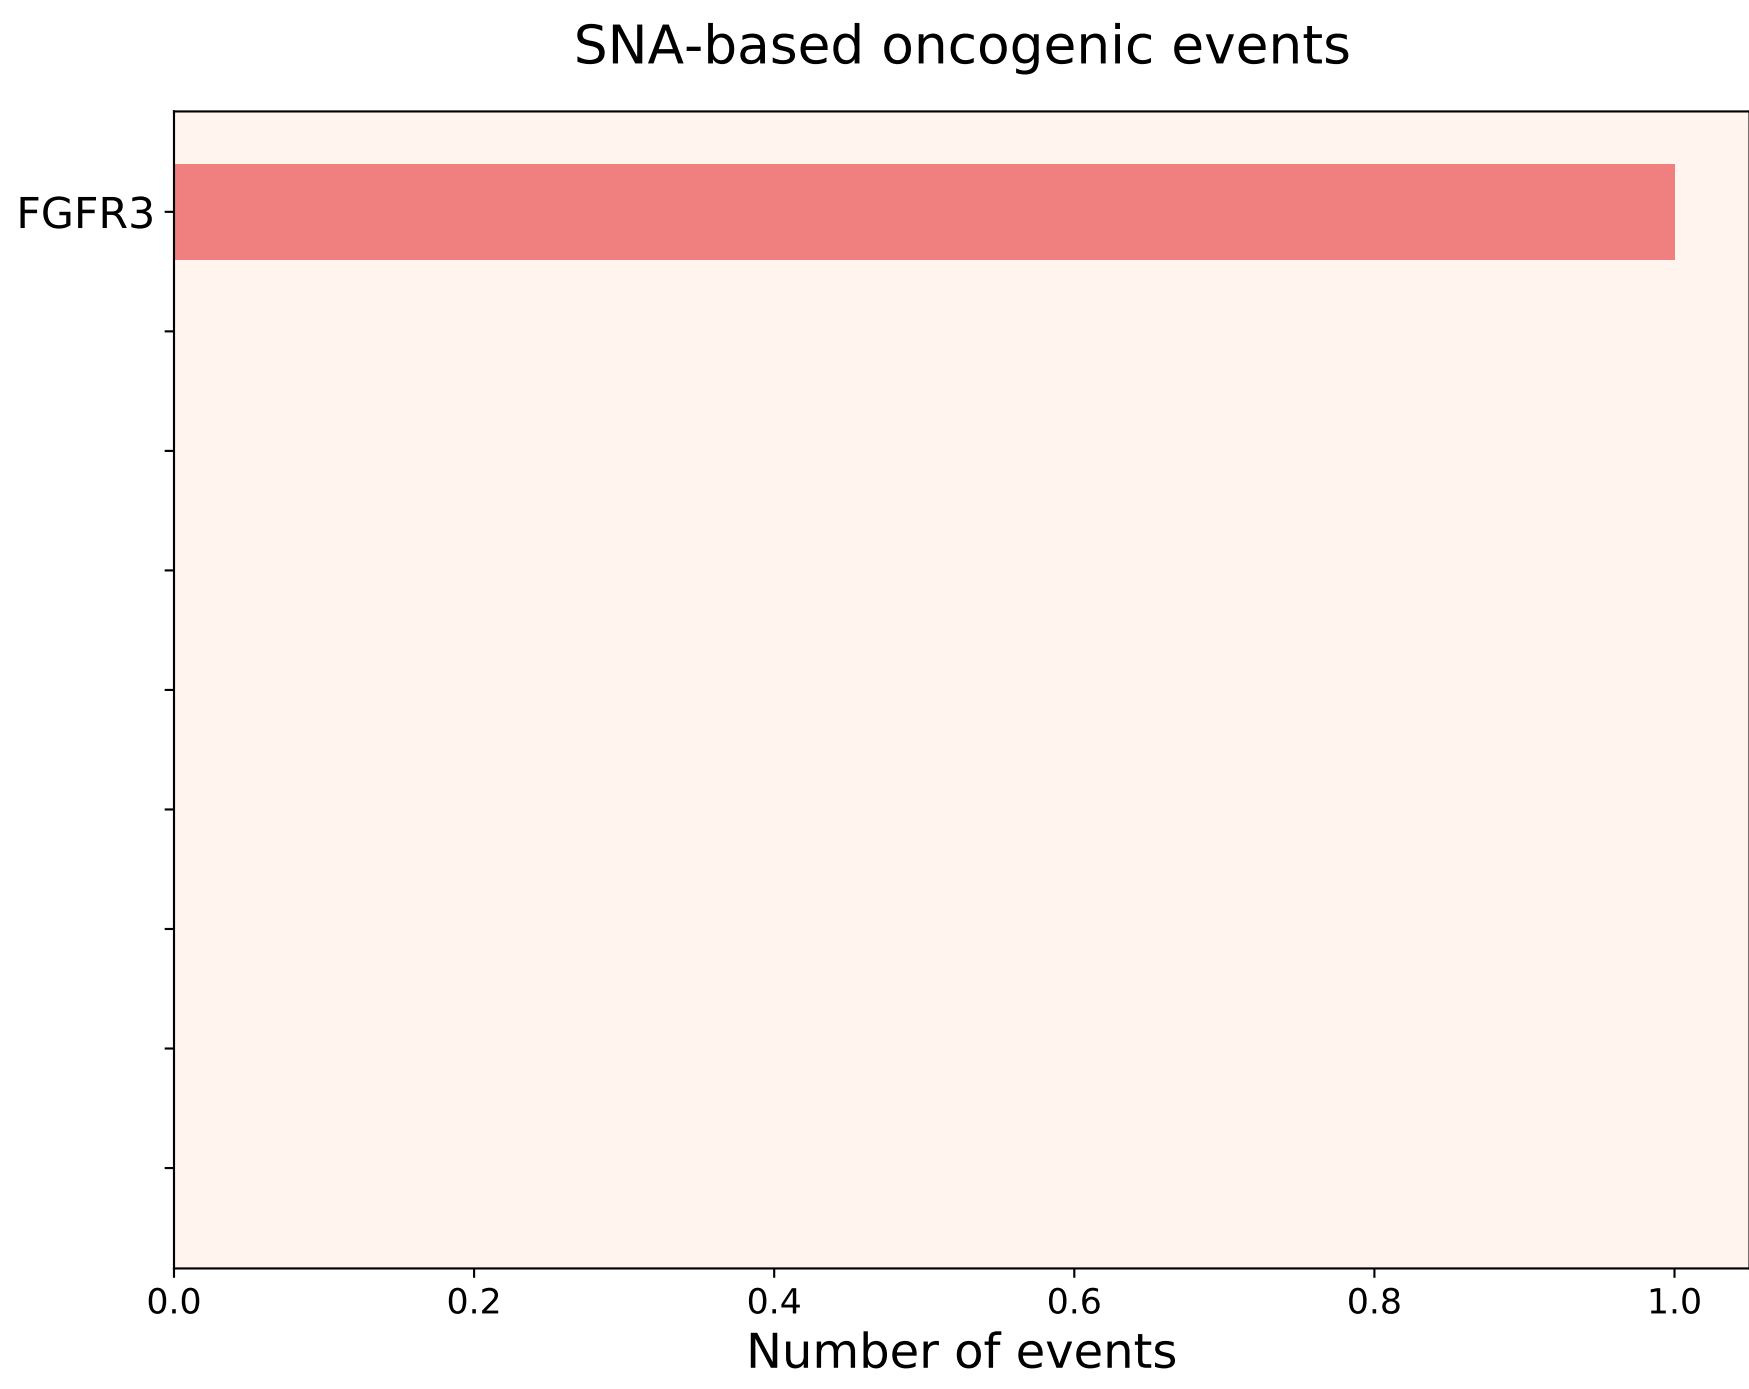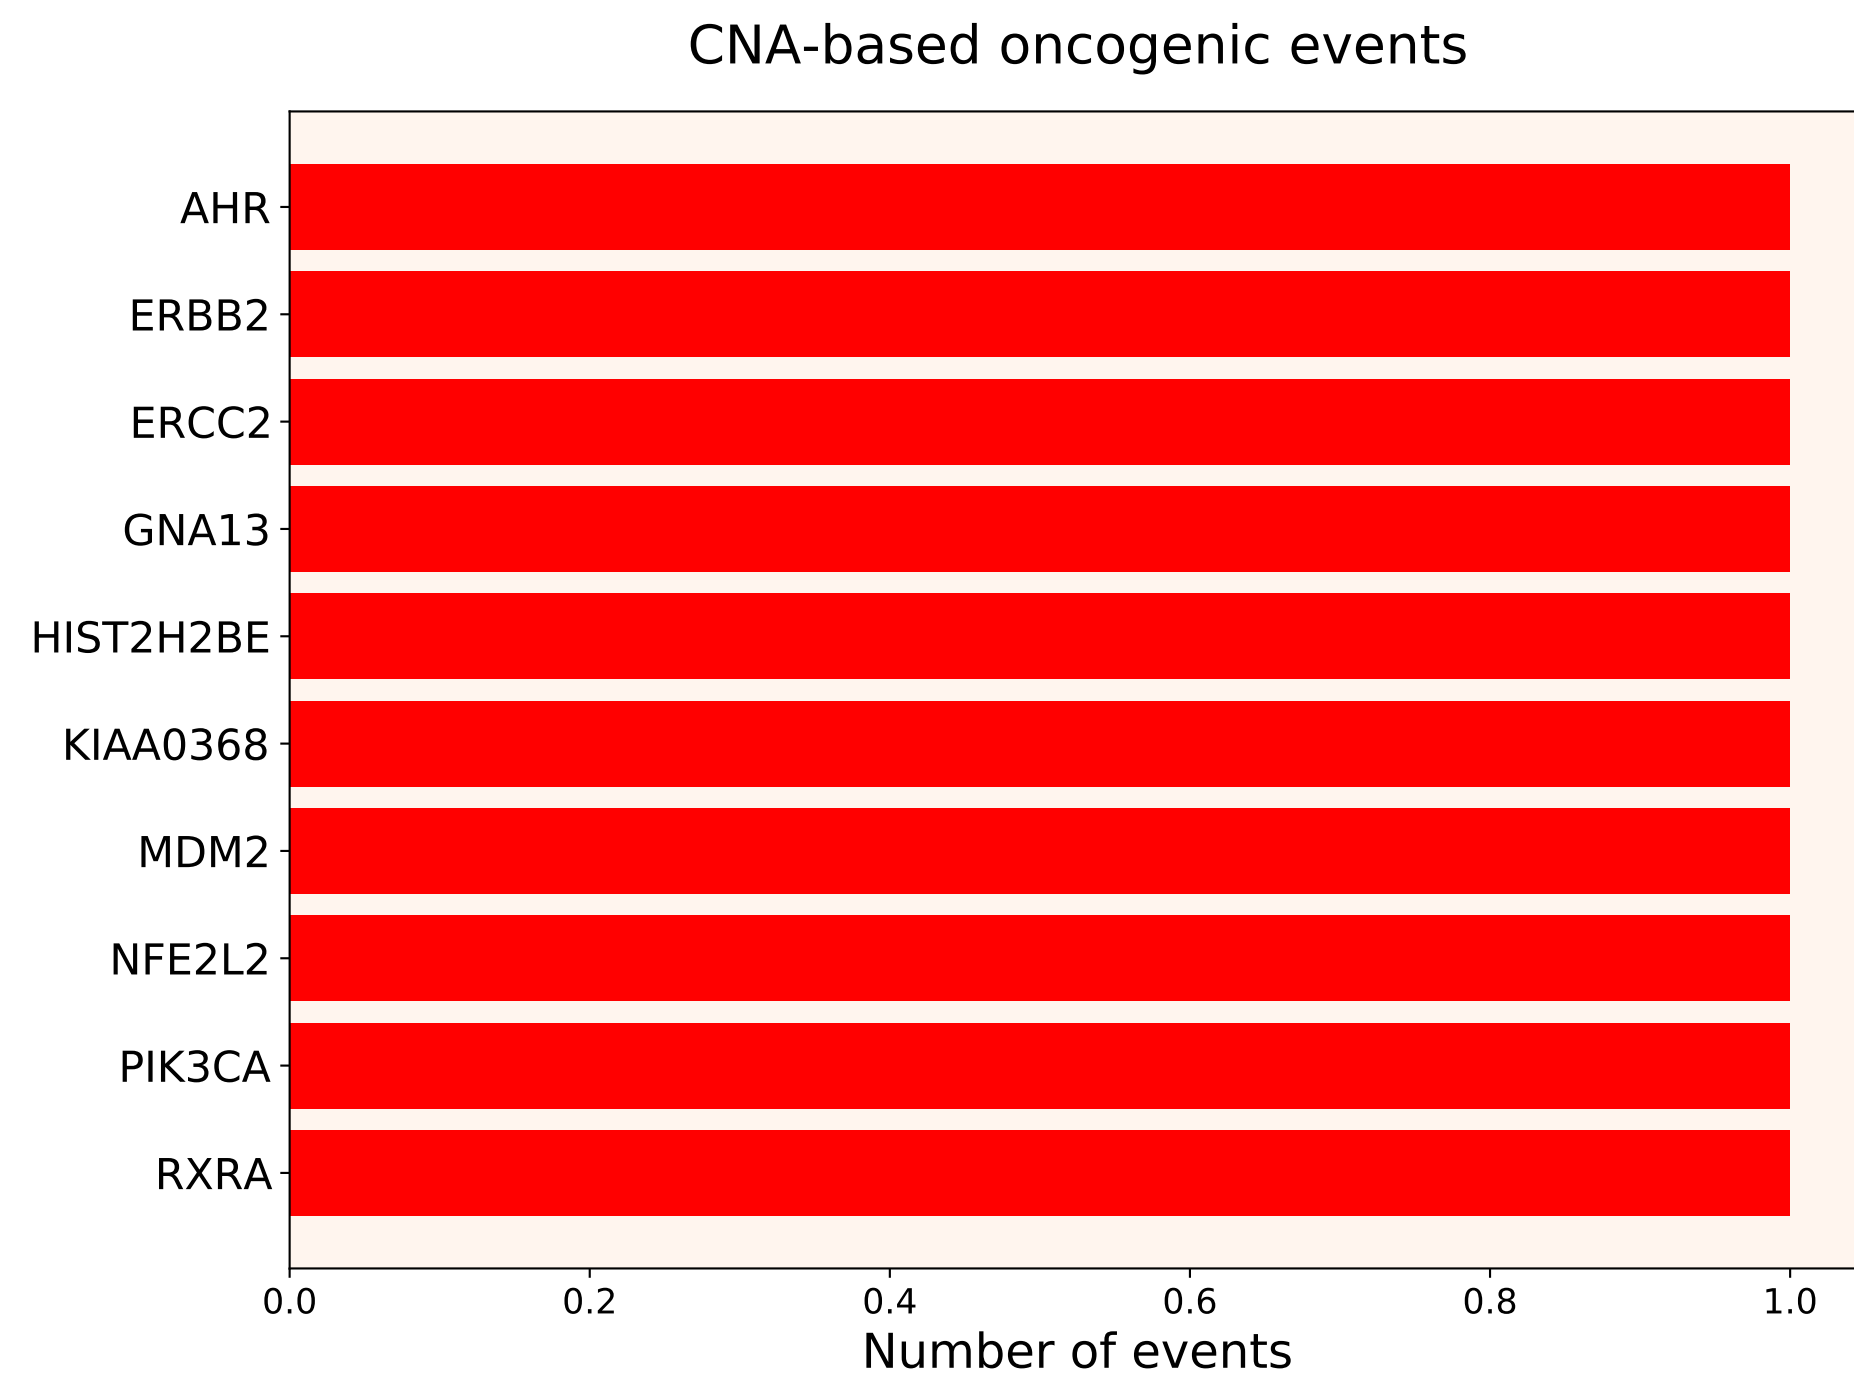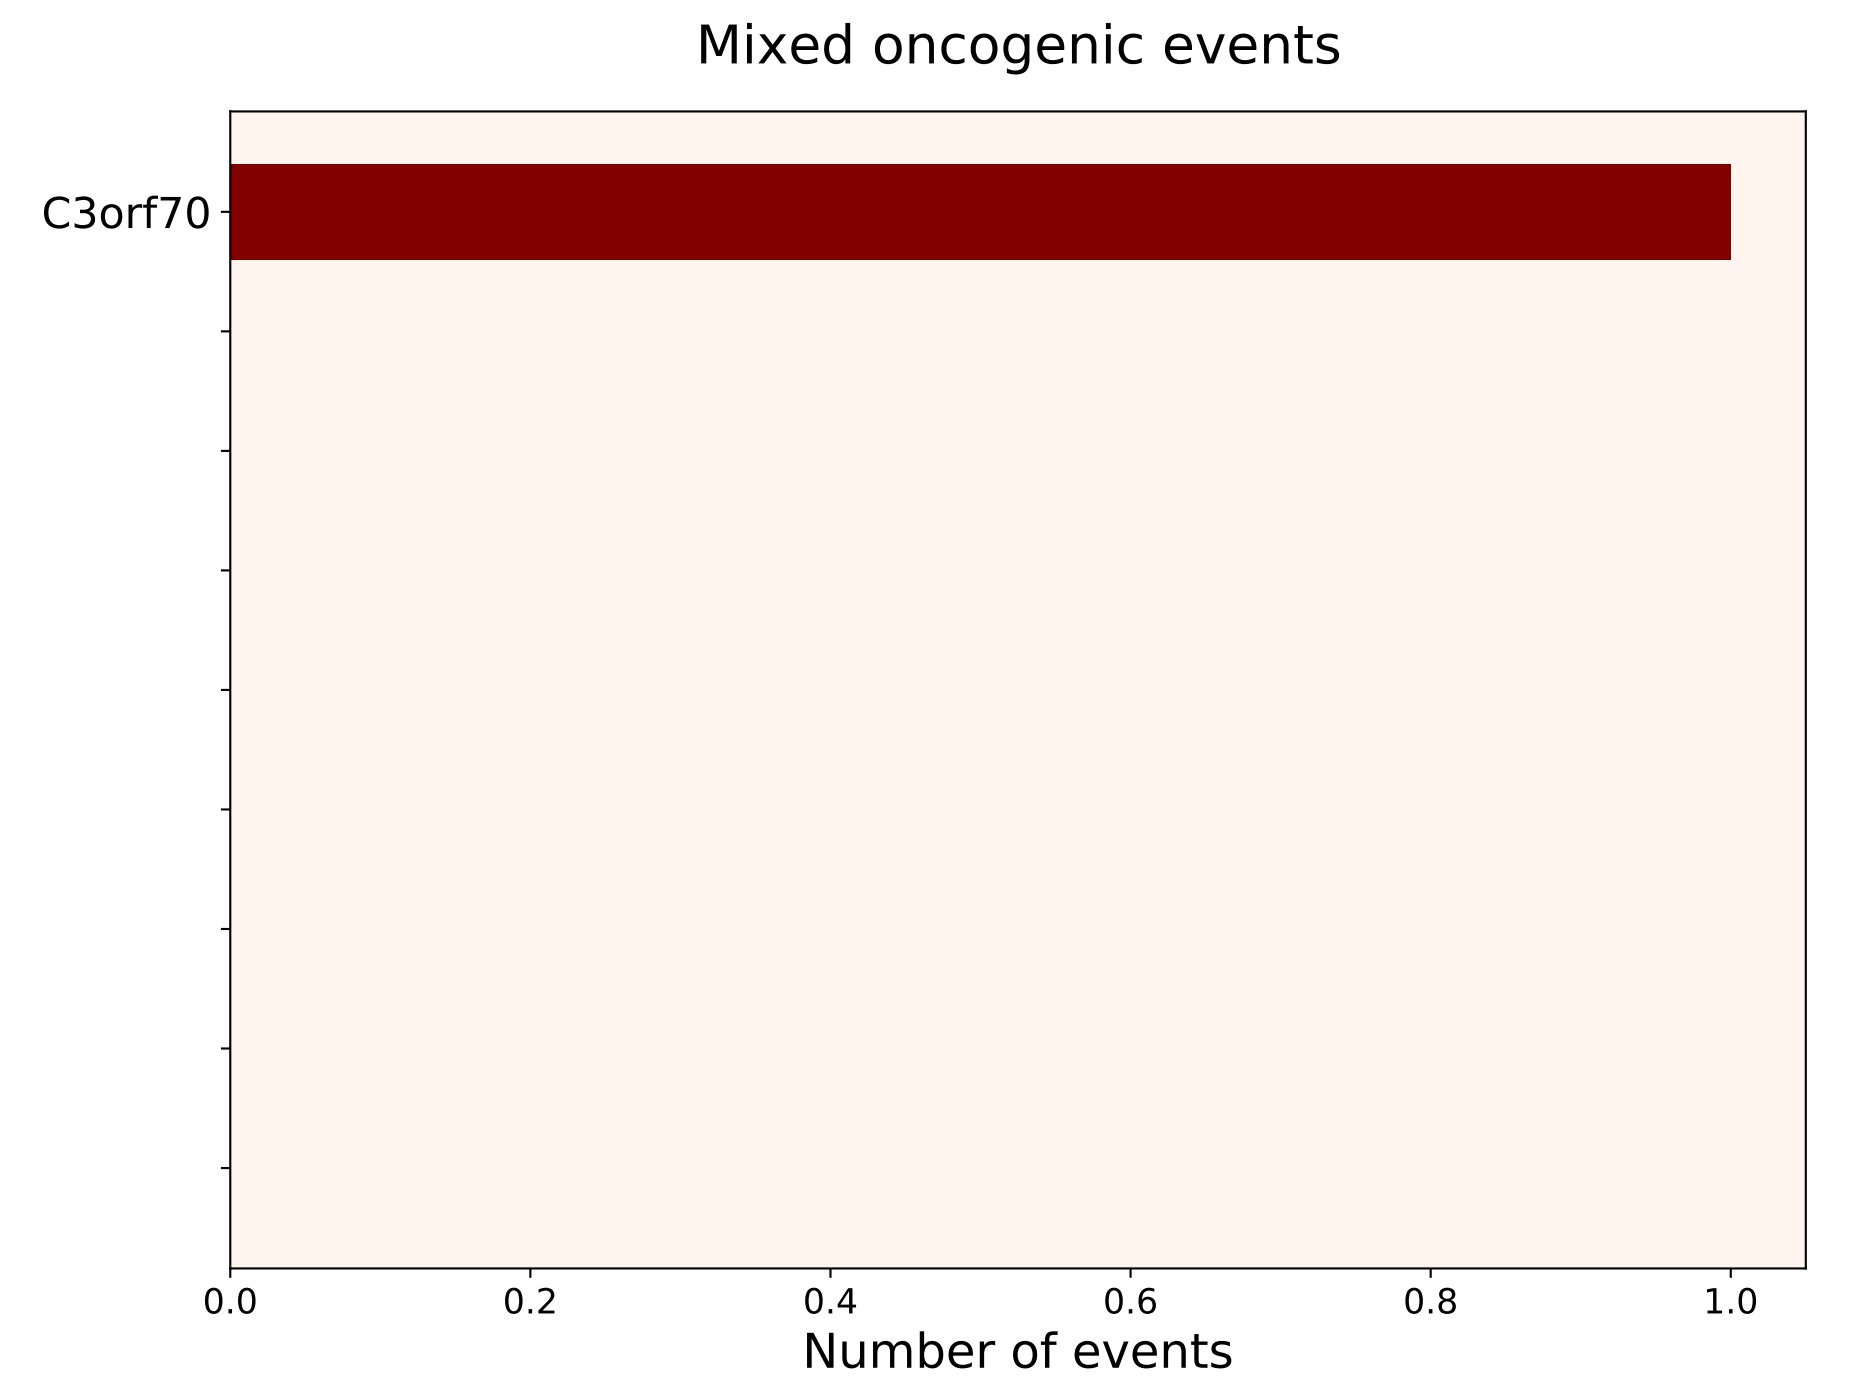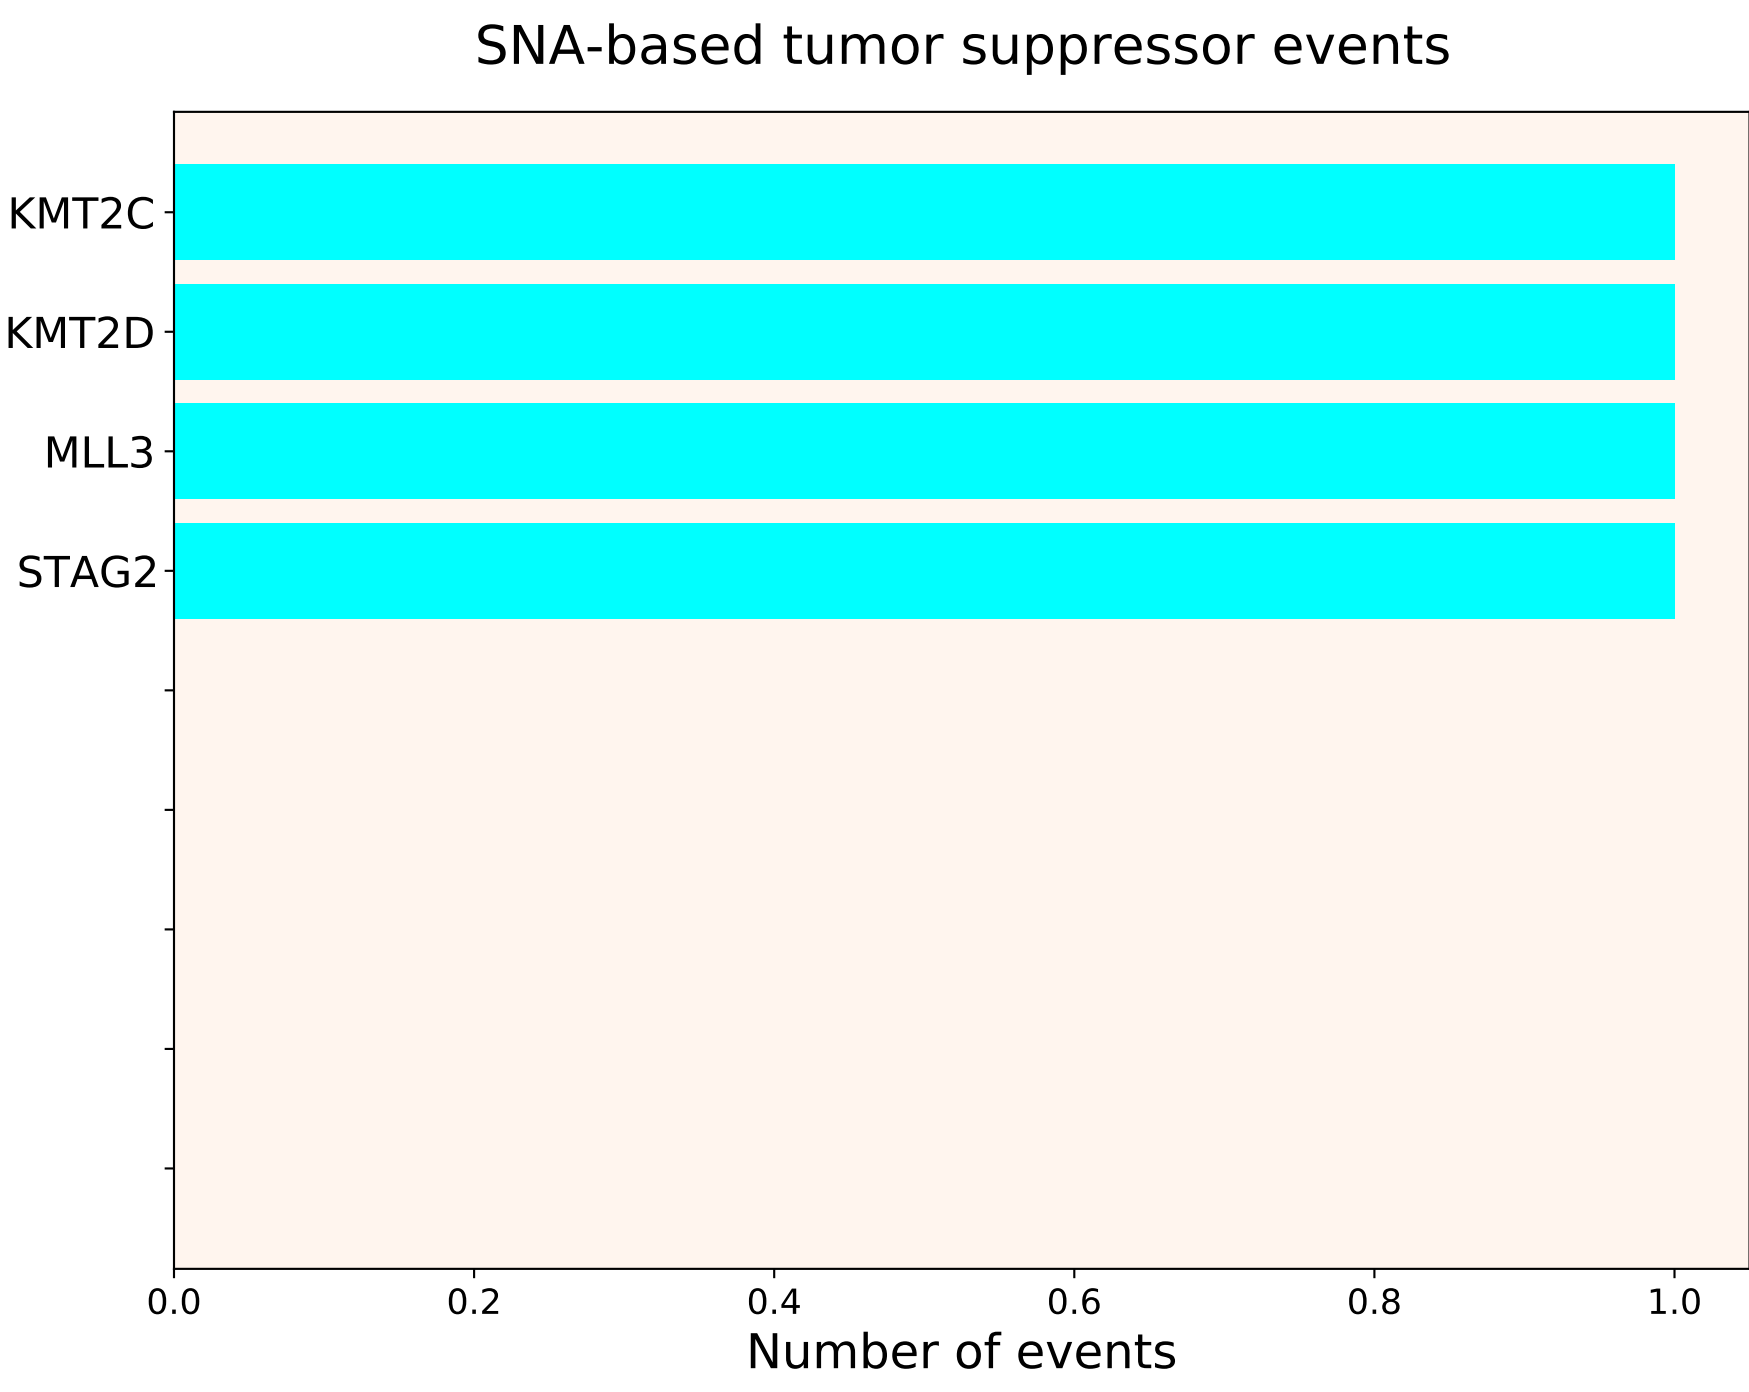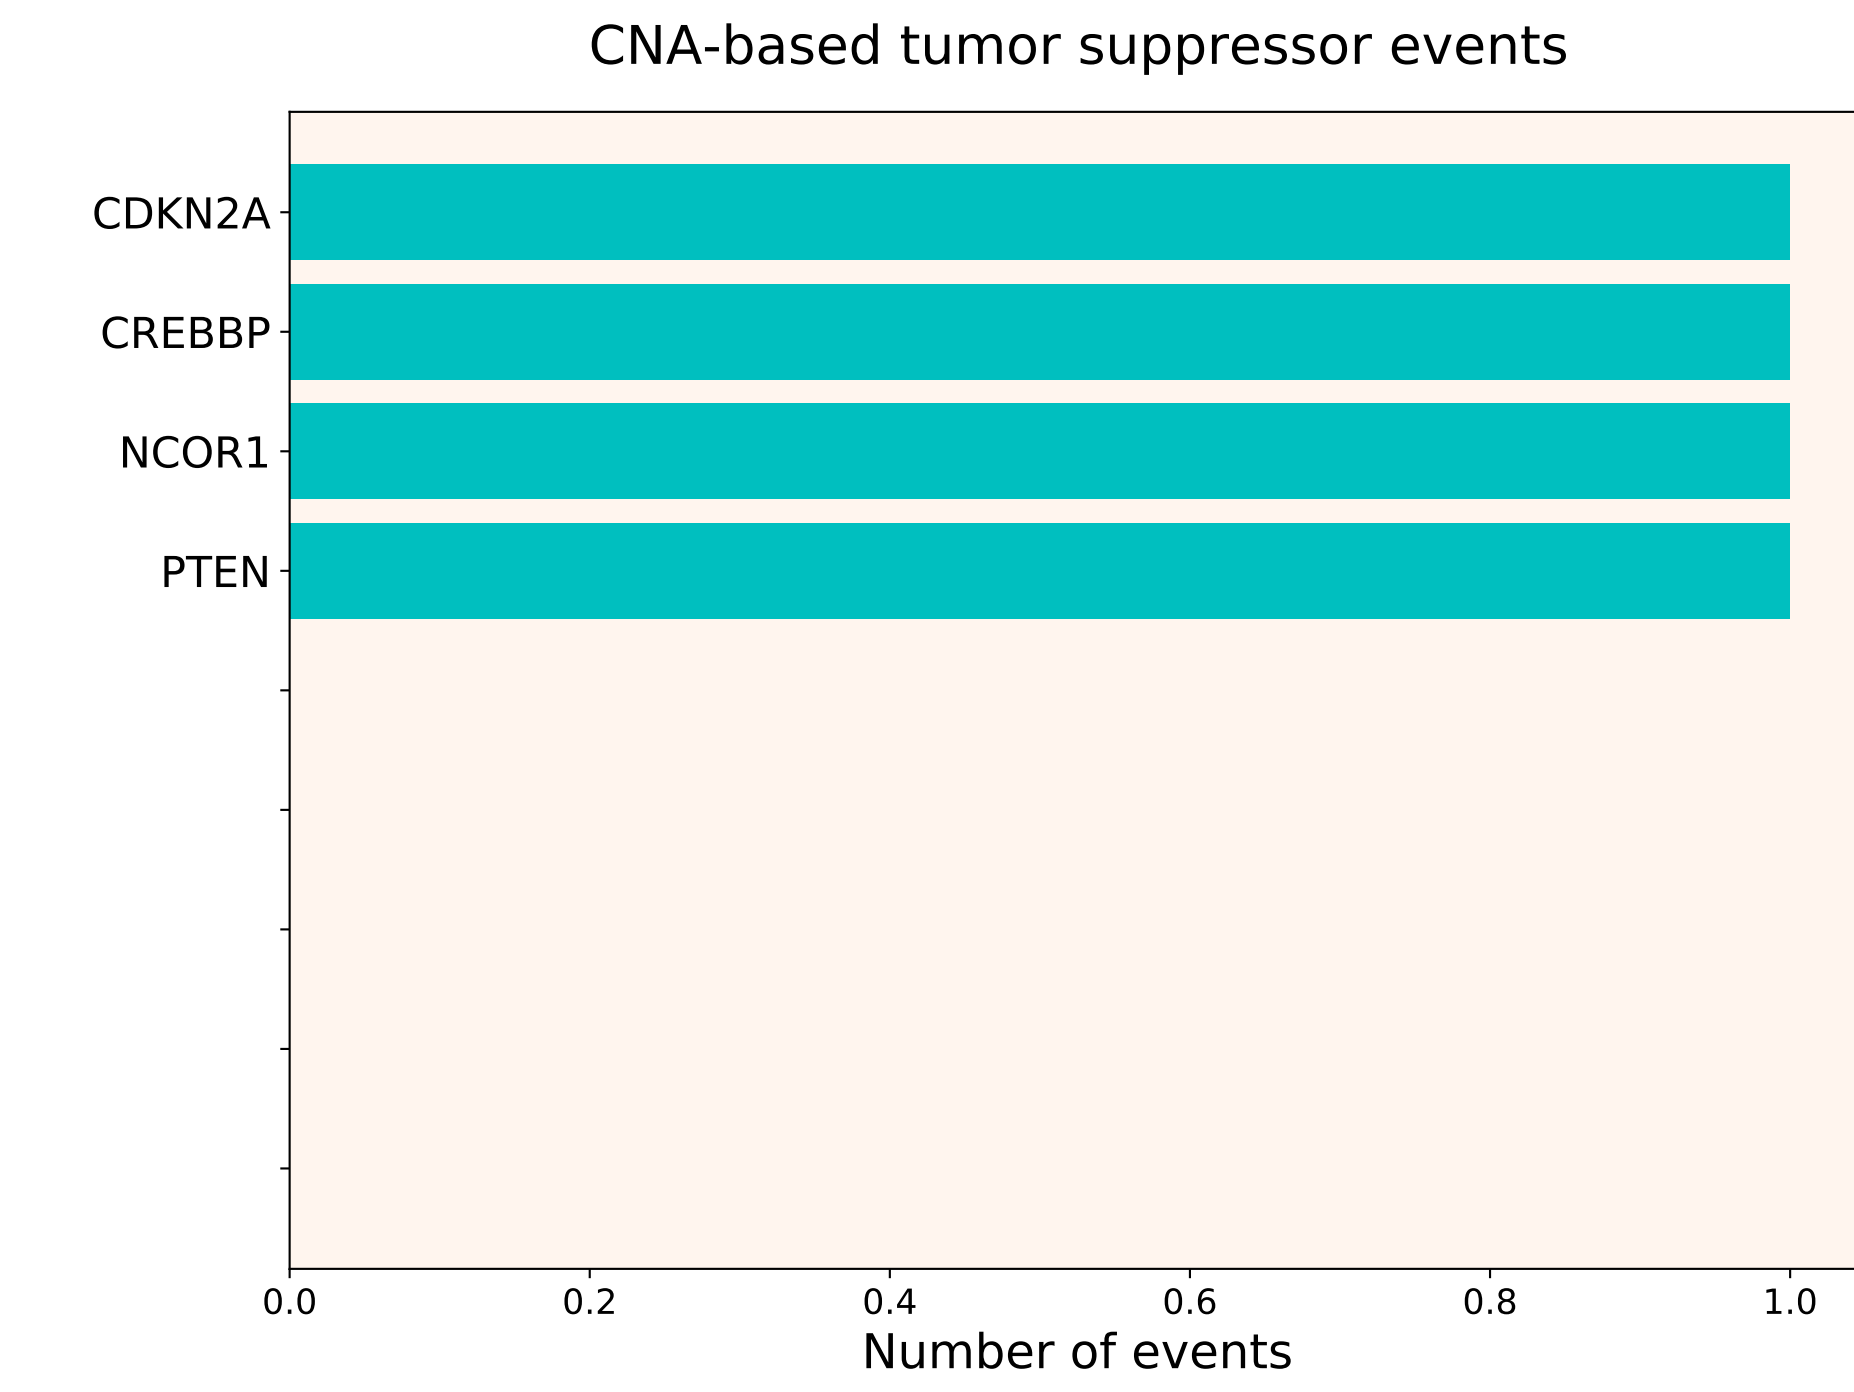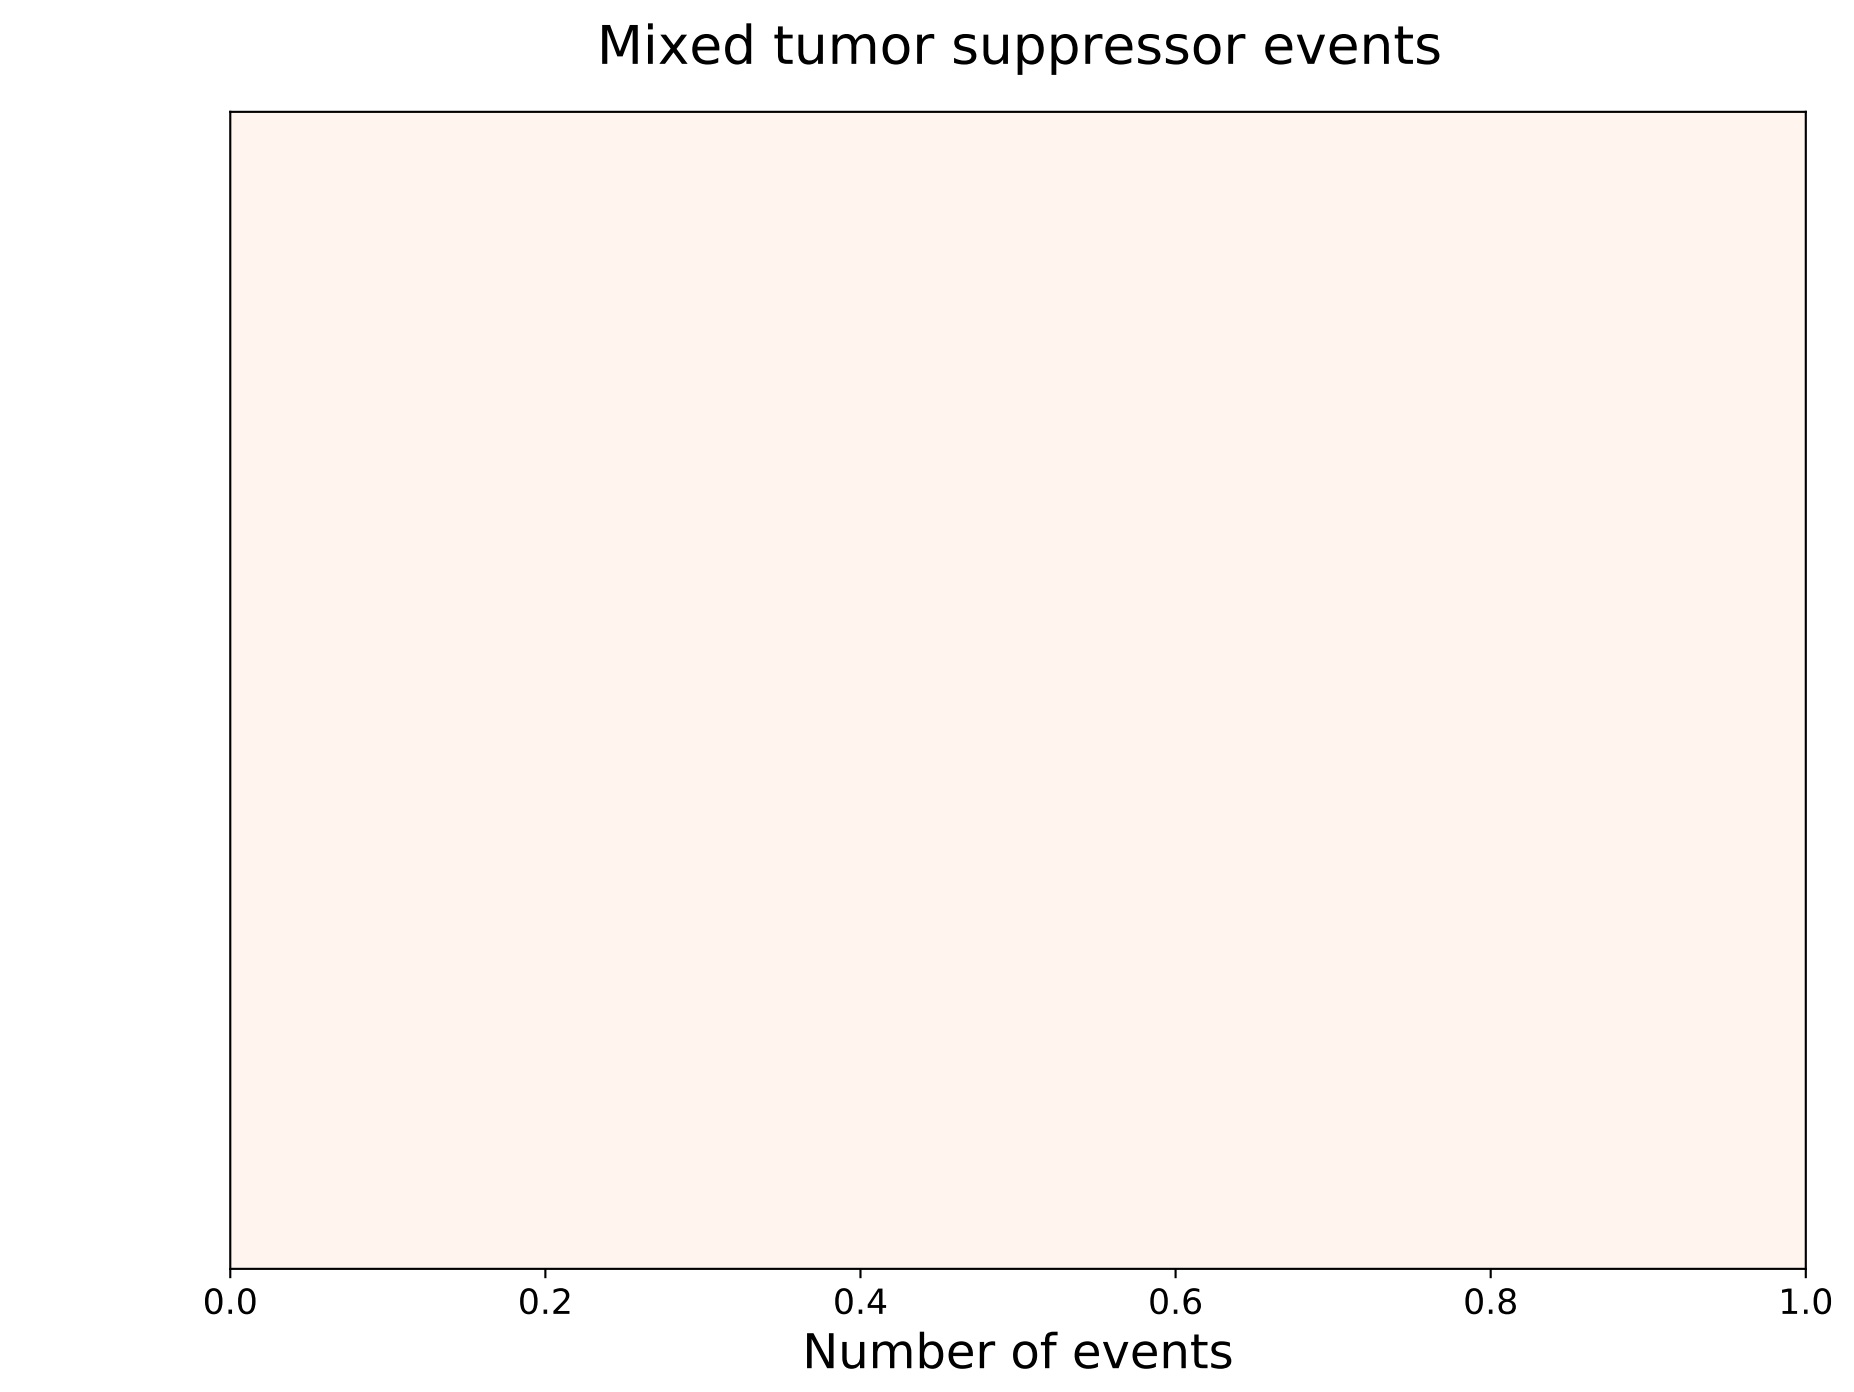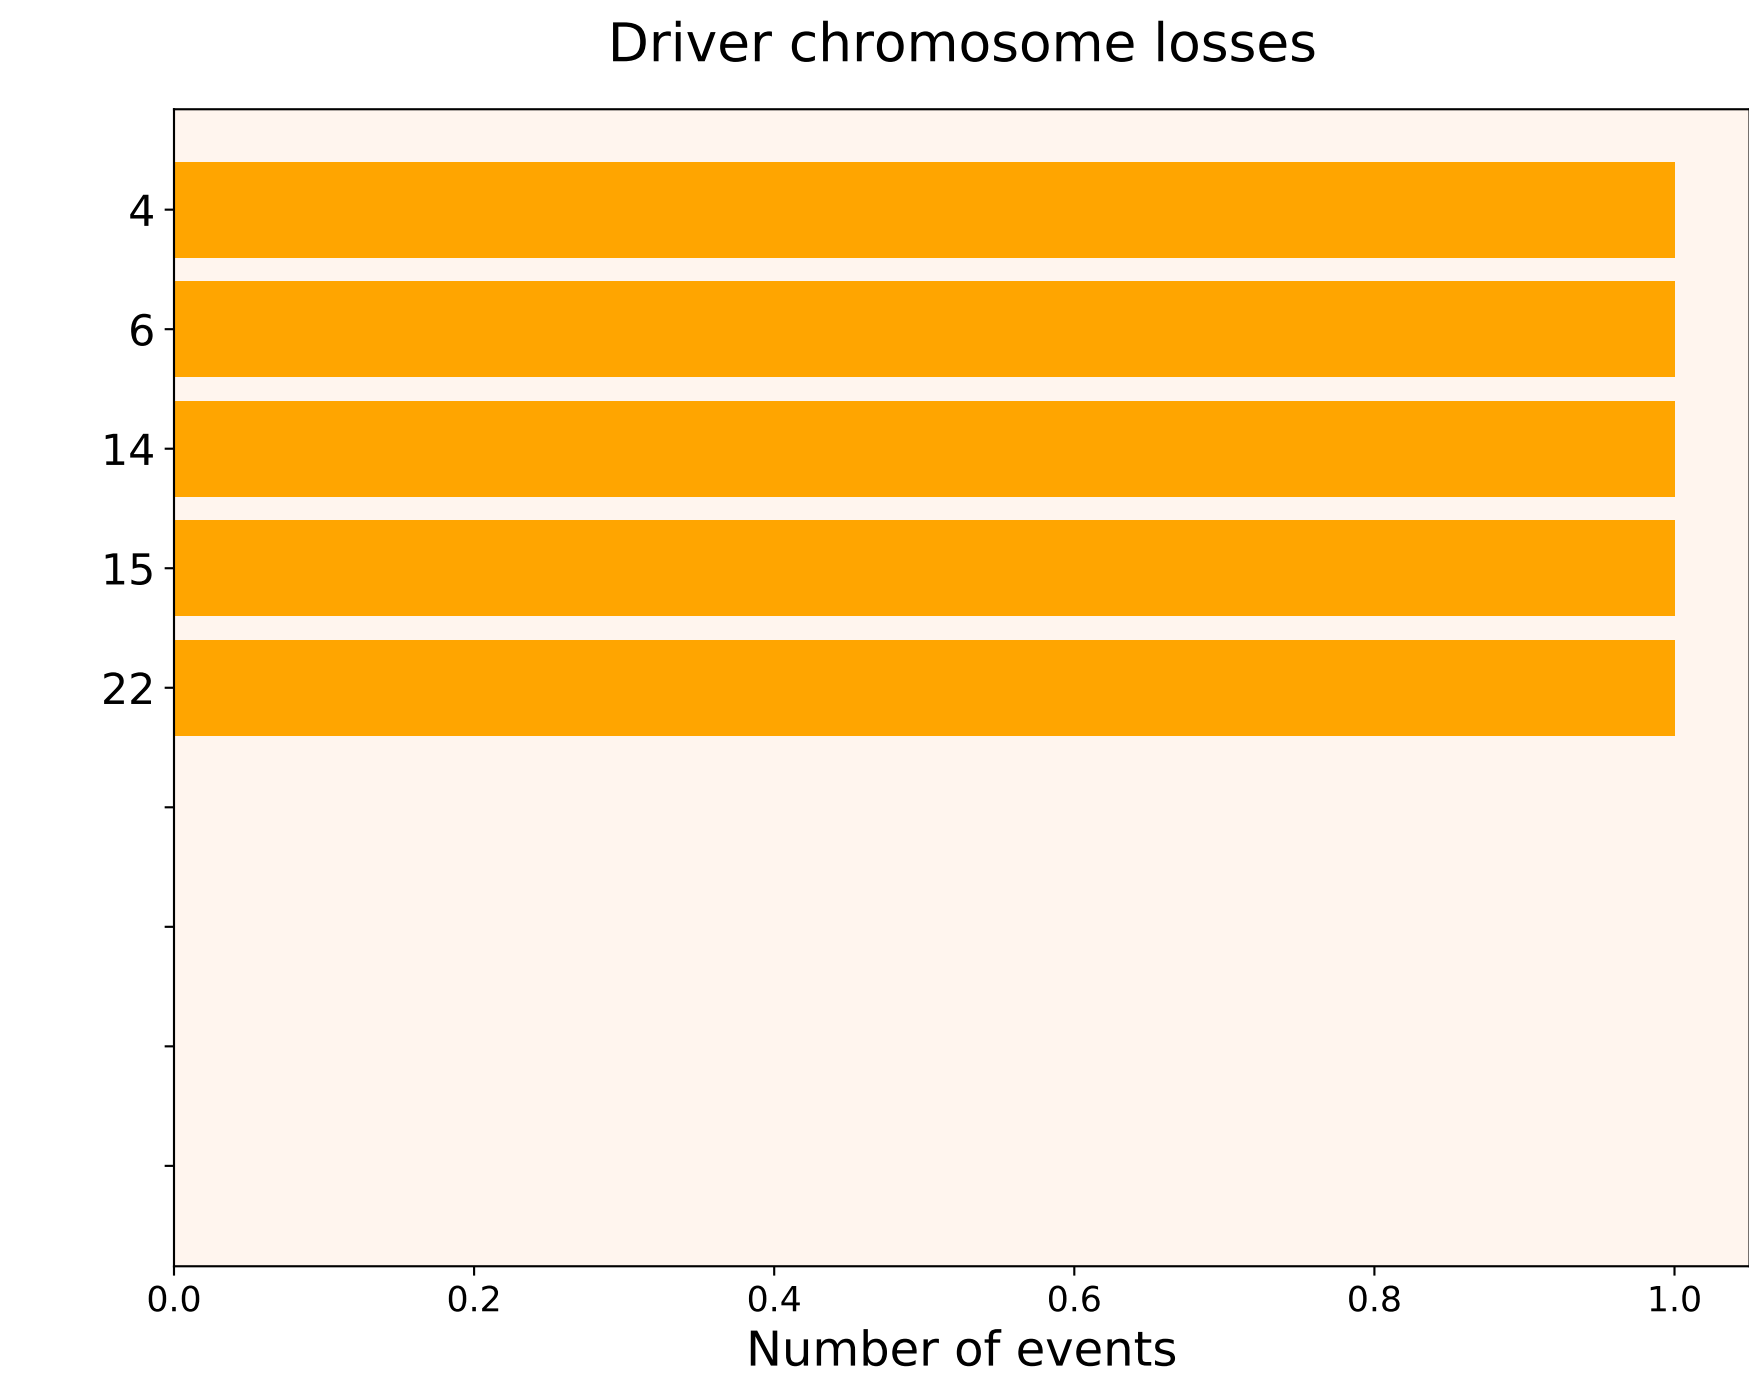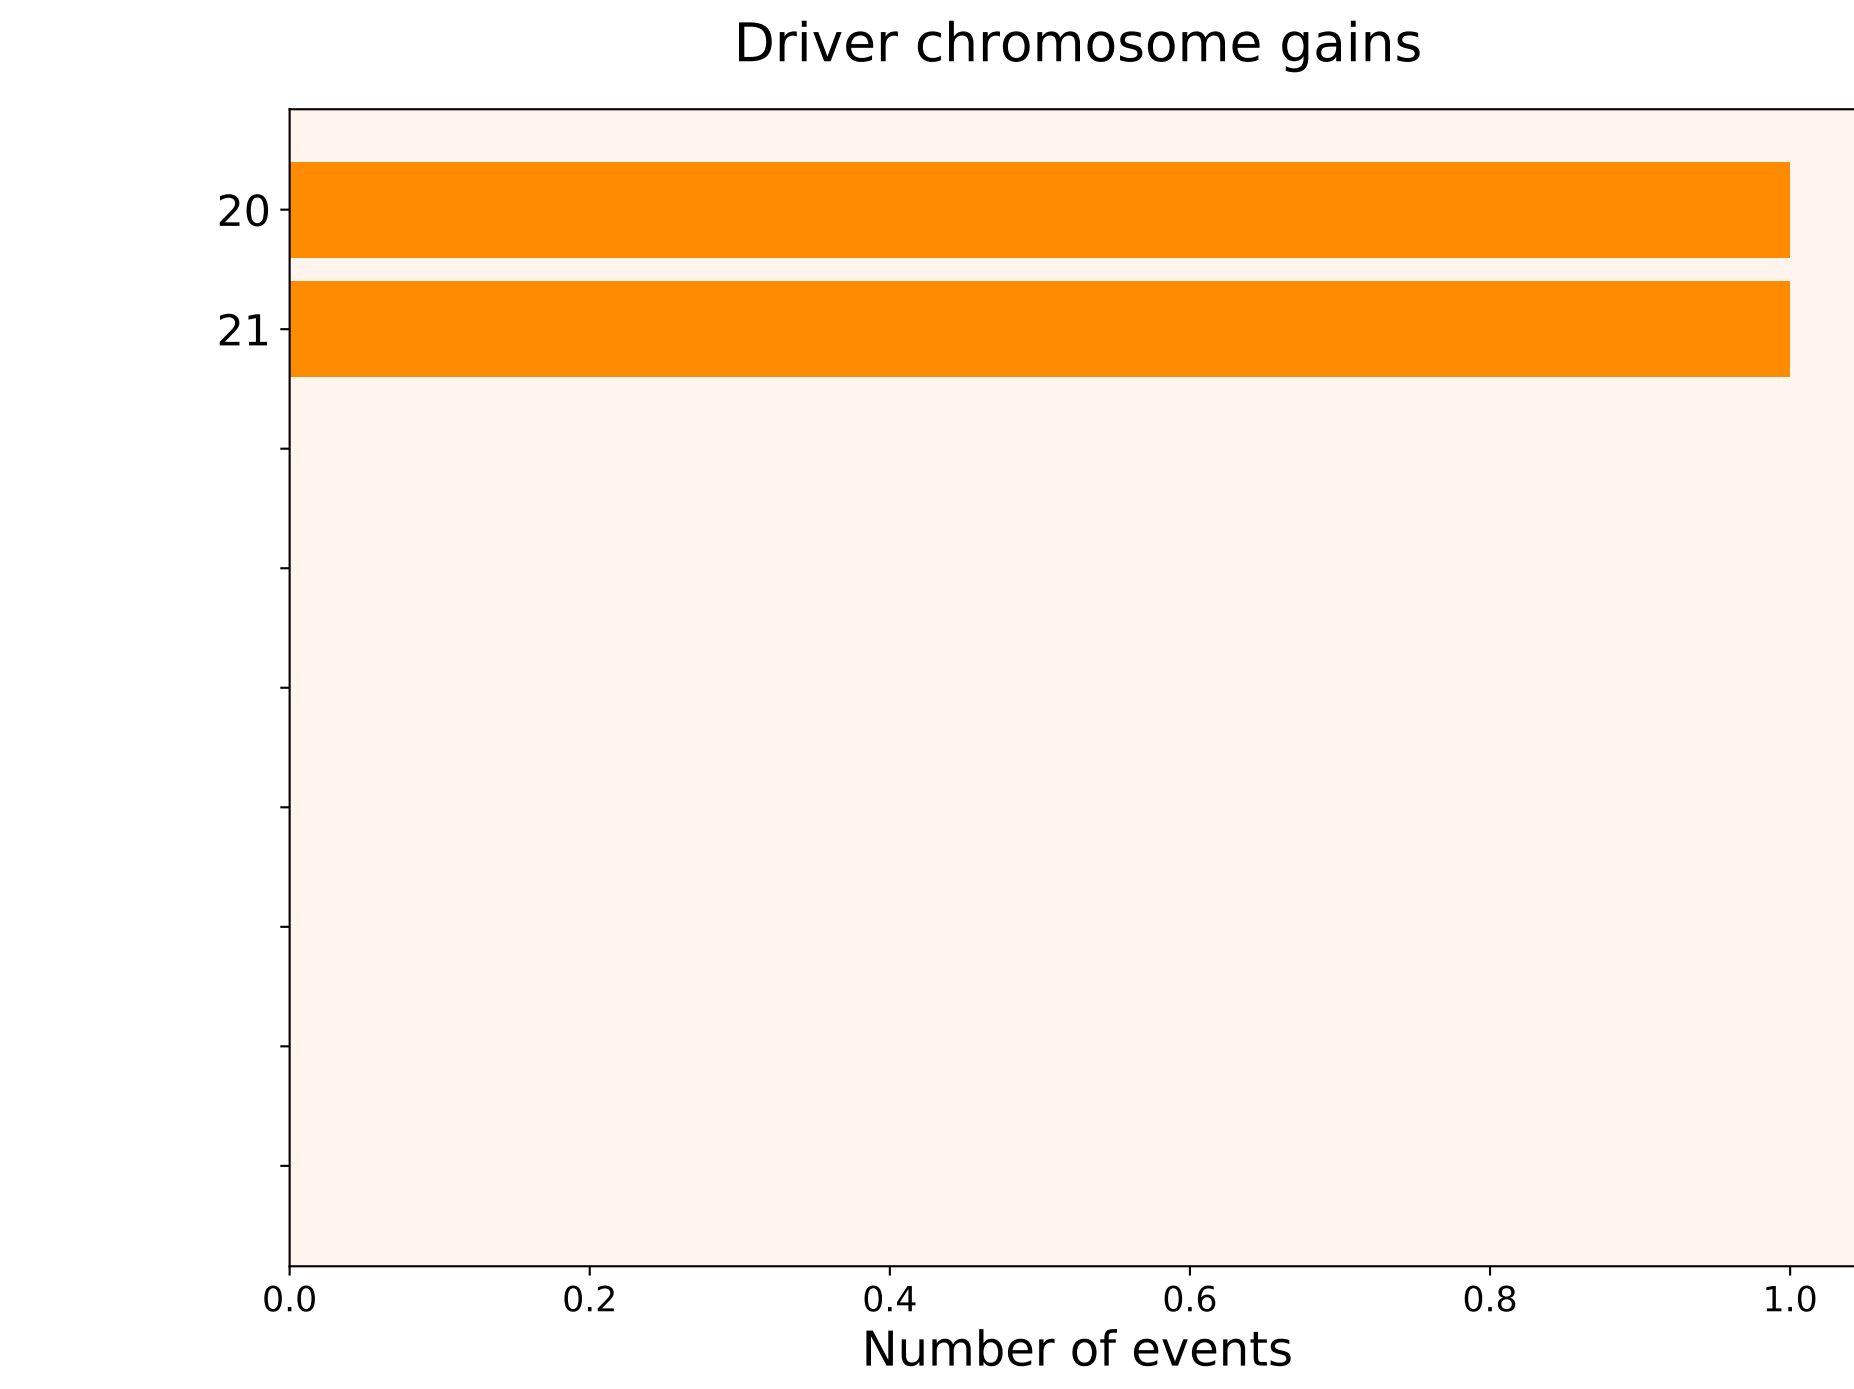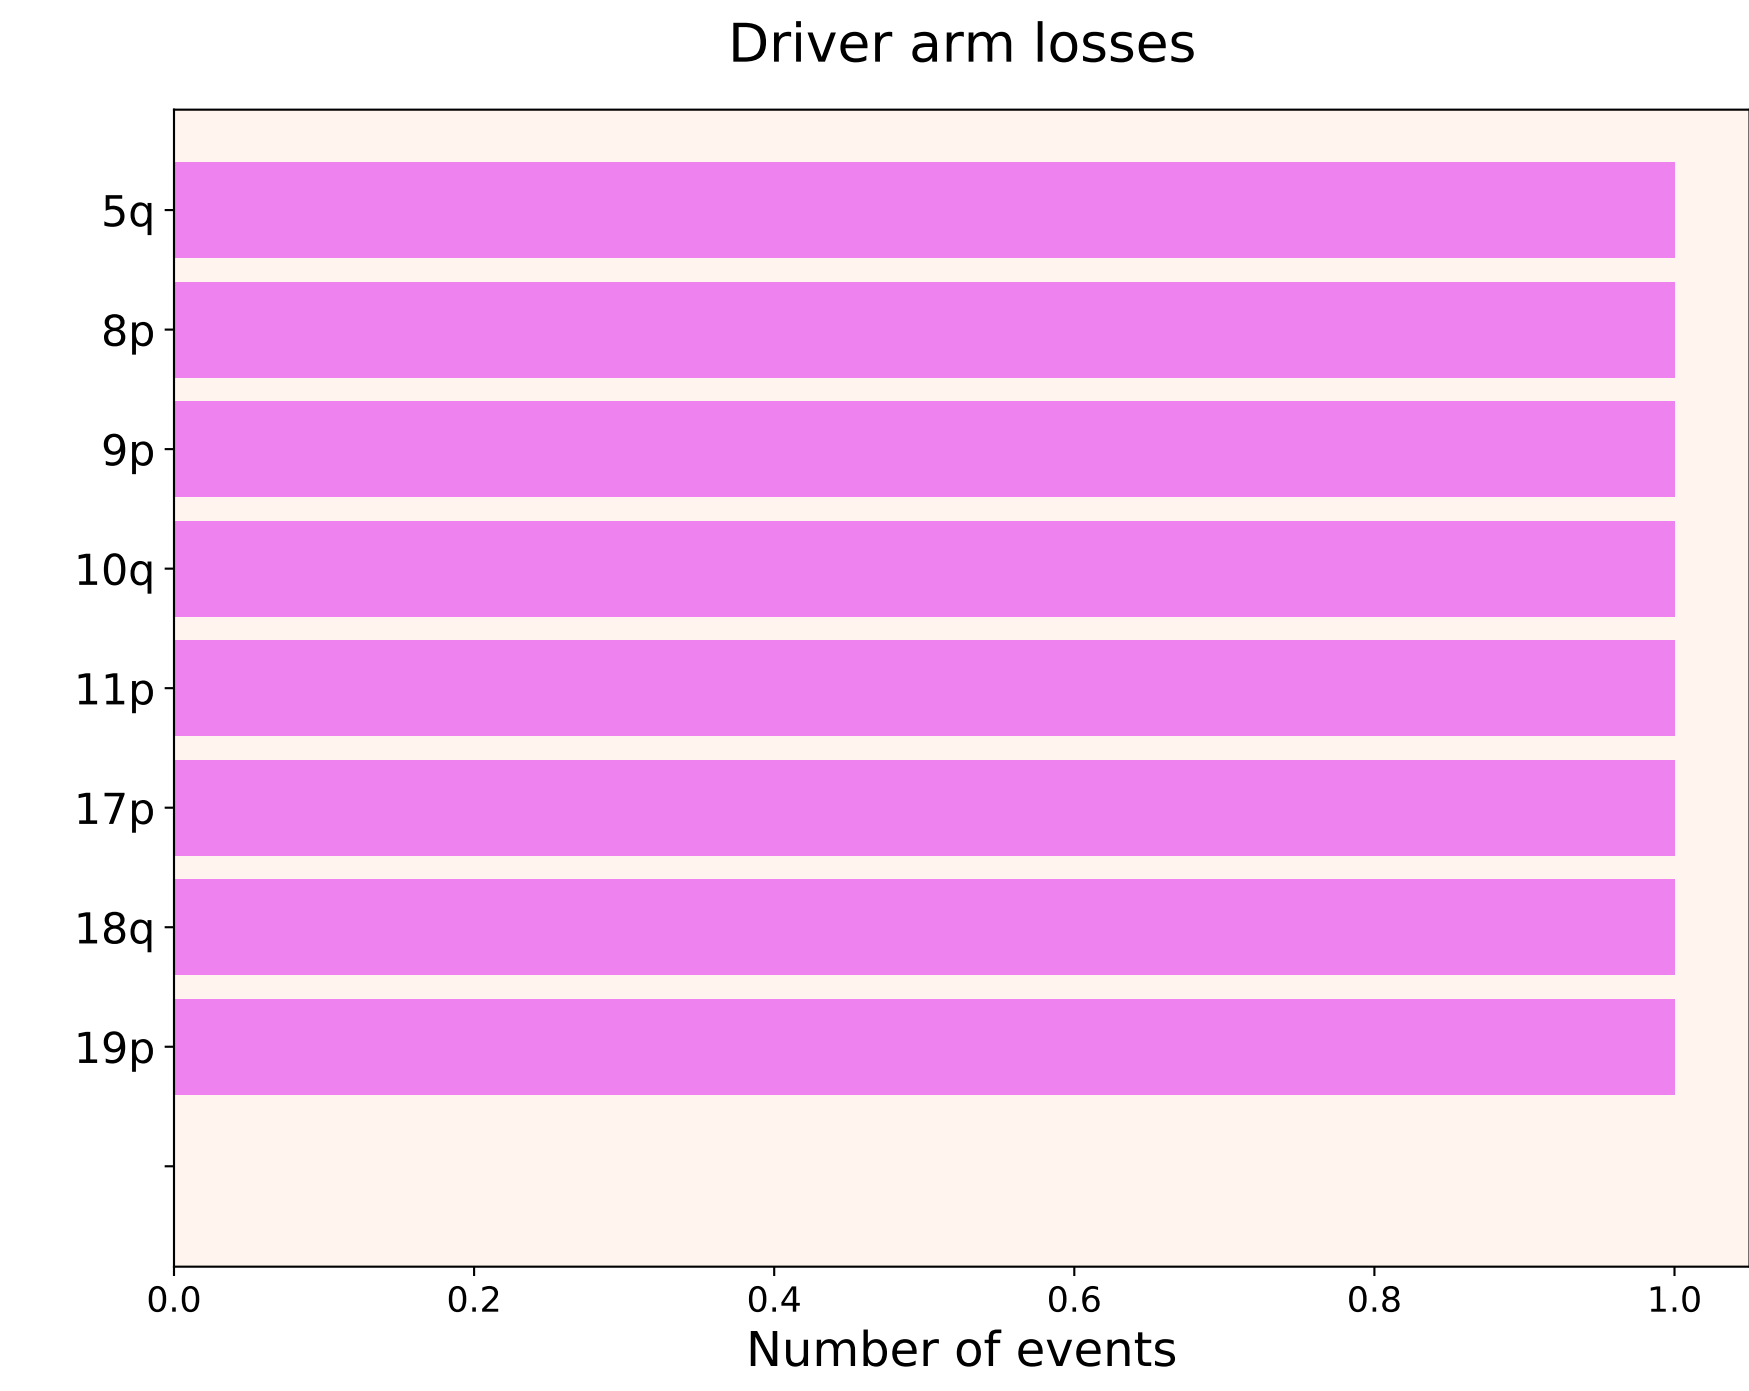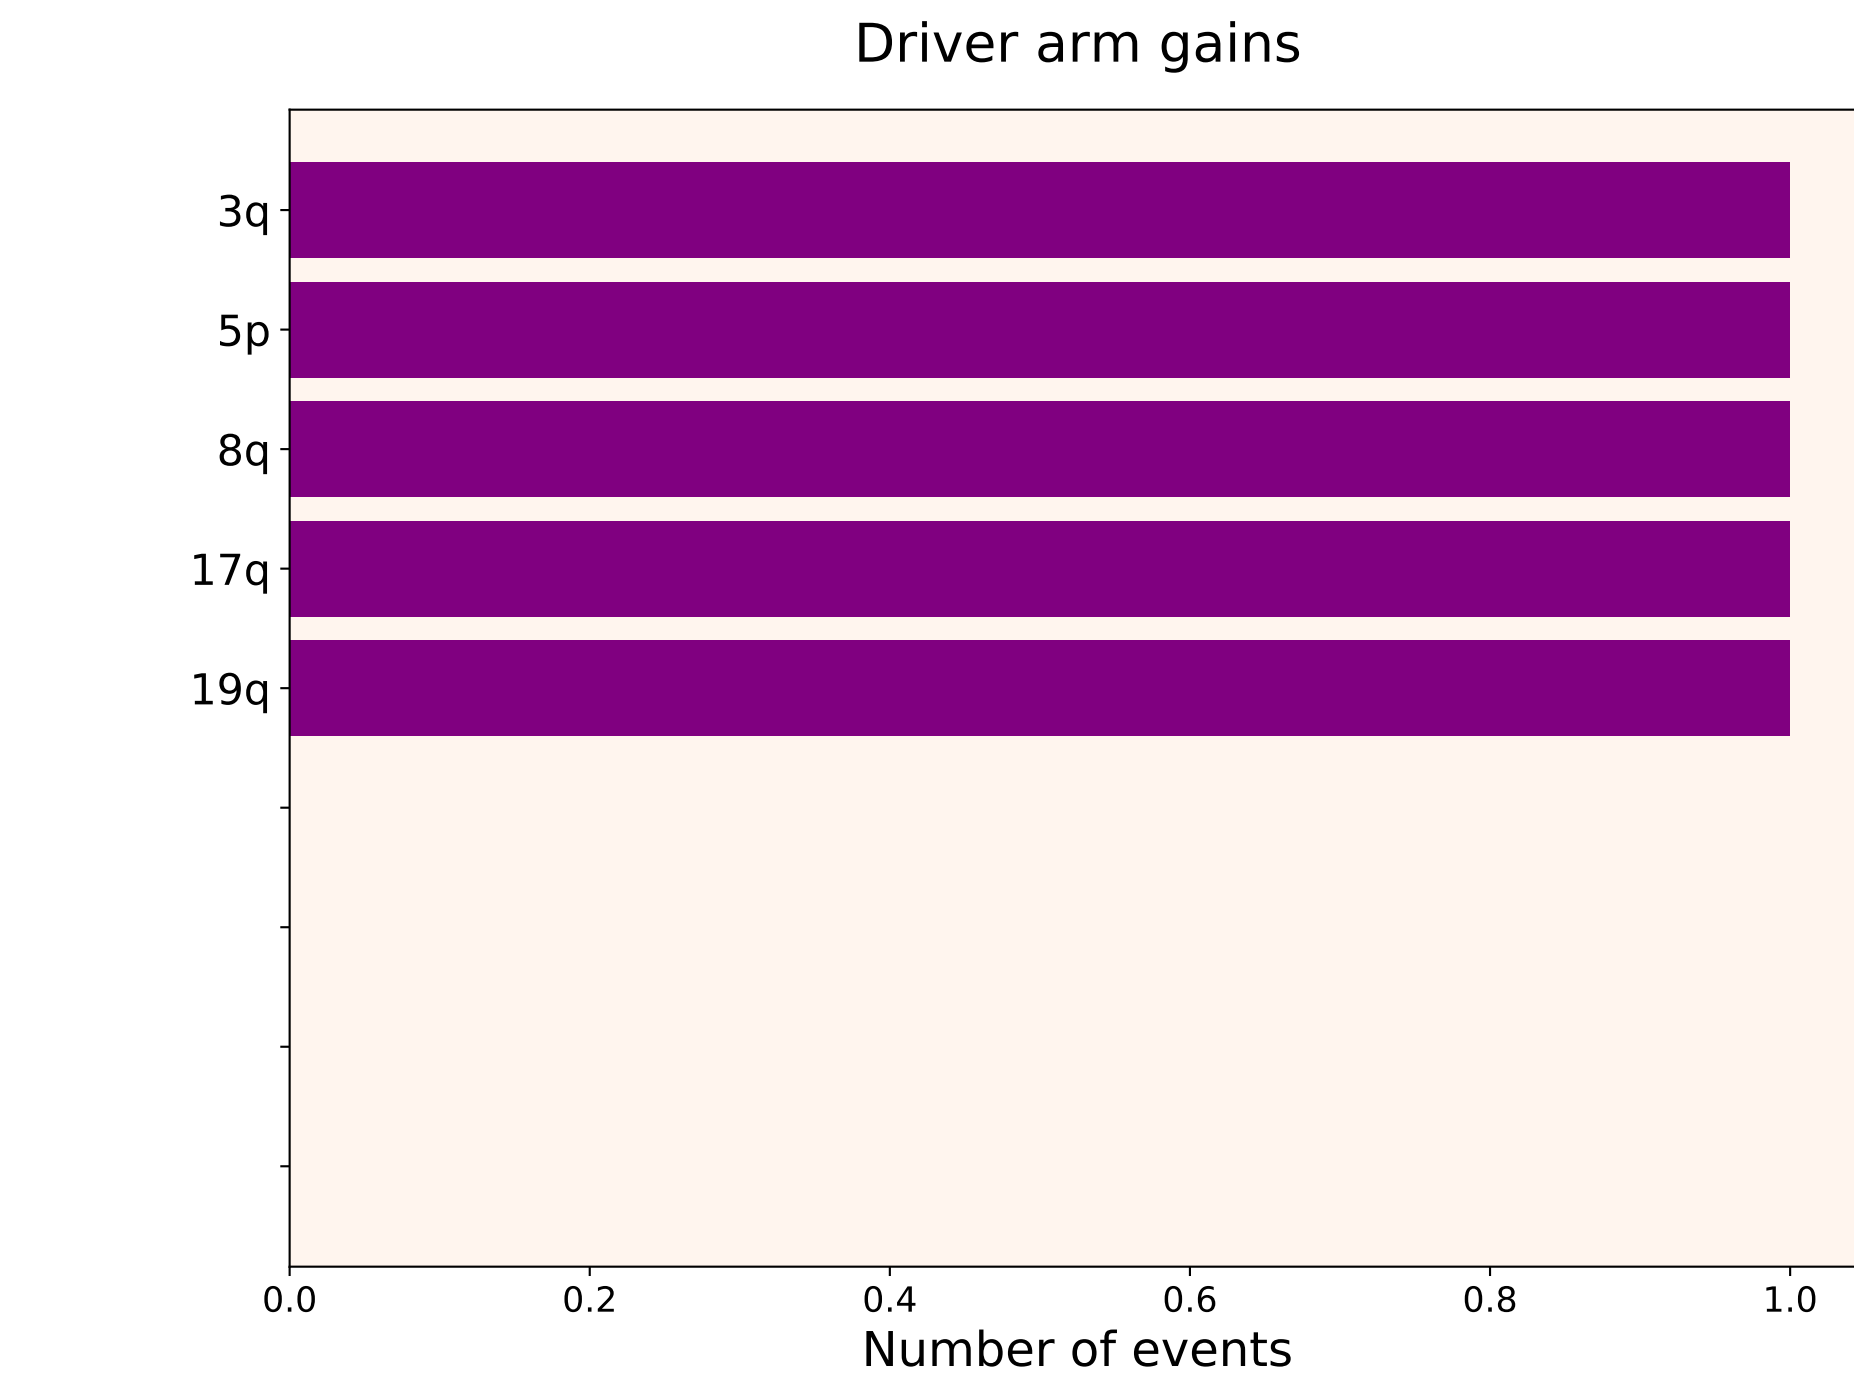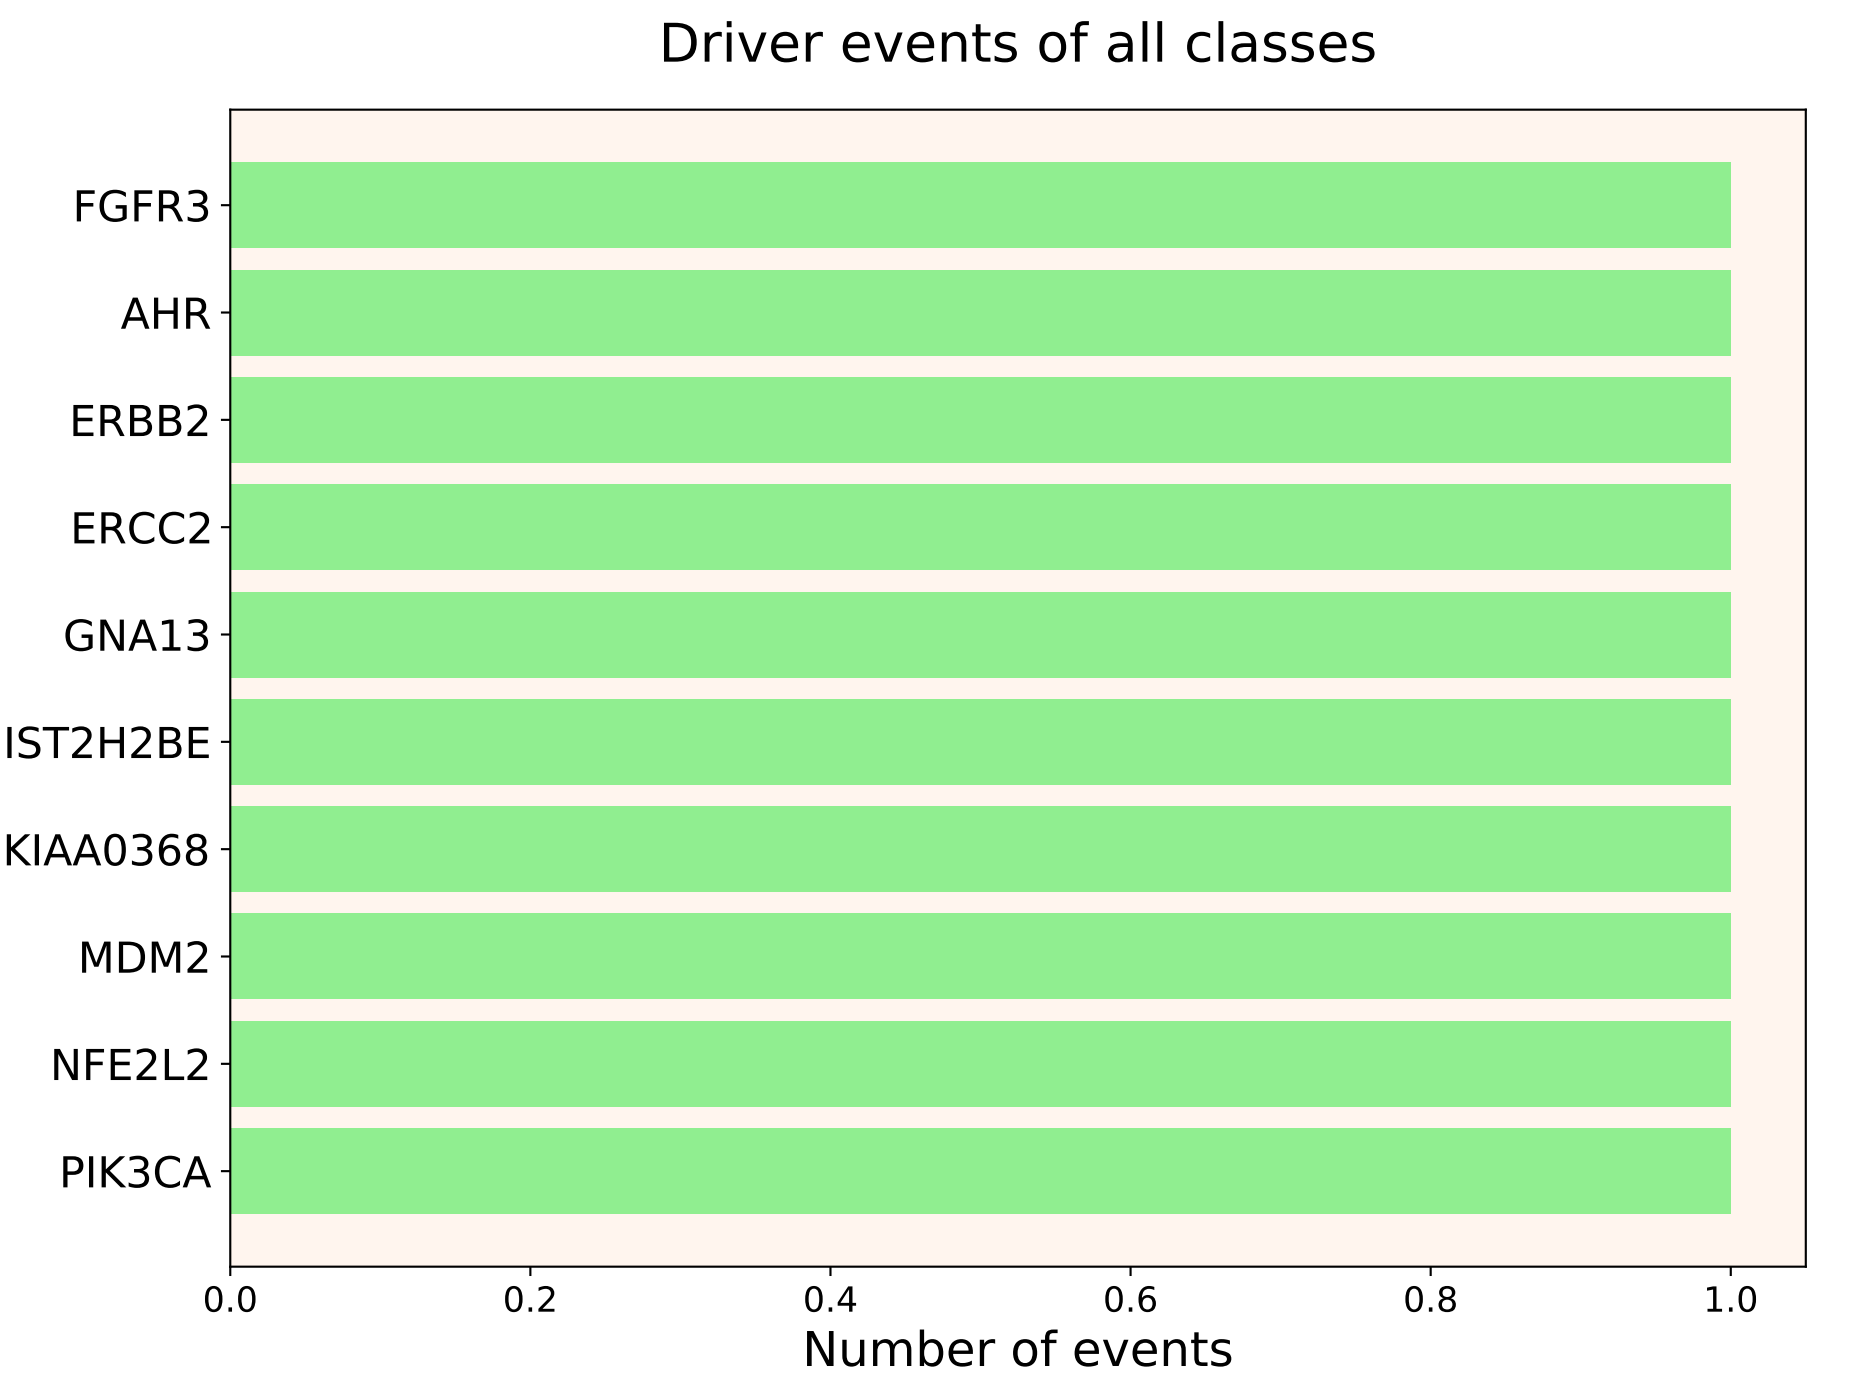

Supplement: Supplemental_Data_S1.zip [file Supplemental_Data_S1.zip]

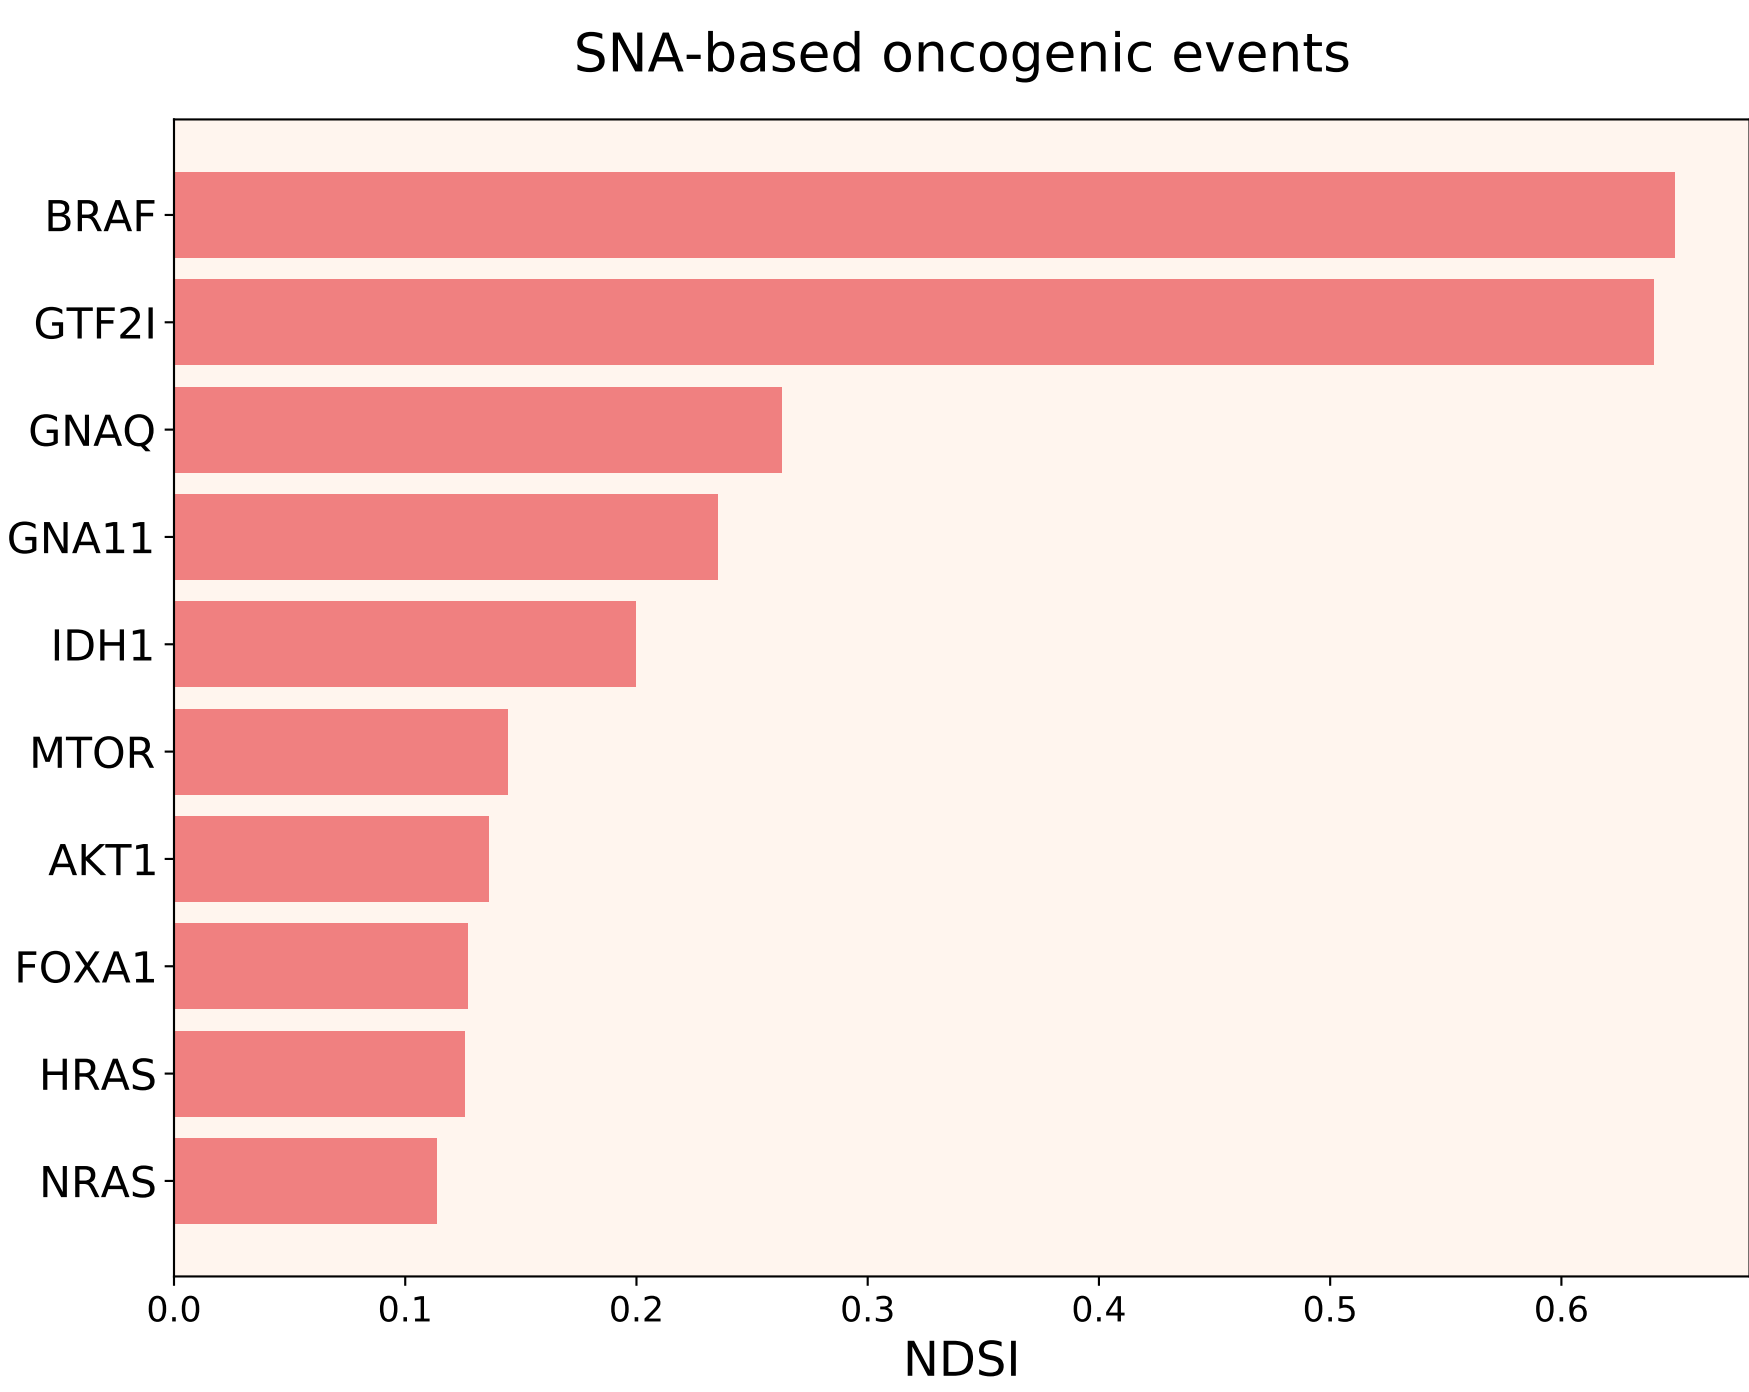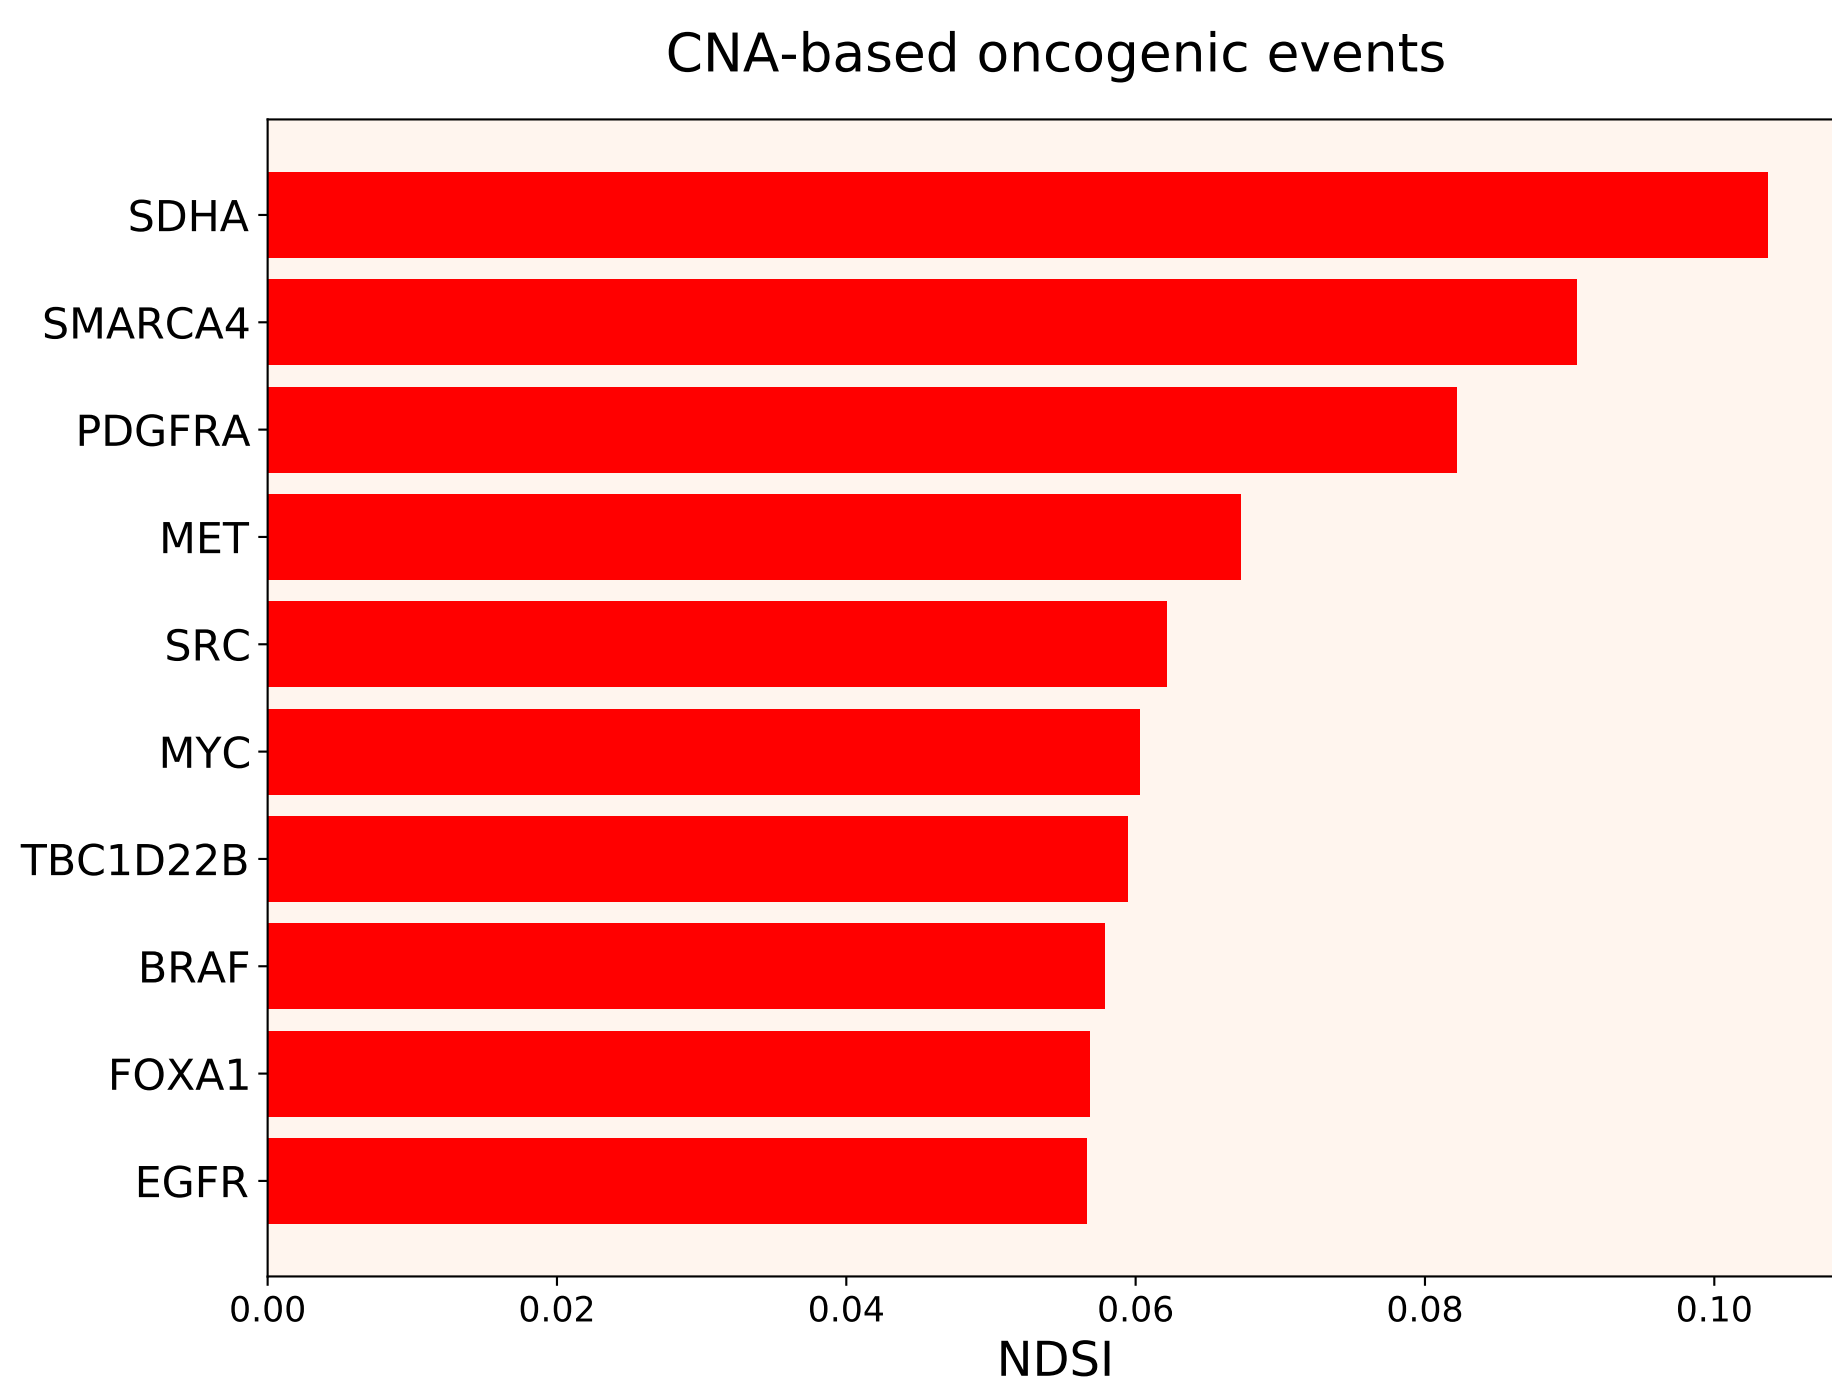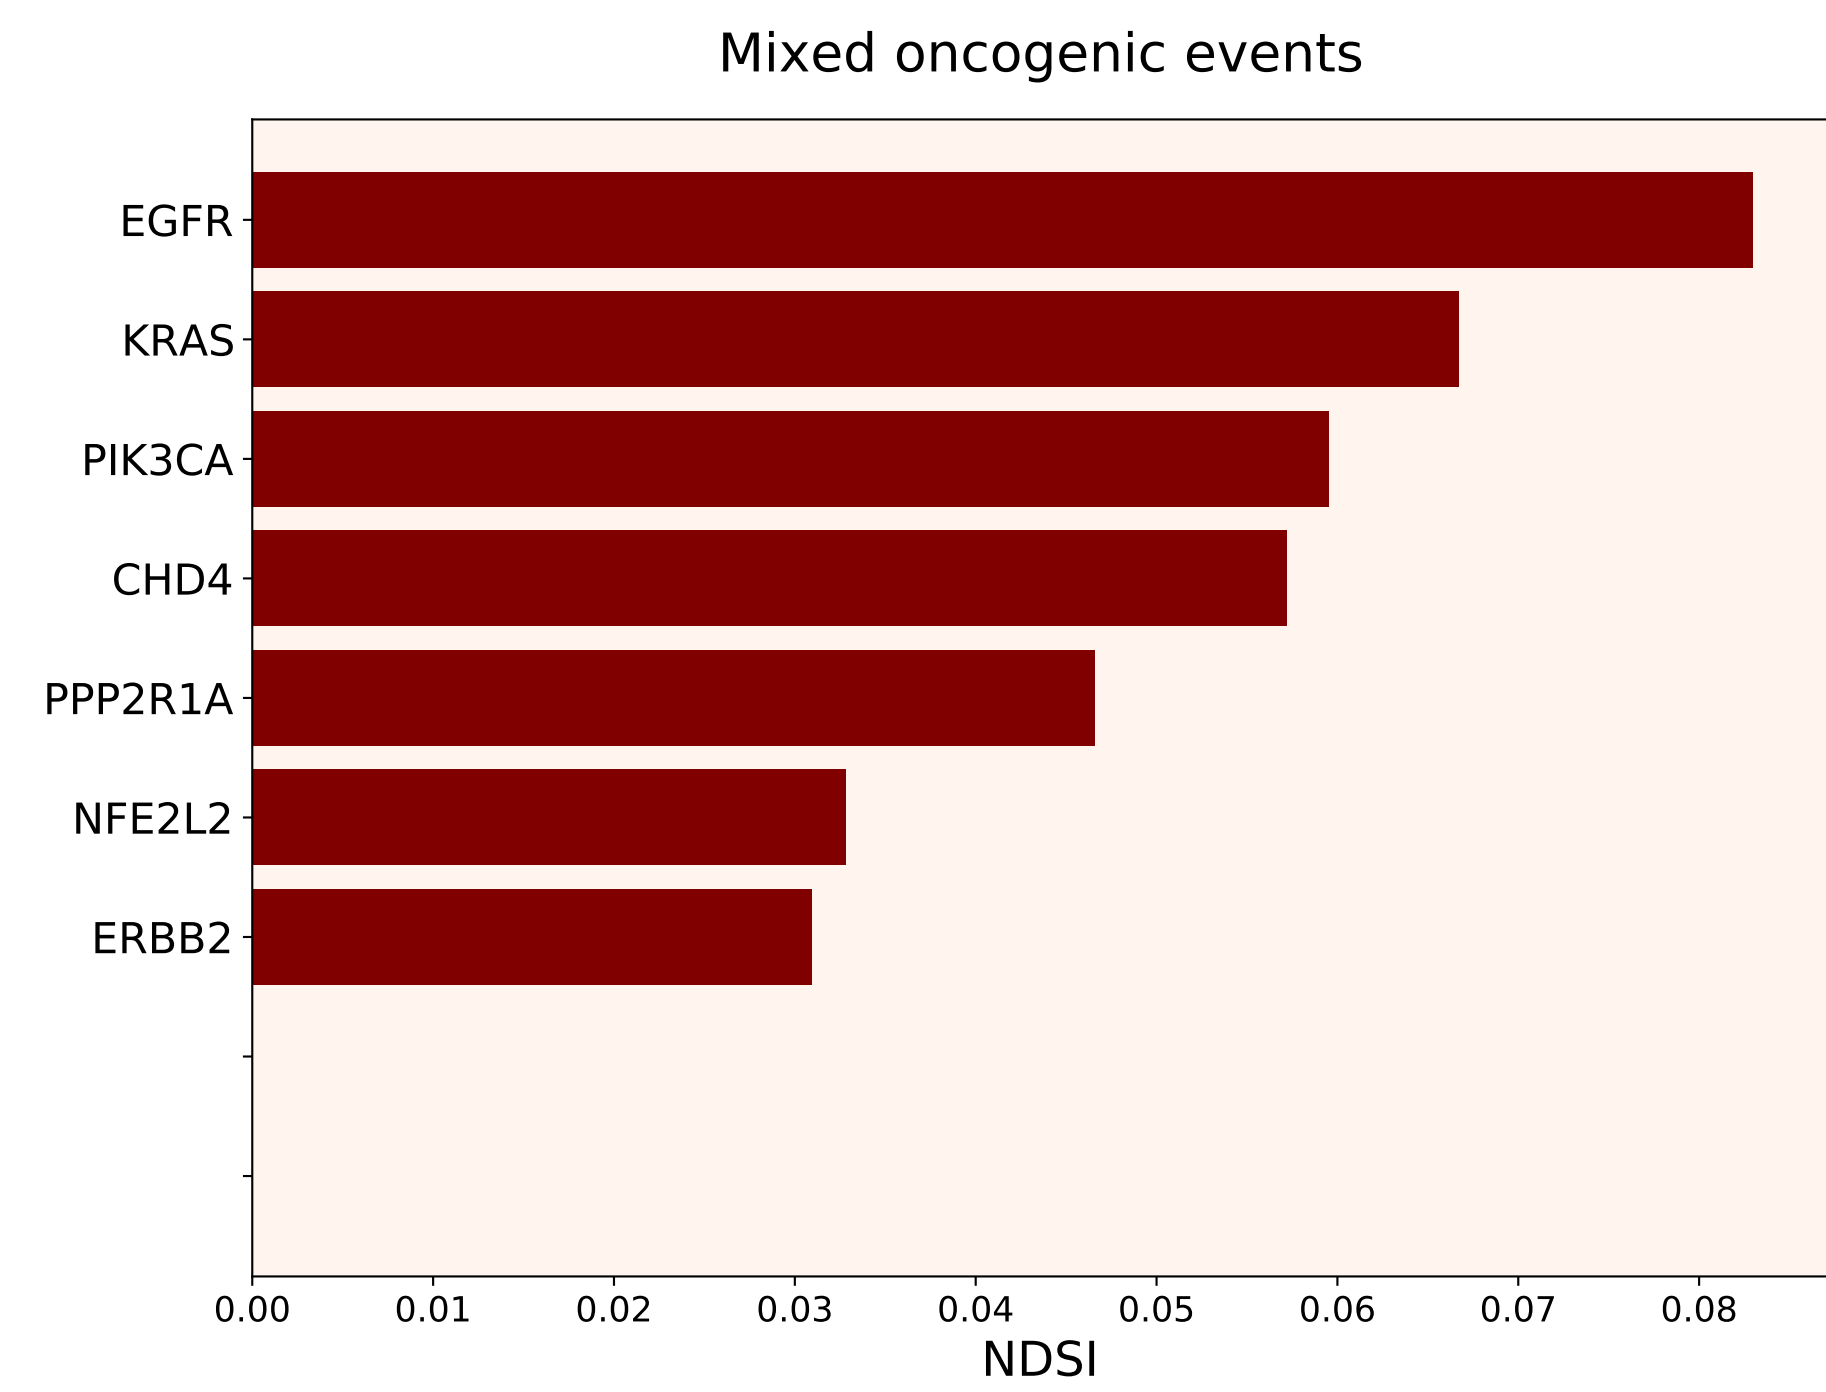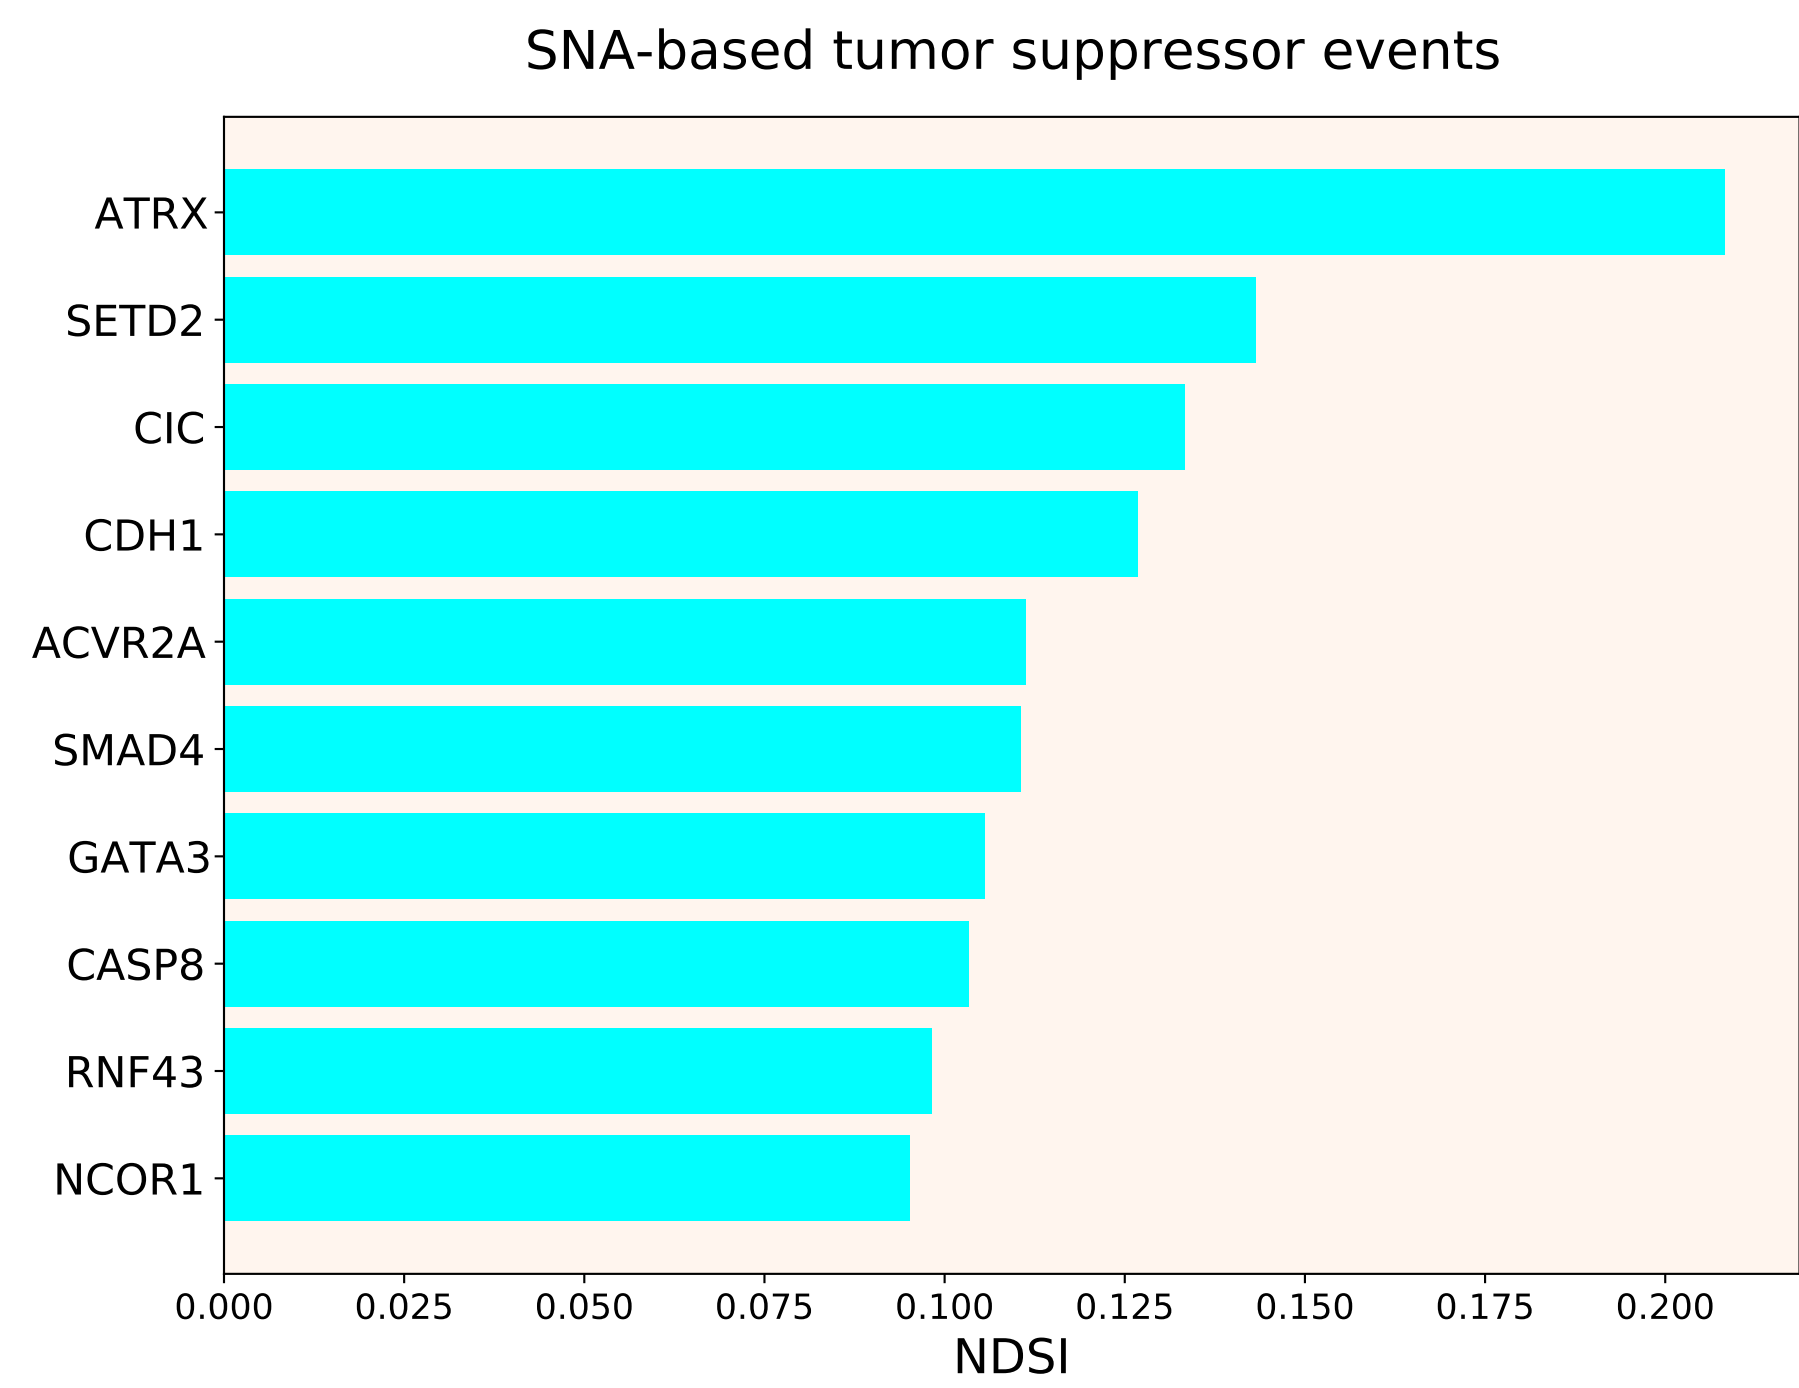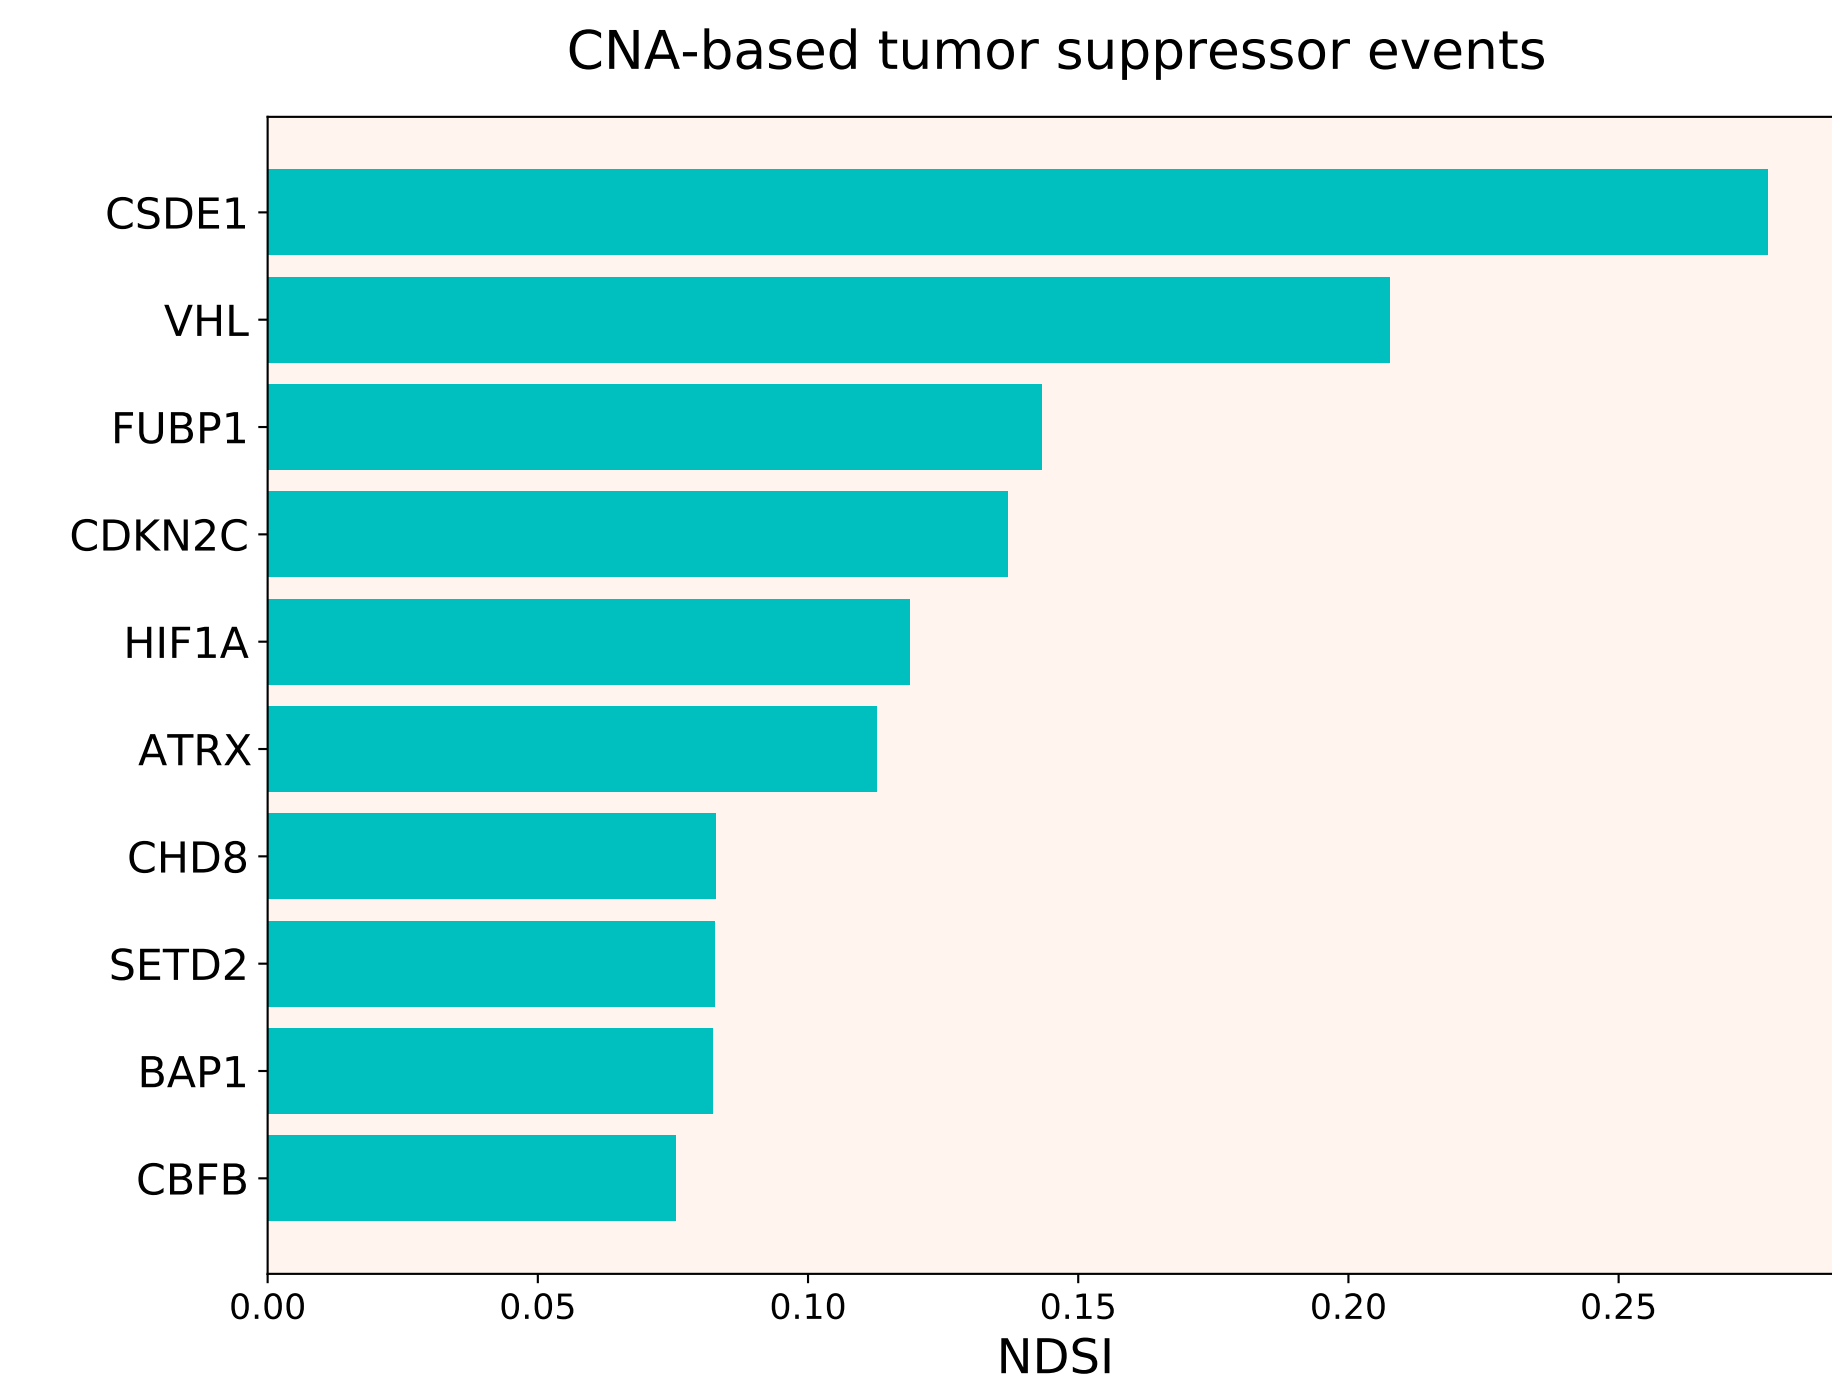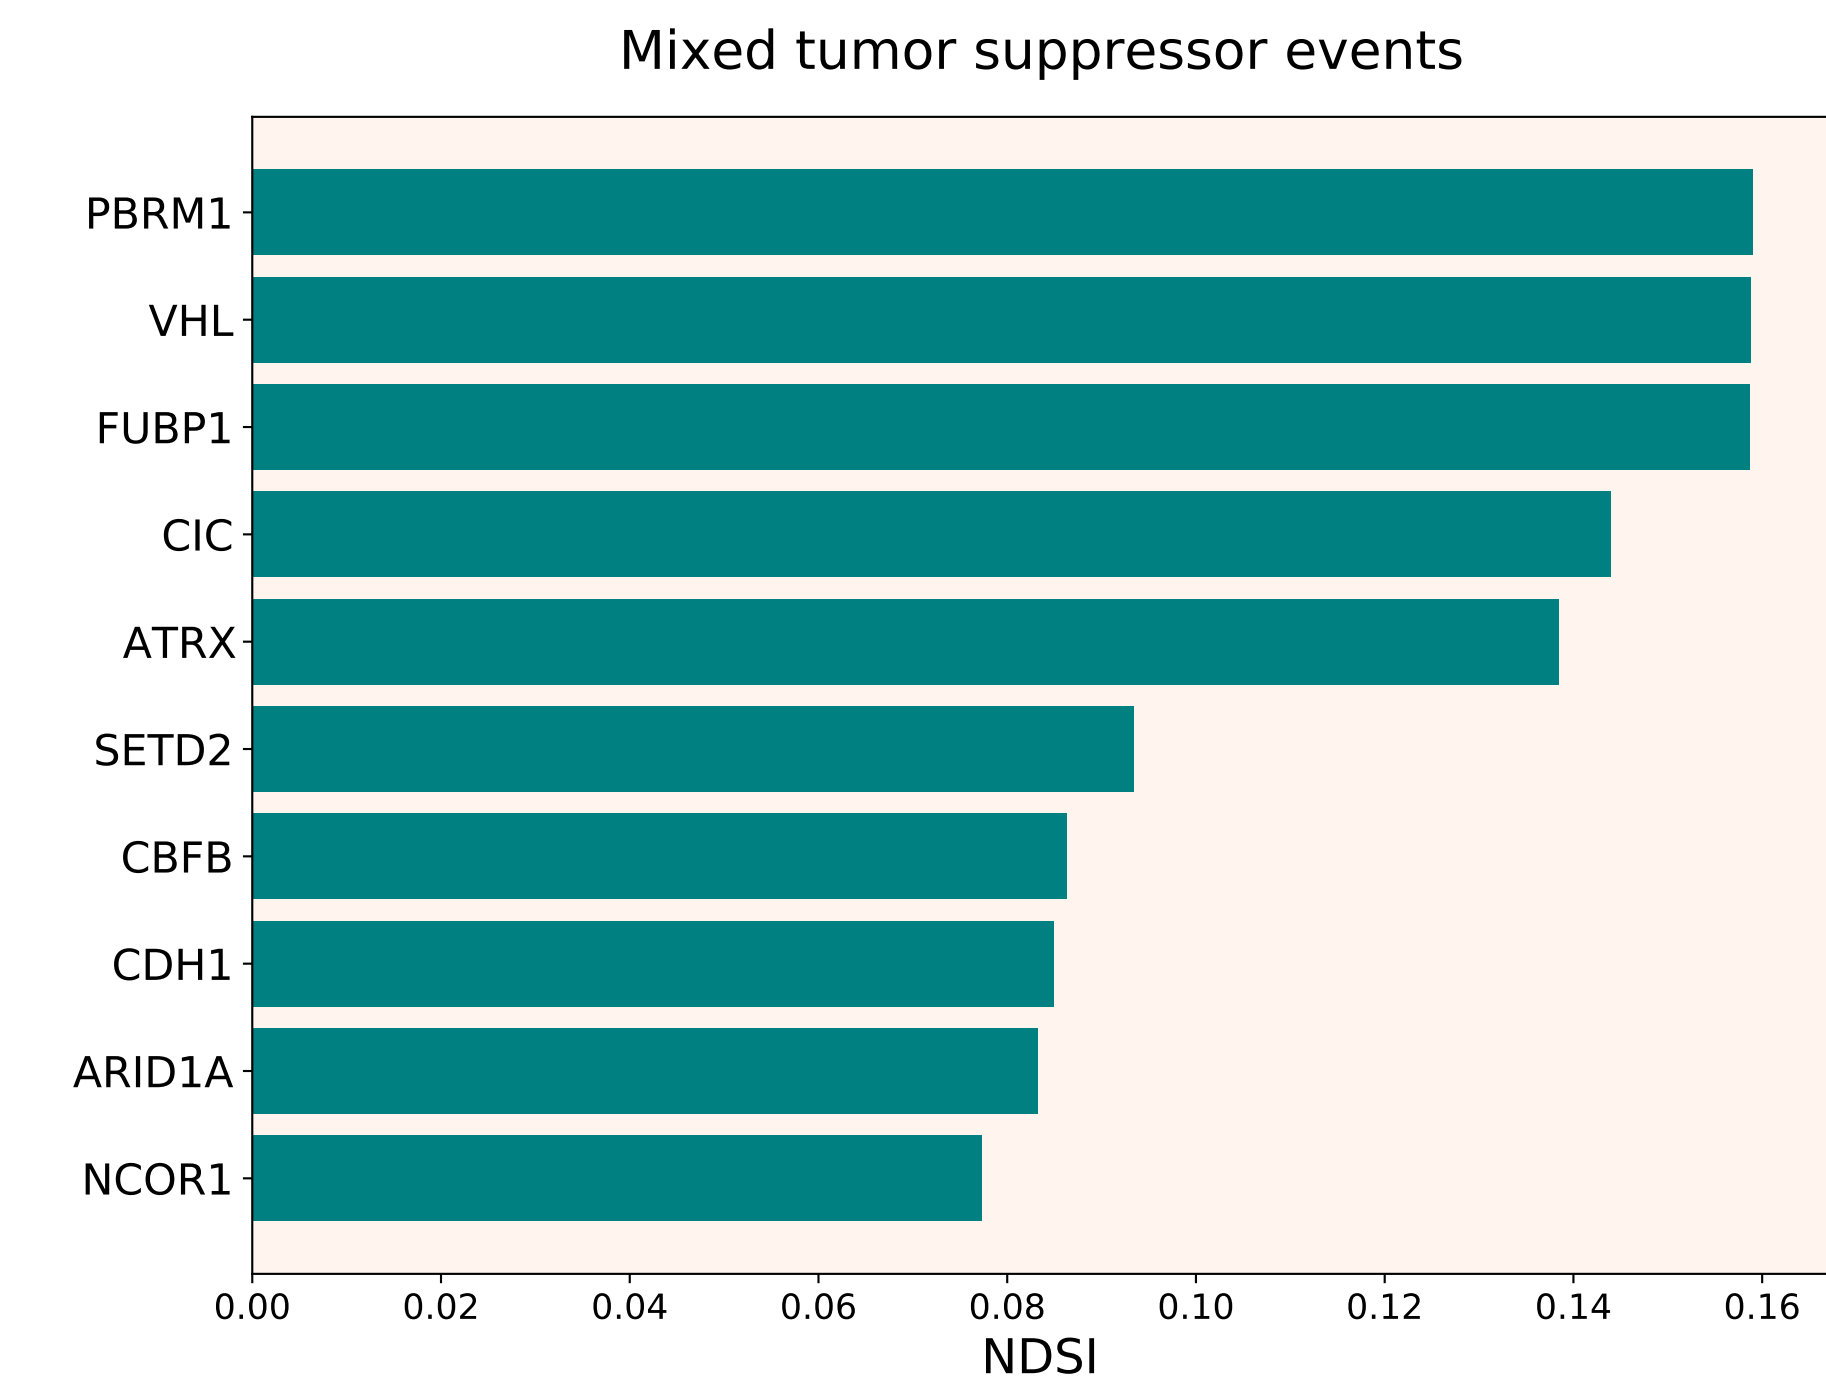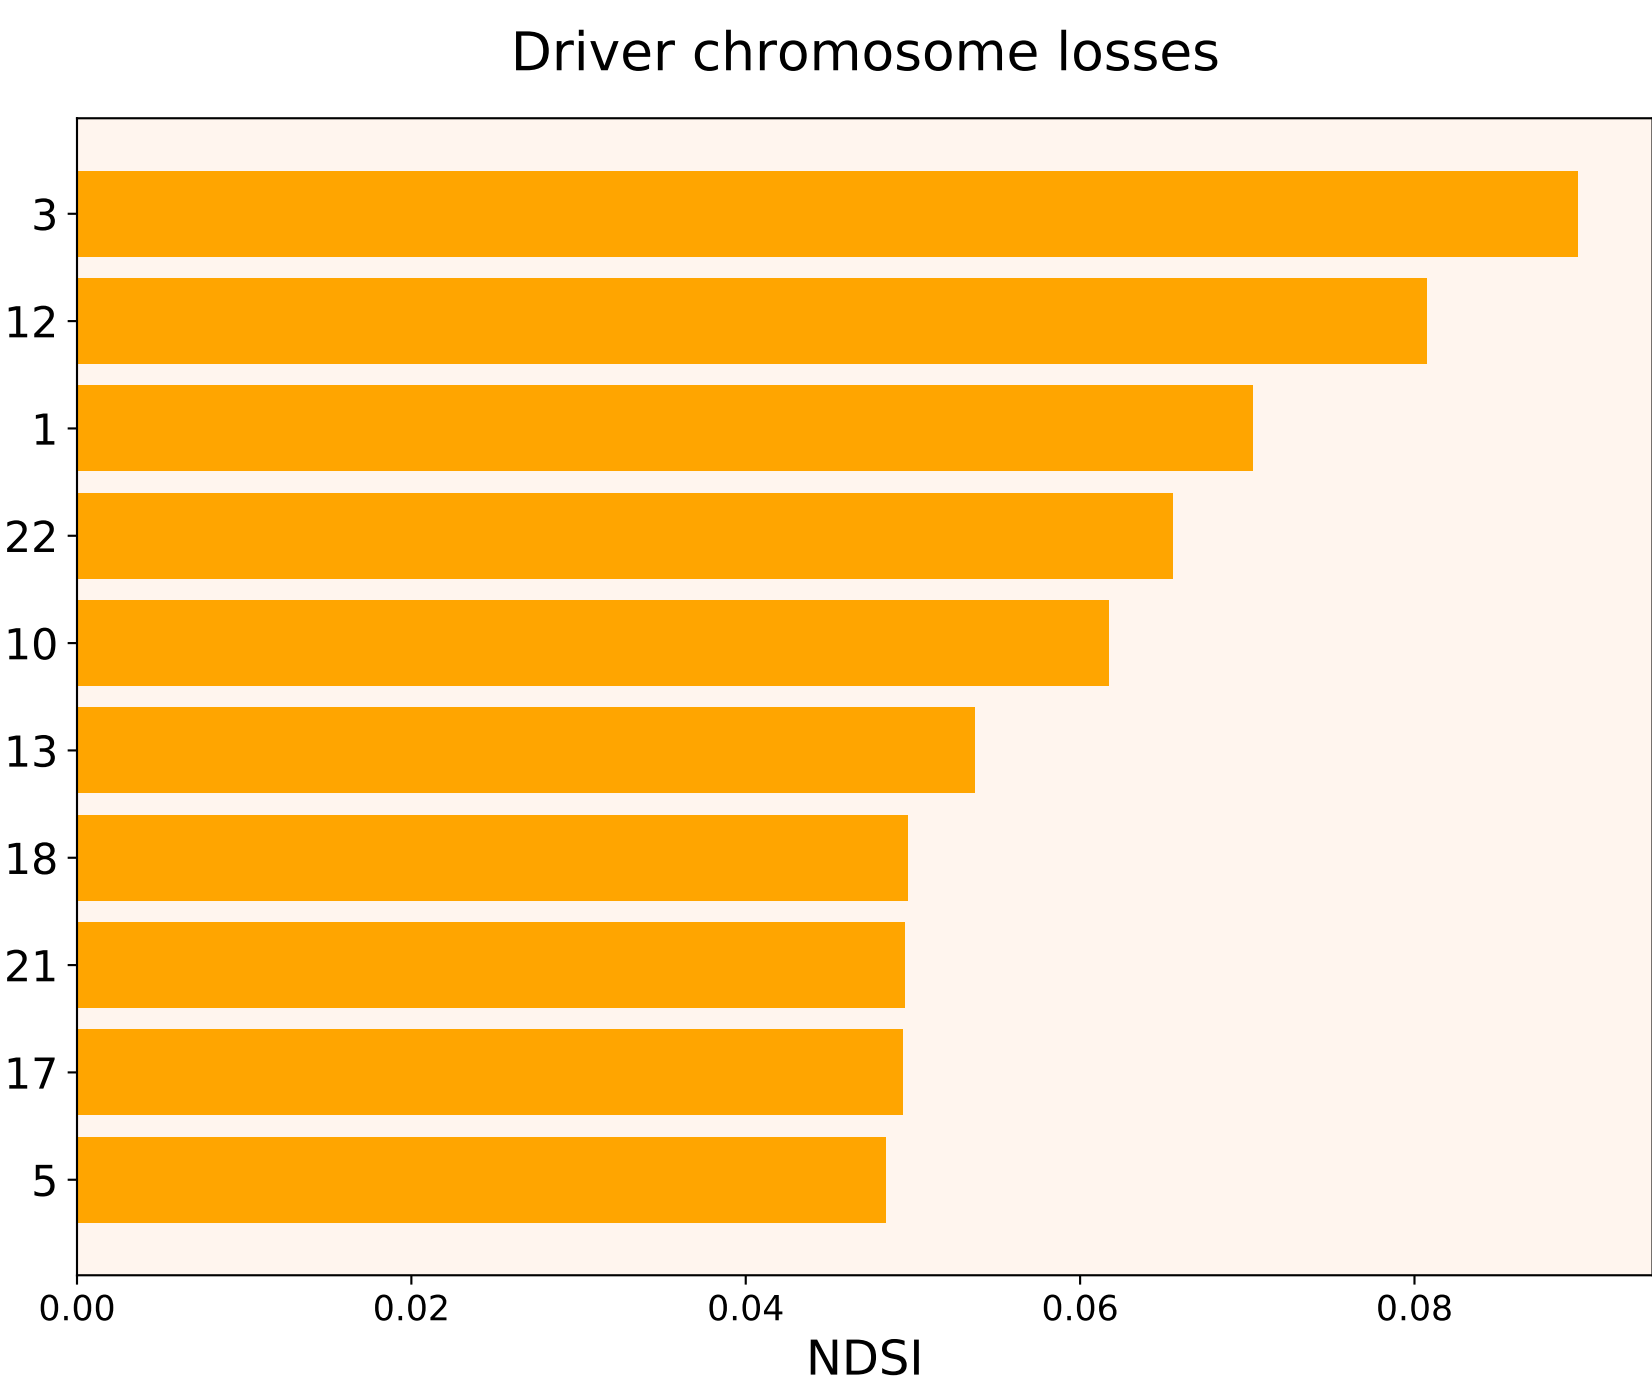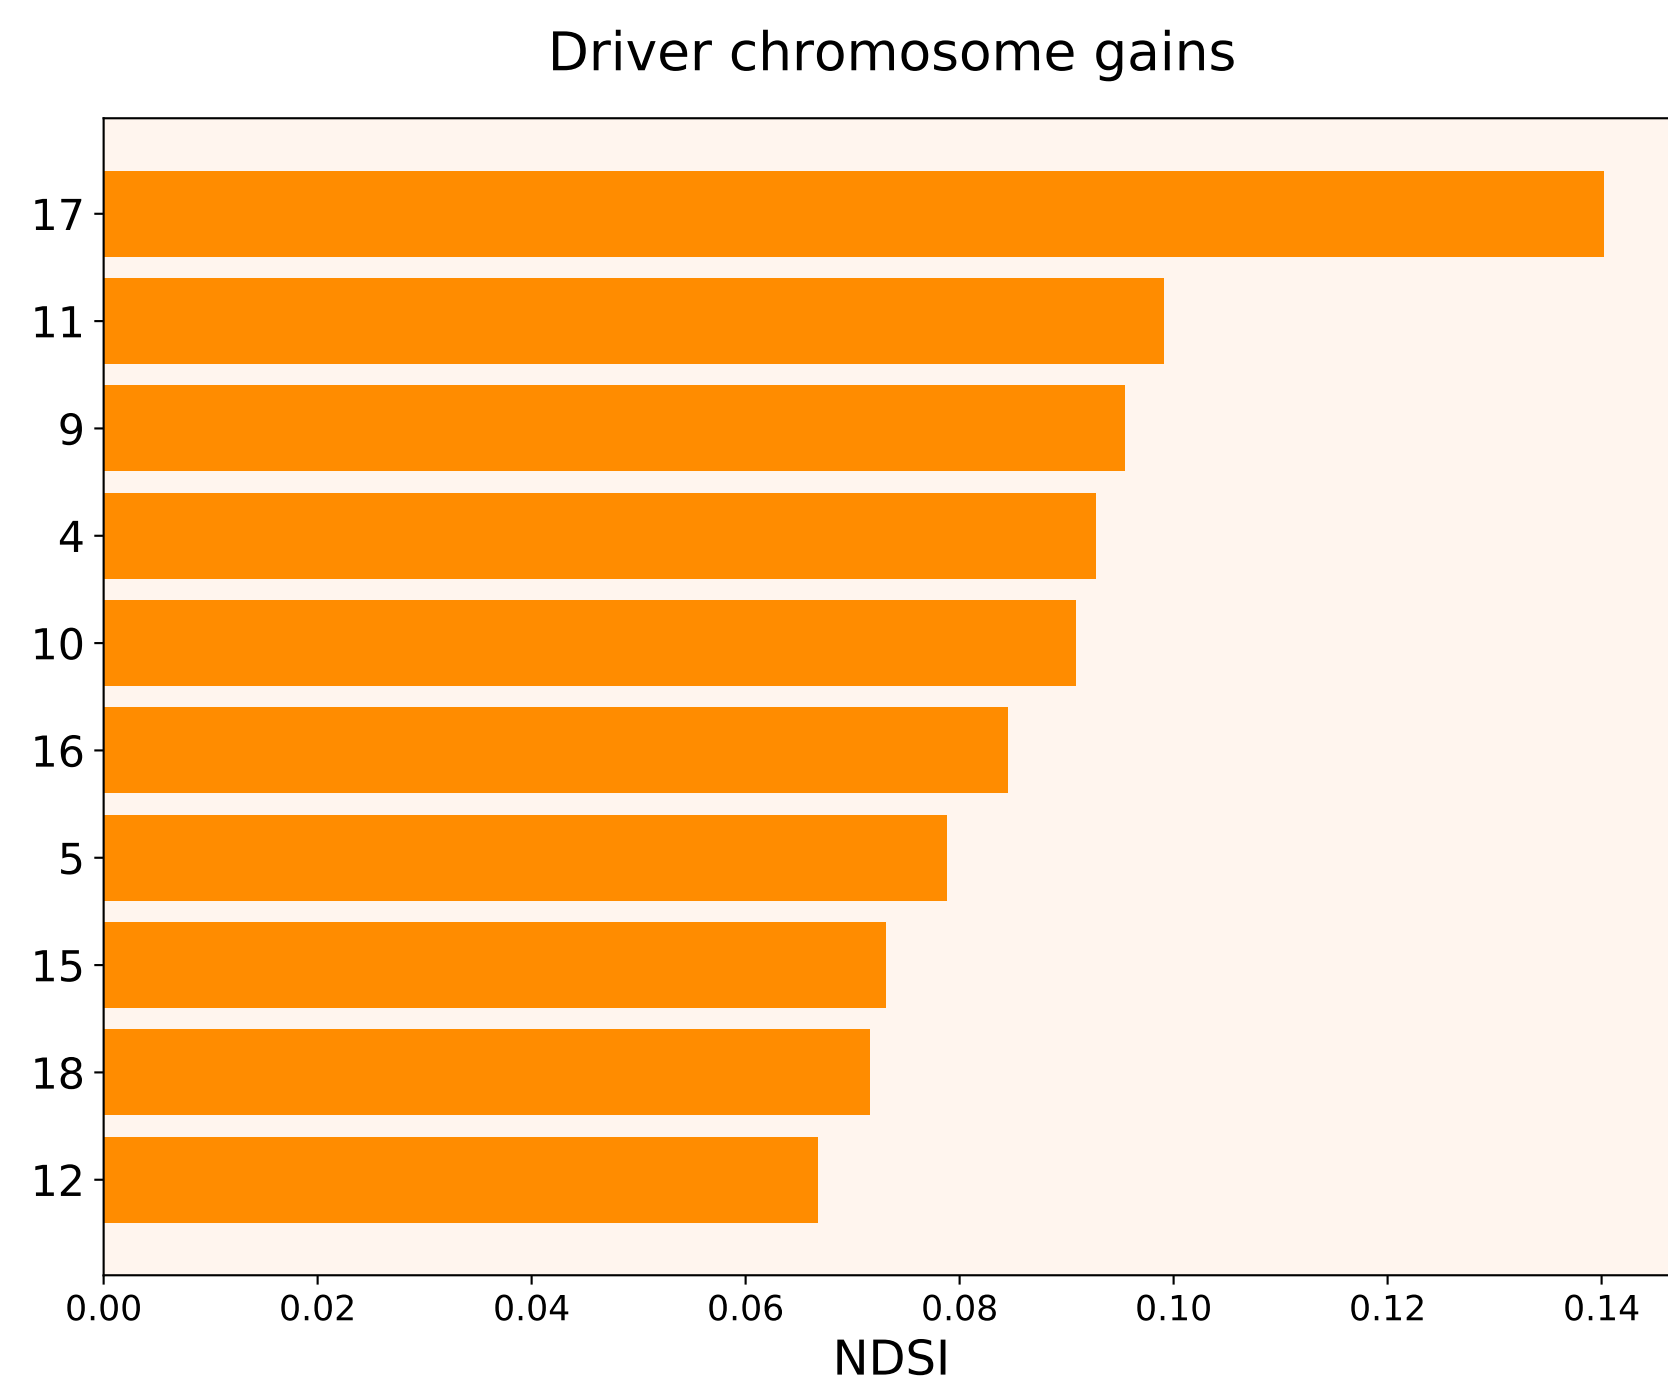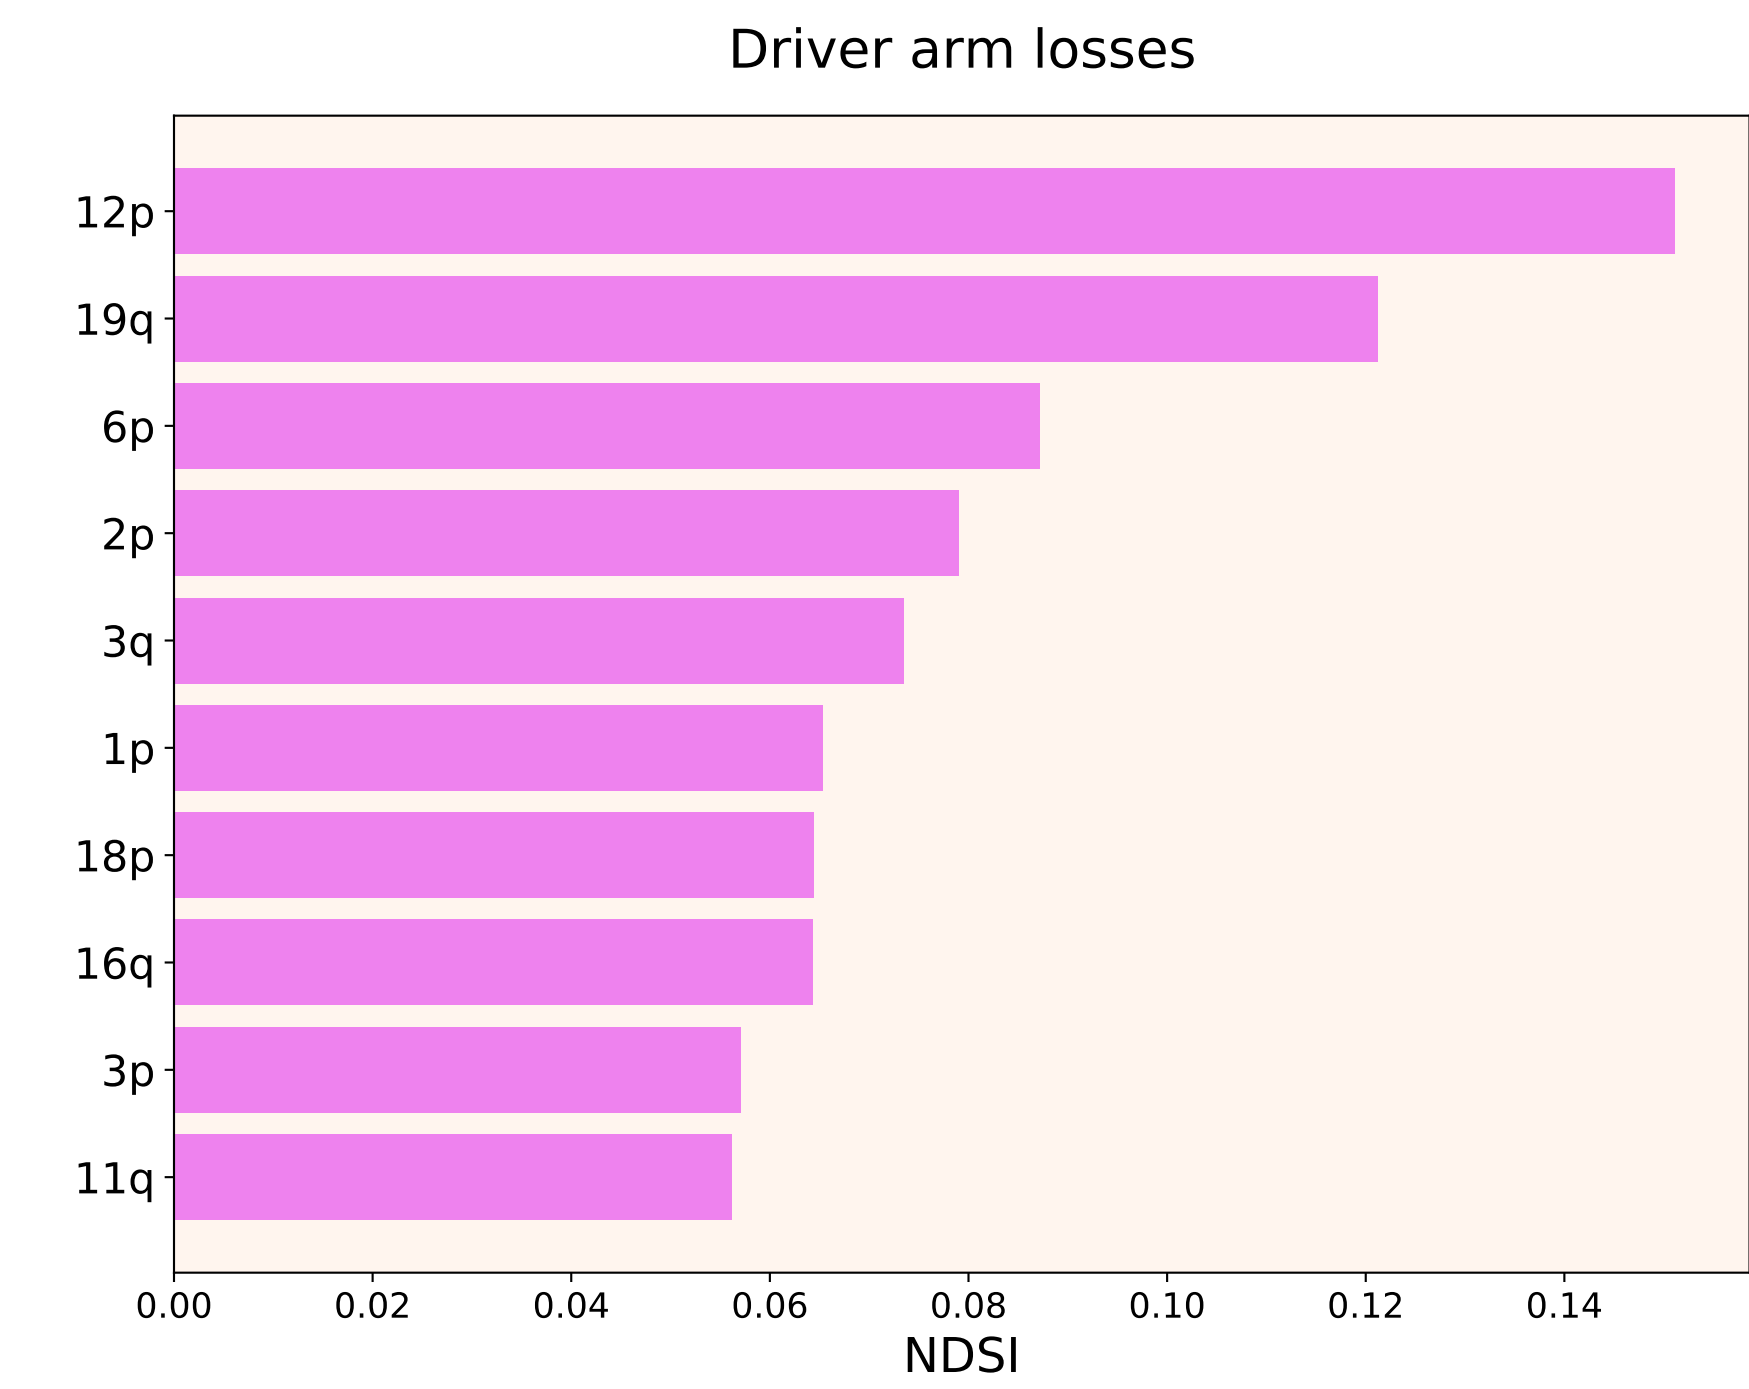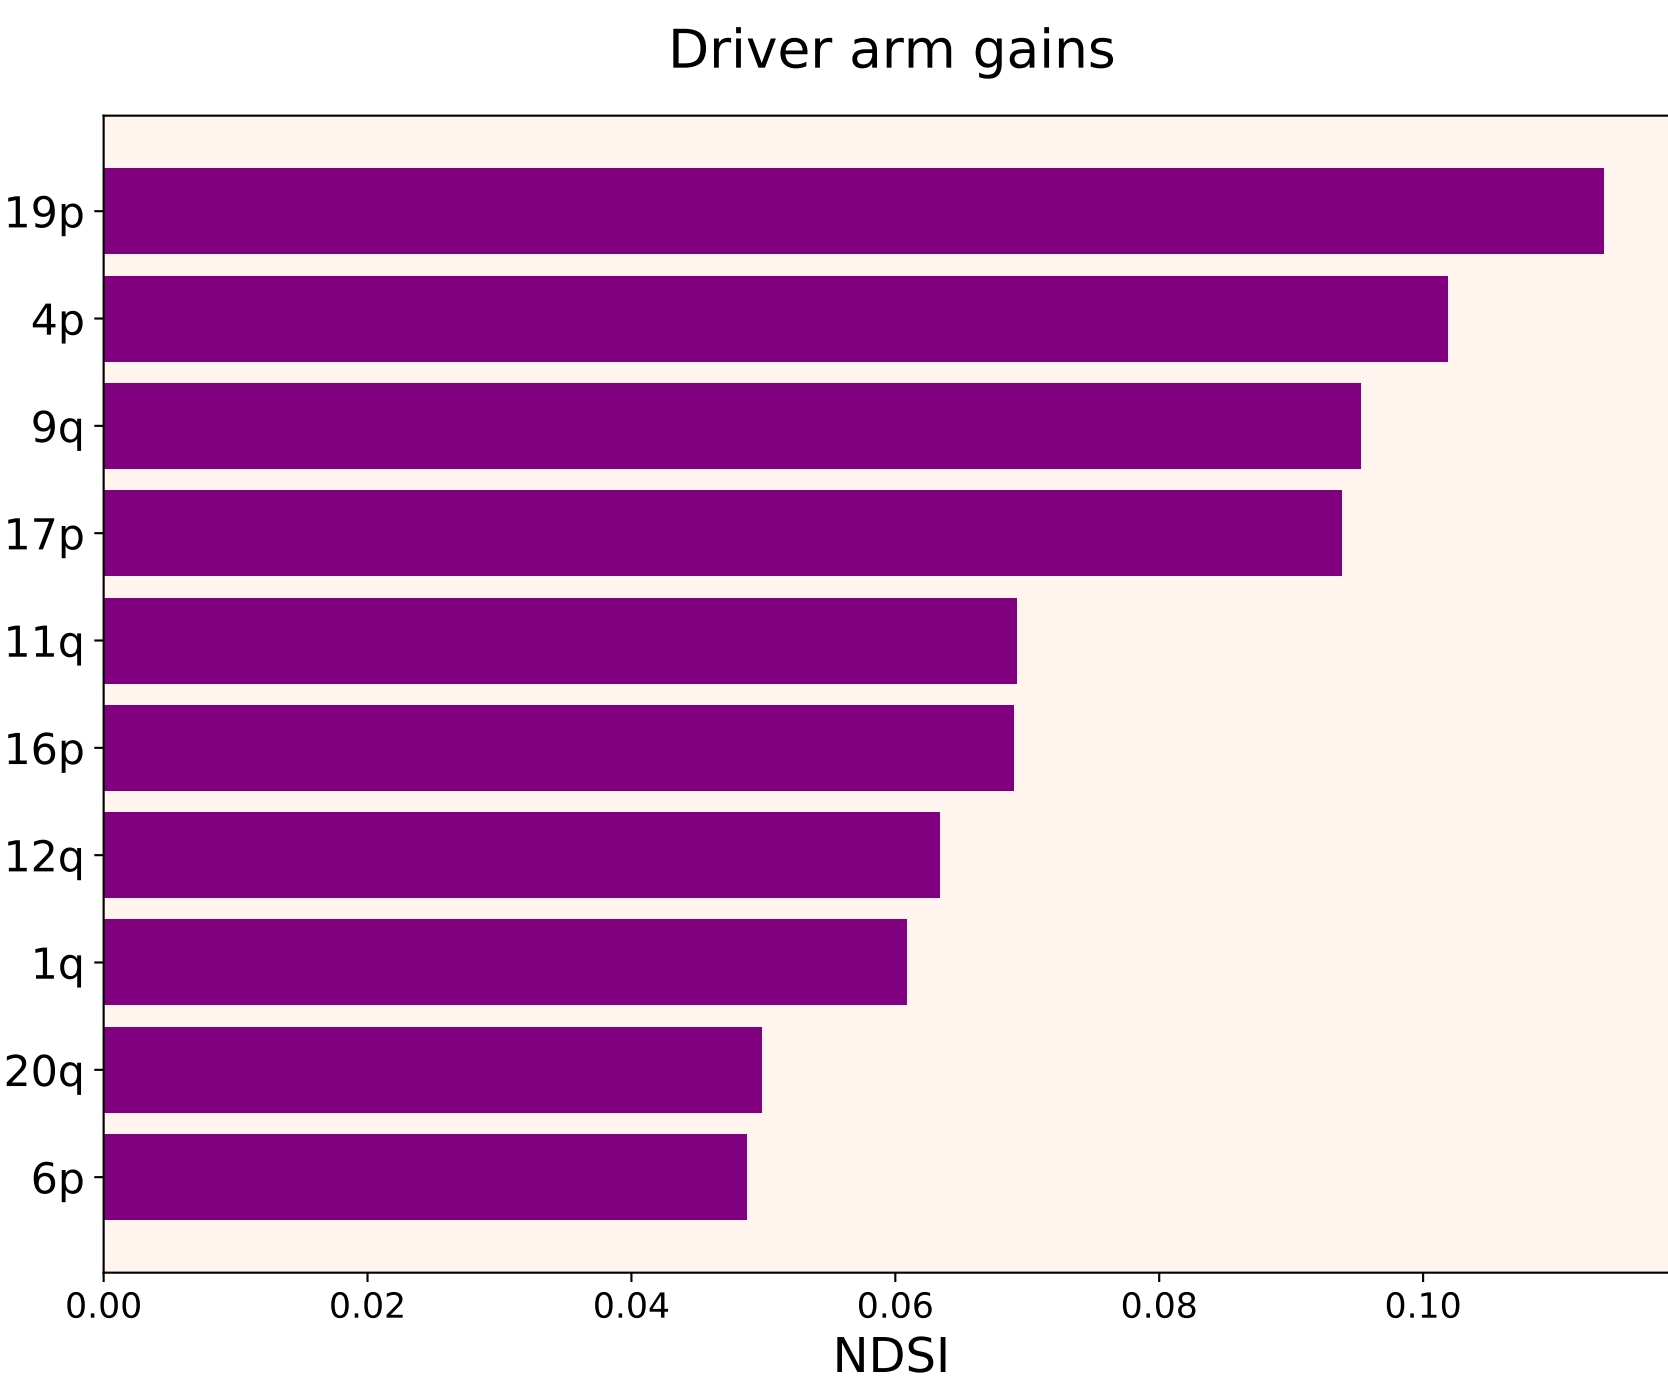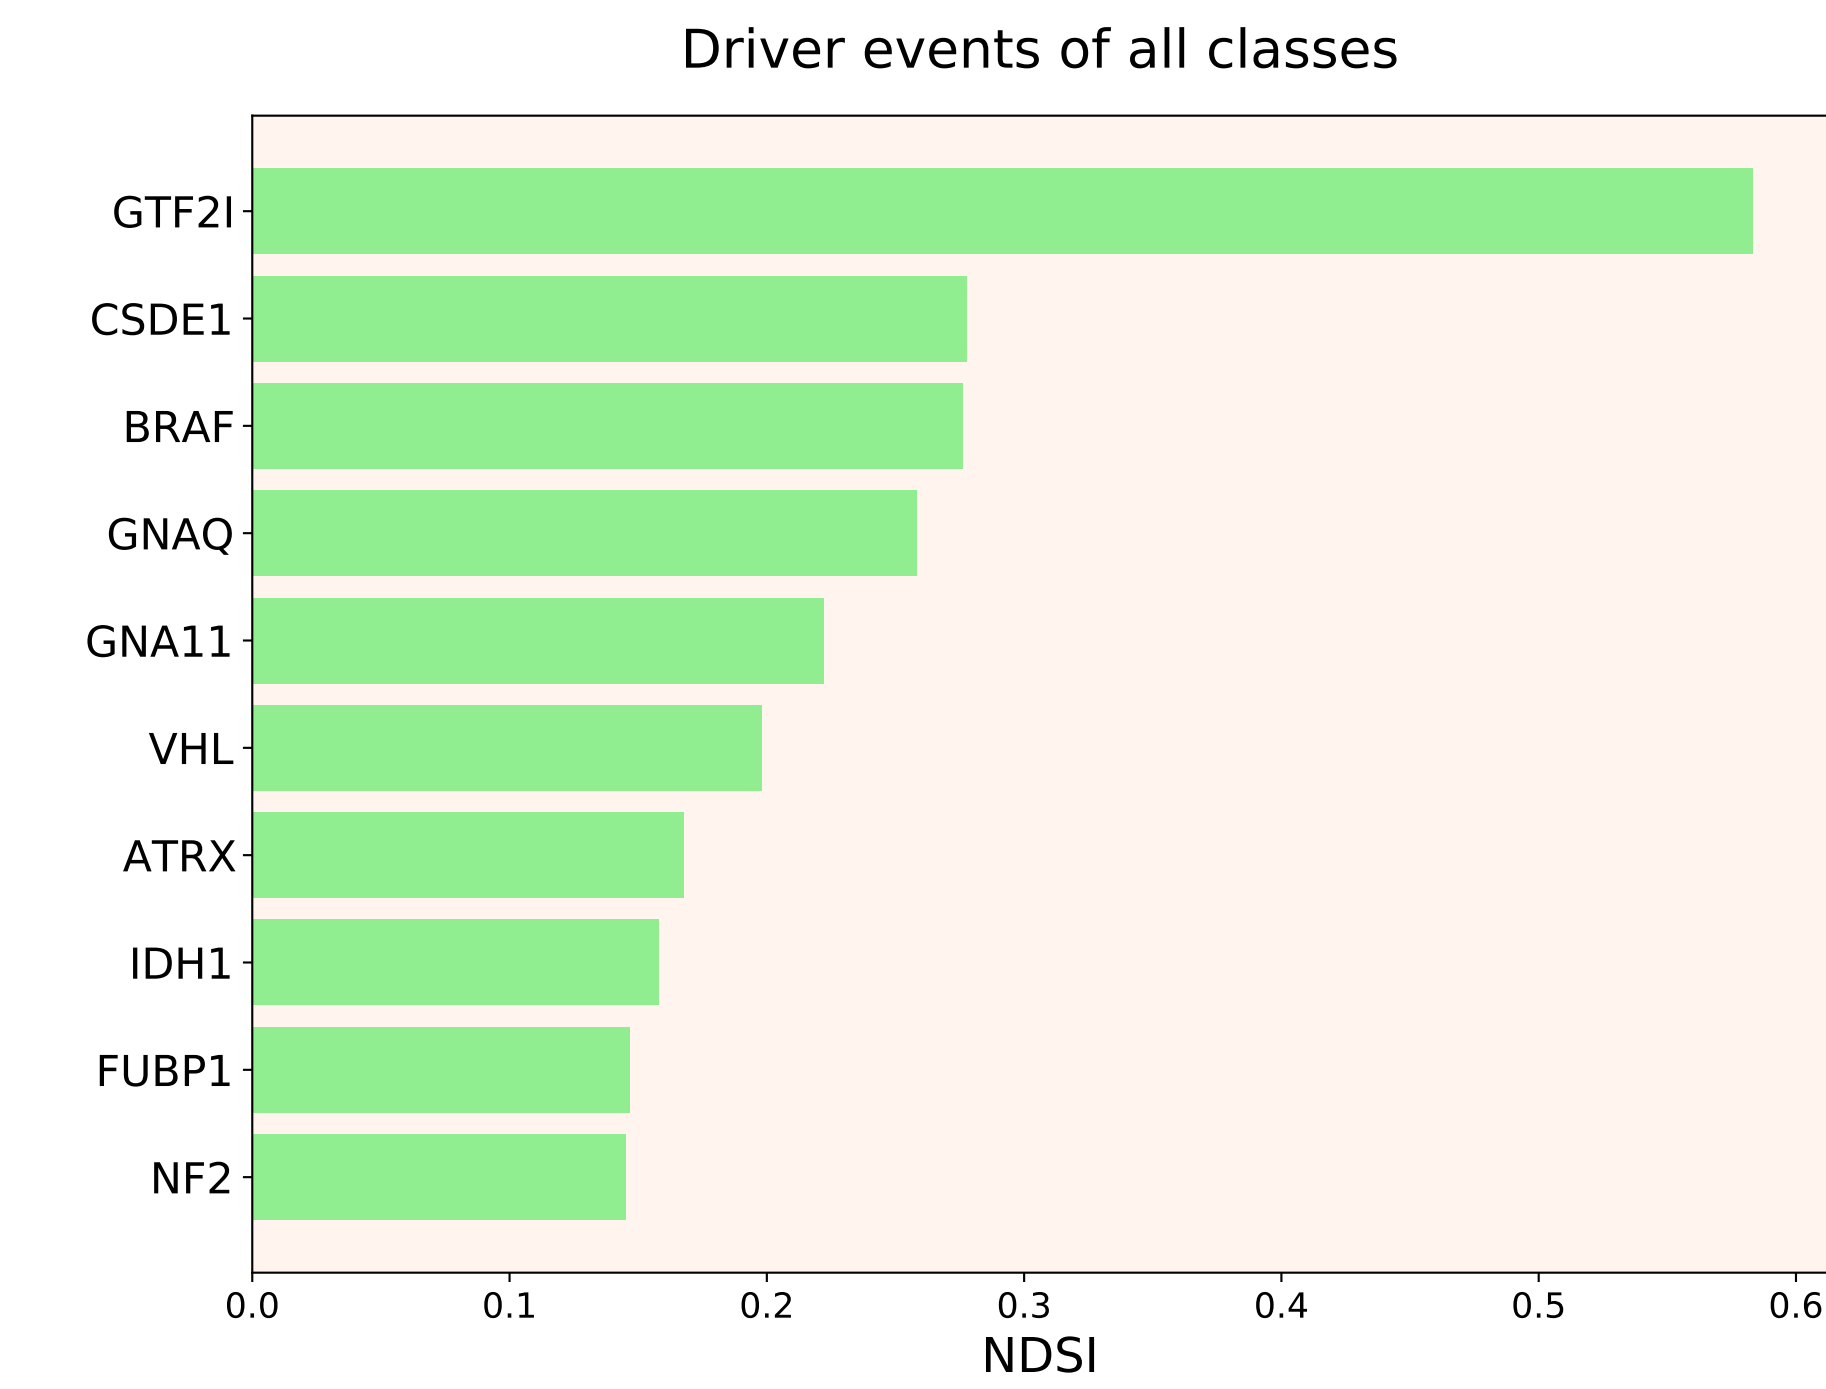

Supplement: Supplemental_Data_S1.zip [file Supplemental_Data_S1.zip]

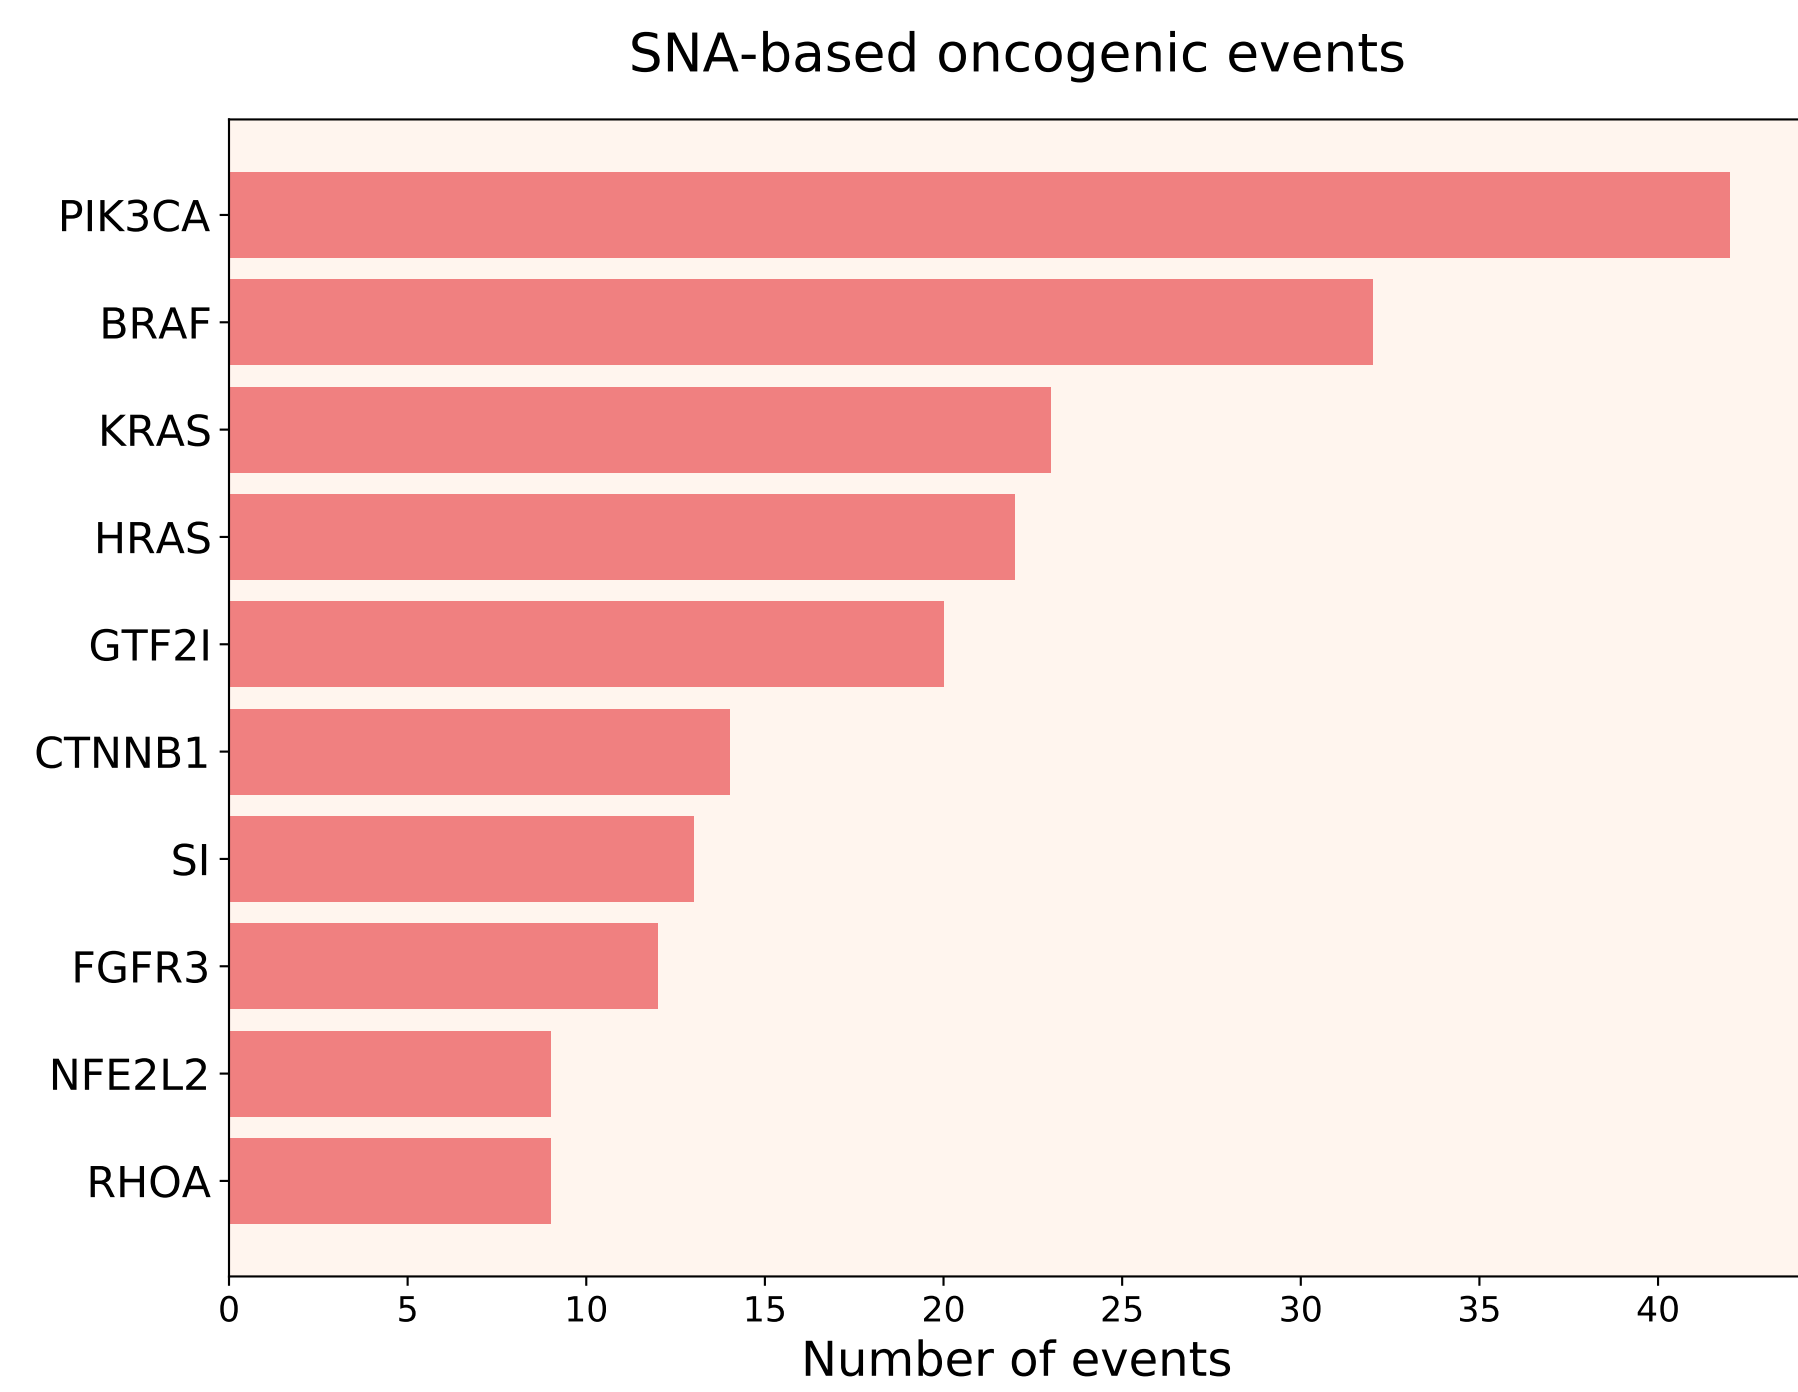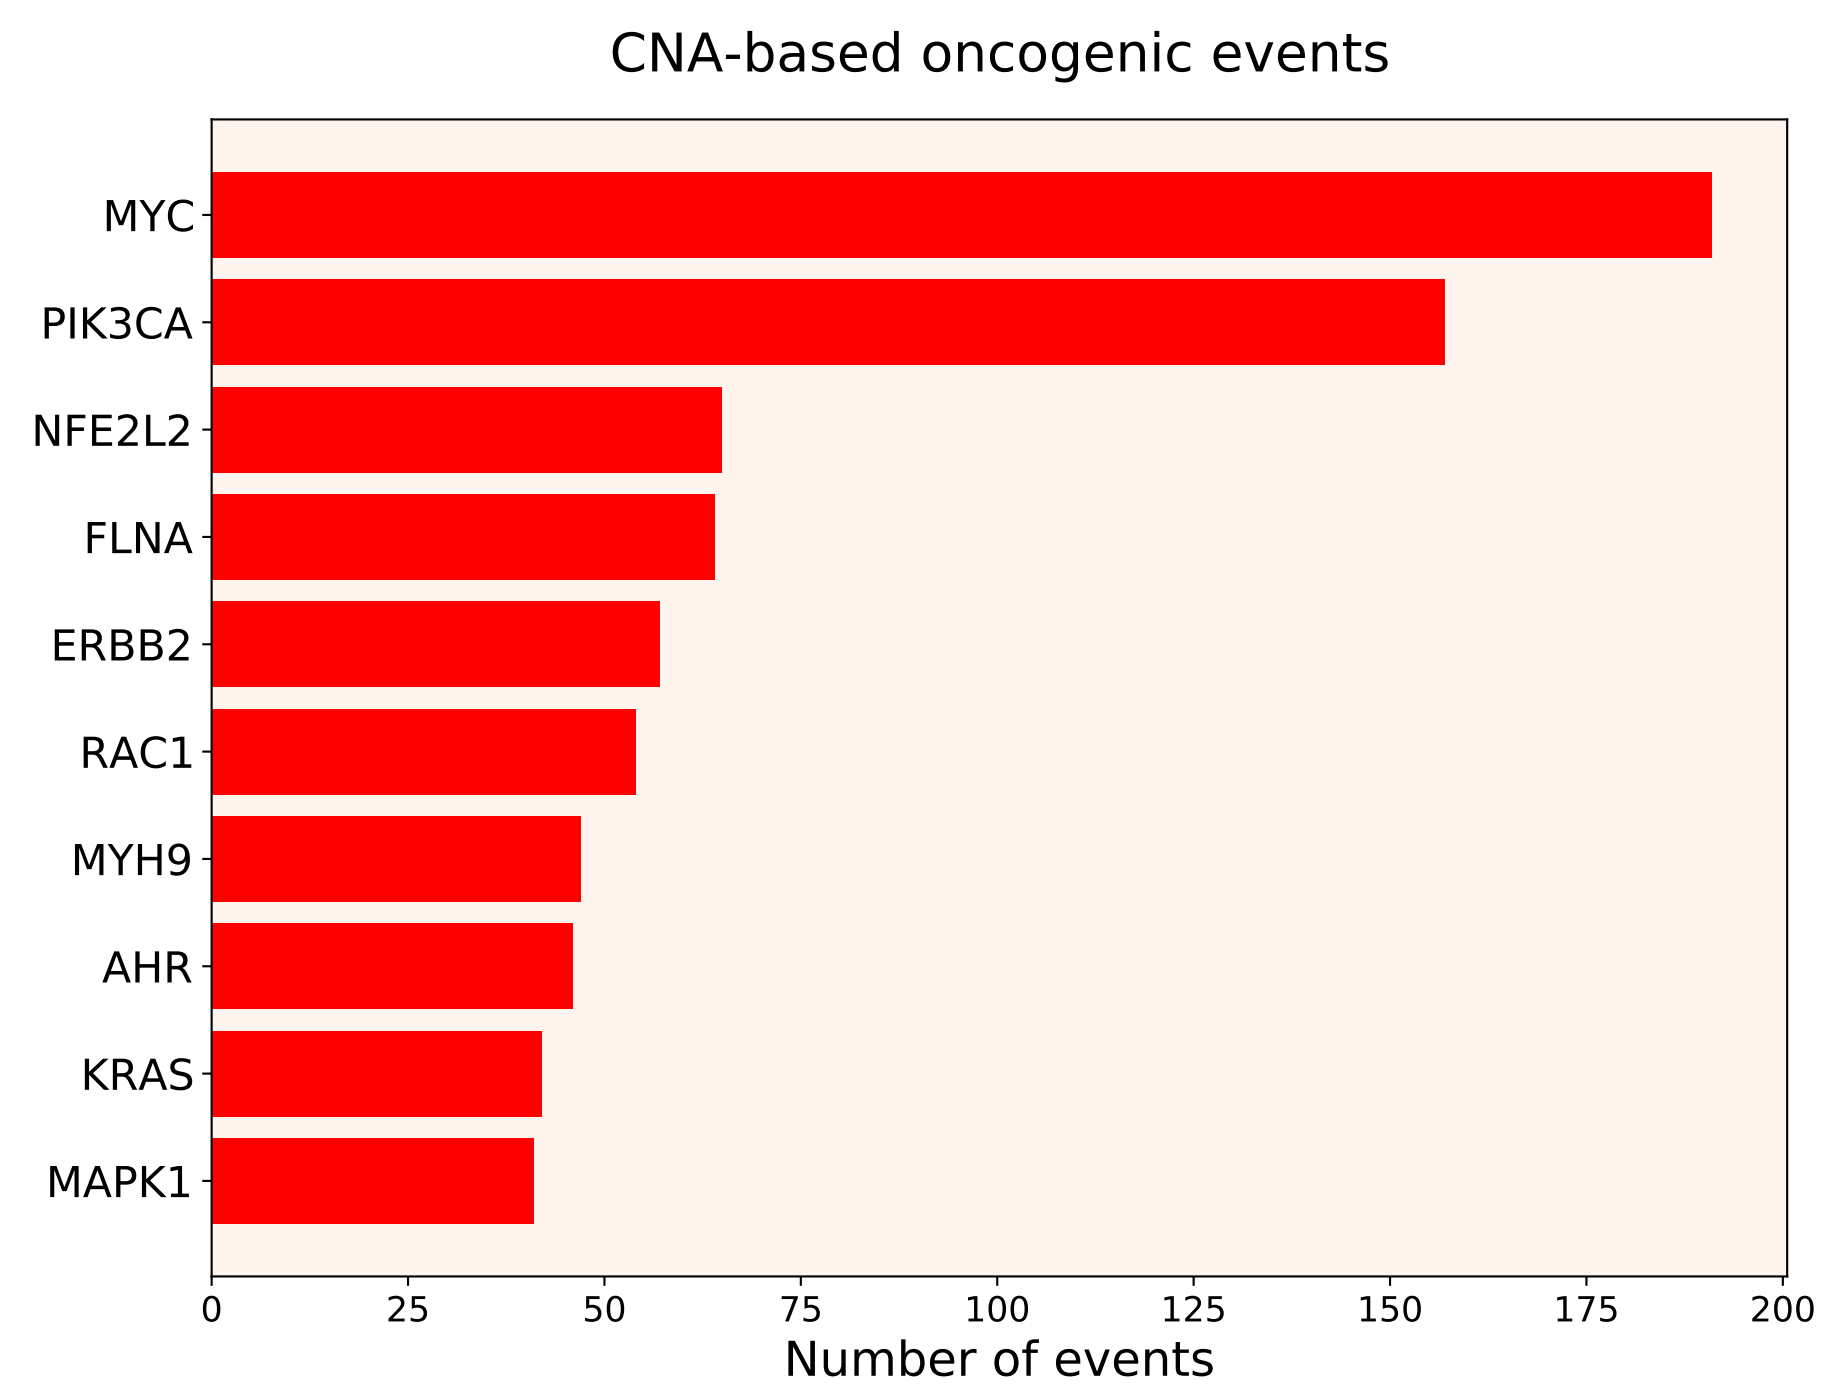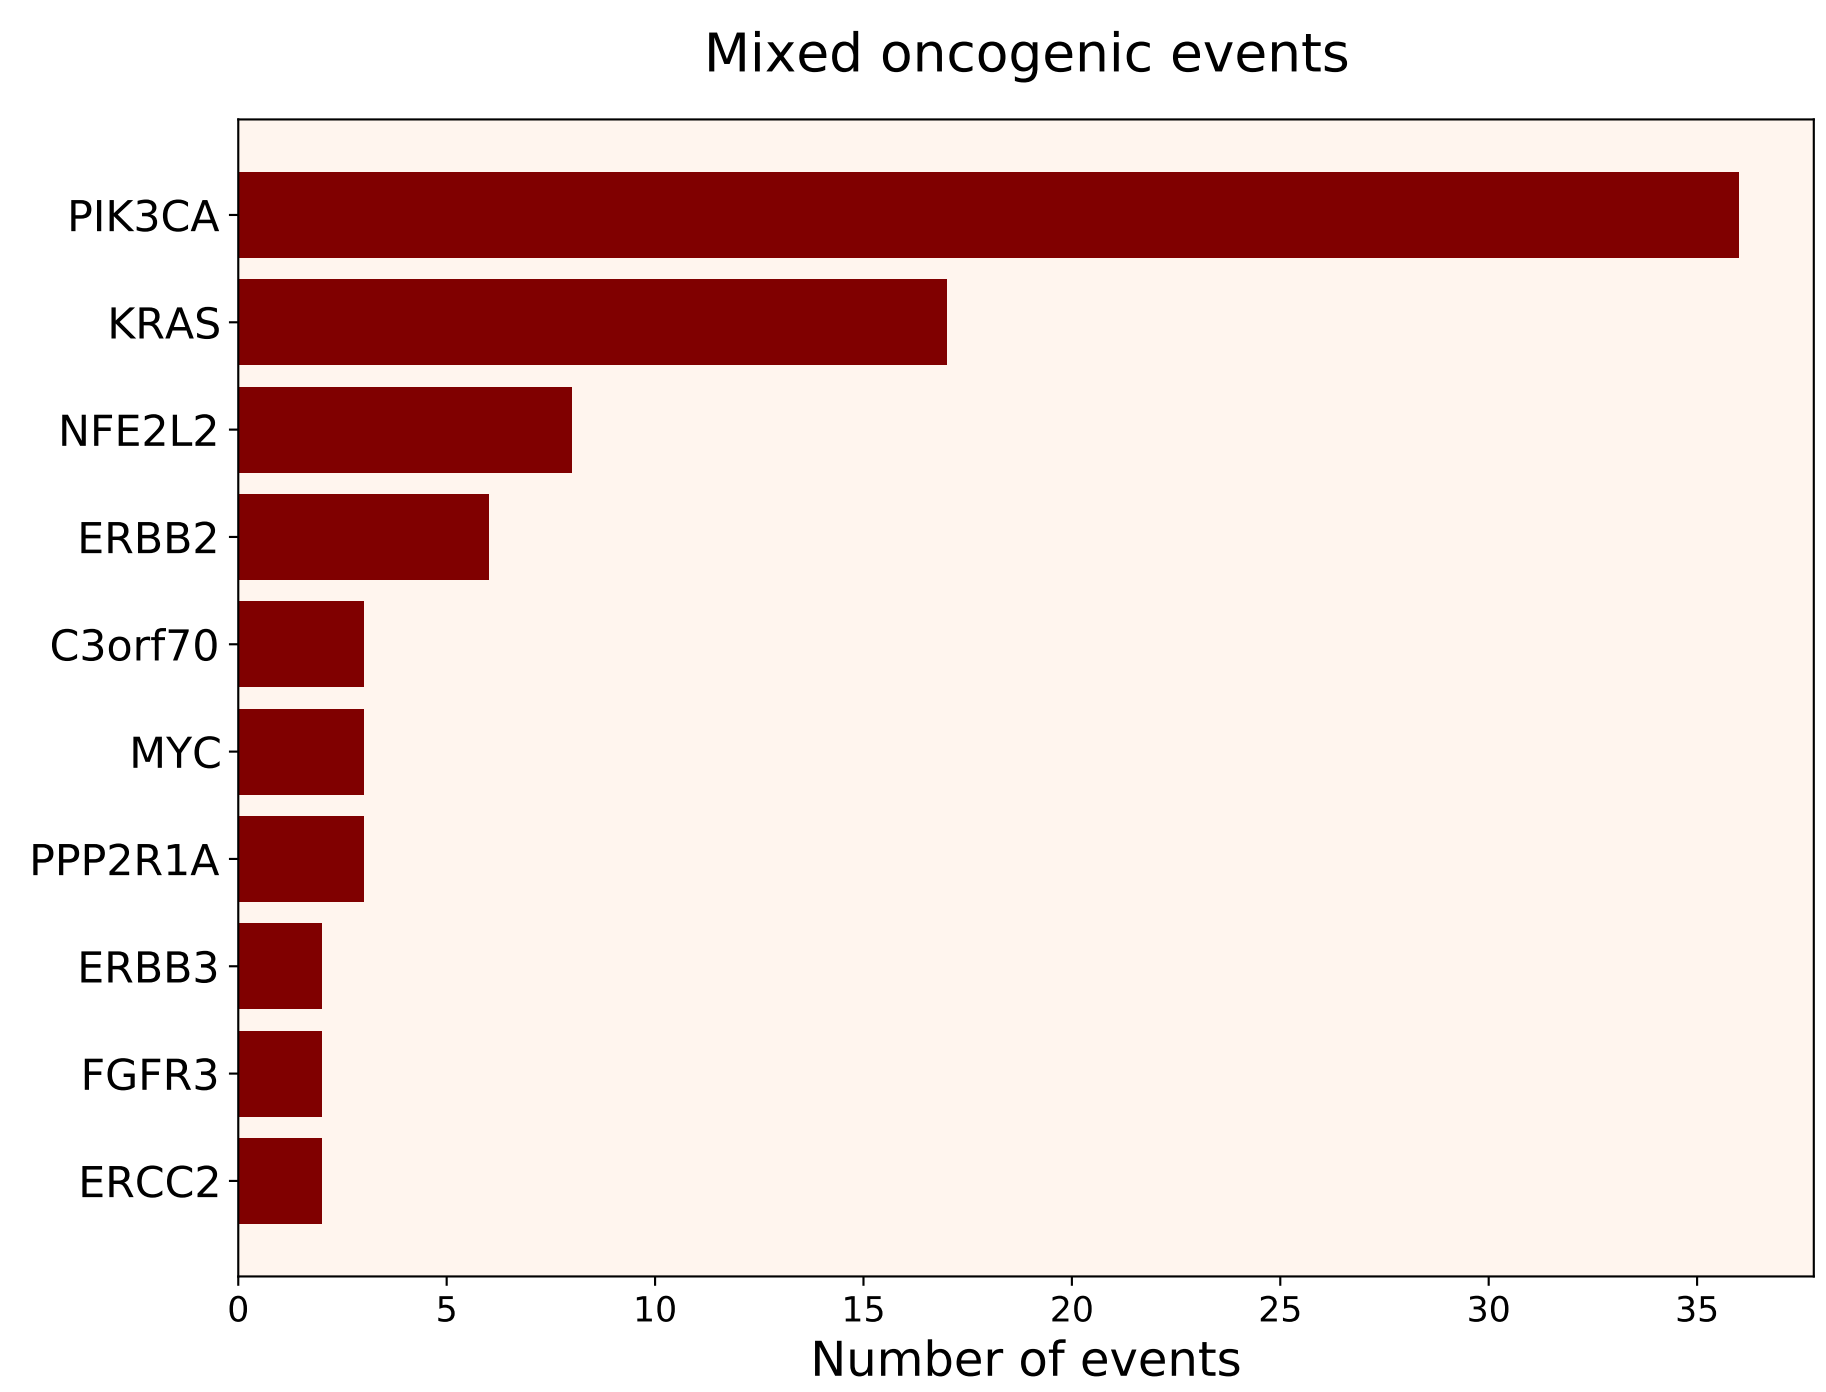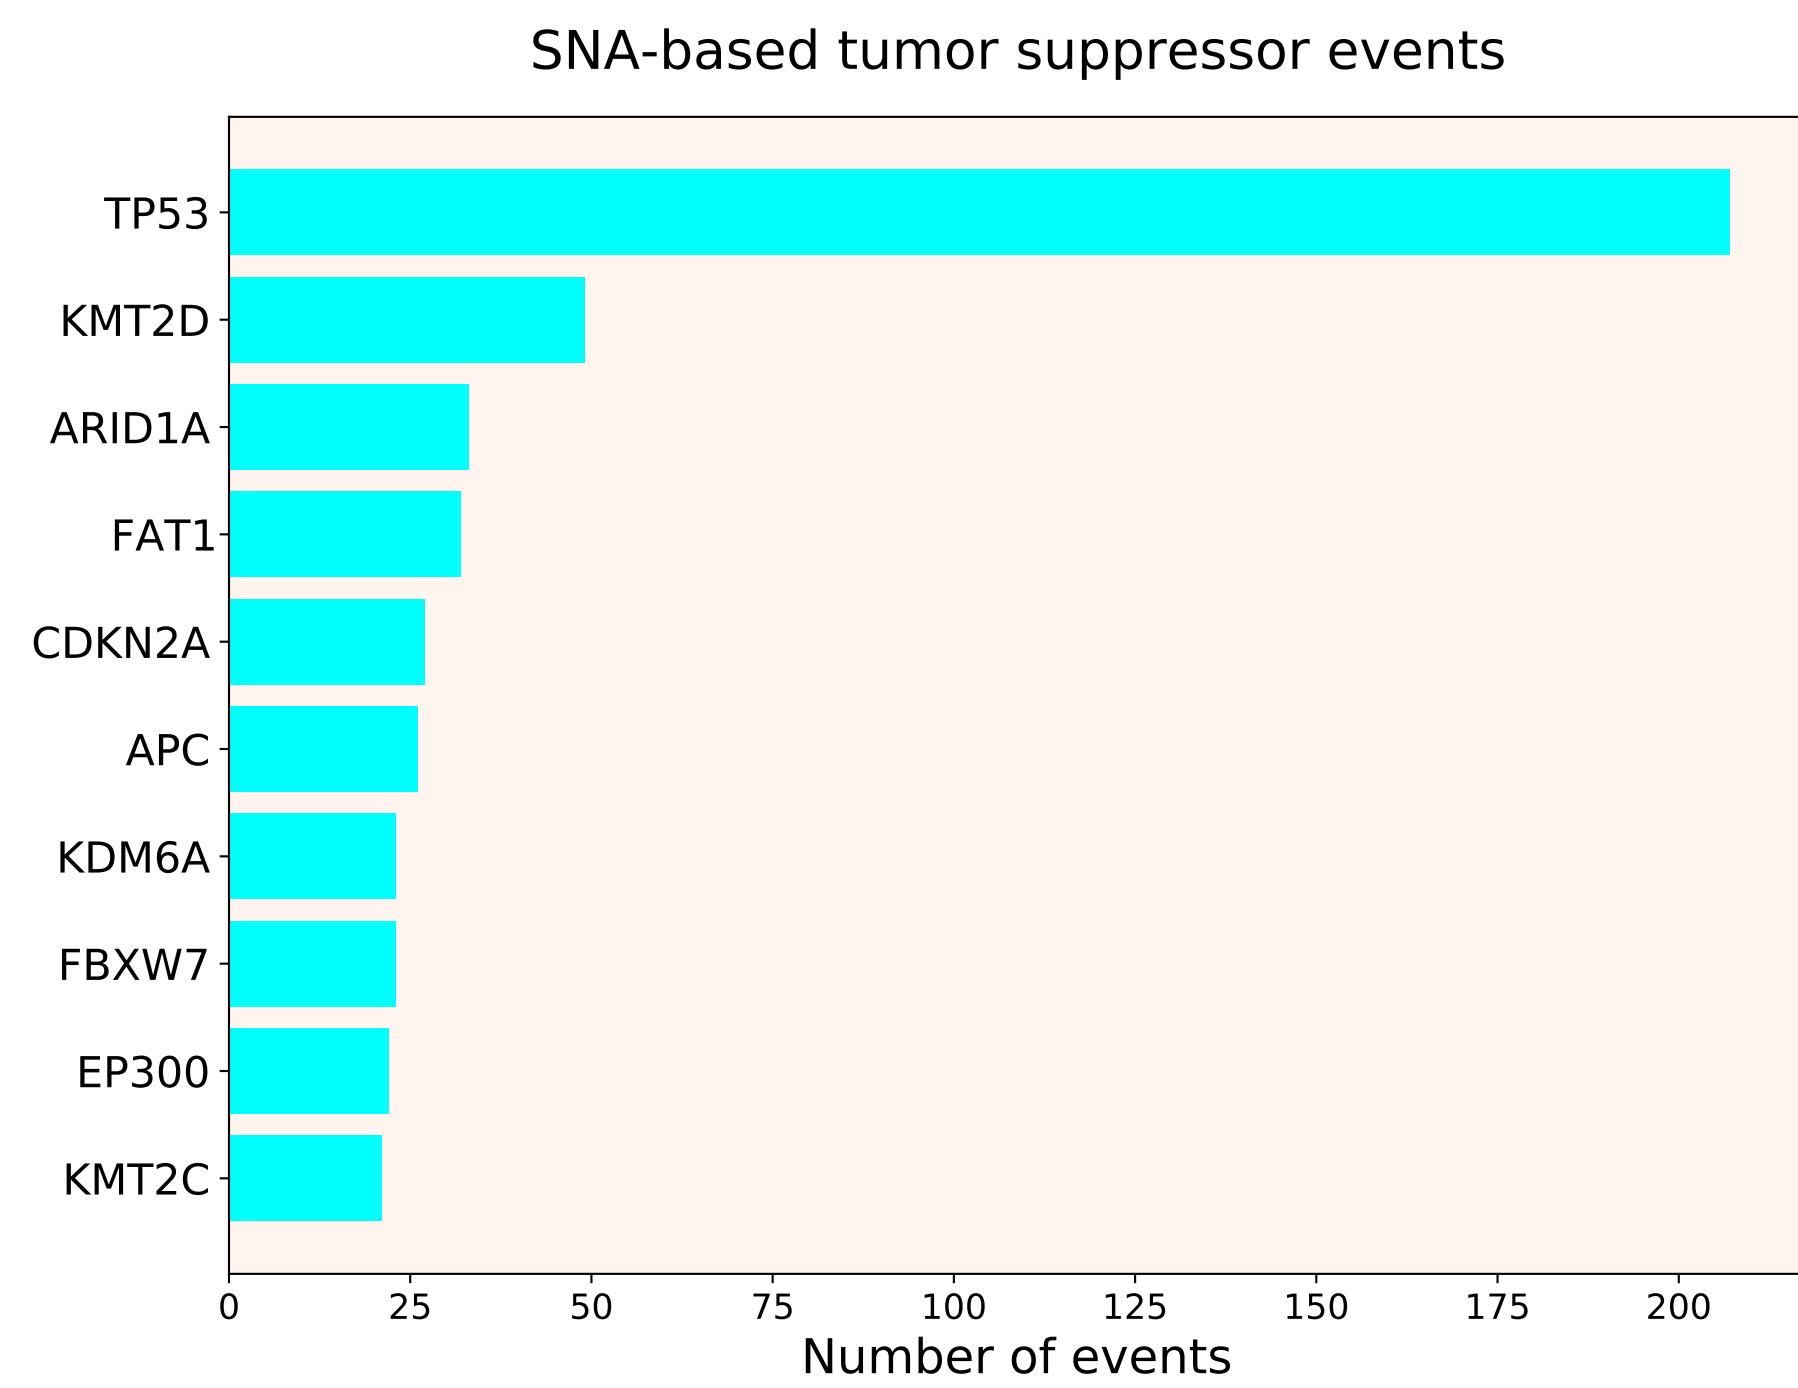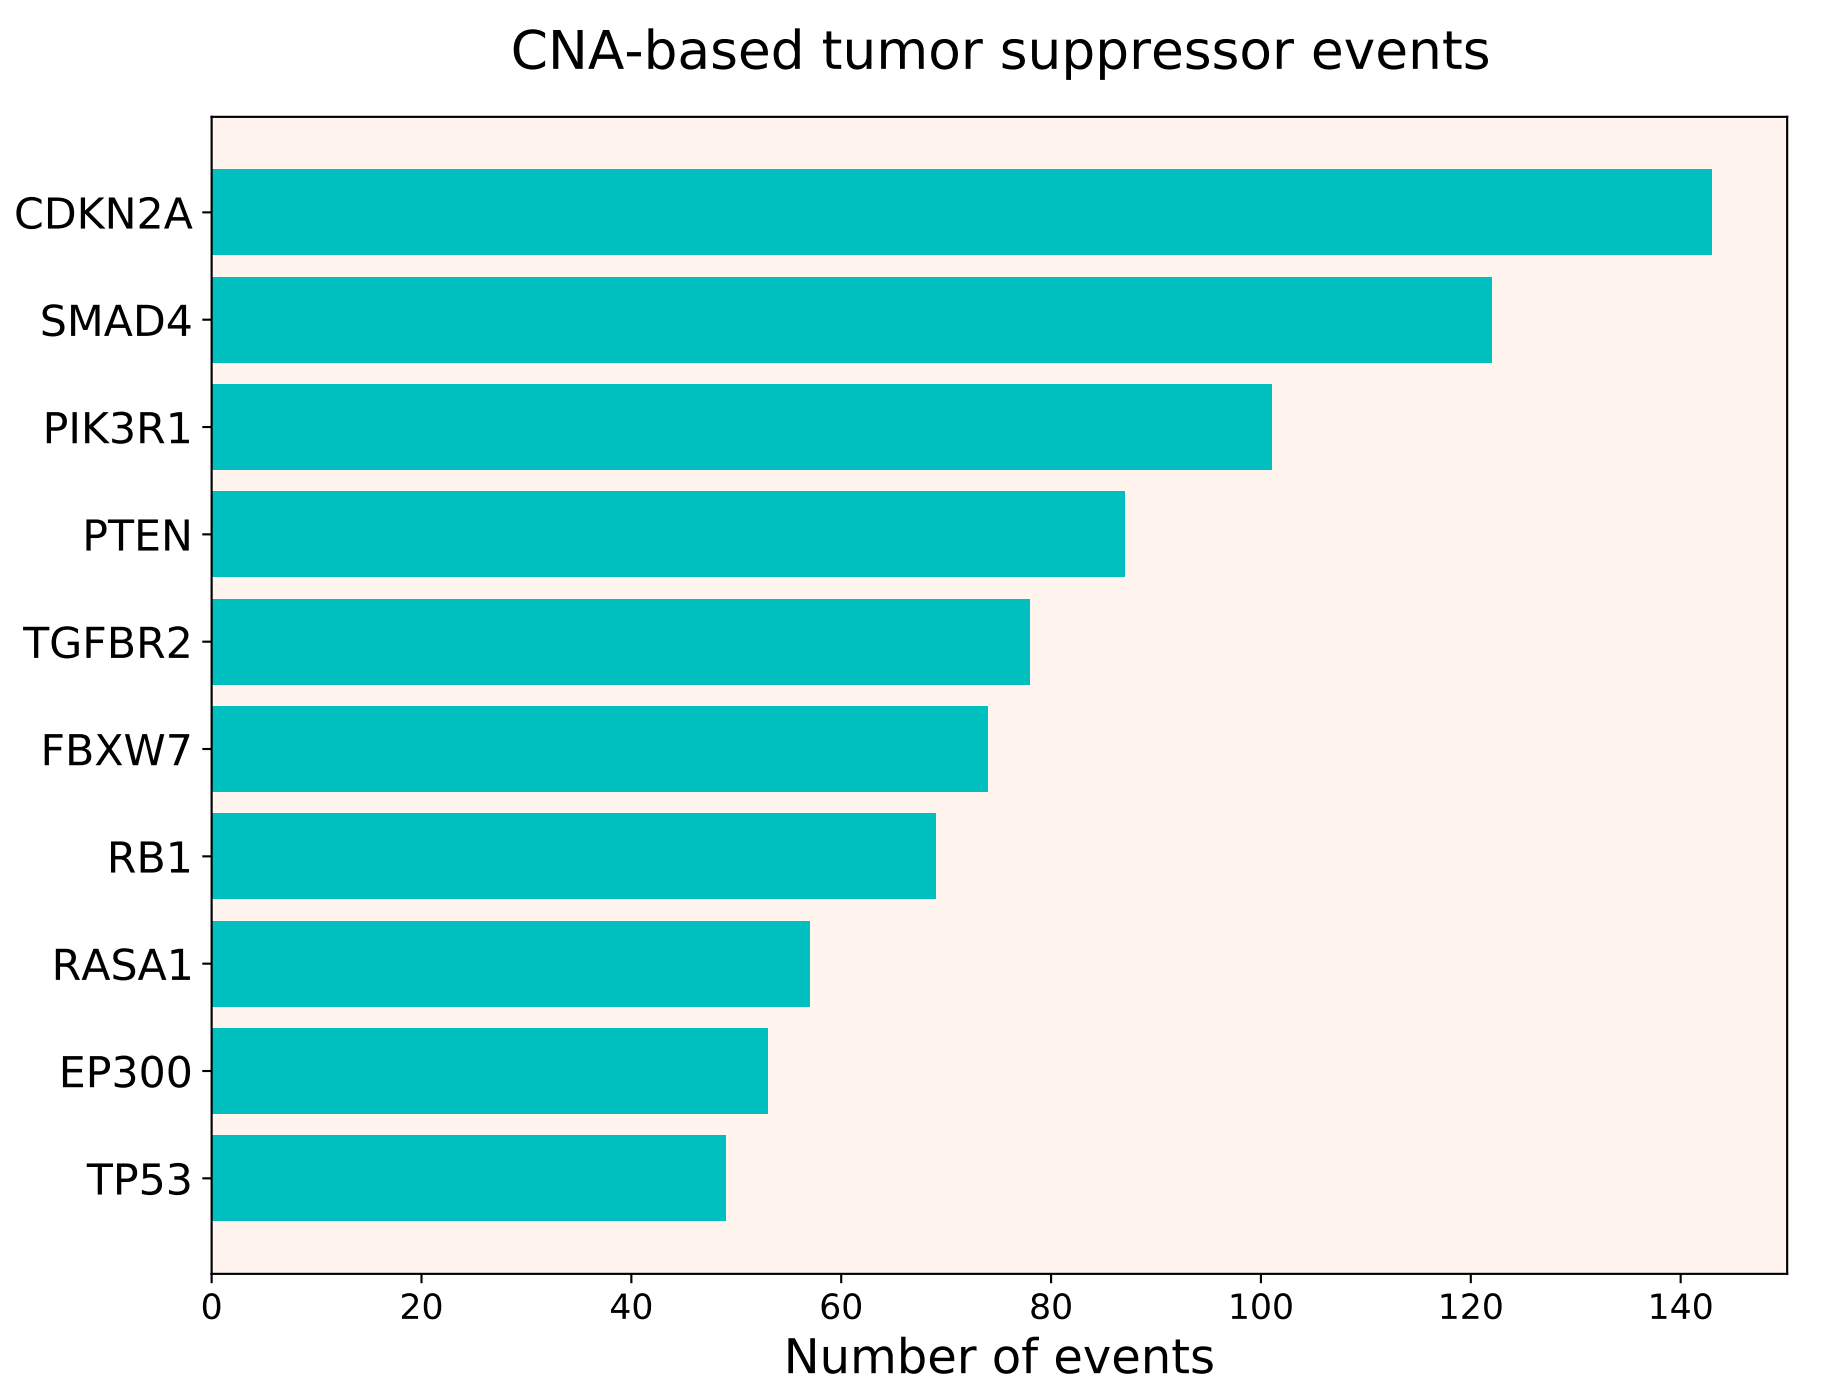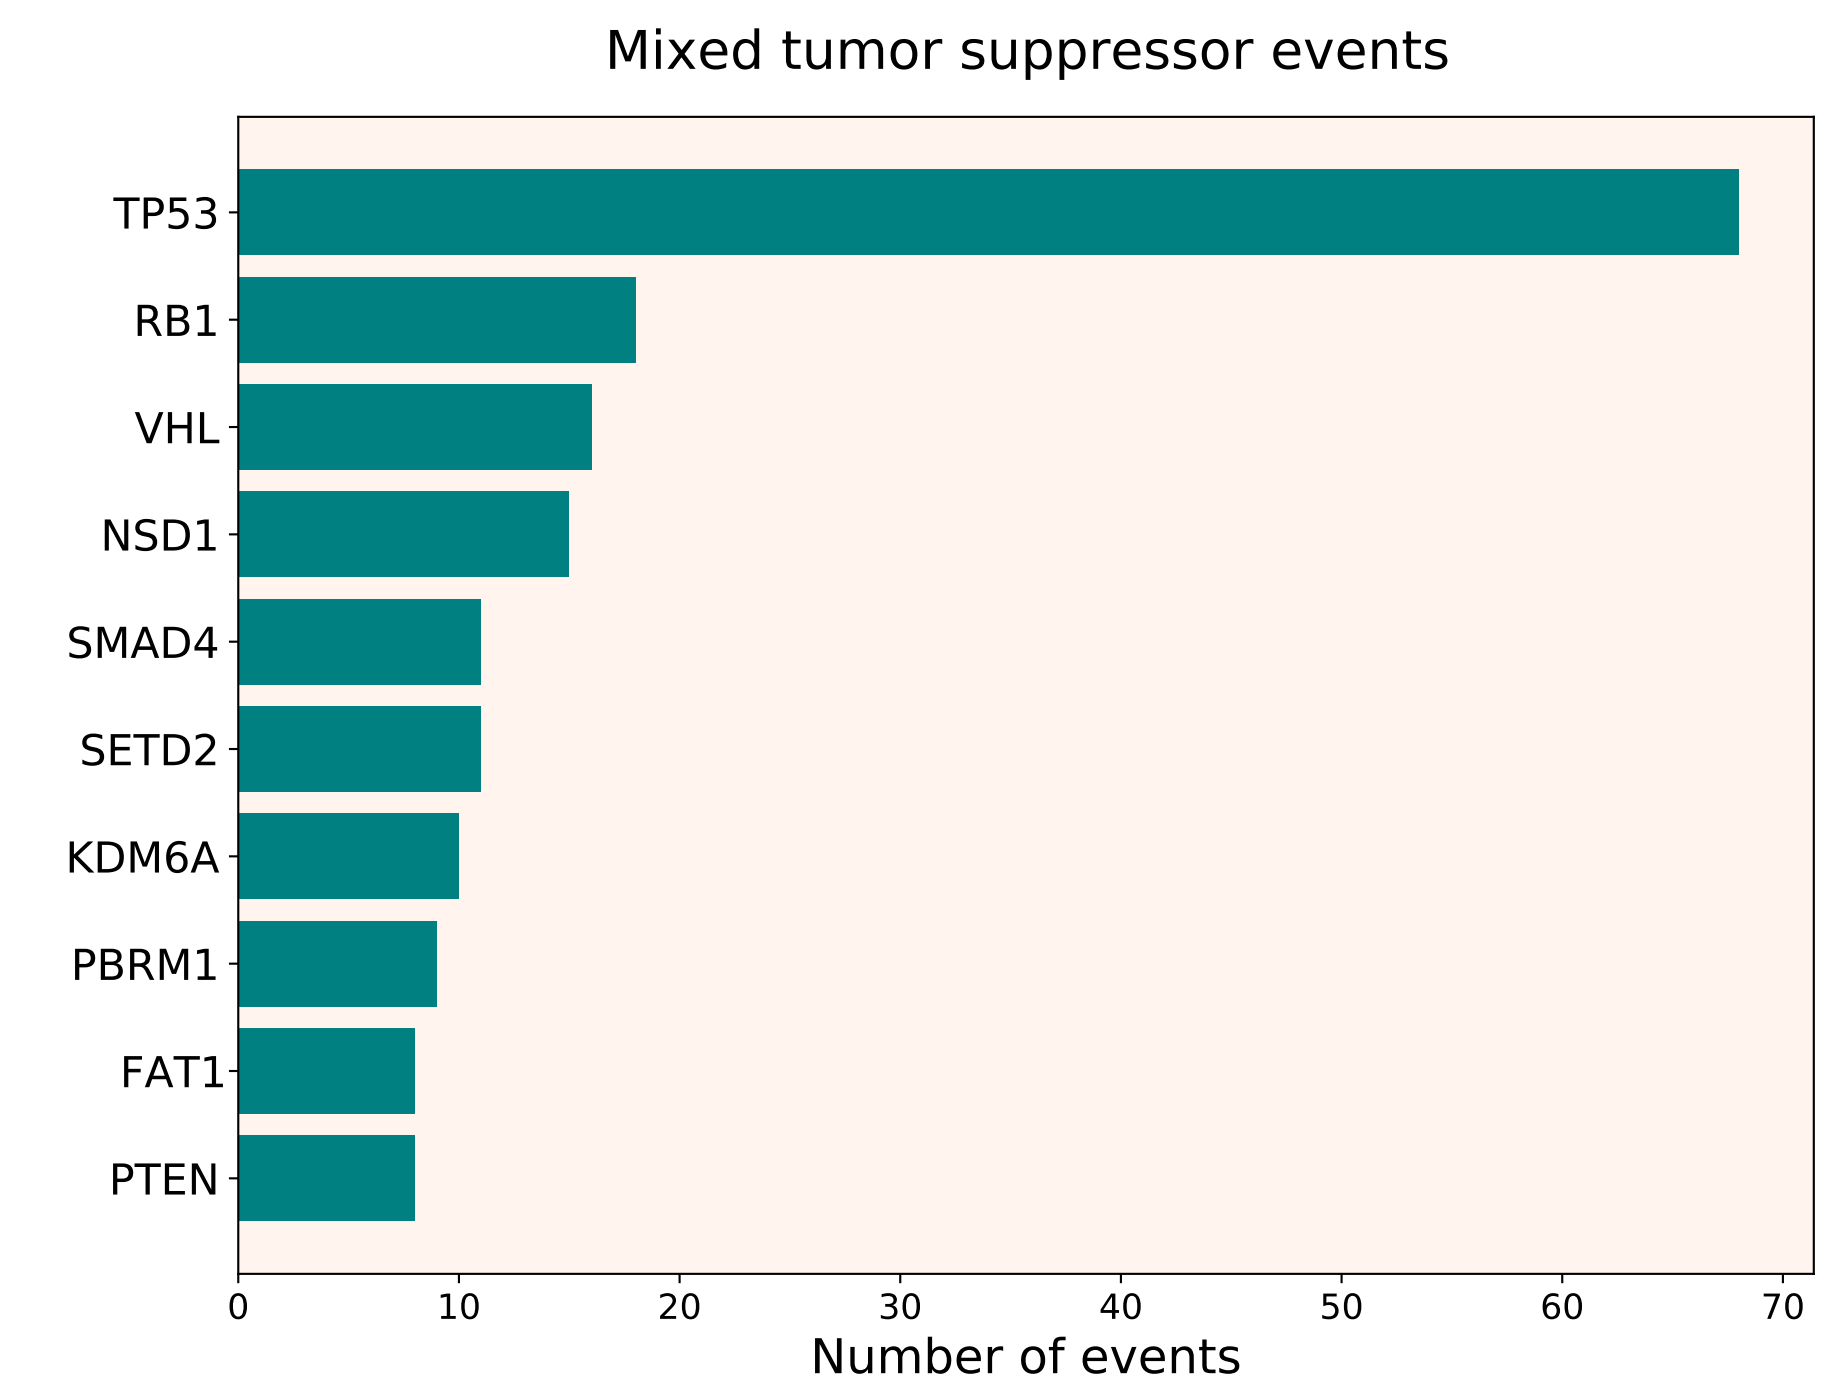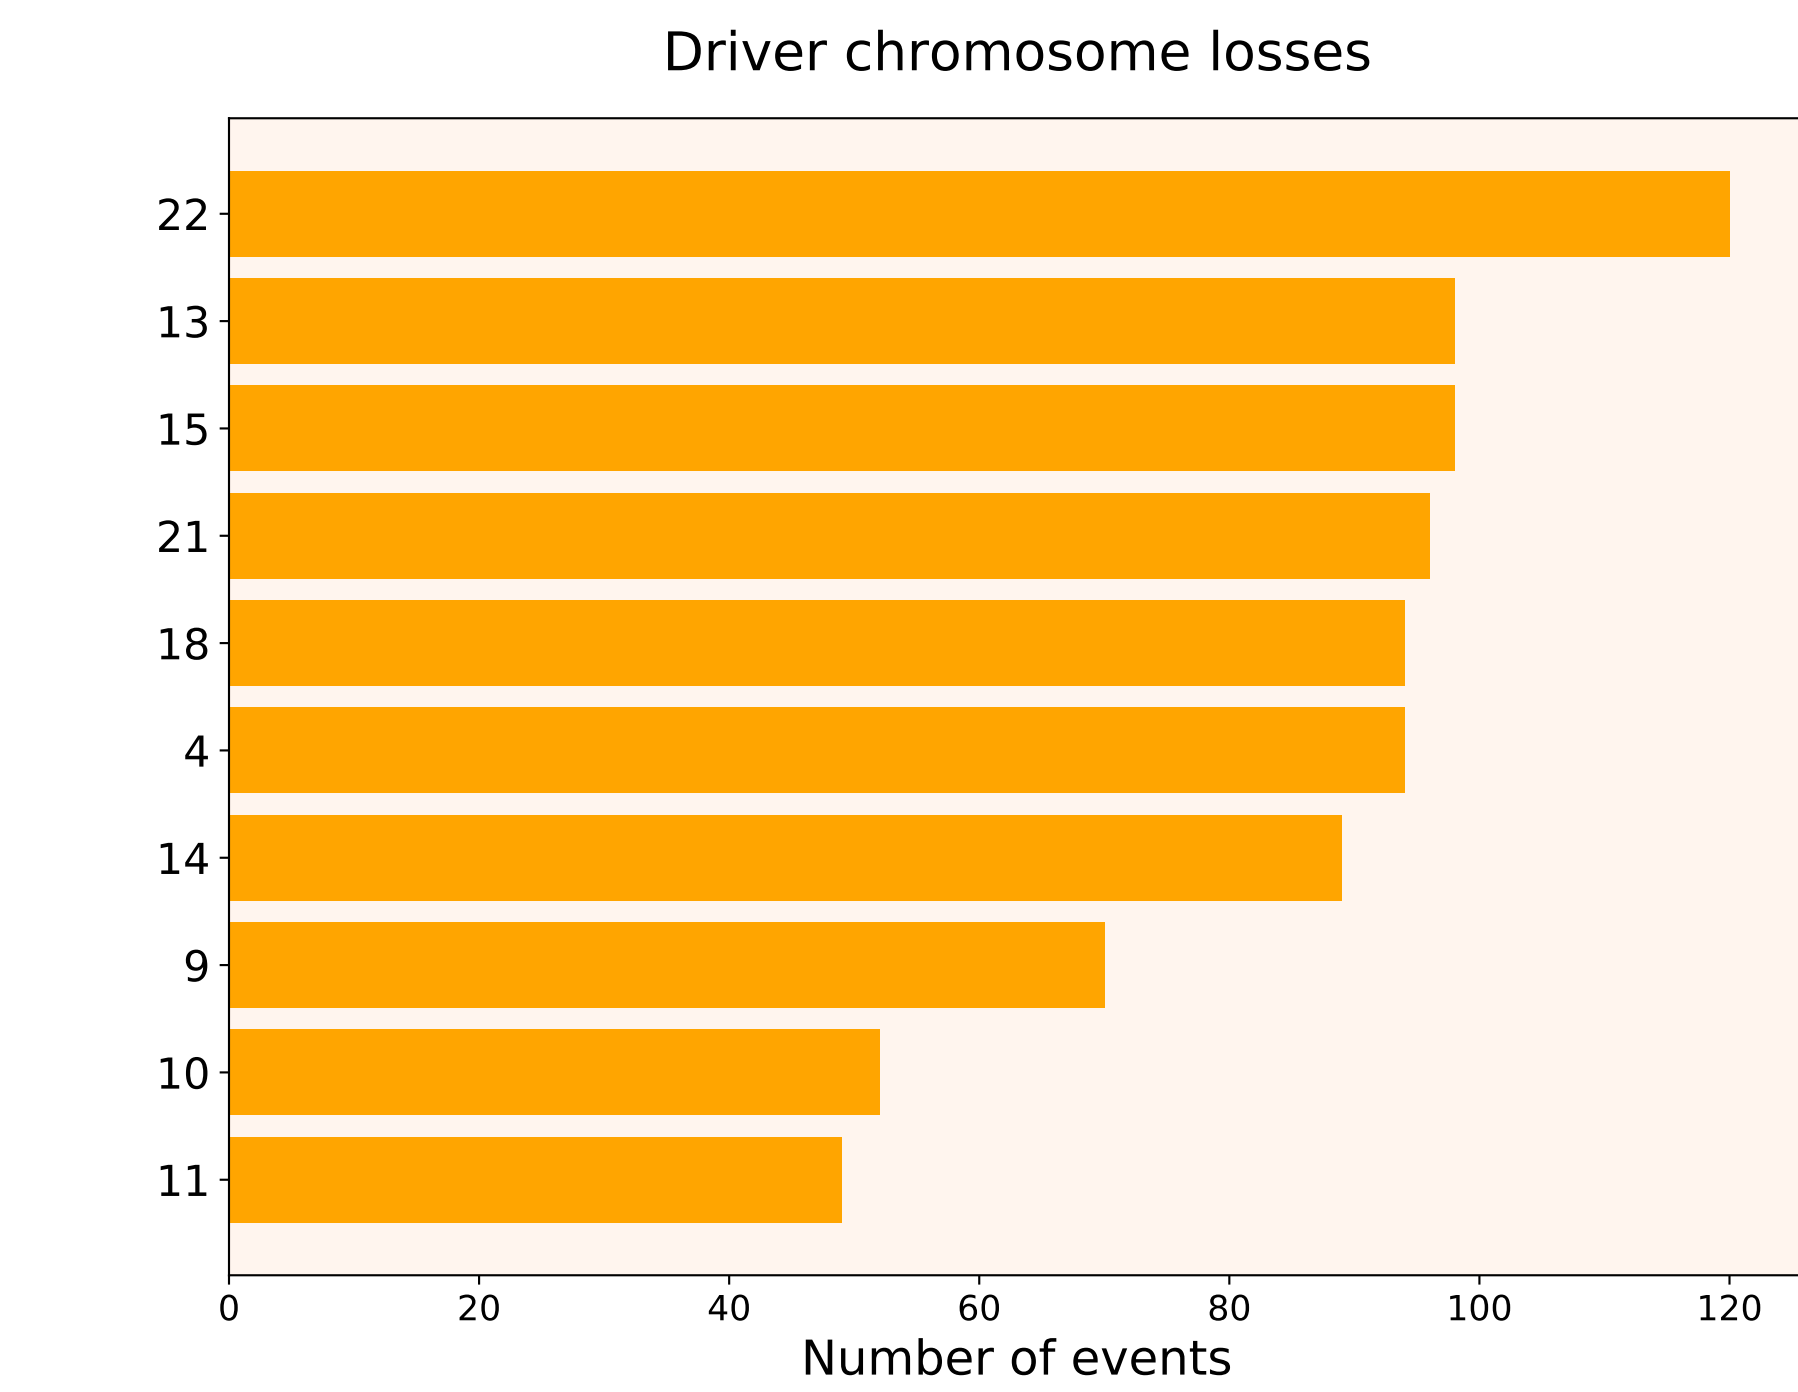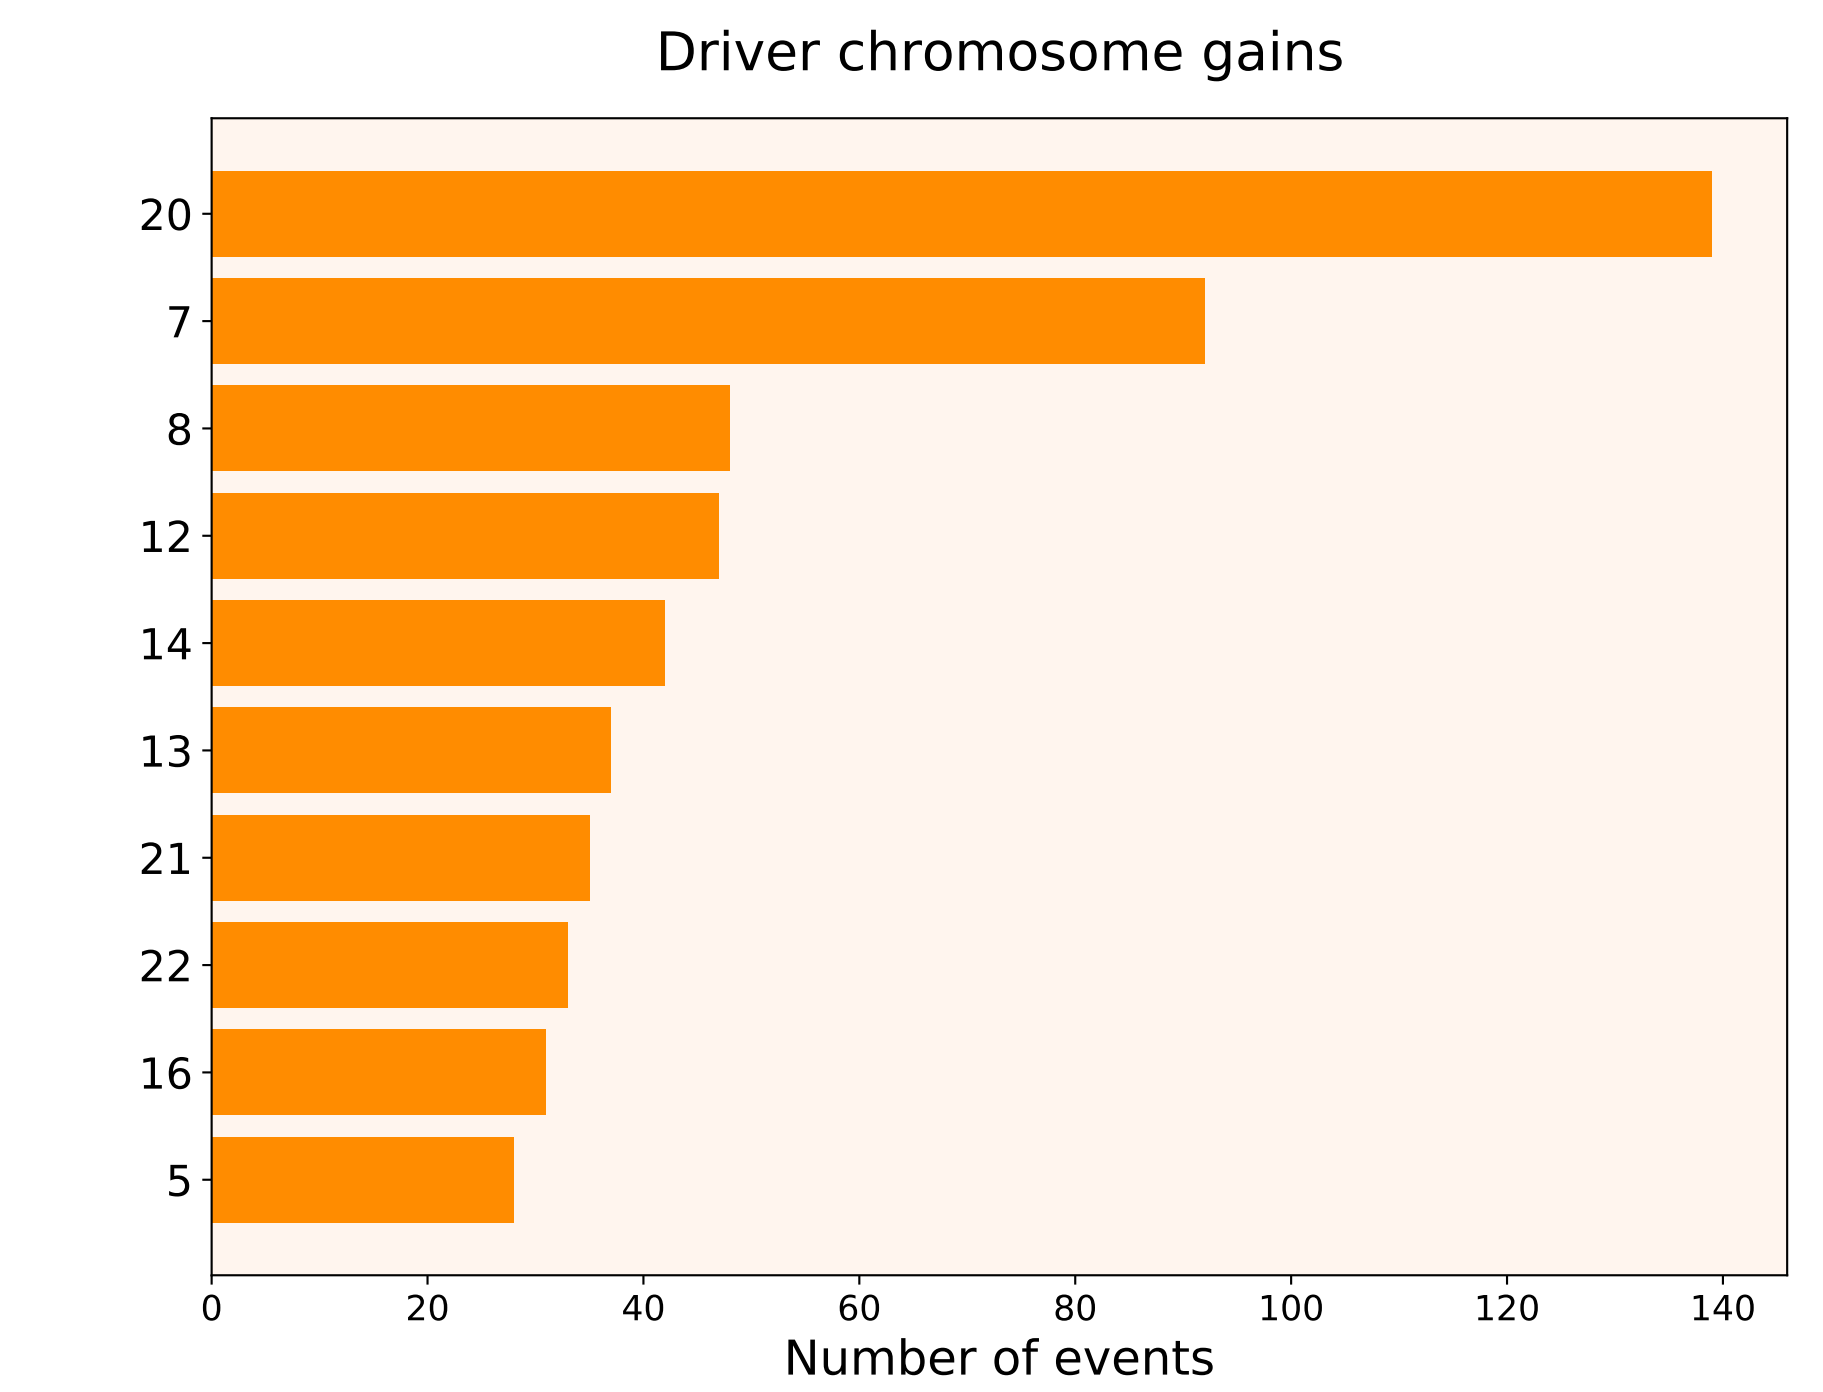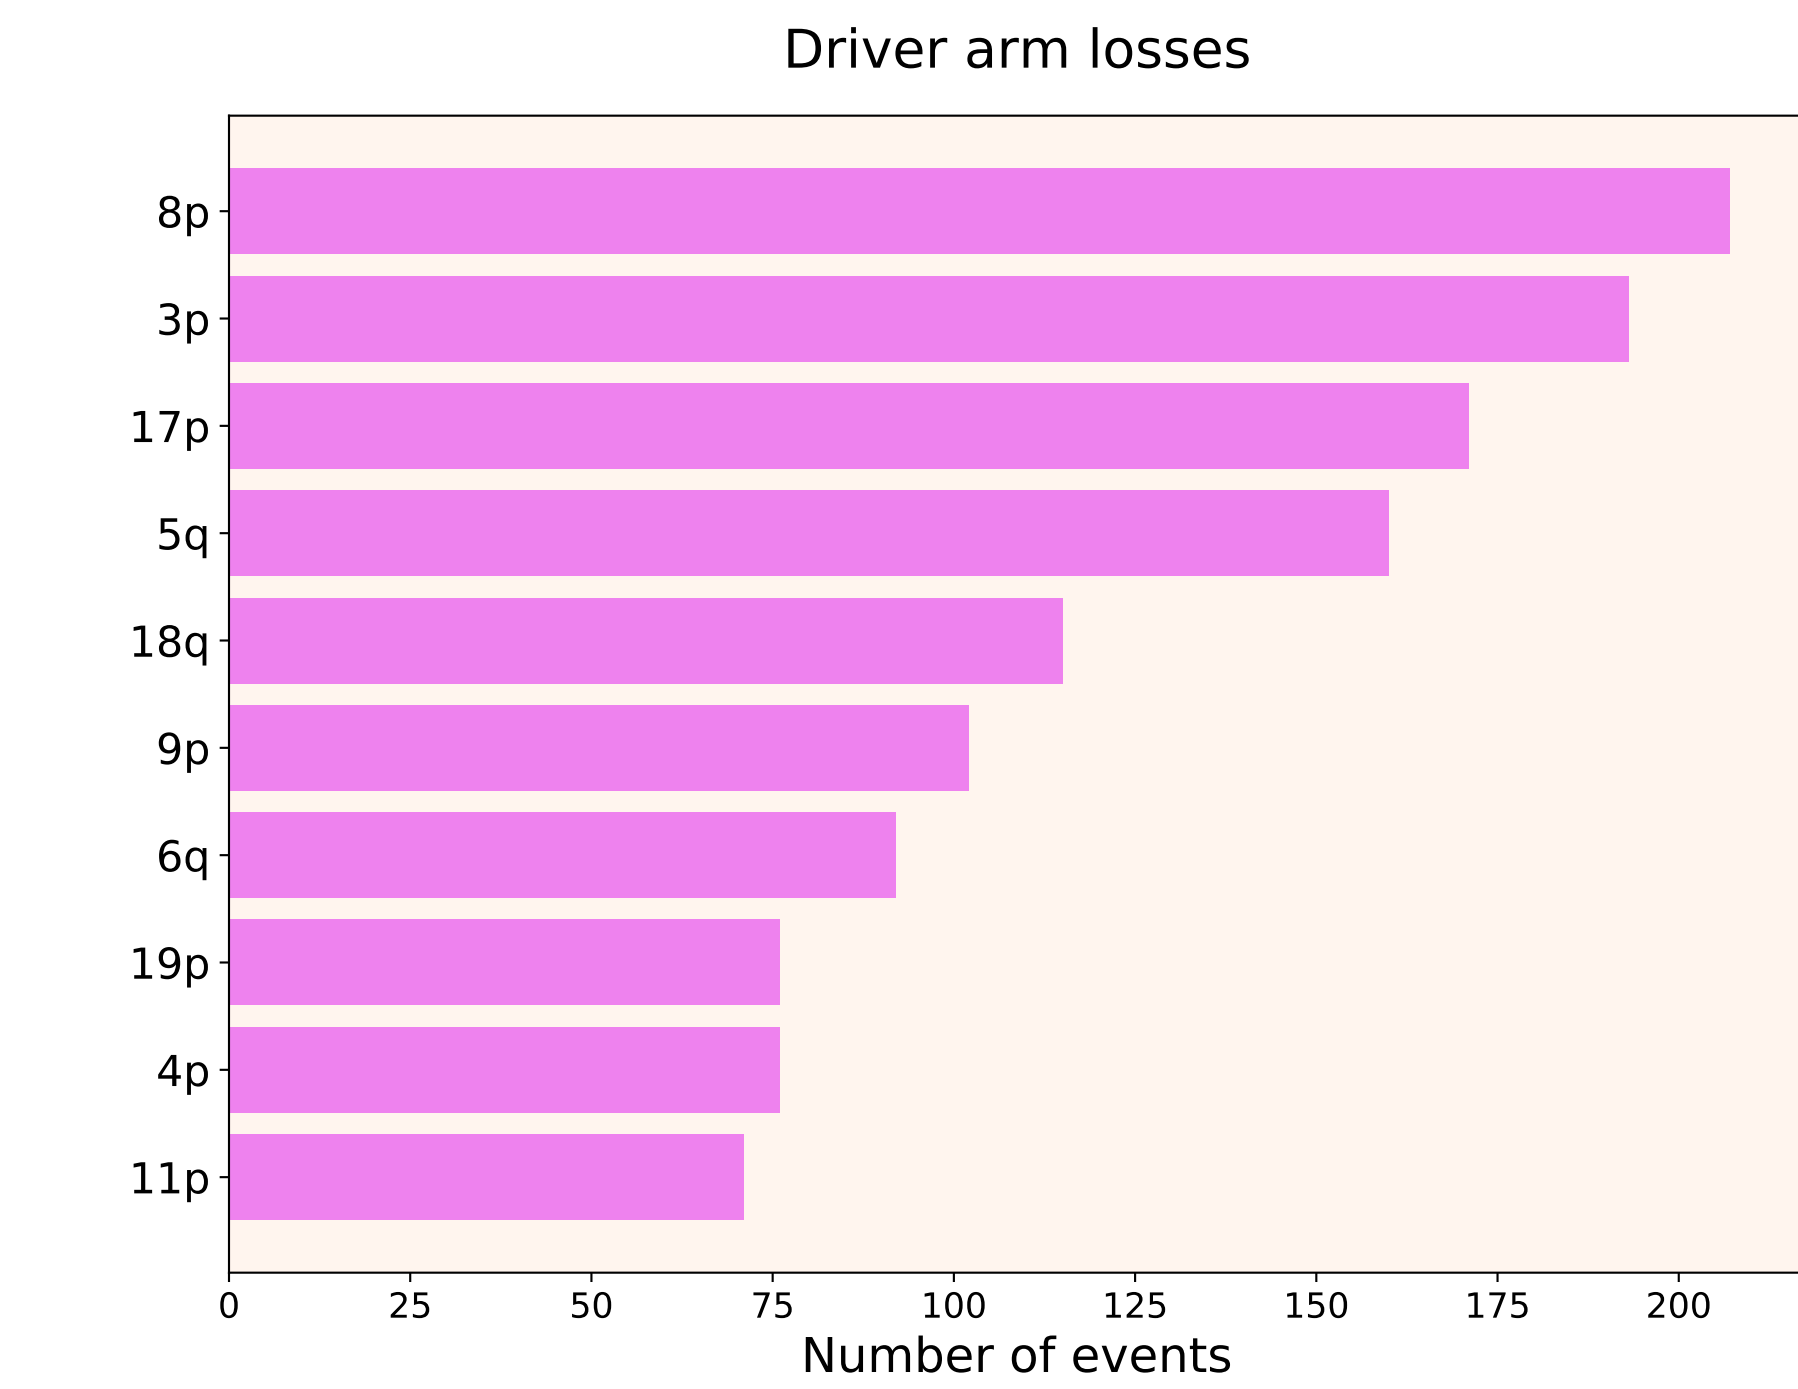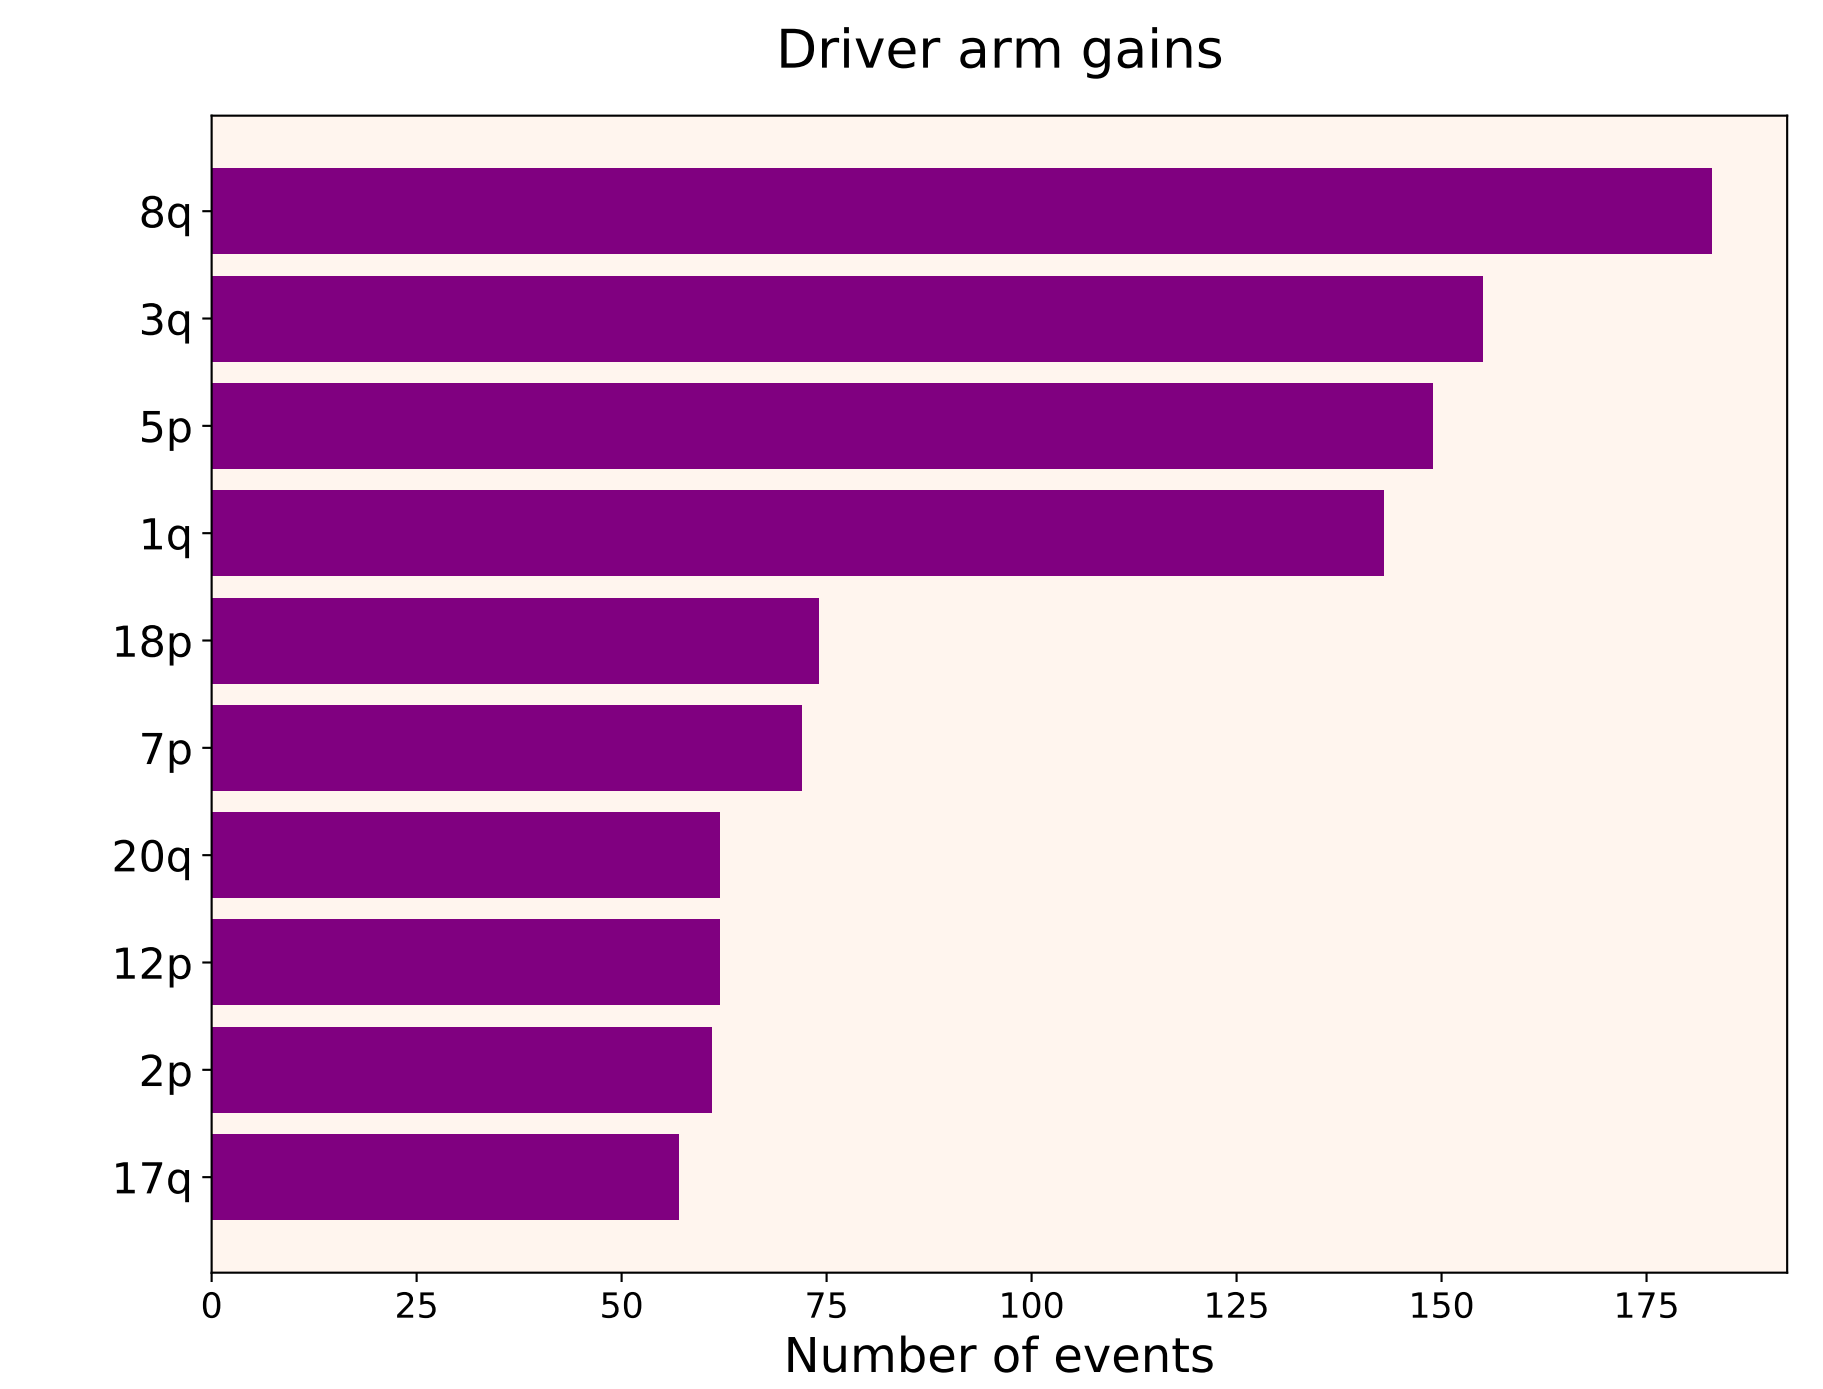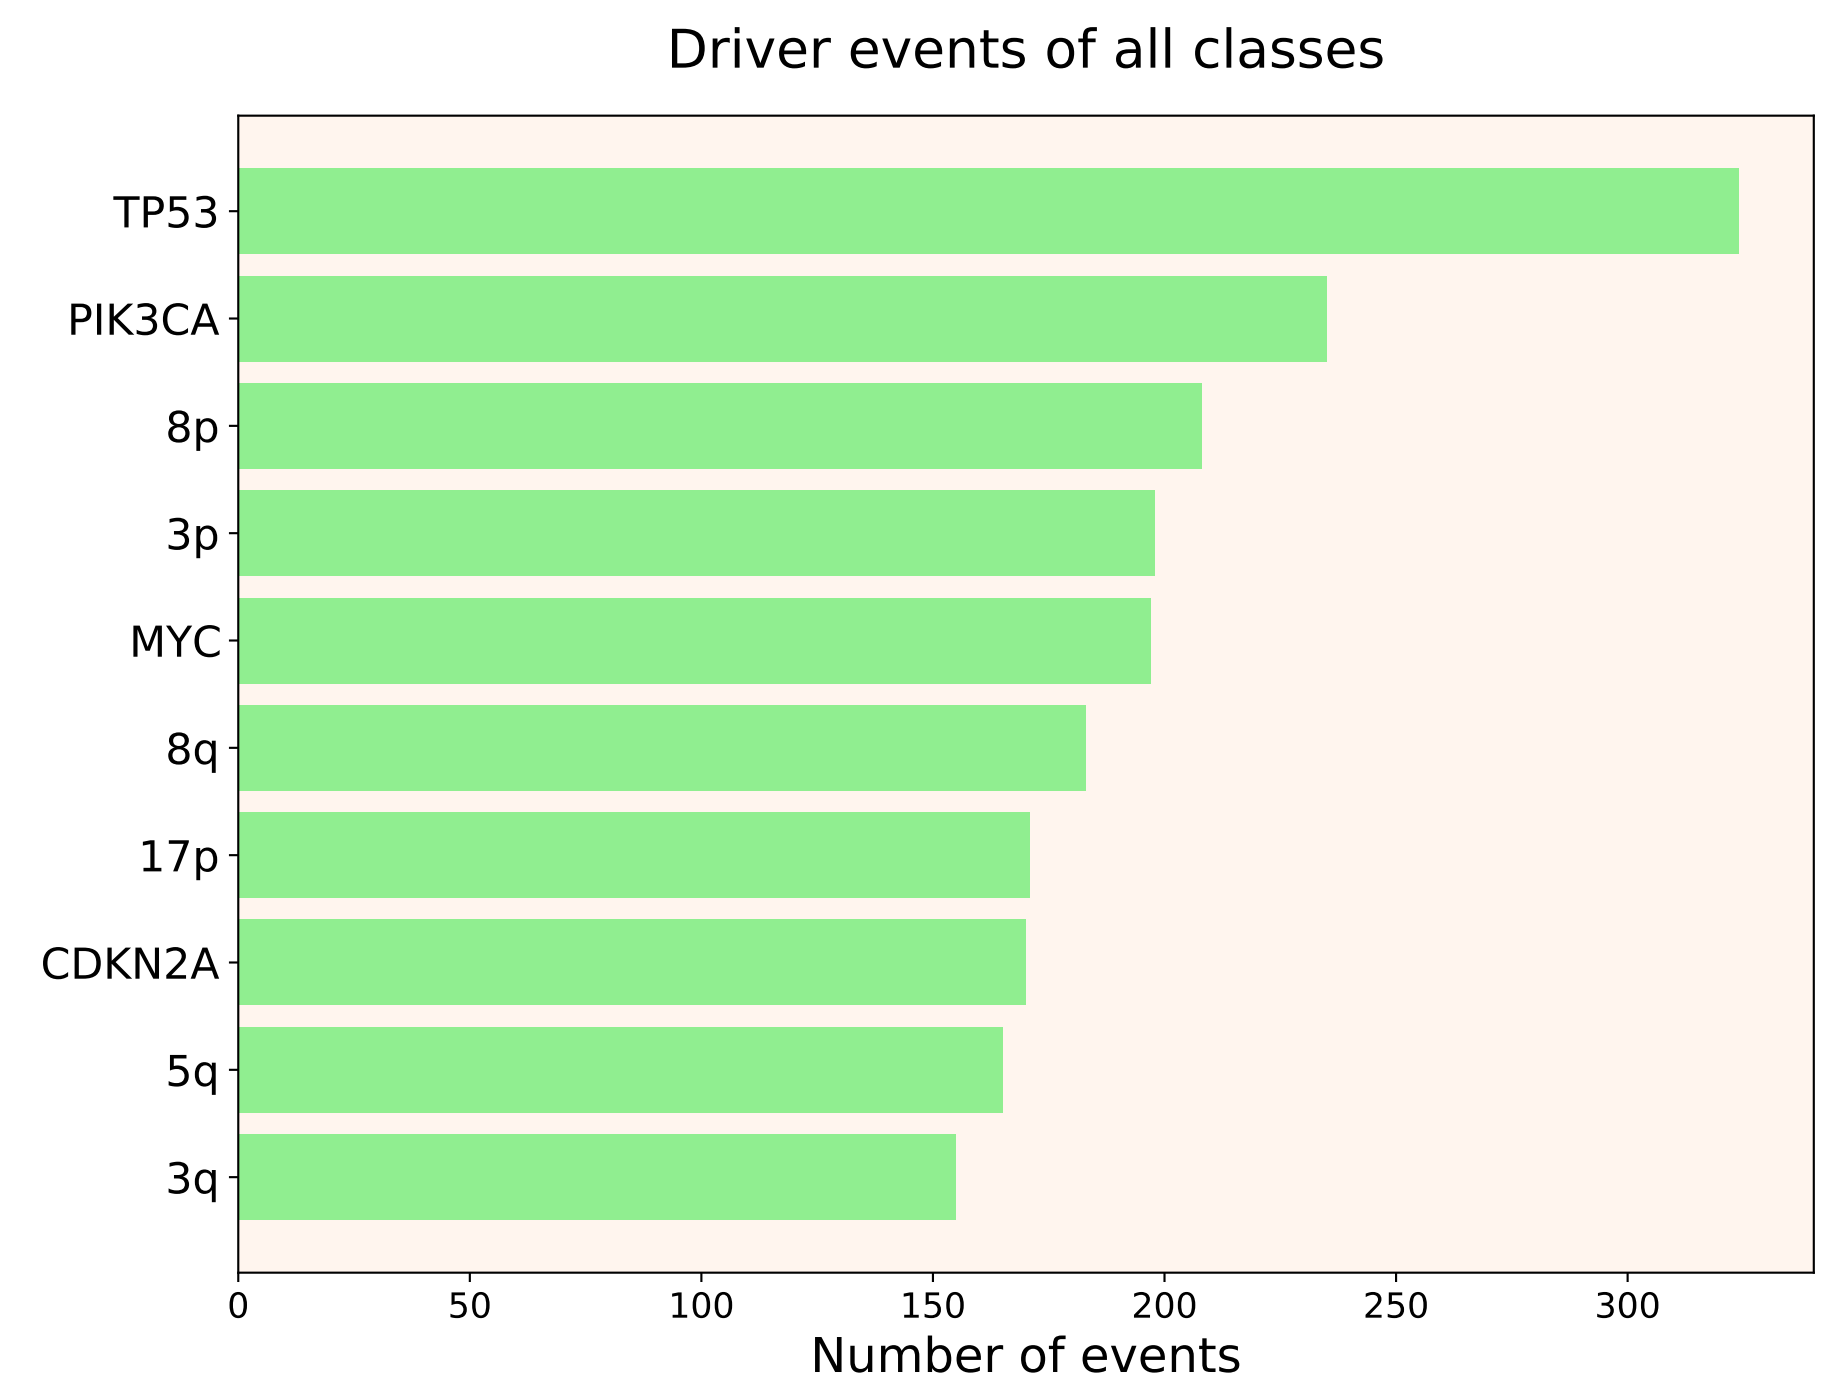

Supplement: Supplemental_Data_S1.zip [file Supplemental_Data_S1.zip]



Supplement: Supplemental_Data_S1.zip [file Supplemental_Data_S1.zip]

Driver event distribution by total number of driver events per patient in females

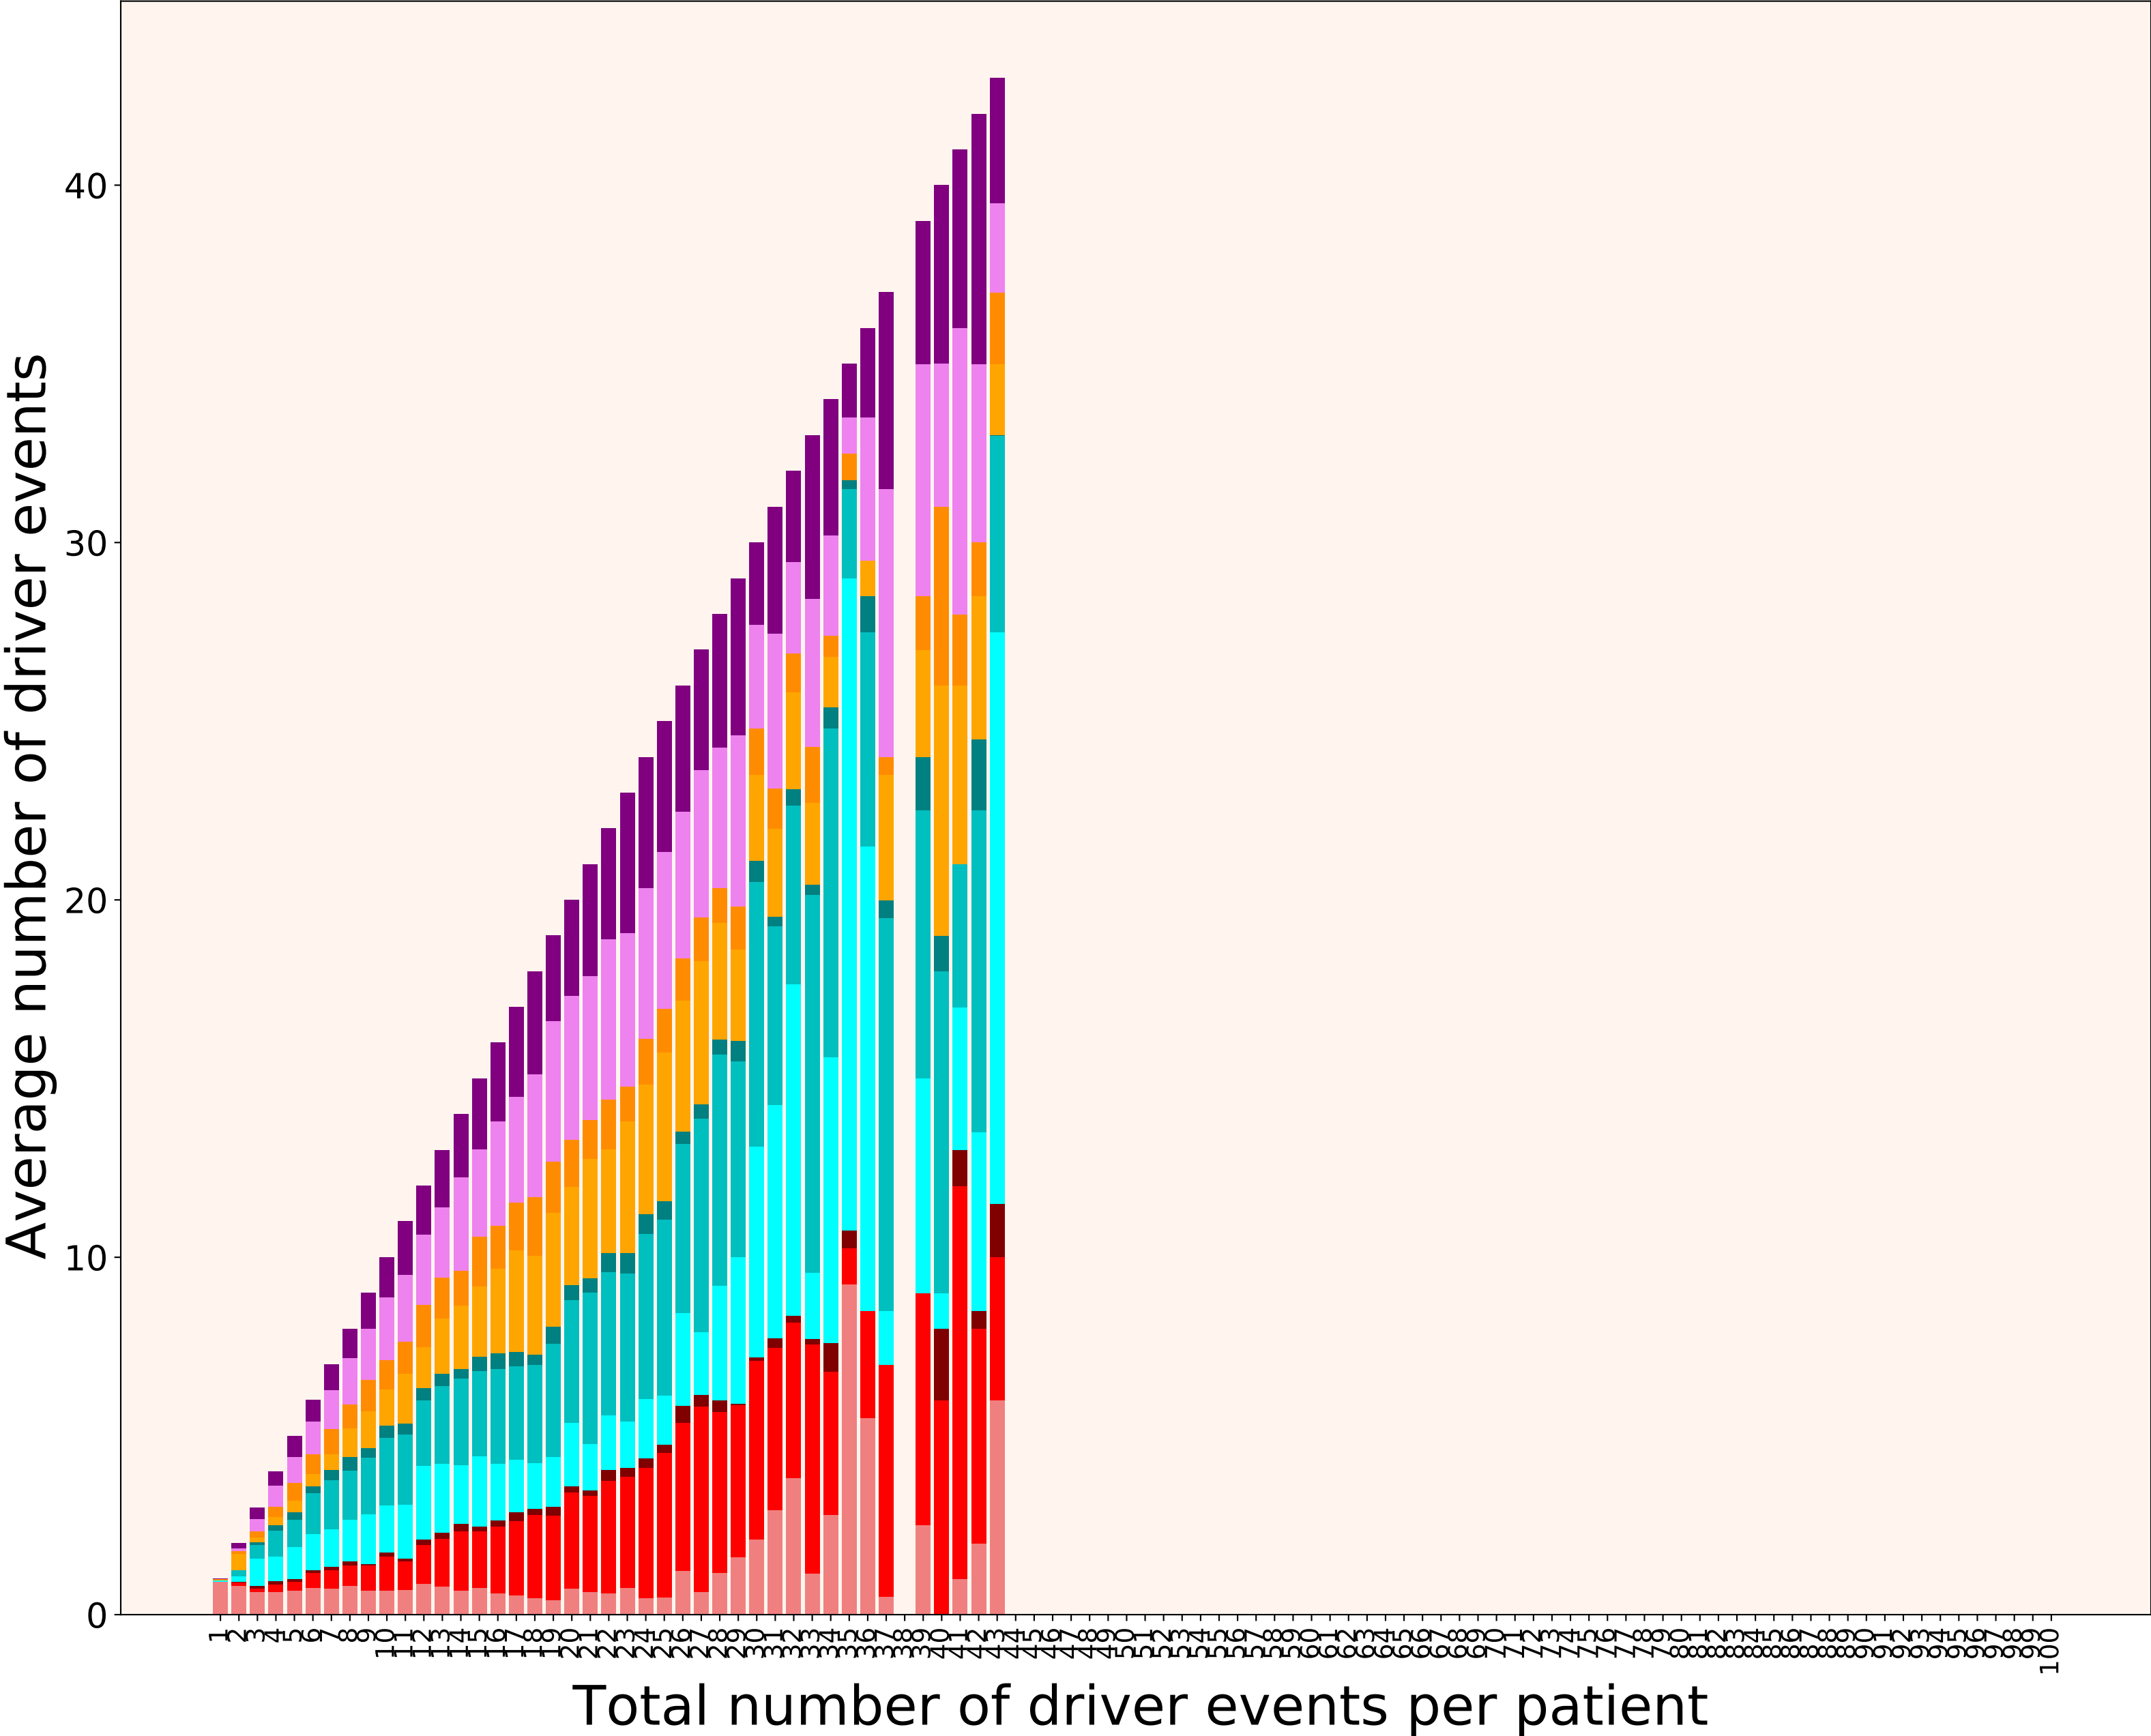

Supplement: Supplemental_Data_S1.zip [file Supplemental_Data_S1.zip]

# BRCA

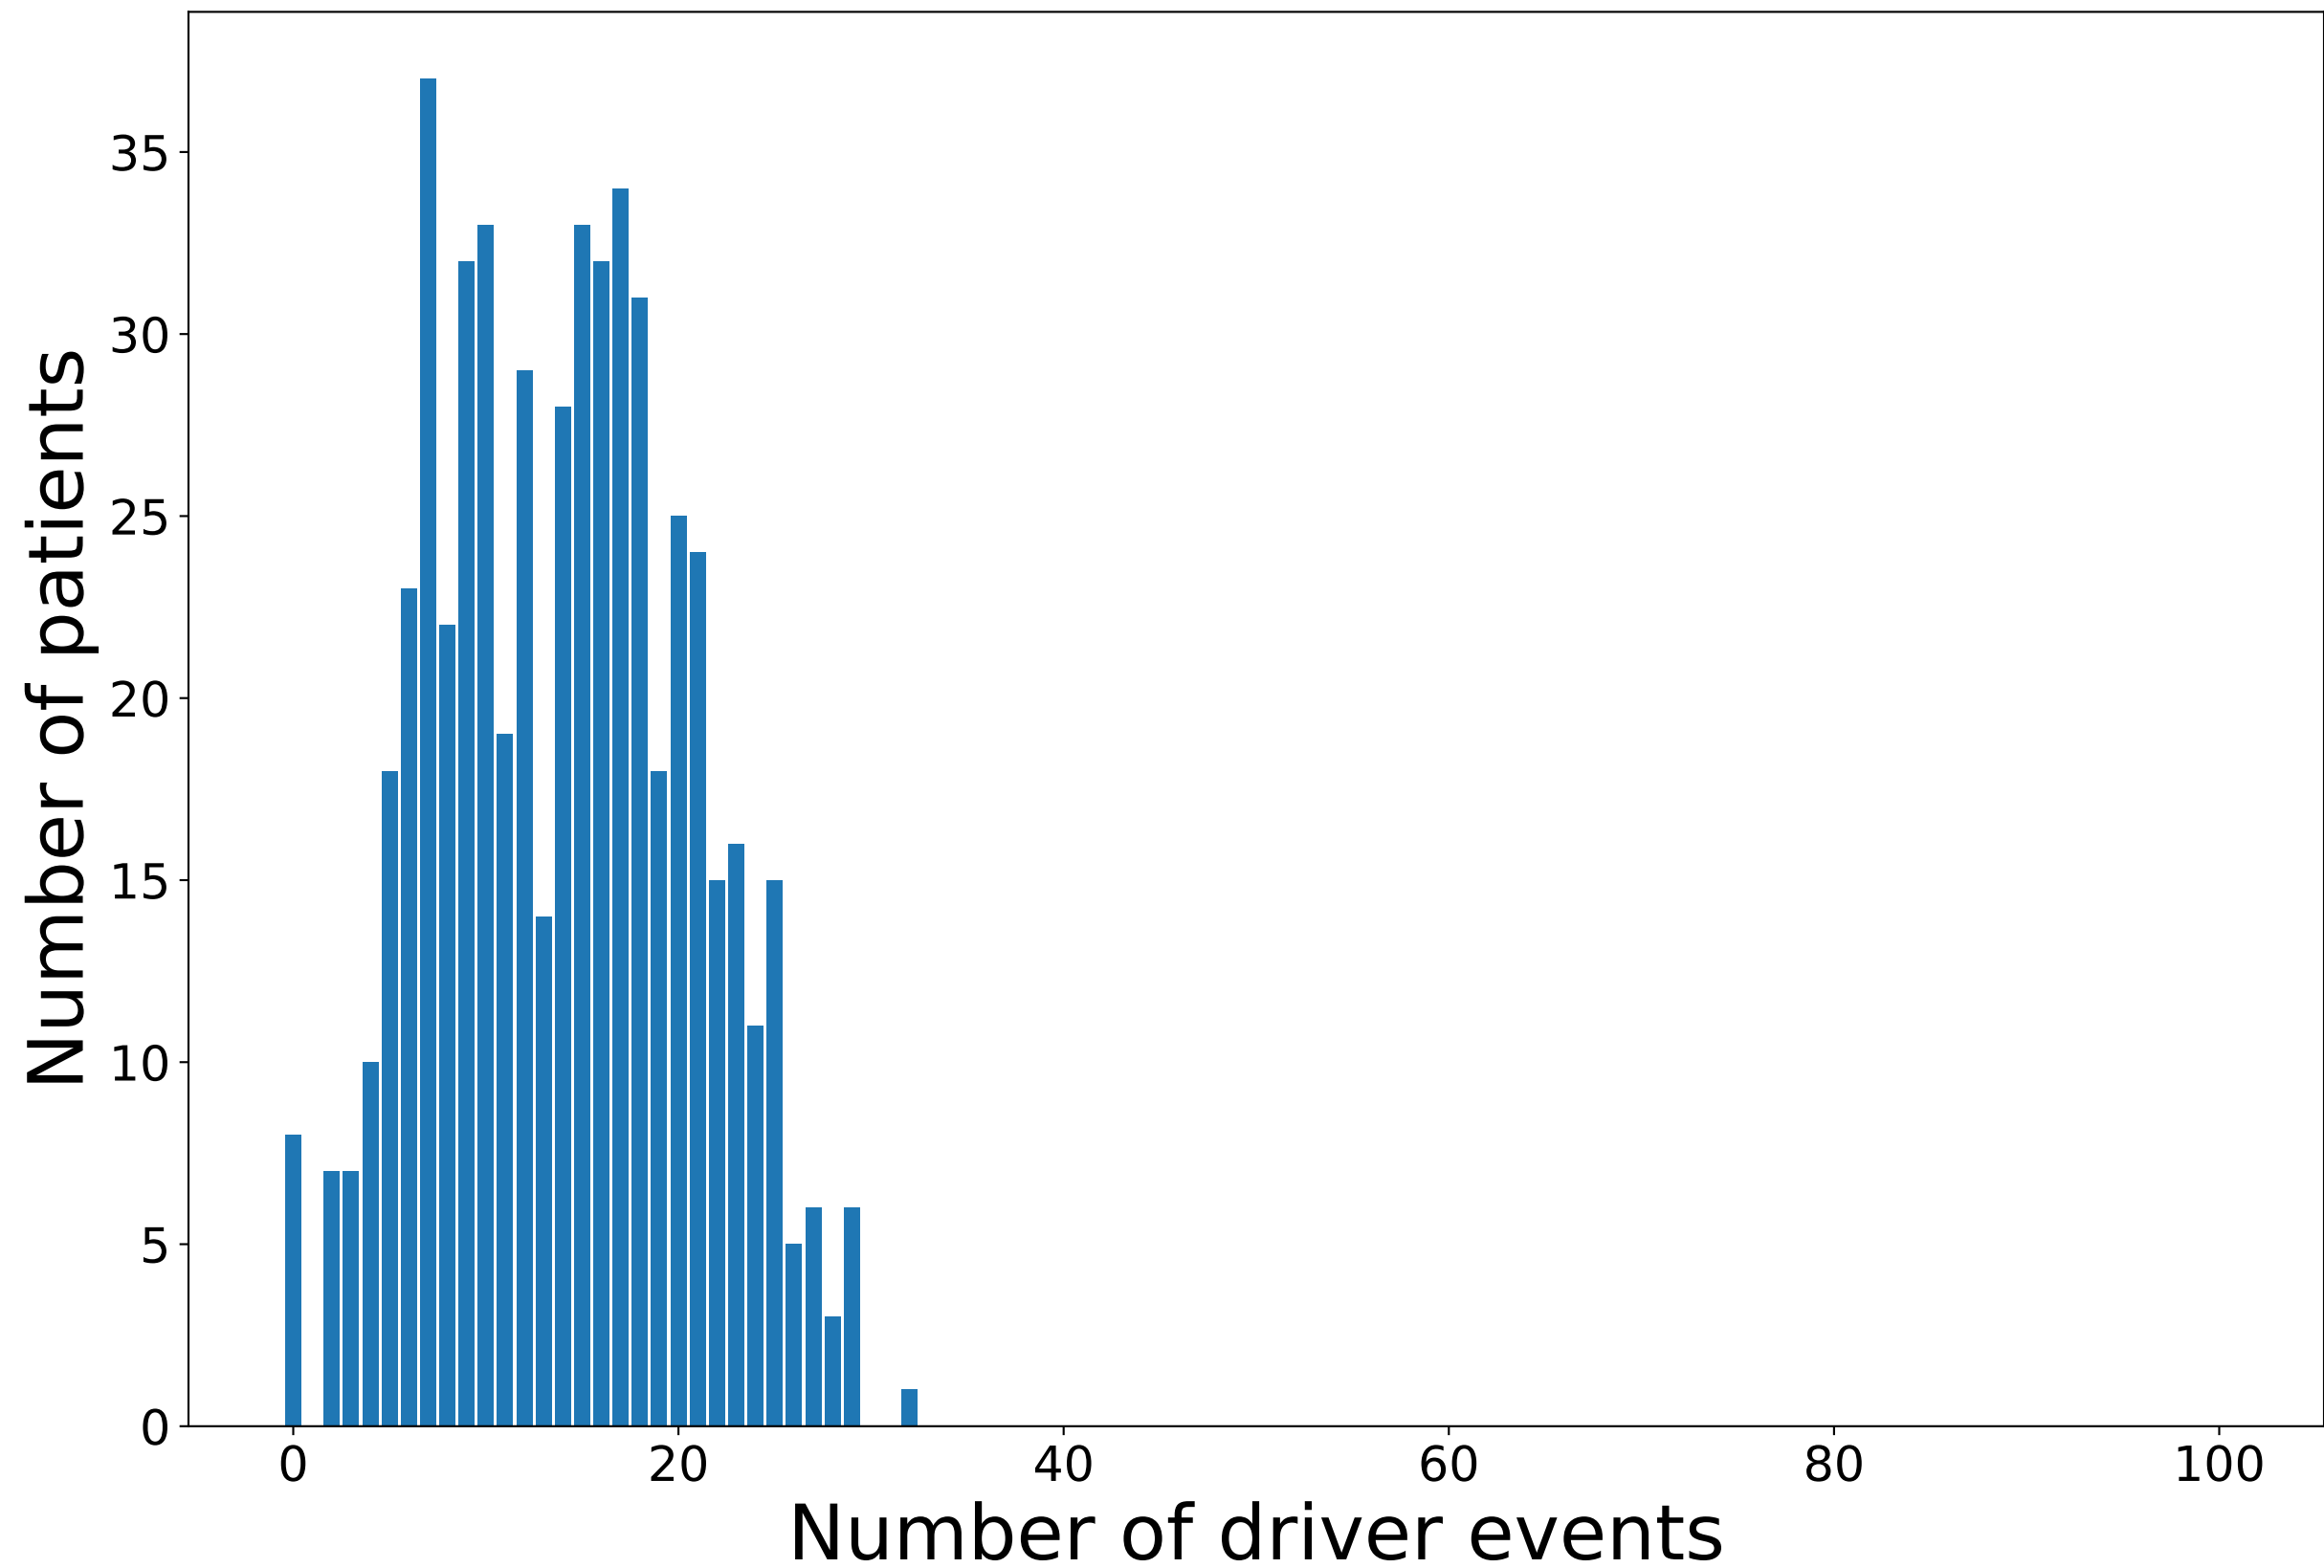

Supplement: Supplemental_Data_S1.zip [file Supplemental_Data_S1.zip]

# THYM\_FEMALE

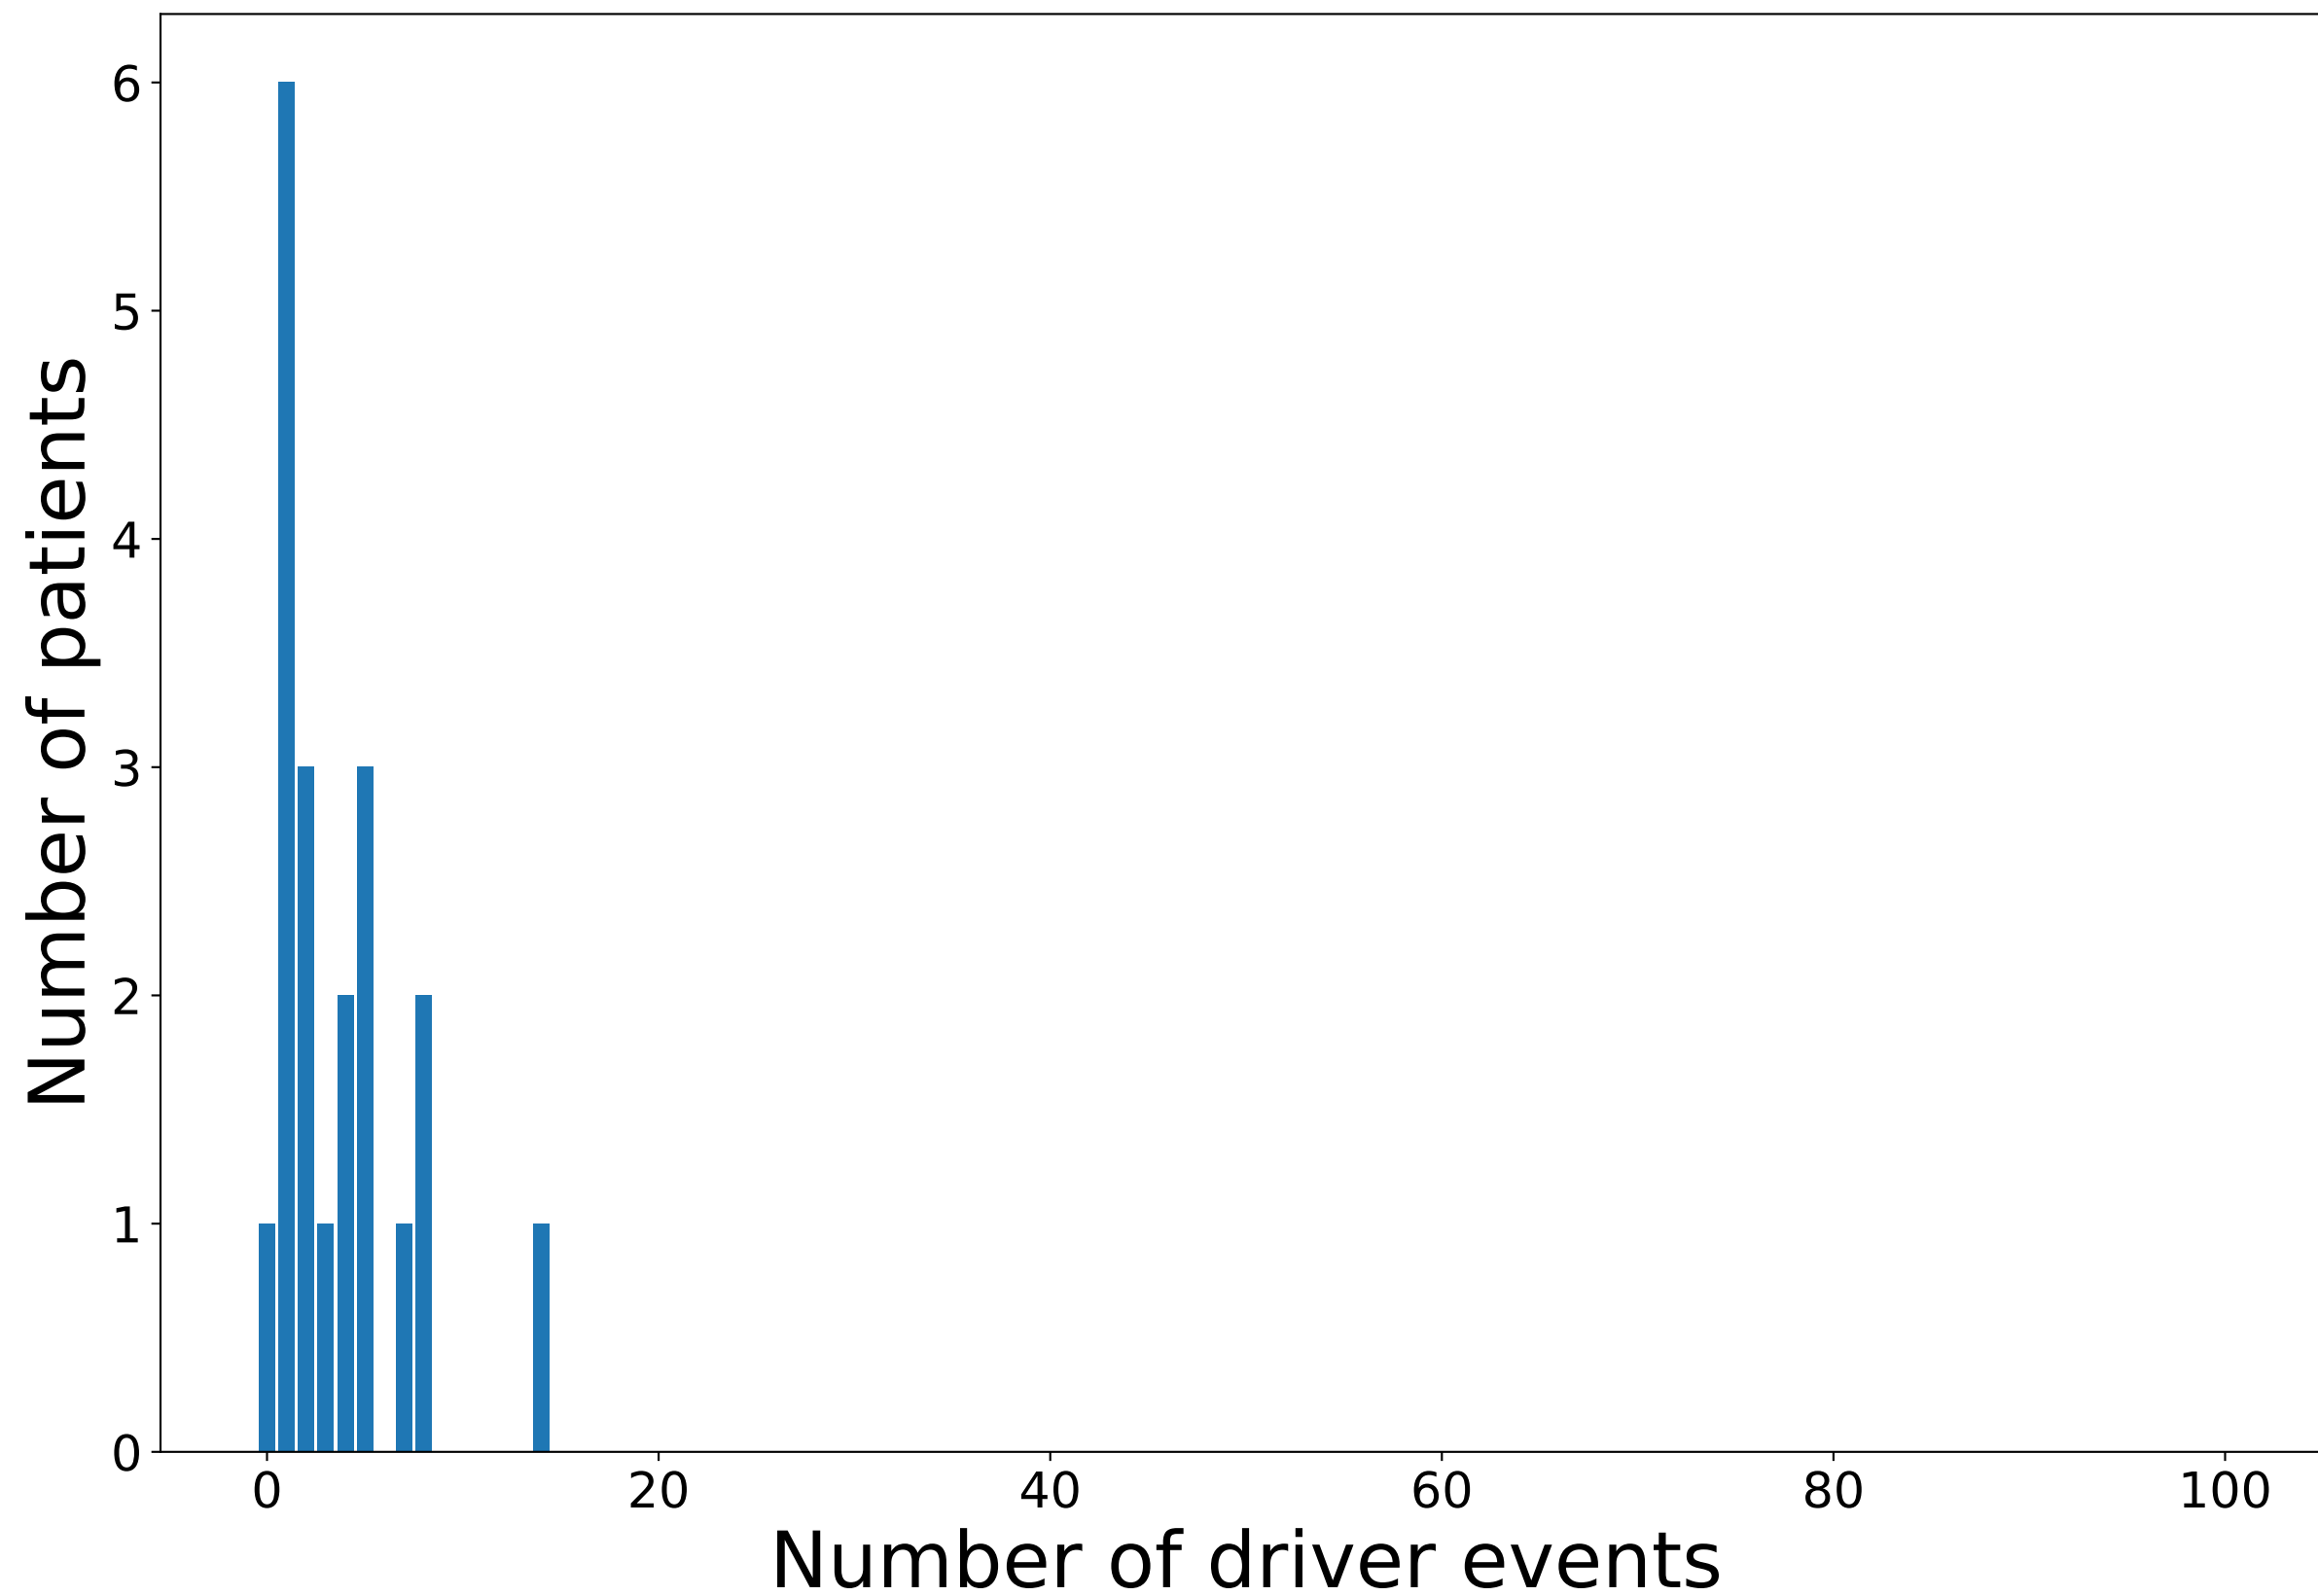

Supplement: Supplemental_Data_S1.zip [file Supplemental_Data_S1.zip]

# LIHC

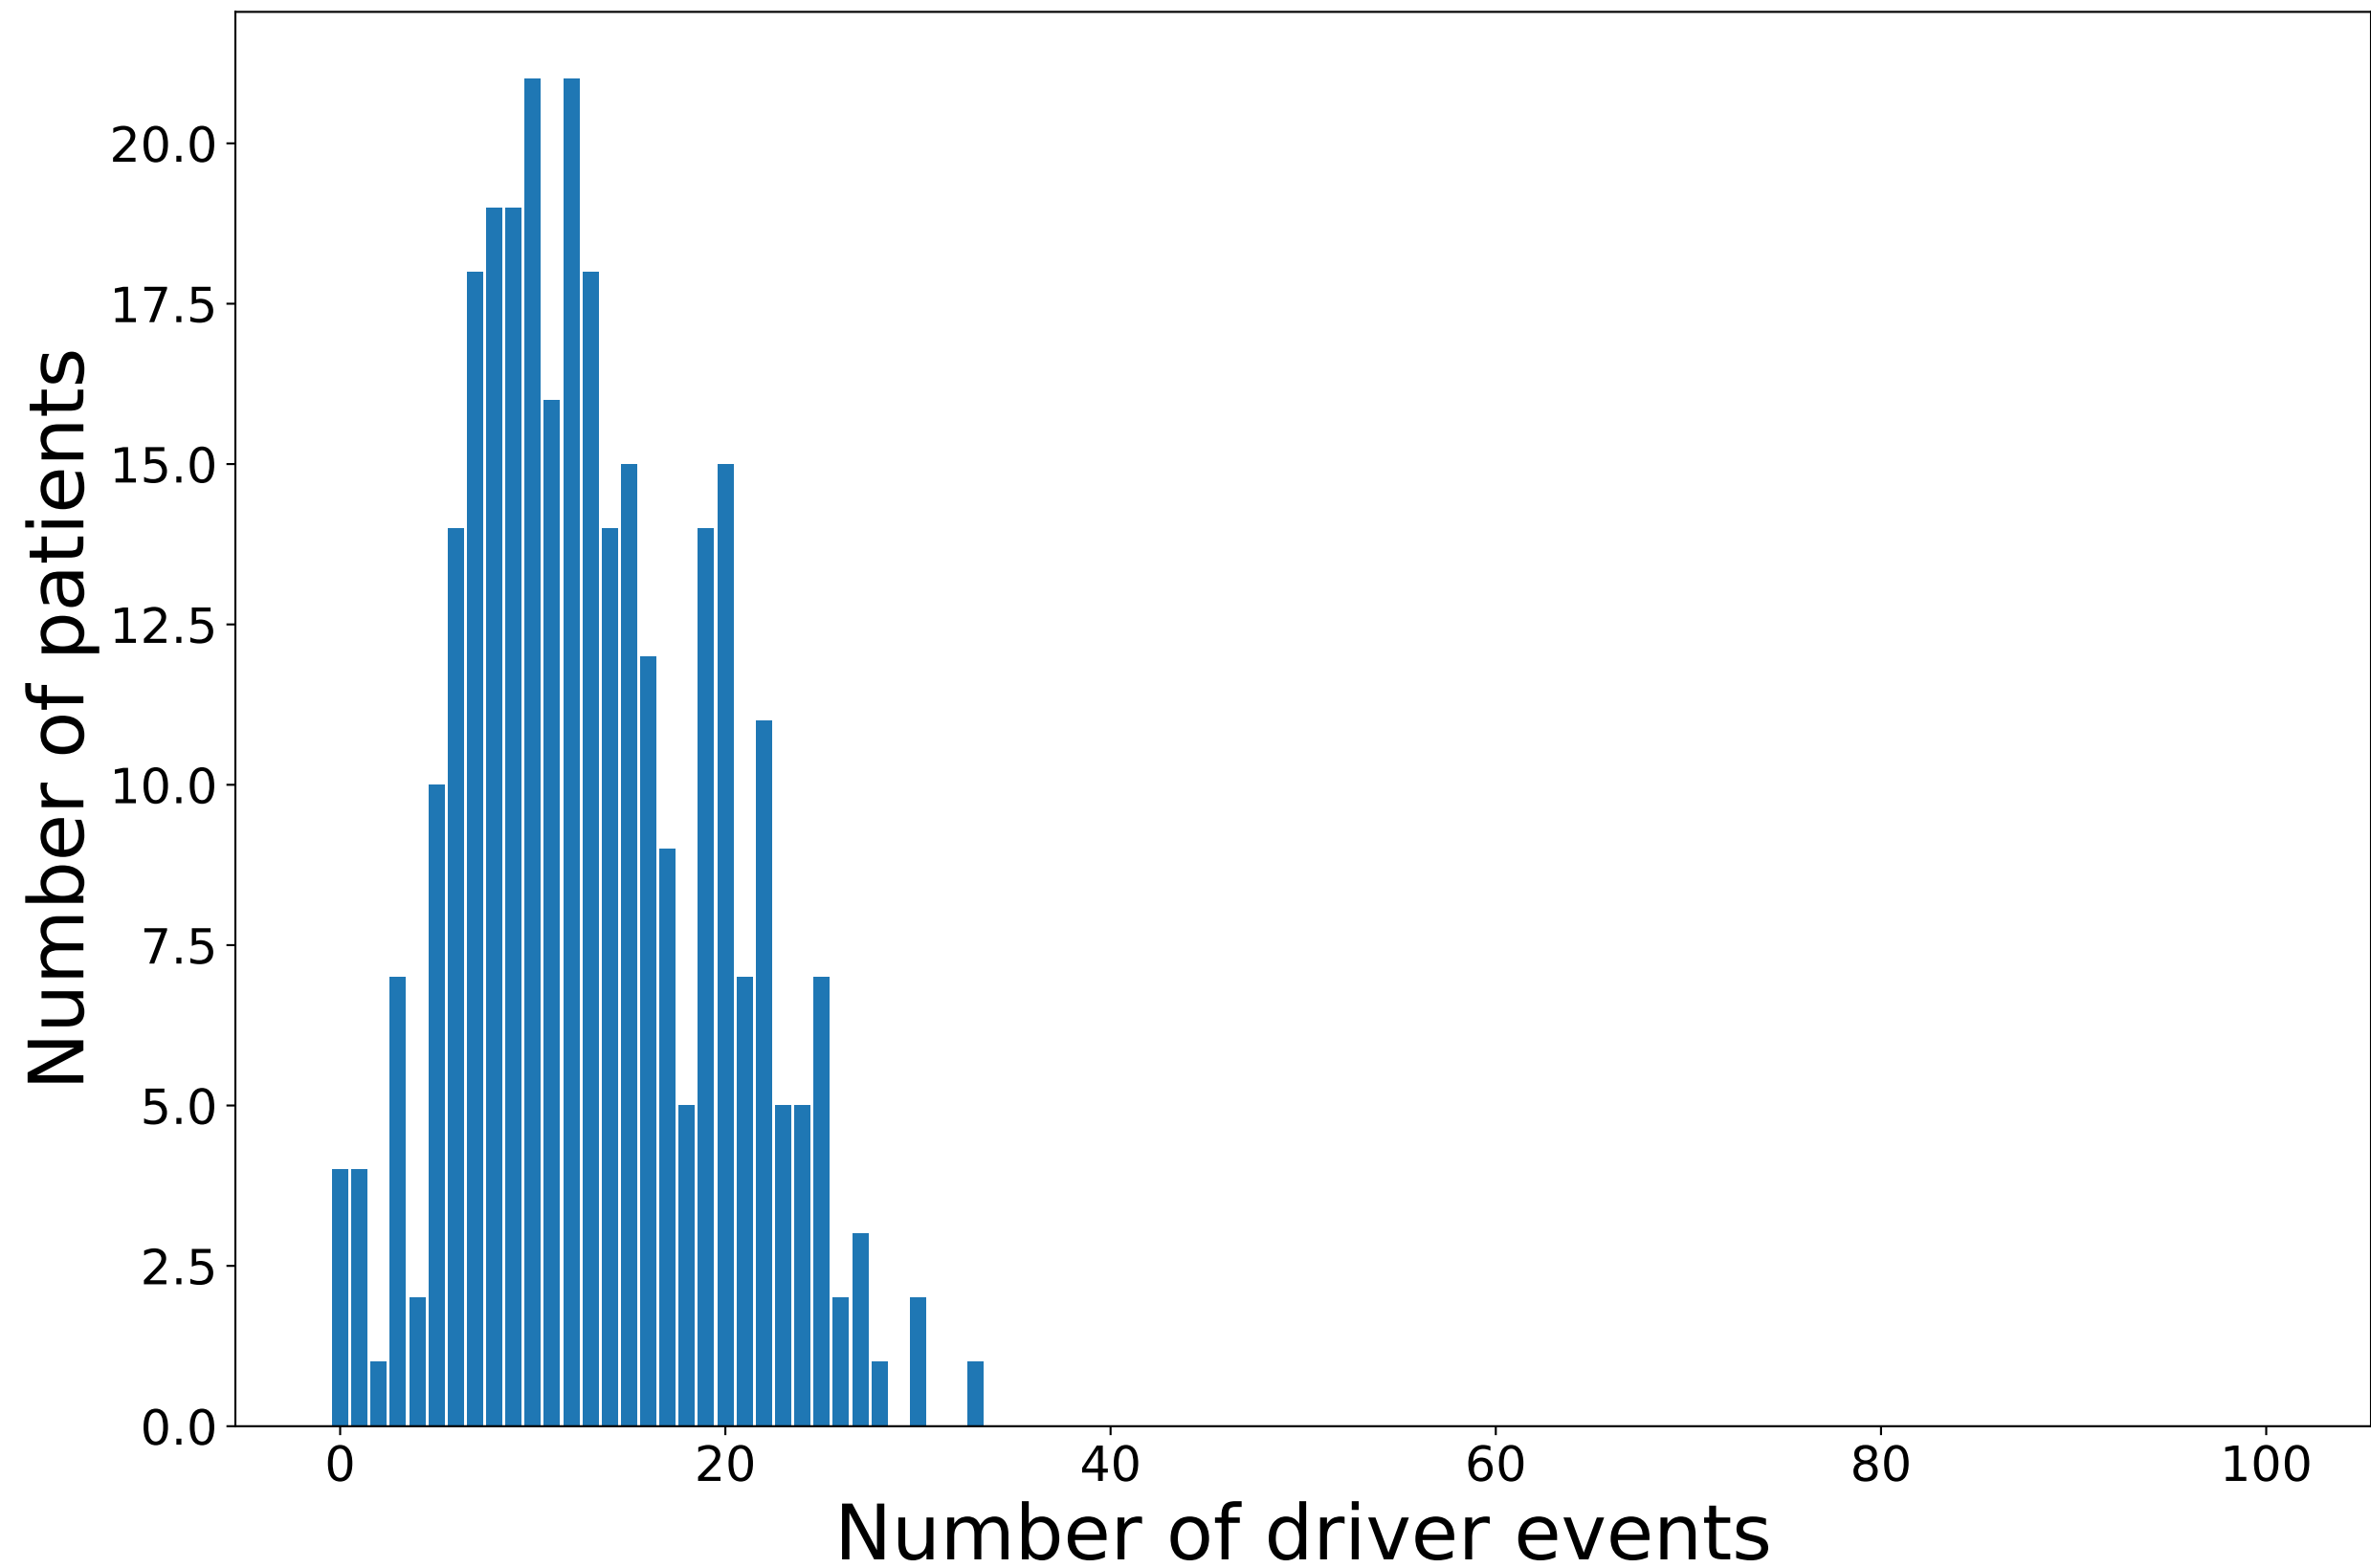

Supplement: Supplemental_Data_S1.zip [file Supplemental_Data_S1.zip]

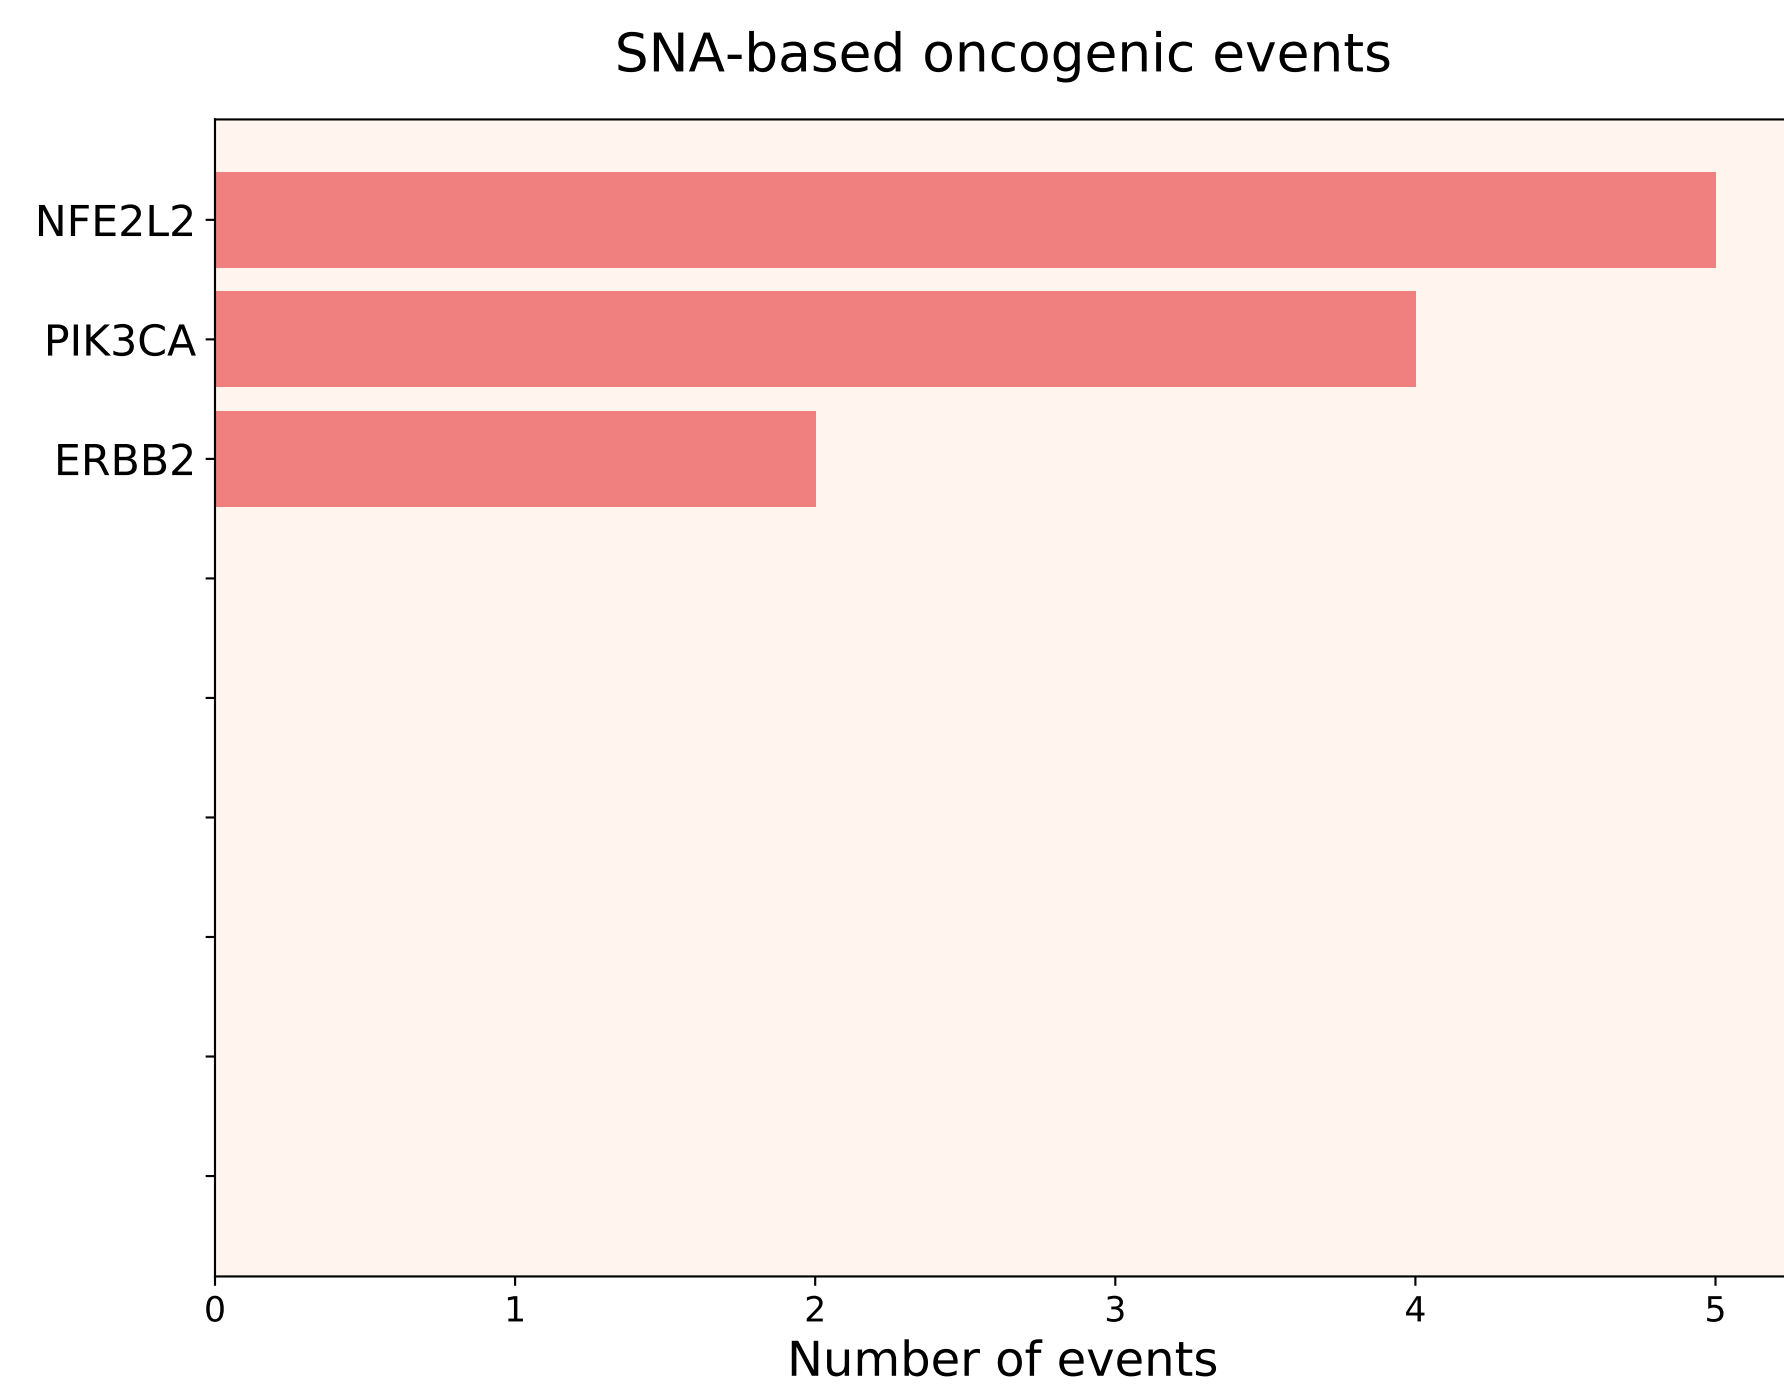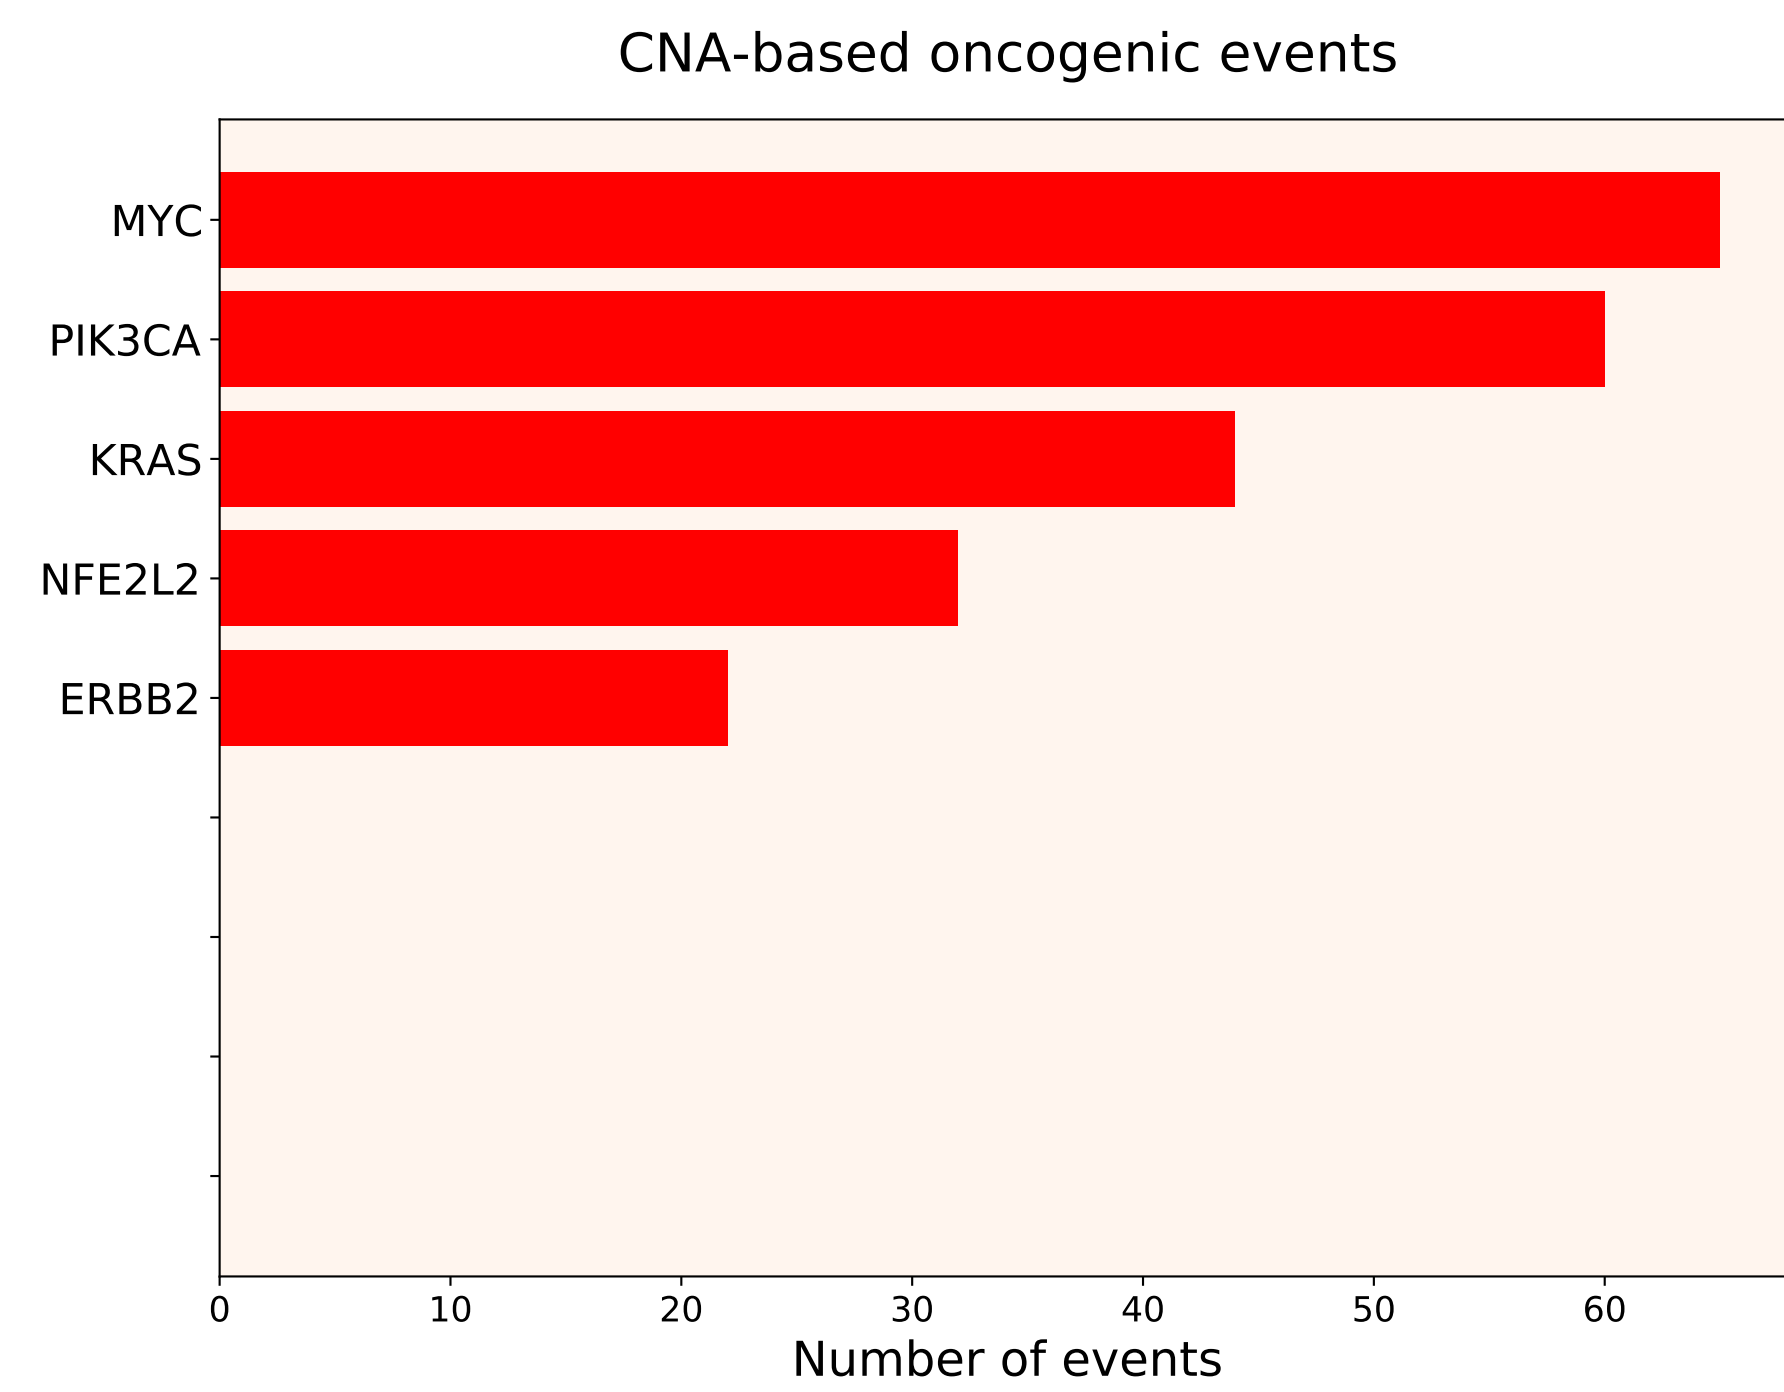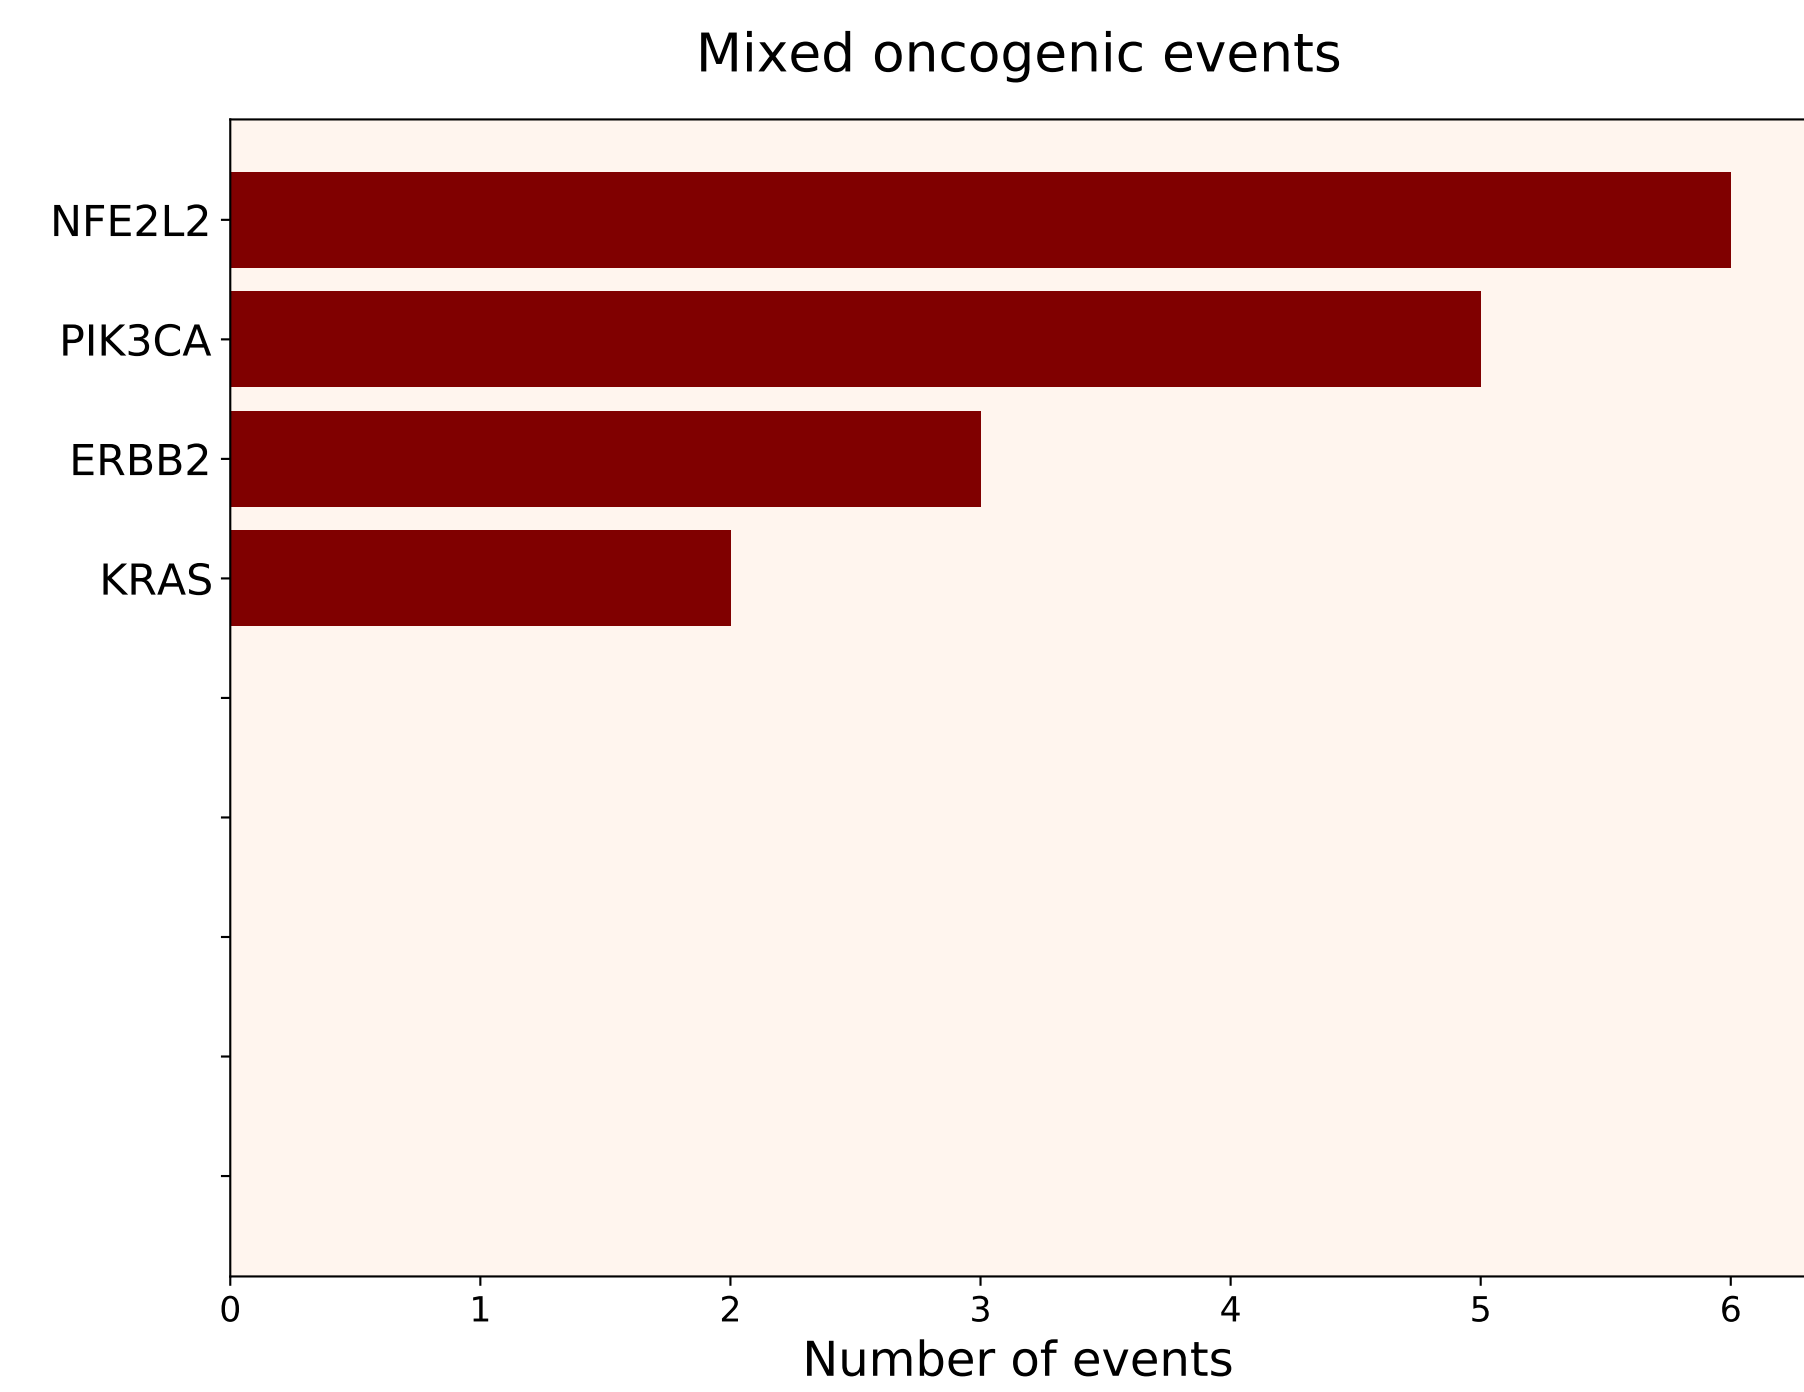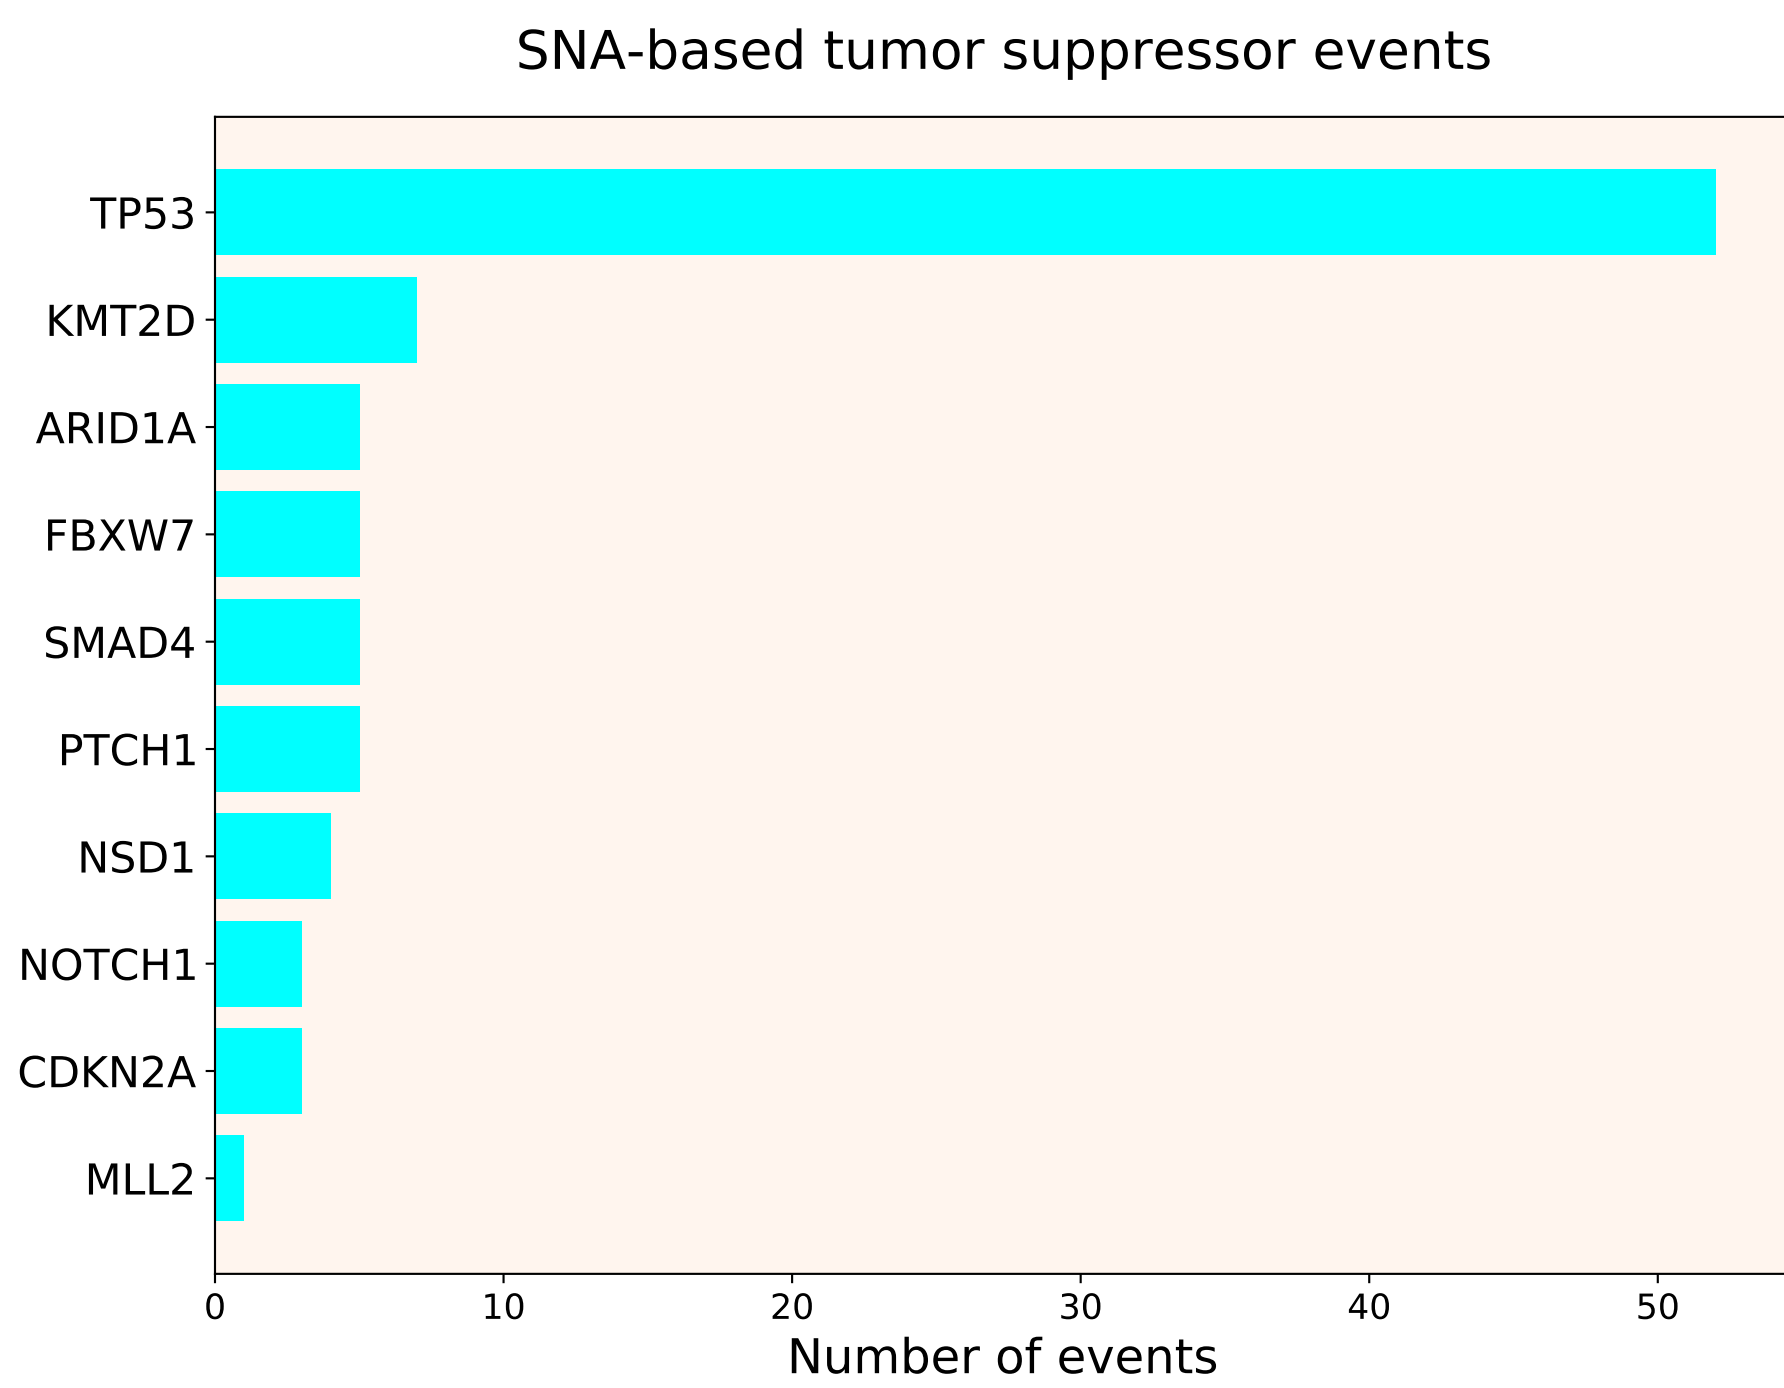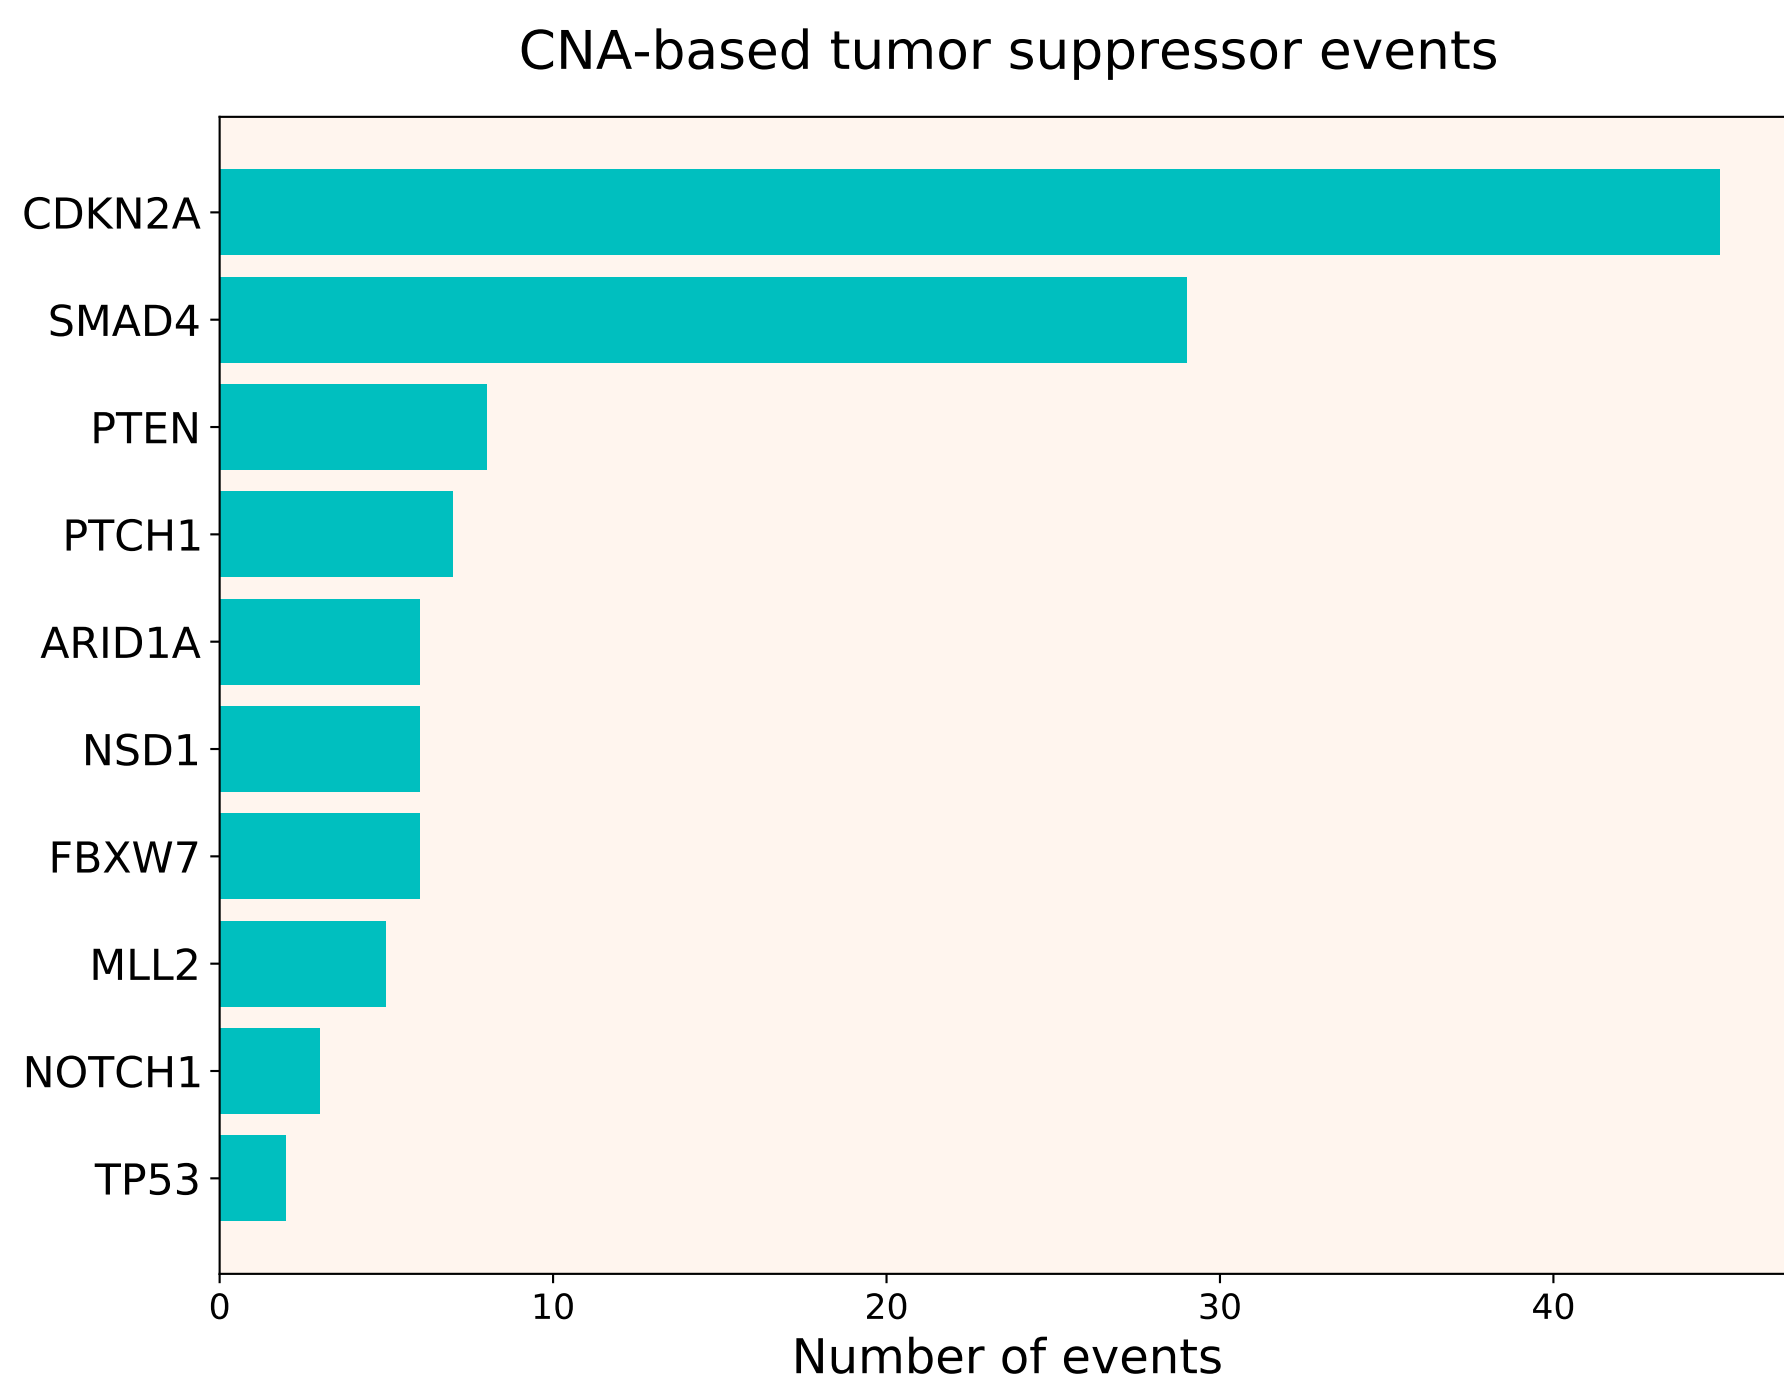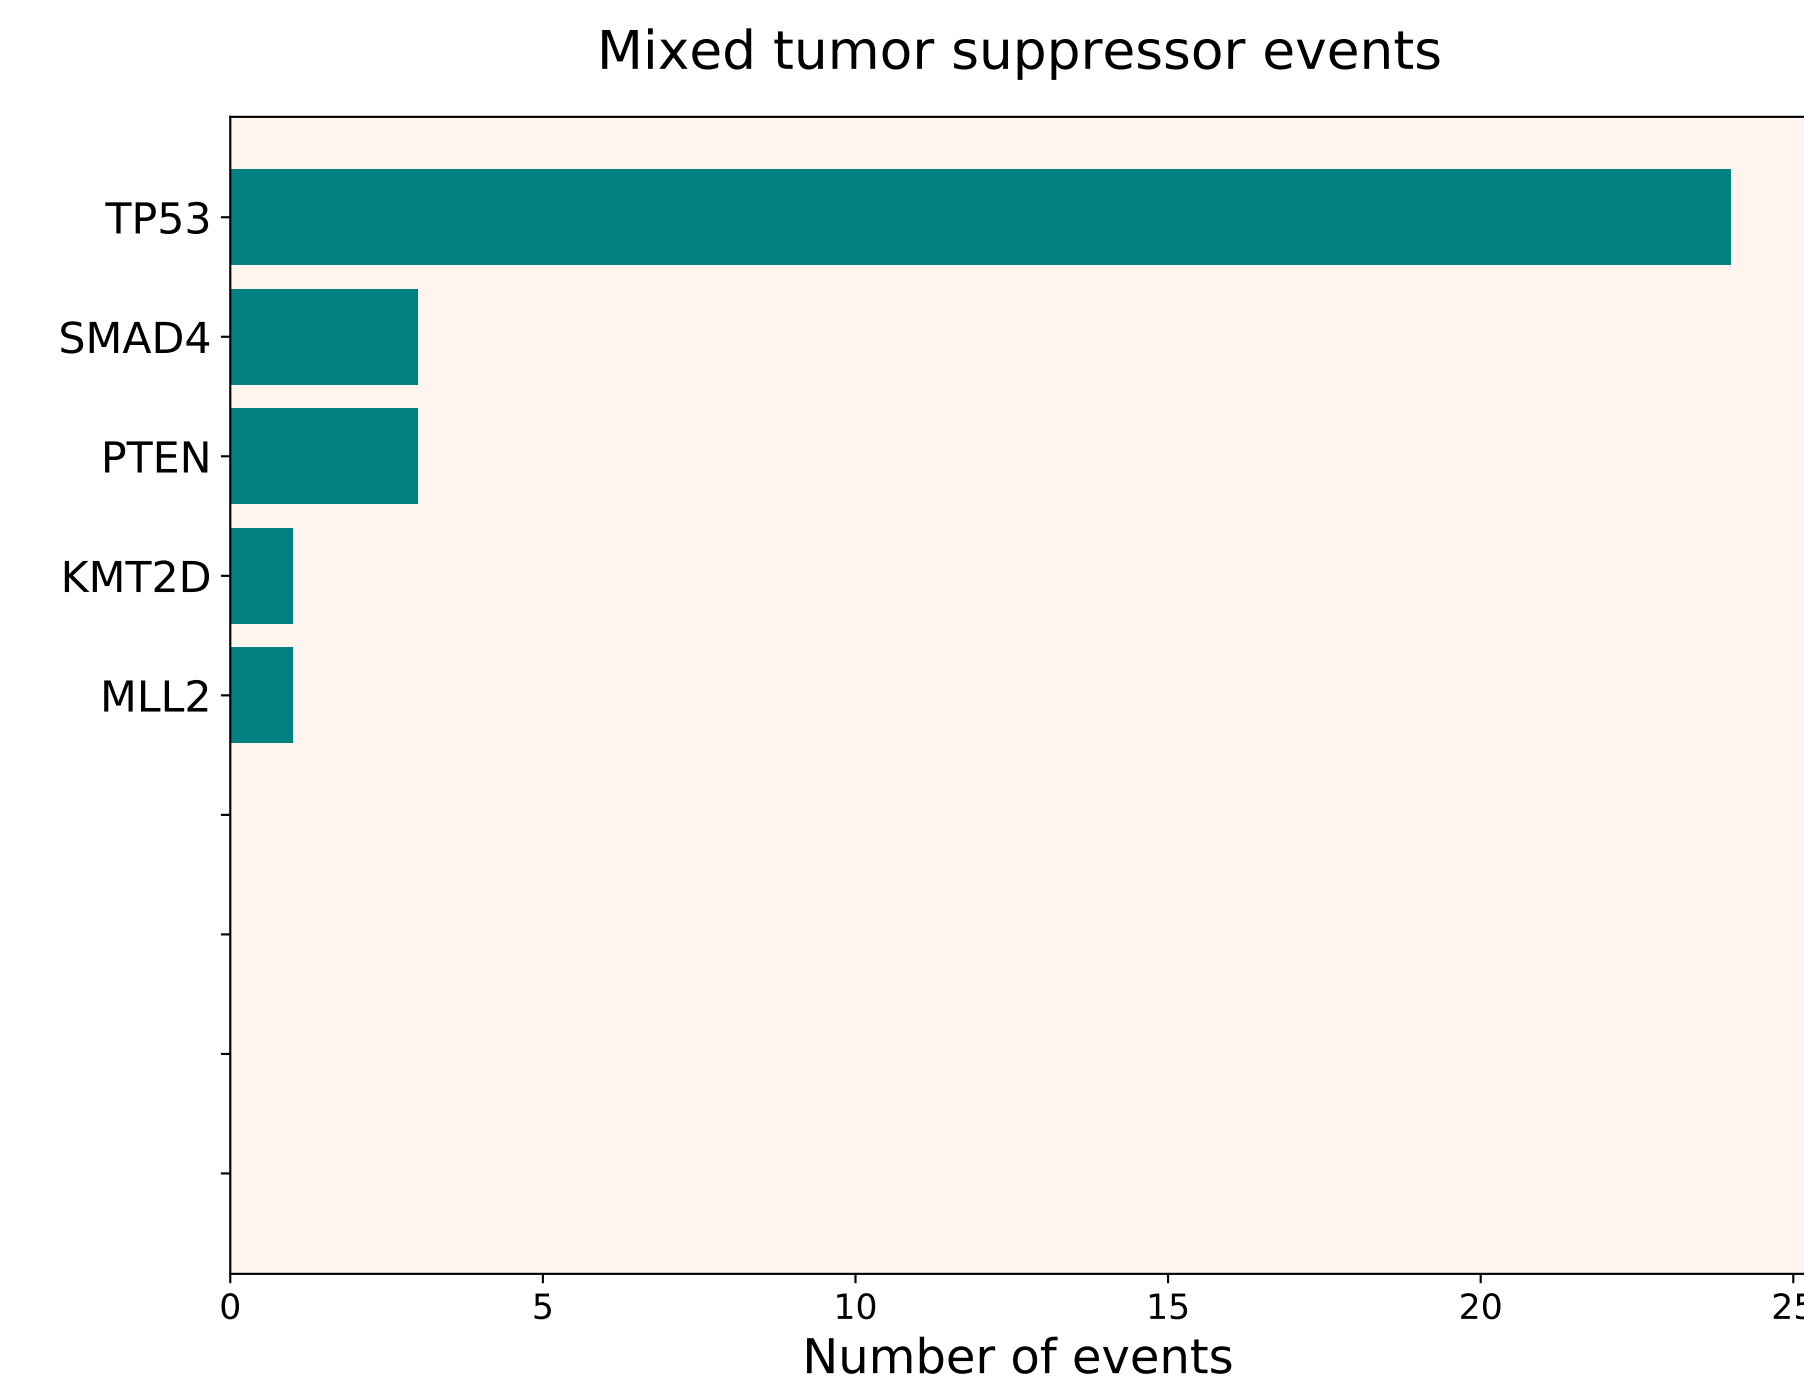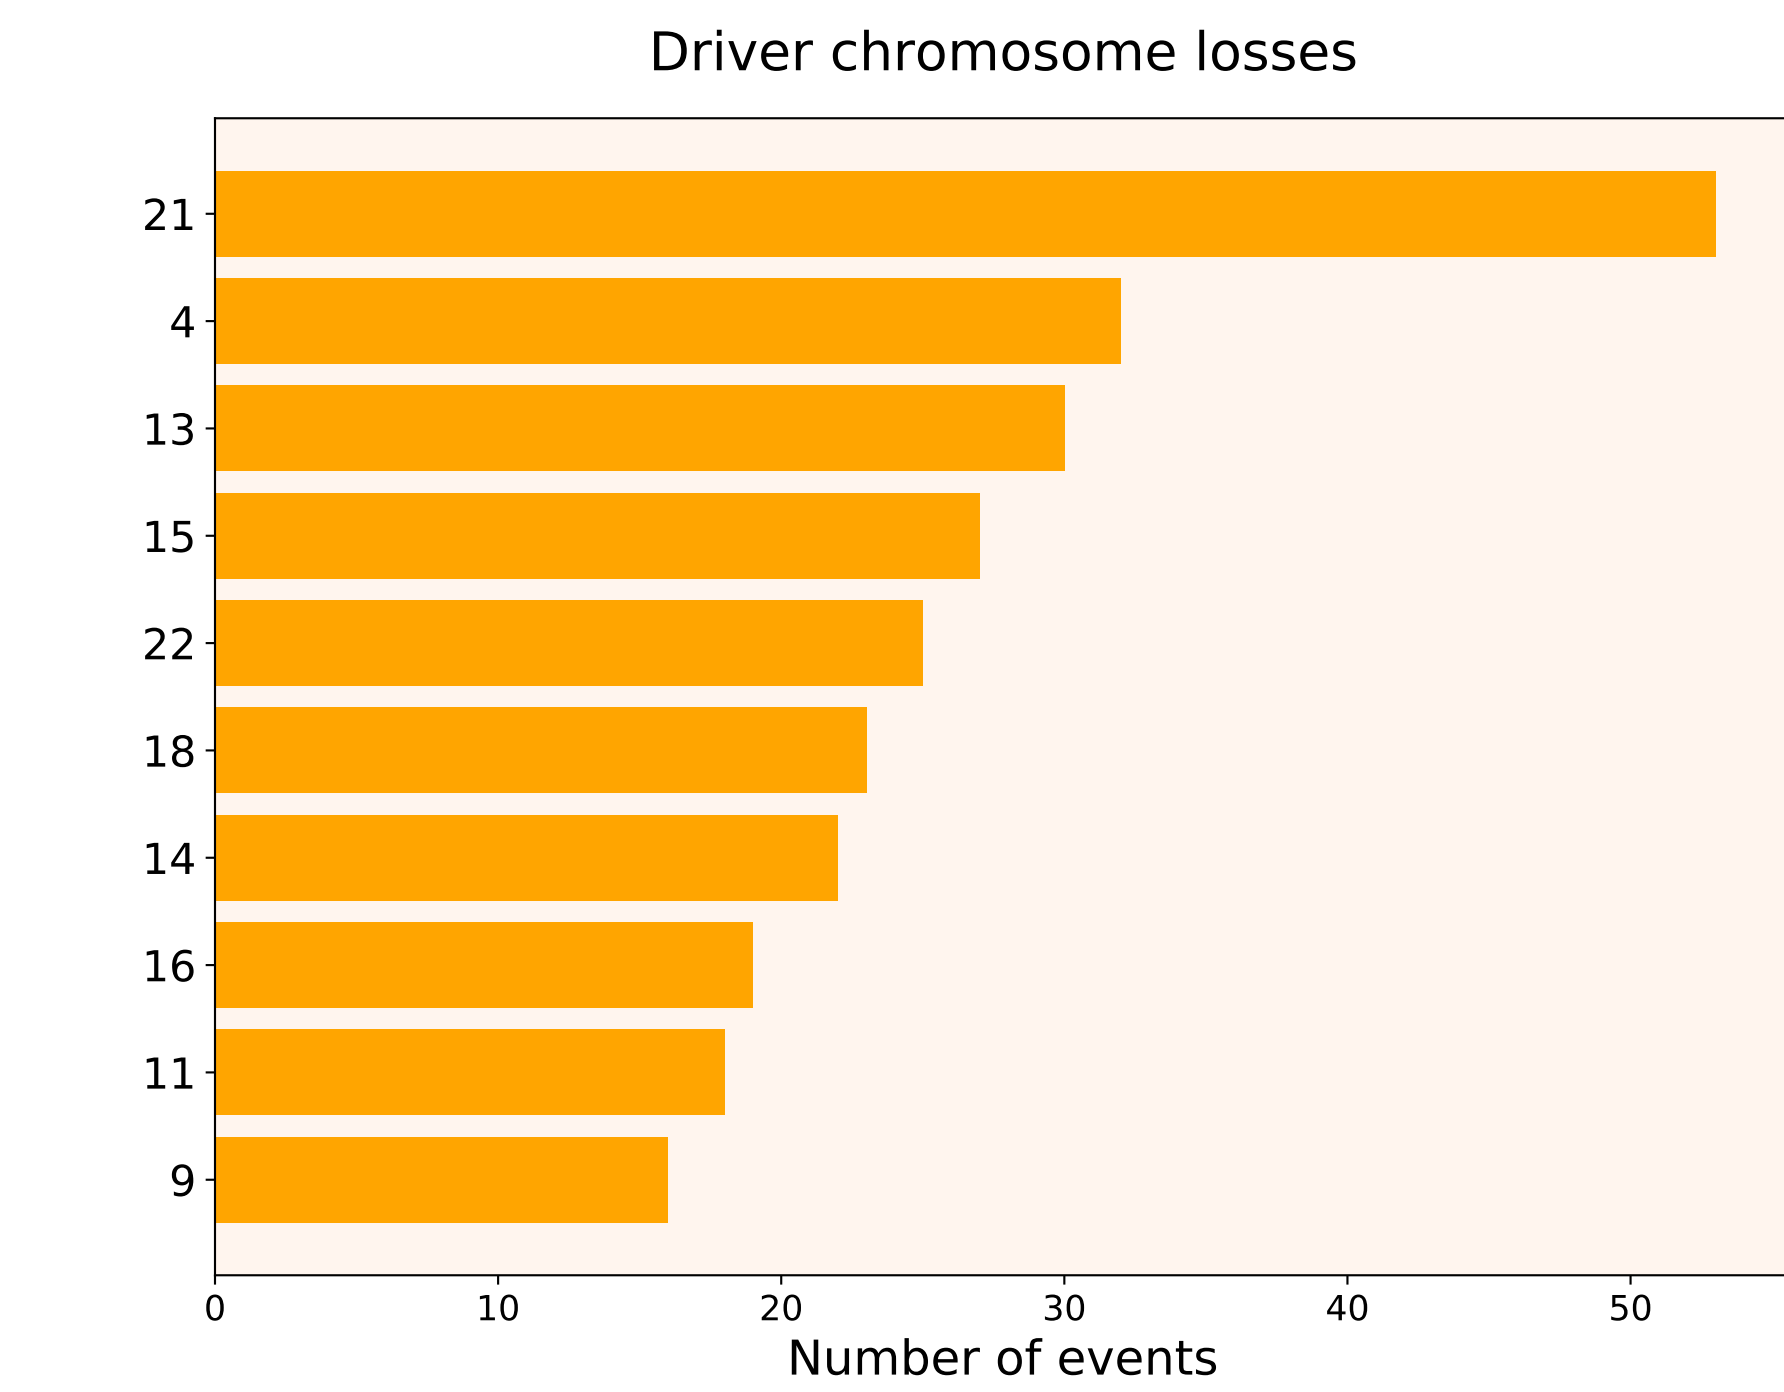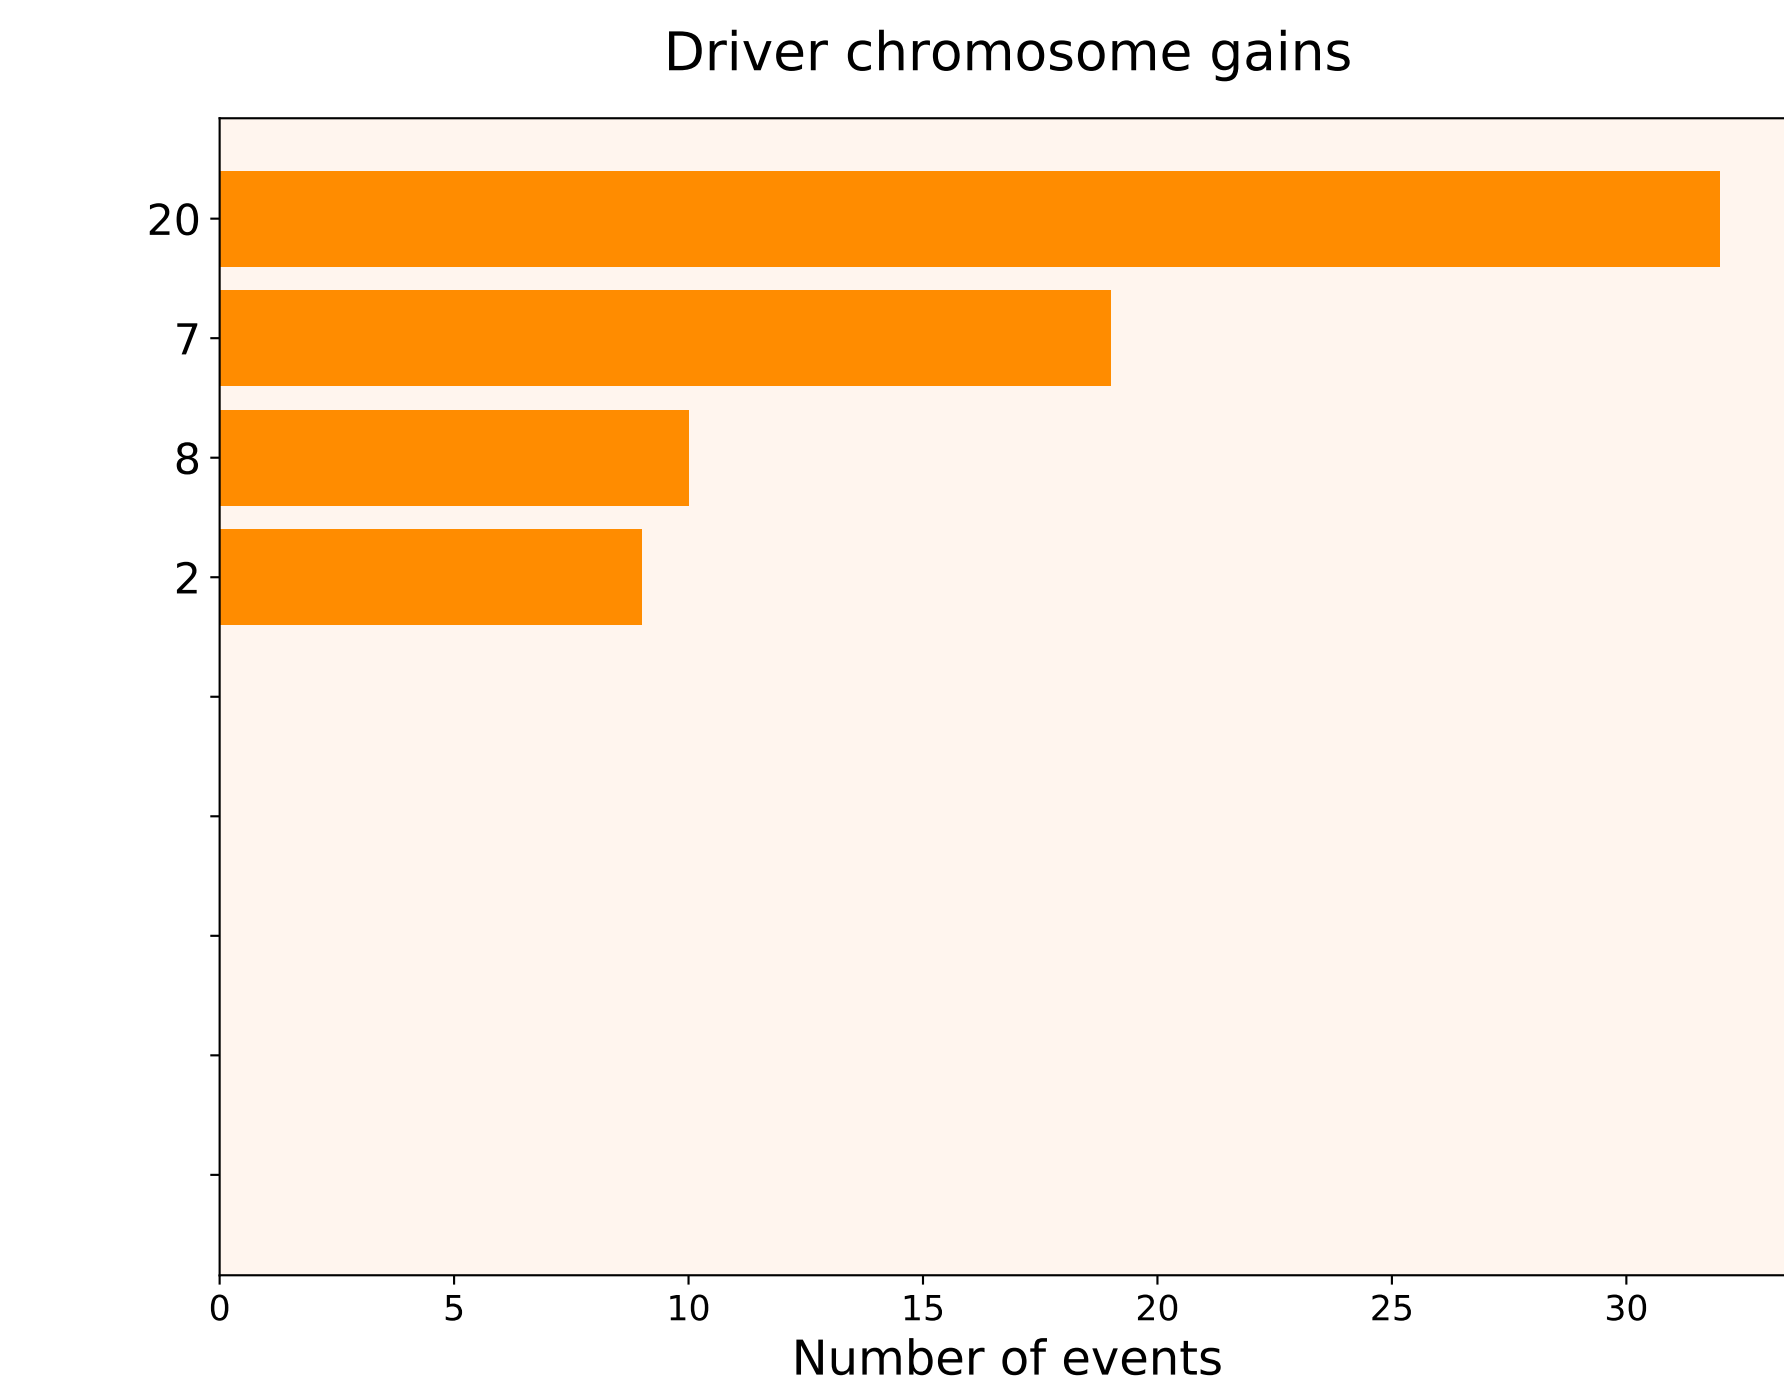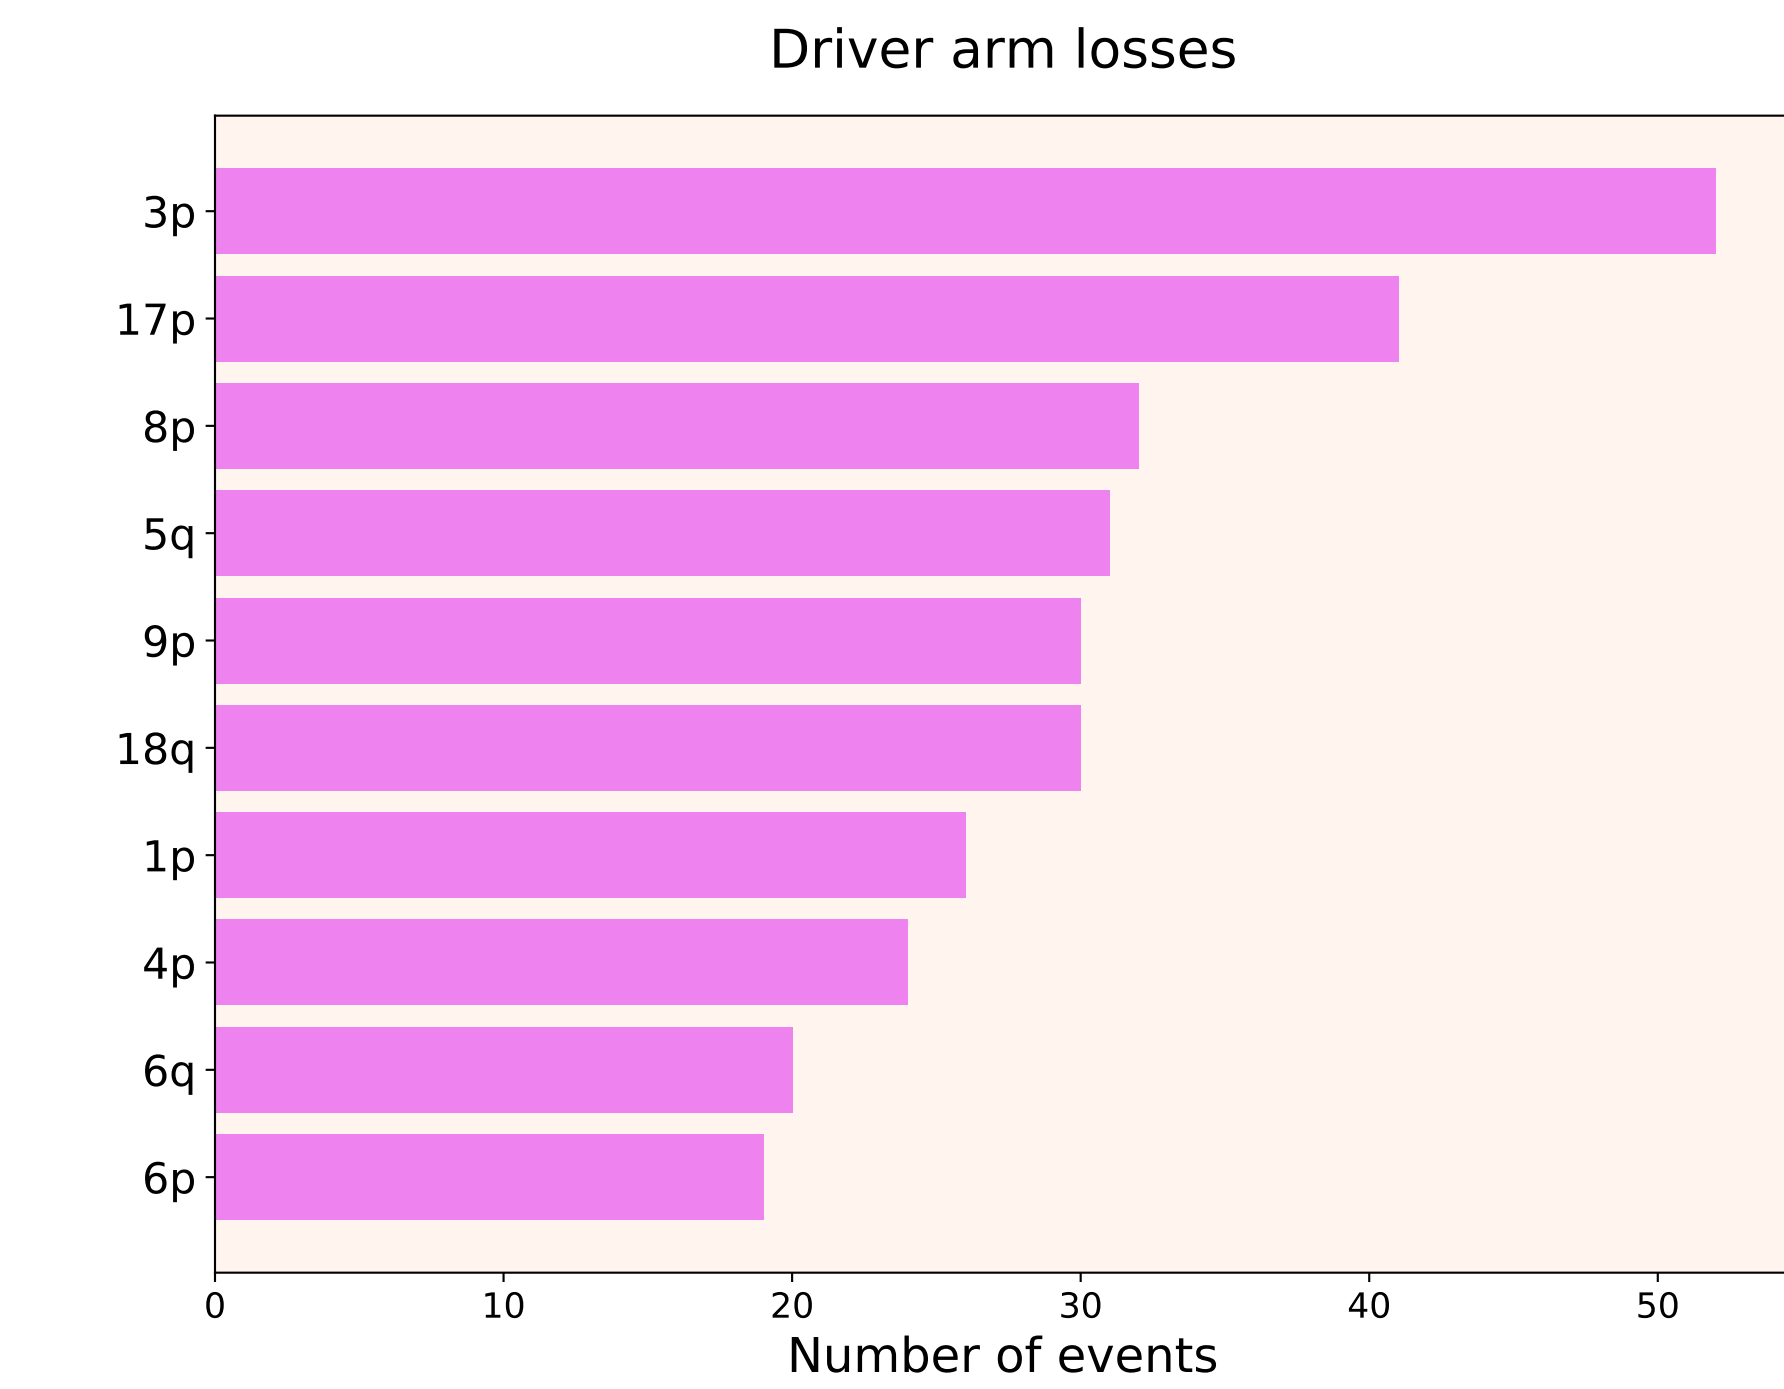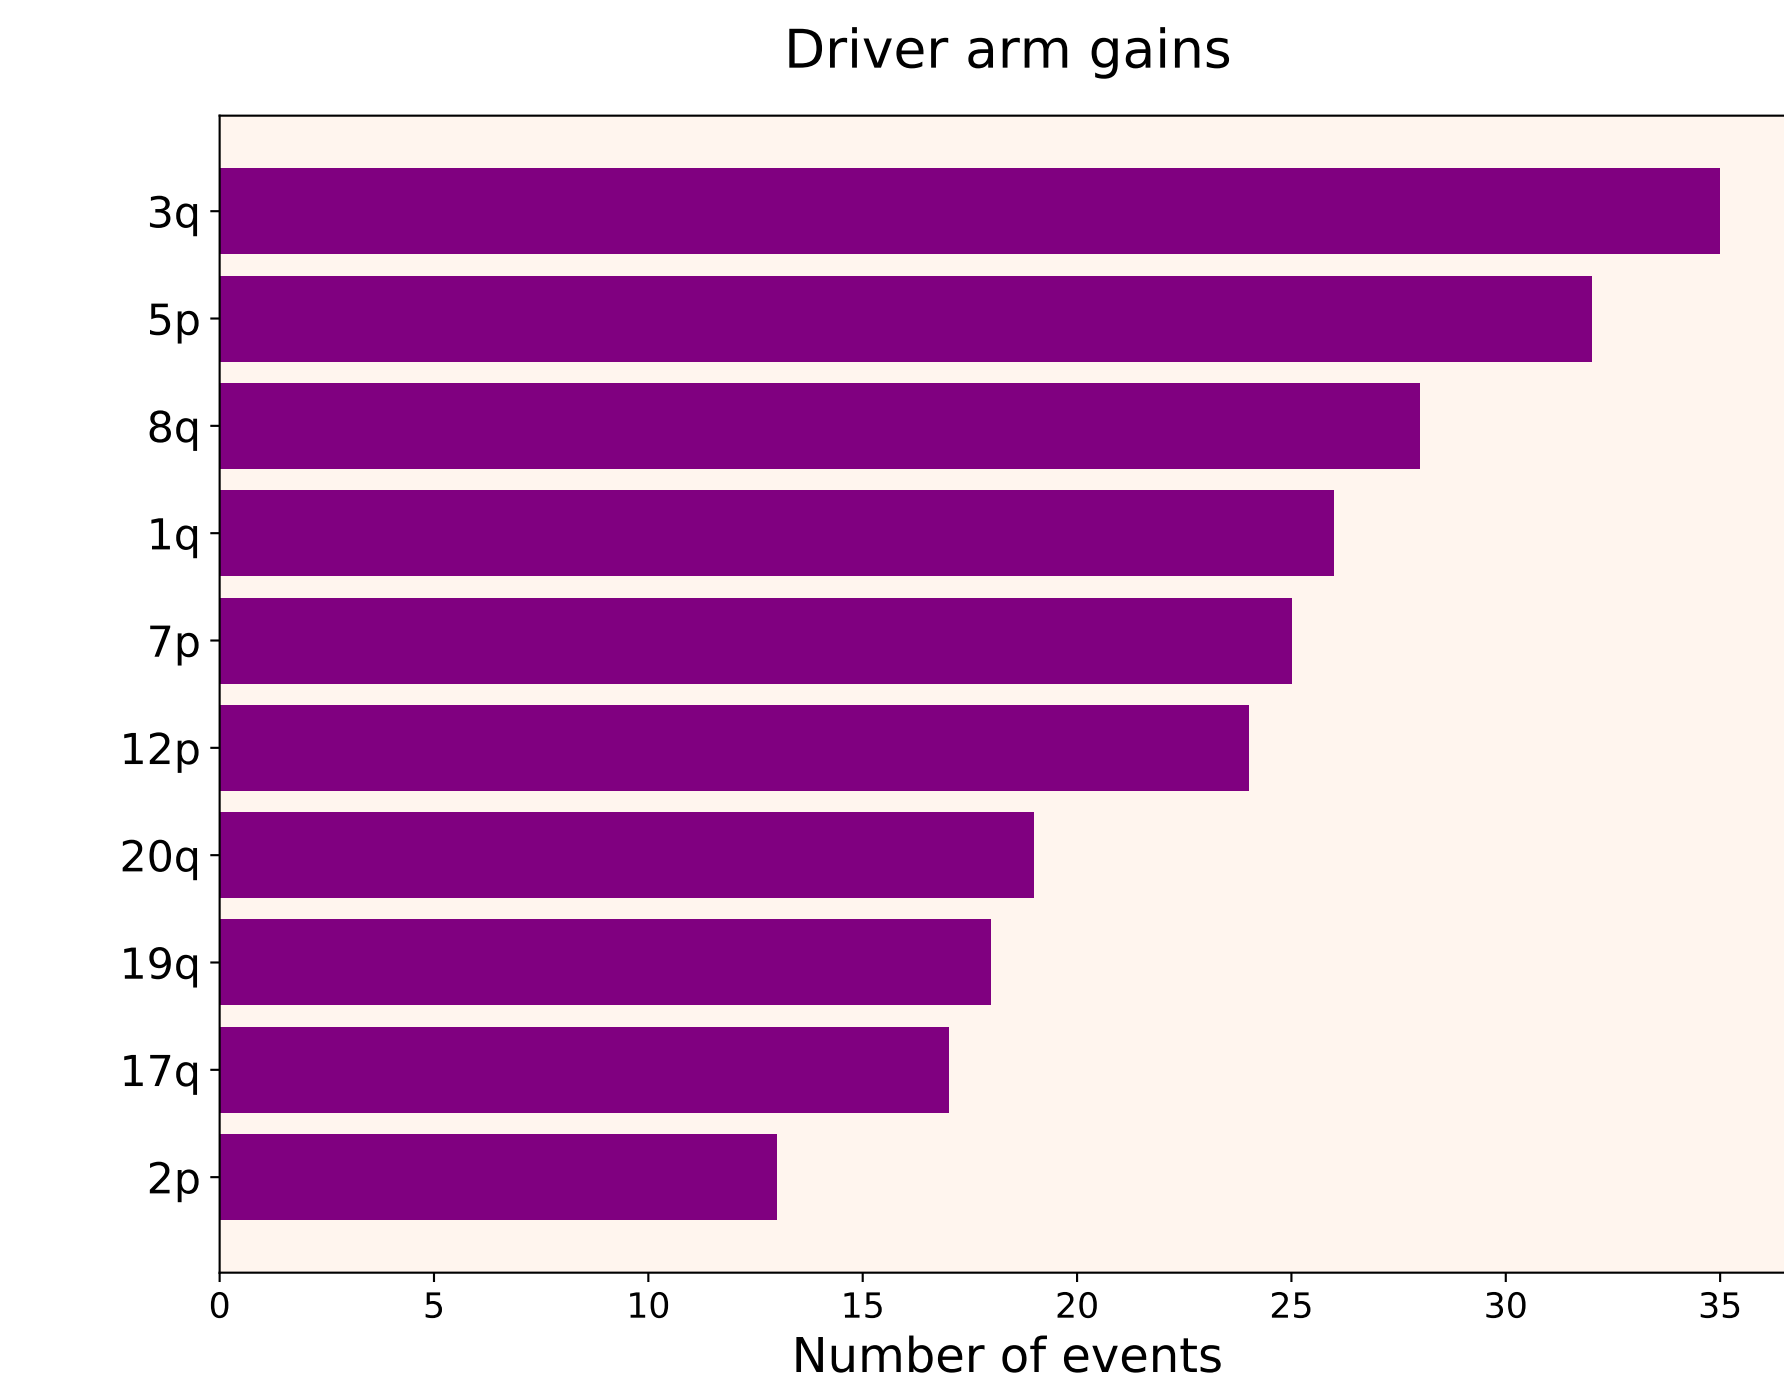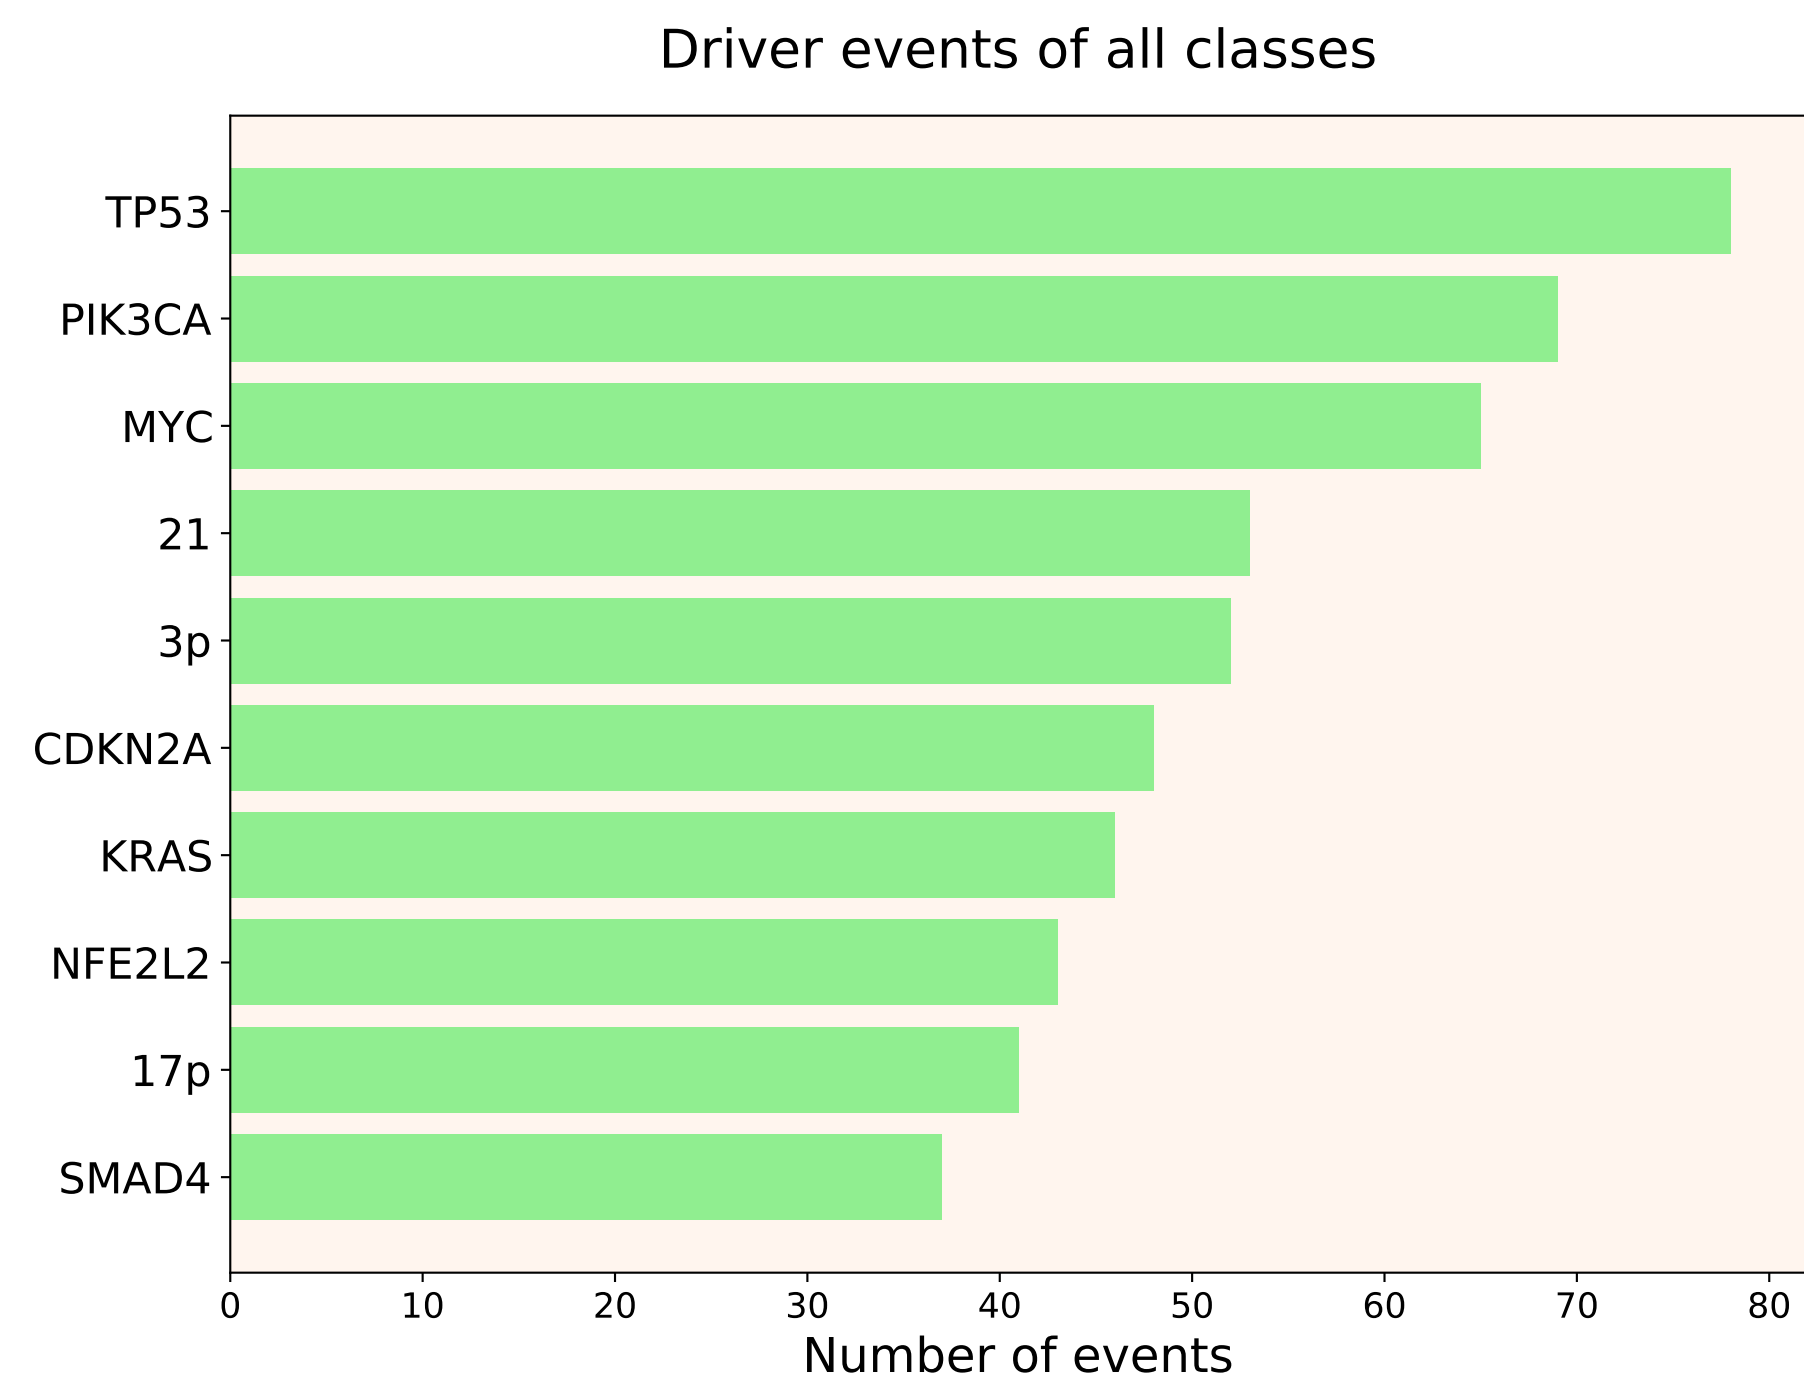

Supplement: Supplemental_Data_S1.zip [file Supplemental_Data_S1.zip]

# LUAD\_MALE

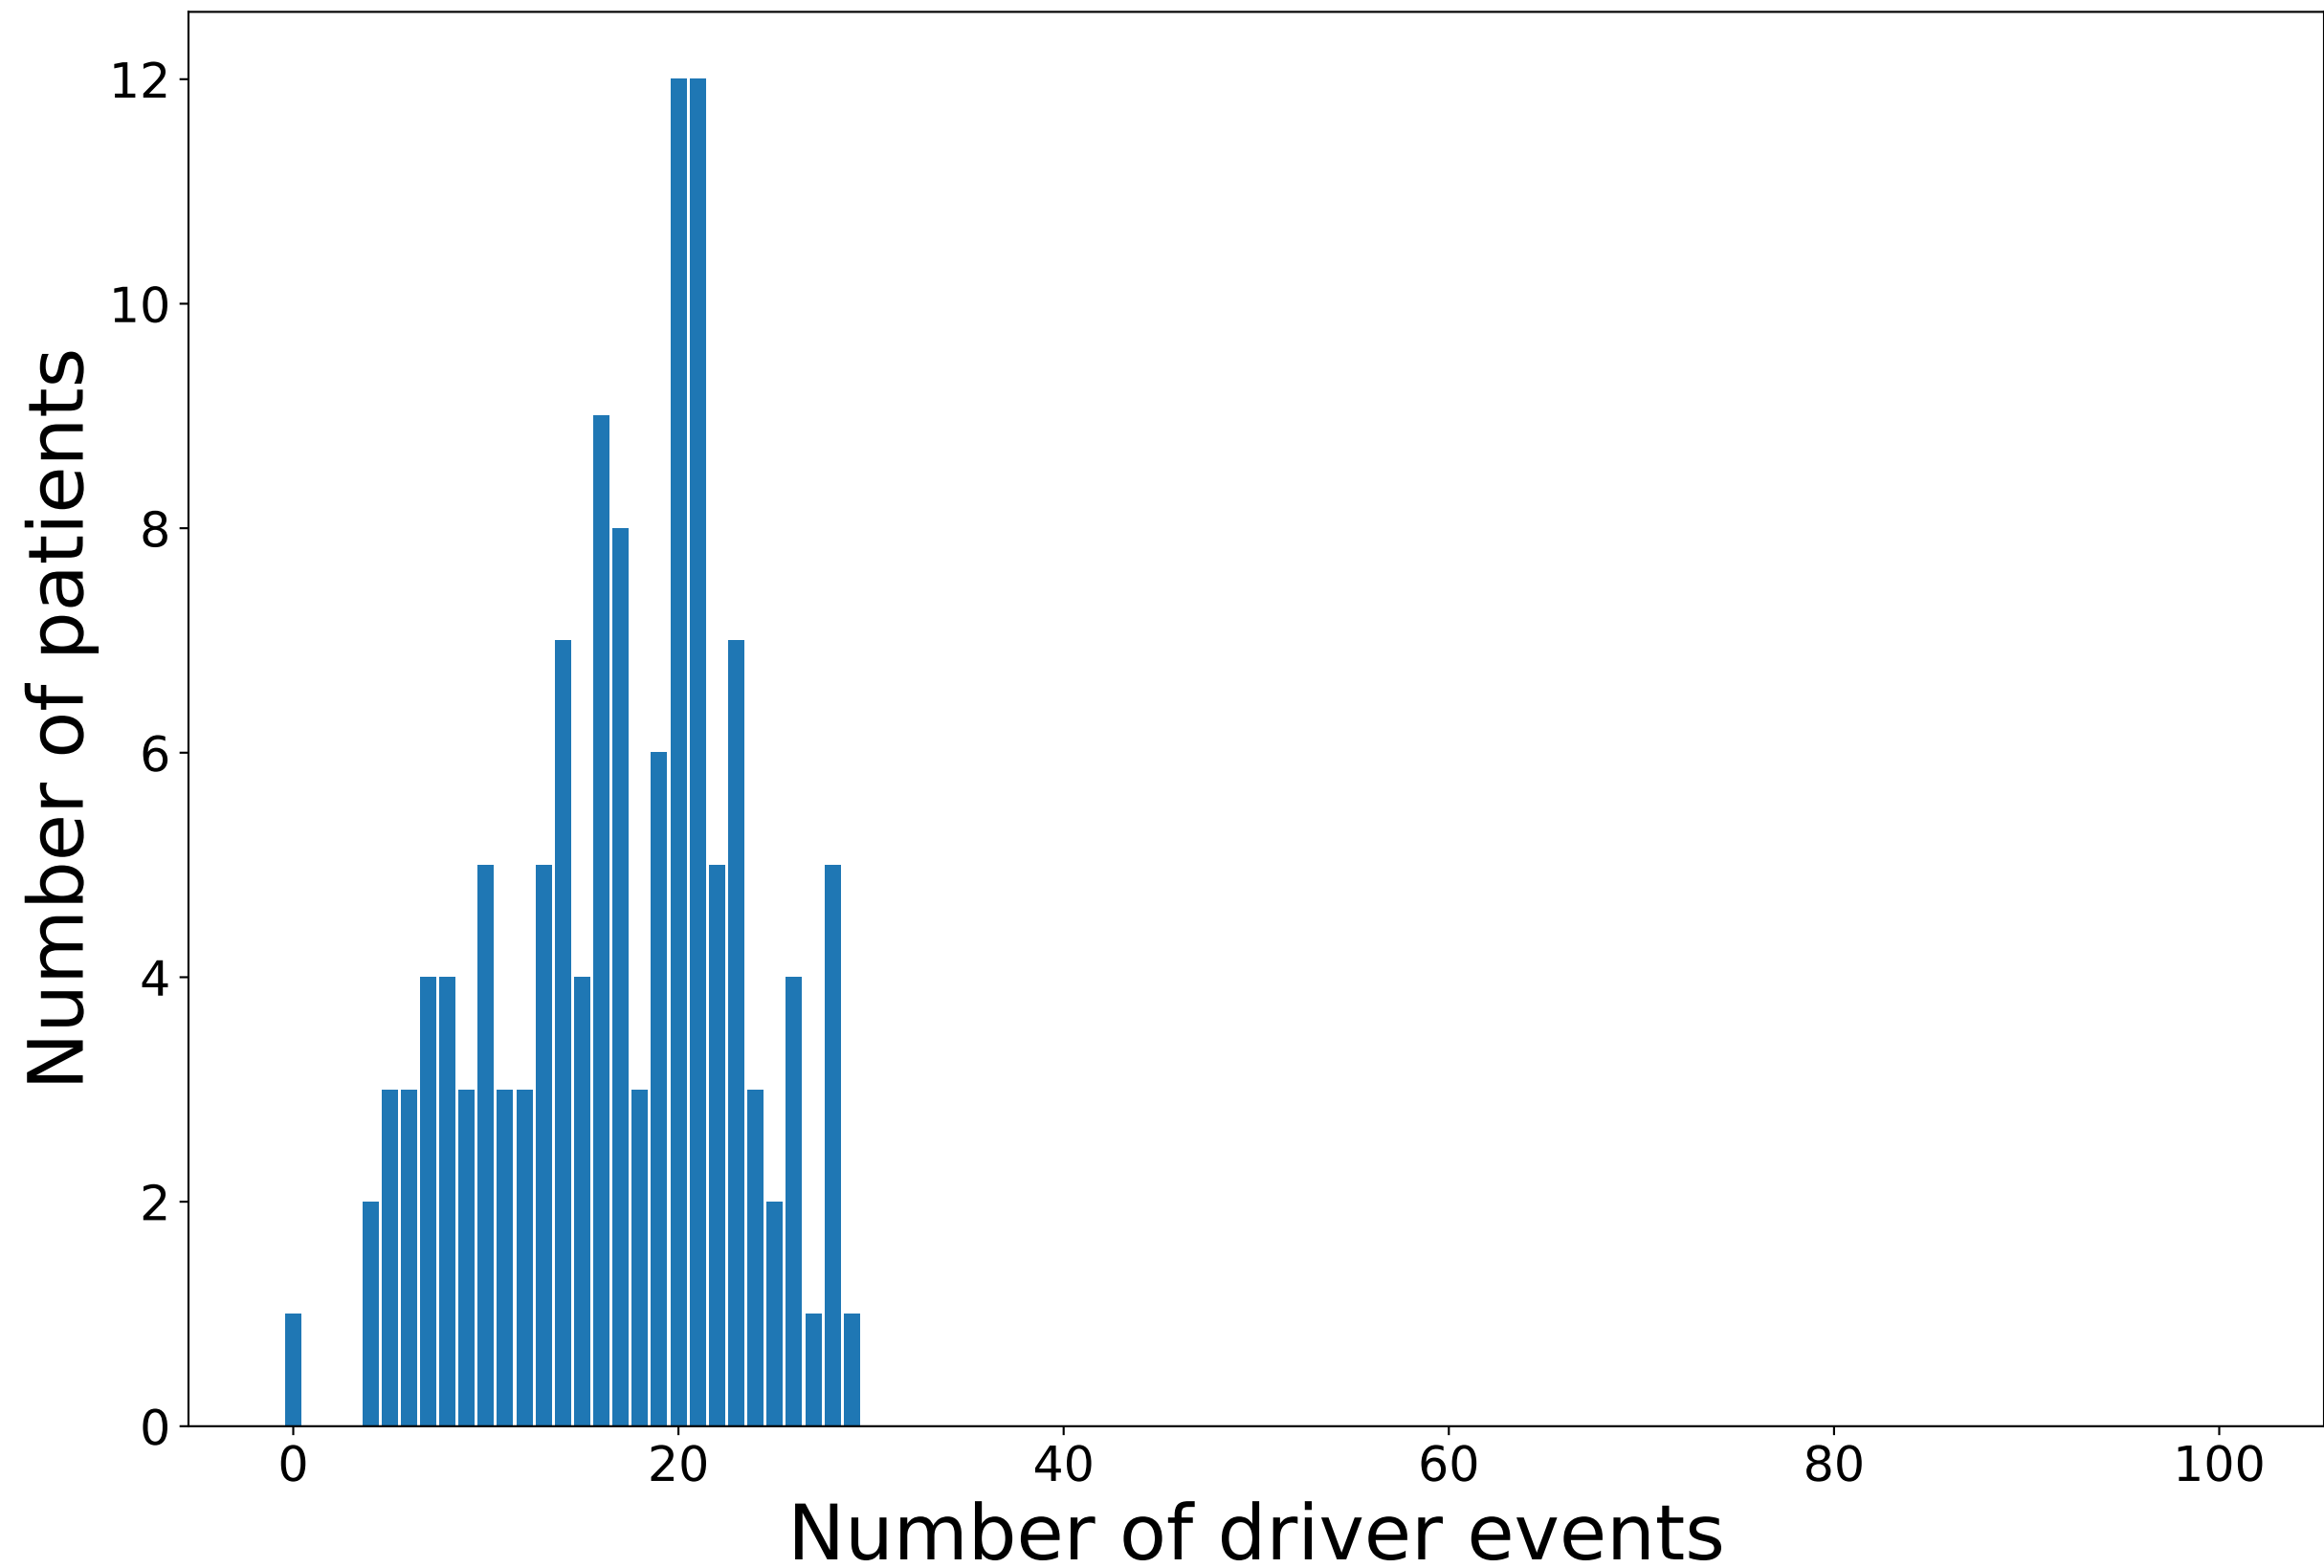

Supplement: Supplemental_Data_S1.zip [file Supplemental_Data_S1.zip]

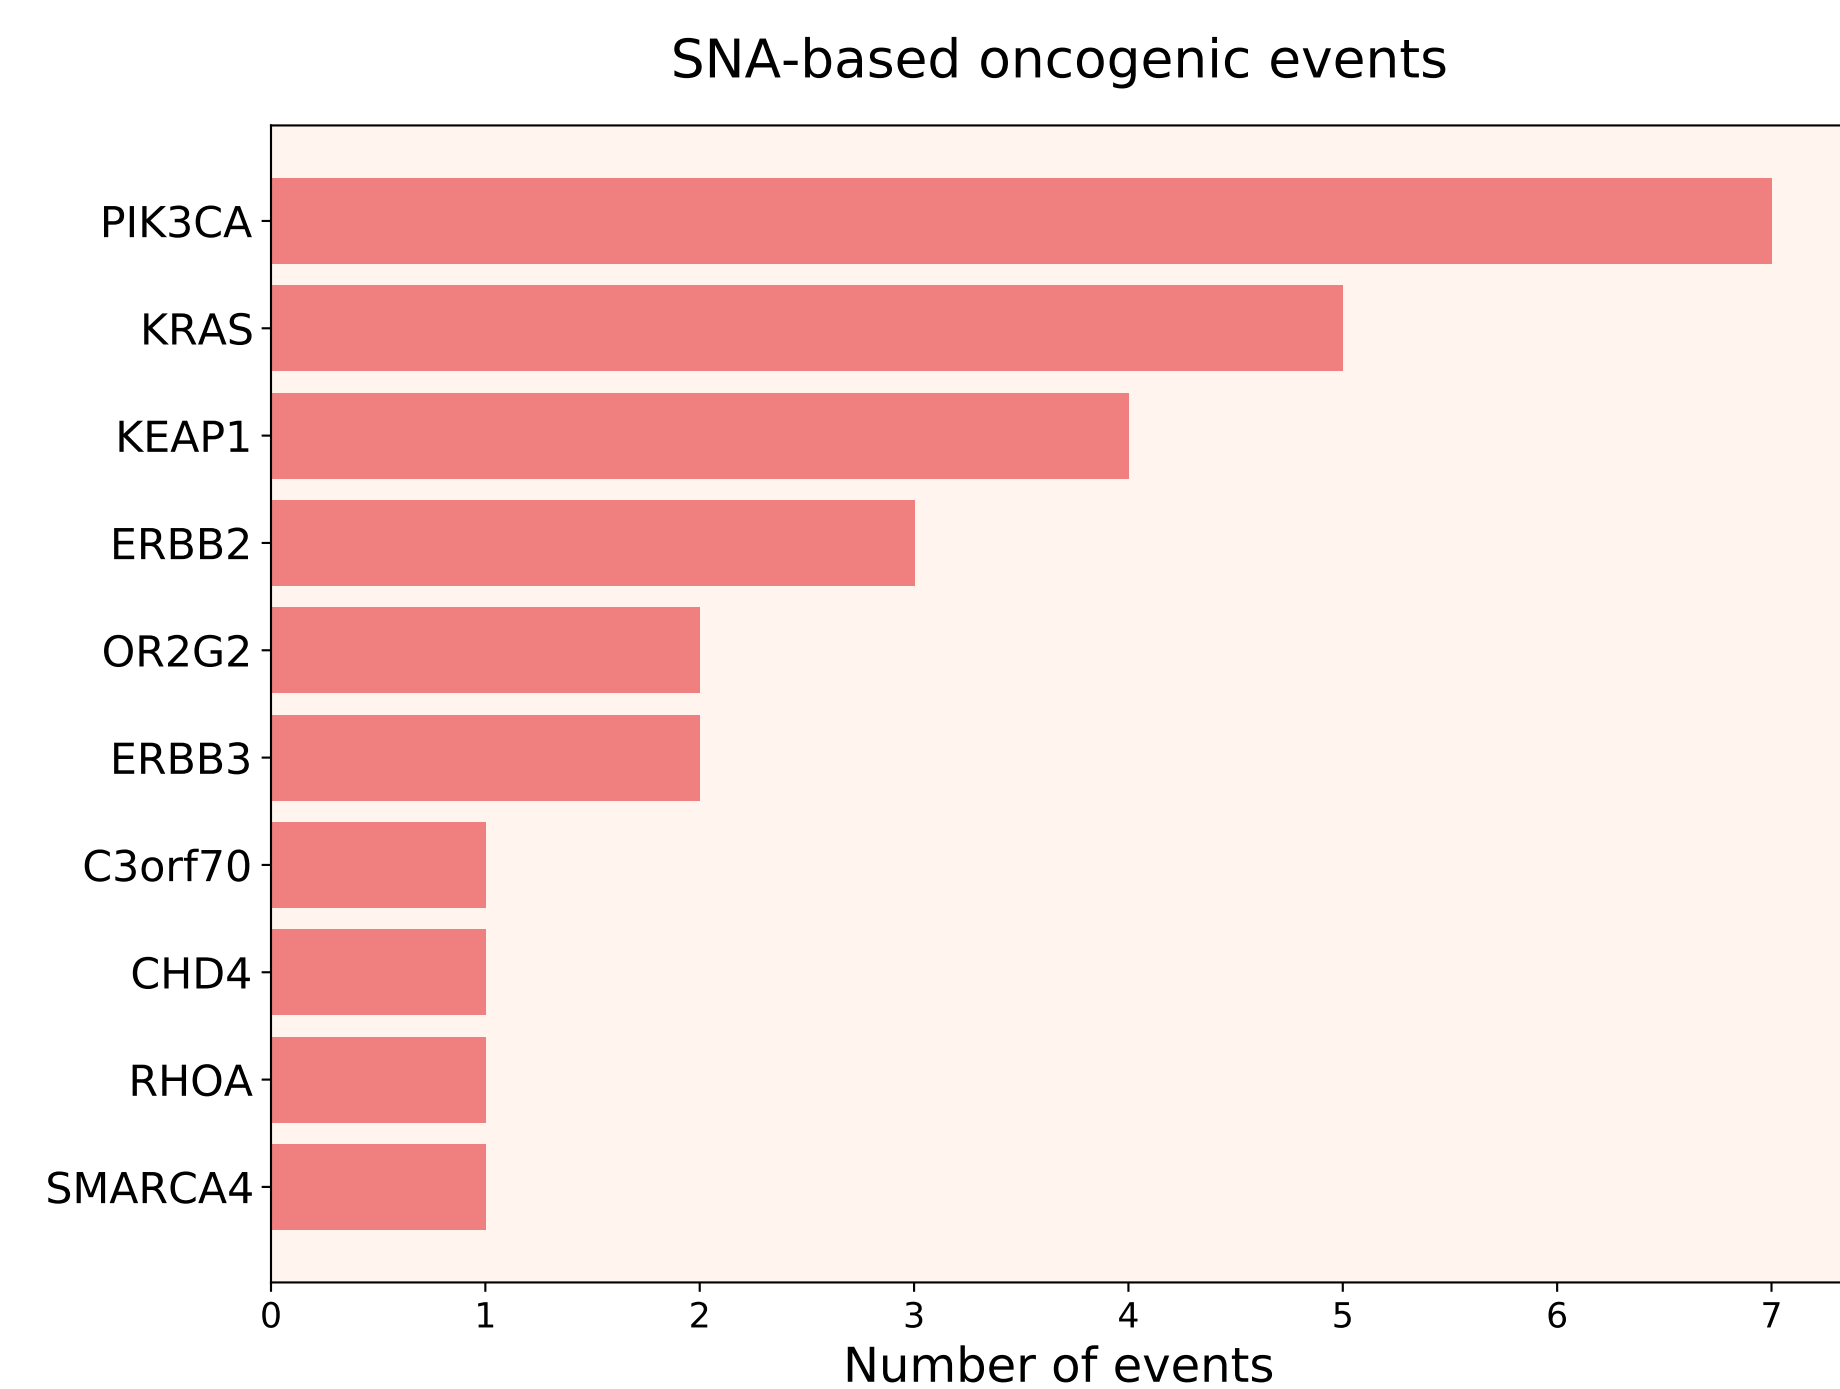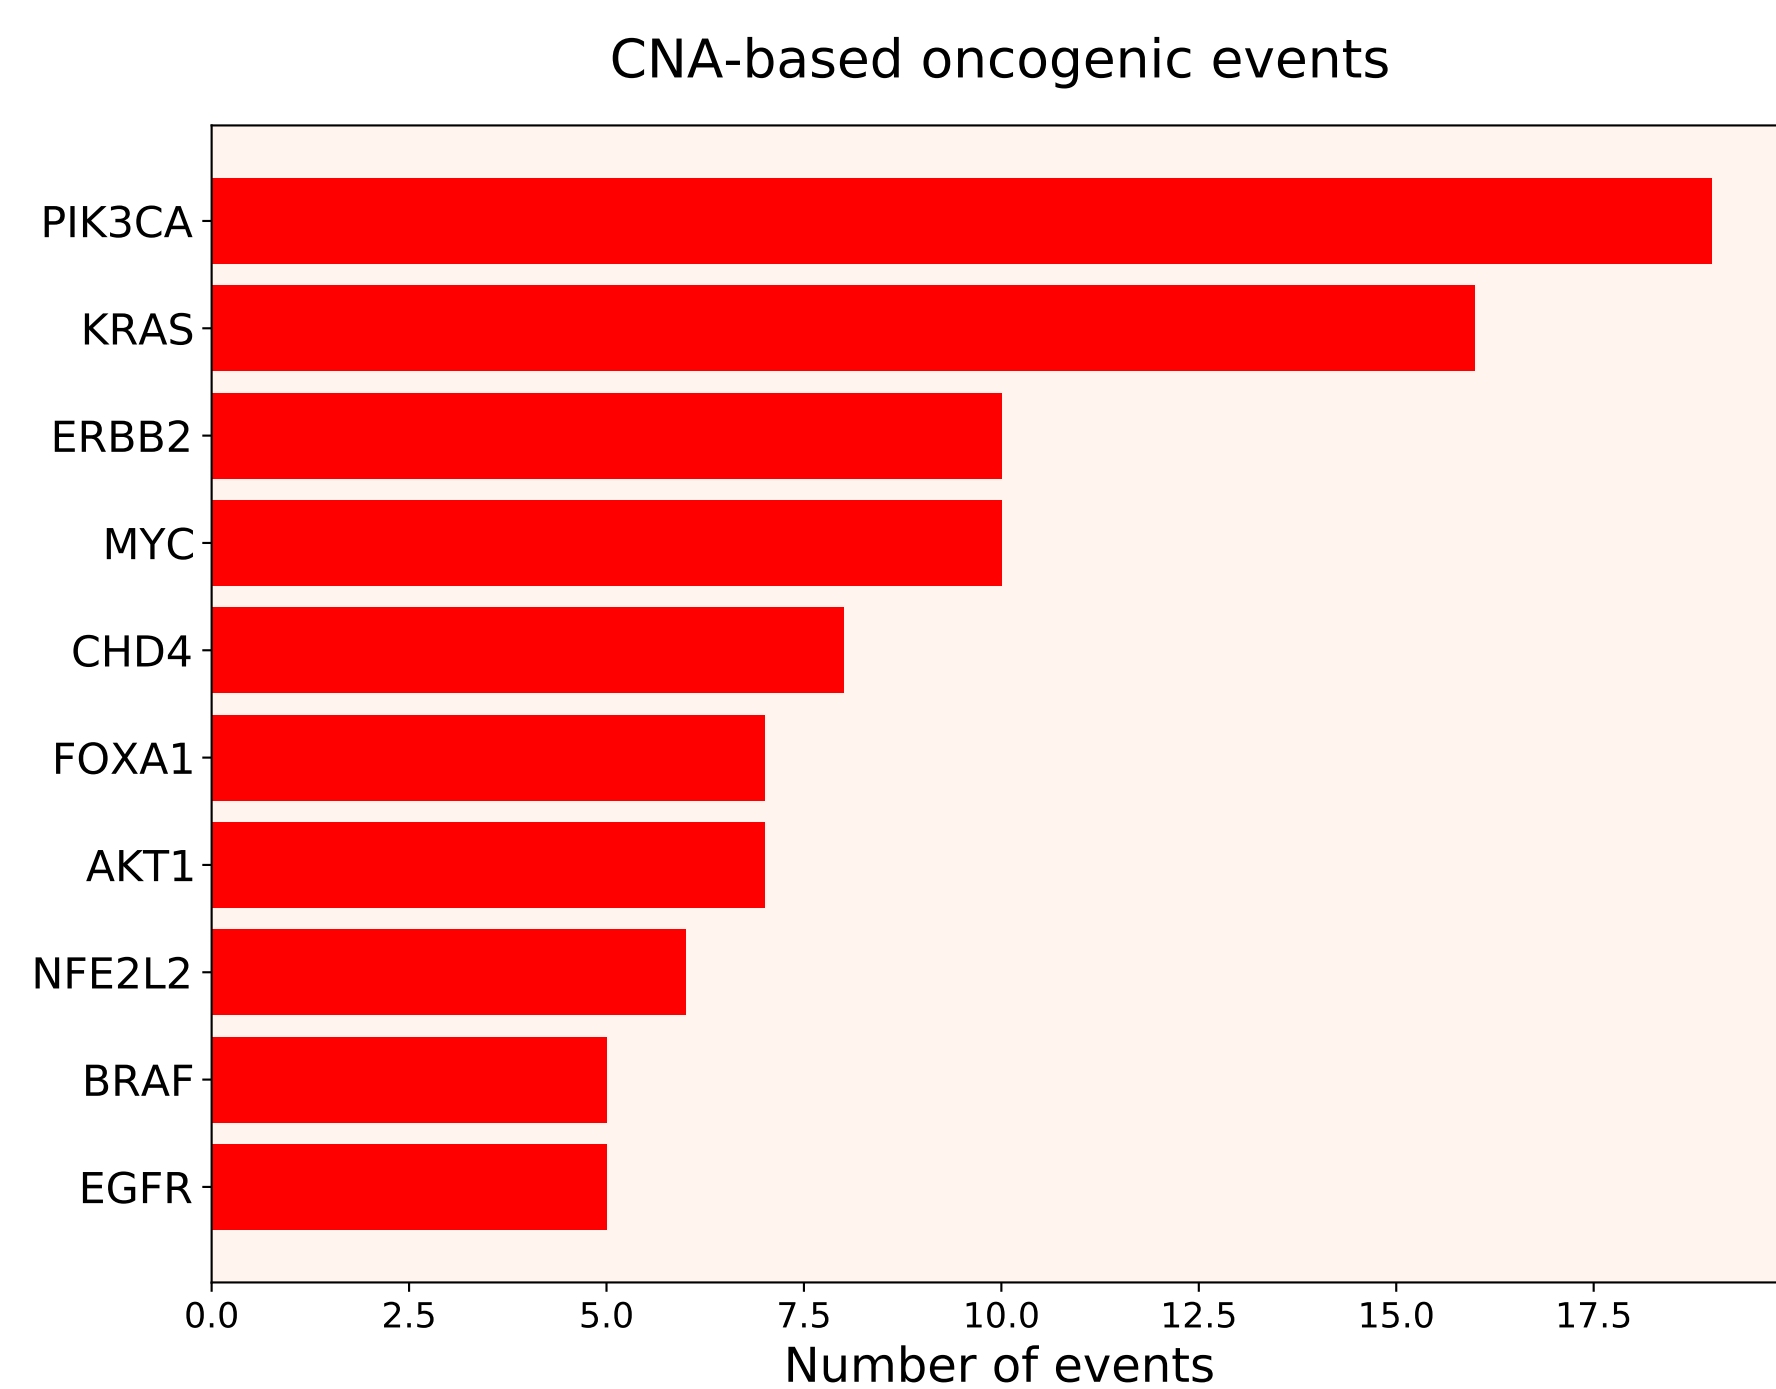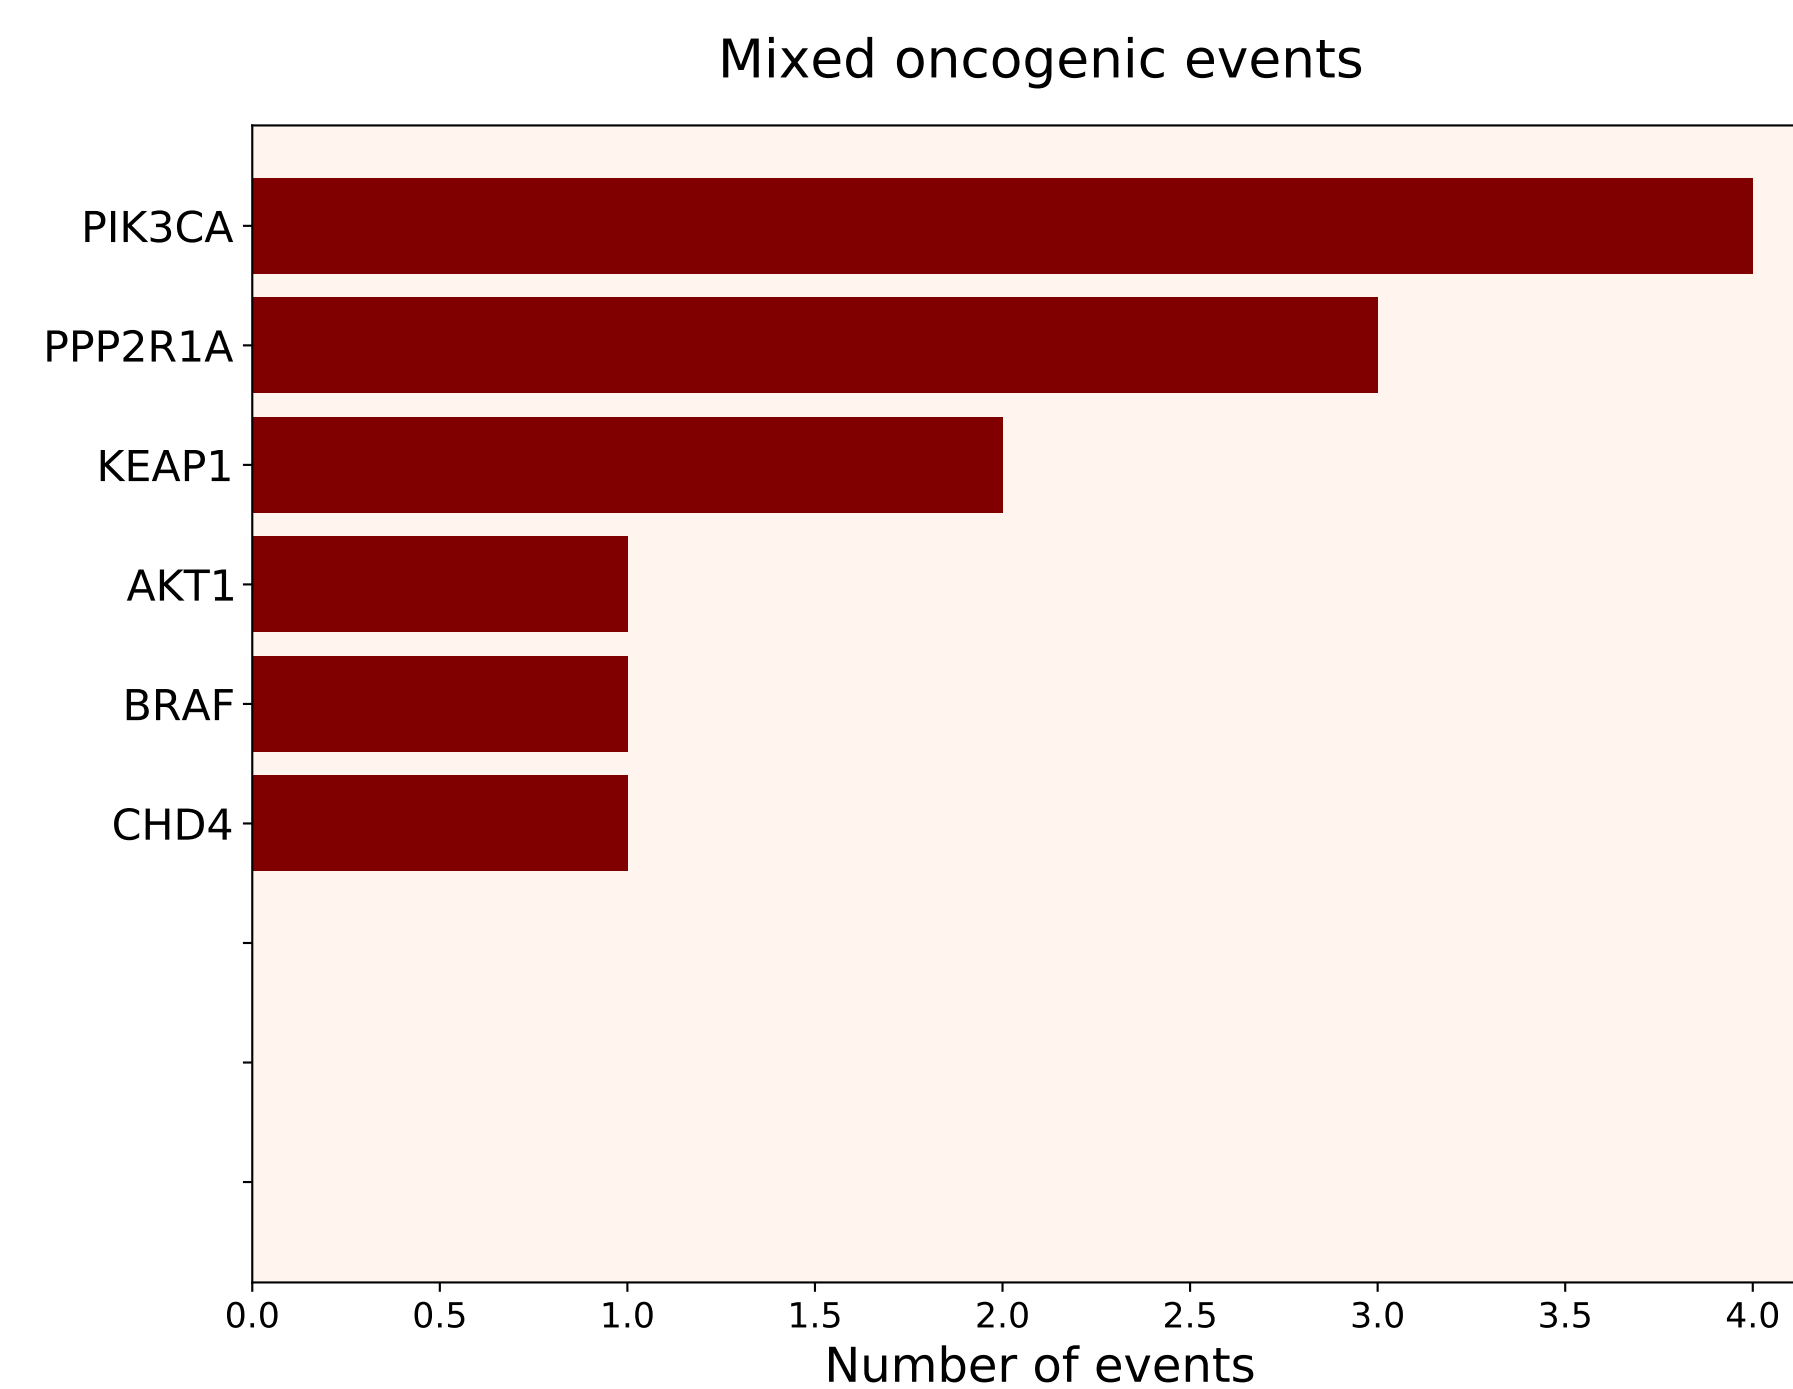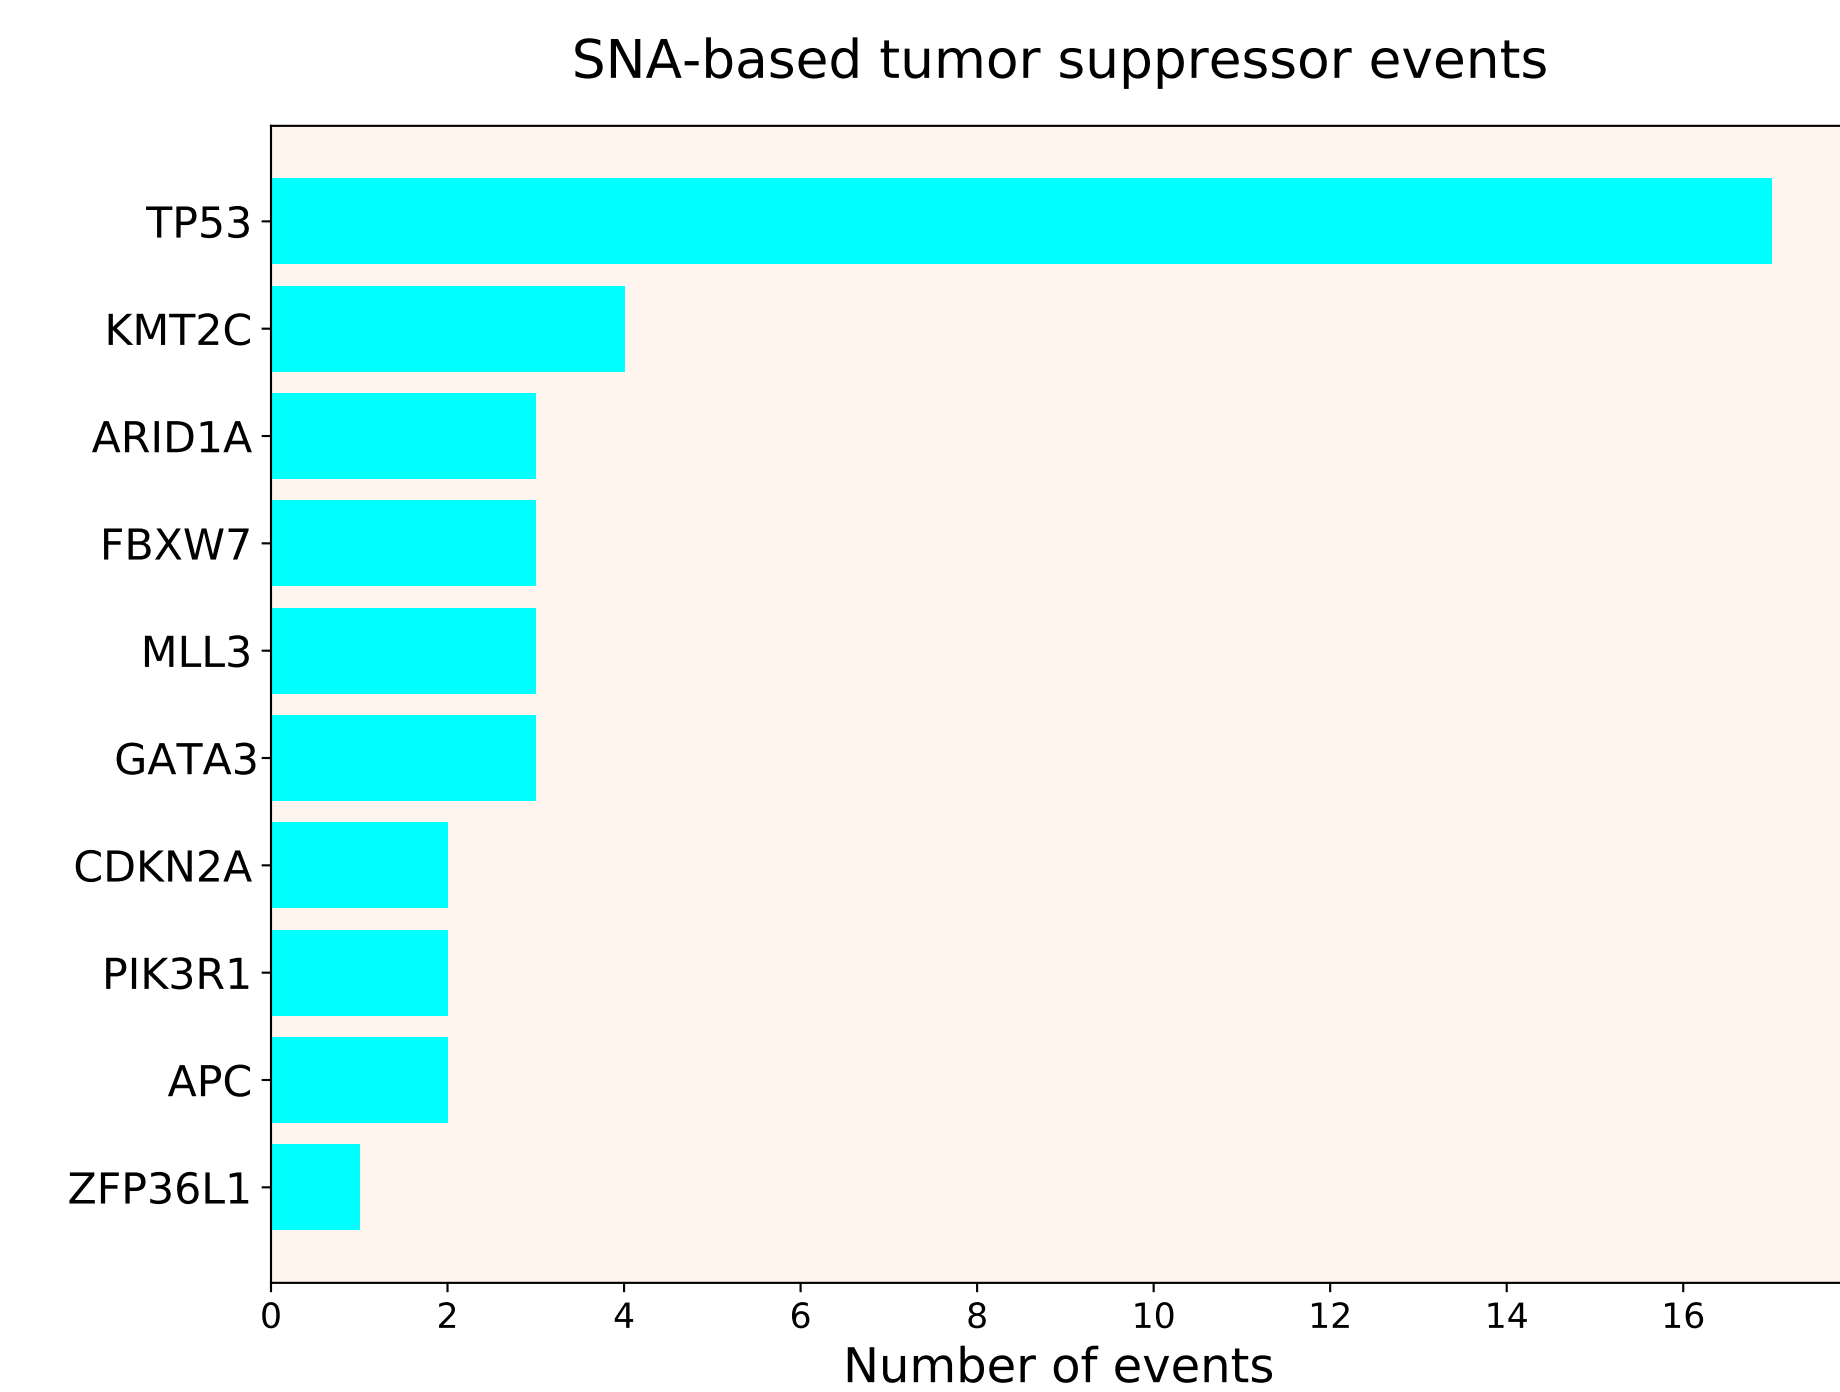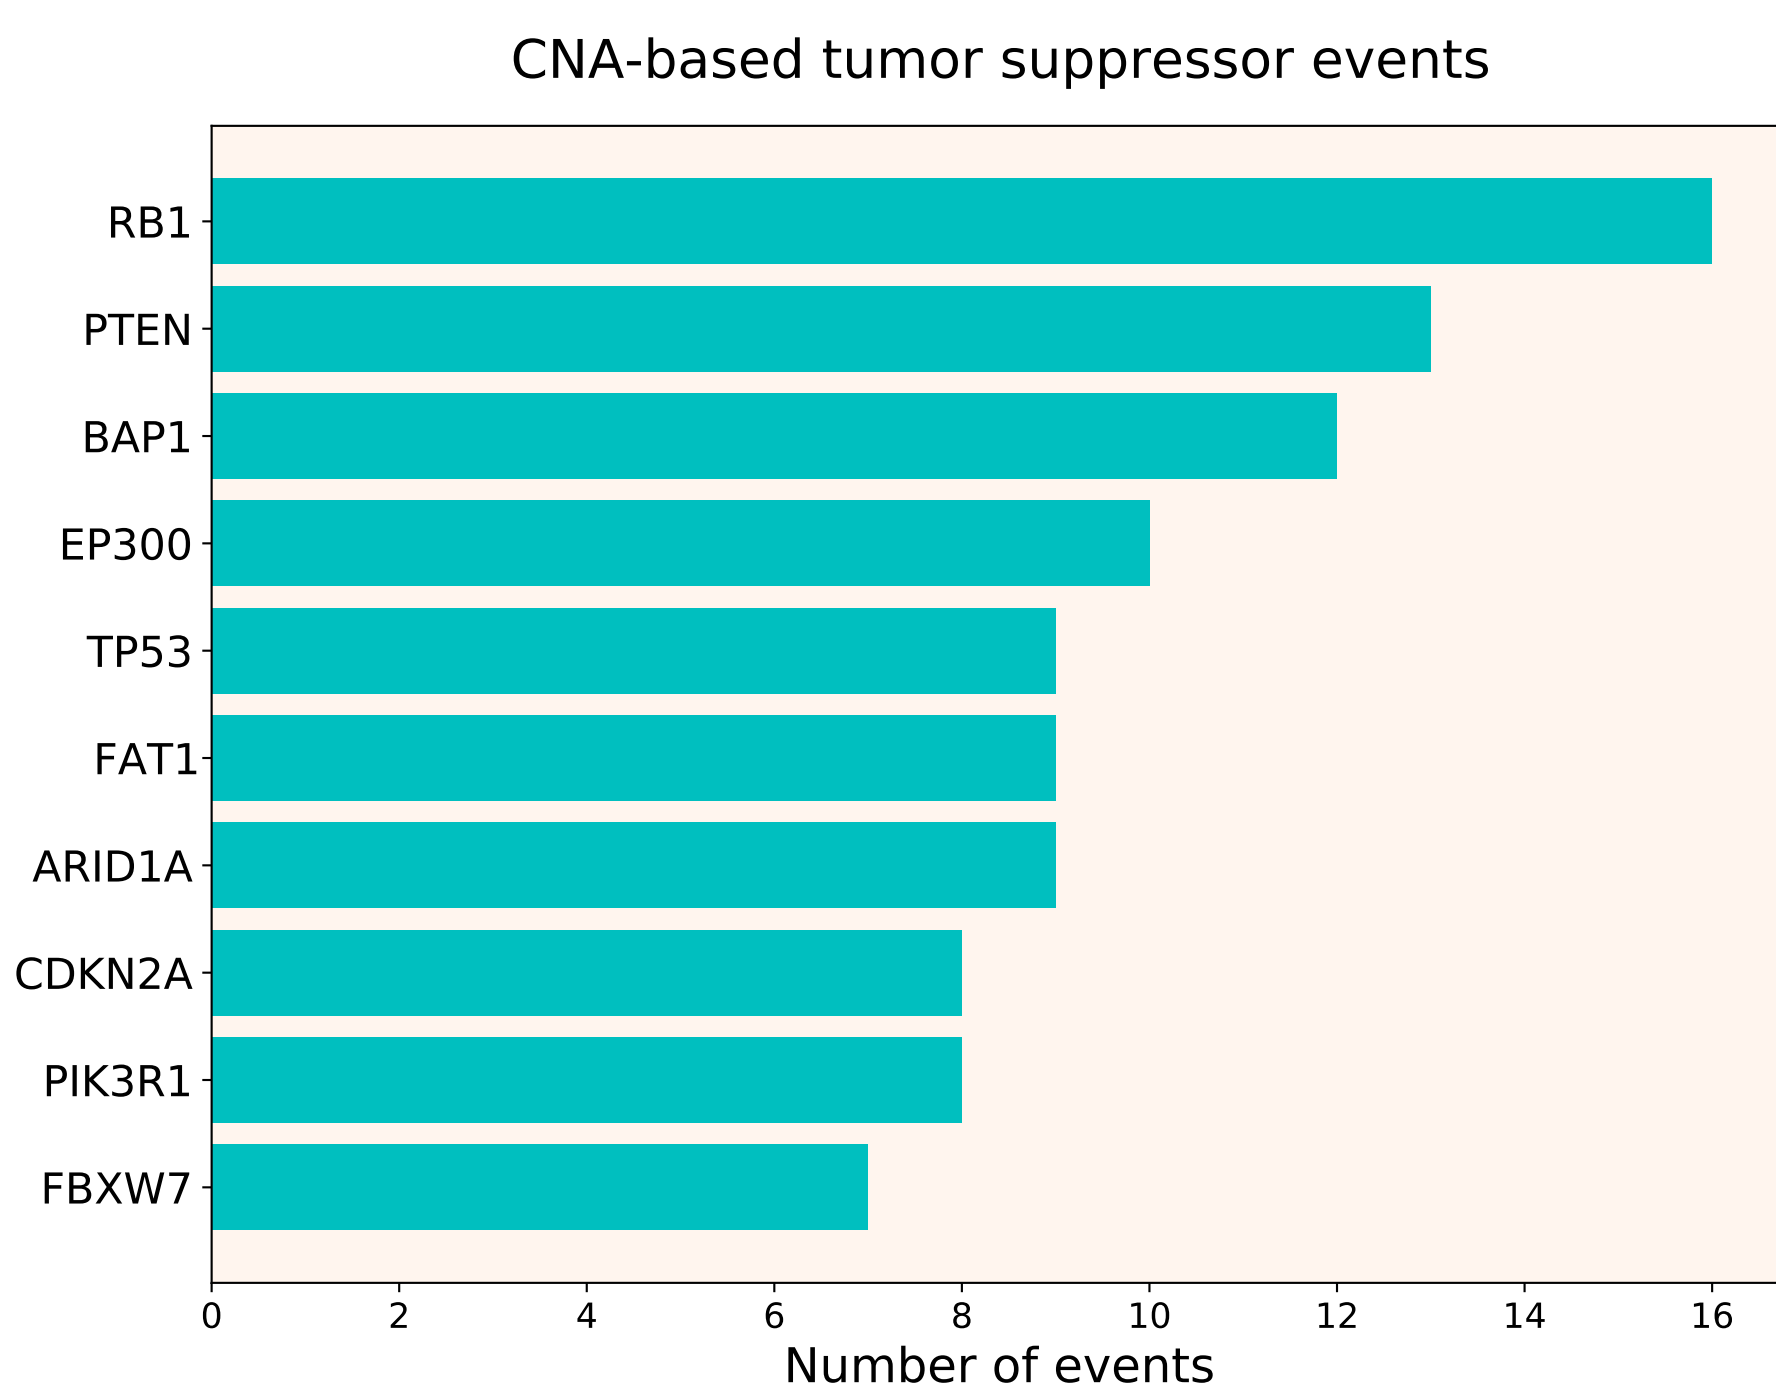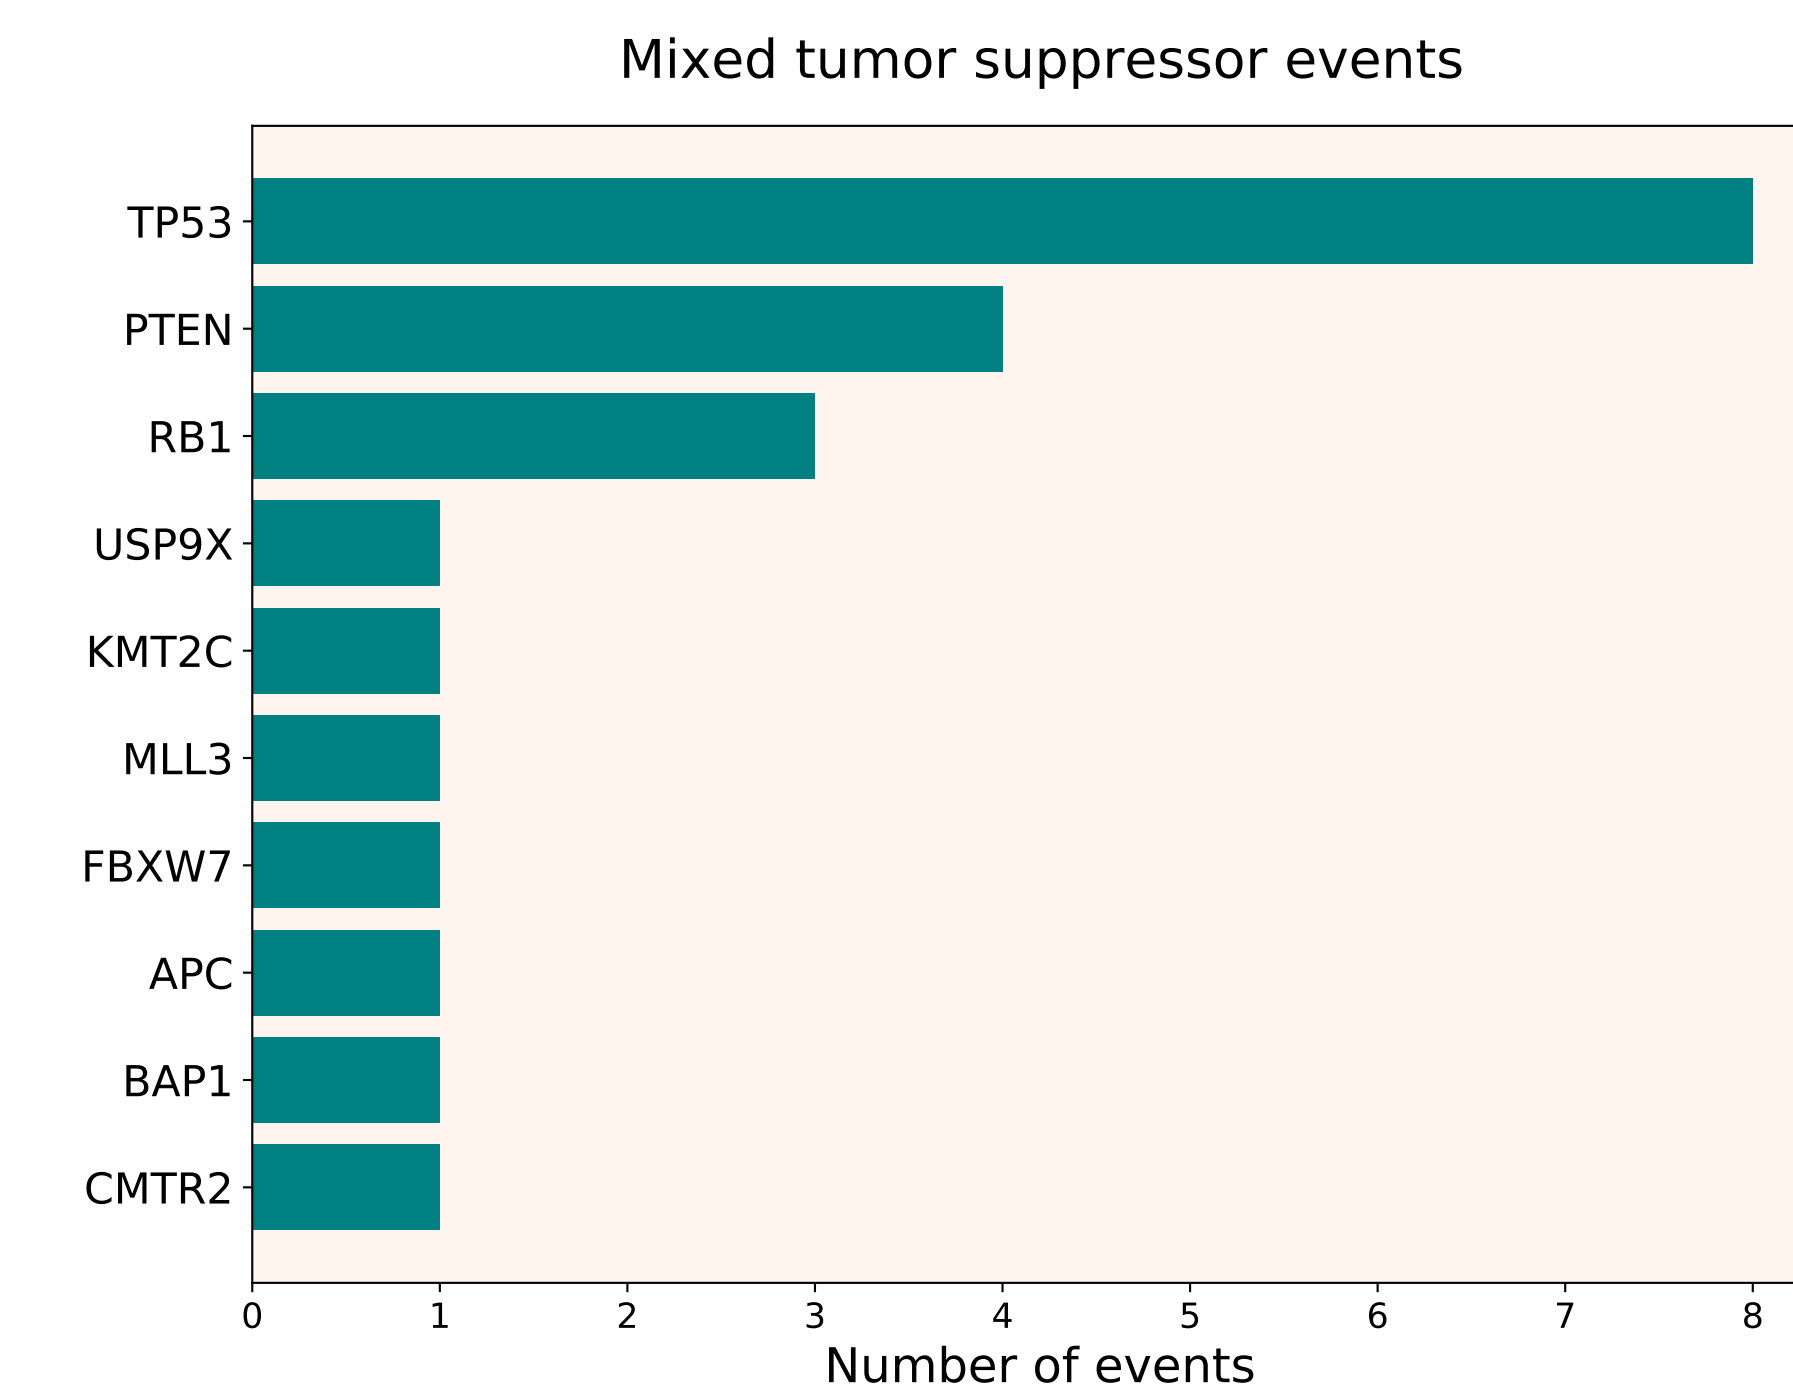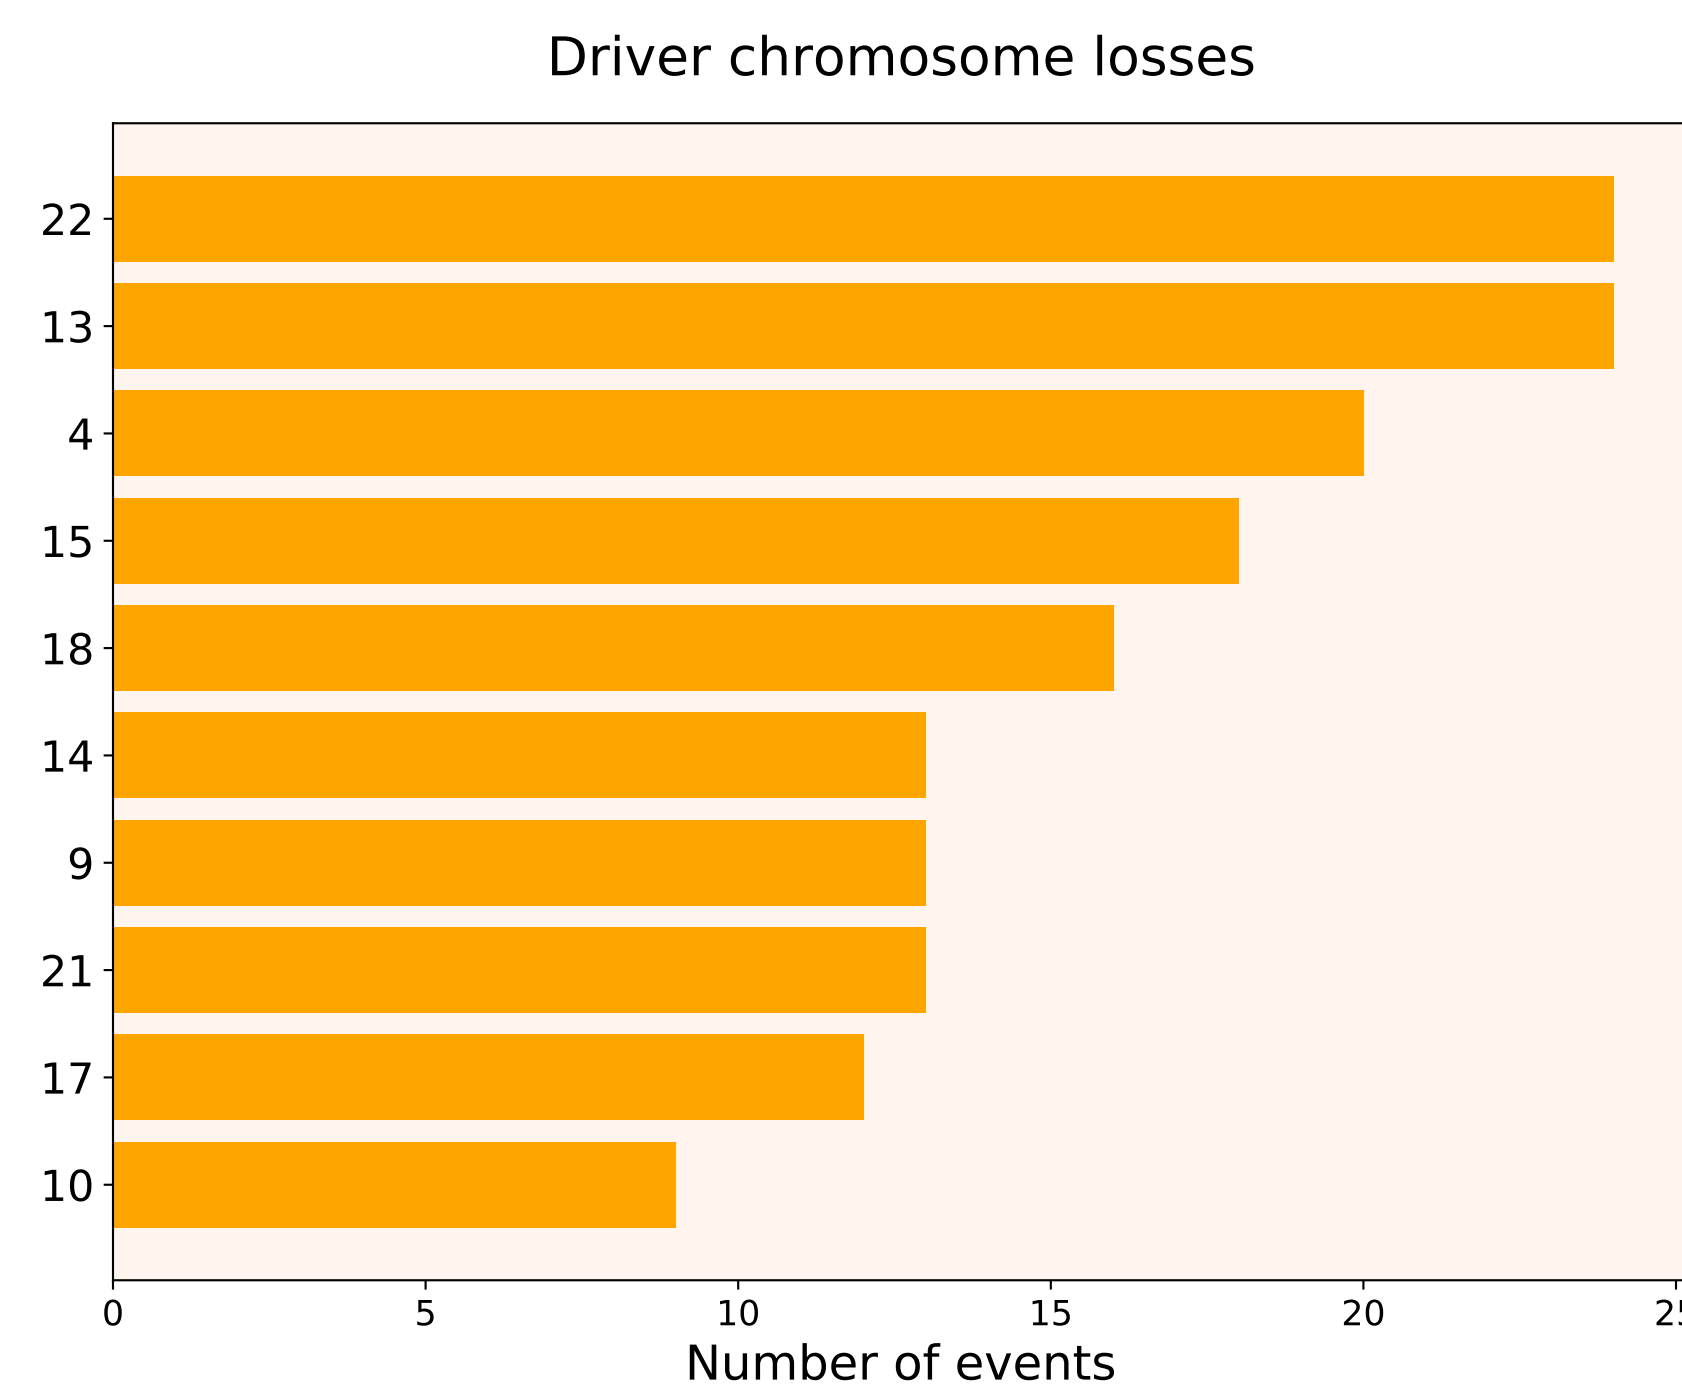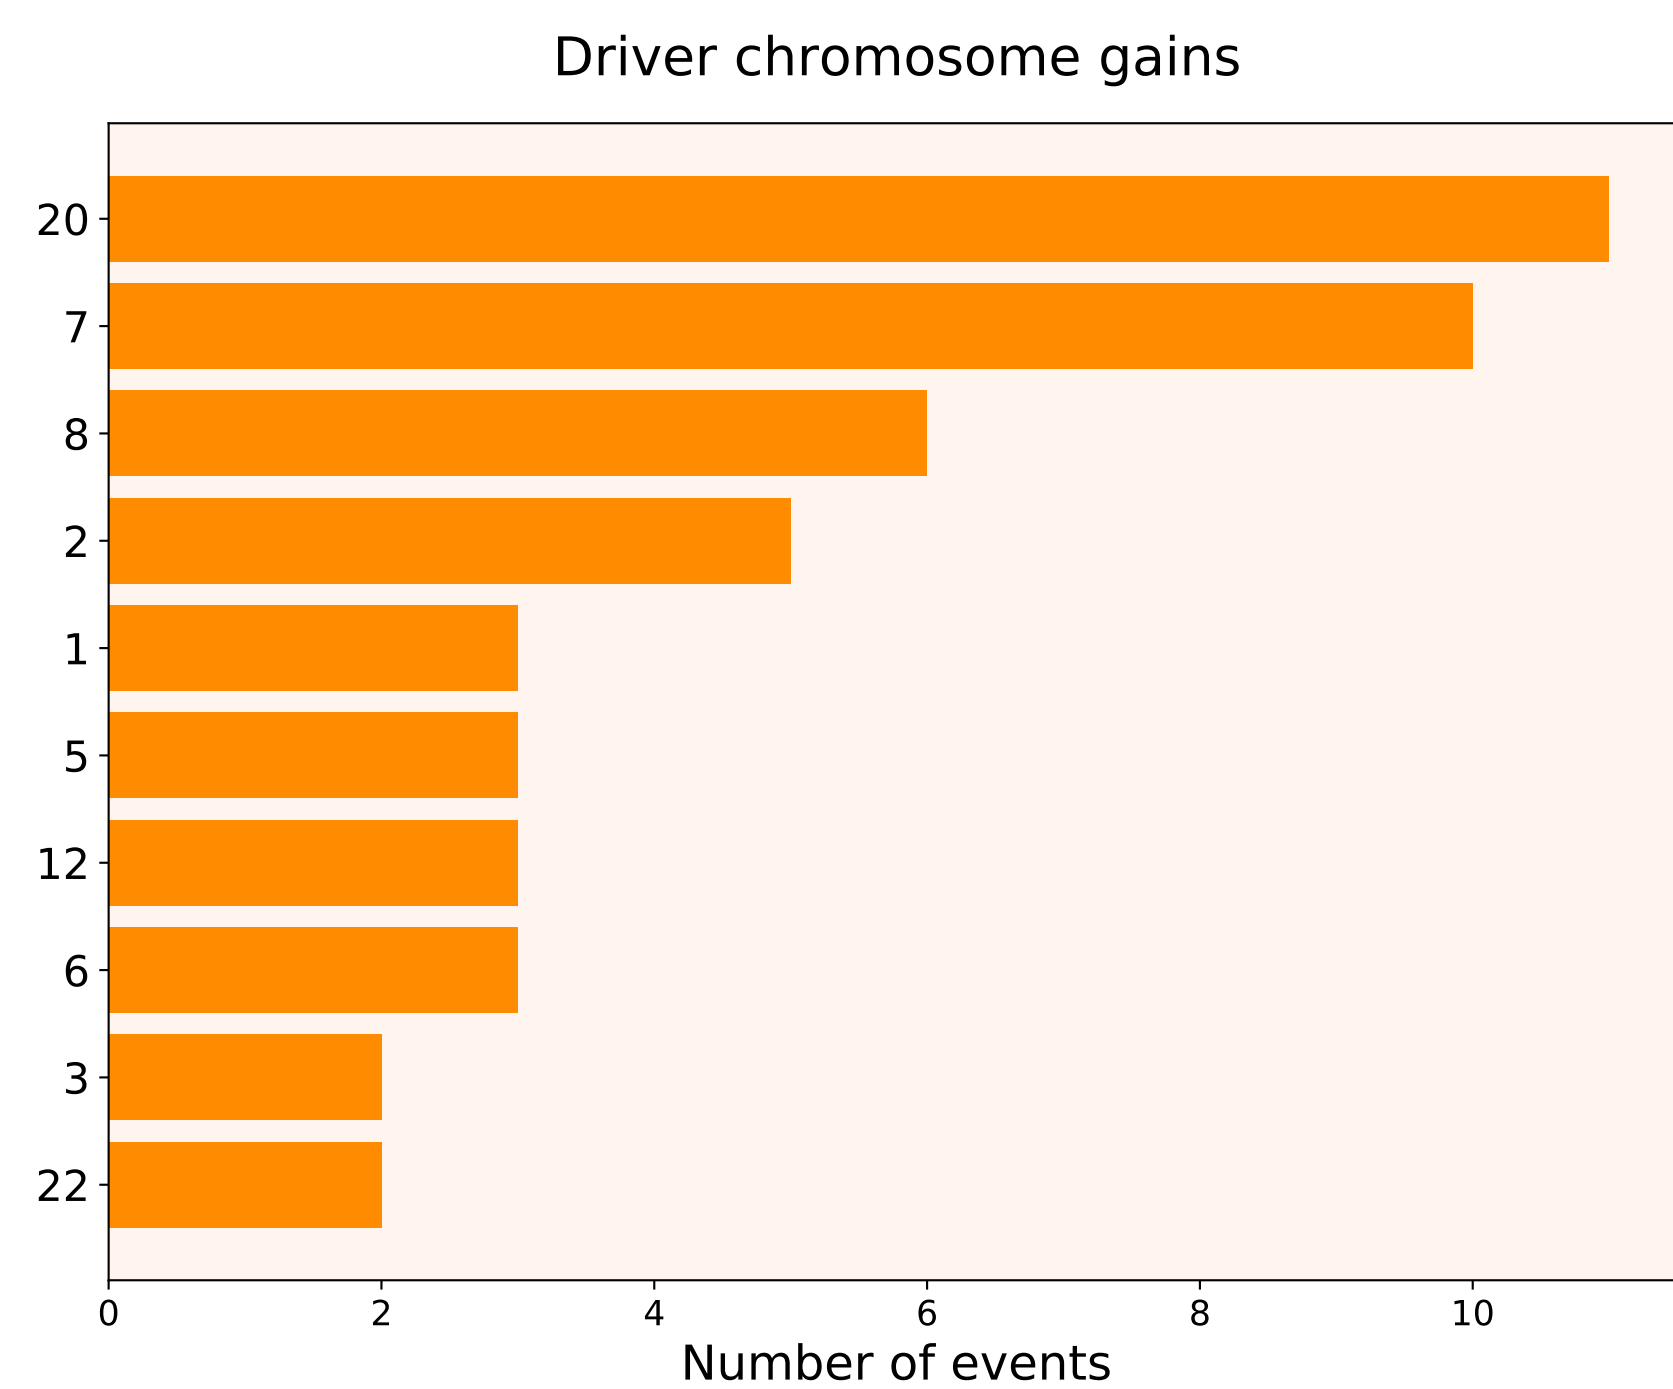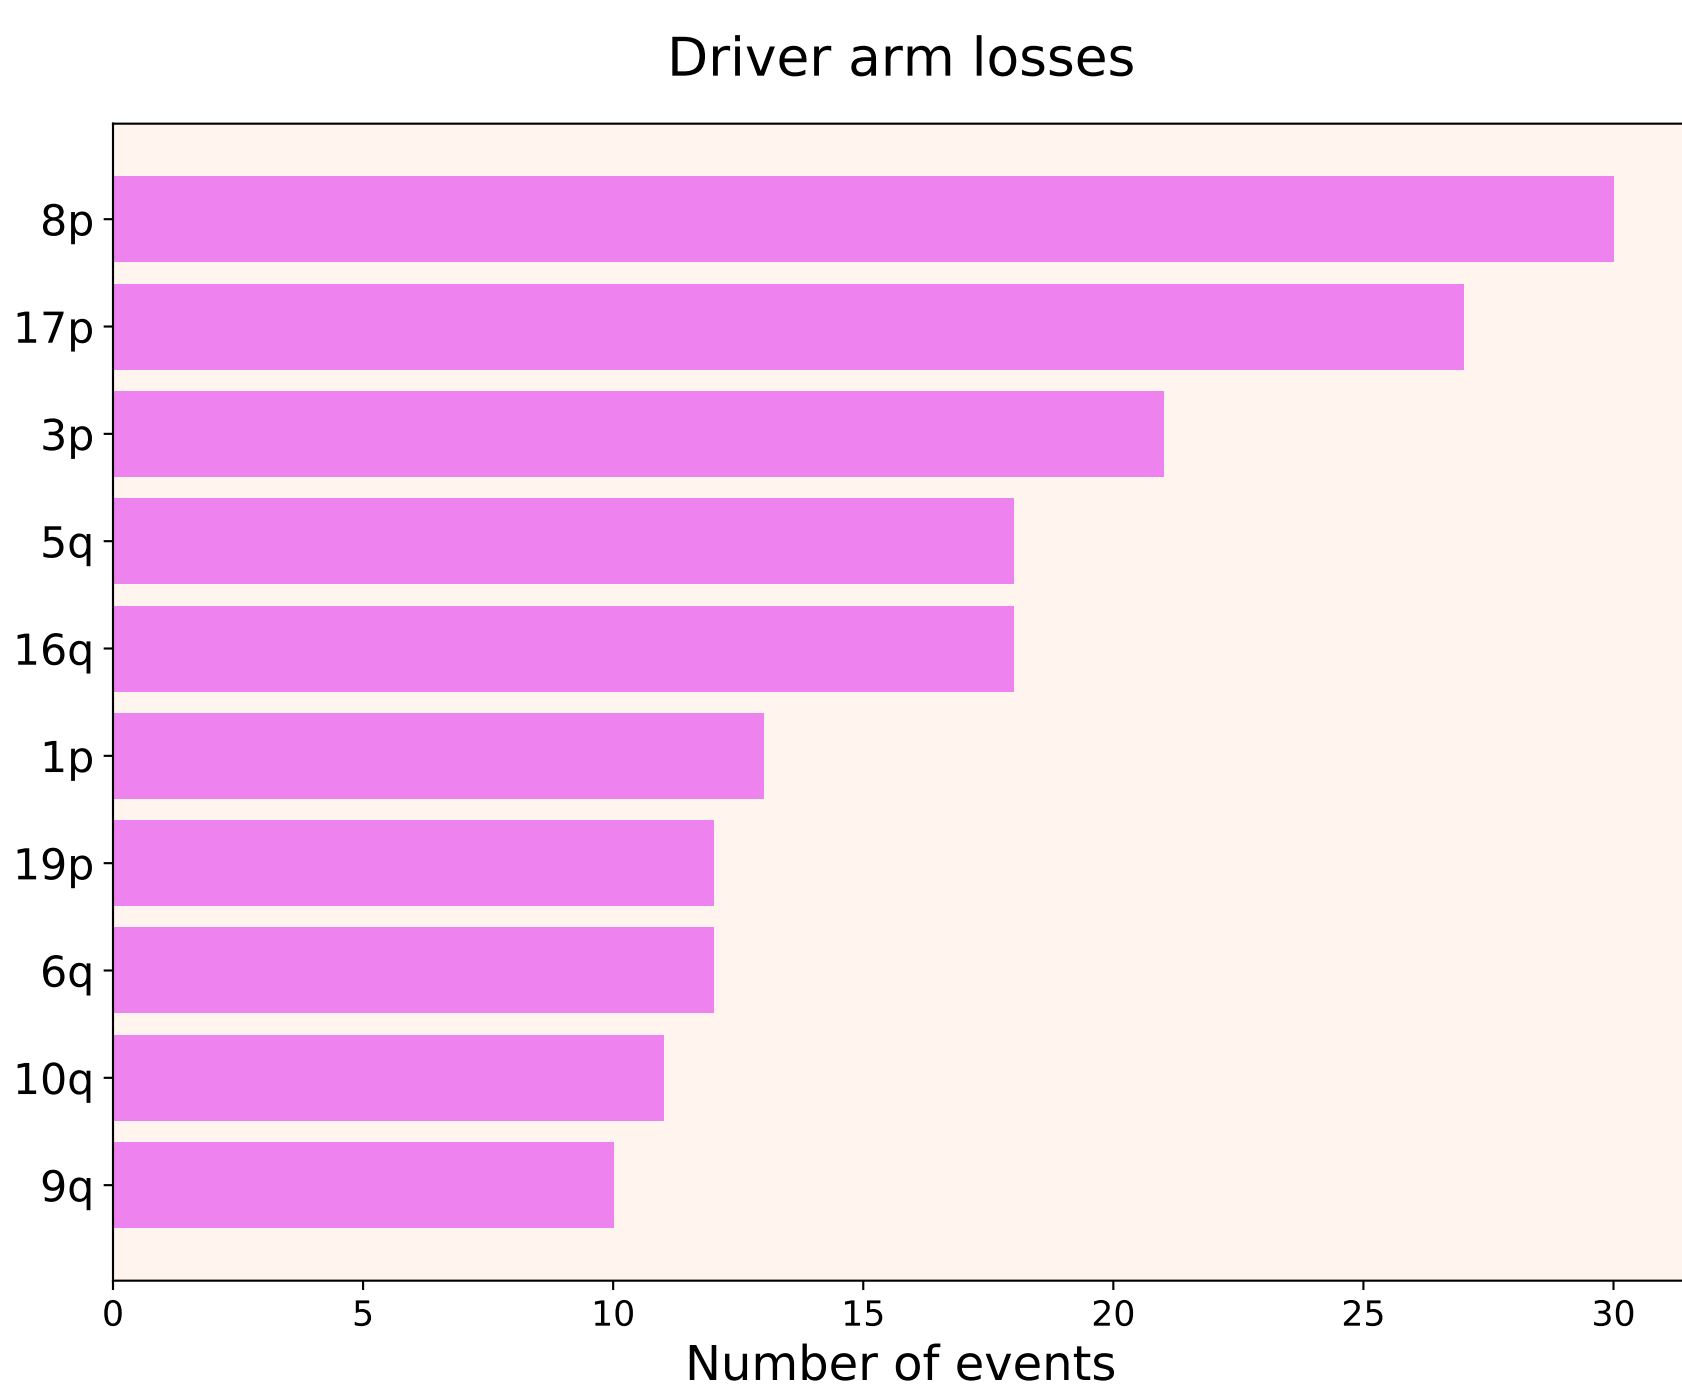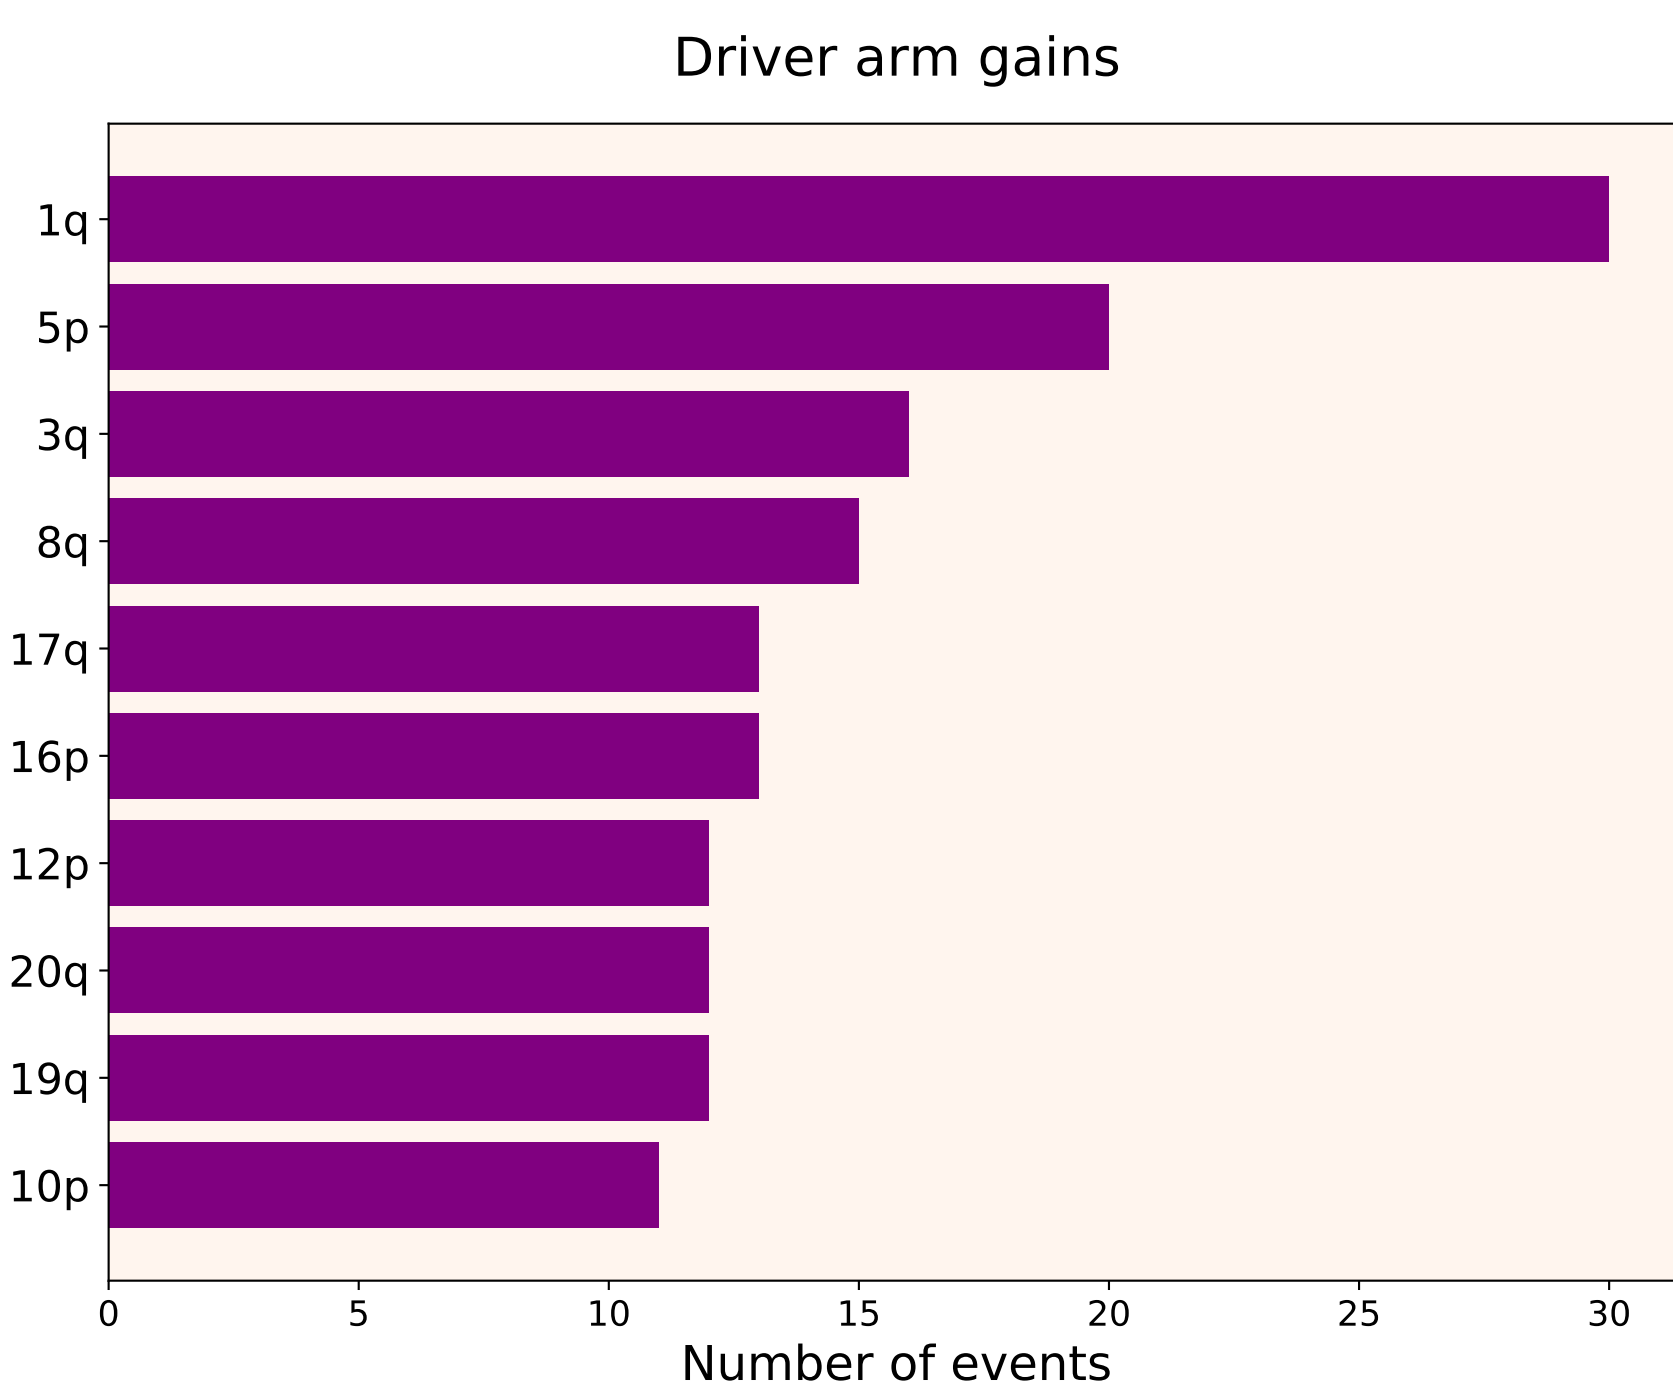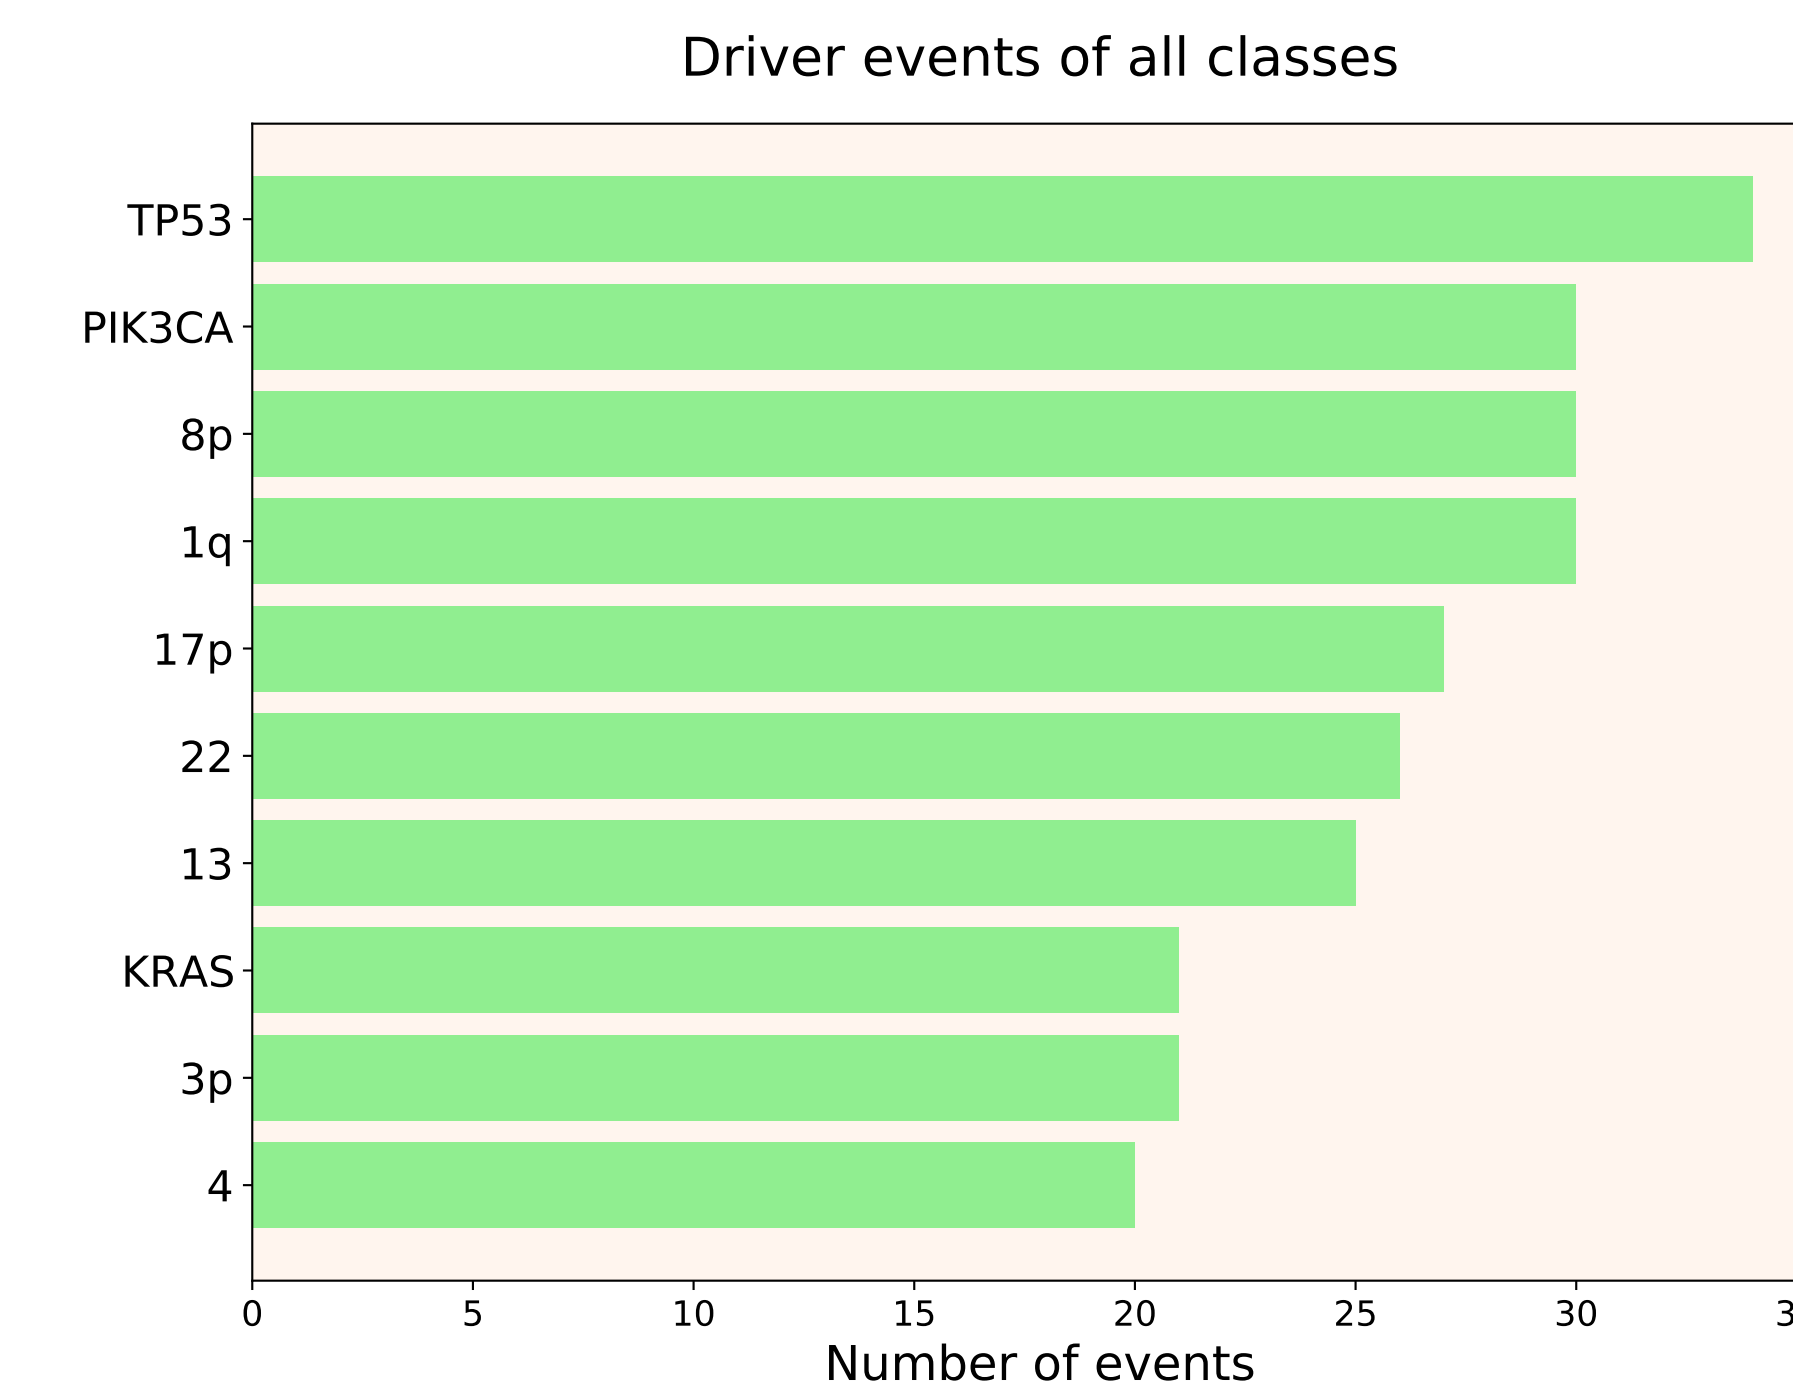

Supplement: Supplemental_Data_S1.zip [file Supplemental_Data_S1.zip]

# PCPG

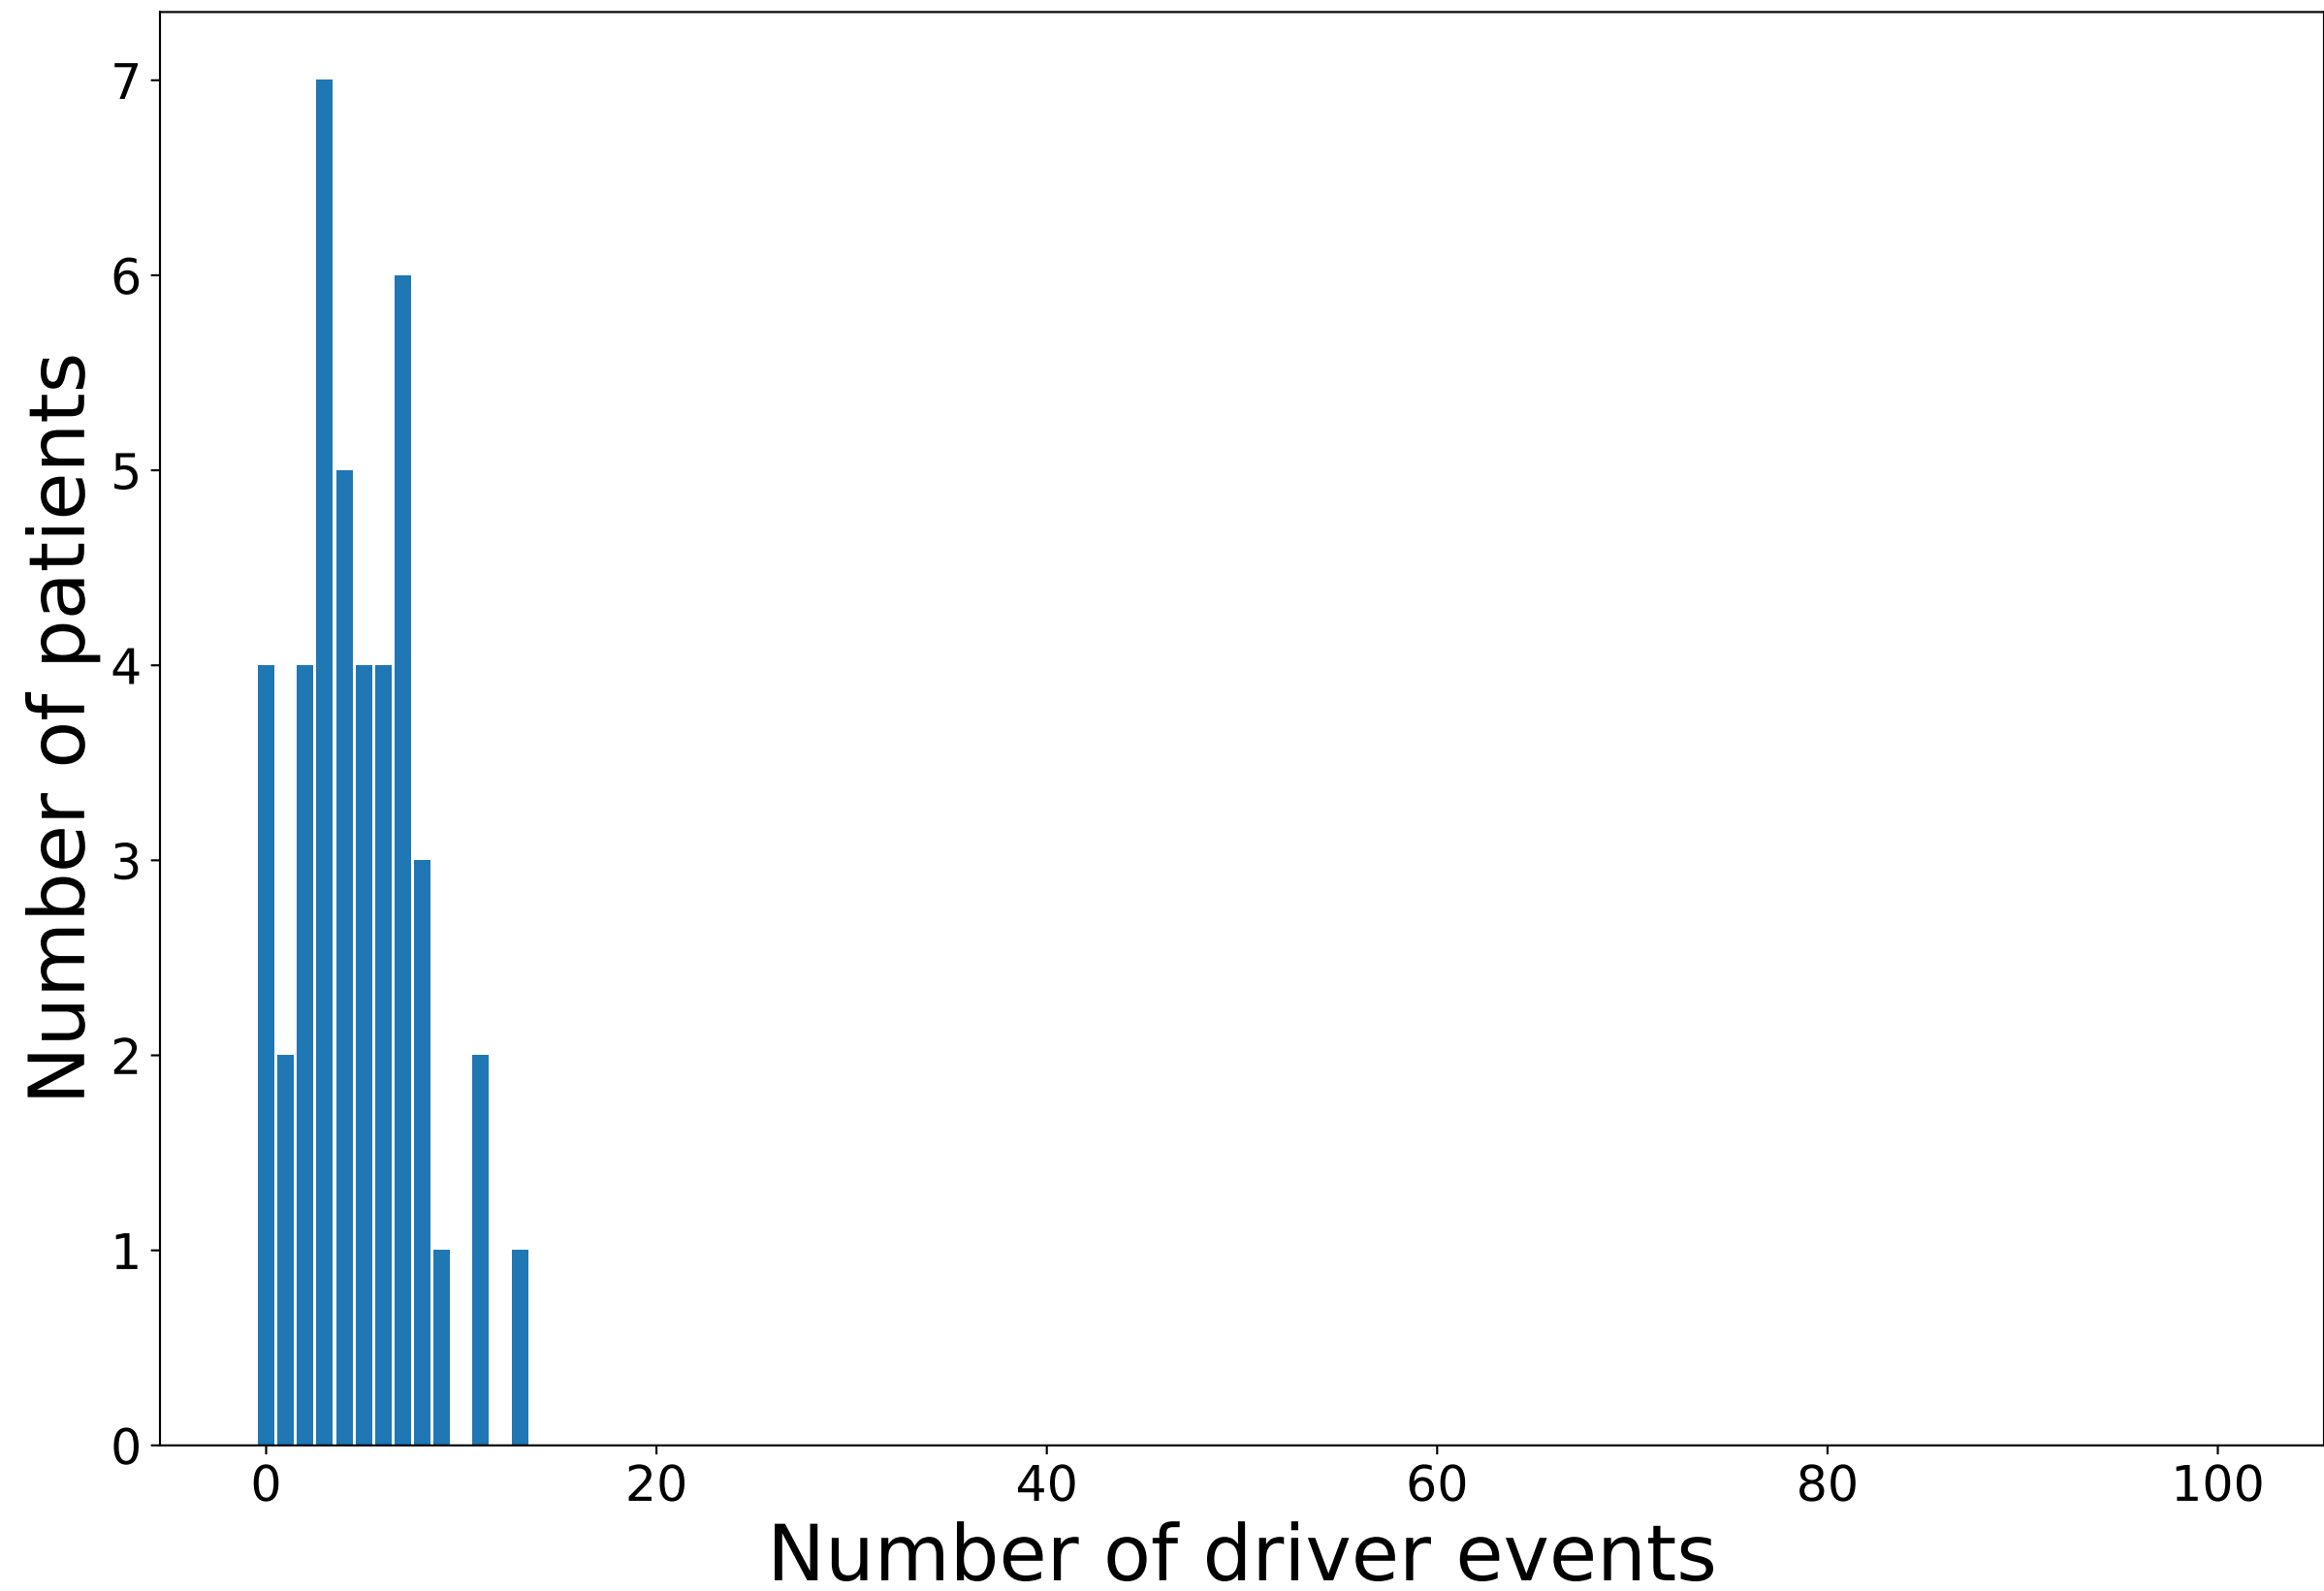

Supplement: Supplemental_Data_S1.zip [file Supplemental_Data_S1.zip]

# KIRC\_FEMALE

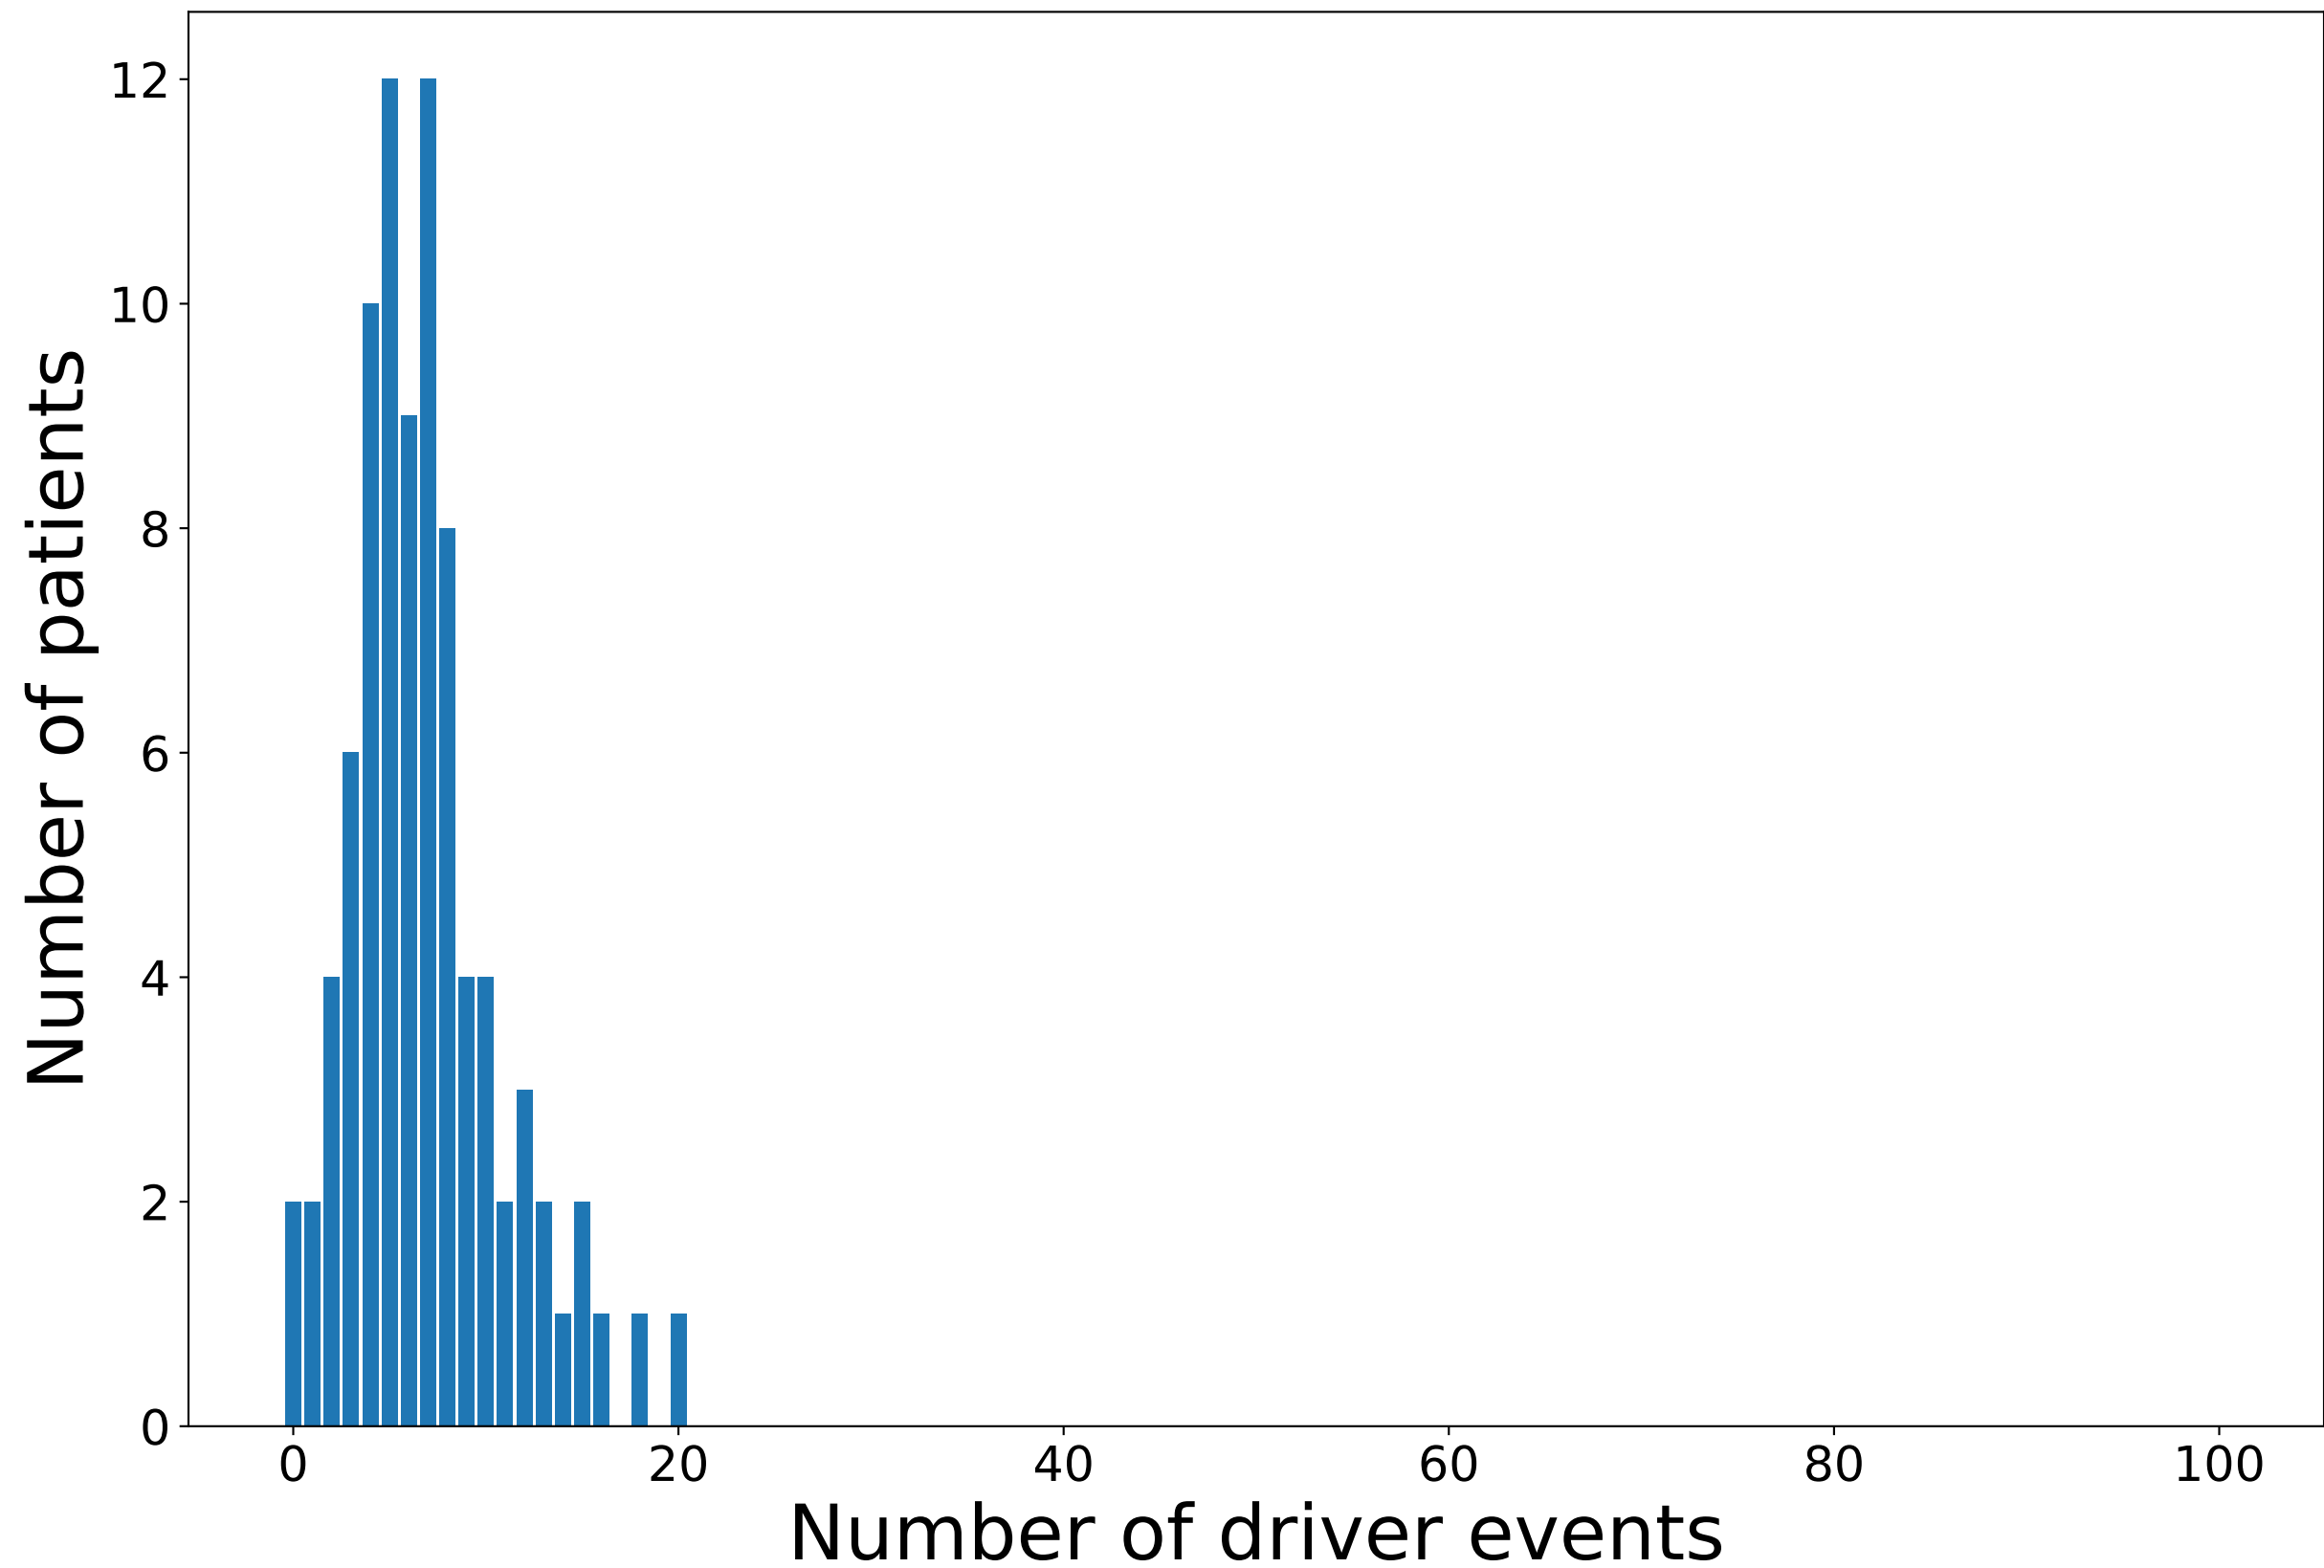

Supplement: Supplemental_Data_S1.zip [file Supplemental_Data_S1.zip]

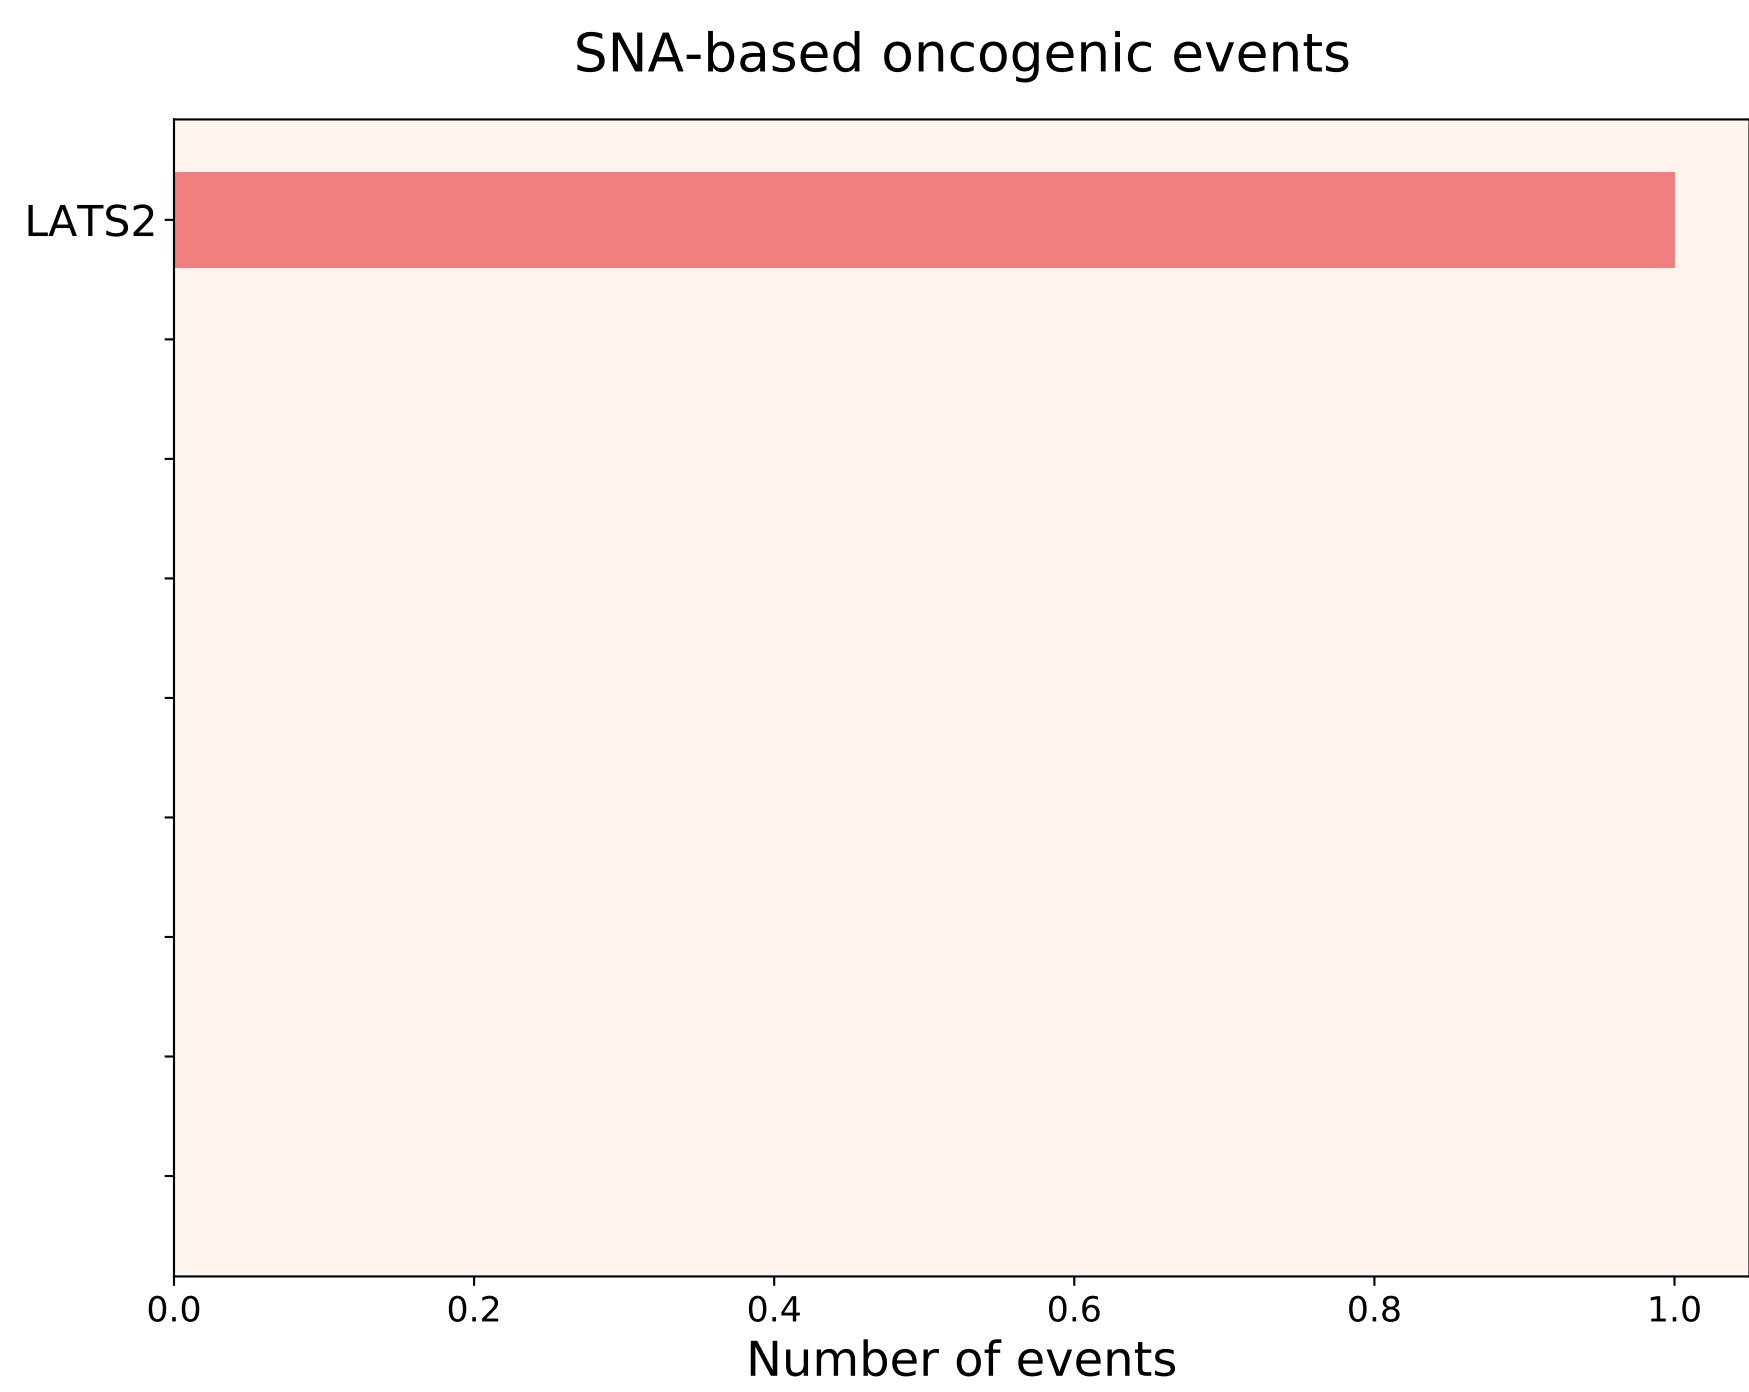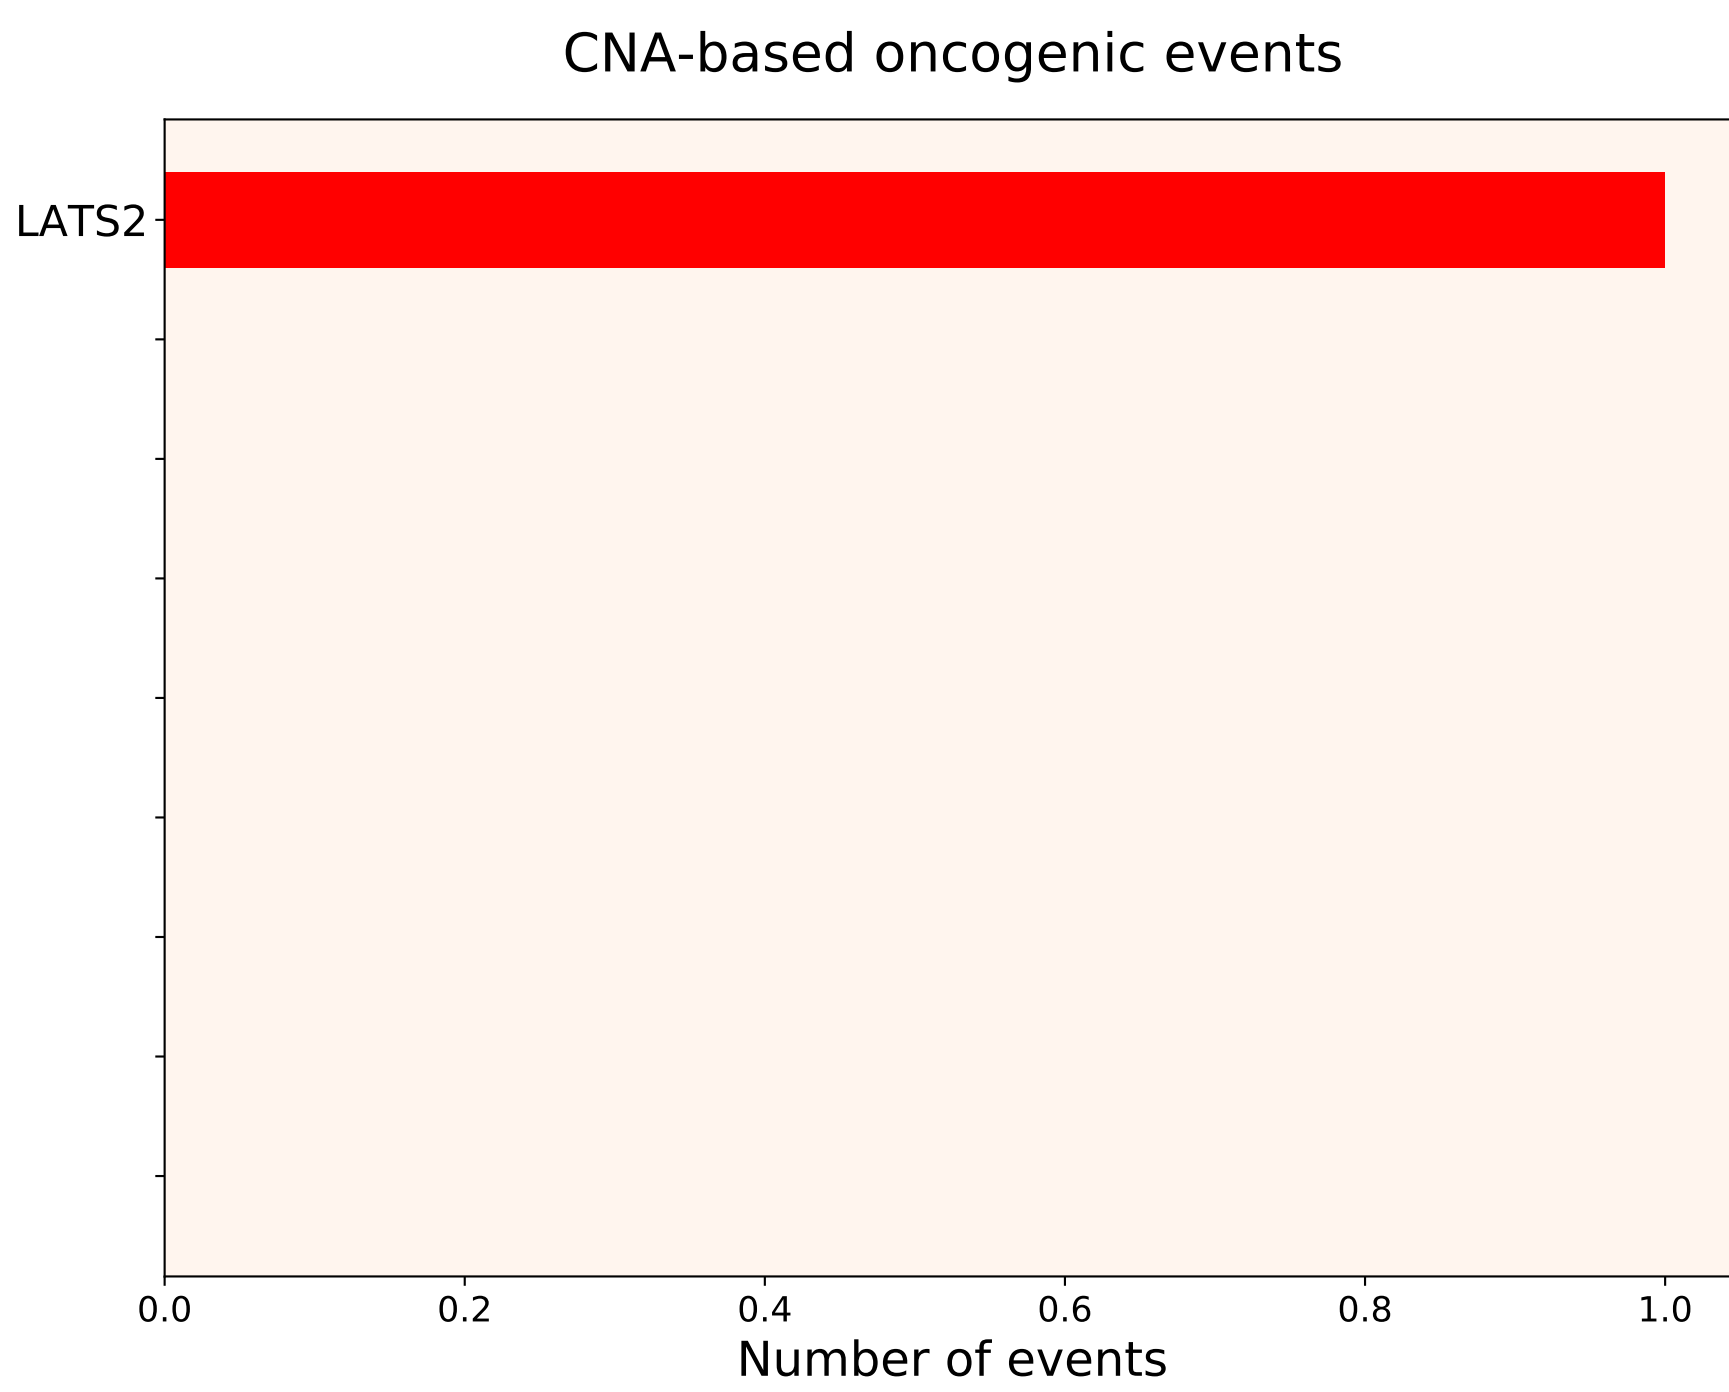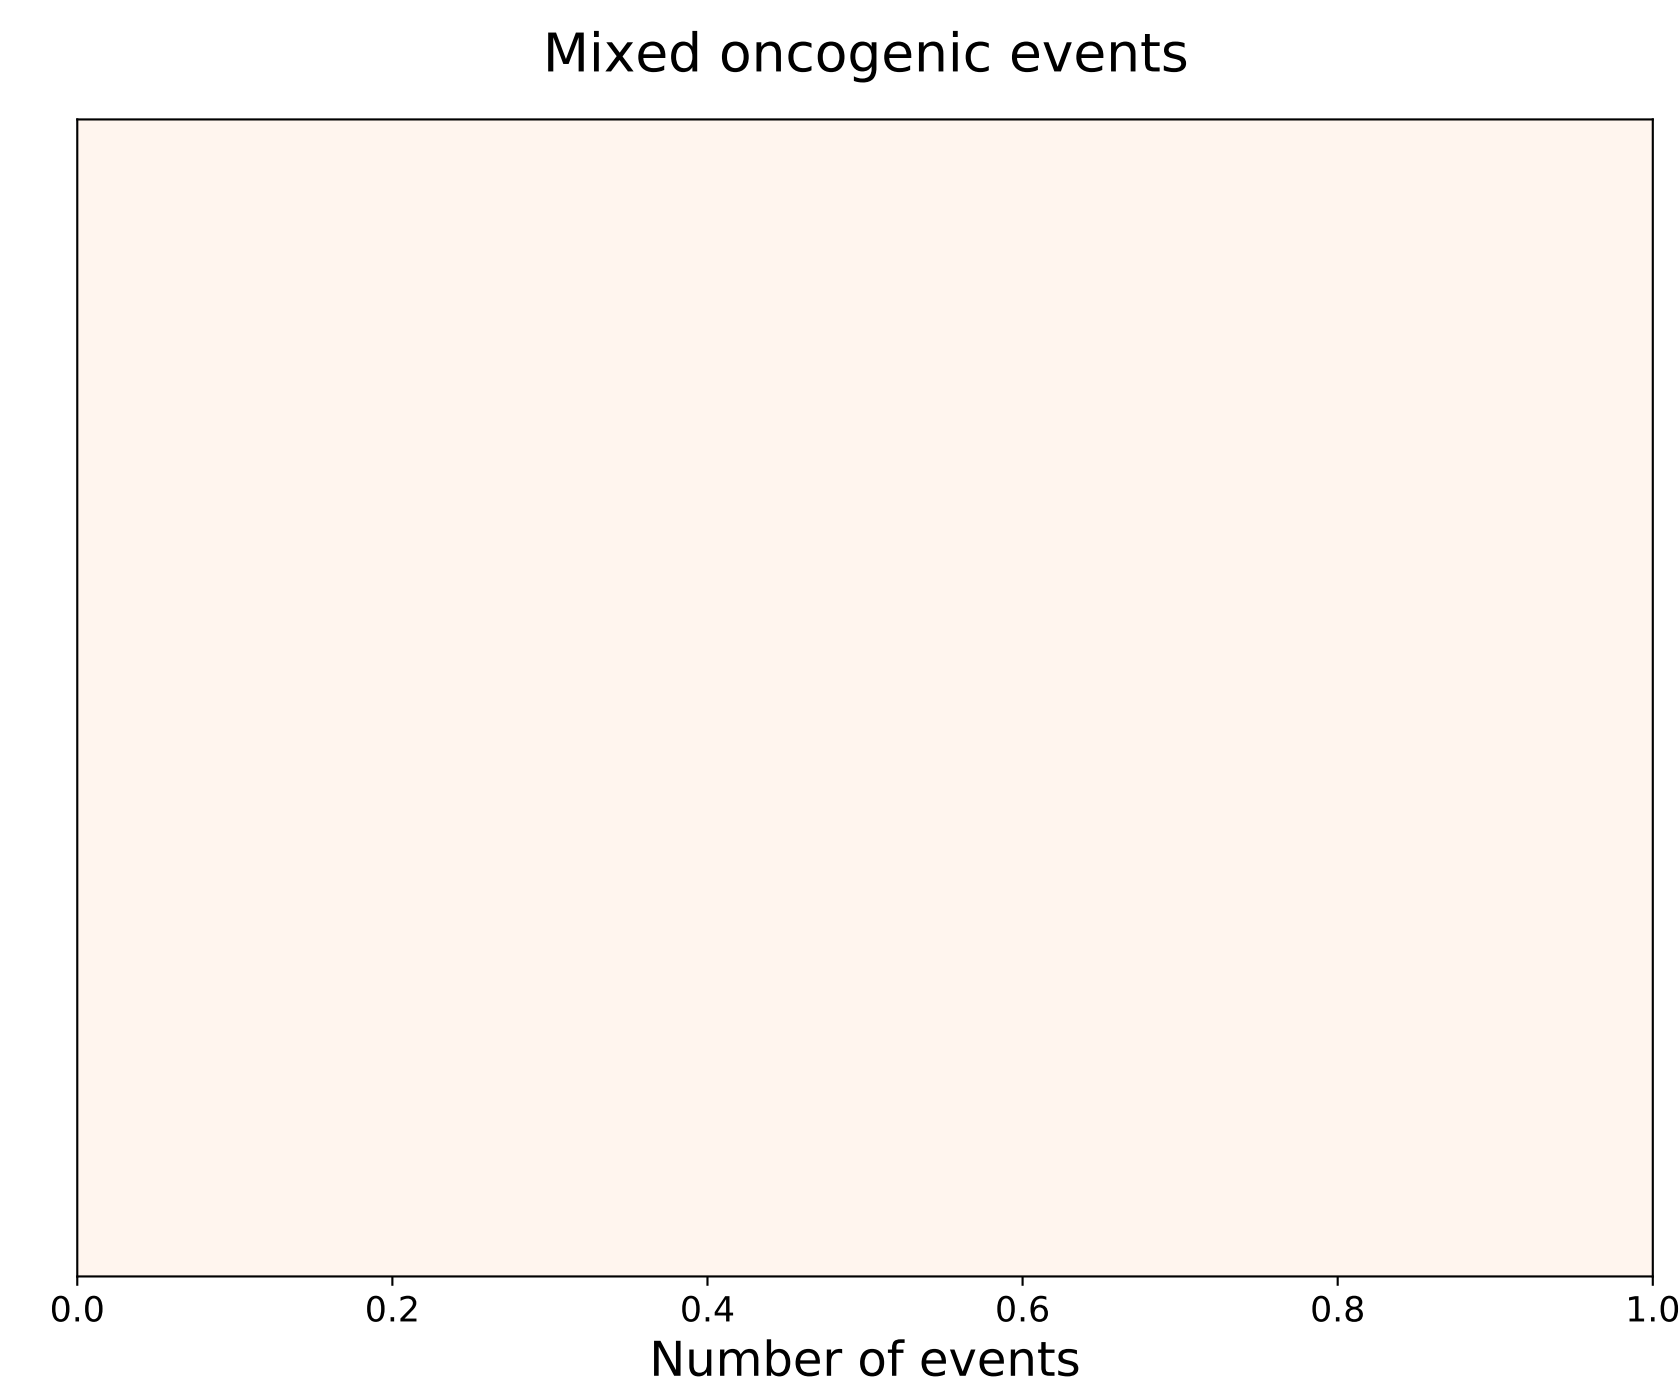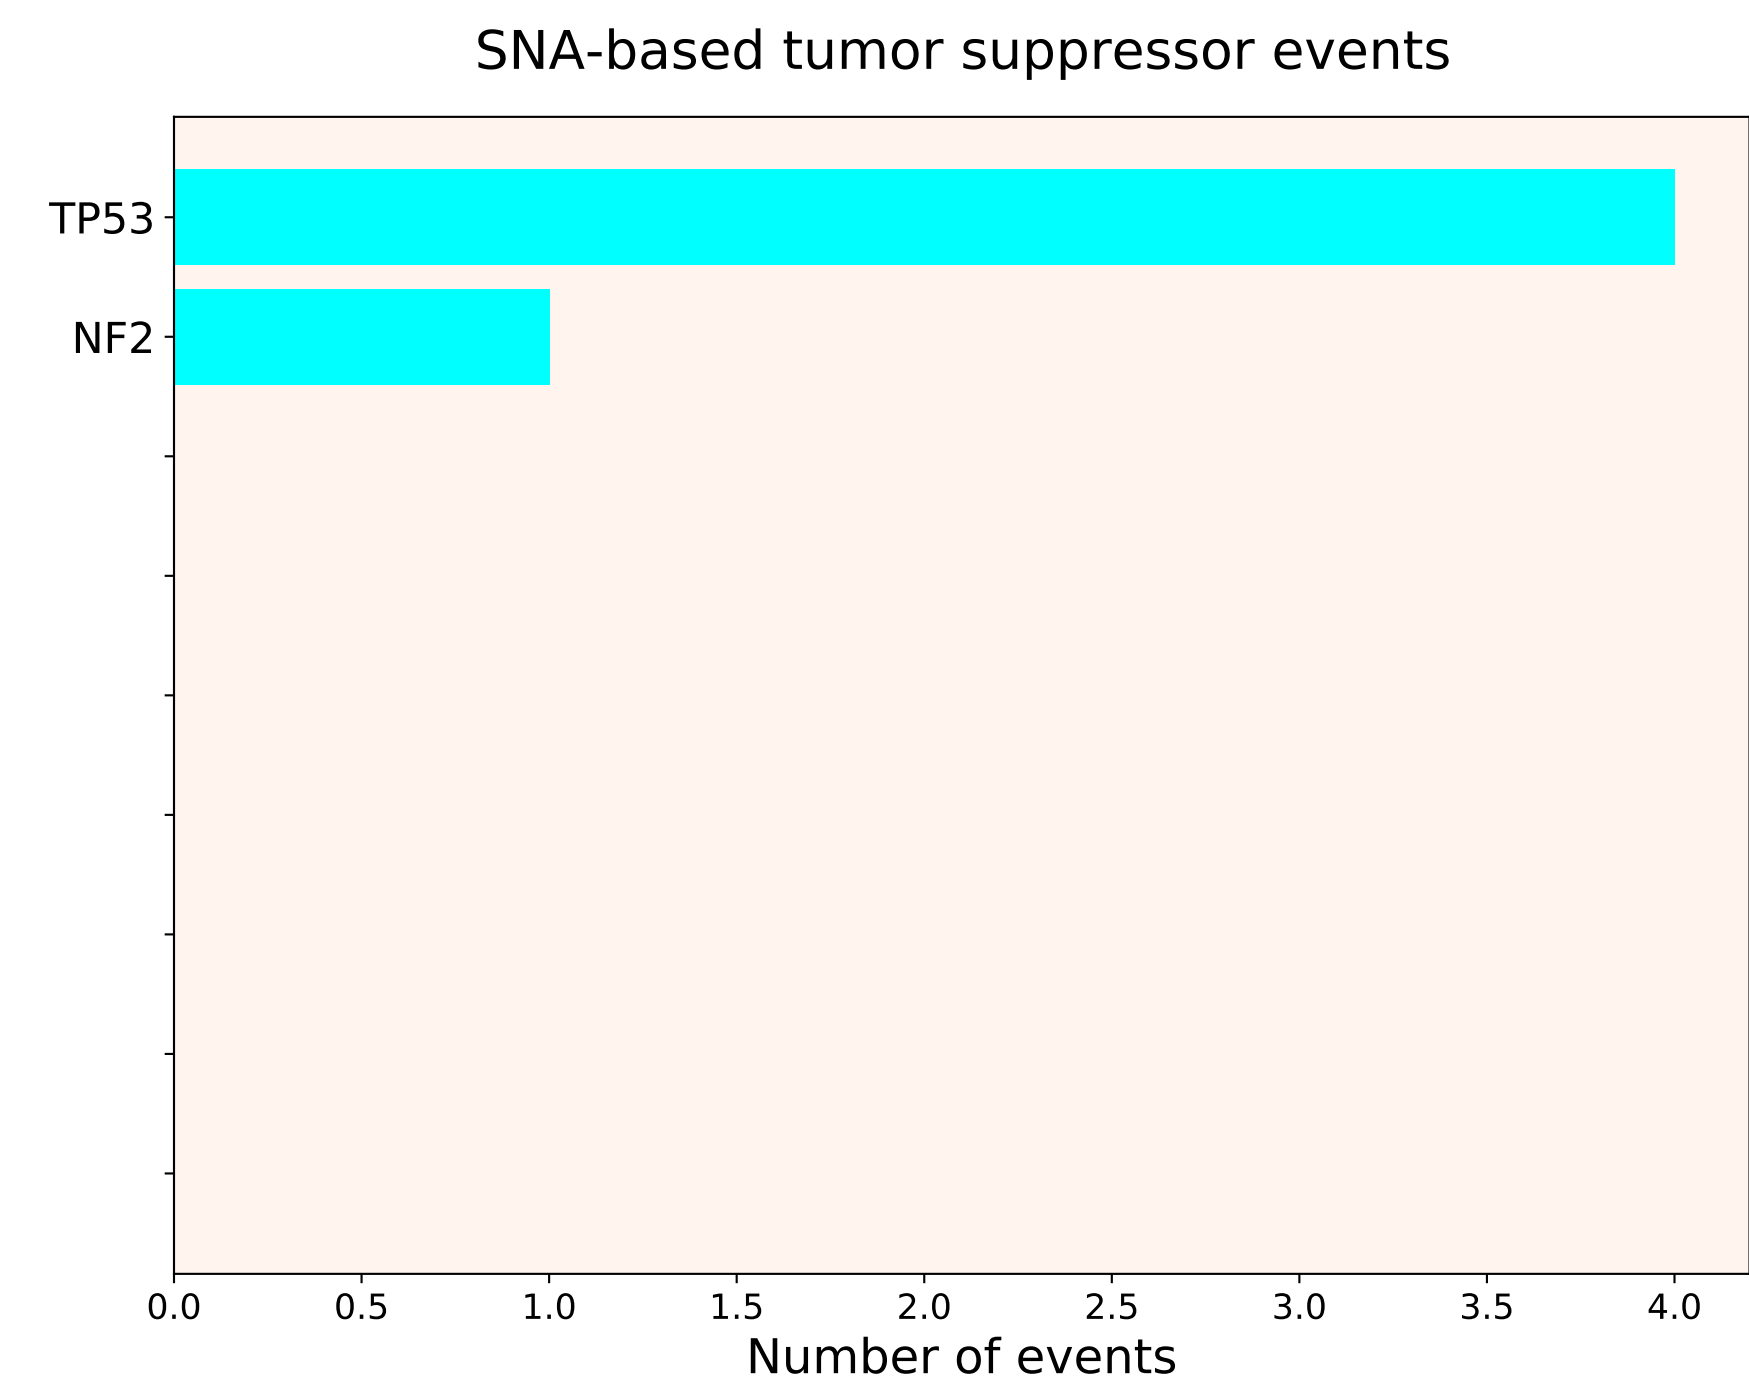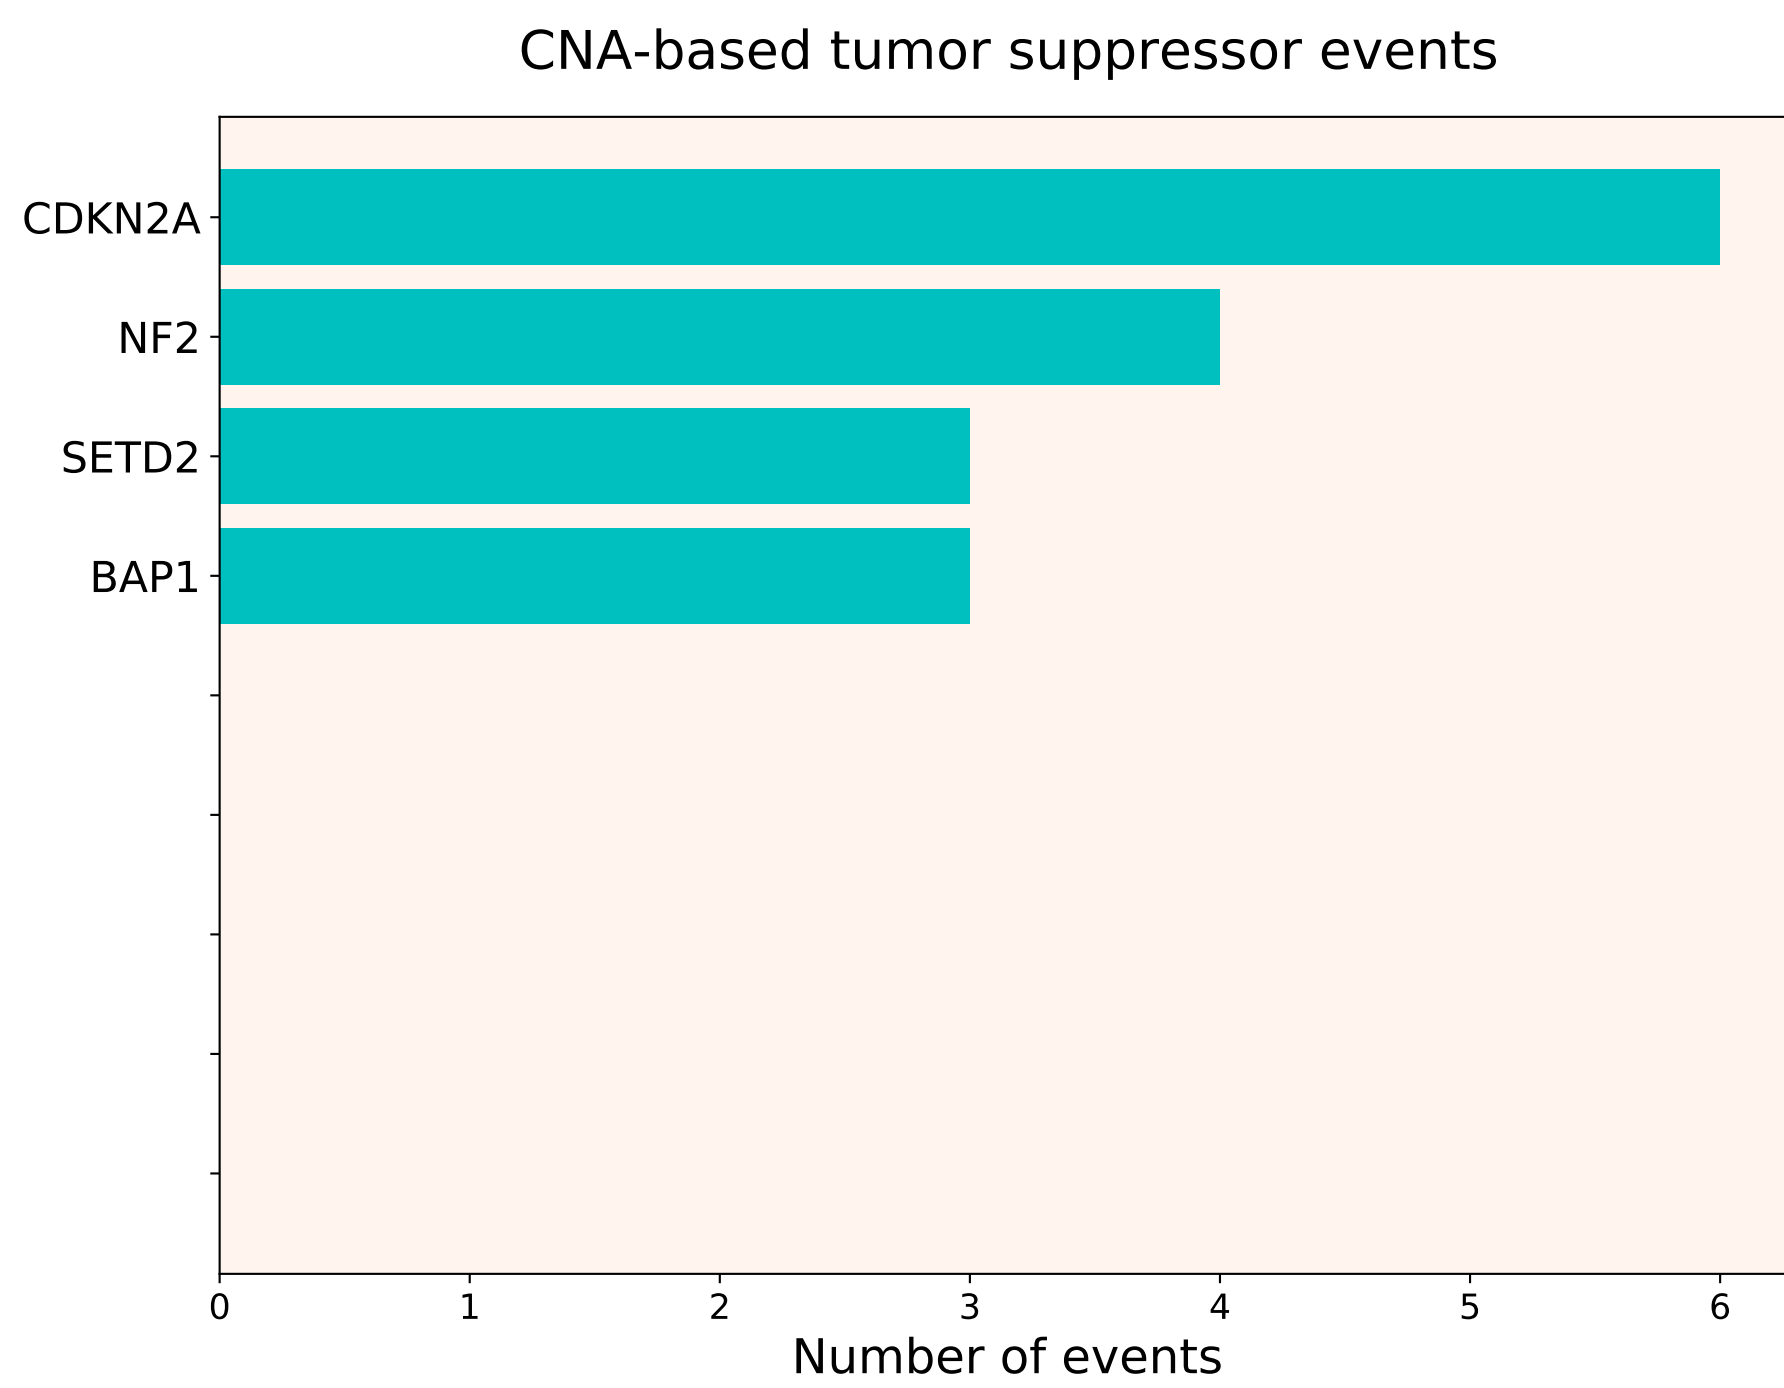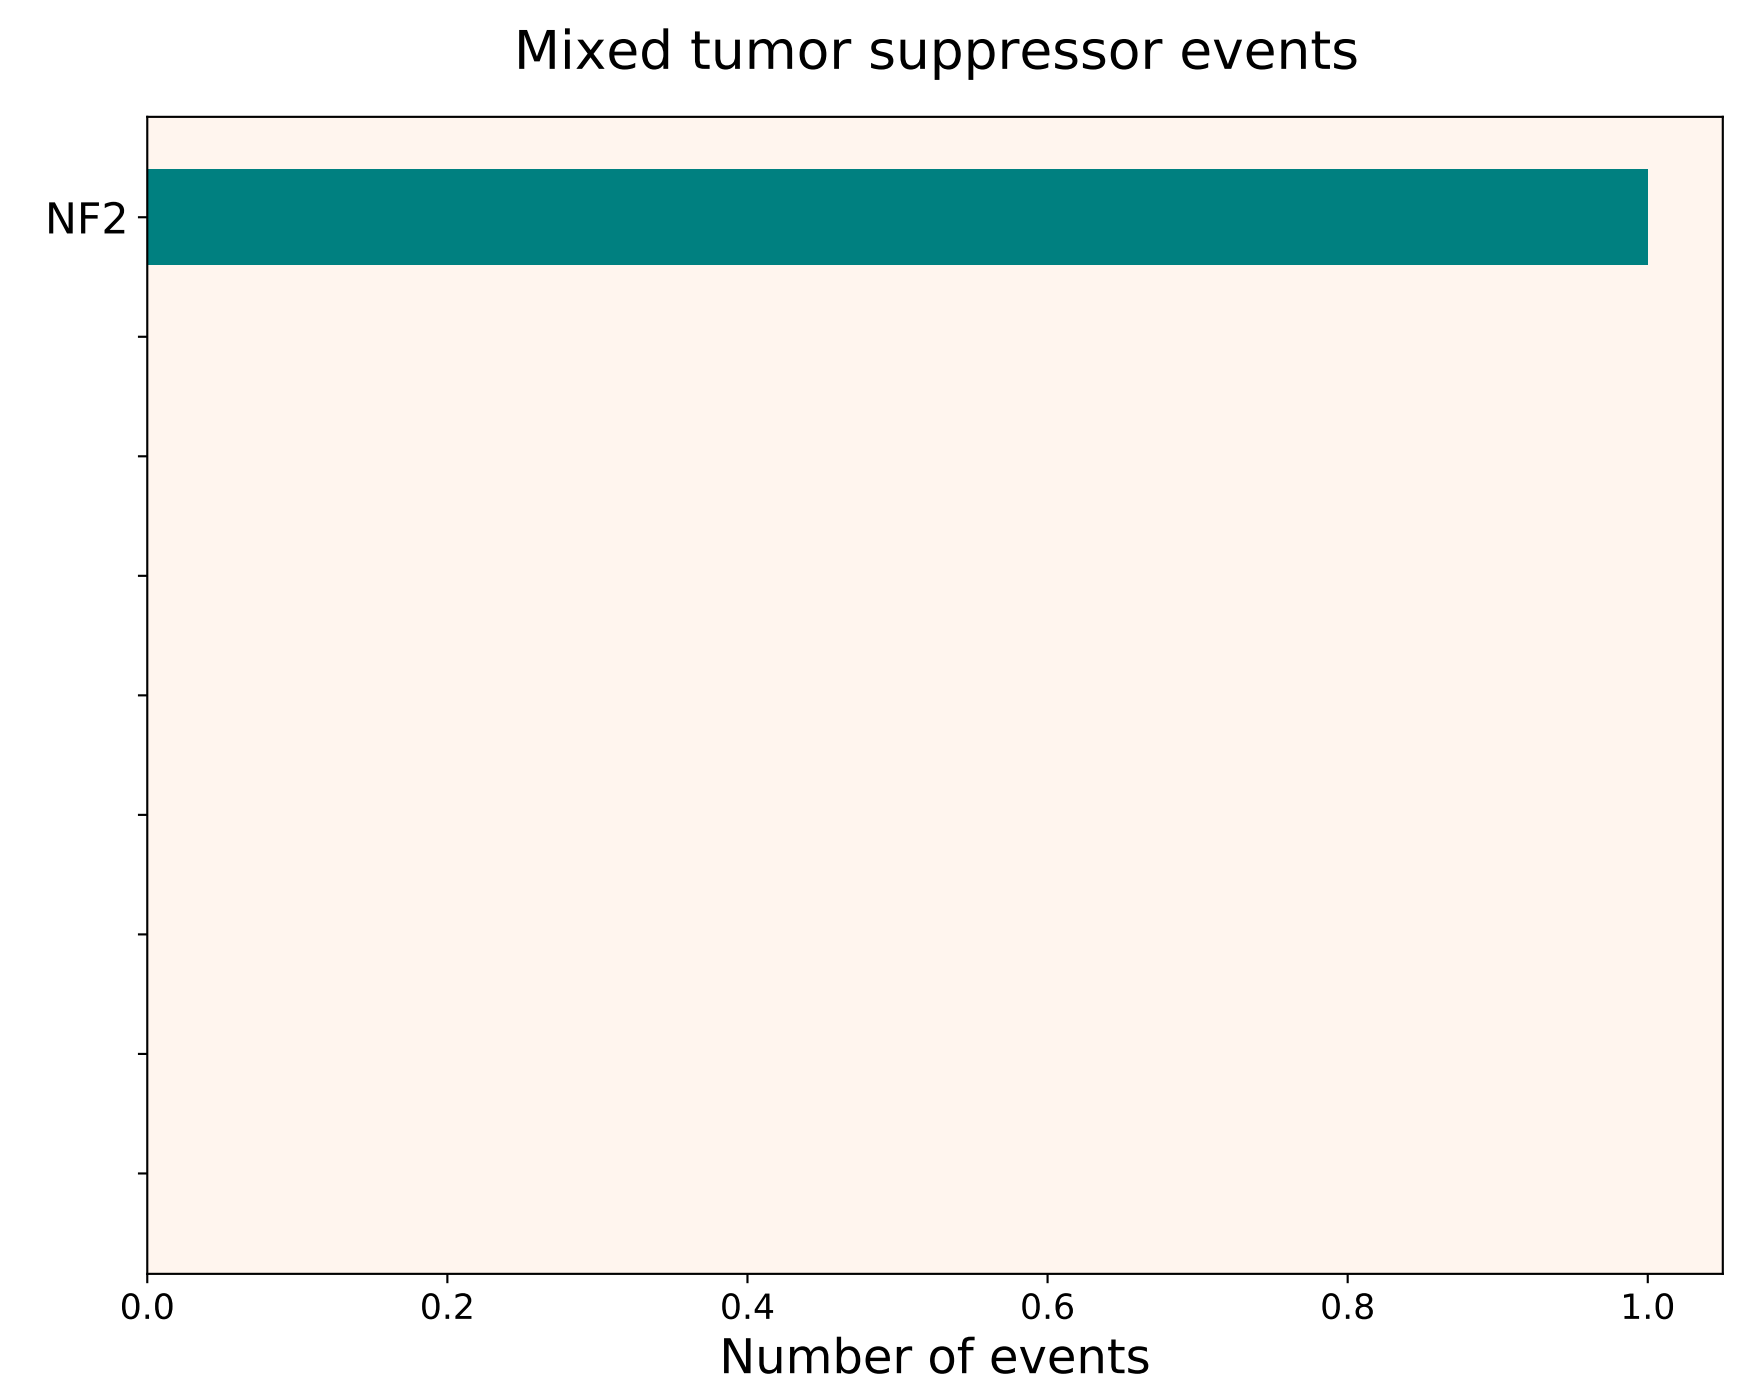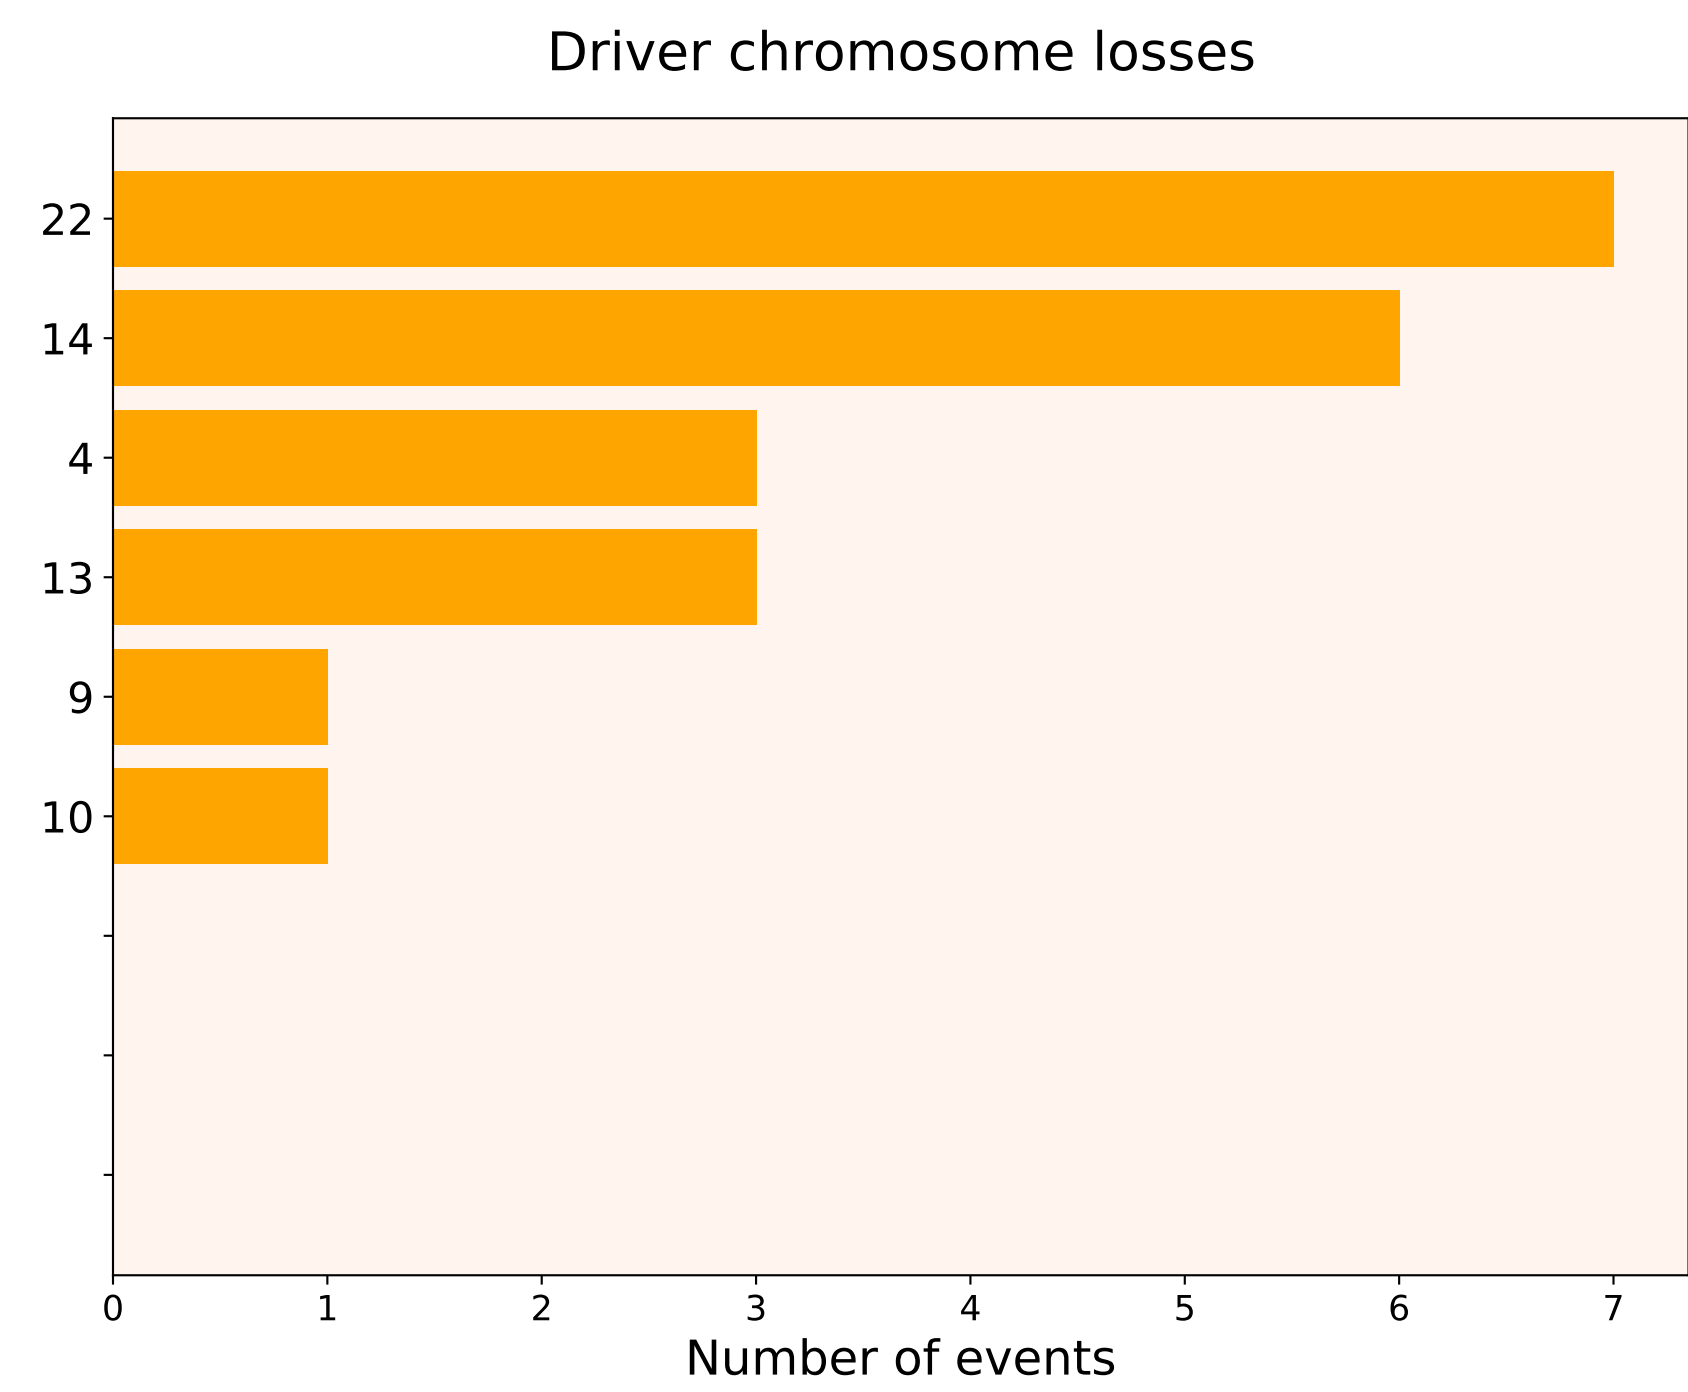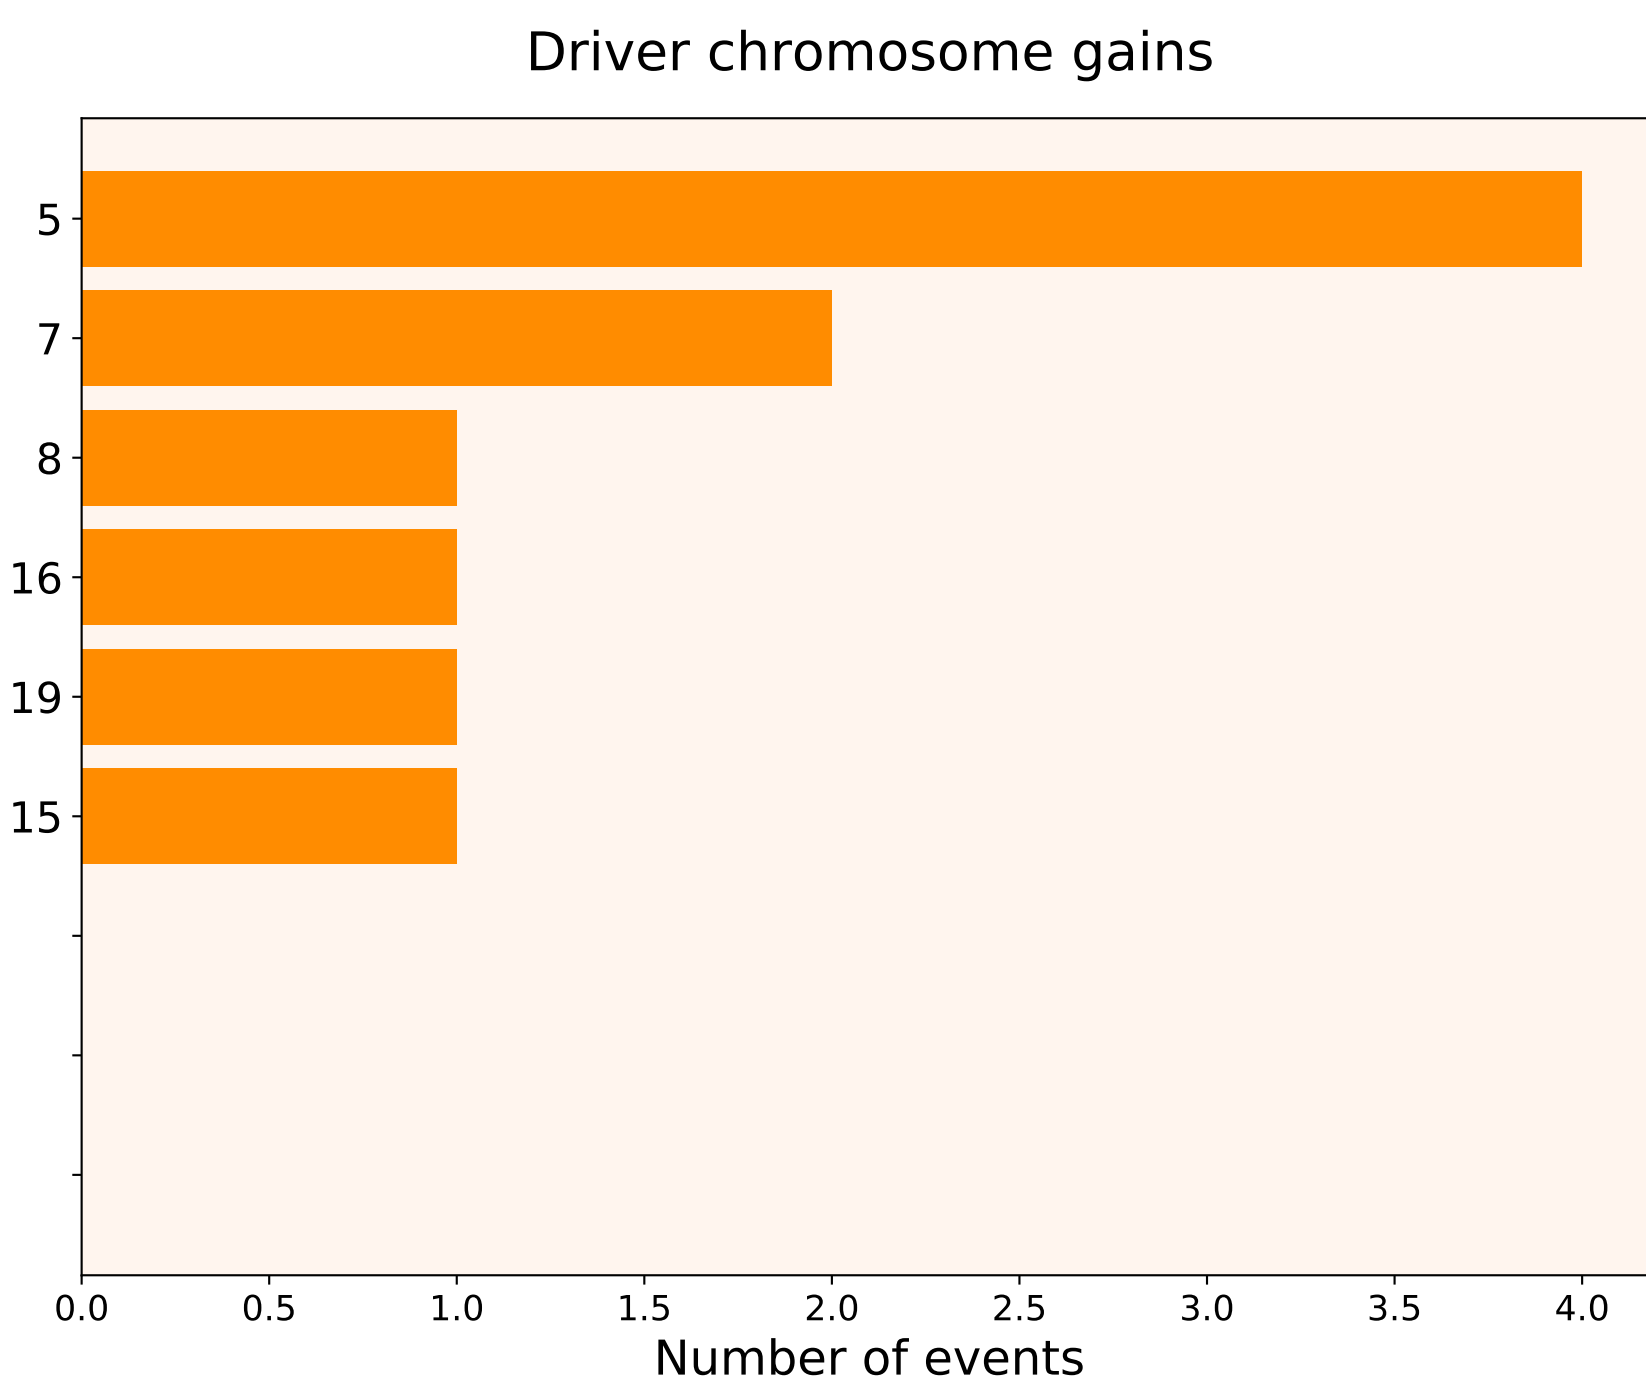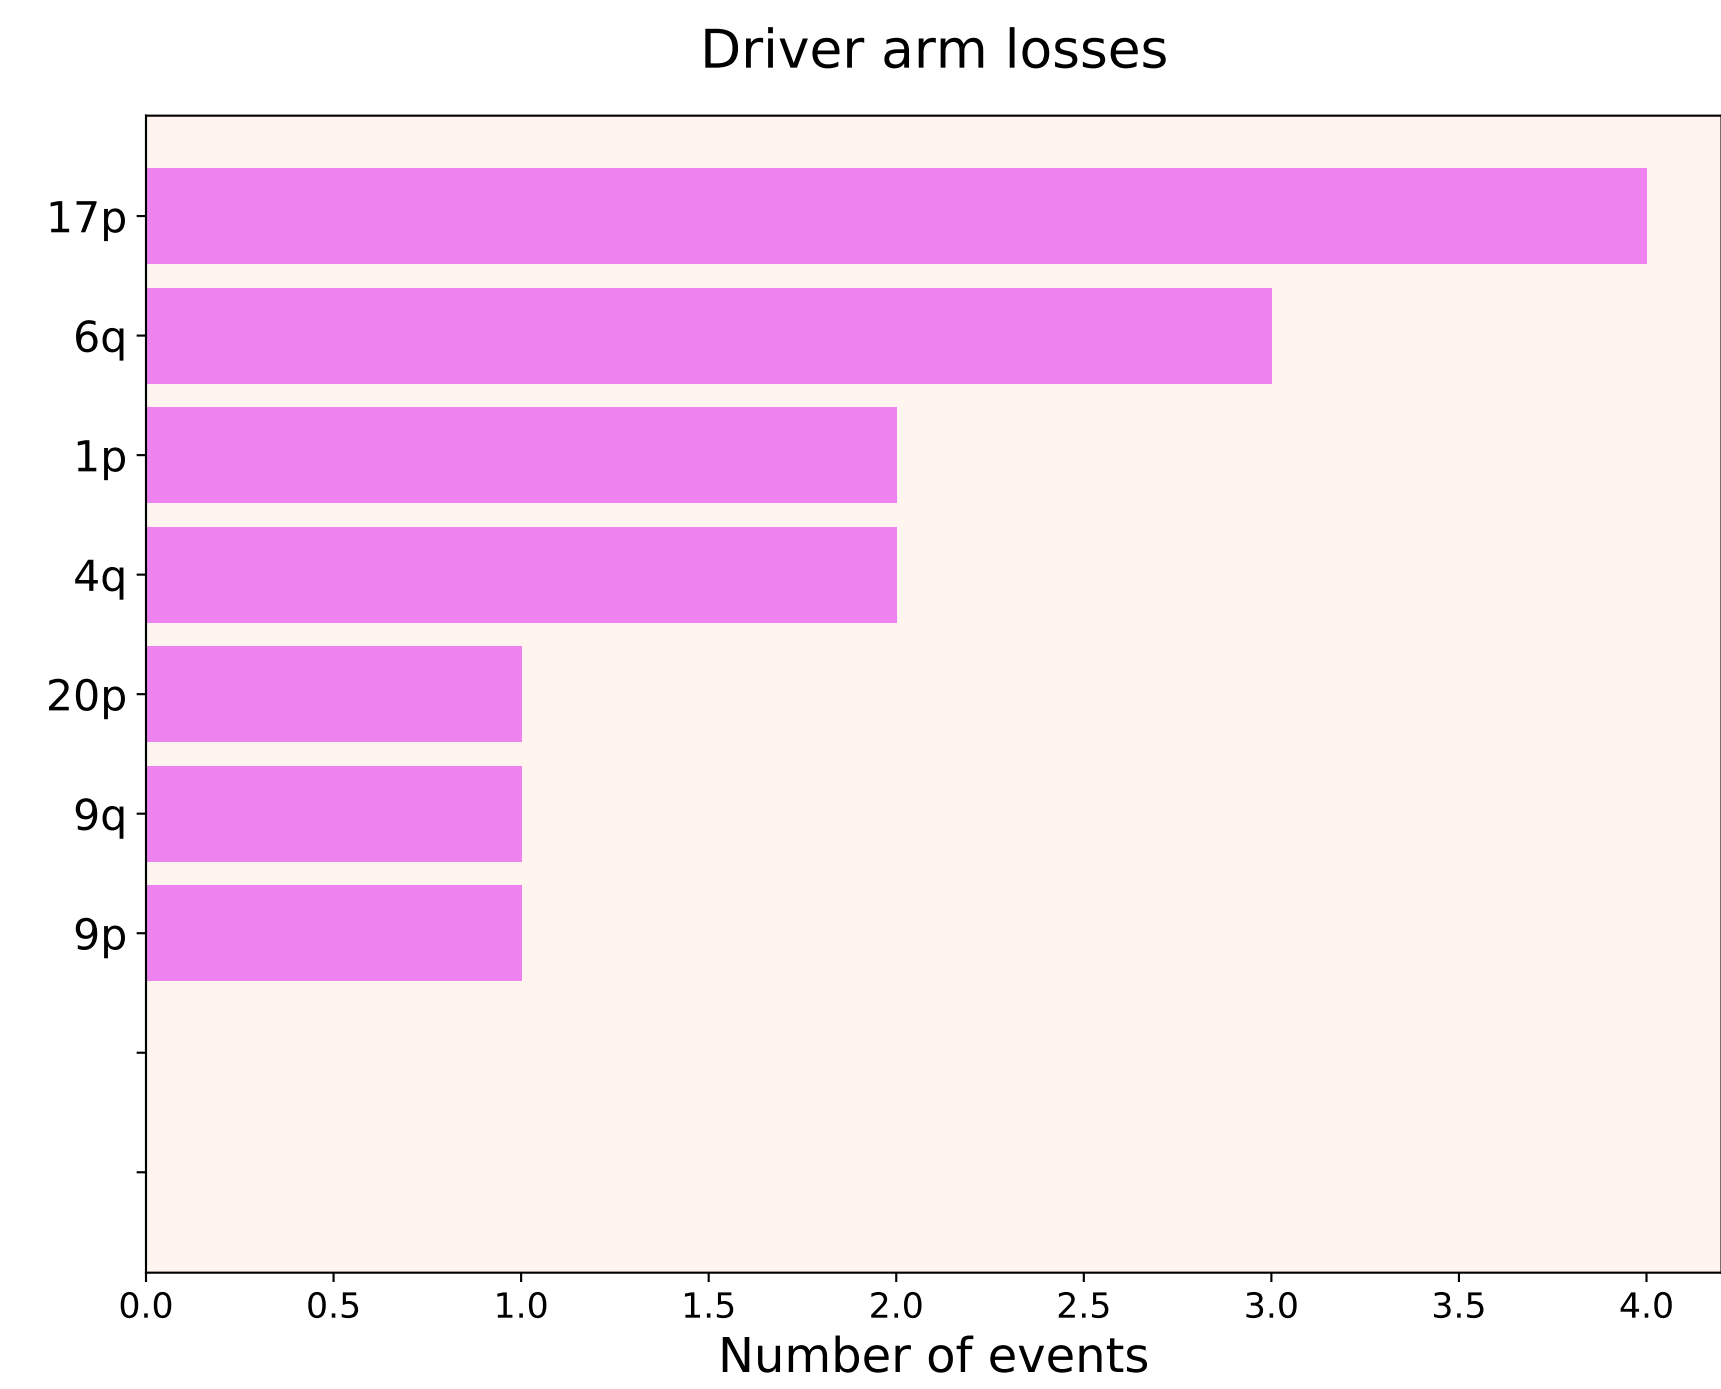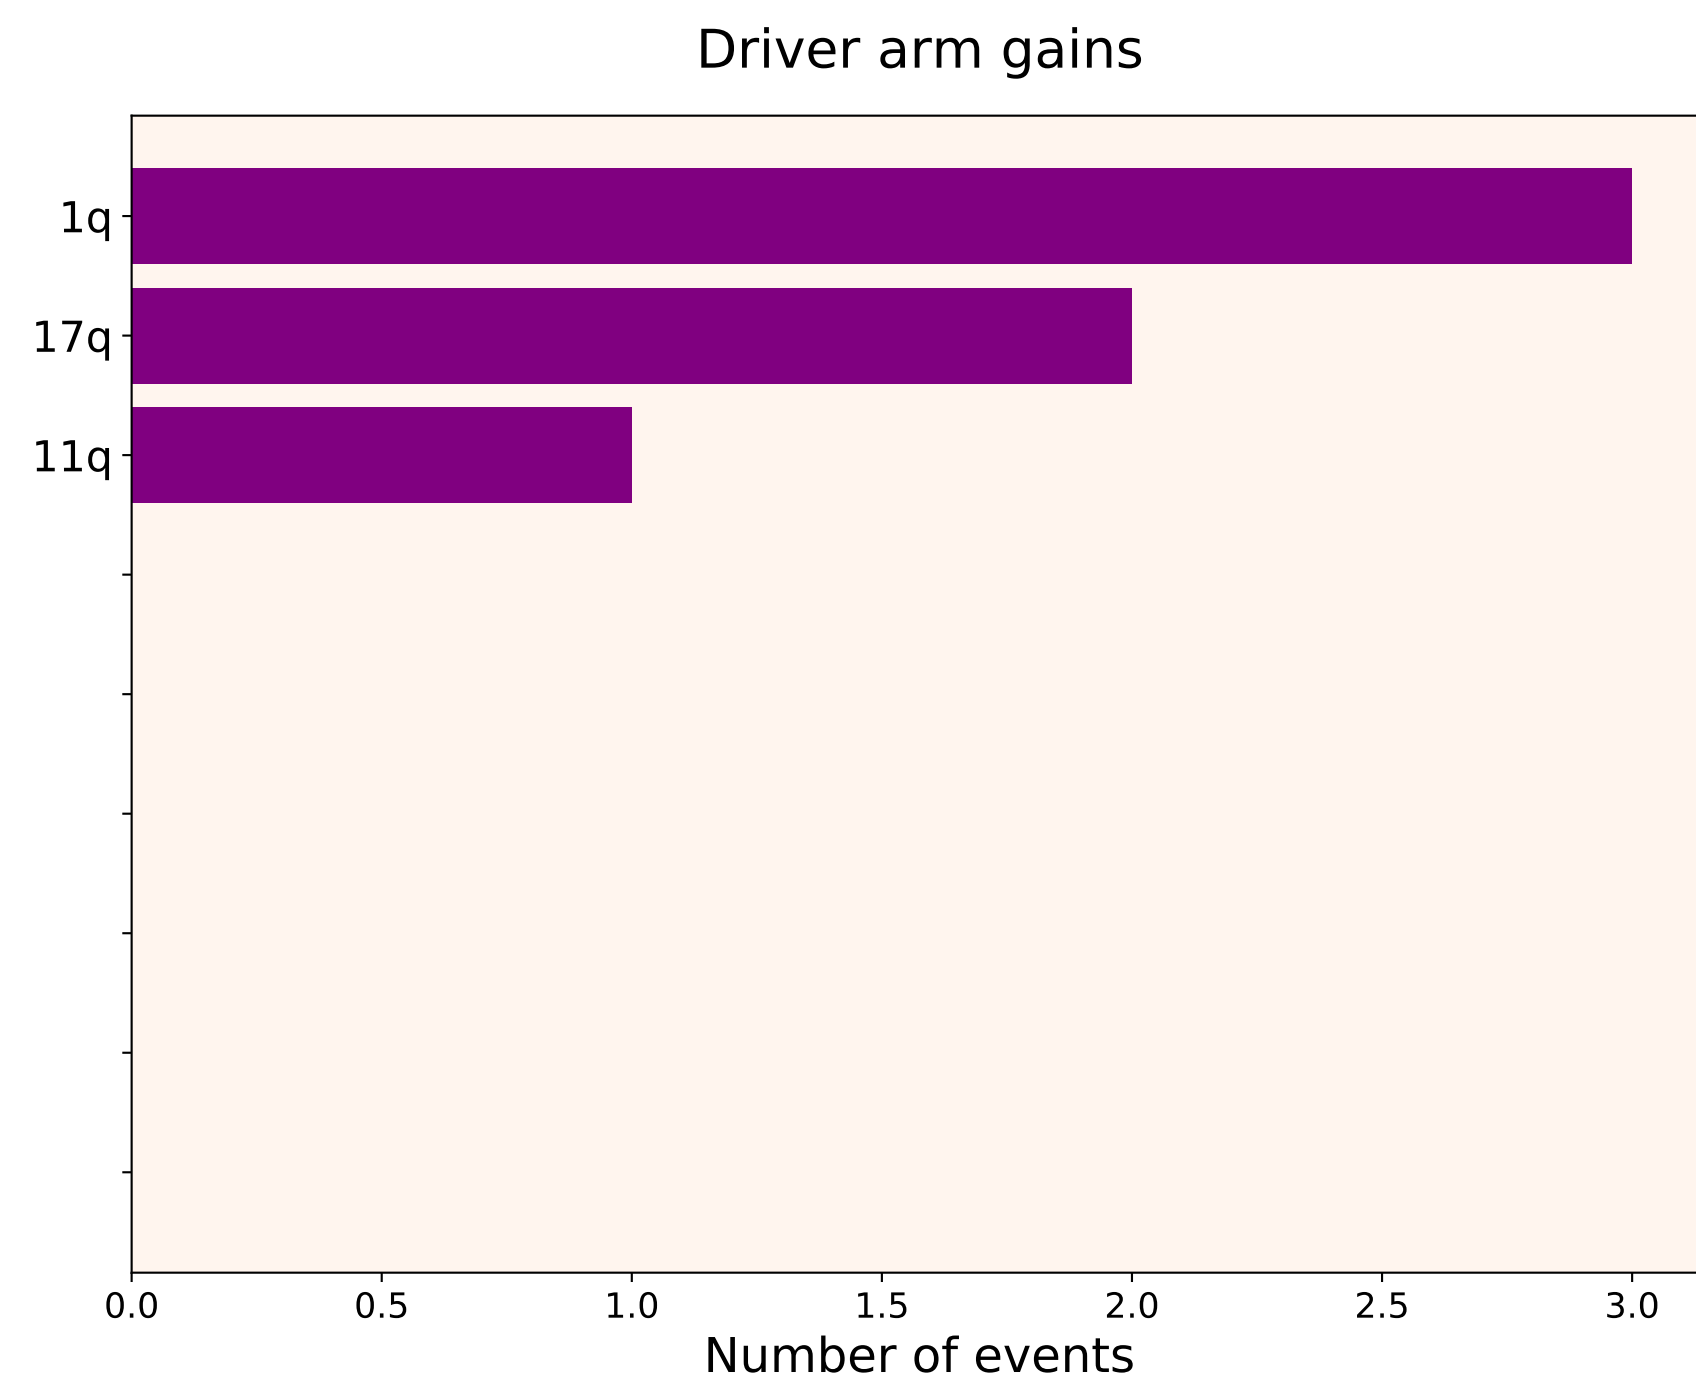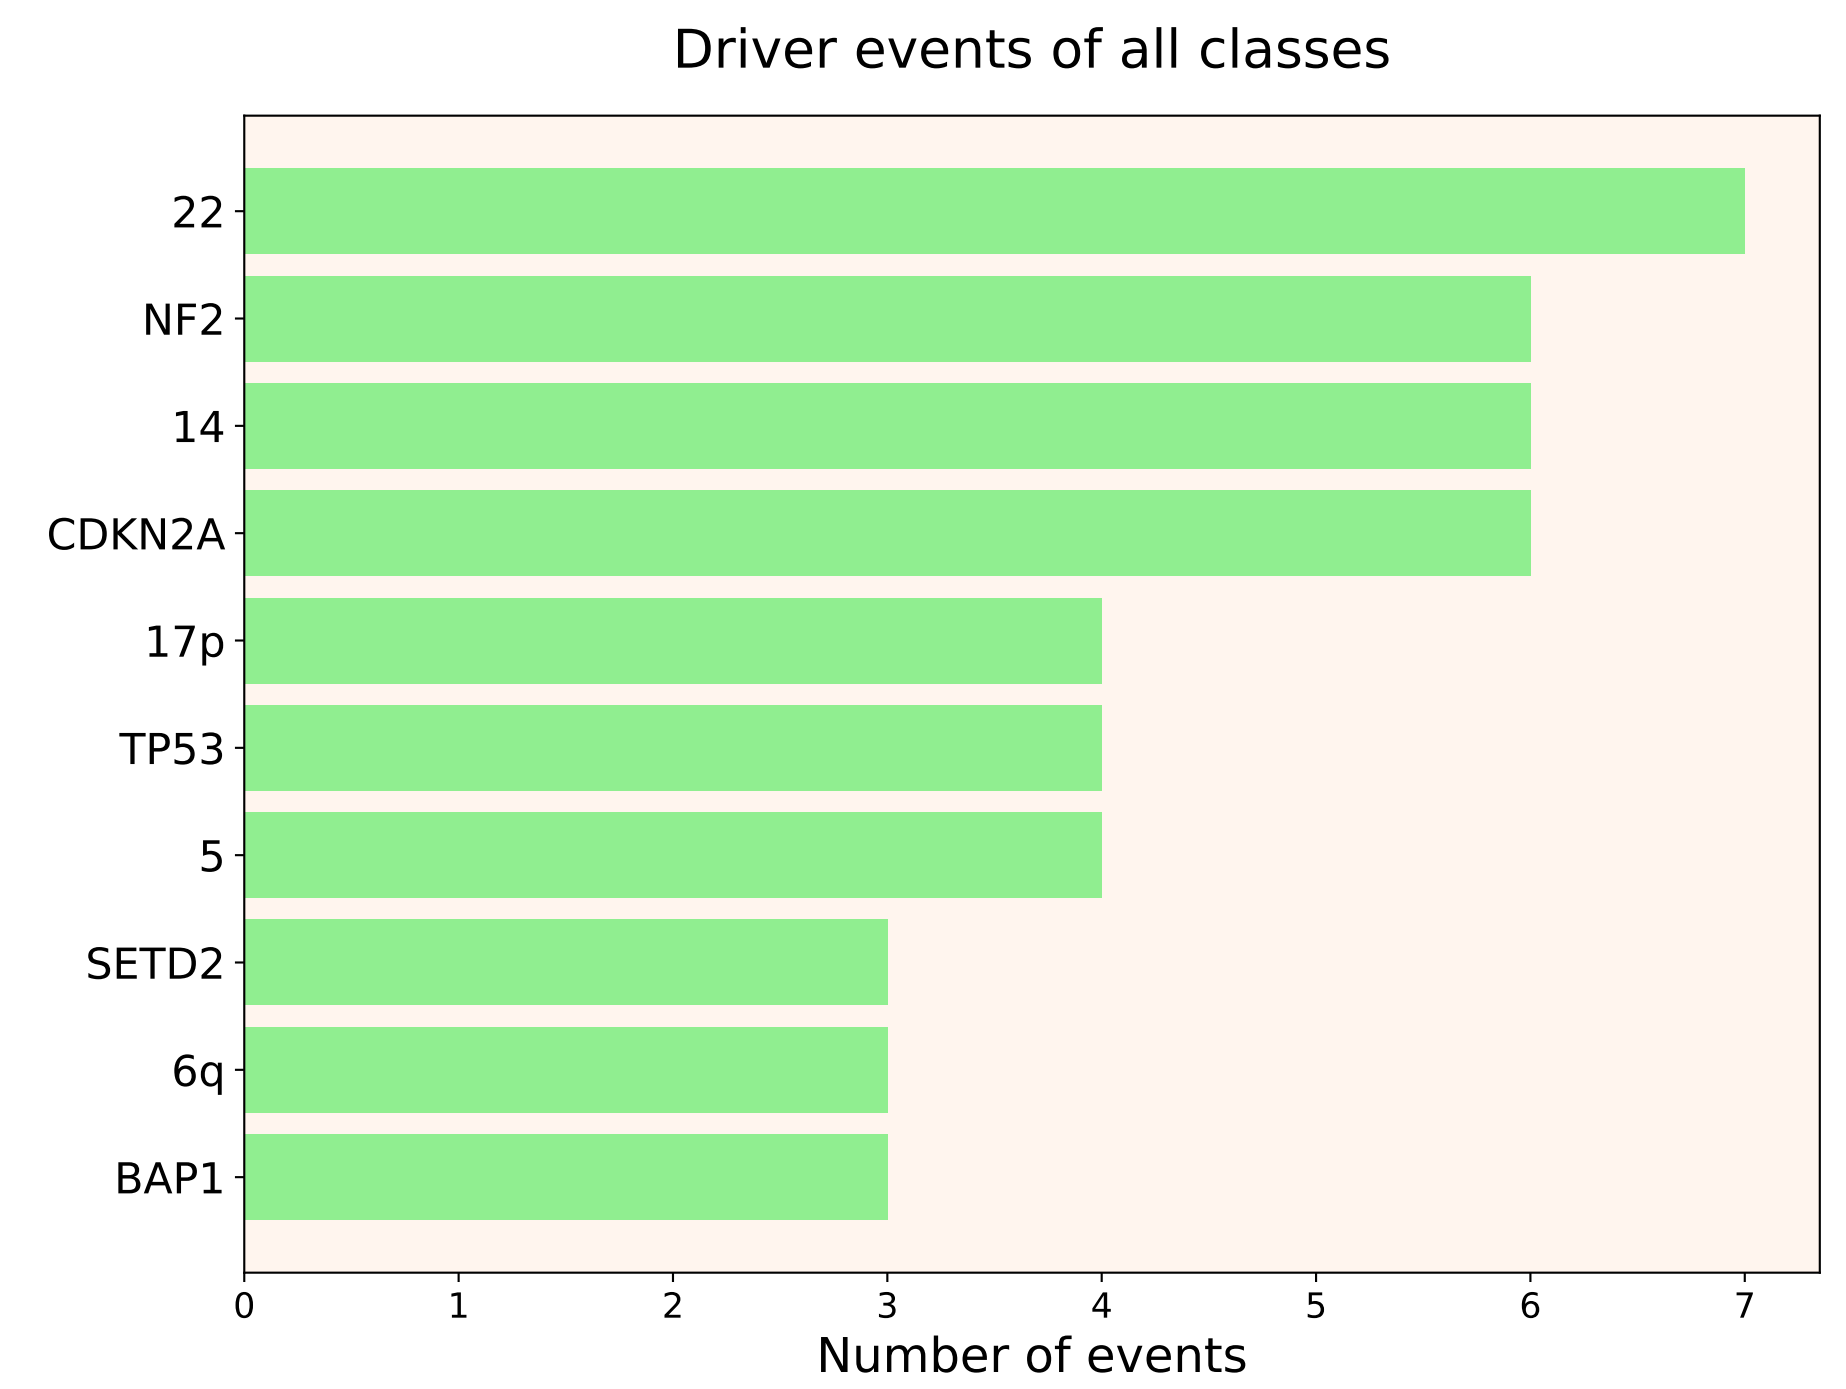

Supplement: Supplemental_Data_S1.zip [file Supplemental_Data_S1.zip]

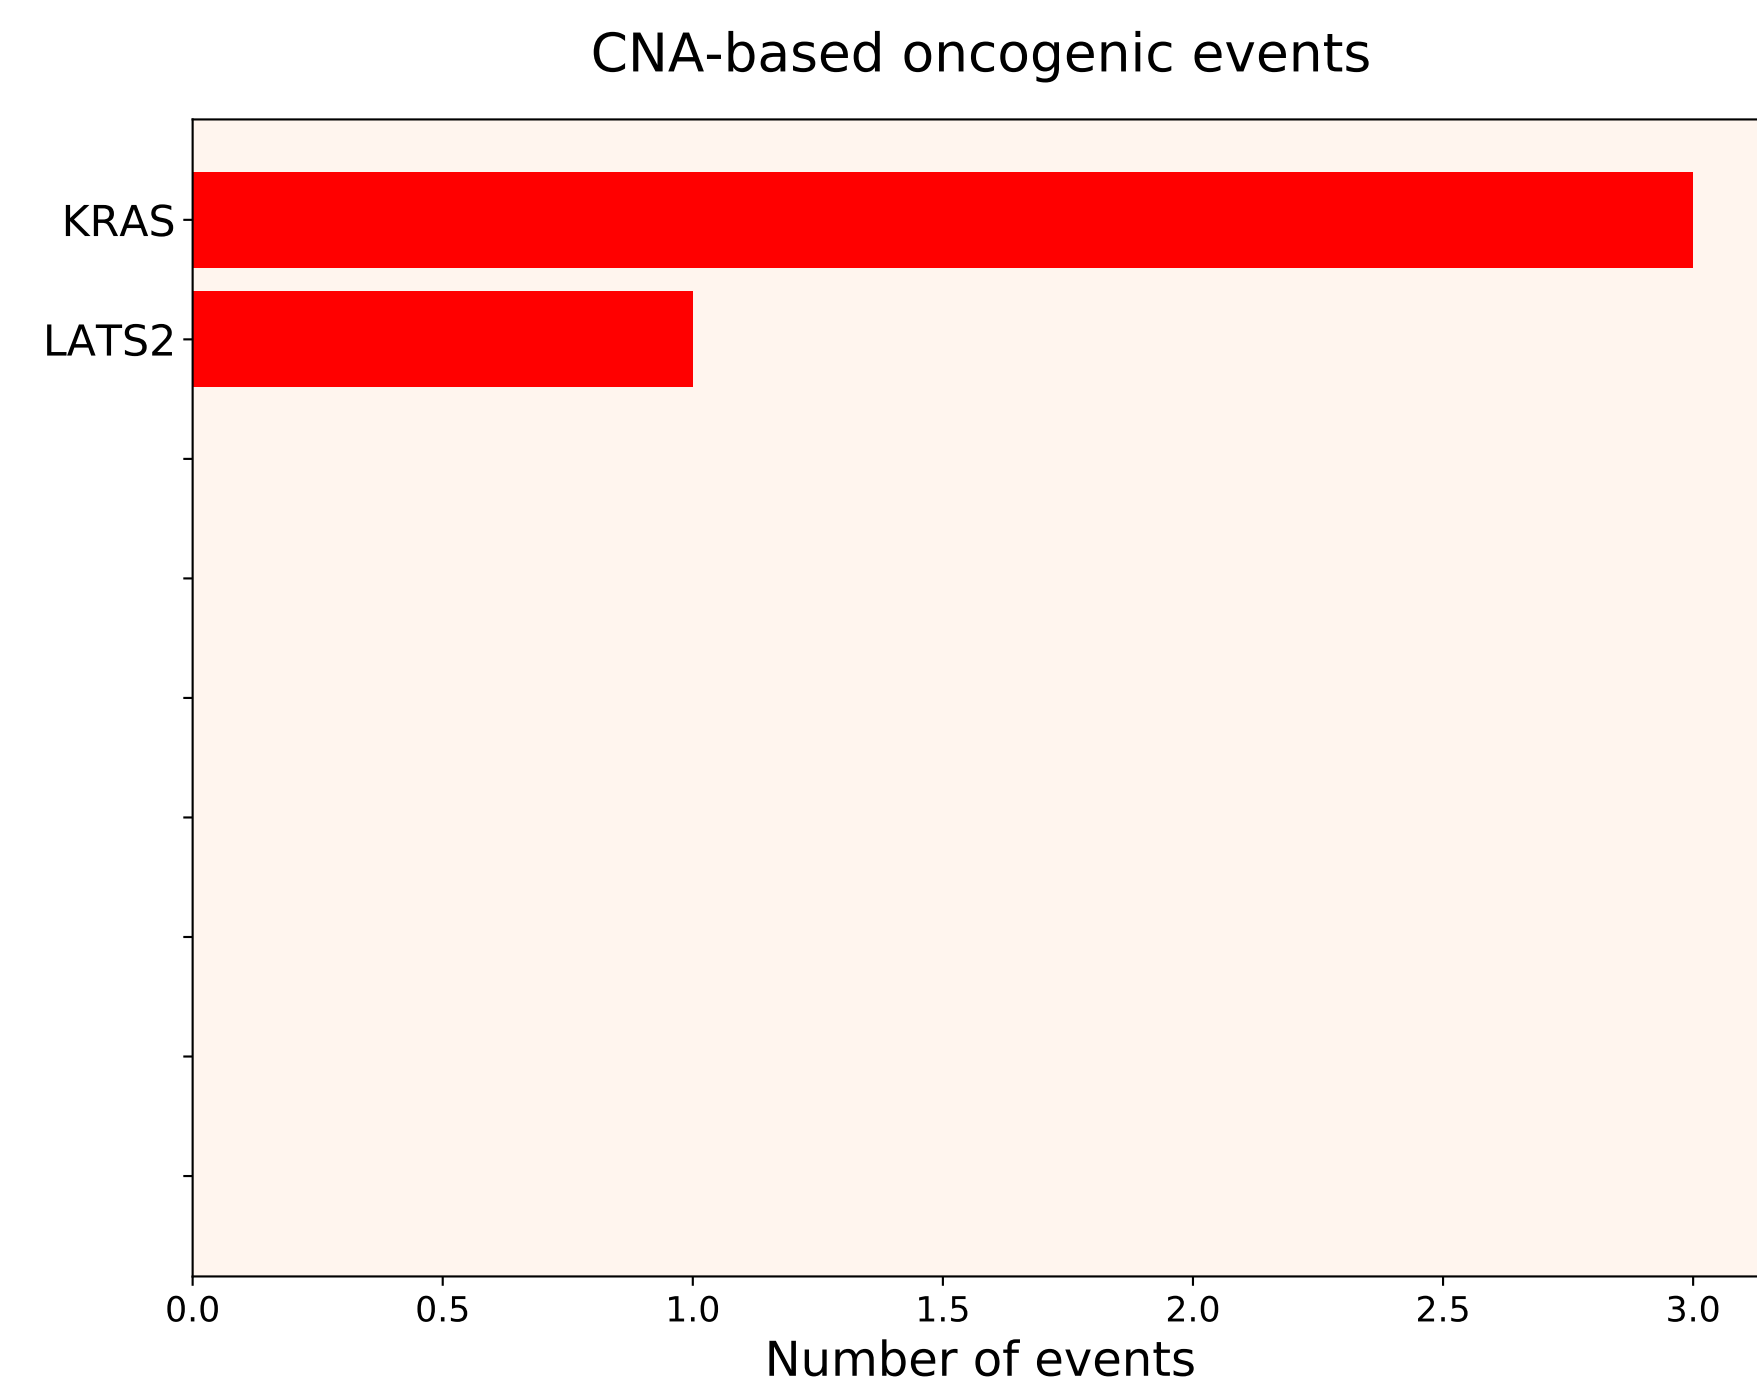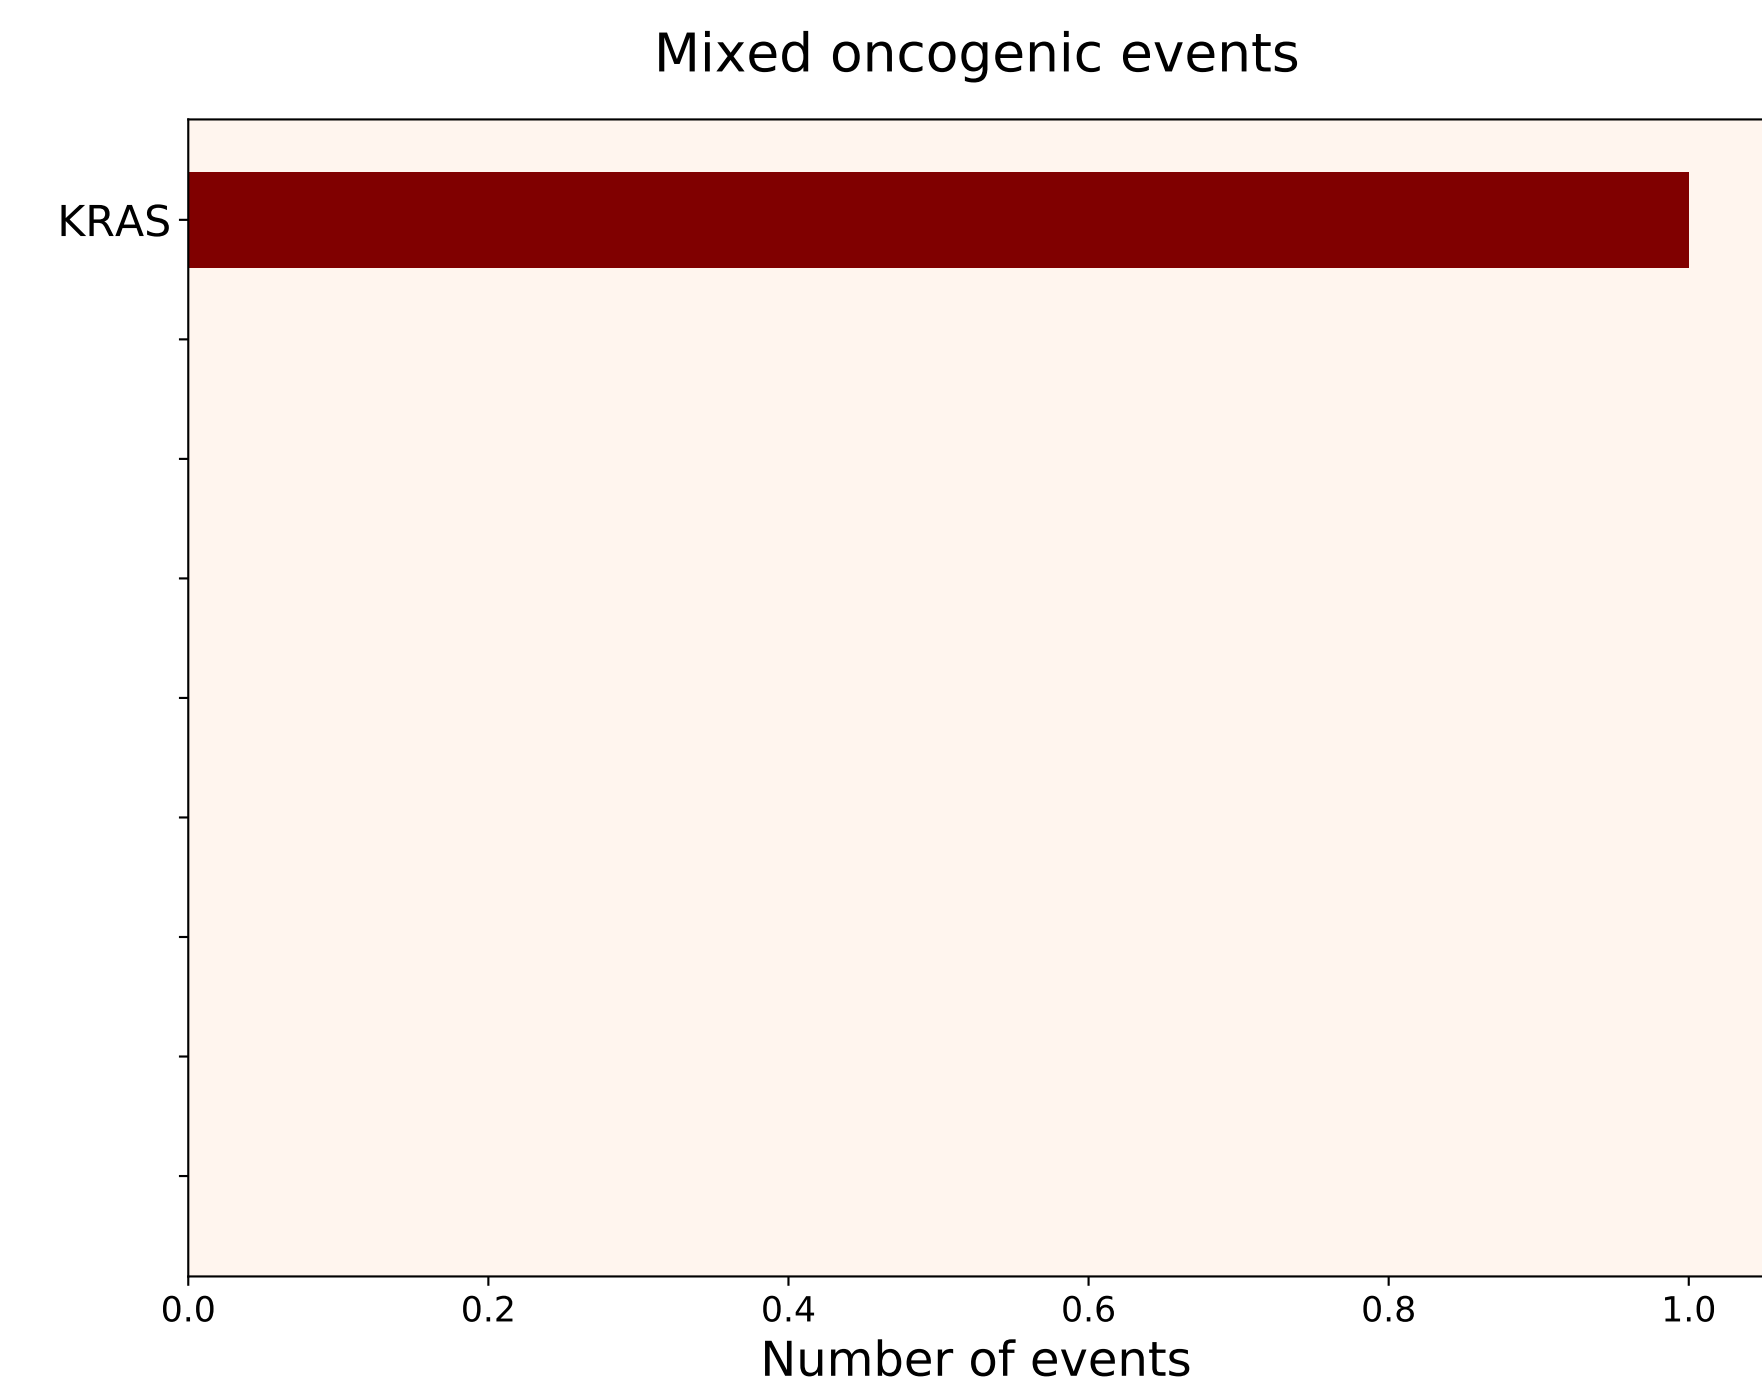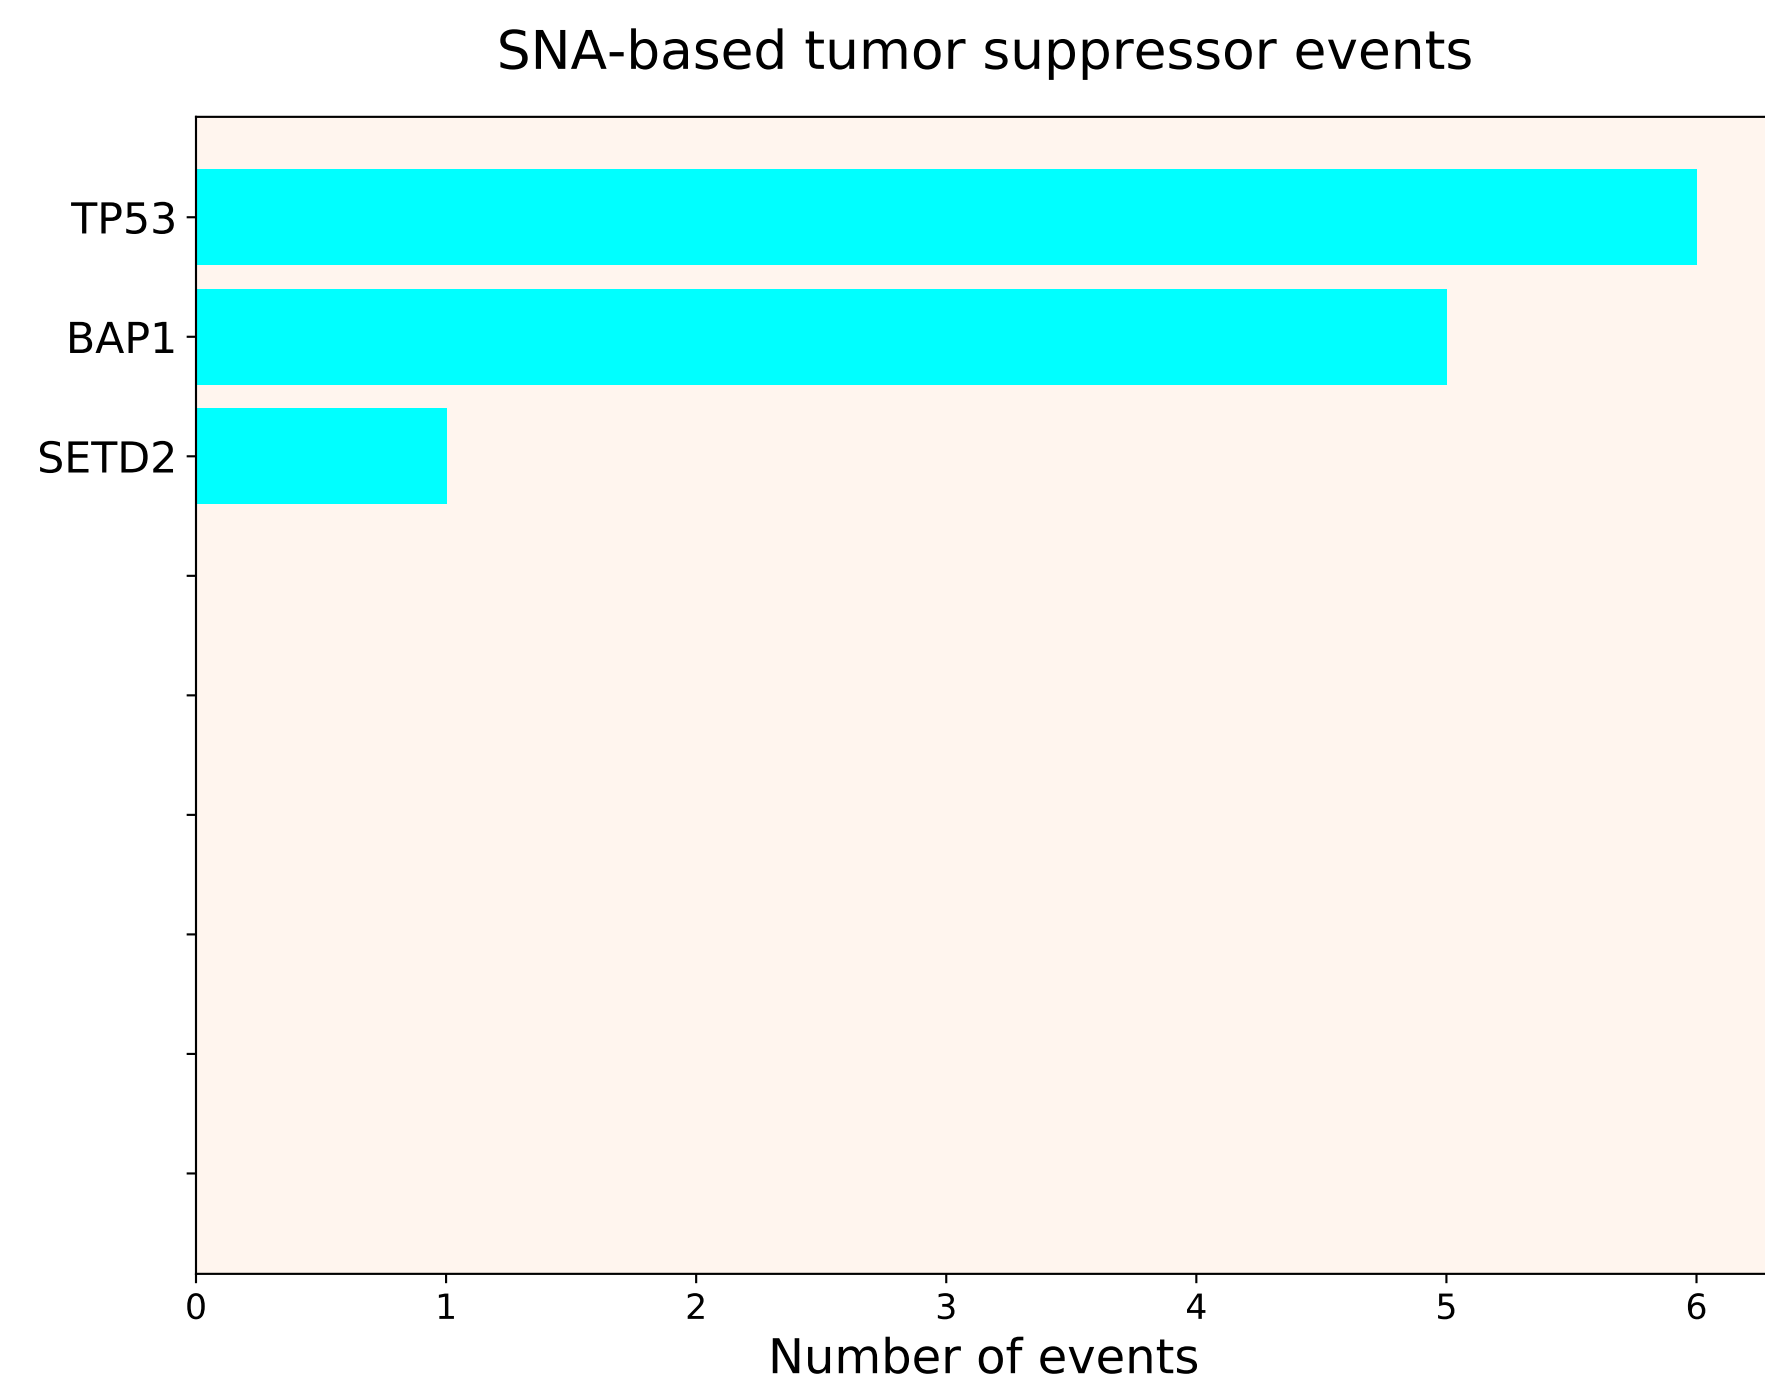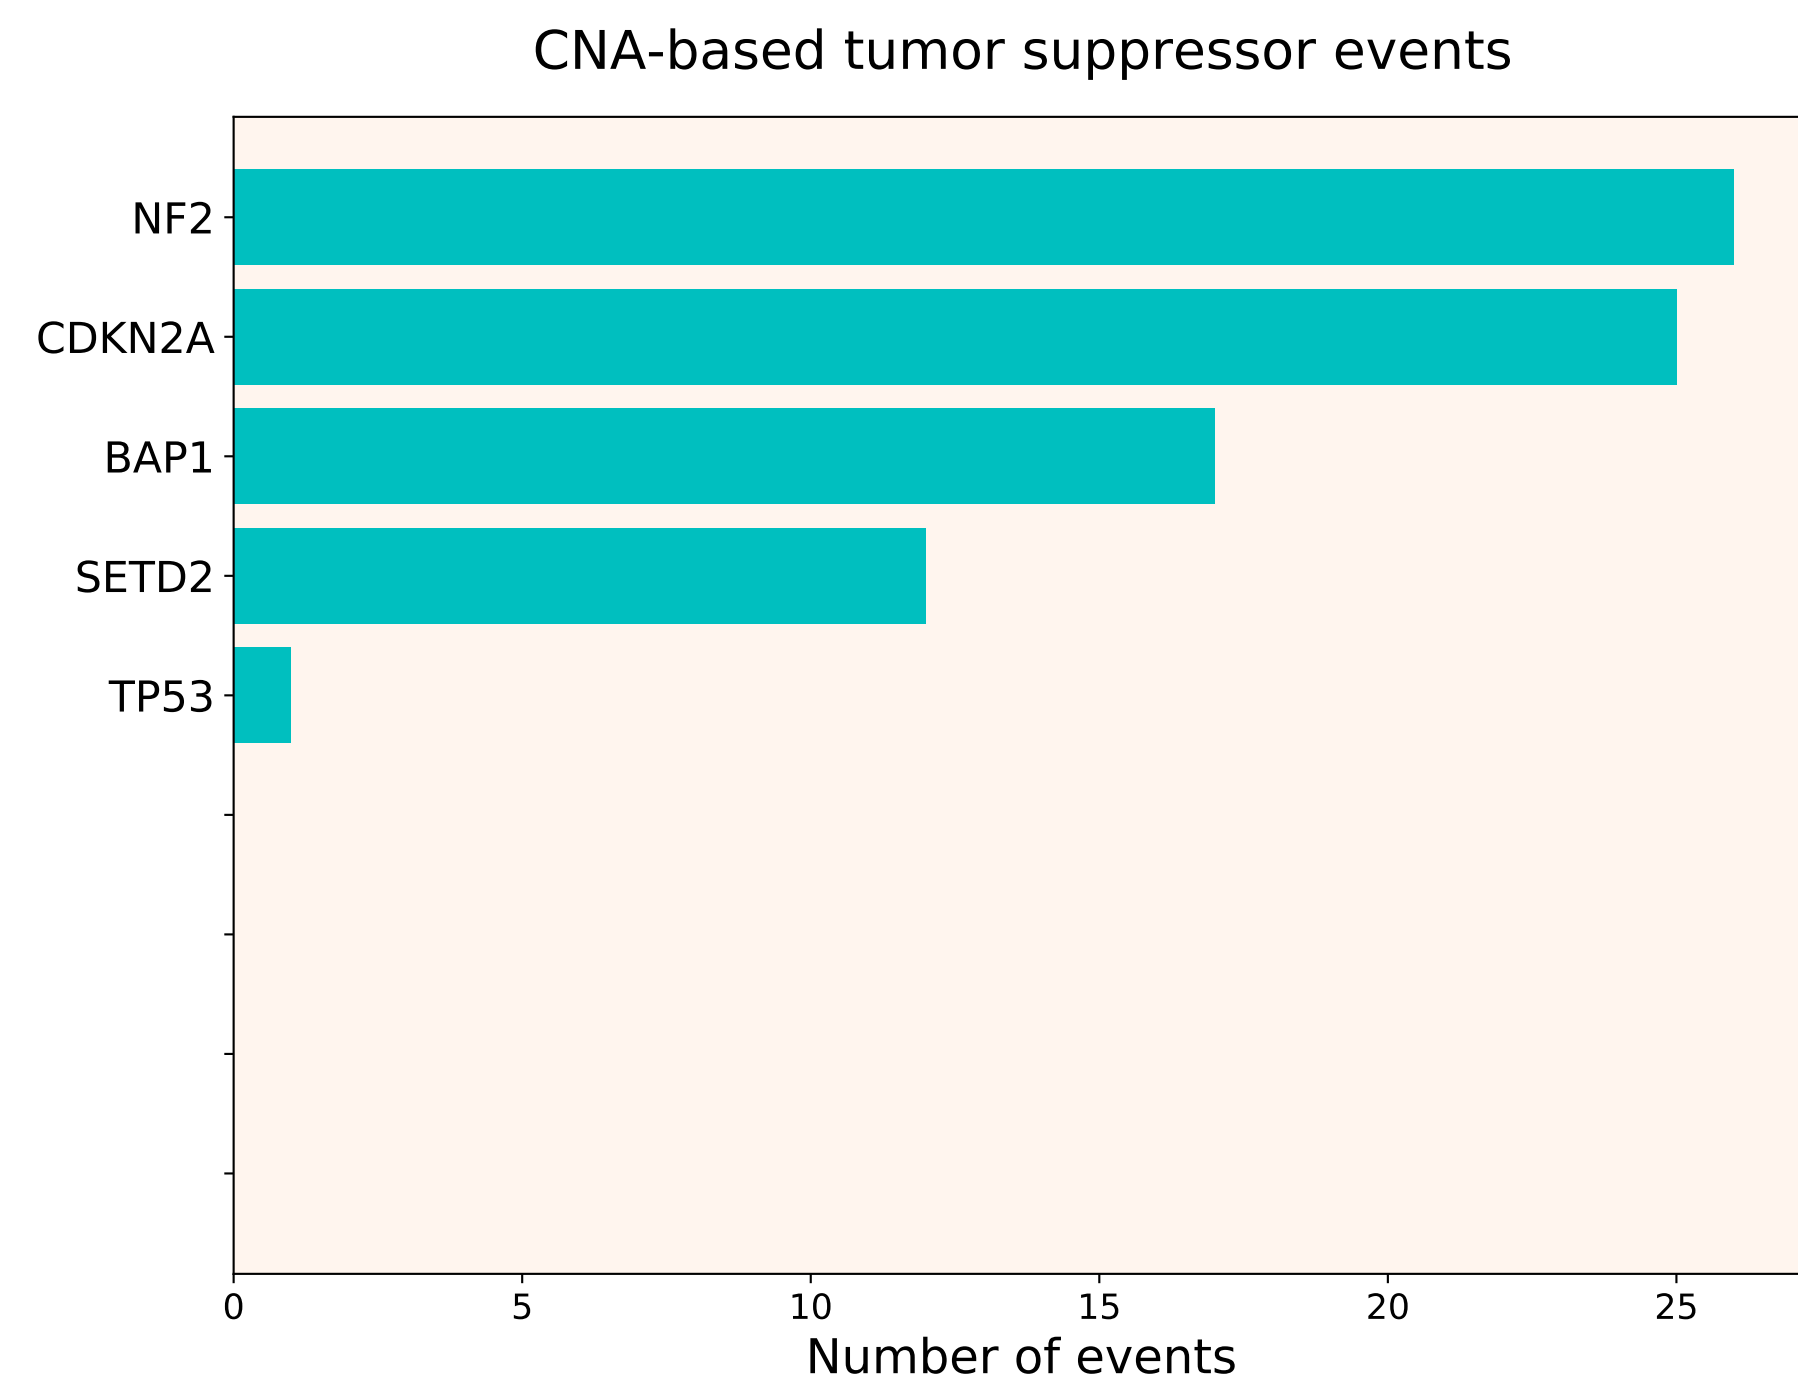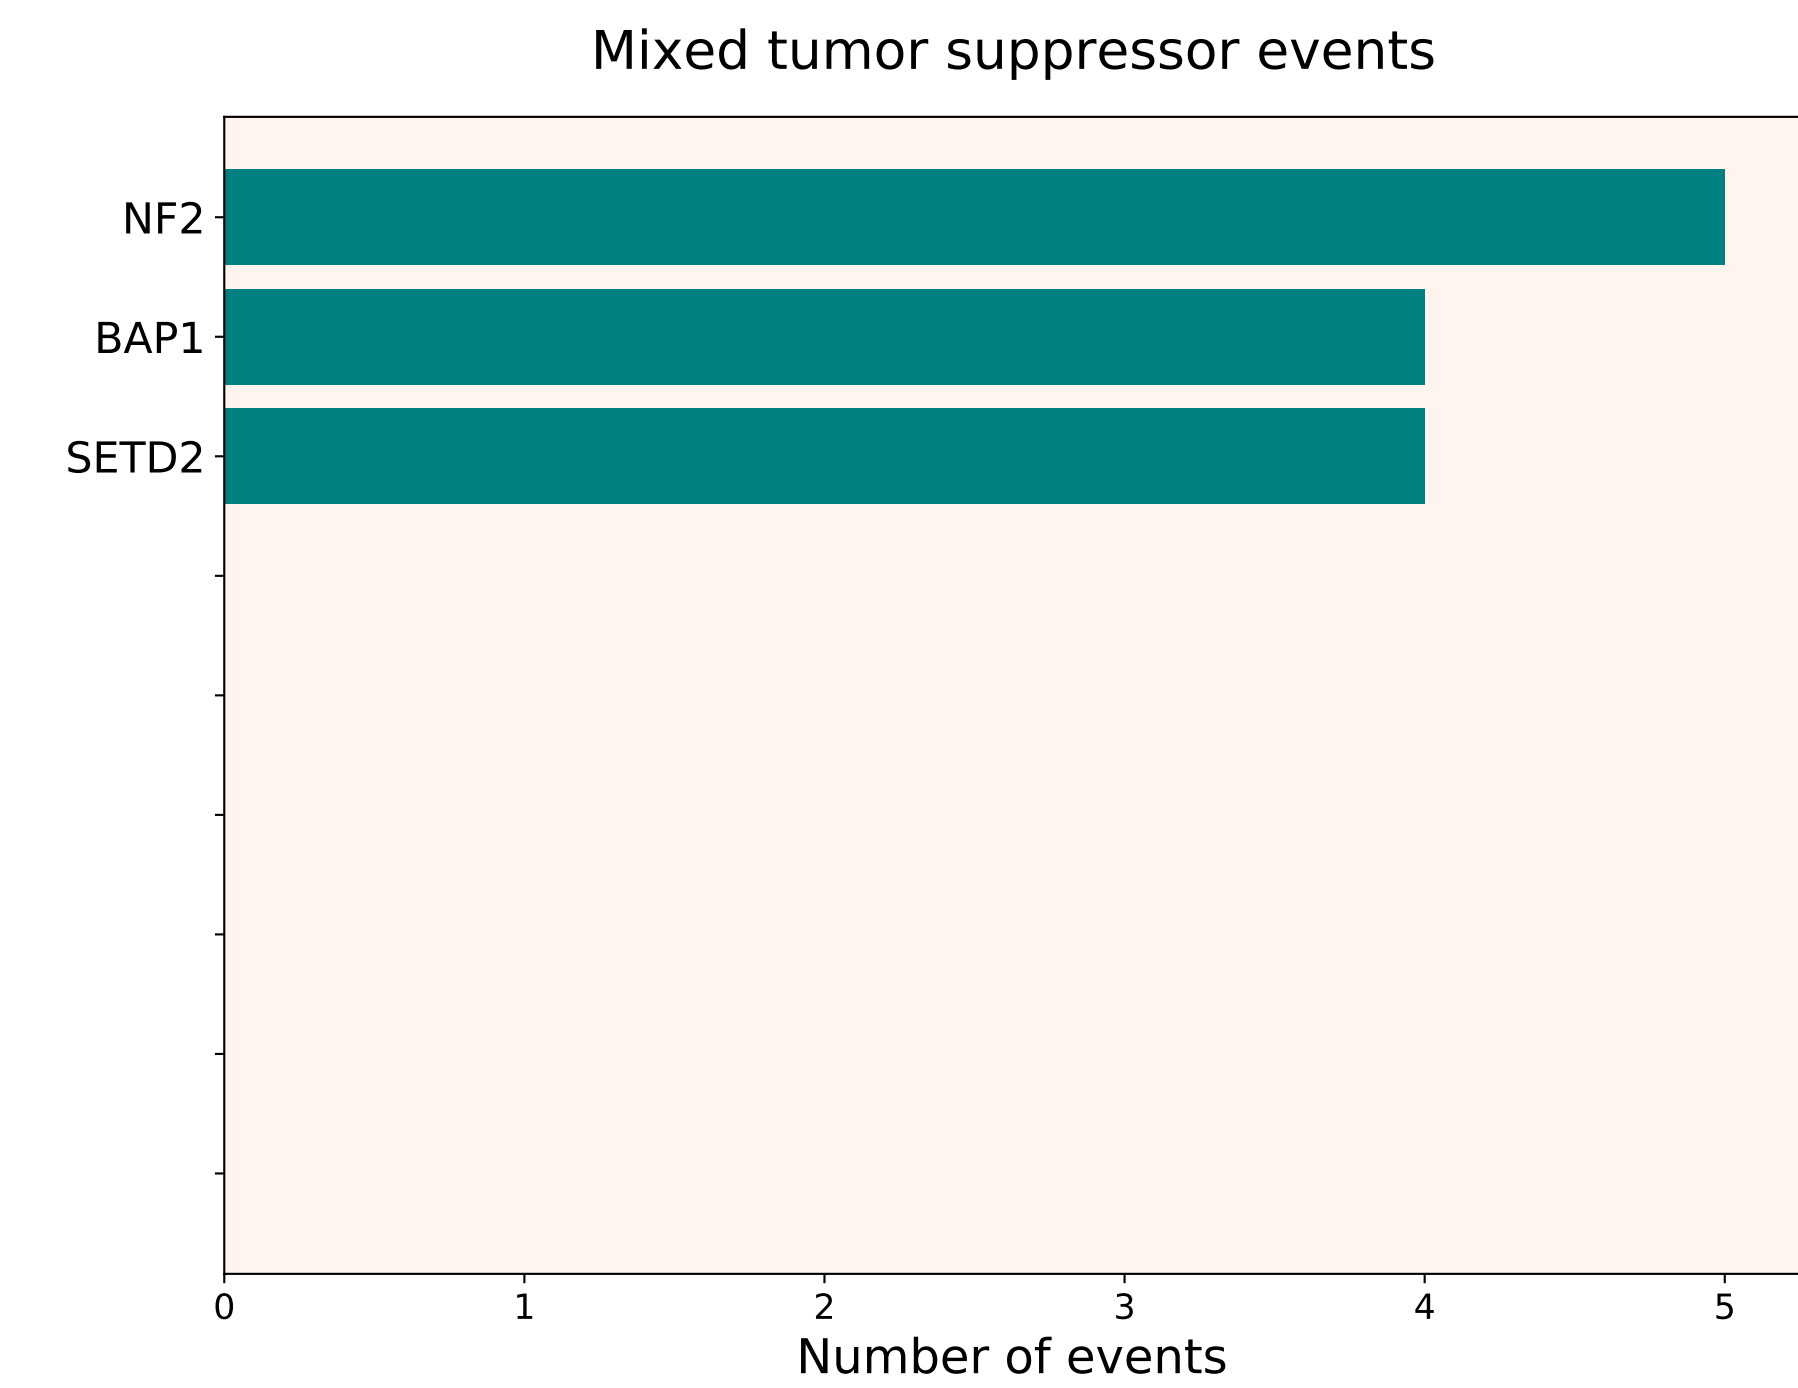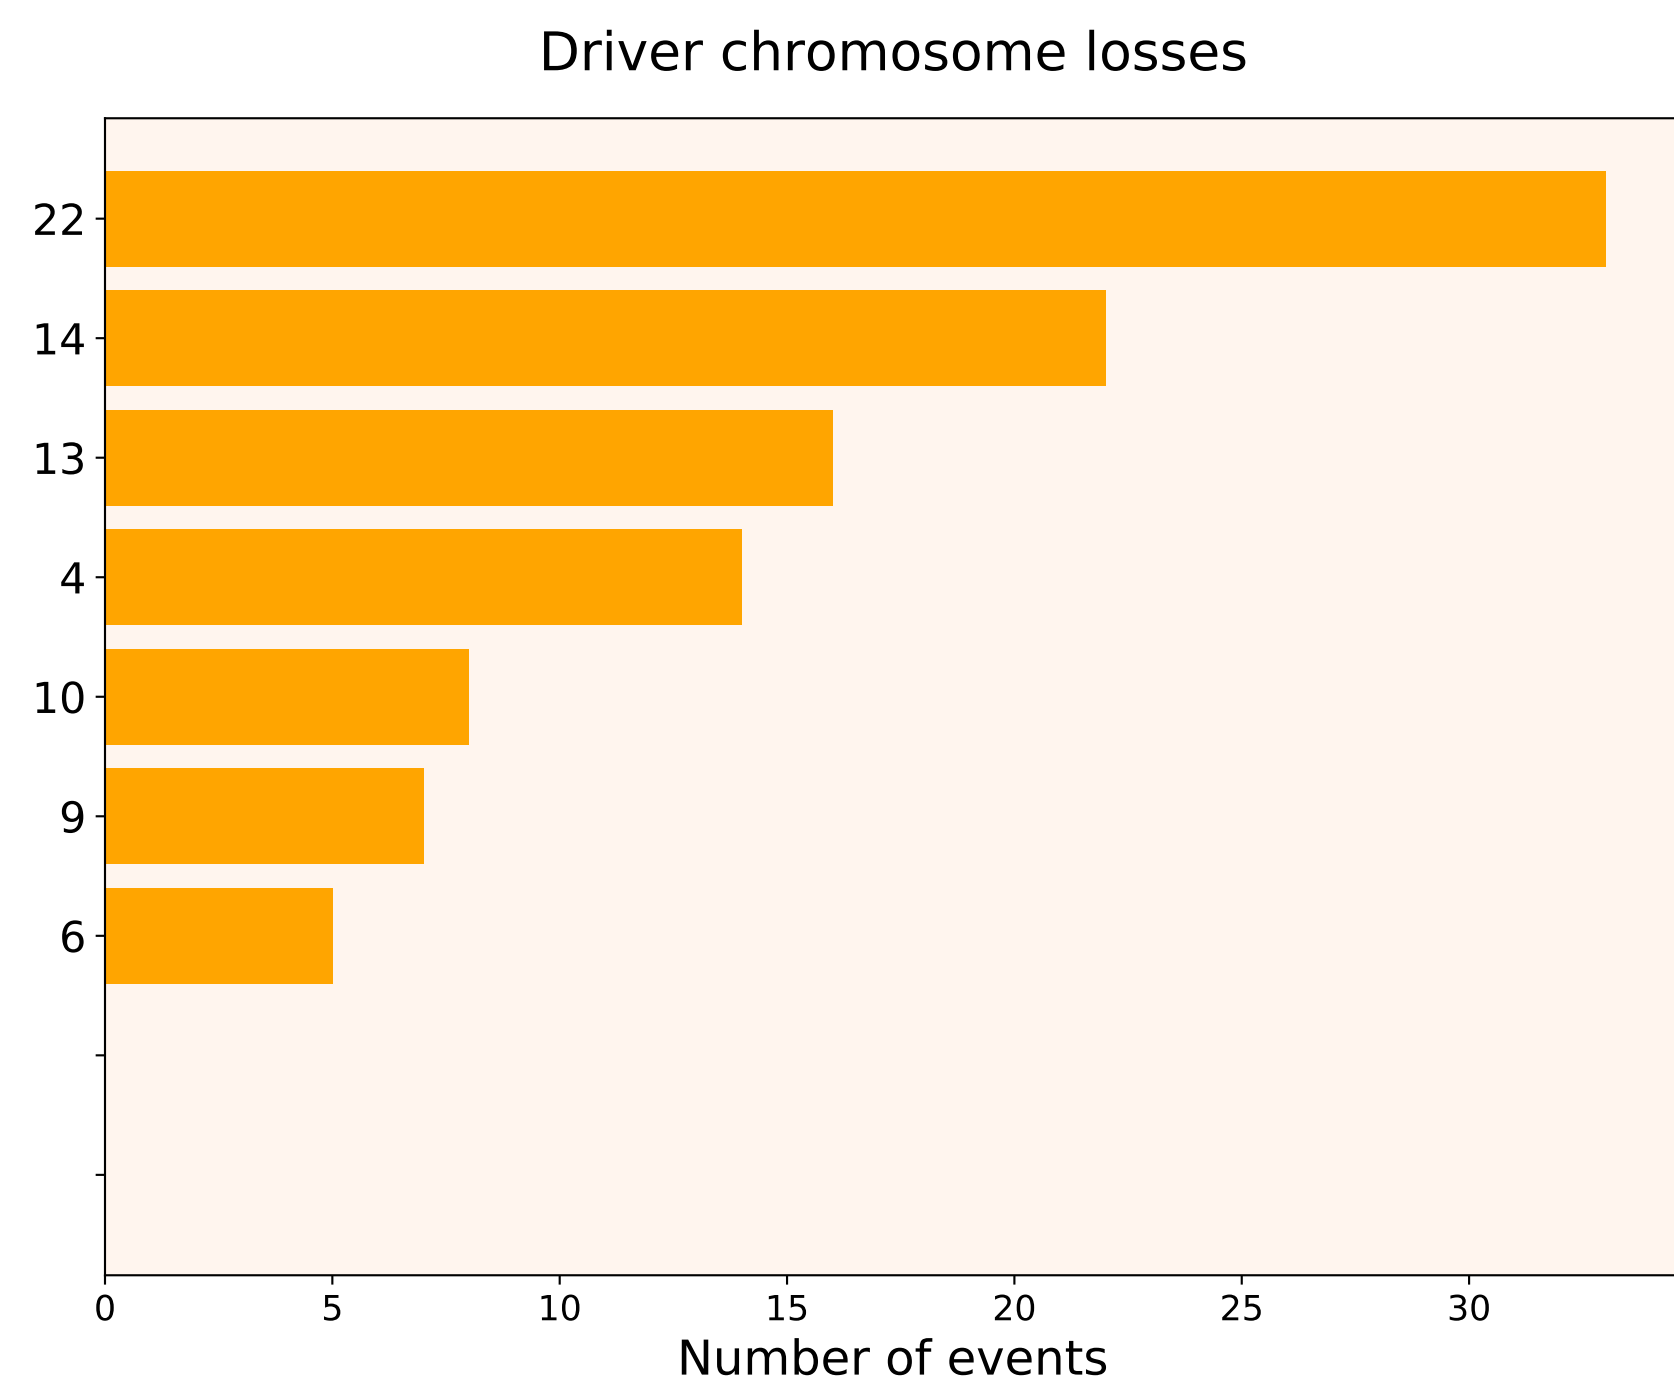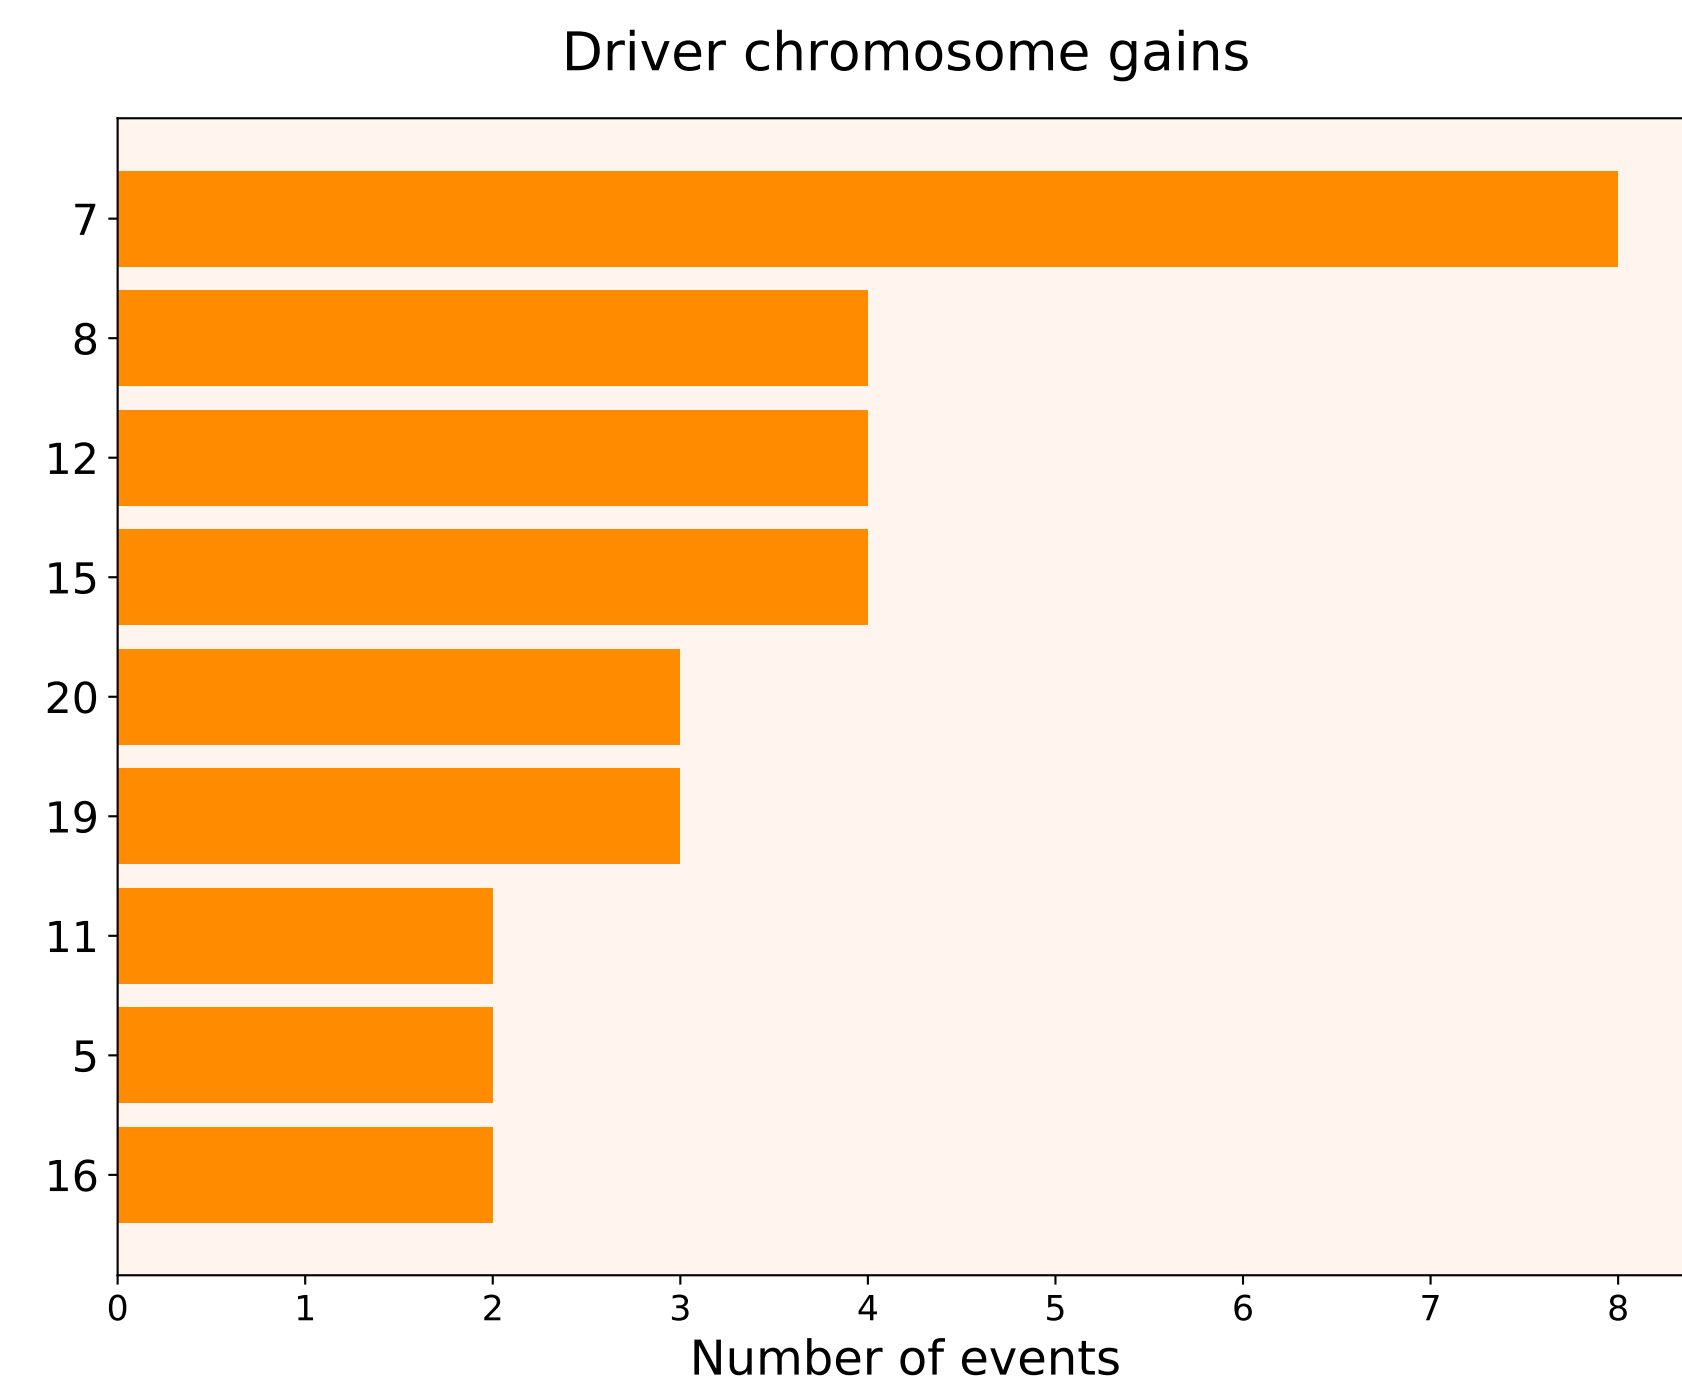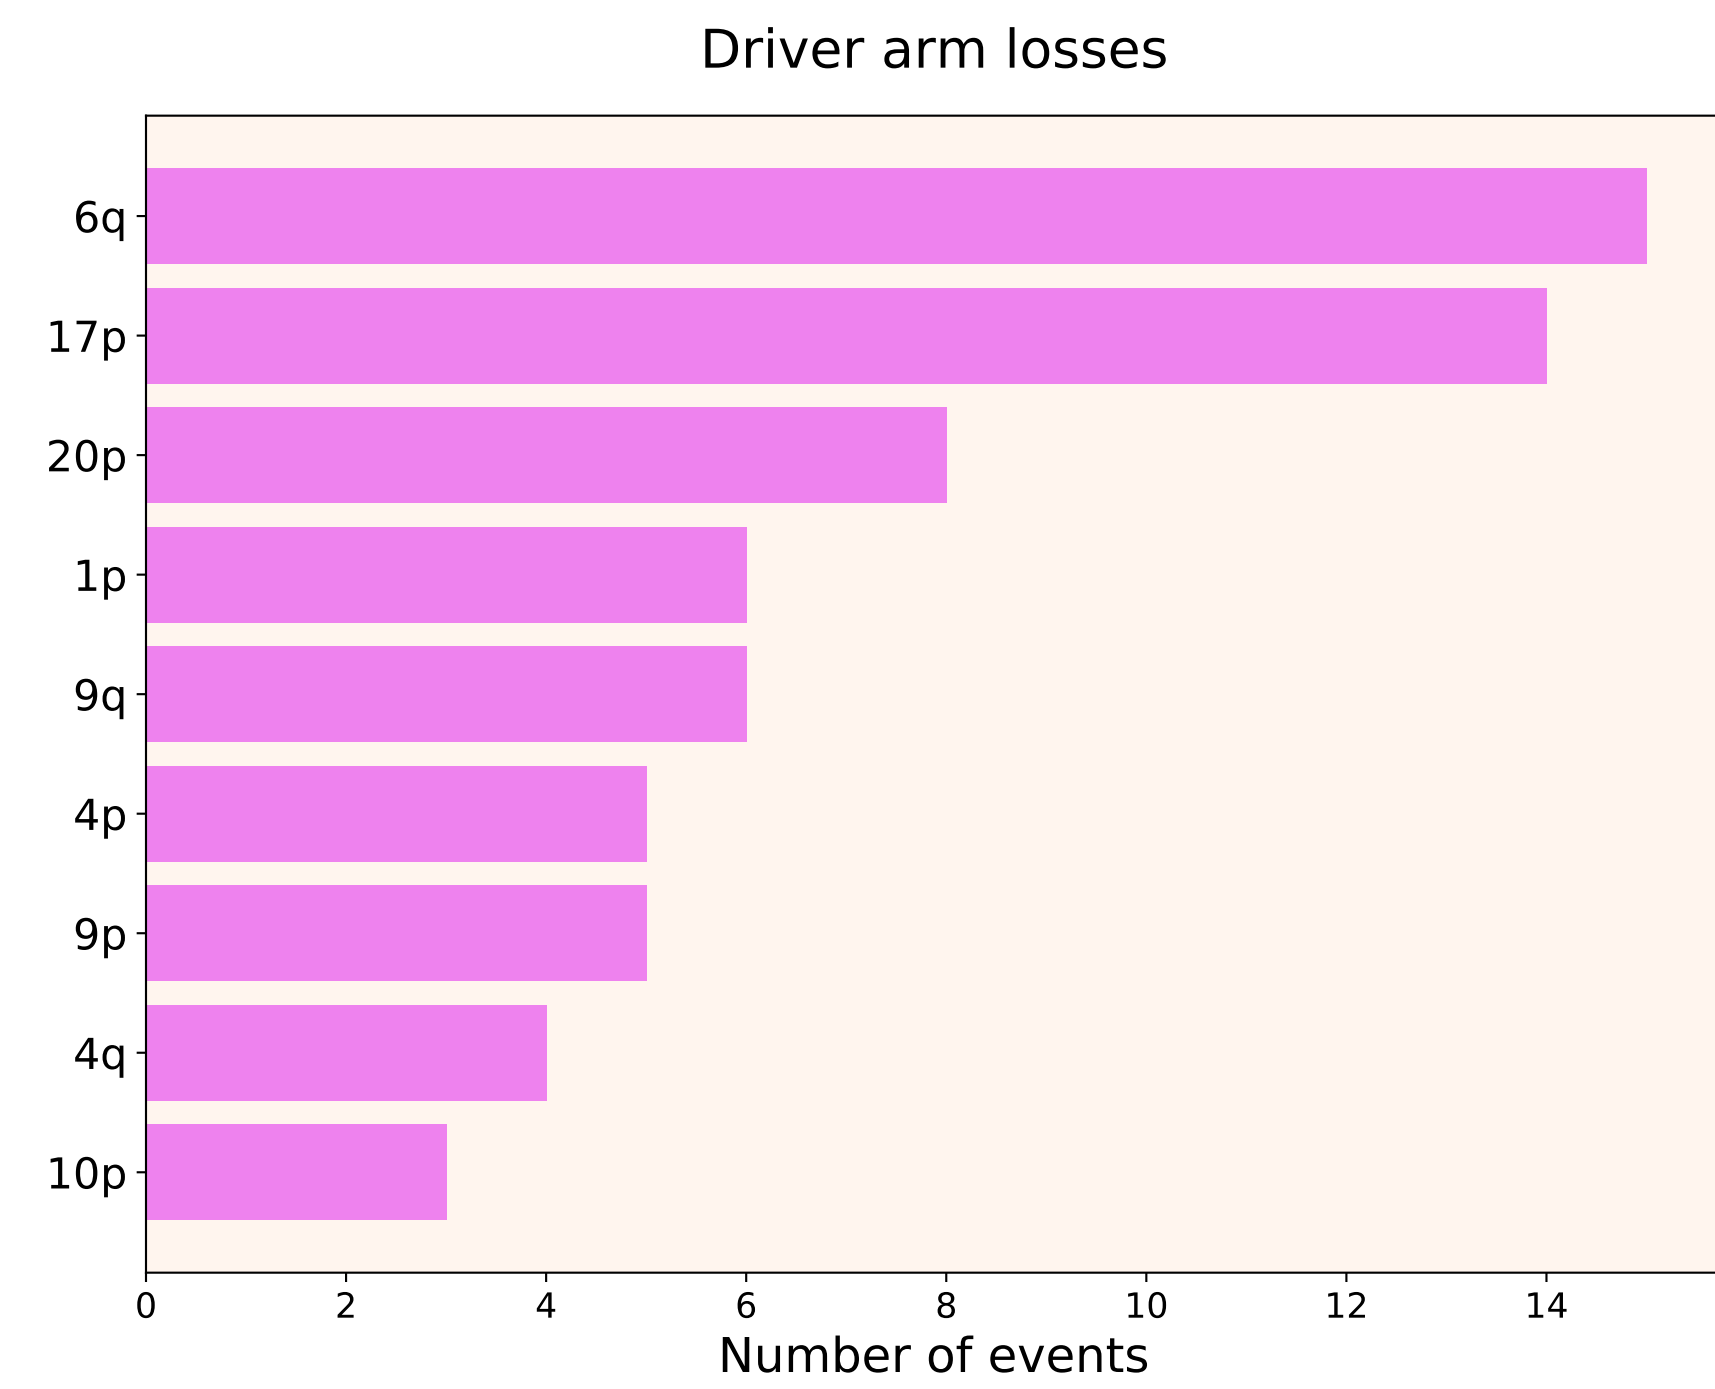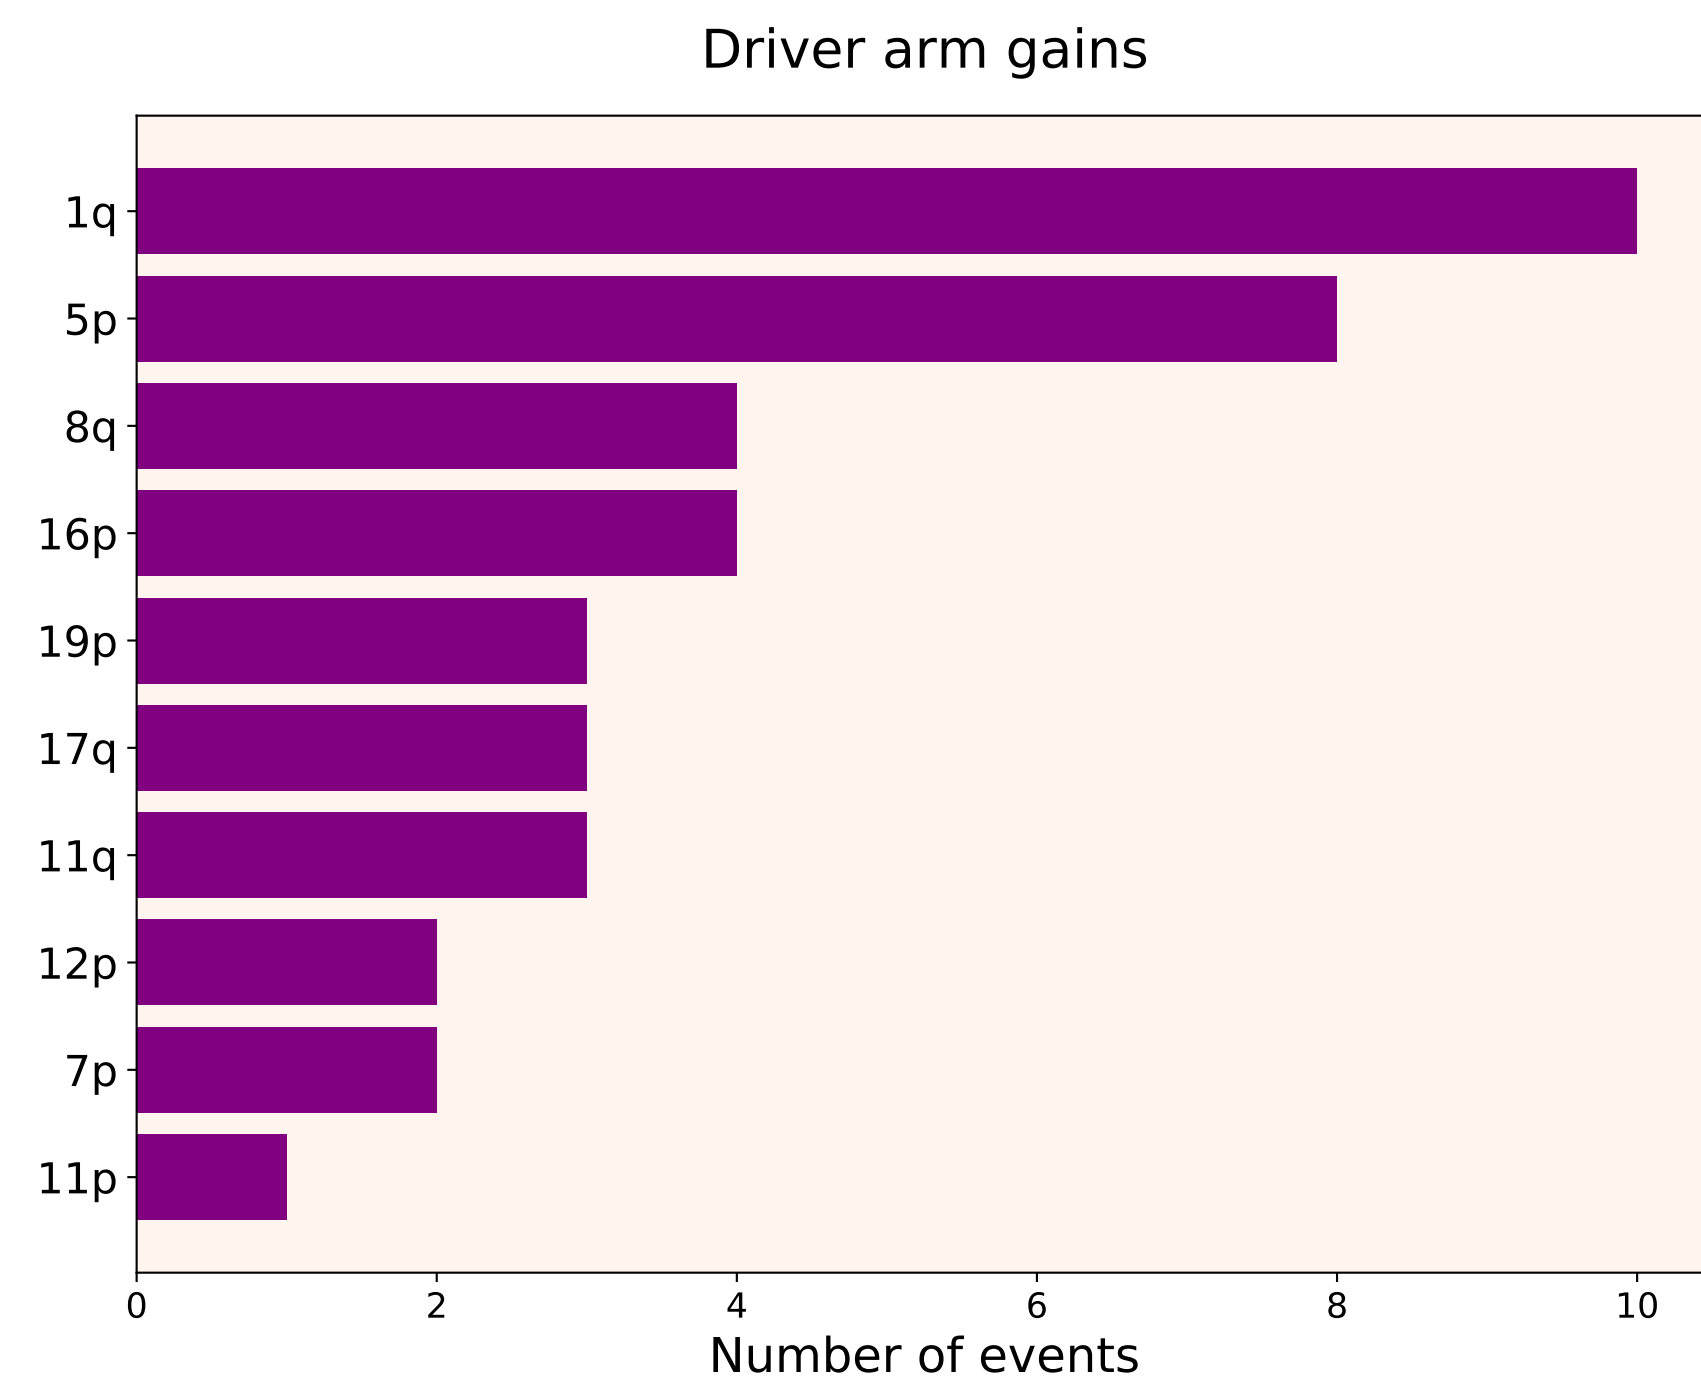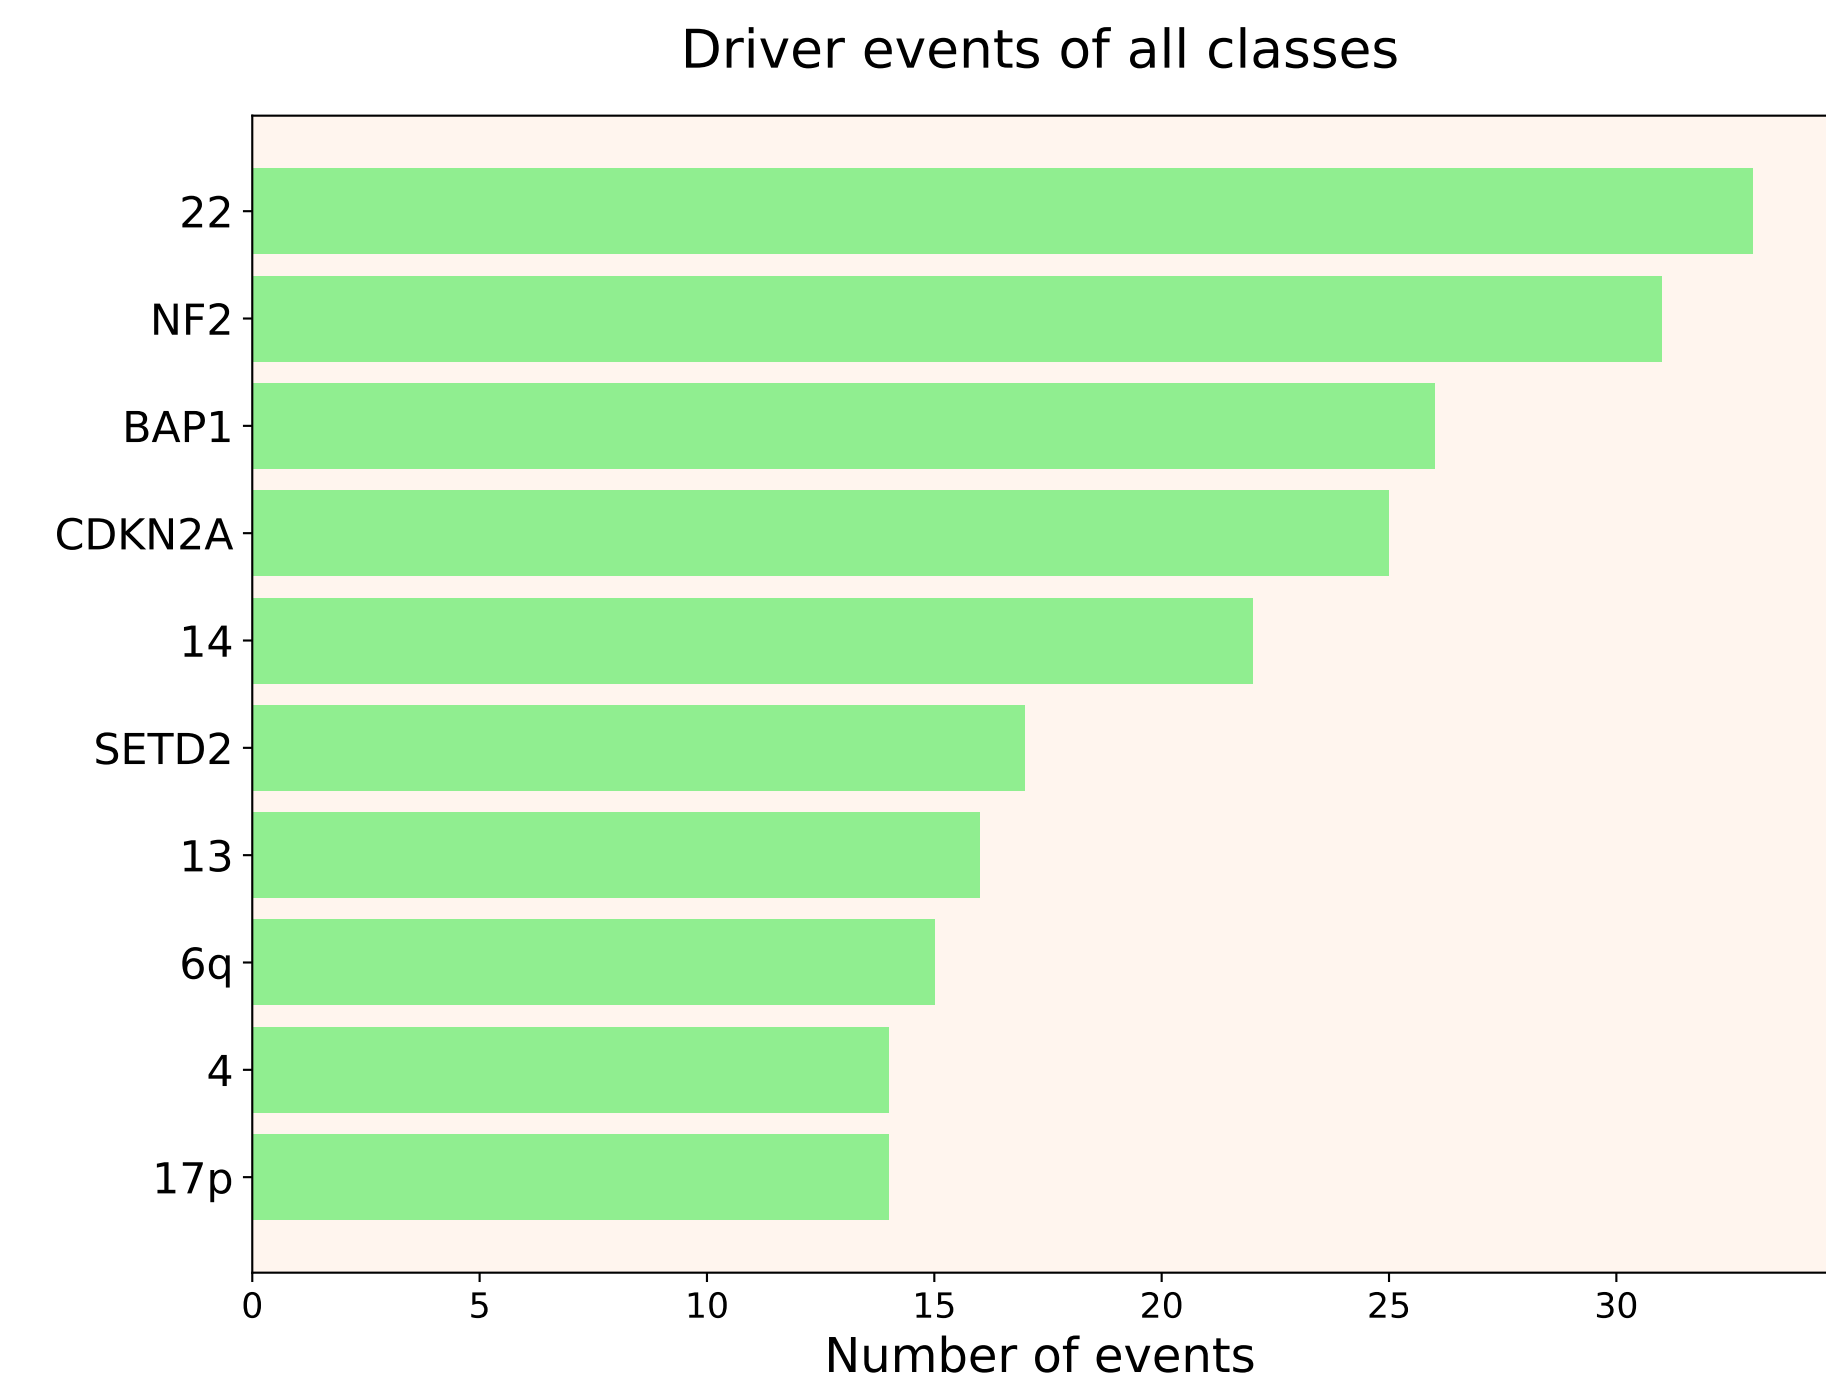

Supplement: Supplemental_Data_S1.zip [file Supplemental_Data_S1.zip]

# Driver event distribution by cancer stage in females

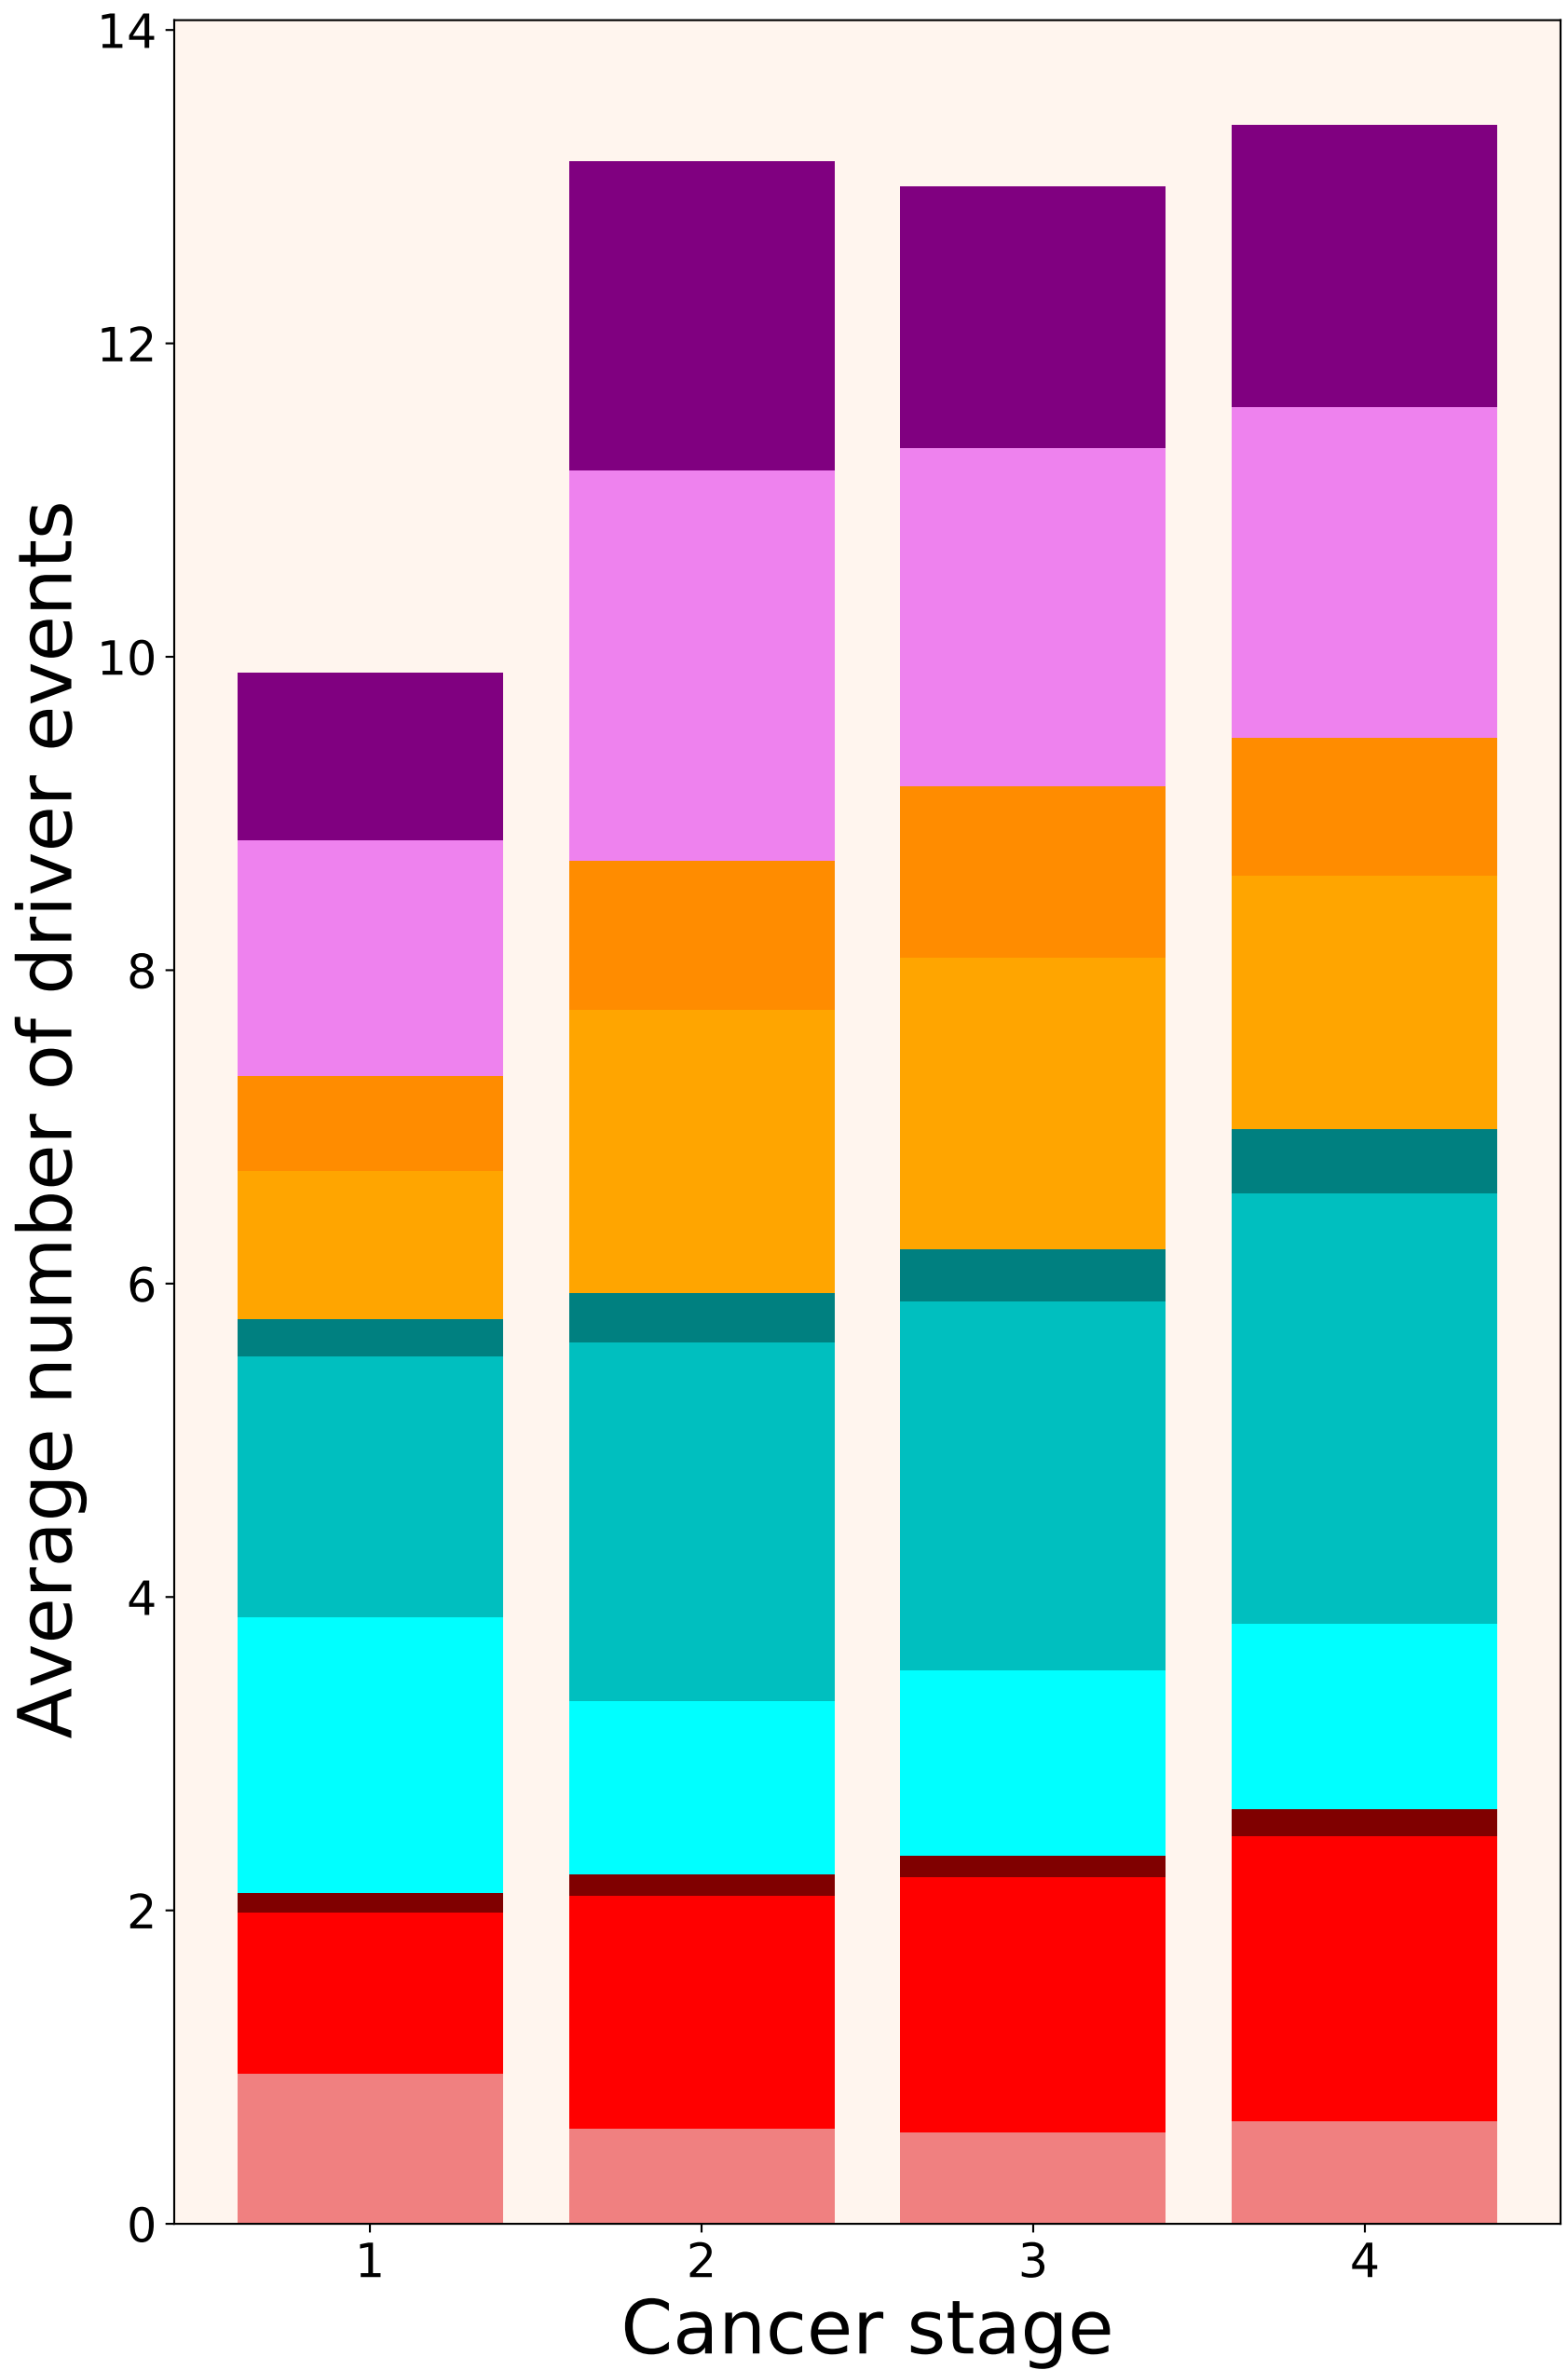

Supplement: Supplemental_Data_S1.zip [file Supplemental_Data_S1.zip]

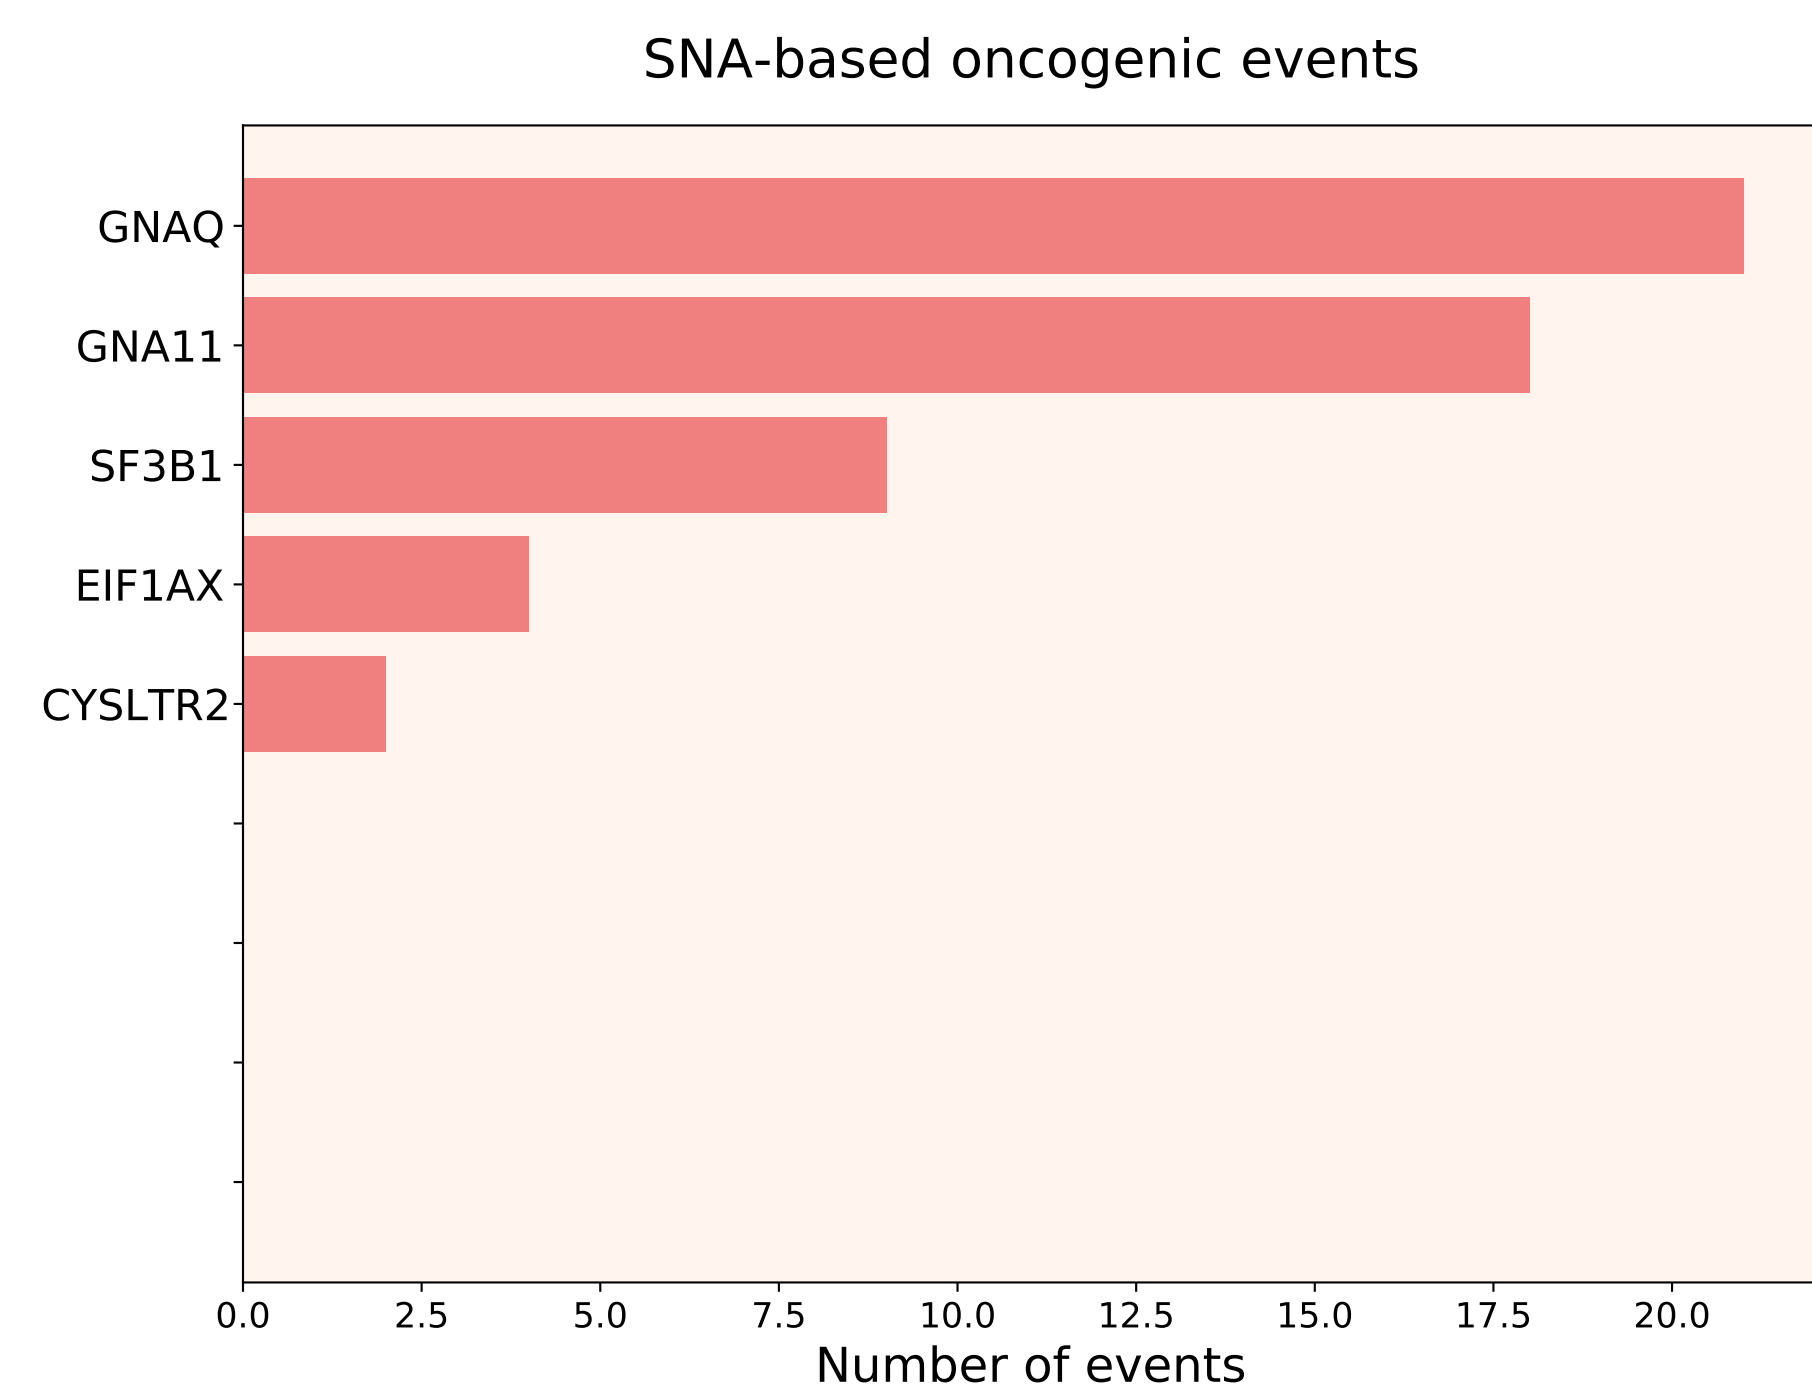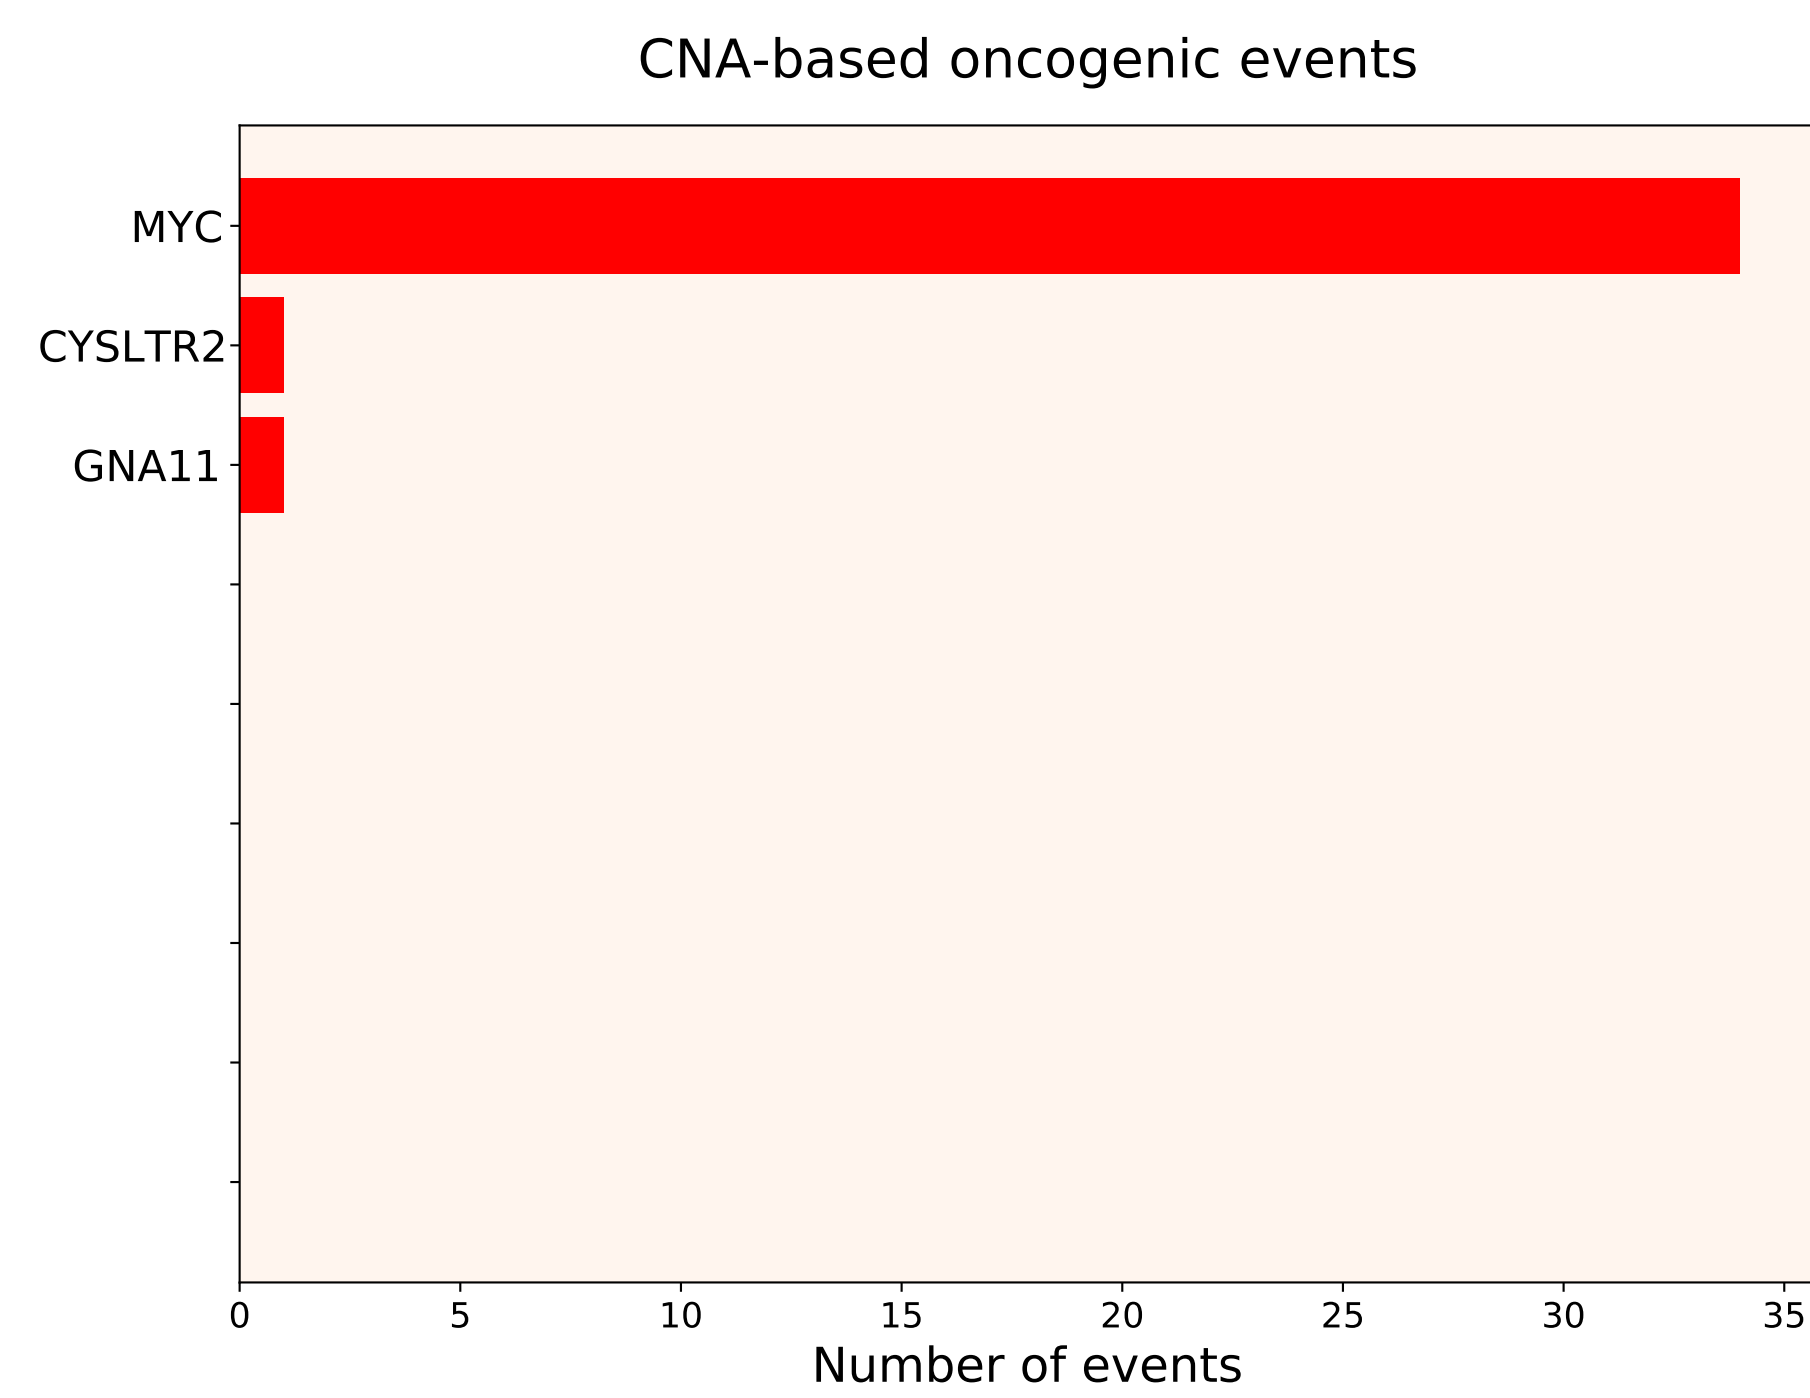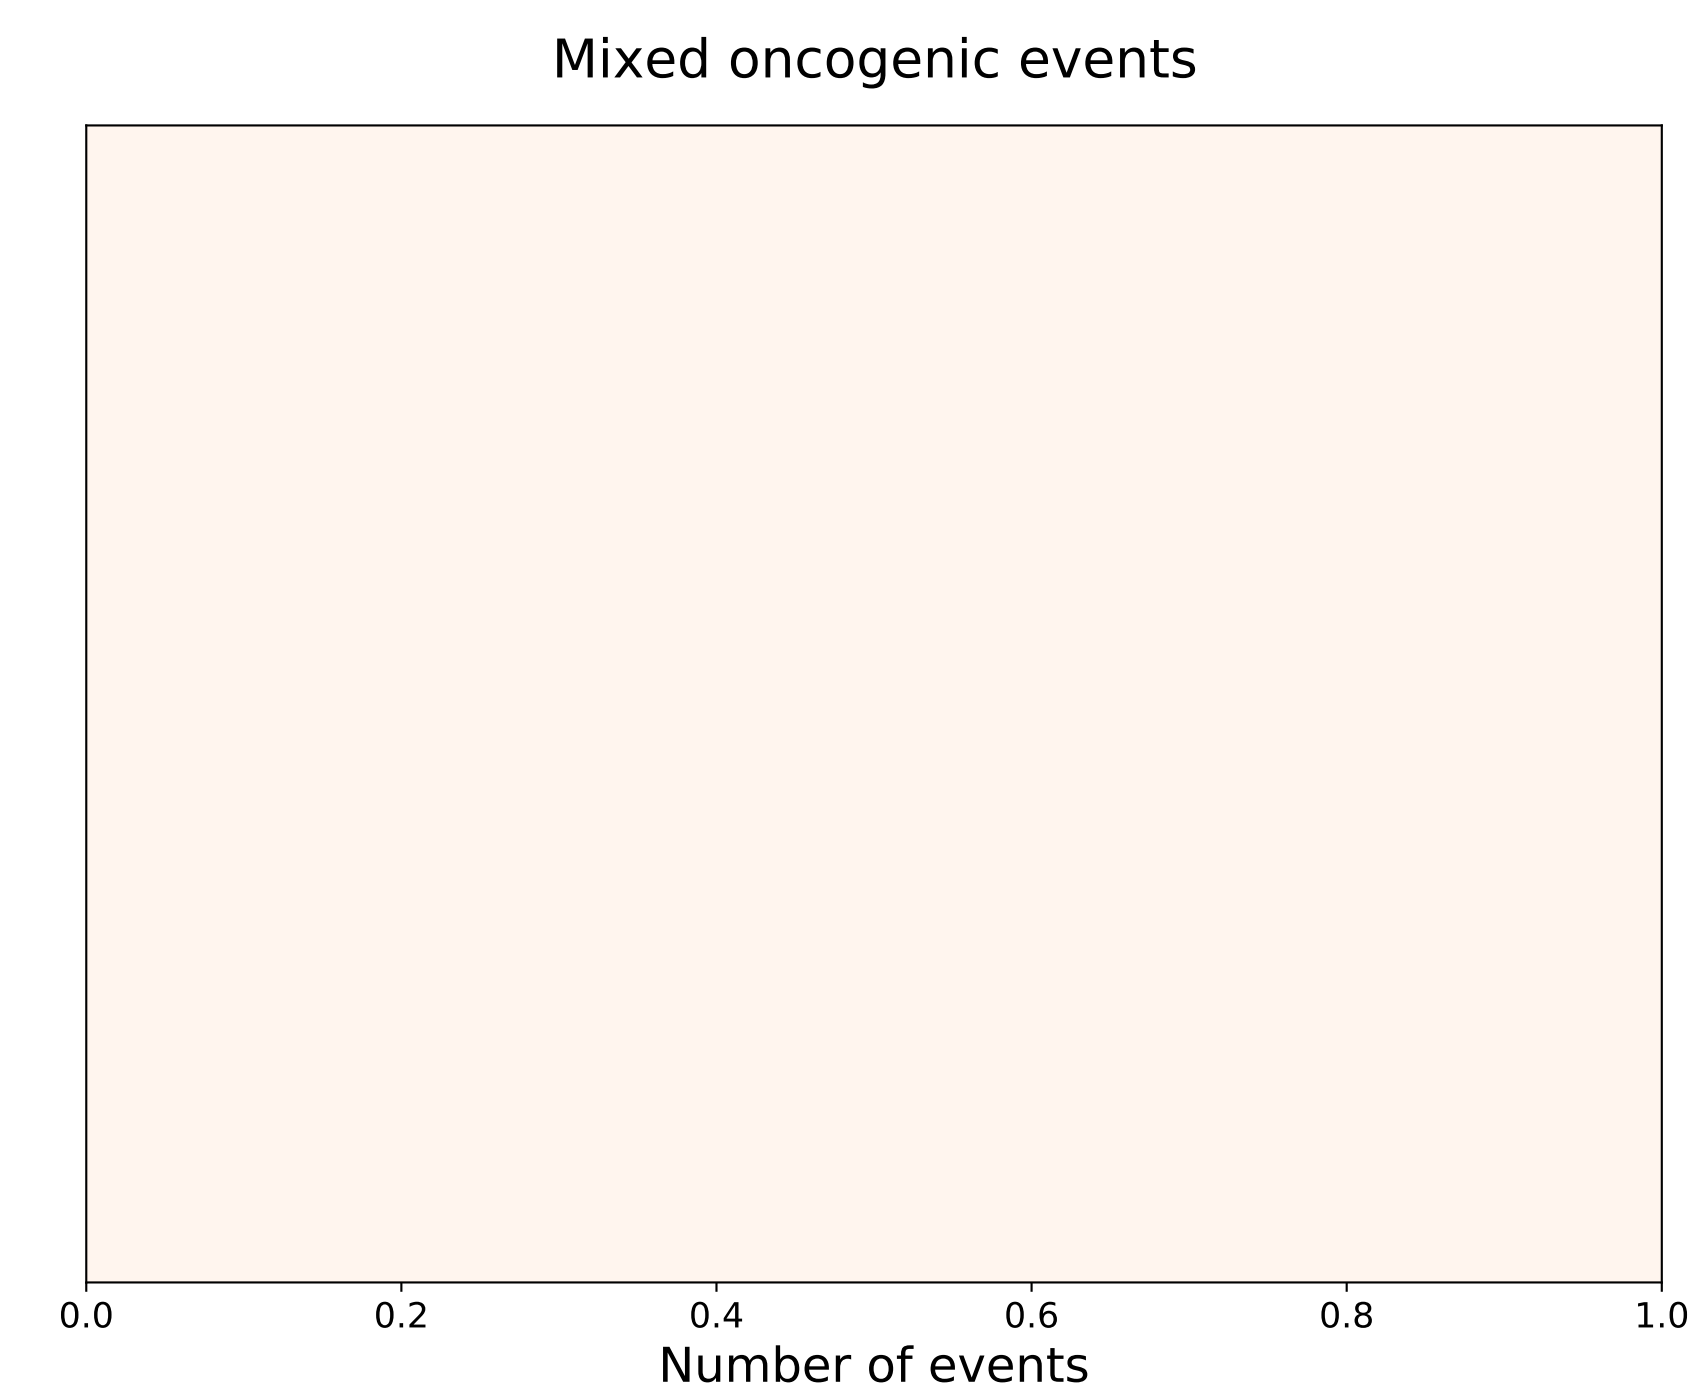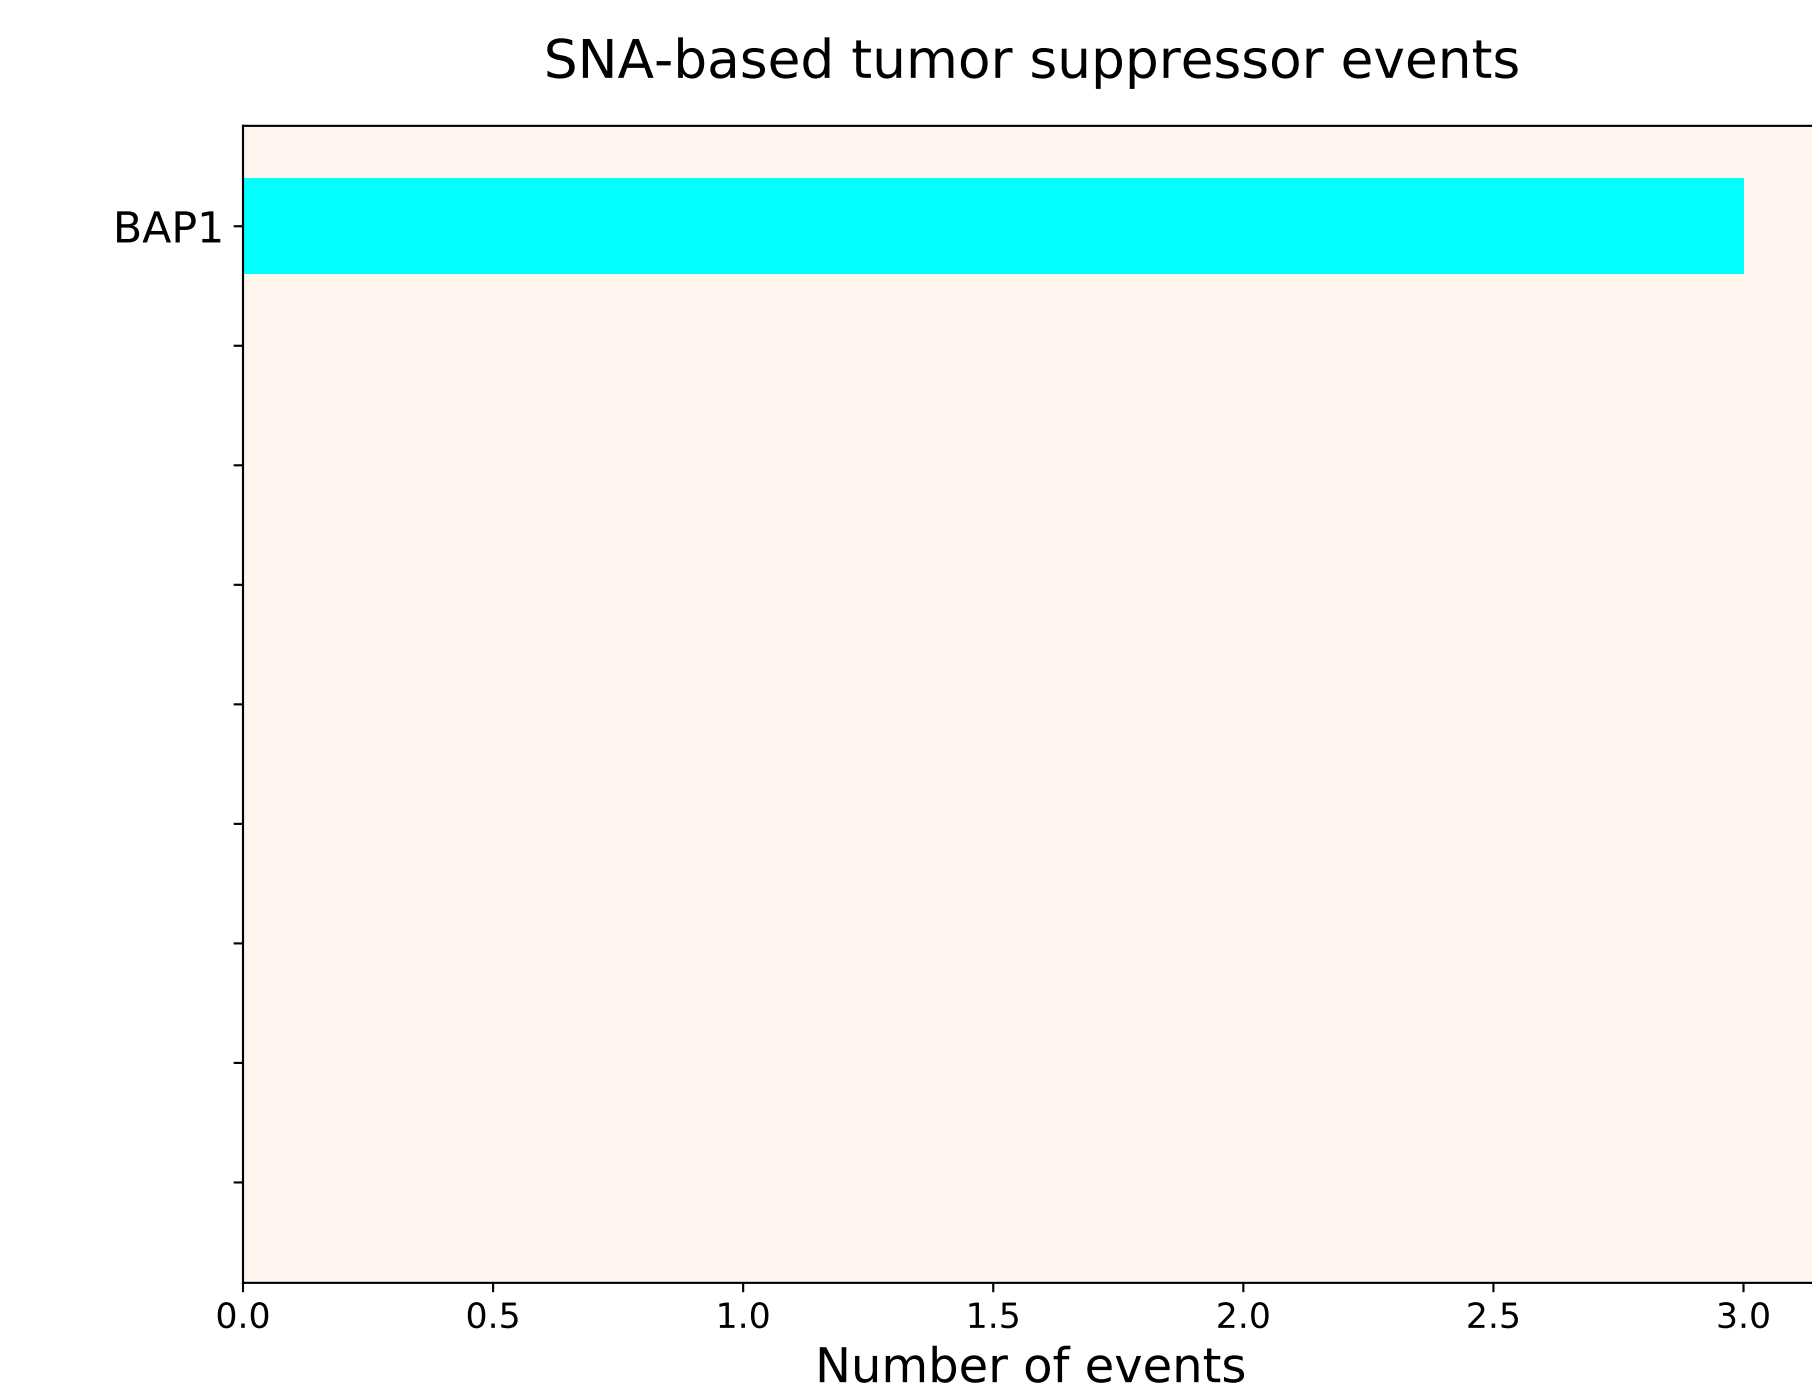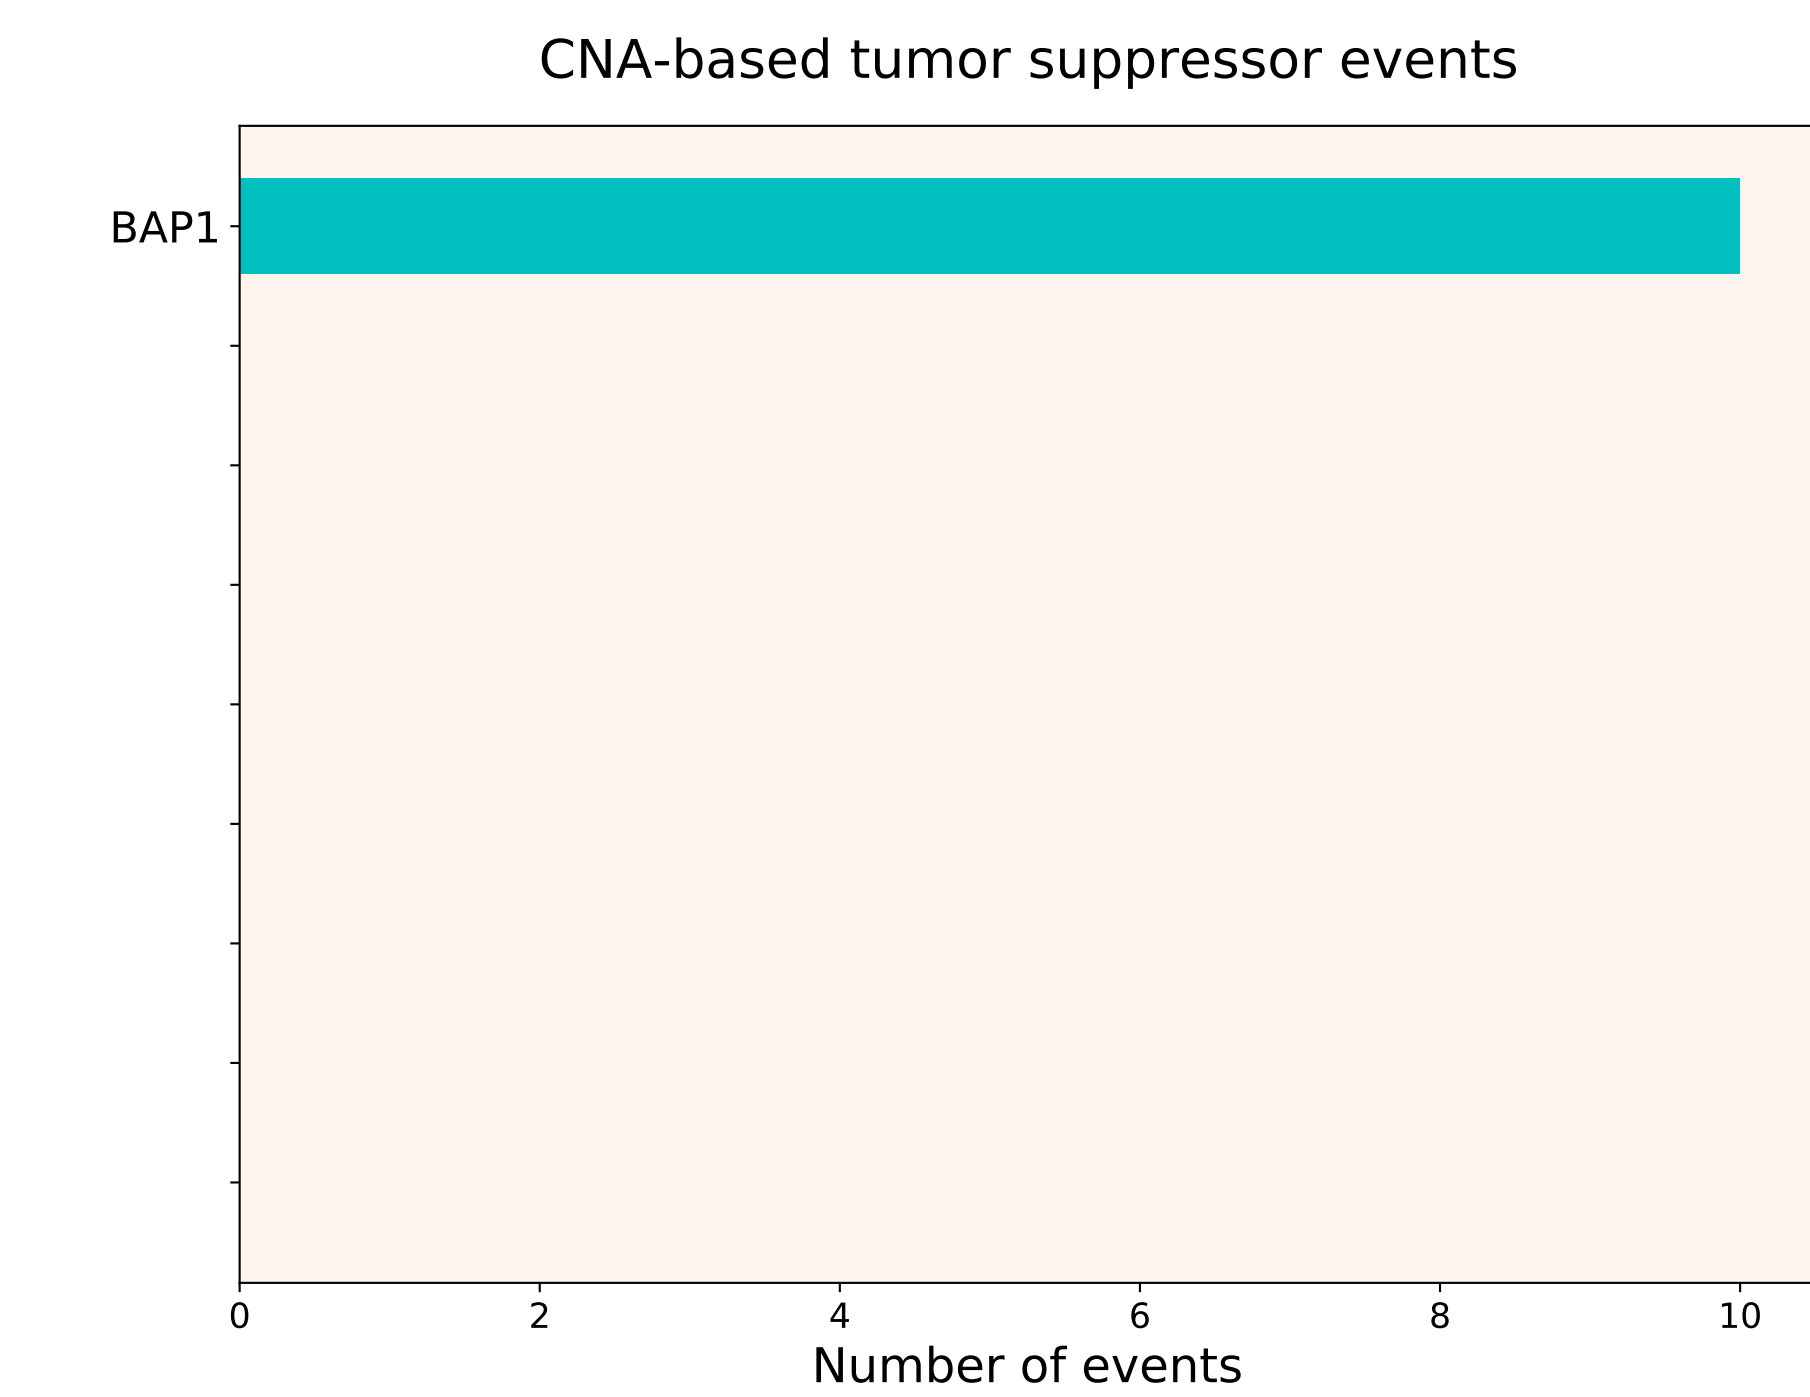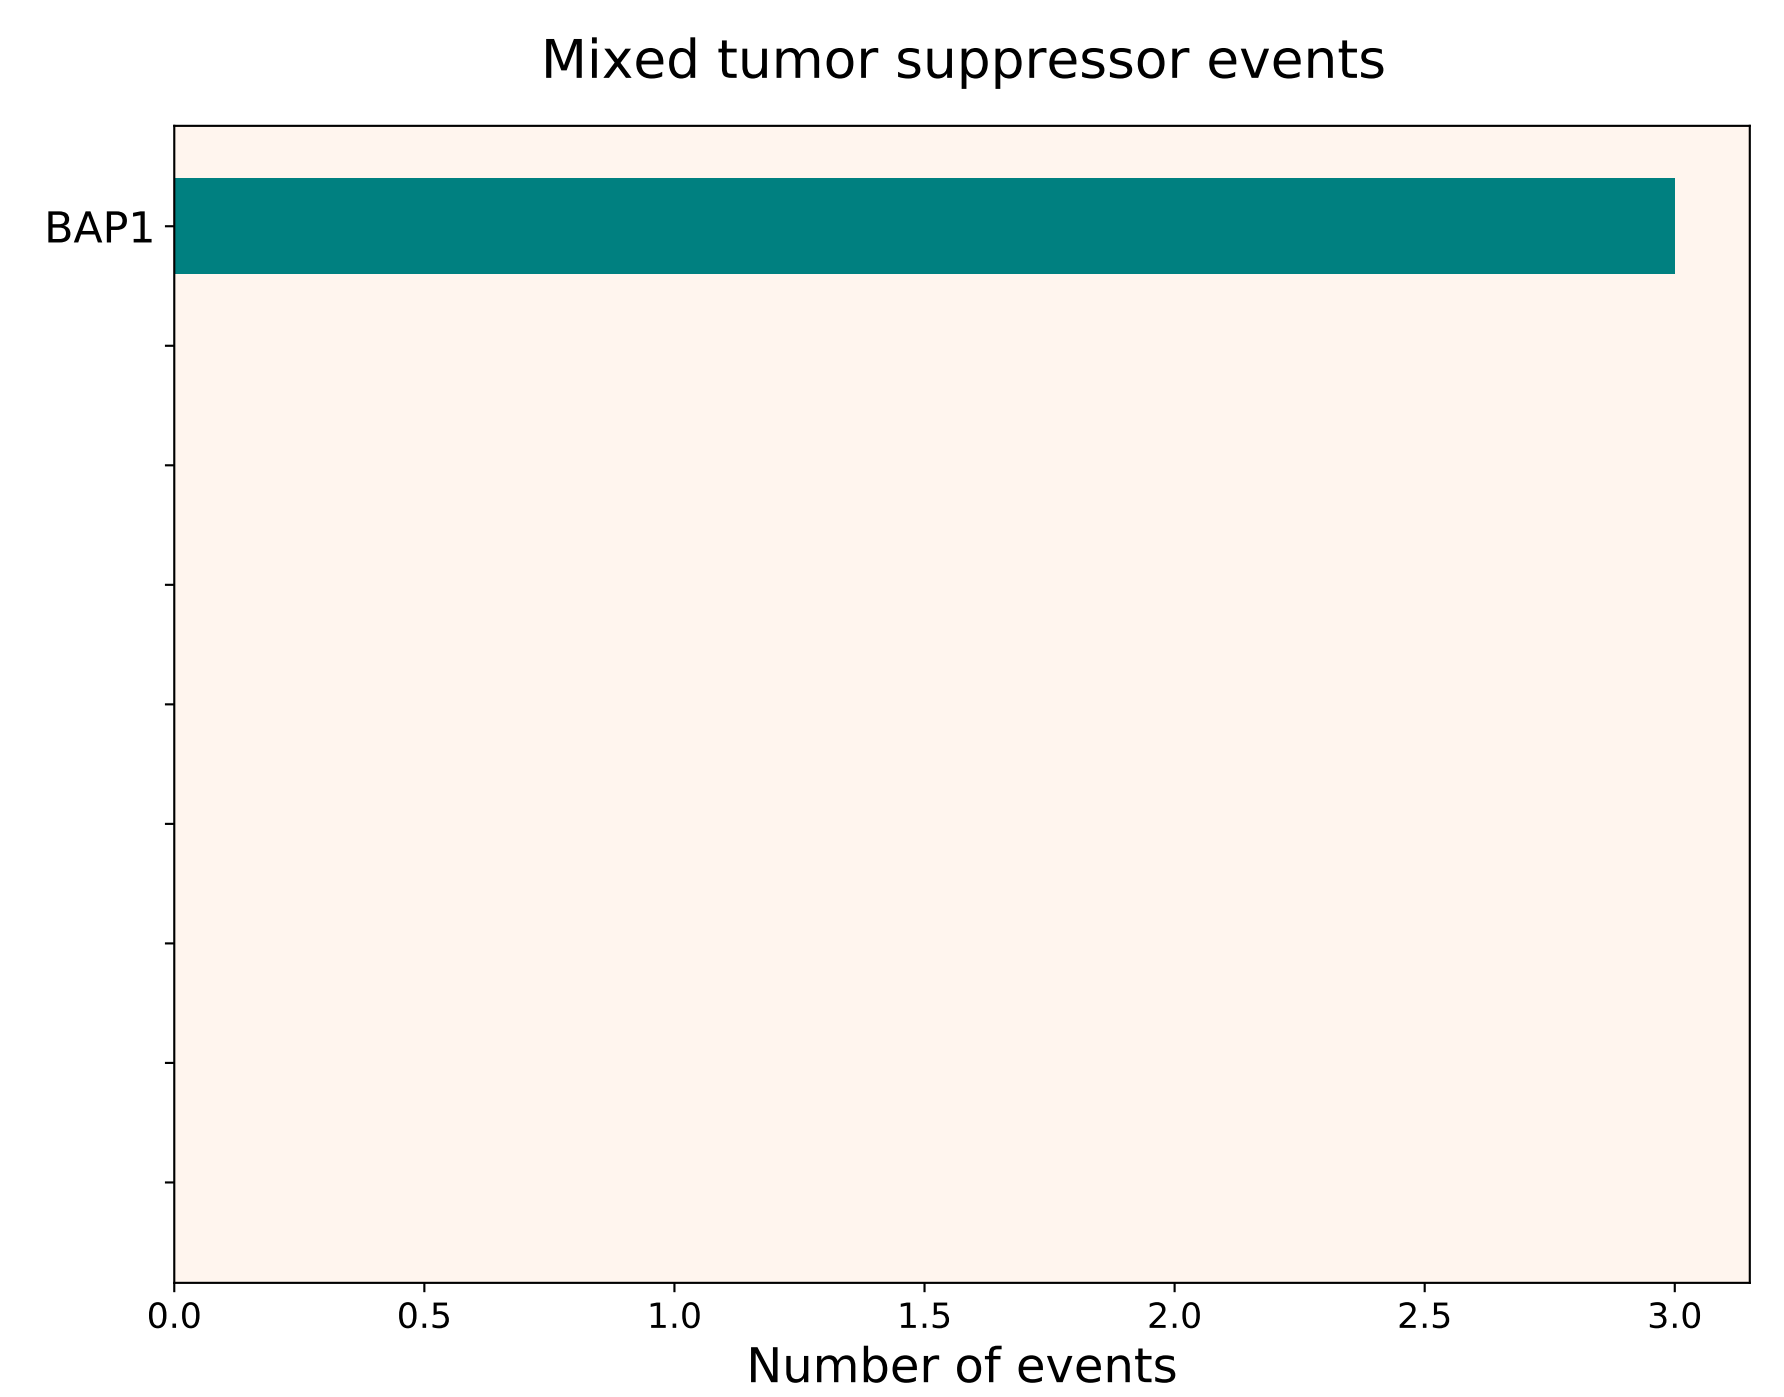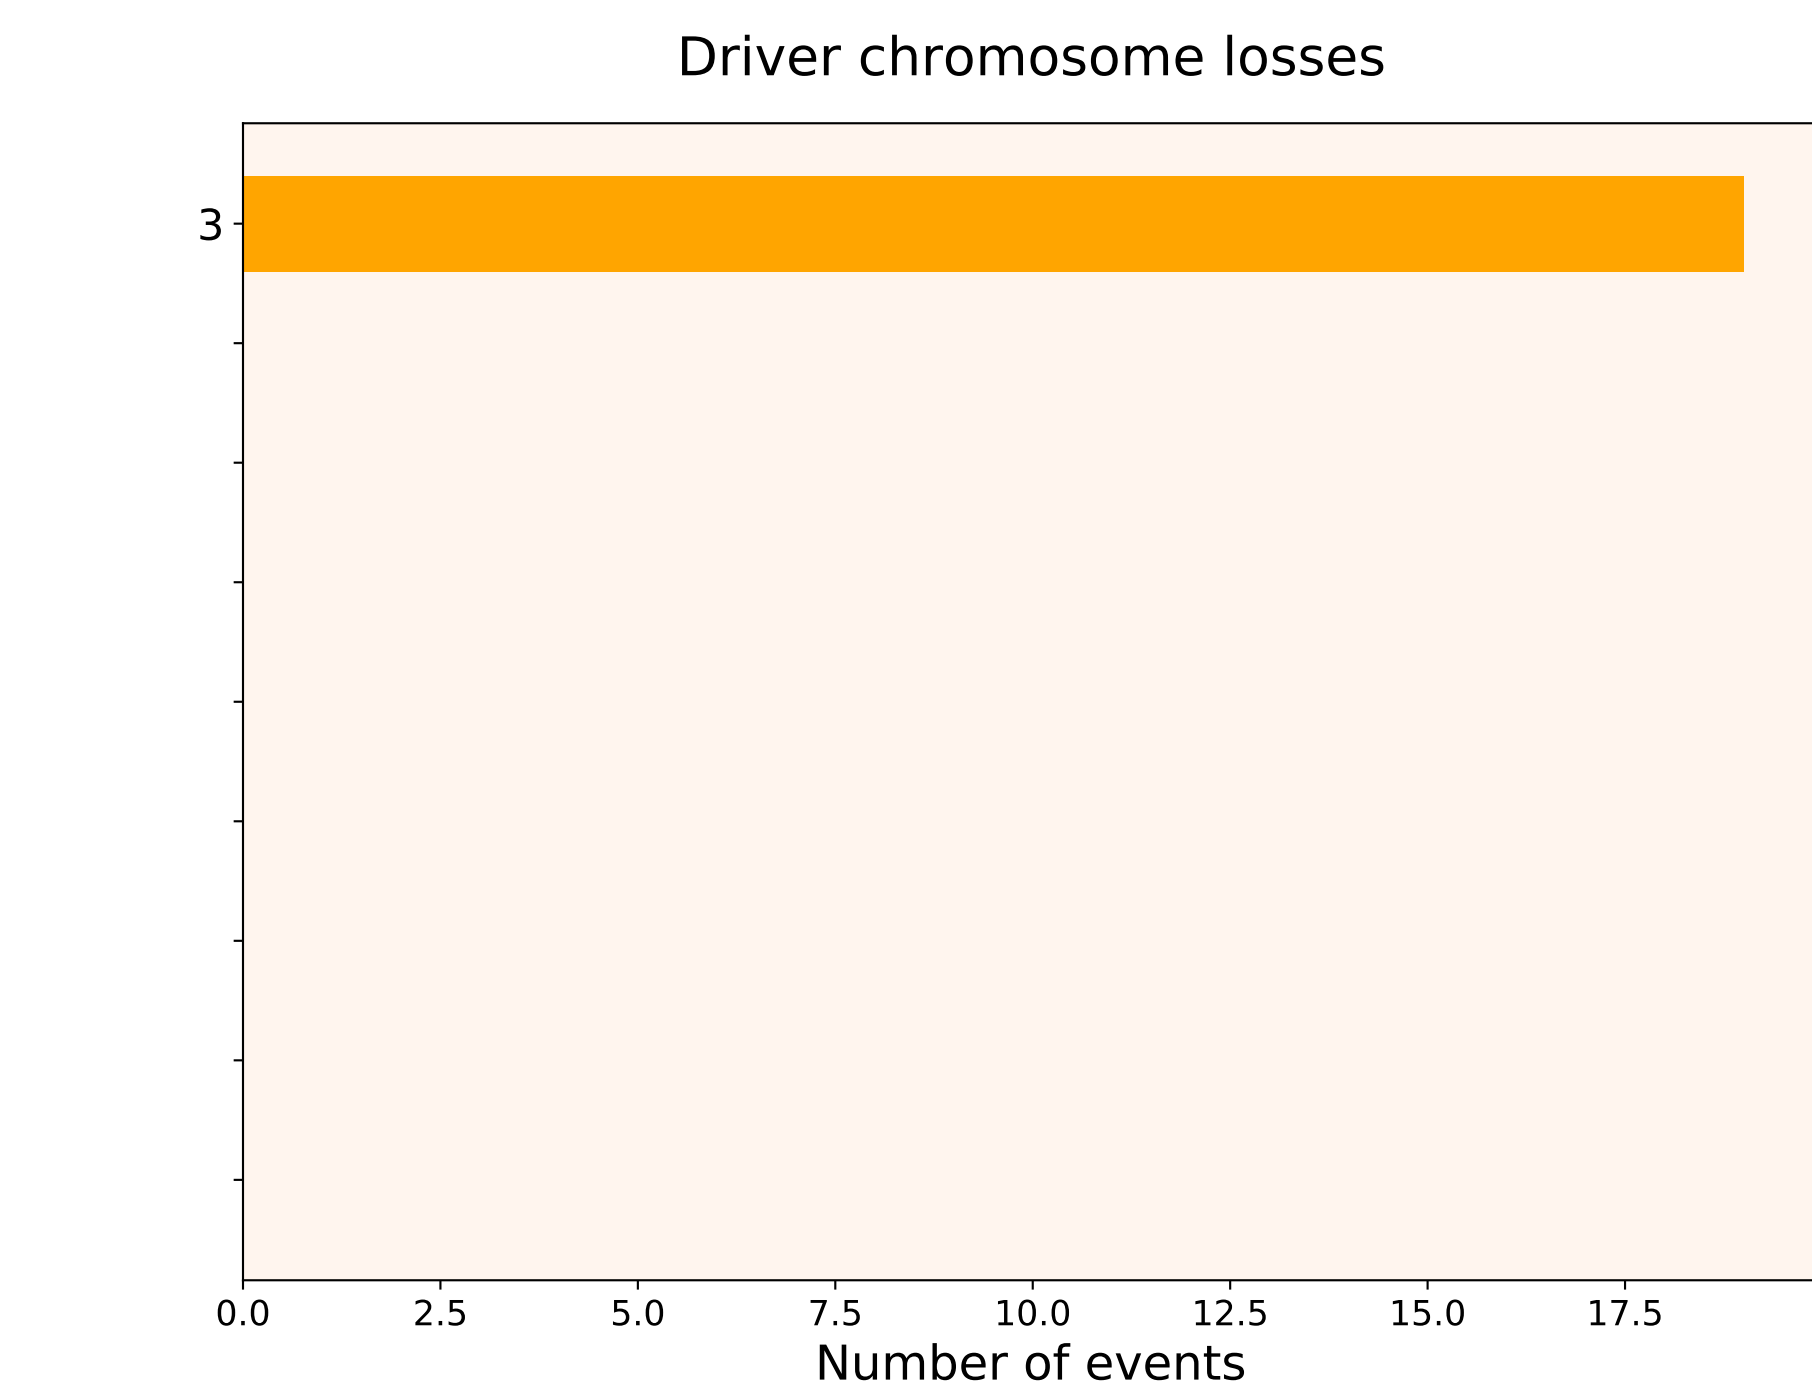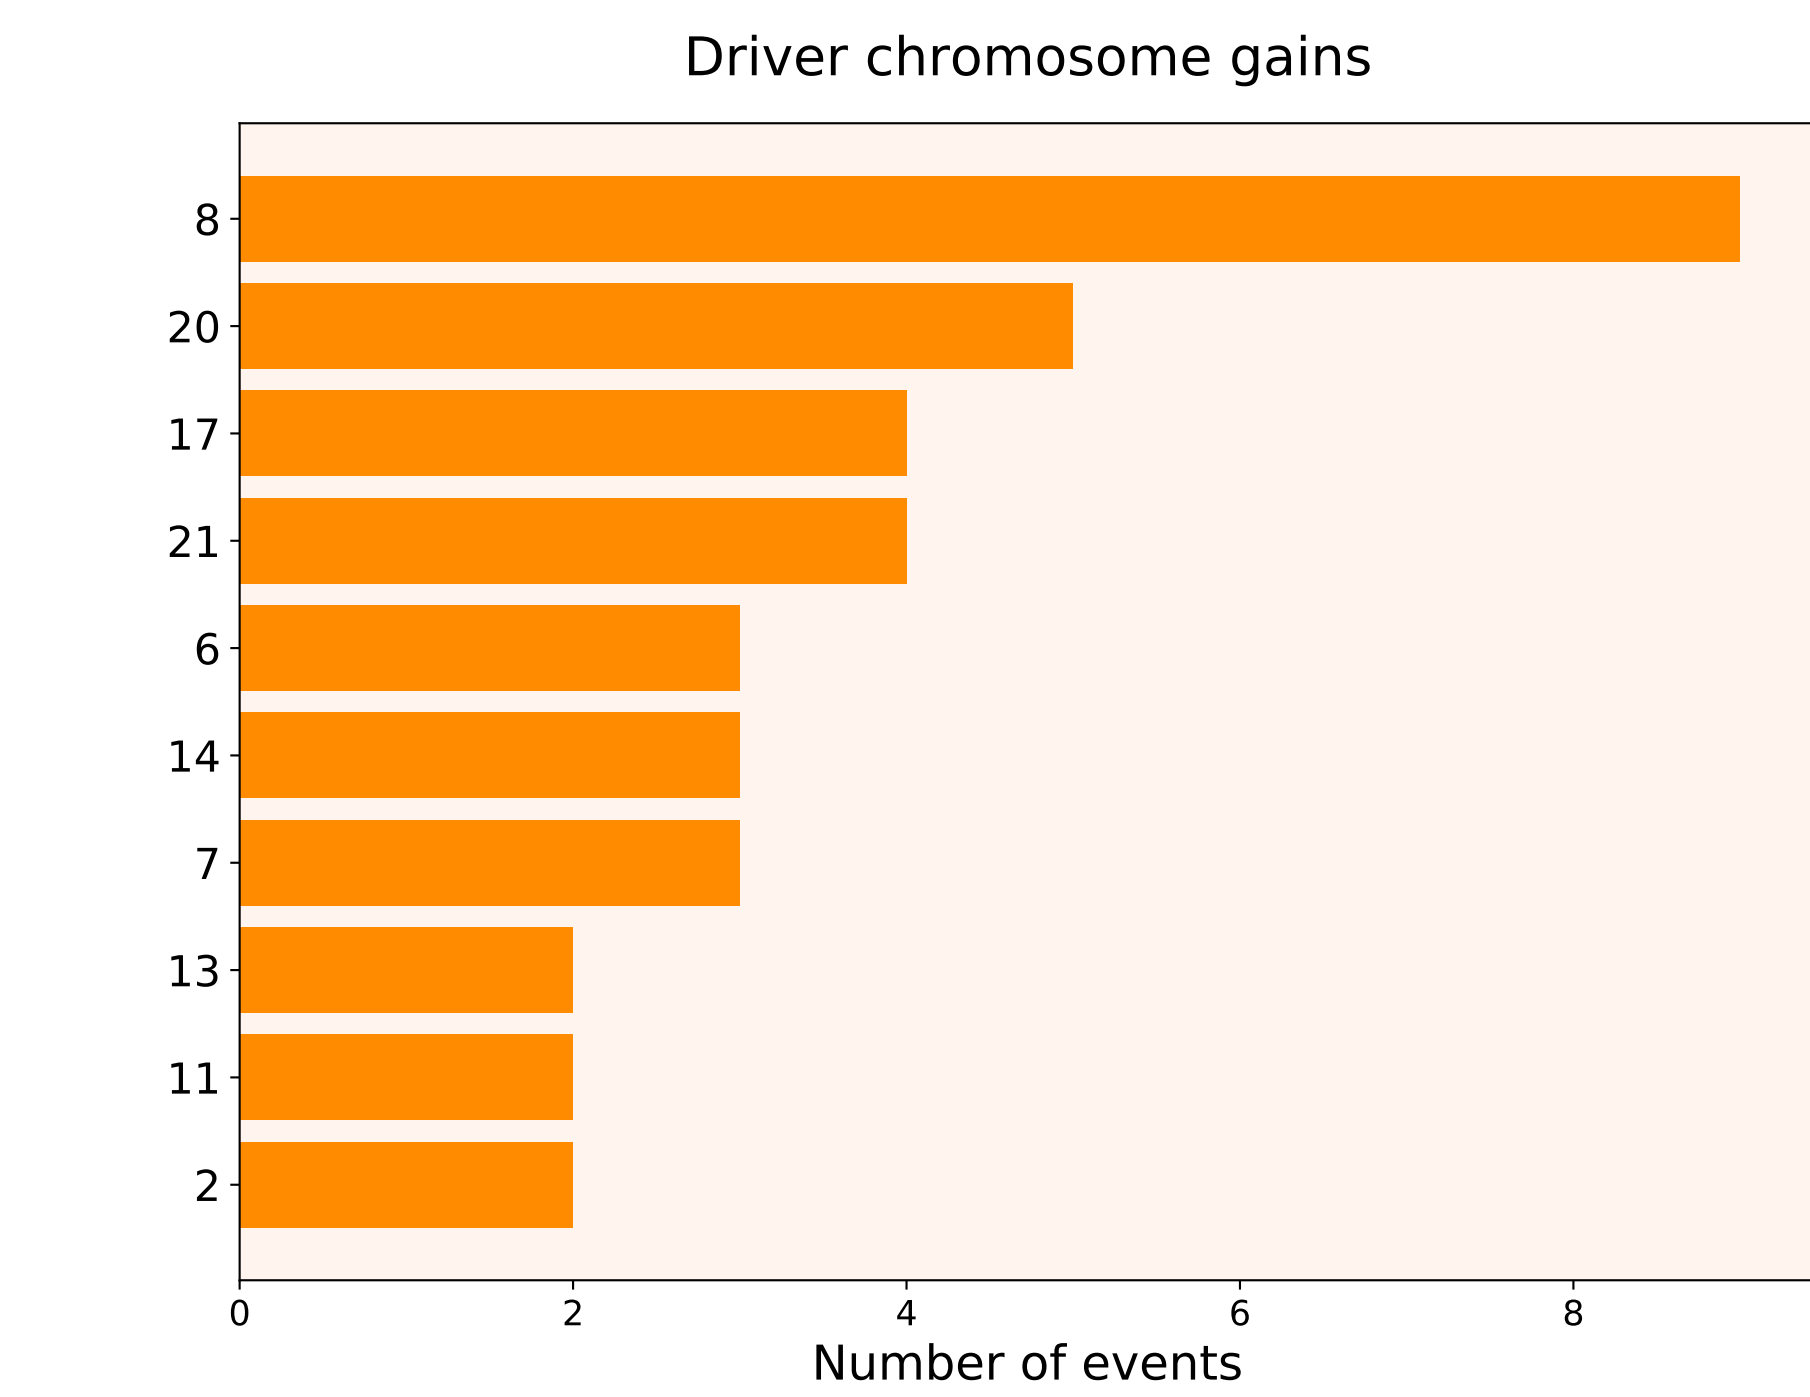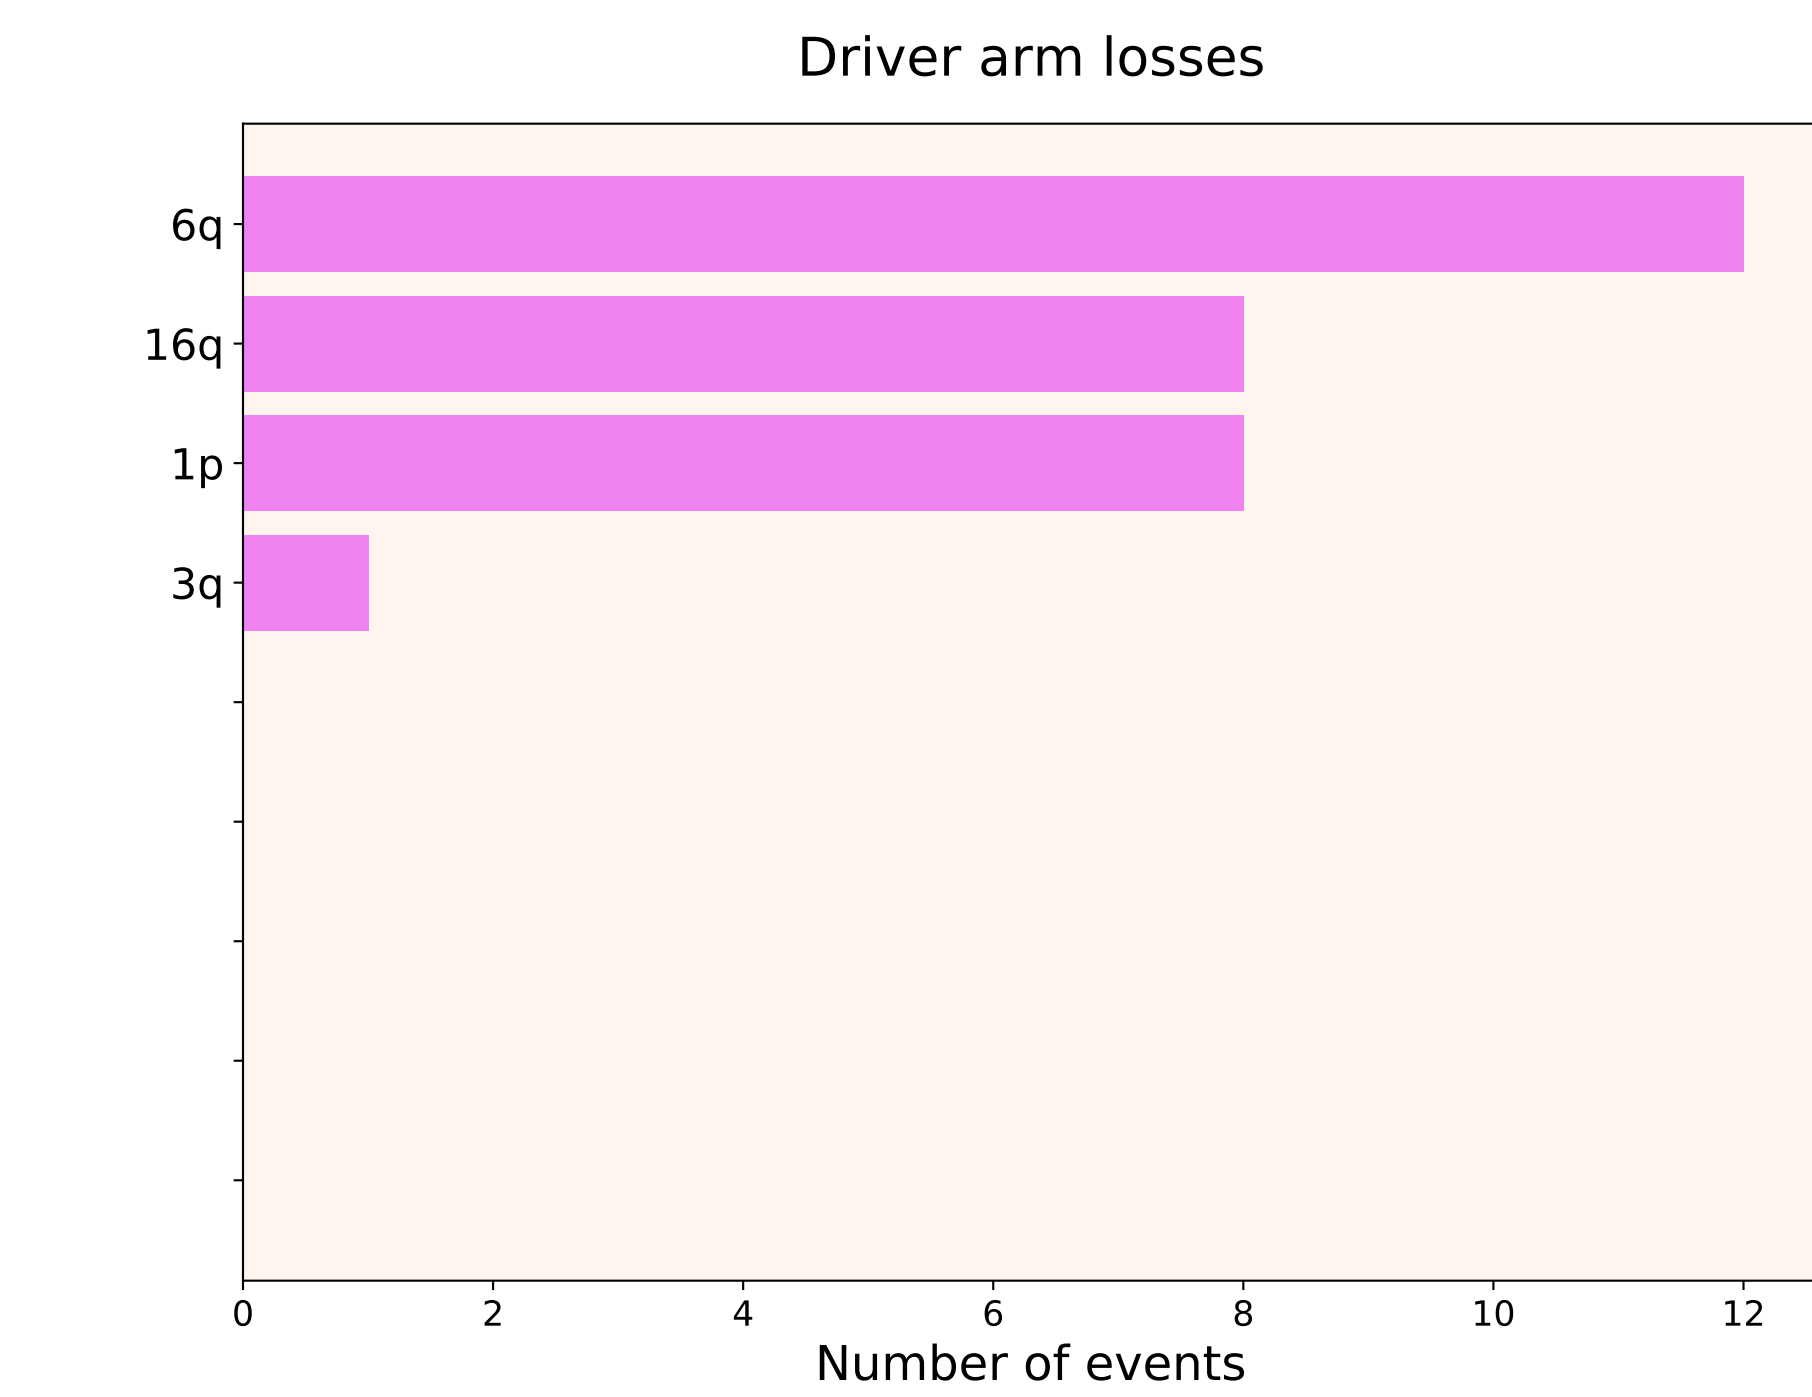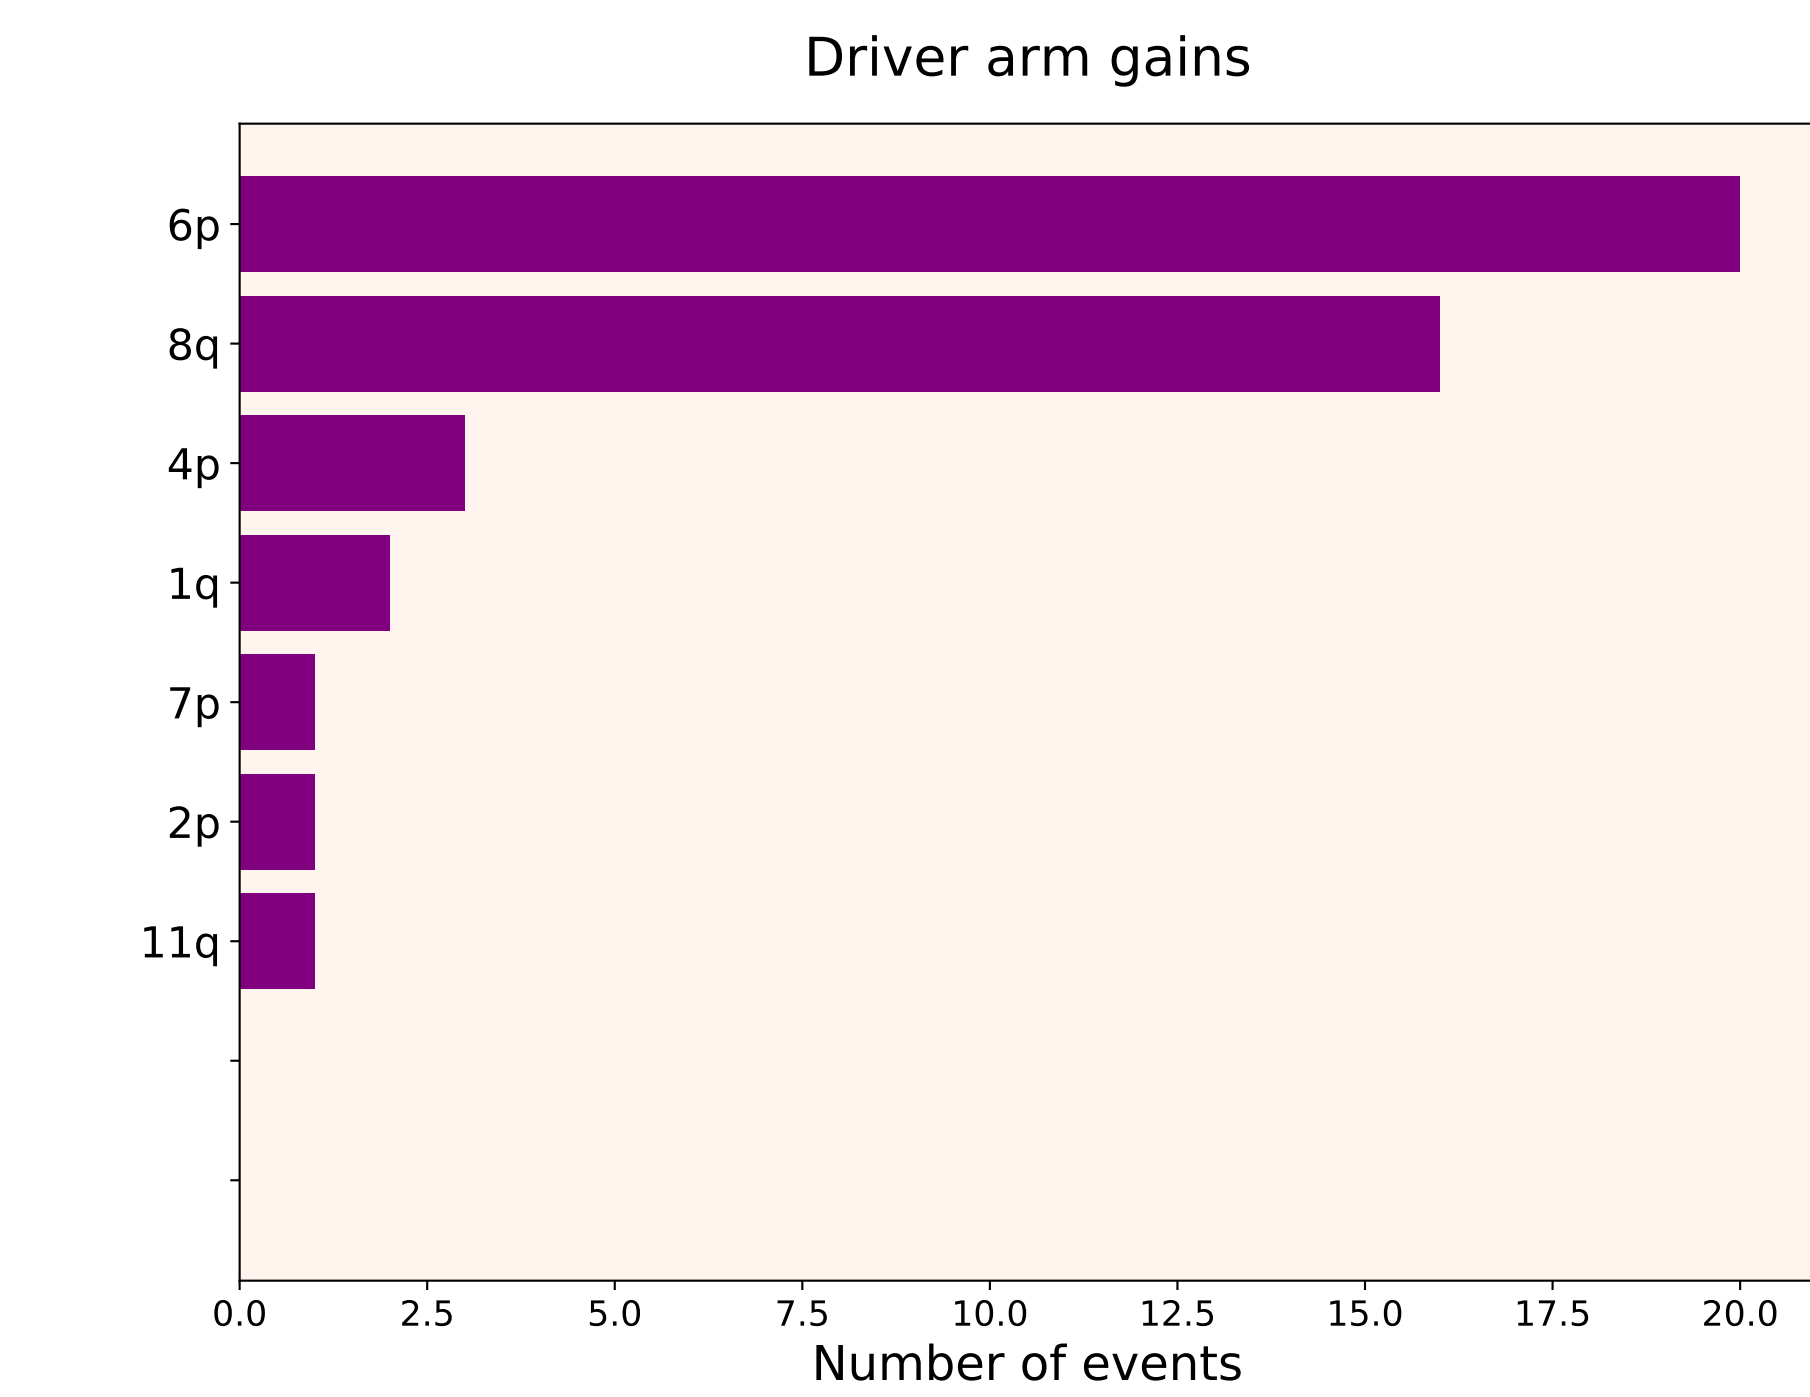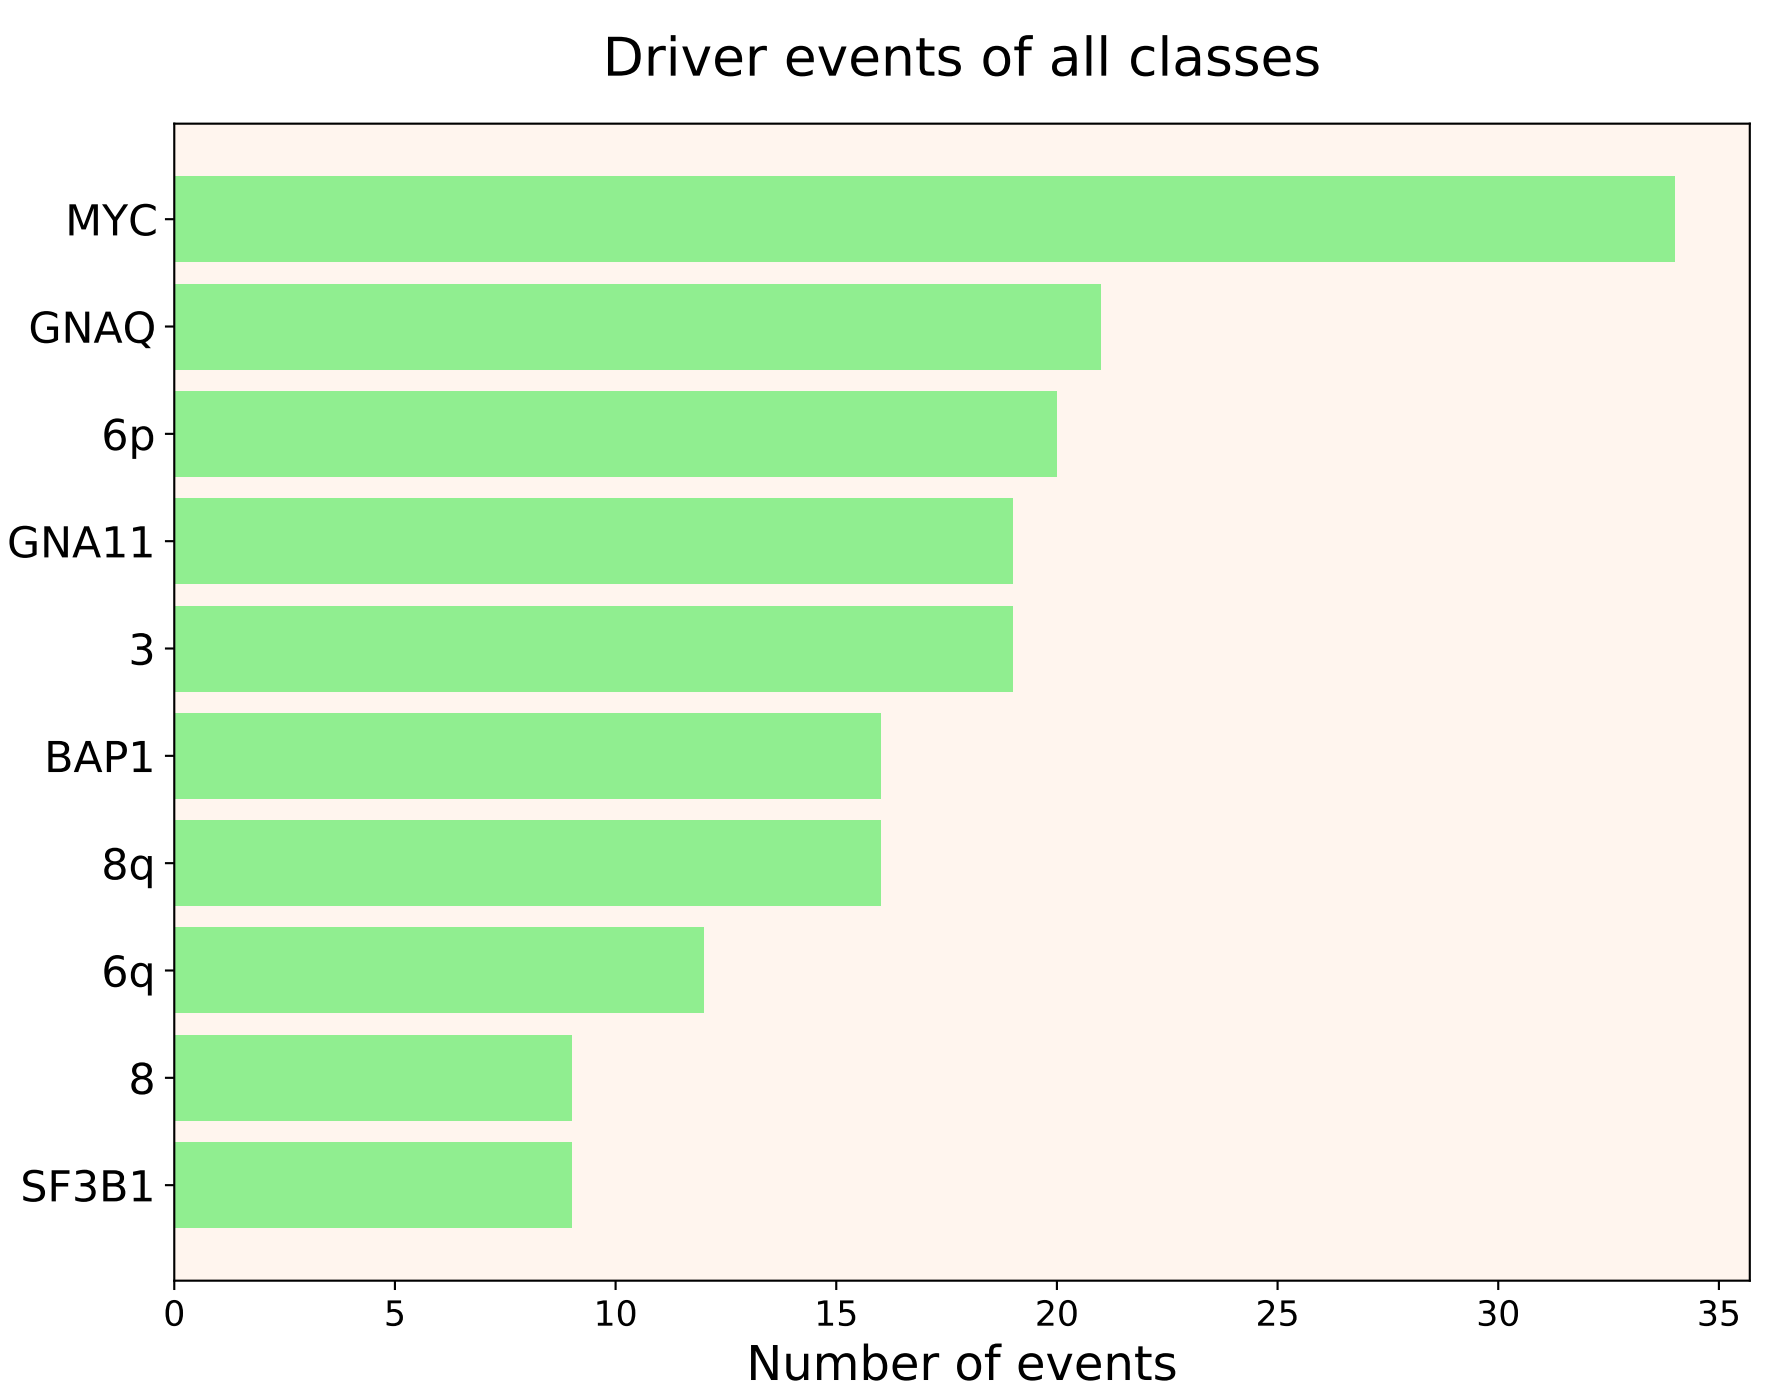

Supplement: Supplemental_Data_S1.zip [file Supplemental_Data_S1.zip]

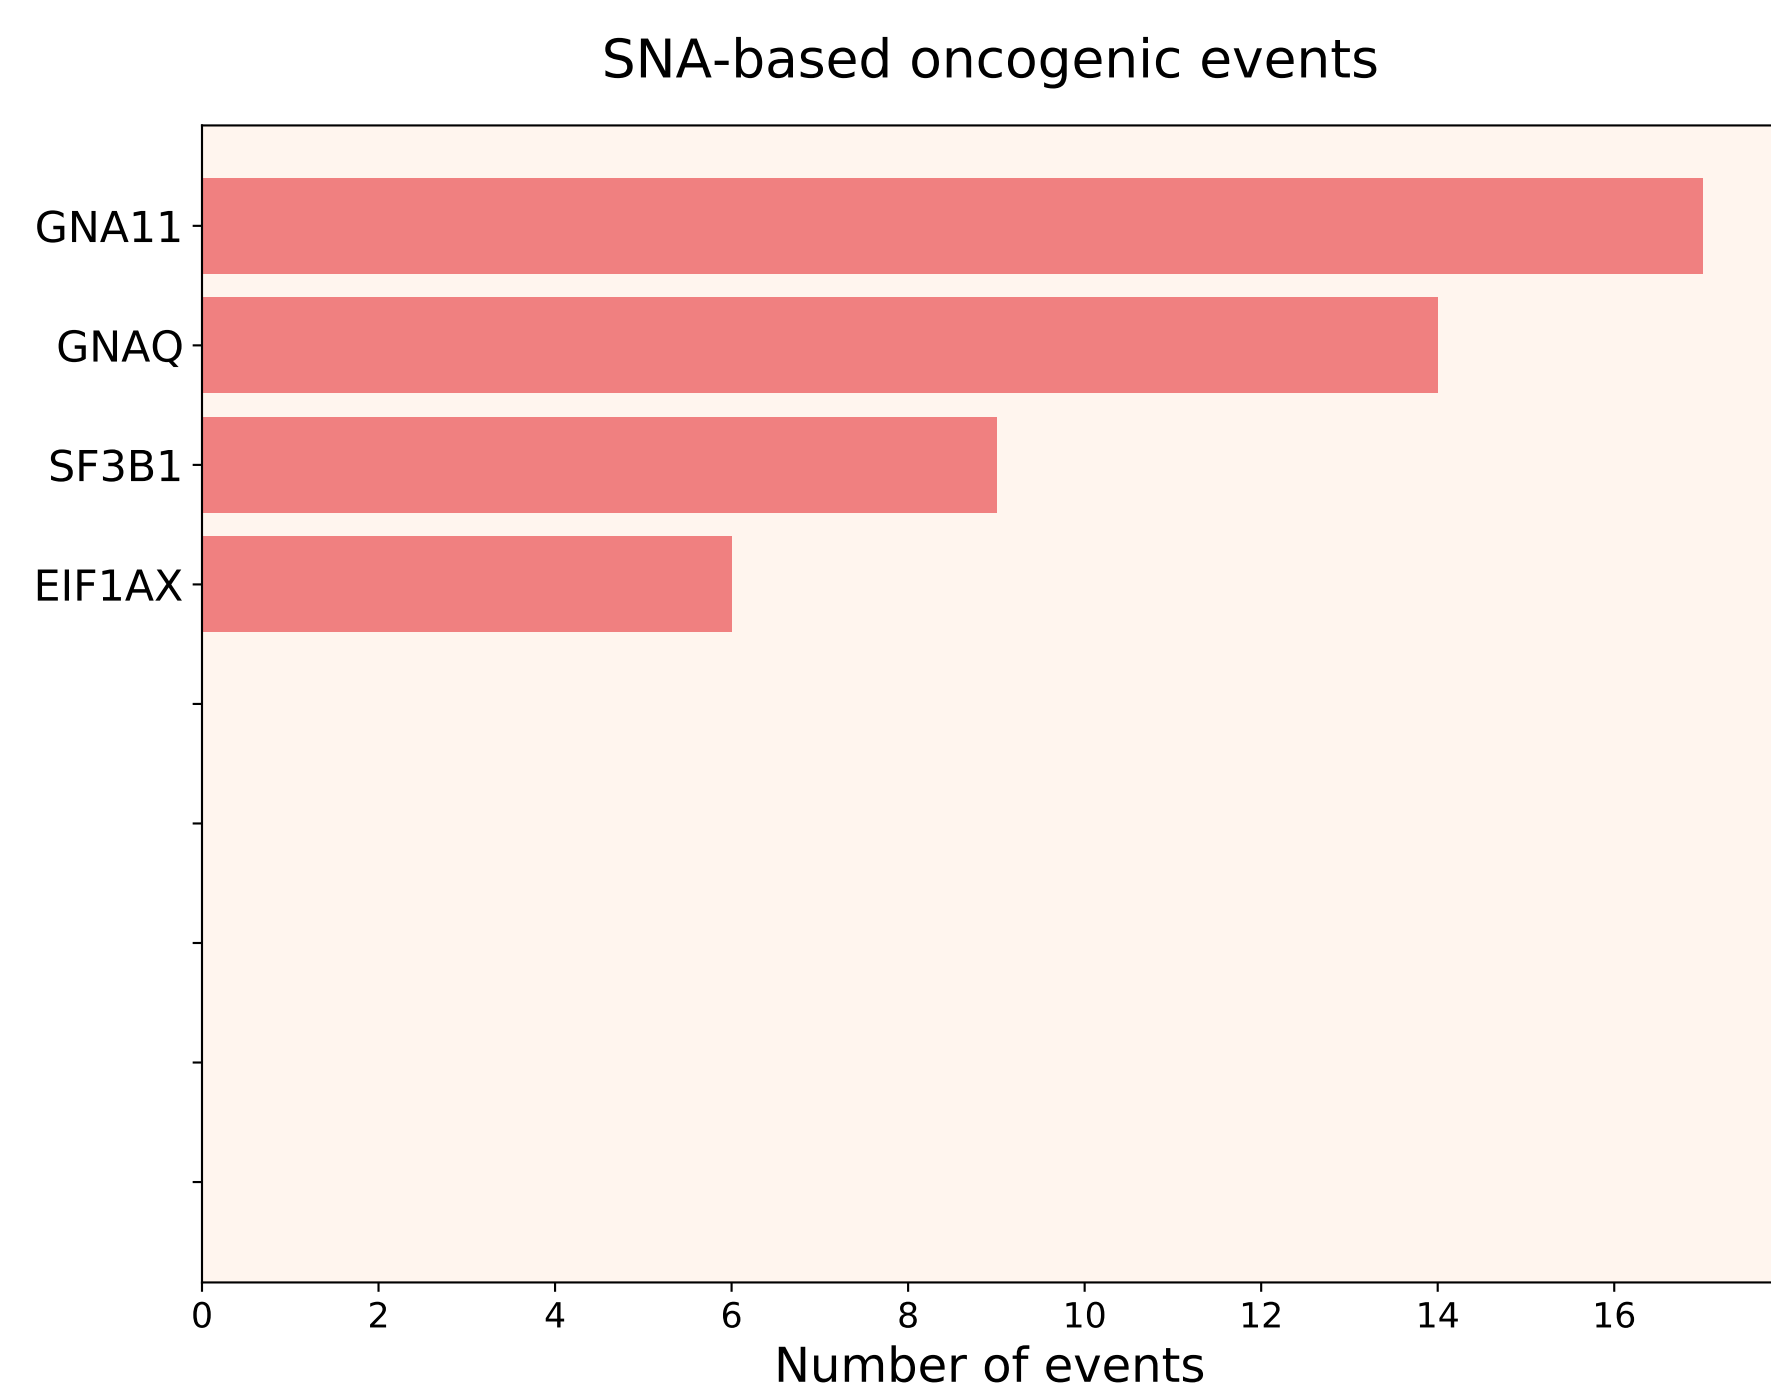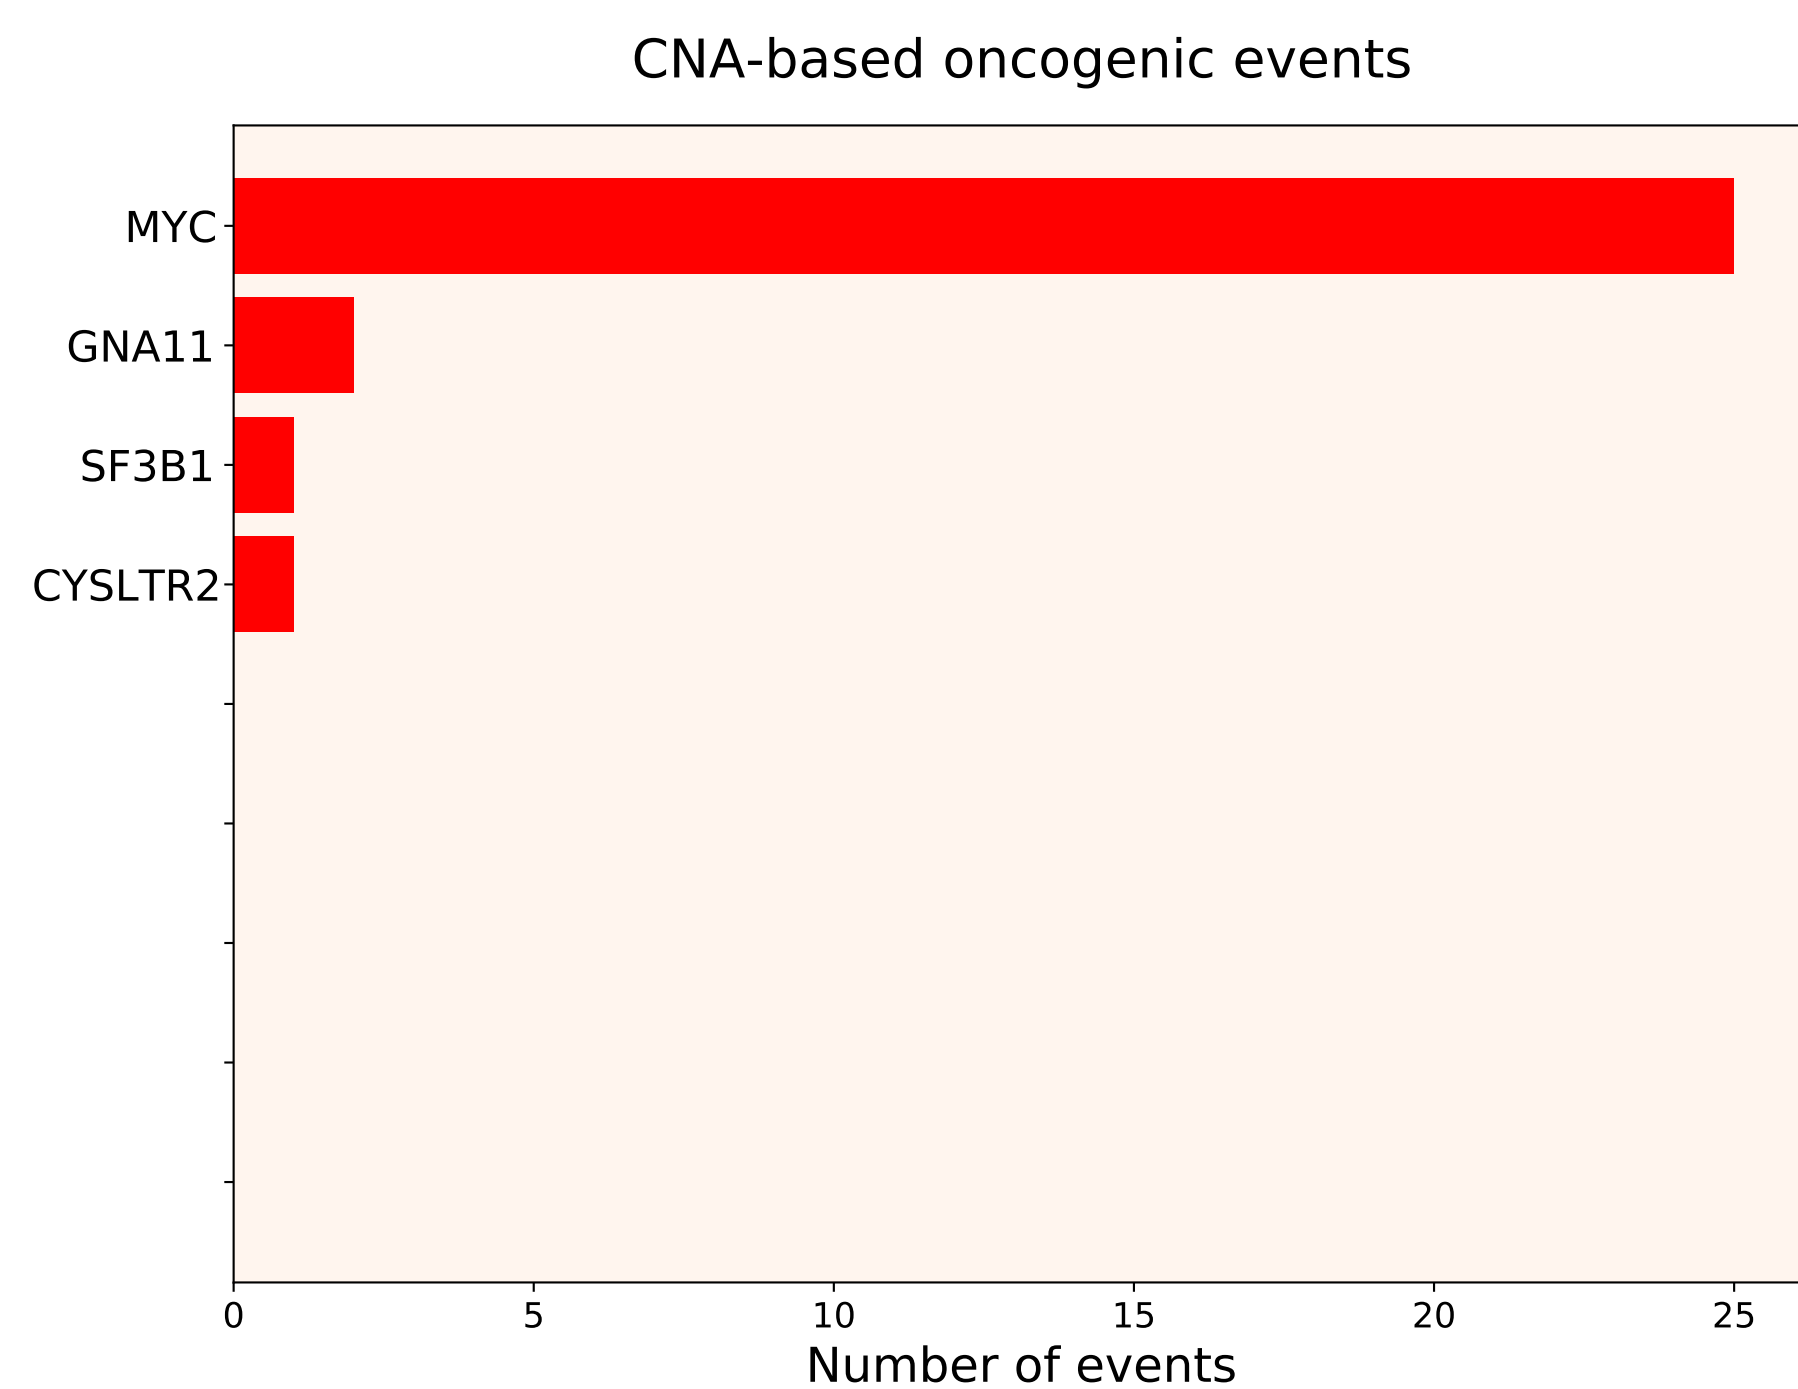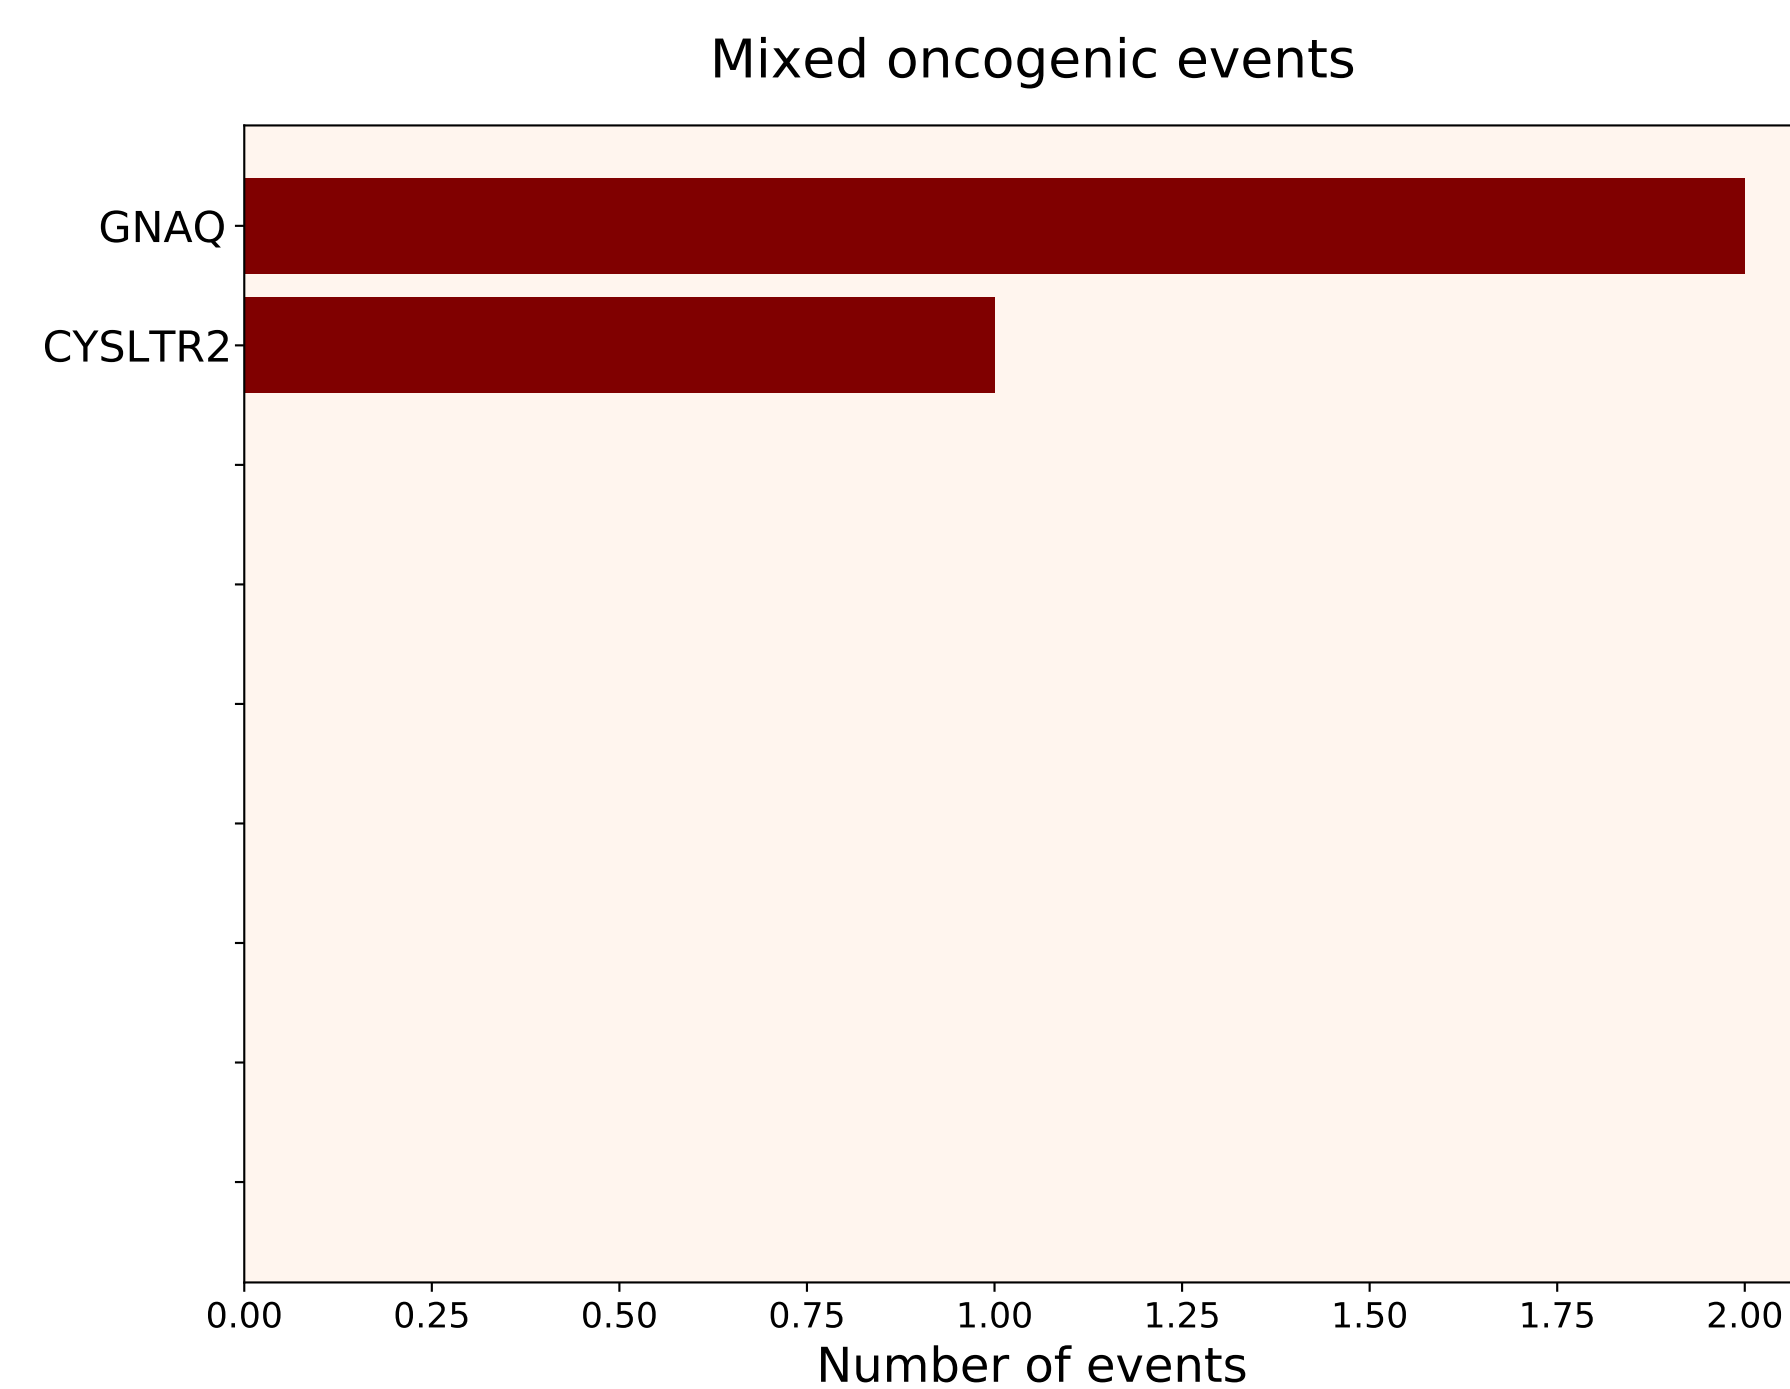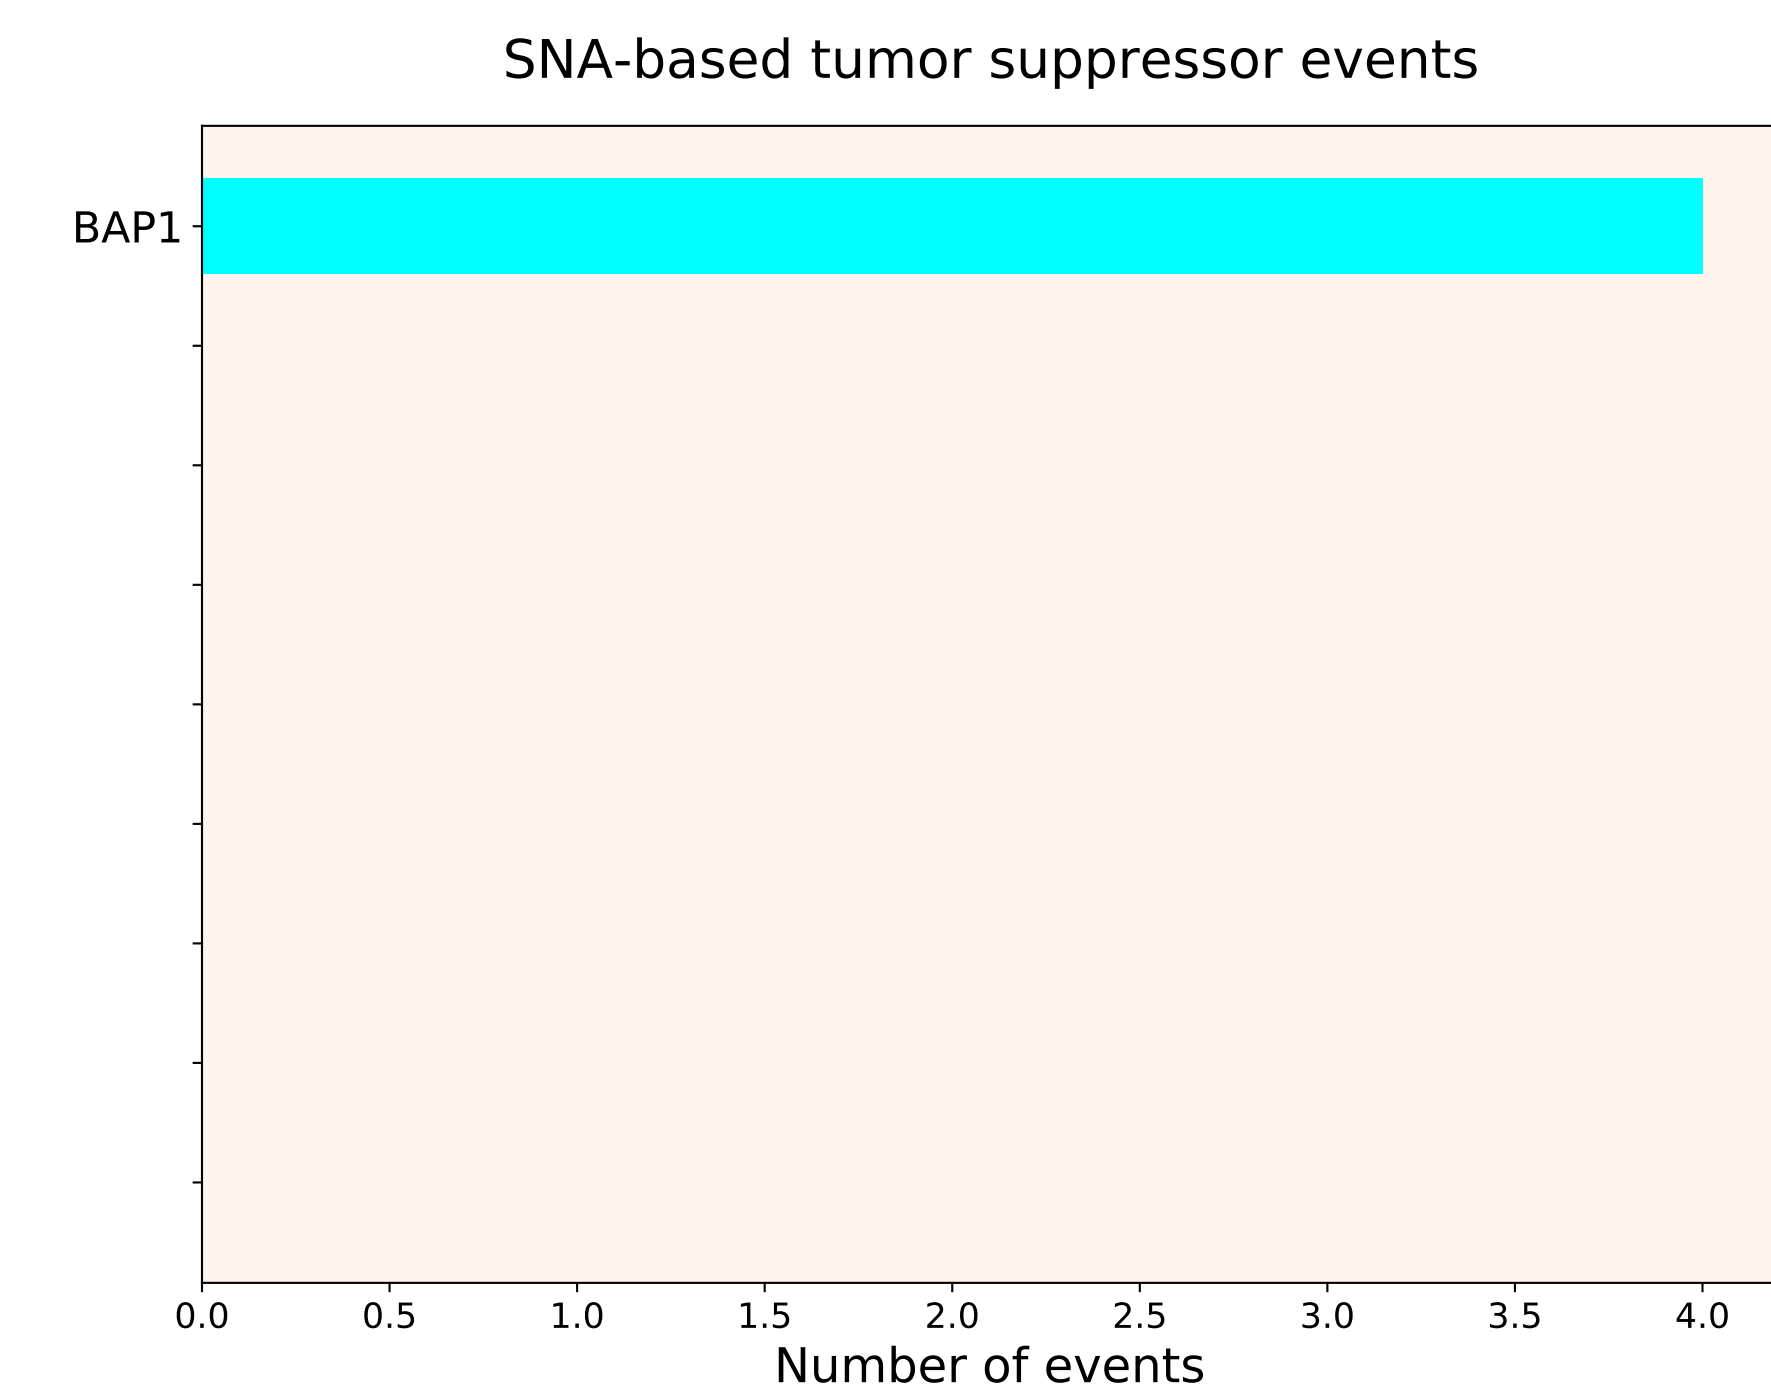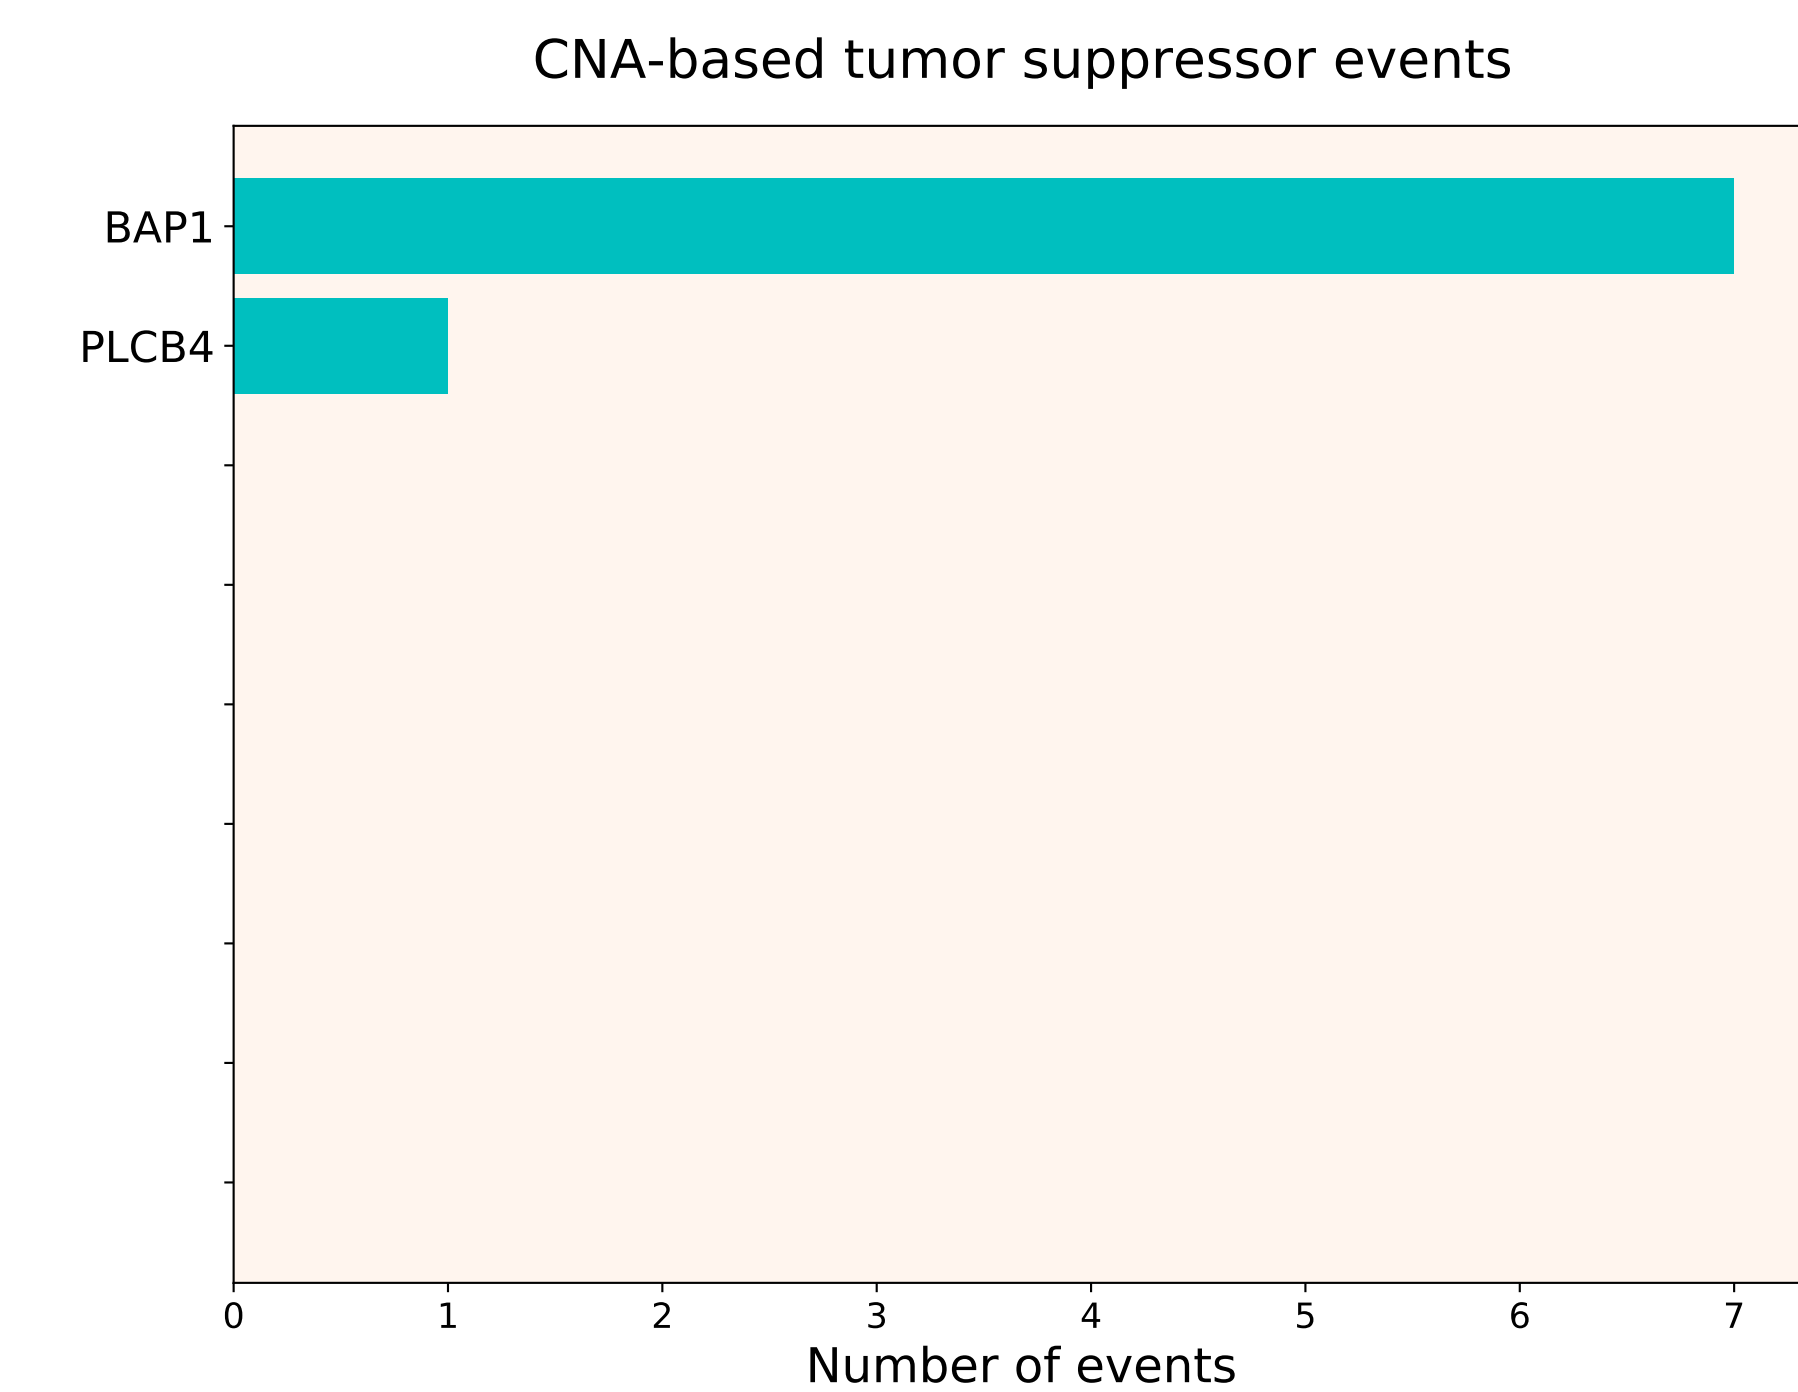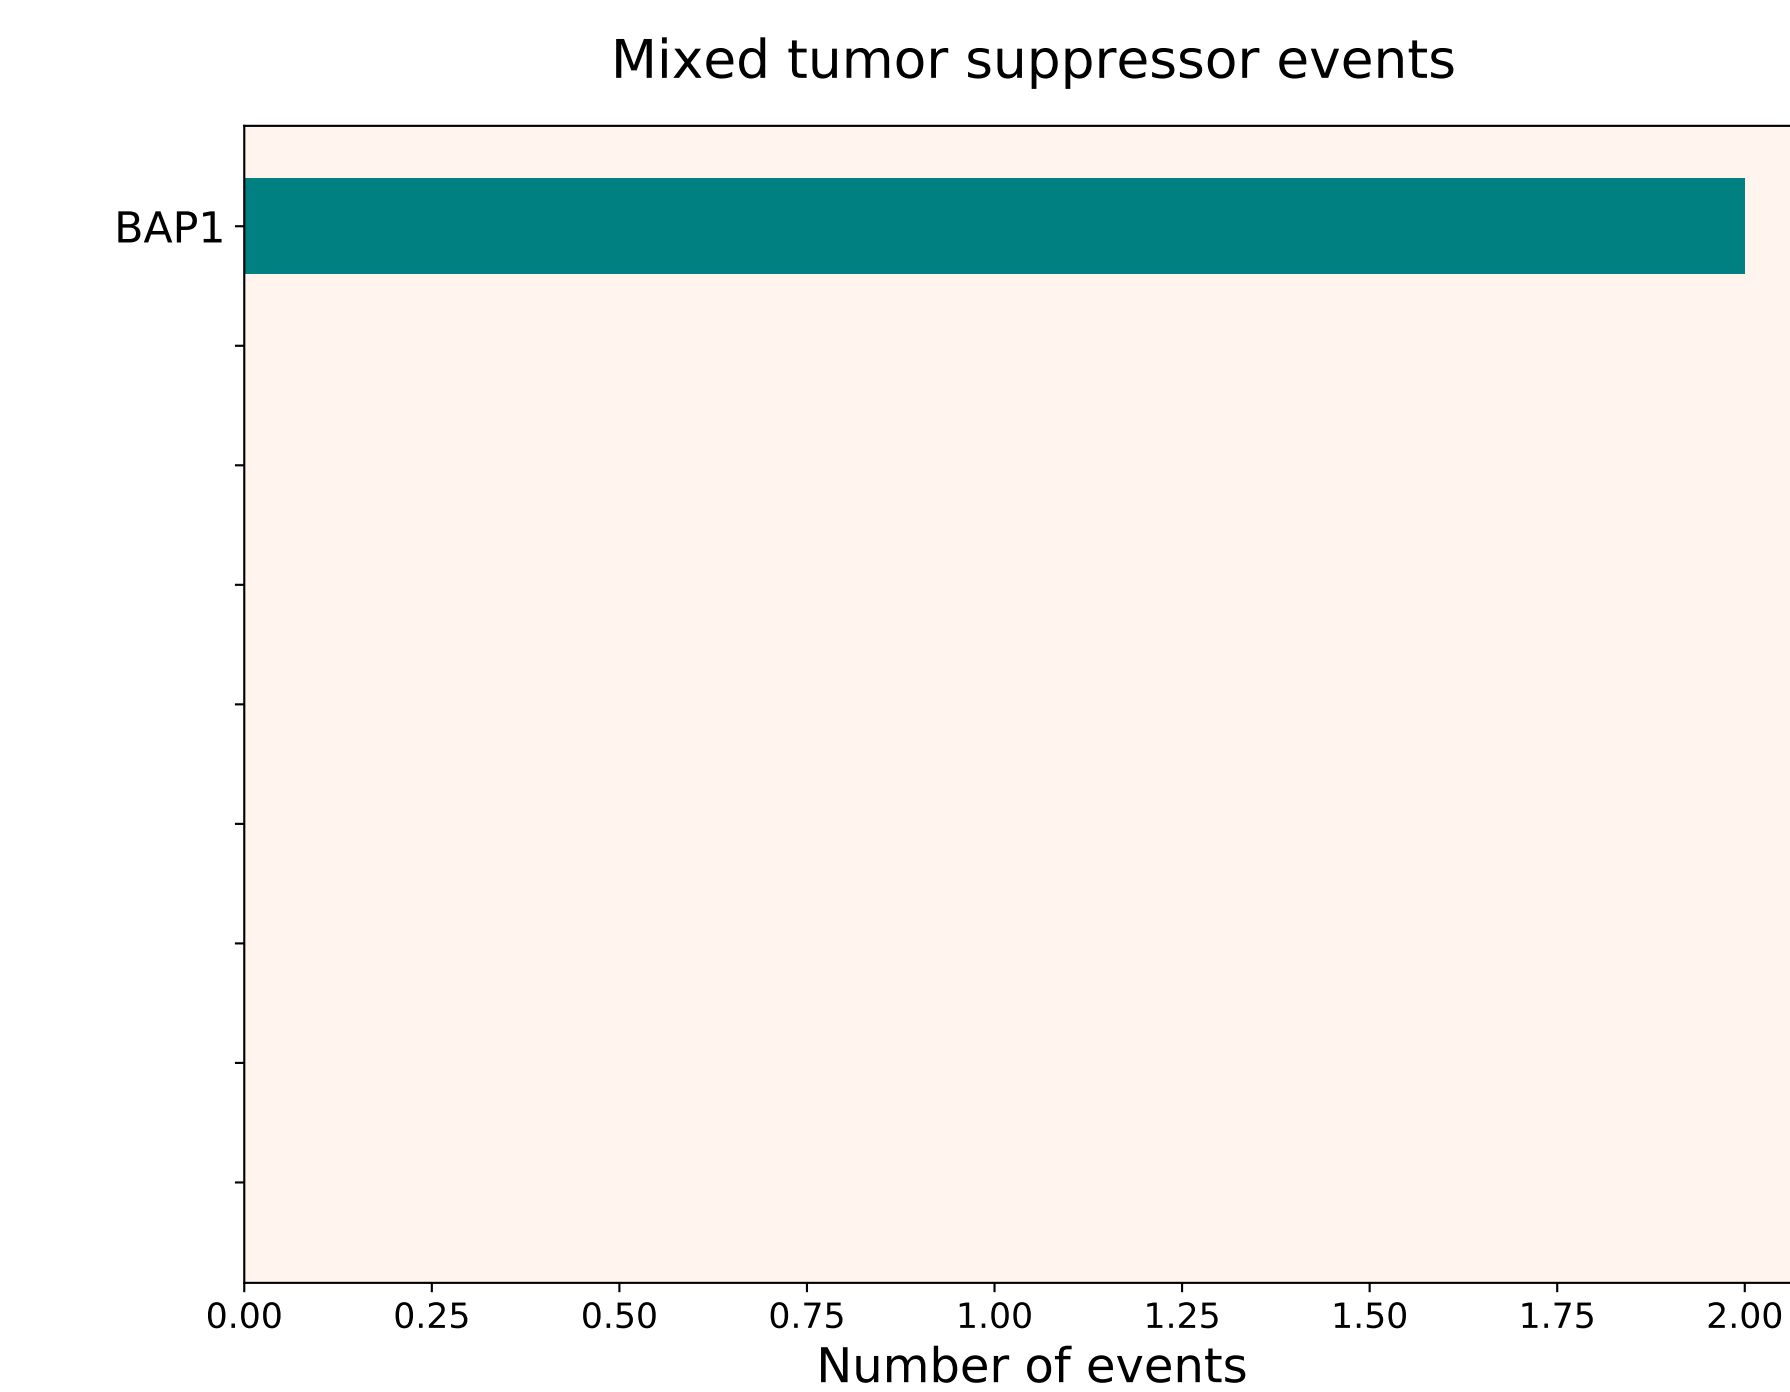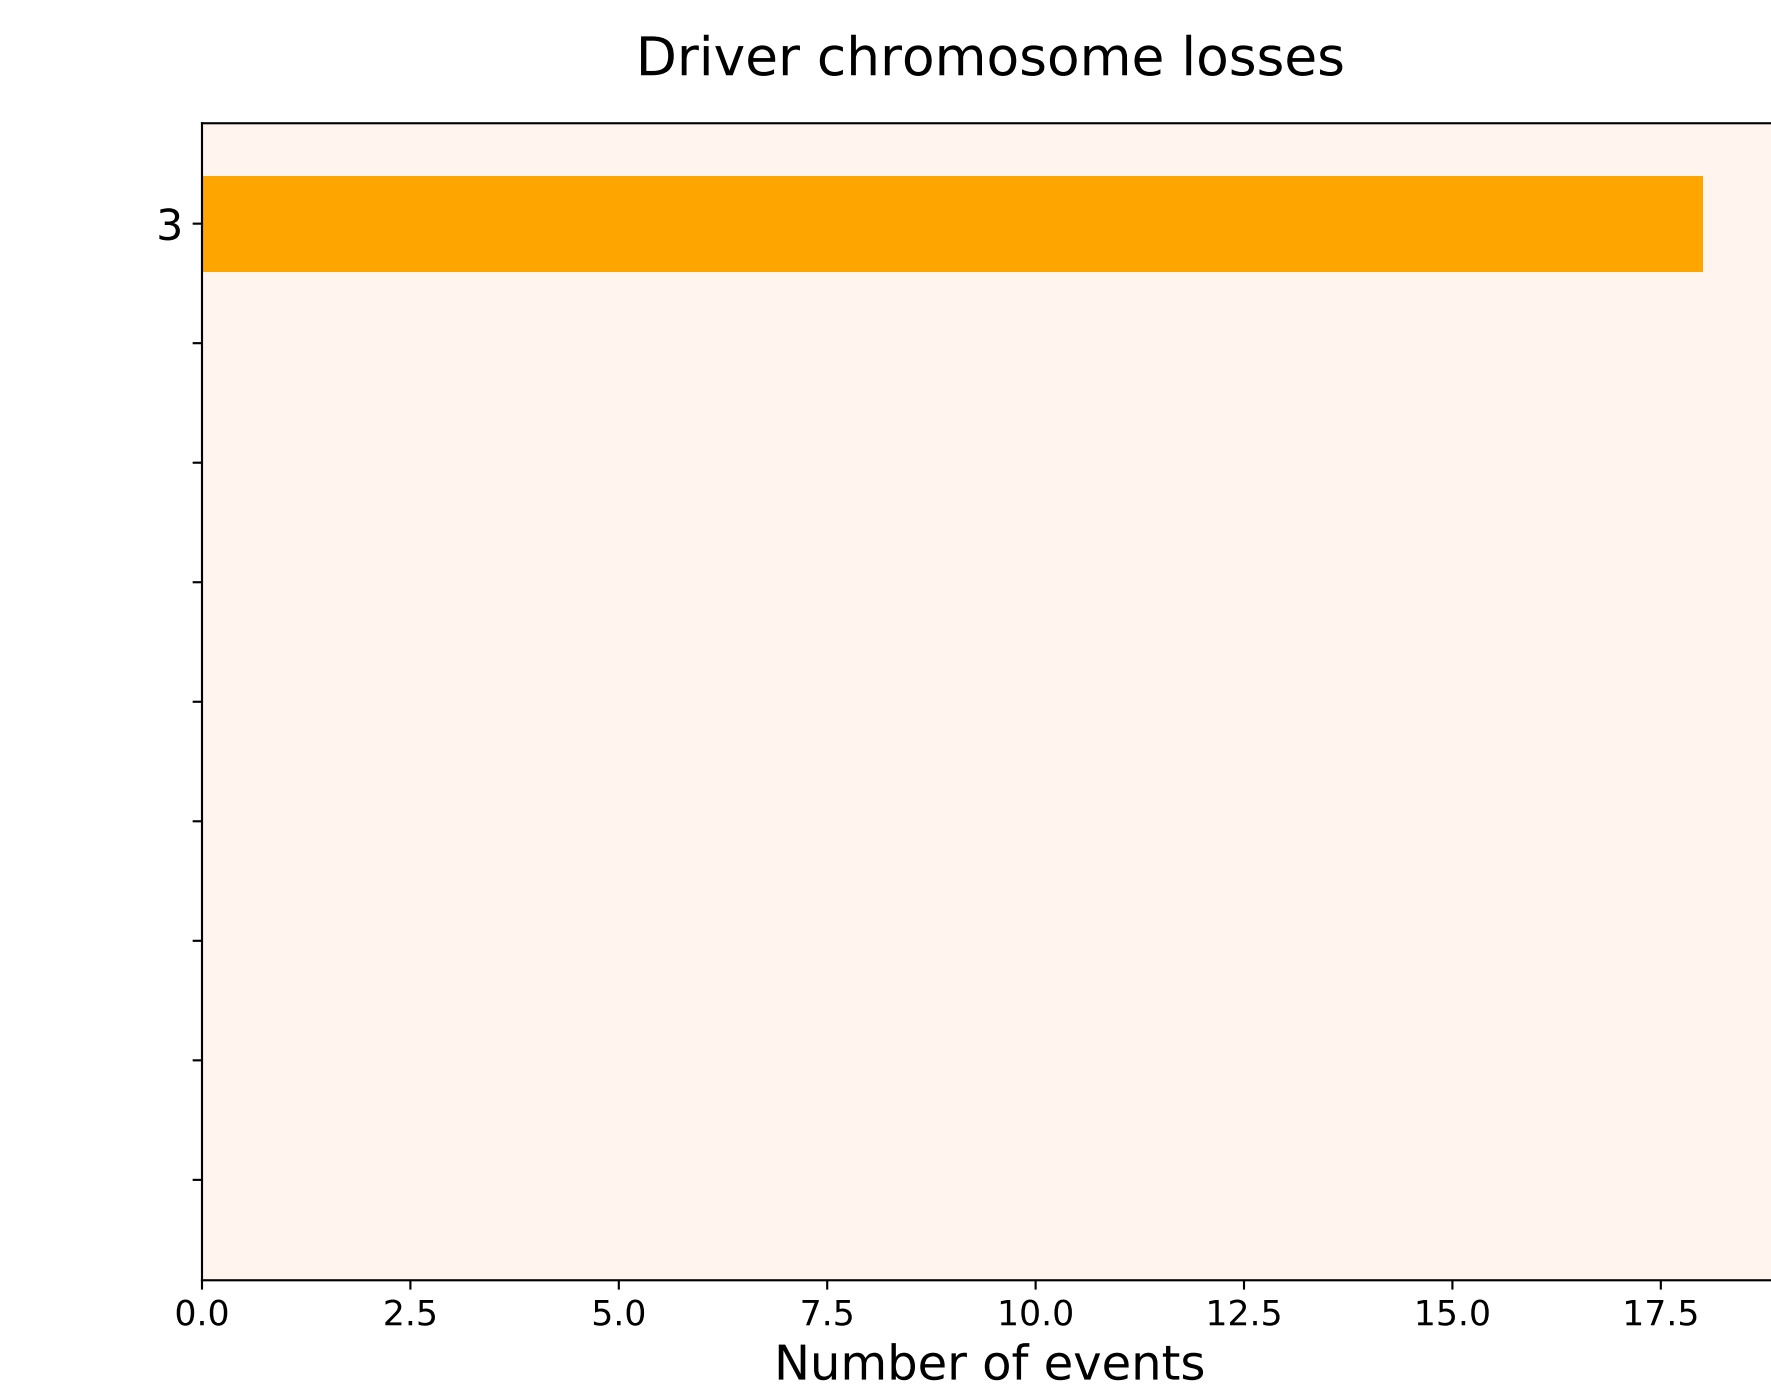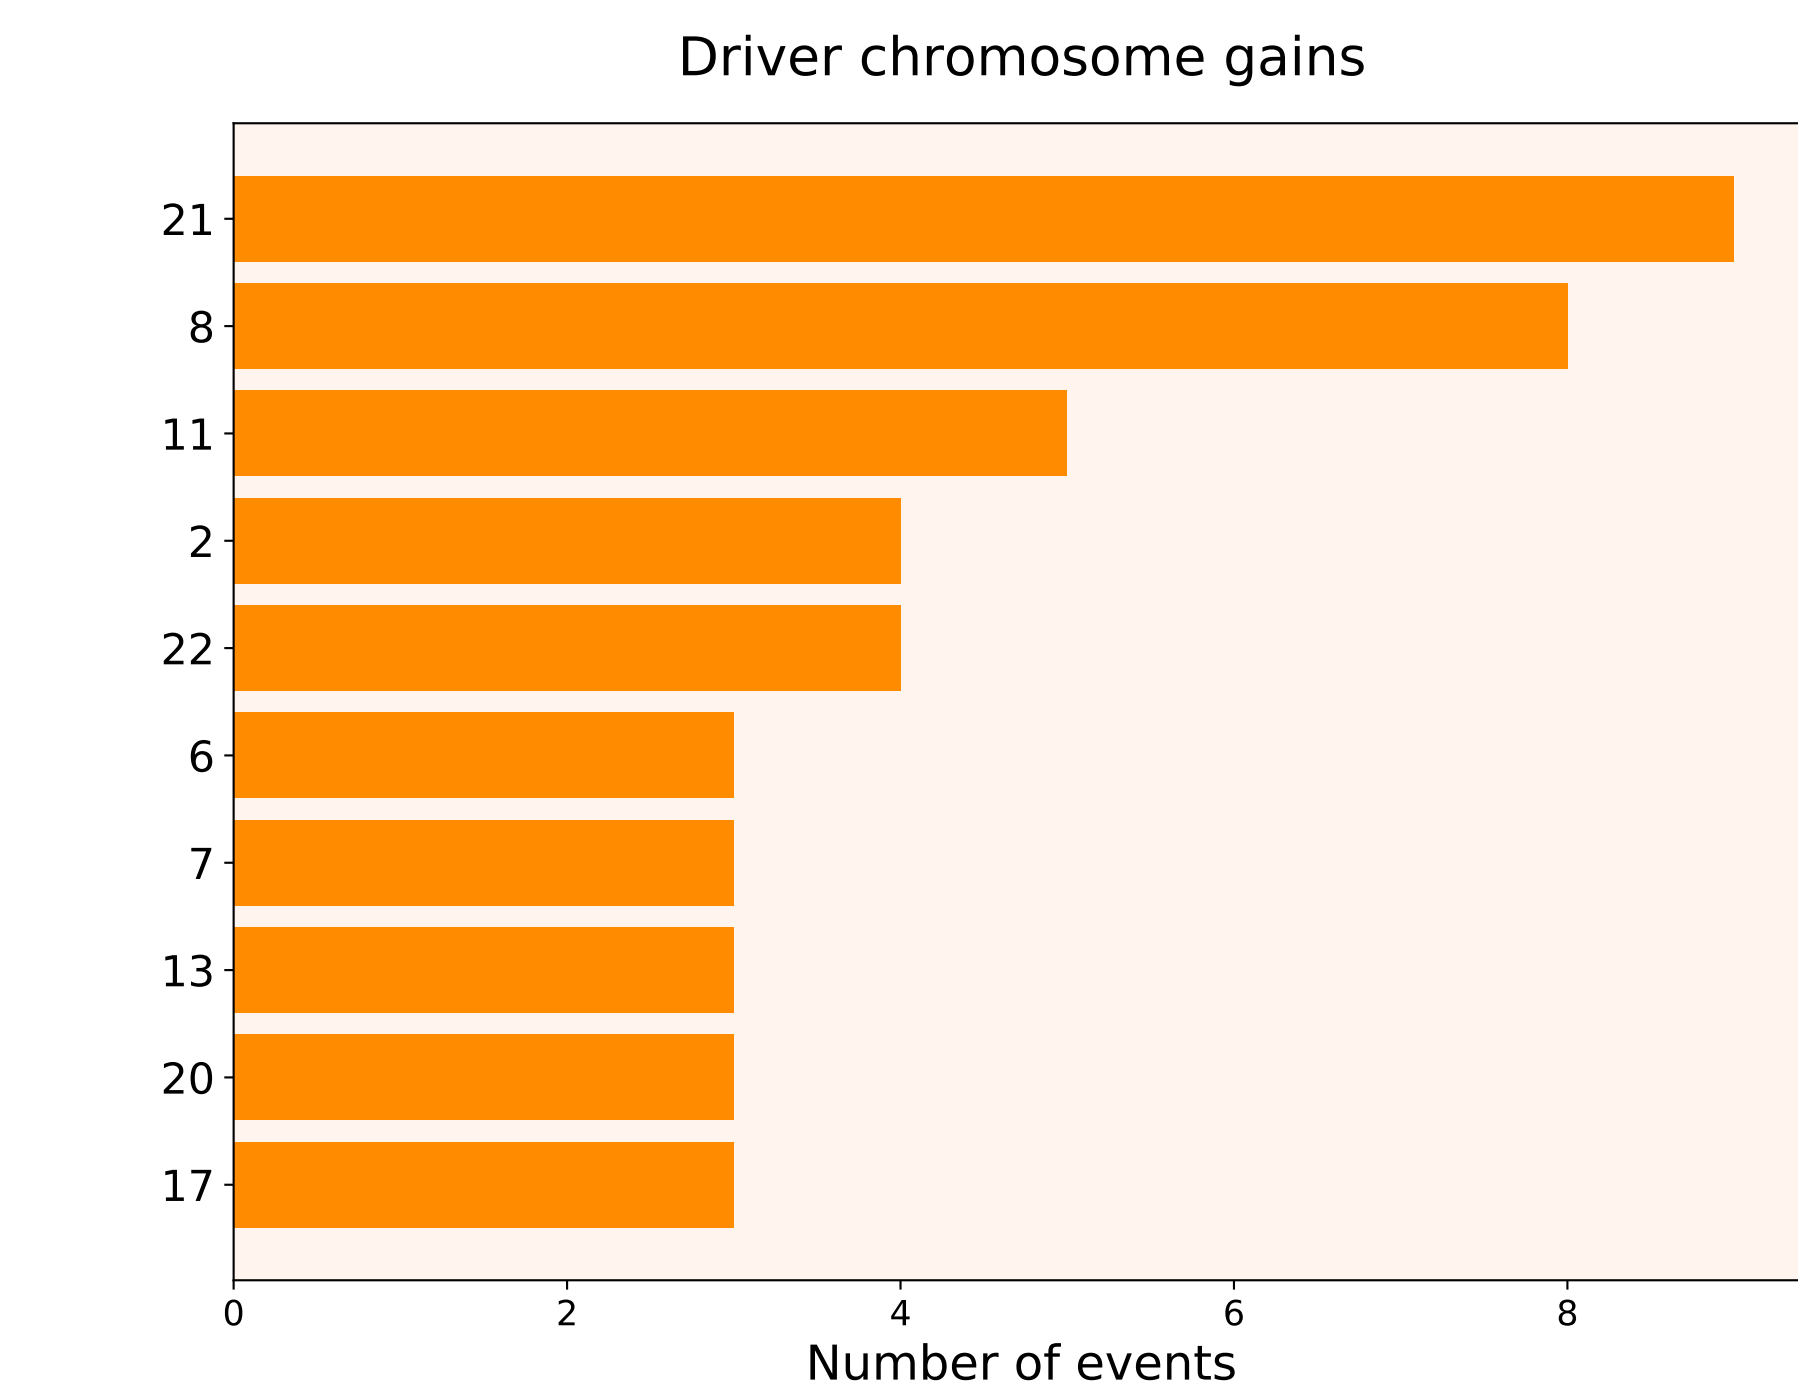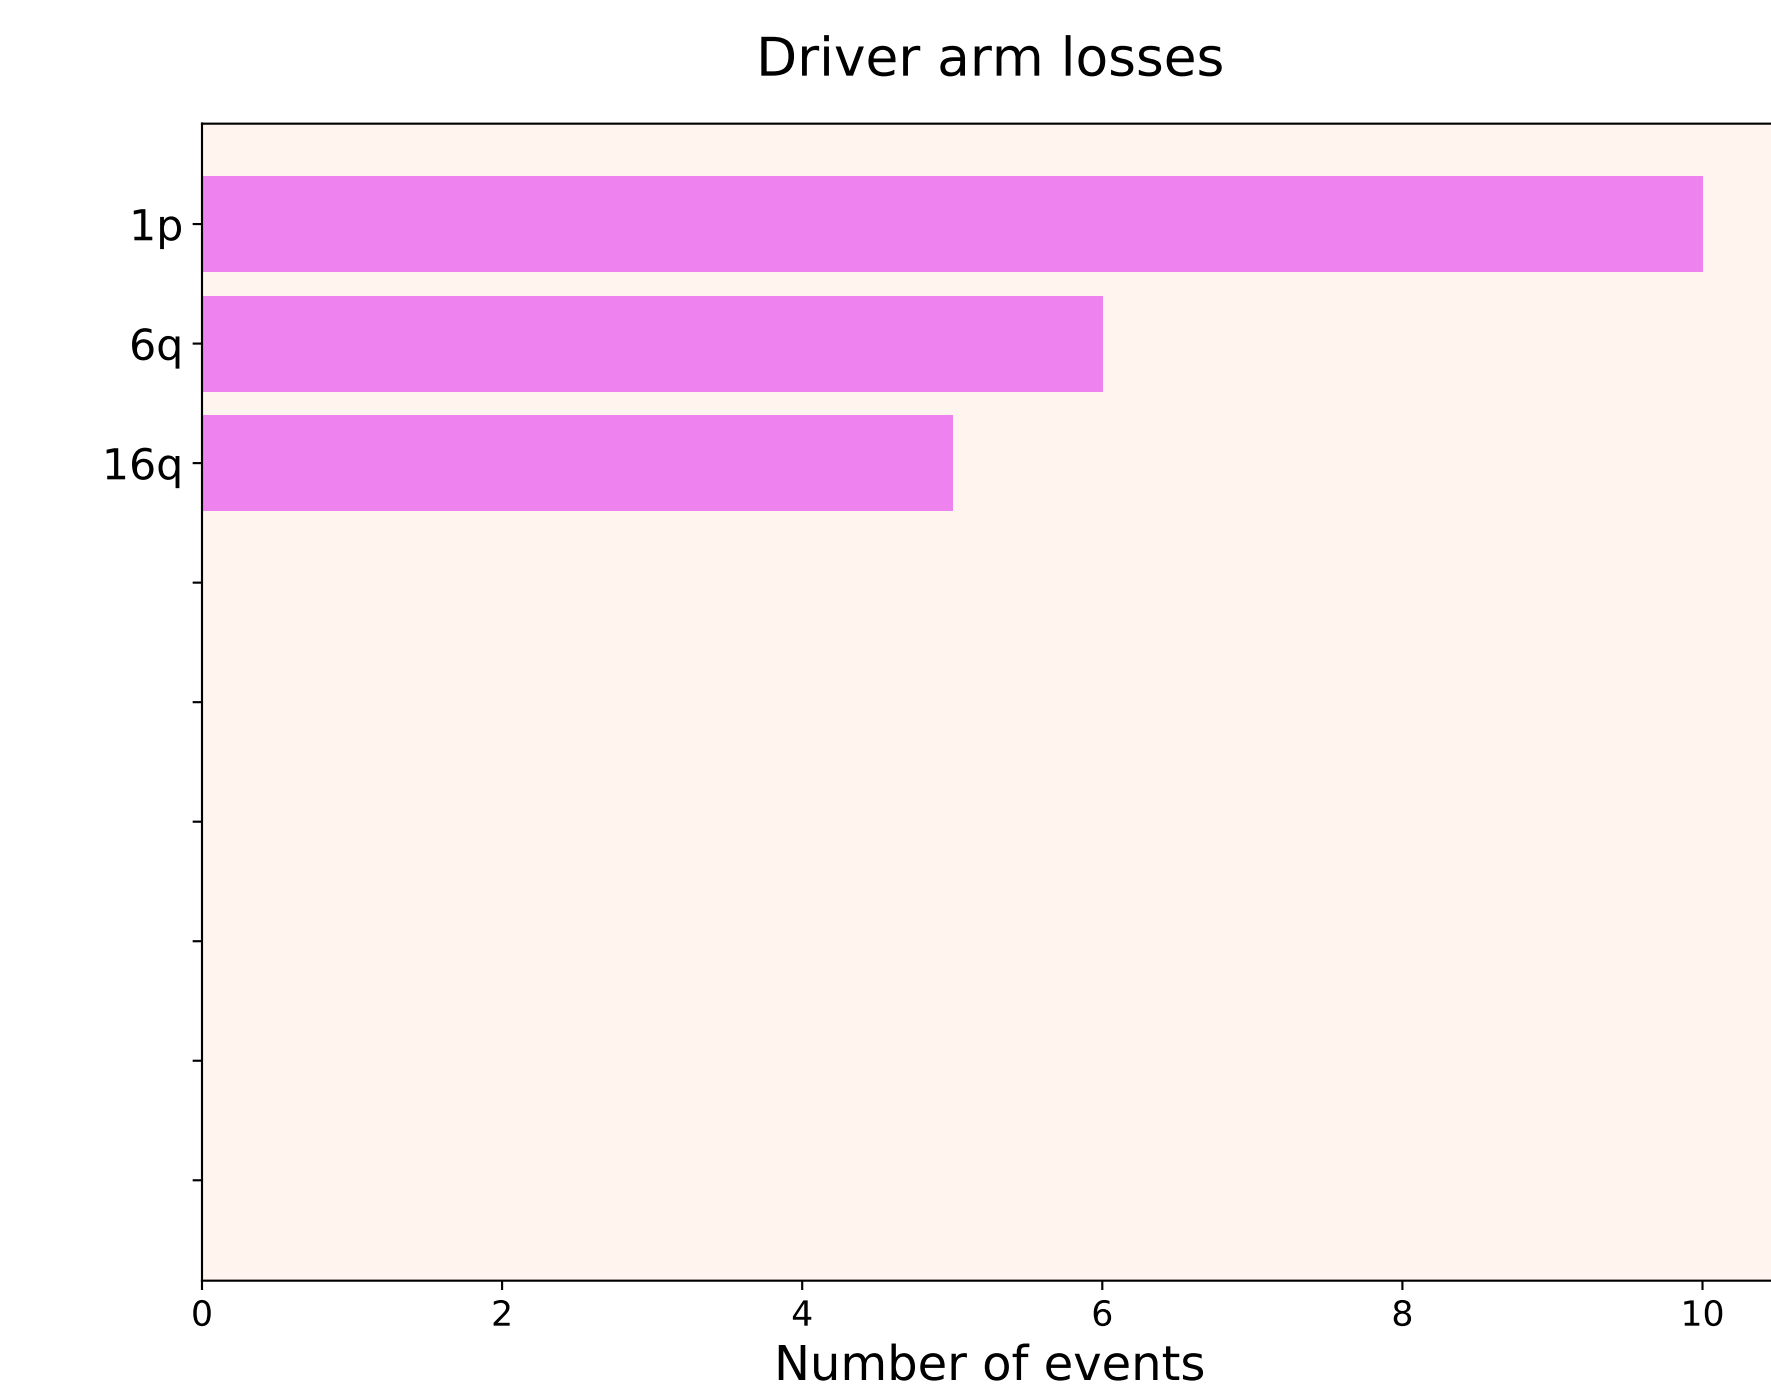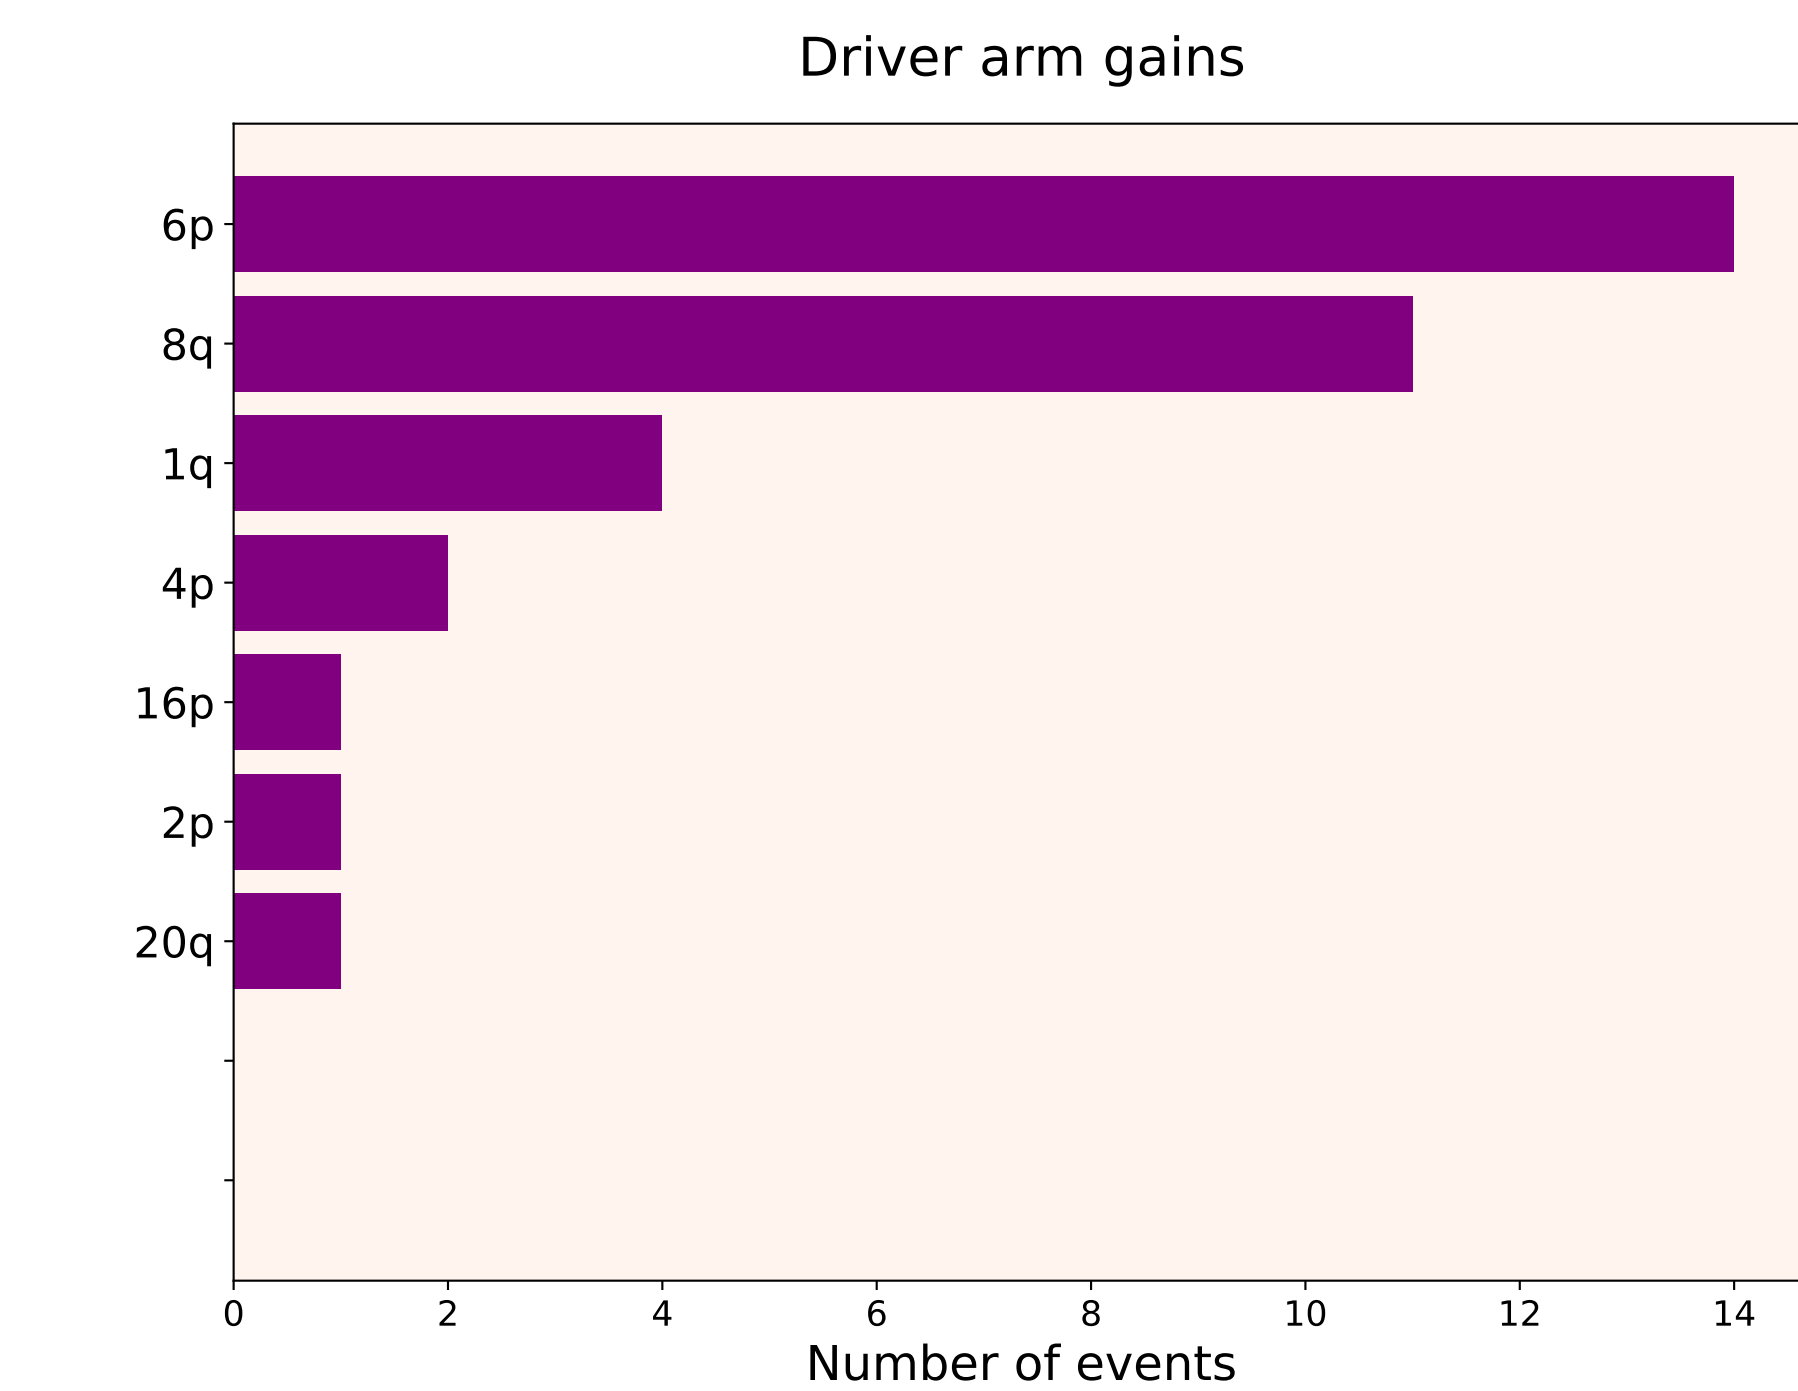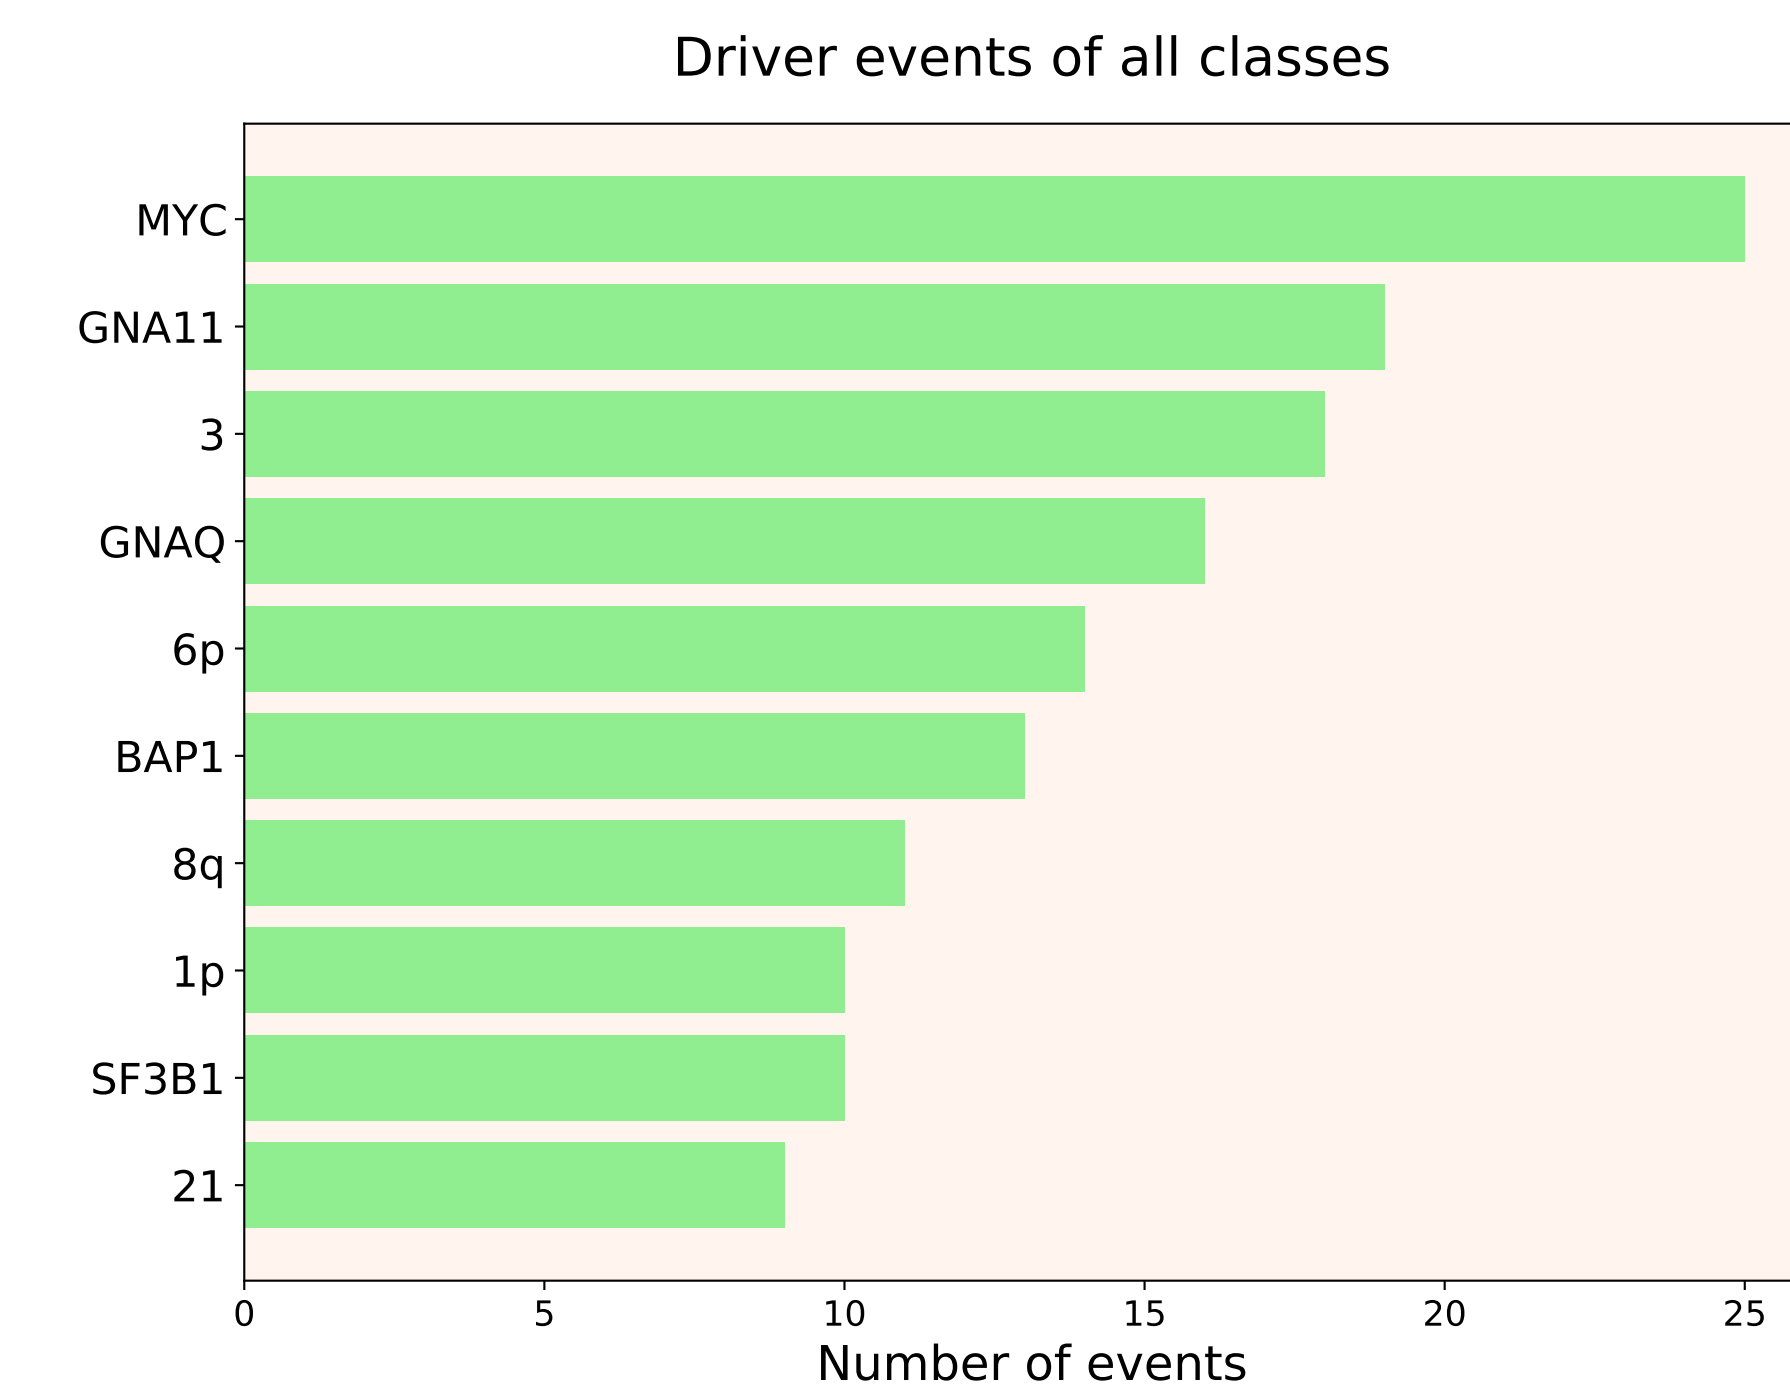

Supplement: Supplemental_Data_S1.zip [file Supplemental_Data_S1.zip]



Supplement: Supplemental_Data_S1.zip [file Supplemental_Data_S1.zip]

# UCEC\_FEMALE

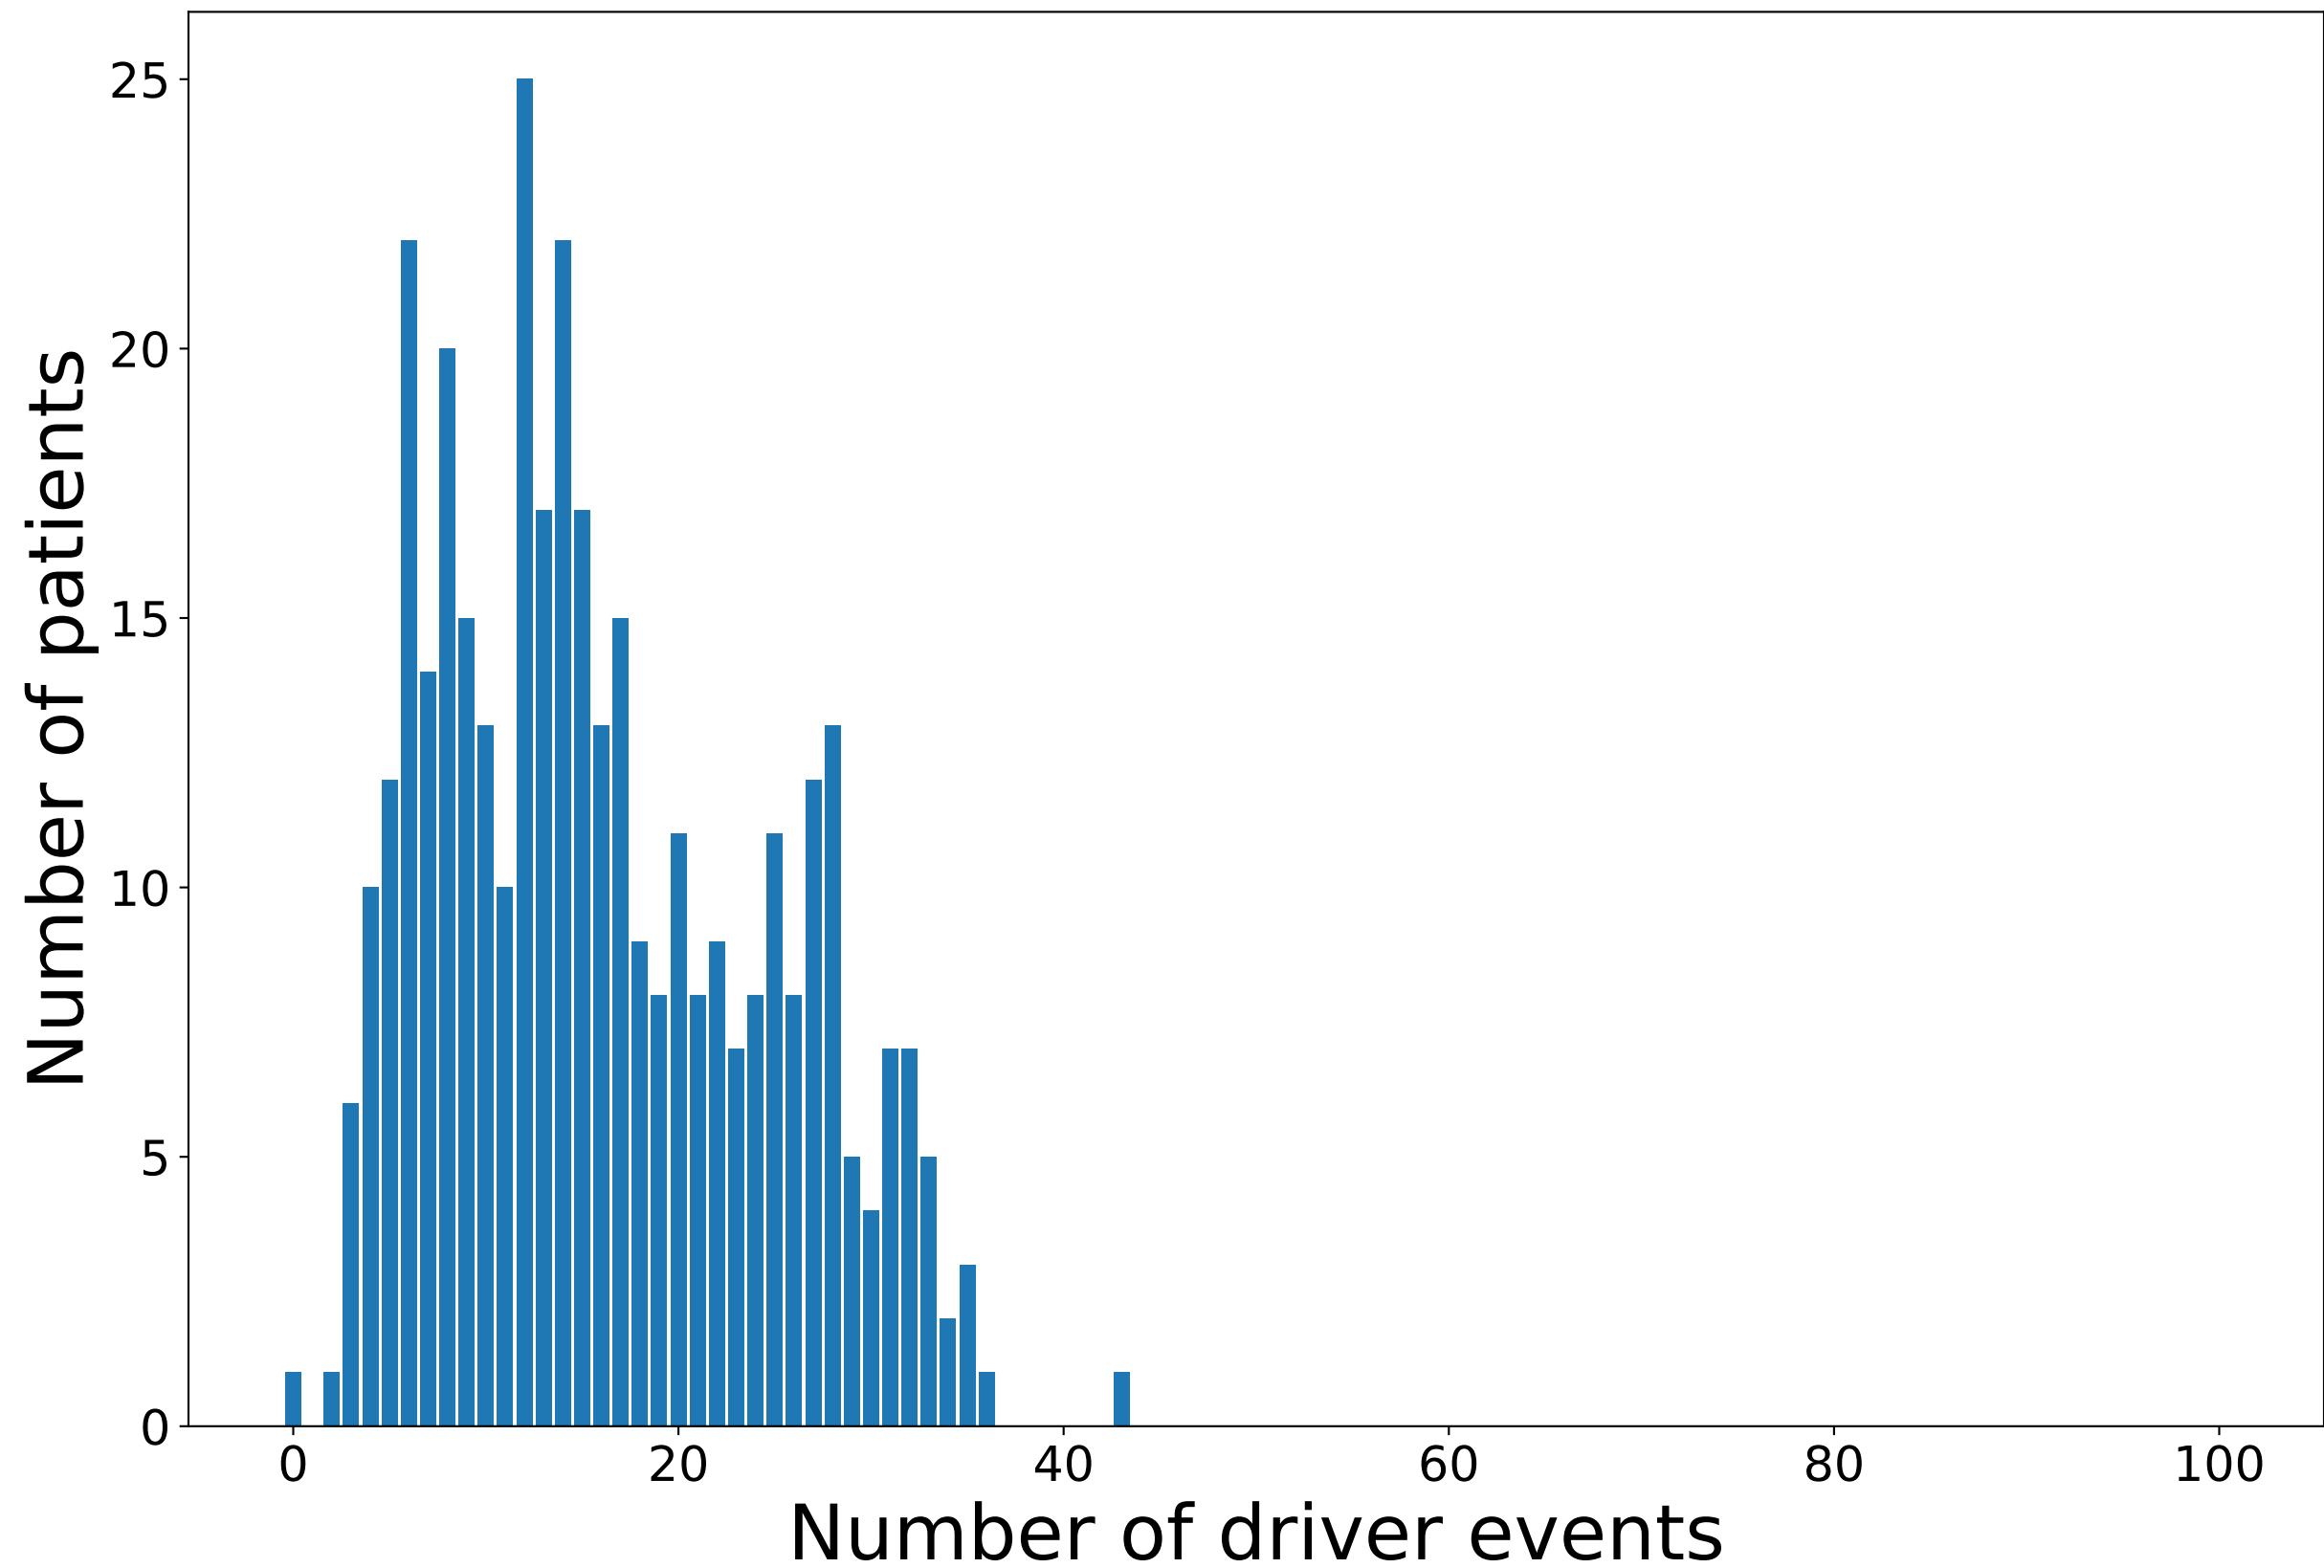

Supplement: Supplemental_Data_S1.zip [file Supplemental_Data_S1.zip]

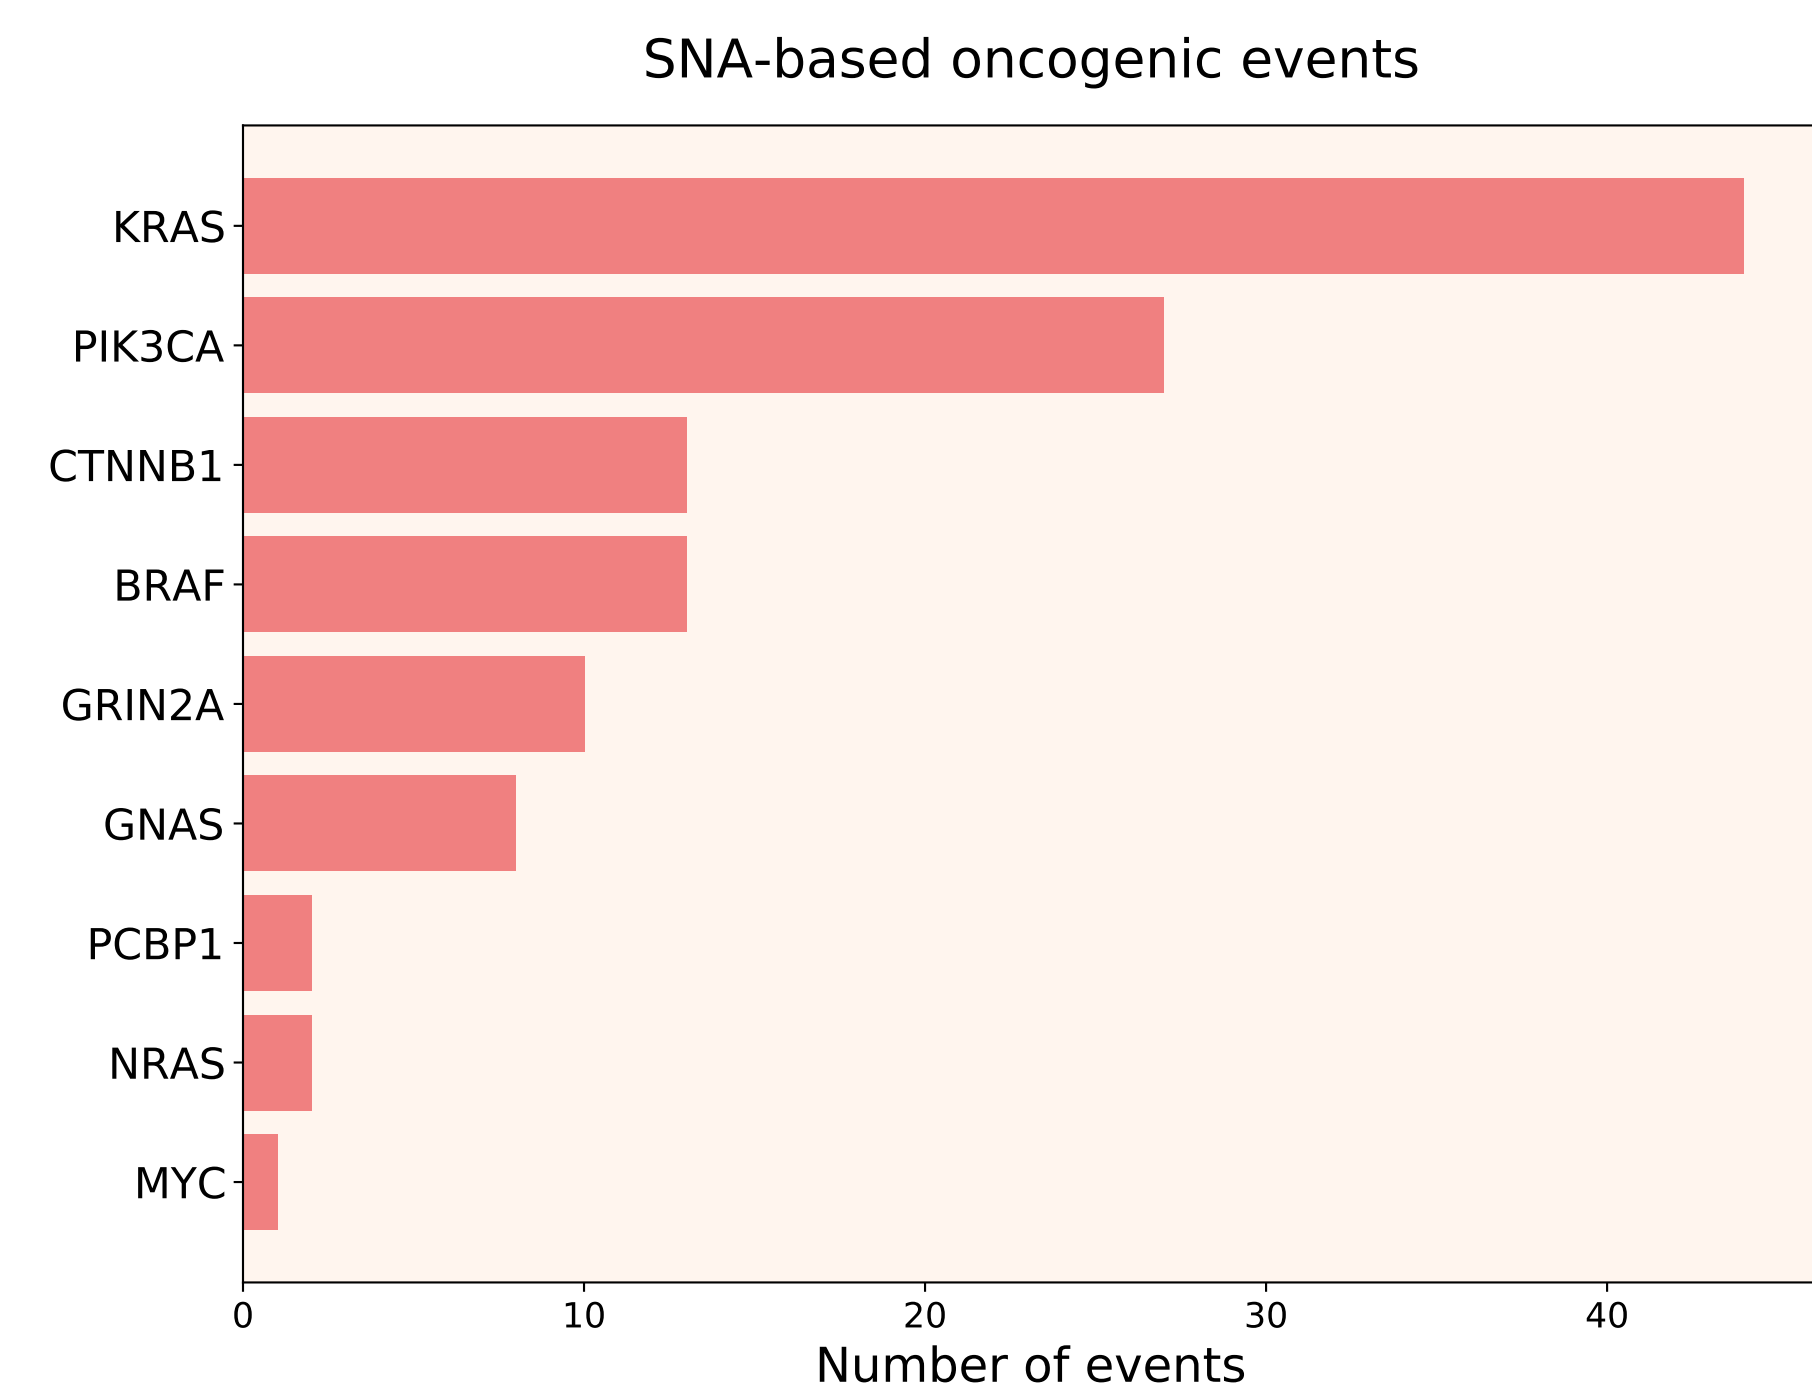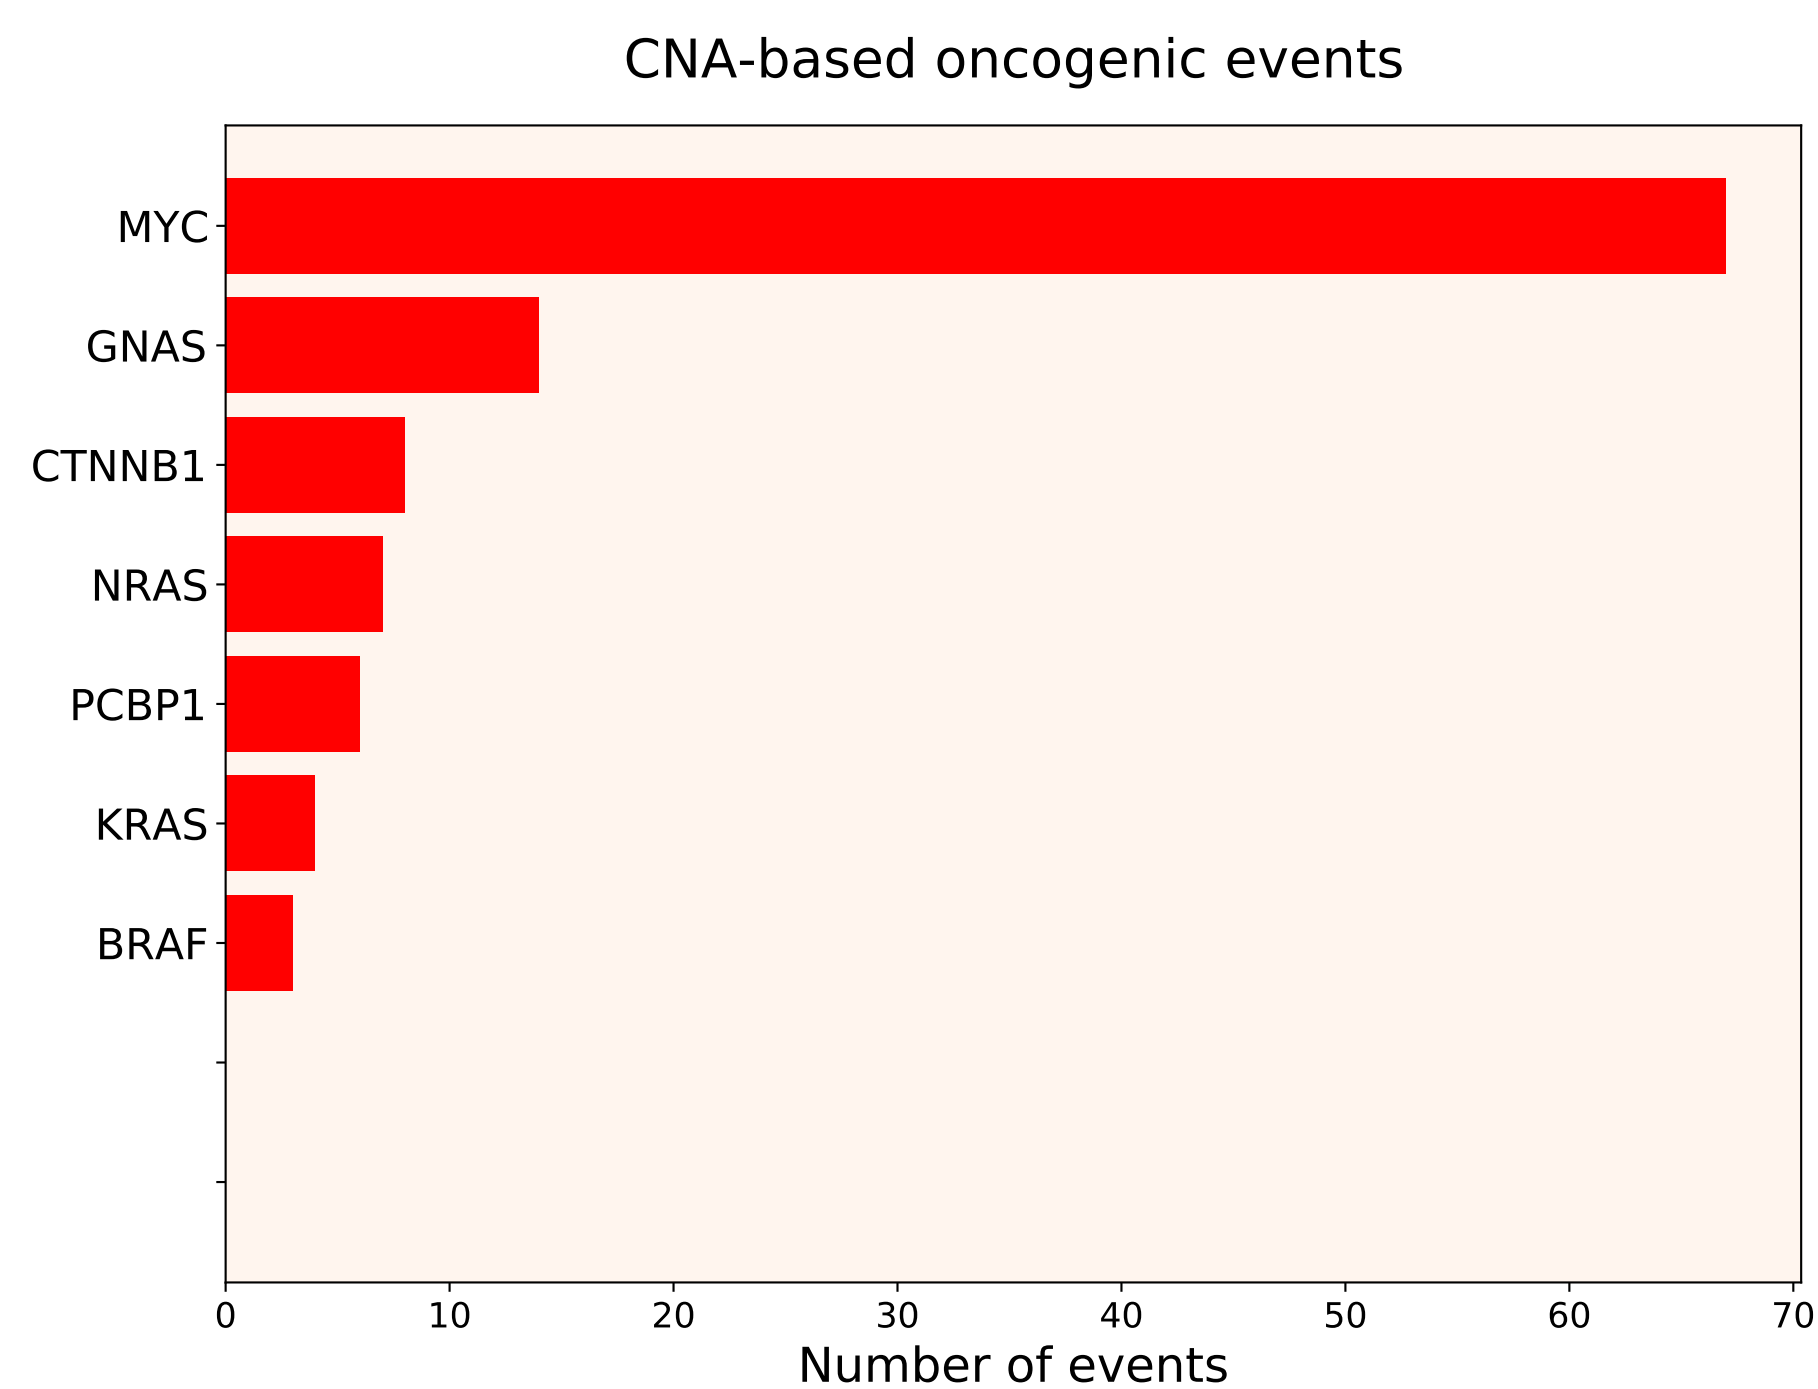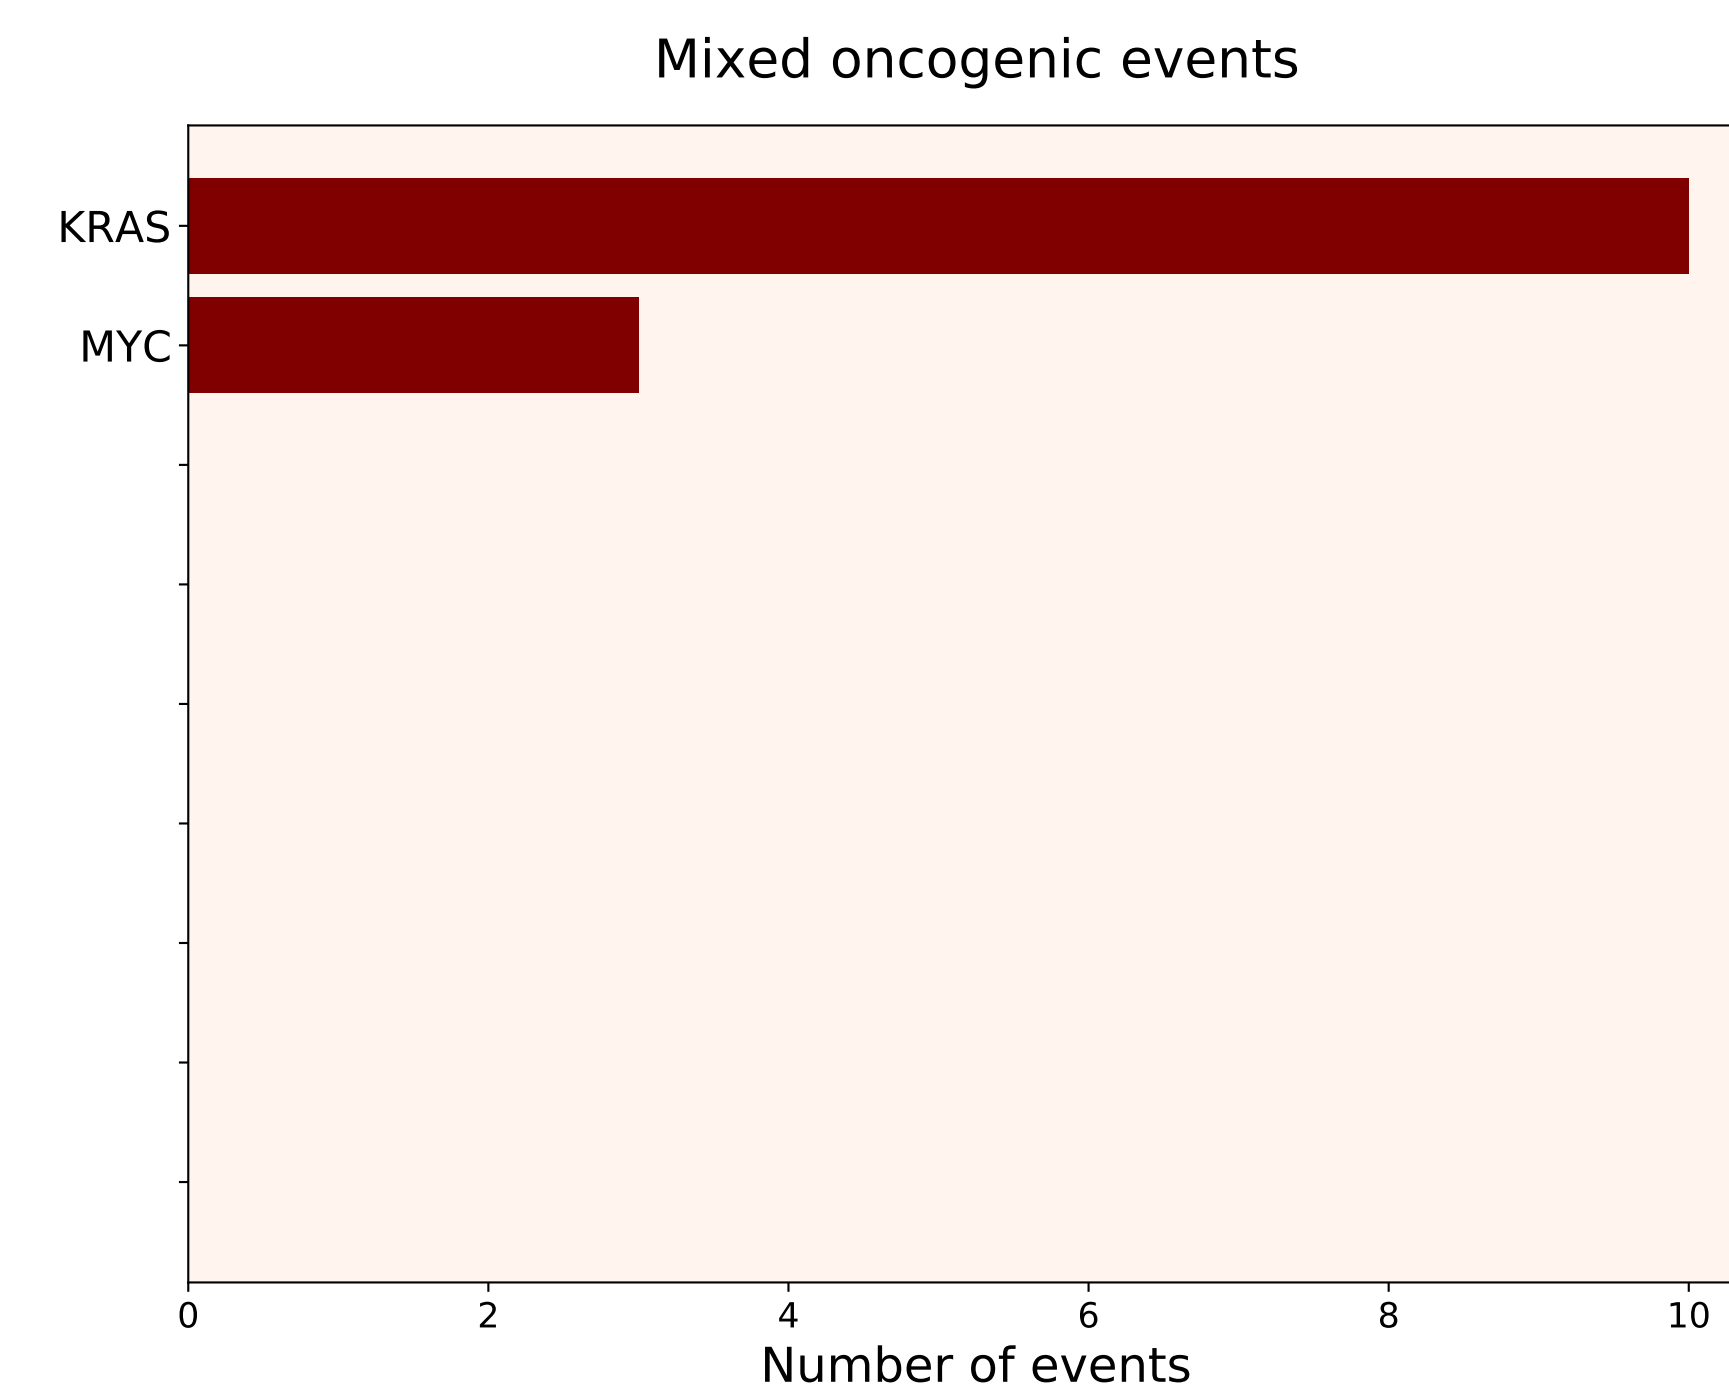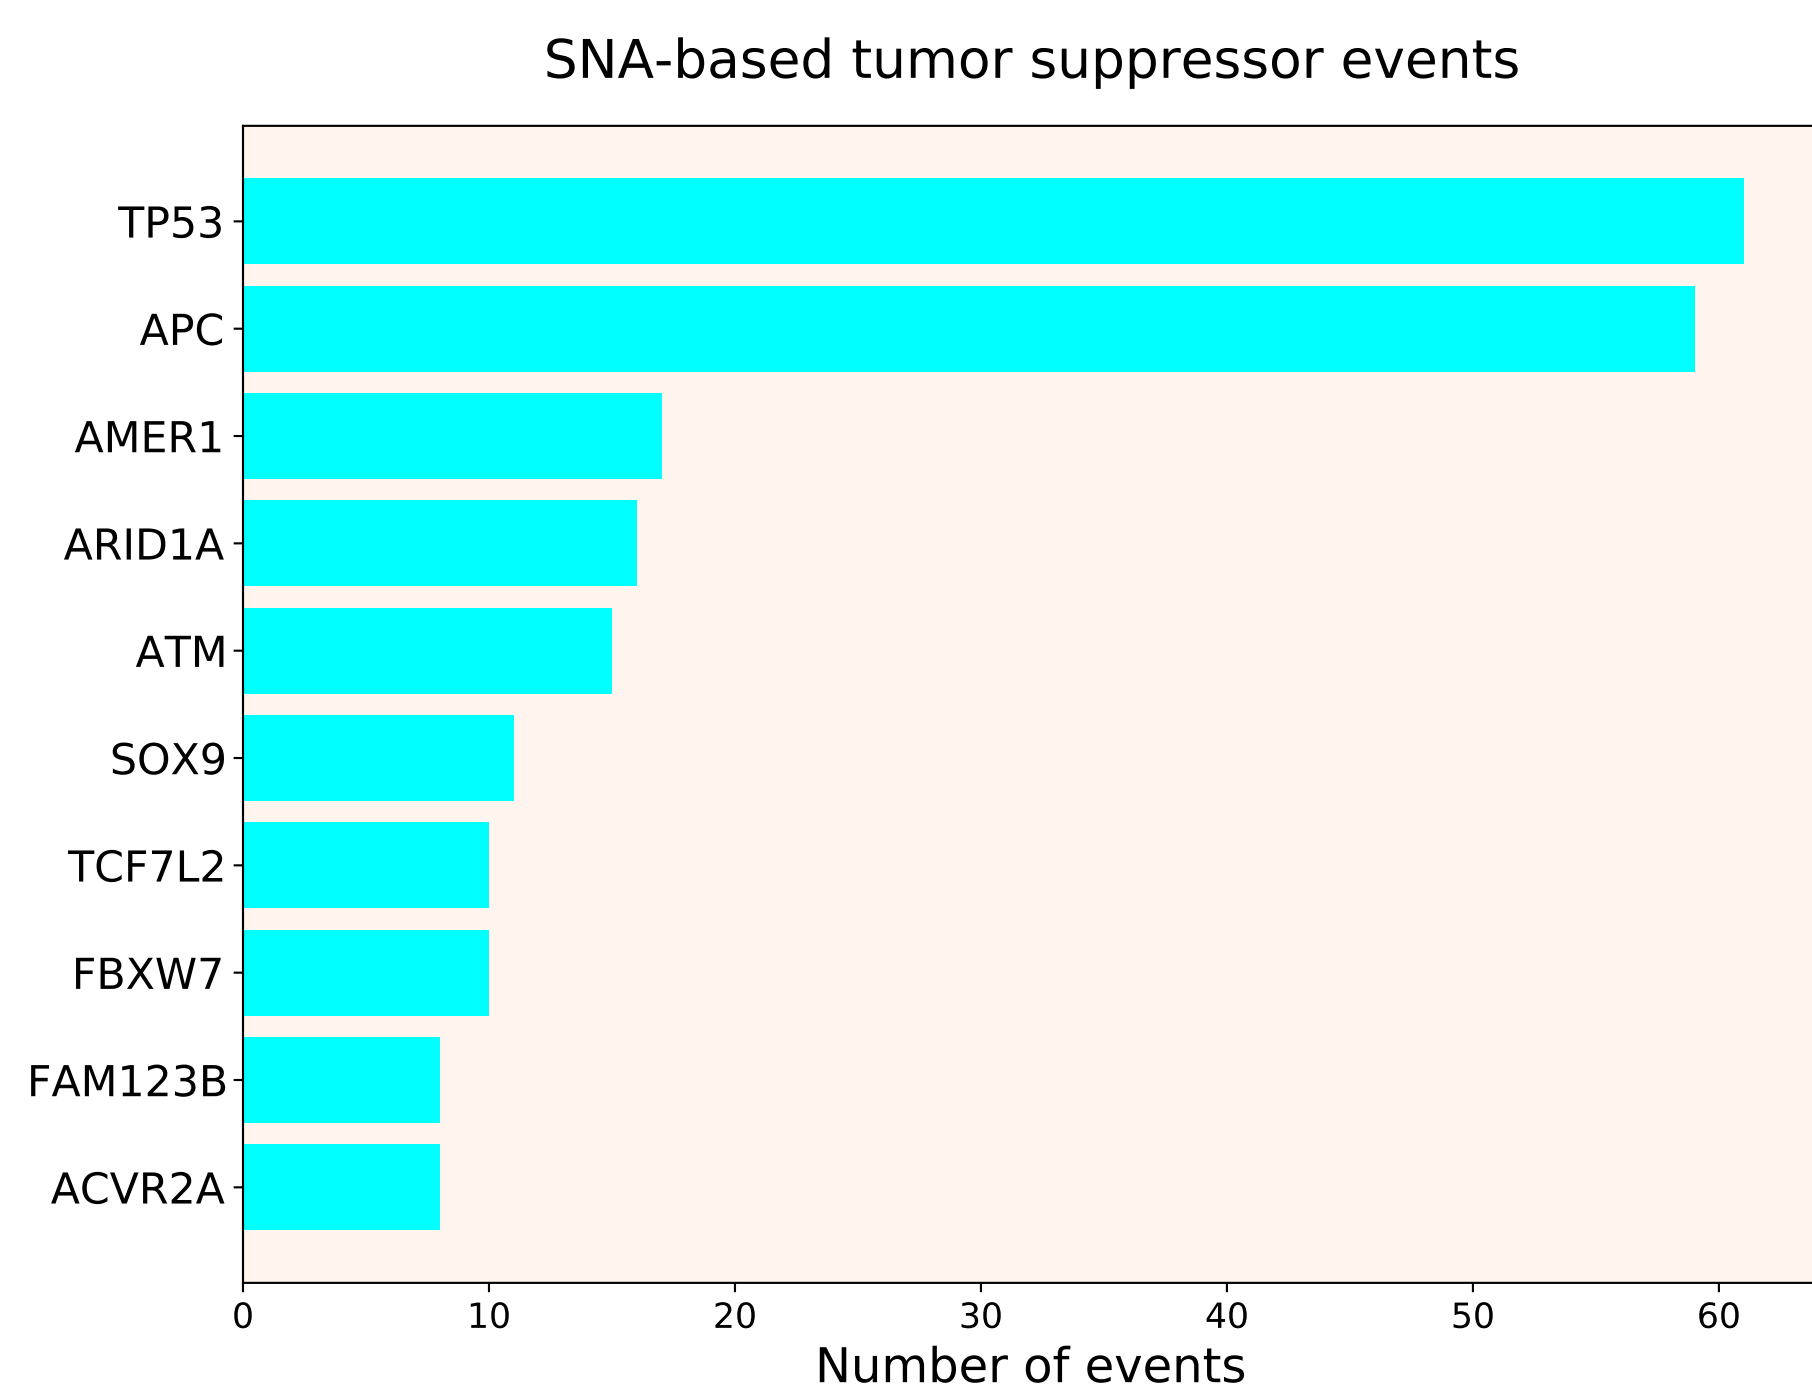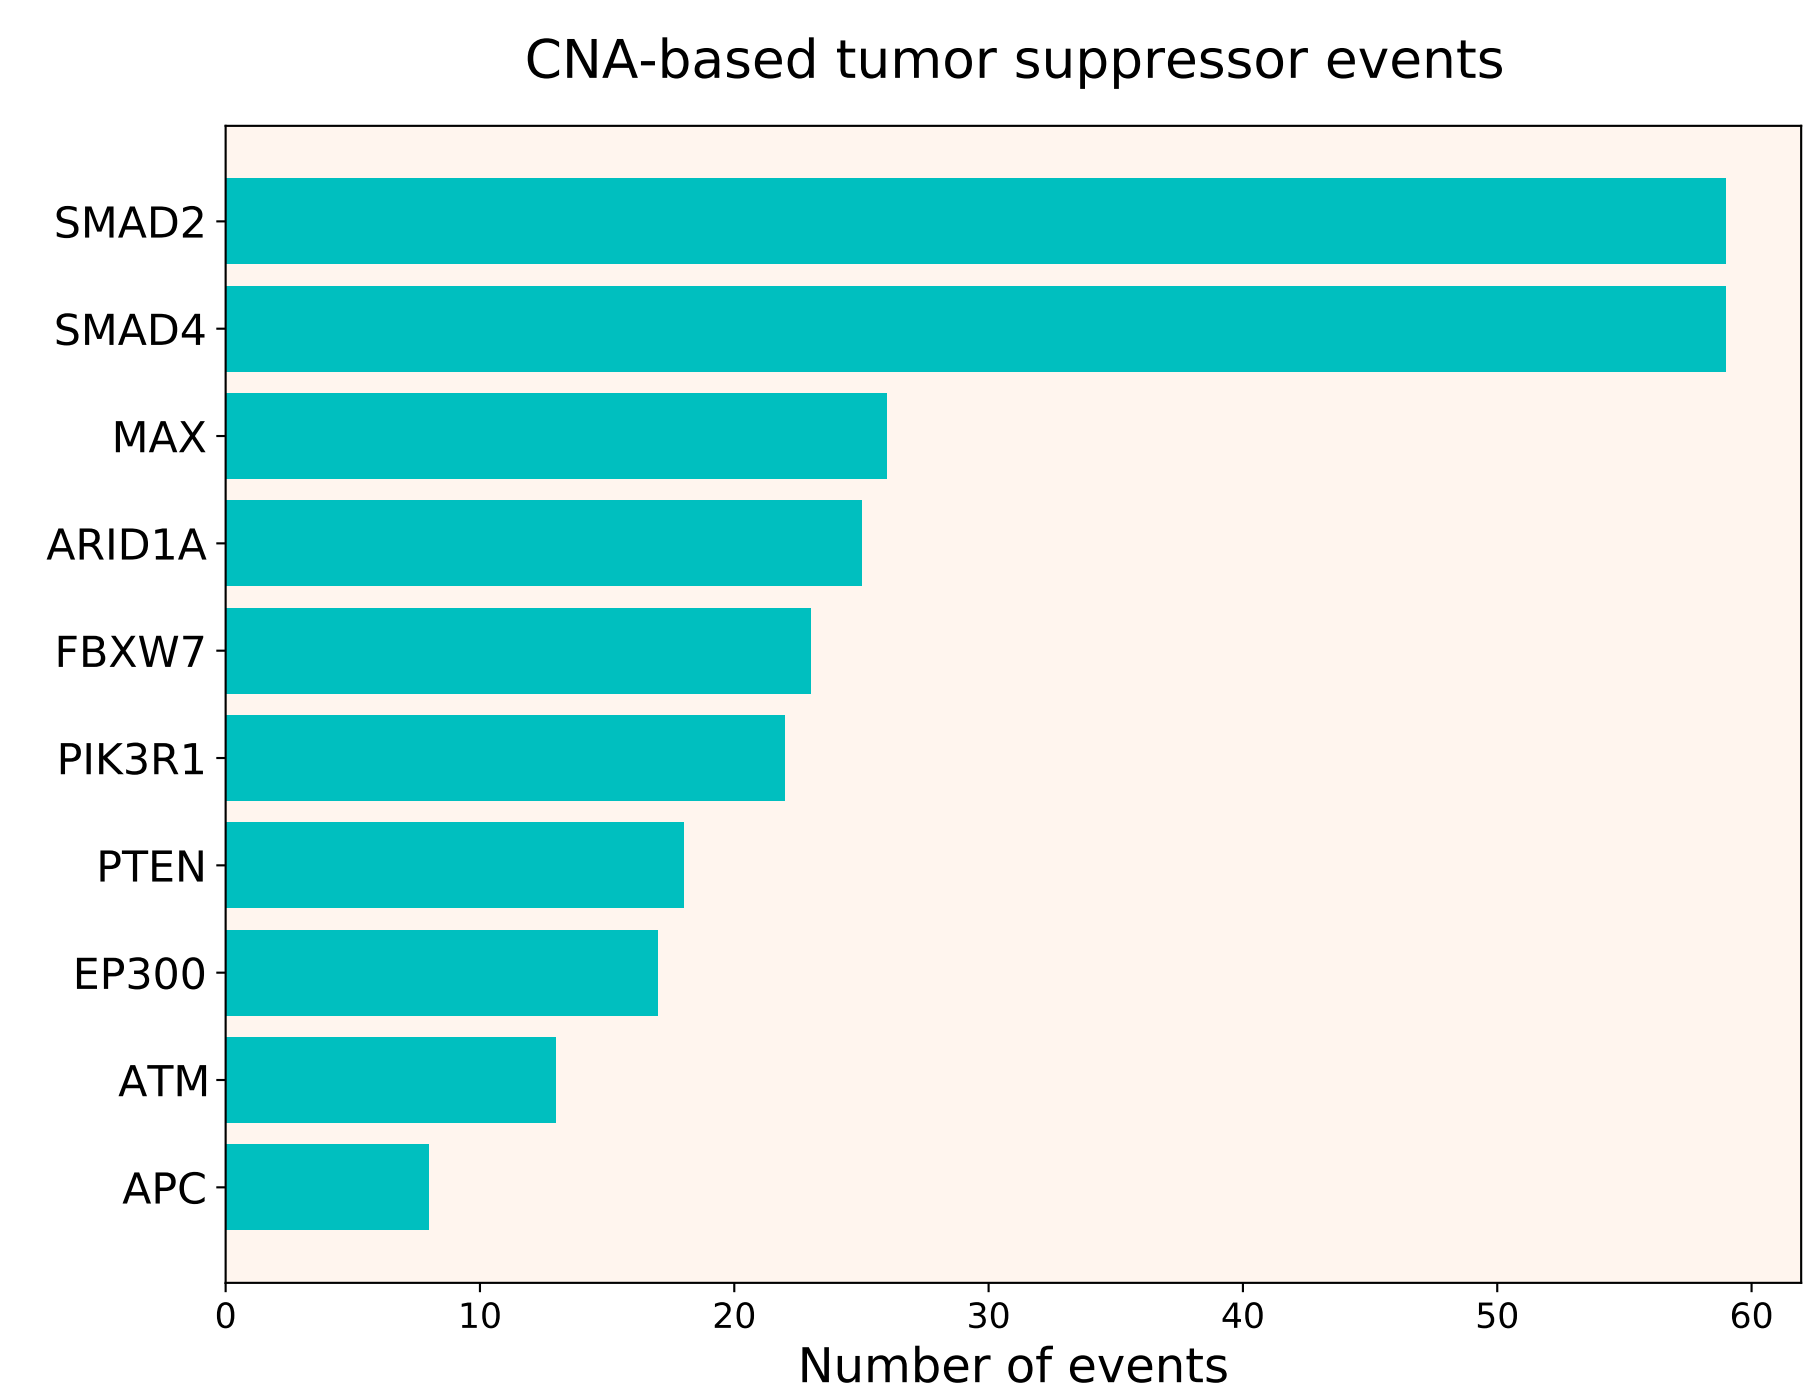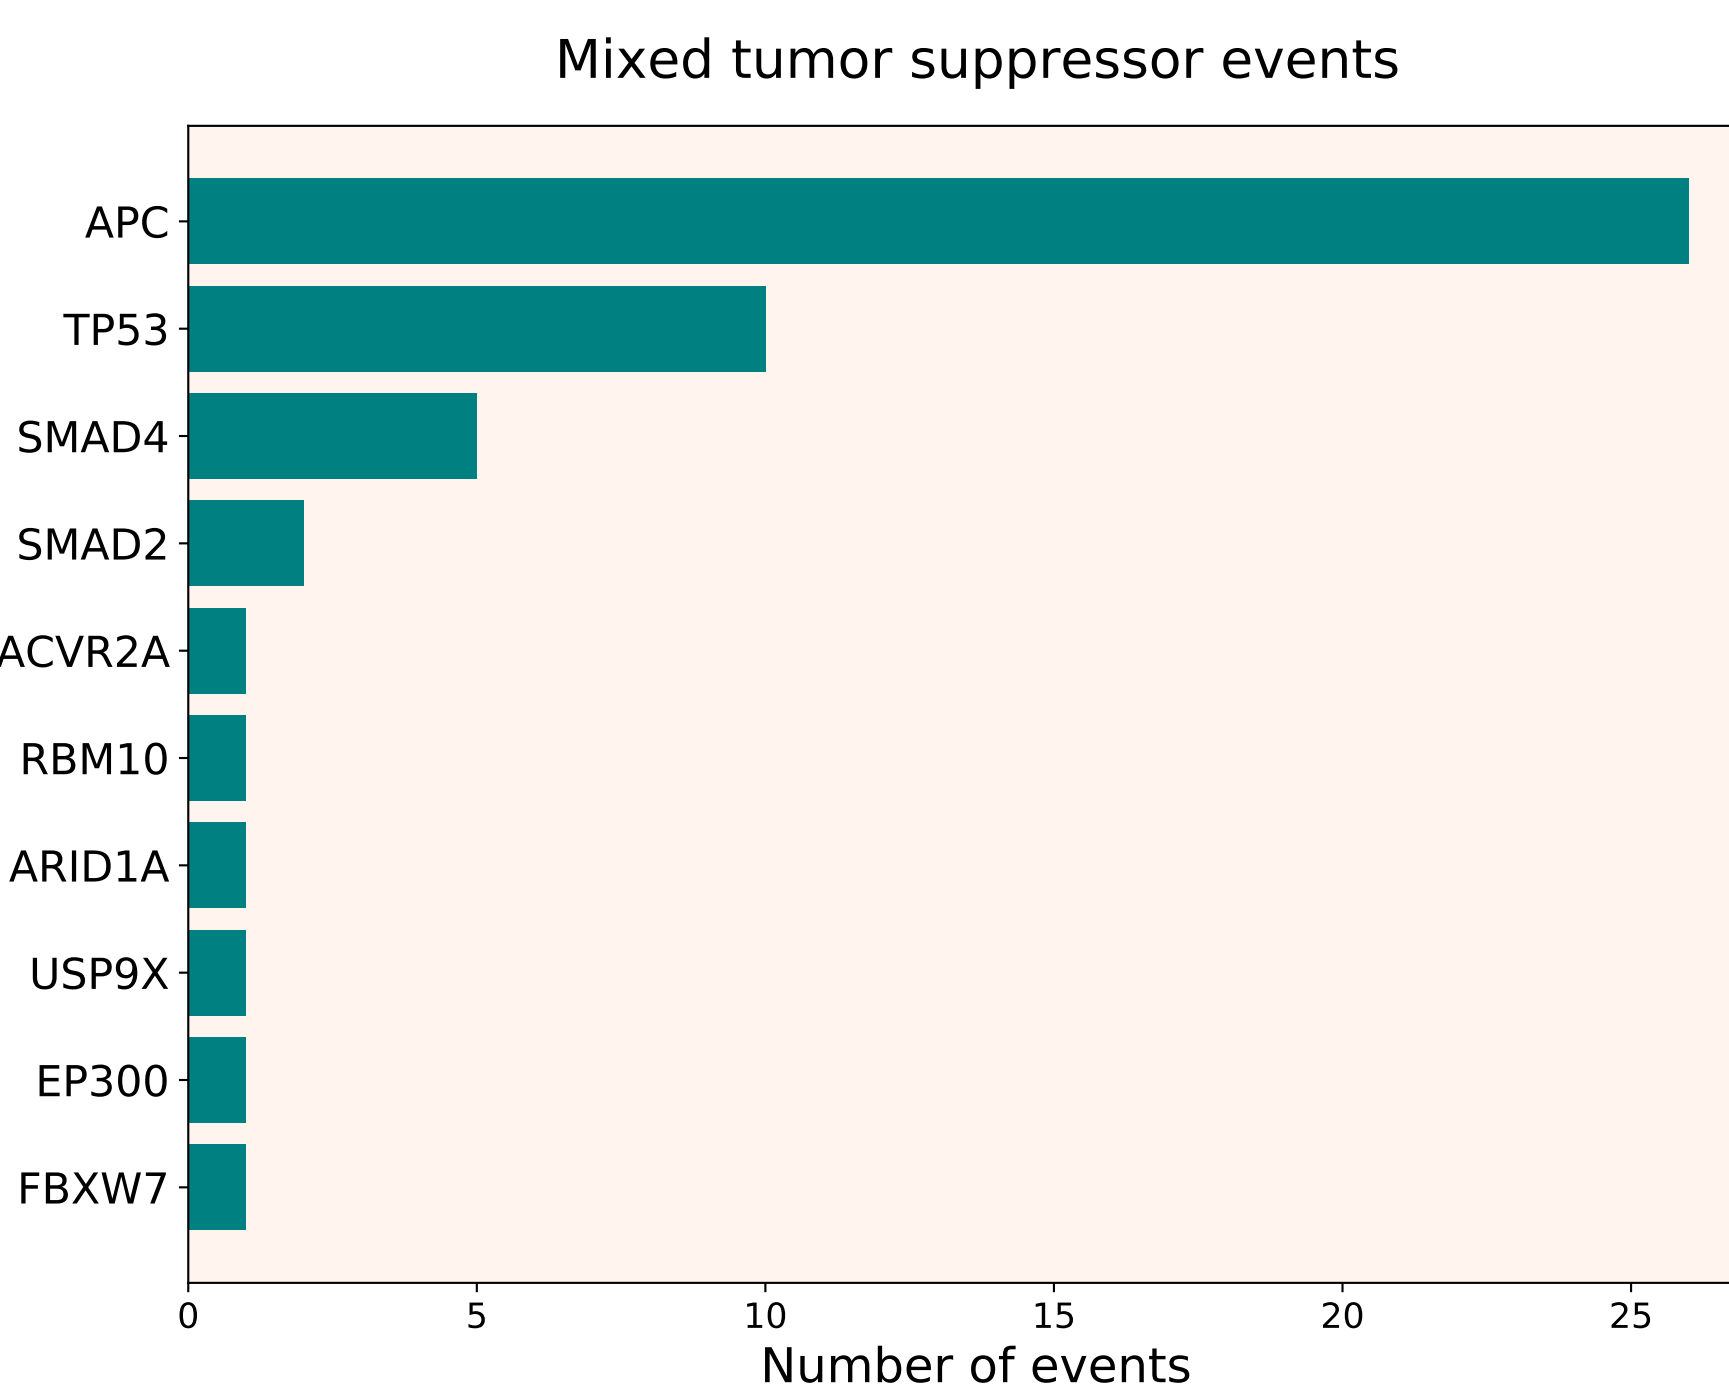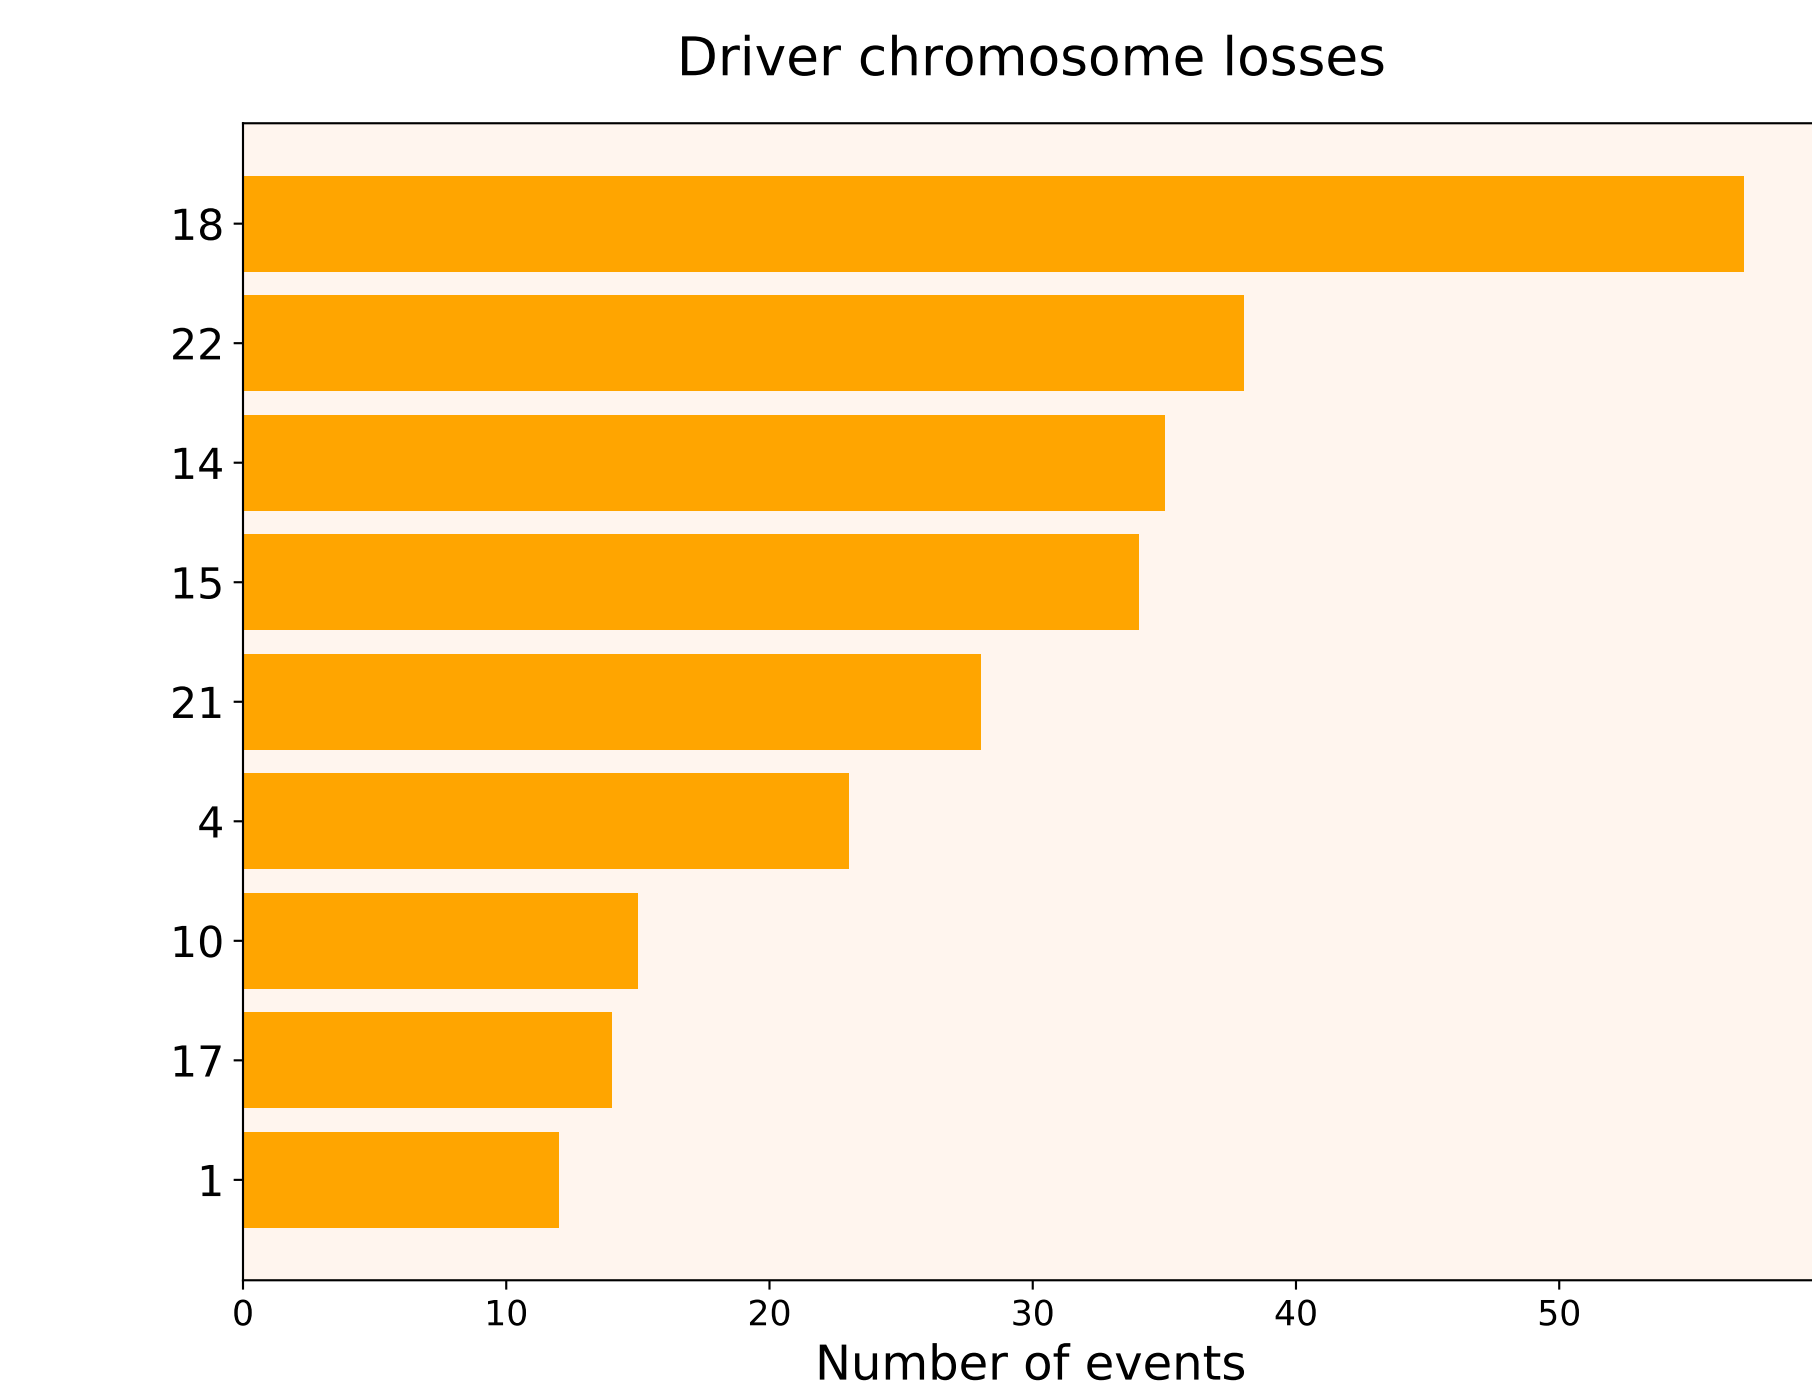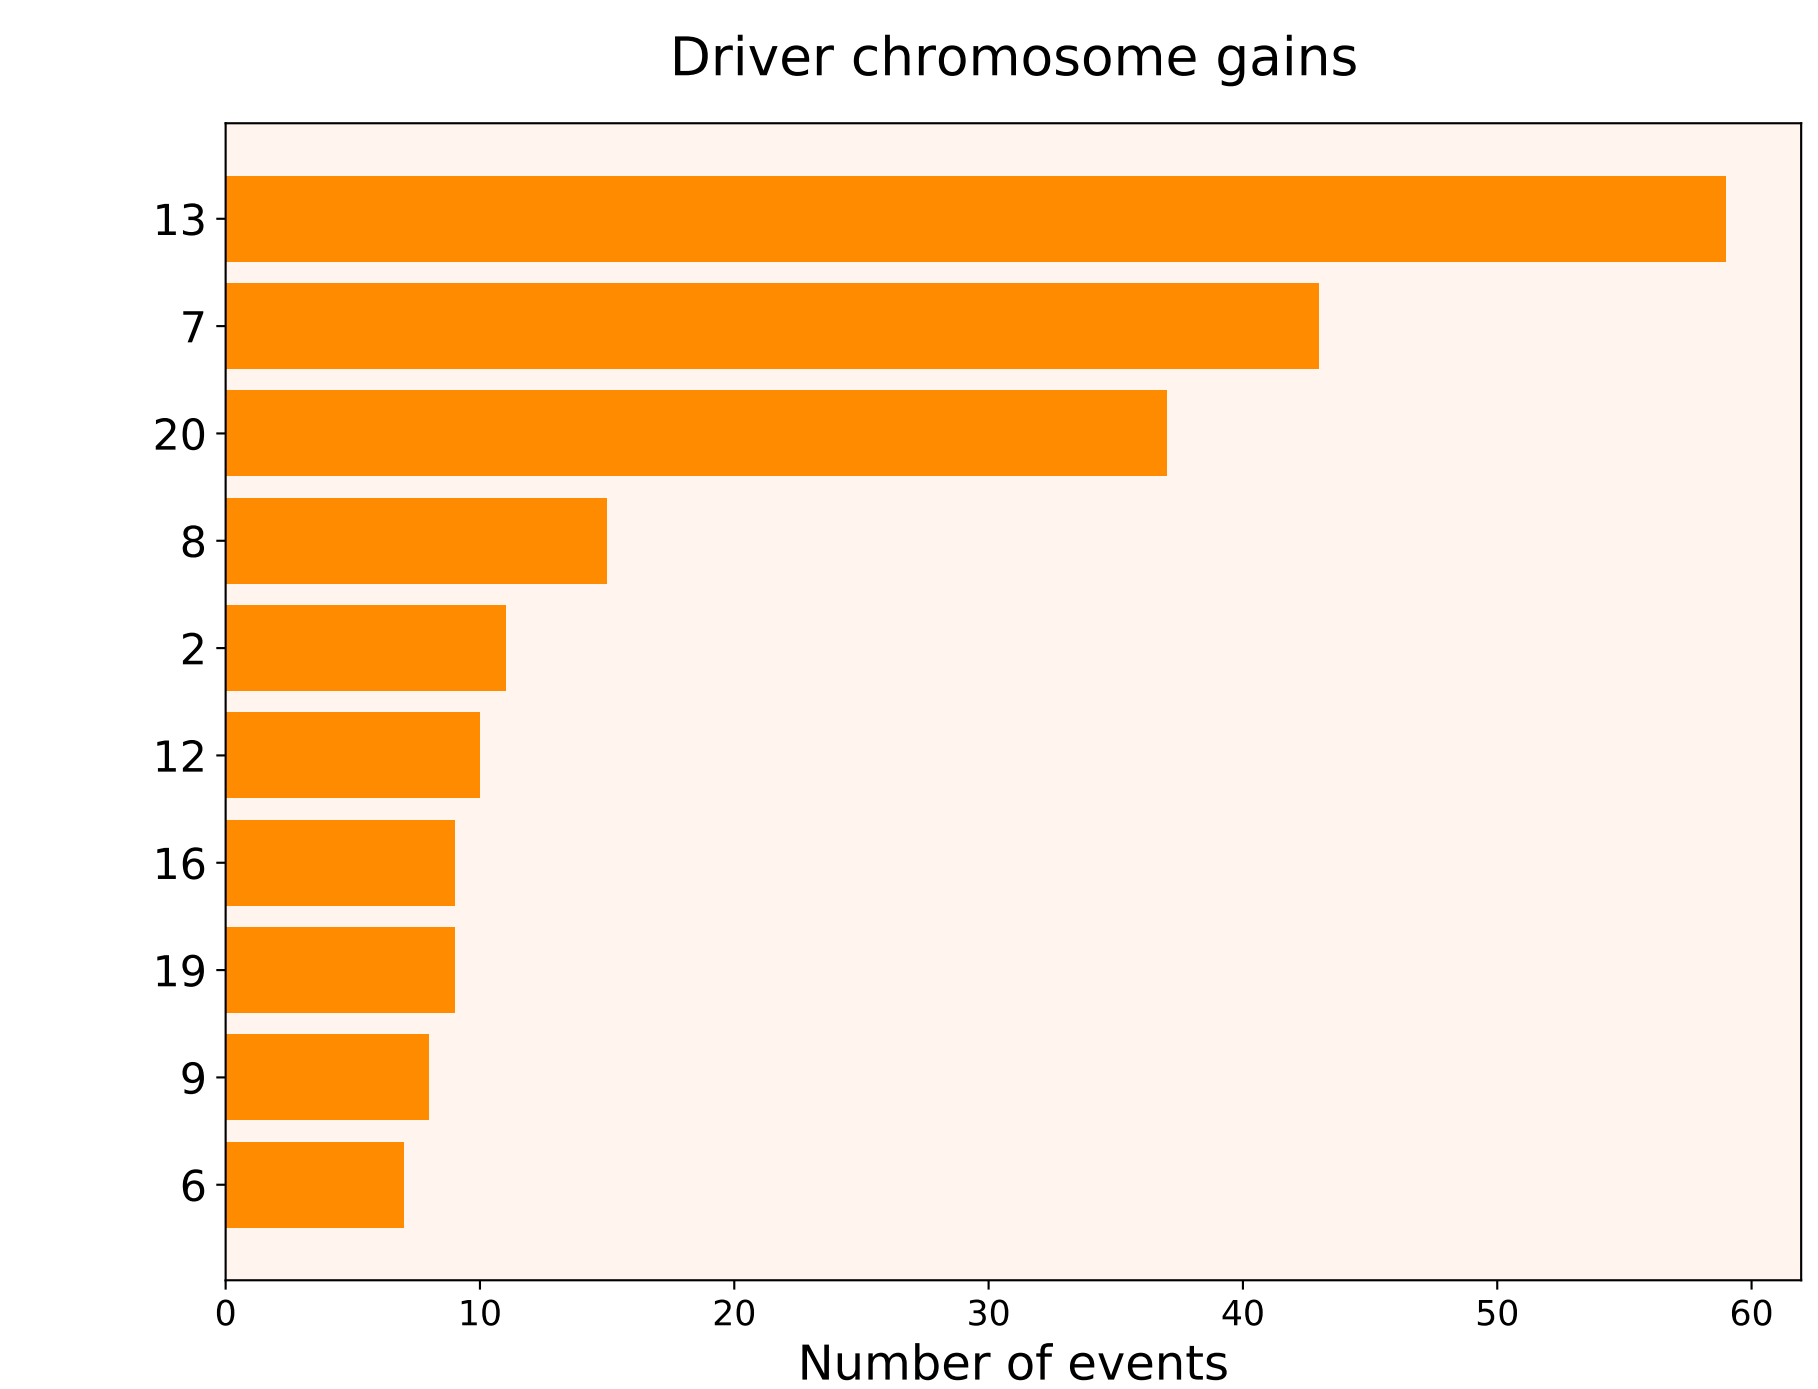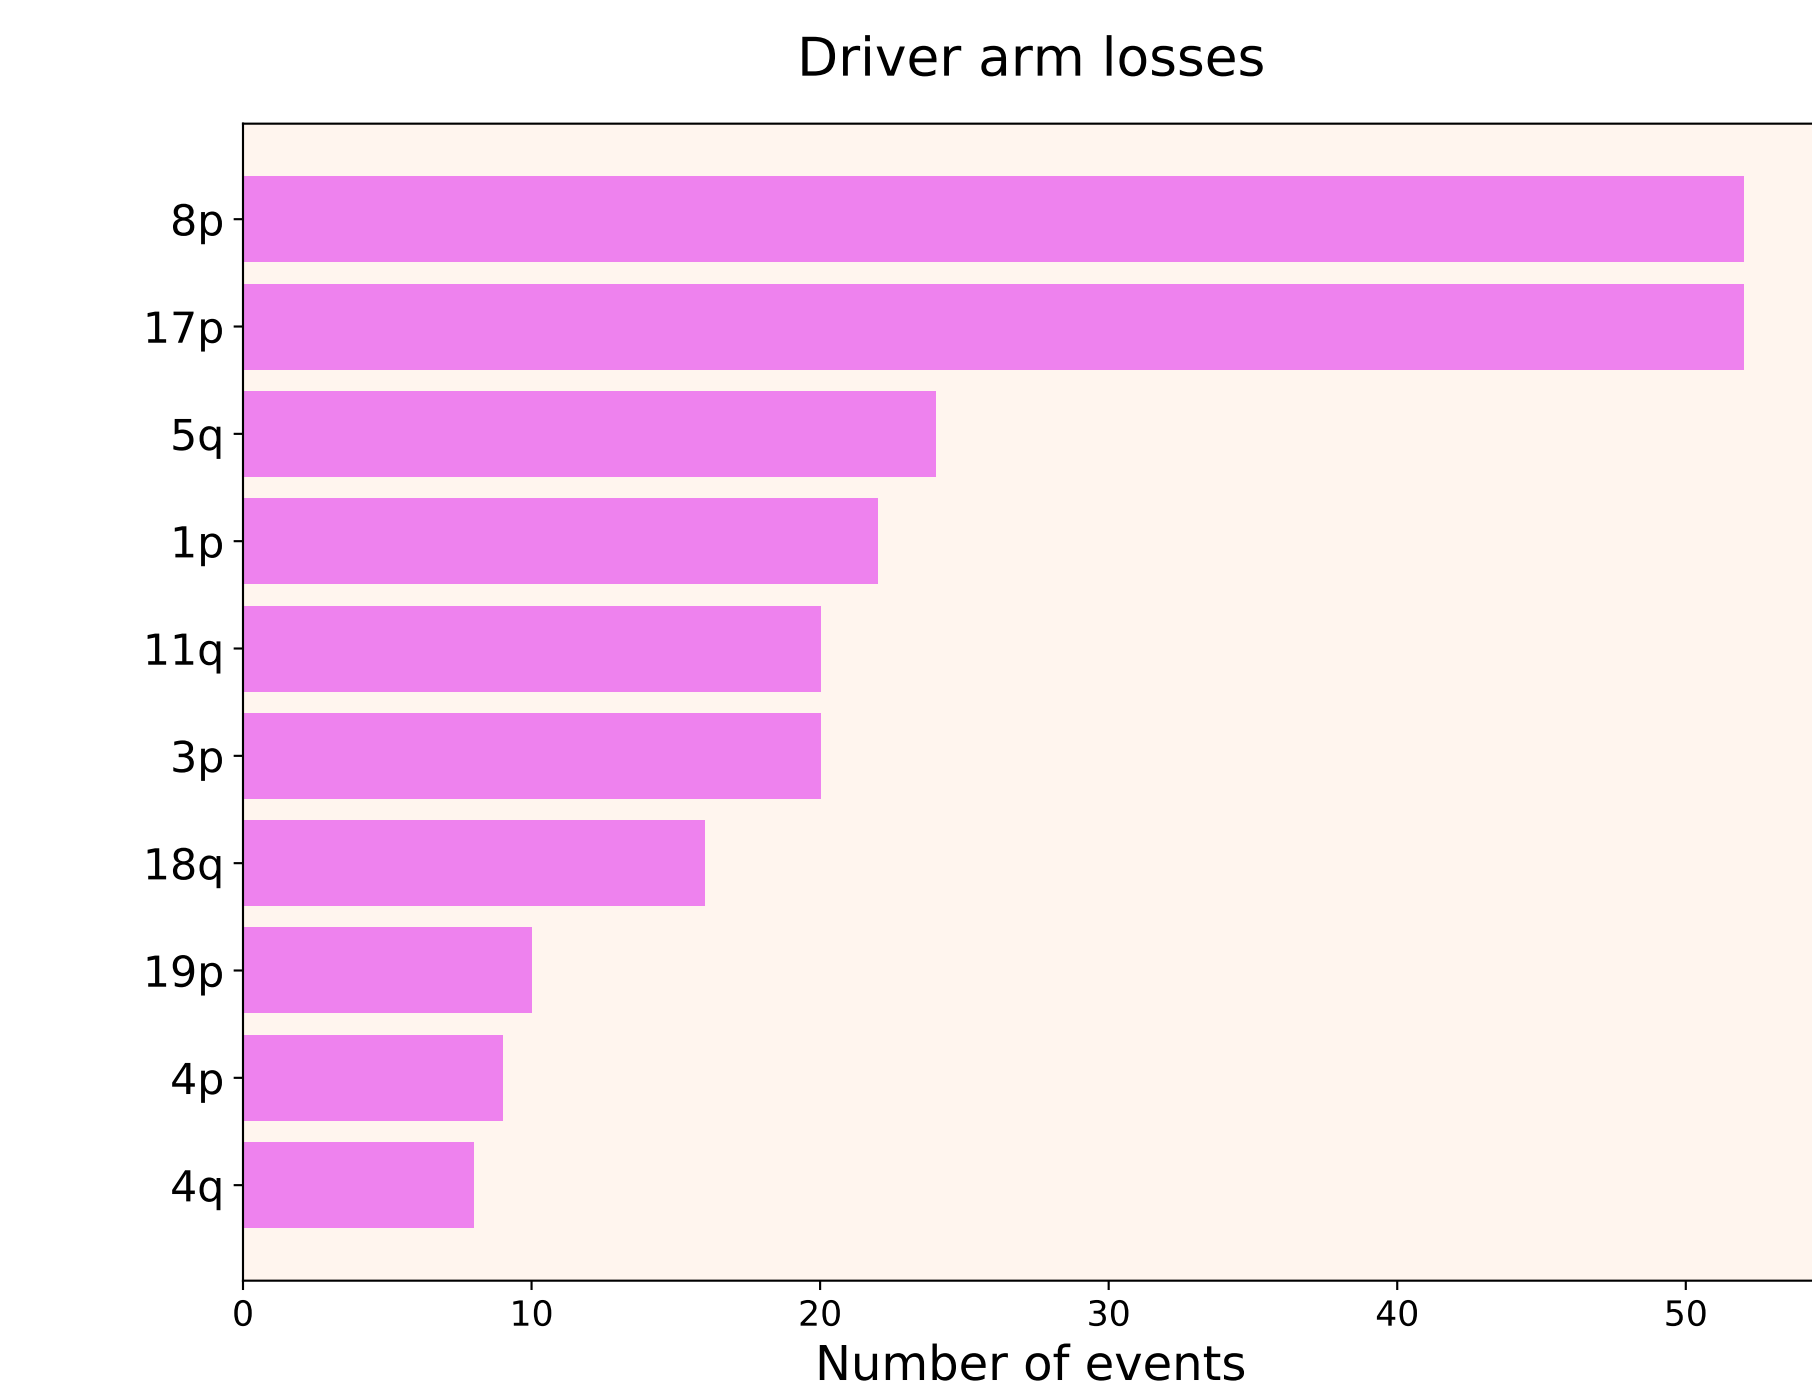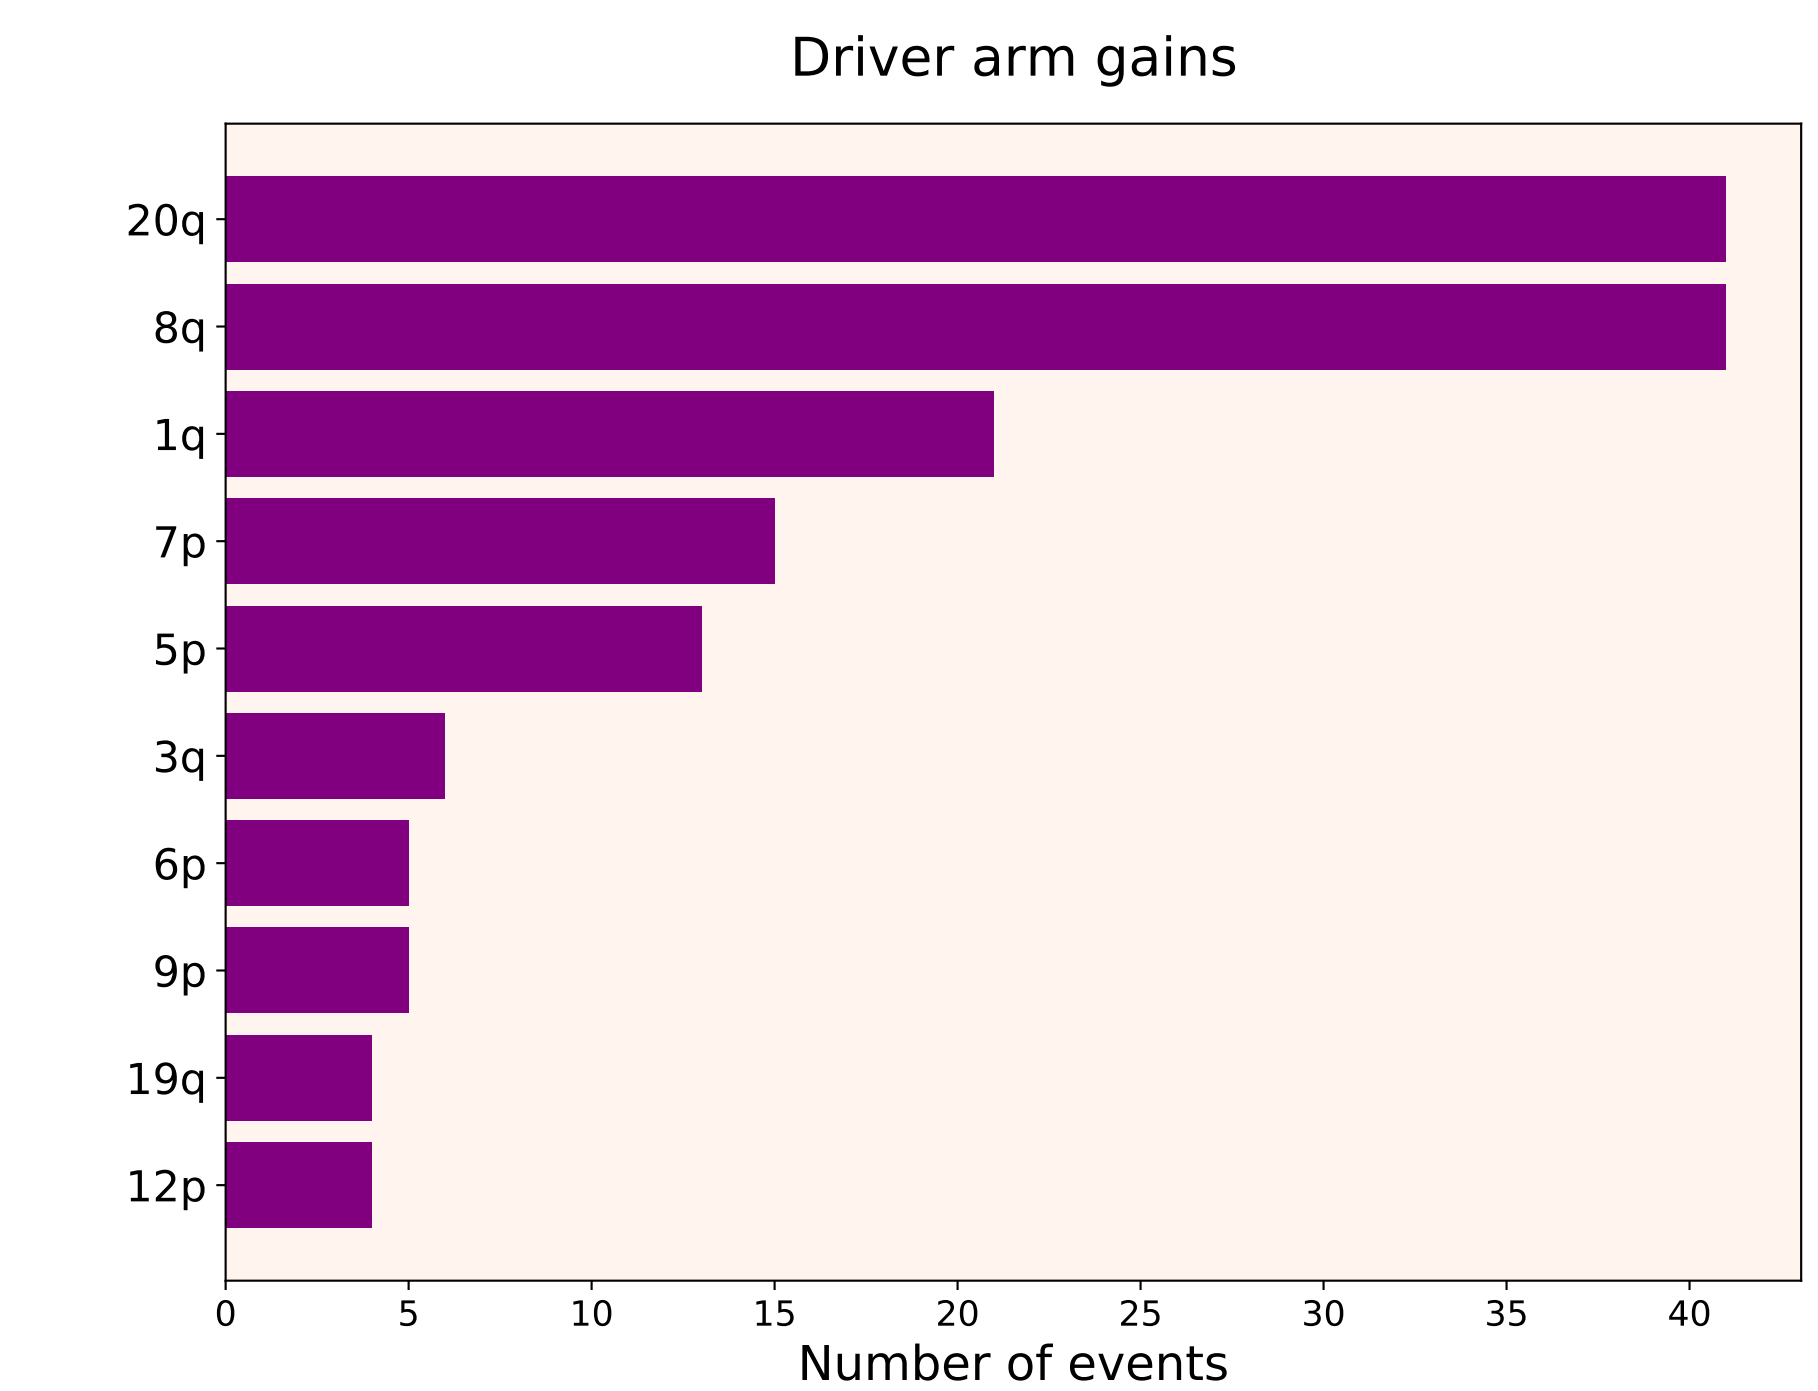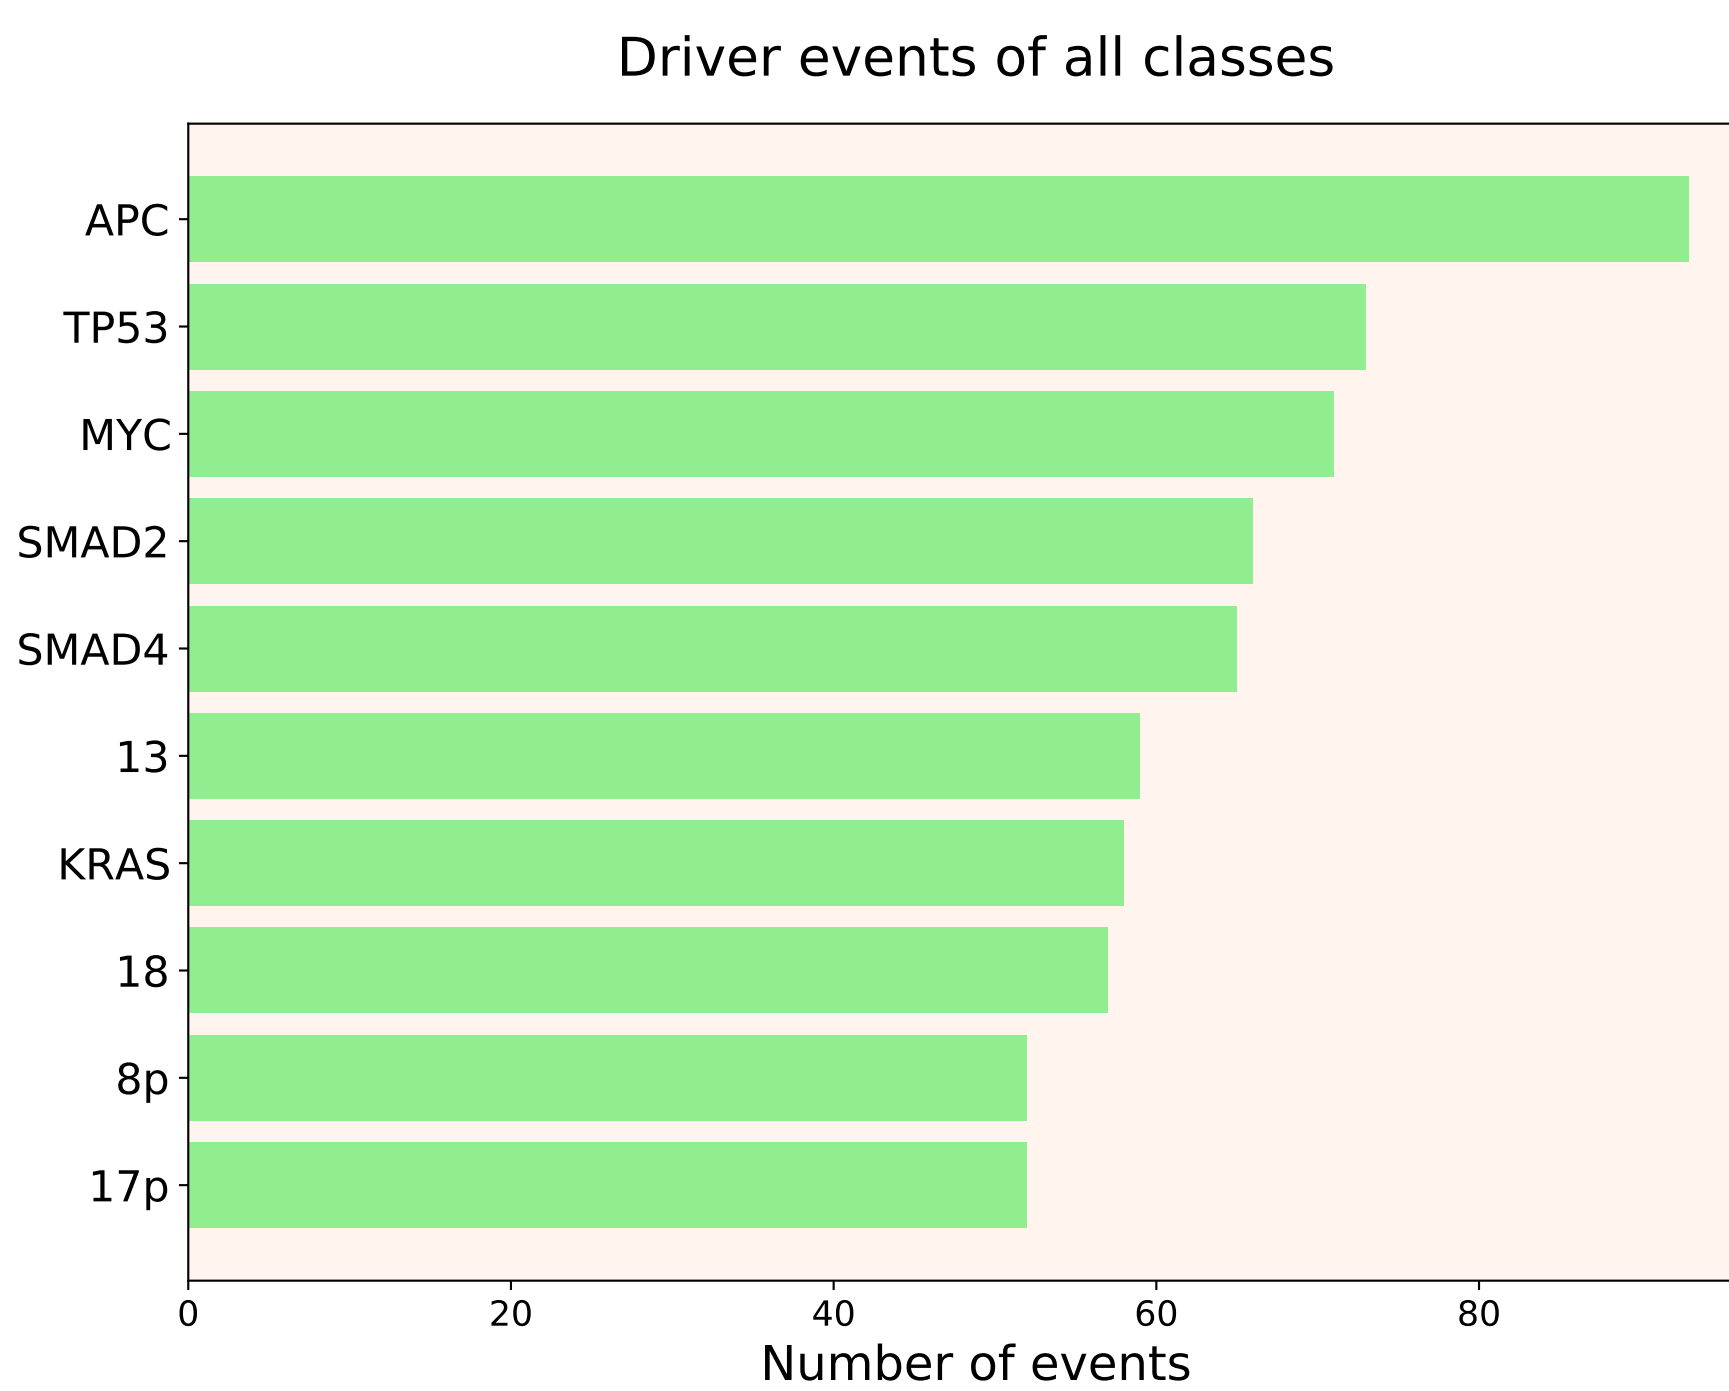

Supplement: Supplemental_Data_S1.zip [file Supplemental_Data_S1.zip]

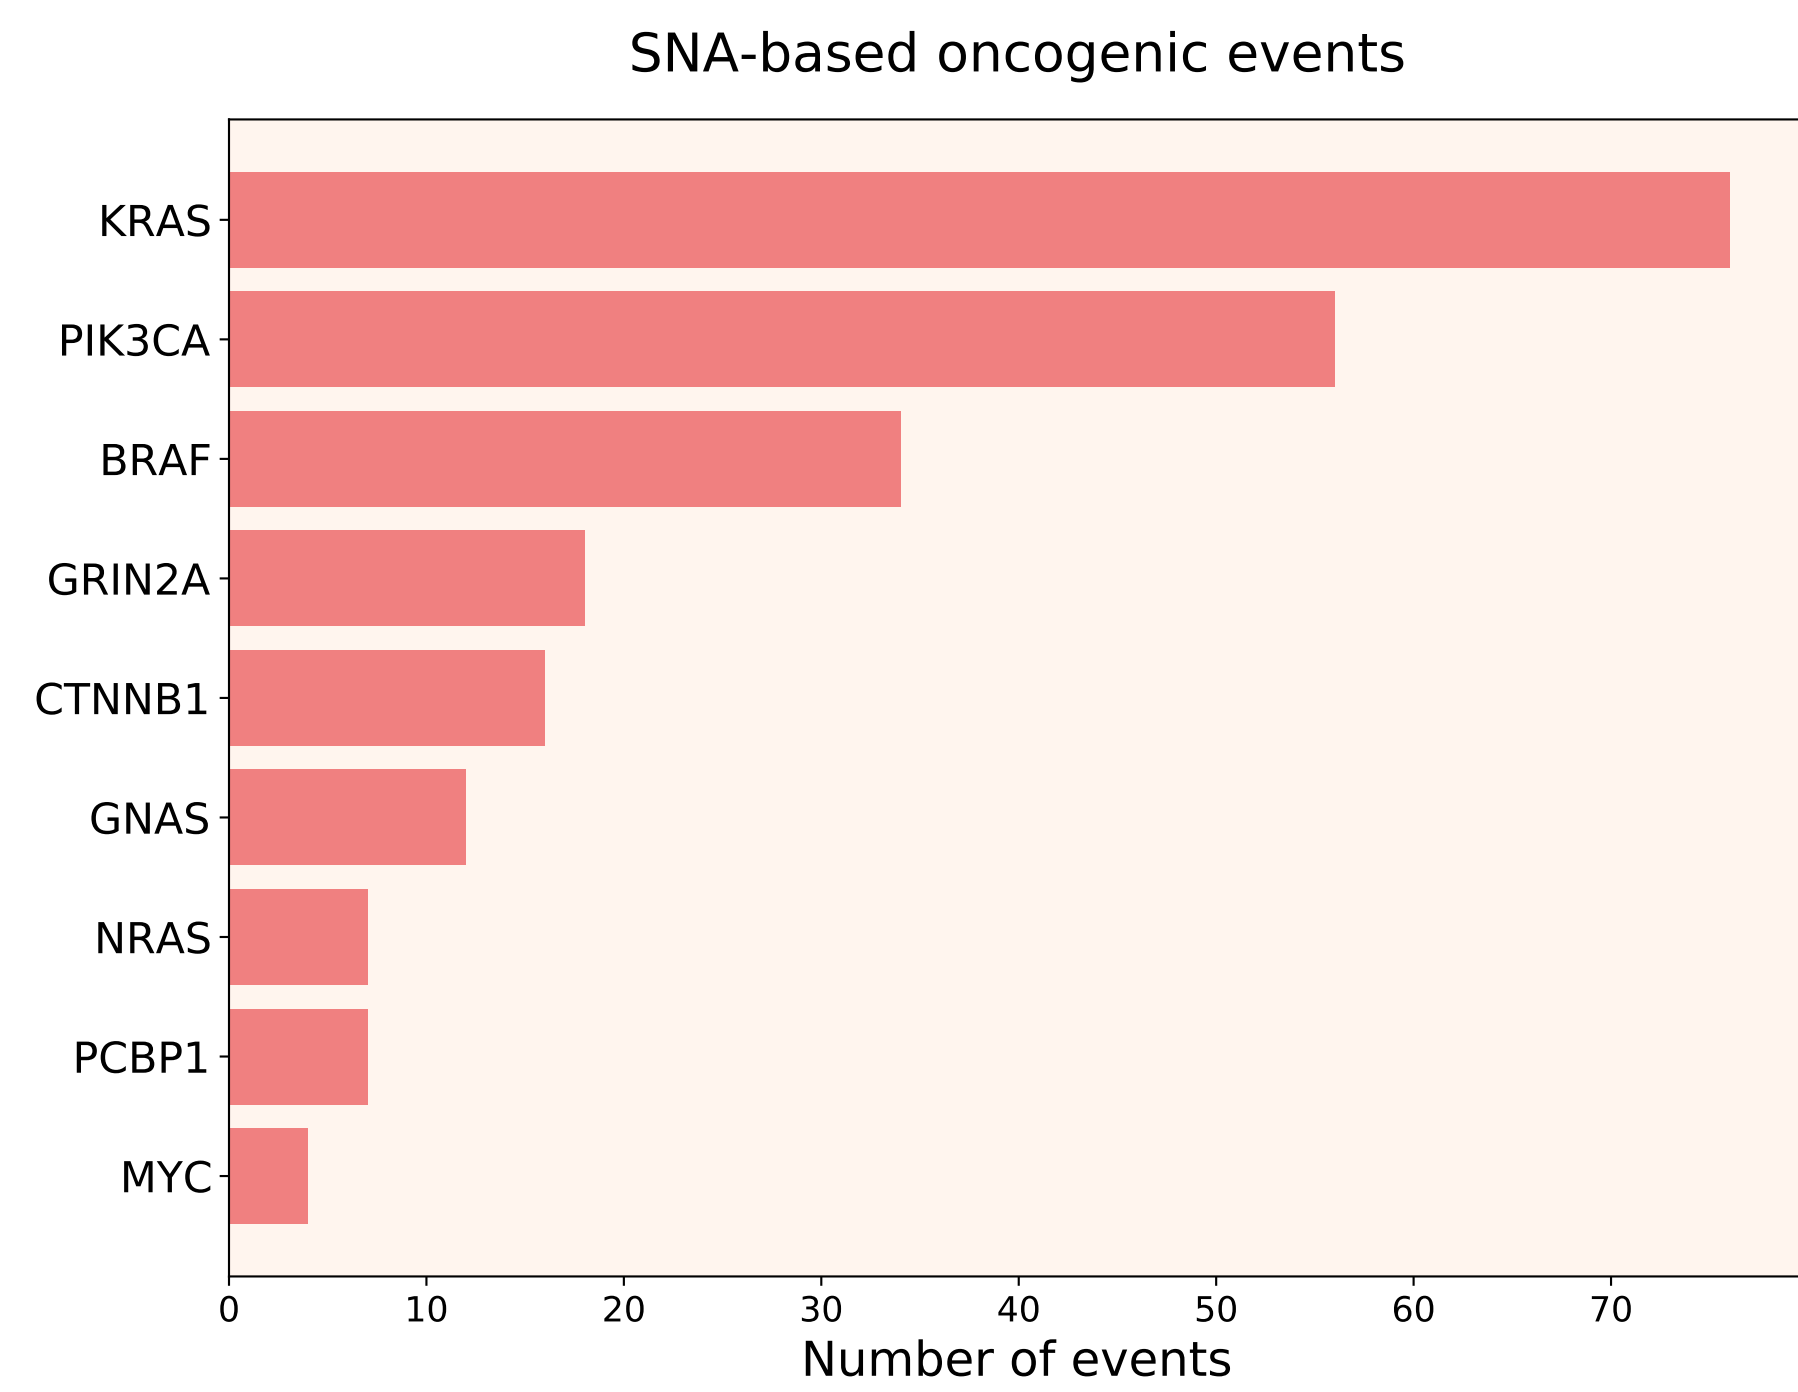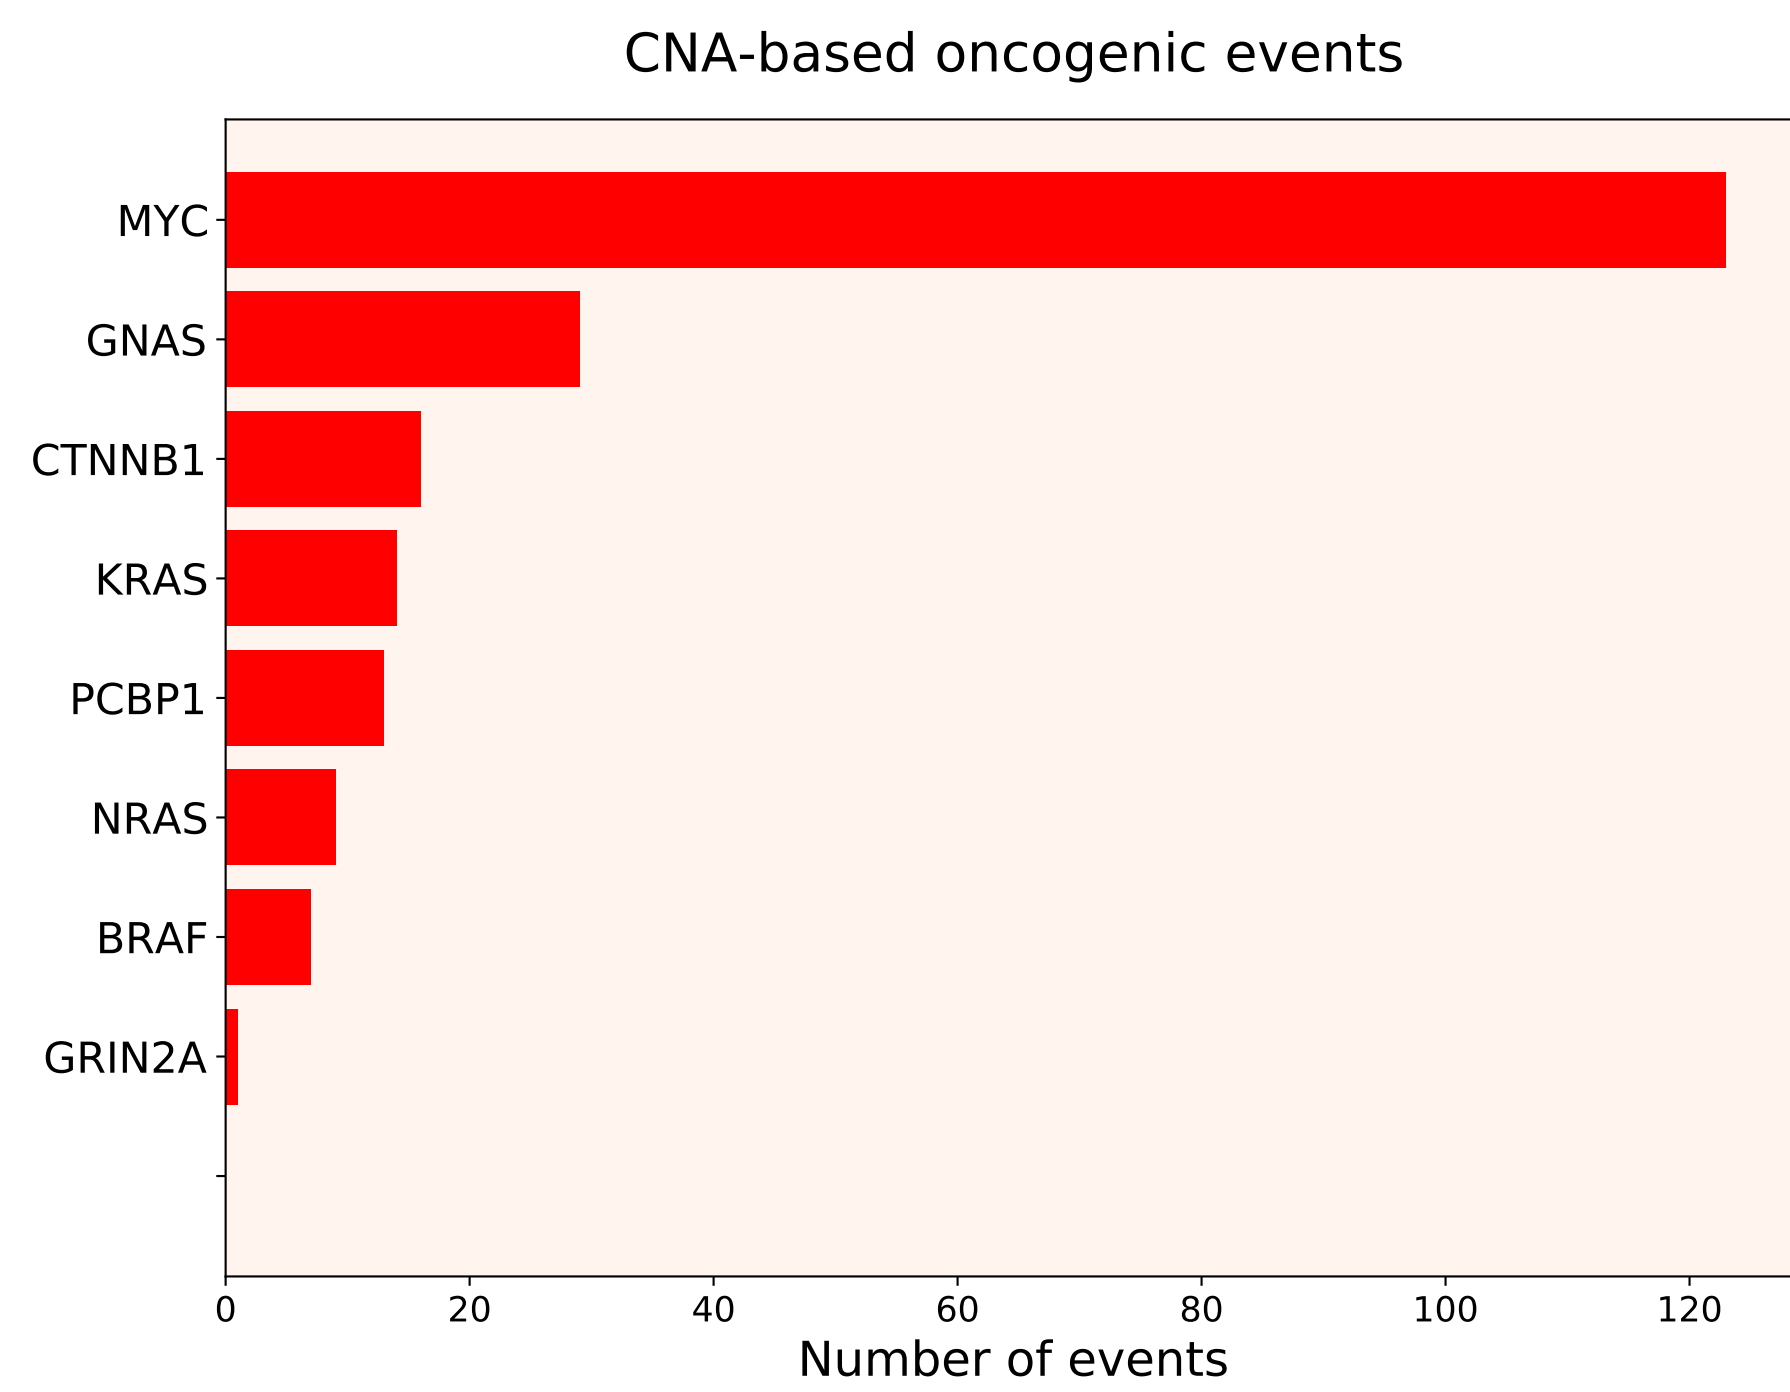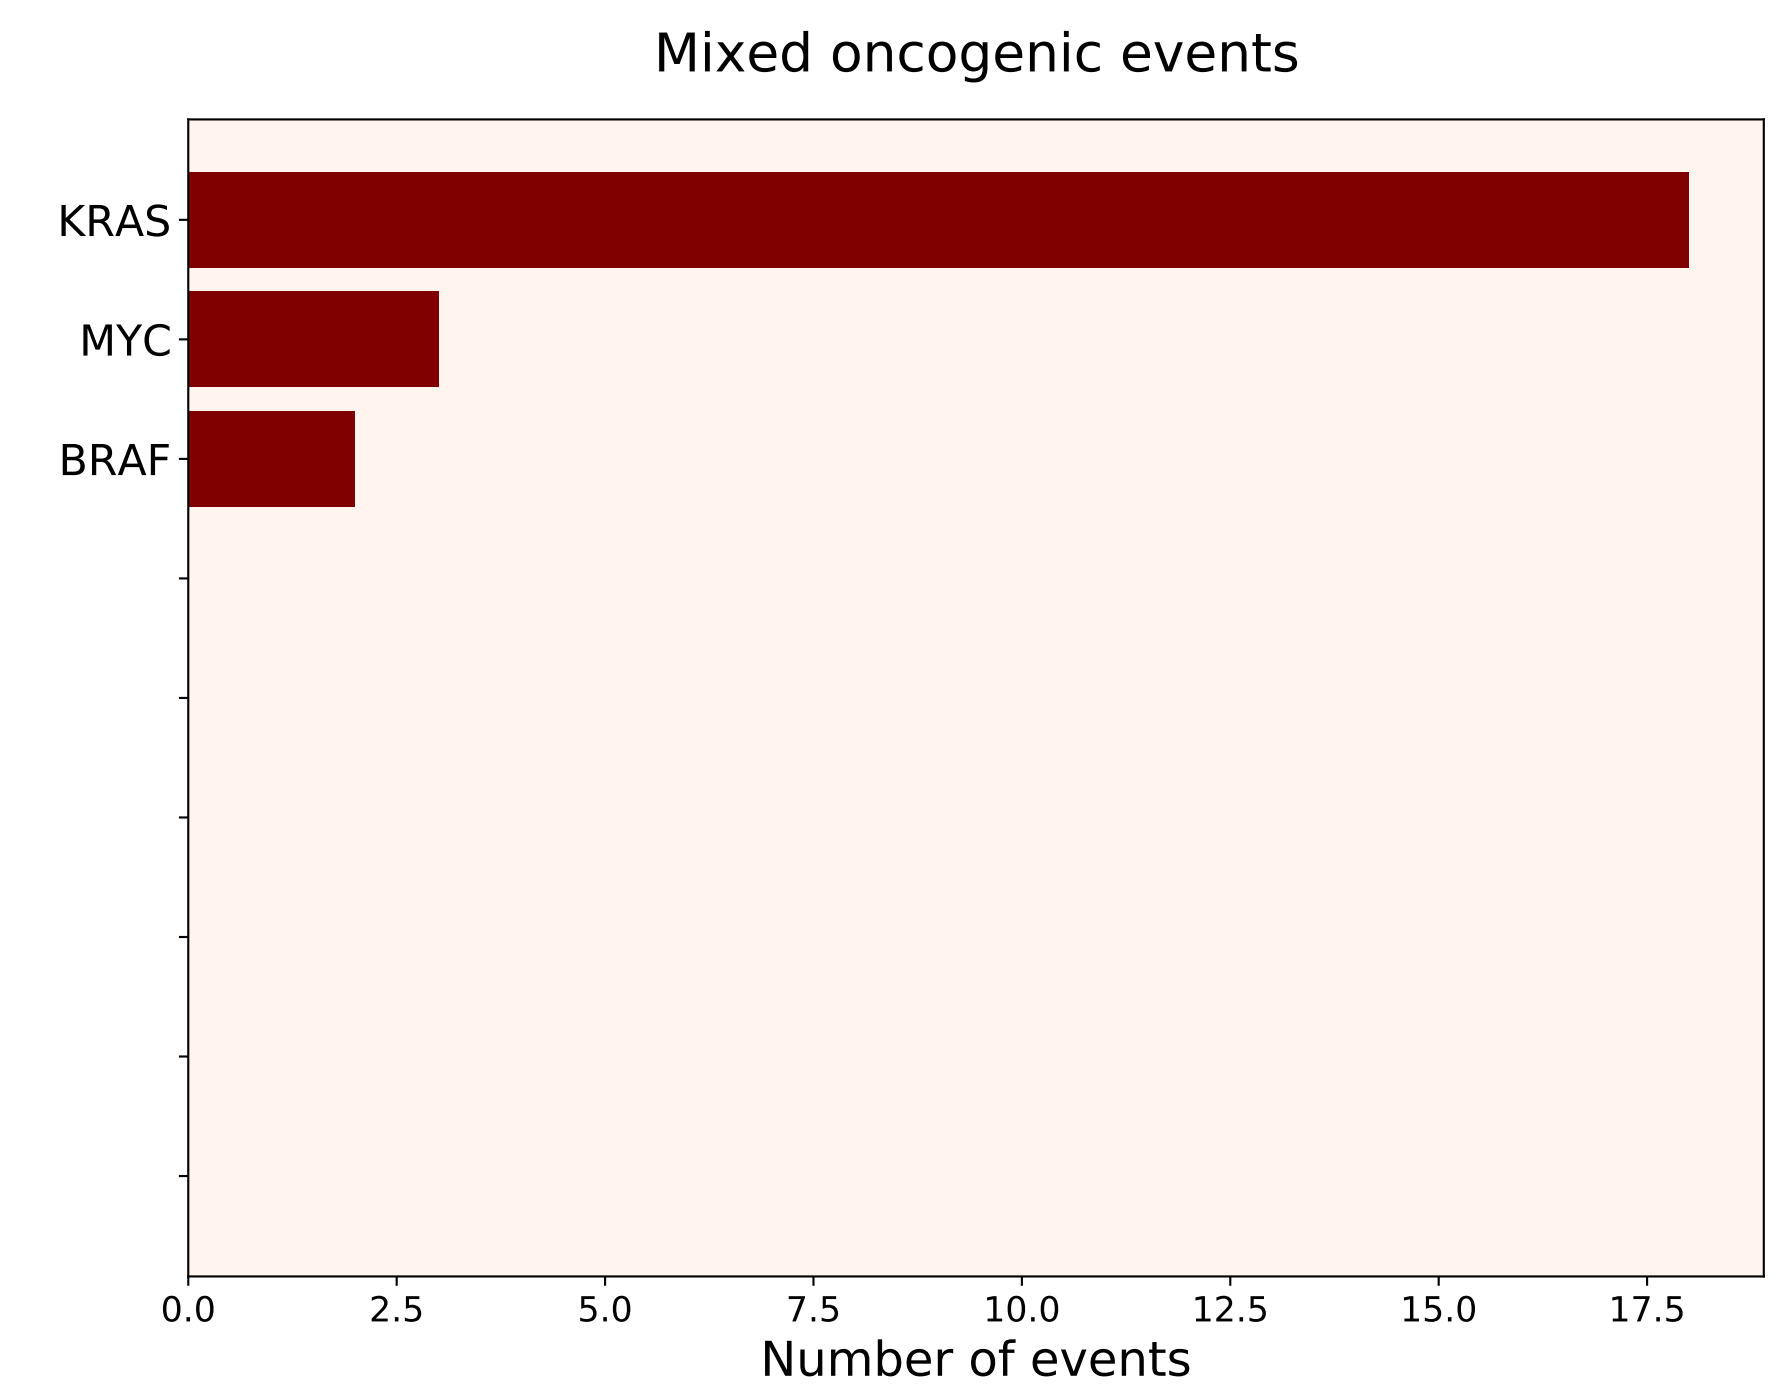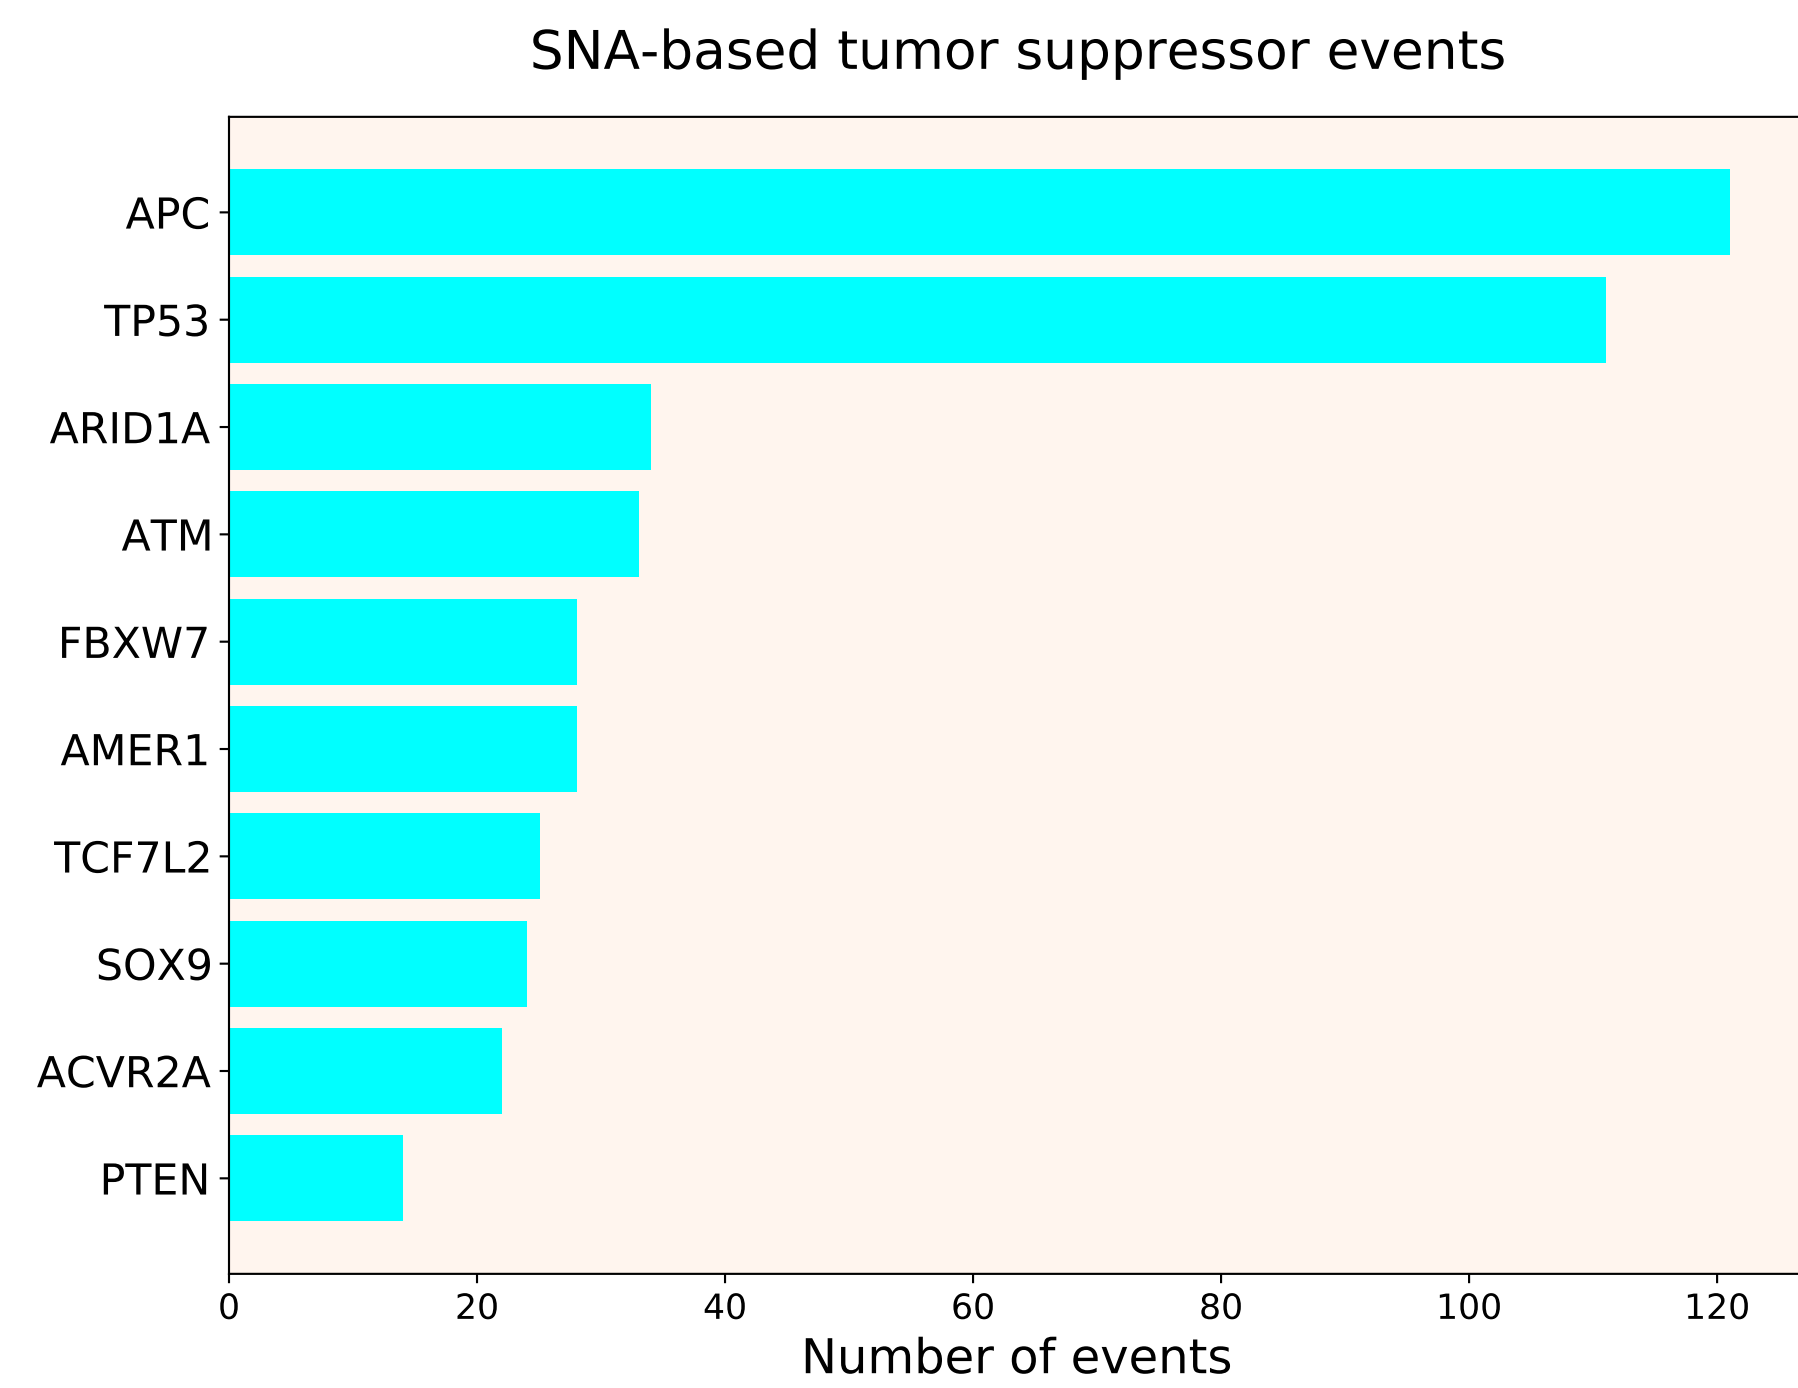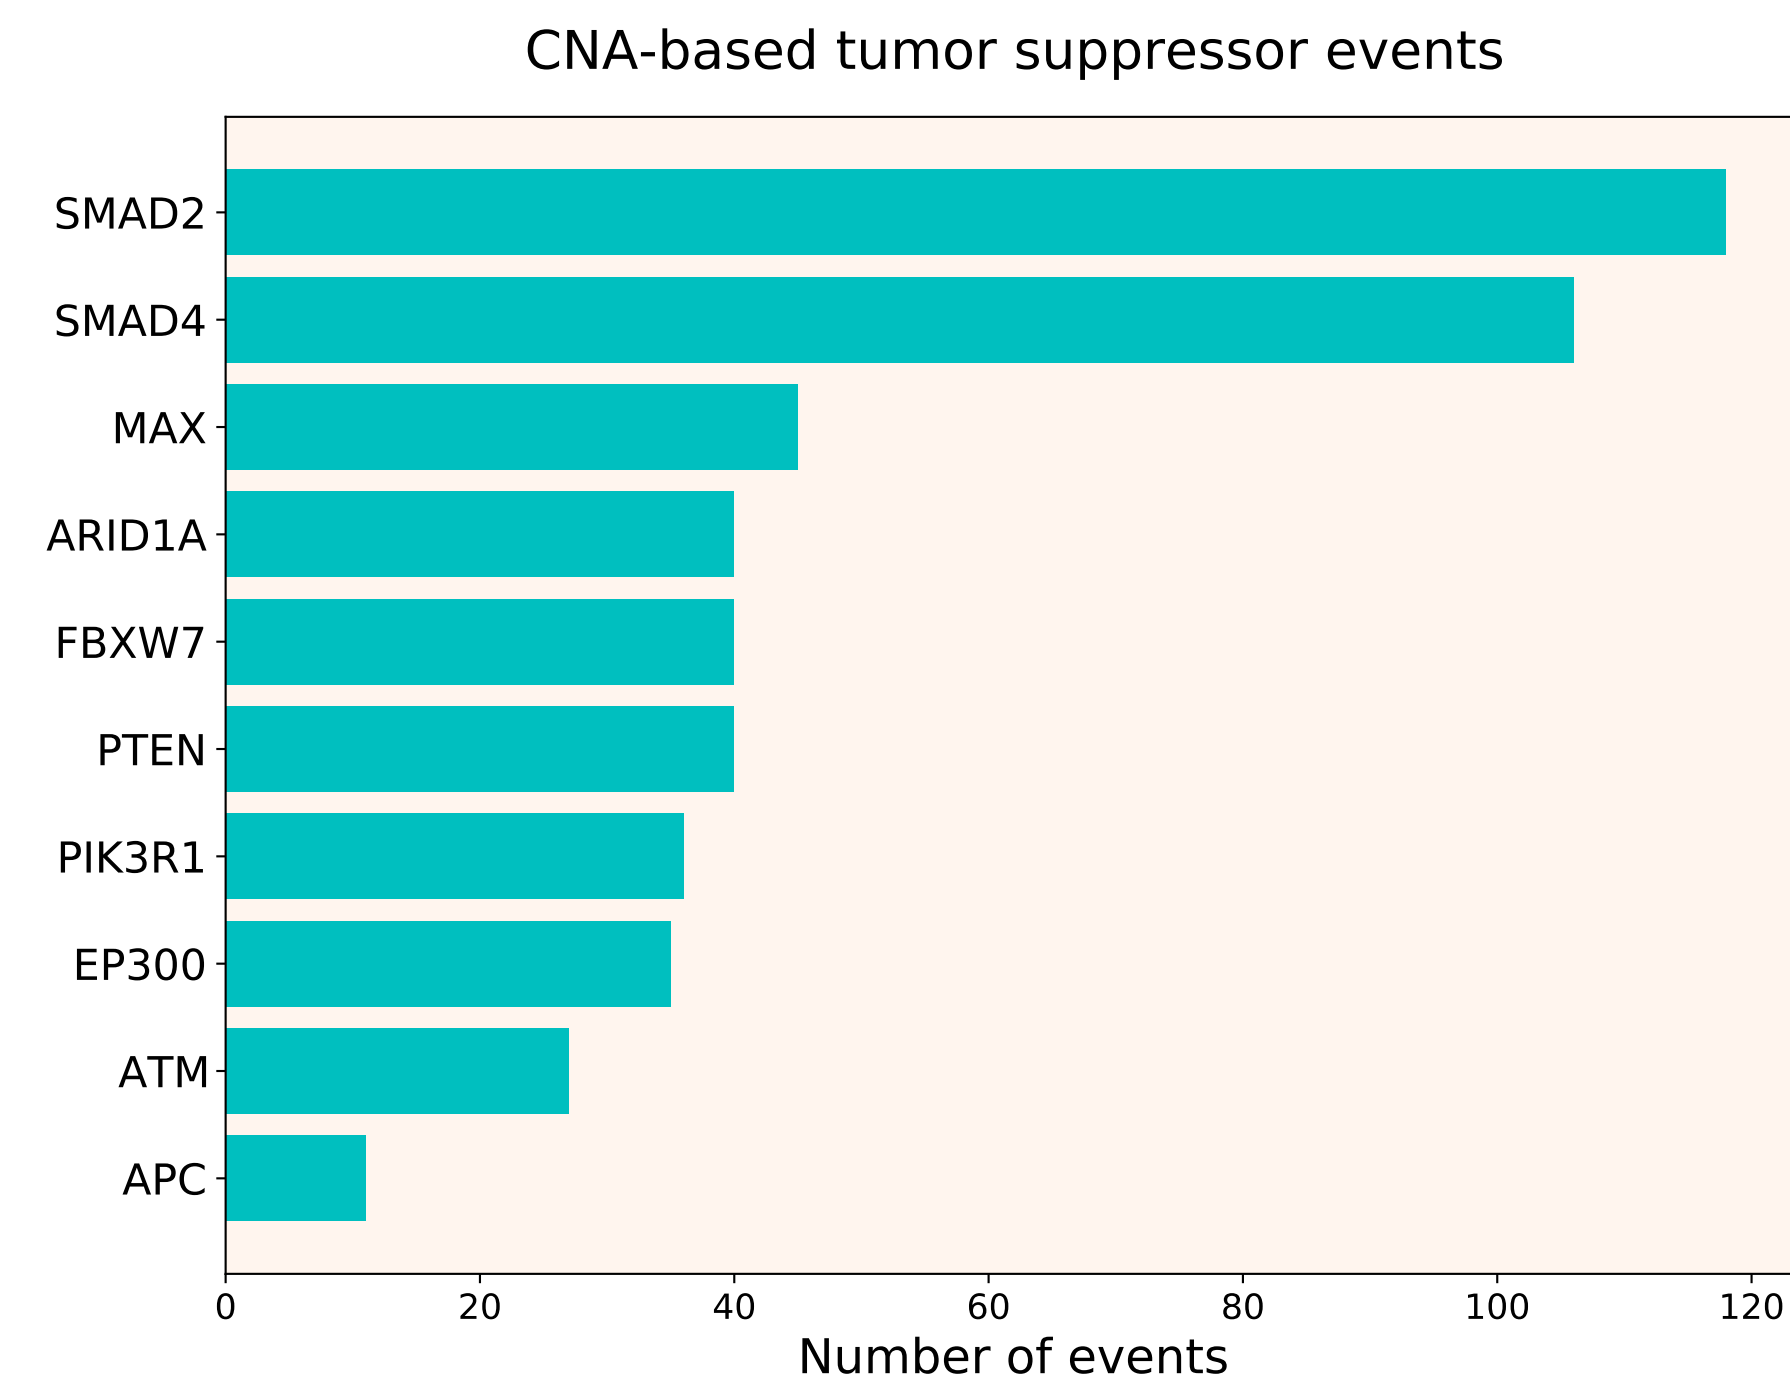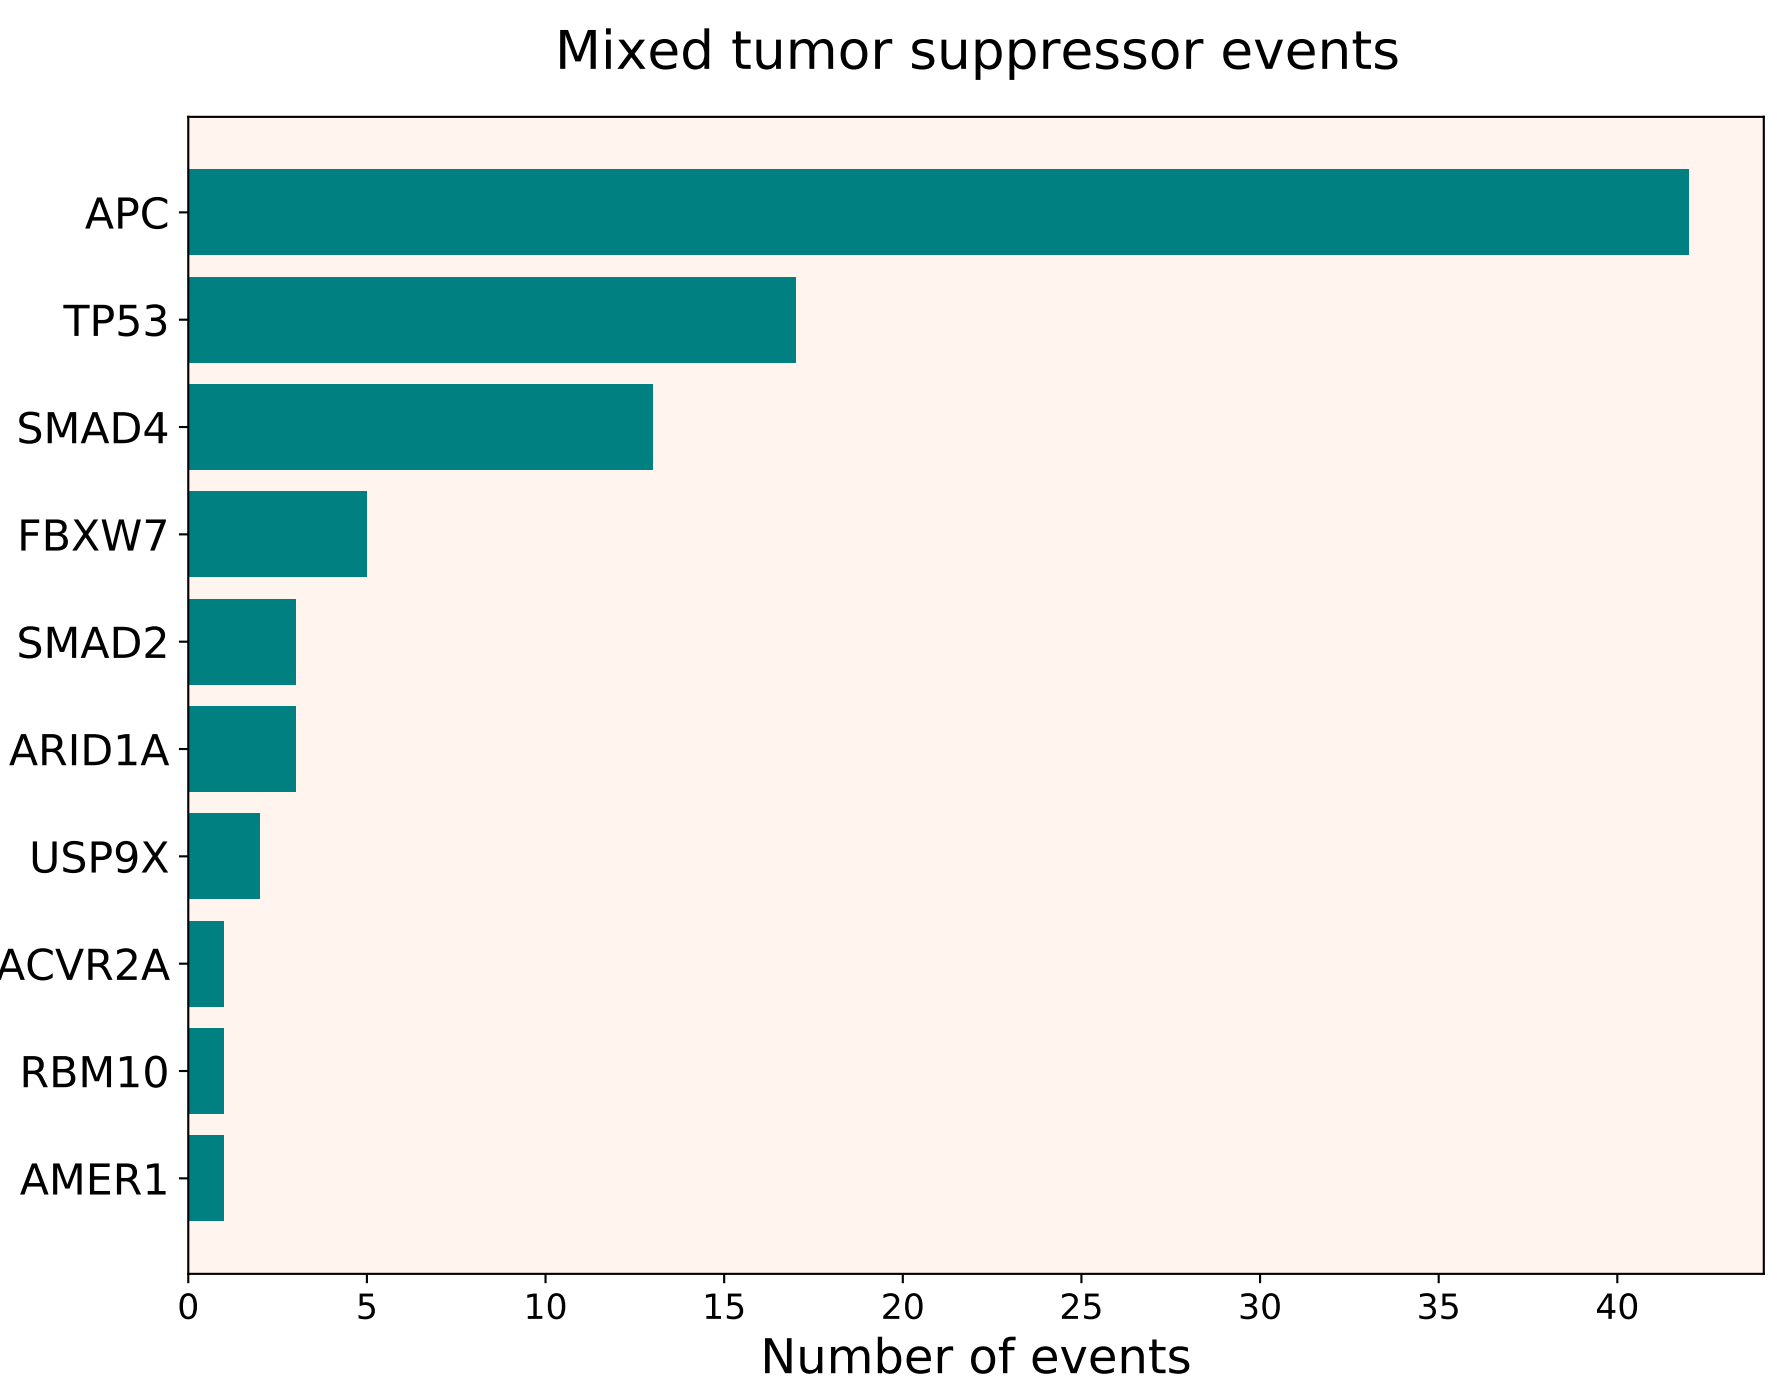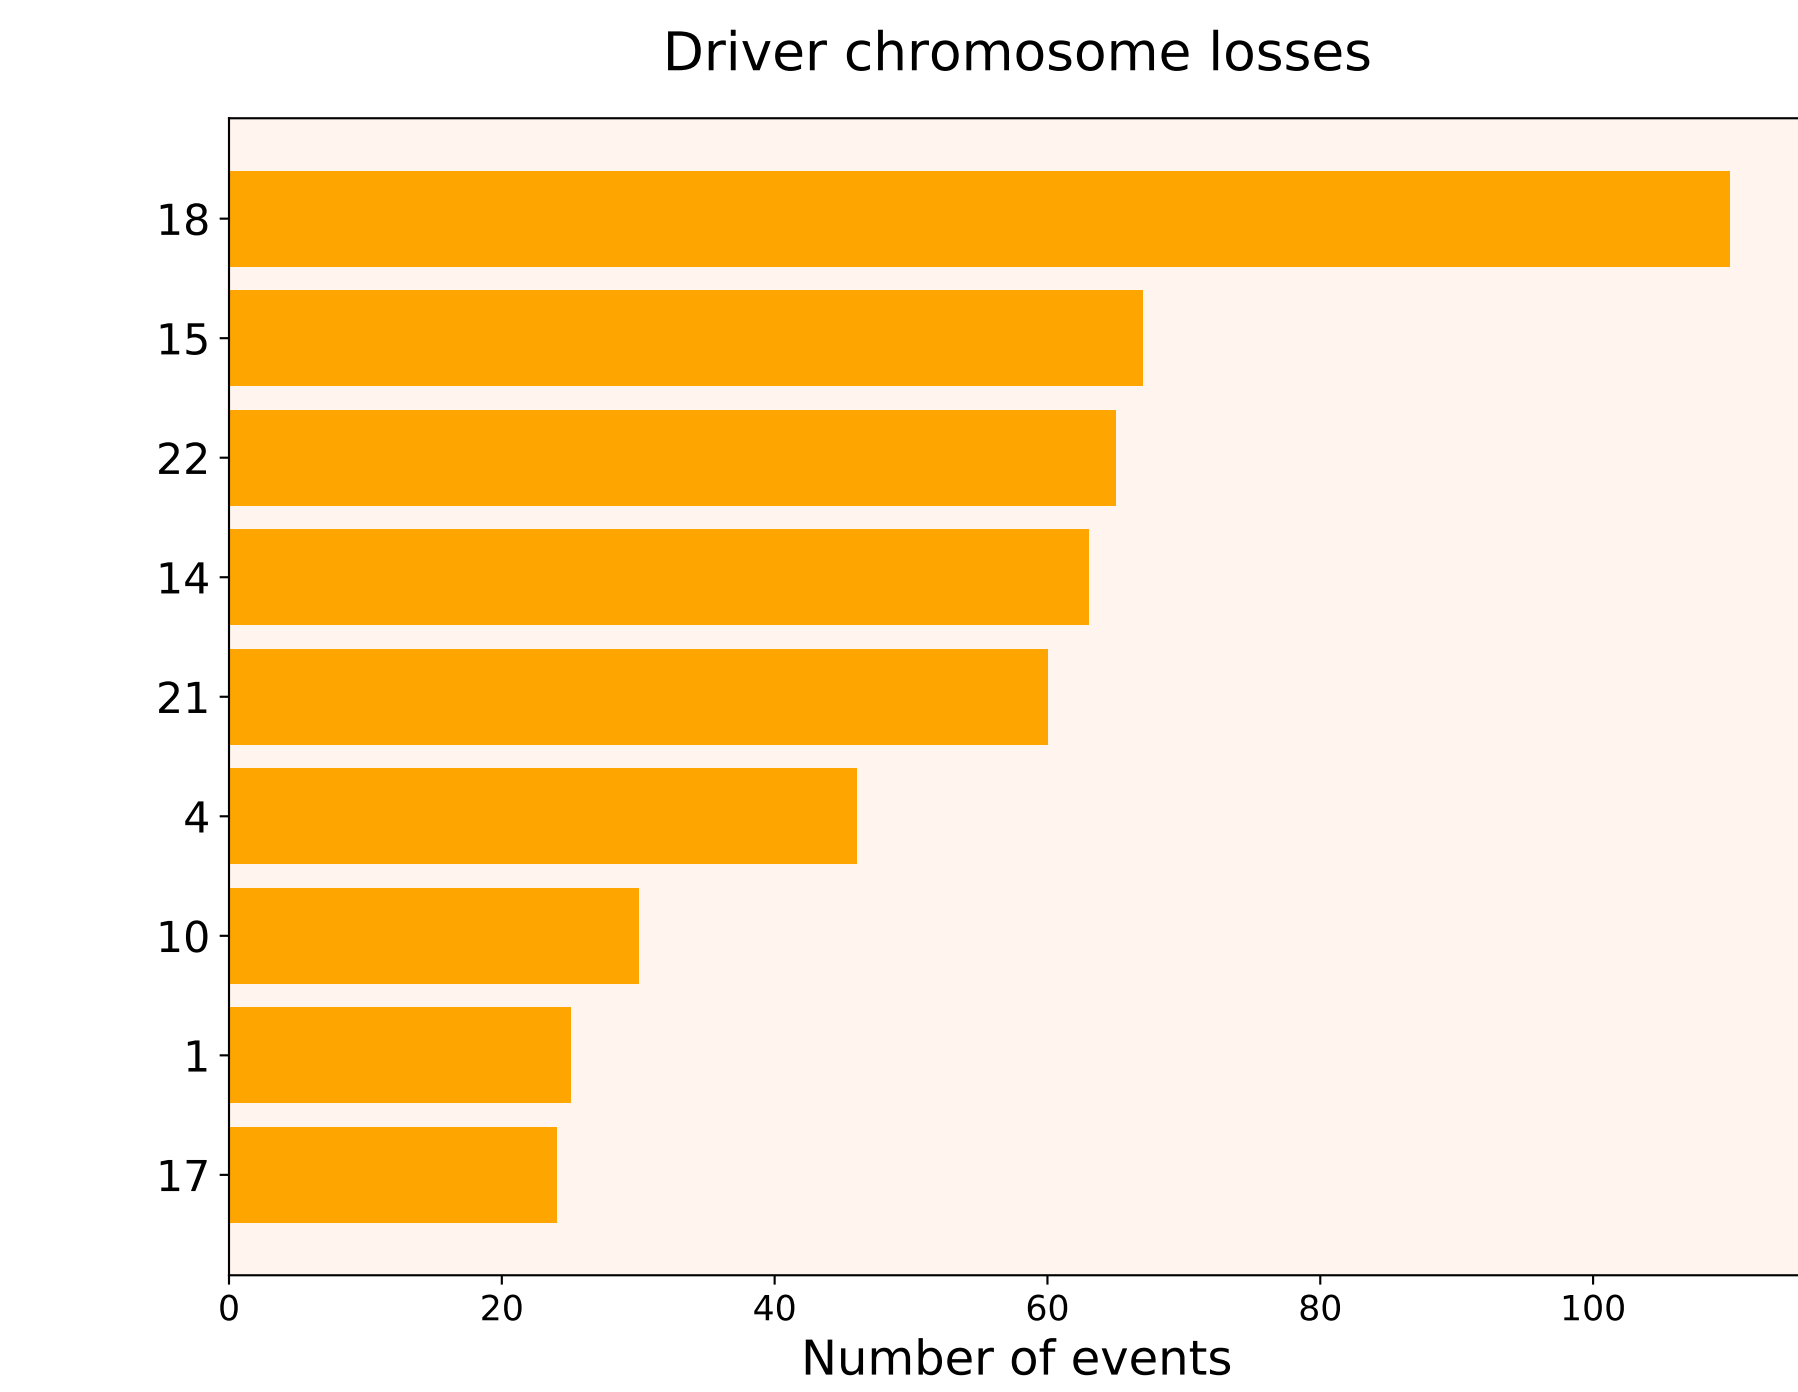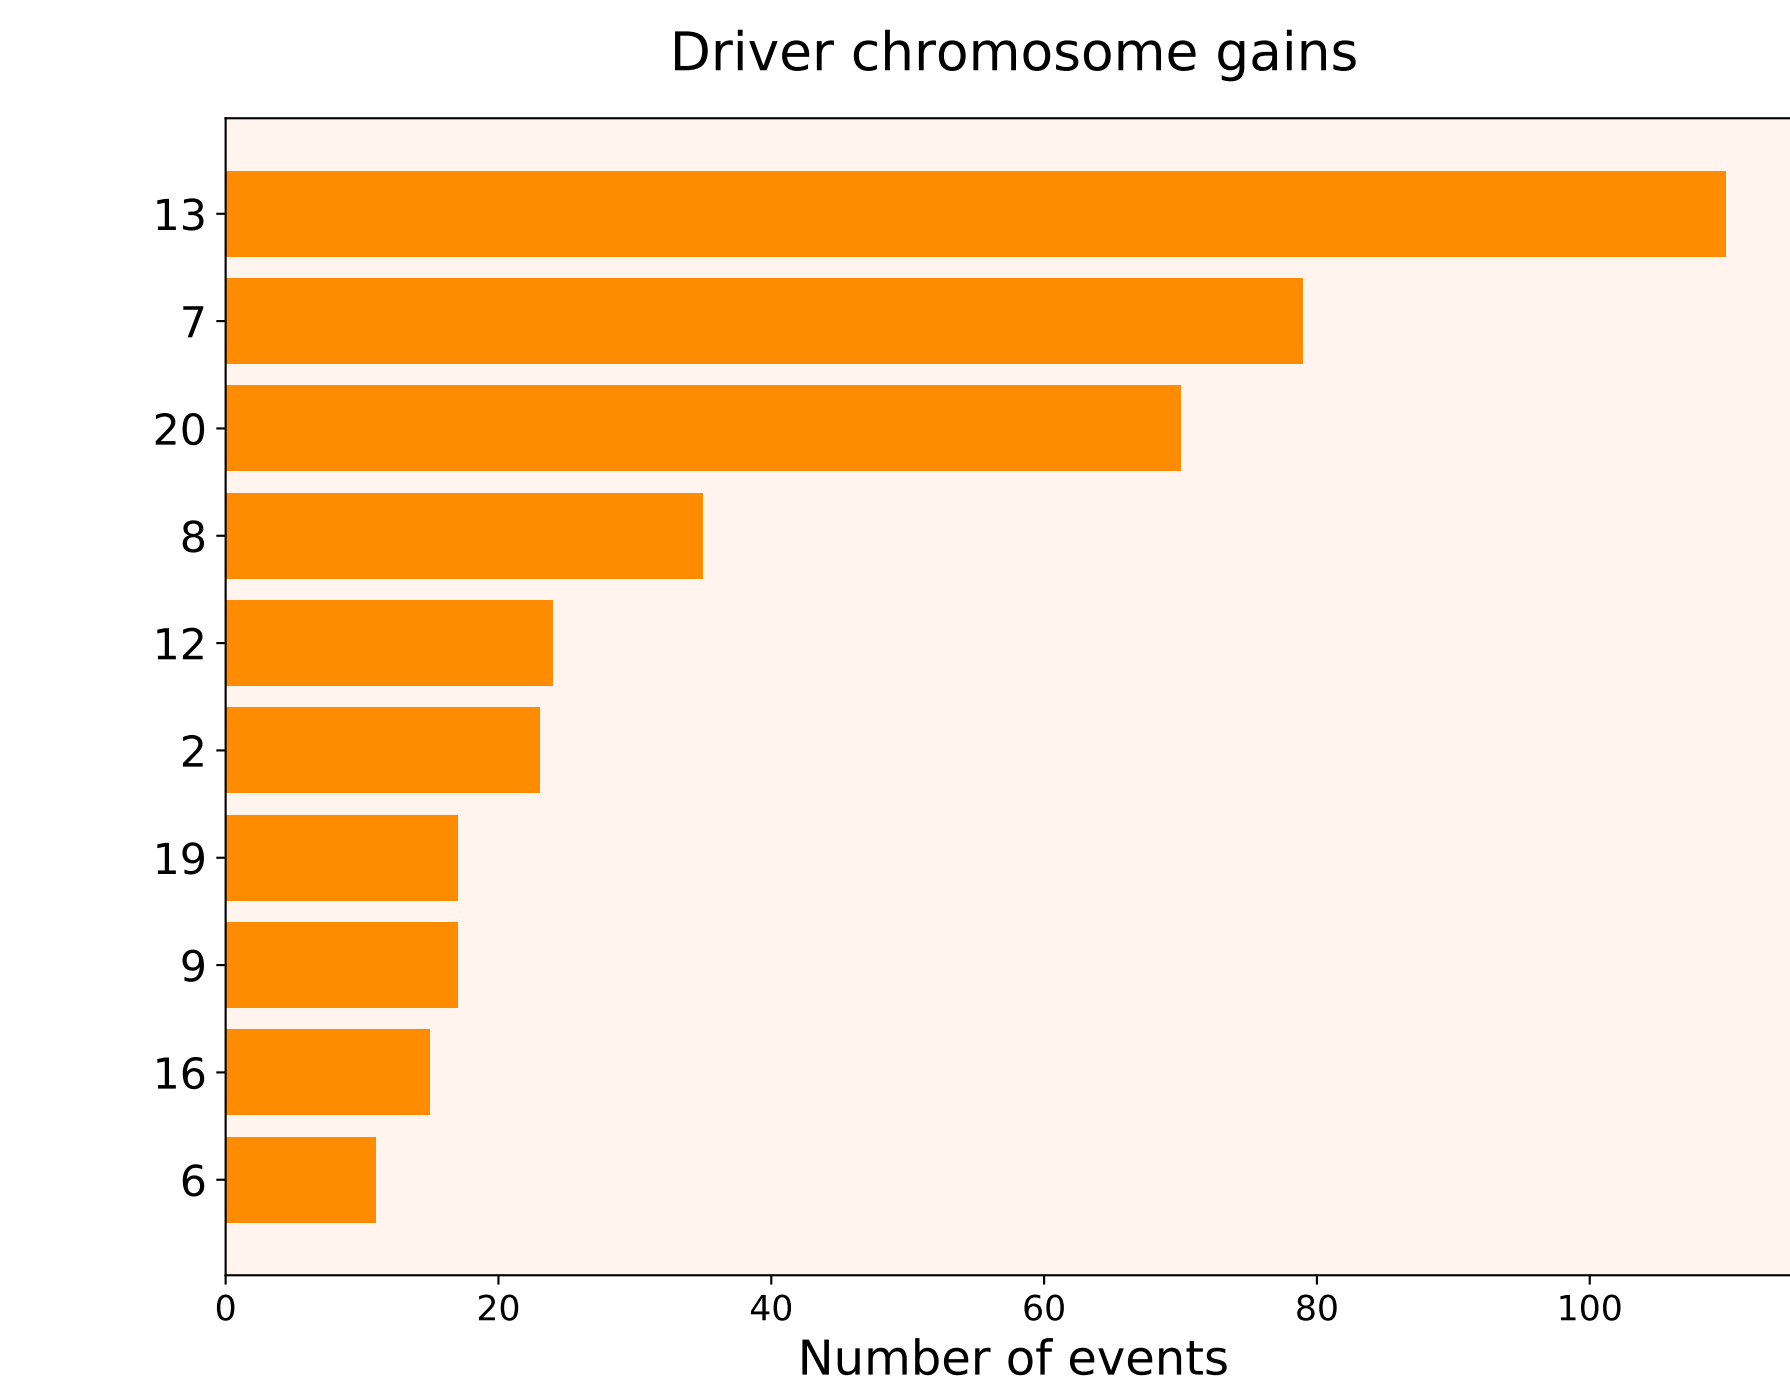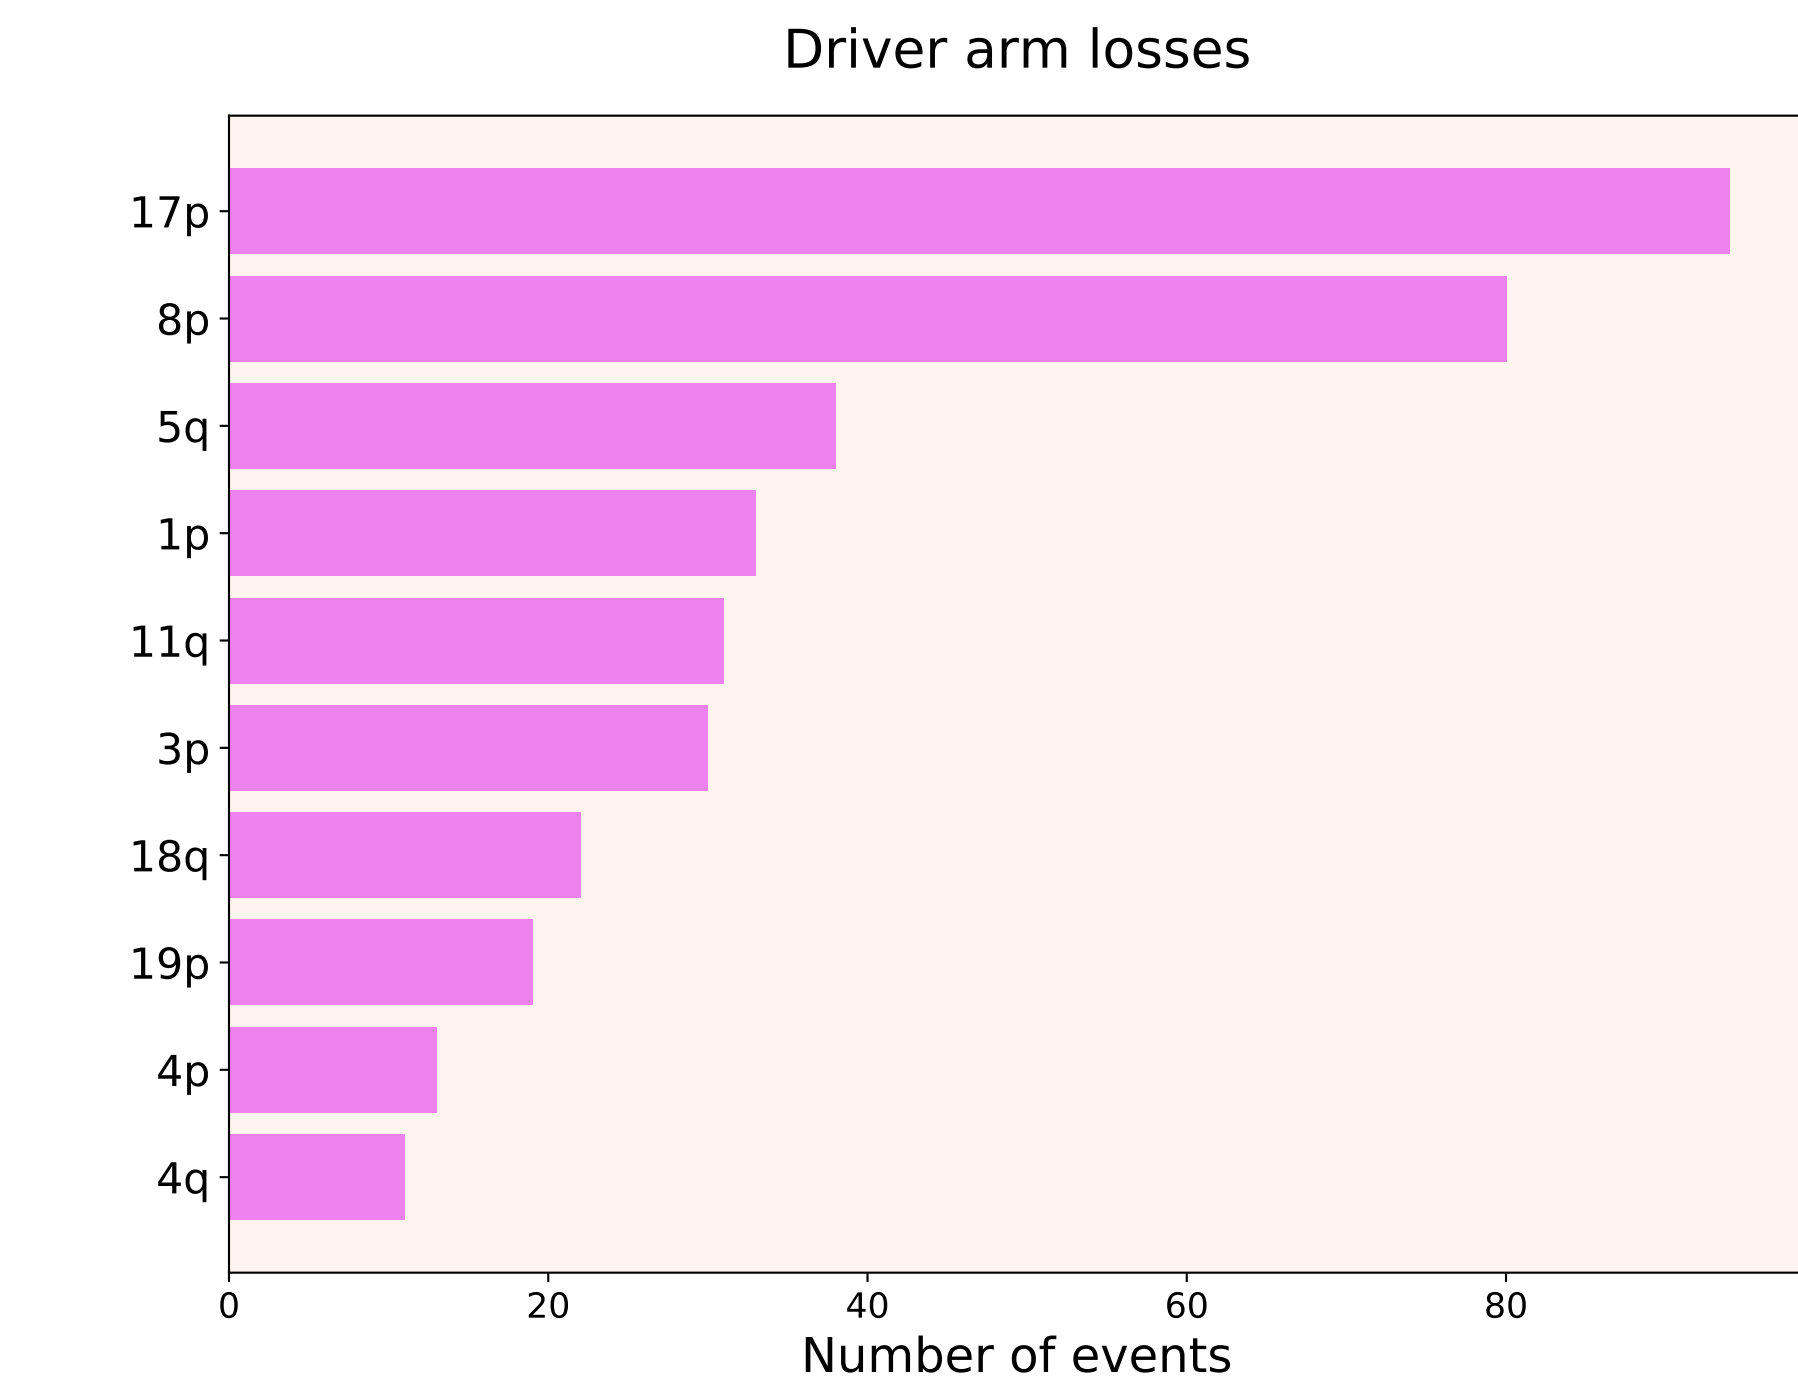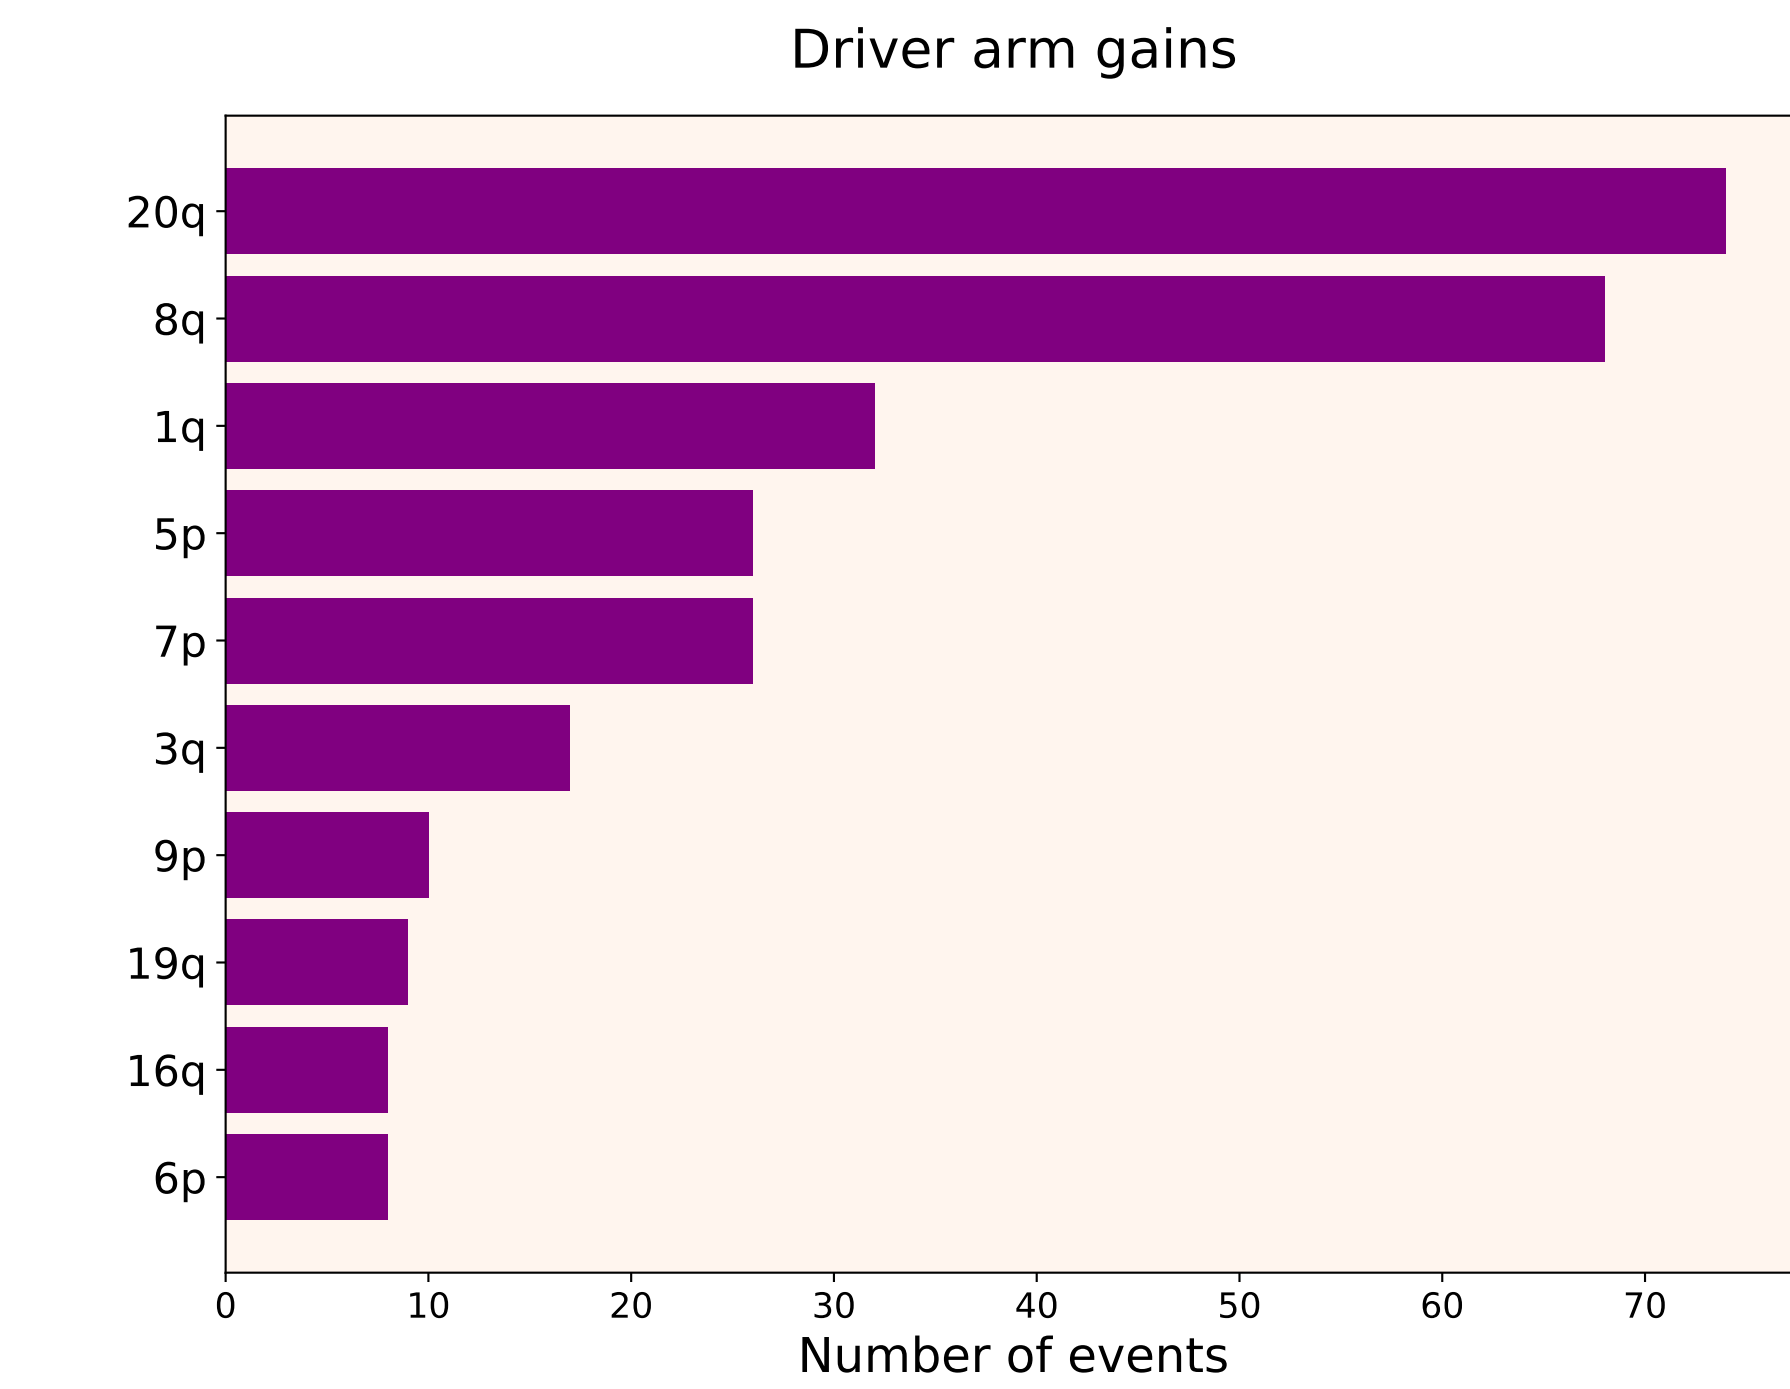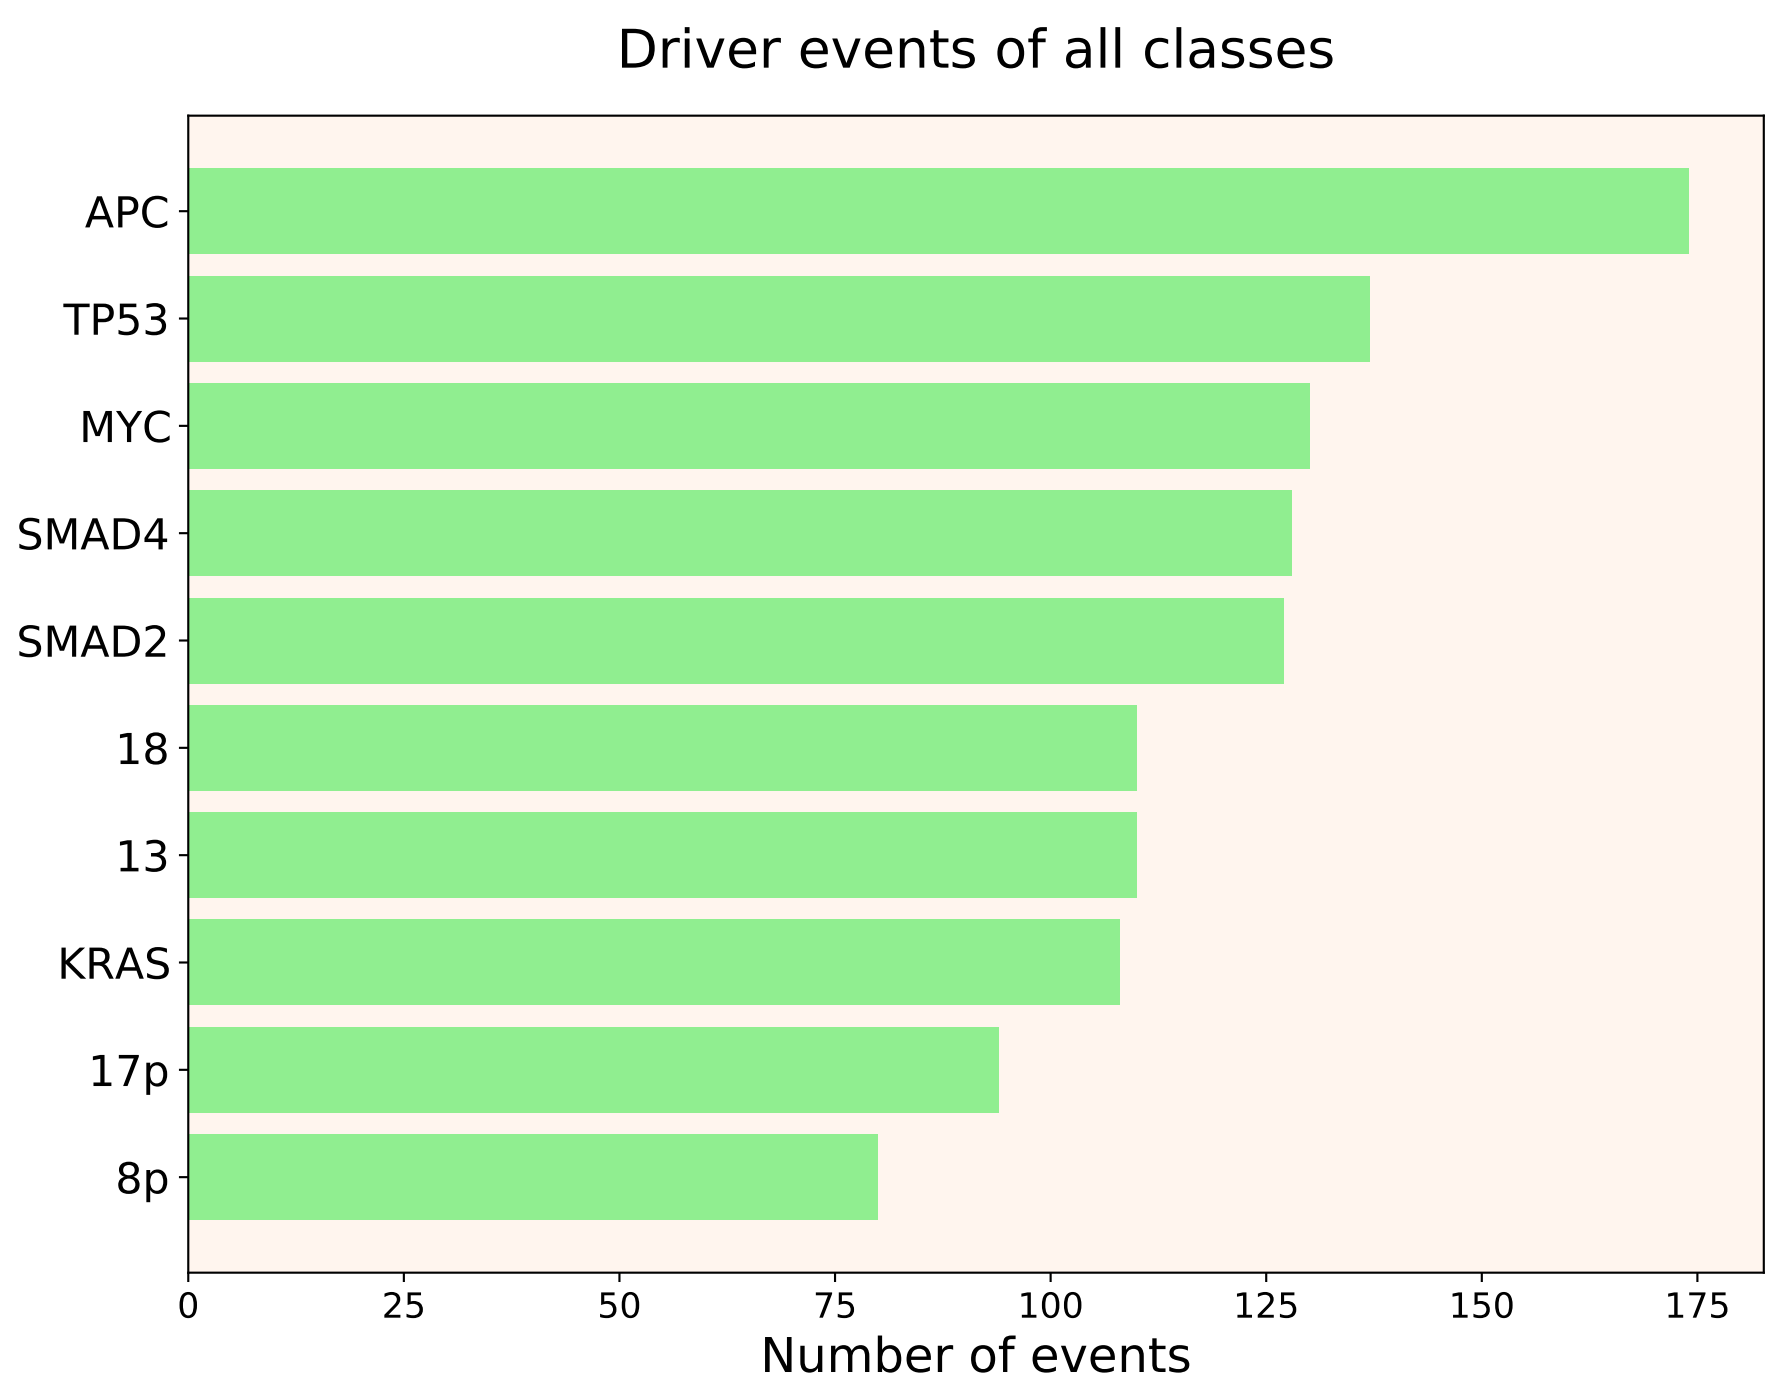

Supplement: Supplemental_Data_S1.zip [file Supplemental_Data_S1.zip]

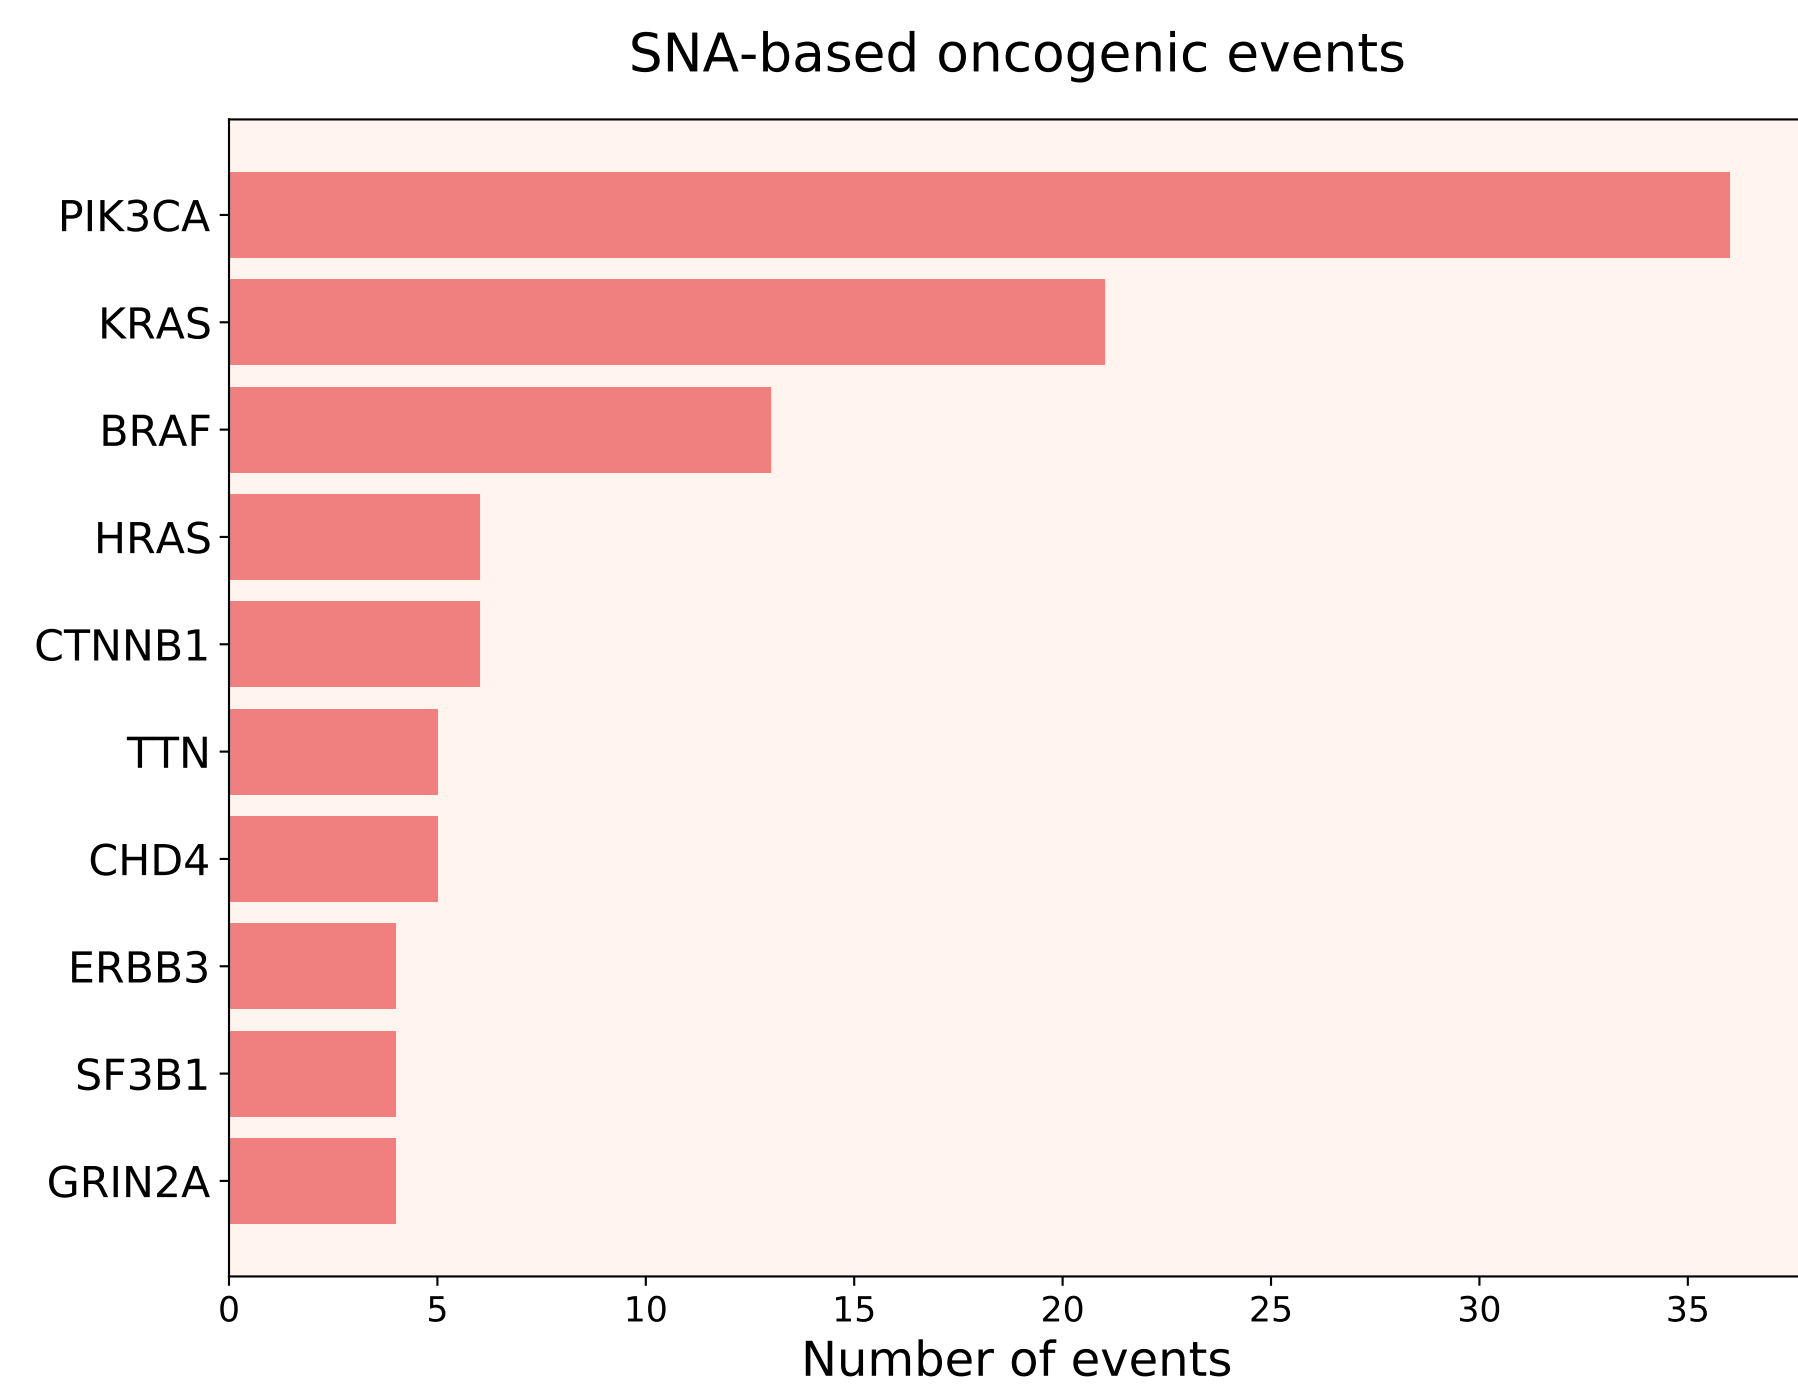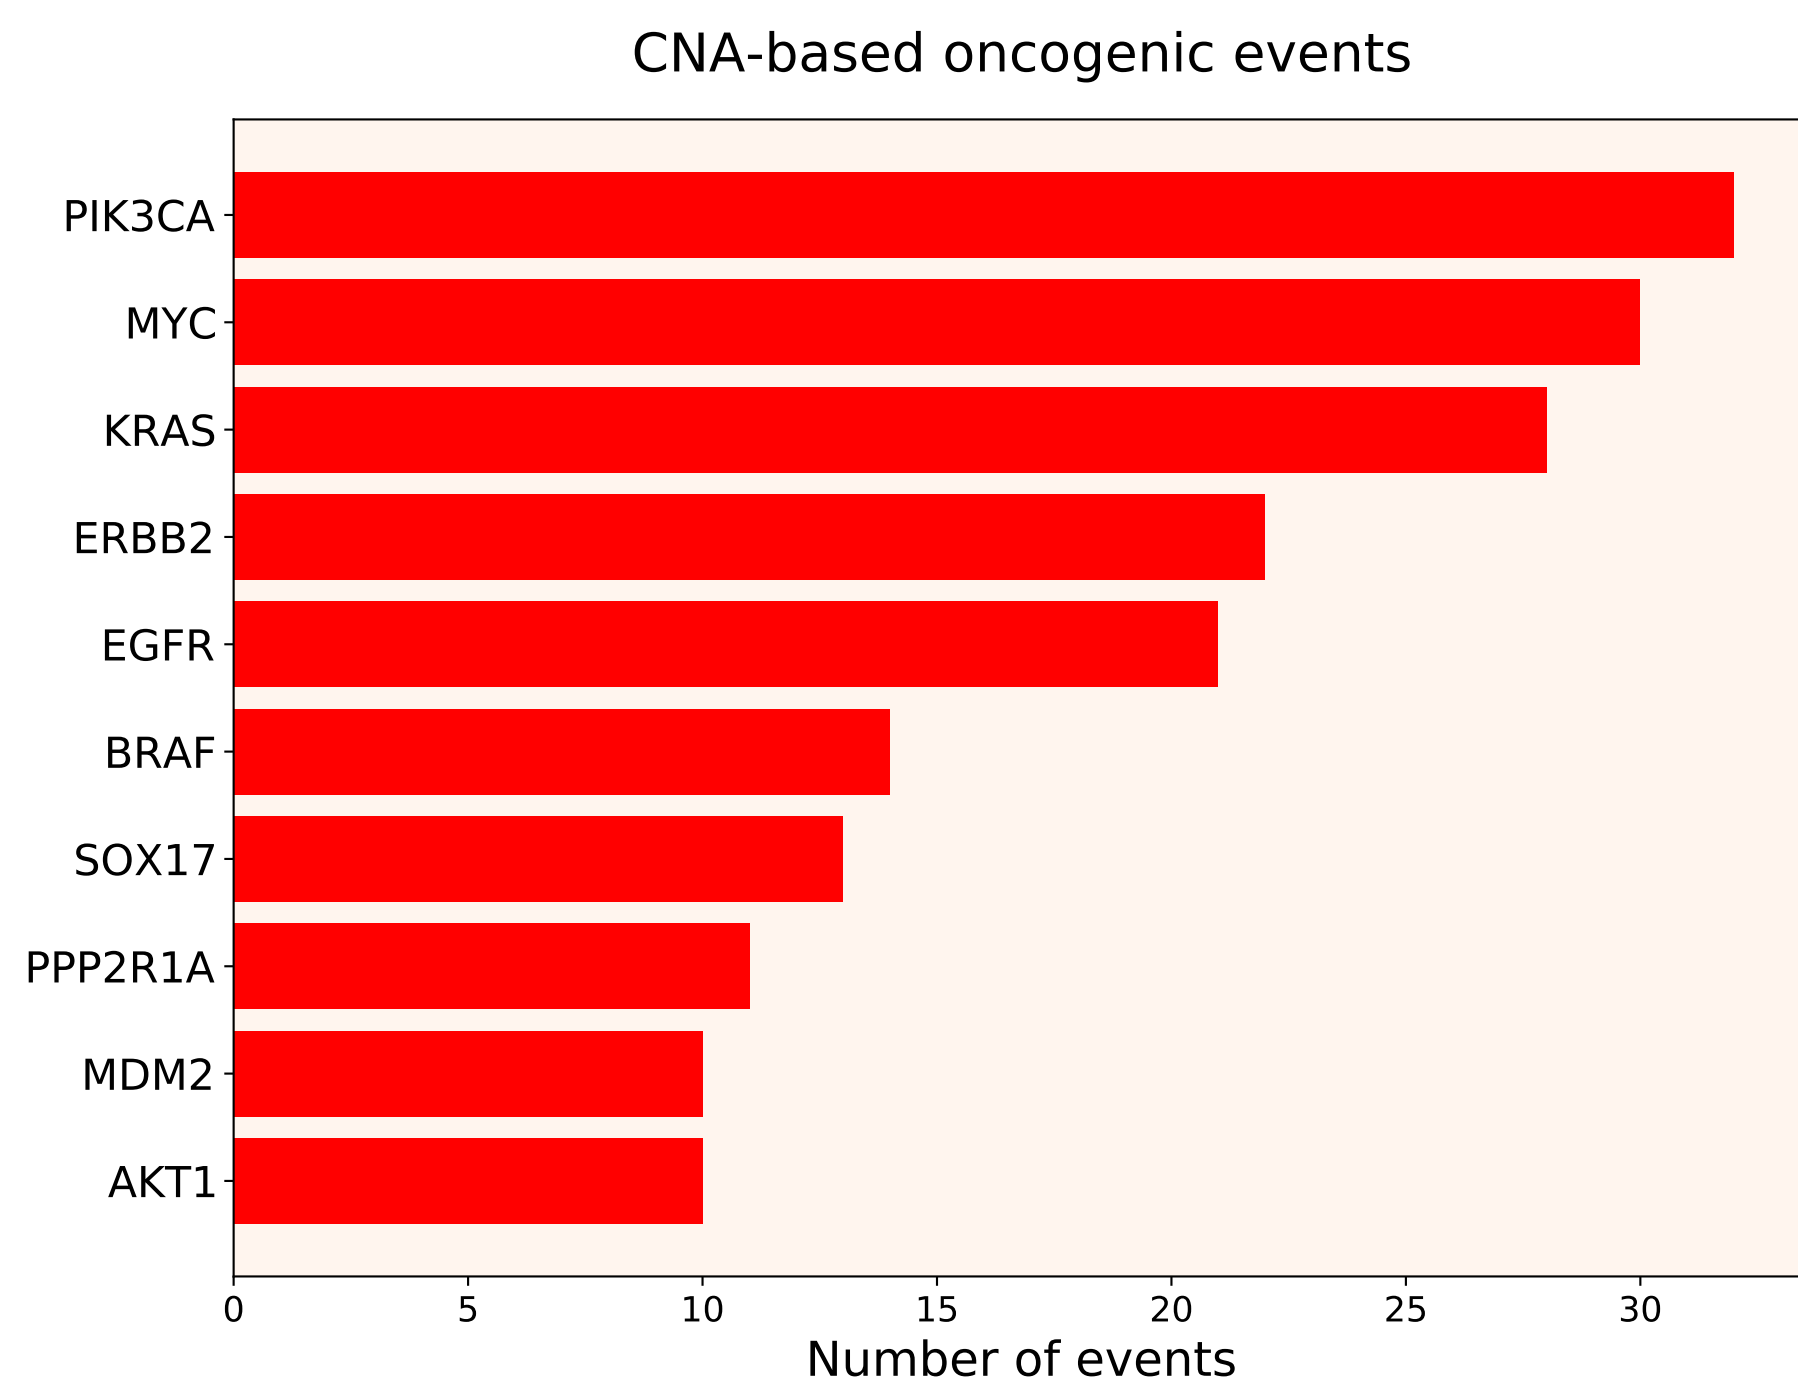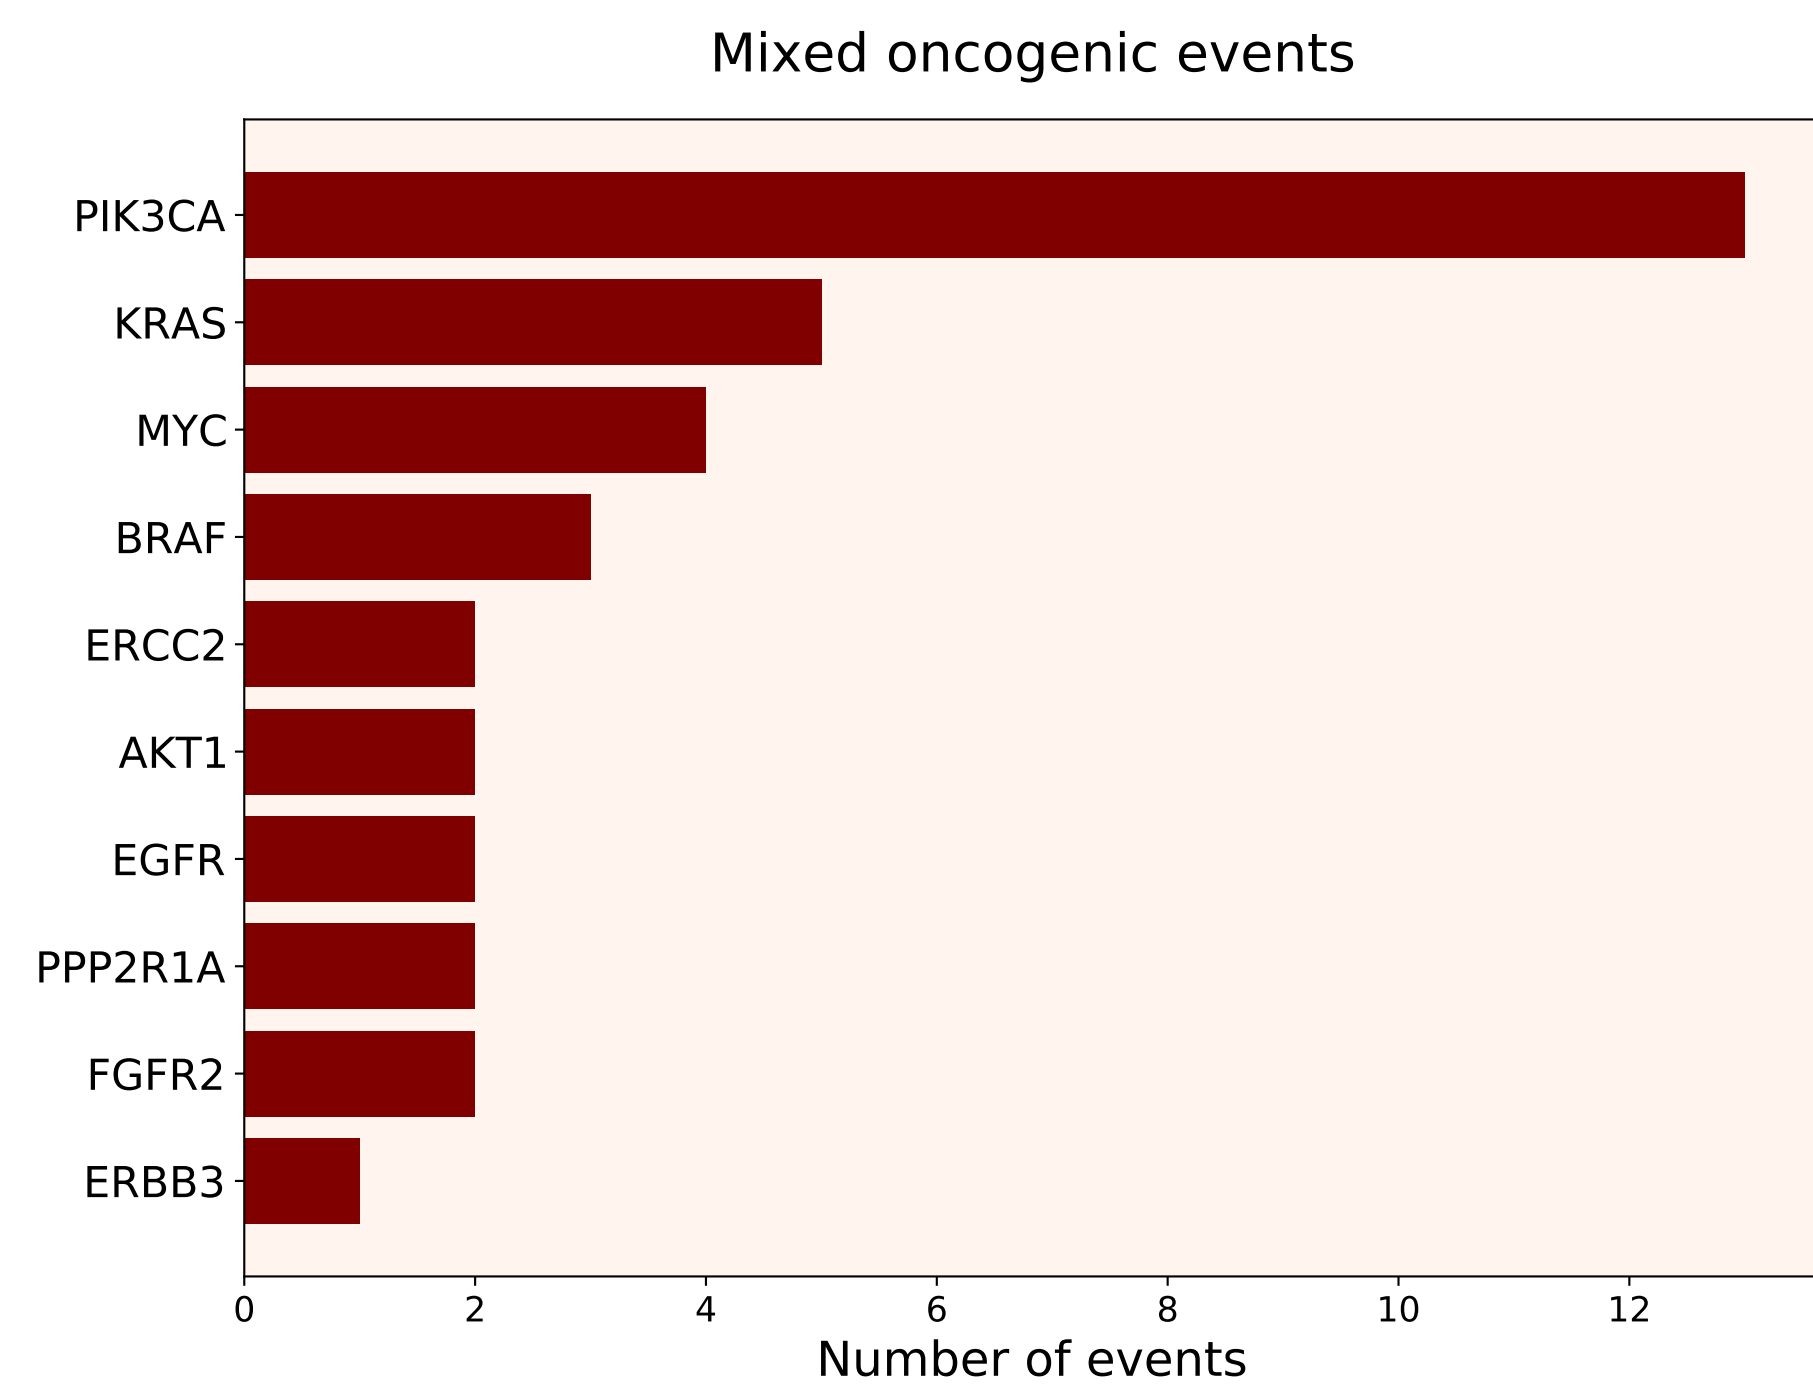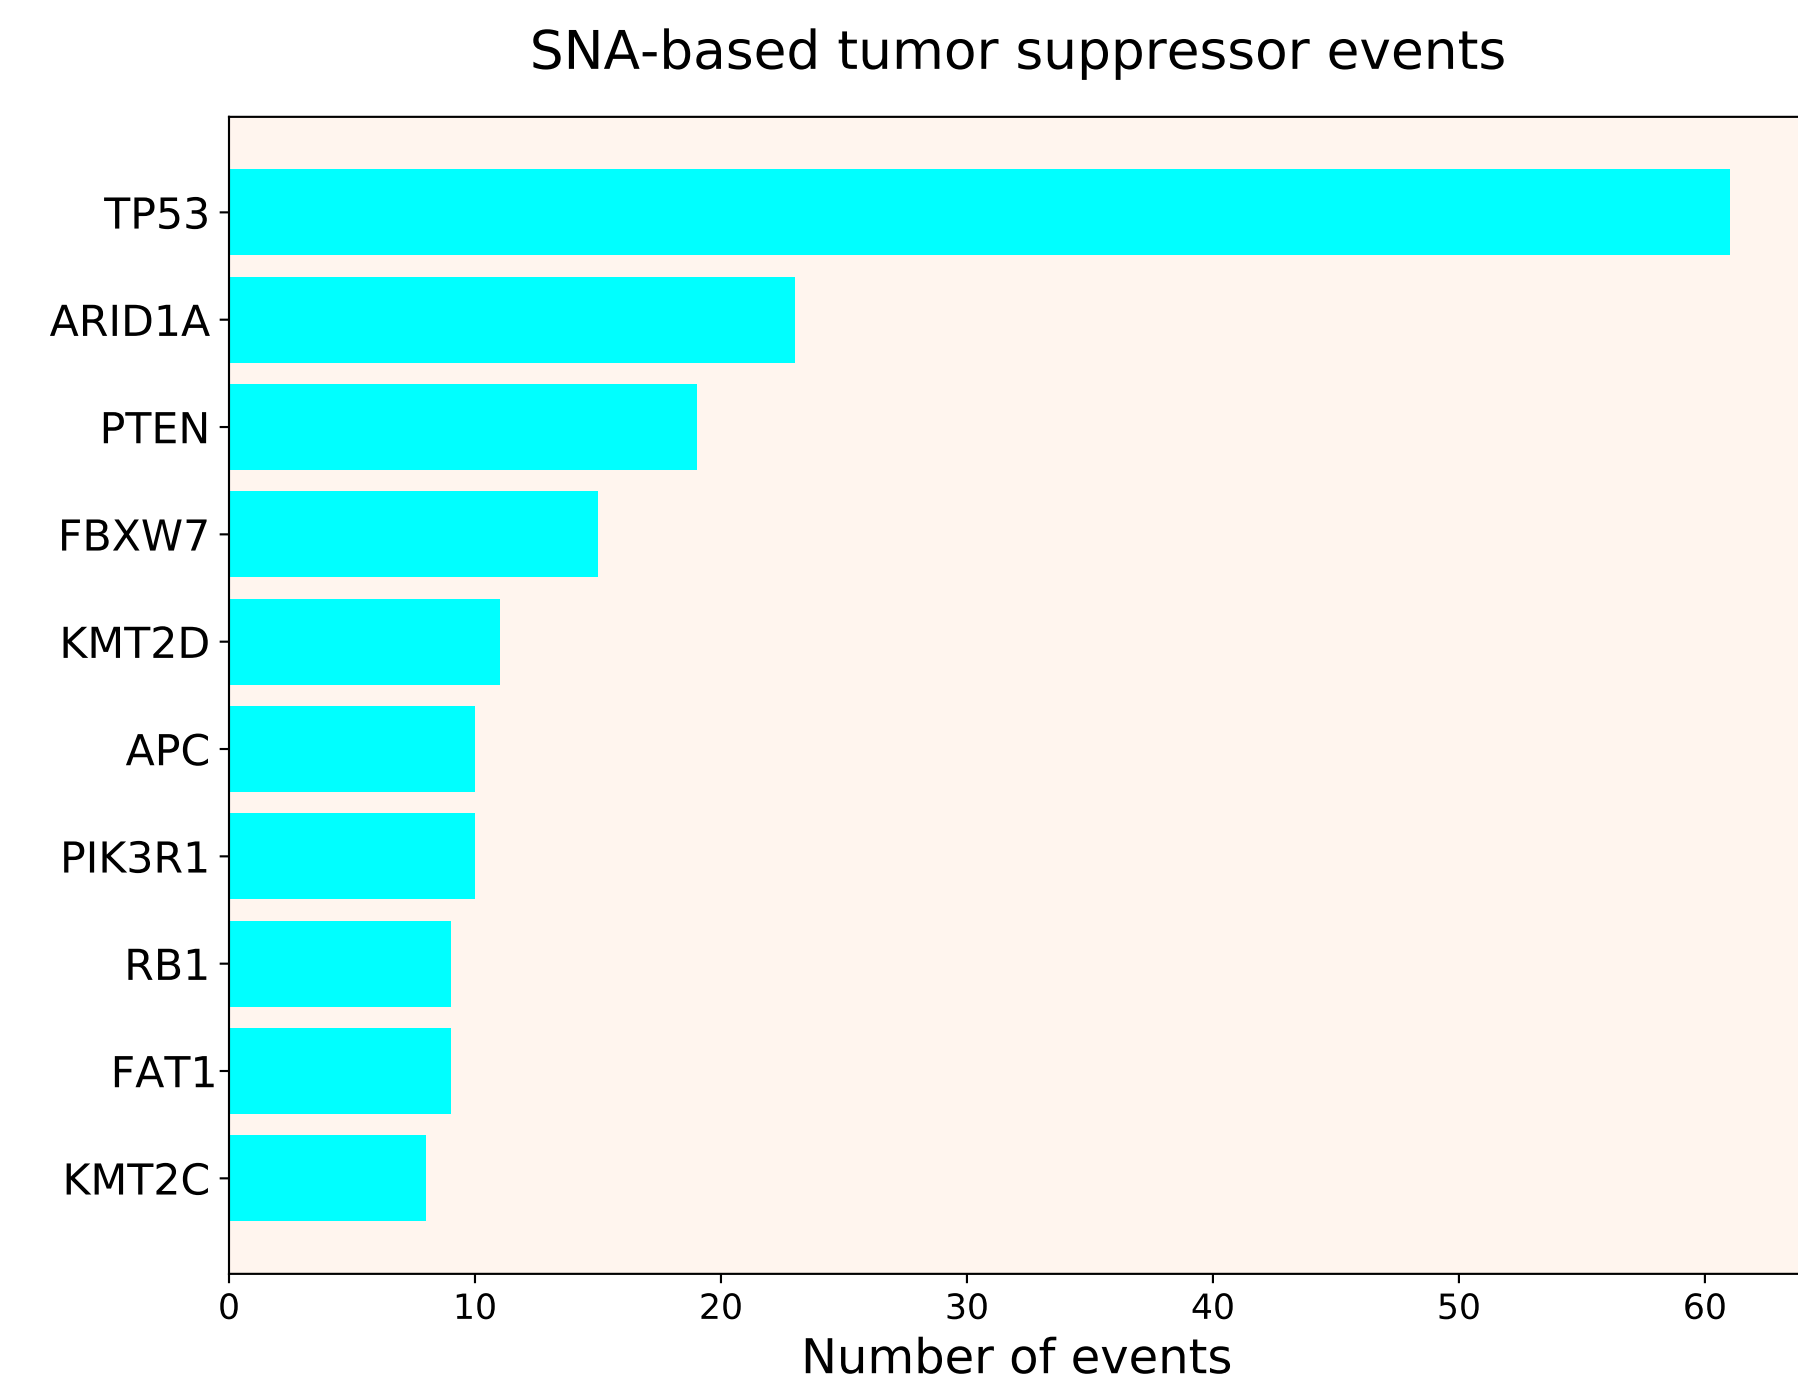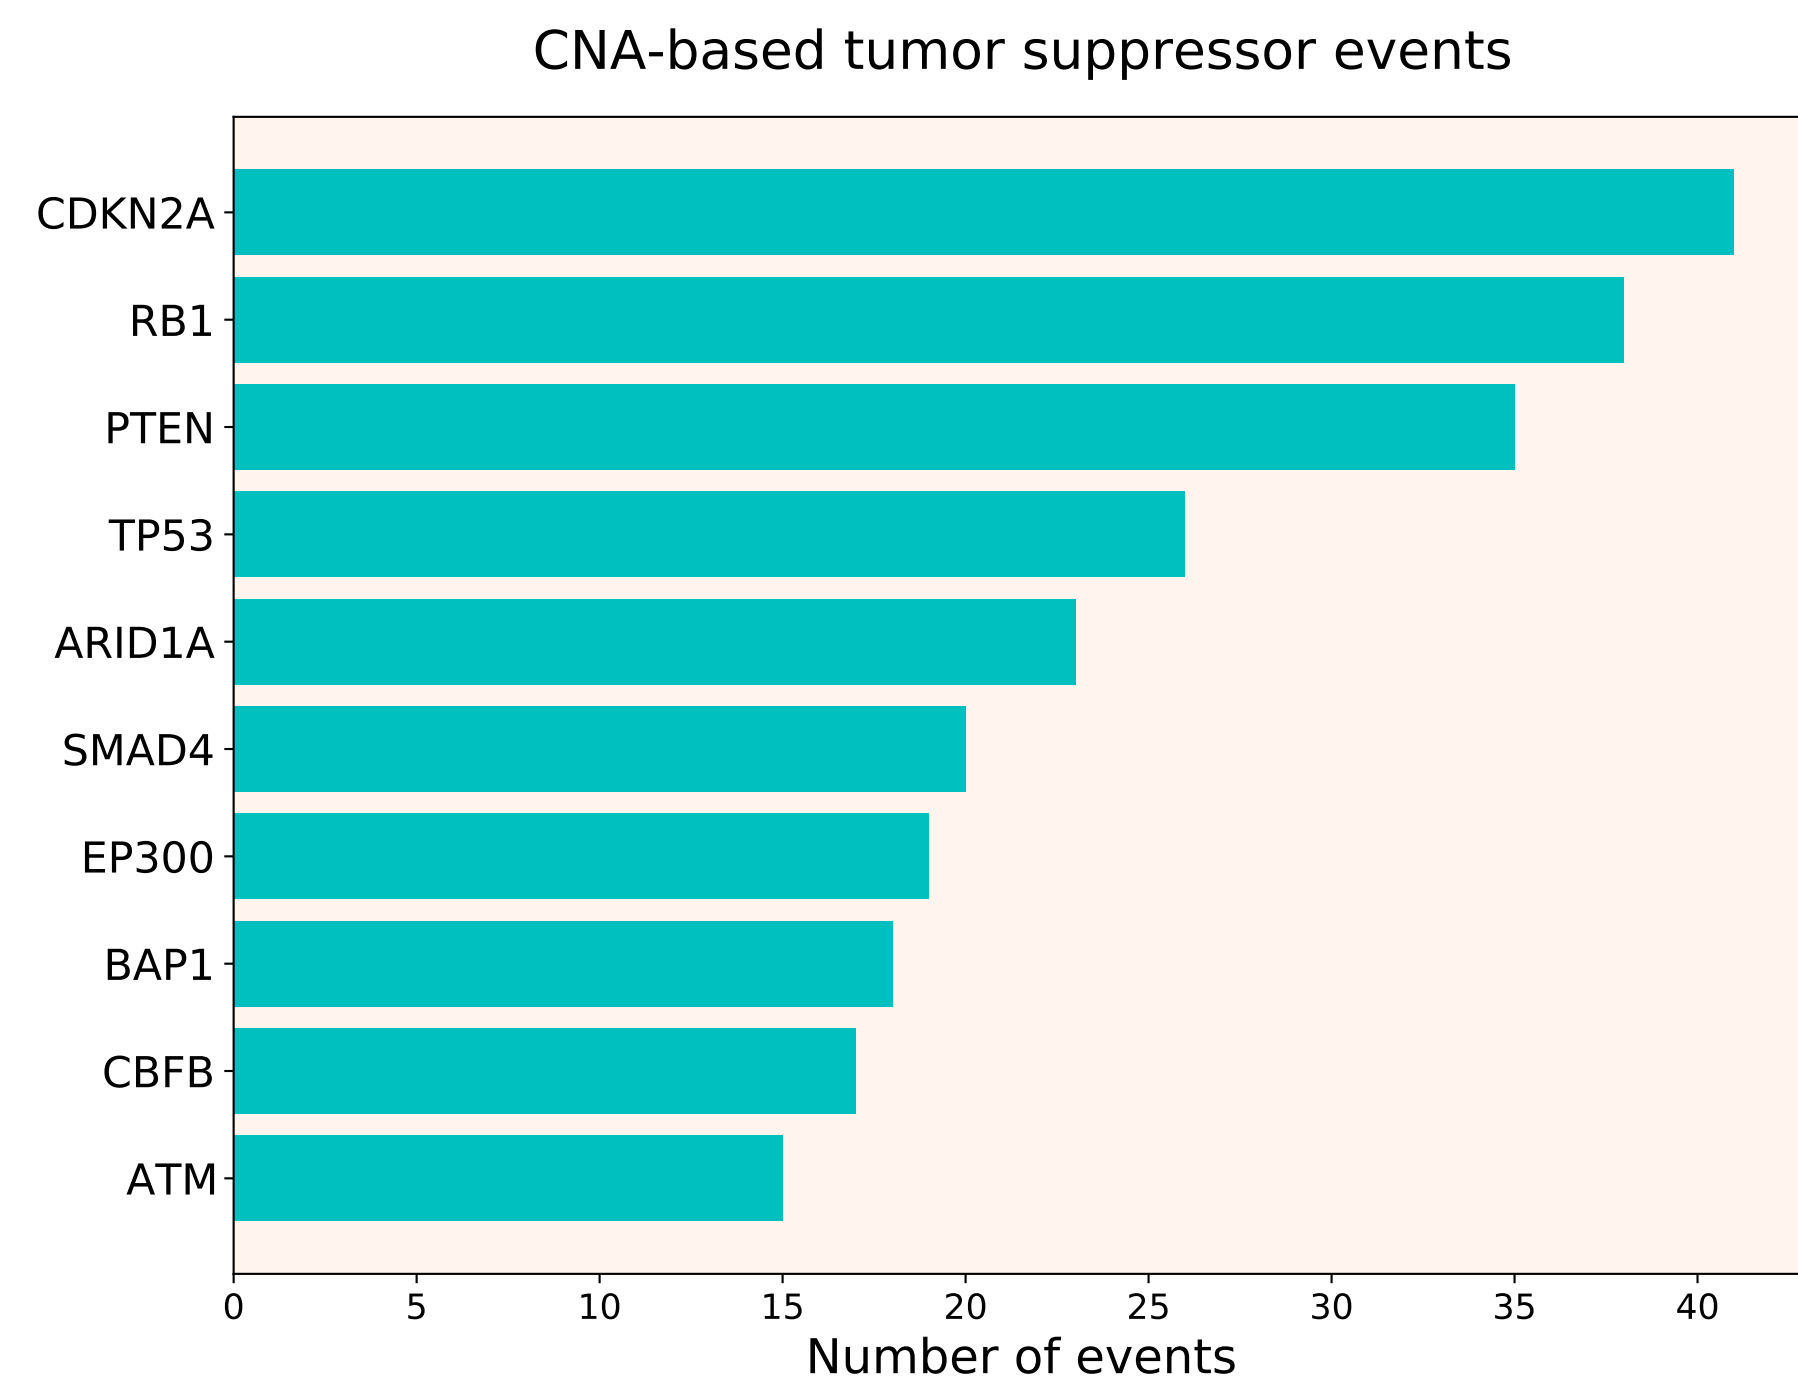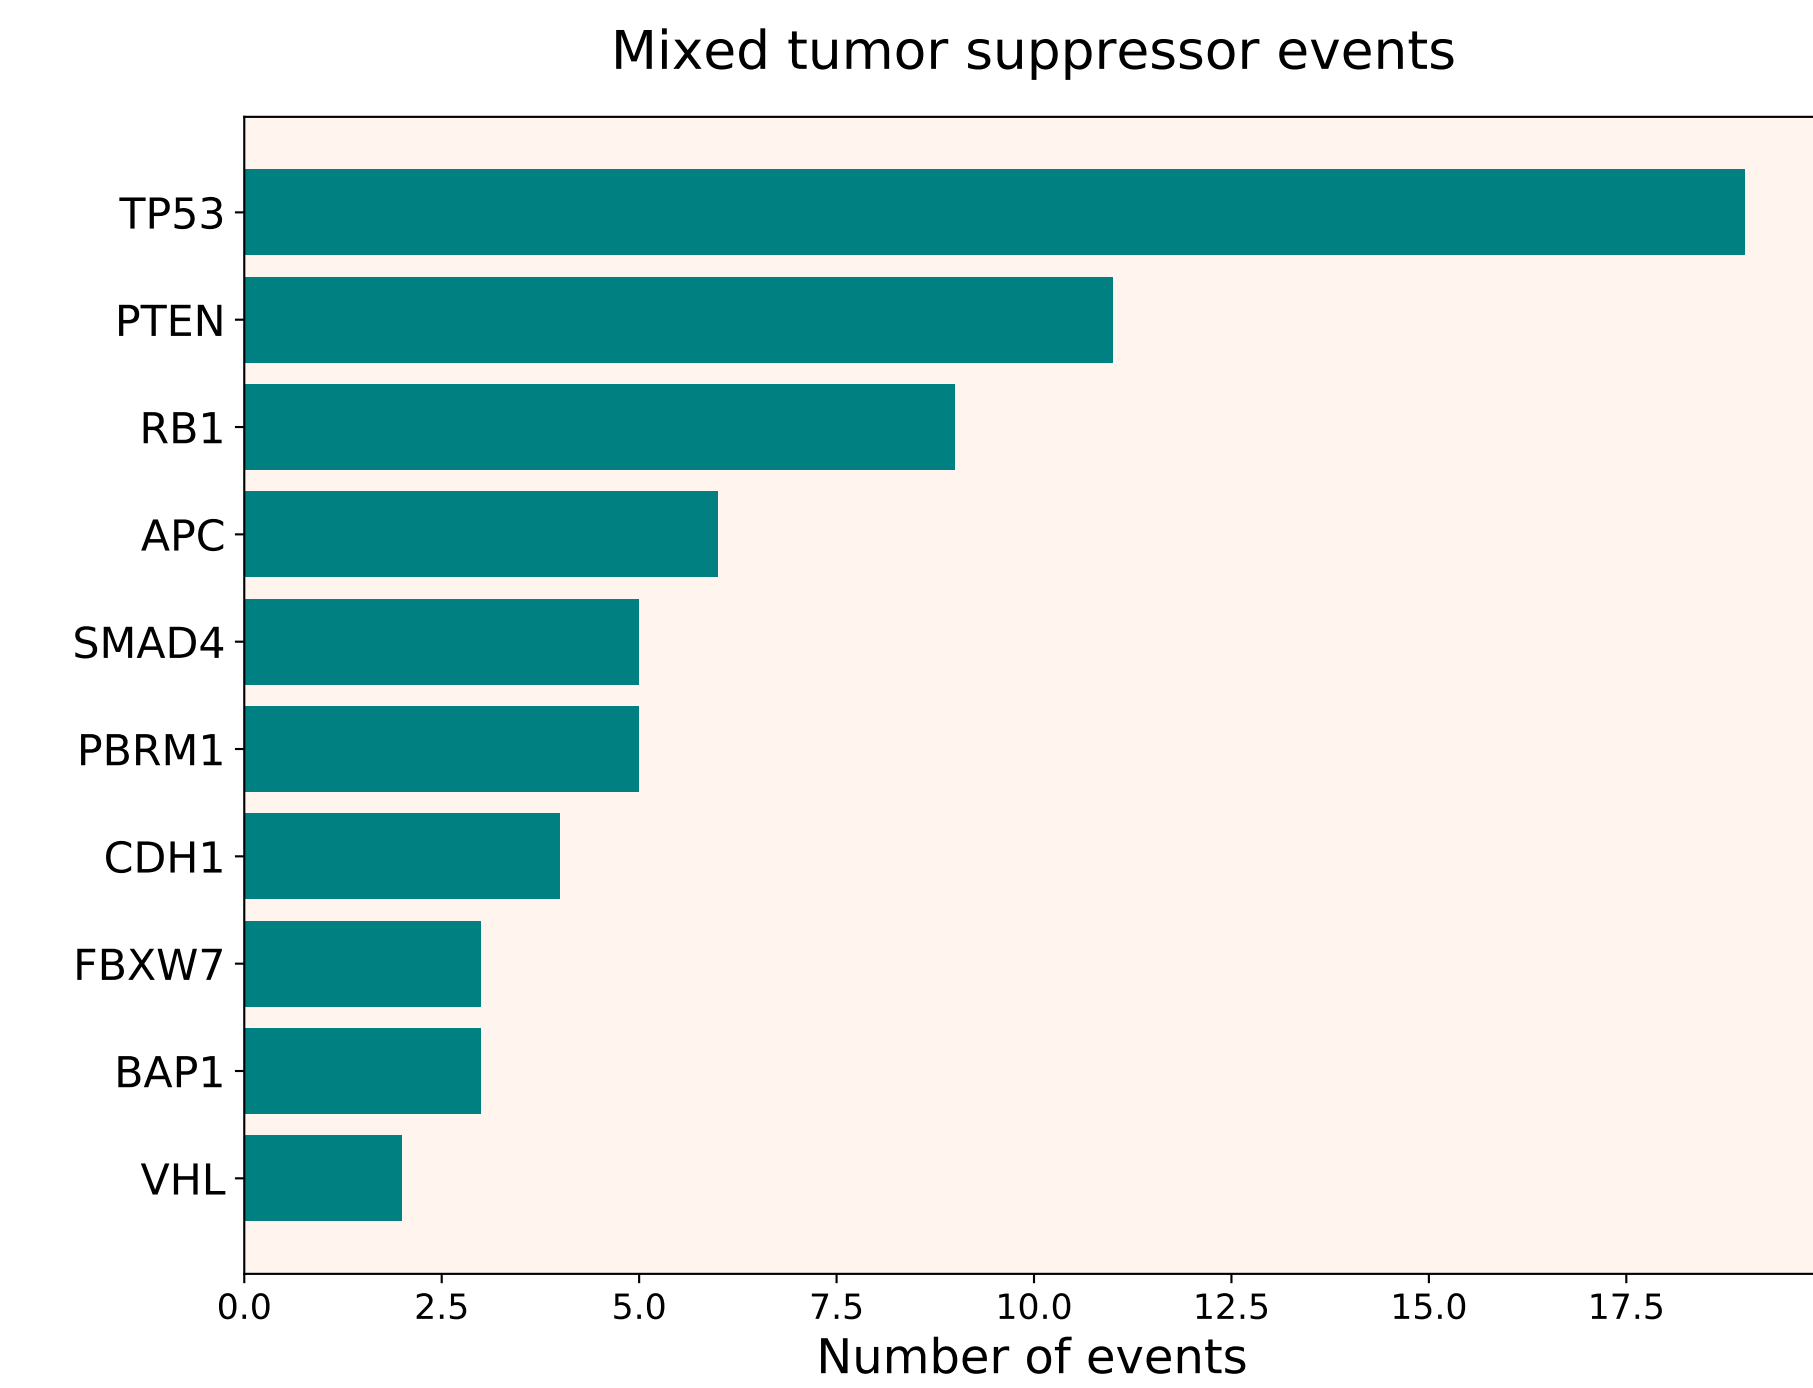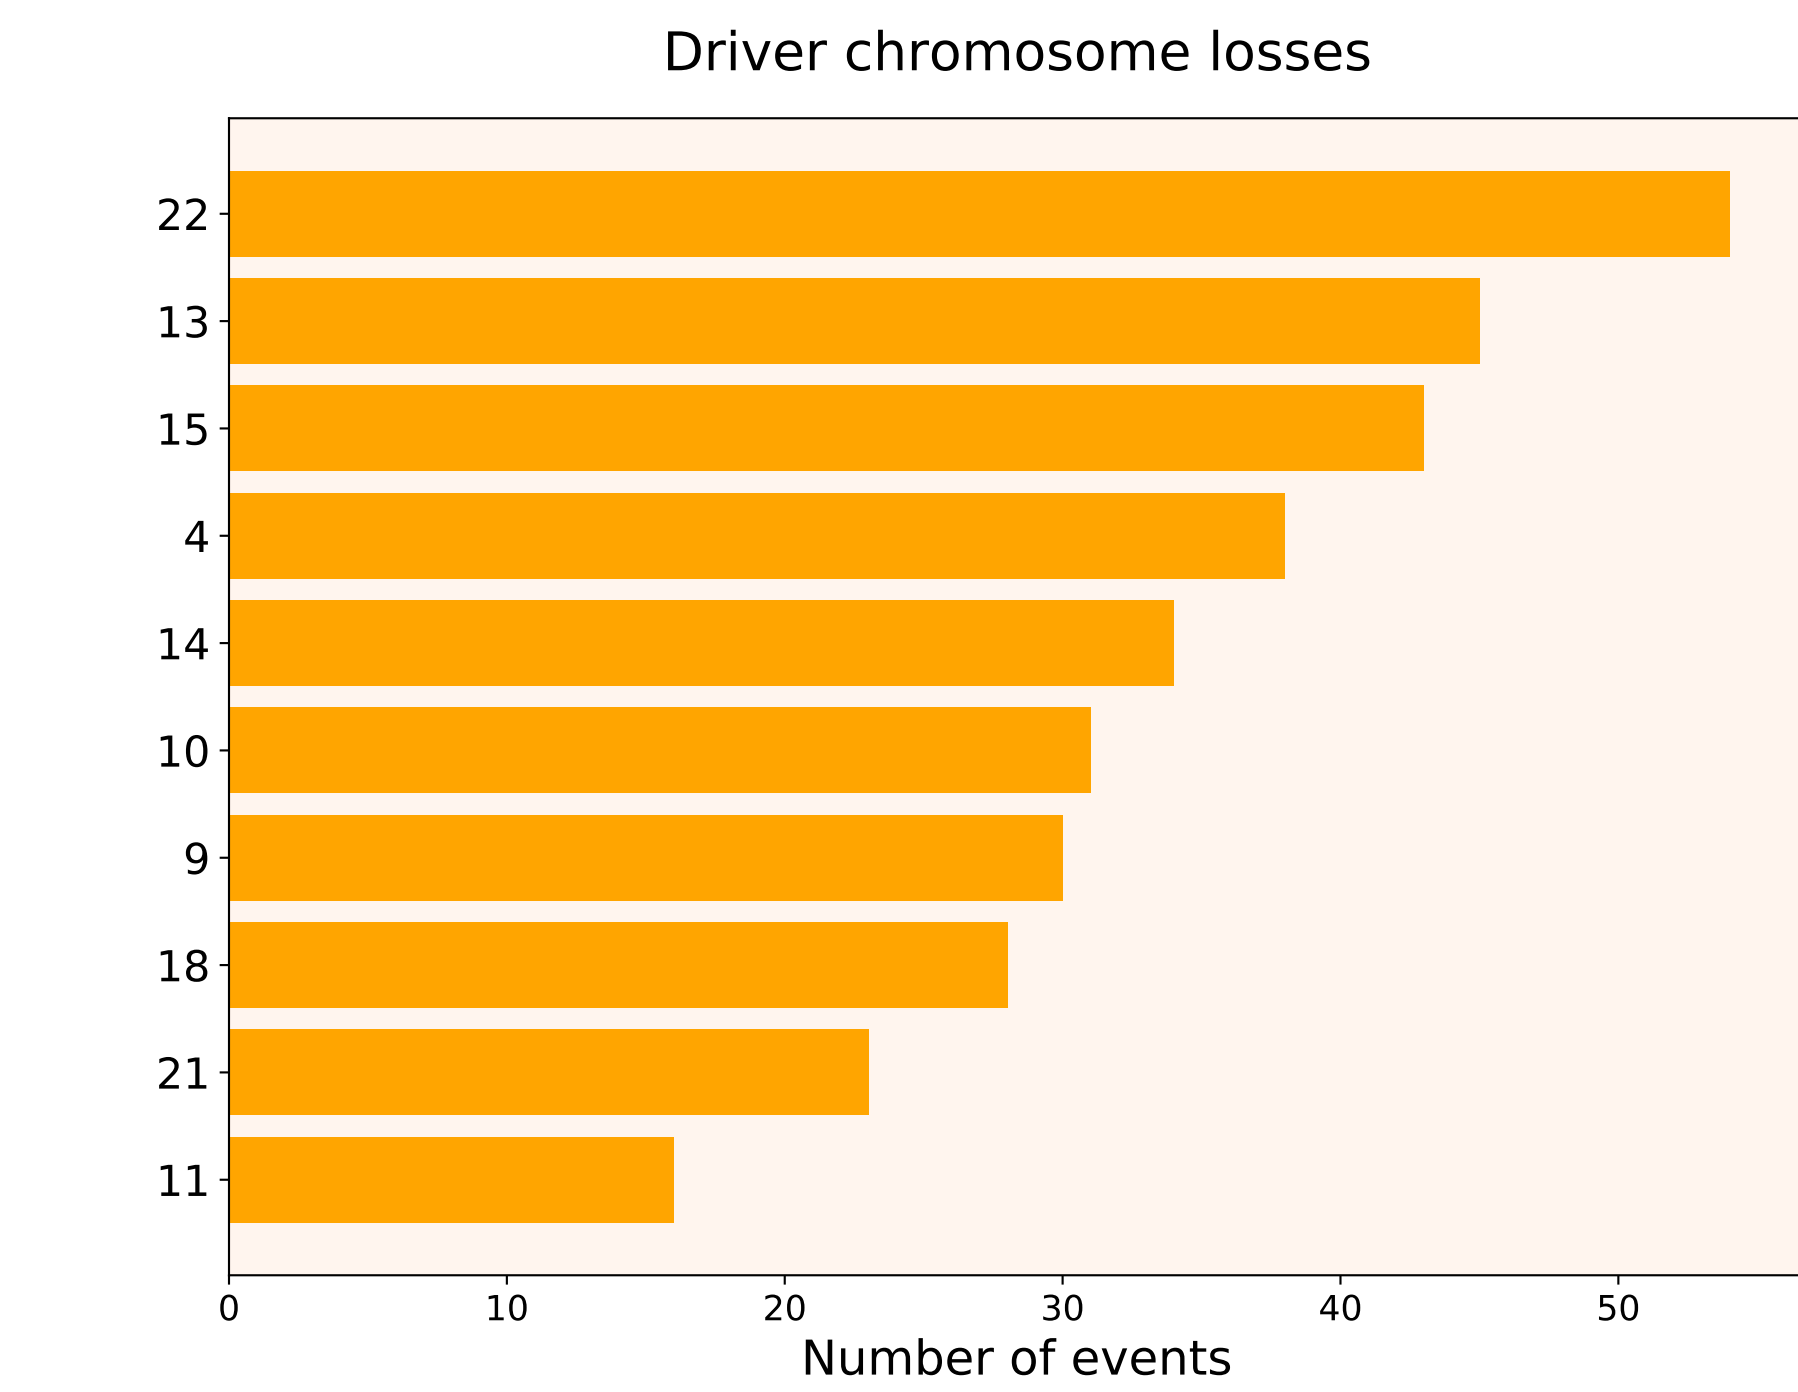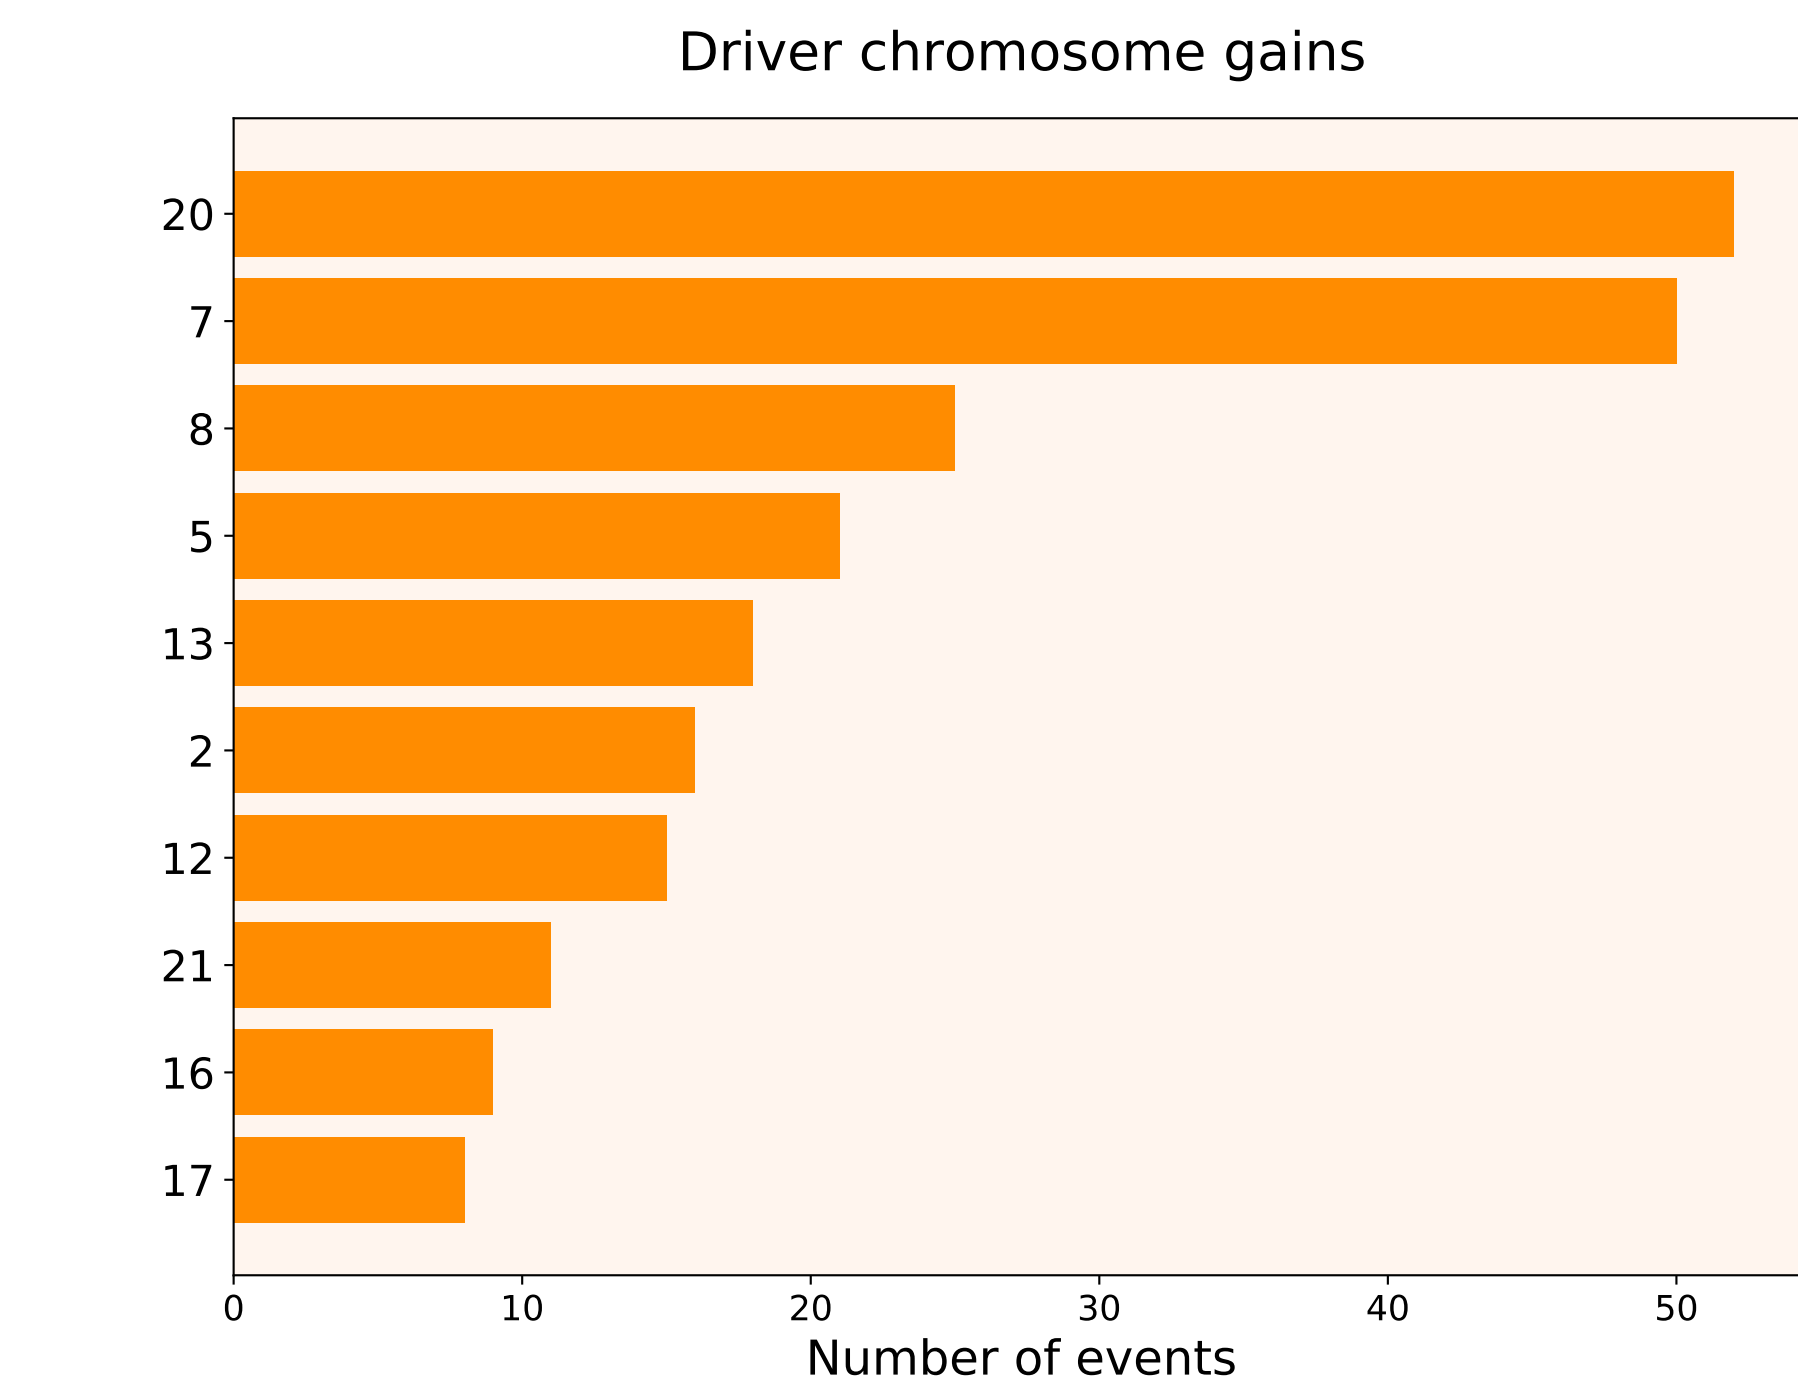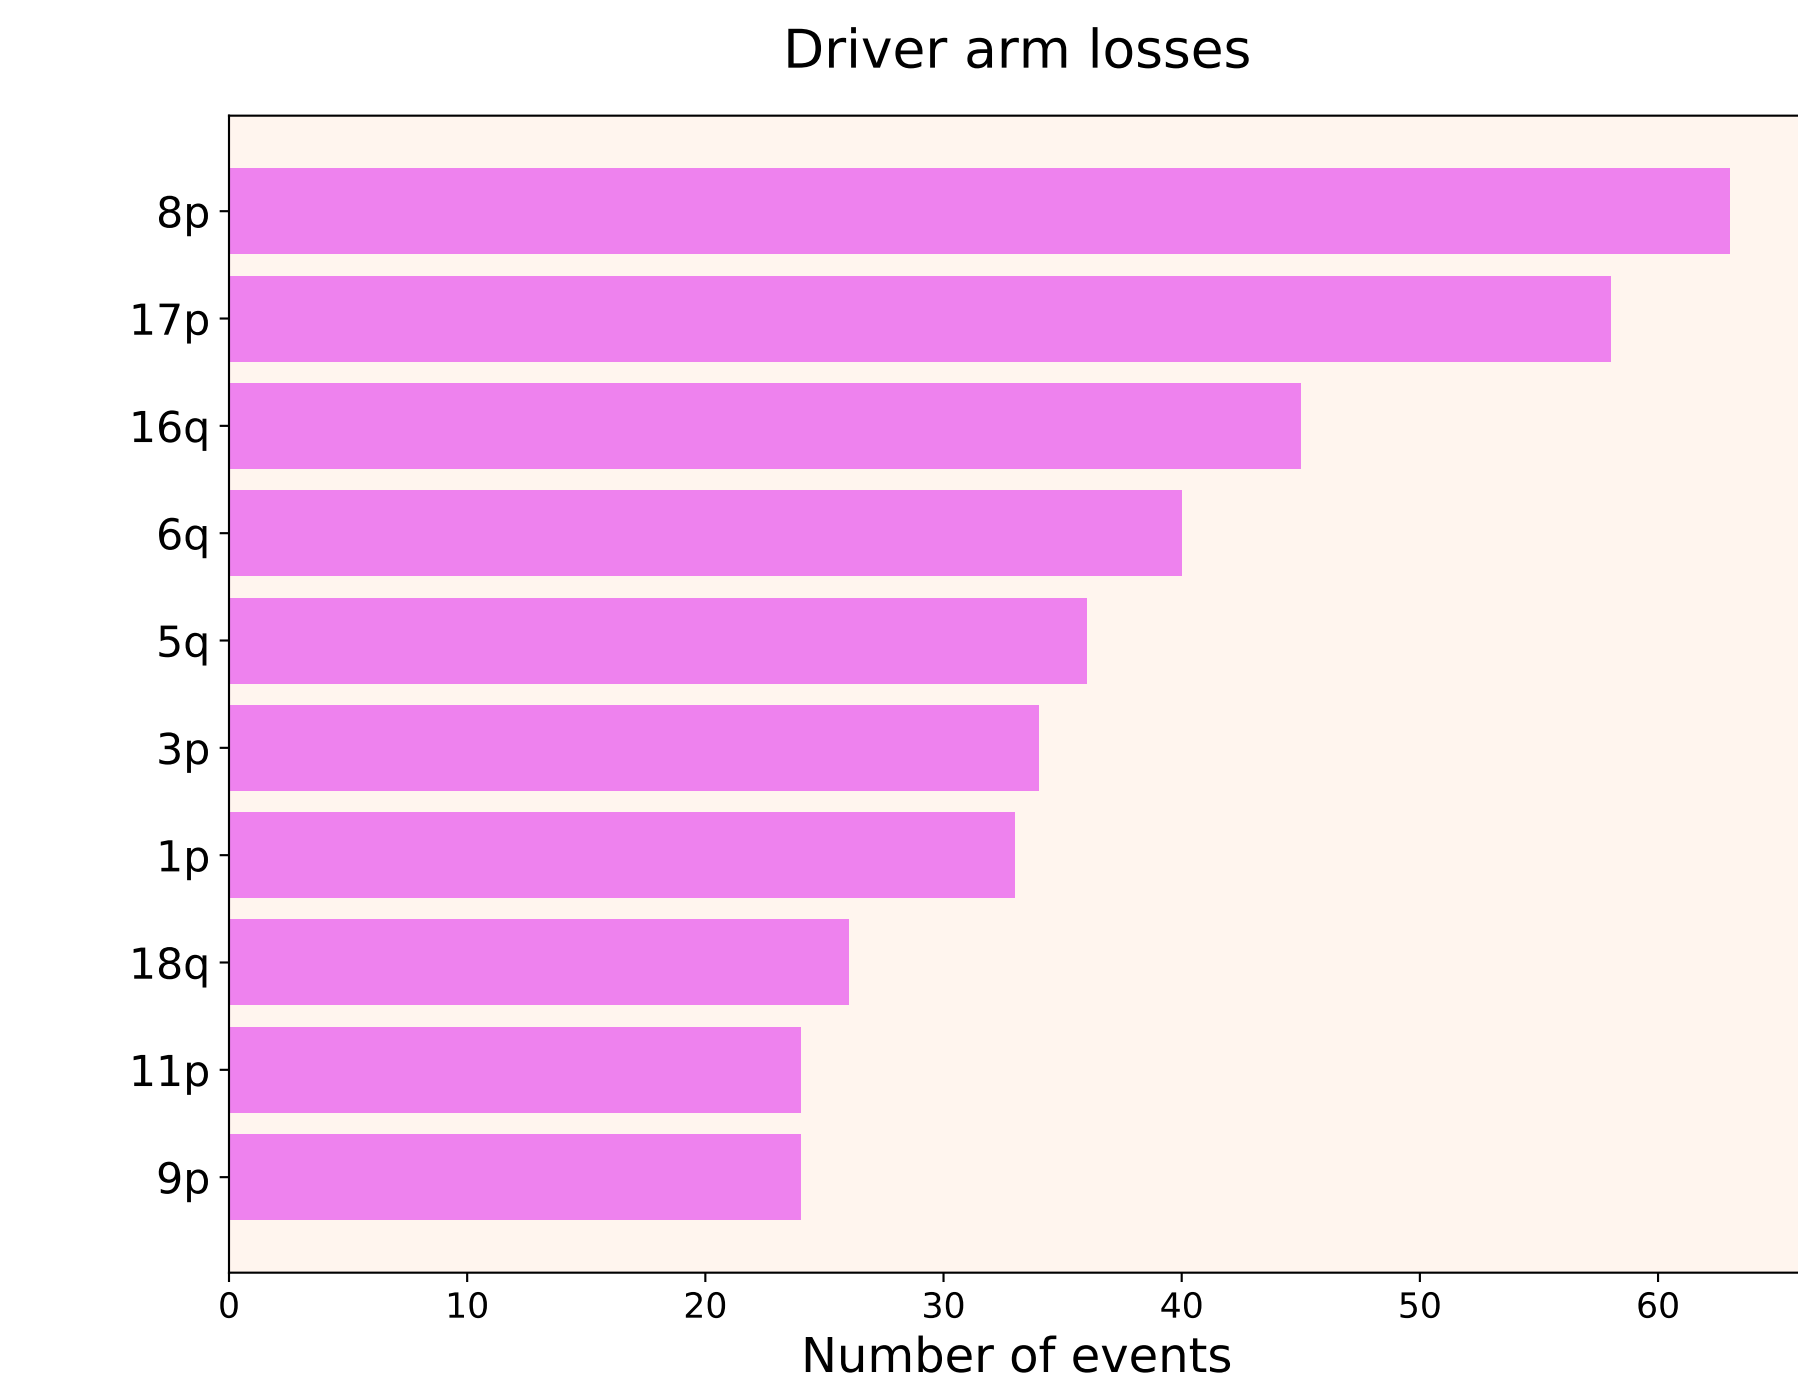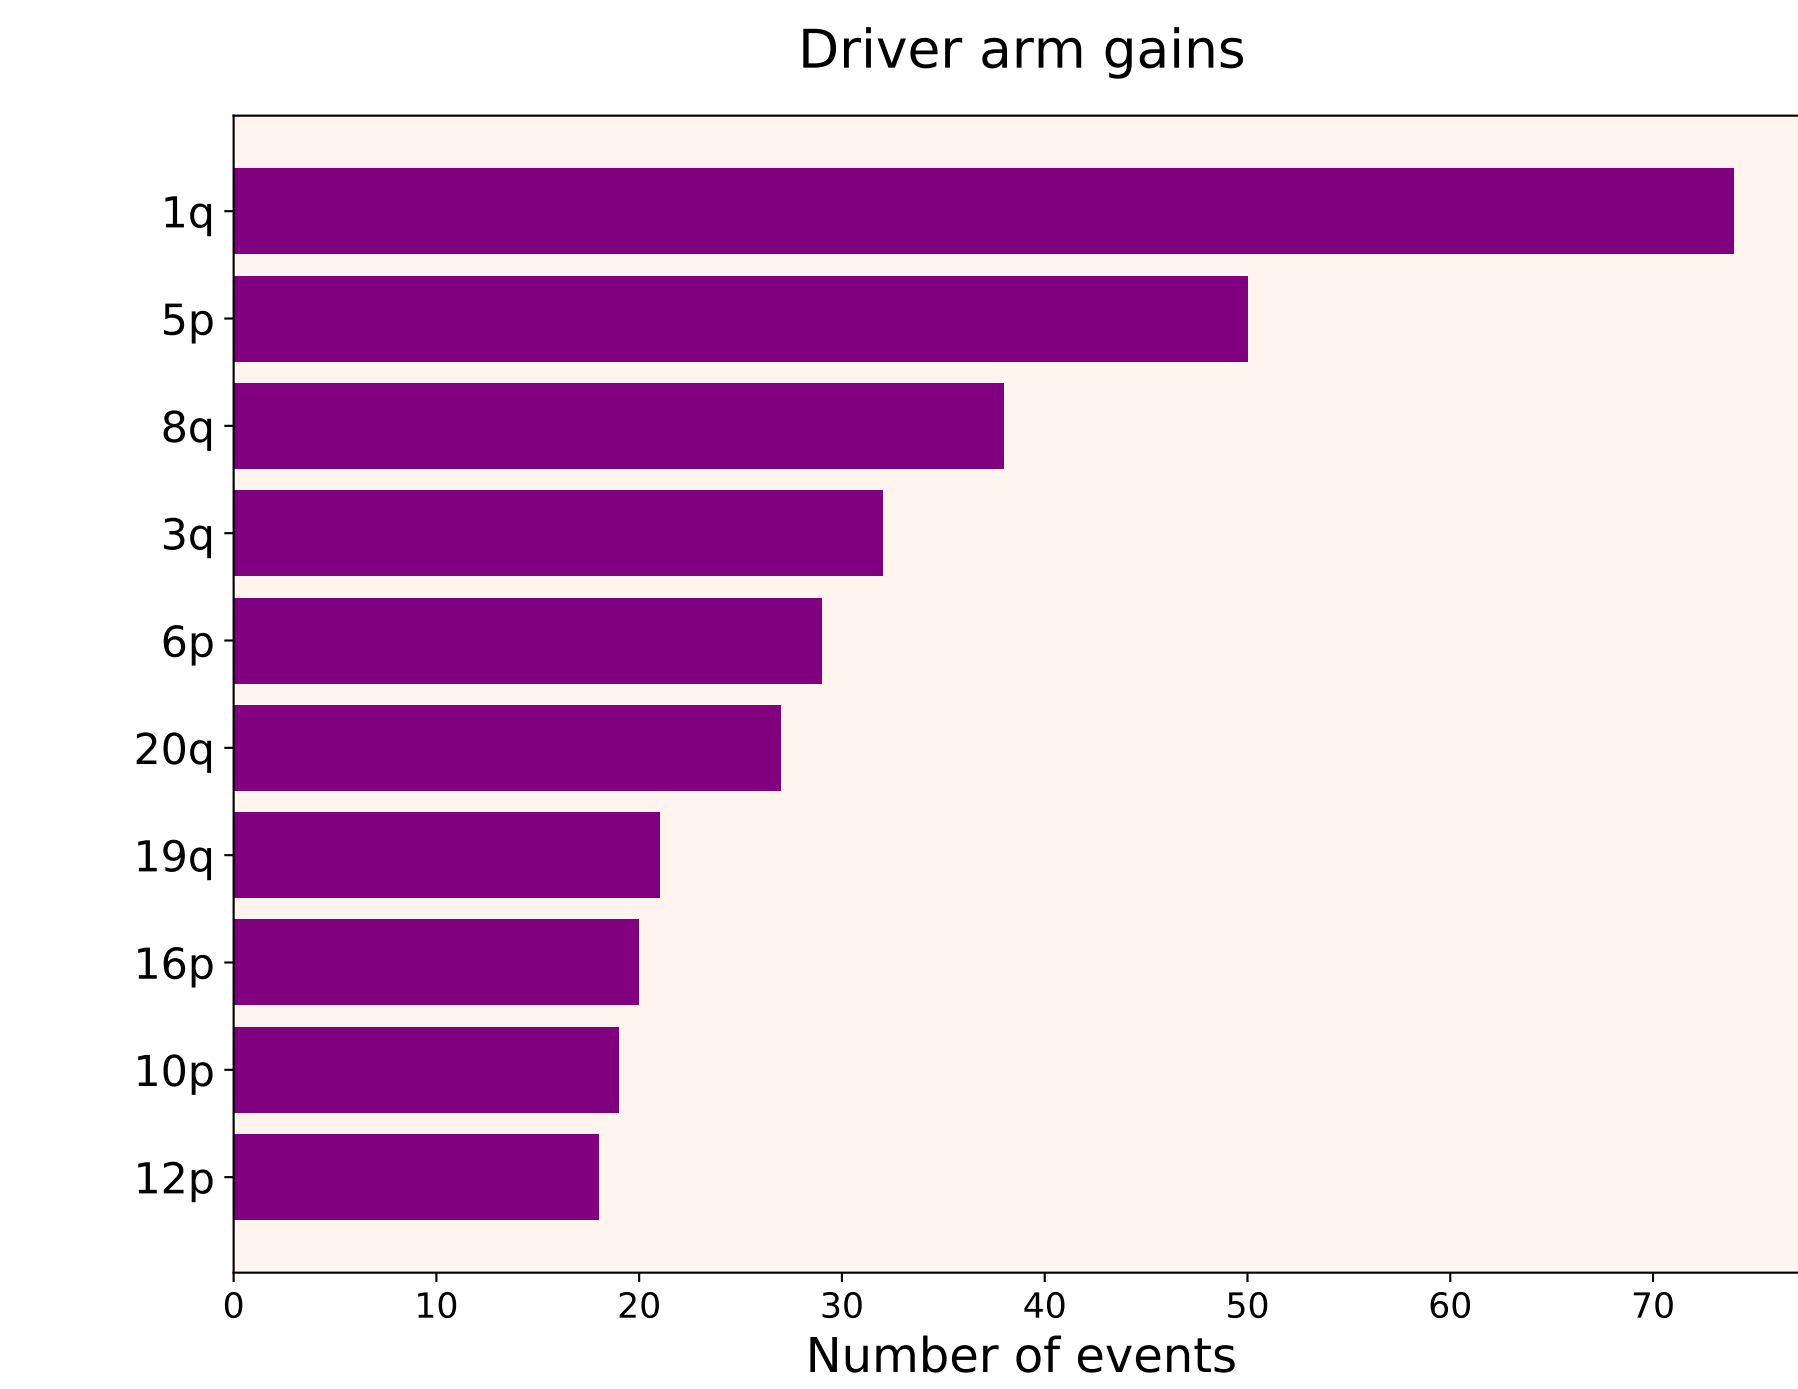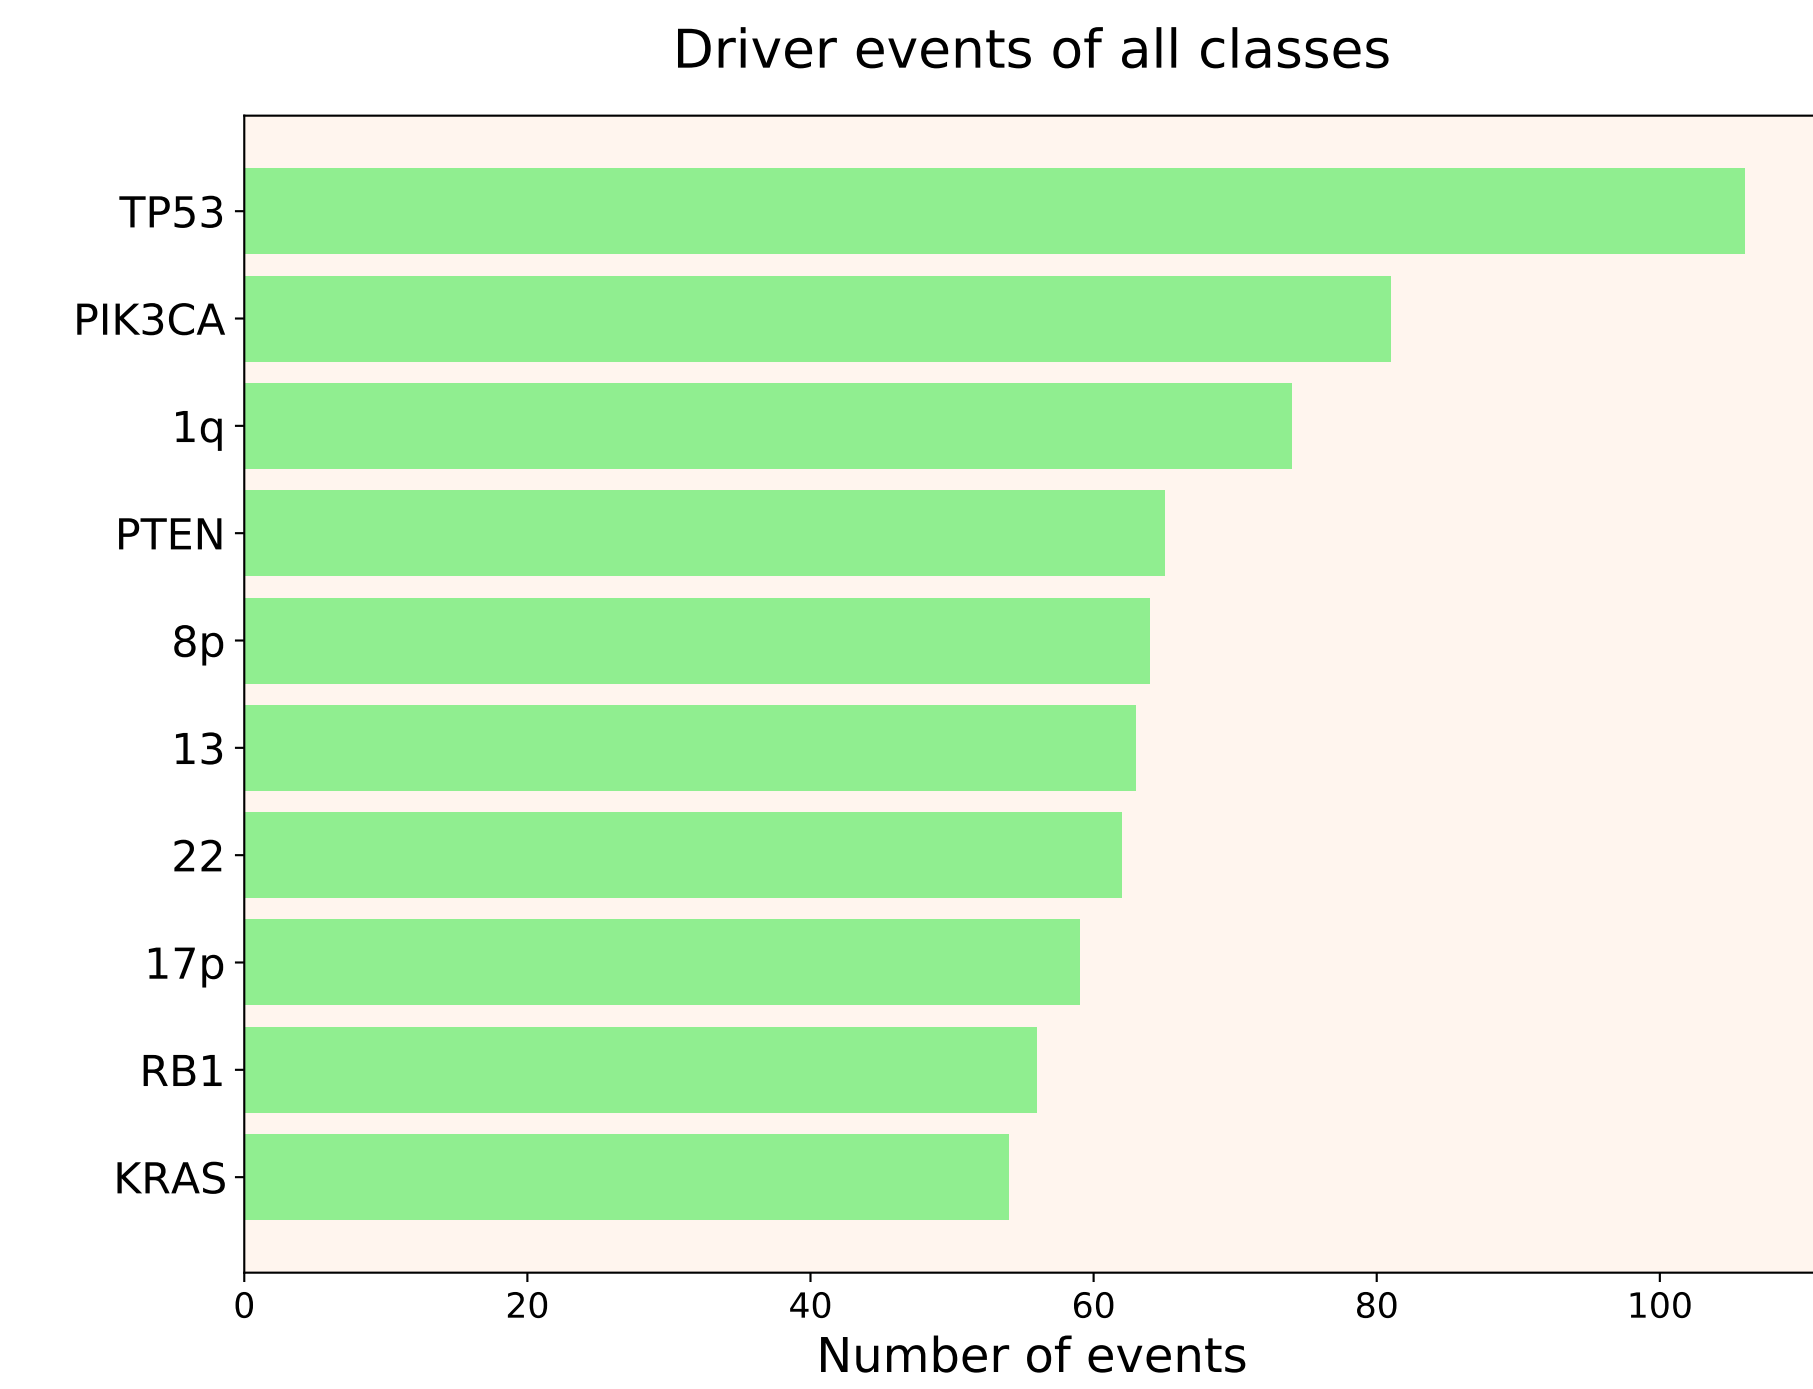

Supplement: Supplemental_Data_S1.zip [file Supplemental_Data_S1.zip]

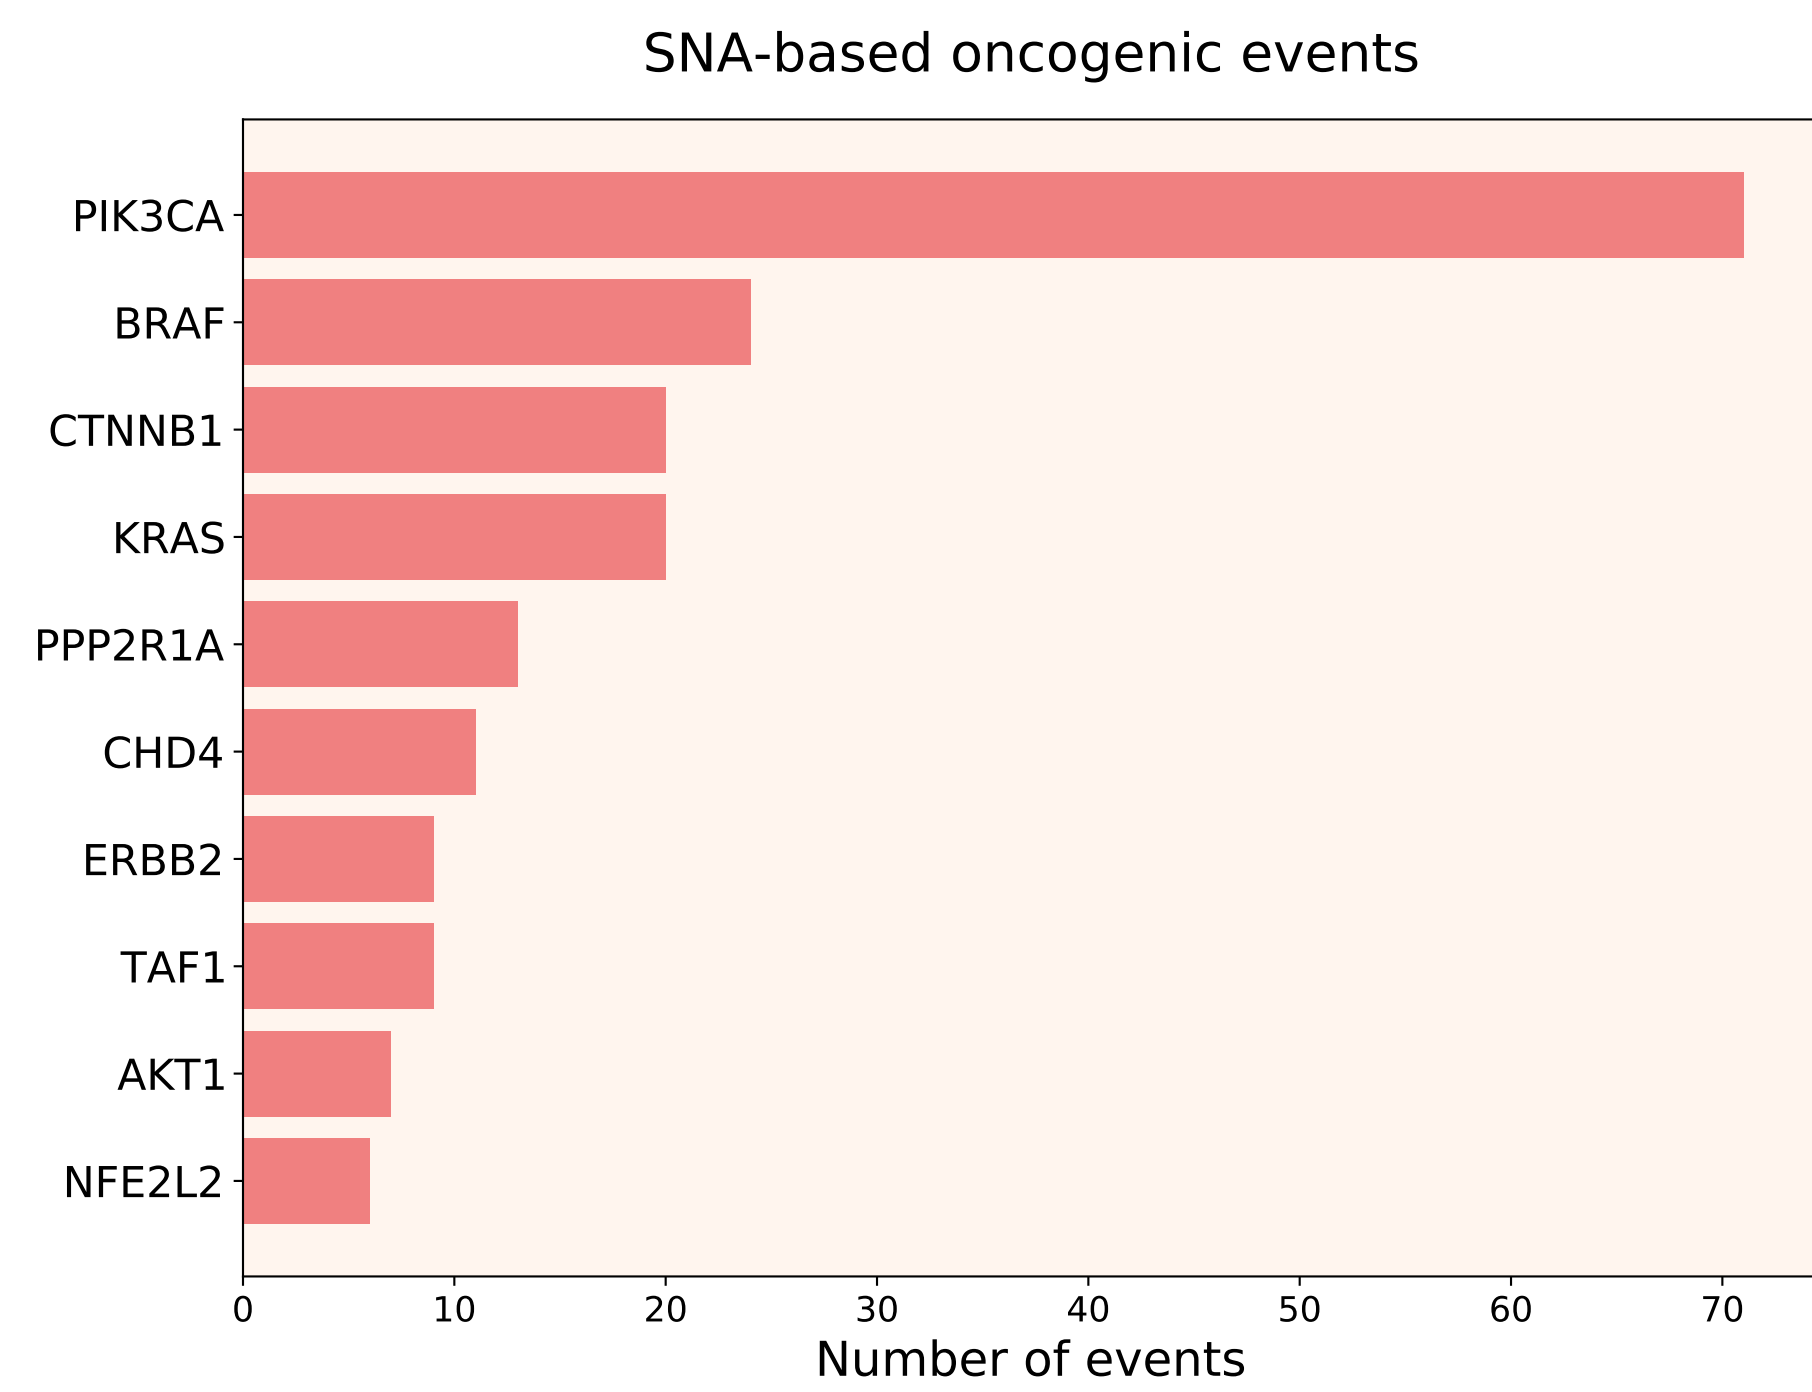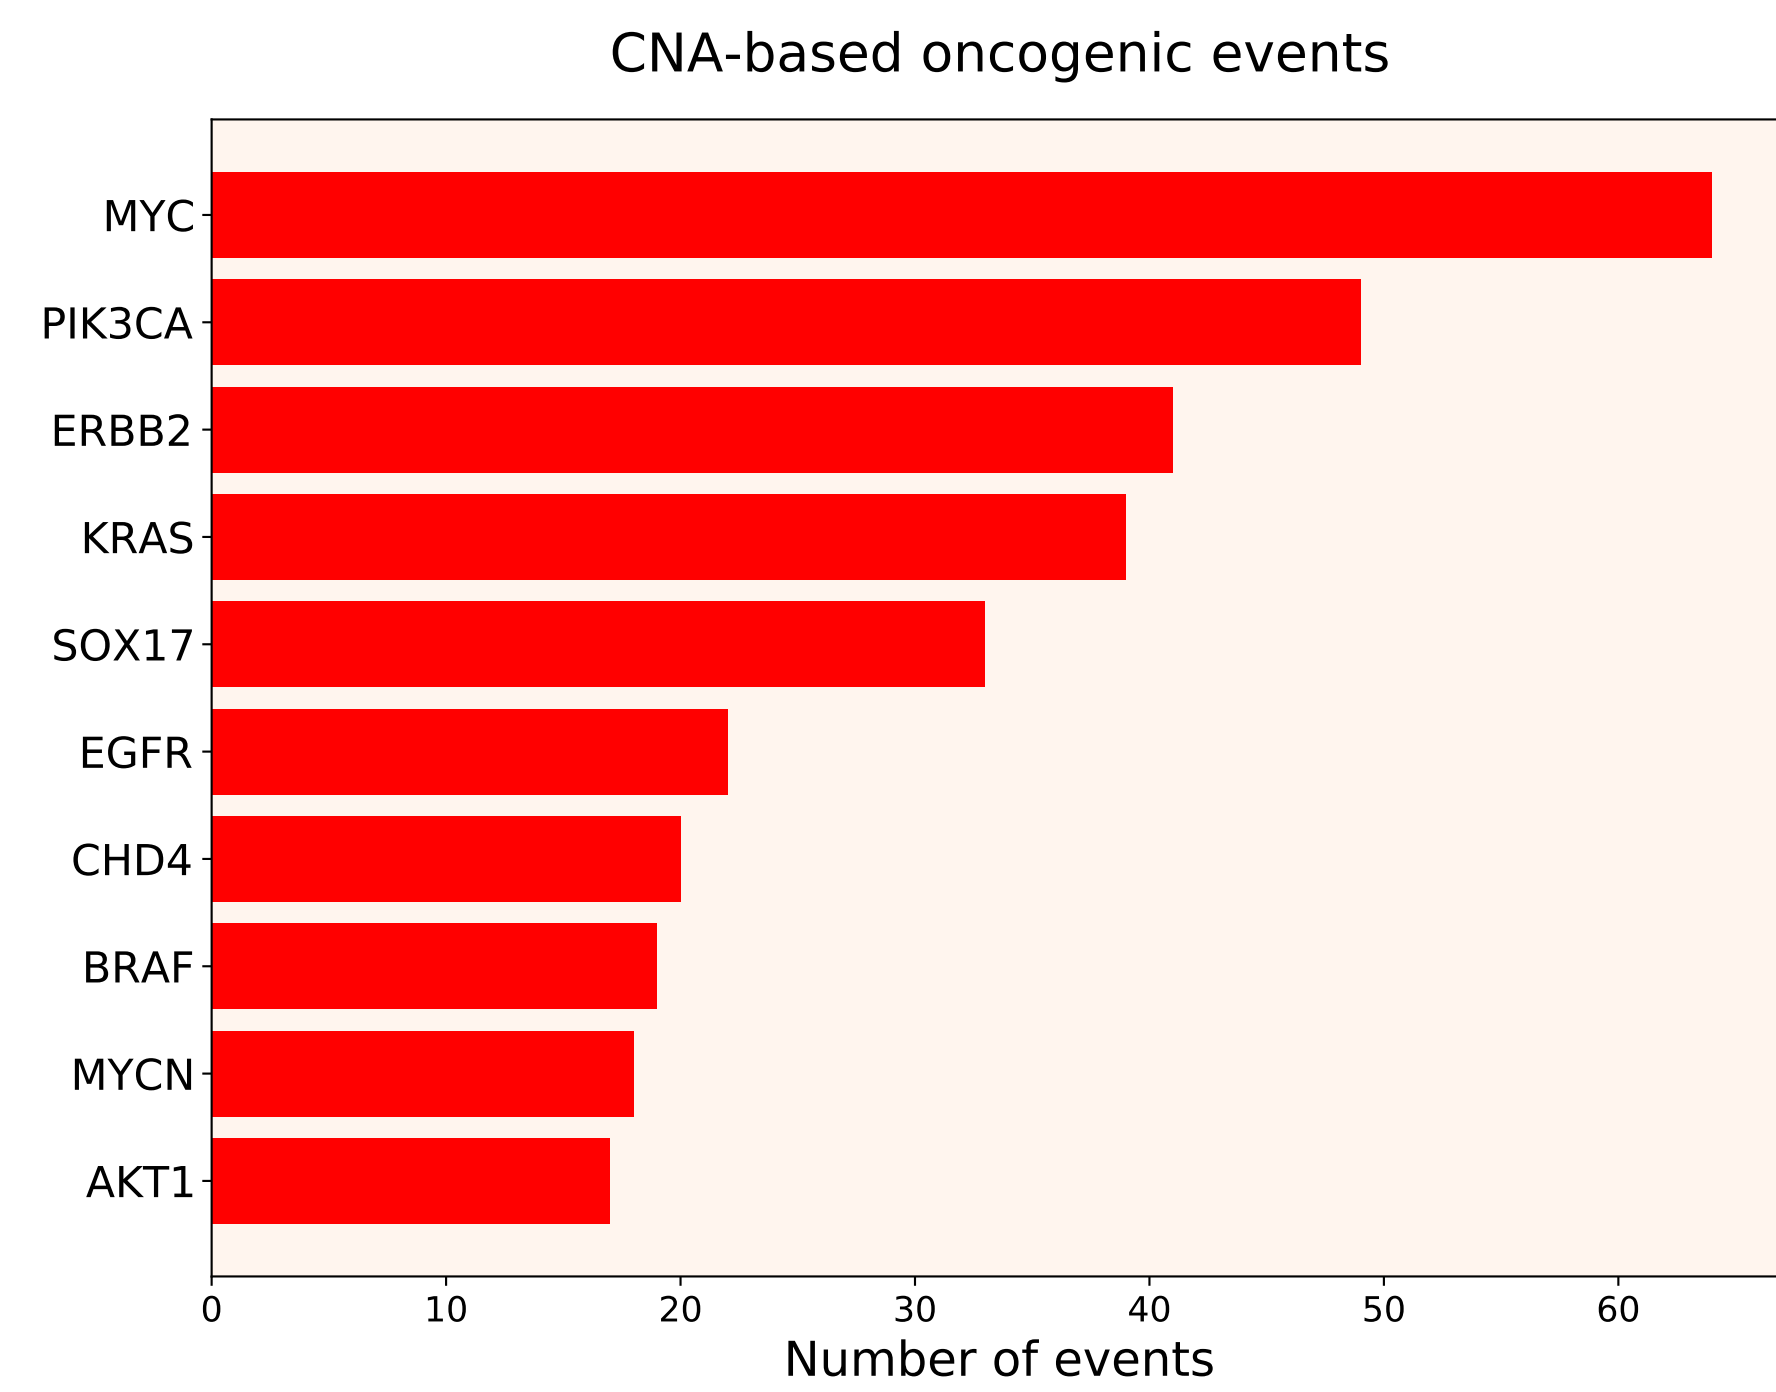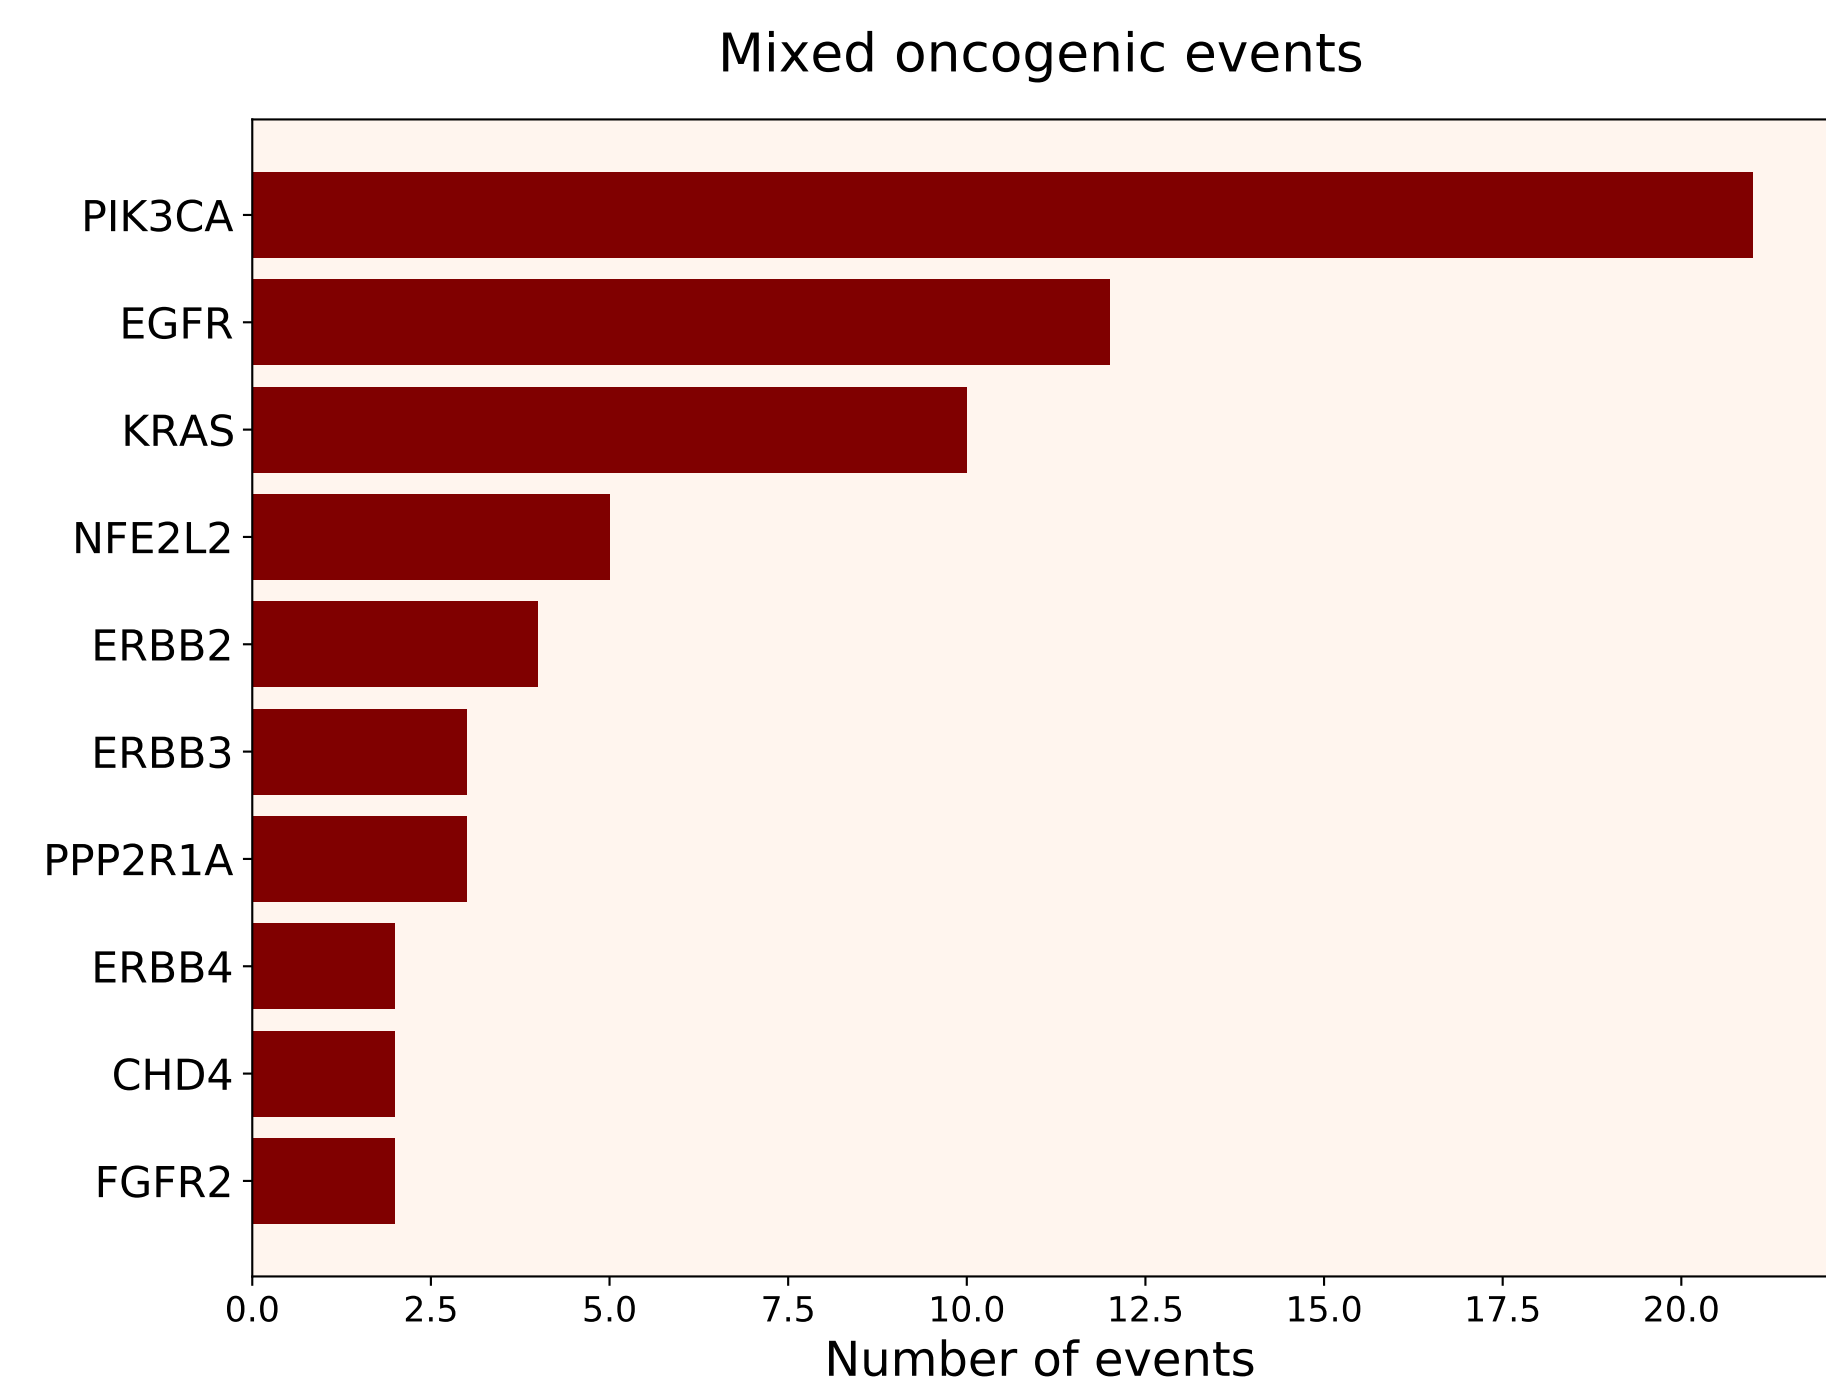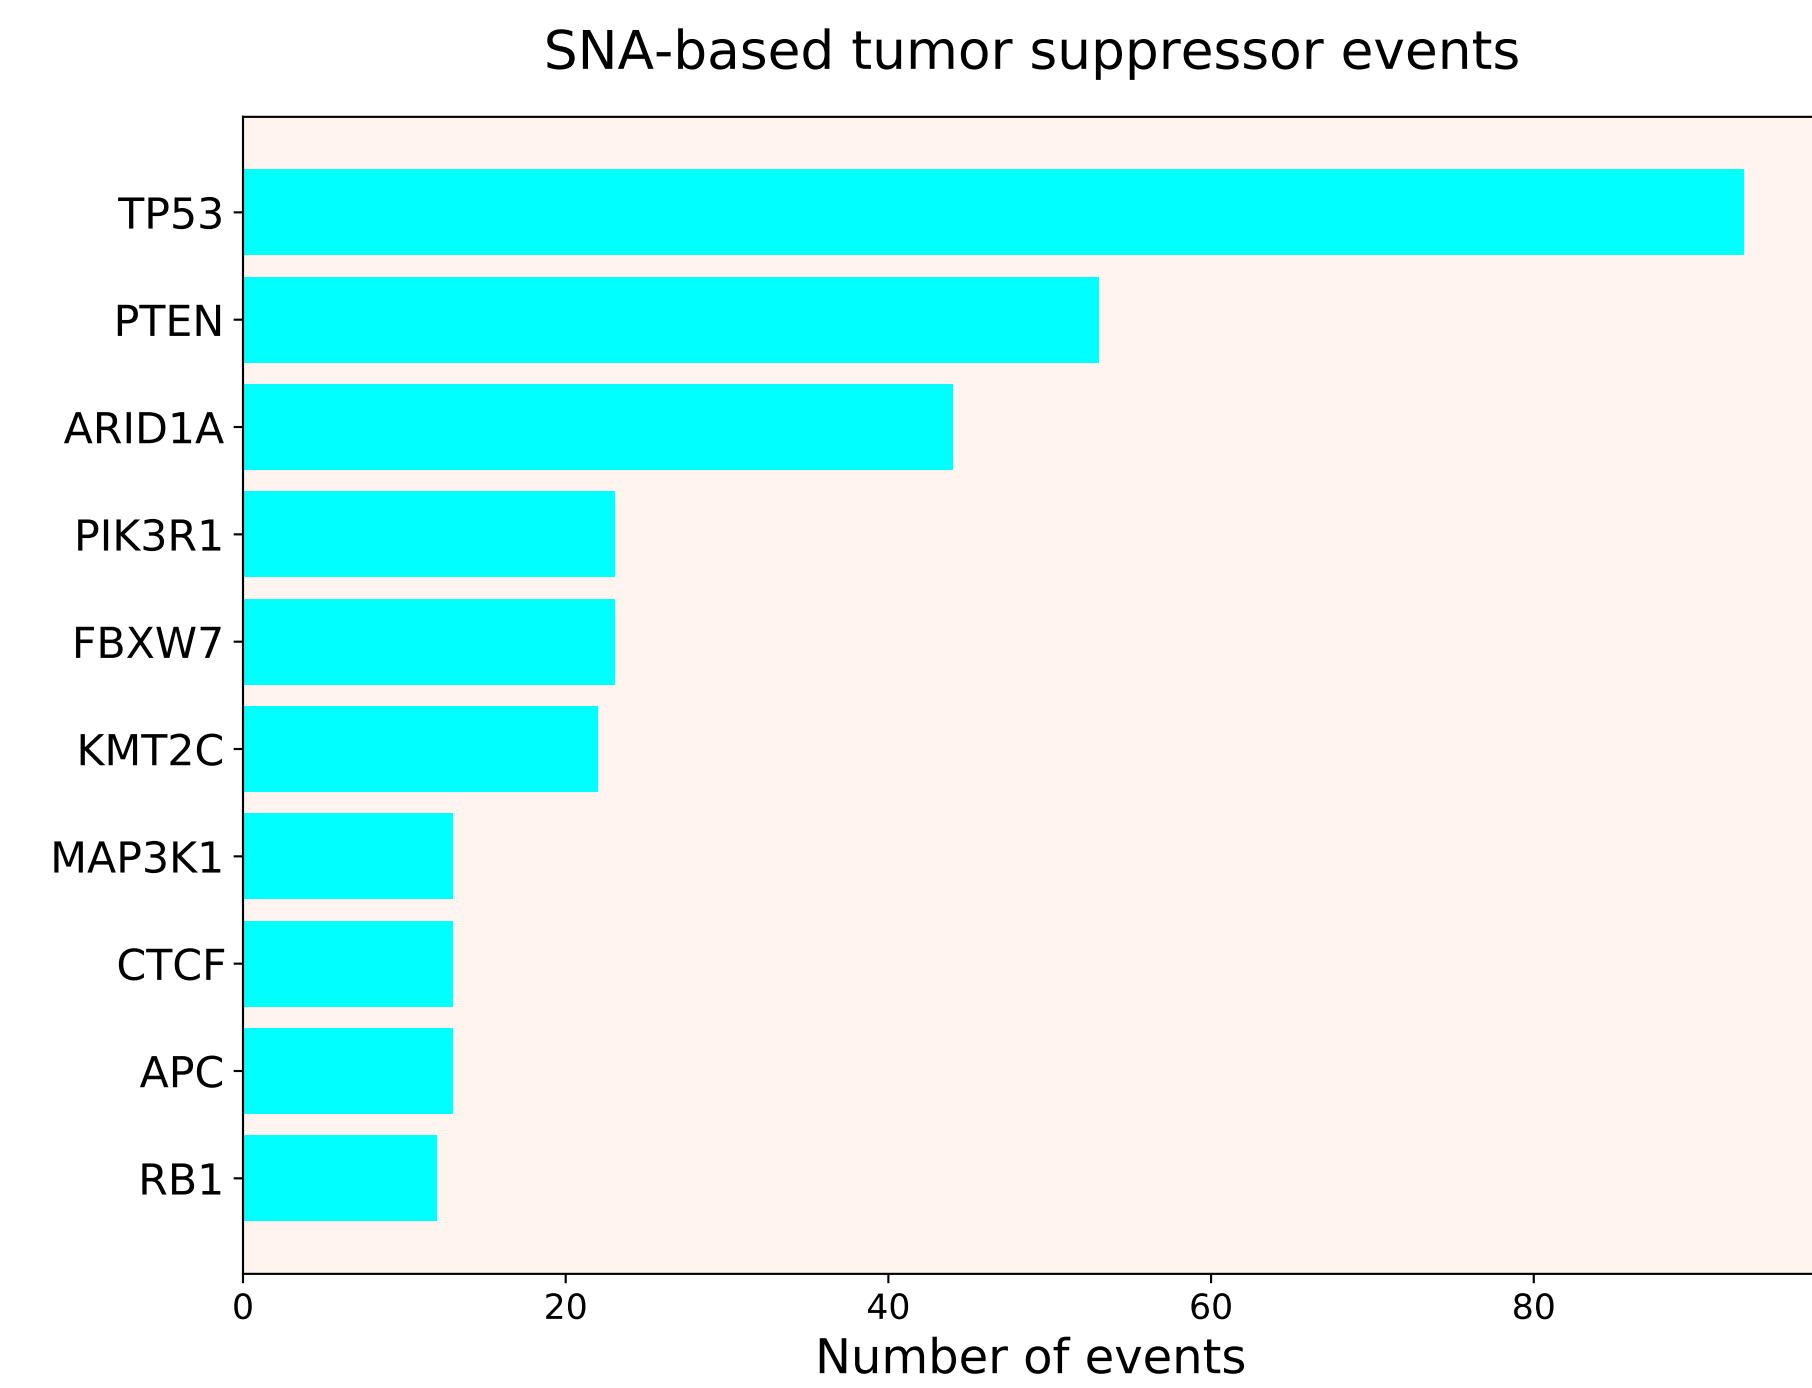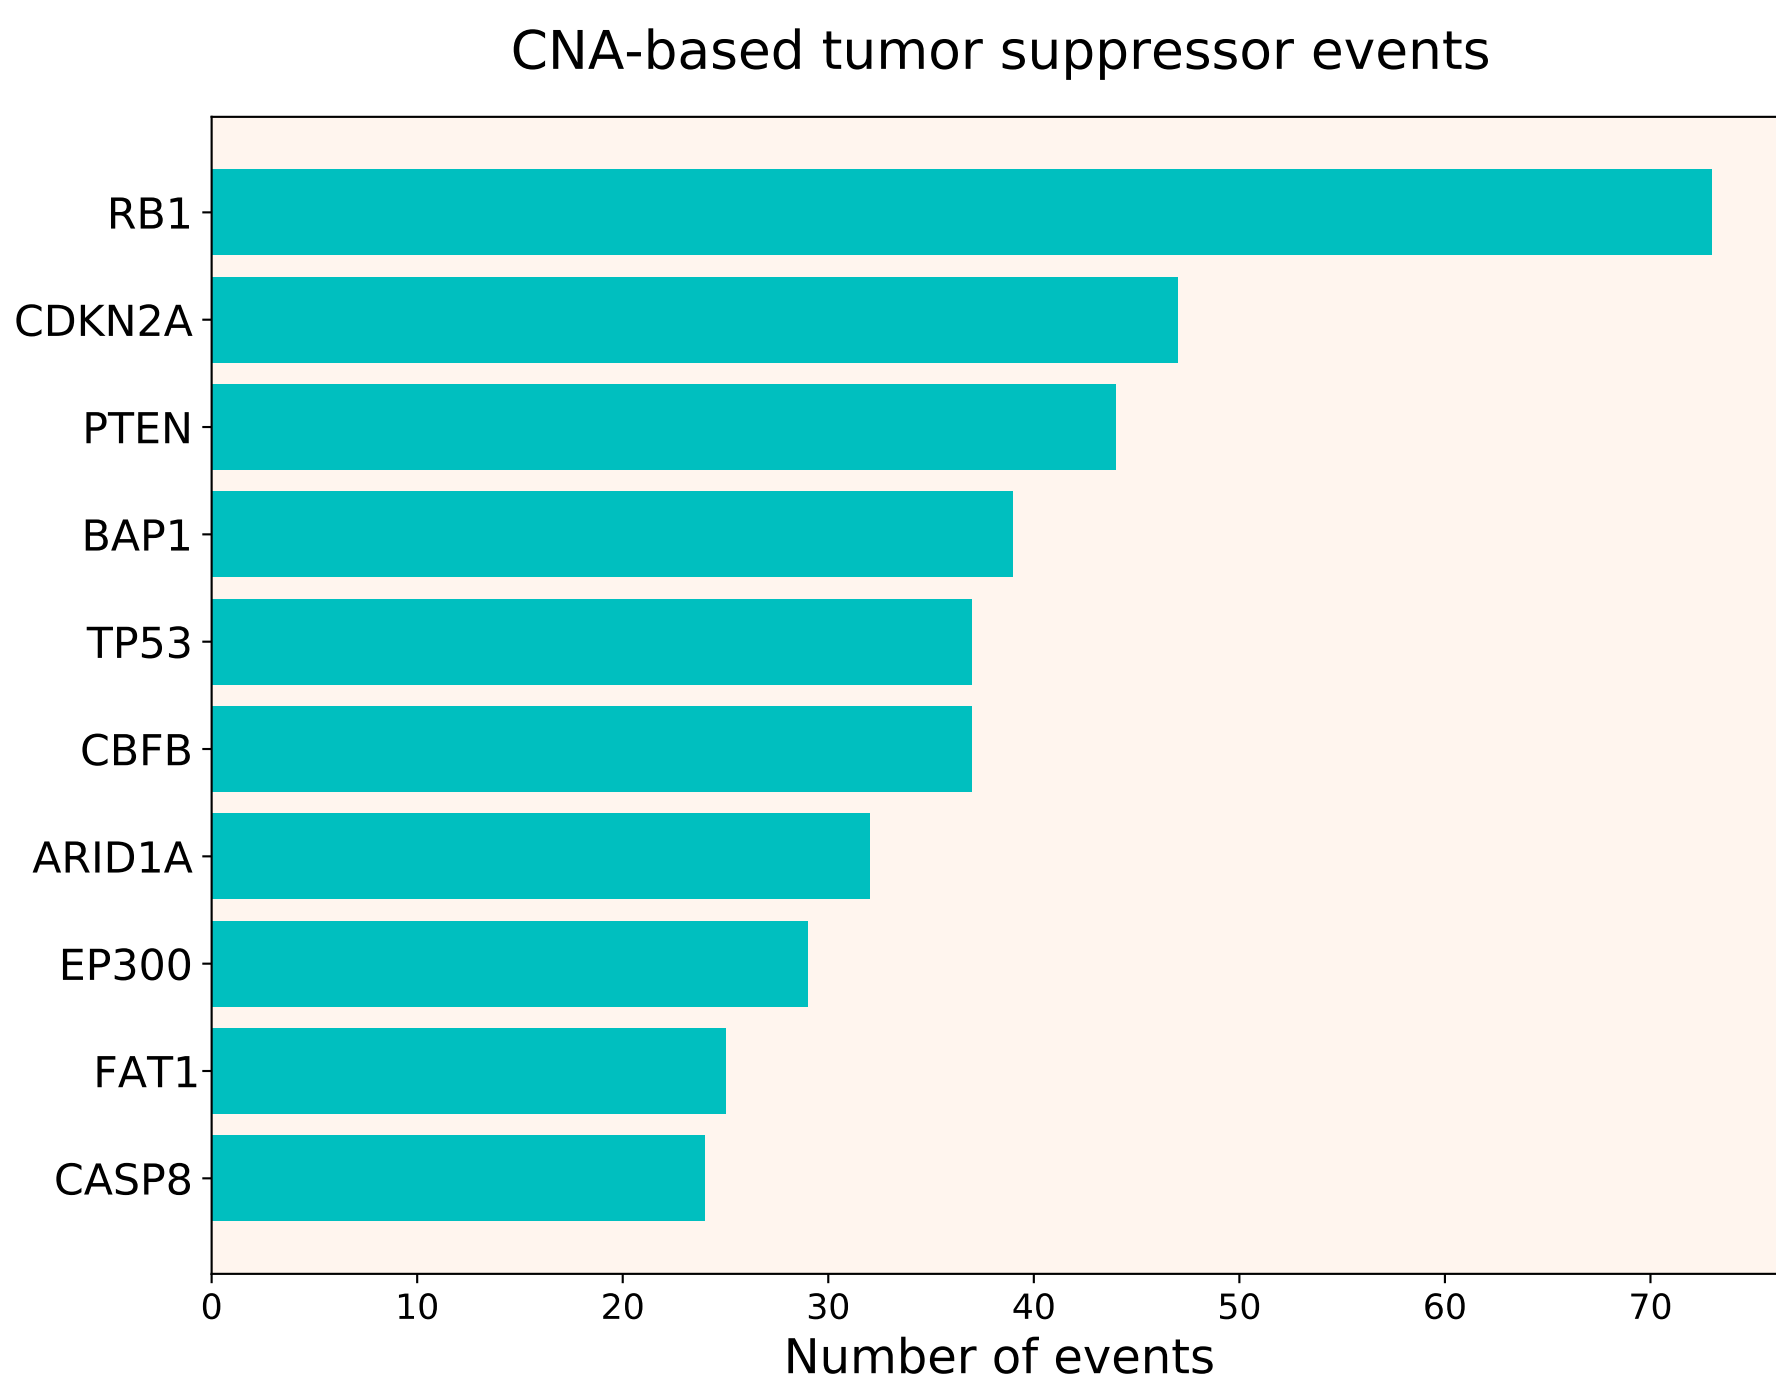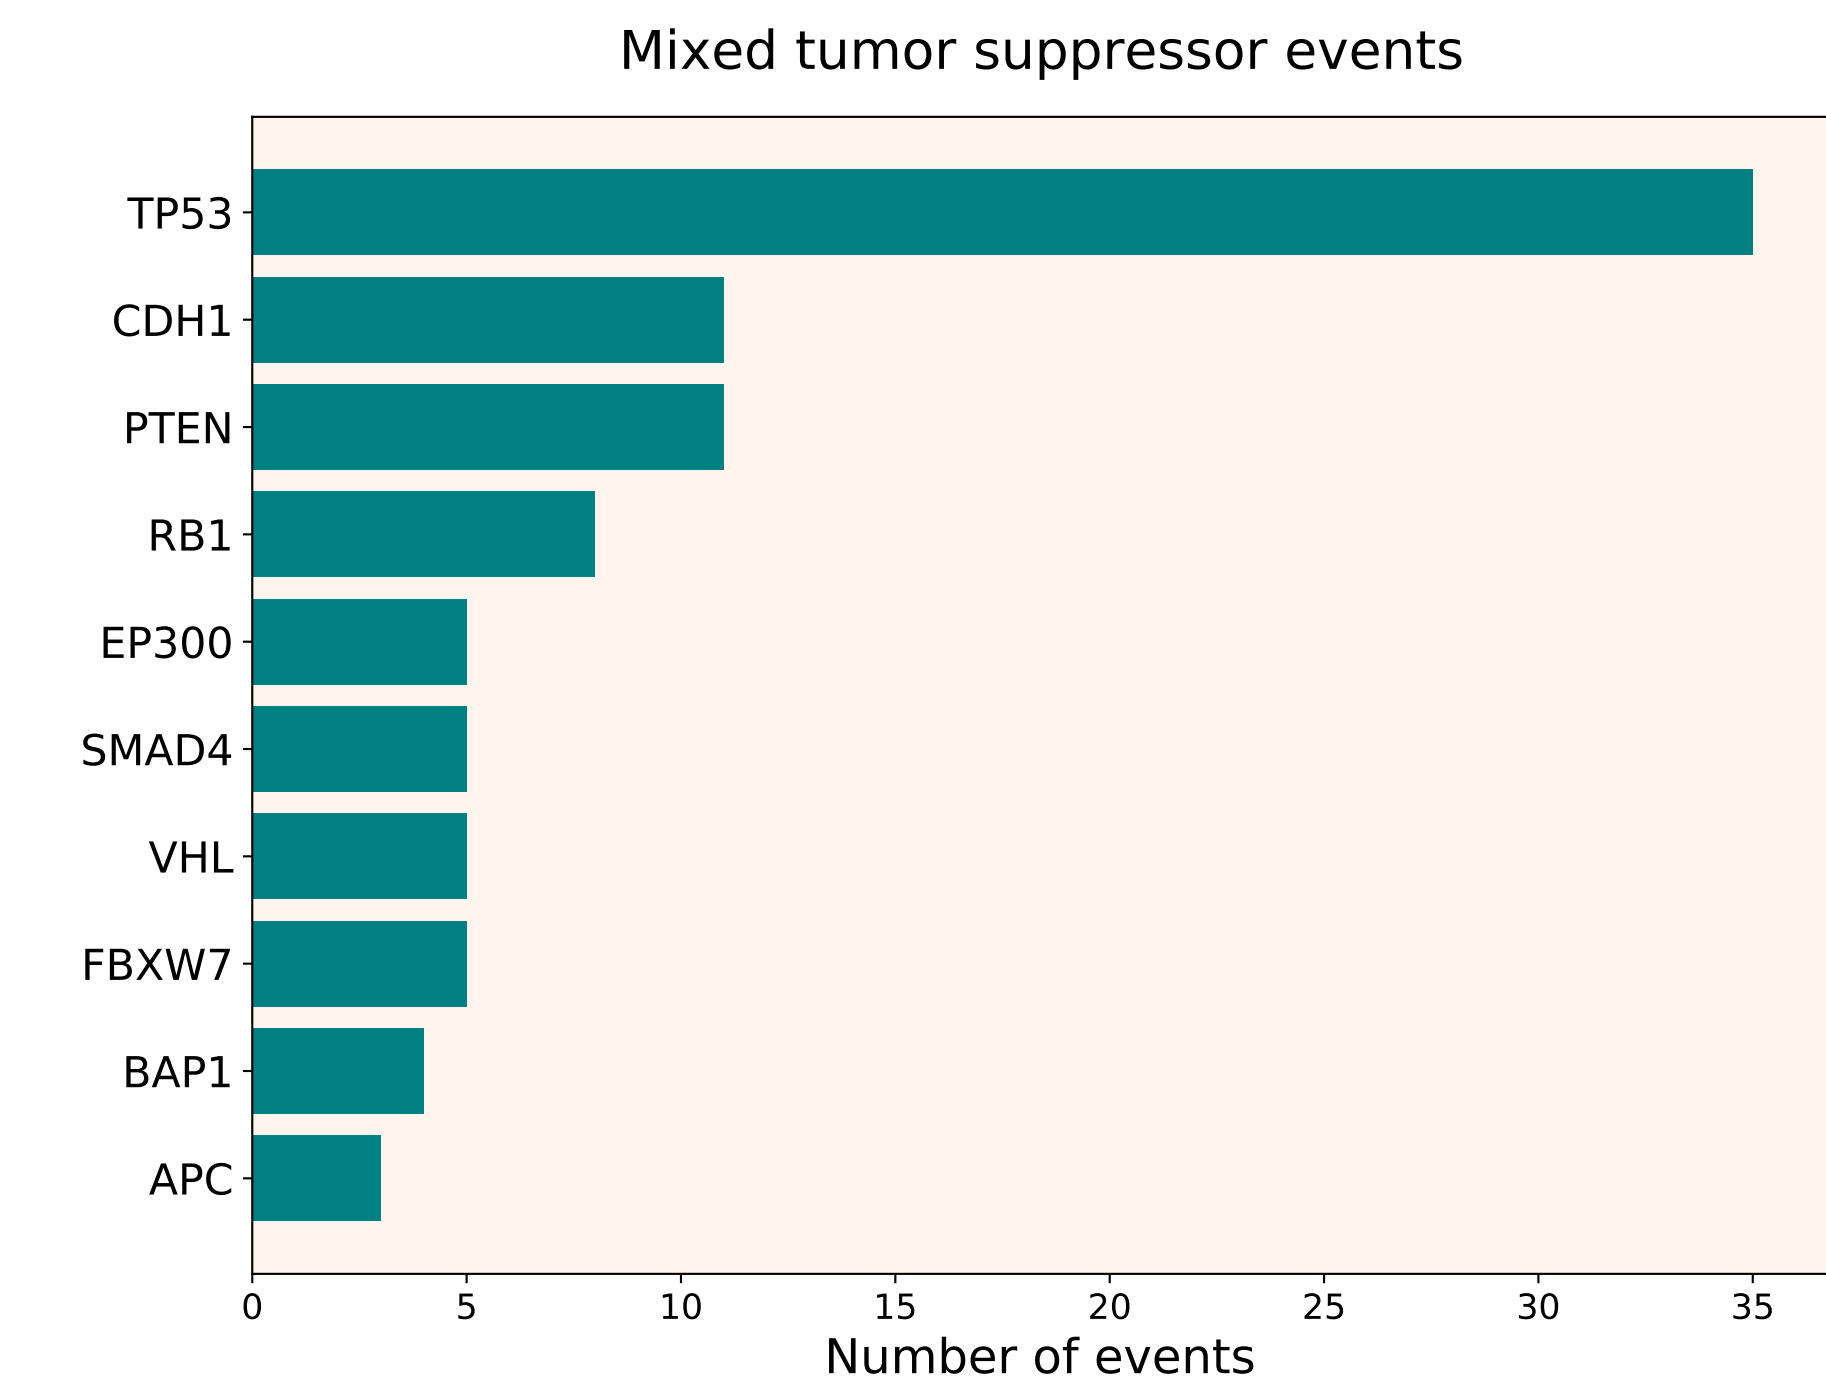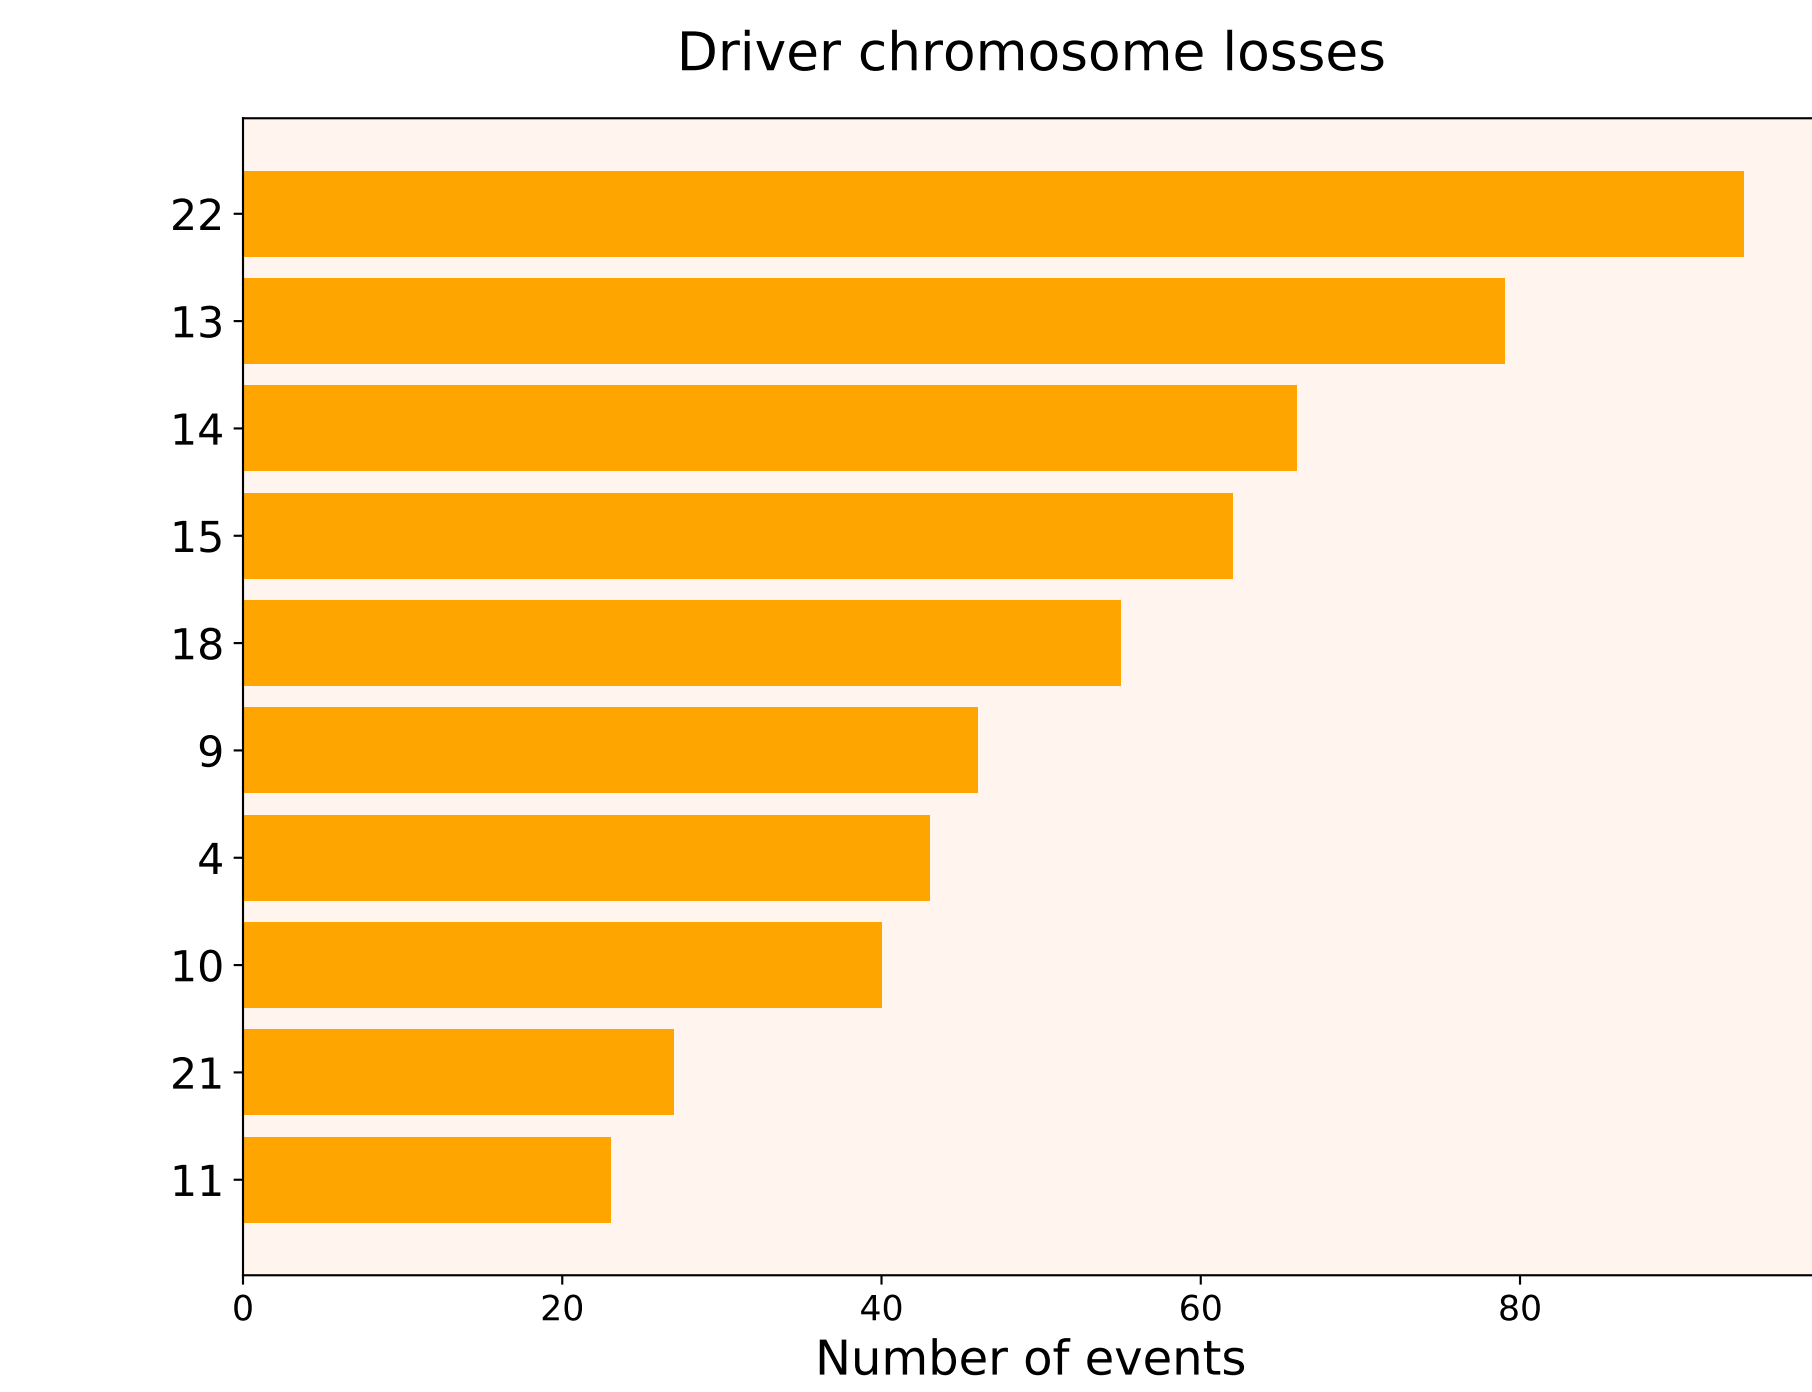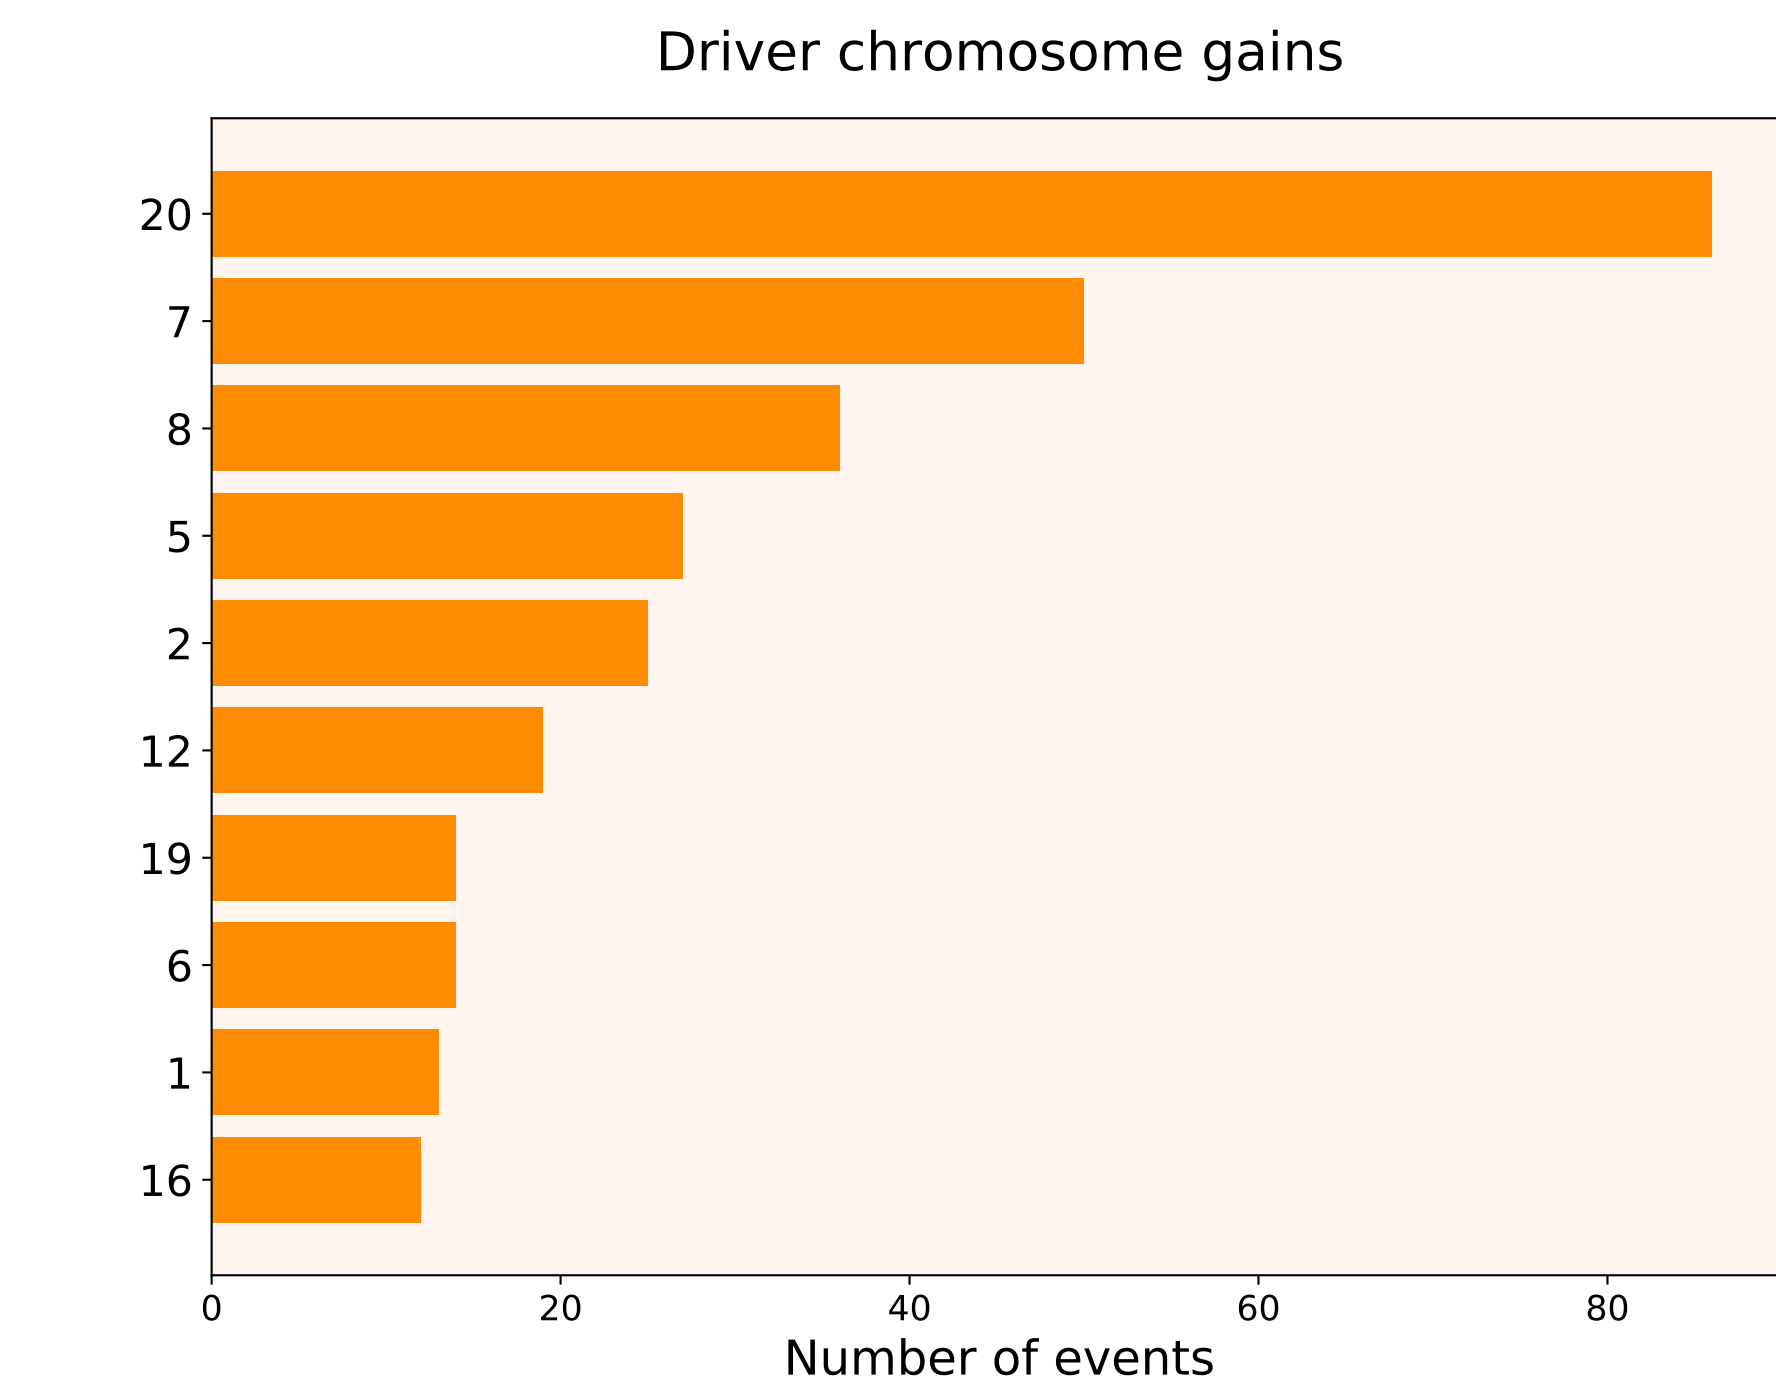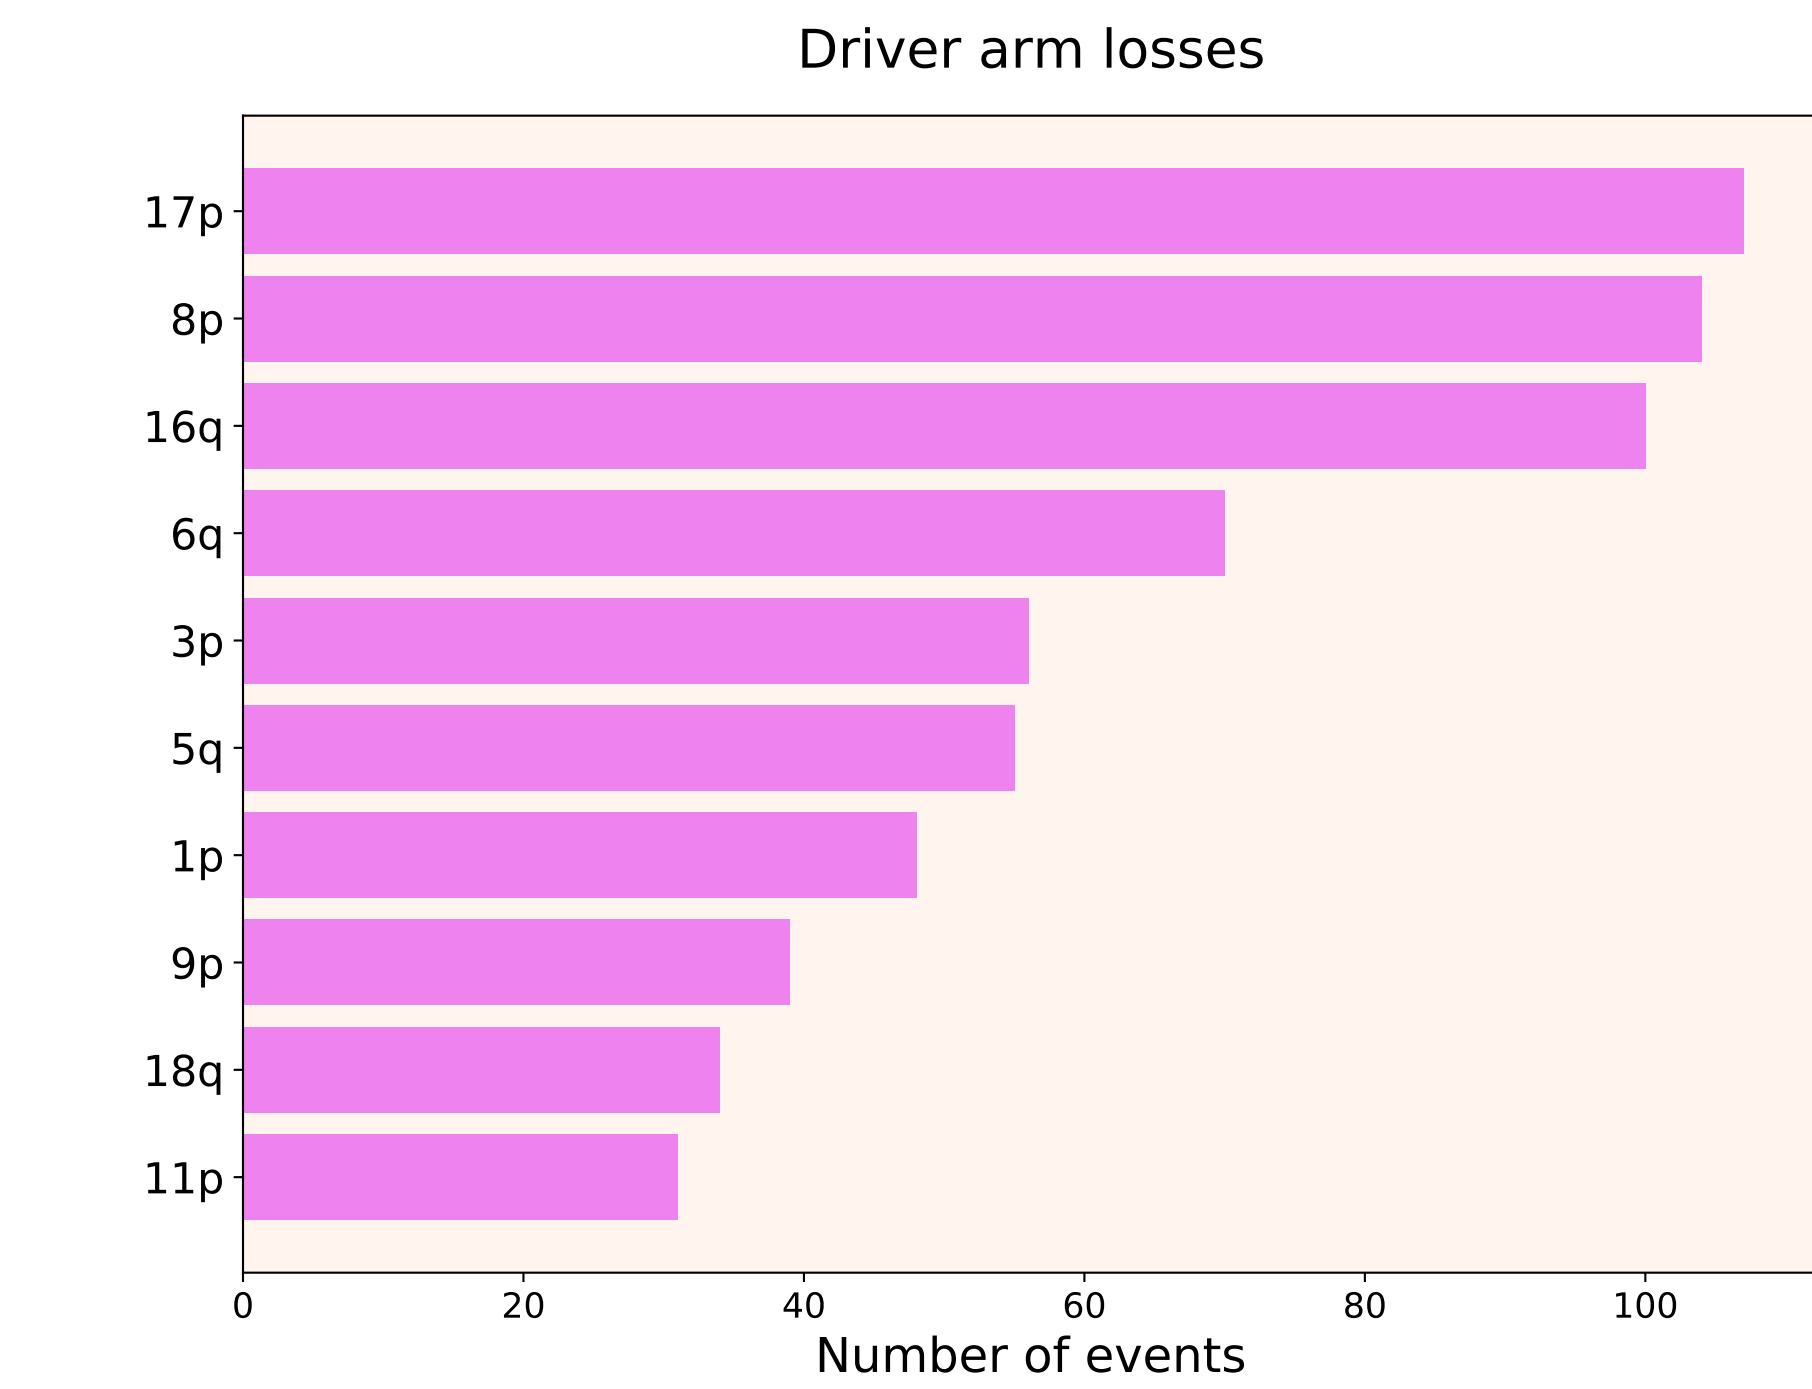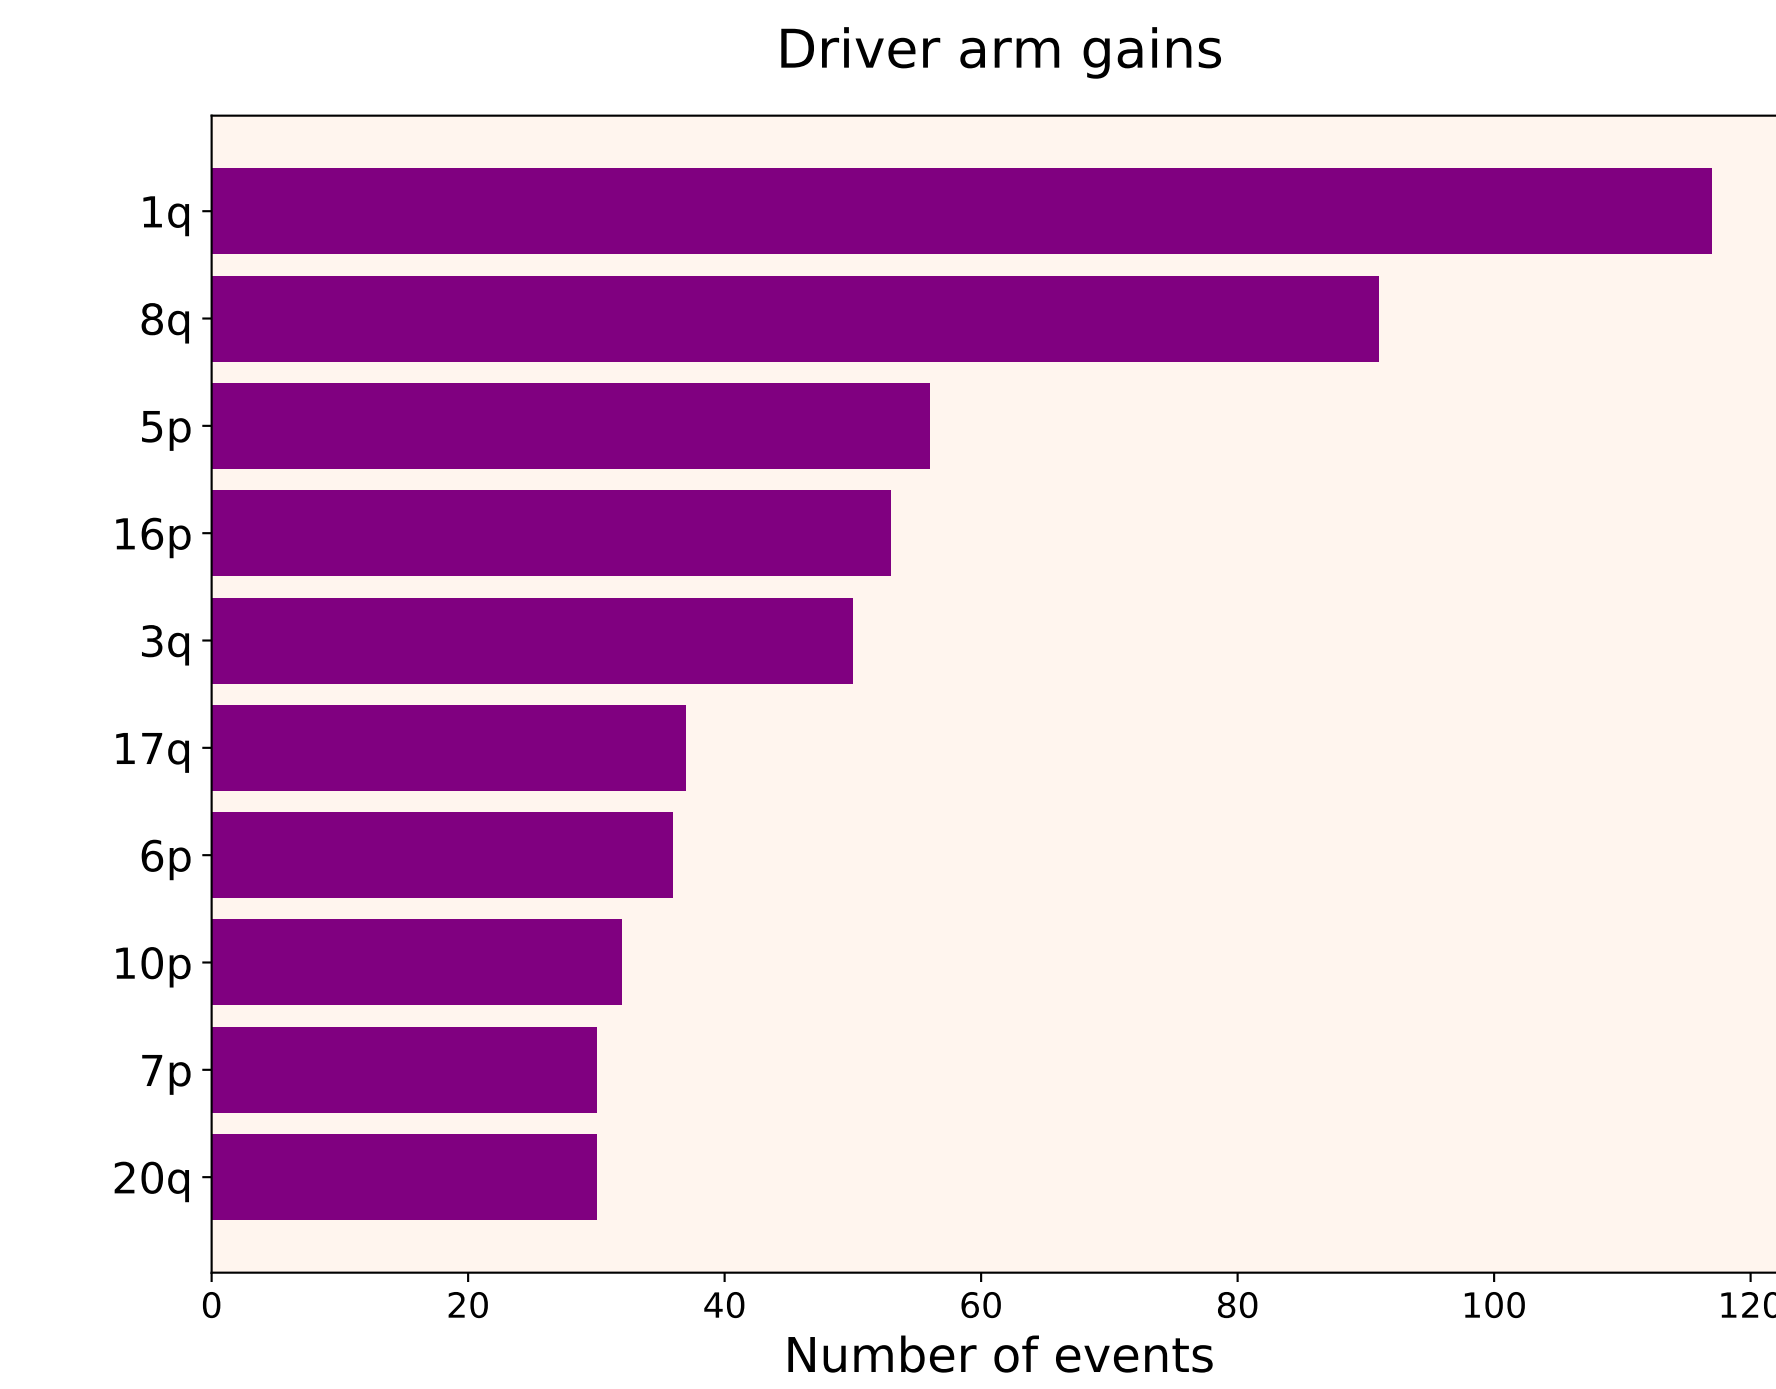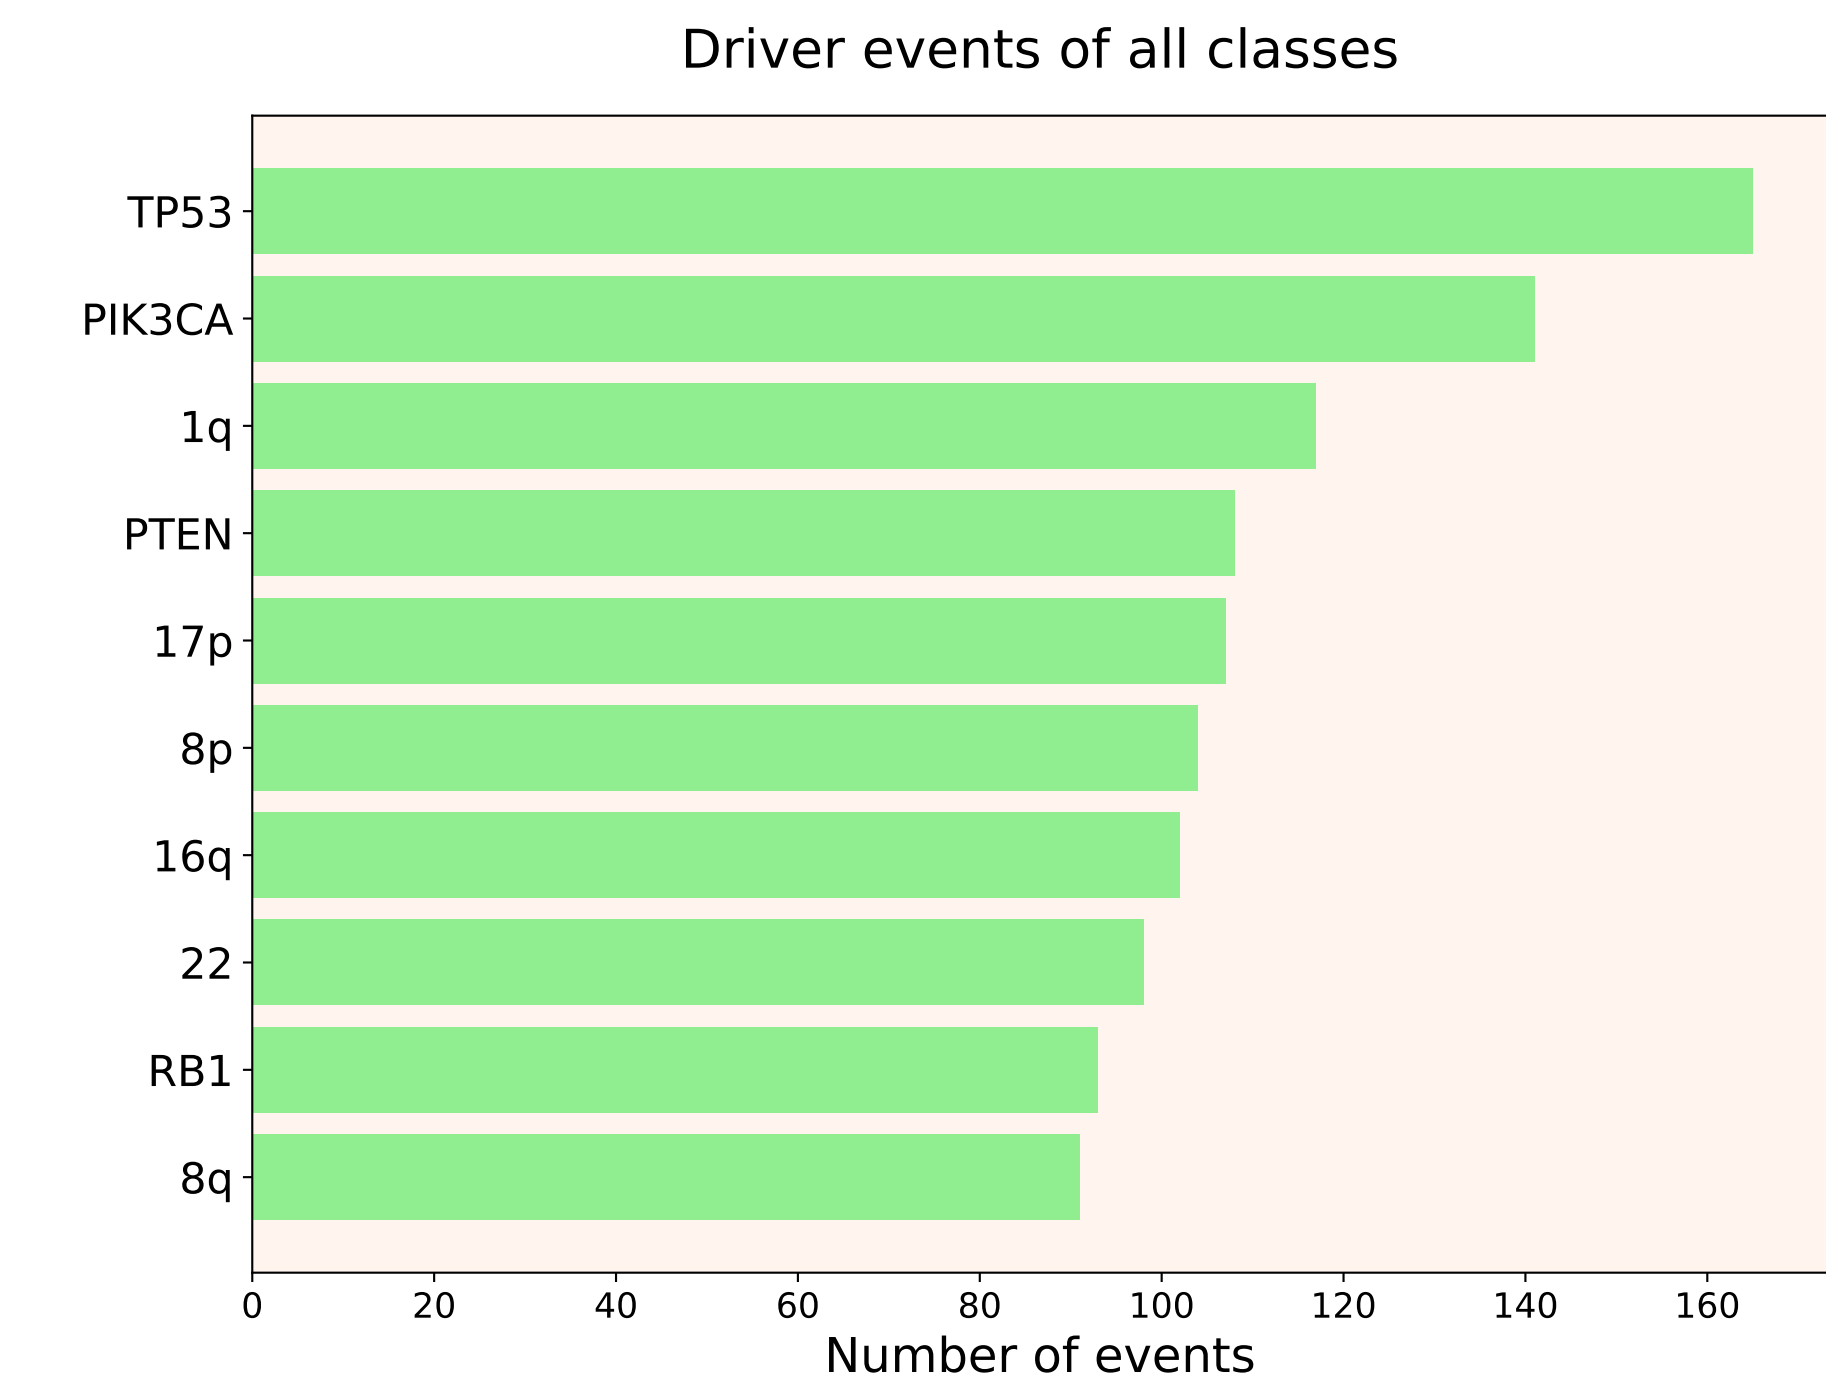

Supplement: Supplemental_Data_S1.zip [file Supplemental_Data_S1.zip]

Driver event distribution by cancer type in females

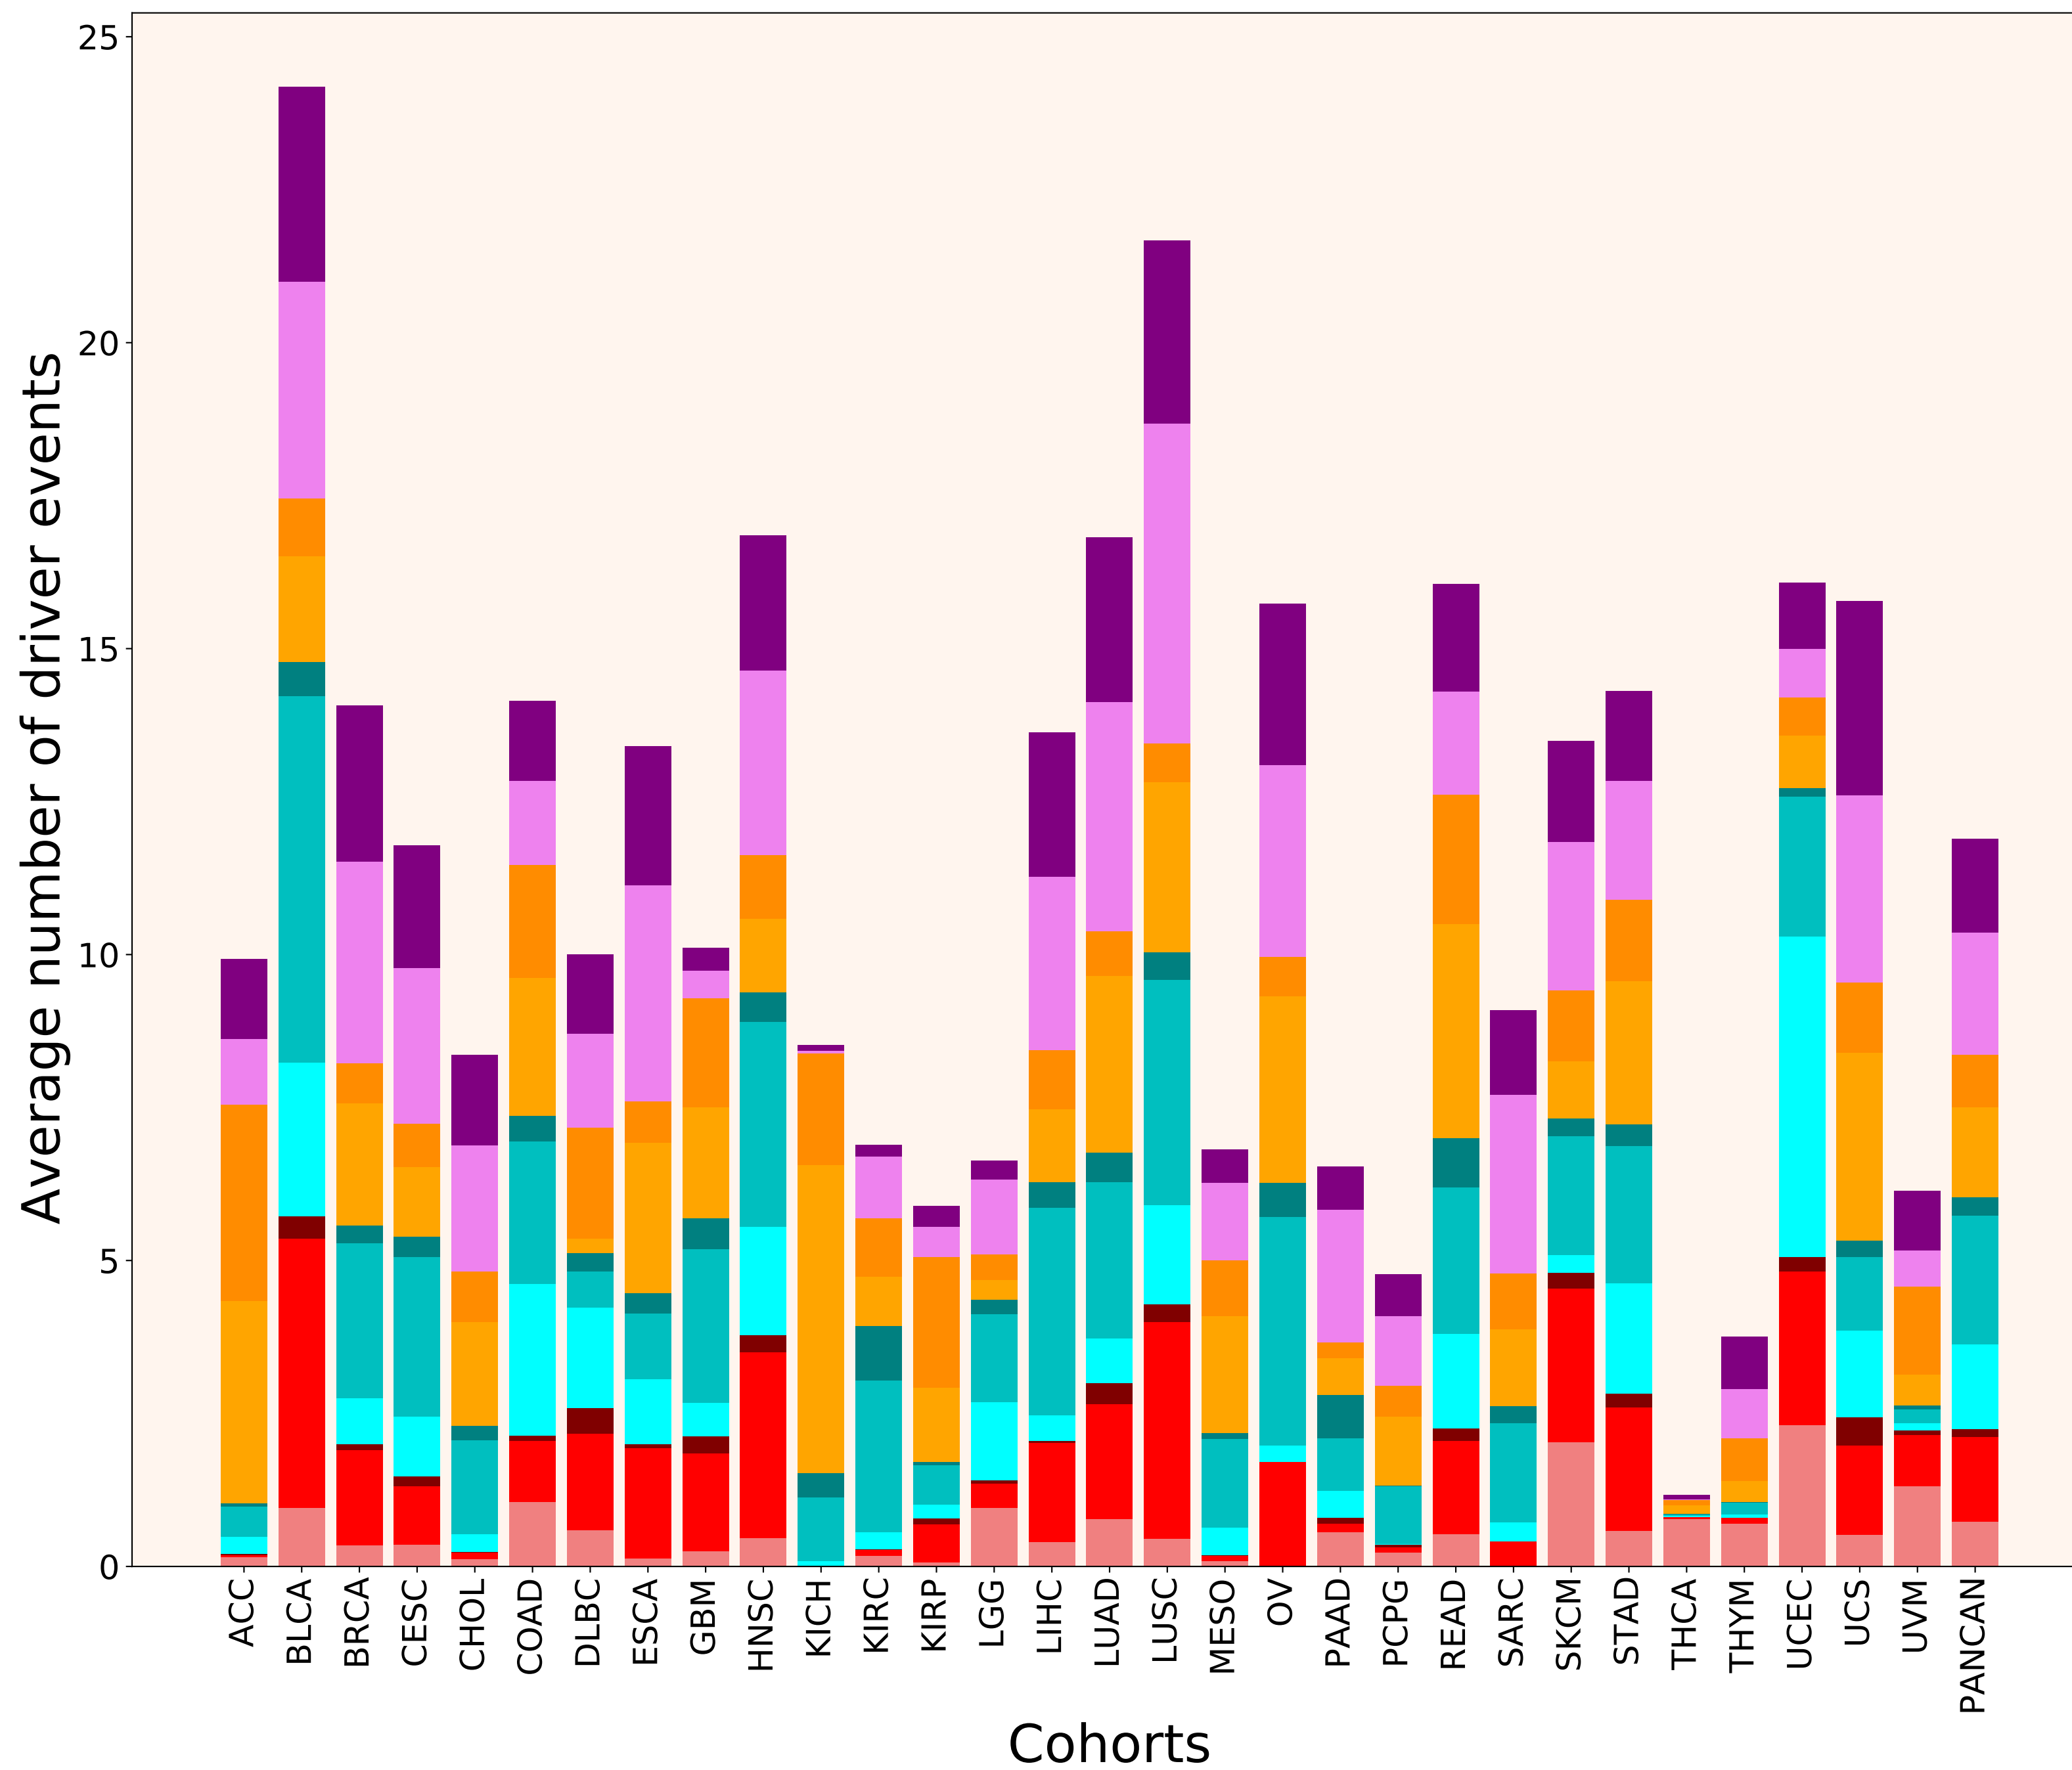

Supplement: Supplemental_Data_S1.zip [file Supplemental_Data_S1.zip]

Driver event distribution by total number of driver events per patient in males

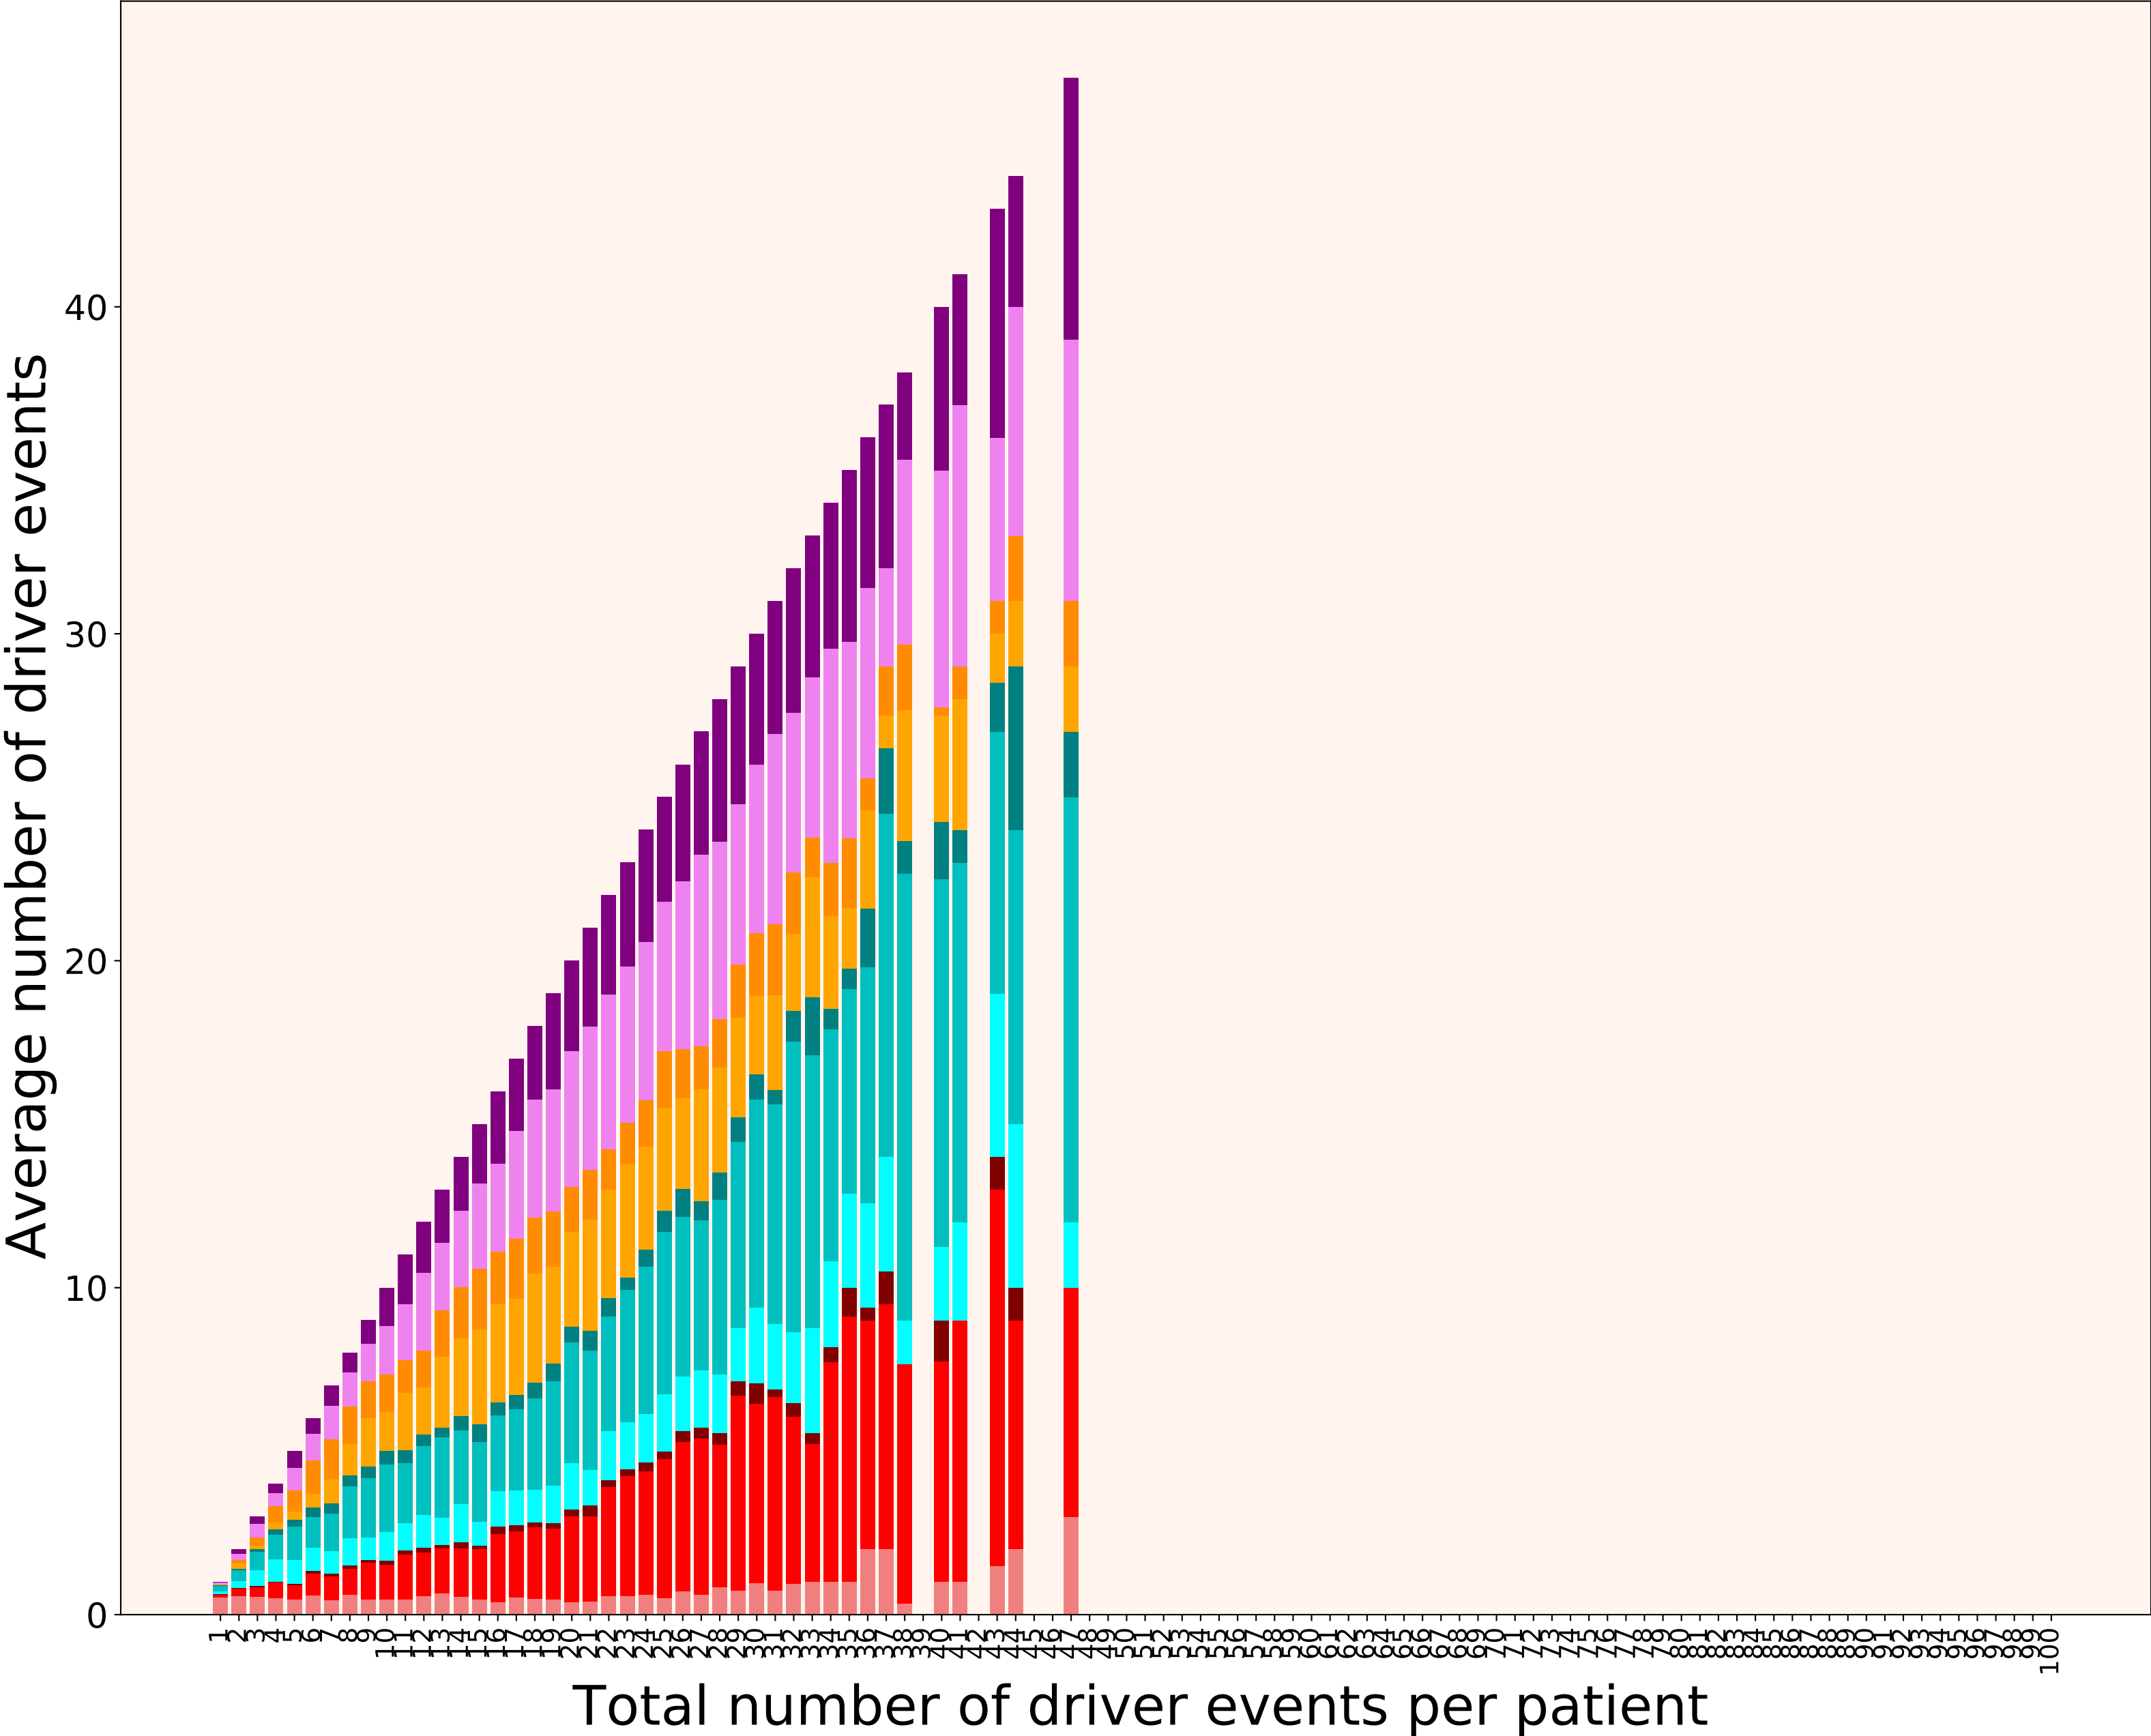

Supplement: Supplemental_Data_S1.zip [file Supplemental_Data_S1.zip]

Driver event distribution by cancer type in males

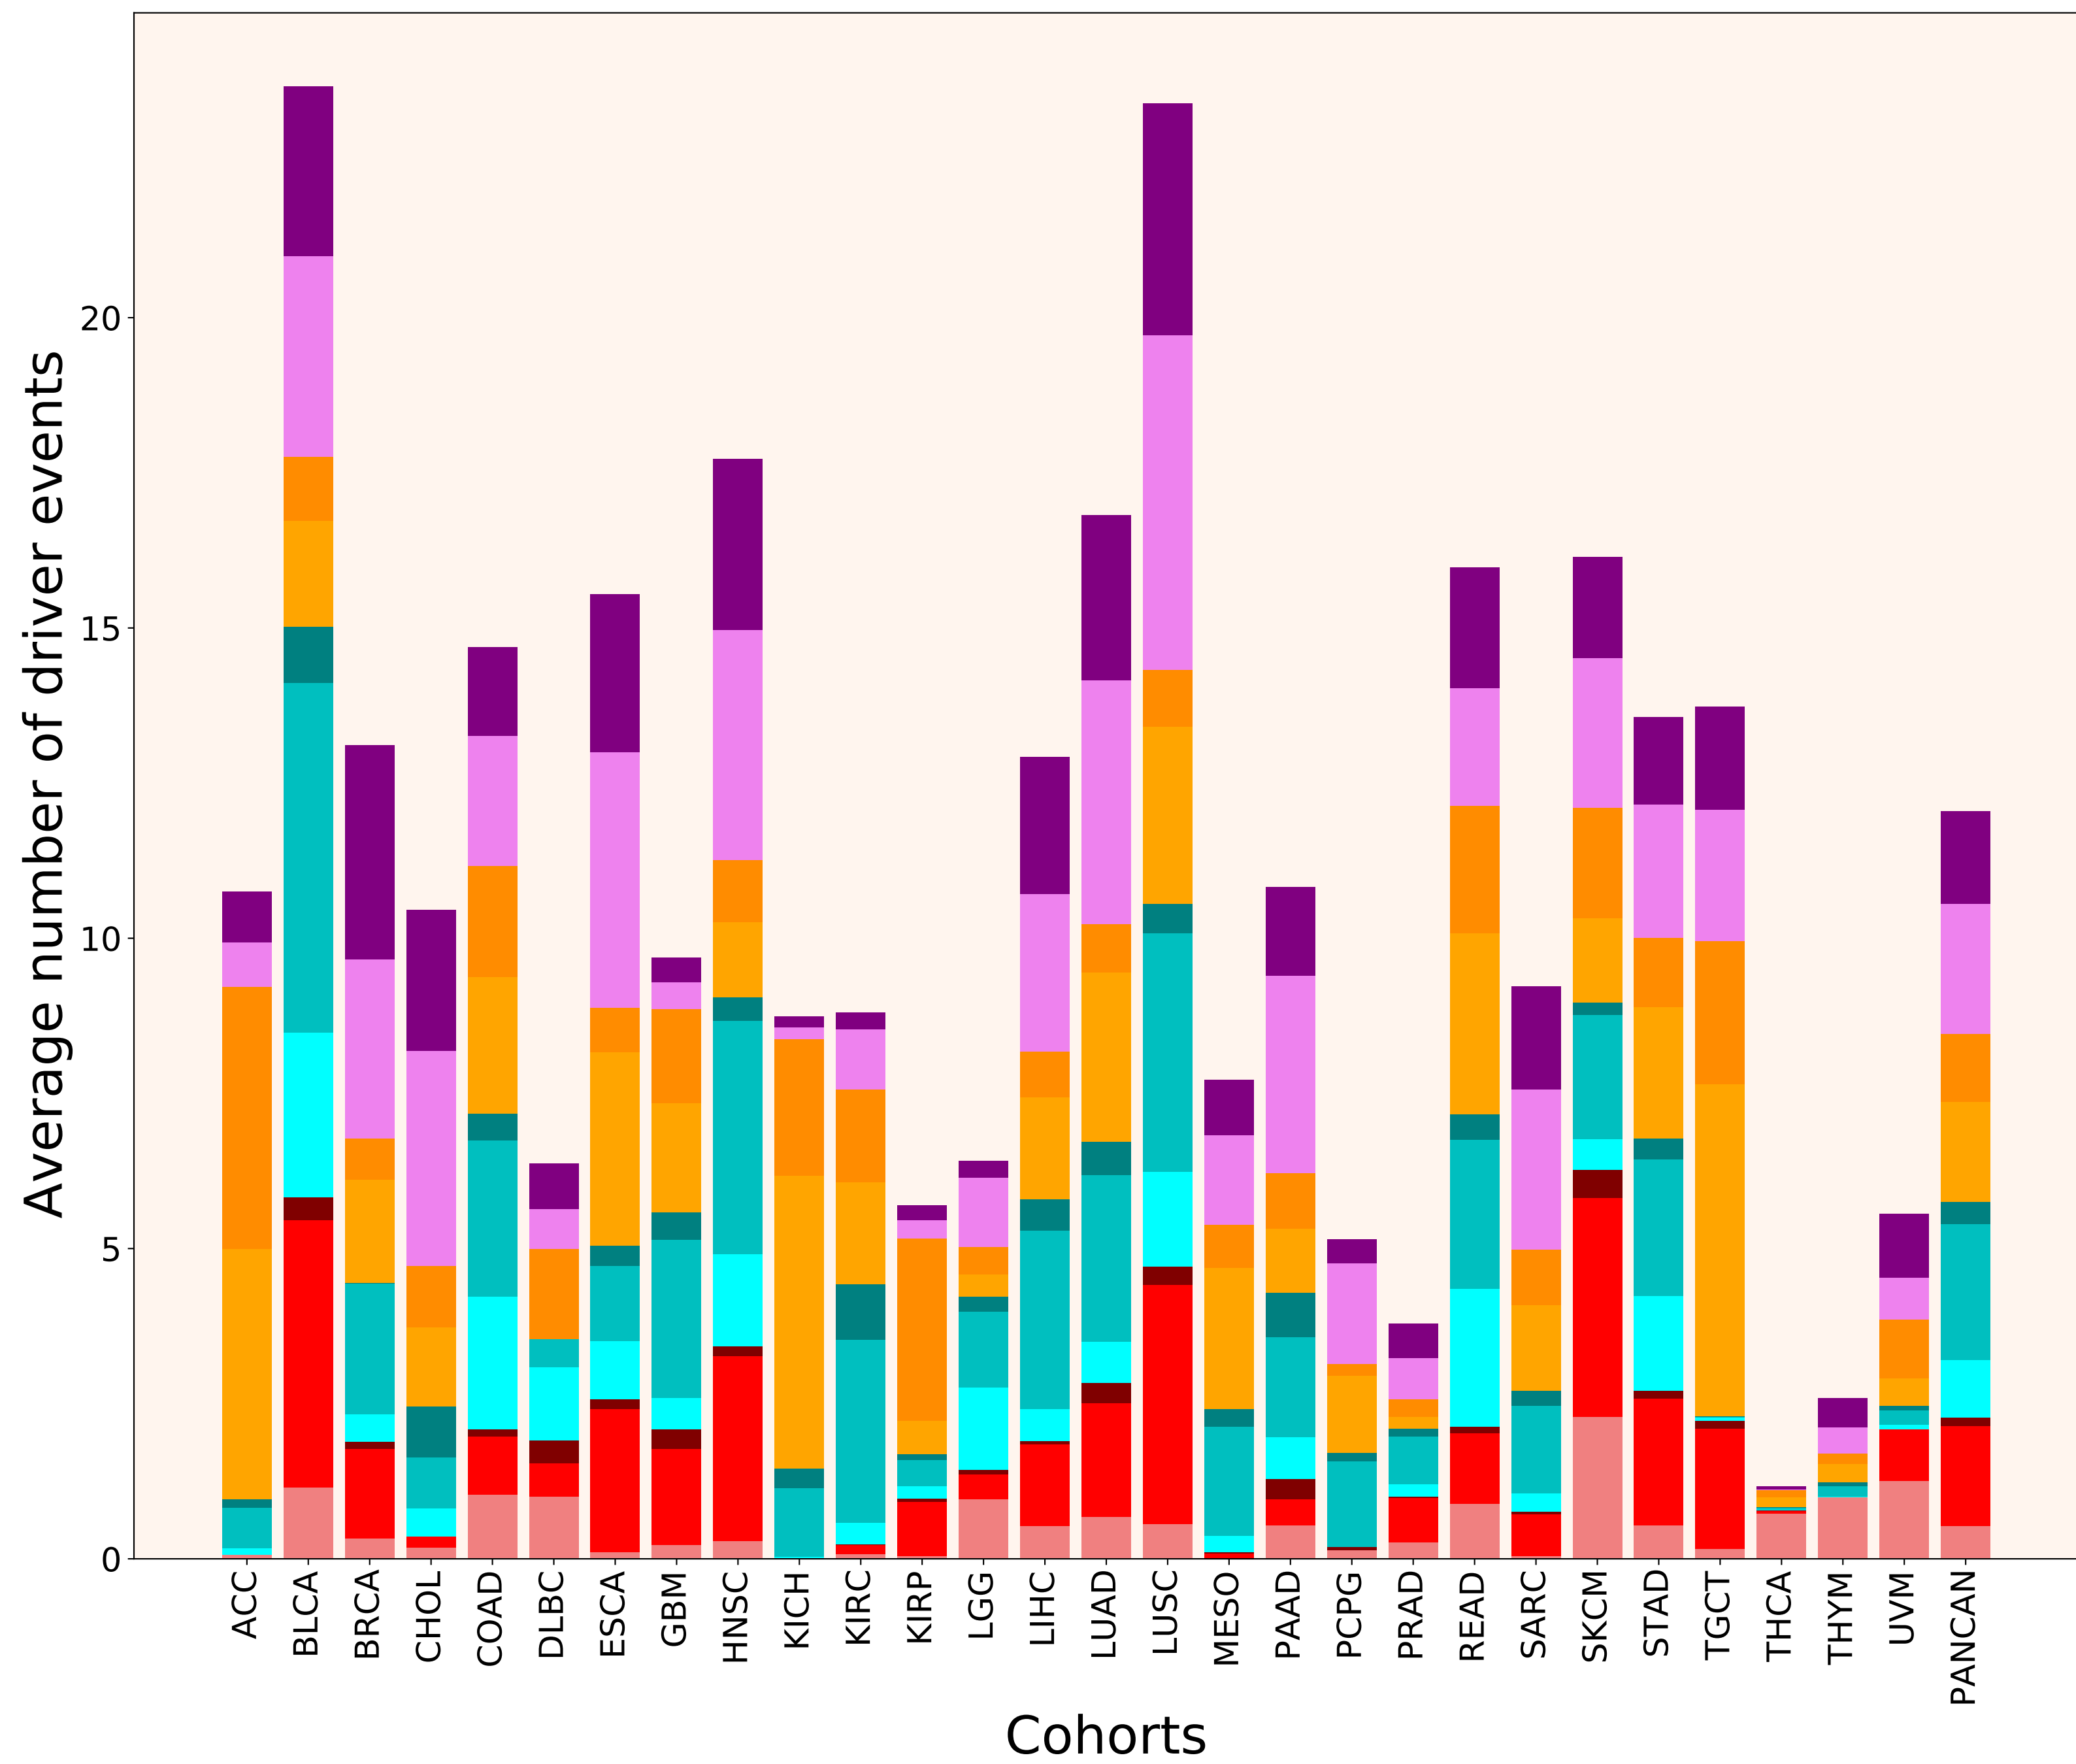

Supplement: Supplemental_Data_S1.zip [file Supplemental_Data_S1.zip]
