# Supplementary figures and images for: Novel Driver Strength Index highlights important cancer genes in TCGA PanCanAtlas patients (part 4 of 4)
Source: PeerJ journal article supplement (doi:10.7717/peerj.13860), 2022-08-11

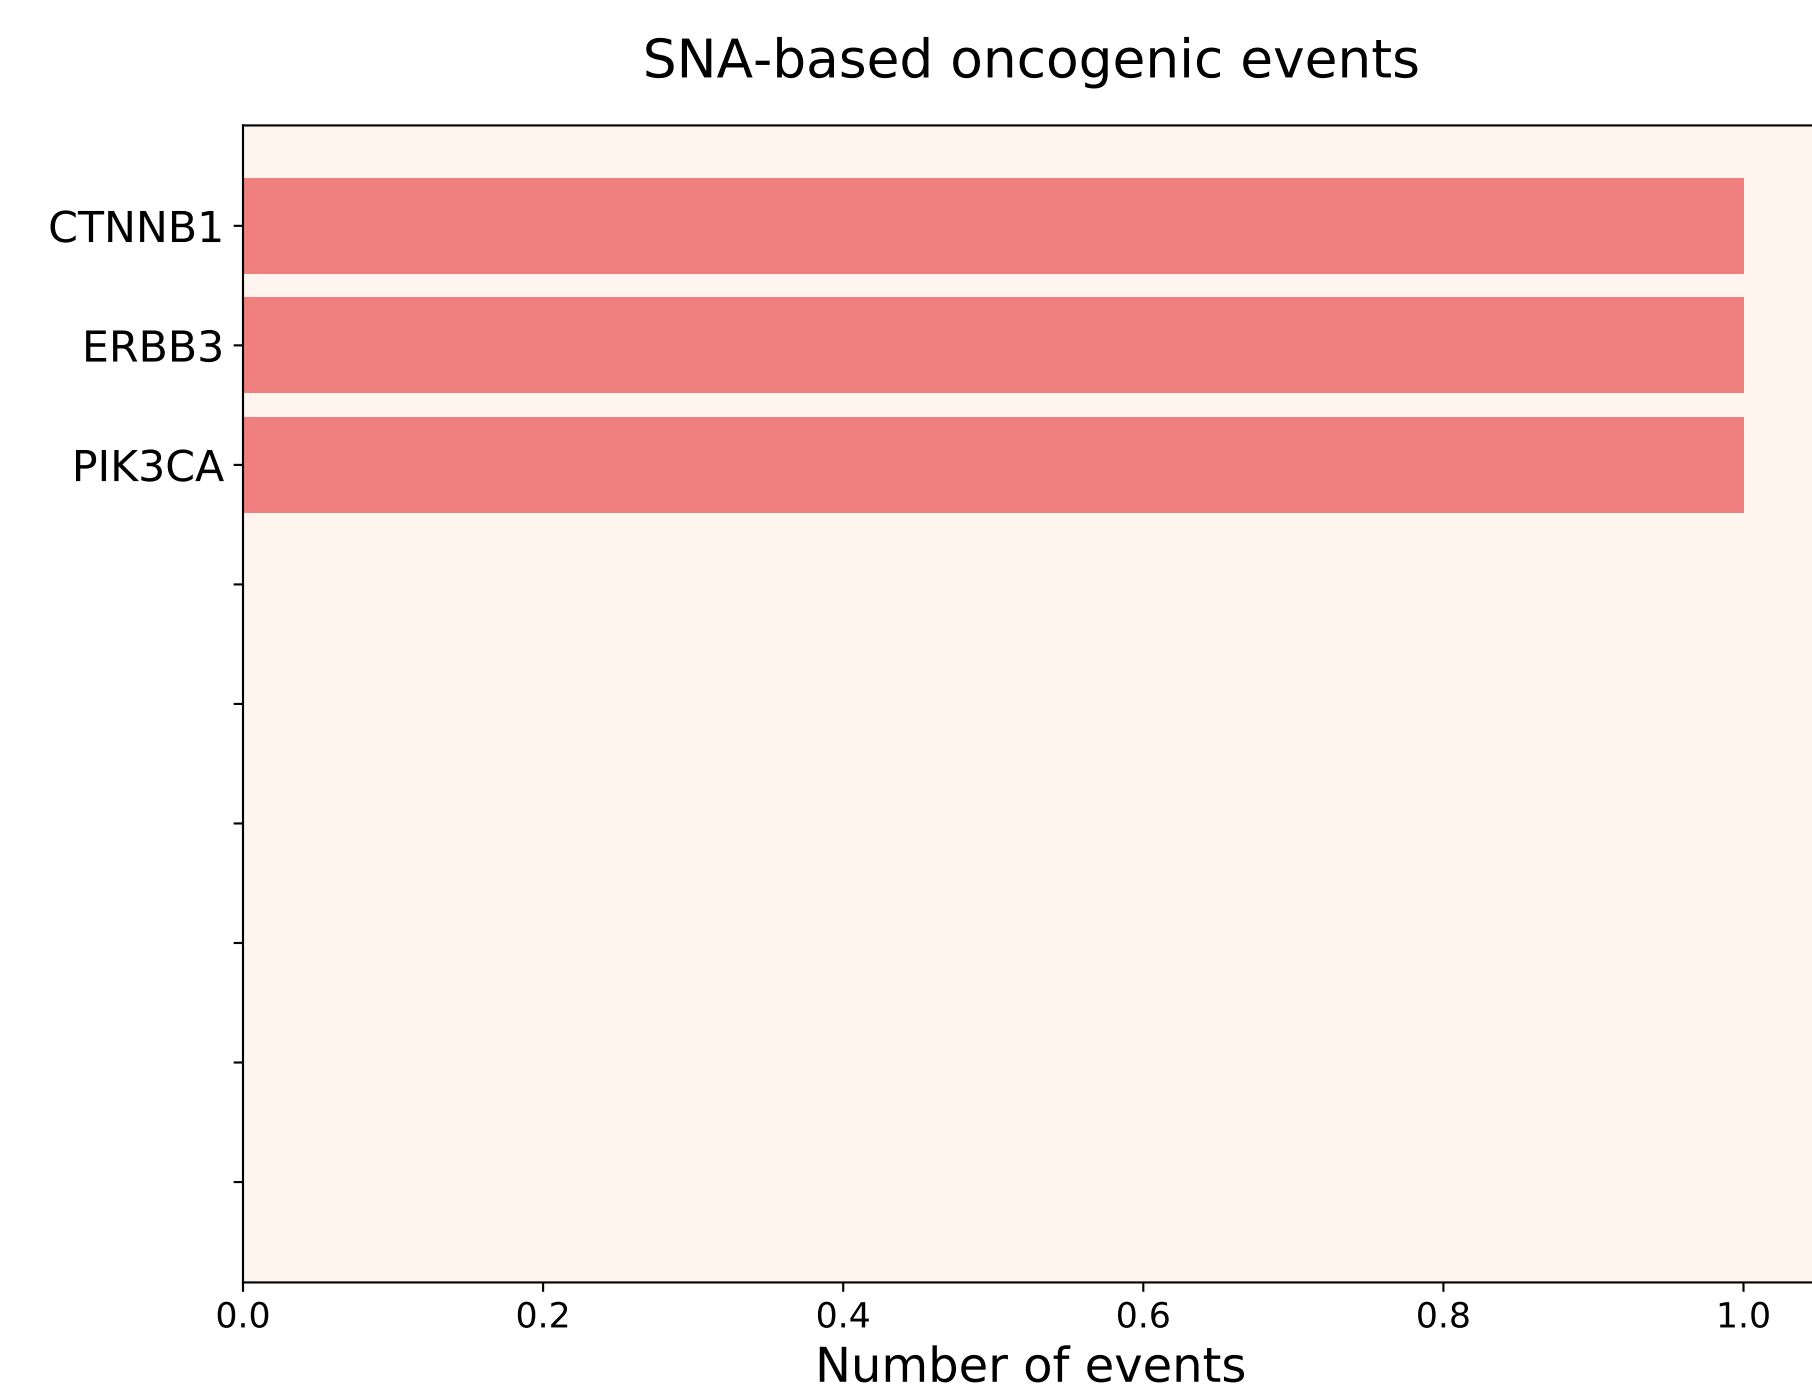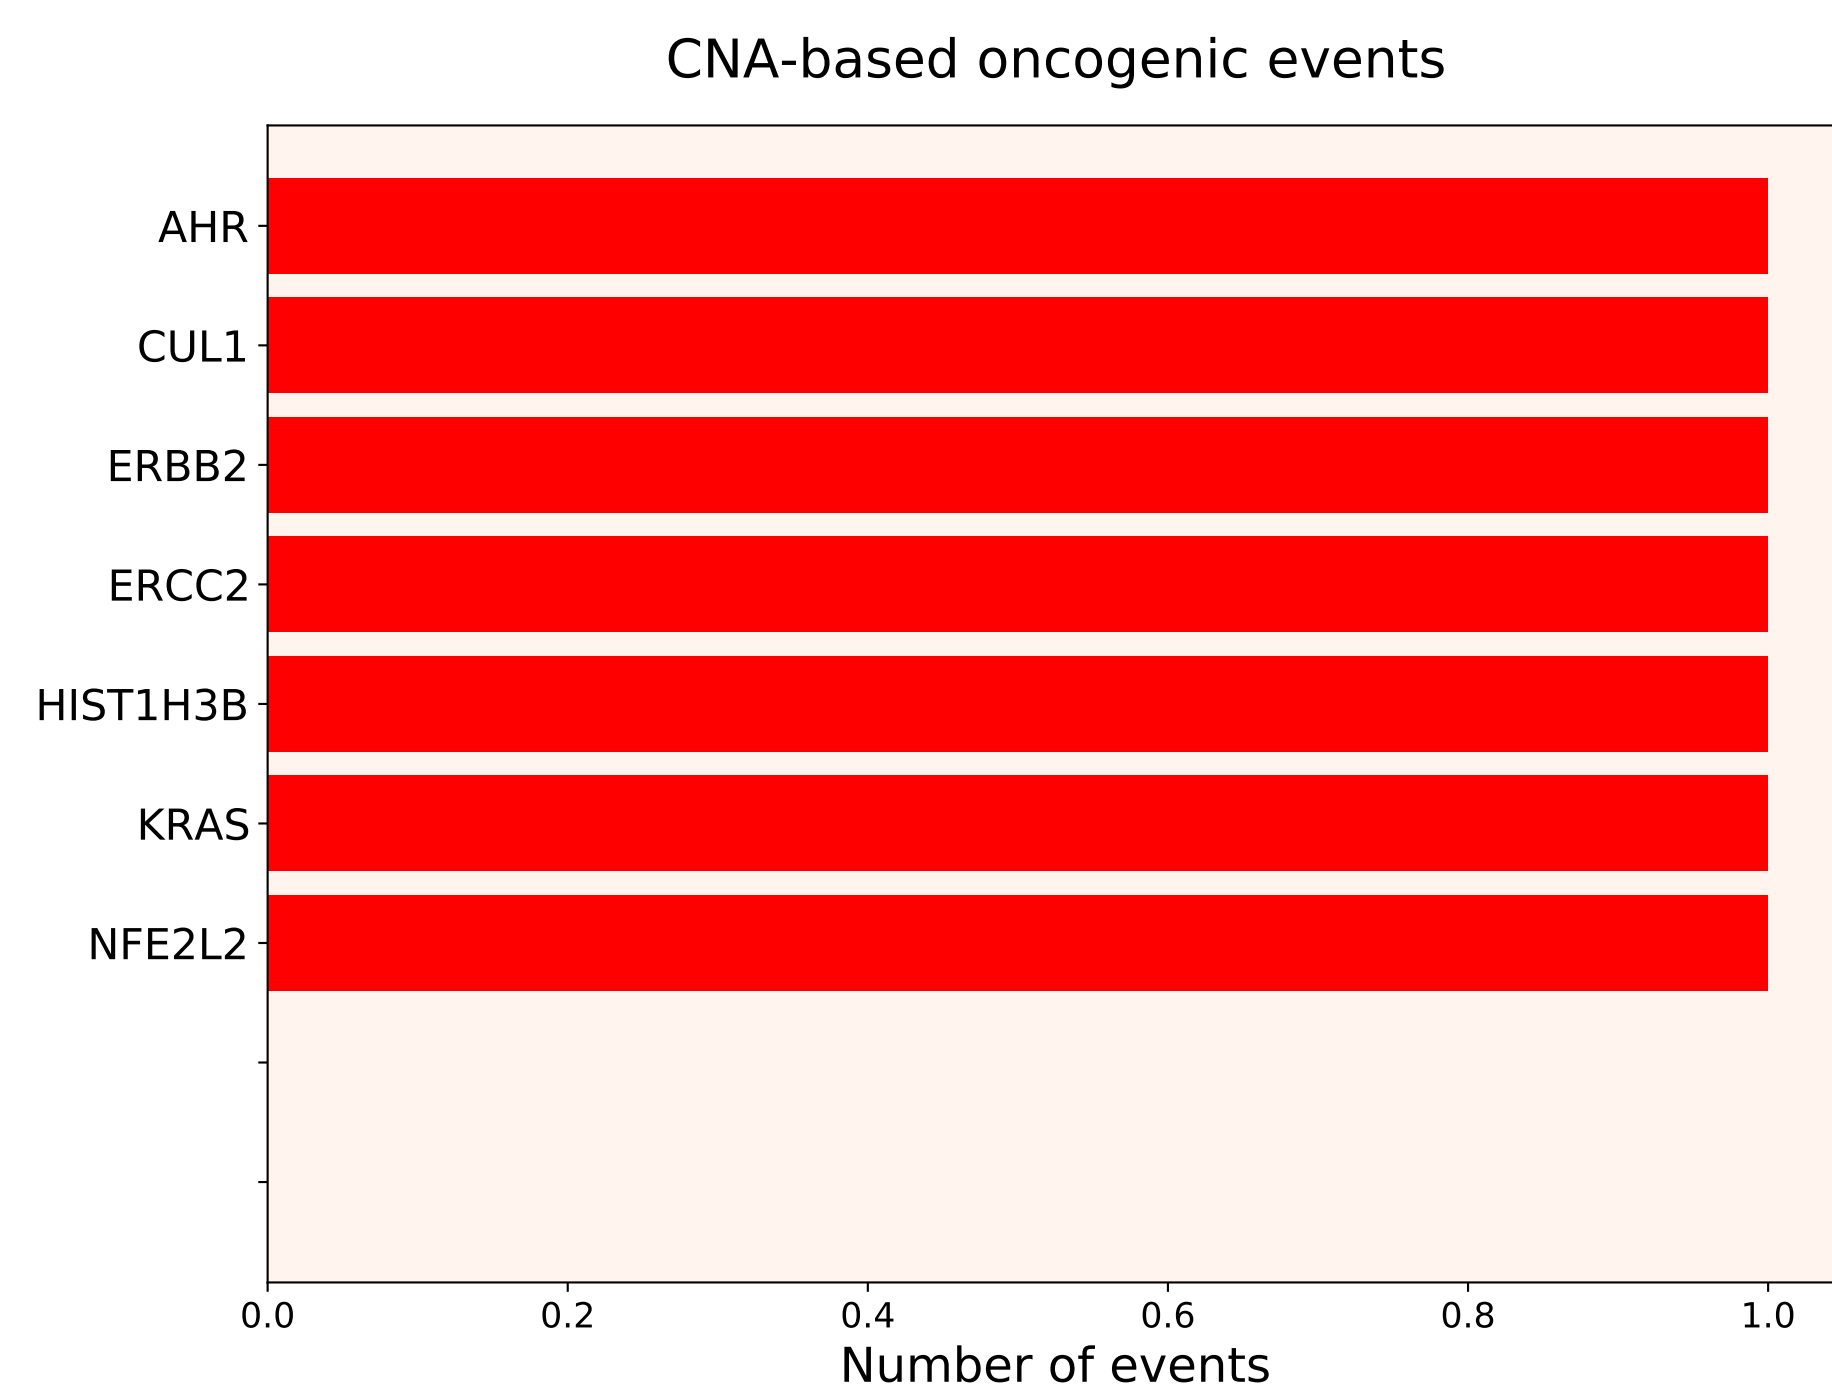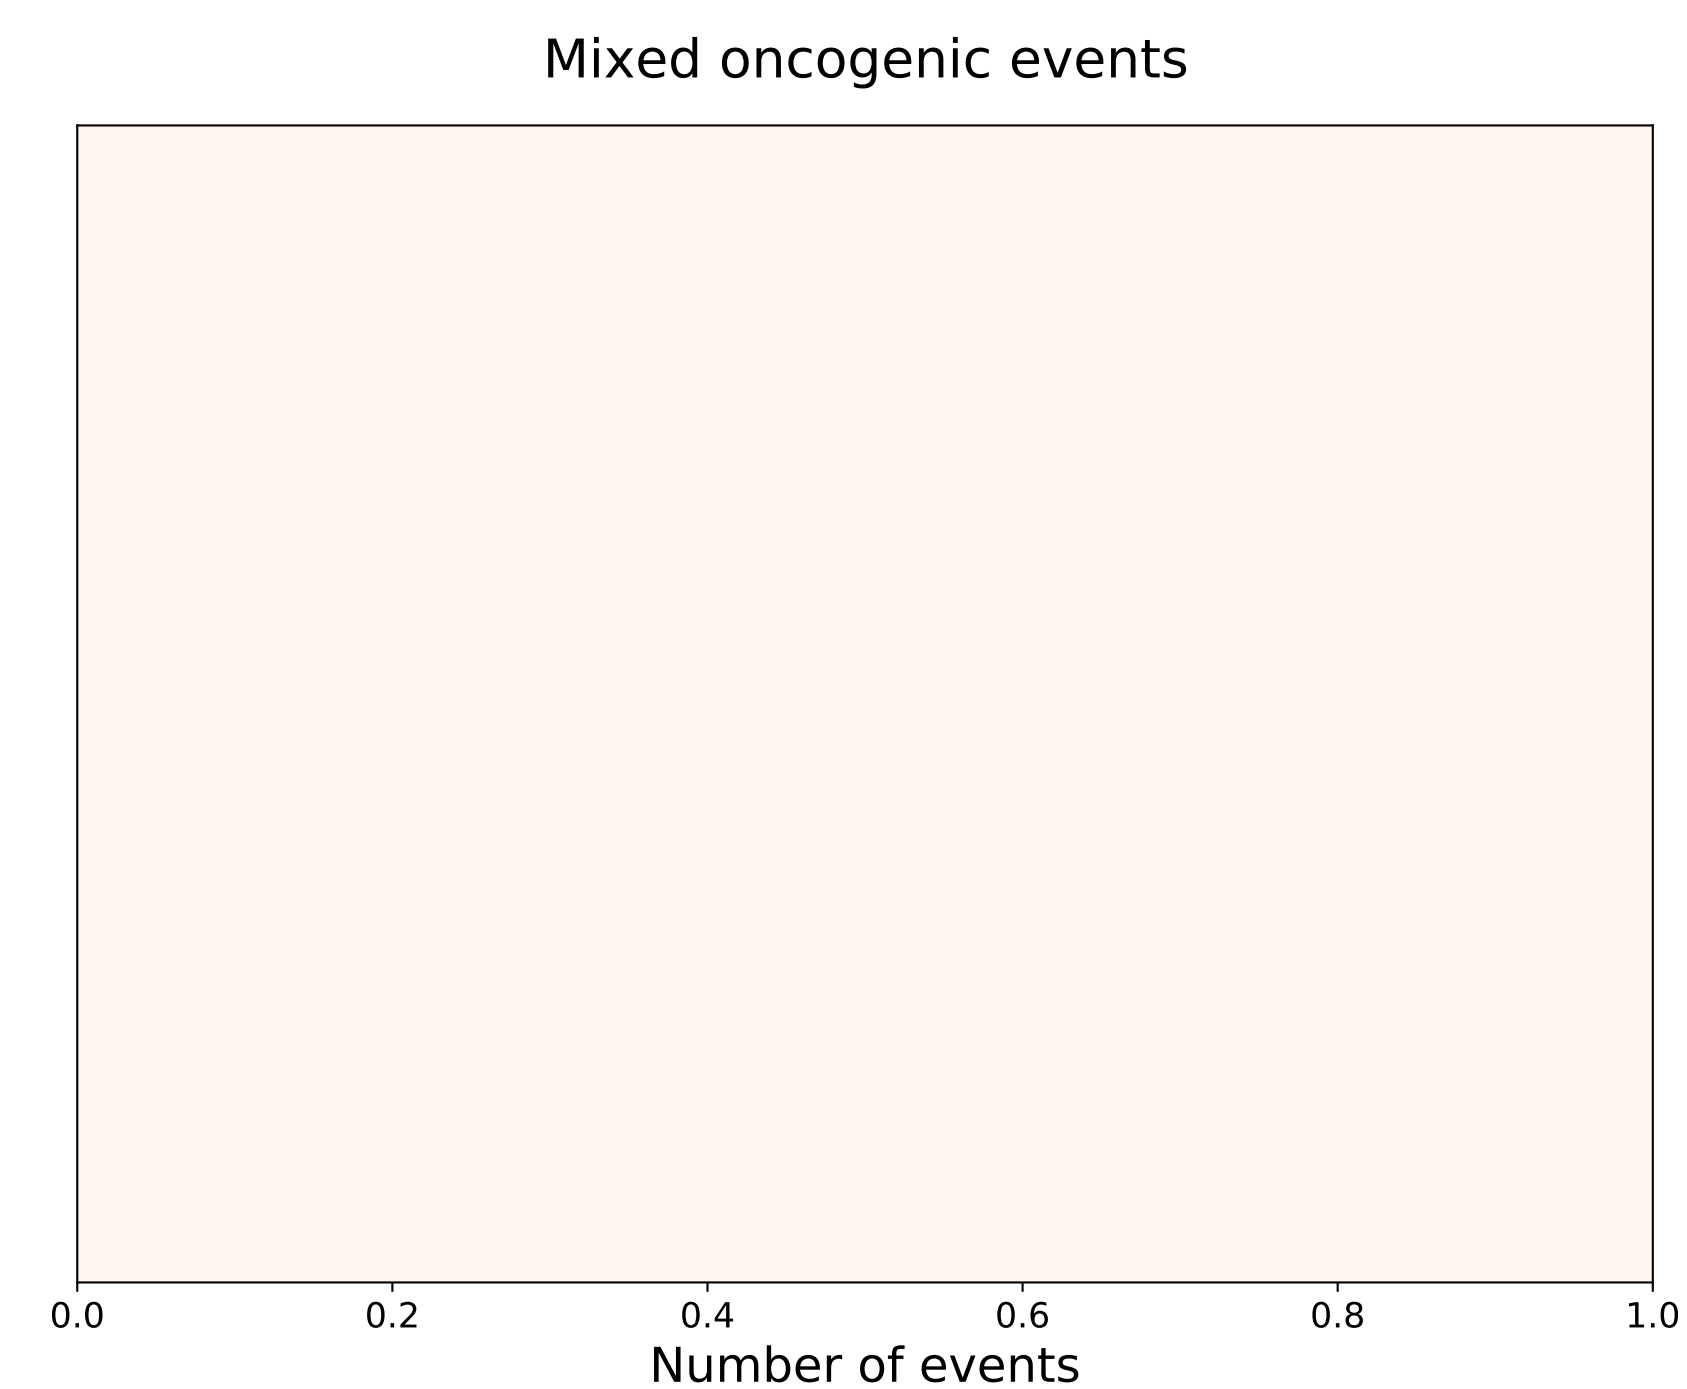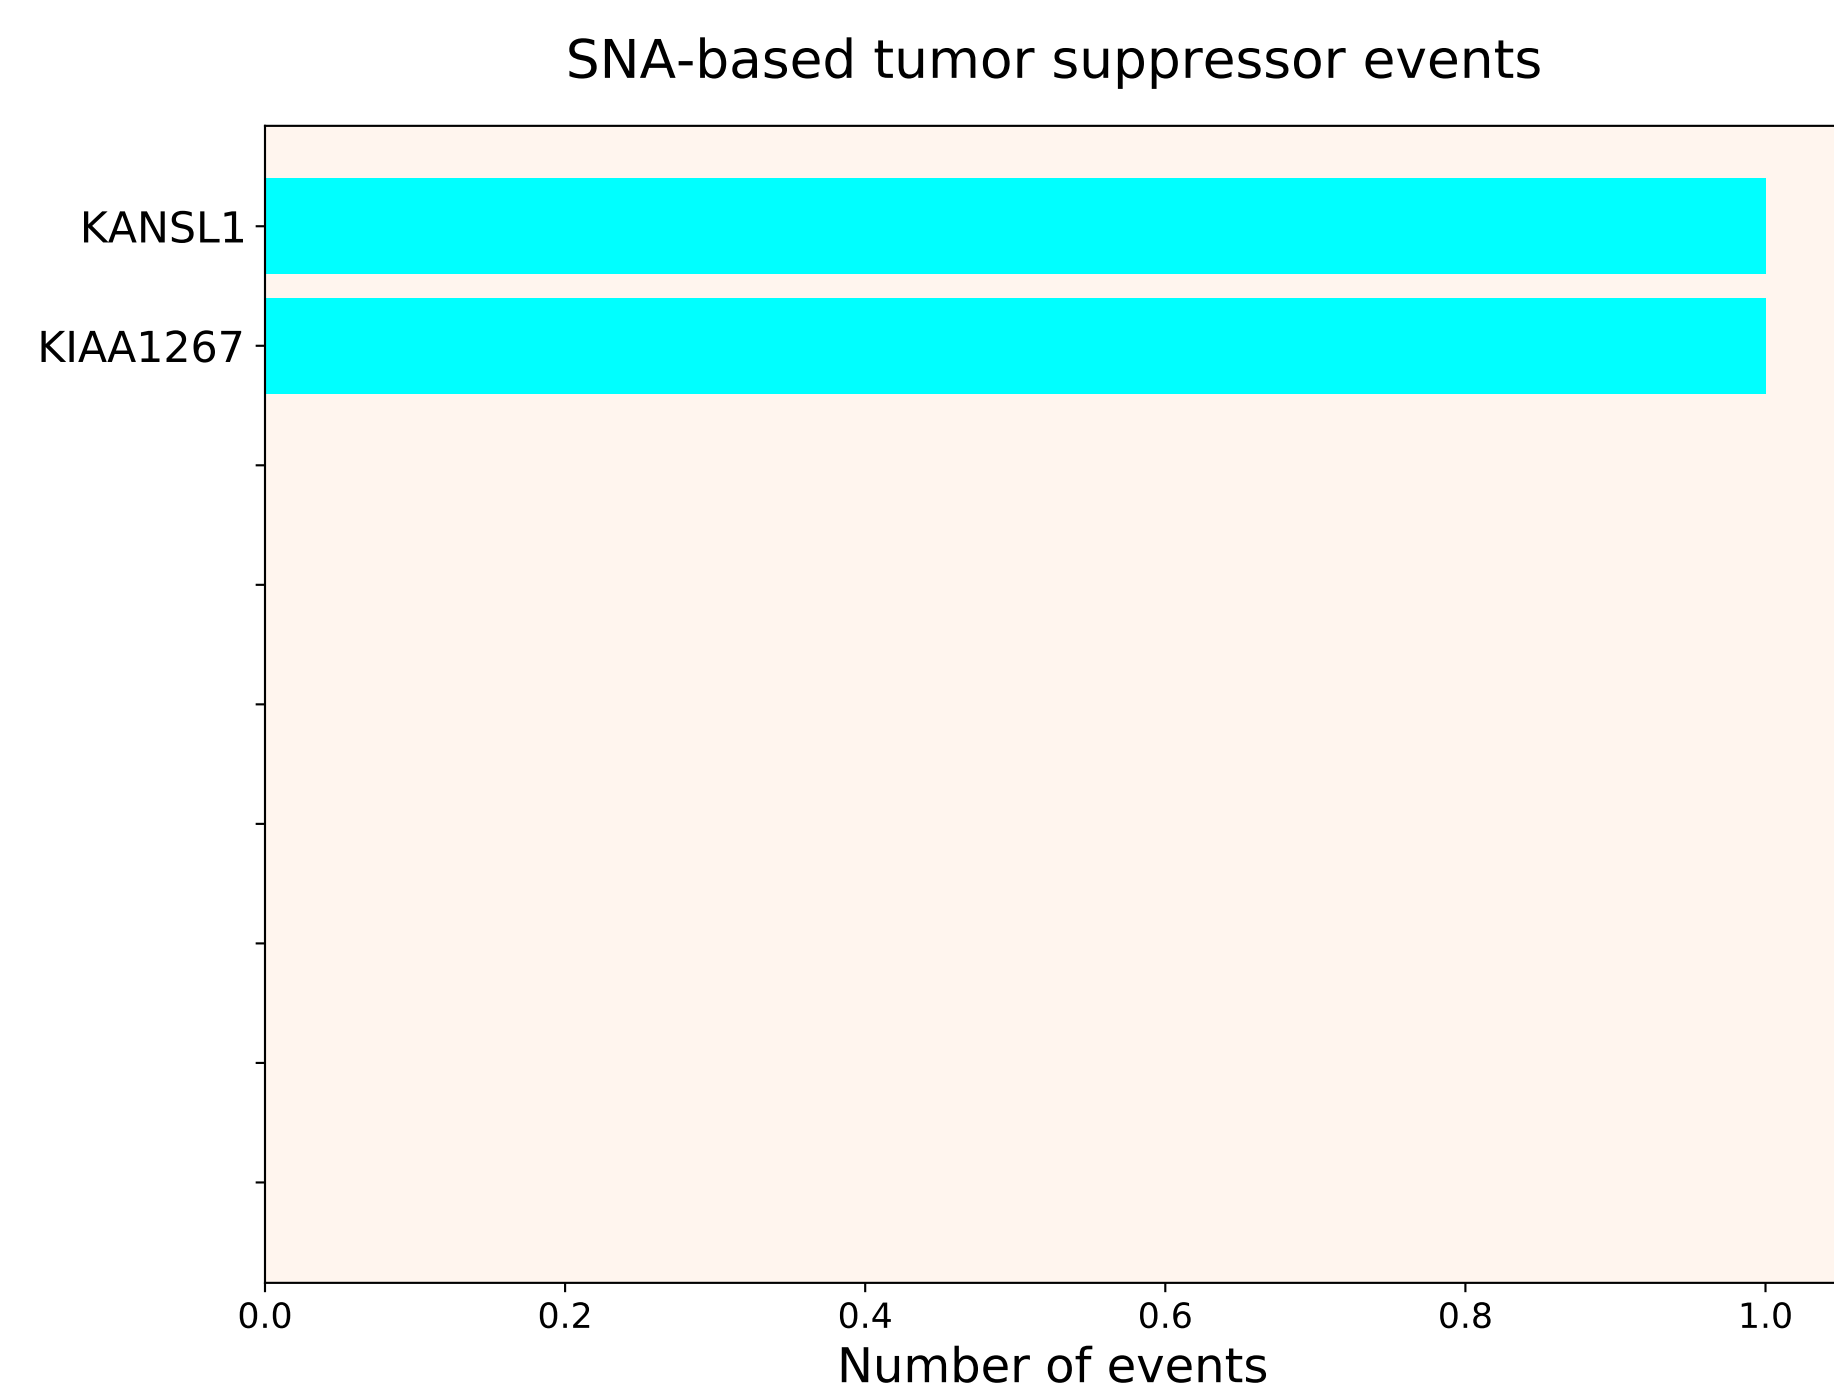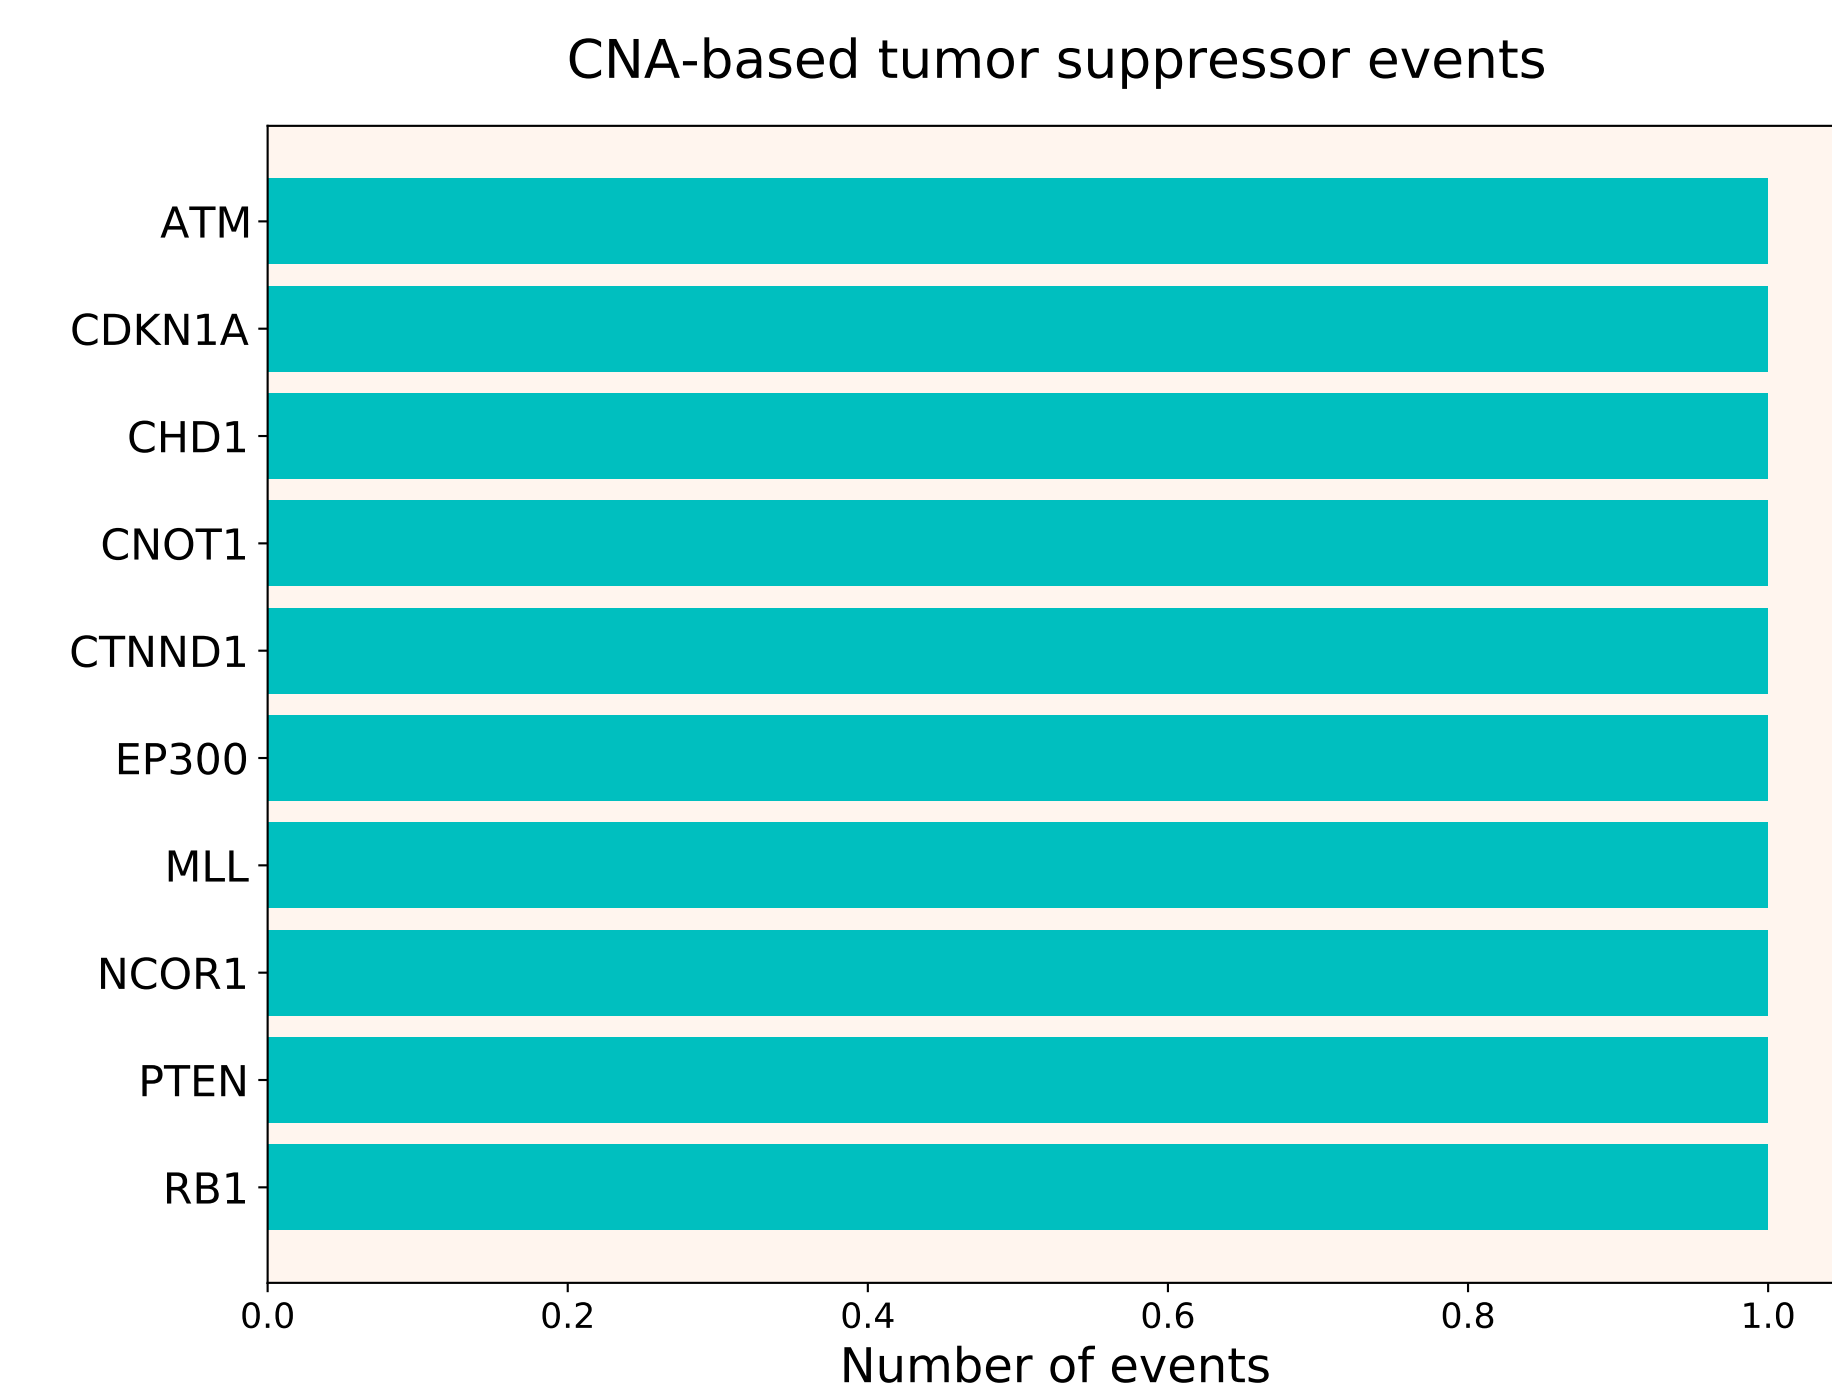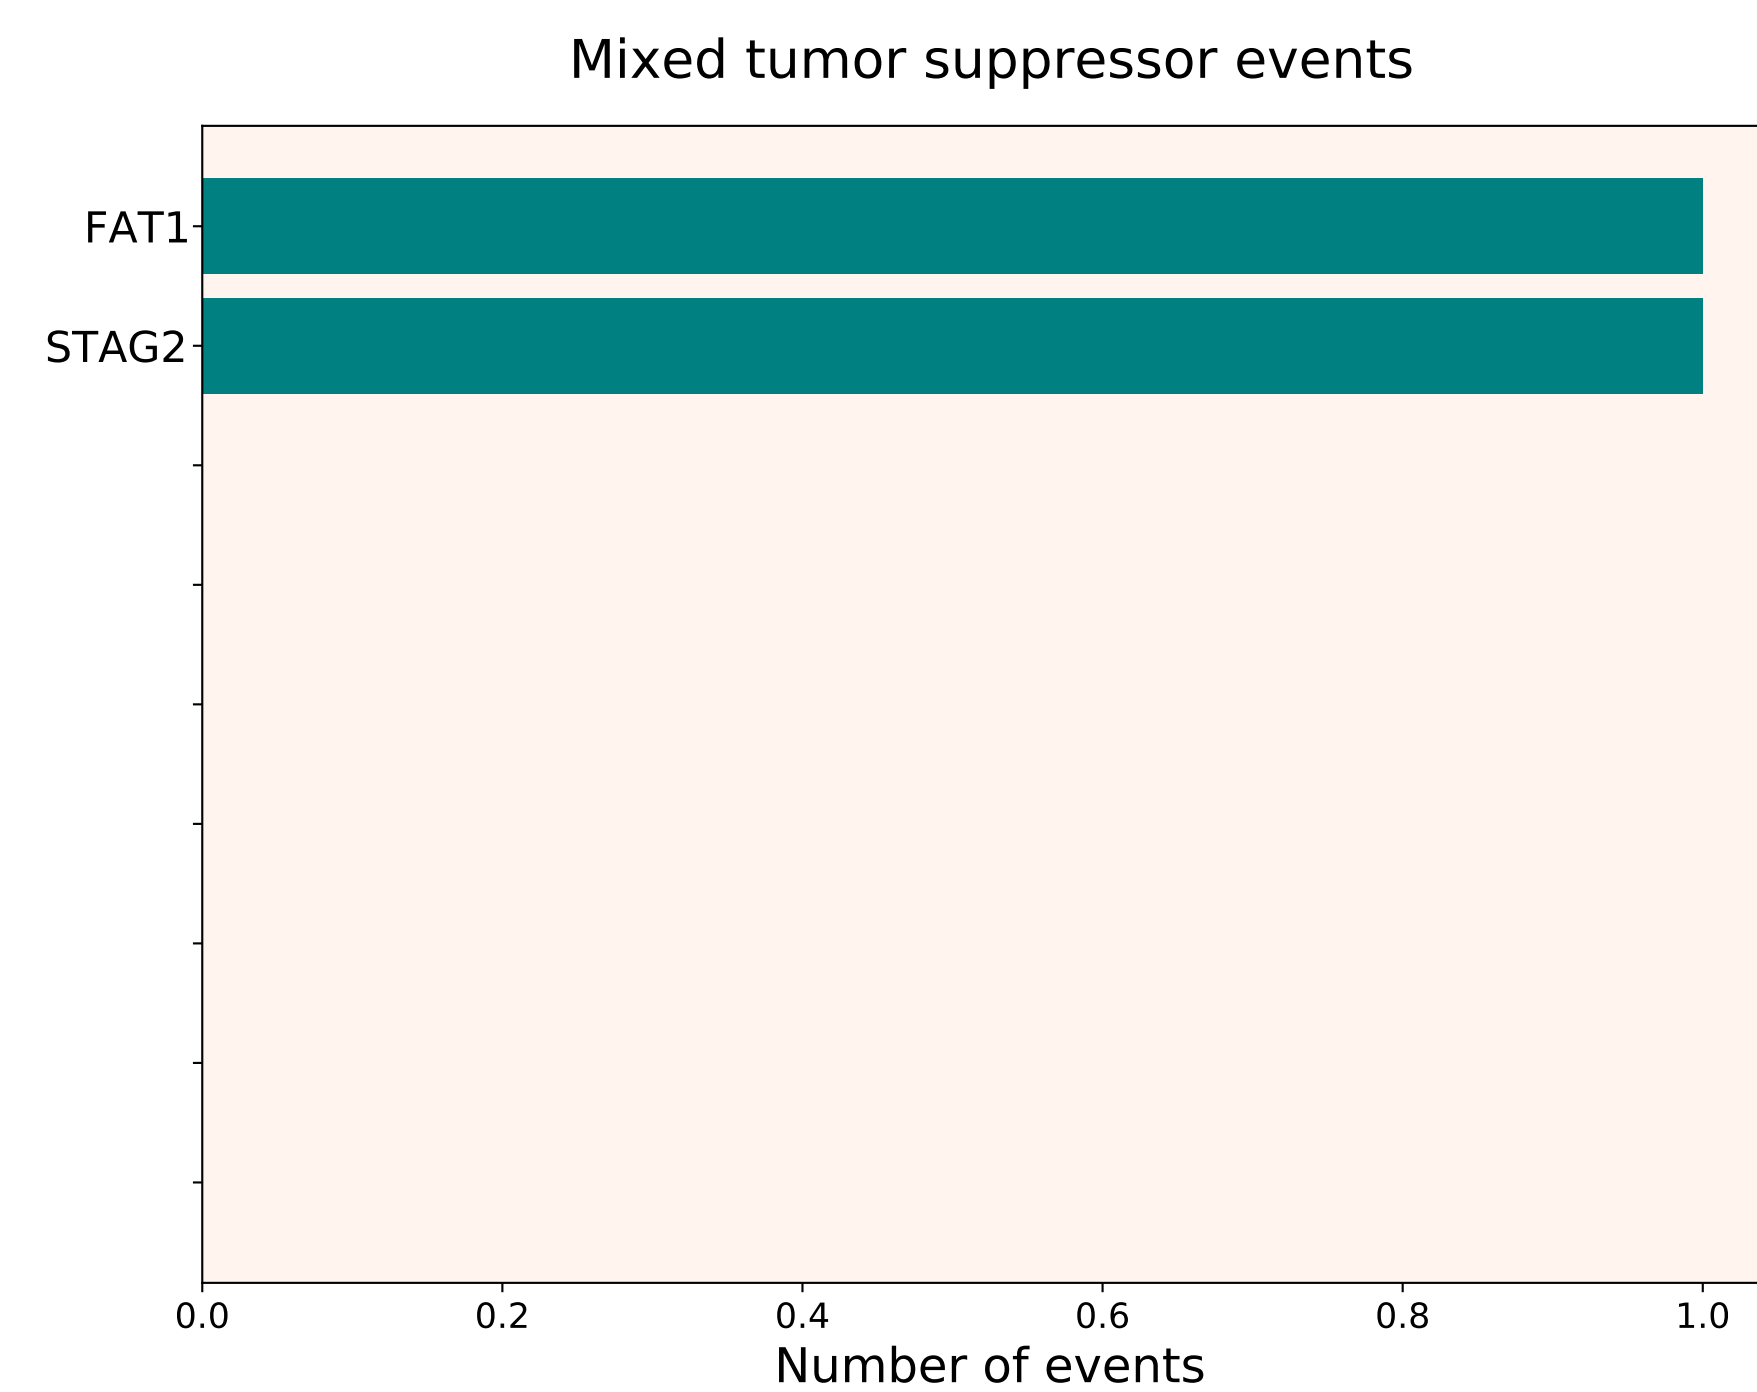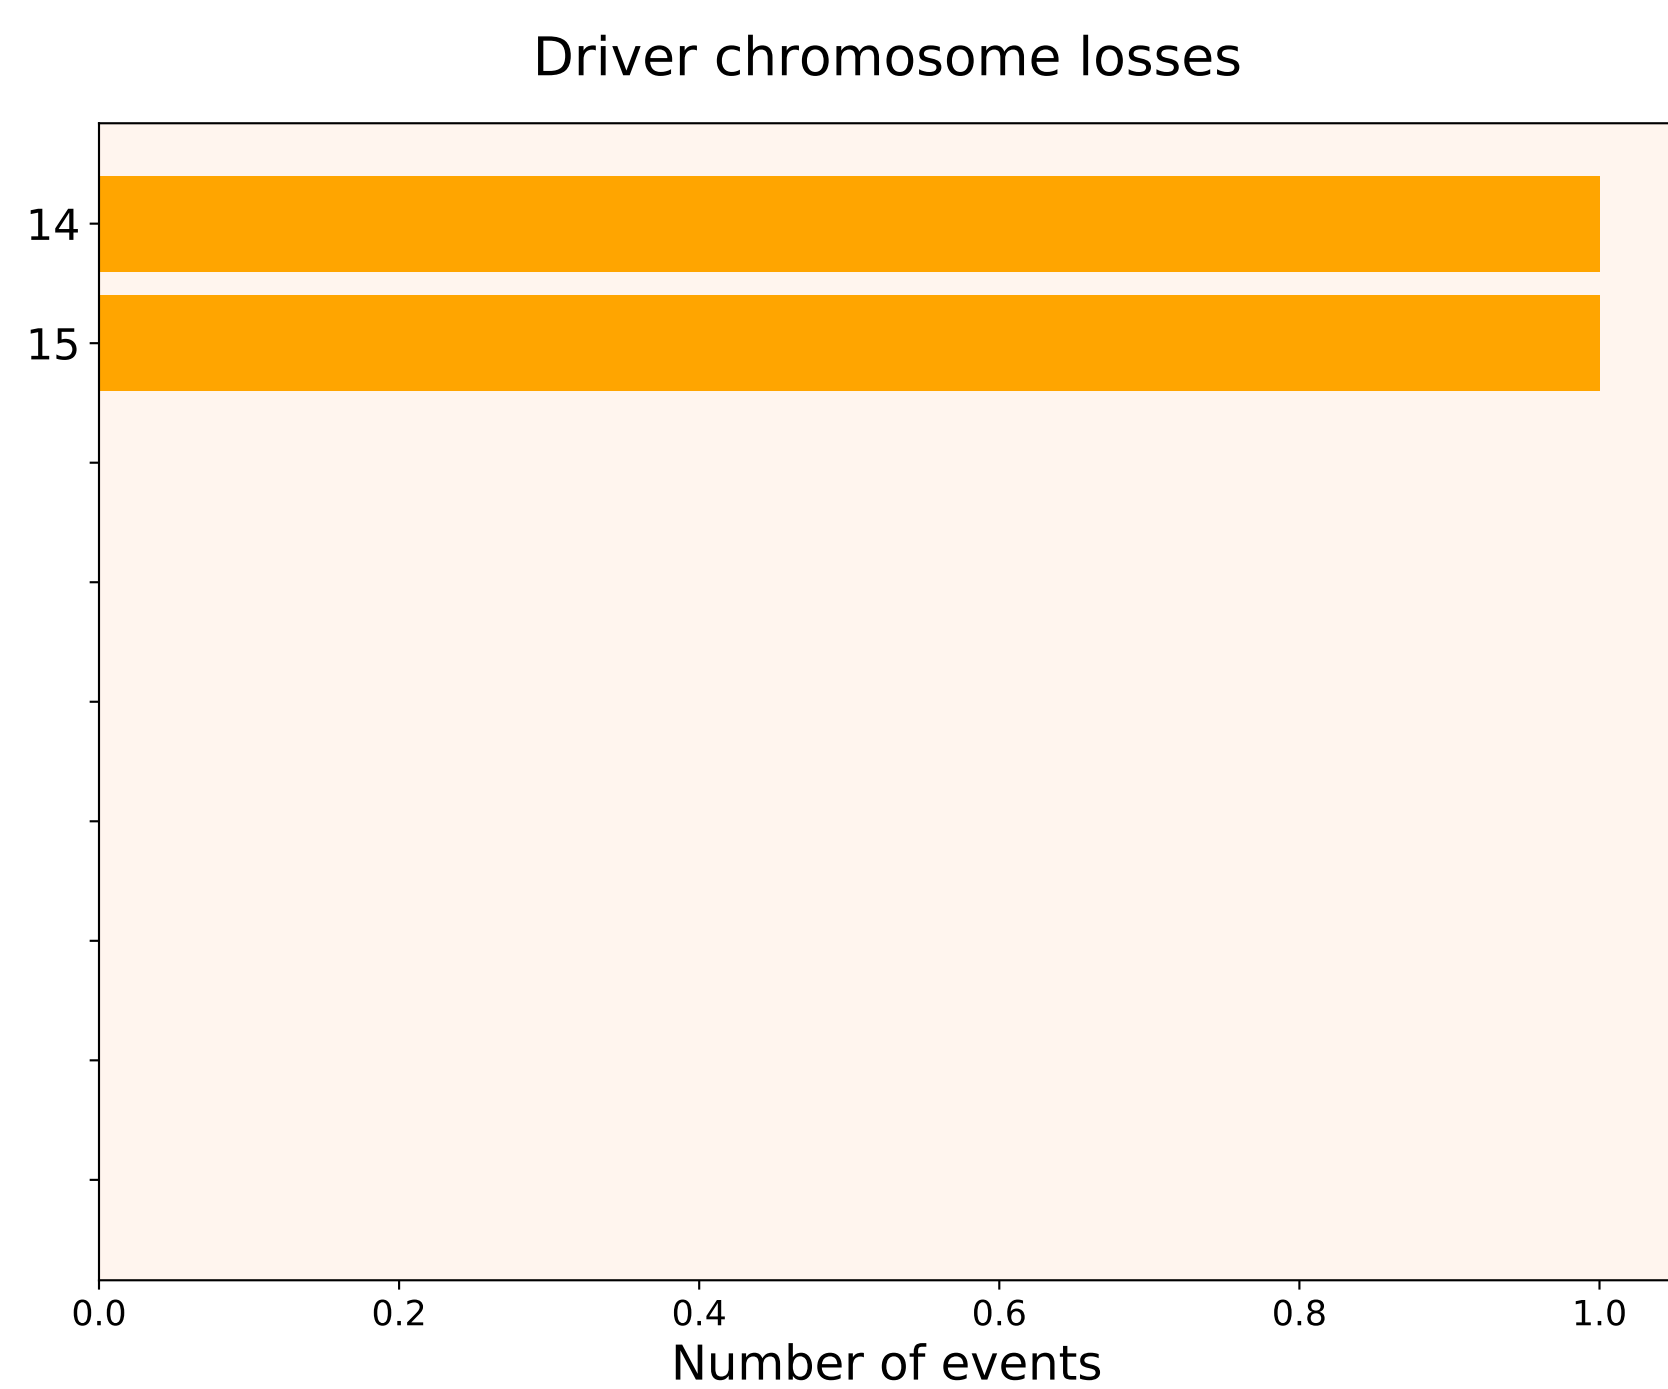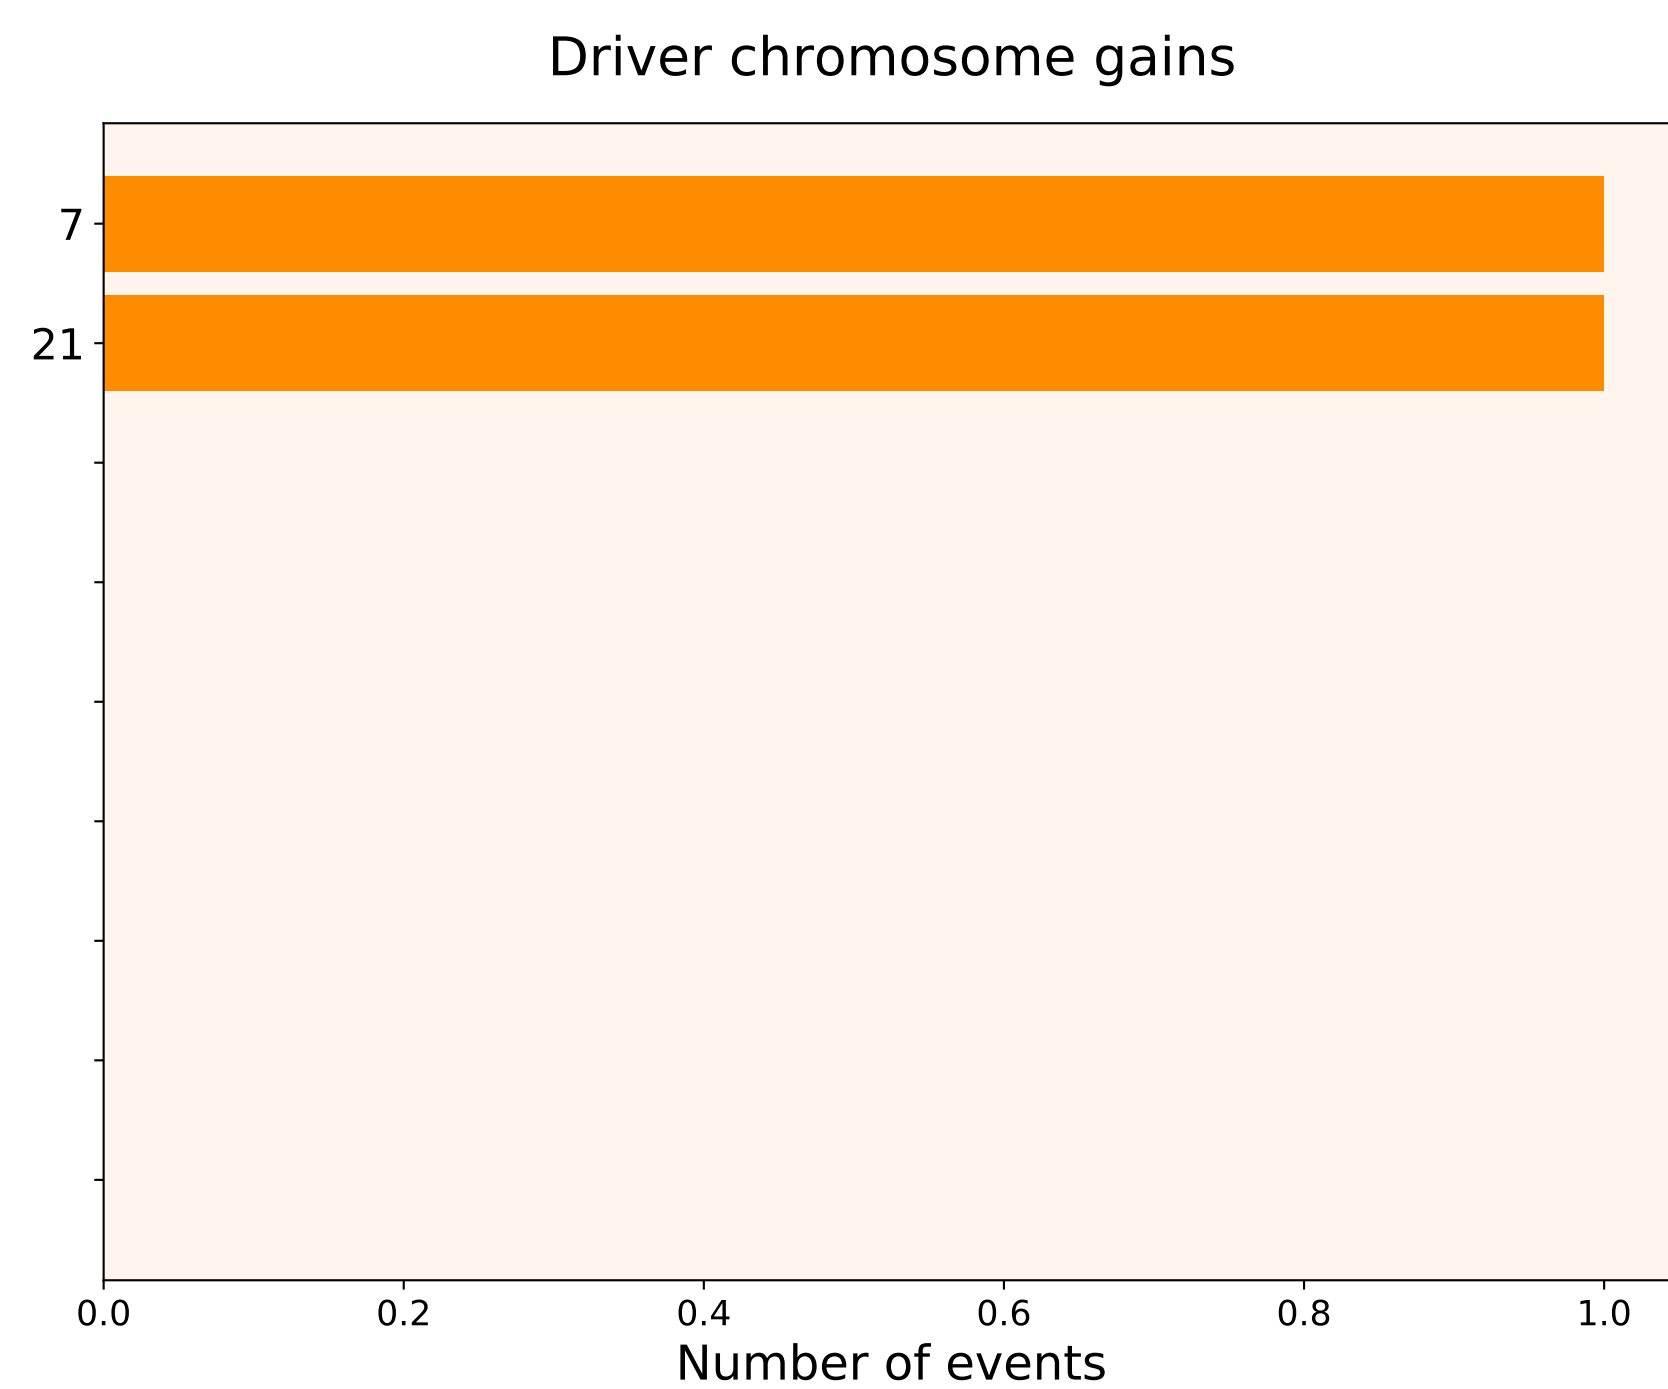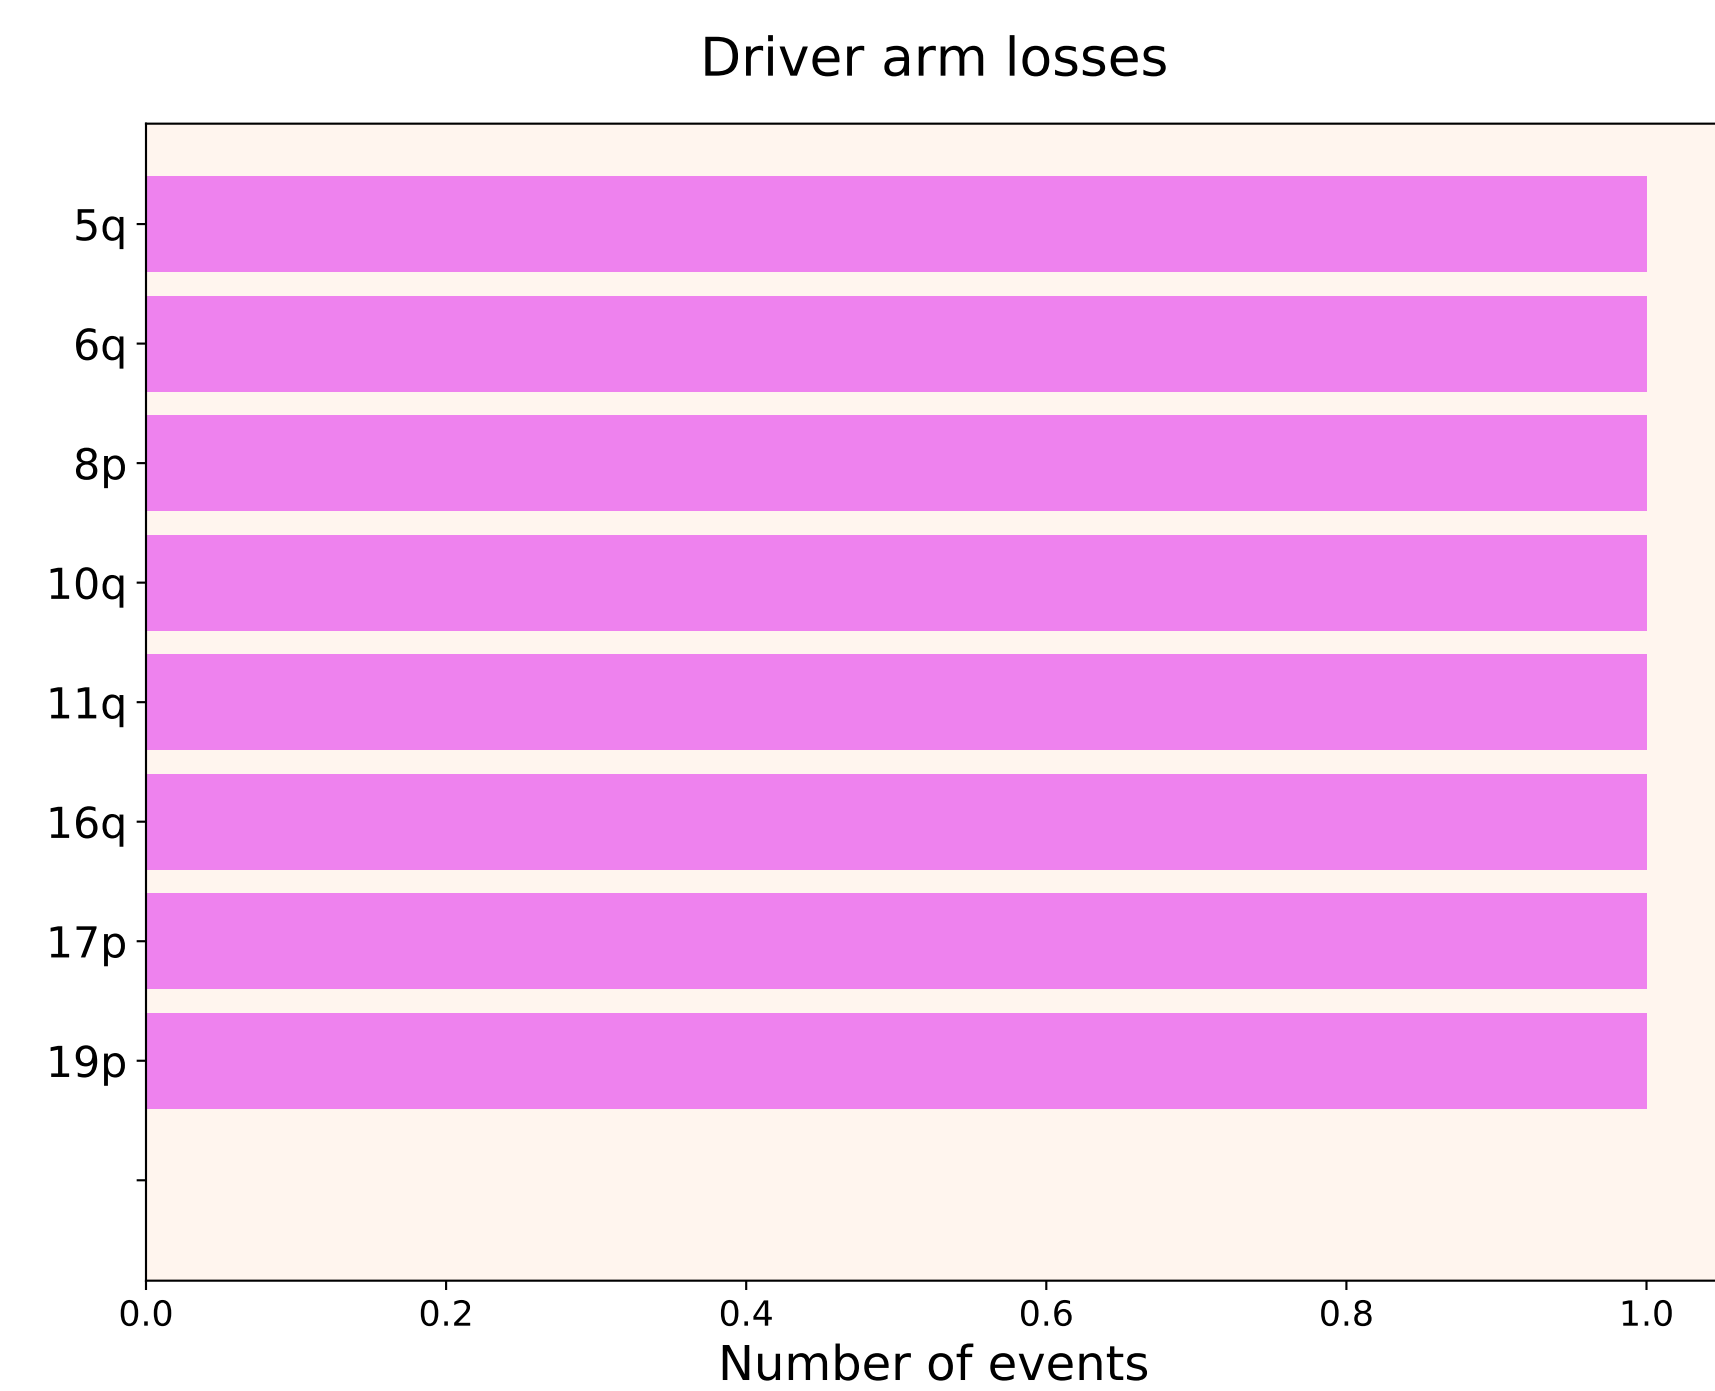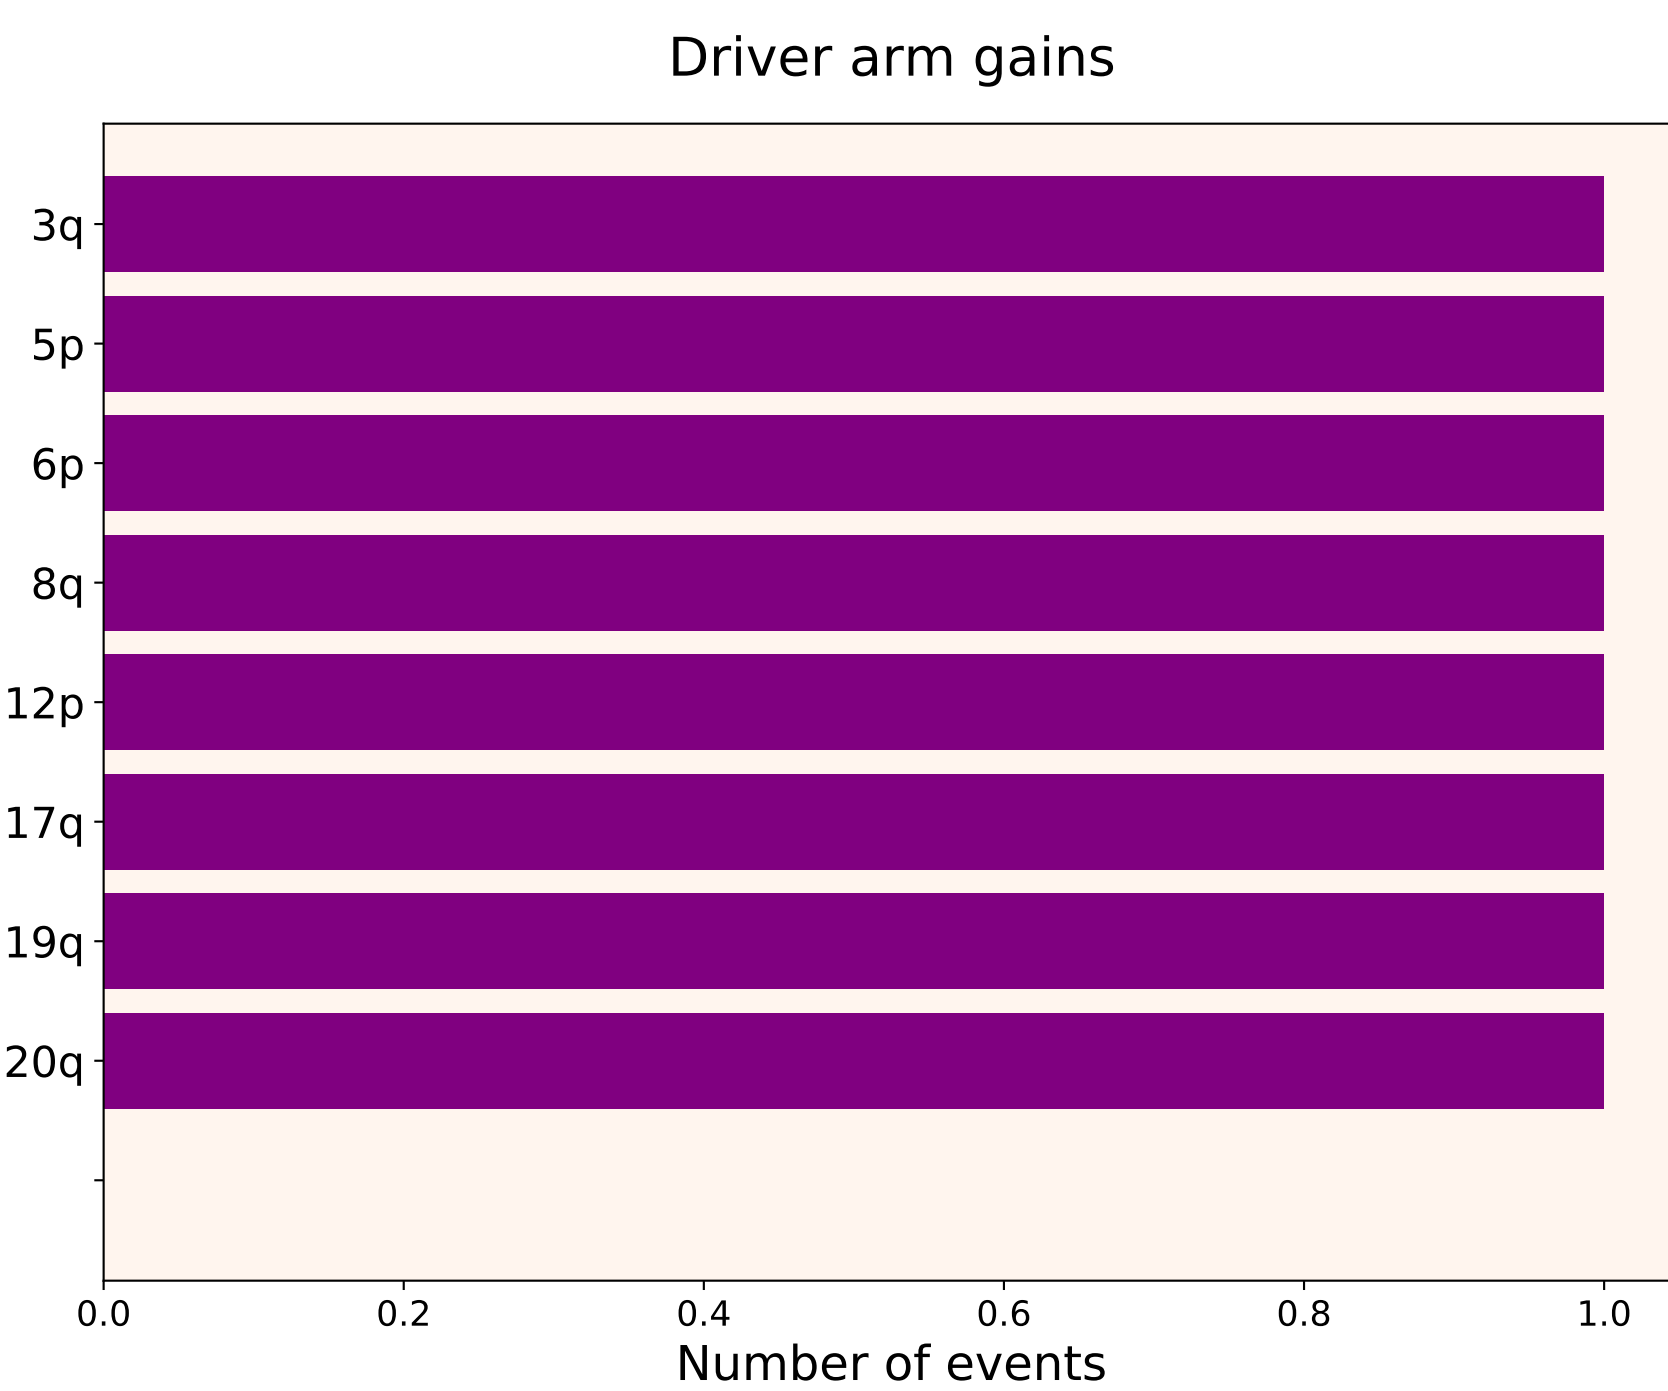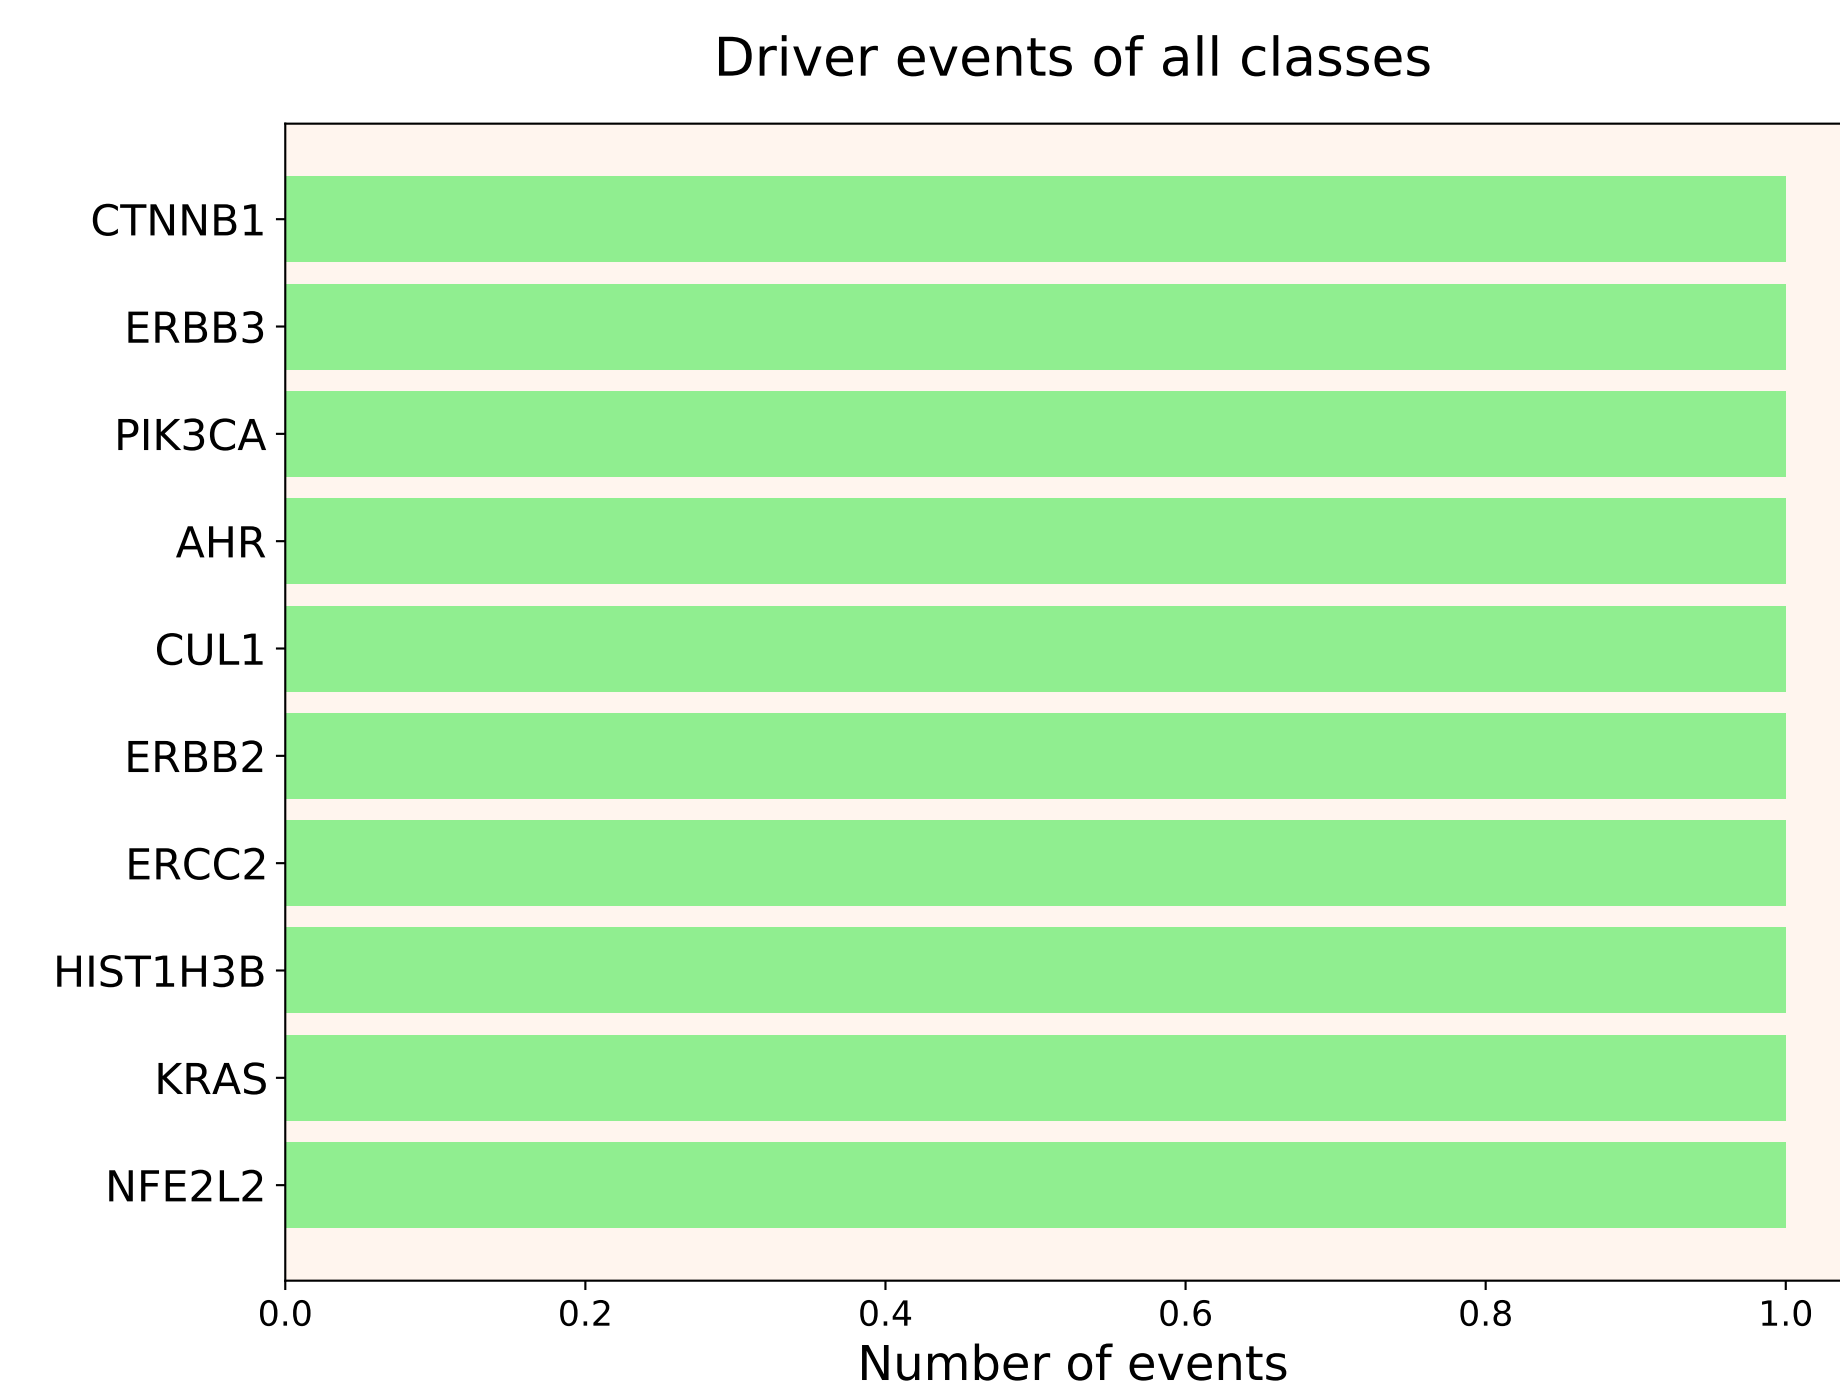

Supplement: Supplemental_Data_S1.zip [file Supplemental_Data_S1.zip]

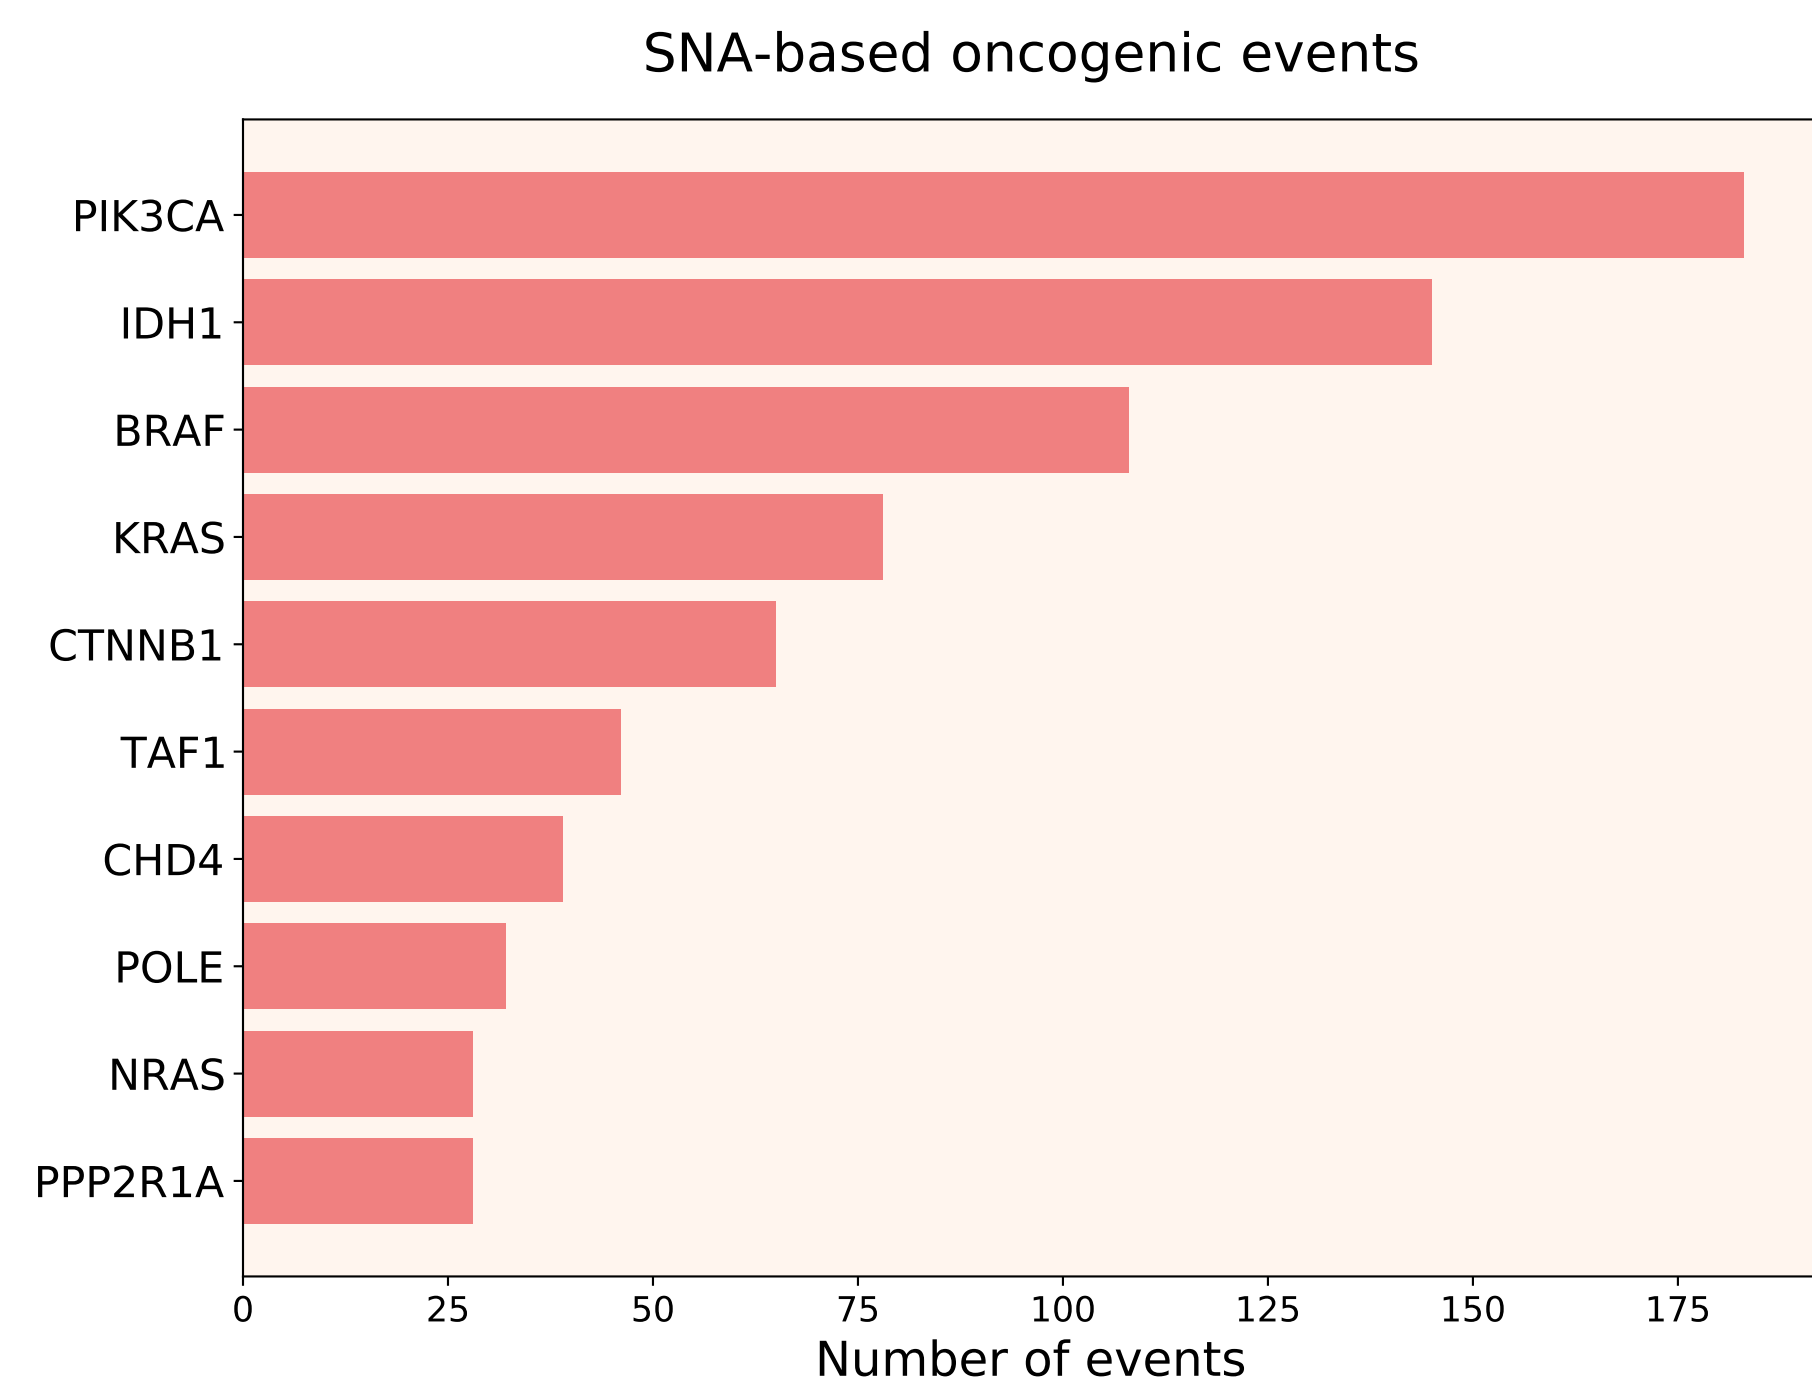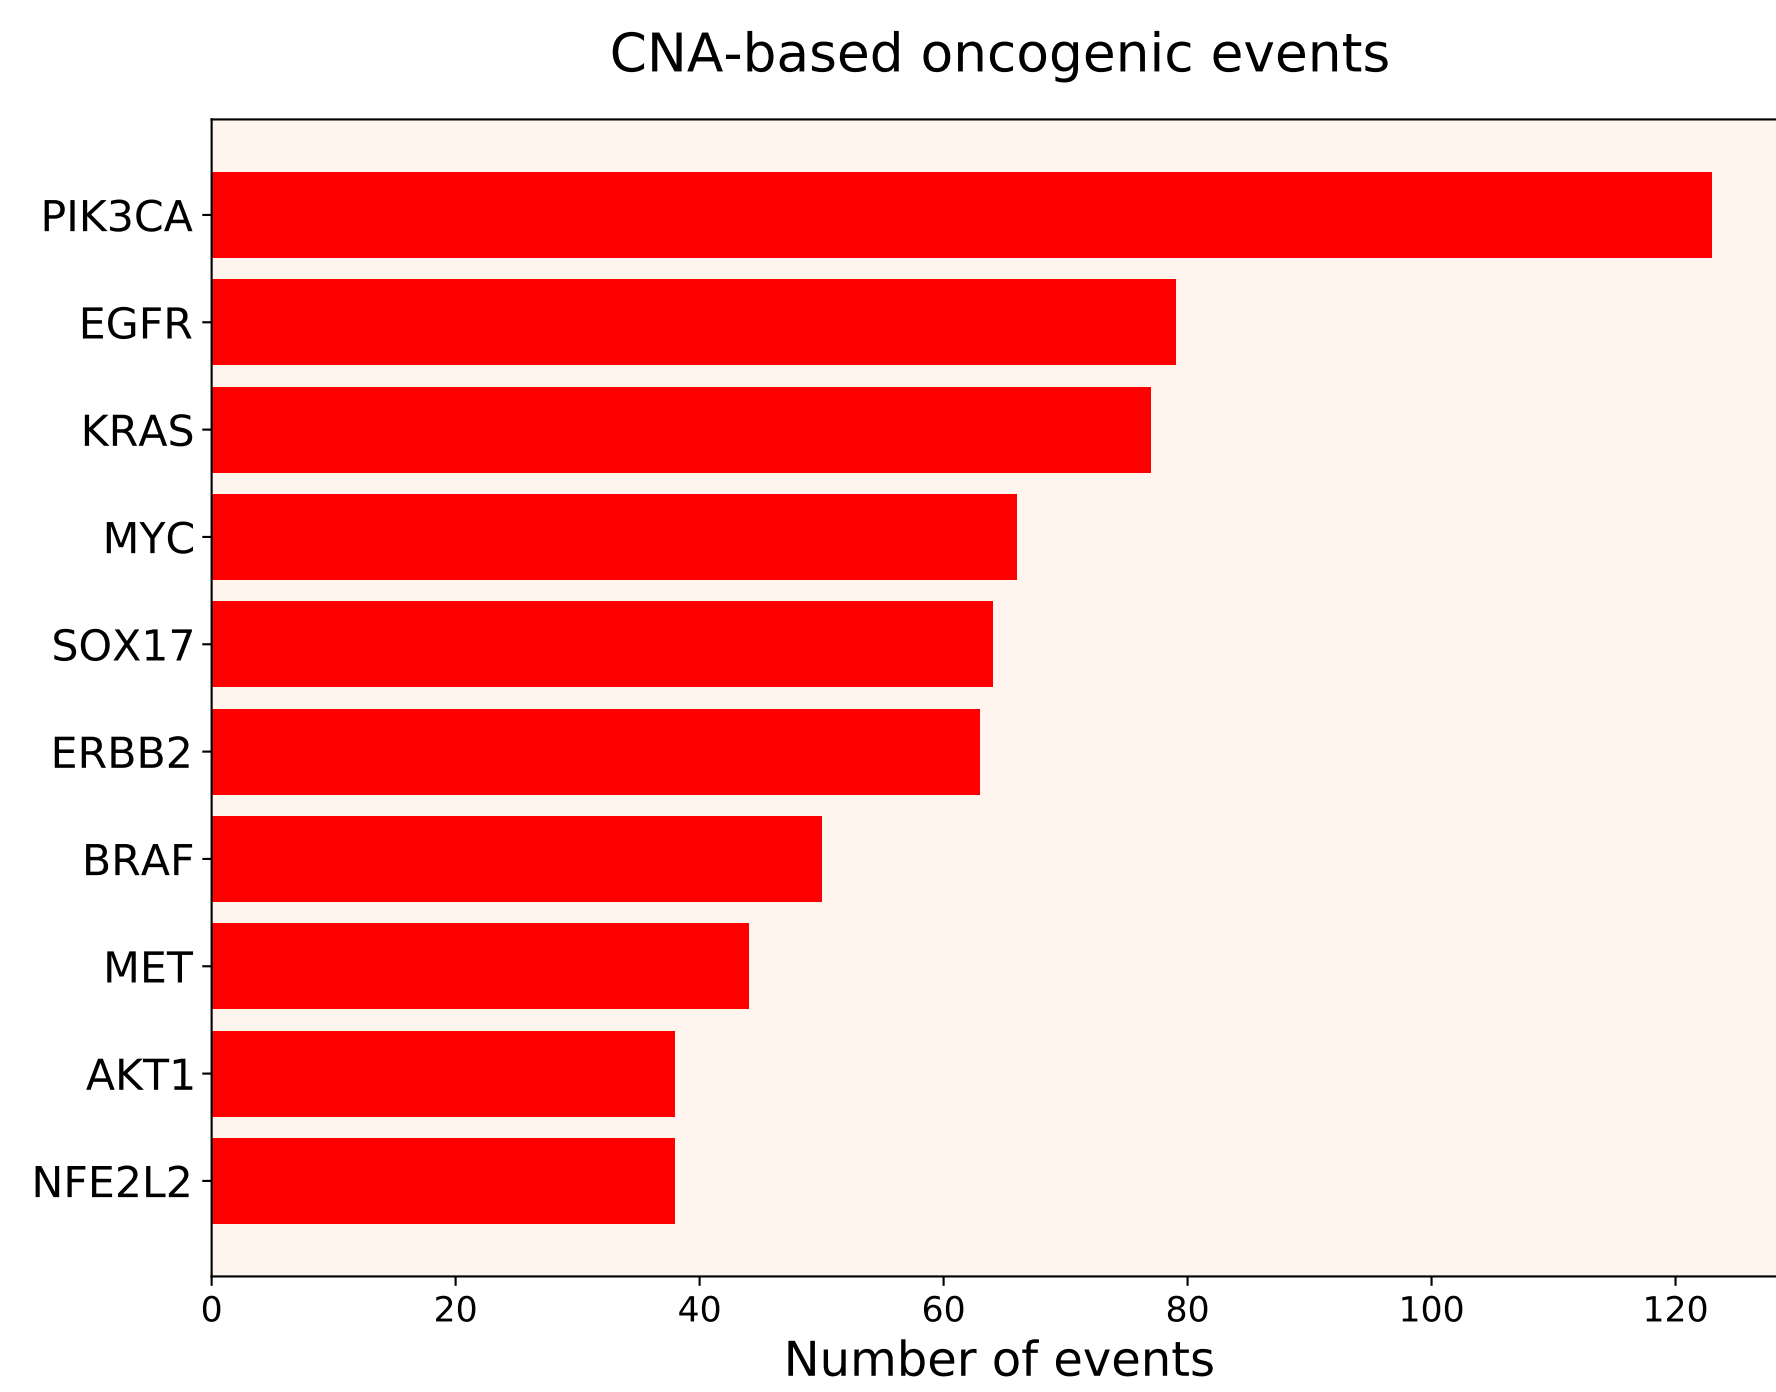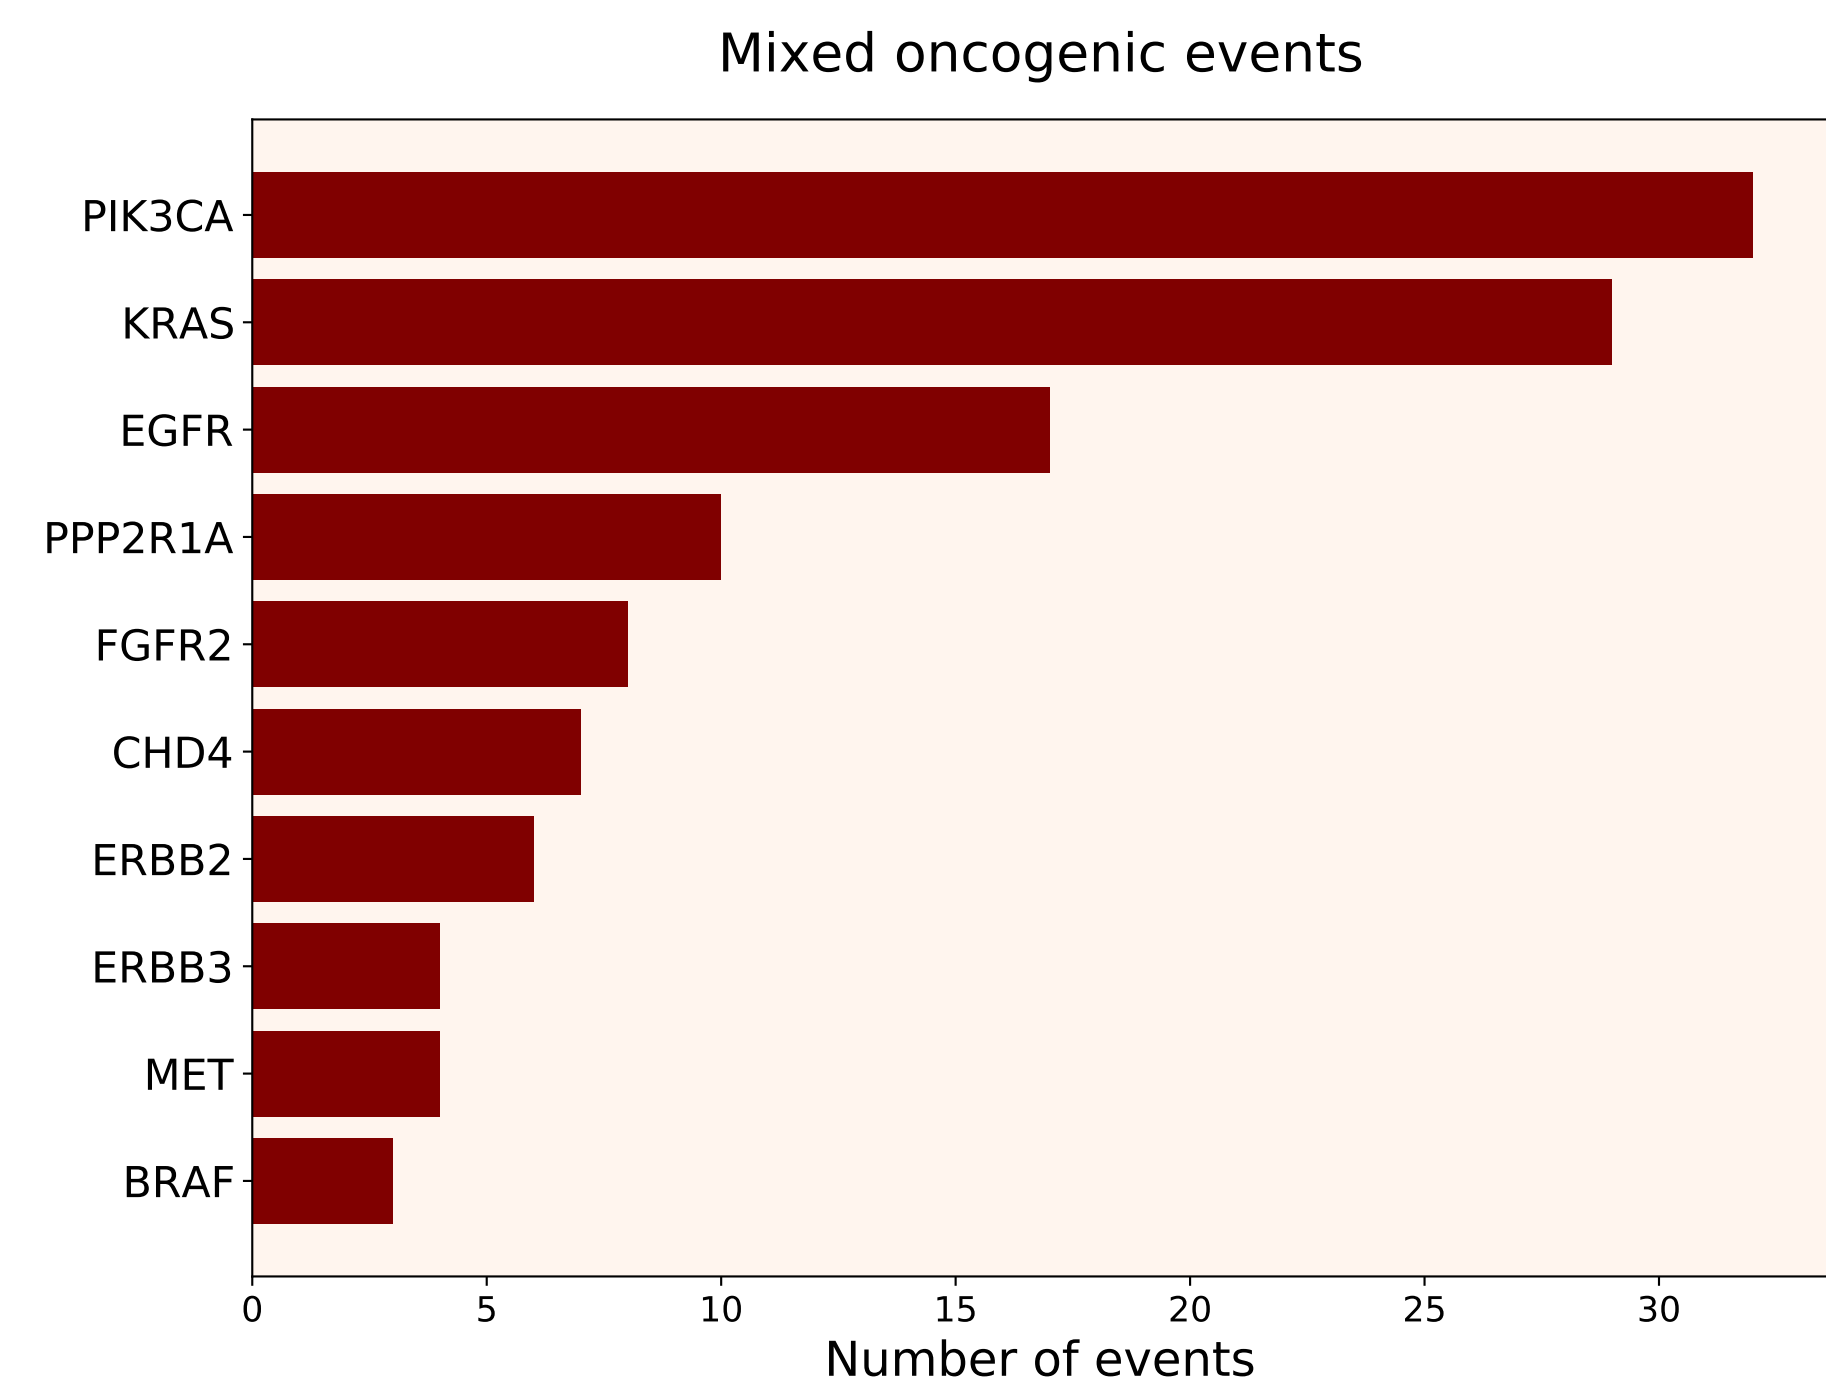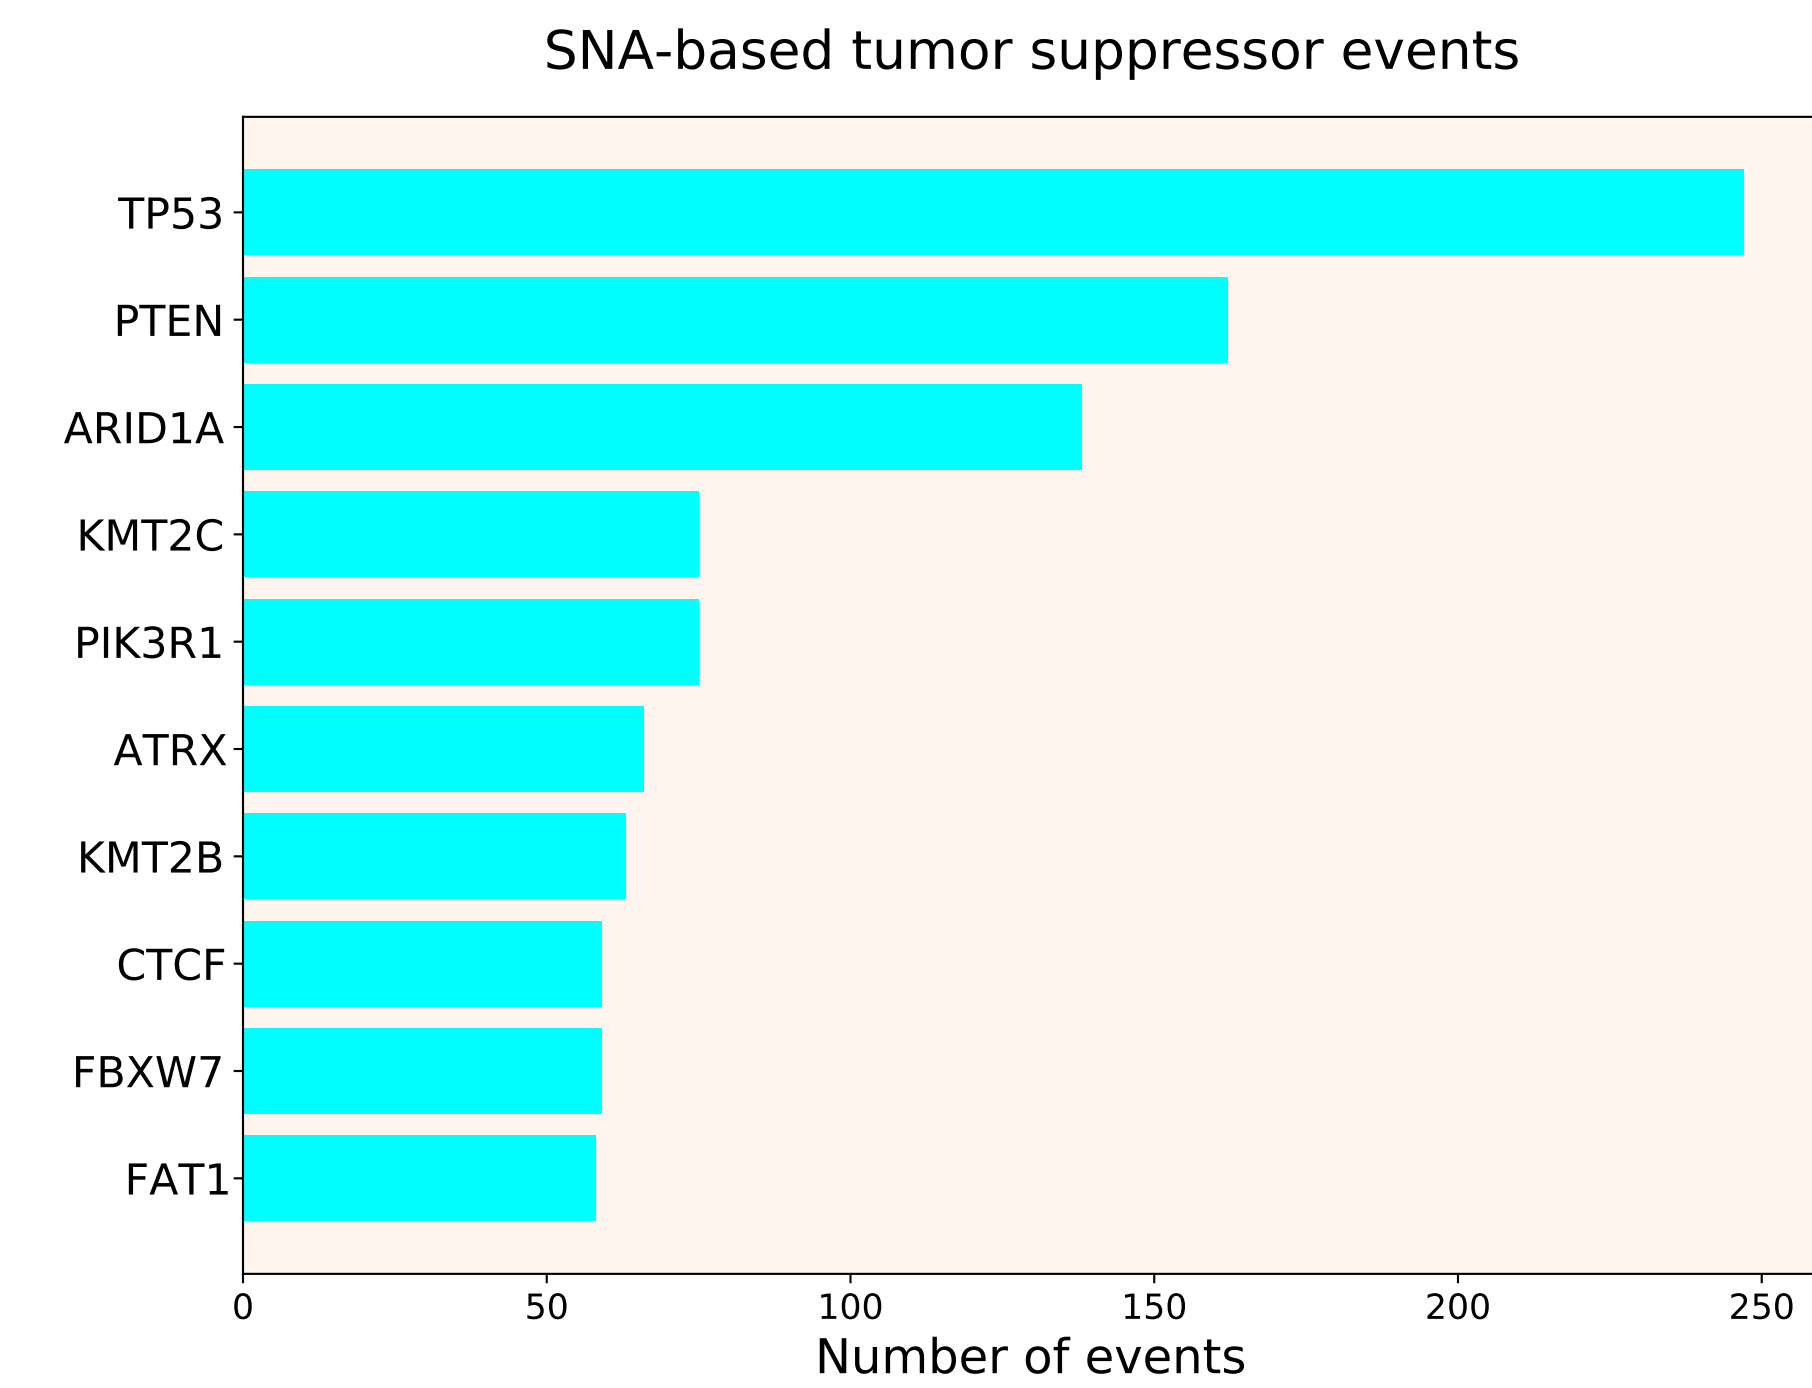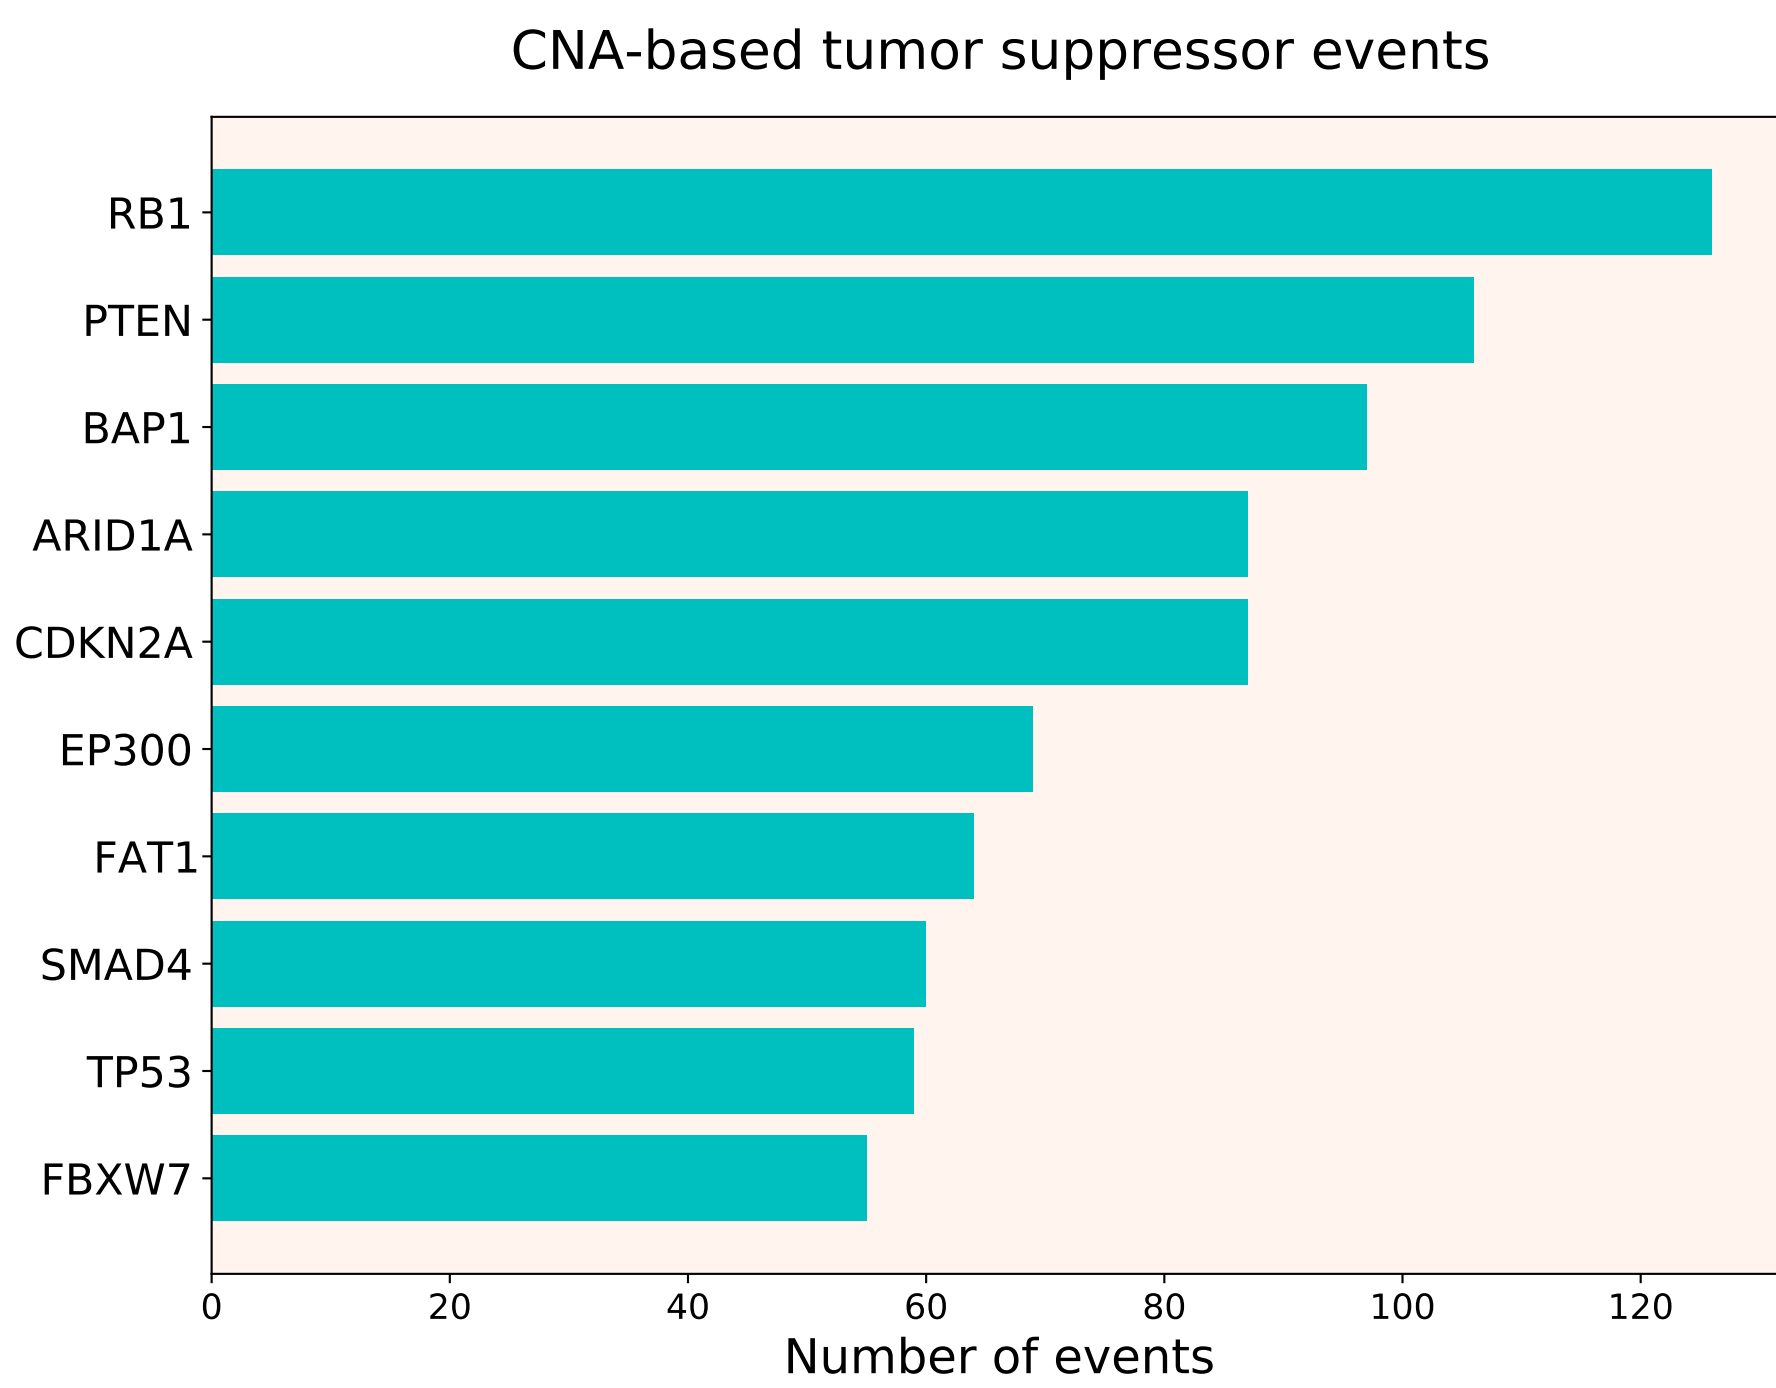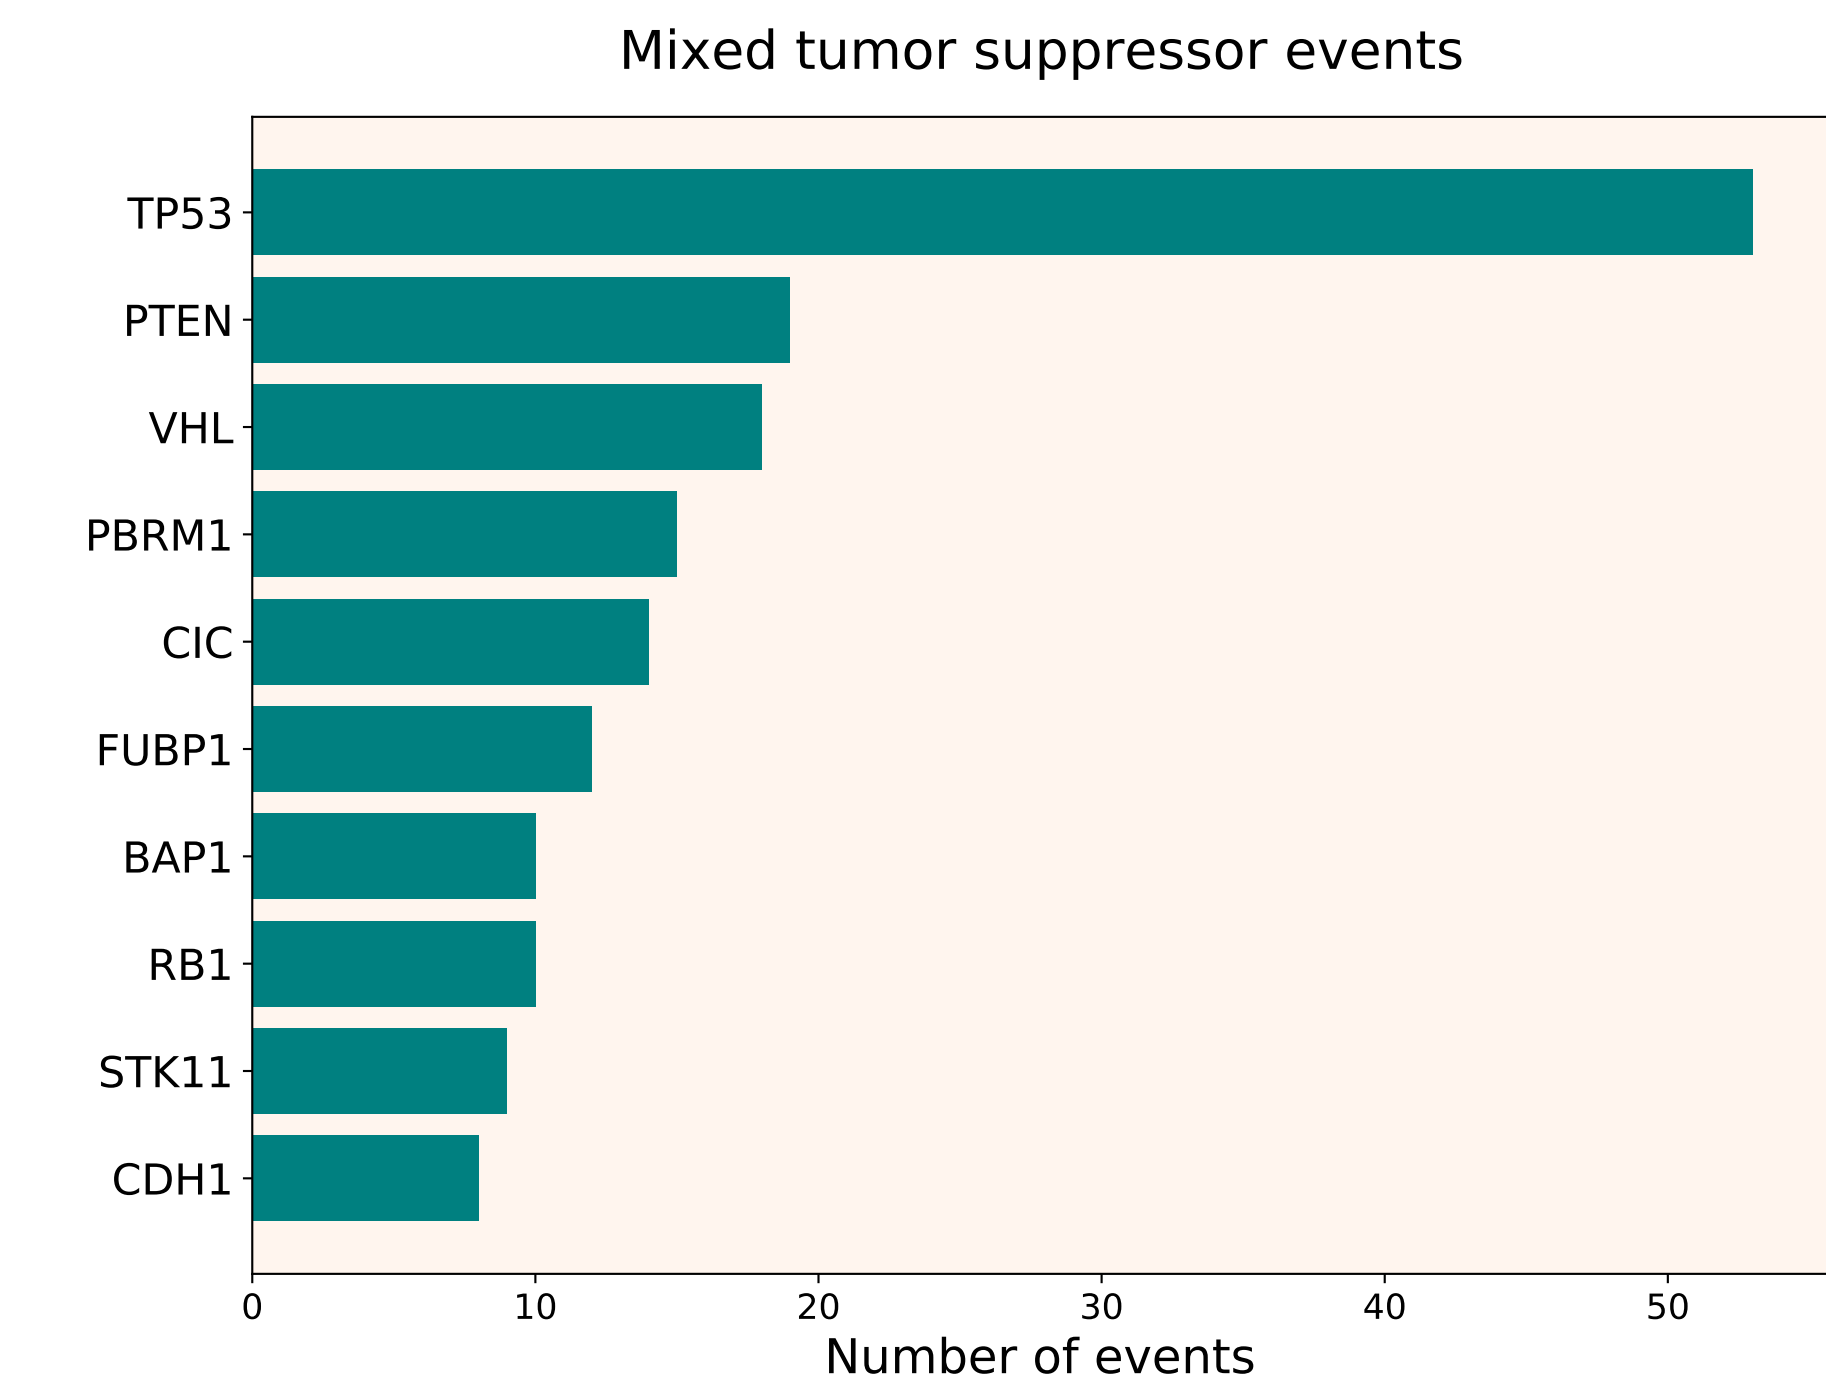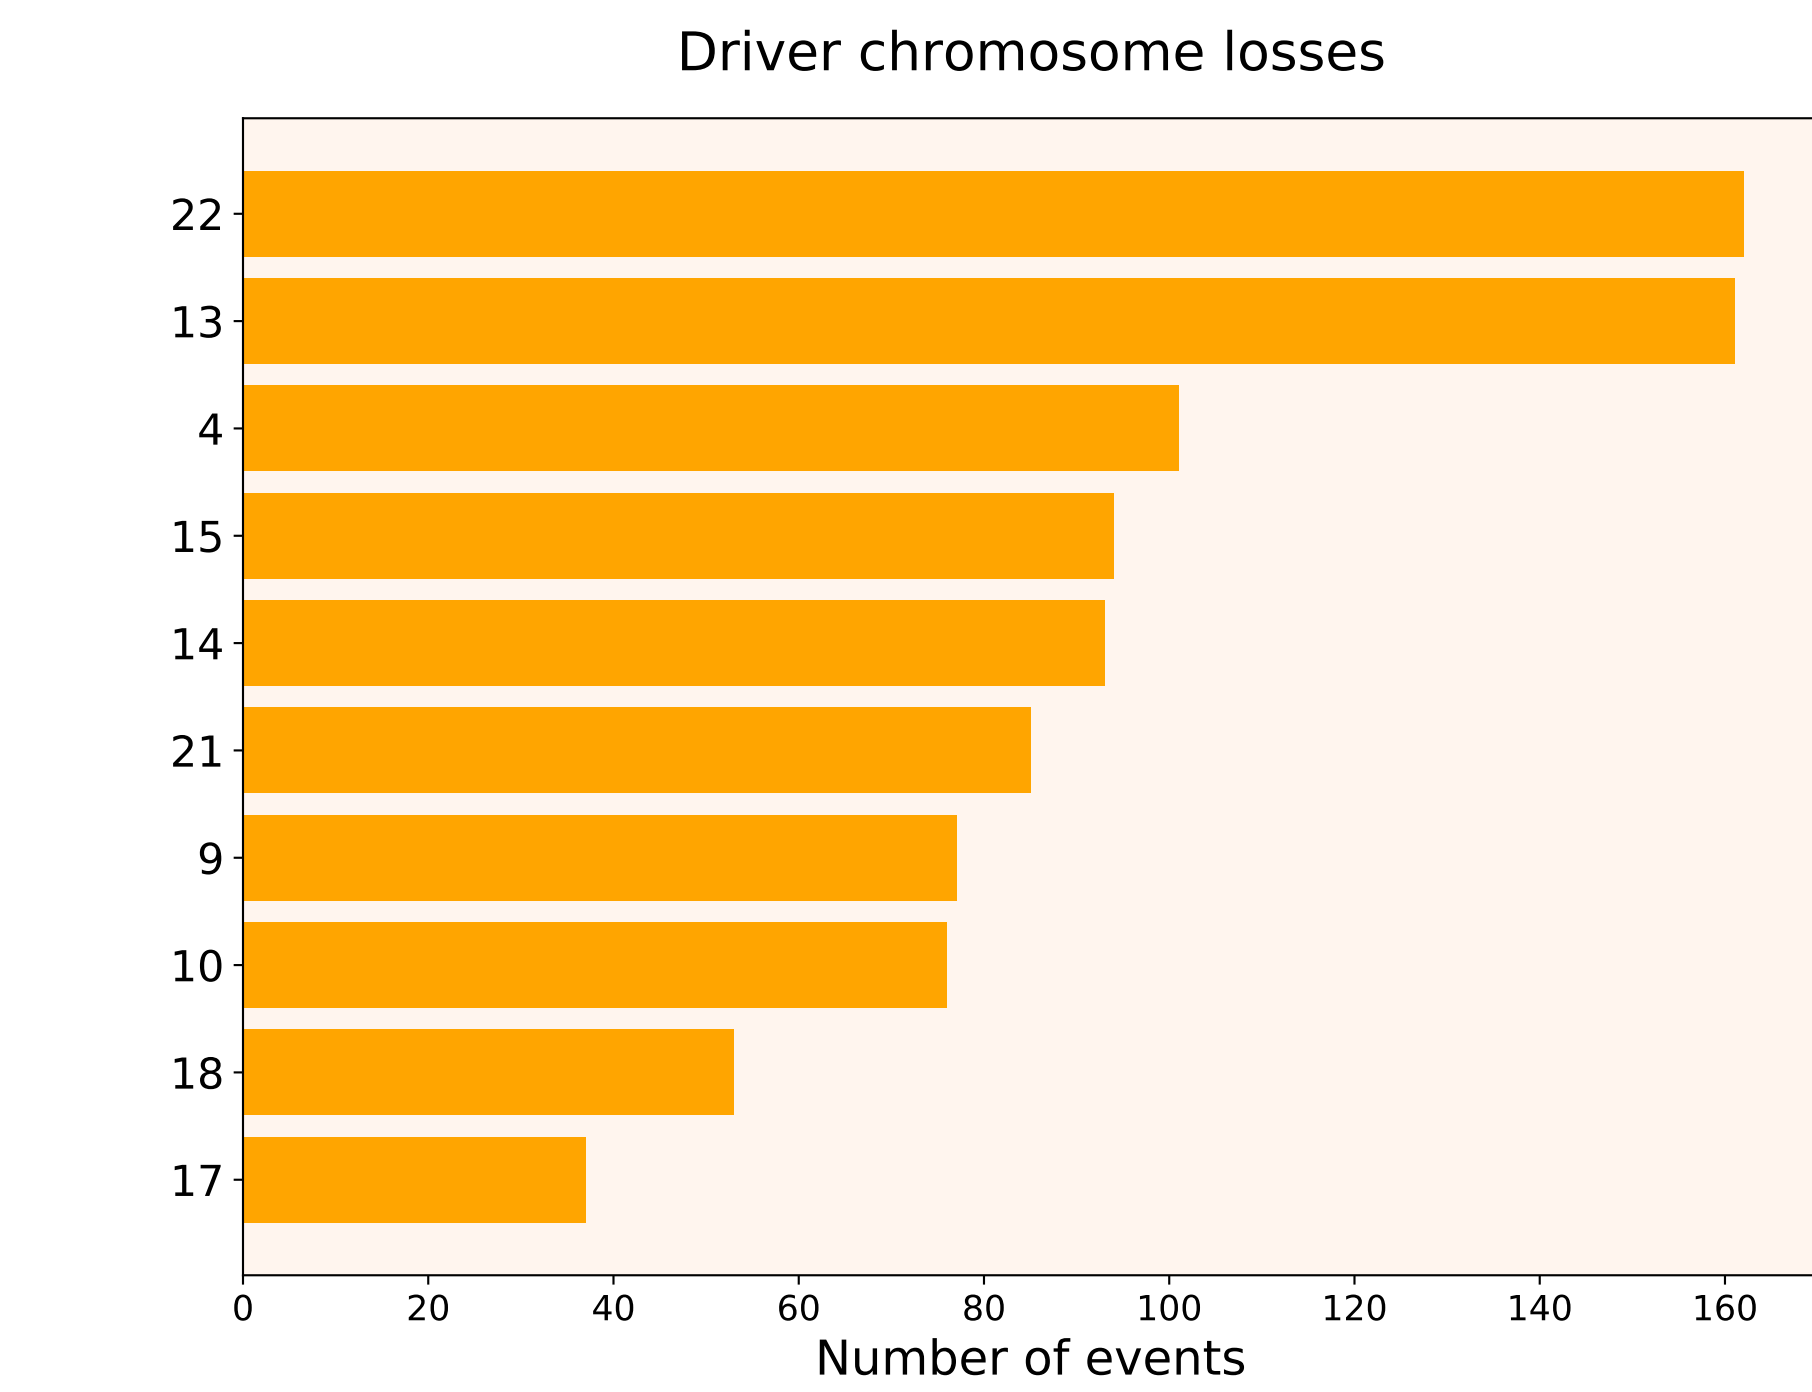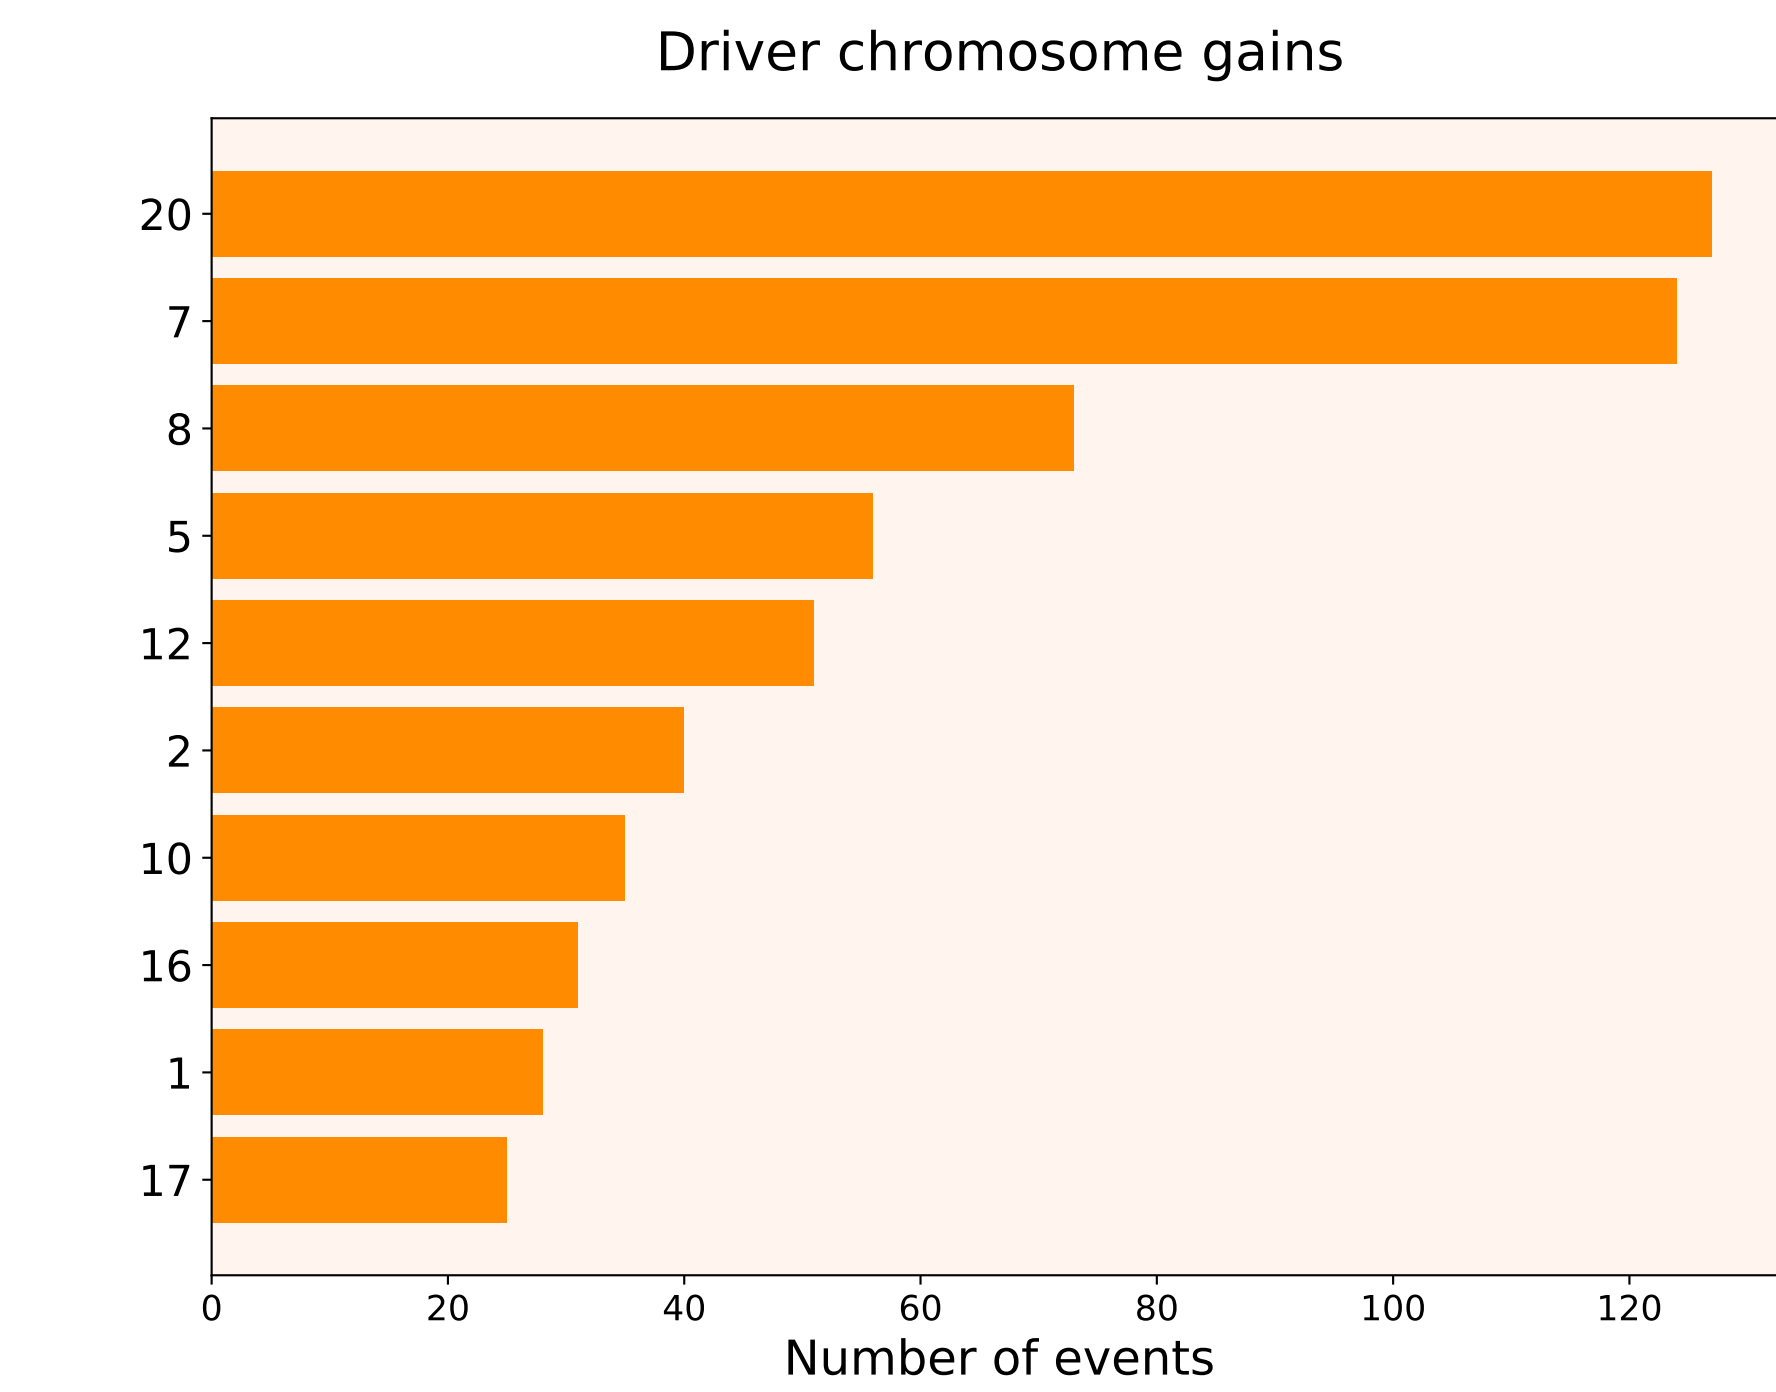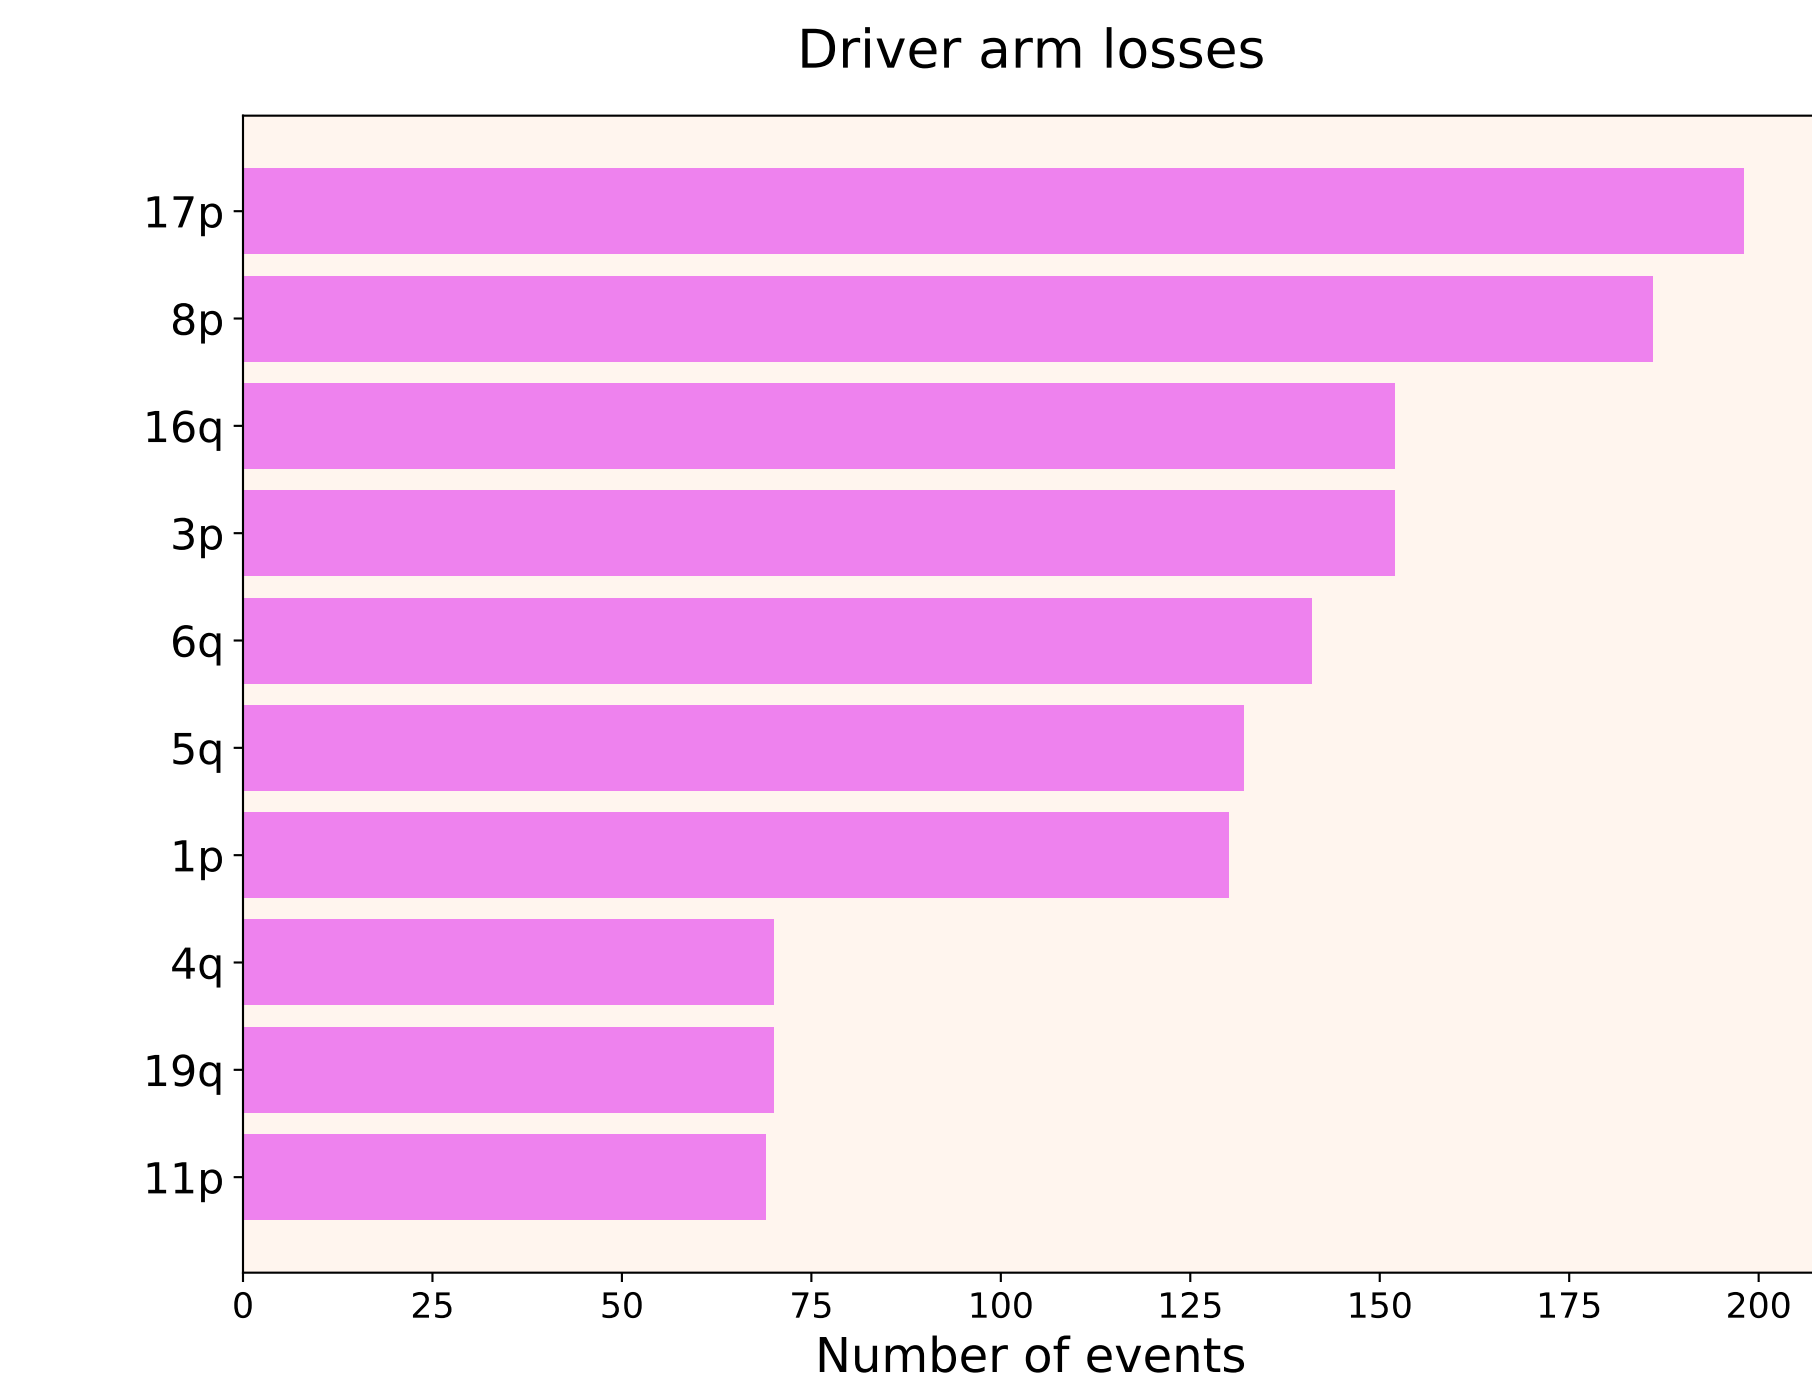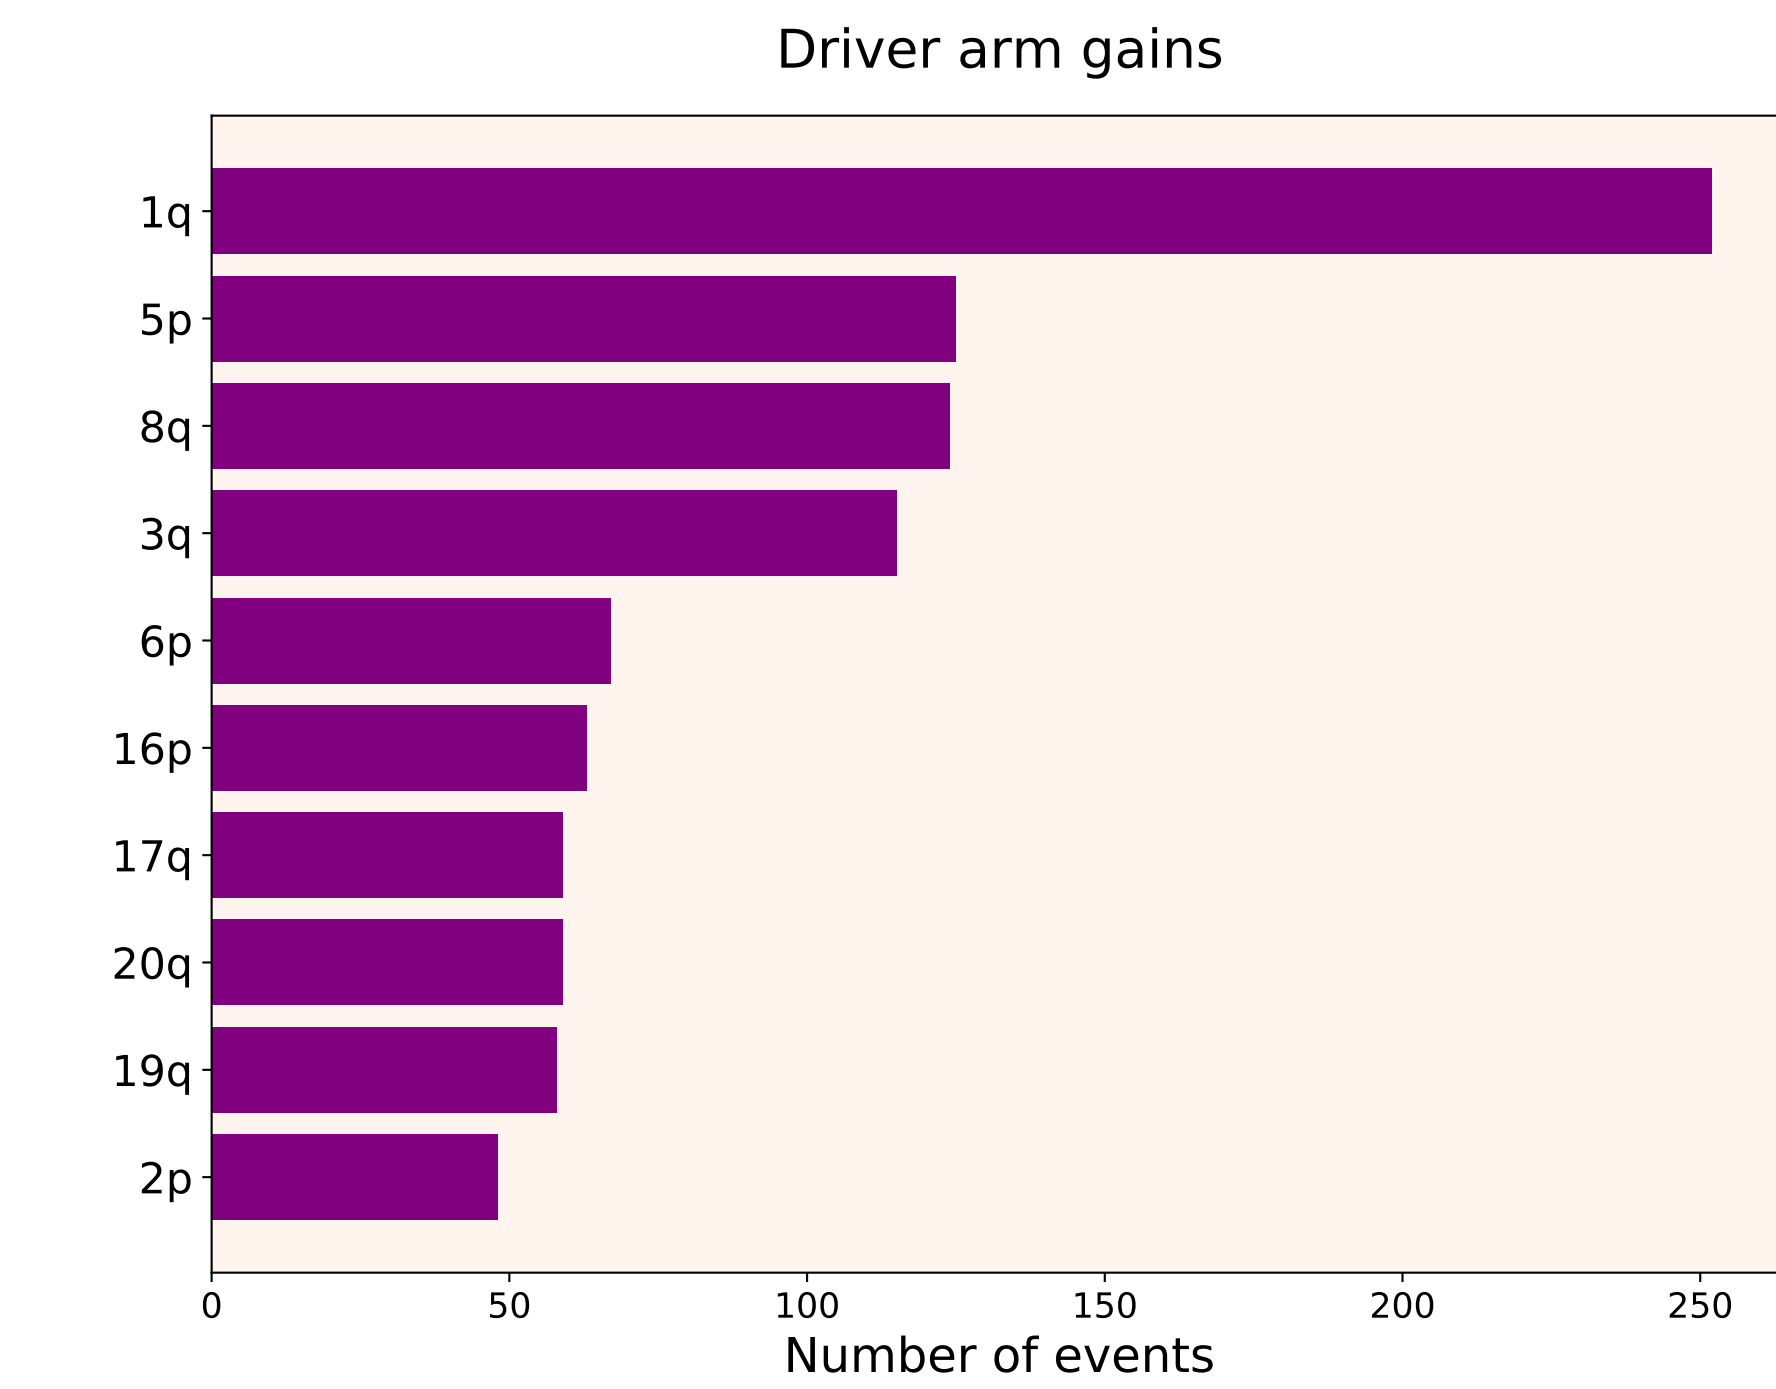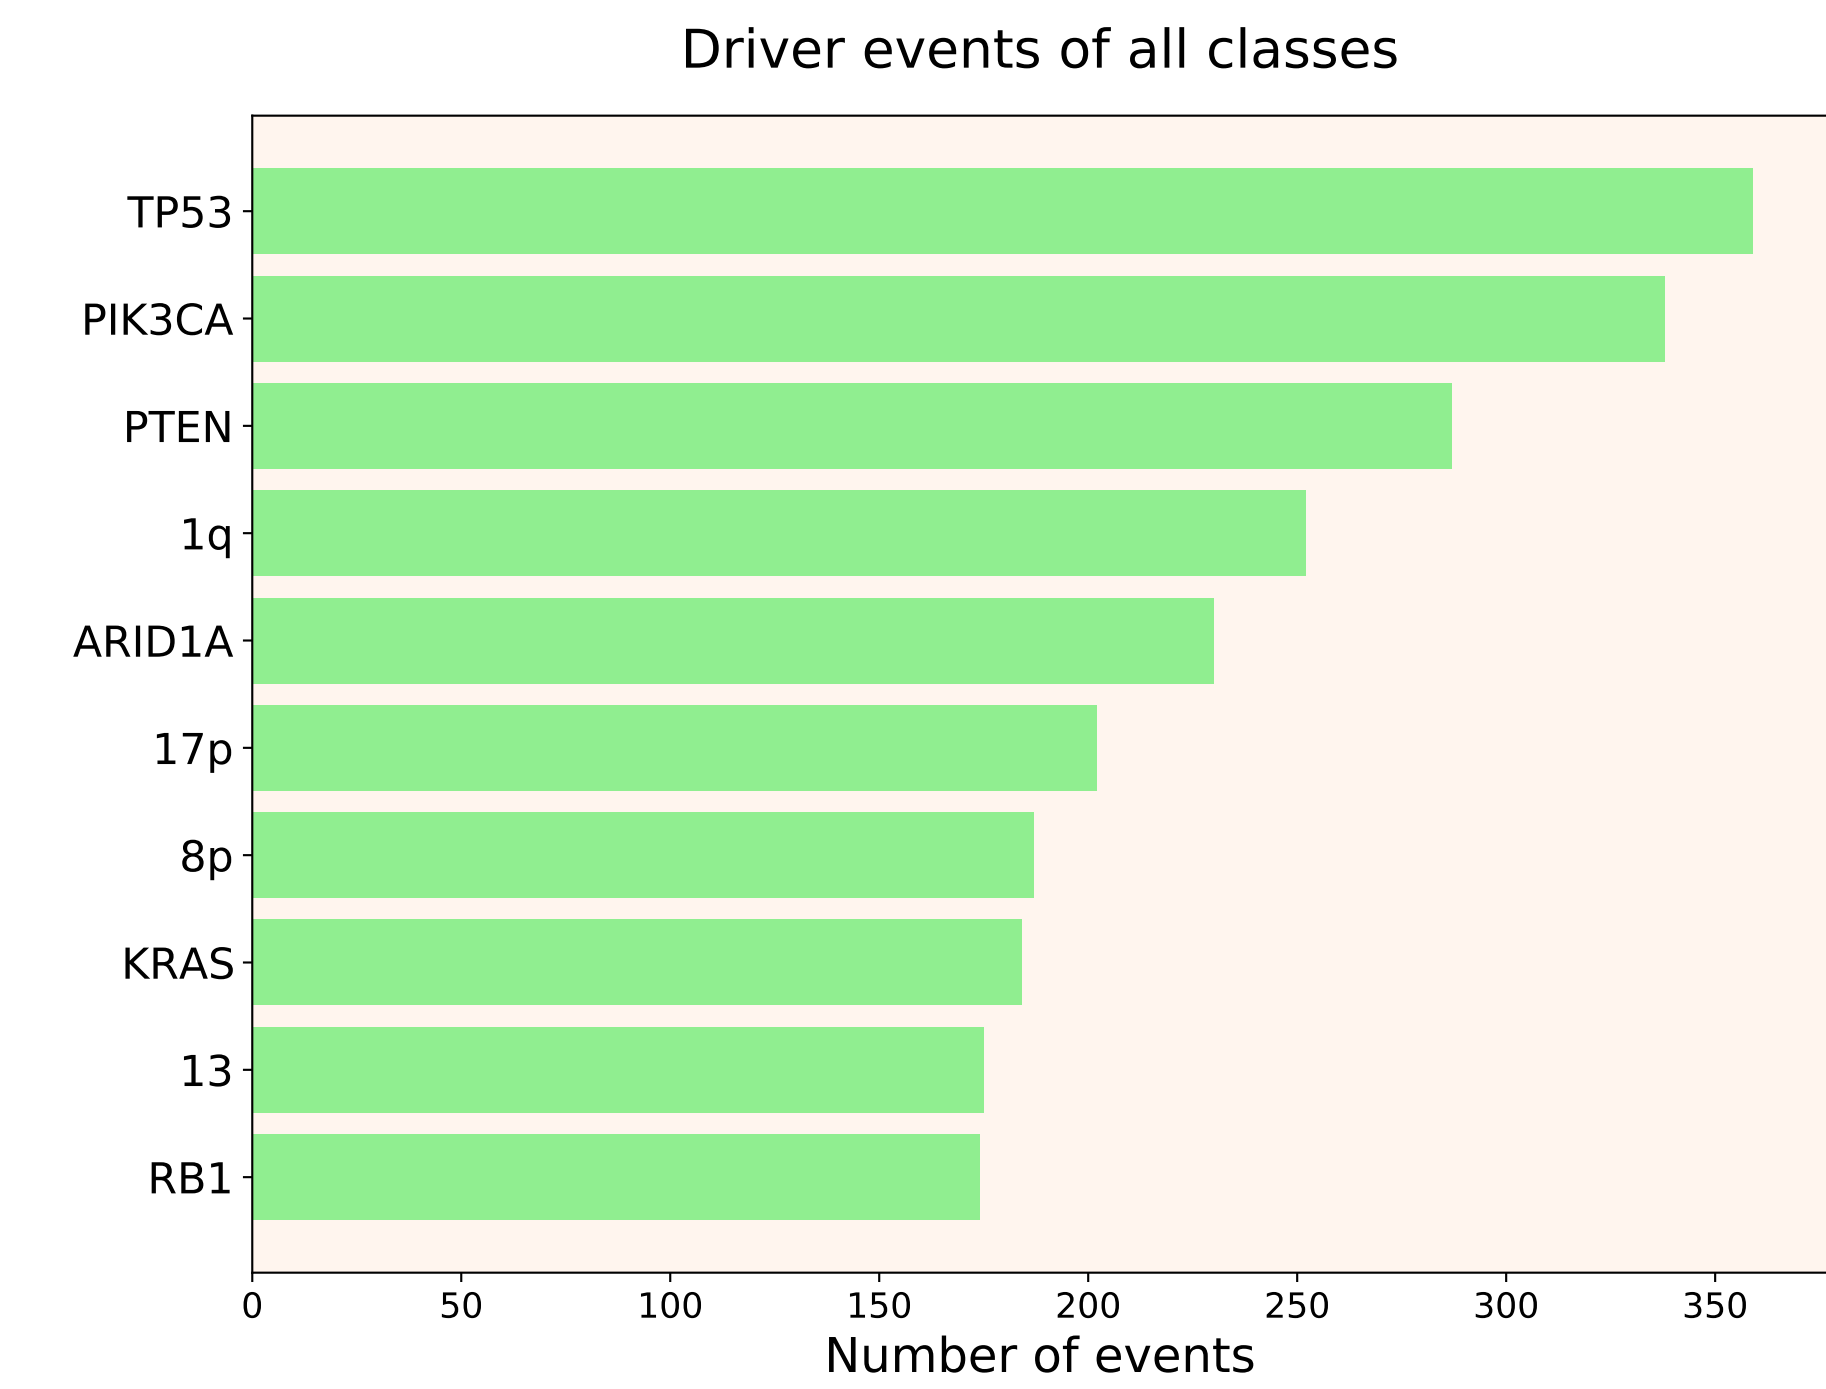

Supplement: Supplemental_Data_S1.zip [file Supplemental_Data_S1.zip]

# LGG\_MALE

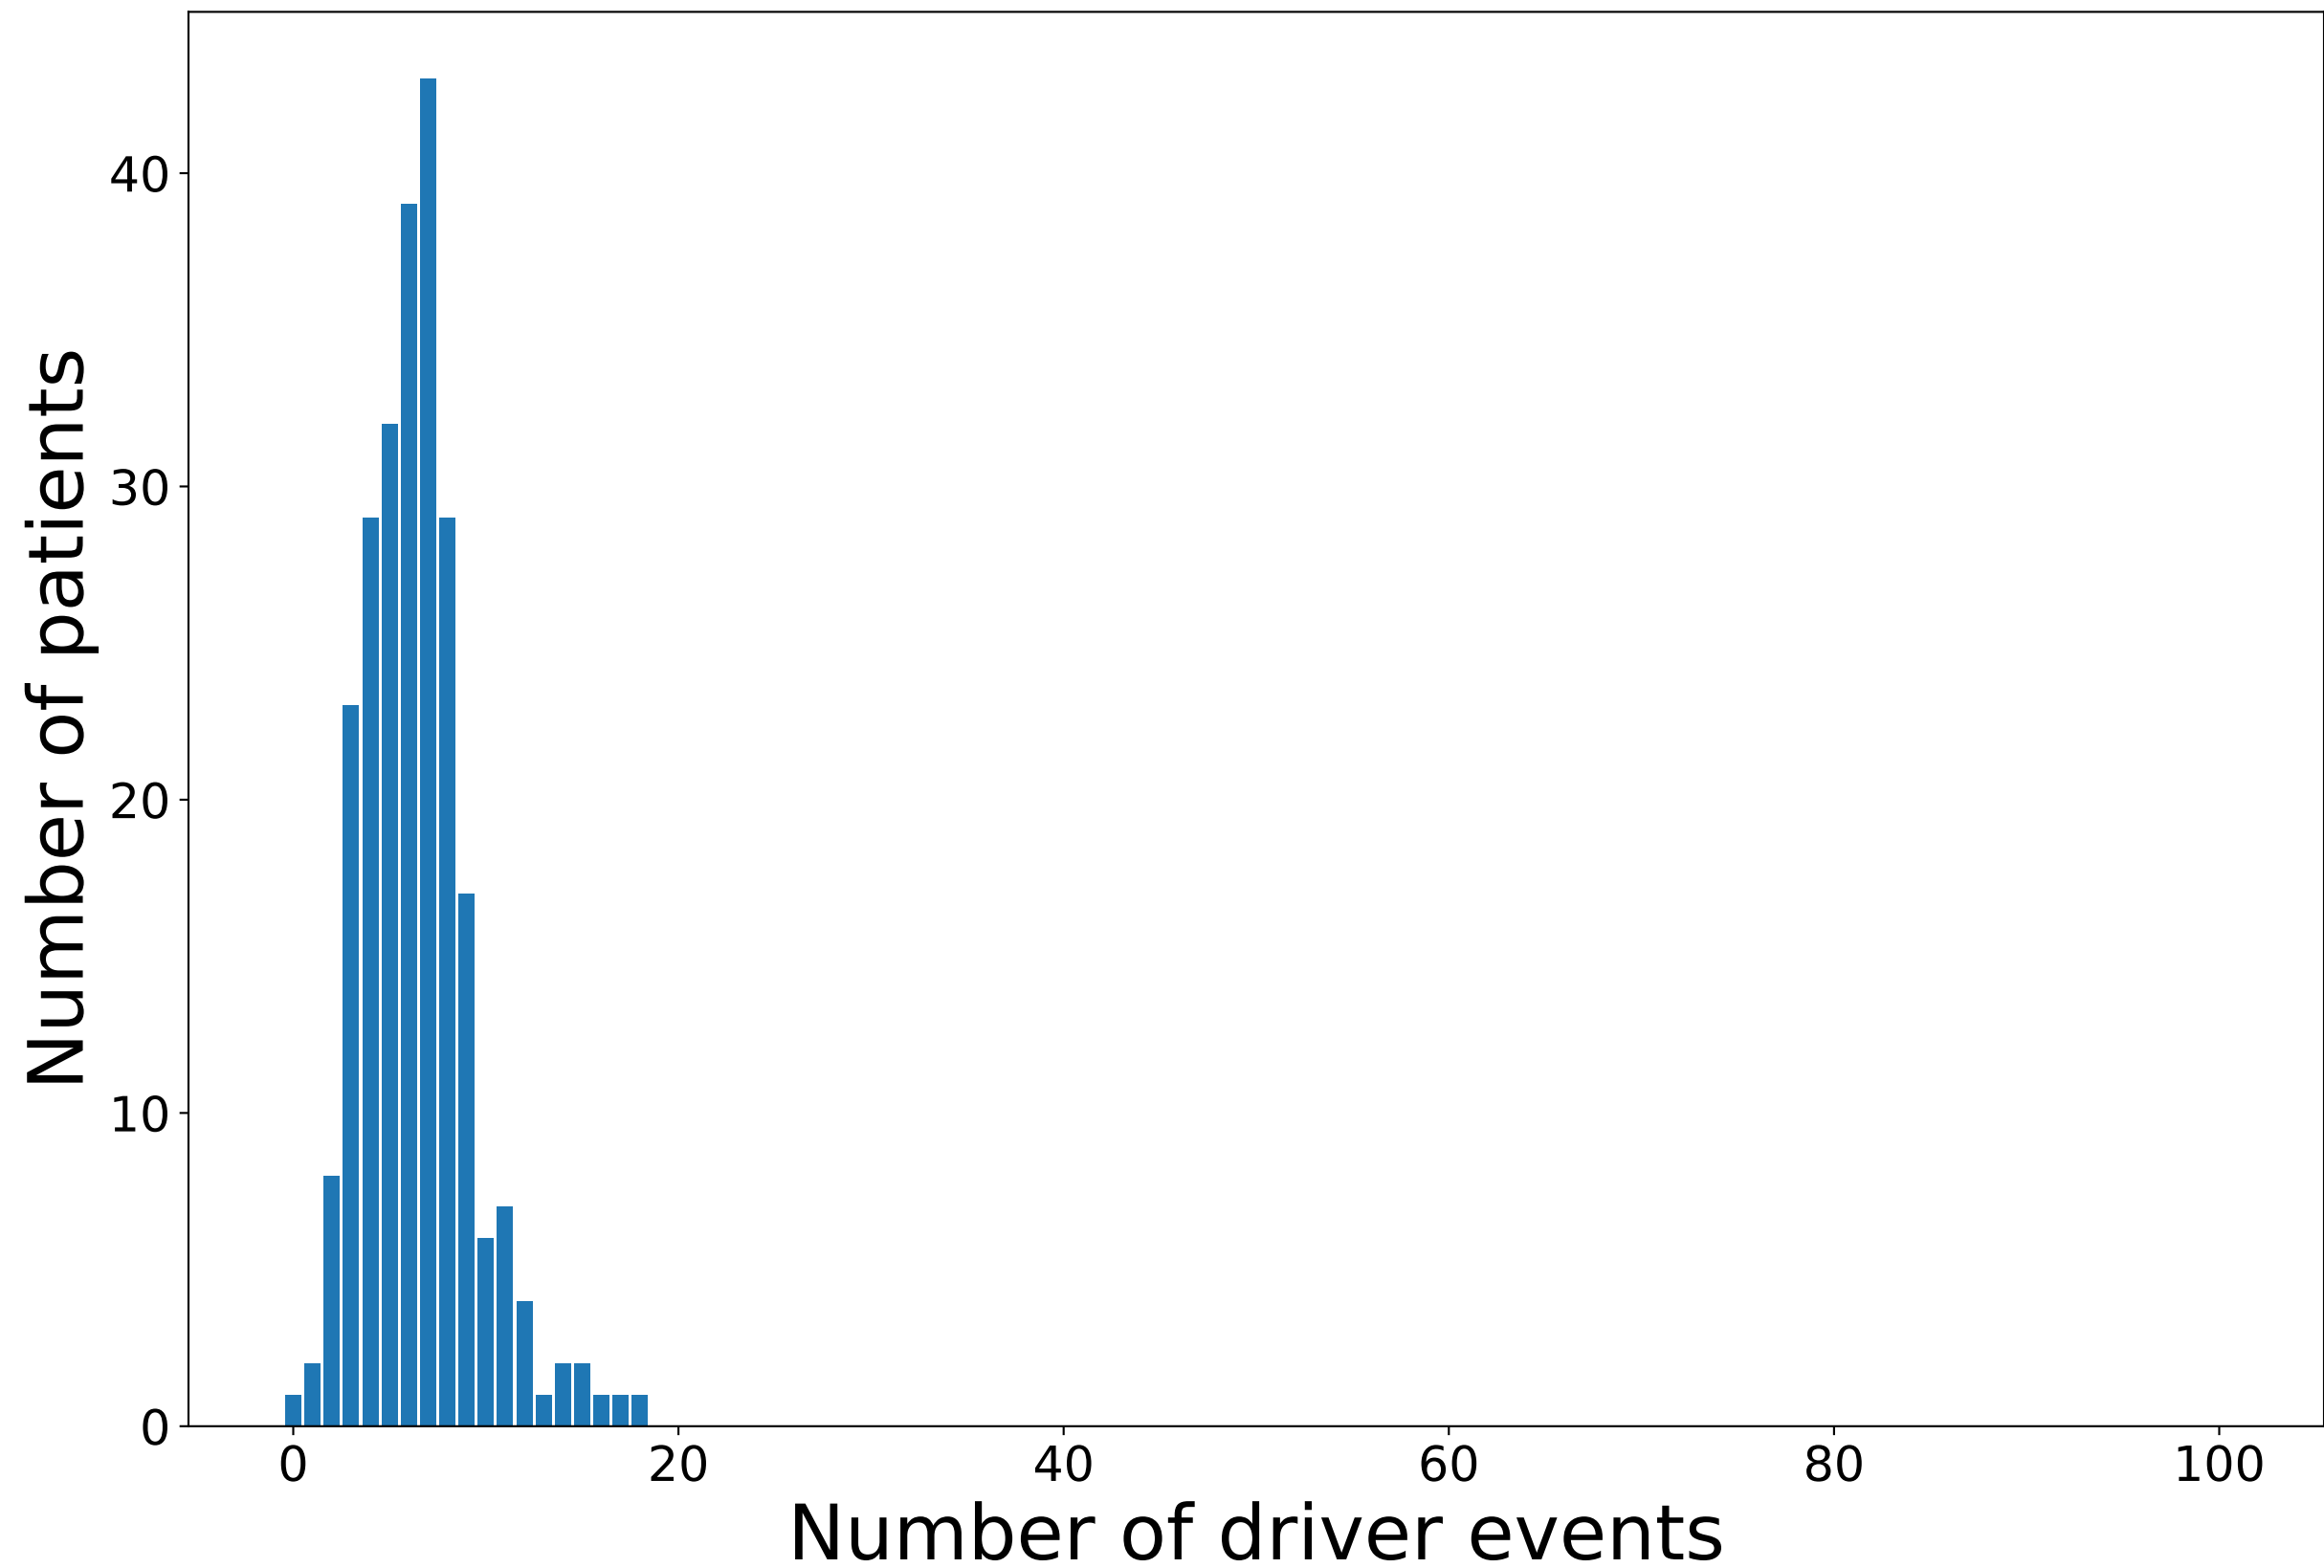

Supplement: Supplemental_Data_S1.zip [file Supplemental_Data_S1.zip]

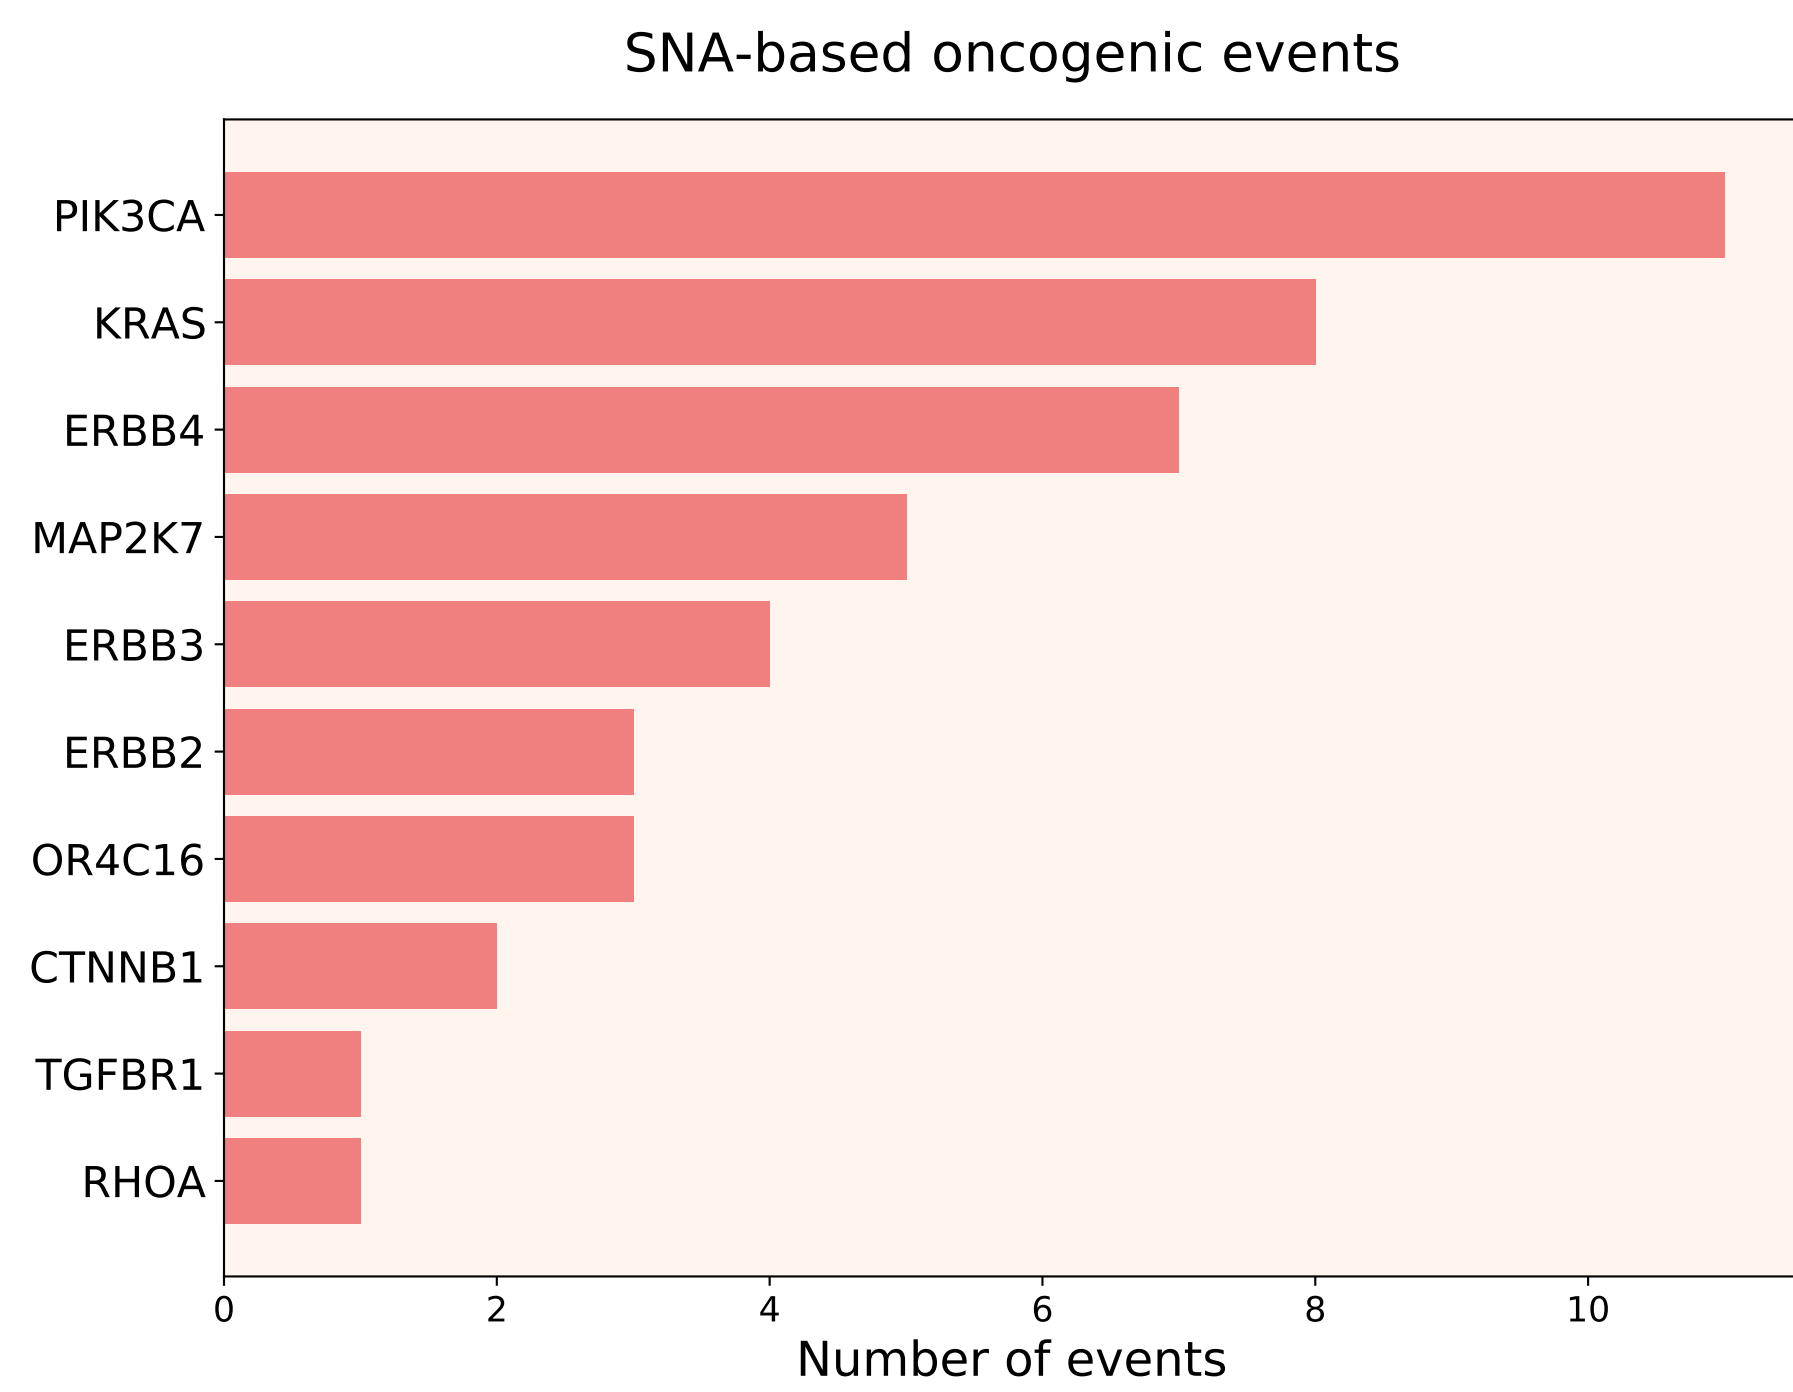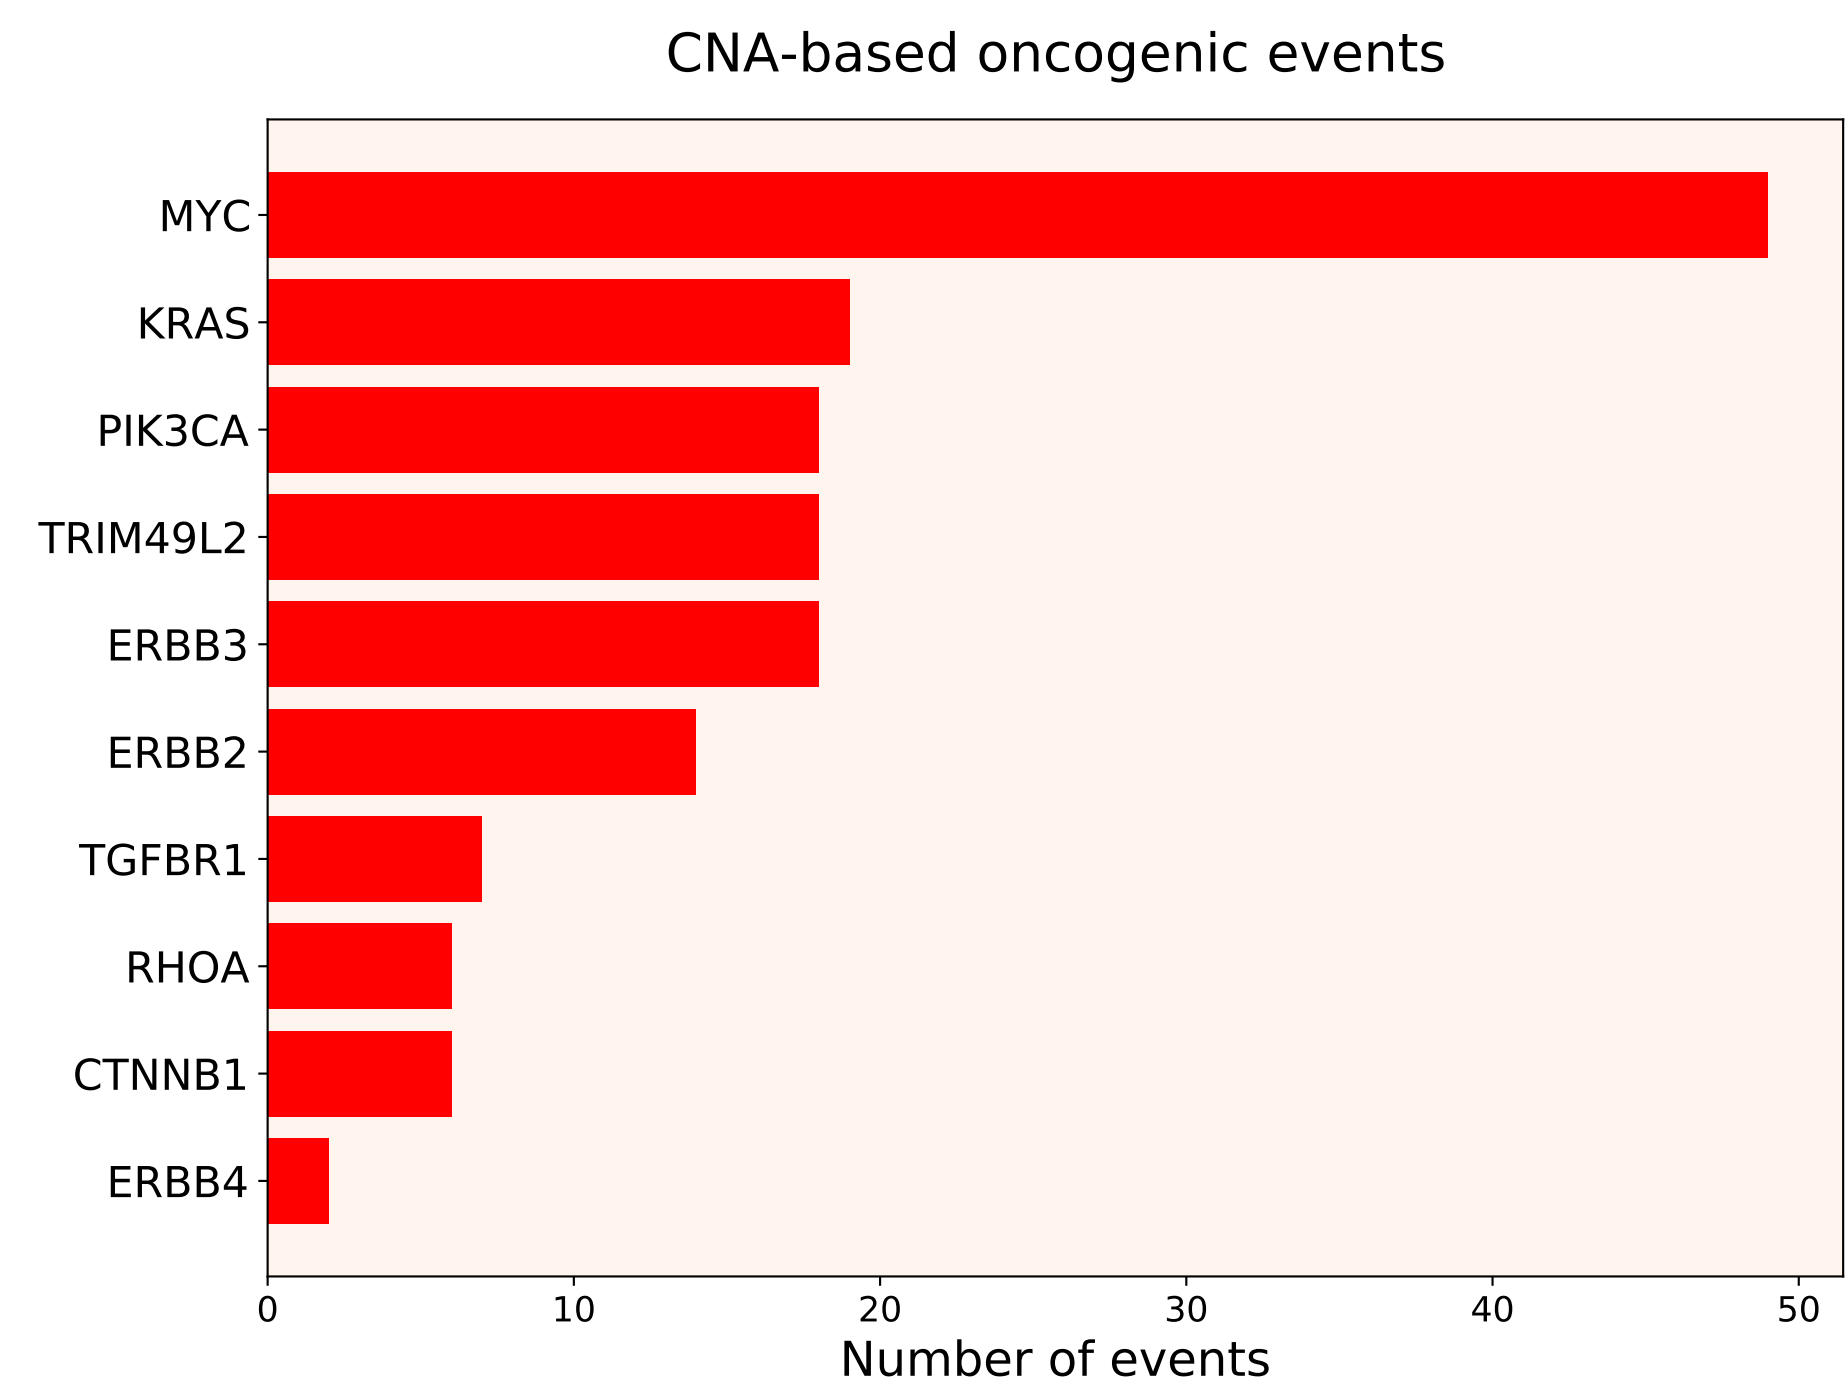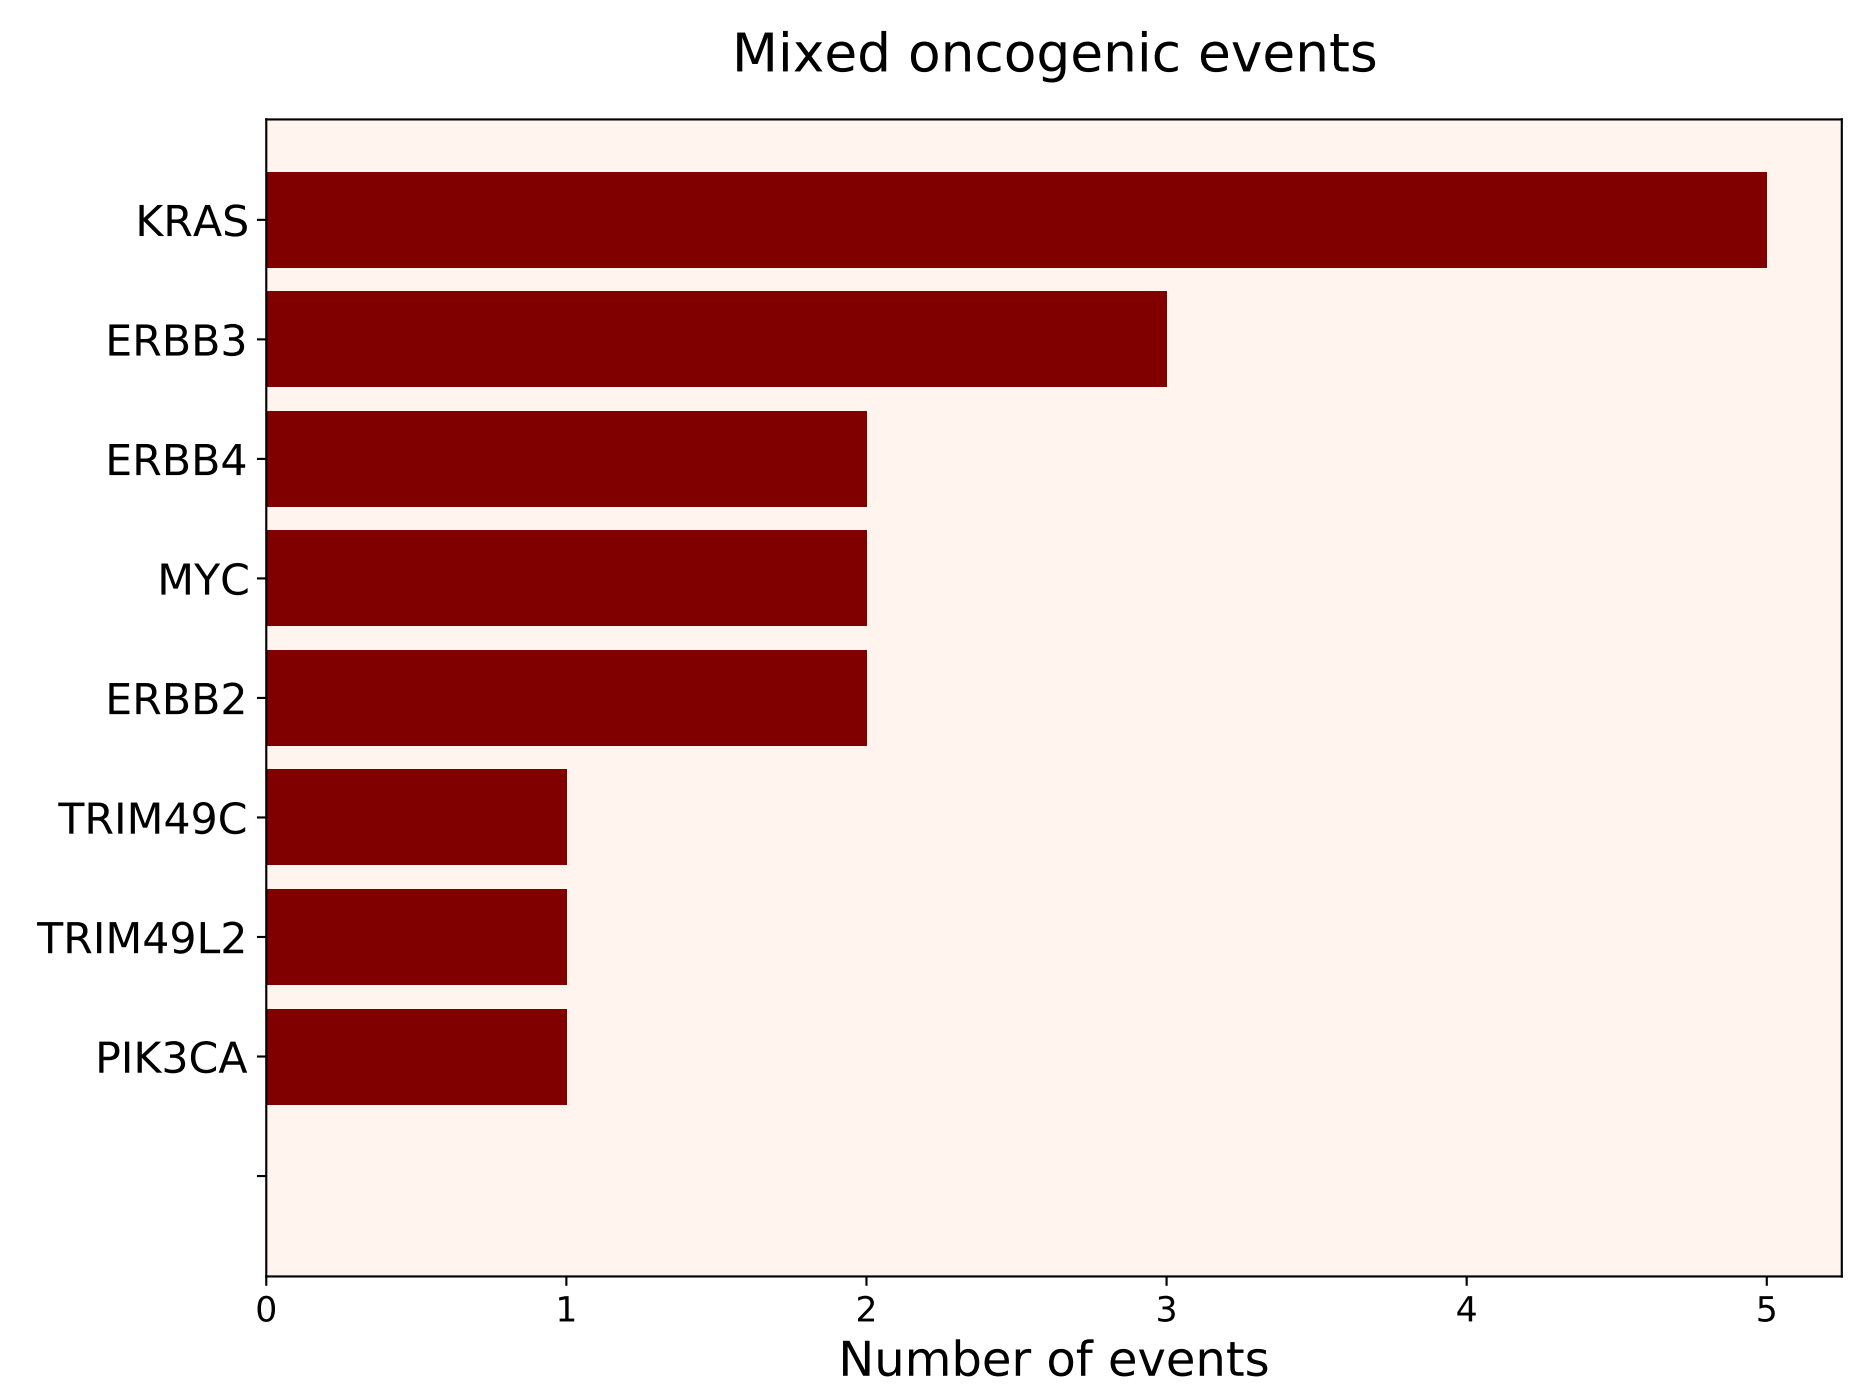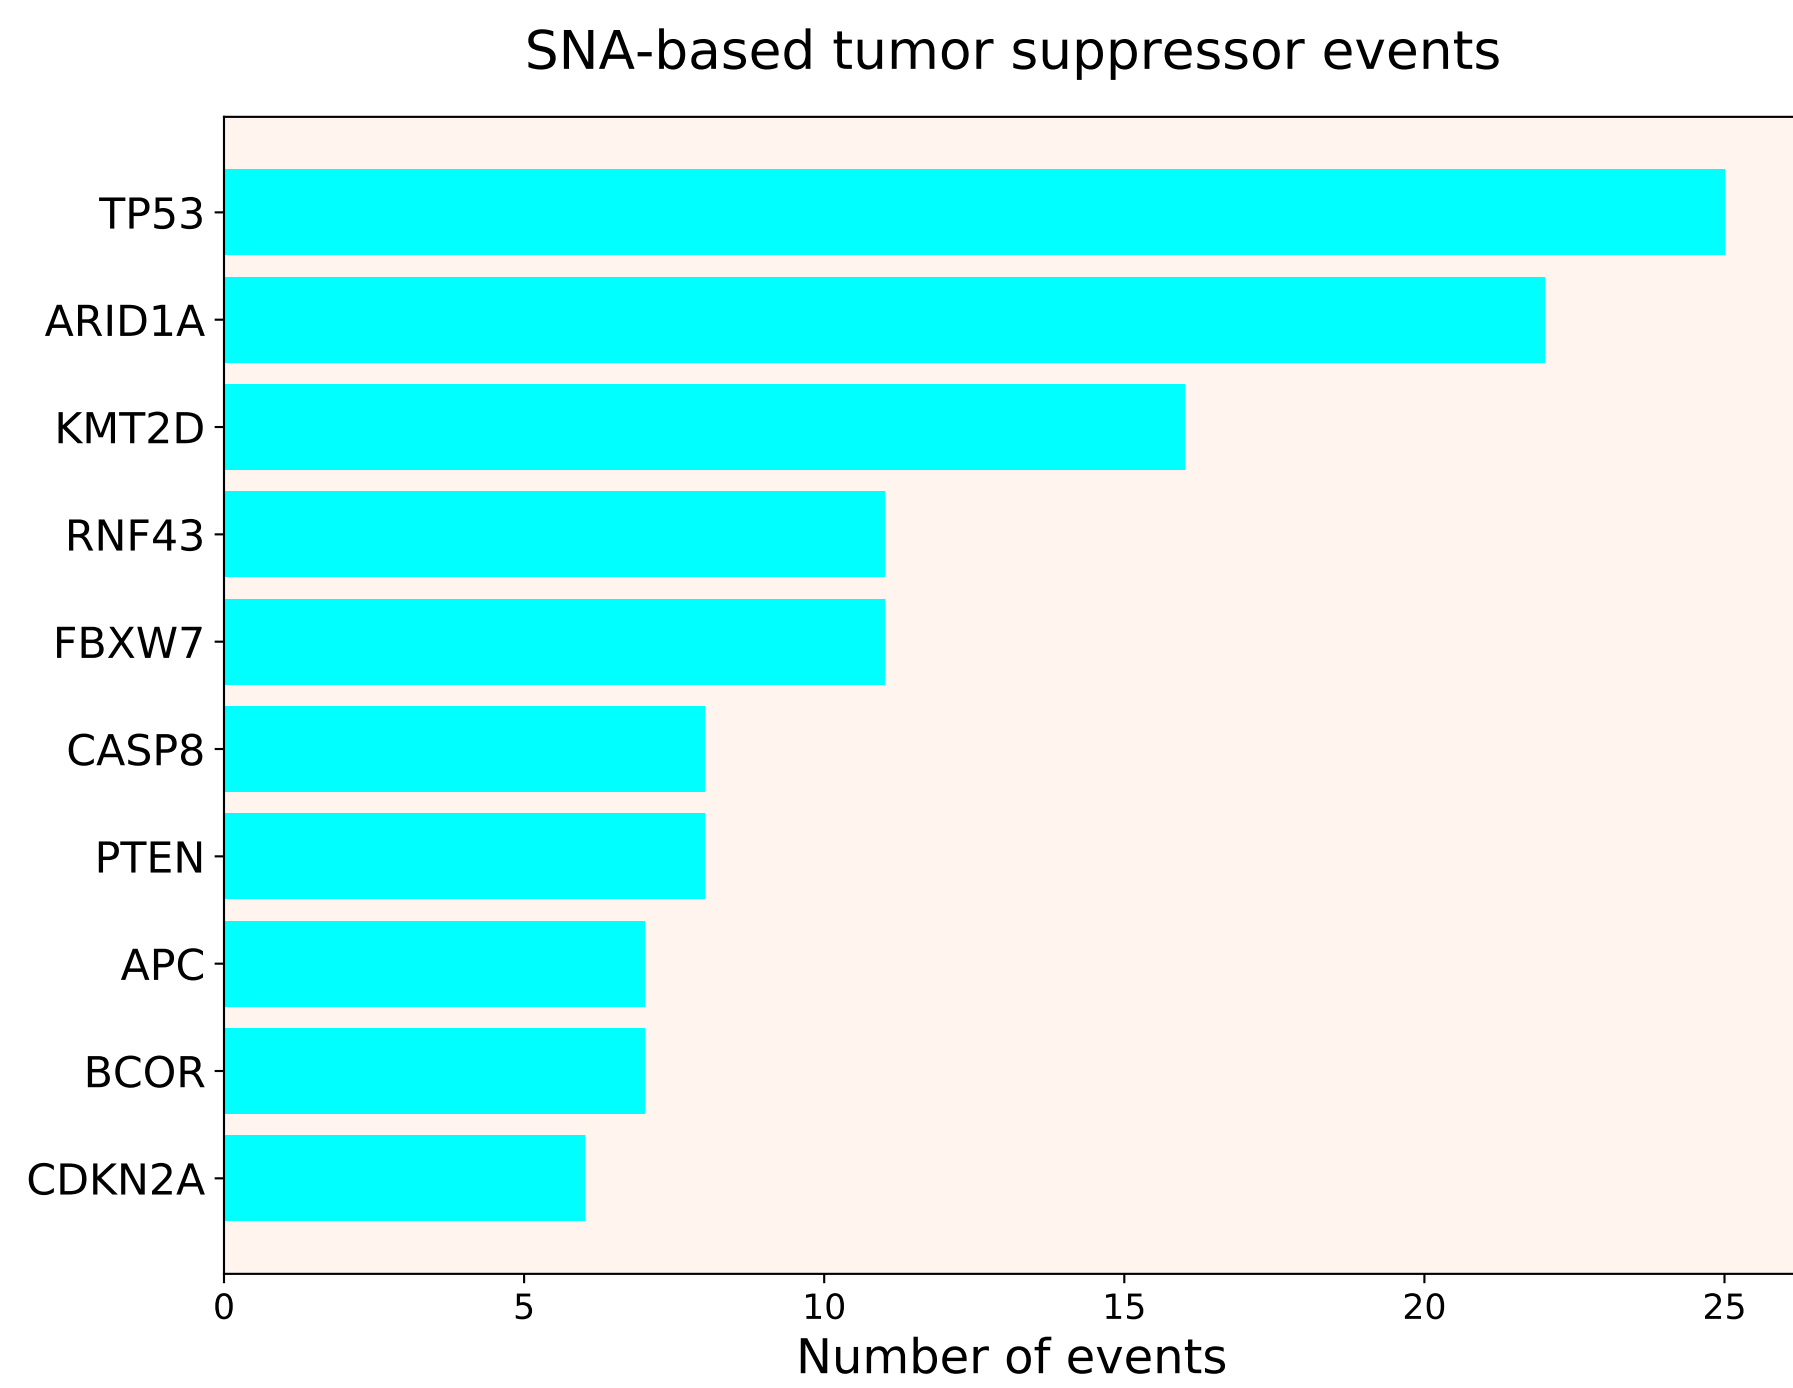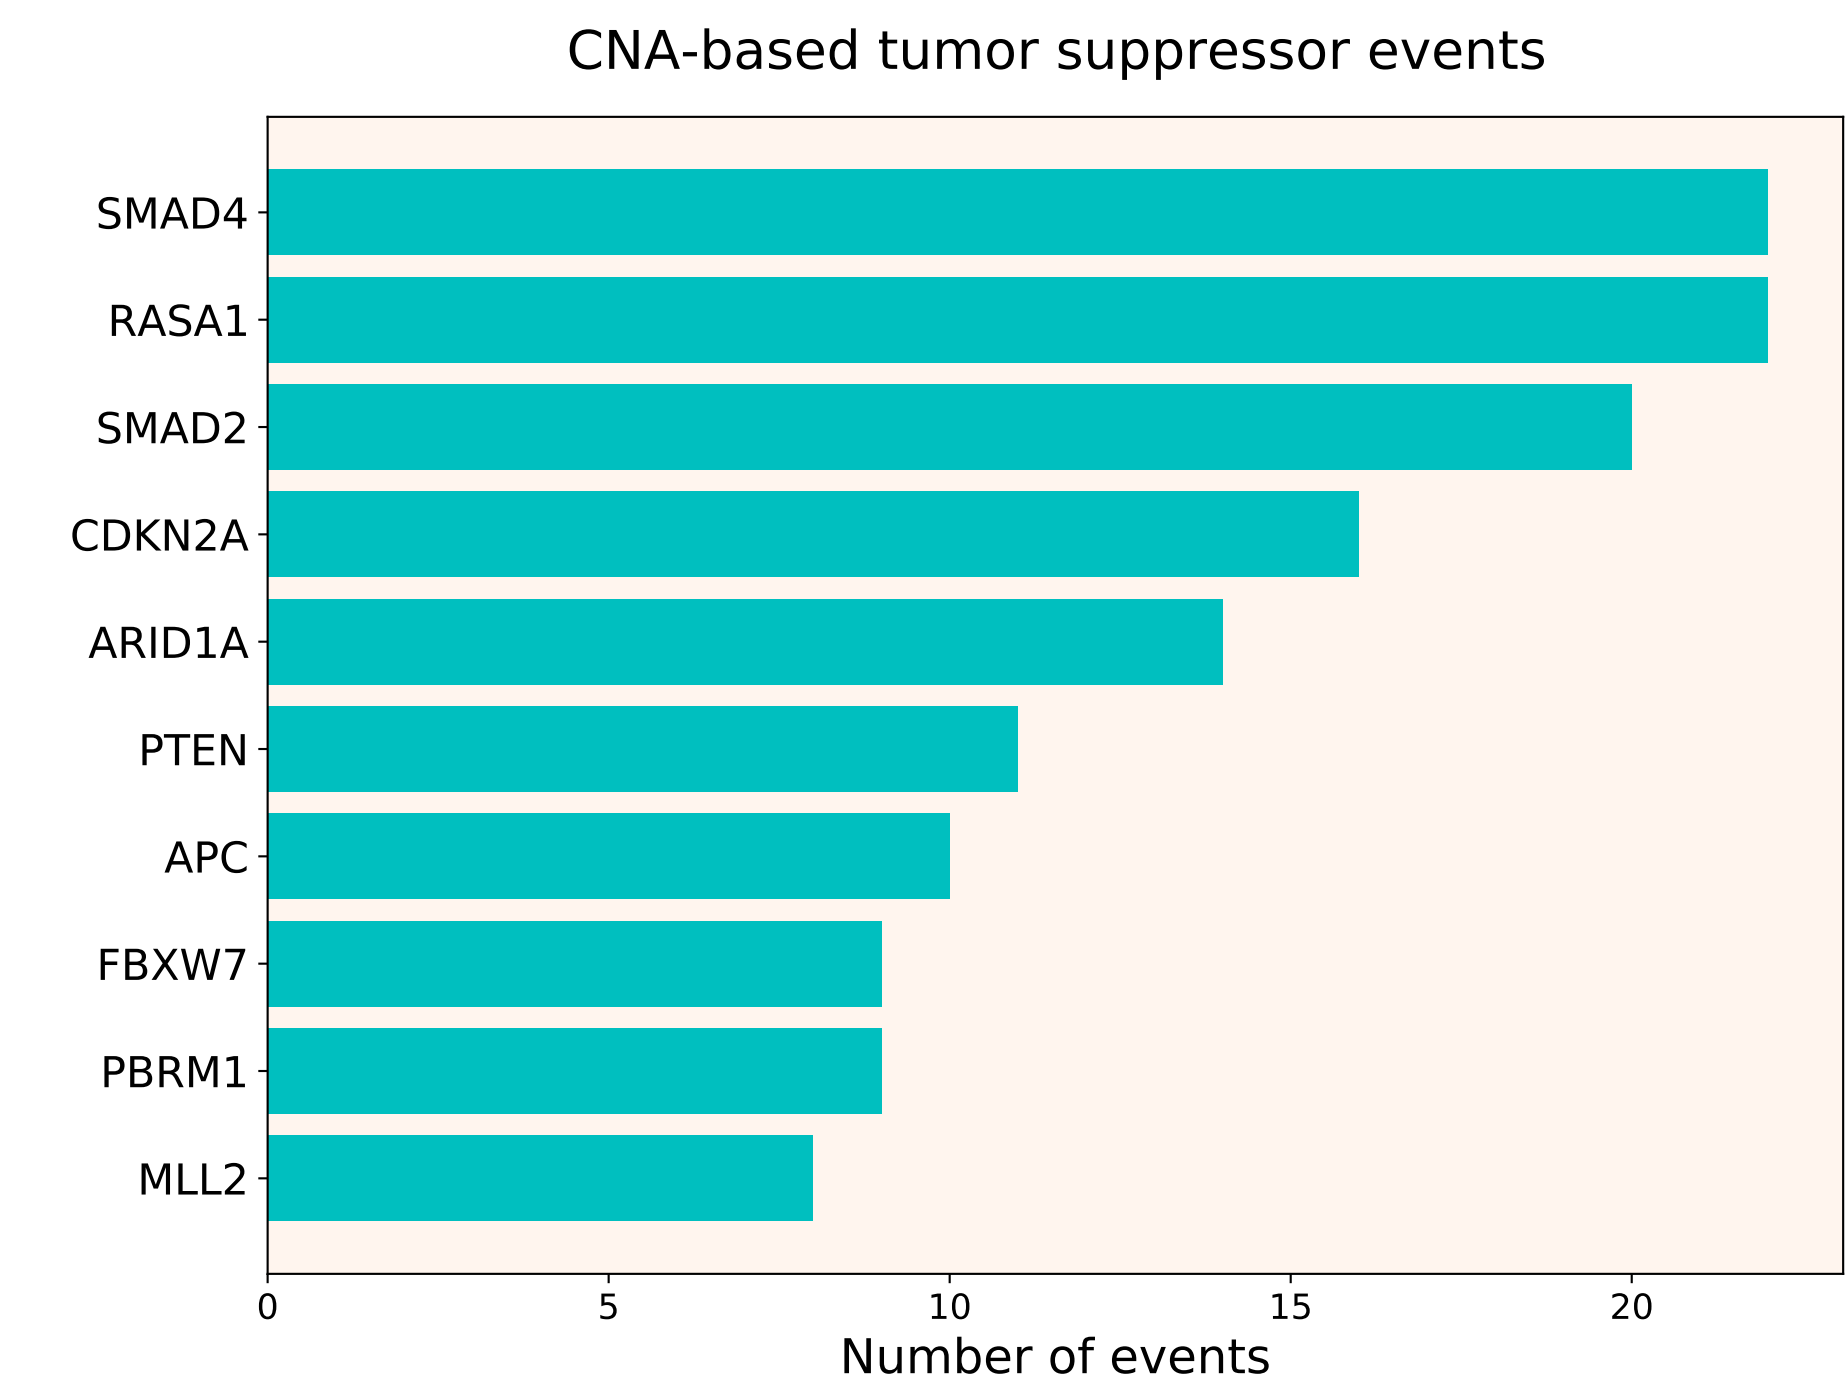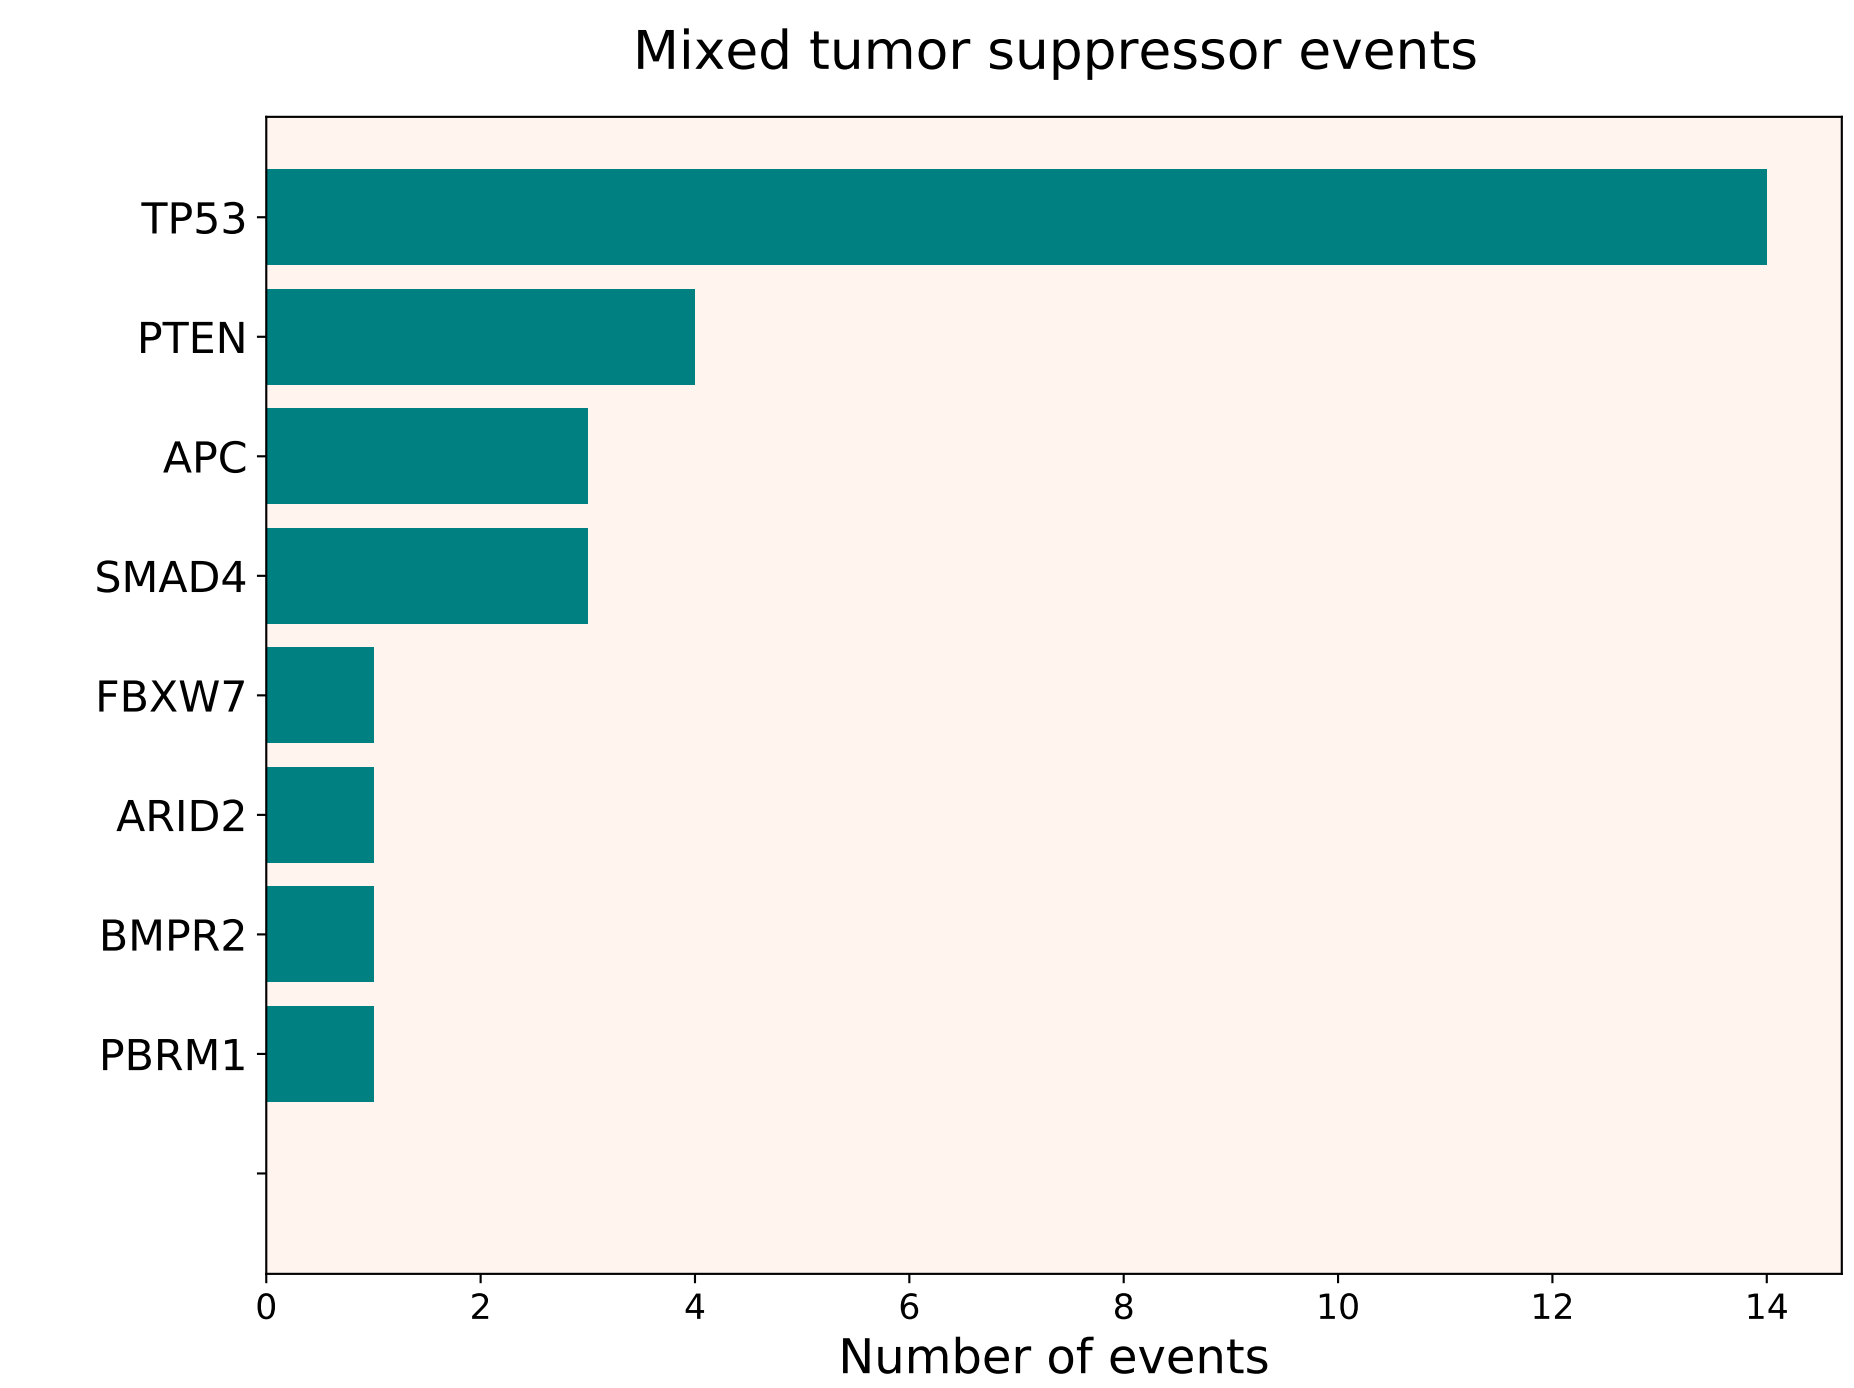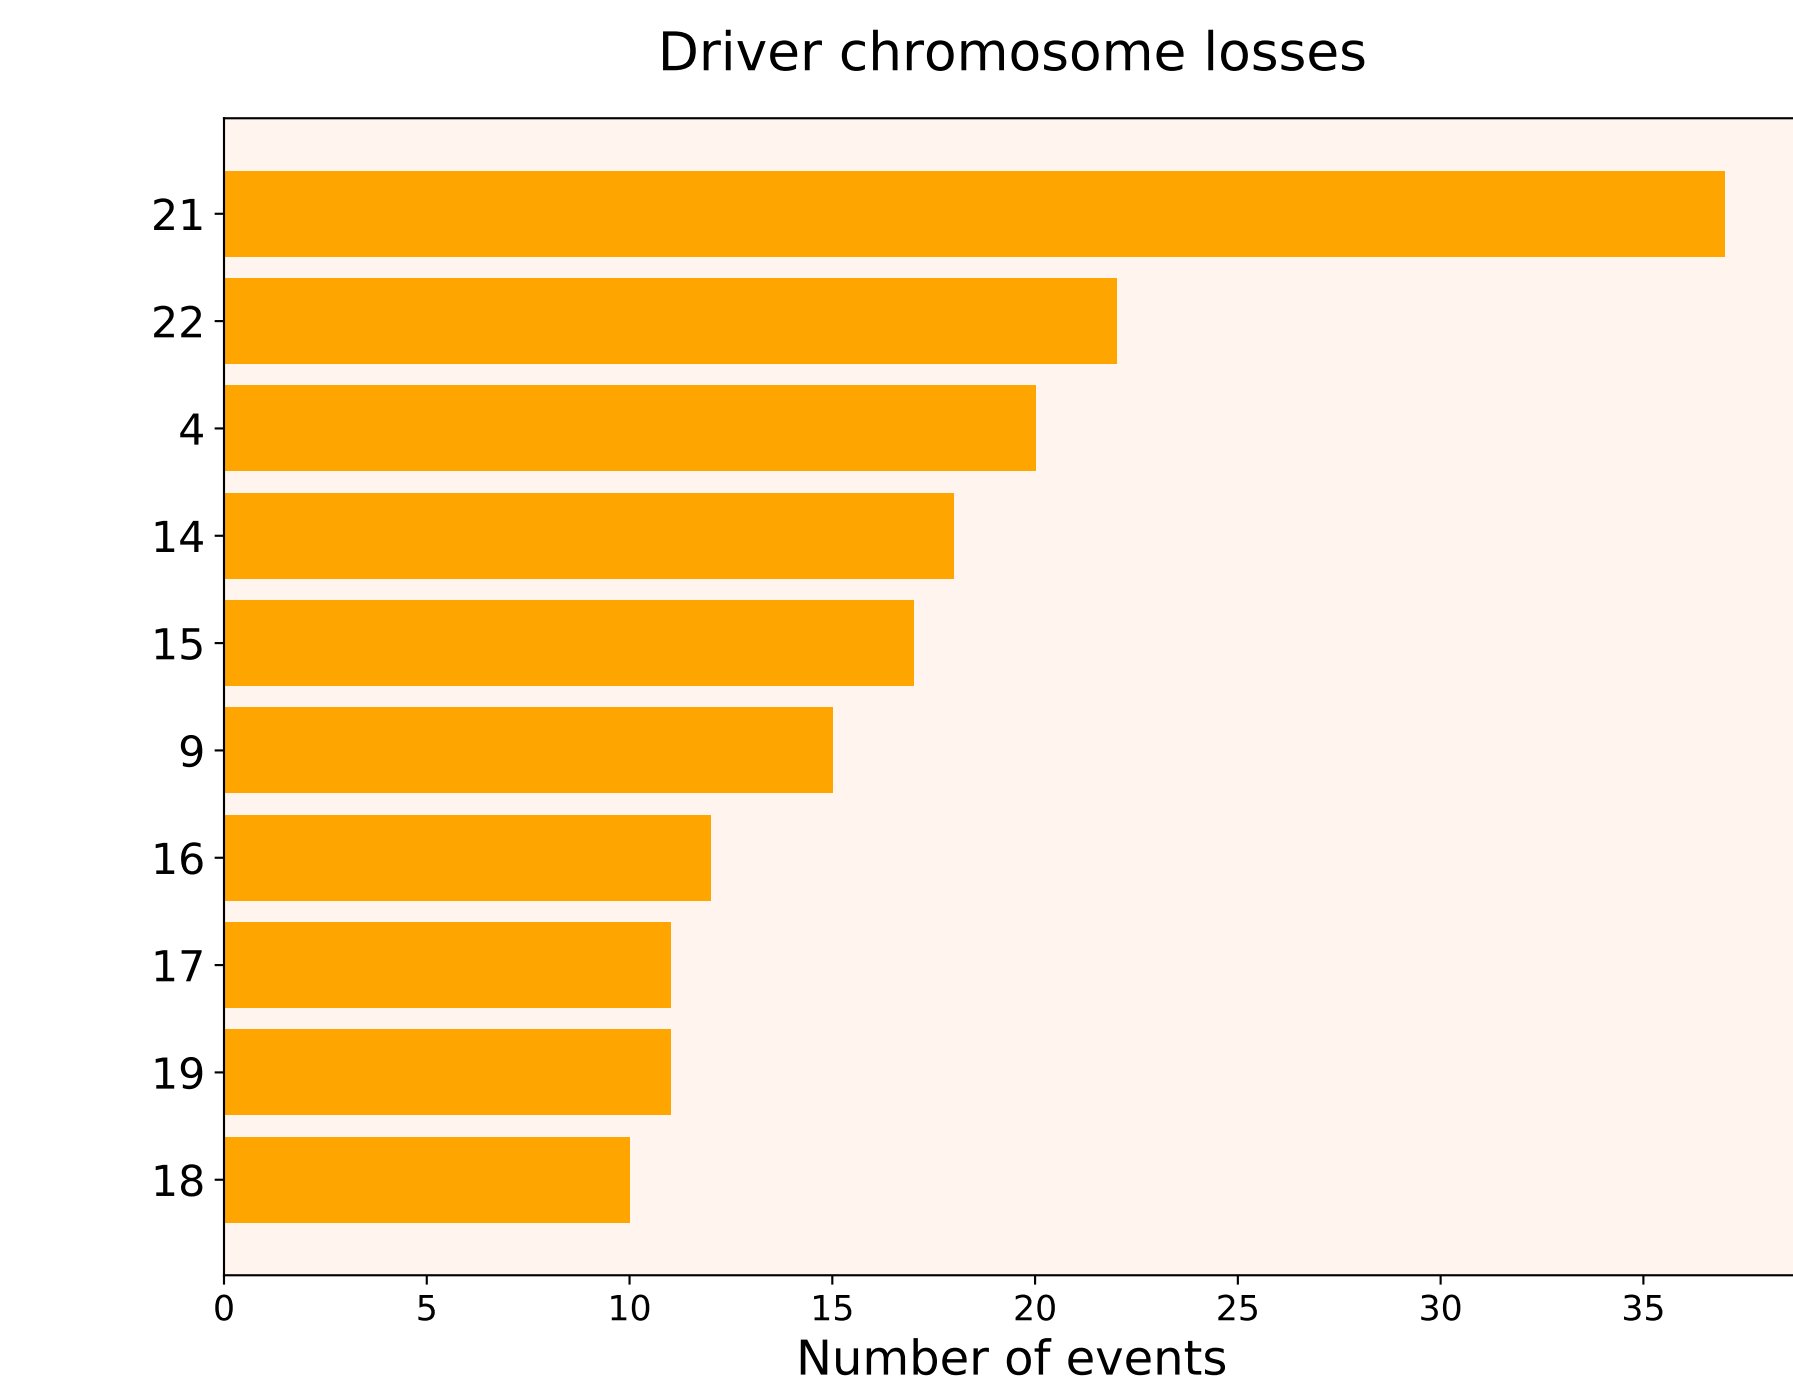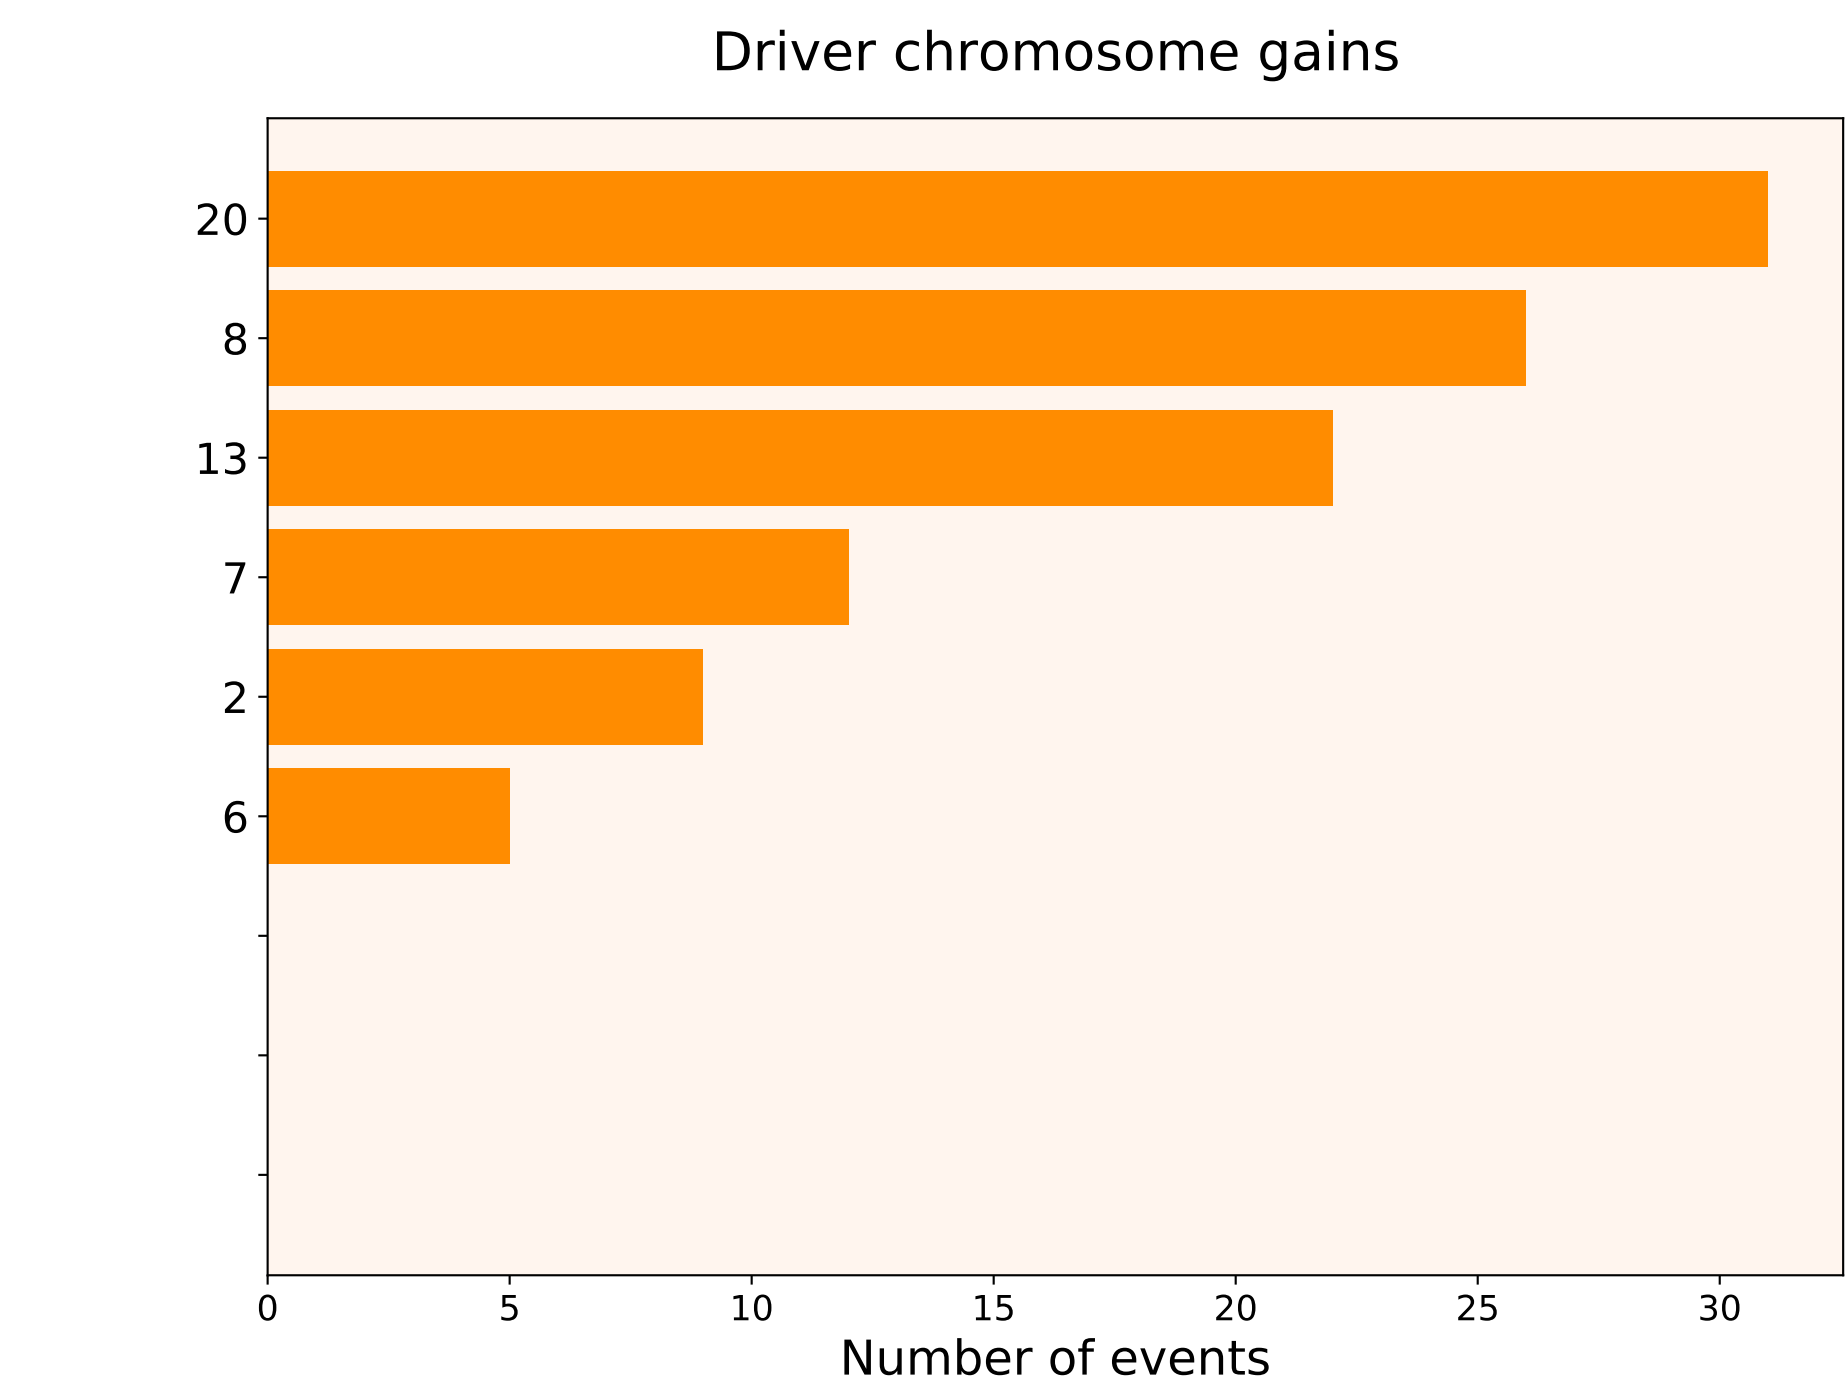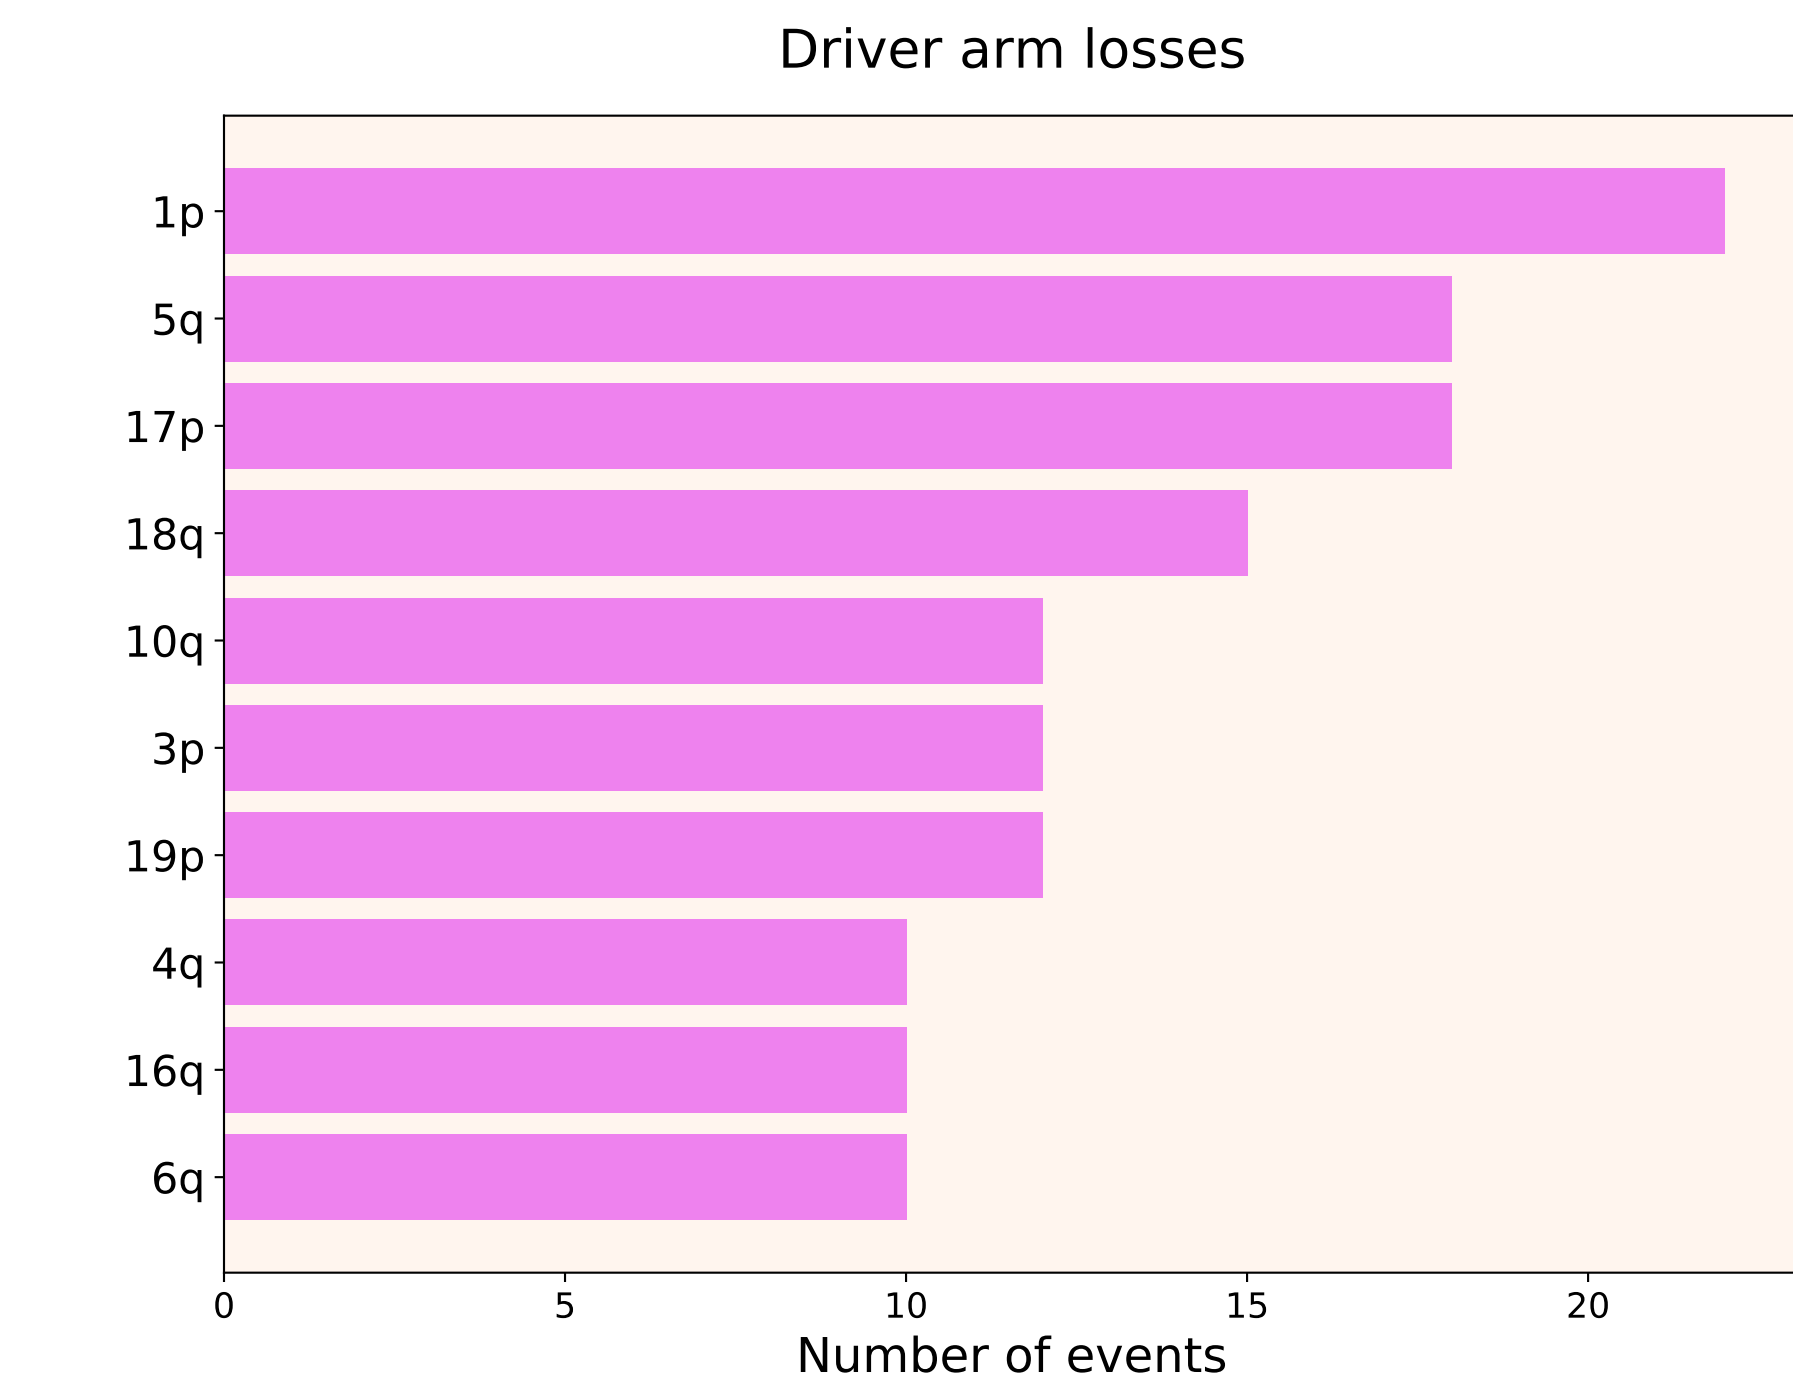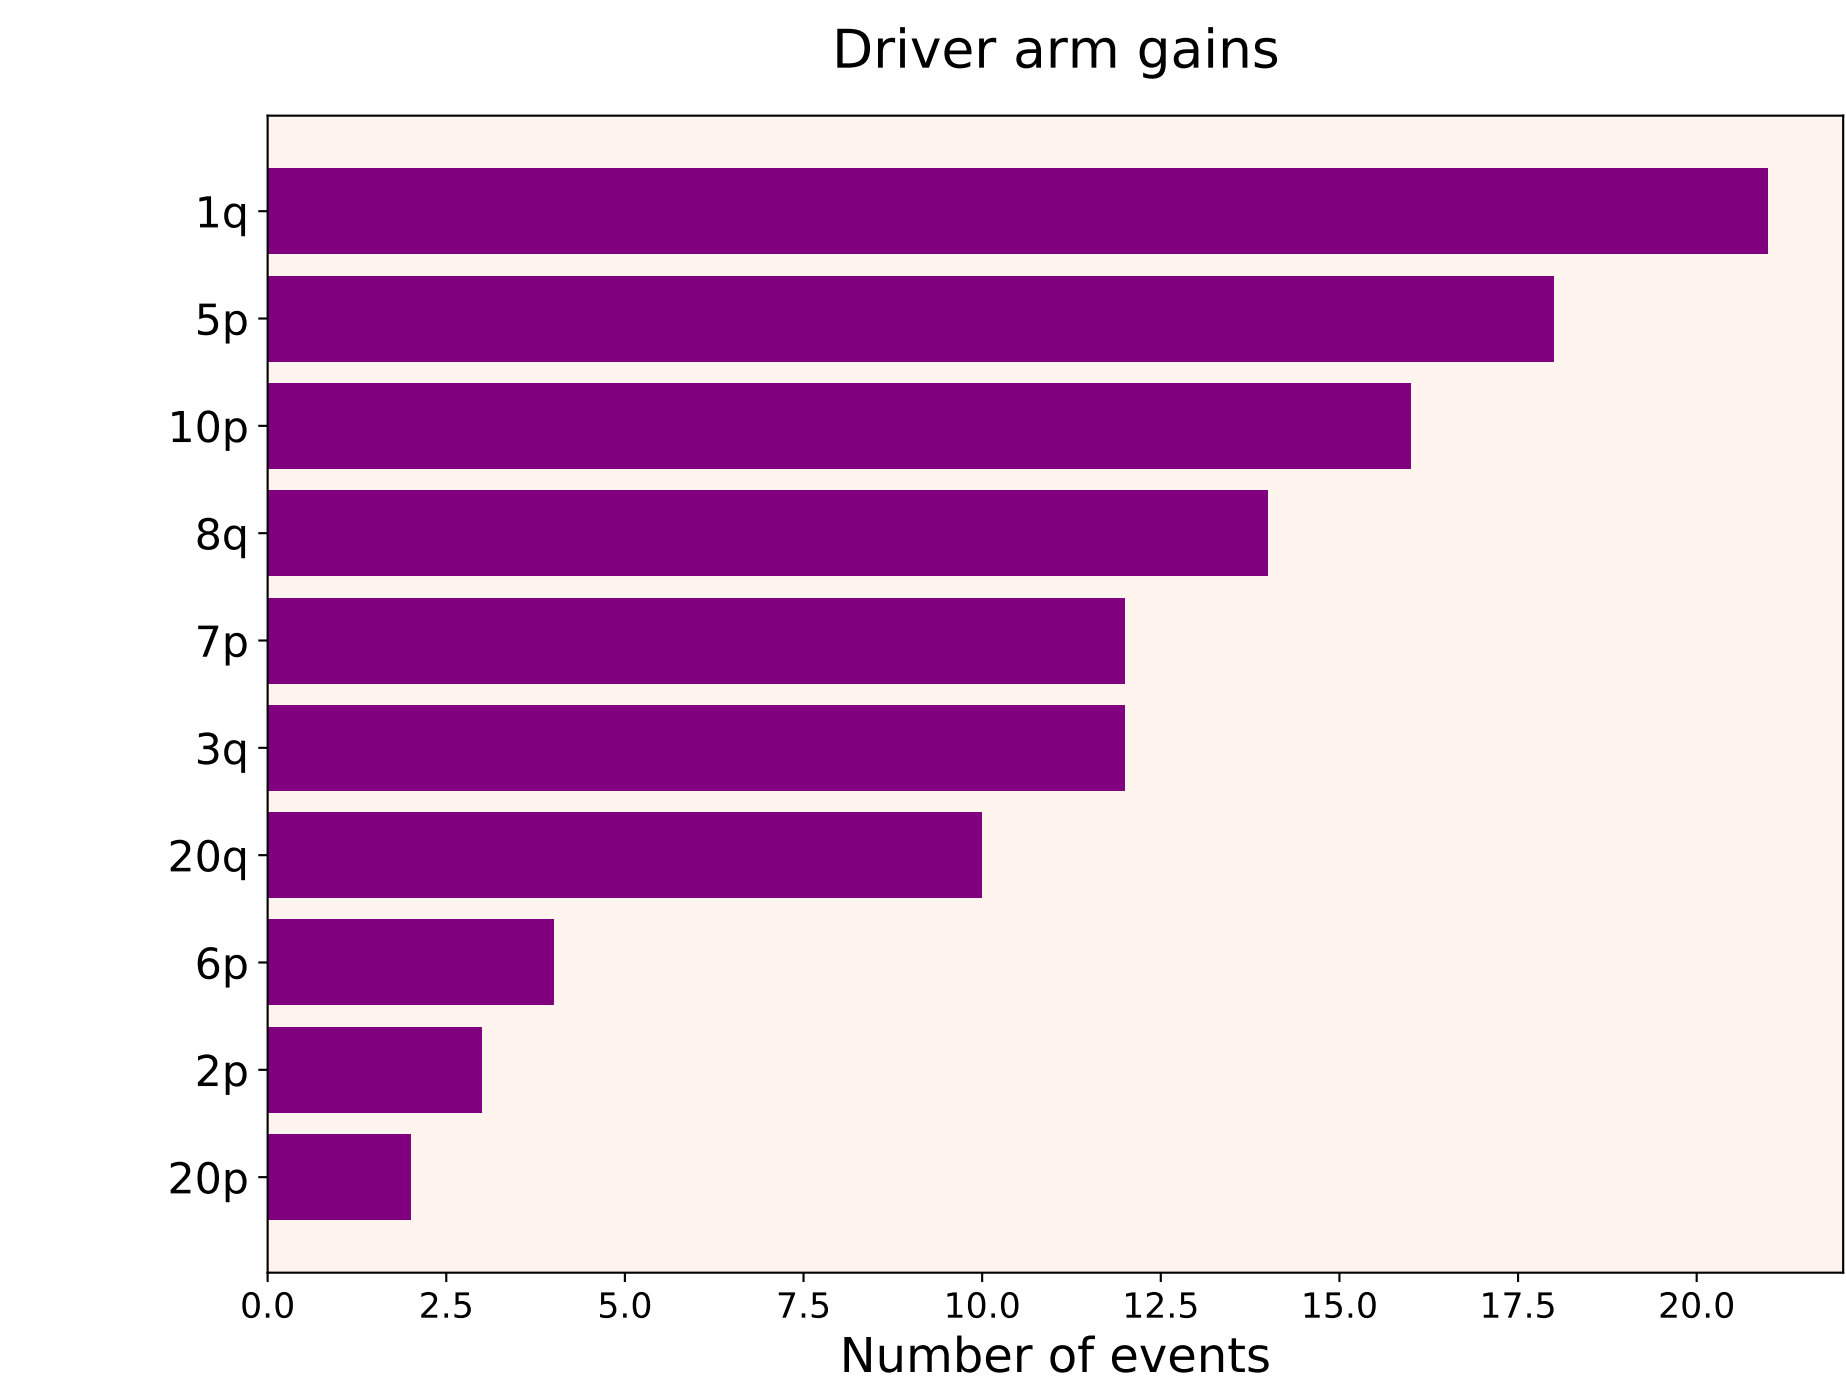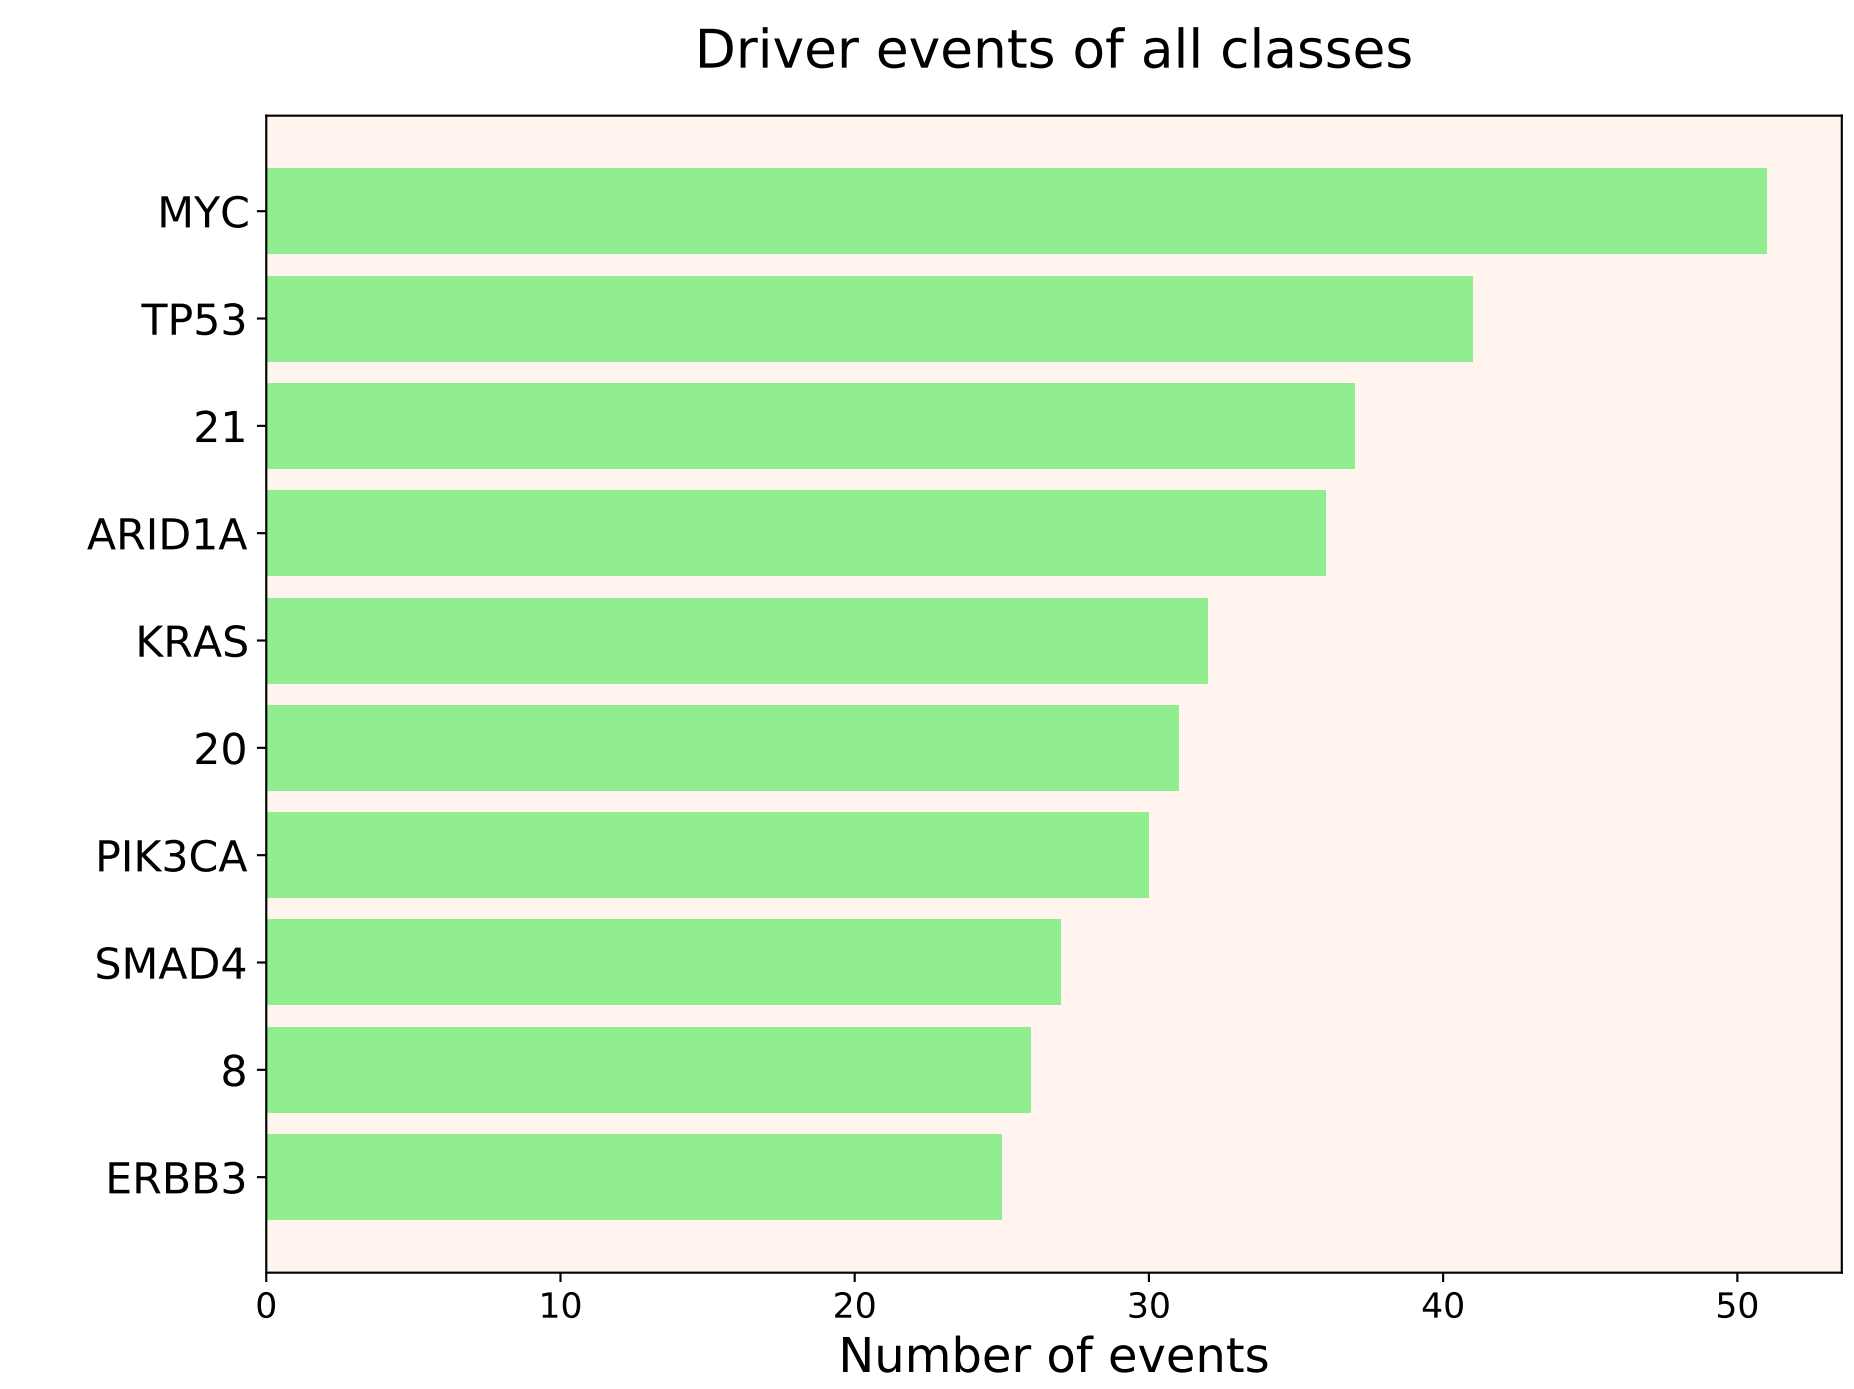

Supplement: Supplemental_Data_S1.zip [file Supplemental_Data_S1.zip]

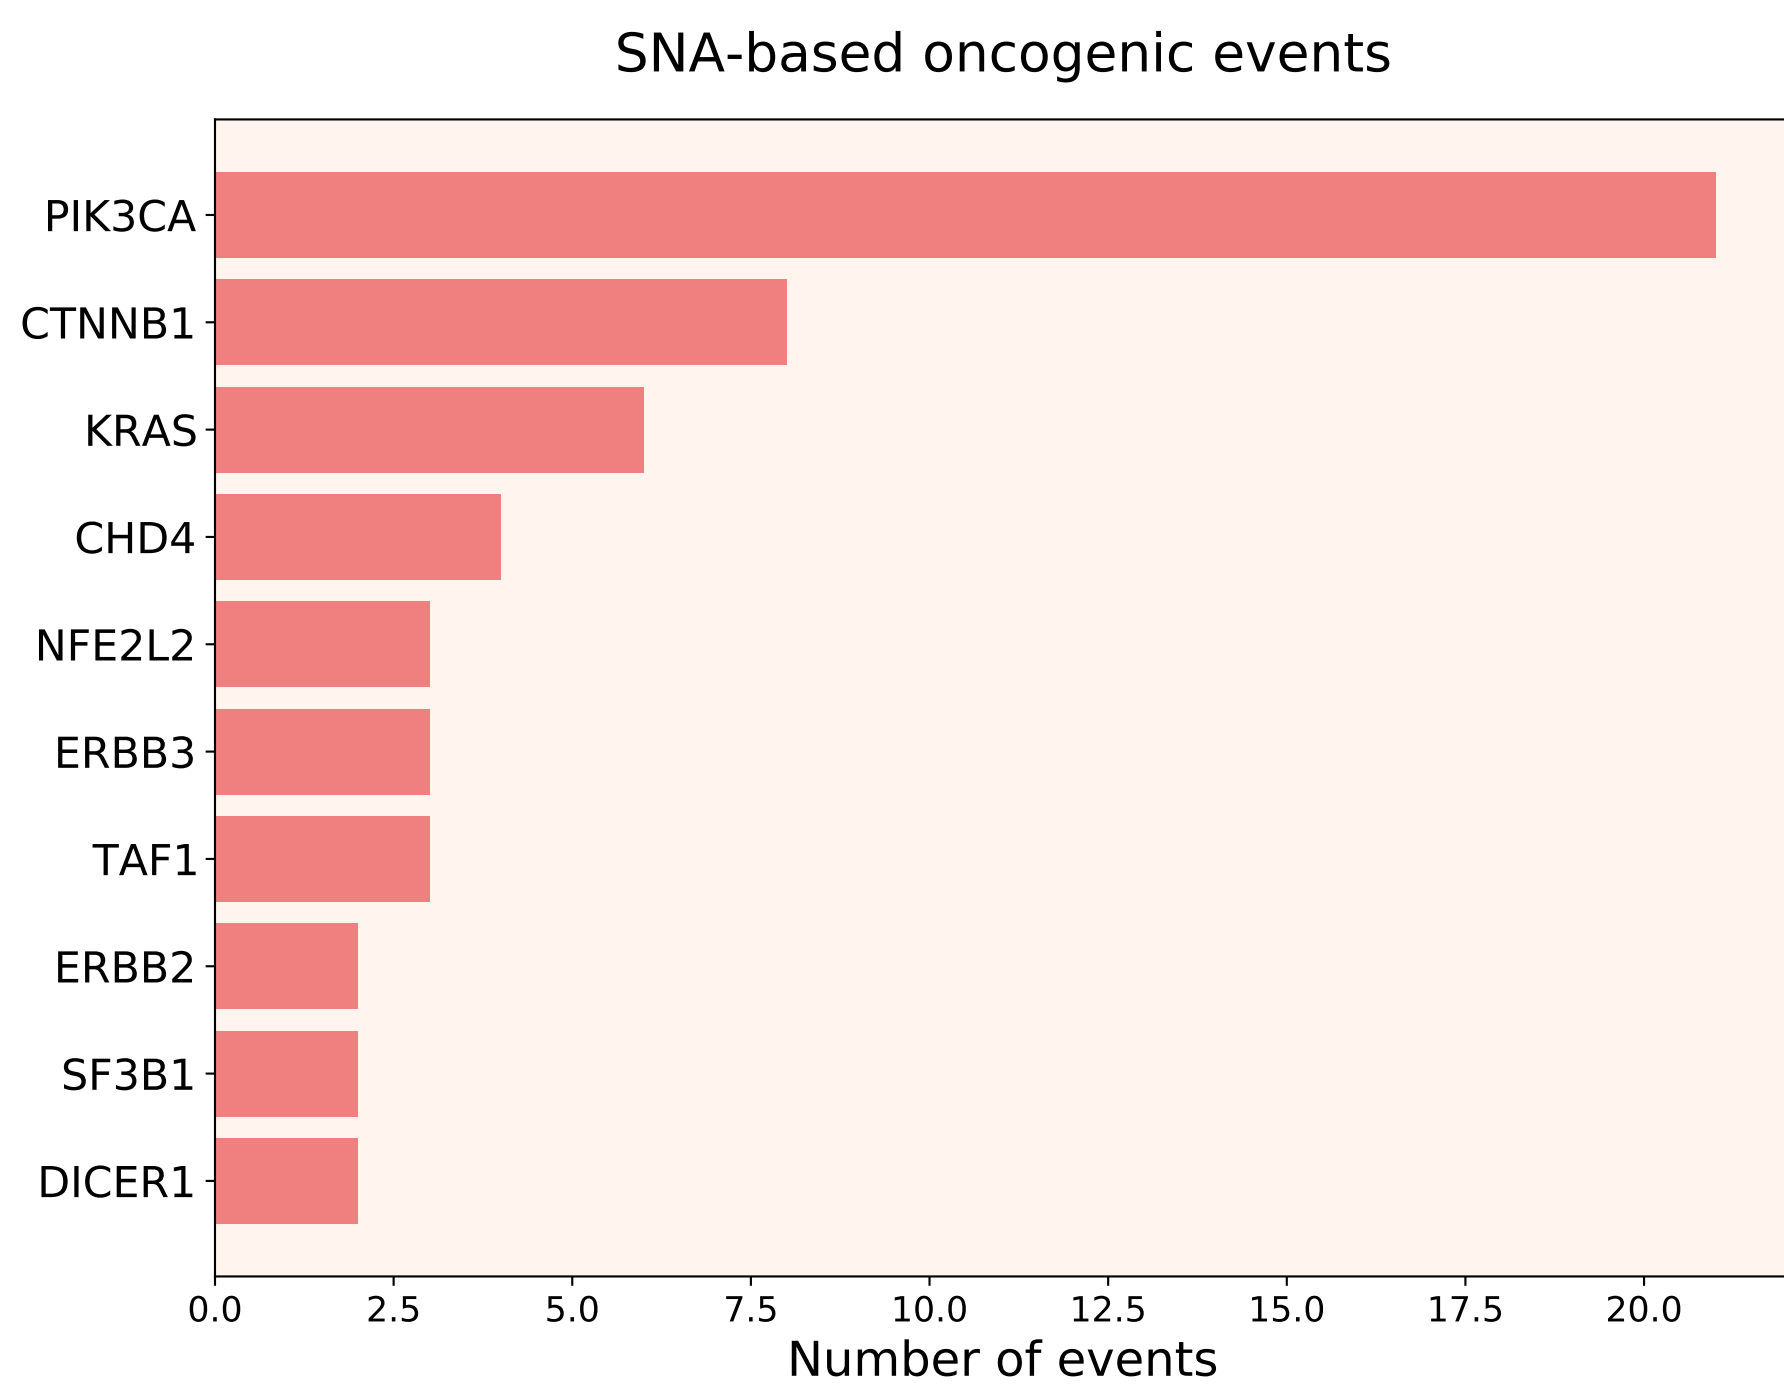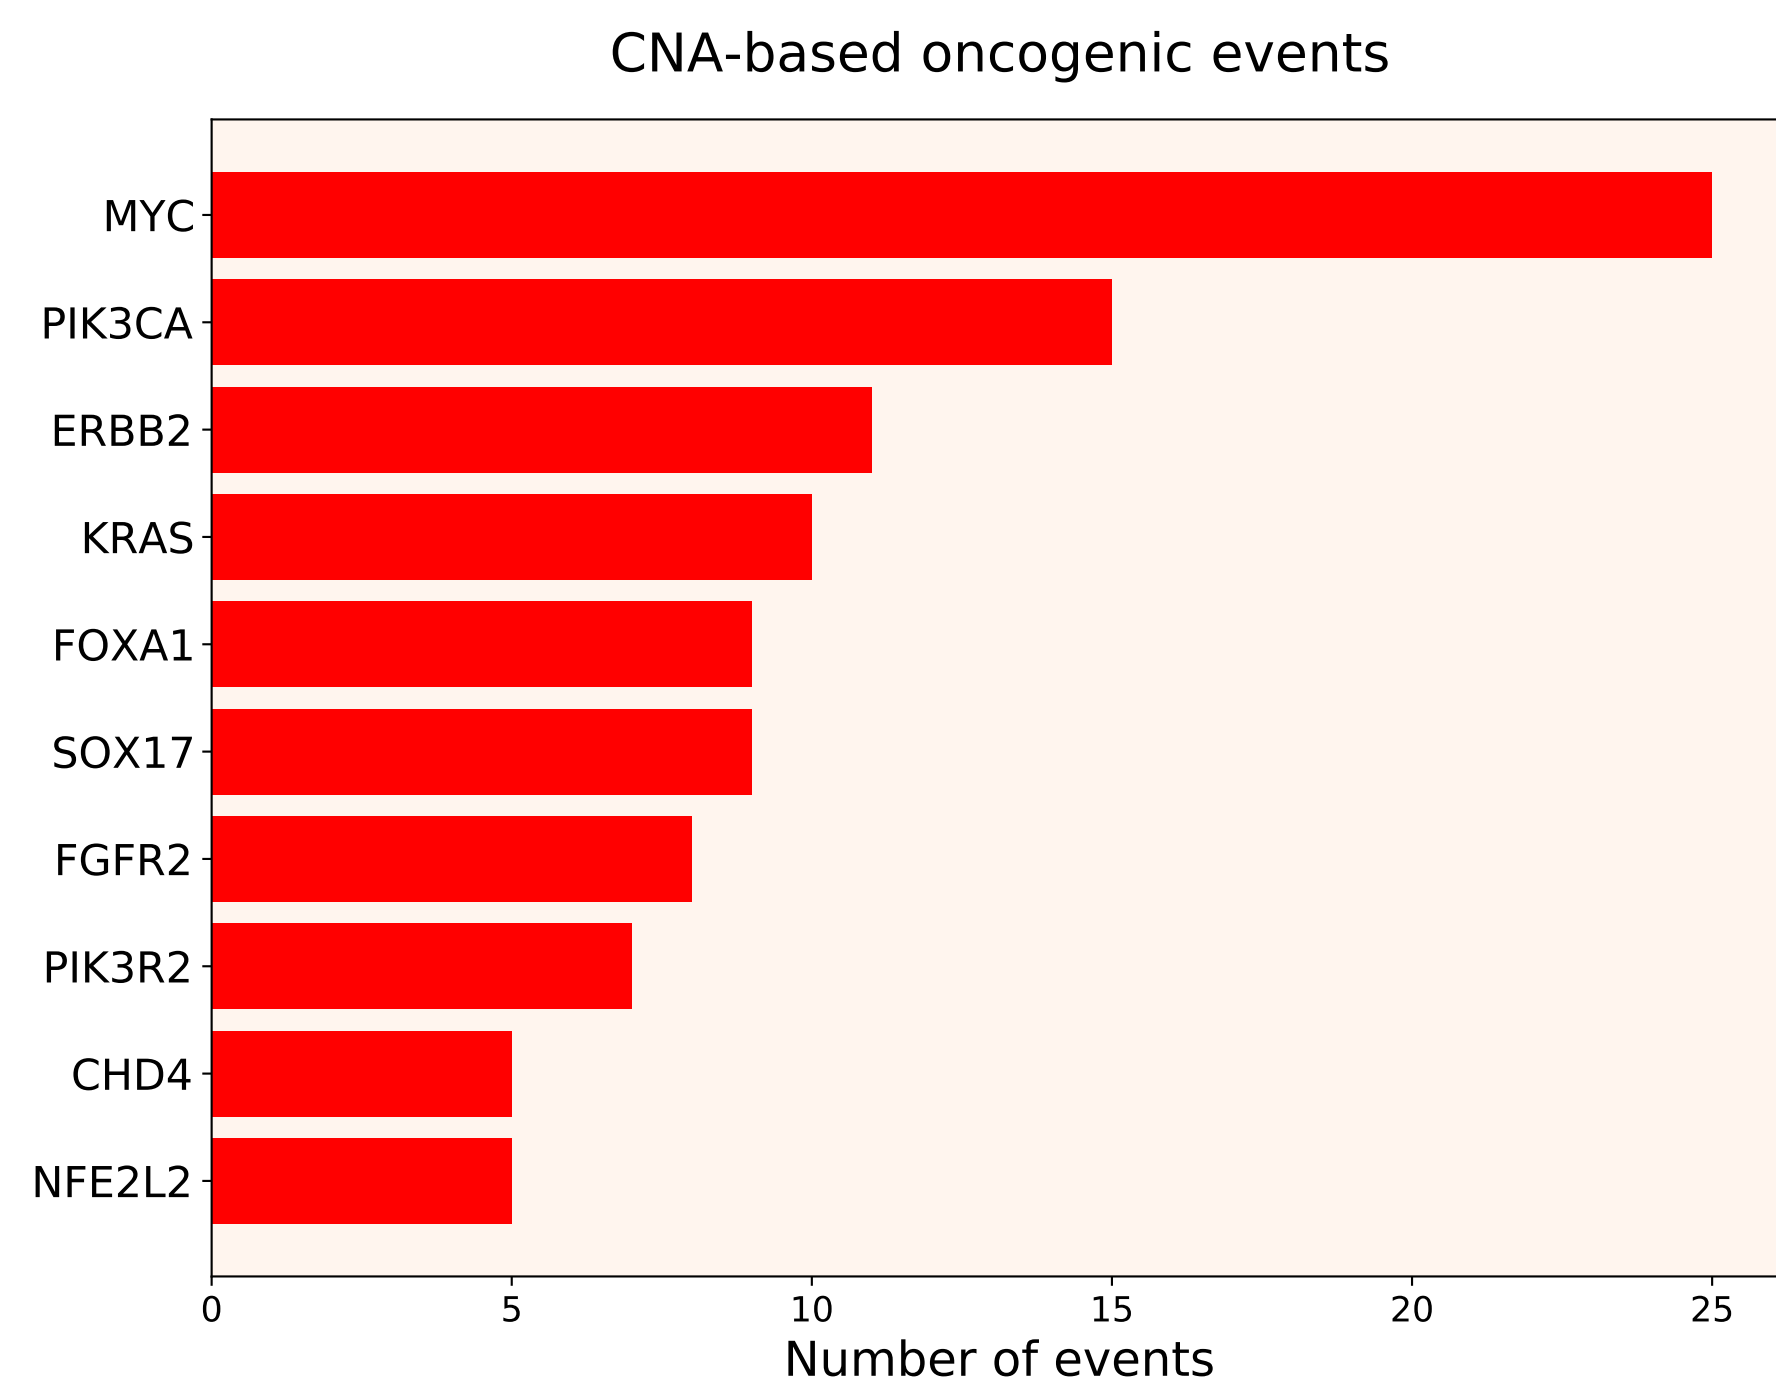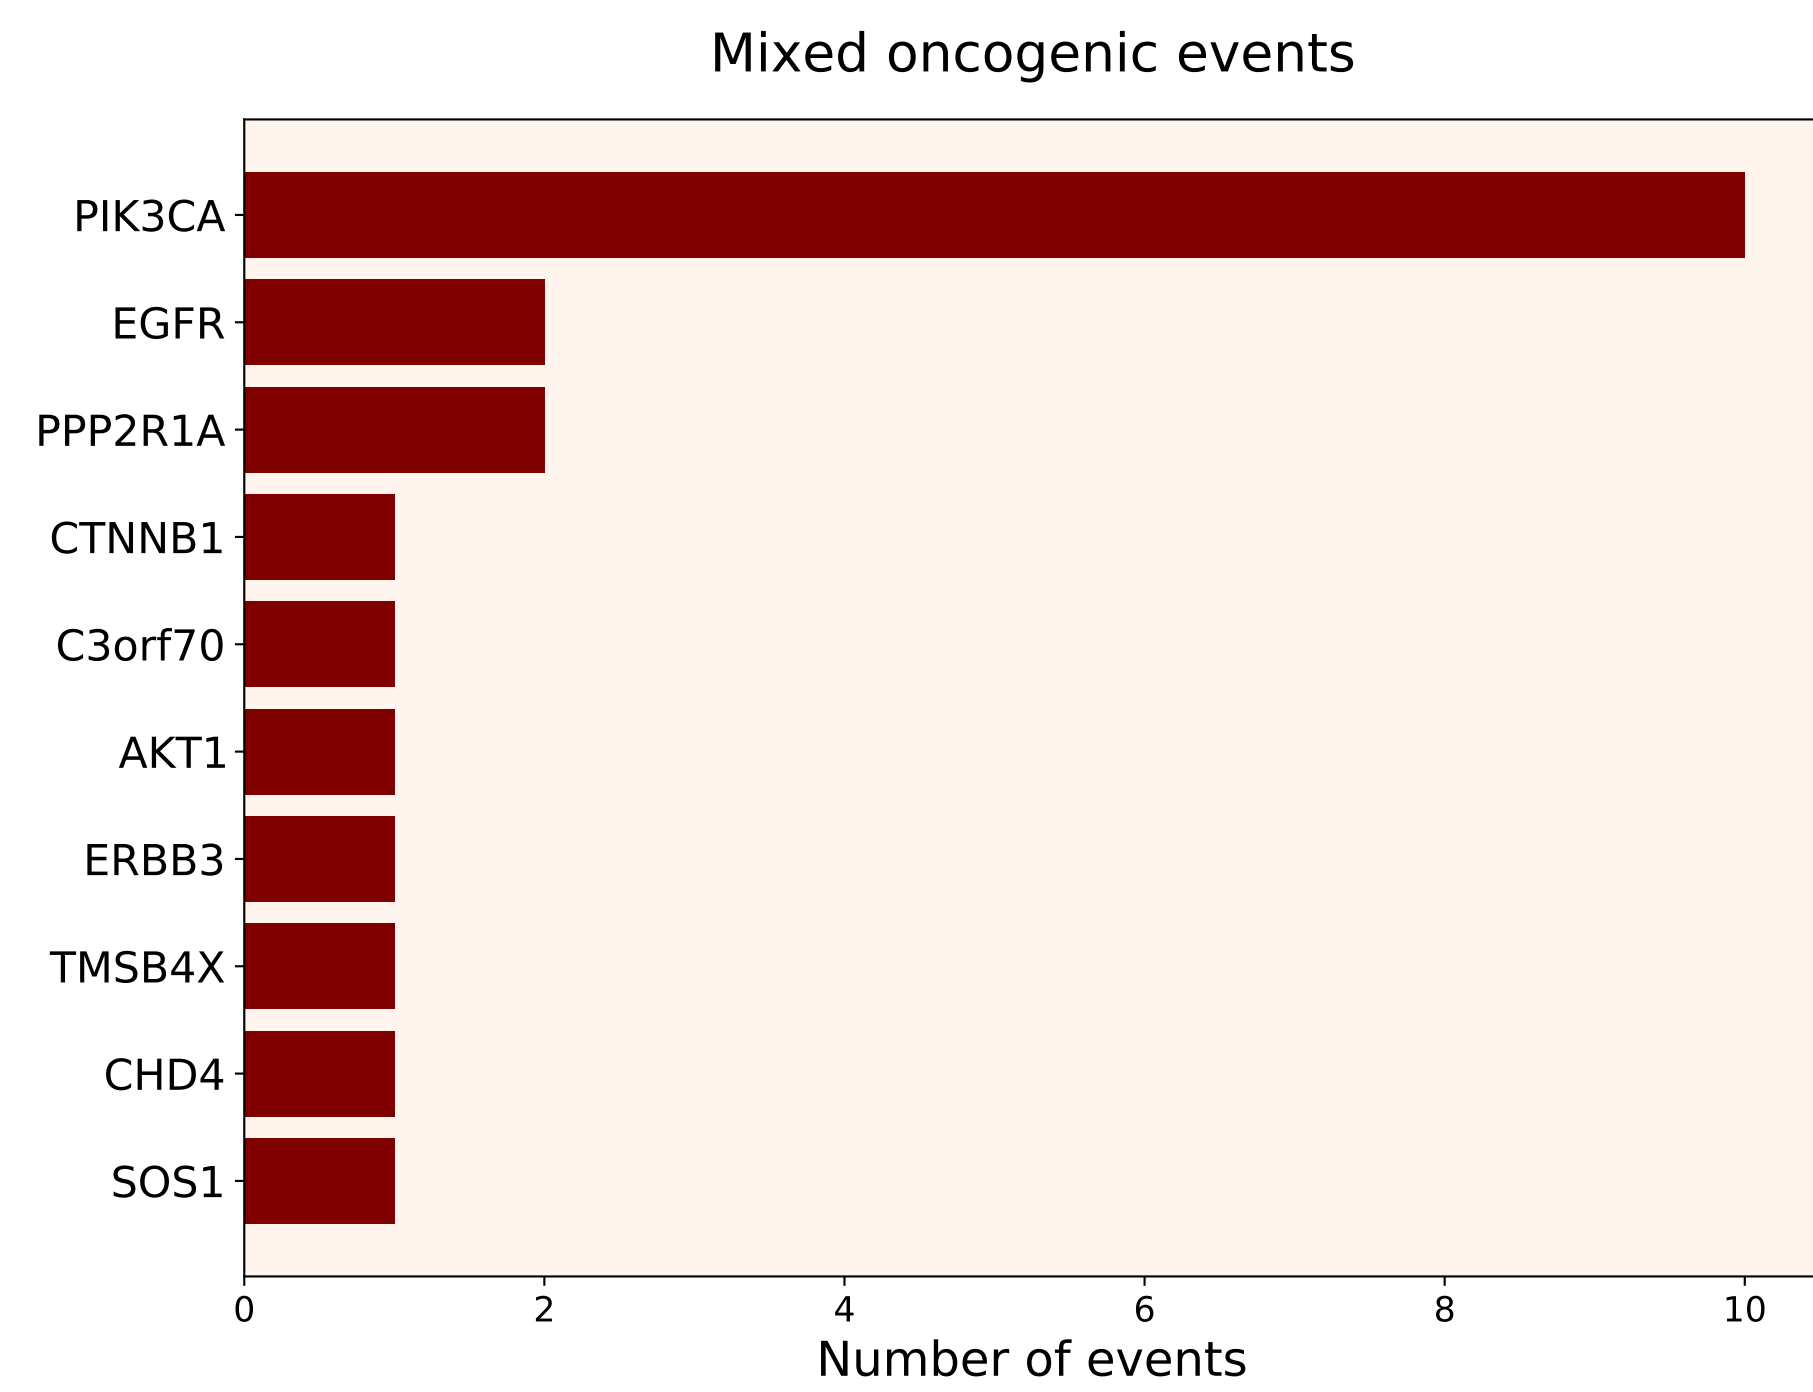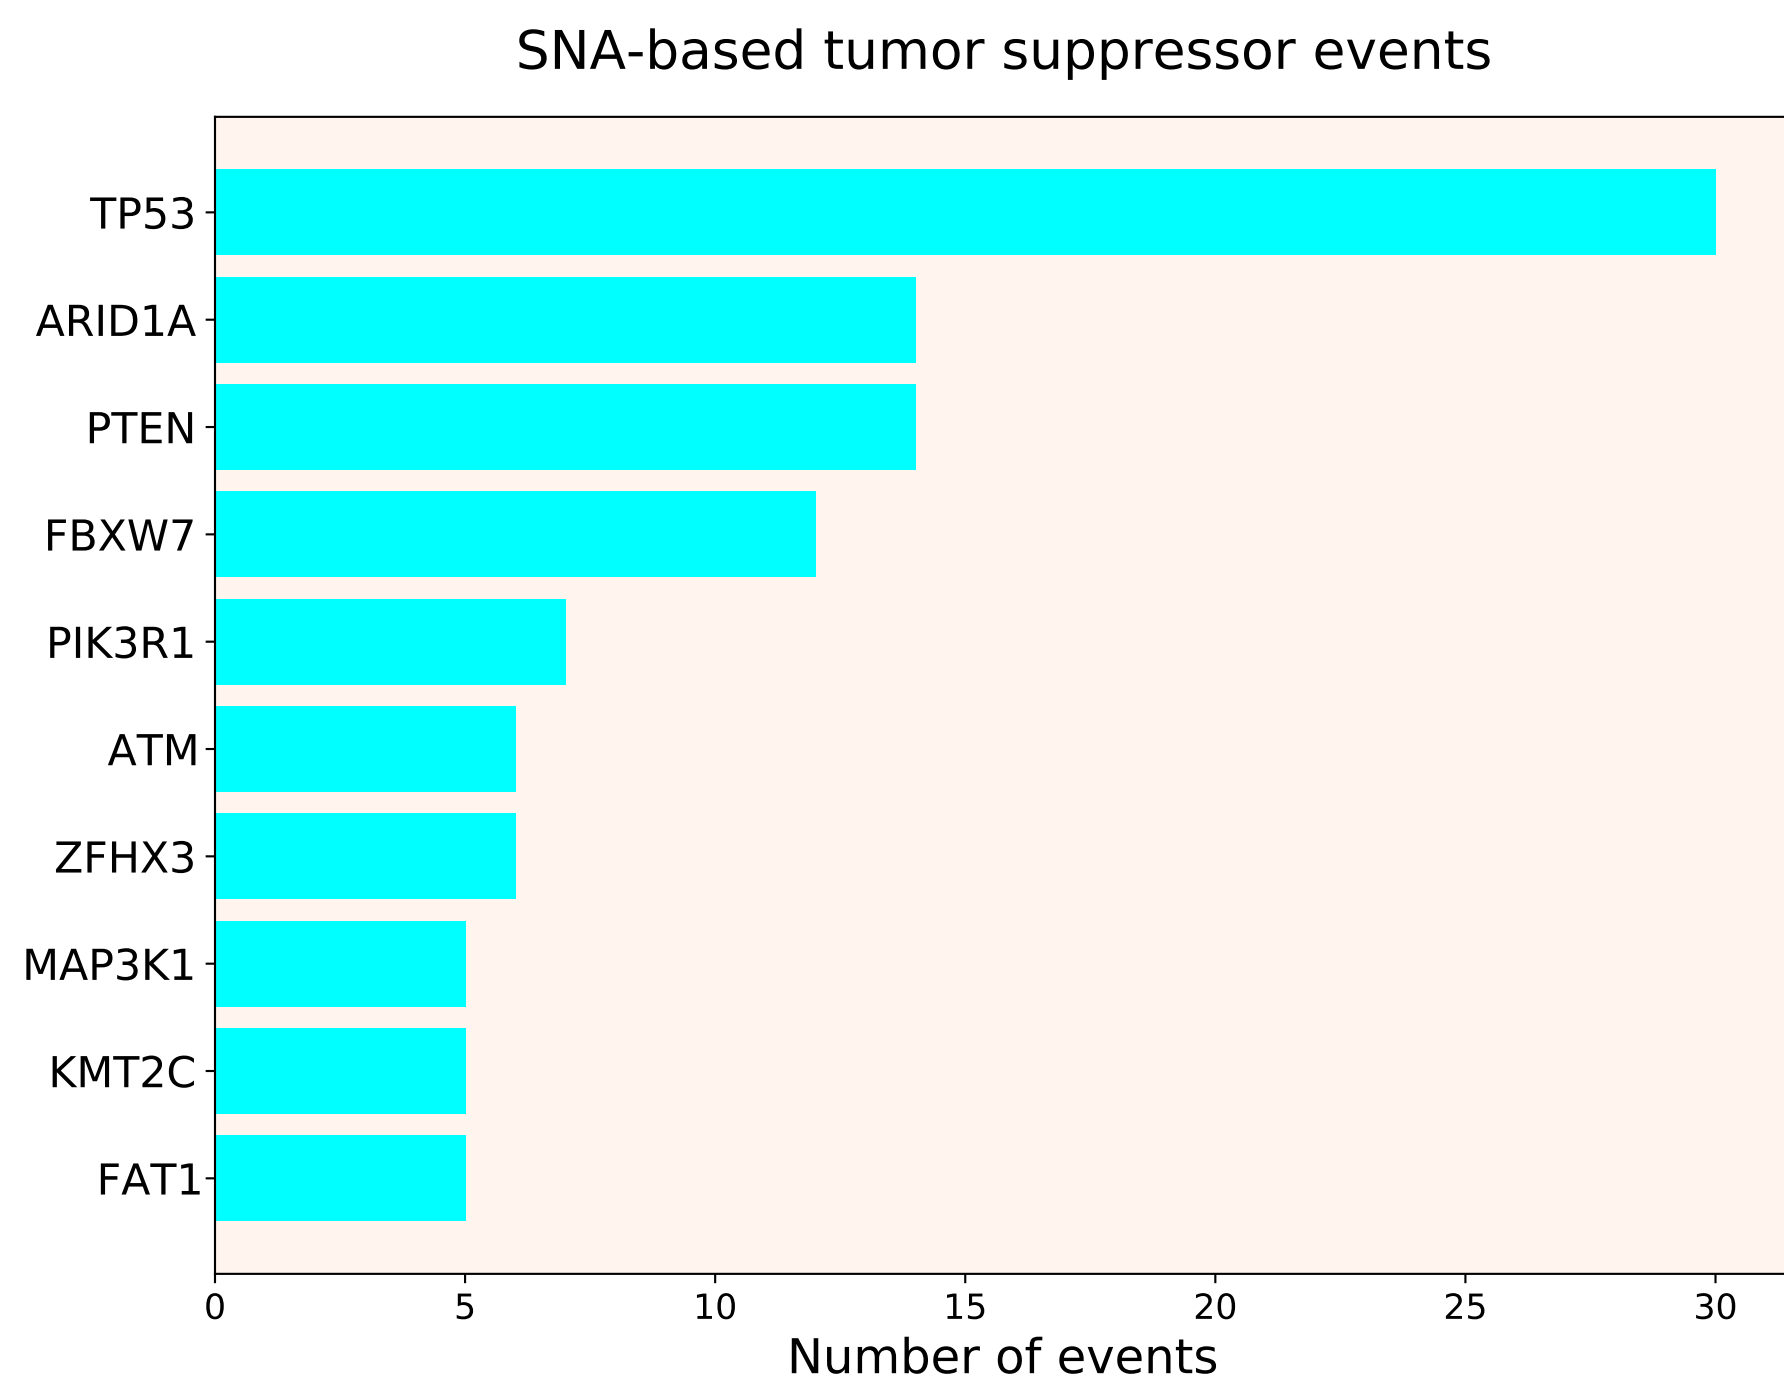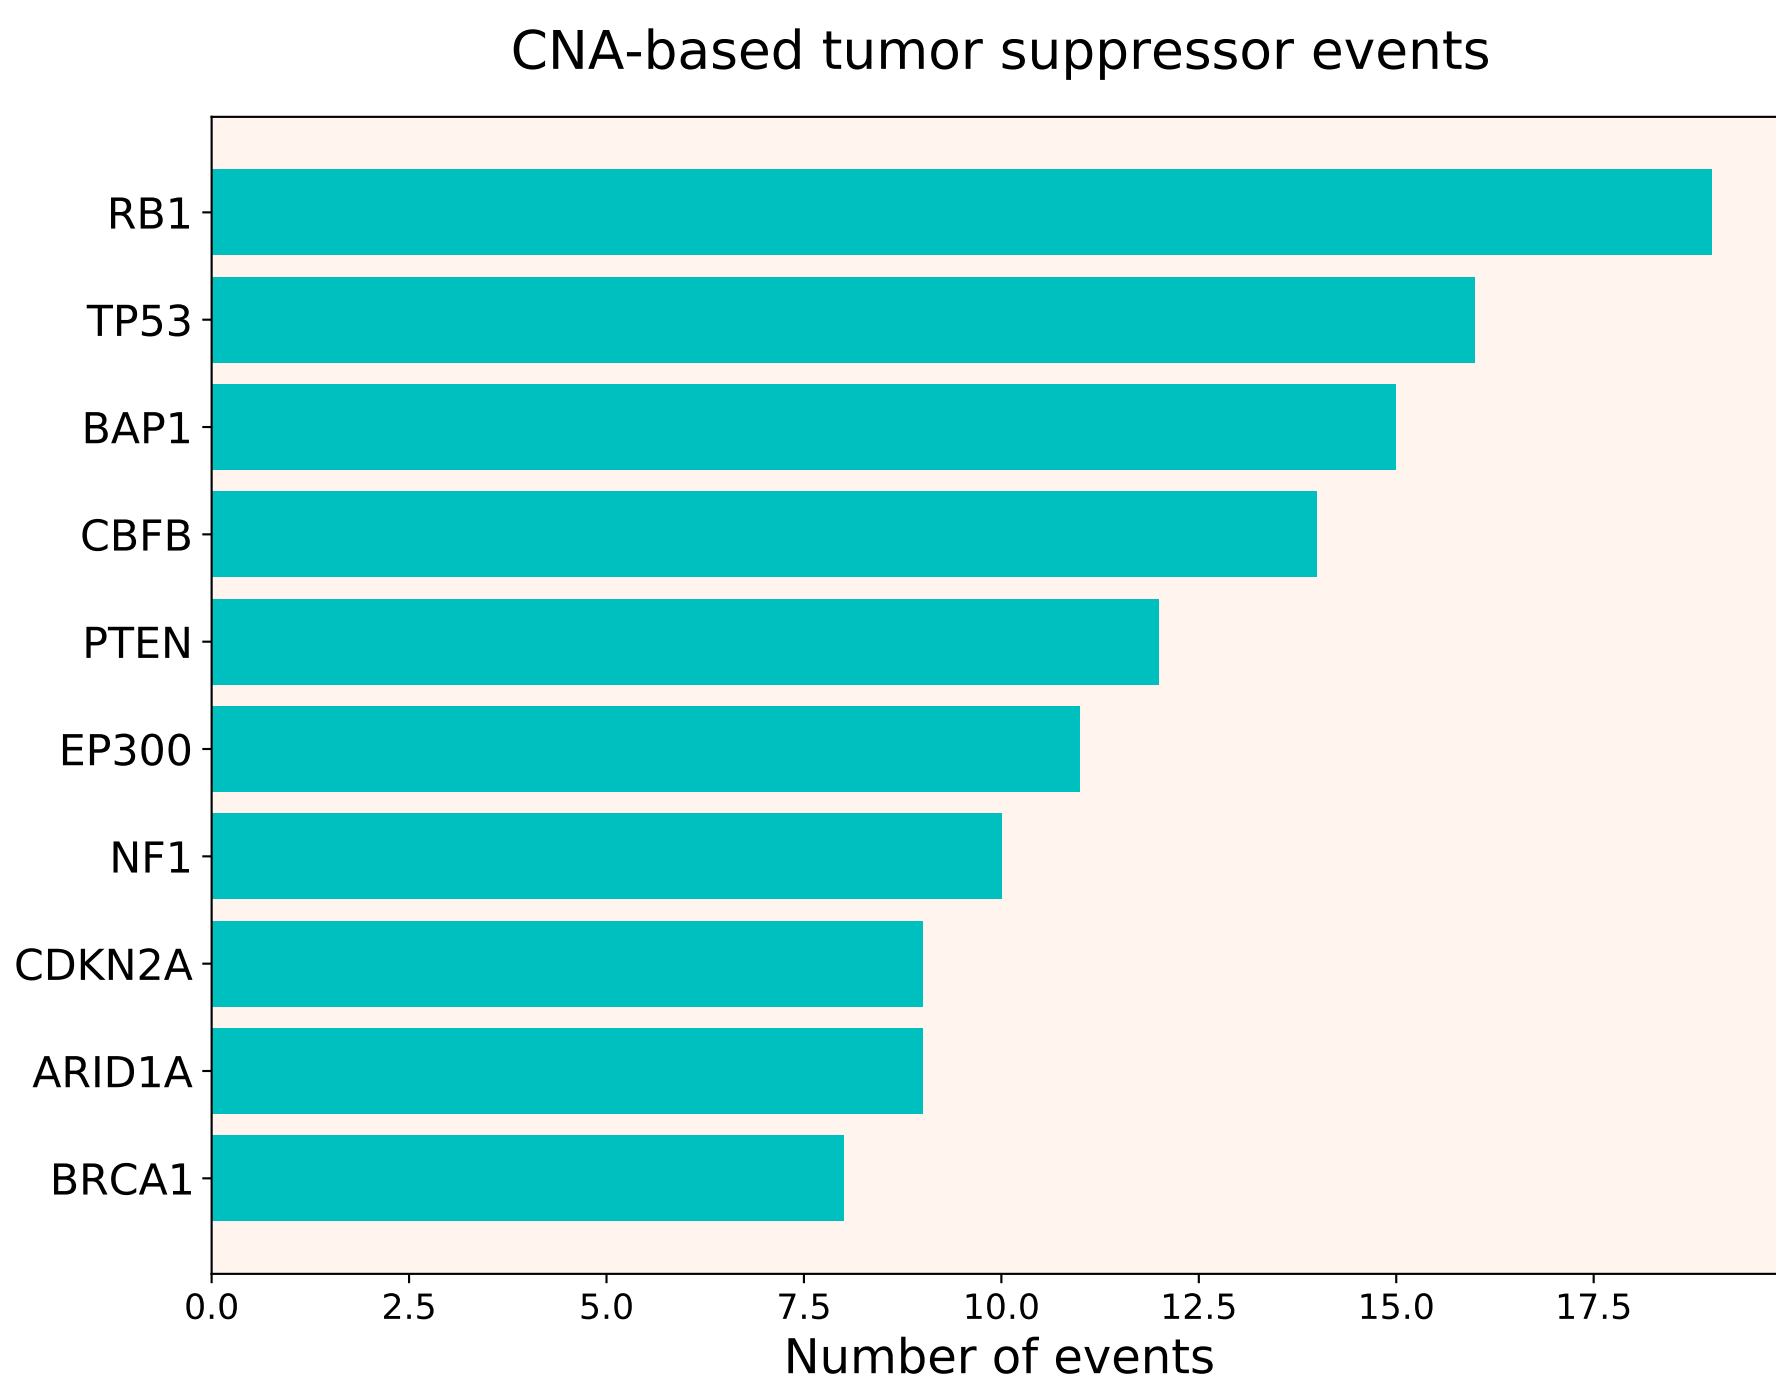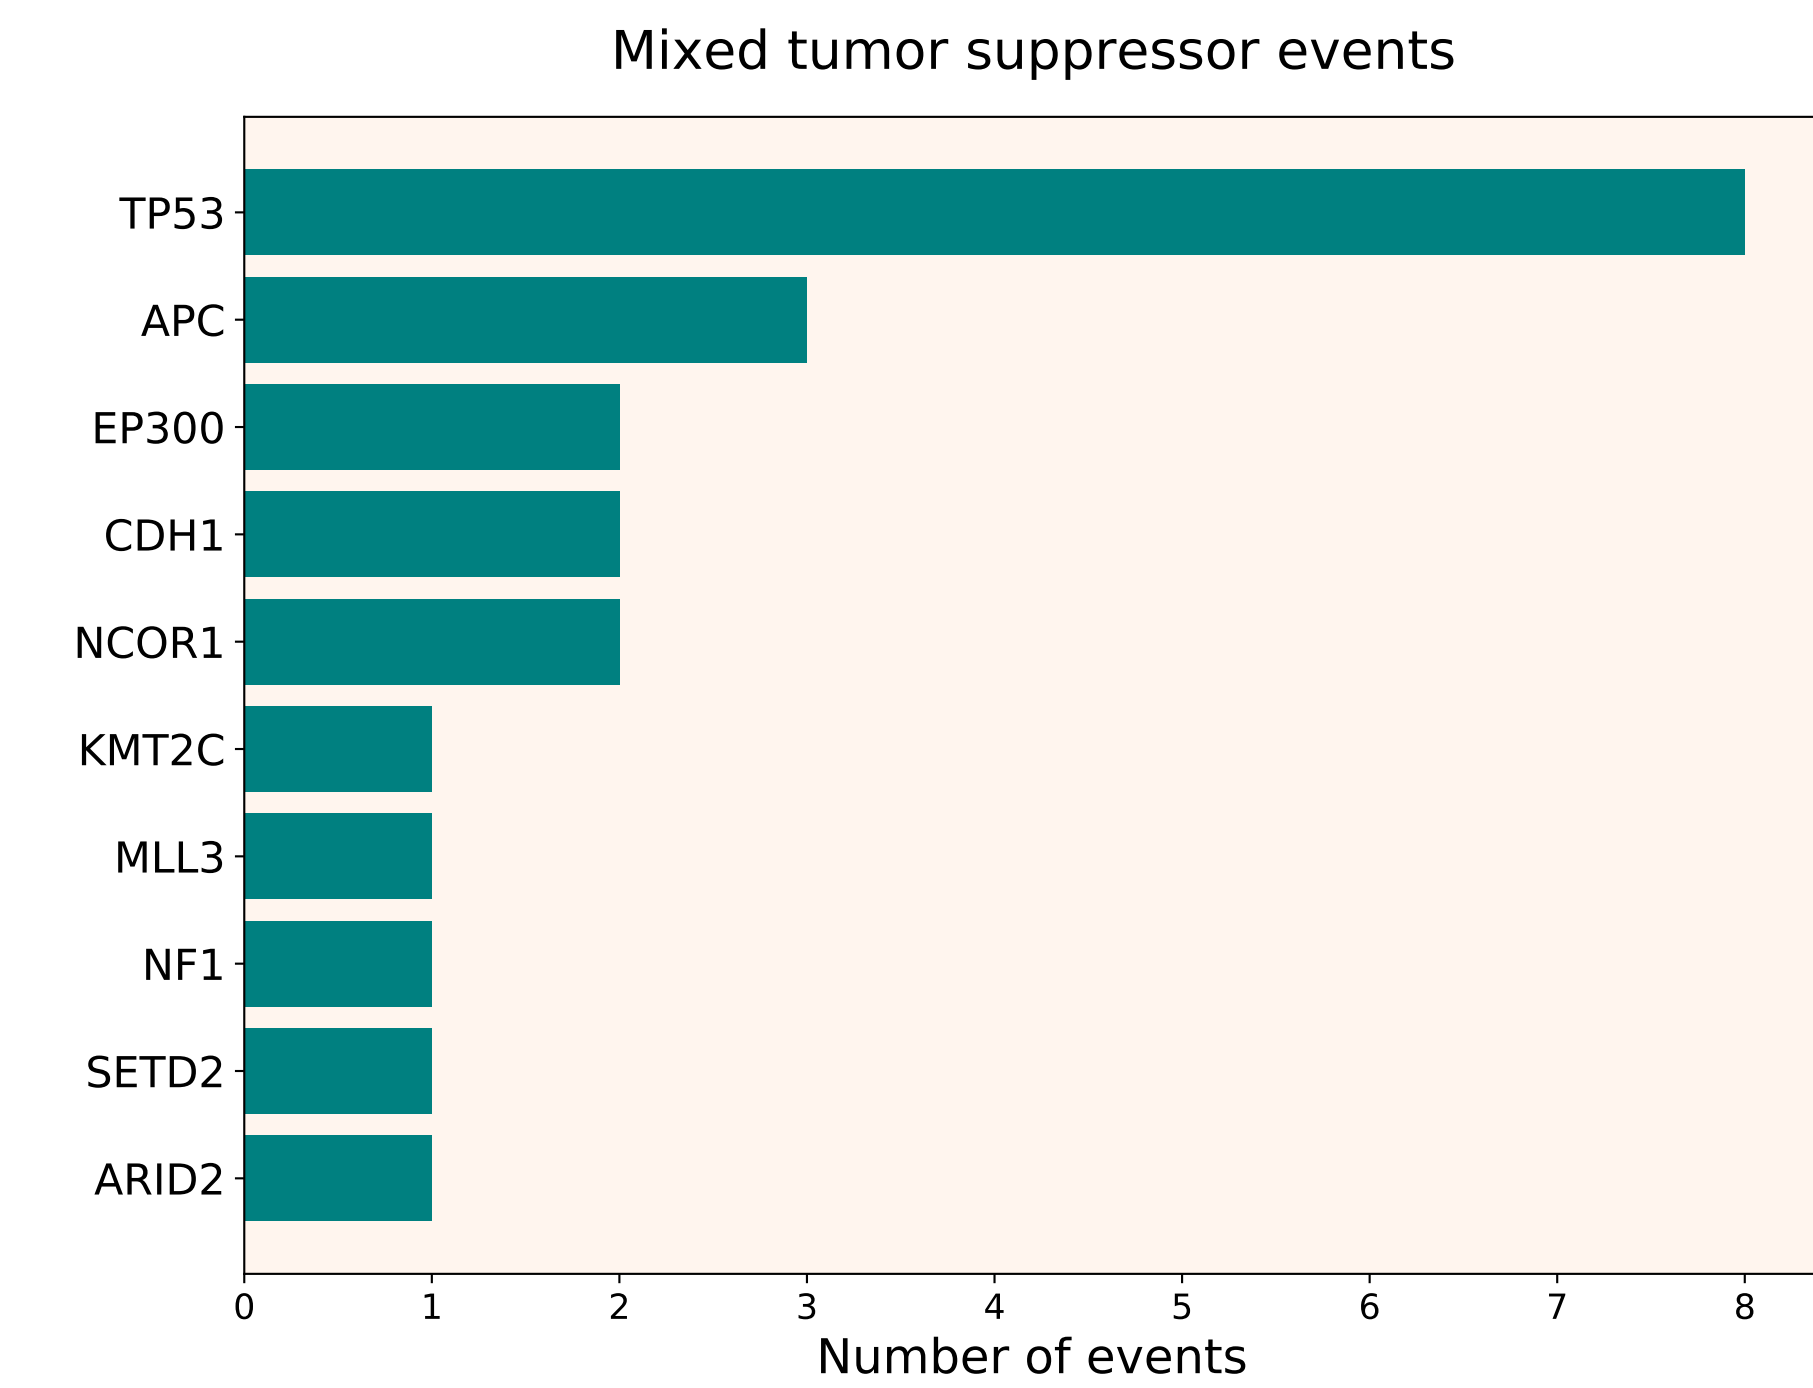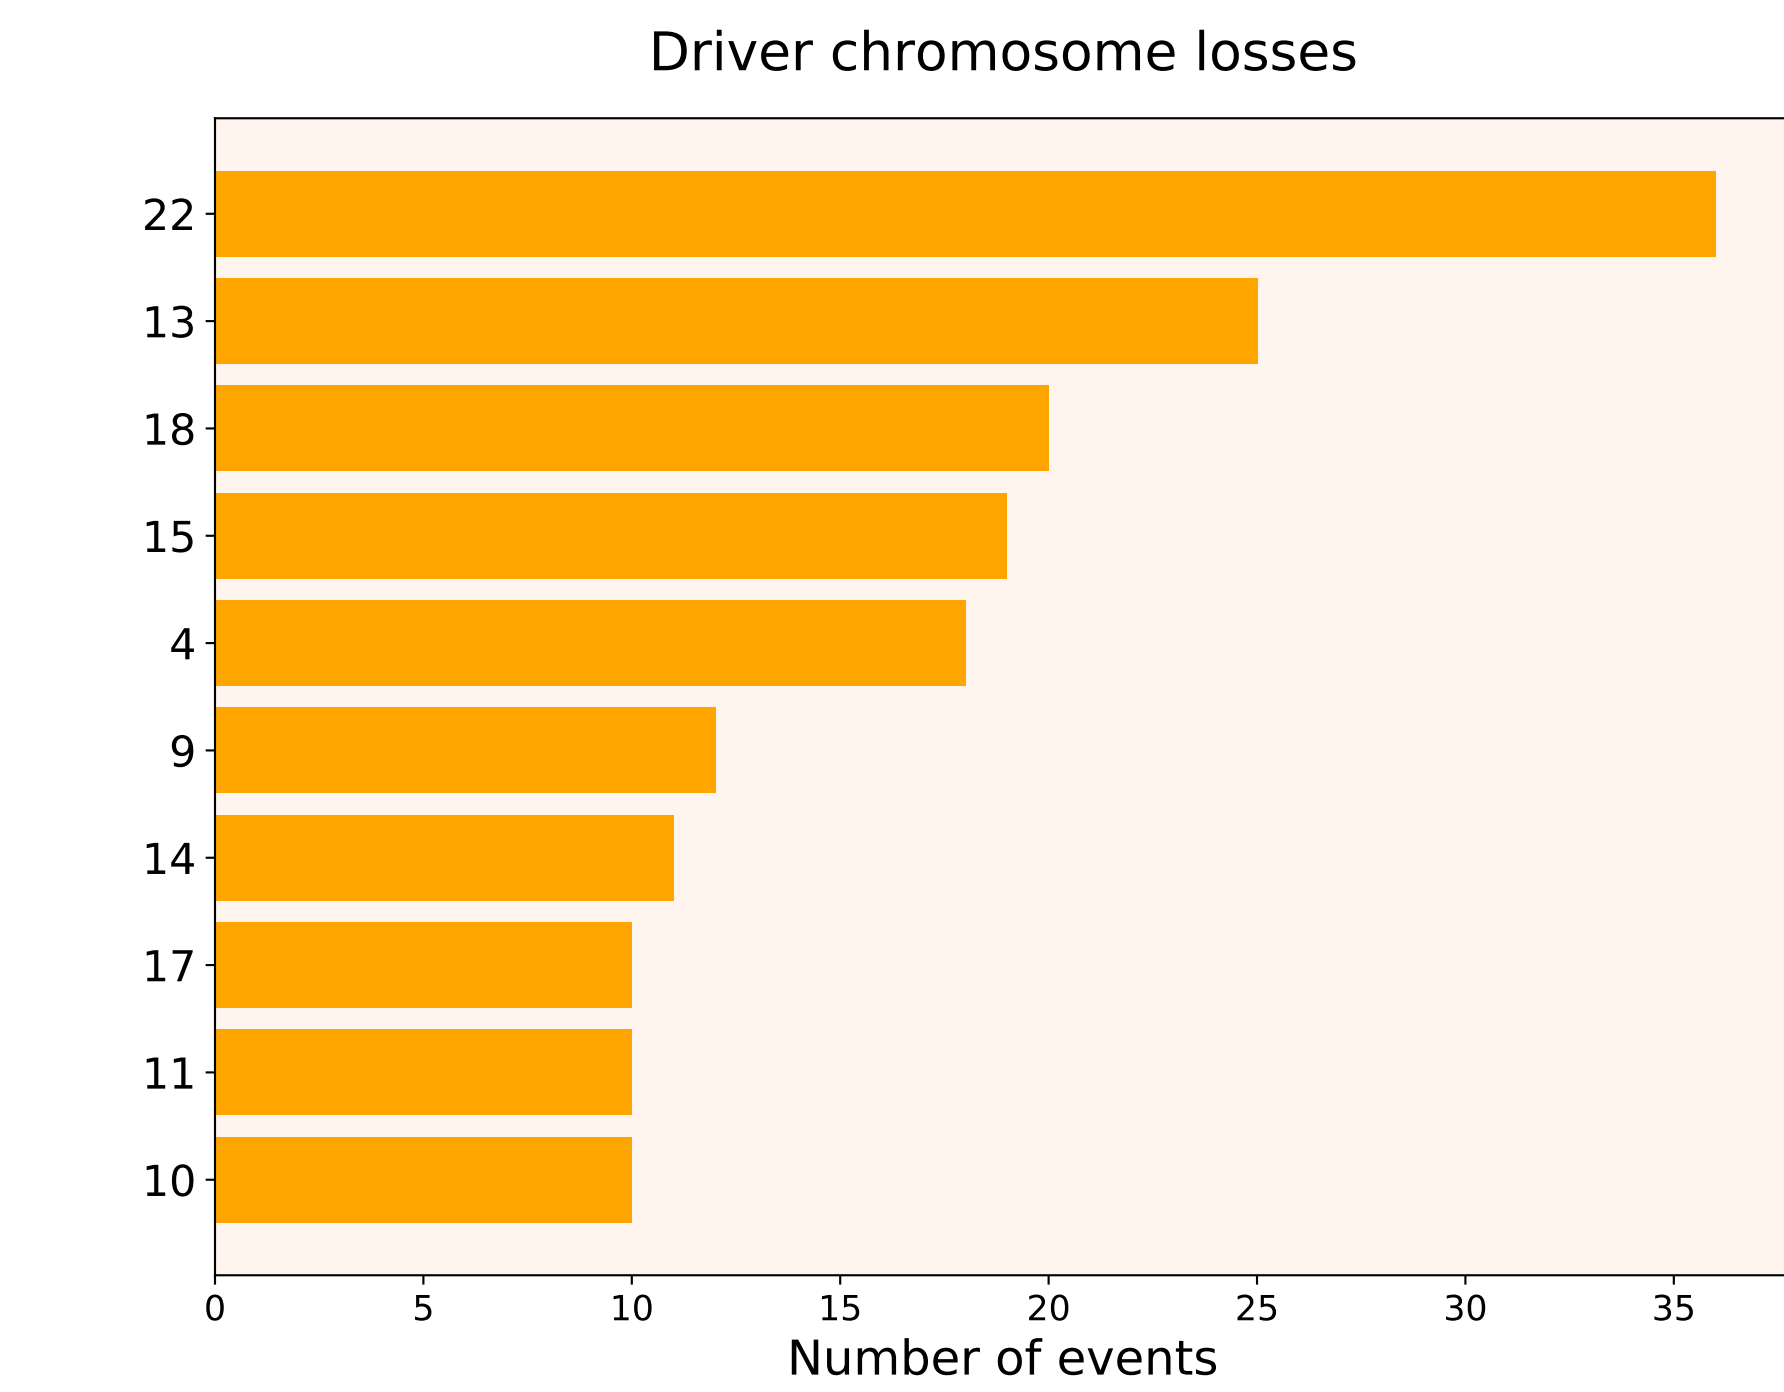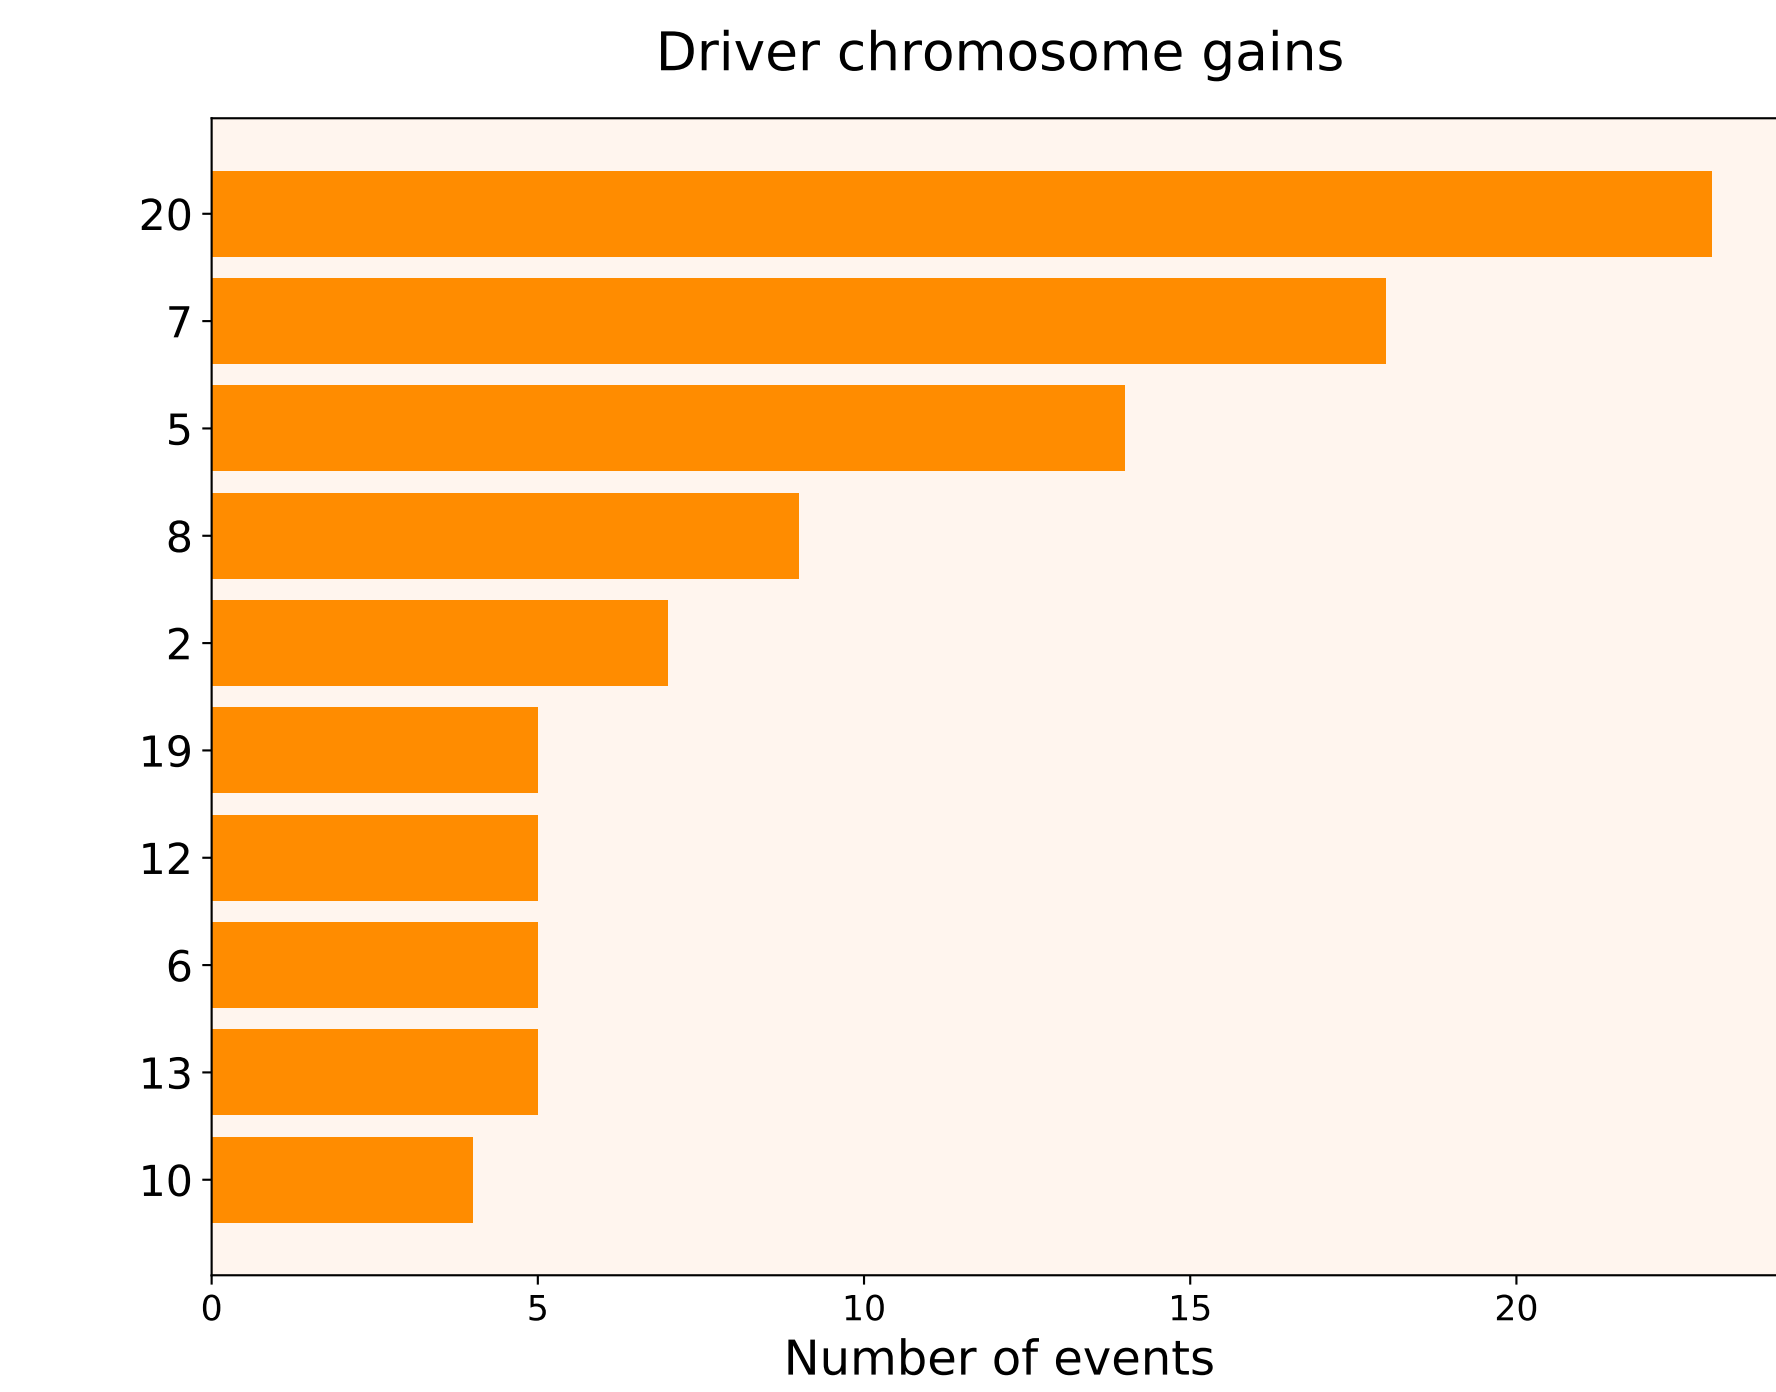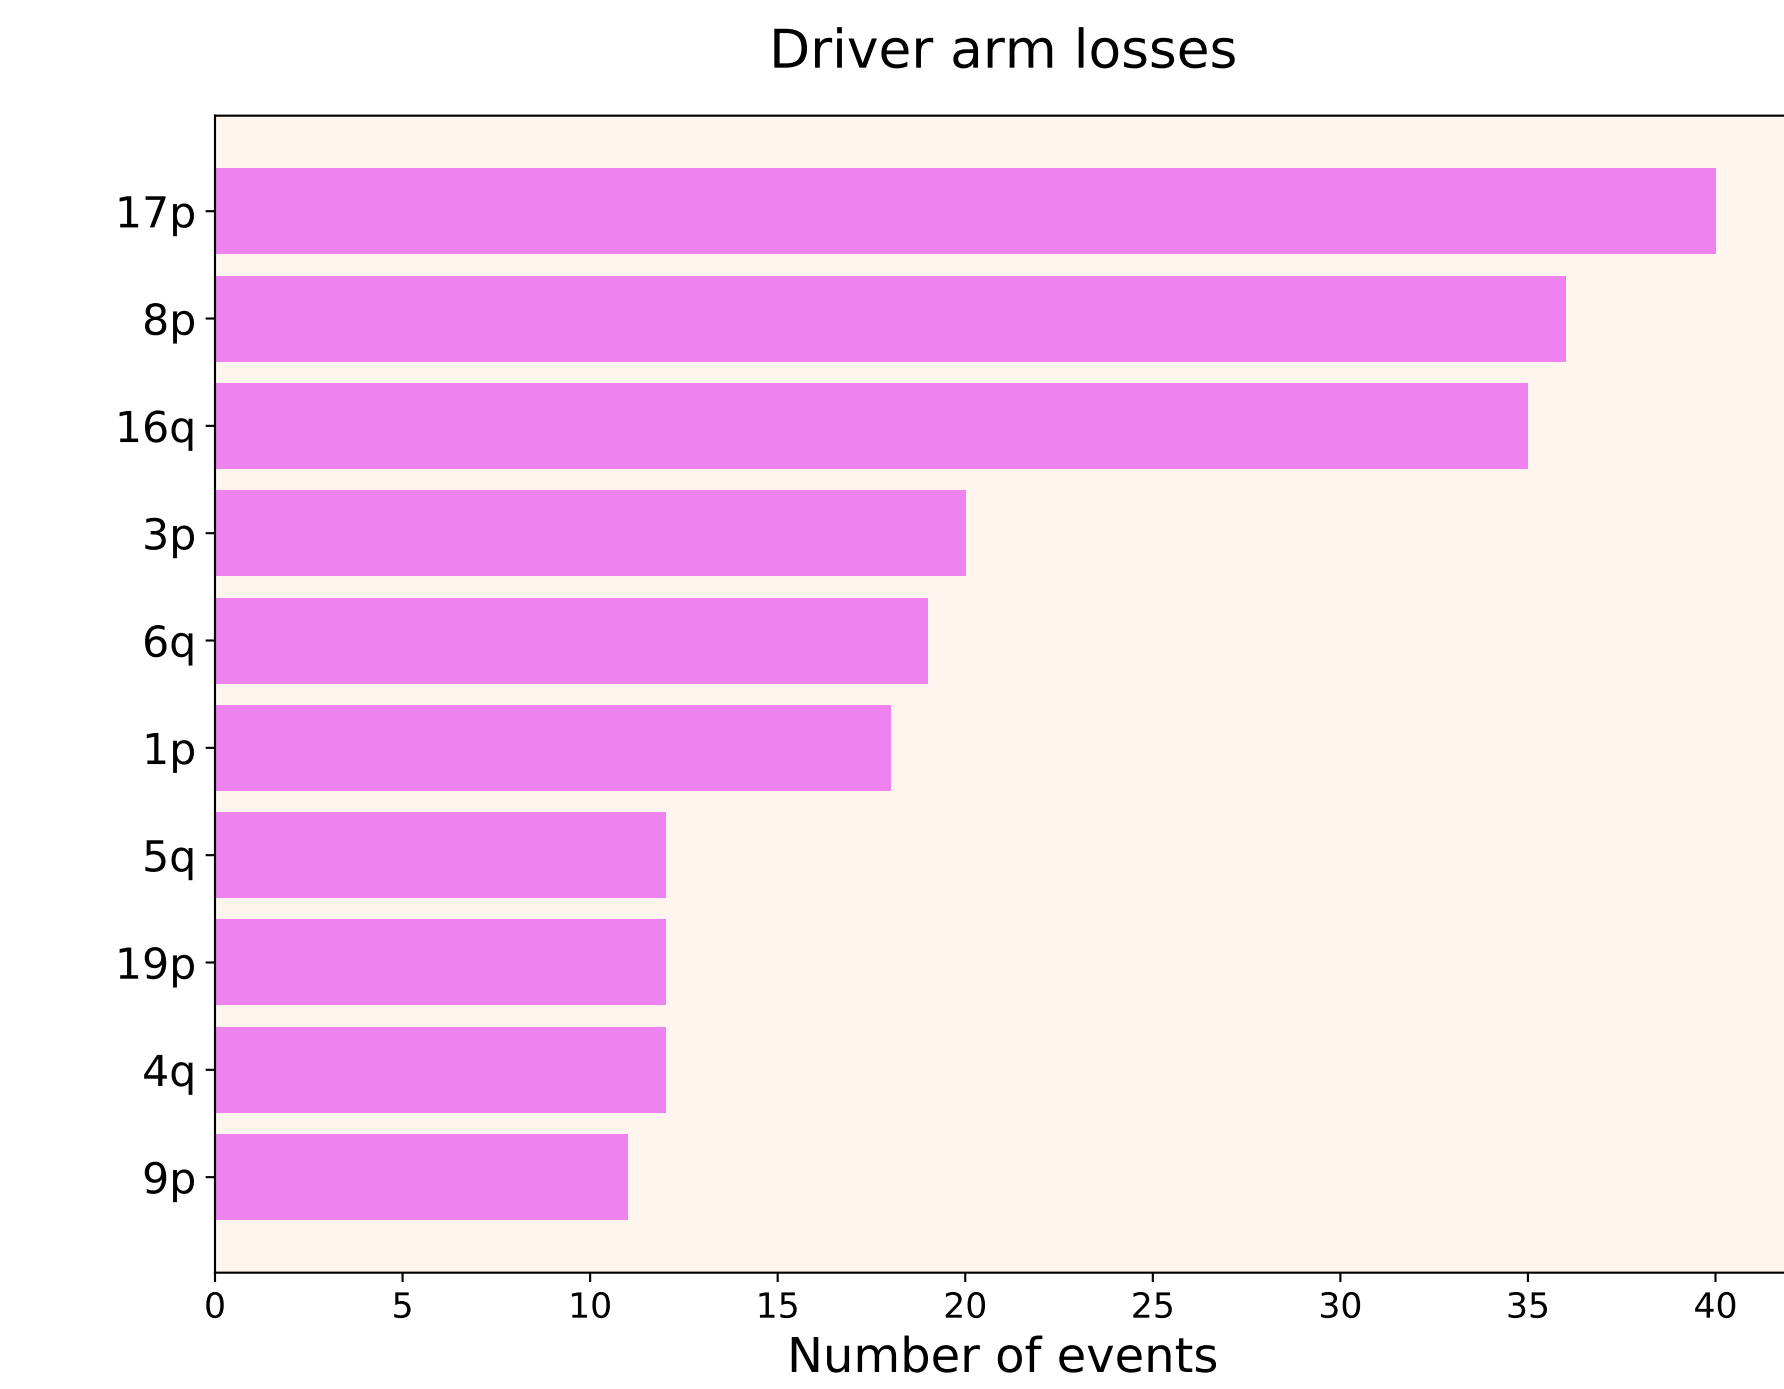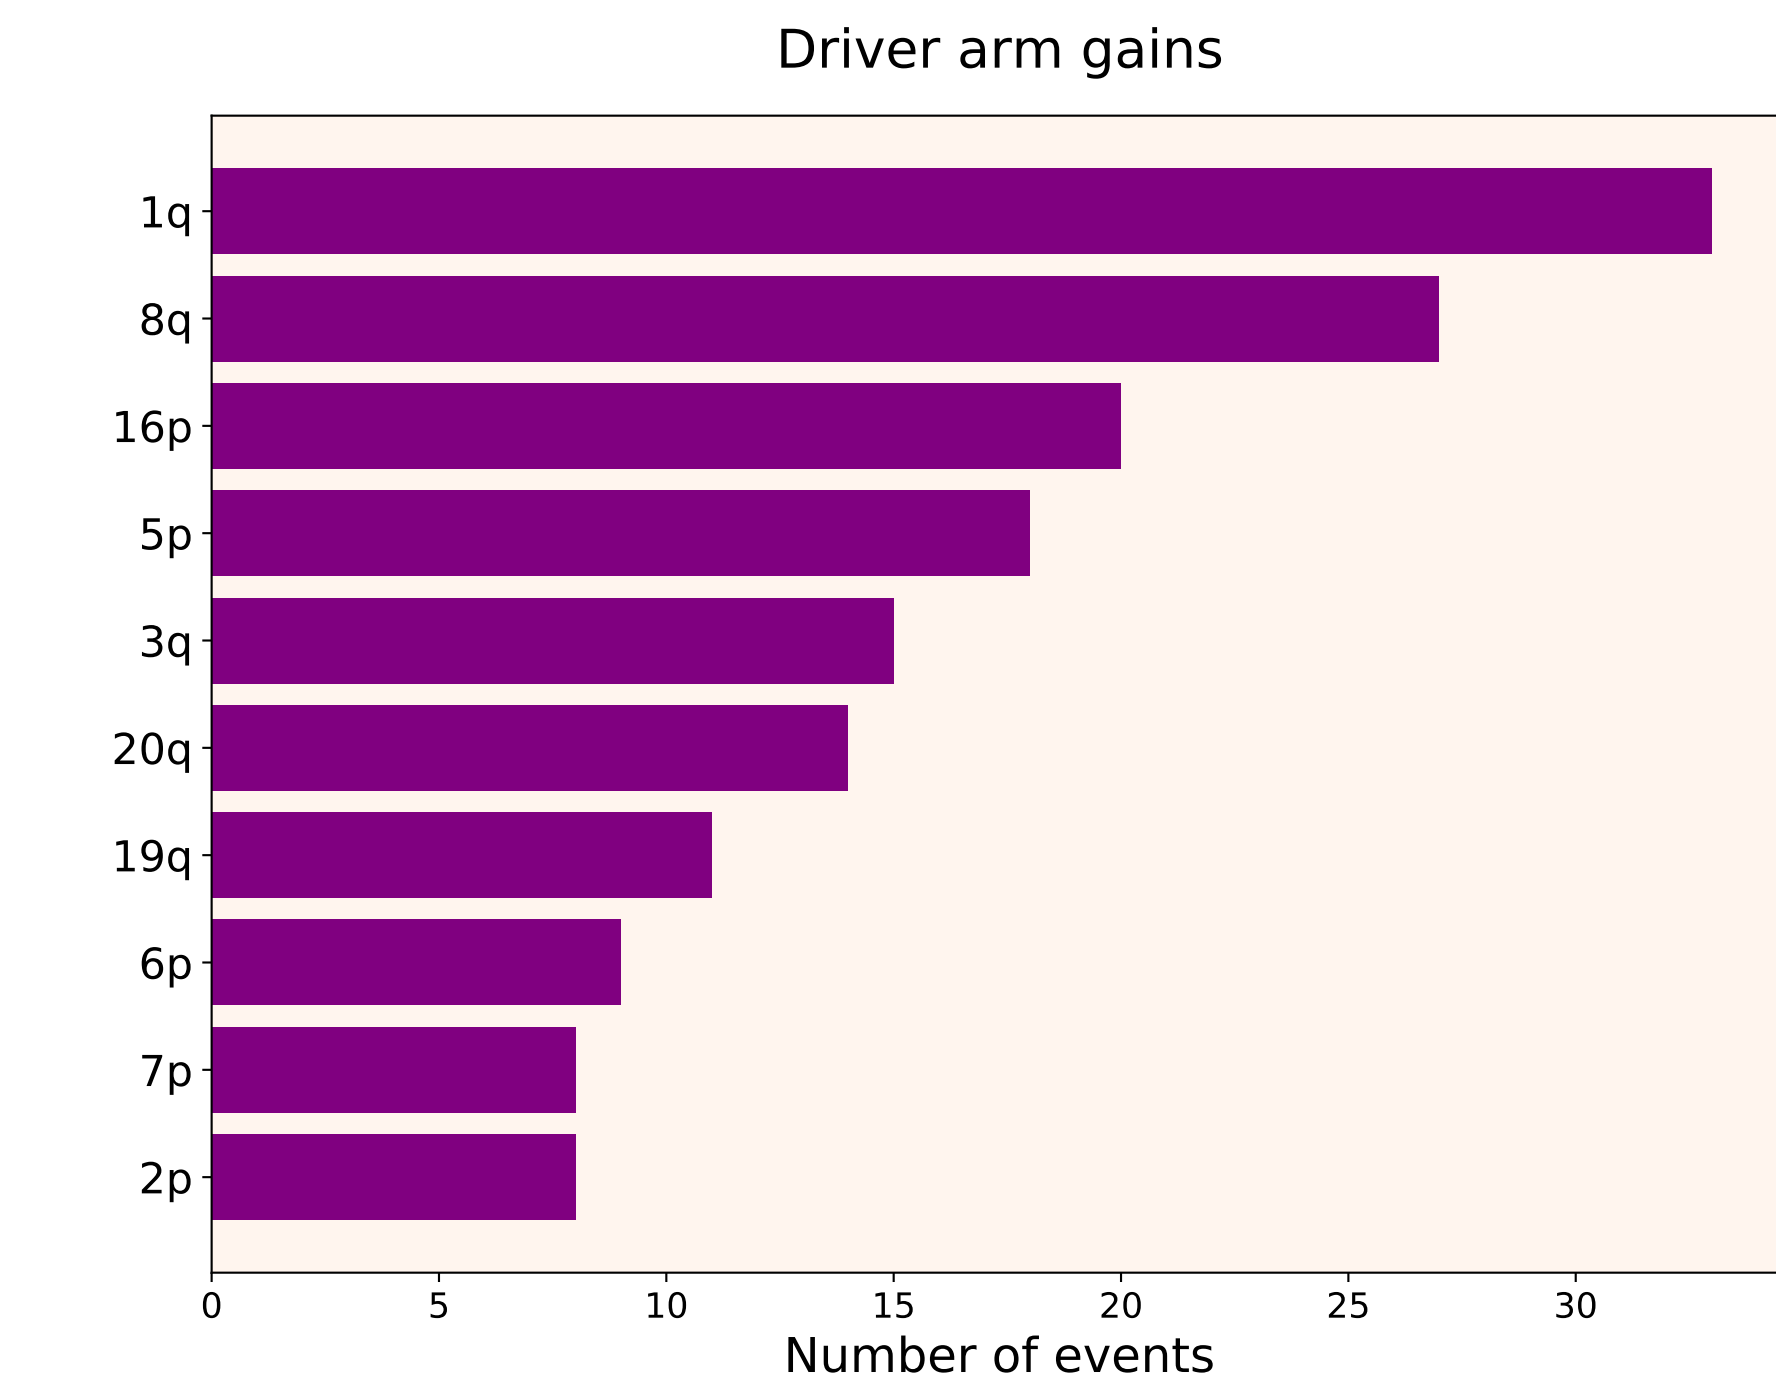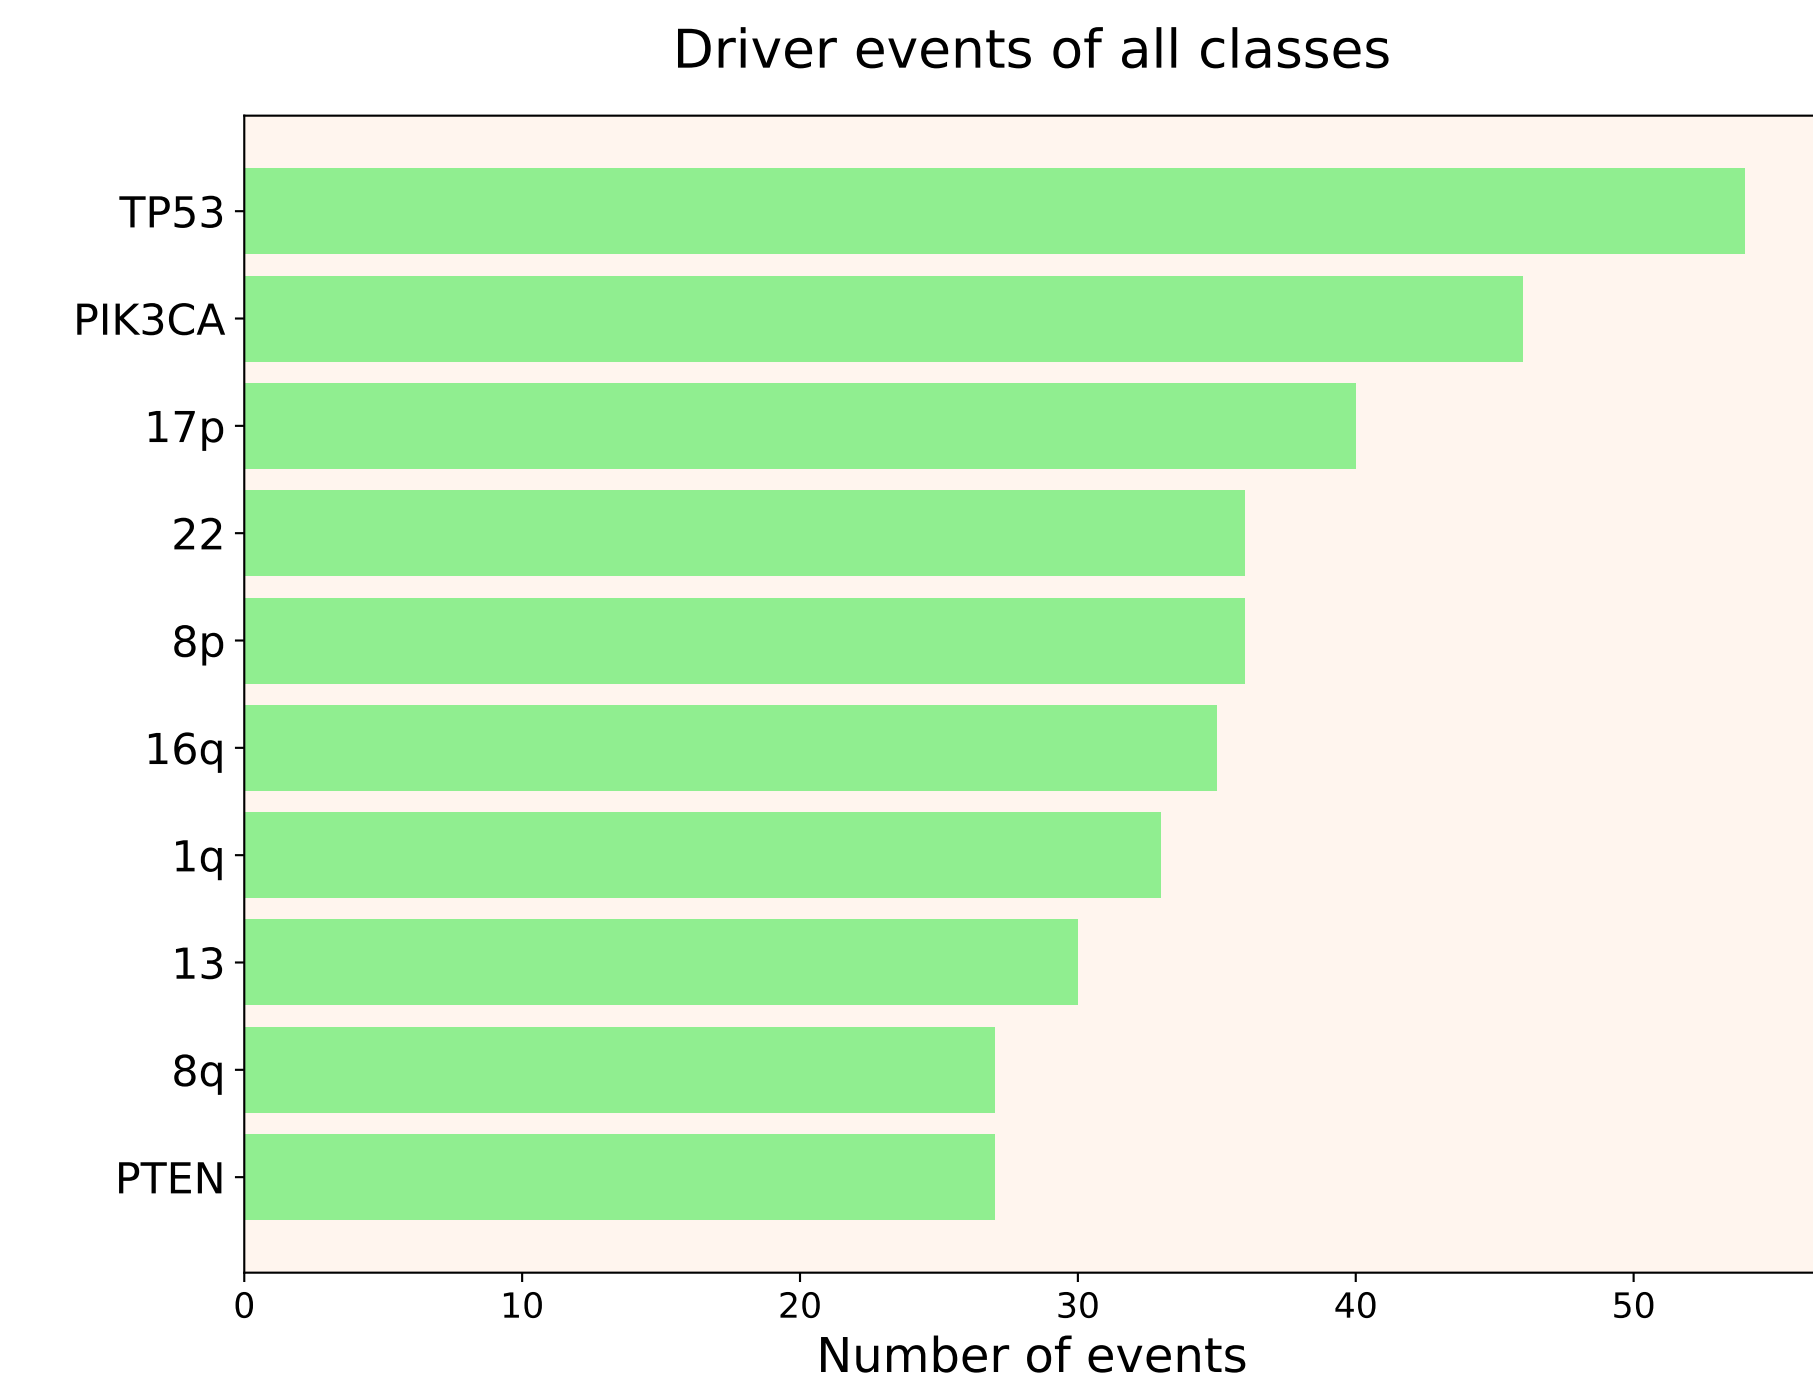

Supplement: Supplemental_Data_S1.zip [file Supplemental_Data_S1.zip]

Driver event distribution by cancer stage in males

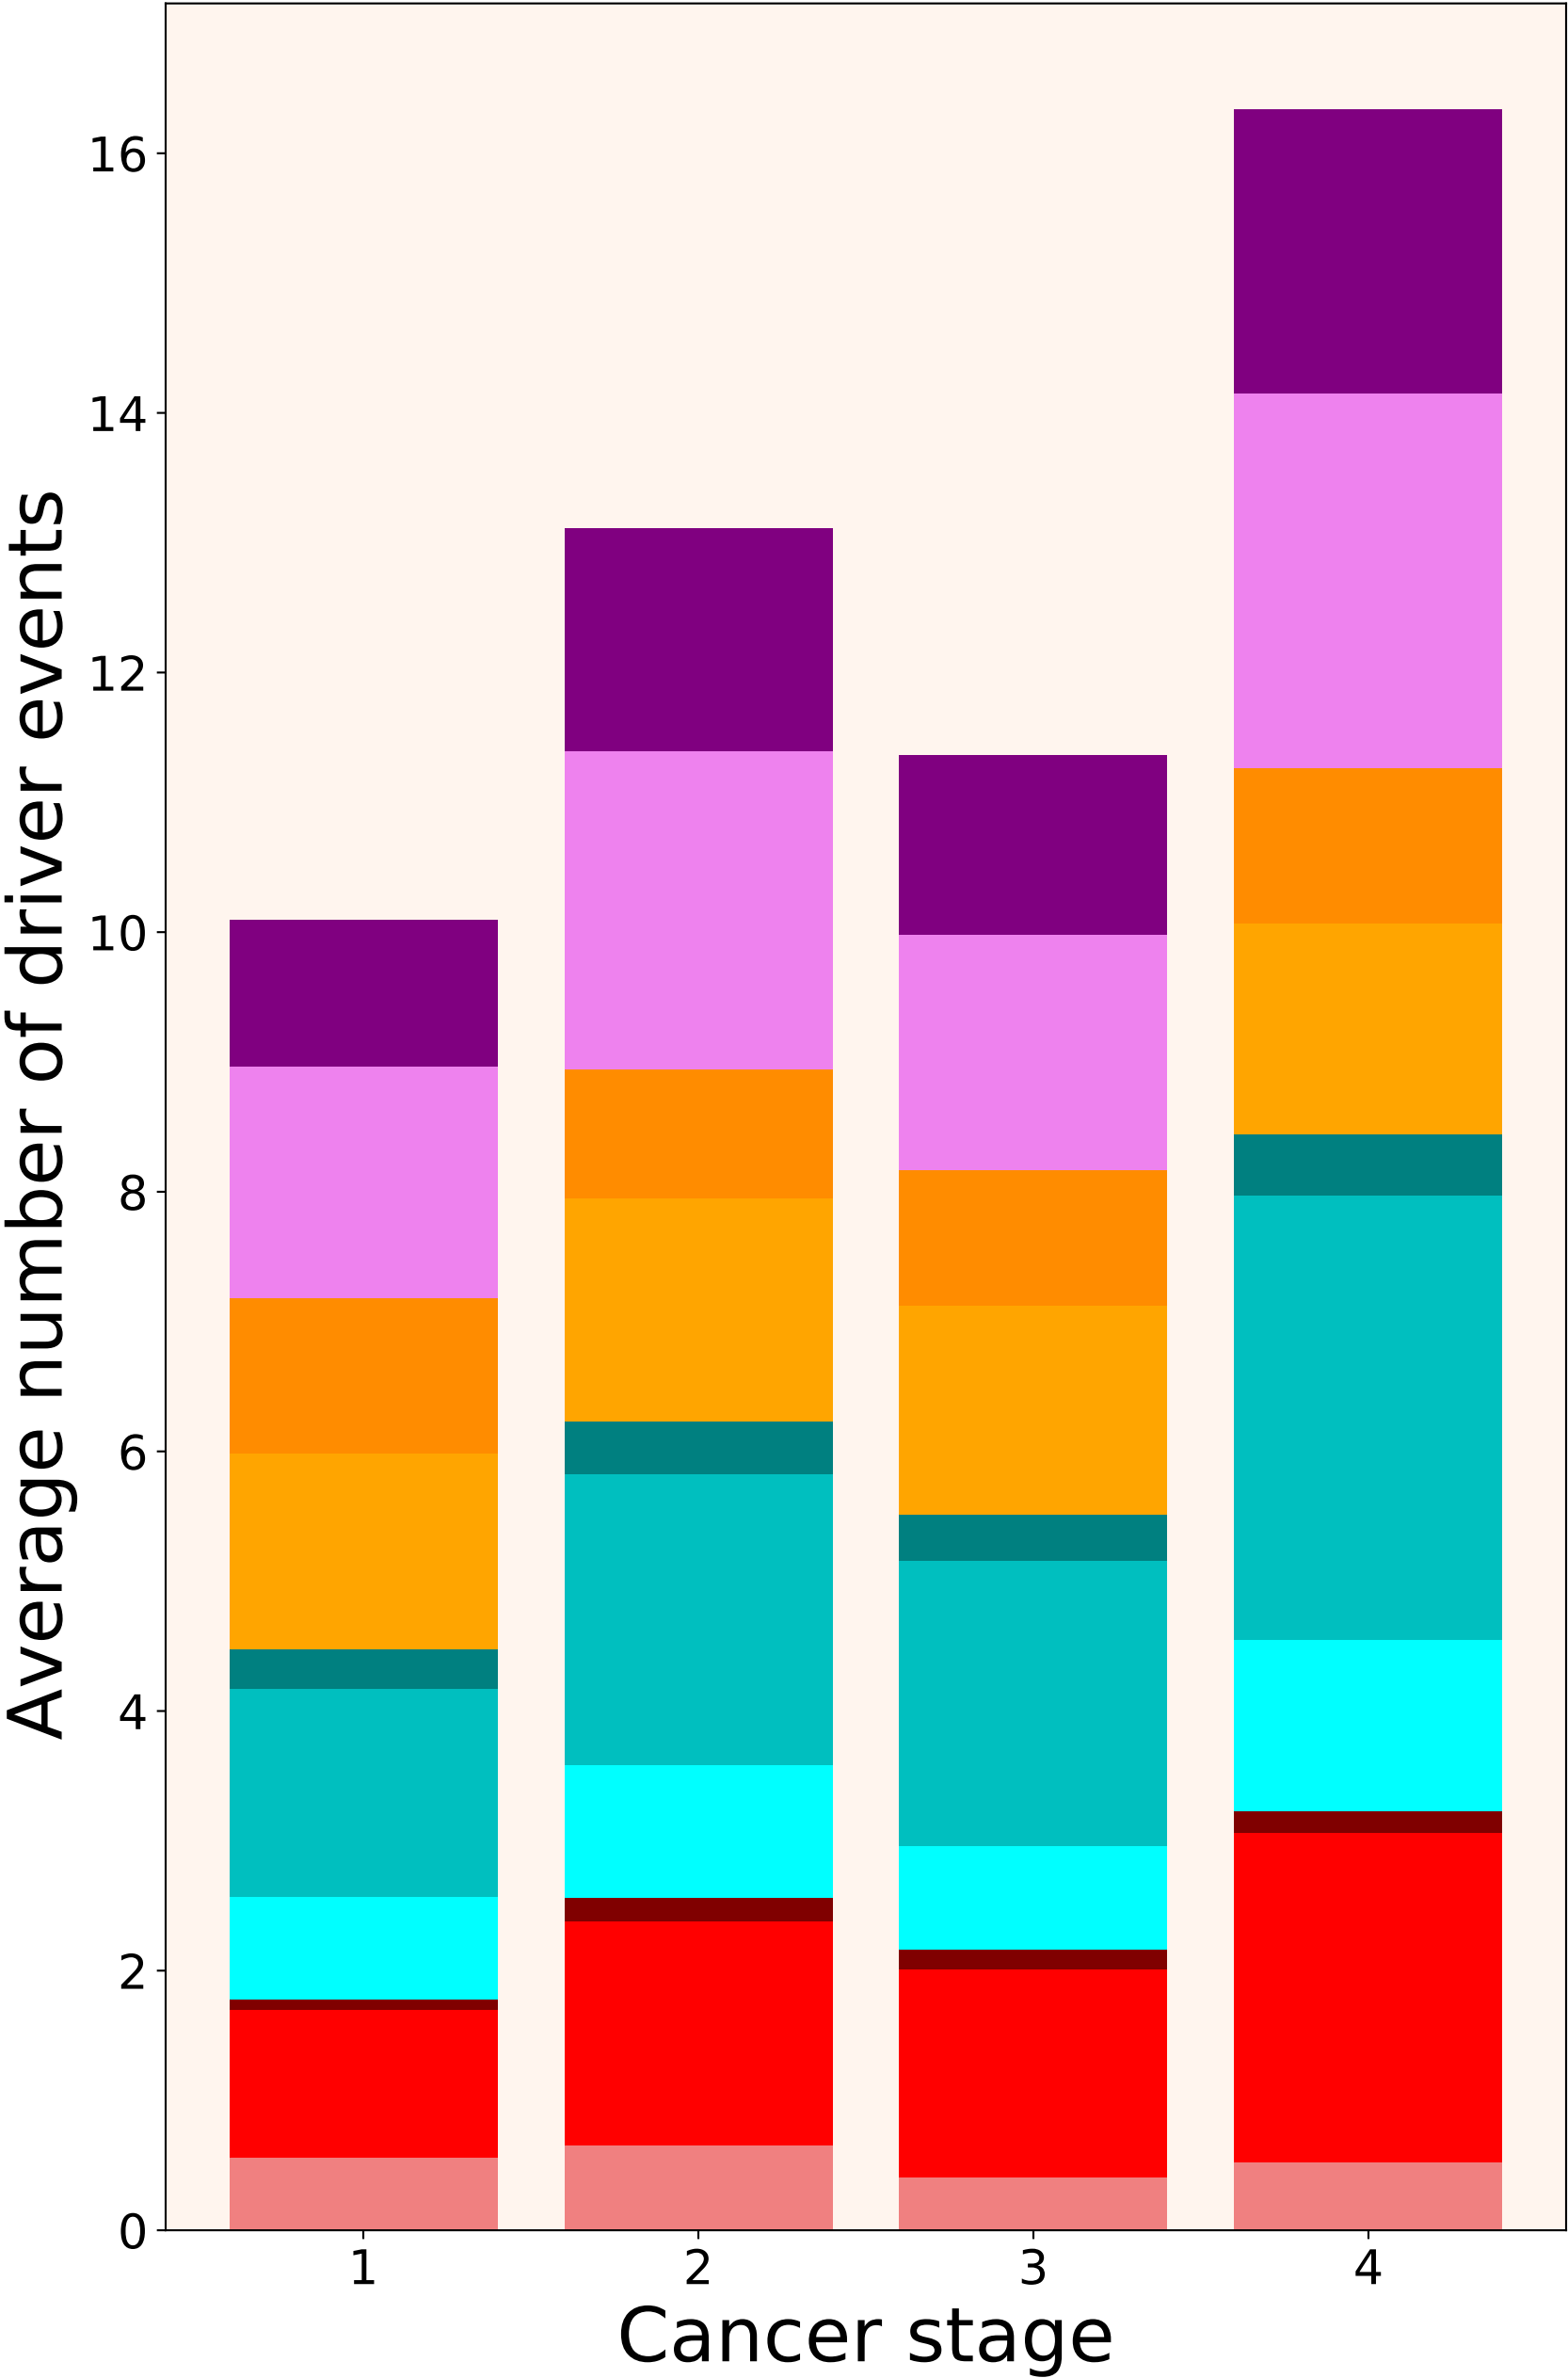

Supplement: Supplemental_Data_S1.zip [file Supplemental_Data_S1.zip]

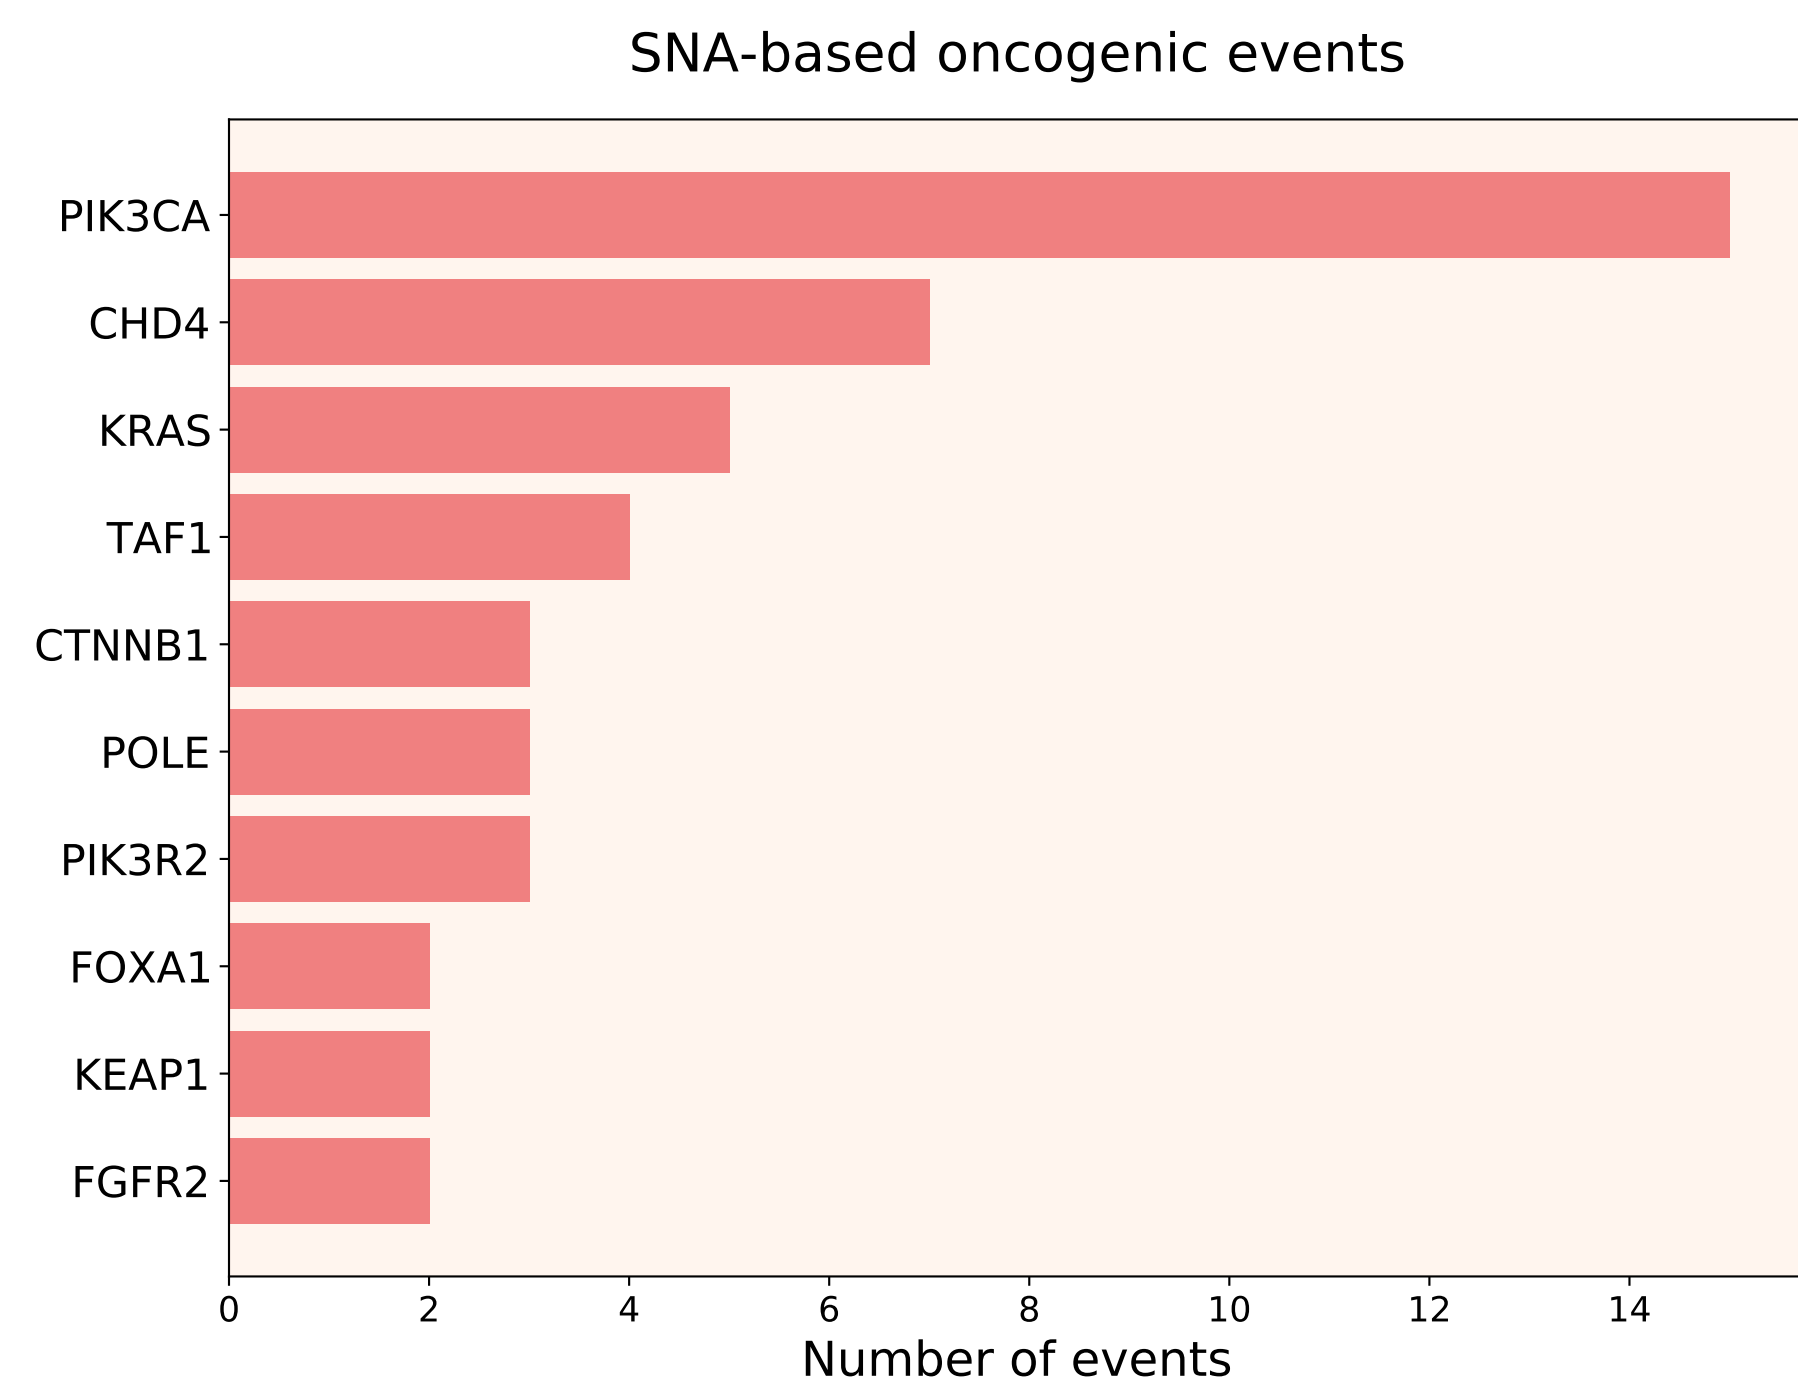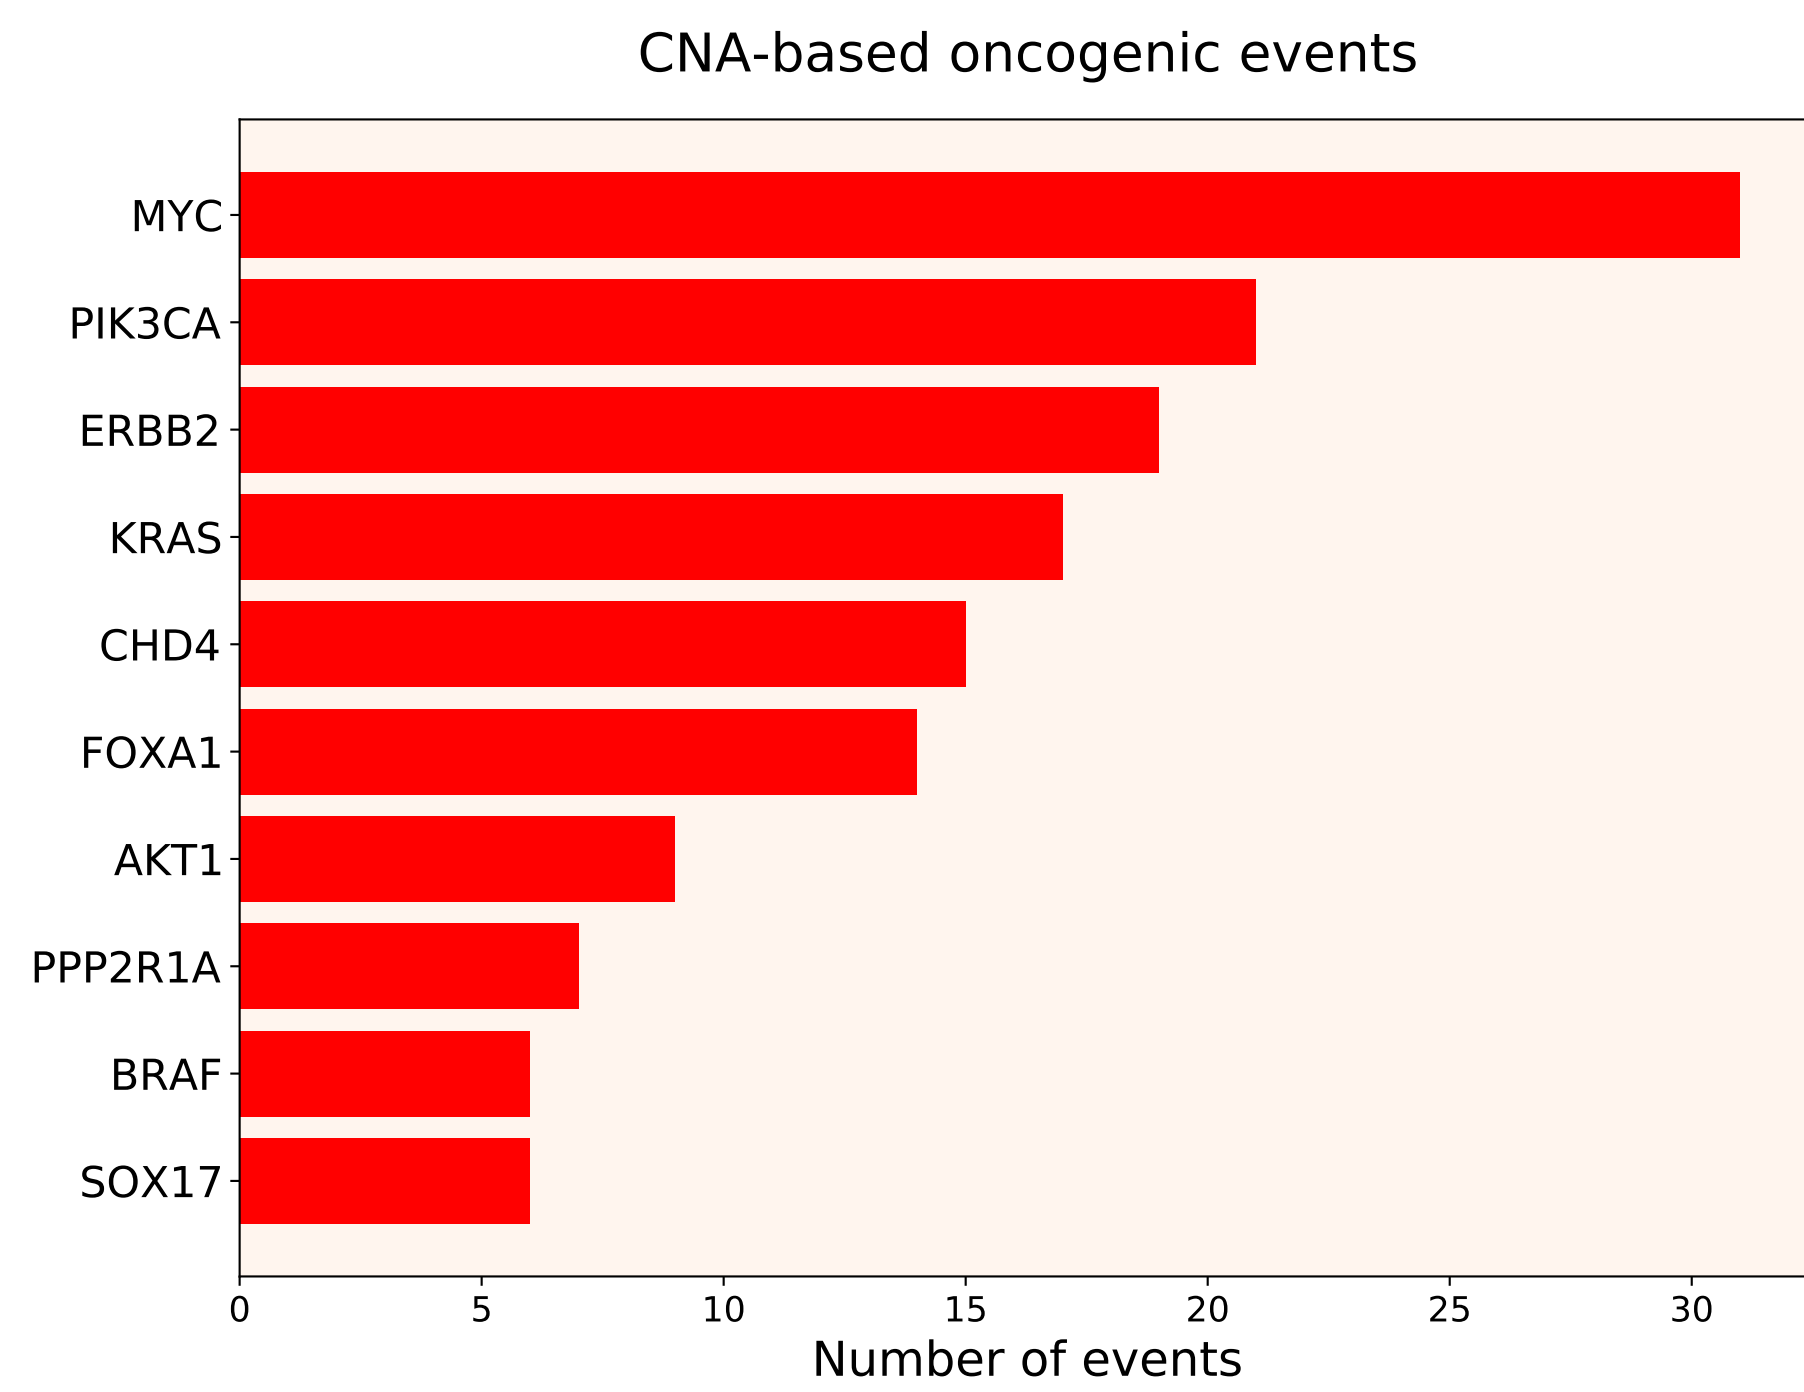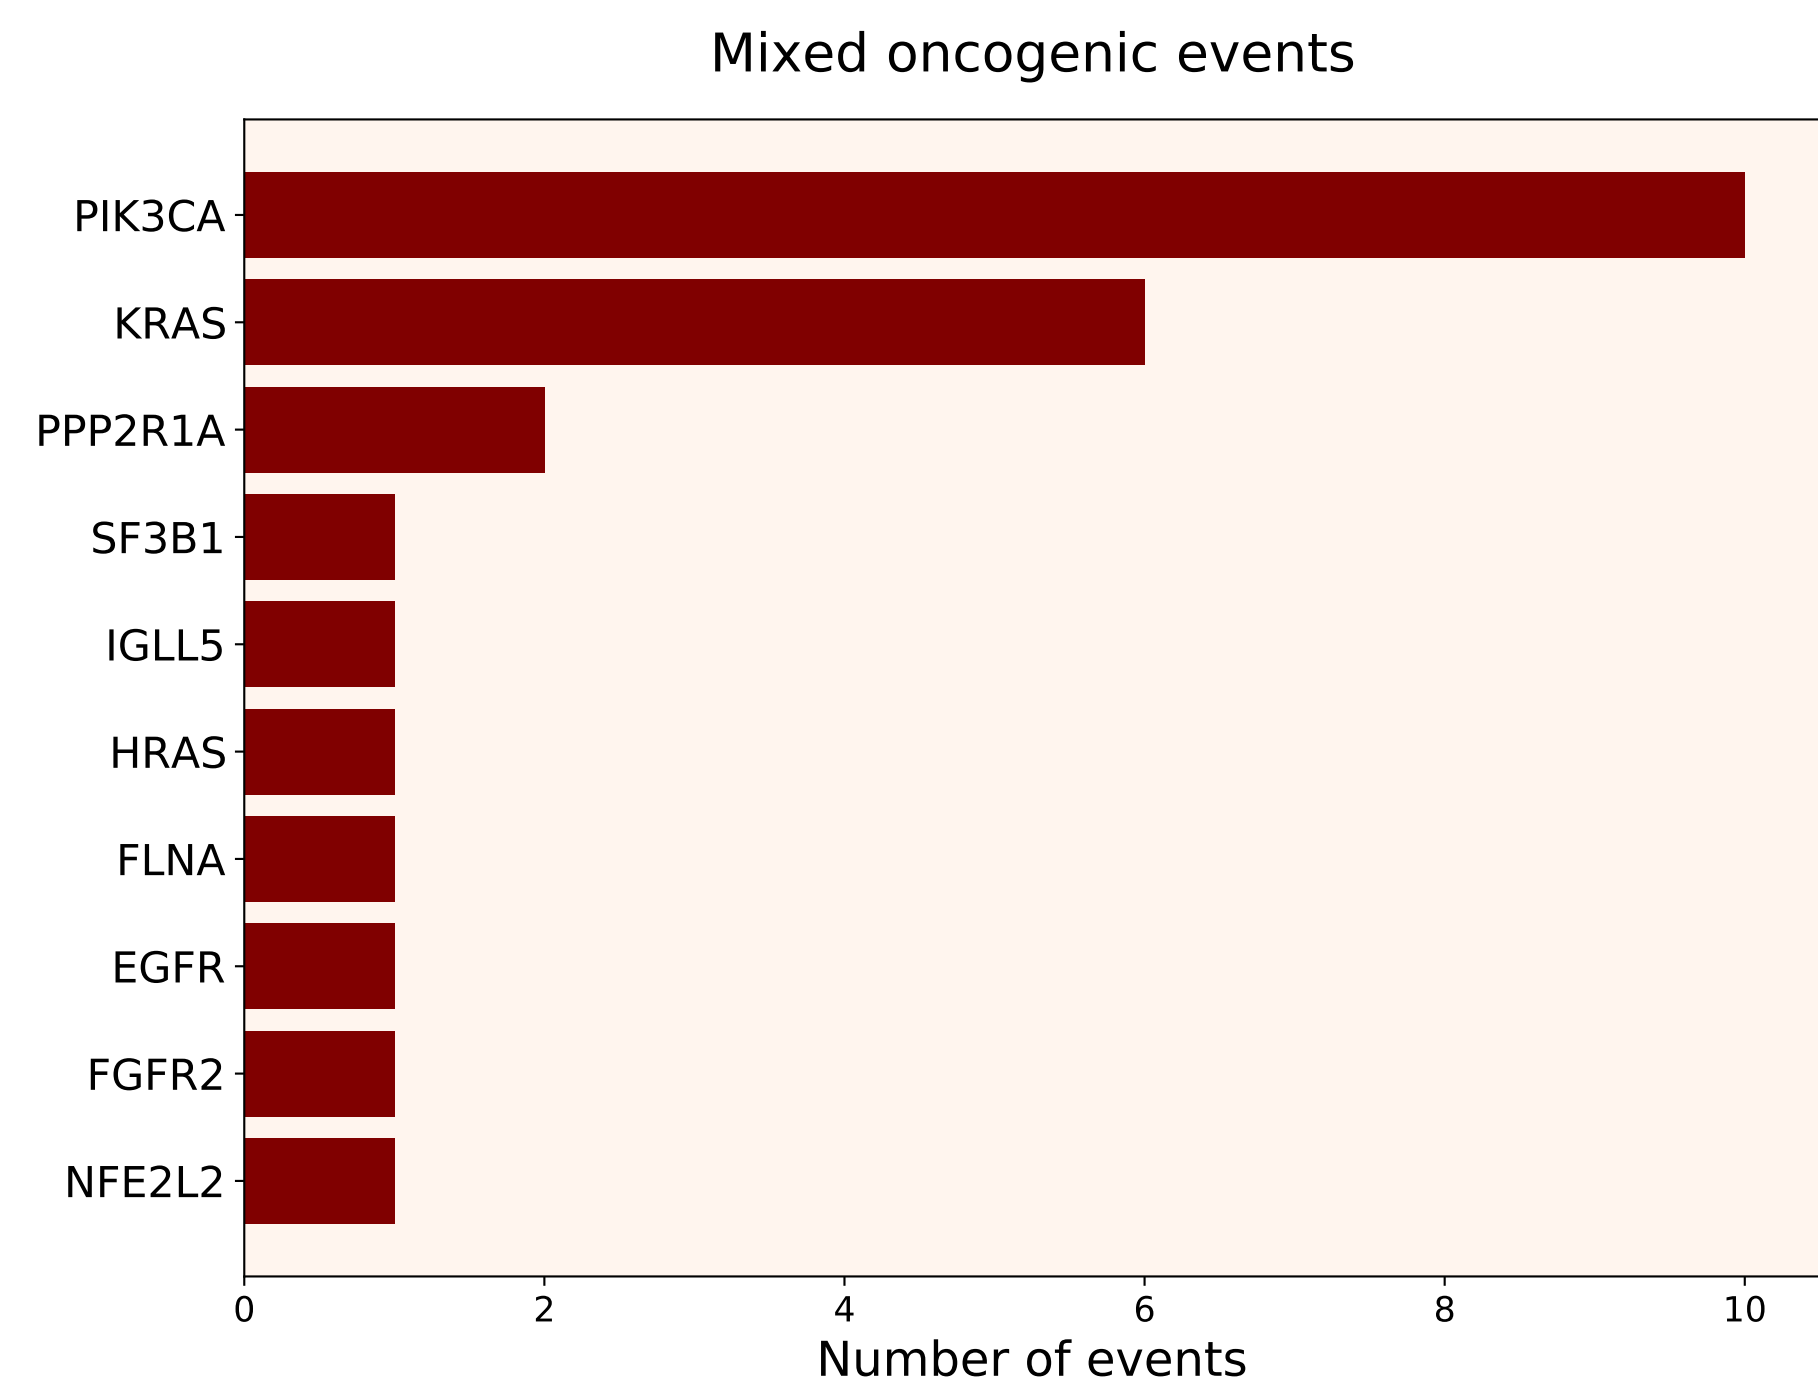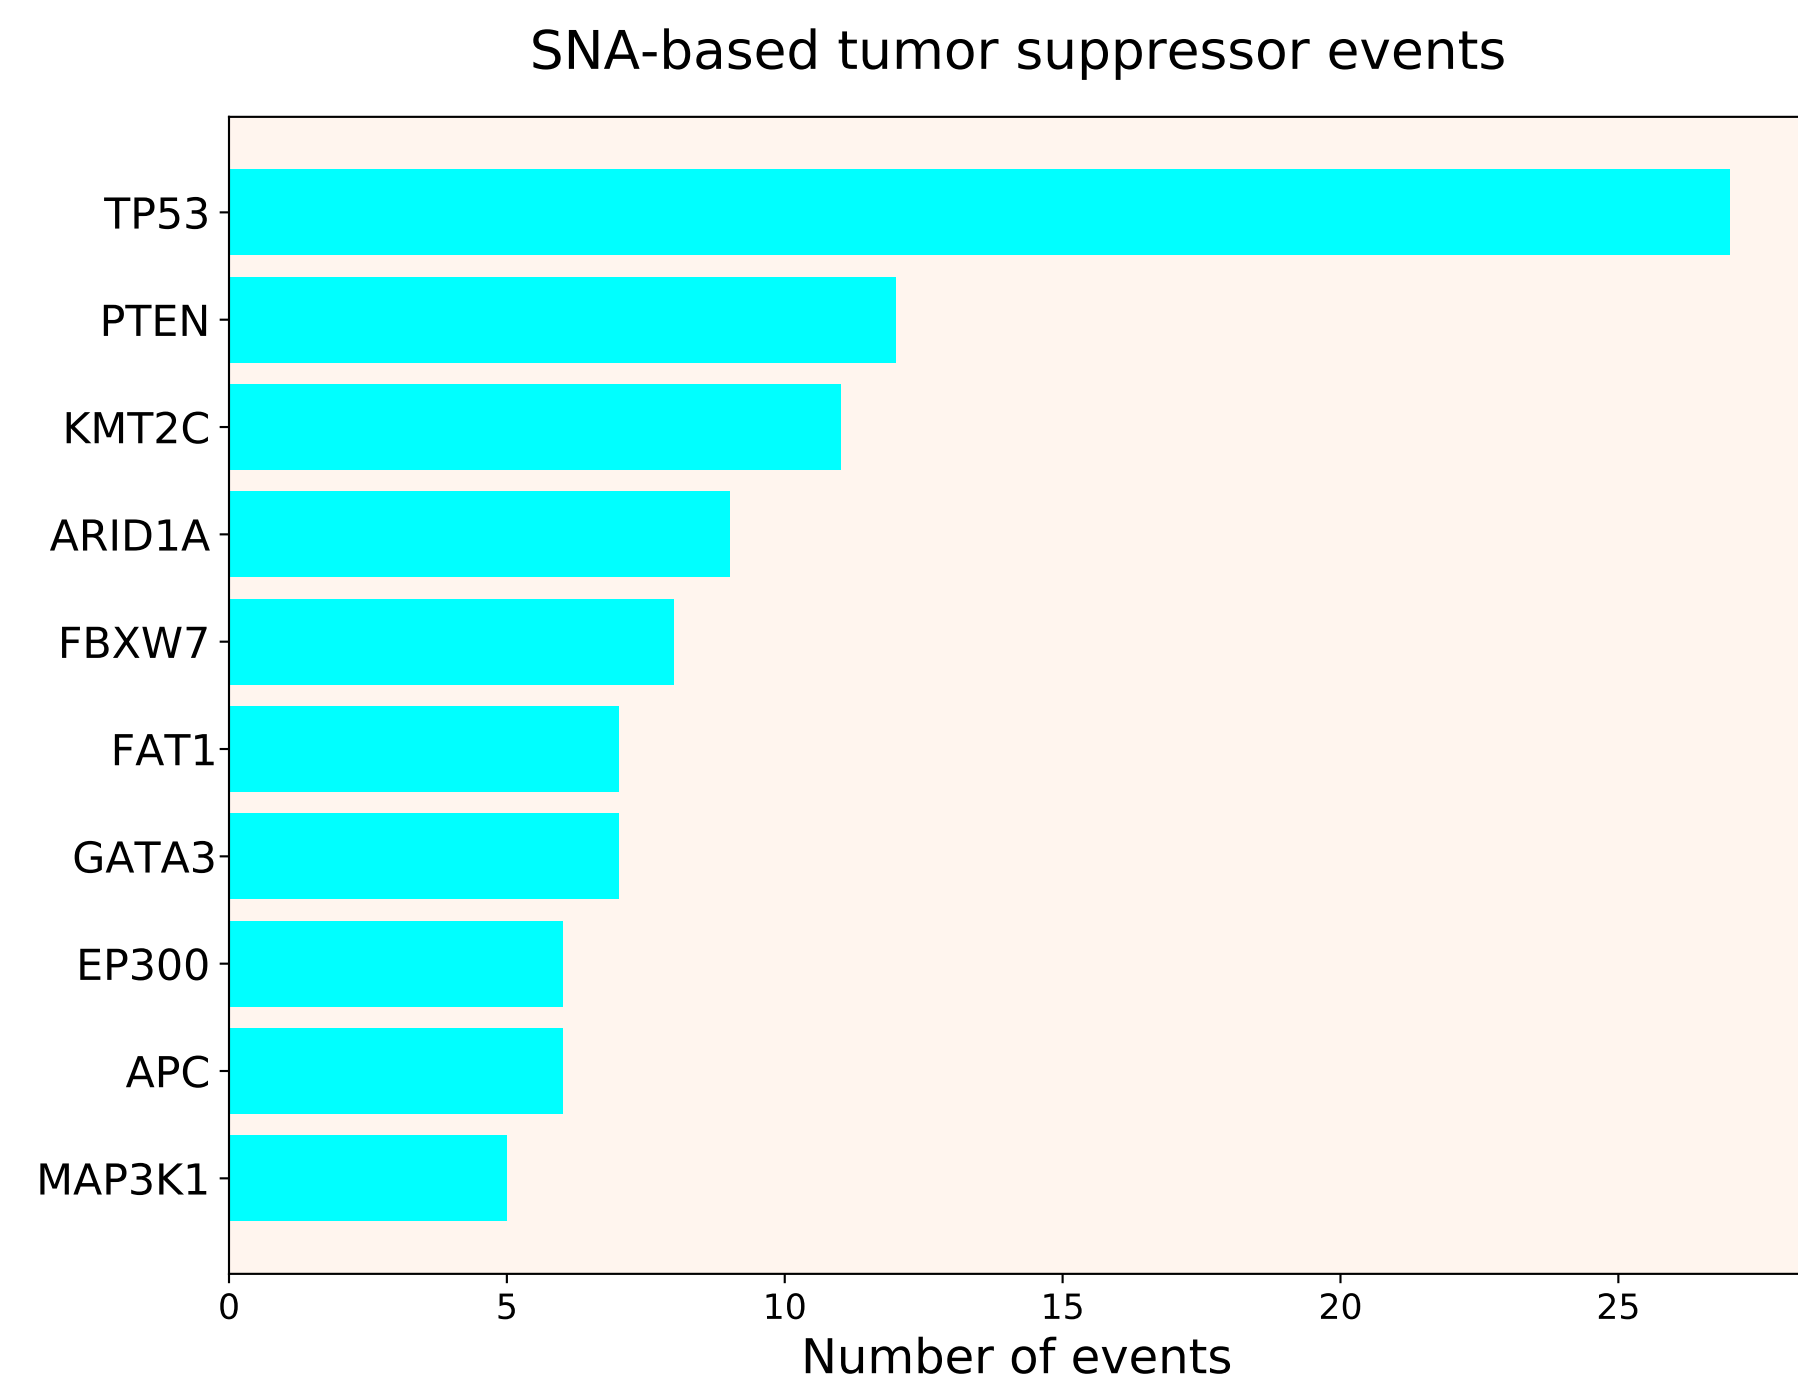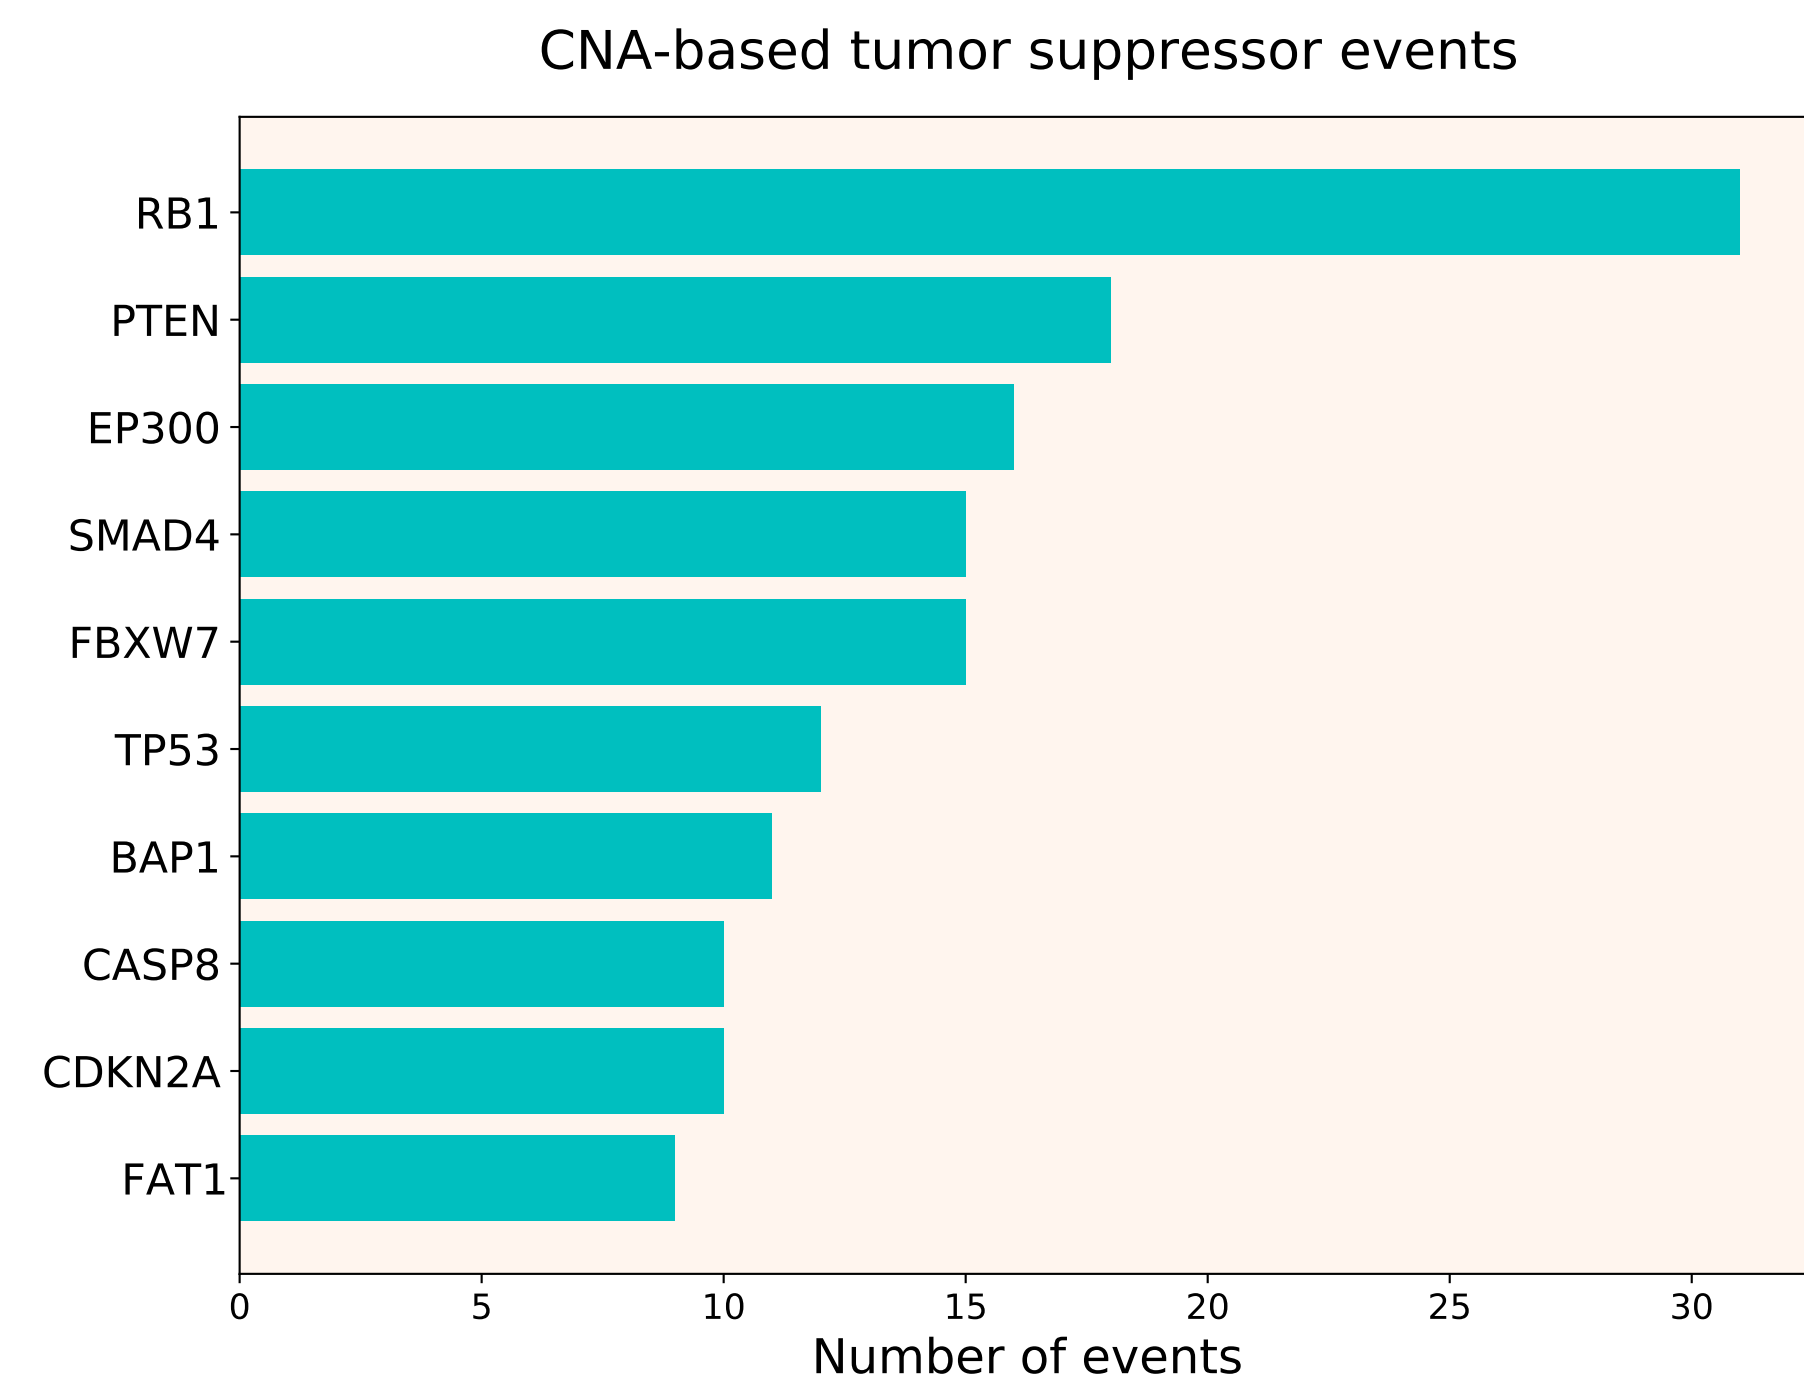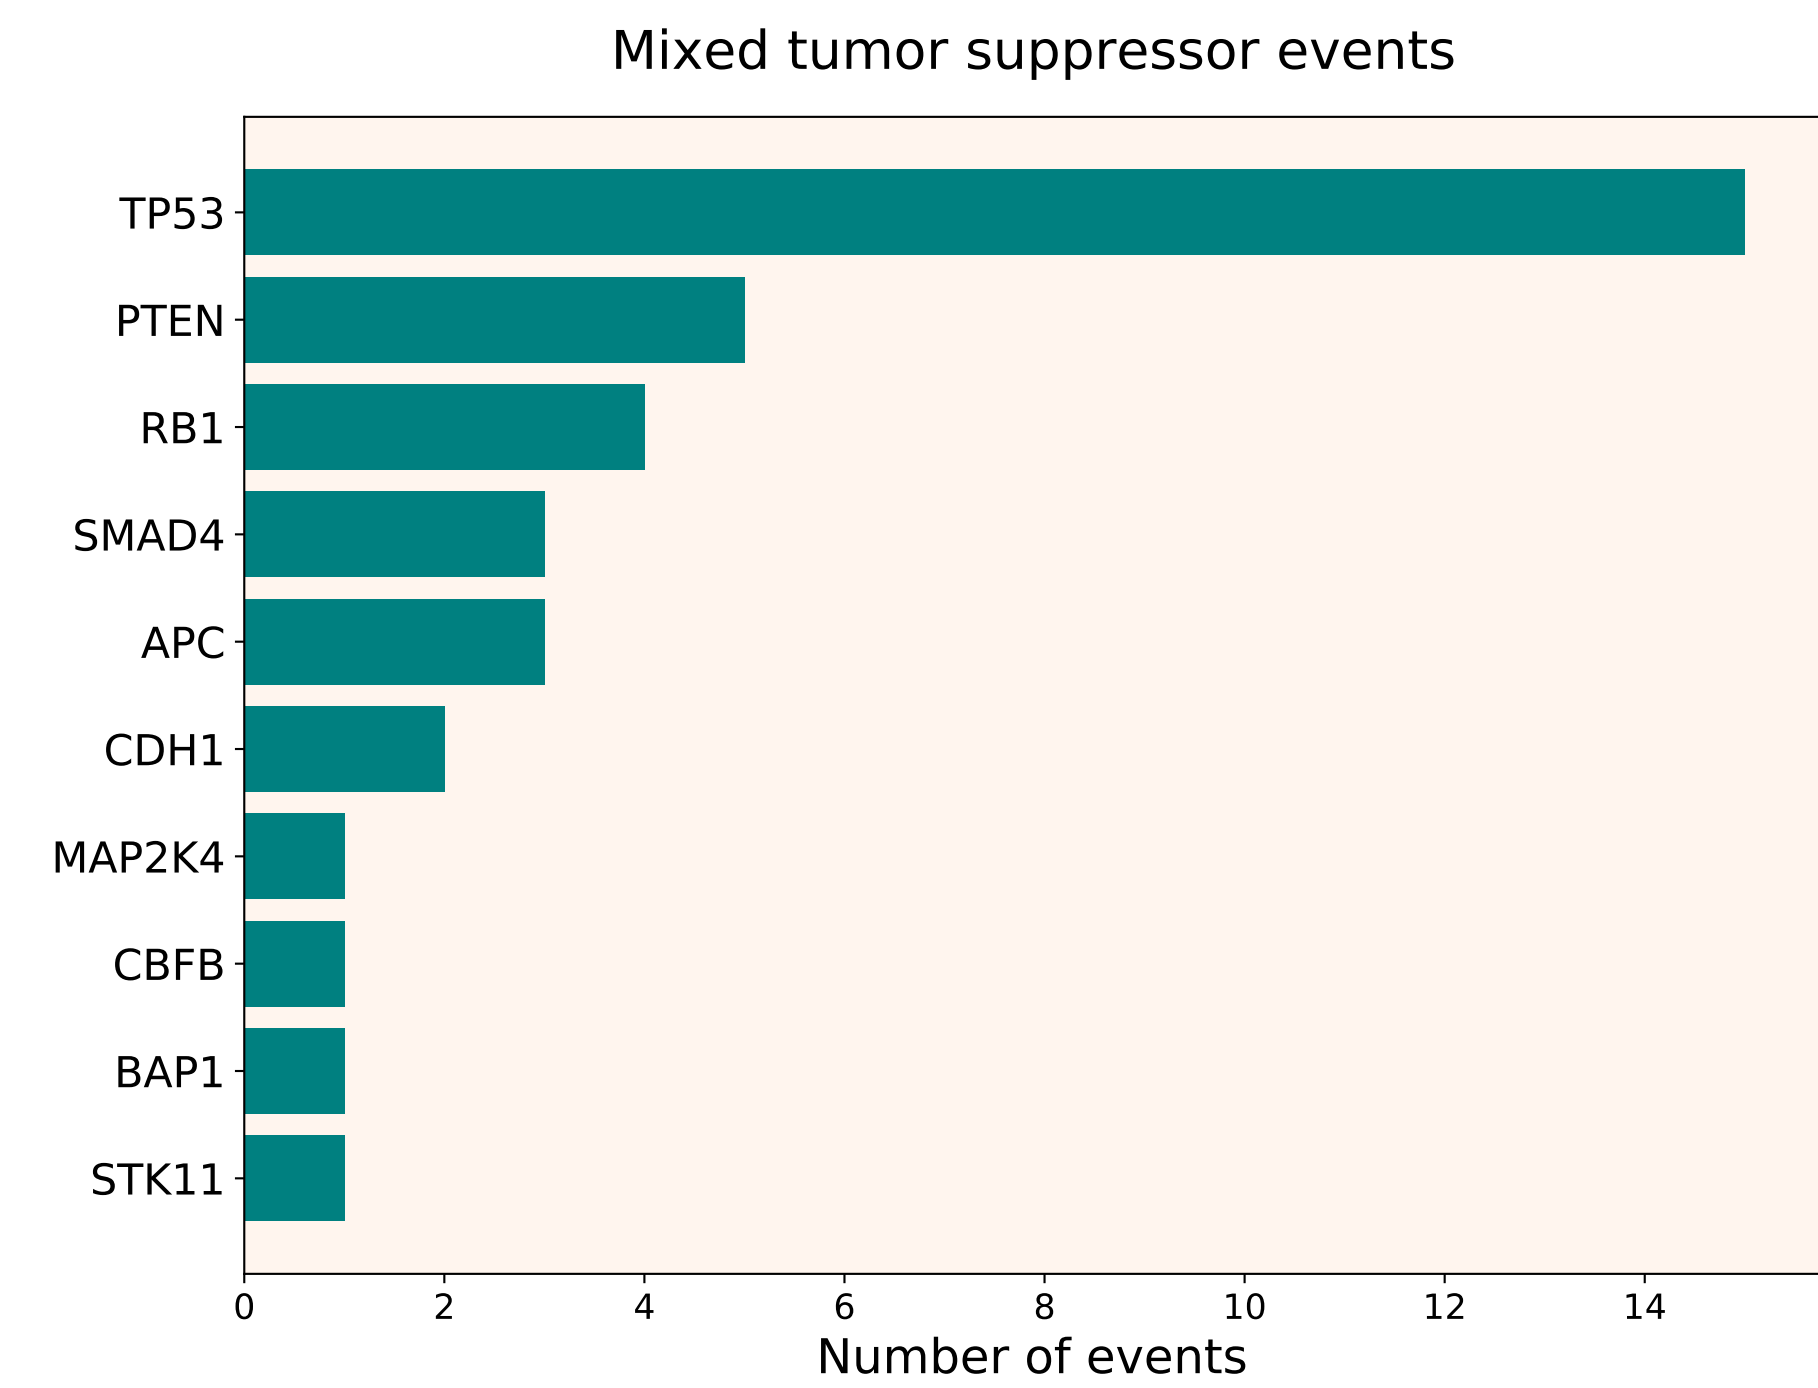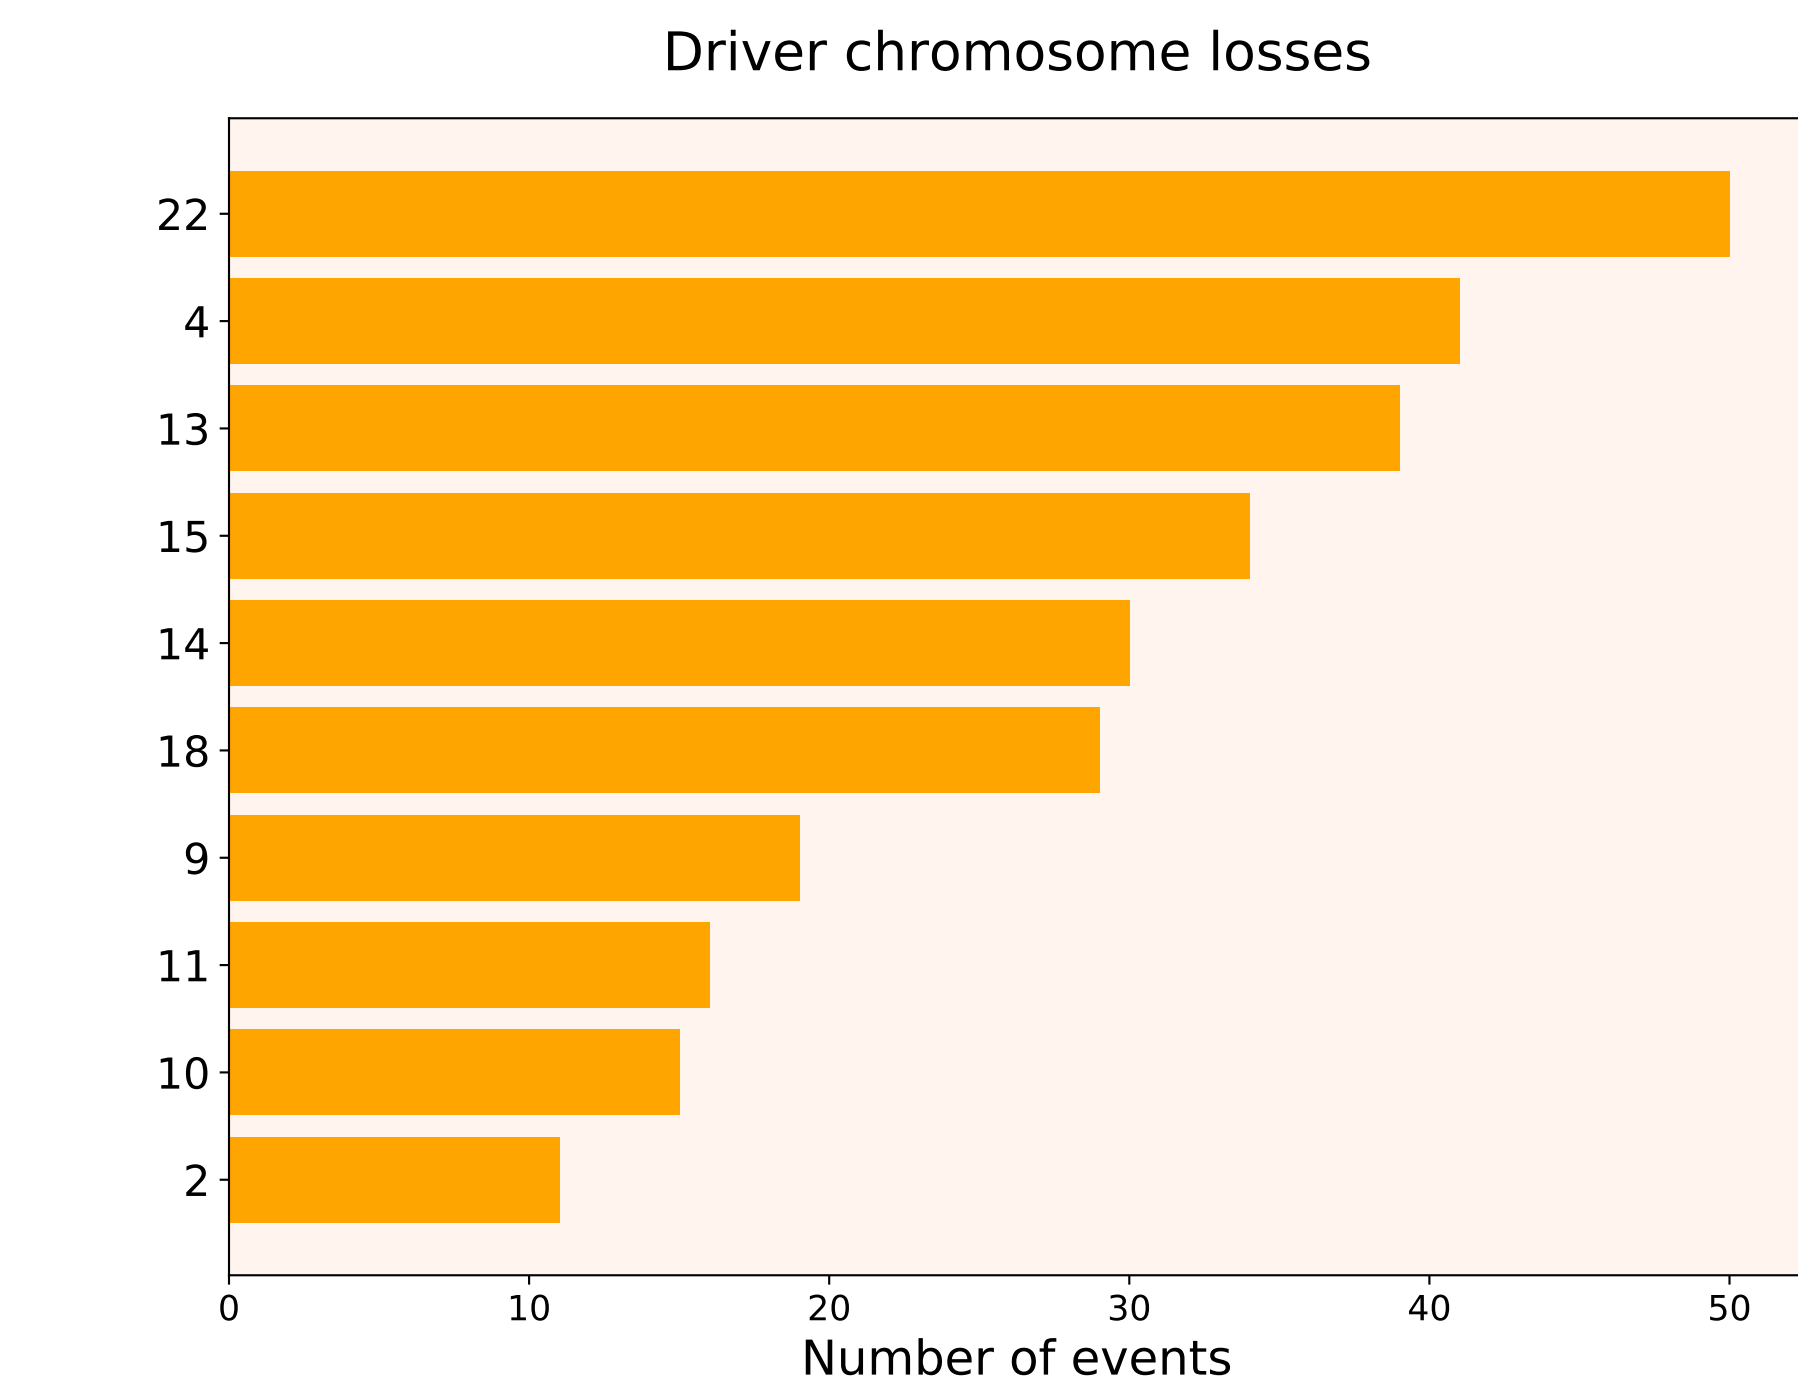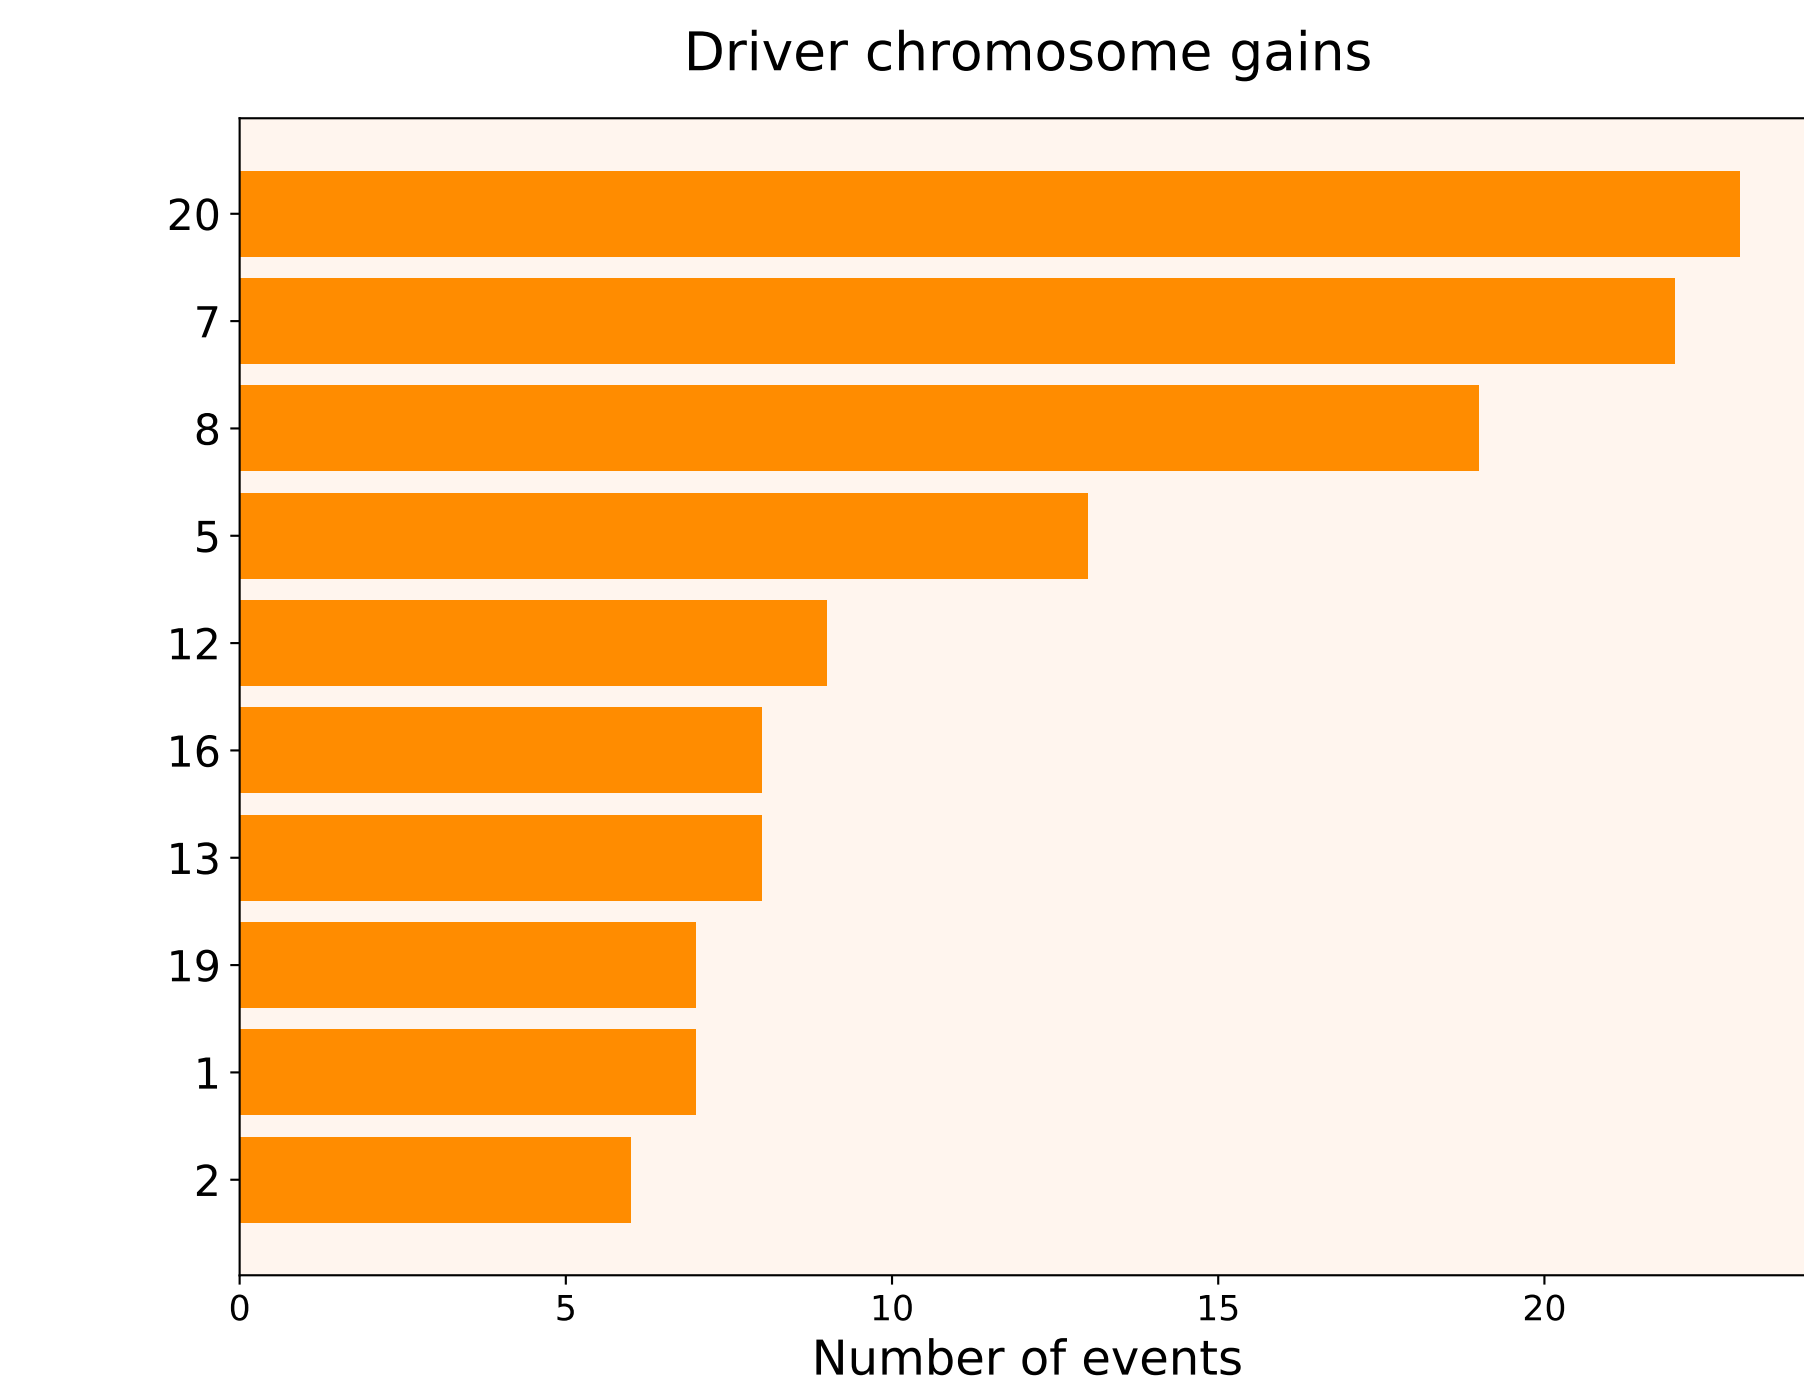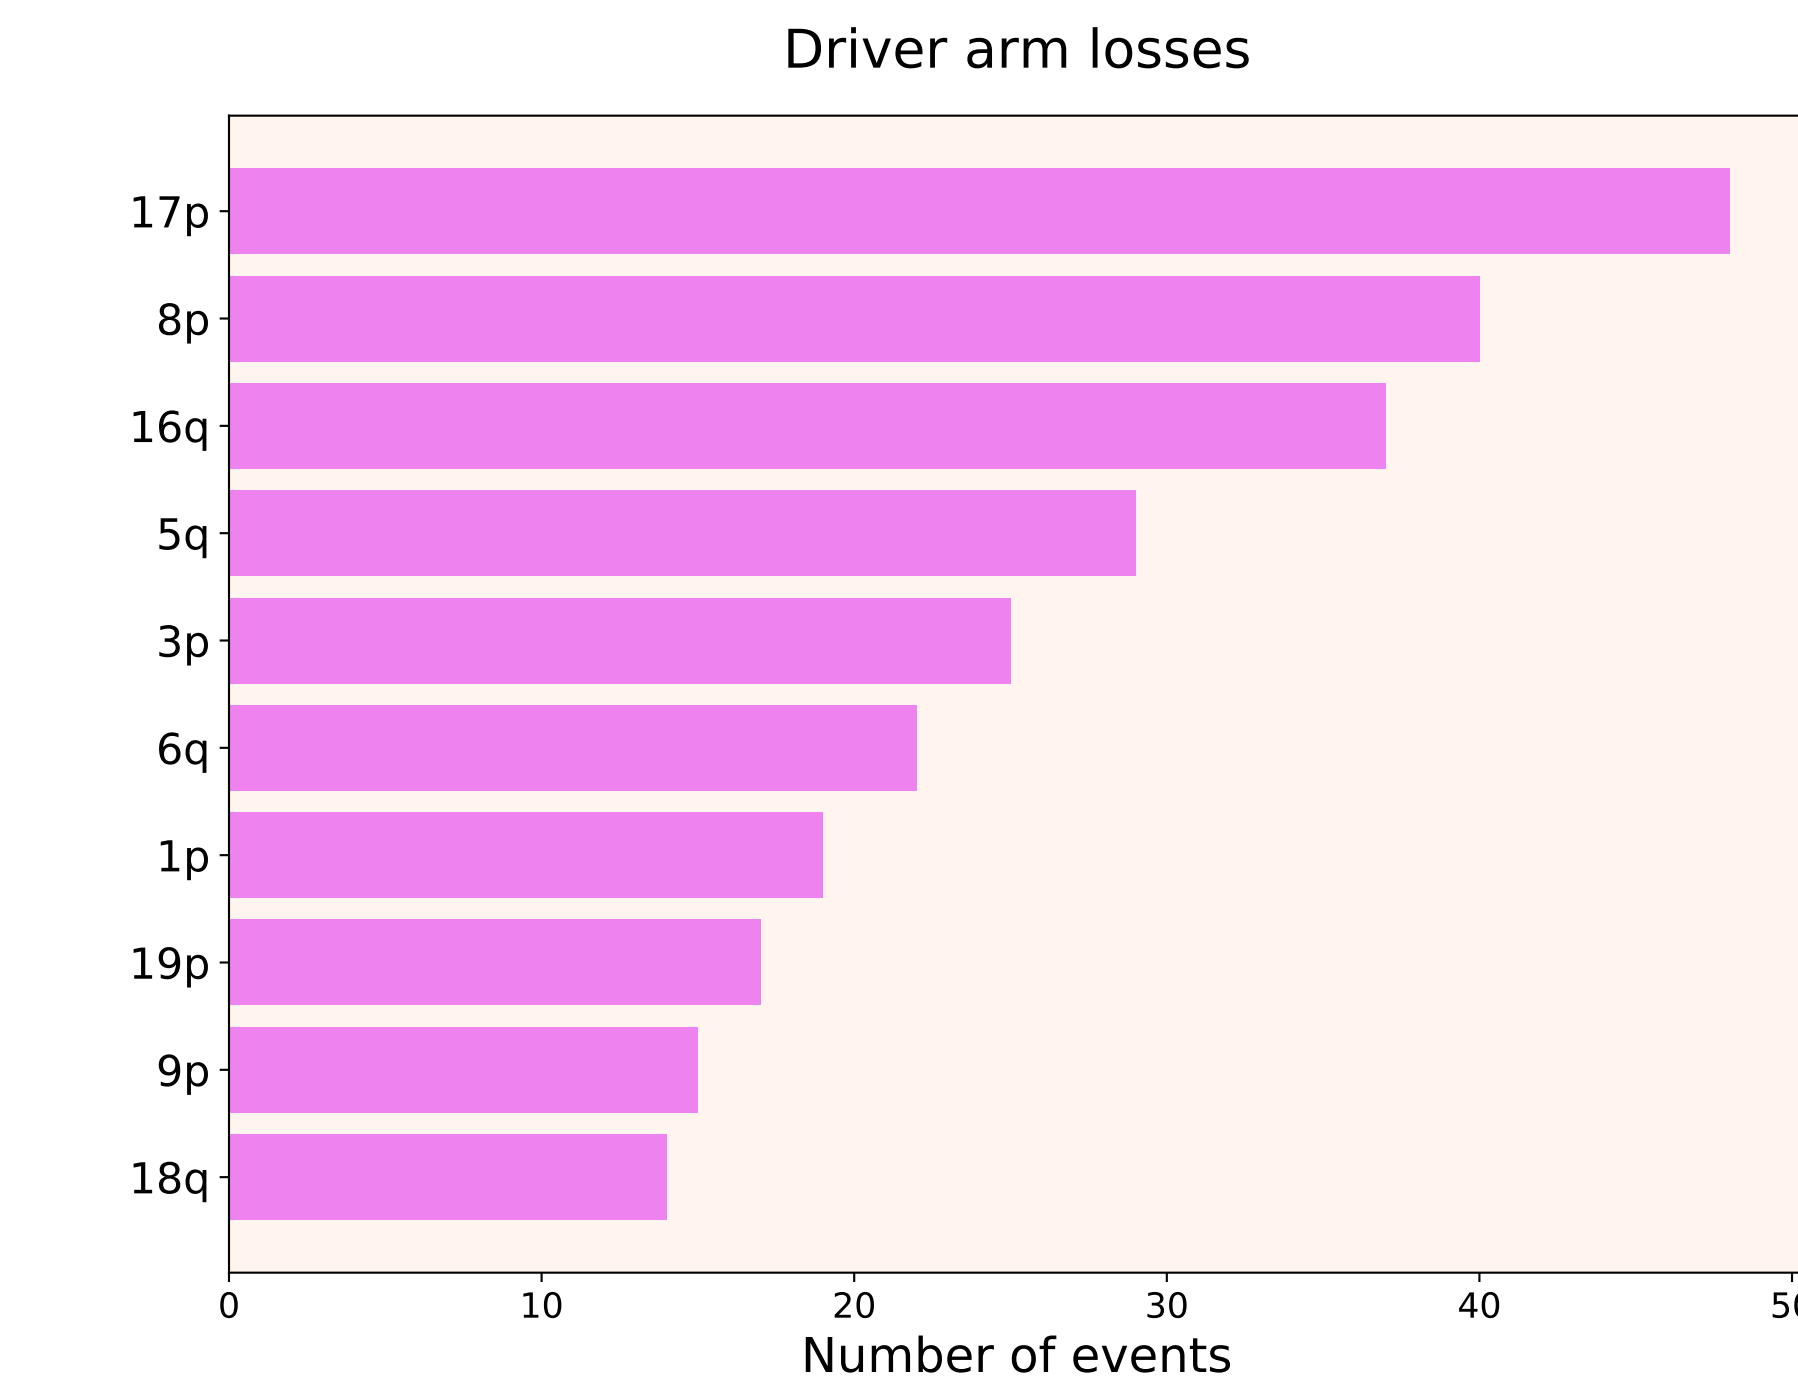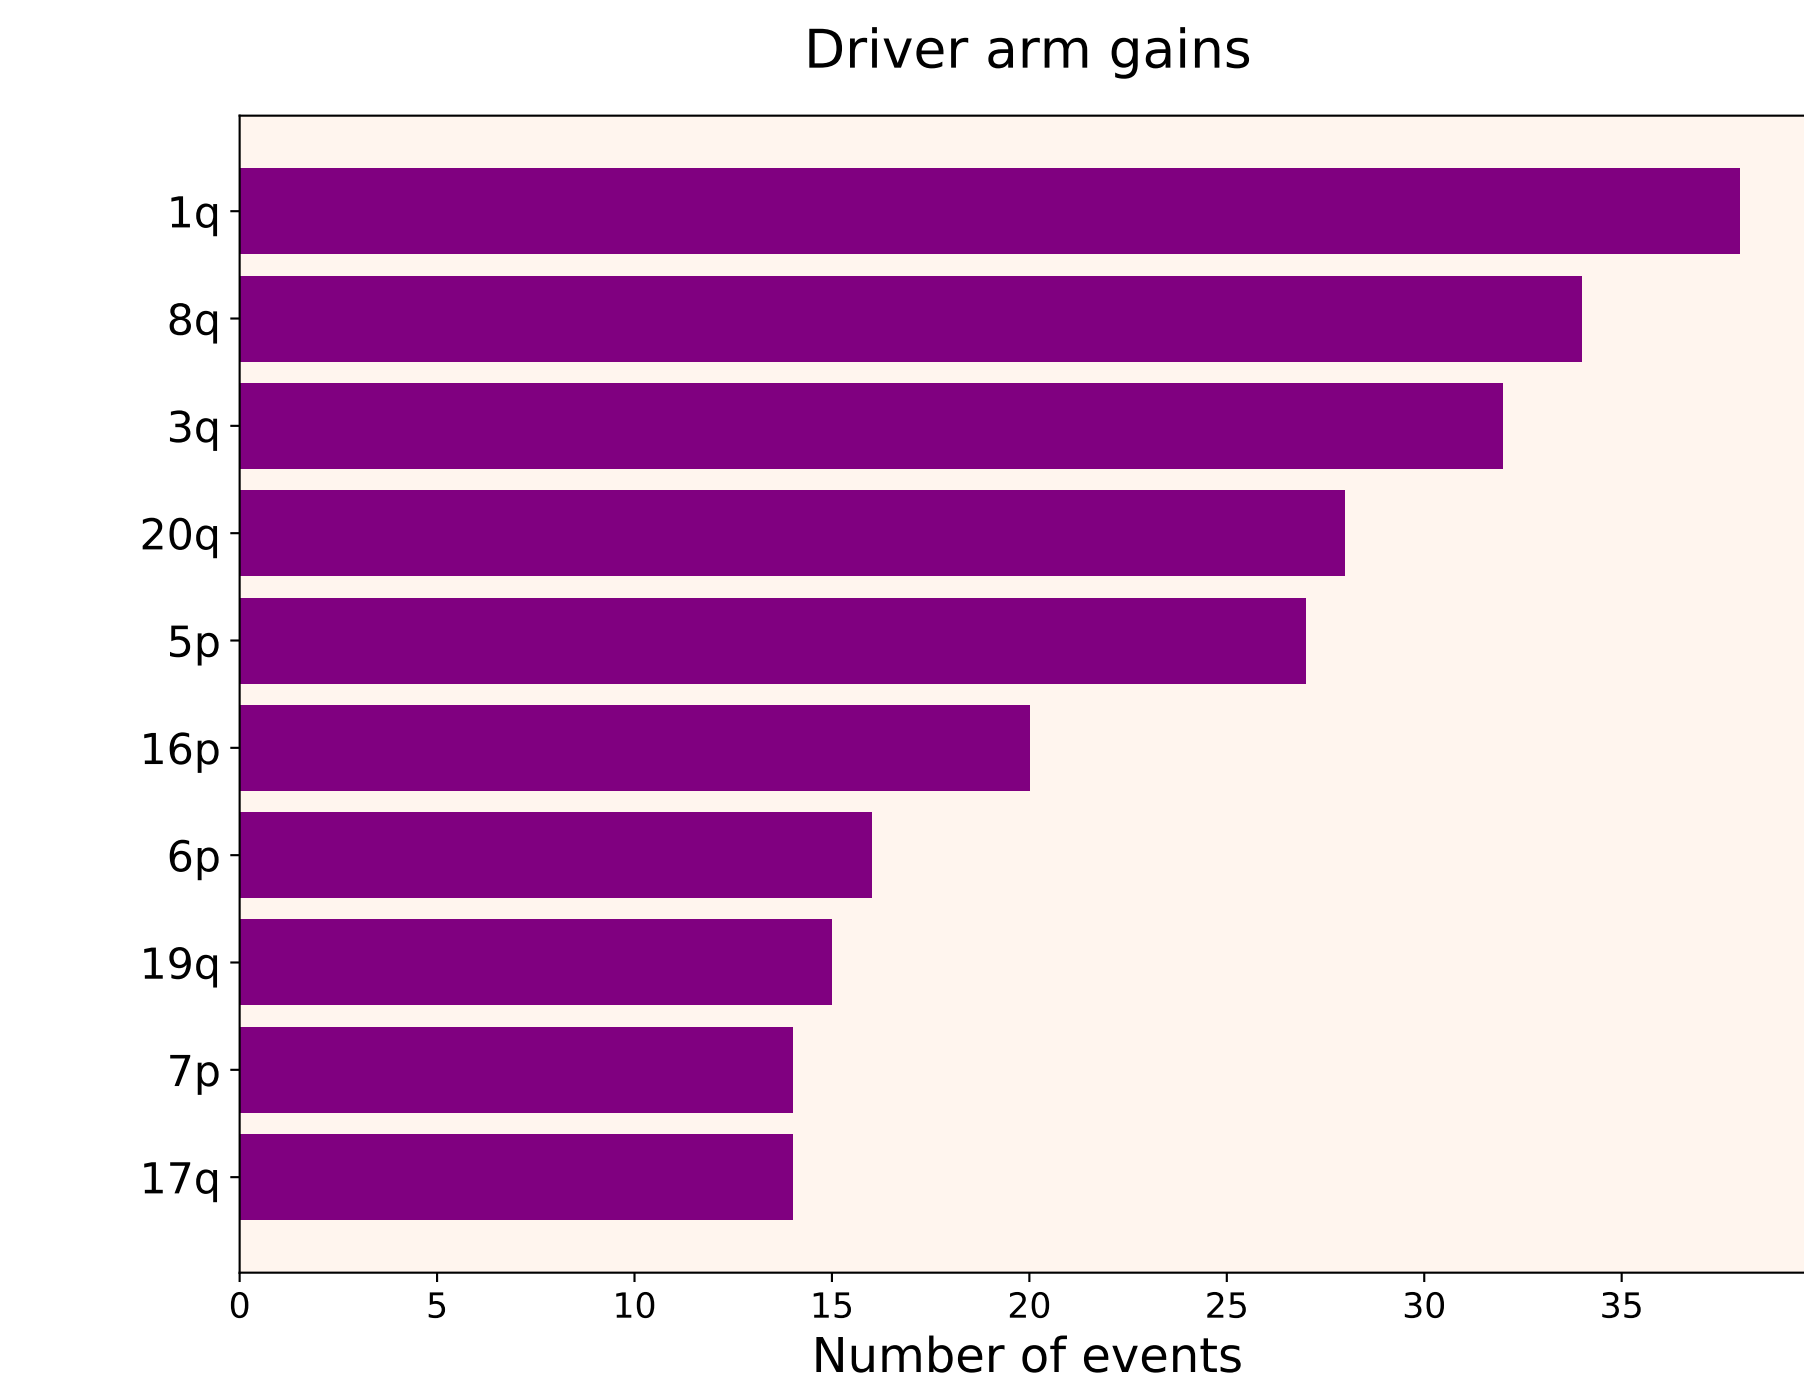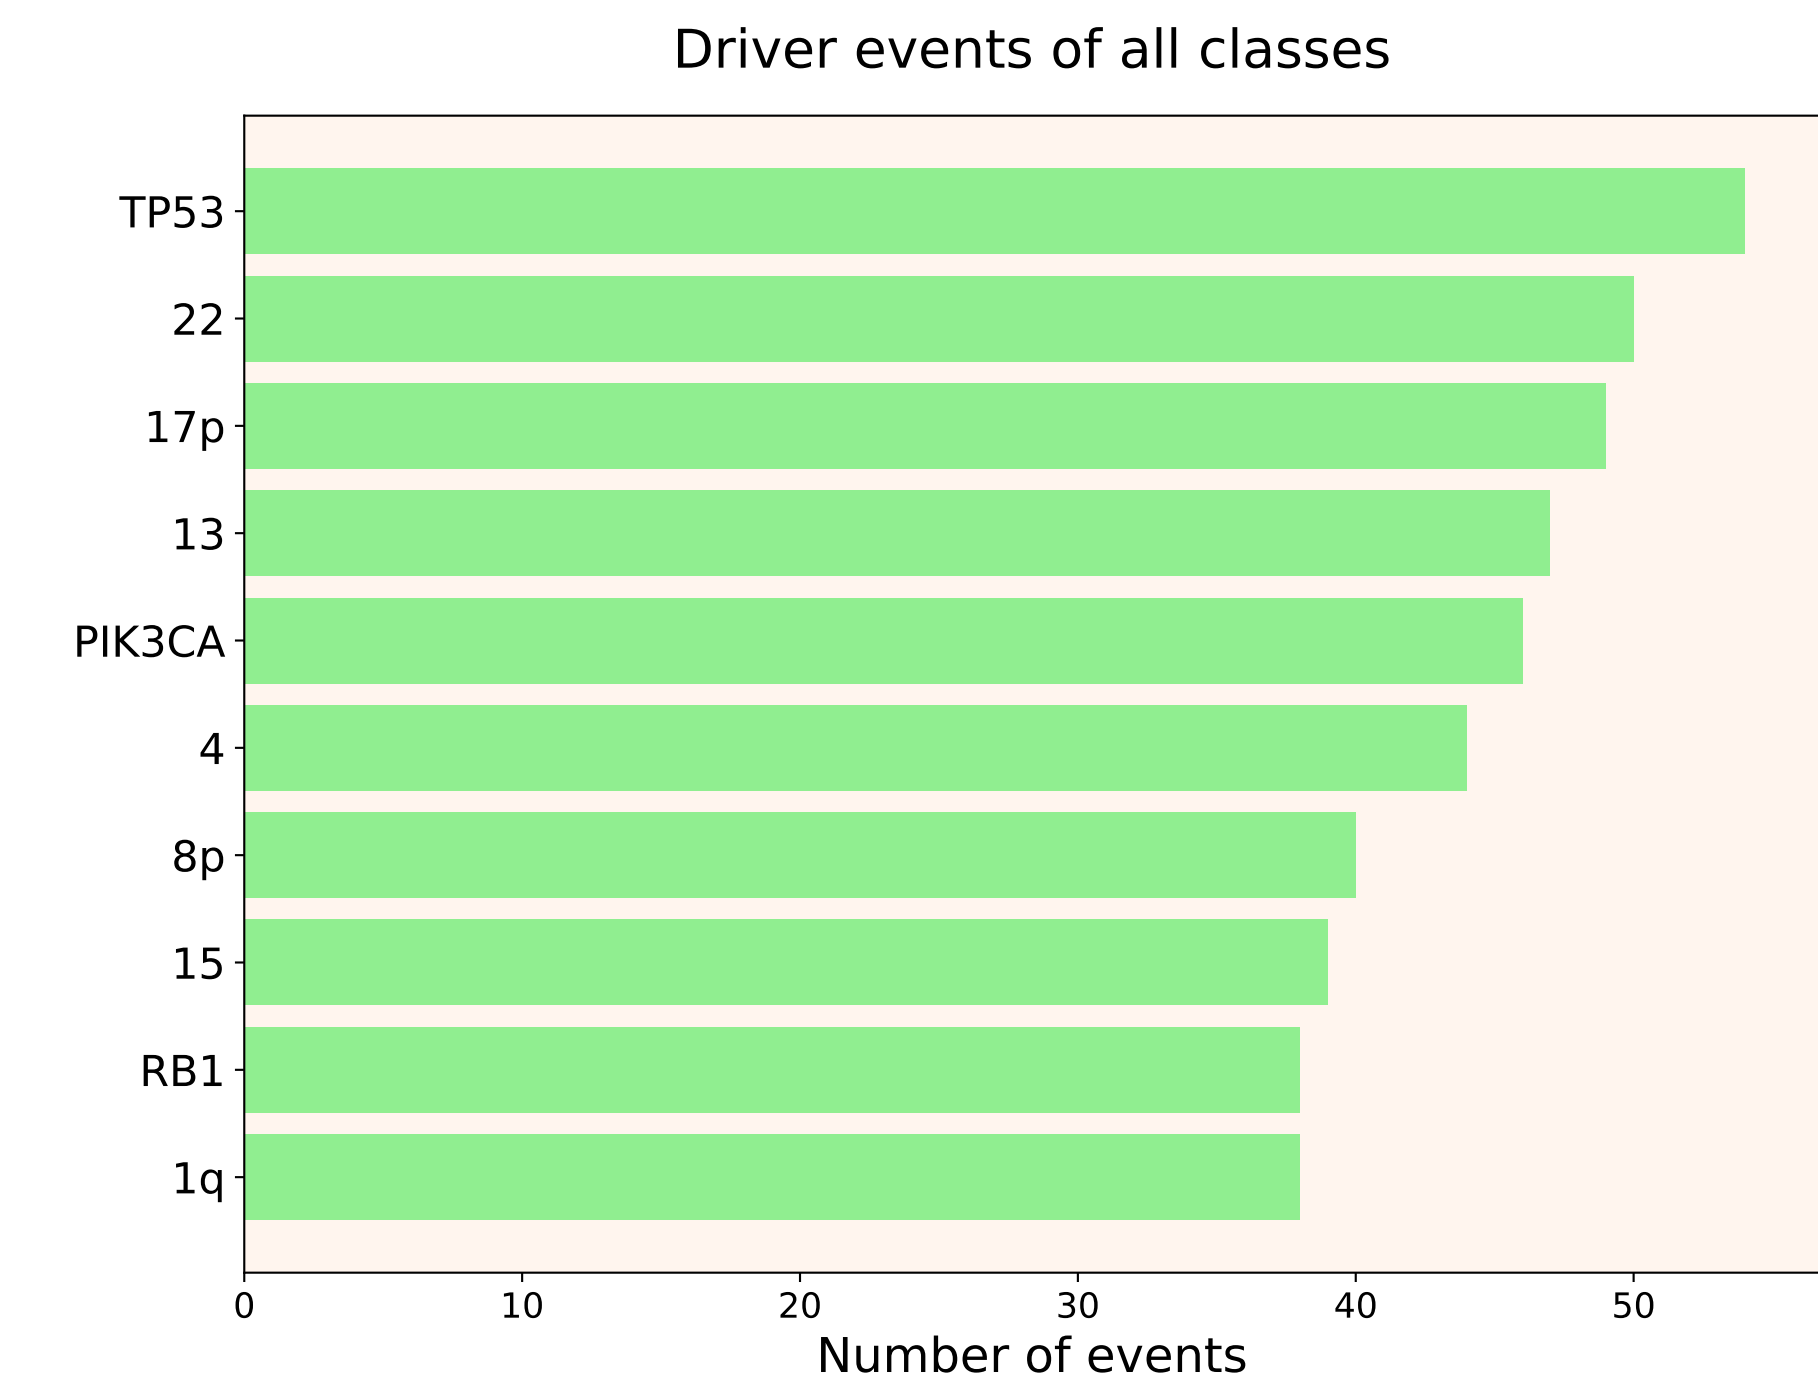

Supplement: Supplemental_Data_S1.zip [file Supplemental_Data_S1.zip]

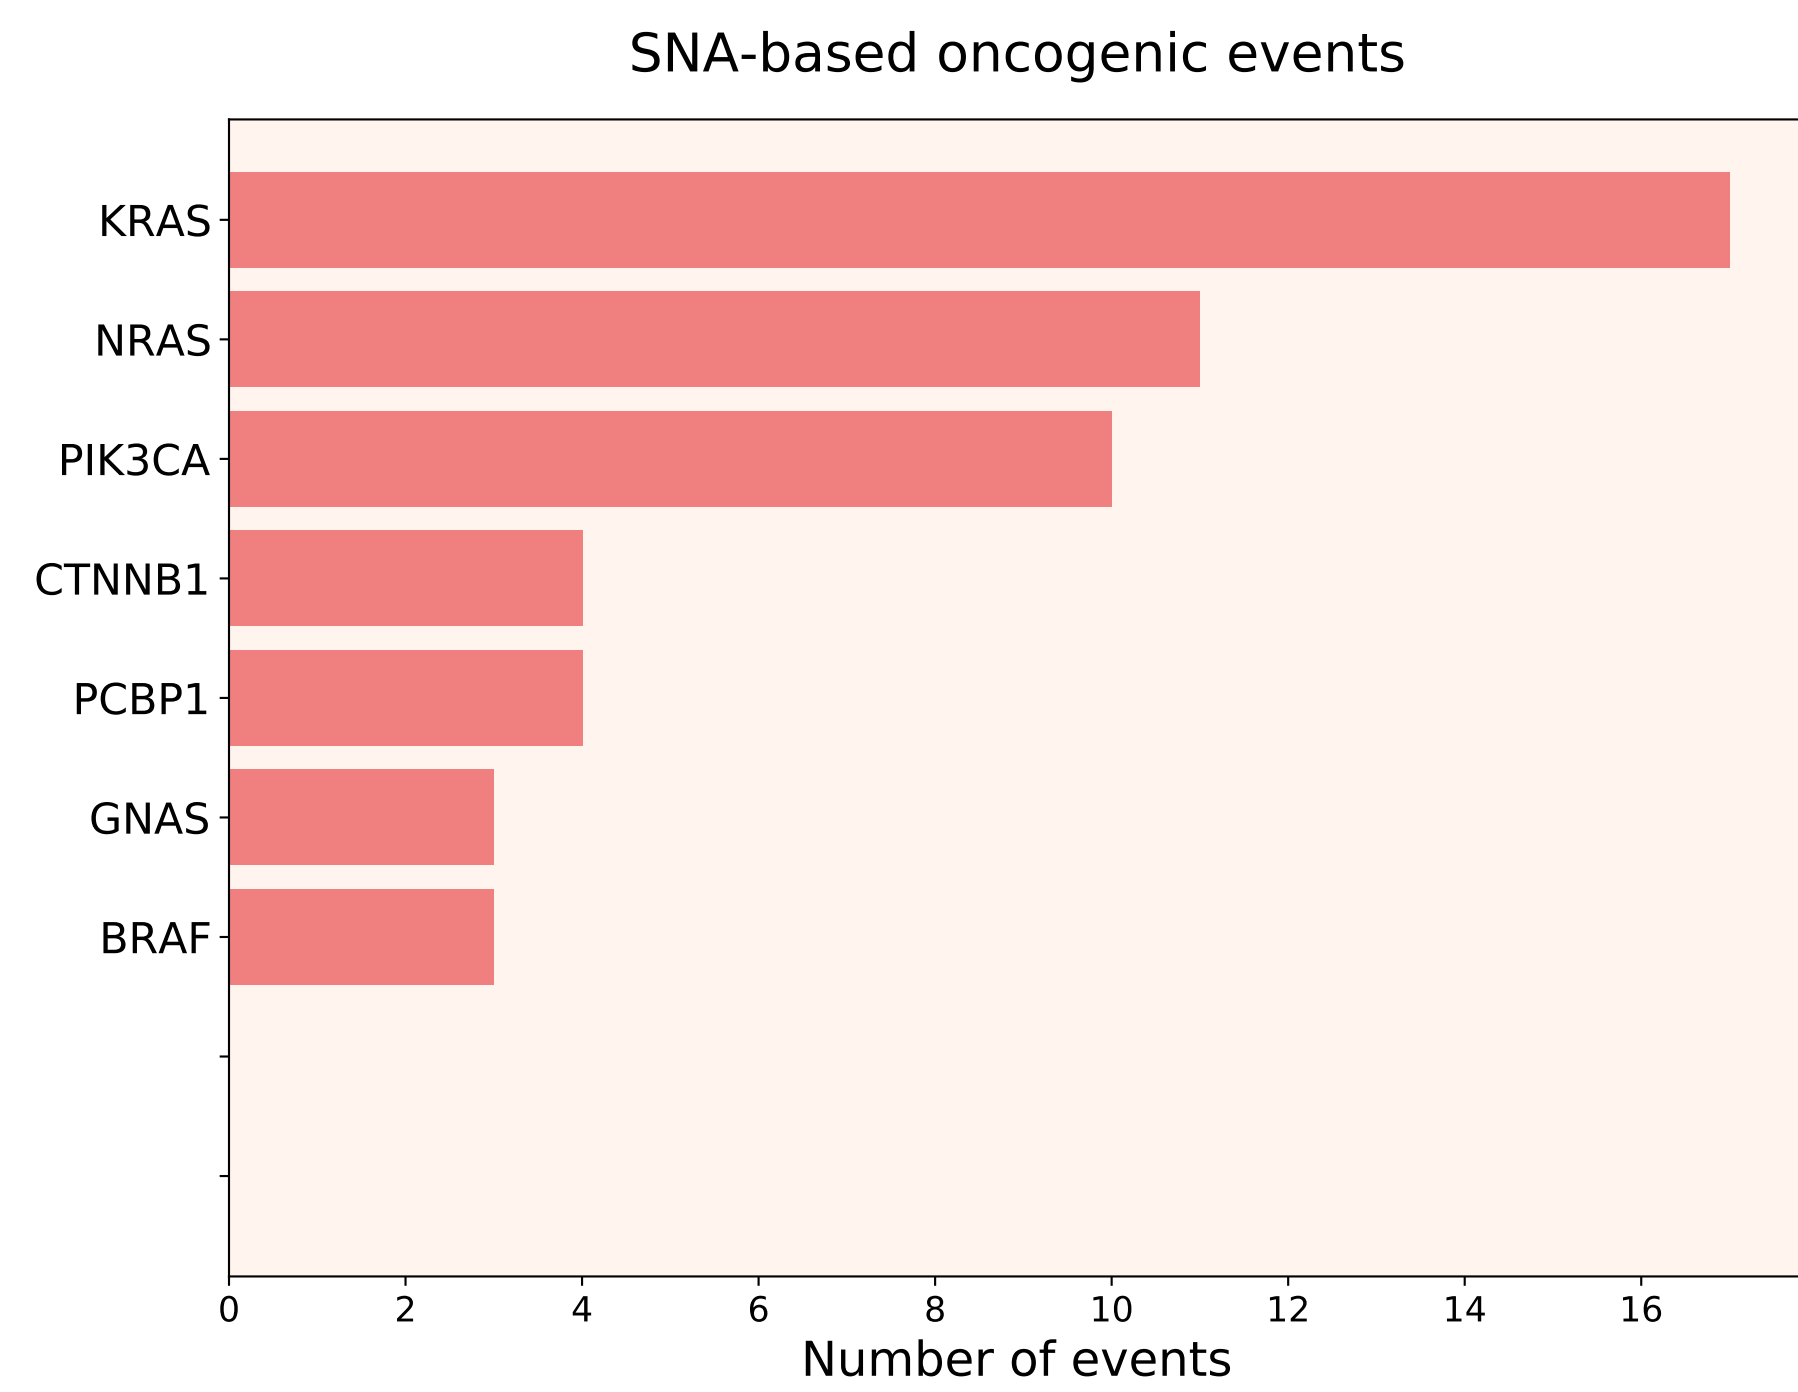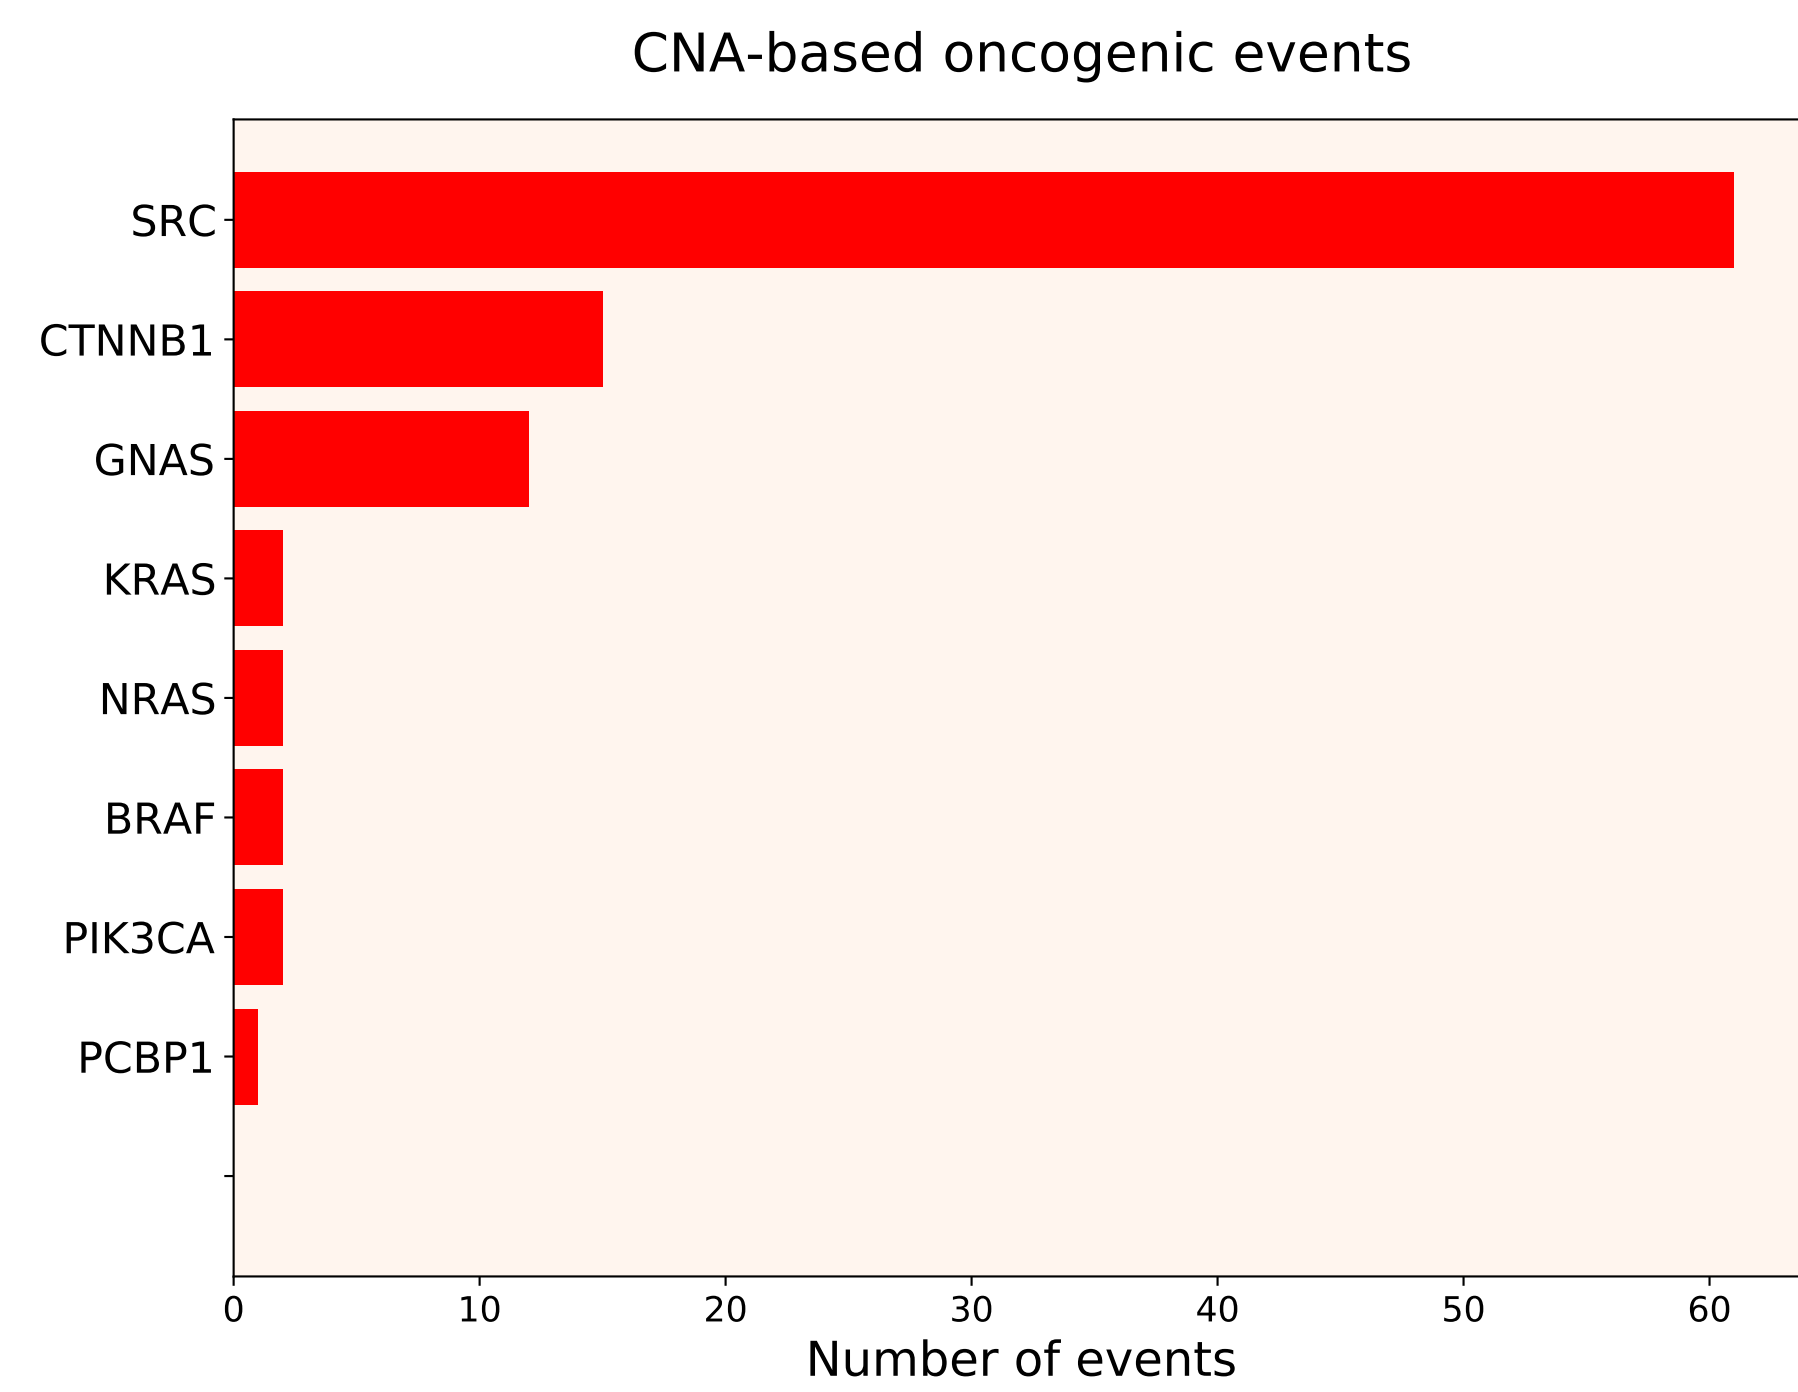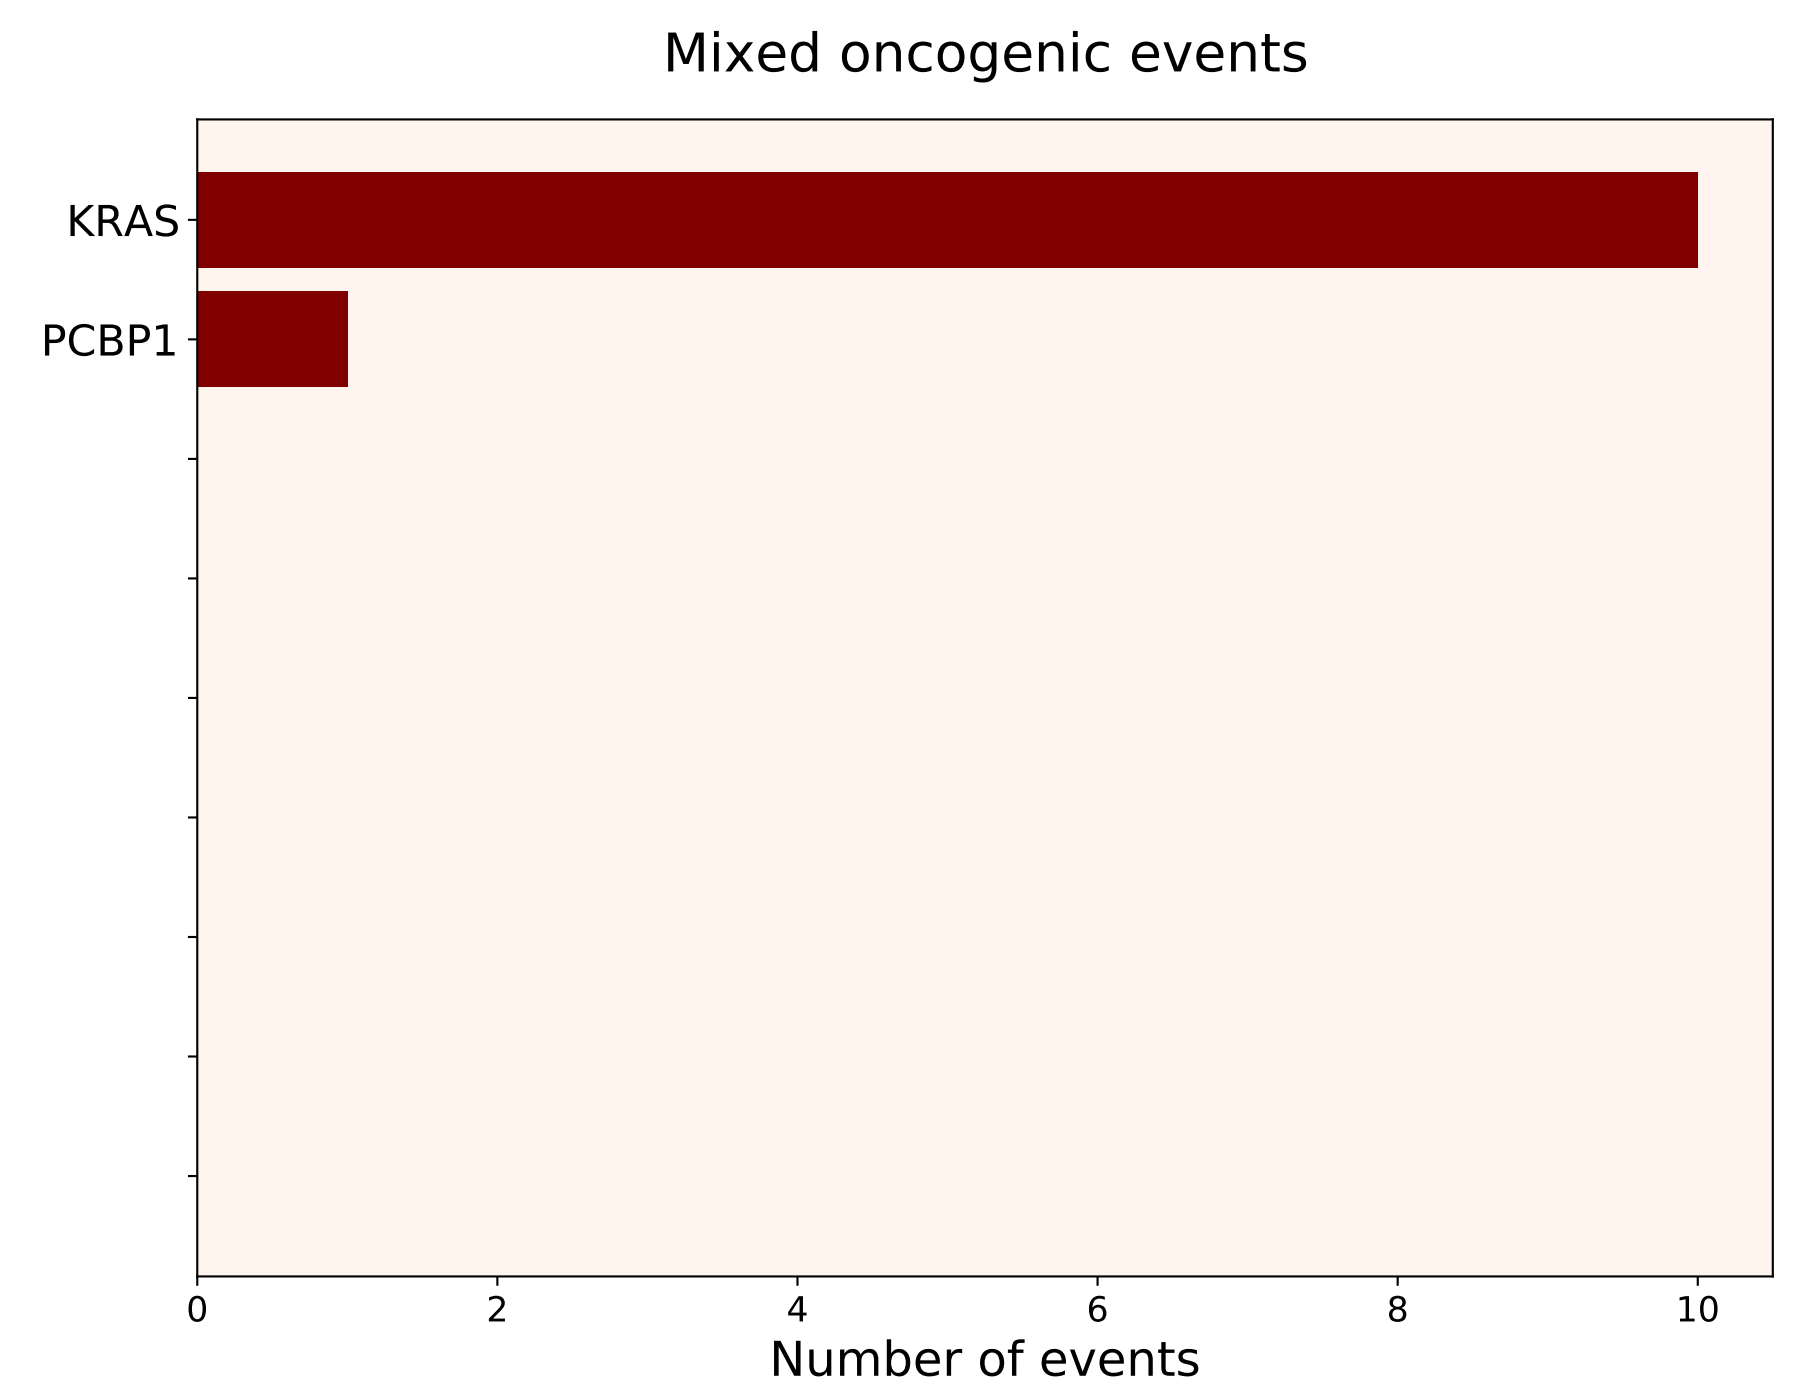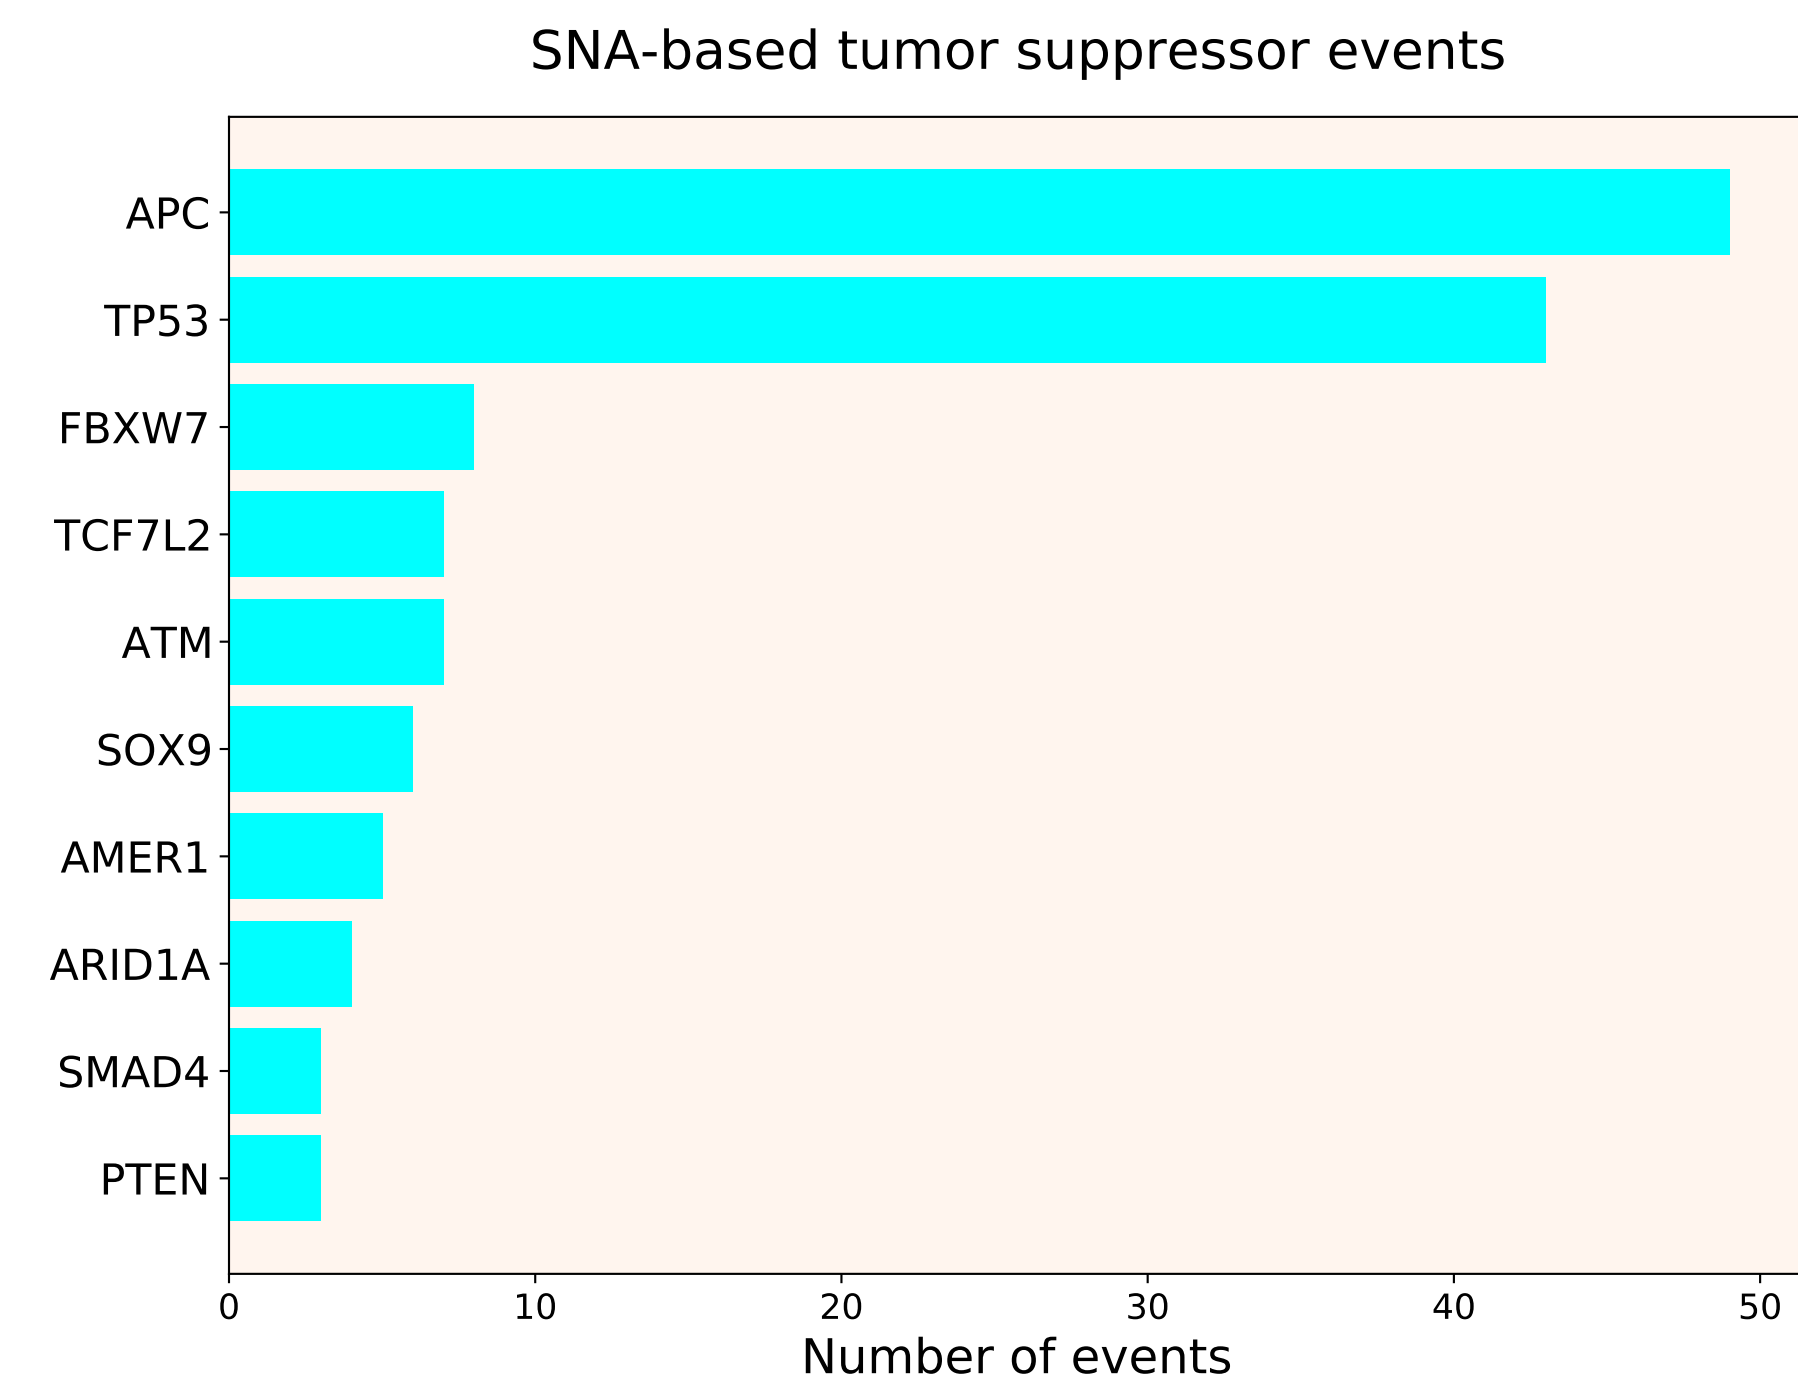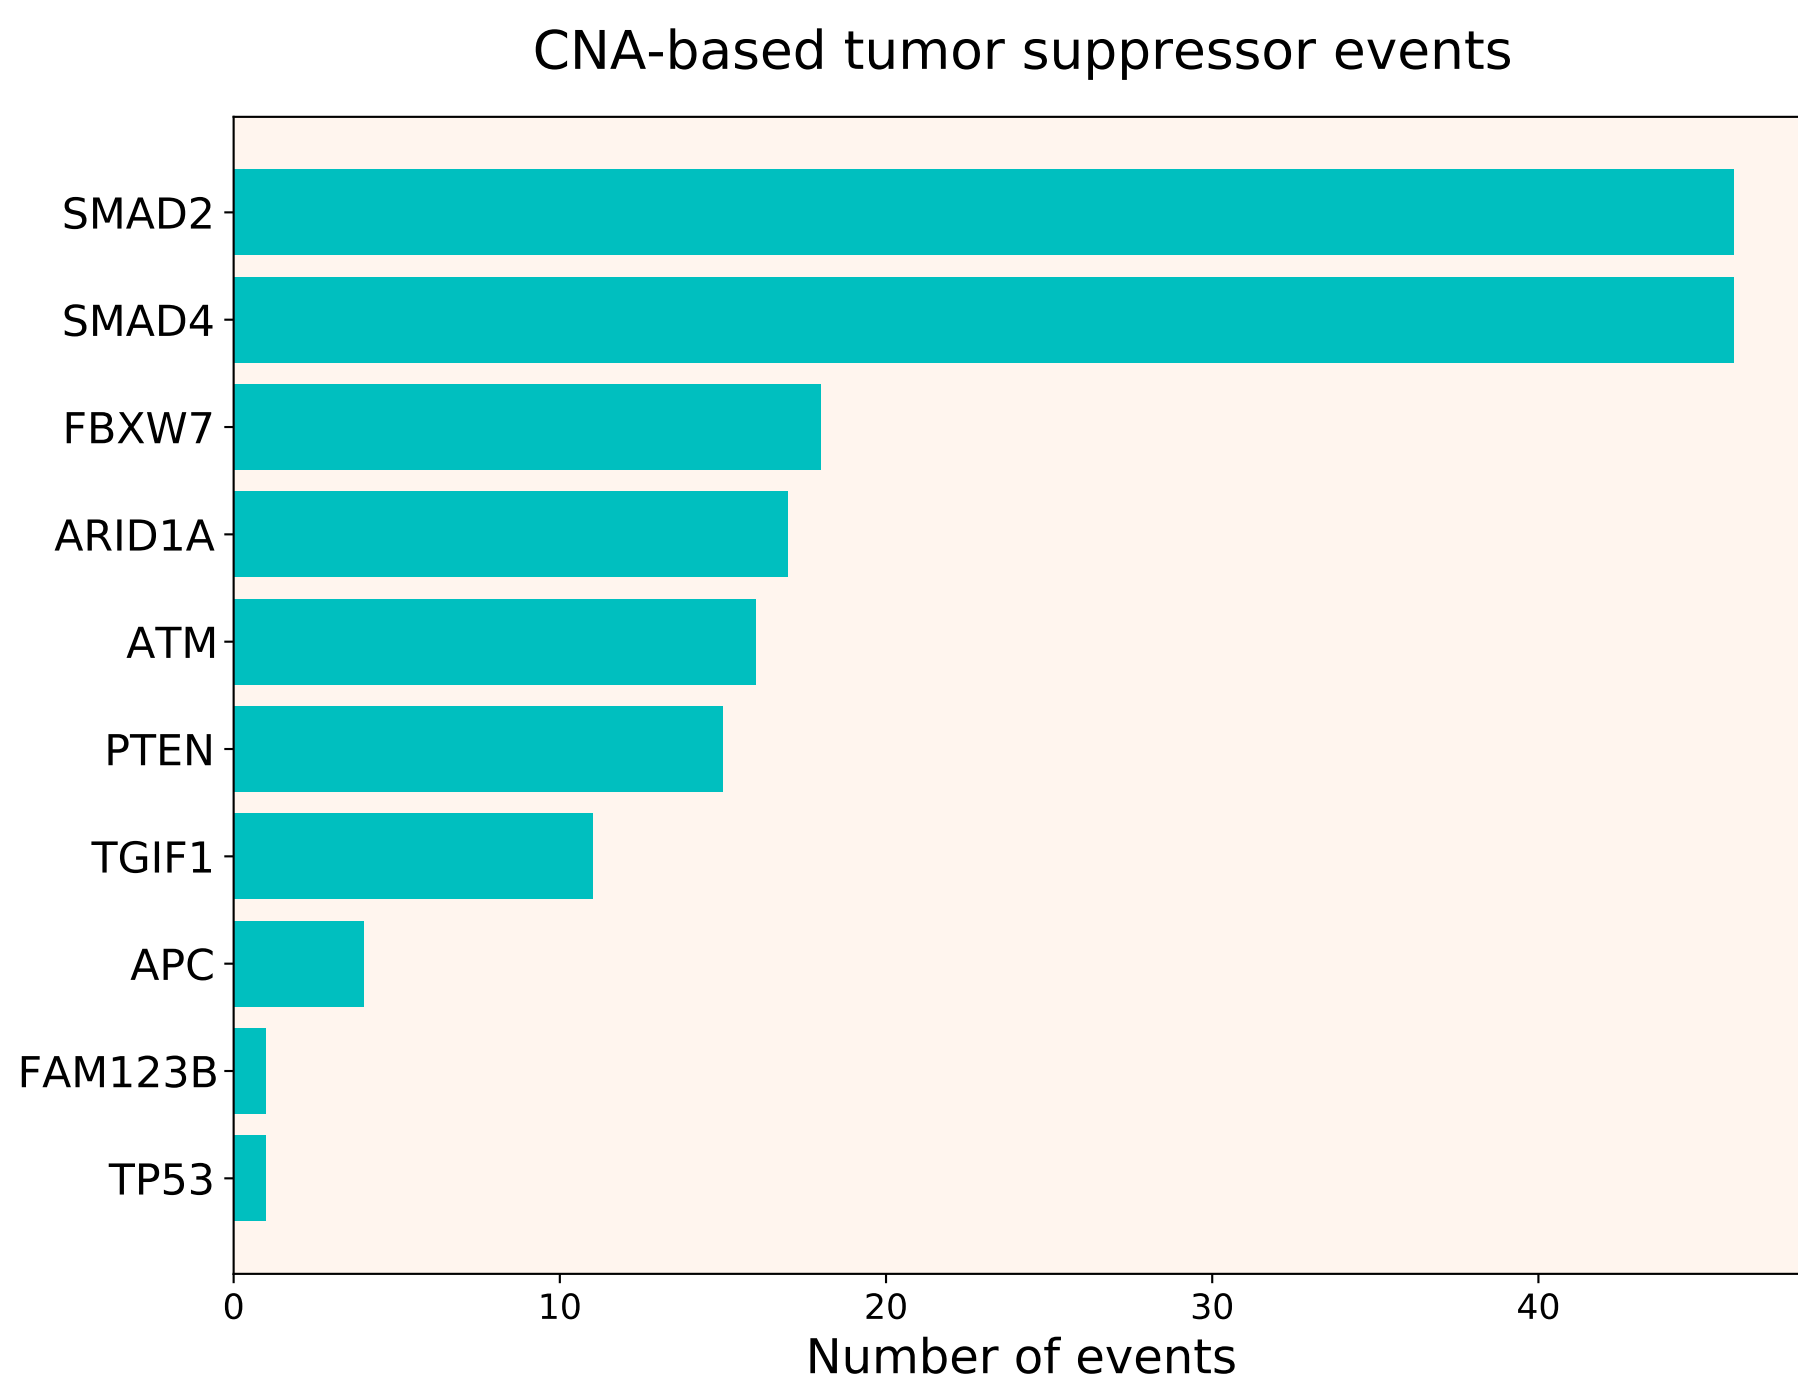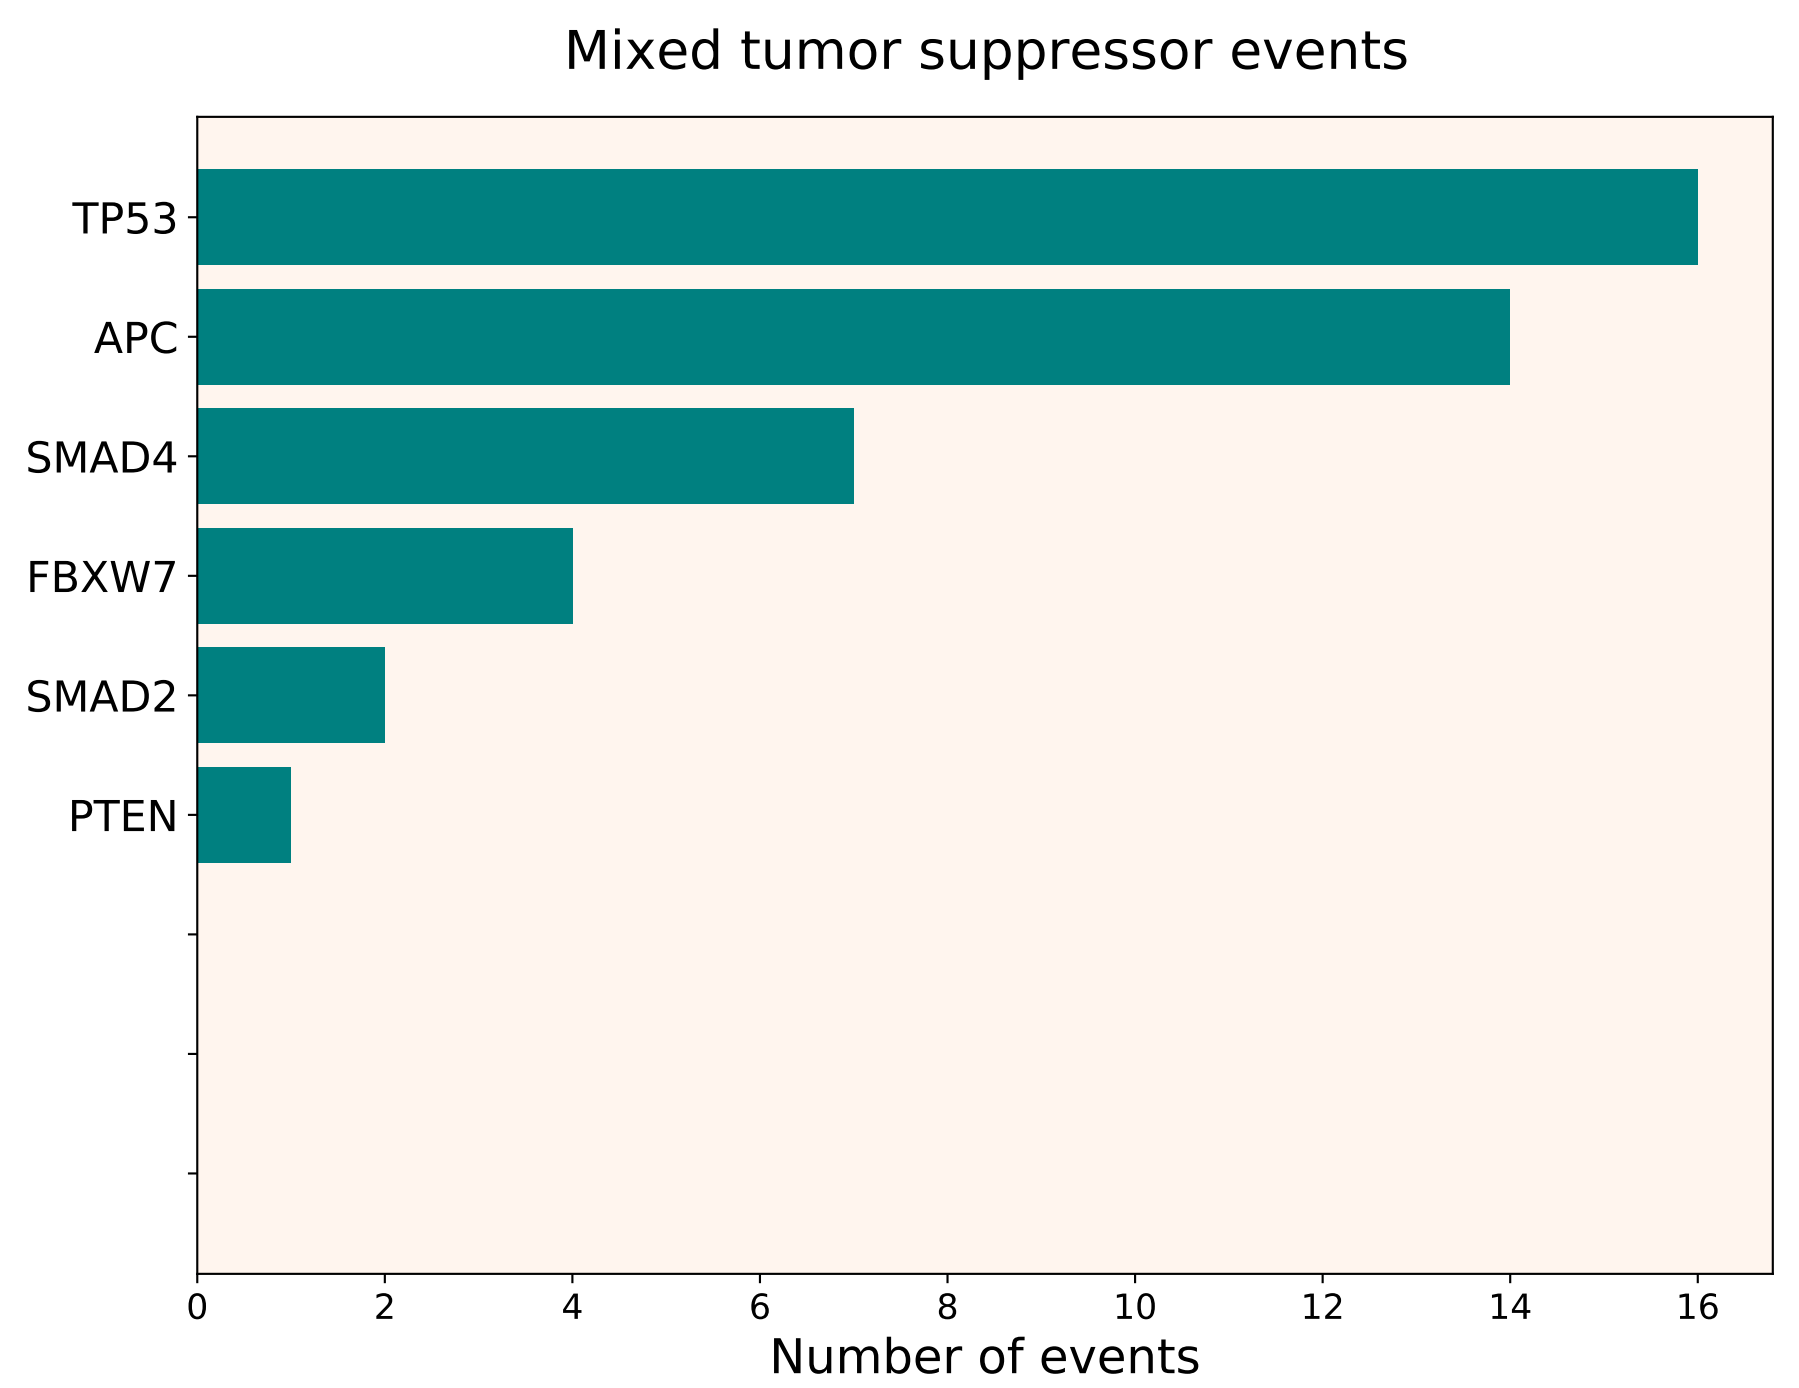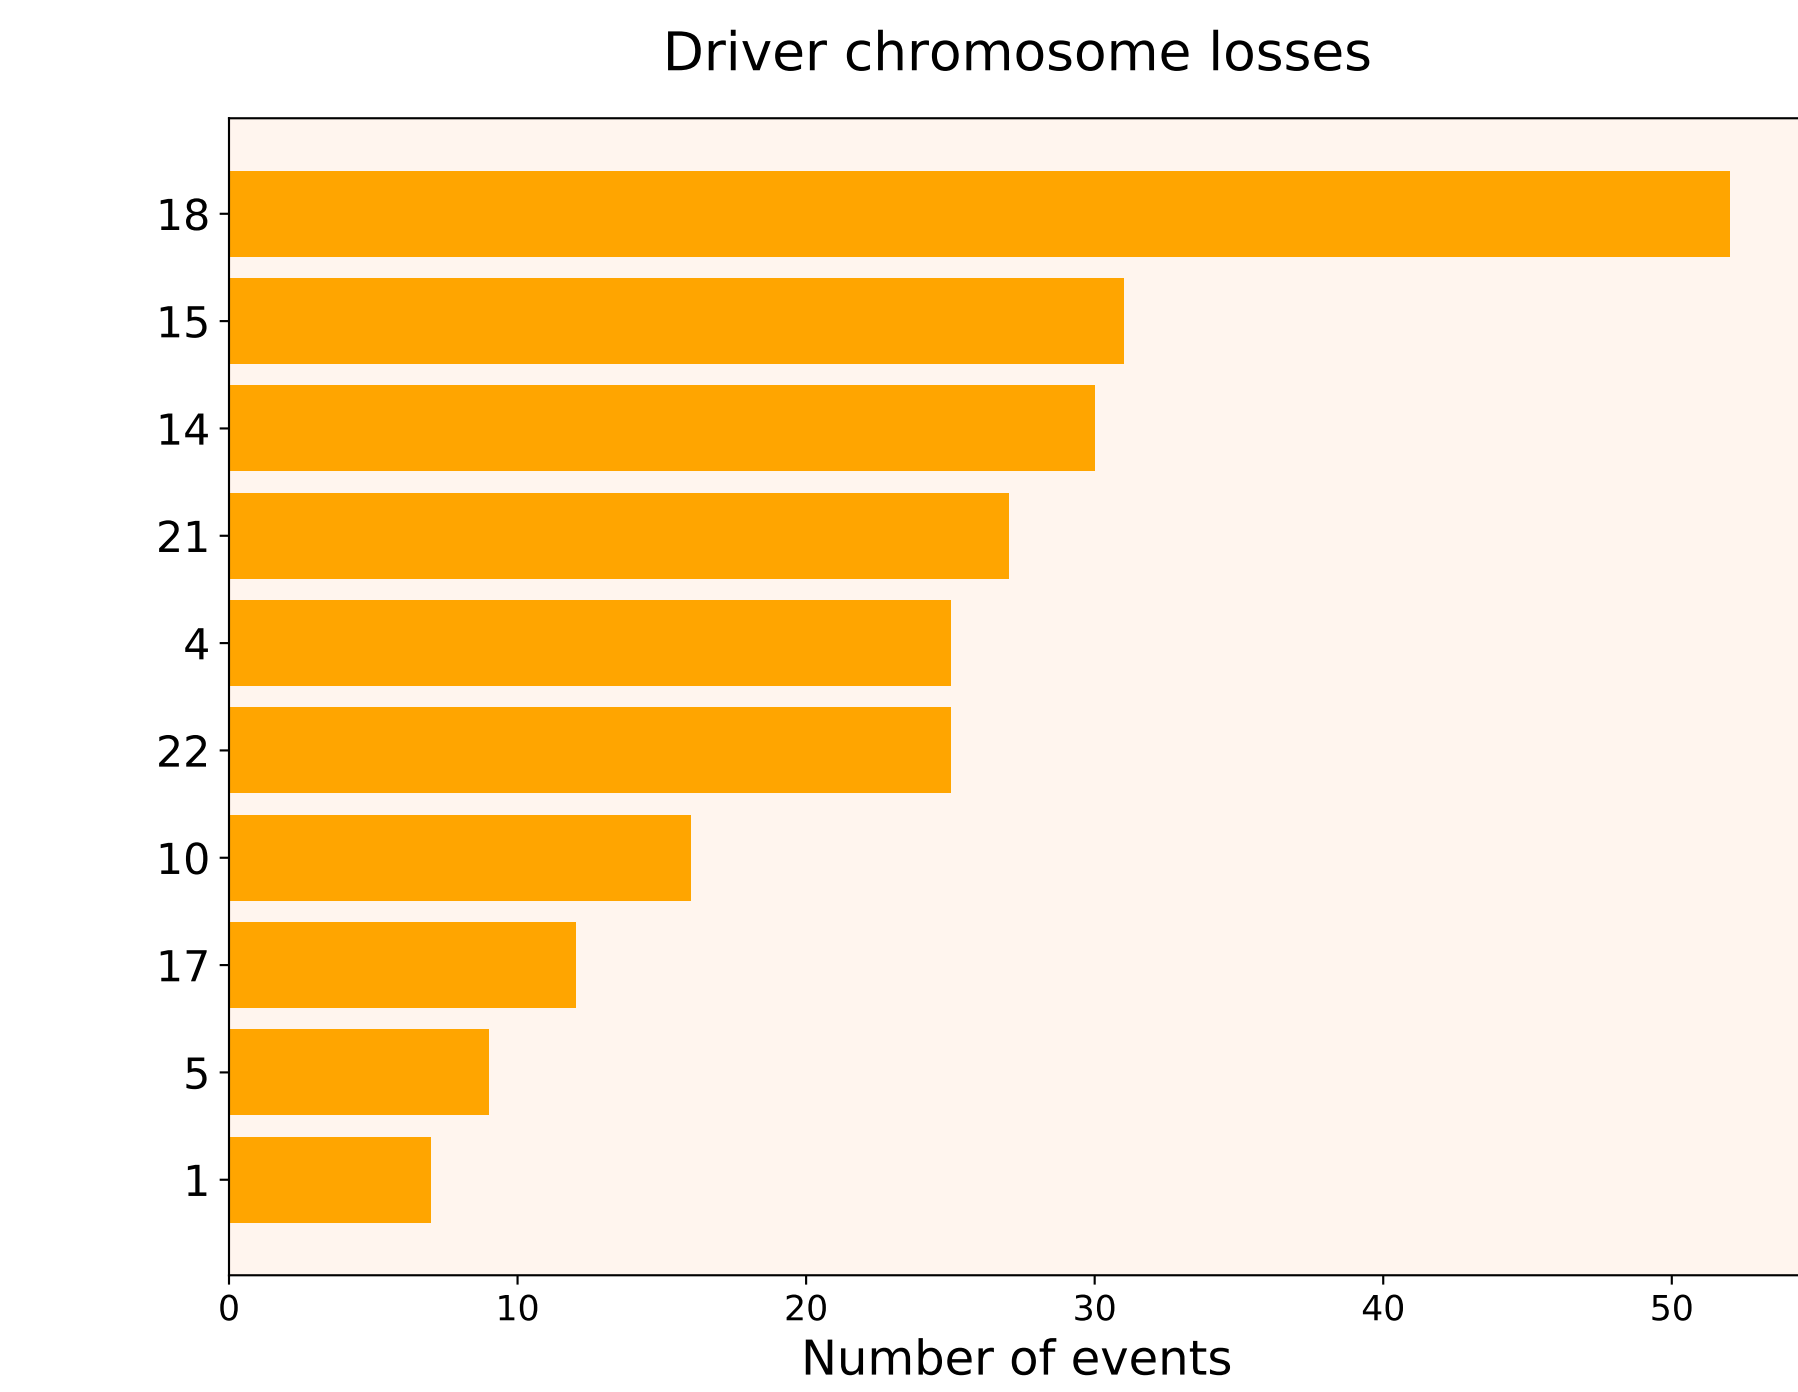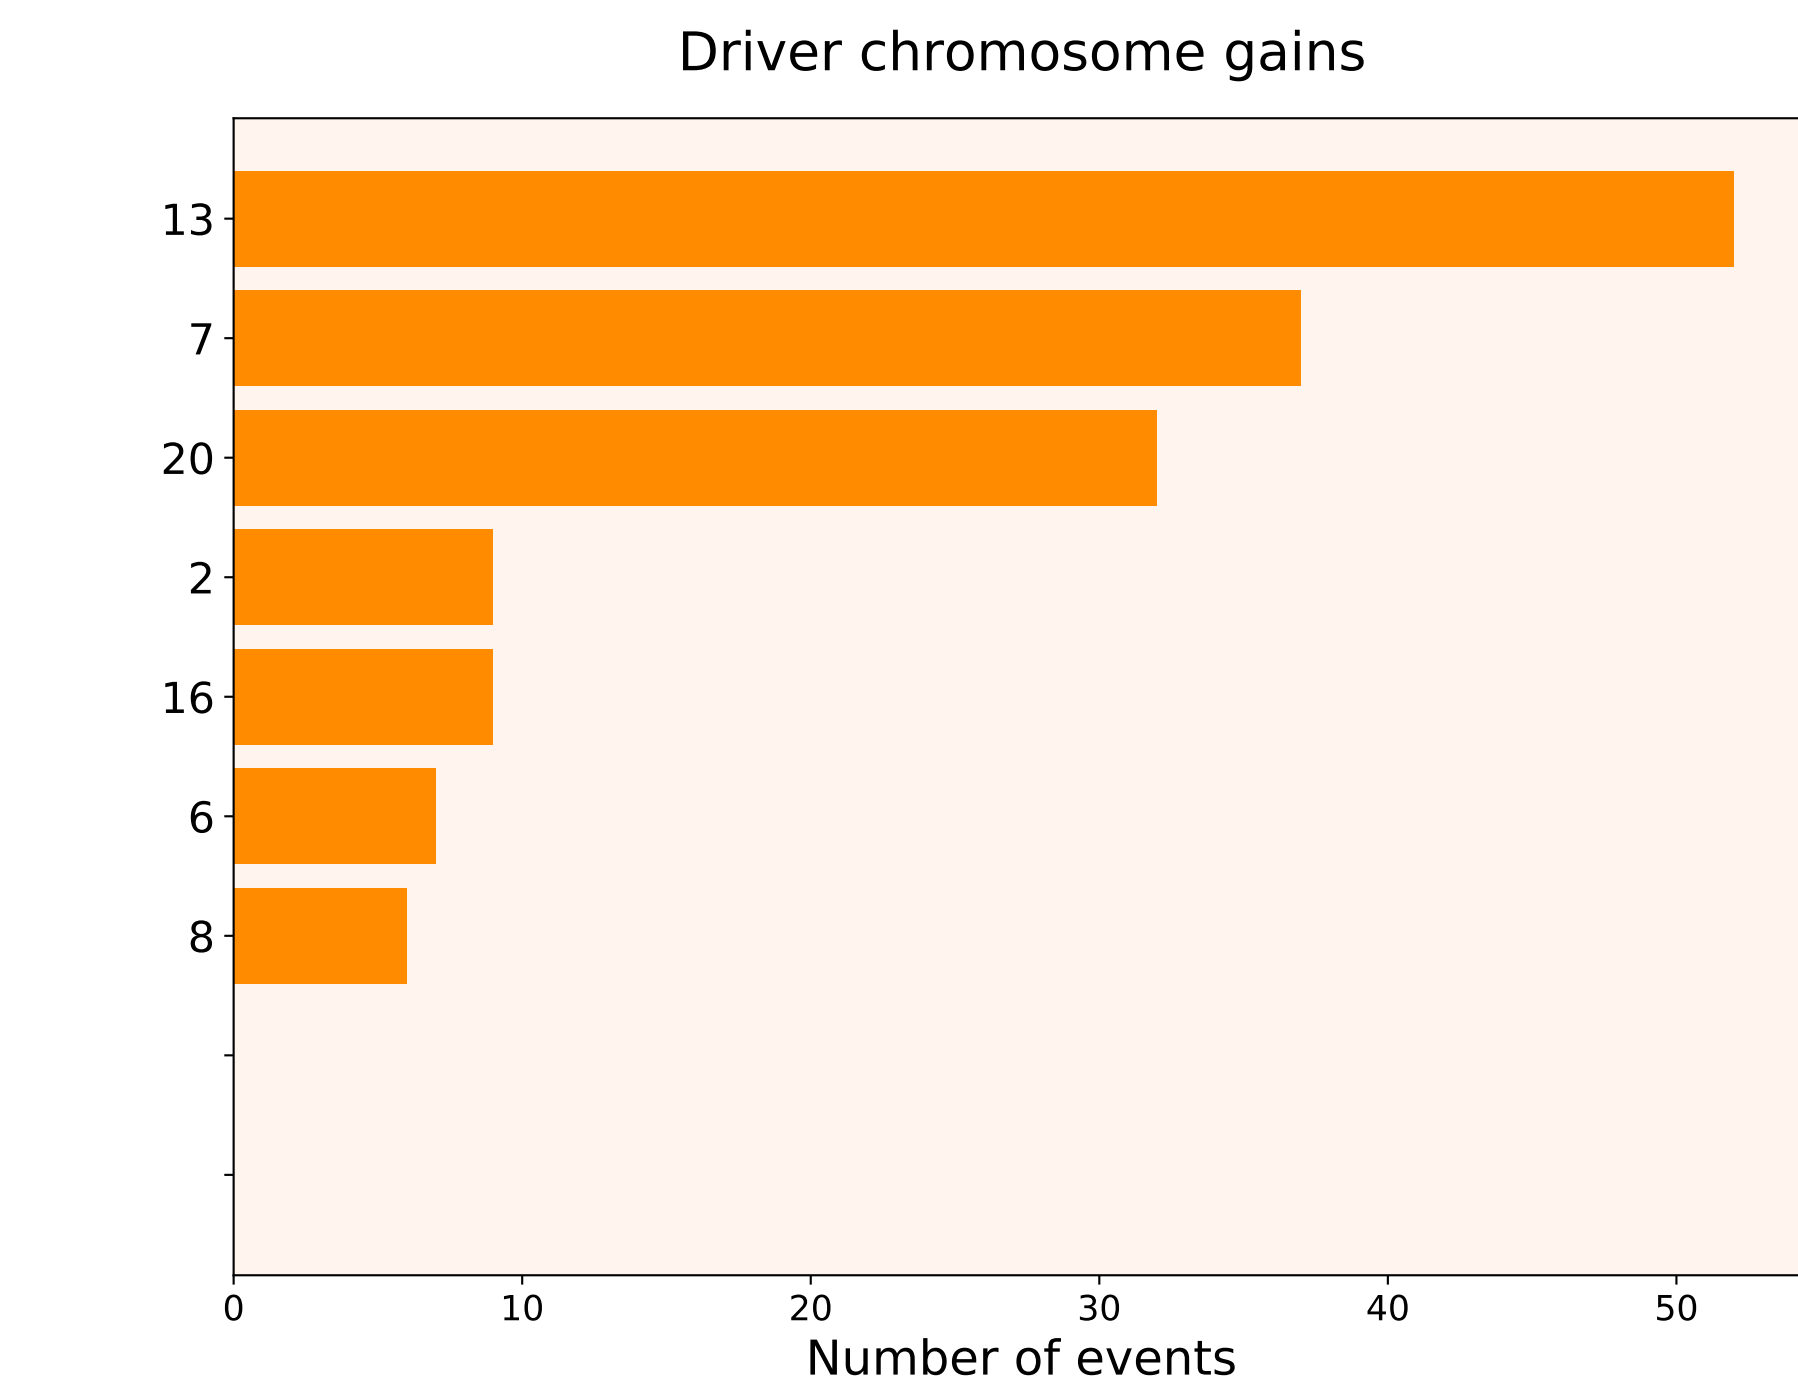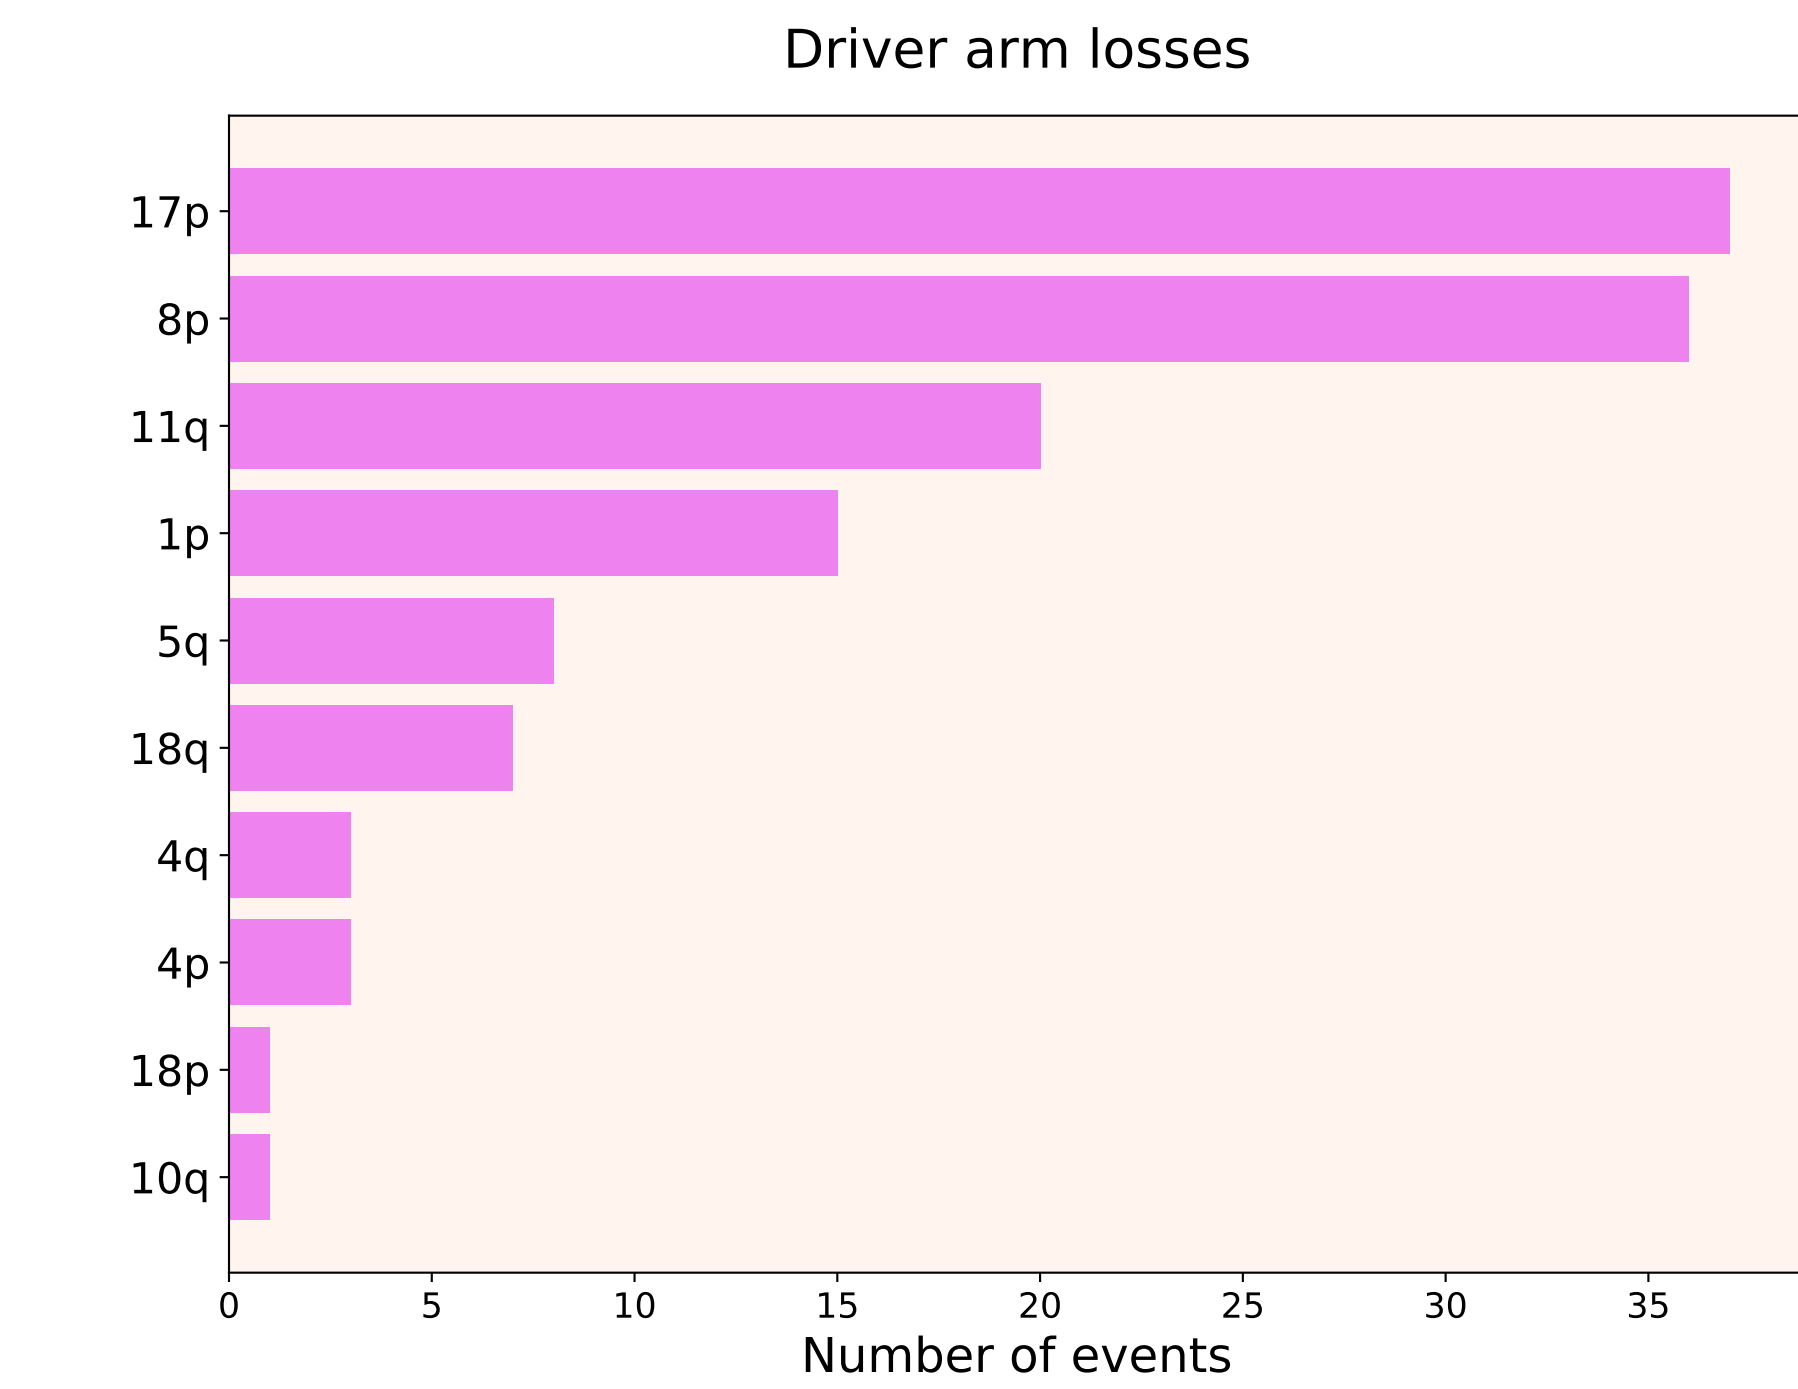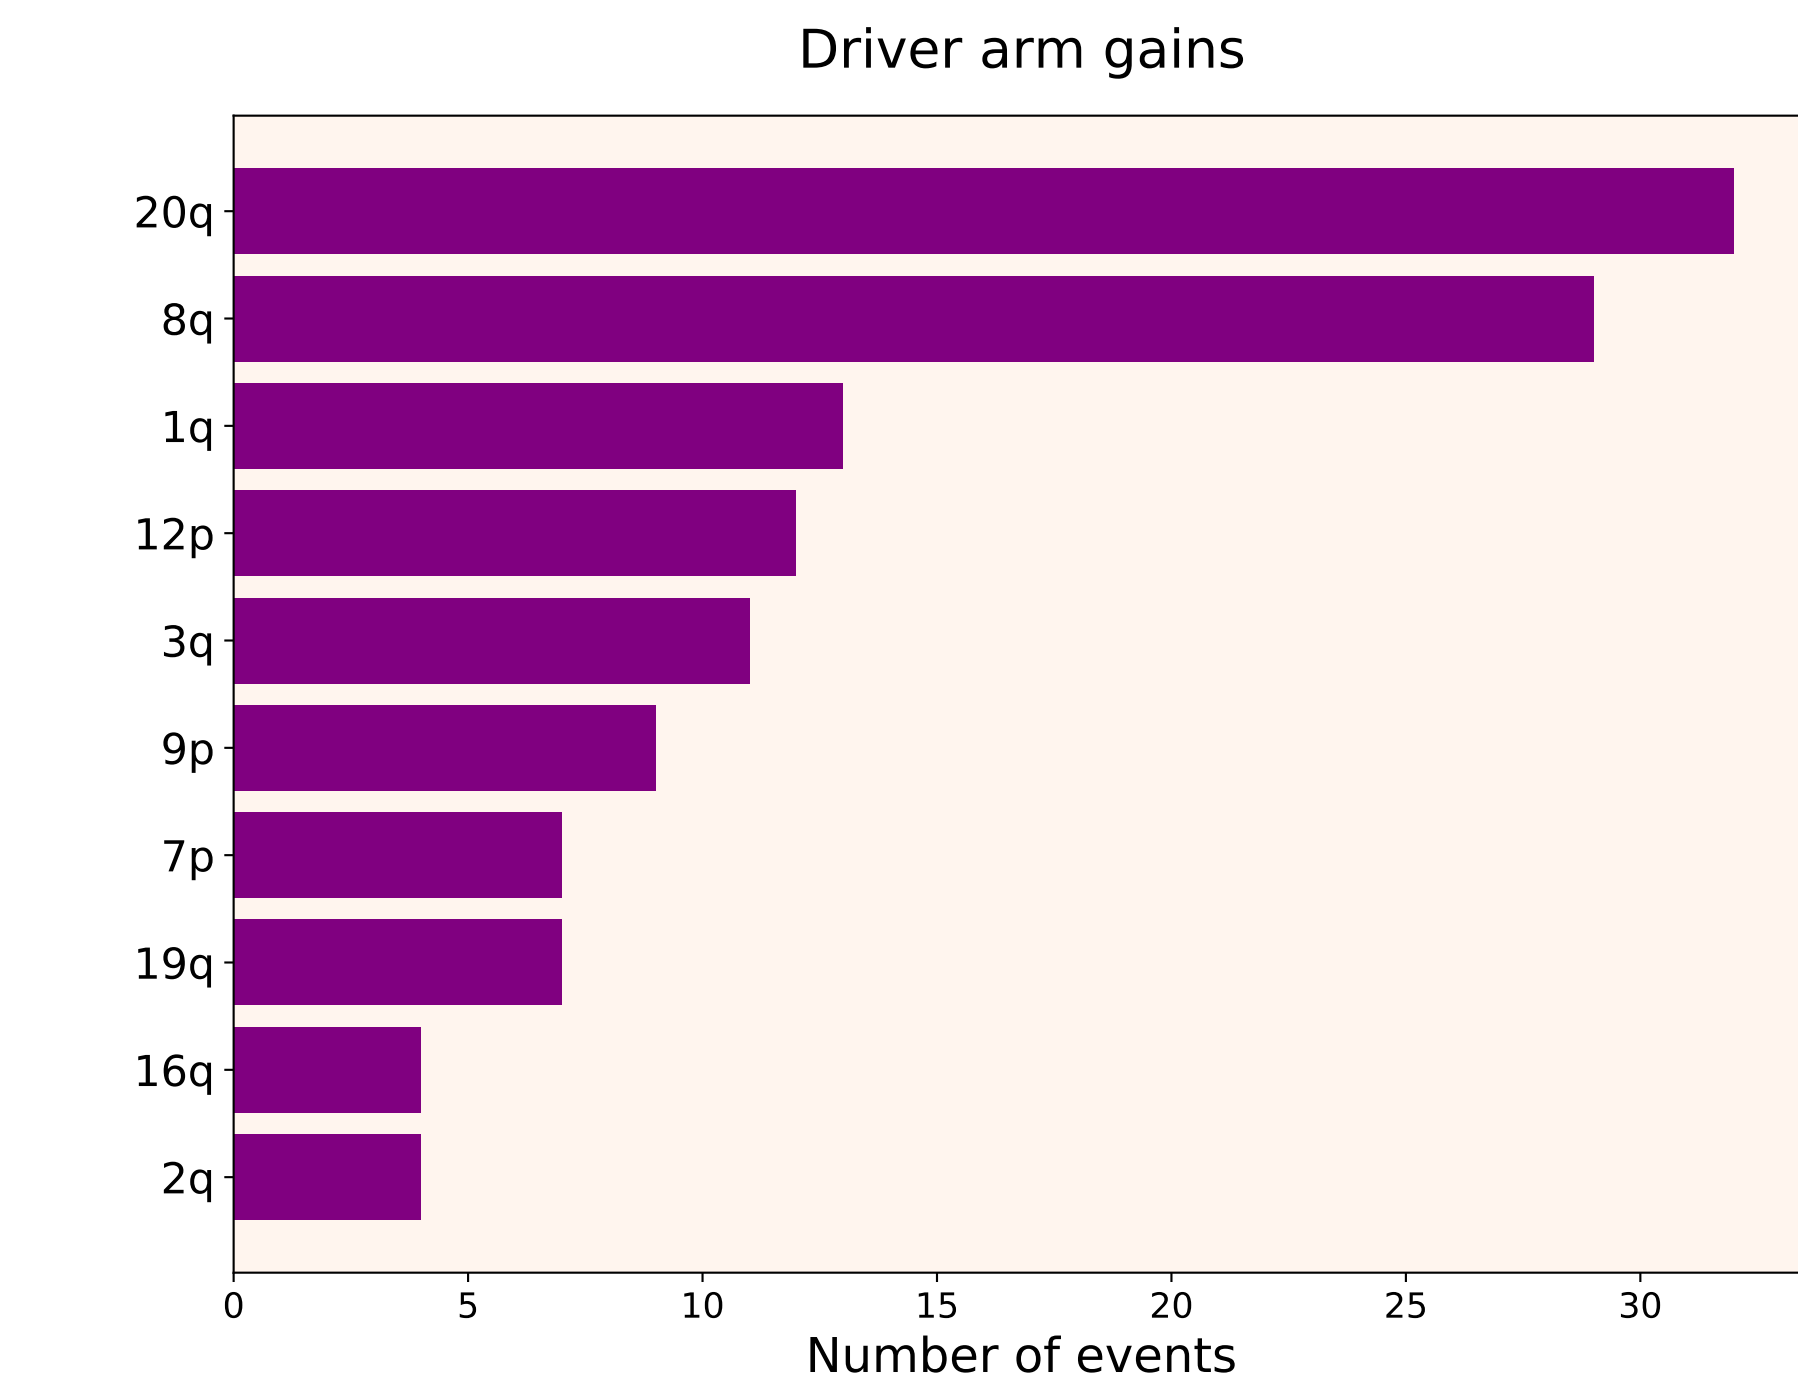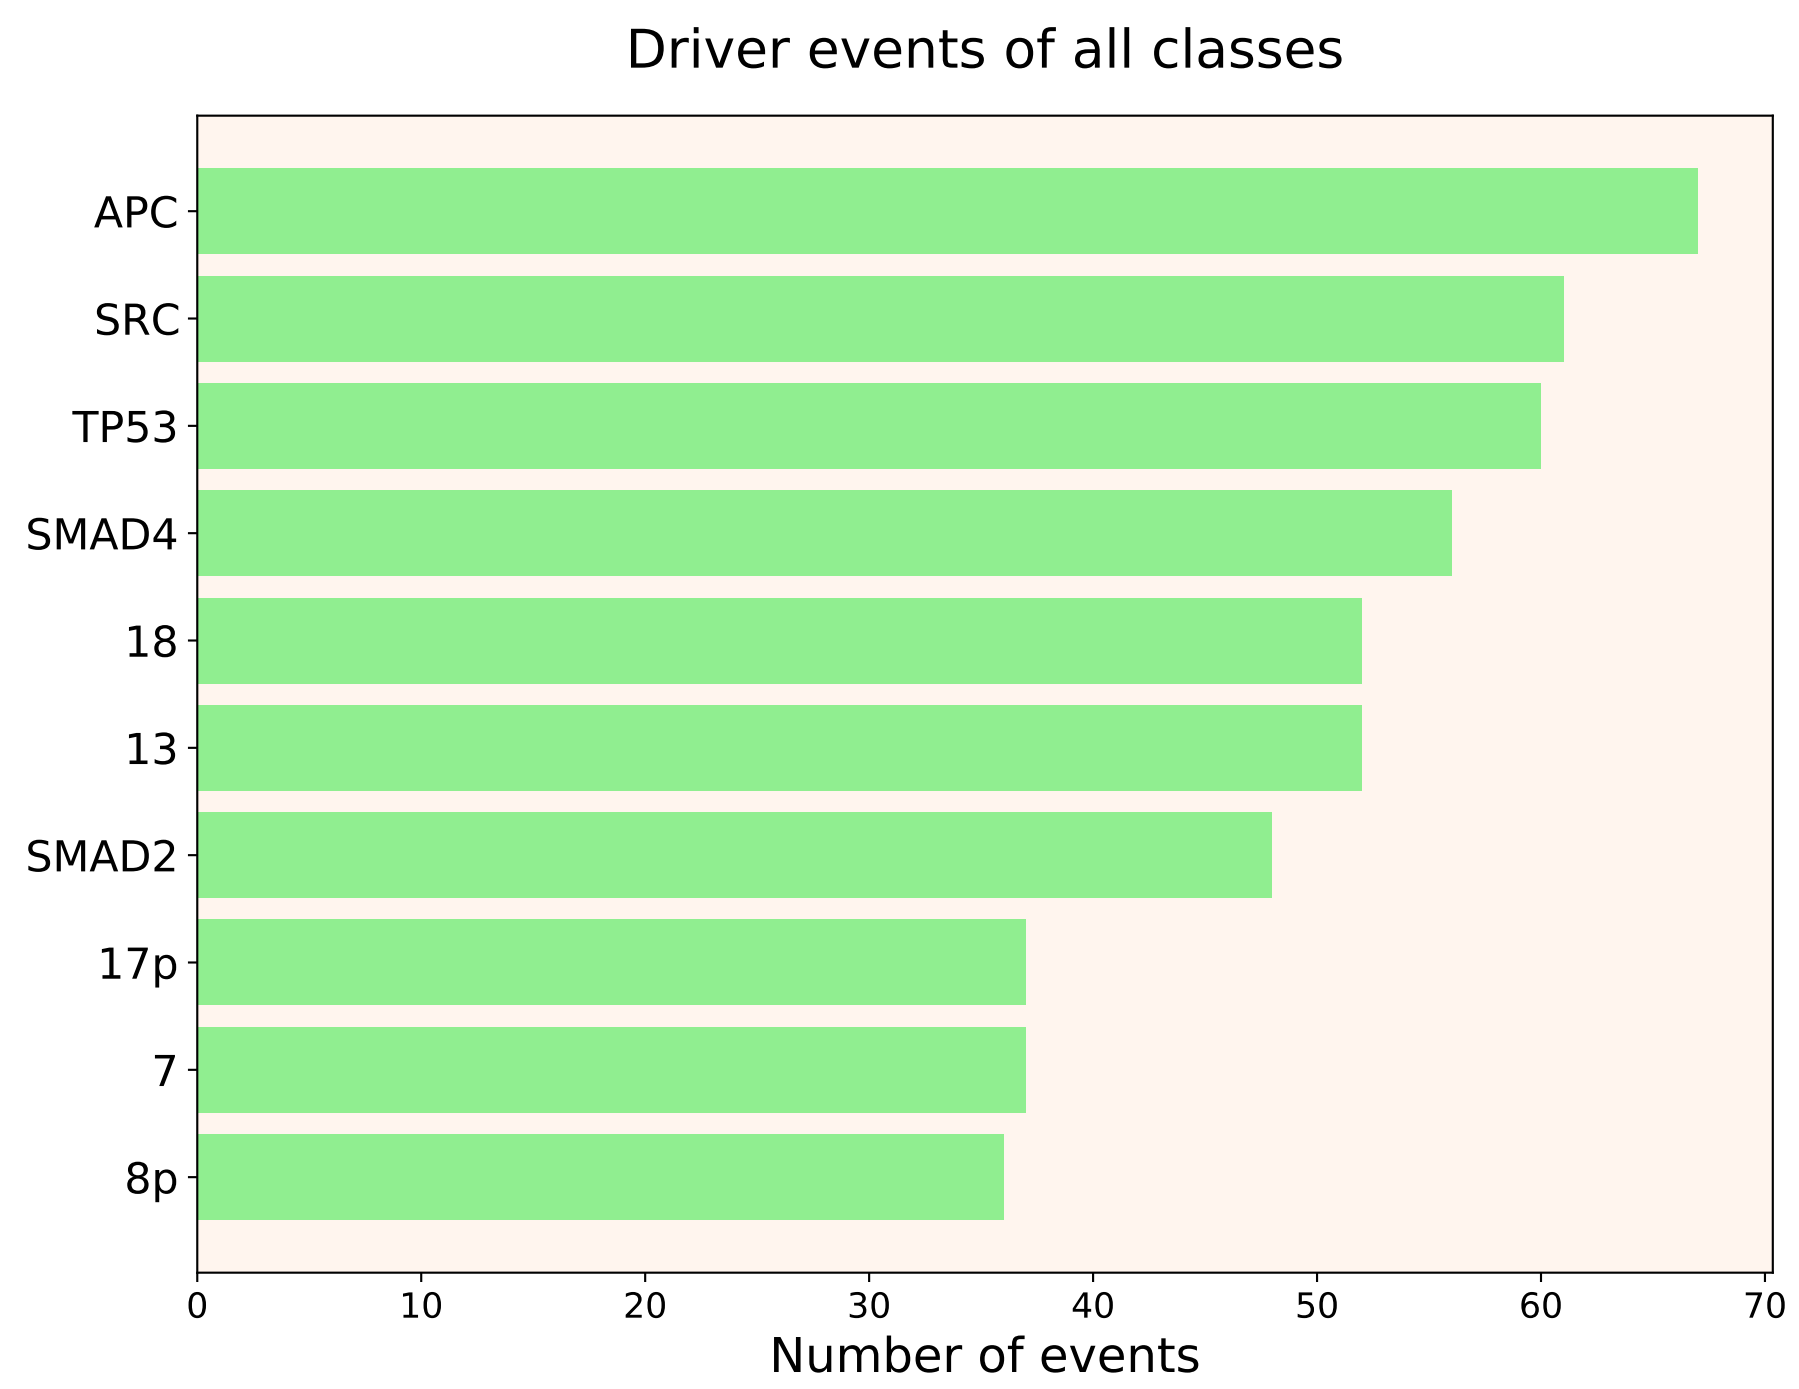

Supplement: Supplemental_Data_S1.zip [file Supplemental_Data_S1.zip]

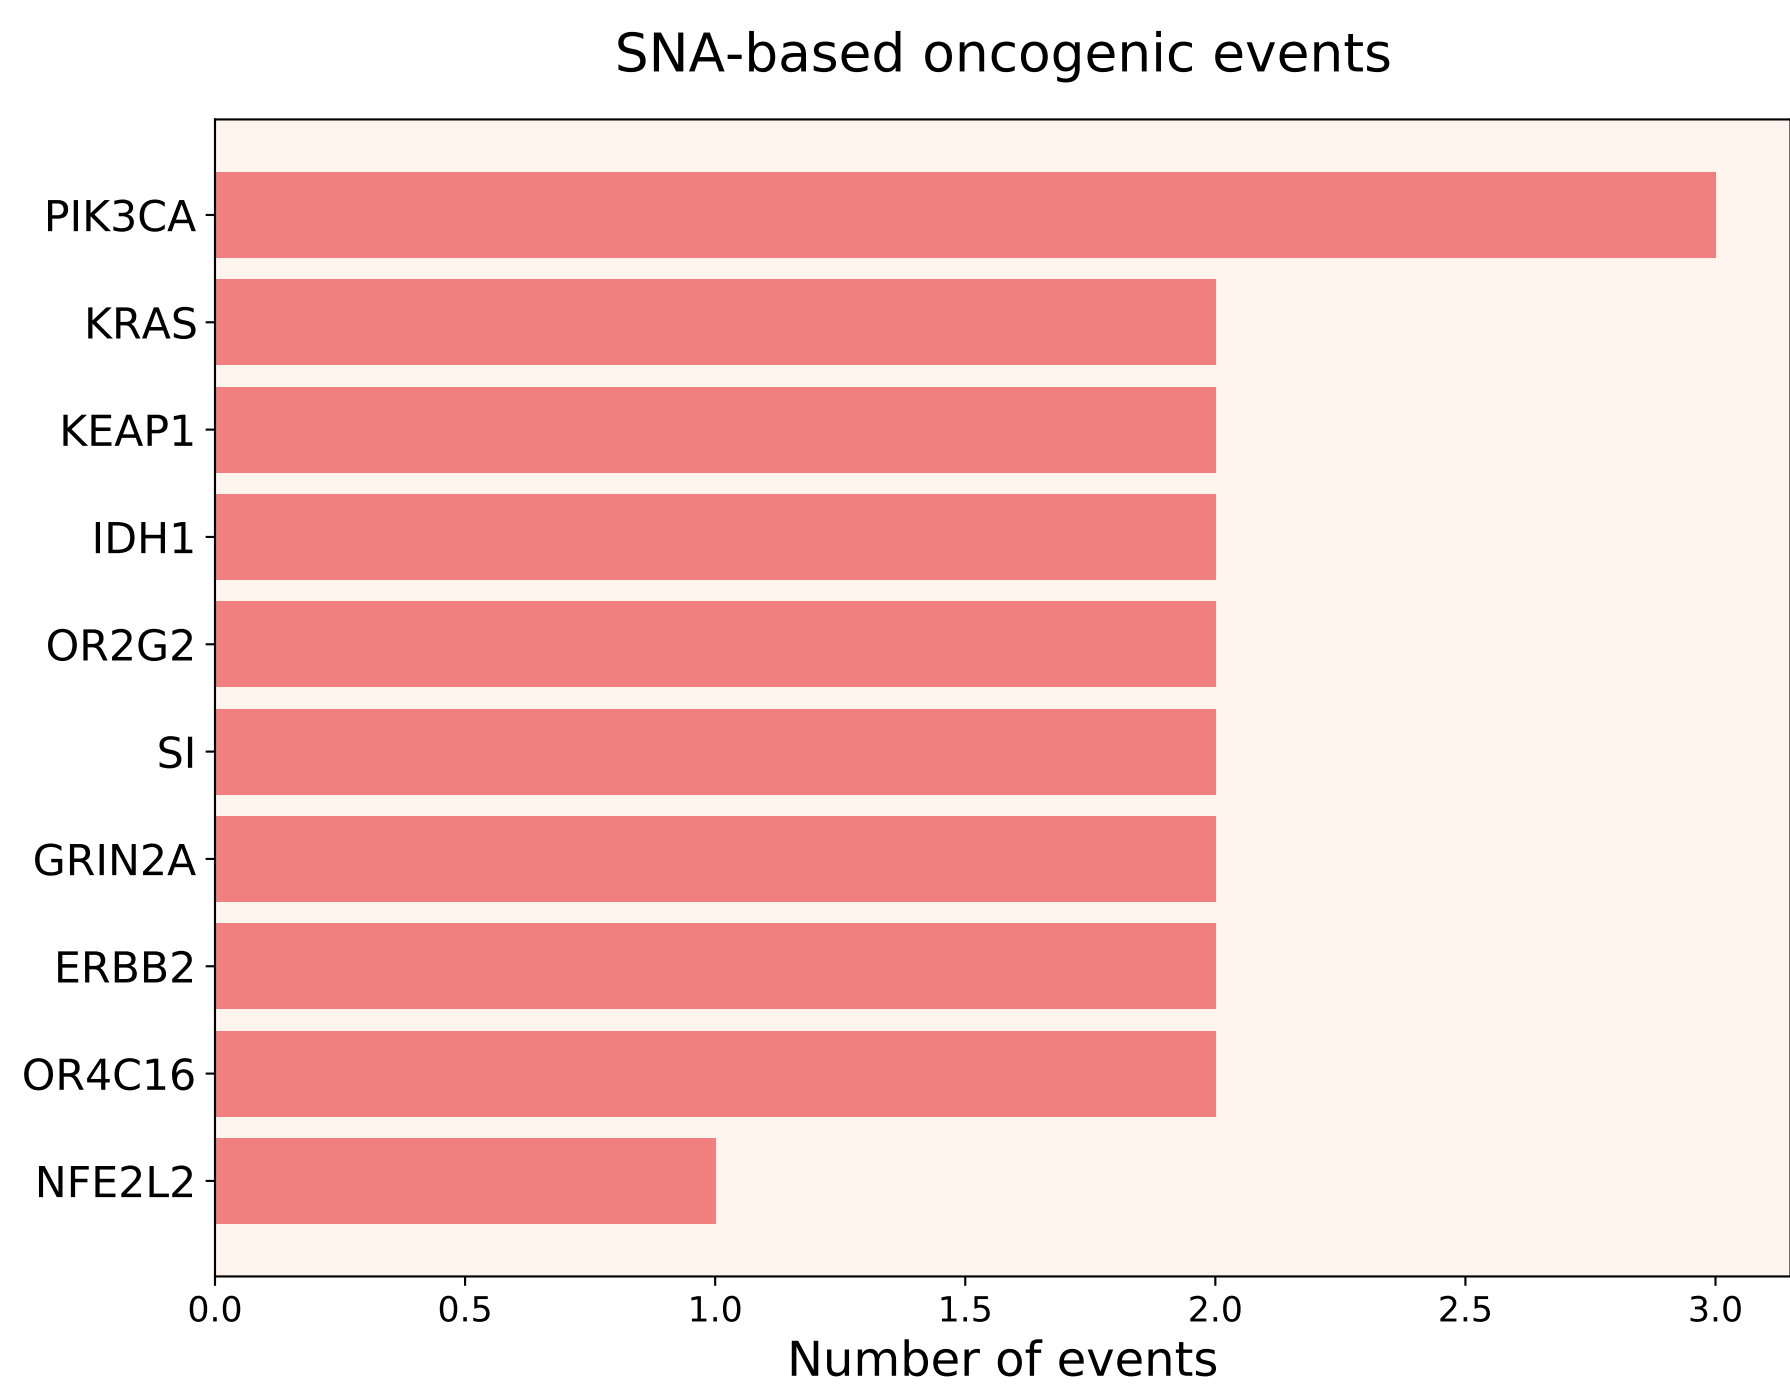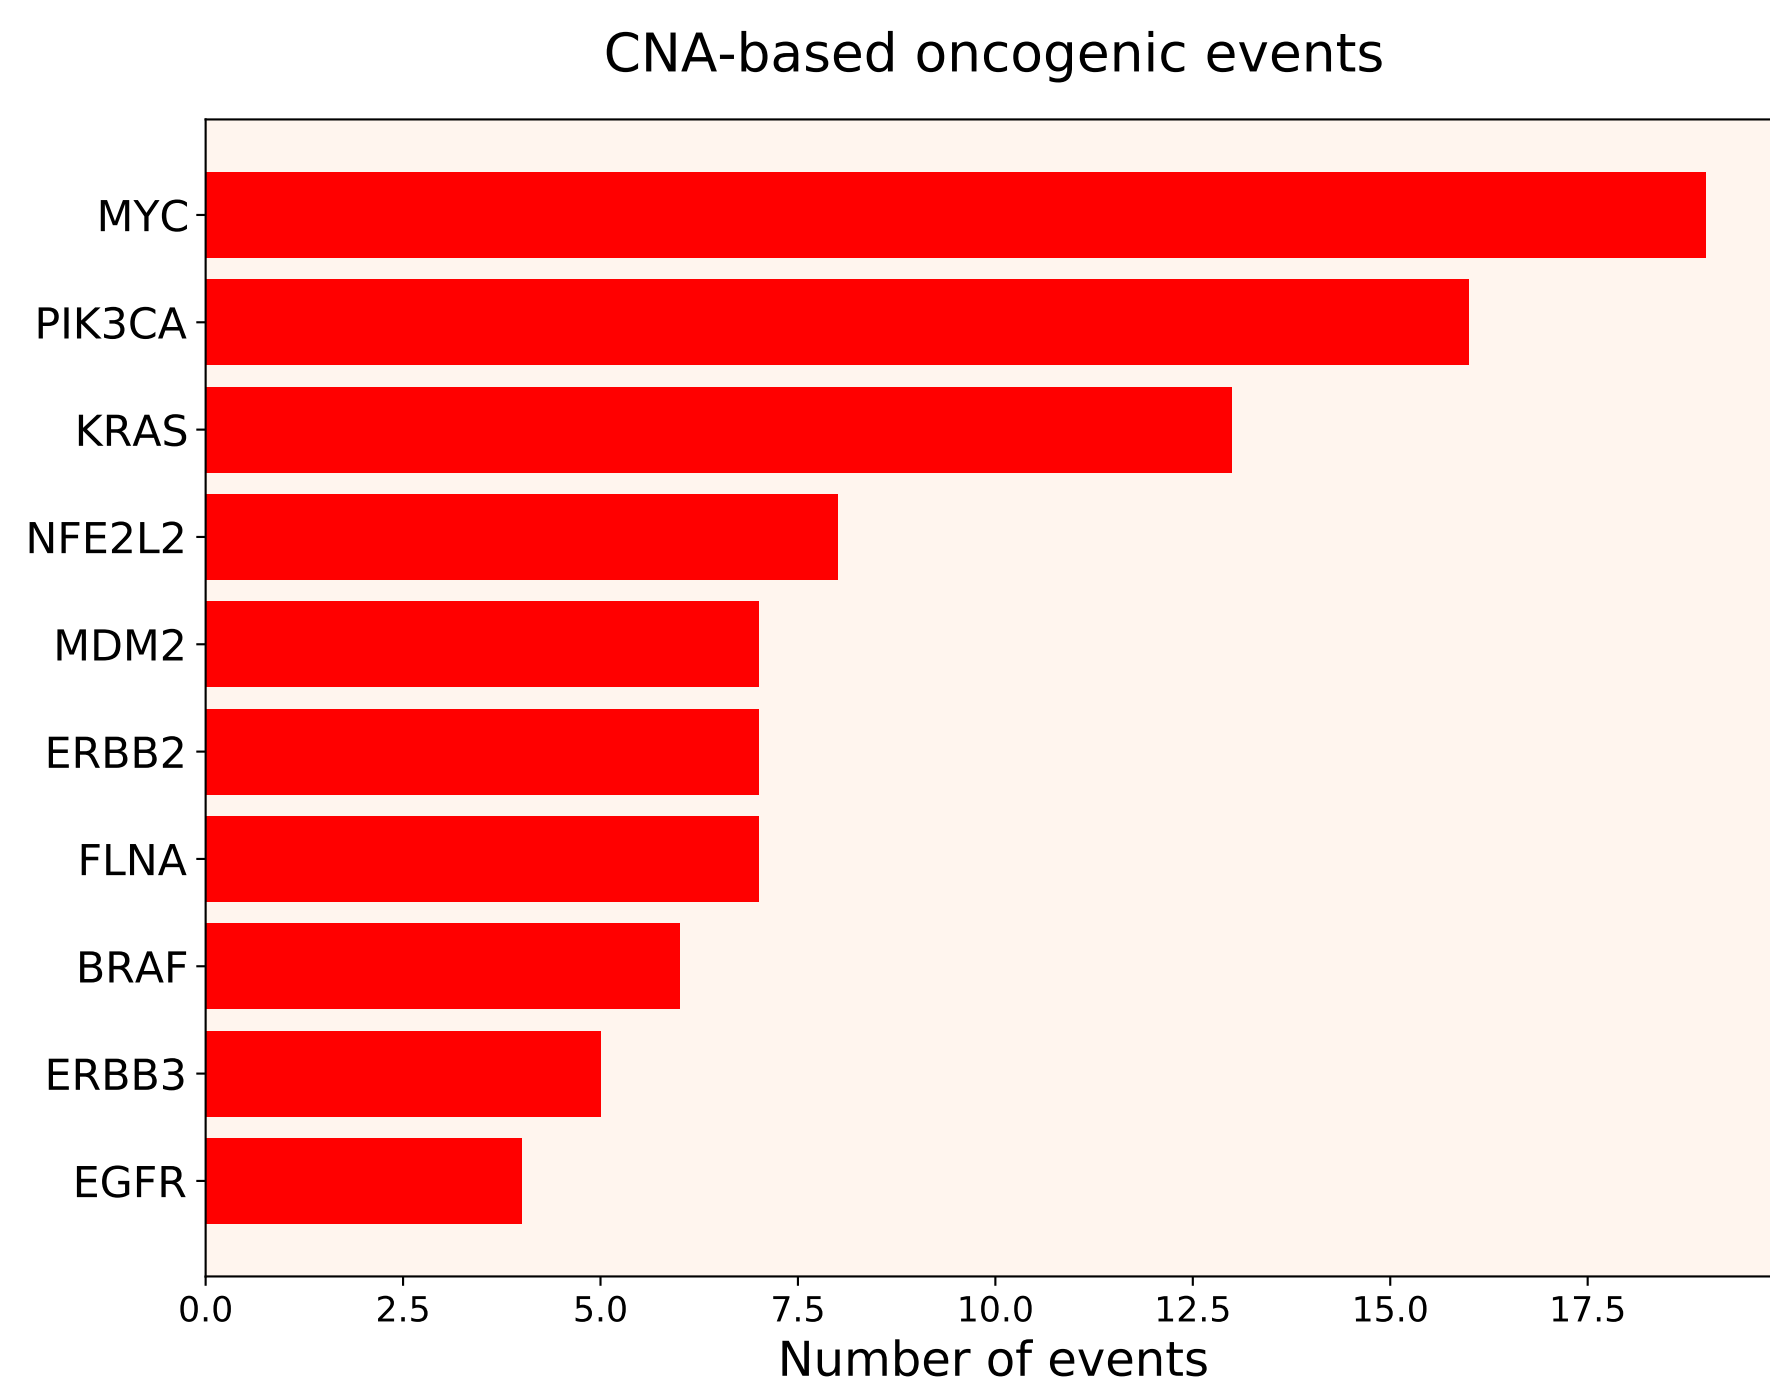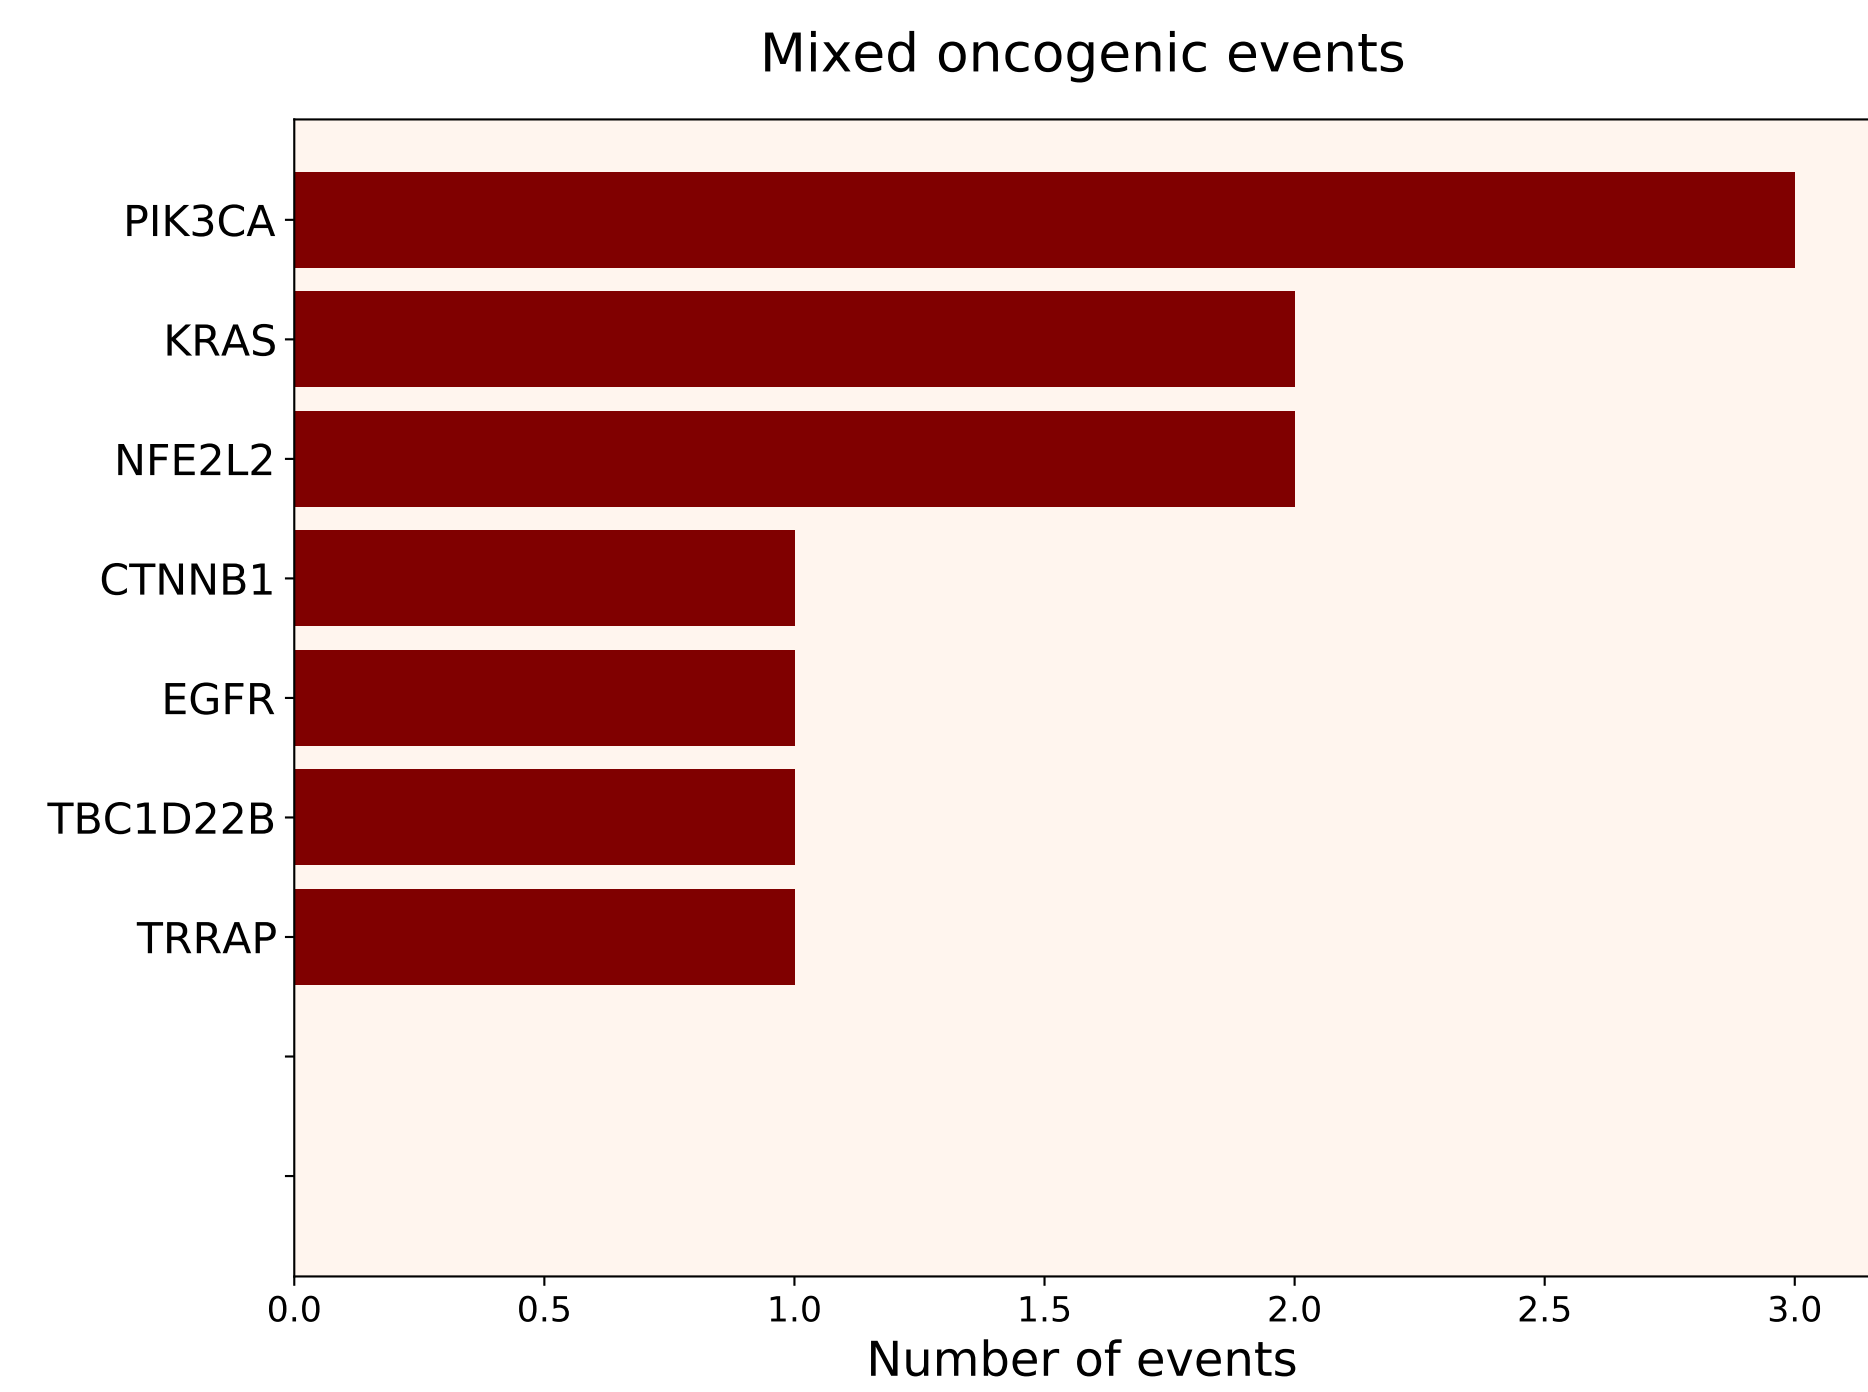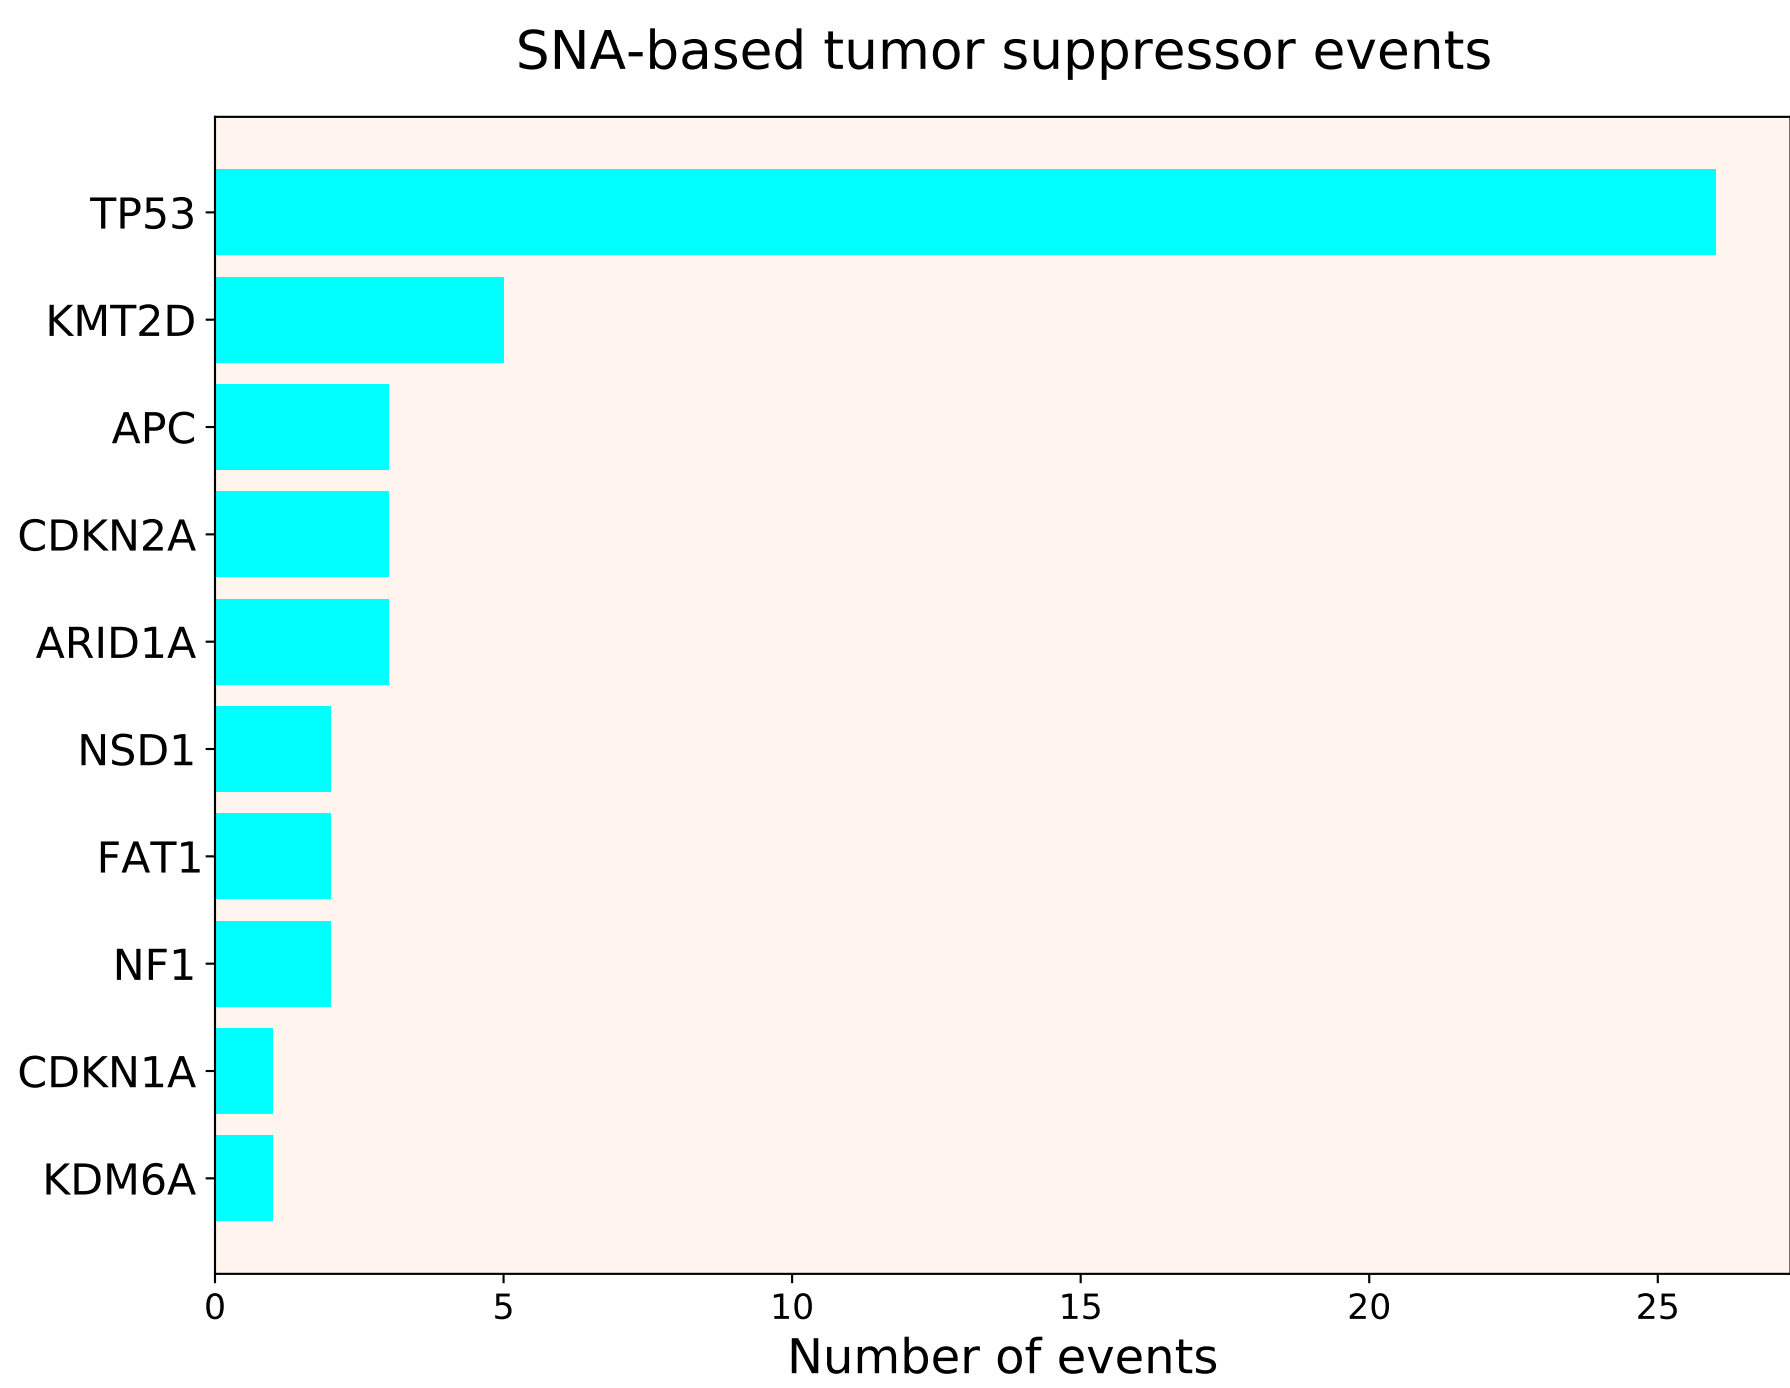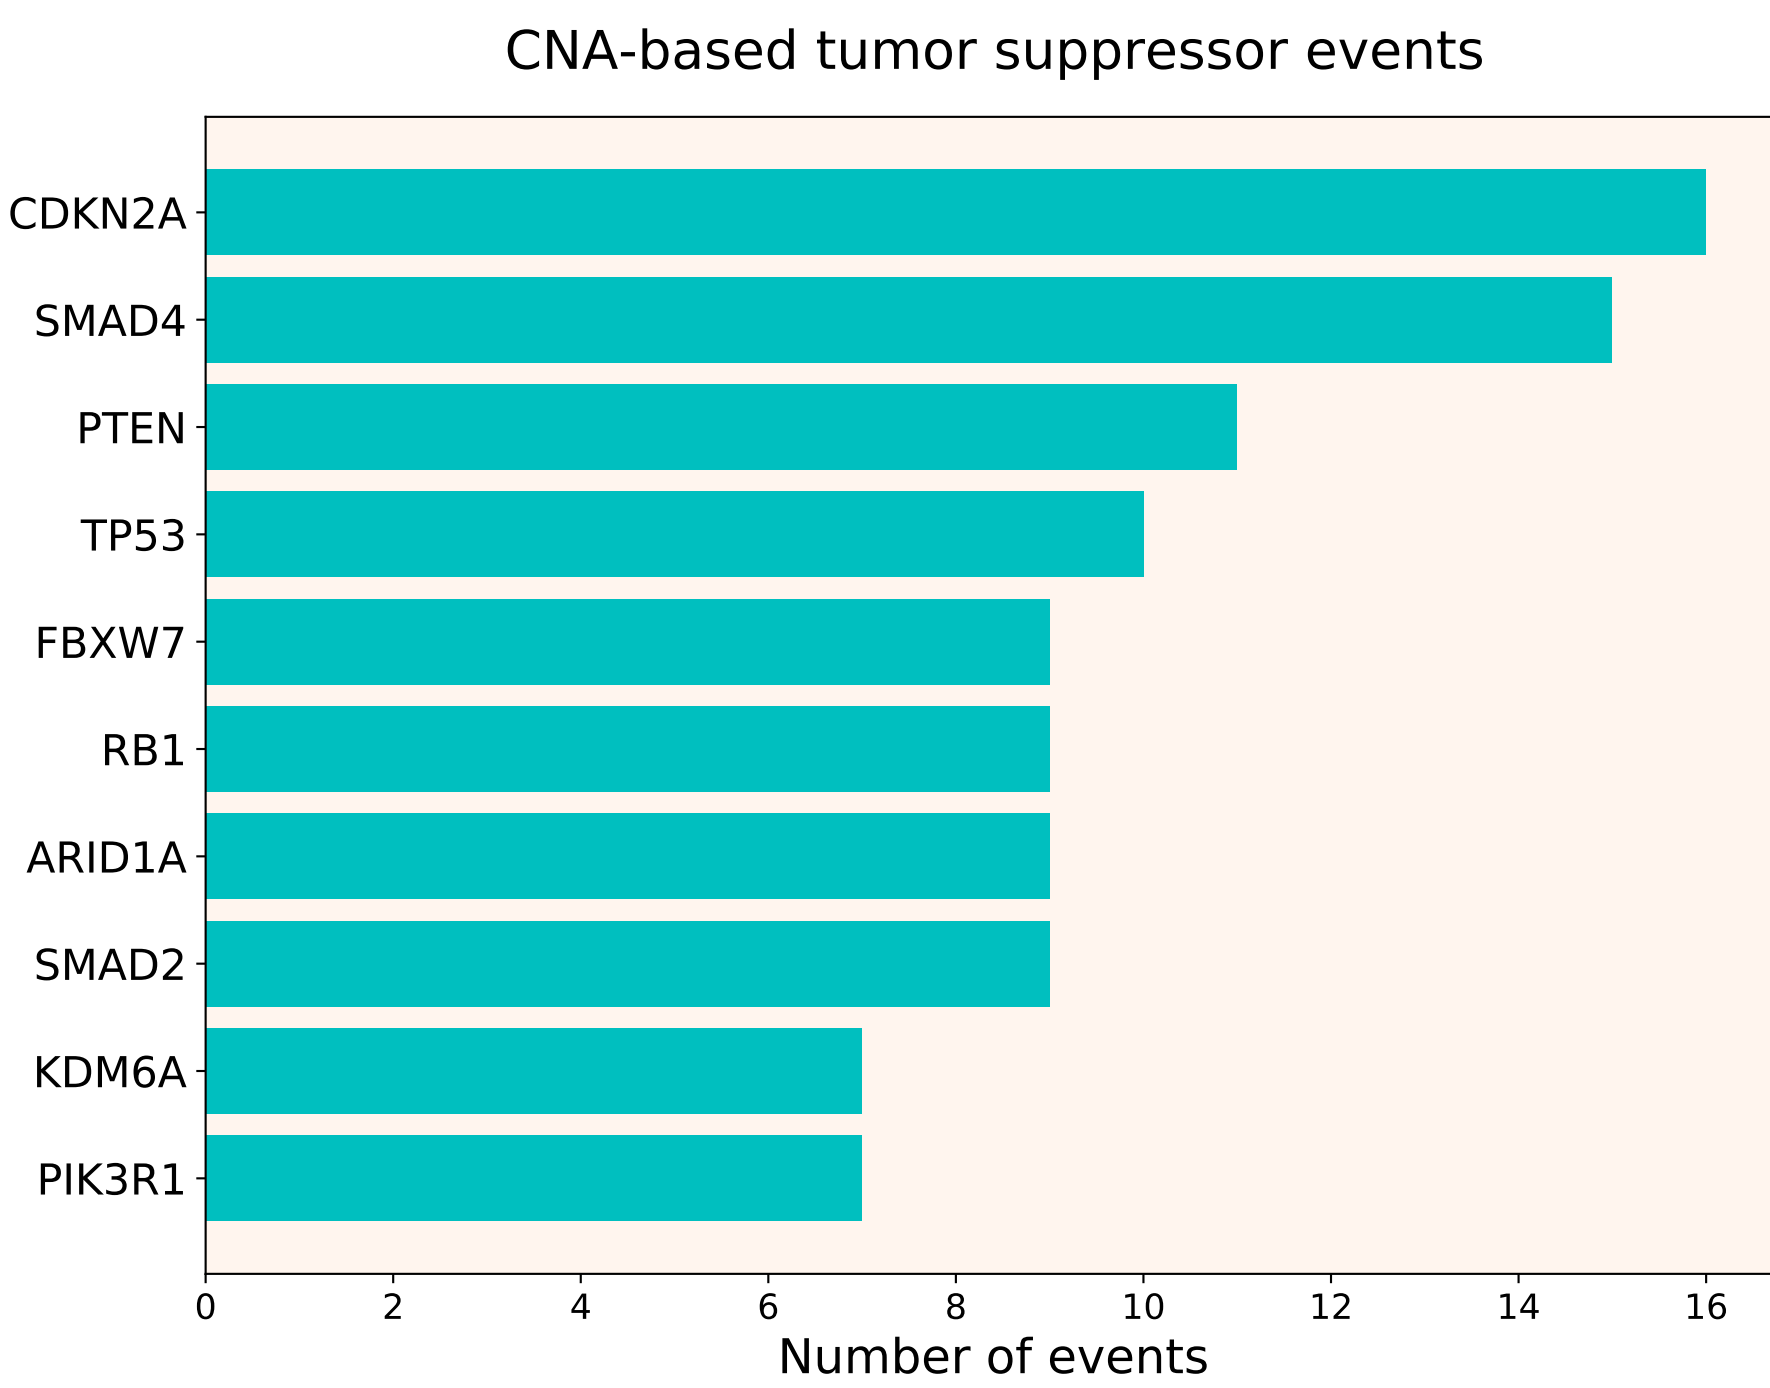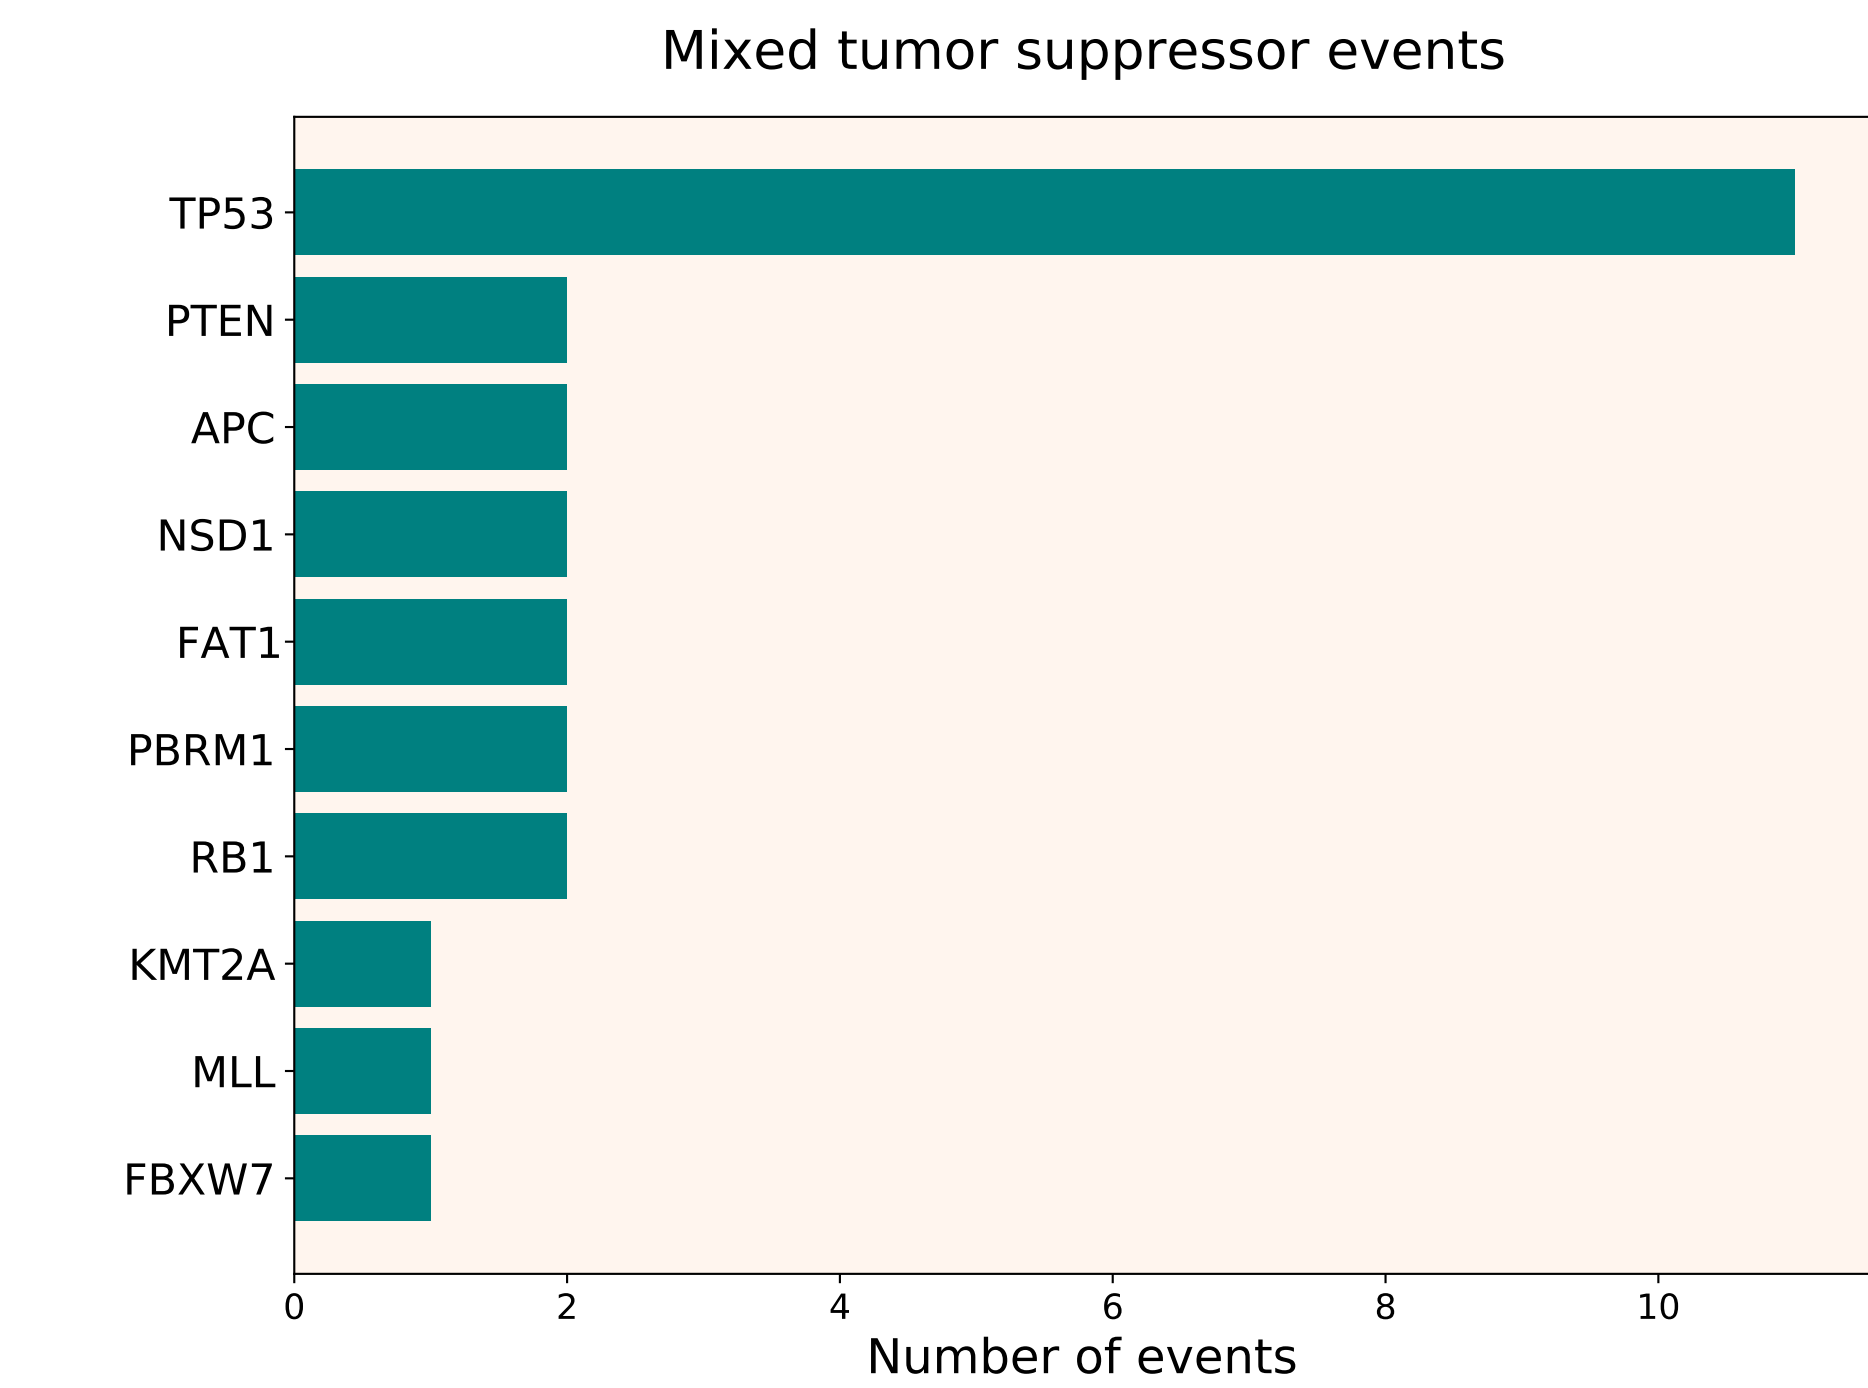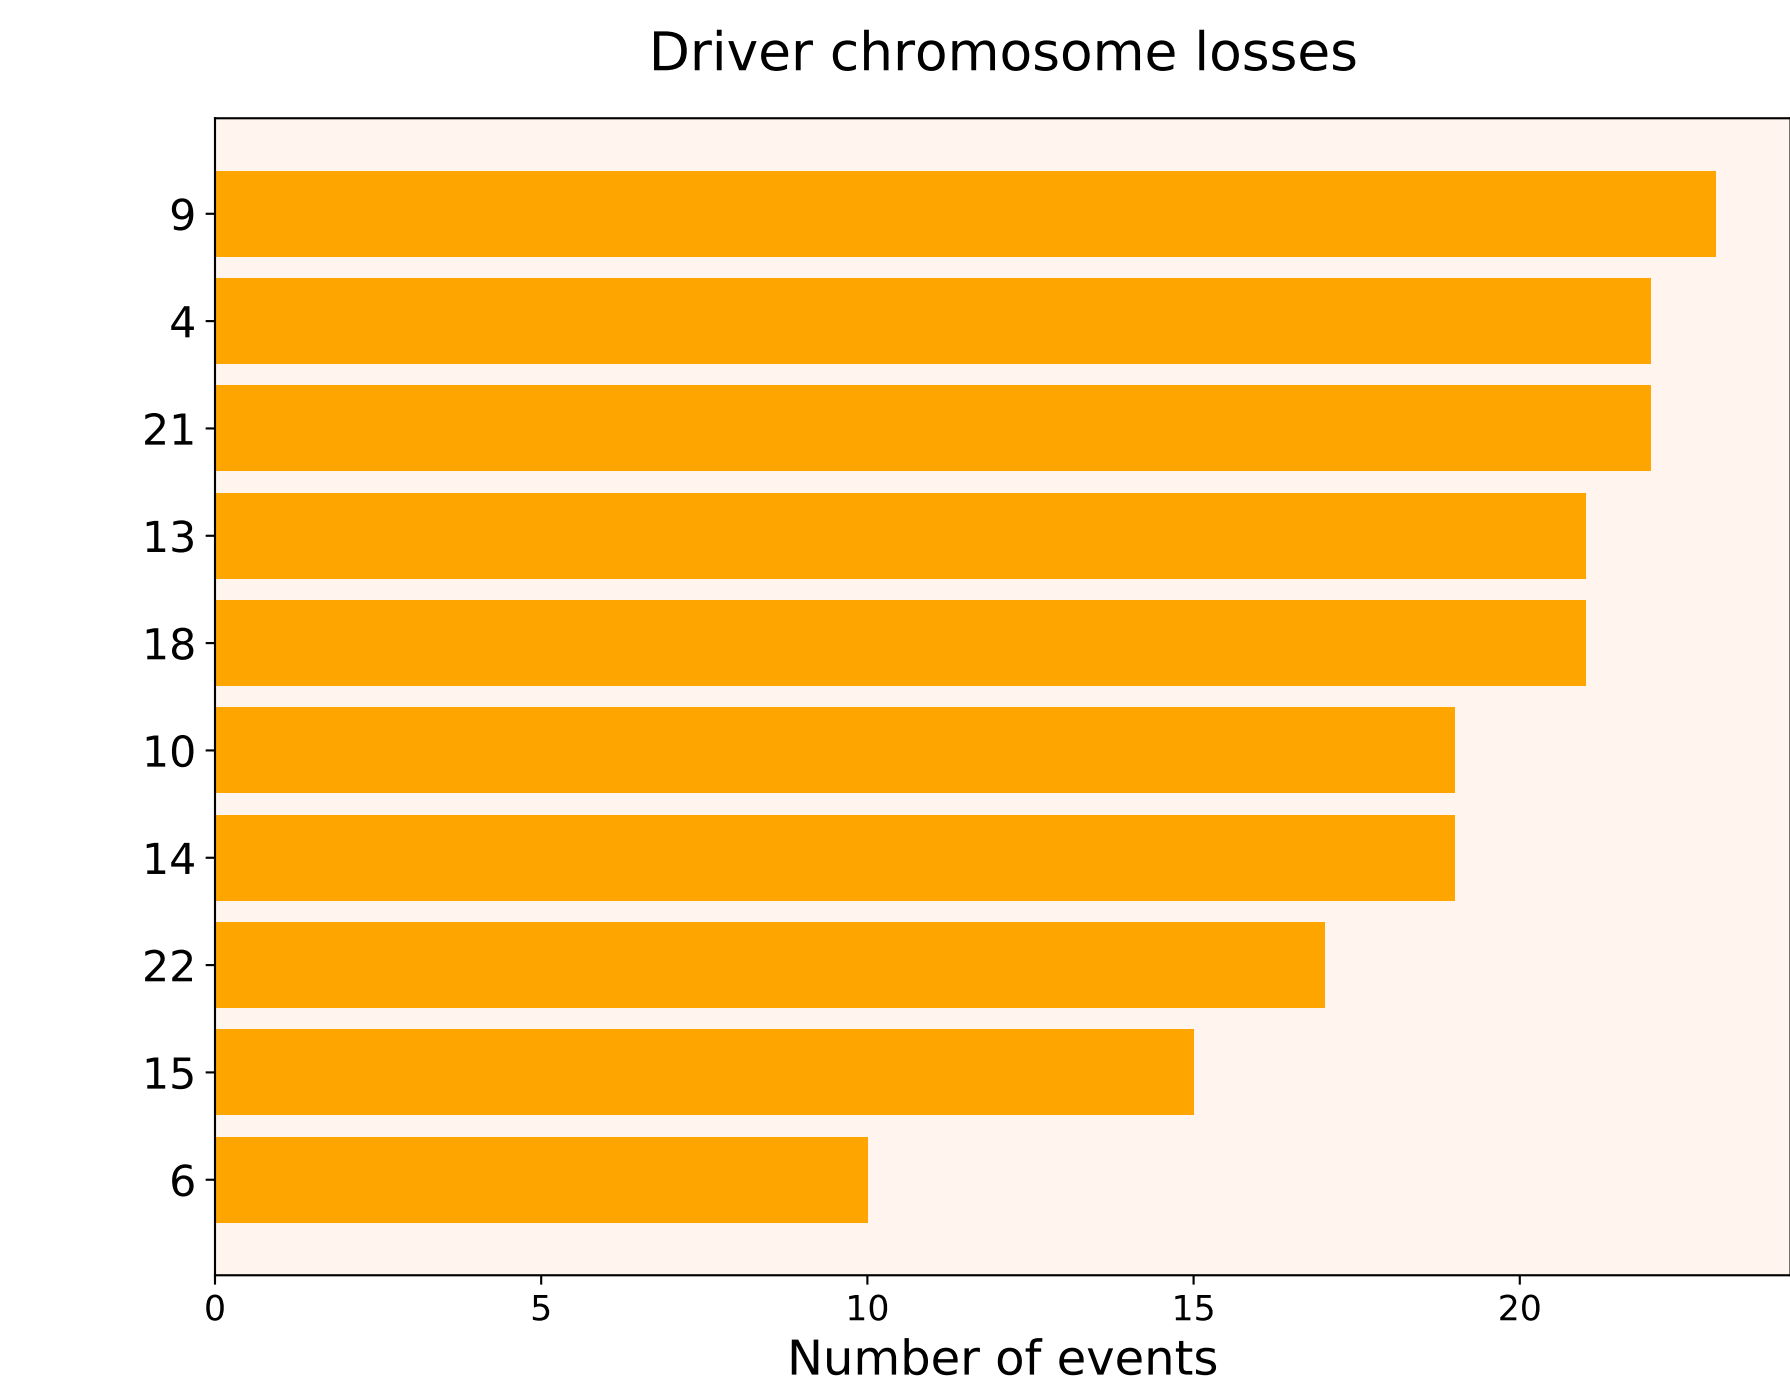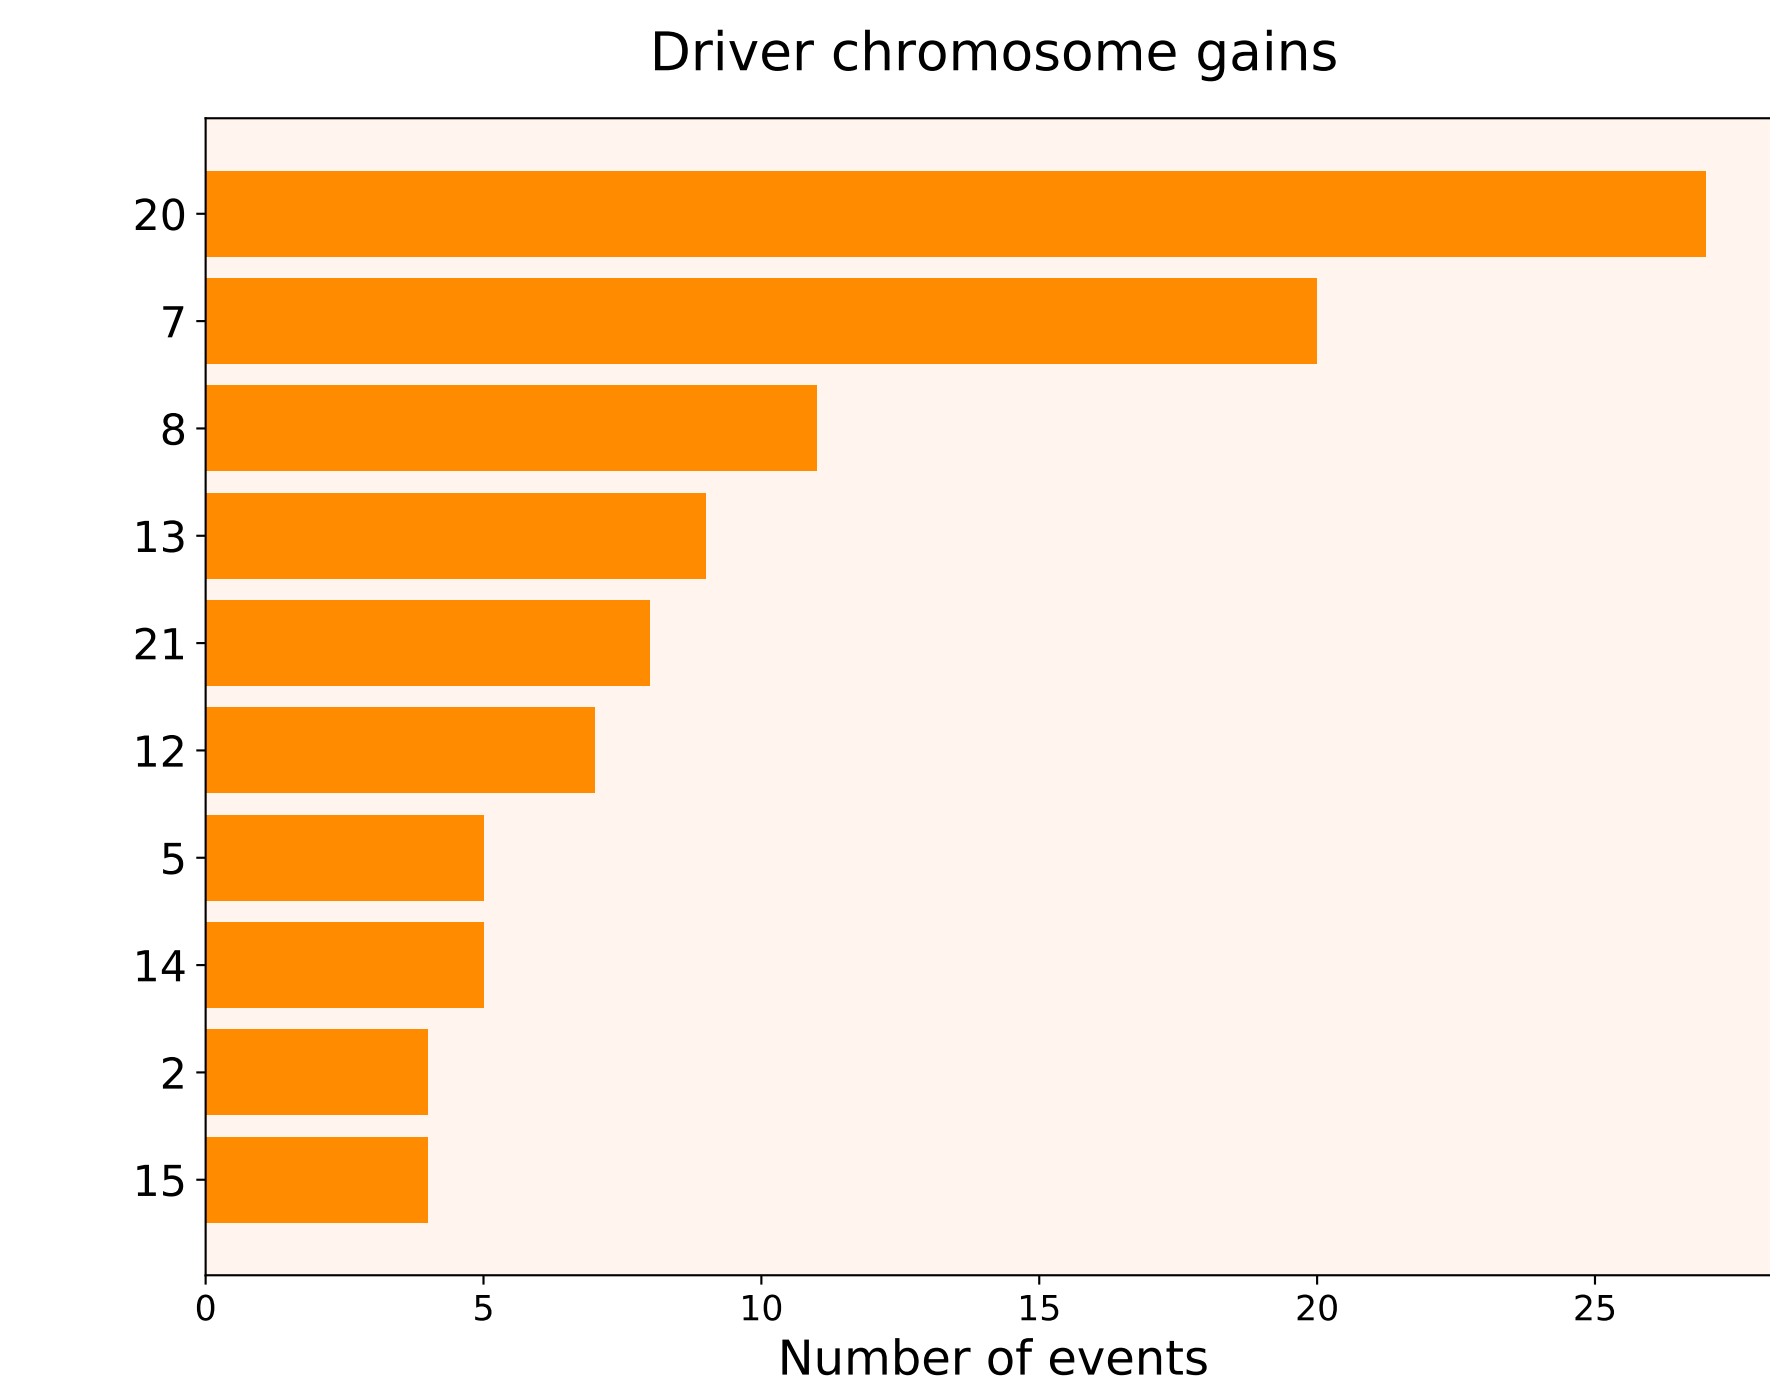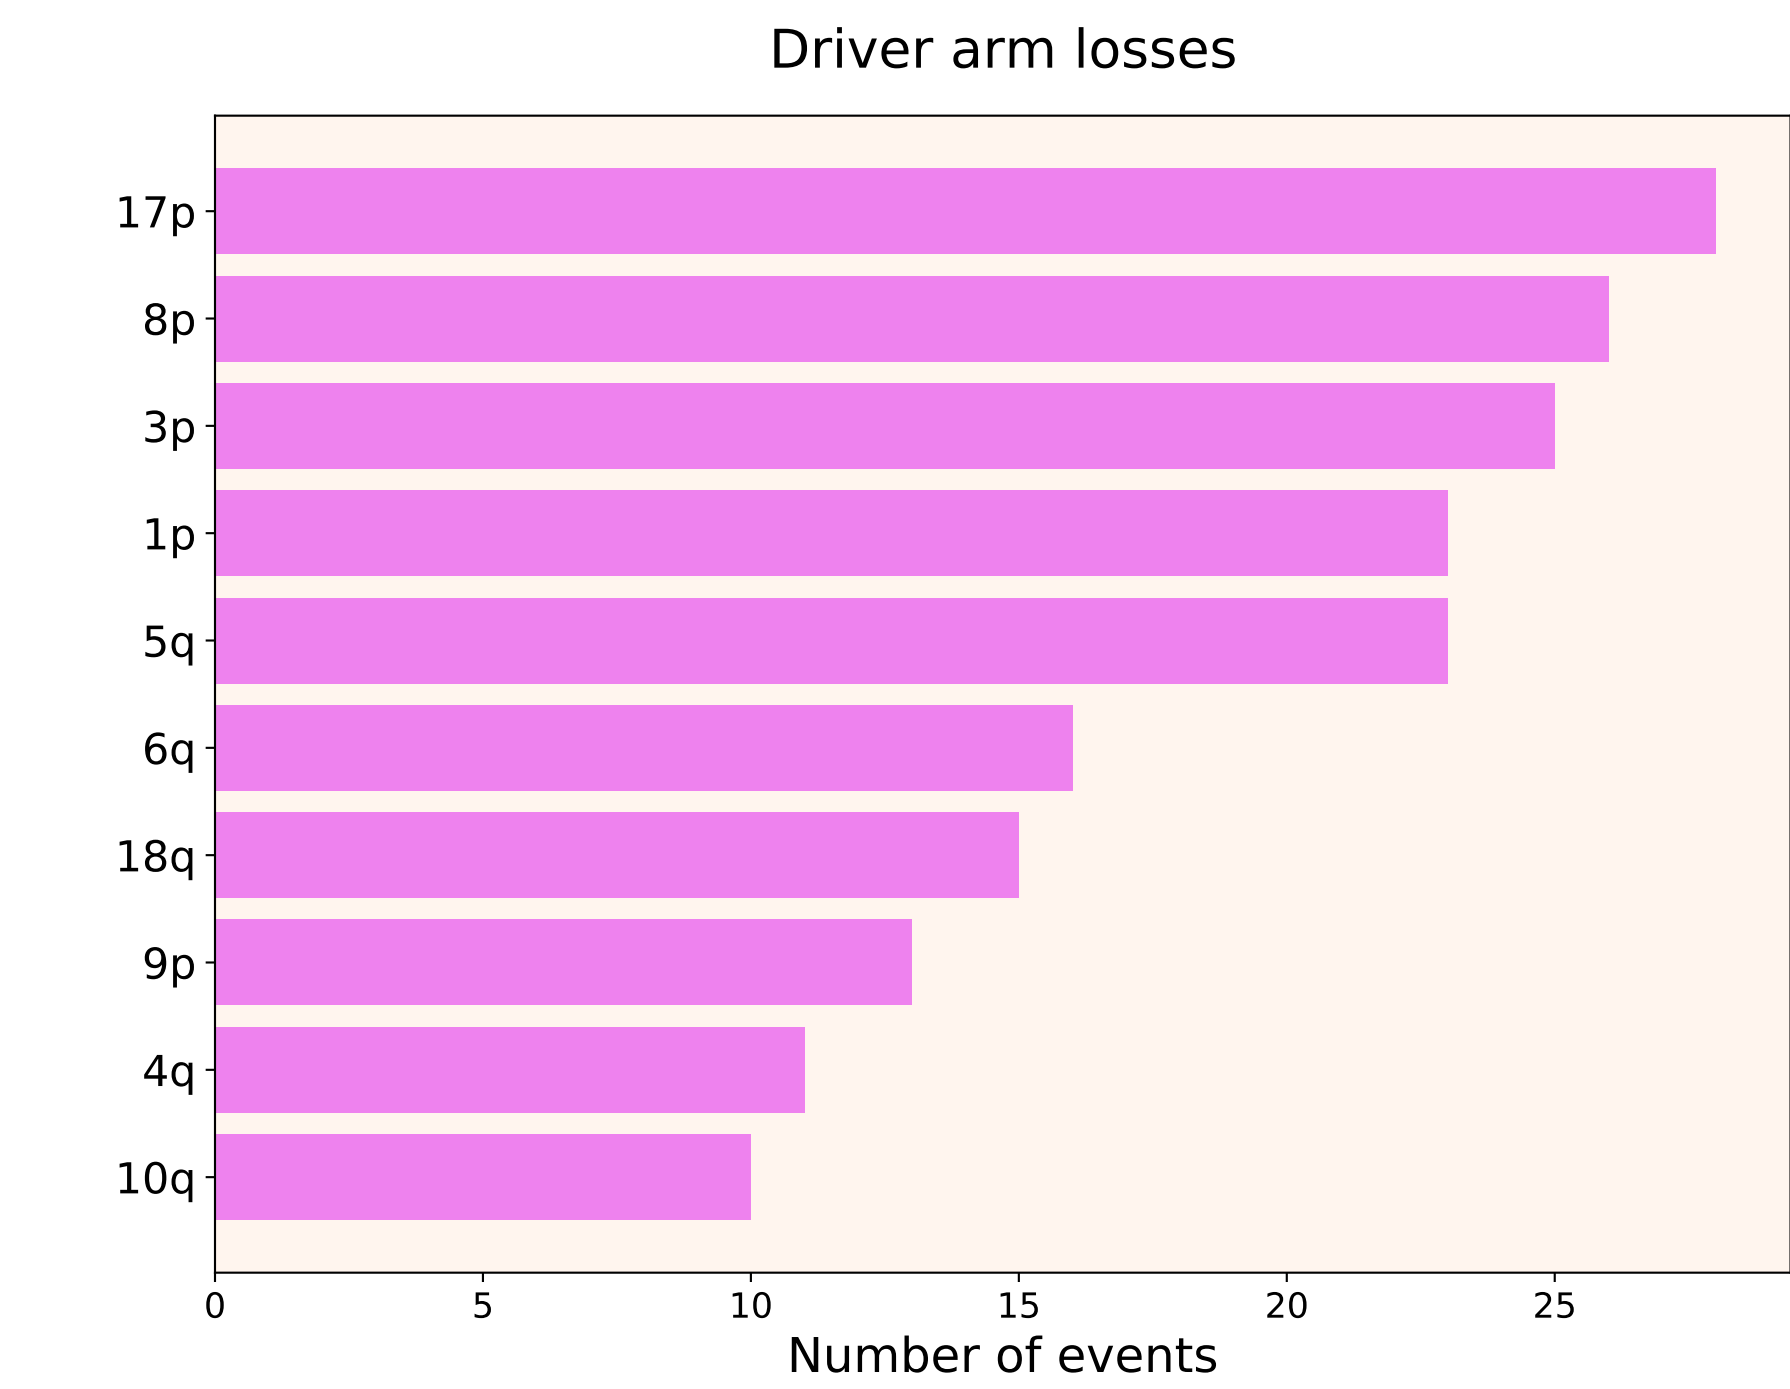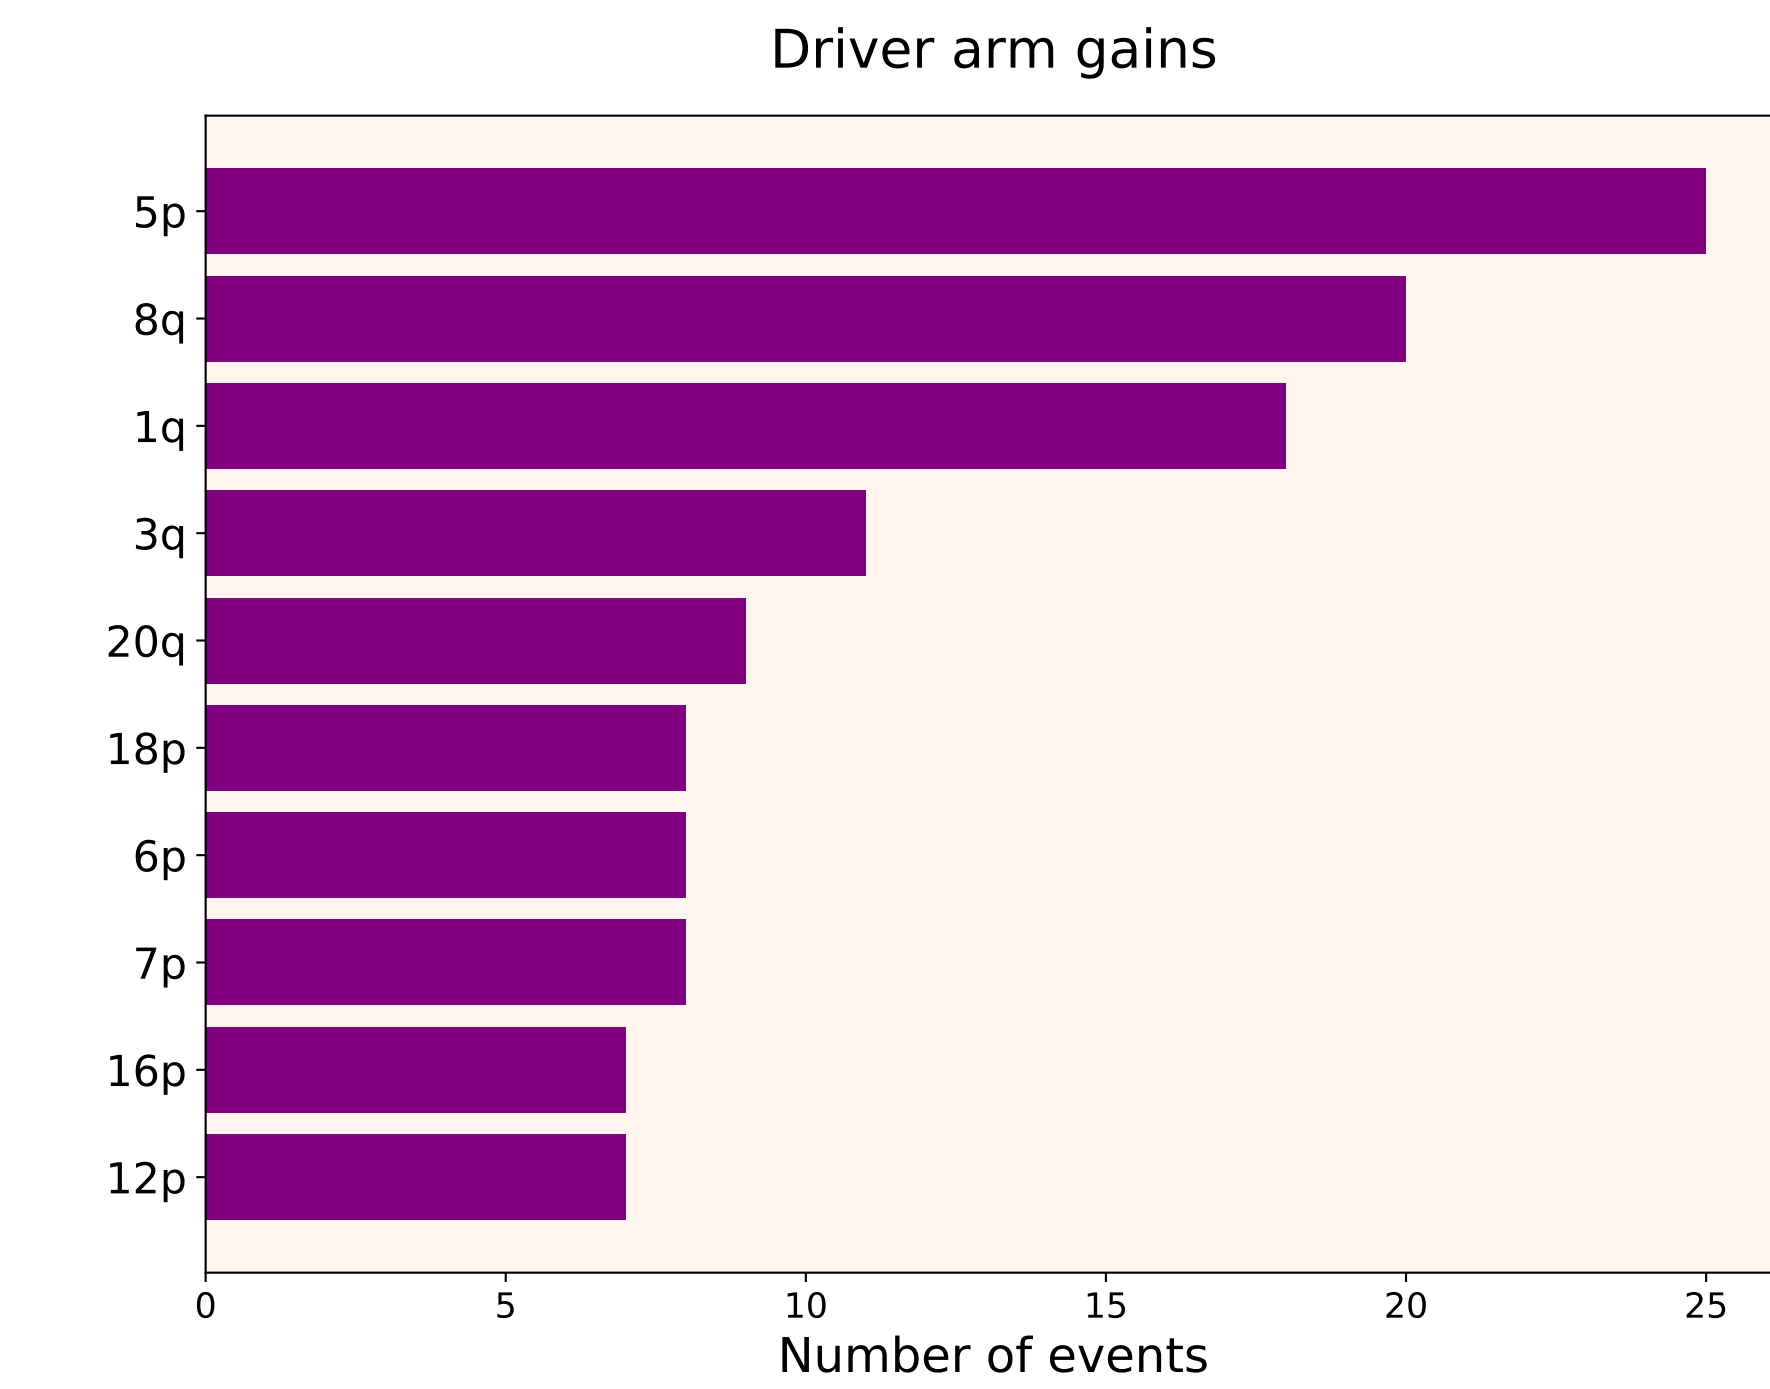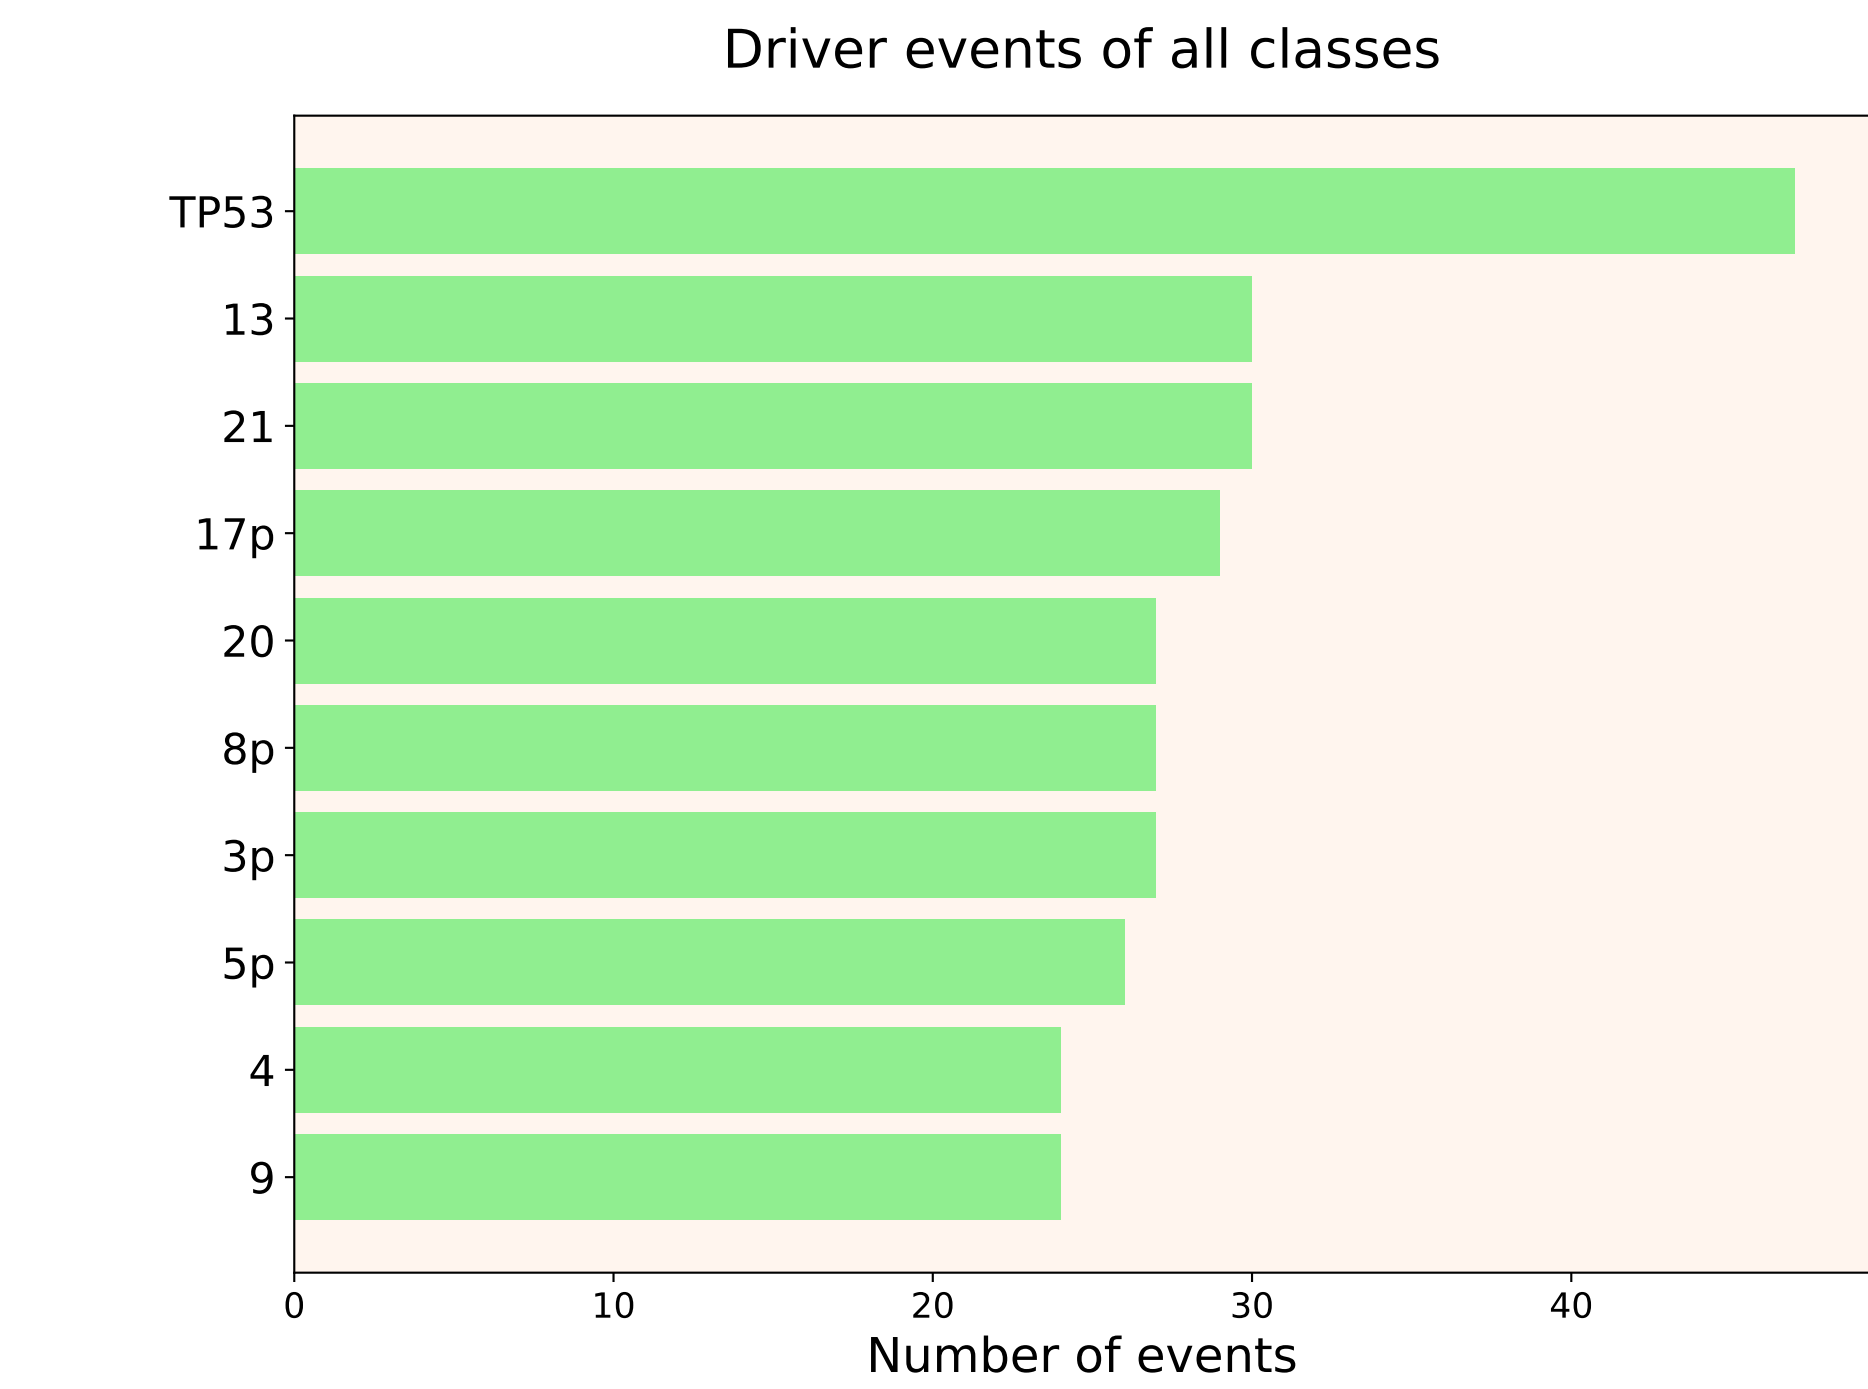

Supplement: Supplemental_Data_S1.zip [file Supplemental_Data_S1.zip]

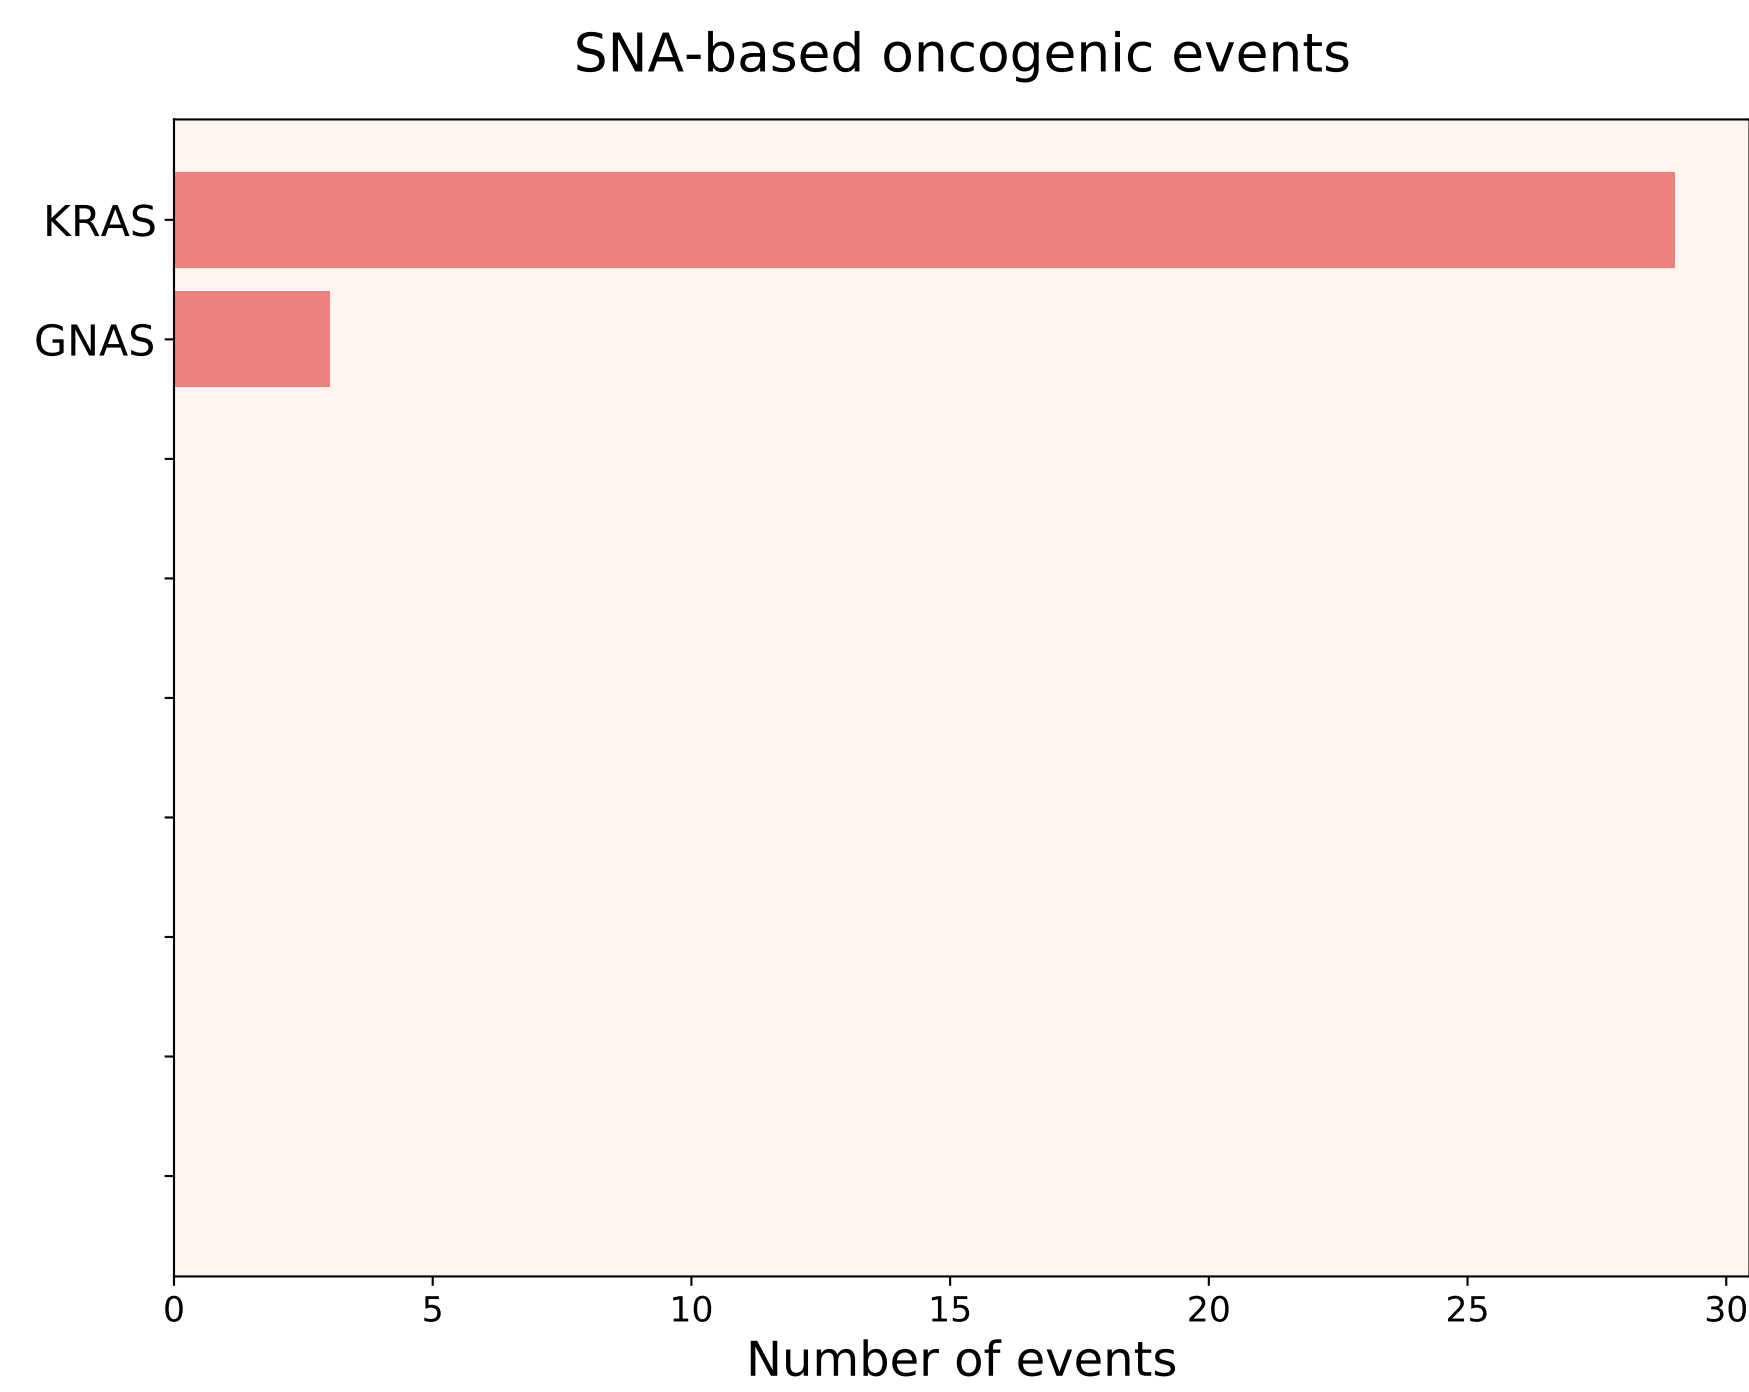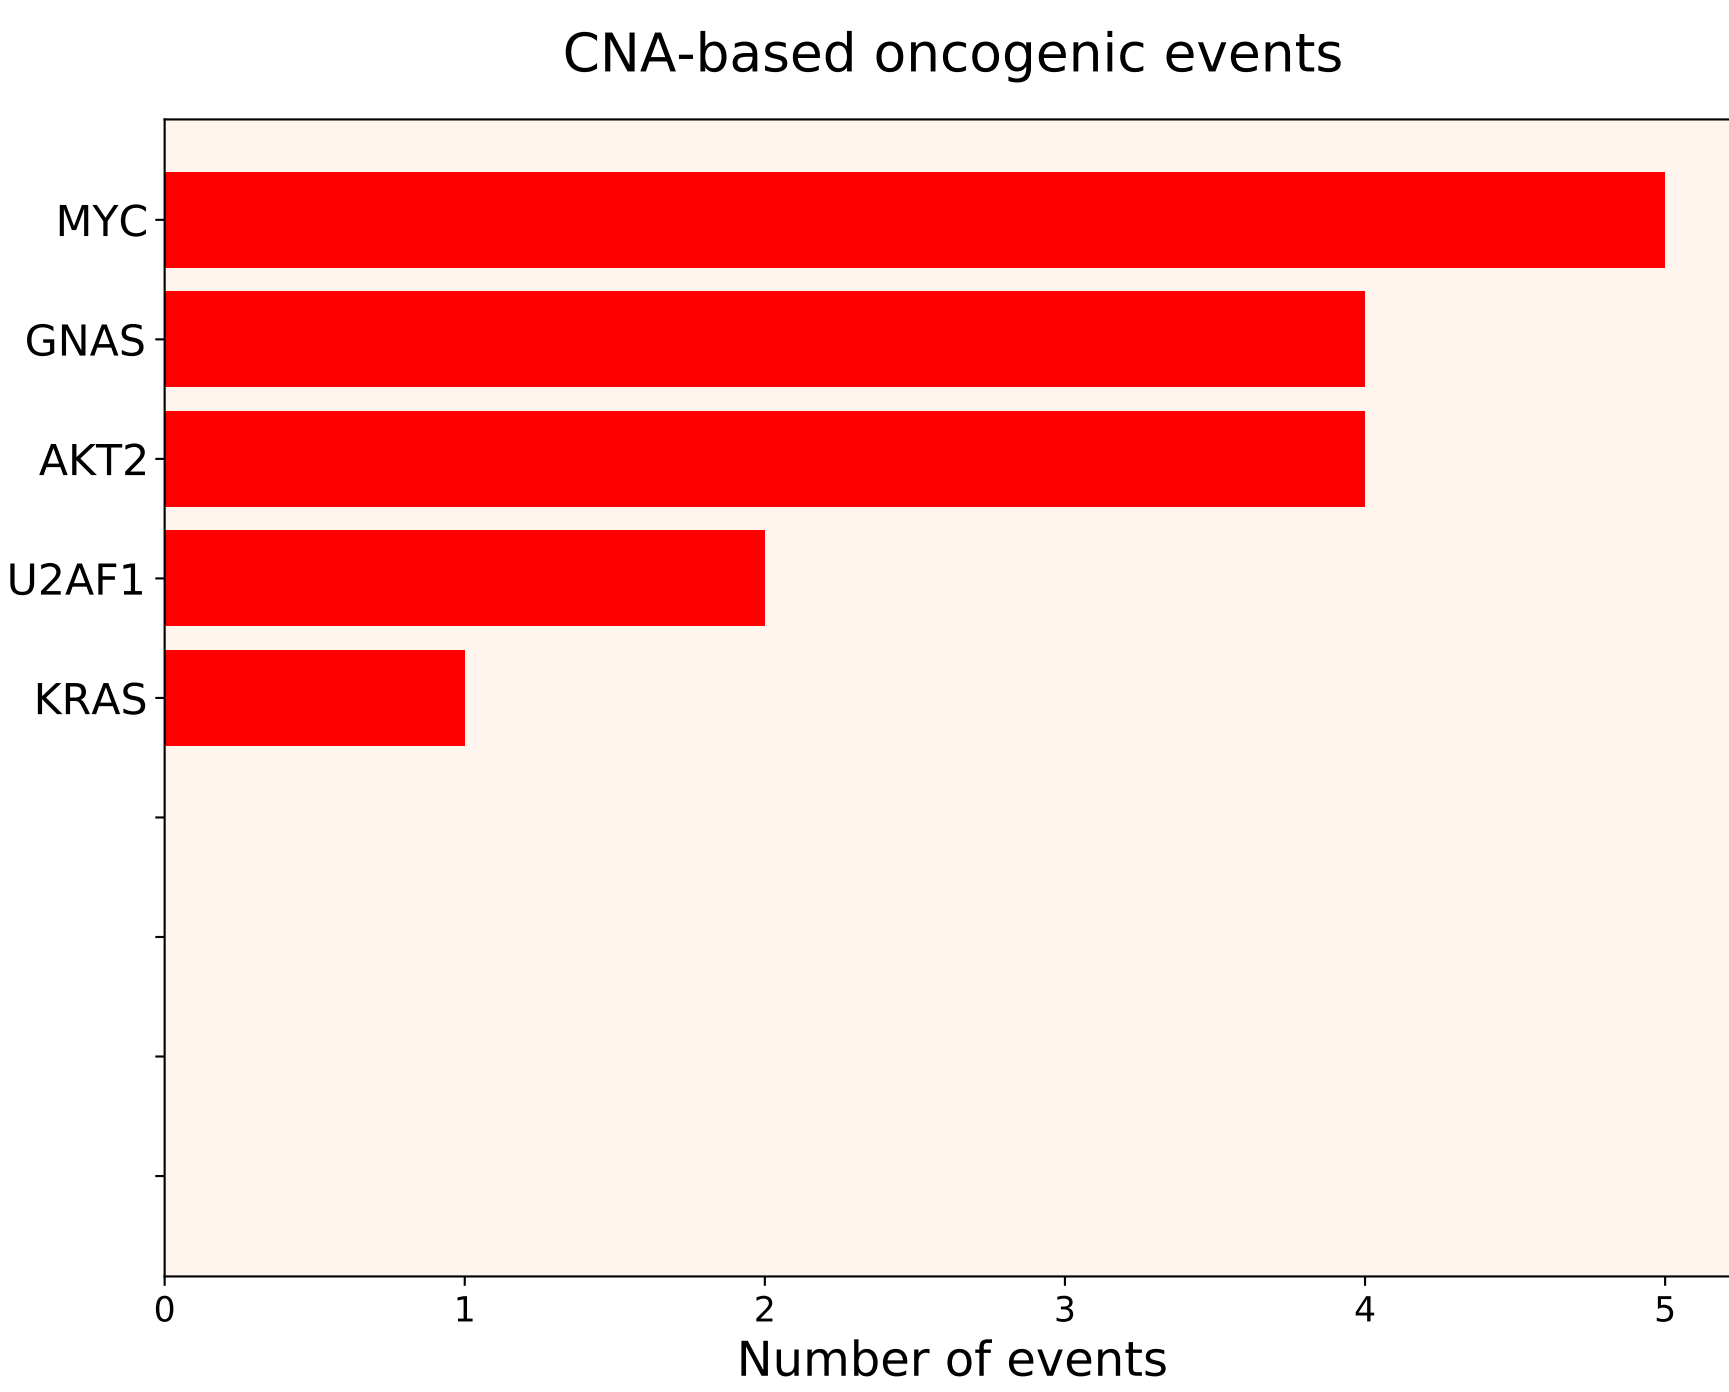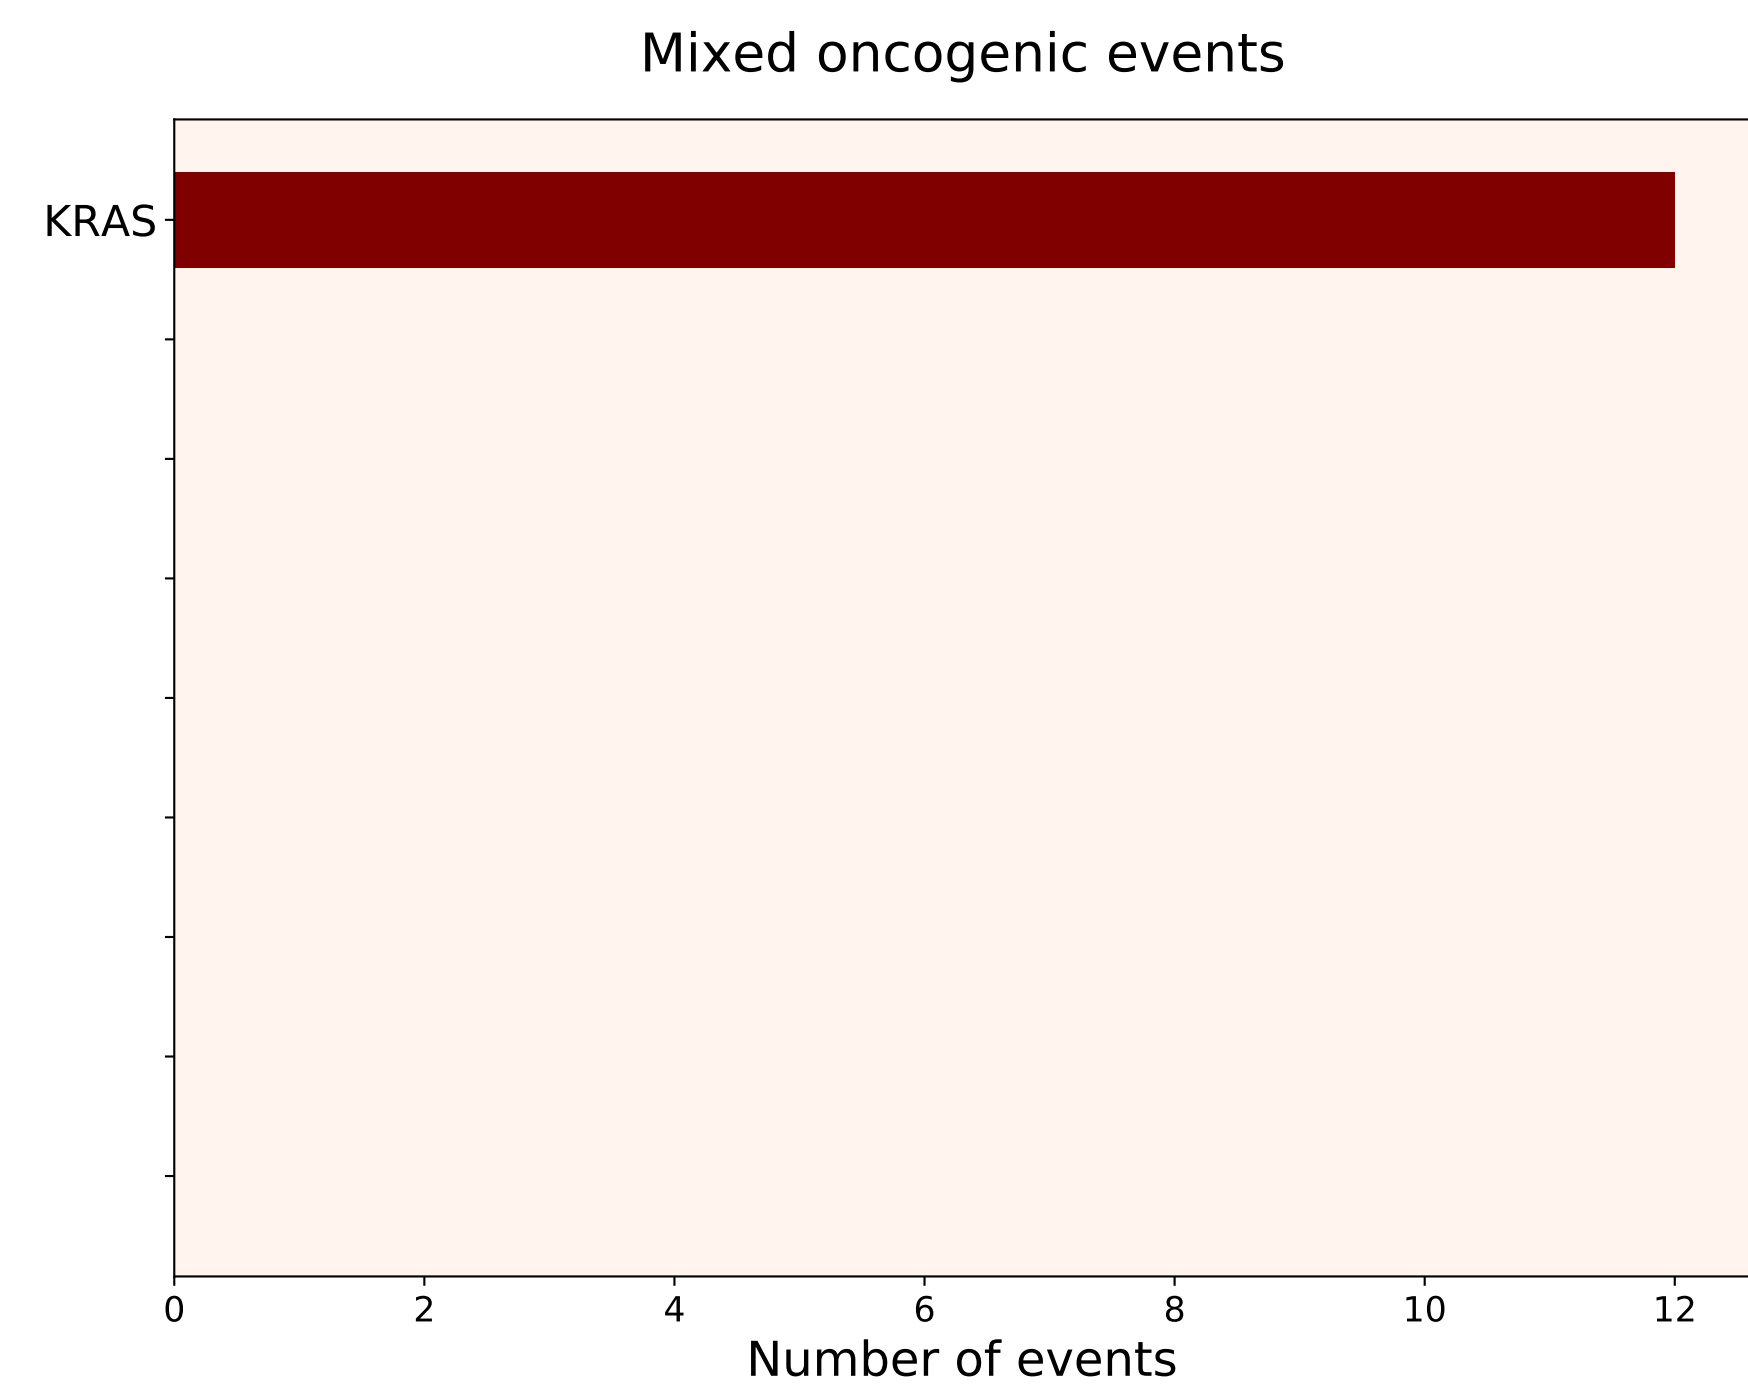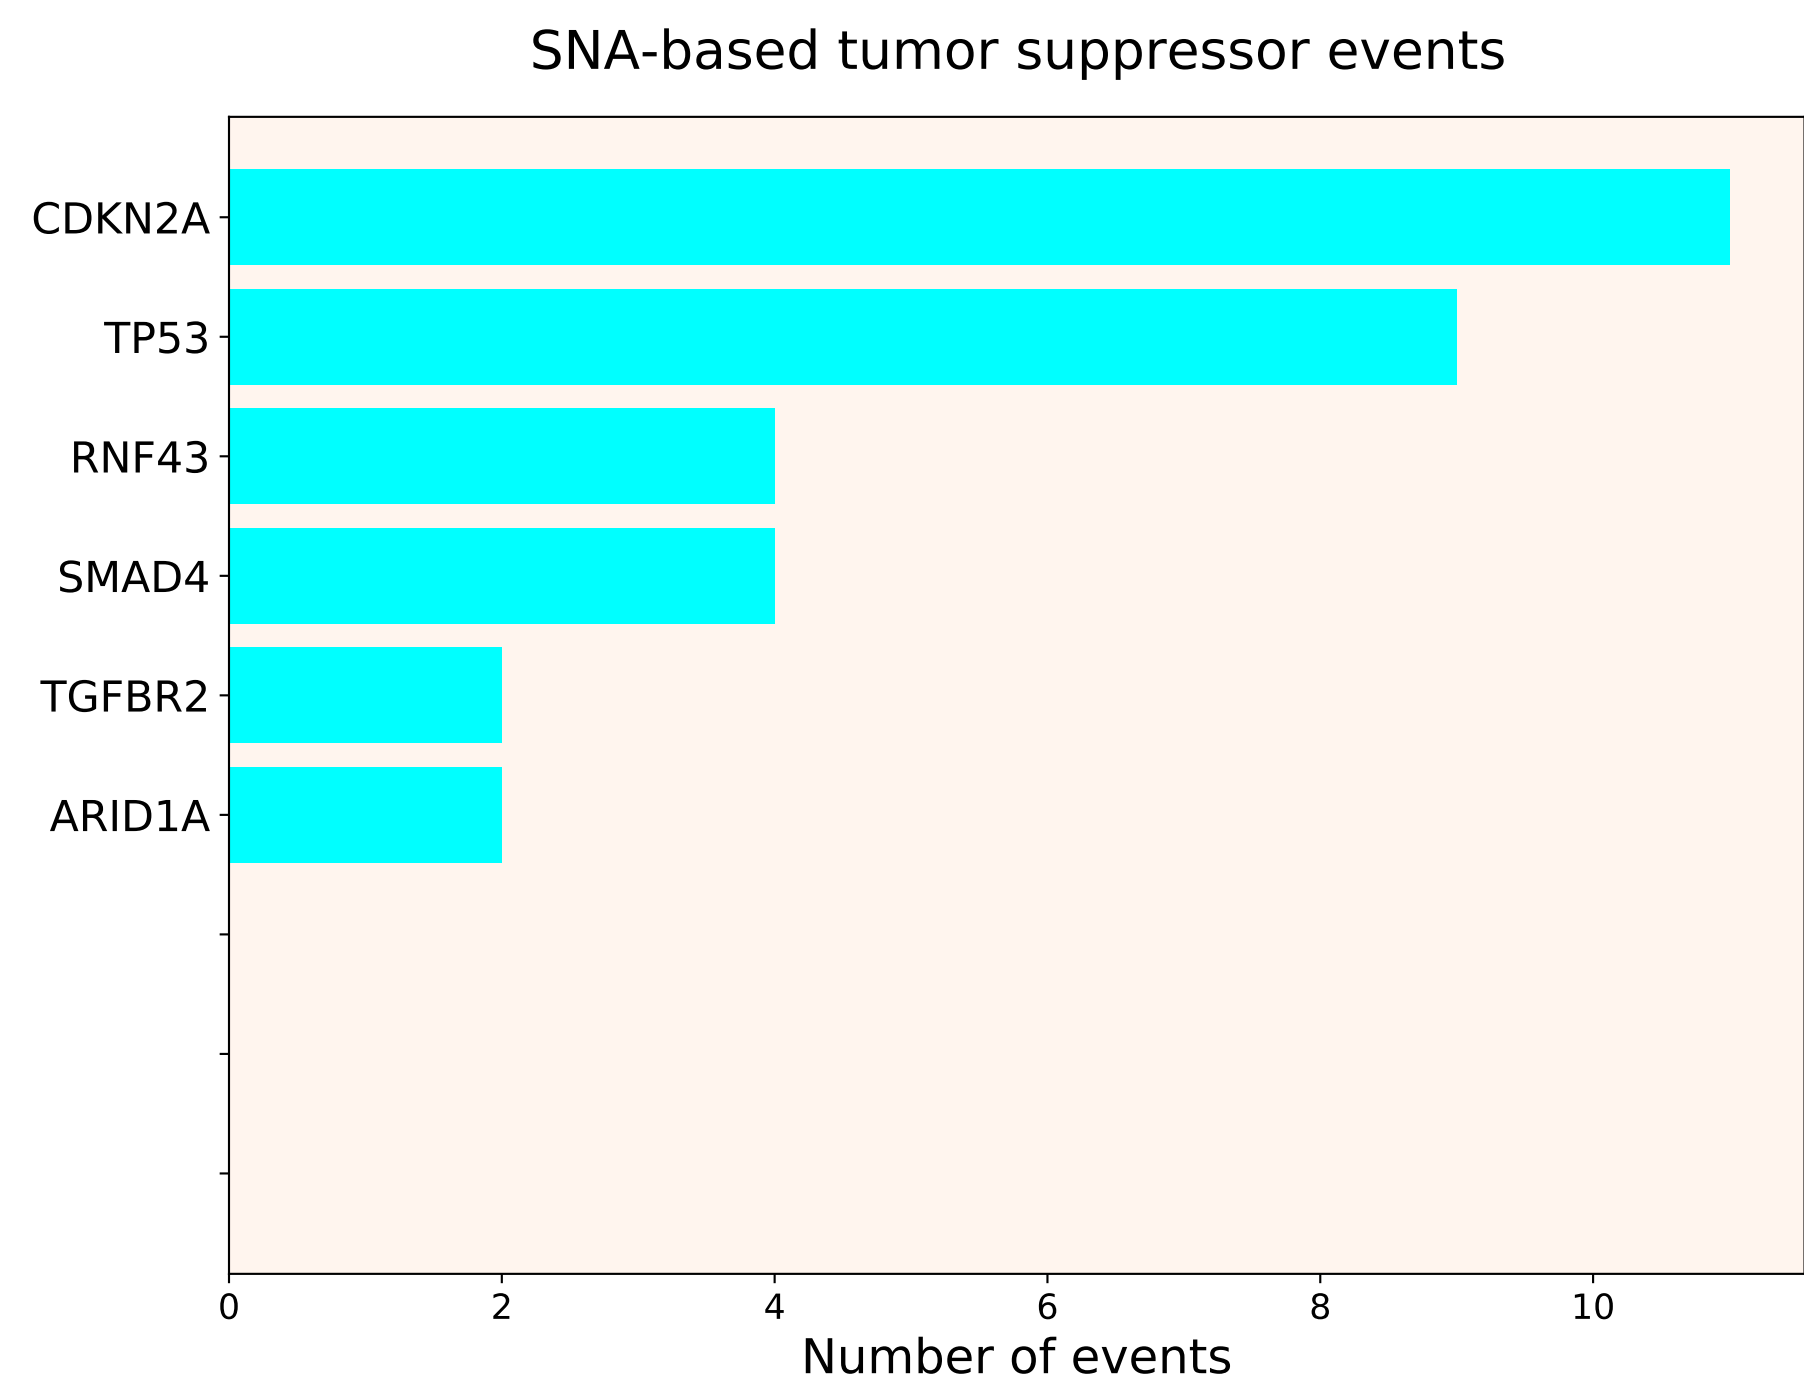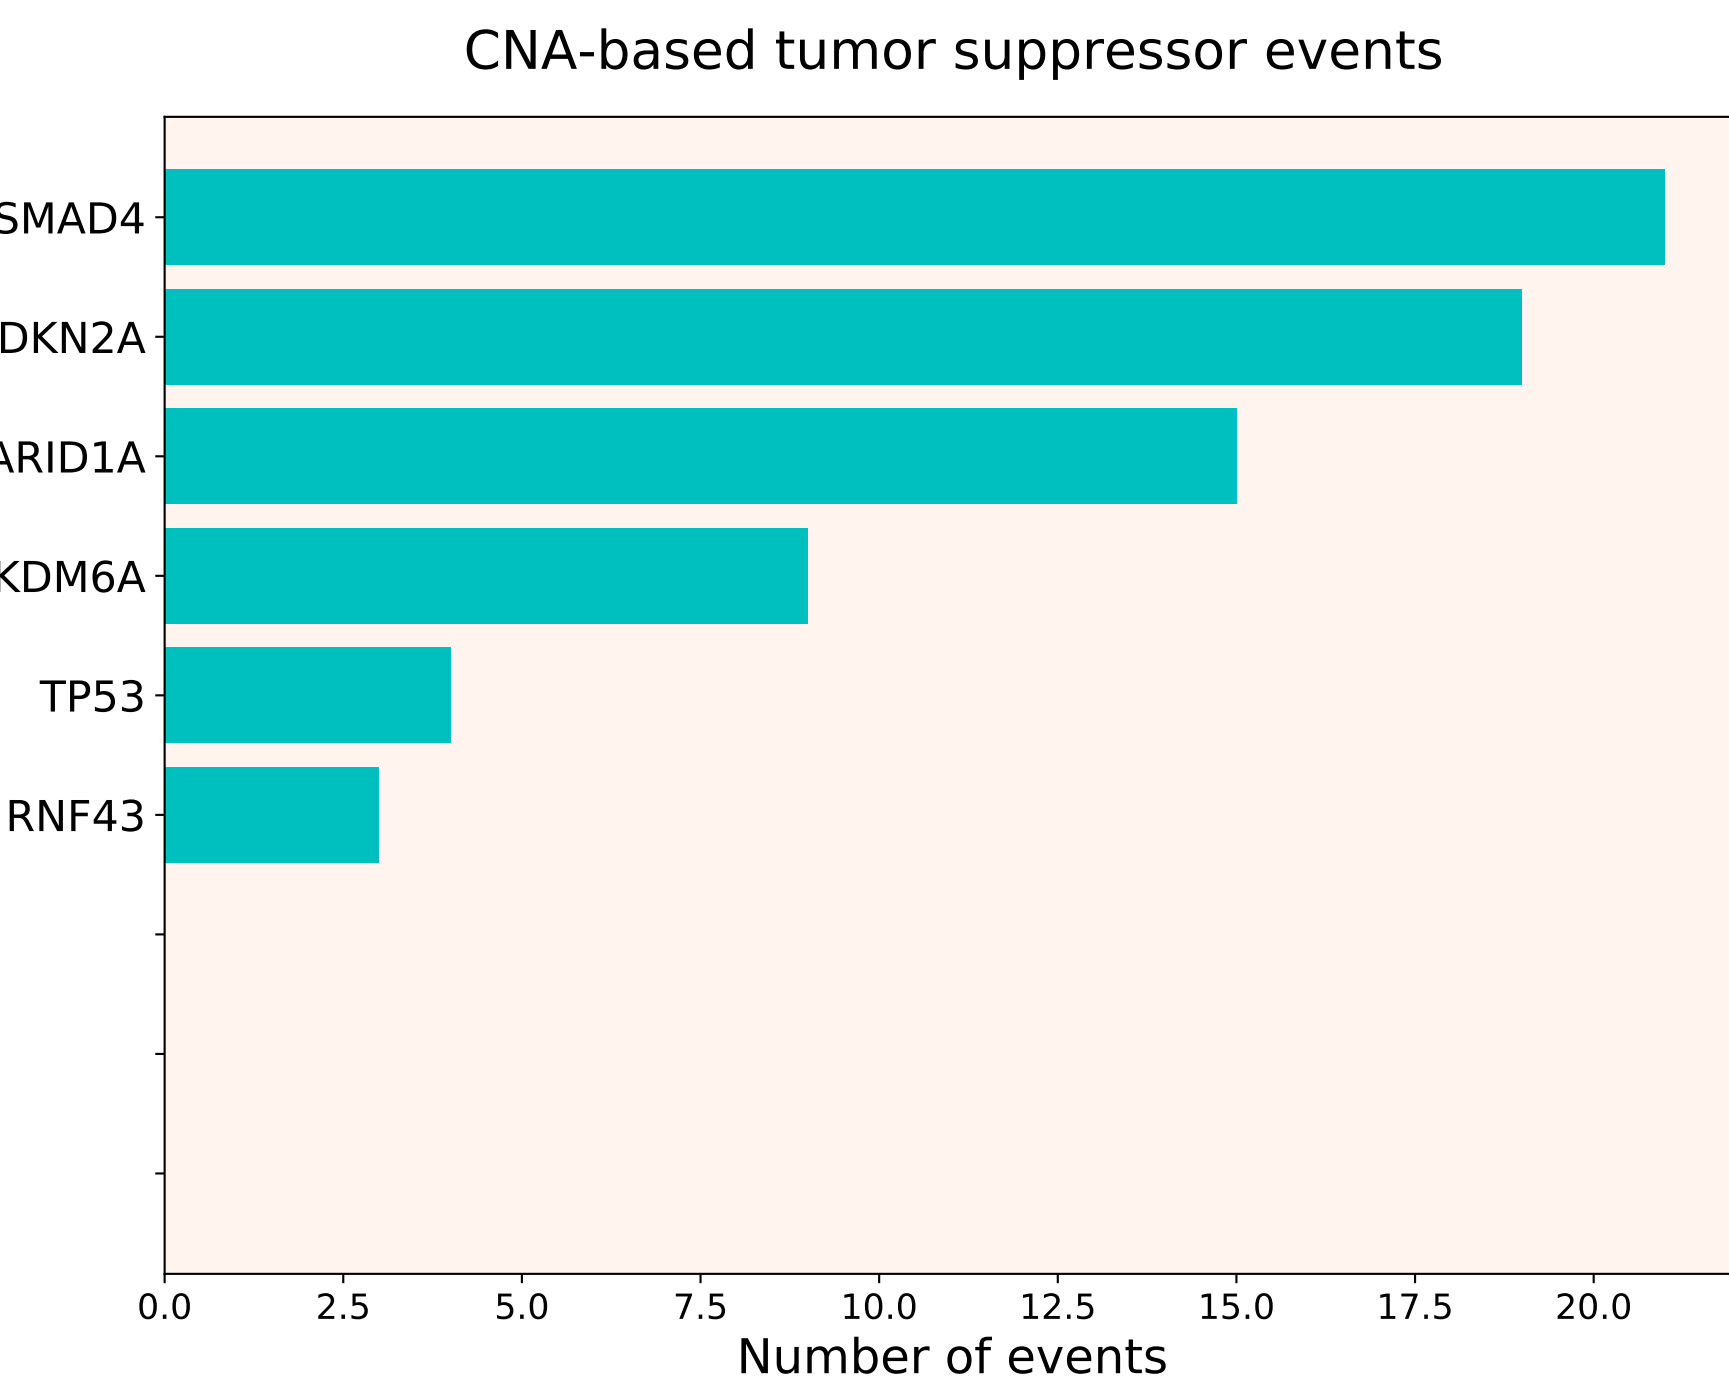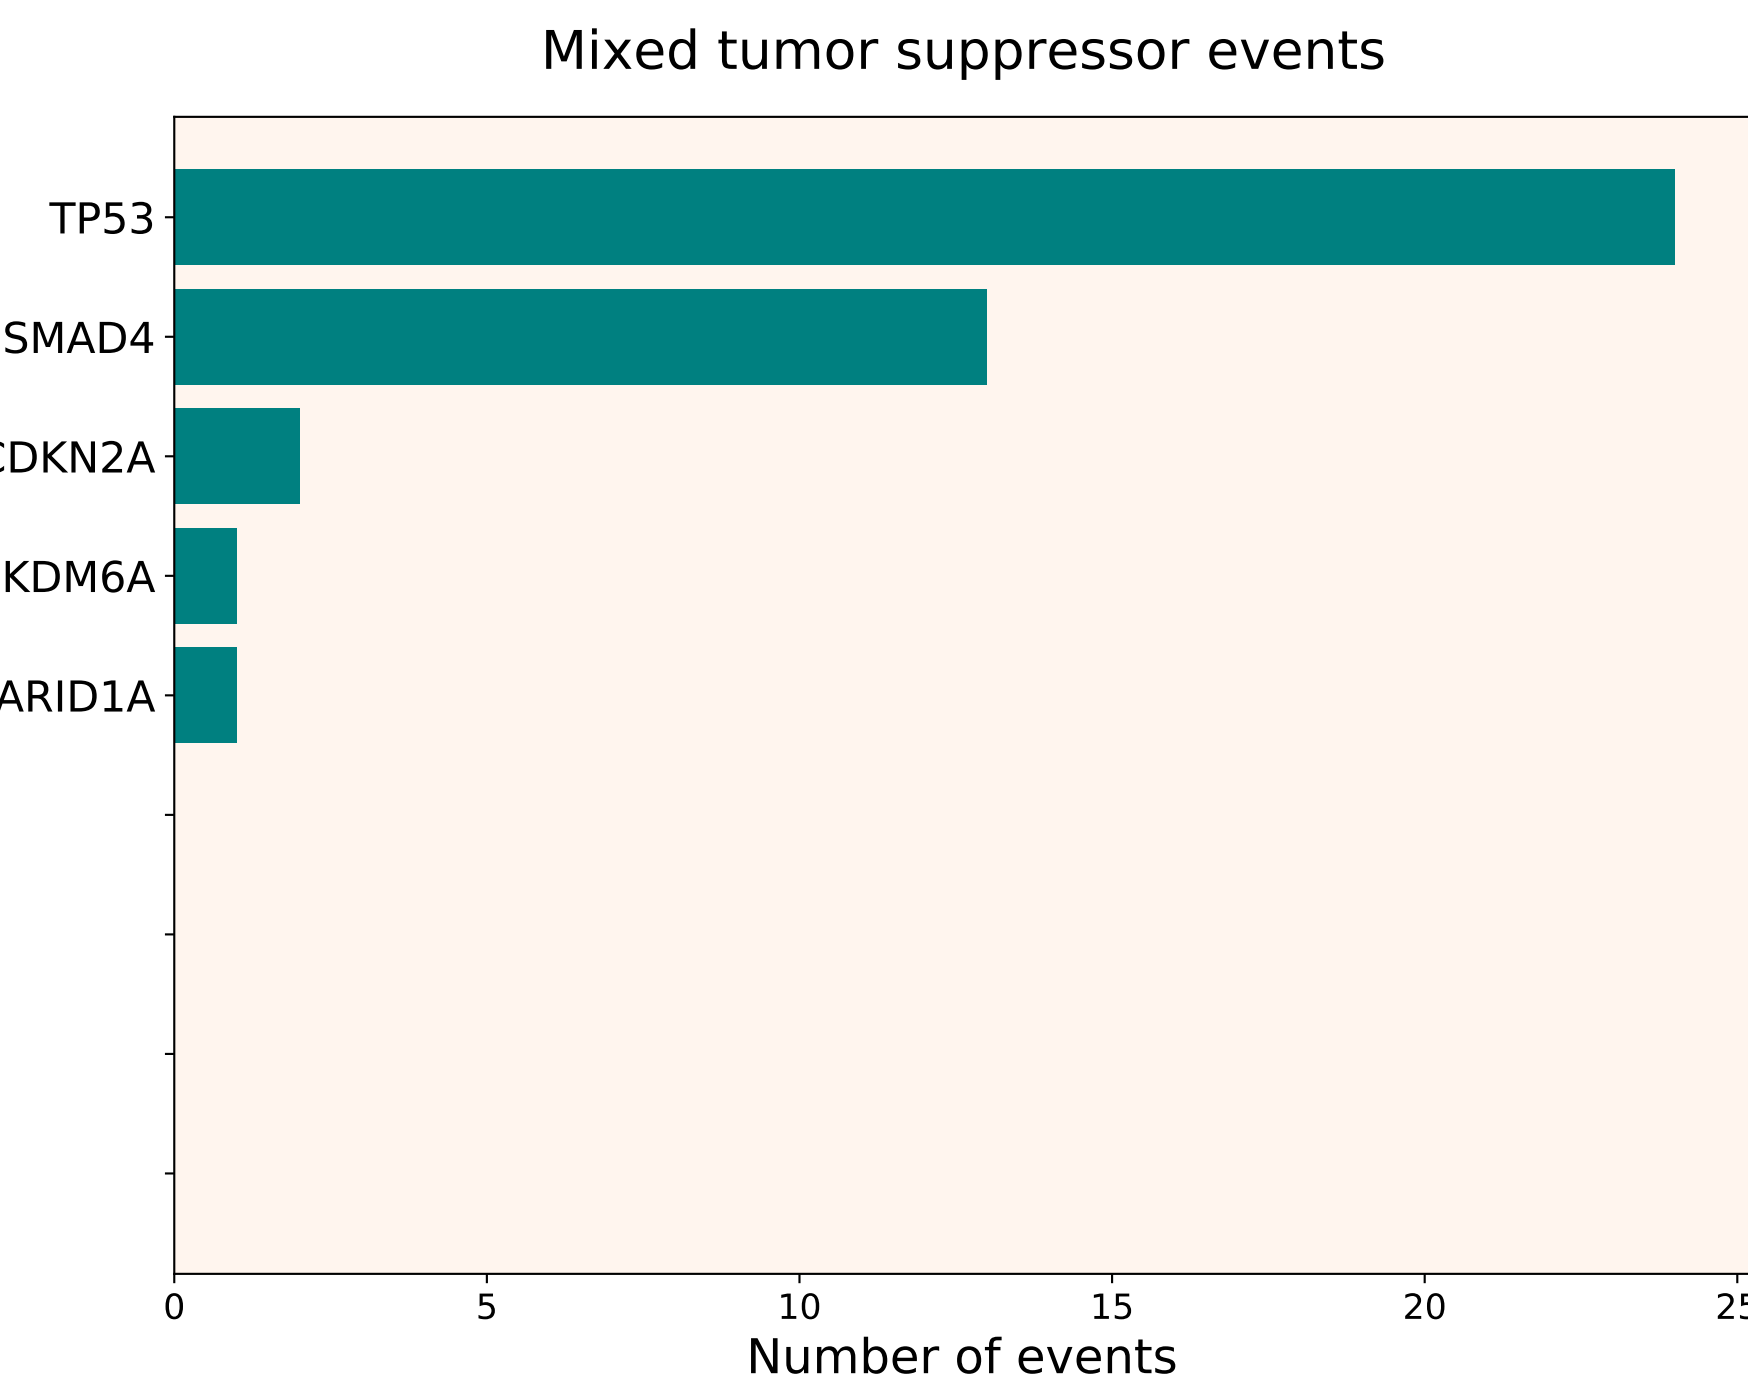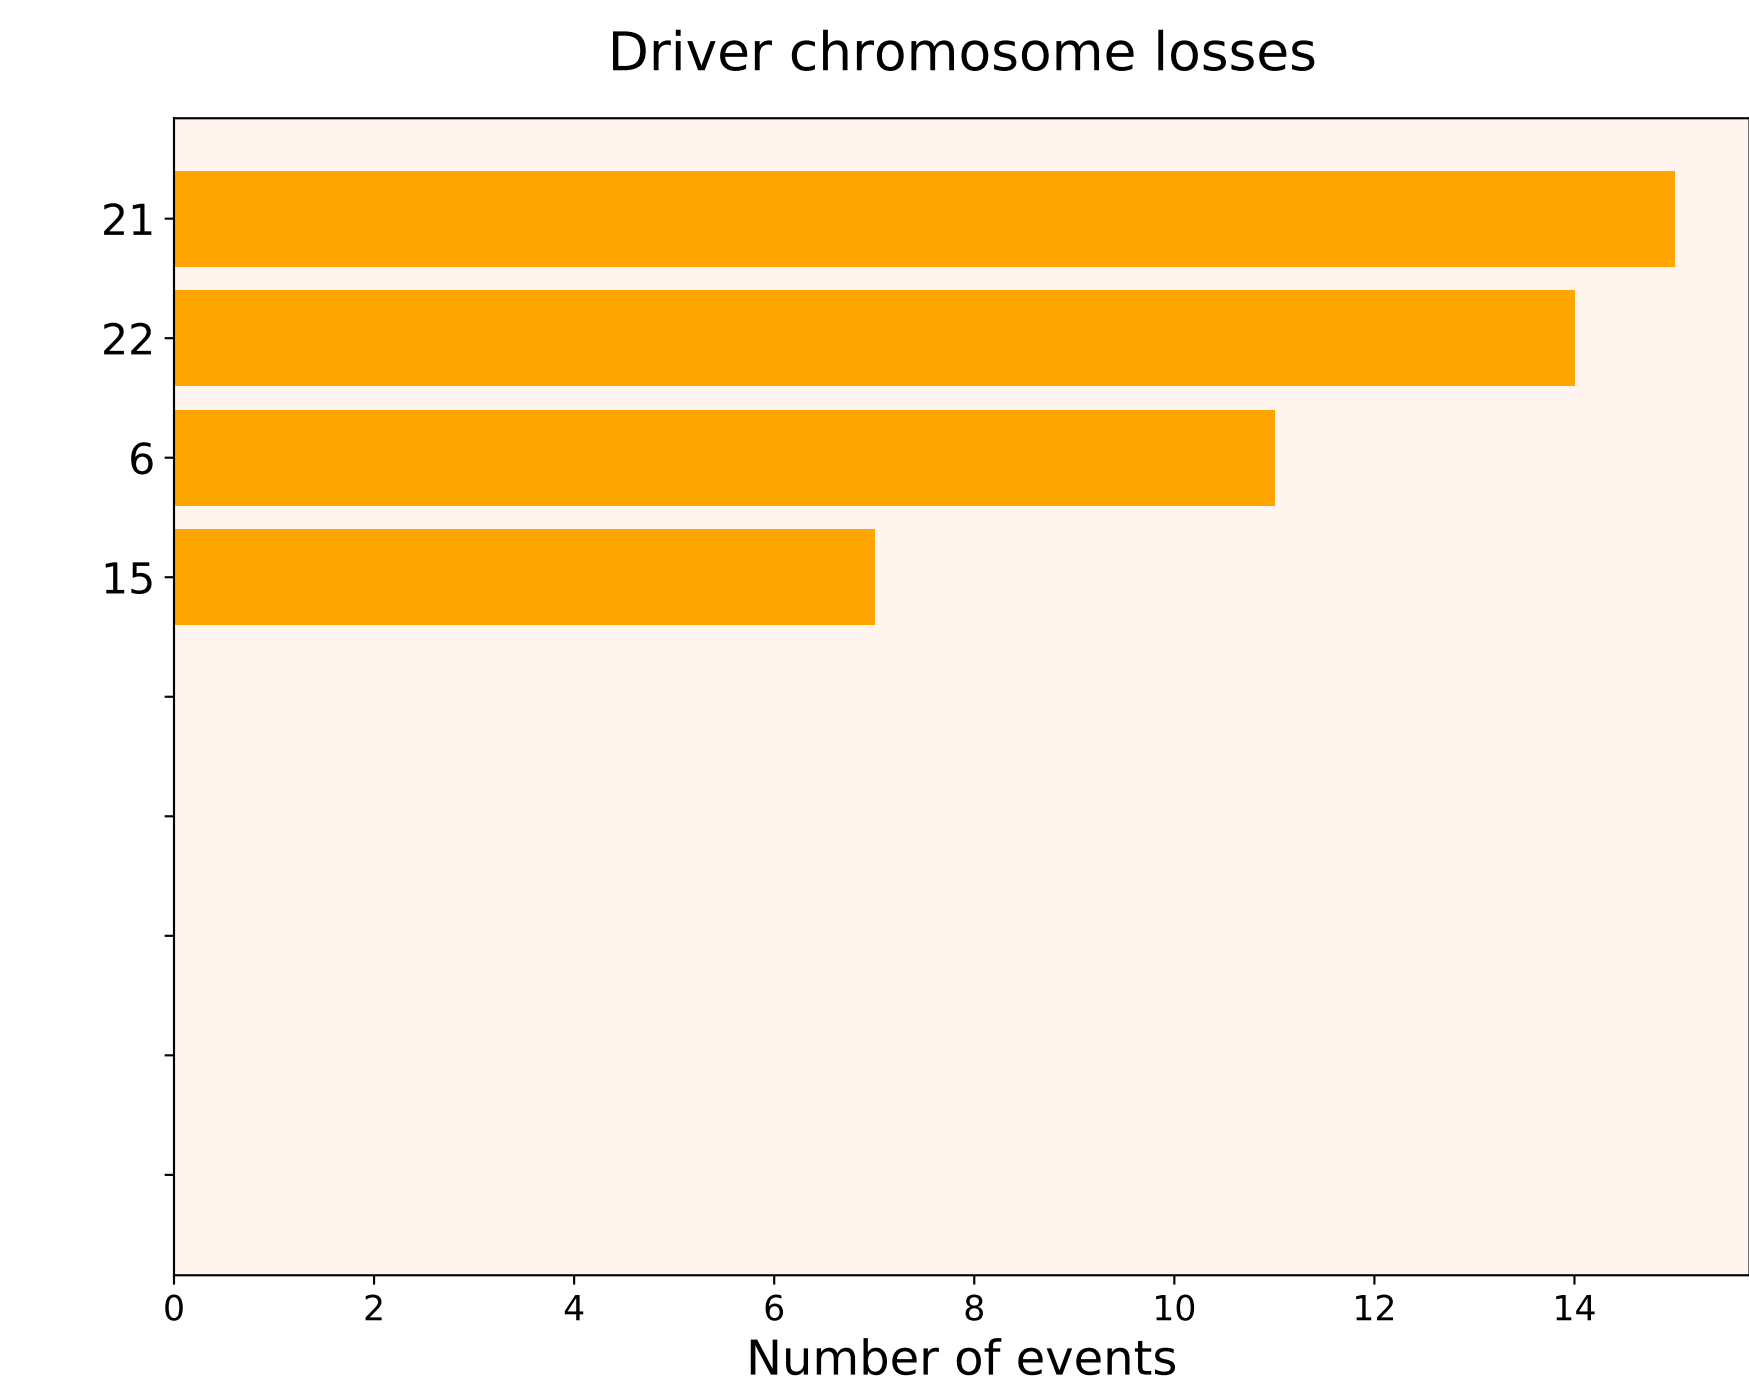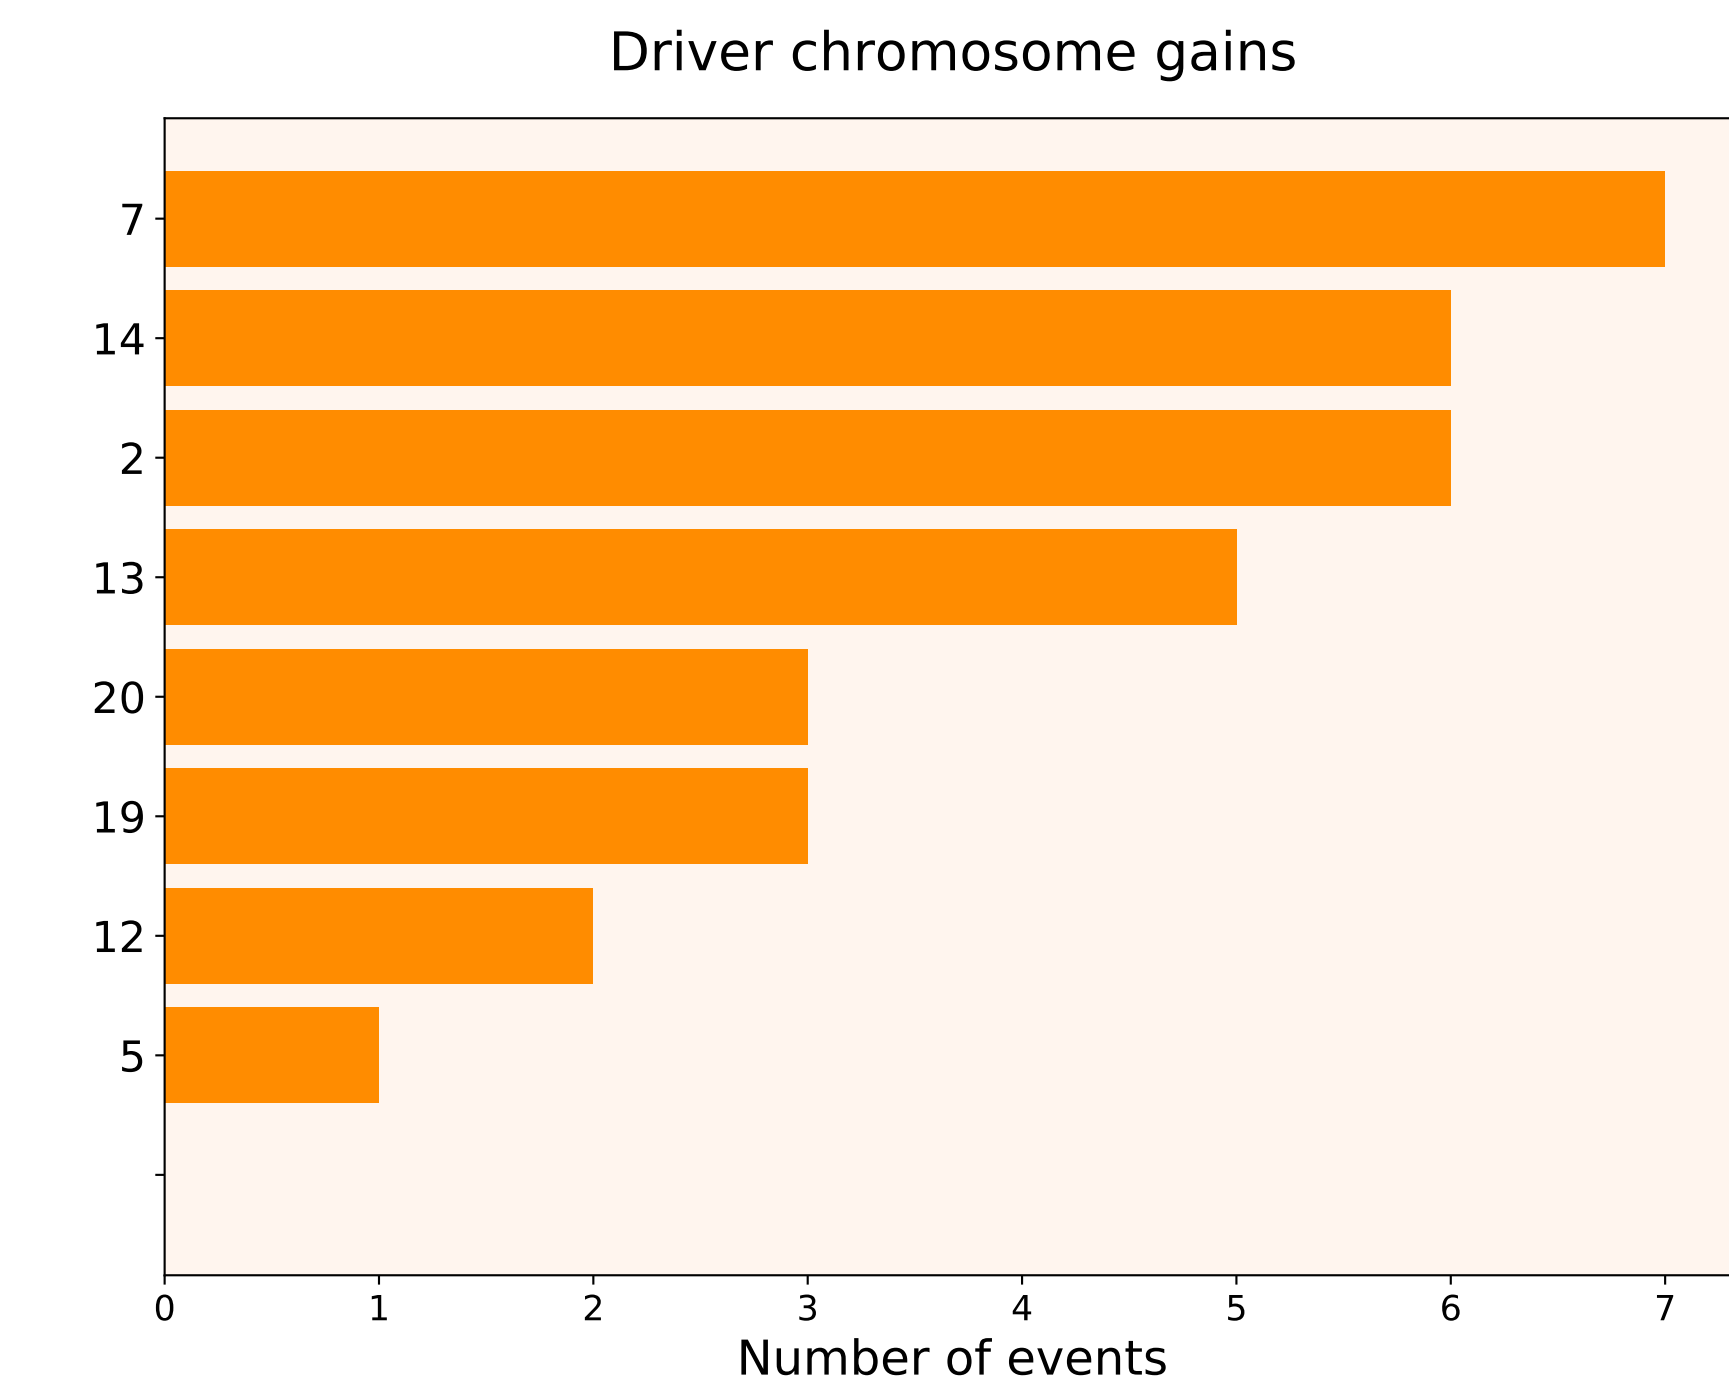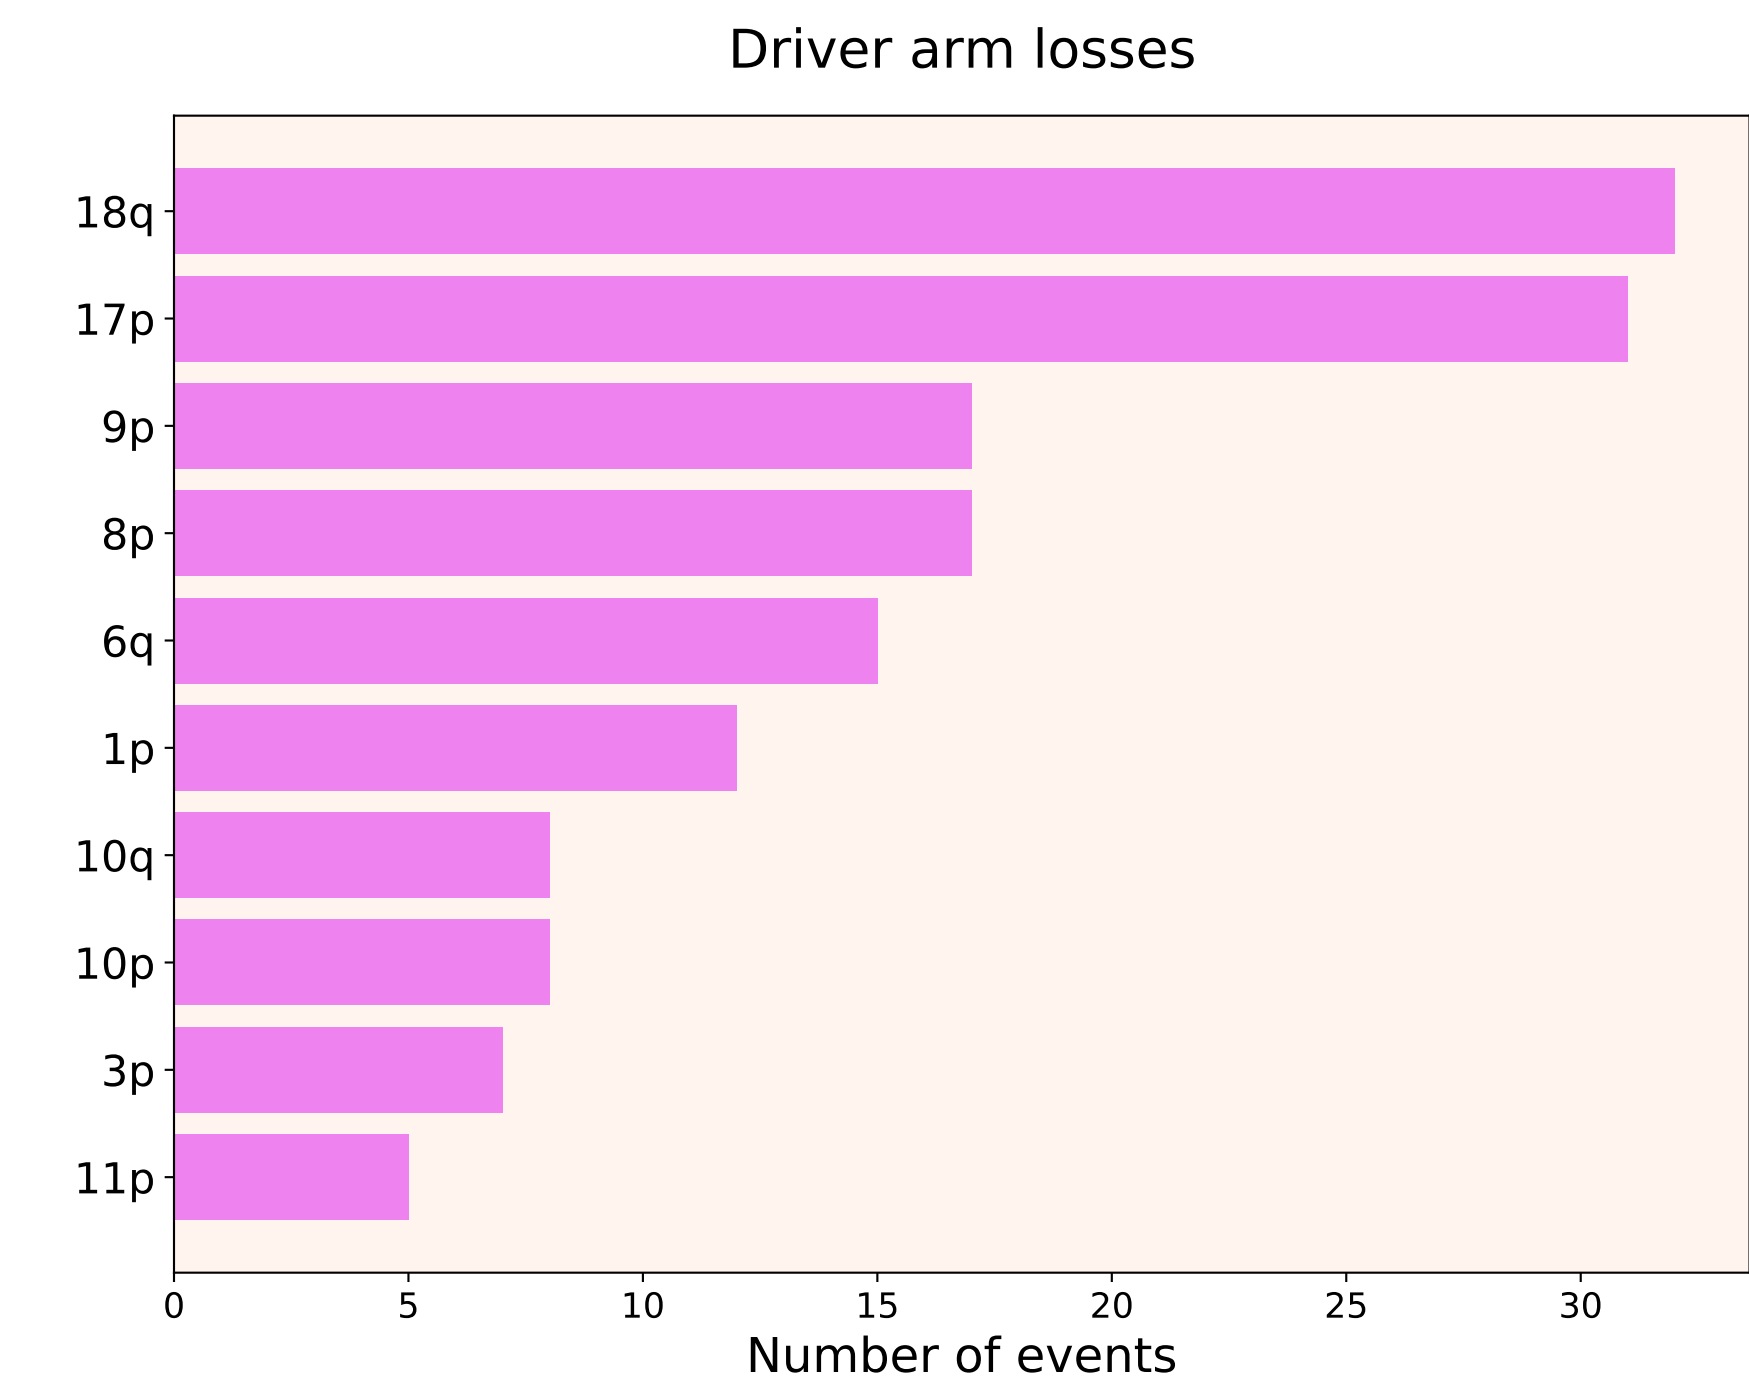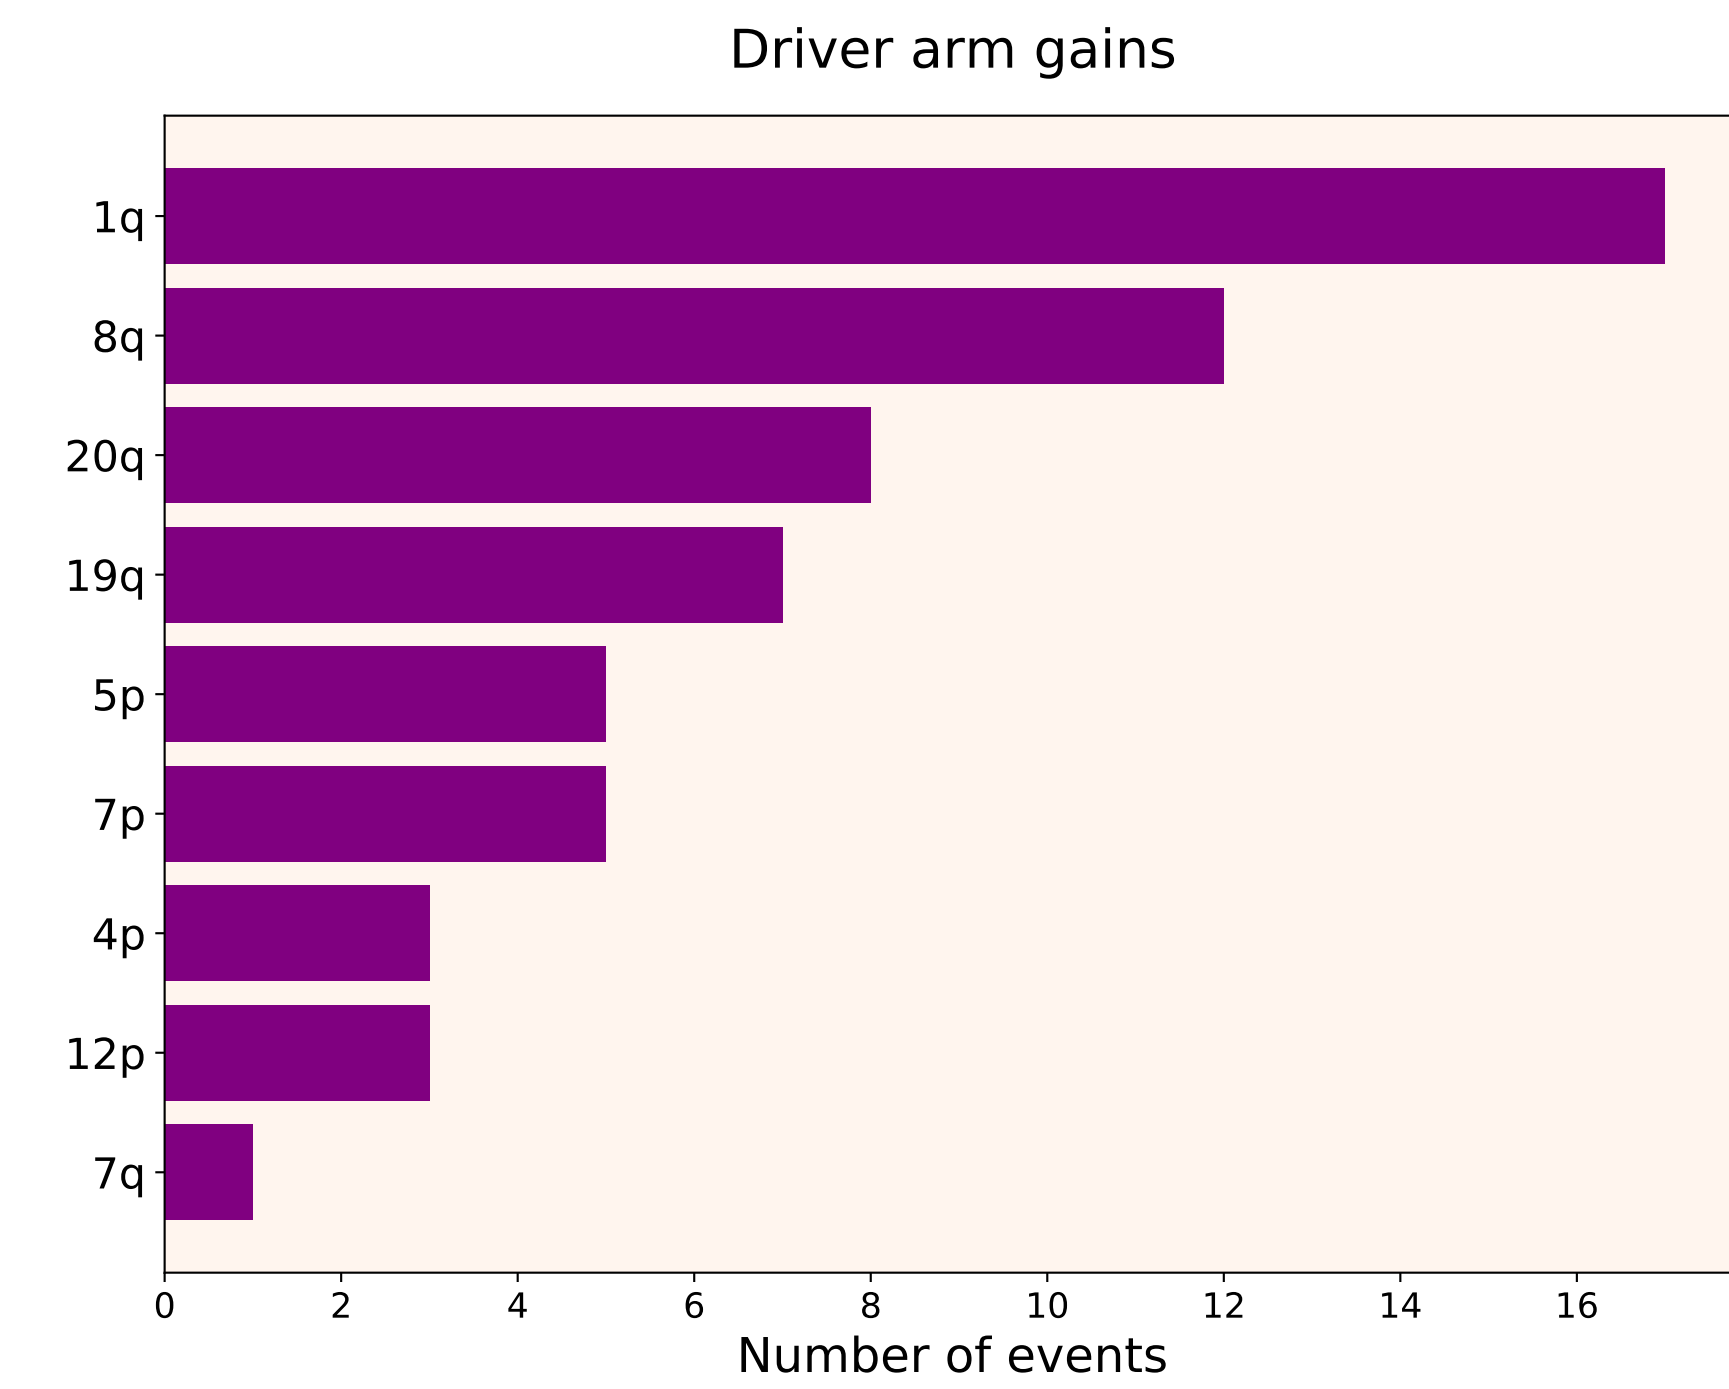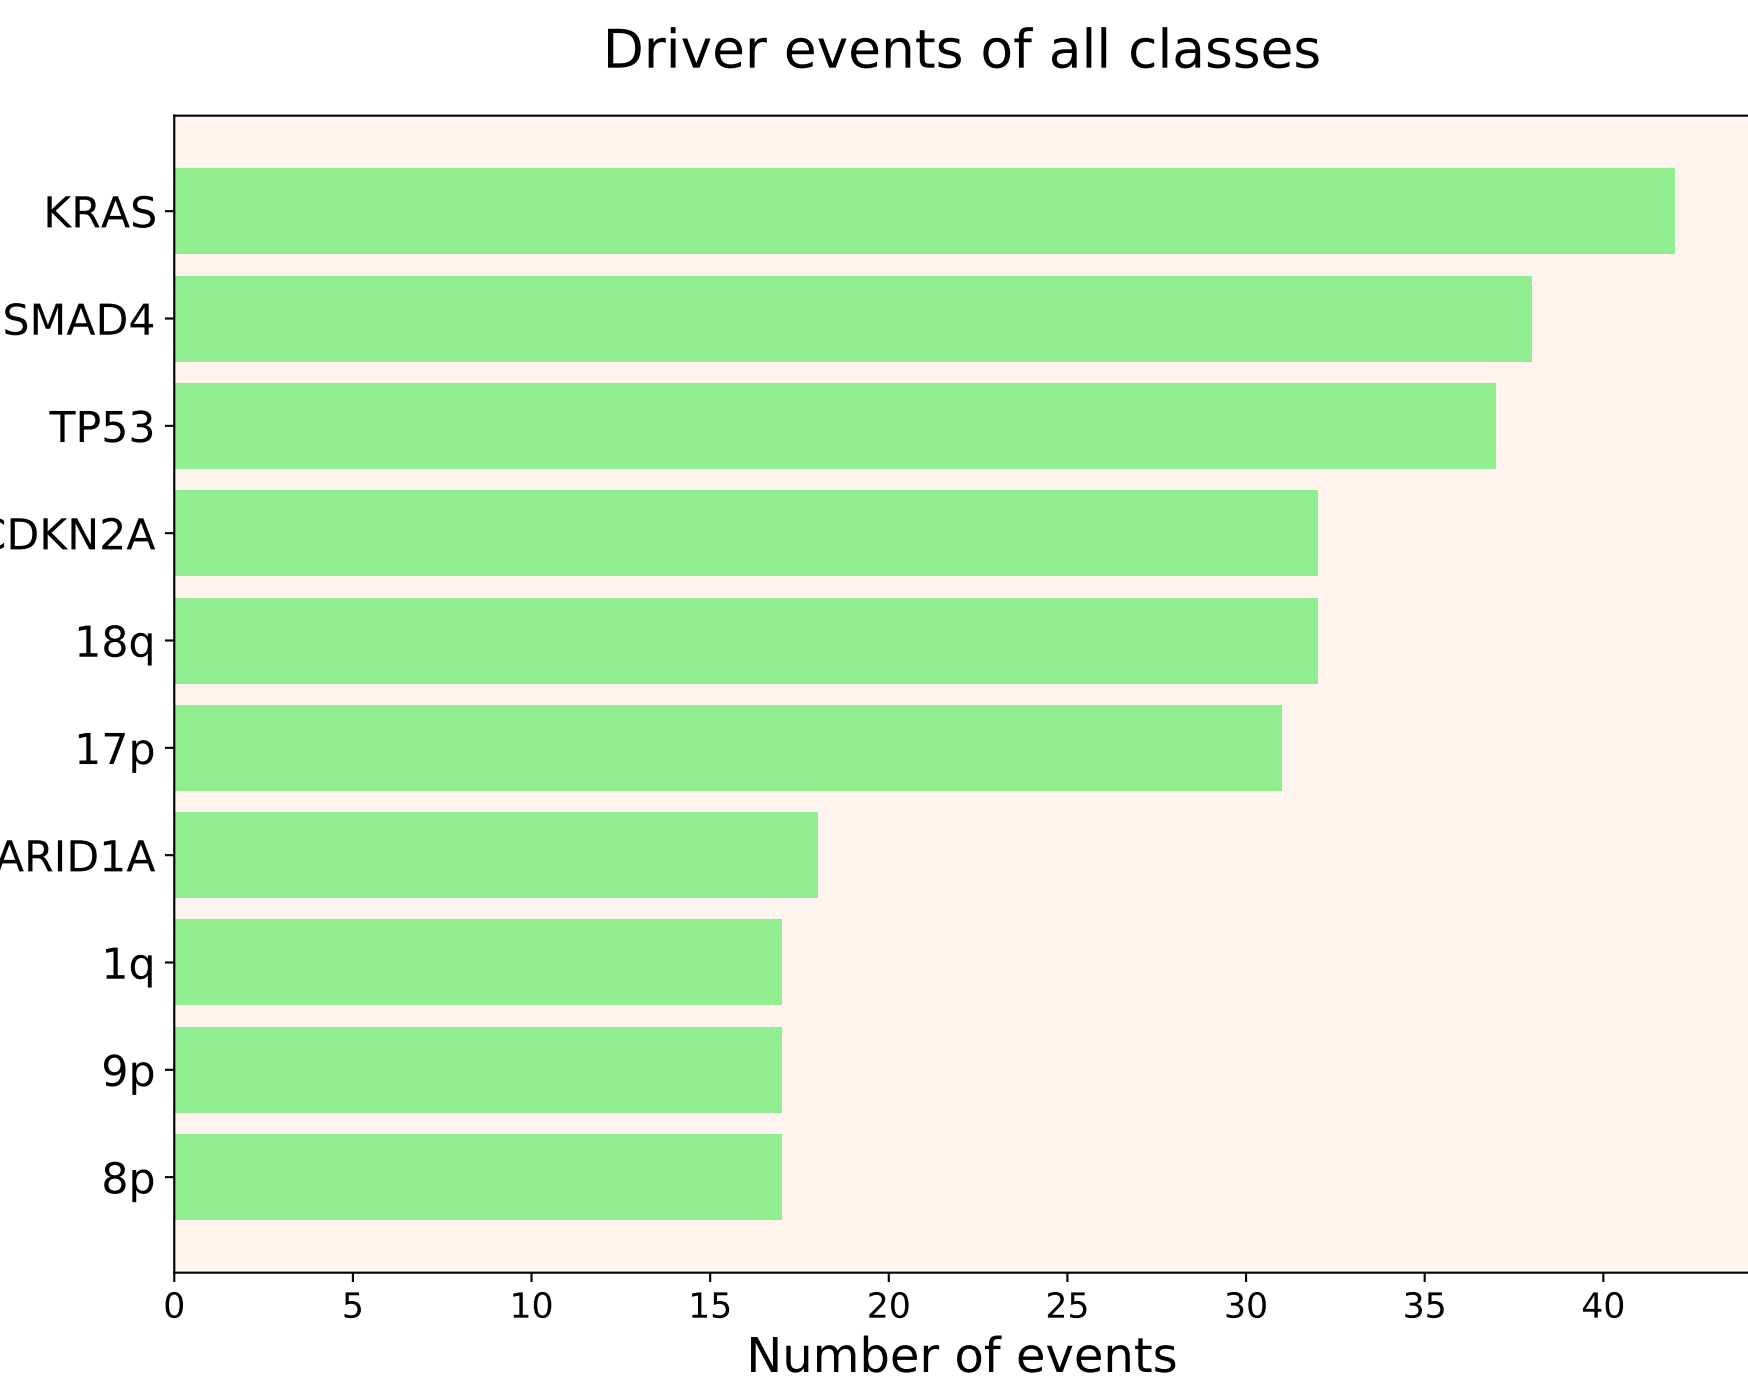

Supplement: Supplemental_Data_S1.zip [file Supplemental_Data_S1.zip]

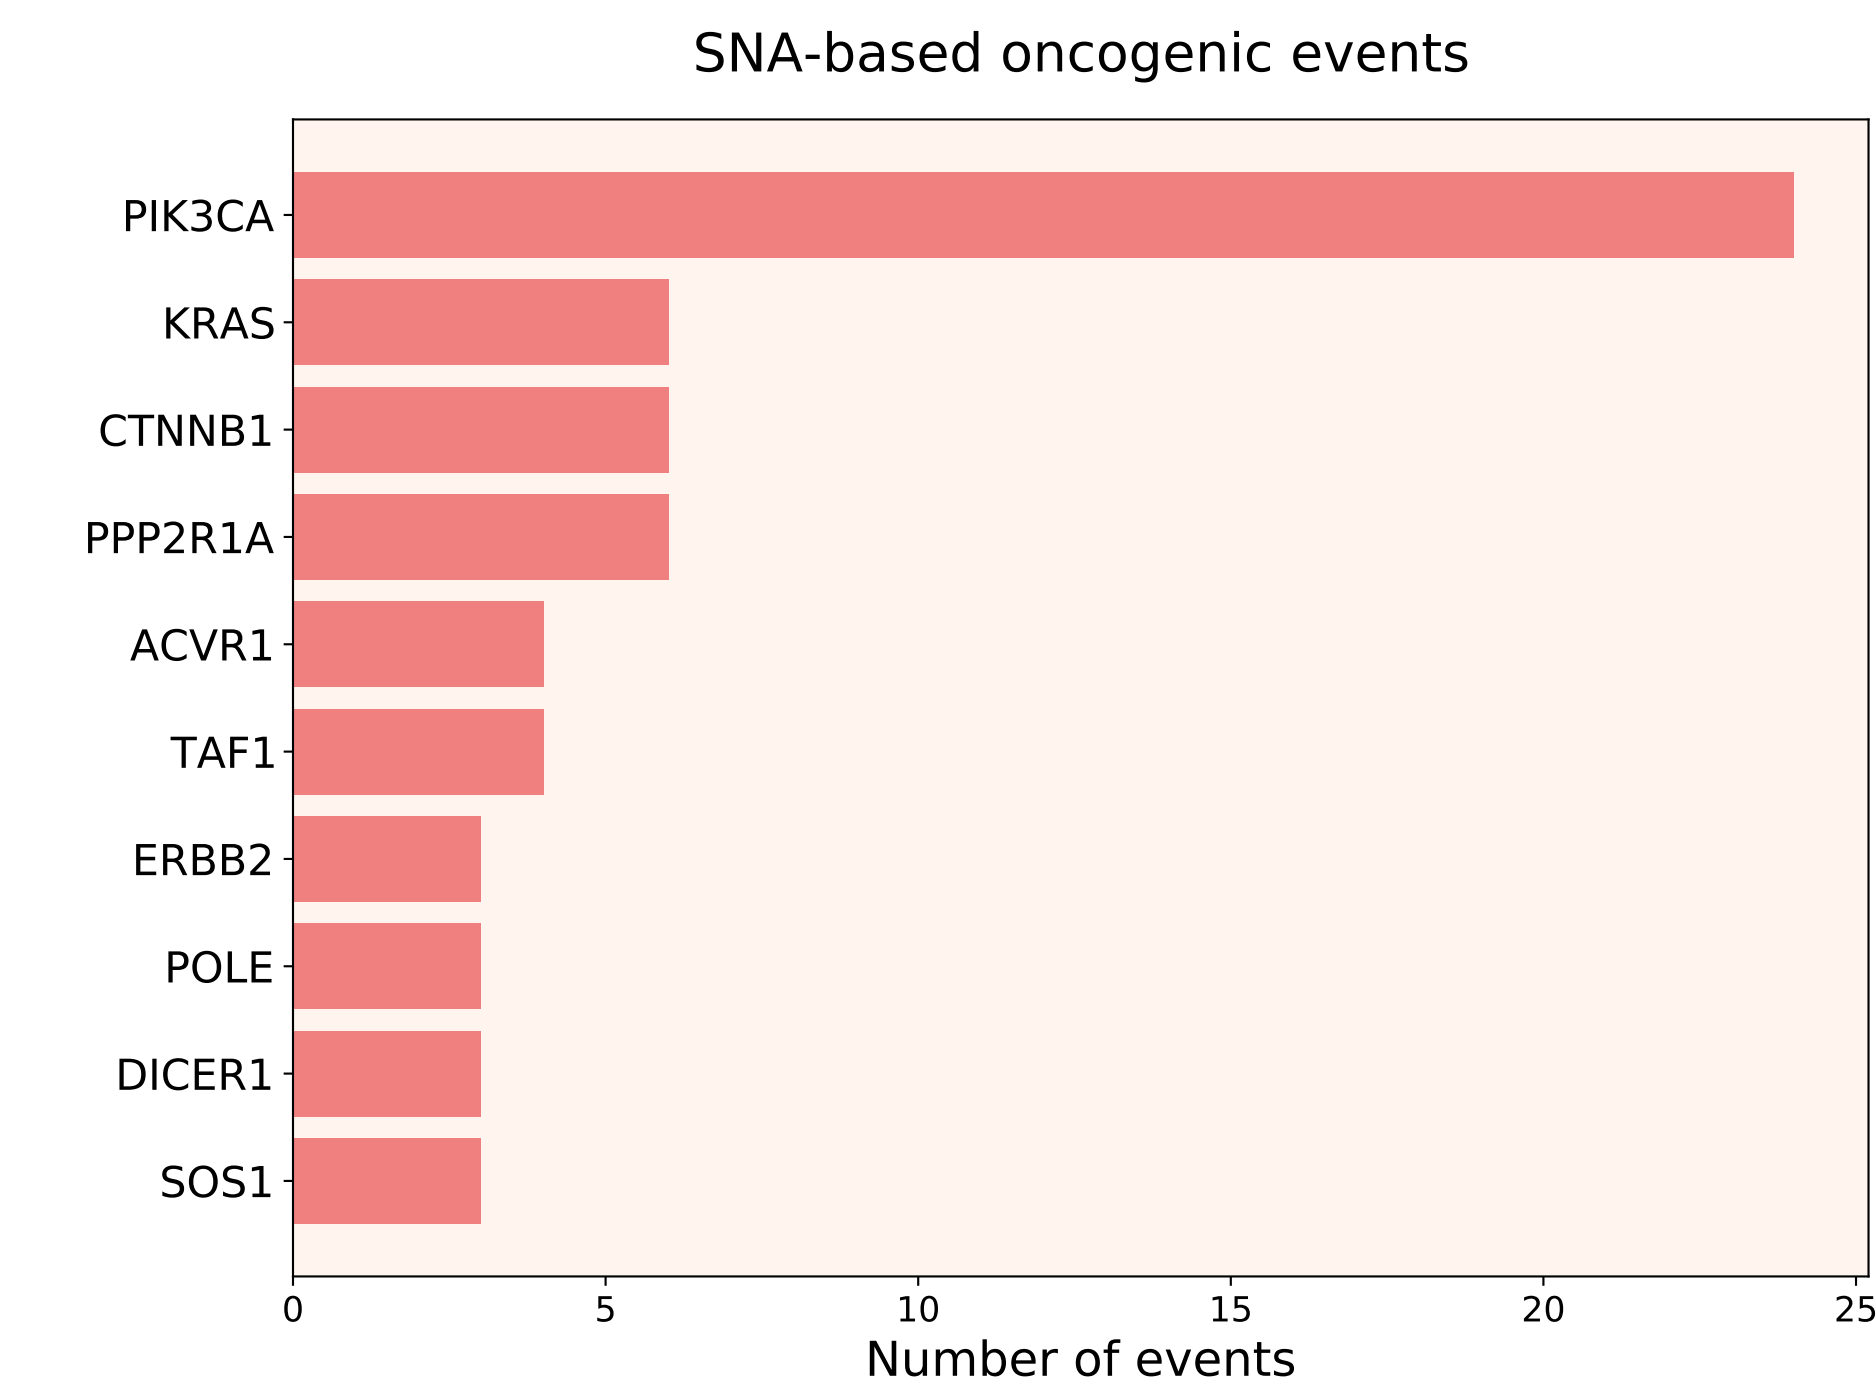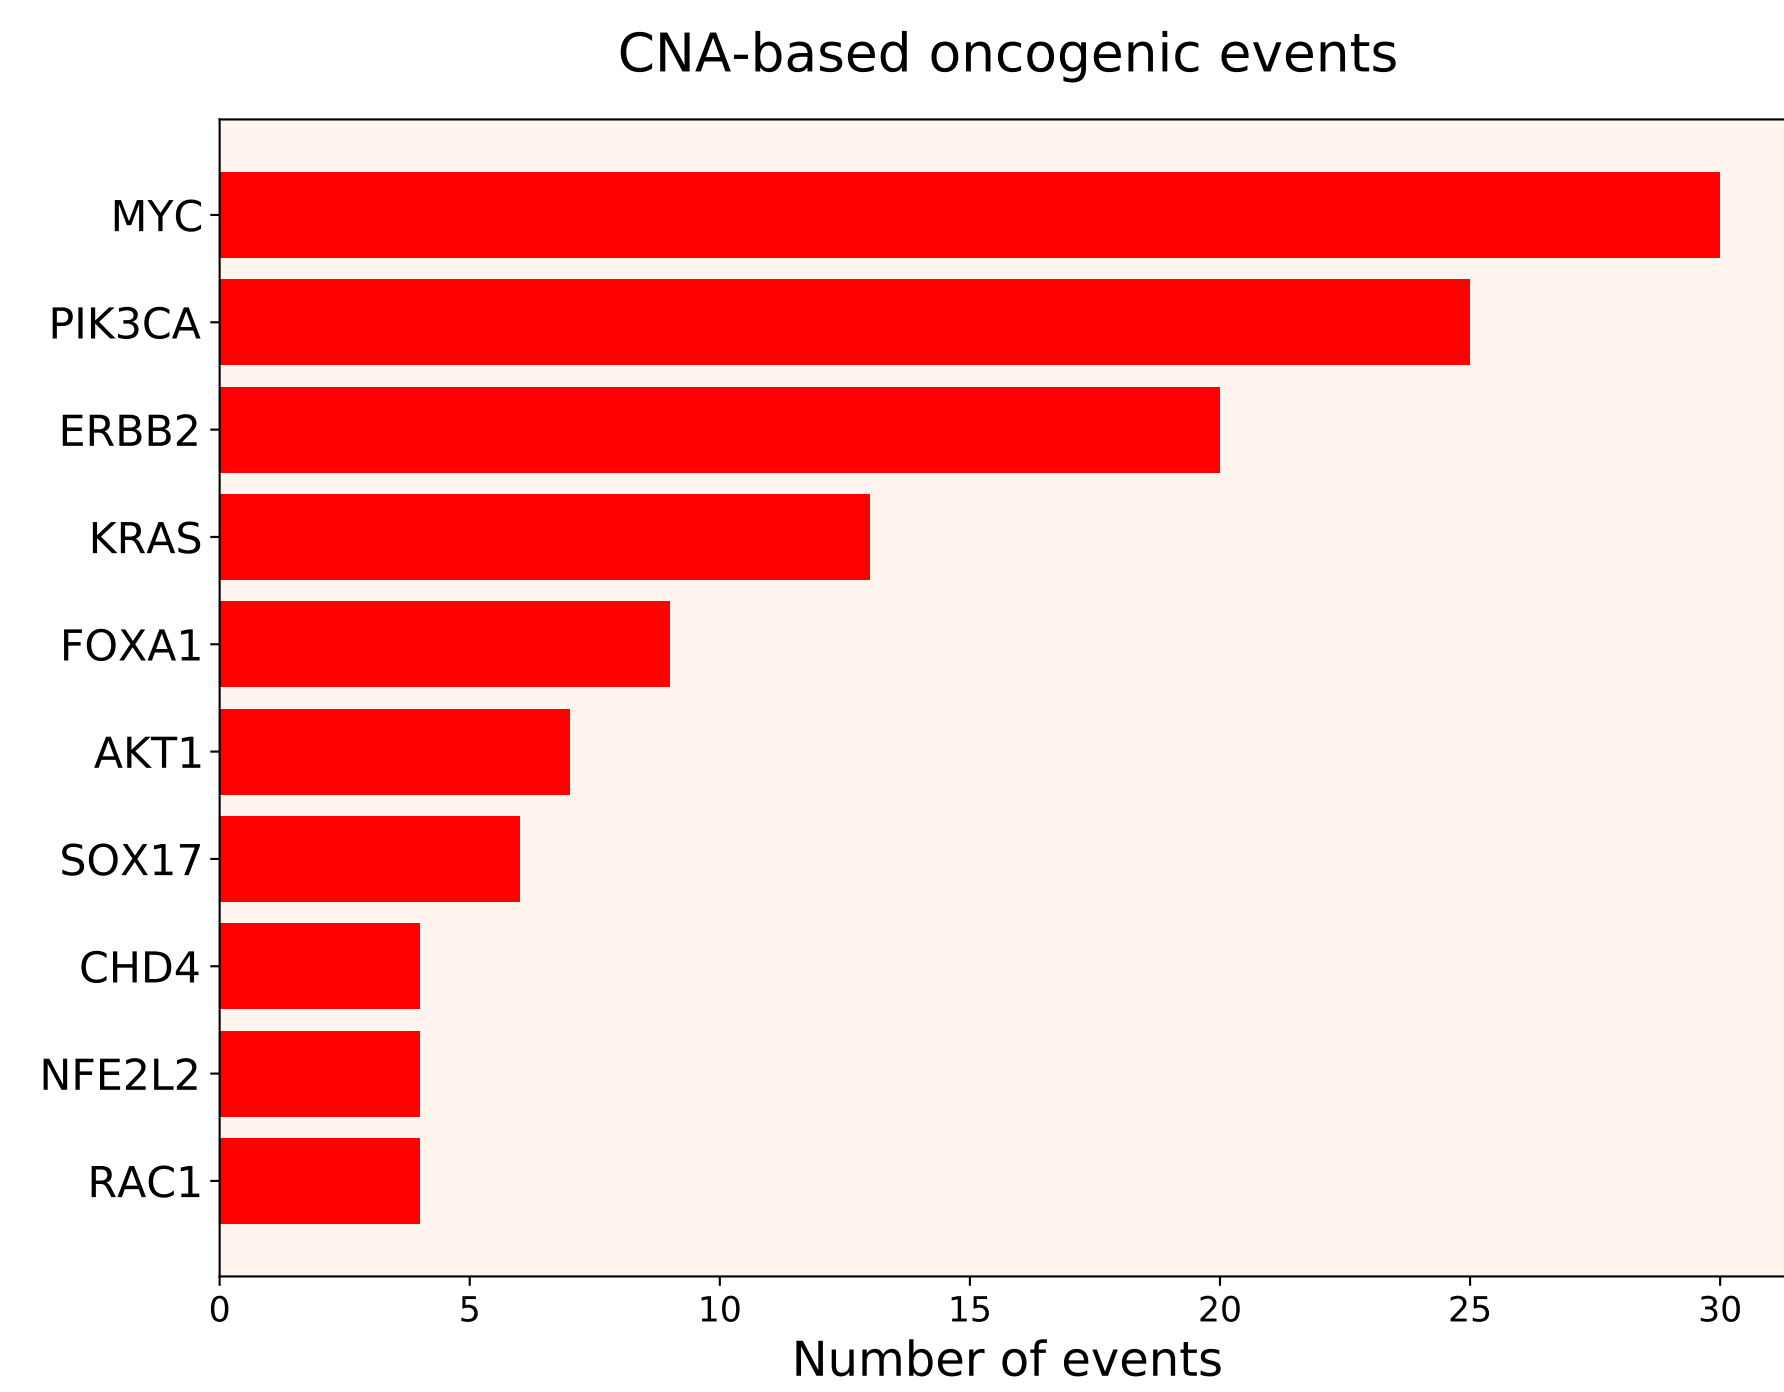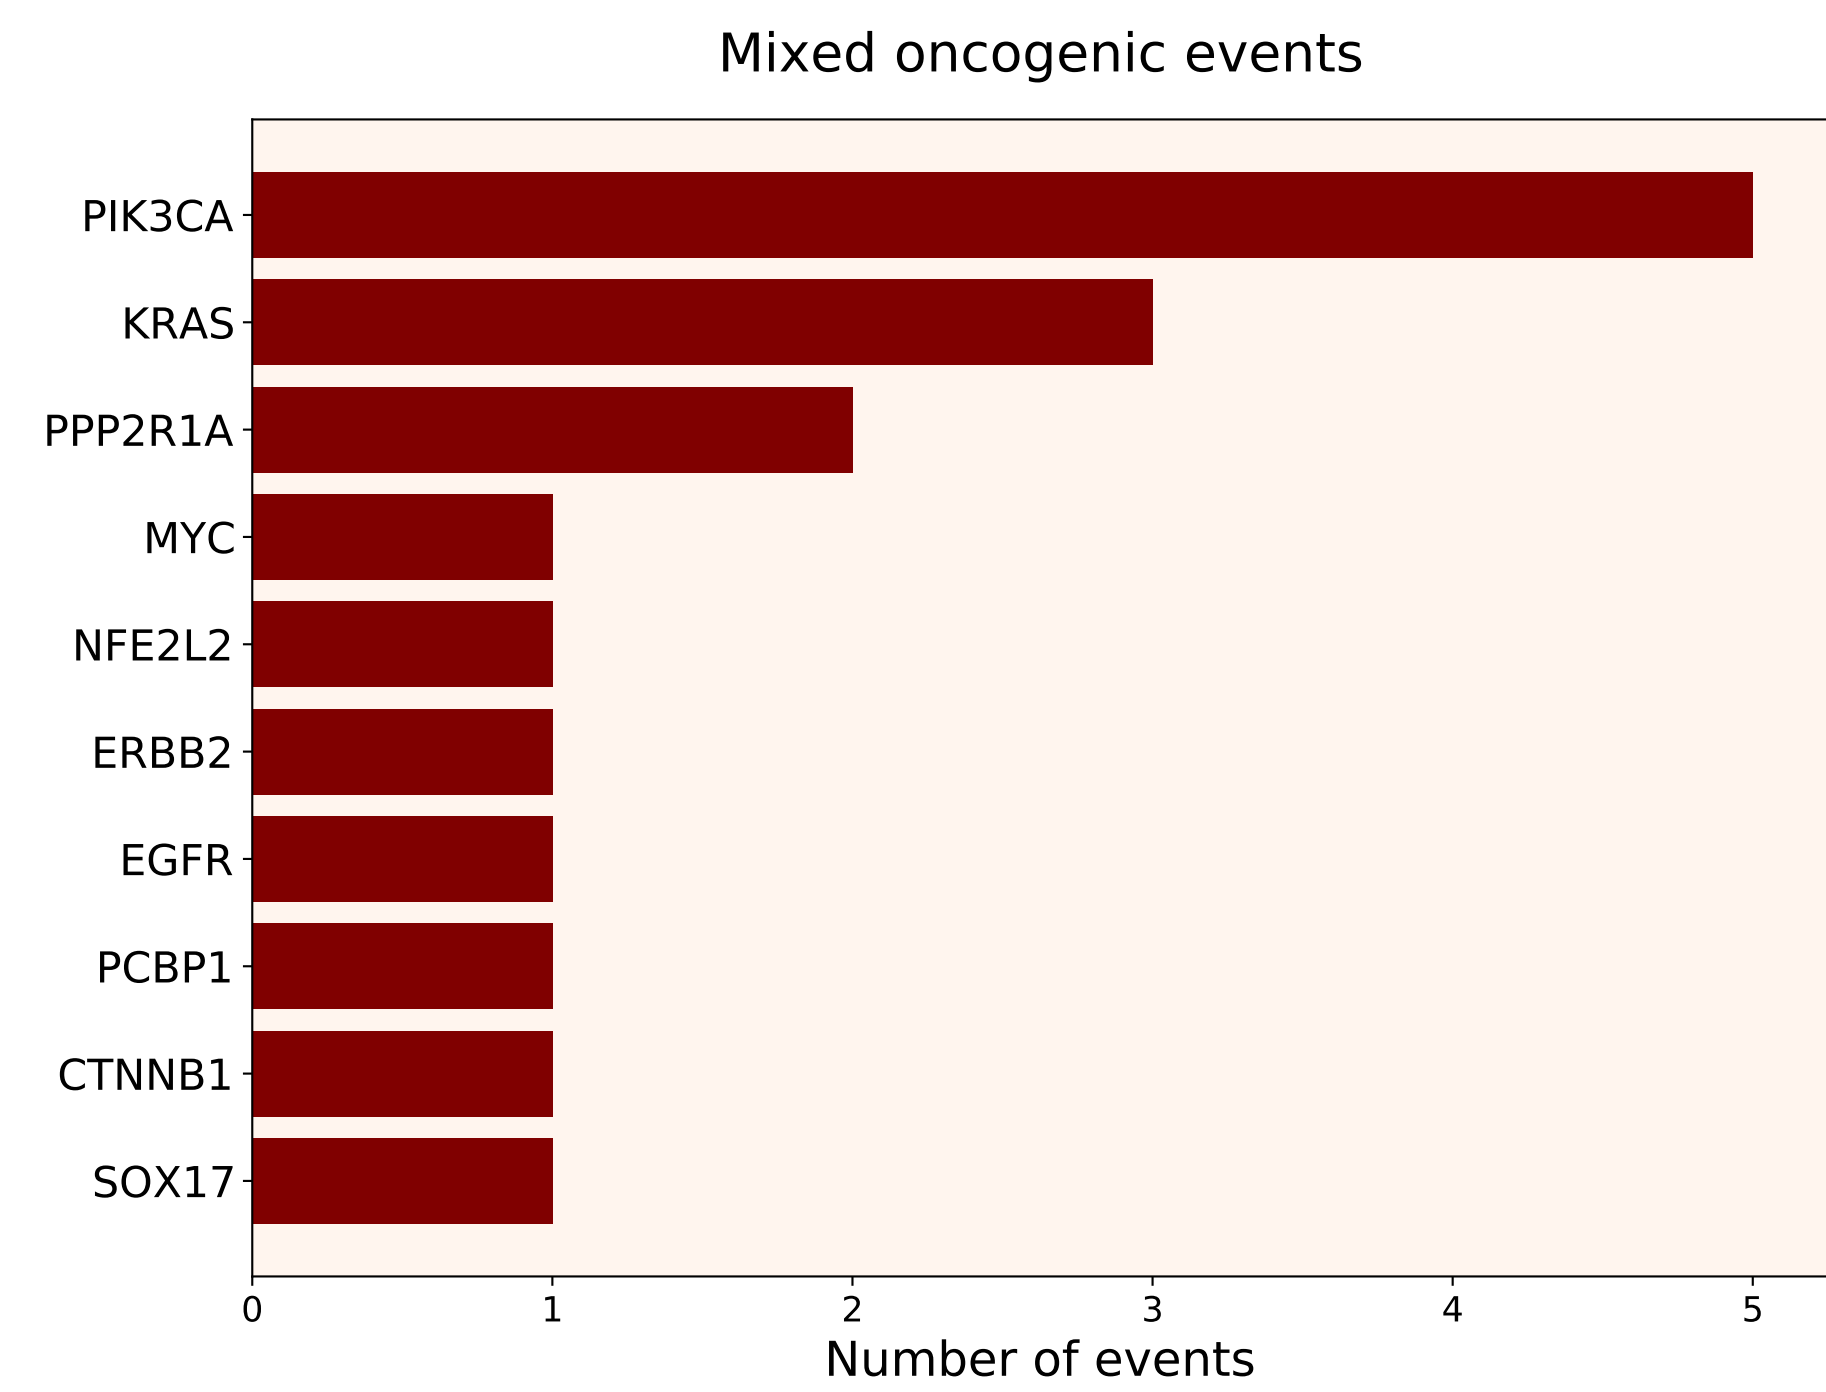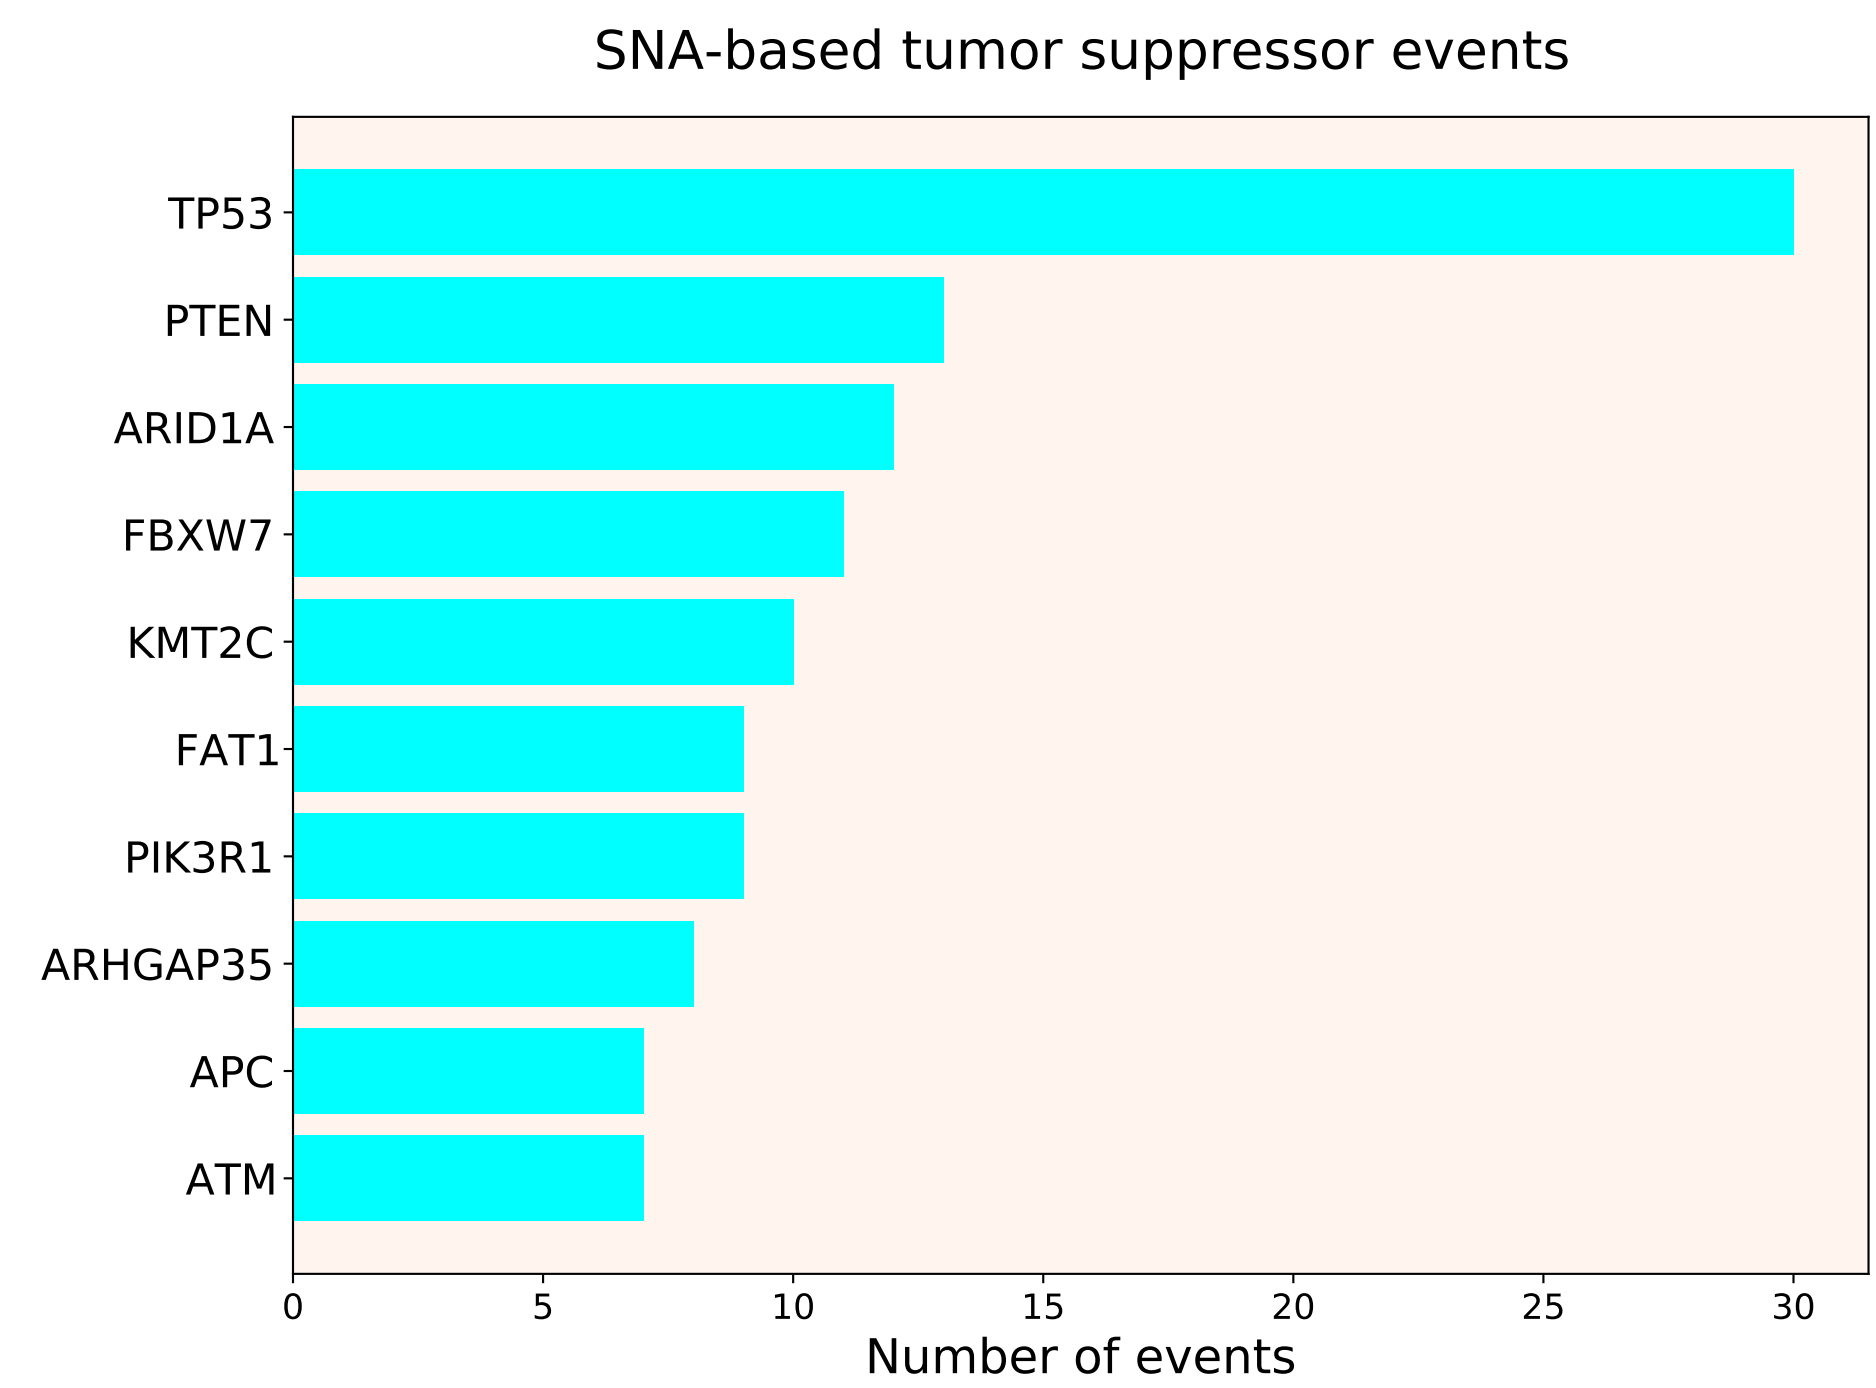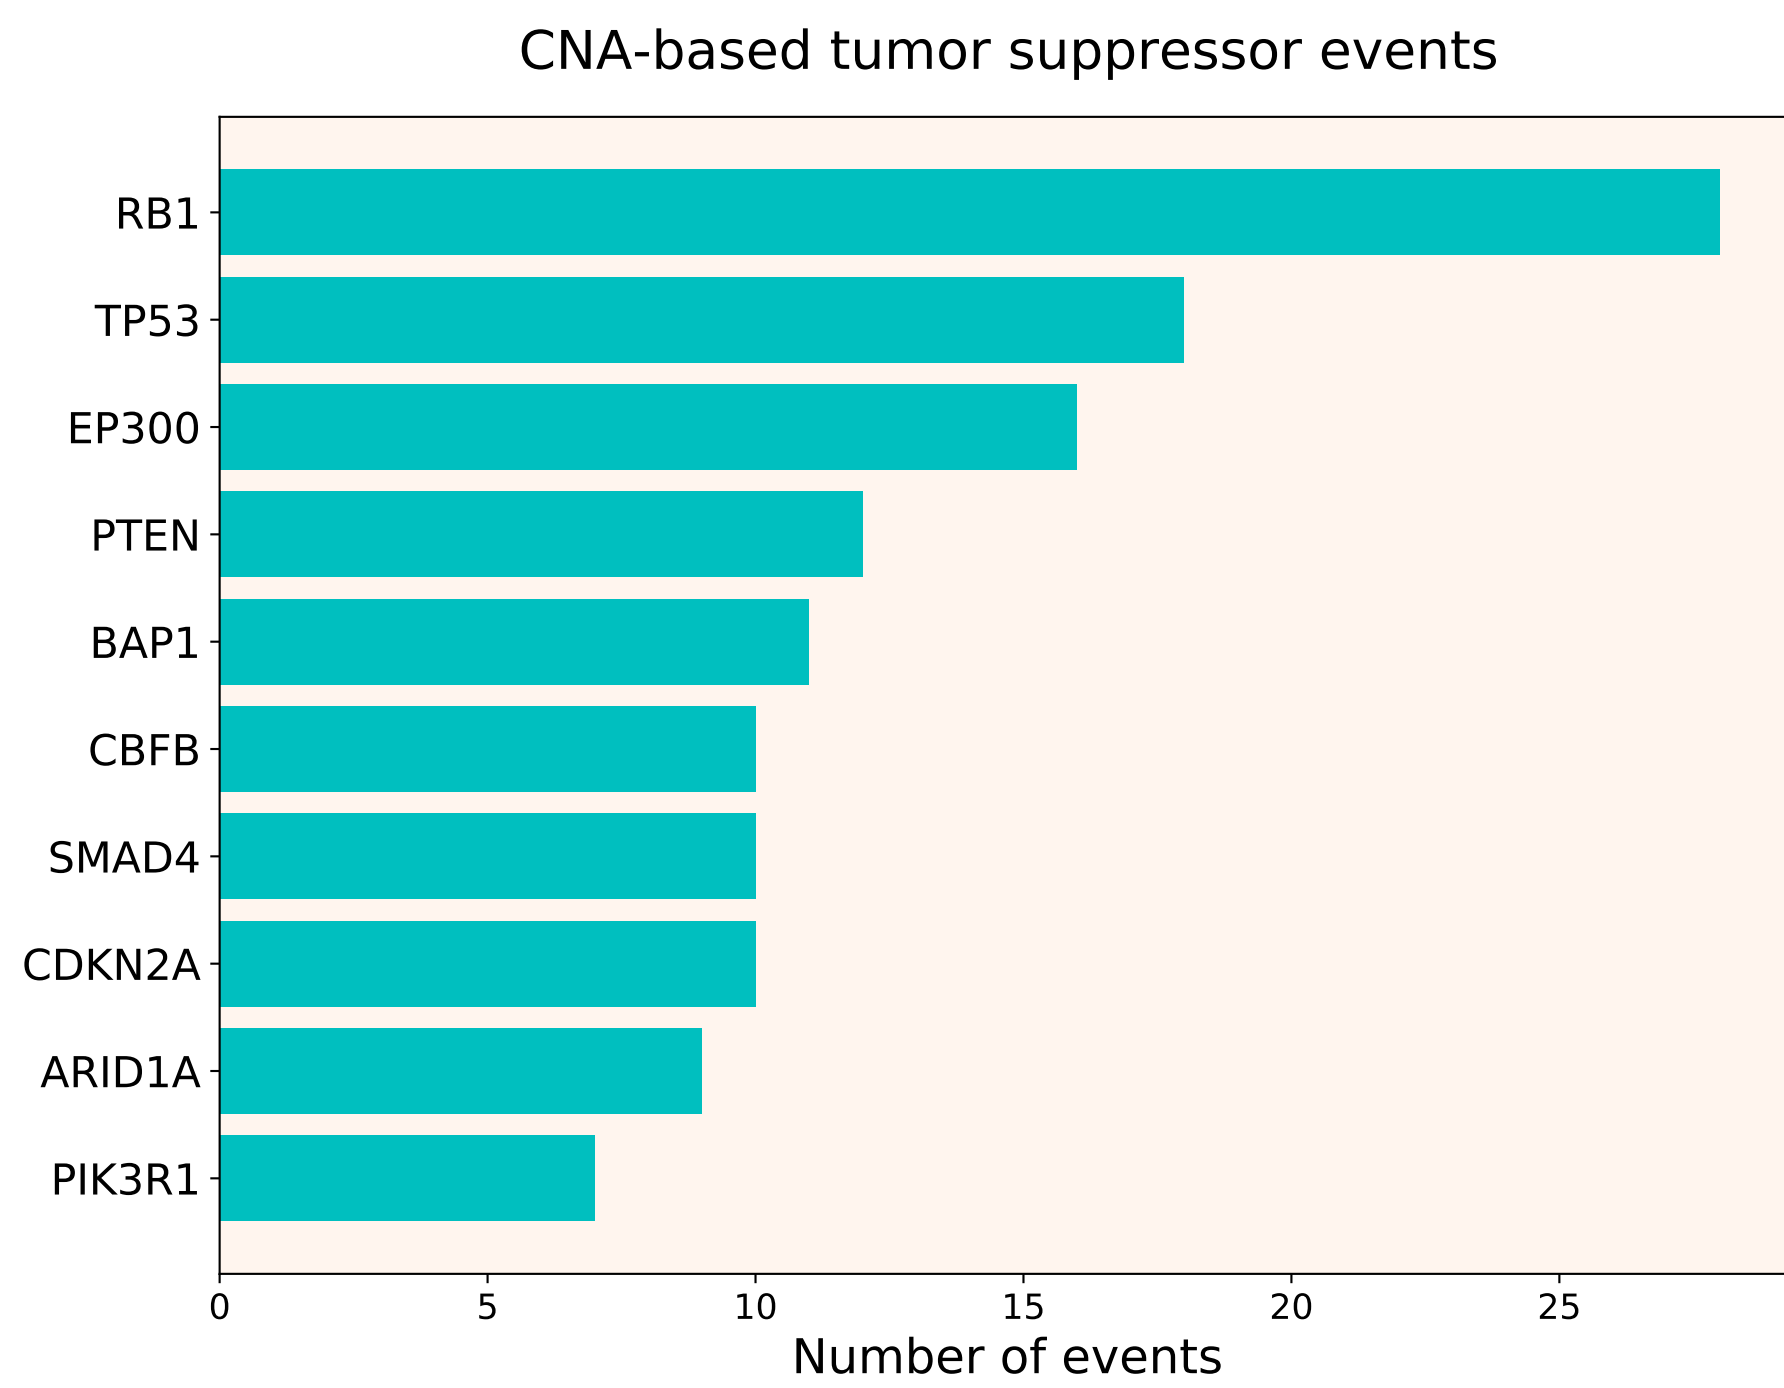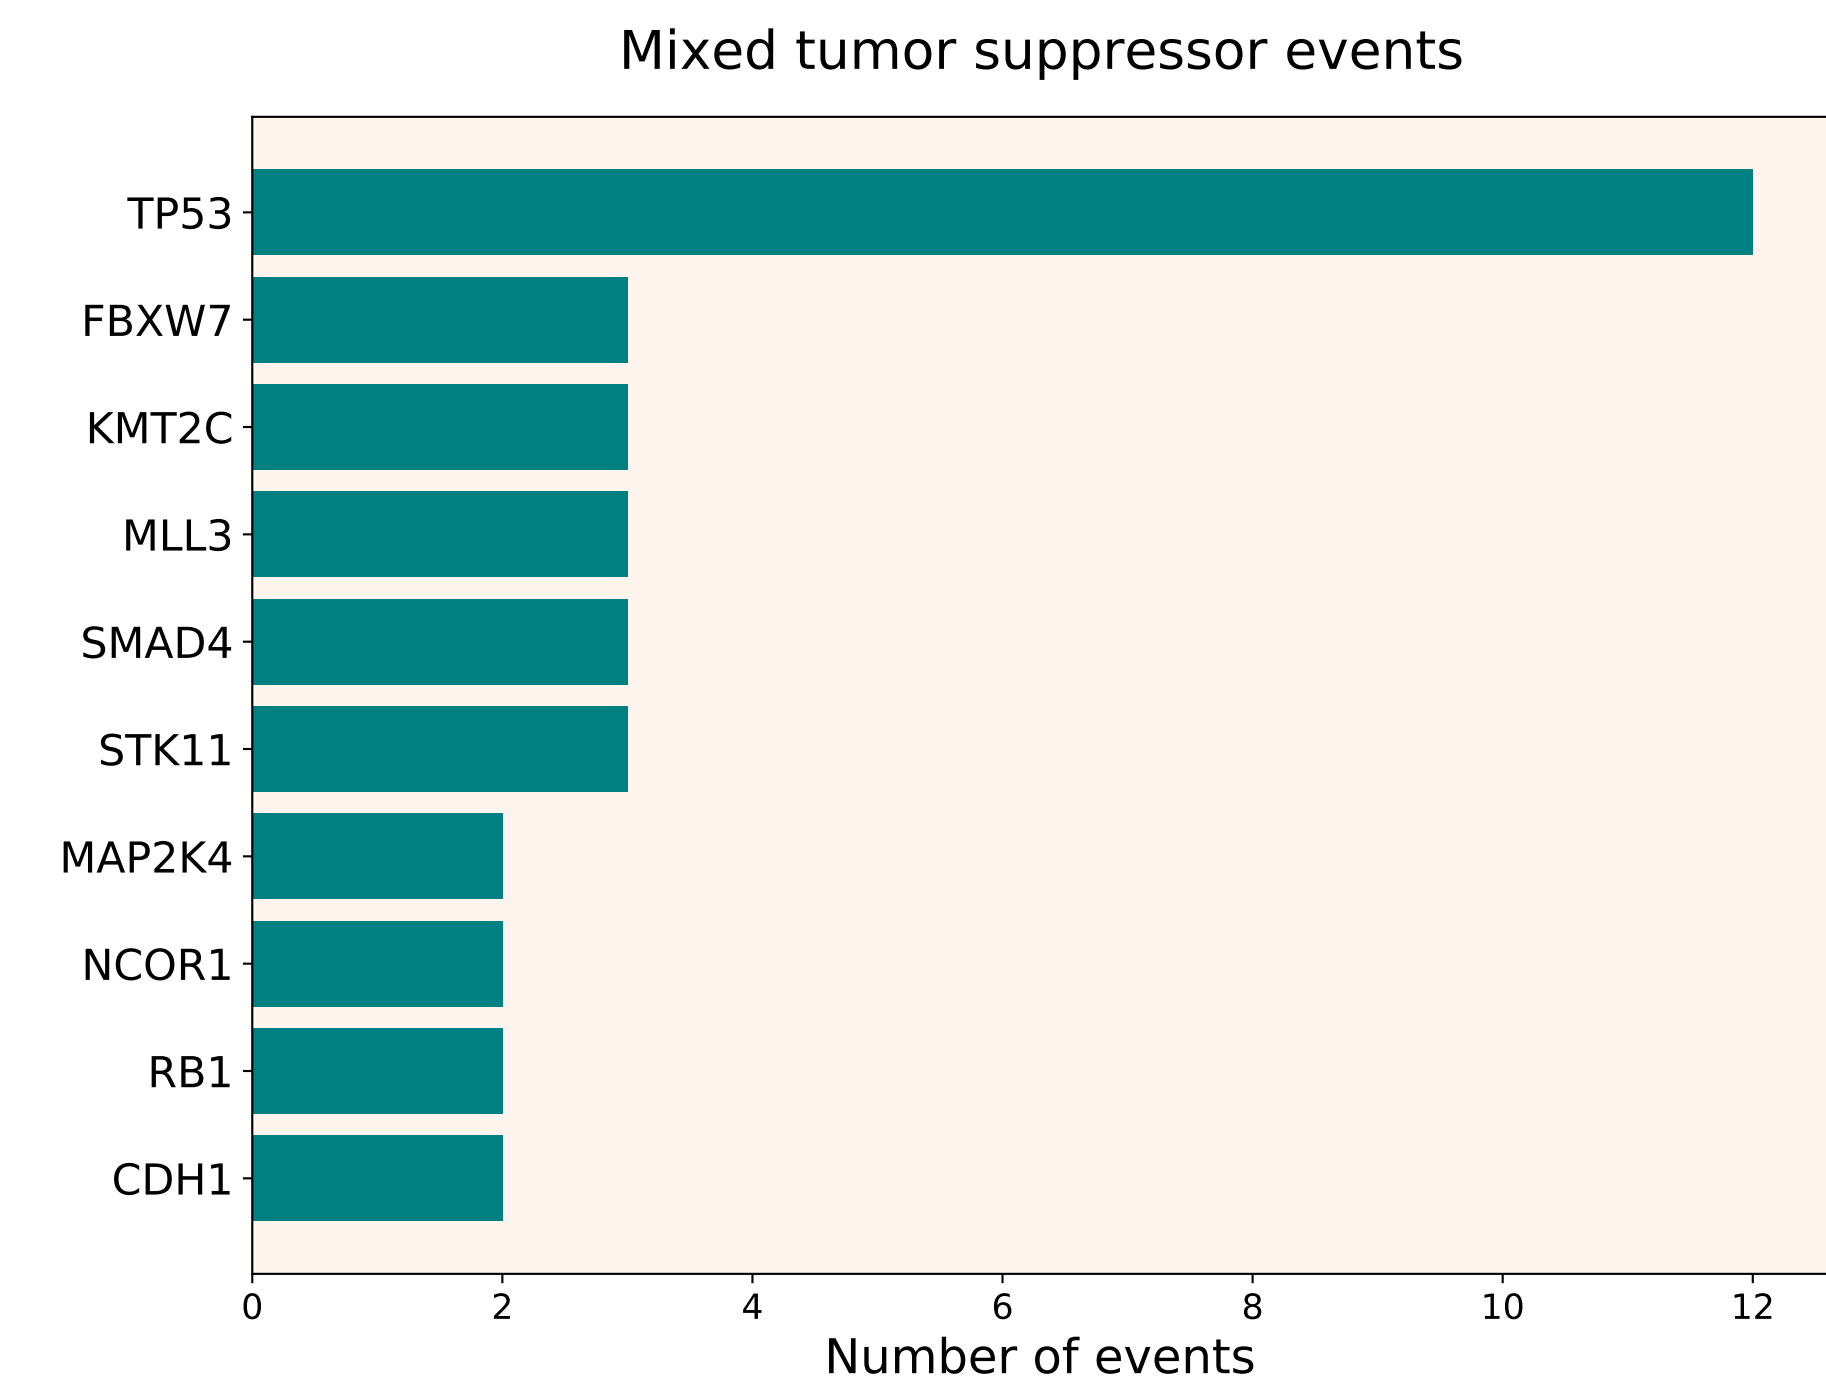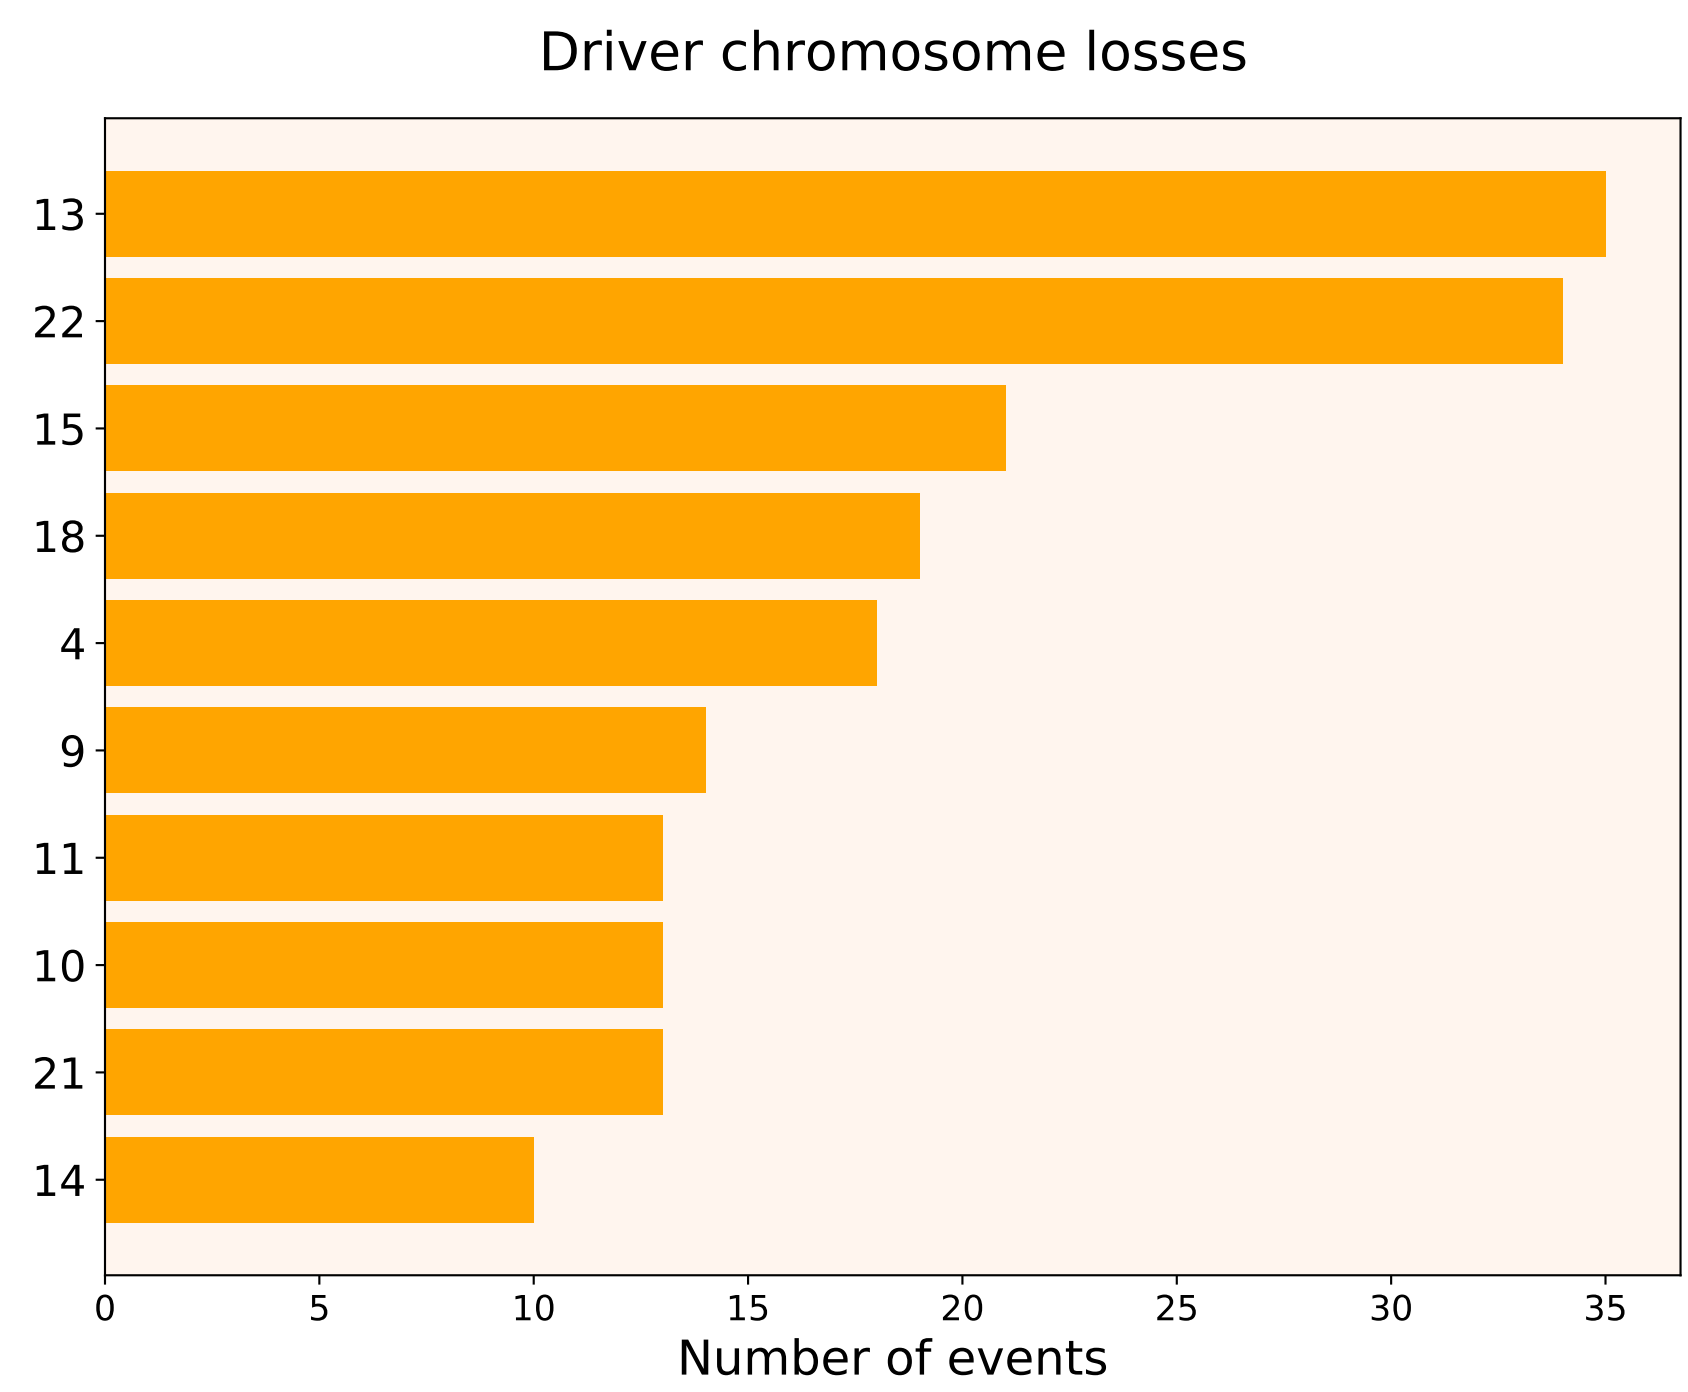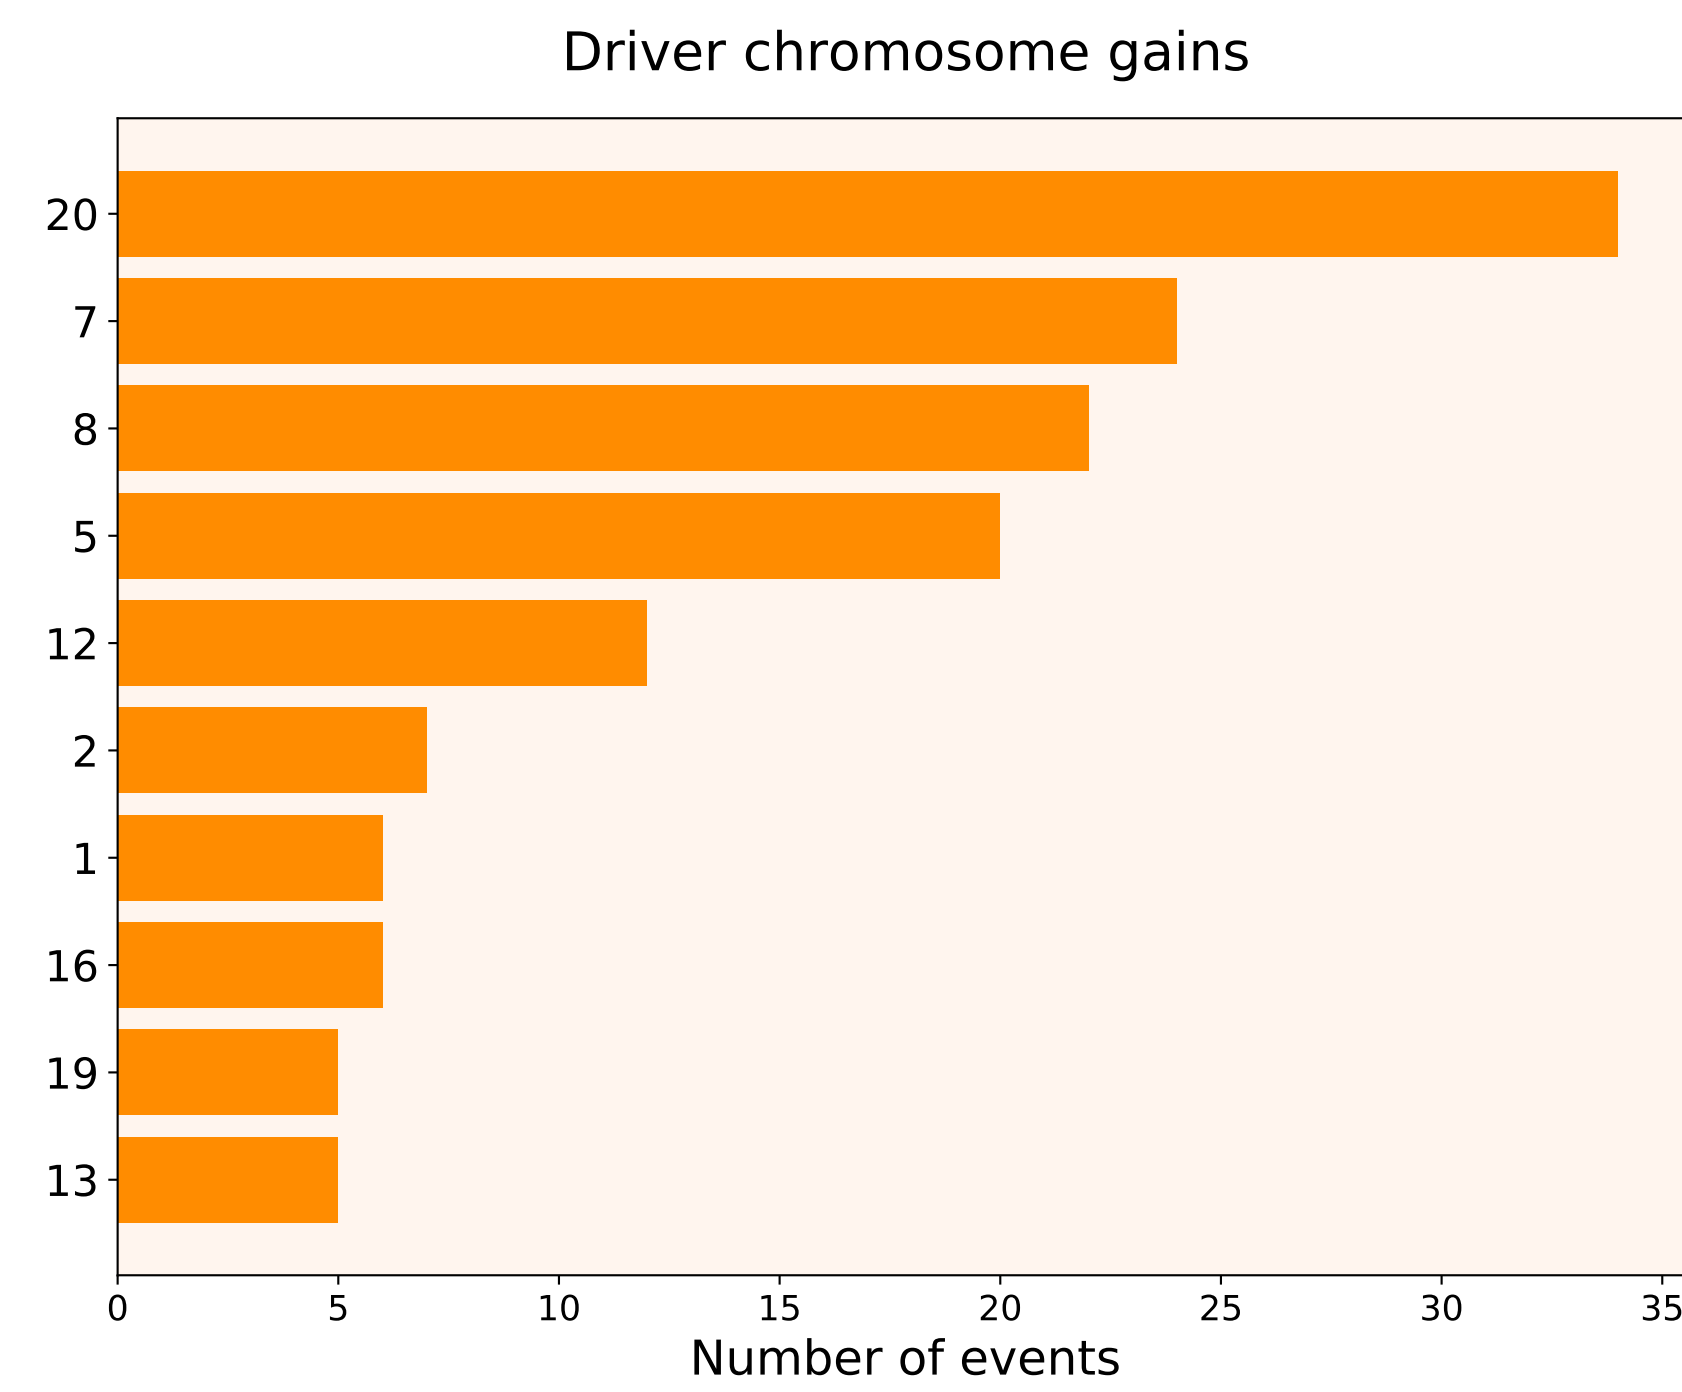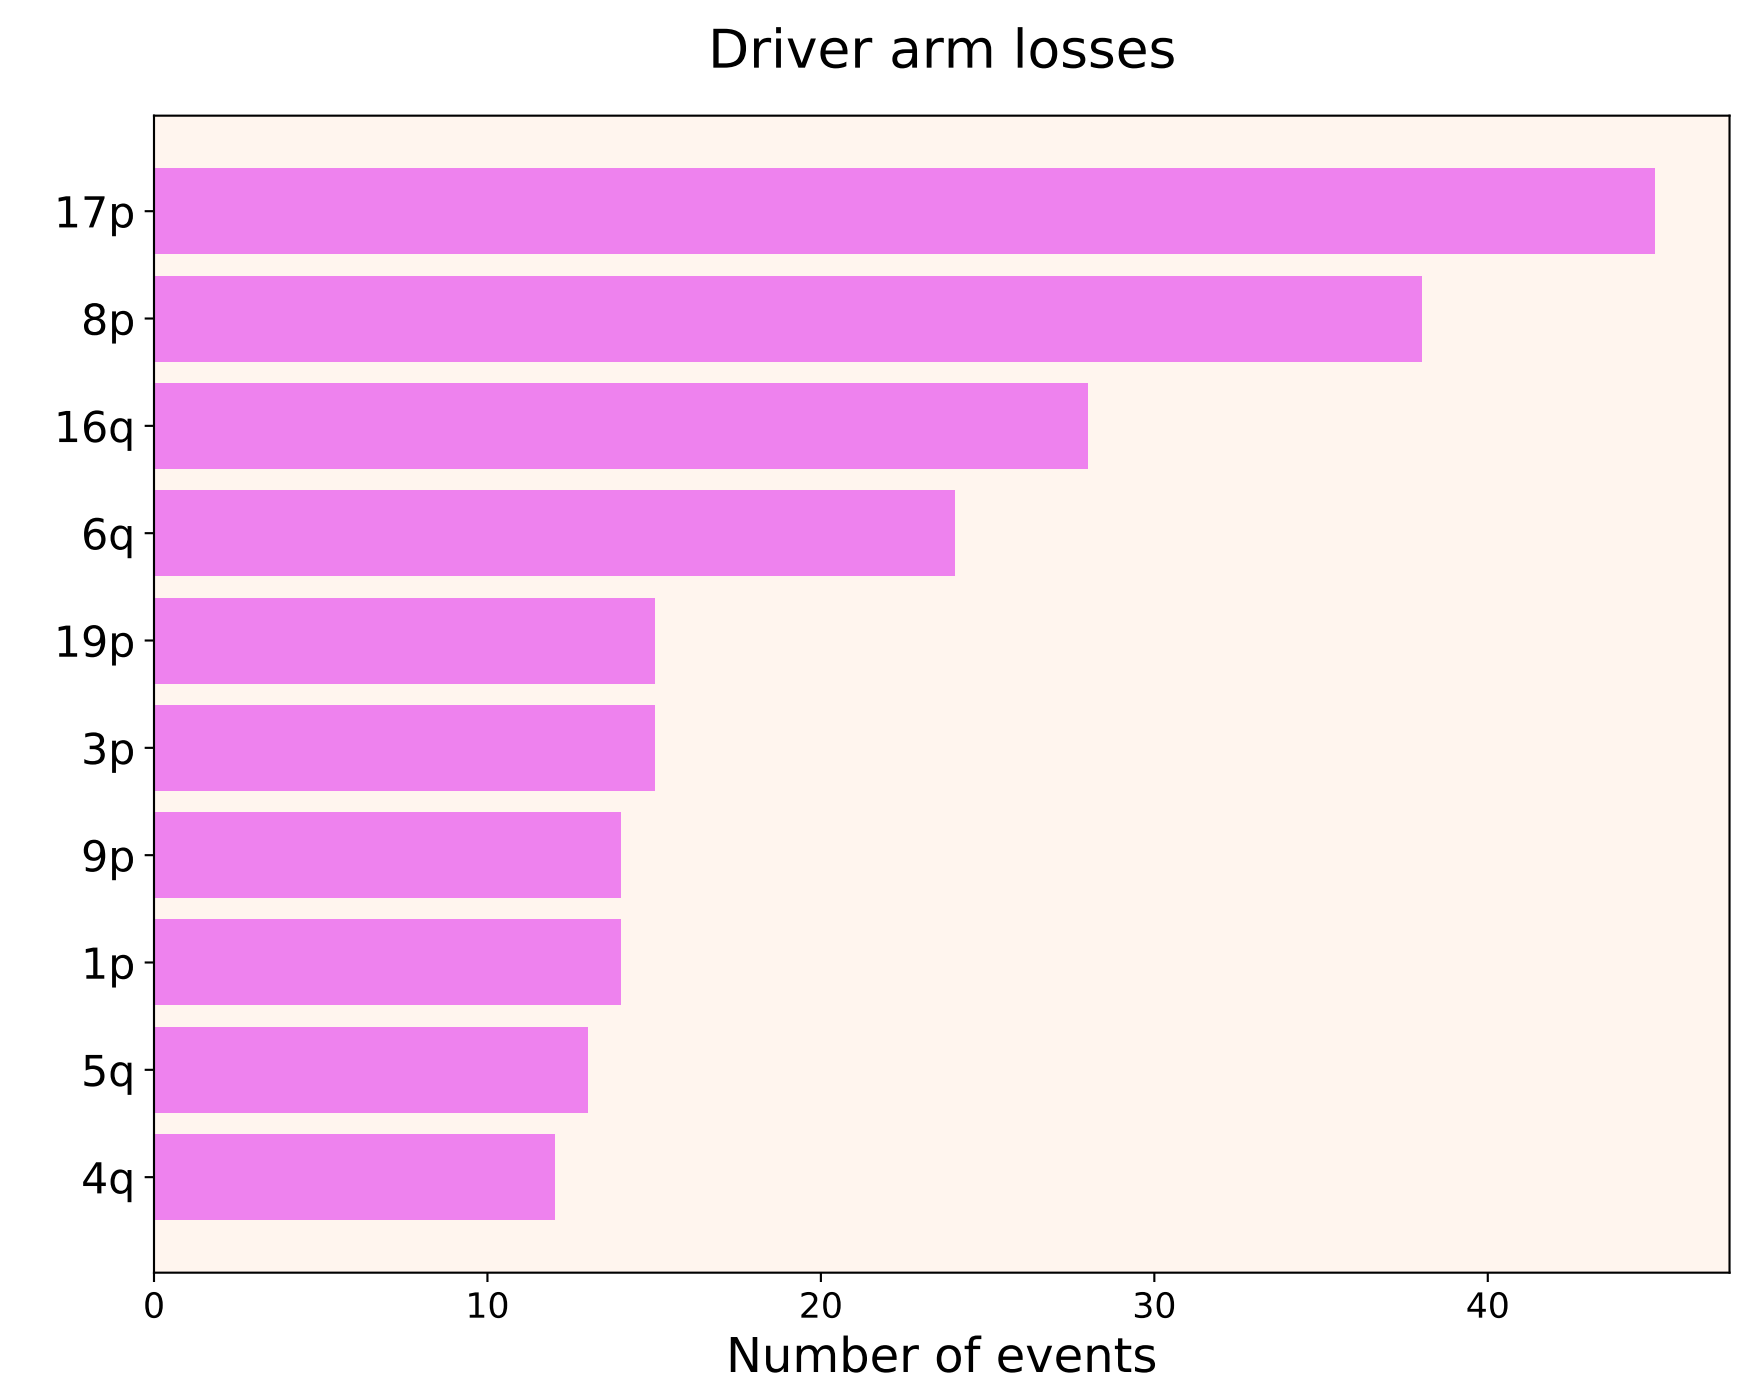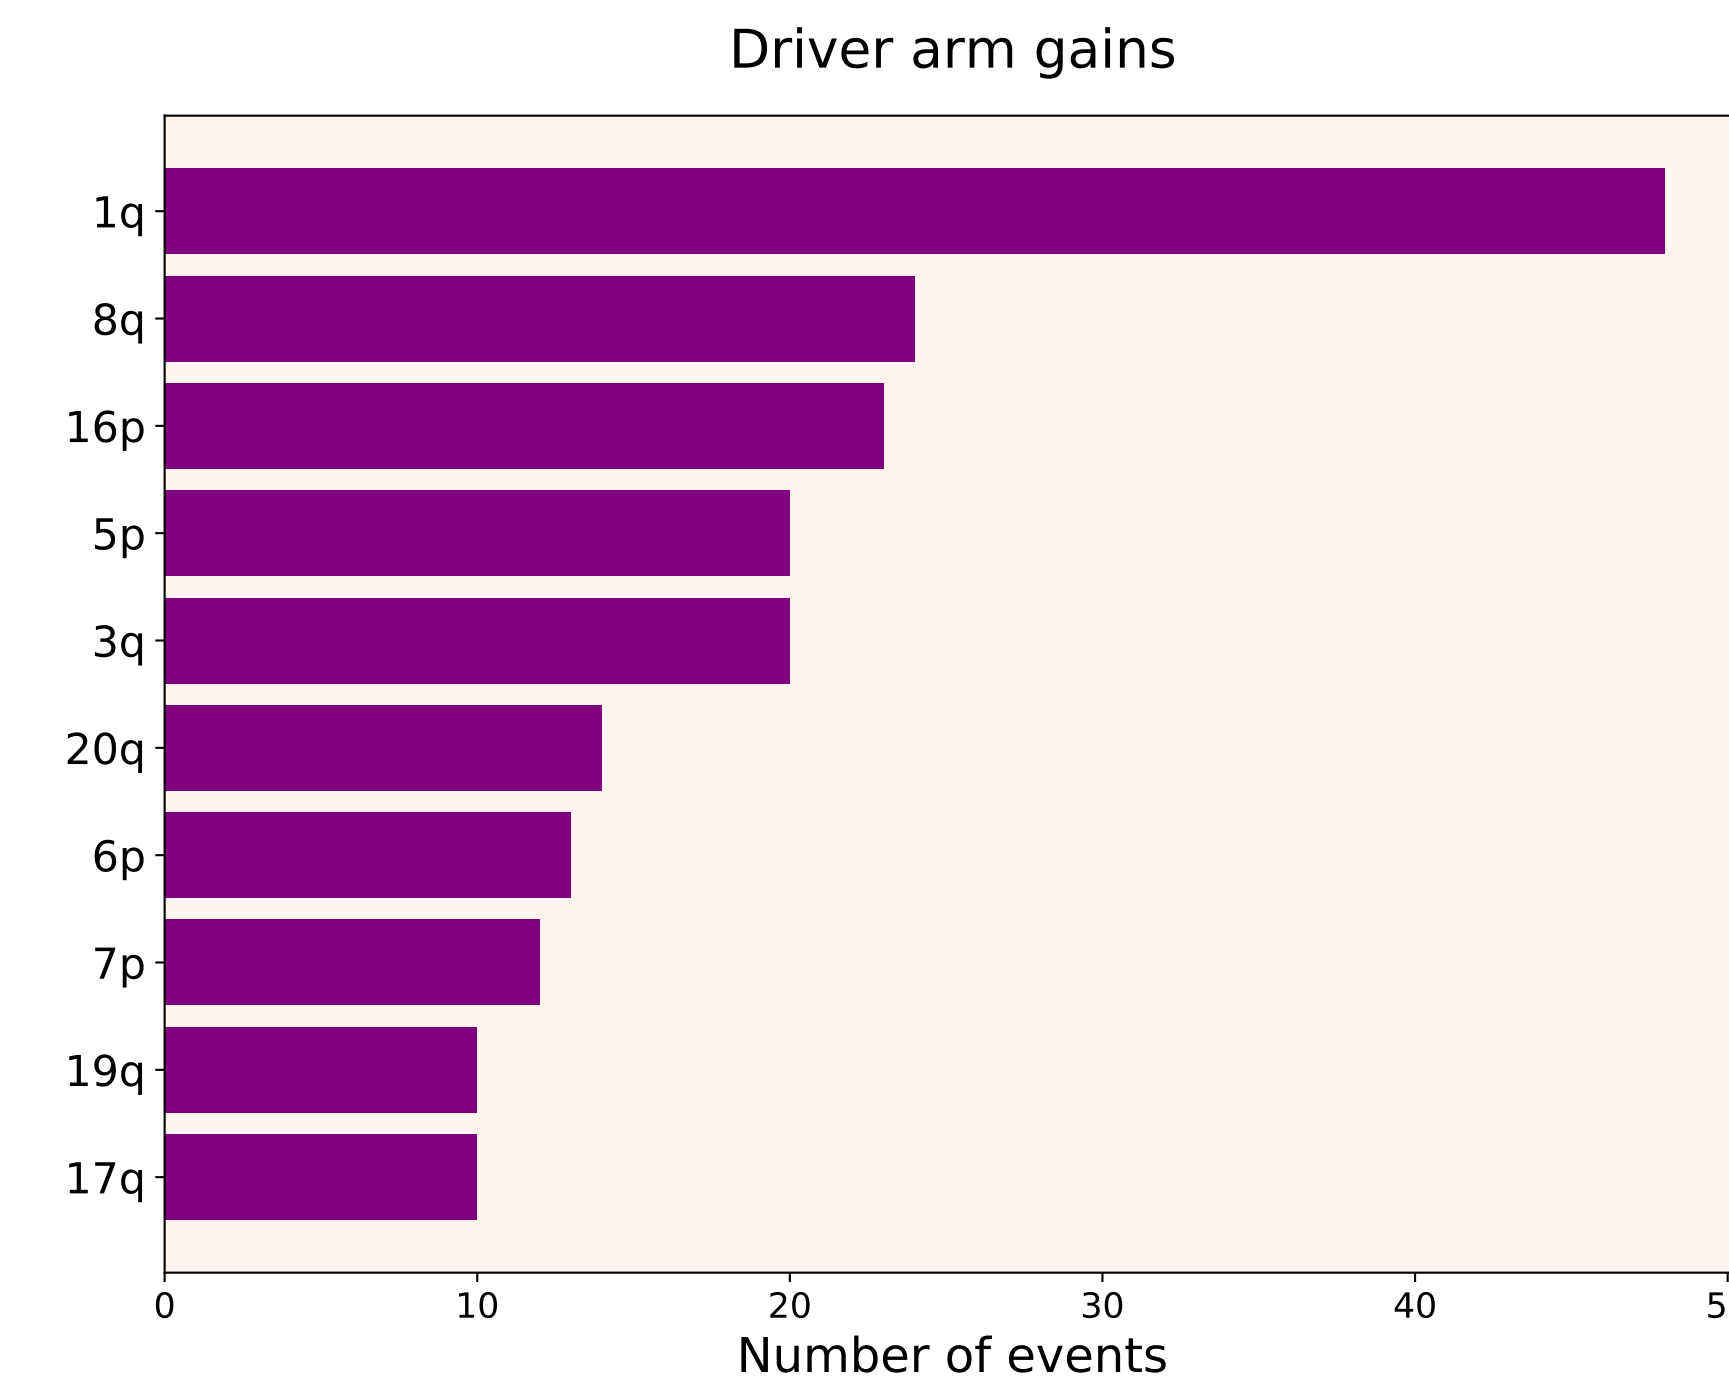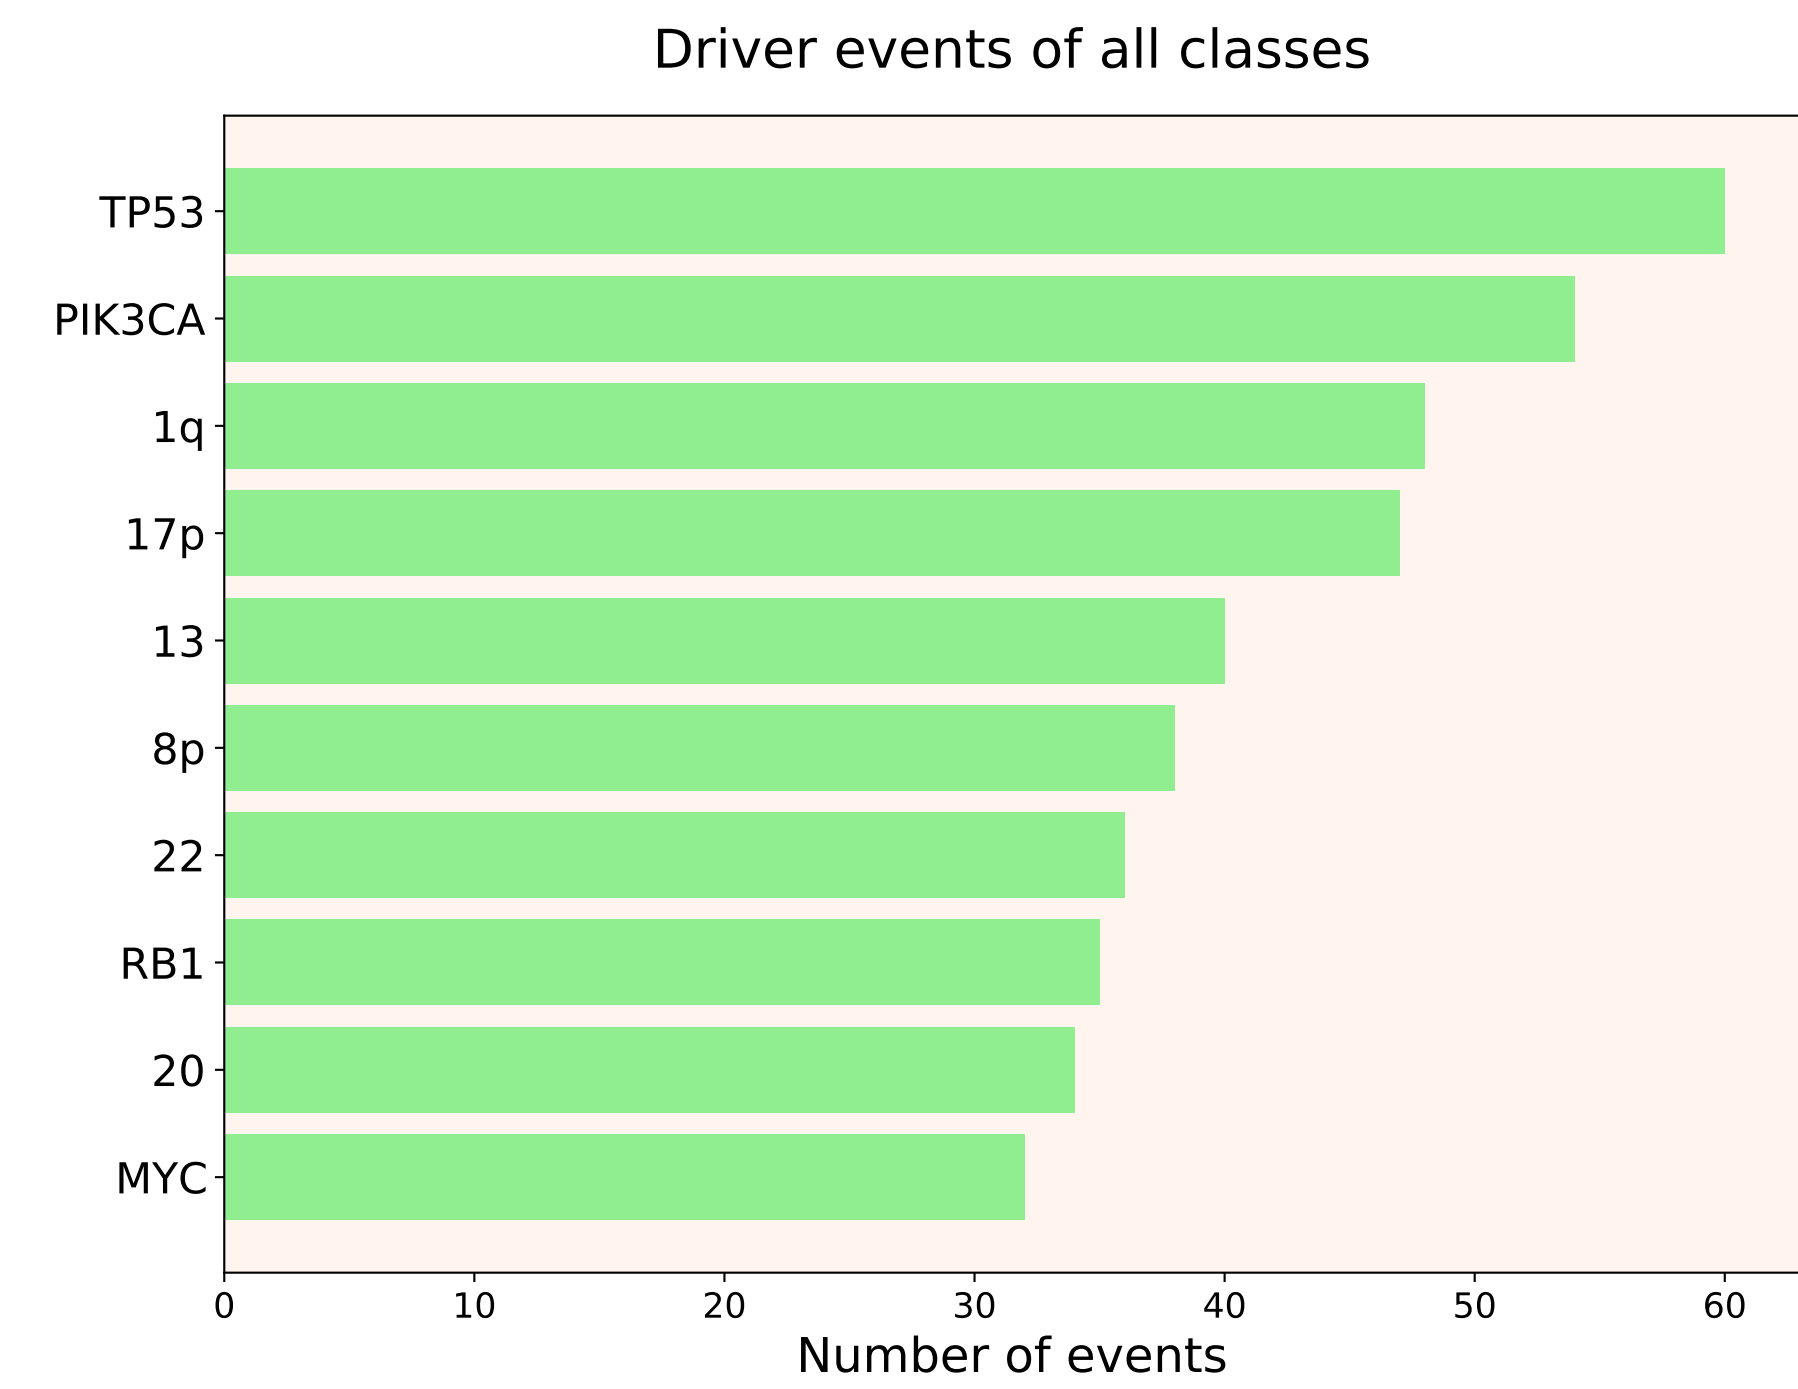

Supplement: Supplemental_Data_S1.zip [file Supplemental_Data_S1.zip]

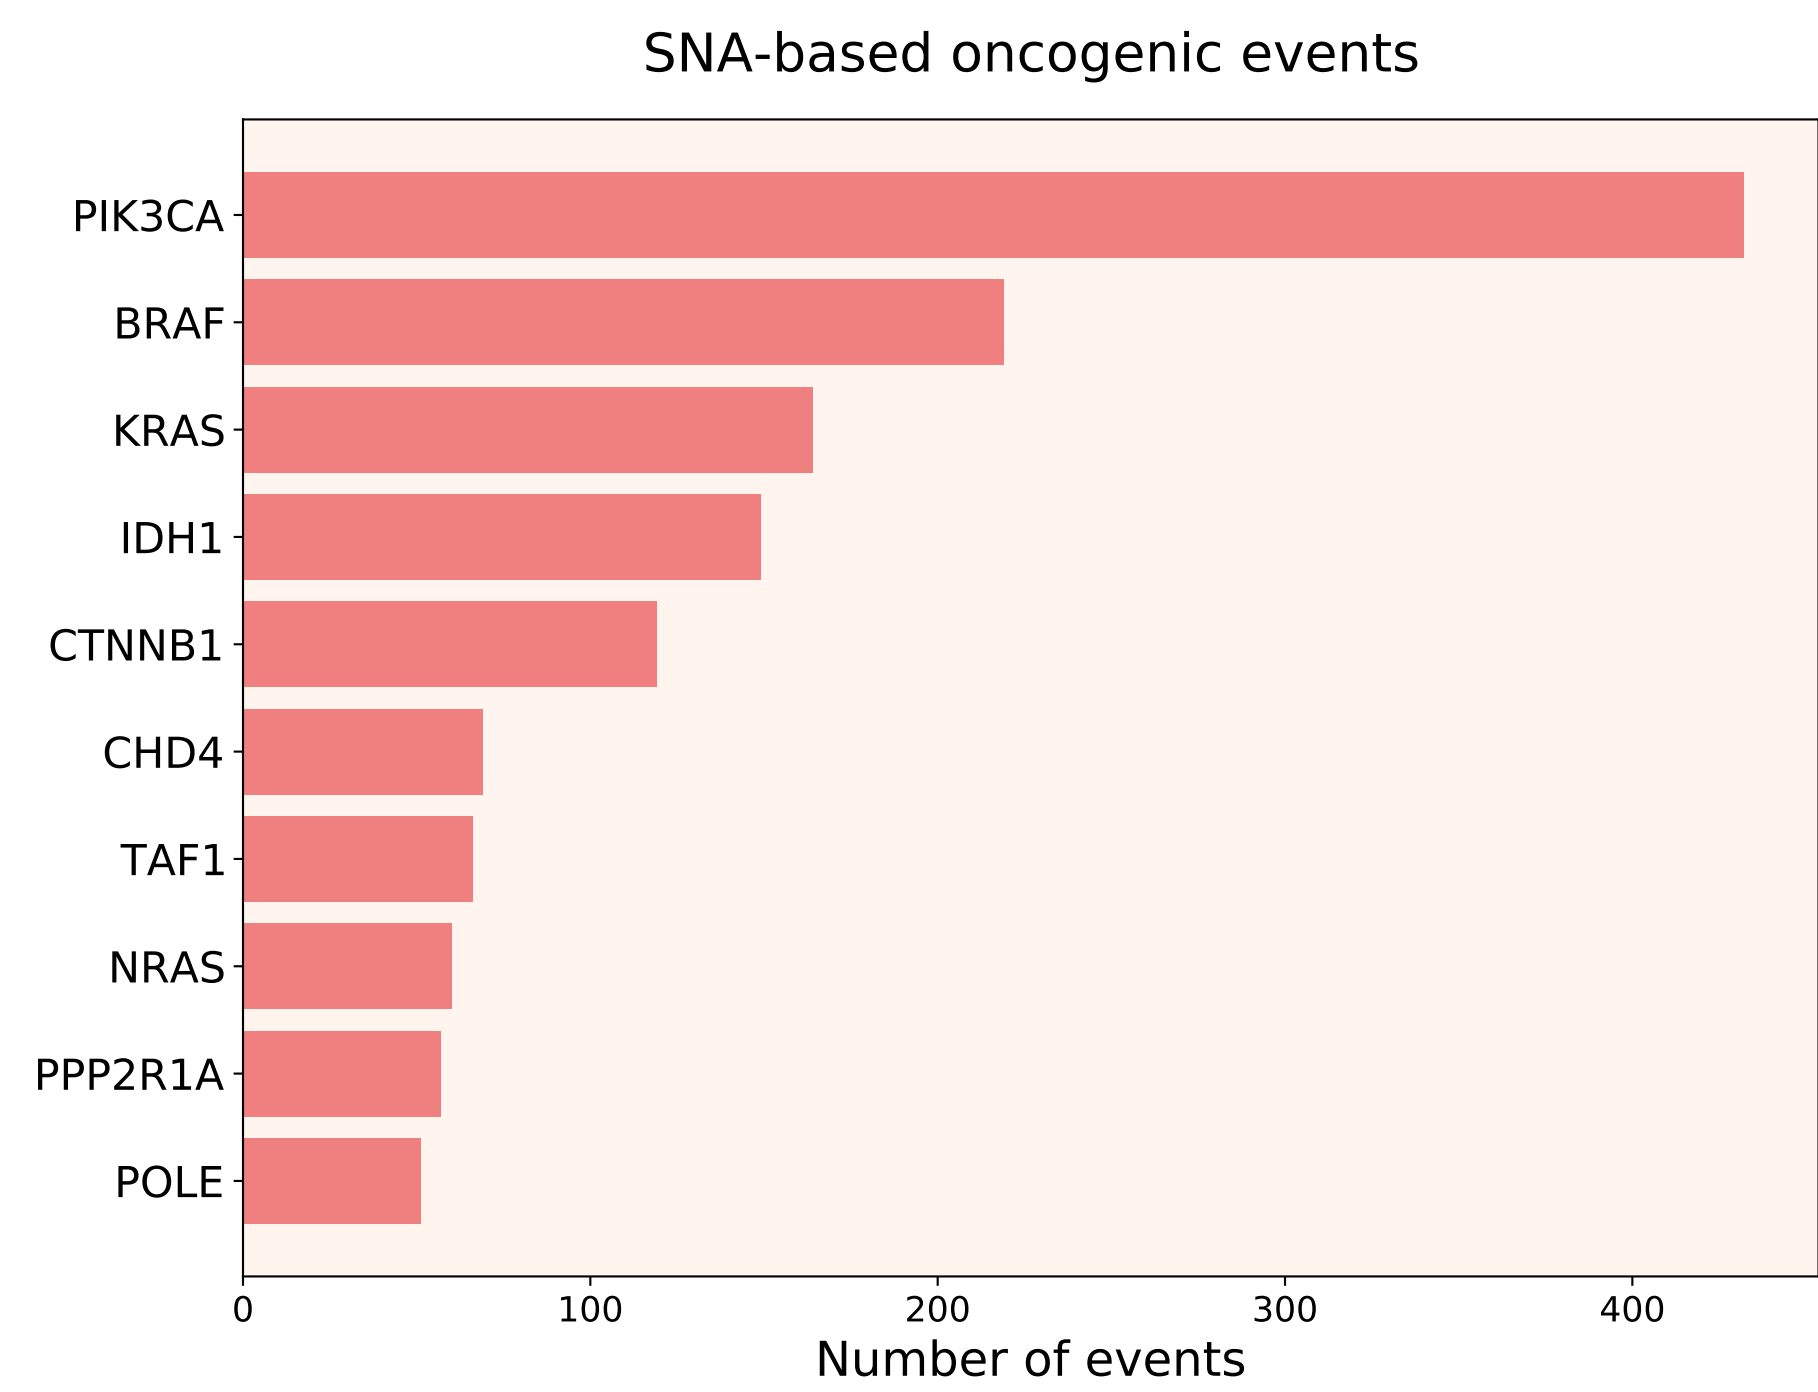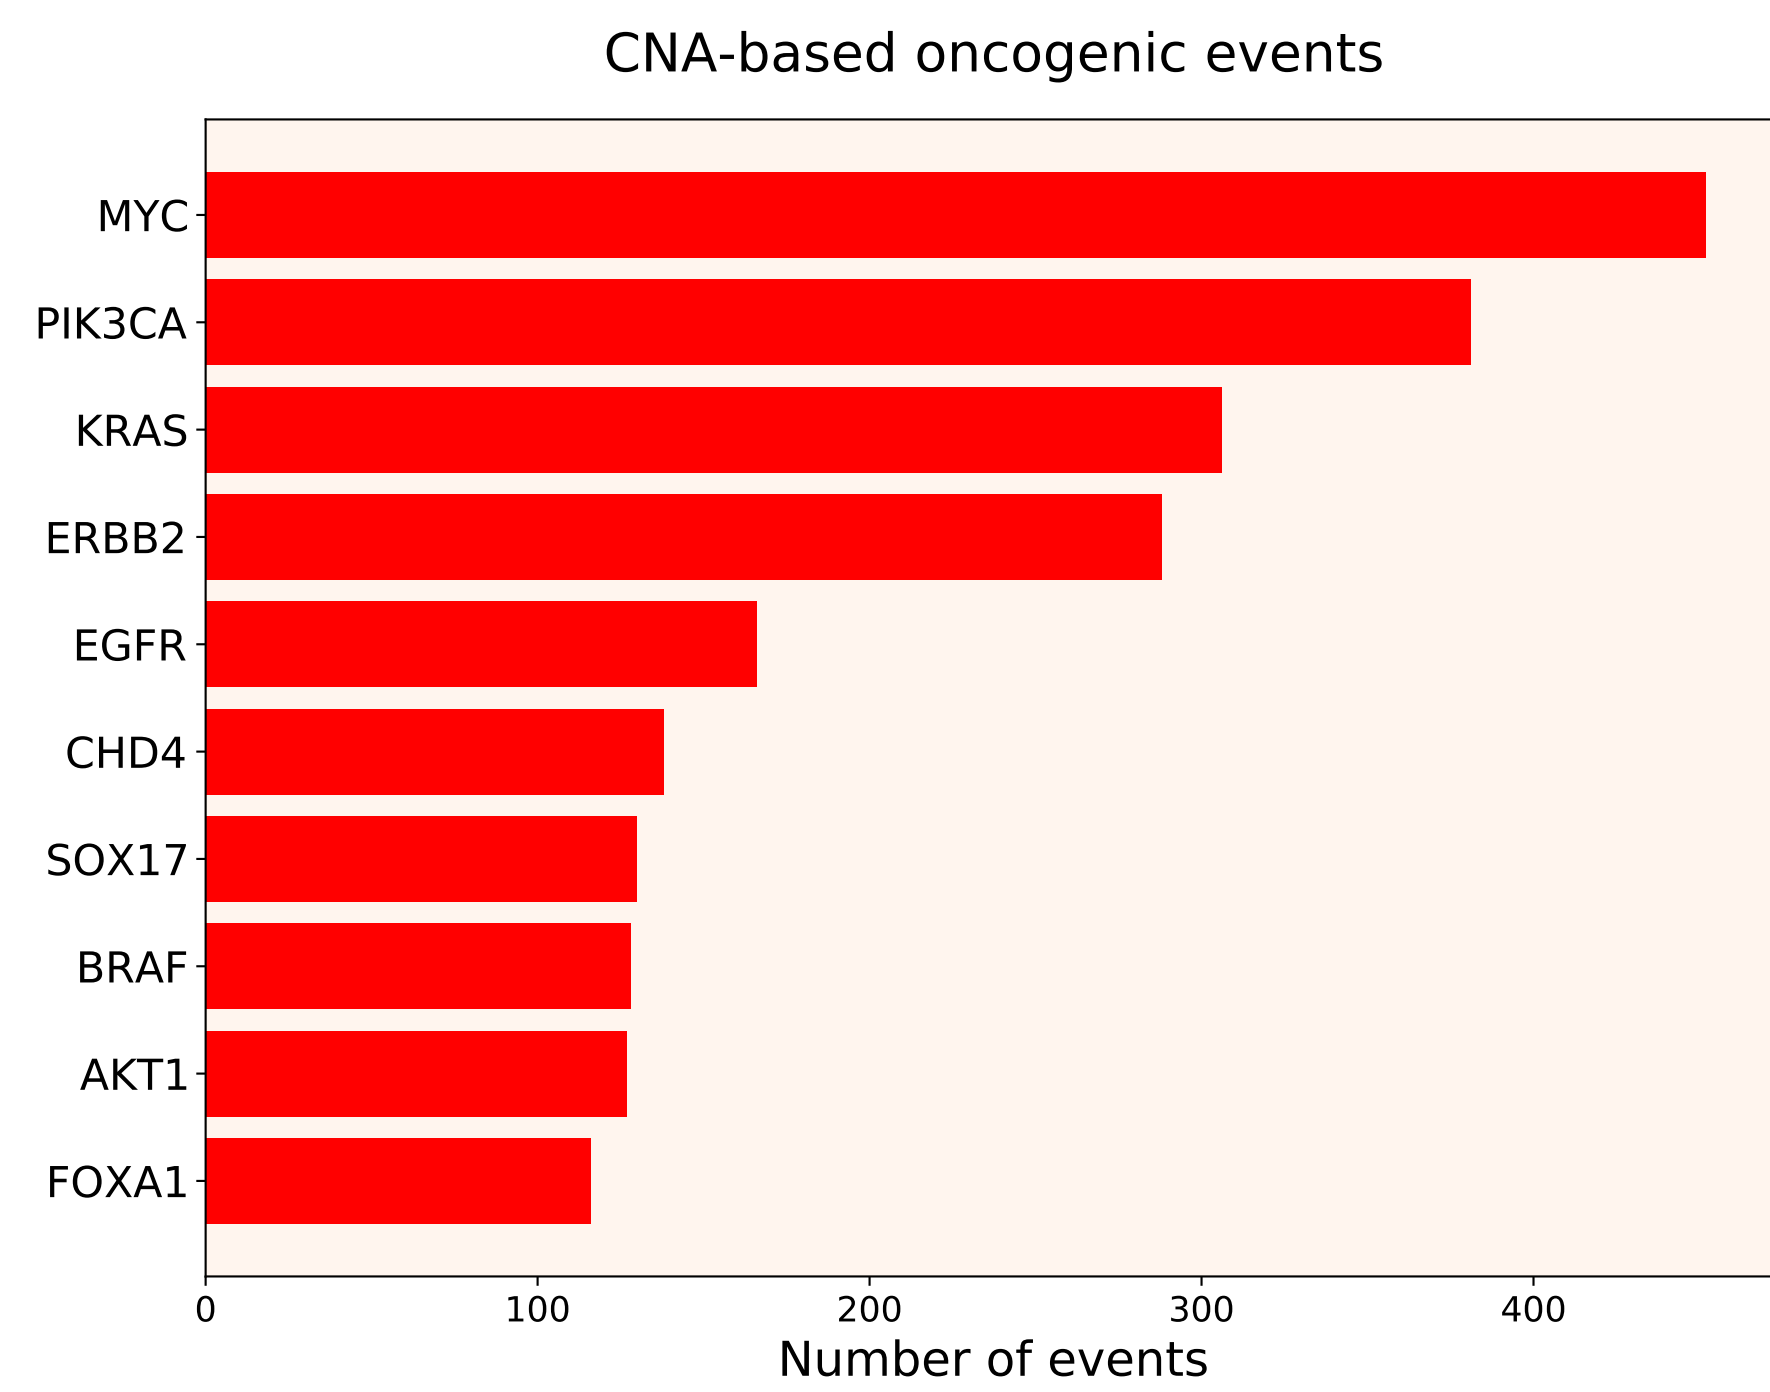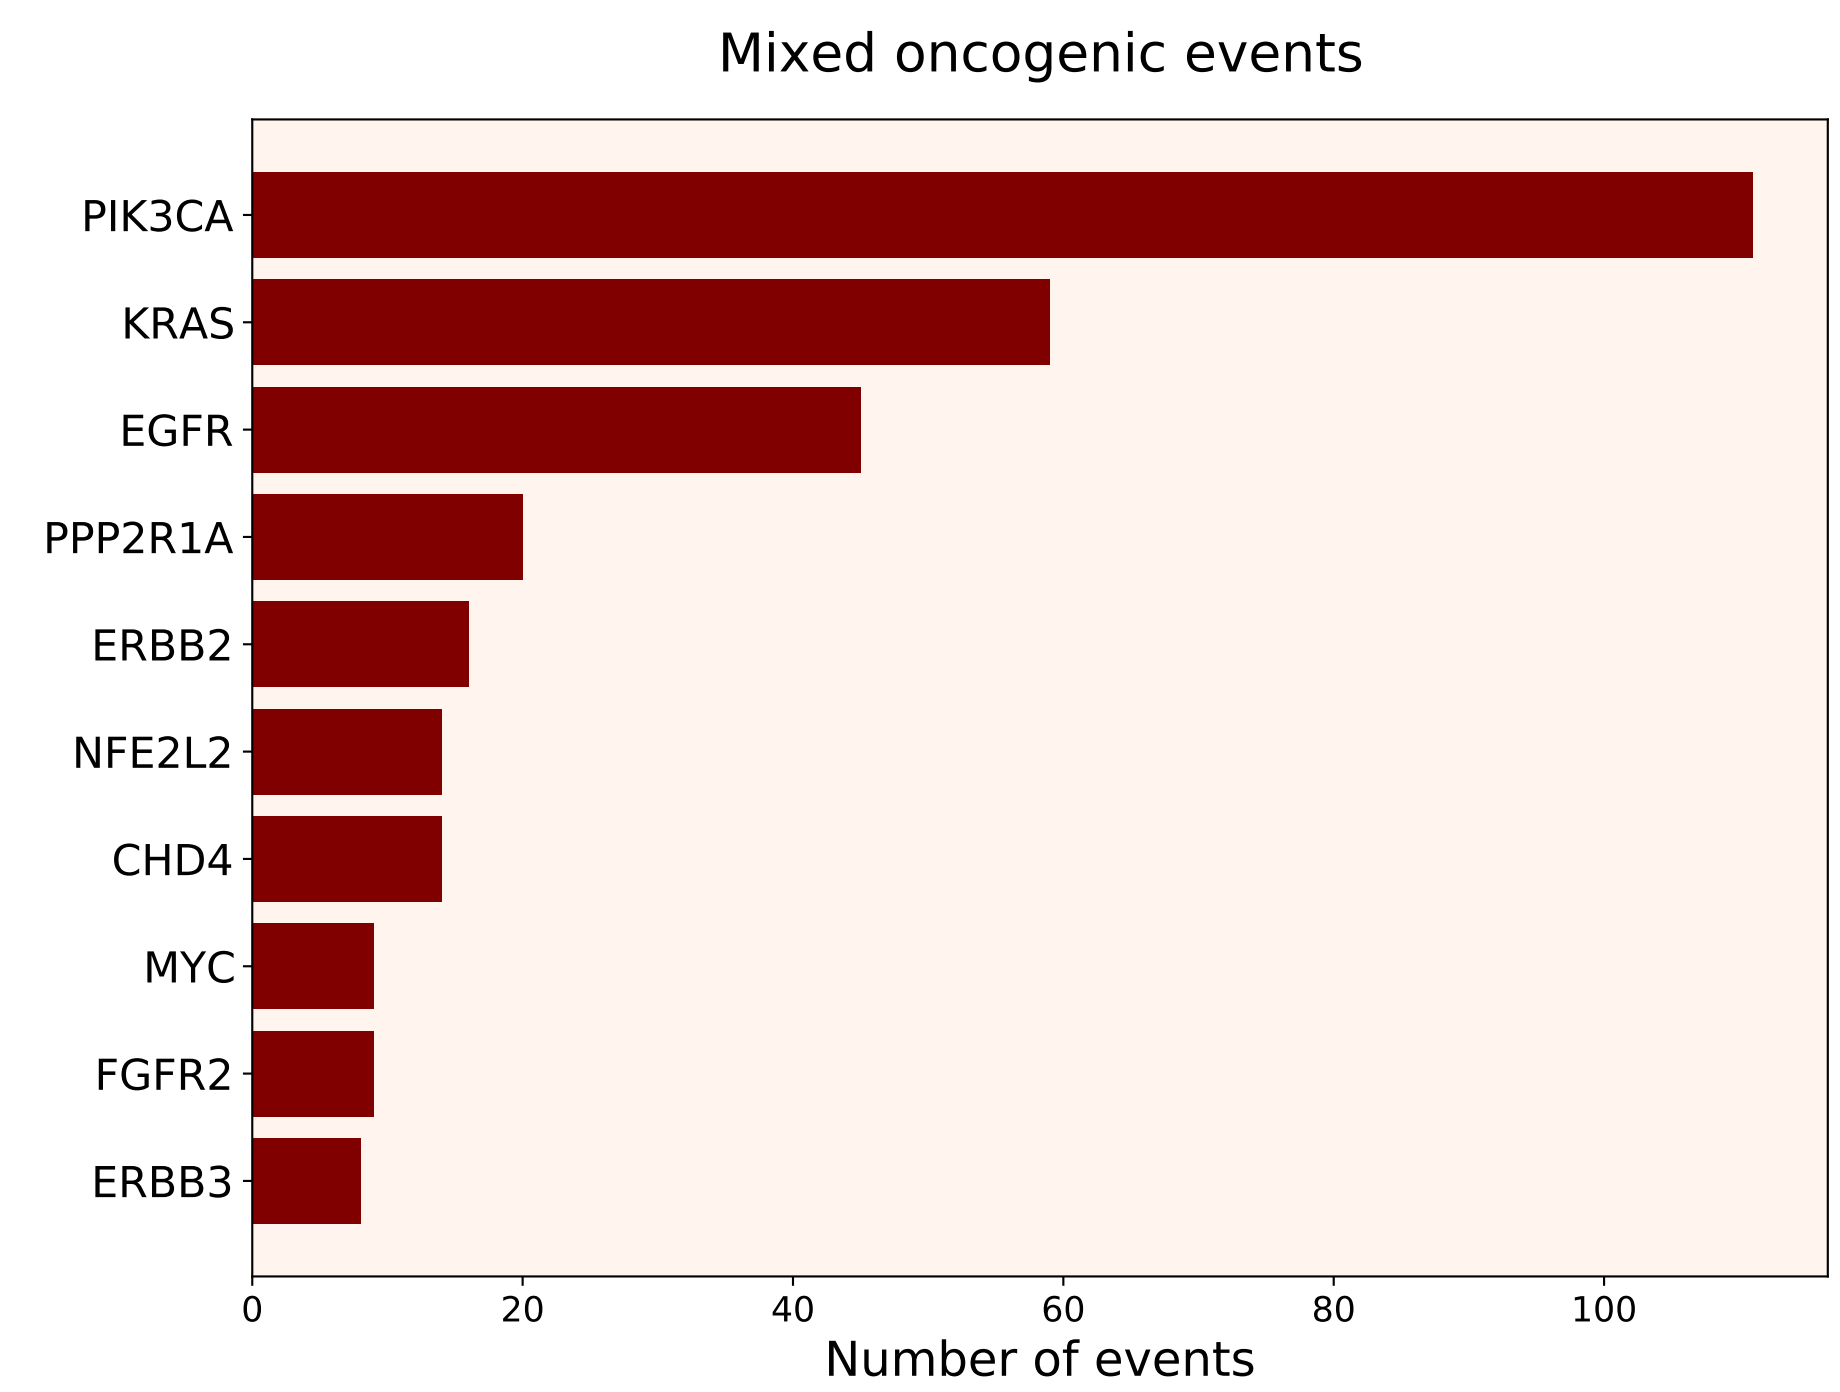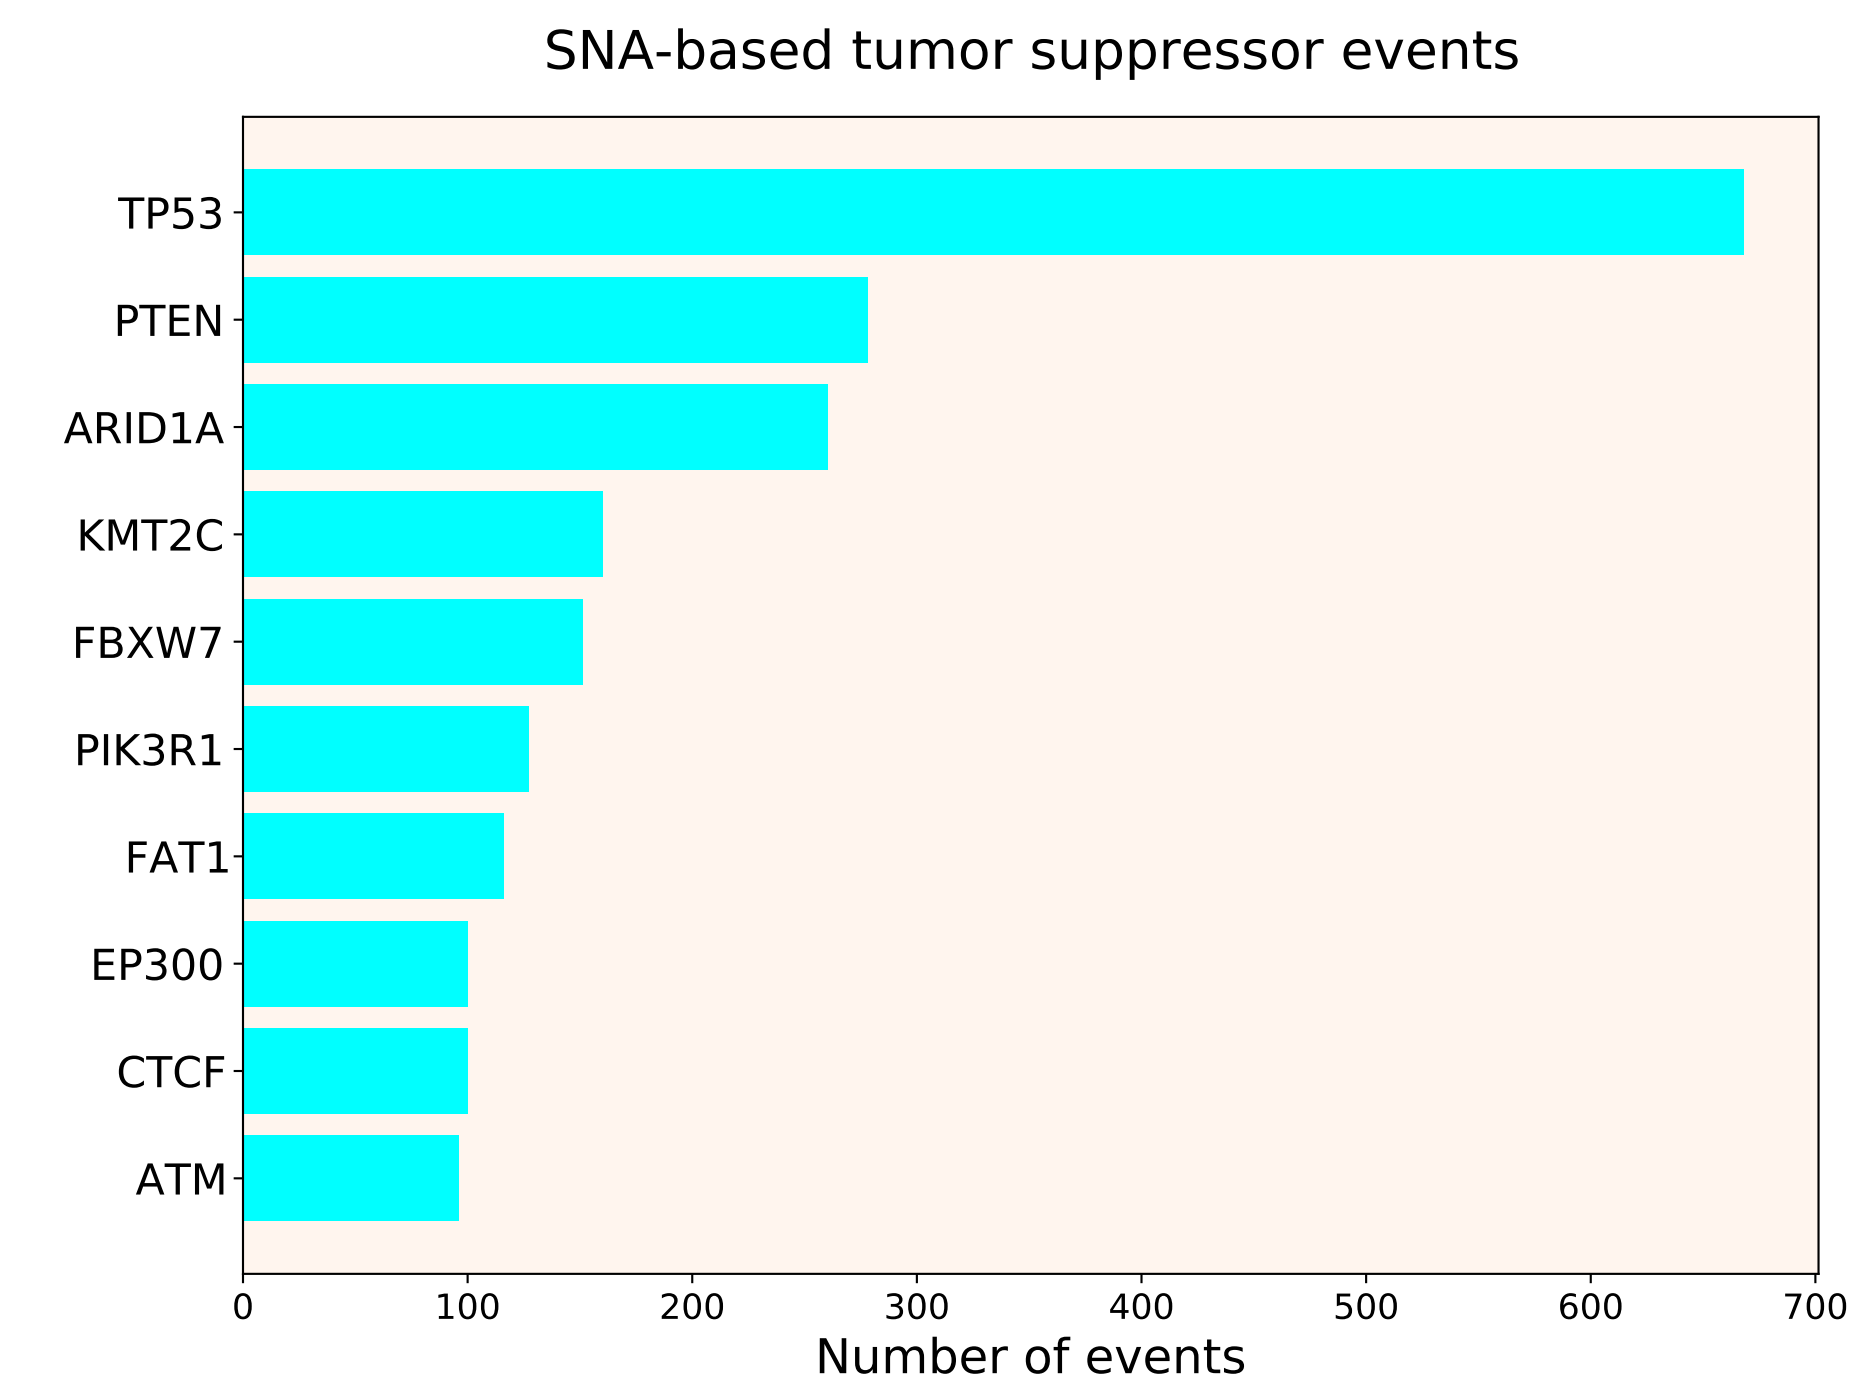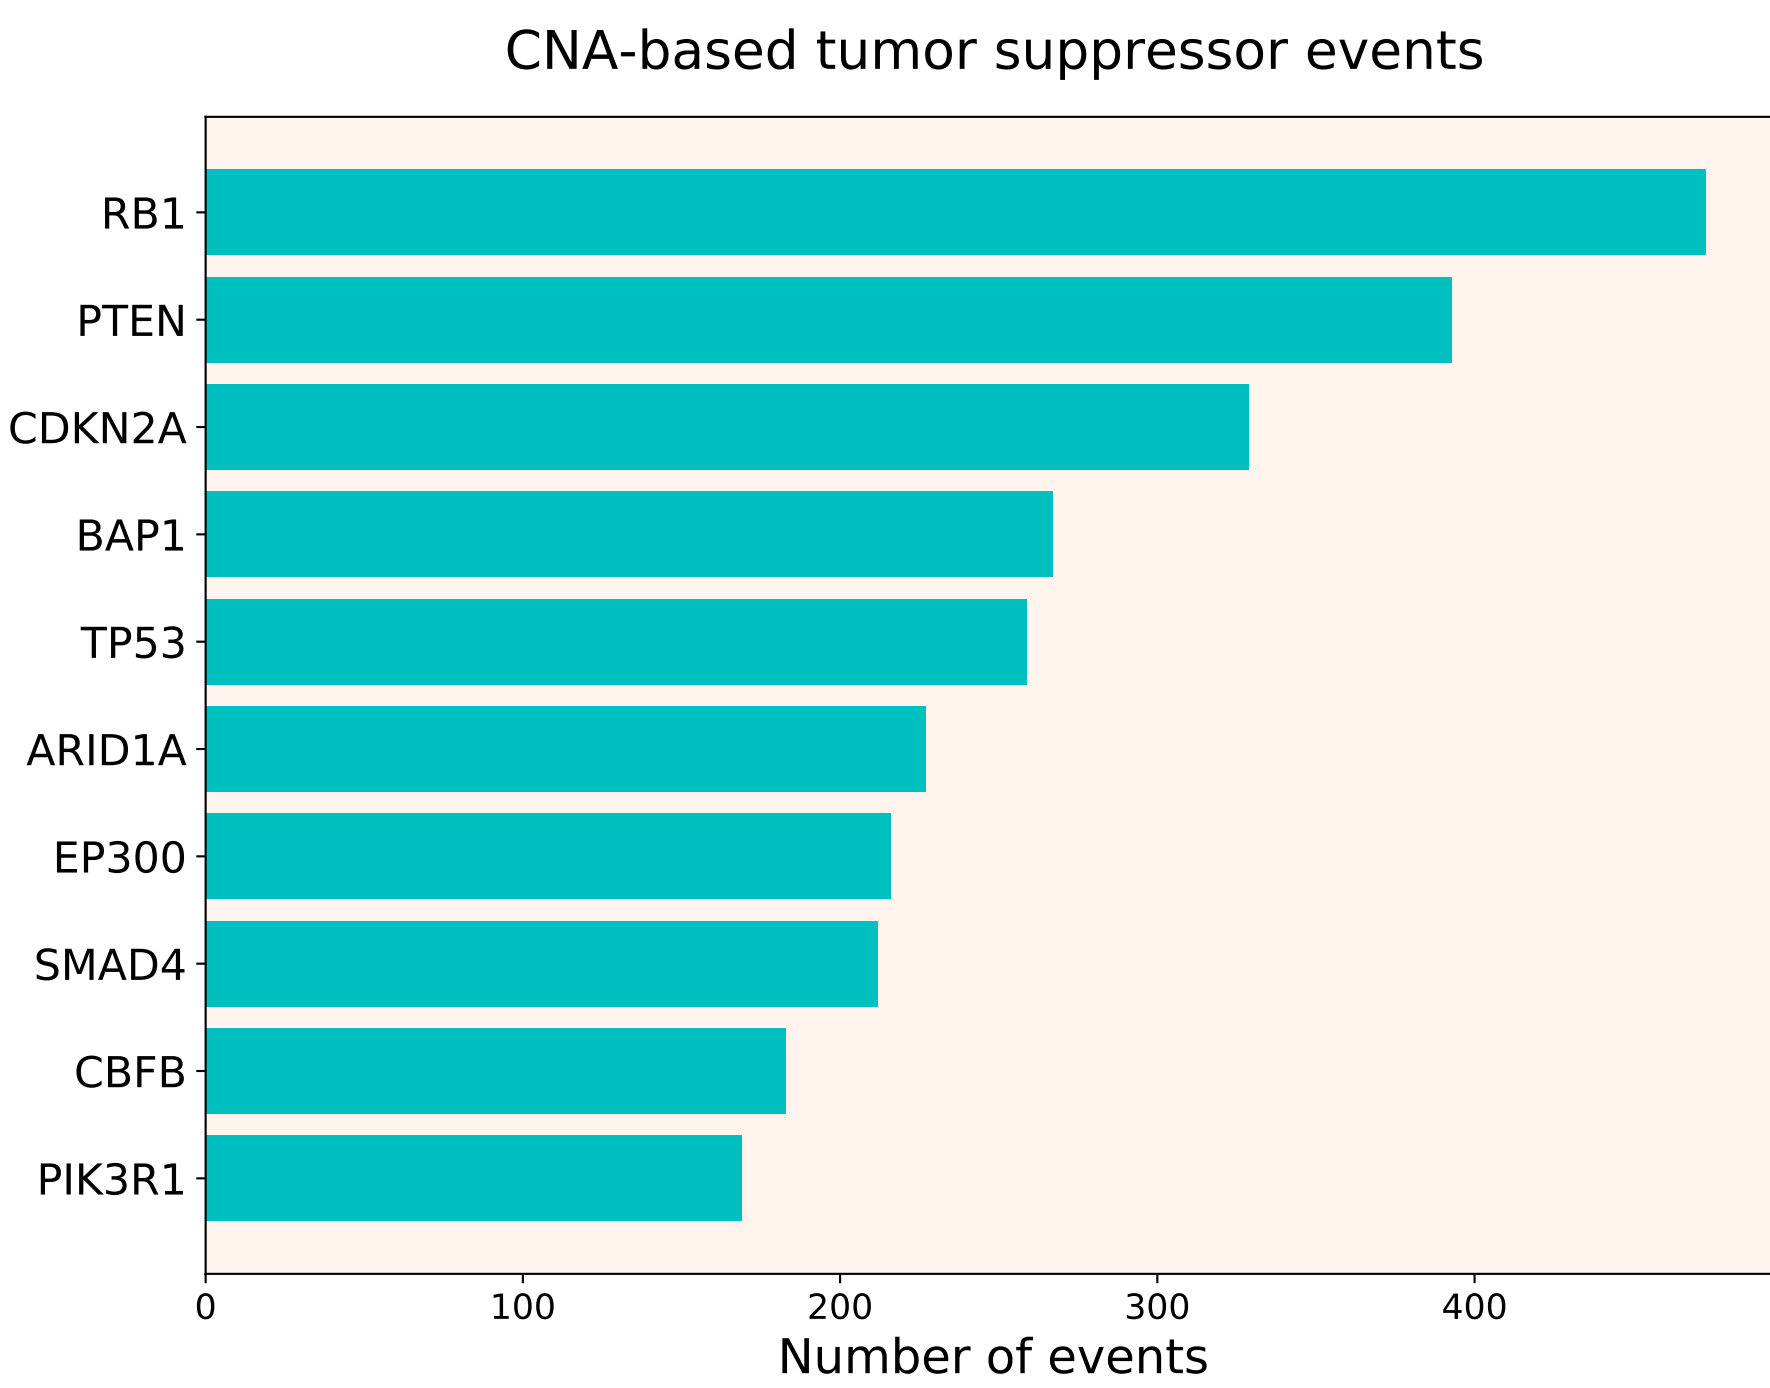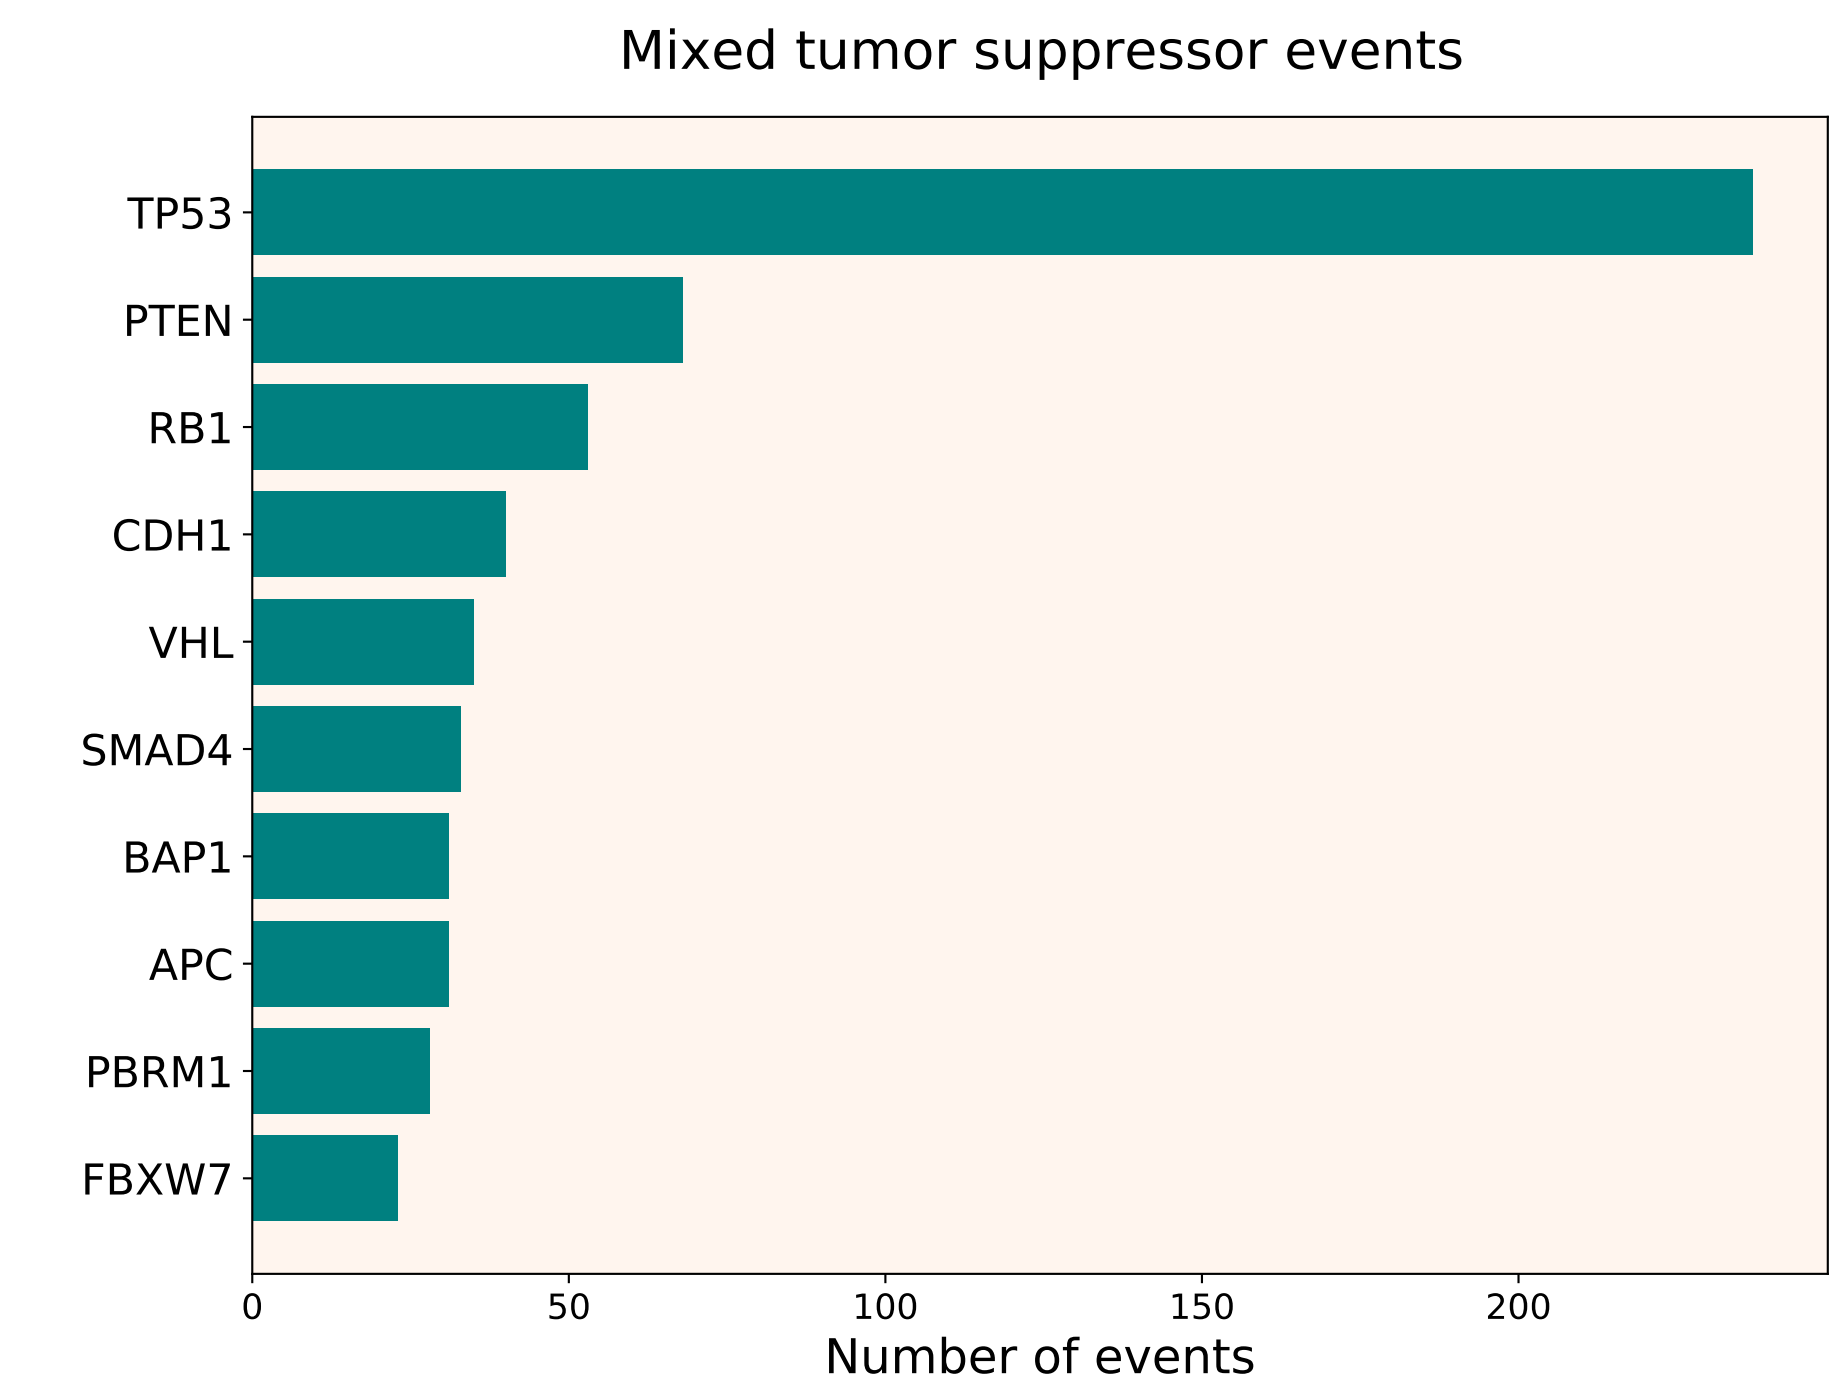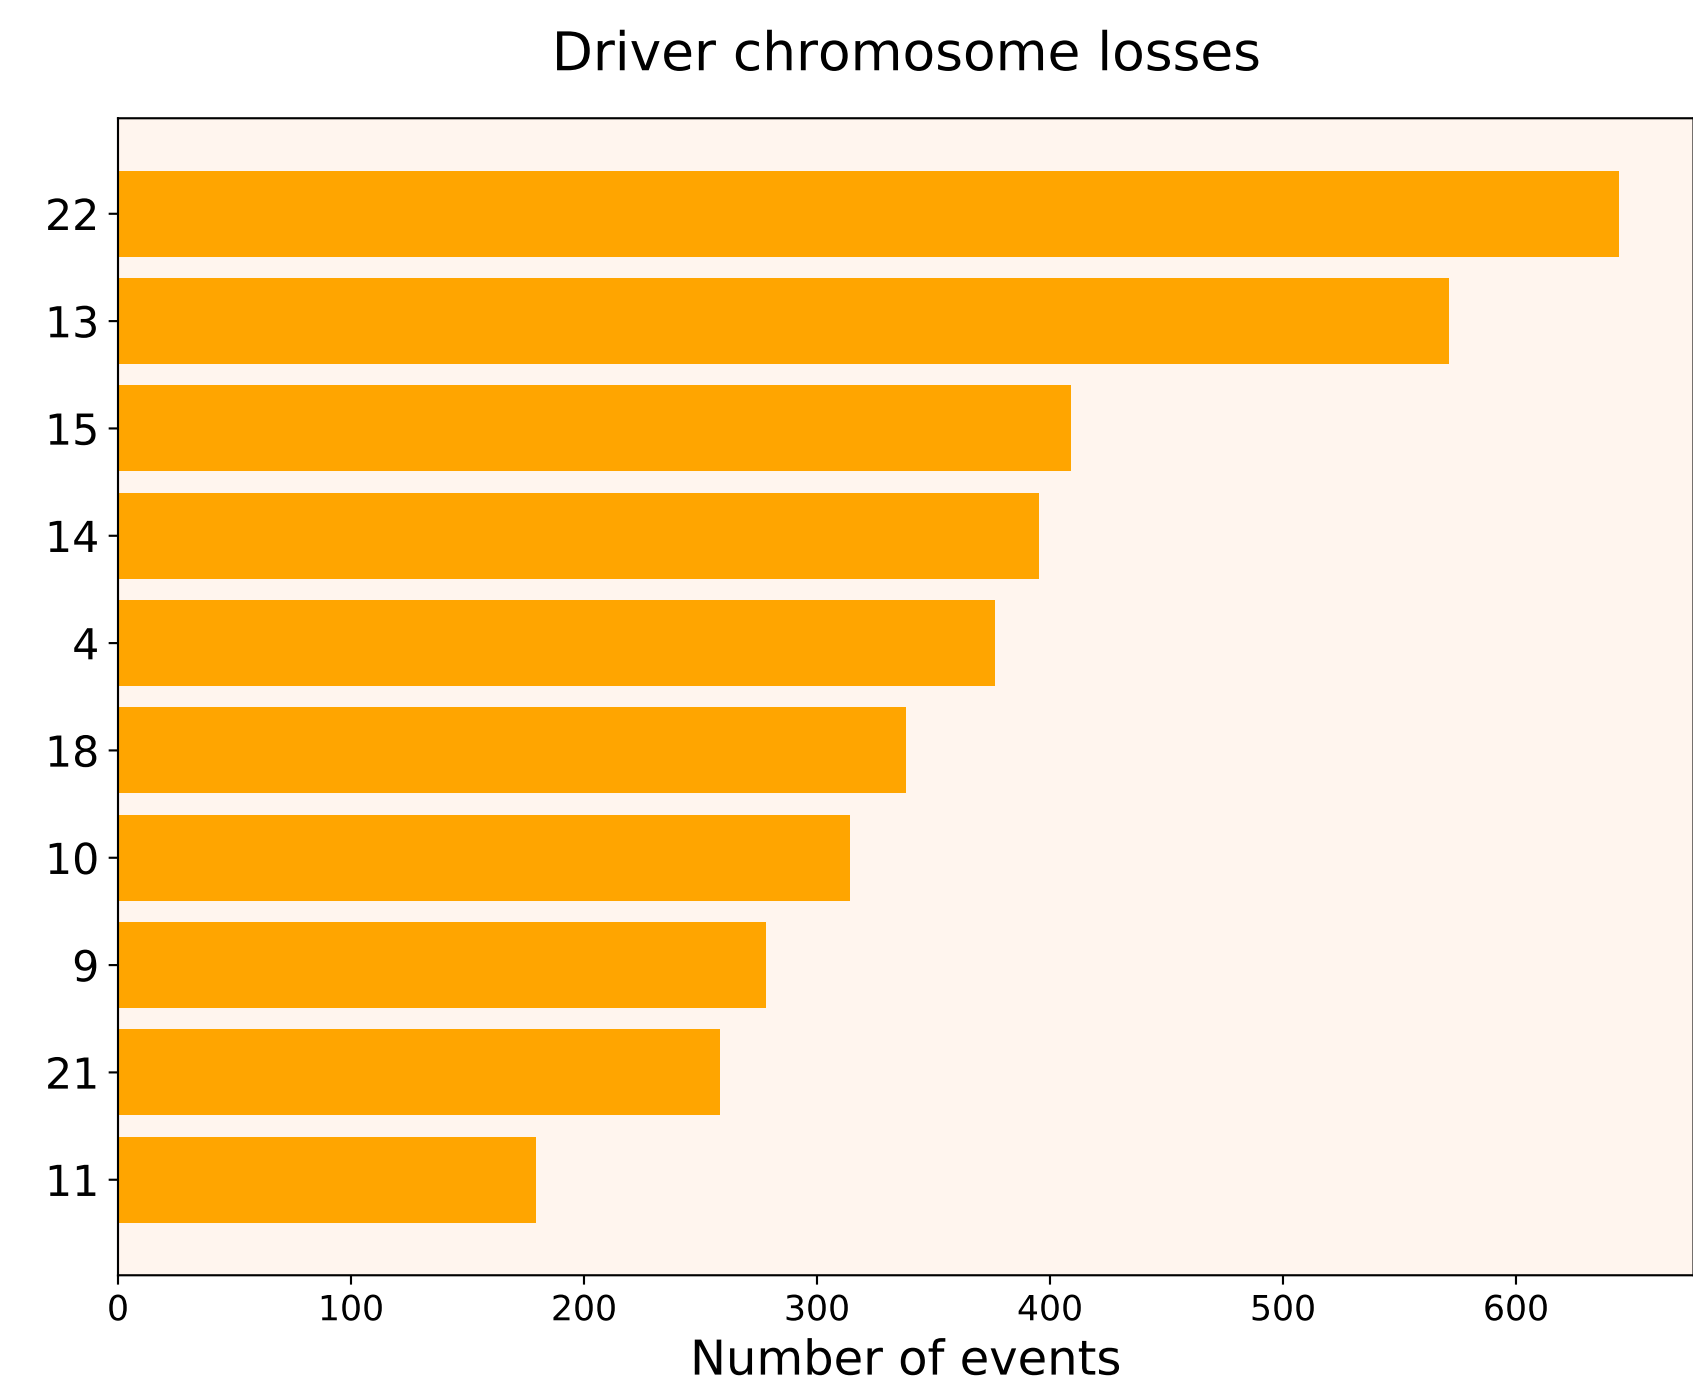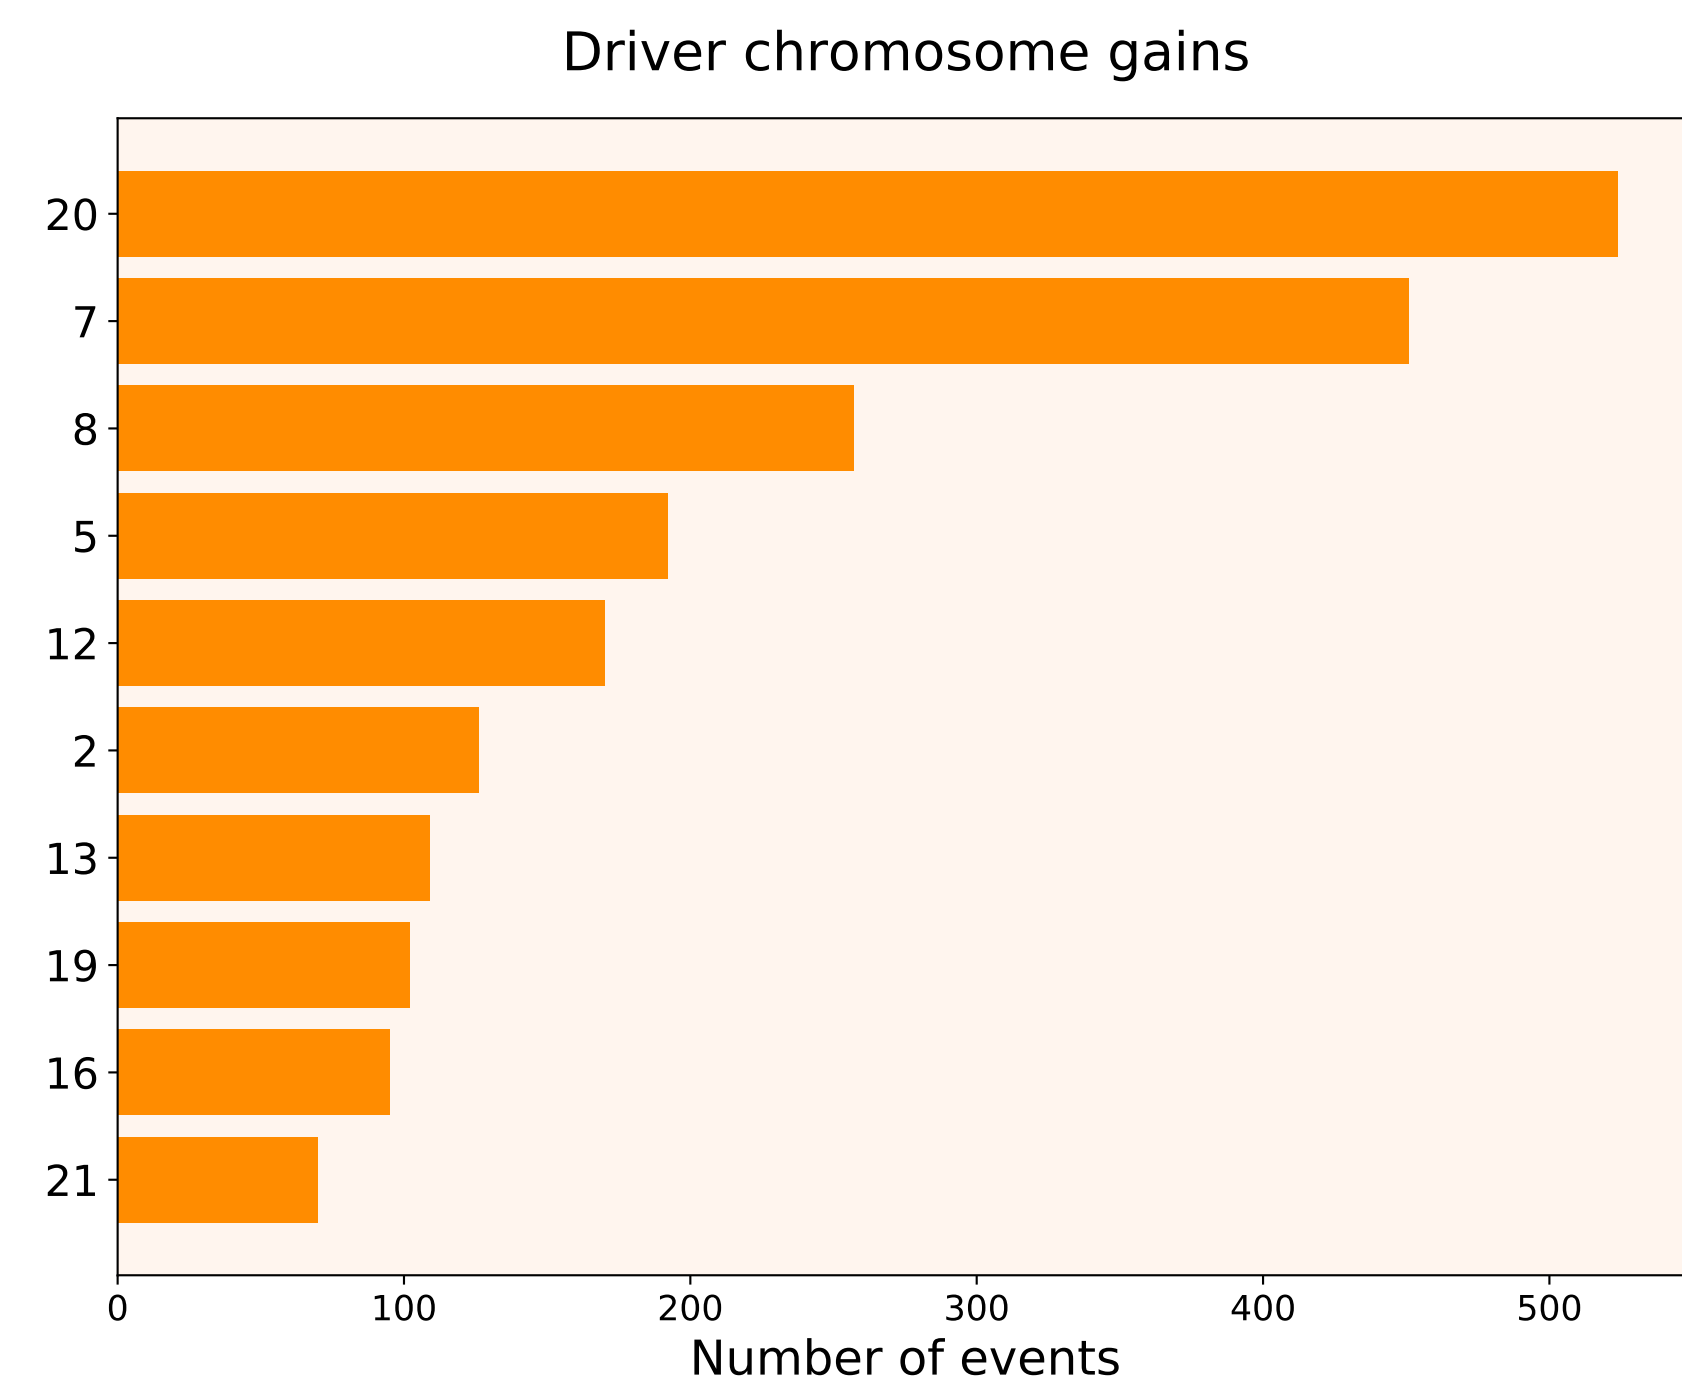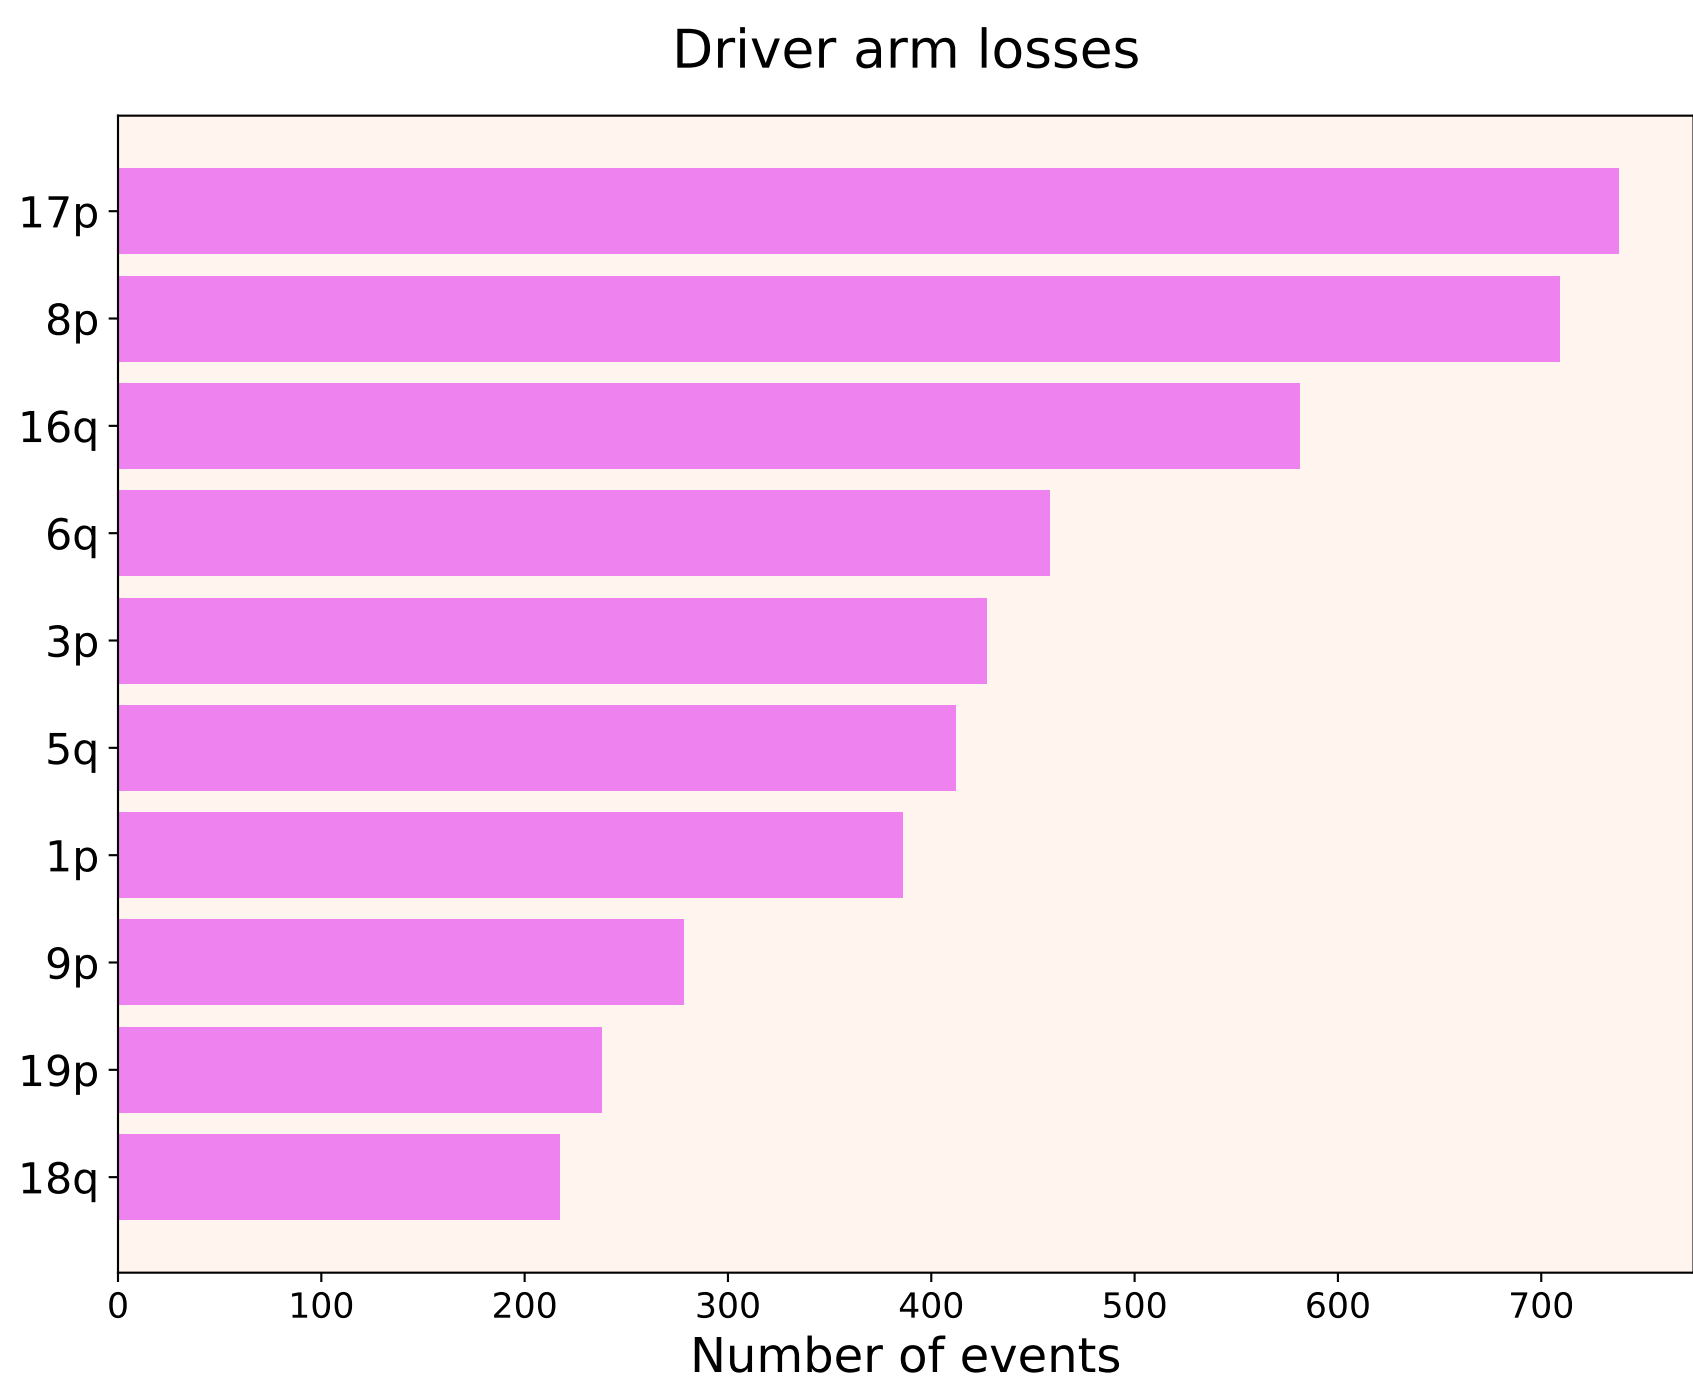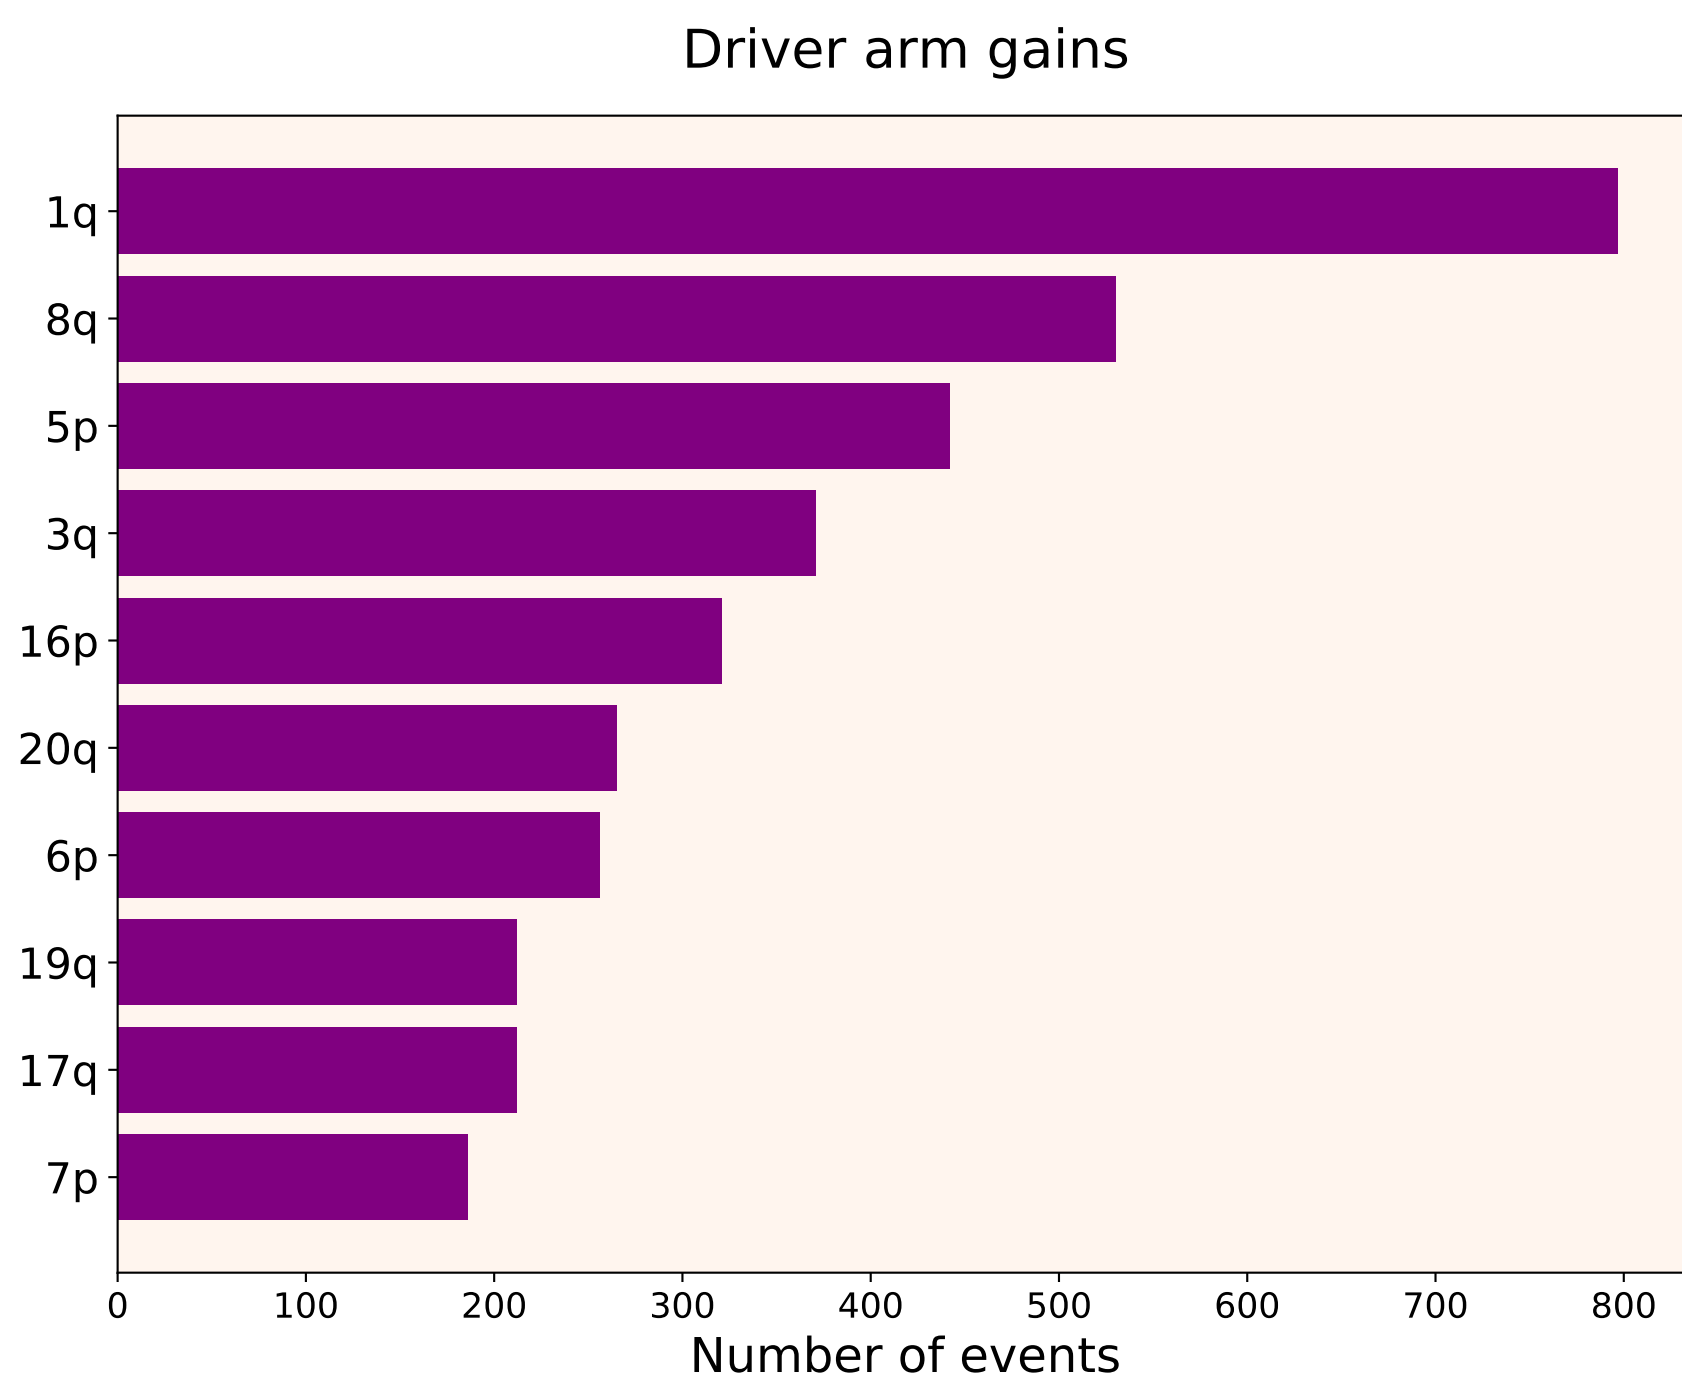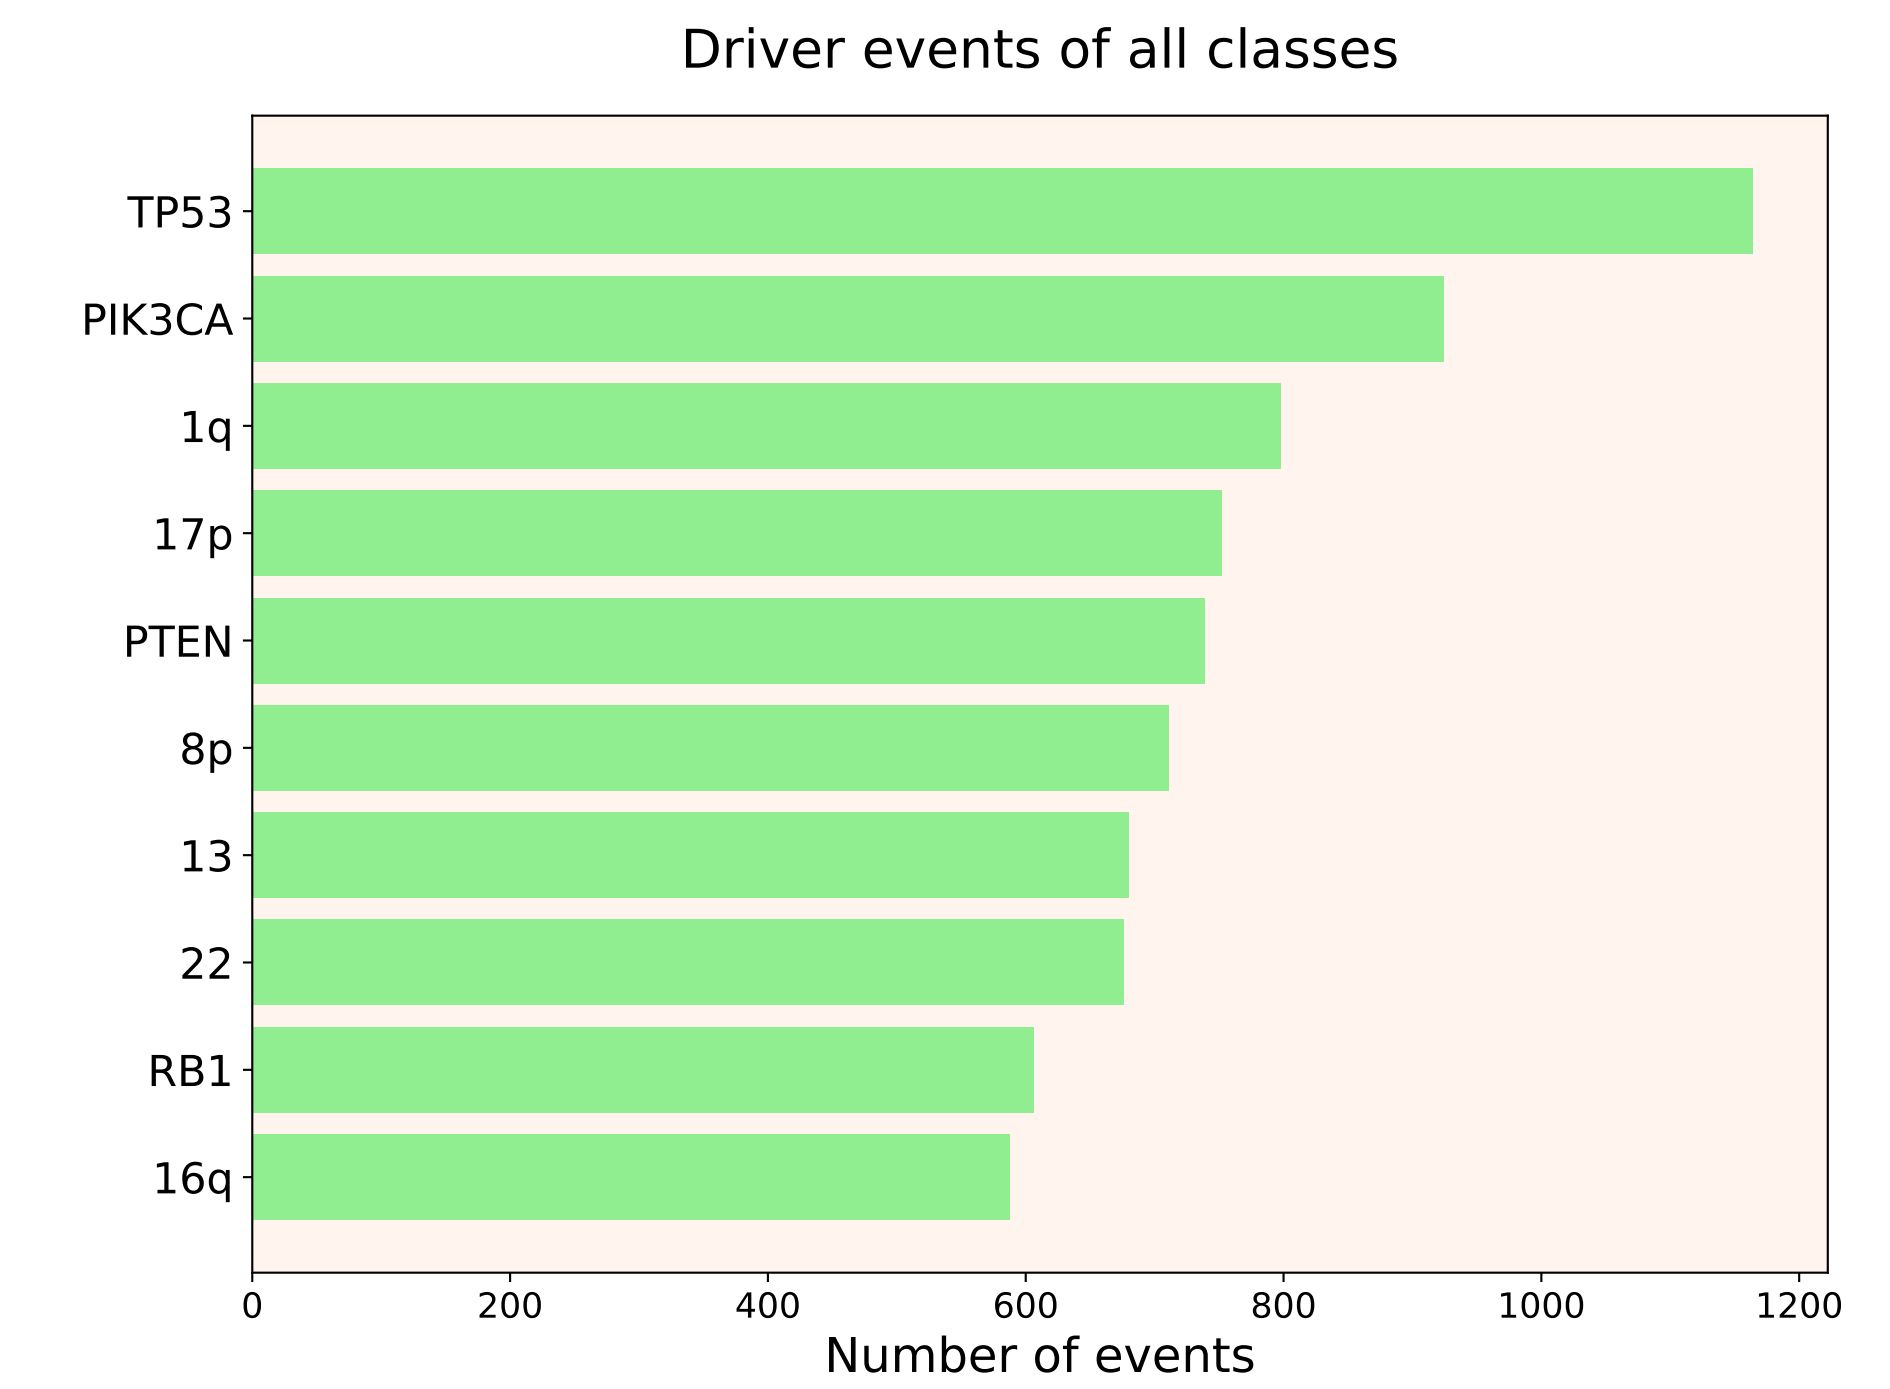

Supplement: Supplemental_Data_S1.zip [file Supplemental_Data_S1.zip]

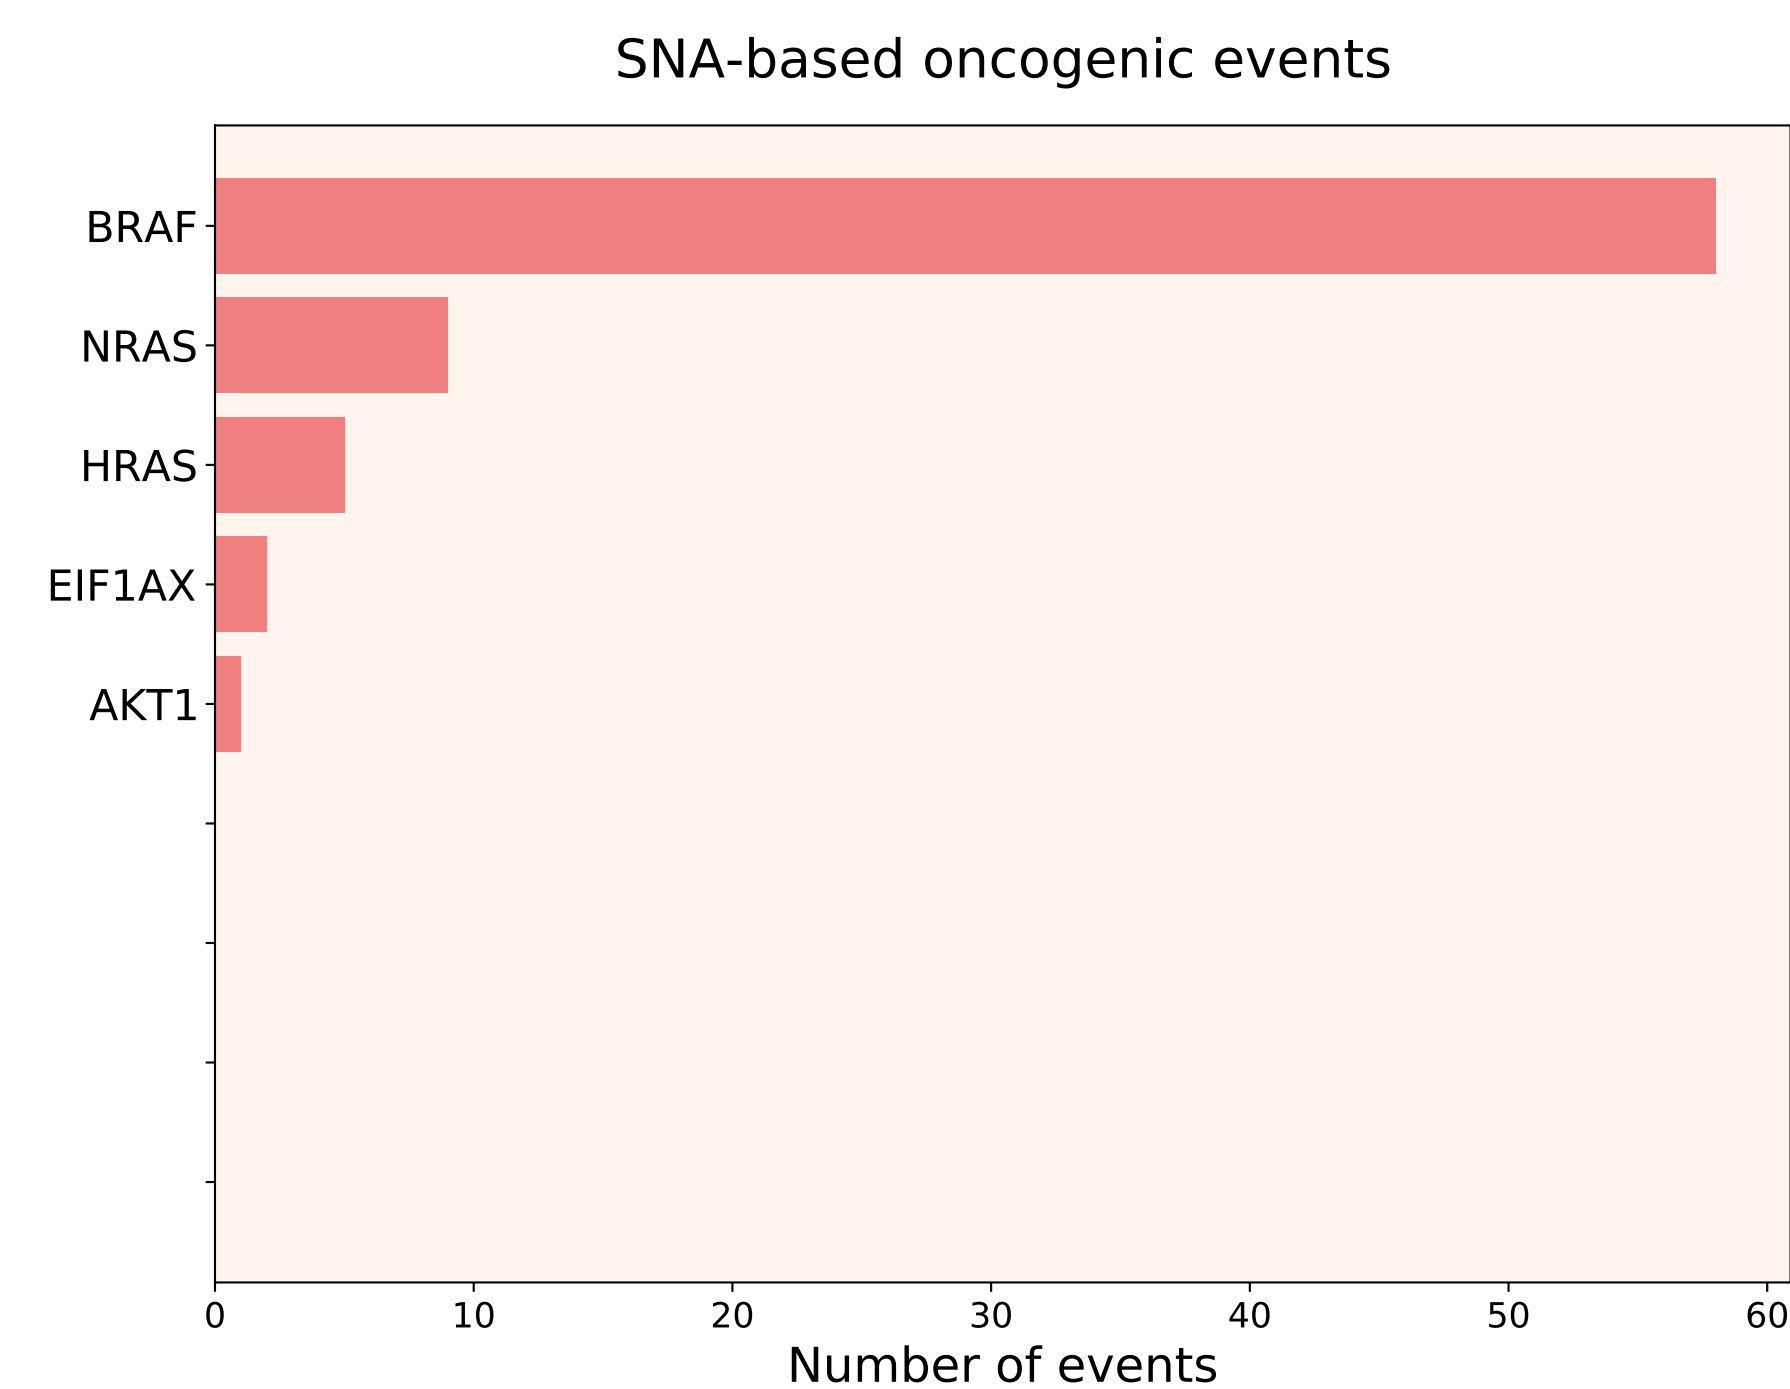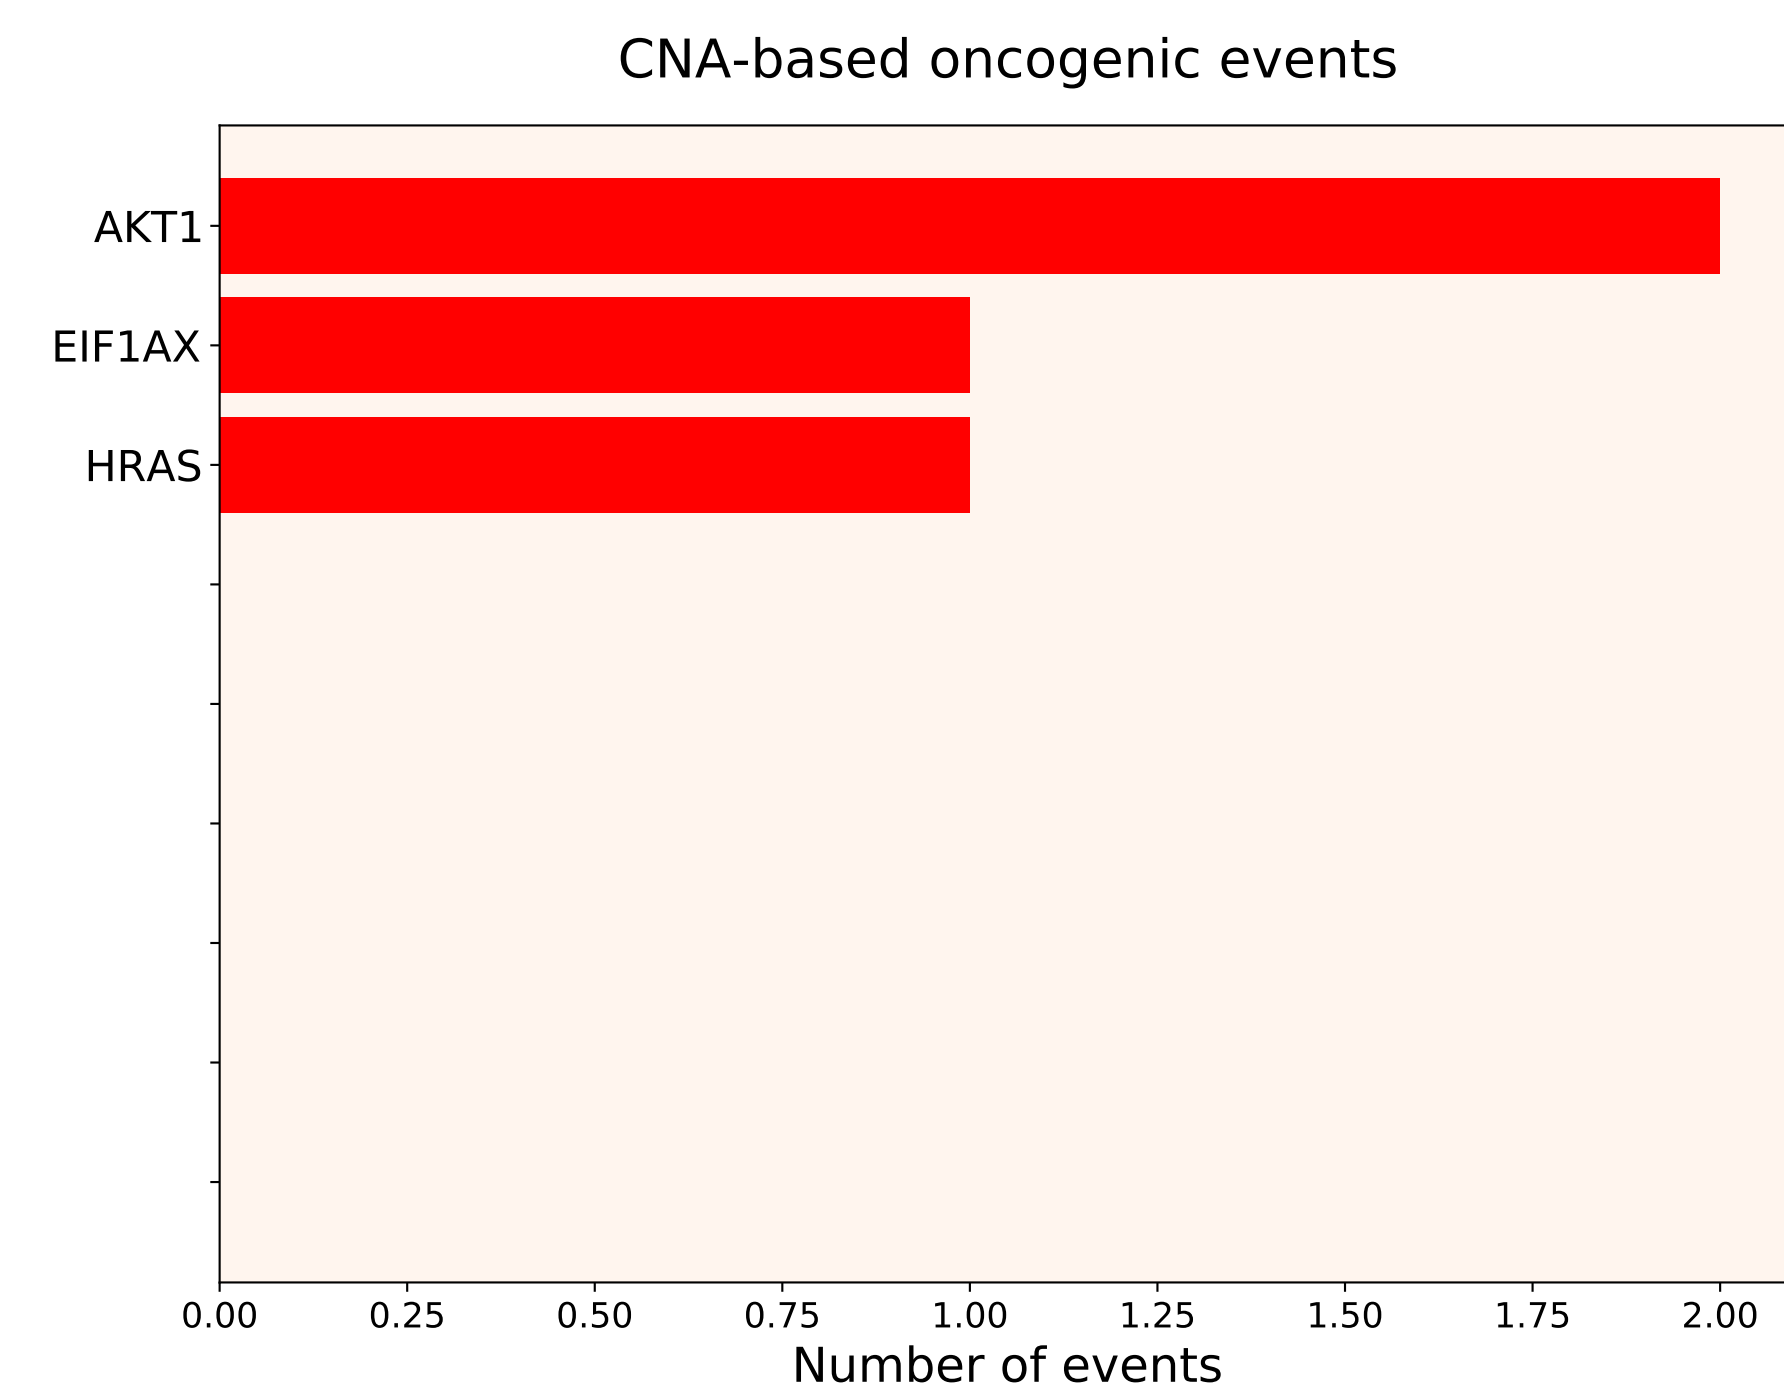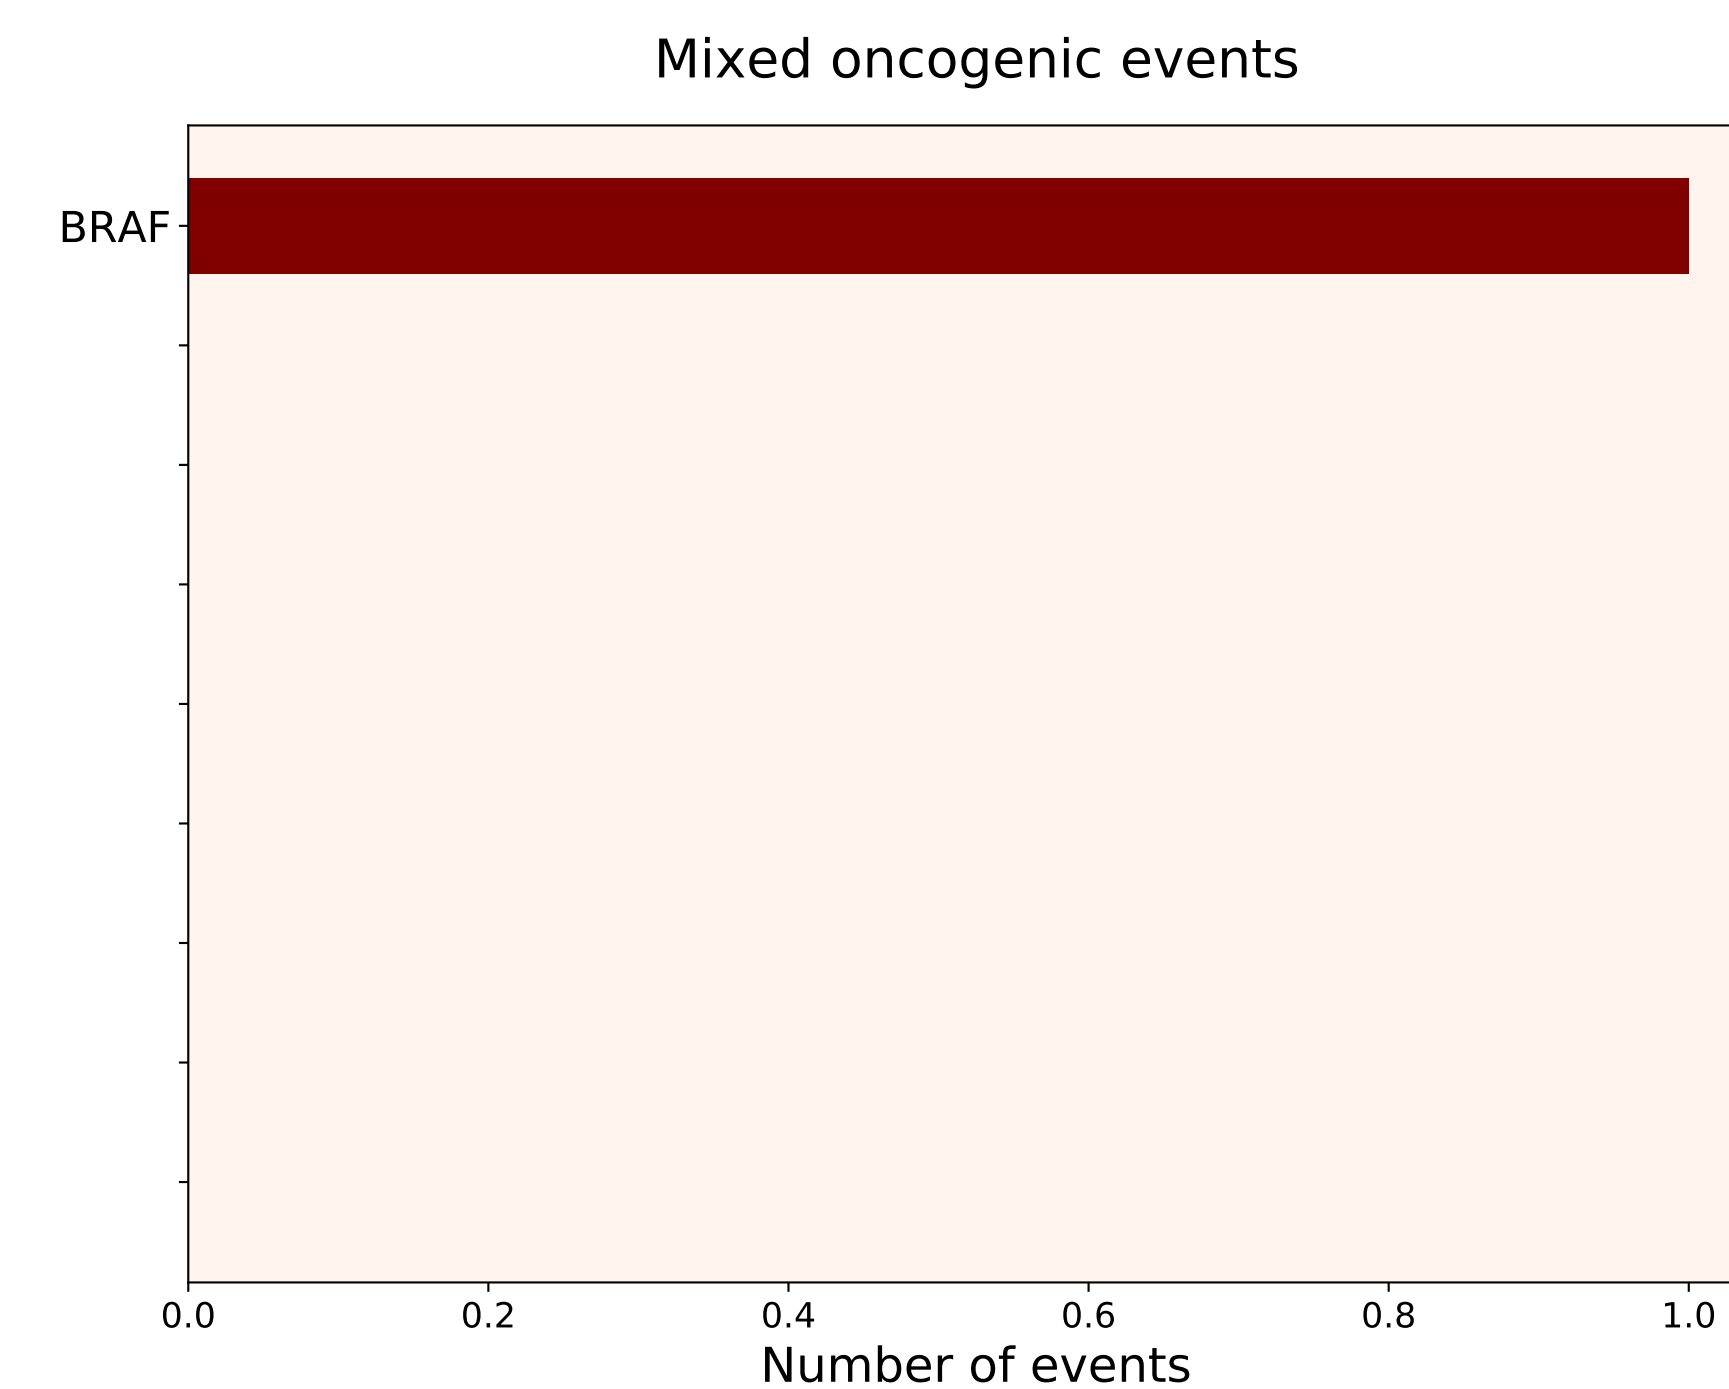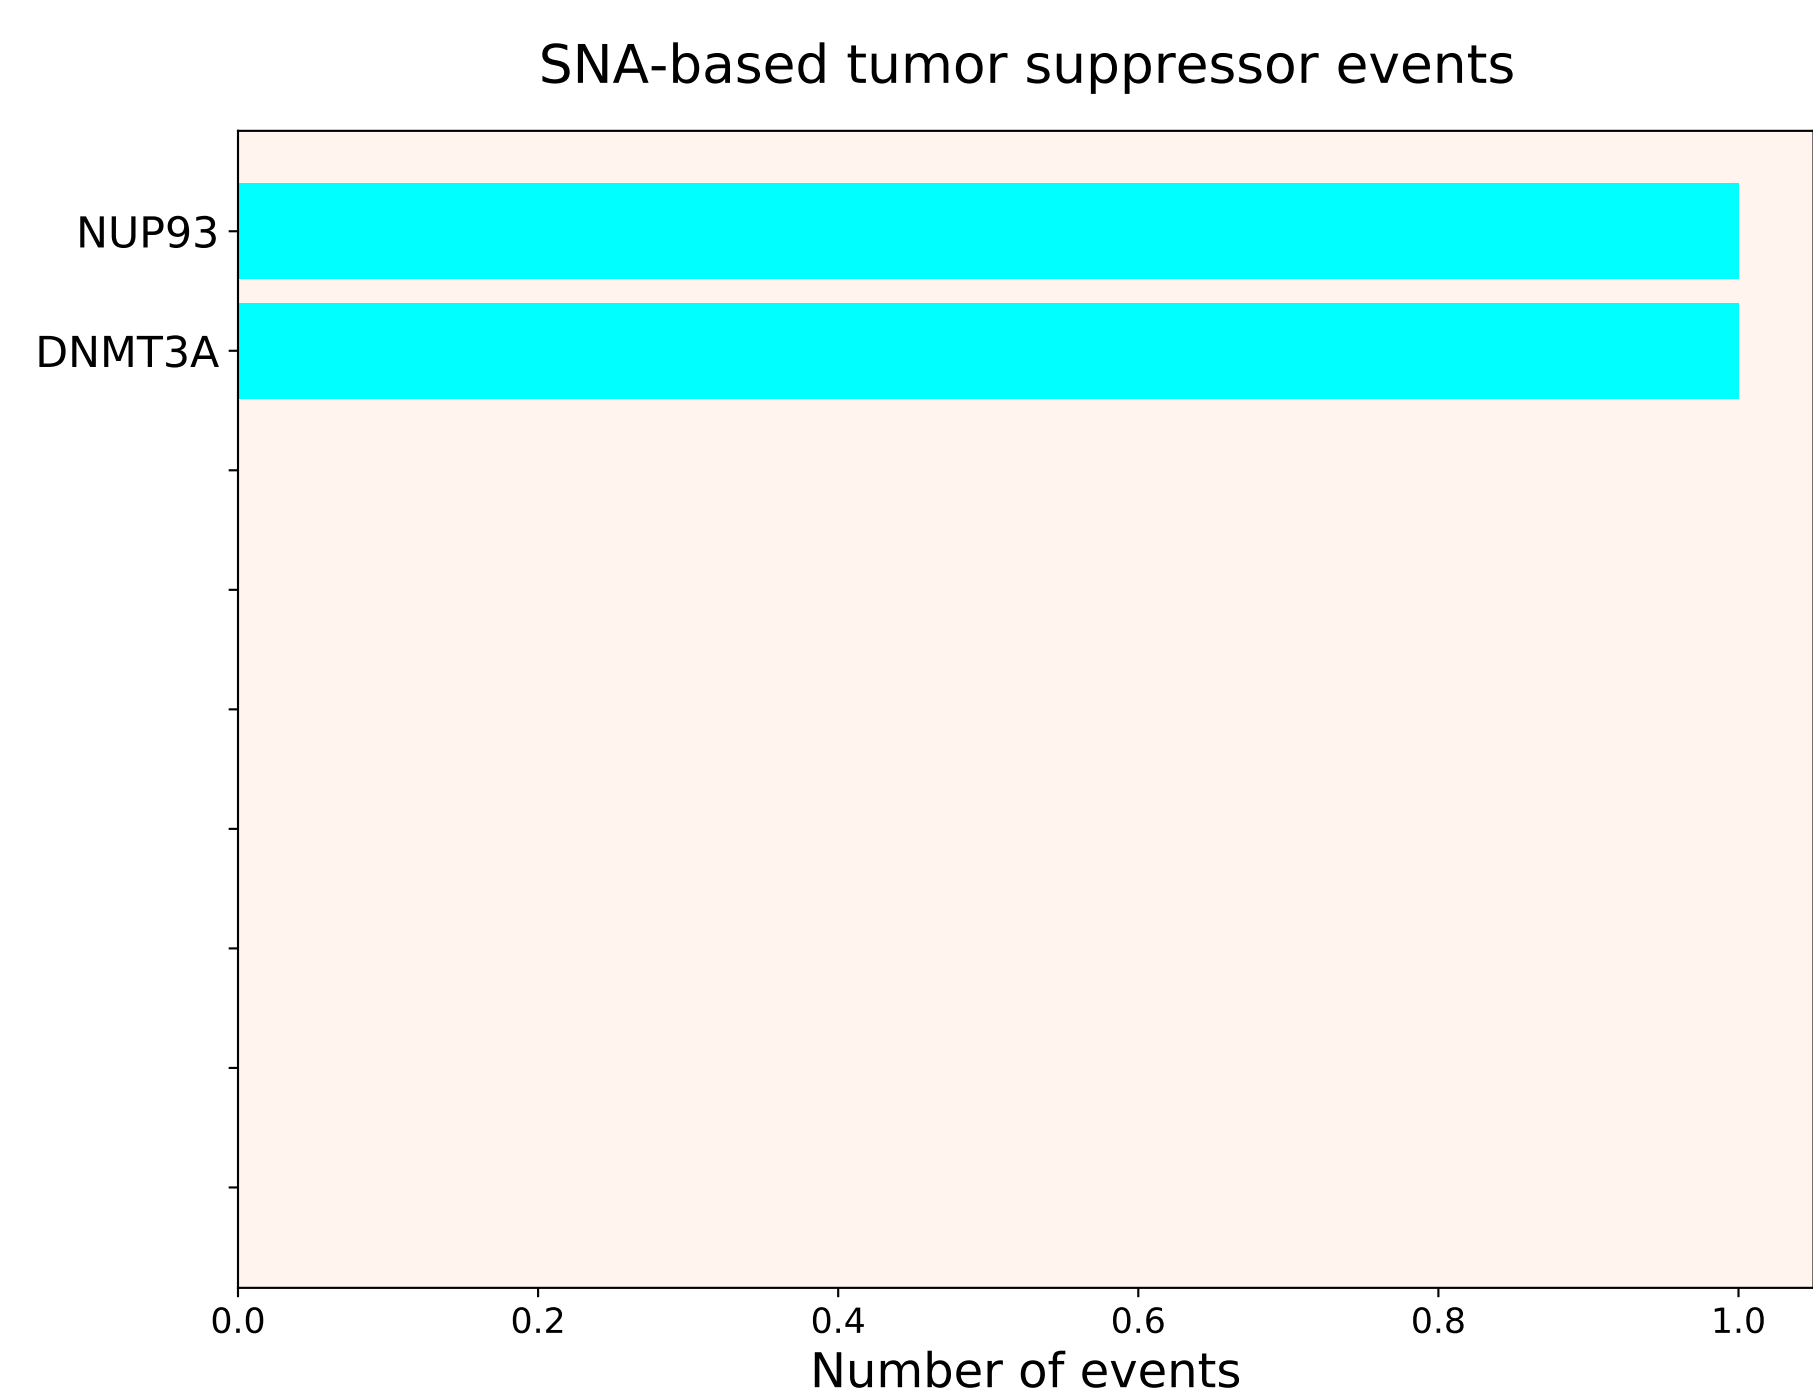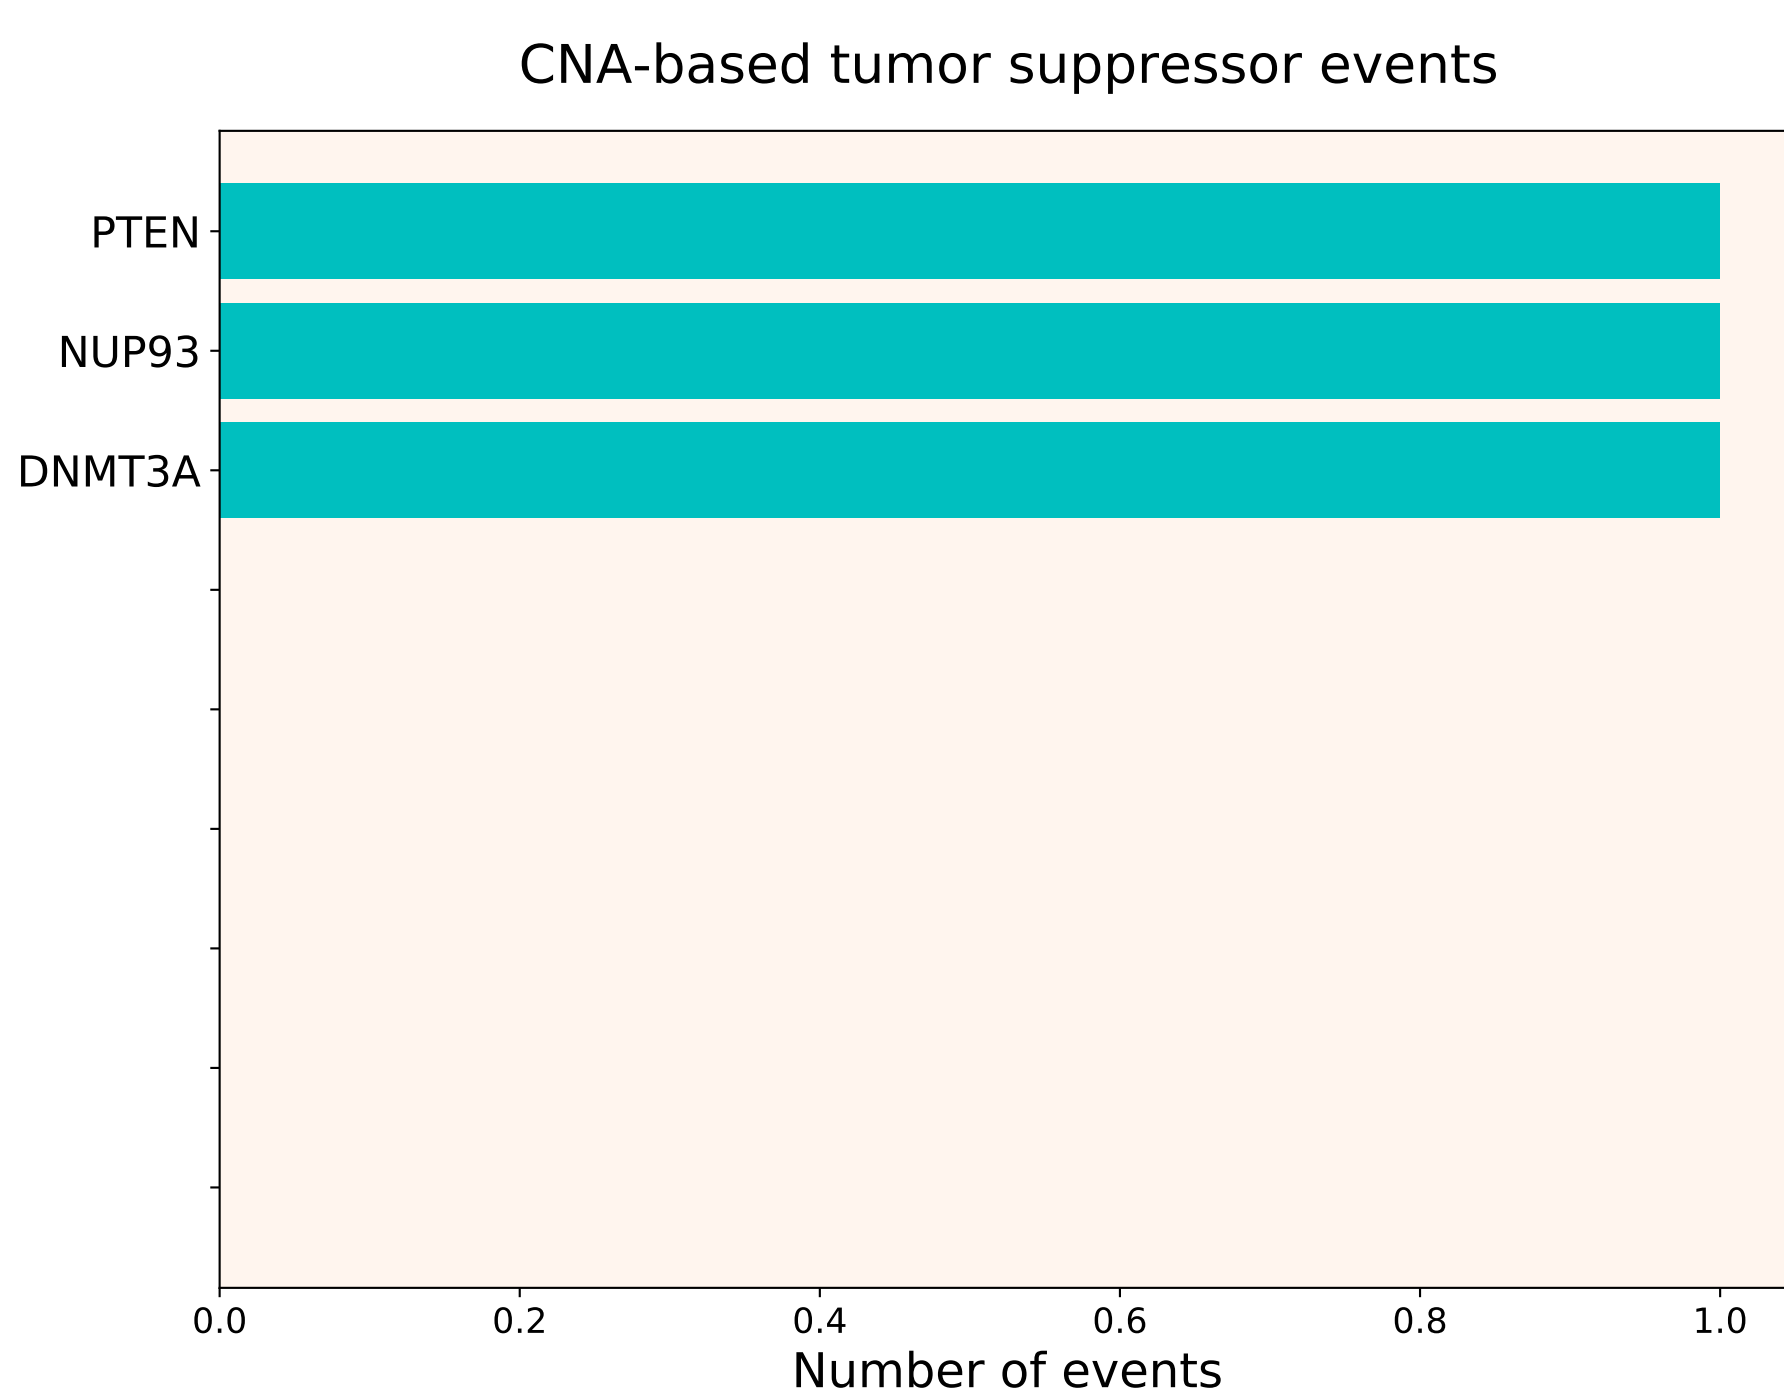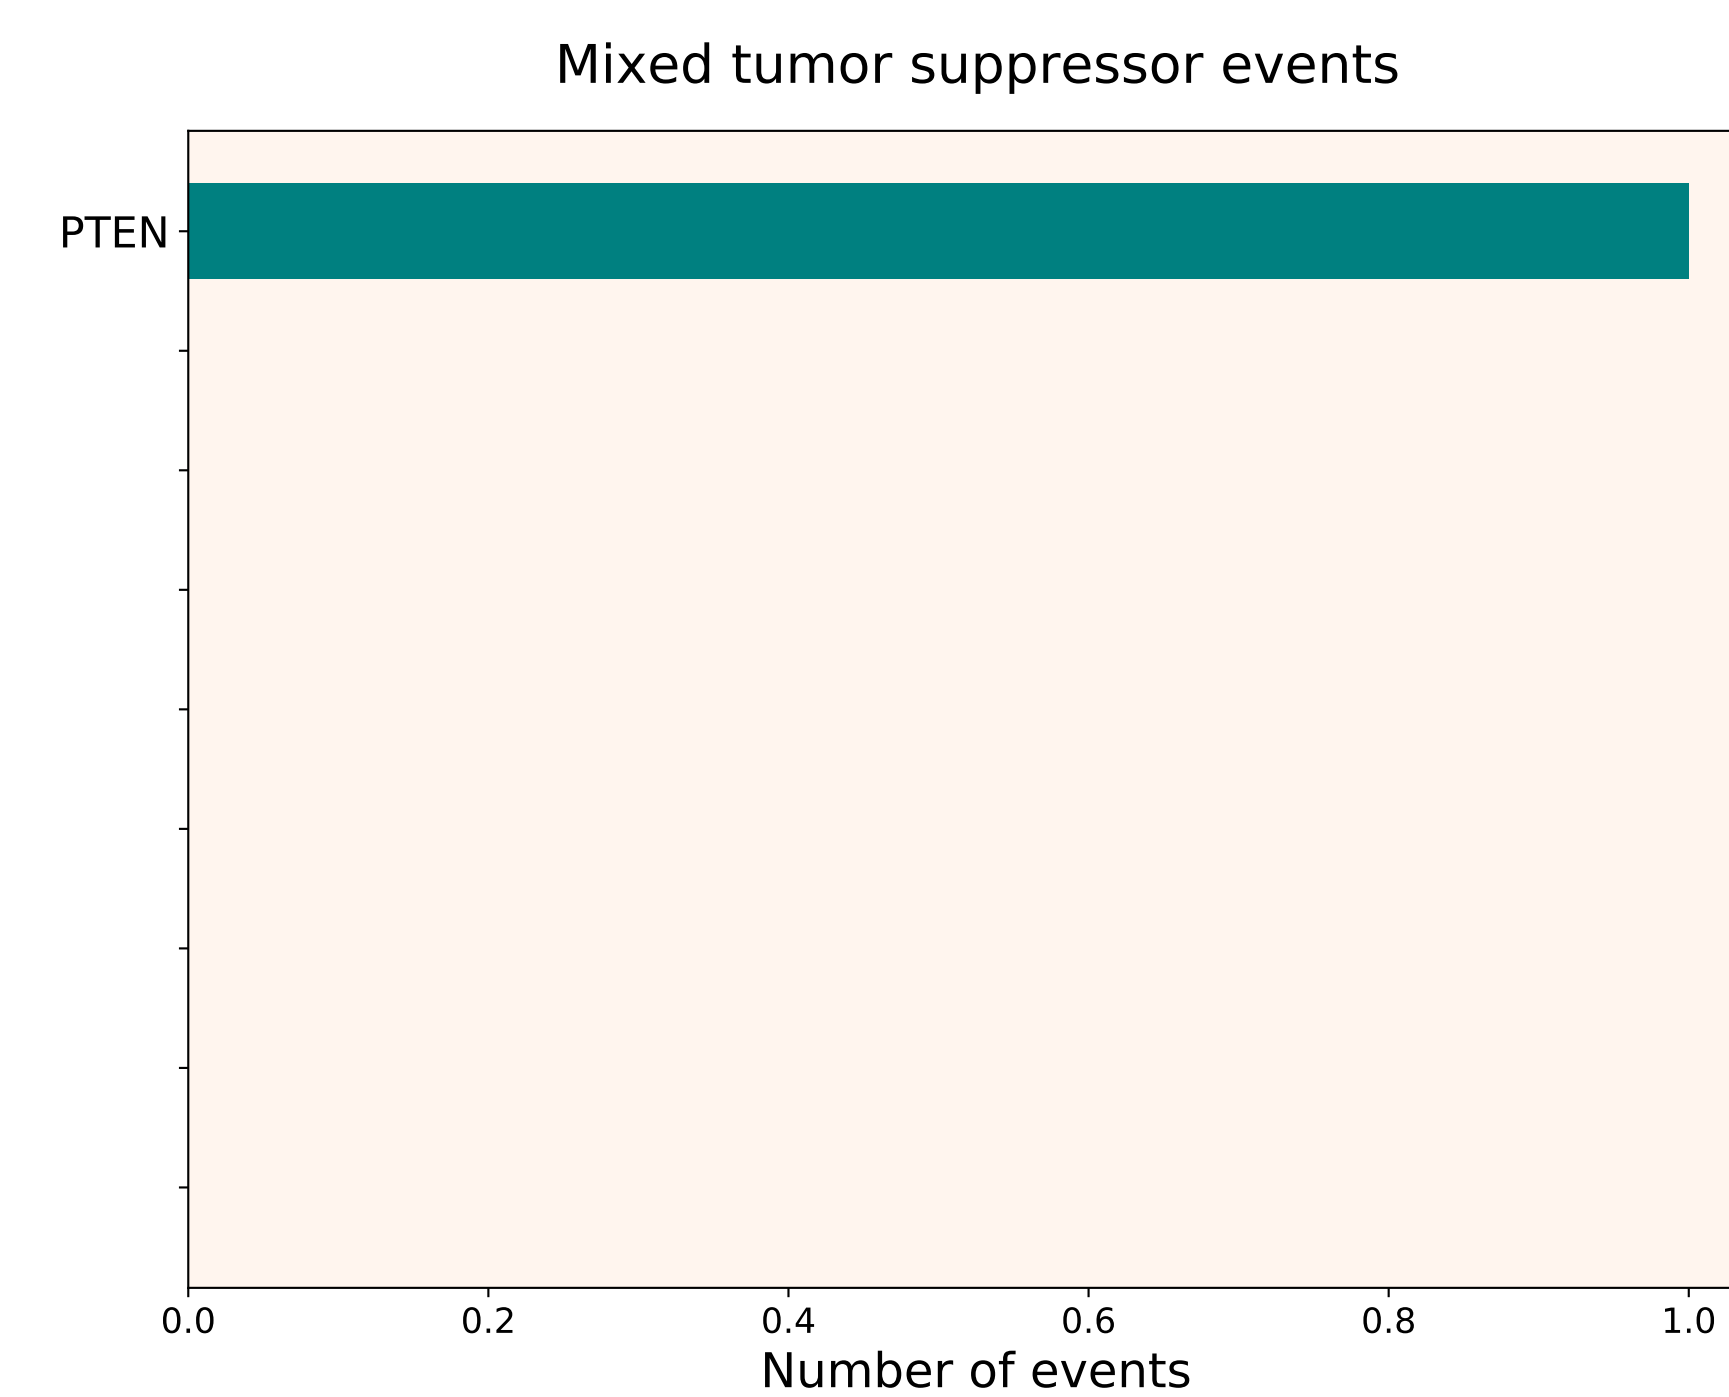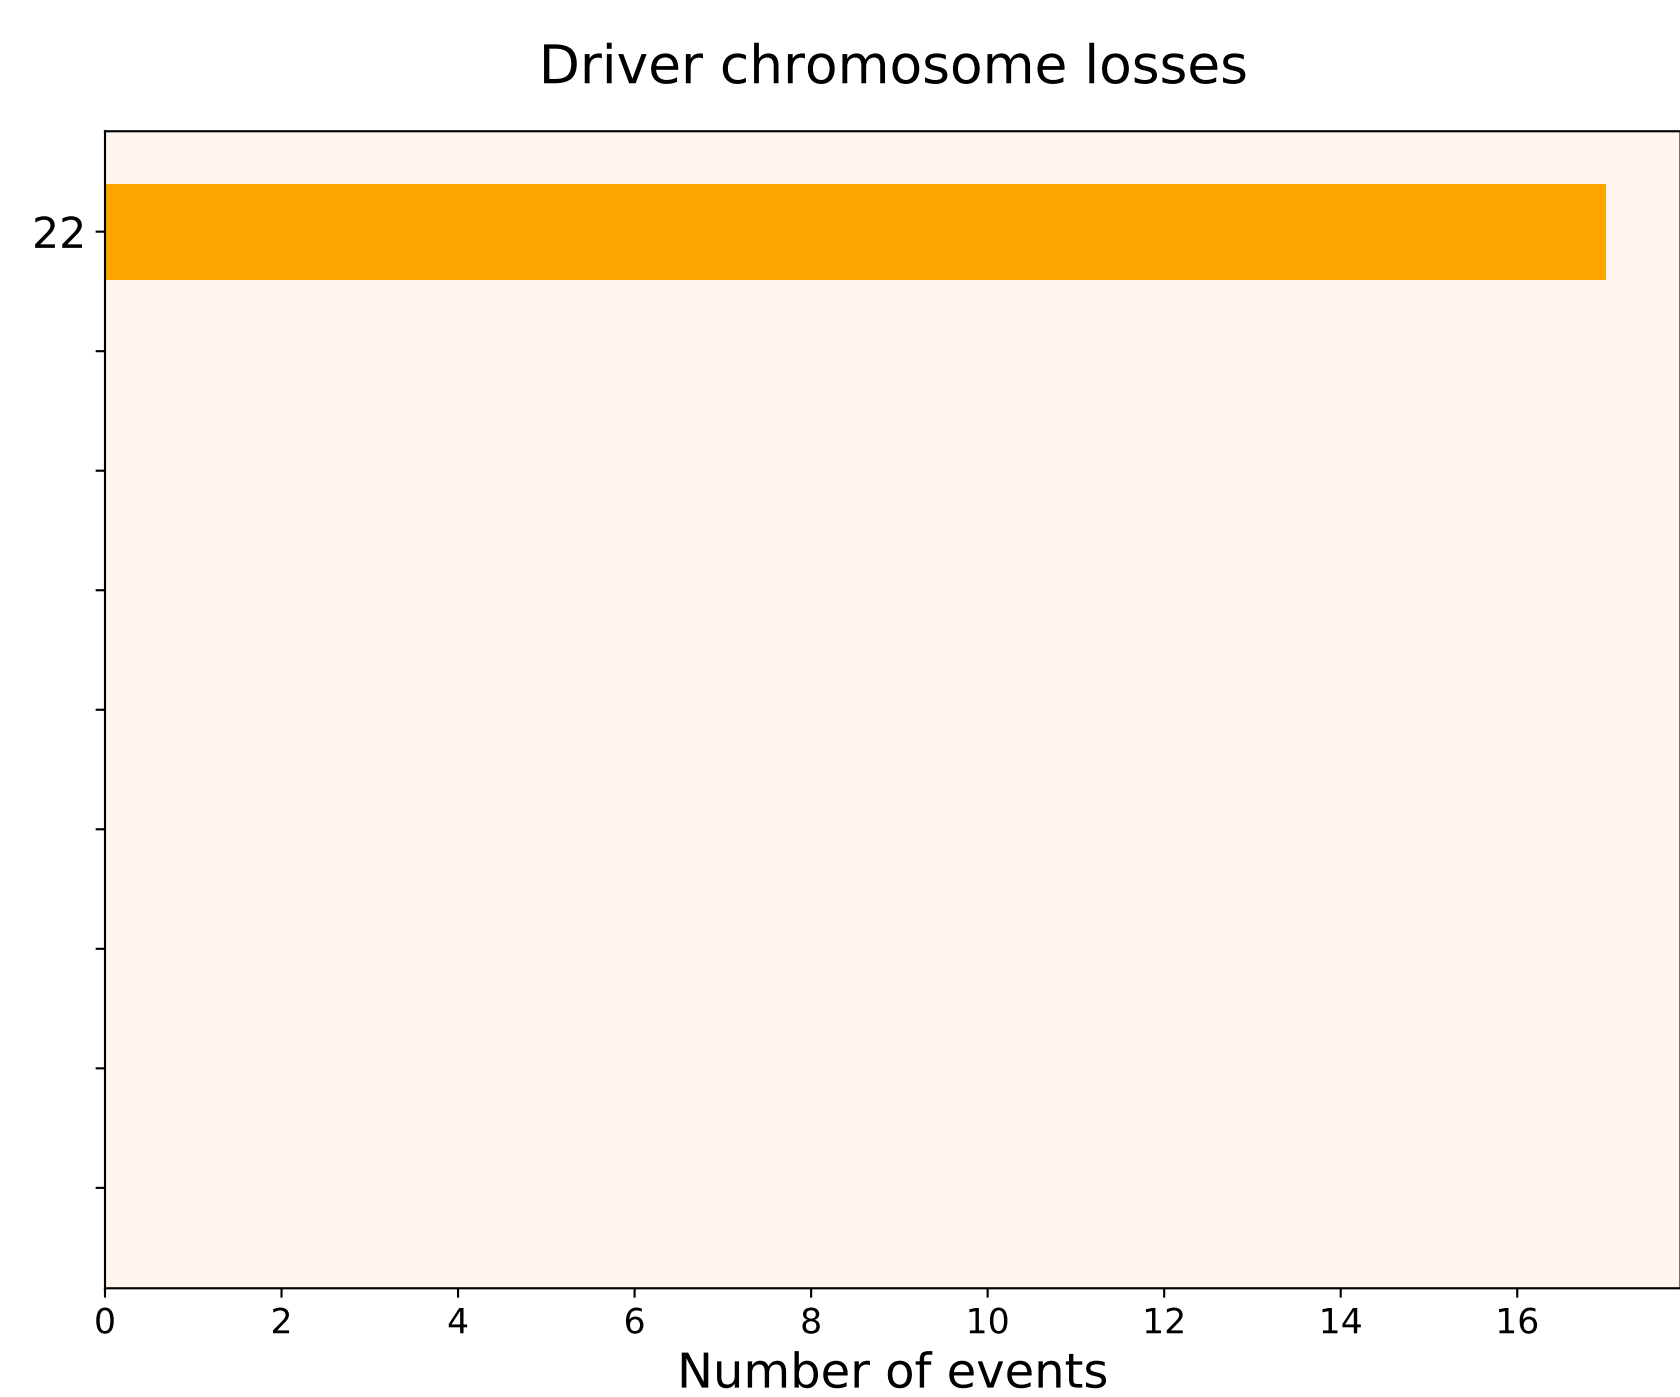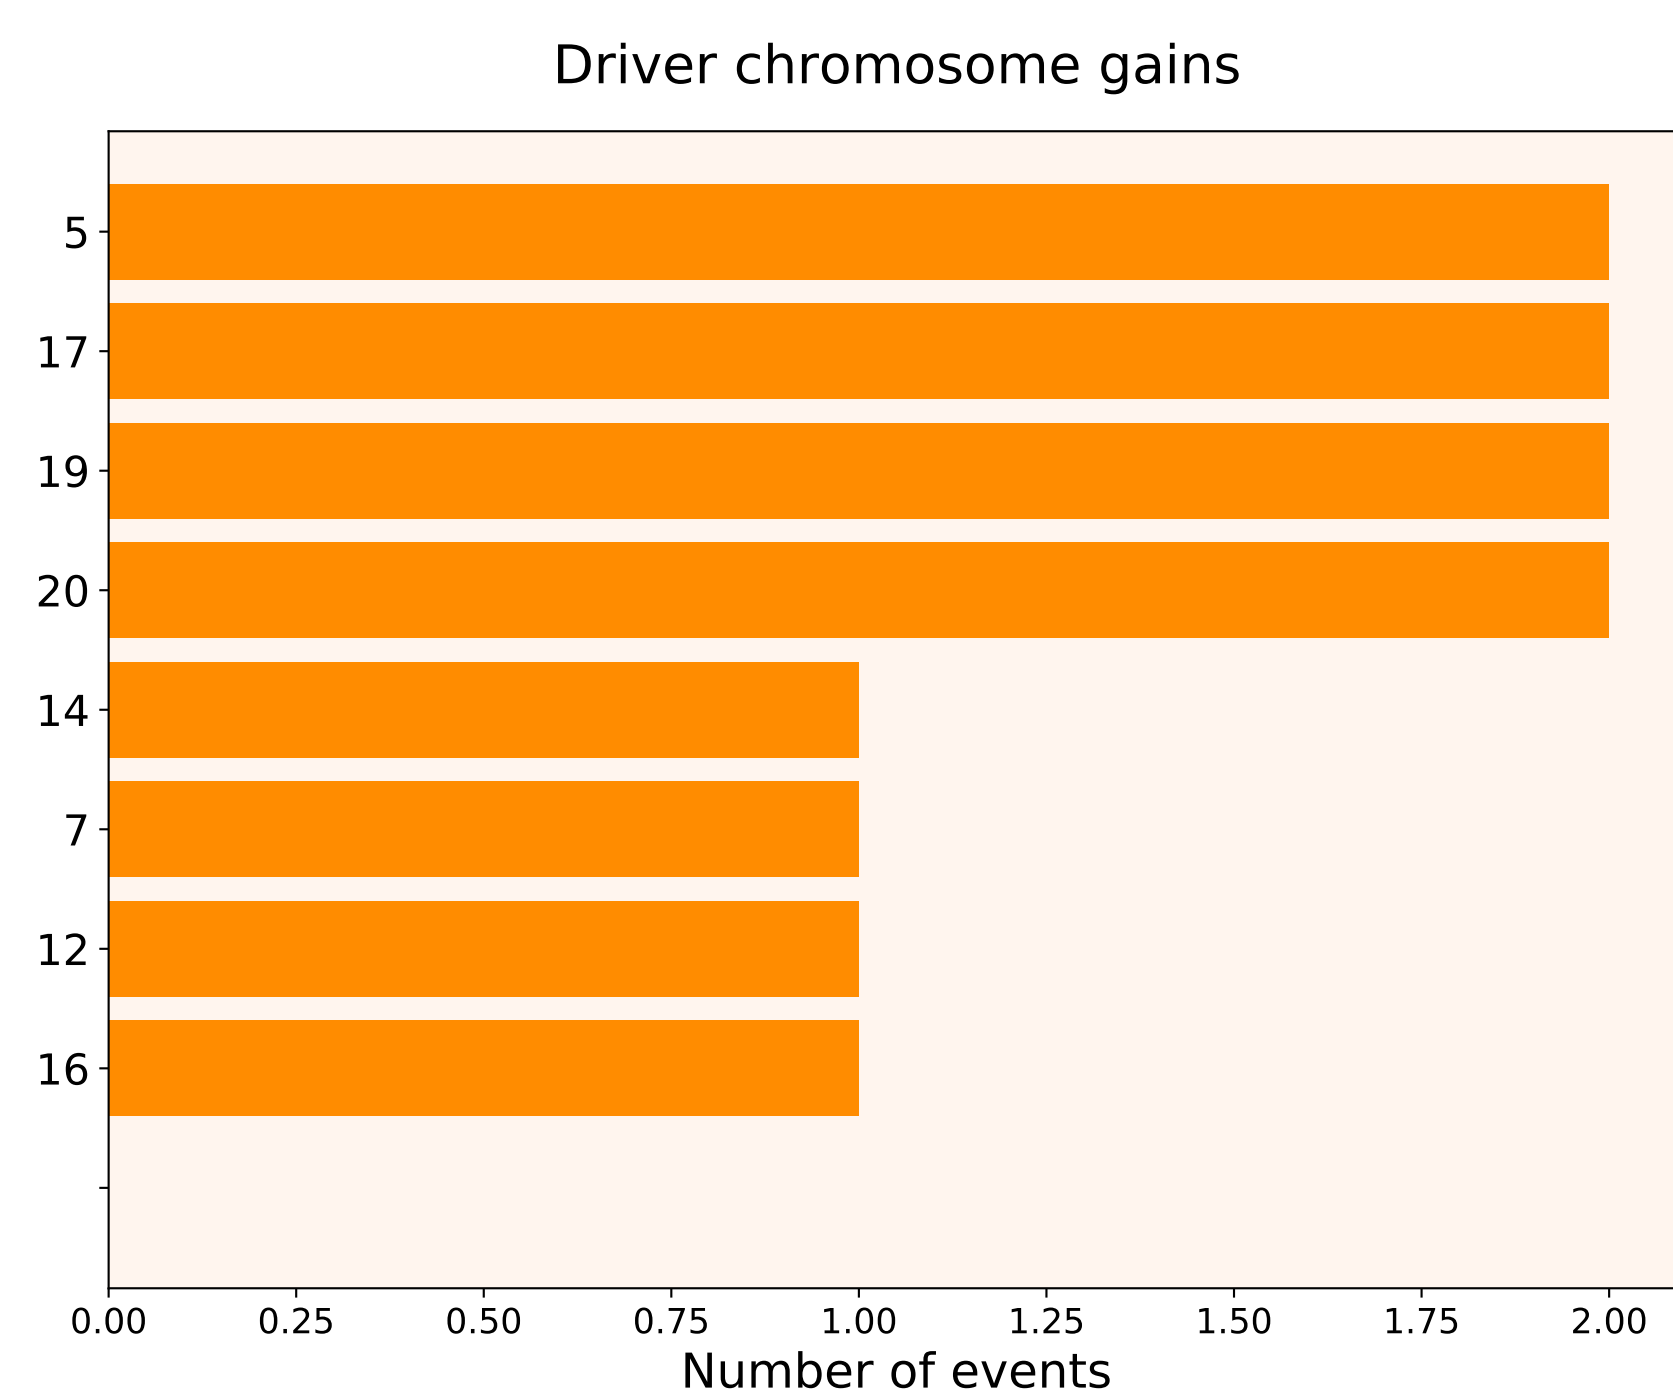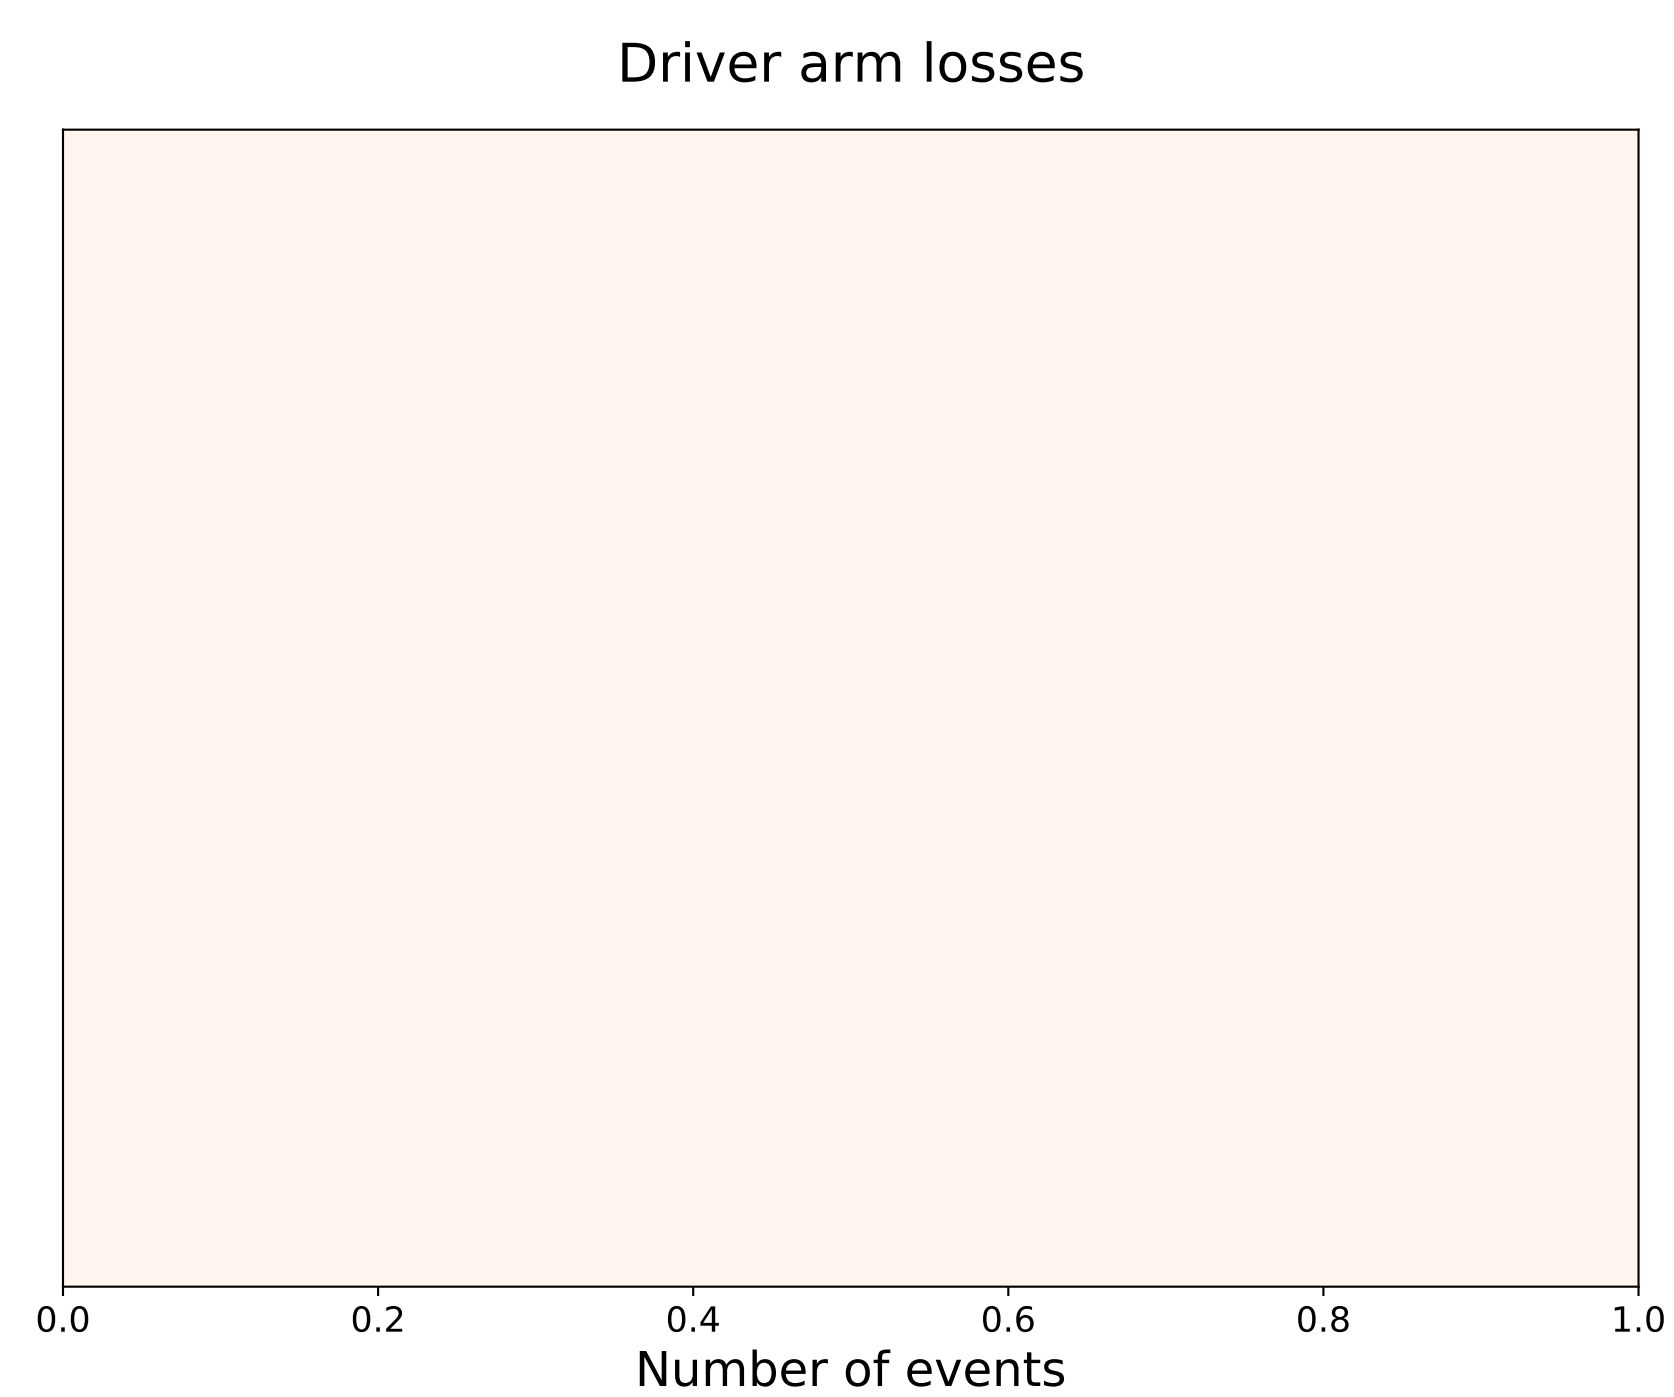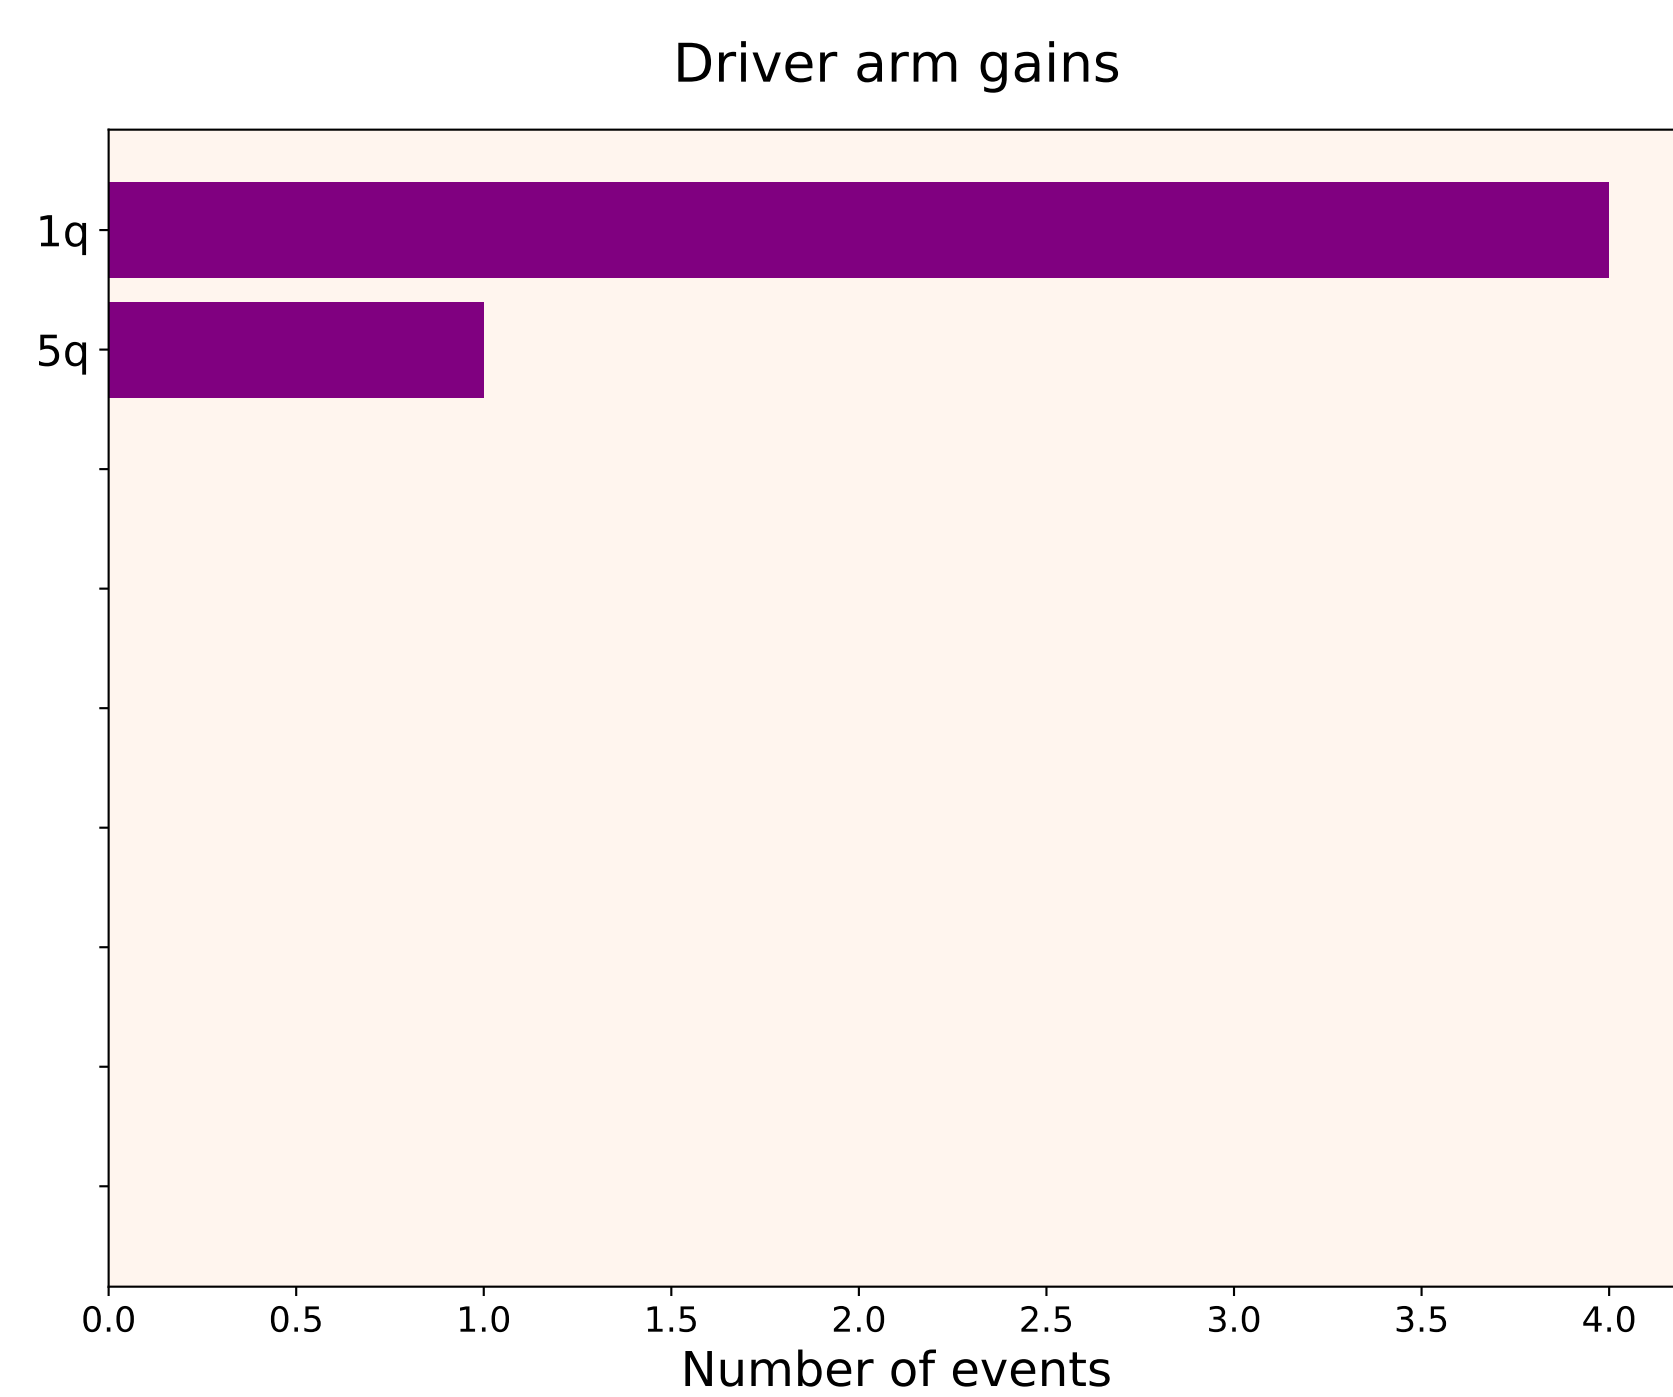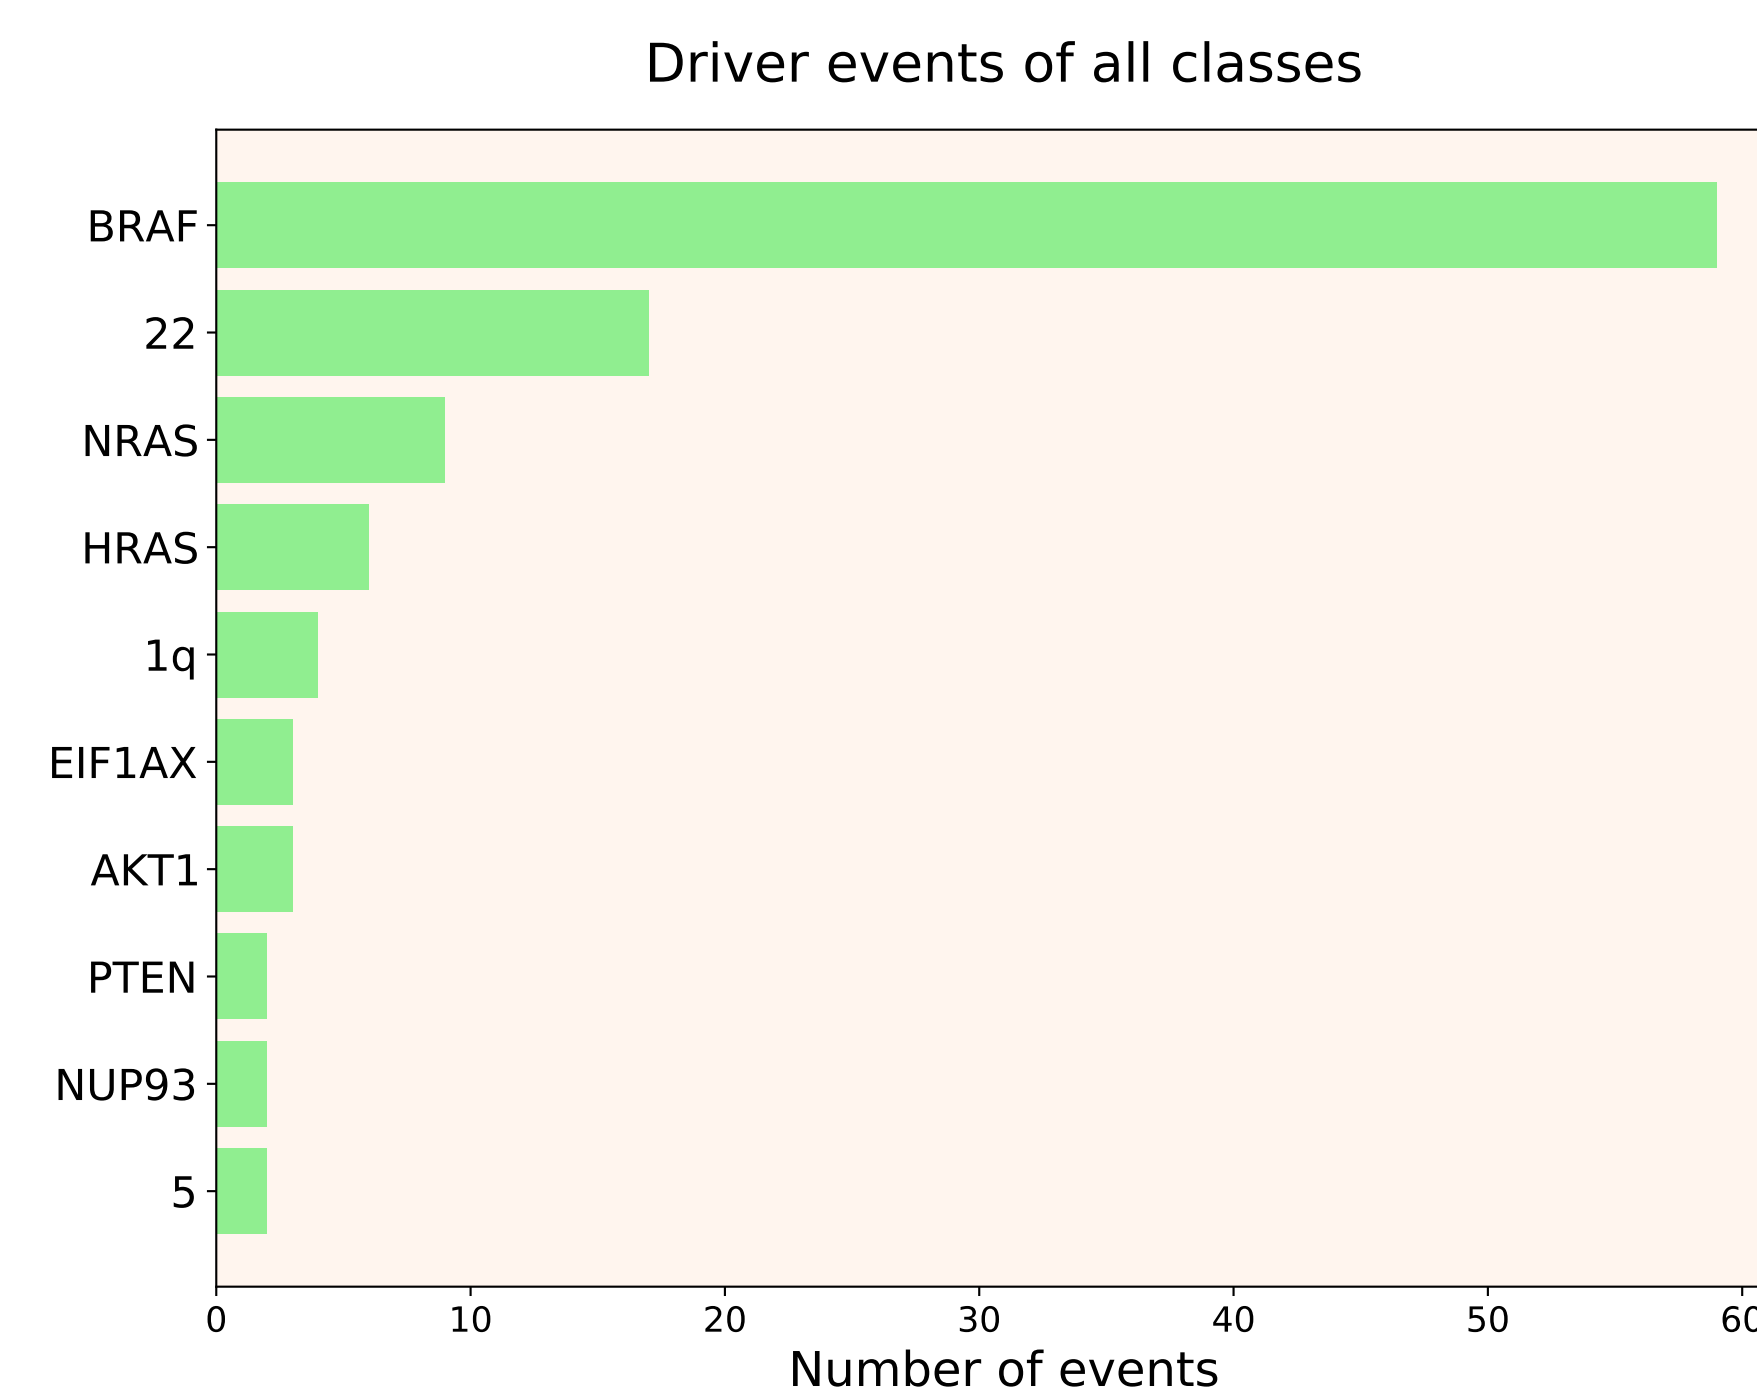

Supplement: Supplemental_Data_S1.zip [file Supplemental_Data_S1.zip]

# BLCA

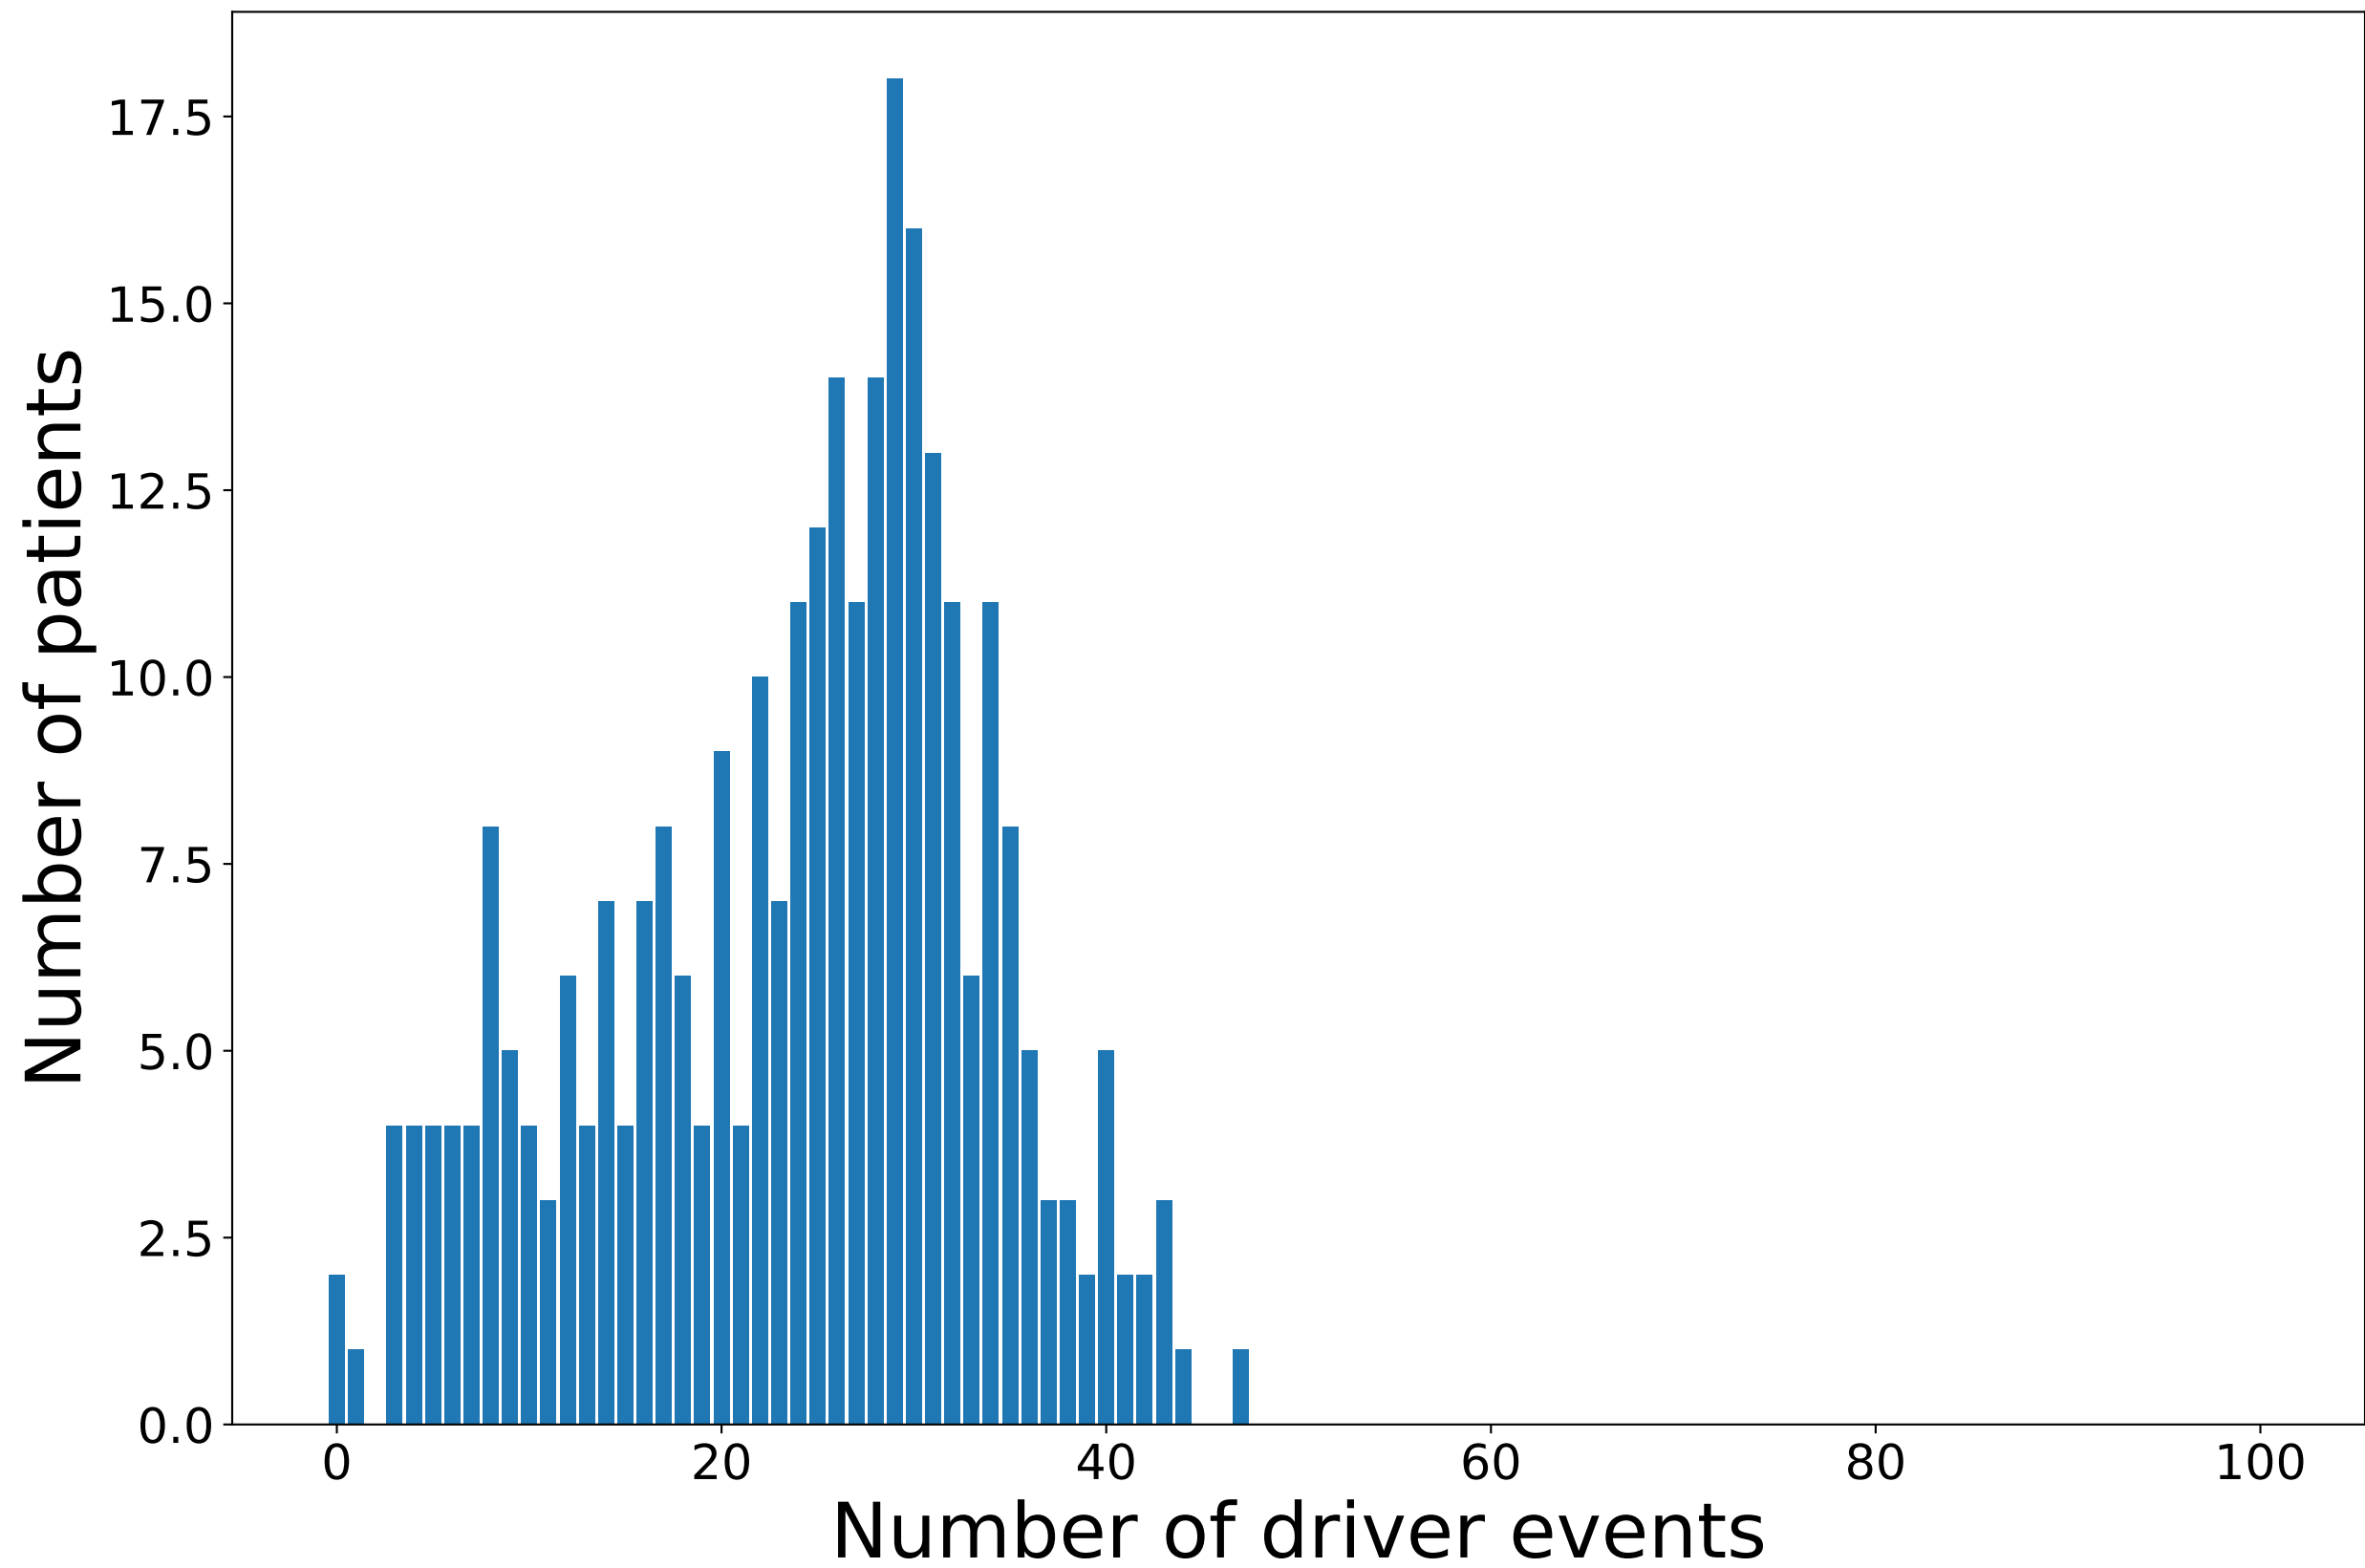

Supplement: Supplemental_Data_S1.zip [file Supplemental_Data_S1.zip]

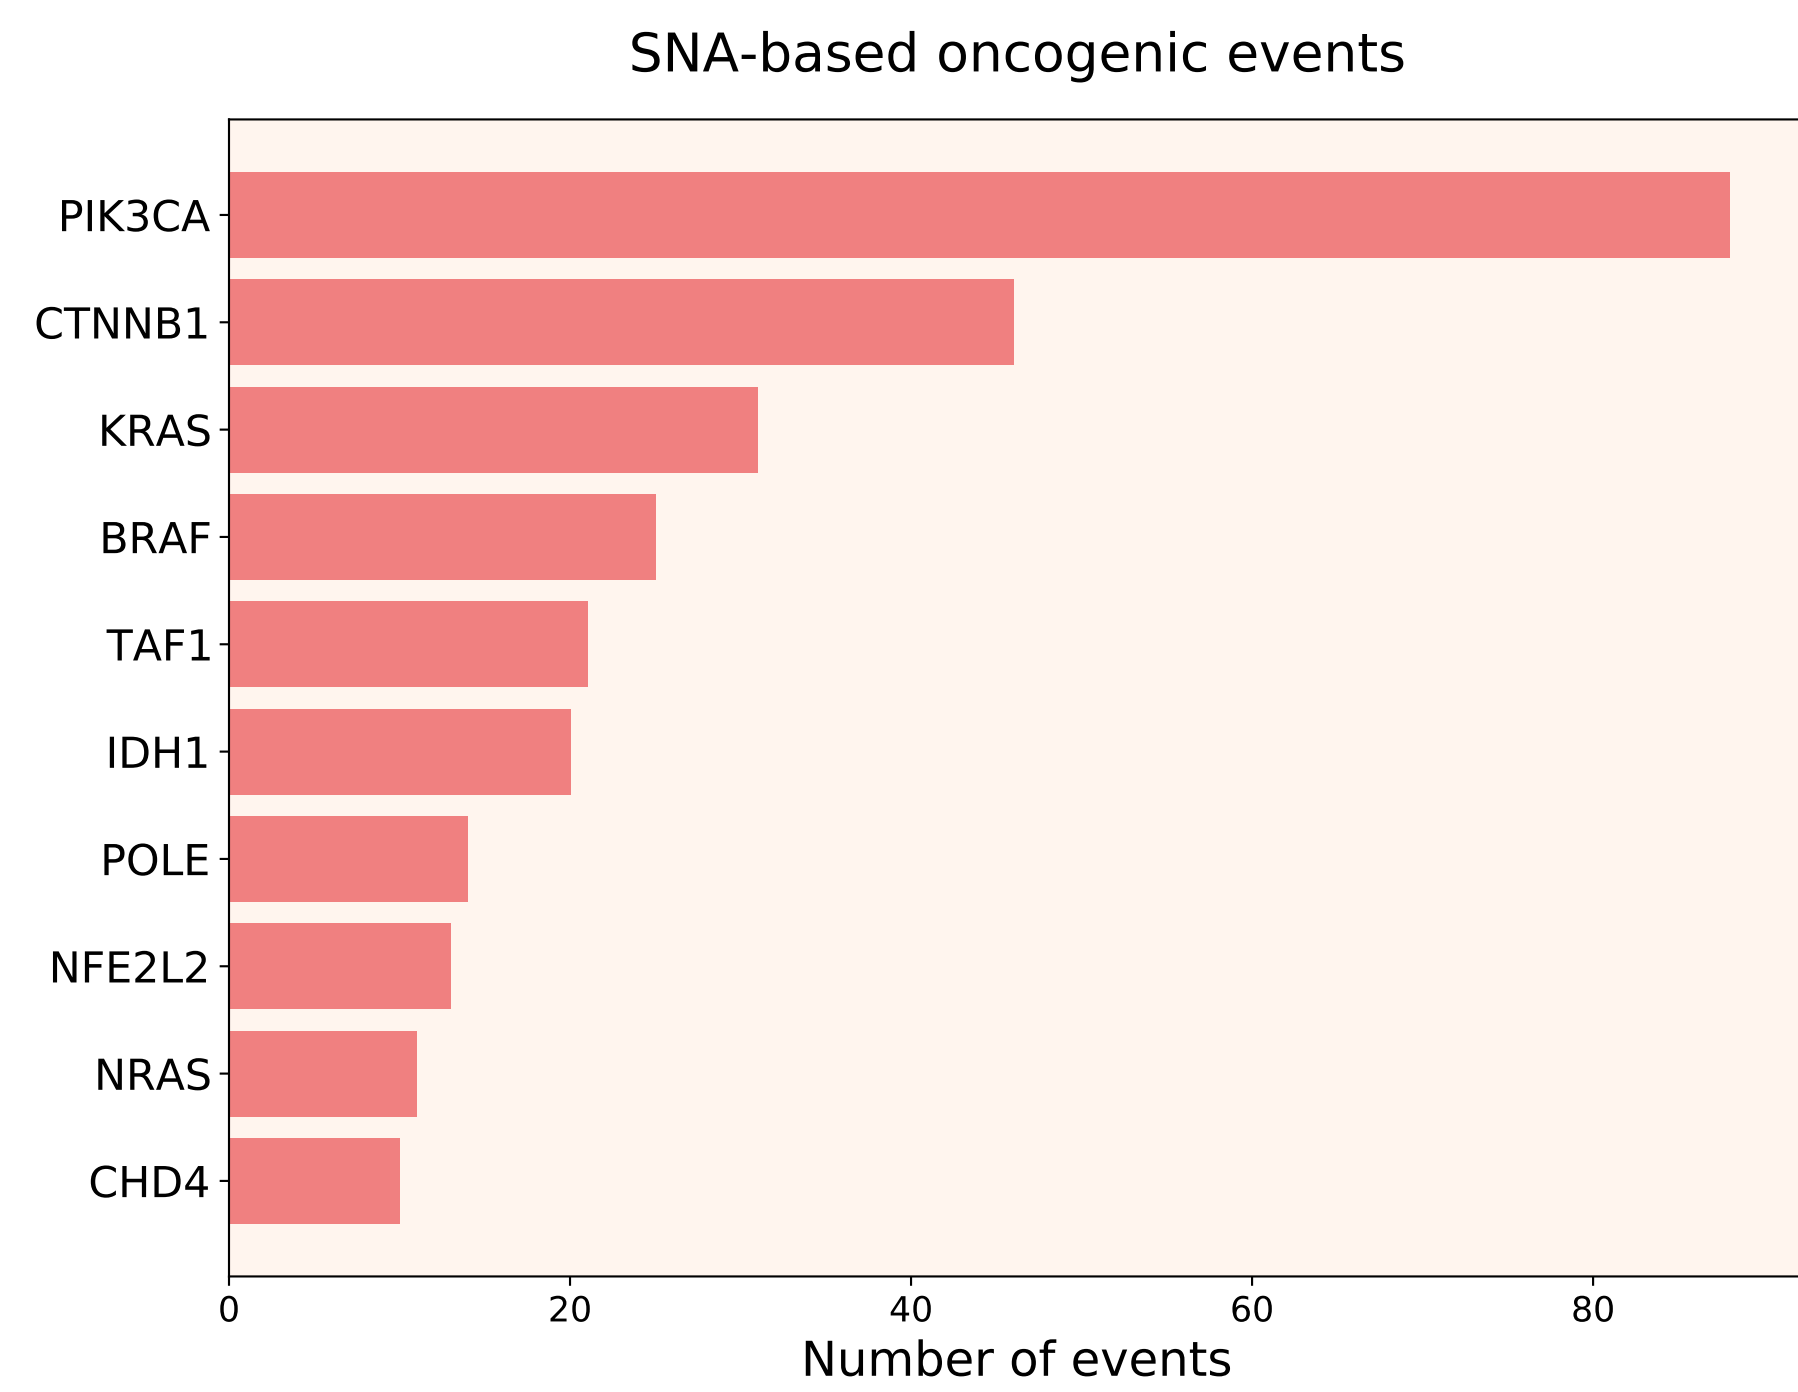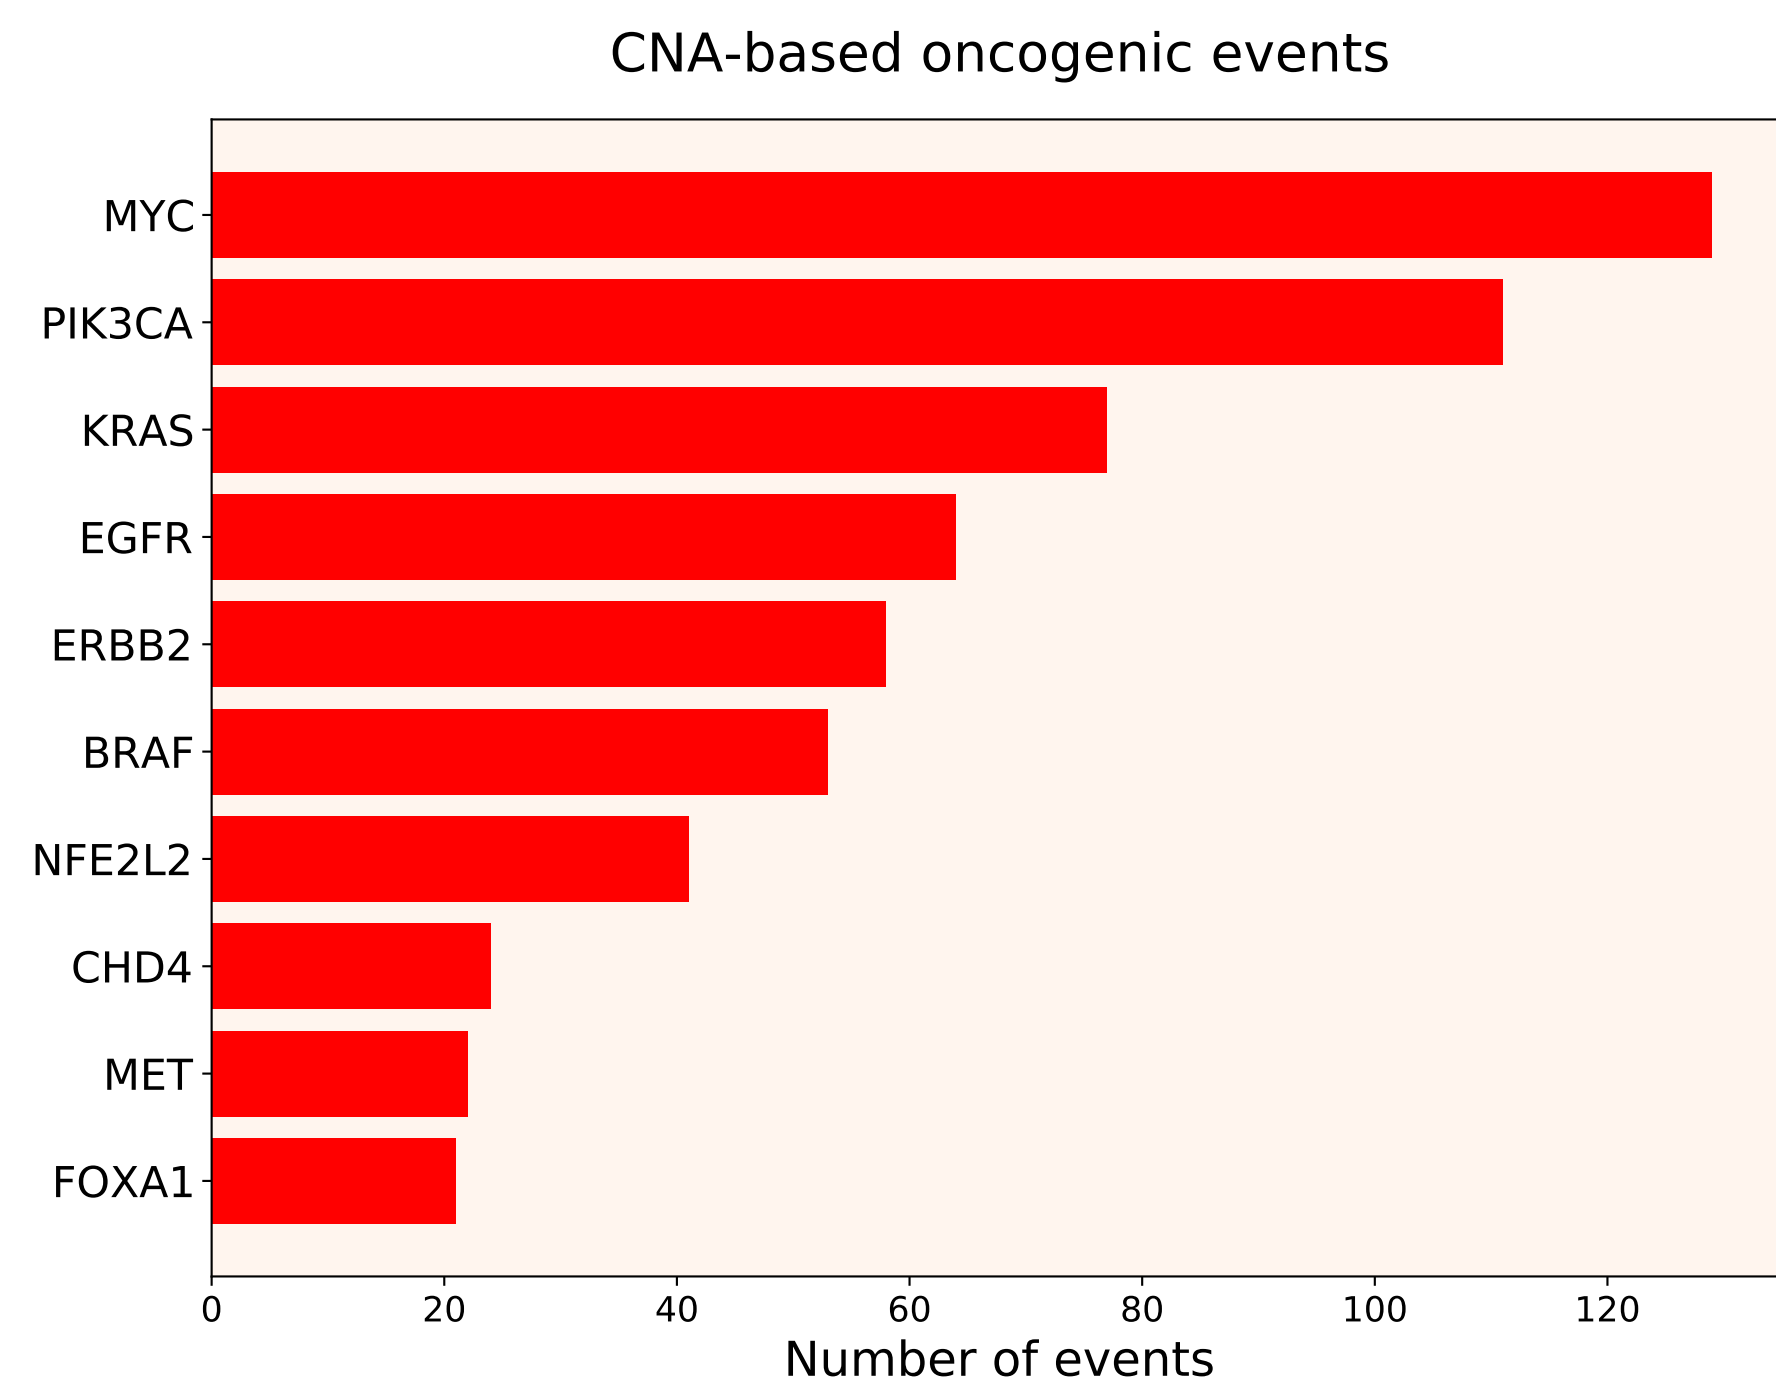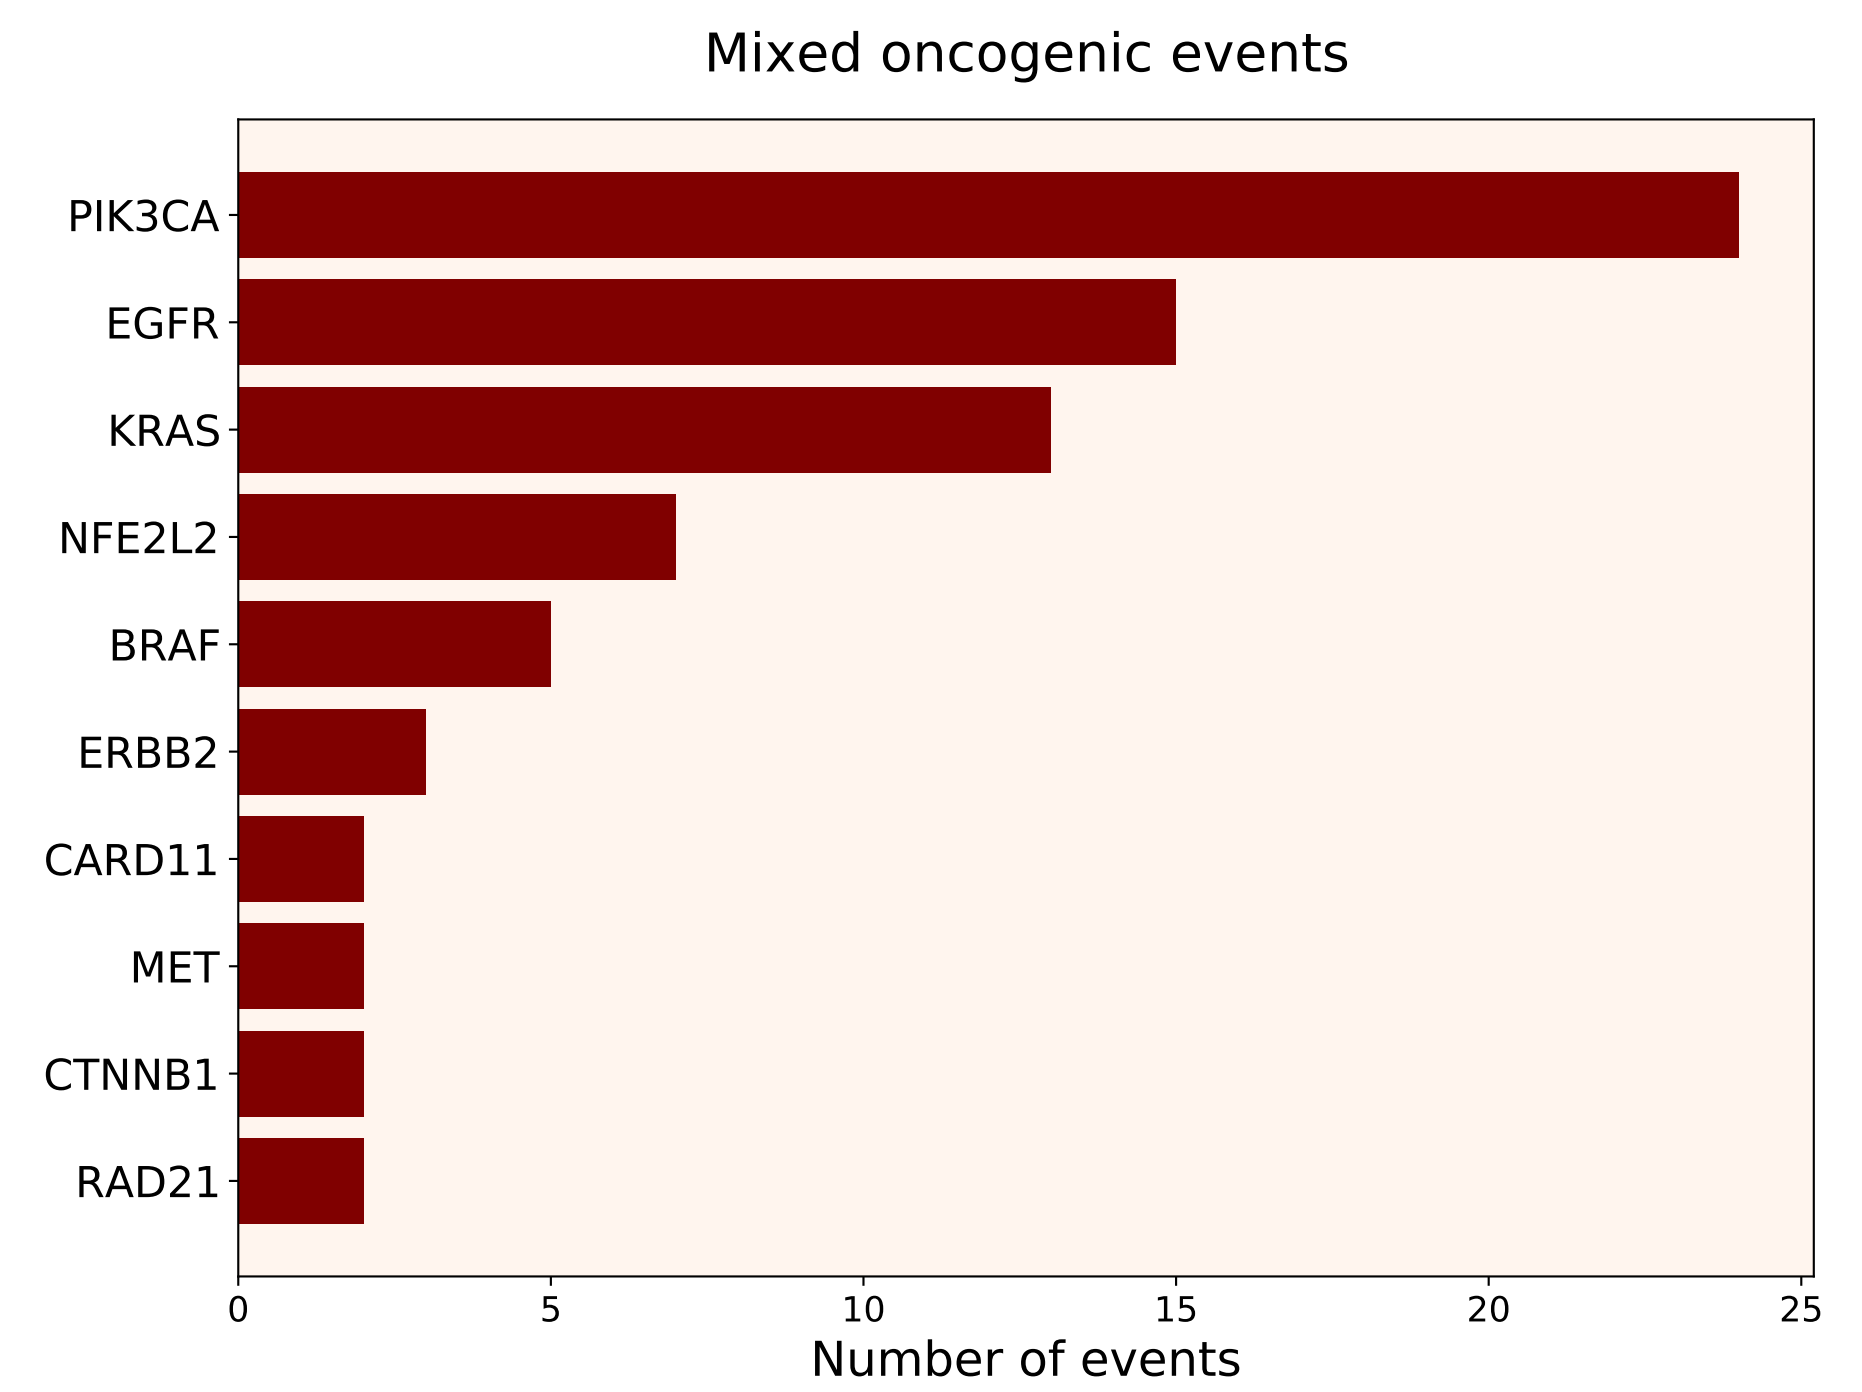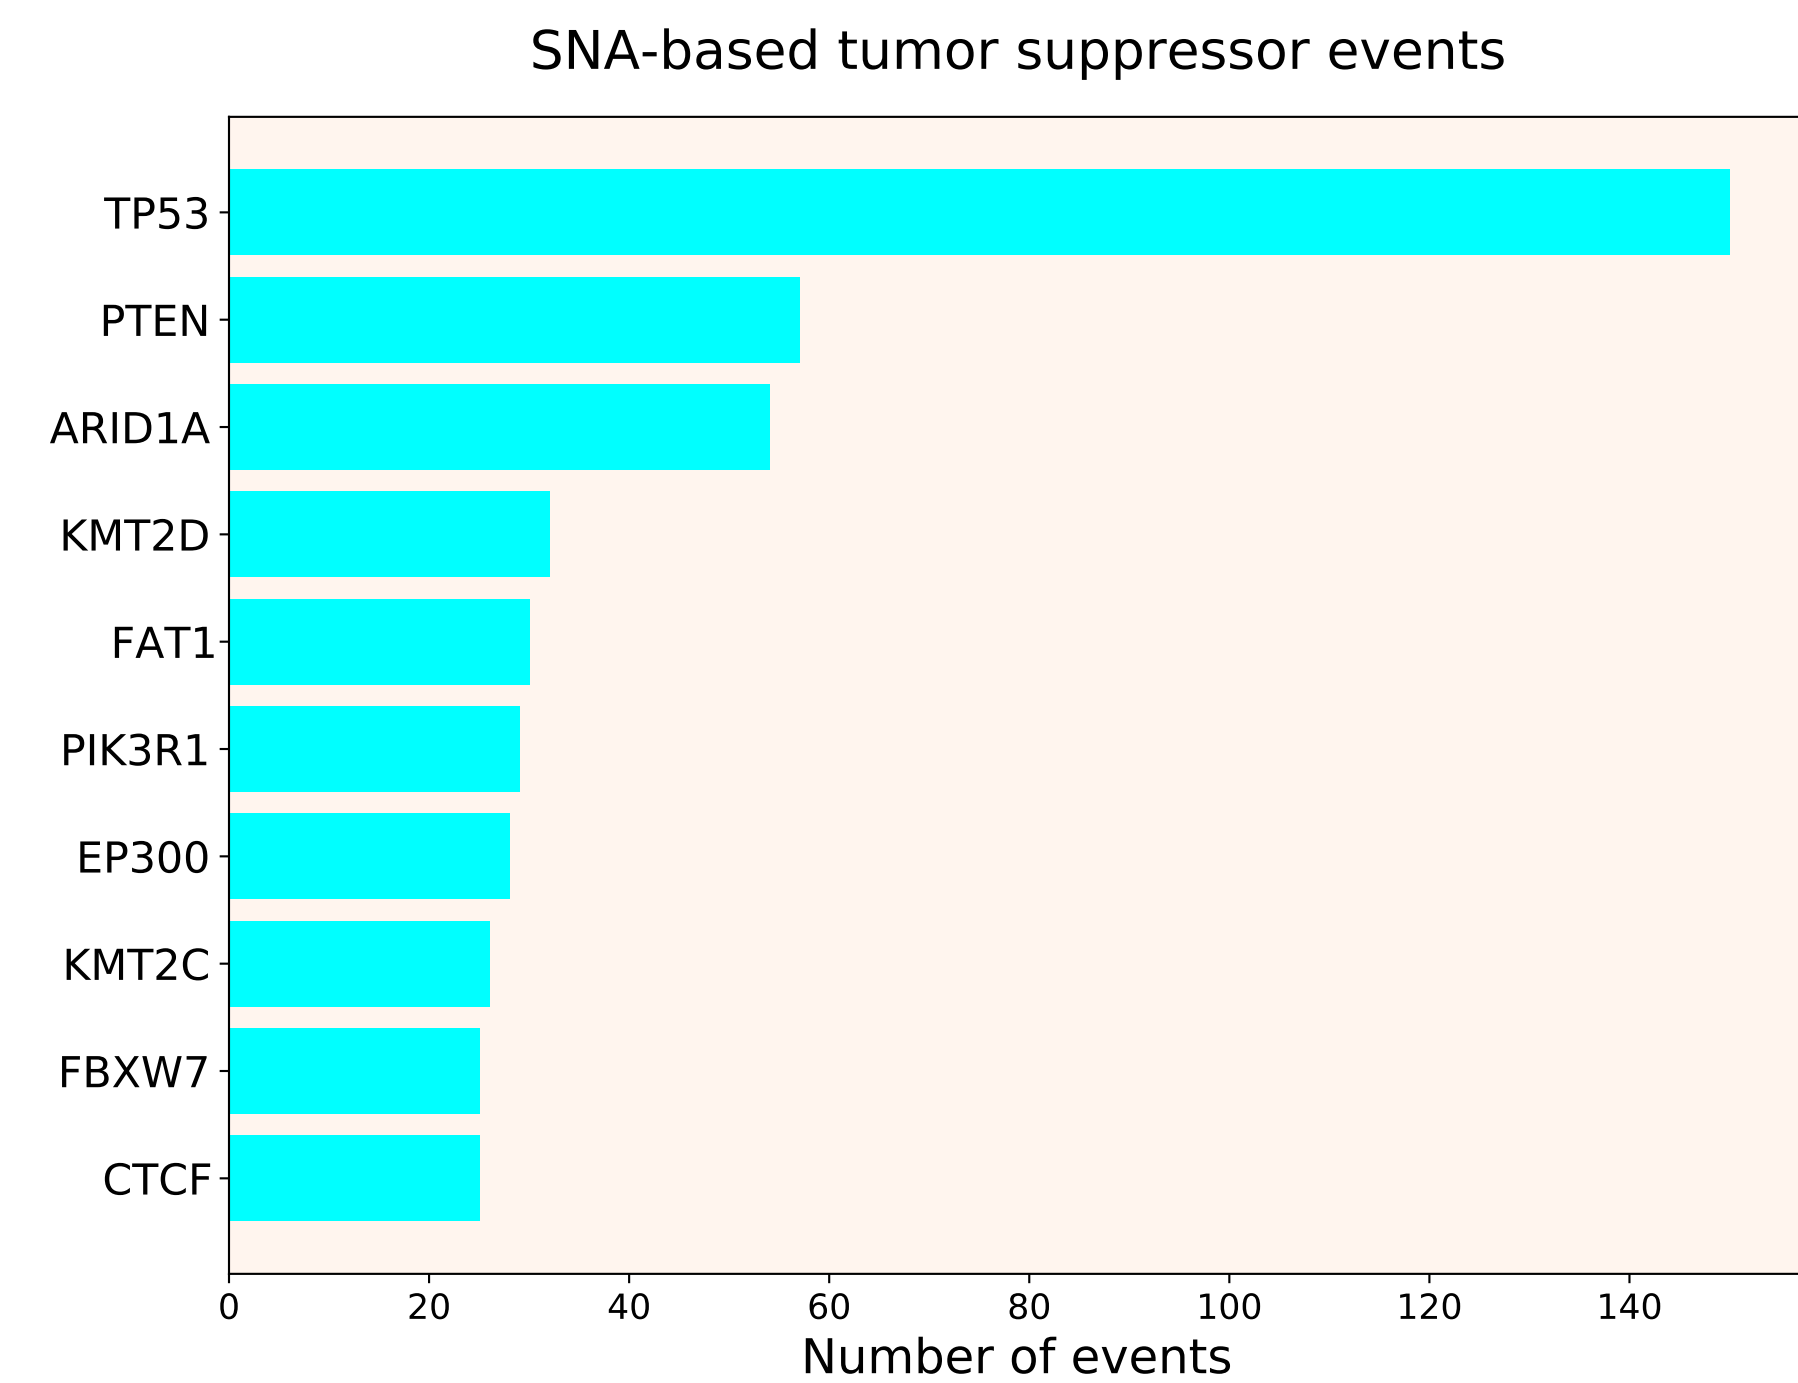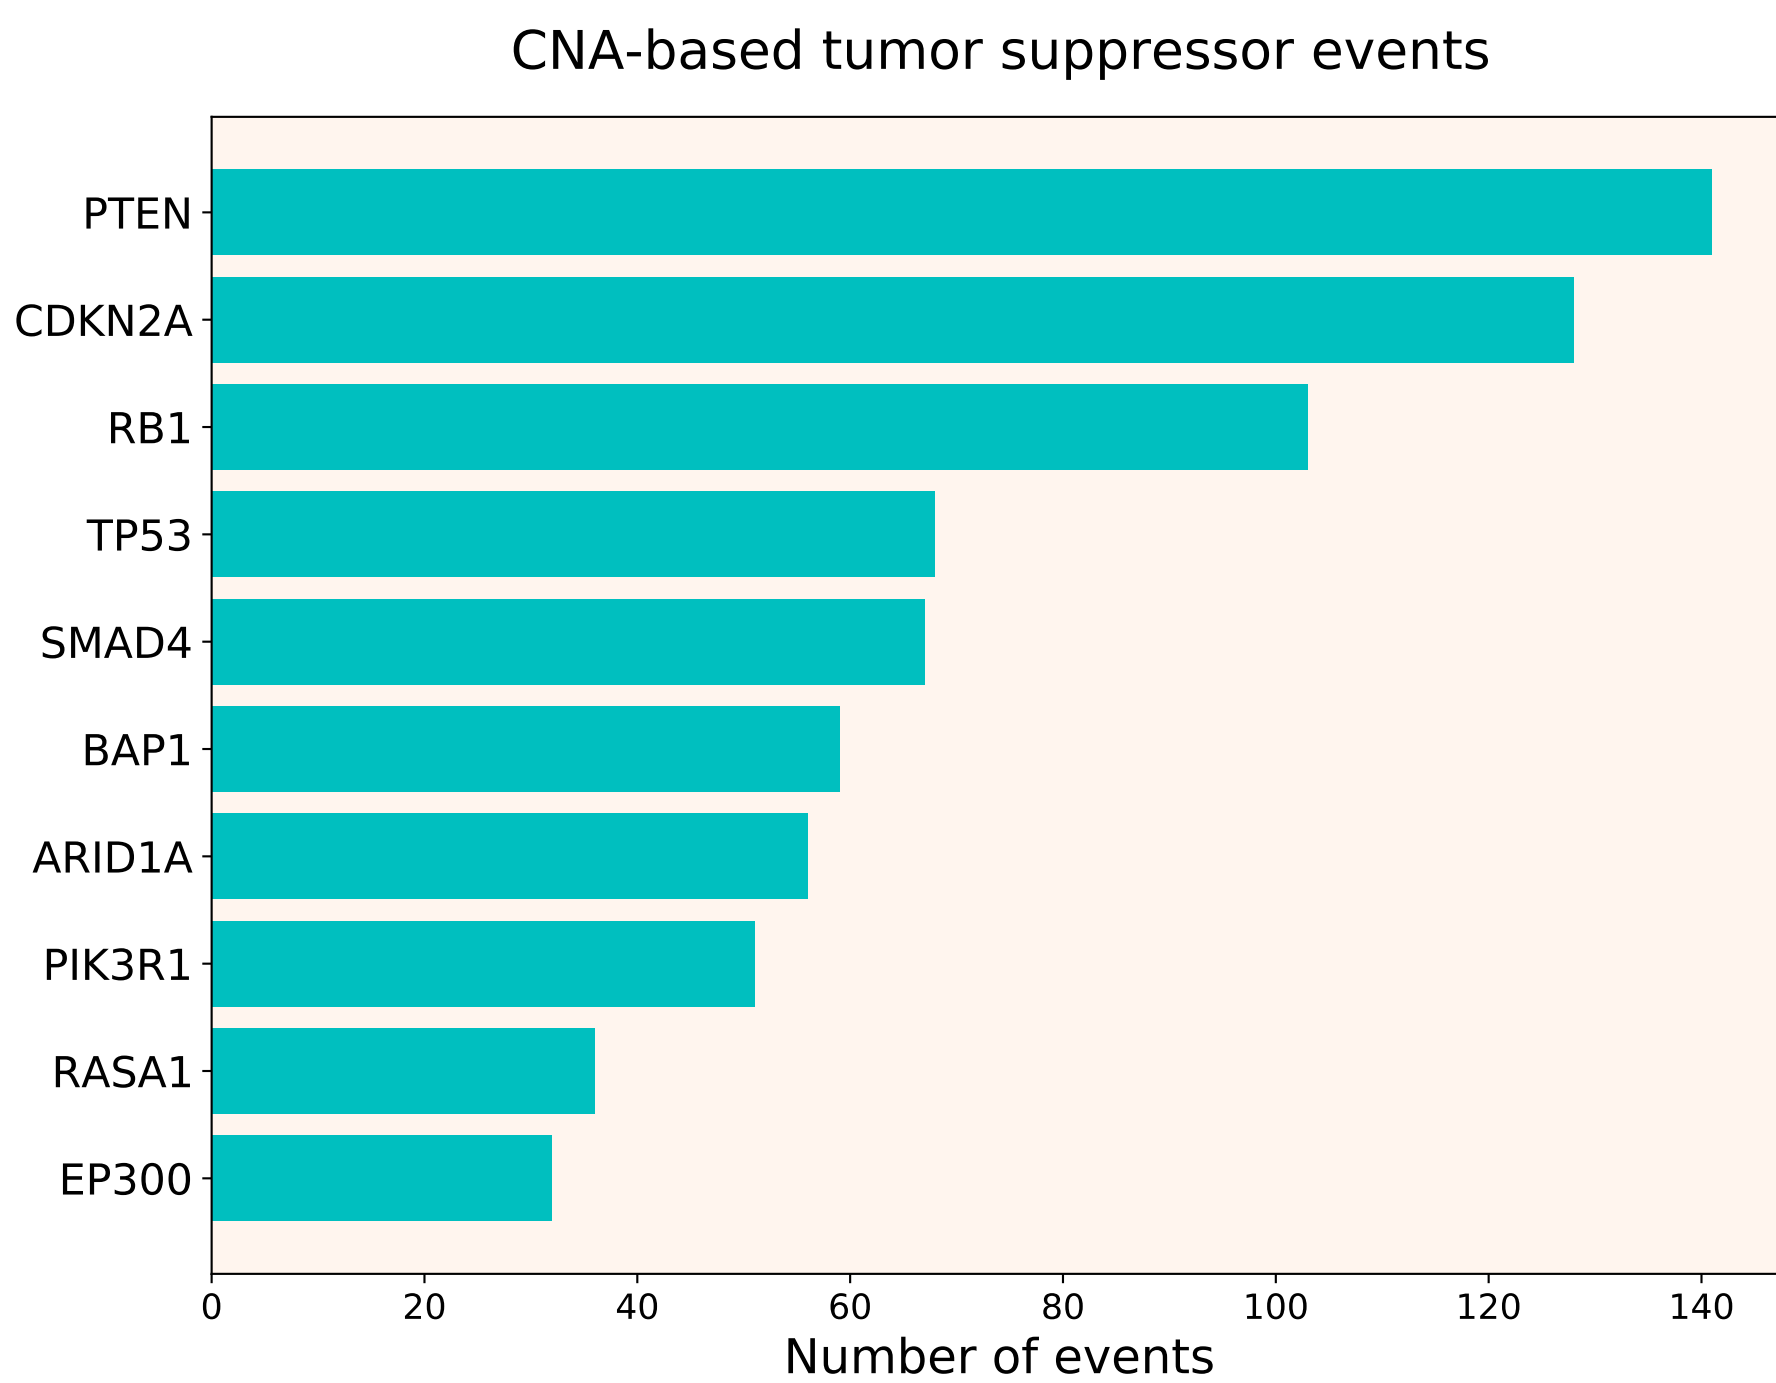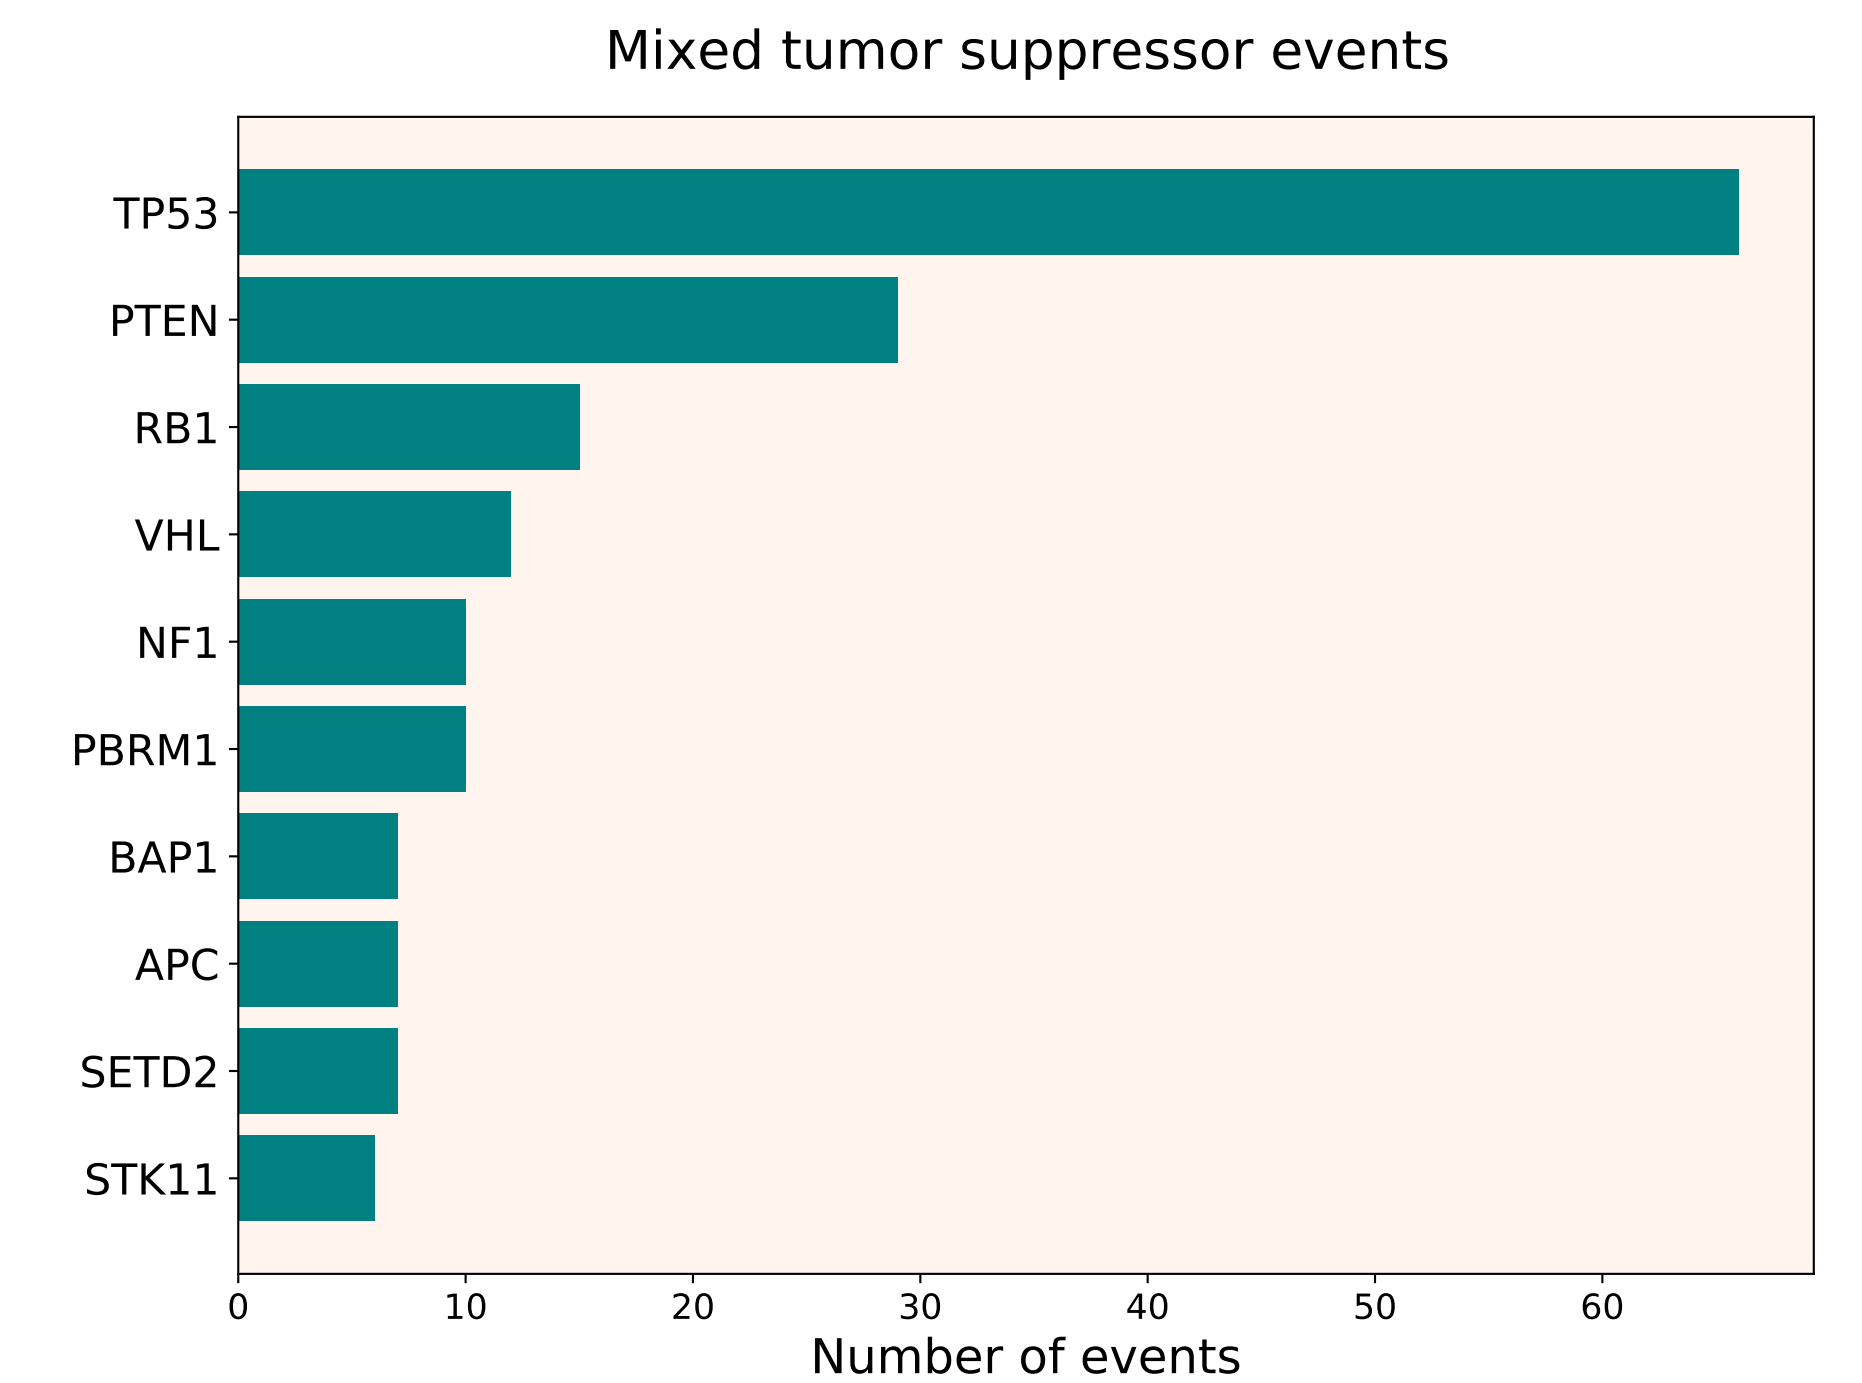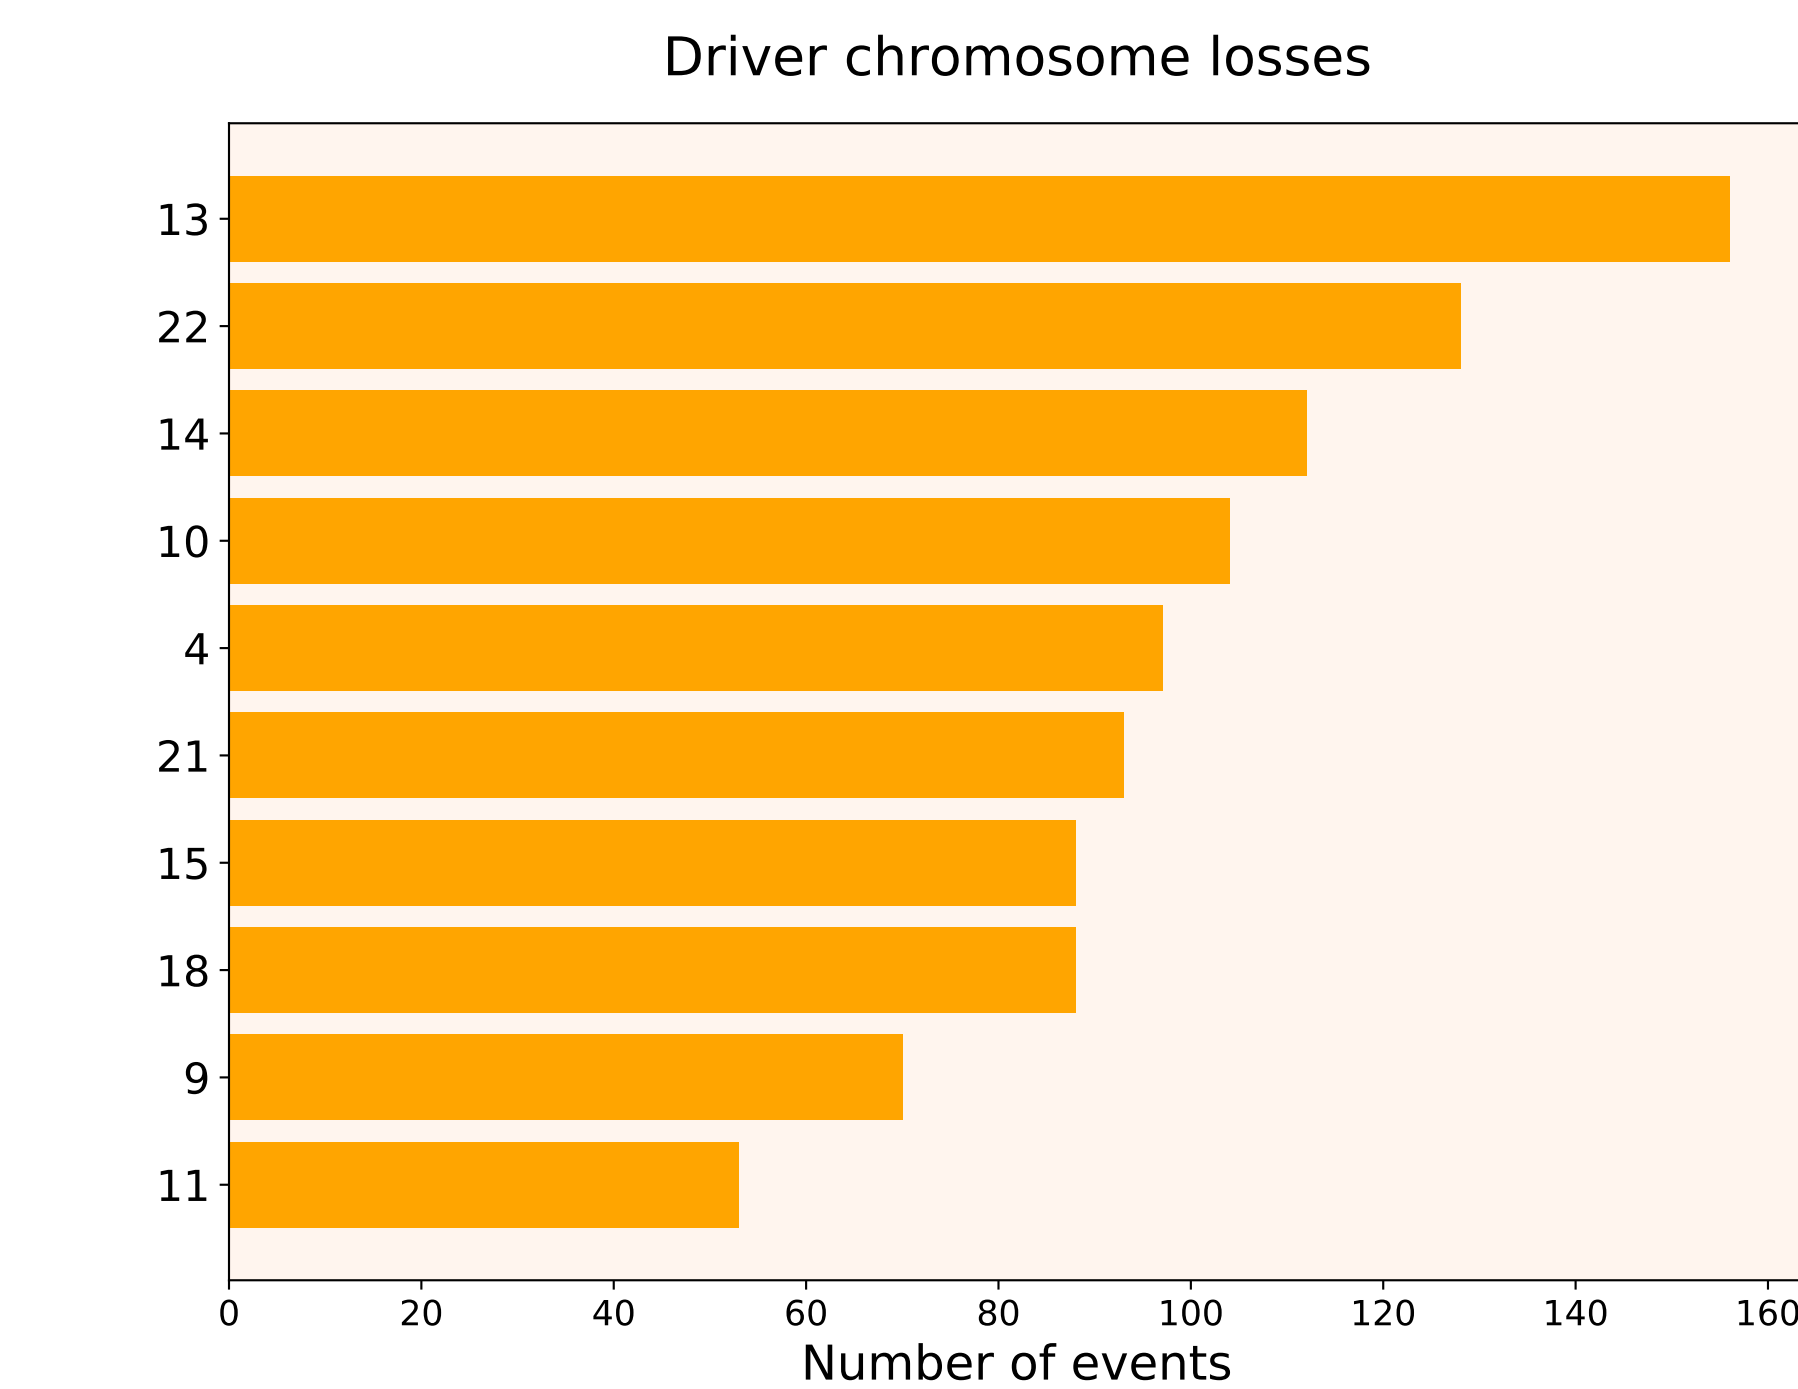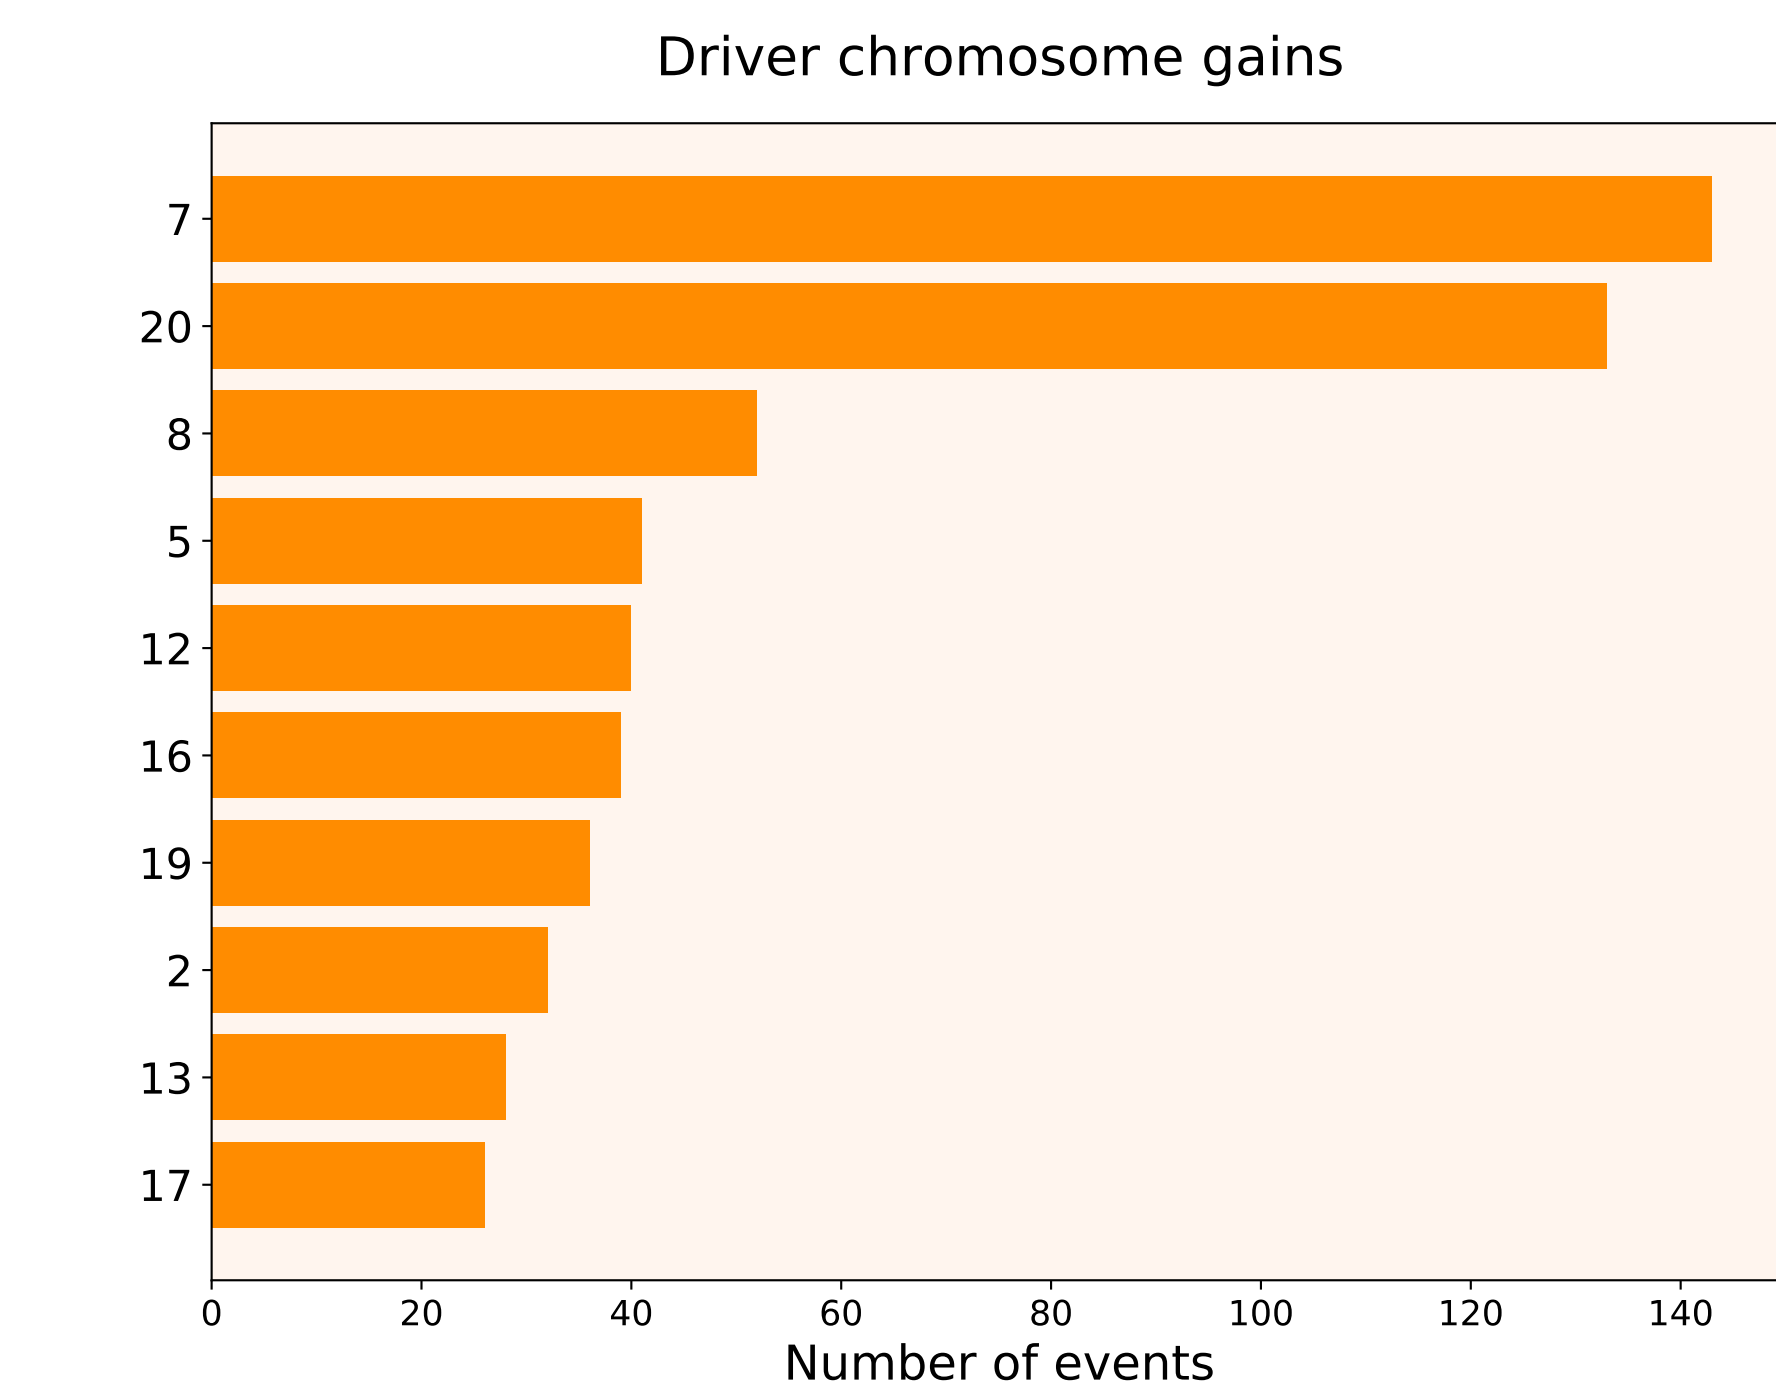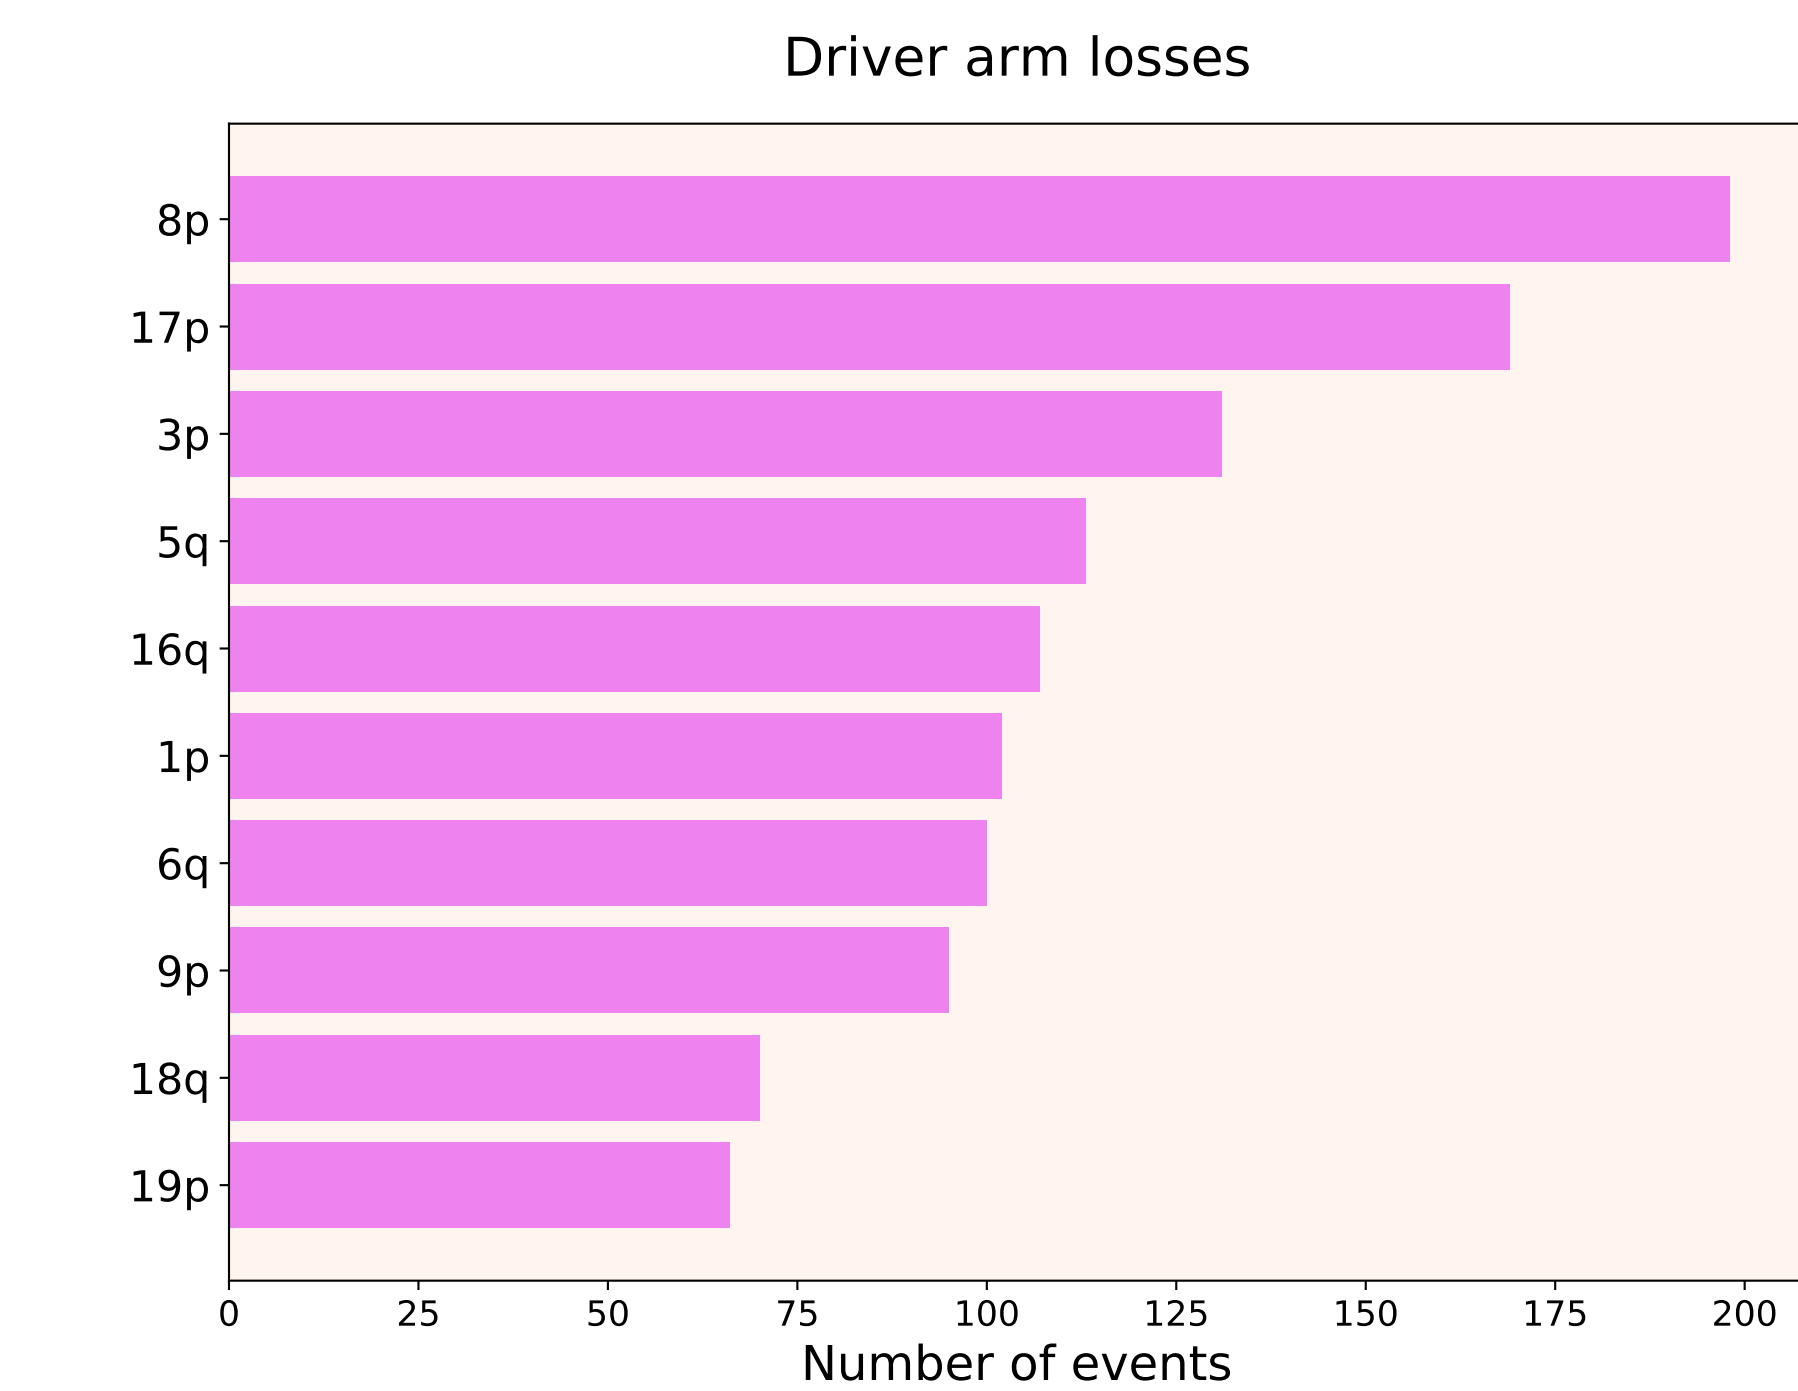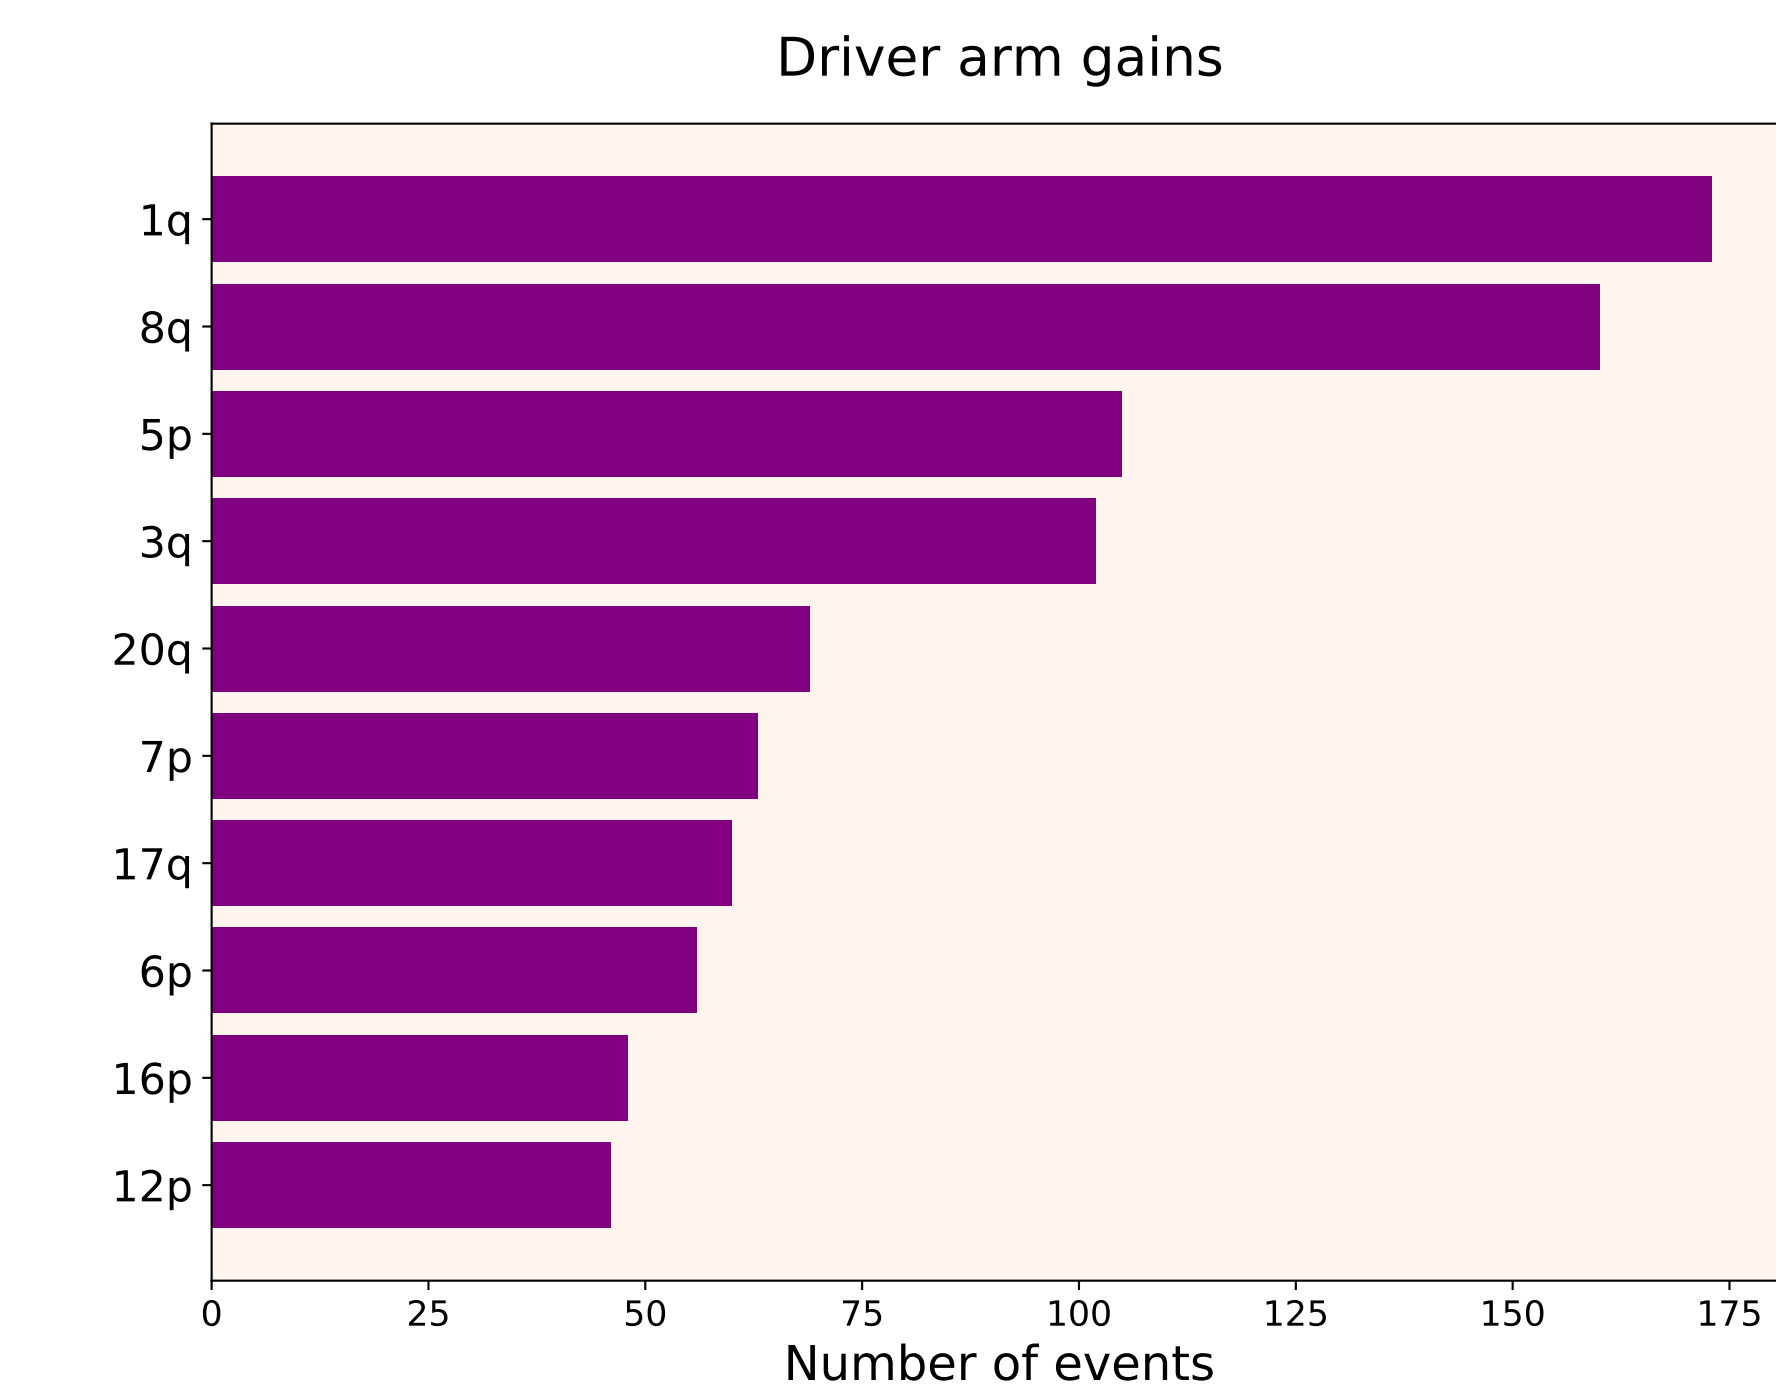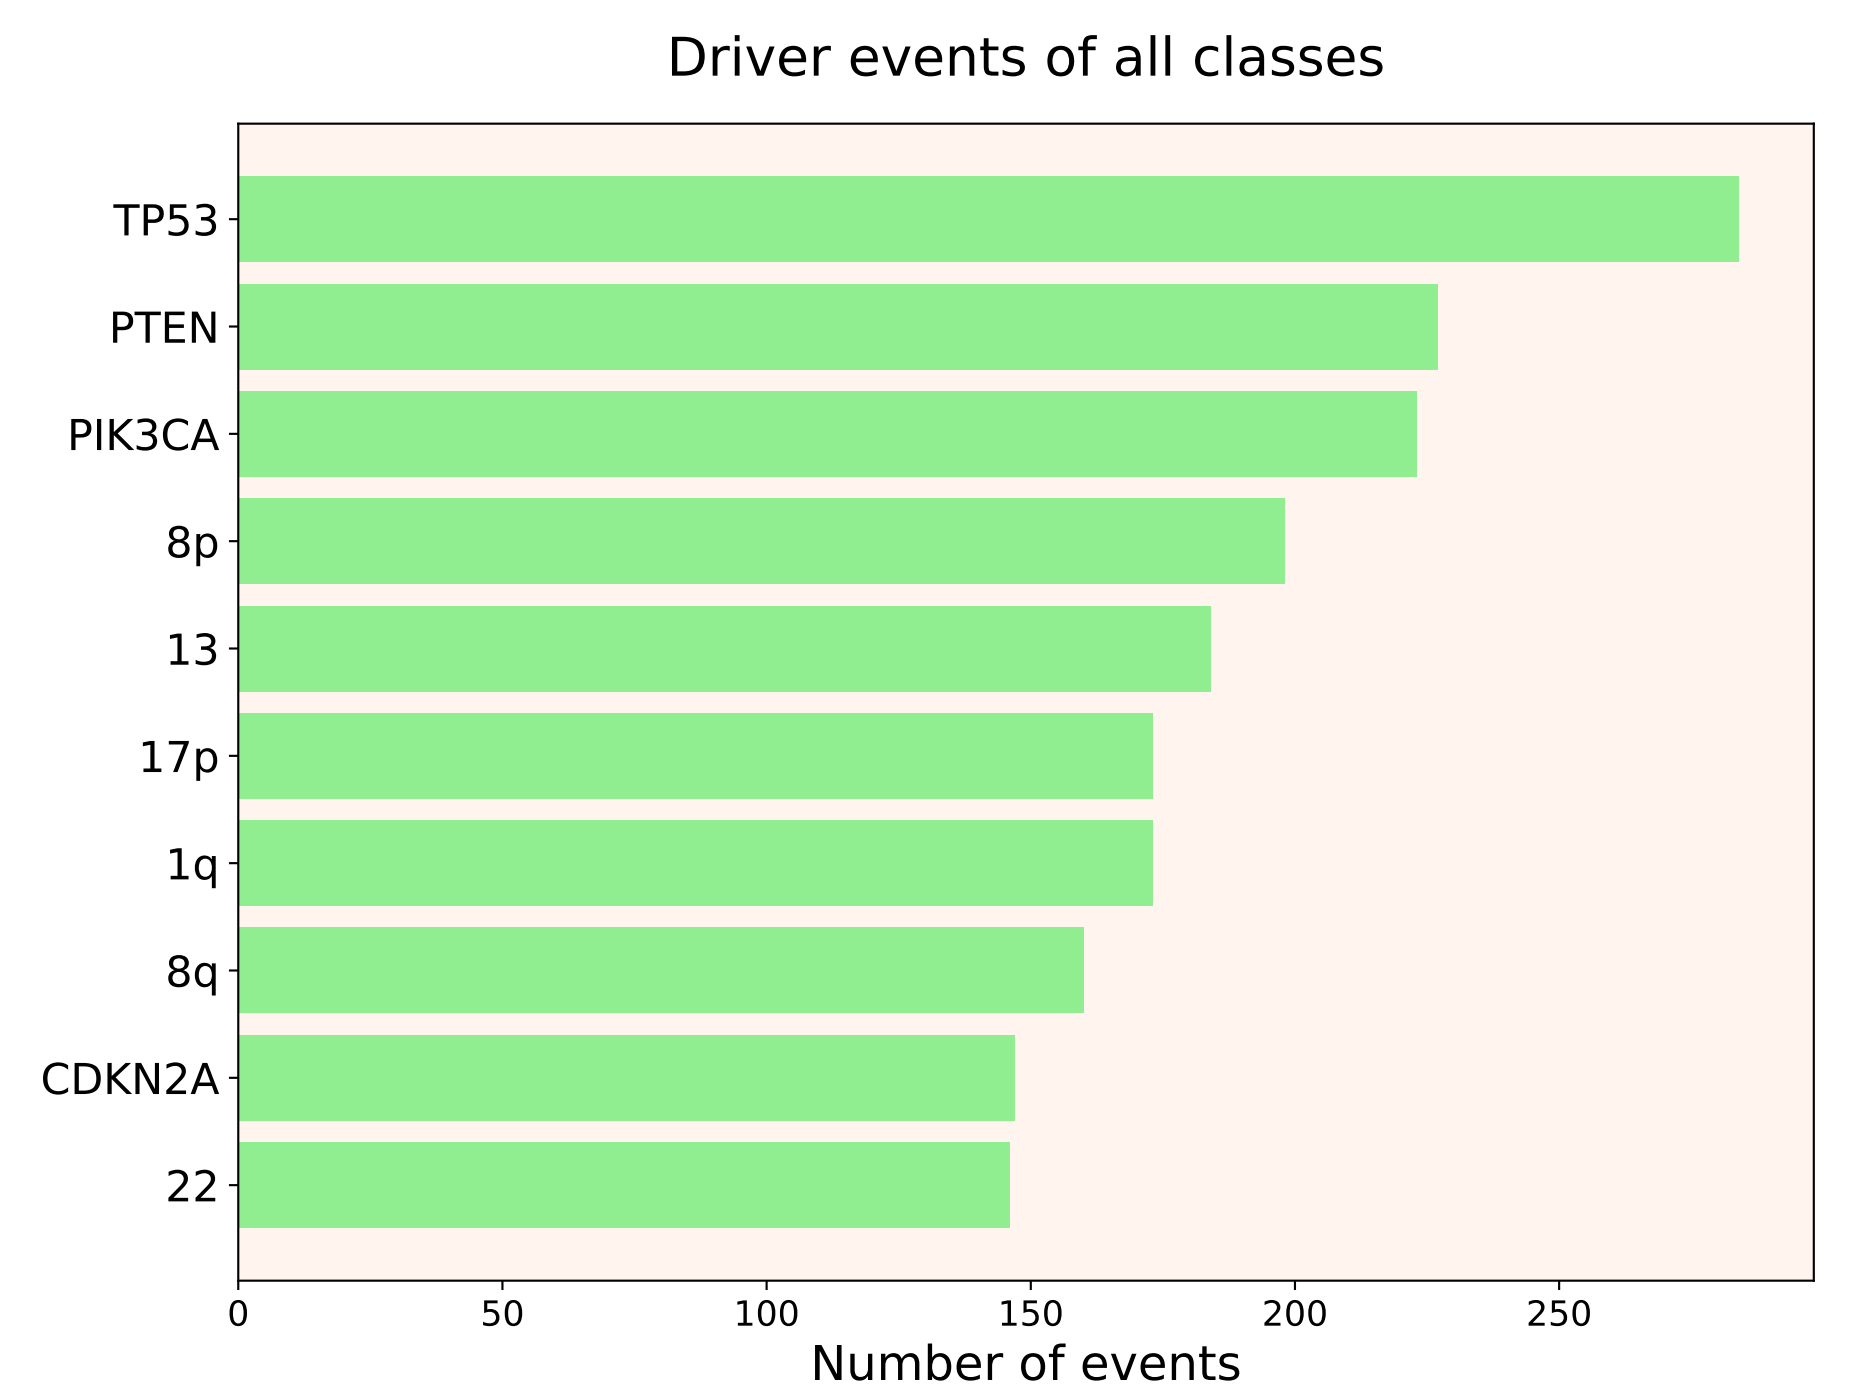

Supplement: Supplemental_Data_S1.zip [file Supplemental_Data_S1.zip]

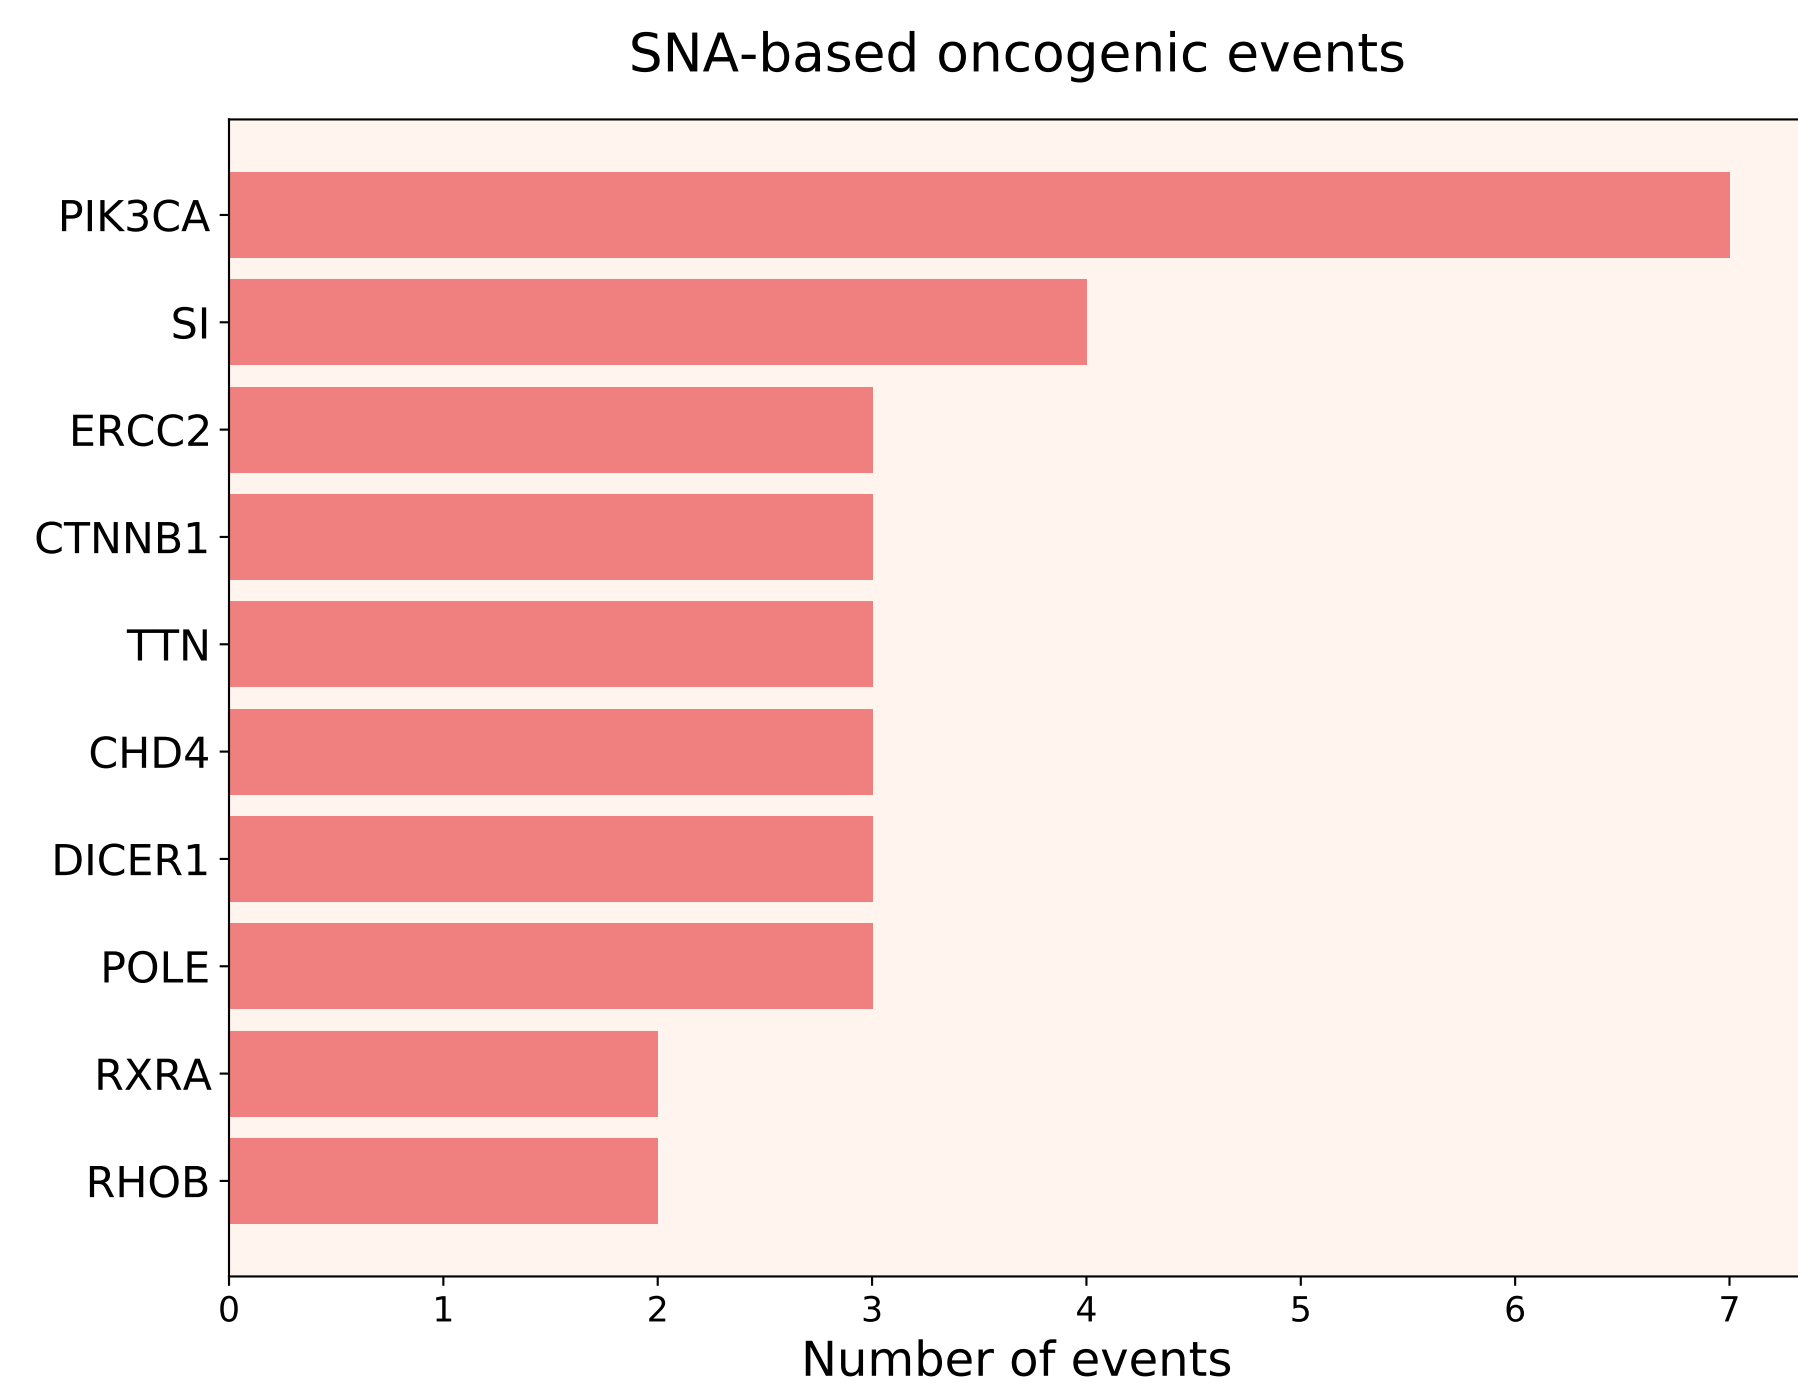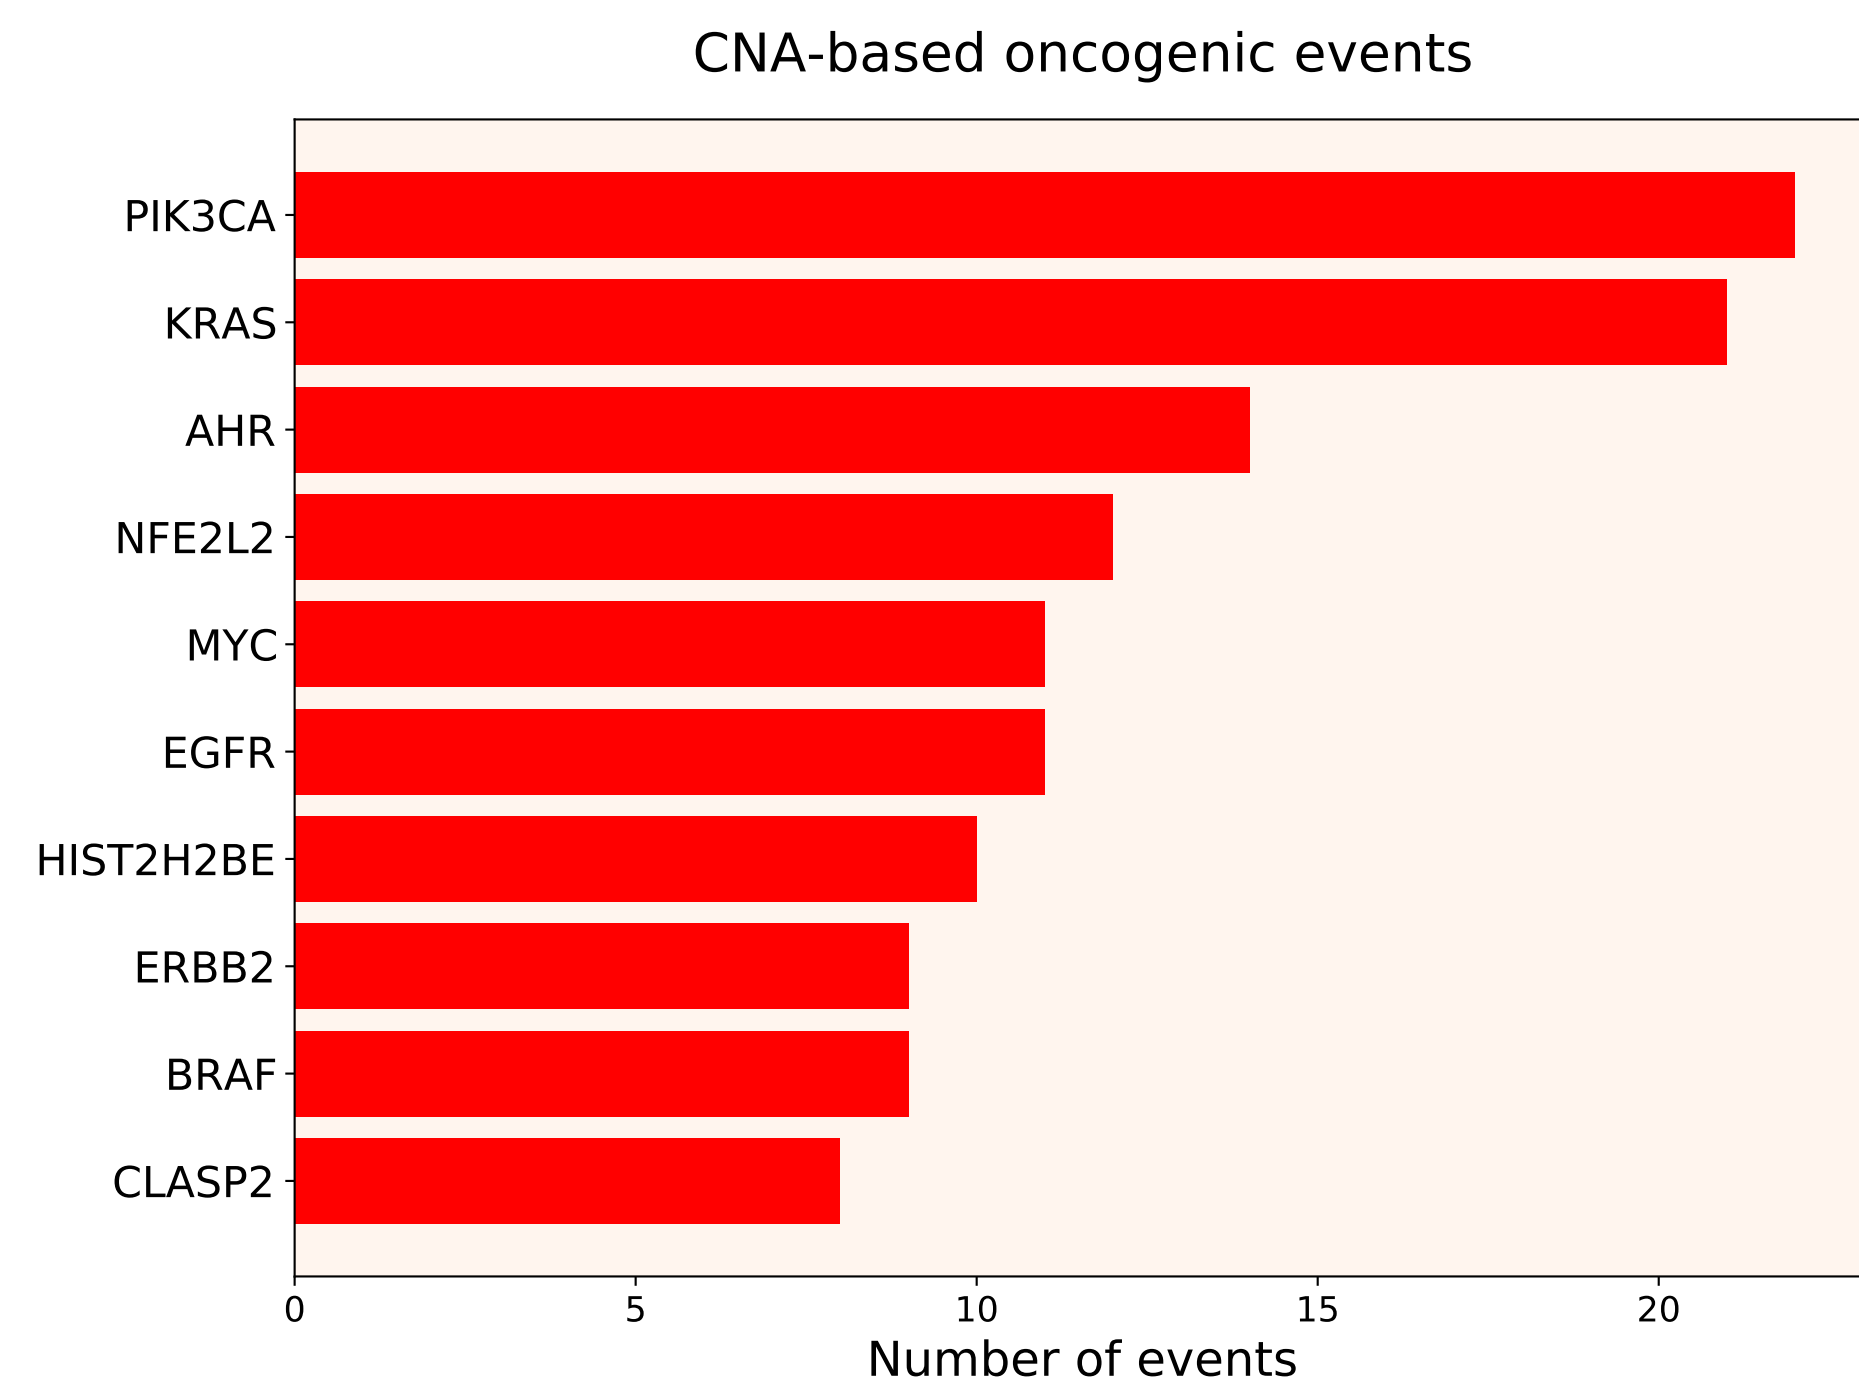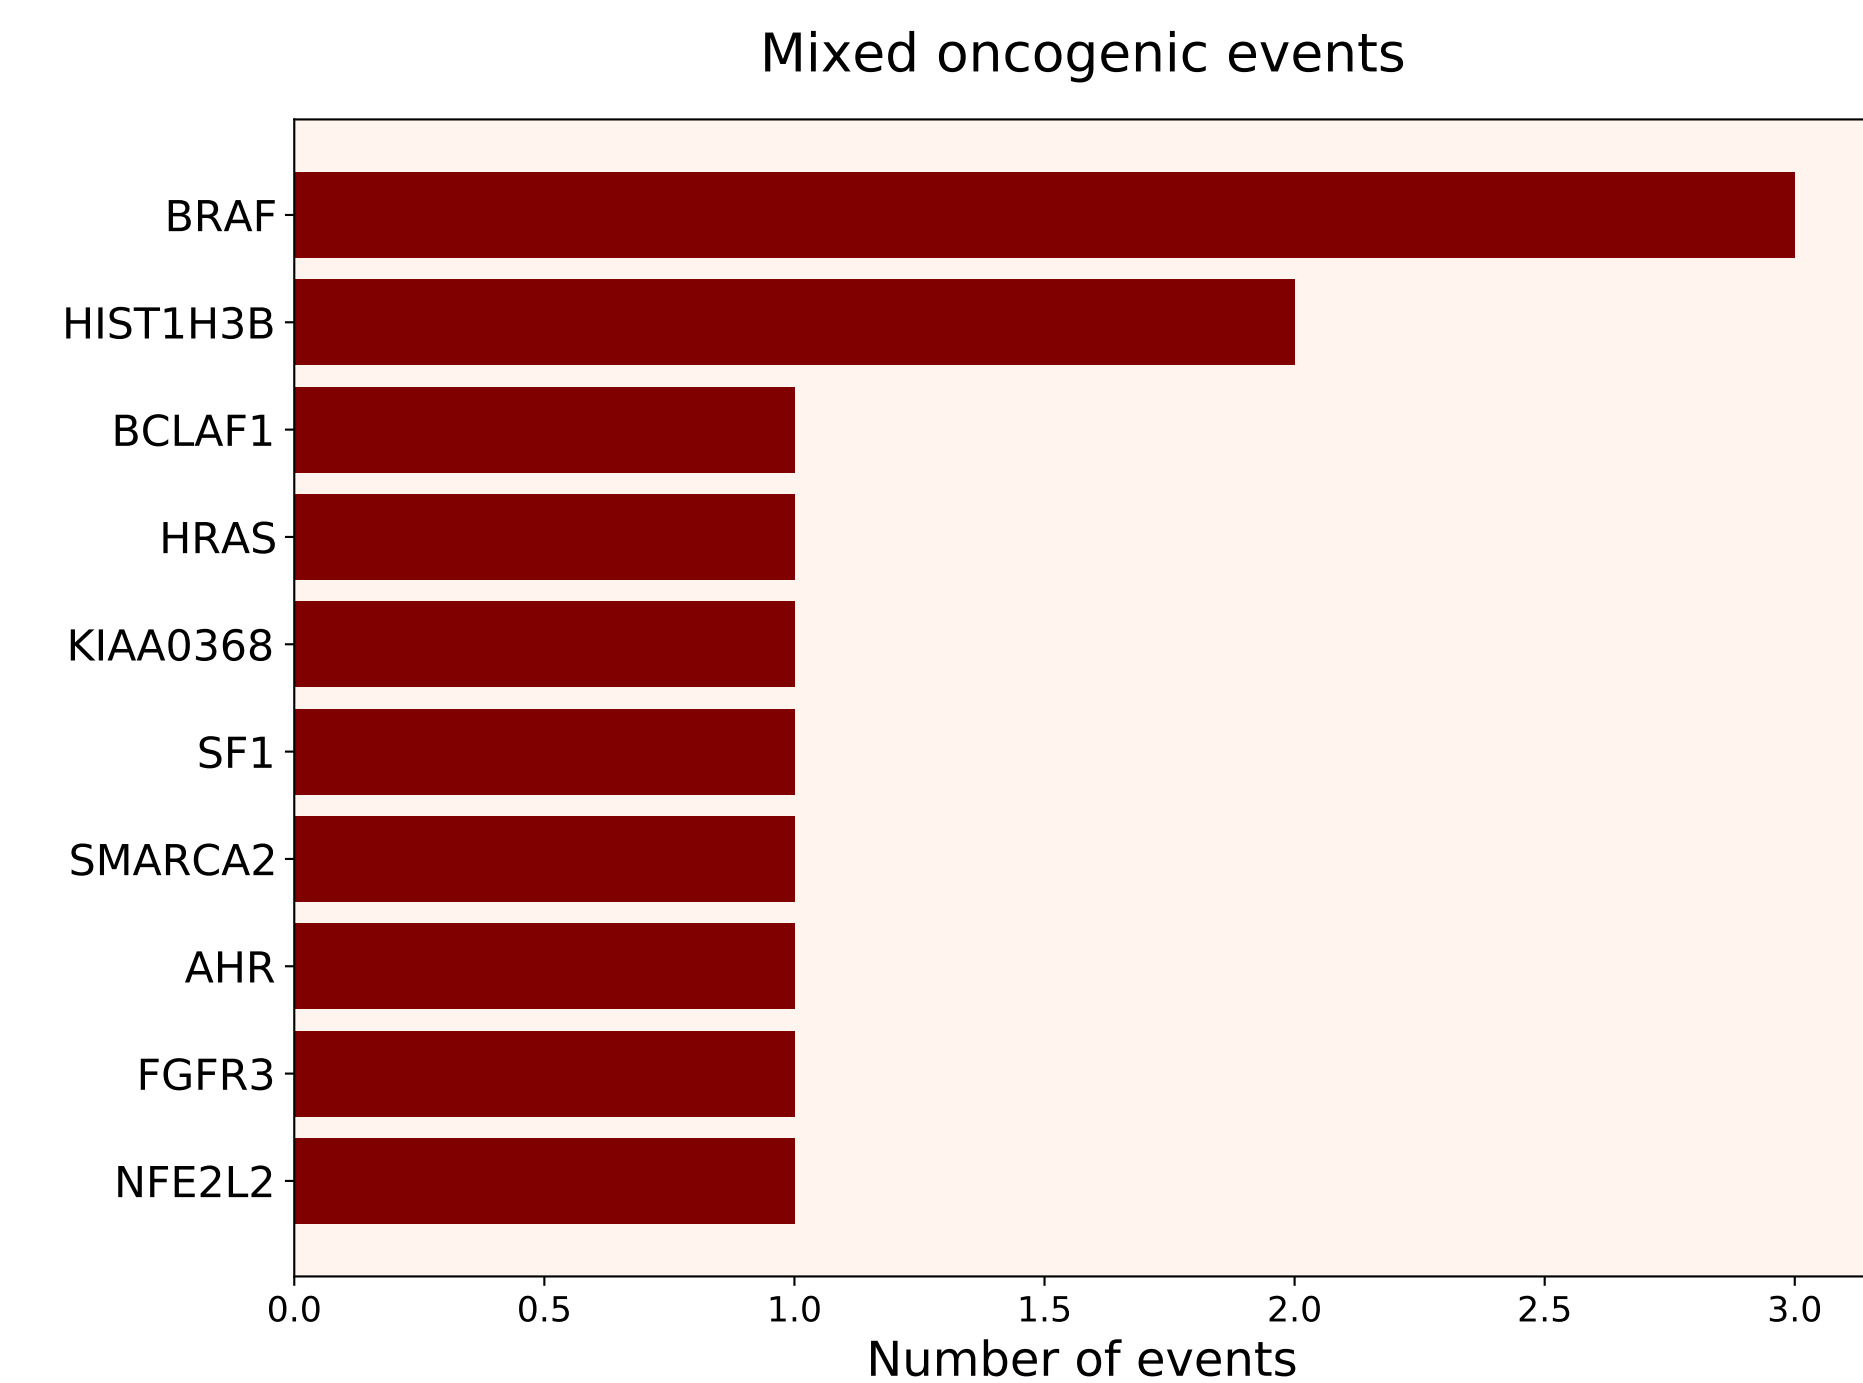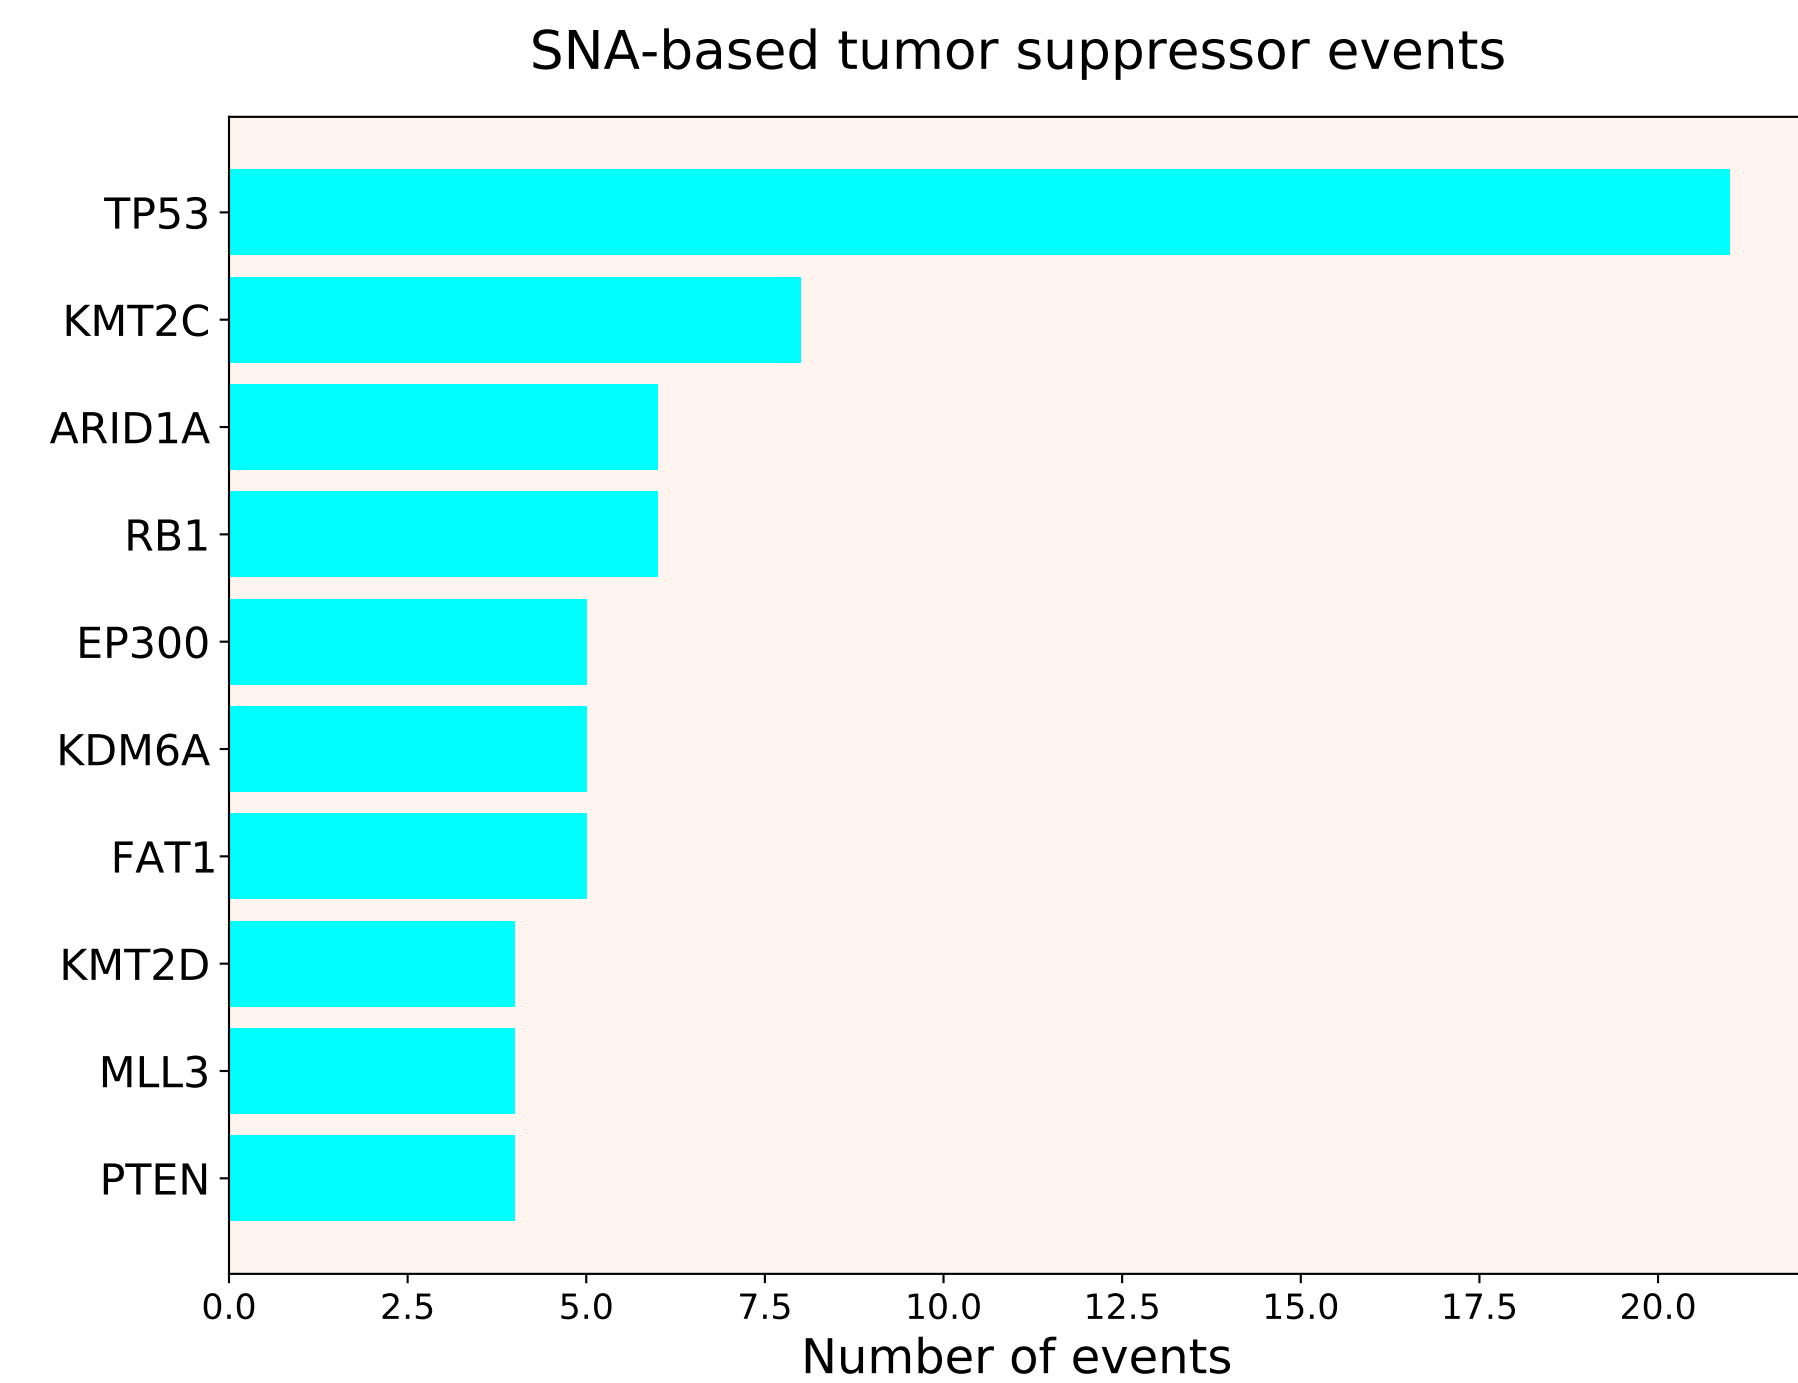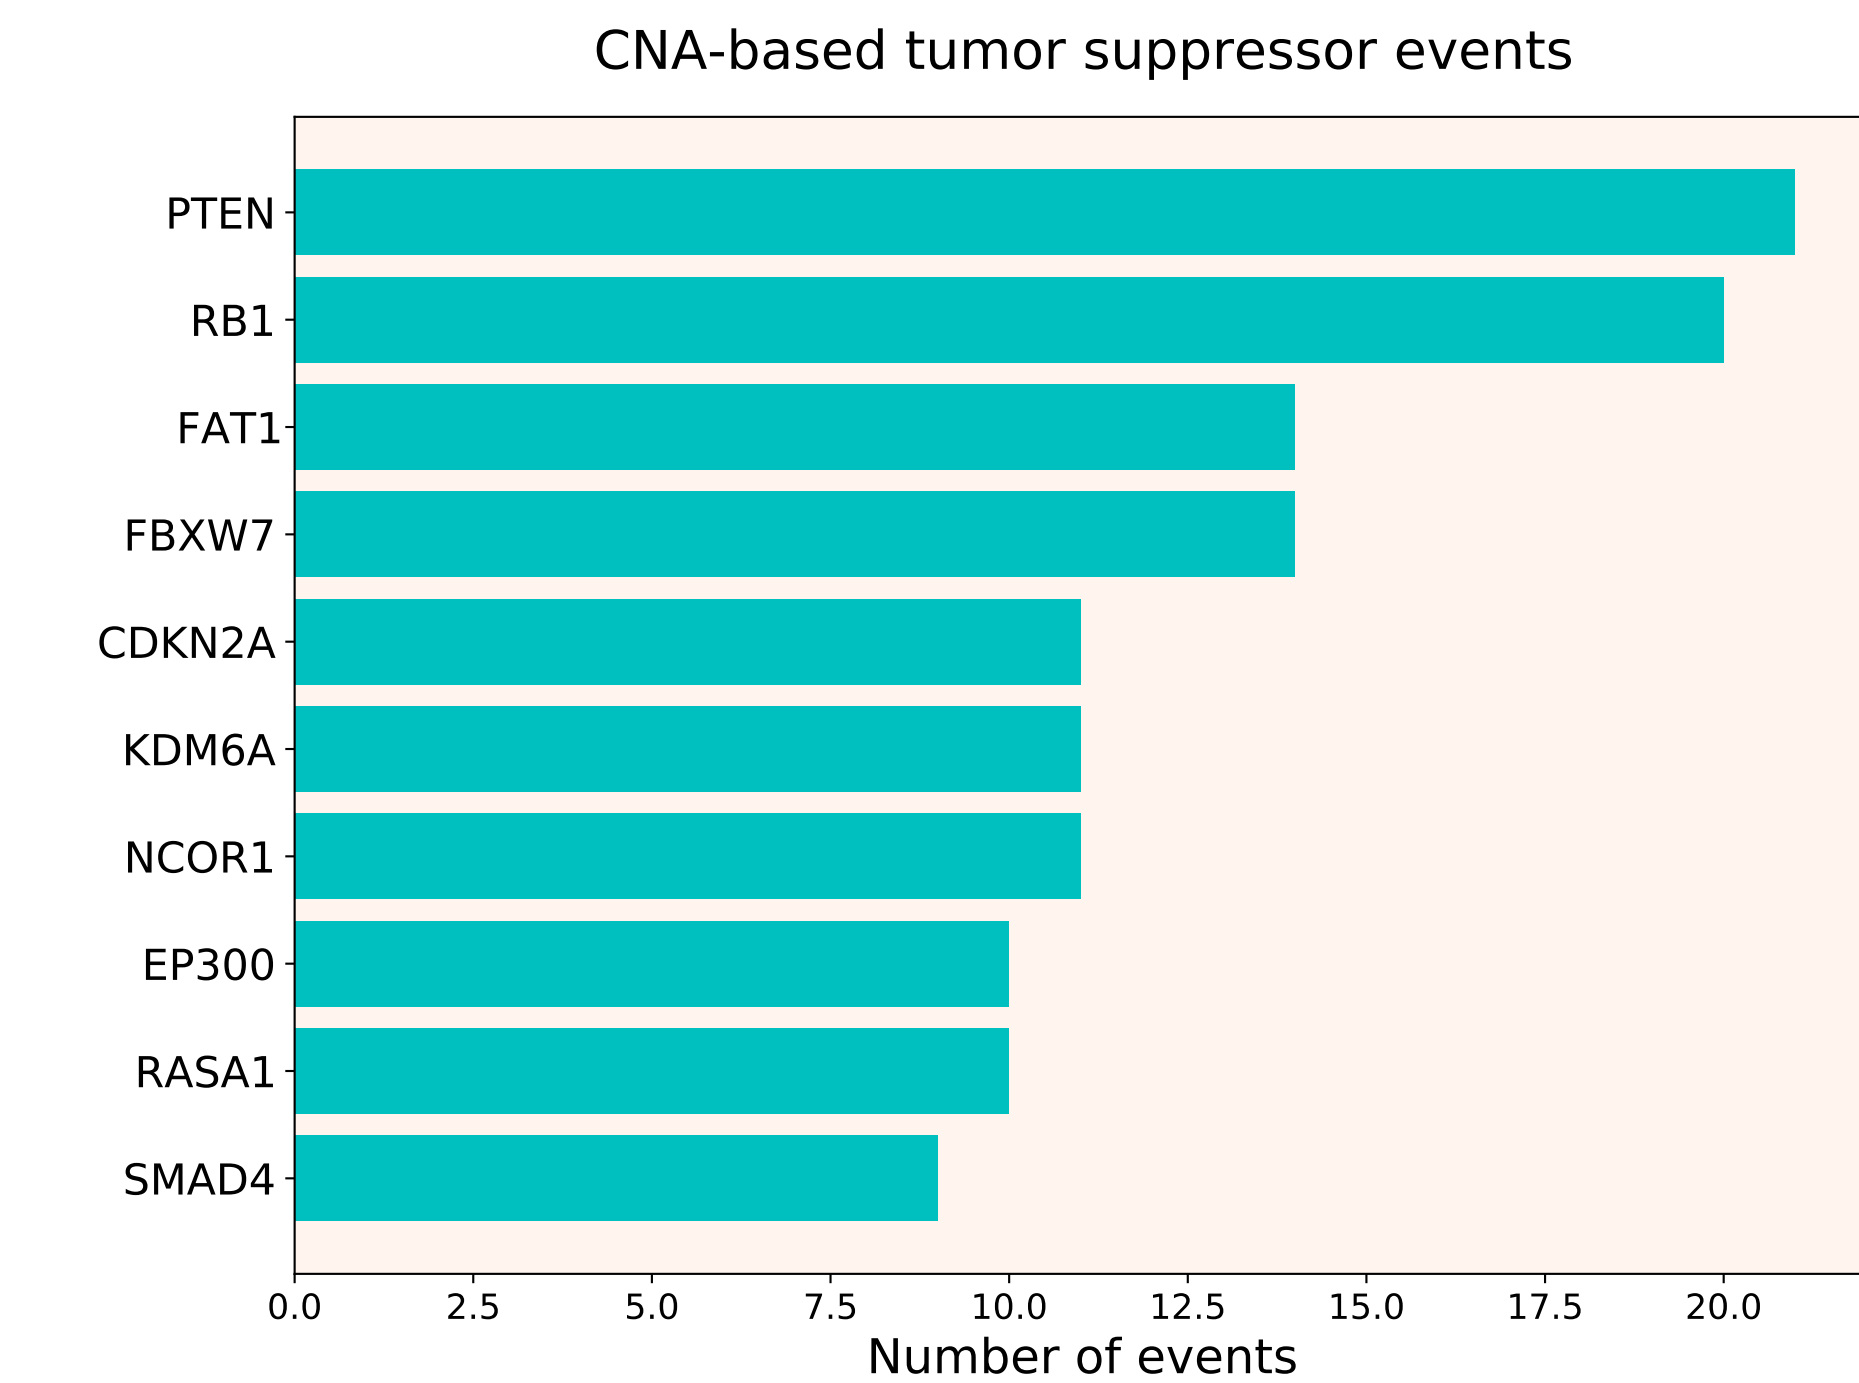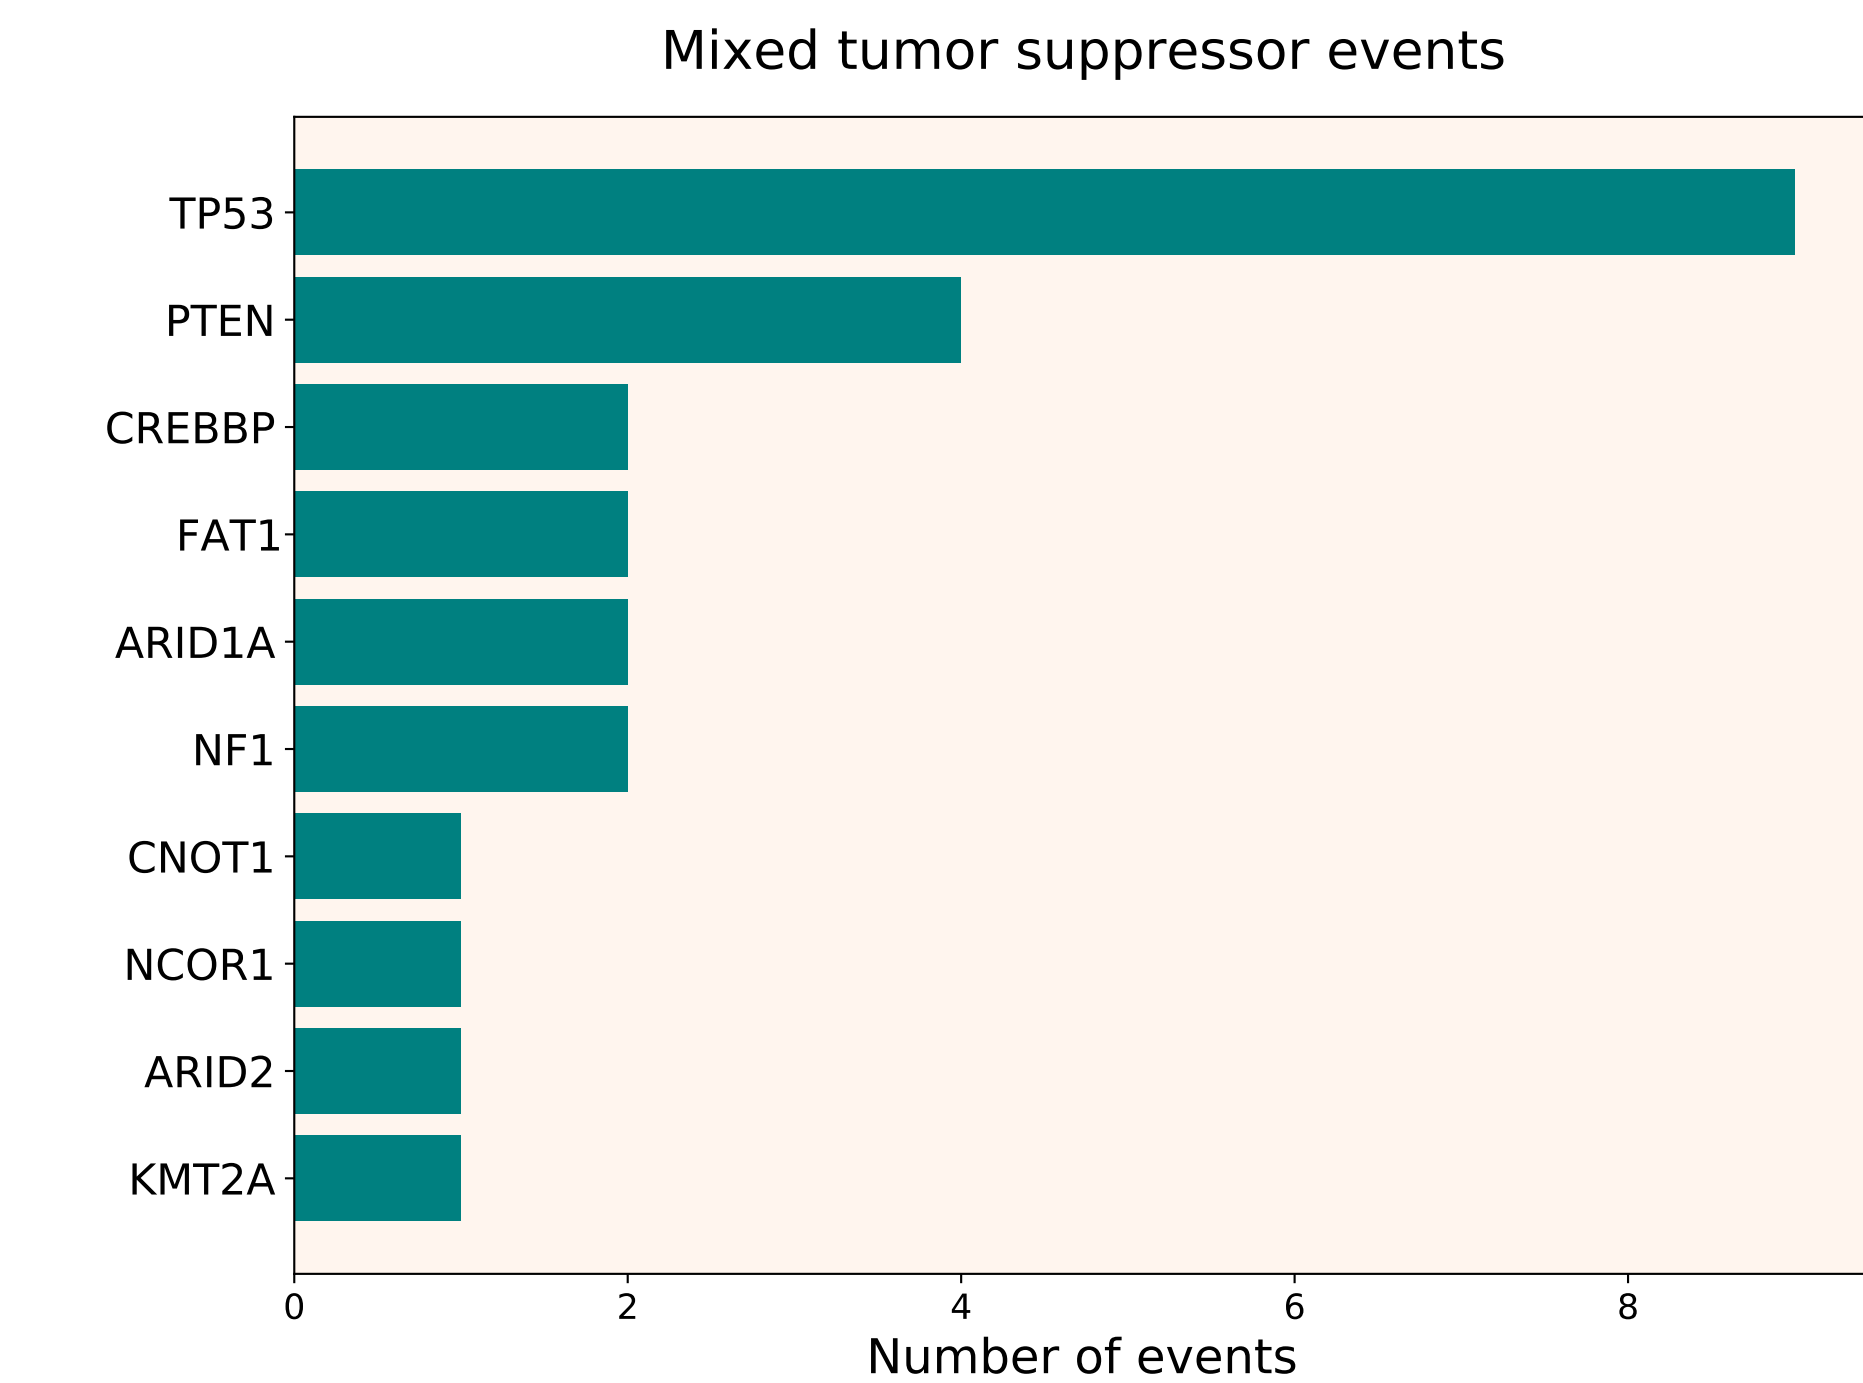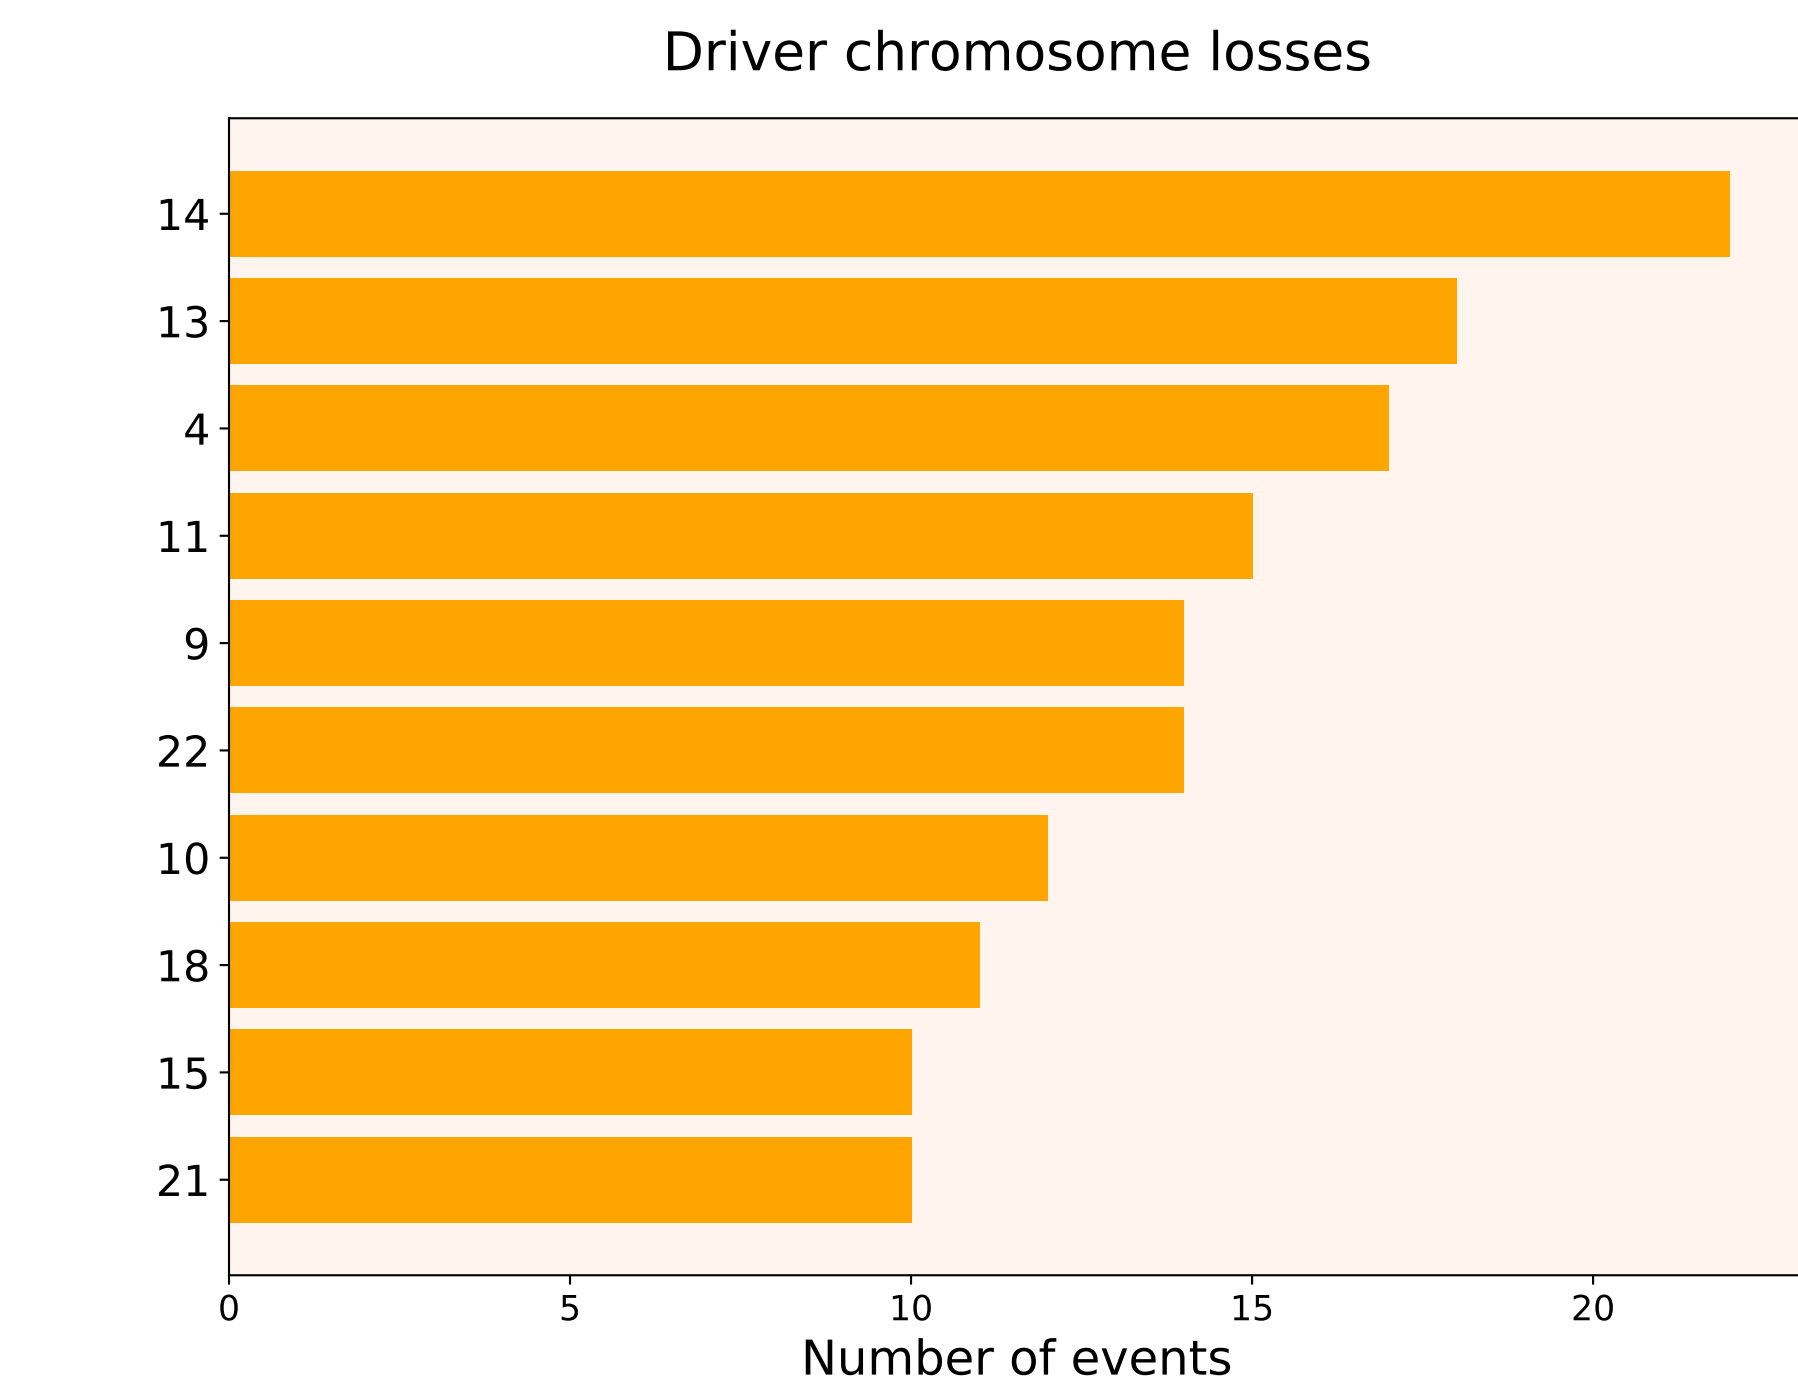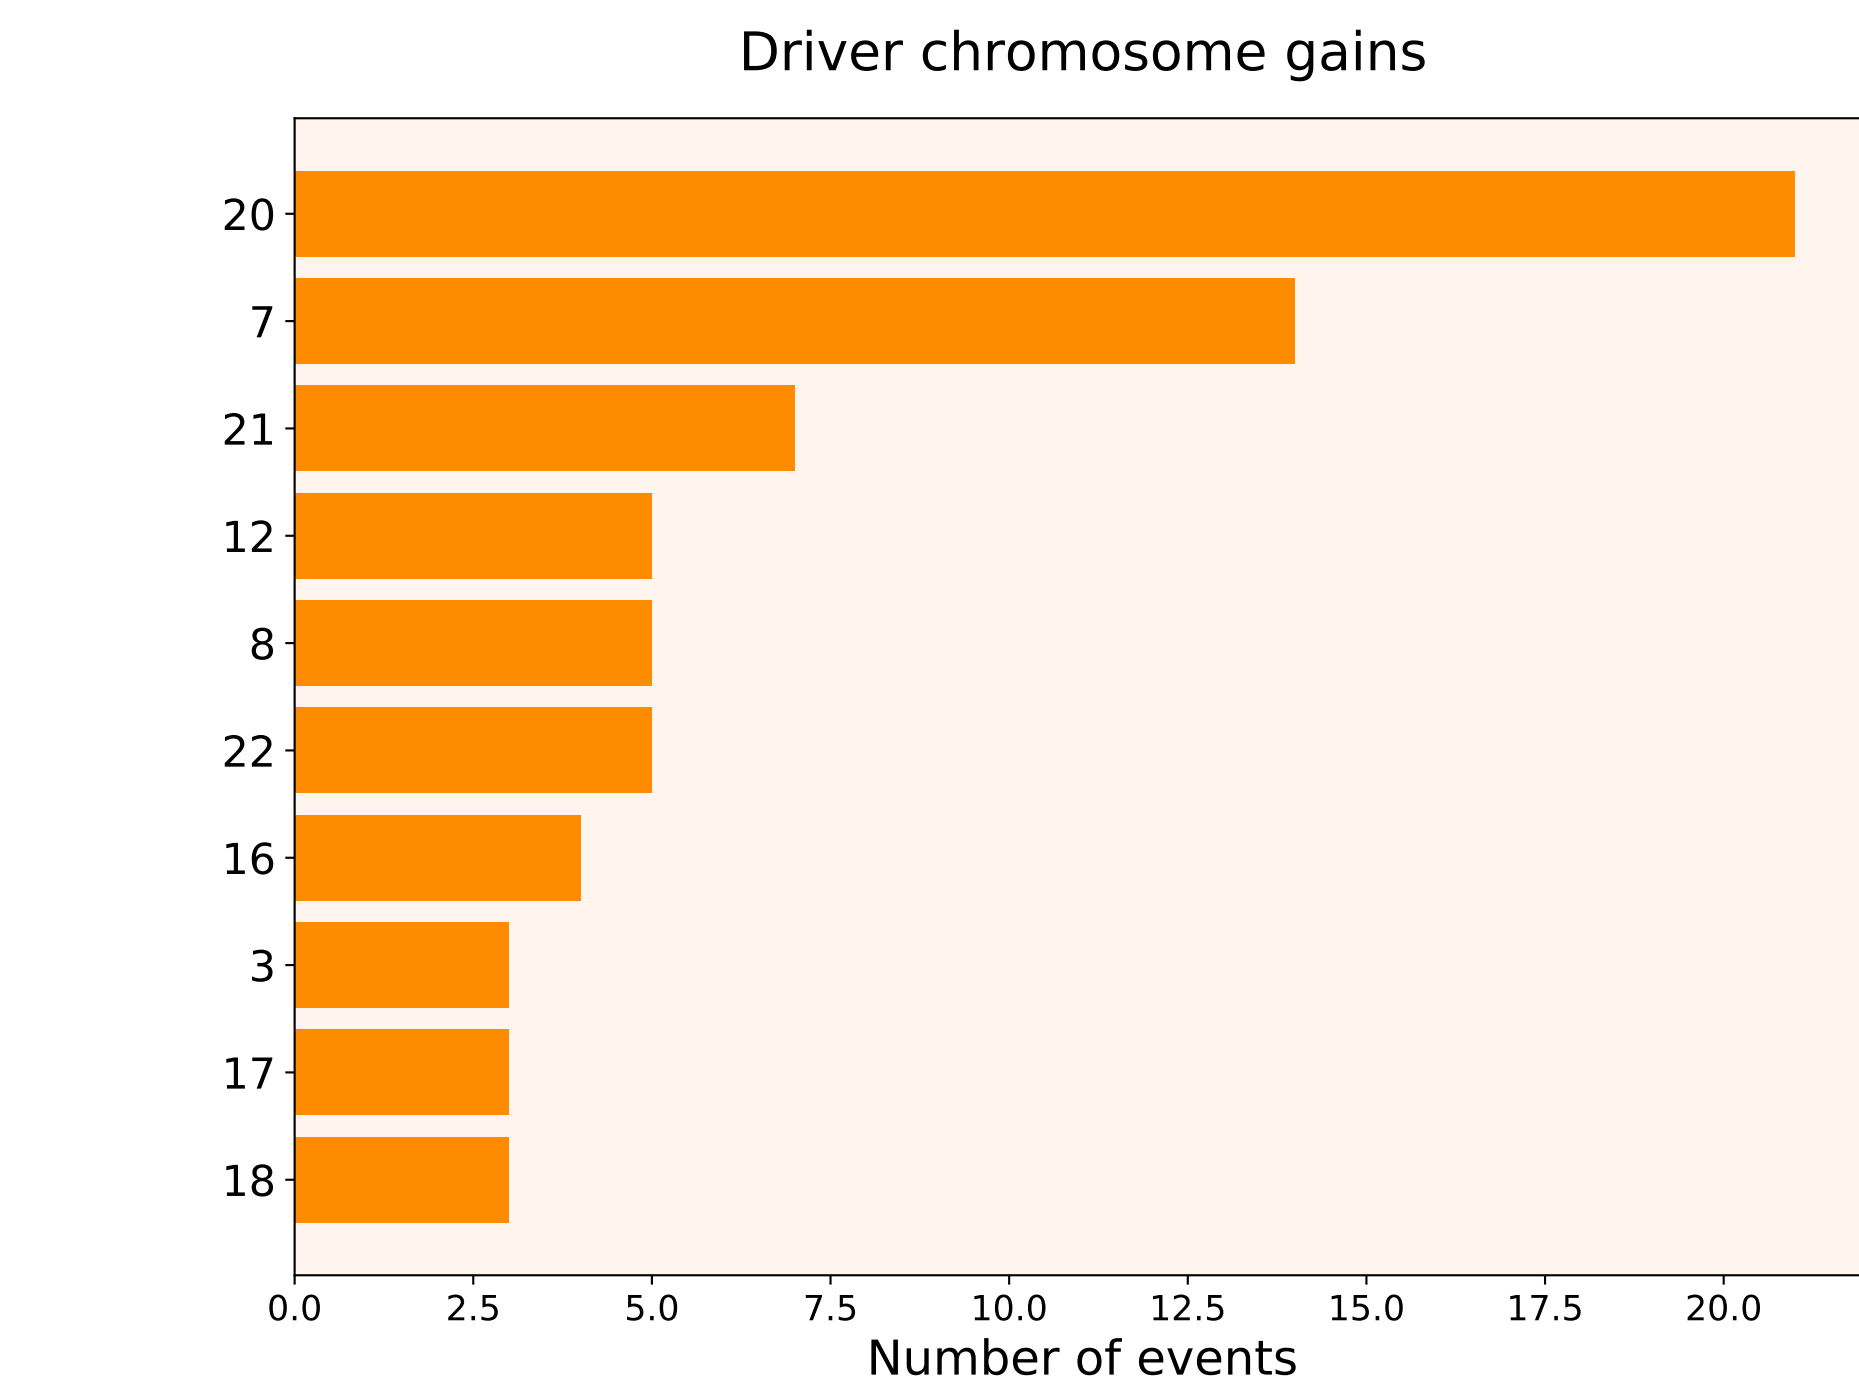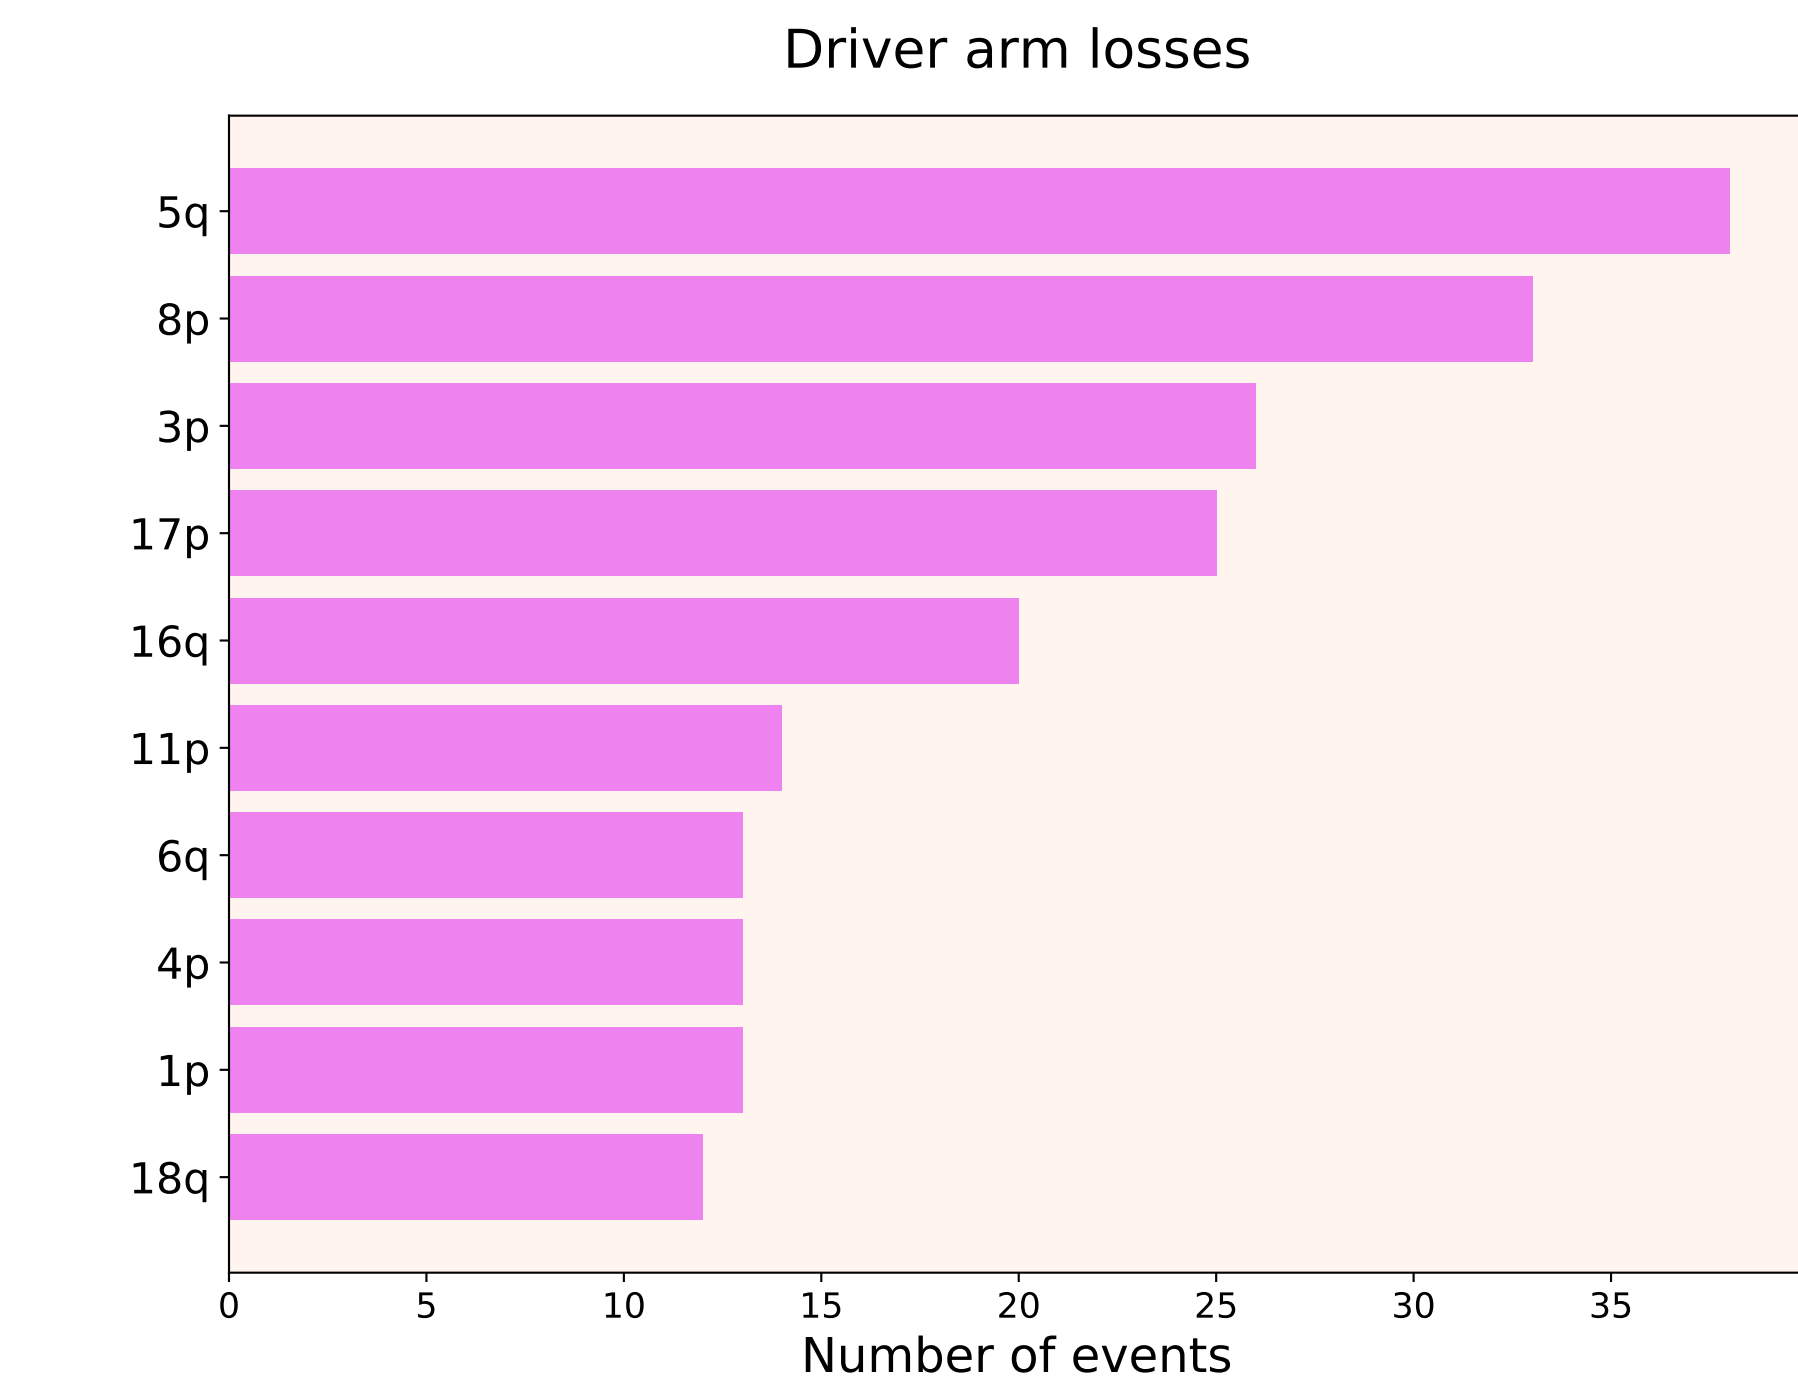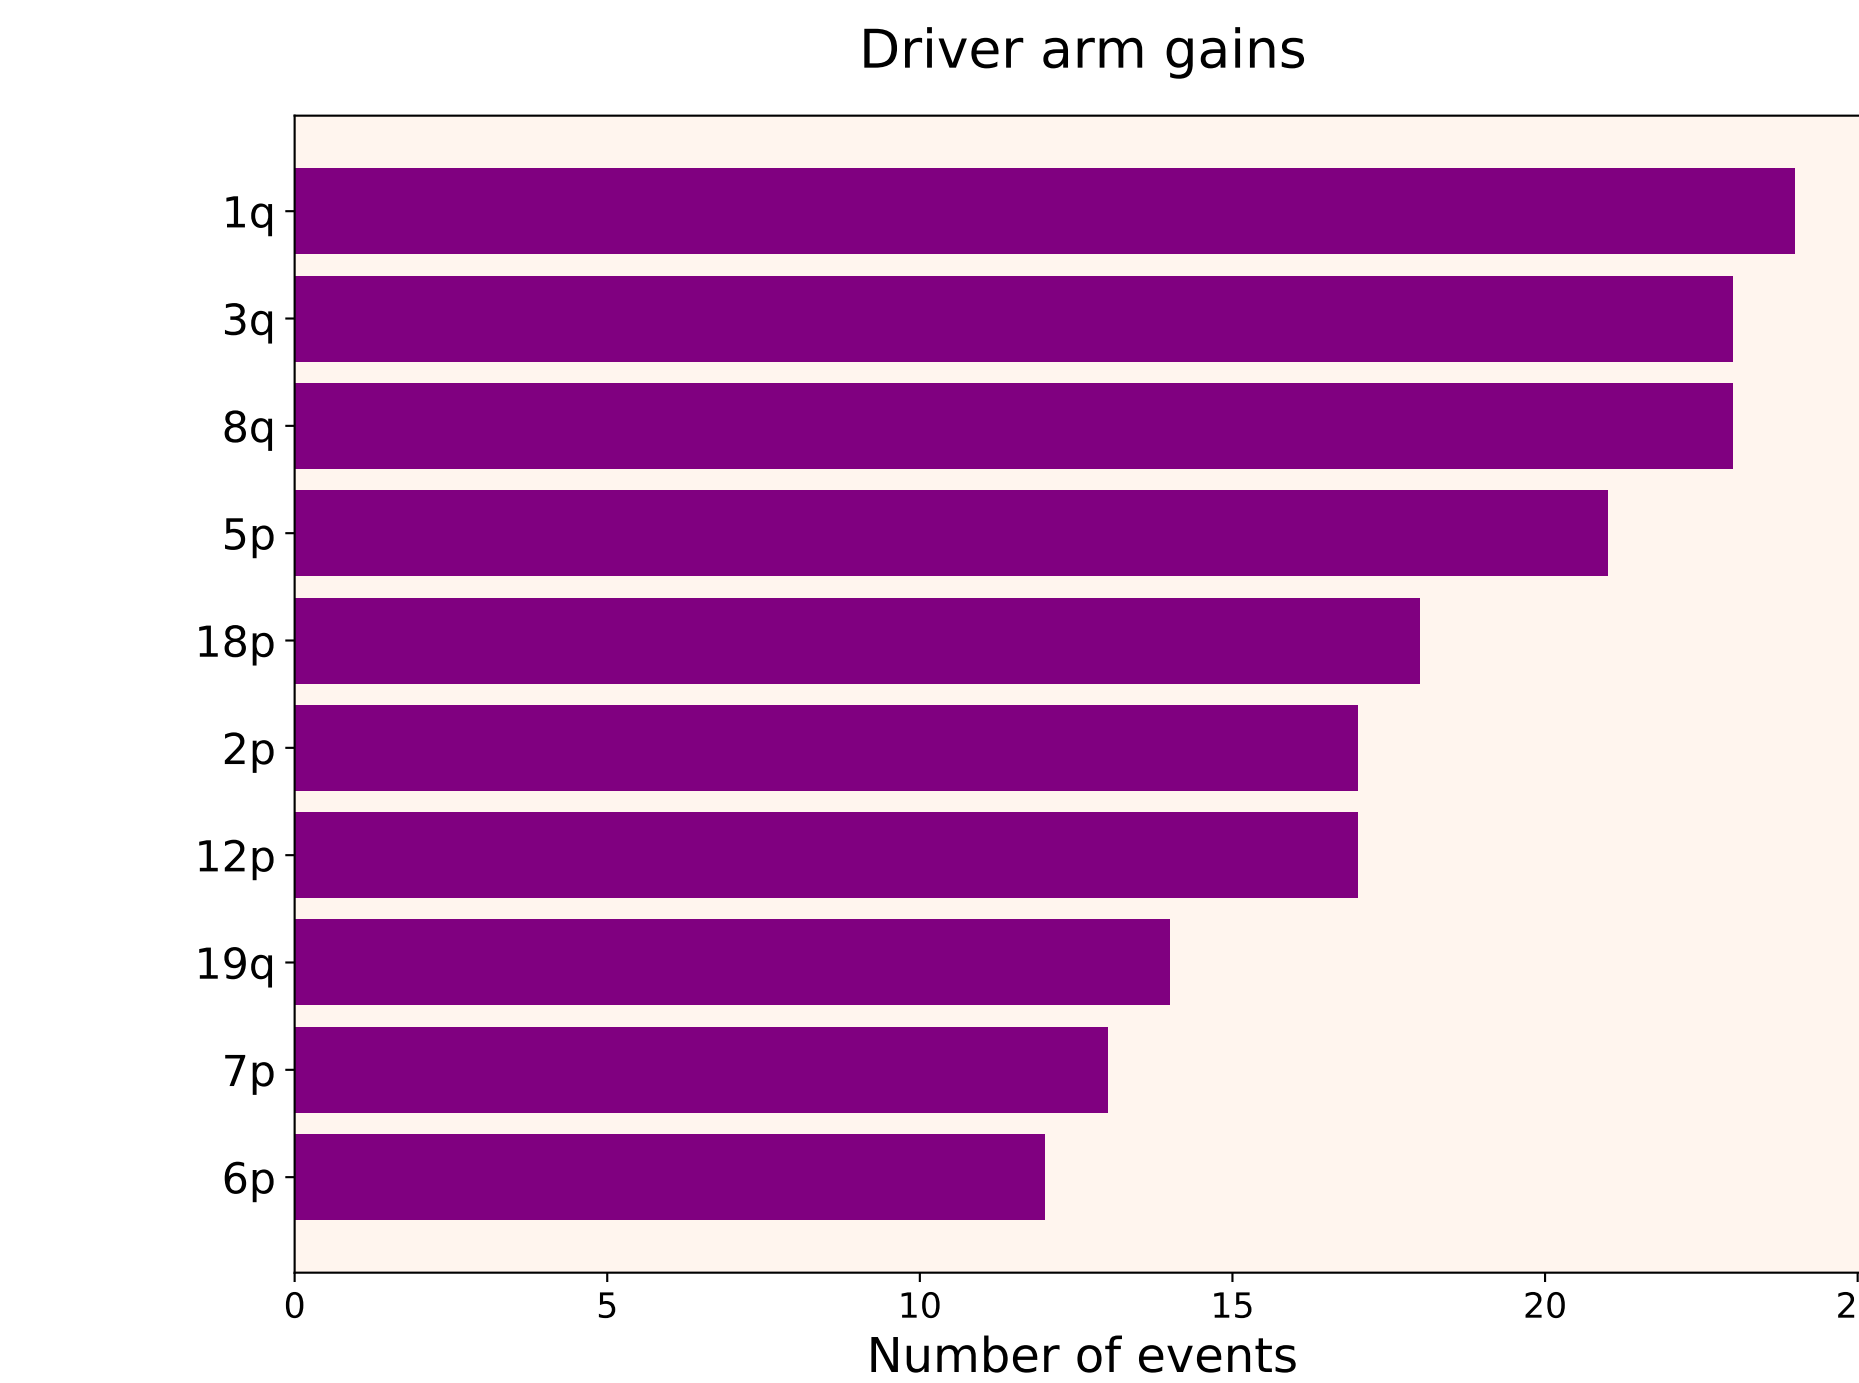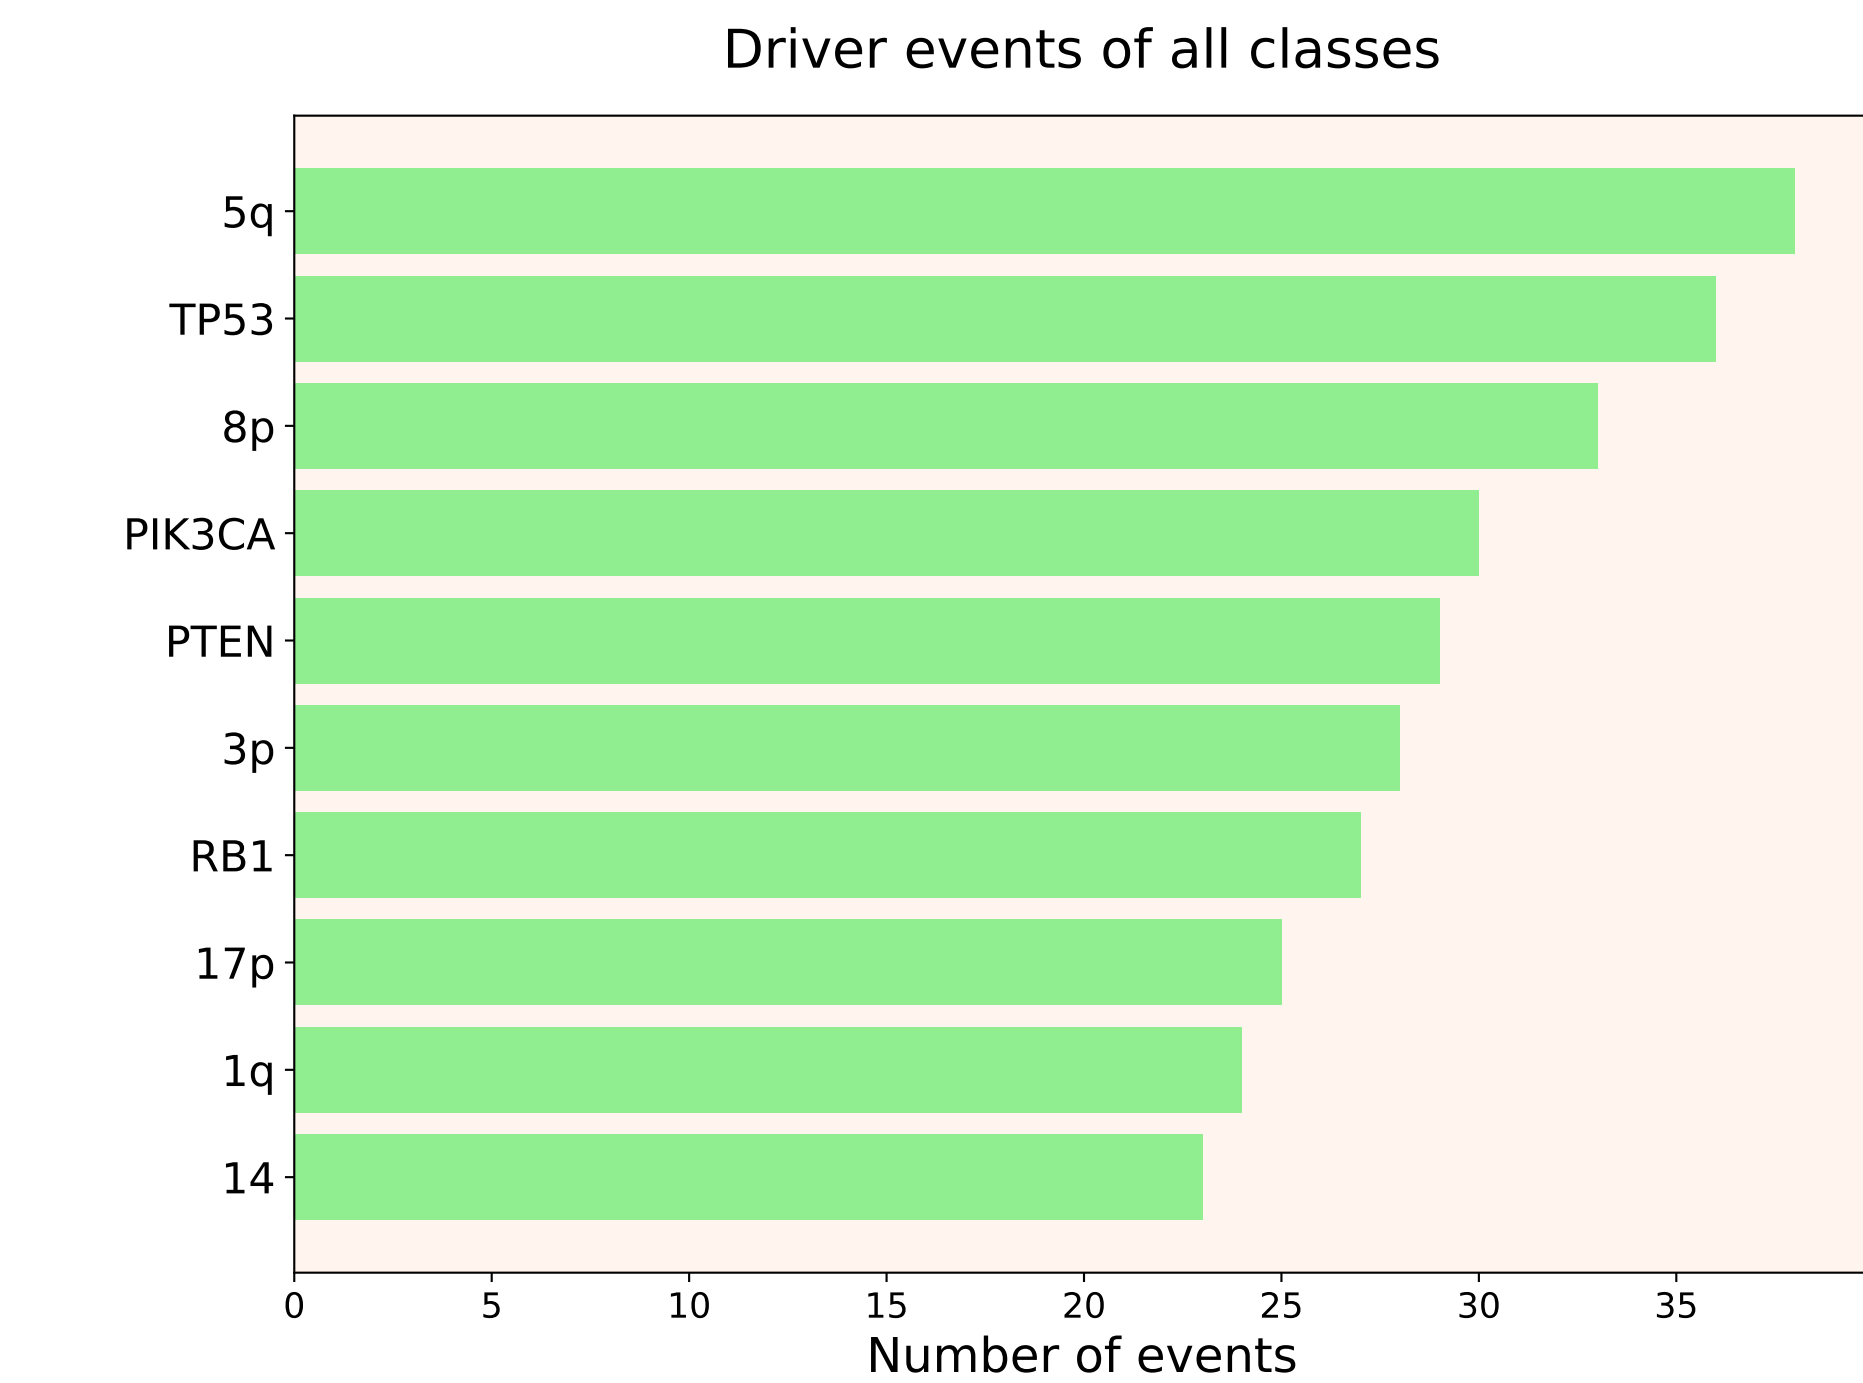

Supplement: Supplemental_Data_S1.zip [file Supplemental_Data_S1.zip]

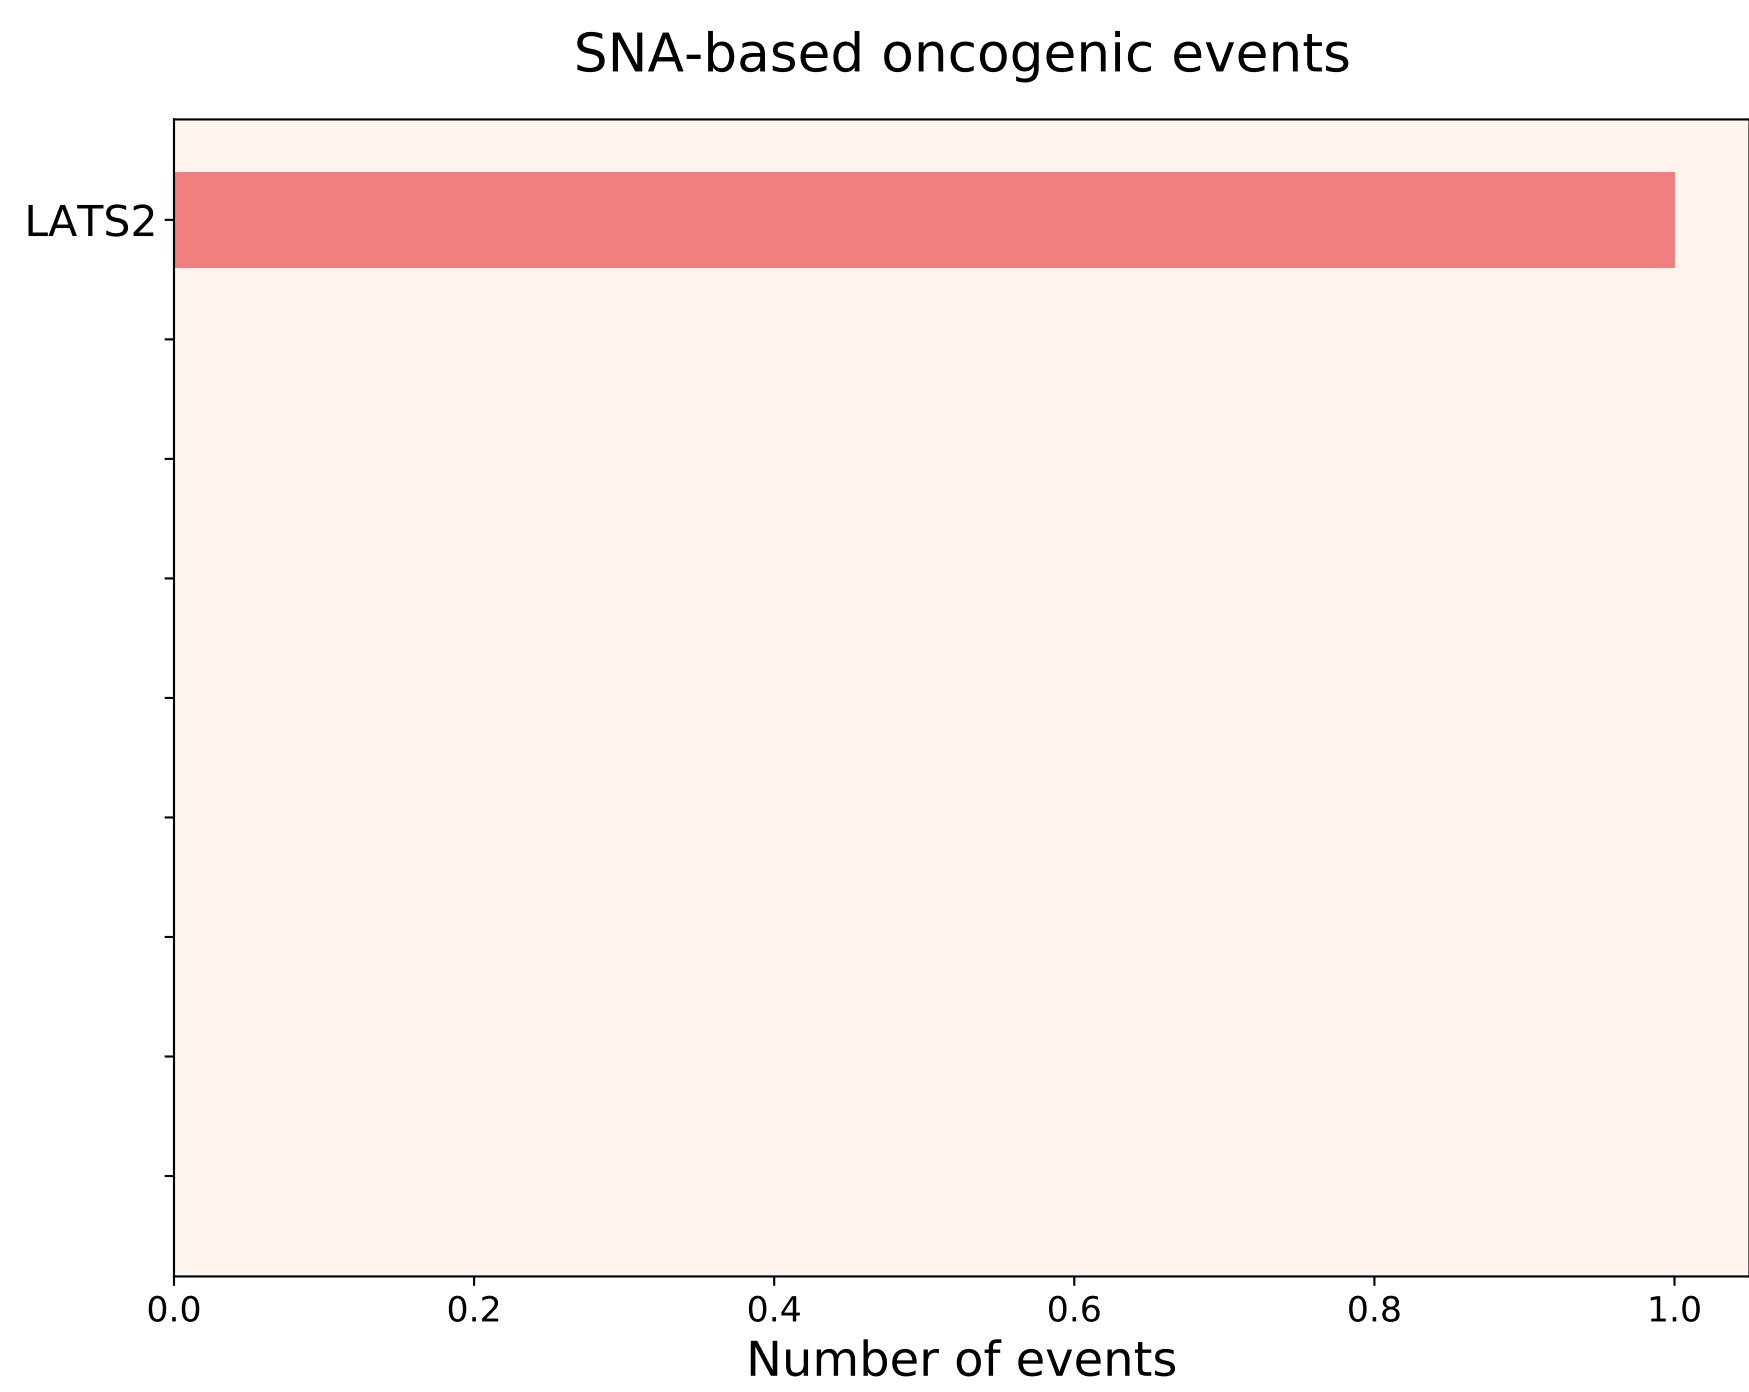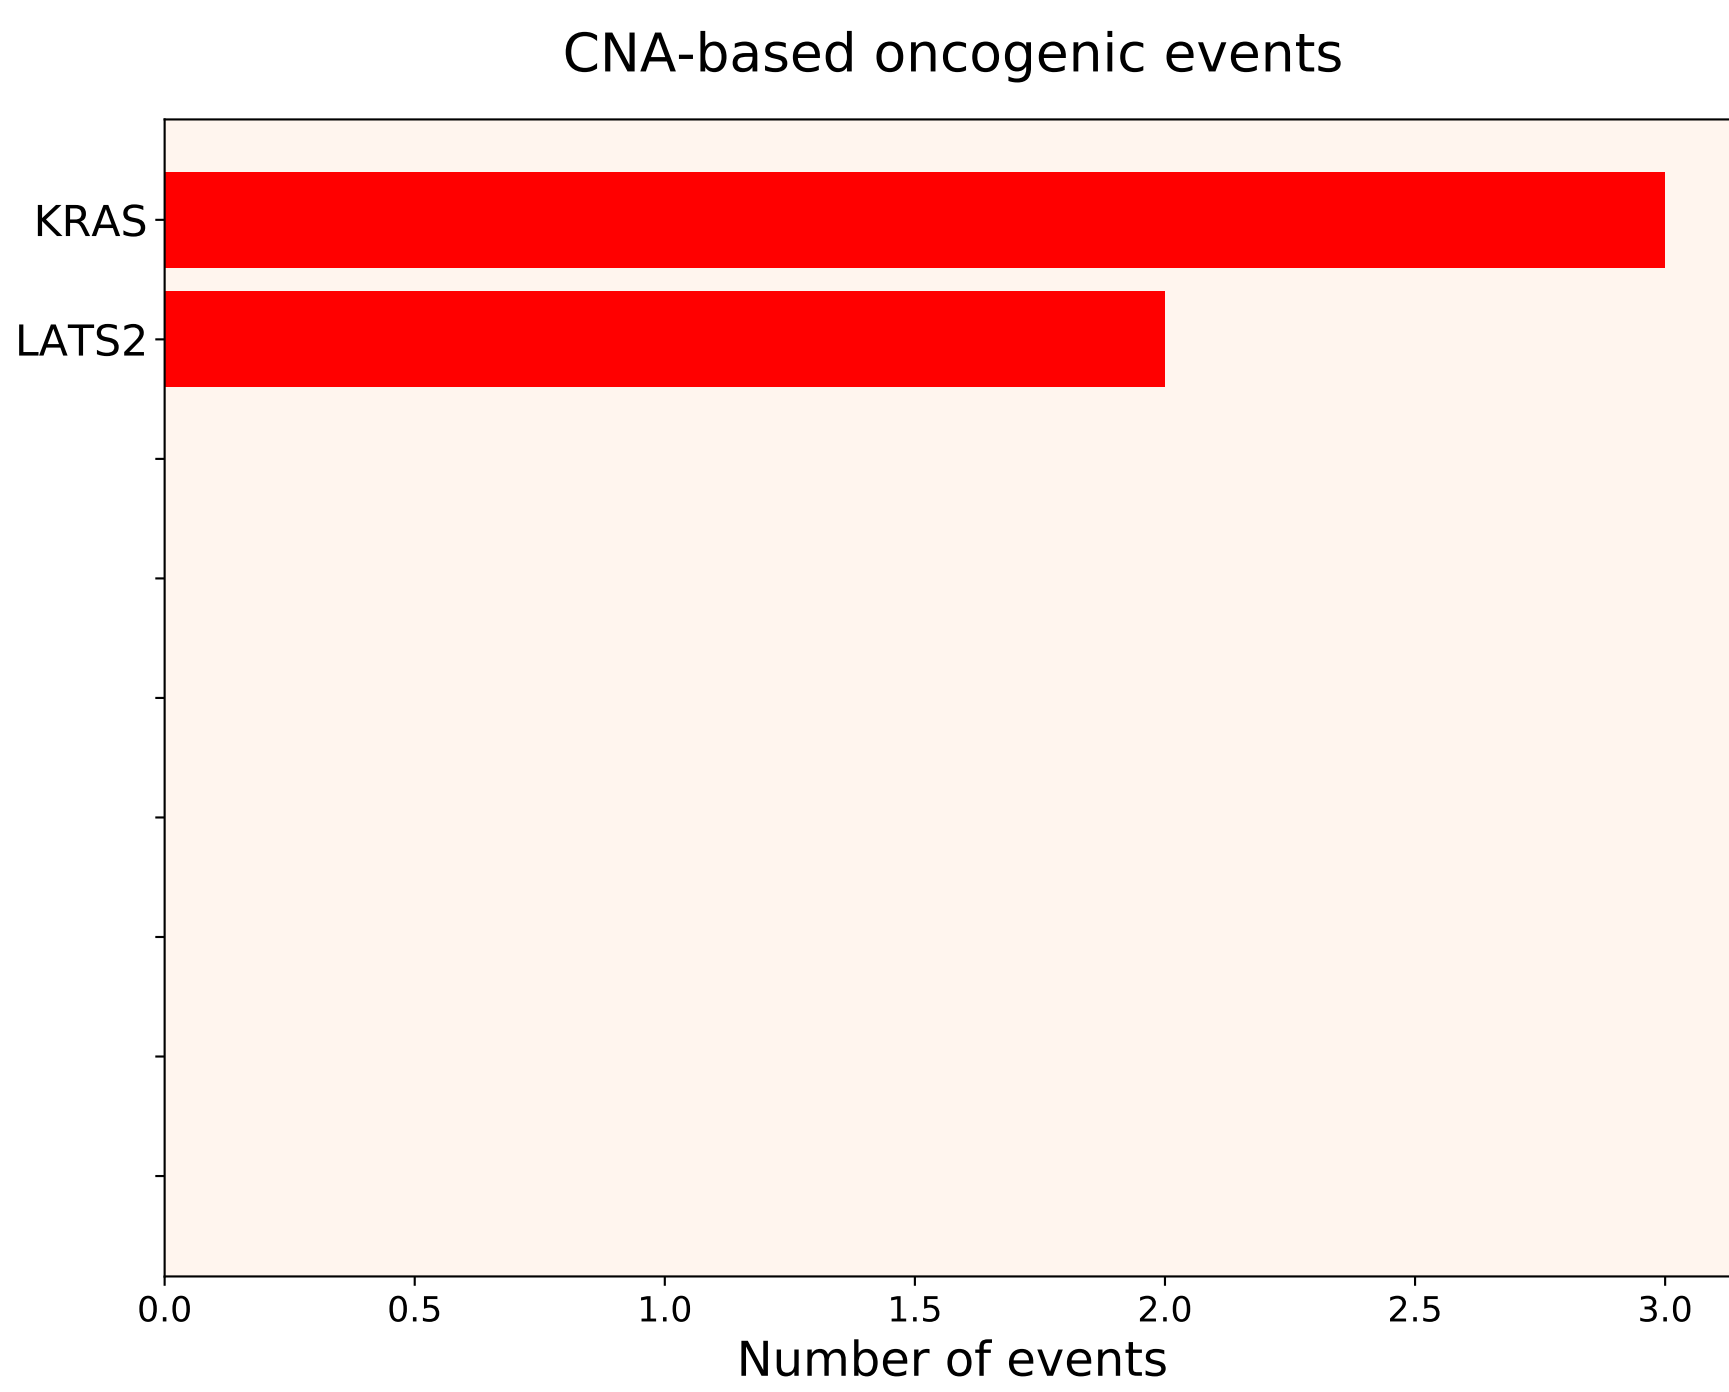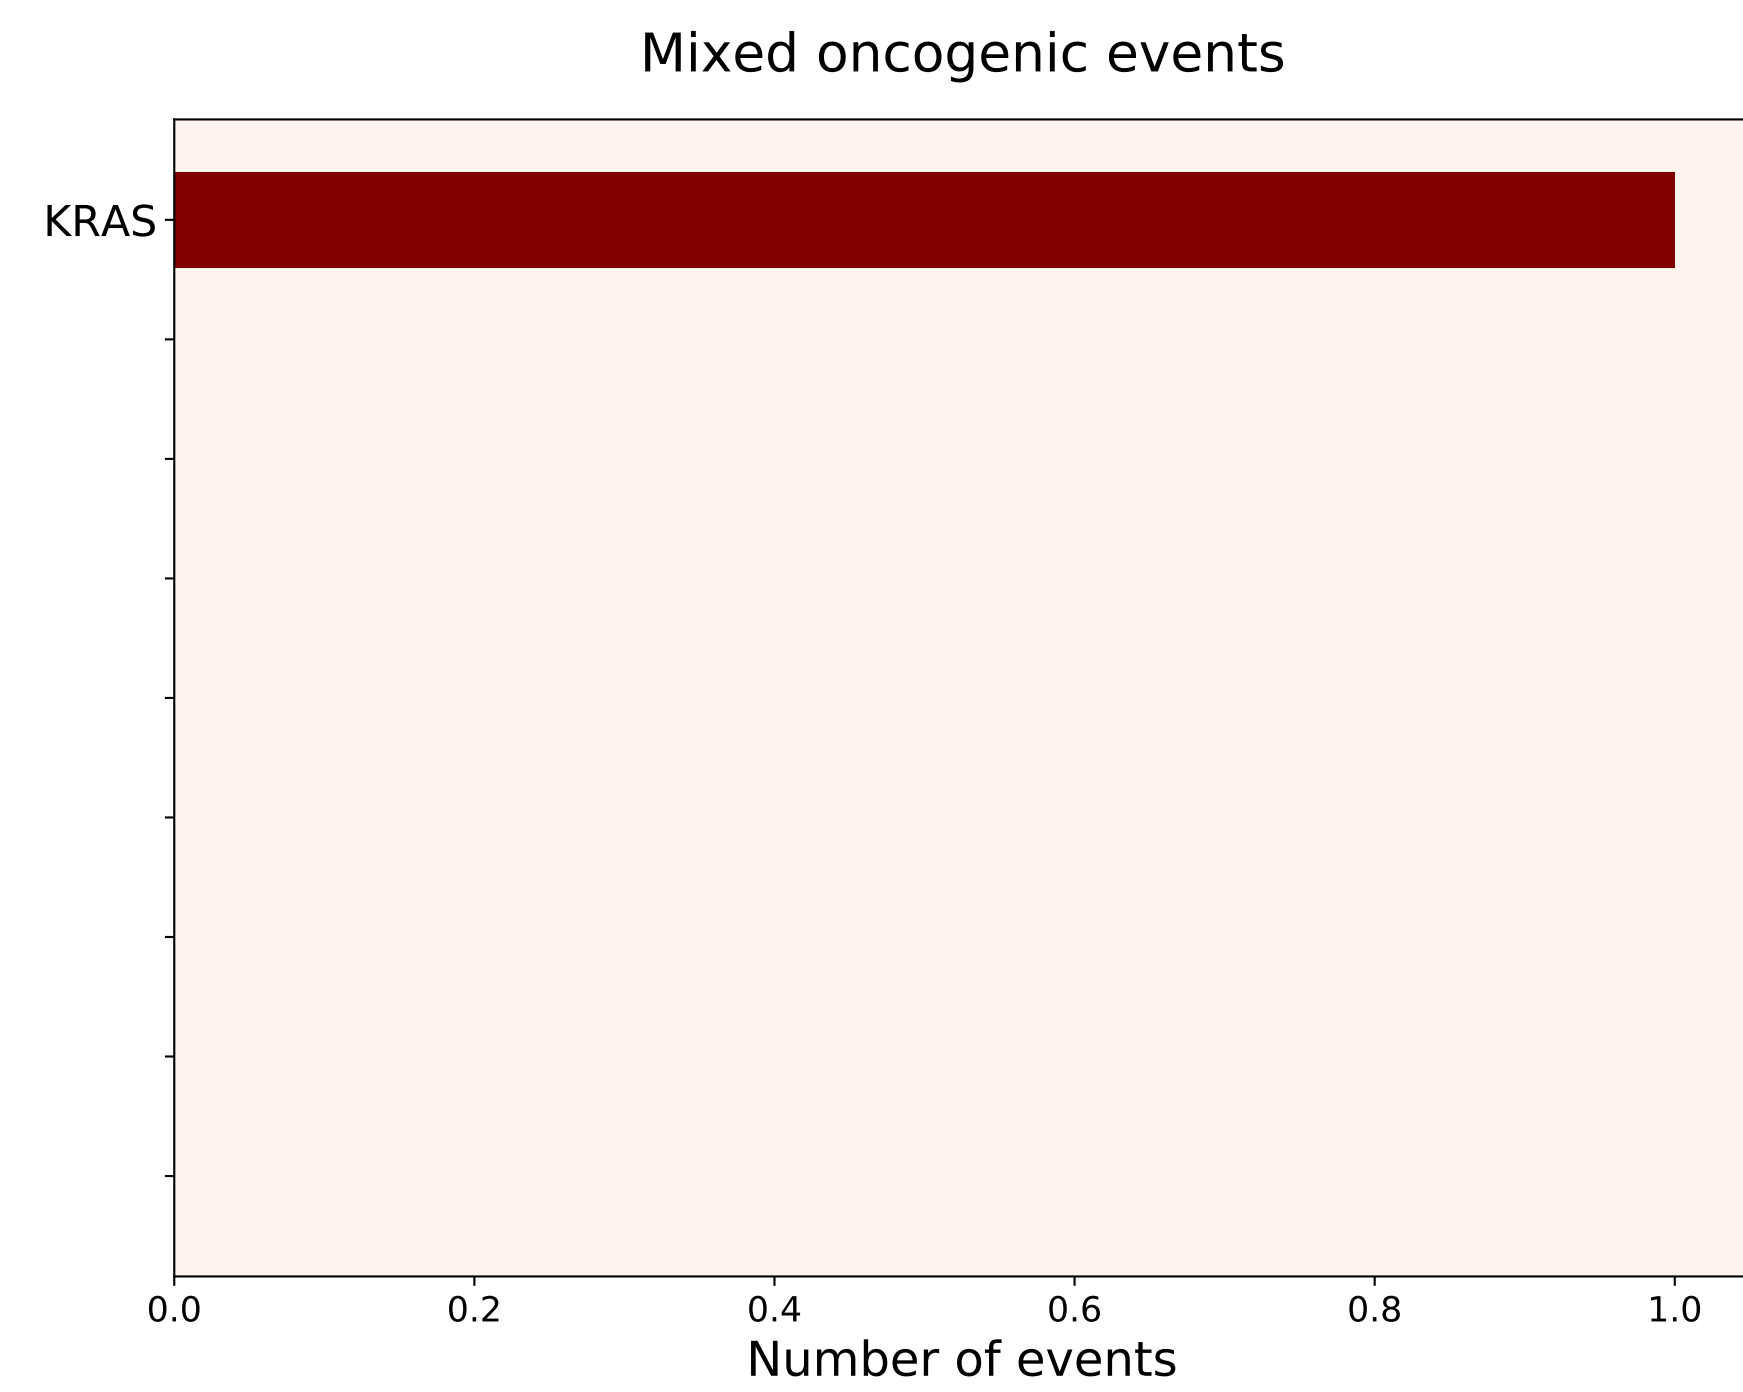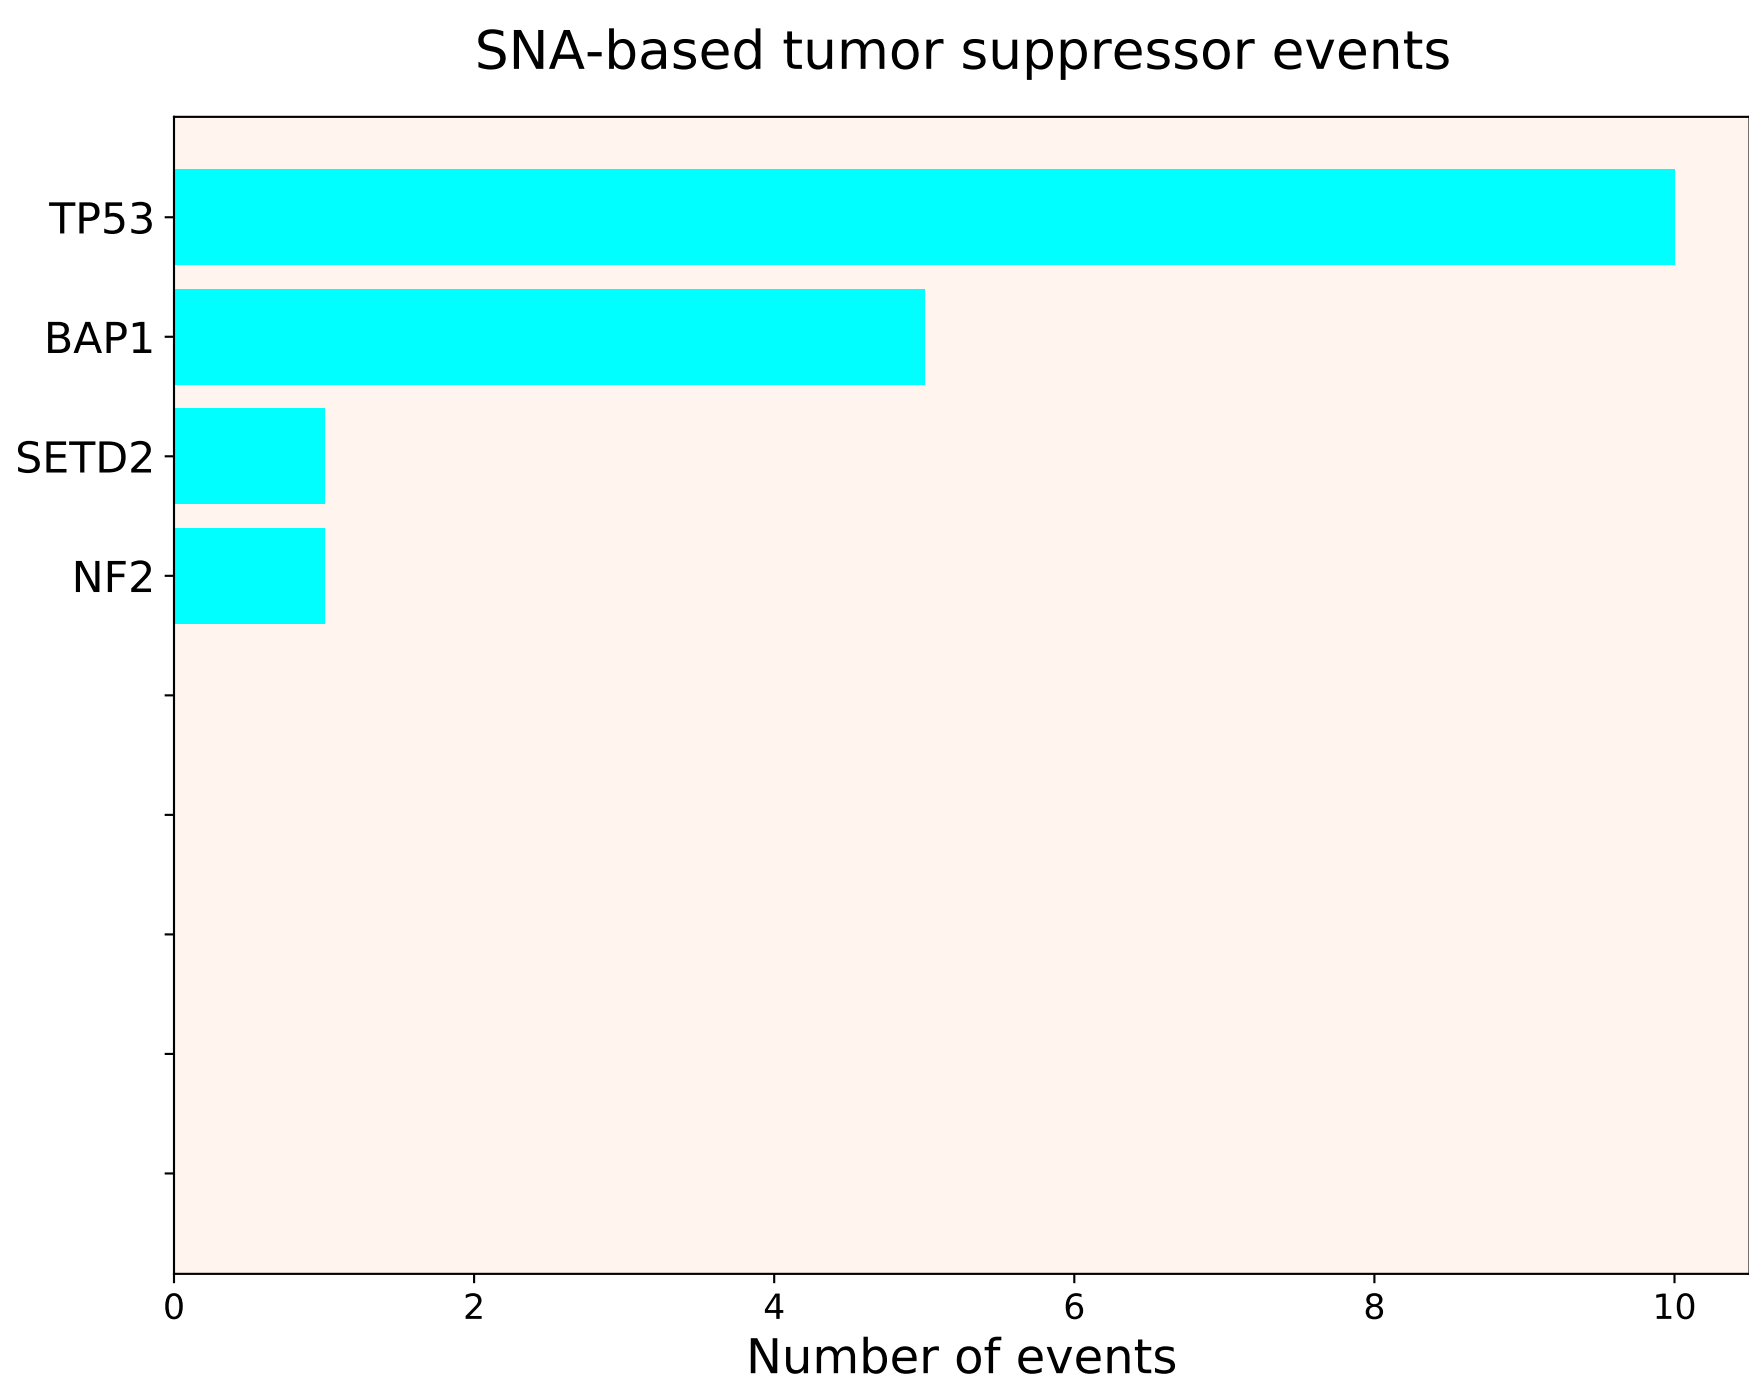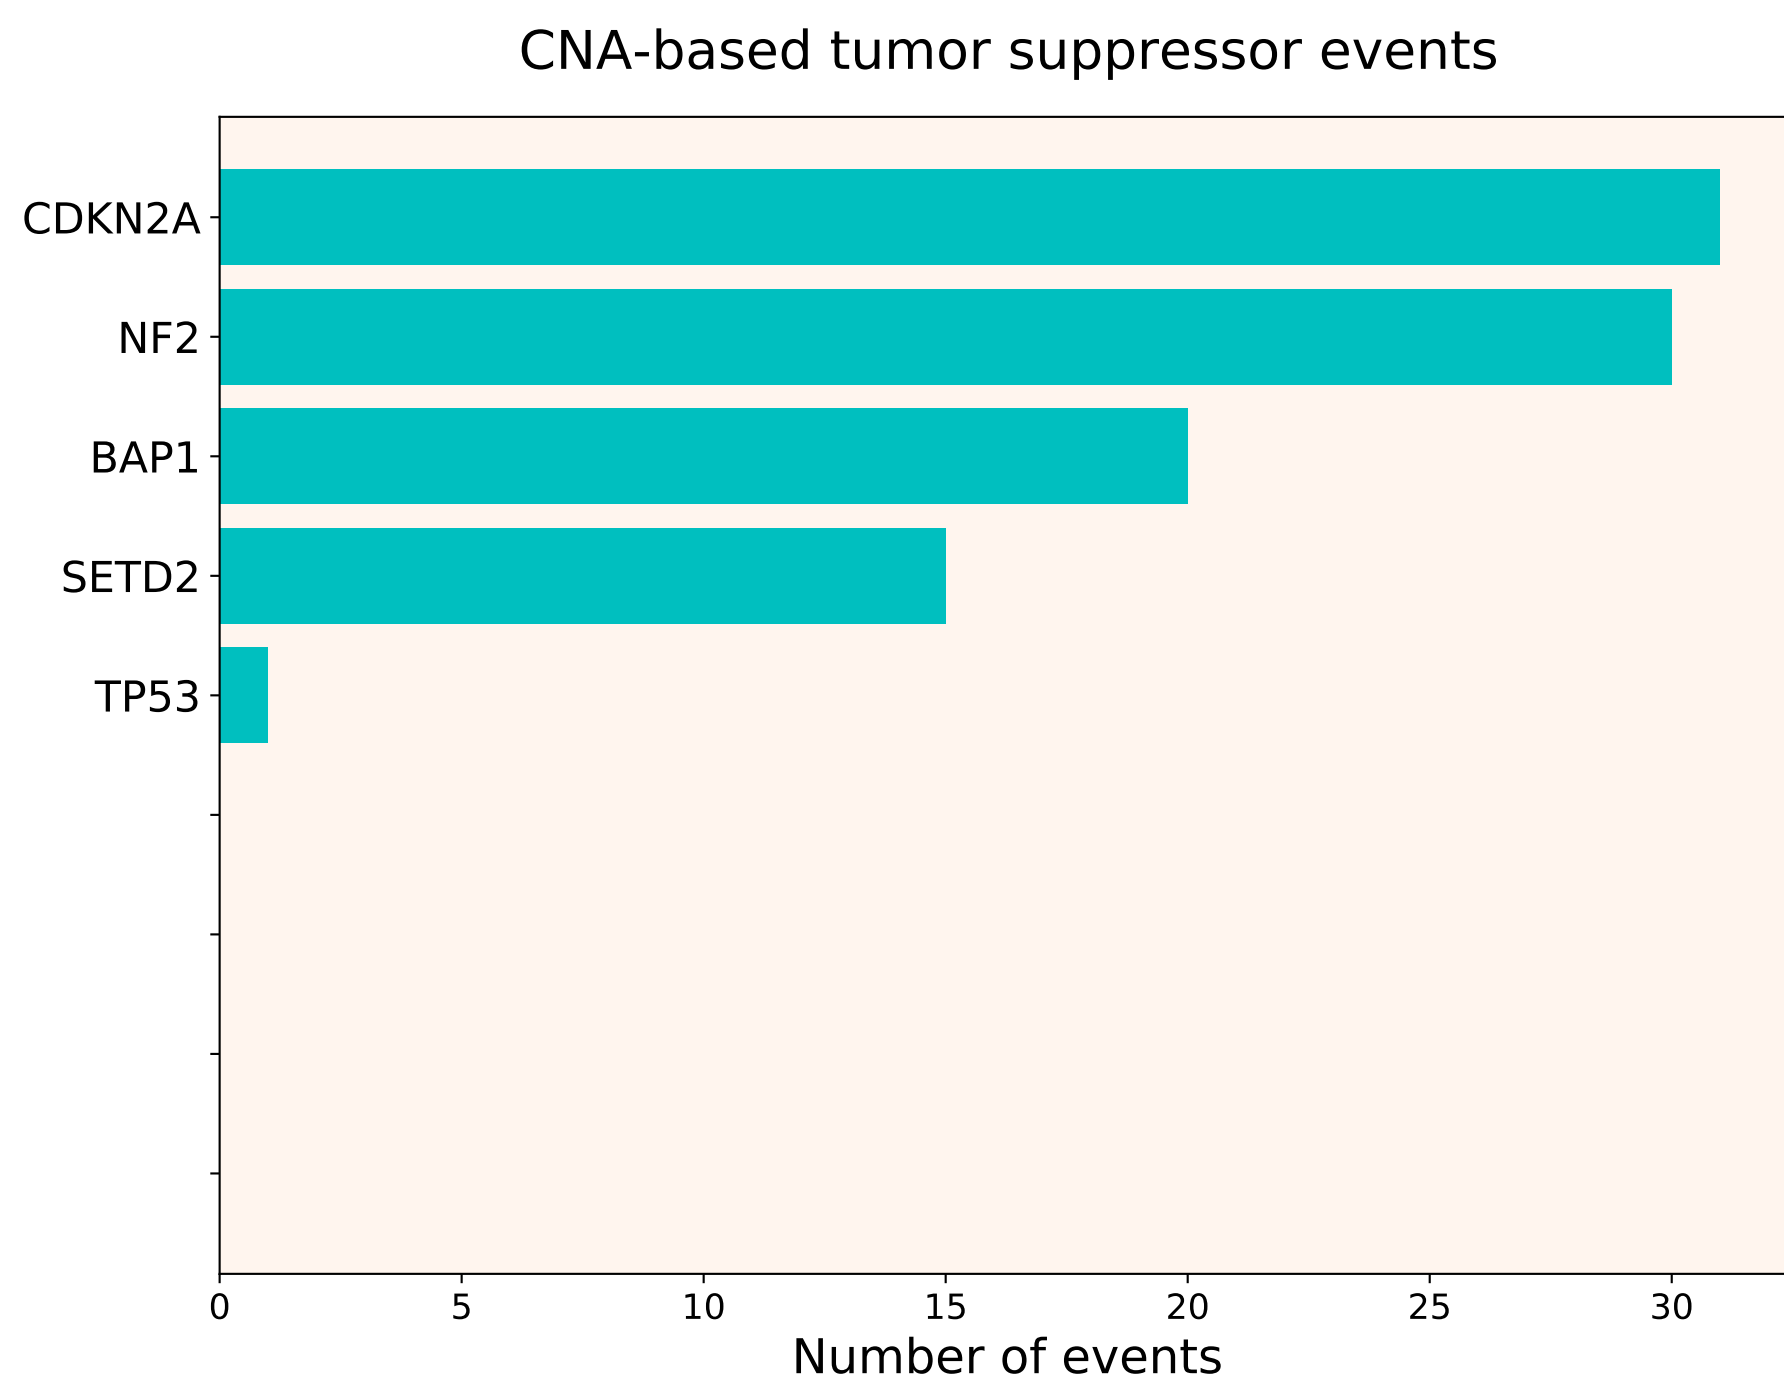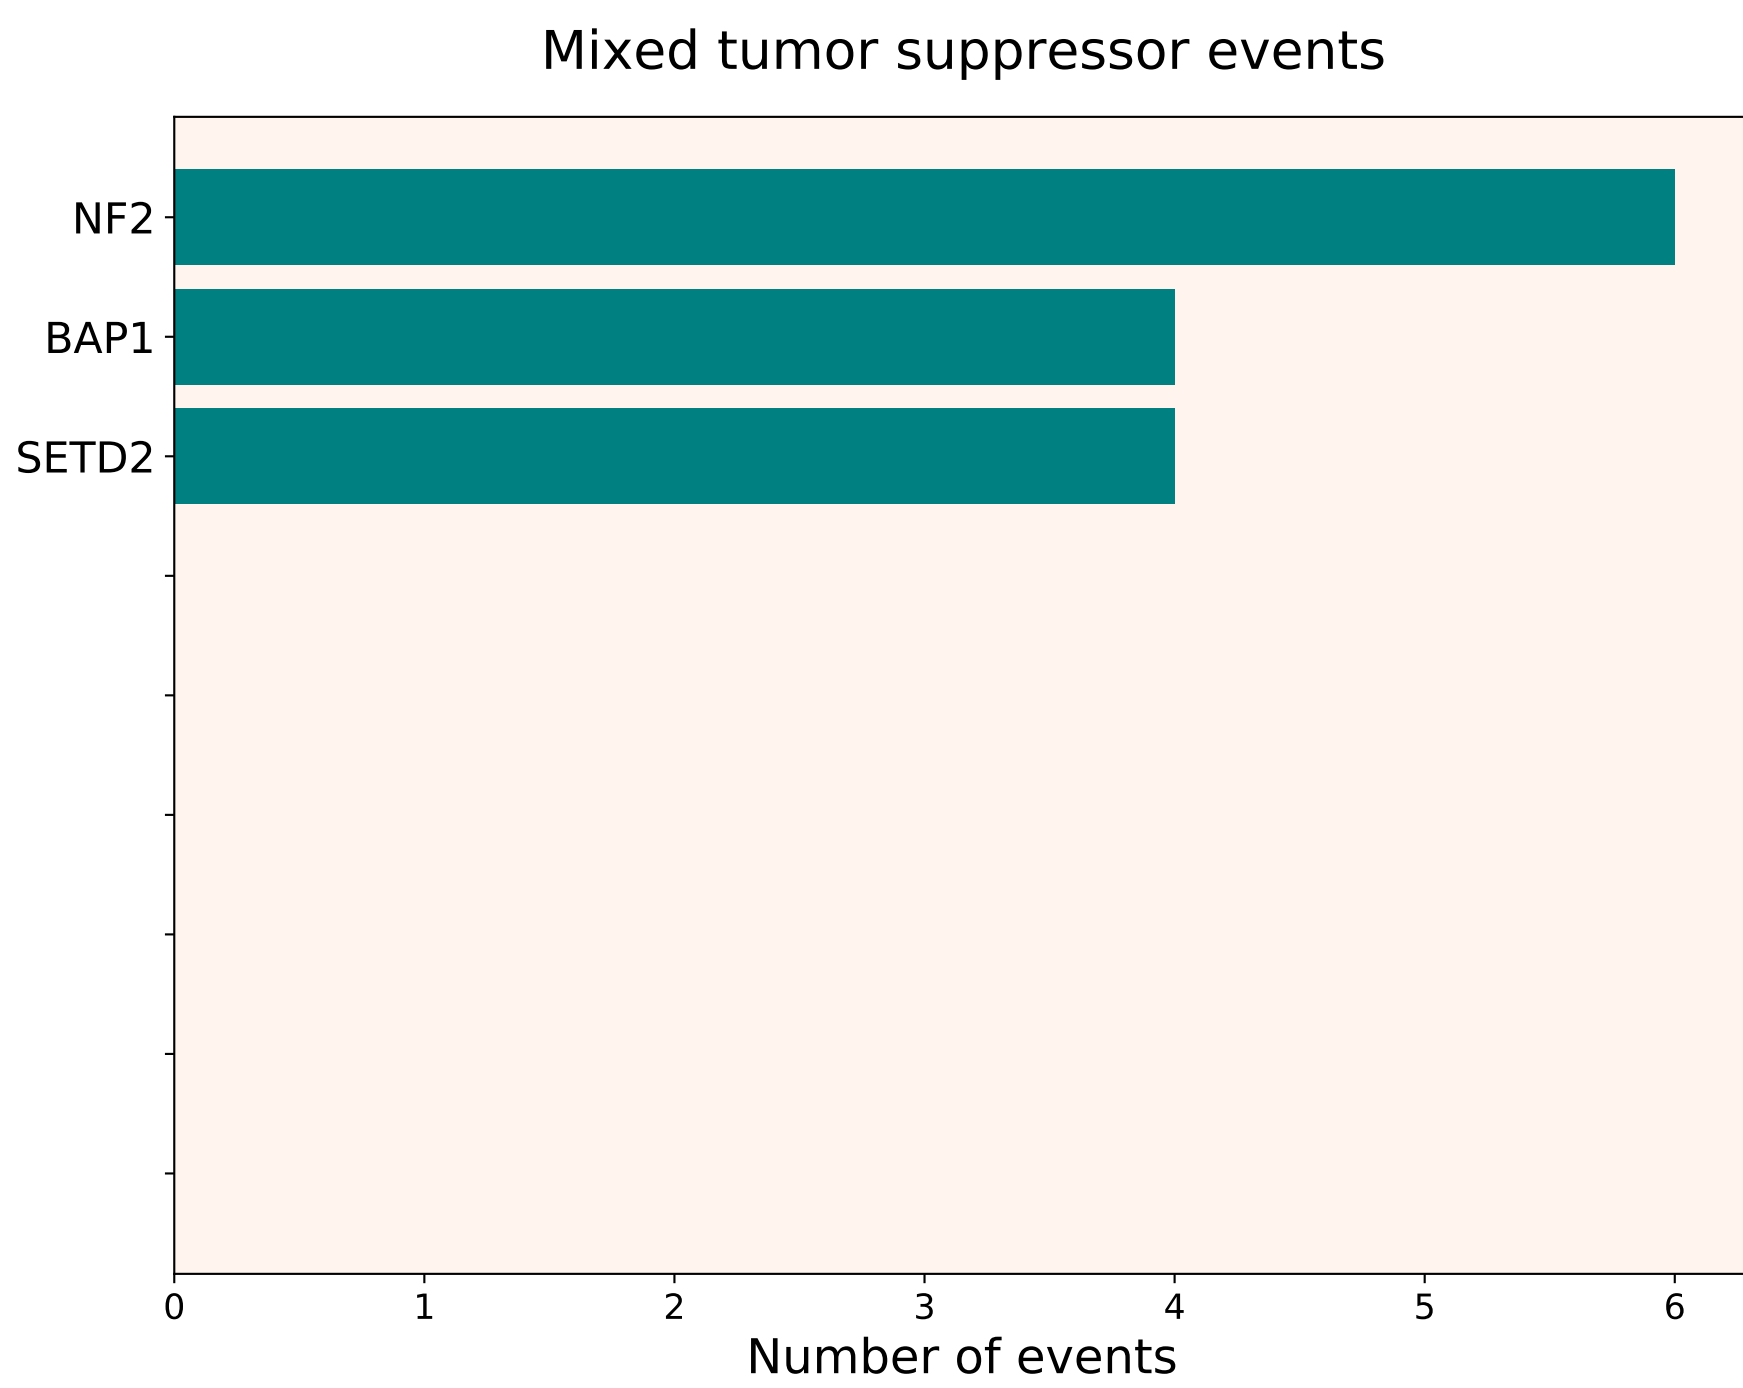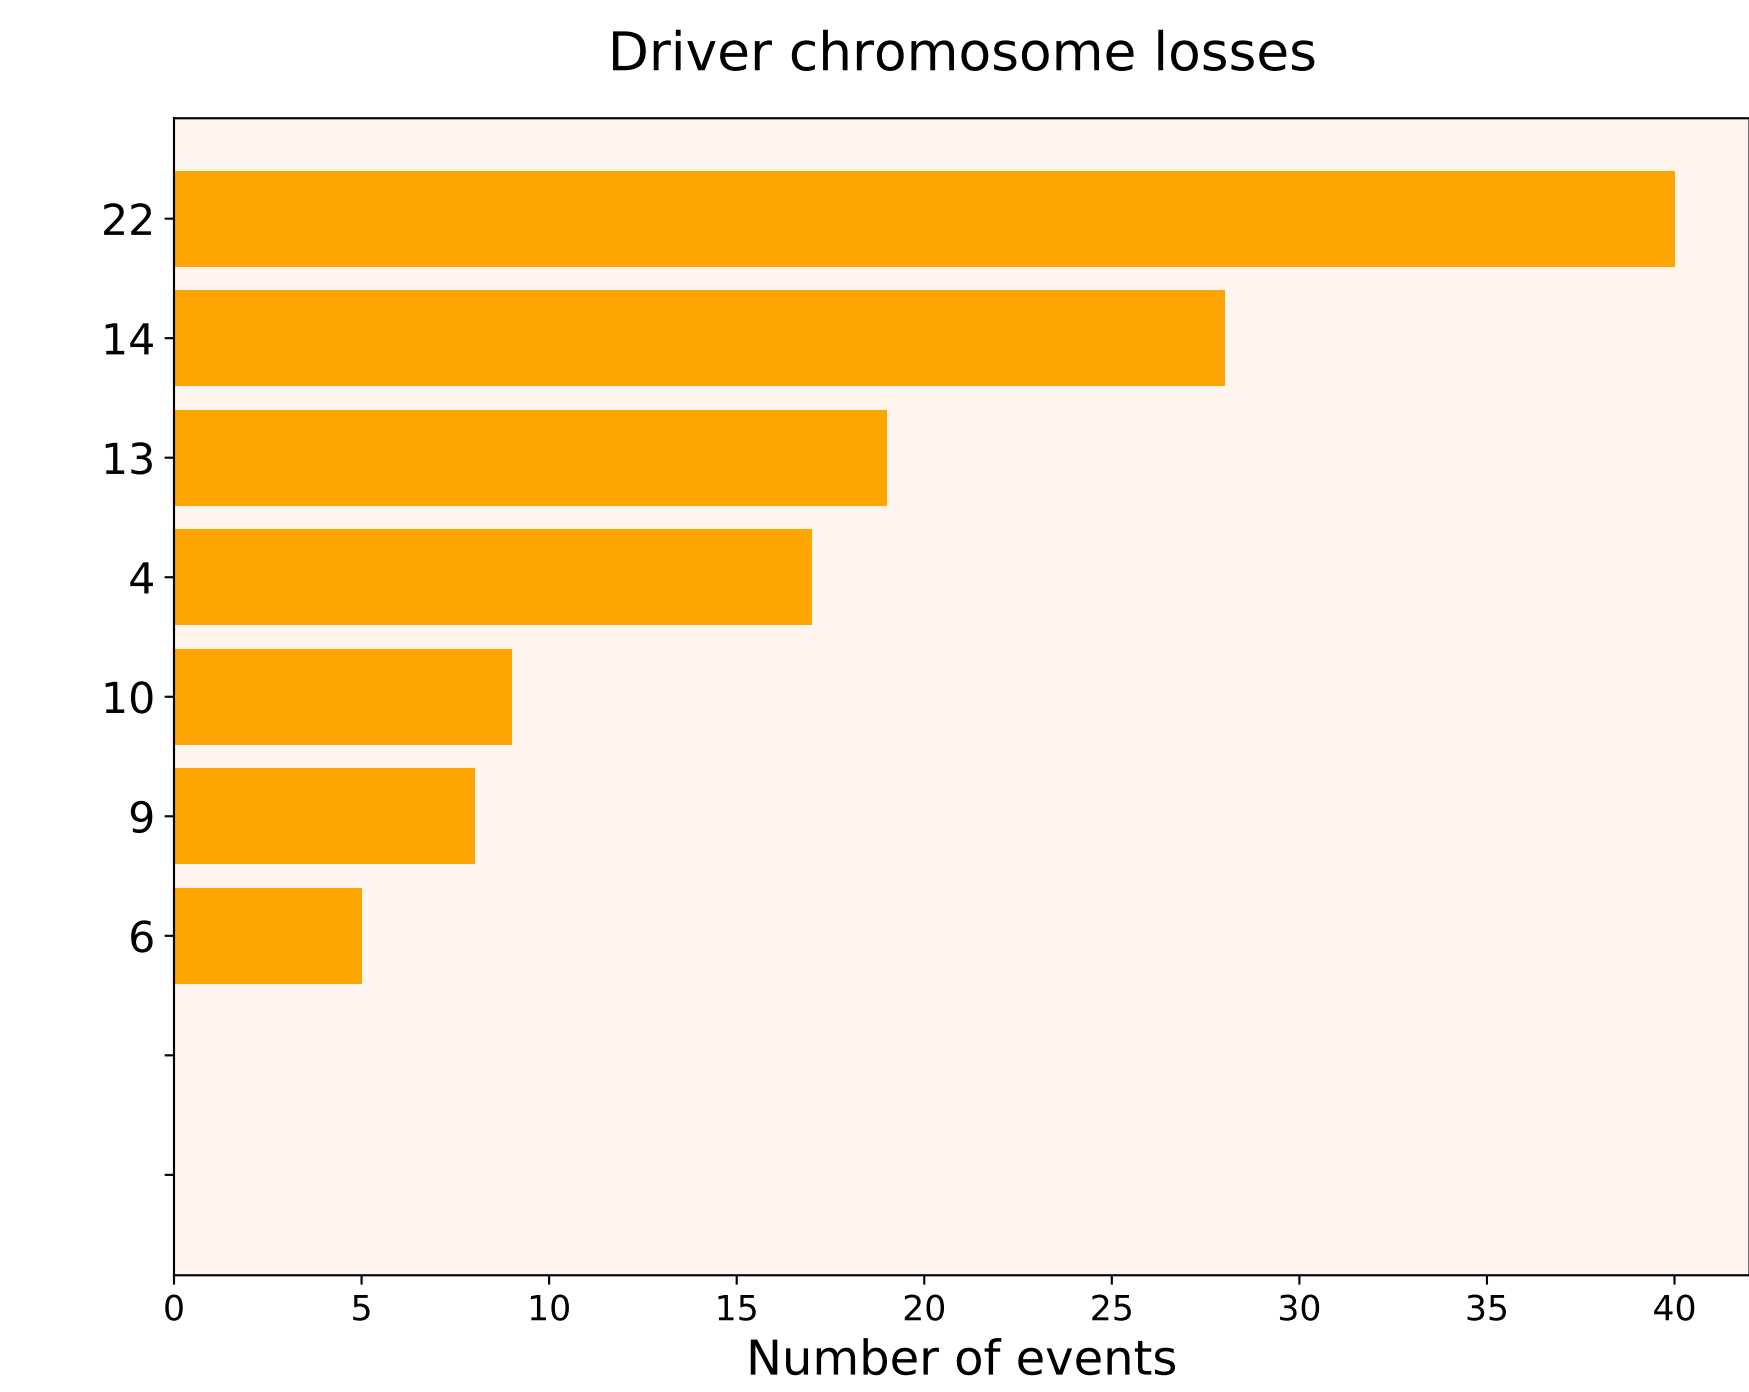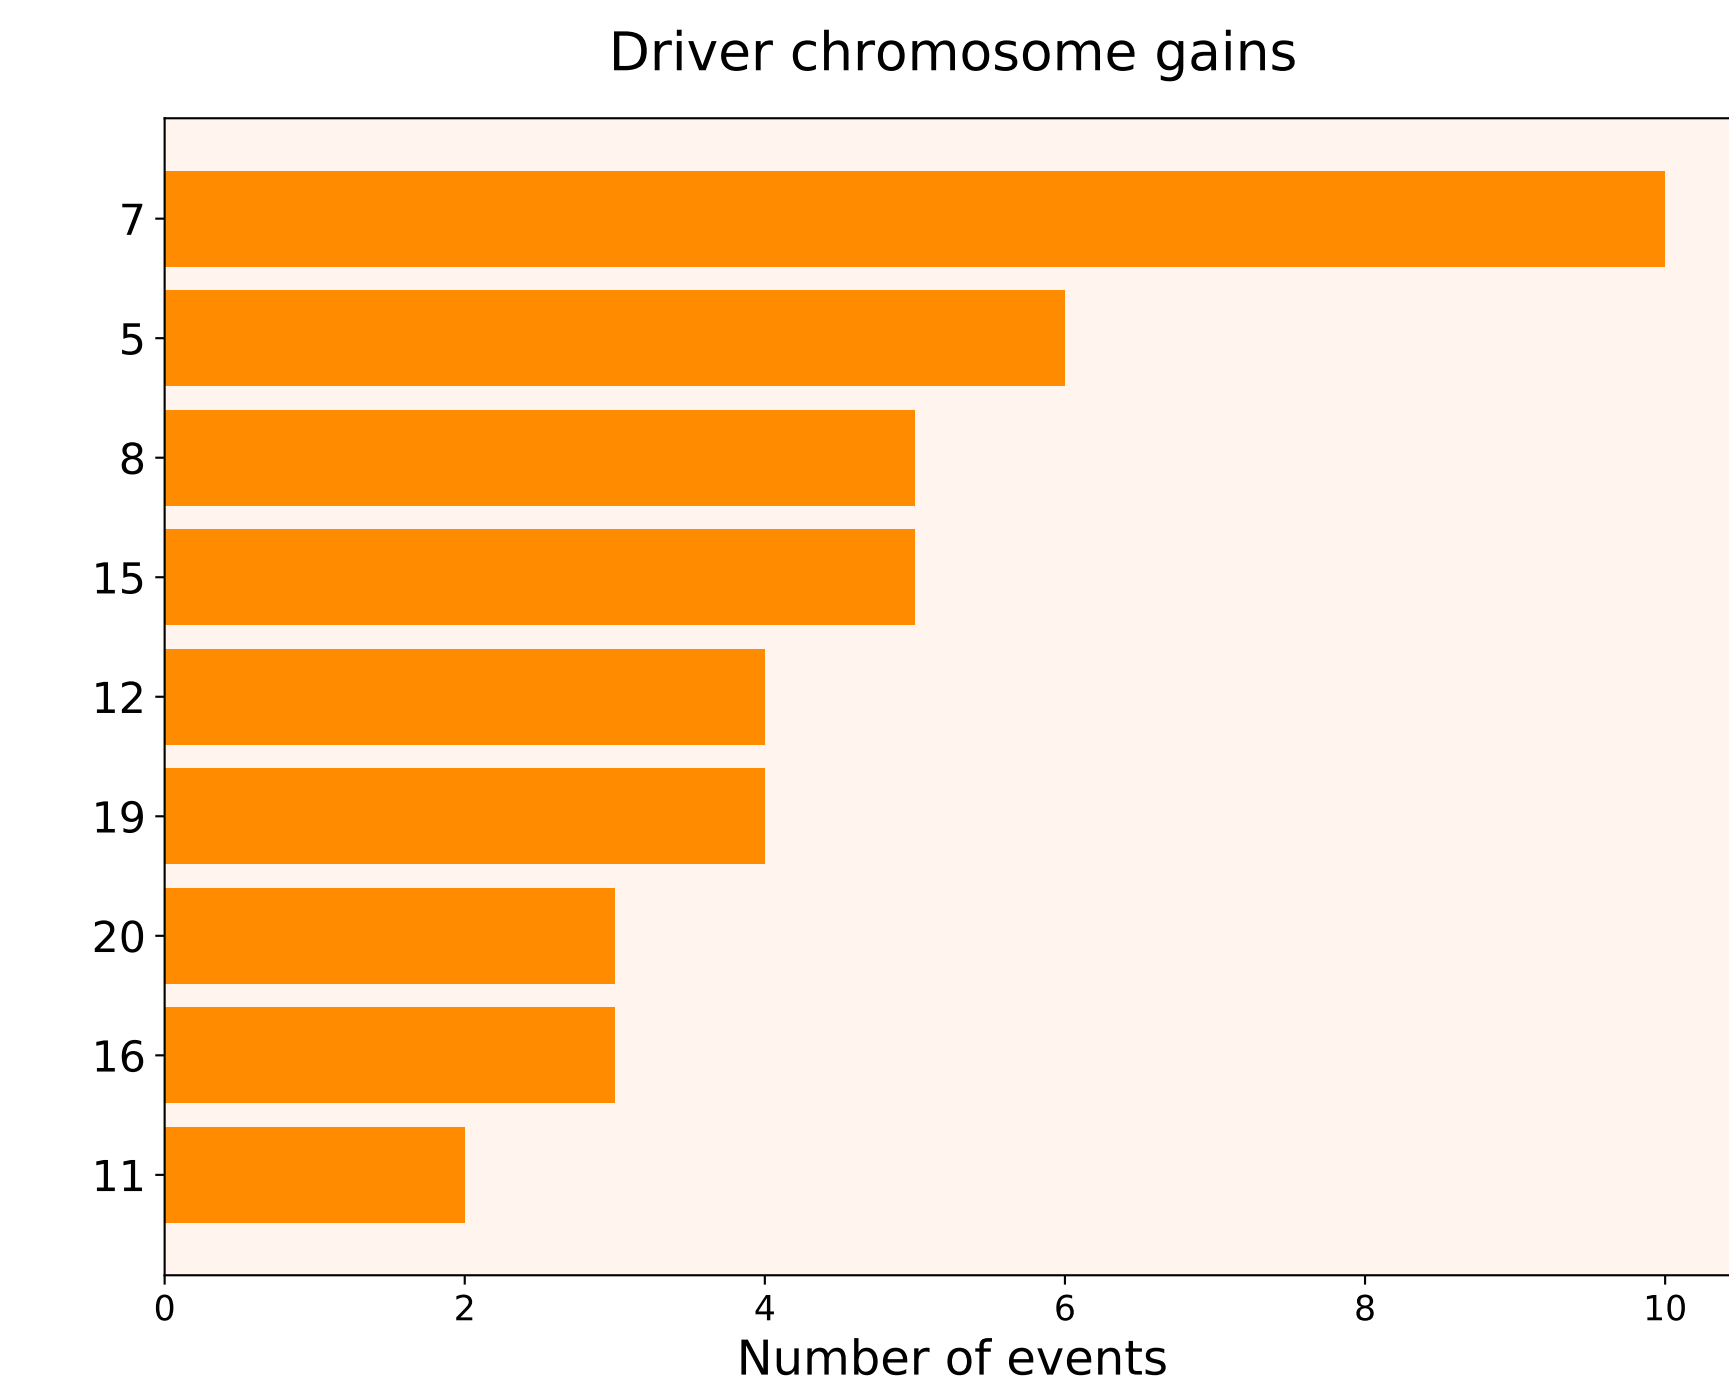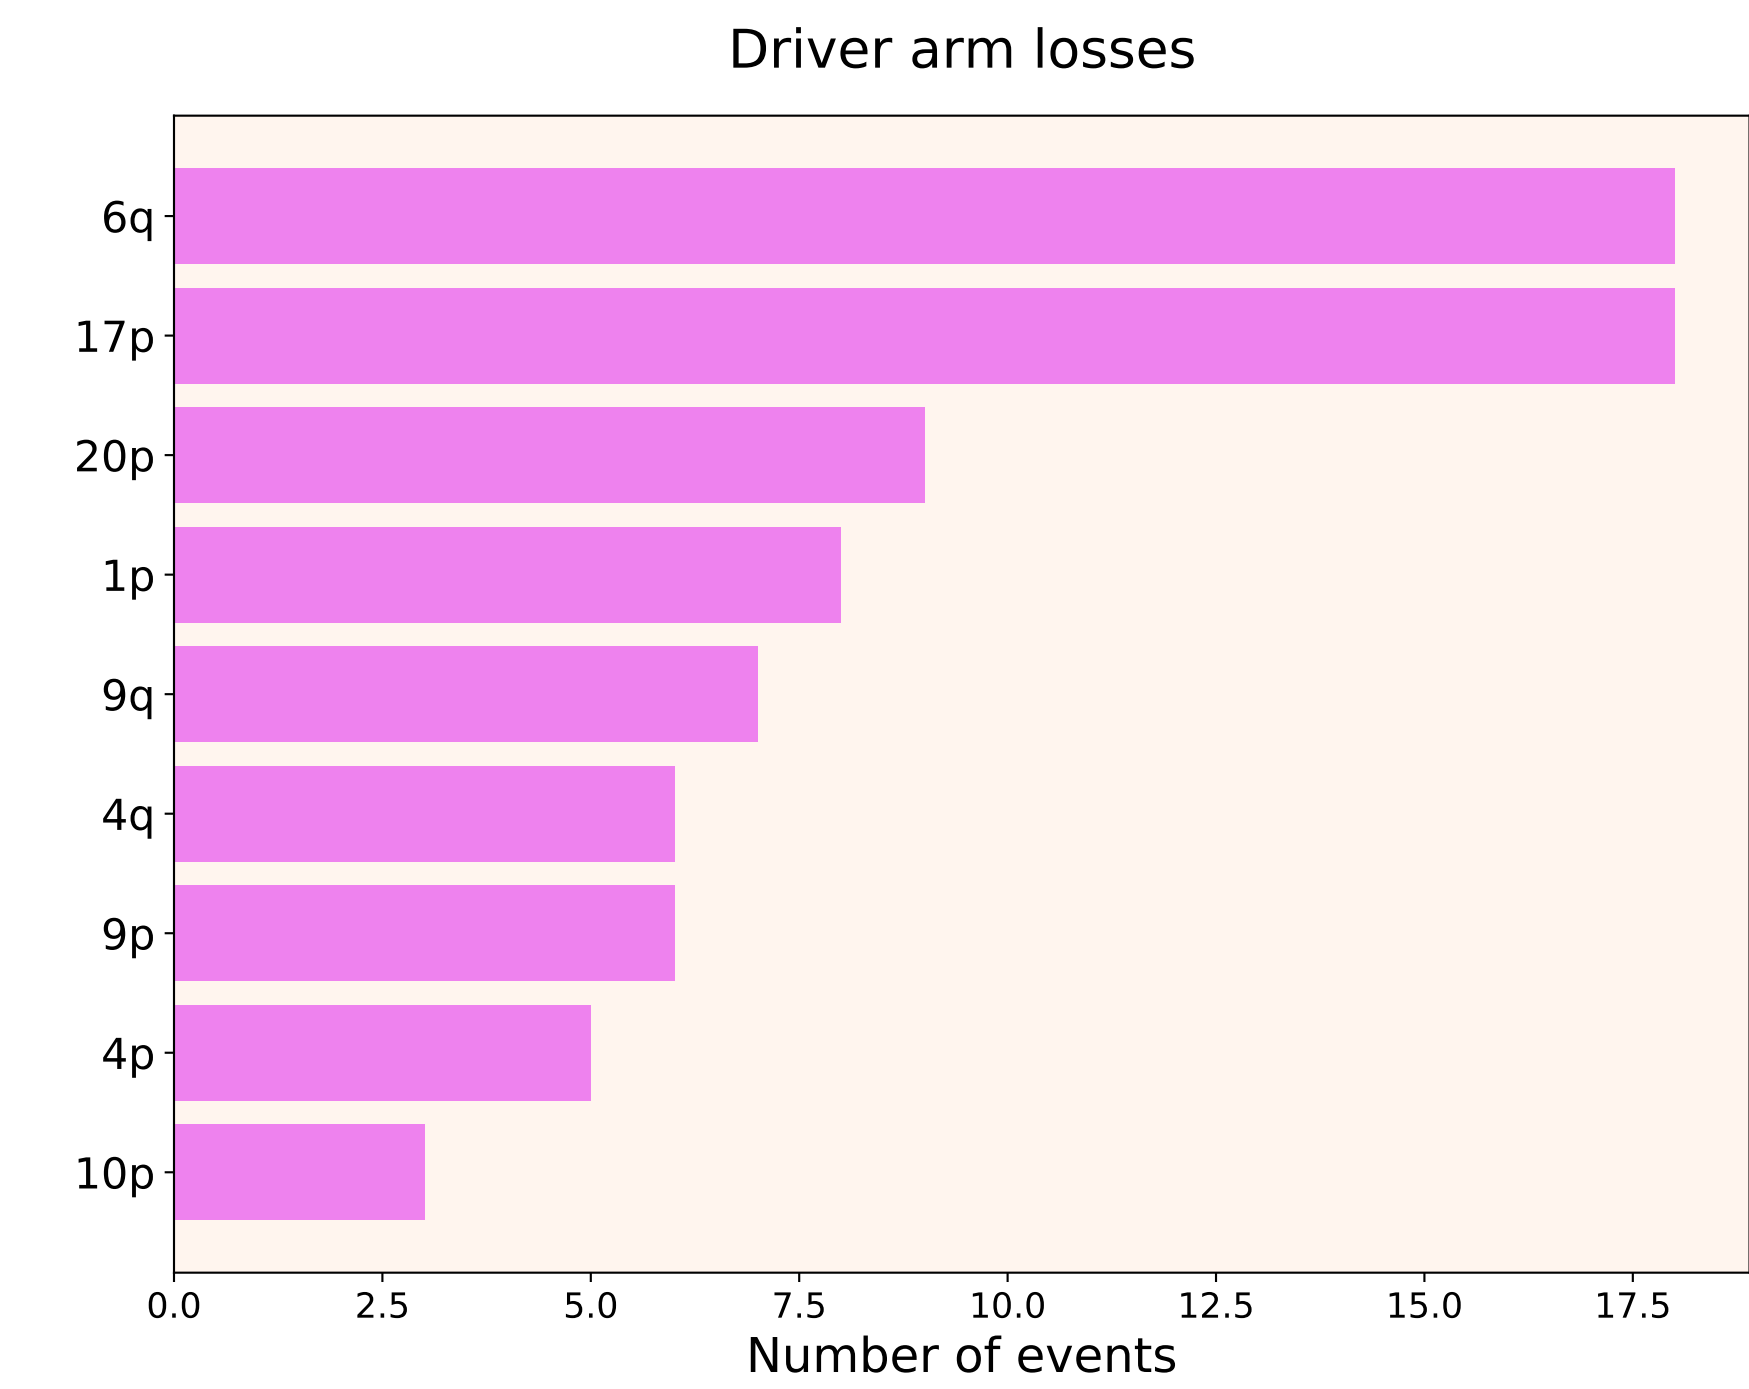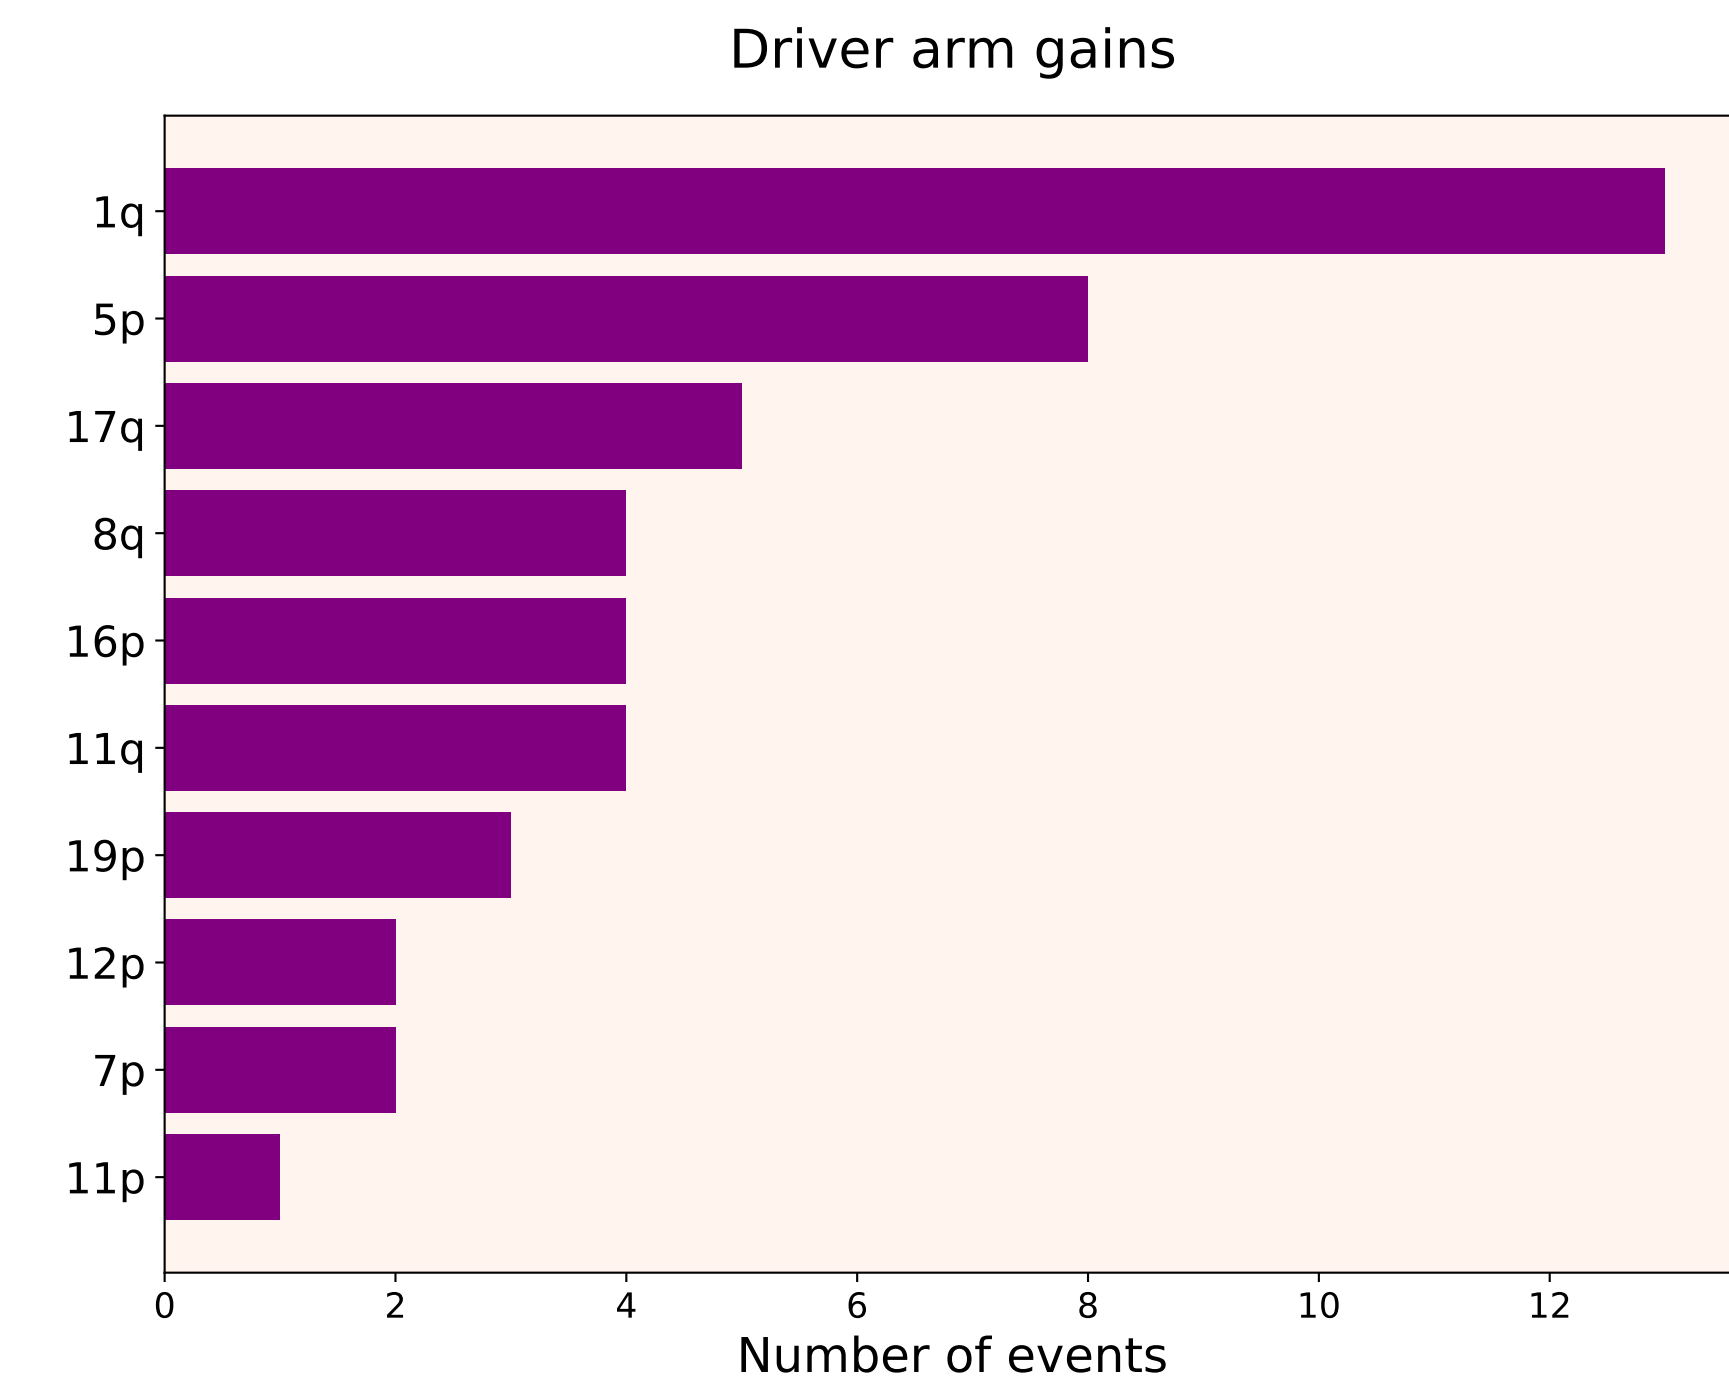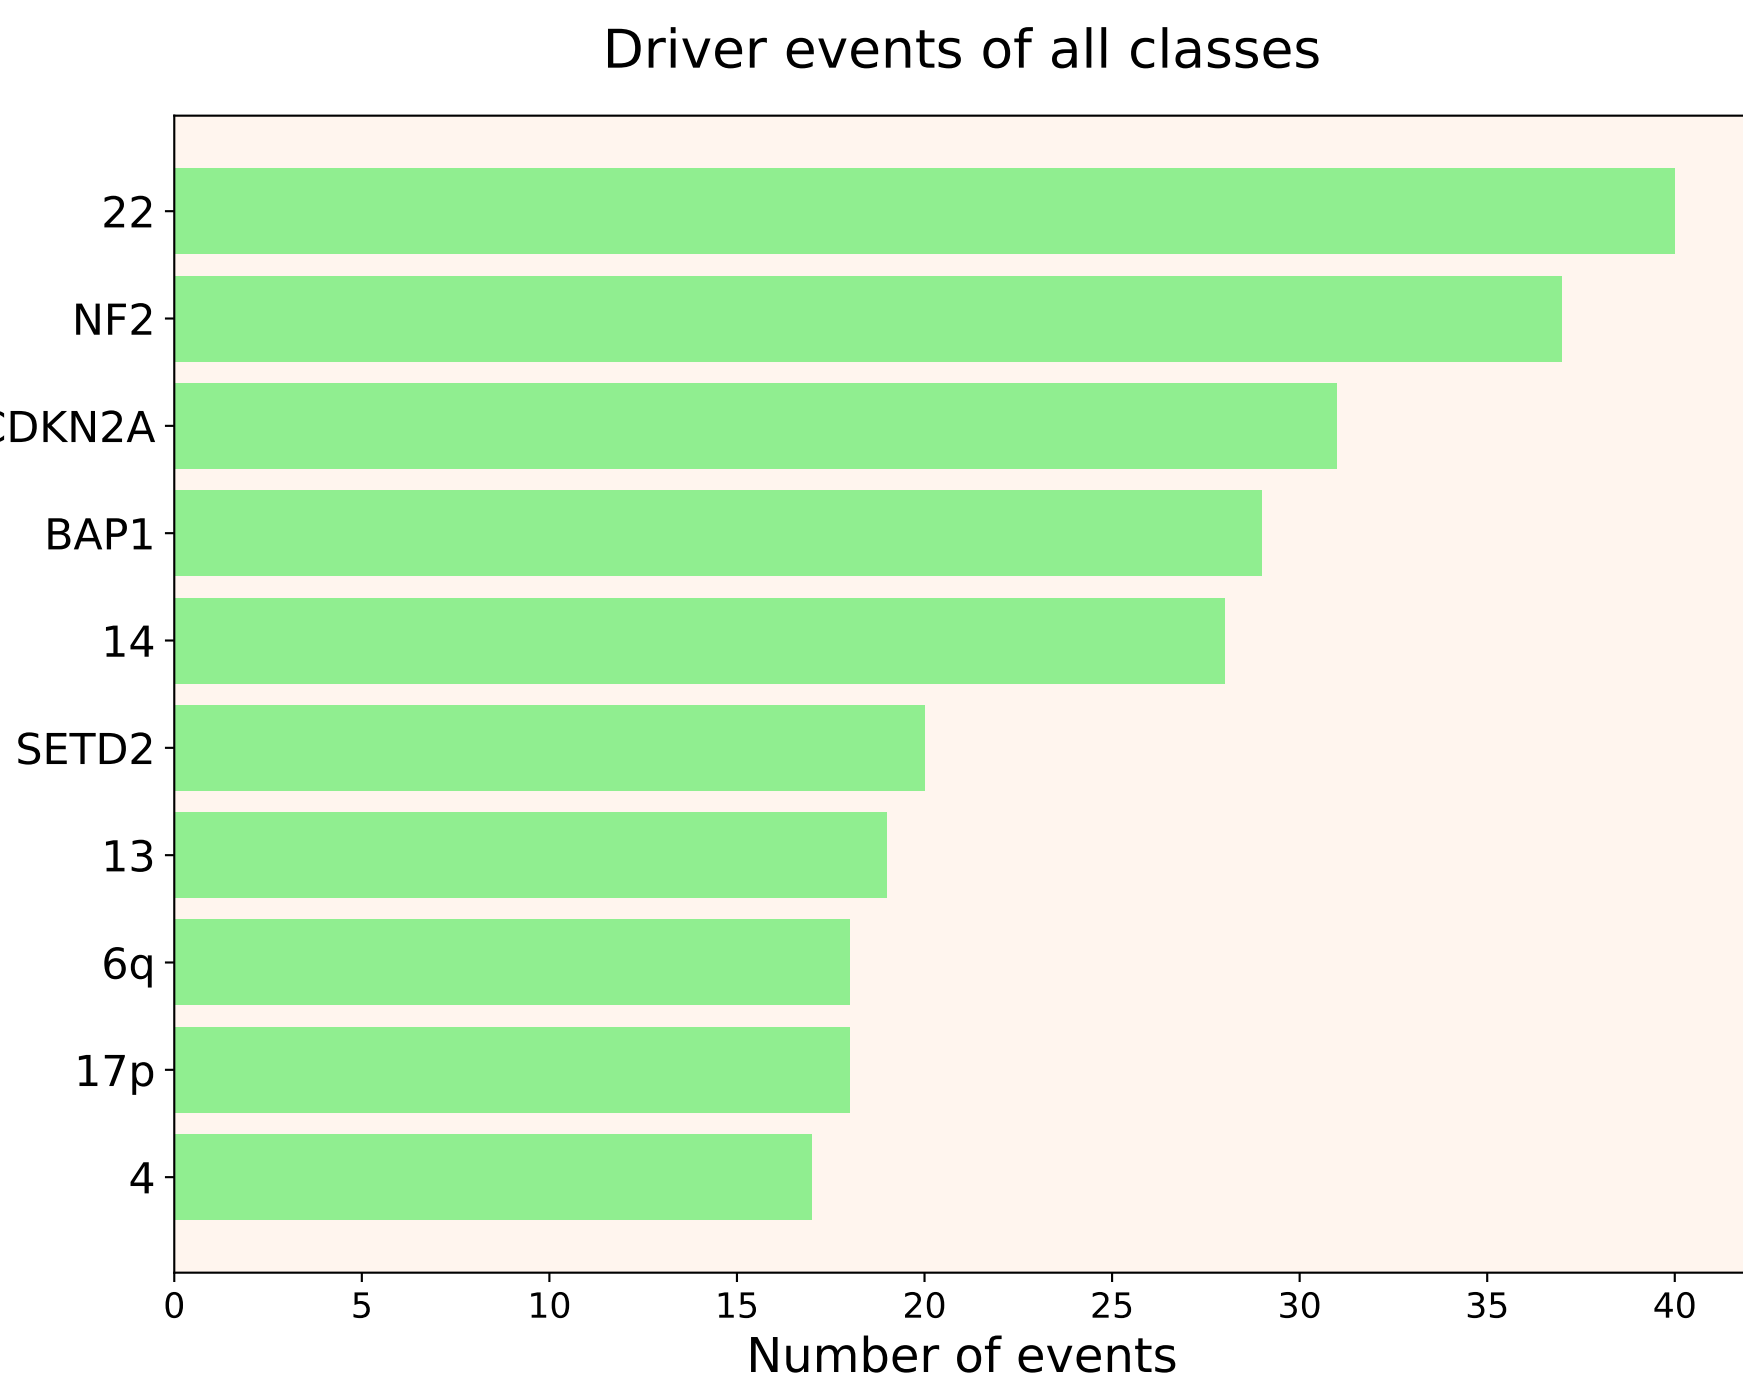

Supplement: Supplemental_Data_S1.zip [file Supplemental_Data_S1.zip]

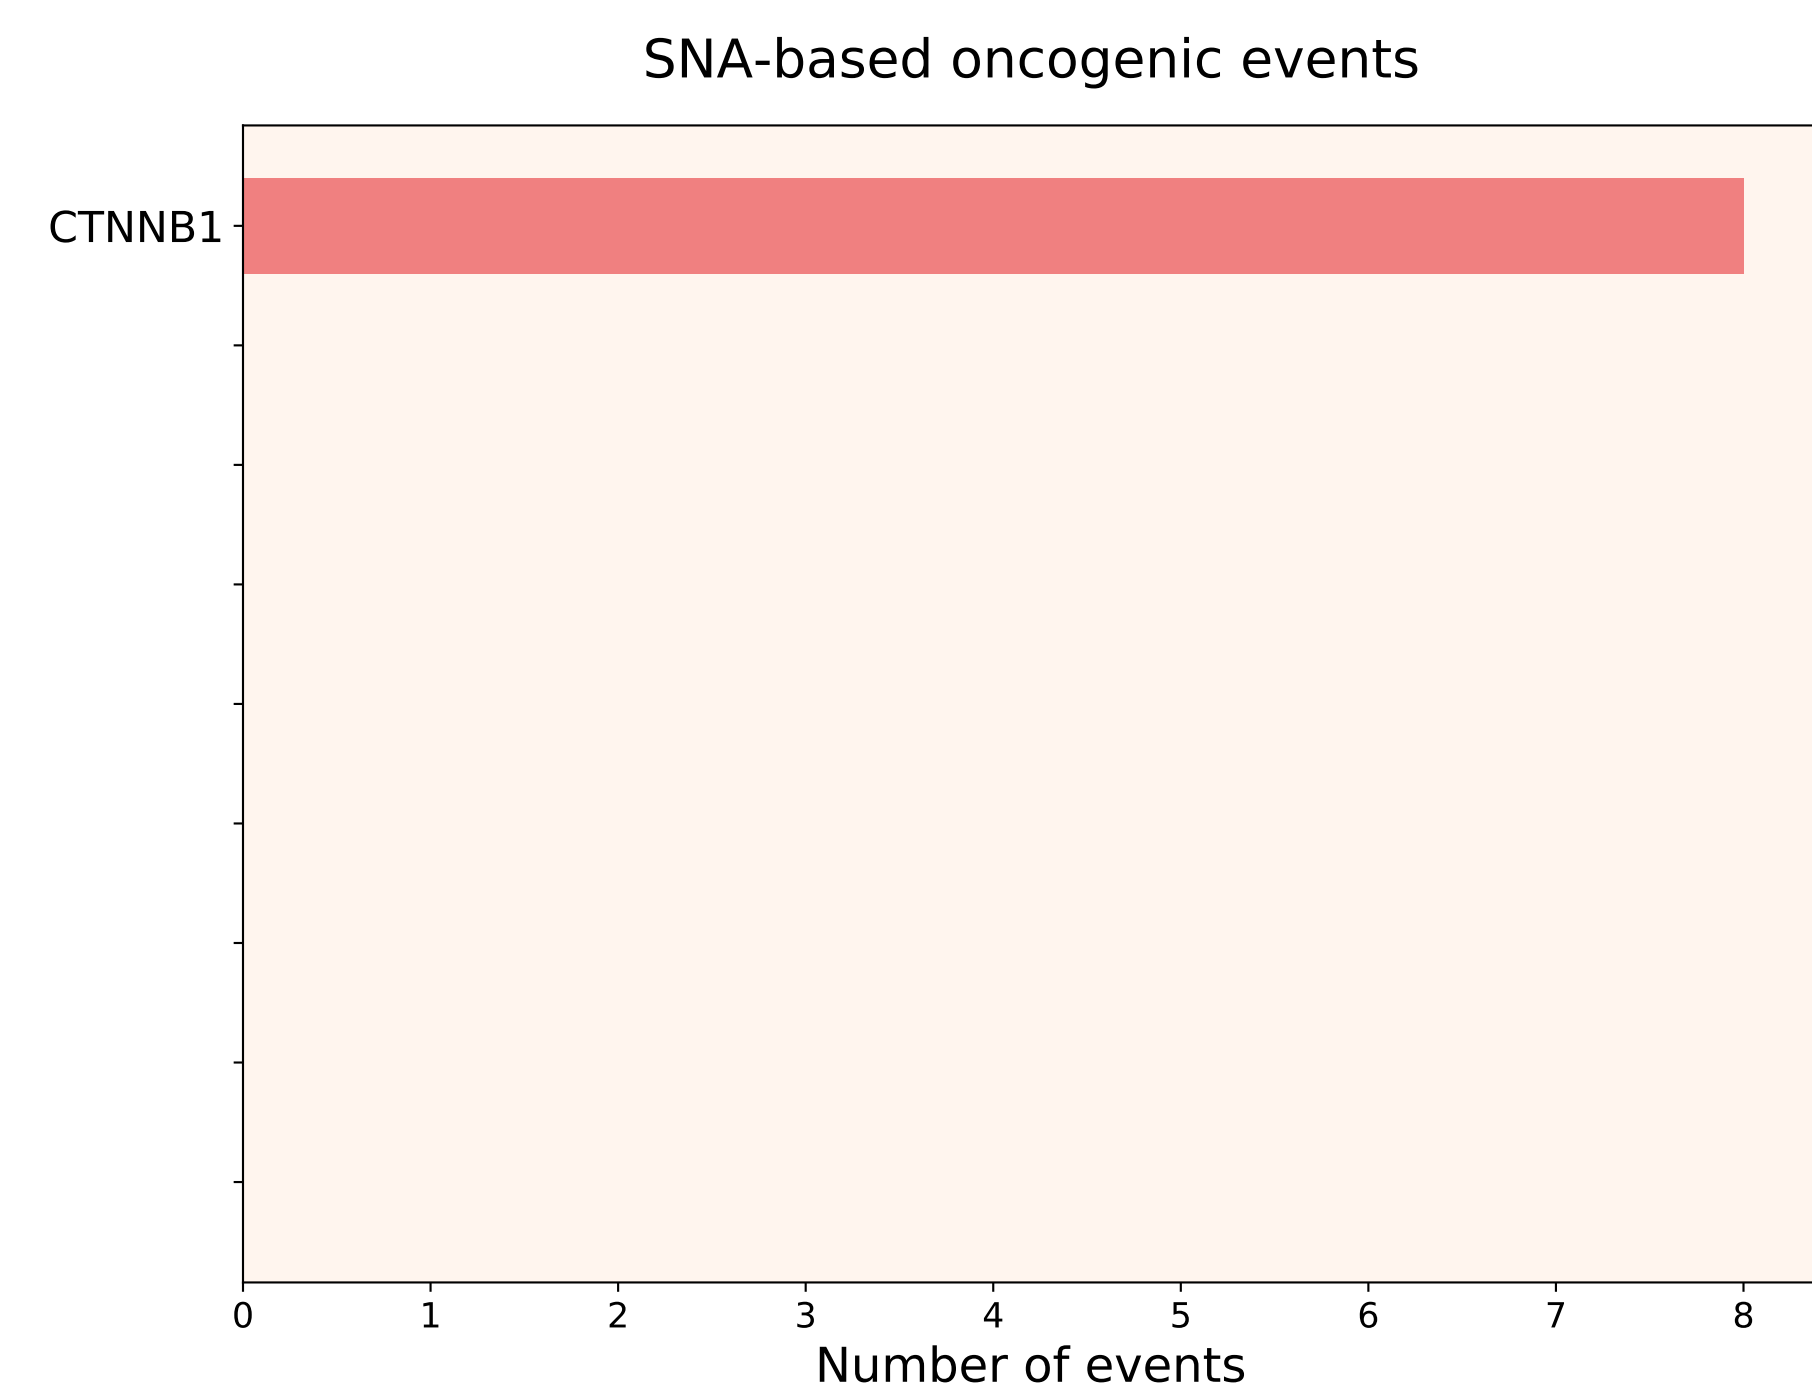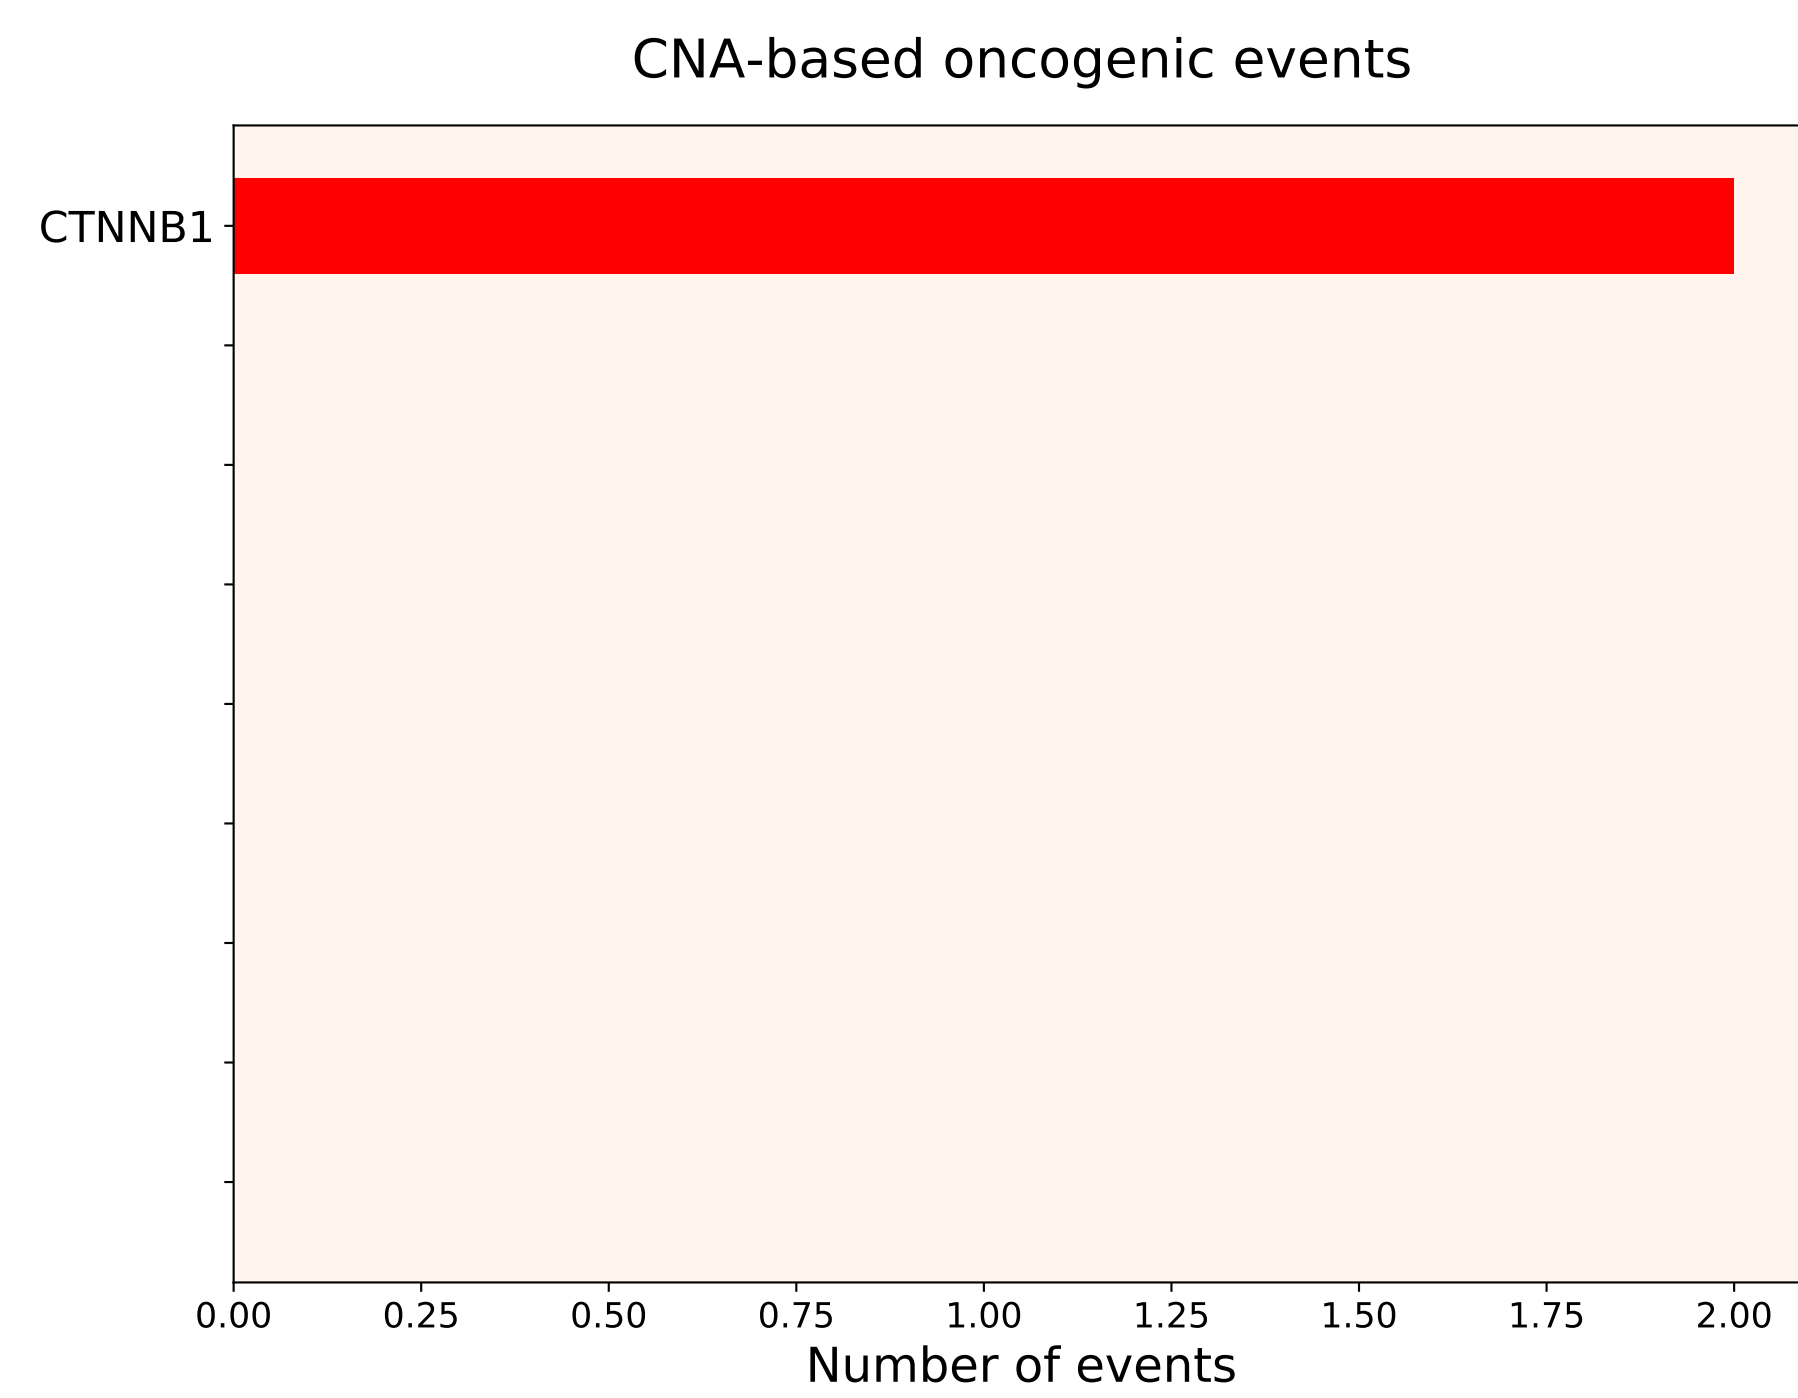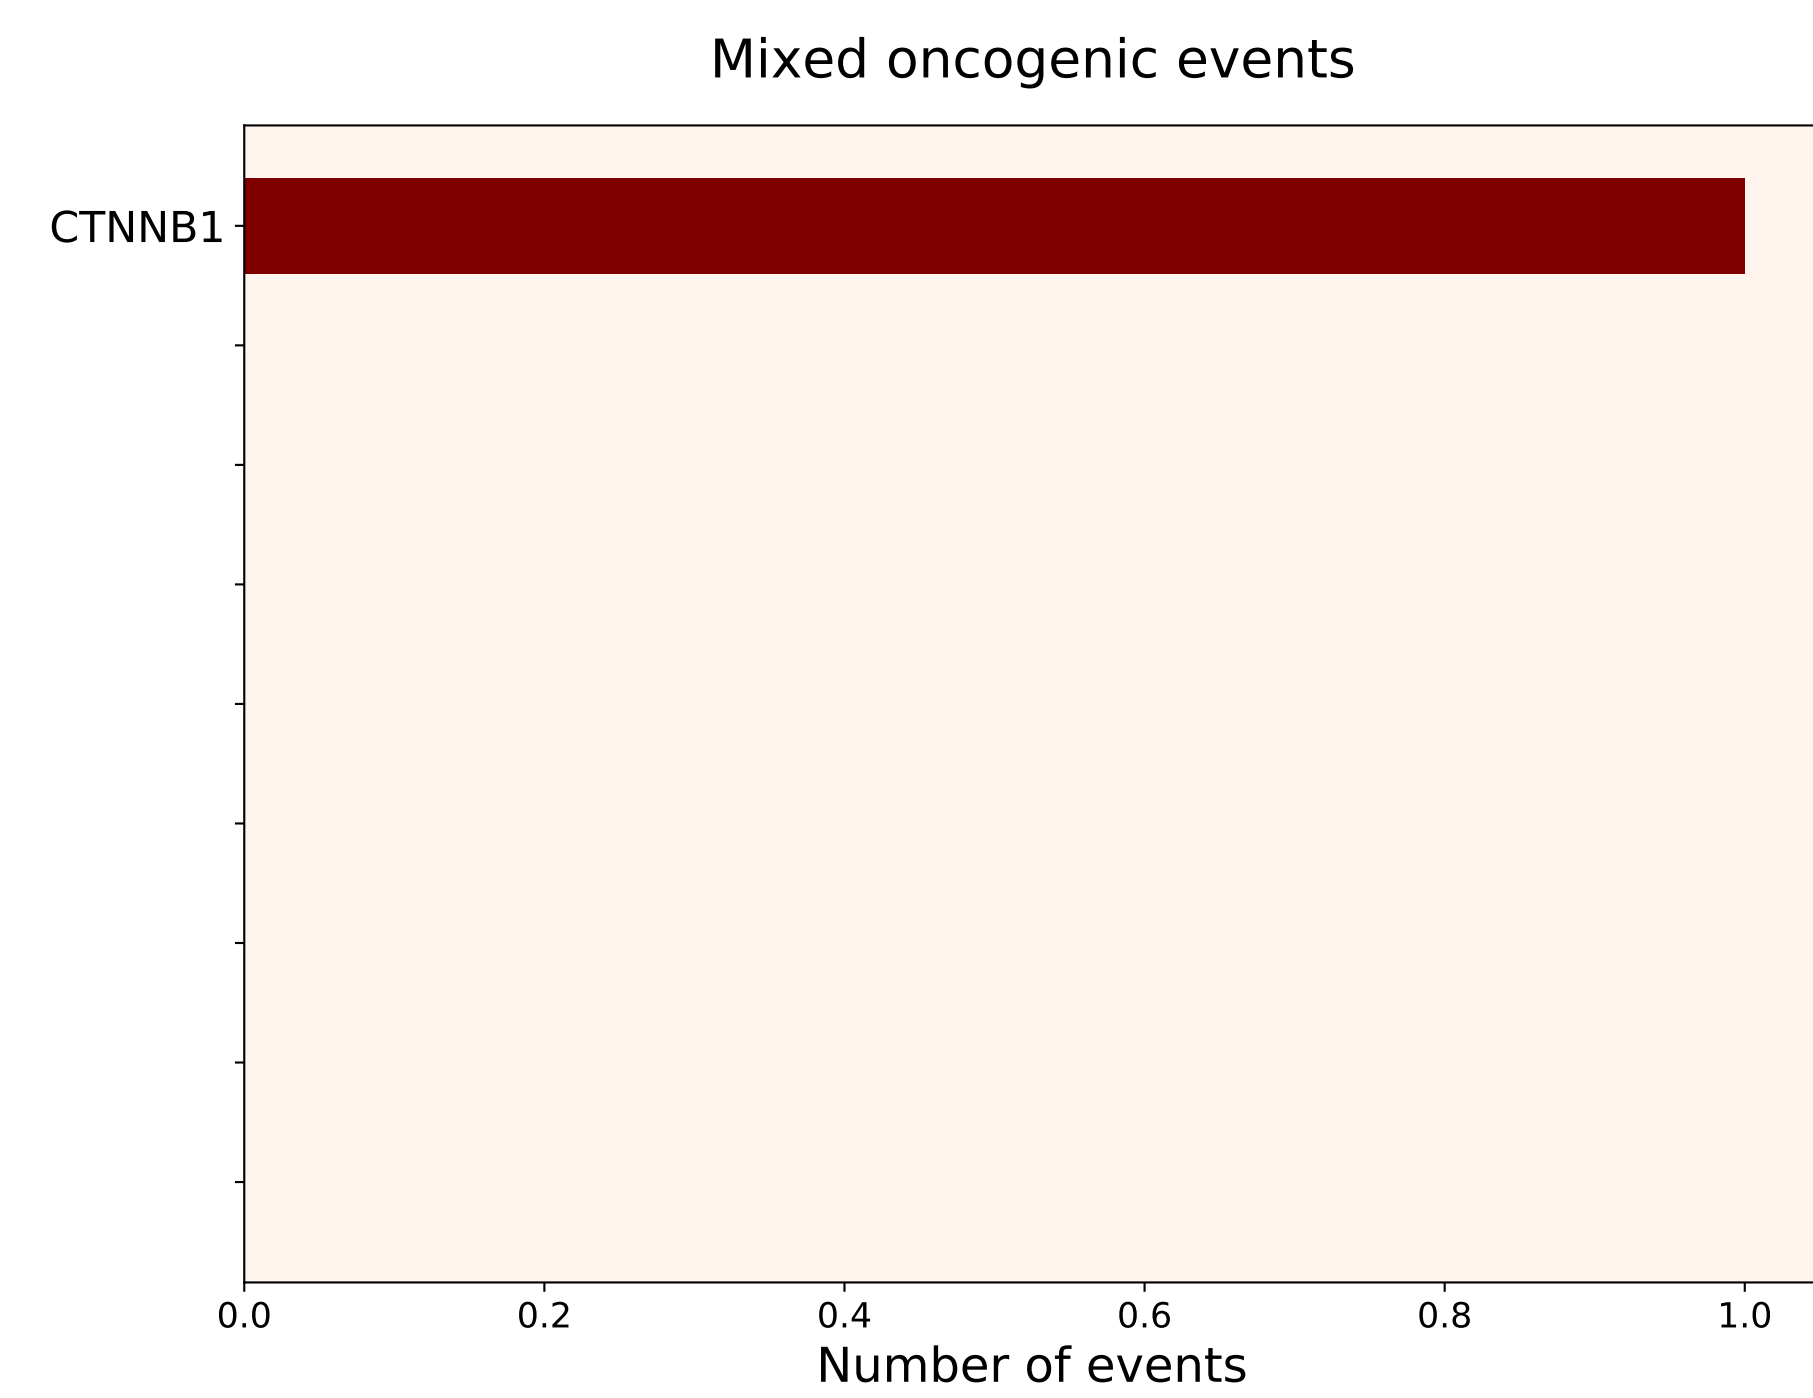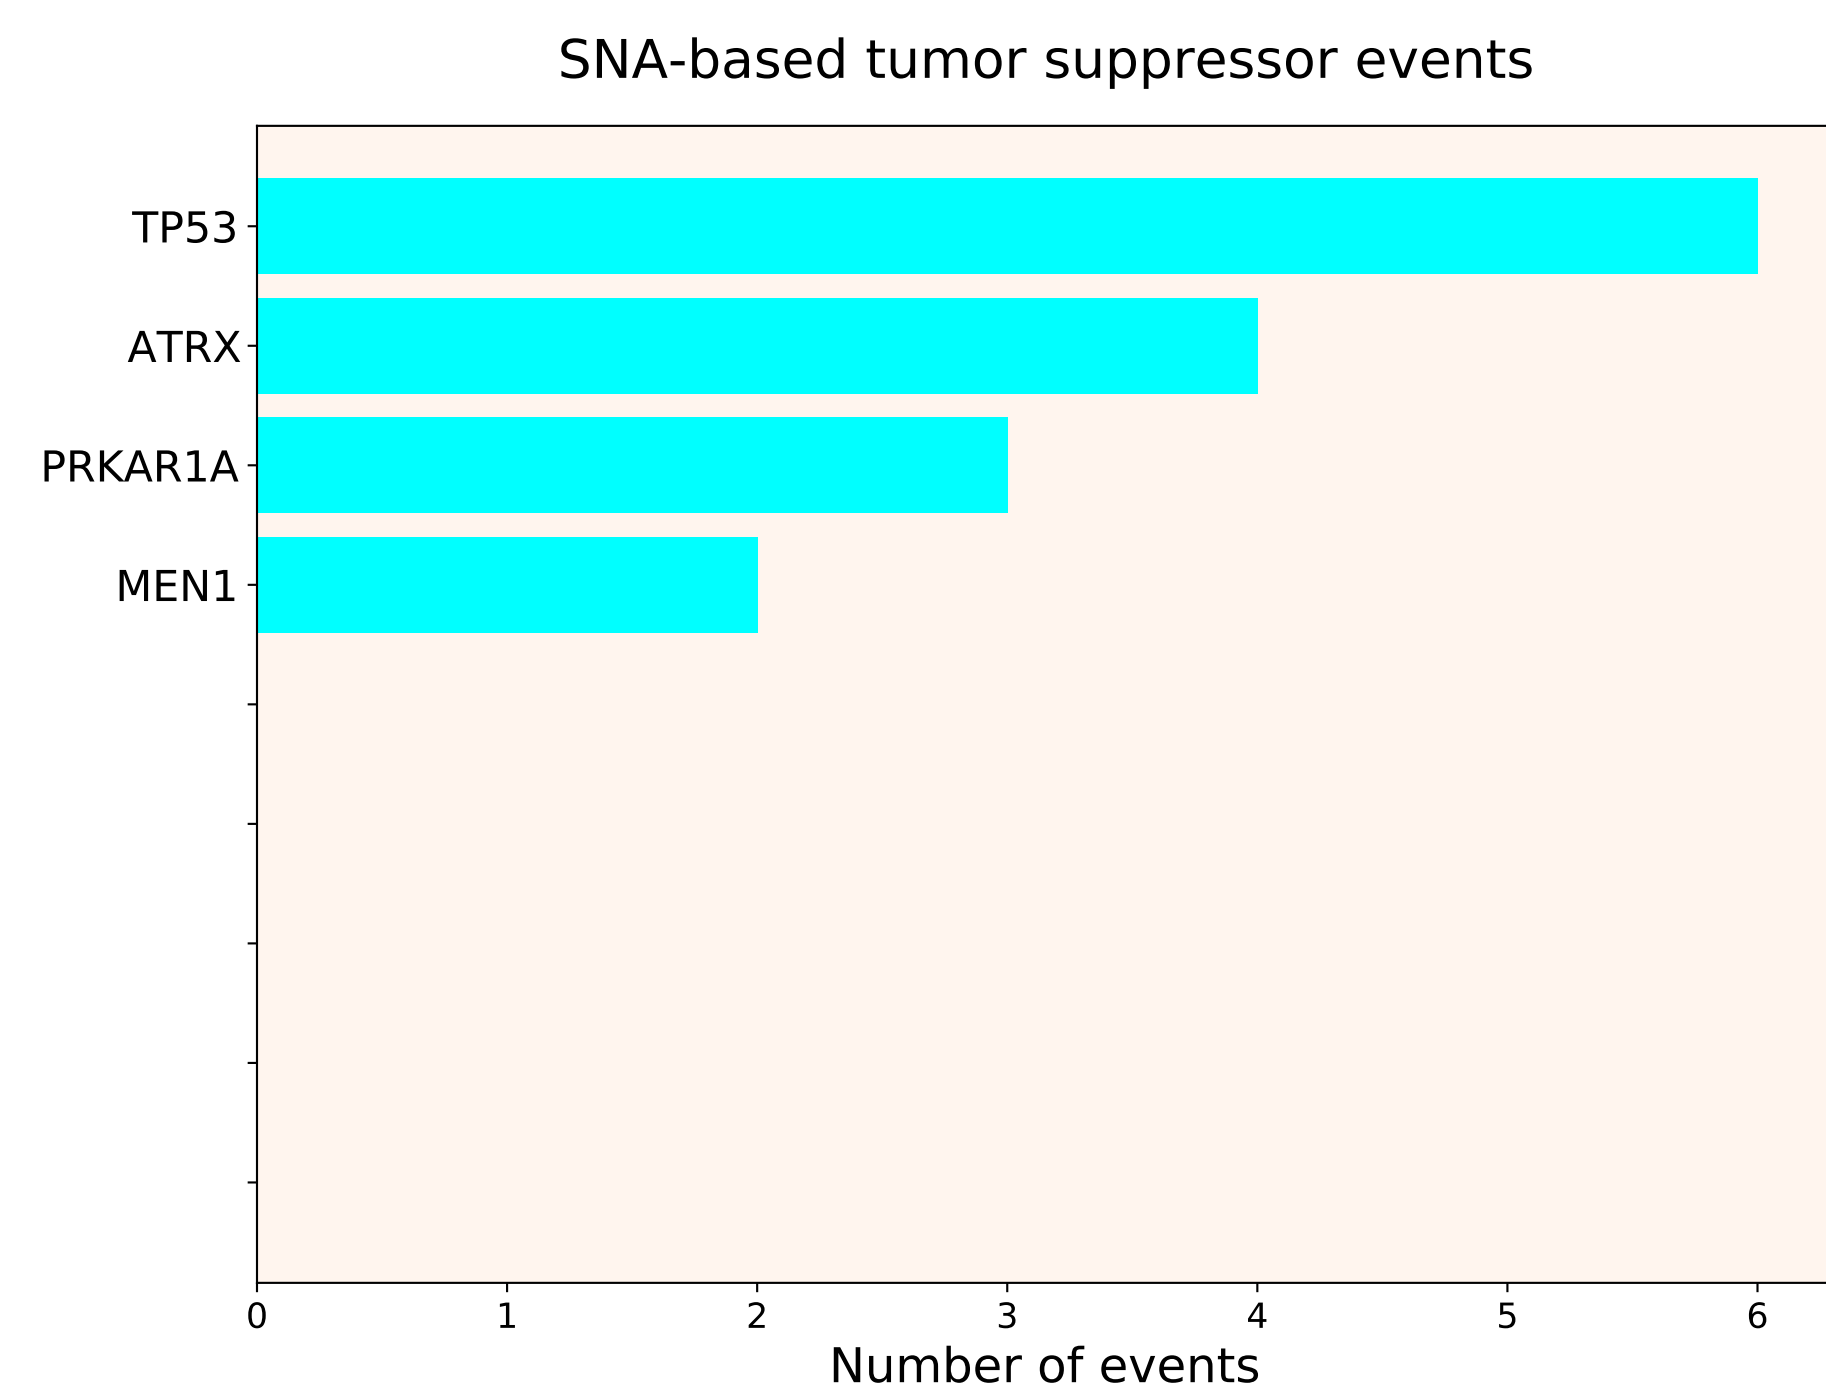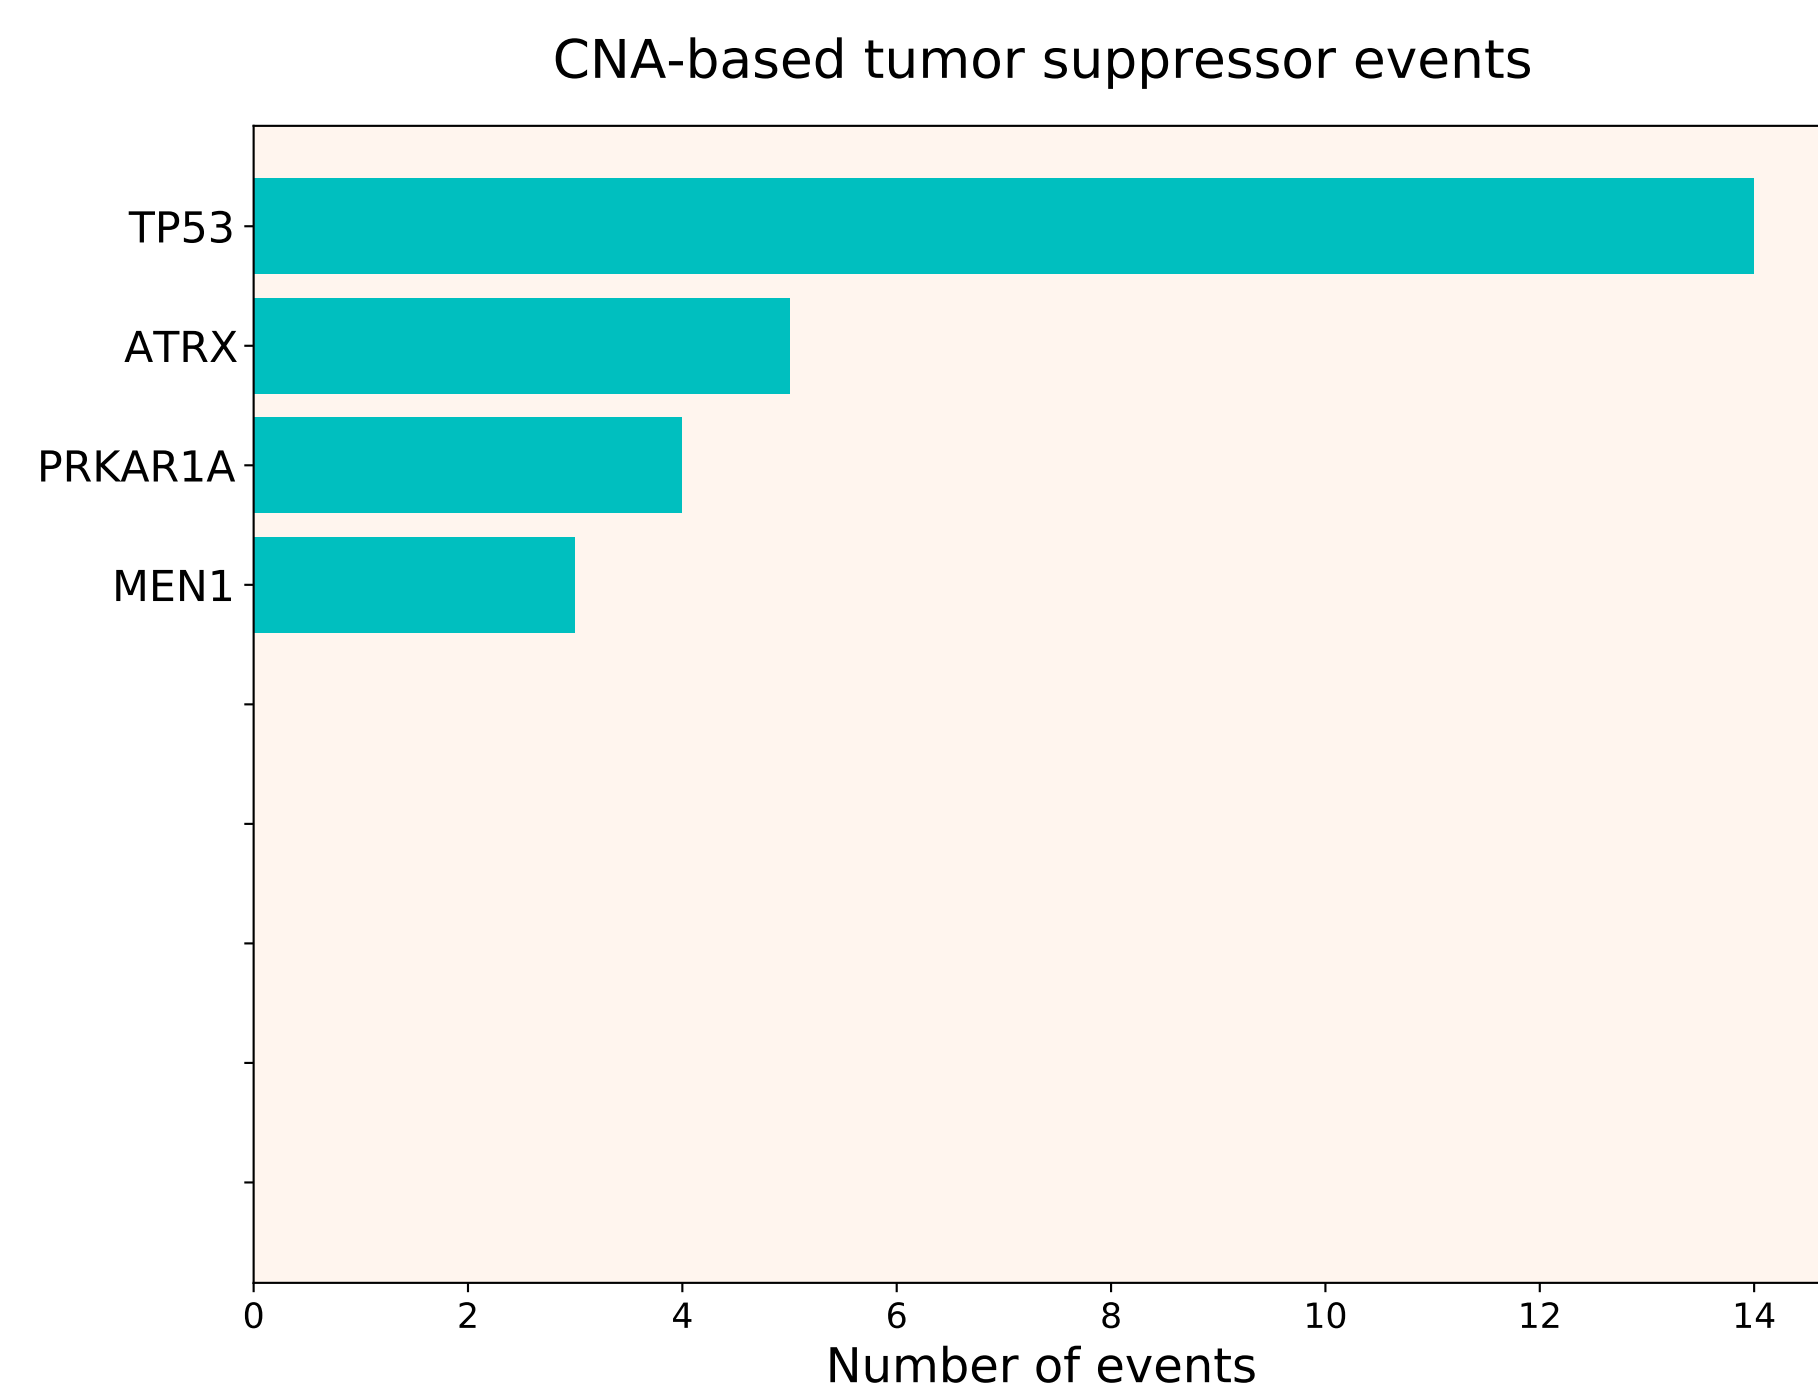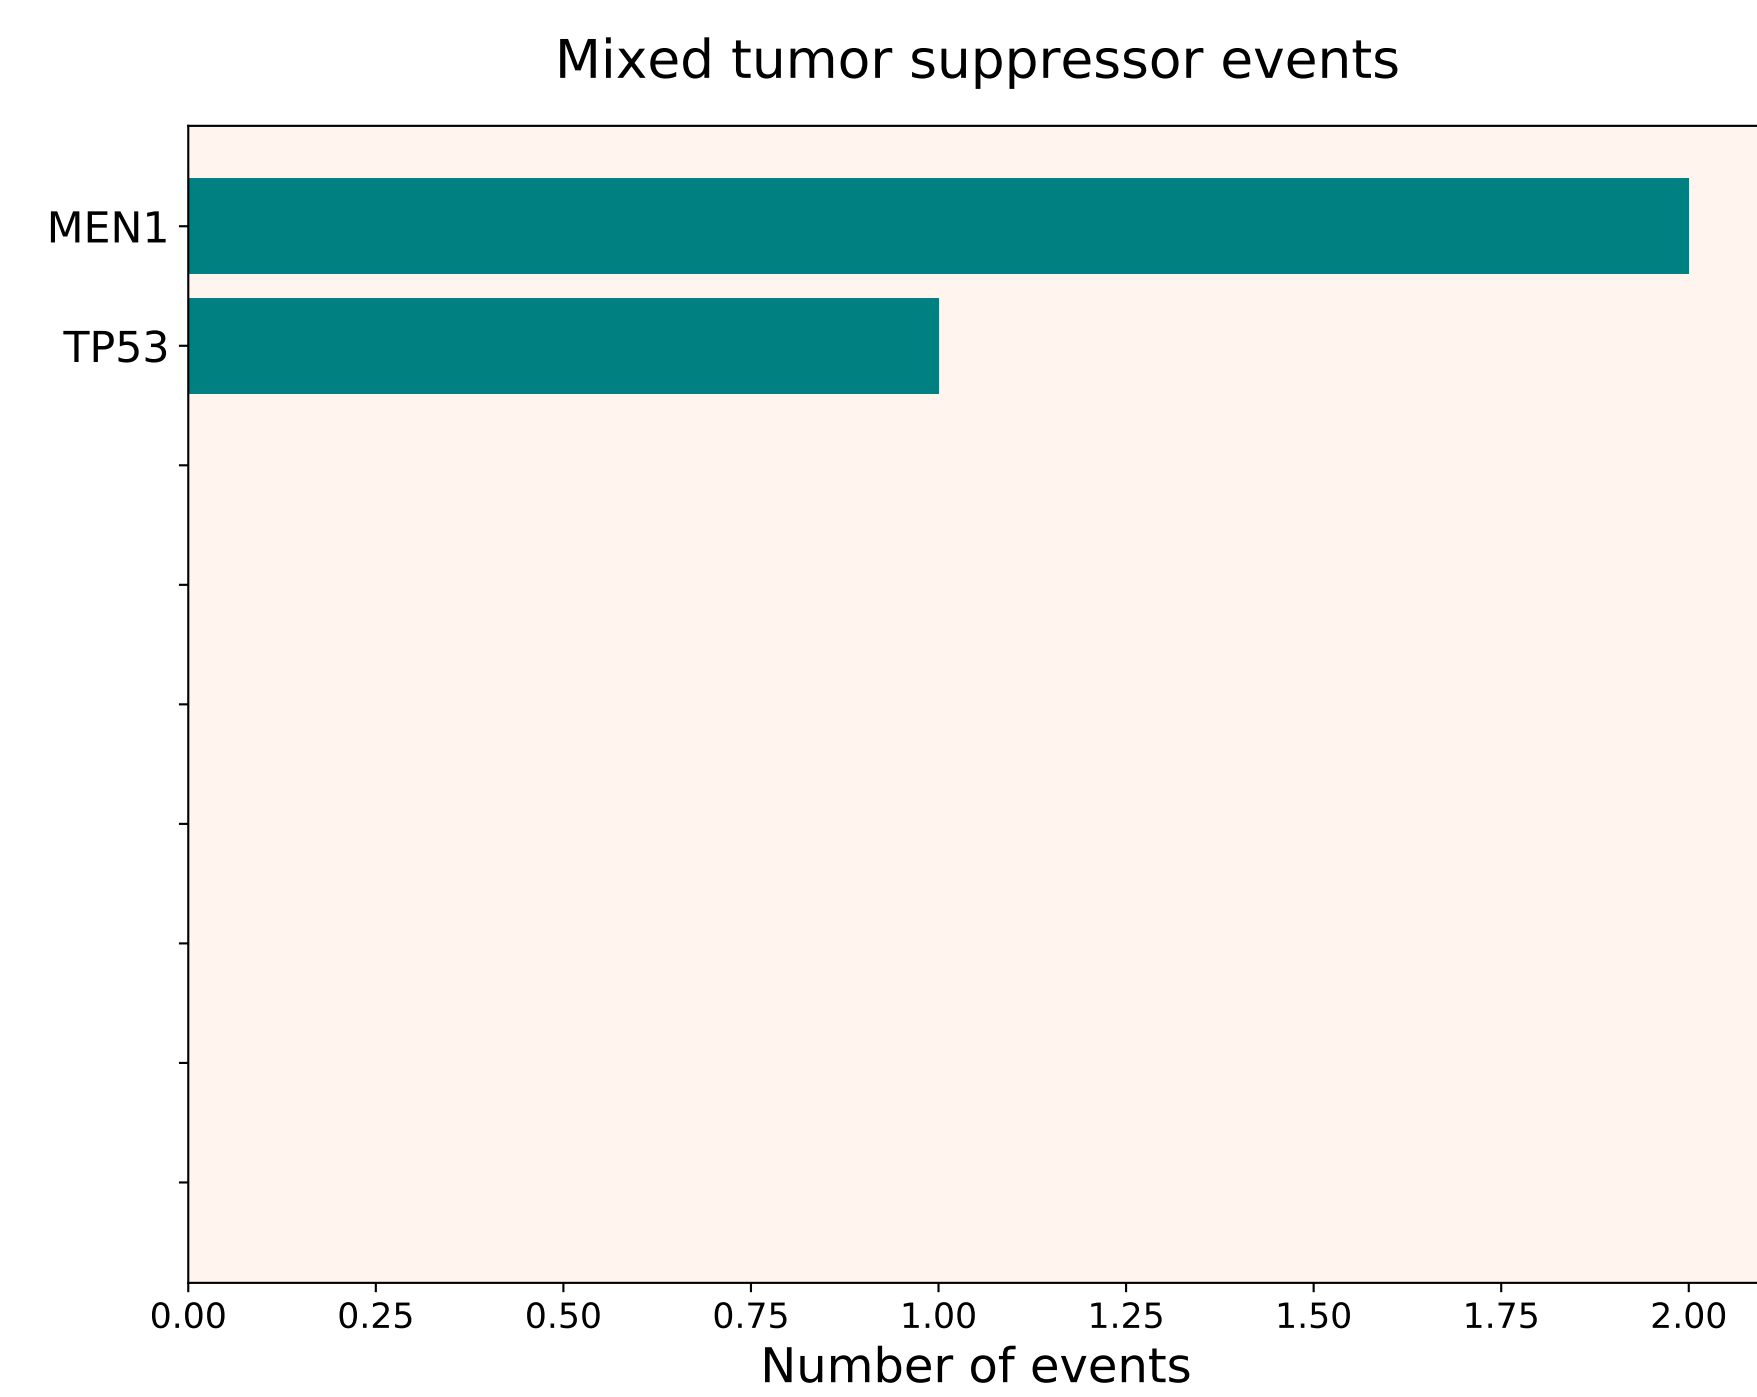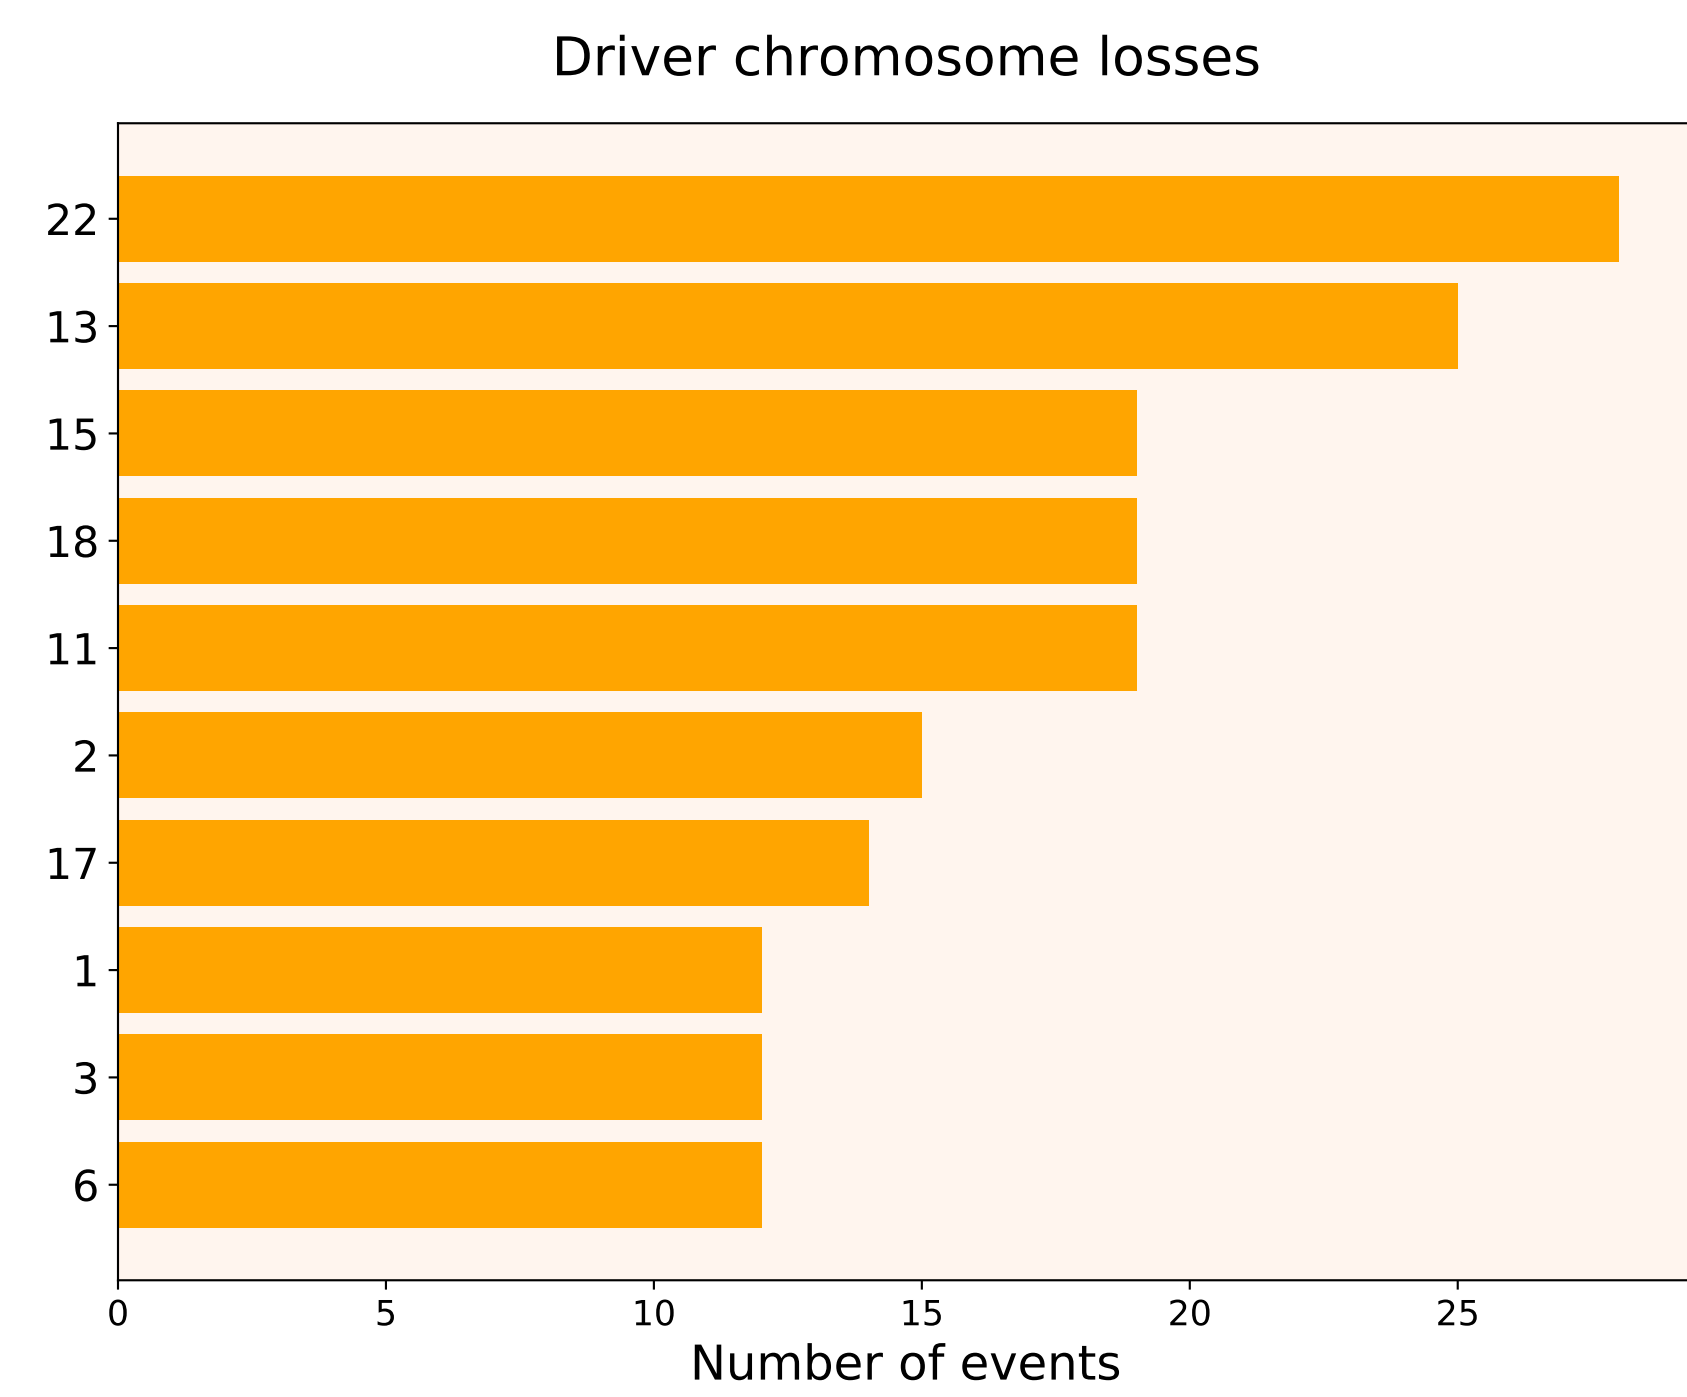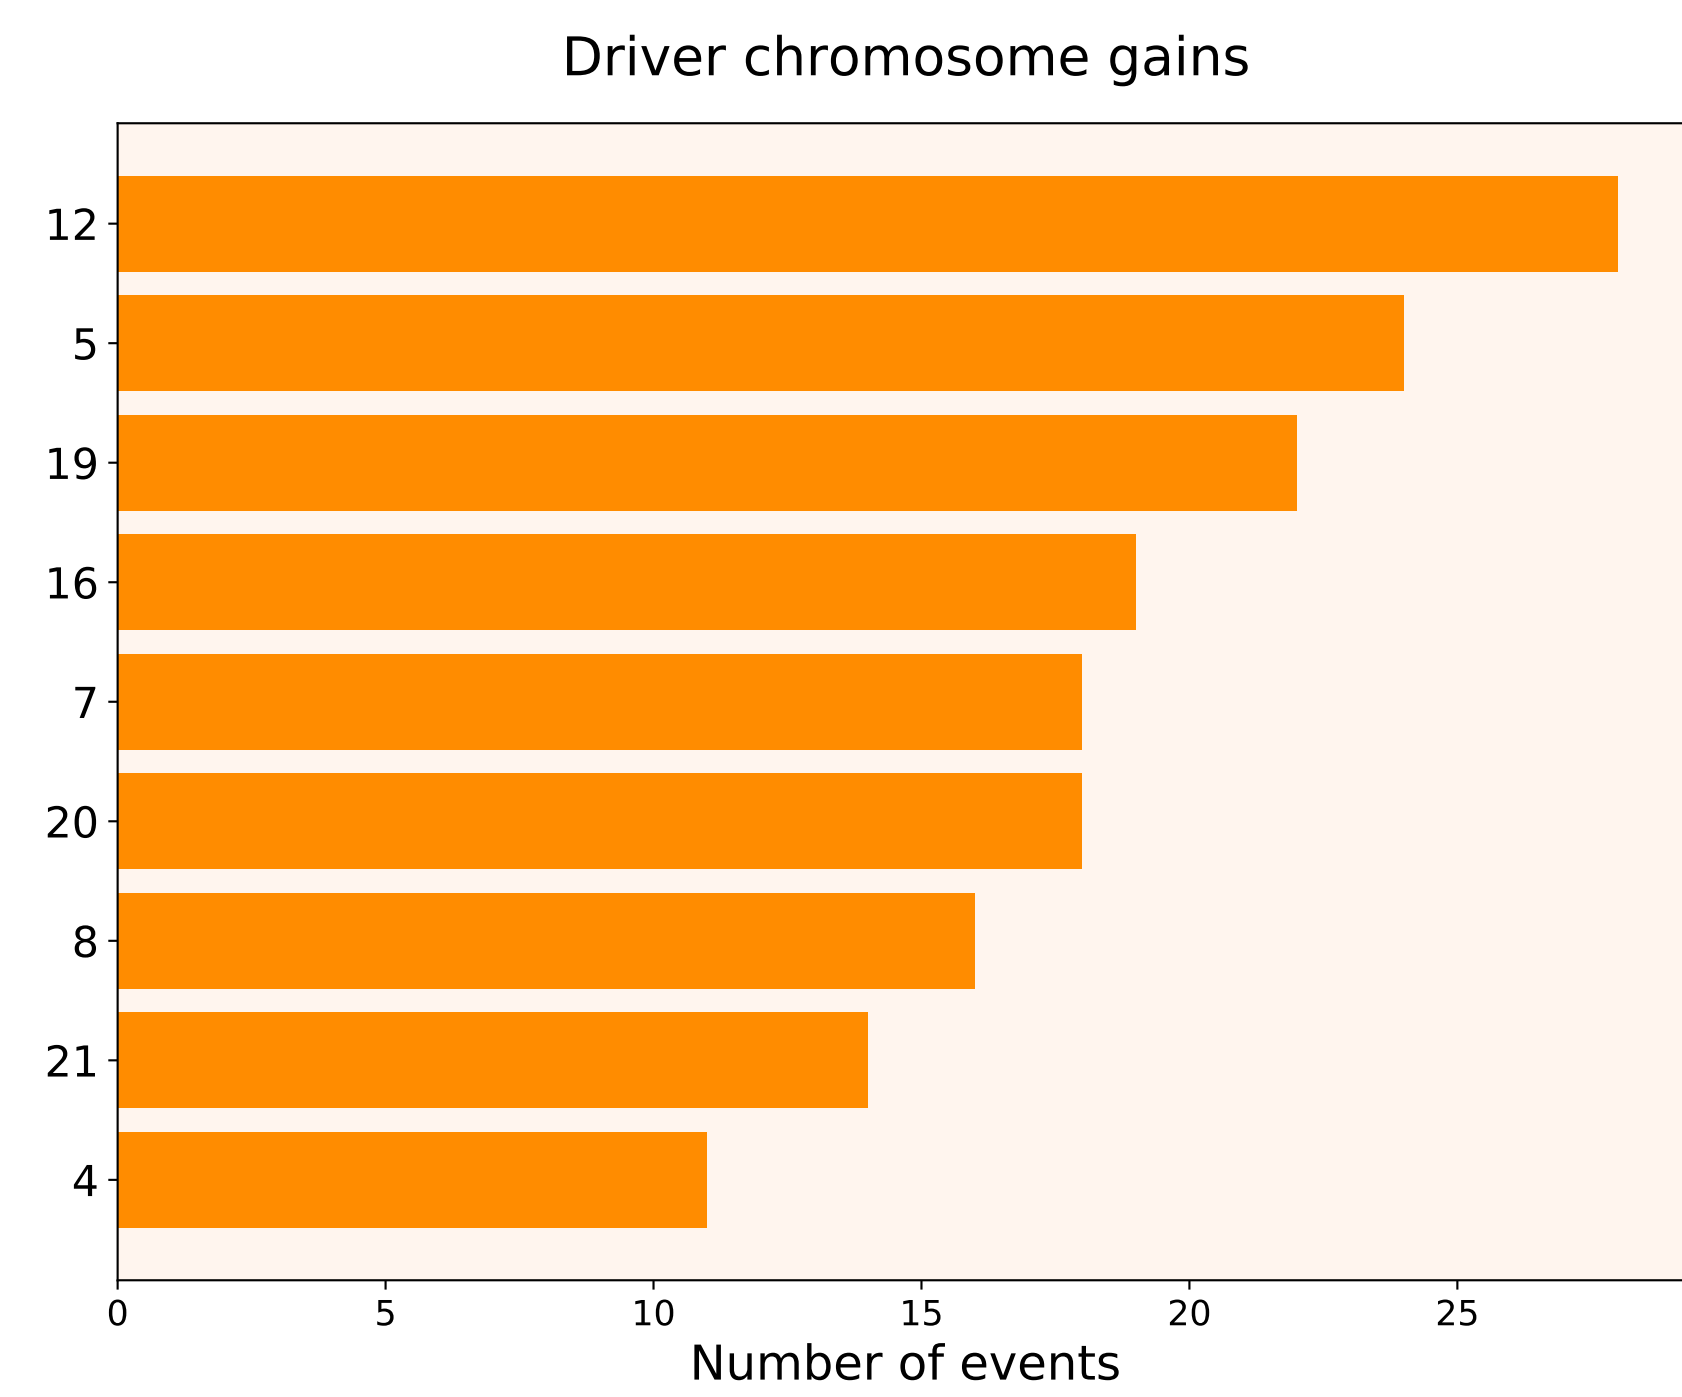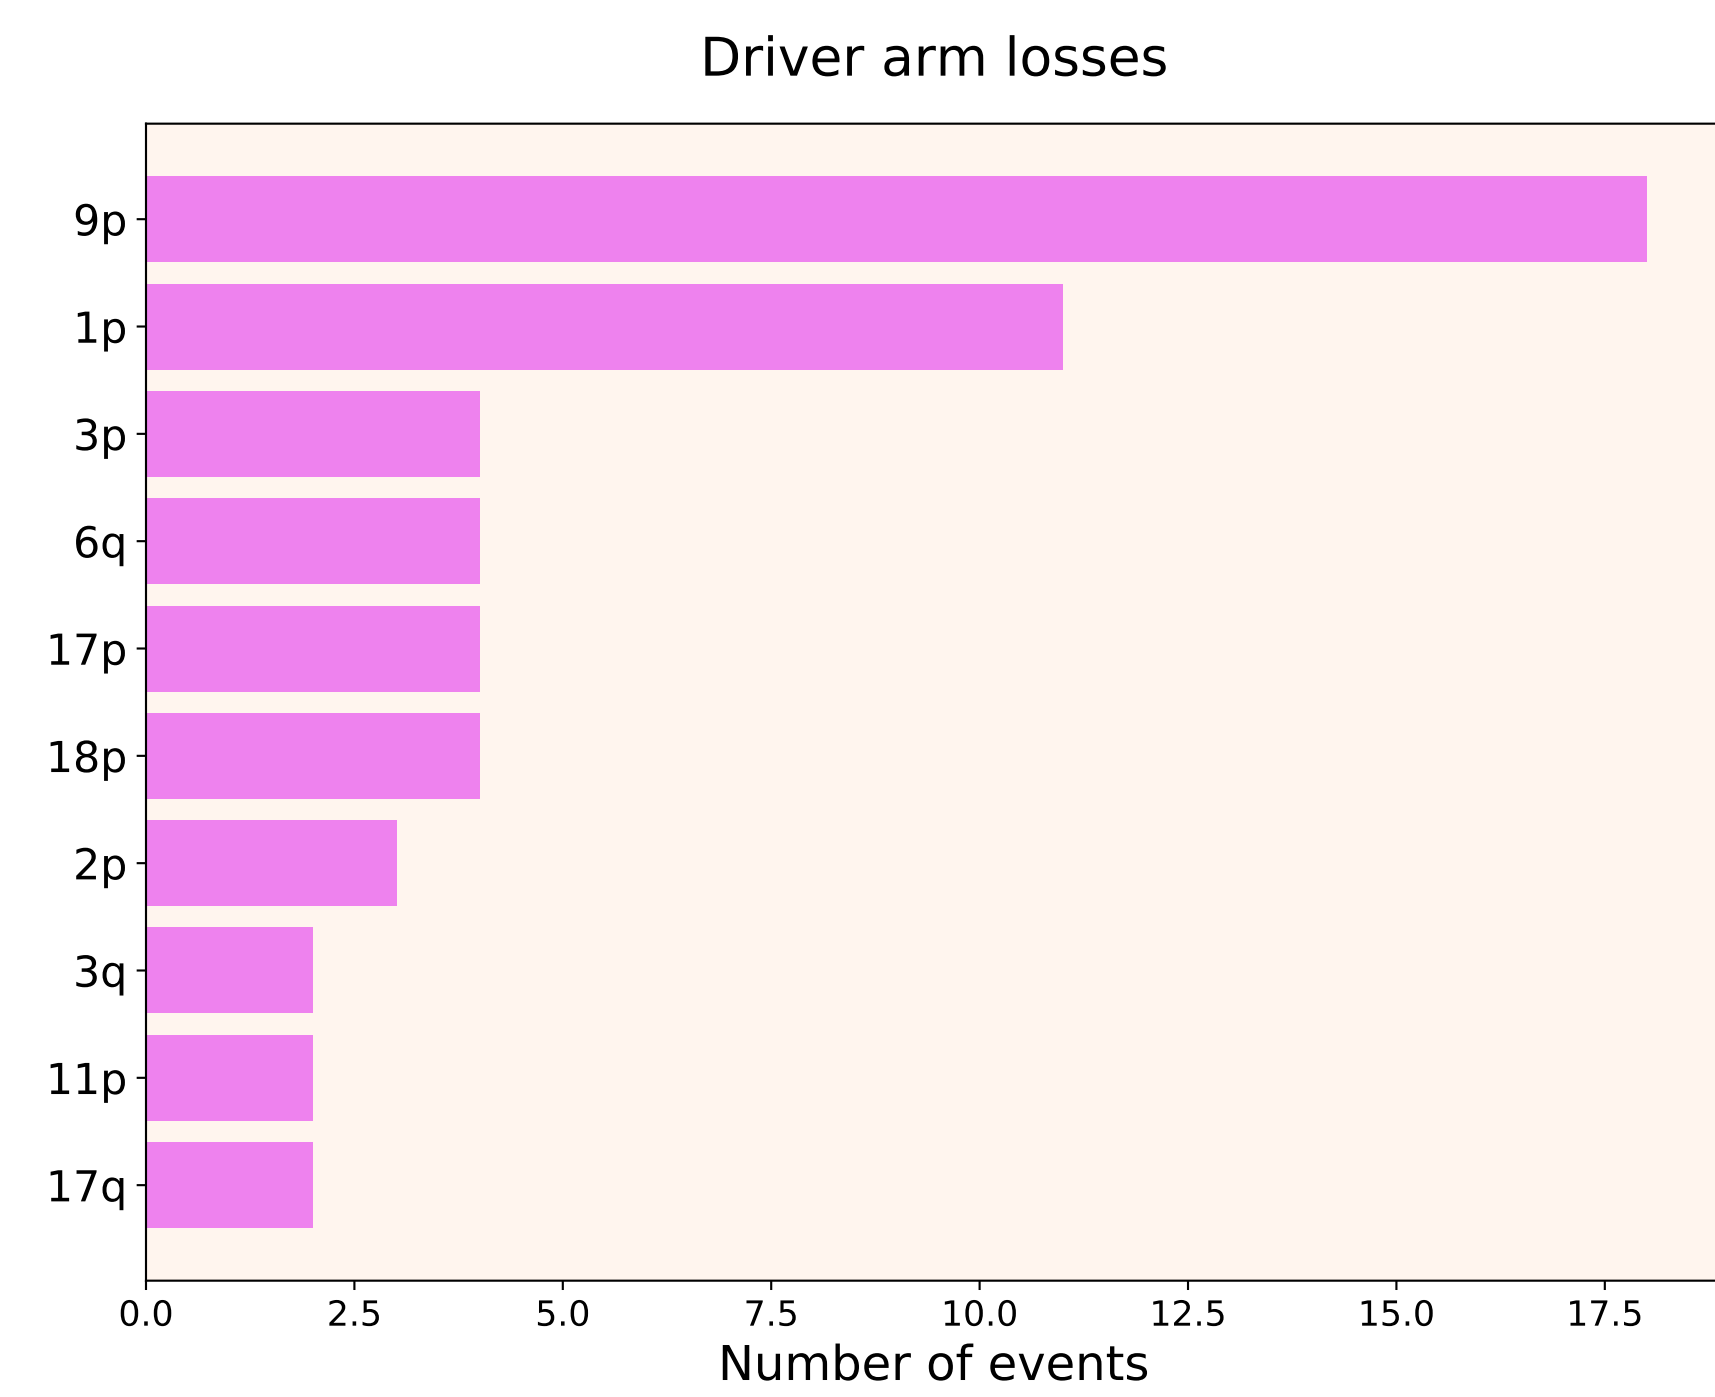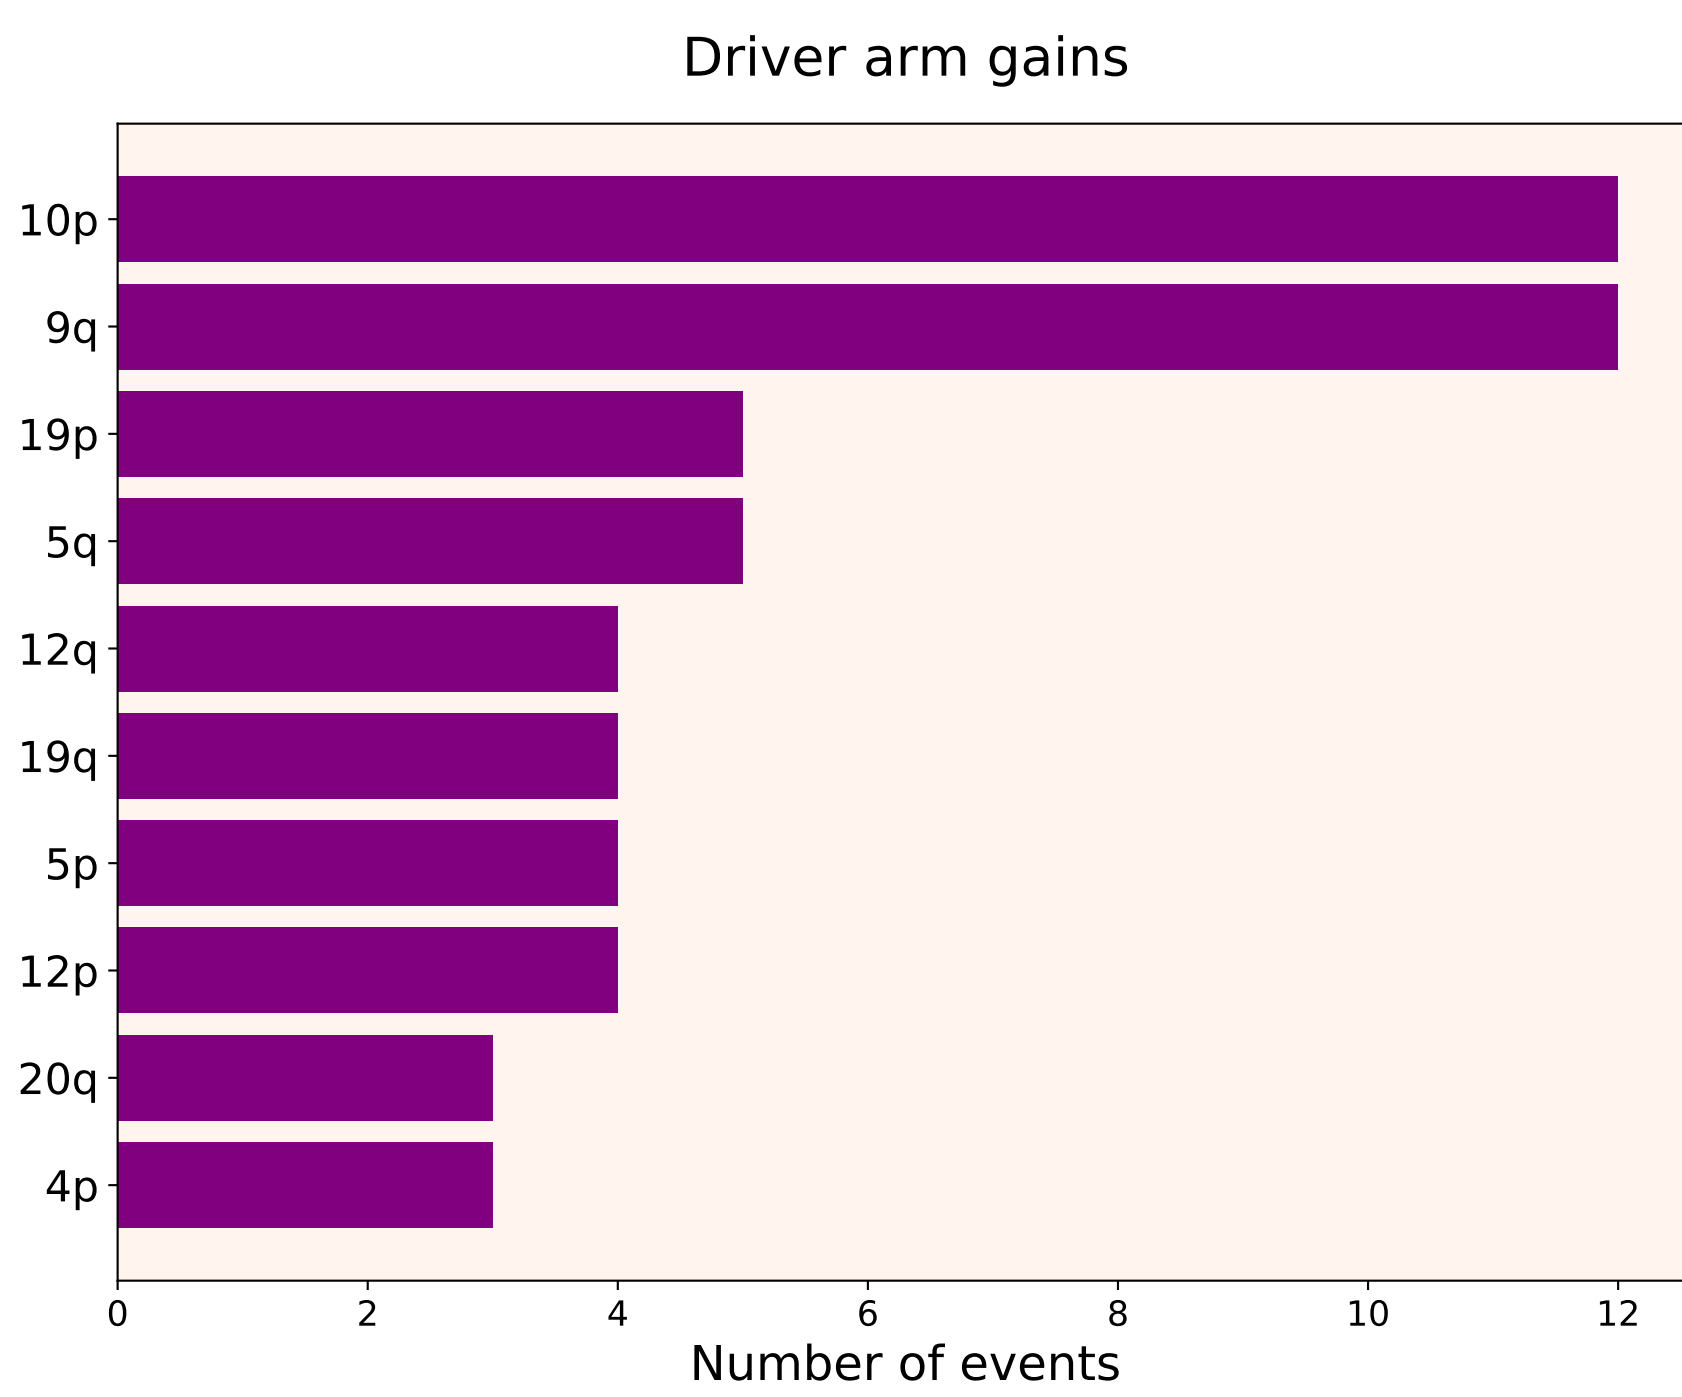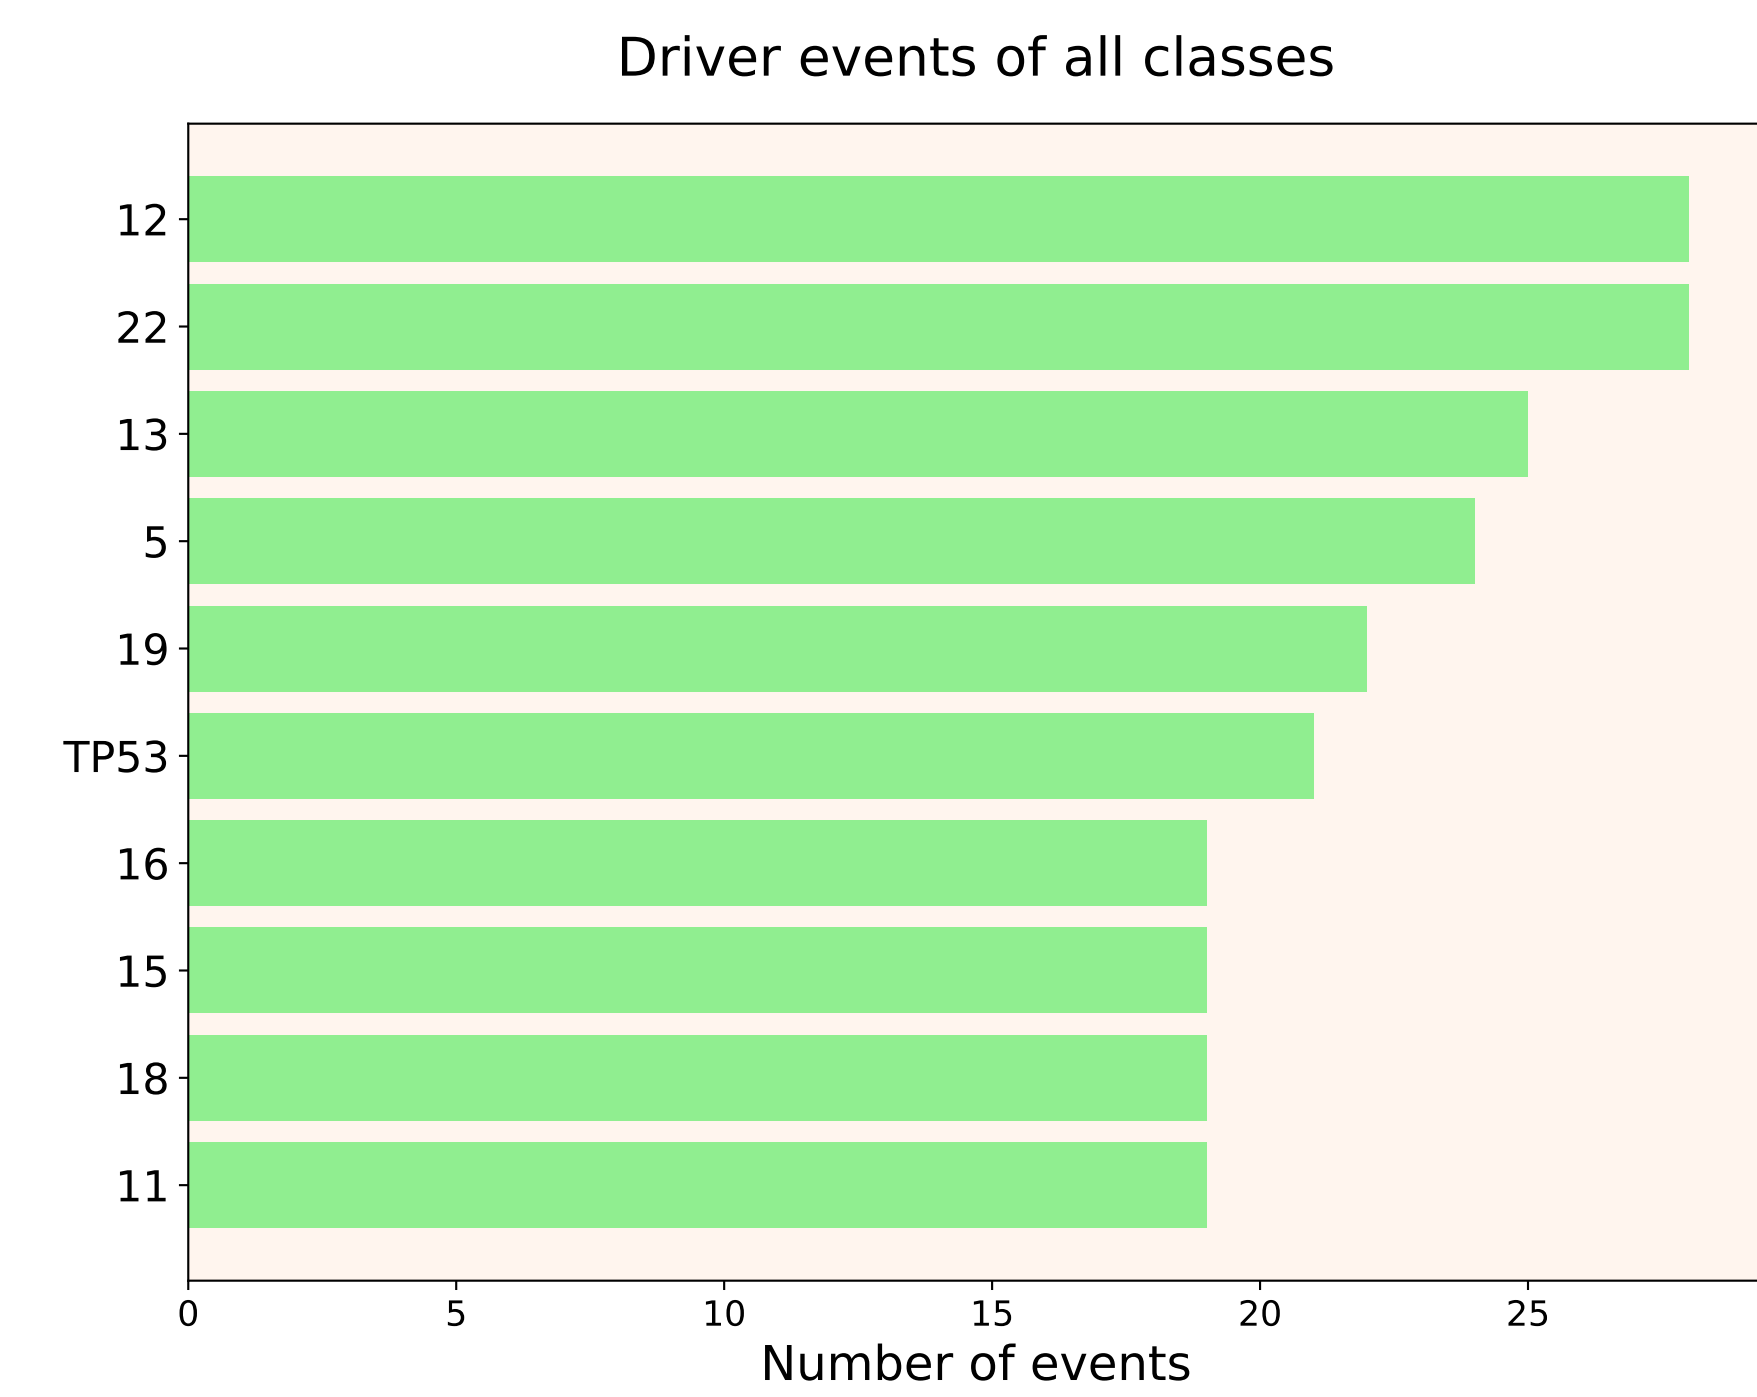

Supplement: Supplemental_Data_S1.zip [file Supplemental_Data_S1.zip]

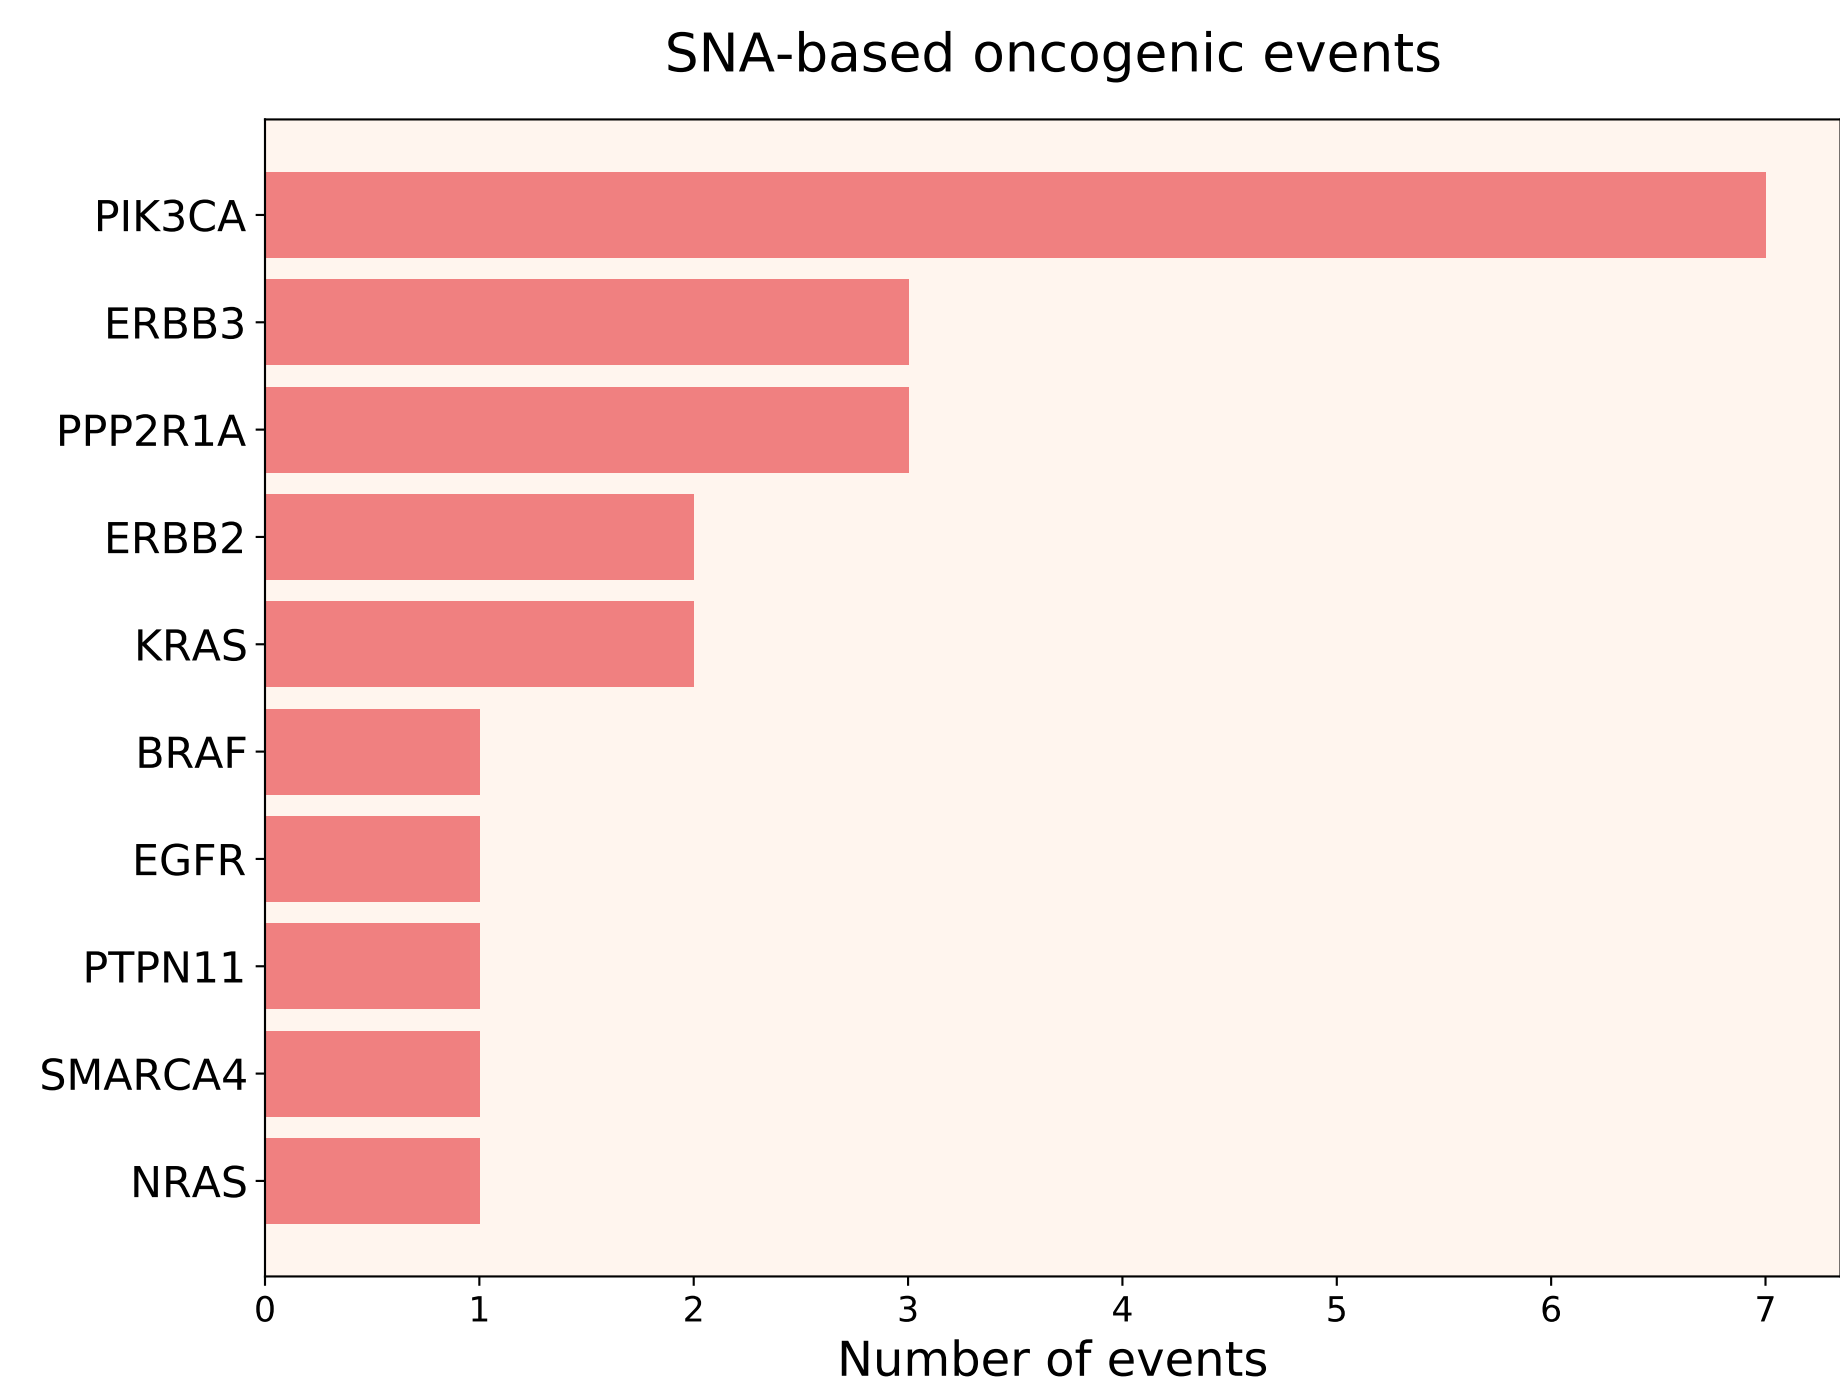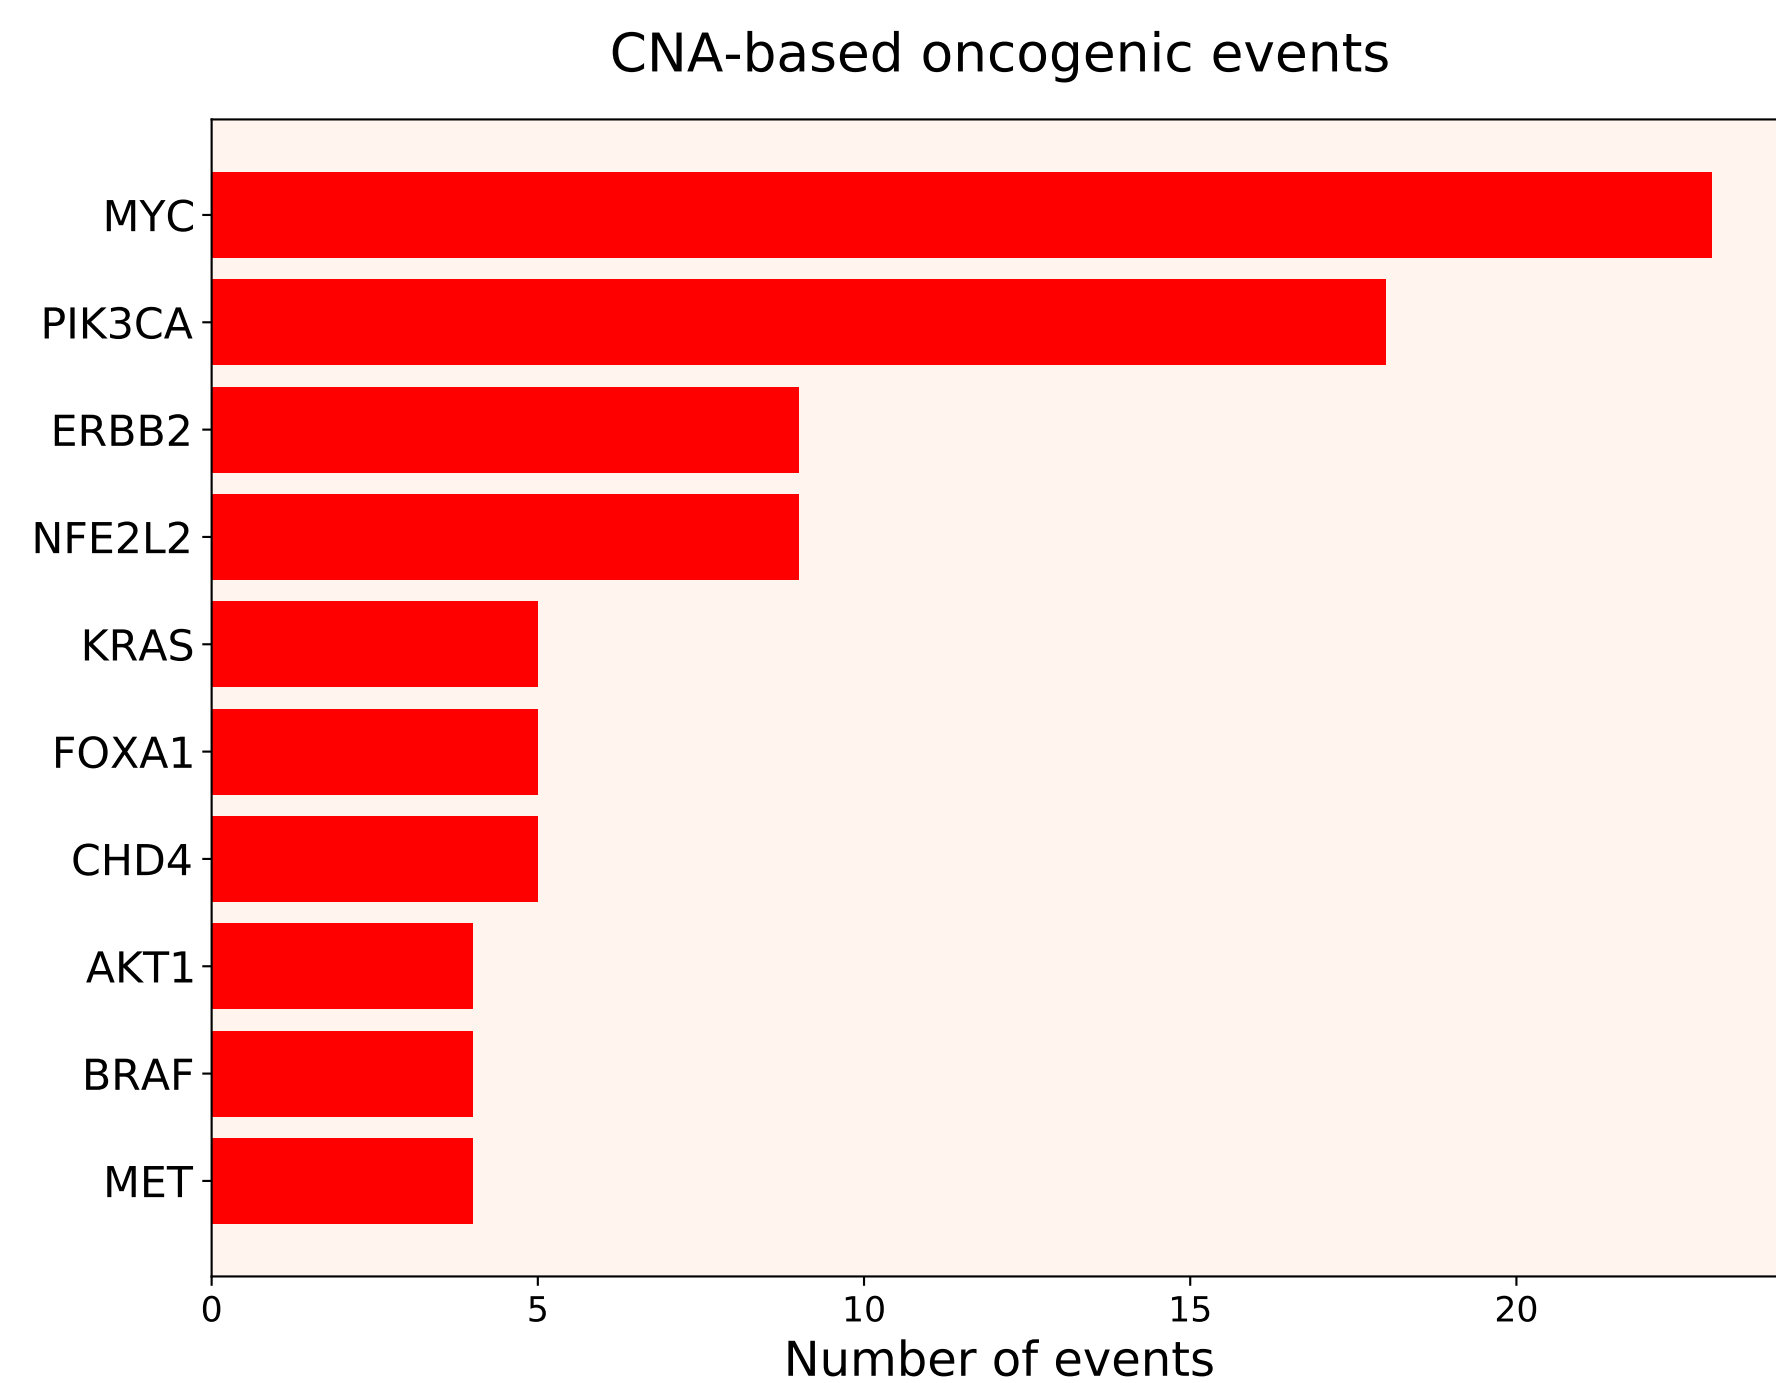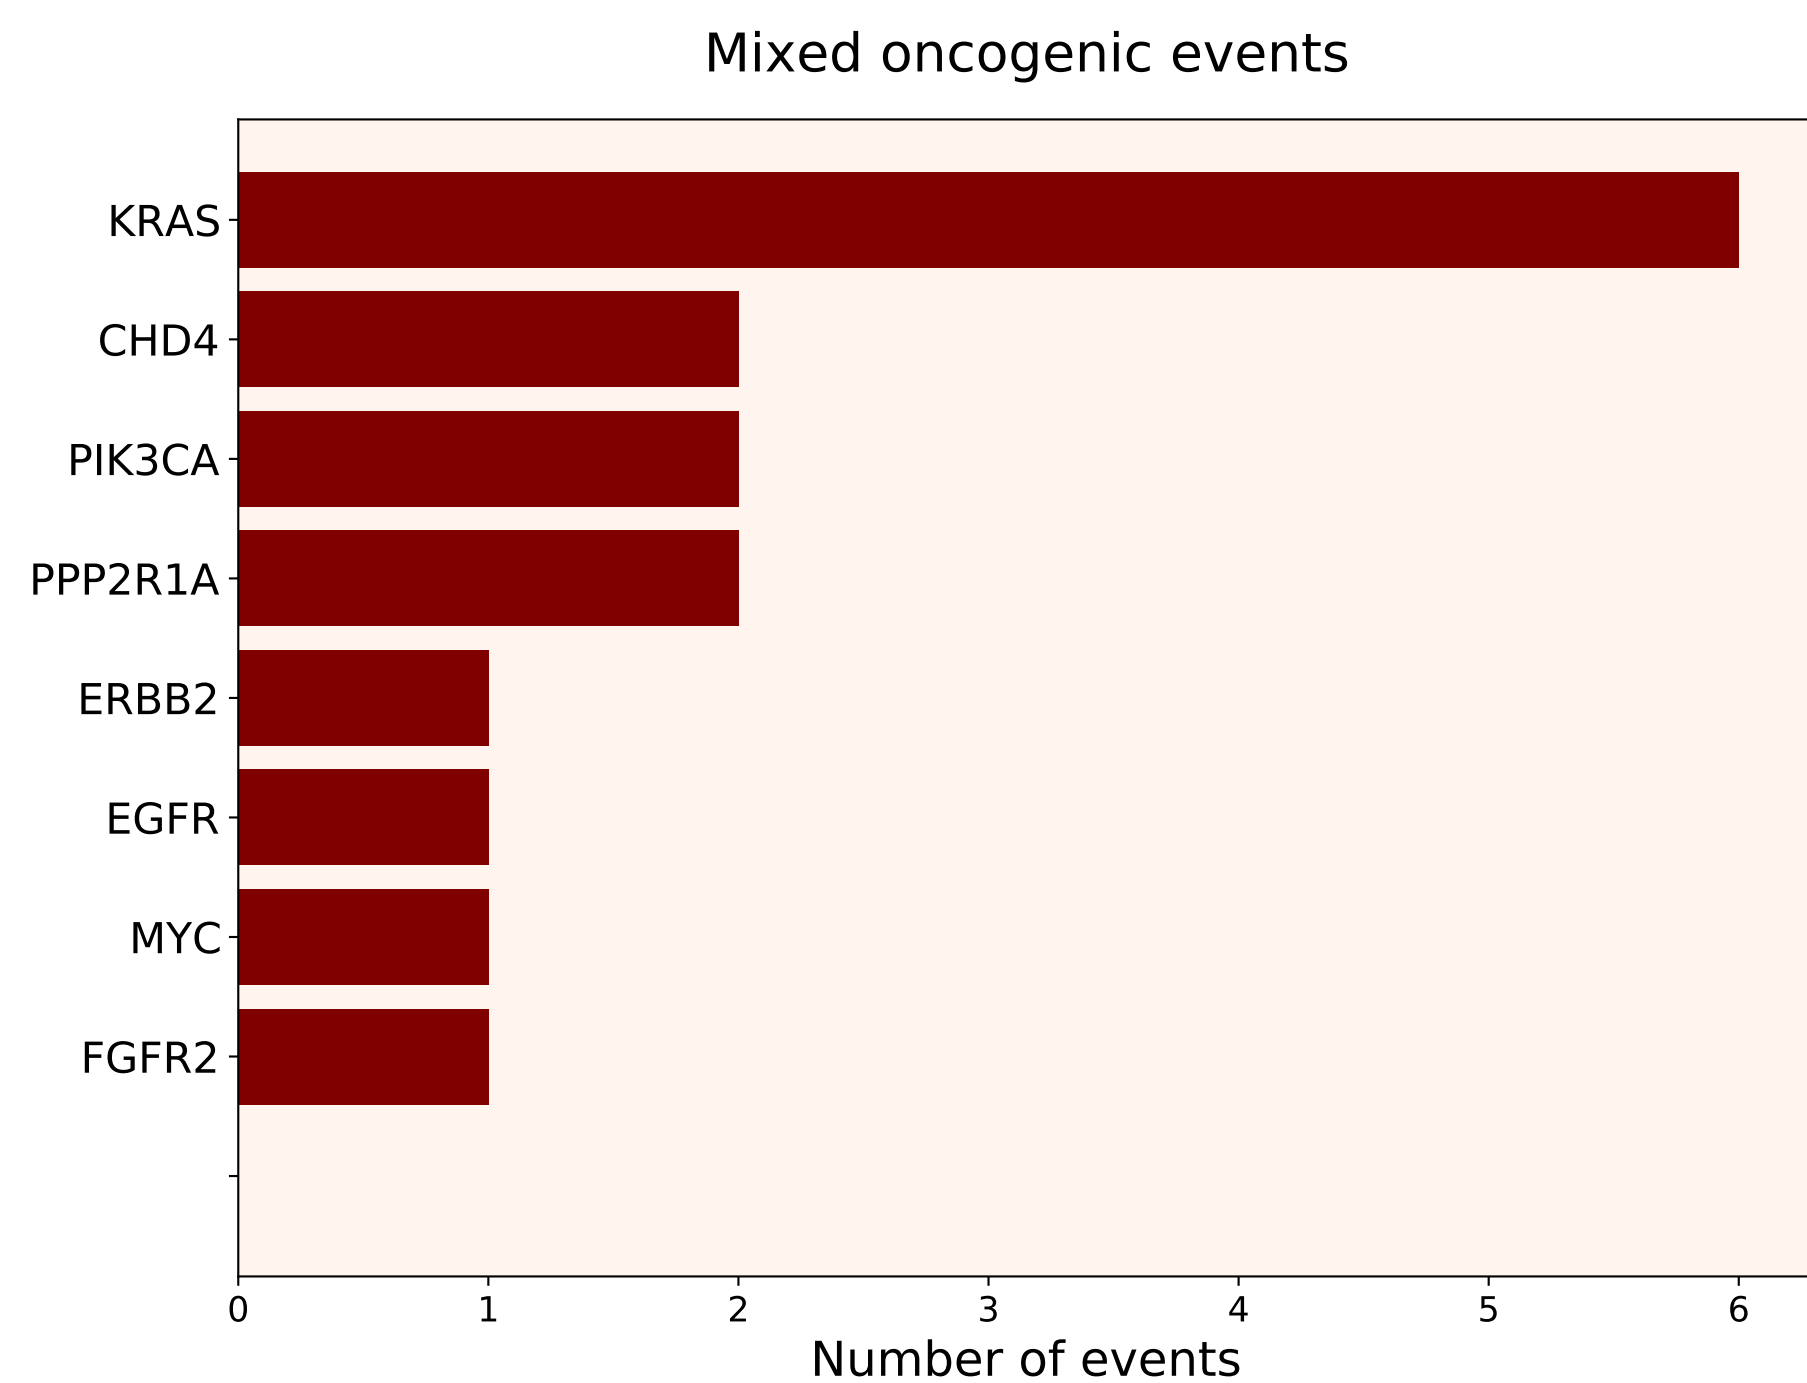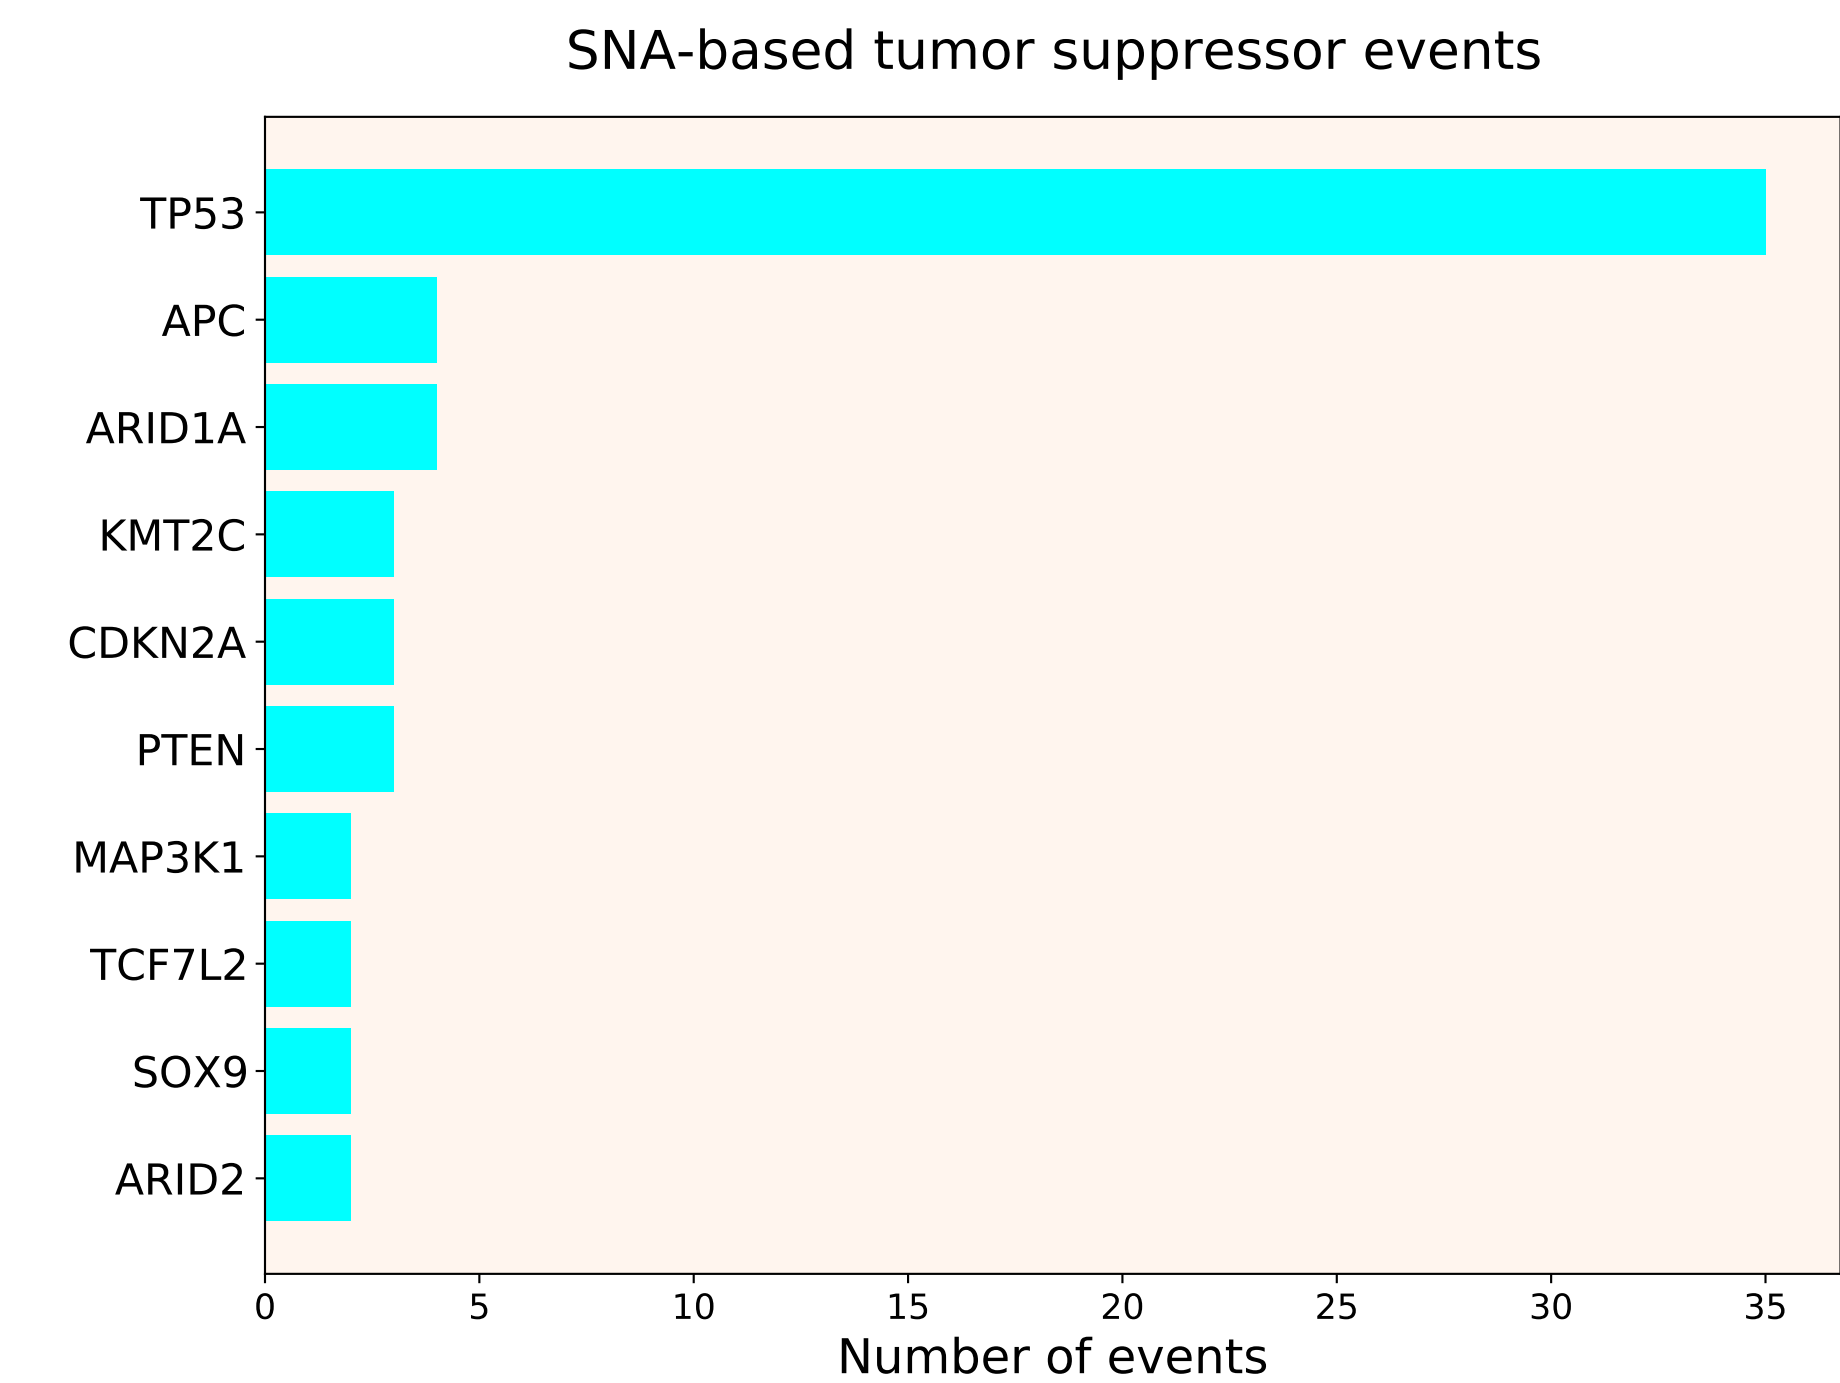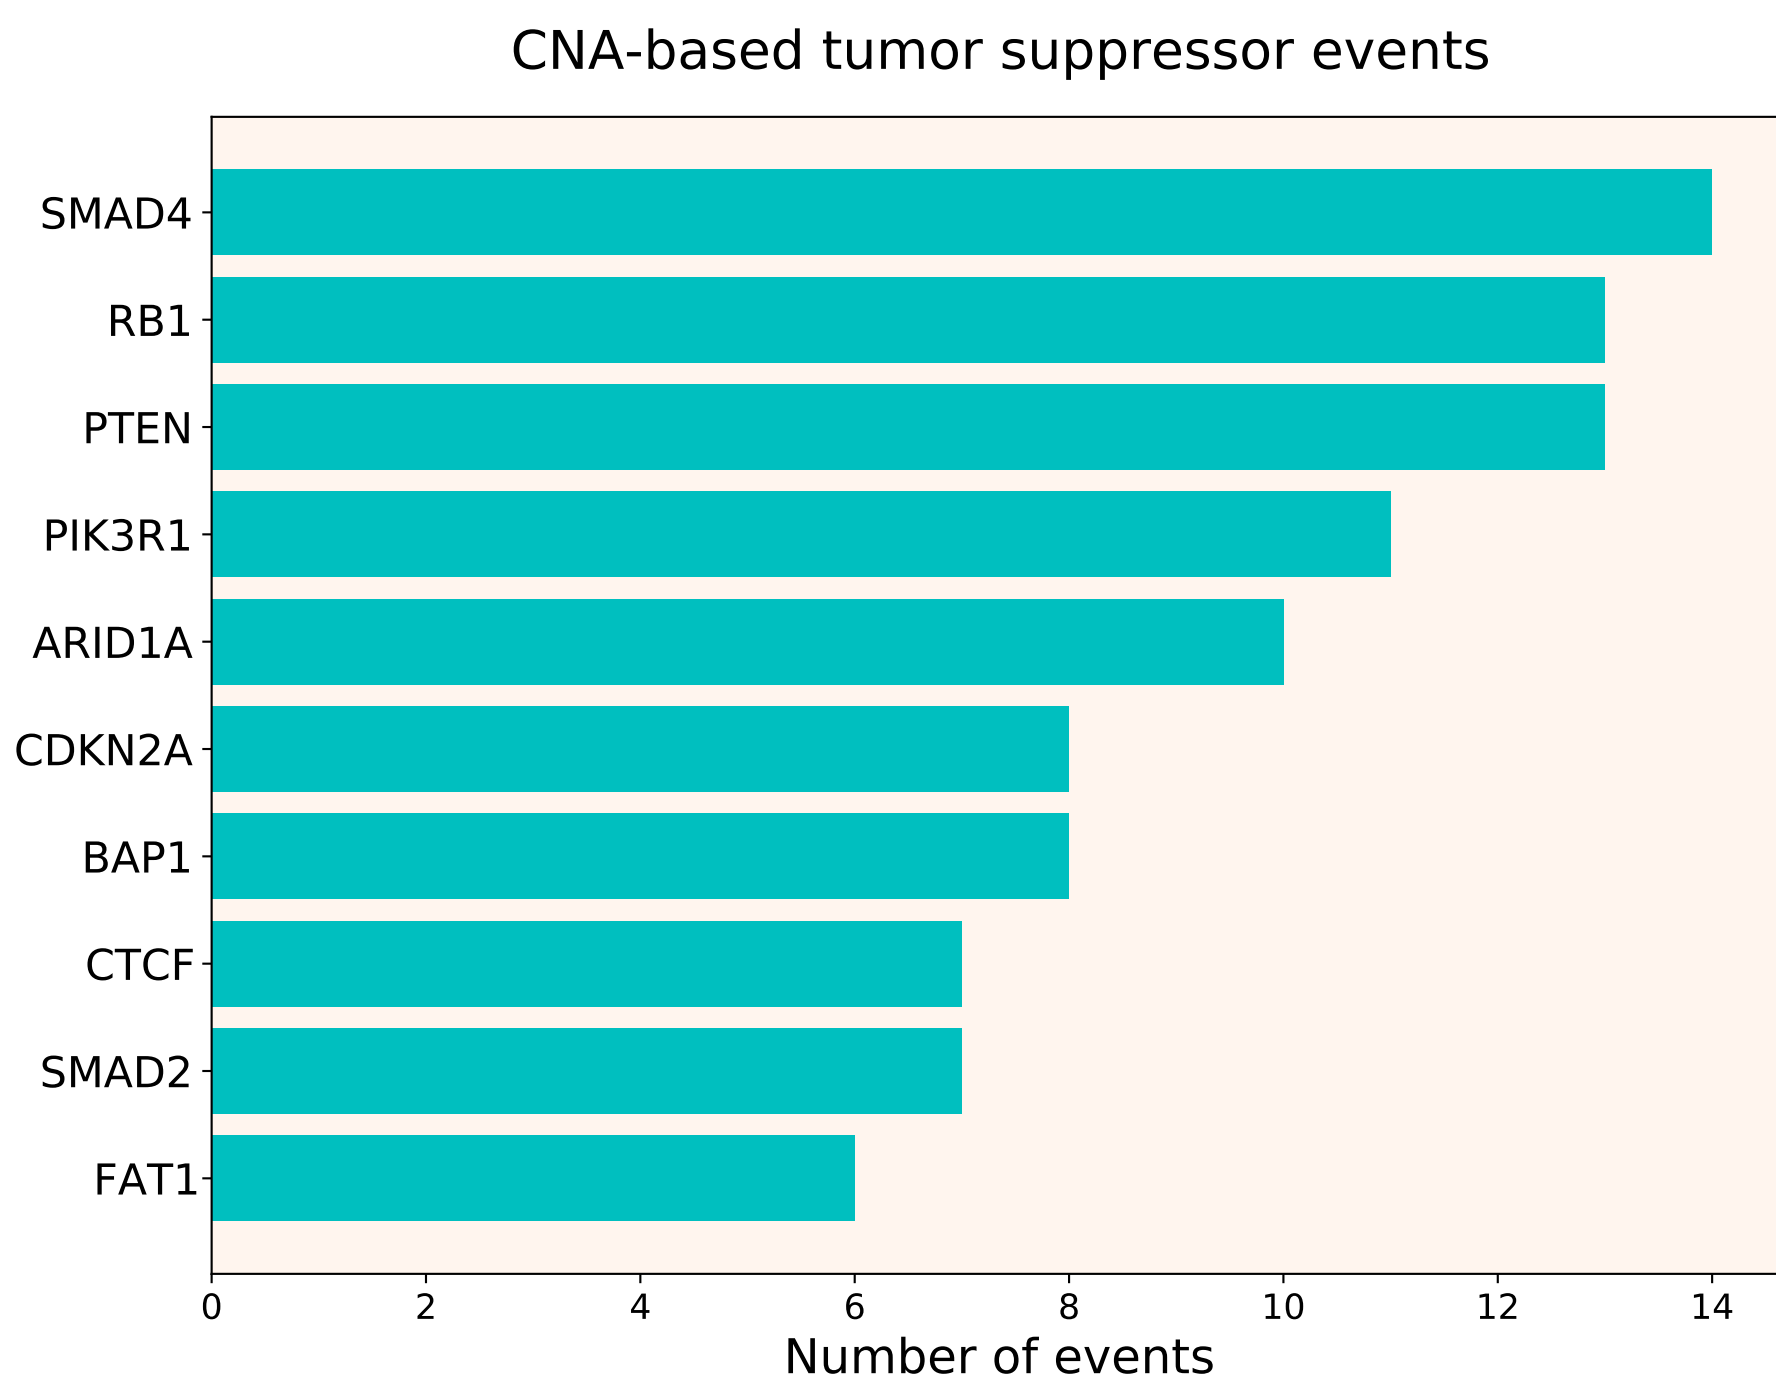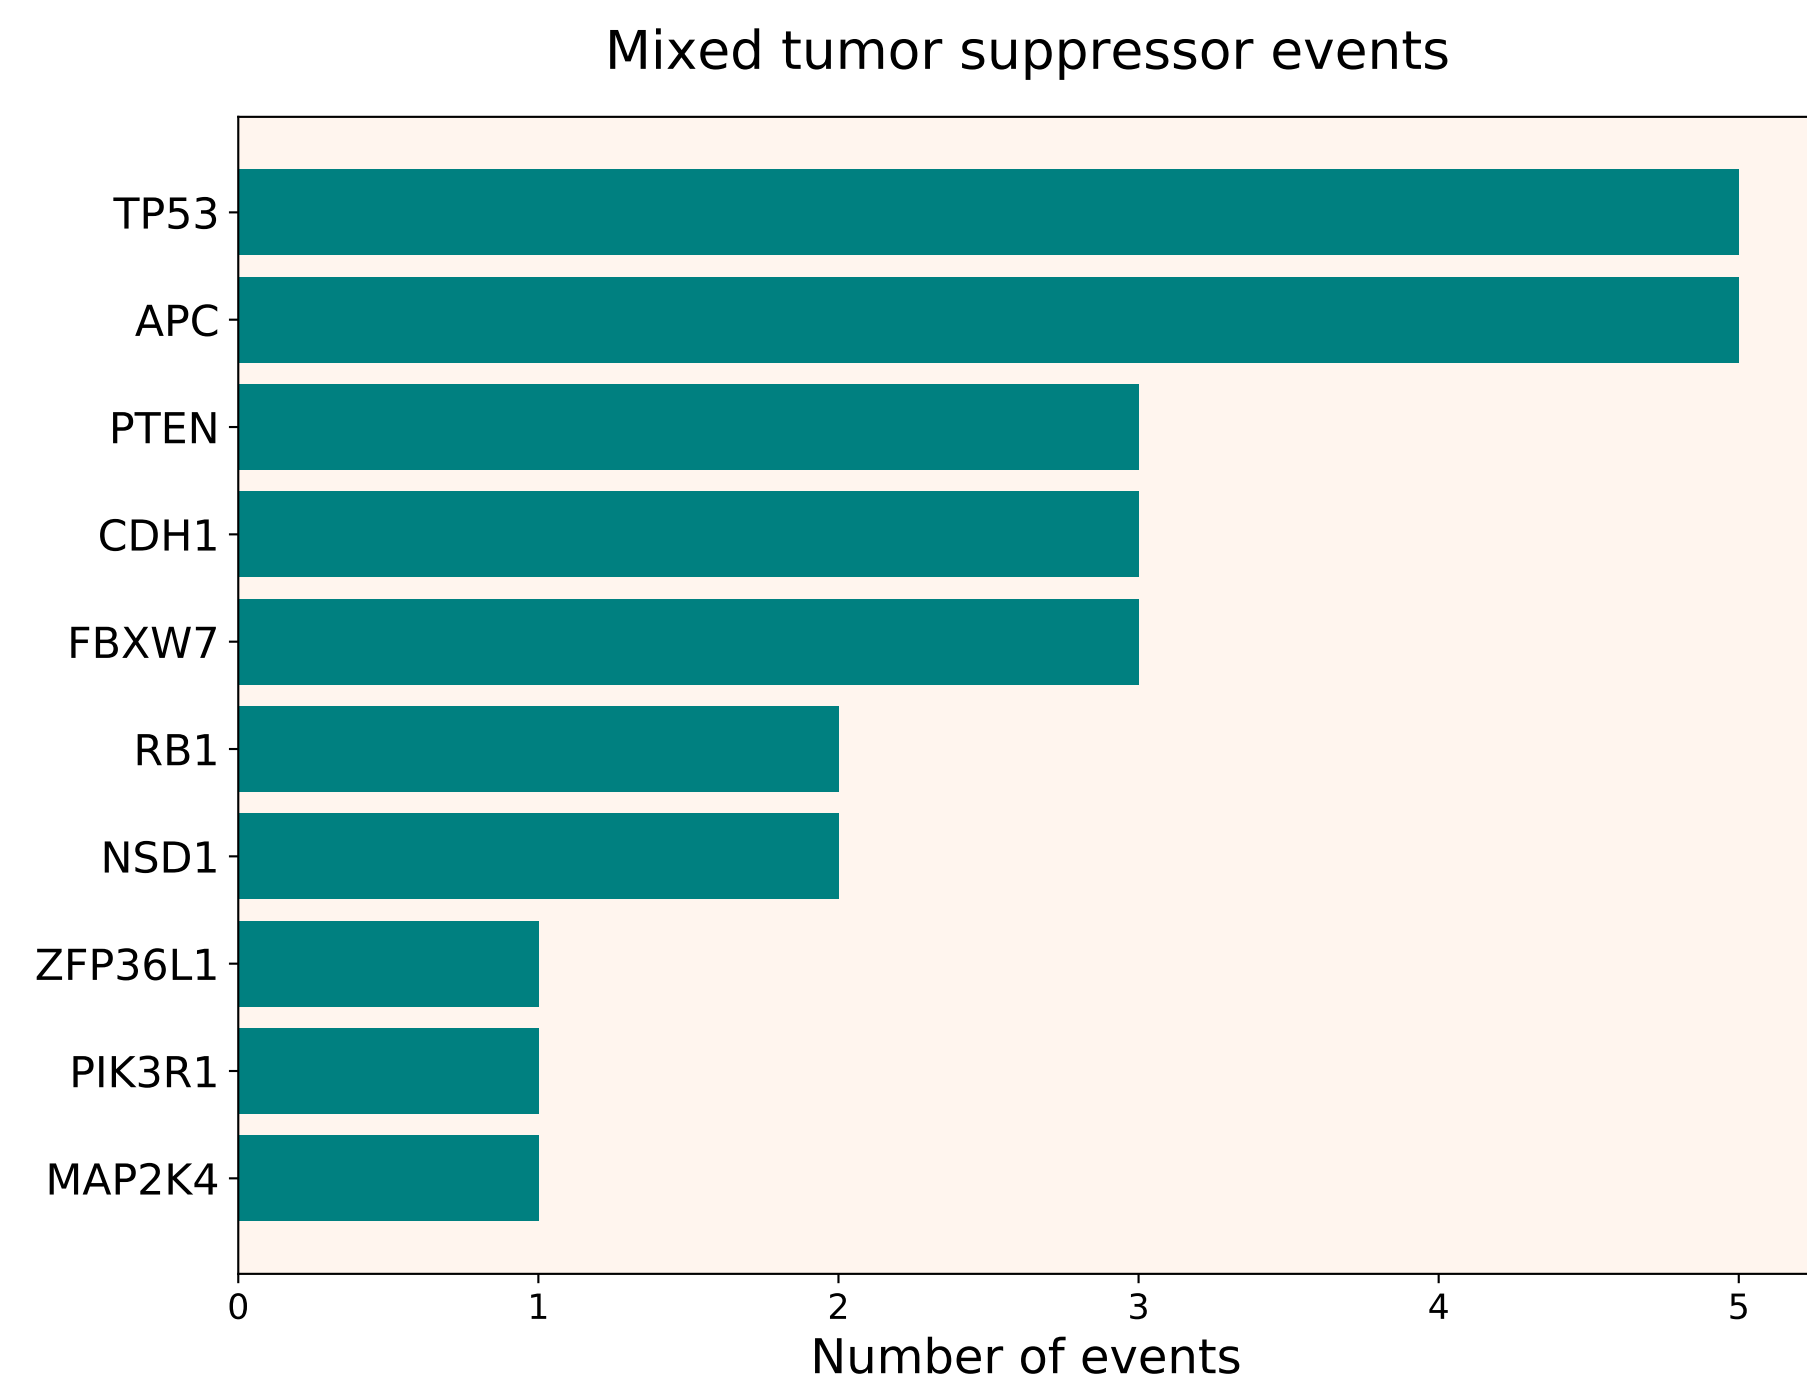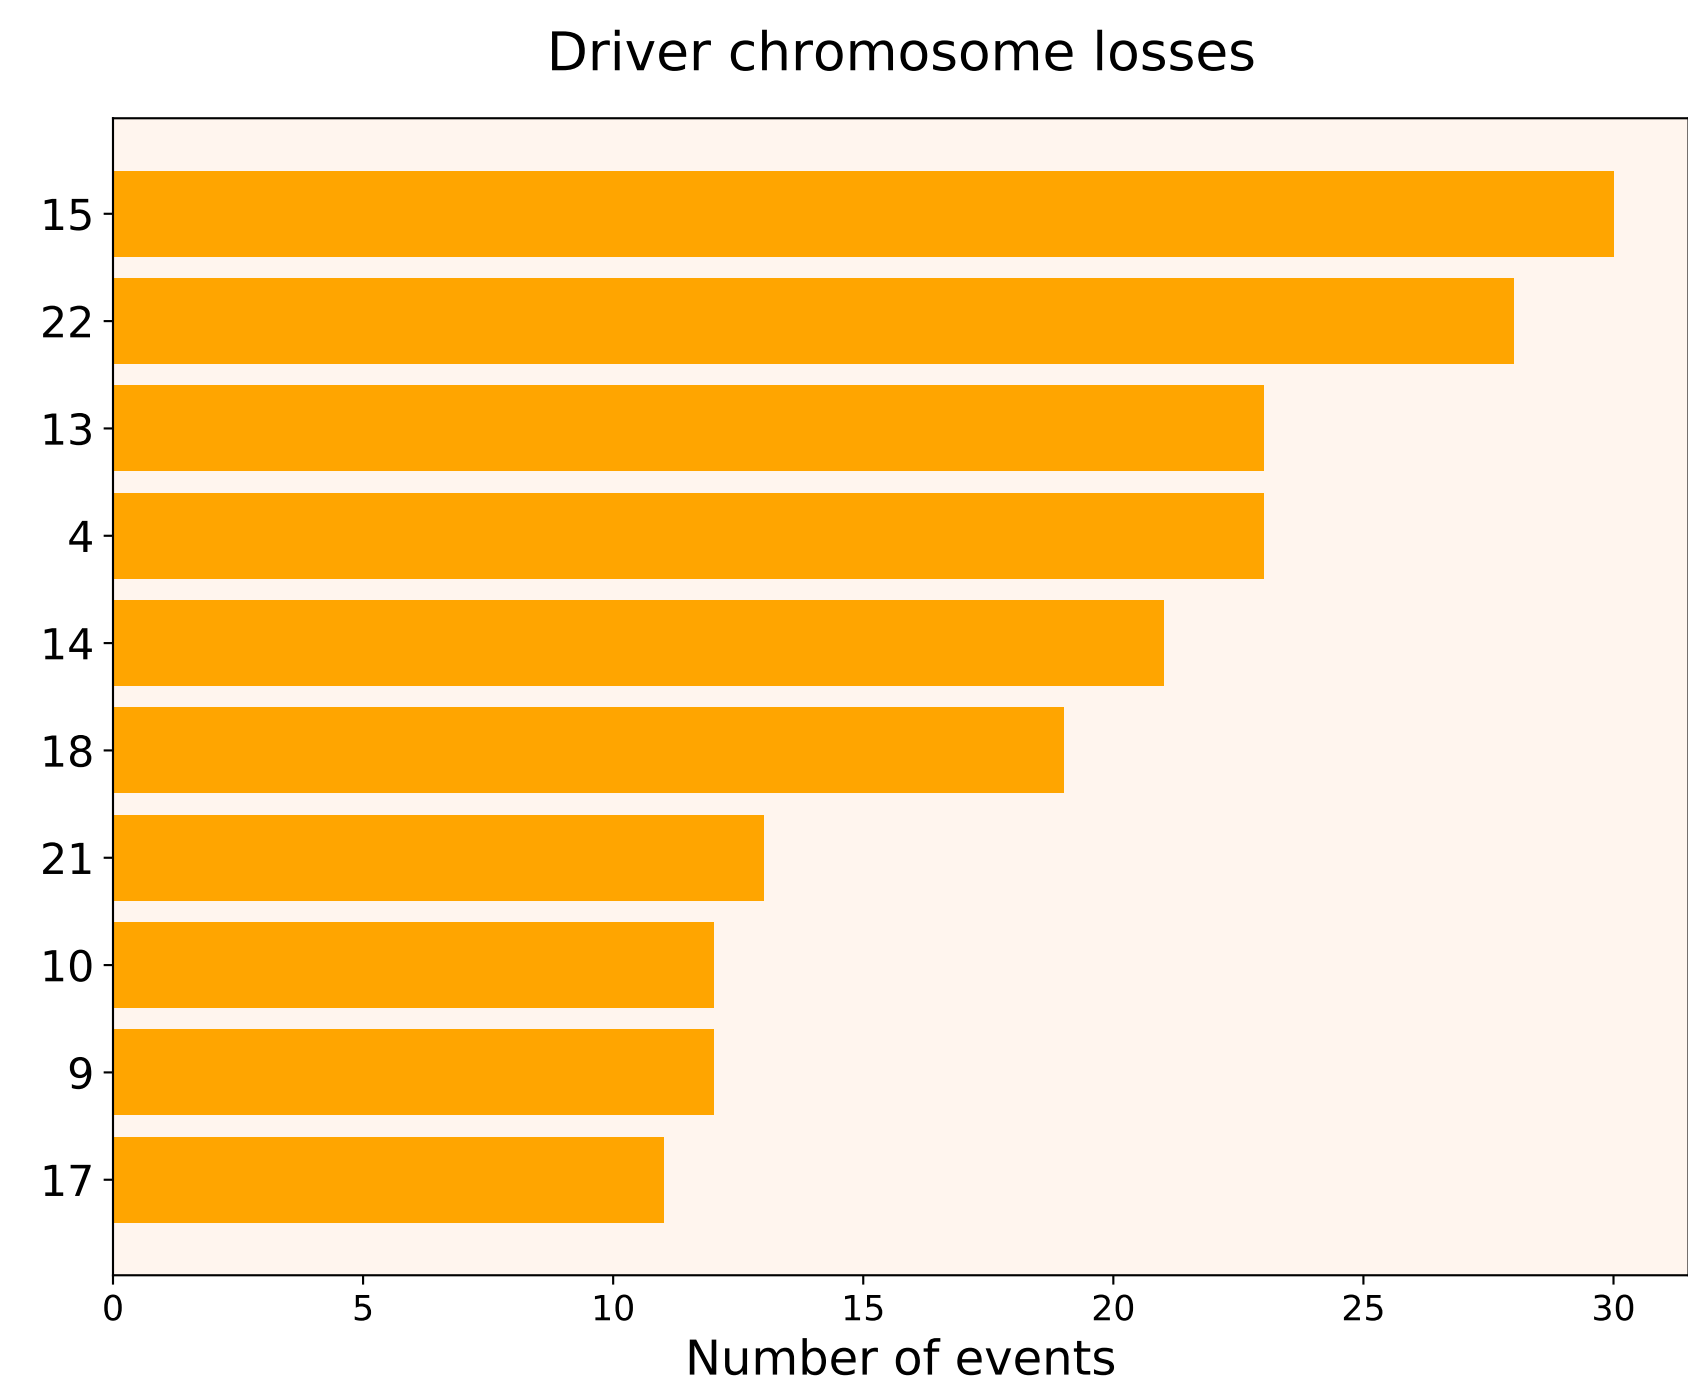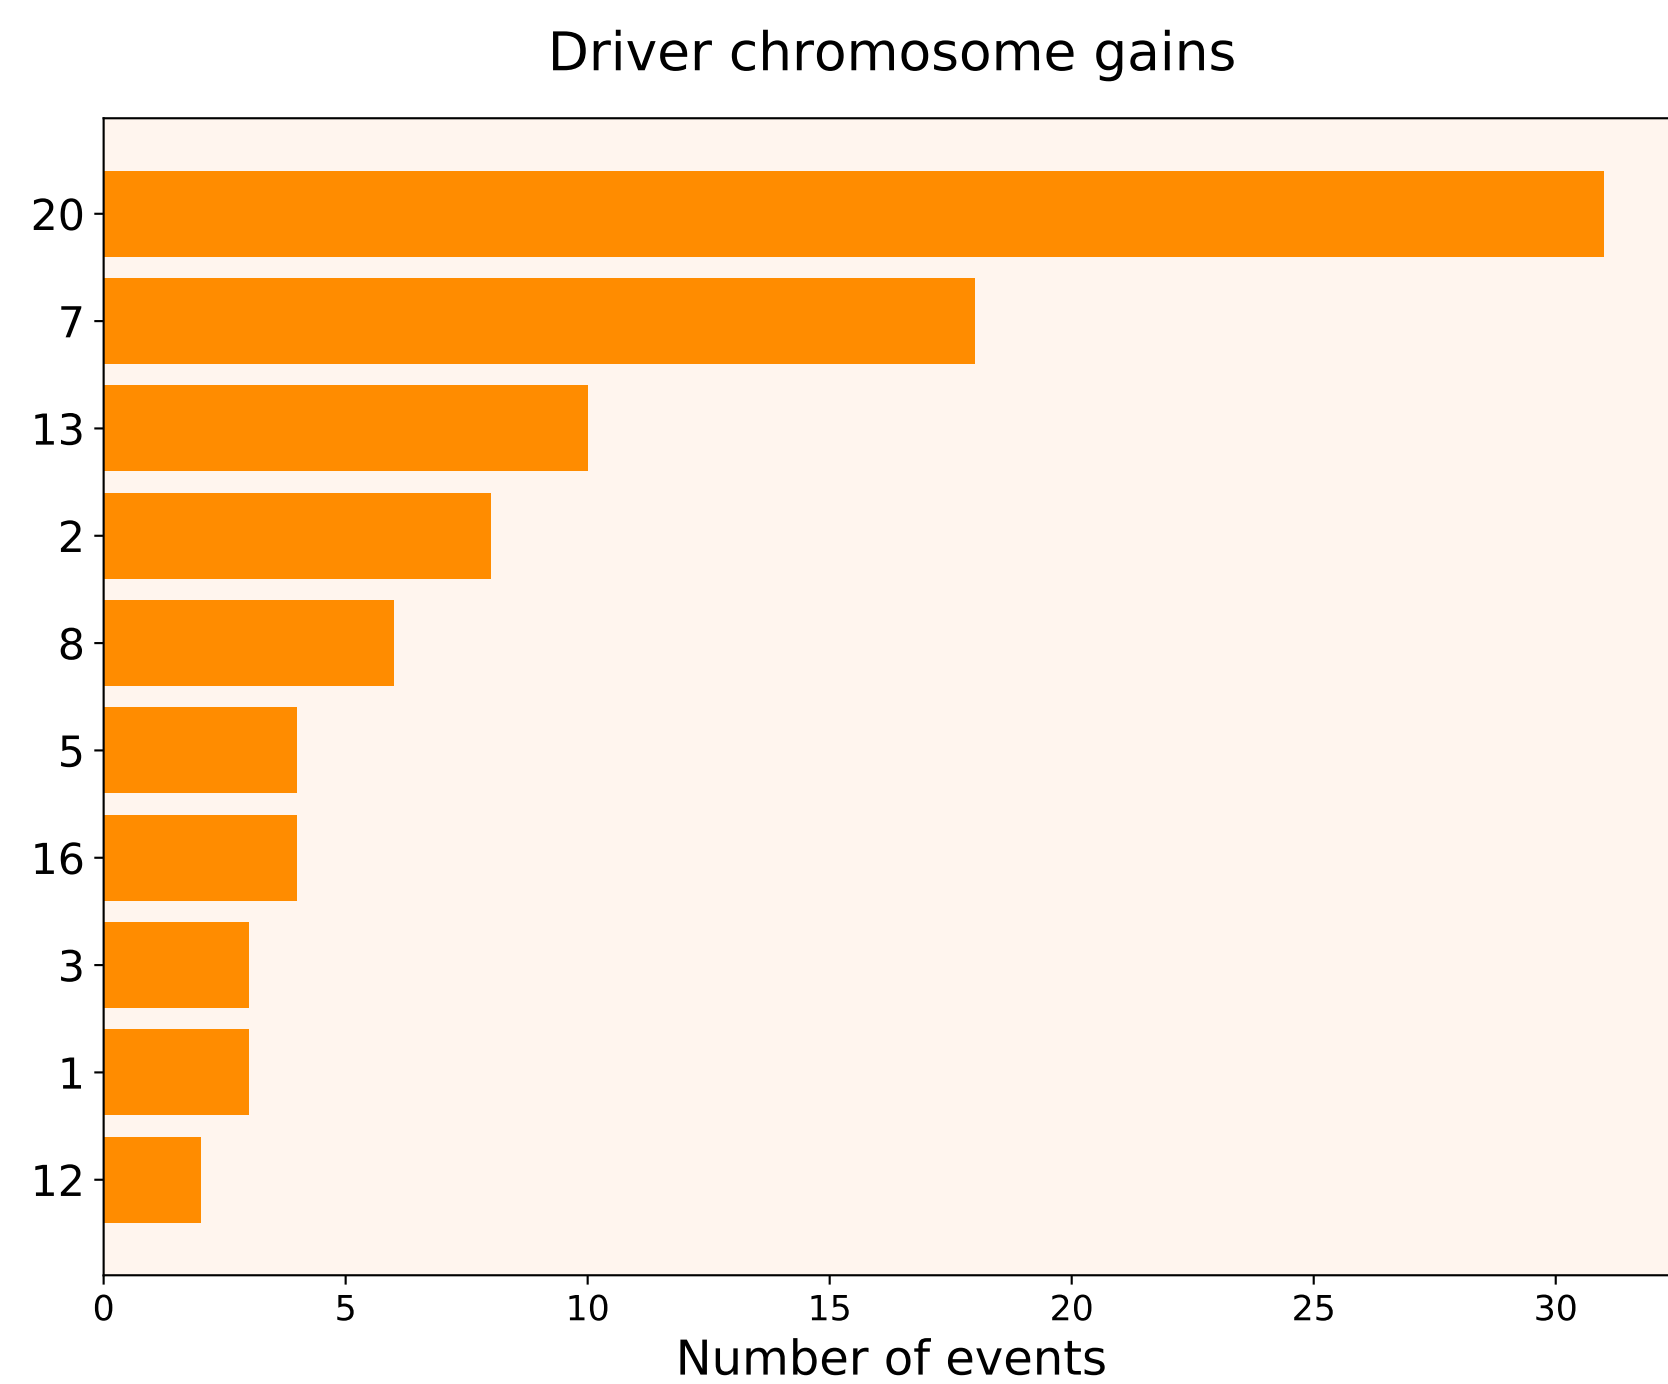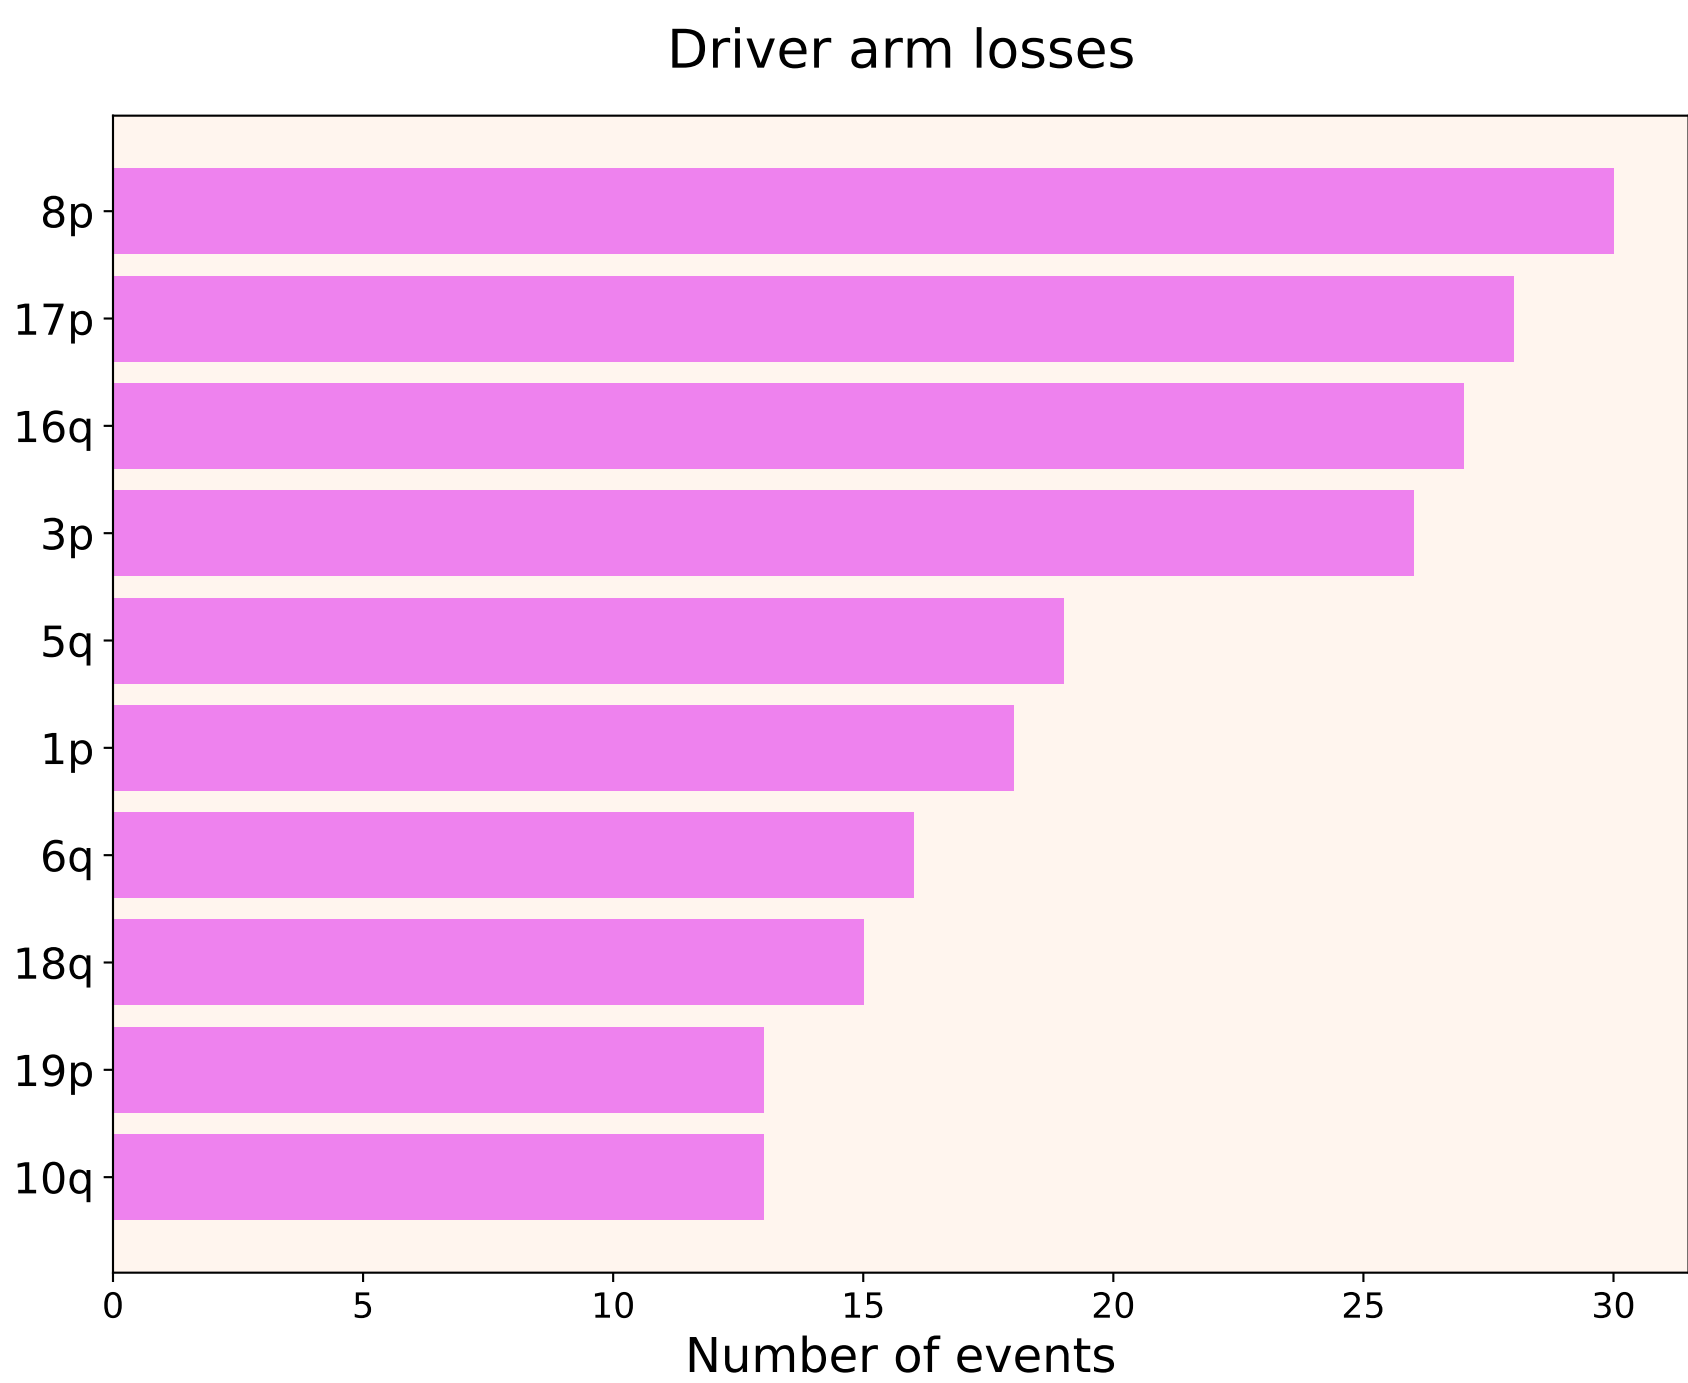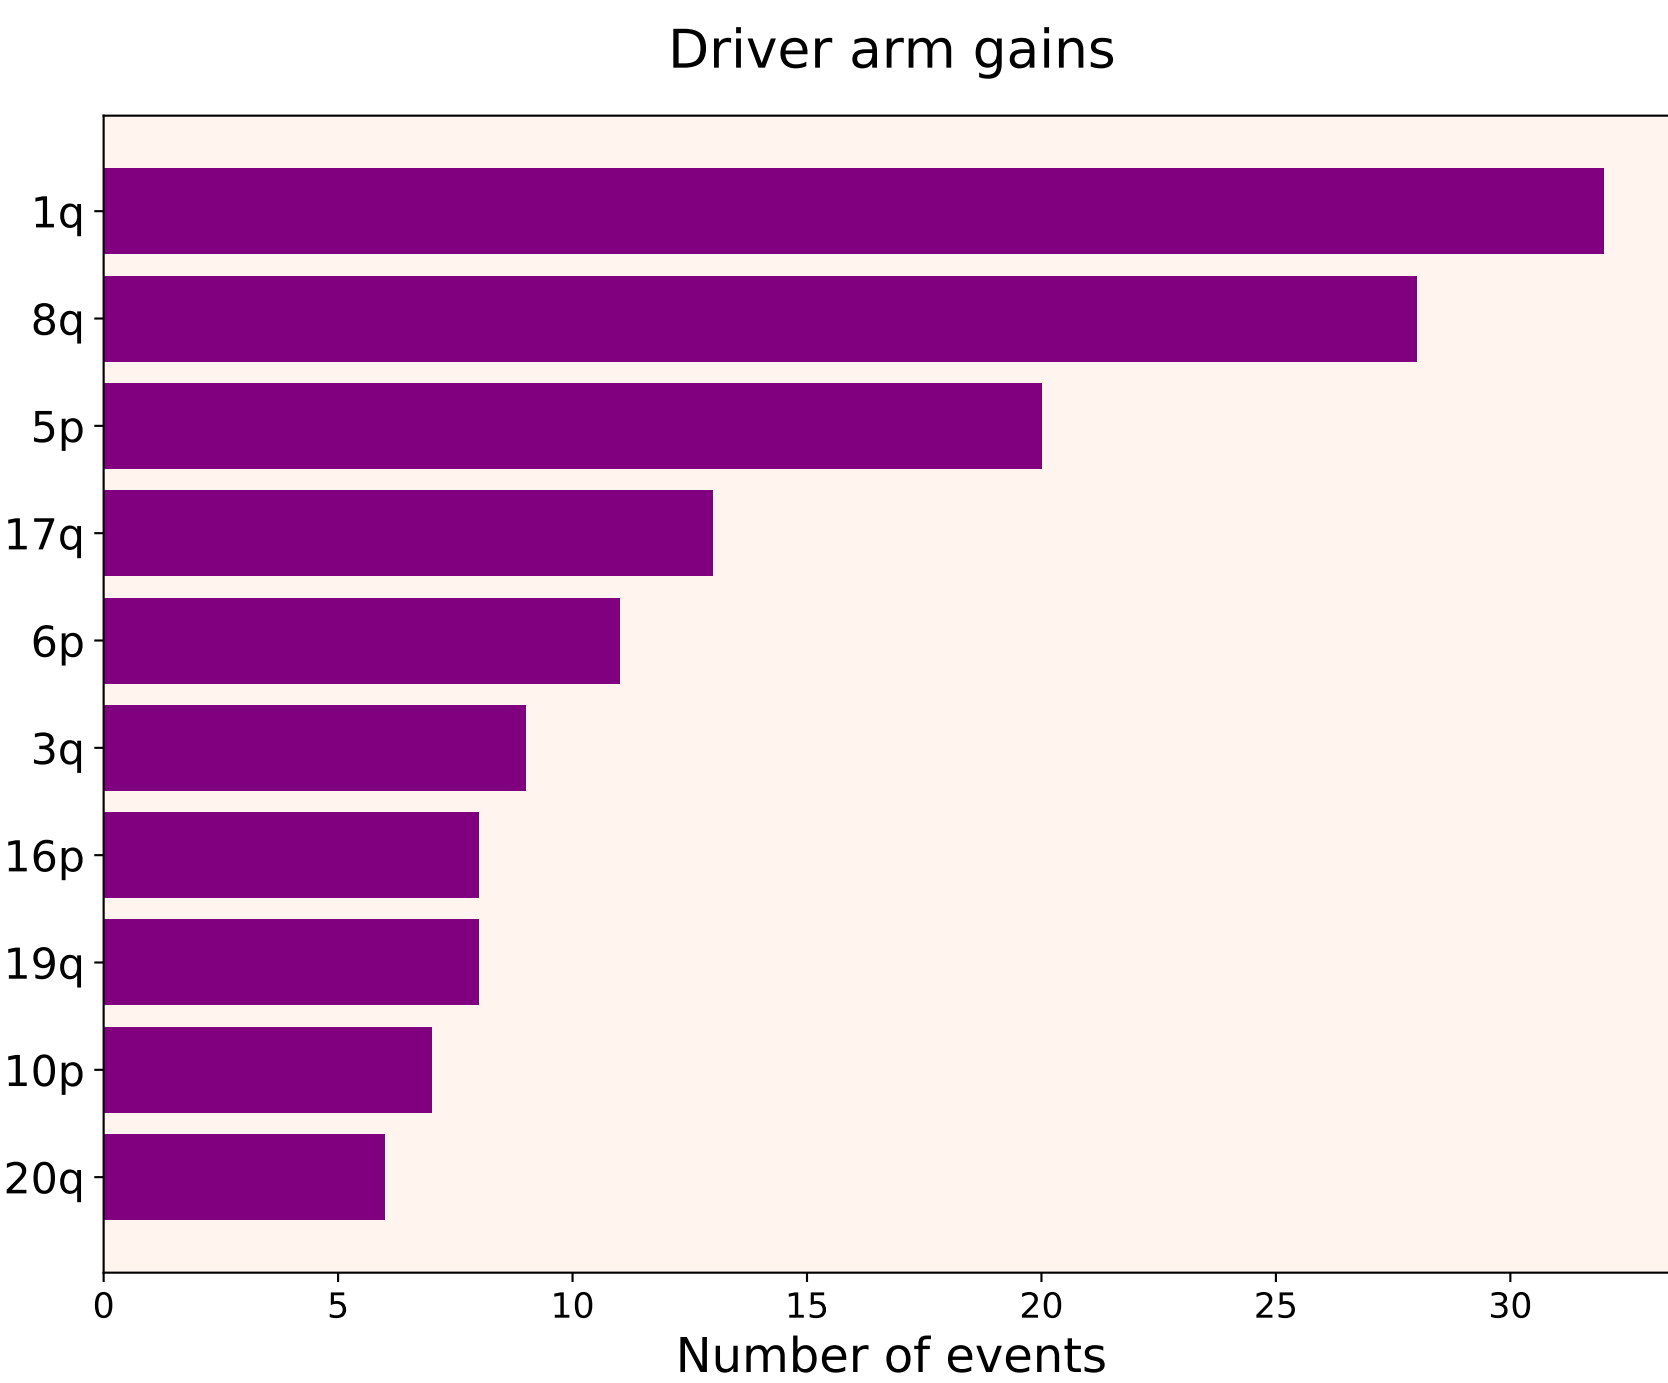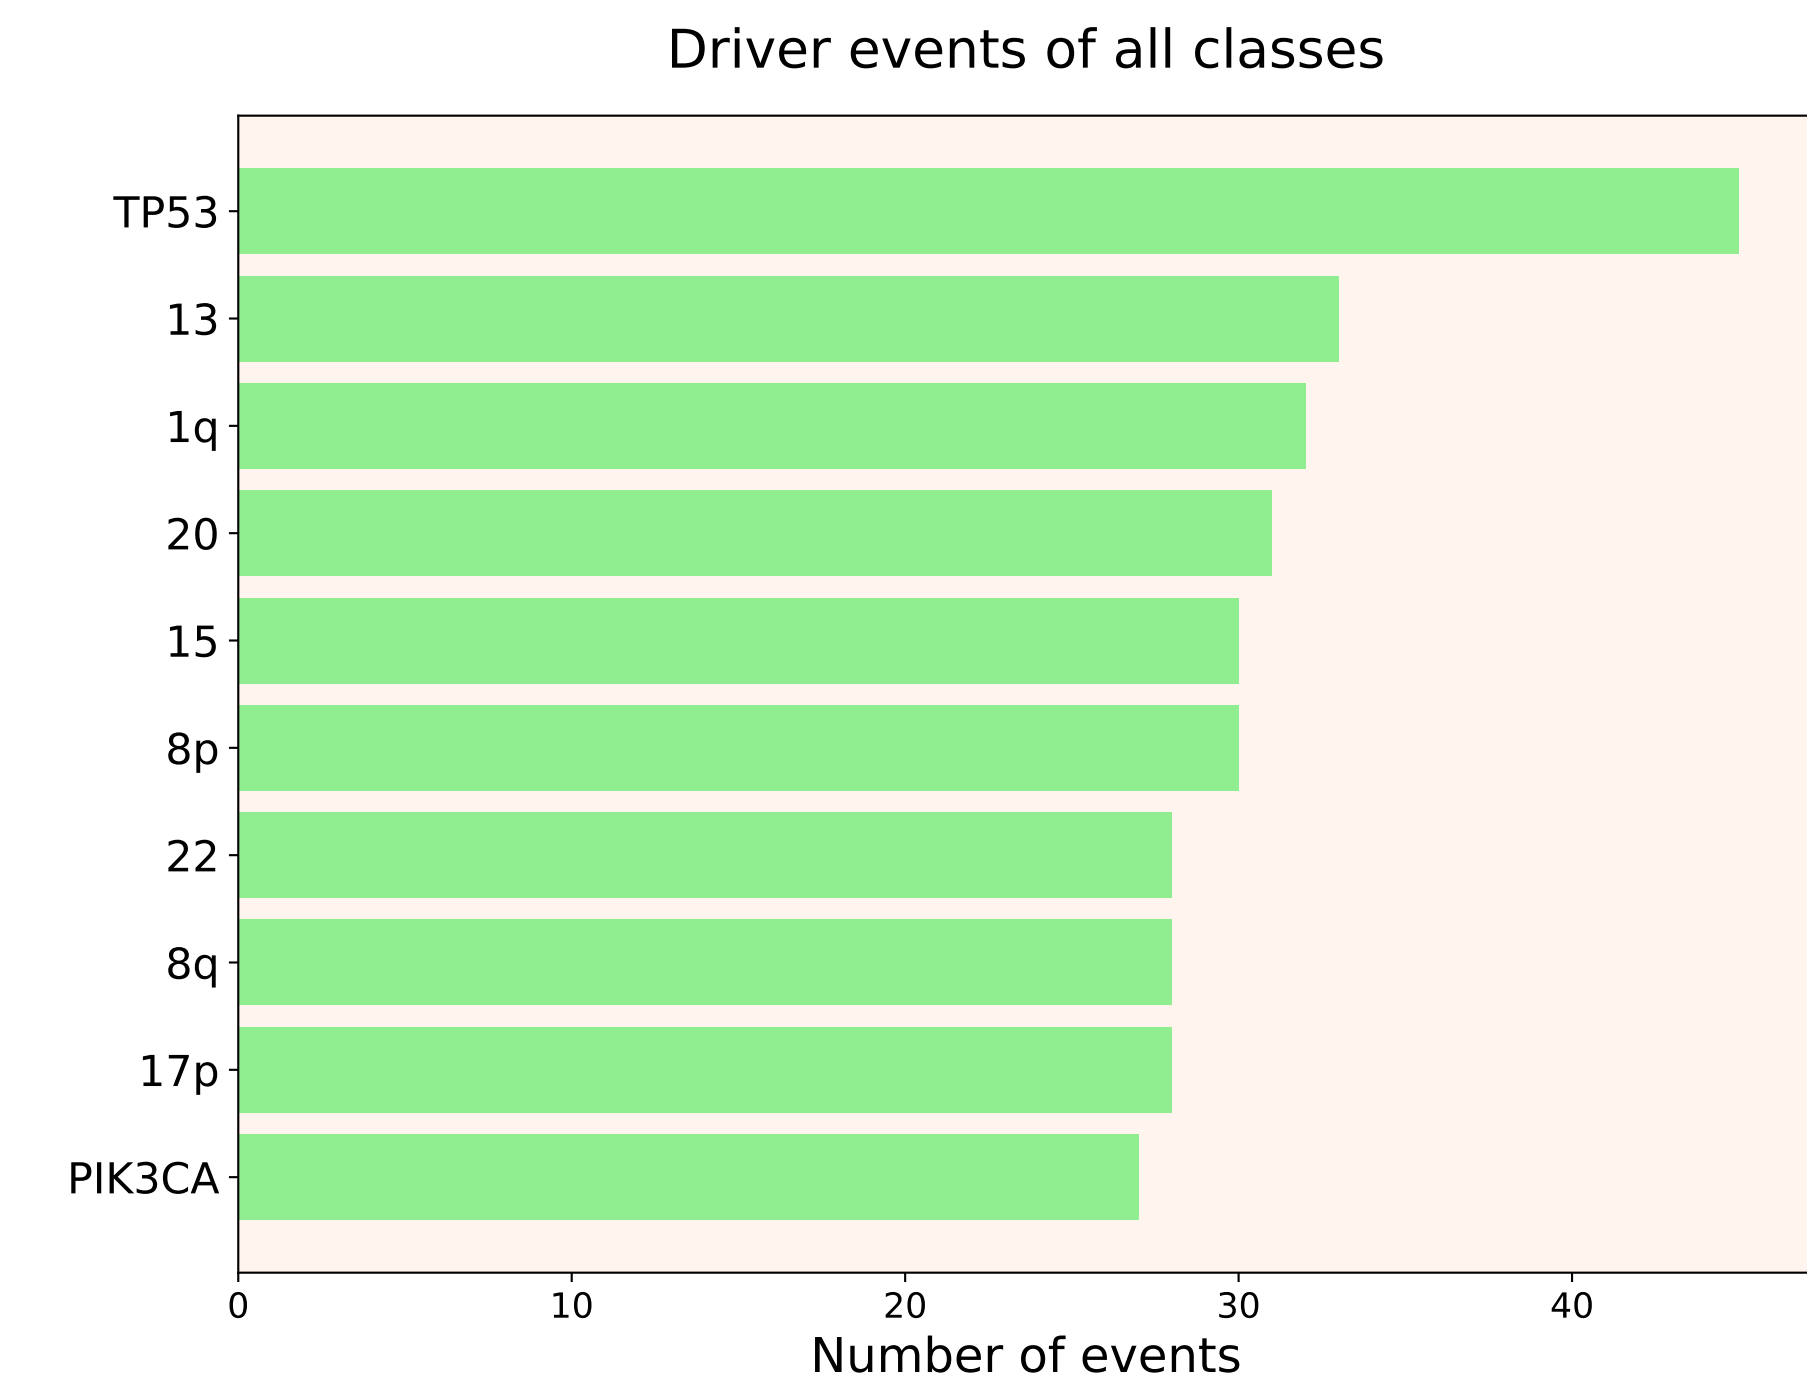

Supplement: Supplemental_Data_S1.zip [file Supplemental_Data_S1.zip]

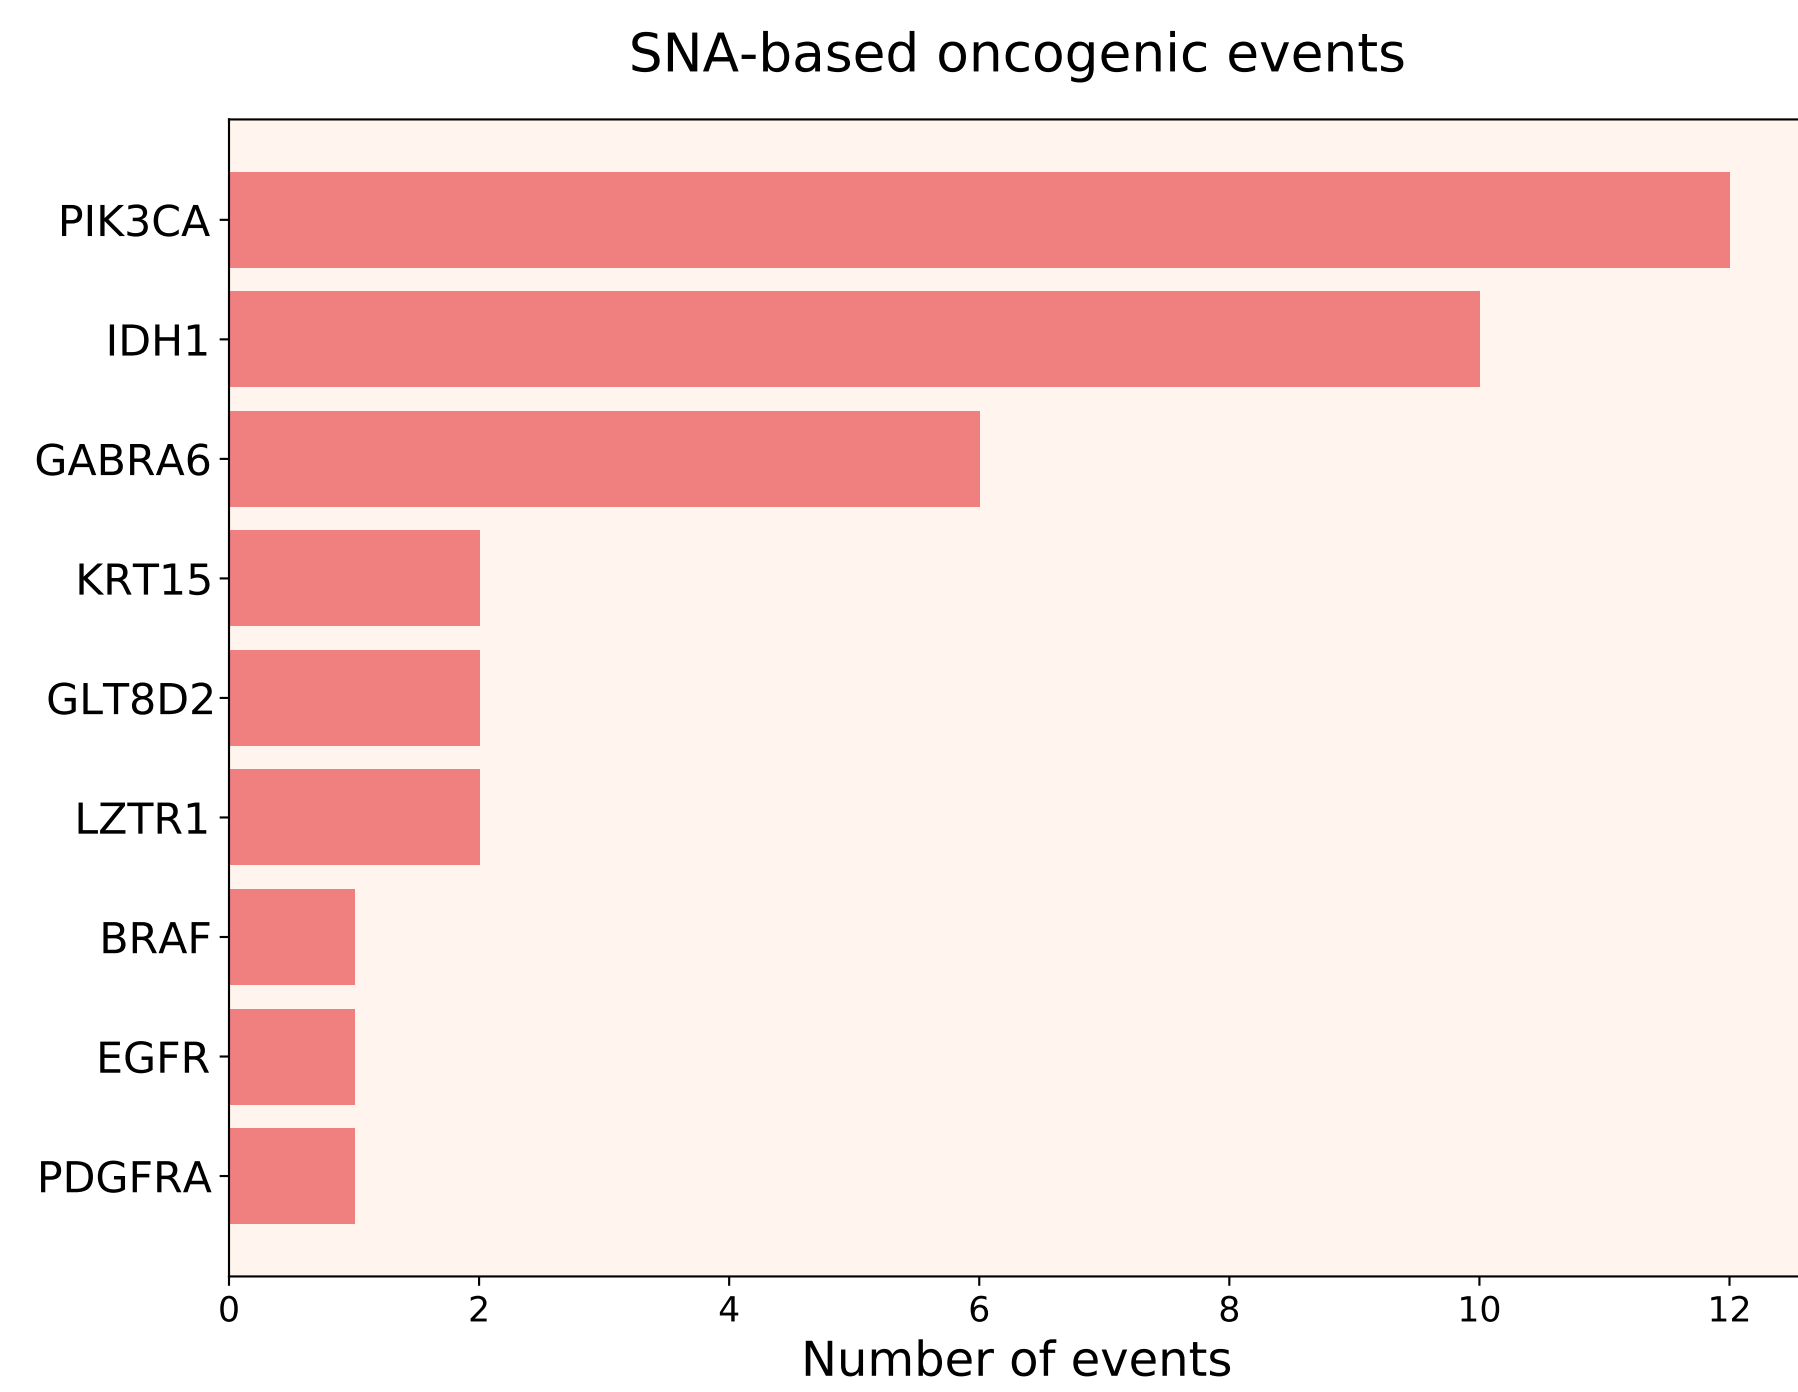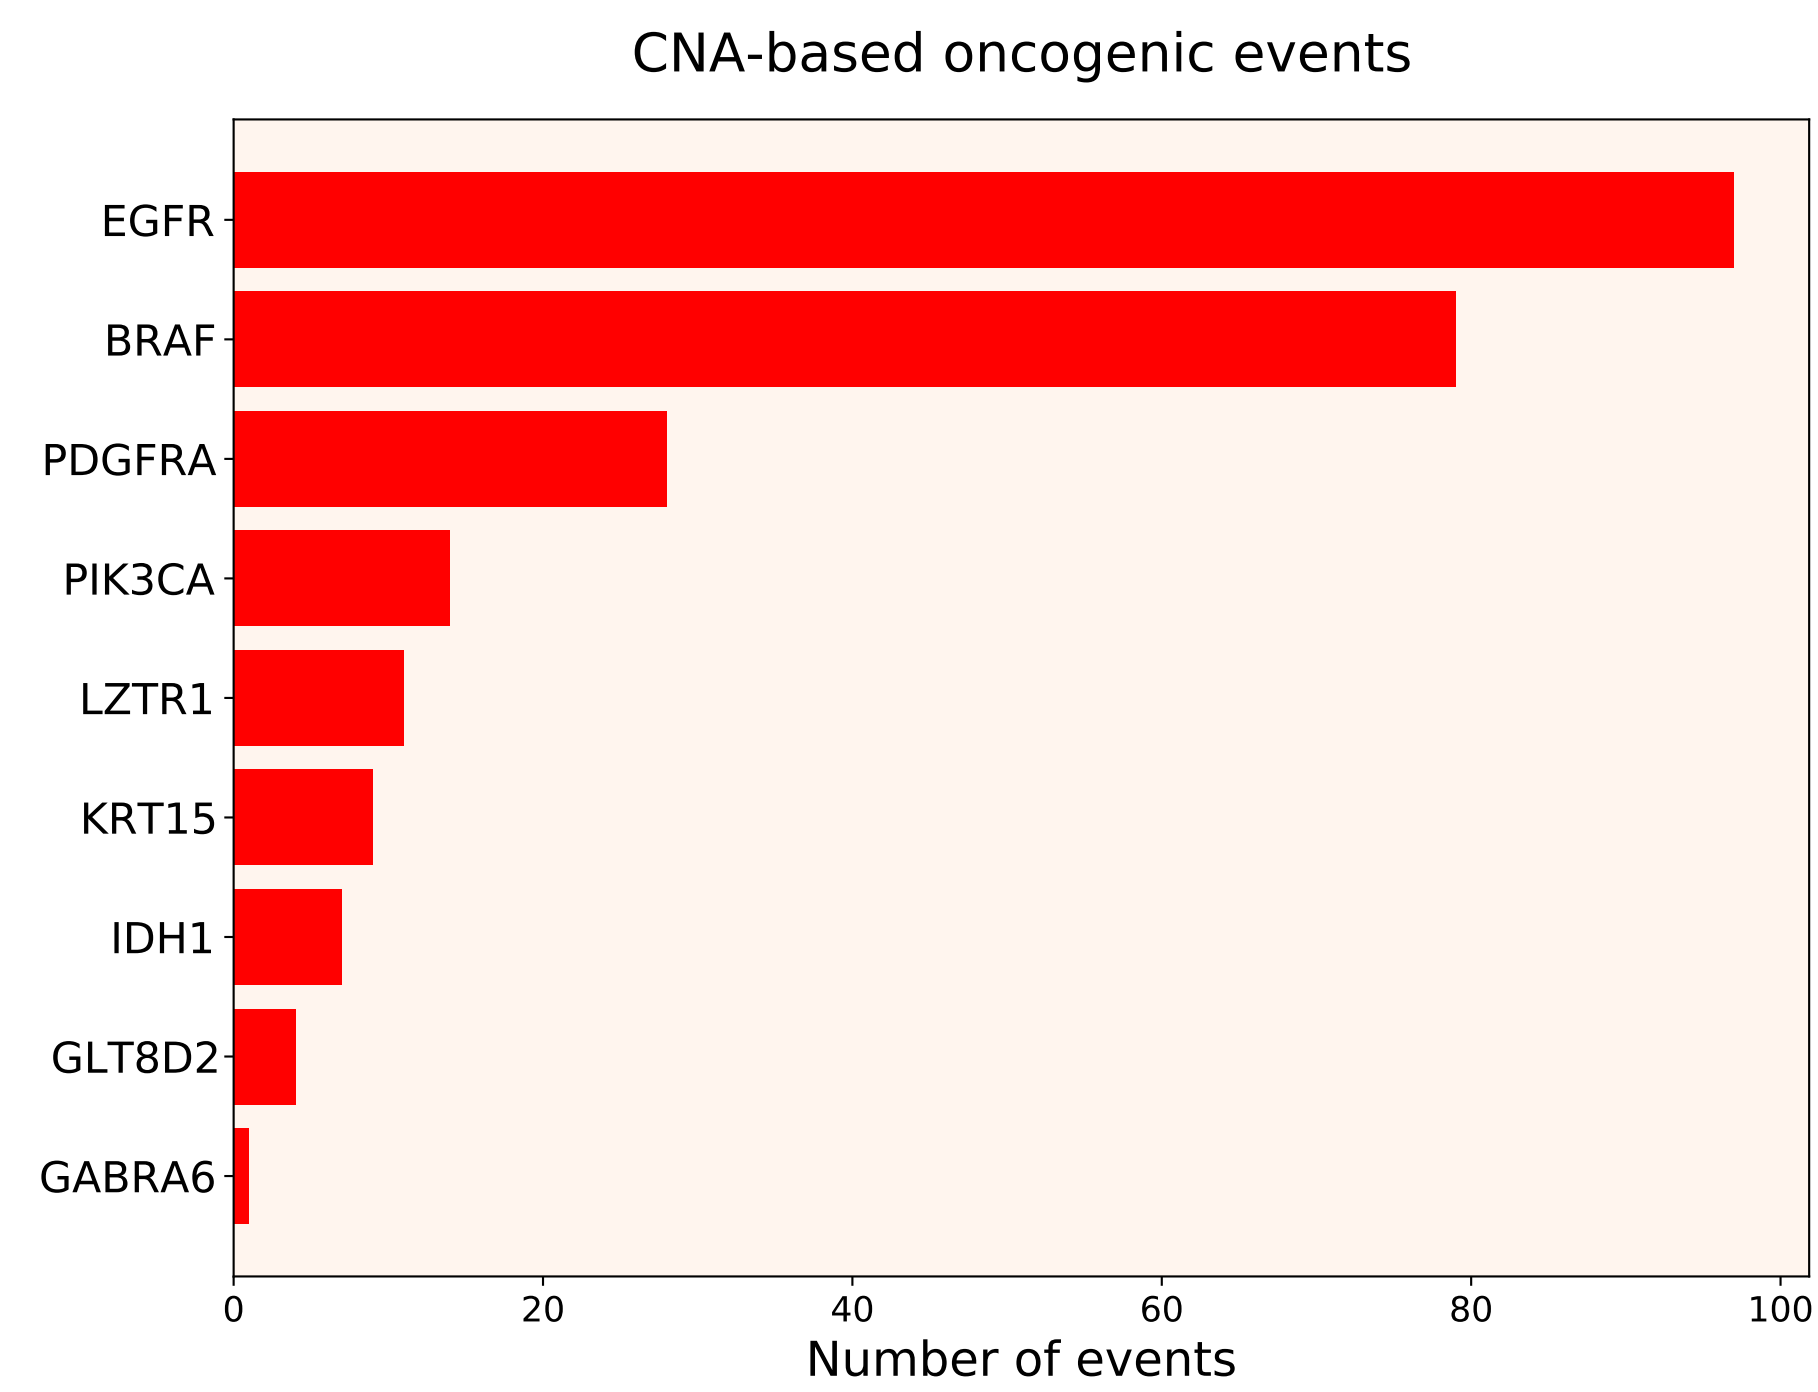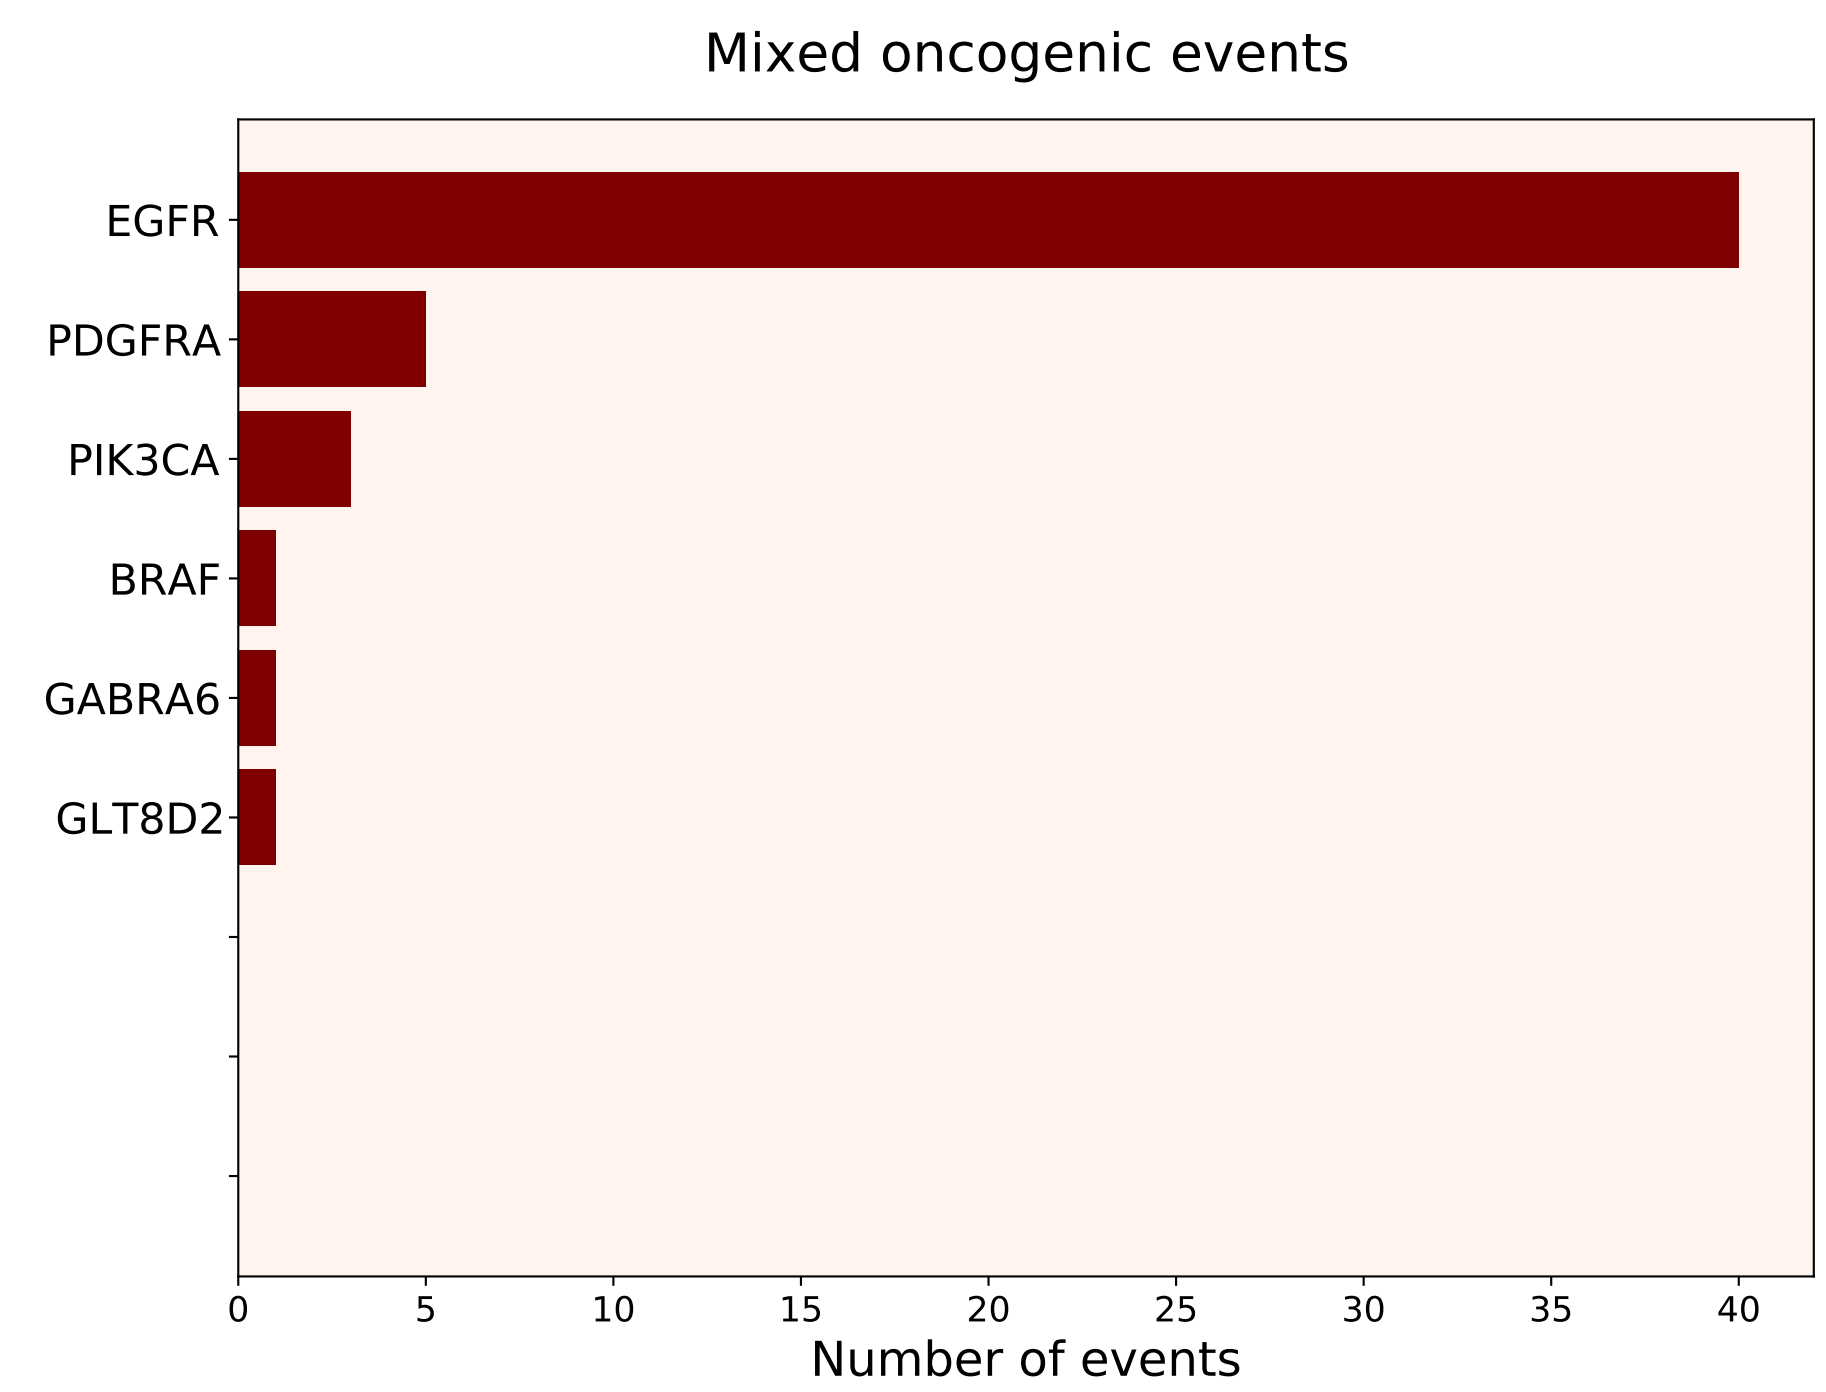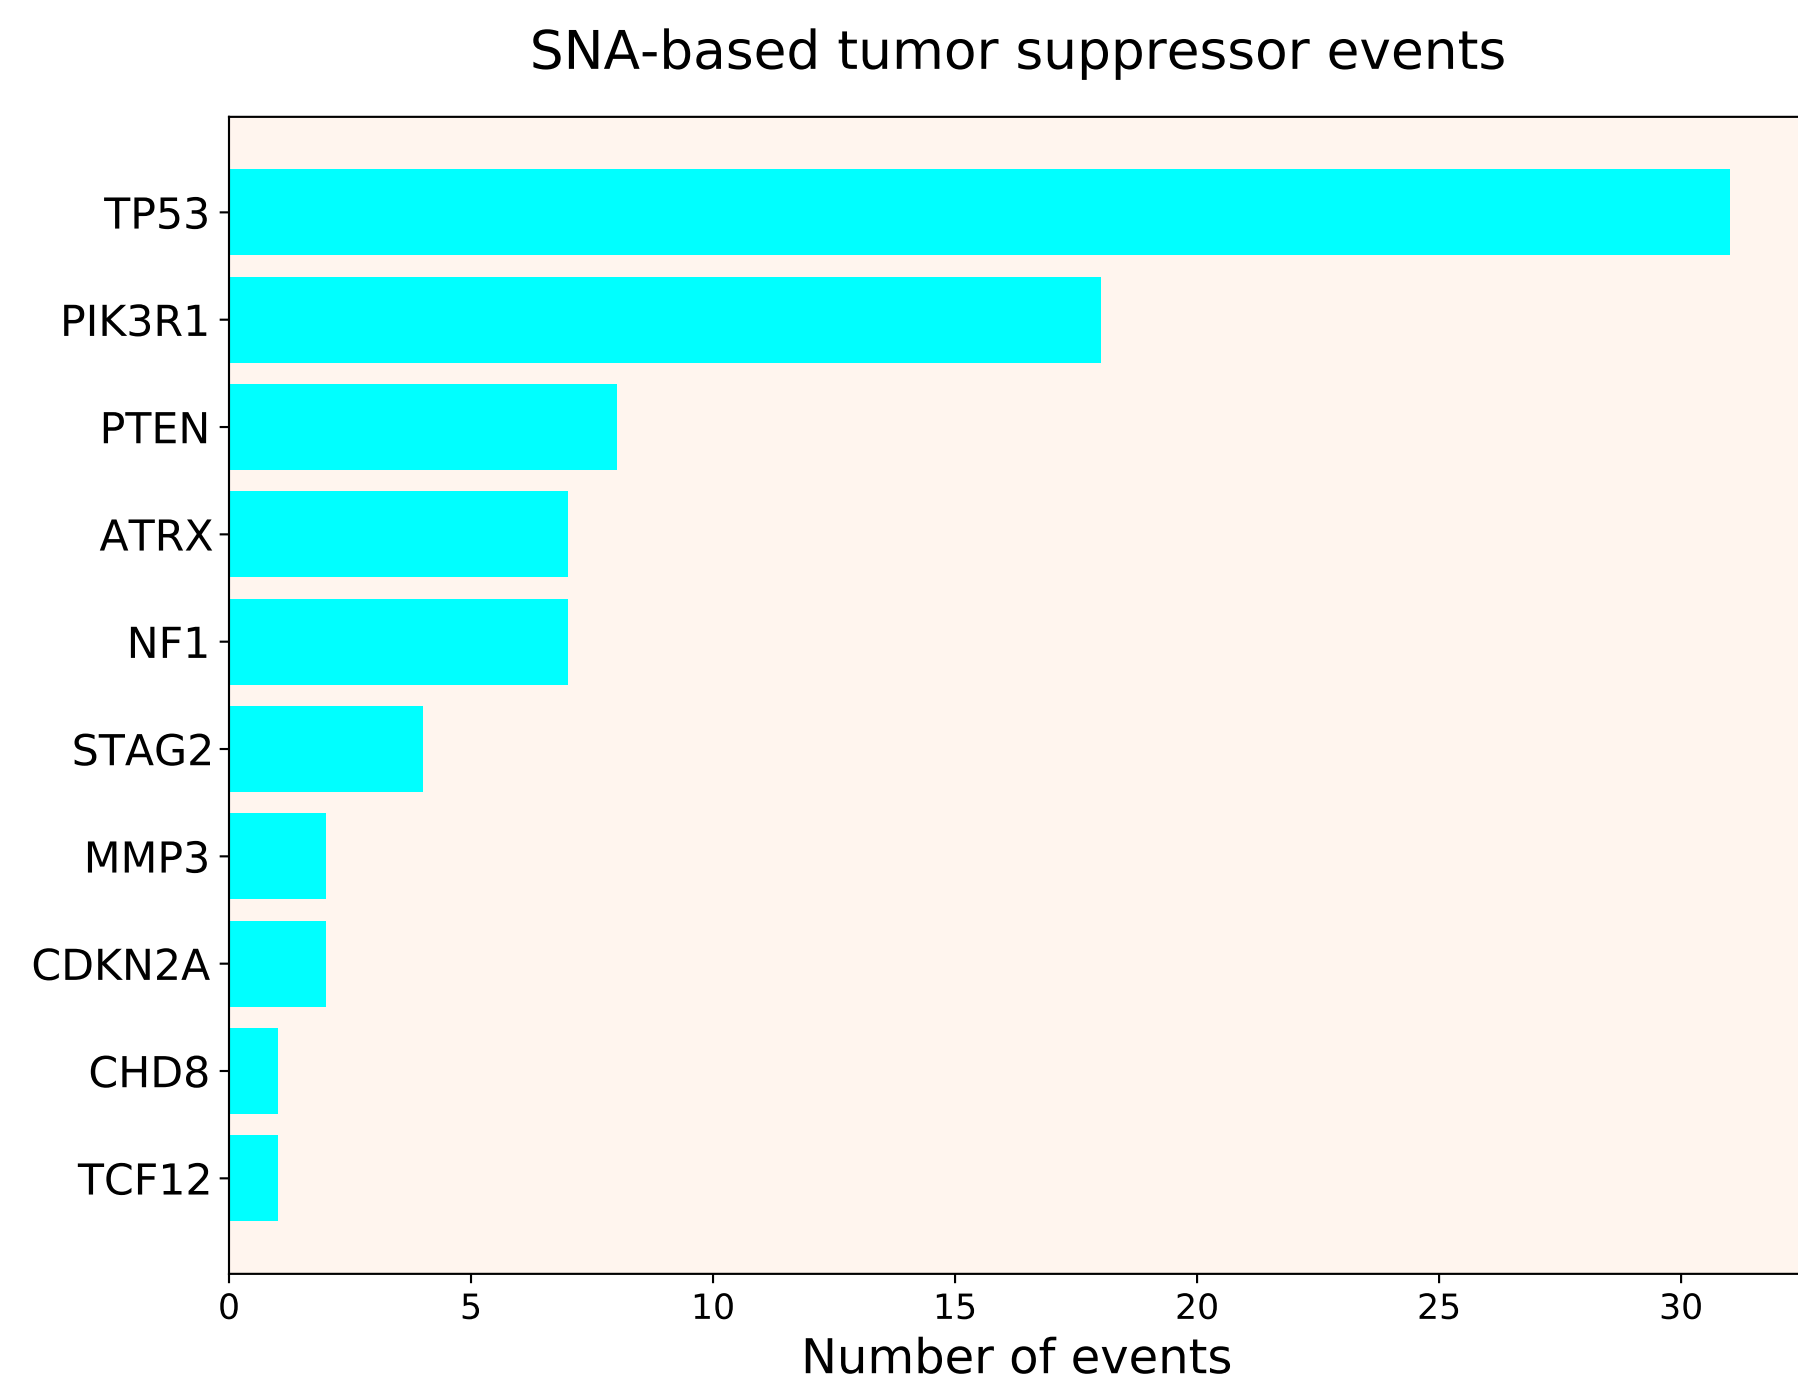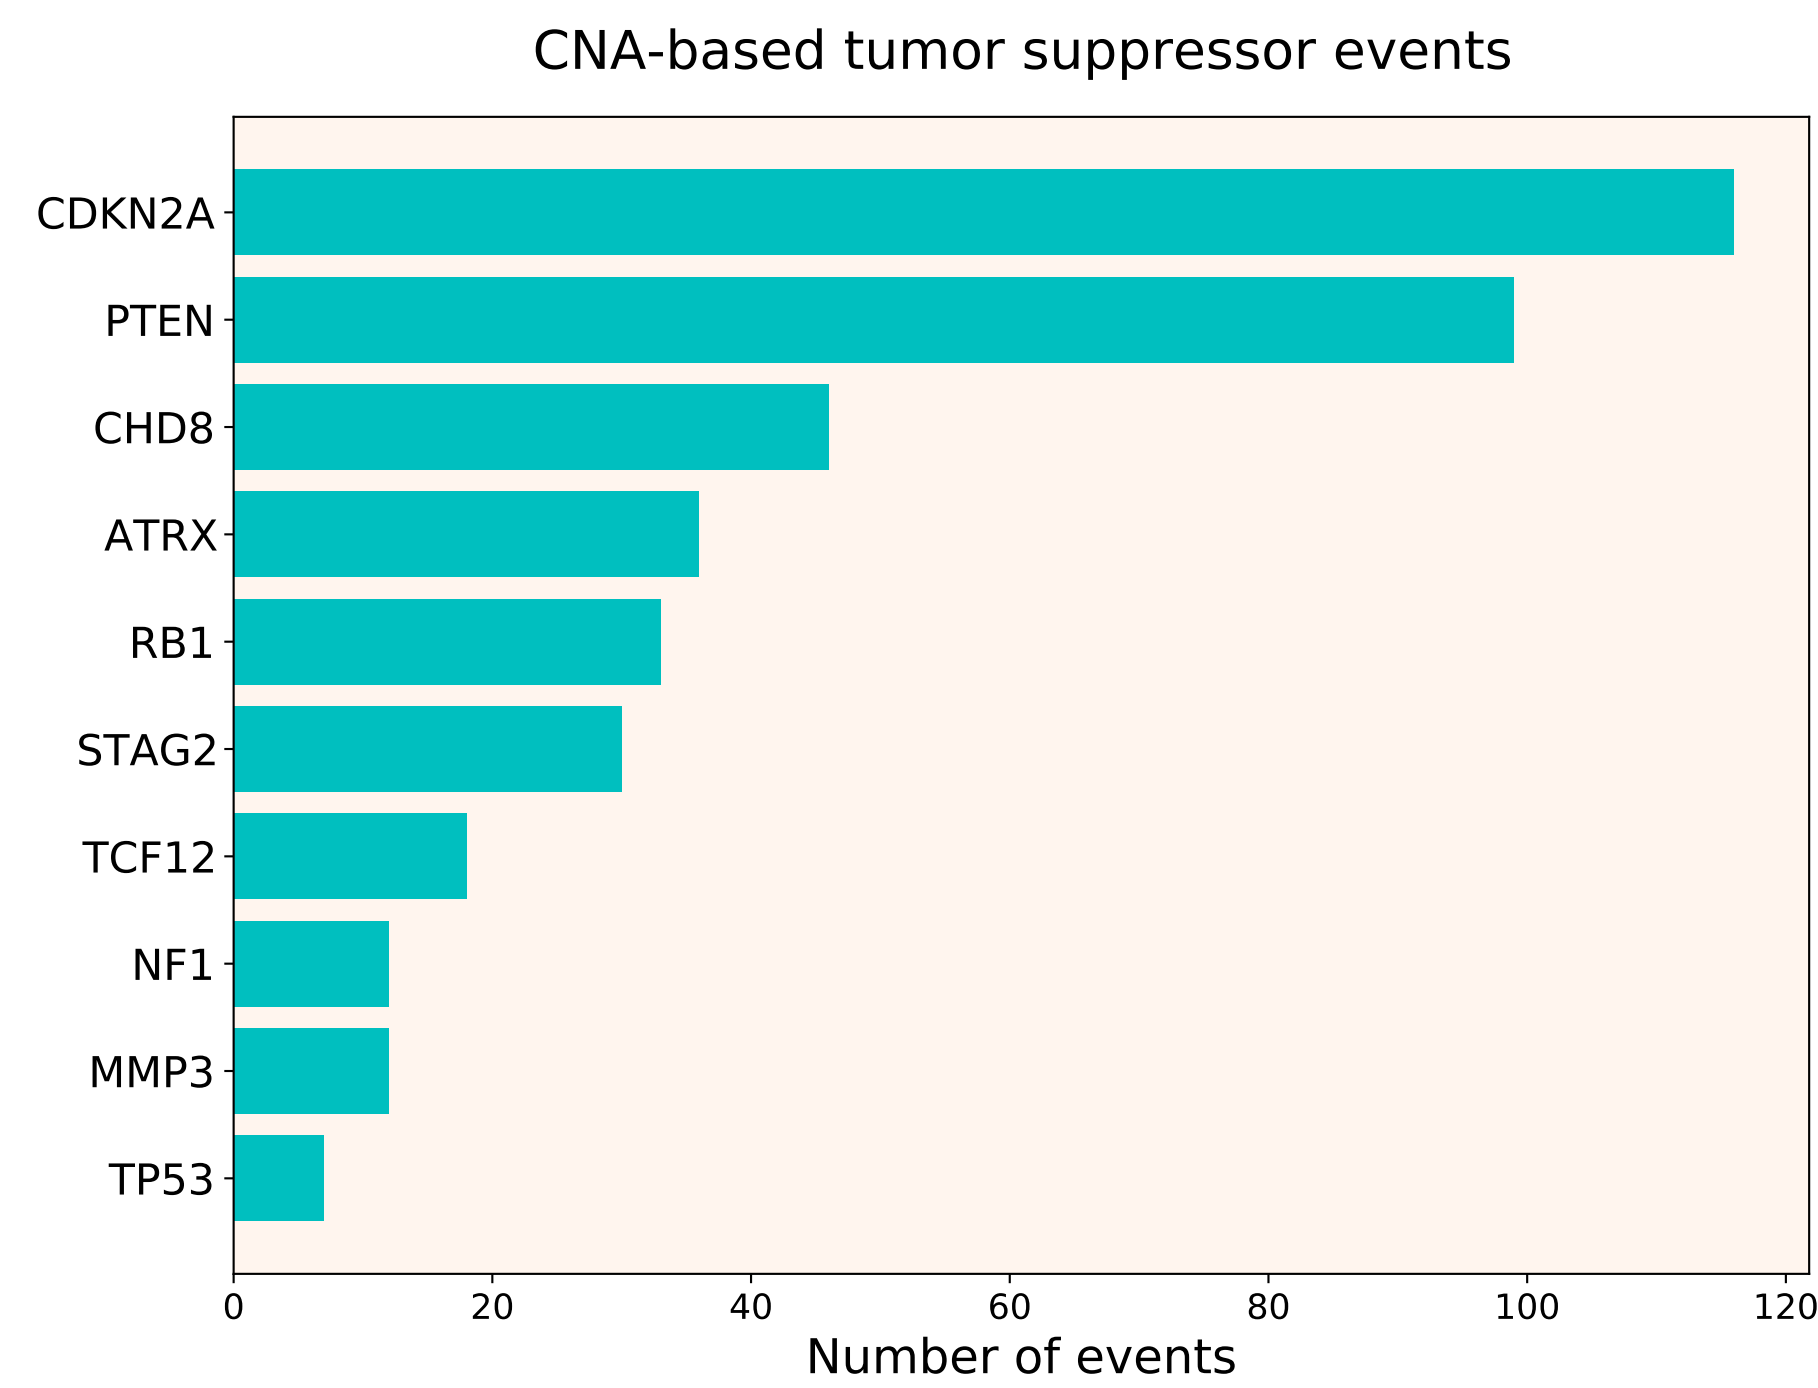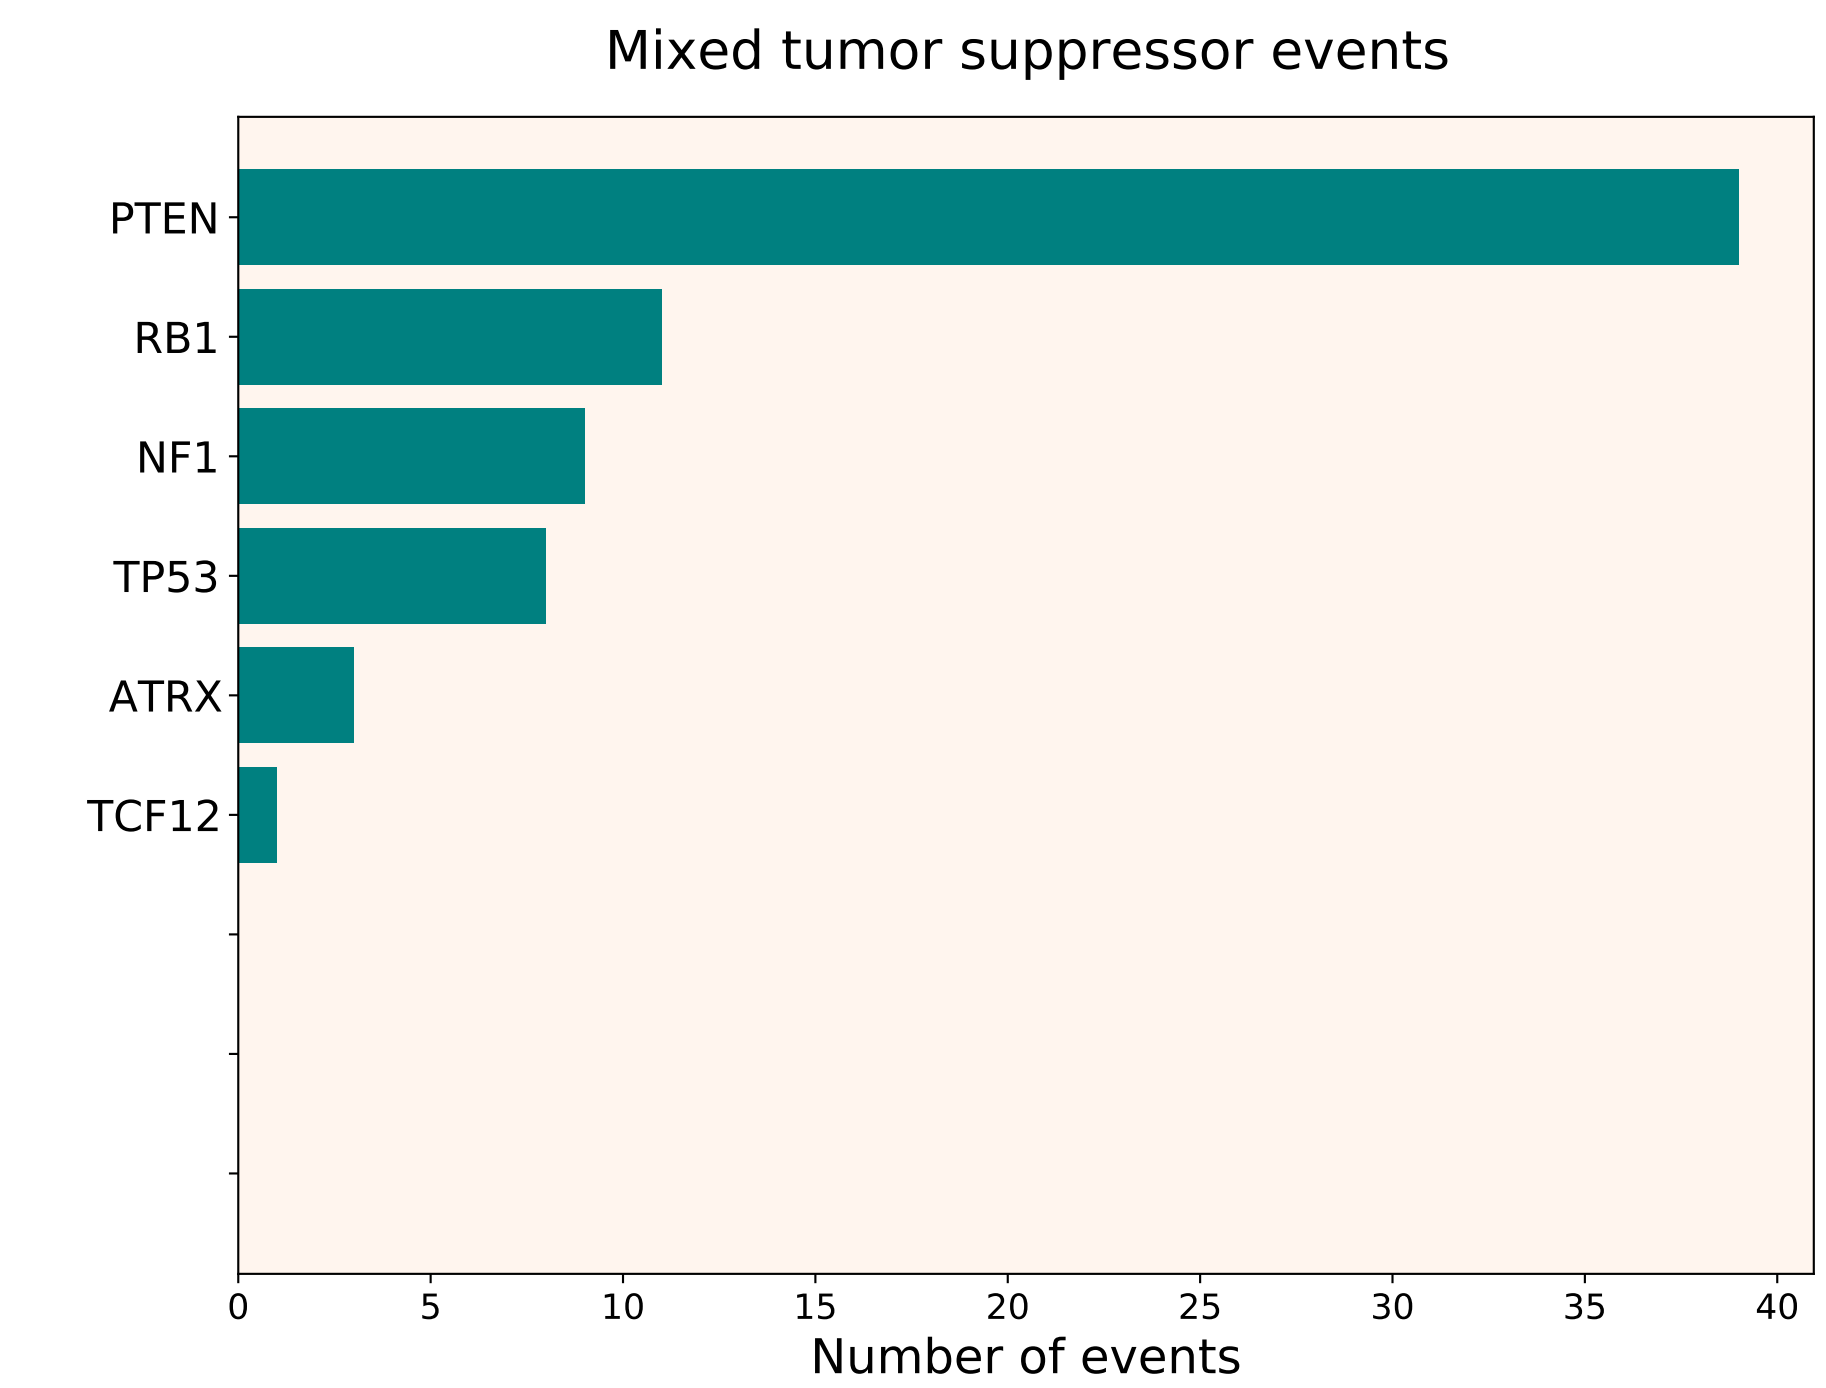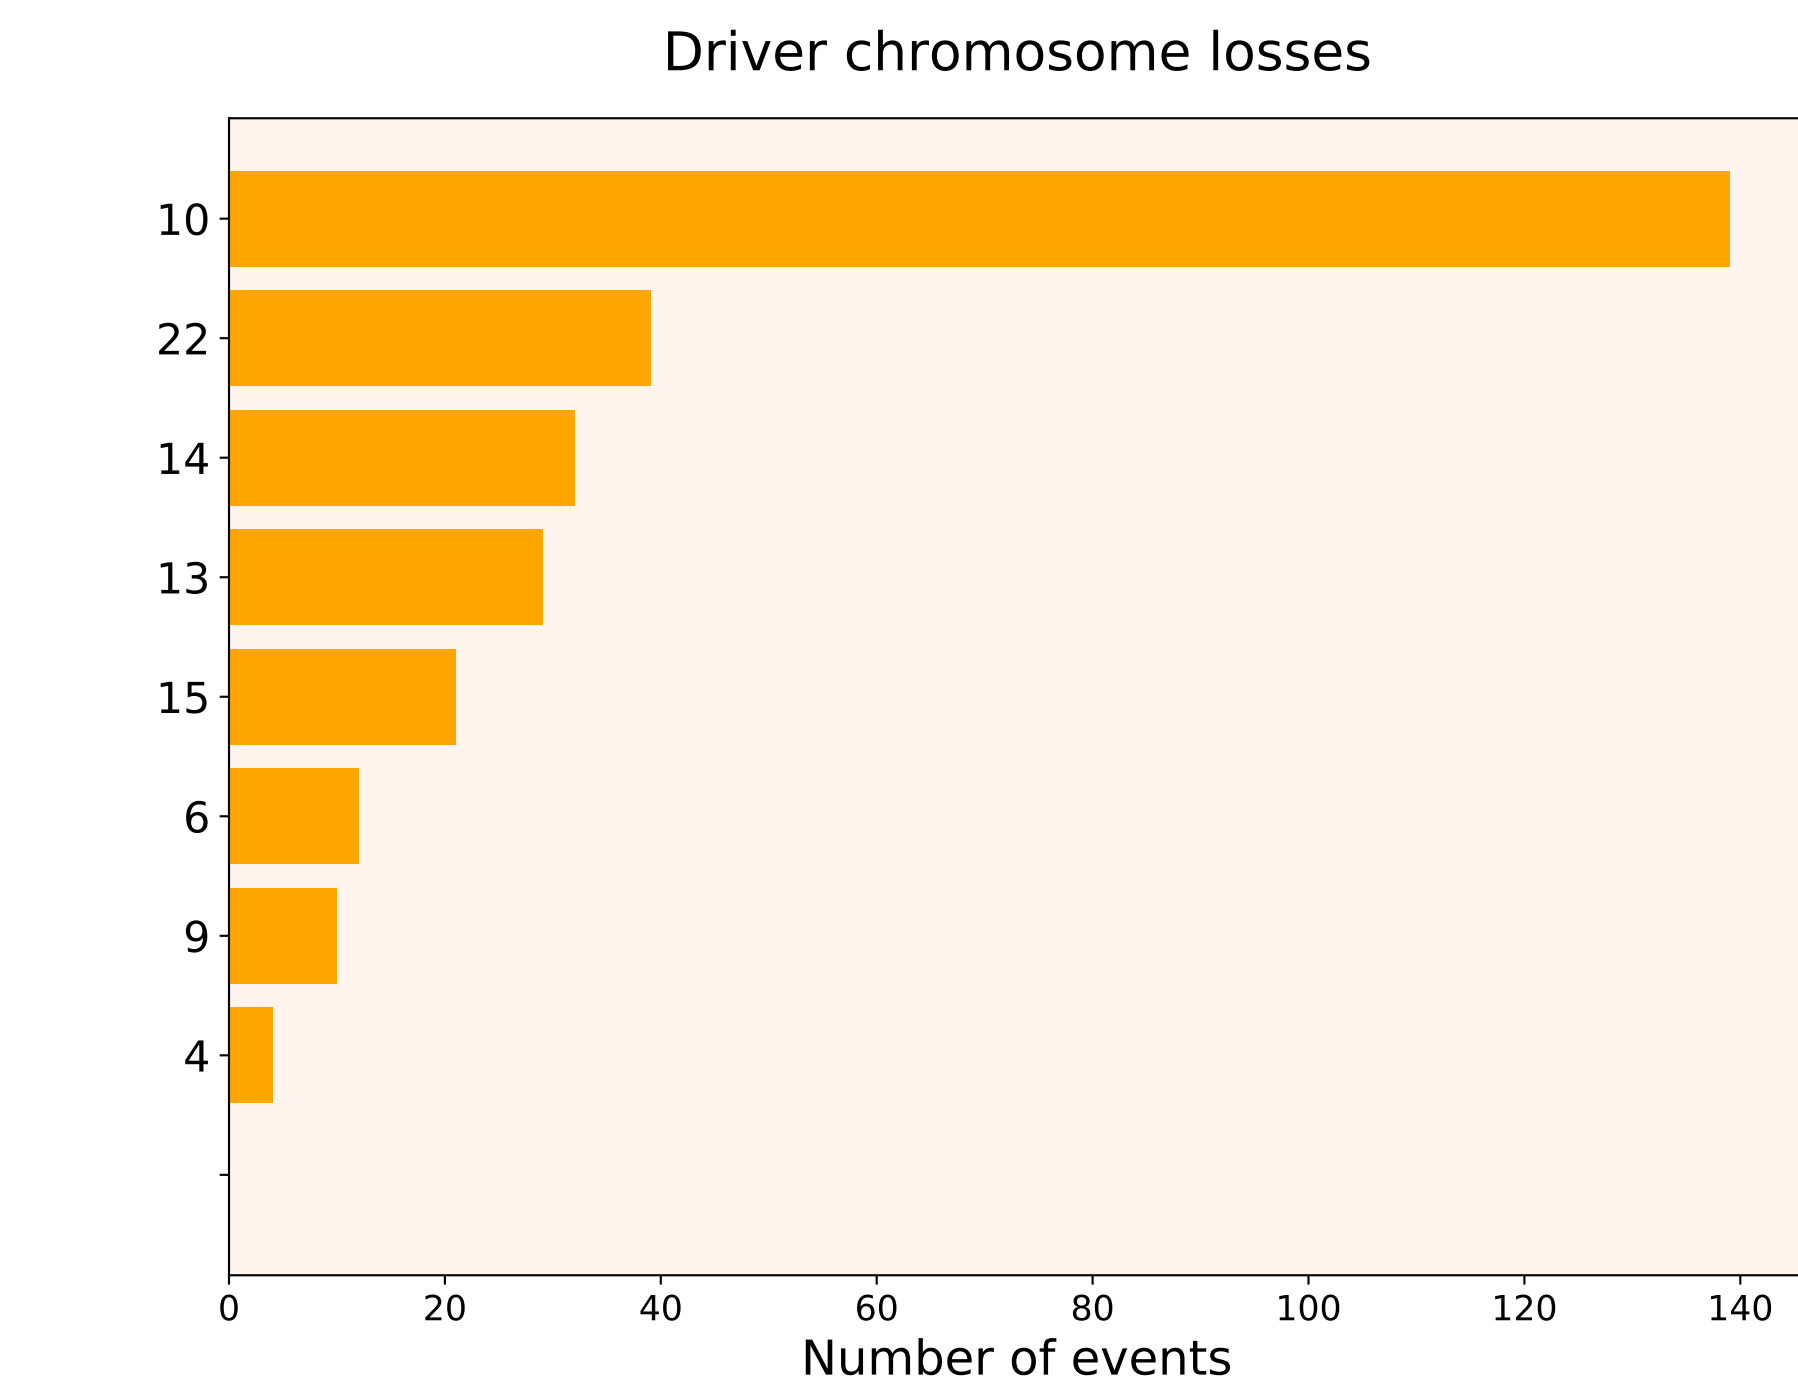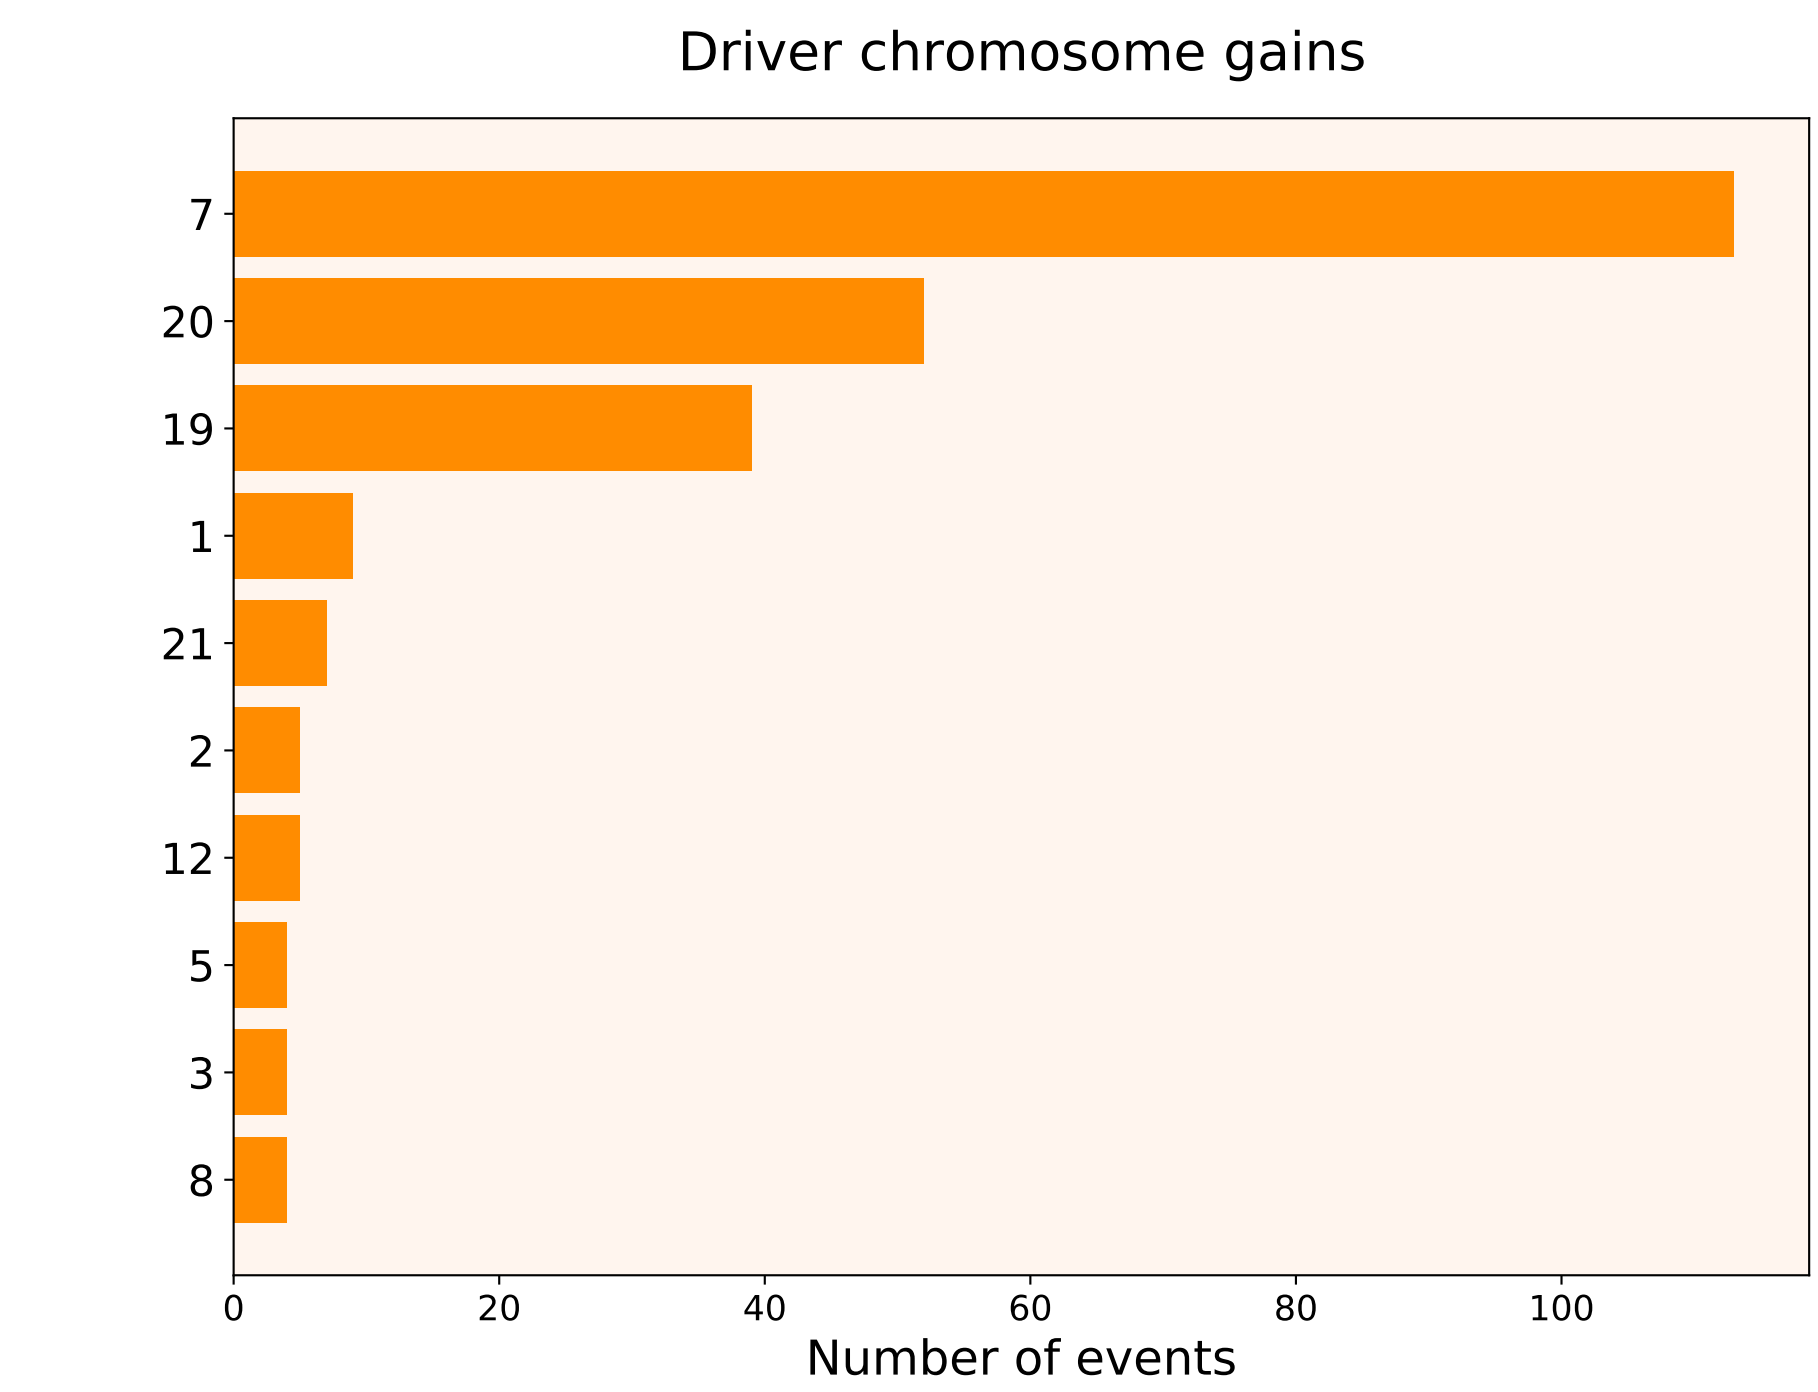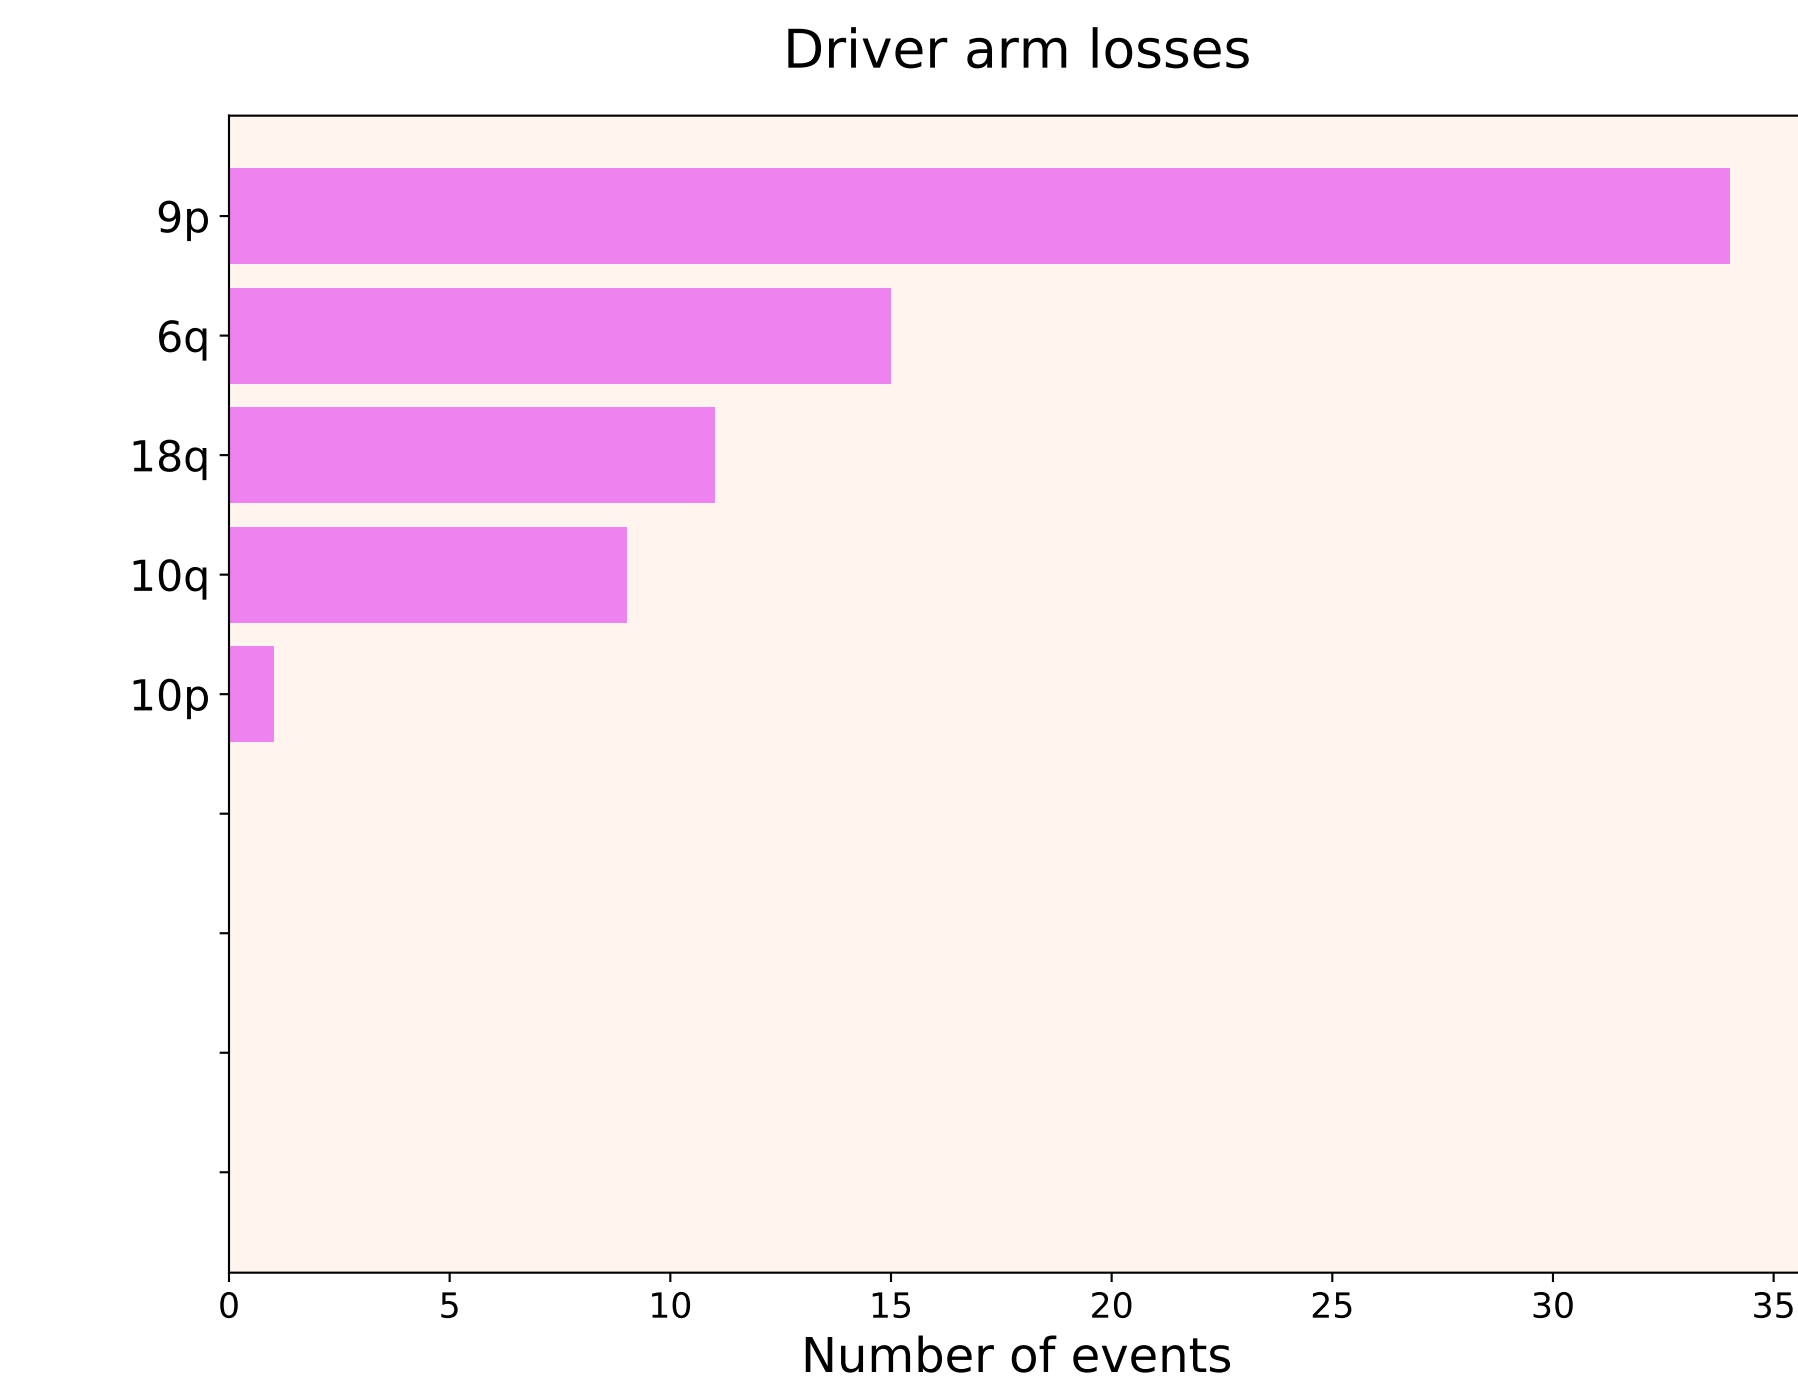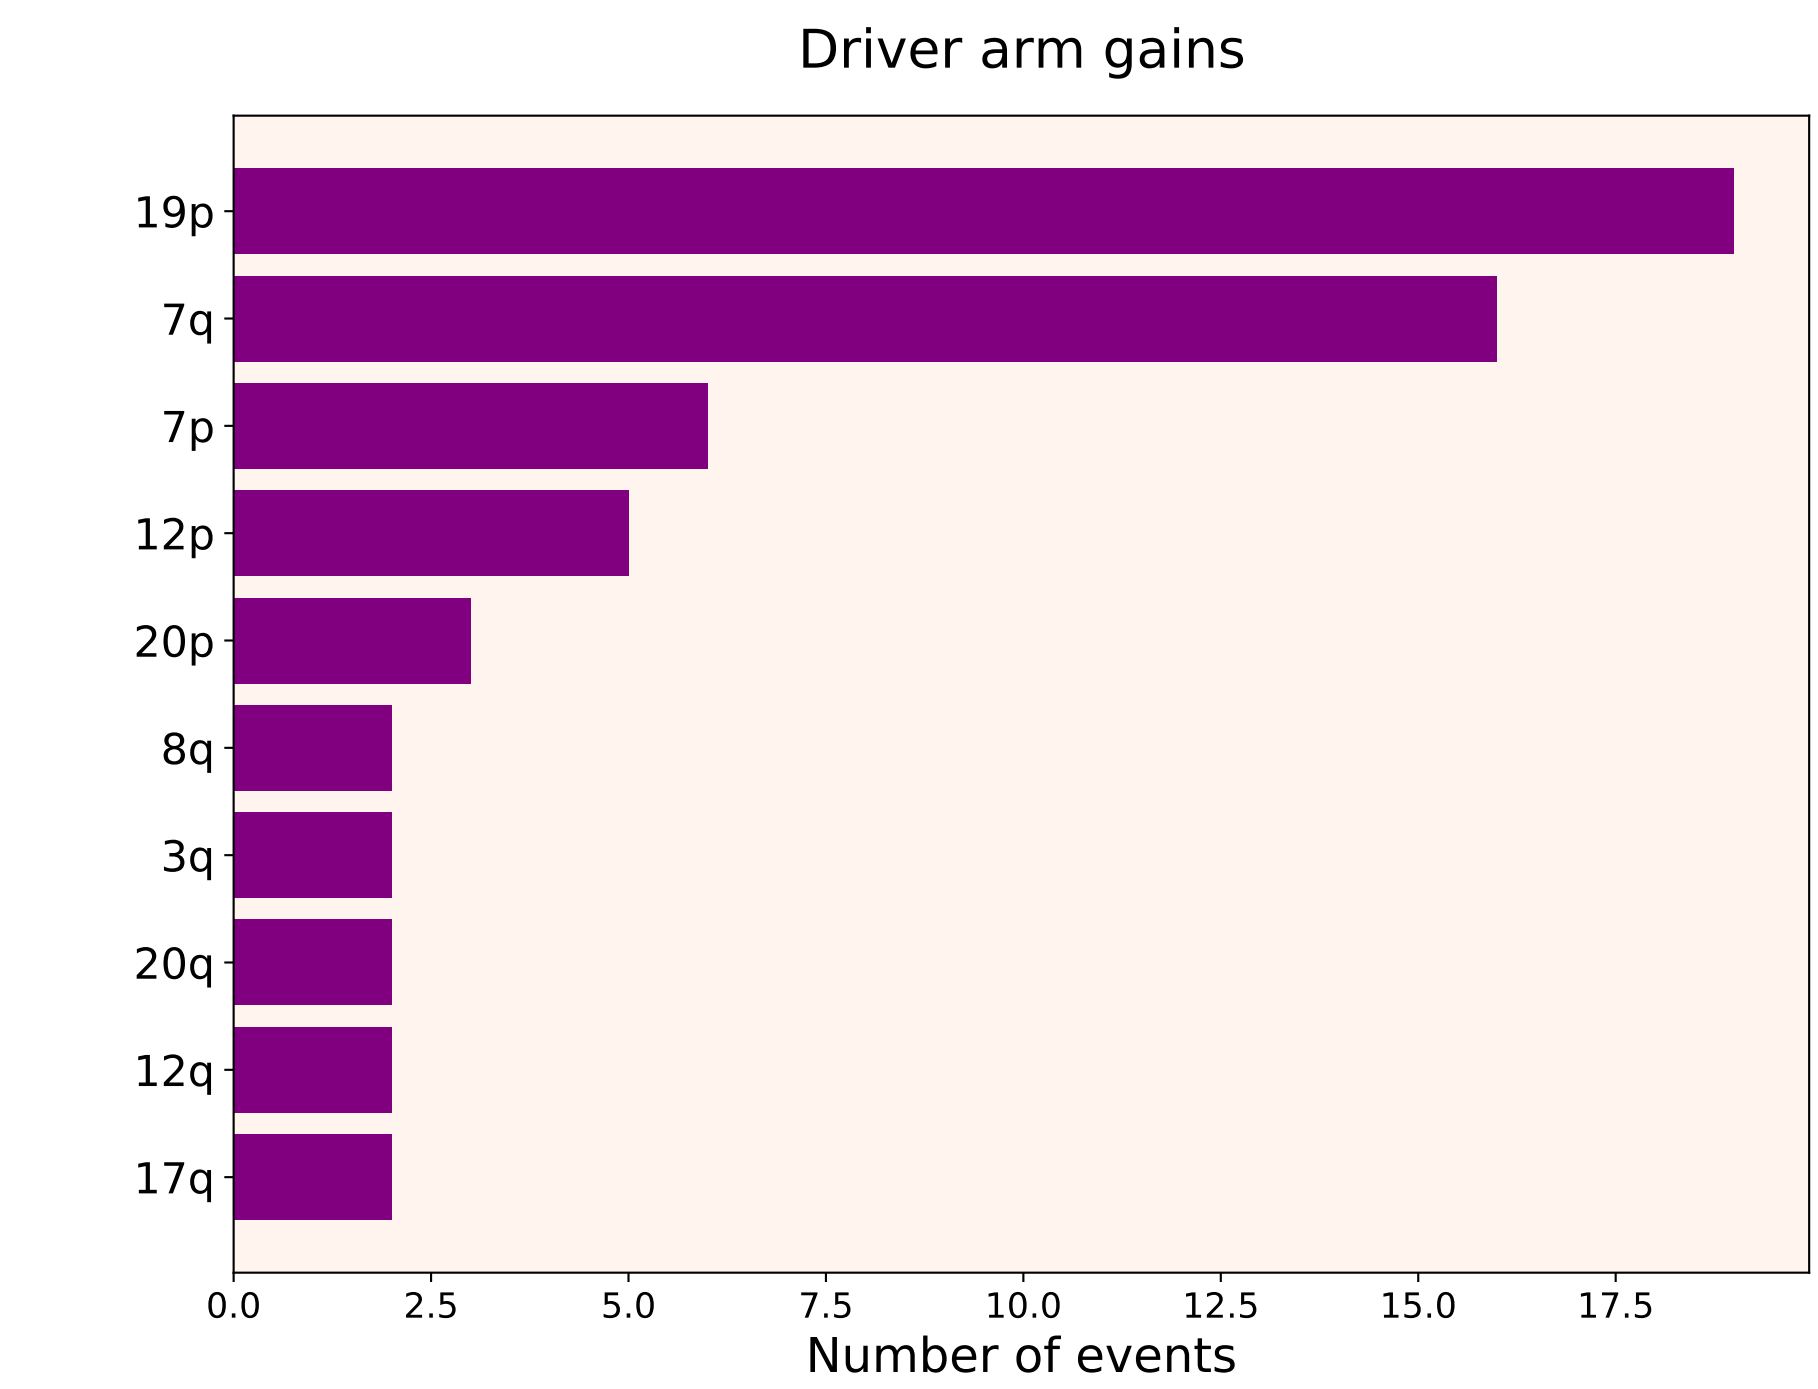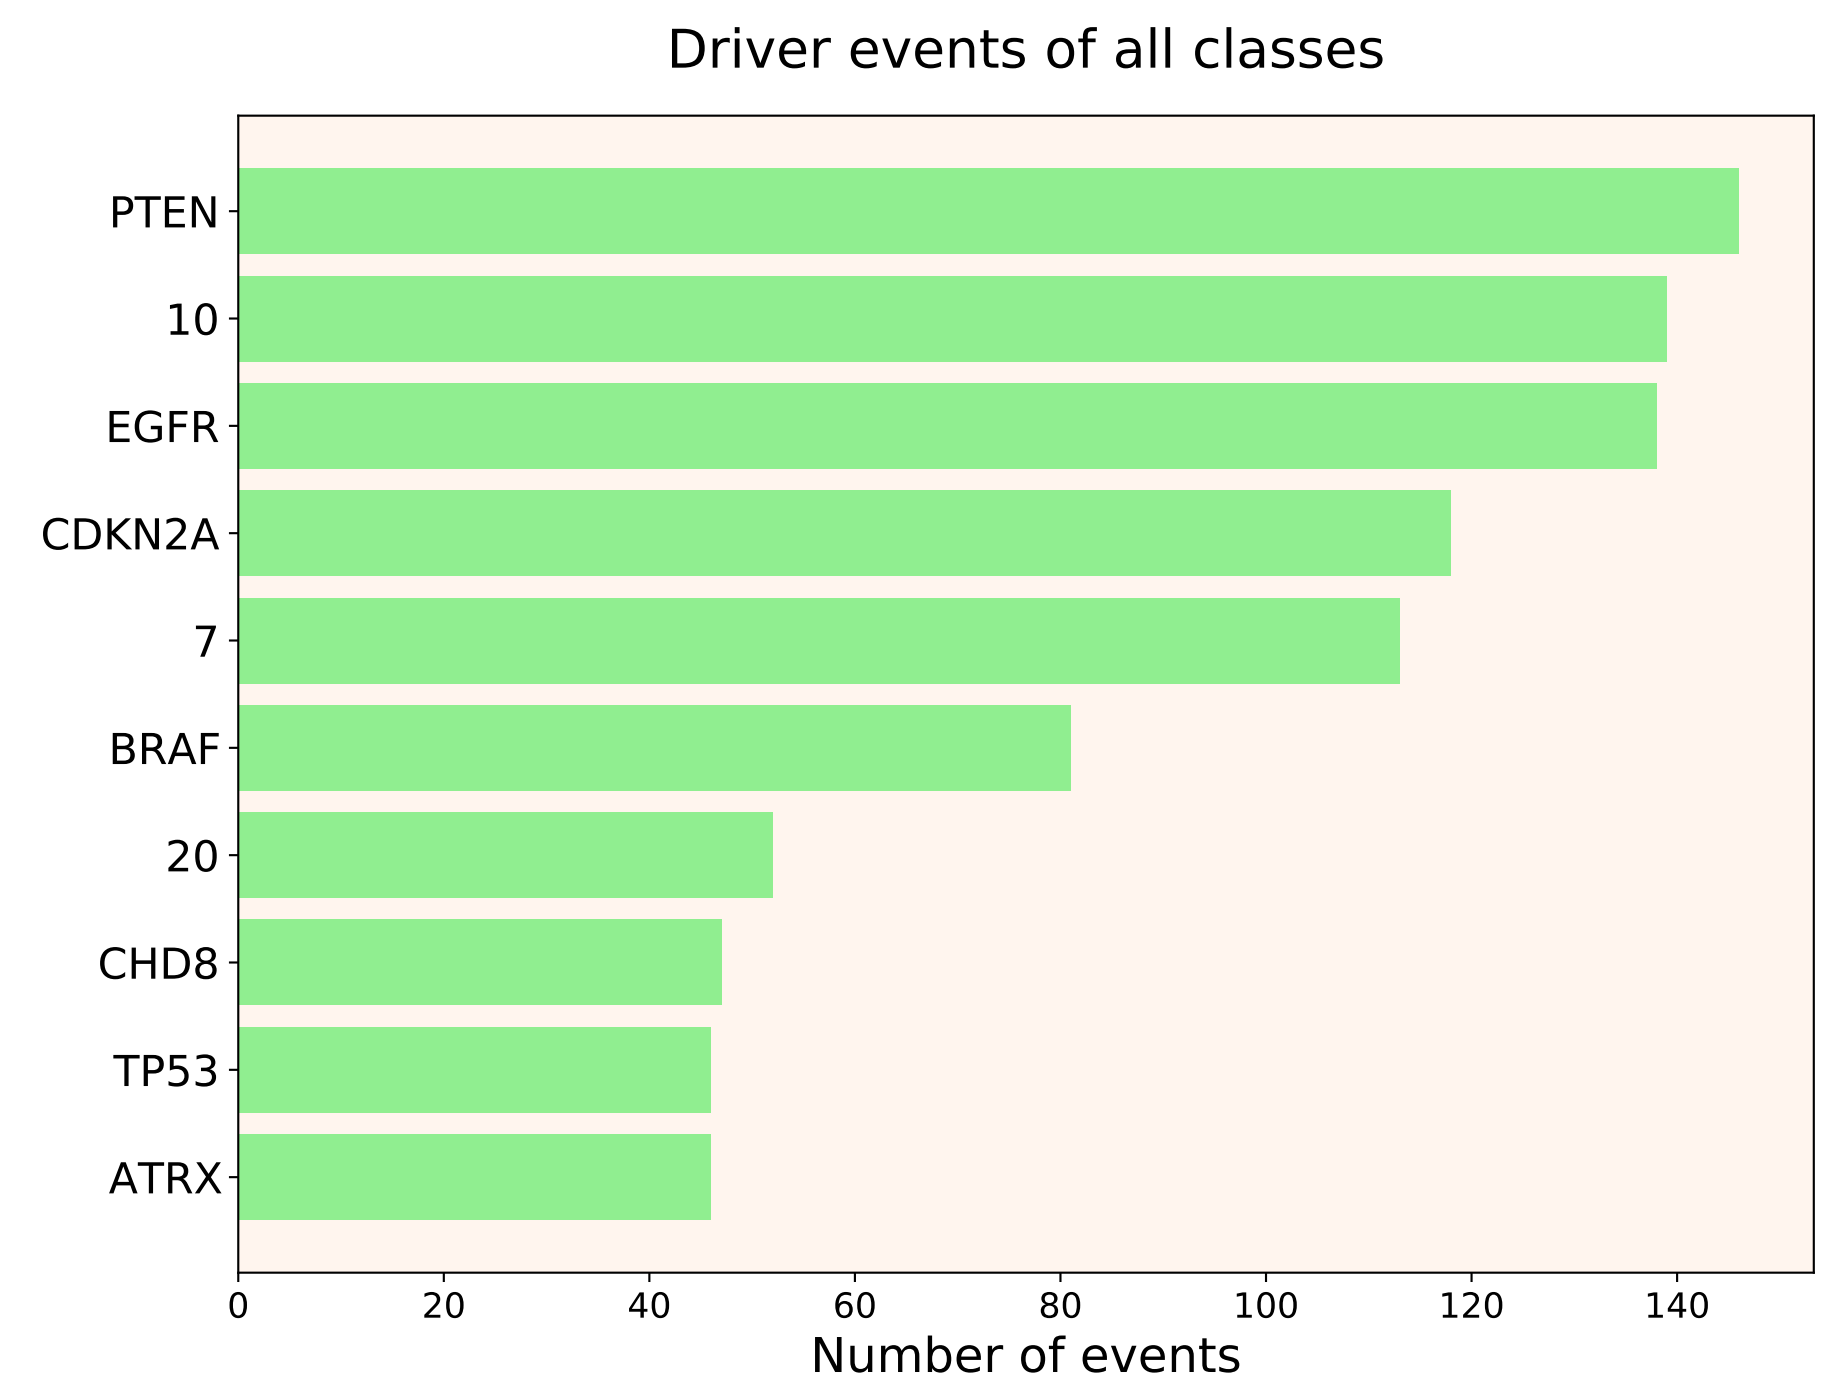

Supplement: Supplemental_Data_S1.zip [file Supplemental_Data_S1.zip]

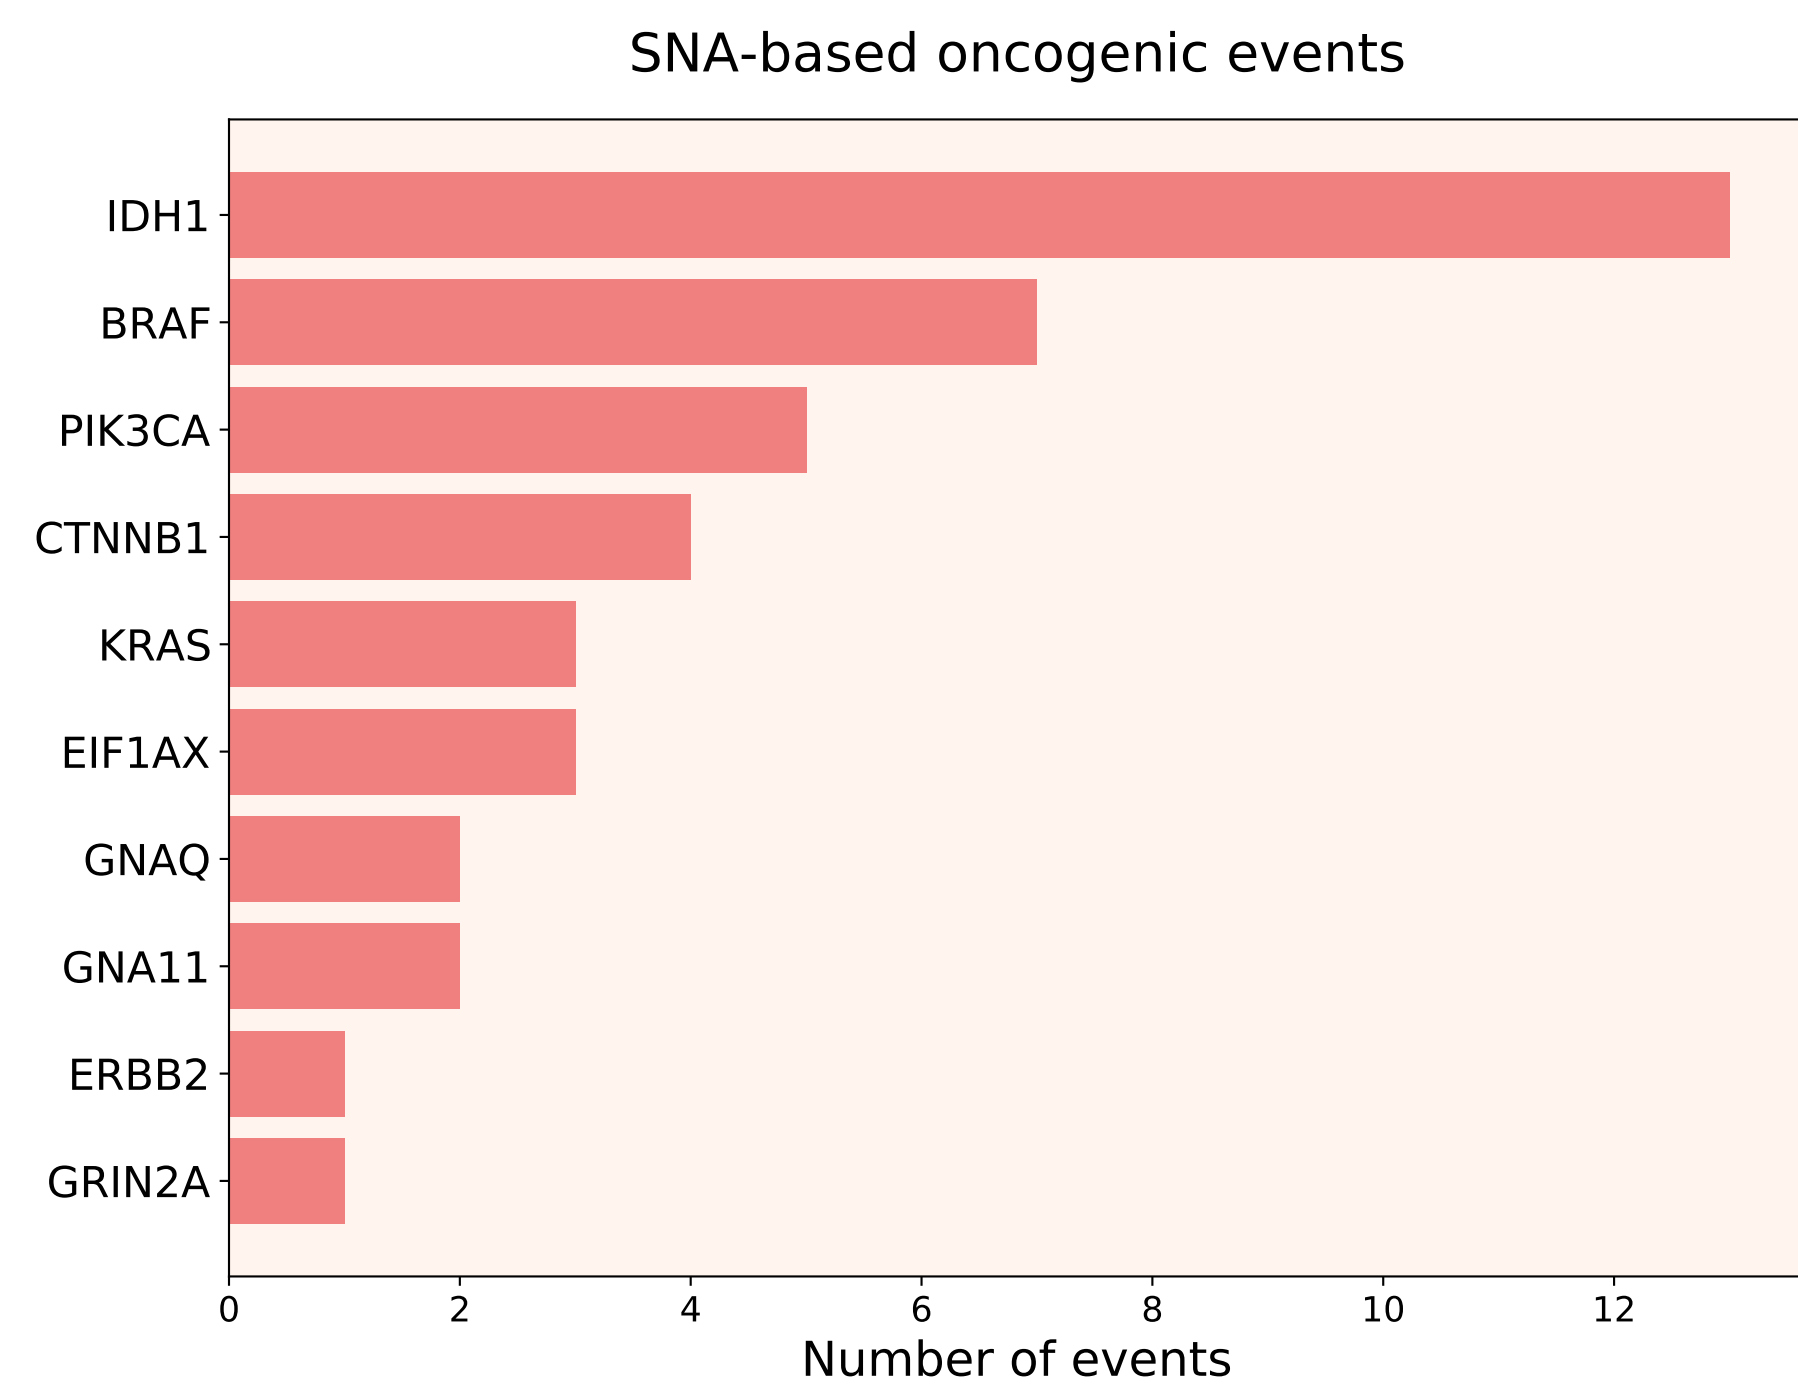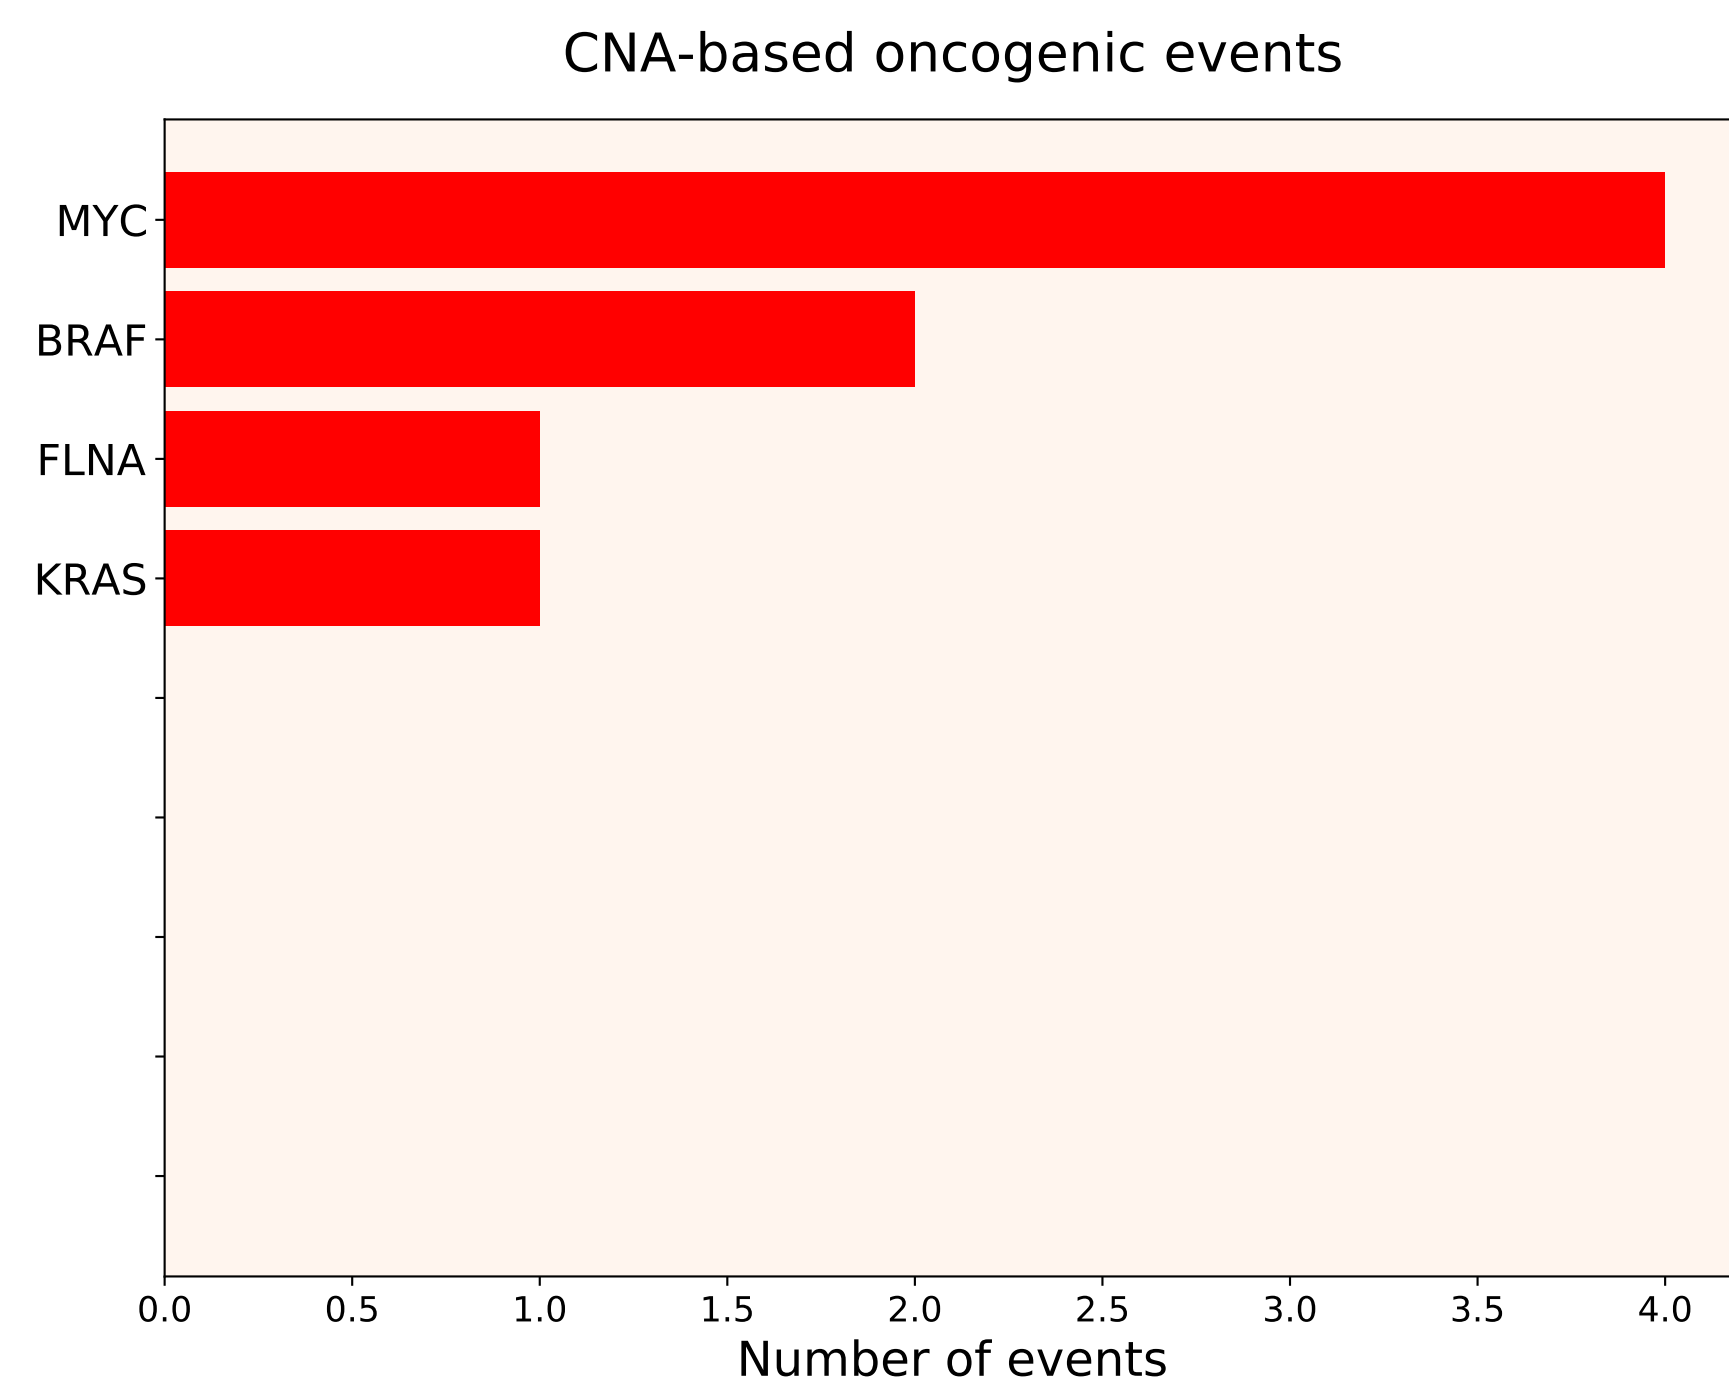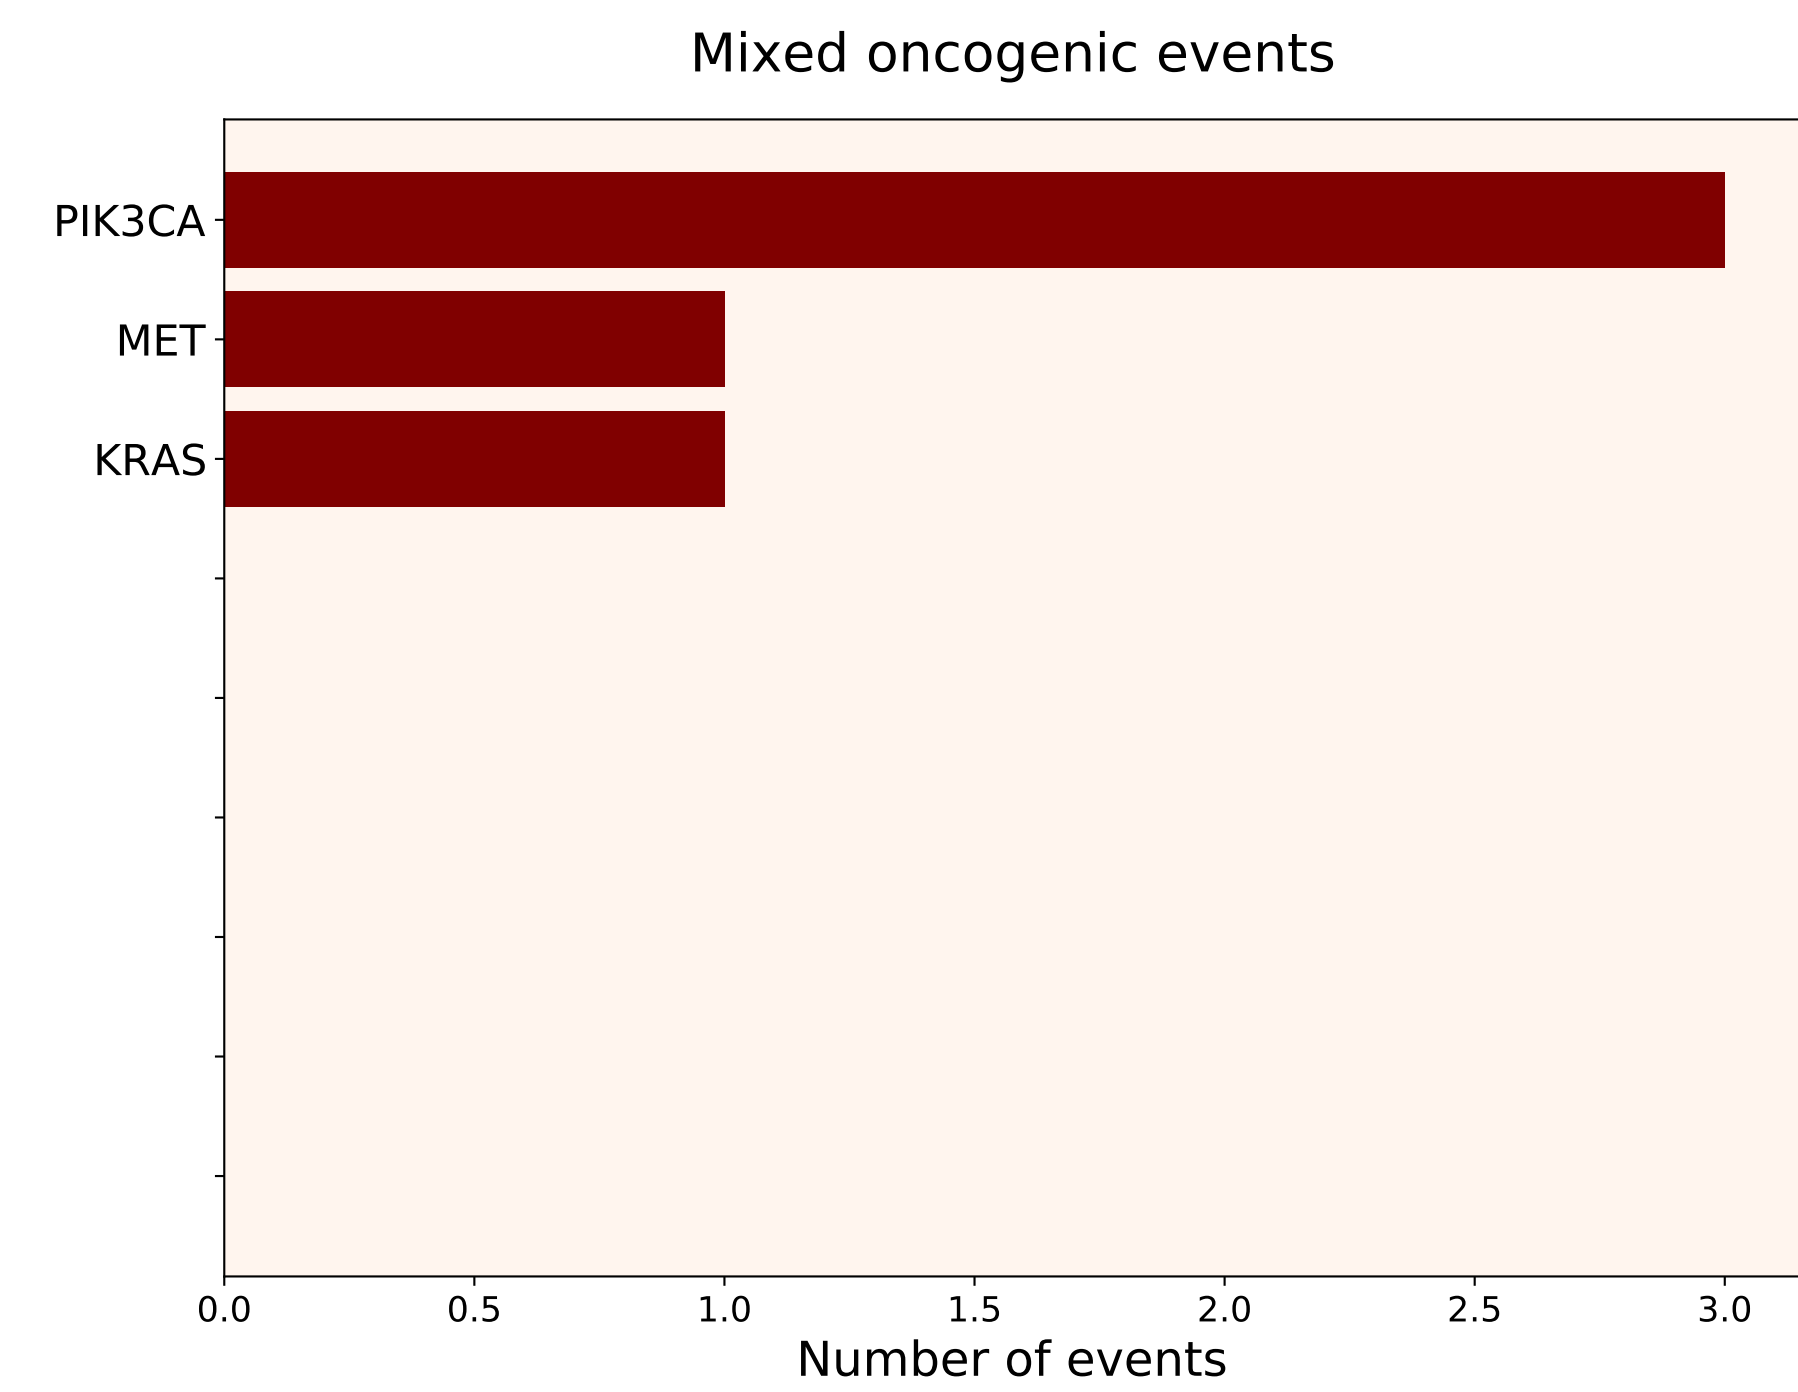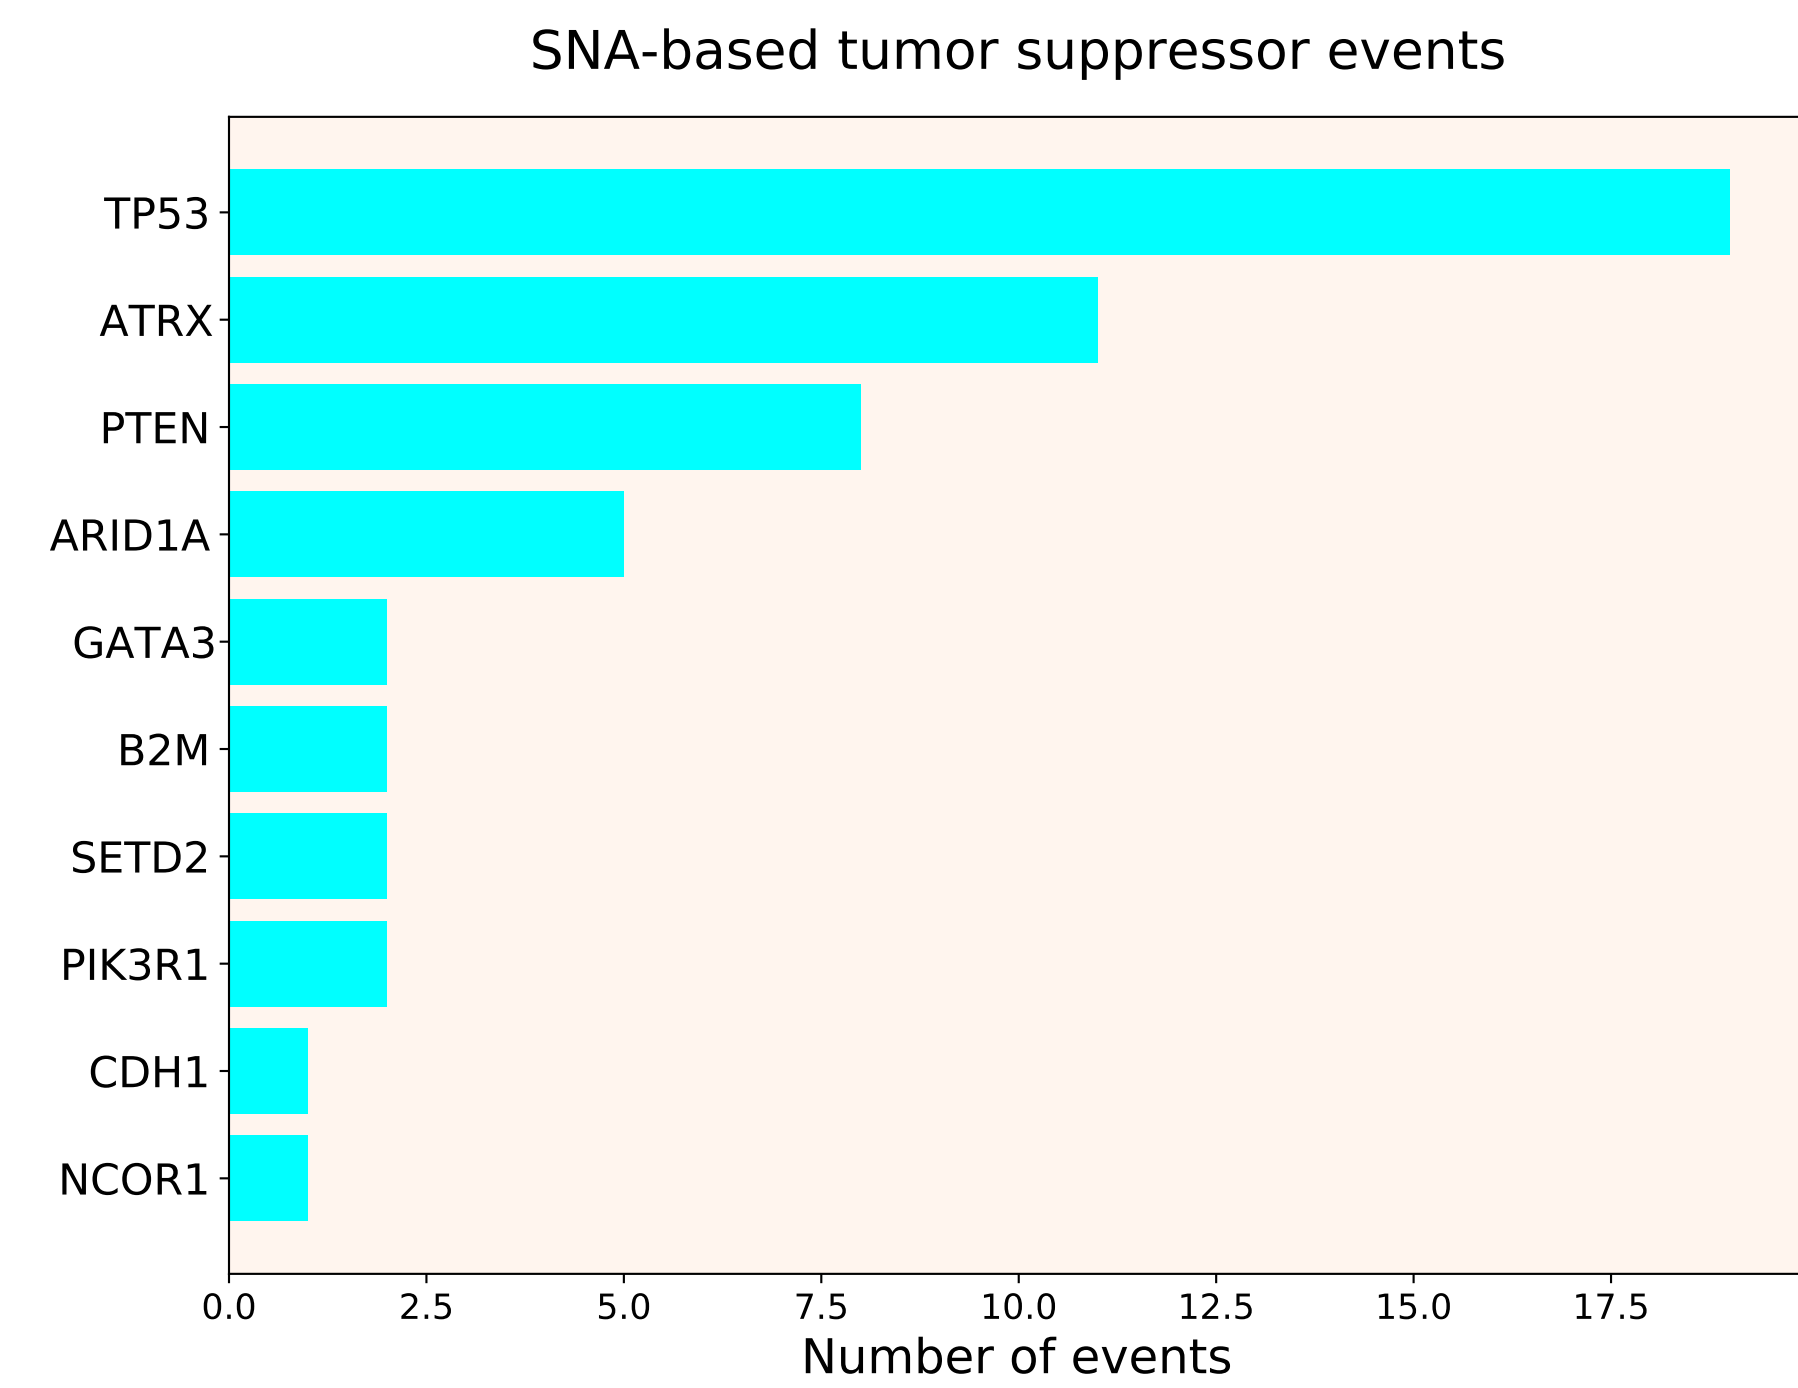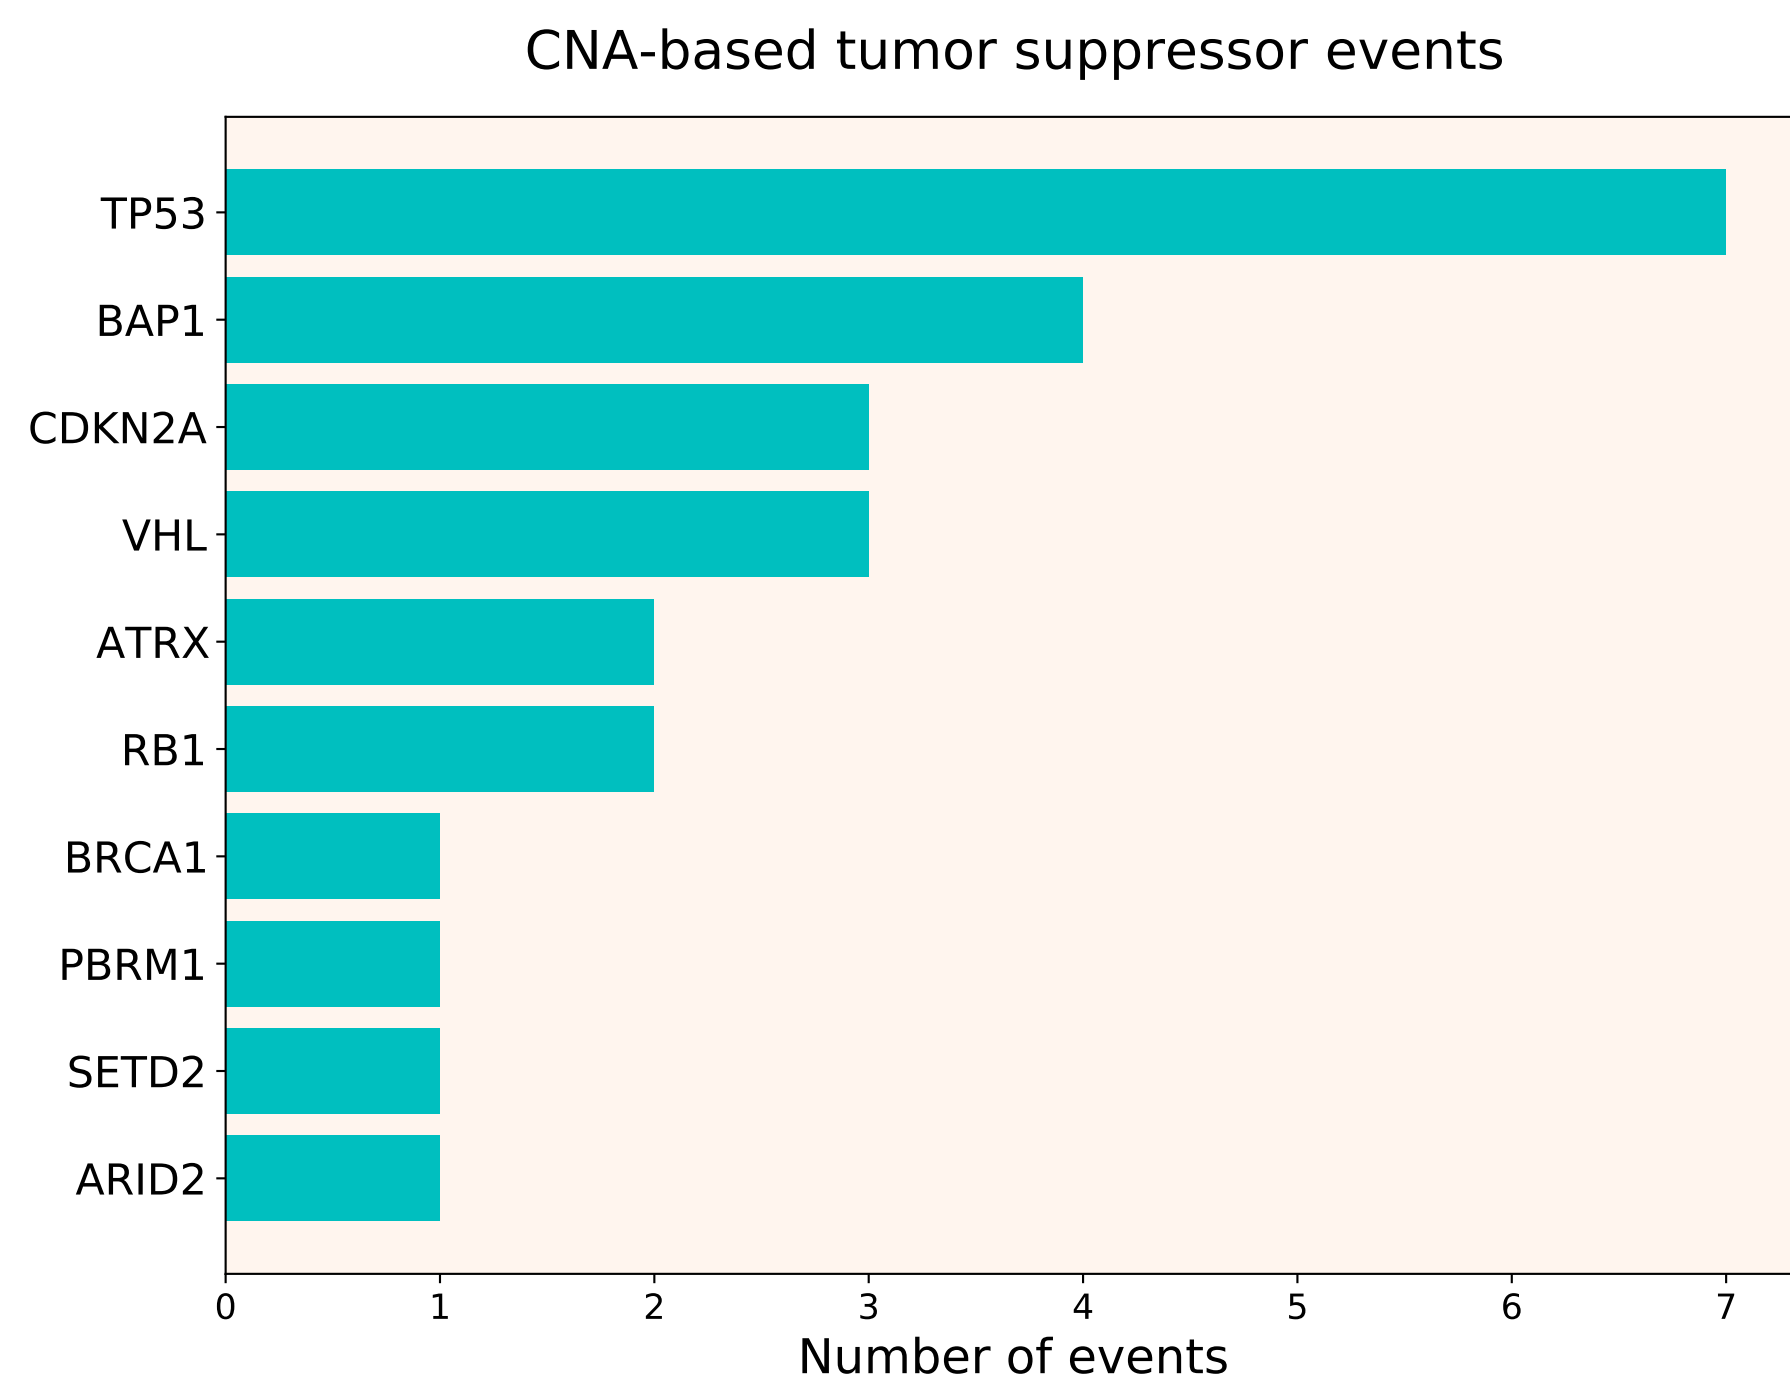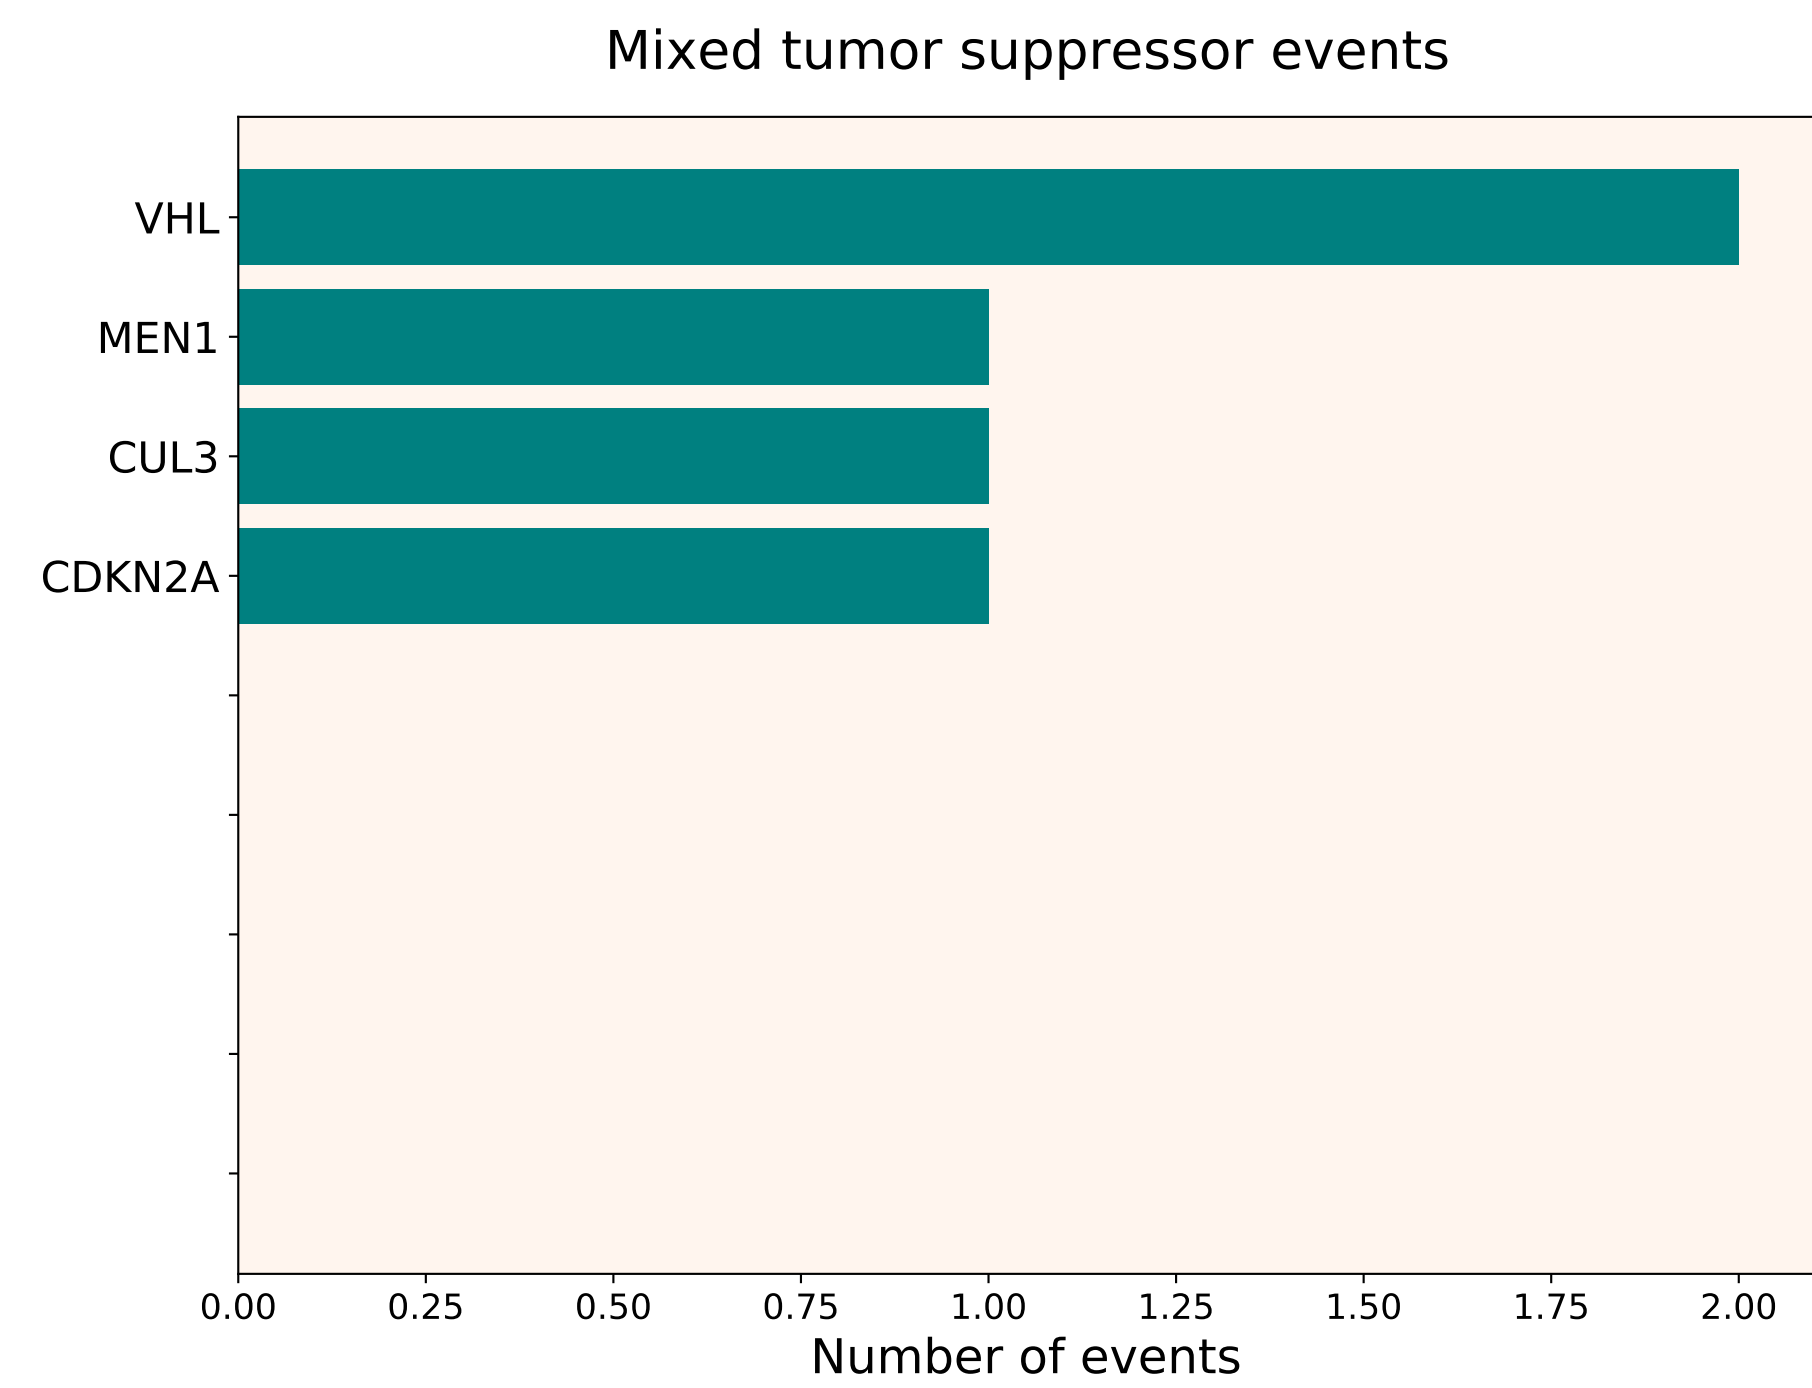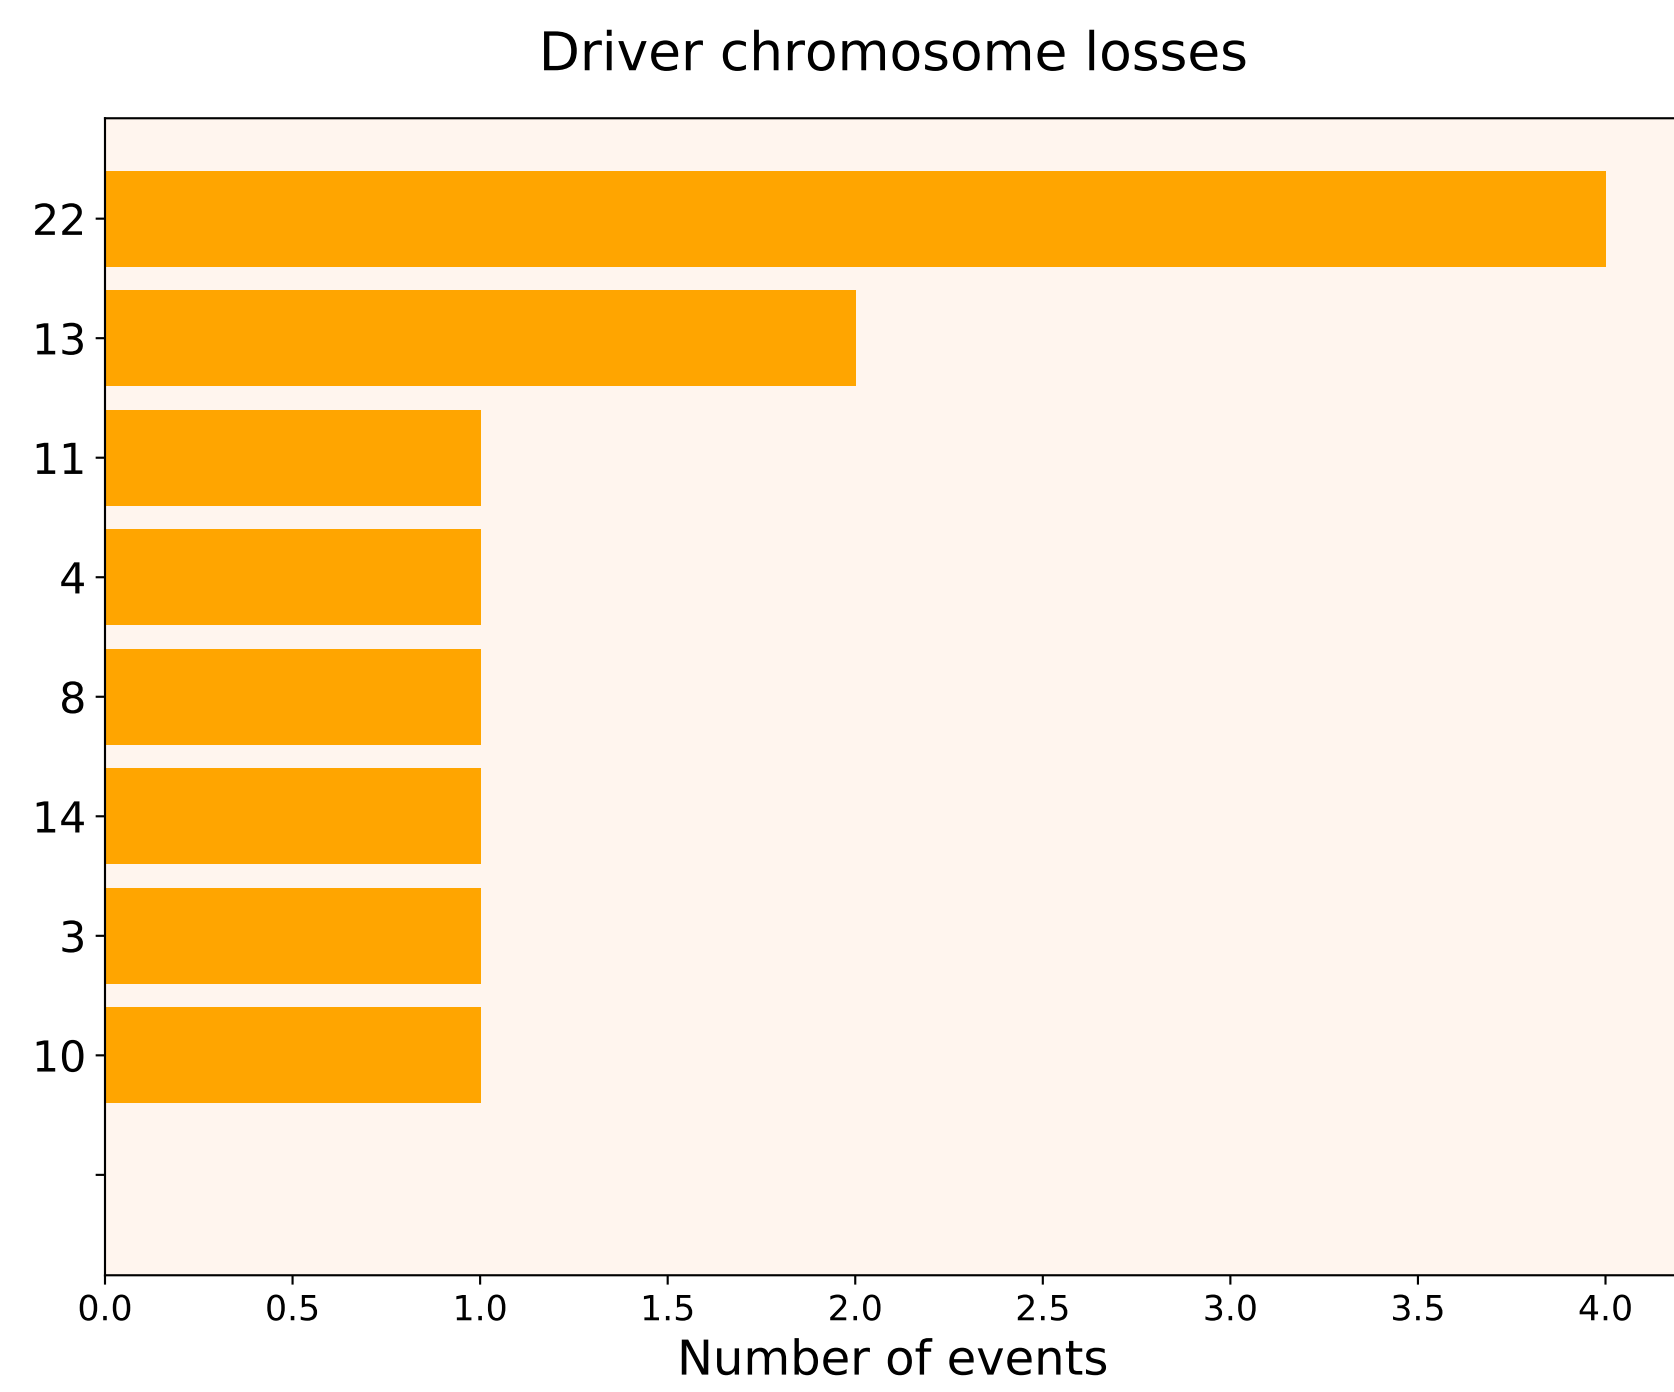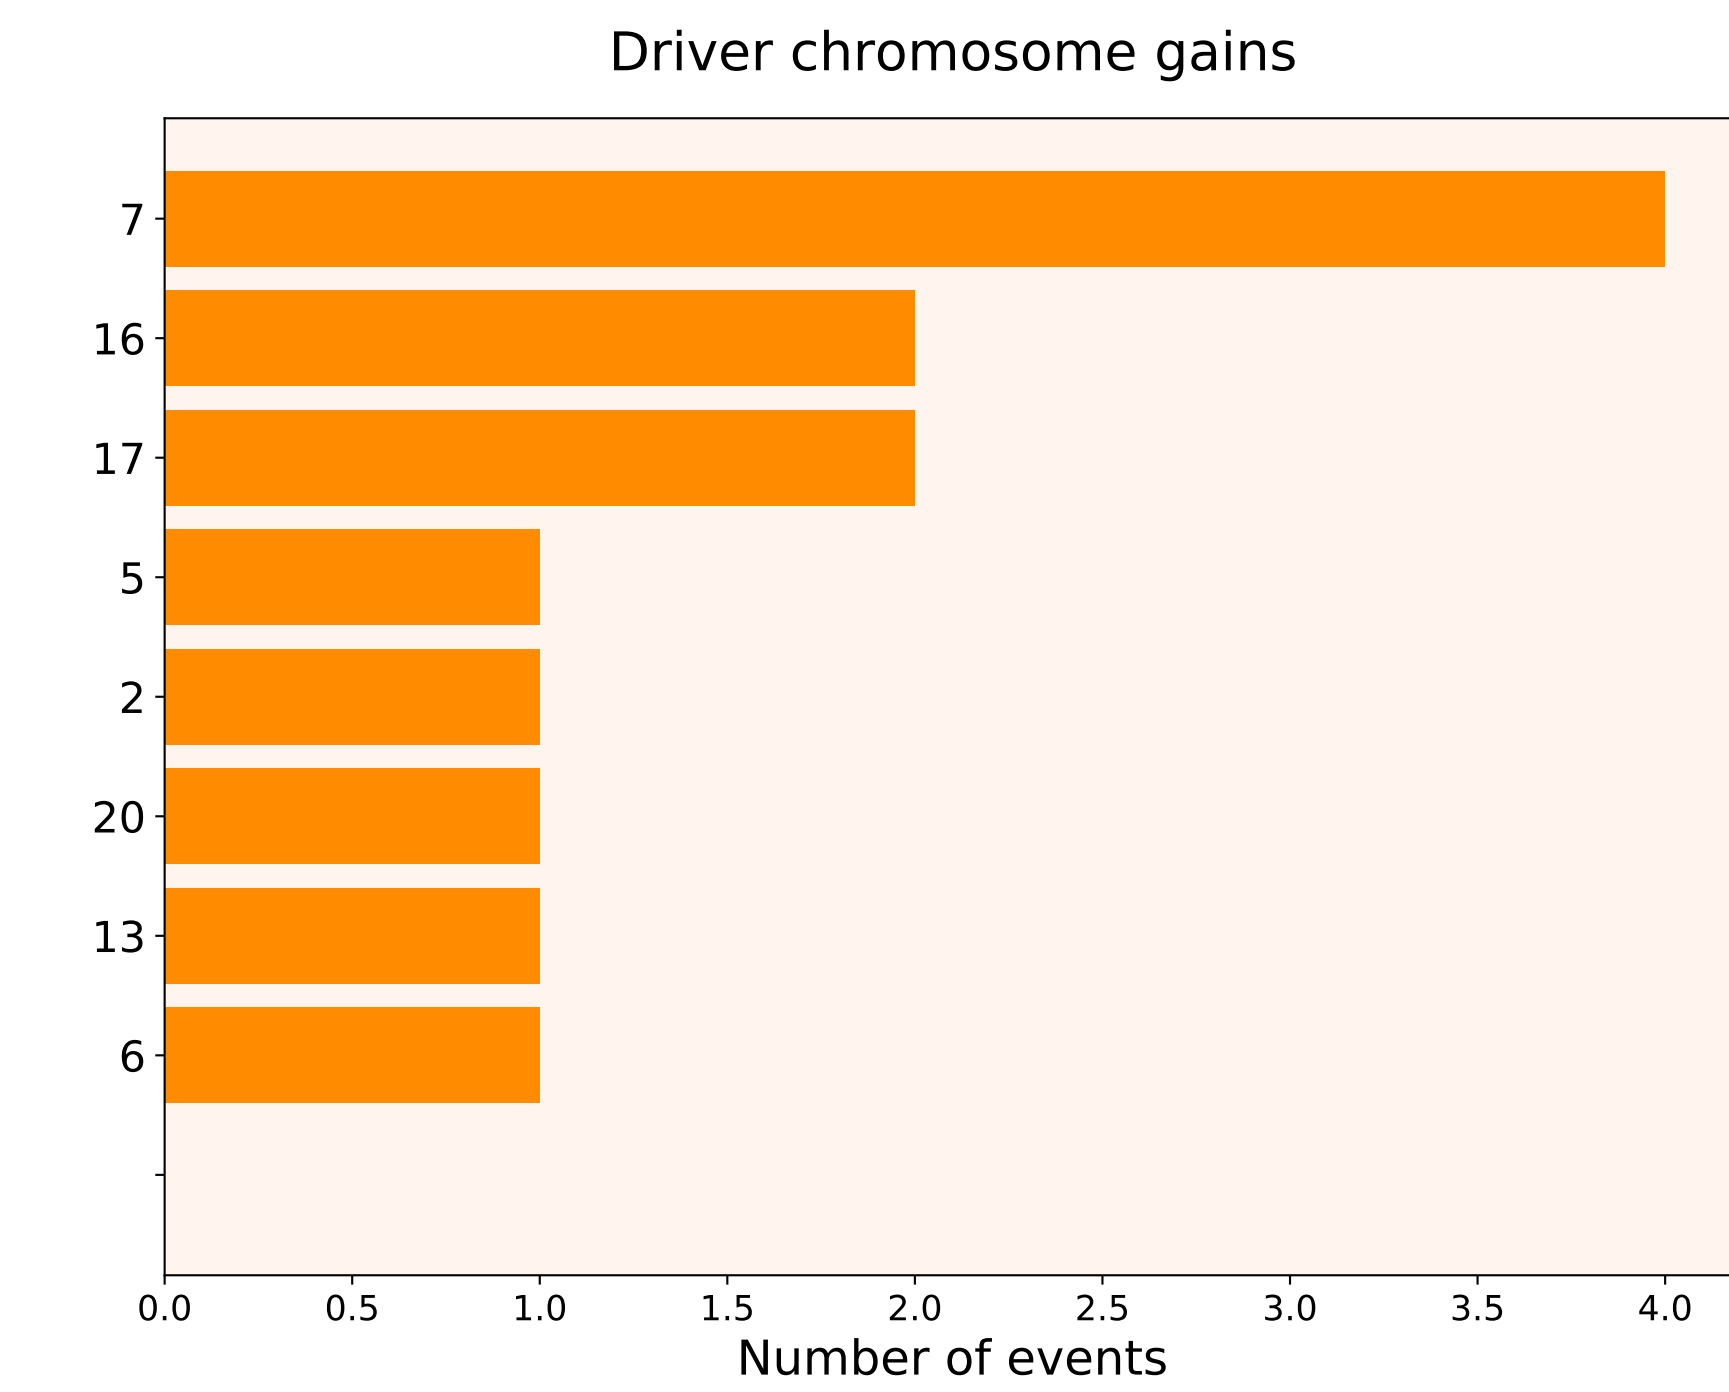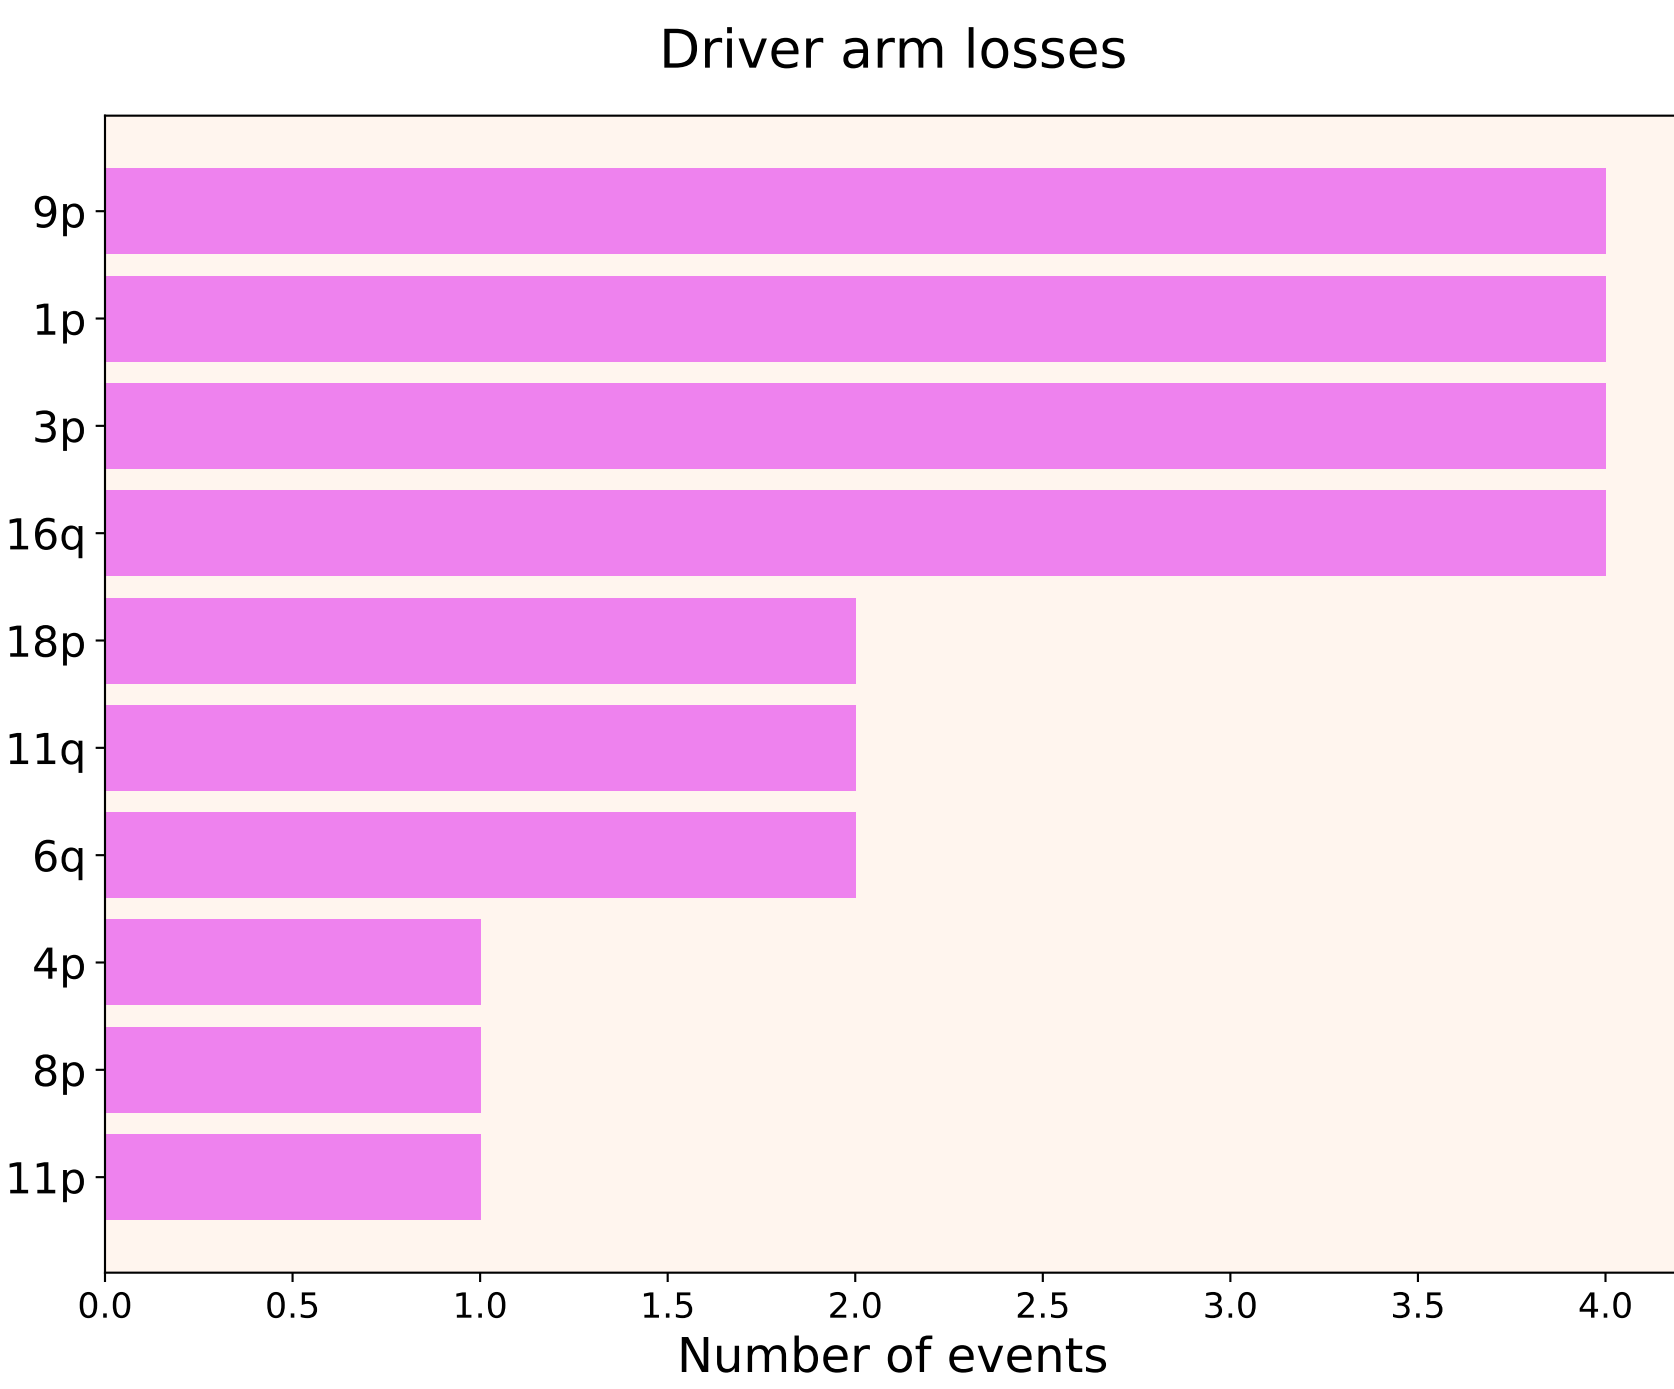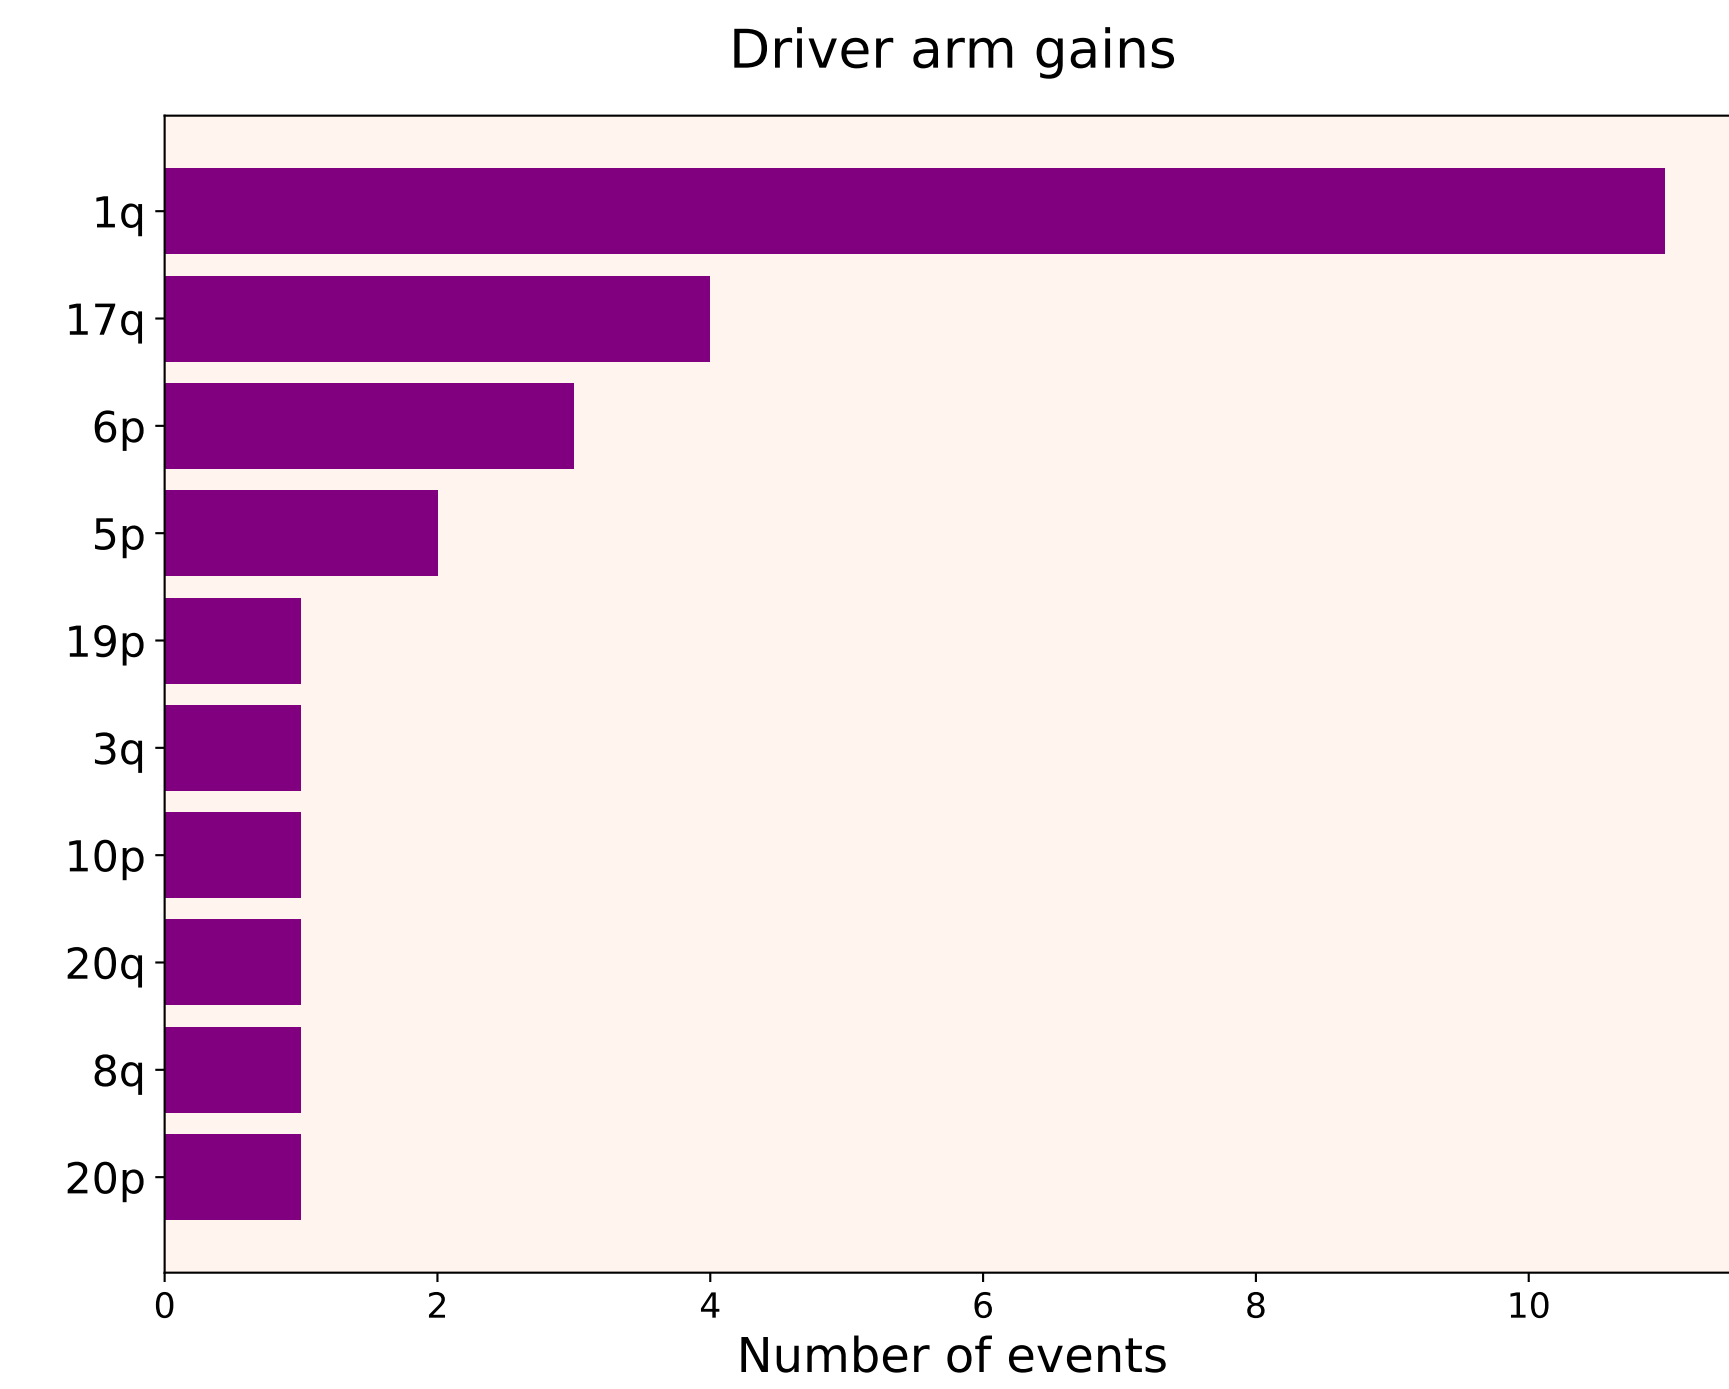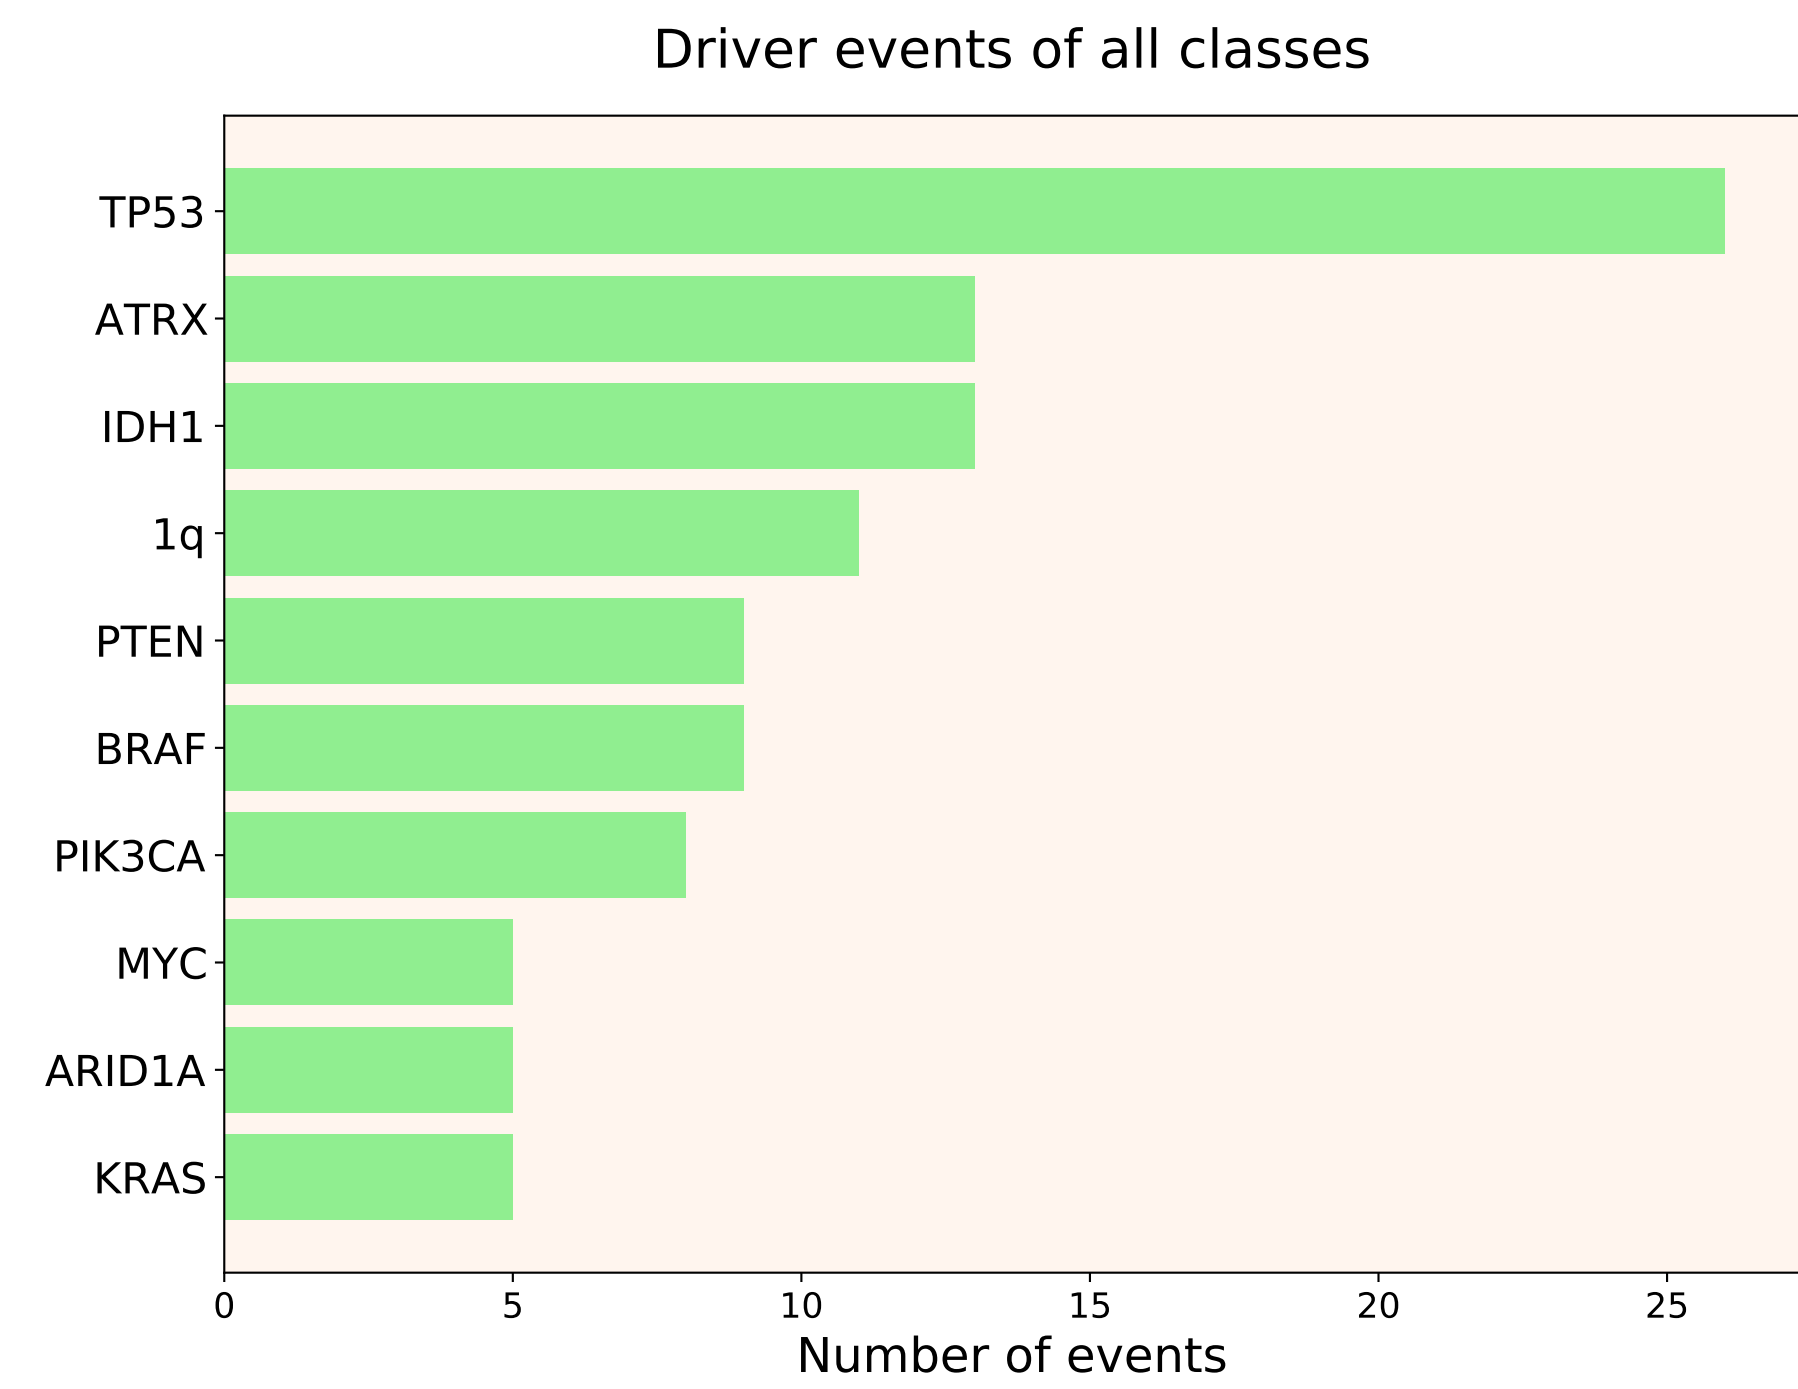

Supplement: Supplemental_Data_S1.zip [file Supplemental_Data_S1.zip]

# ACC\_MALE

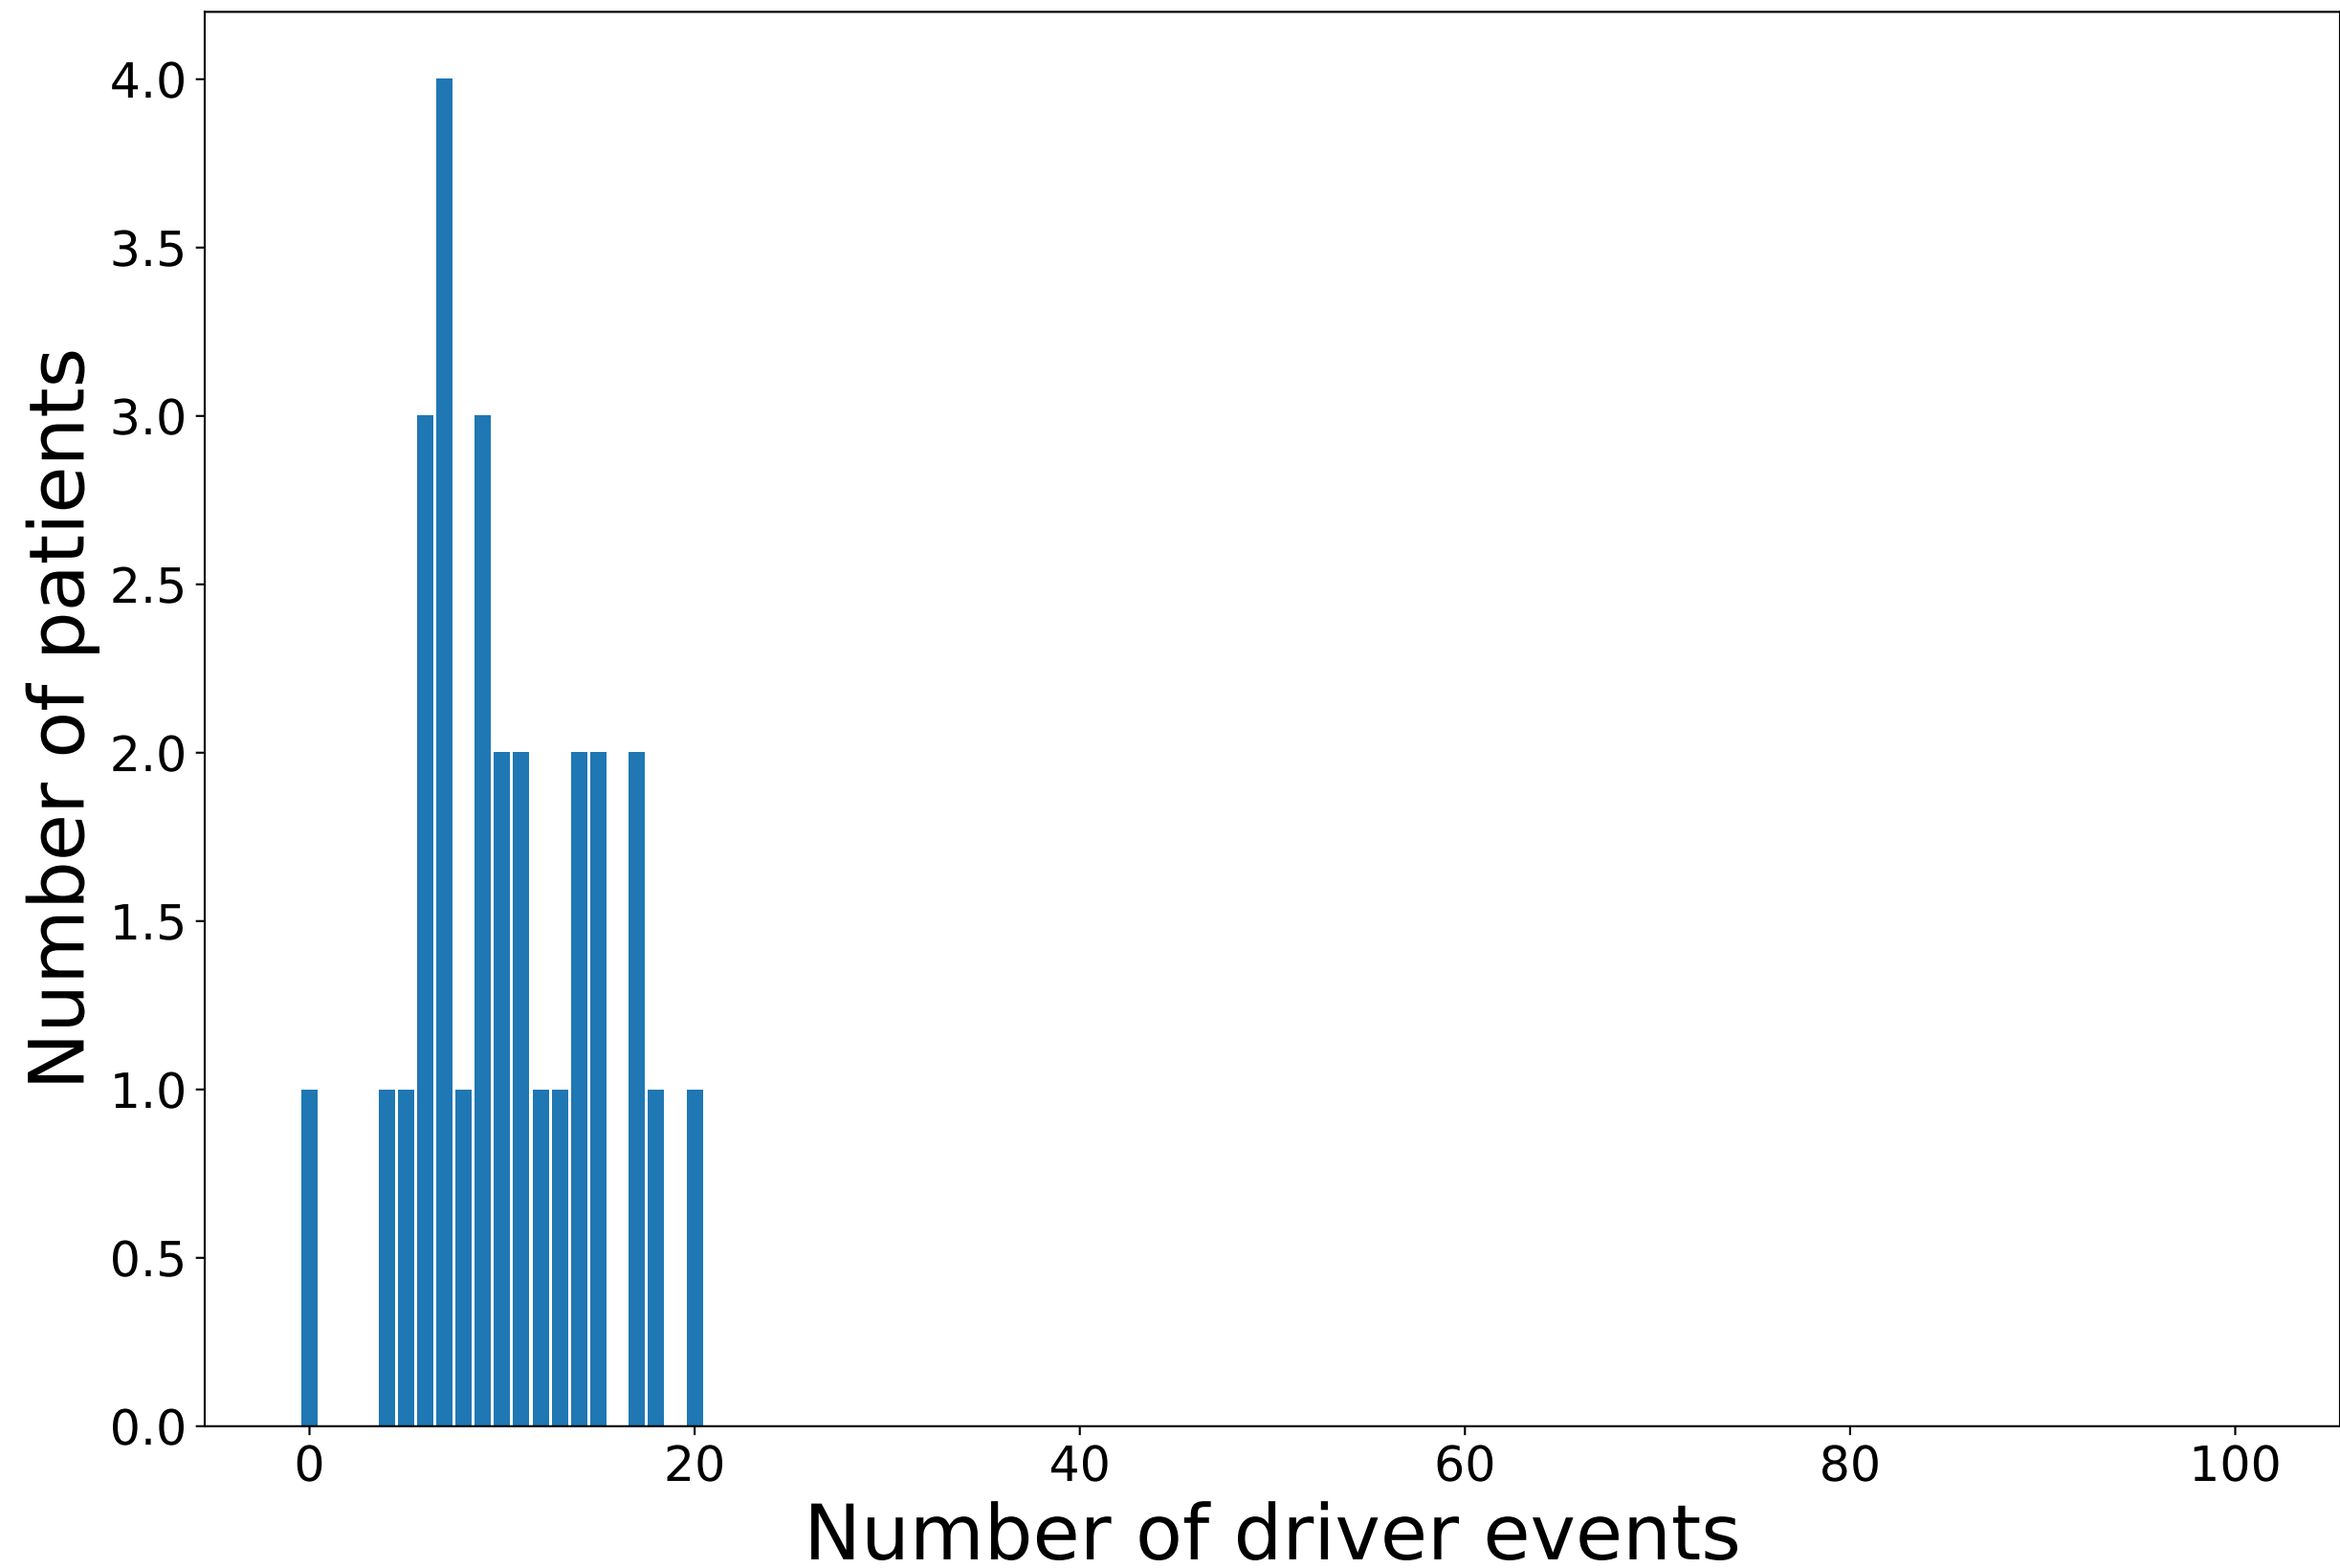

Supplement: Supplemental_Data_S1.zip [file Supplemental_Data_S1.zip]

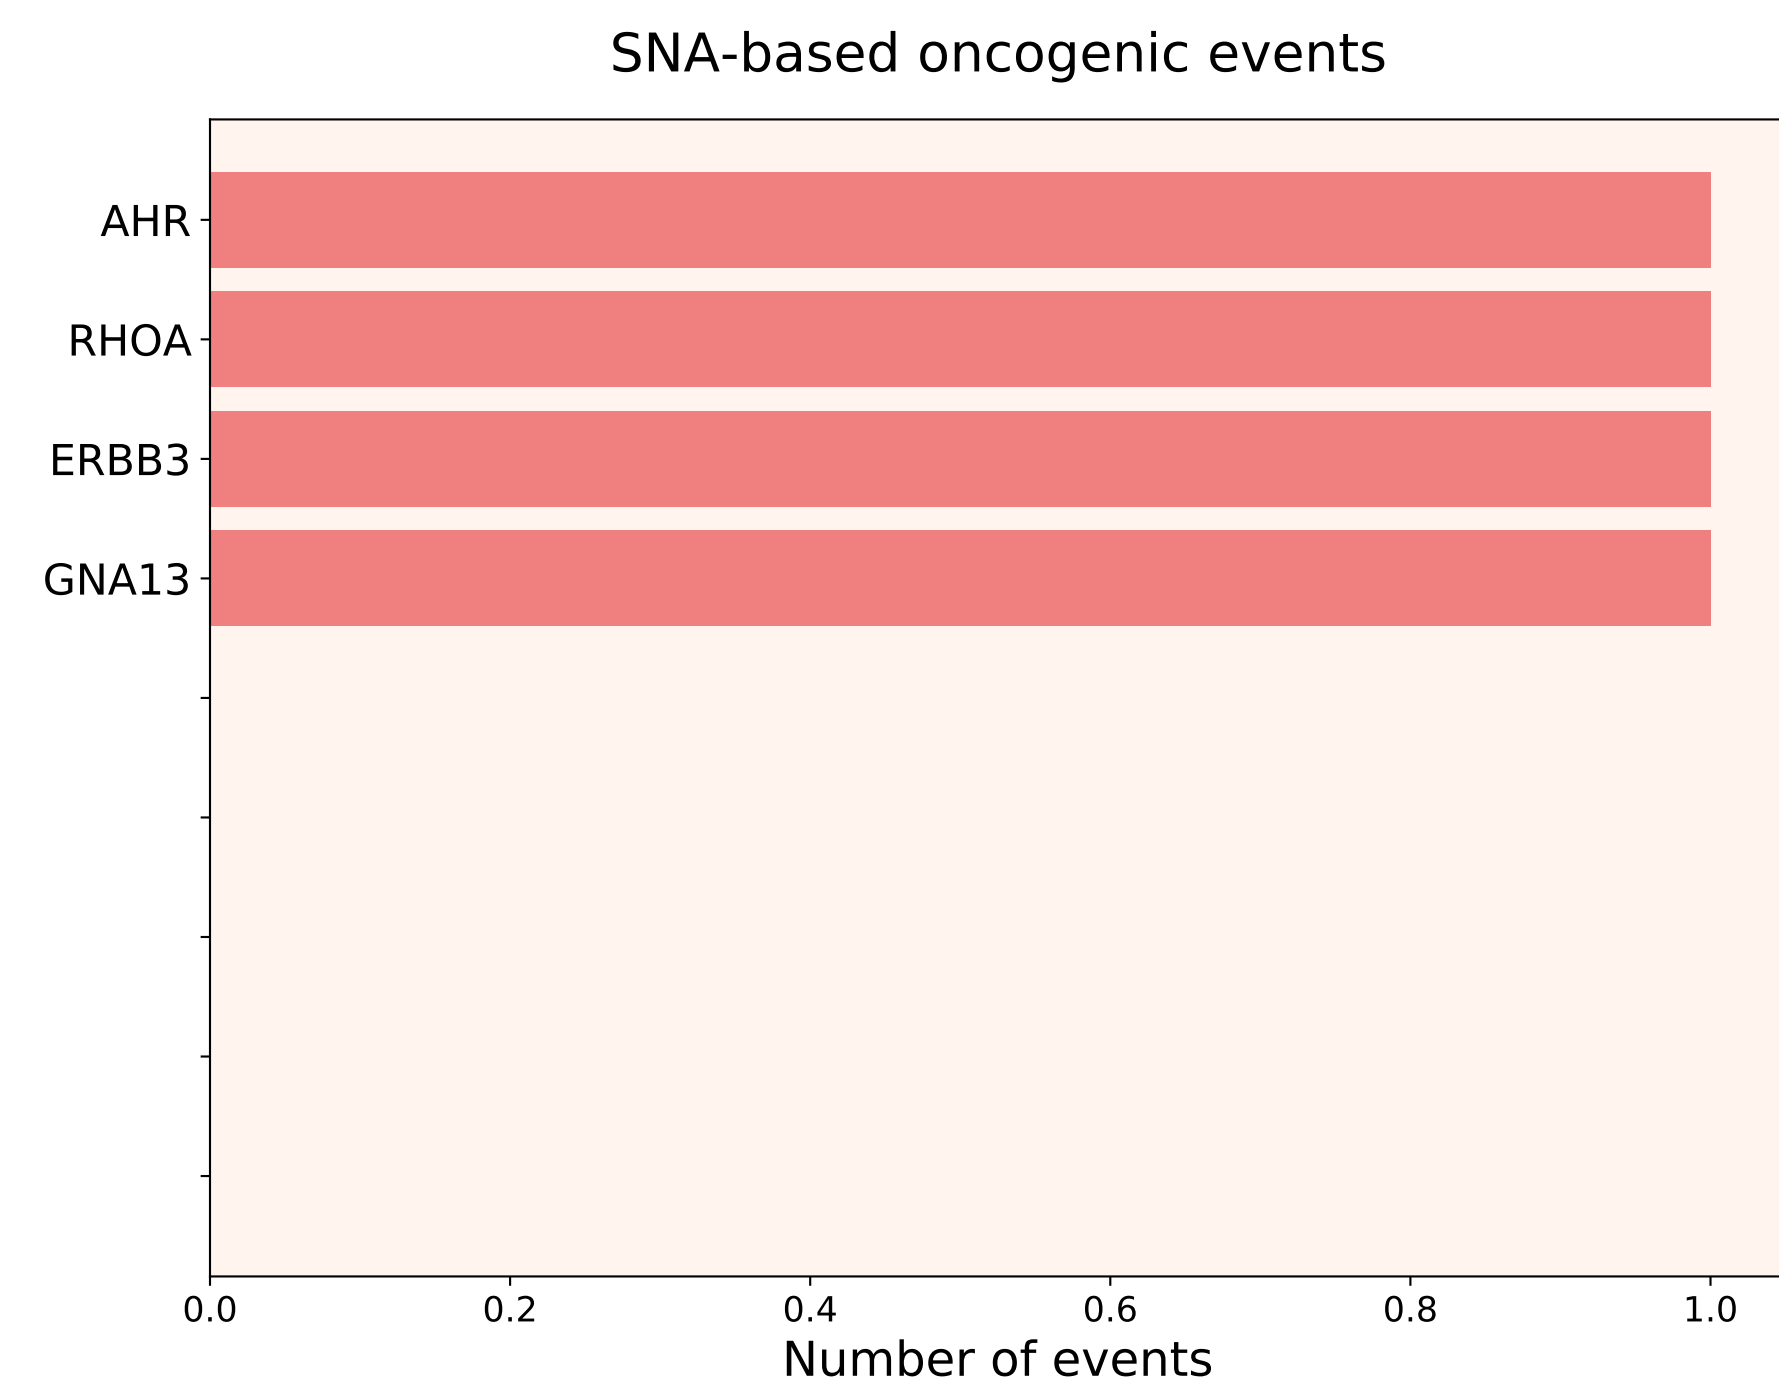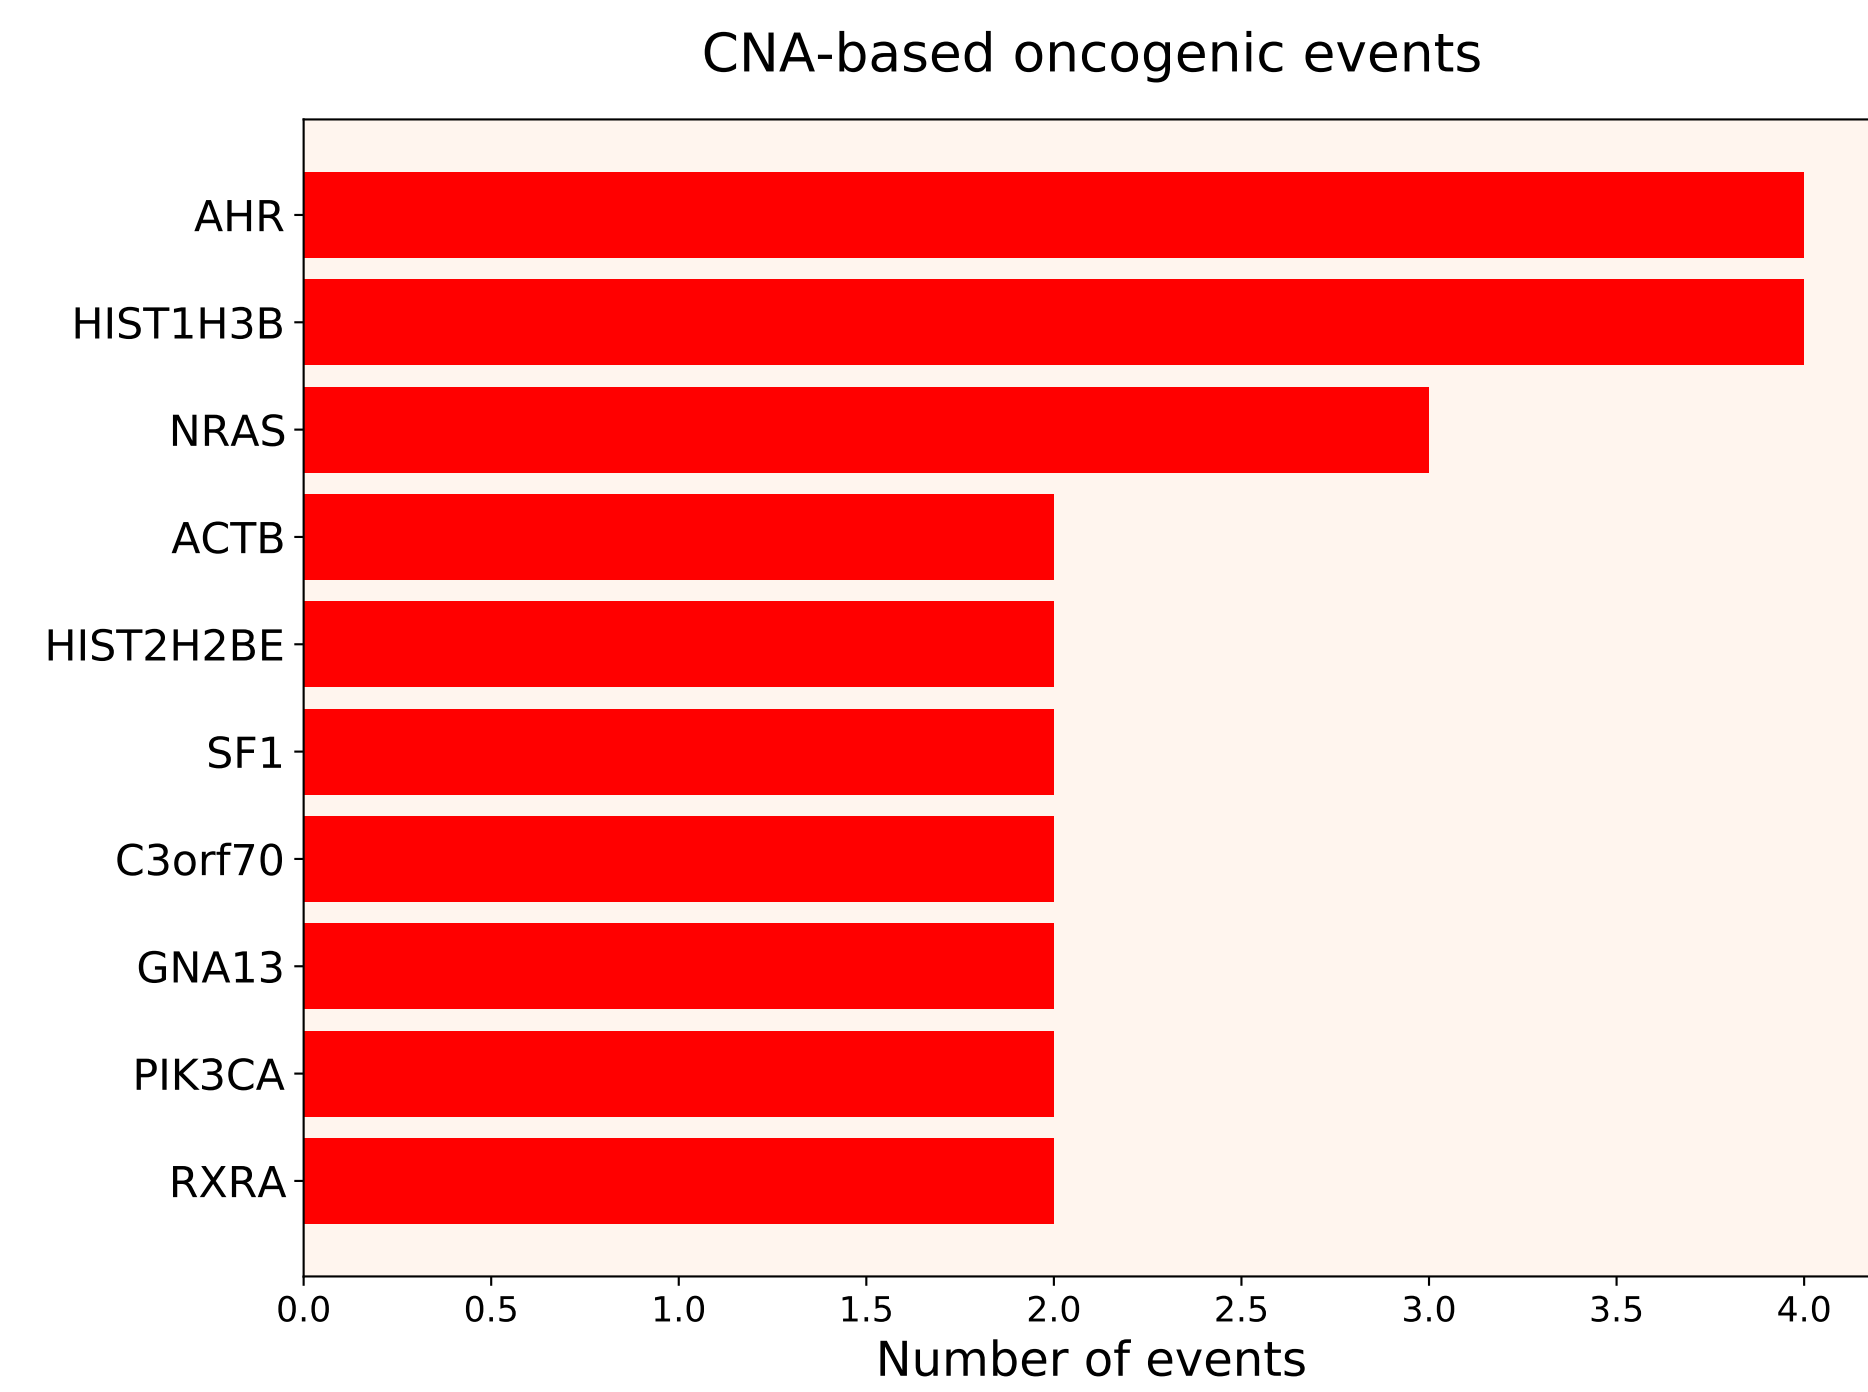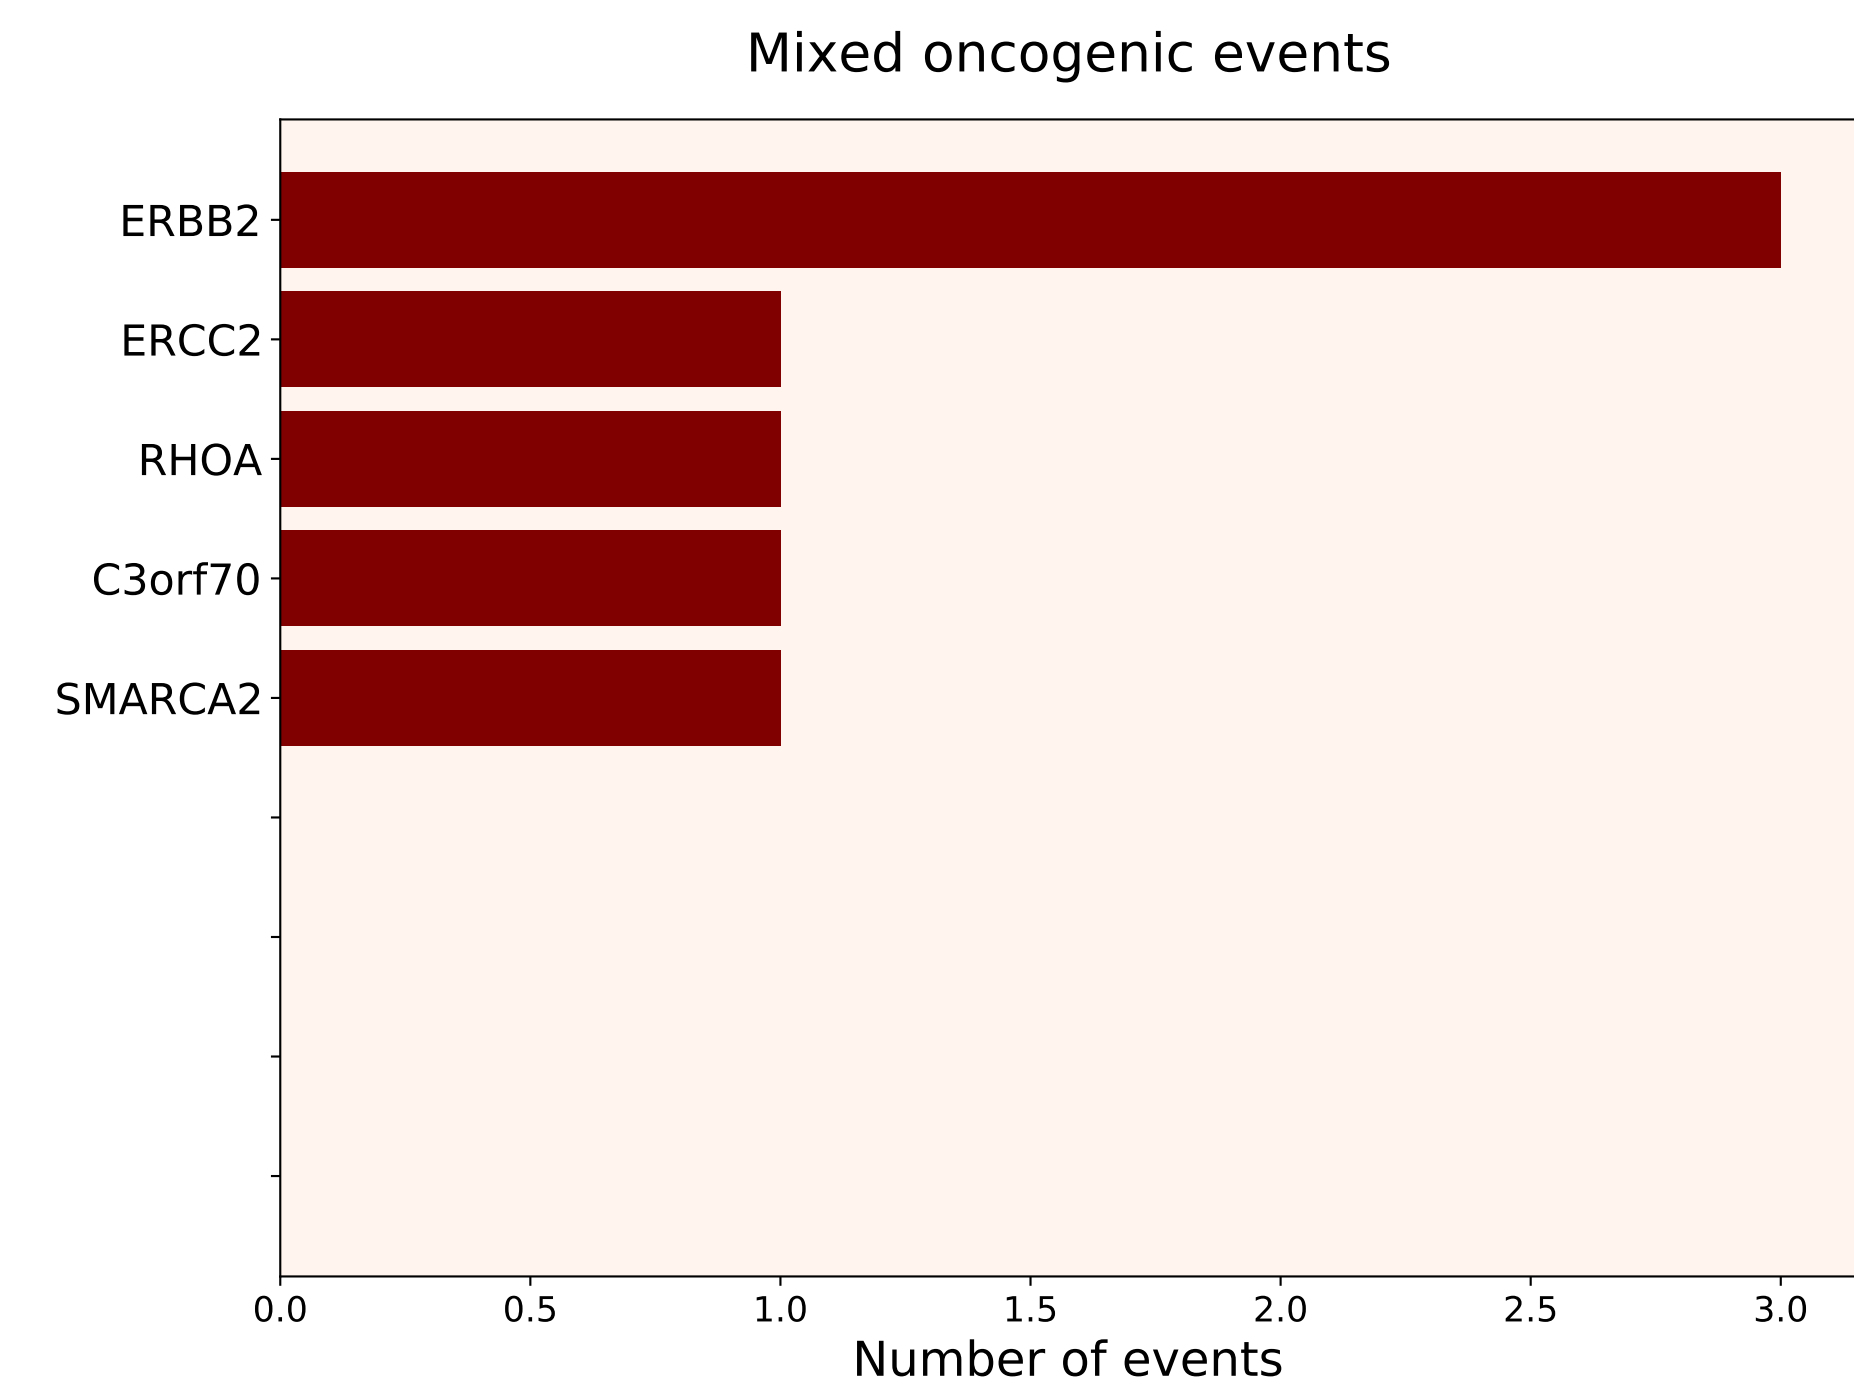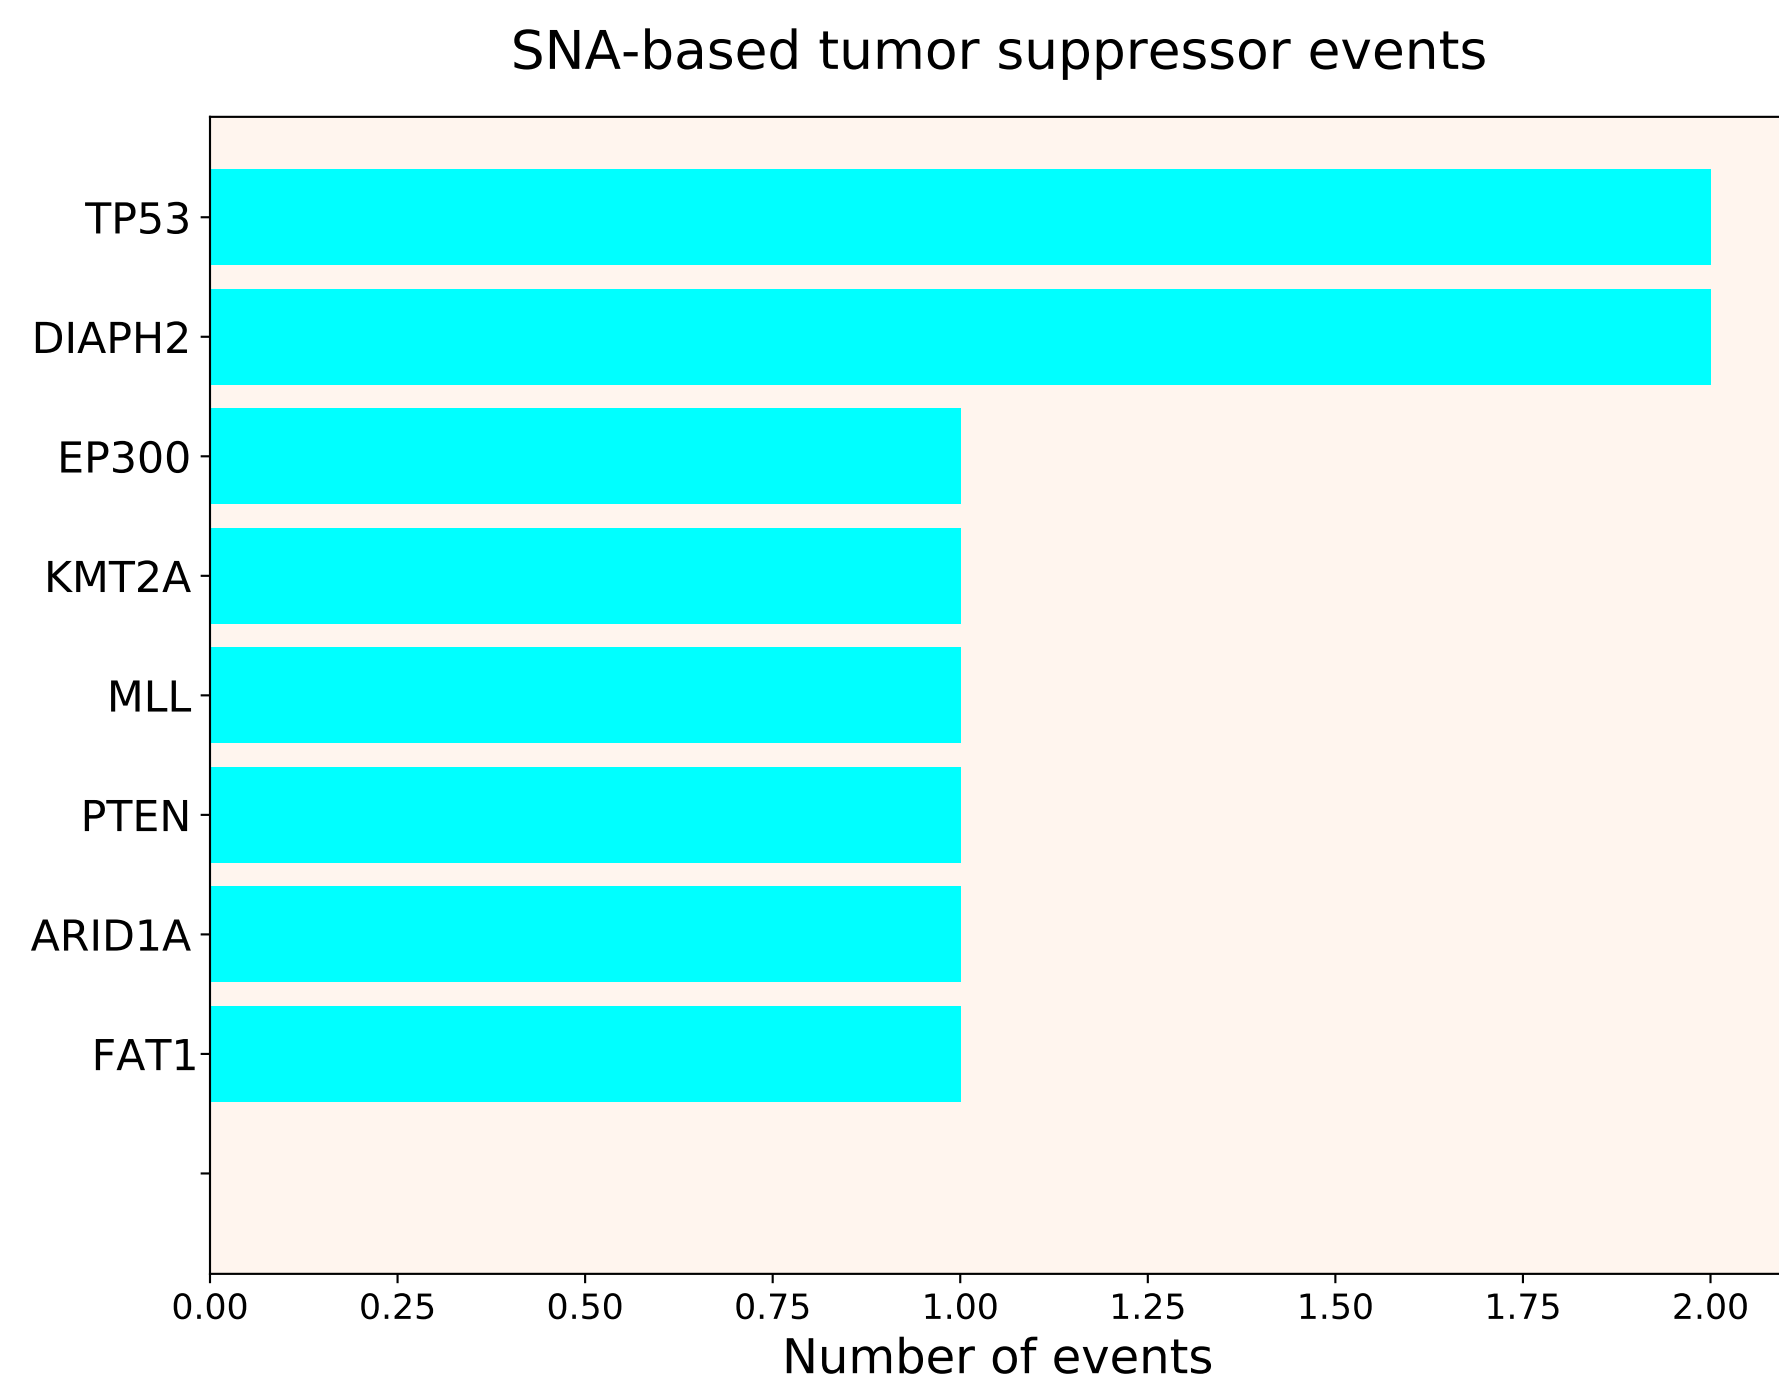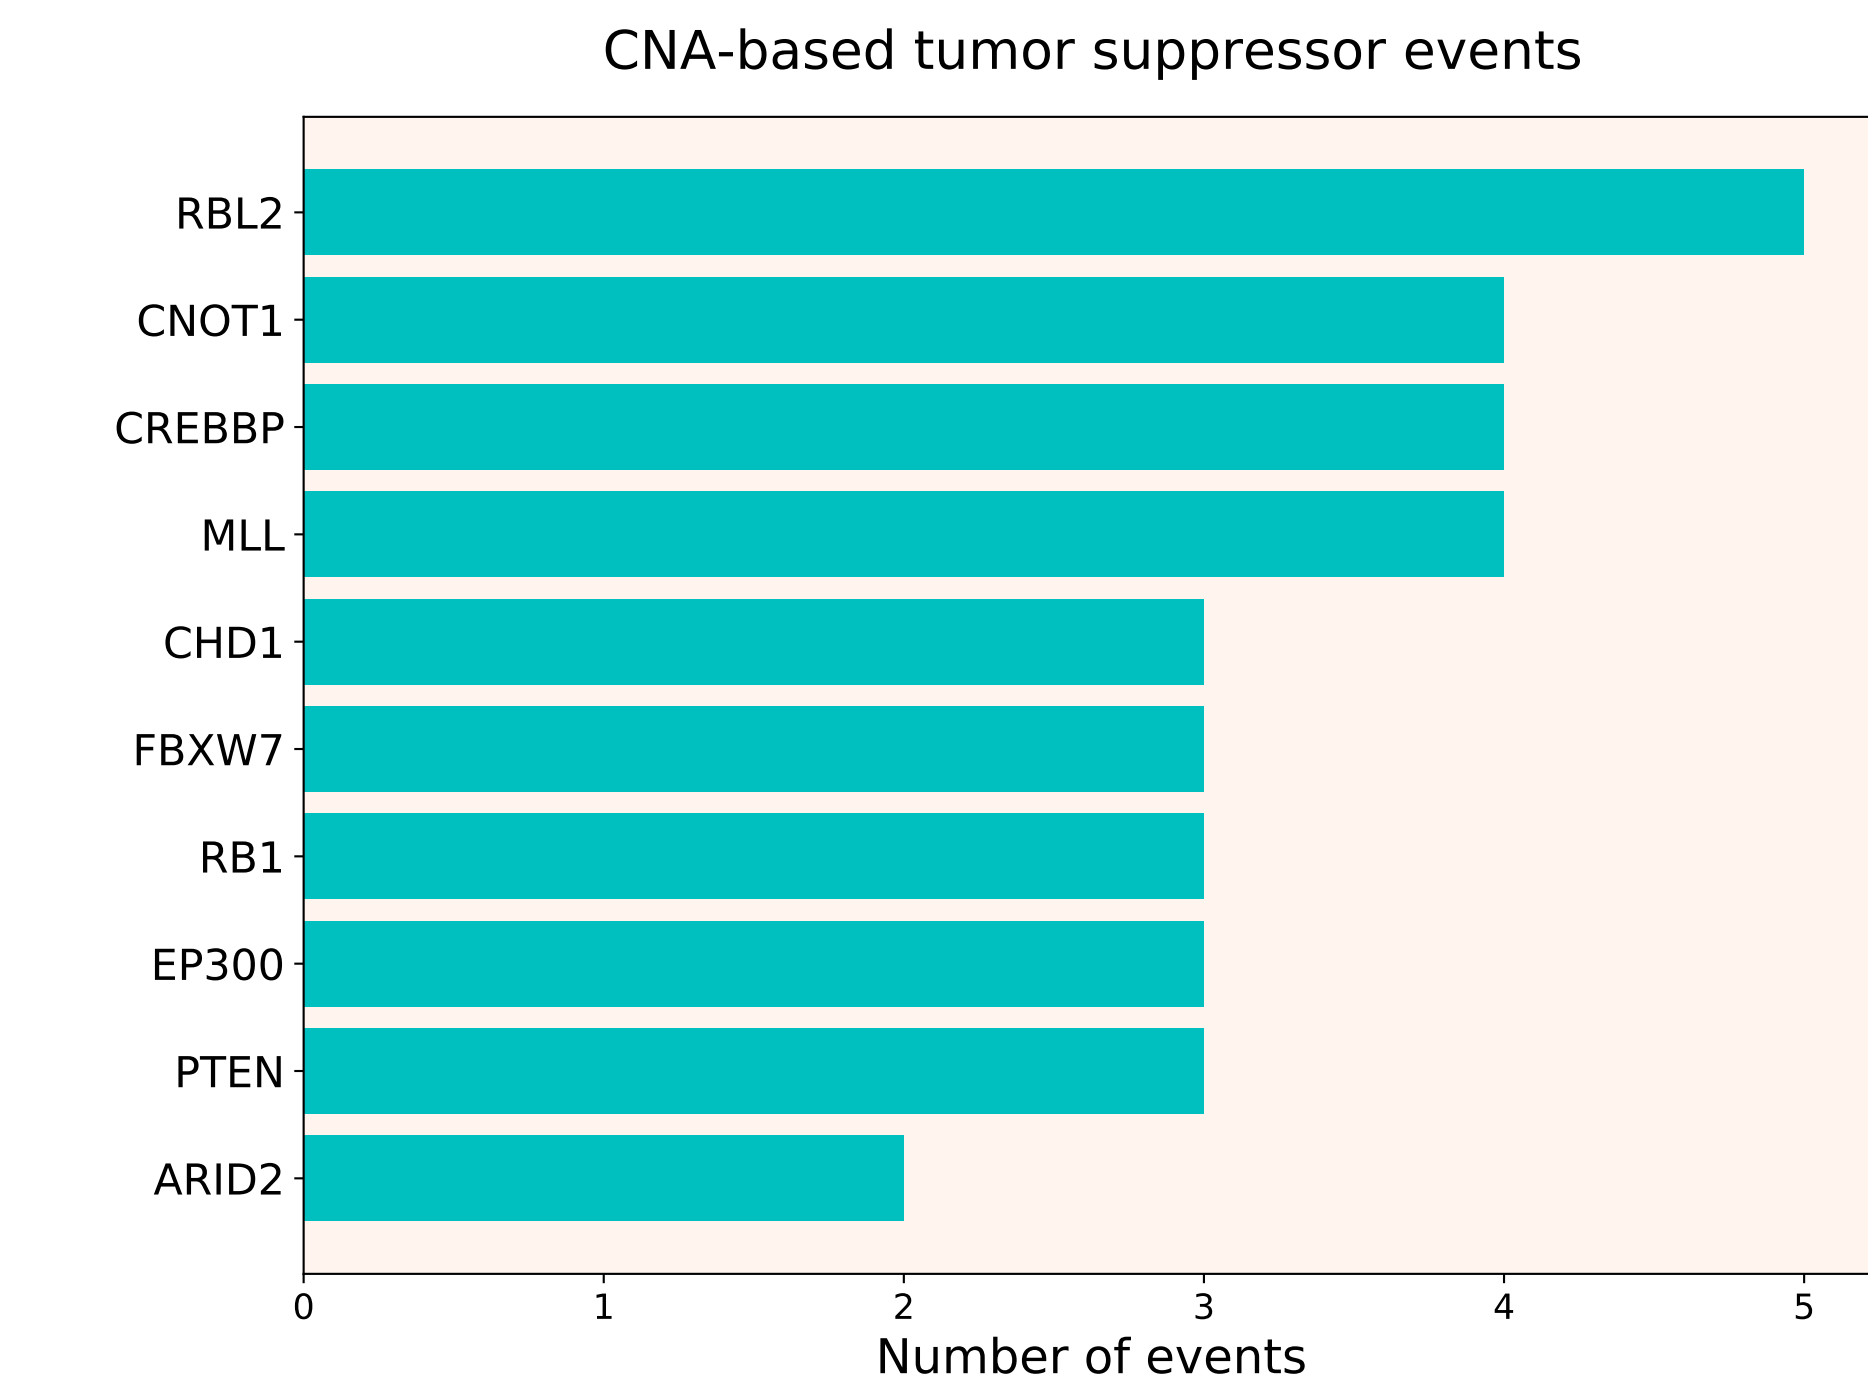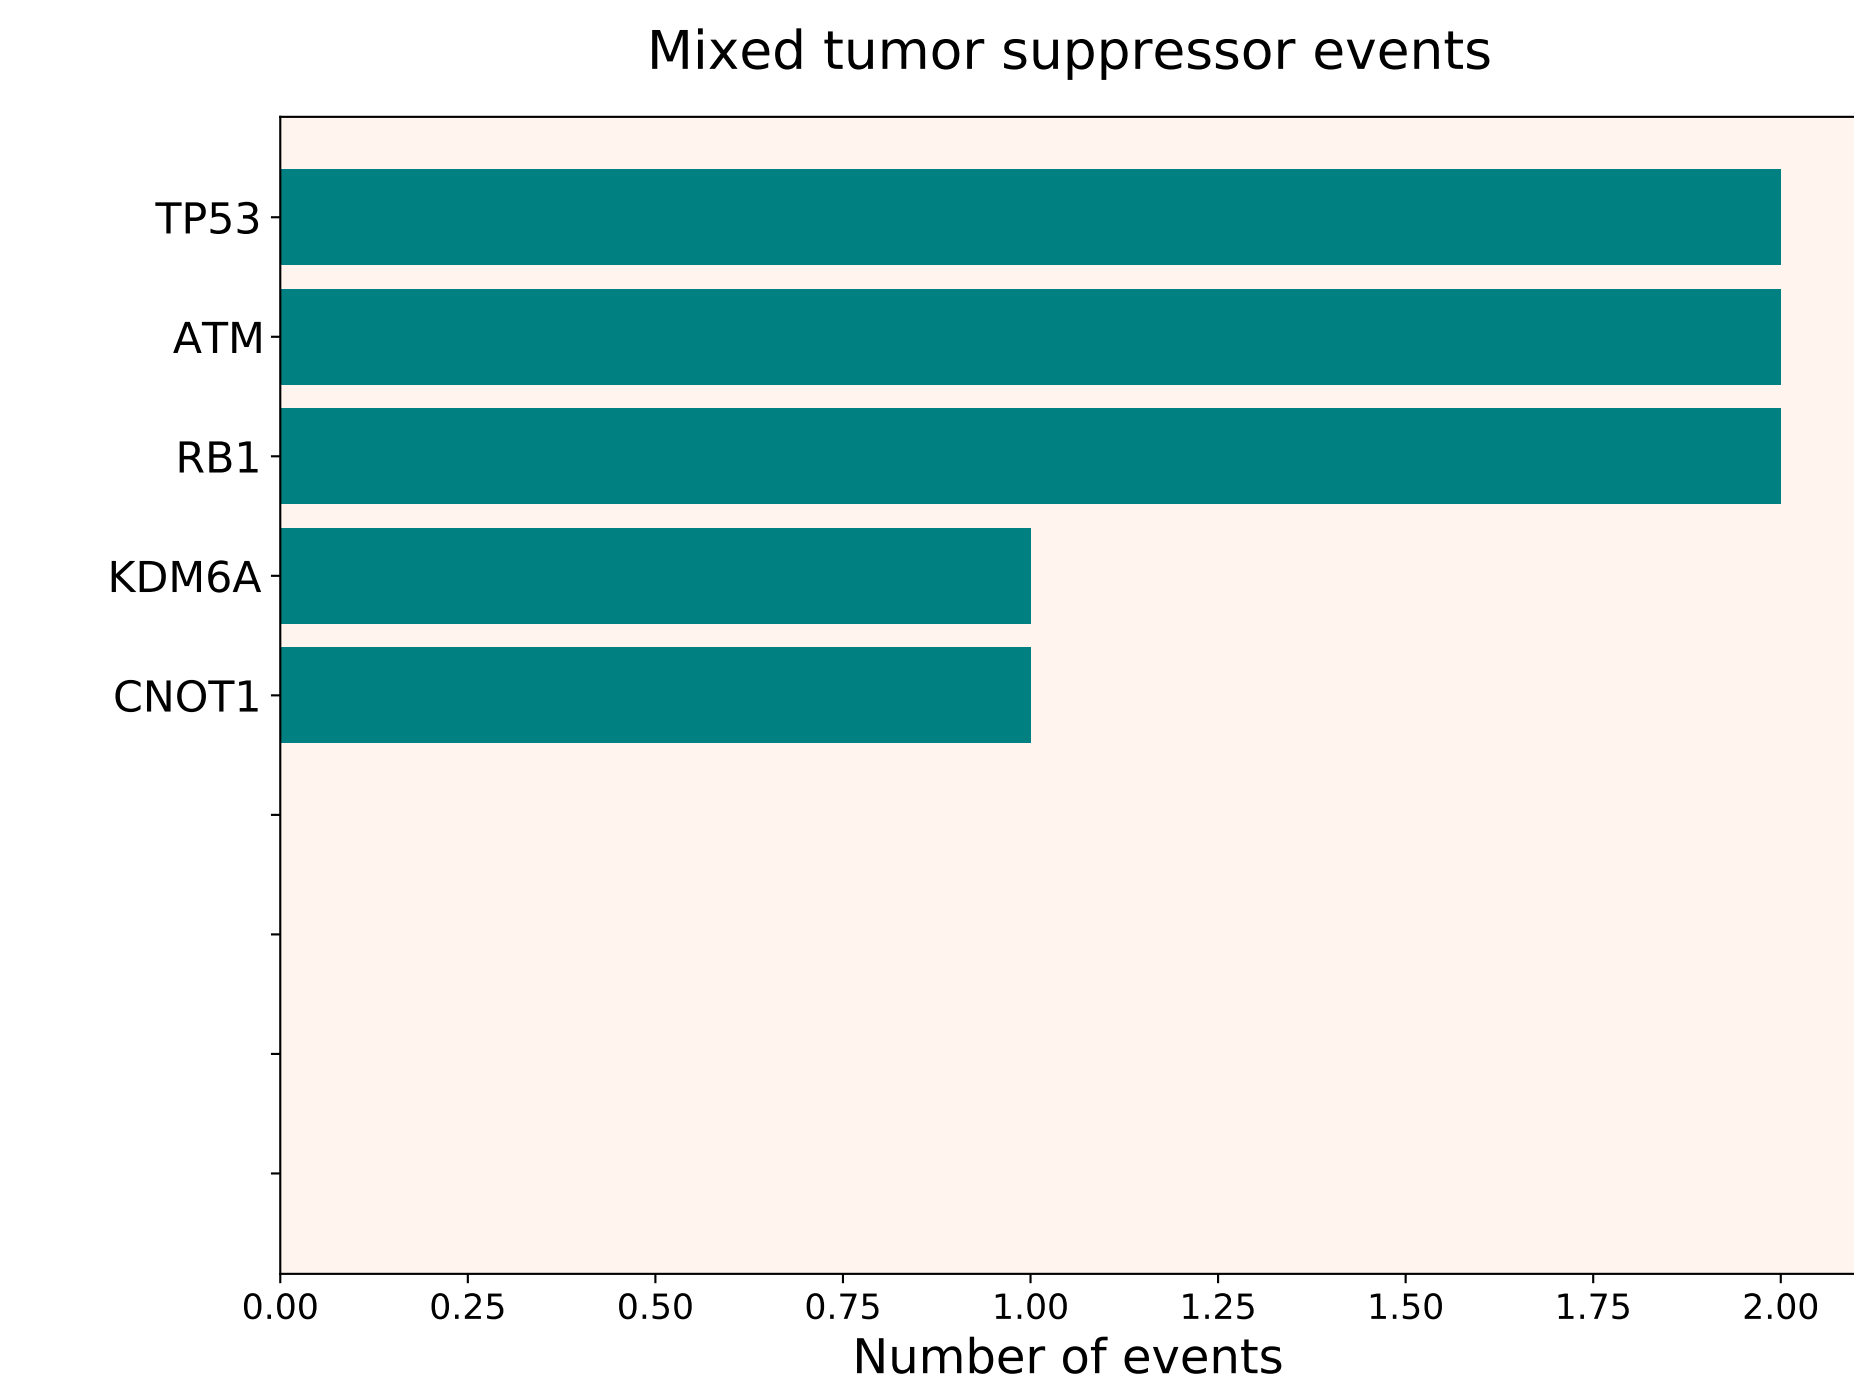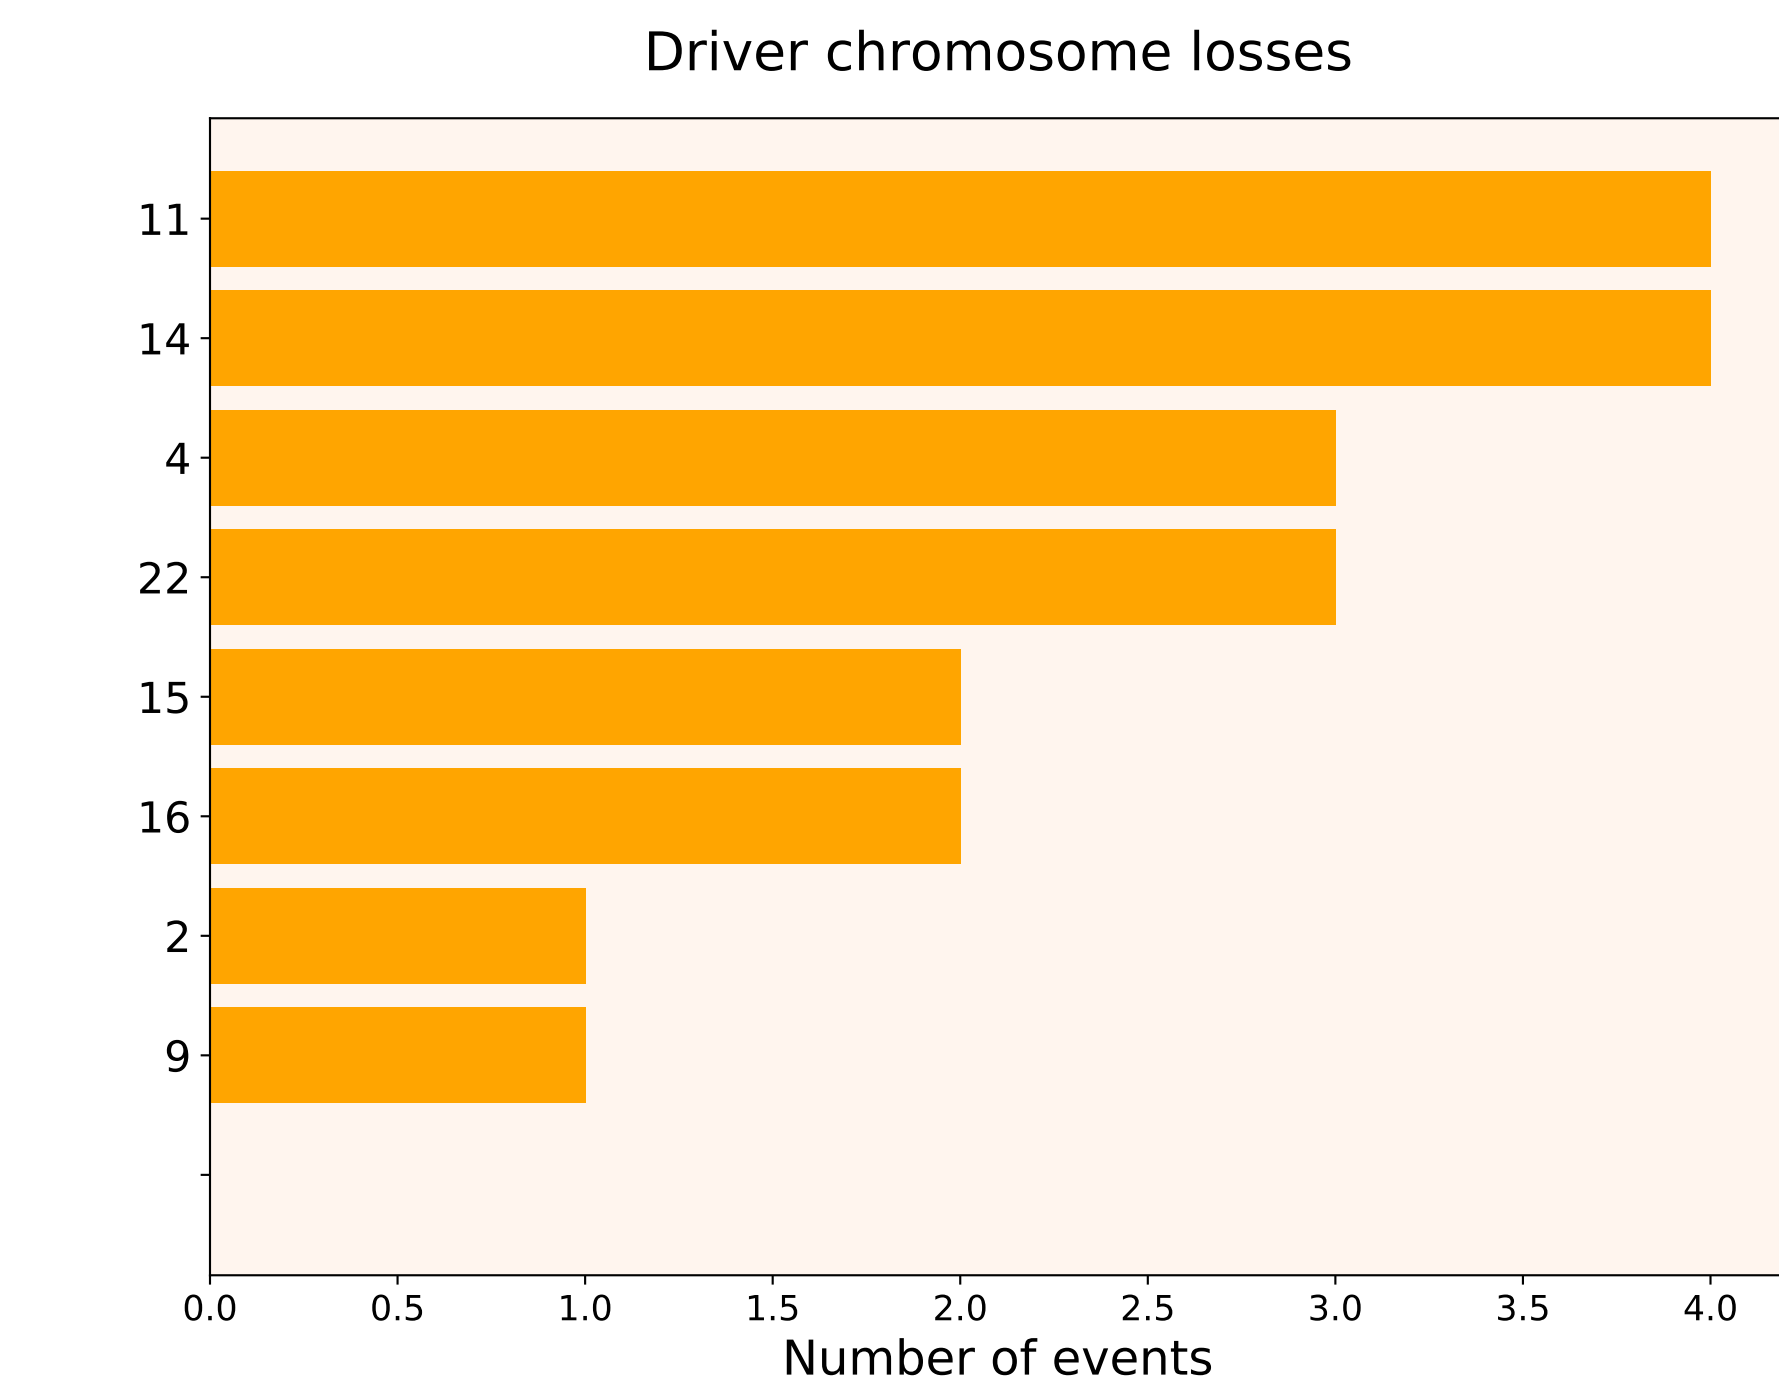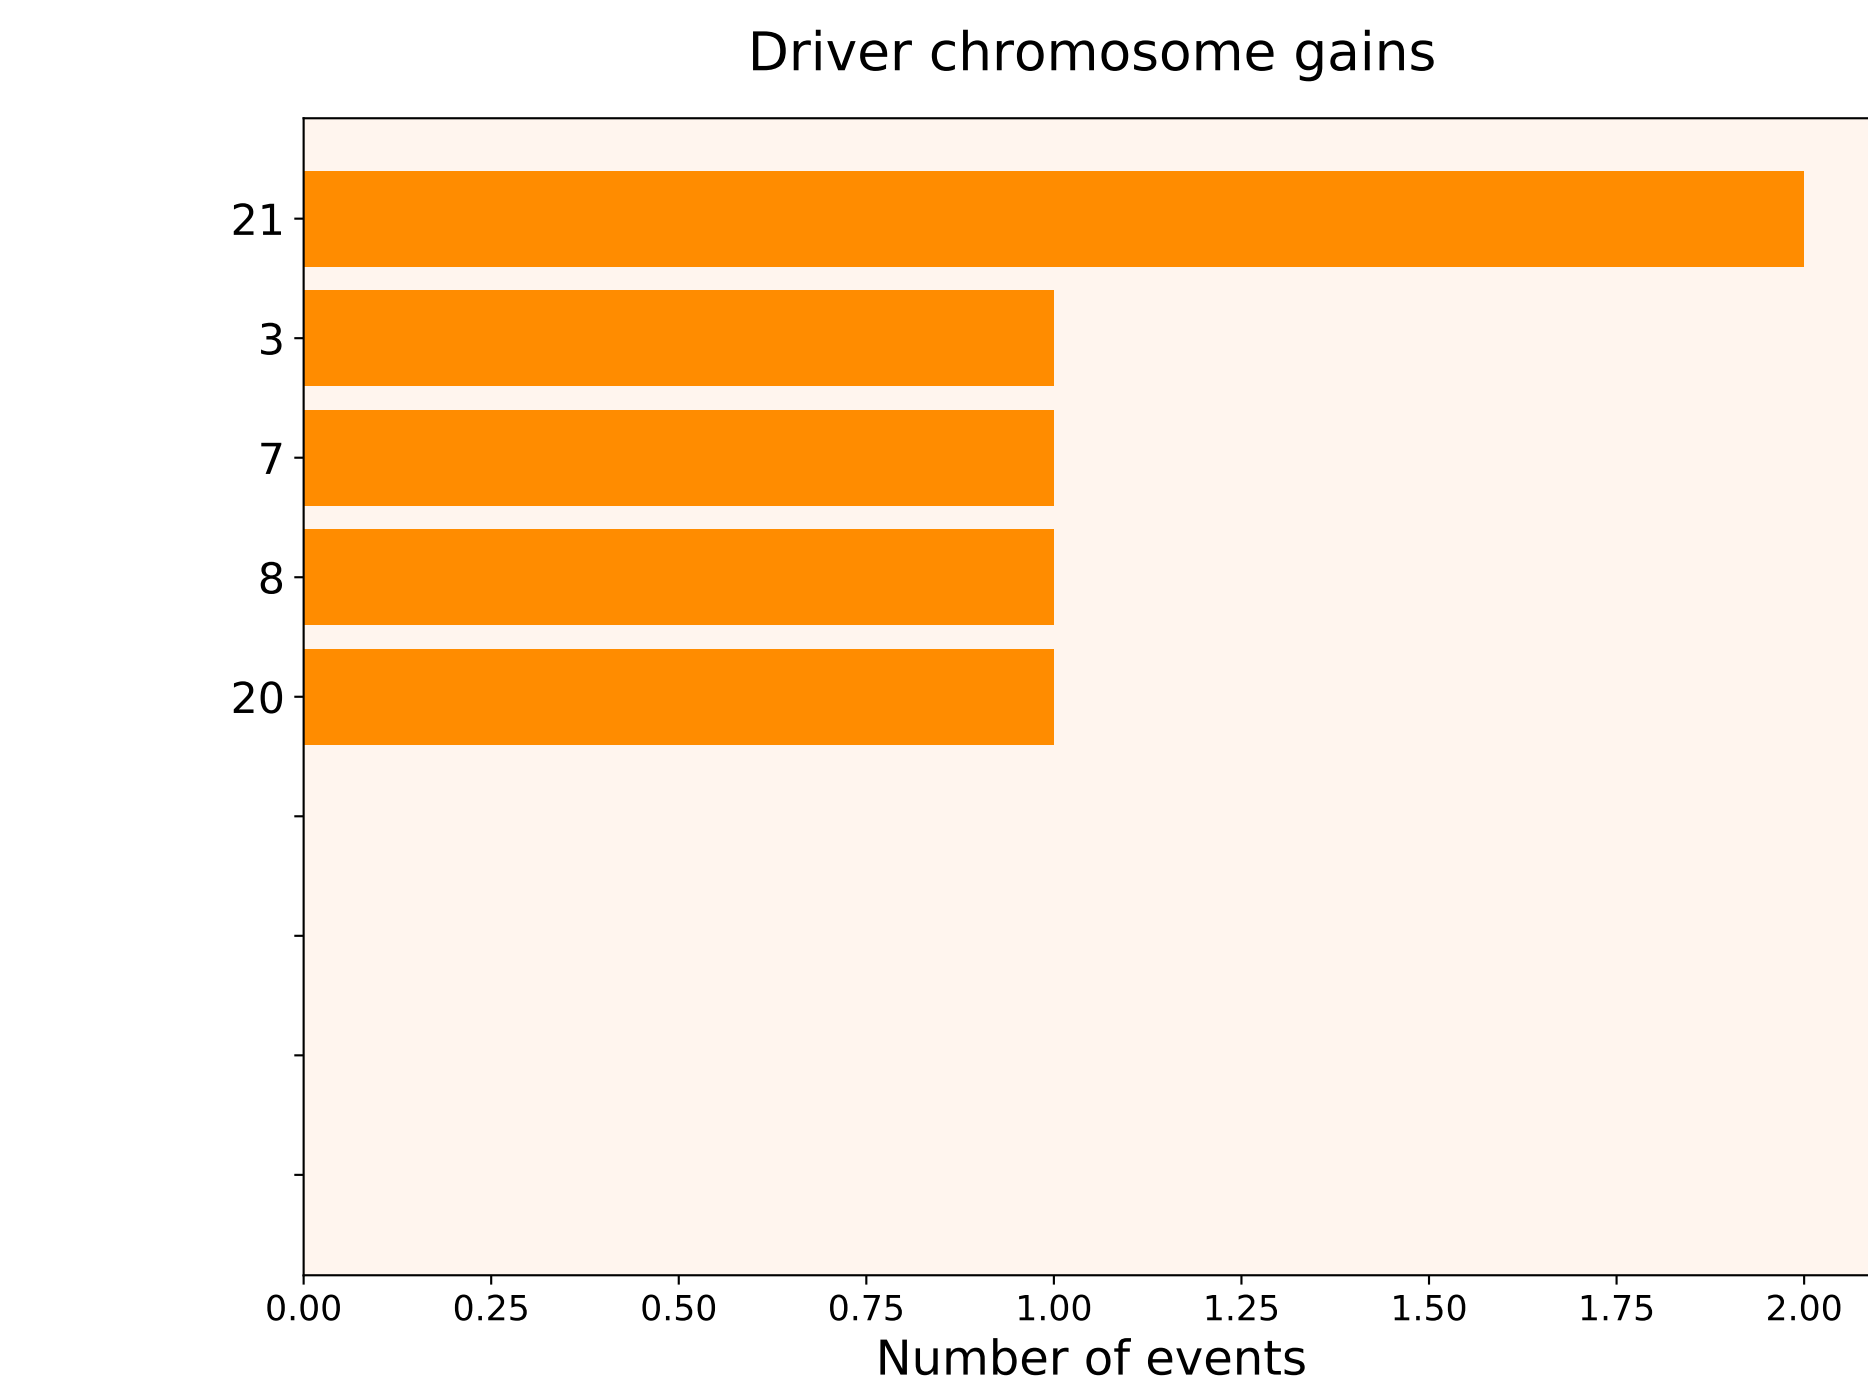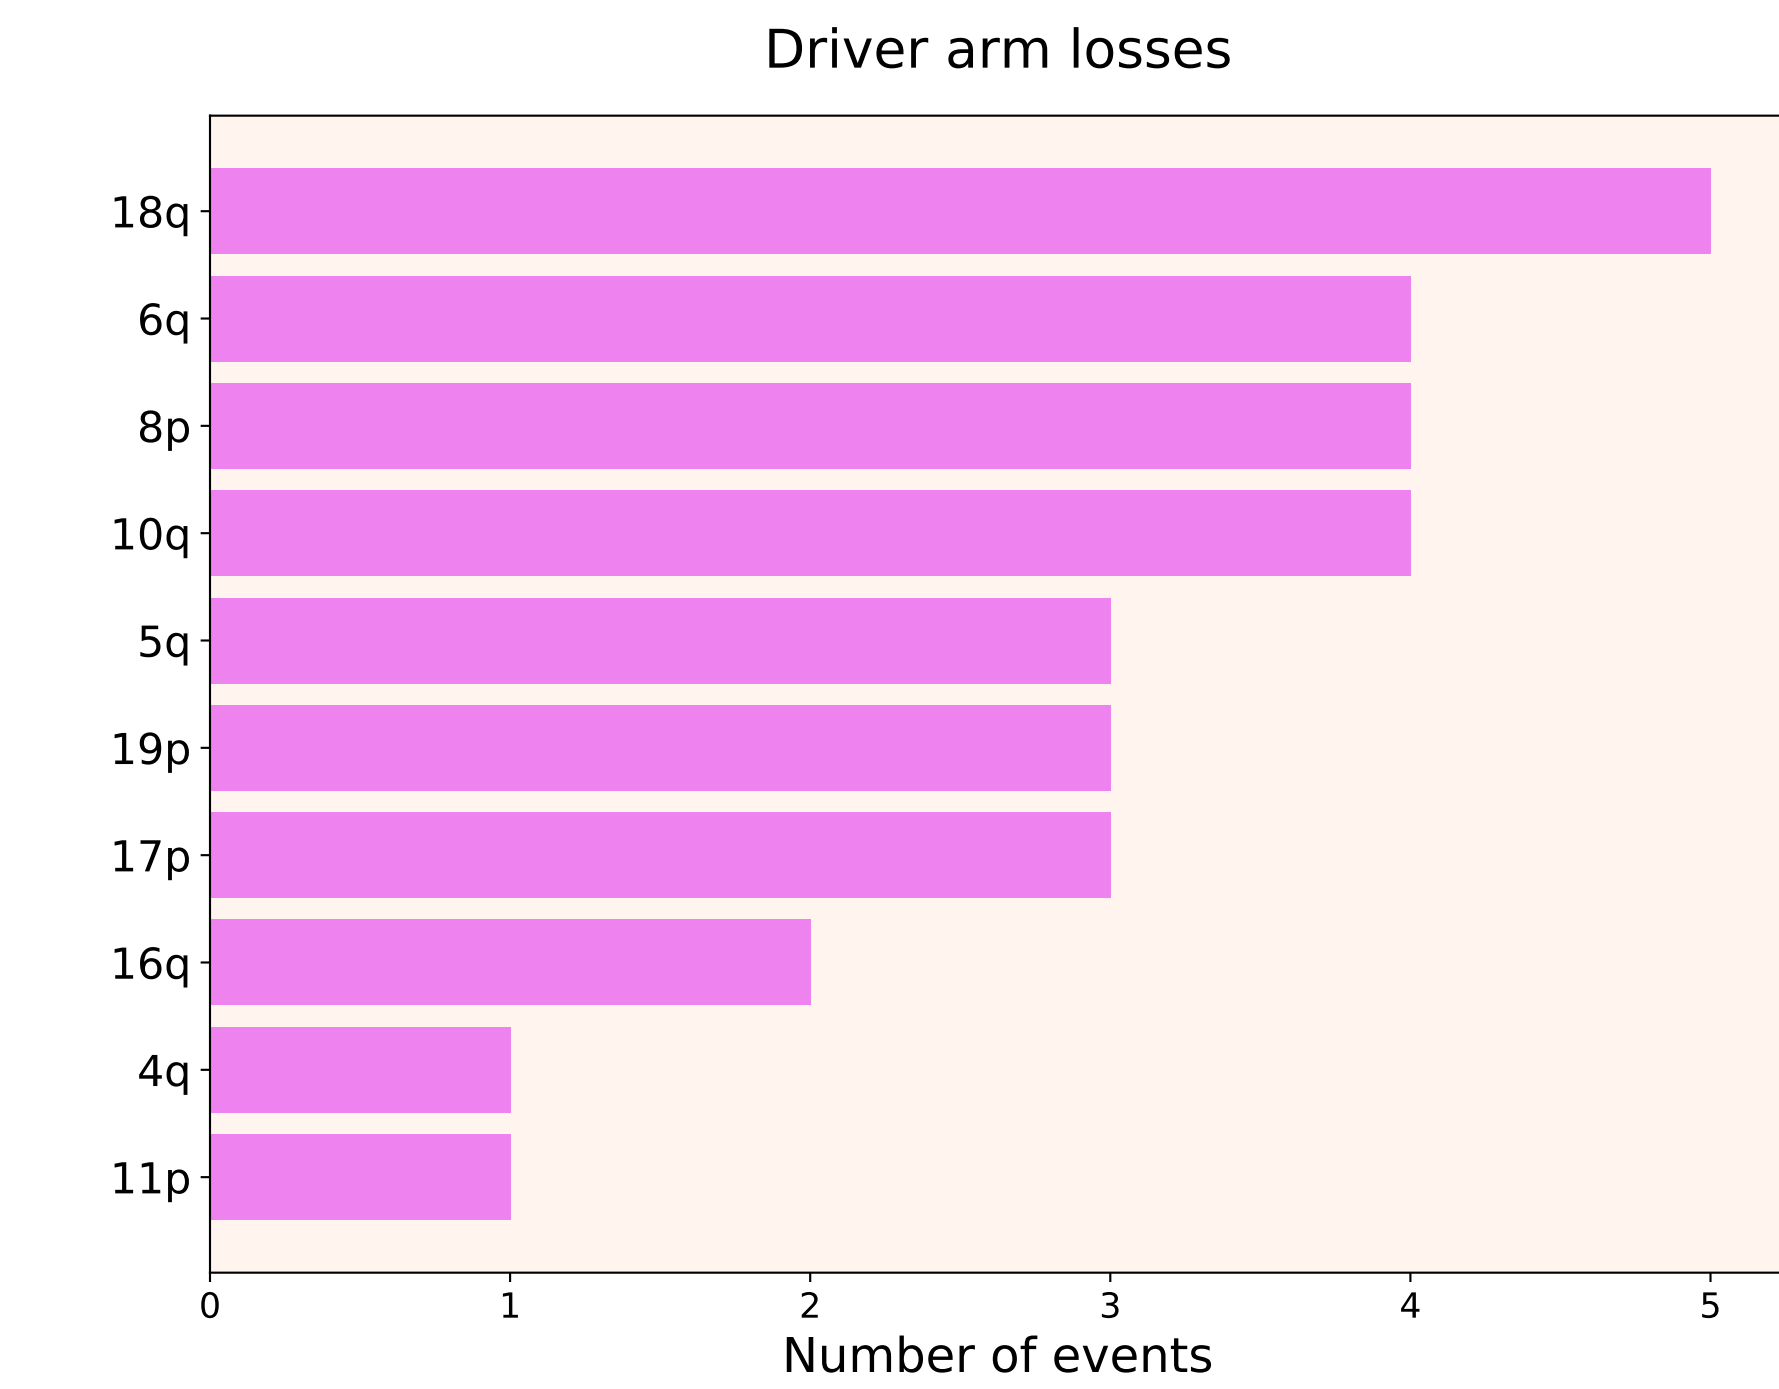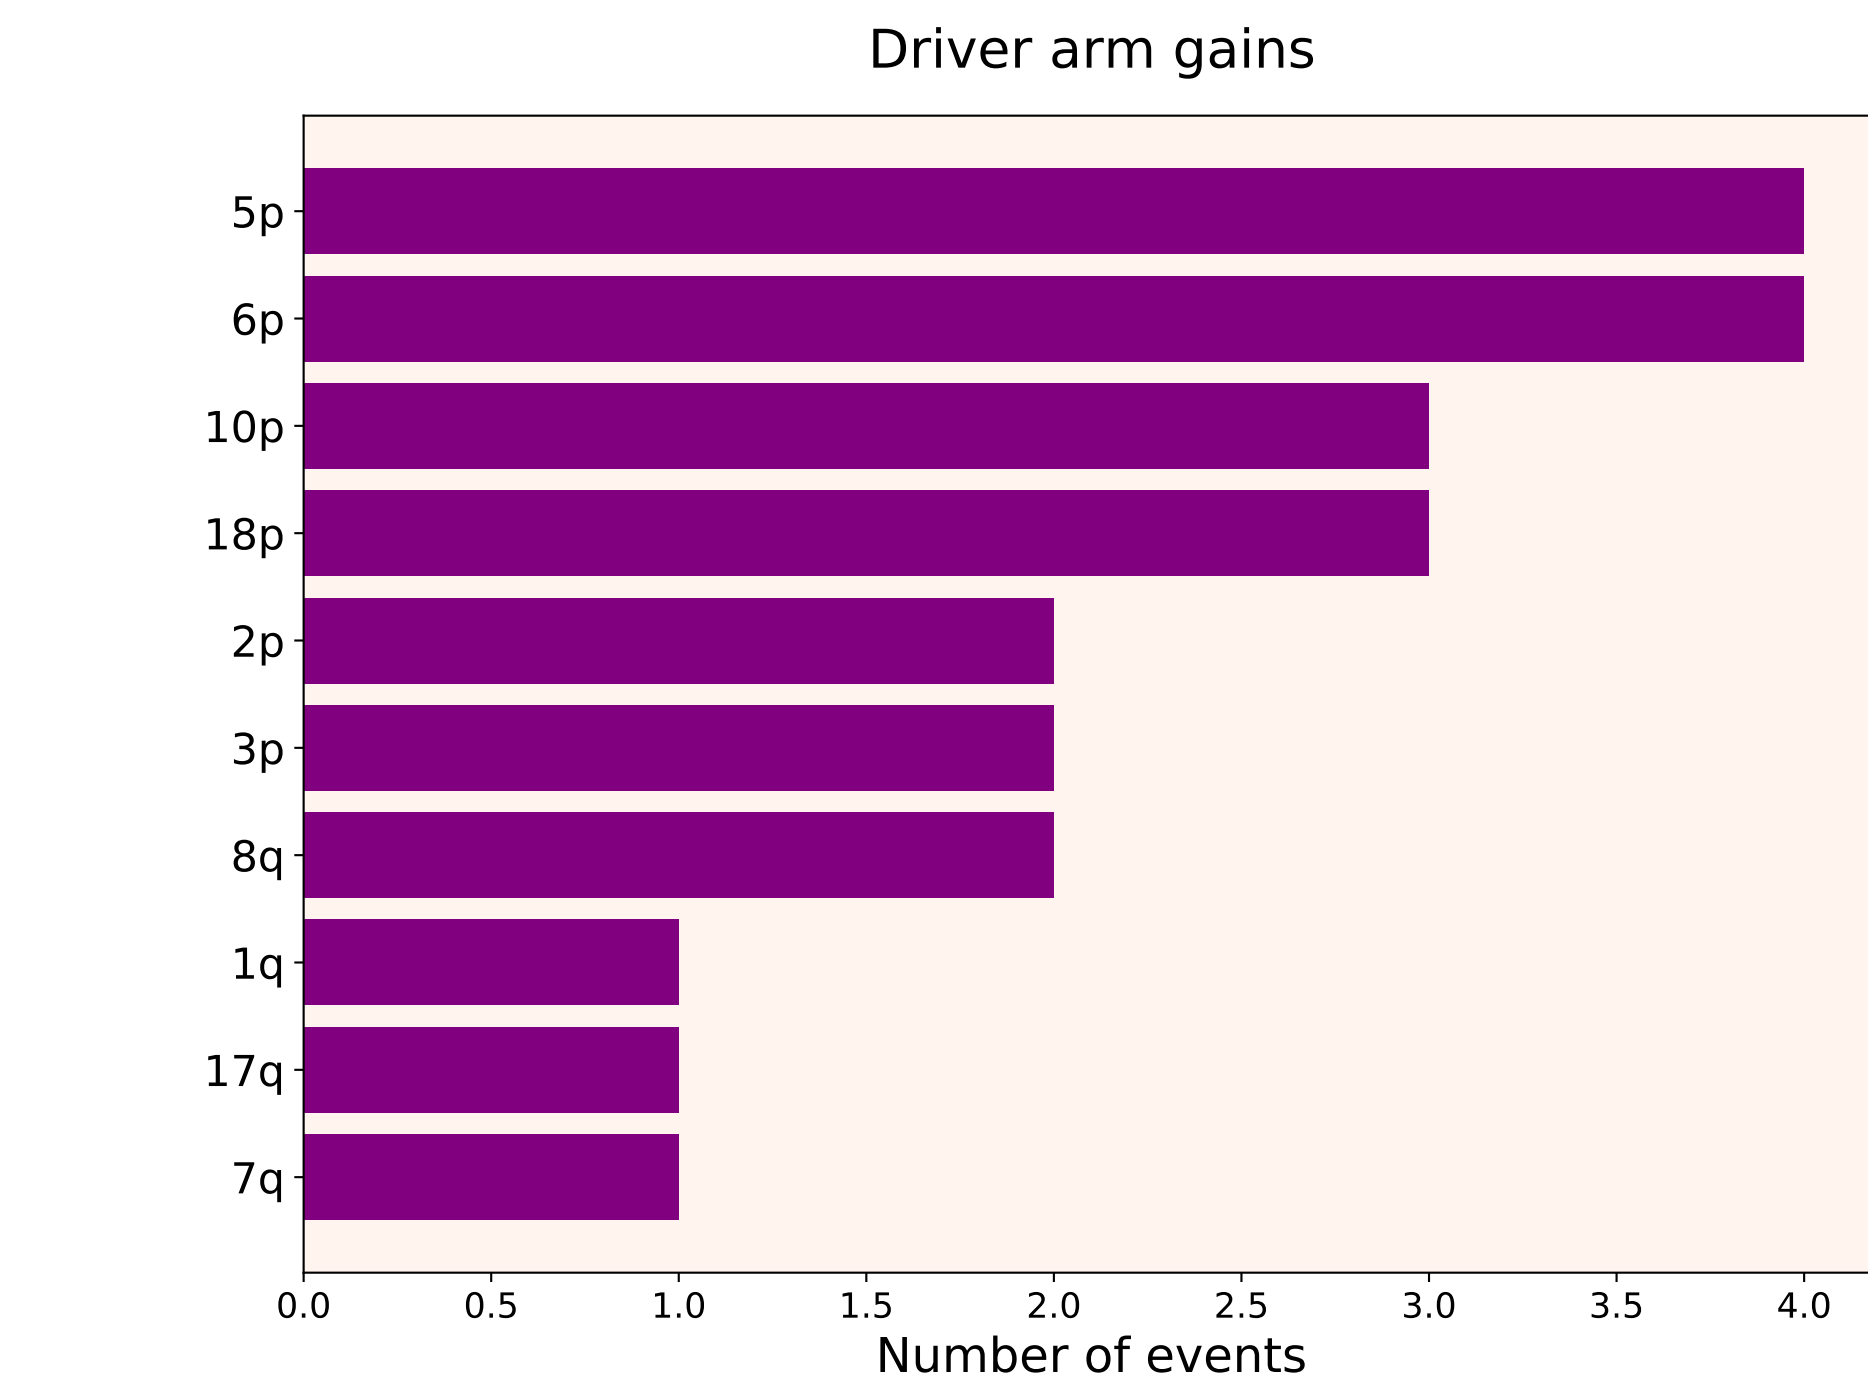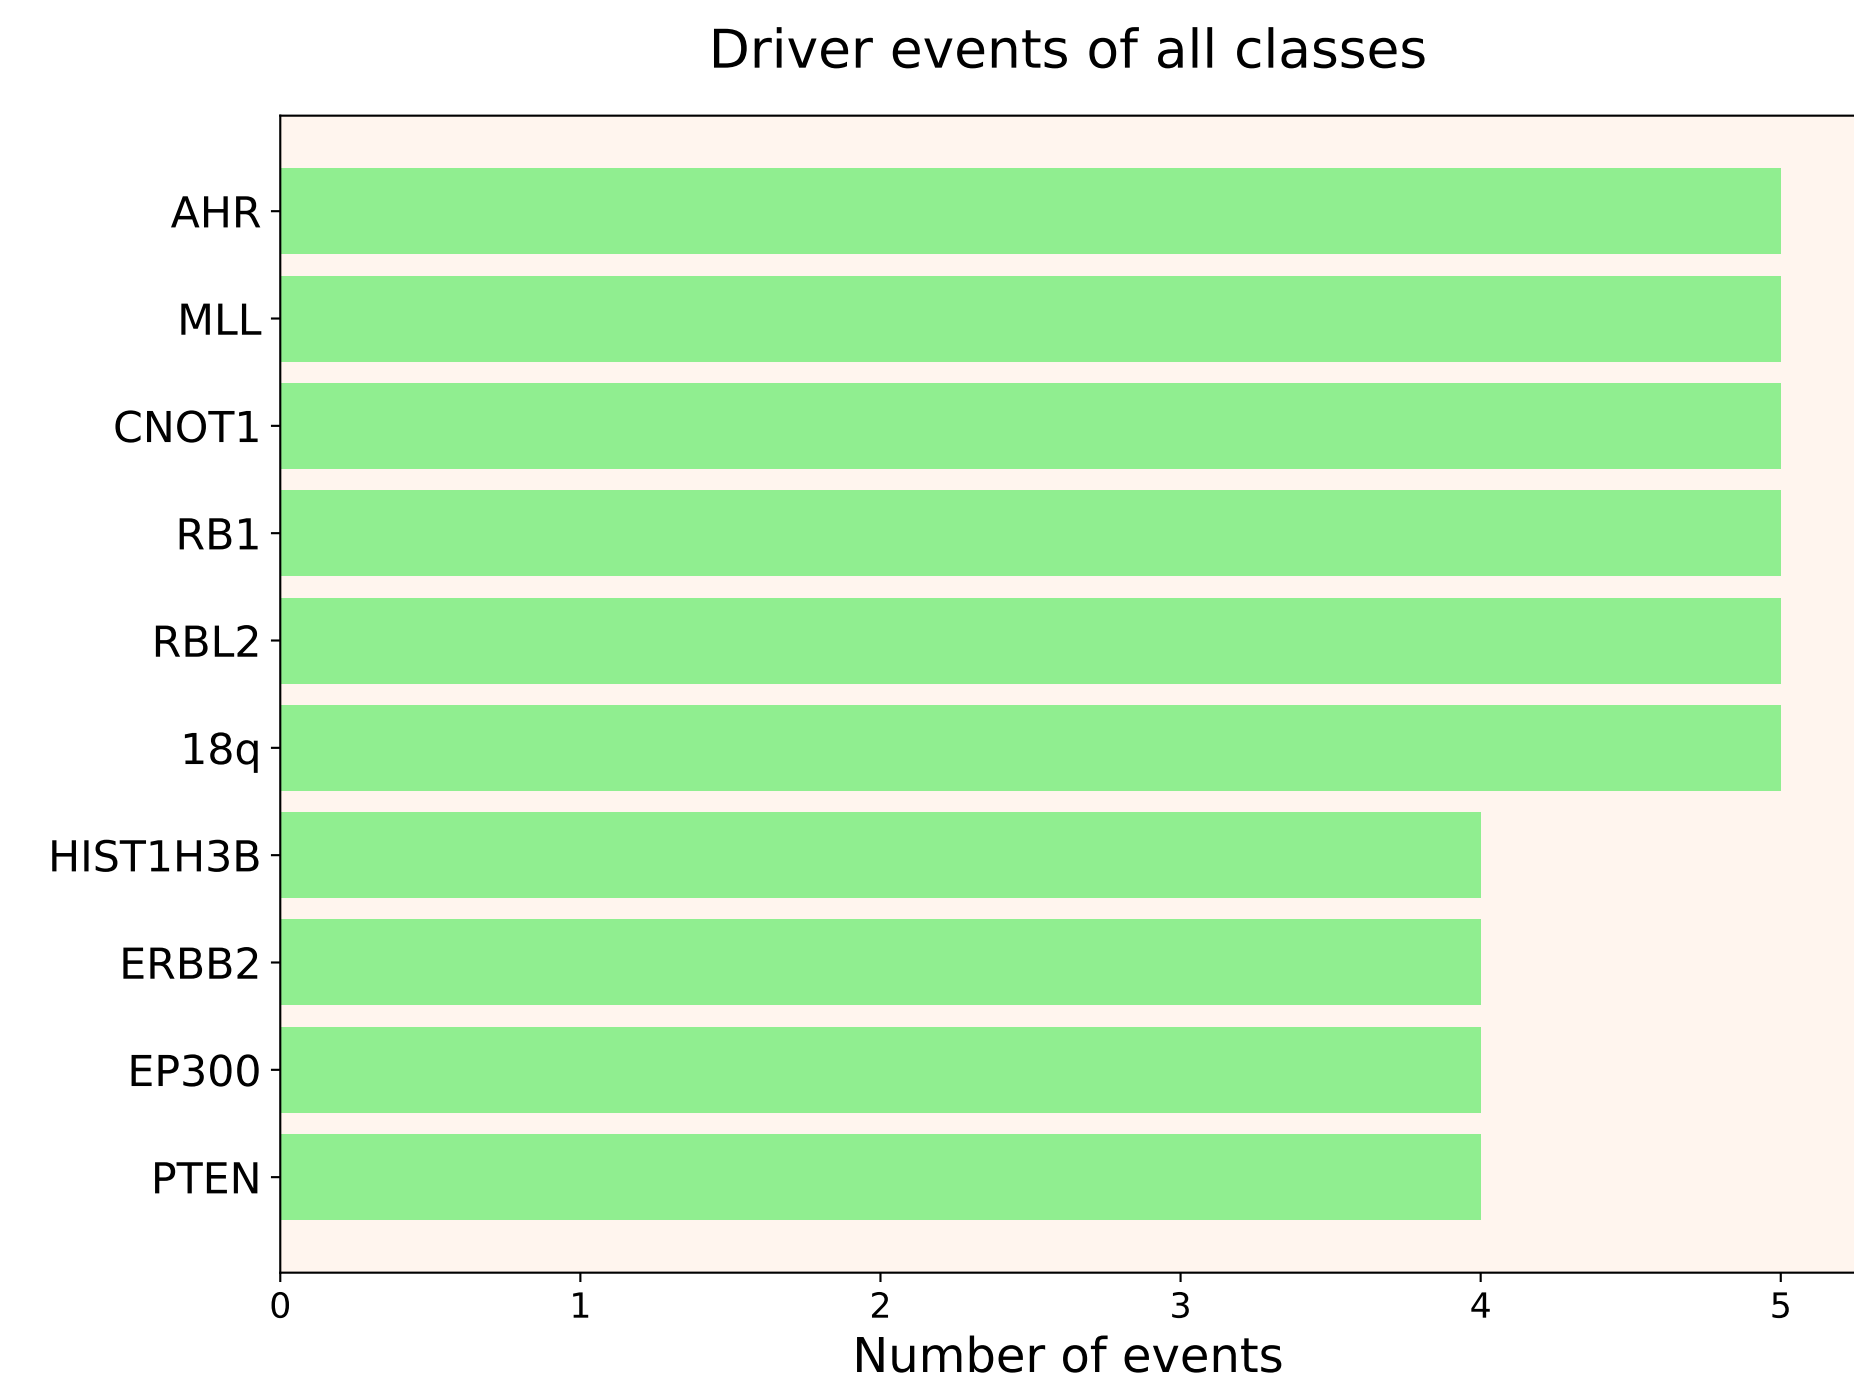

Supplement: Supplemental_Data_S1.zip [file Supplemental_Data_S1.zip]

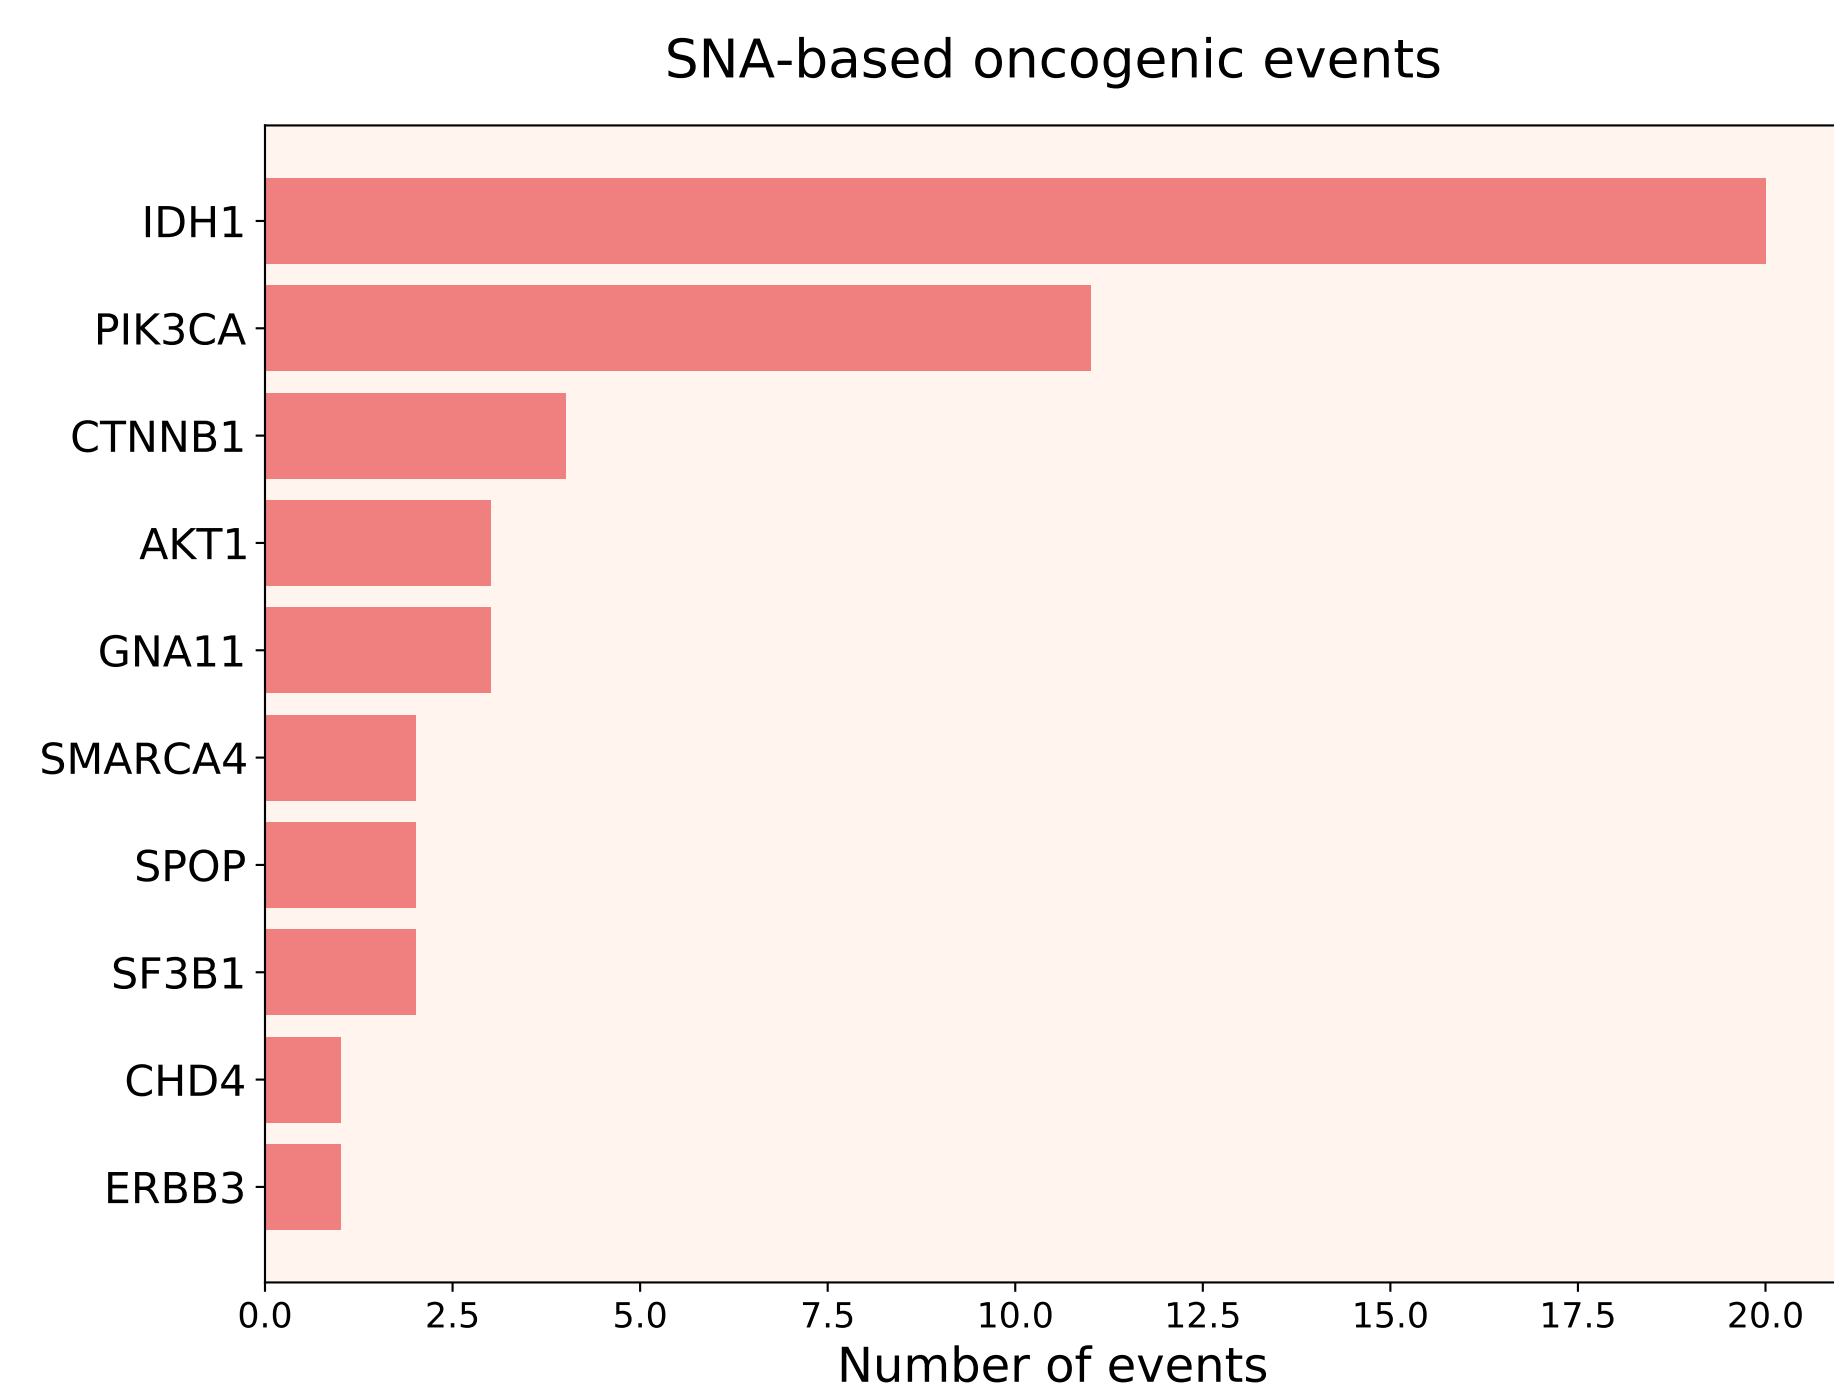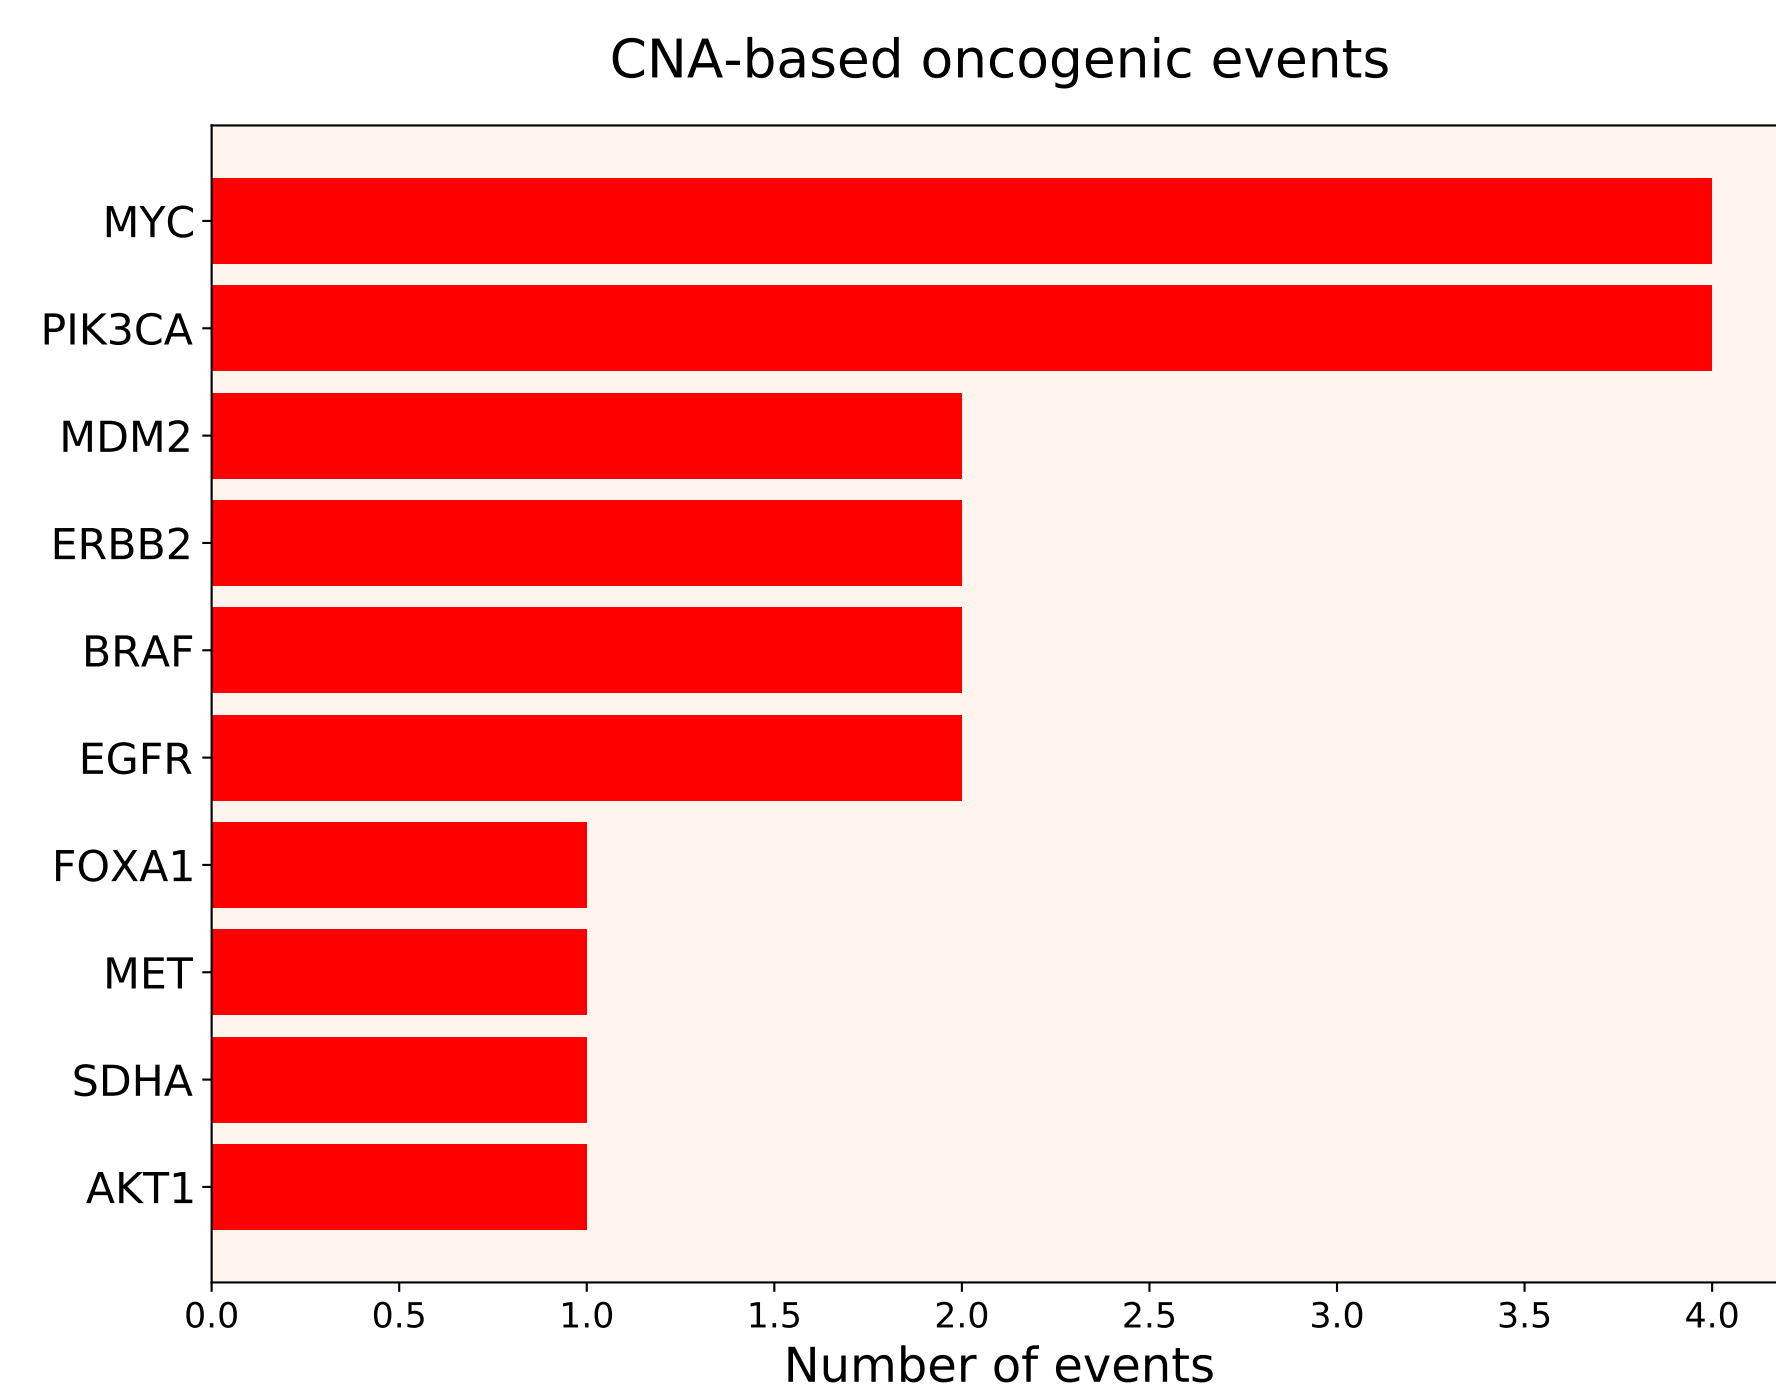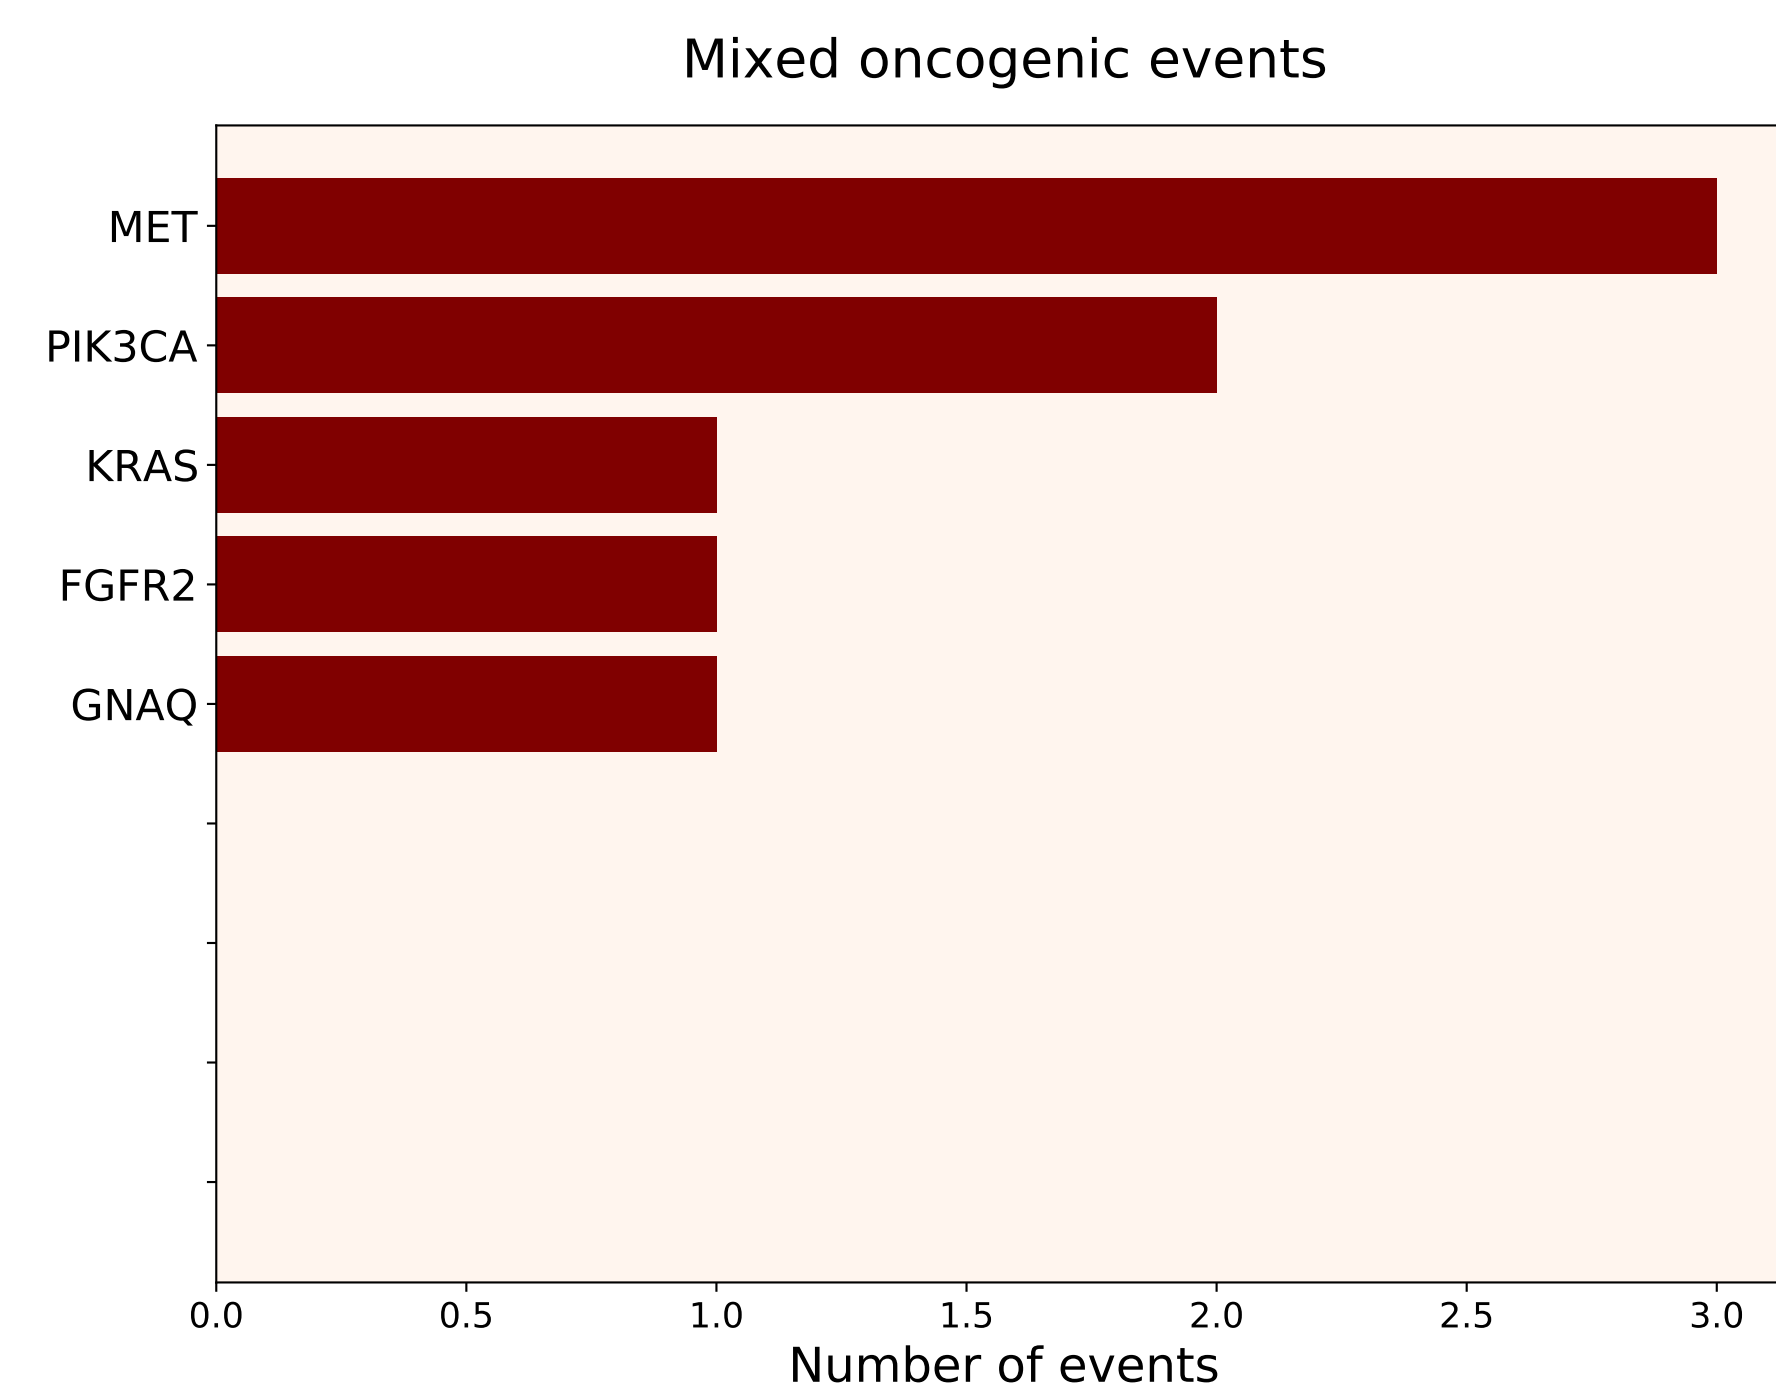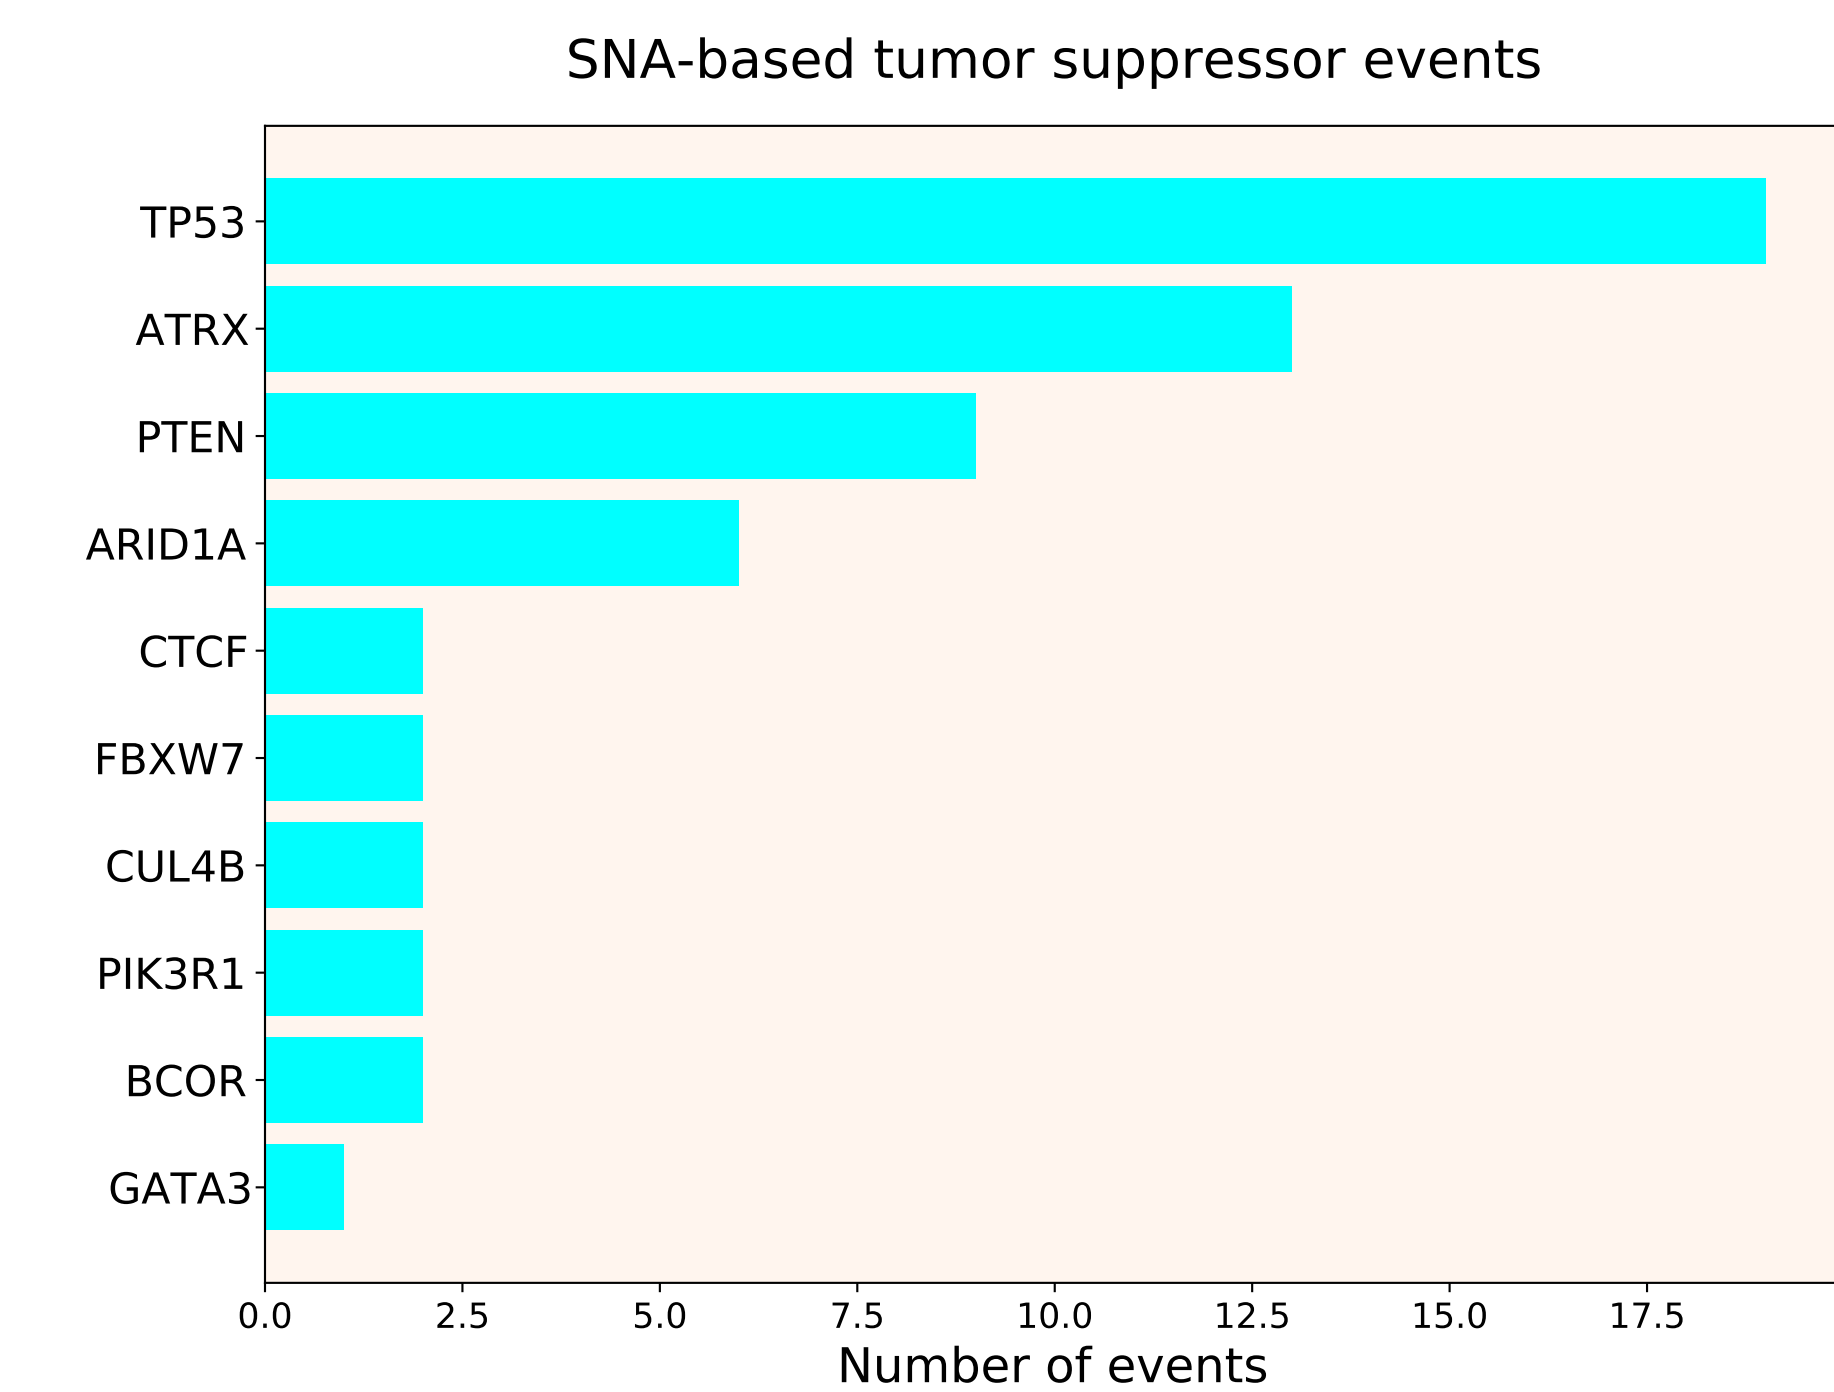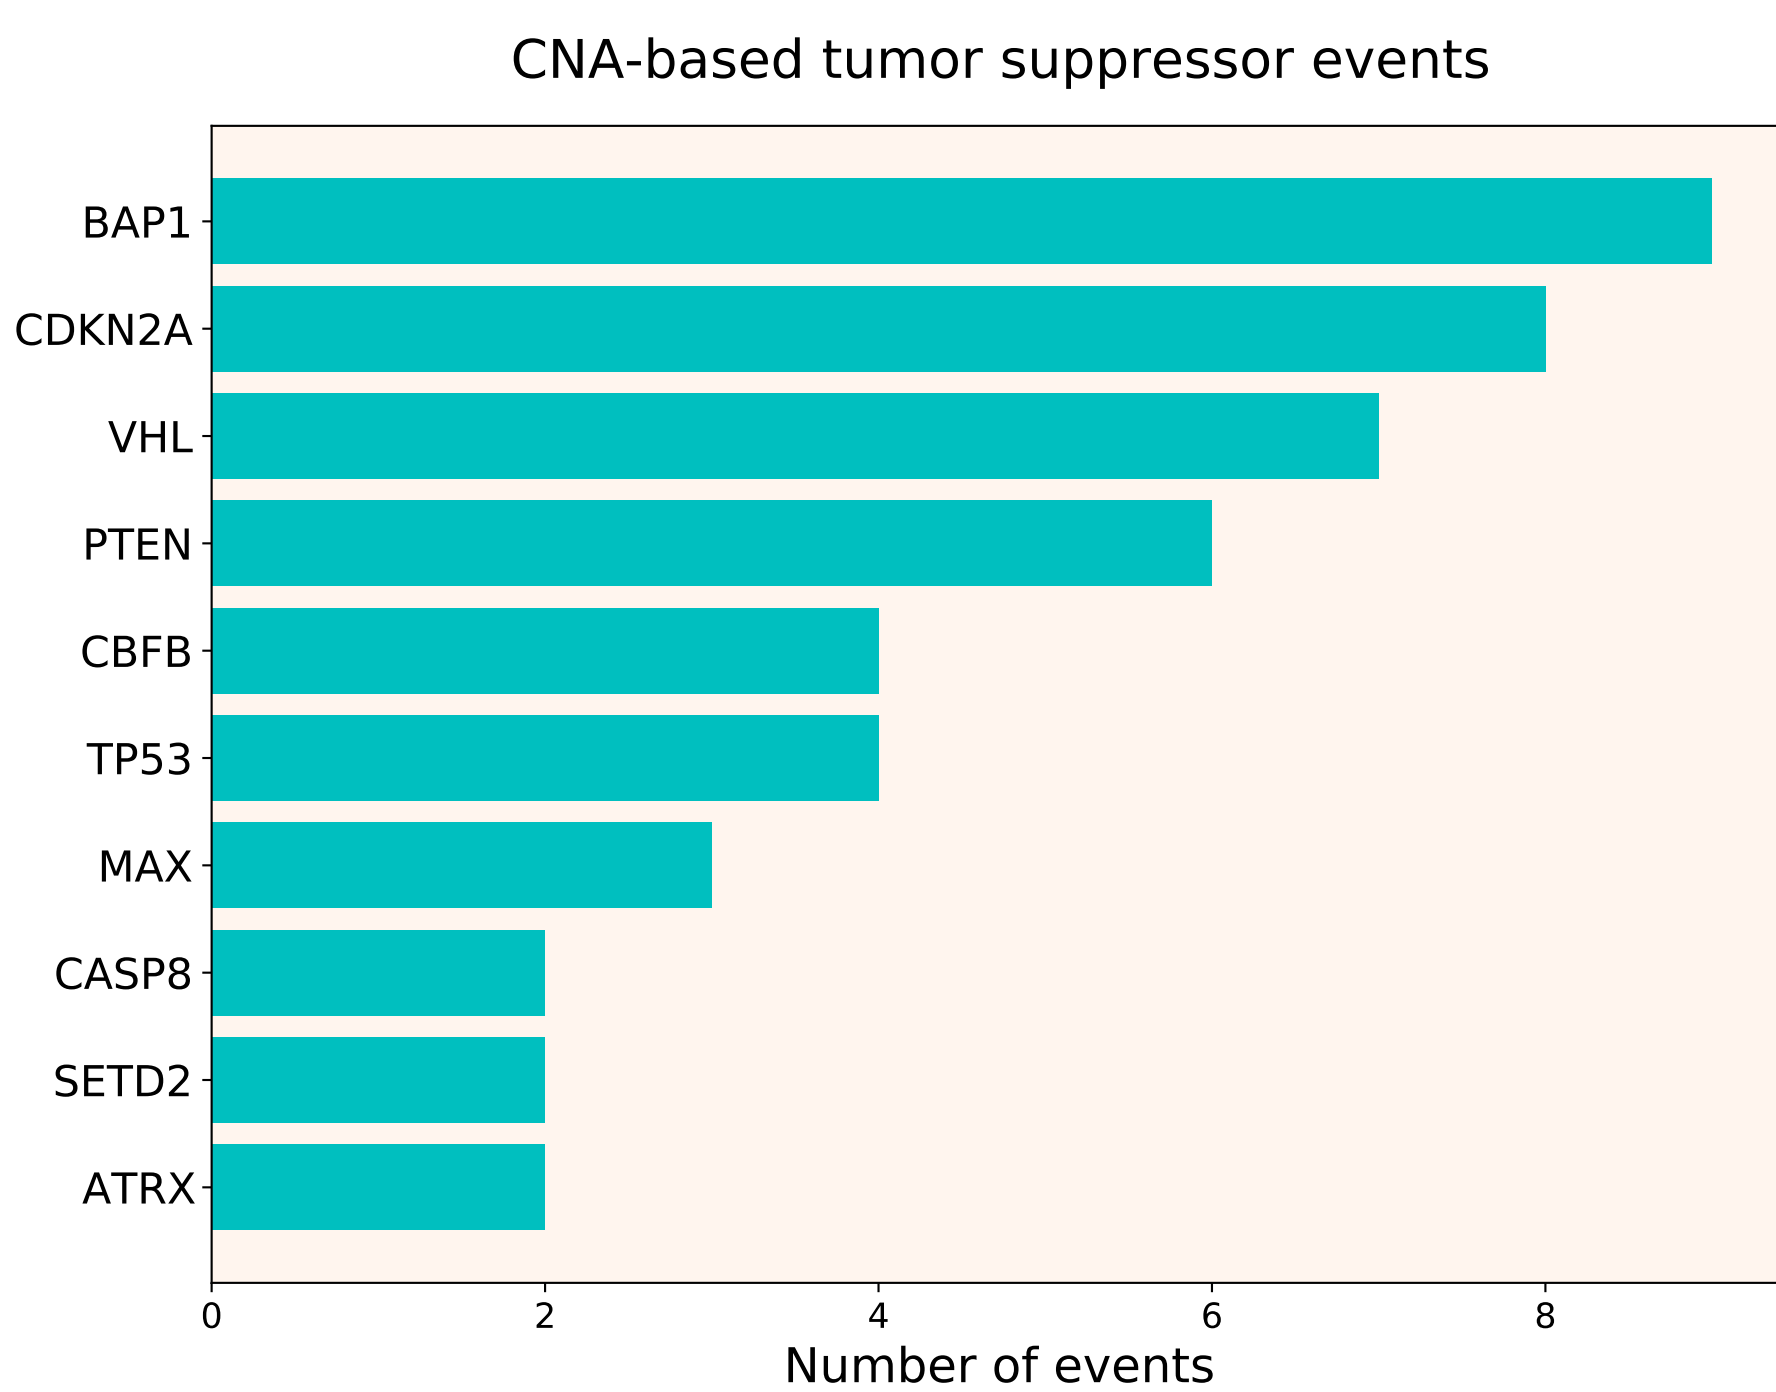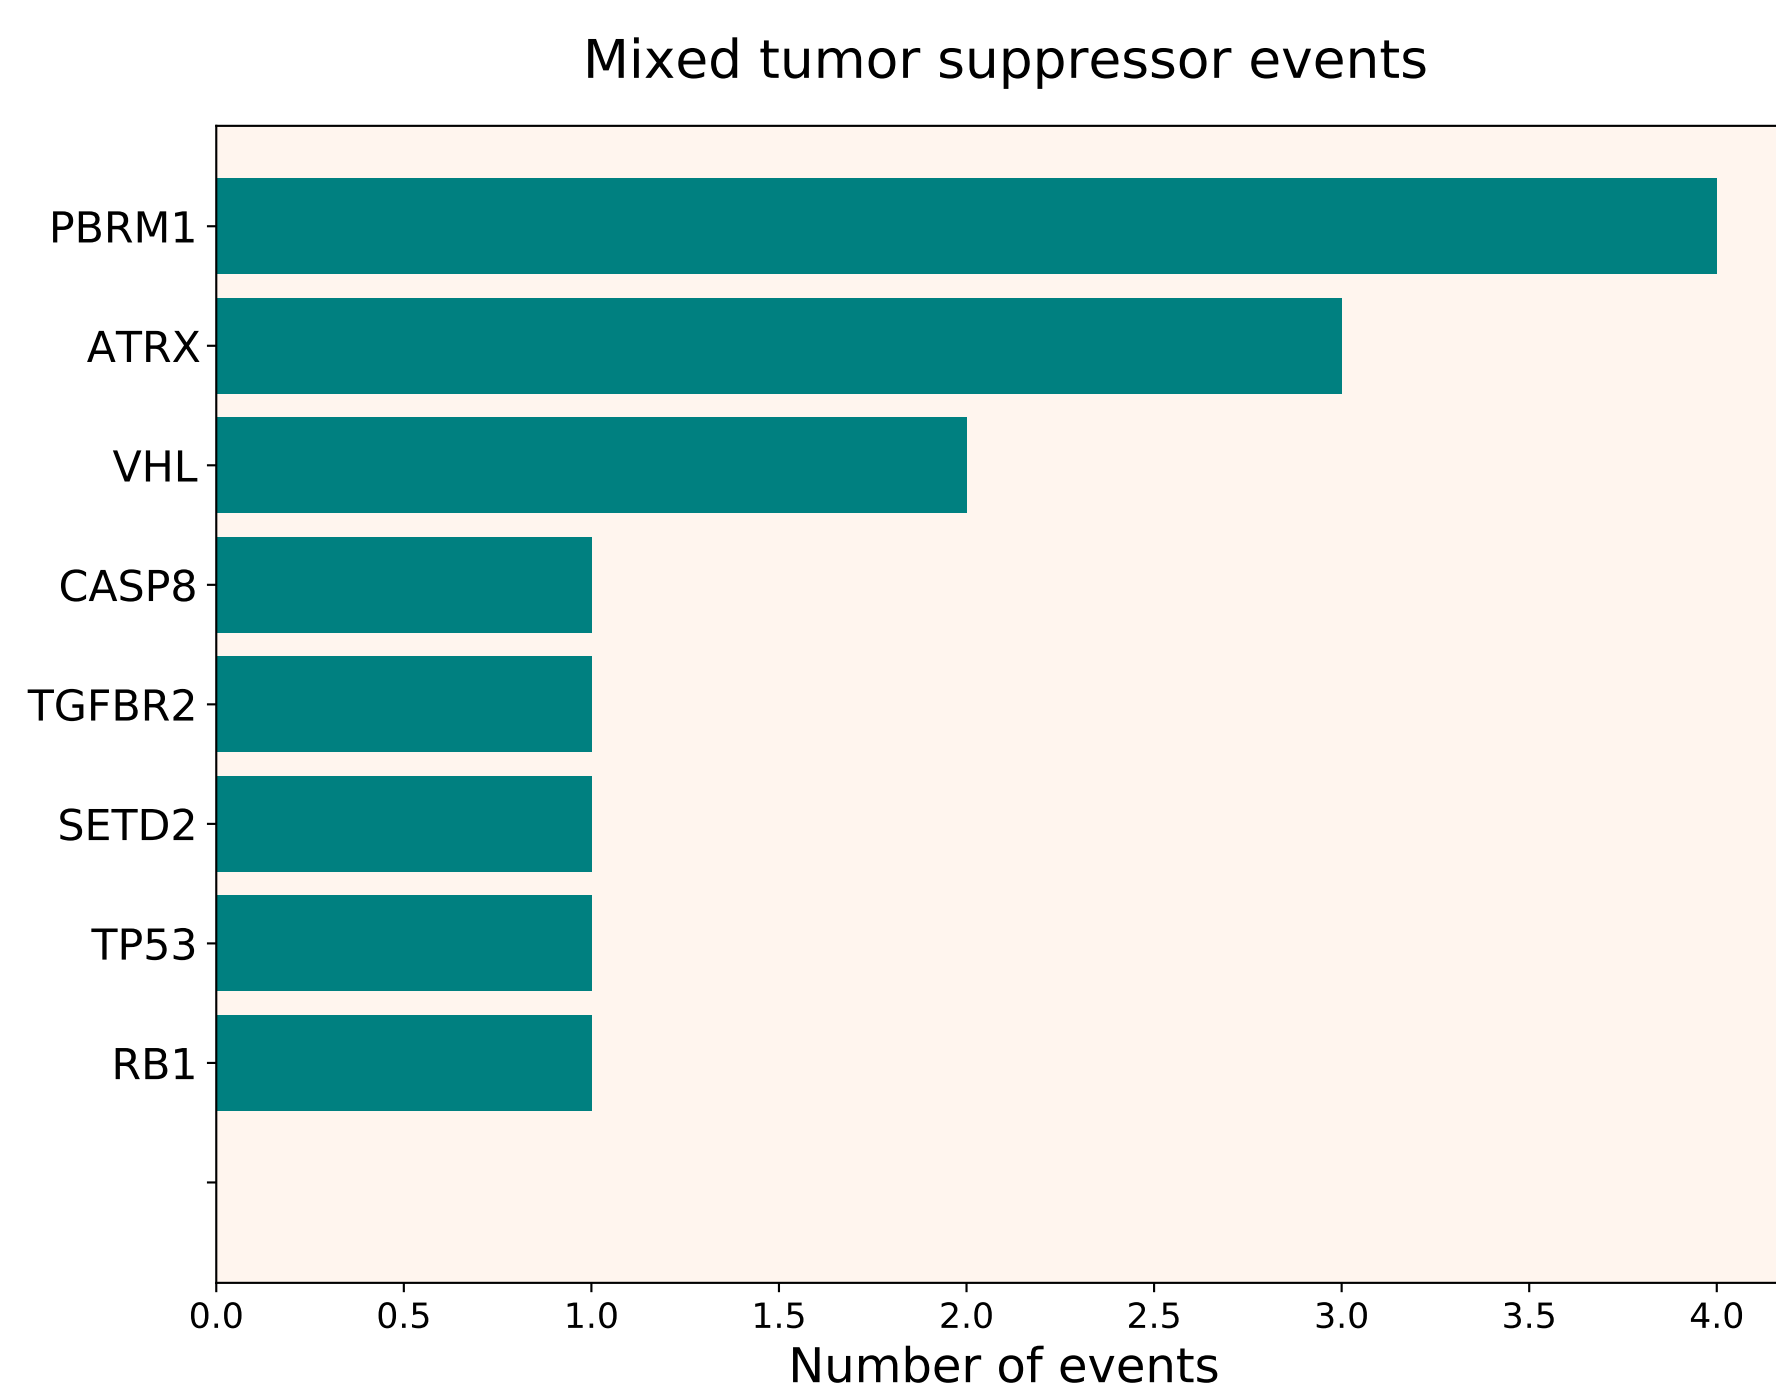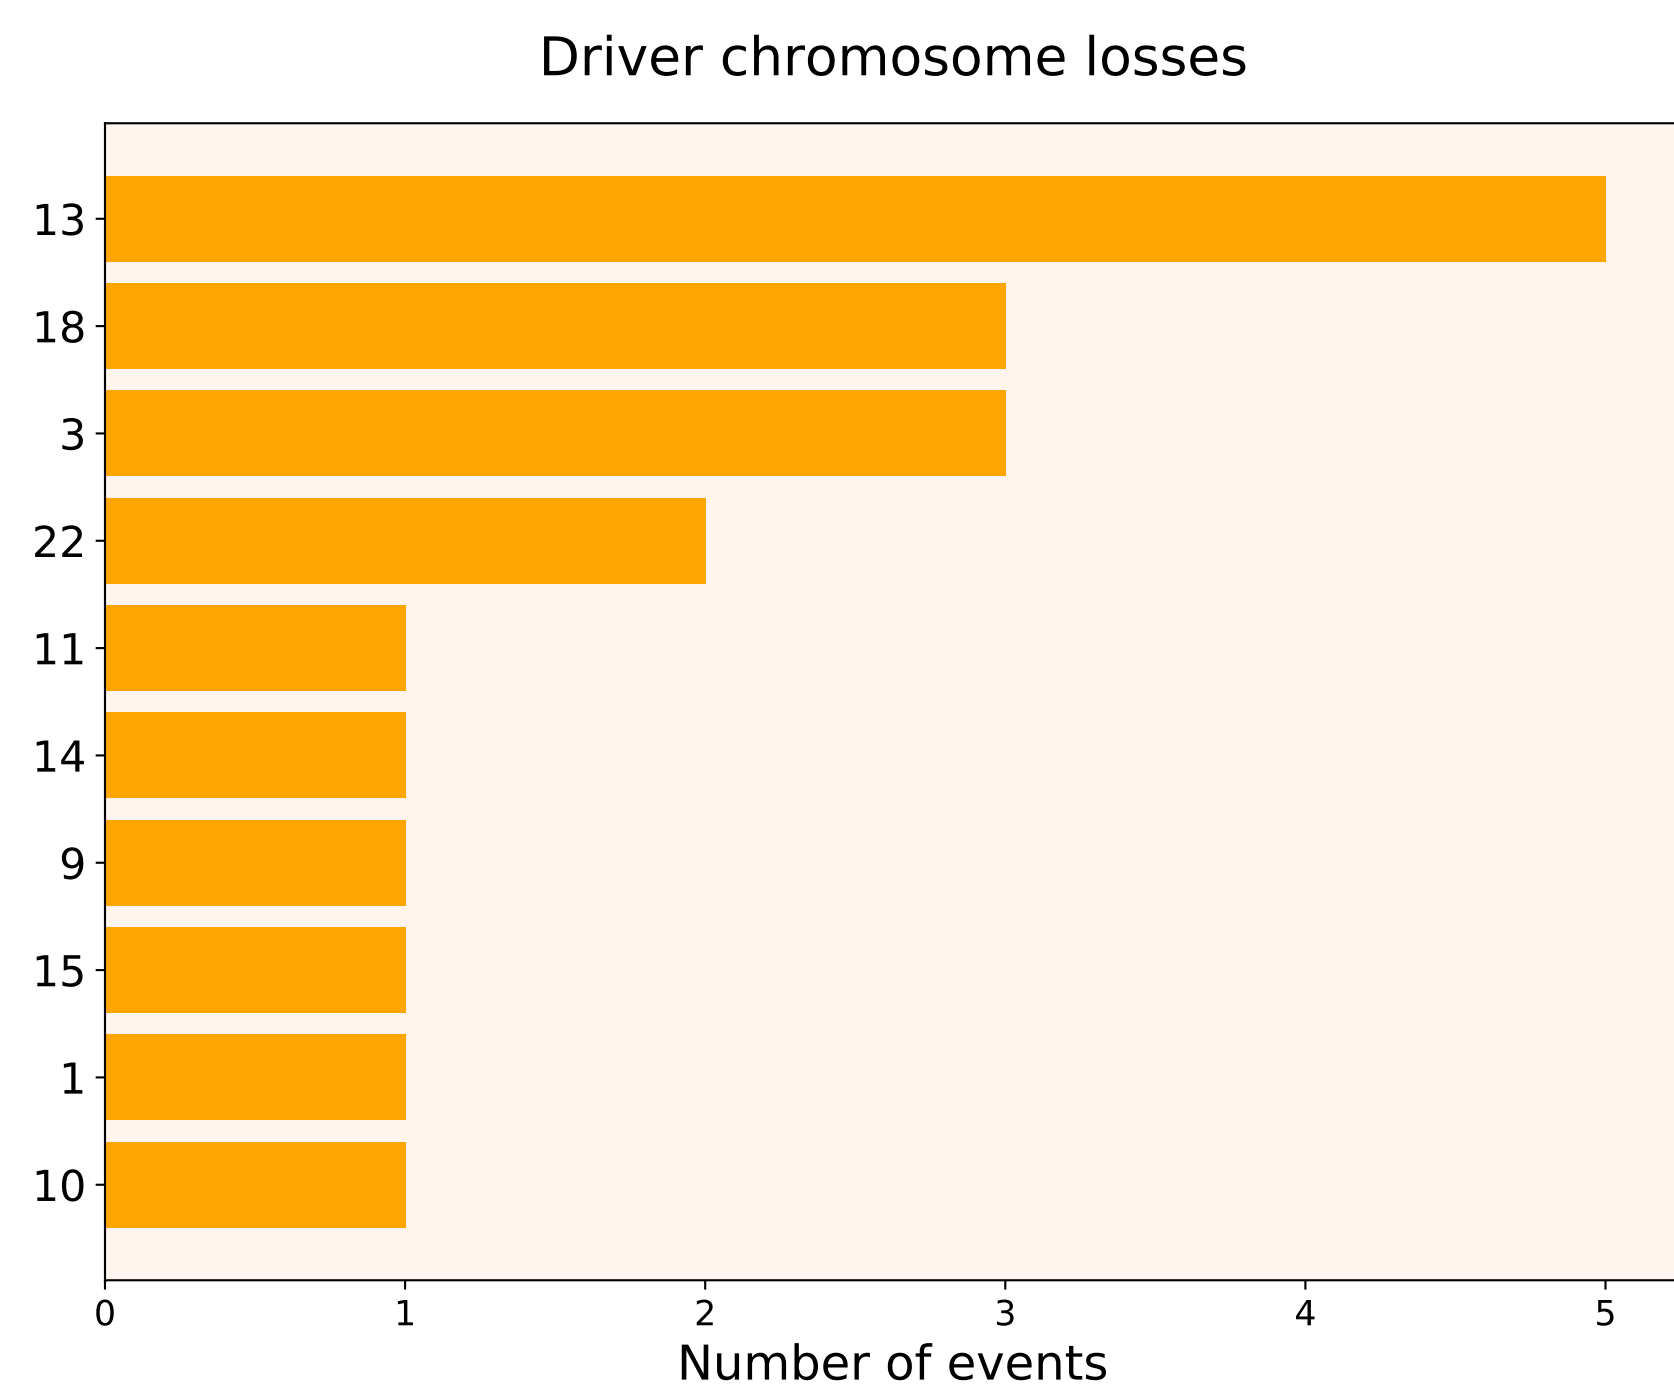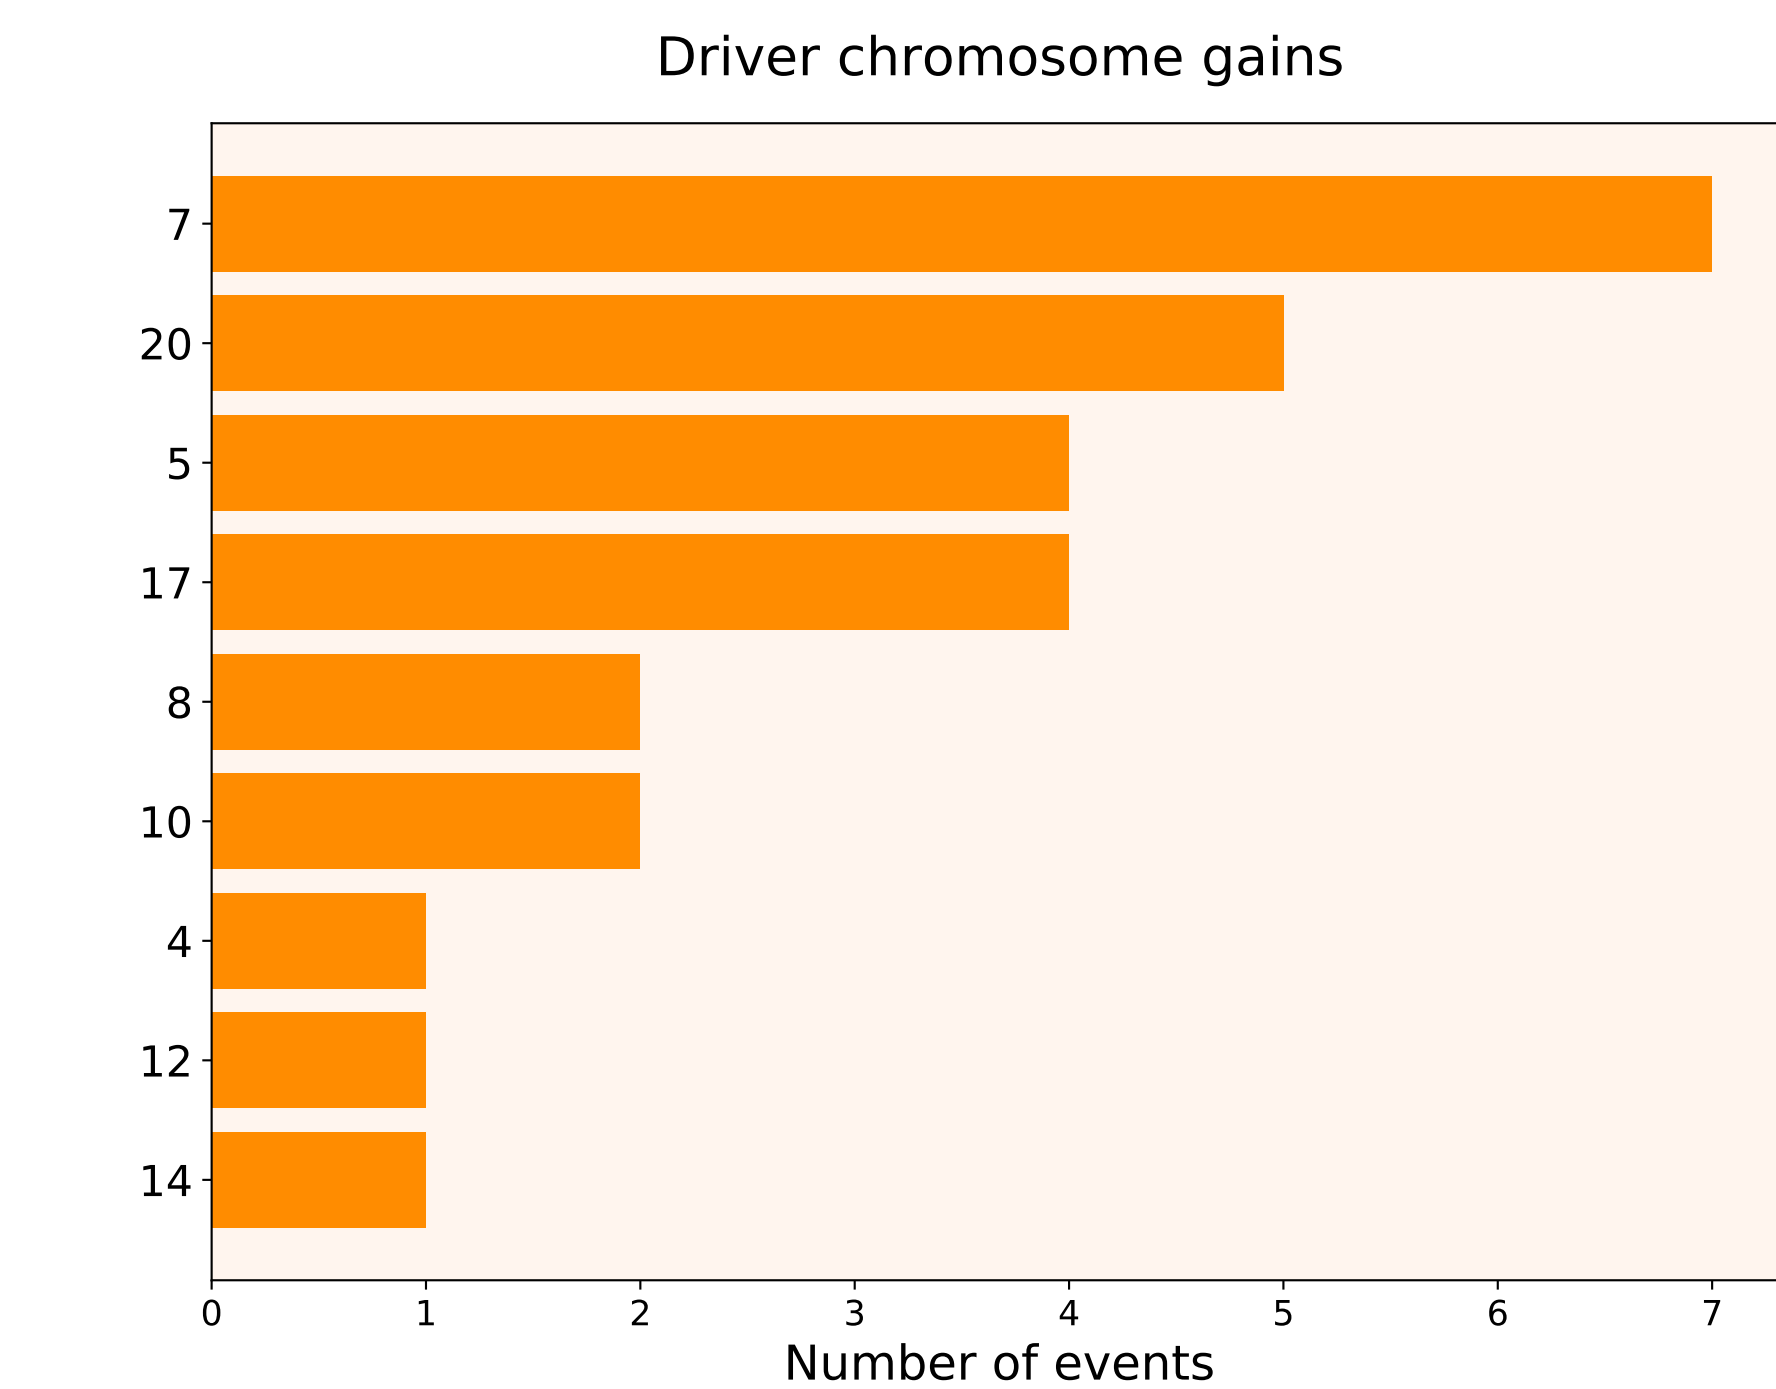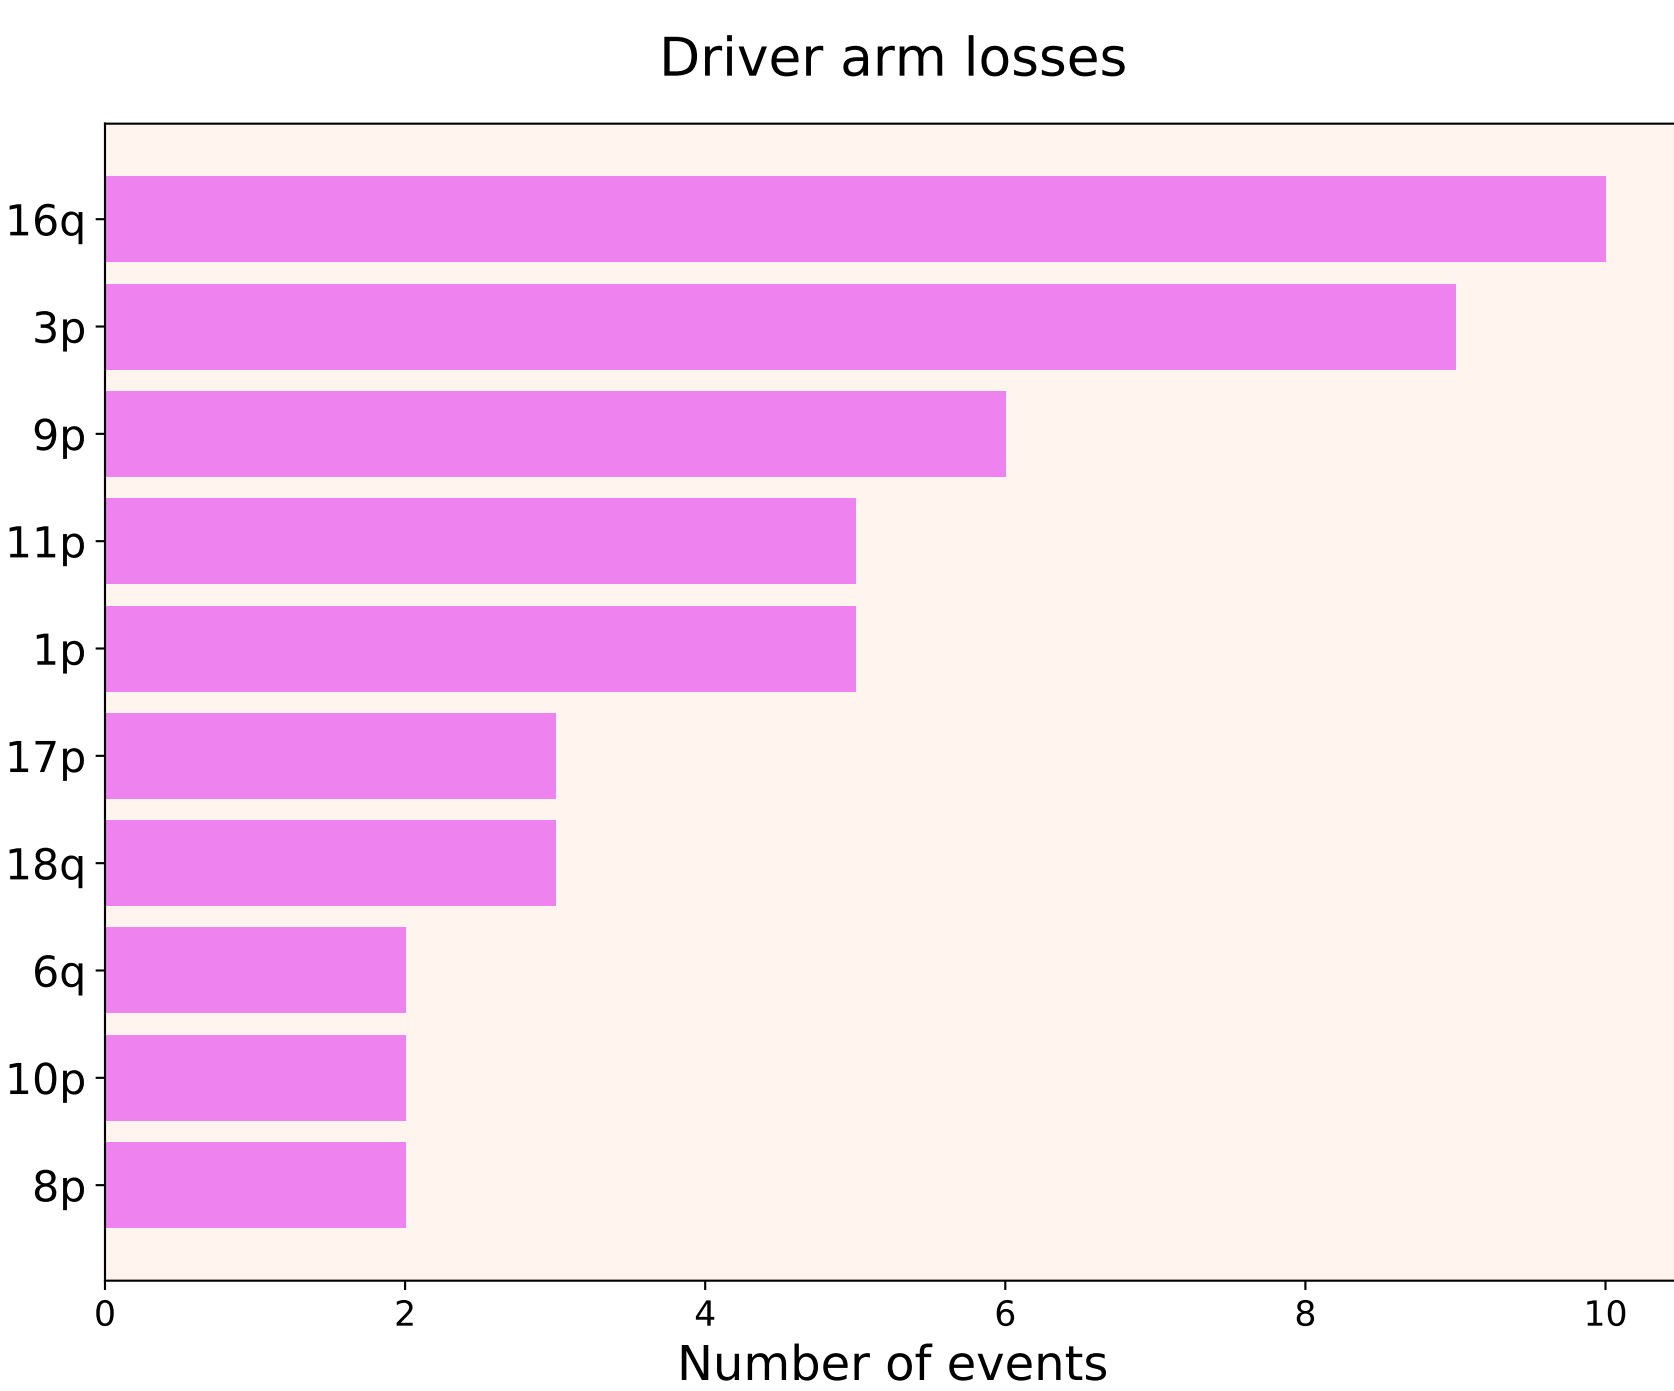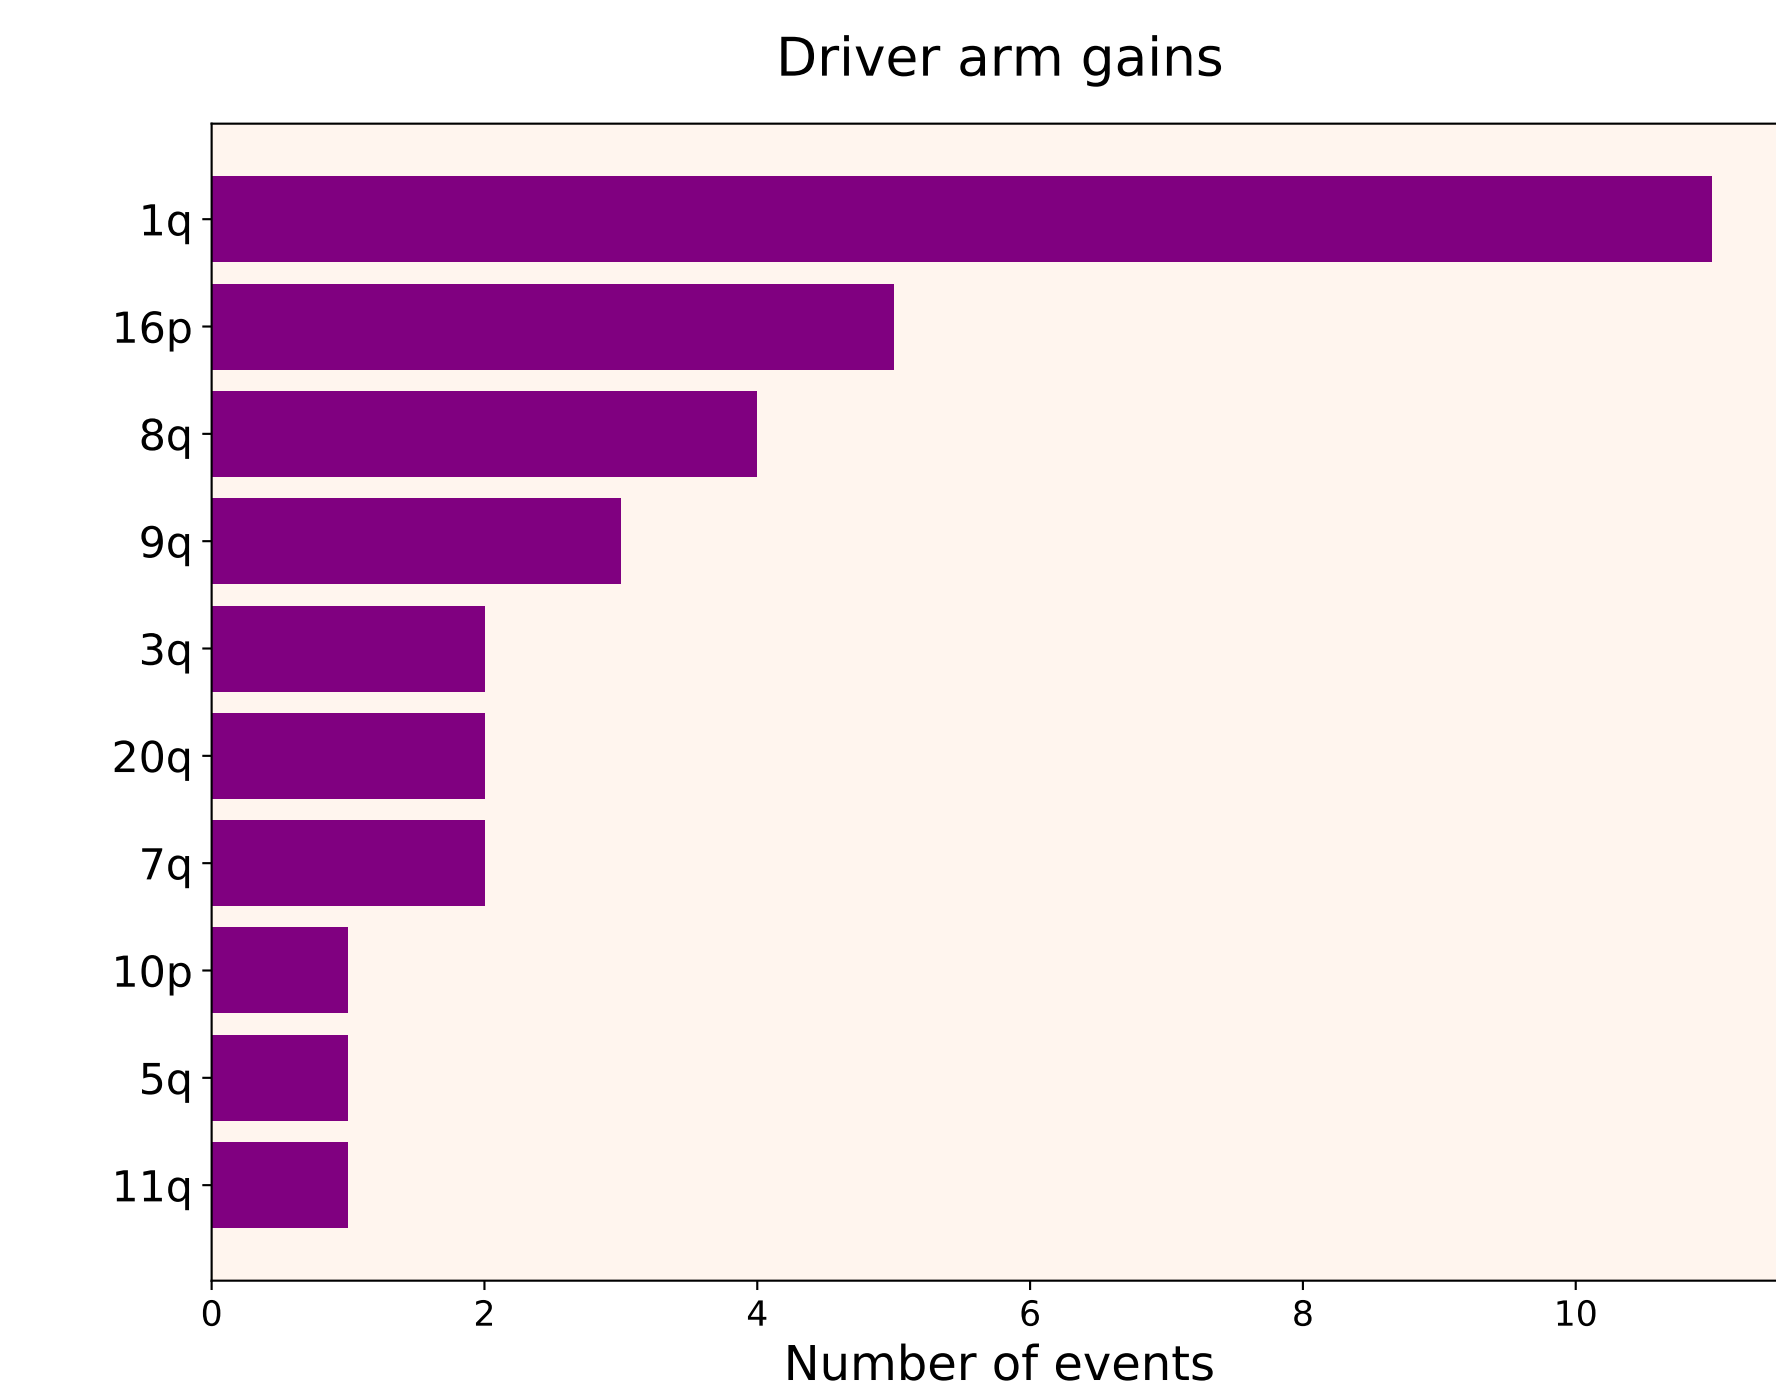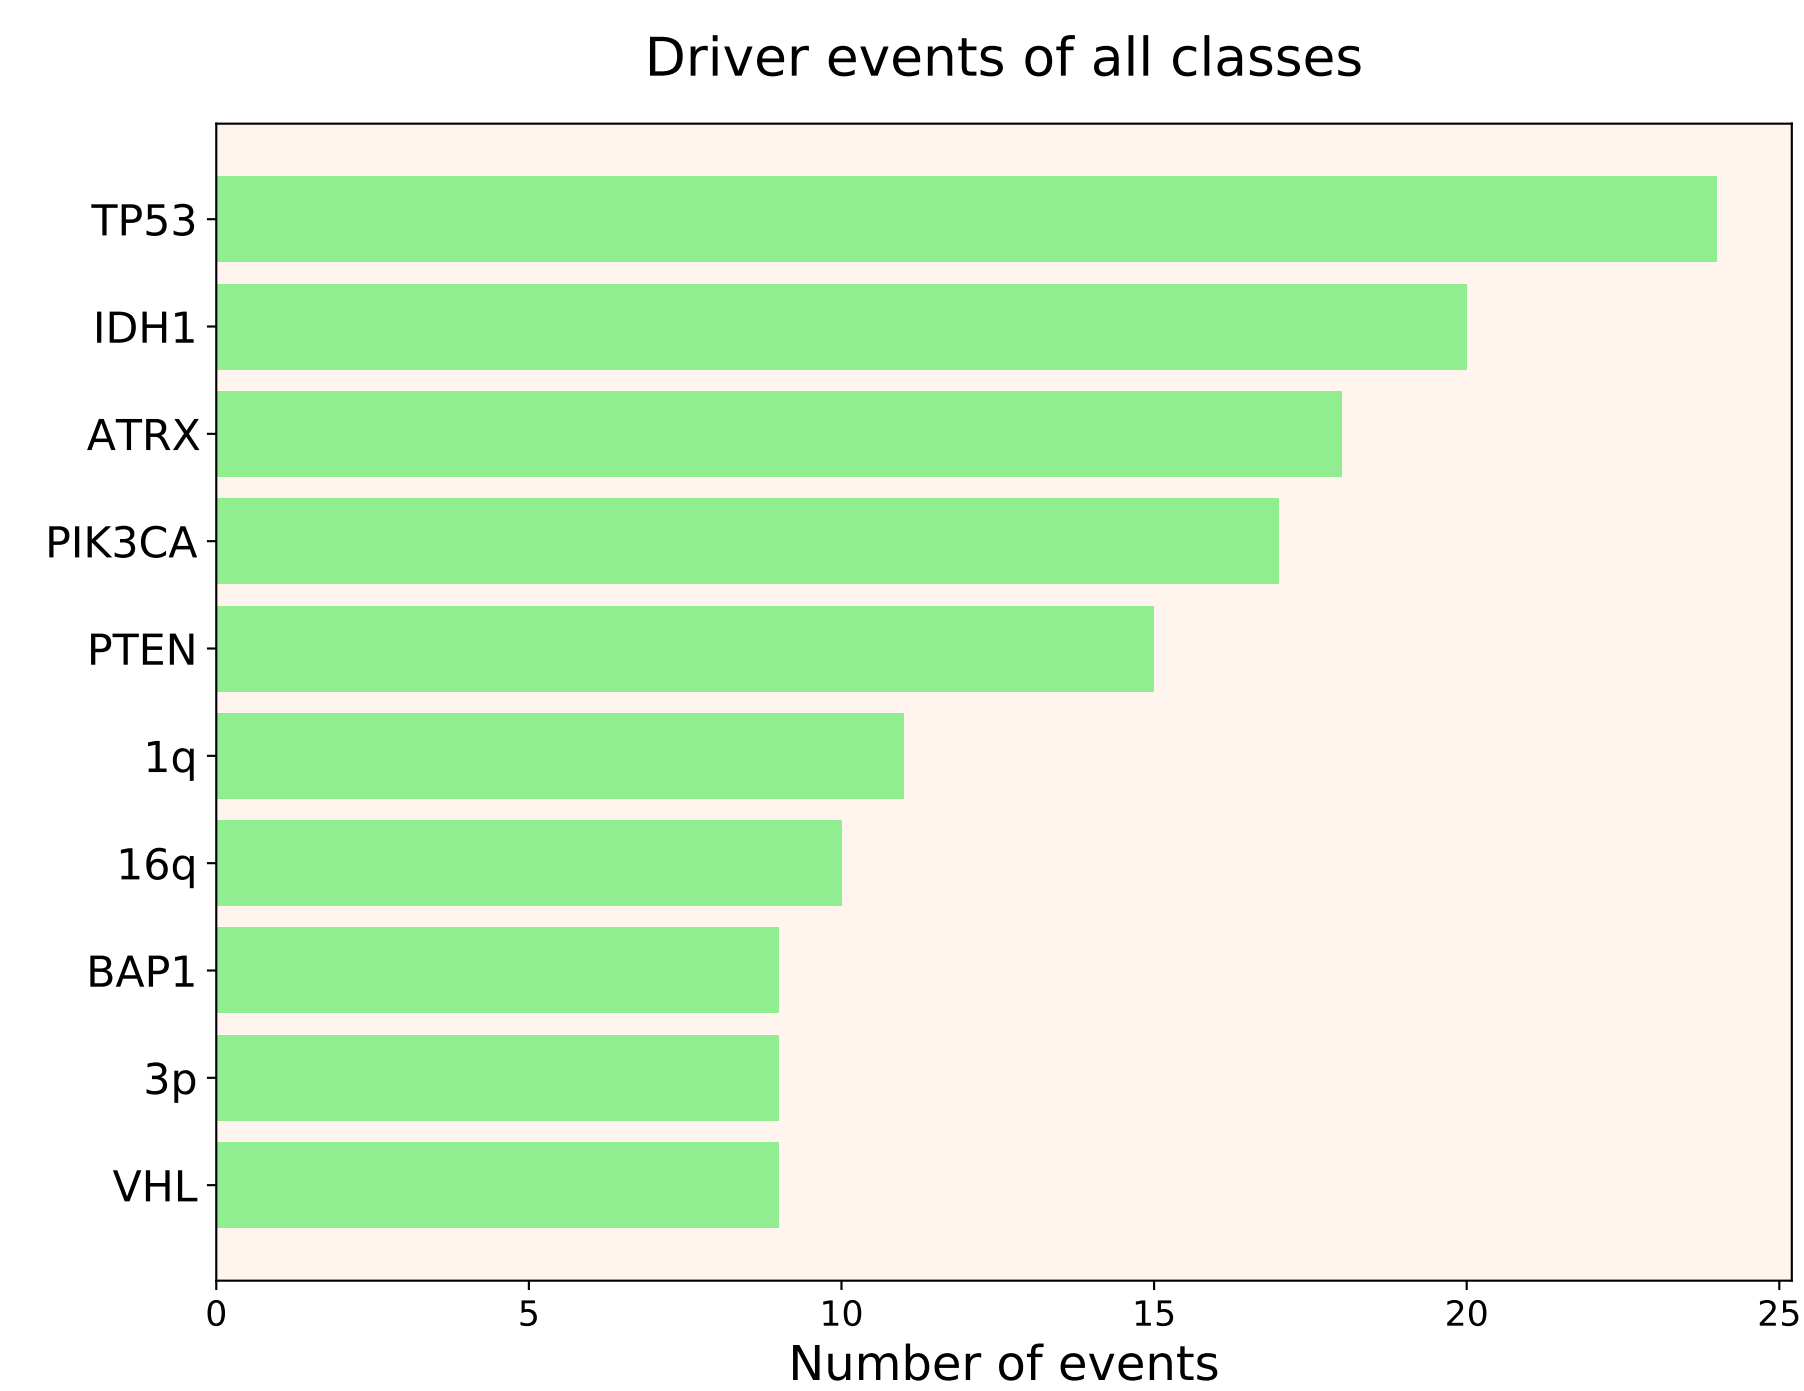

Supplement: Supplemental_Data_S1.zip [file Supplemental_Data_S1.zip]

# COAD

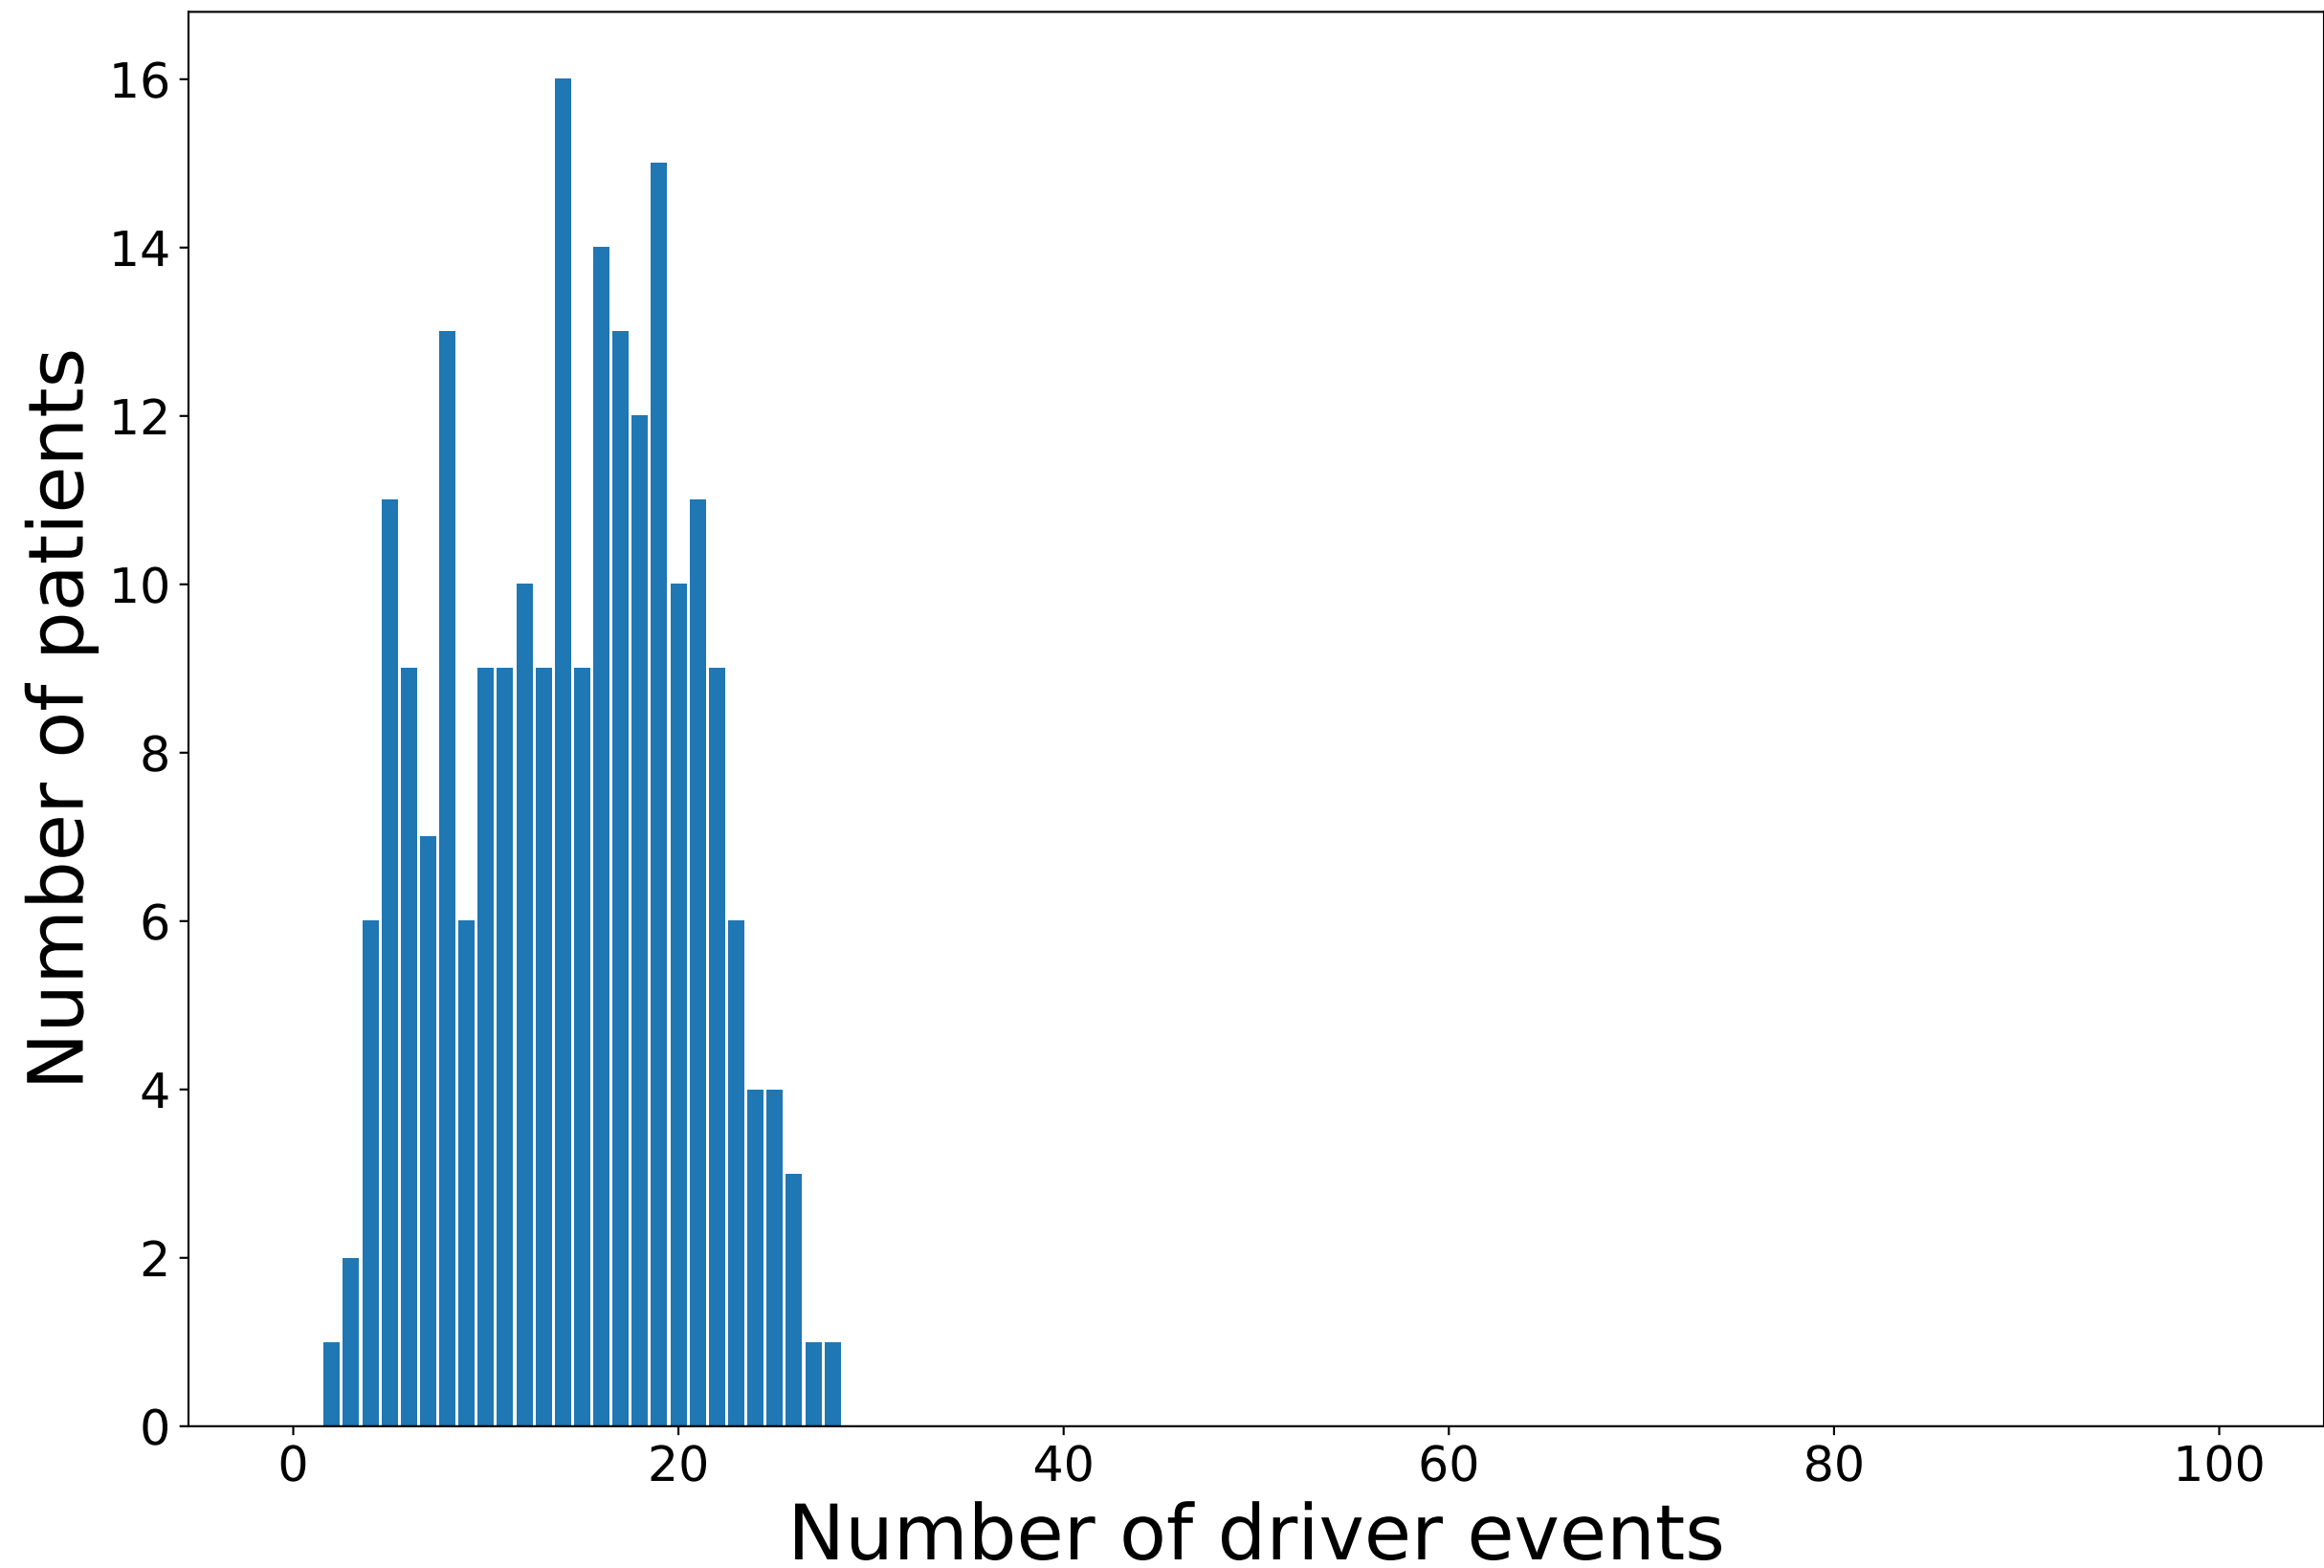

Supplement: Supplemental_Data_S1.zip [file Supplemental_Data_S1.zip]

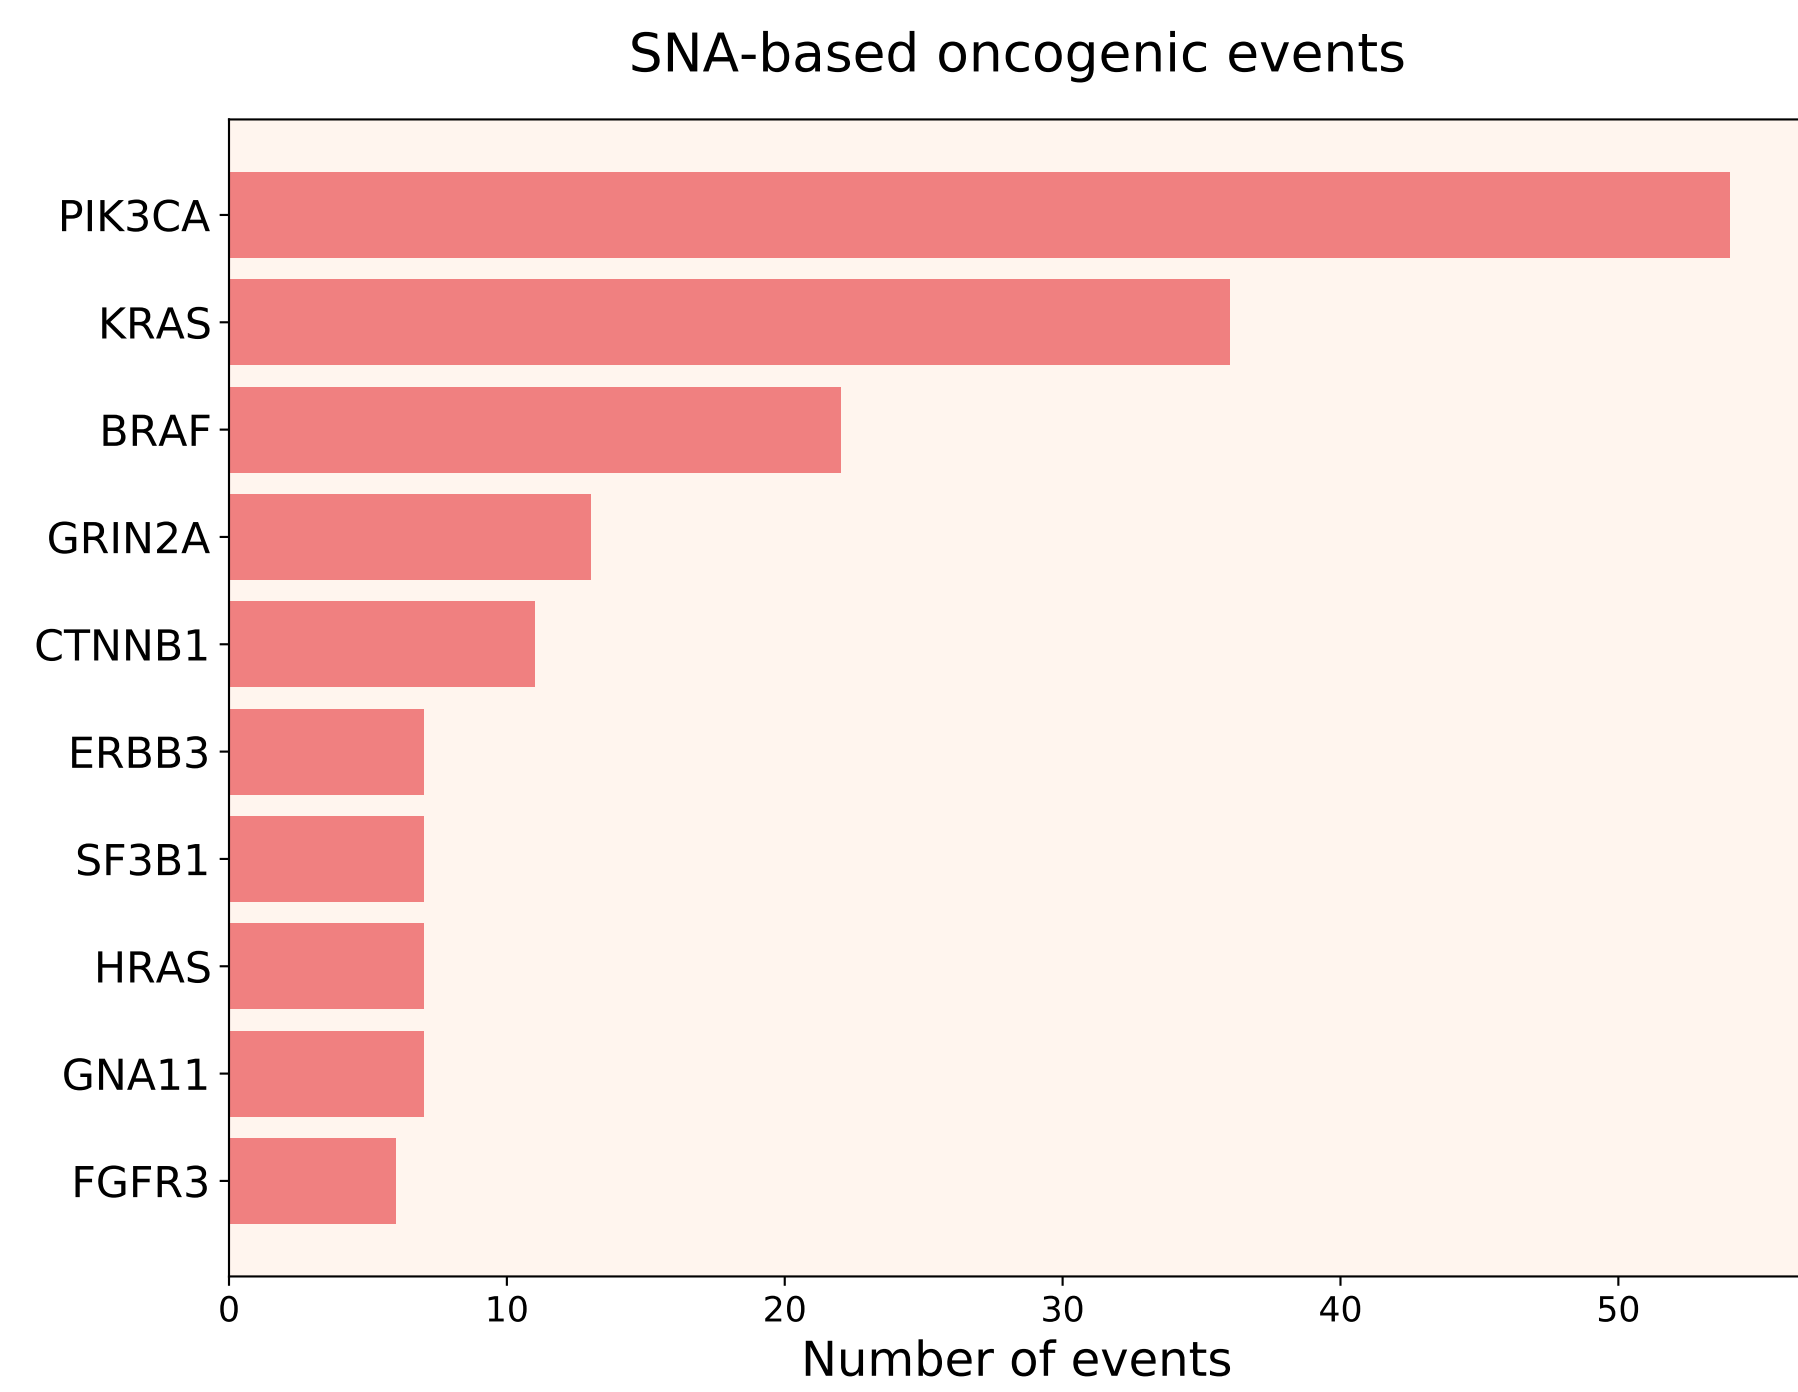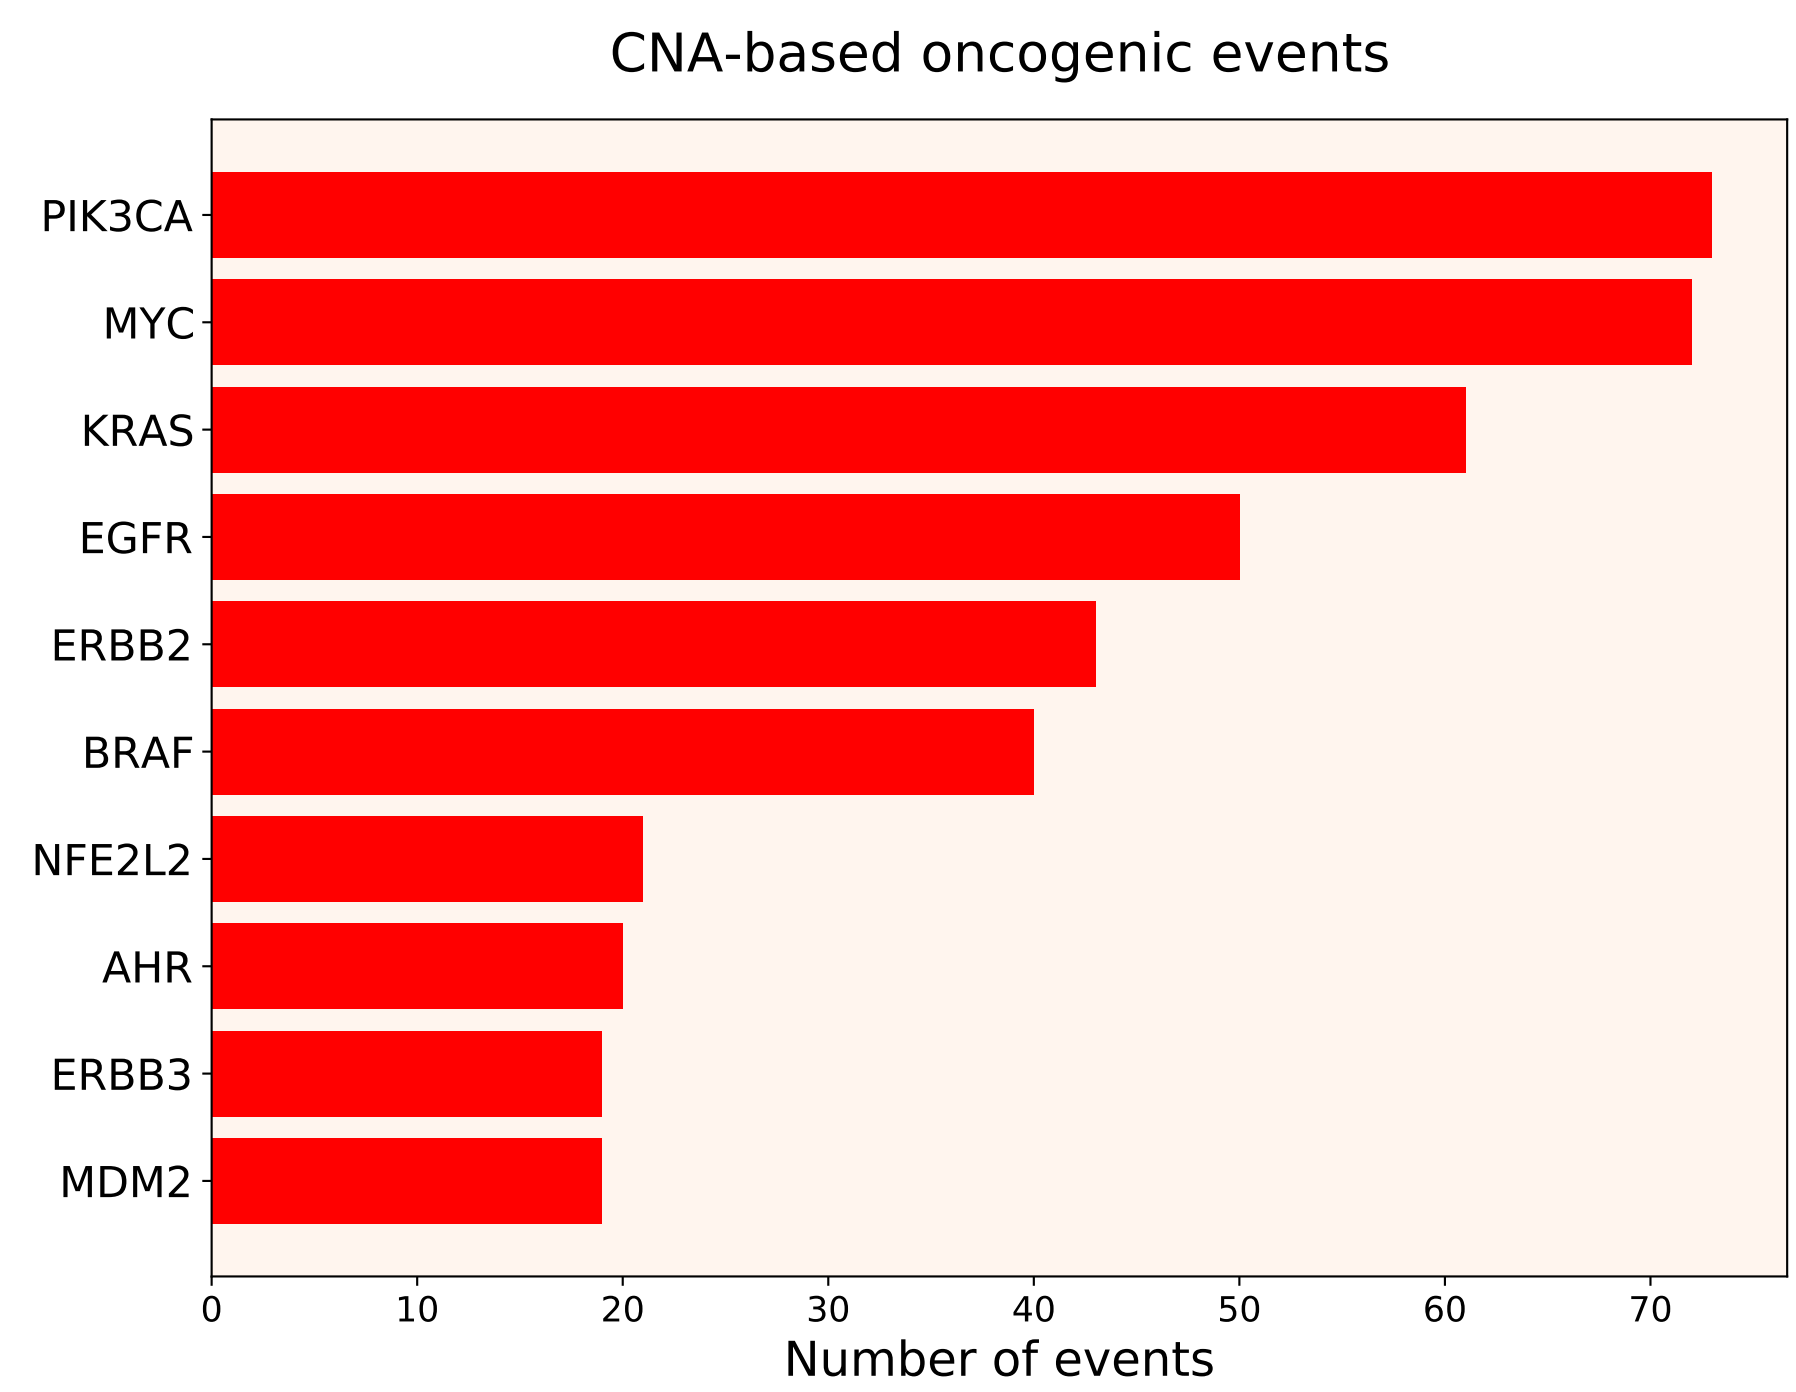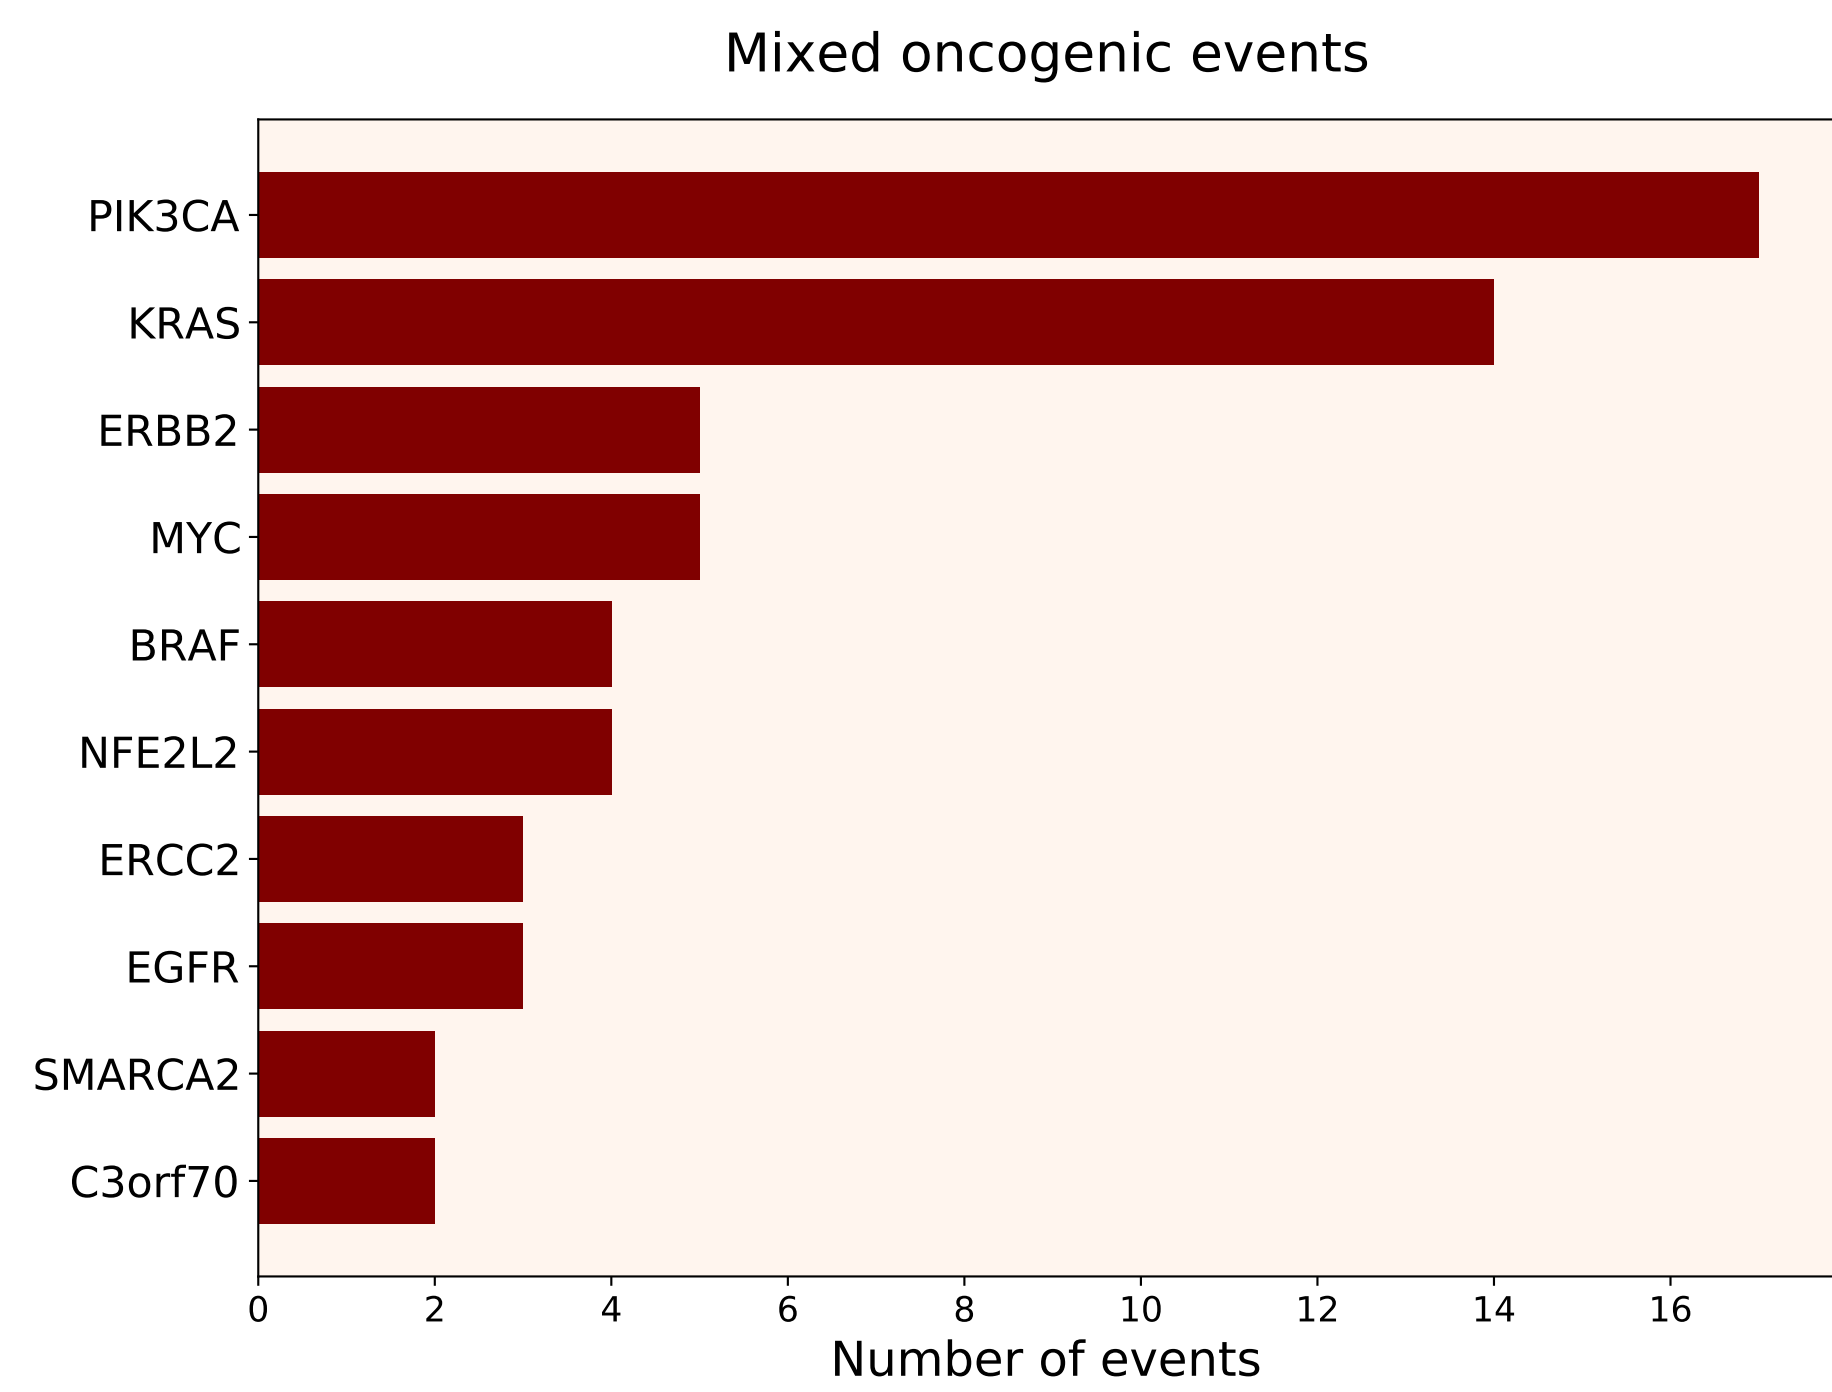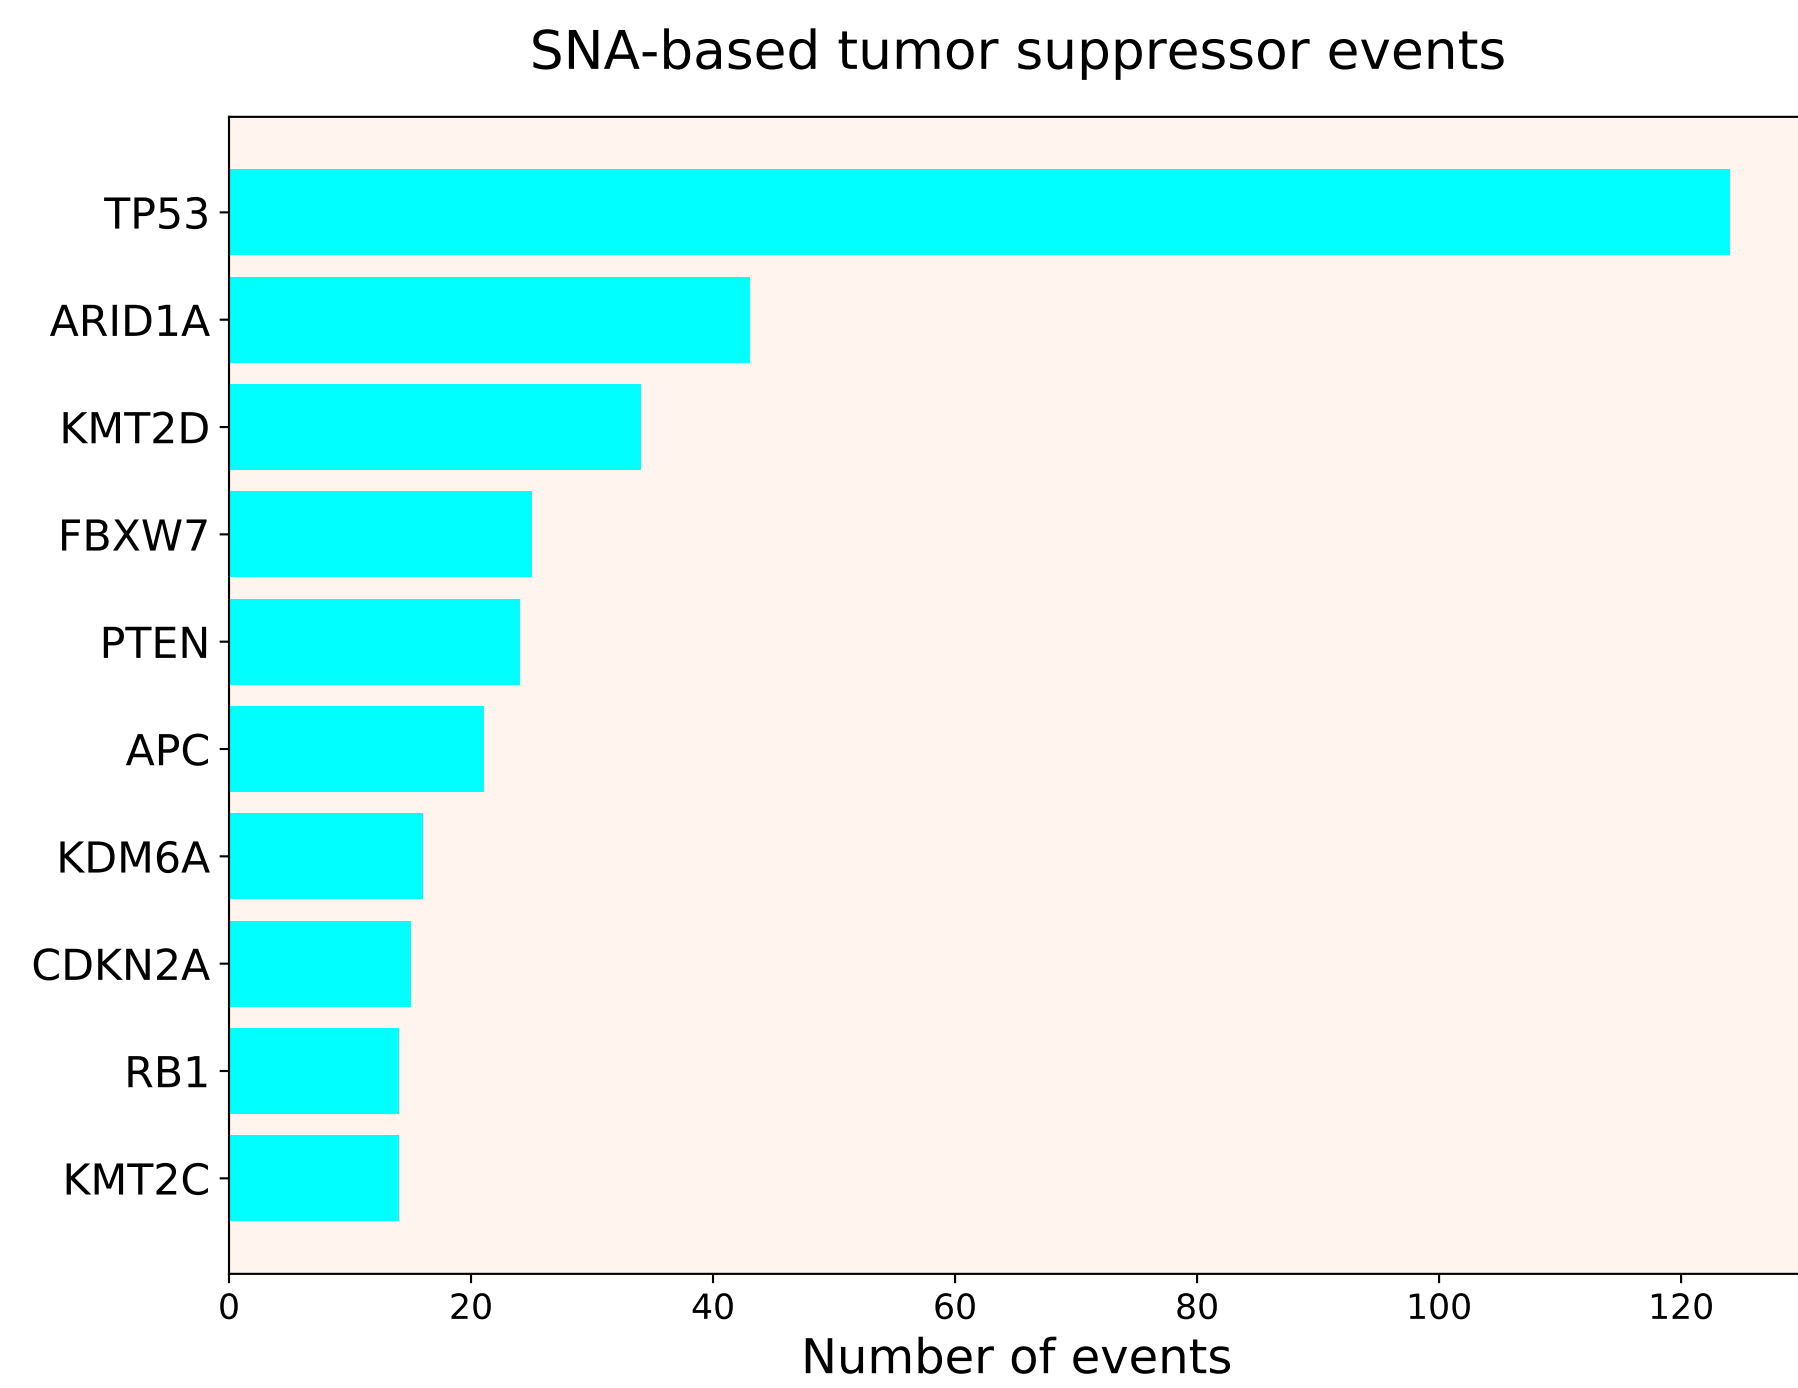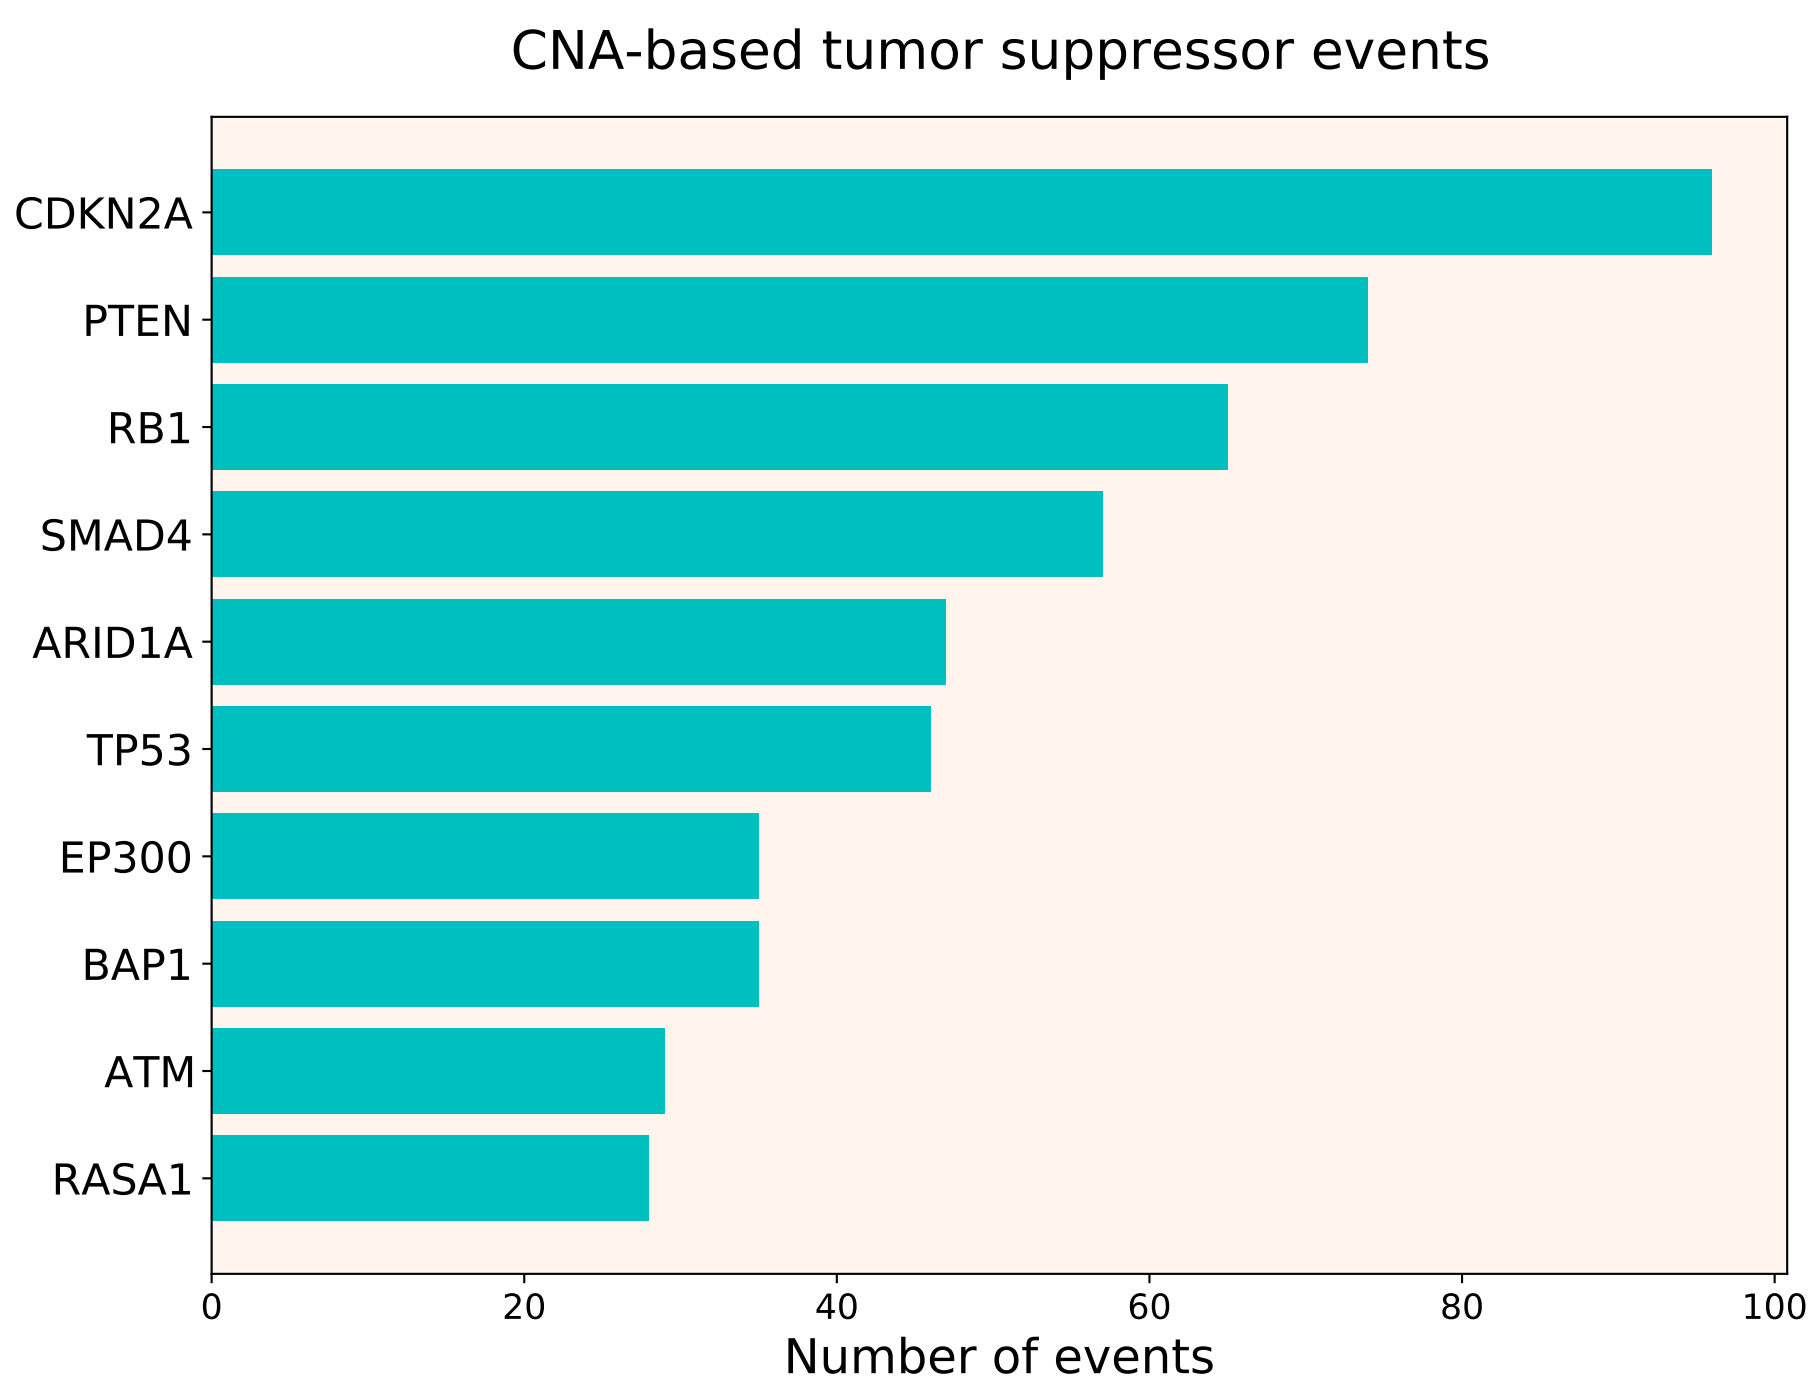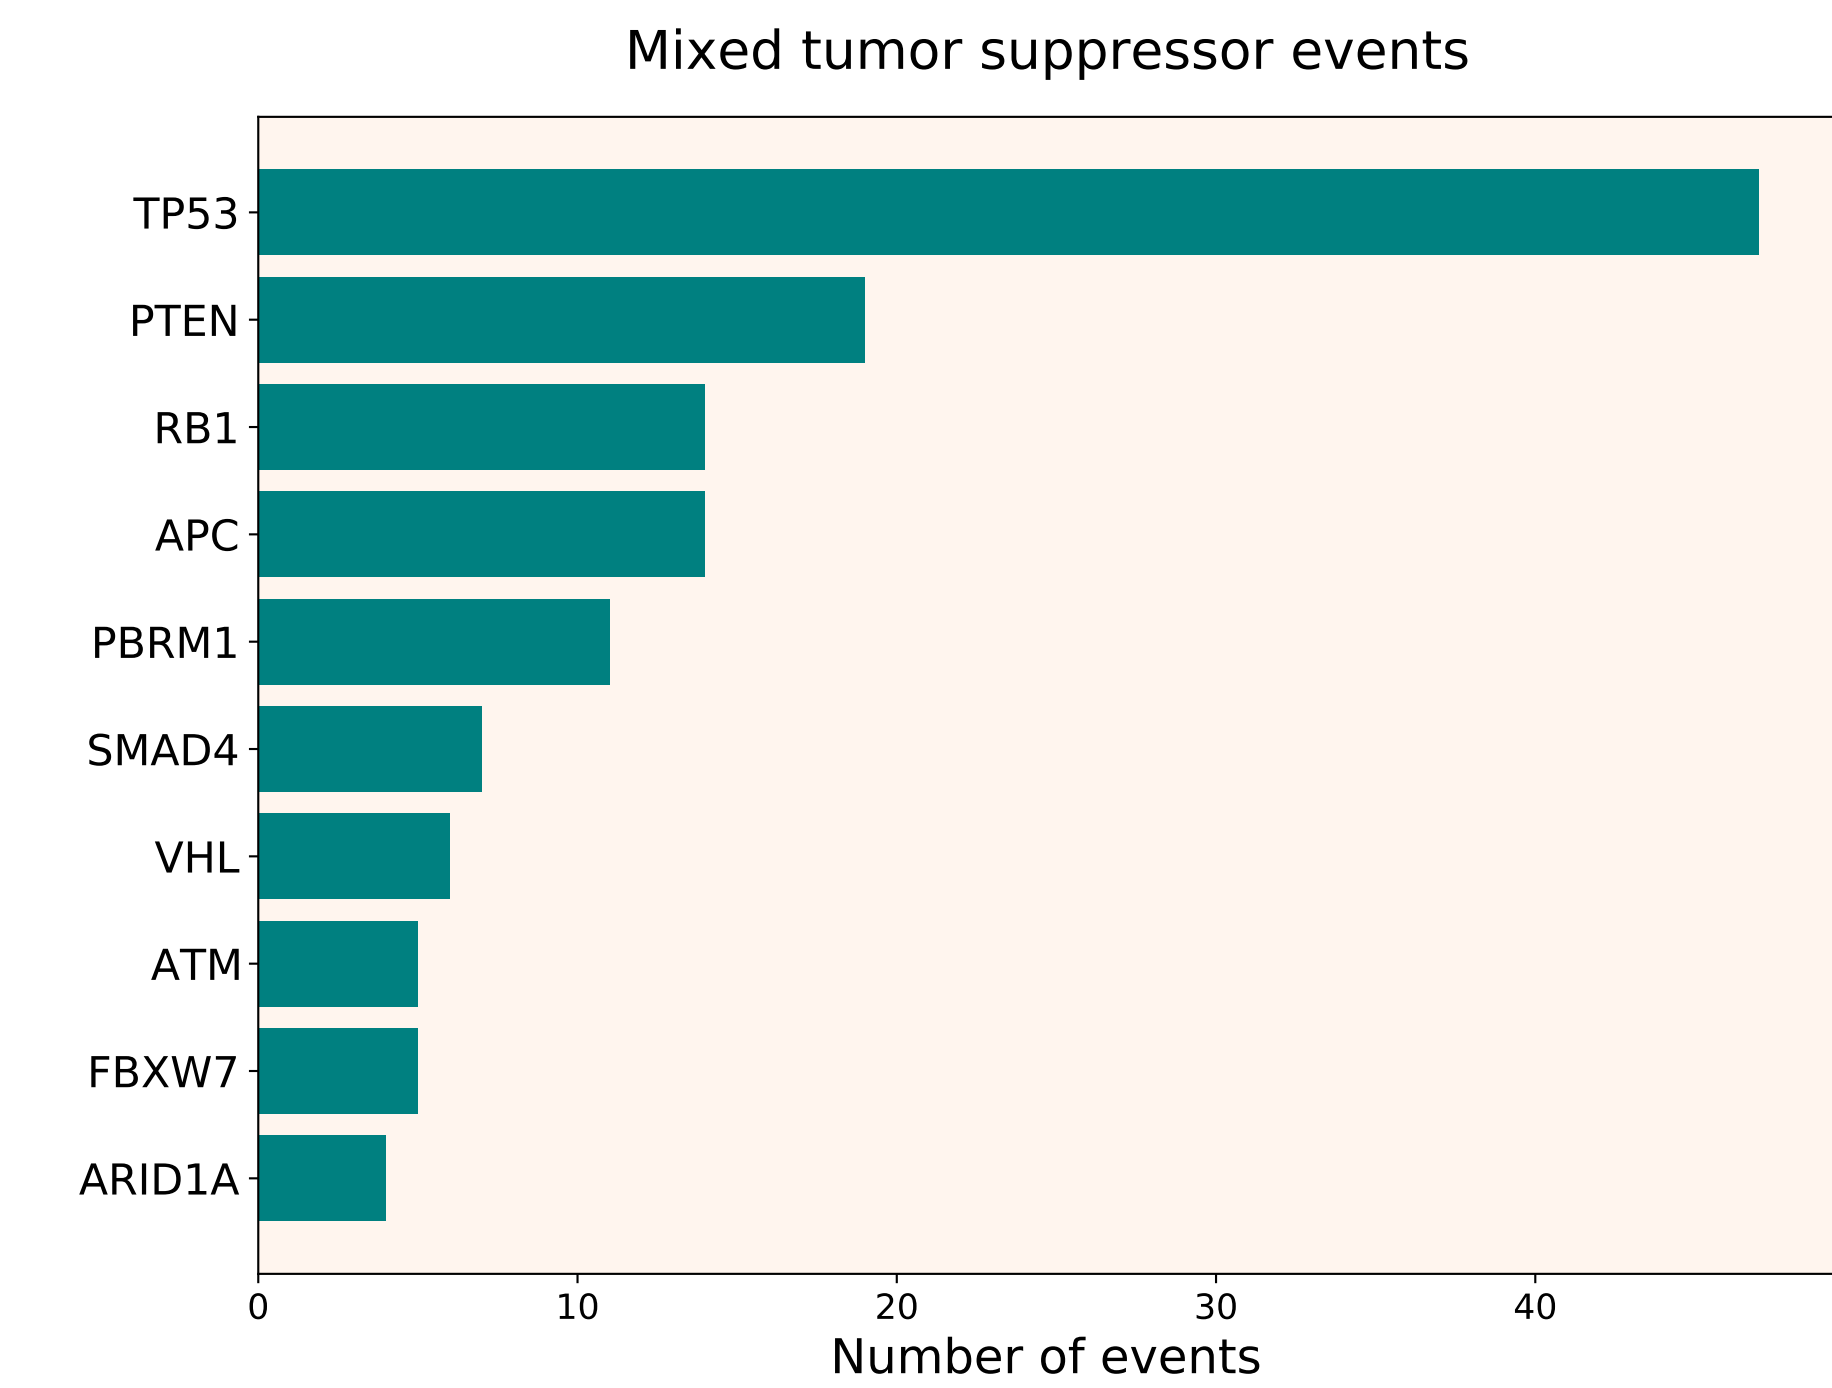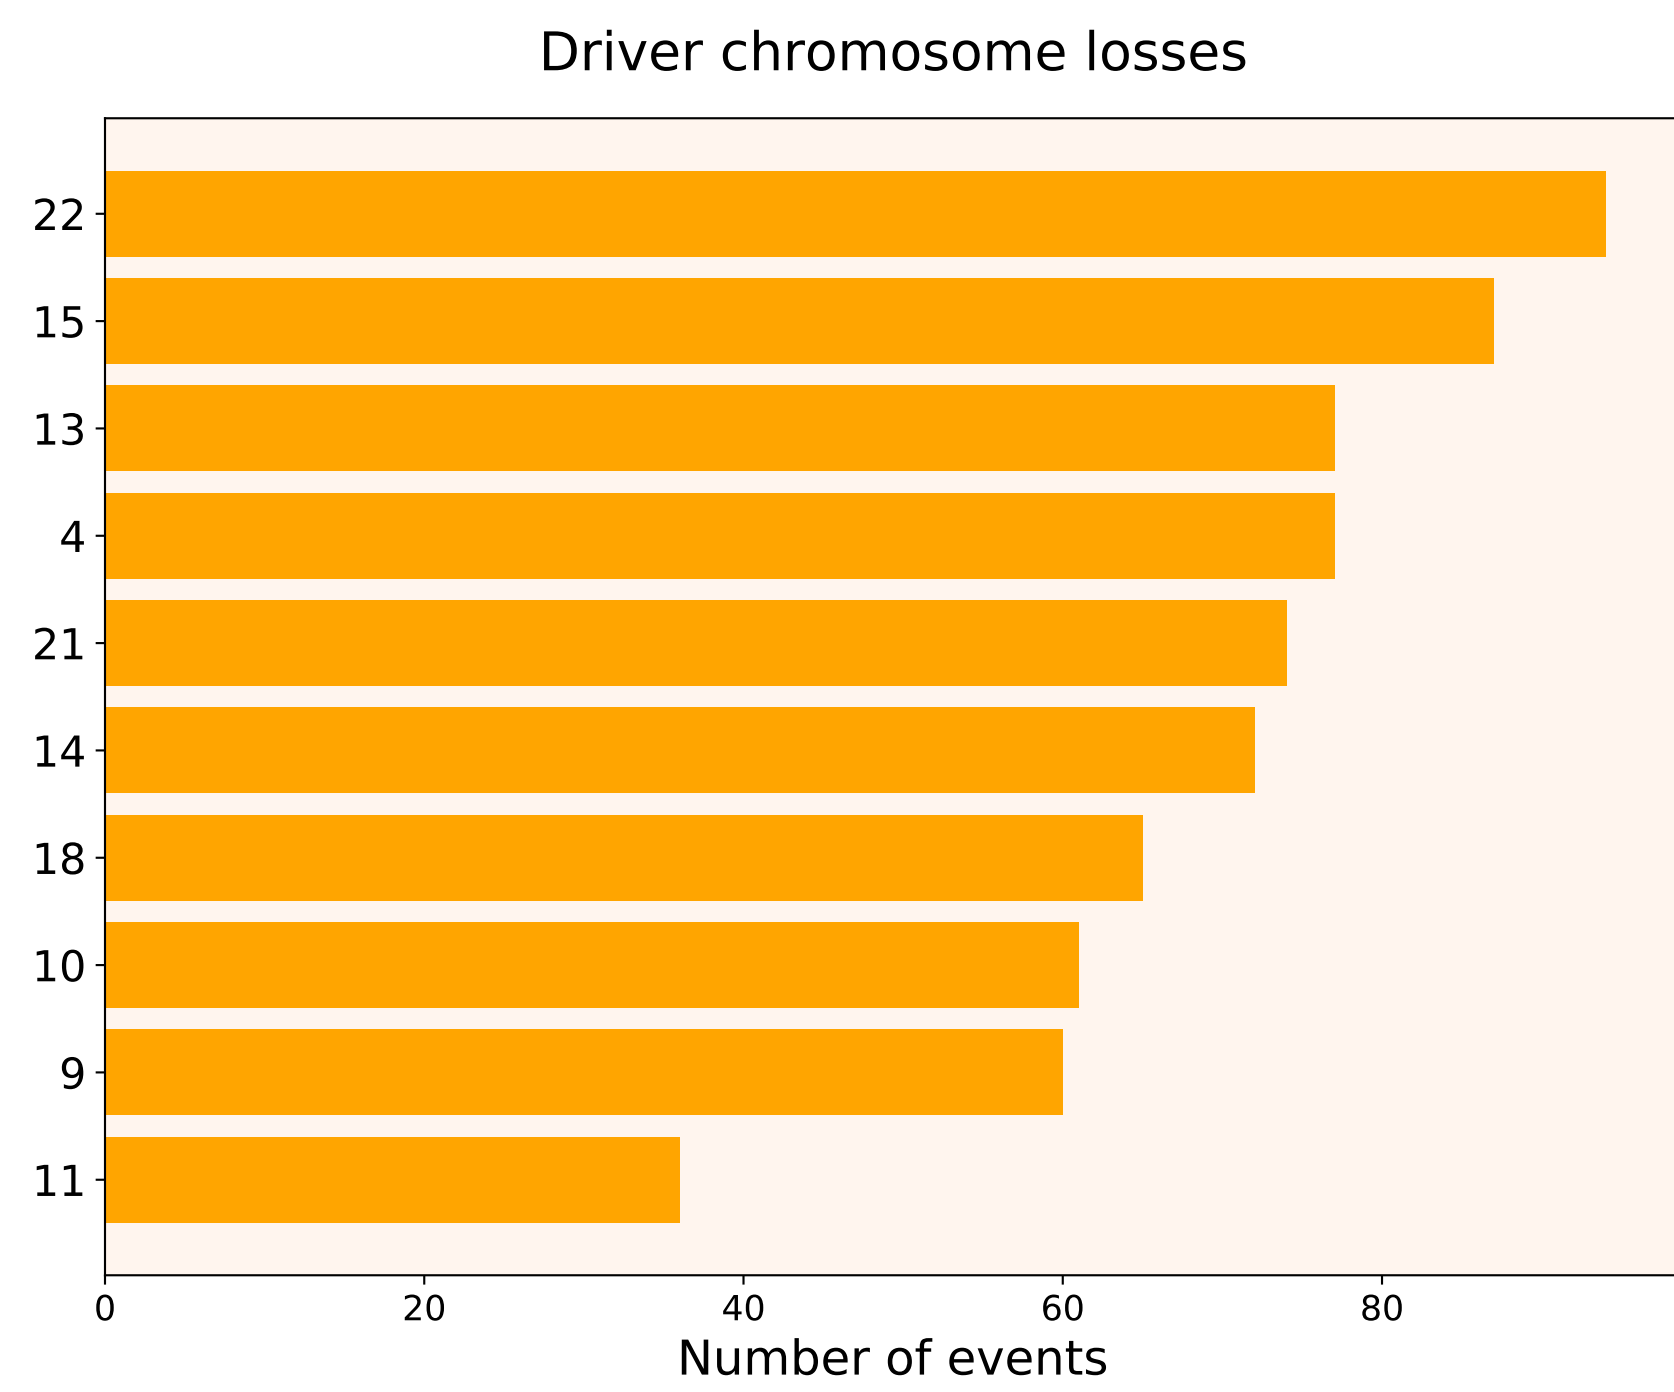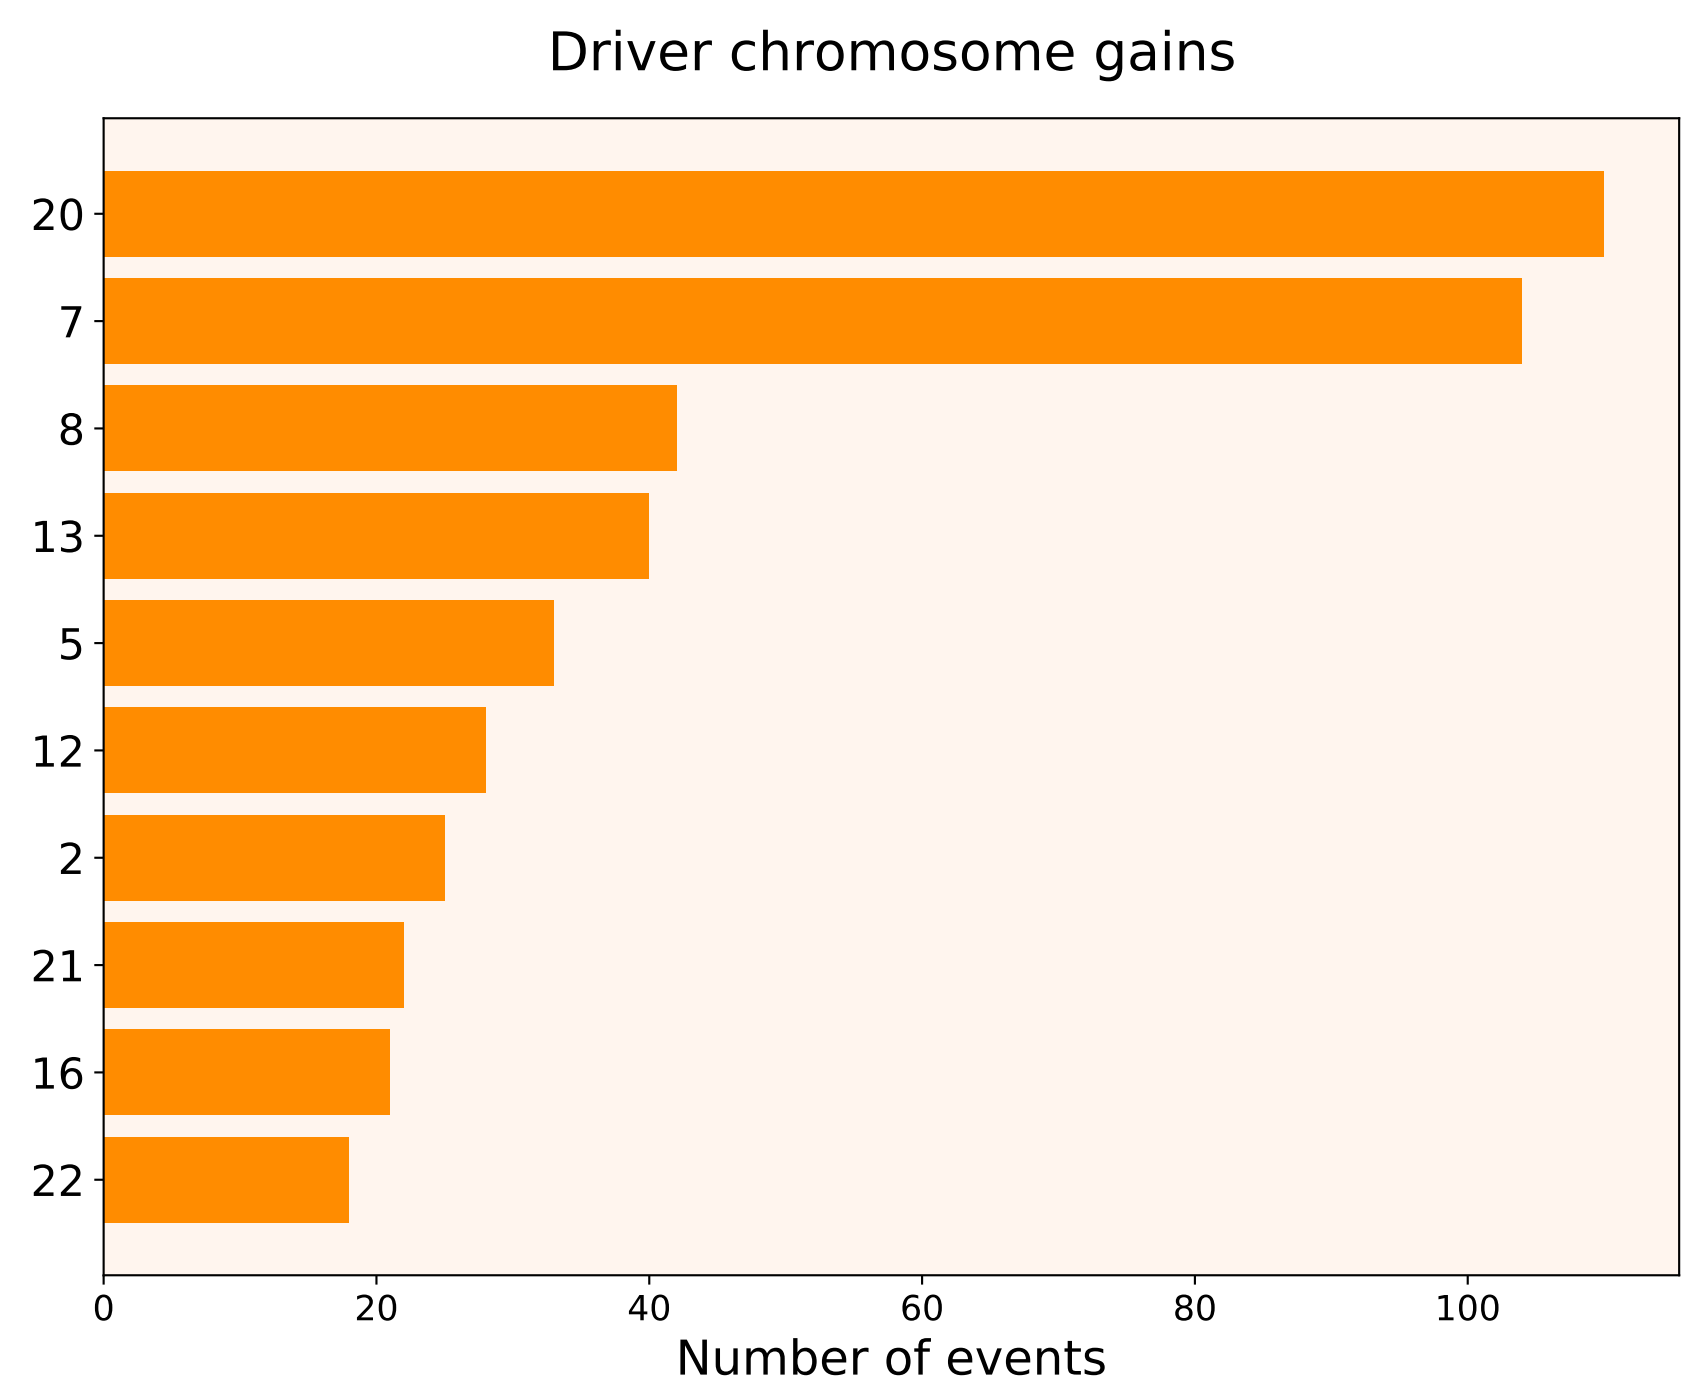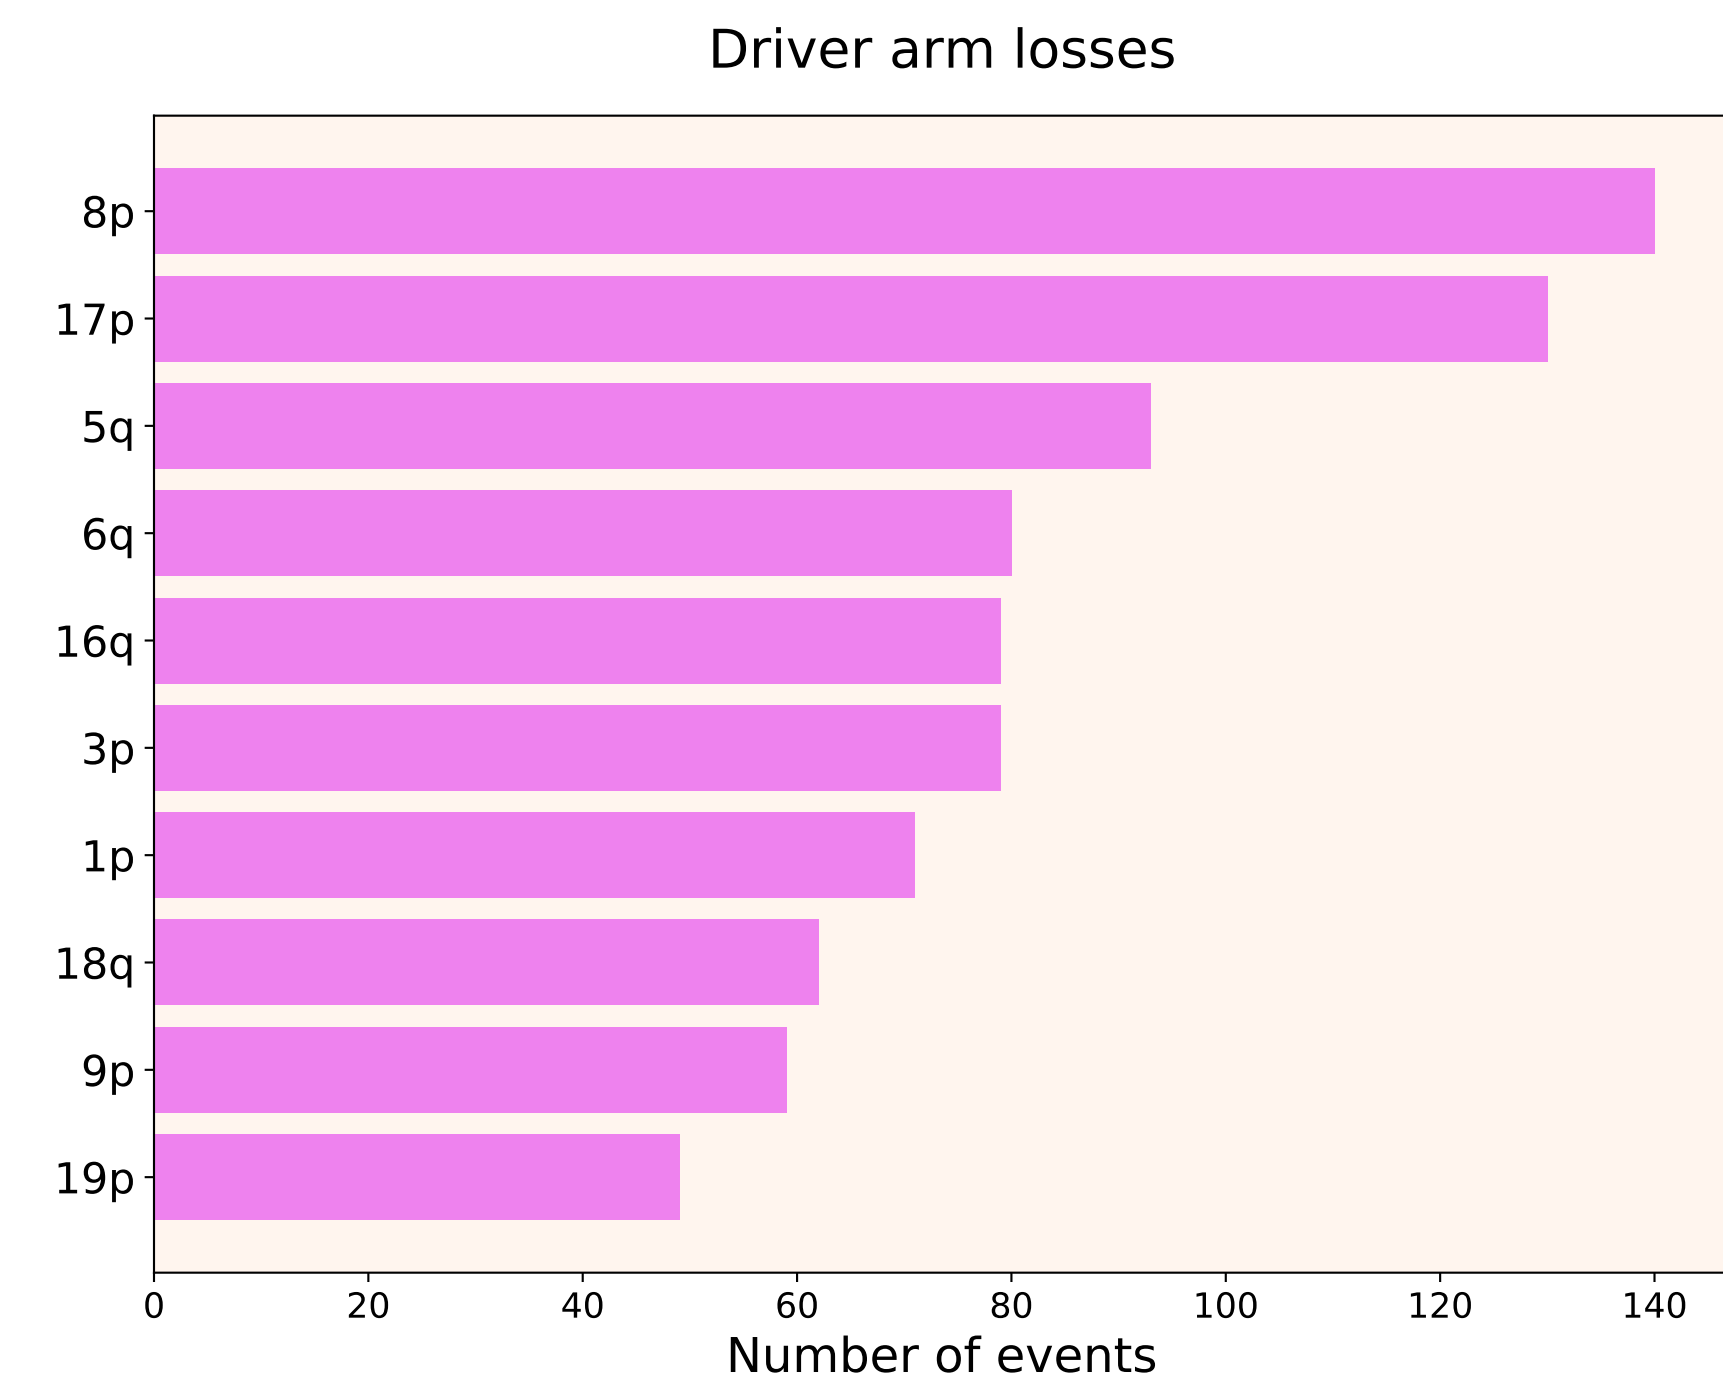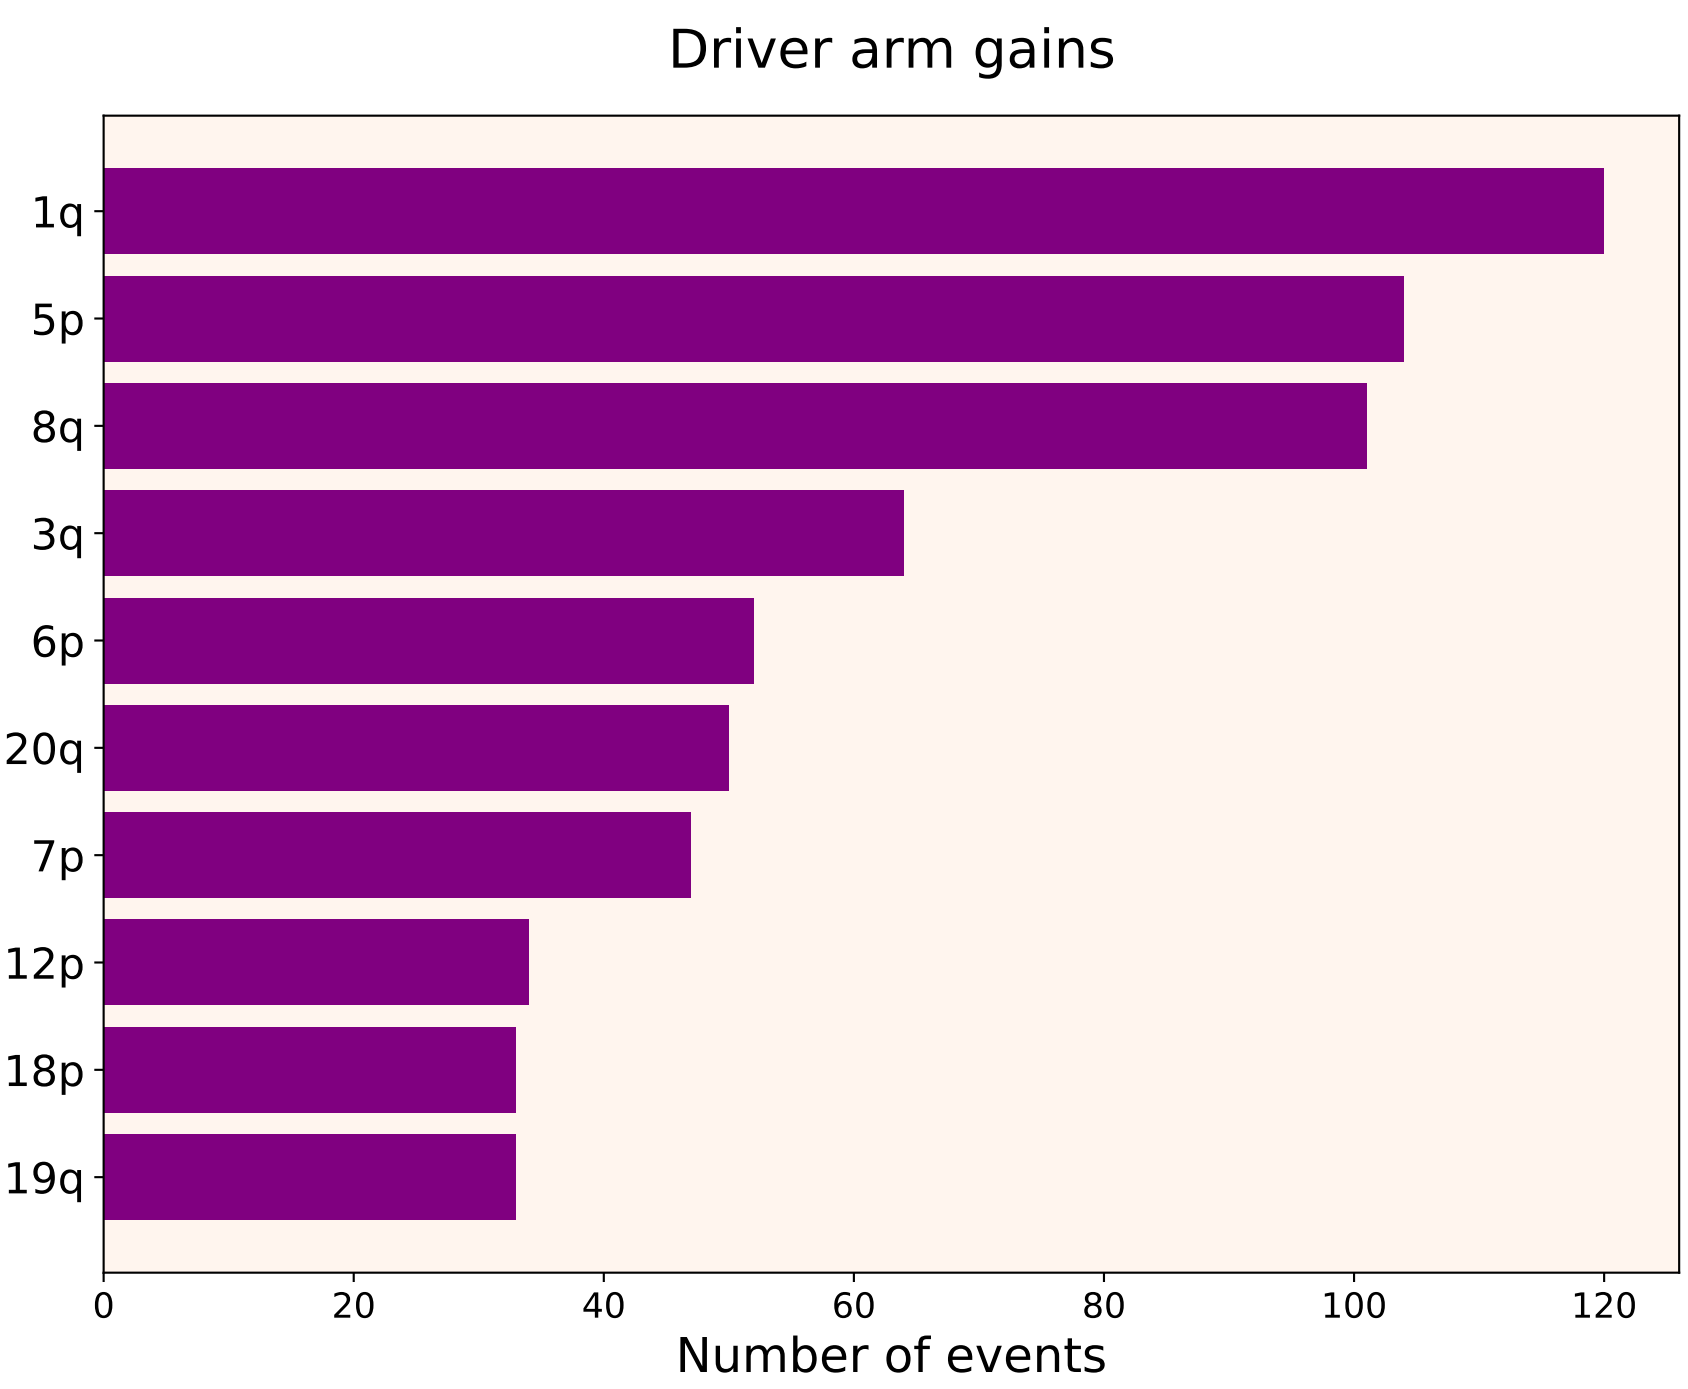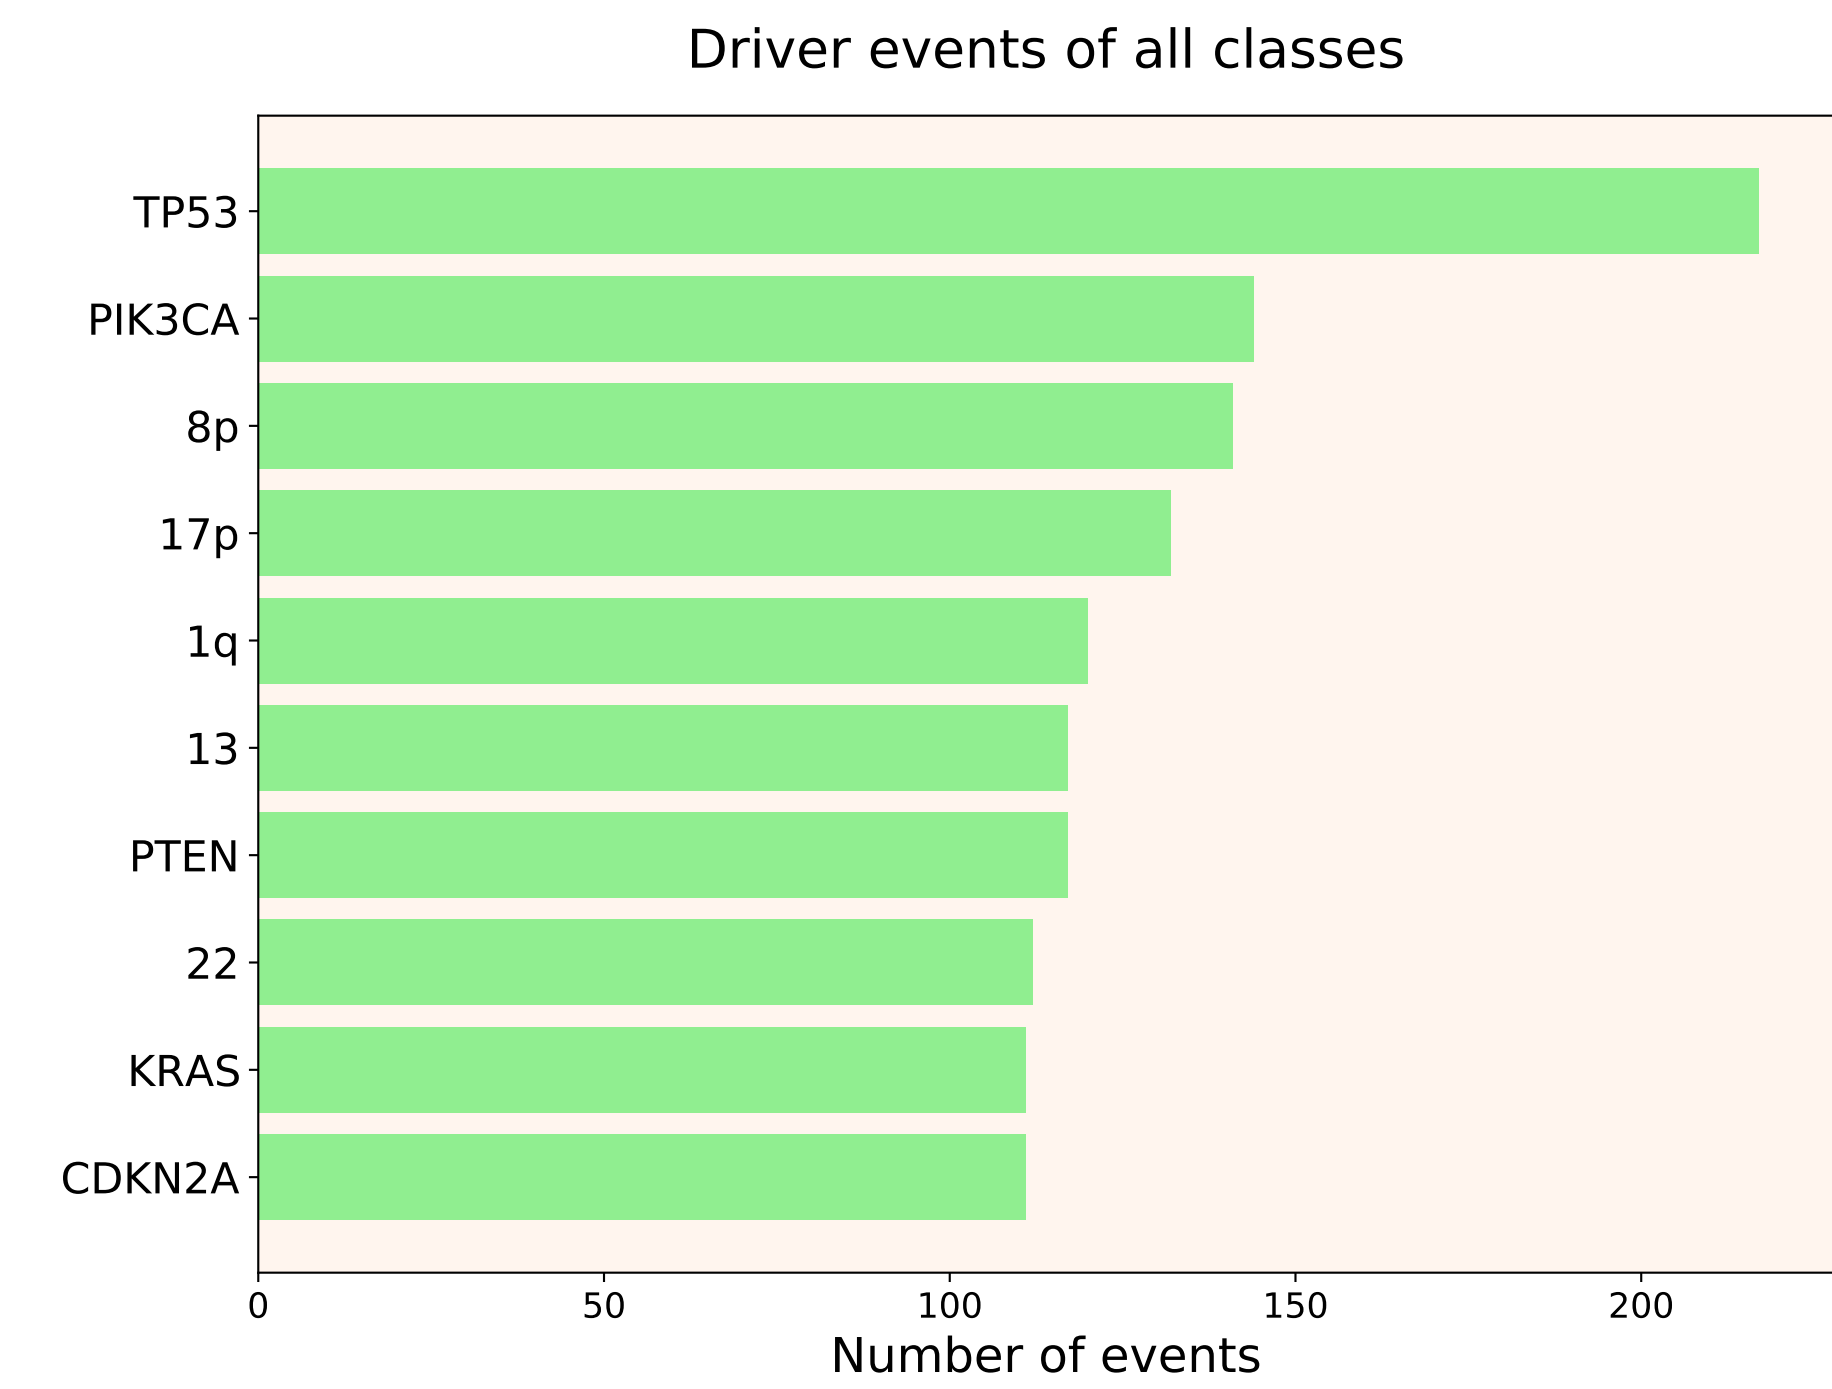

Supplement: Supplemental_Data_S1.zip [file Supplemental_Data_S1.zip]

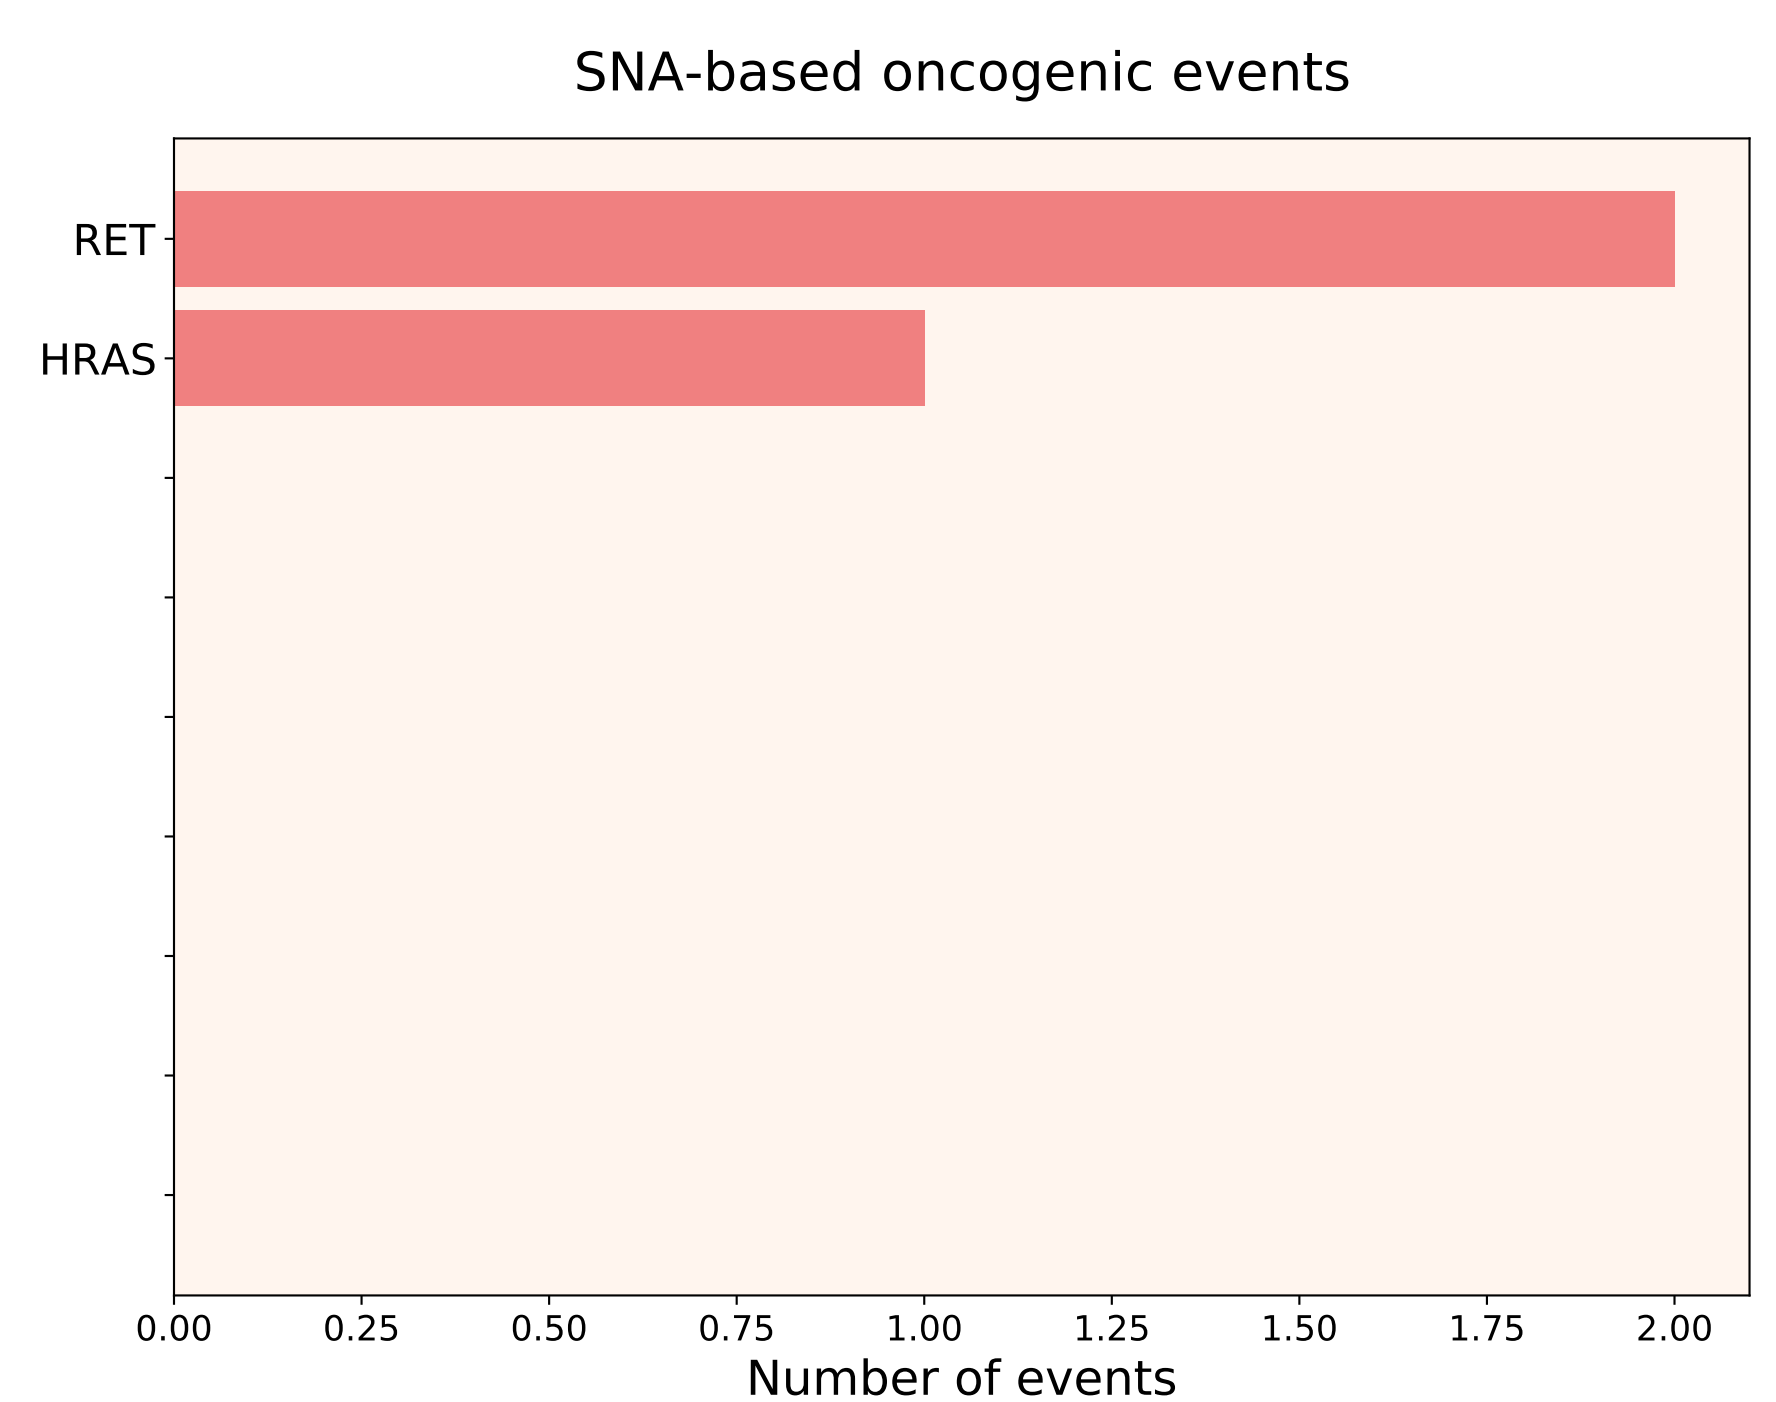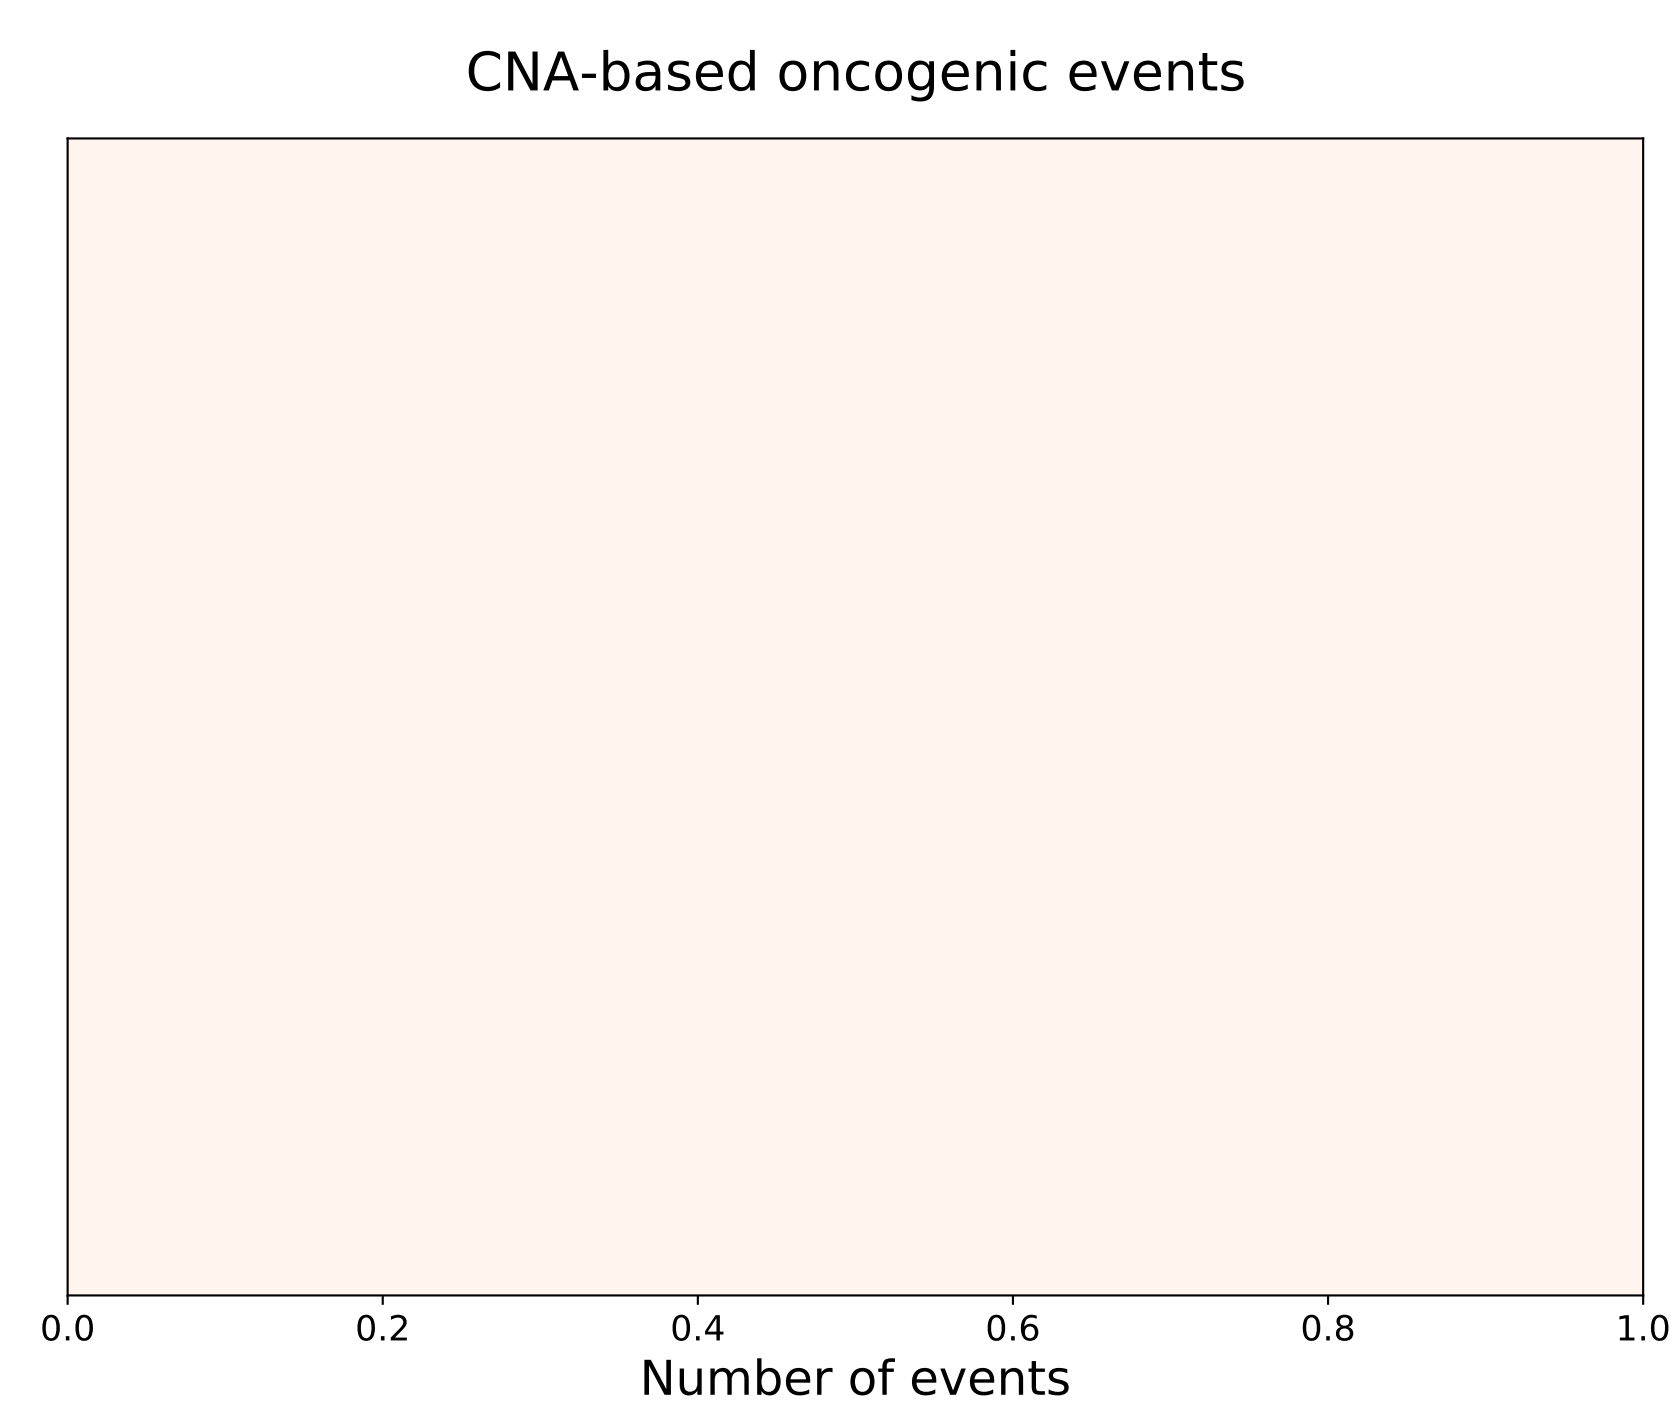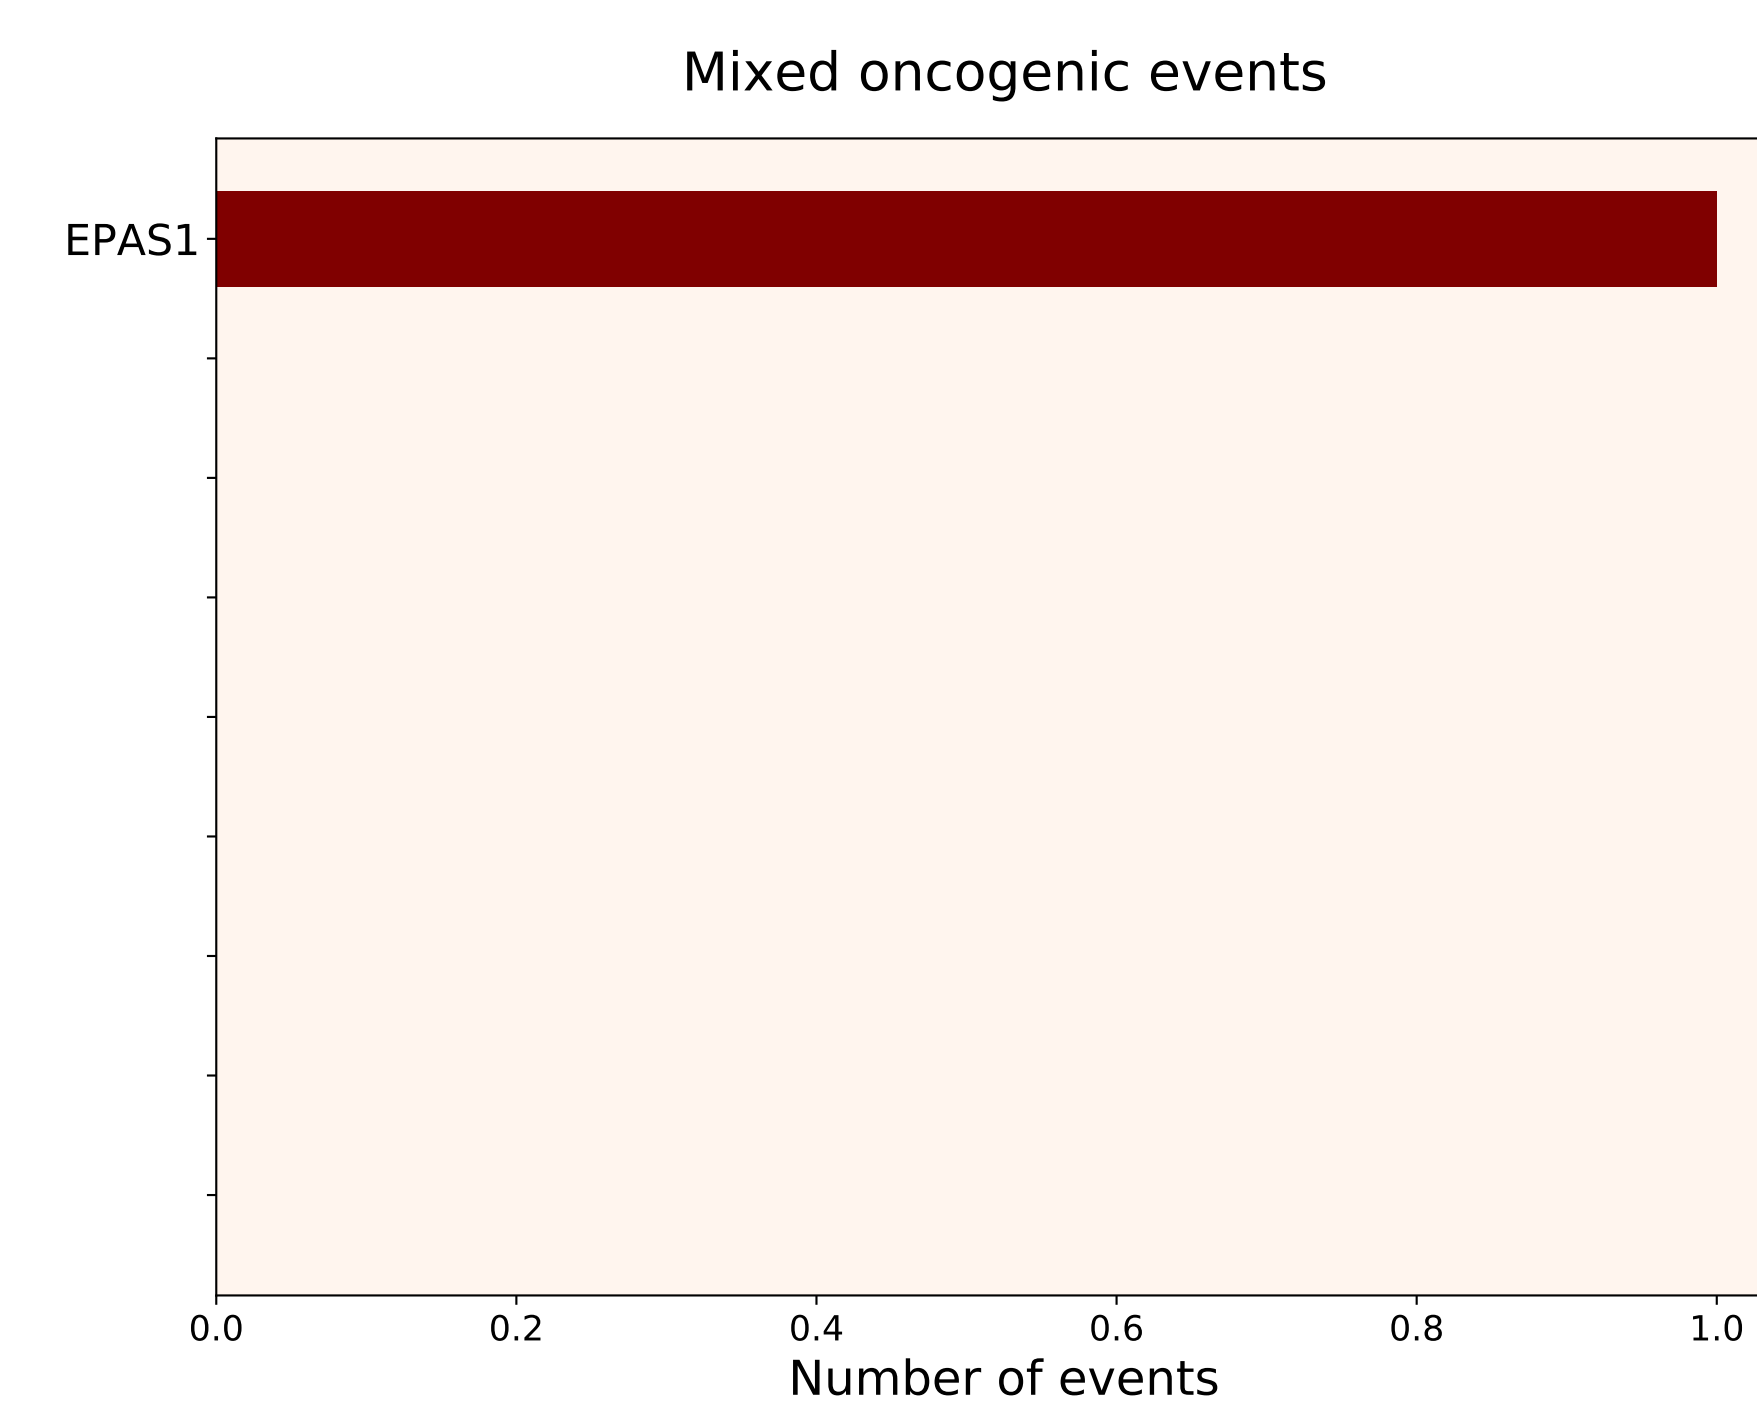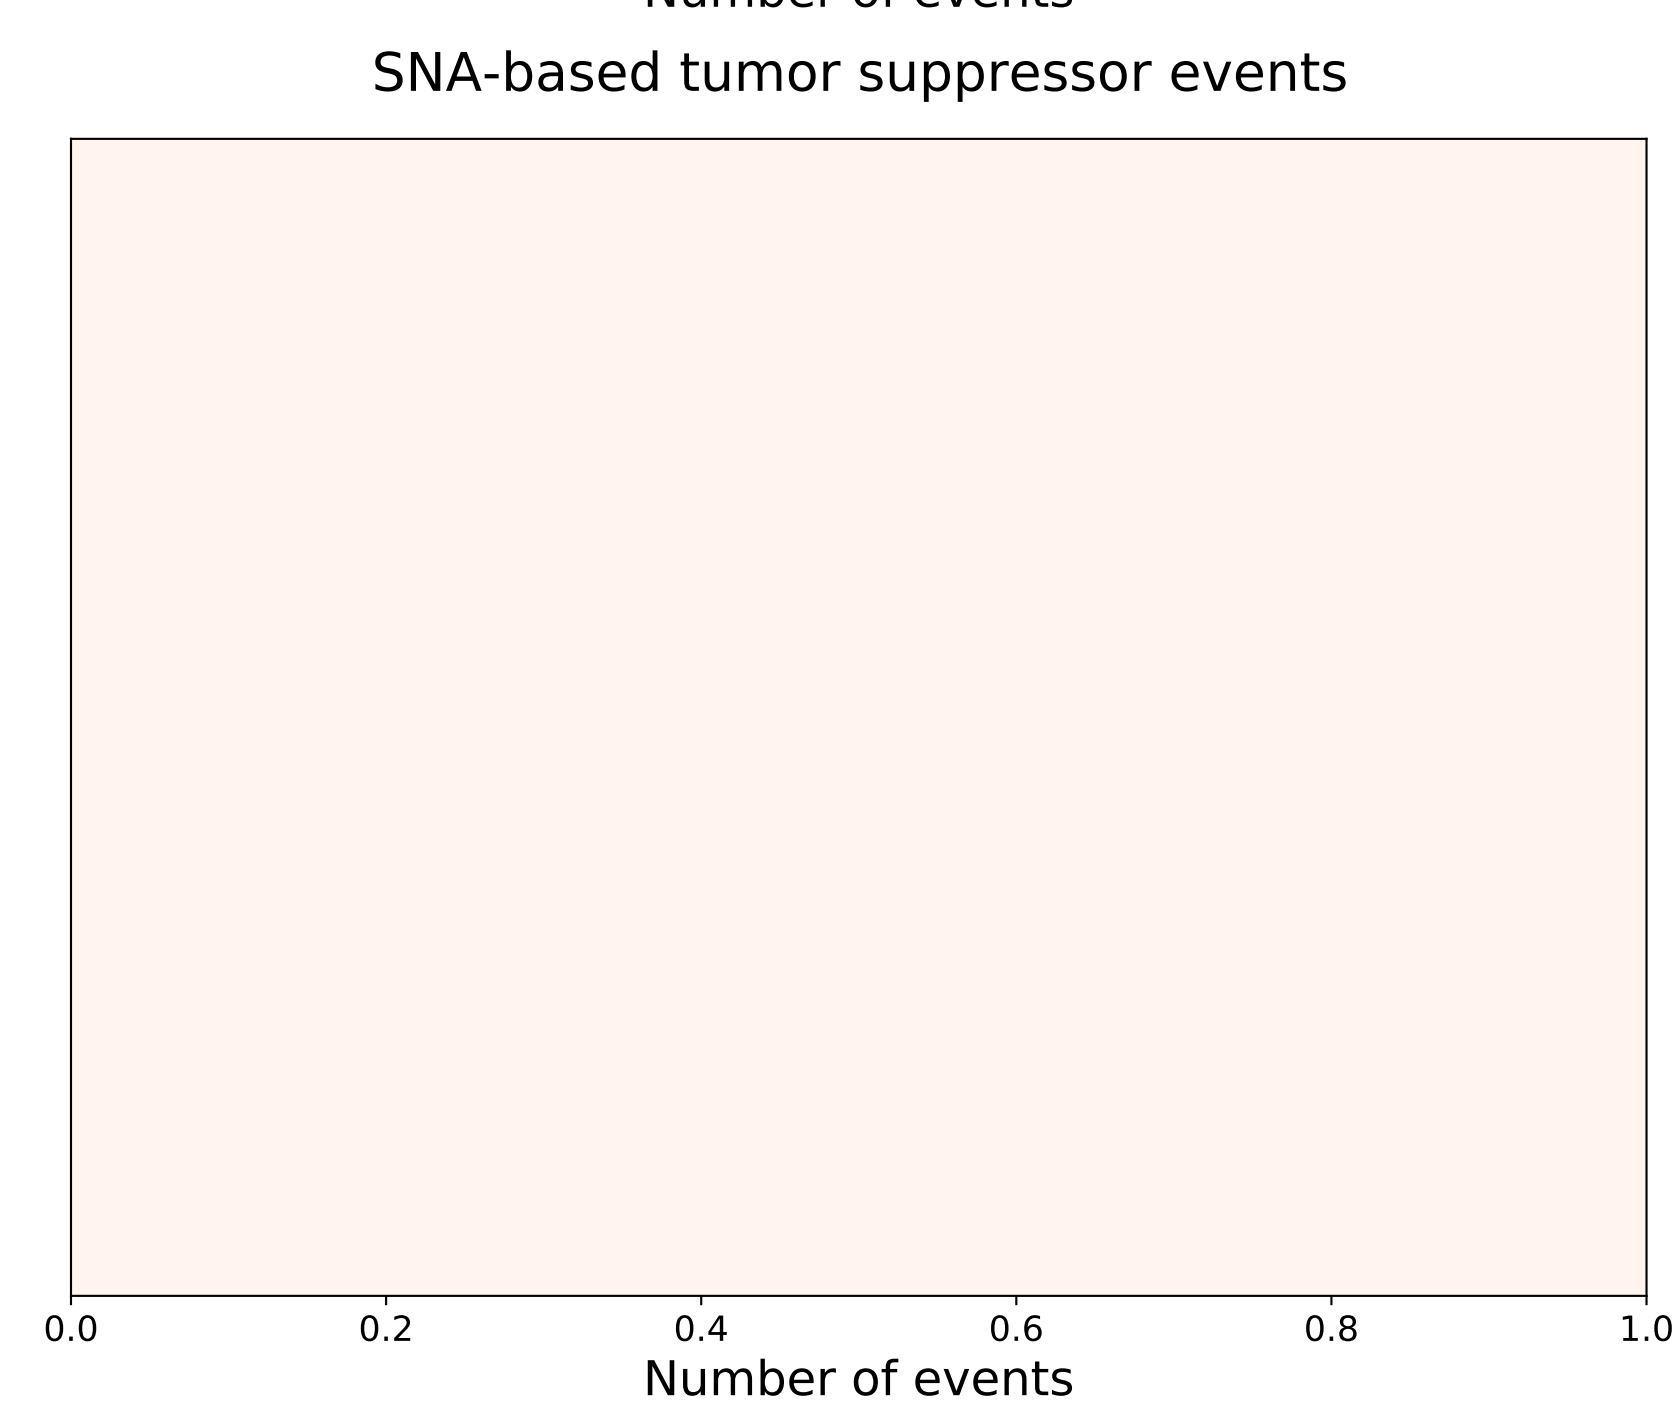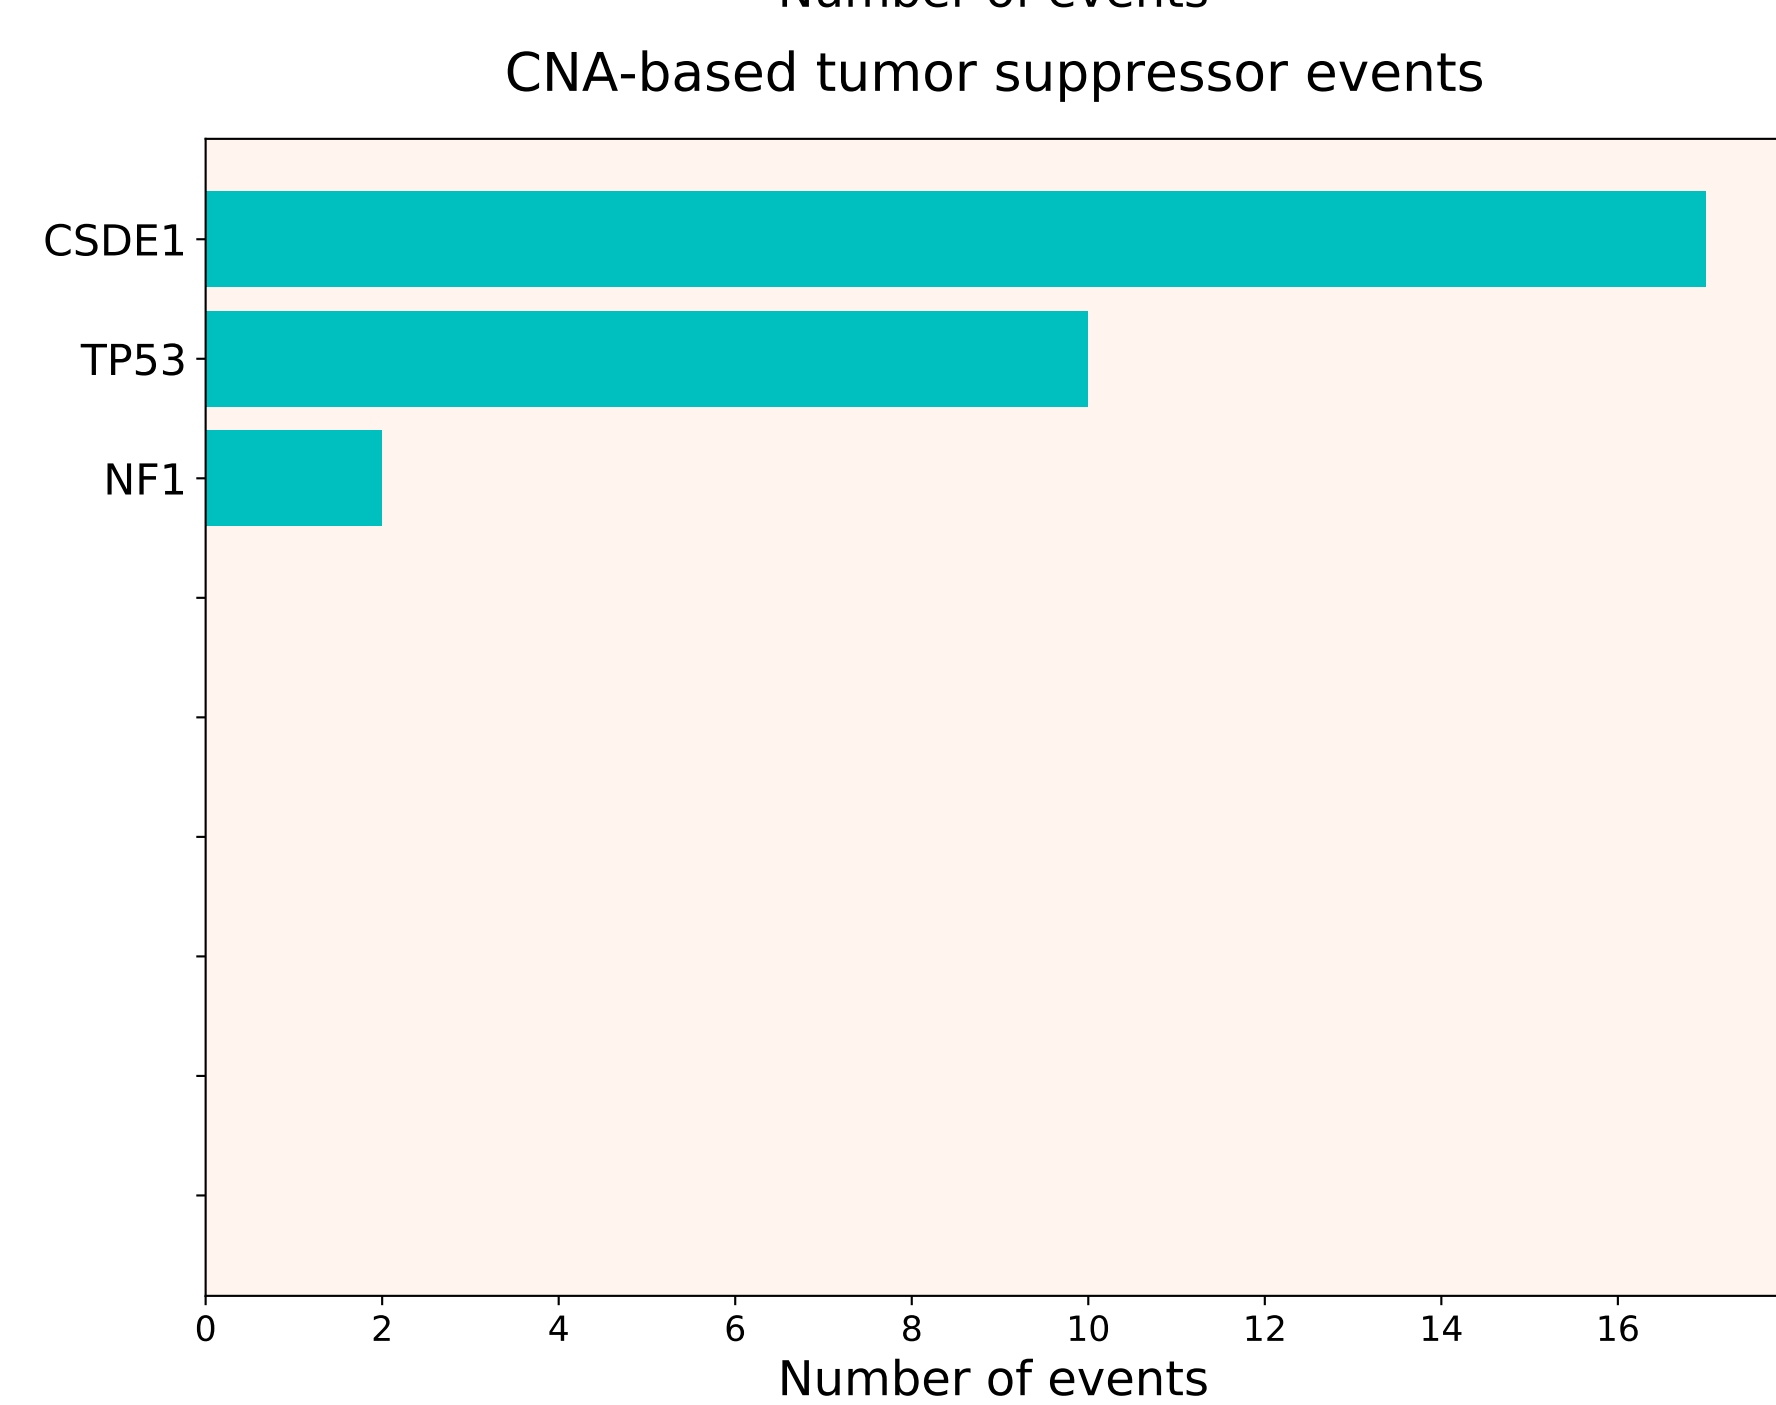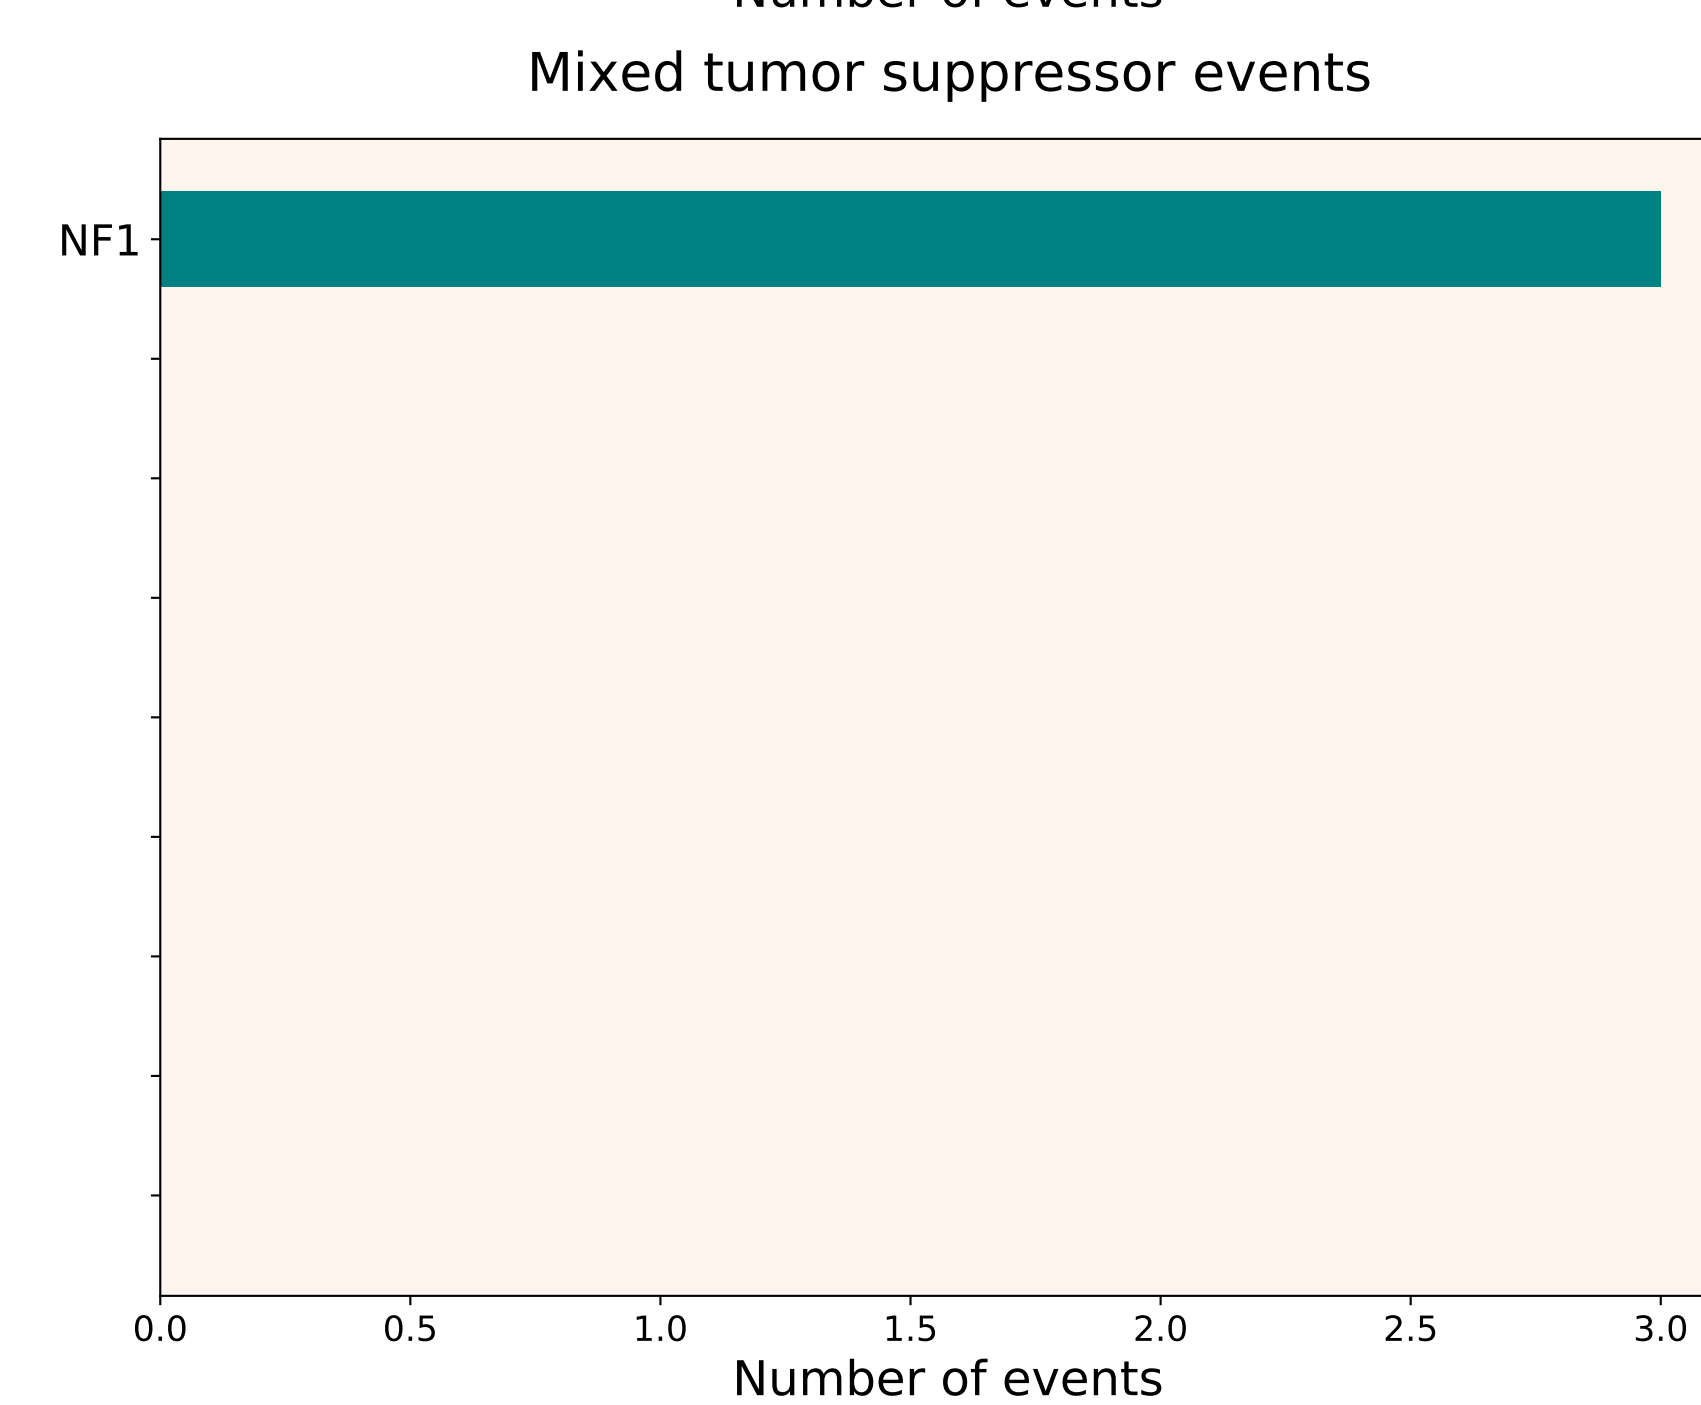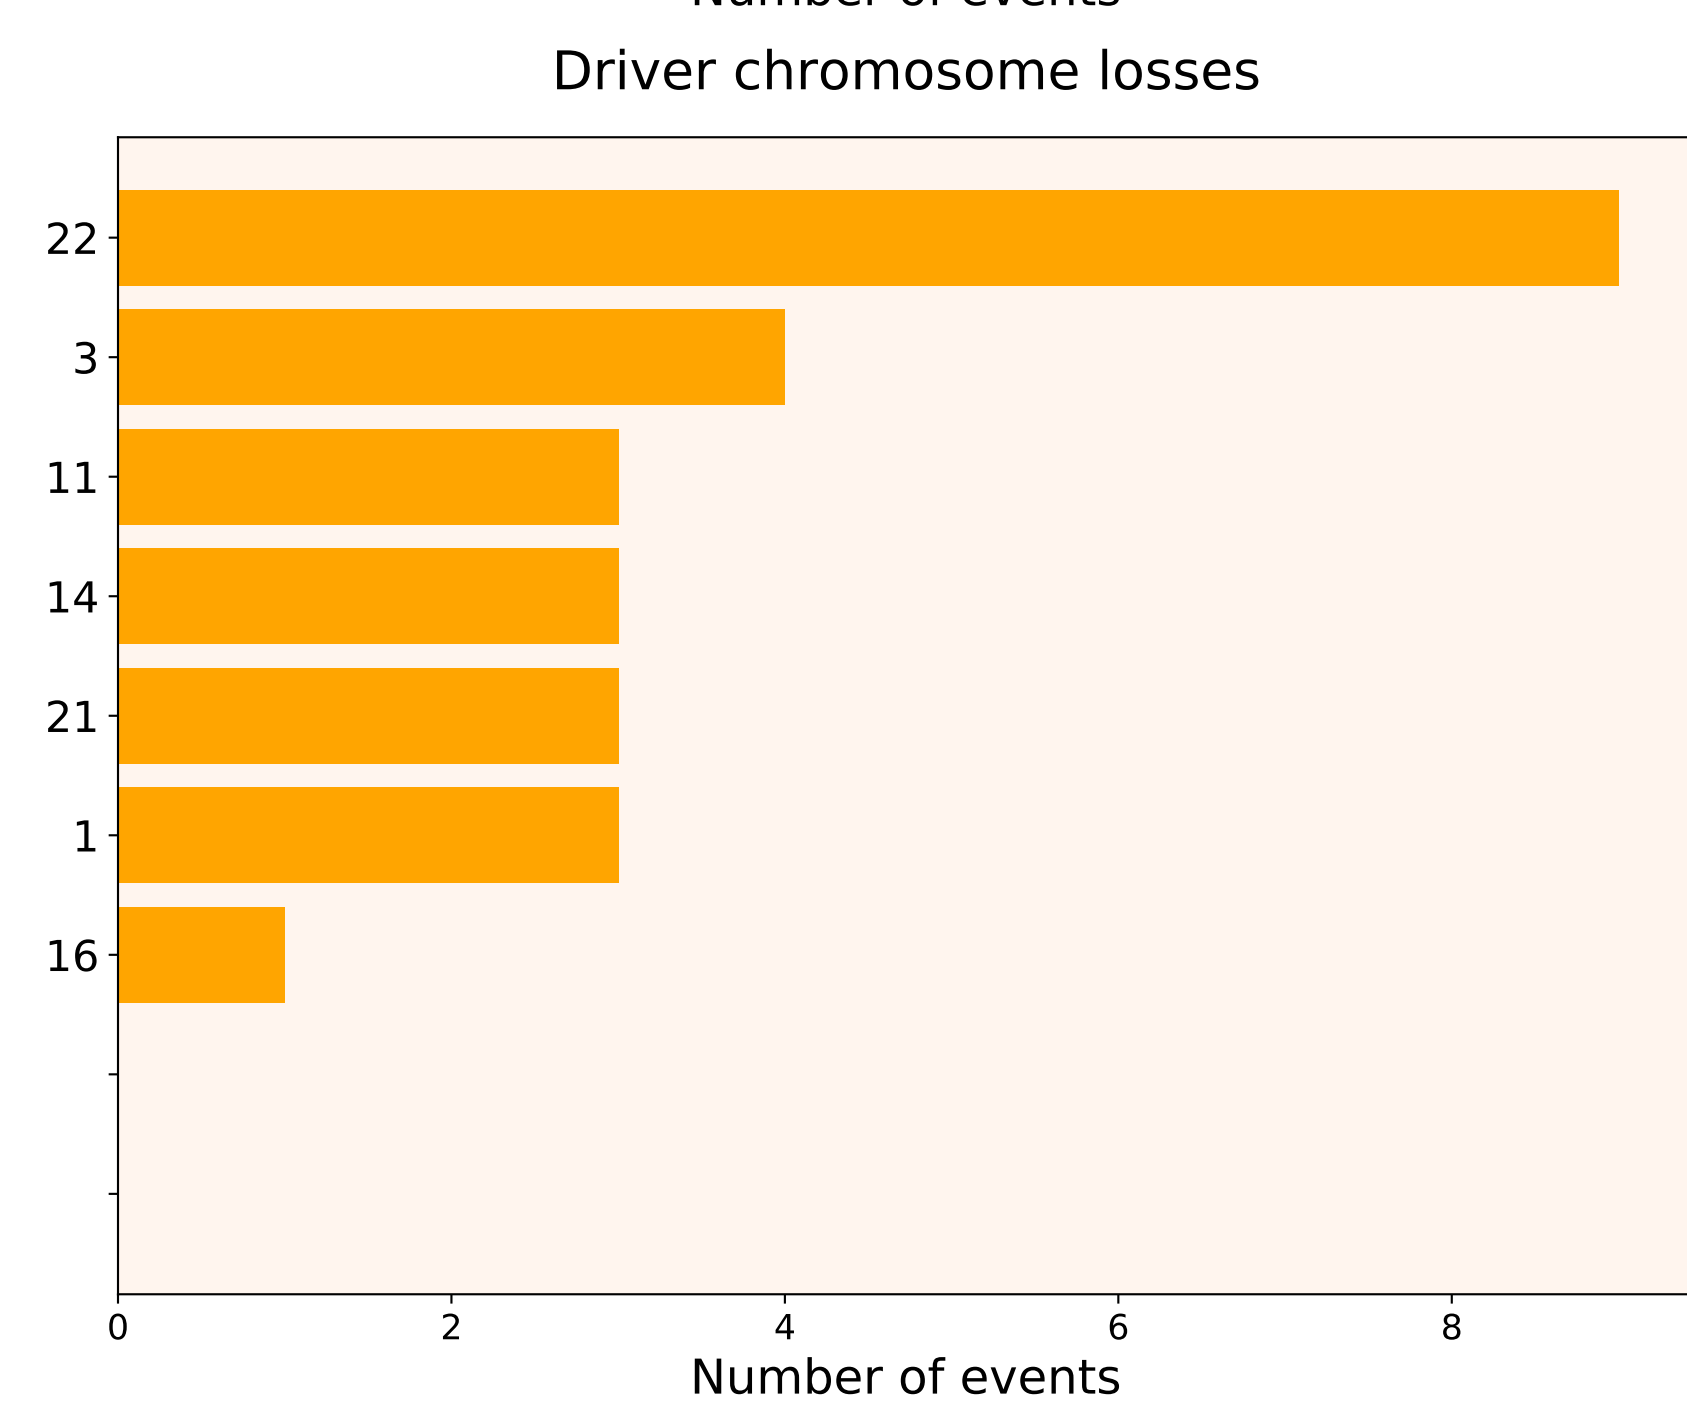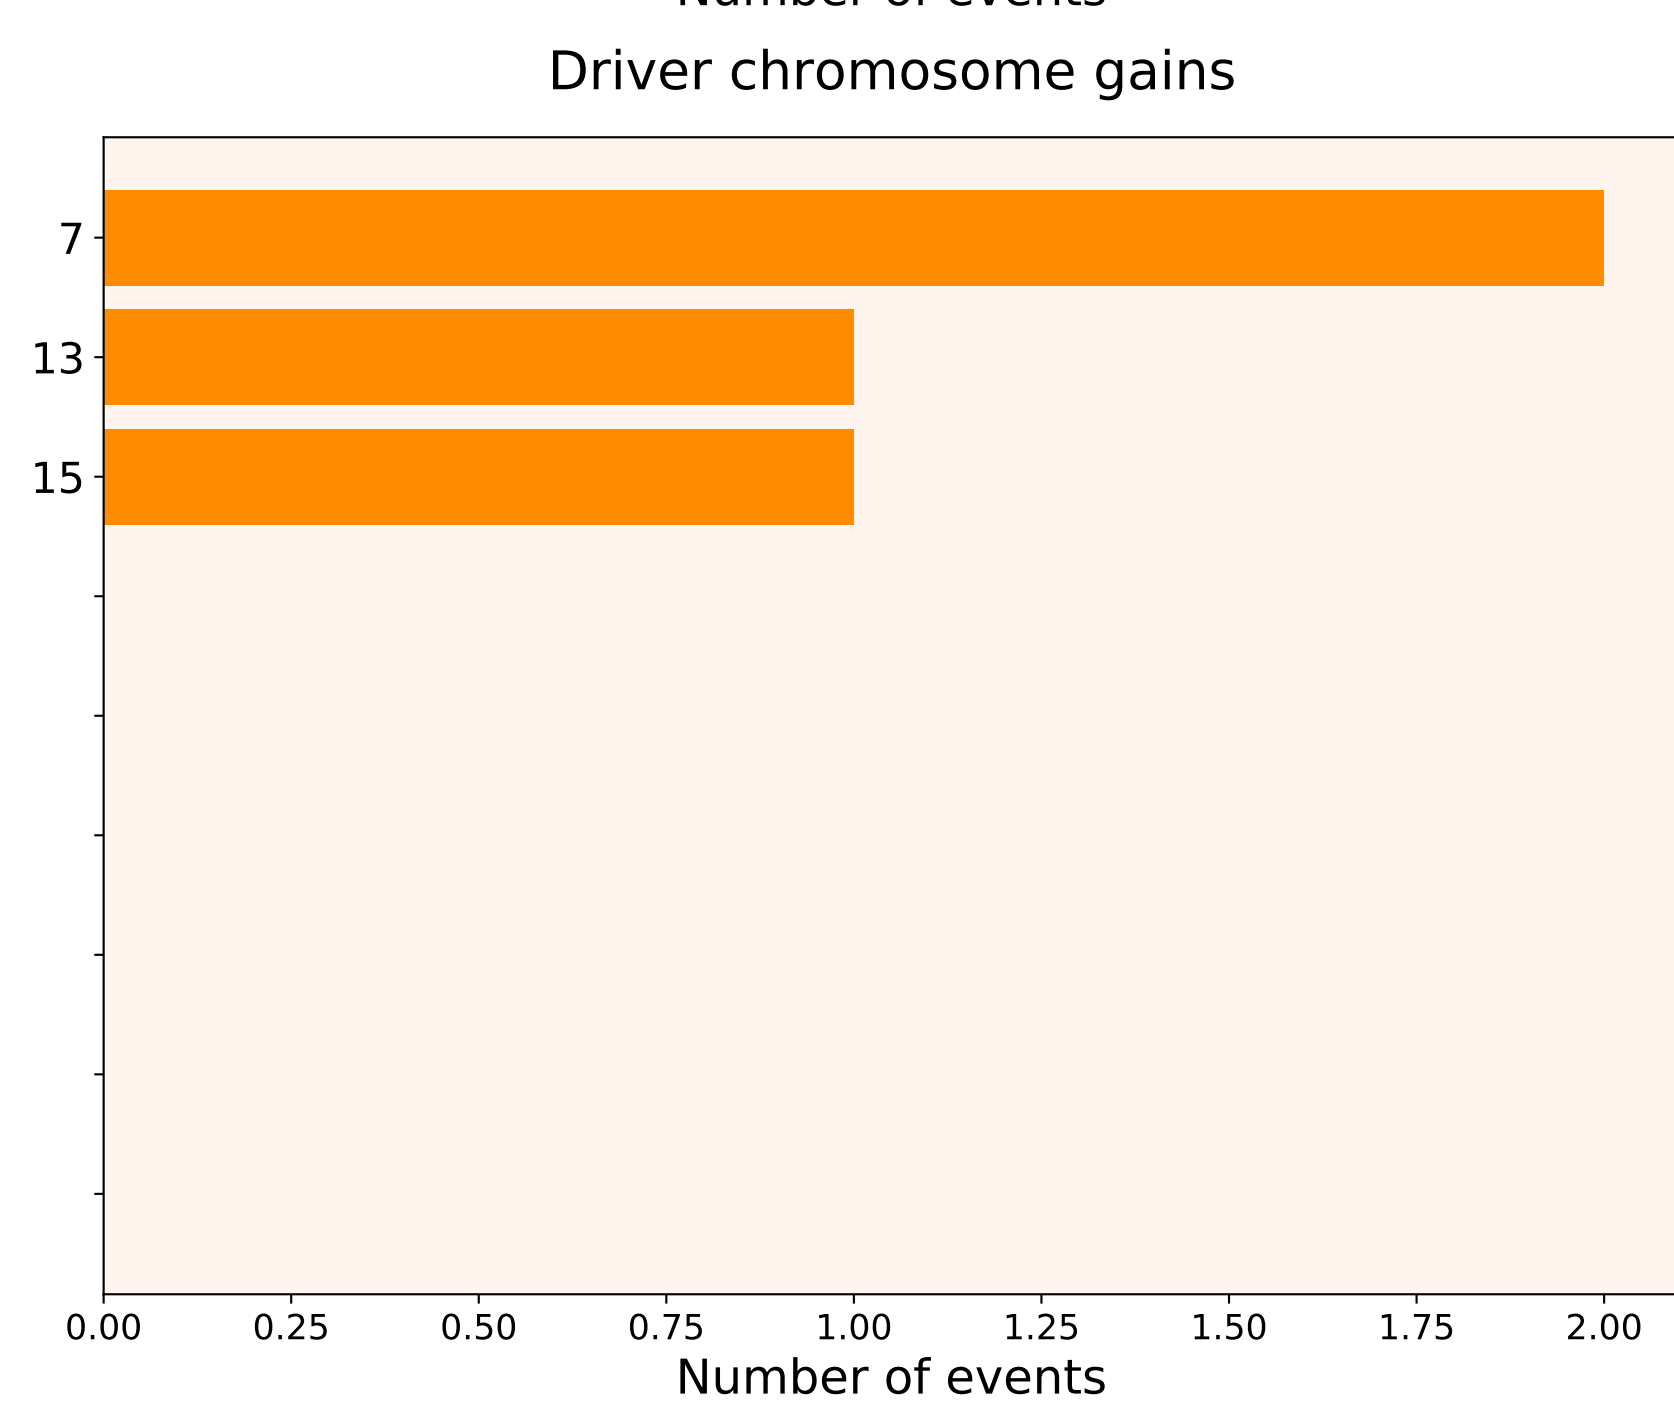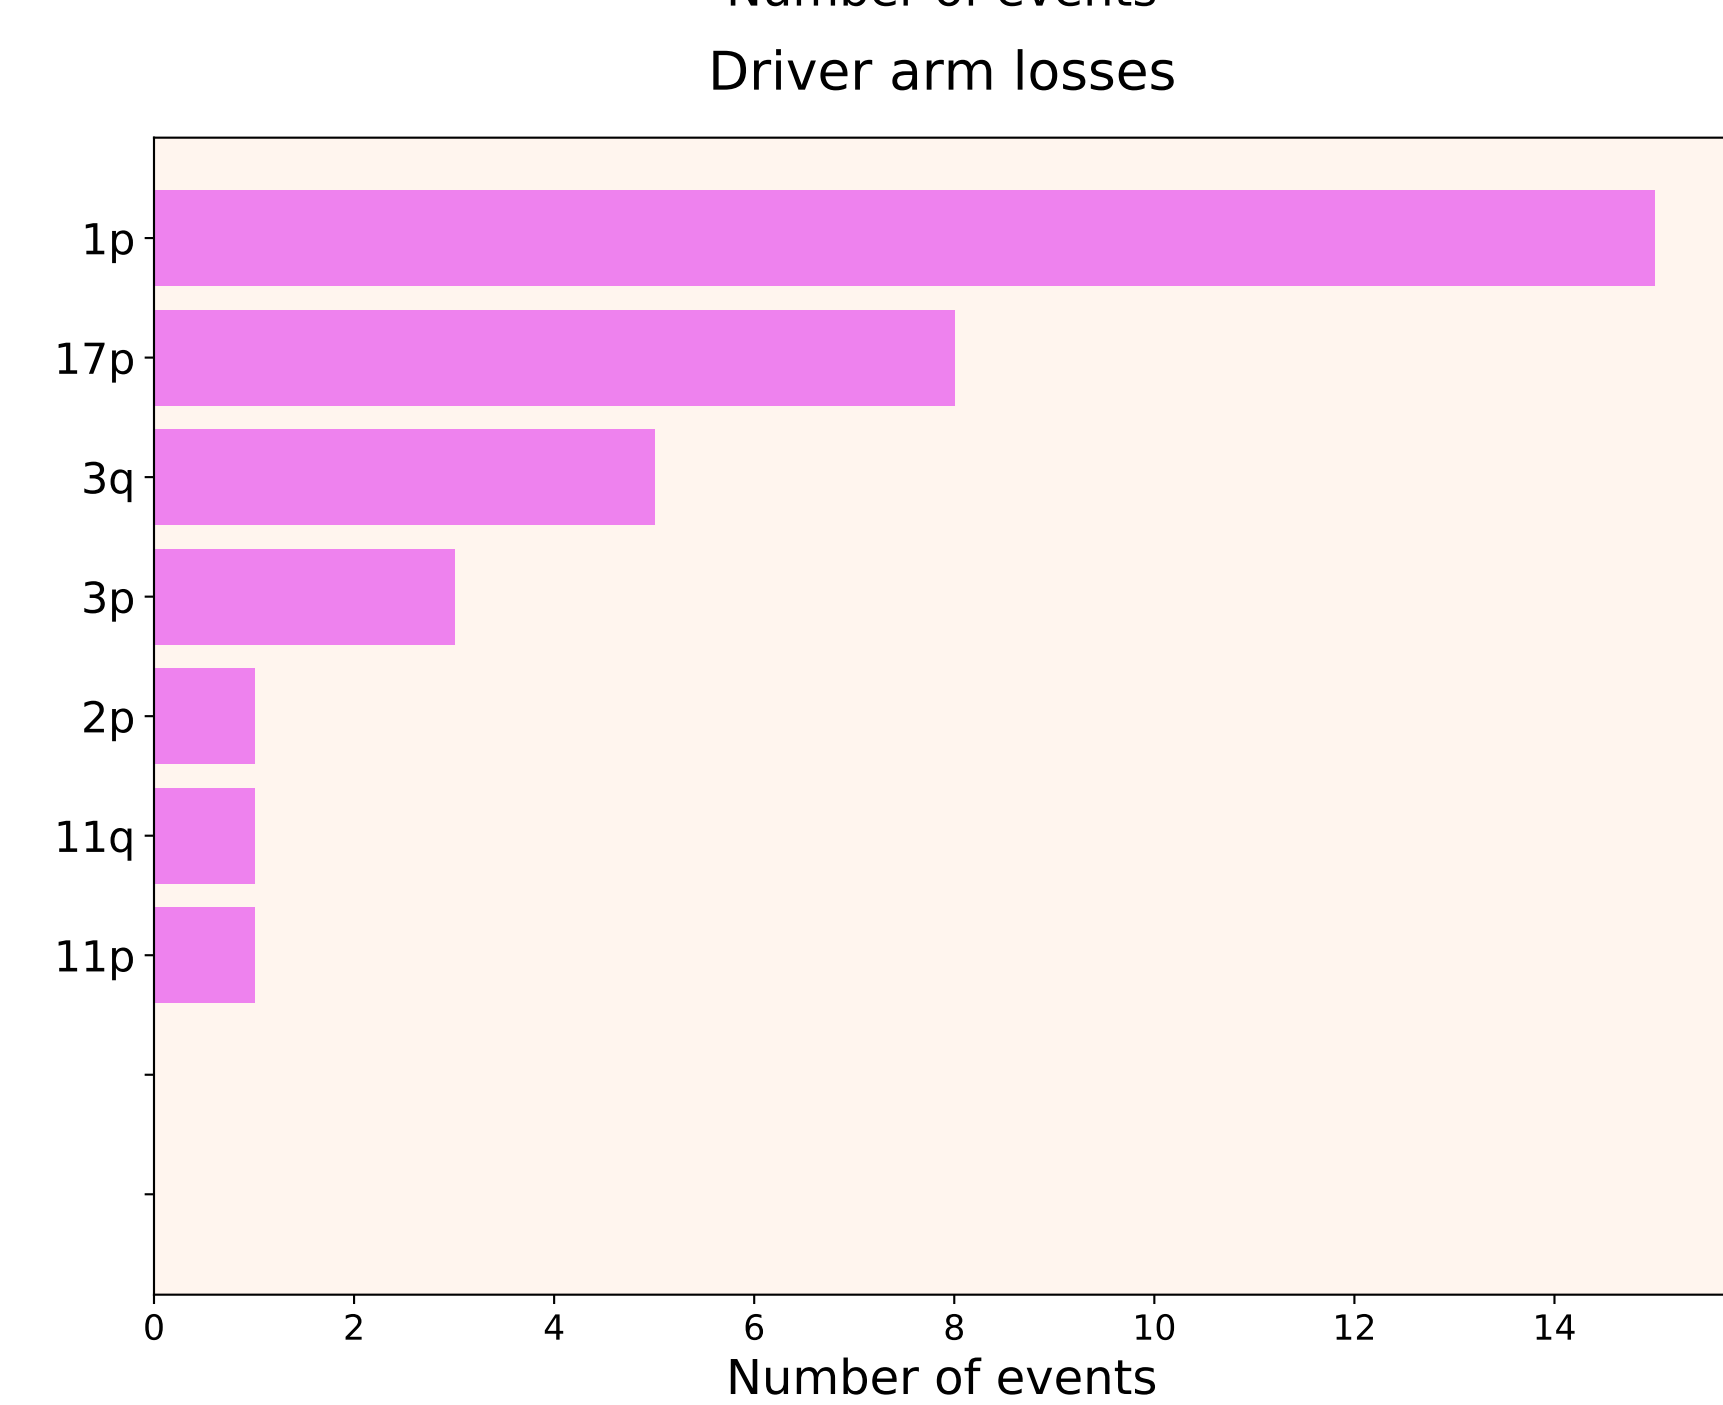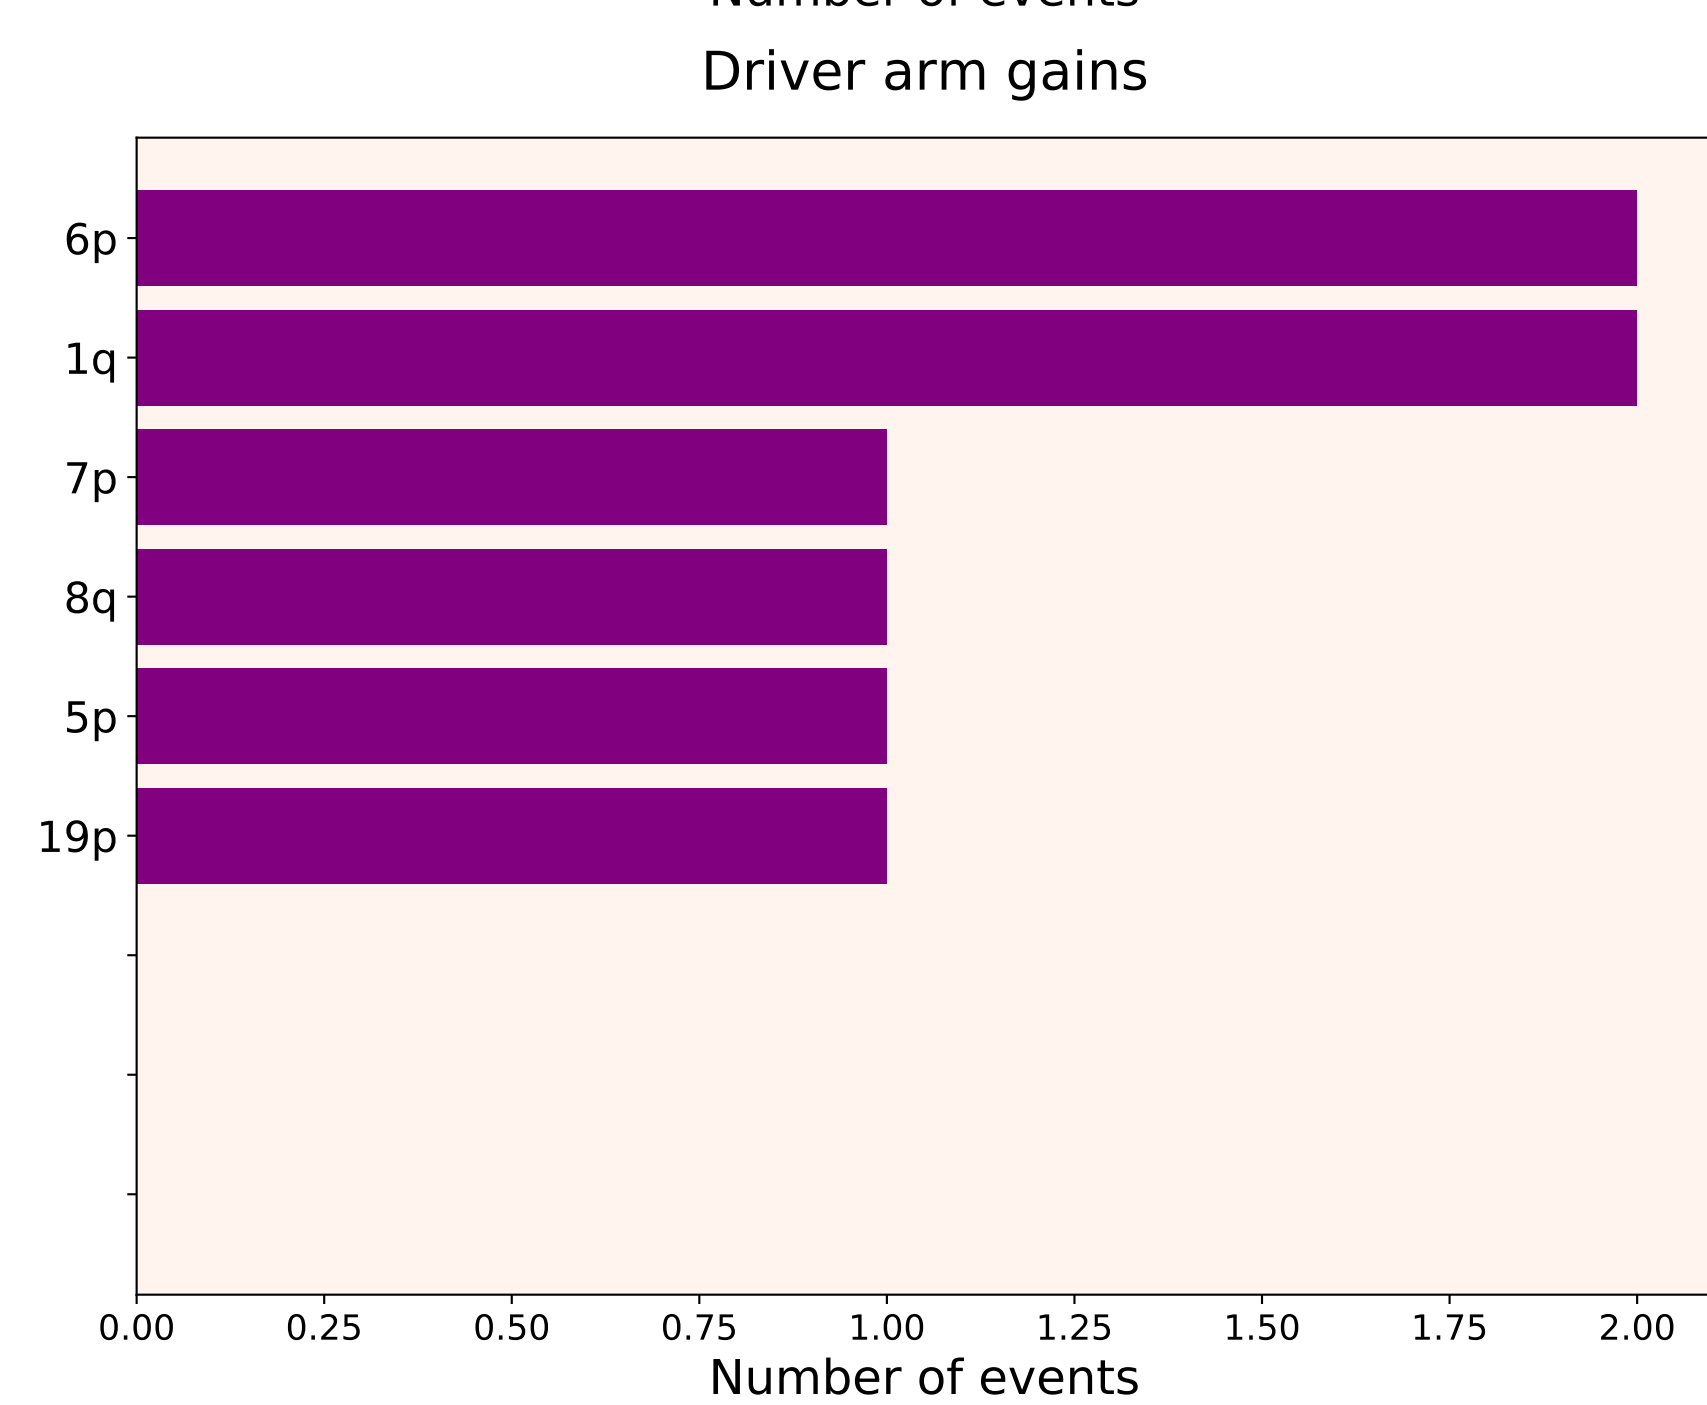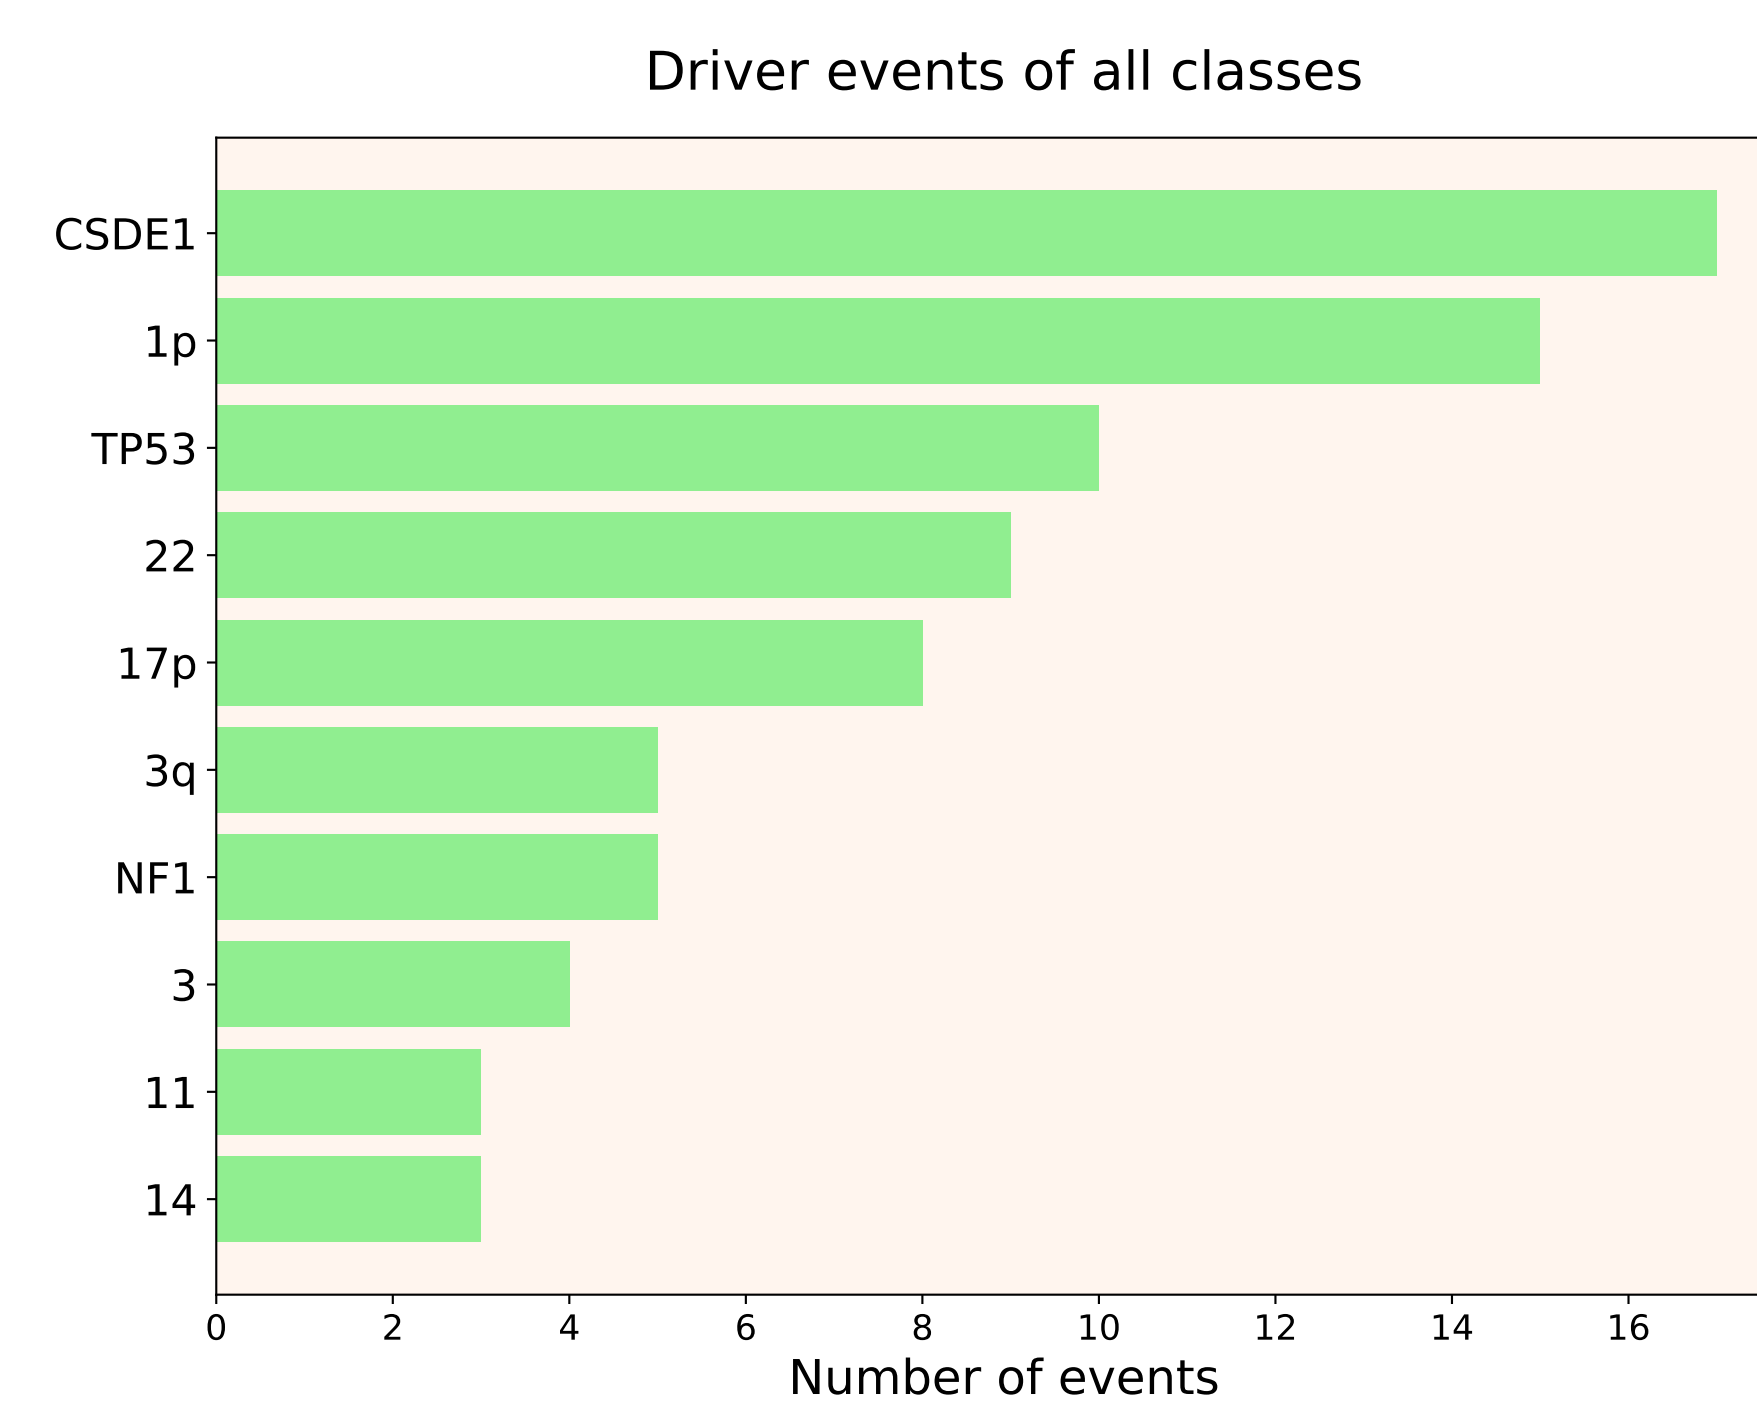

Supplement: Supplemental_Data_S1.zip [file Supplemental_Data_S1.zip]

# UVM\_FEMALE

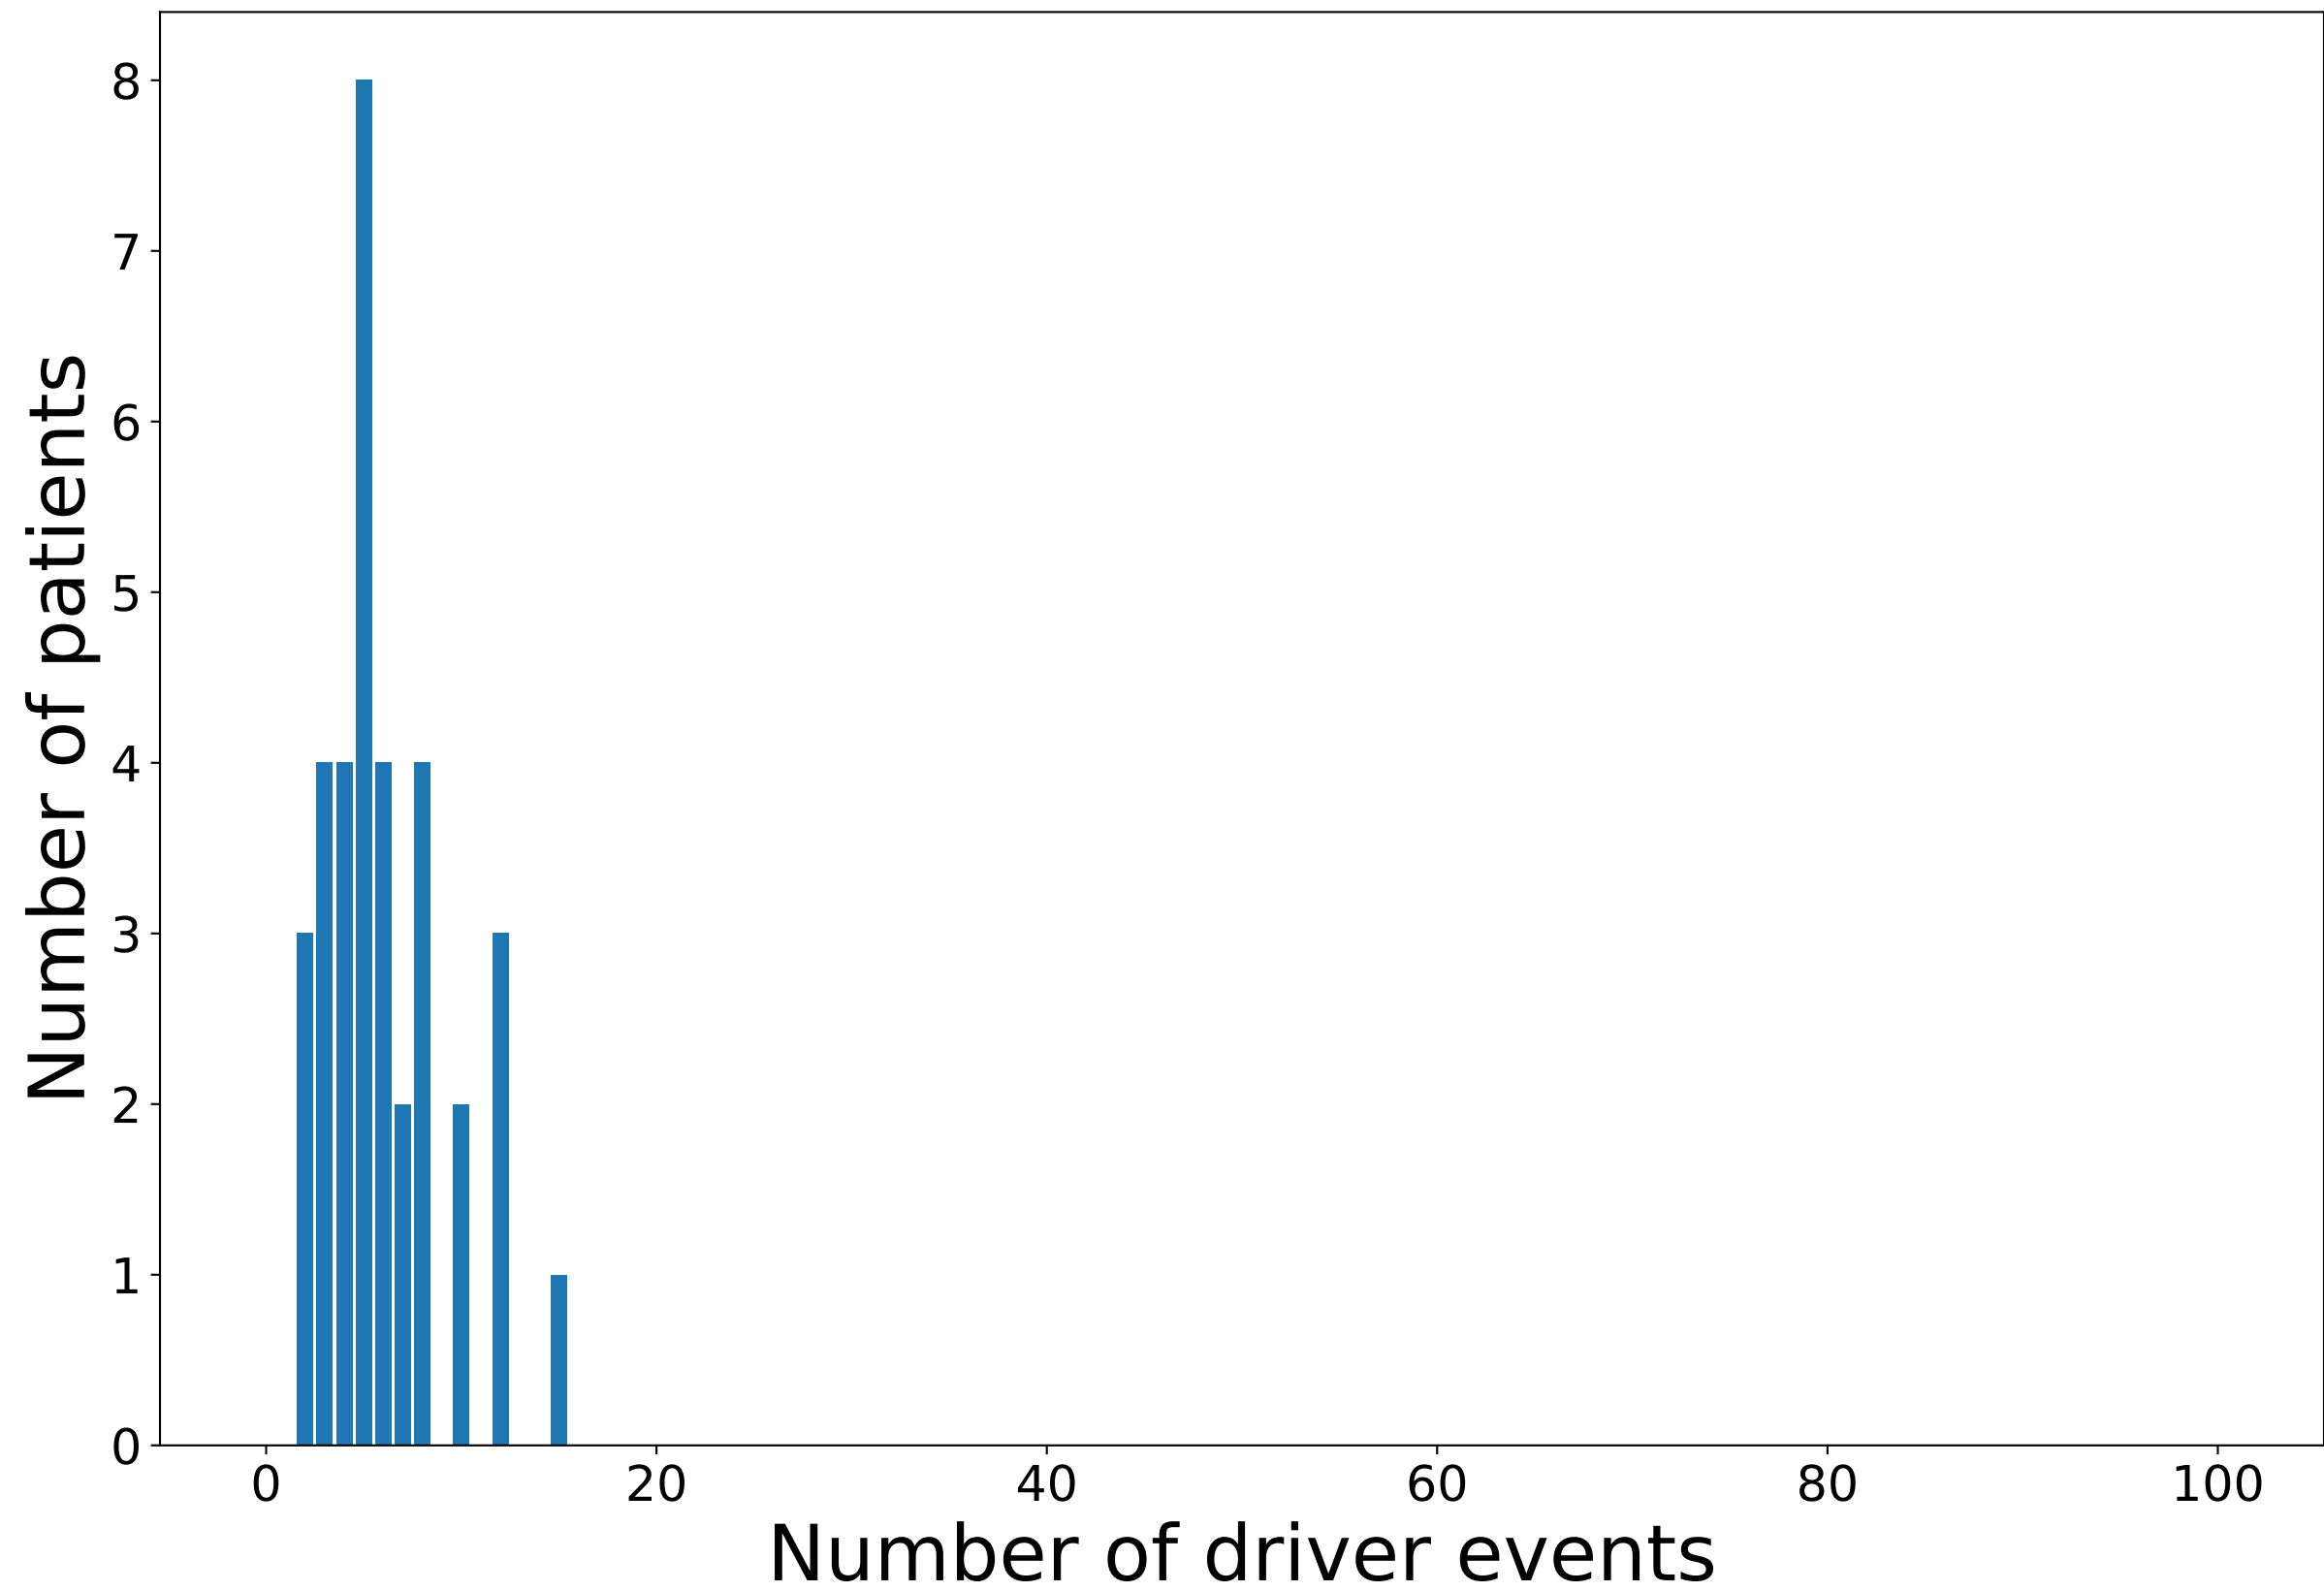

Supplement: Supplemental_Data_S1.zip [file Supplemental_Data_S1.zip]

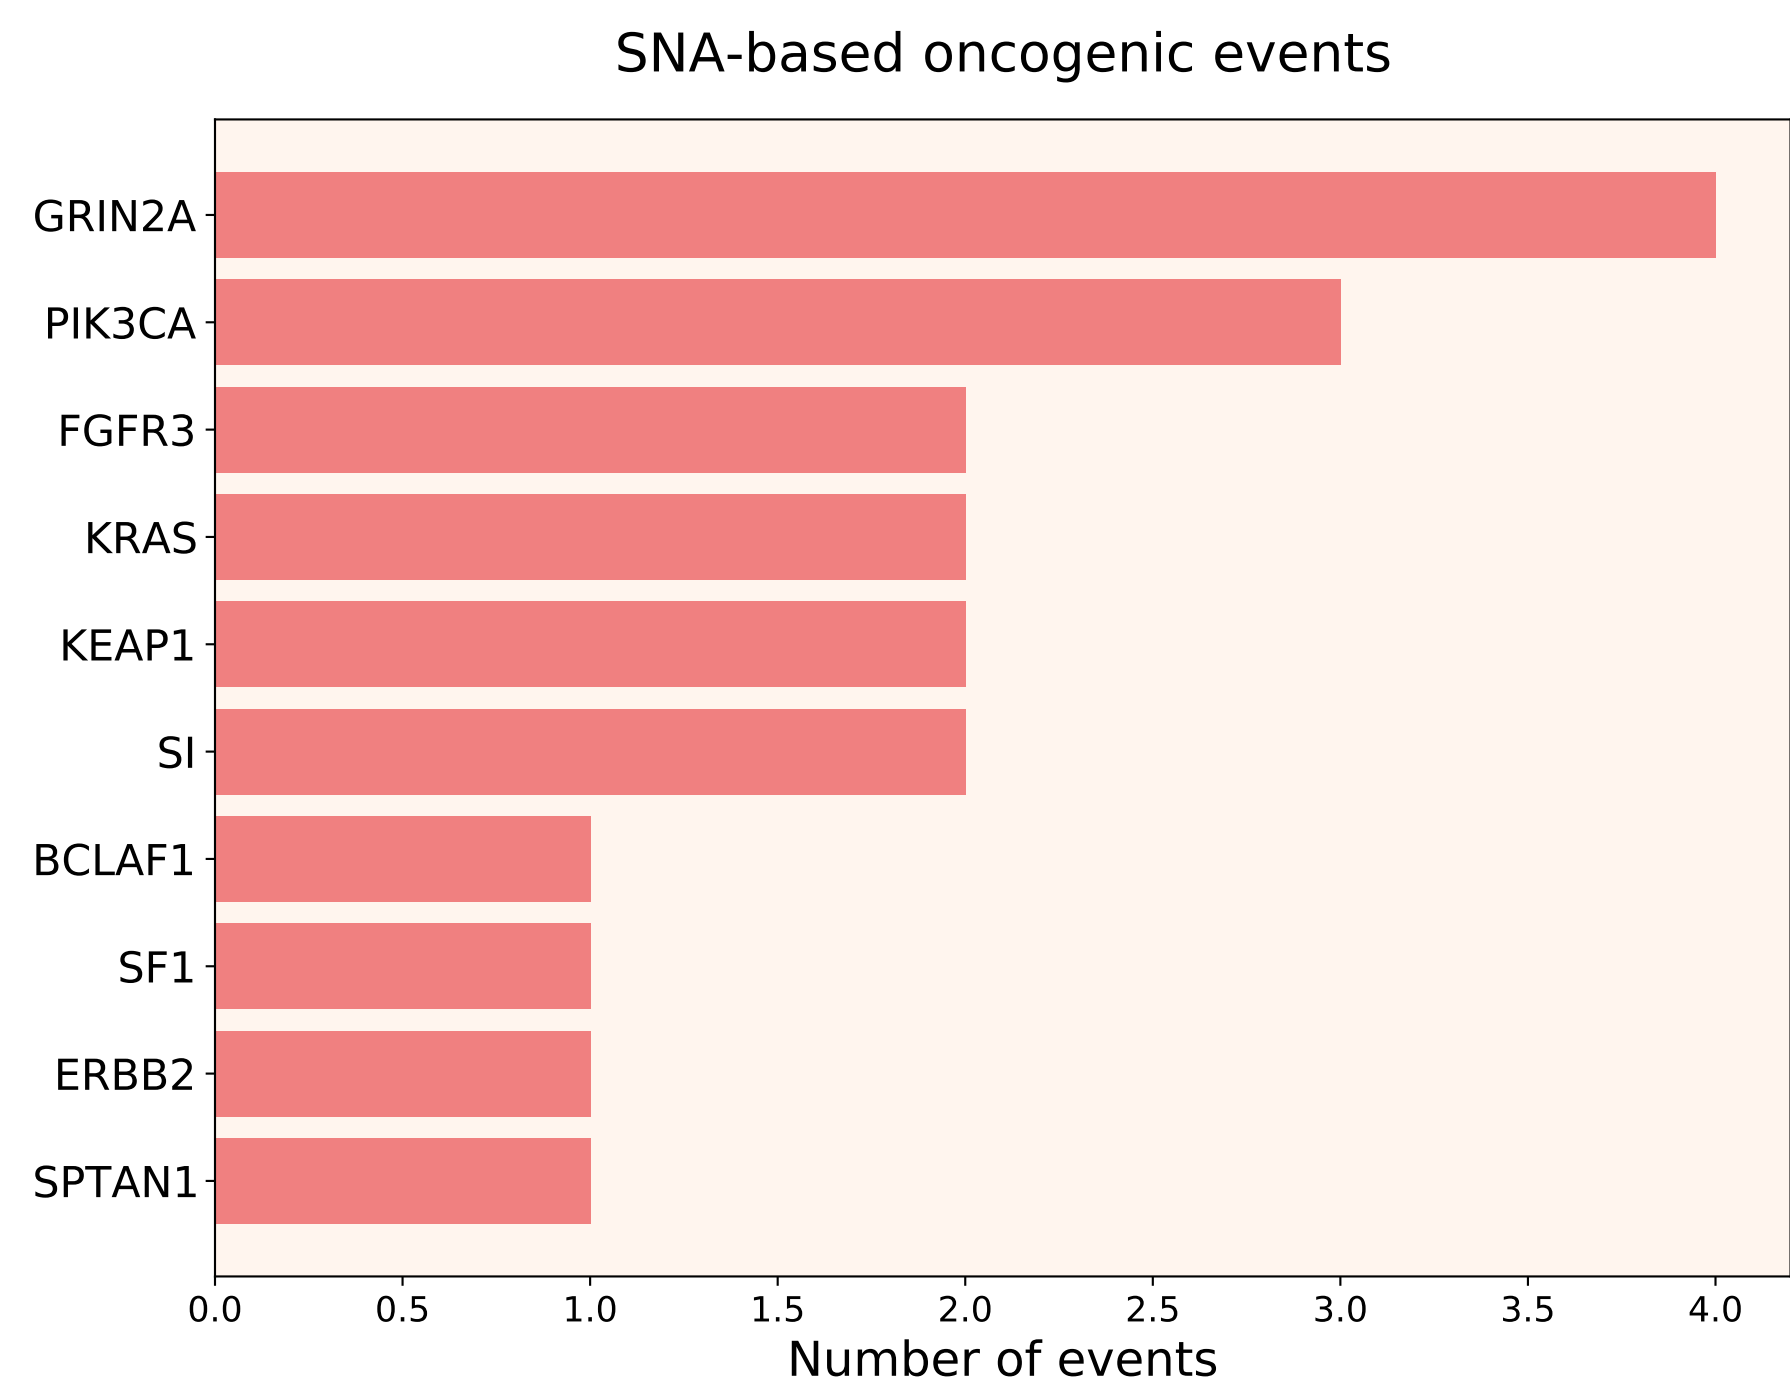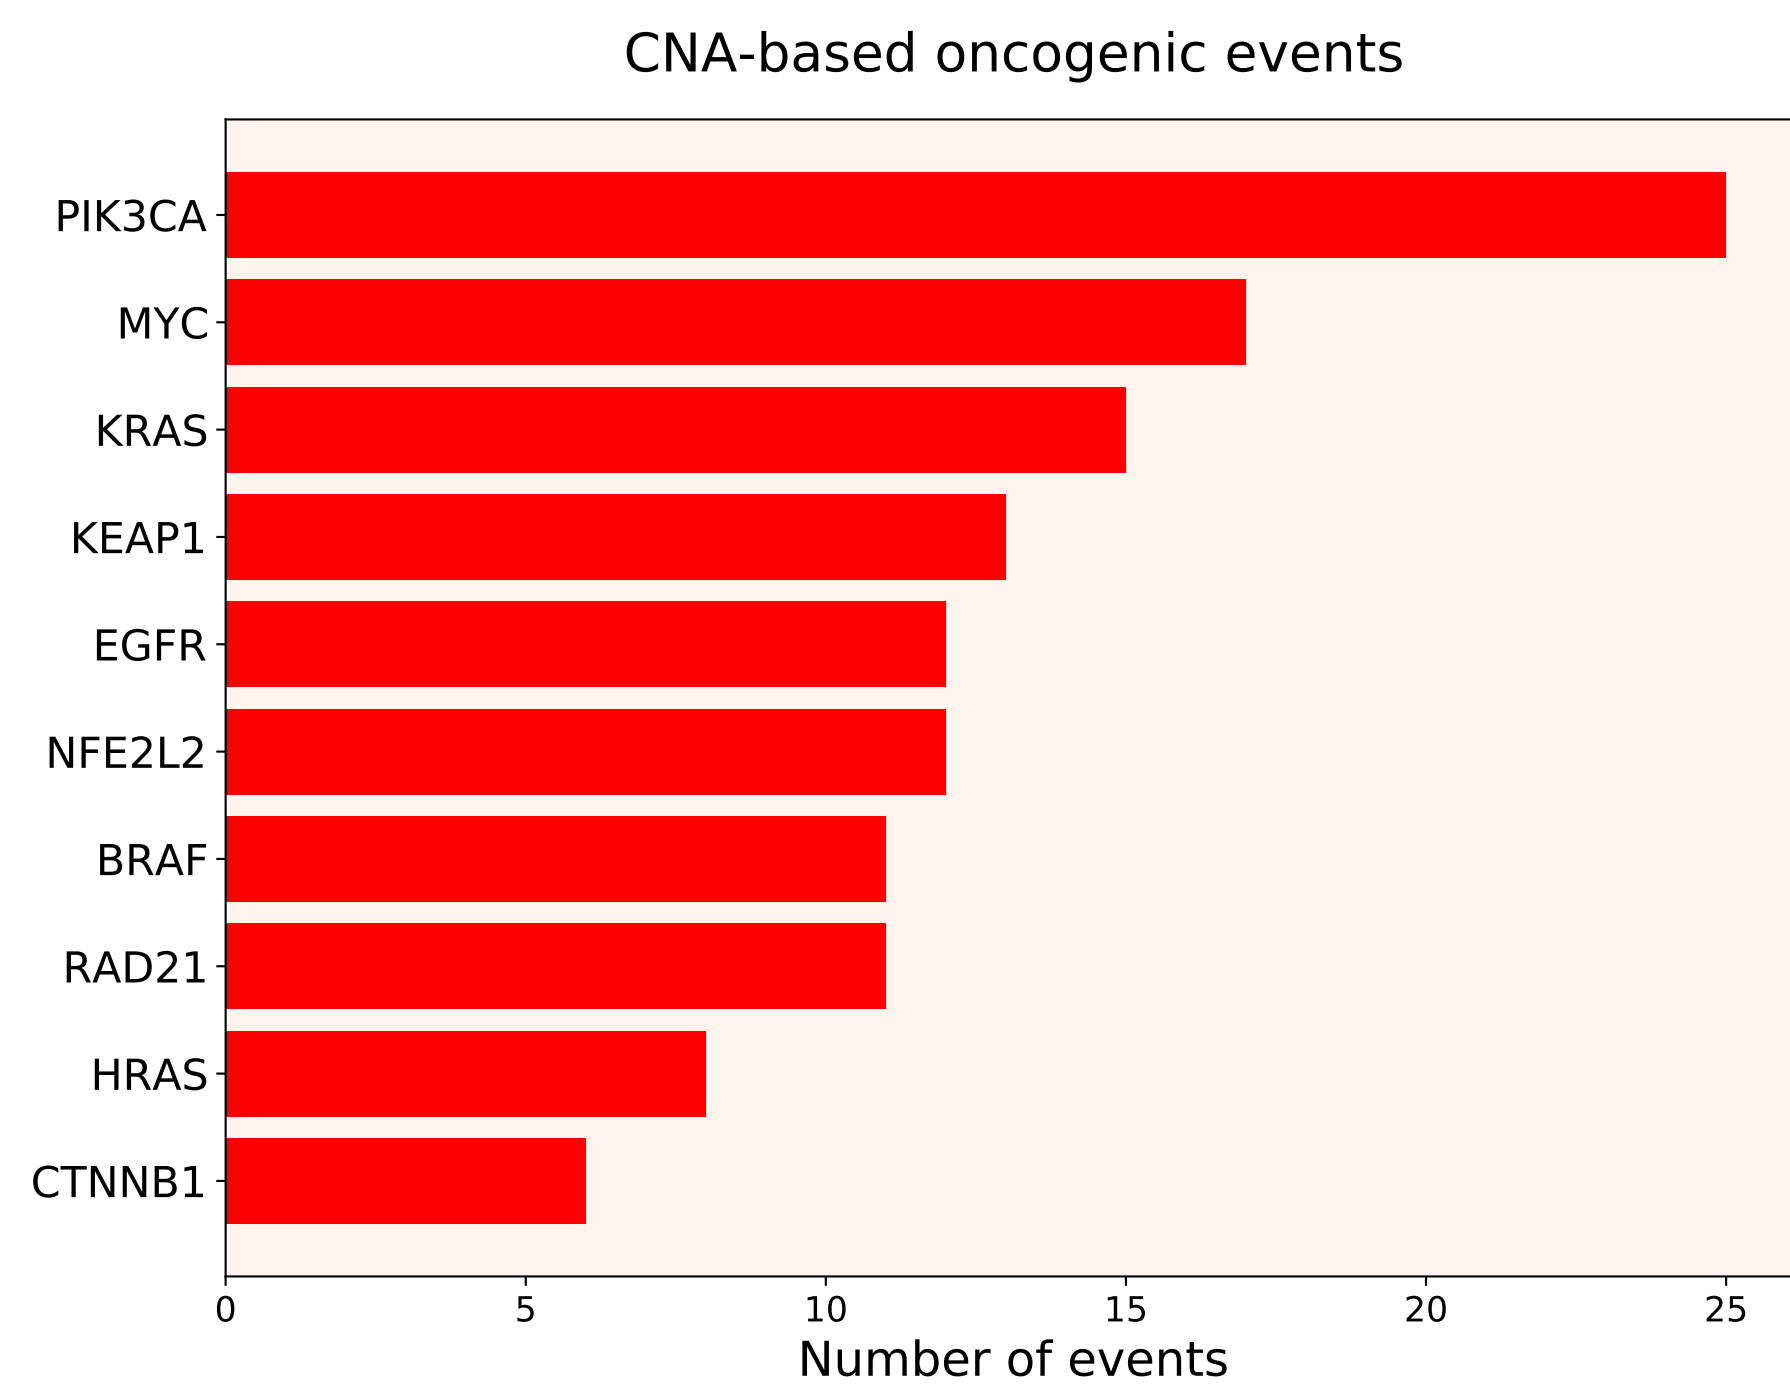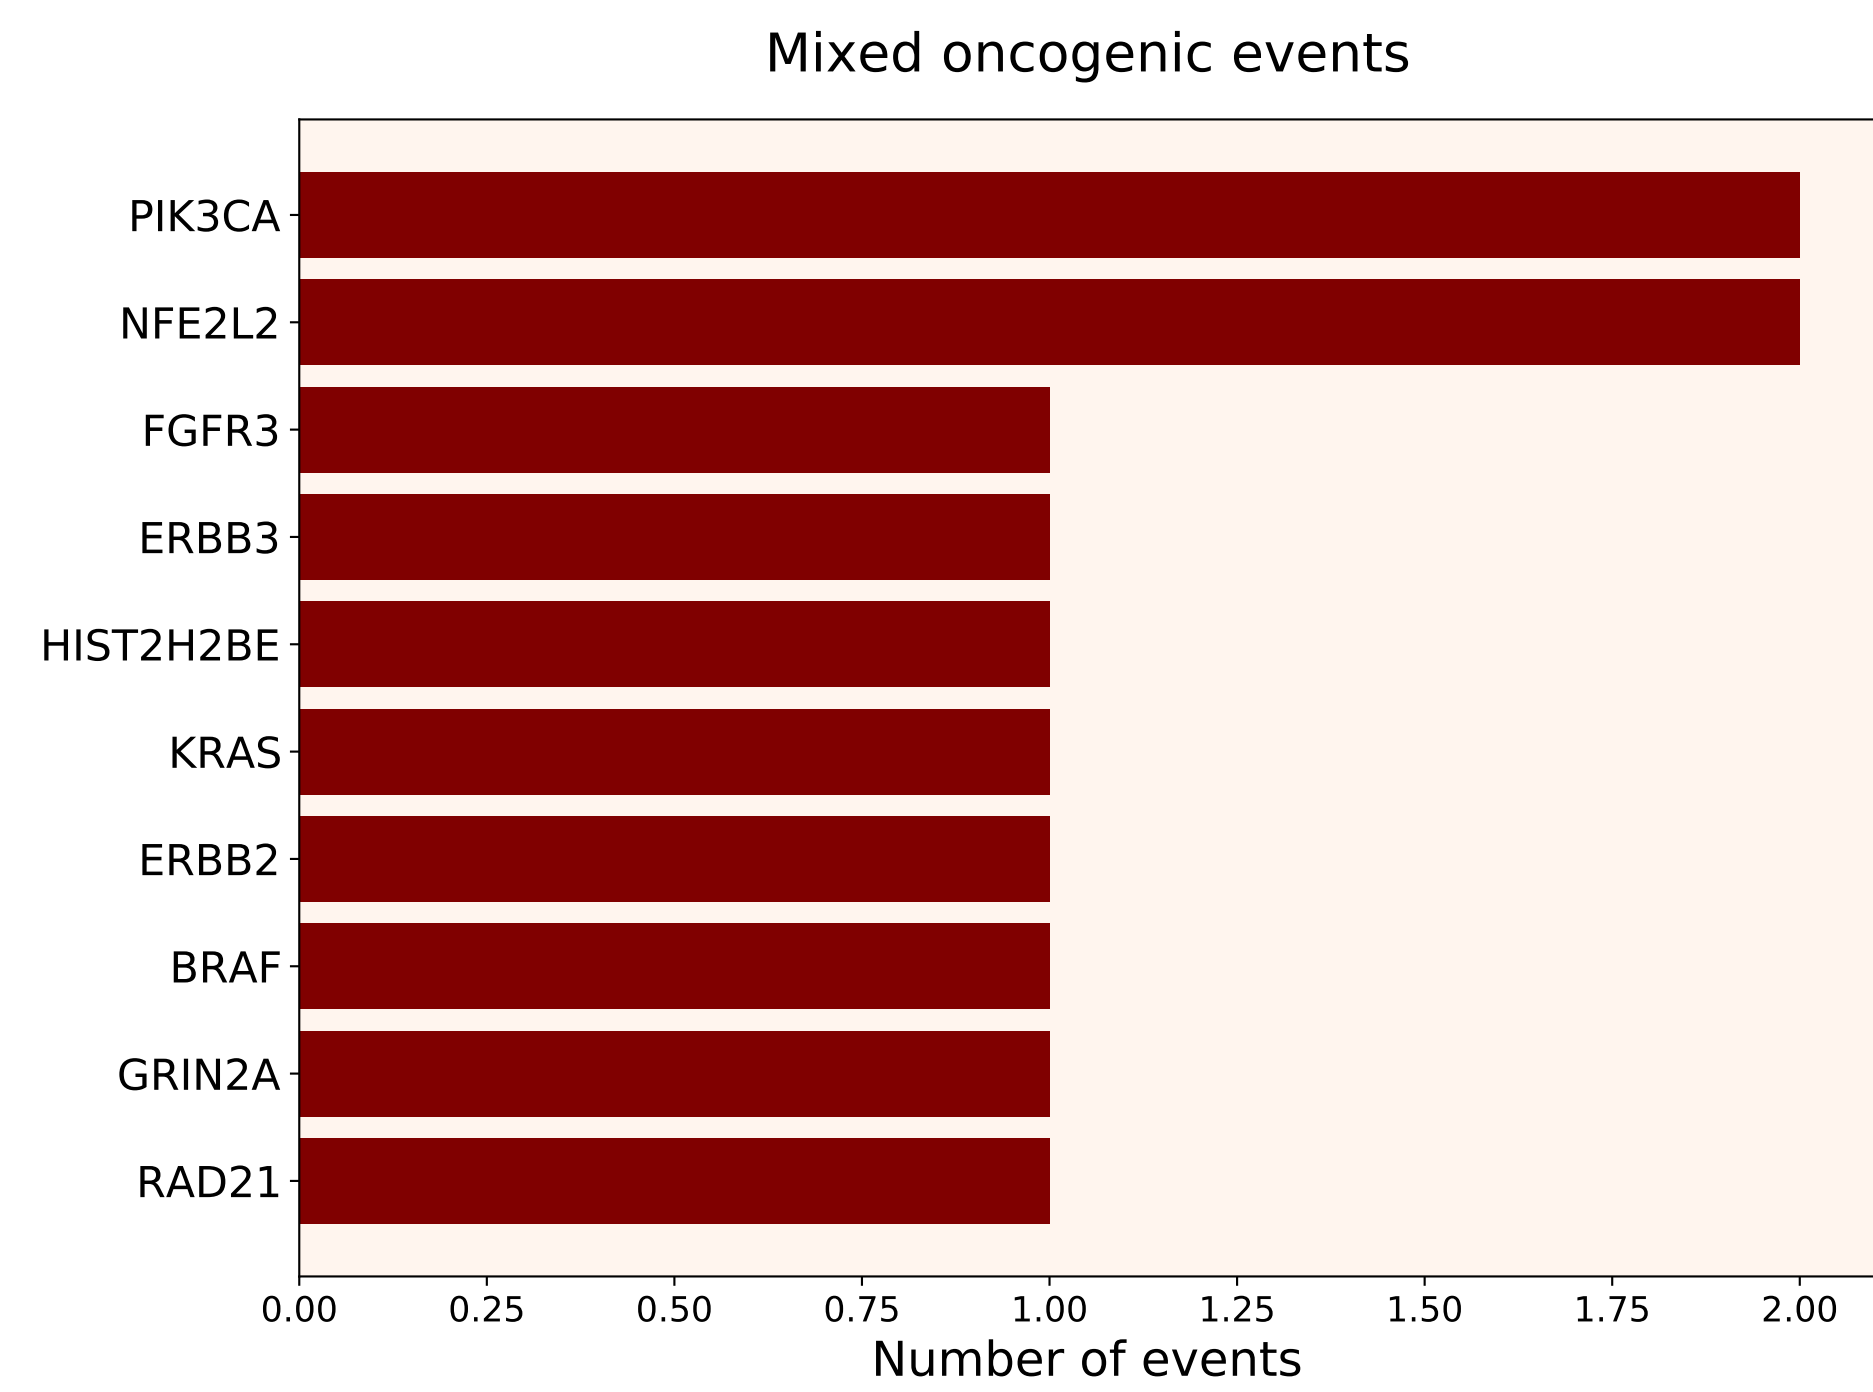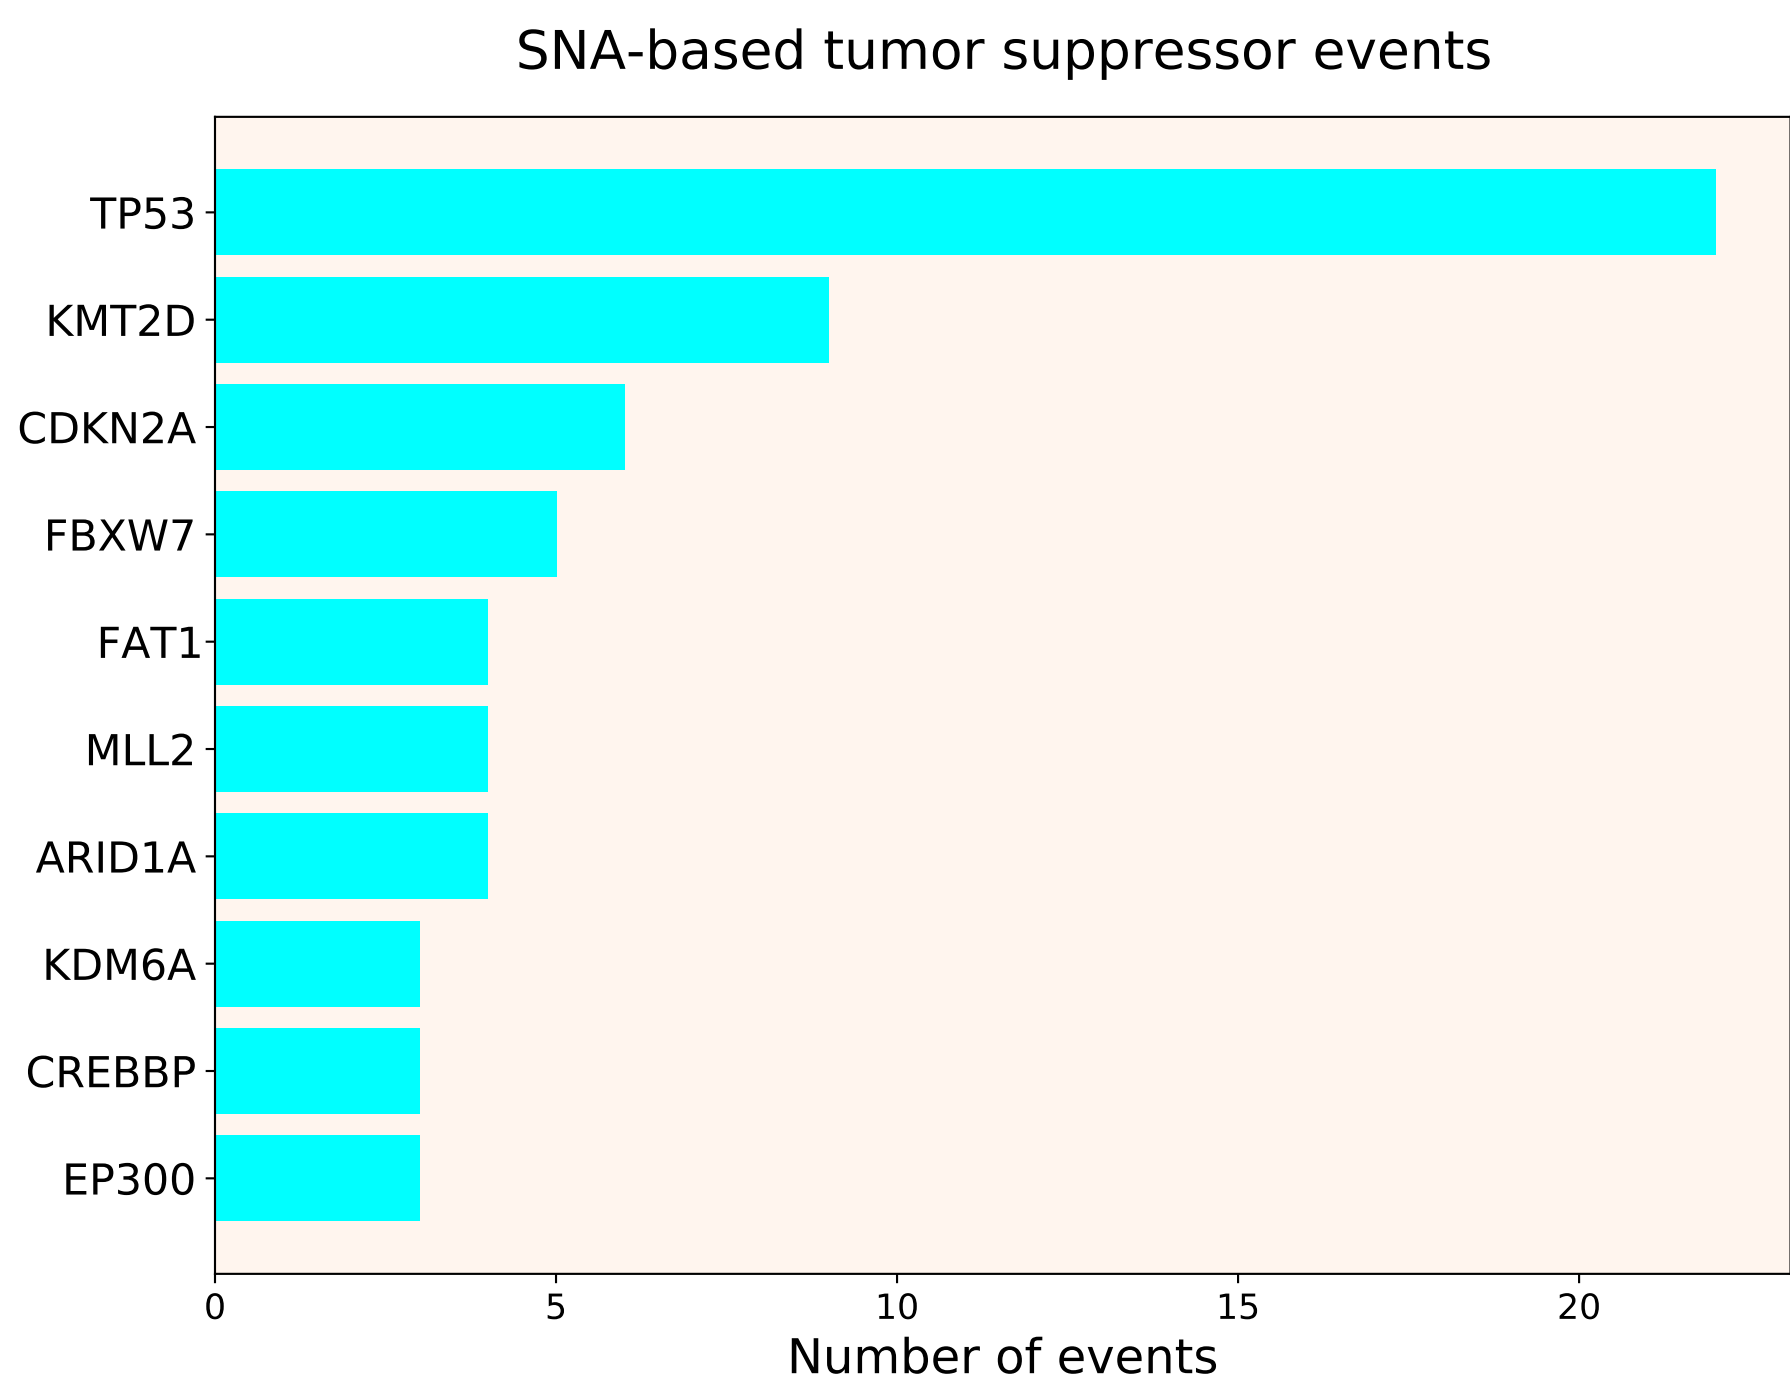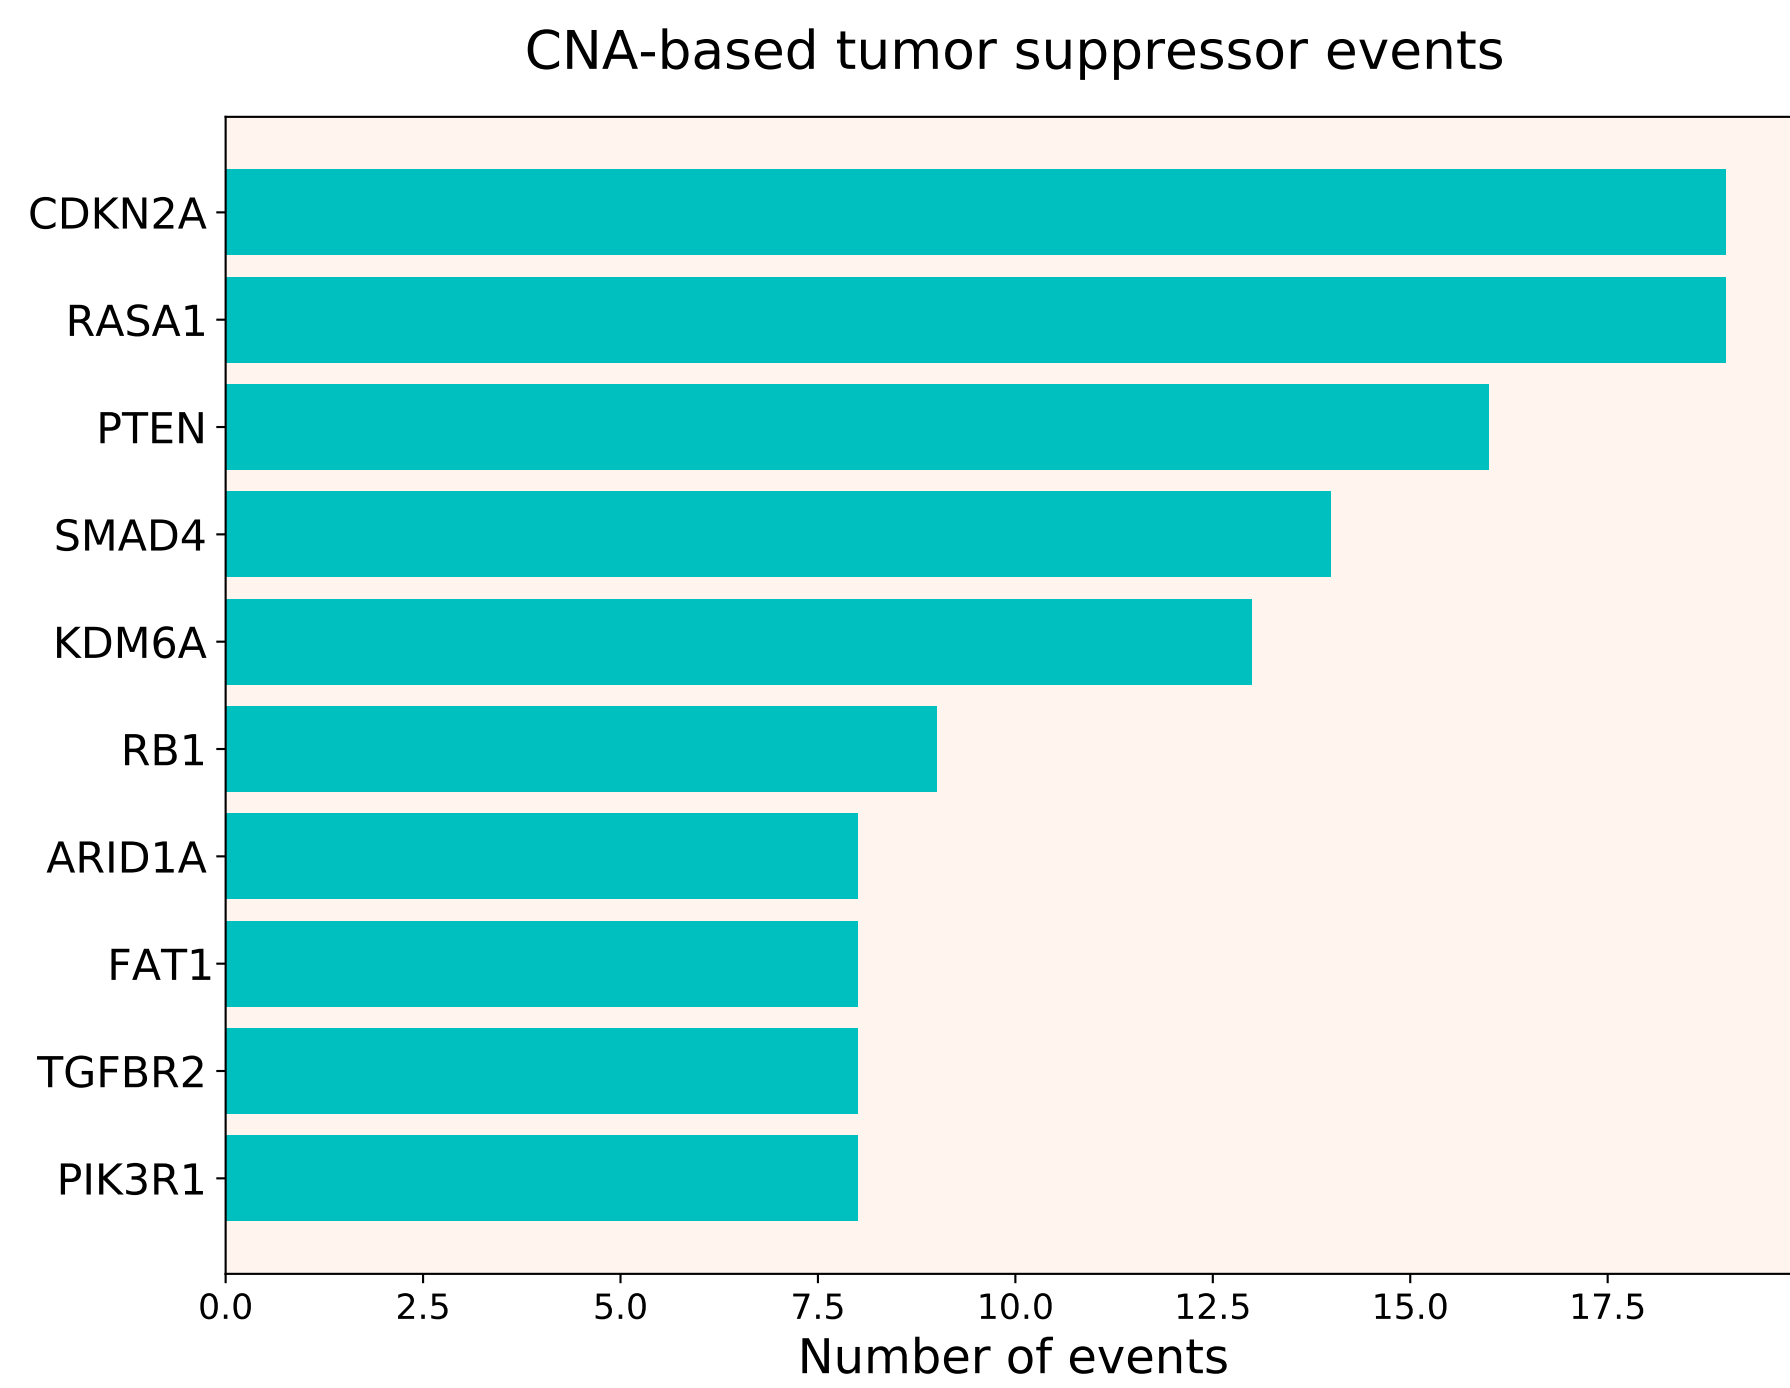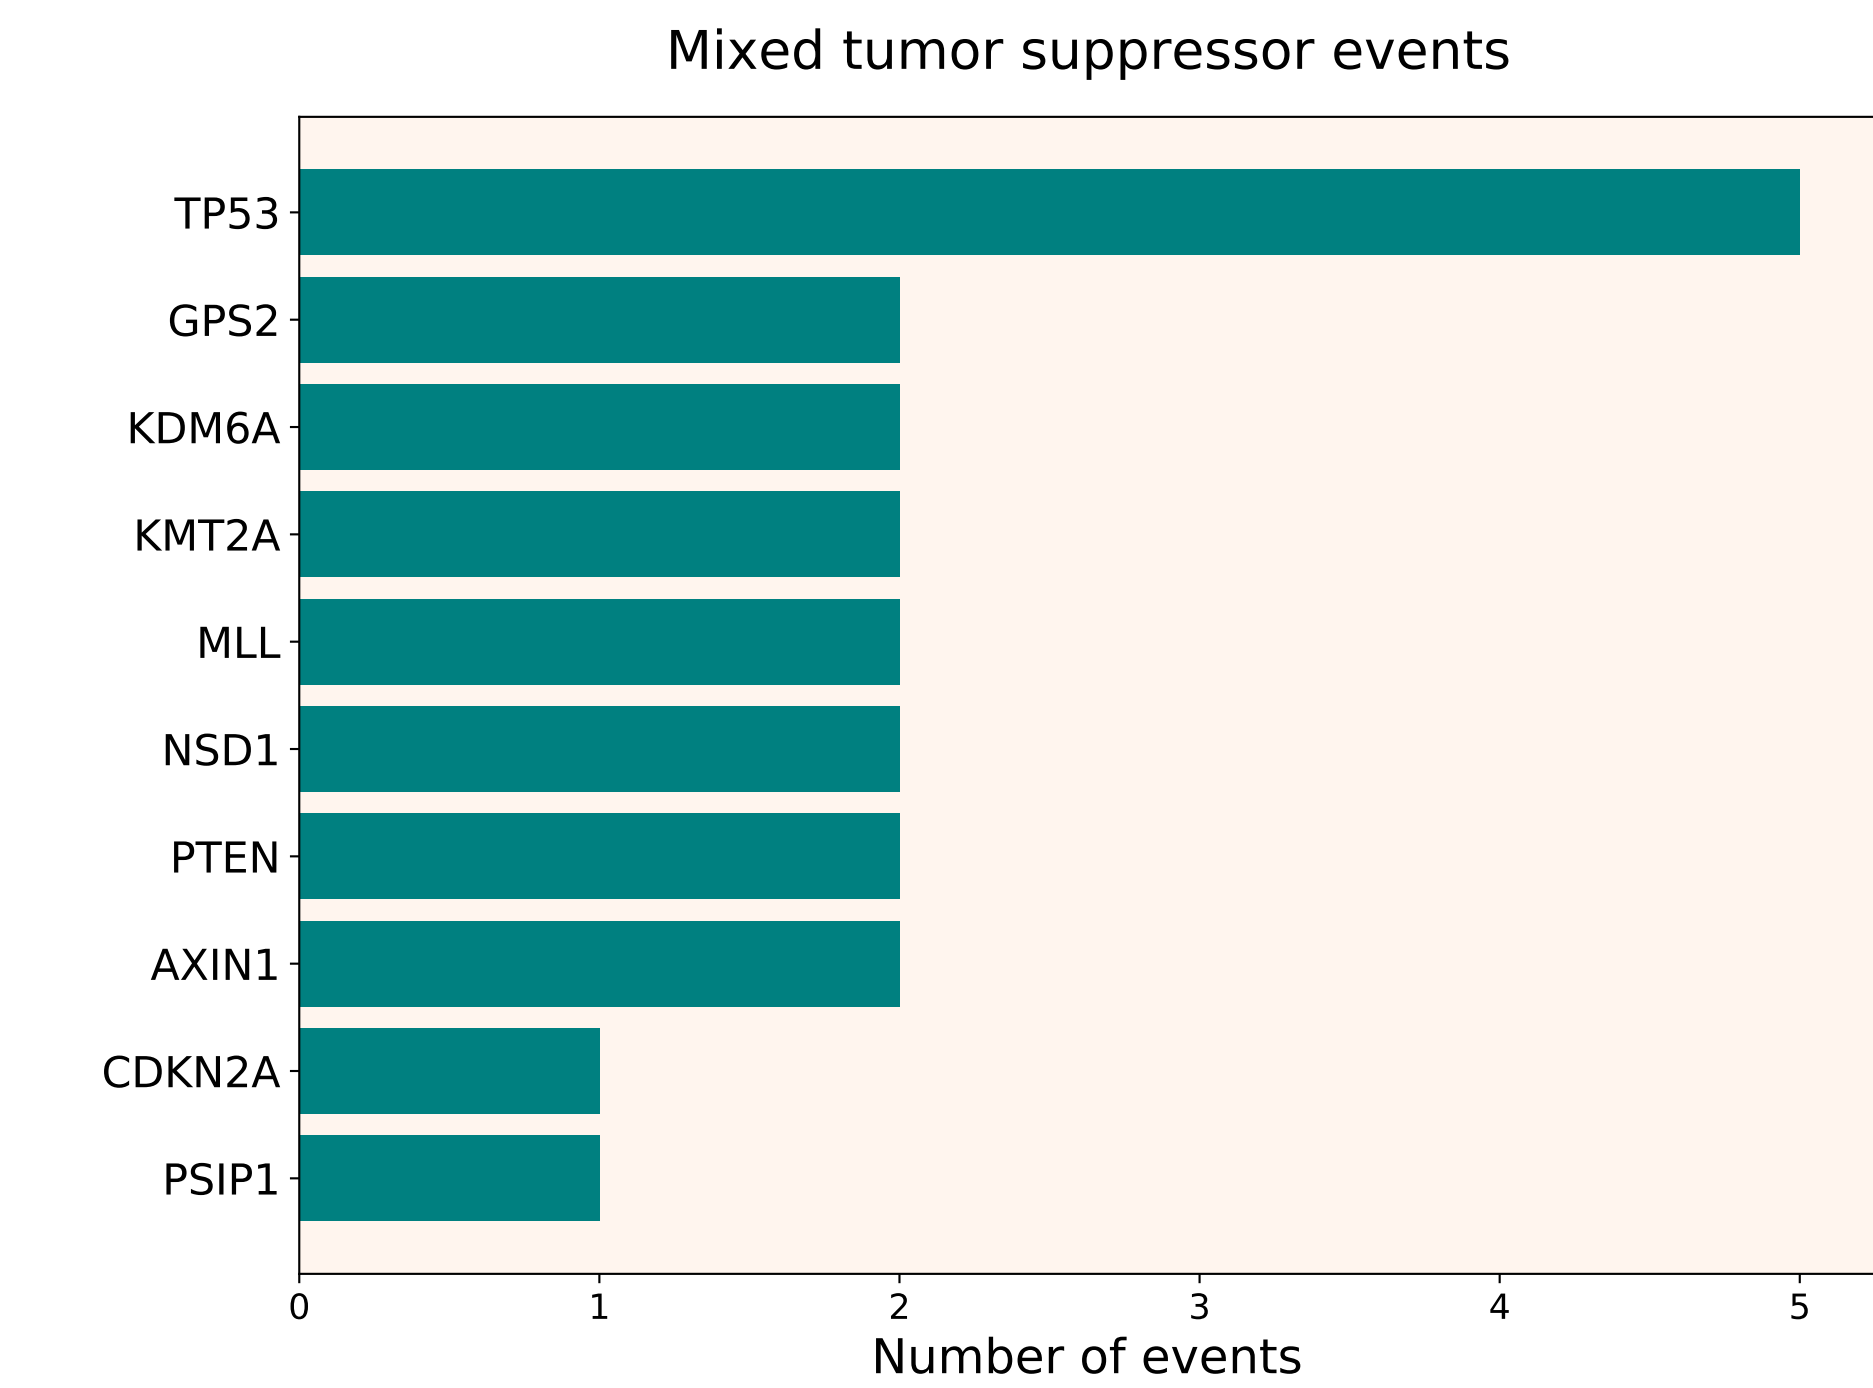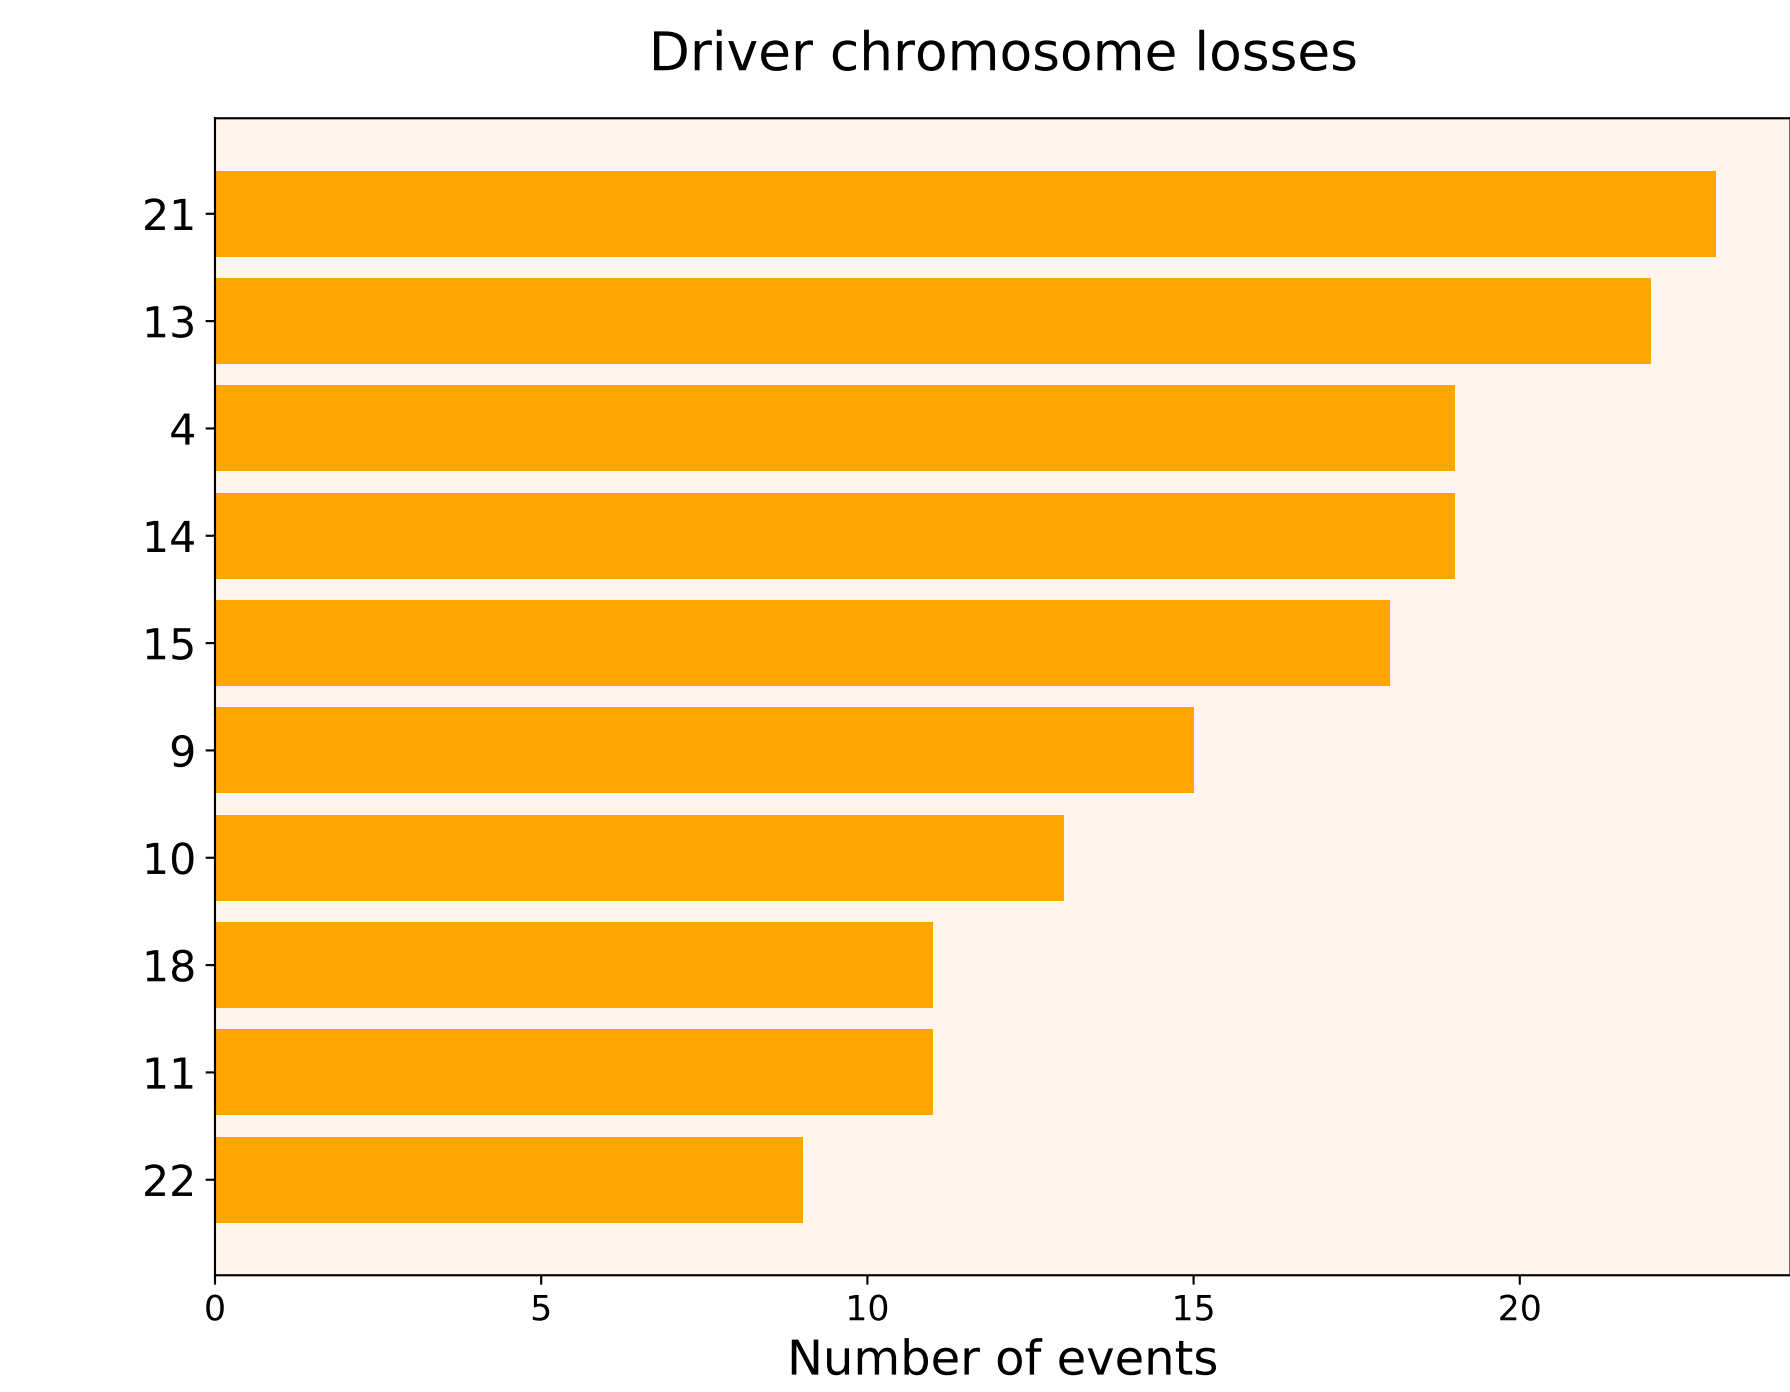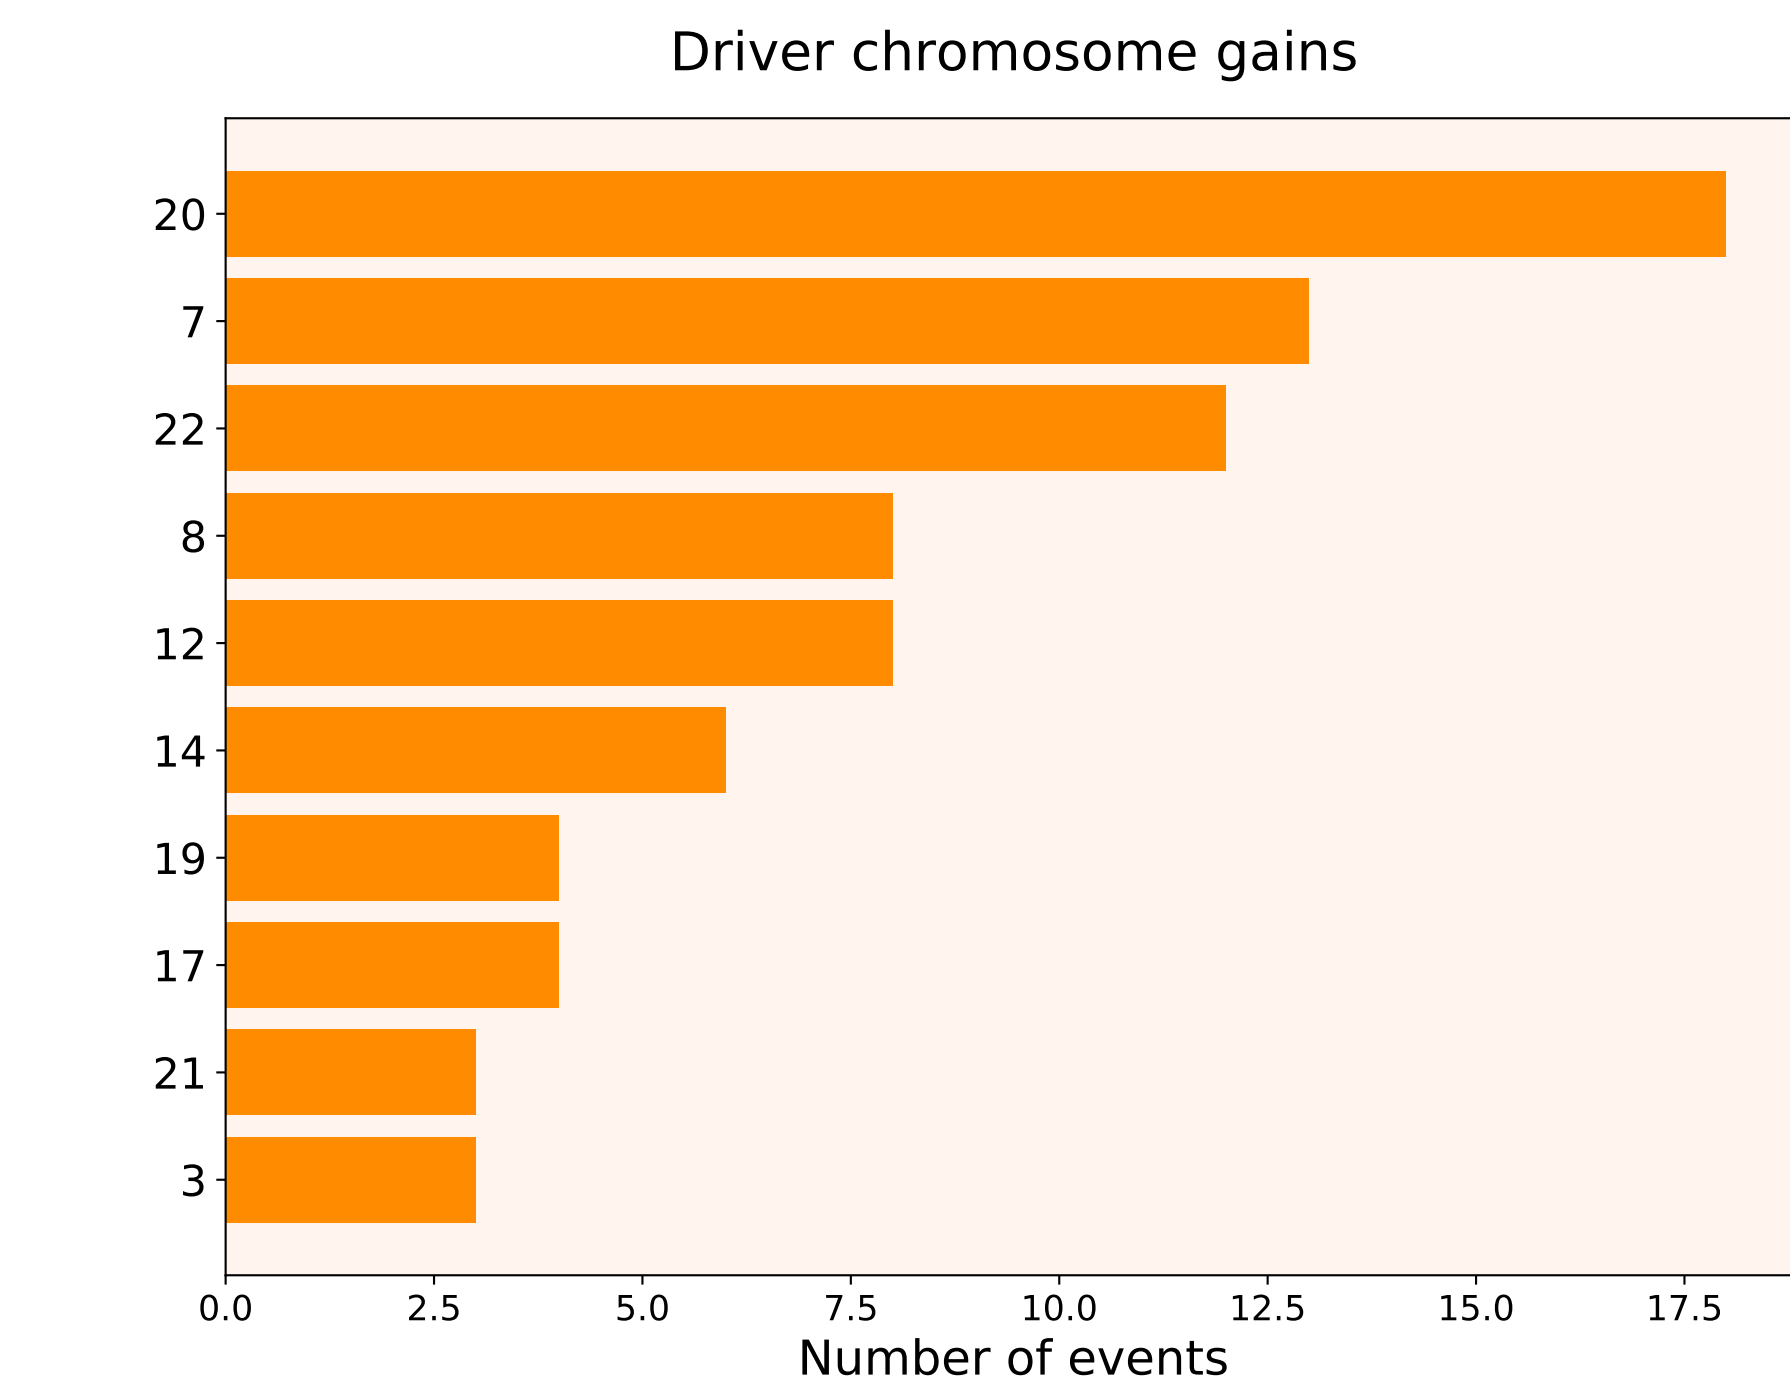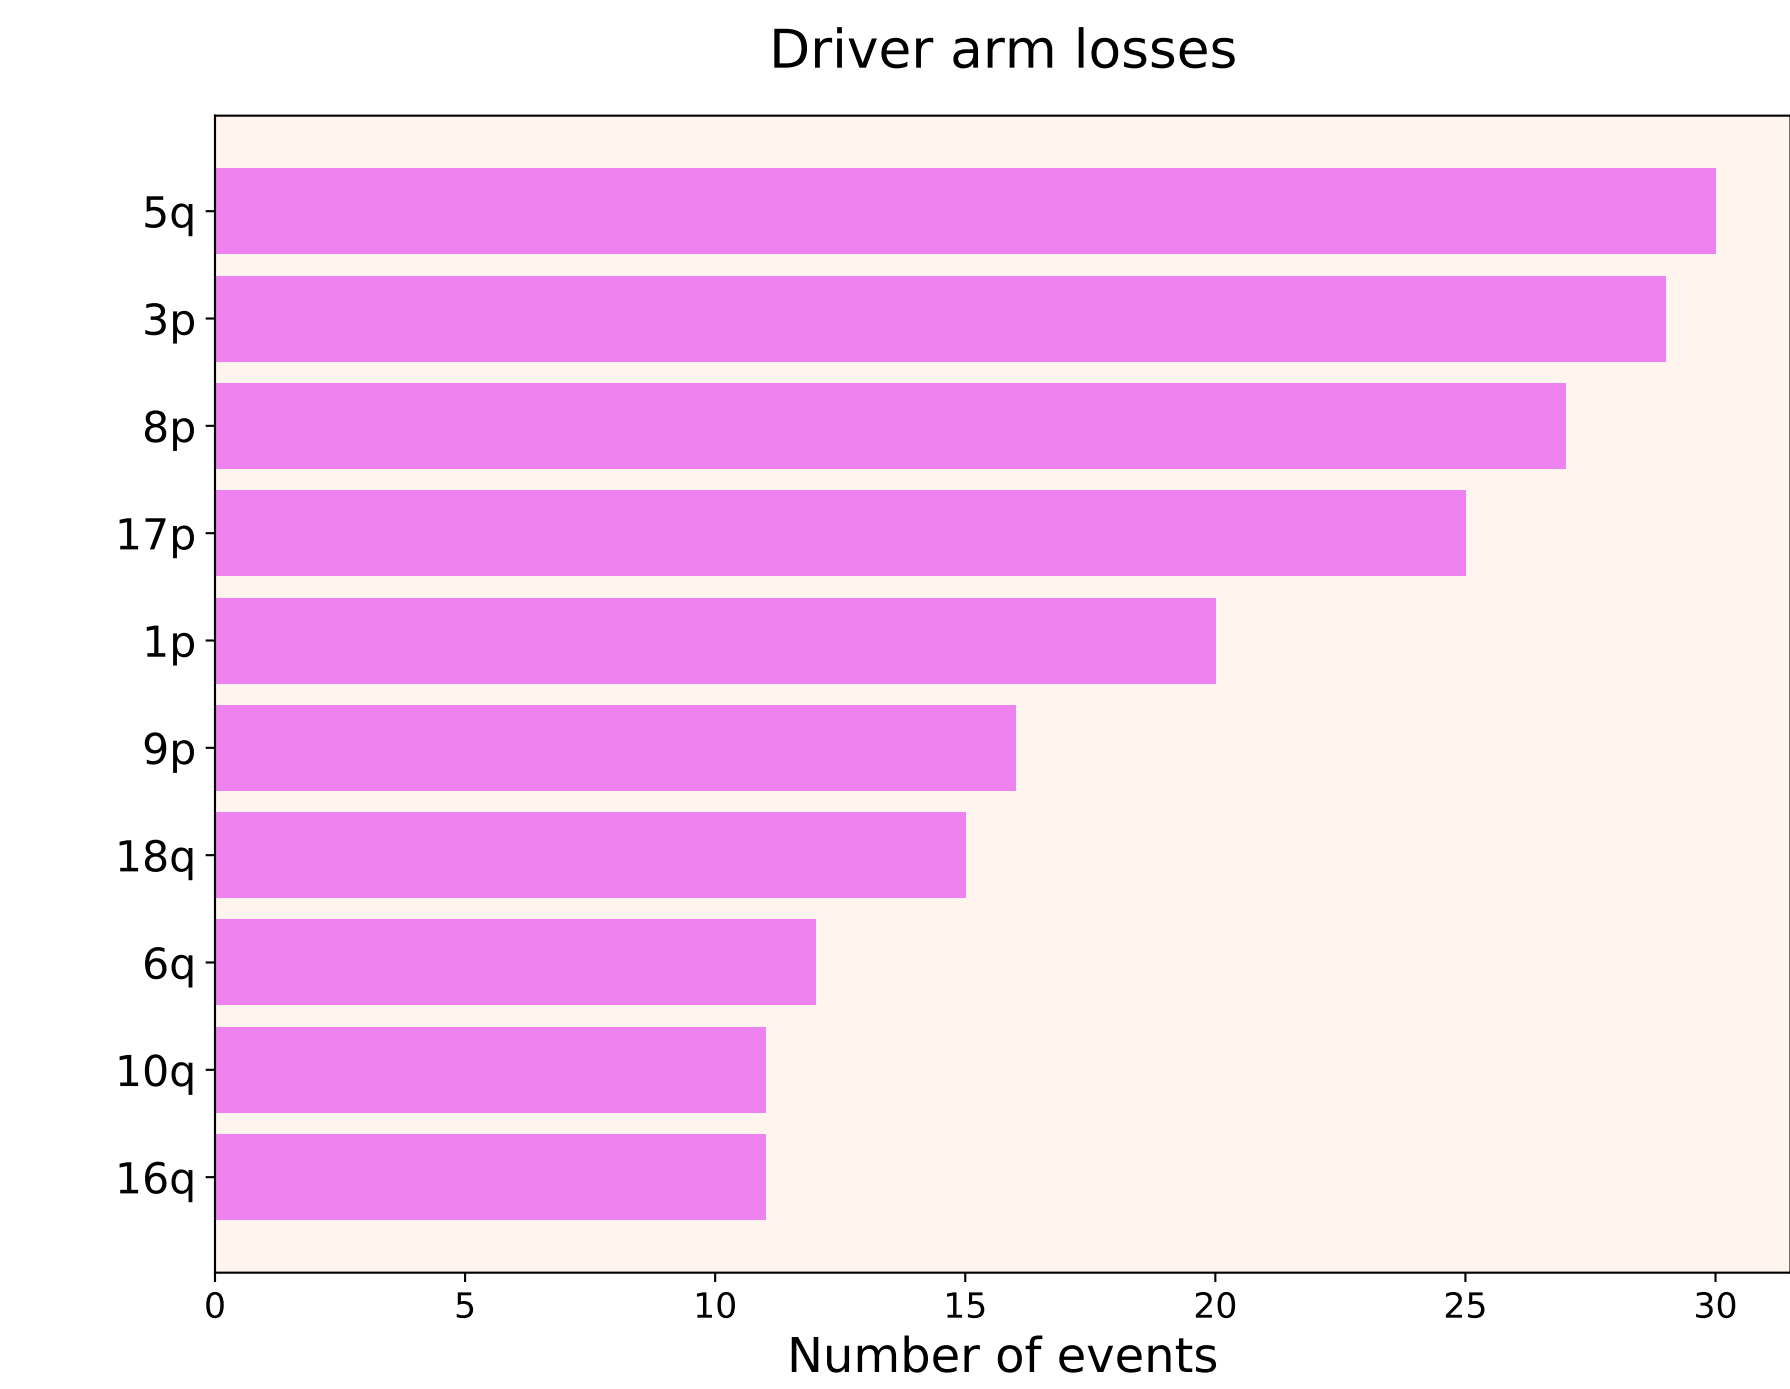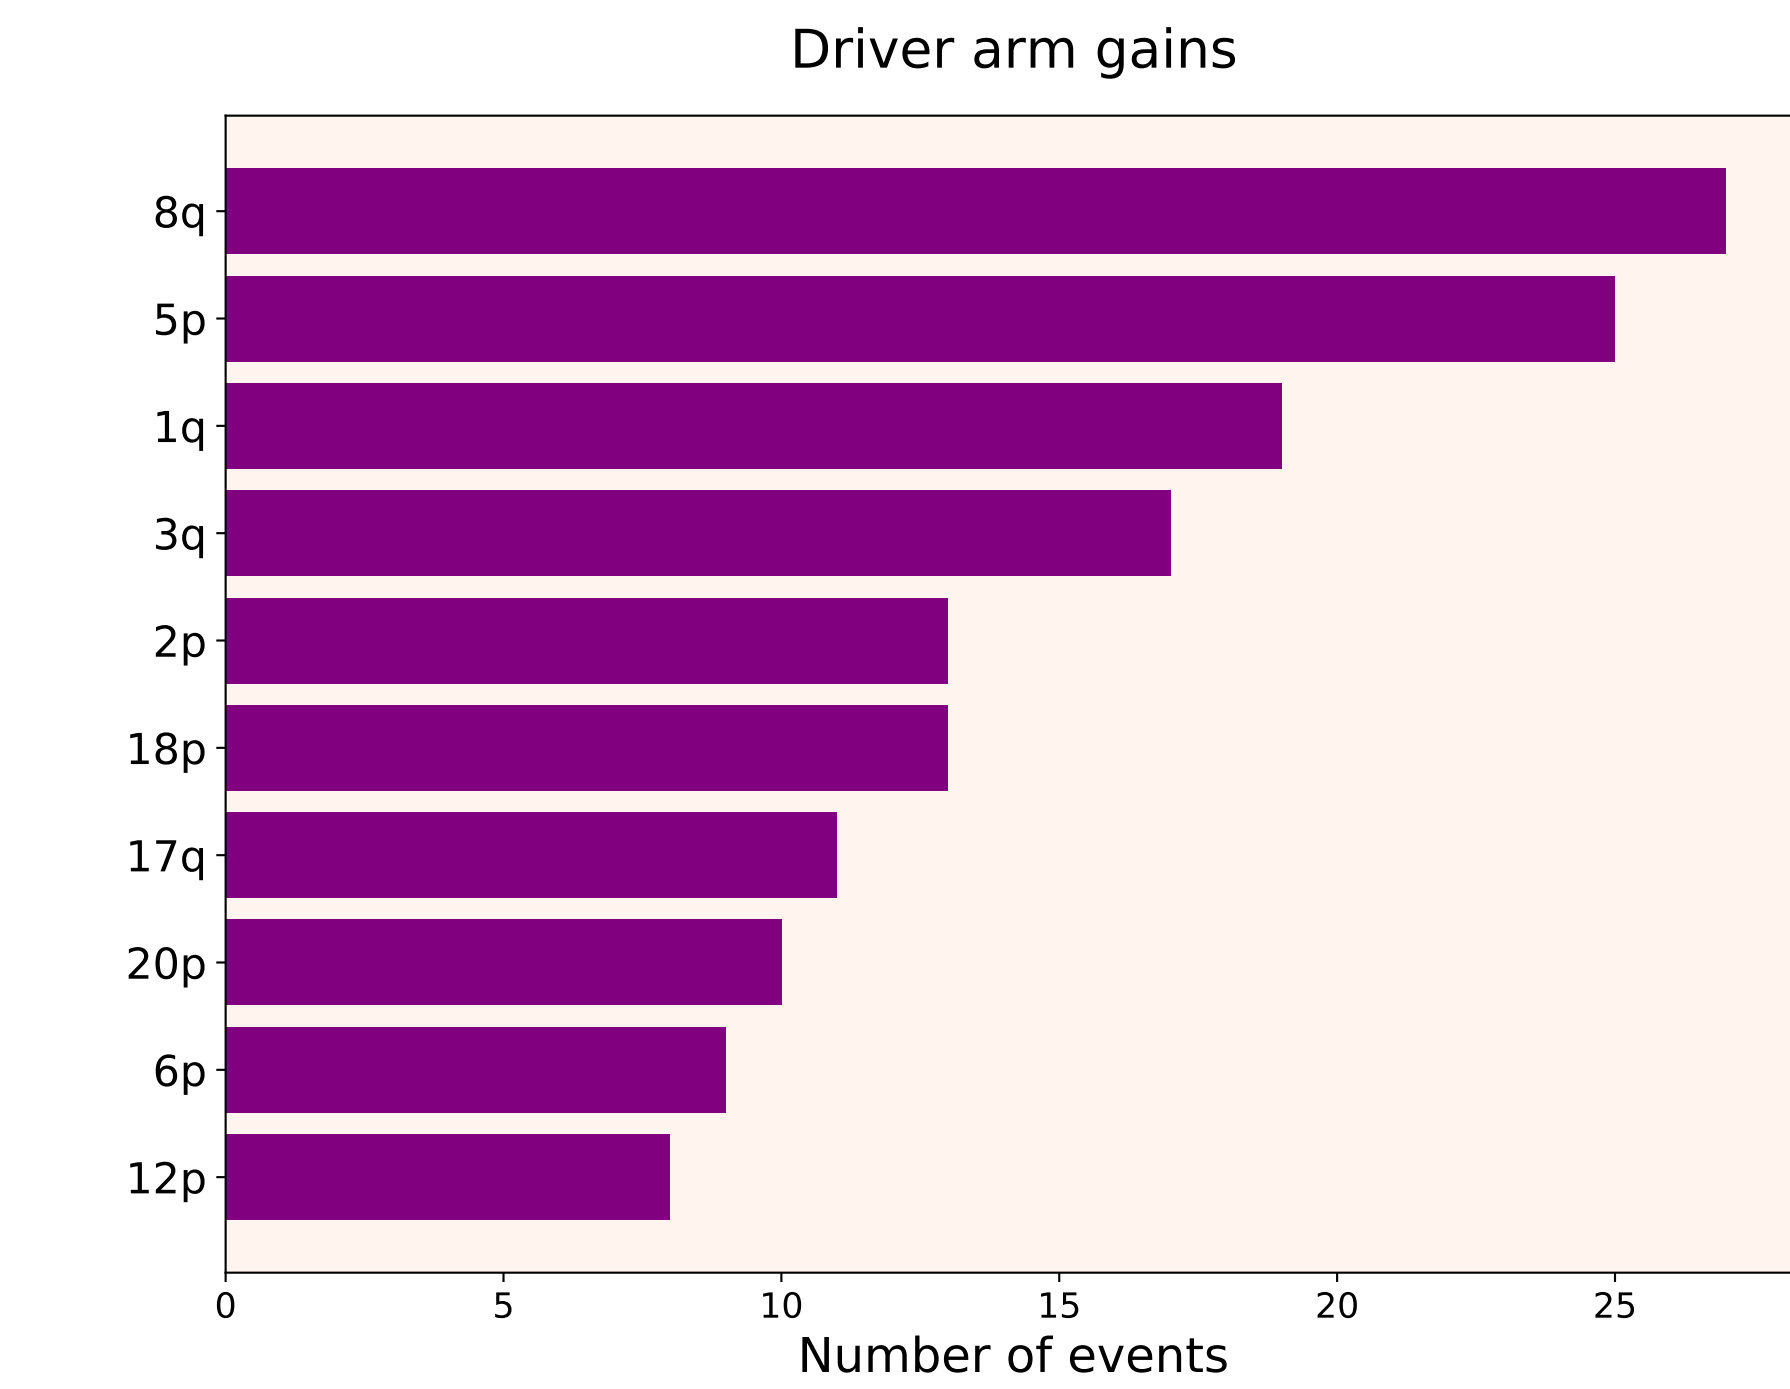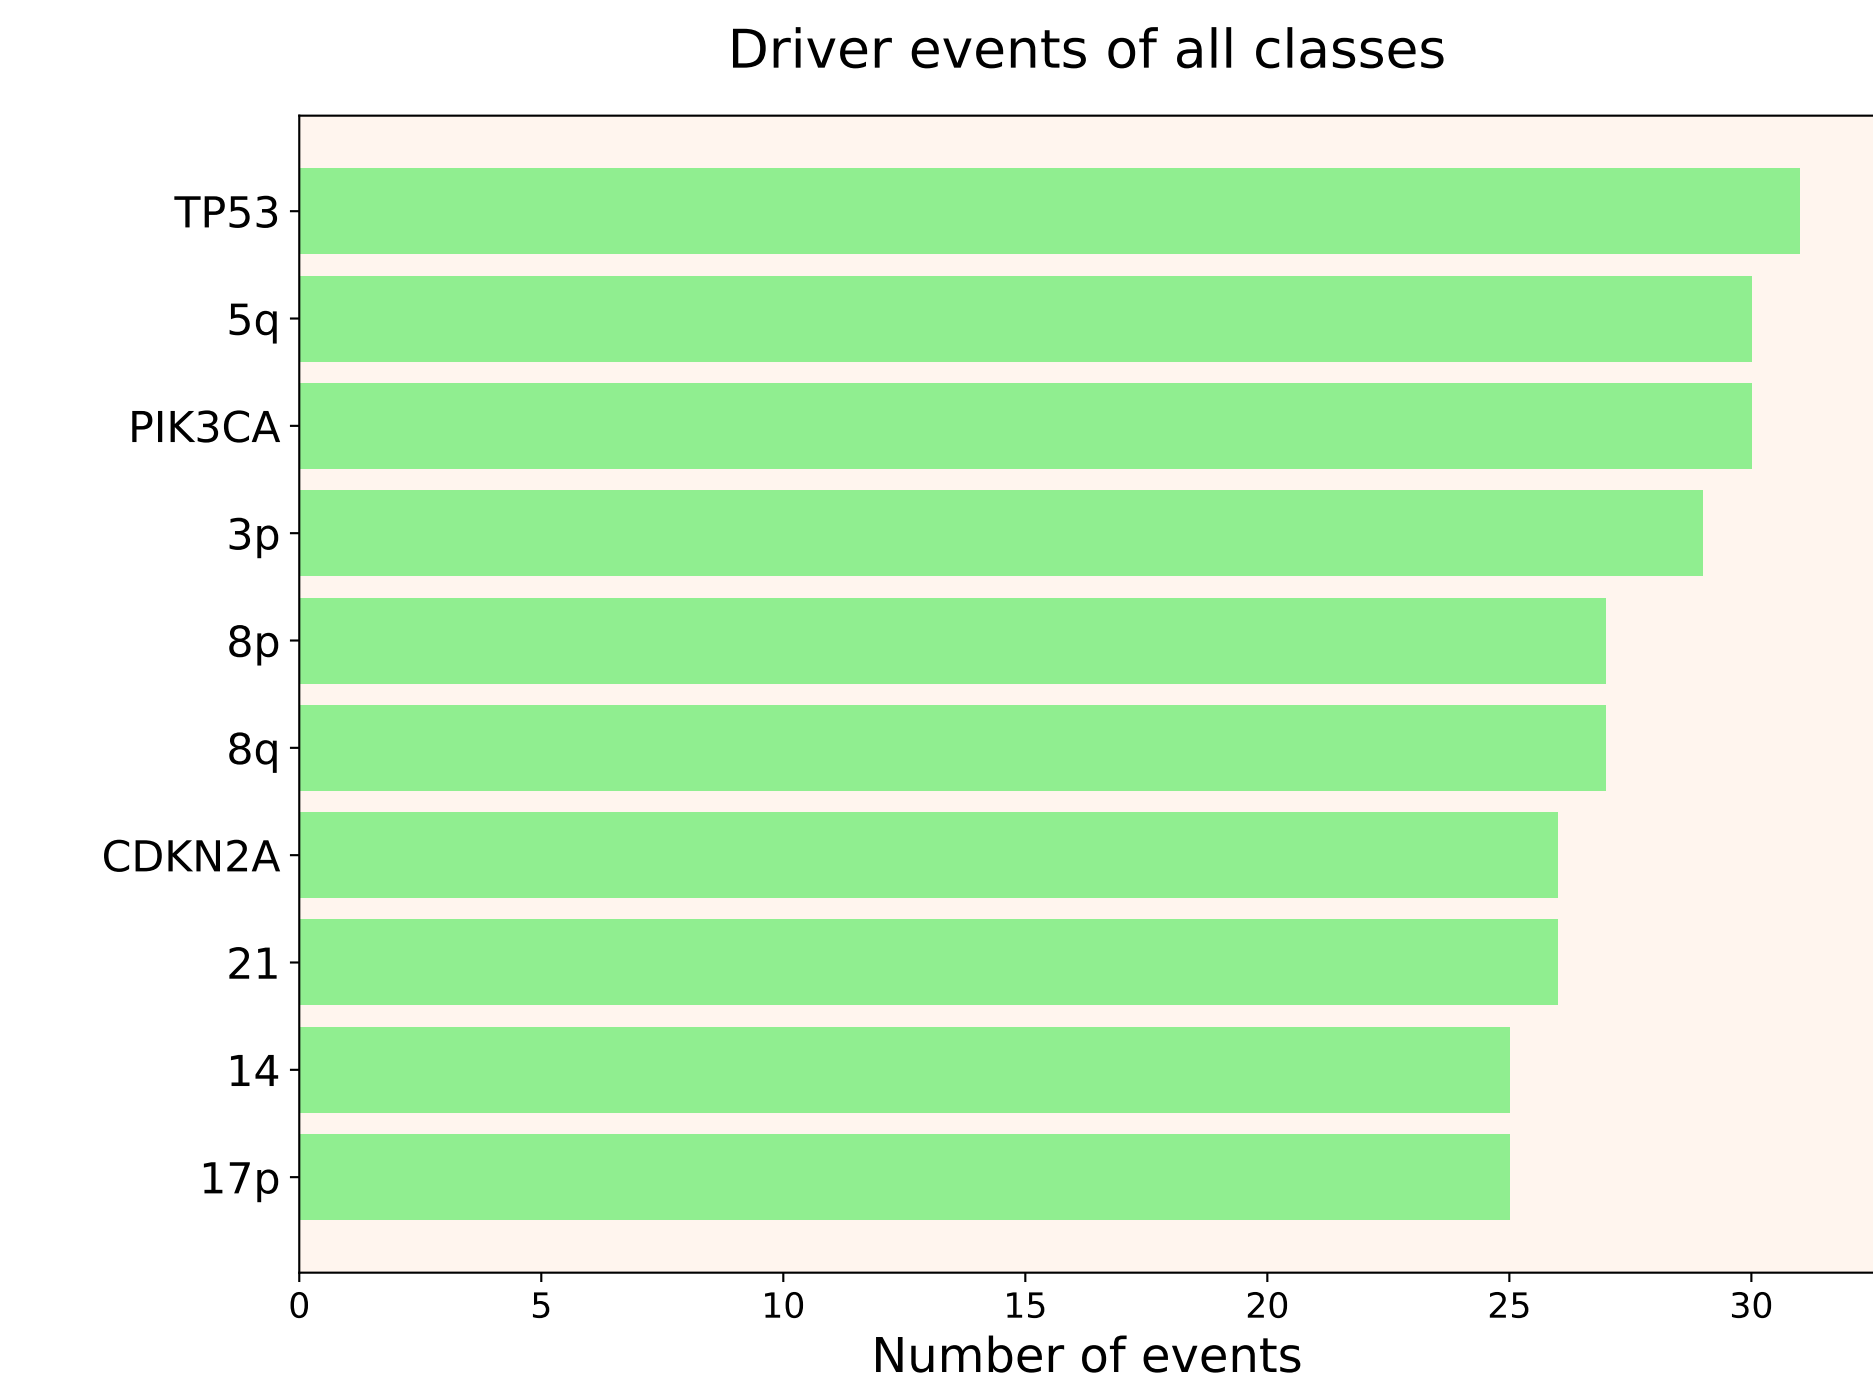

Supplement: Supplemental_Data_S1.zip [file Supplemental_Data_S1.zip]
